# Supplementary material
Source: publisher site journal article supplement (https://www.dovepress.com/article/370247)
Supplement: Supplementary file 1 [file get_supplementary_file.php]

## Supplementary 1

| ENSEMBL         | SYMBOL       | GENENAME                                                     | ENTREZID  | baseMean    | log2FoldChange | lfcSE       | stat         | pvalue      | padj        | sig      |
|-----------------|--------------|--------------------------------------------------------------|-----------|-------------|----------------|-------------|--------------|-------------|-------------|----------|
| ENSG00000231535 | LINC00278    | long intergenic non-protein coding RNA 278                   | 100873962 | 52.21160115 | -9.173523156   | 1.505461673 | -6.093494987 | 1.10E-09    | 2.61E-06    | FDR<0.05 |
| ENSG00000214039 | LINC02418    | long intergenic non-protein coding RNA 2418                  | 100190940 | 61.80662928 | -8.451299663   | 2.011816555 | -4.200830162 | 2.66E-05    | 0.012546957 | FDR<0.05 |
| ENSG00000229236 | TTY10        | testis-specific transcript, Y-linked 10 (non-protein coding) | 246119    | 20.83516828 | -7.847888075   | 1.541554466 | -5.090892504 | 3.56E-07    | 0.000420353 | FDR<0.05 |
| ENSG00000260197 | NA           | NA                                                           | NA        | 18.88723465 | -7.704377649   | 1.686465162 | -4.568358613 | 4.92E-06    | 0.003865288 | FDR<0.05 |
| ENSG00000223414 | LINC00473    | long intergenic non-protein coding RNA 473                   | 90632     | 876.8246309 | -6.836787401   | 1.90217928  | -3.594186665 | 0.000325406 | 0.109661987 | Not Sig  |
| ENSG00000258548 | LINC00645    | long intergenic non-protein coding RNA 645                   | 100505967 | 7.821773737 | -6.435025954   | 2.361743526 | -2.724692958 | 0.006436131 | 0.700480581 | Not Sig  |
| ENSG00000235056 | NA           | NA                                                           | NA        | 5.031948181 | -5.79966191    | 2.453845788 | -2.363498937 | 0.018103279 | 0.998677884 | Not Sig  |
| ENSG00000266869 | NA           | NA                                                           | NA        | 8.887797128 | -5.634027754   | 2.207966895 | -2.551681263 | 0.010720454 | 0.853009137 | Not Sig  |
| ENSG00000230663 | NA           | NA                                                           | NA        | 3.952691937 | -5.441137035   | 2.000584887 | -2.719773138 | 0.006532672 | 0.700480581 | Not Sig  |
| ENSG00000267804 | NA           | NA                                                           | NA        | 3.004644154 | -5.058036206   | 2.101596771 | -2.406758649 | 0.016094802 | 0.978832402 | Not Sig  |
| ENSG00000229459 | NA           | NA                                                           | NA        | 2.571624303 | -4.838468517   | 2.252263111 | -2.148269664 | 0.031692339 | 0.998677884 | Not Sig  |
| ENSG00000232324 | NA           | NA                                                           | NA        | 5.11656178  | -4.807552731   | 1.97305515  | -2.436603321 | 0.014825933 | 0.978832402 | Not Sig  |
| ENSG00000204625 | HCG9         | HLA complex group 9 (non-protein coding)                     | 10255     | 2.380426326 | -4.723257756   | 2.118277167 | -2.229763805 | 0.025763127 | 0.998677884 | Not Sig  |
| ENSG00000214803 | LOC101927588 | uncharacterized LOC101927588                                 | 101927588 | 2.374443359 | -4.721933132   | 2.718528584 | -1.736944449 | 0.082396977 | 0.998677884 | Not Sig  |
| ENSG00000272304 | NA           | NA                                                           | NA        | 18.53833215 | -4.676680197   | 1.870356206 | -2.50042221  | 0.012404537 | 0.914446978 | Not Sig  |
| ENSG00000132204 | NA           | NA                                                           | NA        | 22.91776845 | -4.656101332   | 1.563766906 | -2.977490643 | 0.002906185 | 0.489692198 | Not Sig  |
| ENSG00000225490 | NA           | NA                                                           | NA        | 8.294497592 | -4.644250081   | 1.536547832 | -3.022522295 | 0.002506776 | 0.475349657 | Not Sig  |
| ENSG00000224000 | NA           | NA                                                           | NA        | 2.056907615 | -4.504441954   | 2.775211643 | -1.623098536 | 0.104568343 | 0.998677884 | Not Sig  |
| ENSG00000237726 | NA           | NA                                                           | NA        | 4.133238687 | -4.491177863   | 2.26848184  | -1.979816538 | 0.047724147 | 0.998677884 | Not Sig  |
| ENSG00000226673 | LINC01108    | long intergenic non-protein coding RNA 1108                  | 102216342 | 1.998520155 | -4.471845535   | 2.754089636 | -1.623710963 | 0.10443751  | 0.998677884 | Not Sig  |
| ENSG00000225689 | NA           | NA                                                           | NA        | 3.698126995 | -4.333022349   | 1.893774316 | -2.288035229 | 0.02213547  | 0.998677884 | Not Sig  |
| ENSG00000237087 | NA           | NA                                                           | NA        | 1.817177582 | -4.320541258   | 2.849671435 | -1.51615418  | 0.129480371 | 0.998677884 | Not Sig  |
| ENSG00000226816 | NA           | NA                                                           | NA        | 13.0543435  | -4.305818554   | 1.564143206 | -2.752828856 | 0.005908277 | 0.696881316 | Not Sig  |
| ENSG00000233215 | LINC01687    | long intergenic non-protein coding RNA 1687                  | 101927843 | 25.01593479 | -4.204422157   | 2.198997859 | -1.911971919 | 0.055879796 | 0.998677884 | Not Sig  |
| ENSG00000232164 | LINC01873    | long intergenic non-protein coding RNA 1873                  | 729348    | 1.614013672 | -4.158651614   | 2.913197908 | -1.427521145 | 0.153429735 | 0.998677884 | Not Sig  |
| ENSG00000251538 | LINC02201    | long intergenic non-protein coding RNA 2201                  | 101927379 | 1.547862649 | -4.103312419   | 2.930878706 | -1.400028057 | 0.161504917 | 0.998677884 | Not Sig  |
| ENSG00000247844 | NA           | NA                                                           | NA        | 6.127073673 | -4.007177063   | 2.220278639 | -1.804808186 | 0.071104703 | 0.998677884 | Not Sig  |
| ENSG00000223486 | NA           | NA                                                           | NA        | 2.948862212 | -3.978448288   | 1.888847121 | -2.106283904 | 0.035179699 | 0.998677884 | Not Sig  |
| ENSG00000272312 | NA           | NA                                                           | NA        | 2.916676999 | -3.972910899   | 1.928755227 | -2.059831566 | 0.039414646 | 0.998677884 | Not Sig  |
| ENSG00000235538 | NA           | NA                                                           | NA        | 1.376883952 | -3.935872223   | 2.987146347 | -1.317602744 | 0.187636667 | 0.998677884 | Not Sig  |
| ENSG00000236924 | NA           | NA                                                           | NA        | 4.988334604 | -3.885685395   | 1.754686164 | -2.214461751 | 0.026797031 | 0.998677884 | Not Sig  |
| ENSG00000248753 | NA           | NA                                                           | NA        | 2.727661023 | -3.853586923   | 2.355313222 | -1.636125033 | 0.101813422 | 0.998677884 | Not Sig  |
| ENSG00000261650 | NA           | NA                                                           | NA        | 1.270765466 | -3.815408518   | 3.096863027 | -1.232023659 | 0.217940246 | 0.998677884 | Not Sig  |
| ENSG00000271830 | NA           | NA                                                           | NA        | 1.270765466 | -3.815408518   | 3.096863027 | -1.232023659 | 0.217940246 | 0.998677884 | Not Sig  |

|                 |              |                                             |           |             |              |             |              |             |             |         |
|-----------------|--------------|---------------------------------------------|-----------|-------------|--------------|-------------|--------------|-------------|-------------|---------|
| ENSG00000260976 | LINC01633    | long intergenic non-protein coding RNA 1633 | 101929069 | 1.278039244 | -3.810636685 | 3.114175344 | -1.223642301 | 0.221087195 | 0.998677884 | Not Sig |
| ENSG00000260877 | NA           | NA                                          | NA        | 8.022368247 | -3.787434747 | 2.190510154 | -1.729019489 | 0.083805607 | 0.998677884 | Not Sig |
| ENSG00000260430 | NA           | NA                                          | NA        | 9.969582698 | -3.733758263 | 1.691781772 | -2.206997572 | 0.027314229 | 0.998677884 | Not Sig |
| ENSG00000236452 | NA           | NA                                          | NA        | 4.326181569 | -3.677114795 | 2.000122254 | -1.838445019 | 0.065996857 | 0.998677884 | Not Sig |
| ENSG00000214145 | LINC00887    | long intergenic non-protein coding RNA 887  | 100131551 | 22.94782653 | -3.587259181 | 1.605769135 | -2.233981898 | 0.025484264 | 0.998677884 | Not Sig |
| ENSG00000233214 | NA           | NA                                          | NA        | 1.072293709 | -3.575790331 | 3.189435416 | -1.121135832 | 0.262230048 | 0.998677884 | Not Sig |
| ENSG00000260523 | NA           | NA                                          | NA        | 1.067111771 | -3.552750735 | 3.226817689 | -1.10100758  | 0.270893358 | 0.998677884 | Not Sig |
| ENSG00000236268 | LINC01361    | long intergenic non-protein coding RNA 1361 | 101927498 | 4.274238064 | -3.549390092 | 1.838732171 | -1.930346435 | 0.053563927 | 0.998677884 | Not Sig |
| ENSG00000242147 | LOC105376382 | uncharacterized LOC105376382                | 105376382 | 4.051977255 | -3.54870371  | 1.787059192 | -1.985778493 | 0.047057925 | 0.998677884 | Not Sig |
| ENSG00000228420 | NA           | NA                                          | NA        | 2.222017398 | -3.536826971 | 2.470530091 | -1.431606514 | 0.152256464 | 0.998677884 | Not Sig |
| ENSG00000248473 | LINC01962    | long intergenic non-protein coding RNA 1962 | 102577426 | 1.042200337 | -3.517149219 | 2.666176508 | -1.319173434 | 0.187111138 | 0.998677884 | Not Sig |
| ENSG00000255325 | NA           | NA                                          | NA        | 2.117589348 | -3.469652744 | 2.441239345 | -1.421266928 | 0.155239174 | 0.998677884 | Not Sig |
| ENSG00000253270 | NA           | NA                                          | NA        | 3.792750698 | -3.459054173 | 2.23649238  | -1.546642503 | 0.121949475 | 0.998677884 | Not Sig |
| ENSG00000267696 | NA           | NA                                          | NA        | 0.978630939 | -3.435972296 | 3.300415312 | -1.041072705 | 0.297841806 | 0.998677884 | Not Sig |
| ENSG00000230991 | NA           | NA                                          | NA        | 2.055712167 | -3.393792197 | 2.513587412 | -1.350178705 | 0.176958667 | 0.998677884 | Not Sig |
| ENSG00000267649 | NA           | NA                                          | NA        | 3.635071273 | -3.389484456 | 1.753700974 | -1.932760776 | 0.053265674 | 0.998677884 | Not Sig |
| ENSG00000267421 | LOC101928982 | uncharacterized LOC101928982                | 101928982 | 0.938682163 | -3.381781604 | 3.399867517 | -0.994680406 | 0.319891727 | 0.998677884 | Not Sig |
| ENSG00000242553 | NA           | NA                                          | NA        | 0.947246755 | -3.374442116 | 3.415897679 | -0.987863933 | 0.323219291 | 0.998677884 | Not Sig |
| ENSG00000145063 | FLJ33534     | uncharacterized LOC285150                   | 285150    | 0.927517259 | -3.364451511 | 3.408191639 | -0.987166177 | 0.32356118  | 0.998677884 | Not Sig |
| ENSG00000226007 | NA           | NA                                          | NA        | 3.946136047 | -3.359853281 | 1.803714251 | -1.862741439 | 0.062498653 | 0.998677884 | Not Sig |
| ENSG00000224559 | LINC01087    | long intergenic non-protein coding RNA 1087 | 101927994 | 0.934791038 | -3.356201292 | 3.425207575 | -0.979853401 | 0.327158488 | 0.998677884 | Not Sig |
| ENSG00000249815 | NA           | NA                                          | NA        | 0.934791038 | -3.356201292 | 3.425207575 | -0.979853401 | 0.327158488 | 0.998677884 | Not Sig |
| ENSG00000232721 | NA           | NA                                          | NA        | 5.761716778 | -3.350212673 | 1.894330432 | -1.768547143 | 0.076969478 | 0.998677884 | Not Sig |
| ENSG00000248359 | NA           | NA                                          | NA        | 0.913770729 | -3.346046455 | 3.331811144 | -1.004272545 | 0.315247264 | 0.998677884 | Not Sig |
| ENSG00000249395 | NA           | NA                                          | NA        | 193.9333224 | -3.333776492 | 1.950207576 | -1.709447001 | 0.087368181 | 0.998677884 | Not Sig |
| ENSG00000231483 | NA           | NA                                          | NA        | 19.58594272 | -3.309173749 | 1.38123008  | -2.395816451 | 0.016583392 | 0.978832402 | Not Sig |
| ENSG00000261411 | NA           | NA                                          | NA        | 0.888859295 | -3.308417084 | 3.439448721 | -0.961903303 | 0.336098179 | 0.998677884 | Not Sig |
| ENSG00000267316 | NA           | NA                                          | NA        | 1.918717968 | -3.306909299 | 2.093728164 | -1.579435839 | 0.114236122 | 0.998677884 | Not Sig |
| ENSG00000272279 | NA           | NA                                          | NA        | 3.764793474 | -3.278233059 | 1.742357939 | -1.881492307 | 0.059904981 | 0.998677884 | Not Sig |
| ENSG00000234423 | LINC01250    | long intergenic non-protein coding RNA 1250 | 101927554 | 0.869930827 | -3.25998147  | 3.417481469 | -0.95391343  | 0.340127465 | 0.998677884 | Not Sig |
| ENSG00000237772 | NA           | NA                                          | NA        | 0.869930827 | -3.25998147  | 3.417481469 | -0.95391343  | 0.340127465 | 0.998677884 | Not Sig |
| ENSG00000261161 | NA           | NA                                          | NA        | 0.869930827 | -3.25998147  | 3.417481469 | -0.95391343  | 0.340127465 | 0.998677884 | Not Sig |
| ENSG00000269877 | NA           | NA                                          | NA        | 0.869930827 | -3.25998147  | 3.417481469 | -0.95391343  | 0.340127465 | 0.998677884 | Not Sig |
| ENSG00000262745 | NA           | NA                                          | NA        | 3.259595327 | -3.21659132  | 2.324915234 | -1.383530579 | 0.166502238 | 0.998677884 | Not Sig |
| ENSG00000246774 | NA           | NA                                          | NA        | 0.832563676 | -3.200419467 | 3.451023902 | -0.927382585 | 0.353727929 | 0.998677884 | Not Sig |

|                 |              |                                                             |           |             |              |             |              |             |             |         |
|-----------------|--------------|-------------------------------------------------------------|-----------|-------------|--------------|-------------|--------------|-------------|-------------|---------|
| ENSG00000243081 | NA           | NA                                                          | NA        | 42.16643838 | -3.178440366 | 1.593797315 | -1.994256318 | 0.04612405  | 0.998677884 | Not Sig |
| ENSG00000260646 | NA           | NA                                                          | NA        | 1.74966268  | -3.163972364 | 2.121028584 | -1.491716042 | 0.135773602 | 0.998677884 | Not Sig |
| ENSG00000269524 | NA           | NA                                                          | NA        | 1.716186654 | -3.158872678 | 2.124643542 | -1.486777718 | 0.137073528 | 0.998677884 | Not Sig |
| ENSG00000250103 | PANCR        | PITX2 adjacent non-coding RNA                               | 110231149 | 0.781449996 | -3.116368907 | 3.562757417 | -0.874707016 | 0.381733342 | 0.998677884 | Not Sig |
| ENSG00000269246 | NA           | NA                                                          | NA        | 0.781449996 | -3.116368907 | 3.562757417 | -0.874707016 | 0.381733342 | 0.998677884 | Not Sig |
| ENSG00000229961 | NA           | NA                                                          | NA        | 0.780159183 | -3.115658191 | 3.564361205 | -0.874114045 | 0.38205615  | 0.998677884 | Not Sig |
| ENSG00000257083 | LOC102724421 | uncharacterized LOC102724421                                | 102724421 | 6.425907274 | -3.092301499 | 1.857332181 | -1.664915695 | 0.095929576 | 0.998677884 | Not Sig |
| ENSG00000255983 | NA           | NA                                                          | NA        | 21.85278667 | -3.080958984 | 1.618596056 | -1.903476147 | 0.056978443 | 0.998677884 | Not Sig |
| ENSG00000224865 | LOC101928782 | uncharacterized LOC101928782                                | 101928782 | 3.188920582 | -3.079410876 | 2.051809238 | -1.500827085 | 0.133400291 | 0.998677884 | Not Sig |
| ENSG00000225656 | NA           | NA                                                          | NA        | 1.601672008 | -3.016427281 | 2.149640157 | -1.403224289 | 0.160549967 | 0.998677884 | Not Sig |
| ENSG00000236963 | NA           | NA                                                          | NA        | 0.737610094 | -3.014516207 | 3.640662054 | -0.828013192 | 0.407663029 | 0.998677884 | Not Sig |
| ENSG00000238107 | NA           | NA                                                          | NA        | 0.737610094 | -3.014516207 | 3.640662054 | -0.828013192 | 0.407663029 | 0.998677884 | Not Sig |
| ENSG00000240045 | DWOLF        | DWARF open reading frame                                    | 100507537 | 0.737610094 | -3.014516207 | 3.640662054 | -0.828013192 | 0.407663029 | 0.998677884 | Not Sig |
| ENSG00000249100 | NA           | NA                                                          | NA        | 1.610236599 | -3.003851433 | 2.551766303 | -1.17716557  | 0.239129428 | 0.998677884 | Not Sig |
| ENSG00000259887 | LOC105369971 | uncharacterized LOC105369971                                | 105369971 | 10.41102269 | -2.980476753 | 1.41293805  | -2.109417857 | 0.034908529 | 0.998677884 | Not Sig |
| ENSG00000260364 | NA           | NA                                                          | NA        | 0.711407847 | -2.966683006 | 3.62878871  | -0.81754085  | 0.413619415 | 0.998677884 | Not Sig |
| ENSG00000272180 | NA           | NA                                                          | NA        | 1.540026019 | -2.964403334 | 2.196692748 | -1.349484737 | 0.17718132  | 0.998677884 | Not Sig |
| ENSG00000230647 | NA           | NA                                                          | NA        | 0.69895213  | -2.938944819 | 3.005703783 | -0.977789241 | 0.328178574 | 0.998677884 | Not Sig |
| ENSG00000254699 | NA           | NA                                                          | NA        | 0.69895213  | -2.938944819 | 3.005703783 | -0.977789241 | 0.328178574 | 0.998677884 | Not Sig |
| ENSG00000262198 | NA           | NA                                                          | NA        | 2.714026765 | -2.935791089 | 1.997287891 | -1.469888794 | 0.141591875 | 0.998677884 | Not Sig |
| ENSG00000272088 | NA           | NA                                                          | NA        | 4.039234186 | -2.922190273 | 1.920958294 | -1.521214844 | 0.128205931 | 0.998677884 | Not Sig |
| ENSG00000239216 | NA           | NA                                                          | NA        | 0.686496413 | -2.91838676  | 3.660618141 | -0.797238785 | 0.425312365 | 0.998677884 | Not Sig |
| ENSG00000244214 | NA           | NA                                                          | NA        | 0.686496413 | -2.91838676  | 3.660618141 | -0.797238785 | 0.425312365 | 0.998677884 | Not Sig |
| ENSG00000228789 | HCG22        | HLA complex group 22 (gene/pseudogene)                      | 285834    | 1.473642024 | -2.90598405  | 2.156377822 | -1.347622861 | 0.177779714 | 0.998677884 | Not Sig |
| ENSG00000203496 | NA           | NA                                                          | NA        | 0.672749884 | -2.893028285 | 3.722865964 | -0.777097084 | 0.437101494 | 0.998677884 | Not Sig |
| ENSG00000249998 | NA           | NA                                                          | NA        | 0.672749884 | -2.893028285 | 3.722865964 | -0.777097084 | 0.437101494 | 0.998677884 | Not Sig |
| ENSG00000259692 | NA           | NA                                                          | NA        | 47.90510803 | -2.874068102 | 1.695149005 | -1.695466353 | 0.089986988 | 0.998677884 | Not Sig |
| ENSG00000272366 | NA           | NA                                                          | NA        | 1.457528154 | -2.870288723 | 2.633005424 | -1.090118804 | 0.275660814 | 0.998677884 | Not Sig |
| ENSG00000236289 | GACAT3       | gastric cancer associated transcript 3 (non-protein coding) | 104797537 | 3.833255678 | -2.852805753 | 2.224392944 | -1.282509801 | 0.199663869 | 0.998677884 | Not Sig |
| ENSG00000237764 | LOC101928283 | uncharacterized LOC101928283                                | 101928283 | 1.464169336 | -2.843963444 | 2.62480021  | -1.083497111 | 0.278587833 | 0.998677884 | Not Sig |
| ENSG00000239921 | LINC01471    | long intergenic non-protein coding RNA 1471                 | 101927149 | 1.397616909 | -2.832742657 | 2.232485492 | -1.268873938 | 0.204486029 | 0.998677884 | Not Sig |
| ENSG00000234323 | LINC01505    | long intergenic non-protein coding RNA 1505                 | 100996590 | 1.429402498 | -2.828716999 | 2.610084549 | -1.083764509 | 0.278469225 | 0.998677884 | Not Sig |
| ENSG00000272068 | NA           | NA                                                          | NA        | 136.4801476 | -2.820849019 | 1.384768943 | -2.037053931 | 0.041644638 | 0.998677884 | Not Sig |
| ENSG00000226370 | LINC00375    | long intergenic non-protein coding RNA 375                  | 104355140 | 0.635382733 | -2.816198125 | 3.776587234 | -0.745699212 | 0.455849135 | 0.998677884 | Not Sig |
| ENSG00000227463 | LOC101927575 | uncharacterized LOC101927575                                | 101927575 | 0.635382733 | -2.816198125 | 3.776587234 | -0.745699212 | 0.455849135 | 0.998677884 | Not Sig |

|                 |              |                                             |           |             |              |             |              |             |             |         |
|-----------------|--------------|---------------------------------------------|-----------|-------------|--------------|-------------|--------------|-------------|-------------|---------|
| ENSG00000253872 | NA           | NA                                          | NA        | 5.393581029 | -2.806966164 | 1.556961133 | -1.80284922  | 0.071411898 | 0.998677884 | Not Sig |
| ENSG00000271788 | NA           | NA                                          | NA        | 5.149731855 | -2.80057213  | 1.345538246 | -2.081376831 | 0.037399428 | 0.998677884 | Not Sig |
| ENSG00000249388 | LOC100240734 | uncharacterized LOC100240734                | 100240734 | 2.527167171 | -2.800167691 | 2.001565678 | -1.398988663 | 0.161816383 | 0.998677884 | Not Sig |
| ENSG00000226733 | NA           | NA                                          | NA        | 0.621636203 | -2.788975223 | 3.798086136 | -0.734310682 | 0.462759409 | 0.998677884 | Not Sig |
| ENSG00000232451 | NA           | NA                                          | NA        | 0.621636203 | -2.788975223 | 3.798086136 | -0.734310682 | 0.462759409 | 0.998677884 | Not Sig |
| ENSG00000267175 | NA           | NA                                          | NA        | 0.621636203 | -2.788975223 | 3.798086136 | -0.734310682 | 0.462759409 | 0.998677884 | Not Sig |
| ENSG00000226383 | LINC01876    | long intergenic non-protein coding RNA 1876 | 101929378 | 317.7333991 | -2.78764392  | 1.259521305 | -2.213256663 | 0.026879956 | 0.998677884 | Not Sig |
| ENSG00000260484 | NA           | NA                                          | NA        | 0.609180486 | -2.762266839 | 3.774653976 | -0.731793392 | 0.464294683 | 0.998677884 | Not Sig |
| ENSG00000261045 | LINC02129    | long intergenic non-protein coding RNA 2129 | 105371156 | 0.609180486 | -2.762266839 | 3.774653976 | -0.731793392 | 0.464294683 | 0.998677884 | Not Sig |
| ENSG00000267643 | NA           | NA                                          | NA        | 0.609180486 | -2.762266839 | 3.774653976 | -0.731793392 | 0.464294683 | 0.998677884 | Not Sig |
| ENSG00000223806 | LINC00114    | long intergenic non-protein coding RNA 114  | 400866    | 0.596724769 | -2.73457027  | 3.838678747 | -0.712372785 | 0.476233964 | 0.998677884 | Not Sig |
| ENSG00000272859 | NA           | NA                                          | NA        | 1.329098546 | -2.733513932 | 2.264397204 | -1.207170689 | 0.227366416 | 0.998677884 | Not Sig |
| ENSG00000235736 | NA           | NA                                          | NA        | 1.315119044 | -2.719890868 | 2.203481249 | -1.234360796 | 0.217068491 | 0.998677884 | Not Sig |
| ENSG00000254777 | NA           | NA                                          | NA        | 29.2202864  | -2.693064288 | 1.172733607 | -2.296399005 | 0.021653078 | 0.998677884 | Not Sig |
| ENSG00000236611 | NA           | NA                                          | NA        | 2.314715912 | -2.652378025 | 1.729610127 | -1.533512081 | 0.125149732 | 0.998677884 | Not Sig |
| ENSG00000253985 | NA           | NA                                          | NA        | 1.239093929 | -2.636487005 | 2.34369568  | -1.124927194 | 0.260619887 | 0.998677884 | Not Sig |
| ENSG00000226594 | NA           | NA                                          | NA        | 1.239326902 | -2.633007749 | 2.676037428 | -0.983920375 | 0.325154665 | 0.998677884 | Not Sig |
| ENSG00000269646 | NA           | NA                                          | NA        | 2.237167013 | -2.616754005 | 1.966594718 | -1.330601563 | 0.183320148 | 0.998677884 | Not Sig |
| ENSG00000239482 | LOC105374042 | uncharacterized LOC105374042                | 105374042 | 1.214415468 | -2.603225084 | 2.654850705 | -0.980554228 | 0.326812616 | 0.998677884 | Not Sig |
| ENSG00000249731 | NA           | NA                                          | NA        | 1.233911991 | -2.602744206 | 2.702919672 | -0.962938053 | 0.335578612 | 0.998677884 | Not Sig |
| ENSG00000259347 | NA           | NA                                          | NA        | 0.552884867 | -2.597939984 | 3.959360845 | -0.656151355 | 0.511726744 | 0.998677884 | Not Sig |
| ENSG00000249699 | LINC02261    | long intergenic non-protein coding RNA 2261 | 101929199 | 1.200435965 | -2.587614823 | 2.686123389 | -0.963326865 | 0.335383515 | 0.998677884 | Not Sig |
| ENSG00000232896 | NA           | NA                                          | NA        | 0.54042915  | -2.56704376  | 3.98364085  | -0.644396384 | 0.519318429 | 0.998677884 | Not Sig |
| ENSG00000233891 | NA           | NA                                          | NA        | 0.54042915  | -2.56704376  | 3.98364085  | -0.644396384 | 0.519318429 | 0.998677884 | Not Sig |
| ENSG00000253280 | NA           | NA                                          | NA        | 0.54042915  | -2.56704376  | 3.98364085  | -0.644396384 | 0.519318429 | 0.998677884 | Not Sig |
| ENSG00000254337 | NA           | NA                                          | NA        | 0.54042915  | -2.56704376  | 3.98364085  | -0.644396384 | 0.519318429 | 0.998677884 | Not Sig |
| ENSG00000273365 | NA           | NA                                          | NA        | 1.240786146 | -2.566548906 | 2.300124737 | -1.115830314 | 0.264494775 | 0.998677884 | Not Sig |
| ENSG00000236206 | NA           | NA                                          | NA        | 1.18279831  | -2.539670679 | 2.698237259 | -0.94123327  | 0.346585331 | 0.998677884 | Not Sig |
| ENSG00000248757 | LINC02115    | long intergenic non-protein coding RNA 2115 | 102467212 | 1.18279831  | -2.539670679 | 2.698237259 | -0.94123327  | 0.346585331 | 0.998677884 | Not Sig |
| ENSG00000273295 | NA           | NA                                          | NA        | 54.61104909 | -2.525860142 | 1.9208147   | -1.314994175 | 0.18851186  | 0.998677884 | Not Sig |
| ENSG00000270169 | NA           | NA                                          | NA        | 2.231818423 | -2.5131543   | 1.840920393 | -1.365161856 | 0.172202184 | 0.998677884 | Not Sig |
| ENSG00000271815 | NA           | NA                                          | NA        | 5.533843919 | -2.504795564 | 1.215336567 | -2.060989222 | 0.039304068 | 0.998677884 | Not Sig |
| ENSG00000224235 | NA           | NA                                          | NA        | 0.514226904 | -2.50247891  | 3.992611176 | -0.626777515 | 0.530805085 | 0.998677884 | Not Sig |
| ENSG00000230030 | NA           | NA                                          | NA        | 0.514226904 | -2.50247891  | 3.992611176 | -0.626777515 | 0.530805085 | 0.998677884 | Not Sig |
| ENSG00000231476 | NA           | NA                                          | NA        | 0.514226904 | -2.50247891  | 3.992611176 | -0.626777515 | 0.530805085 | 0.998677884 | Not Sig |

|                 |              |                                             |           |             |              |             |              |             |             |         |
|-----------------|--------------|---------------------------------------------|-----------|-------------|--------------|-------------|--------------|-------------|-------------|---------|
| ENSG00000260004 | NA           | NA                                          | NA        | 0.514226904 | -2.50247891  | 3.992611176 | -0.626777515 | 0.530805085 | 0.998677884 | Not Sig |
| ENSG00000272431 | NA           | NA                                          | NA        | 0.514226904 | -2.50247891  | 3.992611176 | -0.626777515 | 0.530805085 | 0.998677884 | Not Sig |
| ENSG00000244649 | NA           | NA                                          | NA        | 5.651044082 | -2.48646245  | 1.527741073 | -1.627541796 | 0.103622079 | 0.998677884 | Not Sig |
| ENSG00000272537 | NA           | NA                                          | NA        | 1.130393817 | -2.475356889 | 2.383721906 | -1.038441977 | 0.299064335 | 0.998677884 | Not Sig |
| ENSG00000249734 | LINC02236    | long intergenic non-protein coding RNA 2236 | 109729133 | 1.13168463  | -2.474450098 | 2.72996053  | -0.906405082 | 0.364721484 | 0.998677884 | Not Sig |
| ENSG00000237128 | LOC105376468 | uncharacterized LOC105376468                | 105376468 | 0.501771187 | -2.468575978 | 3.317443362 | -0.744120007 | 0.456803876 | 0.998677884 | Not Sig |
| ENSG00000264015 | NA           | NA                                          | NA        | 1.119461885 | -2.459730563 | 2.324283943 | -1.058274558 | 0.289930288 | 0.998677884 | Not Sig |
| ENSG00000258414 | NA           | NA                                          | NA        | 9.399977027 | -2.458683289 | 1.611882647 | -1.525348817 | 0.127172118 | 0.998677884 | Not Sig |
| ENSG00000230876 | LINC00486    | long intergenic non-protein coding RNA 486  | 285045    | 0.48931547  | -2.436109913 | 3.996601574 | -0.609545352 | 0.542163022 | 0.998677884 | Not Sig |
| ENSG00000235450 | NA           | NA                                          | NA        | 0.48931547  | -2.436109913 | 3.996601574 | -0.609545352 | 0.542163022 | 0.998677884 | Not Sig |
| ENSG00000251331 | NA           | NA                                          | NA        | 16.64370502 | -2.424121    | 1.941167597 | -1.248795314 | 0.211739948 | 0.998677884 | Not Sig |
| ENSG00000245662 | NA           | NA                                          | NA        | 1.113647351 | -2.406159761 | 2.796650079 | -0.860372121 | 0.389583949 | 0.998677884 | Not Sig |
| ENSG00000251031 | NA           | NA                                          | NA        | 1.133376846 | -2.404909553 | 2.814377166 | -0.854508622 | 0.392823234 | 0.998677884 | Not Sig |
| ENSG00000203729 | LINC00272    | long intergenic non-protein coding RNA 272  | 388719    | 1.981556083 | -2.395667733 | 2.506444466 | -0.955803237 | 0.339171653 | 0.998677884 | Not Sig |
| ENSG00000231678 | NA           | NA                                          | NA        | 1.087844728 | -2.3874327   | 2.837270079 | -0.841454156 | 0.400093557 | 0.998677884 | Not Sig |
| ENSG00000258976 | NA           | NA                                          | NA        | 2.266753693 | -2.385538653 | 2.479821748 | -0.96197989  | 0.336059706 | 0.998677884 | Not Sig |
| ENSG00000253652 | NA           | NA                                          | NA        | 0.463113223 | -2.366602221 | 4.00097712  | -0.591506062 | 0.554181395 | 0.998677884 | Not Sig |
| ENSG00000257193 | NA           | NA                                          | NA        | 0.463113223 | -2.366602221 | 4.00097712  | -0.591506062 | 0.554181395 | 0.998677884 | Not Sig |
| ENSG00000248802 | NA           | NA                                          | NA        | 9.503294404 | -2.358474366 | 1.855311302 | -1.271201423 | 0.203657001 | 0.998677884 | Not Sig |
| ENSG00000267462 | NA           | NA                                          | NA        | 1.063166266 | -2.35038229  | 2.78443448  | -0.844114777 | 0.398605271 | 0.998677884 | Not Sig |
| ENSG00000269976 | NA           | NA                                          | NA        | 10.72548384 | -2.350380852 | 1.08404907  | -2.168082717 | 0.030152394 | 0.998677884 | Not Sig |
| ENSG00000261039 | LINC02544    | long intergenic non-protein coding RNA 2544 | 101929504 | 4.093444948 | -2.336122755 | 1.471828171 | -1.587225195 | 0.112461651 | 0.998677884 | Not Sig |
| ENSG00000249413 | NA           | NA                                          | NA        | 16.54213616 | -2.33226004  | 1.819911693 | -1.28152374  | 0.200009767 | 0.998677884 | Not Sig |
| ENSG00000249021 | NA           | NA                                          | NA        | 0.450657506 | -2.331083424 | 4.003293609 | -0.582291396 | 0.56037042  | 0.998677884 | Not Sig |
| ENSG00000225278 | NA           | NA                                          | NA        | 70.47193451 | -2.323157709 | 1.098254729 | -2.115317737 | 0.034402876 | 0.998677884 | Not Sig |
| ENSG00000272662 | NA           | NA                                          | NA        | 1.038254832 | -2.313559888 | 2.792914314 | -0.828367657 | 0.407462317 | 0.998677884 | Not Sig |
| ENSG00000261462 | NA           | NA                                          | NA        | 1.069807449 | -2.313345939 | 2.773006382 | -0.83423751  | 0.404147158 | 0.998677884 | Not Sig |
| ENSG00000266821 | NA           | NA                                          | NA        | 3.060605026 | -2.307026112 | 1.603504514 | -1.438740017 | 0.150224197 | 0.998677884 | Not Sig |
| ENSG00000251259 | NA           | NA                                          | NA        | 5.01380248  | -2.295039291 | 1.259556828 | -1.822100631 | 0.068439718 | 0.998677884 | Not Sig |
| ENSG00000232680 | NA           | NA                                          | NA        | 2.894639836 | -2.293837602 | 1.976433368 | -1.160594269 | 0.245806937 | 0.998677884 | Not Sig |
| ENSG00000272549 | LINC02538    | long intergenic non-protein coding RNA 2538 | 401286    | 0.985850339 | -2.237773726 | 2.874450922 | -0.77850476  | 0.436271501 | 0.998677884 | Not Sig |
| ENSG00000260072 | NA           | NA                                          | NA        | 1.017402955 | -2.23776191  | 2.853080297 | -0.784331907 | 0.432845382 | 0.998677884 | Not Sig |
| ENSG00000221571 | NA           | NA                                          | NA        | 0.985617367 | -2.237576928 | 2.812999617 | -0.795441604 | 0.426356667 | 0.998677884 | Not Sig |
| ENSG00000242880 | NA           | NA                                          | NA        | 2.009894477 | -2.213179035 | 2.041392854 | -1.084151456 | 0.278297651 | 0.998677884 | Not Sig |
| ENSG00000228792 | NA           | NA                                          | NA        | 1.761831045 | -2.200290572 | 1.839630469 | -1.196050299 | 0.231676931 | 0.998677884 | Not Sig |

|                 |              |                                             |           |             |              |             |              |             |             |         |
|-----------------|--------------|---------------------------------------------|-----------|-------------|--------------|-------------|--------------|-------------|-------------|---------|
| ENSG00000260232 | NA           | NA                                          | NA        | 0.967580087 | -2.157889001 | 2.872080406 | -0.751333074 | 0.452452229 | 0.998677884 | Not Sig |
| ENSG00000260262 | NA           | NA                                          | NA        | 0.934736658 | -2.15786592  | 2.896236759 | -0.745058536 | 0.456236334 | 0.998677884 | Not Sig |
| ENSG00000266743 | NA           | NA                                          | NA        | 0.933212873 | -2.157856308 | 2.897387636 | -0.744759273 | 0.45641726  | 0.998677884 | Not Sig |
| ENSG00000253658 | LINC01592    | long intergenic non-protein coding RNA 1592 | 100505718 | 0.934503686 | -2.157724992 | 2.896346616 | -0.744981619 | 0.456282832 | 0.998677884 | Not Sig |
| ENSG00000267053 | NA           | NA                                          | NA        | 5.454885286 | -2.14329433  | 1.375706158 | -1.557959393 | 0.119242874 | 0.998677884 | Not Sig |
| ENSG00000262619 | NA           | NA                                          | NA        | 7.832653599 | -2.128691977 | 1.532066235 | -1.389425554 | 0.164703384 | 0.998677884 | Not Sig |
| ENSG00000259033 | NA           | NA                                          | NA        | 0.909825224 | -2.117220424 | 2.845511684 | -0.744056134 | 0.456842516 | 0.998677884 | Not Sig |
| ENSG00000251365 | NA           | NA                                          | NA        | 5.345598431 | -2.108623151 | 1.354140332 | -1.557167379 | 0.119430751 | 0.998677884 | Not Sig |
| ENSG00000272057 | NA           | NA                                          | NA        | 5.092819006 | -2.095955784 | 1.250840257 | -1.675638254 | 0.093809071 | 0.998677884 | Not Sig |
| ENSG00000230731 | NA           | NA                                          | NA        | 0.928922124 | -2.095676328 | 2.88917533  | -0.7253545   | 0.468234579 | 0.998677884 | Not Sig |
| ENSG00000225179 | LINC00457    | long intergenic non-protein coding RNA 457  | 100874179 | 0.897369507 | -2.095312226 | 2.913818034 | -0.719095085 | 0.472082336 | 0.998677884 | Not Sig |
| ENSG00000230024 | NA           | NA                                          | NA        | 0.897369507 | -2.095312226 | 2.913818034 | -0.719095085 | 0.472082336 | 0.998677884 | Not Sig |
| ENSG00000226825 | NA           | NA                                          | NA        | 0.394361887 | -2.094640699 | 4.020211606 | -0.521027474 | 0.602347632 | 0.998677884 | Not Sig |
| ENSG00000227244 | LINC00845    | long intergenic non-protein coding RNA 845  | 100507058 | 0.394361887 | -2.094640699 | 4.020211606 | -0.521027474 | 0.602347632 | 0.998677884 | Not Sig |
| ENSG00000228718 | NA           | NA                                          | NA        | 0.394361887 | -2.094640699 | 4.020211606 | -0.521027474 | 0.602347632 | 0.998677884 | Not Sig |
| ENSG00000229556 | NA           | NA                                          | NA        | 0.394361887 | -2.094640699 | 4.020211606 | -0.521027474 | 0.602347632 | 0.998677884 | Not Sig |
| ENSG00000232271 | NA           | NA                                          | NA        | 0.394361887 | -2.094640699 | 4.020211606 | -0.521027474 | 0.602347632 | 0.998677884 | Not Sig |
| ENSG00000235570 | LINC00533    | long intergenic non-protein coding RNA 533  | 387055    | 0.394361887 | -2.094640699 | 4.020211606 | -0.521027474 | 0.602347632 | 0.998677884 | Not Sig |
| ENSG00000236119 | NA           | NA                                          | NA        | 0.394361887 | -2.094640699 | 4.020211606 | -0.521027474 | 0.602347632 | 0.998677884 | Not Sig |
| ENSG00000236373 | LOC101926942 | uncharacterized LOC101926942                | 101926942 | 0.394361887 | -2.094640699 | 4.020211606 | -0.521027474 | 0.602347632 | 0.998677884 | Not Sig |
| ENSG00000237756 | NA           | NA                                          | NA        | 0.394361887 | -2.094640699 | 4.020211606 | -0.521027474 | 0.602347632 | 0.998677884 | Not Sig |
| ENSG00000238212 | LINC02096    | long intergenic non-protein coding RNA 2096 | 107984977 | 0.394361887 | -2.094640699 | 4.020211606 | -0.521027474 | 0.602347632 | 0.998677884 | Not Sig |
| ENSG00000242440 | NA           | NA                                          | NA        | 0.394361887 | -2.094640699 | 4.020211606 | -0.521027474 | 0.602347632 | 0.998677884 | Not Sig |
| ENSG00000248370 | NA           | NA                                          | NA        | 0.394361887 | -2.094640699 | 4.020211606 | -0.521027474 | 0.602347632 | 0.998677884 | Not Sig |
| ENSG00000249199 | NA           | NA                                          | NA        | 0.394361887 | -2.094640699 | 4.020211606 | -0.521027474 | 0.602347632 | 0.998677884 | Not Sig |
| ENSG00000249519 | NA           | NA                                          | NA        | 0.394361887 | -2.094640699 | 4.020211606 | -0.521027474 | 0.602347632 | 0.998677884 | Not Sig |
| ENSG00000251183 | LINC01861    | long intergenic non-protein coding RNA 1861 | 105378238 | 0.394361887 | -2.094640699 | 4.020211606 | -0.521027474 | 0.602347632 | 0.998677884 | Not Sig |
| ENSG00000253659 | NA           | NA                                          | NA        | 0.394361887 | -2.094640699 | 4.020211606 | -0.521027474 | 0.602347632 | 0.998677884 | Not Sig |
| ENSG00000254038 | NA           | NA                                          | NA        | 0.394361887 | -2.094640699 | 4.020211606 | -0.521027474 | 0.602347632 | 0.998677884 | Not Sig |
| ENSG00000254587 | NA           | NA                                          | NA        | 0.394361887 | -2.094640699 | 4.020211606 | -0.521027474 | 0.602347632 | 0.998677884 | Not Sig |
| ENSG00000256115 | LINC02443    | long intergenic non-protein coding RNA 2443 | 101929584 | 0.394361887 | -2.094640699 | 4.020211606 | -0.521027474 | 0.602347632 | 0.998677884 | Not Sig |
| ENSG00000257004 | NA           | NA                                          | NA        | 0.394361887 | -2.094640699 | 4.020211606 | -0.521027474 | 0.602347632 | 0.998677884 | Not Sig |
| ENSG00000257294 | NA           | NA                                          | NA        | 0.394361887 | -2.094640699 | 4.020211606 | -0.521027474 | 0.602347632 | 0.998677884 | Not Sig |
| ENSG00000260454 | NA           | NA                                          | NA        | 0.394361887 | -2.094640699 | 4.020211606 | -0.521027474 | 0.602347632 | 0.998677884 | Not Sig |
| ENSG00000260983 | NA           | NA                                          | NA        | 0.394361887 | -2.094640699 | 4.020211606 | -0.521027474 | 0.602347632 | 0.998677884 | Not Sig |

|                 |              |                                             |           |             |              |             |              |             |             |         |
|-----------------|--------------|---------------------------------------------|-----------|-------------|--------------|-------------|--------------|-------------|-------------|---------|
| ENSG00000261480 | GOLGA8M      | golgin A8 family member M                   | 653720    | 0.394361887 | -2.094640699 | 4.020211606 | -0.521027474 | 0.602347632 | 0.998677884 | Not Sig |
| ENSG00000262395 | NA           | NA                                          | NA        | 0.394361887 | -2.094640699 | 4.020211606 | -0.521027474 | 0.602347632 | 0.998677884 | Not Sig |
| ENSG00000267334 | NA           | NA                                          | NA        | 0.394361887 | -2.094640699 | 4.020211606 | -0.521027474 | 0.602347632 | 0.998677884 | Not Sig |
| ENSG00000267686 | NA           | NA                                          | NA        | 0.394361887 | -2.094640699 | 4.020211606 | -0.521027474 | 0.602347632 | 0.998677884 | Not Sig |
| ENSG00000224638 | NA           | NA                                          | NA        | 3.541636608 | -2.094424872 | 1.574145341 | -1.330515562 | 0.183348463 | 0.998677884 | Not Sig |
| ENSG00000269903 | NA           | NA                                          | NA        | 2.568073555 | -2.087088479 | 1.650162301 | -1.2647777   | 0.205951028 | 0.998677884 | Not Sig |
| ENSG00000270482 | NA           | NA                                          | NA        | 1.764814075 | -2.071465578 | 2.20515325  | -0.939374884 | 0.347538304 | 0.998677884 | Not Sig |
| ENSG00000255447 | NA           | NA                                          | NA        | 0.903119501 | -2.067179837 | 2.941627066 | -0.702733484 | 0.482221856 | 0.998677884 | Not Sig |
| ENSG00000180422 | LINC00304    | long intergenic non-protein coding RNA 304  | 283860    | 10.54491676 | -2.058812615 | 1.333449714 | -1.543974695 | 0.122594463 | 0.998677884 | Not Sig |
| ENSG00000233056 | NA           | NA                                          | NA        | 0.892187569 | -2.044940429 | 2.946069666 | -0.69412494  | 0.48760386  | 0.998677884 | Not Sig |
| ENSG00000223573 | TINCR        | TINCR ubiquitin domain containing           | 257000    | 79.28638678 | -2.044176655 | 0.956580707 | -2.136962036 | 0.03260108  | 0.998677884 | Not Sig |
| ENSG00000249984 | NA           | NA                                          | NA        | 1.705135802 | -2.041725015 | 2.170313388 | -0.940751242 | 0.346832353 | 0.998677884 | Not Sig |
| ENSG00000225579 | NA           | NA                                          | NA        | 1.840206593 | -2.032121837 | 2.486370376 | -0.817304557 | 0.413754403 | 0.998677884 | Not Sig |
| ENSG00000263893 | NA           | NA                                          | NA        | 3.417079438 | -2.029571285 | 1.919972666 | -1.057083427 | 0.290473514 | 0.998677884 | Not Sig |
| ENSG00000242516 | LINC00960    | long intergenic non-protein coding RNA 960  | 401074    | 21.27602054 | -2.027262205 | 1.644218266 | -1.232964167 | 0.217589133 | 0.998677884 | Not Sig |
| ENSG00000273218 | NA           | NA                                          | NA        | 1.575582033 | -2.021325281 | 2.140729005 | -0.944222868 | 0.345055772 | 0.998677884 | Not Sig |
| ENSG00000205611 | NA           | NA                                          | NA        | 10.14879138 | -2.016422008 | 1.520445593 | -1.326204645 | 0.184771921 | 0.998677884 | Not Sig |
| ENSG00000272769 | NA           | NA                                          | NA        | 14.00887376 | -2.013922689 | 1.410233829 | -1.428077137 | 0.153269657 | 0.998677884 | Not Sig |
| ENSG00000250986 | NA           | NA                                          | NA        | 13.85060205 | -1.993348896 | 1.777598333 | -1.121371943 | 0.262129574 | 0.998677884 | Not Sig |
| ENSG00000256287 | LINC02398    | long intergenic non-protein coding RNA 2398 | 100506393 | 40.28382728 | -1.980860112 | 1.317021213 | -1.504045716 | 0.132569596 | 0.998677884 | Not Sig |
| ENSG00000242767 | ZBTB20-AS4   | ZBTB20 antisense RNA 4                      | 100874131 | 1.53997164  | -1.978810824 | 2.533546004 | -0.781043968 | 0.434776635 | 0.998677884 | Not Sig |
| ENSG00000250241 | LOC101927359 | uncharacterized LOC101927359                | 101927359 | 2.303729601 | -1.976576029 | 2.346472208 | -0.842360724 | 0.399586607 | 0.998677884 | Not Sig |
| ENSG00000271324 | NA           | NA                                          | NA        | 5.772426235 | -1.975247946 | 1.453635641 | -1.358832909 | 0.174199543 | 0.998677884 | Not Sig |
| ENSG00000271973 | NA           | NA                                          | NA        | 0.852005821 | -1.971848291 | 2.528105414 | -0.779970756 | 0.435408089 | 0.998677884 | Not Sig |
| ENSG00000260460 | NA           | NA                                          | NA        | 0.853529606 | -1.971833791 | 2.527141586 | -0.780262492 | 0.435236386 | 0.998677884 | Not Sig |
| ENSG00000261030 | NA           | NA                                          | NA        | 0.885082222 | -1.971537727 | 2.50775051  | -0.786177779 | 0.431763342 | 0.998677884 | Not Sig |
| ENSG00000263494 | NA           | NA                                          | NA        | 4.085161106 | -1.963078243 | 1.566642576 | -1.253047934 | 0.210188263 | 0.998677884 | Not Sig |
| ENSG00000226828 | LOC339529    | uncharacterized LOC339529                   | 339529    | 0.355703924 | -1.961817636 | 4.030963554 | -0.486687019 | 0.626480146 | 0.998677884 | Not Sig |
| ENSG00000228215 | NA           | NA                                          | NA        | 0.355703924 | -1.961817636 | 4.030963554 | -0.486687019 | 0.626480146 | 0.998677884 | Not Sig |
| ENSG00000235659 | NA           | NA                                          | NA        | 0.355703924 | -1.961817636 | 4.030963554 | -0.486687019 | 0.626480146 | 0.998677884 | Not Sig |
| ENSG00000250497 | NA           | NA                                          | NA        | 0.355703924 | -1.961817636 | 4.030963554 | -0.486687019 | 0.626480146 | 0.998677884 | Not Sig |
| ENSG00000253455 | LOC101929217 | uncharacterized LOC101929217                | 101929217 | 0.355703924 | -1.961817636 | 4.030963554 | -0.486687019 | 0.626480146 | 0.998677884 | Not Sig |
| ENSG00000272050 | NA           | NA                                          | NA        | 0.355703924 | -1.961817636 | 4.030963554 | -0.486687019 | 0.626480146 | 0.998677884 | Not Sig |
| ENSG00000273180 | NA           | NA                                          | NA        | 0.355703924 | -1.961817636 | 4.030963554 | -0.486687019 | 0.626480146 | 0.998677884 | Not Sig |
| ENSG00000273335 | NA           | NA                                          | NA        | 0.355703924 | -1.961817636 | 4.030963554 | -0.486687019 | 0.626480146 | 0.998677884 | Not Sig |

|                 |           |                                             |           |             |              |             |              |             |             |         |
|-----------------|-----------|---------------------------------------------|-----------|-------------|--------------|-------------|--------------|-------------|-------------|---------|
| ENSG00000267013 | LINC01929 | long intergenic non-protein coding RNA 1929 | 101927229 | 1.756417915 | -1.939768554 | 2.515567293 | -0.771105809 | 0.440644218 | 0.998677884 | Not Sig |
| ENSG00000229227 | NA        | NA                                          | NA        | 0.827327359 | -1.930059823 | 2.981178283 | -0.647415096 | 0.517363328 | 0.998677884 | Not Sig |
| ENSG00000227877 | MRLN      | myoregulin                                  | 100507027 | 0.343248207 | -1.915193637 | 4.034970552 | -0.474648727 | 0.635037369 | 0.998677884 | Not Sig |
| ENSG00000228707 | NA        | NA                                          | NA        | 0.343248207 | -1.915193637 | 4.034970552 | -0.474648727 | 0.635037369 | 0.998677884 | Not Sig |
| ENSG00000233124 | LINC00456 | long intergenic non-protein coding RNA 456  | 103625683 | 0.343248207 | -1.915193637 | 4.034970552 | -0.474648727 | 0.635037369 | 0.998677884 | Not Sig |
| ENSG00000248307 | LINC00616 | long intergenic non-protein coding RNA 616  | 641365    | 0.343248207 | -1.915193637 | 4.034970552 | -0.474648727 | 0.635037369 | 0.998677884 | Not Sig |
| ENSG00000249306 | LINC01411 | long intergenic non-protein coding RNA 1411 | 101928176 | 0.343248207 | -1.915193637 | 4.034970552 | -0.474648727 | 0.635037369 | 0.998677884 | Not Sig |
| ENSG00000259681 | NA        | NA                                          | NA        | 0.343248207 | -1.915193637 | 4.034970552 | -0.474648727 | 0.635037369 | 0.998677884 | Not Sig |
| ENSG00000260058 | NA        | NA                                          | NA        | 0.343248207 | -1.915193637 | 4.034970552 | -0.474648727 | 0.635037369 | 0.998677884 | Not Sig |
| ENSG00000260515 | NA        | NA                                          | NA        | 0.343248207 | -1.915193637 | 4.034970552 | -0.474648727 | 0.635037369 | 0.998677884 | Not Sig |
| ENSG00000261058 | NA        | NA                                          | NA        | 0.343248207 | -1.915193637 | 4.034970552 | -0.474648727 | 0.635037369 | 0.998677884 | Not Sig |
| ENSG00000273097 | NA        | NA                                          | NA        | 3.698458846 | -1.9143497   | 1.931050912 | -0.991351232 | 0.321514105 | 0.998677884 | Not Sig |
| ENSG00000214955 | NA        | NA                                          | NA        | 3.204017597 | -1.90595705  | 1.570880242 | -1.213305126 | 0.225013184 | 0.998677884 | Not Sig |
| ENSG00000259087 | NA        | NA                                          | NA        | 20.72694782 | -1.898443111 | 1.069583192 | -1.774937308 | 0.075908239 | 0.998677884 | Not Sig |
| ENSG00000256146 | NA        | NA                                          | NA        | 42.47104107 | -1.893403601 | 1.956139068 | -0.967928933 | 0.333079863 | 0.998677884 | Not Sig |
| ENSG00000237838 | NA        | NA                                          | NA        | 3.664027091 | -1.893365465 | 1.670438093 | -1.133454435 | 0.257023466 | 0.998677884 | Not Sig |
| ENSG00000237189 | NA        | NA                                          | NA        | 1.571524256 | -1.890660924 | 2.211888607 | -0.854772215 | 0.392677263 | 0.998677884 | Not Sig |
| ENSG00000260420 | LINC02182 | long intergenic non-protein coding RNA 2182 | 101928880 | 0.802415925 | -1.88294031  | 2.54531777  | -0.739766301 | 0.45944181  | 0.998677884 | Not Sig |
| ENSG00000260186 | NA        | NA                                          | NA        | 0.80089214  | -1.882936193 | 2.546374831 | -0.739457589 | 0.459629184 | 0.998677884 | Not Sig |
| ENSG00000261586 | NA        | NA                                          | NA        | 1.454426204 | -1.881723126 | 2.674261767 | -0.703642085 | 0.481655696 | 0.998677884 | Not Sig |
| ENSG00000227634 | LINC01714 | long intergenic non-protein coding RNA 1714 | 102724539 | 3.603505263 | -1.864237525 | 1.90414069  | -0.979044004 | 0.327558238 | 0.998677884 | Not Sig |
| ENSG00000270883 | NA        | NA                                          | NA        | 1.458764587 | -1.861121262 | 2.13758916  | -0.870663688 | 0.383937811 | 0.998677884 | Not Sig |
| ENSG00000270996 | NA        | NA                                          | NA        | 0.821512824 | -1.857010902 | 2.973733624 | -0.624471165 | 0.532318201 | 0.998677884 | Not Sig |
| ENSG00000232812 | LINC01717 | long intergenic non-protein coding RNA 1717 | 105372893 | 0.789960208 | -1.85687091  | 3.003461346 | -0.618243651 | 0.53641474  | 0.998677884 | Not Sig |
| ENSG00000253505 | NA        | NA                                          | NA        | 0.789960208 | -1.85687091  | 3.003461346 | -0.618243651 | 0.53641474  | 0.998677884 | Not Sig |
| ENSG00000267065 | LINC02080 | long intergenic non-protein coding RNA 2080 | 101928514 | 1.53263332  | -1.855441062 | 2.246261121 | -0.826013077 | 0.408796673 | 0.998677884 | Not Sig |
| ENSG00000272516 | NA        | NA                                          | NA        | 1.629279119 | -1.835108158 | 2.137934172 | -0.858355782 | 0.390696036 | 0.998677884 | Not Sig |
| ENSG00000261600 | NA        | NA                                          | NA        | 7.542857653 | -1.828610406 | 1.342097126 | -1.362502289 | 0.173039422 | 0.998677884 | Not Sig |
| ENSG00000263257 | NA        | NA                                          | NA        | 2.259825159 | -1.825518903 | 1.644888601 | -1.109813091 | 0.267079577 | 0.998677884 | Not Sig |
| ENSG00000250415 | NA        | NA                                          | NA        | 1.616823402 | -1.820664502 | 2.166617972 | -0.840325579 | 0.400725863 | 0.998677884 | Not Sig |
| ENSG00000206114 | NA        | NA                                          | NA        | 0.31704596  | -1.81933062  | 4.043612619 | -0.449927031 | 0.652763056 | 0.998677884 | Not Sig |
| ENSG00000223863 | LINC01805 | long intergenic non-protein coding RNA 1805 | 105374774 | 0.31704596  | -1.81933062  | 4.043612619 | -0.449927031 | 0.652763056 | 0.998677884 | Not Sig |
| ENSG00000225012 | NA        | NA                                          | NA        | 0.31704596  | -1.81933062  | 4.043612619 | -0.449927031 | 0.652763056 | 0.998677884 | Not Sig |
| ENSG00000226434 | NA        | NA                                          | NA        | 0.31704596  | -1.81933062  | 4.043612619 | -0.449927031 | 0.652763056 | 0.998677884 | Not Sig |
| ENSG00000226917 | LINC01276 | long intergenic non-protein coding RNA 1276 | 103106903 | 0.31704596  | -1.81933062  | 4.043612619 | -0.449927031 | 0.652763056 | 0.998677884 | Not Sig |



|                 |              |                                             |           |             |              |             |              |             |             |         |
|-----------------|--------------|---------------------------------------------|-----------|-------------|--------------|-------------|--------------|-------------|-------------|---------|
| ENSG00000227342 | LINC00307    | long intergenic non-protein coding RNA 307  | 266919    | 0.31704596  | -1.81933062  | 4.043612619 | -0.449927031 | 0.652763056 | 0.998677884 | Not Sig |
| ENSG00000229311 | LOC101927827 | uncharacterized LOC101927827                | 101927827 | 0.31704596  | -1.81933062  | 4.043612619 | -0.449927031 | 0.652763056 | 0.998677884 | Not Sig |
| ENSG00000229311 | LOC105369268 | uncharacterized LOC105369268                | 105369268 | 0.31704596  | -1.81933062  | 4.043612619 | -0.449927031 | 0.652763056 | 0.998677884 | Not Sig |
| ENSG00000230262 | MIRLET7DHG   | MIRLET7D host gene                          | 158257    | 0.31704596  | -1.81933062  | 4.043612619 | -0.449927031 | 0.652763056 | 0.998677884 | Not Sig |
| ENSG00000230401 | LINC01972    | long intergenic non-protein coding RNA 1972 | 105374293 | 0.31704596  | -1.81933062  | 4.043612619 | -0.449927031 | 0.652763056 | 0.998677884 | Not Sig |
| ENSG00000232002 | NA           | NA                                          | NA        | 0.31704596  | -1.81933062  | 4.043612619 | -0.449927031 | 0.652763056 | 0.998677884 | Not Sig |
| ENSG00000233086 | NA           | NA                                          | NA        | 0.31704596  | -1.81933062  | 4.043612619 | -0.449927031 | 0.652763056 | 0.998677884 | Not Sig |
| ENSG00000234535 | NA           | NA                                          | NA        | 0.31704596  | -1.81933062  | 4.043612619 | -0.449927031 | 0.652763056 | 0.998677884 | Not Sig |
| ENSG00000235491 | NA           | NA                                          | NA        | 0.31704596  | -1.81933062  | 4.043612619 | -0.449927031 | 0.652763056 | 0.998677884 | Not Sig |
| ENSG00000235830 | NA           | NA                                          | NA        | 0.31704596  | -1.81933062  | 4.043612619 | -0.449927031 | 0.652763056 | 0.998677884 | Not Sig |
| ENSG00000235933 | NA           | NA                                          | NA        | 0.31704596  | -1.81933062  | 4.043612619 | -0.449927031 | 0.652763056 | 0.998677884 | Not Sig |
| ENSG00000250105 | NA           | NA                                          | NA        | 0.31704596  | -1.81933062  | 4.043612619 | -0.449927031 | 0.652763056 | 0.998677884 | Not Sig |
| ENSG00000250596 | NA           | NA                                          | NA        | 0.31704596  | -1.81933062  | 4.043612619 | -0.449927031 | 0.652763056 | 0.998677884 | Not Sig |
| ENSG00000251216 | NA           | NA                                          | NA        | 0.31704596  | -1.81933062  | 4.043612619 | -0.449927031 | 0.652763056 | 0.998677884 | Not Sig |
| ENSG00000251573 | LINC02106    | long intergenic non-protein coding RNA 2106 | 100287592 | 0.31704596  | -1.81933062  | 4.043612619 | -0.449927031 | 0.652763056 | 0.998677884 | Not Sig |
| ENSG00000254366 | NA           | NA                                          | NA        | 0.31704596  | -1.81933062  | 4.043612619 | -0.449927031 | 0.652763056 | 0.998677884 | Not Sig |
| ENSG00000254789 | NA           | NA                                          | NA        | 0.31704596  | -1.81933062  | 4.043612619 | -0.449927031 | 0.652763056 | 0.998677884 | Not Sig |
| ENSG00000256422 | LINC02552    | long intergenic non-protein coding RNA 2552 | 102723895 | 0.31704596  | -1.81933062  | 4.043612619 | -0.449927031 | 0.652763056 | 0.998677884 | Not Sig |
| ENSG00000260626 | NA           | NA                                          | NA        | 0.31704596  | -1.81933062  | 4.043612619 | -0.449927031 | 0.652763056 | 0.998677884 | Not Sig |
| ENSG00000261265 | NA           | NA                                          | NA        | 0.31704596  | -1.81933062  | 4.043612619 | -0.449927031 | 0.652763056 | 0.998677884 | Not Sig |
| ENSG00000261432 | LINC01613    | long intergenic non-protein coding RNA 1613 | 106146149 | 0.31704596  | -1.81933062  | 4.043612619 | -0.449927031 | 0.652763056 | 0.998677884 | Not Sig |
| ENSG00000261466 | NA           | NA                                          | NA        | 0.31704596  | -1.81933062  | 4.043612619 | -0.449927031 | 0.652763056 | 0.998677884 | Not Sig |
| ENSG00000266268 | NA           | NA                                          | NA        | 0.31704596  | -1.81933062  | 4.043612619 | -0.449927031 | 0.652763056 | 0.998677884 | Not Sig |
| ENSG00000272121 | NA           | NA                                          | NA        | 0.31704596  | -1.81933062  | 4.043612619 | -0.449927031 | 0.652763056 | 0.998677884 | Not Sig |
| ENSG00000272855 | NA           | NA                                          | NA        | 0.31704596  | -1.81933062  | 4.043612619 | -0.449927031 | 0.652763056 | 0.998677884 | Not Sig |
| ENSG00000273342 | NA           | NA                                          | NA        | 0.31704596  | -1.81933062  | 4.043612619 | -0.449927031 | 0.652763056 | 0.998677884 | Not Sig |
| ENSG00000272010 | NA           | NA                                          | NA        | 8.062946823 | -1.812499742 | 1.385654502 | -1.308045937 | 0.190857729 | 0.998677884 | Not Sig |
| ENSG00000234722 | LINC01287    | long intergenic non-protein coding RNA 1287 | 103724390 | 0.762234176 | -1.807380738 | 2.977276703 | -0.607058368 | 0.543812177 | 0.998677884 | Not Sig |
| ENSG00000235158 | NA           | NA                                          | NA        | 1.624097181 | -1.799283931 | 2.193961279 | -0.820107423 | 0.412154871 | 0.998677884 | Not Sig |
| ENSG00000236714 | LINC01844    | long intergenic non-protein coding RNA 1844 | 101926975 | 5.101987435 | -1.795076061 | 1.633250561 | -1.099081858 | 0.271732362 | 0.998677884 | Not Sig |
| ENSG00000256001 | NA           | NA                                          | NA        | 0.782854861 | -1.781504492 | 2.997276608 | -0.594374402 | 0.552261725 | 0.998677884 | Not Sig |
| ENSG00000273293 | NA           | NA                                          | NA        | 0.782854861 | -1.781504492 | 2.997276608 | -0.594374402 | 0.552261725 | 0.998677884 | Not Sig |
| ENSG00000272795 | NA           | NA                                          | NA        | 0.751302244 | -1.781022661 | 3.029304165 | -0.587931275 | 0.556578423 | 0.998677884 | Not Sig |
| ENSG00000254396 | NA           | NA                                          | NA        | 0.749778459 | -1.780999059 | 3.030901969 | -0.587613548 | 0.556791715 | 0.998677884 | Not Sig |
| ENSG00000223834 | NA           | NA                                          | NA        | 1.487502606 | -1.780257078 | 2.339989774 | -0.760796948 | 0.446778358 | 0.998677884 | Not Sig |

|                 |              |                                             |           |             |              |             |              |             |             |         |
|-----------------|--------------|---------------------------------------------|-----------|-------------|--------------|-------------|--------------|-------------|-------------|---------|
| ENSG00000260895 | NA           | NA                                          | NA        | 5.883061698 | -1.780189593 | 1.174783453 | -1.515334242 | 0.129687781 | 0.998677884 | Not Sig |
| ENSG00000254101 | LINC02055    | long intergenic non-protein coding RNA 2055 | 107986980 | 6.810842754 | -1.774903536 | 1.400929787 | -1.266946818 | 0.205174307 | 0.998677884 | Not Sig |
| ENSG00000270604 | HCG17        | HLA complex group 17 (non-protein coding)   | 414778    | 4.332600277 | -1.774318584 | 1.256535041 | -1.412072506 | 0.157928613 | 0.998677884 | Not Sig |
| ENSG00000272048 | NA           | NA                                          | NA        | 13.92346953 | -1.773511131 | 1.02767933  | -1.725743701 | 0.084393532 | 0.998677884 | Not Sig |
| ENSG00000204603 | LINC01257    | long intergenic non-protein coding RNA 1257 | 116437    | 0.304590243 | -1.769119893 | 4.048364865 | -0.436996158 | 0.662114134 | 0.998677884 | Not Sig |
| ENSG00000227193 | NA           | NA                                          | NA        | 0.304590243 | -1.769119893 | 4.048364865 | -0.436996158 | 0.662114134 | 0.998677884 | Not Sig |
| ENSG00000229654 | NA           | NA                                          | NA        | 0.304590243 | -1.769119893 | 4.048364865 | -0.436996158 | 0.662114134 | 0.998677884 | Not Sig |
| ENSG00000231149 | NA           | NA                                          | NA        | 0.304590243 | -1.769119893 | 4.048364865 | -0.436996158 | 0.662114134 | 0.998677884 | Not Sig |
| ENSG00000259478 | NA           | NA                                          | NA        | 0.304590243 | -1.769119893 | 4.048364865 | -0.436996158 | 0.662114134 | 0.998677884 | Not Sig |
| ENSG00000264334 | NA           | NA                                          | NA        | 0.304590243 | -1.769119893 | 4.048364865 | -0.436996158 | 0.662114134 | 0.998677884 | Not Sig |
| ENSG00000267644 | NA           | NA                                          | NA        | 0.304590243 | -1.769119893 | 4.048364865 | -0.436996158 | 0.662114134 | 0.998677884 | Not Sig |
| ENSG00000271201 | NA           | NA                                          | NA        | 0.304590243 | -1.769119893 | 4.048364865 | -0.436996158 | 0.662114134 | 0.998677884 | Not Sig |
| ENSG00000272984 | NA           | NA                                          | NA        | 0.304590243 | -1.769119893 | 4.048364865 | -0.436996158 | 0.662114134 | 0.998677884 | Not Sig |
| ENSG00000188660 | LINC00319    | long intergenic non-protein coding RNA 319  | 284836    | 30.99246724 | -1.761549317 | 1.136927122 | -1.549395105 | 0.12128677  | 0.998677884 | Not Sig |
| ENSG00000256443 | NA           | NA                                          | NA        | 35.0030519  | -1.745689092 | 1.164972549 | -1.498480881 | 0.134008356 | 0.998677884 | Not Sig |
| ENSG00000273381 | NA           | NA                                          | NA        | 25.42871351 | -1.738762579 | 0.862033982 | -2.017046444 | 0.043690667 | 0.998677884 | Not Sig |
| ENSG00000236790 | LINC00299    | long intergenic non-protein coding RNA 299  | 339789    | 57.05086326 | -1.737443896 | 1.100302324 | -1.579060462 | 0.114322189 | 0.998677884 | Not Sig |
| ENSG00000178248 | LINC01658    | long intergenic non-protein coding RNA 1658 | 388882    | 0.292134526 | -1.717573259 | 4.053411964 | -0.423735183 | 0.671758954 | 0.998677884 | Not Sig |
| ENSG00000178457 | LINC00314    | long intergenic non-protein coding RNA 314  | 246705    | 0.292134526 | -1.717573259 | 4.053411964 | -0.423735183 | 0.671758954 | 0.998677884 | Not Sig |
| ENSG00000180081 | NA           | NA                                          | NA        | 0.292134526 | -1.717573259 | 4.053411964 | -0.423735183 | 0.671758954 | 0.998677884 | Not Sig |
| ENSG00000223881 | NA           | NA                                          | NA        | 0.292134526 | -1.717573259 | 4.053411964 | -0.423735183 | 0.671758954 | 0.998677884 | Not Sig |
| ENSG00000225785 | NA           | NA                                          | NA        | 0.292134526 | -1.717573259 | 4.053411964 | -0.423735183 | 0.671758954 | 0.998677884 | Not Sig |
| ENSG00000226542 | NA           | NA                                          | NA        | 0.292134526 | -1.717573259 | 4.053411964 | -0.423735183 | 0.671758954 | 0.998677884 | Not Sig |
| ENSG00000226965 | LOC105375451 | uncharacterized LOC105375451                | 105375451 | 0.292134526 | -1.717573259 | 4.053411964 | -0.423735183 | 0.671758954 | 0.998677884 | Not Sig |
| ENSG00000228361 | NA           | NA                                          | NA        | 0.292134526 | -1.717573259 | 4.053411964 | -0.423735183 | 0.671758954 | 0.998677884 | Not Sig |
| ENSG00000229801 | NA           | NA                                          | NA        | 0.292134526 | -1.717573259 | 4.053411964 | -0.423735183 | 0.671758954 | 0.998677884 | Not Sig |
| ENSG00000235979 | NA           | NA                                          | NA        | 0.292134526 | -1.717573259 | 4.053411964 | -0.423735183 | 0.671758954 | 0.998677884 | Not Sig |
| ENSG00000236106 | NA           | NA                                          | NA        | 0.292134526 | -1.717573259 | 4.053411964 | -0.423735183 | 0.671758954 | 0.998677884 | Not Sig |
| ENSG00000236687 | NA           | NA                                          | NA        | 0.292134526 | -1.717573259 | 4.053411964 | -0.423735183 | 0.671758954 | 0.998677884 | Not Sig |
| ENSG00000237720 | NA           | NA                                          | NA        | 0.292134526 | -1.717573259 | 4.053411964 | -0.423735183 | 0.671758954 | 0.998677884 | Not Sig |
| ENSG00000241048 | NA           | NA                                          | NA        | 0.292134526 | -1.717573259 | 4.053411964 | -0.423735183 | 0.671758954 | 0.998677884 | Not Sig |
| ENSG00000242659 | NA           | NA                                          | NA        | 0.292134526 | -1.717573259 | 4.053411964 | -0.423735183 | 0.671758954 | 0.998677884 | Not Sig |
| ENSG00000249405 | NA           | NA                                          | NA        | 0.292134526 | -1.717573259 | 4.053411964 | -0.423735183 | 0.671758954 | 0.998677884 | Not Sig |
| ENSG00000253855 | NA           | NA                                          | NA        | 0.292134526 | -1.717573259 | 4.053411964 | -0.423735183 | 0.671758954 | 0.998677884 | Not Sig |
| ENSG00000255433 | LOC101927120 | uncharacterized LOC101927120                | 101927120 | 0.292134526 | -1.717573259 | 4.053411964 | -0.423735183 | 0.671758954 | 0.998677884 | Not Sig |

|                 |              |                                             |           |             |              |             |              |             |             |         |
|-----------------|--------------|---------------------------------------------|-----------|-------------|--------------|-------------|--------------|-------------|-------------|---------|
| ENSG00000256218 | NA           | NA                                          | NA        | 0.292134526 | -1.717573259 | 4.053411964 | -0.423735183 | 0.671758954 | 0.998677884 | Not Sig |
| ENSG00000257467 | PPFIA2-AS1   | PPFIA2 antisense RNA 1                      | 102724663 | 0.292134526 | -1.717573259 | 4.053411964 | -0.423735183 | 0.671758954 | 0.998677884 | Not Sig |
| ENSG00000257470 | NA           | NA                                          | NA        | 0.292134526 | -1.717573259 | 4.053411964 | -0.423735183 | 0.671758954 | 0.998677884 | Not Sig |
| ENSG00000257472 | NA           | NA                                          | NA        | 0.292134526 | -1.717573259 | 4.053411964 | -0.423735183 | 0.671758954 | 0.998677884 | Not Sig |
| ENSG00000257683 | NA           | NA                                          | NA        | 0.292134526 | -1.717573259 | 4.053411964 | -0.423735183 | 0.671758954 | 0.998677884 | Not Sig |
| ENSG00000258338 | NA           | NA                                          | NA        | 0.292134526 | -1.717573259 | 4.053411964 | -0.423735183 | 0.671758954 | 0.998677884 | Not Sig |
| ENSG00000258853 | NA           | NA                                          | NA        | 0.292134526 | -1.717573259 | 4.053411964 | -0.423735183 | 0.671758954 | 0.998677884 | Not Sig |
| ENSG00000259235 | NA           | NA                                          | NA        | 0.292134526 | -1.717573259 | 4.053411964 | -0.423735183 | 0.671758954 | 0.998677884 | Not Sig |
| ENSG00000259252 | NA           | NA                                          | NA        | 0.292134526 | -1.717573259 | 4.053411964 | -0.423735183 | 0.671758954 | 0.998677884 | Not Sig |
| ENSG00000260416 | NA           | NA                                          | NA        | 0.292134526 | -1.717573259 | 4.053411964 | -0.423735183 | 0.671758954 | 0.998677884 | Not Sig |
| ENSG00000261146 | NA           | NA                                          | NA        | 0.292134526 | -1.717573259 | 4.053411964 | -0.423735183 | 0.671758954 | 0.998677884 | Not Sig |
| ENSG00000261402 | NA           | NA                                          | NA        | 0.292134526 | -1.717573259 | 4.053411964 | -0.423735183 | 0.671758954 | 0.998677884 | Not Sig |
| ENSG00000265380 | NA           | NA                                          | NA        | 0.292134526 | -1.717573259 | 4.053411964 | -0.423735183 | 0.671758954 | 0.998677884 | Not Sig |
| ENSG00000267109 | NA           | NA                                          | NA        | 0.292134526 | -1.717573259 | 4.053411964 | -0.423735183 | 0.671758954 | 0.998677884 | Not Sig |
| ENSG00000270173 | NA           | NA                                          | NA        | 0.292134526 | -1.717573259 | 4.053411964 | -0.423735183 | 0.671758954 | 0.998677884 | Not Sig |
| ENSG00000272710 | NA           | NA                                          | NA        | 0.292134526 | -1.717573259 | 4.053411964 | -0.423735183 | 0.671758954 | 0.998677884 | Not Sig |
| ENSG00000273125 | LINC01990    | long intergenic non-protein coding RNA 1990 | 101929607 | 0.292134526 | -1.717573259 | 4.053411964 | -0.423735183 | 0.671758954 | 0.998677884 | Not Sig |
| ENSG00000251600 | LOC101927636 | uncharacterized LOC101927636                | 101927636 | 6.297141229 | -1.71318735  | 1.29095869  | -1.327065973 | 0.18448686  | 0.998677884 | Not Sig |
| ENSG00000226355 | NA           | NA                                          | NA        | 1.351355288 | -1.708642245 | 2.24351544  | -0.76159148  | 0.446303861 | 0.998677884 | Not Sig |
| ENSG00000225094 | NA           | NA                                          | NA        | 1.351355288 | -1.708642245 | 2.24351544  | -0.76159148  | 0.446303861 | 0.998677884 | Not Sig |
| ENSG00000260006 | NA           | NA                                          | NA        | 176.4621642 | -1.704554926 | 0.947594788 | -1.798822606 | 0.072046746 | 0.998677884 | Not Sig |
| ENSG00000236975 | NA           | NA                                          | NA        | 3.345079736 | -1.703640071 | 1.597642125 | -1.06634649  | 0.286267041 | 0.998677884 | Not Sig |
| ENSG00000260470 | NA           | NA                                          | NA        | 22.89768889 | -1.691812131 | 1.085378232 | -1.55873048  | 0.119060185 | 0.998677884 | Not Sig |
| ENSG00000229722 | NA           | NA                                          | NA        | 1.420042083 | -1.671907769 | 2.297605174 | -0.727674097 | 0.466813111 | 0.998677884 | Not Sig |
| ENSG00000254261 | NA           | NA                                          | NA        | 1.420042083 | -1.671907769 | 2.297605174 | -0.727674097 | 0.466813111 | 0.998677884 | Not Sig |
| ENSG00000235704 | NA           | NA                                          | NA        | 1.959292693 | -1.671007379 | 2.496625035 | -0.669306506 | 0.503299978 | 0.998677884 | Not Sig |
| ENSG00000236209 | NA           | NA                                          | NA        | 7.702649484 | -1.66522473  | 1.807531302 | -0.921270203 | 0.356909374 | 0.998677884 | Not Sig |
| ENSG00000257890 | NA           | NA                                          | NA        | 4.370984522 | -1.662821131 | 1.904643644 | -0.873035298 | 0.382643838 | 0.998677884 | Not Sig |
| ENSG00000262194 | NA           | NA                                          | NA        | 19.79040065 | -1.648235226 | 1.039784022 | -1.585170757 | 0.112927543 | 0.998677884 | Not Sig |
| ENSG00000272282 | NA           | NA                                          | NA        | 8.436051913 | -1.647950417 | 1.376697972 | -1.197031194 | 0.231294396 | 0.998677884 | Not Sig |
| ENSG00000256417 | NA           | NA                                          | NA        | 43.82923197 | -1.646656335 | 1.483194244 | -1.110209497 | 0.266908761 | 0.998677884 | Not Sig |
| ENSG00000269873 | NA           | NA                                          | NA        | 7.424371882 | -1.645988981 | 1.029312696 | -1.59911462  | 0.109795137 | 0.998677884 | Not Sig |
| ENSG00000222032 | NA           | NA                                          | NA        | 5.172703309 | -1.641483165 | 1.621418153 | -1.012374977 | 0.311358798 | 0.998677884 | Not Sig |
| ENSG00000225872 | LINC01529    | long intergenic non-protein coding RNA 1529 | 644050    | 2.576983391 | -1.631207348 | 1.740459205 | -0.937228142 | 0.348641217 | 0.998677884 | Not Sig |
| ENSG00000261722 | NA           | NA                                          | NA        | 0.739014959 | -1.626060991 | 3.070877989 | -0.529510126 | 0.596451622 | 0.998677884 | Not Sig |

|                 |              |                                                                              |           |             |              |             |              |             |             |         |
|-----------------|--------------|------------------------------------------------------------------------------|-----------|-------------|--------------|-------------|--------------|-------------|-------------|---------|
| ENSG00000262213 | NA           | NA                                                                           | NA        | 0.739014959 | -1.626060991 | 3.070877989 | -0.529510126 | 0.596451622 | 0.998677884 | Not Sig |
| ENSG00000267247 | NA           | NA                                                                           | NA        | 0.739014959 | -1.626060991 | 3.070877989 | -0.529510126 | 0.596451622 | 0.998677884 | Not Sig |
| ENSG00000272203 | NA           | NA                                                                           | NA        | 1.370452187 | -1.606990946 | 2.284288638 | -0.703497325 | 0.481745873 | 0.998677884 | Not Sig |
| ENSG00000255364 | NA           | NA                                                                           | NA        | 0.693482841 | -1.597119275 | 3.1171406   | -0.512366775 | 0.60839434  | 0.998677884 | Not Sig |
| ENSG00000257657 | NA           | NA                                                                           | NA        | 0.693482841 | -1.597119275 | 3.1171406   | -0.512366775 | 0.60839434  | 0.998677884 | Not Sig |
| ENSG00000231324 | NA           | NA                                                                           | NA        | 0.695006626 | -1.597094377 | 3.115354044 | -0.512652608 | 0.608194346 | 0.998677884 | Not Sig |
| ENSG00000225680 | NA           | NA                                                                           | NA        | 3.471689825 | -1.595387218 | 1.975722682 | -0.807495522 | 0.419381053 | 0.998677884 | Not Sig |
| ENSG00000272103 | NA           | NA                                                                           | NA        | 1.465574201 | -1.594793422 | 2.293978664 | -0.695208481 | 0.486924658 | 0.998677884 | Not Sig |
| ENSG00000254480 | LOC100506082 | uncharacterized LOC100506082                                                 | 100506082 | 3.715421475 | -1.58828953  | 2.271581155 | -0.699199994 | 0.484427054 | 0.998677884 | Not Sig |
| ENSG00000225725 | FAM66E       | family with sequence similarity 66 member E                                  | 100132103 | 3.097628666 | -1.583696058 | 1.599201615 | -0.990304189 | 0.32202546  | 0.998677884 | Not Sig |
| ENSG00000229569 | NA           | NA                                                                           | NA        | 5.875267595 | -1.58276318  | 1.127177275 | -1.404183011 | 0.16026436  | 0.998677884 | Not Sig |
| ENSG00000272800 | NA           | NA                                                                           | NA        | 13.14521035 | -1.574721833 | 1.611669463 | -0.977074933 | 0.328532057 | 0.998677884 | Not Sig |
| ENSG00000260360 | NA           | NA                                                                           | NA        | 2.575740212 | -1.551814602 | 1.742131052 | -0.890756525 | 0.373059803 | 0.998677884 | Not Sig |
| ENSG00000273011 | NA           | NA                                                                           | NA        | 1.319338507 | -1.544543103 | 2.305923002 | -0.669815559 | 0.502975374 | 0.998677884 | Not Sig |
| ENSG00000254319 | LOC101927815 | uncharacterized LOC101927815                                                 | 101927815 | 0.668804379 | -1.537489412 | 3.137410817 | -0.490050396 | 0.624098238 | 0.998677884 | Not Sig |
| ENSG00000227482 | NA           | NA                                                                           | NA        | 3.928765702 | -1.536100156 | 1.364077741 | -1.126108952 | 0.260119405 | 0.998677884 | Not Sig |
| ENSG00000251138 | LOC100507377 | uncharacterized LOC100507377                                                 | 100507377 | 79.75006848 | -1.532681358 | 1.963976777 | -0.780396884 | 0.435157301 | 0.998677884 | Not Sig |
| ENSG00000232063 | LOC100132077 | uncharacterized LOC100132077                                                 | 100132077 | 40.73608303 | -1.5299893   | 0.963815599 | -1.587429485 | 0.112415406 | 0.998677884 | Not Sig |
| ENSG00000271584 | NA           | NA                                                                           | NA        | 2.611183954 | -1.529949888 | 1.605688183 | -0.952831256 | 0.340675575 | 0.998677884 | Not Sig |
| ENSG00000253967 | LOC101926892 | uncharacterized LOC101926892                                                 | 101926892 | 1.198014246 | -1.519391681 | 2.74618033  | -0.553274548 | 0.580075427 | 0.998677884 | Not Sig |
| ENSG00000260574 | NA           | NA                                                                           | NA        | 1.917867765 | -1.513406989 | 1.901157222 | -0.796045152 | 0.426005792 | 0.998677884 | Not Sig |
| ENSG00000270076 | NA           | NA                                                                           | NA        | 0.656348662 | -1.504984781 | 2.702432582 | -0.556900028 | 0.577595735 | 0.998677884 | Not Sig |
| ENSG00000235021 | NA           | NA                                                                           | NA        | 0.687901278 | -1.504867059 | 2.674224369 | -0.562730291 | 0.573618554 | 0.998677884 | Not Sig |
| ENSG00000270876 | NA           | NA                                                                           | NA        | 2.484677755 | -1.492349276 | 1.678442138 | -0.889127627 | 0.373934493 | 0.998677884 | Not Sig |
| ENSG00000253343 | NA           | NA                                                                           | NA        | 1.782564002 | -1.491306136 | 2.118498073 | -0.703945005 | 0.481467023 | 0.998677884 | Not Sig |
| ENSG00000226172 | LOC105378933 | uncharacterized LOC105378933                                                 | 105378933 | 10.65851377 | -1.486125984 | 1.8223412   | -0.815503696 | 0.41478405  | 0.998677884 | Not Sig |
| ENSG00000229588 | NA           | NA                                                                           | NA        | 0.675445561 | -1.474792912 | 3.119527599 | -0.472761617 | 0.636383261 | 0.998677884 | Not Sig |
| ENSG00000250126 | NA           | NA                                                                           | NA        | 0.643892945 | -1.47476044  | 3.159505069 | -0.466769449 | 0.640664836 | 0.998677884 | Not Sig |
| ENSG00000250098 | NA           | NA                                                                           | NA        | 2.445786819 | -1.468476608 | 1.467814586 | -1.000451026 | 0.317092287 | 0.998677884 | Not Sig |
| ENSG00000250259 | NA           | NA                                                                           | NA        | 4.508432814 | -1.468269096 | 1.550162816 | -0.947170891 | 0.343551706 | 0.998677884 | Not Sig |
| ENSG00000228679 | NA           | NA                                                                           | NA        | 2.432040289 | -1.460945206 | 1.500784263 | -0.973454508 | 0.33032746  | 0.998677884 | Not Sig |
| ENSG00000197813 | NA           | NA                                                                           | NA        | 87.10050389 | -1.460917023 | 1.006277559 | -1.451803242 | 0.146556322 | 0.998677884 | Not Sig |
| ENSG00000228140 | NA           | NA                                                                           | NA        | 4.970367497 | -1.460203214 | 1.60666345  | -0.908841994 | 0.363433536 | 0.998677884 | Not Sig |
| ENSG00000258556 | NA           | NA                                                                           | NA        | 1.242022579 | -1.447757521 | 2.314386671 | -0.625546949 | 0.531612145 | 0.998677884 | Not Sig |
| ENSG00000240405 | SAMMSON      | survival associated mitochondrial melanoma specific oncogenic non-coding RNA | 101927152 | 7.91338319  | -1.444680011 | 1.817465896 | -0.794886998 | 0.426679238 | 0.998677884 | Not Sig |

|                 |              |                                             |           |             |              |             |              |             |             |         |
|-----------------|--------------|---------------------------------------------|-----------|-------------|--------------|-------------|--------------|-------------|-------------|---------|
| ENSG00000249951 | NA           | NA                                          | NA        | 1.737200315 | -1.441211709 | 2.534651431 | -0.568603513 | 0.56962524  | 0.998677884 | Not Sig |
| ENSG00000234690 | LOC101927043 | uncharacterized LOC101927043                | 101927043 | 94.51224049 | -1.429695028 | 0.839089678 | -1.703864397 | 0.088406424 | 0.998677884 | Not Sig |
| ENSG00000250994 | NA           | NA                                          | NA        | 3.705382512 | -1.428539026 | 1.329233669 | -1.074708729 | 0.282505155 | 0.998677884 | Not Sig |
| ENSG00000271722 | NA           | NA                                          | NA        | 6.008102005 | -1.424892731 | 1.090110349 | -1.307108709 | 0.191175794 | 0.998677884 | Not Sig |
| ENSG00000272108 | NA           | NA                                          | NA        | 13.38386048 | -1.422189669 | 1.292460496 | -1.100373801 | 0.271169289 | 0.998677884 | Not Sig |
| ENSG00000238261 | NA           | NA                                          | NA        | 79.77807388 | -1.418503012 | 0.993607225 | -1.427629526 | 0.153398521 | 0.998677884 | Not Sig |
| ENSG00000225667 | NA           | NA                                          | NA        | 0.617690698 | -1.41102996  | 3.185192546 | -0.442996754 | 0.657768082 | 0.998677884 | Not Sig |
| ENSG00000273245 | NA           | NA                                          | NA        | 20.34403422 | -1.407585655 | 0.880031408 | -1.599472066 | 0.109715751 | 0.998677884 | Not Sig |
| ENSG00000269895 | NA           | NA                                          | NA        | 21.95837971 | -1.400693479 | 1.07787299  | -1.299497707 | 0.19377318  | 0.998677884 | Not Sig |
| ENSG00000231829 | NA           | NA                                          | NA        | 13.028141   | -1.392188715 | 0.902090448 | -1.543291715 | 0.122760013 | 0.998677884 | Not Sig |
| ENSG00000269110 | NA           | NA                                          | NA        | 1.124924527 | -1.387491661 | 2.364400877 | -0.586825895 | 0.557320643 | 0.998677884 | Not Sig |
| ENSG00000263508 | NA           | NA                                          | NA        | 1.666590111 | -1.379938962 | 2.120387145 | -0.650795759 | 0.515178338 | 0.998677884 | Not Sig |
| ENSG00000264254 | NA           | NA                                          | NA        | 0.605234981 | -1.377653768 | 3.197881457 | -0.430802013 | 0.666612336 | 0.998677884 | Not Sig |
| ENSG00000271109 | LOC102723540 | uncharacterized LOC102723540                | 102723540 | 34.18429185 | -1.370873709 | 0.896358013 | -1.529381886 | 0.1261698   | 0.998677884 | Not Sig |
| ENSG00000237760 | NA           | NA                                          | NA        | 1.83344649  | -1.357158864 | 1.773702396 | -0.765155906 | 0.444178713 | 0.998677884 | Not Sig |
| ENSG00000224714 | LOC101928887 | uncharacterized LOC101928887                | 101928887 | 2.276942489 | -1.351247765 | 2.077376941 | -0.650458633 | 0.515396014 | 0.998677884 | Not Sig |
| ENSG00000260640 | NA           | NA                                          | NA        | 1.100013093 | -1.349816126 | 2.368166467 | -0.569983633 | 0.568688799 | 0.998677884 | Not Sig |
| ENSG00000273454 | NA           | NA                                          | NA        | 6.214915542 | -1.340327223 | 1.078201465 | -1.243113894 | 0.213825866 | 0.998677884 | Not Sig |
| ENSG00000258845 | NA           | NA                                          | NA        | 1.086266563 | -1.33560306  | 2.800419405 | -0.476929655 | 0.633412214 | 0.998677884 | Not Sig |
| ENSG00000272983 | NA           | NA                                          | NA        | 49.26758942 | -1.325211734 | 0.836109222 | -1.584974427 | 0.112972145 | 0.998677884 | Not Sig |
| ENSG00000237689 | NA           | NA                                          | NA        | 1.731618753 | -1.314974067 | 1.882578095 | -0.698496424 | 0.484866794 | 0.998677884 | Not Sig |
| ENSG00000236204 | LINC01376    | long intergenic non-protein coding RNA 1376 | 400945    | 122.0733468 | -1.313630907 | 1.092705525 | -1.202181993 | 0.229293024 | 0.998677884 | Not Sig |
| ENSG00000273113 | NA           | NA                                          | NA        | 6.07933628  | -1.310422654 | 1.240384186 | -1.056465141 | 0.290755759 | 0.998677884 | Not Sig |
| ENSG00000253123 | NA           | NA                                          | NA        | 5.475075715 | -1.306887575 | 1.649255254 | -0.792410739 | 0.42812122  | 0.998677884 | Not Sig |
| ENSG00000273329 | NA           | NA                                          | NA        | 253.5215519 | -1.301651109 | 0.721838355 | -1.803244591 | 0.07134981  | 0.998677884 | Not Sig |
| ENSG00000244219 | TMEM225B     | transmembrane protein 225B                  | 100289187 | 13.39824798 | -1.29606842  | 1.042848832 | -1.242815238 | 0.213935926 | 0.998677884 | Not Sig |
| ENSG00000267834 | NA           | NA                                          | NA        | 5.141841183 | -1.290667588 | 1.354158671 | -0.953114001 | 0.340532313 | 0.998677884 | Not Sig |
| ENSG00000272832 | NA           | NA                                          | NA        | 1.062878915 | -1.288481662 | 2.374332163 | -0.54267119  | 0.587356213 | 0.998677884 | Not Sig |
| ENSG00000265542 | NA           | NA                                          | NA        | 3.741802315 | -1.283048591 | 1.441306079 | -0.890198557 | 0.373359279 | 0.998677884 | Not Sig |
| ENSG00000249738 | LOC285626    | uncharacterized LOC285626                   | 285626    | 21.7235986  | -1.278598194 | 1.084909642 | -1.178529662 | 0.238585514 | 0.998677884 | Not Sig |
| ENSG00000270102 | NA           | NA                                          | NA        | 7.296216232 | -1.275857094 | 1.04104334  | -1.225556176 | 0.220365738 | 0.998677884 | Not Sig |
| ENSG00000231156 | NA           | NA                                          | NA        | 1.048899412 | -1.273560493 | 2.812858715 | -0.452763762 | 0.65071886  | 0.998677884 | Not Sig |
| ENSG00000245149 | RNF139-AS1   | RNF139 antisense RNA 1 (head to head)       | 101927612 | 70.99700568 | -1.27283323  | 0.759512741 | -1.675855007 | 0.093766596 | 0.998677884 | Not Sig |
| ENSG00000266385 | NA           | NA                                          | NA        | 14.71331457 | -1.260909204 | 1.021611786 | -1.234235177 | 0.217115283 | 0.998677884 | Not Sig |
| ENSG00000259967 | NA           | NA                                          | NA        | 3.804361506 | -1.258519119 | 1.368315797 | -0.919757794 | 0.357699343 | 0.998677884 | Not Sig |

|                 |            |                                                            |           |             |              |             |              |             |             |         |
|-----------------|------------|------------------------------------------------------------|-----------|-------------|--------------|-------------|--------------|-------------|-------------|---------|
| ENSG00000254333 | NDST1-AS1  | NDST1 antisense RNA 1                                      | 102546298 | 2.692503279 | -1.242340123 | 1.476328165 | -0.841506754 | 0.400064103 | 0.998677884 | Not Sig |
| ENSG00000225640 | LINC01729  | long intergenic non-protein coding RNA 1729                | 101929207 | 1.655826611 | -1.237270277 | 1.670868699 | -0.740495215 | 0.458999563 | 0.998677884 | Not Sig |
| ENSG00000273019 | NA         | NA                                                         | NA        | 1.217279577 | -1.237204366 | 2.305654782 | -0.536595667 | 0.591546938 | 0.998677884 | Not Sig |
| ENSG00000230131 | NA         | NA                                                         | NA        | 2.776693361 | -1.236497259 | 1.434125967 | -0.862195712 | 0.388579829 | 0.998677884 | Not Sig |
| ENSG00000241593 | NA         | NA                                                         | NA        | 1.119342965 | -1.235117416 | 2.42320309  | -0.509704458 | 0.61025853  | 0.998677884 | Not Sig |
| ENSG00000265787 | CYP4F35P   | cytochrome P450 family 4 subfamily F member 35, pseudogene | 284233    | 17.24061444 | -1.234333927 | 0.852920165 | -1.447185772 | 0.1478449   | 0.998677884 | Not Sig |
| ENSG00000231298 | LINC00704  | long intergenic non-protein coding RNA 704                 | 100216001 | 1.120633778 | -1.234165024 | 2.422508838 | -0.509457388 | 0.61043166  | 0.998677884 | Not Sig |
| ENSG00000232316 | NA         | NA                                                         | NA        | 2.083441713 | -1.222984146 | 1.702359639 | -0.718405276 | 0.472507435 | 0.998677884 | Not Sig |
| ENSG00000267454 | ZNF582-AS1 | ZNF582 antisense RNA 1 (head to head)                      | 386758    | 19.68801015 | -1.21375865  | 1.060838132 | -1.144150662 | 0.25256116  | 0.998677884 | Not Sig |
| ENSG00000270810 | NA         | NA                                                         | NA        | 3.878165698 | -1.212370702 | 1.260486272 | -0.961827772 | 0.336136125 | 0.998677884 | Not Sig |
| ENSG00000272005 | NA         | NA                                                         | NA        | 184.5442598 | -1.210833486 | 0.838461417 | -1.444113541 | 0.14870704  | 0.998677884 | Not Sig |
| ENSG00000272784 | NA         | NA                                                         | NA        | 1.567978376 | -1.210253199 | 2.203219751 | -0.549311161 | 0.582791929 | 0.998677884 | Not Sig |
| ENSG00000237609 | NA         | NA                                                         | NA        | 16.63508868 | -1.208506572 | 0.993387055 | -1.21655156  | 0.223774882 | 0.998677884 | Not Sig |
| ENSG00000230058 | NA         | NA                                                         | NA        | 2.055482708 | -1.207618723 | 1.729391664 | -0.698291051 | 0.484995194 | 0.998677884 | Not Sig |
| ENSG00000182366 | FAM87A     | family with sequence similarity 87 member A                | 157693    | 3.228354328 | -1.204151272 | 1.619407141 | -0.743575375 | 0.457133406 | 0.998677884 | Not Sig |
| ENSG00000232309 | NA         | NA                                                         | NA        | 1.04524126  | -1.202106194 | 2.468054422 | -0.487066324 | 0.626211331 | 0.998677884 | Not Sig |
| ENSG00000261728 | NA         | NA                                                         | NA        | 1.04524126  | -1.202106194 | 2.468054422 | -0.487066324 | 0.626211331 | 0.998677884 | Not Sig |
| ENSG00000270039 | NA         | NA                                                         | NA        | 8.714513499 | -1.200586772 | 1.004072584 | -1.195717113 | 0.231806971 | 0.998677884 | Not Sig |
| ENSG00000265799 | NA         | NA                                                         | NA        | 2.822225479 | -1.199498609 | 1.652149696 | -0.726022958 | 0.467824697 | 0.998677884 | Not Sig |
| ENSG00000226051 | ZNF503-AS1 | ZNF503 antisense RNA 1                                     | 253264    | 77.77502856 | -1.194150576 | 0.908695859 | -1.314136698 | 0.188800206 | 0.998677884 | Not Sig |
| ENSG00000215241 | LINC02449  | long intergenic non-protein coding RNA 2449                | 101927905 | 40.72450349 | -1.189314238 | 1.032954237 | -1.151371663 | 0.249579367 | 0.998677884 | Not Sig |
| ENSG00000261008 | LINC01572  | long intergenic non-protein coding RNA 1572                | 101927957 | 88.64860737 | -1.188955216 | 1.253672483 | -0.948377851 | 0.342937131 | 0.998677884 | Not Sig |
| ENSG00000228463 | NA         | NA                                                         | NA        | 13.97130127 | -1.188033426 | 1.053912509 | -1.12726001  | 0.259632565 | 0.998677884 | Not Sig |
| ENSG00000271643 | NA         | NA                                                         | NA        | 27.96852466 | -1.180874776 | 0.881398522 | -1.339773946 | 0.180318848 | 0.998677884 | Not Sig |
| ENSG00000267457 | NA         | NA                                                         | NA        | 15.14727344 | -1.180035778 | 1.074340943 | -1.098381092 | 0.272038115 | 0.998677884 | Not Sig |
| ENSG00000185186 | LINC00313  | long intergenic non-protein coding RNA 313                 | 114038    | 71.50410678 | -1.17619406  | 0.876318751 | -1.342198896 | 0.179531514 | 0.998677884 | Not Sig |
| ENSG00000272555 | NA         | NA                                                         | NA        | 8.155654191 | -1.168029956 | 1.165434157 | -1.002227323 | 0.316233814 | 0.998677884 | Not Sig |
| ENSG00000253177 | NA         | NA                                                         | NA        | 2.273286117 | -1.166902869 | 2.095954871 | -0.556740455 | 0.577704772 | 0.998677884 | Not Sig |
| ENSG00000259590 | NA         | NA                                                         | NA        | 3.169477084 | -1.158320884 | 1.656574534 | -0.699226543 | 0.484410465 | 0.998677884 | Not Sig |
| ENSG00000273230 | NA         | NA                                                         | NA        | 99.97882037 | -1.157208363 | 1.033218492 | -1.120003535 | 0.262712256 | 0.998677884 | Not Sig |
| ENSG00000242569 | NA         | NA                                                         | NA        | 32.59543722 | -1.154892238 | 1.215156993 | -0.950405787 | 0.341906105 | 0.998677884 | Not Sig |
| ENSG00000273165 | NA         | NA                                                         | NA        | 17.65949377 | -1.143630664 | 1.04343466  | -1.096025183 | 0.273067754 | 0.998677884 | Not Sig |
| ENSG00000271382 | NA         | NA                                                         | NA        | 4.156432994 | -1.142714127 | 1.529540411 | -0.747096395 | 0.455005376 | 0.998677884 | Not Sig |
| ENSG00000227388 | NA         | NA                                                         | NA        | 64.02419648 | -1.14206263  | 1.012645216 | -1.127801338 | 0.259403828 | 0.998677884 | Not Sig |
| ENSG00000234871 | NA         | NA                                                         | NA        | 6.167465218 | -1.134510547 | 1.201990594 | -0.943859755 | 0.34524132  | 0.998677884 | Not Sig |

|                 |              |                                                               |           |             |              |             |              |             |             |         |
|-----------------|--------------|---------------------------------------------------------------|-----------|-------------|--------------|-------------|--------------|-------------|-------------|---------|
| ENSG00000229625 | NA           | NA                                                            | NA        | 0.548939363 | -1.132859691 | 4.020211012 | -0.281791102 | 0.778103694 | 0.998677884 | Not Sig |
| ENSG00000238156 | NA           | NA                                                            | NA        | 0.548939363 | -1.132859691 | 4.020211012 | -0.281791102 | 0.778103694 | 0.998677884 | Not Sig |
| ENSG00000239739 | NA           | NA                                                            | NA        | 0.548939363 | -1.132859691 | 4.020211012 | -0.281791102 | 0.778103694 | 0.998677884 | Not Sig |
| ENSG00000249857 | NA           | NA                                                            | NA        | 0.547415578 | -1.132859691 | 4.020211012 | -0.281791102 | 0.778103694 | 0.998677884 | Not Sig |
| ENSG00000259727 | NA           | NA                                                            | NA        | 0.548939363 | -1.132859691 | 4.020211012 | -0.281791102 | 0.778103694 | 0.998677884 | Not Sig |
| ENSG00000261043 | NA           | NA                                                            | NA        | 0.547415578 | -1.132859691 | 4.020211012 | -0.281791102 | 0.778103694 | 0.998677884 | Not Sig |
| ENSG00000272971 | NA           | NA                                                            | NA        | 0.548939363 | -1.132859691 | 4.020211012 | -0.281791102 | 0.778103694 | 0.998677884 | Not Sig |
| ENSG00000229642 | NA           | NA                                                            | NA        | 0.580491979 | -1.132325222 | 3.986259799 | -0.284057056 | 0.776366656 | 0.998677884 | Not Sig |
| ENSG00000232650 | LINC01780    | long intergenic non-protein coding RNA 1780                   | 105378934 | 0.580491979 | -1.132325222 | 3.986259799 | -0.284057056 | 0.776366656 | 0.998677884 | Not Sig |
| ENSG00000261790 | NA           | NA                                                            | NA        | 0.580491979 | -1.132325222 | 3.986259799 | -0.284057056 | 0.776366656 | 0.998677884 | Not Sig |
| ENSG00000262117 | BCAR4        | breast cancer anti-estrogen resistance 4 (non-protein coding) | 400500    | 0.580491979 | -1.132325222 | 3.986259799 | -0.284057056 | 0.776366656 | 0.998677884 | Not Sig |
| ENSG00000245975 | LOC101928725 | uncharacterized LOC101928725                                  | 101928725 | 11.99290508 | -1.130461992 | 0.872416786 | -1.295782028 | 0.195050591 | 0.998677884 | Not Sig |
| ENSG00000266877 | NA           | NA                                                            | NA        | 1.089249593 | -1.130236669 | 2.457754774 | -0.459865517 | 0.645612753 | 0.998677884 | Not Sig |
| ENSG00000272334 | NA           | NA                                                            | NA        | 3.157468624 | -1.1300177   | 1.636971852 | -0.690309793 | 0.489999391 | 0.998677884 | Not Sig |
| ENSG00000260433 | LINC01917    | long intergenic non-protein coding RNA 1917                   | 101928167 | 1.650012076 | -1.129321669 | 2.178055272 | -0.518500005 | 0.604109457 | 0.998677884 | Not Sig |
| ENSG00000258593 | NA           | NA                                                            | NA        | 17.10639106 | -1.125269939 | 1.091750427 | -1.030702541 | 0.302680333 | 0.998677884 | Not Sig |
| ENSG00000270237 | NA           | NA                                                            | NA        | 5.435872138 | -1.12200105  | 1.20645248  | -0.930000202 | 0.35237098  | 0.998677884 | Not Sig |
| ENSG00000253948 | LOC105375666 | uncharacterized LOC105375666                                  | 105375666 | 11.39111729 | -1.120577903 | 0.908385519 | -1.233592874 | 0.21735465  | 0.998677884 | Not Sig |
| ENSG00000248227 | NA           | NA                                                            | NA        | 0.995651364 | -1.119483912 | 2.817525038 | -0.397328825 | 0.691124994 | 0.998677884 | Not Sig |
| ENSG00000227356 | LINC00866    | long intergenic non-protein coding RNA 866                    | 100505561 | 2.083377172 | -1.119372308 | 1.638256402 | -0.683270522 | 0.494435917 | 0.998677884 | Not Sig |
| ENSG00000255910 | NA           | NA                                                            | NA        | 64.12550069 | -1.116788642 | 1.262017592 | -0.884923197 | 0.376198056 | 0.998677884 | Not Sig |
| ENSG00000237422 | NA           | NA                                                            | NA        | 7.643832099 | -1.116650557 | 1.152898005 | -0.96855971  | 0.332764914 | 0.998677884 | Not Sig |
| ENSG00000249258 | NA           | NA                                                            | NA        | 12.12593311 | -1.116453999 | 0.975935452 | -1.143983442 | 0.252630504 | 0.998677884 | Not Sig |
| ENSG00000257433 | LOC105369748 | uncharacterized LOC105369748                                  | 105369748 | 22.7761051  | -1.115579829 | 0.977364824 | -1.141415981 | 0.253696858 | 0.998677884 | Not Sig |
| ENSG00000253891 | NA           | NA                                                            | NA        | 0.994127579 | -1.114391148 | 2.436217888 | -0.457426716 | 0.647364366 | 0.998677884 | Not Sig |
| ENSG00000250371 | NA           | NA                                                            | NA        | 4.255493767 | -1.110550974 | 1.409621593 | -0.787836239 | 0.430792501 | 0.998677884 | Not Sig |
| ENSG00000257613 | NA           | NA                                                            | NA        | 7.714071295 | -1.109798047 | 1.141265943 | -0.972427201 | 0.330838065 | 0.998677884 | Not Sig |
| ENSG00000249664 | NA           | NA                                                            | NA        | 4.961881363 | -1.107510893 | 1.847711327 | -0.599396062 | 0.548908802 | 0.998677884 | Not Sig |
| ENSG00000232987 | LINC01219    | long intergenic non-protein coding RNA 1219                   | 104355220 | 6.114661101 | -1.095873886 | 1.029311351 | -1.064667056 | 0.287026623 | 0.998677884 | Not Sig |
| ENSG00000273375 | NA           | NA                                                            | NA        | 6.696676865 | -1.095459487 | 1.010025532 | -1.084585935 | 0.278105087 | 0.998677884 | Not Sig |
| ENSG00000269947 | NA           | NA                                                            | NA        | 9.857739102 | -1.092630663 | 0.942658468 | -1.159094944 | 0.246417487 | 0.998677884 | Not Sig |
| ENSG00000272463 | NA           | NA                                                            | NA        | 41.6592996  | -1.08832479  | 1.250994636 | -0.869967591 | 0.384318116 | 0.998677884 | Not Sig |
| ENSG00000261320 | NA           | NA                                                            | NA        | 2.014290753 | -1.084966264 | 2.048858081 | -0.529546812 | 0.59642618  | 0.998677884 | Not Sig |
| ENSG00000266490 | NA           | NA                                                            | NA        | 22.27862027 | -1.068898902 | 0.963321831 | -1.109596884 | 0.267172775 | 0.998677884 | Not Sig |
| ENSG00000272071 | NA           | NA                                                            | NA        | 3.995207591 | -1.063642922 | 1.366595477 | -0.778315851 | 0.436382833 | 0.998677884 | Not Sig |

|                 |           |                                               |           |             |              |             |              |             |             |         |
|-----------------|-----------|-----------------------------------------------|-----------|-------------|--------------|-------------|--------------|-------------|-------------|---------|
| ENSG00000267722 | NA        | NA                                            | NA        | 3.694797605 | -1.061892621 | 1.891140474 | -0.561509119 | 0.574450516 | 0.998677884 | Not Sig |
| ENSG00000223759 | NA        | NA                                            | NA        | 17.87251467 | -1.060963667 | 0.835911733 | -1.269229304 | 0.204359292 | 0.998677884 | Not Sig |
| ENSG00000227740 | NA        | NA                                            | NA        | 5.635088763 | -1.059274992 | 1.161183674 | -0.912237242 | 0.361643843 | 0.998677884 | Not Sig |
| ENSG00000259336 | NA        | NA                                            | NA        | 12.19724748 | -1.059184059 | 1.028528401 | -1.029805359 | 0.303101385 | 0.998677884 | Not Sig |
| ENSG00000270009 | NA        | NA                                            | NA        | 1.586675651 | -1.056850688 | 2.152901953 | -0.490895875 | 0.623500095 | 0.998677884 | Not Sig |
| ENSG00000273160 | NA        | NA                                            | NA        | 7.360559679 | -1.055787094 | 1.166883793 | -0.904791977 | 0.365575603 | 0.998677884 | Not Sig |
| ENSG00000248994 | NA        | NA                                            | NA        | 5.213971701 | -1.053154348 | 1.510557998 | -0.697195572 | 0.48568041  | 0.998677884 | Not Sig |
| ENSG00000234902 | NA        | NA                                            | NA        | 13.40593568 | -1.052326802 | 1.554583837 | -0.676918656 | 0.498457566 | 0.998677884 | Not Sig |
| ENSG00000254211 | NA        | NA                                            | NA        | 1.992081742 | -1.049221607 | 1.737217961 | -0.60396659  | 0.545865855 | 0.998677884 | Not Sig |
| ENSG00000244063 | NA        | NA                                            | NA        | 2.140965383 | -1.049053896 | 1.780417514 | -0.589217915 | 0.555715101 | 0.998677884 | Not Sig |
| ENSG00000256596 | NA        | NA                                            | NA        | 2.462414365 | -1.047385393 | 1.810780425 | -0.578416565 | 0.562982913 | 0.998677884 | Not Sig |
| ENSG00000225873 | LINC00694 | long intergenic non-protein coding RNA 694    | 102724231 | 12.44628711 | -1.04589598  | 1.206317721 | -0.86701535  | 0.385933599 | 0.998677884 | Not Sig |
| ENSG00000271752 | NA        | NA                                            | NA        | 0.9569934   | -1.043575984 | 2.444366195 | -0.426931115 | 0.669429502 | 0.998677884 | Not Sig |
| ENSG00000272754 | NA        | NA                                            | NA        | 17.45478883 | -1.041621547 | 0.85686267  | -1.215622507 | 0.224128756 | 0.998677884 | Not Sig |
| ENSG00000243179 | NA        | NA                                            | NA        | 5.084756477 | -1.039914931 | 1.832155295 | -0.567591041 | 0.570312692 | 0.998677884 | Not Sig |
| ENSG00000259757 | NA        | NA                                            | NA        | 4.330469423 | -1.039775118 | 1.560133056 | -0.666465667 | 0.505113501 | 0.998677884 | Not Sig |
| ENSG00000260417 | NA        | NA                                            | NA        | 125.499928  | -1.038337193 | 0.808131148 | -1.284862235 | 0.19884043  | 0.998677884 | Not Sig |
| ENSG00000228065 | NA        | NA                                            | NA        | 260.765497  | -1.035262628 | 1.209739365 | -0.855773283 | 0.392123196 | 0.998677884 | Not Sig |
| ENSG00000227116 | NA        | NA                                            | NA        | 2.925687494 | -1.031198574 | 1.454276927 | -0.709079925 | 0.47827488  | 0.998677884 | Not Sig |
| ENSG00000260823 | NA        | NA                                            | NA        | 1.59394943  | -1.029726628 | 2.187849981 | -0.470656872 | 0.637885788 | 0.998677884 | Not Sig |
| ENSG00000249231 | CASC16    | cancer susceptibility 16 (non-protein coding) | 643714    | 9.208711852 | -1.028757862 | 1.464425944 | -0.702499069 | 0.482367982 | 0.998677884 | Not Sig |
| ENSG00000273488 | NA        | NA                                            | NA        | 18.67914529 | -1.024140165 | 1.083645913 | -0.945087462 | 0.344614226 | 0.998677884 | Not Sig |
| ENSG00000260737 | LINC01227 | long intergenic non-protein coding RNA 1227   | 101928276 | 1.025680195 | -1.022346656 | 2.427695056 | -0.421118235 | 0.673668747 | 0.998677884 | Not Sig |
| ENSG00000247095 | MIR210HG  | MIR210 host gene                              | 100506211 | 143.2471508 | -1.021550441 | 0.678270946 | -1.506109685 | 0.132039019 | 0.998677884 | Not Sig |
| ENSG00000254083 | LINC01591 | long intergenic non-protein coding RNA 1591   | 286094    | 1.02720398  | -1.017651754 | 2.427329304 | -0.419247505 | 0.675035257 | 0.998677884 | Not Sig |
| ENSG00000241882 | NA        | NA                                            | NA        | 2.102074447 | -1.017532601 | 1.811101597 | -0.561830768 | 0.574231327 | 0.998677884 | Not Sig |
| ENSG00000231705 | NA        | NA                                            | NA        | 11.4488841  | -1.016159025 | 0.891812783 | -1.139430881 | 0.254523482 | 0.998677884 | Not Sig |
| ENSG00000273075 | NA        | NA                                            | NA        | 4.323865811 | -1.015775697 | 1.52871158  | -0.664465233 | 0.506392593 | 0.998677884 | Not Sig |
| ENSG00000271975 | NA        | NA                                            | NA        | 111.6131577 | -1.011641143 | 0.914732362 | -1.105942224 | 0.268751528 | 0.998677884 | Not Sig |
| ENSG00000224715 | LOC339685 | uncharacterized LOC339685                     | 339685    | 1.109870277 | -1.007210023 | 2.825957624 | -0.356413703 | 0.721530768 | 0.998677884 | Not Sig |
| ENSG00000203585 | LINC02408 | long intergenic non-protein coding RNA 2408   | 100507175 | 15.07995283 | -1.007067235 | 1.139688358 | -0.88363387  | 0.376893889 | 0.998677884 | Not Sig |
| ENSG00000269423 | NA        | NA                                            | NA        | 4.471225666 | -1.004814028 | 1.28511137  | -0.781888676 | 0.43428     | 0.998677884 | Not Sig |
| ENSG00000237520 | NA        | NA                                            | NA        | 1.388202114 | -0.998507452 | 2.281632134 | -0.437628589 | 0.661655543 | 0.998677884 | Not Sig |
| ENSG00000259584 | NA        | NA                                            | NA        | 3.390816165 | -0.997995519 | 1.886118732 | -0.529126561 | 0.596717657 | 0.998677884 | Not Sig |
| ENSG00000214146 | LINC02026 | long intergenic non-protein coding RNA 2026   | 647323    | 26.85128562 | -0.996697308 | 0.89230819  | -1.116987739 | 0.263999568 | 0.998677884 | Not Sig |



|                 |              |                                            |           |             |              |             |              |             |             |         |
|-----------------|--------------|--------------------------------------------|-----------|-------------|--------------|-------------|--------------|-------------|-------------|---------|
| ENSG00000271553 | NA           | NA                                         | NA        | 20.50229614 | -0.995452656 | 1.059052465 | -0.939946498 | 0.347245005 | 0.998677884 | Not Sig |
| ENSG00000259815 | NA           | NA                                         | NA        | 0.508757614 | -0.994218599 | 3.400389985 | -0.292383698 | 0.769993271 | 0.998677884 | Not Sig |
| ENSG00000223783 | NA           | NA                                         | NA        | 0.541834015 | -0.993498173 | 3.342175794 | -0.297260896 | 0.766267333 | 0.998677884 | Not Sig |
| ENSG00000250064 | NA           | NA                                         | NA        | 0.541834015 | -0.993498173 | 3.342175794 | -0.297260896 | 0.766267333 | 0.998677884 | Not Sig |
| ENSG00000272864 | NA           | NA                                         | NA        | 4.128523404 | -0.993086513 | 1.875466023 | -0.529514532 | 0.596448566 | 0.998677884 | Not Sig |
| ENSG00000260388 | LINC00562    | long intergenic non-protein coding RNA 562 | 100861549 | 8.443280361 | -0.987326398 | 0.956421971 | -1.032312543 | 0.301925727 | 0.998677884 | Not Sig |
| ENSG00000272824 | NA           | NA                                         | NA        | 7.356906445 | -0.986090594 | 1.797235071 | -0.548670906 | 0.583231316 | 0.998677884 | Not Sig |
| ENSG00000249746 | NA           | NA                                         | NA        | 20.70706697 | -0.980999986 | 1.453767034 | -0.674798618 | 0.499803718 | 0.998677884 | Not Sig |
| ENSG00000273449 | NA           | NA                                         | NA        | 23.35524417 | -0.980674194 | 1.198432762 | -0.818297217 | 0.413187495 | 0.998677884 | Not Sig |
| ENSG00000253844 | NA           | NA                                         | NA        | 1.916056628 | -0.979798936 | 2.117146493 | -0.462792225 | 0.643513305 | 0.998677884 | Not Sig |
| ENSG00000272156 | NA           | NA                                         | NA        | 20.04774005 | -0.975092298 | 0.893555617 | -1.091249699 | 0.275163025 | 0.998677884 | Not Sig |
| ENSG00000272130 | NA           | NA                                         | NA        | 4.329561327 | -0.974489077 | 1.228800472 | -0.793040937 | 0.427753972 | 0.998677884 | Not Sig |
| ENSG00000269967 | NA           | NA                                         | NA        | 72.87086996 | -0.972196382 | 1.159301675 | -0.838605173 | 0.401690907 | 0.998677884 | Not Sig |
| ENSG00000230537 | LOC100507103 | uncharacterized LOC100507103               | 100507103 | 13.01249355 | -0.972124961 | 0.923175416 | -1.053023016 | 0.292330444 | 0.998677884 | Not Sig |
| ENSG00000234129 | NA           | NA                                         | NA        | 17.07424201 | -0.968863468 | 1.045780021 | -0.926450544 | 0.354211888 | 0.998677884 | Not Sig |
| ENSG00000251584 | NA           | NA                                         | NA        | 2.79268653  | -0.9568702   | 1.726491958 | -0.554228009 | 0.579422812 | 0.998677884 | Not Sig |
| ENSG00000226087 | NA           | NA                                         | NA        | 0.904355935 | -0.956543431 | 2.502640604 | -0.382213662 | 0.702302889 | 0.998677884 | Not Sig |
| ENSG00000258768 | NA           | NA                                         | NA        | 33.31534857 | -0.955549487 | 0.860190209 | -1.110858362 | 0.26662932  | 0.998677884 | Not Sig |
| ENSG00000269979 | NA           | NA                                         | NA        | 35.77604664 | -0.955543726 | 0.722285422 | -1.322944776 | 0.185853743 | 0.998677884 | Not Sig |
| ENSG00000272777 | NA           | NA                                         | NA        | 10.41055456 | -0.953874214 | 1.003829879 | -0.950234929 | 0.341992894 | 0.998677884 | Not Sig |
| ENSG00000255136 | NA           | NA                                         | NA        | 0.496301897 | -0.94988546  | 3.418531179 | -0.277863623 | 0.781117049 | 0.998677884 | Not Sig |
| ENSG00000256717 | NA           | NA                                         | NA        | 0.496301897 | -0.94988546  | 3.418531179 | -0.277863623 | 0.781117049 | 0.998677884 | Not Sig |
| ENSG00000260303 | NA           | NA                                         | NA        | 0.496301897 | -0.94988546  | 3.418531179 | -0.277863623 | 0.781117049 | 0.998677884 | Not Sig |
| ENSG00000263082 | NA           | NA                                         | NA        | 0.496301897 | -0.94988546  | 3.418531179 | -0.277863623 | 0.781117049 | 0.998677884 | Not Sig |
| ENSG00000263655 | NA           | NA                                         | NA        | 0.496301897 | -0.94988546  | 3.418531179 | -0.277863623 | 0.781117049 | 0.998677884 | Not Sig |
| ENSG00000229582 | NA           | NA                                         | NA        | 0.497825682 | -0.94986408  | 3.415620161 | -0.278094178 | 0.780940065 | 0.998677884 | Not Sig |
| ENSG00000230836 | NA           | NA                                         | NA        | 0.497825682 | -0.94986408  | 3.415620161 | -0.278094178 | 0.780940065 | 0.998677884 | Not Sig |
| ENSG00000250577 | NA           | NA                                         | NA        | 0.497825682 | -0.94986408  | 3.415620161 | -0.278094178 | 0.780940065 | 0.998677884 | Not Sig |
| ENSG00000259443 | NA           | NA                                         | NA        | 0.529378298 | -0.949430784 | 3.358201484 | -0.282720018 | 0.77739147  | 0.998677884 | Not Sig |
| ENSG00000269489 | NA           | NA                                         | NA        | 1.51640053  | -0.948654459 | 1.911941748 | -0.496173306 | 0.619772143 | 0.998677884 | Not Sig |
| ENSG00000254839 | LOC101929269 | uncharacterized LOC101929269               | 101929269 | 3.307027487 | -0.939759326 | 1.911605282 | -0.491607412 | 0.622996902 | 0.998677884 | Not Sig |
| ENSG00000249846 | NA           | NA                                         | NA        | 58.1739424  | -0.938139935 | 0.902331949 | -1.039683829 | 0.298486816 | 0.998677884 | Not Sig |
| ENSG00000269913 | NA           | NA                                         | NA        | 12.99261446 | -0.93670568  | 0.941078507 | -0.995353388 | 0.319564421 | 0.998677884 | Not Sig |
| ENSG00000261839 | NA           | NA                                         | NA        | 2.801484095 | -0.935802279 | 1.417986679 | -0.65995139  | 0.509285024 | 0.998677884 | Not Sig |
| ENSG00000234427 | NA           | NA                                         | NA        | 5.89428656  | -0.934668501 | 1.574789187 | -0.59351976  | 0.552833363 | 0.998677884 | Not Sig |

|                 |           |                                                                                                           |           |             |              |             |              |             |             |         |
|-----------------|-----------|-----------------------------------------------------------------------------------------------------------|-----------|-------------|--------------|-------------|--------------|-------------|-------------|---------|
| ENSG00000228569 | NA        | NA                                                                                                        | NA        | 1.866699705 | -0.929797219 | 1.807629538 | -0.51437377  | 0.606990695 | 0.998677884 | Not Sig |
| ENSG00000255366 | NA        | NA                                                                                                        | NA        | 22.45613087 | -0.927153664 | 1.304386107 | -0.710796948 | 0.477210072 | 0.998677884 | Not Sig |
| ENSG00000245330 | NA        | NA                                                                                                        | NA        | 1.936910285 | -0.925183904 | 1.601691378 | -0.577629322 | 0.563514406 | 0.998677884 | Not Sig |
| ENSG00000272216 | NA        | NA                                                                                                        | NA        | 145.2127183 | -0.918369859 | 0.682951891 | -1.344706517 | 0.178720029 | 0.998677884 | Not Sig |
| ENSG00000266835 | GAPLINC   | <small>gastric adenocarcinoma associated, positive CD41 regulator, long intergenic non-coding RNA</small> | 100505592 | 17.17873445 | -0.915229761 | 0.847121241 | -1.080399967 | 0.27996411  | 0.998677884 | Not Sig |
| ENSG00000226029 | LINC01772 | <small>long intergenic non-protein coding RNA 1772</small>                                                | 107984921 | 48.28962286 | -0.910252305 | 0.795006076 | -1.144962702 | 0.252224608 | 0.998677884 | Not Sig |
| ENSG00000228742 | LINC02577 | <small>long intergenic non-protein coding RNA 2577</small>                                                | 111216280 | 27.29206861 | -0.908502285 | 1.526956563 | -0.594975854 | 0.551859611 | 0.998677884 | Not Sig |
| ENSG00000249167 | NA        | NA                                                                                                        | NA        | 3.413362038 | -0.90546393  | 1.4465554   | -0.625944869 | 0.531351103 | 0.998677884 | Not Sig |
| ENSG00000185495 | NA        | NA                                                                                                        | NA        | 9.830045674 | -0.903763005 | 1.221196504 | -0.740063538 | 0.459261442 | 0.998677884 | Not Sig |
| ENSG00000260257 | NA        | NA                                                                                                        | NA        | 143.5956886 | -0.892462165 | 0.747242616 | -1.194340561 | 0.232344778 | 0.998677884 | Not Sig |
| ENSG00000273104 | NA        | NA                                                                                                        | NA        | 1.775803899 | -0.888349646 | 1.780012786 | -0.49906925  | 0.6177306   | 0.998677884 | Not Sig |
| ENSG00000257534 | NA        | NA                                                                                                        | NA        | 10.39167204 | -0.888329464 | 1.36983679  | -0.648492923 | 0.516666187 | 0.998677884 | Not Sig |
| ENSG00000233117 | NA        | NA                                                                                                        | NA        | 75.15678893 | -0.885057755 | 1.123422694 | -0.787822571 | 0.430800497 | 0.998677884 | Not Sig |
| ENSG00000272459 | NA        | NA                                                                                                        | NA        | 2.727215738 | -0.884914586 | 1.384742699 | -0.639046219 | 0.522792865 | 0.998677884 | Not Sig |
| ENSG00000273001 | NA        | NA                                                                                                        | NA        | 3.243905346 | -0.884775939 | 1.603147594 | -0.55189924  | 0.581017389 | 0.998677884 | Not Sig |
| ENSG00000266411 | NA        | NA                                                                                                        | NA        | 3.793013141 | -0.883656661 | 1.369869529 | -0.645066295 | 0.518884225 | 0.998677884 | Not Sig |
| ENSG00000239572 | NA        | NA                                                                                                        | NA        | 0.949888053 | -0.883303627 | 2.444591291 | -0.361329777 | 0.717852936 | 0.998677884 | Not Sig |
| ENSG00000260135 | NA        | NA                                                                                                        | NA        | 22.66002026 | -0.8755026   | 1.31259932  | -0.666999126 | 0.504772692 | 0.998677884 | Not Sig |
| ENSG00000212766 | EWSAT1    | <small>Ewing sarcoma associated transcript 1</small>                                                      | 283673    | 1.899776106 | -0.870953214 | 2.03271009  | -0.428468977 | 0.668309715 | 0.998677884 | Not Sig |
| ENSG00000179136 | LINC00670 | <small>long intergenic non-protein coding RNA 670</small>                                                 | 284034    | 6.325479816 | -0.861736298 | 1.141800817 | -0.754716835 | 0.450418903 | 0.998677884 | Not Sig |
| ENSG00000273162 | NA        | NA                                                                                                        | NA        | 9.18442126  | -0.858797021 | 1.008936024 | -0.85119076  | 0.394663395 | 0.998677884 | Not Sig |
| ENSG00000226005 | NA        | NA                                                                                                        | NA        | 0.471623435 | -0.857549609 | 4.043611904 | -0.212075152 | 0.832048405 | 0.998677884 | Not Sig |
| ENSG00000227042 | NA        | NA                                                                                                        | NA        | 0.471623435 | -0.857549609 | 4.043611904 | -0.212075152 | 0.832048405 | 0.998677884 | Not Sig |
| ENSG00000228334 | NA        | NA                                                                                                        | NA        | 0.471623435 | -0.857549609 | 4.043611904 | -0.212075152 | 0.832048405 | 0.998677884 | Not Sig |
| ENSG00000229291 | NA        | NA                                                                                                        | NA        | 0.503176052 | -0.857549609 | 4.043611904 | -0.212075152 | 0.832048405 | 0.998677884 | Not Sig |
| ENSG00000229433 | LINC02069 | <small>long intergenic non-protein coding RNA 2069</small>                                                | 101928992 | 0.503176052 | -0.857549609 | 4.043611904 | -0.212075152 | 0.832048405 | 0.998677884 | Not Sig |
| ENSG00000240707 | LINC01168 | <small>long intergenic non-protein coding RNA 1168</small>                                                | 399829    | 0.503176052 | -0.857549609 | 4.043611904 | -0.212075152 | 0.832048405 | 0.998677884 | Not Sig |
| ENSG00000248150 | LINC02150 | <small>long intergenic non-protein coding RNA 2150</small>                                                | 101929505 | 0.503176052 | -0.857549609 | 4.043611904 | -0.212075152 | 0.832048405 | 0.998677884 | Not Sig |
| ENSG00000249926 | NA        | NA                                                                                                        | NA        | 0.471623435 | -0.857549609 | 4.043611904 | -0.212075152 | 0.832048405 | 0.998677884 | Not Sig |
| ENSG00000257194 | NA        | NA                                                                                                        | NA        | 0.471623435 | -0.857549609 | 4.043611904 | -0.212075152 | 0.832048405 | 0.998677884 | Not Sig |
| ENSG00000259754 | NA        | NA                                                                                                        | NA        | 0.471623435 | -0.857549609 | 4.043611904 | -0.212075152 | 0.832048405 | 0.998677884 | Not Sig |
| ENSG00000263317 | LINC01982 | <small>long intergenic non-protein coding RNA 1982</small>                                                | 105371830 | 0.471623435 | -0.857549609 | 4.043611904 | -0.212075152 | 0.832048405 | 0.998677884 | Not Sig |
| ENSG00000243321 | LINC01998 | <small>long intergenic non-protein coding RNA 1998</small>                                                | 107986046 | 0.47009965  | -0.857549609 | 4.043611904 | -0.212075152 | 0.832048405 | 0.998677884 | Not Sig |
| ENSG00000271901 | NA        | NA                                                                                                        | NA        | 0.47009965  | -0.857549609 | 4.043611904 | -0.212075152 | 0.832048405 | 0.998677884 | Not Sig |
| ENSG00000271947 | NA        | NA                                                                                                        | NA        | 0.47009965  | -0.857549609 | 4.043611904 | -0.212075152 | 0.832048405 | 0.998677884 | Not Sig |

|                 |           |                                             |           |             |              |             |              |             |             |         |
|-----------------|-----------|---------------------------------------------|-----------|-------------|--------------|-------------|--------------|-------------|-------------|---------|
| ENSG00000234584 | NA        | NA                                          | NA        | 15.81643717 | -0.84880984  | 1.048095215 | -0.809859475 | 0.418020946 | 0.998677884 | Not Sig |
| ENSG00000261621 | NA        | NA                                          | NA        | 2.162227046 | -0.842968013 | 2.420470753 | -0.348266143 | 0.727640318 | 0.998677884 | Not Sig |
| ENSG00000273172 | NA        | NA                                          | NA        | 3.745157989 | -0.841615867 | 1.624880493 | -0.517955548 | 0.604489284 | 0.998677884 | Not Sig |
| ENSG00000233942 | NA        | NA                                          | NA        | 7.895005914 | -0.83904489  | 1.255508692 | -0.668290786 | 0.503947994 | 0.998677884 | Not Sig |
| ENSG00000259134 | LINC00924 | long intergenic non-protein coding RNA 924  | 145820    | 12.80458306 | -0.838475963 | 1.093641501 | -0.766682649 | 0.443270223 | 0.998677884 | Not Sig |
| ENSG00000178412 | LOC284241 | uncharacterized LOC284241                   | 284241    | 1.808880301 | -0.83694207  | 1.592710532 | -0.52548285  | 0.599247572 | 0.998677884 | Not Sig |
| ENSG00000260302 | NA        | NA                                          | NA        | 6.38532652  | -0.836891812 | 1.071893741 | -0.780760051 | 0.434943634 | 0.998677884 | Not Sig |
| ENSG00000273281 | NA        | NA                                          | NA        | 15.60632228 | -0.835940431 | 0.870807756 | -0.95995979  | 0.337075452 | 0.998677884 | Not Sig |
| ENSG00000240996 | NA        | NA                                          | NA        | 3.238323784 | -0.834506515 | 1.418499659 | -0.588302232 | 0.556329448 | 0.998677884 | Not Sig |
| ENSG00000259685 | NA        | NA                                          | NA        | 1.305704249 | -0.832795094 | 1.963763915 | -0.424081066 | 0.671506694 | 0.998677884 | Not Sig |
| ENSG00000256299 | NA        | NA                                          | NA        | 8.594958464 | -0.8259166   | 1.482403212 | -0.557147066 | 0.577426953 | 0.998677884 | Not Sig |
| ENSG00000271204 | NA        | NA                                          | NA        | 323.1785003 | -0.82571477  | 0.849356309 | -0.972165346 | 0.330968297 | 0.998677884 | Not Sig |
| ENSG00000273069 | NA        | NA                                          | NA        | 1.29500529  | -0.825080395 | 2.713872146 | -0.304023311 | 0.761110132 | 0.998677884 | Not Sig |
| ENSG00000226320 | NA        | NA                                          | NA        | 4.912383505 | -0.820048107 | 1.927582169 | -0.425428352 | 0.670524441 | 0.998677884 | Not Sig |
| ENSG00000235127 | NA        | NA                                          | NA        | 1.007642916 | -0.819555688 | 2.859073478 | -0.286650796 | 0.774379716 | 0.998677884 | Not Sig |
| ENSG00000259543 | NA        | NA                                          | NA        | 1.007642916 | -0.819555688 | 2.859073478 | -0.286650796 | 0.774379716 | 0.998677884 | Not Sig |
| ENSG00000233858 | NA        | NA                                          | NA        | 2.047471045 | -0.818947934 | 2.51248114  | -0.325951873 | 0.744460768 | 0.998677884 | Not Sig |
| ENSG00000270104 | NA        | NA                                          | NA        | 0.490720335 | -0.814298087 | 3.413450241 | -0.238555722 | 0.811450103 | 0.998677884 | Not Sig |
| ENSG00000259473 | LINC02205 | long intergenic non-protein coding RNA 2205 | 105370880 | 0.459167718 | -0.813417692 | 3.477916883 | -0.233880716 | 0.815077584 | 0.998677884 | Not Sig |
| ENSG00000228961 | LINC01690 | long intergenic non-protein coding RNA 1690 | 102724502 | 0.457643933 | -0.813374153 | 3.481198408 | -0.233647744 | 0.815258459 | 0.998677884 | Not Sig |
| ENSG00000229563 | LINC01204 | long intergenic non-protein coding RNA 1204 | 101927528 | 0.457643933 | -0.813374153 | 3.481198408 | -0.233647744 | 0.815258459 | 0.998677884 | Not Sig |
| ENSG00000269908 | NA        | NA                                          | NA        | 0.457643933 | -0.813374153 | 3.481198408 | -0.233647744 | 0.815258459 | 0.998677884 | Not Sig |
| ENSG00000258331 | LINC02461 | long intergenic non-protein coding RNA 2461 | 105369740 | 1.868391922 | -0.809395839 | 2.097346965 | -0.385914135 | 0.699560262 | 0.998677884 | Not Sig |
| ENSG00000260591 | NA        | NA                                          | NA        | 15.73605104 | -0.807493937 | 1.020219627 | -0.791490298 | 0.428657935 | 0.998677884 | Not Sig |
| ENSG00000268543 | NA        | NA                                          | NA        | 15.20997235 | -0.80653472  | 0.994027358 | -0.811380807 | 0.417147018 | 0.998677884 | Not Sig |
| ENSG00000258714 | NA        | NA                                          | NA        | 8.325413554 | -0.80625619  | 1.158506428 | -0.695944512 | 0.48646358  | 0.998677884 | Not Sig |
| ENSG00000270178 | NA        | NA                                          | NA        | 1.36521587  | -0.80388334  | 2.247913034 | -0.357613185 | 0.72063281  | 0.998677884 | Not Sig |
| ENSG00000272565 | NA        | NA                                          | NA        | 321.3678501 | -0.801188295 | 0.783151744 | -1.023030724 | 0.30629332  | 0.998677884 | Not Sig |
| ENSG00000267067 | NA        | NA                                          | NA        | 1.854179447 | -0.801009005 | 2.068874246 | -0.387171432 | 0.698629298 | 0.998677884 | Not Sig |
| ENSG00000267183 | NA        | NA                                          | NA        | 26.83114797 | -0.798761741 | 0.850749624 | -0.938891676 | 0.347786363 | 0.998677884 | Not Sig |
| ENSG00000270058 | NA        | NA                                          | NA        | 3.200131766 | -0.797961131 | 1.920738101 | -0.415445047 | 0.677816136 | 0.998677884 | Not Sig |
| ENSG00000228793 | NA        | NA                                          | NA        | 5.14556739  | -0.79736339  | 1.578479857 | -0.505146383 | 0.613456026 | 0.998677884 | Not Sig |
| ENSG00000272143 | FGF14-AS2 | FGF14 antisense RNA 2                       | 283481    | 27.4219783  | -0.796778856 | 1.317644095 | -0.604699599 | 0.545378615 | 0.998677884 | Not Sig |
| ENSG00000203650 | LINC01285 | long intergenic non-protein coding RNA 1285 | 101928287 | 7.794809315 | -0.79513018  | 1.019985839 | -0.779550214 | 0.43565567  | 0.998677884 | Not Sig |
| ENSG00000269942 | NA        | NA                                          | NA        | 11.87329899 | -0.790509295 | 1.031739938 | -0.766190458 | 0.443562985 | 0.998677884 | Not Sig |

|                 |              |                                             |           |             |              |             |              |             |             |         |
|-----------------|--------------|---------------------------------------------|-----------|-------------|--------------|-------------|--------------|-------------|-------------|---------|
| ENSG00000227136 | NA           | NA                                          | NA        | 1.75776662  | -0.789671814 | 1.624968735 | -0.485961235 | 0.626994651 | 0.998677884 | Not Sig |
| ENSG00000260645 | NA           | NA                                          | NA        | 13.93520007 | -0.788173897 | 0.936804663 | -0.841342842 | 0.400155896 | 0.998677884 | Not Sig |
| ENSG00000260911 | NA           | NA                                          | NA        | 10.96100389 | -0.786269725 | 1.059191073 | -0.742330393 | 0.457887182 | 0.998677884 | Not Sig |
| ENSG00000268401 | NA           | NA                                          | NA        | 2.213276186 | -0.783119394 | 1.578264434 | -0.496190231 | 0.619760203 | 0.998677884 | Not Sig |
| ENSG00000223714 | LOC105373185 | uncharacterized LOC105373185                | 105373185 | 0.860516033 | -0.78297439  | 2.560296993 | -0.305813893 | 0.75974635  | 0.998677884 | Not Sig |
| ENSG00000267606 | NA           | NA                                          | NA        | 3.464819184 | -0.781544867 | 1.309885523 | -0.596651275 | 0.55074023  | 0.998677884 | Not Sig |
| ENSG00000248954 | NA           | NA                                          | NA        | 10.71120754 | -0.776511207 | 1.221027476 | -0.635949004 | 0.524809661 | 0.998677884 | Not Sig |
| ENSG00000272255 | NA           | NA                                          | NA        | 1.484616721 | -0.776255904 | 2.597223992 | -0.298879075 | 0.765032314 | 0.998677884 | Not Sig |
| ENSG00000258285 | NA           | NA                                          | NA        | 3.102064292 | -0.774964682 | 1.942125522 | -0.399029143 | 0.689871731 | 0.998677884 | Not Sig |
| ENSG00000244733 | NA           | NA                                          | NA        | 1.485907534 | -0.774016399 | 2.664357487 | -0.290507713 | 0.771427851 | 0.998677884 | Not Sig |
| ENSG00000226276 | NA           | NA                                          | NA        | 10.5493465  | -0.770097549 | 1.203460012 | -0.639902897 | 0.52223573  | 0.998677884 | Not Sig |
| ENSG00000259915 | NA           | NA                                          | NA        | 25.12256222 | -0.769816928 | 0.948378764 | -0.811718859 | 0.416952971 | 0.998677884 | Not Sig |
| ENSG00000228251 | NA           | NA                                          | NA        | 15.31849878 | -0.768246776 | 1.218351407 | -0.630562555 | 0.528326589 | 0.998677884 | Not Sig |
| ENSG00000260065 | NA           | NA                                          | NA        | 138.1086787 | -0.76808361  | 0.916113364 | -0.838415462 | 0.401797408 | 0.998677884 | Not Sig |
| ENSG00000256360 | NA           | NA                                          | NA        | 7.986985134 | -0.768041099 | 0.943508728 | -0.814026491 | 0.415629775 | 0.998677884 | Not Sig |
| ENSG00000261775 | NA           | NA                                          | NA        | 12.43182331 | -0.767883346 | 0.970017236 | -0.791618249 | 0.428583303 | 0.998677884 | Not Sig |
| ENSG00000225135 | NA           | NA                                          | NA        | 63.11468749 | -0.766464898 | 1.019779539 | -0.751598624 | 0.452292471 | 0.998677884 | Not Sig |
| ENSG00000231429 | NA           | NA                                          | NA        | 1.732855186 | -0.763174065 | 1.701319443 | -0.44857776  | 0.65373628  | 0.998677884 | Not Sig |
| ENSG00000227036 | LINC00511    | long intergenic non-protein coding RNA 511  | 400619    | 417.8149922 | -0.762533171 | 1.078247327 | -0.707196903 | 0.479444123 | 0.998677884 | Not Sig |
| ENSG00000261925 | NA           | NA                                          | NA        | 4.979816485 | -0.760316602 | 1.742248776 | -0.436399562 | 0.662546857 | 0.998677884 | Not Sig |
| ENSG00000272365 | NA           | NA                                          | NA        | 10.24037853 | -0.759386842 | 0.910720469 | -0.833830872 | 0.404376296 | 0.998677884 | Not Sig |
| ENSG00000228918 | LINC01344    | long intergenic non-protein coding RNA 1344 | 400799    | 6.04814966  | -0.758426418 | 1.150577345 | -0.659170303 | 0.509786414 | 0.998677884 | Not Sig |
| ENSG00000233895 | NA           | NA                                          | NA        | 154.8471844 | -0.757293858 | 0.816188075 | -0.927842347 | 0.353489354 | 0.998677884 | Not Sig |
| ENSG00000229352 | NA           | NA                                          | NA        | 0.446712001 | -0.755792249 | 4.0534112   | -0.186458321 | 0.85208536  | 0.998677884 | Not Sig |
| ENSG00000237343 | NA           | NA                                          | NA        | 0.446712001 | -0.755792249 | 4.0534112   | -0.186458321 | 0.85208536  | 0.998677884 | Not Sig |
| ENSG00000255772 | LINC01479    | long intergenic non-protein coding RNA 1479 | 101927922 | 0.446712001 | -0.755792249 | 4.0534112   | -0.186458321 | 0.85208536  | 0.998677884 | Not Sig |
| ENSG00000262921 | NA           | NA                                          | NA        | 0.446712001 | -0.755792249 | 4.0534112   | -0.186458321 | 0.85208536  | 0.998677884 | Not Sig |
| ENSG00000264486 | NA           | NA                                          | NA        | 0.445188216 | -0.755792249 | 4.0534112   | -0.186458321 | 0.85208536  | 0.998677884 | Not Sig |
| ENSG00000268804 | NA           | NA                                          | NA        | 0.446712001 | -0.755792249 | 4.0534112   | -0.186458321 | 0.85208536  | 0.998677884 | Not Sig |
| ENSG00000273030 | NA           | NA                                          | NA        | 0.446712001 | -0.755792249 | 4.0534112   | -0.186458321 | 0.85208536  | 0.998677884 | Not Sig |
| ENSG00000232806 | NA           | NA                                          | NA        | 0.478264618 | -0.755792249 | 4.0534112   | -0.186458321 | 0.85208536  | 0.998677884 | Not Sig |
| ENSG00000233798 | NA           | NA                                          | NA        | 0.478264618 | -0.755792249 | 4.0534112   | -0.186458321 | 0.85208536  | 0.998677884 | Not Sig |
| ENSG00000243550 | NA           | NA                                          | NA        | 0.478264618 | -0.755792249 | 4.0534112   | -0.186458321 | 0.85208536  | 0.998677884 | Not Sig |
| ENSG00000249356 | NA           | NA                                          | NA        | 0.478264618 | -0.755792249 | 4.0534112   | -0.186458321 | 0.85208536  | 0.998677884 | Not Sig |
| ENSG00000254605 | NA           | NA                                          | NA        | 0.478264618 | -0.755792249 | 4.0534112   | -0.186458321 | 0.85208536  | 0.998677884 | Not Sig |

|                 |              |                                             |           |             |              |             |              |             |             |         |
|-----------------|--------------|---------------------------------------------|-----------|-------------|--------------|-------------|--------------|-------------|-------------|---------|
| ENSG00000255947 | NA           | NA                                          | NA        | 0.478264618 | -0.755792249 | 4.0534112   | -0.186458321 | 0.85208536  | 0.998677884 | Not Sig |
| ENSG00000212694 | LINC01089    | long intergenic non-protein coding RNA 1089 | 338799    | 267.0942049 | -0.752403965 | 0.681641348 | -1.103812096 | 0.269674657 | 0.998677884 | Not Sig |
| ENSG00000270661 | NA           | NA                                          | NA        | 16.10515171 | -0.747569685 | 0.824598996 | -0.906585733 | 0.364625909 | 0.998677884 | Not Sig |
| ENSG00000260423 | LINC02367    | long intergenic non-protein coding RNA 2367 | 101930452 | 18.29408779 | -0.744639587 | 0.779061226 | -0.955816516 | 0.339164943 | 0.998677884 | Not Sig |
| ENSG00000272369 | NA           | NA                                          | NA        | 35.67879964 | -0.744593926 | 0.87906948  | -0.847025113 | 0.396981124 | 0.998677884 | Not Sig |
| ENSG00000258048 | NA           | NA                                          | NA        | 6.028163352 | -0.742288055 | 1.089642418 | -0.681221695 | 0.495731222 | 0.998677884 | Not Sig |
| ENSG00000270109 | NA           | NA                                          | NA        | 2.493067267 | -0.737893915 | 1.94207861  | -0.379950591 | 0.703982092 | 0.998677884 | Not Sig |
| ENSG00000231246 | NA           | NA                                          | NA        | 6.465565991 | -0.737171304 | 1.516558314 | -0.48608174  | 0.626909213 | 0.998677884 | Not Sig |
| ENSG00000261842 | NA           | NA                                          | NA        | 1.792366807 | -0.736021582 | 1.782420993 | -0.412933636 | 0.679655236 | 0.998677884 | Not Sig |
| ENSG00000255992 | NA           | NA                                          | NA        | 3.905339041 | -0.73549338  | 1.340727377 | -0.548577878 | 0.583295171 | 0.998677884 | Not Sig |
| ENSG00000235884 | LINC00941    | long intergenic non-protein coding RNA 941  | 100287314 | 4.92445993  | -0.73504664  | 1.441099811 | -0.510059494 | 0.610009782 | 0.998677884 | Not Sig |
| ENSG00000250387 | NA           | NA                                          | NA        | 3.67399346  | -0.734824602 | 1.696037807 | -0.433259565 | 0.66482621  | 0.998677884 | Not Sig |
| ENSG00000273156 | NA           | NA                                          | NA        | 9.746491604 | -0.727896257 | 1.006500032 | -0.723195464 | 0.469559805 | 0.998677884 | Not Sig |
| ENSG00000229195 | NA           | NA                                          | NA        | 9.53174439  | -0.72677208  | 1.06566682  | -0.681988091 | 0.495246482 | 0.998677884 | Not Sig |
| ENSG00000231611 | NA           | NA                                          | NA        | 13.57759475 | -0.724715462 | 0.856470639 | -0.846164982 | 0.397460714 | 0.998677884 | Not Sig |
| ENSG00000233536 | NA           | NA                                          | NA        | 2.56655839  | -0.720496633 | 1.76723842  | -0.407696339 | 0.683496626 | 0.998677884 | Not Sig |
| ENSG00000237253 | NA           | NA                                          | NA        | 1.657462668 | -0.71444638  | 1.828775441 | -0.390669277 | 0.696041711 | 0.998677884 | Not Sig |
| ENSG00000205037 | LOC400553    | uncharacterized LOC400553                   | 400553    | 1.646763709 | -0.714322836 | 2.554973456 | -0.279581314 | 0.779798745 | 0.998677884 | Not Sig |
| ENSG00000268392 | NA           | NA                                          | NA        | 6.569067257 | -0.713592134 | 1.104445431 | -0.646109001 | 0.518208767 | 0.998677884 | Not Sig |
| ENSG00000257835 | NA           | NA                                          | NA        | 4.534557126 | -0.713588085 | 1.245235665 | -0.573054647 | 0.566607694 | 0.998677884 | Not Sig |
| ENSG00000265750 | NA           | NA                                          | NA        | 9.723675286 | -0.710617355 | 1.038058815 | -0.684563672 | 0.493619297 | 0.998677884 | Not Sig |
| ENSG00000272192 | NA           | NA                                          | NA        | 1.764640775 | -0.709912075 | 1.867641566 | -0.38011152  | 0.703862635 | 0.998677884 | Not Sig |
| ENSG00000228950 | NA           | NA                                          | NA        | 19.37611259 | -0.709341129 | 1.505462082 | -0.471178343 | 0.637513383 | 0.998677884 | Not Sig |
| ENSG00000249476 | NA           | NA                                          | NA        | 100.0520332 | -0.709041111 | 0.724003285 | -0.979334107 | 0.327414923 | 0.998677884 | Not Sig |
| ENSG00000230880 | NA           | NA                                          | NA        | 18.6994368  | -0.708082691 | 1.42498134  | -0.496906641 | 0.619254888 | 0.998677884 | Not Sig |
| ENSG00000248112 | NA           | NA                                          | NA        | 1.729197033 | -0.707547571 | 1.889937266 | -0.374376221 | 0.708124432 | 0.998677884 | Not Sig |
| ENSG00000263126 | NA           | NA                                          | NA        | 8.532164331 | -0.706569115 | 1.079578949 | -0.654485821 | 0.512798859 | 0.998677884 | Not Sig |
| ENSG00000225484 | NUTM2B-AS1   | NUTM2B antisense RNA 1                      | 101060691 | 164.5279611 | -0.7047866   | 0.697857799 | -1.009928671 | 0.312529465 | 0.998677884 | Not Sig |
| ENSG00000260910 | LINC00565    | long intergenic non-protein coding RNA 565  | 100861555 | 4.562876502 | -0.703560313 | 1.401333392 | -0.502064902 | 0.615621868 | 0.998677884 | Not Sig |
| ENSG00000271911 | NA           | NA                                          | NA        | 3.791499517 | -0.70189782  | 1.307444689 | -0.536847047 | 0.591373271 | 0.998677884 | Not Sig |
| ENSG00000271259 | NA           | NA                                          | NA        | 7.172744308 | -0.701326993 | 1.072329094 | -0.654022163 | 0.513097527 | 0.998677884 | Not Sig |
| ENSG00000226578 | NA           | NA                                          | NA        | 23.57377578 | -0.699601174 | 0.871913235 | -0.802374762 | 0.422336208 | 0.998677884 | Not Sig |
| ENSG00000269720 | LOC105372343 | uncharacterized LOC105372343                | 105372343 | 9.677486731 | -0.69553026  | 1.141188612 | -0.609478795 | 0.542207124 | 0.998677884 | Not Sig |
| ENSG00000232977 | LINC00327    | long intergenic non-protein coding RNA 327  | 100506697 | 28.90437708 | -0.695104949 | 1.194175832 | -0.58207923  | 0.560513315 | 0.998677884 | Not Sig |
| ENSG00000259321 | NA           | NA                                          | NA        | 17.23259641 | -0.686257147 | 0.891905002 | -0.769428522 | 0.441638962 | 0.998677884 | Not Sig |

|                 |              |                                             |           |             |              |             |              |             |             |         |
|-----------------|--------------|---------------------------------------------|-----------|-------------|--------------|-------------|--------------|-------------|-------------|---------|
| ENSG00000270557 | NA           | NA                                          | NA        | 14.04336951 | -0.685730139 | 0.912516306 | -0.751471655 | 0.452368853 | 0.998677884 | Not Sig |
| ENSG00000251555 | NA           | NA                                          | NA        | 1.272396655 | -0.682339278 | 2.316005229 | -0.294619057 | 0.768284902 | 0.998677884 | Not Sig |
| ENSG00000264043 | NA           | NA                                          | NA        | 15.99726279 | -0.680966312 | 0.946811766 | -0.719220373 | 0.472005149 | 0.998677884 | Not Sig |
| ENSG00000234608 | MAPKAPK5-AS1 | MAPKAPK5 antisense RNA 1                    | 51275     | 46.57790485 | -0.678504061 | 0.755880122 | -0.897634482 | 0.36938045  | 0.998677884 | Not Sig |
| ENSG00000259004 | LINC02285    | long intergenic non-protein coding RNA 2285 | 101929422 | 4.564000664 | -0.676333333 | 1.588539488 | -0.425757959 | 0.670284224 | 0.998677884 | Not Sig |
| ENSG00000240423 | LINC00636    | long intergenic non-protein coding RNA 636  | 285205    | 1.34413102  | -0.67557503  | 2.00243508  | -0.337376745 | 0.735832913 | 0.998677884 | Not Sig |
| ENSG00000213373 | LINC00671    | long intergenic non-protein coding RNA 671  | 388387    | 1.275444226 | -0.675385662 | 2.315786883 | -0.291644135 | 0.770558727 | 0.998677884 | Not Sig |
| ENSG00000259920 | NA           | NA                                          | NA        | 1.275444226 | -0.675385662 | 2.315786883 | -0.291644135 | 0.770558727 | 0.998677884 | Not Sig |
| ENSG00000257877 | NA           | NA                                          | NA        | 56.98257086 | -0.66271291  | 1.01757887  | -0.651264417 | 0.514875814 | 0.998677884 | Not Sig |
| ENSG00000238290 | NA           | NA                                          | NA        | 41.89544106 | -0.660992801 | 1.177966063 | -0.561130598 | 0.574708511 | 0.998677884 | Not Sig |
| ENSG00000178440 | NA           | NA                                          | NA        | 75.50437159 | -0.65511325  | 0.773515036 | -0.846930207 | 0.397034024 | 0.998677884 | Not Sig |
| ENSG00000232412 | LOC101928402 | uncharacterized LOC101928402                | 101928402 | 7.178608256 | -0.6547032   | 1.089309899 | -0.60102566  | 0.547822896 | 0.998677884 | Not Sig |
| ENSG00000272140 | NA           | NA                                          | NA        | 66.14994709 | -0.654294744 | 0.837969156 | -0.780810056 | 0.434914218 | 0.998677884 | Not Sig |
| ENSG00000264433 | NA           | NA                                          | NA        | 10.68190512 | -0.653416493 | 1.191605503 | -0.548349677 | 0.583451823 | 0.998677884 | Not Sig |
| ENSG00000272994 | NA           | NA                                          | NA        | 40.70702065 | -0.649369691 | 0.747952266 | -0.868196702 | 0.385286659 | 0.998677884 | Not Sig |
| ENSG00000235477 | NA           | NA                                          | NA        | 127.1278331 | -0.649186804 | 0.719601334 | -0.90214786  | 0.366978328 | 0.998677884 | Not Sig |
| ENSG00000225675 | LINC01771    | long intergenic non-protein coding RNA 1771 | 105378732 | 1.74700312  | -0.645084479 | 1.874481528 | -0.344140216 | 0.73074084  | 0.998677884 | Not Sig |
| ENSG00000261433 | NA           | NA                                          | NA        | 3.707244894 | -0.64332842  | 1.234092608 | -0.521296713 | 0.60216009  | 0.998677884 | Not Sig |
| ENSG00000272076 | NA           | NA                                          | NA        | 16.5678553  | -0.640387001 | 1.019514903 | -0.628129122 | 0.529919357 | 0.998677884 | Not Sig |
| ENSG00000267711 | NA           | NA                                          | NA        | 6.58112513  | -0.637201088 | 1.498383604 | -0.425258984 | 0.67064789  | 0.998677884 | Not Sig |
| ENSG00000273307 | NA           | NA                                          | NA        | 2.499541798 | -0.637131915 | 1.673411422 | -0.380738357 | 0.703397404 | 0.998677884 | Not Sig |
| ENSG00000231842 | NA           | NA                                          | NA        | 22.09367435 | -0.636794424 | 0.950807679 | -0.669740514 | 0.50302322  | 0.998677884 | Not Sig |
| ENSG00000152487 | NA           | NA                                          | NA        | 20.83983529 | -0.633305427 | 0.742791129 | -0.852602303 | 0.393879885 | 0.998677884 | Not Sig |
| ENSG00000248491 | NA           | NA                                          | NA        | 14.25412686 | -0.627564045 | 1.124503504 | -0.558081005 | 0.576789071 | 0.998677884 | Not Sig |
| ENSG00000259865 | NA           | NA                                          | NA        | 85.84508319 | -0.62496639  | 1.072857609 | -0.582525011 | 0.5602131   | 0.998677884 | Not Sig |
| ENSG00000251072 | LMNB1-DT     | LMNB1 divergent transcript                  | 102723557 | 1.19829495  | -0.624372792 | 2.353983921 | -0.265240891 | 0.790823896 | 0.998677884 | Not Sig |
| ENSG00000261542 | NA           | NA                                          | NA        | 25.363136   | -0.619475039 | 0.938741007 | -0.659899838 | 0.509318108 | 0.998677884 | Not Sig |
| ENSG00000230649 | NA           | NA                                          | NA        | 3.873468677 | -0.619460084 | 1.54295591  | -0.401476206 | 0.688069553 | 0.998677884 | Not Sig |
| ENSG00000272688 | NA           | NA                                          | NA        | 52.45481625 | -0.619283762 | 0.978748475 | -0.632730244 | 0.526909816 | 0.998677884 | Not Sig |
| ENSG00000224934 | NA           | NA                                          | NA        | 52.29765635 | -0.618237687 | 0.790488147 | -0.782096088 | 0.434158106 | 0.998677884 | Not Sig |
| ENSG00000247877 | NA           | NA                                          | NA        | 9.251815701 | -0.616911155 | 1.283492454 | -0.480650395 | 0.630764992 | 0.998677884 | Not Sig |
| ENSG00000271590 | NA           | NA                                          | NA        | 22.6781479  | -0.614493823 | 0.902451946 | -0.680915838 | 0.495924746 | 0.998677884 | Not Sig |
| ENSG00000248161 | NA           | NA                                          | NA        | 6.480105023 | -0.61247247  | 1.018630853 | -0.601270291 | 0.547659974 | 0.998677884 | Not Sig |
| ENSG00000272112 | NA           | NA                                          | NA        | 11.81156326 | -0.611741522 | 1.107409143 | -0.552407866 | 0.580668943 | 0.998677884 | Not Sig |
| ENSG00000228434 | NA           | NA                                          | NA        | 158.2008459 | -0.611621424 | 0.725350337 | -0.843208299 | 0.399111958 | 0.998677884 | Not Sig |

|                 |              |                                               |           |             |              |             |              |             |             |         |
|-----------------|--------------|-----------------------------------------------|-----------|-------------|--------------|-------------|--------------|-------------|-------------|---------|
| ENSG00000225916 | NA           | NA                                            | NA        | 1.636610791 | -0.611262225 | 1.952477082 | -0.313070115 | 0.754227393 | 0.998677884 | Not Sig |
| ENSG00000267201 | LINC01775    | long intergenic non-protein coding RNA 1775   | 101928602 | 0.853410686 | -0.605451375 | 2.560759486 | -0.236434299 | 0.813095683 | 0.998677884 | Not Sig |
| ENSG00000257272 | NA           | NA                                            | NA        | 3.261823705 | -0.604158451 | 1.439914617 | -0.419579358 | 0.67479277  | 0.998677884 | Not Sig |
| ENSG00000235100 | NA           | NA                                            | NA        | 3.646610892 | -0.600889431 | 1.655534676 | -0.362957925 | 0.716636315 | 0.998677884 | Not Sig |
| ENSG00000237585 | NA           | NA                                            | NA        | 0.854934471 | -0.600619076 | 2.560188499 | -0.234599552 | 0.814519557 | 0.998677884 | Not Sig |
| ENSG00000261087 | NA           | NA                                            | NA        | 63.81061115 | -0.599553705 | 0.752271848 | -0.796990751 | 0.425456403 | 0.998677884 | Not Sig |
| ENSG00000225643 | NA           | NA                                            | NA        | 10.85244176 | -0.595994563 | 0.908254931 | -0.656197443 | 0.511697094 | 0.998677884 | Not Sig |
| ENSG00000261341 | LOC105372440 | uncharacterized LOC105372440                  | 105372440 | 1.29301734  | -0.59404391  | 2.254190816 | -0.263528671 | 0.792143128 | 0.998677884 | Not Sig |
| ENSG00000229373 | NA           | NA                                            | NA        | 0.769220603 | -0.592281458 | 3.018745909 | -0.196201163 | 0.844452718 | 0.998677884 | Not Sig |
| ENSG00000232837 | LINC01700    | long intergenic non-protein coding RNA 1700   | 101928435 | 0.769220603 | -0.592281458 | 3.018745909 | -0.196201163 | 0.844452718 | 0.998677884 | Not Sig |
| ENSG00000267268 | NA           | NA                                            | NA        | 0.769220603 | -0.592281458 | 3.018745909 | -0.196201163 | 0.844452718 | 0.998677884 | Not Sig |
| ENSG00000255458 | NA           | NA                                            | NA        | 14.18079261 | -0.591453241 | 0.952591359 | -0.620888733 | 0.534672835 | 0.998677884 | Not Sig |
| ENSG00000228857 | NA           | NA                                            | NA        | 6.244369908 | -0.590224287 | 1.050354568 | -0.561928615 | 0.574164657 | 0.998677884 | Not Sig |
| ENSG00000260193 | NA           | NA                                            | NA        | 8.168889115 | -0.587623949 | 0.949800642 | -0.618681356 | 0.536126294 | 0.998677884 | Not Sig |
| ENSG00000230400 | LINC01747    | long intergenic non-protein coding RNA 1747   | 105372566 | 2.062237943 | -0.587539197 | 2.006148501 | -0.292869245 | 0.769622097 | 0.998677884 | Not Sig |
| ENSG00000225498 | NA           | NA                                            | NA        | 4.49952317  | -0.585723449 | 1.248182009 | -0.469261249 | 0.63888291  | 0.998677884 | Not Sig |
| ENSG00000259995 | NA           | NA                                            | NA        | 0.925145051 | -0.58566444  | 2.936068387 | -0.199472343 | 0.841893276 | 0.998677884 | Not Sig |
| ENSG00000235621 | LINC00494    | long intergenic non-protein coding RNA 494    | 284749    | 9.817685411 | -0.584626386 | 1.281065011 | -0.456359654 | 0.648131373 | 0.998677884 | Not Sig |
| ENSG00000225218 | NA           | NA                                            | NA        | 19.01843783 | -0.583951633 | 1.003819814 | -0.581729534 | 0.560748875 | 0.998677884 | Not Sig |
| ENSG00000249375 | CASC11       | cancer susceptibility 11 (non-protein coding) | 100270680 | 3.708704138 | -0.583847444 | 1.334800675 | -0.437404217 | 0.661818227 | 0.998677884 | Not Sig |
| ENSG00000251273 | LINC02228    | long intergenic non-protein coding RNA 2228   | 105374694 | 0.772268174 | -0.581255587 | 3.016810133 | -0.192672247 | 0.84721566  | 0.998677884 | Not Sig |
| ENSG00000254952 | NA           | NA                                            | NA        | 0.772268174 | -0.581255587 | 3.016810133 | -0.192672247 | 0.84721566  | 0.998677884 | Not Sig |
| ENSG00000242924 | NA           | NA                                            | NA        | 0.840954969 | -0.579130306 | 2.281407637 | -0.253847799 | 0.799613145 | 0.998677884 | Not Sig |
| ENSG00000259894 | NA           | NA                                            | NA        | 3.226446285 | -0.578834713 | 1.299860238 | -0.445305346 | 0.656099105 | 0.998677884 | Not Sig |
| ENSG00000254288 | NA           | NA                                            | NA        | 6.692541154 | -0.578808814 | 1.121216354 | -0.516232939 | 0.605691727 | 0.998677884 | Not Sig |
| ENSG00000272892 | NA           | NA                                            | NA        | 4.250946159 | -0.578056521 | 1.565522009 | -0.369242028 | 0.711947332 | 0.998677884 | Not Sig |
| ENSG00000238078 | LINC01352    | long intergenic non-protein coding RNA 1352   | 101929730 | 1.173616488 | -0.577445968 | 2.314142548 | -0.249529126 | 0.802951514 | 0.998677884 | Not Sig |
| ENSG00000272692 | NA           | NA                                            | NA        | 15.35528305 | -0.5764452   | 0.876928478 | -0.657345741 | 0.510958631 | 0.998677884 | Not Sig |
| ENSG00000259423 | NA           | NA                                            | NA        | 2.049782226 | -0.575198697 | 1.995396454 | -0.288262864 | 0.773145531 | 0.998677884 | Not Sig |
| ENSG00000271538 | LINC02427    | long intergenic non-protein coding RNA 2427   | 105377585 | 9.536560803 | -0.57309247  | 1.212907481 | -0.472494794 | 0.636573657 | 0.998677884 | Not Sig |
| ENSG00000272871 | NA           | NA                                            | NA        | 45.97182173 | -0.569652607 | 0.936614279 | -0.60820406  | 0.543052142 | 0.998677884 | Not Sig |
| ENSG00000256039 | NA           | NA                                            | NA        | 11.60275952 | -0.569168028 | 0.932600458 | -0.61030211  | 0.541661699 | 0.998677884 | Not Sig |
| ENSG00000259448 | NA           | NA                                            | NA        | 15.65360625 | -0.567633584 | 0.989814246 | -0.573474858 | 0.566323218 | 0.998677884 | Not Sig |
| ENSG00000272144 | NA           | NA                                            | NA        | 25.25316362 | -0.566360839 | 0.731863216 | -0.7738616   | 0.43901264  | 0.998677884 | Not Sig |
| ENSG00000272077 | NA           | NA                                            | NA        | 28.06075537 | -0.565289101 | 0.818879252 | -0.690320459 | 0.489992685 | 0.998677884 | Not Sig |

|                 |              |                                                                |           |             |              |             |              |             |             |         |
|-----------------|--------------|----------------------------------------------------------------|-----------|-------------|--------------|-------------|--------------|-------------|-------------|---------|
| ENSG00000273175 | NA           | NA                                                             | NA        | 4.044013604 | -0.564860028 | 1.197382504 | -0.471745684 | 0.637108325 | 0.998677884 | Not Sig |
| ENSG00000245532 | NEAT1        | nuclear paraspeckle assembly transcript 1 (non-protein coding) | 283131    | 80601.26309 | -0.564483232 | 0.812232556 | -0.694977353 | 0.487069495 | 0.998677884 | Not Sig |
| ENSG00000204792 | LINC01291    | long intergenic non-protein coding RNA 1291                    | 102724515 | 1.243827068 | -0.563782724 | 2.091816478 | -0.269518253 | 0.787530898 | 0.998677884 | Not Sig |
| ENSG00000266389 | NA           | NA                                                             | NA        | 12.79092024 | -0.563641985 | 1.235876825 | -0.456066474 | 0.648342178 | 0.998677884 | Not Sig |
| ENSG00000267381 | NA           | NA                                                             | NA        | 20.51327112 | -0.561499432 | 0.851483234 | -0.659436863 | 0.509615277 | 0.998677884 | Not Sig |
| ENSG00000273448 | NA           | NA                                                             | NA        | 39.93124309 | -0.56104034  | 0.935803728 | -0.599527789 | 0.548820984 | 0.998677884 | Not Sig |
| ENSG00000270171 | NA           | NA                                                             | NA        | 0.756764886 | -0.559545302 | 3.026767629 | -0.184865629 | 0.85333443  | 0.998677884 | Not Sig |
| ENSG00000273014 | NA           | NA                                                             | NA        | 60.1393564  | -0.556860044 | 1.176421098 | -0.47335095  | 0.635962818 | 0.998677884 | Not Sig |
| ENSG00000267397 | NA           | NA                                                             | NA        | 8.278231985 | -0.552094755 | 1.076630853 | -0.512798563 | 0.608092235 | 0.998677884 | Not Sig |
| ENSG00000267289 | LOC100996288 | uncharacterized LOC100996288                                   | 100996288 | 0.759812457 | -0.548511549 | 3.024765851 | -0.181340168 | 0.856100579 | 0.998677884 | Not Sig |
| ENSG00000233220 | NA           | NA                                                             | NA        | 5.035125789 | -0.54516099  | 1.54029093  | -0.353933779 | 0.723388511 | 0.998677884 | Not Sig |
| ENSG00000250670 | NA           | NA                                                             | NA        | 2.733969192 | -0.54410631  | 1.465399001 | -0.371302498 | 0.710412237 | 0.998677884 | Not Sig |
| ENSG00000235358 | NA           | NA                                                             | NA        | 19.80614869 | -0.540248701 | 1.316621766 | -0.410329462 | 0.681564282 | 0.998677884 | Not Sig |
| ENSG00000260331 | NA           | NA                                                             | NA        | 5.211815558 | -0.536884238 | 1.112810259 | -0.482458024 | 0.629480611 | 0.998677884 | Not Sig |
| ENSG00000226202 | NA           | NA                                                             | NA        | 3.707926904 | -0.534322336 | 1.530240088 | -0.349175492 | 0.726957564 | 0.998677884 | Not Sig |
| ENSG00000272761 | NA           | NA                                                             | NA        | 496.3560725 | -0.533850237 | 0.979697727 | -0.544913214 | 0.585813208 | 0.998677884 | Not Sig |
| ENSG00000230454 | NA           | NA                                                             | NA        | 78.82631674 | -0.53263638  | 0.852067654 | -0.625110433 | 0.531898581 | 0.998677884 | Not Sig |
| ENSG00000266573 | LOC105372028 | uncharacterized LOC105372028                                   | 105372028 | 2.492771534 | -0.524690889 | 2.017970862 | -0.26000915  | 0.794856715 | 0.998677884 | Not Sig |
| ENSG00000272690 | LINC02018    | long intergenic non-protein coding RNA 2018                    | 107986100 | 50.58407839 | -0.523154686 | 0.877167247 | -0.59641384  | 0.550898797 | 0.998677884 | Not Sig |
| ENSG00000271966 | NA           | NA                                                             | NA        | 10.80685859 | -0.522406429 | 1.052685869 | -0.496260513 | 0.619710622 | 0.998677884 | Not Sig |
| ENSG00000256538 | NA           | NA                                                             | NA        | 3.540492406 | -0.521103174 | 1.570238569 | -0.331862422 | 0.739993147 | 0.998677884 | Not Sig |
| ENSG00000257556 | NA           | NA                                                             | NA        | 46.6388347  | -0.521038179 | 0.851191446 | -0.612128072 | 0.540453026 | 0.998677884 | Not Sig |
| ENSG00000227946 | NA           | NA                                                             | NA        | 86.18046263 | -0.520149025 | 0.78123092  | -0.665807013 | 0.505534462 | 0.998677884 | Not Sig |
| ENSG00000269038 | NA           | NA                                                             | NA        | 8.055527245 | -0.517736894 | 1.040802195 | -0.49744024  | 0.618878635 | 0.998677884 | Not Sig |
| ENSG00000269974 | NA           | NA                                                             | NA        | 13.51234233 | -0.517068004 | 1.847268514 | -0.279909499 | 0.779546939 | 0.998677884 | Not Sig |
| ENSG00000269928 | NA           | NA                                                             | NA        | 40.59468004 | -0.516263911 | 0.691985158 | -0.746062115 | 0.455629893 | 0.998677884 | Not Sig |
| ENSG00000268573 | NA           | NA                                                             | NA        | 87.34848204 | -0.514457818 | 0.684300037 | -0.751801534 | 0.452170419 | 0.998677884 | Not Sig |
| ENSG00000232411 | NA           | NA                                                             | NA        | 12.78202731 | -0.51430676  | 0.920687948 | -0.558611374 | 0.576426976 | 0.998677884 | Not Sig |
| ENSG00000256152 | NA           | NA                                                             | NA        | 8.229868361 | -0.514235255 | 0.935702194 | -0.549571496 | 0.582613314 | 0.998677884 | Not Sig |
| ENSG00000272379 | NA           | NA                                                             | NA        | 9.928758068 | -0.513755062 | 1.104623356 | -0.465095237 | 0.641863257 | 0.998677884 | Not Sig |
| ENSG00000258569 | NA           | NA                                                             | NA        | 5.13145206  | -0.510084414 | 1.101903273 | -0.462912151 | 0.643427338 | 0.998677884 | Not Sig |
| ENSG00000248441 | LINC01197    | long intergenic non-protein coding RNA 1197                    | 400456    | 18.22708516 | -0.509110941 | 1.130302479 | -0.450420087 | 0.652407564 | 0.998677884 | Not Sig |
| ENSG00000248441 | LOC105370994 | uncharacterized LOC105370994                                   | 105370994 | 18.22708516 | -0.509110941 | 1.130302479 | -0.450420087 | 0.652407564 | 0.998677884 | Not Sig |
| ENSG00000226756 | NA           | NA                                                             | NA        | 3.335083636 | -0.508709954 | 1.40062614  | -0.363201813 | 0.716454133 | 0.998677884 | Not Sig |
| ENSG00000270346 | NA           | NA                                                             | NA        | 18.40856717 | -0.506045615 | 0.921111377 | -0.549385913 | 0.582740639 | 0.998677884 | Not Sig |



|                 |              |                                             |           |             |              |             |              |             |             |         |
|-----------------|--------------|---------------------------------------------|-----------|-------------|--------------|-------------|--------------|-------------|-------------|---------|
| ENSG00000260804 | LINC01963    | long intergenic non-protein coding RNA 1963 | 150967    | 92.00840473 | -0.503439547 | 0.913496872 | -0.551112503 | 0.581556555 | 0.998677884 | Not Sig |
| ENSG00000272201 | NA           | NA                                          | NA        | 66.35270781 | -0.503078701 | 0.680614717 | -0.739153426 | 0.459813838 | 0.998677884 | Not Sig |
| ENSG00000273272 | NA           | NA                                          | NA        | 26.09977856 | -0.502853695 | 0.875487517 | -0.574369919 | 0.565717504 | 0.998677884 | Not Sig |
| ENSG00000260810 | NA           | NA                                          | NA        | 4.371872576 | -0.502485089 | 1.1994935   | -0.418914391 | 0.675278699 | 0.998677884 | Not Sig |
| ENSG00000260317 | NA           | NA                                          | NA        | 24.43491332 | -0.500282829 | 1.194483221 | -0.418827841 | 0.675341956 | 0.998677884 | Not Sig |
| ENSG00000241288 | LOC101927056 | uncharacterized LOC101927056                | 101927056 | 99.19378965 | -0.498718002 | 0.606215675 | -0.822674211 | 0.410693284 | 0.998677884 | Not Sig |
| ENSG00000268649 | NA           | NA                                          | NA        | 1.9403031   | -0.497601245 | 1.887203396 | -0.263671233 | 0.792033264 | 0.998677884 | Not Sig |
| ENSG00000249988 | NA           | NA                                          | NA        | 2.811053927 | -0.495601297 | 1.388843449 | -0.356844608 | 0.721208139 | 0.998677884 | Not Sig |
| ENSG00000237989 | LINC01679    | long intergenic non-protein coding RNA 1679 | 101928399 | 37.46994898 | -0.491274768 | 0.848905332 | -0.578715612 | 0.56278108  | 0.998677884 | Not Sig |
| ENSG00000273487 | NA           | NA                                          | NA        | 2.656653265 | -0.490972675 | 1.457267358 | -0.336913245 | 0.7361823   | 0.998677884 | Not Sig |
| ENSG00000266930 | NA           | NA                                          | NA        | 21.86334548 | -0.49065593  | 0.853040555 | -0.575184763 | 0.565166346 | 0.998677884 | Not Sig |
| ENSG00000234177 | LINC01114    | long intergenic non-protein coding RNA 1114 | 284998    | 0.802297005 | -0.490446932 | 2.579461392 | -0.190135403 | 0.849203028 | 0.998677884 | Not Sig |
| ENSG00000269946 | NA           | NA                                          | NA        | 39.4297583  | -0.486778003 | 0.858841042 | -0.566784747 | 0.570860435 | 0.998677884 | Not Sig |
| ENSG00000260179 | NA           | NA                                          | NA        | 7.040370976 | -0.486416188 | 0.997305992 | -0.487730137 | 0.625741002 | 0.998677884 | Not Sig |
| ENSG00000272791 | NA           | NA                                          | NA        | 5.078603636 | -0.485197421 | 1.166056419 | -0.416101153 | 0.677335986 | 0.998677884 | Not Sig |
| ENSG00000269939 | NA           | NA                                          | NA        | 37.95989618 | -0.484418074 | 0.890095811 | -0.544231383 | 0.586282259 | 0.998677884 | Not Sig |
| ENSG00000272452 | NA           | NA                                          | NA        | 47.40655028 | -0.483057915 | 0.868928845 | -0.555923443 | 0.578263191 | 0.998677884 | Not Sig |
| ENSG00000229246 | NA           | NA                                          | NA        | 1.877133326 | -0.479649567 | 2.138471566 | -0.224295508 | 0.822527371 | 0.998677884 | Not Sig |
| ENSG00000261097 | LINC00563    | long intergenic non-protein coding RNA 563  | 100861554 | 0.87403137  | -0.478559914 | 2.552750409 | -0.187468353 | 0.851293435 | 0.998677884 | Not Sig |
| ENSG00000266312 | NA           | NA                                          | NA        | 1.842133516 | -0.477841536 | 2.022633705 | -0.236247194 | 0.813240861 | 0.998677884 | Not Sig |
| ENSG00000267838 | NA           | NA                                          | NA        | 23.47344639 | -0.474676706 | 0.742851116 | -0.638993058 | 0.522827448 | 0.998677884 | Not Sig |
| ENSG00000241679 | NA           | NA                                          | NA        | 10.20246384 | -0.472701194 | 1.240711772 | -0.380991947 | 0.703209224 | 0.998677884 | Not Sig |
| ENSG00000260837 | NA           | NA                                          | NA        | 17.35692287 | -0.470864713 | 0.834793167 | -0.564049554 | 0.572720408 | 0.998677884 | Not Sig |
| ENSG00000197332 | NA           | NA                                          | NA        | 5.704967872 | -0.466639527 | 1.310742049 | -0.356011717 | 0.721831791 | 0.998677884 | Not Sig |
| ENSG00000238266 | LINC00707    | long intergenic non-protein coding RNA 707  | 100507127 | 4.05634024  | -0.466629805 | 1.636692913 | -0.285105289 | 0.775563478 | 0.998677884 | Not Sig |
| ENSG00000265485 | LINC01915    | long intergenic non-protein coding RNA 1915 | 729950    | 4.075335028 | -0.465239679 | 1.387541954 | -0.335297738 | 0.7374005   | 0.998677884 | Not Sig |
| ENSG00000260468 | NA           | NA                                          | NA        | 67.99167382 | -0.464298407 | 0.902294678 | -0.514575136 | 0.606849943 | 0.998677884 | Not Sig |
| ENSG00000272065 | NA           | NA                                          | NA        | 7.599080968 | -0.463829894 | 1.03397266  | -0.448590095 | 0.65372738  | 0.998677884 | Not Sig |
| ENSG00000196559 | NA           | NA                                          | NA        | 14.11950708 | -0.462960061 | 0.998429719 | -0.463688182 | 0.642871166 | 0.998677884 | Not Sig |
| ENSG00000253627 | NA           | NA                                          | NA        | 1.180257671 | -0.462054204 | 2.055985406 | -0.22473613  | 0.822184556 | 0.998677884 | Not Sig |
| ENSG00000229321 | NA           | NA                                          | NA        | 7.578172834 | -0.459813845 | 1.286379898 | -0.35744794  | 0.720756493 | 0.998677884 | Not Sig |
| ENSG00000226067 | NA           | NA                                          | NA        | 56.92046537 | -0.459004536 | 0.648918743 | -0.707337461 | 0.479356791 | 0.998677884 | Not Sig |
| ENSG00000235999 | NA           | NA                                          | NA        | 175.9090688 | -0.456647286 | 0.619530336 | -0.737086241 | 0.461069906 | 0.998677884 | Not Sig |
| ENSG00000263063 | LOC101929552 | uncharacterized LOC101929552                | 101929552 | 2.581260747 | -0.456577759 | 1.562005159 | -0.292302337 | 0.770055472 | 0.998677884 | Not Sig |
| ENSG00000260025 | NA           | NA                                          | NA        | 11.60747532 | -0.449422208 | 1.002549542 | -0.448279301 | 0.653951637 | 0.998677884 | Not Sig |

|                 |              |                                                               |           |             |              |             |              |             |             |         |
|-----------------|--------------|---------------------------------------------------------------|-----------|-------------|--------------|-------------|--------------|-------------|-------------|---------|
| ENSG00000264469 | NA           | NA                                                            | NA        | 101.6295525 | -0.449375896 | 0.671680424 | -0.669032296 | 0.503474876 | 0.998677884 | Not Sig |
| ENSG00000264083 | NA           | NA                                                            | NA        | 6.592342873 | -0.448511608 | 1.303228486 | -0.344154239 | 0.730730294 | 0.998677884 | Not Sig |
| ENSG00000227502 | LINC01268    | long intergenic non-protein coding RNA 1268                   | 285758    | 35.68338262 | -0.447735696 | 1.090250248 | -0.410672409 | 0.681312761 | 0.998677884 | Not Sig |
| ENSG00000230366 | DSCR9        | Down syndrome critical region 9 (non-protein coding)          | 257203    | 3.771839767 | -0.44743073  | 1.449700165 | -0.308636738 | 0.757597871 | 0.998677884 | Not Sig |
| ENSG00000225706 | NA           | NA                                                            | NA        | 6.227521429 | -0.445681878 | 1.195938102 | -0.372662998 | 0.709399279 | 0.998677884 | Not Sig |
| ENSG00000266935 | NA           | NA                                                            | NA        | 4.566463369 | -0.44567281  | 1.254258663 | -0.355327672 | 0.722344127 | 0.998677884 | Not Sig |
| ENSG00000225975 | LINC01534    | long intergenic non-protein coding RNA 1534                   | 101927621 | 42.08291783 | -0.445149115 | 0.699159975 | -0.636691359 | 0.524325903 | 0.998677884 | Not Sig |
| ENSG00000255299 | NA           | NA                                                            | NA        | 3.61081694  | -0.445140226 | 1.325157832 | -0.335914874 | 0.736935061 | 0.998677884 | Not Sig |
| ENSG00000247363 | LOC100507250 | uncharacterized LOC100507250                                  | 100507250 | 9.760167043 | -0.440355063 | 1.161491102 | -0.379129089 | 0.704592006 | 0.998677884 | Not Sig |
| ENSG00000259539 | NA           | NA                                                            | NA        | 17.11297341 | -0.440015511 | 0.82823965  | -0.531265934 | 0.595234509 | 0.998677884 | Not Sig |
| ENSG00000224015 | LOC107987500 | uncharacterized LOC107987500                                  | 107987500 | 2.180145405 | -0.437965122 | 2.094173772 | -0.209135043 | 0.834342819 | 0.998677884 | Not Sig |
| ENSG00000266970 | LOC101928674 | uncharacterized LOC101928674                                  | 101928674 | 46.25870191 | -0.434253946 | 0.955569326 | -0.454445256 | 0.649508386 | 0.998677884 | Not Sig |
| ENSG00000254266 | PKIA-AS1     | PKIA antisense RNA 1                                          | 101927003 | 5.952170841 | -0.433035964 | 1.126818788 | -0.38429956  | 0.700756434 | 0.998677884 | Not Sig |
| ENSG00000273416 | NA           | NA                                                            | NA        | 4.371669999 | -0.427276285 | 1.458741926 | -0.292907387 | 0.769592943 | 0.998677884 | Not Sig |
| ENSG00000258066 | NA           | NA                                                            | NA        | 4.323741925 | -0.427193281 | 1.153561861 | -0.370325421 | 0.711140035 | 0.998677884 | Not Sig |
| ENSG00000236799 | LOC102724589 | uncharacterized LOC102724589                                  | 102724589 | 2.684547728 | -0.420017369 | 1.368956498 | -0.306815717 | 0.758983645 | 0.998677884 | Not Sig |
| ENSG00000270154 | NA           | NA                                                            | NA        | 23.72309886 | -0.419672408 | 1.00544734  | -0.417398695 | 0.676386809 | 0.998677884 | Not Sig |
| ENSG00000267279 | NA           | NA                                                            | NA        | 8.940556965 | -0.418695906 | 1.198775082 | -0.349269777 | 0.726886786 | 0.998677884 | Not Sig |
| ENSG00000269973 | NA           | NA                                                            | NA        | 87.55019228 | -0.418281051 | 0.625623141 | -0.668583087 | 0.503761464 | 0.998677884 | Not Sig |
| ENSG00000250682 | NA           | NA                                                            | NA        | 1.44501141  | -0.416644491 | 2.260984785 | -0.184275672 | 0.853797198 | 0.998677884 | Not Sig |
| ENSG00000256150 | ITFG2-AS1    | ITFG2 antisense RNA 1                                         | 283440    | 2.599066834 | -0.416232382 | 1.507706083 | -0.276069976 | 0.782494321 | 0.998677884 | Not Sig |
| ENSG00000270100 | NA           | NA                                                            | NA        | 7.496370423 | -0.41557884  | 0.980597679 | -0.423801574 | 0.67171053  | 0.998677884 | Not Sig |
| ENSG00000249685 | NA           | NA                                                            | NA        | 15.190092   | -0.414434436 | 0.824474186 | -0.502665145 | 0.615199719 | 0.998677884 | Not Sig |
| ENSG00000269996 | NA           | NA                                                            | NA        | 186.3993009 | -0.413556778 | 0.737432052 | -0.560806622 | 0.574929372 | 0.998677884 | Not Sig |
| ENSG00000248508 | SRP14-AS1    | SRP14 antisense RNA1 (head to head)                           | 100131089 | 129.9506026 | -0.40870635  | 0.837050546 | -0.488269618 | 0.625358879 | 0.998677884 | Not Sig |
| ENSG00000271009 | NA           | NA                                                            | NA        | 12.66048235 | -0.404301064 | 0.991903474 | -0.407601218 | 0.68356647  | 0.998677884 | Not Sig |
| ENSG00000259869 | NA           | NA                                                            | NA        | 2.987559807 | -0.404230932 | 1.579246992 | -0.255964351 | 0.797978364 | 0.998677884 | Not Sig |
| ENSG00000261353 | NA           | NA                                                            | NA        | 14.8975497  | -0.403796736 | 1.134826448 | -0.355822458 | 0.721973529 | 0.998677884 | Not Sig |
| ENSG00000273032 | DGCR9        | DiGeorge syndrome critical region gene 9 (non-protein coding) | 25787     | 7.659881718 | -0.403689618 | 1.817783042 | -0.222077997 | 0.824253166 | 0.998677884 | Not Sig |
| ENSG00000226453 | NA           | NA                                                            | NA        | 21.65803588 | -0.402722237 | 1.200032522 | -0.335592769 | 0.737177978 | 0.998677884 | Not Sig |
| ENSG00000231690 | LINC00574    | long intergenic non-protein coding RNA 574                    | 80069     | 7.771768645 | -0.402276446 | 1.186558012 | -0.339028047 | 0.734588601 | 0.998677884 | Not Sig |
| ENSG00000269220 | LINC00528    | long intergenic non-protein coding RNA 528                    | 200298    | 19.80737678 | -0.400766637 | 0.916903601 | -0.437086992 | 0.66204826  | 0.998677884 | Not Sig |
| ENSG00000237248 | LINC00987    | long intergenic non-protein coding RNA 987                    | 100499405 | 62.91199495 | -0.399567975 | 1.039024465 | -0.3845607   | 0.700562916 | 0.998677884 | Not Sig |
| ENSG00000253476 | NA           | NA                                                            | NA        | 13.16838095 | -0.394873415 | 0.844181513 | -0.467758899 | 0.639957016 | 0.998677884 | Not Sig |
| ENSG00000262837 | NA           | NA                                                            | NA        | 44.40260482 | -0.394527511 | 0.710617423 | -0.555189753 | 0.578764877 | 0.998677884 | Not Sig |

|                 |              |                                             |           |             |              |             |              |             |             |         |
|-----------------|--------------|---------------------------------------------|-----------|-------------|--------------|-------------|--------------|-------------|-------------|---------|
| ENSG00000228512 | NA           | NA                                          | NA        | 3.340609039 | -0.394363072 | 1.282303757 | -0.307542631 | 0.758430379 | 0.998677884 | Not Sig |
| ENSG00000236066 | NA           | NA                                          | NA        | 9.518265073 | -0.393536111 | 0.904302686 | -0.435181844 | 0.66343044  | 0.998677884 | Not Sig |
| ENSG00000267730 | NA           | NA                                          | NA        | 1.504290058 | -0.384435968 | 1.710744253 | -0.22471855  | 0.822198233 | 0.998677884 | Not Sig |
| ENSG00000256582 | NA           | NA                                          | NA        | 3.03156814  | -0.384063377 | 1.649943967 | -0.232773588 | 0.815937223 | 0.998677884 | Not Sig |
| ENSG00000231083 | NA           | NA                                          | NA        | 1.057409625 | -0.380993052 | 2.375579052 | -0.160379025 | 0.872582511 | 0.998677884 | Not Sig |
| ENSG00000253369 | NA           | NA                                          | NA        | 0.835373406 | -0.372502197 | 2.979980387 | -0.12500156  | 0.900522315 | 0.998677884 | Not Sig |
| ENSG00000224137 | LINC01857    | long intergenic non-protein coding RNA 1857 | 102724714 | 9.488233245 | -0.368808755 | 1.245440685 | -0.296127114 | 0.767133008 | 0.998677884 | Not Sig |
| ENSG00000124915 | DKFZP434K028 | uncharacterized LOC26070                    | 26070     | 2.26133555  | -0.36839436  | 2.021777003 | -0.182213152 | 0.855415452 | 0.998677884 | Not Sig |
| ENSG00000268362 | NA           | NA                                          | NA        | 351.3459478 | -0.367591369 | 0.685087569 | -0.536561142 | 0.591570791 | 0.998677884 | Not Sig |
| ENSG00000257900 | NA           | NA                                          | NA        | 4.794964054 | -0.364837791 | 1.462600454 | -0.249444604 | 0.803016886 | 0.998677884 | Not Sig |
| ENSG00000226091 | LINC00937    | long intergenic non-protein coding RNA 937  | 389634    | 33.10550691 | -0.364505579 | 0.909731615 | -0.400673751 | 0.688660339 | 0.998677884 | Not Sig |
| ENSG00000270189 | NA           | NA                                          | NA        | 90.15832793 | -0.363174539 | 0.911860956 | -0.398278419 | 0.690424967 | 0.998677884 | Not Sig |
| ENSG00000261532 | NA           | NA                                          | NA        | 3.548521117 | -0.362949116 | 1.674808863 | -0.216710768 | 0.828433755 | 0.998677884 | Not Sig |
| ENSG00000203499 | FAM83H-AS1   | FAM83H antisense RNA 1 (head to head)       | 100128338 | 933.4350179 | -0.362913767 | 1.051006287 | -0.345301233 | 0.72986792  | 0.998677884 | Not Sig |
| ENSG00000270750 | NA           | NA                                          | NA        | 4.018741896 | -0.361619392 | 1.890112724 | -0.191321601 | 0.848273639 | 0.998677884 | Not Sig |
| ENSG00000267130 | NA           | NA                                          | NA        | 4.223165748 | -0.361511519 | 1.471564394 | -0.245664763 | 0.805941751 | 0.998677884 | Not Sig |
| ENSG00000214347 | NA           | NA                                          | NA        | 1.11539746  | -0.360599423 | 2.101553259 | -0.171587097 | 0.863762152 | 0.998677884 | Not Sig |
| ENSG00000235499 | NA           | NA                                          | NA        | 85.30507194 | -0.358351598 | 0.765332233 | -0.468230112 | 0.63962004  | 0.998677884 | Not Sig |
| ENSG00000248538 | LOC101929128 | uncharacterized LOC101929128                | 101929128 | 12.76112828 | -0.355050424 | 1.428627608 | -0.248525524 | 0.803727824 | 0.998677884 | Not Sig |
| ENSG00000273403 | NA           | NA                                          | NA        | 6.874405883 | -0.354157186 | 1.07592583  | -0.329165056 | 0.742030934 | 0.998677884 | Not Sig |
| ENSG00000271020 | NA           | NA                                          | NA        | 17.6297805  | -0.353425915 | 1.112930153 | -0.317563428 | 0.750816119 | 0.998677884 | Not Sig |
| ENSG00000250312 | ZNF718       | zinc finger protein 718                     | 255403    | 289.7074697 | -0.353223258 | 0.73011908  | -0.48378856  | 0.628535935 | 0.998677884 | Not Sig |
| ENSG00000136315 | NA           | NA                                          | NA        | 1.116921245 | -0.351286349 | 2.365847869 | -0.148482222 | 0.881962215 | 0.998677884 | Not Sig |
| ENSG00000272593 | NA           | NA                                          | NA        | 18.55969057 | -0.350793419 | 0.982546367 | -0.357024798 | 0.721073241 | 0.998677884 | Not Sig |
| ENSG00000232611 | NA           | NA                                          | NA        | 99.49922147 | -0.349061625 | 0.756971709 | -0.461129023 | 0.64470604  | 0.998677884 | Not Sig |
| ENSG00000266538 | NA           | NA                                          | NA        | 50.53446979 | -0.345435822 | 0.839819658 | -0.41132143  | 0.680836858 | 0.998677884 | Not Sig |
| ENSG00000257084 | MIR200CHG    | MIR200C and MIR141 host gene                | 105369635 | 42.84120173 | -0.345096572 | 0.935185137 | -0.369014175 | 0.712117159 | 0.998677884 | Not Sig |
| ENSG00000234571 | NA           | NA                                          | NA        | 2.724498285 | -0.345010903 | 1.427826114 | -0.241633697 | 0.809064009 | 0.998677884 | Not Sig |
| ENSG00000259725 | NA           | NA                                          | NA        | 4.605298146 | -0.343195595 | 1.545731444 | -0.222027957 | 0.82429212  | 0.998677884 | Not Sig |
| ENSG00000226237 | GAS1RR       | GAS1 adjacent regulatory RNA                | 100506834 | 17.05993941 | -0.340310788 | 1.191333098 | -0.285655446 | 0.775142032 | 0.998677884 | Not Sig |
| ENSG00000268038 | LINC01785    | long intergenic non-protein coding RNA 1785 | 374890    | 0.822917689 | -0.339663568 | 2.986810896 | -0.113721149 | 0.909458846 | 0.998677884 | Not Sig |
| ENSG00000233013 | NA           | NA                                          | NA        | 13.70764182 | -0.338525186 | 0.977521381 | -0.346309751 | 0.729109941 | 0.998677884 | Not Sig |
| ENSG00000250551 | NA           | NA                                          | NA        | 10.45853772 | -0.337847526 | 1.21176526  | -0.278806083 | 0.780393646 | 0.998677884 | Not Sig |
| ENSG00000254802 | NA           | NA                                          | NA        | 2.495315687 | -0.336798124 | 1.748276249 | -0.192645827 | 0.847236352 | 0.998677884 | Not Sig |
| ENSG00000231028 | LINC00271    | long intergenic non-protein coding RNA 271  | 100131814 | 48.81647211 | -0.336093215 | 0.839774875 | -0.400218231 | 0.688995788 | 0.998677884 | Not Sig |

|                 |              |                                                                     |           |             |              |             |              |             |             |         |
|-----------------|--------------|---------------------------------------------------------------------|-----------|-------------|--------------|-------------|--------------|-------------|-------------|---------|
| ENSG00000271967 | NA           | NA                                                                  | NA        | 4.542128372 | -0.335989403 | 1.438593434 | -0.233554106 | 0.815331161 | 0.998677884 | Not Sig |
| ENSG00000267339 | LINC00906    | long intergenic non-protein coding RNA 906                          | 148145    | 1.101417958 | -0.335856438 | 2.324037726 | -0.144514194 | 0.885094449 | 0.998677884 | Not Sig |
| ENSG00000237857 | NA           | NA                                                                  | NA        | 31.51267294 | -0.335375775 | 0.986156966 | -0.340083563 | 0.7337936   | 0.998677884 | Not Sig |
| ENSG00000236438 | NA           | NA                                                                  | NA        | 127.0998951 | -0.335239902 | 0.702635079 | -0.477118083 | 0.633278039 | 0.998677884 | Not Sig |
| ENSG00000188825 | LINC00910    | long intergenic non-protein coding RNA 910                          | 100130581 | 195.6815064 | -0.333243306 | 0.802007742 | -0.415511333 | 0.67776762  | 0.998677884 | Not Sig |
| ENSG00000272960 | NA           | NA                                                                  | NA        | 13.16680939 | -0.331243141 | 0.963050265 | -0.343952079 | 0.730882325 | 0.998677884 | Not Sig |
| ENSG00000215483 | LINC00548    | long intergenic non-protein coding RNA 548                          | 400123    | 9.860447011 | -0.329383302 | 0.930767098 | -0.353883698 | 0.723426045 | 0.998677884 | Not Sig |
| ENSG00000215483 | LINC00598    | long intergenic non-protein coding RNA 598                          | 646982    | 9.860447011 | -0.329383302 | 0.930767098 | -0.353883698 | 0.723426045 | 0.998677884 | Not Sig |
| ENSG00000261786 | NA           | NA                                                                  | NA        | 34.88806955 | -0.323989343 | 1.110011404 | -0.291879292 | 0.770378917 | 0.998677884 | Not Sig |
| ENSG00000260359 | NA           | NA                                                                  | NA        | 229.6480679 | -0.323221827 | 0.680766066 | -0.474791332 | 0.634935712 | 0.998677884 | Not Sig |
| ENSG00000273476 | NA           | NA                                                                  | NA        | 2.765698622 | -0.320923155 | 1.664310297 | -0.192826515 | 0.847094837 | 0.998677884 | Not Sig |
| ENSG00000272940 | NA           | NA                                                                  | NA        | 4.27208052  | -0.317683421 | 1.435335144 | -0.221330483 | 0.824835117 | 0.998677884 | Not Sig |
| ENSG00000260539 | NA           | NA                                                                  | NA        | 655.3646706 | -0.31767428  | 0.665744225 | -0.477171665 | 0.633239886 | 0.998677884 | Not Sig |
| ENSG00000228488 | NA           | NA                                                                  | NA        | 0.700469268 | -0.317399663 | 3.790885961 | -0.083727041 | 0.933273457 | 0.998677884 | Not Sig |
| ENSG00000231210 | NA           | NA                                                                  | NA        | 0.700469268 | -0.317399663 | 3.790885961 | -0.083727041 | 0.933273457 | 0.998677884 | Not Sig |
| ENSG00000260177 | NA           | NA                                                                  | NA        | 0.700469268 | -0.317399663 | 3.790885961 | -0.083727041 | 0.933273457 | 0.998677884 | Not Sig |
| ENSG00000272335 | NA           | NA                                                                  | NA        | 143.4967835 | -0.313361667 | 0.714009426 | -0.438876092 | 0.660751321 | 0.998677884 | Not Sig |
| ENSG00000270143 | NA           | NA                                                                  | NA        | 30.43914383 | -0.310971126 | 0.862928531 | -0.360367185 | 0.718572563 | 0.998677884 | Not Sig |
| ENSG00000248175 | NA           | NA                                                                  | NA        | 112.6238627 | -0.307044217 | 0.797107005 | -0.385198242 | 0.700090546 | 0.998677884 | Not Sig |
| ENSG00000259548 | NA           | NA                                                                  | NA        | 6.017570017 | -0.306592498 | 1.223989222 | -0.250486273 | 0.802211319 | 0.998677884 | Not Sig |
| ENSG00000257261 | NA           | NA                                                                  | NA        | 90.50802591 | -0.305857687 | 0.808068378 | -0.37850471  | 0.705055695 | 0.998677884 | Not Sig |
| ENSG00000234519 | LOC102724357 | uncharacterized LOC102724357                                        | 102724357 | 0.703516838 | -0.30519397  | 3.787428294 | -0.080580791 | 0.935775343 | 0.998677884 | Not Sig |
| ENSG00000236740 | LOC101927189 | uncharacterized LOC101927189                                        | 101927189 | 0.703516838 | -0.30519397  | 3.787428294 | -0.080580791 | 0.935775343 | 0.998677884 | Not Sig |
| ENSG00000270988 | NA           | NA                                                                  | NA        | 1.092009811 | -0.304139985 | 2.369681112 | -0.128346377 | 0.897874865 | 0.998677884 | Not Sig |
| ENSG00000272576 | NA           | NA                                                                  | NA        | 4.229196348 | -0.301674848 | 1.225669789 | -0.246130606 | 0.805581131 | 0.998677884 | Not Sig |
| ENSG00000272347 | NA           | NA                                                                  | NA        | 24.44707375 | -0.300789305 | 1.46026974  | -0.205982016 | 0.836804959 | 0.998677884 | Not Sig |
| ENSG00000236700 | NA           | NA                                                                  | NA        | 25.96066124 | -0.30004571  | 1.289219423 | -0.232734401 | 0.815967654 | 0.998677884 | Not Sig |
| ENSG00000232098 | NA           | NA                                                                  | NA        | 195.9769873 | -0.296458946 | 0.763369146 | -0.388355945 | 0.697752642 | 0.998677884 | Not Sig |
| ENSG00000225493 | LINC01107    | long intergenic non-protein coding RNA 1107                         | 151171    | 1.231140159 | -0.296164484 | 2.760190153 | -0.10729858  | 0.914552111 | 0.998677884 | Not Sig |
| ENSG00000227060 | NA           | NA                                                                  | NA        | 2.214448078 | -0.29593139  | 1.696825931 | -0.174402916 | 0.861548823 | 0.998677884 | Not Sig |
| ENSG00000260923 | NA           | NA                                                                  | NA        | 9.607518173 | -0.293951247 | 0.893709715 | -0.328911325 | 0.742222714 | 0.998677884 | Not Sig |
| ENSG00000242622 | NA           | NA                                                                  | NA        | 55.09614301 | -0.291923338 | 0.759956072 | -0.384131857 | 0.700880721 | 0.998677884 | Not Sig |
| ENSG00000242086 | SDHAP2       | succinate dehydrogenase complex flavoprotein subunit A pseudogene 2 | 727956    | 1194.582635 | -0.291024887 | 0.696965268 | -0.4175601   | 0.676268774 | 0.998677884 | Not Sig |
| ENSG00000237927 | NA           | NA                                                                  | NA        | 28.68401864 | -0.290792704 | 1.218753973 | -0.238598364 | 0.811417034 | 0.998677884 | Not Sig |
| ENSG00000249628 | NA           | NA                                                                  | NA        | 16.01847936 | -0.290583419 | 1.476024486 | -0.196868969 | 0.843930077 | 0.998677884 | Not Sig |

|                 |              |                                             |           |             |              |             |              |             |             |         |
|-----------------|--------------|---------------------------------------------|-----------|-------------|--------------|-------------|--------------|-------------|-------------|---------|
| ENSG00000267167 | NA           | NA                                          | NA        | 10.30139389 | -0.290438451 | 0.937345923 | -0.309851938 | 0.756673553 | 0.998677884 | Not Sig |
| ENSG00000223647 | LINC01946    | long intergenic non-protein coding RNA 1946 | 105374449 | 0.701993053 | -0.289851729 | 3.150668871 | -0.091996887 | 0.926700513 | 0.998677884 | Not Sig |
| ENSG00000271862 | NA           | NA                                          | NA        | 36.55921625 | -0.287973407 | 0.865788318 | -0.332614106 | 0.739425594 | 0.998677884 | Not Sig |
| ENSG00000268340 | NA           | NA                                          | NA        | 2.762040469 | -0.287311849 | 1.627369821 | -0.17654982  | 0.859862013 | 0.998677884 | Not Sig |
| ENSG00000249426 | NA           | NA                                          | NA        | 1.778499577 | -0.28496185  | 1.846734985 | -0.154305762 | 0.877368654 | 0.998677884 | Not Sig |
| ENSG00000267093 | NA           | NA                                          | NA        | 2.133538539 | -0.280972203 | 1.815005885 | -0.154805119 | 0.876974955 | 0.998677884 | Not Sig |
| ENSG00000272361 | NA           | NA                                          | NA        | 3.614986989 | -0.277881786 | 1.26719216  | -0.219289382 | 0.826424633 | 0.998677884 | Not Sig |
| ENSG00000260672 | NA           | NA                                          | NA        | 12.46458365 | -0.276866782 | 1.034569363 | -0.267615485 | 0.78899531  | 0.998677884 | Not Sig |
| ENSG00000263874 | LINC00672    | long intergenic non-protein coding RNA 672  | 100505576 | 39.08231928 | -0.276451469 | 0.756189851 | -0.365584738 | 0.714674965 | 0.998677884 | Not Sig |
| ENSG00000268471 | LINC02486    | long intergenic non-protein coding RNA 2486 | 54553     | 98.11648092 | -0.276100422 | 0.719723868 | -0.383619933 | 0.701260164 | 0.998677884 | Not Sig |
| ENSG00000250842 | NA           | NA                                          | NA        | 1.834963627 | -0.273290156 | 1.750856709 | -0.15608939  | 0.875962561 | 0.998677884 | Not Sig |
| ENSG00000268816 | NA           | NA                                          | NA        | 14.900191   | -0.272698751 | 1.113970865 | -0.244798818 | 0.806612209 | 0.998677884 | Not Sig |
| ENSG00000237356 | NA           | NA                                          | NA        | 30.3178992  | -0.272647013 | 0.905189014 | -0.30120451  | 0.763258551 | 0.998677884 | Not Sig |
| ENSG00000223804 | NA           | NA                                          | NA        | 101.5820229 | -0.270359653 | 0.613253423 | -0.44086122  | 0.65931347  | 0.998677884 | Not Sig |
| ENSG00000267414 | LOC101927943 | uncharacterized LOC101927943                | 101927943 | 27.91693633 | -0.269758892 | 1.018628619 | -0.264825557 | 0.791143848 | 0.998677884 | Not Sig |
| ENSG00000224511 | LINC00365    | long intergenic non-protein coding RNA 365  | 100874146 | 12.69526469 | -0.265250365 | 1.430720262 | -0.185396385 | 0.852918143 | 0.998677884 | Not Sig |
| ENSG00000232053 | NA           | NA                                          | NA        | 4.347474819 | -0.263461492 | 1.50793205  | -0.174717085 | 0.861301943 | 0.998677884 | Not Sig |
| ENSG00000227456 | LINC00310    | long intergenic non-protein coding RNA 310  | 114036    | 33.98029675 | -0.263306129 | 0.879801962 | -0.29927886  | 0.764727283 | 0.998677884 | Not Sig |
| ENSG00000249601 | NA           | NA                                          | NA        | 1.136018145 | -0.261560918 | 2.319622237 | -0.112760136 | 0.910220724 | 0.998677884 | Not Sig |
| ENSG00000261610 | NA           | NA                                          | NA        | 2.480093006 | -0.260378271 | 1.66094048  | -0.156765564 | 0.875429613 | 0.998677884 | Not Sig |
| ENSG00000272567 | NA           | NA                                          | NA        | 4.857717296 | -0.259515709 | 1.87997831  | -0.138041863 | 0.890207332 | 0.998677884 | Not Sig |
| ENSG00000268707 | NA           | NA                                          | NA        | 5.27473733  | -0.257801299 | 1.303034762 | -0.197846832 | 0.843164904 | 0.998677884 | Not Sig |
| ENSG00000273211 | NA           | NA                                          | NA        | 10.63297387 | -0.257699152 | 0.909743792 | -0.283265633 | 0.776973219 | 0.998677884 | Not Sig |
| ENSG00000233137 | NA           | NA                                          | NA        | 1375.879505 | -0.255470271 | 0.767655524 | -0.332792852 | 0.739290654 | 0.998677884 | Not Sig |
| ENSG00000272093 | NA           | NA                                          | NA        | 61.6397521  | -0.249224307 | 0.685136761 | -0.363758481 | 0.716038369 | 0.998677884 | Not Sig |
| ENSG00000271344 | NA           | NA                                          | NA        | 5.868094811 | -0.248709801 | 1.058509414 | -0.234962295 | 0.814237998 | 0.998677884 | Not Sig |
| ENSG00000227911 | NA           | NA                                          | NA        | 20.63712975 | -0.246151549 | 0.873415098 | -0.281826533 | 0.778076525 | 0.998677884 | Not Sig |
| ENSG00000231346 | NA           | NA                                          | NA        | 8.675267775 | -0.246045898 | 0.924713387 | -0.26607801  | 0.79017913  | 0.998677884 | Not Sig |
| ENSG00000206567 | NA           | NA                                          | NA        | 59.60692679 | -0.245040933 | 0.824274531 | -0.297280729 | 0.766252193 | 0.998677884 | Not Sig |
| ENSG00000247400 | DNAJC3-AS1   | DNAJC3 antisense RNA 1 (head to head)       | 100289274 | 109.7011671 | -0.244617267 | 0.745967754 | -0.327919358 | 0.742972637 | 0.998677884 | Not Sig |
| ENSG00000267583 | NA           | NA                                          | NA        | 10.4849596  | -0.243563359 | 1.029620651 | -0.236556404 | 0.813000945 | 0.998677884 | Not Sig |
| ENSG00000272695 | GAS6-AS2     | GAS6 antisense RNA 2 (head to head)         | 100506394 | 11.0790226  | -0.239079112 | 1.019021811 | -0.234616285 | 0.814506569 | 0.998677884 | Not Sig |
| ENSG00000272630 | NA           | NA                                          | NA        | 33.46375257 | -0.232248073 | 0.741181872 | -0.313348291 | 0.754016065 | 0.998677884 | Not Sig |
| ENSG00000272024 | NA           | NA                                          | NA        | 3.947184344 | -0.23213309  | 1.247661416 | -0.186054555 | 0.852401979 | 0.998677884 | Not Sig |
| ENSG00000264112 | NA           | NA                                          | NA        | 397.6390236 | -0.231926564 | 0.871604347 | -0.266091564 | 0.790168692 | 0.998677884 | Not Sig |

|                 |              |                                                                       |           |             |              |             |              |             |             |         |
|-----------------|--------------|-----------------------------------------------------------------------|-----------|-------------|--------------|-------------|--------------|-------------|-------------|---------|
| ENSG00000224957 | LINC01266    | long intergenic non-protein coding RNA 1266                           | 101927215 | 33.03331121 | -0.23013104  | 0.871623712 | -0.264025676 | 0.791760134 | 0.998677884 | Not Sig |
| ENSG00000261404 | LOC101928035 | uncharacterized LOC101928035                                          | 101928035 | 3.447520028 | -0.230039585 | 1.403749776 | -0.163875065 | 0.869829497 | 0.998677884 | Not Sig |
| ENSG00000230490 | NA           | NA                                                                    | NA        | 34.49034563 | -0.229607807 | 0.901439702 | -0.25471233  | 0.798945292 | 0.998677884 | Not Sig |
| ENSG00000248714 | LOC102724596 | uncharacterized LOC102724596                                          | 102724596 | 4.358687356 | -0.22868104  | 1.251400337 | -0.182740114 | 0.855001939 | 0.998677884 | Not Sig |
| ENSG00000272908 | NA           | NA                                                                    | NA        | 25.21294207 | -0.228237622 | 1.059637801 | -0.21539211  | 0.829461621 | 0.998677884 | Not Sig |
| ENSG00000260979 | NA           | NA                                                                    | NA        | 1.388083194 | -0.228033725 | 2.264575726 | -0.100696003 | 0.919791784 | 0.998677884 | Not Sig |
| ENSG00000245556 | SCAMP1-AS1   | SCAMP1 antisense RNA 1                                                | 728769    | 101.1093261 | -0.227310521 | 0.726421332 | -0.31291829  | 0.754342742 | 0.998677884 | Not Sig |
| ENSG00000249241 | LINC02265    | long intergenic non-protein coding RNA 2265                           | 101060498 | 2.012214278 | -0.22642652  | 2.485610624 | -0.091094928 | 0.927417163 | 0.998677884 | Not Sig |
| ENSG00000273290 | NA           | NA                                                                    | NA        | 174.4085821 | -0.22577853  | 0.606537529 | -0.372241649 | 0.709712939 | 0.998677884 | Not Sig |
| ENSG00000273456 | NA           | NA                                                                    | NA        | 22.69686219 | -0.223560614 | 1.016373057 | -0.219959209 | 0.825902923 | 0.998677884 | Not Sig |
| ENSG00000234509 | NA           | NA                                                                    | NA        | 6.94655514  | -0.223310437 | 1.214036618 | -0.183940446 | 0.854060175 | 0.998677884 | Not Sig |
| ENSG00000246067 | RAB30-AS1    | RAB30 antisense RNA 1 (head to head)                                  | 100506233 | 253.2371594 | -0.222939457 | 0.670117833 | -0.332686948 | 0.739370603 | 0.998677884 | Not Sig |
| ENSG00000268355 | NA           | NA                                                                    | NA        | 6.640917408 | -0.22251025  | 1.123859305 | -0.197987638 | 0.843054735 | 0.998677884 | Not Sig |
| ENSG00000239407 | NA           | NA                                                                    | NA        | 92.40027102 | -0.221825571 | 0.753860649 | -0.294252753 | 0.768564773 | 0.998677884 | Not Sig |
| ENSG00000214870 | NA           | NA                                                                    | NA        | 63.25161477 | -0.22163051  | 0.869983983 | -0.254752403 | 0.79891434  | 0.998677884 | Not Sig |
| ENSG00000268316 | NA           | NA                                                                    | NA        | 1.517805395 | -0.221349855 | 1.917173898 | -0.115456326 | 0.908083435 | 0.998677884 | Not Sig |
| ENSG00000260563 | NA           | NA                                                                    | NA        | 57.39667207 | -0.216329116 | 0.794672027 | -0.2722244   | 0.785449482 | 0.998677884 | Not Sig |
| ENSG00000273190 | NA           | NA                                                                    | NA        | 7.624793383 | -0.216062937 | 1.082814144 | -0.19953834  | 0.841841655 | 0.998677884 | Not Sig |
| ENSG00000237753 | NA           | NA                                                                    | NA        | 27.55132928 | -0.210218226 | 0.743410243 | -0.28277553  | 0.777348913 | 0.998677884 | Not Sig |
| ENSG00000232884 | NA           | NA                                                                    | NA        | 6.429219777 | -0.20953666  | 1.637907532 | -0.127929481 | 0.89820478  | 0.998677884 | Not Sig |
| ENSG00000223891 | OSER1-AS1    | OSER1 antisense RNA 1 (head to head)                                  | 100505783 | 125.0646442 | -0.208635927 | 0.678413483 | -0.307535054 | 0.758436146 | 0.998677884 | Not Sig |
| ENSG00000249669 | NA           | NA                                                                    | NA        | 1116.03989  | -0.208635264 | 0.766209343 | -0.272295379 | 0.785394909 | 0.998677884 | Not Sig |
| ENSG00000265533 | LOC643542    | uncharacterized LOC643542                                             | 643542    | 1.716686937 | -0.208165713 | 1.826250678 | -0.11398529  | 0.909249454 | 0.998677884 | Not Sig |
| ENSG00000247624 | CPEB2-AS1    | CPEB2 antisense RNA 1 (head to head)                                  | 441009    | 20.12533445 | -0.207644059 | 0.834544007 | -0.248811395 | 0.803506676 | 0.998677884 | Not Sig |
| ENSG00000230709 | NA           | NA                                                                    | NA        | 6.420655186 | -0.207158169 | 1.859829338 | -0.11138558  | 0.911310594 | 0.998677884 | Not Sig |
| ENSG00000269814 | NA           | NA                                                                    | NA        | 1.013569723 | -0.204096954 | 2.429387984 | -0.084011675 | 0.933047149 | 0.998677884 | Not Sig |
| ENSG00000273015 | NA           | NA                                                                    | NA        | 188.0132017 | -0.204060936 | 0.69191285  | -0.294922889 | 0.768052787 | 0.998677884 | Not Sig |
| ENSG00000269892 | NA           | NA                                                                    | NA        | 3.769389432 | -0.203107027 | 1.487344259 | -0.136556837 | 0.891381096 | 0.998677884 | Not Sig |
| ENSG00000234155 | LINC02535    | long intergenic non-protein coding RNA 2535                           | 101928820 | 18.27076125 | -0.202659708 | 1.884395735 | -0.107546257 | 0.914355631 | 0.998677884 | Not Sig |
| ENSG00000234810 | NA           | NA                                                                    | NA        | 1.015093508 | -0.200481764 | 2.42907461  | -0.082534214 | 0.934221912 | 0.998677884 | Not Sig |
| ENSG00000226562 | NA           | NA                                                                    | NA        | 3.804628816 | -0.197644171 | 1.233183359 | -0.16027152  | 0.872667193 | 0.998677884 | Not Sig |
| ENSG00000270019 | NA           | NA                                                                    | NA        | 28.18227055 | -0.197619147 | 0.754965889 | -0.261759041 | 0.793507219 | 0.998677884 | Not Sig |
| ENSG00000214293 | APTR         | Alu-mediated CDMNA/p21 transcriptional regulator (non-protein coding) | 100505854 | 218.8311921 | -0.196897943 | 0.707261917 | -0.278394663 | 0.780709416 | 0.998677884 | Not Sig |
| ENSG00000258689 | LINC01269    | long intergenic non-protein coding RNA 1269                           | 103695436 | 4.1005748   | -0.192724319 | 1.528262932 | -0.126106781 | 0.8996474   | 0.998677884 | Not Sig |
| ENSG00000272370 | NA           | NA                                                                    | NA        | 4.982731885 | -0.189860379 | 1.229065004 | -0.154475457 | 0.877234861 | 0.998677884 | Not Sig |

|                 |           |                                             |           |             |              |             |              |             |             |         |
|-----------------|-----------|---------------------------------------------|-----------|-------------|--------------|-------------|--------------|-------------|-------------|---------|
| ENSG00000232229 | LINC00865 | long intergenic non-protein coding RNA 865  | 643529    | 90.98543462 | -0.189237397 | 0.975814209 | -0.193927692 | 0.846232501 | 0.998677884 | Not Sig |
| ENSG00000267651 | NA        | NA                                          | NA        | 8.270426276 | -0.188893566 | 1.511075541 | -0.125006038 | 0.90051877  | 0.998677884 | Not Sig |
| ENSG00000231507 | LINC01353 | long intergenic non-protein coding RNA 1353 | 100506775 | 6.176865265 | -0.188830685 | 1.198714977 | -0.157527593 | 0.874829064 | 0.998677884 | Not Sig |
| ENSG00000231485 | NA        | NA                                          | NA        | 28.92465878 | -0.188548352 | 1.143316676 | -0.164913498 | 0.869012068 | 0.998677884 | Not Sig |
| ENSG00000273148 | NA        | NA                                          | NA        | 22.61687456 | -0.188214297 | 0.78657888  | -0.239282164 | 0.810886794 | 0.998677884 | Not Sig |
| ENSG00000273265 | NA        | NA                                          | NA        | 6.222065627 | -0.185680982 | 1.199562968 | -0.154790525 | 0.876986461 | 0.998677884 | Not Sig |
| ENSG00000226281 | NA        | NA                                          | NA        | 7.707340662 | -0.184675139 | 1.041879369 | -0.177251939 | 0.8593105   | 0.998677884 | Not Sig |
| ENSG00000271576 | NA        | NA                                          | NA        | 7.056349116 | -0.1842514   | 1.110868918 | -0.165862414 | 0.868265227 | 0.998677884 | Not Sig |
| ENSG00000261386 | NA        | NA                                          | NA        | 13.70104341 | -0.180770712 | 0.990317487 | -0.18253814  | 0.855160426 | 0.998677884 | Not Sig |
| ENSG00000237096 | NA        | NA                                          | NA        | 0.733545669 | -0.180511057 | 3.127184389 | -0.057723189 | 0.953969122 | 0.998677884 | Not Sig |
| ENSG00000271983 | NA        | NA                                          | NA        | 7.331536378 | -0.180359392 | 0.964731732 | -0.186952896 | 0.851697565 | 0.998677884 | Not Sig |
| ENSG00000266913 | LINC01841 | long intergenic non-protein coding RNA 1841 | 105372288 | 4.120748227 | -0.180097875 | 1.670022061 | -0.107841615 | 0.914121332 | 0.998677884 | Not Sig |
| ENSG00000247373 | NA        | NA                                          | NA        | 27.0574871  | -0.179893765 | 0.886509451 | -0.202923686 | 0.839194681 | 0.998677884 | Not Sig |
| ENSG00000269975 | NA        | NA                                          | NA        | 1.395356973 | -0.179390303 | 2.294191215 | -0.078193265 | 0.937674319 | 0.998677884 | Not Sig |
| ENSG00000225434 | LINC01504 | long intergenic non-protein coding RNA 1504 | 100507540 | 150.1253567 | -0.174577925 | 0.678118162 | -0.257444697 | 0.796835502 | 0.998677884 | Not Sig |
| ENSG00000268913 | NA        | NA                                          | NA        | 27.10592543 | -0.17448473  | 0.702904091 | -0.24823405  | 0.803953322 | 0.998677884 | Not Sig |
| ENSG00000273193 | NA        | NA                                          | NA        | 30.19539266 | -0.171112906 | 1.298847627 | -0.131742094 | 0.89518829  | 0.998677884 | Not Sig |
| ENSG00000235117 | NA        | NA                                          | NA        | 7.327158743 | -0.169110125 | 1.261388096 | -0.134066688 | 0.893349841 | 0.998677884 | Not Sig |
| ENSG00000235497 | NA        | NA                                          | NA        | 1.748239553 | -0.168445346 | 1.786833445 | -0.094270312 | 0.924894433 | 0.998677884 | Not Sig |
| ENSG00000272520 | NA        | NA                                          | NA        | 73.64962454 | -0.165852163 | 0.731282211 | -0.226796386 | 0.820582074 | 0.998677884 | Not Sig |
| ENSG00000265728 | NA        | NA                                          | NA        | 0.664858874 | -0.162246978 | 3.181182316 | -0.0510021   | 0.959323847 | 0.998677884 | Not Sig |
| ENSG00000272519 | NA        | NA                                          | NA        | 0.664858874 | -0.162246978 | 3.181182316 | -0.0510021   | 0.959323847 | 0.998677884 | Not Sig |
| ENSG00000262074 | SNORD3B-2 | small nucleolar RNA, C/D box 3B-2           | 780852    | 37.35880406 | -0.161415881 | 1.493931773 | -0.108047693 | 0.91395786  | 0.998677884 | Not Sig |
| ENSG00000259711 | NA        | NA                                          | NA        | 2.145530091 | -0.159249627 | 1.732156243 | -0.091937219 | 0.92674792  | 0.998677884 | Not Sig |
| ENSG00000257742 | NA        | NA                                          | NA        | 242.9178162 | -0.159164575 | 1.049982231 | -0.151587875 | 0.879511997 | 0.998677884 | Not Sig |
| ENSG00000225857 | NA        | NA                                          | NA        | 3.55423397  | -0.158577512 | 1.335535328 | -0.11873704  | 0.90548369  | 0.998677884 | Not Sig |
| ENSG00000257086 | NA        | NA                                          | NA        | 26.83007235 | -0.157360363 | 0.940940191 | -0.16723737  | 0.867183281 | 0.998677884 | Not Sig |
| ENSG00000230417 | LINC00595 | long intergenic non-protein coding RNA 595  | 414243    | 2.865096258 | -0.157204114 | 1.33866649  | -0.117433368 | 0.906516643 | 0.998677884 | Not Sig |
| ENSG00000230417 | LINC00856 | long intergenic non-protein coding RNA 856  | 100132987 | 2.865096258 | -0.157204114 | 1.33866649  | -0.117433368 | 0.906516643 | 0.998677884 | Not Sig |
| ENSG00000267737 | NA        | NA                                          | NA        | 19.98360711 | -0.155388453 | 0.935713408 | -0.166064151 | 0.868106466 | 0.998677884 | Not Sig |
| ENSG00000271889 | NA        | NA                                          | NA        | 0.663335089 | -0.153244474 | 2.733651929 | -0.056058517 | 0.95529519  | 0.998677884 | Not Sig |
| ENSG00000229694 | LINC00484 | long intergenic non-protein coding RNA 484  | 100129347 | 2.050807701 | -0.147113988 | 1.670563655 | -0.088062486 | 0.929827013 | 0.998677884 | Not Sig |
| ENSG00000203801 | LINC00222 | long intergenic non-protein coding RNA 222  | 387111    | 14.61168203 | -0.143728859 | 1.038317196 | -0.138424809 | 0.889904691 | 0.998677884 | Not Sig |
| ENSG00000230939 | NA        | NA                                          | NA        | 3.303820105 | -0.142804185 | 1.375939428 | -0.10378668  | 0.917338637 | 0.998677884 | Not Sig |
| ENSG00000259071 | NA        | NA                                          | NA        | 26.24892469 | -0.140026075 | 0.769785981 | -0.181902605 | 0.85565916  | 0.998677884 | Not Sig |

|                 |              |                                                 |           |             |              |             |              |             |             |         |
|-----------------|--------------|-------------------------------------------------|-----------|-------------|--------------|-------------|--------------|-------------|-------------|---------|
| ENSG00000224445 | LINC01708    | long intergenic non-protein coding RNA 1708     | 101928270 | 2.386896181 | -0.138756095 | 1.727596421 | -0.080317424 | 0.9359848   | 0.998677884 | Not Sig |
| ENSG00000272129 | NA           | NA                                              | NA        | 27.56230478 | -0.138230573 | 0.94585315  | -0.146143799 | 0.883807871 | 0.998677884 | Not Sig |
| ENSG00000260896 | LINC02170    | long intergenic non-protein coding RNA 2170     | 100996425 | 3.164217211 | -0.136979397 | 1.279007583 | -0.10709819  | 0.914711083 | 0.998677884 | Not Sig |
| ENSG00000261584 | NA           | NA                                              | NA        | 36.07910541 | -0.135330931 | 0.763491948 | -0.177252597 | 0.859309983 | 0.998677884 | Not Sig |
| ENSG00000241213 | LINC02024    | long intergenic non-protein coding RNA 2024     | 105374057 | 14.14182088 | -0.13111417  | 1.624638773 | -0.080703583 | 0.935677687 | 0.998677884 | Not Sig |
| ENSG00000271755 | NA           | NA                                              | NA        | 8.0997894   | -0.130722678 | 1.102278797 | -0.118593117 | 0.905597719 | 0.998677884 | Not Sig |
| ENSG00000237921 | NA           | NA                                              | NA        | 0.649355587 | -0.130115936 | 3.194730616 | -0.040728297 | 0.967512503 | 0.998677884 | Not Sig |
| ENSG00000270134 | NA           | NA                                              | NA        | 0.649355587 | -0.130115936 | 3.194730616 | -0.040728297 | 0.967512503 | 0.998677884 | Not Sig |
| ENSG00000272947 | NA           | NA                                              | NA        | 9.258686721 | -0.128762678 | 1.000998623 | -0.128634221 | 0.897647087 | 0.998677884 | Not Sig |
| ENSG00000249328 | LOC101927040 | uncharacterized LOC101927040                    | 101927040 | 2.276670504 | -0.123494136 | 1.648807112 | -0.07489908  | 0.940295009 | 0.998677884 | Not Sig |
| ENSG00000260682 | NA           | NA                                              | NA        | 55.26308055 | -0.120214739 | 0.843340431 | -0.142545922 | 0.886648809 | 0.998677884 | Not Sig |
| ENSG00000224034 | NA           | NA                                              | NA        | 8.899855033 | -0.120184495 | 1.037302887 | -0.115862489 | 0.907761524 | 0.998677884 | Not Sig |
| ENSG00000179219 | LINC00311    | long intergenic non-protein coding RNA 311      | 197196    | 7.480251686 | -0.118877474 | 1.023064818 | -0.116197402 | 0.907496096 | 0.998677884 | Not Sig |
| ENSG00000232224 | NA           | NA                                              | NA        | 16.58834193 | -0.117252181 | 0.939143613 | -0.124850108 | 0.900642217 | 0.998677884 | Not Sig |
| ENSG00000260633 | NA           | NA                                              | NA        | 7.668434268 | -0.117000208 | 1.104887316 | -0.10589334  | 0.915666978 | 0.998677884 | Not Sig |
| ENSG00000253395 | NA           | NA                                              | NA        | 8.754498683 | -0.11366726  | 1.389186923 | -0.08182287  | 0.93478757  | 0.998677884 | Not Sig |
| ENSG00000256128 | NA           | NA                                              | NA        | 16.54688718 | -0.112099431 | 0.994456419 | -0.112724327 | 0.910249114 | 0.998677884 | Not Sig |
| ENSG00000255002 | LINC02324    | long intergenic non-protein coding RNA 2324     | 100128233 | 3.960067085 | -0.112059204 | 2.345838231 | -0.047769365 | 0.961900052 | 0.998677884 | Not Sig |
| ENSG00000225163 | LINC00618    | long intergenic non-protein coding RNA 618      | 145249    | 2.09136884  | -0.111673653 | 1.727146157 | -0.064657906 | 0.948446379 | 0.998677884 | Not Sig |
| ENSG00000254610 | NA           | NA                                              | NA        | 13.55806104 | -0.109972383 | 1.071928488 | -0.102593022 | 0.918285981 | 0.998677884 | Not Sig |
| ENSG00000258913 | C14orf144    | chromosome 14 open reading frame 144 (putative) | 145195    | 8.820229517 | -0.109071817 | 1.172681914 | -0.093010574 | 0.925895161 | 0.998677884 | Not Sig |
| ENSG00000272141 | NA           | NA                                              | NA        | 76.77190049 | -0.108827978 | 0.789284826 | -0.137881756 | 0.890333869 | 0.998677884 | Not Sig |
| ENSG00000258733 | NA           | NA                                              | NA        | 34.81644201 | -0.104938917 | 0.766443901 | -0.136916631 | 0.891096693 | 0.998677884 | Not Sig |
| ENSG00000259070 | LINC00639    | long intergenic non-protein coding RNA 639      | 283547    | 77.50188169 | -0.104393101 | 1.150300964 | -0.090752859 | 0.927688969 | 0.998677884 | Not Sig |
| ENSG00000231527 | NA           | NA                                              | NA        | 3.745799206 | -0.10394001  | 1.585570255 | -0.065553708 | 0.947733145 | 0.998677884 | Not Sig |
| ENSG00000272853 | NA           | NA                                              | NA        | 19.27017043 | -0.103034431 | 0.785721876 | -0.131133464 | 0.895669729 | 0.998677884 | Not Sig |
| ENSG00000245468 | NA           | NA                                              | NA        | 12.1412299  | -0.102451462 | 1.064695464 | -0.096226072 | 0.923341025 | 0.998677884 | Not Sig |
| ENSG00000267539 | NA           | NA                                              | NA        | 1.289536    | -0.102222061 | 2.301647147 | -0.044412568 | 0.964575543 | 0.998677884 | Not Sig |
| ENSG00000269619 | NA           | NA                                              | NA        | 2.6611057   | -0.097092216 | 1.585815006 | -0.061225437 | 0.951179672 | 0.998677884 | Not Sig |
| ENSG00000259673 | IQCH-AS1     | IQCH antisense RNA 1                            | 100506686 | 139.7435313 | -0.095700833 | 0.628370665 | -0.152299969 | 0.878950349 | 0.998677884 | Not Sig |
| ENSG00000267475 | NA           | NA                                              | NA        | 8.568139179 | -0.09520196  | 0.951827911 | -0.100020139 | 0.920328337 | 0.998677884 | Not Sig |
| ENSG00000260011 | NA           | NA                                              | NA        | 1.67132325  | -0.092766238 | 1.834254334 | -0.05057436  | 0.959664695 | 0.998677884 | Not Sig |
| ENSG00000272440 | NA           | NA                                              | NA        | 10.7650243  | -0.091063679 | 0.916800955 | -0.099327645 | 0.92087813  | 0.998677884 | Not Sig |
| ENSG00000270964 | NA           | NA                                              | NA        | 16.73508991 | -0.090905339 | 0.989587045 | -0.091861892 | 0.926807769 | 0.998677884 | Not Sig |
| ENSG00000267002 | NA           | NA                                              | NA        | 93.96935338 | -0.090440979 | 0.667060252 | -0.135581424 | 0.892152191 | 0.998677884 | Not Sig |



|                 |              |                                             |           |             |              |             |              |             |             |         |
|-----------------|--------------|---------------------------------------------|-----------|-------------|--------------|-------------|--------------|-------------|-------------|---------|
| ENSG00000259959 | NA           | NA                                          | NA        | 116.8257732 | -0.088115137 | 0.923097232 | -0.095455965 | 0.923952665 | 0.998677884 | Not Sig |
| ENSG00000260260 | SNHG19       | small nucleolar RNA host gene 19            | 100507303 | 111.8448217 | -0.085626679 | 0.871541581 | -0.098247382 | 0.921735859 | 0.998677884 | Not Sig |
| ENSG00000248866 | USP46-AS1    | USP46 antisense RNA 1                       | 643783    | 63.83935755 | -0.08410711  | 0.666758381 | -0.126143312 | 0.899618484 | 0.998677884 | Not Sig |
| ENSG00000267058 | LOC100505715 | uncharacterized LOC100505715                | 100505715 | 19.8326509  | -0.083696761 | 0.985898678 | -0.084893877 | 0.93234576  | 0.998677884 | Not Sig |
| ENSG00000261618 | NA           | NA                                          | NA        | 86.88847377 | -0.080121391 | 0.876117321 | -0.091450528 | 0.927134615 | 0.998677884 | Not Sig |
| ENSG00000271736 | NA           | NA                                          | NA        | 2.954004113 | -0.075609174 | 2.034767703 | -0.037158627 | 0.970358527 | 0.998677884 | Not Sig |
| ENSG00000223546 | LINC00630    | long intergenic non-protein coding RNA 630  | 100287765 | 203.2129023 | -0.074966363 | 0.75268107  | -0.099599108 | 0.920662602 | 0.998677884 | Not Sig |
| ENSG00000236453 | NA           | NA                                          | NA        | 0.766622071 | -0.07490447  | 3.720815455 | -0.020131197 | 0.983938713 | 0.998677884 | Not Sig |
| ENSG00000270001 | NA           | NA                                          | NA        | 8.584050472 | -0.072955369 | 0.954465627 | -0.076435827 | 0.939072367 | 0.998677884 | Not Sig |
| ENSG00000269990 | NA           | NA                                          | NA        | 112.8707108 | -0.069958027 | 0.68312366  | -0.102409024 | 0.918432021 | 0.998677884 | Not Sig |
| ENSG00000267575 | LOC101927151 | uncharacterized LOC101927151                | 101927151 | 151.361426  | -0.065976212 | 0.70807175  | -0.093177297 | 0.92576271  | 0.998677884 | Not Sig |
| ENSG00000272040 | NA           | NA                                          | NA        | 16.22729481 | -0.065444086 | 0.786660293 | -0.083192308 | 0.933698629 | 0.998677884 | Not Sig |
| ENSG00000236389 | NA           | NA                                          | NA        | 1.334835146 | -0.061360349 | 1.963526916 | -0.031250068 | 0.975070111 | 0.998677884 | Not Sig |
| ENSG00000261423 | TMEM202-AS1  | TMEM202 antisense RNA 1                     | 105370888 | 64.12508147 | -0.060990714 | 0.733229621 | -0.08318092  | 0.933707684 | 0.998677884 | Not Sig |
| ENSG00000260977 | NA           | NA                                          | NA        | 12.50664001 | -0.058700447 | 0.872442791 | -0.067282861 | 0.946356521 | 0.998677884 | Not Sig |
| ENSG00000270949 | NA           | NA                                          | NA        | 109.1239458 | -0.056657644 | 0.686681317 | -0.082509371 | 0.934241666 | 0.998677884 | Not Sig |
| ENSG00000272416 | NA           | NA                                          | NA        | 7.736704532 | -0.055972558 | 0.9590601   | -0.058361888 | 0.953460372 | 0.998677884 | Not Sig |
| ENSG00000265242 | NA           | NA                                          | NA        | 27.3295295  | -0.054748933 | 0.852456024 | -0.064224935 | 0.948791123 | 0.998677884 | Not Sig |
| ENSG00000272382 | NA           | NA                                          | NA        | 4.259451406 | -0.054550843 | 1.311014127 | -0.041609653 | 0.966809878 | 0.998677884 | Not Sig |
| ENSG00000267232 | NA           | NA                                          | NA        | 0.694887706 | -0.054517542 | 2.714760492 | -0.020081897 | 0.983978041 | 0.998677884 | Not Sig |
| ENSG00000260032 | NORAD        | non-coding RNA activated by DNA damage      | 647979    | 11077.20682 | -0.054390875 | 0.622538619 | -0.087369479 | 0.930377829 | 0.998677884 | Not Sig |
| ENSG00000260743 | NA           | NA                                          | NA        | 5.807620715 | -0.054051151 | 1.162746927 | -0.04648574  | 0.9629231   | 0.998677884 | Not Sig |
| ENSG00000235475 | LINC01372    | long intergenic non-protein coding RNA 1372 | 101929736 | 30.29550345 | -0.053816644 | 0.758208427 | -0.070978694 | 0.943414713 | 0.998677884 | Not Sig |
| ENSG00000231496 | NA           | NA                                          | NA        | 17.33665001 | -0.053099445 | 1.048349555 | -0.050650515 | 0.95960401  | 0.998677884 | Not Sig |
| ENSG00000271912 | NA           | NA                                          | NA        | 64.33062429 | -0.051512751 | 0.86164229  | -0.059784381 | 0.952327366 | 0.998677884 | Not Sig |
| ENSG00000249631 | NA           | NA                                          | NA        | 4.952109807 | -0.049556396 | 1.398695285 | -0.035430444 | 0.971736509 | 0.998677884 | Not Sig |
| ENSG00000232077 | LINC01031    | long intergenic non-protein coding RNA 1031 | 101929184 | 5.856644335 | -0.047483119 | 1.230152482 | -0.038599377 | 0.969209799 | 0.998677884 | Not Sig |
| ENSG00000233754 | NA           | NA                                          | NA        | 0.62315334  | -0.046469299 | 3.891796224 | -0.011940322 | 0.990473228 | 0.998677884 | Not Sig |
| ENSG00000251168 | NA           | NA                                          | NA        | 0.62315334  | -0.046469299 | 3.891796224 | -0.011940322 | 0.990473228 | 0.998677884 | Not Sig |
| ENSG00000258604 | NA           | NA                                          | NA        | 0.62315334  | -0.046469299 | 3.891796224 | -0.011940322 | 0.990473228 | 0.998677884 | Not Sig |
| ENSG00000260118 | NA           | NA                                          | NA        | 10.38718477 | -0.046236454 | 0.971069312 | -0.047613959 | 0.962023907 | 0.998677884 | Not Sig |
| ENSG00000260409 | NA           | NA                                          | NA        | 10.79760722 | -0.045212481 | 1.305139347 | -0.034641881 | 0.972365306 | 0.998677884 | Not Sig |
| ENSG00000240907 | NA           | NA                                          | NA        | 1.635712857 | -0.042424564 | 2.228197763 | -0.019039856 | 0.984809311 | 0.998677884 | Not Sig |
| ENSG00000273356 | NA           | NA                                          | NA        | 14.40947043 | -0.041532688 | 0.957910893 | -0.04335757  | 0.9654165   | 0.998677884 | Not Sig |
| ENSG00000236120 | NA           | NA                                          | NA        | 4.306274337 | -0.041164433 | 1.379383824 | -0.029842624 | 0.976192565 | 0.998677884 | Not Sig |

|                 |           |                                                                       |           |             |              |             |              |             |             |         |
|-----------------|-----------|-----------------------------------------------------------------------|-----------|-------------|--------------|-------------|--------------|-------------|-------------|---------|
| ENSG00000250903 | NA        | NA                                                                    | NA        | 846.7267018 | -0.040593553 | 0.700092177 | -0.057983154 | 0.953762047 | 0.998677884 | Not Sig |
| ENSG00000272992 | NA        | NA                                                                    | NA        | 2.502813913 | -0.038187716 | 1.962818756 | -0.019455549 | 0.984477697 | 0.998677884 | Not Sig |
| ENSG00000271855 | NA        | NA                                                                    | NA        | 11.65613048 | -0.03748325  | 0.891915302 | -0.042025571 | 0.966478314 | 0.998677884 | Not Sig |
| ENSG00000271734 | NA        | NA                                                                    | NA        | 4.080066387 | -0.037345413 | 1.290702139 | -0.028934184 | 0.976917082 | 0.998677884 | Not Sig |
| ENSG00000235408 | SNORA71B  | small nucleolar RNA, H/ACA box 71B                                    | 26776     | 13.90007868 | -0.035995712 | 0.879280922 | -0.04093767  | 0.967345587 | 0.998677884 | Not Sig |
| ENSG00000256050 | NA        | NA                                                                    | NA        | 5.543172871 | -0.035969317 | 1.18871928  | -0.030258882 | 0.975860589 | 0.998677884 | Not Sig |
| ENSG00000265933 | LINC00668 | long intergenic non-protein coding RNA 668                            | 400643    | 0.626200911 | -0.034233039 | 3.887445812 | -0.008806049 | 0.992973388 | 0.998677884 | Not Sig |
| ENSG00000266961 | NA        | NA                                                                    | NA        | 0.626200911 | -0.034233039 | 3.887445812 | -0.008806049 | 0.992973388 | 0.998677884 | Not Sig |
| ENSG00000261474 | NA        | NA                                                                    | NA        | 44.09078109 | -0.028531602 | 0.706907803 | -0.040361137 | 0.967805213 | 0.998677884 | Not Sig |
| ENSG00000258647 | LINC00930 | long intergenic non-protein coding RNA 930                            | 100144604 | 8.710799805 | -0.028458567 | 1.229166089 | -0.023152743 | 0.981528434 | 0.998677884 | Not Sig |
| ENSG00000272360 | NA        | NA                                                                    | NA        | 4.076852166 | -0.026740694 | 1.285649513 | -0.020799365 | 0.983405704 | 0.998677884 | Not Sig |
| ENSG00000254226 | LINC01933 | long intergenic non-protein coding RNA 1933                           | 101927115 | 2.933180852 | -0.022487854 | 1.467523227 | -0.015323678 | 0.987773952 | 0.998677884 | Not Sig |
| ENSG00000271427 | NA        | NA                                                                    | NA        | 3.114562775 | -0.020920775 | 1.65158534  | -0.012667087 | 0.989893397 | 0.998677884 | Not Sig |
| ENSG00000271646 | NA        | NA                                                                    | NA        | 97.67305911 | -0.020189023 | 0.671033576 | -0.030086458 | 0.975998101 | 0.998677884 | Not Sig |
| ENSG00000256092 | NA        | NA                                                                    | NA        | 9.958266436 | -0.019162428 | 0.942773783 | -0.020325585 | 0.983783646 | 0.998677884 | Not Sig |
| ENSG00000248599 | FLJ42969  | uncharacterized LOC441374                                             | 441374    | 0.995532444 | -0.018970854 | 1.968806624 | -0.009635712 | 0.992311933 | 0.998677884 | Not Sig |
| ENSG00000259806 | NA        | NA                                                                    | NA        | 41.11790202 | -0.017489317 | 0.75229255  | -0.023248027 | 0.981452429 | 0.998677884 | Not Sig |
| ENSG00000225860 | LINC02072 | long intergenic non-protein coding RNA 2072                           | 440446    | 0.31157667  | -0.017400677 | 4.080472857 | -0.004264378 | 0.996597529 | 0.998677884 | Not Sig |
| ENSG00000227685 | NA        | NA                                                                    | NA        | 0.31157667  | -0.017400677 | 4.080472857 | -0.004264378 | 0.996597529 | 0.998677884 | Not Sig |
| ENSG00000236985 | NA        | NA                                                                    | NA        | 0.31157667  | -0.017400677 | 4.080472857 | -0.004264378 | 0.996597529 | 0.998677884 | Not Sig |
| ENSG00000243083 | LINC00870 | long intergenic non-protein coding RNA 870                            | 201617    | 0.31157667  | -0.017400677 | 4.080472857 | -0.004264378 | 0.996597529 | 0.998677884 | Not Sig |
| ENSG00000244252 | NA        | NA                                                                    | NA        | 0.31157667  | -0.017400677 | 4.080472857 | -0.004264378 | 0.996597529 | 0.998677884 | Not Sig |
| ENSG00000250603 | NA        | NA                                                                    | NA        | 0.31157667  | -0.017400677 | 4.080472857 | -0.004264378 | 0.996597529 | 0.998677884 | Not Sig |
| ENSG00000253778 | NA        | NA                                                                    | NA        | 0.31157667  | -0.017400677 | 4.080472857 | -0.004264378 | 0.996597529 | 0.998677884 | Not Sig |
| ENSG00000255267 | LOC399886 | uncharacterized LOC399886                                             | 399886    | 0.31157667  | -0.017400677 | 4.080472857 | -0.004264378 | 0.996597529 | 0.998677884 | Not Sig |
| ENSG00000259093 | NA        | NA                                                                    | NA        | 0.31157667  | -0.017400677 | 4.080472857 | -0.004264378 | 0.996597529 | 0.998677884 | Not Sig |
| ENSG00000260880 | HCCAT5    | hepatocellular carcinoma associated transcript 5 (non-protein coding) | 283902    | 0.31157667  | -0.017400677 | 4.080472857 | -0.004264378 | 0.996597529 | 0.998677884 | Not Sig |
| ENSG00000267211 | NA        | NA                                                                    | NA        | 0.31157667  | -0.017400677 | 4.080472857 | -0.004264378 | 0.996597529 | 0.998677884 | Not Sig |
| ENSG00000228058 | LINC01736 | long intergenic non-protein coding RNA 1736                           | 101927532 | 0.344653072 | -0.017400677 | 4.080472857 | -0.004264378 | 0.996597529 | 0.998677884 | Not Sig |
| ENSG00000228534 | NA        | NA                                                                    | NA        | 0.344653072 | -0.017400677 | 4.080472857 | -0.004264378 | 0.996597529 | 0.998677884 | Not Sig |
| ENSG00000229962 | NA        | NA                                                                    | NA        | 0.344653072 | -0.017400677 | 4.080472857 | -0.004264378 | 0.996597529 | 0.998677884 | Not Sig |
| ENSG00000231979 | NA        | NA                                                                    | NA        | 0.344653072 | -0.017400677 | 4.080472857 | -0.004264378 | 0.996597529 | 0.998677884 | Not Sig |
| ENSG00000234540 | NA        | NA                                                                    | NA        | 0.344653072 | -0.017400677 | 4.080472857 | -0.004264378 | 0.996597529 | 0.998677884 | Not Sig |
| ENSG00000256725 | NA        | NA                                                                    | NA        | 0.344653072 | -0.017400677 | 4.080472857 | -0.004264378 | 0.996597529 | 0.998677884 | Not Sig |
| ENSG00000260902 | LINC02011 | long intergenic non-protein coding RNA 2011                           | 152274    | 0.344653072 | -0.017400677 | 4.080472857 | -0.004264378 | 0.996597529 | 0.998677884 | Not Sig |

|                 |              |                                             |           |             |              |             |              |             |             |         |
|-----------------|--------------|---------------------------------------------|-----------|-------------|--------------|-------------|--------------|-------------|-------------|---------|
| ENSG00000261231 | LINC02133    | long intergenic non-protein coding RNA 2133 | 101927132 | 0.344653072 | -0.017400677 | 4.080472857 | -0.004264378 | 0.996597529 | 0.998677884 | Not Sig |
| ENSG00000264174 | NA           | NA                                          | NA        | 0.344653072 | -0.017400677 | 4.080472857 | -0.004264378 | 0.996597529 | 0.998677884 | Not Sig |
| ENSG00000196273 | LINC00523    | long intergenic non-protein coding RNA 523  | 283601    | 0.299120953 | -0.017400677 | 4.080472857 | -0.004264378 | 0.996597529 | 0.998677884 | Not Sig |
| ENSG00000224099 | NA           | NA                                          | NA        | 0.299120953 | -0.017400677 | 4.080472857 | -0.004264378 | 0.996597529 | 0.998677884 | Not Sig |
| ENSG00000227579 | NA           | NA                                          | NA        | 0.299120953 | -0.017400677 | 4.080472857 | -0.004264378 | 0.996597529 | 0.998677884 | Not Sig |
| ENSG00000231090 | MIR4422HG    | MIR4422 host gene                           | 109729135 | 0.350234634 | -0.017400677 | 4.080472857 | -0.004264378 | 0.996597529 | 0.998677884 | Not Sig |
| ENSG00000249036 | NA           | NA                                          | NA        | 0.299120953 | -0.017400677 | 4.080472857 | -0.004264378 | 0.996597529 | 0.998677884 | Not Sig |
| ENSG00000249091 | NA           | NA                                          | NA        | 0.299120953 | -0.017400677 | 4.080472857 | -0.004264378 | 0.996597529 | 0.998677884 | Not Sig |
| ENSG00000251604 | NA           | NA                                          | NA        | 0.299120953 | -0.017400677 | 4.080472857 | -0.004264378 | 0.996597529 | 0.998677884 | Not Sig |
| ENSG00000253377 | NA           | NA                                          | NA        | 0.299120953 | -0.017400677 | 4.080472857 | -0.004264378 | 0.996597529 | 0.998677884 | Not Sig |
| ENSG00000257141 | NA           | NA                                          | NA        | 0.299120953 | -0.017400677 | 4.080472857 | -0.004264378 | 0.996597529 | 0.998677884 | Not Sig |
| ENSG00000259553 | NA           | NA                                          | NA        | 0.299120953 | -0.017400677 | 4.080472857 | -0.004264378 | 0.996597529 | 0.998677884 | Not Sig |
| ENSG00000259888 | NA           | NA                                          | NA        | 0.299120953 | -0.017400677 | 4.080472857 | -0.004264378 | 0.996597529 | 0.998677884 | Not Sig |
| ENSG00000261156 | LINC01989    | long intergenic non-protein coding RNA 1989 | 101927239 | 0.299120953 | -0.017400677 | 4.080472857 | -0.004264378 | 0.996597529 | 0.998677884 | Not Sig |
| ENSG00000261501 | NA           | NA                                          | NA        | 0.350234634 | -0.017400677 | 4.080472857 | -0.004264378 | 0.996597529 | 0.998677884 | Not Sig |
| ENSG00000267388 | NA           | NA                                          | NA        | 0.350234634 | -0.017400677 | 4.080472857 | -0.004264378 | 0.996597529 | 0.998677884 | Not Sig |
| ENSG00000272691 | NA           | NA                                          | NA        | 0.350234634 | -0.017400677 | 4.080472857 | -0.004264378 | 0.996597529 | 0.998677884 | Not Sig |
| ENSG00000273493 | NA           | NA                                          | NA        | 0.350234634 | -0.017400677 | 4.080472857 | -0.004264378 | 0.996597529 | 0.998677884 | Not Sig |
| ENSG00000228683 | NA           | NA                                          | NA        | 0.313100455 | -0.017400677 | 4.080472857 | -0.004264378 | 0.996597529 | 0.998677884 | Not Sig |
| ENSG00000233068 | NA           | NA                                          | NA        | 0.313100455 | -0.017400677 | 4.080472857 | -0.004264378 | 0.996597529 | 0.998677884 | Not Sig |
| ENSG00000238043 | NA           | NA                                          | NA        | 0.313100455 | -0.017400677 | 4.080472857 | -0.004264378 | 0.996597529 | 0.998677884 | Not Sig |
| ENSG00000249173 | NA           | NA                                          | NA        | 0.313100455 | -0.017400677 | 4.080472857 | -0.004264378 | 0.996597529 | 0.998677884 | Not Sig |
| ENSG00000256953 | NA           | NA                                          | NA        | 0.313100455 | -0.017400677 | 4.080472857 | -0.004264378 | 0.996597529 | 0.998677884 | Not Sig |
| ENSG00000260612 | NA           | NA                                          | NA        | 0.313100455 | -0.017400677 | 4.080472857 | -0.004264378 | 0.996597529 | 0.998677884 | Not Sig |
| ENSG00000261029 | NA           | NA                                          | NA        | 0.313100455 | -0.017400677 | 4.080472857 | -0.004264378 | 0.996597529 | 0.998677884 | Not Sig |
| ENSG00000261886 | NA           | NA                                          | NA        | 0.313100455 | -0.017400677 | 4.080472857 | -0.004264378 | 0.996597529 | 0.998677884 | Not Sig |
| ENSG00000272856 | NA           | NA                                          | NA        | 0.313100455 | -0.017400677 | 4.080472857 | -0.004264378 | 0.996597529 | 0.998677884 | Not Sig |
| ENSG00000227683 | NA           | NA                                          | NA        | 0.332197355 | -0.017400677 | 4.080472857 | -0.004264378 | 0.996597529 | 0.998677884 | Not Sig |
| ENSG00000230013 | NA           | NA                                          | NA        | 0.383311035 | -0.017400677 | 4.080472857 | -0.004264378 | 0.996597529 | 0.998677884 | Not Sig |
| ENSG00000231512 | NA           | NA                                          | NA        | 0.383311035 | -0.017400677 | 4.080472857 | -0.004264378 | 0.996597529 | 0.998677884 | Not Sig |
| ENSG00000234318 | NA           | NA                                          | NA        | 0.383311035 | -0.017400677 | 4.080472857 | -0.004264378 | 0.996597529 | 0.998677884 | Not Sig |
| ENSG00000235007 | NA           | NA                                          | NA        | 0.383311035 | -0.017400677 | 4.080472857 | -0.004264378 | 0.996597529 | 0.998677884 | Not Sig |
| ENSG00000236747 | LINC01282    | long intergenic non-protein coding RNA 1282 | 101927449 | 0.332197355 | -0.017400677 | 4.080472857 | -0.004264378 | 0.996597529 | 0.998677884 | Not Sig |
| ENSG00000248837 | LOC105374524 | uncharacterized LOC105374524                | 105374524 | 0.332197355 | -0.017400677 | 4.080472857 | -0.004264378 | 0.996597529 | 0.998677884 | Not Sig |
| ENSG00000248964 | LOC101929470 | uncharacterized LOC101929470                | 101929470 | 0.332197355 | -0.017400677 | 4.080472857 | -0.004264378 | 0.996597529 | 0.998677884 | Not Sig |

|                 |           |                                             |           |             |              |             |              |             |             |         |
|-----------------|-----------|---------------------------------------------|-----------|-------------|--------------|-------------|--------------|-------------|-------------|---------|
| ENSG00000249792 | NA        | NA                                          | NA        | 0.383311035 | -0.017400677 | 4.080472857 | -0.004264378 | 0.996597529 | 0.998677884 | Not Sig |
| ENSG00000249877 | NA        | NA                                          | NA        | 0.383311035 | -0.017400677 | 4.080472857 | -0.004264378 | 0.996597529 | 0.998677884 | Not Sig |
| ENSG00000250436 | LINC02499 | long intergenic non-protein coding RNA 2499 | 728040    | 0.332197355 | -0.017400677 | 4.080472857 | -0.004264378 | 0.996597529 | 0.998677884 | Not Sig |
| ENSG00000253745 | NA        | NA                                          | NA        | 0.332197355 | -0.017400677 | 4.080472857 | -0.004264378 | 0.996597529 | 0.998677884 | Not Sig |
| ENSG00000254532 | NA        | NA                                          | NA        | 0.332197355 | -0.017400677 | 4.080472857 | -0.004264378 | 0.996597529 | 0.998677884 | Not Sig |
| ENSG00000258312 | NA        | NA                                          | NA        | 0.332197355 | -0.017400677 | 4.080472857 | -0.004264378 | 0.996597529 | 0.998677884 | Not Sig |
| ENSG00000266604 | NA        | NA                                          | NA        | 0.332197355 | -0.017400677 | 4.080472857 | -0.004264378 | 0.996597529 | 0.998677884 | Not Sig |
| ENSG00000267172 | NA        | NA                                          | NA        | 0.383311035 | -0.017400677 | 4.080472857 | -0.004264378 | 0.996597529 | 0.998677884 | Not Sig |
| ENSG00000269972 | NA        | NA                                          | NA        | 0.383311035 | -0.017400677 | 4.080472857 | -0.004264378 | 0.996597529 | 0.998677884 | Not Sig |
| ENSG00000269987 | NA        | NA                                          | NA        | 0.383311035 | -0.017400677 | 4.080472857 | -0.004264378 | 0.996597529 | 0.998677884 | Not Sig |
| ENSG00000272798 | NA        | NA                                          | NA        | 0.332197355 | -0.017400677 | 4.080472857 | -0.004264378 | 0.996597529 | 0.998677884 | Not Sig |
| ENSG00000206129 | NA        | NA                                          | NA        | 0.300644738 | -0.017400677 | 4.080472857 | -0.004264378 | 0.996597529 | 0.998677884 | Not Sig |
| ENSG00000225156 | NA        | NA                                          | NA        | 0.351758419 | -0.017400677 | 4.080472857 | -0.004264378 | 0.996597529 | 0.998677884 | Not Sig |
| ENSG00000225760 | NA        | NA                                          | NA        | 0.351758419 | -0.017400677 | 4.080472857 | -0.004264378 | 0.996597529 | 0.998677884 | Not Sig |
| ENSG00000230229 | NA        | NA                                          | NA        | 0.351758419 | -0.017400677 | 4.080472857 | -0.004264378 | 0.996597529 | 0.998677884 | Not Sig |
| ENSG00000231039 | NA        | NA                                          | NA        | 0.300644738 | -0.017400677 | 4.080472857 | -0.004264378 | 0.996597529 | 0.998677884 | Not Sig |
| ENSG00000236572 | NA        | NA                                          | NA        | 0.351758419 | -0.017400677 | 4.080472857 | -0.004264378 | 0.996597529 | 0.998677884 | Not Sig |
| ENSG00000236961 | NA        | NA                                          | NA        | 0.300644738 | -0.017400677 | 4.080472857 | -0.004264378 | 0.996597529 | 0.998677884 | Not Sig |
| ENSG00000237212 | NA        | NA                                          | NA        | 0.300644738 | -0.017400677 | 4.080472857 | -0.004264378 | 0.996597529 | 0.998677884 | Not Sig |
| ENSG00000249736 | LINC02242 | long intergenic non-protein coding RNA 2242 | 105379006 | 0.351758419 | -0.017400677 | 4.080472857 | -0.004264378 | 0.996597529 | 0.998677884 | Not Sig |
| ENSG00000253746 | NA        | NA                                          | NA        | 0.351758419 | -0.017400677 | 4.080472857 | -0.004264378 | 0.996597529 | 0.998677884 | Not Sig |
| ENSG00000258119 | NA        | NA                                          | NA        | 0.300644738 | -0.017400677 | 4.080472857 | -0.004264378 | 0.996597529 | 0.998677884 | Not Sig |
| ENSG00000259113 | NA        | NA                                          | NA        | 0.351758419 | -0.017400677 | 4.080472857 | -0.004264378 | 0.996597529 | 0.998677884 | Not Sig |
| ENSG00000259942 | NA        | NA                                          | NA        | 0.300644738 | -0.017400677 | 4.080472857 | -0.004264378 | 0.996597529 | 0.998677884 | Not Sig |
| ENSG00000261185 | NA        | NA                                          | NA        | 0.300644738 | -0.017400677 | 4.080472857 | -0.004264378 | 0.996597529 | 0.998677884 | Not Sig |
| ENSG00000264595 | NA        | NA                                          | NA        | 0.300644738 | -0.017400677 | 4.080472857 | -0.004264378 | 0.996597529 | 0.998677884 | Not Sig |
| ENSG00000268120 | NA        | NA                                          | NA        | 0.351758419 | -0.017400677 | 4.080472857 | -0.004264378 | 0.996597529 | 0.998677884 | Not Sig |
| ENSG00000271738 | NA        | NA                                          | NA        | 101.7822425 | -0.015325344 | 0.655926803 | -0.023364412 | 0.981359592 | 0.998677884 | Not Sig |
| ENSG00000177338 | NA        | NA                                          | NA        | 1.238422319 | -0.012956331 | 2.306406968 | -0.005617539 | 0.995517876 | 0.998677884 | Not Sig |
| ENSG00000244564 | NA        | NA                                          | NA        | 1.238422319 | -0.012956331 | 2.306406968 | -0.005617539 | 0.995517876 | 0.998677884 | Not Sig |
| ENSG00000177788 | NA        | NA                                          | NA        | 27.04683849 | -0.011529236 | 1.158294934 | -0.009953628 | 0.992058285 | 0.998677884 | Not Sig |
| ENSG00000271782 | NA        | NA                                          | NA        | 4.010874396 | -0.010881223 | 1.631856114 | -0.006668004 | 0.994679742 | 0.998677884 | Not Sig |
| ENSG00000251396 | NA        | NA                                          | NA        | 18.60018404 | -0.009058646 | 0.853769942 | -0.010610173 | 0.991534466 | 0.998677884 | Not Sig |
| ENSG00000224739 | NA        | NA                                          | NA        | 2.216927691 | -0.008431516 | 1.560964914 | -0.005401477 | 0.995690266 | 0.998677884 | Not Sig |
| ENSG00000261712 | NA        | NA                                          | NA        | 7.338738871 | -0.008304075 | 1.213842869 | -0.006841145 | 0.994541599 | 0.998677884 | Not Sig |

|                 |              |                                                                   |           |             |              |             |              |             |             |         |
|-----------------|--------------|-------------------------------------------------------------------|-----------|-------------|--------------|-------------|--------------|-------------|-------------|---------|
| ENSG00000225039 | LINC01058    | long intergenic non-protein coding RNA 1058                       | 103724387 | 3.218555275 | -0.007797722 | 1.308754172 | -0.005958126 | 0.995246131 | 0.998677884 | Not Sig |
| ENSG00000271840 | NA           | NA                                                                | NA        | 27.34636305 | -0.007345635 | 0.73878234  | -0.009942895 | 0.992066848 | 0.998677884 | Not Sig |
| ENSG00000226516 | FAM138B      | family with sequence similarity 138 member B                      | 654412    | 0.925321864 | -0.006660992 | 2.450510692 | -0.002718206 | 0.997831188 | 0.998677884 | Not Sig |
| ENSG00000259438 | NA           | NA                                                                | NA        | 0.925321864 | -0.006660992 | 2.450510692 | -0.002718206 | 0.997831188 | 0.998677884 | Not Sig |
| ENSG00000261211 | NA           | NA                                                                | NA        | 16.18105502 | -0.000721488 | 0.91029401  | -0.000792588 | 0.999367606 | 0.999367606 | Not Sig |
| ENSG00000267957 | NA           | NA                                                                | NA        | 31.169169   | 0.002490587  | 0.738857029 | 0.003370865  | 0.997310444 | 0.998677884 | Not Sig |
| ENSG00000260778 | LOC106660606 | uncharacterized LOC106660606                                      | 106660606 | 30.66974628 | 0.003754072  | 0.952739223 | 0.003940293  | 0.996856109 | 0.998677884 | Not Sig |
| ENSG00000228906 | NA           | NA                                                                | NA        | 64.1974258  | 0.00380484   | 0.921708944 | 0.004128027  | 0.99670632  | 0.998677884 | Not Sig |
| ENSG00000272236 | NA           | NA                                                                | NA        | 3.021197518 | 0.004659075  | 1.354984509 | 0.003438471  | 0.997256502 | 0.998677884 | Not Sig |
| ENSG00000259702 | NA           | NA                                                                | NA        | 0.981552942 | 0.004979191  | 2.436018293 | 0.002043987  | 0.998369135 | 0.998792532 | Not Sig |
| ENSG00000206028 | NA           | NA                                                                | NA        | 1.224442817 | 0.006997886  | 2.217852443 | 0.003155253  | 0.997482476 | 0.998677884 | Not Sig |
| ENSG00000265752 | NA           | NA                                                                | NA        | 3.801526867 | 0.007420371  | 1.29282043  | 0.005739676  | 0.995420426 | 0.998677884 | Not Sig |
| ENSG00000260046 | NA           | NA                                                                | NA        | 5.800578227 | 0.00880647   | 1.448580699 | 0.006079379  | 0.995149388 | 0.998677884 | Not Sig |
| ENSG00000267640 | NA           | NA                                                                | NA        | 29.07871829 | 0.012616692  | 1.003239839 | 0.012575948  | 0.98996611  | 0.998677884 | Not Sig |
| ENSG00000227245 | NA           | NA                                                                | NA        | 0.613745194 | 0.013026401  | 3.229154691 | 0.004033997  | 0.996781345 | 0.998677884 | Not Sig |
| ENSG00000236499 | LINC00896    | long intergenic non-protein coding RNA 896                        | 150197    | 16.51234441 | 0.017721174  | 0.965600083 | 0.018352499  | 0.985357646 | 0.998677884 | Not Sig |
| ENSG00000269929 | NA           | NA                                                                | NA        | 223.4172773 | 0.017729263  | 0.6202495   | 0.028584082  | 0.977196308 | 0.998677884 | Not Sig |
| ENSG00000227293 | NA           | NA                                                                | NA        | 0.911342362 | 0.019547172  | 2.454322847 | 0.007964385  | 0.993645408 | 0.998677884 | Not Sig |
| ENSG00000230817 | LINC01362    | long intergenic non-protein coding RNA 1362                       | 103283057 | 1.411919881 | 0.019549129  | 2.003124336 | 0.009759319  | 0.992213314 | 0.998677884 | Not Sig |
| ENSG00000248079 | DPH6-AS1     | DPH6 antisense RNA 1 (head to head)                               | 100507466 | 16.30606628 | 0.021187081  | 1.075483912 | 0.019700044  | 0.984282656 | 0.998677884 | Not Sig |
| ENSG00000231401 | NA           | NA                                                                | NA        | 16.44446896 | 0.02214273   | 1.212798195 | 0.018257555  | 0.985433388 | 0.998677884 | Not Sig |
| ENSG00000266918 | NA           | NA                                                                | NA        | 5.669172378 | 0.022659143  | 1.316055078 | 0.017217473  | 0.986263123 | 0.998677884 | Not Sig |
| ENSG00000253376 | NA           | NA                                                                | NA        | 1.041064562 | 0.023222044  | 2.423903248 | 0.009580434  | 0.992356037 | 0.998677884 | Not Sig |
| ENSG00000233757 | NA           | NA                                                                | NA        | 83.59022312 | 0.023472333  | 0.712912831 | 0.032924548  | 0.973734757 | 0.998677884 | Not Sig |
| ENSG00000272966 | NA           | NA                                                                | NA        | 1.283954438 | 0.026064113  | 2.723634837 | 0.009569606  | 0.992364676 | 0.998677884 | Not Sig |
| ENSG00000261280 | NA           | NA                                                                | NA        | 10.12103436 | 0.026327625  | 1.269685019 | 0.020735556  | 0.983456606 | 0.998677884 | Not Sig |
| ENSG00000225684 | FAM225B      | family with sequence similarity 225 member B (non-protein coding) | 100128385 | 6.673840744 | 0.027496007  | 0.991755401 | 0.027724585  | 0.977881815 | 0.998677884 | Not Sig |
| ENSG00000264868 | NA           | NA                                                                | NA        | 596.1285758 | 0.027795017  | 1.080067342 | 0.025734522  | 0.979469088 | 0.998677884 | Not Sig |
| ENSG00000246898 | NA           | NA                                                                | NA        | 27.29020829 | 0.028598753  | 1.04246333  | 0.027433822  | 0.978113722 | 0.998677884 | Not Sig |
| ENSG00000224848 | NA           | NA                                                                | NA        | 26.2627914  | 0.029032125  | 1.04599704  | 0.027755456  | 0.977857193 | 0.998677884 | Not Sig |
| ENSG00000267528 | NA           | NA                                                                | NA        | 1.341709301 | 0.029199414  | 1.963867641 | 0.014868321  | 0.988137233 | 0.998677884 | Not Sig |
| ENSG00000272922 | NA           | NA                                                                | NA        | 1.938427422 | 0.030874313  | 1.557286439 | 0.019825712  | 0.984182406 | 0.998677884 | Not Sig |
| ENSG00000224961 | LINC01752    | long intergenic non-protein coding RNA 1752                       | 101929395 | 3.159928242 | 0.031478869  | 1.960837197 | 0.01605379   | 0.987191479 | 0.998677884 | Not Sig |
| ENSG00000273081 | NA           | NA                                                                | NA        | 12.60920409 | 0.035083959  | 0.844813395 | 0.041528649  | 0.966874454 | 0.998677884 | Not Sig |
| ENSG00000235398 | NA           | NA                                                                | NA        | 15.01343835 | 0.038211064  | 0.929056388 | 0.041128897  | 0.967193138 | 0.998677884 | Not Sig |

|                 |           |                                             |           |             |             |             |             |             |             |         |
|-----------------|-----------|---------------------------------------------|-----------|-------------|-------------|-------------|-------------|-------------|-------------|---------|
| ENSG00000245937 | LINC01184 | long intergenic non-protein coding RNA 1184 | 644873    | 401.719527  | 0.038895996 | 0.673488093 | 0.057753057 | 0.953945331 | 0.998677884 | Not Sig |
| ENSG00000272377 | NA        | NA                                          | NA        | 15.71569862 | 0.039649018 | 0.824285645 | 0.048101066 | 0.961635696 | 0.998677884 | Not Sig |
| ENSG00000272308 | NA        | NA                                          | NA        | 11.28834845 | 0.044698679 | 0.845809944 | 0.05284719  | 0.957853661 | 0.998677884 | Not Sig |
| ENSG00000241732 | NA        | NA                                          | NA        | 61.34444852 | 0.045220184 | 0.929609613 | 0.048644273 | 0.961202787 | 0.998677884 | Not Sig |
| ENSG00000262951 | NA        | NA                                          | NA        | 2.354814859 | 0.046554593 | 1.47763613  | 0.031506128 | 0.974865905 | 0.998677884 | Not Sig |
| ENSG00000265121 | NA        | NA                                          | NA        | 1.999462828 | 0.046880883 | 1.813238476 | 0.02585478  | 0.979373168 | 0.998677884 | Not Sig |
| ENSG00000264247 | LINC00909 | long intergenic non-protein coding RNA 909  | 400657    | 178.4941978 | 0.0469586   | 0.625420161 | 0.075083285 | 0.940148447 | 0.998677884 | Not Sig |
| ENSG00000230658 | KLHL7-AS1 | KLHL7 antisense RNA 1 (head to head)        | 100775104 | 9.296031812 | 0.049078758 | 1.302008174 | 0.037694662 | 0.969931132 | 0.998677884 | Not Sig |
| ENSG00000267242 | NA        | NA                                          | NA        | 14.91901564 | 0.050856574 | 0.823827075 | 0.061732098 | 0.950776178 | 0.998677884 | Not Sig |
| ENSG00000253428 | LINC01942 | long intergenic non-protein coding RNA 1942 | 105377736 | 17.50717751 | 0.051848721 | 1.108968708 | 0.046753998 | 0.962709293 | 0.998677884 | Not Sig |
| ENSG00000263753 | LINC00667 | long intergenic non-protein coding RNA 667  | 339290    | 786.0440257 | 0.052284752 | 0.603931662 | 0.086573955 | 0.931010169 | 0.998677884 | Not Sig |
| ENSG00000228033 | NA        | NA                                          | NA        | 0.598241906 | 0.054500104 | 3.930079236 | 0.013867431 | 0.988935745 | 0.998677884 | Not Sig |
| ENSG00000233906 | NA        | NA                                          | NA        | 0.598241906 | 0.054500104 | 3.930079236 | 0.013867431 | 0.988935745 | 0.998677884 | Not Sig |
| ENSG00000249667 | NA        | NA                                          | NA        | 0.598241906 | 0.054500104 | 3.930079236 | 0.013867431 | 0.988935745 | 0.998677884 | Not Sig |
| ENSG00000254620 | NA        | NA                                          | NA        | 0.598241906 | 0.054500104 | 3.930079236 | 0.013867431 | 0.988935745 | 0.998677884 | Not Sig |
| ENSG00000259672 | NA        | NA                                          | NA        | 0.598241906 | 0.054500104 | 3.930079236 | 0.013867431 | 0.988935745 | 0.998677884 | Not Sig |
| ENSG00000261013 | NA        | NA                                          | NA        | 0.598241906 | 0.054500104 | 3.930079236 | 0.013867431 | 0.988935745 | 0.998677884 | Not Sig |
| ENSG00000273399 | NA        | NA                                          | NA        | 12.40765712 | 0.055680766 | 1.16070414  | 0.047971541 | 0.961738924 | 0.998677884 | Not Sig |
| ENSG00000250790 | NA        | NA                                          | NA        | 4.897706727 | 0.055799183 | 1.222229906 | 0.04565359  | 0.963586355 | 0.998677884 | Not Sig |
| ENSG00000238033 | LOC401312 | uncharacterized LOC401312                   | 401312    | 2.640189282 | 0.058578308 | 1.482970518 | 0.039500656 | 0.968491231 | 0.998677884 | Not Sig |
| ENSG00000227082 | NA        | NA                                          | NA        | 7.668909023 | 0.058663152 | 0.941289534 | 0.062322112 | 0.95030632  | 0.998677884 | Not Sig |
| ENSG00000258181 | NA        | NA                                          | NA        | 11.63399828 | 0.06071105  | 1.017565642 | 0.059663031 | 0.952424016 | 0.998677884 | Not Sig |
| ENSG00000226197 | NA        | NA                                          | NA        | 0.601289477 | 0.066736094 | 3.925385693 | 0.017001156 | 0.986435694 | 0.998677884 | Not Sig |
| ENSG00000255980 | NA        | NA                                          | NA        | 0.601289477 | 0.066736094 | 3.925385693 | 0.017001156 | 0.986435694 | 0.998677884 | Not Sig |
| ENSG00000257048 | NA        | NA                                          | NA        | 0.601289477 | 0.066736094 | 3.925385693 | 0.017001156 | 0.986435694 | 0.998677884 | Not Sig |
| ENSG00000272264 | NA        | NA                                          | NA        | 15.98307974 | 0.067444446 | 1.328250211 | 0.050776914 | 0.959503287 | 0.998677884 | Not Sig |
| ENSG00000234773 | NA        | NA                                          | NA        | 38.30100615 | 0.068616205 | 0.95113582  | 0.072141332 | 0.942489434 | 0.998677884 | Not Sig |
| ENSG00000257259 | LINC02388 | long intergenic non-protein coding RNA 2388 | 101927653 | 0.656229742 | 0.070824967 | 3.188937423 | 0.022209582 | 0.982280774 | 0.998677884 | Not Sig |
| ENSG00000232046 | LINC01798 | long intergenic non-protein coding RNA 1798 | 100507073 | 12.79417423 | 0.072072604 | 1.151783229 | 0.062574799 | 0.950105098 | 0.998677884 | Not Sig |
| ENSG00000215808 | LINC01139 | long intergenic non-protein coding RNA 1139 | 339535    | 12.4098538  | 0.075113954 | 1.56455635  | 0.048009747 | 0.961708475 | 0.998677884 | Not Sig |
| ENSG00000260619 | NA        | NA                                          | NA        | 2.575840871 | 0.075683044 | 1.686054712 | 0.044887656 | 0.964196856 | 0.998677884 | Not Sig |
| ENSG00000253688 | NA        | NA                                          | NA        | 0.657753527 | 0.076195949 | 3.187611878 | 0.023903772 | 0.980929365 | 0.998677884 | Not Sig |
| ENSG00000259717 | LINC00677 | long intergenic non-protein coding RNA 677  | 105370683 | 0.657753527 | 0.076195949 | 3.187611878 | 0.023903772 | 0.980929365 | 0.998677884 | Not Sig |
| ENSG00000263553 | NA        | NA                                          | NA        | 0.657753527 | 0.076195949 | 3.187611878 | 0.023903772 | 0.980929365 | 0.998677884 | Not Sig |
| ENSG00000260899 | NA        | NA                                          | NA        | 1.316797867 | 0.078308663 | 2.256253681 | 0.034707384 | 0.972313073 | 0.998677884 | Not Sig |

|                 |           |                                                                             |           |             |             |             |             |             |             |         |
|-----------------|-----------|-----------------------------------------------------------------------------|-----------|-------------|-------------|-------------|-------------|-------------|-------------|---------|
| ENSG00000244227 | LRRC77P   | leucine rich repeat containing 77, pseudogene                               | 646168    | 3.207791775 | 0.079700427 | 1.435890714 | 0.055505914 | 0.955735418 | 0.998677884 | Not Sig |
| ENSG00000227486 | NA        | NA                                                                          | NA        | 43.87717487 | 0.081191847 | 0.786599011 | 0.103218852 | 0.917789278 | 0.998677884 | Not Sig |
| ENSG00000228826 | NA        | NA                                                                          | NA        | 1.242015931 | 0.084184943 | 2.305851324 | 0.036509268 | 0.970876289 | 0.998677884 | Not Sig |
| ENSG00000270720 | NA        | NA                                                                          | NA        | 3.443953913 | 0.08511194  | 1.486214131 | 0.057272636 | 0.954328018 | 0.998677884 | Not Sig |
| ENSG00000237357 | NA        | NA                                                                          | NA        | 7.222501137 | 0.085250678 | 1.330220861 | 0.064087612 | 0.948900466 | 0.998677884 | Not Sig |
| ENSG00000251562 | MALAT1    | metastasis associated lung adenocarcinoma transcript 1 (non-protein coding) | 378938    | 747111.7871 | 0.085989935 | 0.806182252 | 0.106663145 | 0.915056221 | 0.998677884 | Not Sig |
| ENSG00000228414 | LINC01185 | long intergenic non-protein coding RNA 1185                                 | 400957    | 2.121195094 | 0.08626227  | 1.758004372 | 0.049068291 | 0.960864873 | 0.998677884 | Not Sig |
| ENSG00000272043 | NA        | NA                                                                          | NA        | 2.775901051 | 0.086334832 | 1.379884947 | 0.062566689 | 0.950111556 | 0.998677884 | Not Sig |
| ENSG00000243089 | NA        | NA                                                                          | NA        | 0.942894978 | 0.090134059 | 2.445813274 | 0.036852388 | 0.970602703 | 0.998677884 | Not Sig |
| ENSG00000244567 | NA        | NA                                                                          | NA        | 87.12819504 | 0.090450595 | 0.762910251 | 0.118559942 | 0.905624003 | 0.998677884 | Not Sig |
| ENSG00000237943 | NA        | NA                                                                          | NA        | 56.07409932 | 0.090451648 | 0.985530737 | 0.091779632 | 0.926873127 | 0.998677884 | Not Sig |
| ENSG00000227640 | SOX21-AS1 | SOX21 antisense divergent transcript 1                                      | 100507533 | 18.1725858  | 0.090479496 | 0.98810728  | 0.091568494 | 0.927040884 | 0.998677884 | Not Sig |
| ENSG00000268836 | NA        | NA                                                                          | NA        | 9.046910728 | 0.091161813 | 0.932717433 | 0.097737867 | 0.922140446 | 0.998677884 | Not Sig |
| ENSG00000272374 | NA        | NA                                                                          | NA        | 70.82207644 | 0.093164568 | 0.659931191 | 0.141173154 | 0.887733153 | 0.998677884 | Not Sig |
| ENSG00000267052 | NA        | NA                                                                          | NA        | 1.661450939 | 0.094662174 | 1.874447611 | 0.050501371 | 0.959722857 | 0.998677884 | Not Sig |
| ENSG00000243276 | NA        | NA                                                                          | NA        | 0.71550839  | 0.094722379 | 3.140102032 | 0.030165382 | 0.975935157 | 0.998677884 | Not Sig |
| ENSG00000258860 | NA        | NA                                                                          | NA        | 0.71550839  | 0.094722379 | 3.140102032 | 0.030165382 | 0.975935157 | 0.998677884 | Not Sig |
| ENSG00000272462 | NA        | NA                                                                          | NA        | 83.01199365 | 0.09499366  | 0.800514226 | 0.118665798 | 0.905540134 | 0.998677884 | Not Sig |
| ENSG00000203999 | LINC01270 | long intergenic non-protein coding RNA 1270                                 | 284751    | 76.3466167  | 0.095053316 | 1.023518194 | 0.092869201 | 0.926007474 | 0.998677884 | Not Sig |
| ENSG00000272644 | NA        | NA                                                                          | NA        | 10.45243078 | 0.095468429 | 0.962622106 | 0.099175396 | 0.92099901  | 0.998677884 | Not Sig |
| ENSG00000267045 | NA        | NA                                                                          | NA        | 41.4416023  | 0.095914377 | 0.914618469 | 0.104868183 | 0.916480406 | 0.998677884 | Not Sig |
| ENSG00000260054 | NA        | NA                                                                          | NA        | 452.108543  | 0.096219182 | 0.730647594 | 0.131690275 | 0.895229278 | 0.998677884 | Not Sig |
| ENSG00000260023 | NA        | NA                                                                          | NA        | 28.87993871 | 0.097772511 | 0.914312543 | 0.106935546 | 0.914840114 | 0.998677884 | Not Sig |
| ENSG00000248884 | NA        | NA                                                                          | NA        | 1.588192788 | 0.098194799 | 1.830004971 | 0.053658214 | 0.957207475 | 0.998677884 | Not Sig |
| ENSG00000260657 | NA        | NA                                                                          | NA        | 2.746651234 | 0.100341253 | 1.500271431 | 0.066882066 | 0.94667559  | 0.998677884 | Not Sig |
| ENSG00000255693 | LINC02389 | long intergenic non-protein coding RNA 2389                                 | 400046    | 12.06855325 | 0.101657272 | 1.156996451 | 0.08786308  | 0.929985501 | 0.998677884 | Not Sig |
| ENSG00000266897 | NA        | NA                                                                          | NA        | 14.0392256  | 0.102649109 | 1.168652628 | 0.087835432 | 0.930007476 | 0.998677884 | Not Sig |
| ENSG00000223665 | NA        | NA                                                                          | NA        | 2.306748749 | 0.105990545 | 1.712377634 | 0.061896712 | 0.950645086 | 0.998677884 | Not Sig |
| ENSG00000224239 | NA        | NA                                                                          | NA        | 6.551441736 | 0.111186681 | 0.998449397 | 0.111359356 | 0.911331389 | 0.998677884 | Not Sig |
| ENSG00000223779 | NA        | NA                                                                          | NA        | 39.22510791 | 0.111305163 | 0.780743918 | 0.142562959 | 0.886635353 | 0.998677884 | Not Sig |
| ENSG00000261670 | NA        | NA                                                                          | NA        | 2.7385339   | 0.112574366 | 1.636517167 | 0.068788992 | 0.94515758  | 0.998677884 | Not Sig |
| ENSG00000267586 | LINC00907 | long intergenic non-protein coding RNA 907                                  | 284260    | 13.60577039 | 0.112602532 | 0.899262158 | 0.12521658  | 0.900352091 | 0.998677884 | Not Sig |
| ENSG00000226328 | NA        | NA                                                                          | NA        | 119.6007122 | 0.114770566 | 0.723243268 | 0.158688744 | 0.873914107 | 0.998677884 | Not Sig |
| ENSG00000188070 | C11orf95  | chromosome 11 open reading frame 95                                         | 65998     | 638.3395434 | 0.117368657 | 0.773177849 | 0.151800336 | 0.879344417 | 0.998677884 | Not Sig |
| ENSG00000271893 | NA        | NA                                                                          | NA        | 1.229560214 | 0.117751749 | 2.734624654 | 0.043059565 | 0.965654052 | 0.998677884 | Not Sig |

|                 |              |                                                 |           |             |             |             |             |             |             |         |
|-----------------|--------------|-------------------------------------------------|-----------|-------------|-------------|-------------|-------------|-------------|-------------|---------|
| ENSG00000253988 | NA           | NA                                              | NA        | 1.873334239 | 0.118696984 | 2.118312685 | 0.056033741 | 0.955314928 | 0.998677884 | Not Sig |
| ENSG00000237461 | LOC101928438 | uncharacterized LOC101928438                    | 101928438 | 8.305608096 | 0.122564579 | 0.956450989 | 0.128145175 | 0.898034087 | 0.998677884 | Not Sig |
| ENSG00000230606 | NA           | NA                                              | NA        | 172.7045531 | 0.122852361 | 0.744908219 | 0.164922815 | 0.869004734 | 0.998677884 | Not Sig |
| ENSG00000264964 | NA           | NA                                              | NA        | 4.843848097 | 0.123121108 | 1.370348428 | 0.089846572 | 0.928409139 | 0.998677884 | Not Sig |
| ENSG00000253853 | NA           | NA                                              | NA        | 4.527911029 | 0.123949161 | 1.264850443 | 0.097995112 | 0.921936174 | 0.998677884 | Not Sig |
| ENSG00000261734 | NA           | NA                                              | NA        | 3.709933924 | 0.126057584 | 1.427583485 | 0.088301375 | 0.929637146 | 0.998677884 | Not Sig |
| ENSG00000273409 | LOC101929497 | uncharacterized LOC101929497                    | 101929497 | 1.574213286 | 0.127249664 | 2.16932012  | 0.058658777 | 0.953223894 | 0.998677884 | Not Sig |
| ENSG00000272316 | NA           | NA                                              | NA        | 120.4056949 | 0.128292822 | 0.842082574 | 0.152351831 | 0.878909446 | 0.998677884 | Not Sig |
| ENSG00000255135 | NA           | NA                                              | NA        | 23.61155863 | 0.12999194  | 0.861243166 | 0.150935236 | 0.880026805 | 0.998677884 | Not Sig |
| ENSG00000268615 | NA           | NA                                              | NA        | 4.534239143 | 0.131017204 | 1.519283234 | 0.086236194 | 0.931278659 | 0.998677884 | Not Sig |
| ENSG00000224959 | NA           | NA                                              | NA        | 95.77969857 | 0.132819971 | 0.794934984 | 0.16708281  | 0.867304892 | 0.998677884 | Not Sig |
| ENSG00000235244 | DANT2        | DXZ4 associated non-coding transcript 2, distal | 642776    | 236.7797116 | 0.134555214 | 0.9349972   | 0.14390975  | 0.885571736 | 0.998677884 | Not Sig |
| ENSG00000271978 | NA           | NA                                              | NA        | 4.778074684 | 0.135141957 | 1.236338989 | 0.109308174 | 0.912958064 | 0.998677884 | Not Sig |
| ENSG00000259031 | NA           | NA                                              | NA        | 5.485698712 | 0.138375073 | 1.090918622 | 0.126842709 | 0.899064892 | 0.998677884 | Not Sig |
| ENSG00000232855 | NA           | NA                                              | NA        | 40.85243638 | 0.138413742 | 0.722582492 | 0.191554243 | 0.848091388 | 0.998677884 | Not Sig |
| ENSG00000255669 | ITFG2-AS1    | ITFG2 antisense RNA 1                           | 283440    | 9.680900588 | 0.139747888 | 1.046537583 | 0.133533559 | 0.893771425 | 0.998677884 | Not Sig |
| ENSG00000272091 | NA           | NA                                              | NA        | 74.39571838 | 0.141346438 | 0.766680277 | 0.184361646 | 0.853729756 | 0.998677884 | Not Sig |
| ENSG00000272371 | NA           | NA                                              | NA        | 2.48342128  | 0.141817374 | 1.420244034 | 0.09985423  | 0.920460054 | 0.998677884 | Not Sig |
| ENSG00000273305 | NA           | NA                                              | NA        | 20.70496442 | 0.14292557  | 0.993408692 | 0.143873887 | 0.885600057 | 0.998677884 | Not Sig |
| ENSG00000185168 | NA           | NA                                              | NA        | 80.04204878 | 0.143943167 | 0.980462923 | 0.146811433 | 0.88328086  | 0.998677884 | Not Sig |
| ENSG00000268129 | LOC100289361 | uncharacterized LOC100289361                    | 100289361 | 8.008422781 | 0.143961022 | 1.252490638 | 0.114939799 | 0.908492839 | 0.998677884 | Not Sig |
| ENSG00000238142 | LOC105376805 | uncharacterized LOC105376805                    | 105376805 | 157.6237856 | 0.145027277 | 0.680813598 | 0.213020535 | 0.831310946 | 0.998677884 | Not Sig |
| ENSG00000237697 | NA           | NA                                              | NA        | 89.97865096 | 0.147183152 | 0.709746682 | 0.207374203 | 0.835717628 | 0.998677884 | Not Sig |
| ENSG00000258504 | NA           | NA                                              | NA        | 3.043238195 | 0.148367457 | 1.379477189 | 0.107553397 | 0.914349966 | 0.998677884 | Not Sig |
| ENSG00000260248 | NA           | NA                                              | NA        | 2.657151814 | 0.148414576 | 1.721904743 | 0.086192094 | 0.931313715 | 0.998677884 | Not Sig |
| ENSG00000225096 | NA           | NA                                              | NA        | 4.471069369 | 0.150231021 | 1.277036622 | 0.117640339 | 0.906352641 | 0.998677884 | Not Sig |
| ENSG00000256101 | NA           | NA                                              | NA        | 2.94381705  | 0.150403482 | 1.394812209 | 0.107830632 | 0.914130044 | 0.998677884 | Not Sig |
| ENSG00000246084 | LINC02325    | long intergenic non-protein coding RNA 2325     | 101929241 | 6.487233141 | 0.150841643 | 1.1373658   | 0.132623684 | 0.894491001 | 0.998677884 | Not Sig |
| ENSG00000272087 | NA           | NA                                              | NA        | 6.778131187 | 0.154169155 | 1.11073035  | 0.138799804 | 0.889608349 | 0.998677884 | Not Sig |
| ENSG00000228223 | HCG11        | HLA complex group 11 (non-protein coding)       | 493812    | 375.9542373 | 0.155109536 | 0.627141288 | 0.247327897 | 0.804654471 | 0.998677884 | Not Sig |
| ENSG00000234572 | LINC01800    | long intergenic non-protein coding RNA 1800     | 101927438 | 2.184300327 | 0.156837008 | 1.493782837 | 0.104993178 | 0.916381222 | 0.998677884 | Not Sig |
| ENSG00000197308 | GATA3-AS1    | GATA3 antisense RNA 1                           | 399717    | 1.822853155 | 0.15815098  | 1.850781631 | 0.085450913 | 0.931902918 | 0.998677884 | Not Sig |
| ENSG00000225331 | LINC01678    | long intergenic non-protein coding RNA 1678     | 105377138 | 26.13020834 | 0.158370499 | 0.970755486 | 0.163141493 | 0.870407031 | 0.998677884 | Not Sig |
| ENSG00000273374 | NA           | NA                                              | NA        | 3.117442011 | 0.158790777 | 1.770626659 | 0.089680553 | 0.92854107  | 0.998677884 | Not Sig |
| ENSG00000268287 | NA           | NA                                              | NA        | 2.109518391 | 0.159551901 | 1.565537029 | 0.101915124 | 0.918824045 | 0.998677884 | Not Sig |



|                 |            |                                             |           |             |             |             |             |             |             |         |
|-----------------|------------|---------------------------------------------|-----------|-------------|-------------|-------------|-------------|-------------|-------------|---------|
| ENSG00000272003 | NA         | NA                                          | NA        | 33.76605403 | 0.161808548 | 0.874984645 | 0.184927301 | 0.853286057 | 0.998677884 | Not Sig |
| ENSG00000254054 | NA         | NA                                          | NA        | 4.462690447 | 0.162710095 | 1.505706564 | 0.108062287 | 0.913946284 | 0.998677884 | Not Sig |
| ENSG00000228566 | NA         | NA                                          | NA        | 0.631318308 | 0.164093824 | 3.21301676  | 0.051071574 | 0.959268487 | 0.998677884 | Not Sig |
| ENSG00000230533 | NA         | NA                                          | NA        | 0.631318308 | 0.164093824 | 3.21301676  | 0.051071574 | 0.959268487 | 0.998677884 | Not Sig |
| ENSG00000267100 | ILF3-AS1   | ILF3 antisense RNA 1 (head to head)         | 147727    | 221.7334577 | 0.16723836  | 0.866258512 | 0.193058259 | 0.846913342 | 0.998677884 | Not Sig |
| ENSG00000272472 | NA         | NA                                          | NA        | 8.742519599 | 0.16787448  | 1.833955901 | 0.091536814 | 0.927066056 | 0.998677884 | Not Sig |
| ENSG00000271882 | NA         | NA                                          | NA        | 5.711369575 | 0.174314571 | 1.123903023 | 0.15509752  | 0.876744438 | 0.998677884 | Not Sig |
| ENSG00000255102 | NA         | NA                                          | NA        | 2.746586693 | 0.174420898 | 2.016725596 | 0.086487174 | 0.931079151 | 0.998677884 | Not Sig |
| ENSG00000254295 | NA         | NA                                          | NA        | 5.730047832 | 0.176300418 | 1.101660709 | 0.160031502 | 0.872856259 | 0.998677884 | Not Sig |
| ENSG00000267010 | NA         | NA                                          | NA        | 57.59042623 | 0.176327722 | 0.679288736 | 0.259576985 | 0.795190091 | 0.998677884 | Not Sig |
| ENSG00000258675 | LINC02308  | long intergenic non-protein coding RNA 2308 | 100506700 | 1.610337258 | 0.178289455 | 2.169291203 | 0.082187884 | 0.934497308 | 0.998677884 | Not Sig |
| ENSG00000258651 | SEC23A-AS1 | SEC23A antisense RNA 1                      | 105370458 | 5.279711823 | 0.181524268 | 1.054968062 | 0.172066126 | 0.863385543 | 0.998677884 | Not Sig |
| ENSG00000257698 | NA         | NA                                          | NA        | 37.98563198 | 0.18278046  | 0.850207813 | 0.214983275 | 0.829780358 | 0.998677884 | Not Sig |
| ENSG00000259504 | NA         | NA                                          | NA        | 1.468791937 | 0.185549306 | 1.916411572 | 0.09682122  | 0.922868372 | 0.998677884 | Not Sig |
| ENSG00000253686 | LINC01484  | long intergenic non-protein coding RNA 1484 | 101928136 | 11.36398453 | 0.188511822 | 1.100033533 | 0.171369159 | 0.863933503 | 0.998677884 | Not Sig |
| ENSG00000272250 | NA         | NA                                          | NA        | 4.687830493 | 0.190041708 | 1.23528848  | 0.153843989 | 0.877732748 | 0.998677884 | Not Sig |
| ENSG00000273004 | NA         | NA                                          | NA        | 13.65415145 | 0.190924505 | 0.920058302 | 0.207513485 | 0.835608862 | 0.998677884 | Not Sig |
| ENSG00000244041 | LINC01011  | long intergenic non-protein coding RNA 1011 | 401232    | 58.7032666  | 0.192573713 | 0.649499339 | 0.296495626 | 0.766851607 | 0.998677884 | Not Sig |
| ENSG00000182057 | OGFRP1     | opioid growth factor receptor pseudogene 1  | 388906    | 17.92154627 | 0.193479759 | 1.078938086 | 0.179324246 | 0.85768311  | 0.998677884 | Not Sig |
| ENSG00000236485 | NA         | NA                                          | NA        | 0.689306143 | 0.196207754 | 3.804909683 | 0.051566994 | 0.95887372  | 0.998677884 | Not Sig |
| ENSG00000230839 | NA         | NA                                          | NA        | 4.006143275 | 0.196796956 | 1.257369729 | 0.156514787 | 0.875627264 | 0.998677884 | Not Sig |
| ENSG00000254119 | NA         | NA                                          | NA        | 3.905176331 | 0.198906845 | 2.005692374 | 0.099171163 | 0.921002371 | 0.998677884 | Not Sig |
| ENSG00000254302 | NA         | NA                                          | NA        | 1.30969252  | 0.200586869 | 2.300175096 | 0.087205043 | 0.930508531 | 0.998677884 | Not Sig |
| ENSG00000253641 | LINC00001  | uncharacterized LINC00001                   | 101929191 | 17.10706451 | 0.202349866 | 0.822899023 | 0.24589878  | 0.805760588 | 0.998677884 | Not Sig |
| ENSG00000273209 | NA         | NA                                          | NA        | 4.364503625 | 0.205690195 | 1.586492668 | 0.129650896 | 0.896842634 | 0.998677884 | Not Sig |
| ENSG00000231412 | NA         | NA                                          | NA        | 2.134943404 | 0.208921424 | 2.104362492 | 0.09928015  | 0.920915839 | 0.998677884 | Not Sig |
| ENSG00000186842 | NA         | NA                                          | NA        | 6.093864124 | 0.209542858 | 1.555968518 | 0.134670371 | 0.8928725   | 0.998677884 | Not Sig |
| ENSG00000226380 | NA         | NA                                          | NA        | 829.5936932 | 0.209604281 | 0.85290394  | 0.245753678 | 0.805872917 | 0.998677884 | Not Sig |
| ENSG00000258636 | NA         | NA                                          | NA        | 2.688304806 | 0.211053135 | 2.05258986  | 0.102822848 | 0.918103571 | 0.998677884 | Not Sig |
| ENSG00000245526 | LINC00461  | long intergenic non-protein coding RNA 461  | 645323    | 9.070706238 | 0.212062101 | 1.487090259 | 0.142602037 | 0.886604488 | 0.998677884 | Not Sig |
| ENSG00000223633 | NA         | NA                                          | NA        | 4.331845865 | 0.214487501 | 1.431307313 | 0.149854262 | 0.880879598 | 0.998677884 | Not Sig |
| ENSG00000229160 | NA         | NA                                          | NA        | 0.965039448 | 0.215185077 | 2.879491225 | 0.074730242 | 0.940429345 | 0.998677884 | Not Sig |
| ENSG00000228526 | MIR34AHG   | MIR34A host gene                            | 106614088 | 68.73731789 | 0.215252447 | 0.677218298 | 0.317847948 | 0.750600278 | 0.998677884 | Not Sig |
| ENSG00000270041 | NA         | NA                                          | NA        | 21.07825619 | 0.216385587 | 1.057406457 | 0.204638042 | 0.837854931 | 0.998677884 | Not Sig |
| ENSG00000263934 | SNORD3A    | small nucleolar RNA, C/D box 3A             | 780851    | 57243.91503 | 0.218727057 | 0.795091241 | 0.275096801 | 0.783241869 | 0.998677884 | Not Sig |

|                 |              |                                             |           |             |             |             |             |             |             |         |
|-----------------|--------------|---------------------------------------------|-----------|-------------|-------------|-------------|-------------|-------------|-------------|---------|
| ENSG00000273355 | NA           | NA                                          | NA        | 3.290401913 | 0.219816088 | 1.351861083 | 0.162602571 | 0.870831363 | 0.998677884 | Not Sig |
| ENSG00000236230 | NA           | NA                                          | NA        | 1.497296983 | 0.221932239 | 1.973608908 | 0.112449958 | 0.910466646 | 0.998677884 | Not Sig |
| ENSG00000245571 | FAM111A-DT   | FAM111A divergent transcript                | 101927204 | 117.186426  | 0.221932495 | 0.620788203 | 0.357501148 | 0.720716667 | 0.998677884 | Not Sig |
| ENSG00000271141 | NA           | NA                                          | NA        | 13.7022125  | 0.222254708 | 0.878564076 | 0.252974956 | 0.800287566 | 0.998677884 | Not Sig |
| ENSG00000273192 | NA           | NA                                          | NA        | 42.42335362 | 0.2243309   | 1.134023887 | 0.197818496 | 0.843187074 | 0.998677884 | Not Sig |
| ENSG00000227542 | NA           | NA                                          | NA        | 26.00352321 | 0.224892576 | 0.963496519 | 0.233412961 | 0.815440749 | 0.998677884 | Not Sig |
| ENSG00000231231 | NA           | NA                                          | NA        | 3.76145739  | 0.22546143  | 1.371224836 | 0.164423385 | 0.869397855 | 0.998677884 | Not Sig |
| ENSG00000225793 | NA           | NA                                          | NA        | 25.81488645 | 0.225741073 | 0.771083558 | 0.292758249 | 0.769706943 | 0.998677884 | Not Sig |
| ENSG00000248397 | NA           | NA                                          | NA        | 0.676850426 | 0.226388284 | 3.171573244 | 0.071380437 | 0.943094979 | 0.998677884 | Not Sig |
| ENSG00000272092 | NA           | NA                                          | NA        | 15.40713411 | 0.226482932 | 0.987071128 | 0.229449455 | 0.818519602 | 0.998677884 | Not Sig |
| ENSG00000229214 | LINC00242    | long intergenic non-protein coding RNA 242  | 401288    | 4.59806545  | 0.229876197 | 1.502069305 | 0.153039674 | 0.878366988 | 0.998677884 | Not Sig |
| ENSG00000270107 | NA           | NA                                          | NA        | 6.881827954 | 0.232826422 | 1.01714696  | 0.228901458 | 0.818945508 | 0.998677884 | Not Sig |
| ENSG00000271943 | NA           | NA                                          | NA        | 3.86755897  | 0.238834797 | 1.288976753 | 0.185290229 | 0.853001402 | 0.998677884 | Not Sig |
| ENSG00000267350 | NA           | NA                                          | NA        | 348.425961  | 0.240218537 | 0.628552567 | 0.382177322 | 0.702329842 | 0.998677884 | Not Sig |
| ENSG00000242759 | LINC00882    | long intergenic non-protein coding RNA 882  | 100302640 | 16.41040863 | 0.240888867 | 0.999358252 | 0.241043557 | 0.809521358 | 0.998677884 | Not Sig |
| ENSG00000228079 | NA           | NA                                          | NA        | 7.725975416 | 0.241176036 | 1.225451243 | 0.196805901 | 0.843979433 | 0.998677884 | Not Sig |
| ENSG00000229108 | NA           | NA                                          | NA        | 2.367447389 | 0.247096551 | 1.599884034 | 0.154446539 | 0.877257661 | 0.998677884 | Not Sig |
| ENSG00000270170 | NA           | NA                                          | NA        | 164.8972851 | 0.247694048 | 0.802691024 | 0.308579566 | 0.757641367 | 0.998677884 | Not Sig |
| ENSG00000225880 | LINC00115    | long intergenic non-protein coding RNA 115  | 79854     | 63.96742756 | 0.248409363 | 0.761497695 | 0.326211576 | 0.744264284 | 0.998677884 | Not Sig |
| ENSG00000270147 | NA           | NA                                          | NA        | 3.032241723 | 0.250298802 | 1.319566863 | 0.189682546 | 0.849557899 | 0.998677884 | Not Sig |
| ENSG00000267070 | NA           | NA                                          | NA        | 1.544352886 | 0.250599643 | 1.877678316 | 0.1334625   | 0.893827619 | 0.998677884 | Not Sig |
| ENSG00000258479 | LINC00640    | long intergenic non-protein coding RNA 640  | 283553    | 2.68454108  | 0.253479086 | 1.518435645 | 0.166934362 | 0.867421696 | 0.998677884 | Not Sig |
| ENSG00000253105 | LOC102724804 | uncharacterized LOC102724804                | 102724804 | 3.731942138 | 0.258529344 | 1.648069718 | 0.156867966 | 0.875348907 | 0.998677884 | Not Sig |
| ENSG00000254731 | NA           | NA                                          | NA        | 13.32842029 | 0.261004083 | 0.957155942 | 0.272687105 | 0.785093748 | 0.998677884 | Not Sig |
| ENSG00000261795 | NA           | NA                                          | NA        | 5.393194347 | 0.261405138 | 1.454062696 | 0.179775699 | 0.857328662 | 0.998677884 | Not Sig |
| ENSG00000223387 | LINC02068    | long intergenic non-protein coding RNA 2068 | 105374219 | 7.152583677 | 0.262790832 | 1.402035729 | 0.187435189 | 0.851319435 | 0.998677884 | Not Sig |
| ENSG00000255198 | SNHG9        | small nucleolar RNA host gene 9             | 735301    | 30.7418779  | 0.262828008 | 0.83813145  | 0.313588051 | 0.753833936 | 0.998677884 | Not Sig |
| ENSG00000260369 | NA           | NA                                          | NA        | 10.60045358 | 0.263726181 | 1.157199851 | 0.22790029  | 0.819723758 | 0.998677884 | Not Sig |
| ENSG00000188185 | NA           | NA                                          | NA        | 172.0081081 | 0.263760909 | 0.644897303 | 0.408996763 | 0.682542037 | 0.998677884 | Not Sig |
| ENSG00000256742 | NA           | NA                                          | NA        | 7.773777683 | 0.264786352 | 0.95205829  | 0.278119895 | 0.780920324 | 0.998677884 | Not Sig |
| ENSG00000258425 | NA           | NA                                          | NA        | 2.815514842 | 0.265024899 | 1.711443928 | 0.154854562 | 0.876935976 | 0.998677884 | Not Sig |
| ENSG00000247317 | NA           | NA                                          | NA        | 62.72511378 | 0.266366664 | 0.868381419 | 0.306739249 | 0.759041853 | 0.998677884 | Not Sig |
| ENSG00000267108 | NA           | NA                                          | NA        | 2.817038627 | 0.266563342 | 1.671252868 | 0.159499108 | 0.873275661 | 0.998677884 | Not Sig |
| ENSG00000270172 | NA           | NA                                          | NA        | 49.53268291 | 0.267734517 | 1.179809942 | 0.226930209 | 0.820478011 | 0.998677884 | Not Sig |
| ENSG00000265282 | NA           | NA                                          | NA        | 5.658250706 | 0.271775017 | 1.421856525 | 0.191140957 | 0.84841516  | 0.998677884 | Not Sig |

|                 |              |                                             |           |             |             |             |             |             |             |         |
|-----------------|--------------|---------------------------------------------|-----------|-------------|-------------|-------------|-------------|-------------|-------------|---------|
| ENSG00000261088 | NA           | NA                                          | NA        | 96.45769882 | 0.27249956  | 0.681723313 | 0.399721639 | 0.689361552 | 0.998677884 | Not Sig |
| ENSG00000248636 | LOC105370027 | uncharacterized LOC105370027                | 105370027 | 20.30049599 | 0.27270685  | 0.864325411 | 0.315514095 | 0.752371351 | 0.998677884 | Not Sig |
| ENSG00000260693 | NA           | NA                                          | NA        | 10.51015038 | 0.27344293  | 1.125967351 | 0.242851562 | 0.80812039  | 0.998677884 | Not Sig |
| ENSG00000273077 | NA           | NA                                          | NA        | 1.531897169 | 0.274007895 | 1.711767818 | 0.16007305  | 0.872823531 | 0.998677884 | Not Sig |
| ENSG00000230844 | ZNF674-AS1   | ZNF674 antisense RNA 1 (head to head)       | 401588    | 54.65501893 | 0.275141244 | 0.662081499 | 0.415570053 | 0.677724644 | 0.998677884 | Not Sig |
| ENSG00000251015 | SLC25A30-AS1 | SLC25A30 antisense RNA 1                    | 100874259 | 2.255930899 | 0.277205333 | 2.023362194 | 0.137002329 | 0.891028954 | 0.998677884 | Not Sig |
| ENSG00000269640 | NA           | NA                                          | NA        | 80.39920736 | 0.278241856 | 0.956318344 | 0.290951081 | 0.771088733 | 0.998677884 | Not Sig |
| ENSG00000232593 | NA           | NA                                          | NA        | 154.391446  | 0.278789425 | 0.663454176 | 0.420209014 | 0.67433277  | 0.998677884 | Not Sig |
| ENSG00000204261 | PSMB8-AS1    | PSMB8 antisense RNA 1 (head to head)        | 100507463 | 230.0238259 | 0.281615452 | 1.019101194 | 0.276337084 | 0.782289176 | 0.998677884 | Not Sig |
| ENSG00000270020 | NA           | NA                                          | NA        | 7.028335398 | 0.282104112 | 1.507662074 | 0.187113622 | 0.851571548 | 0.998677884 | Not Sig |
| ENSG00000258735 | LINC00637    | long intergenic non-protein coding RNA 637  | 145216    | 4.183875427 | 0.285023905 | 1.174905055 | 0.242593139 | 0.808320597 | 0.998677884 | Not Sig |
| ENSG00000260122 | NA           | NA                                          | NA        | 2.590942852 | 0.285446719 | 1.656967419 | 0.172270569 | 0.863224821 | 0.998677884 | Not Sig |
| ENSG00000230555 | NA           | NA                                          | NA        | 34.31621957 | 0.285627482 | 0.865145452 | 0.330149666 | 0.741286877 | 0.998677884 | Not Sig |
| ENSG00000273344 | PAXIP1-AS1   | PAXIP1 antisense RNA 1 (head to head)       | 202781    | 184.2284981 | 0.287935744 | 0.780637525 | 0.368846916 | 0.712241832 | 0.998677884 | Not Sig |
| ENSG00000263470 | NA           | NA                                          | NA        | 16.82250465 | 0.288582397 | 1.158647589 | 0.24906831  | 0.803307942 | 0.998677884 | Not Sig |
| ENSG00000232388 | SMIM26       | small integral membrane protein 26          | 388789    | 234.9608258 | 0.289118578 | 0.634554438 | 0.455624547 | 0.648659989 | 0.998677884 | Not Sig |
| ENSG00000237604 | NA           | NA                                          | NA        | 30.85312188 | 0.289127004 | 0.998063969 | 0.289687848 | 0.772055053 | 0.998677884 | Not Sig |
| ENSG00000222041 | CYTOR        | cytoskeleton regulator RNA                  | 112597    | 316.8757582 | 0.290106425 | 0.710034293 | 0.408580864 | 0.682847276 | 0.998677884 | Not Sig |
| ENSG00000272744 | NA           | NA                                          | NA        | 3.776896137 | 0.290309412 | 1.257562792 | 0.230850828 | 0.817430693 | 0.998677884 | Not Sig |
| ENSG00000260777 | NA           | NA                                          | NA        | 1.185720313 | 0.290940668 | 2.356656744 | 0.123454835 | 0.901746937 | 0.998677884 | Not Sig |
| ENSG00000231196 | NA           | NA                                          | NA        | 0.855046743 | 0.292947181 | 2.97057206  | 0.09861642  | 0.921442832 | 0.998677884 | Not Sig |
| ENSG00000260158 | NA           | NA                                          | NA        | 0.855046743 | 0.292947181 | 2.97057206  | 0.09861642  | 0.921442832 | 0.998677884 | Not Sig |
| ENSG00000266824 | NA           | NA                                          | NA        | 0.855046743 | 0.292947181 | 2.97057206  | 0.09861642  | 0.921442832 | 0.998677884 | Not Sig |
| ENSG00000264575 | NA           | NA                                          | NA        | 30.27665676 | 0.295998759 | 0.749907572 | 0.394713656 | 0.693054224 | 0.998677884 | Not Sig |
| ENSG00000205444 | NA           | NA                                          | NA        | 0.664394709 | 0.297017953 | 3.836612821 | 0.077416713 | 0.938292046 | 0.998677884 | Not Sig |
| ENSG00000233321 | NA           | NA                                          | NA        | 0.664394709 | 0.297017953 | 3.836612821 | 0.077416713 | 0.938292046 | 0.998677884 | Not Sig |
| ENSG00000258602 | LINC01629    | long intergenic non-protein coding RNA 1629 | 105370578 | 0.664394709 | 0.297017953 | 3.836612821 | 0.077416713 | 0.938292046 | 0.998677884 | Not Sig |
| ENSG00000261298 | NA           | NA                                          | NA        | 0.664394709 | 0.297017953 | 3.836612821 | 0.077416713 | 0.938292046 | 0.998677884 | Not Sig |
| ENSG00000260482 | NA           | NA                                          | NA        | 234.022291  | 0.297539499 | 0.732424536 | 0.40623912  | 0.684566913 | 0.998677884 | Not Sig |
| ENSG00000257219 | LINC02407    | long intergenic non-protein coding RNA 2407 | 105369848 | 5.949400743 | 0.297620935 | 1.090377057 | 0.272952308 | 0.784889876 | 0.998677884 | Not Sig |
| ENSG00000224577 | LINC01117    | long intergenic non-protein coding RNA 1117 | 102724224 | 2.505334557 | 0.298421816 | 1.687120165 | 0.176882372 | 0.859600786 | 0.998677884 | Not Sig |
| ENSG00000205662 | NA           | NA                                          | NA        | 16.64120691 | 0.300345488 | 1.451051719 | 0.206984689 | 0.836021816 | 0.998677884 | Not Sig |
| ENSG00000235052 | NA           | NA                                          | NA        | 3.232182885 | 0.302717076 | 1.283050794 | 0.235935379 | 0.813482814 | 0.998677884 | Not Sig |
| ENSG00000237940 | LINC01238    | long intergenic non-protein coding RNA 1238 | 102723927 | 34.31569326 | 0.303776172 | 0.712721385 | 0.426220089 | 0.669947481 | 0.998677884 | Not Sig |
| ENSG00000268416 | NA           | NA                                          | NA        | 127.4878213 | 0.304131282 | 1.194567913 | 0.254595221 | 0.79903575  | 0.998677884 | Not Sig |

|                 |              |                                             |           |             |             |             |             |             |             |         |
|-----------------|--------------|---------------------------------------------|-----------|-------------|-------------|-------------|-------------|-------------|-------------|---------|
| ENSG00000259072 | NA           | NA                                          | NA        | 2.15611013  | 0.309631878 | 1.732463188 | 0.178723496 | 0.858154819 | 0.998677884 | Not Sig |
| ENSG00000233096 | NA           | NA                                          | NA        | 1.508742493 | 0.312363887 | 2.200492201 | 0.141951827 | 0.887118057 | 0.998677884 | Not Sig |
| ENSG00000261187 | NA           | NA                                          | NA        | 8.84572812  | 0.316438708 | 0.916569042 | 0.345242632 | 0.729911971 | 0.998677884 | Not Sig |
| ENSG00000261824 | LINC00662    | long intergenic non-protein coding RNA 662  | 148189    | 269.6719549 | 0.317120299 | 0.639971071 | 0.495522865 | 0.620231086 | 0.998677884 | Not Sig |
| ENSG00000247011 | NA           | NA                                          | NA        | 18.75551317 | 0.317327182 | 1.140535981 | 0.278226366 | 0.780838596 | 0.998677884 | Not Sig |
| ENSG00000226920 | NA           | NA                                          | NA        | 10.0556151  | 0.317983747 | 0.912070998 | 0.348639248 | 0.727360158 | 0.998677884 | Not Sig |
| ENSG00000250490 | LINC02145    | long intergenic non-protein coding RNA 2145 | 401172    | 7.837273683 | 0.320209823 | 1.304482609 | 0.245468832 | 0.806093438 | 0.998677884 | Not Sig |
| ENSG00000233154 | LINC01762    | long intergenic non-protein coding RNA 1762 | 101929023 | 8.210442437 | 0.320337284 | 1.165934402 | 0.274747261 | 0.783510419 | 0.998677884 | Not Sig |
| ENSG00000266667 | NA           | NA                                          | NA        | 1.231252431 | 0.322226556 | 2.309113824 | 0.139545549 | 0.889019065 | 0.998677884 | Not Sig |
| ENSG00000234225 | NA           | NA                                          | NA        | 7.548603492 | 0.322838986 | 1.157060415 | 0.279016533 | 0.780232137 | 0.998677884 | Not Sig |
| ENSG00000272070 | NA           | NA                                          | NA        | 40.68180516 | 0.327292328 | 1.053342692 | 0.310717804 | 0.756015161 | 0.998677884 | Not Sig |
| ENSG00000251615 | NA           | NA                                          | NA        | 66.2362006  | 0.328656905 | 0.879434179 | 0.373714046 | 0.708617074 | 0.998677884 | Not Sig |
| ENSG00000254153 | NA           | NA                                          | NA        | 2.613320294 | 0.328816471 | 1.38922398  | 0.236690753 | 0.812896709 | 0.998677884 | Not Sig |
| ENSG00000225194 | LINC00092    | long intergenic non-protein coding RNA 92   | 100188953 | 42.5594687  | 0.329268924 | 1.542264636 | 0.213497033 | 0.830939303 | 0.998677884 | Not Sig |
| ENSG00000229989 | NA           | NA                                          | NA        | 181.9358517 | 0.329609471 | 0.799441348 | 0.412299754 | 0.680119729 | 0.998677884 | Not Sig |
| ENSG00000253161 | NA           | NA                                          | NA        | 4.630300077 | 0.331593889 | 1.167128477 | 0.284110871 | 0.776325416 | 0.998677884 | Not Sig |
| ENSG00000272523 | LINC01023    | long intergenic non-protein coding RNA 1023 | 100652853 | 14.25681463 | 0.333041851 | 1.244156765 | 0.267684797 | 0.788941953 | 0.998677884 | Not Sig |
| ENSG00000259925 | NA           | NA                                          | NA        | 161.9816794 | 0.333325714 | 0.759208321 | 0.43904381  | 0.660629792 | 0.998677884 | Not Sig |
| ENSG00000228889 | UBAC2-AS1    | UBAC2 antisense RNA 1                       | 100289373 | 26.24484037 | 0.335544968 | 0.775930897 | 0.432441819 | 0.66542033  | 0.998677884 | Not Sig |
| ENSG00000247765 | NA           | NA                                          | NA        | 6.216421356 | 0.336872453 | 1.204585686 | 0.279658356 | 0.779739631 | 0.998677884 | Not Sig |
| ENSG00000267940 | NA           | NA                                          | NA        | 8.477575225 | 0.339378657 | 0.941275082 | 0.360552047 | 0.718434342 | 0.998677884 | Not Sig |
| ENSG00000234493 | RHOXF1P1     | Rhox homeobox family member 1 pseudogene 1  | 101928941 | 1.742770263 | 0.345921852 | 1.7439492   | 0.198355463 | 0.84276696  | 0.998677884 | Not Sig |
| ENSG00000230345 | NA           | NA                                          | NA        | 1.218796714 | 0.34955039  | 2.310063039 | 0.151316386 | 0.879726144 | 0.998677884 | Not Sig |
| ENSG00000253799 | LINC01030    | long intergenic non-protein coding RNA 1030 | 101937451 | 1.161041851 | 0.351537554 | 2.057987469 | 0.170816178 | 0.864368308 | 0.998677884 | Not Sig |
| ENSG00000249069 | LINC01033    | long intergenic non-protein coding RNA 1033 | 104355136 | 2.701103988 | 0.352143012 | 1.407569976 | 0.250177979 | 0.802449714 | 0.998677884 | Not Sig |
| ENSG00000271958 | NA           | NA                                          | NA        | 1.221844284 | 0.35496197  | 2.309787885 | 0.153677302 | 0.877864183 | 0.998677884 | Not Sig |
| ENSG00000273139 | NA           | NA                                          | NA        | 8.511692229 | 0.355229719 | 1.148269861 | 0.309360832 | 0.757047062 | 0.998677884 | Not Sig |
| ENSG00000255455 | LOC103611081 | uncharacterized LOC103611081                | 103611081 | 199.5295827 | 0.364885309 | 0.622936912 | 0.58575002  | 0.558043515 | 0.998677884 | Not Sig |
| ENSG00000272444 | NA           | NA                                          | NA        | 7.732656968 | 0.369127352 | 1.247377702 | 0.295922679 | 0.767289131 | 0.998677884 | Not Sig |
| ENSG00000233396 | LINC01719    | long intergenic non-protein coding RNA 1719 | 101928979 | 55.00316085 | 0.371499876 | 0.88980993  | 0.417504754 | 0.676309248 | 0.998677884 | Not Sig |
| ENSG00000268945 | NA           | NA                                          | NA        | 0.88964693  | 0.378972007 | 2.953636267 | 0.128306932 | 0.89790608  | 0.998677884 | Not Sig |
| ENSG00000273181 | NA           | NA                                          | NA        | 1.148586134 | 0.379817526 | 1.877041333 | 0.202349048 | 0.839643858 | 0.998677884 | Not Sig |
| ENSG00000269949 | NA           | NA                                          | NA        | 5.649677589 | 0.380628077 | 1.255322979 | 0.303211272 | 0.76172886  | 0.998677884 | Not Sig |
| ENSG00000234362 | LINC01914    | long intergenic non-protein coding RNA 1914 | 101929723 | 12.89309942 | 0.380990764 | 1.048822424 | 0.363255738 | 0.716413854 | 0.998677884 | Not Sig |
| ENSG00000257496 | NA           | NA                                          | NA        | 2.814923277 | 0.381040108 | 1.96823832  | 0.193594497 | 0.846493407 | 0.998677884 | Not Sig |

|                 |              |                                                           |           |             |             |             |             |             |             |         |
|-----------------|--------------|-----------------------------------------------------------|-----------|-------------|-------------|-------------|-------------|-------------|-------------|---------|
| ENSG00000260123 | NA           | NA                                                        | NA        | 1.150109919 | 0.382229092 | 1.876975783 | 0.203640929 | 0.838634106 | 0.998677884 | Not Sig |
| ENSG00000273084 | NA           | NA                                                        | NA        | 61.18307804 | 0.383091119 | 0.858964075 | 0.445992099 | 0.655602953 | 0.998677884 | Not Sig |
| ENSG00000223855 | HRAT92       | heart tissue-associated transcript 92                     | 441307    | 50.10758279 | 0.385344664 | 0.987392185 | 0.390265054 | 0.696340562 | 0.998677884 | Not Sig |
| ENSG00000273258 | NA           | NA                                                        | NA        | 6.533251392 | 0.38648073  | 1.194911498 | 0.32343879  | 0.746362956 | 0.998677884 | Not Sig |
| ENSG00000259714 | NA           | NA                                                        | NA        | 1.396593407 | 0.386919194 | 1.956787194 | 0.197731872 | 0.843254852 | 0.998677884 | Not Sig |
| ENSG00000251164 | HULC         | hepatocellular carcinoma up-regulated long non-coding RNA | 728655    | 7.867256992 | 0.387423797 | 1.007160441 | 0.384669394 | 0.700482374 | 0.998677884 | Not Sig |
| ENSG00000254028 | NA           | NA                                                        | NA        | 5.232271564 | 0.388663165 | 1.459476377 | 0.266303156 | 0.790005743 | 0.998677884 | Not Sig |
| ENSG00000253190 | NA           | NA                                                        | NA        | 1.456105027 | 0.389716111 | 1.916543889 | 0.203343171 | 0.838866815 | 0.998677884 | Not Sig |
| ENSG00000241544 | LINC02029    | long intergenic non-protein coding RNA 2029               | 105374177 | 2.40045925  | 0.391983852 | 1.515858302 | 0.258588716 | 0.79595259  | 0.998677884 | Not Sig |
| ENSG00000266651 | NA           | NA                                                        | NA        | 1.515383676 | 0.39470984  | 1.917237299 | 0.205874275 | 0.83688912  | 0.998677884 | Not Sig |
| ENSG00000225470 | JPX          | JPX transcript, XIST activator (non-protein coding)       | 554203    | 489.5216949 | 0.399401865 | 0.783321219 | 0.509882606 | 0.610133708 | 0.998677884 | Not Sig |
| ENSG00000228265 | RALY-AS1     | RALY antisense RNA 1                                      | 101926888 | 32.76107252 | 0.400435054 | 0.773304041 | 0.517823563 | 0.604581376 | 0.998677884 | Not Sig |
| ENSG00000248371 | LINC02056    | long intergenic non-protein coding RNA 2056               | 102477328 | 2.153703538 | 0.400792387 | 2.015314044 | 0.198873415 | 0.842361766 | 0.998677884 | Not Sig |
| ENSG00000261117 | NA           | NA                                                        | NA        | 4.366685724 | 0.401255852 | 1.368825963 | 0.293138692 | 0.769416144 | 0.998677884 | Not Sig |
| ENSG00000242791 | NA           | NA                                                        | NA        | 6.546125751 | 0.40176484  | 1.17122207  | 0.343030455 | 0.731575549 | 0.998677884 | Not Sig |
| ENSG00000267198 | NA           | NA                                                        | NA        | 7.397820236 | 0.40307894  | 1.134413959 | 0.355319094 | 0.722350553 | 0.998677884 | Not Sig |
| ENSG00000227373 | LOC102724601 | uncharacterized LOC102724601                              | 102724601 | 2.256990519 | 0.413883084 | 1.527120636 | 0.271021866 | 0.786374215 | 0.998677884 | Not Sig |
| ENSG00000203279 | NA           | NA                                                        | NA        | 4.562800301 | 0.415756143 | 1.799769335 | 0.231005238 | 0.817310733 | 0.998677884 | Not Sig |
| ENSG00000250548 | LOC101927780 | uncharacterized LOC101927780                              | 101927780 | 15.08034563 | 0.415816678 | 1.126684413 | 0.369062244 | 0.71208133  | 0.998677884 | Not Sig |
| ENSG00000225285 | NA           | NA                                                        | NA        | 114.0304682 | 0.421925845 | 0.841084428 | 0.501645056 | 0.61591722  | 0.998677884 | Not Sig |
| ENSG00000253214 | NA           | NA                                                        | NA        | 4.054981654 | 0.428537683 | 1.242400293 | 0.344927223 | 0.730149084 | 0.998677884 | Not Sig |
| ENSG00000229495 | NA           | NA                                                        | NA        | 2.243011017 | 0.428843924 | 1.746791785 | 0.245503745 | 0.806066409 | 0.998677884 | Not Sig |
| ENSG00000204802 | NA           | NA                                                        | NA        | 11.29508143 | 0.433576592 | 1.146161013 | 0.378285936 | 0.705218192 | 0.998677884 | Not Sig |
| ENSG00000261220 | NA           | NA                                                        | NA        | 10.22997986 | 0.434344165 | 0.882970603 | 0.491912374 | 0.62278129  | 0.998677884 | Not Sig |
| ENSG00000261705 | NA           | NA                                                        | NA        | 39.24495799 | 0.434583321 | 0.723478258 | 0.600686083 | 0.54804909  | 0.998677884 | Not Sig |
| ENSG00000258102 | MAP1LC3B2    | microtubule associated protein 1 light chain 3 beta 2     | 643246    | 1.428146023 | 0.439153081 | 2.201659797 | 0.19946455  | 0.841899371 | 0.998677884 | Not Sig |
| ENSG00000237595 | NA           | NA                                                        | NA        | 2.293114491 | 0.442386098 | 1.450680722 | 0.304950697 | 0.760403703 | 0.998677884 | Not Sig |
| ENSG00000188971 | NA           | NA                                                        | NA        | 1181.725558 | 0.442850958 | 0.607072516 | 0.729486094 | 0.465704371 | 0.998677884 | Not Sig |
| ENSG00000237359 | NA           | NA                                                        | NA        | 19.76972515 | 0.44308751  | 0.924844471 | 0.479094079 | 0.631871702 | 0.998677884 | Not Sig |
| ENSG00000260306 | NA           | NA                                                        | NA        | 9.86641556  | 0.447688642 | 1.011317348 | 0.442678693 | 0.657998156 | 0.998677884 | Not Sig |
| ENSG00000227531 | NA           | NA                                                        | NA        | 3.83981781  | 0.44996937  | 1.527793427 | 0.294522389 | 0.768358758 | 0.998677884 | Not Sig |
| ENSG00000272327 | NA           | NA                                                        | NA        | 18.0081793  | 0.450267958 | 1.042220461 | 0.432027555 | 0.665721386 | 0.998677884 | Not Sig |
| ENSG00000266709 | MGC12916     | uncharacterized protein MGC12916                          | 84815     | 32.40218182 | 0.452332686 | 0.930721798 | 0.486002034 | 0.626965724 | 0.998677884 | Not Sig |
| ENSG00000272666 | LOC105373098 | uncharacterized LOC105373098                              | 105373098 | 11.67325874 | 0.453074755 | 1.083309104 | 0.418232204 | 0.675777352 | 0.998677884 | Not Sig |
| ENSG00000272672 | NA           | NA                                                        | NA        | 5.433937406 | 0.454221054 | 1.080149451 | 0.420516858 | 0.674107917 | 0.998677884 | Not Sig |

|                 |              |                                             |           |             |             |             |             |             |             |         |
|-----------------|--------------|---------------------------------------------|-----------|-------------|-------------|-------------|-------------|-------------|-------------|---------|
| ENSG00000270091 | NA           | NA                                          | NA        | 13.75011889 | 0.458397621 | 0.824519246 | 0.555957454 | 0.57823994  | 0.998677884 | Not Sig |
| ENSG00000273472 | NA           | NA                                          | NA        | 16.84489751 | 0.458674351 | 0.918560944 | 0.499340141 | 0.617539781 | 0.998677884 | Not Sig |
| ENSG00000258499 | LINC02287    | long intergenic non-protein coding RNA 2287 | 101929002 | 1.723608823 | 0.461593185 | 1.875048675 | 0.246176641 | 0.805545497 | 0.998677884 | Not Sig |
| ENSG00000214837 | LINC01347    | long intergenic non-protein coding RNA 1347 | 731275    | 32.33593845 | 0.464676404 | 0.889319228 | 0.522507991 | 0.601316684 | 0.998677884 | Not Sig |
| ENSG00000245694 | LOC101927480 | uncharacterized LOC101927480                | 101927480 | 316.4463699 | 0.465719179 | 0.671129358 | 0.693933551 | 0.487723882 | 0.998677884 | Not Sig |
| ENSG00000254689 | NA           | NA                                          | NA        | 0.803933062 | 0.466247279 | 2.579235039 | 0.180769597 | 0.856548428 | 0.998677884 | Not Sig |
| ENSG00000269962 | NA           | NA                                          | NA        | 0.803933062 | 0.466247279 | 2.579235039 | 0.180769597 | 0.856548428 | 0.998677884 | Not Sig |
| ENSG00000243012 | NA           | NA                                          | NA        | 2.324667108 | 0.468274068 | 1.471733542 | 0.318178566 | 0.75034949  | 0.998677884 | Not Sig |
| ENSG00000251377 | NA           | NA                                          | NA        | 2.208924409 | 0.472490844 | 1.617516545 | 0.292108817 | 0.770203426 | 0.998677884 | Not Sig |
| ENSG00000227240 | NA           | NA                                          | NA        | 2.630662216 | 0.475705464 | 1.647956986 | 0.288663763 | 0.772838696 | 0.998677884 | Not Sig |
| ENSG00000186369 | NA           | NA                                          | NA        | 1.842126868 | 0.476619436 | 2.052214052 | 0.232246454 | 0.816346599 | 0.998677884 | Not Sig |
| ENSG00000251027 | LINC01950    | long intergenic non-protein coding RNA 1950 | 102467213 | 1.097472453 | 0.478336593 | 2.064710124 | 0.231672518 | 0.816792378 | 0.998677884 | Not Sig |
| ENSG00000273424 | NA           | NA                                          | NA        | 8.359579238 | 0.47999414  | 1.029329342 | 0.466317359 | 0.640988355 | 0.998677884 | Not Sig |
| ENSG00000259747 | NA           | NA                                          | NA        | 1.213215152 | 0.481454637 | 2.094250153 | 0.229893567 | 0.818174475 | 0.998677884 | Not Sig |
| ENSG00000245060 | LINC00847    | long intergenic non-protein coding RNA 847  | 729678    | 284.7029747 | 0.488647182 | 0.688065551 | 0.710175333 | 0.477595415 | 0.998677884 | Not Sig |
| ENSG00000272707 | NA           | NA                                          | NA        | 7.425796576 | 0.490452755 | 1.012762154 | 0.484272396 | 0.628192564 | 0.998677884 | Not Sig |
| ENSG00000255670 | NA           | NA                                          | NA        | 5.855955818 | 0.490556524 | 1.241388332 | 0.395167661 | 0.692719157 | 0.998677884 | Not Sig |
| ENSG00000249279 | LINC02057    | long intergenic non-protein coding RNA 2057 | 105378992 | 10.68629435 | 0.494087406 | 1.084084104 | 0.455764829 | 0.648559098 | 0.998677884 | Not Sig |
| ENSG00000263050 | NA           | NA                                          | NA        | 13.7627296  | 0.494329164 | 0.873076145 | 0.566192499 | 0.571262929 | 0.998677884 | Not Sig |
| ENSG00000272667 | NA           | NA                                          | NA        | 59.79137194 | 0.496942556 | 1.057593299 | 0.469880583 | 0.638440338 | 0.998677884 | Not Sig |
| ENSG00000231054 | NA           | NA                                          | NA        | 1.891997369 | 0.497137734 | 1.818851567 | 0.273325071 | 0.784603345 | 0.998677884 | Not Sig |
| ENSG00000268164 | NA           | NA                                          | NA        | 9.677522065 | 0.499224748 | 1.392503123 | 0.358508889 | 0.719962517 | 0.998677884 | Not Sig |
| ENSG00000235641 | NA           | NA                                          | NA        | 6.098195859 | 0.499915562 | 1.24897013  | 0.400262224 | 0.688963388 | 0.998677884 | Not Sig |
| ENSG00000256982 | NA           | NA                                          | NA        | 1.581663878 | 0.501510972 | 1.886315016 | 0.265868091 | 0.790340801 | 0.998677884 | Not Sig |
| ENSG00000267311 | NA           | NA                                          | NA        | 26.85054999 | 0.501788187 | 0.974675957 | 0.514825654 | 0.606674857 | 0.998677884 | Not Sig |
| ENSG00000260464 | NA           | NA                                          | NA        | 13.65540666 | 0.503262122 | 0.846073262 | 0.594820974 | 0.551963146 | 0.998677884 | Not Sig |
| ENSG00000261005 | NA           | NA                                          | NA        | 55.94315527 | 0.50419678  | 0.826800434 | 0.609816782 | 0.541983184 | 0.998677884 | Not Sig |
| ENSG00000224635 | NA           | NA                                          | NA        | 9.186403322 | 0.50730935  | 1.115356578 | 0.454840506 | 0.649223987 | 0.998677884 | Not Sig |
| ENSG00000231977 | NA           | NA                                          | NA        | 0.849465181 | 0.509859884 | 2.278925901 | 0.223728153 | 0.822968838 | 0.998677884 | Not Sig |
| ENSG00000251221 | LINC01337    | long intergenic non-protein coding RNA 1337 | 103689917 | 0.849465181 | 0.509859884 | 2.278925901 | 0.223728153 | 0.822968838 | 0.998677884 | Not Sig |
| ENSG00000228590 | NA           | NA                                          | NA        | 1.141480787 | 0.511900824 | 2.319187896 | 0.22072417  | 0.82530721  | 0.998677884 | Not Sig |
| ENSG00000236481 | NA           | NA                                          | NA        | 3.254031621 | 0.513021974 | 1.456028576 | 0.352343342 | 0.724580787 | 0.998677884 | Not Sig |
| ENSG00000228421 | NA           | NA                                          | NA        | 6.106255254 | 0.520901659 | 1.177093353 | 0.442532155 | 0.658104167 | 0.998677884 | Not Sig |
| ENSG00000270115 | NA           | NA                                          | NA        | 34.46015048 | 0.524477582 | 0.878587637 | 0.596955341 | 0.550537198 | 0.998677884 | Not Sig |
| ENSG00000232453 | LOC105378753 | uncharacterized LOC105378753                | 105378753 | 18.01855714 | 0.52472458  | 0.795212627 | 0.659854437 | 0.509347246 | 0.998677884 | Not Sig |

|                 |              |                                              |           |             |             |             |             |             |             |         |
|-----------------|--------------|----------------------------------------------|-----------|-------------|-------------|-------------|-------------|-------------|-------------|---------|
| ENSG00000251611 | NA           | NA                                           | NA        | 27.84877987 | 0.526224141 | 0.75927939  | 0.693057322 | 0.488273579 | 0.998677884 | Not Sig |
| ENSG00000271888 | NA           | NA                                           | NA        | 7.698007508 | 0.526231881 | 1.145850621 | 0.459249986 | 0.646054659 | 0.998677884 | Not Sig |
| ENSG00000231966 | NA           | NA                                           | NA        | 5.220193554 | 0.527315342 | 1.115348967 | 0.472780589 | 0.636369724 | 0.998677884 | Not Sig |
| ENSG00000226644 | NA           | NA                                           | NA        | 5.39554281  | 0.531639143 | 1.496807655 | 0.355182004 | 0.722453246 | 0.998677884 | Not Sig |
| ENSG00000236537 | NA           | NA                                           | NA        | 349.544462  | 0.53556806  | 0.613667304 | 0.872733575 | 0.382808313 | 0.998677884 | Not Sig |
| ENSG00000271784 | NA           | NA                                           | NA        | 0.835485679 | 0.538286119 | 2.567540398 | 0.209650496 | 0.833940465 | 0.998677884 | Not Sig |
| ENSG00000249346 | LINC01016    | long intergenic non-protein coding RNA 1016  | 100507584 | 0.779254601 | 0.542896611 | 3.013299767 | 0.180166812 | 0.857021613 | 0.998677884 | Not Sig |
| ENSG00000267452 | NA           | NA                                           | NA        | 8.132824031 | 0.545661935 | 1.26917655  | 0.42993383  | 0.667243776 | 0.998677884 | Not Sig |
| ENSG00000267712 | LINC01539    | long intergenic non-protein coding RNA 1539  | 100505474 | 1.13207264  | 0.546400165 | 2.320331223 | 0.235483693 | 0.813833334 | 0.998677884 | Not Sig |
| ENSG00000223561 | LOC646588    | uncharacterized LOC646588                    | 646588    | 30.37602429 | 0.549768465 | 1.114059375 | 0.493482194 | 0.621671918 | 0.998677884 | Not Sig |
| ENSG00000215374 | FAM66B       | family with sequence similarity 66 member B  | 100128890 | 55.18125583 | 0.555267782 | 0.789579258 | 0.703245147 | 0.481902988 | 0.998677884 | Not Sig |
| ENSG00000254606 | NA           | NA                                           | NA        | 9.242483304 | 0.556666485 | 1.064412656 | 0.522979957 | 0.600988201 | 0.998677884 | Not Sig |
| ENSG00000178947 | SMIM10L2A    | small integral membrane protein 10 like 2A   | 399668    | 224.926048  | 0.557261461 | 0.91986866  | 0.605805464 | 0.544643941 | 0.998677884 | Not Sig |
| ENSG00000270265 | NA           | NA                                           | NA        | 12.42870868 | 0.558619439 | 1.005493116 | 0.555567642 | 0.578506457 | 0.998677884 | Not Sig |
| ENSG00000242258 | LINC00996    | long intergenic non-protein coding RNA 996   | 285972    | 53.77634405 | 0.5632522   | 0.926310547 | 0.608059793 | 0.543147817 | 0.998677884 | Not Sig |
| ENSG00000256373 | NA           | NA                                           | NA        | 6.12440706  | 0.563598498 | 1.349601747 | 0.417603563 | 0.676236991 | 0.998677884 | Not Sig |
| ENSG00000237513 | NA           | NA                                           | NA        | 73.66011697 | 0.568251806 | 1.050770139 | 0.540795541 | 0.588648517 | 0.998677884 | Not Sig |
| ENSG00000234139 | NA           | NA                                           | NA        | 5.018126406 | 0.57413566  | 1.204495227 | 0.476660801 | 0.63360368  | 0.998677884 | Not Sig |
| ENSG00000230021 | LOC101928626 | uncharacterized LOC101928626                 | 101928626 | 1.644769111 | 0.574966571 | 1.888254389 | 0.304496351 | 0.760749773 | 0.998677884 | Not Sig |
| ENSG00000225913 | NA           | NA                                           | NA        | 0.765275099 | 0.580623509 | 2.597145575 | 0.223562173 | 0.823098    | 0.998677884 | Not Sig |
| ENSG00000249776 | NA           | NA                                           | NA        | 5.468202607 | 0.587037007 | 1.407371252 | 0.417115957 | 0.676593594 | 0.998677884 | Not Sig |
| ENSG00000228623 | ZNF883       | zinc finger protein 883                      | 169834    | 22.19707565 | 0.587900441 | 0.845710184 | 0.695155921 | 0.486957593 | 0.998677884 | Not Sig |
| ENSG00000259905 | PWRN1        | Prader-Willi region non-protein coding RNA 1 | 791114    | 7.526374443 | 0.589031975 | 1.496533591 | 0.393597564 | 0.69387818  | 0.998677884 | Not Sig |
| ENSG00000224626 | NA           | NA                                           | NA        | 6.276892694 | 0.592787685 | 1.273853774 | 0.465349867 | 0.641680929 | 0.998677884 | Not Sig |
| ENSG00000273348 | NA           | NA                                           | NA        | 1.576082316 | 0.598863202 | 1.868409255 | 0.320520357 | 0.748573901 | 0.998677884 | Not Sig |
| ENSG00000233903 | NA           | NA                                           | NA        | 16.66088108 | 0.601511035 | 1.079780448 | 0.557067908 | 0.577481033 | 0.998677884 | Not Sig |
| ENSG00000271185 | NA           | NA                                           | NA        | 1.579129886 | 0.603558328 | 1.9264319   | 0.313303744 | 0.754049906 | 0.998677884 | Not Sig |
| ENSG00000225518 | NA           | NA                                           | NA        | 22.68749391 | 0.603810545 | 1.15722116  | 0.521776275 | 0.601826111 | 0.998677884 | Not Sig |
| ENSG00000224843 | LINC00240    | long intergenic non-protein coding RNA 240   | 100133205 | 32.96744968 | 0.60683236  | 0.968309914 | 0.626692293 | 0.530860957 | 0.998677884 | Not Sig |
| ENSG00000225708 | NA           | NA                                           | NA        | 1.519618266 | 0.608879363 | 2.147001976 | 0.283595157 | 0.776720649 | 0.998677884 | Not Sig |
| ENSG00000230978 | LINC00160    | long intergenic non-protein coding RNA 160   | 54064     | 2.210383653 | 0.611623318 | 1.672059711 | 0.365790357 | 0.714521516 | 0.998677884 | Not Sig |
| ENSG00000239774 | NA           | NA                                           | NA        | 0.809283432 | 0.617023958 | 2.995206387 | 0.20600382  | 0.836787927 | 0.998677884 | Not Sig |
| ENSG00000229178 | NA           | NA                                           | NA        | 5.689425666 | 0.617537071 | 1.302083039 | 0.474268578 | 0.635308396 | 0.998677884 | Not Sig |
| ENSG00000266976 | LOC102724908 | uncharacterized LOC102724908                 | 102724908 | 1.565150384 | 0.620290702 | 1.826229639 | 0.339656464 | 0.734115251 | 0.998677884 | Not Sig |
| ENSG00000239828 | NA           | NA                                           | NA        | 8.830640387 | 0.622830217 | 1.267091699 | 0.491543128 | 0.623042356 | 0.998677884 | Not Sig |

|                 |              |                                                                   |           |             |             |             |             |             |             |         |
|-----------------|--------------|-------------------------------------------------------------------|-----------|-------------|-------------|-------------|-------------|-------------|-------------|---------|
| ENSG00000260509 | NA           | NA                                                                | NA        | 0.812331002 | 0.624652492 | 2.993471316 | 0.208671614 | 0.834704601 | 0.998677884 | Not Sig |
| ENSG00000267272 | LINC01140    | long intergenic non-protein coding RNA 1140                       | 339524    | 20.25889748 | 0.62844495  | 1.048811895 | 0.599201347 | 0.549038625 | 0.998677884 | Not Sig |
| ENSG00000260750 | LOC101928737 | uncharacterized LOC101928737                                      | 101928737 | 7.929671499 | 0.628619905 | 1.036697549 | 0.606367697 | 0.544270614 | 0.998677884 | Not Sig |
| ENSG00000272716 | NA           | NA                                                                | NA        | 3.292866398 | 0.630221231 | 1.364561224 | 0.461848996 | 0.644189612 | 0.998677884 | Not Sig |
| ENSG00000240875 | LINC00886    | long intergenic non-protein coding RNA 886                        | 730091    | 61.29043143 | 0.634442364 | 0.647725518 | 0.979492618 | 0.327336634 | 0.998677884 | Not Sig |
| ENSG00000266402 | SNHG25       | small nucleolar RNA host gene 25                                  | 105376843 | 29.24013663 | 0.636528835 | 0.891131696 | 0.714292666 | 0.475046227 | 0.998677884 | Not Sig |
| ENSG00000251218 | LOC101927845 | uncharacterized LOC101927845                                      | 101927845 | 2.780297327 | 0.636598298 | 1.715298845 | 0.371129672 | 0.710540951 | 0.998677884 | Not Sig |
| ENSG00000269916 | NA           | NA                                                                | NA        | 1.963500542 | 0.637569745 | 2.02731759  | 0.314489328 | 0.753149421 | 0.998677884 | Not Sig |
| ENSG00000229388 | LINC01715    | long intergenic non-protein coding RNA 1715                       | 105378616 | 9.256896198 | 0.638182927 | 1.128595477 | 0.565466494 | 0.571756508 | 0.998677884 | Not Sig |
| ENSG00000264520 | NA           | NA                                                                | NA        | 2.123146001 | 0.639382505 | 2.042998885 | 0.312962728 | 0.754308979 | 0.998677884 | Not Sig |
| ENSG00000218510 | LINC00339    | long intergenic non-protein coding RNA 339                        | 29092     | 194.7805043 | 0.639735107 | 0.698844595 | 0.915418266 | 0.359972093 | 0.998677884 | Not Sig |
| ENSG00000205181 | LINC00654    | long intergenic non-protein coding RNA 654                        | 149837    | 342.3521654 | 0.643692661 | 0.663260615 | 0.970497337 | 0.331798652 | 0.998677884 | Not Sig |
| ENSG00000251388 | NA           | NA                                                                | NA        | 2.126193571 | 0.645218307 | 1.681109874 | 0.383804959 | 0.701123012 | 0.998677884 | Not Sig |
| ENSG00000267499 | NA           | NA                                                                | NA        | 1.273134778 | 0.647151357 | 2.062106704 | 0.313830199 | 0.753650007 | 0.998677884 | Not Sig |
| ENSG00000227403 | LINC01806    | long intergenic non-protein coding RNA 1806                       | 100996579 | 81.87593525 | 0.649349894 | 0.76808175  | 0.845417684 | 0.397877675 | 0.998677884 | Not Sig |
| ENSG00000263280 | NA           | NA                                                                | NA        | 1.371850404 | 0.650583441 | 2.249472573 | 0.289215992 | 0.772416095 | 0.998677884 | Not Sig |
| ENSG00000233261 | FAM238A      | family with sequence similarity 238 member A (non-protein coding) | 645528    | 4.024287861 | 0.663681092 | 1.862105554 | 0.356414324 | 0.721530304 | 0.998677884 | Not Sig |
| ENSG00000254837 | NA           | NA                                                                | NA        | 99.51359259 | 0.666578544 | 0.648989654 | 1.027101958 | 0.304372457 | 0.998677884 | Not Sig |
| ENSG00000270012 | NA           | NA                                                                | NA        | 68.02783445 | 0.669234501 | 0.712401643 | 0.939406174 | 0.347522245 | 0.998677884 | Not Sig |
| ENSG00000224429 | NA           | NA                                                                | NA        | 14.35114196 | 0.670435515 | 0.981306309 | 0.683207179 | 0.494475937 | 0.998677884 | Not Sig |
| ENSG00000205663 | NA           | NA                                                                | NA        | 118.5408549 | 0.670563189 | 1.491654014 | 0.449543381 | 0.653039721 | 0.998677884 | Not Sig |
| ENSG00000260219 | LOC101928707 | uncharacterized LOC101928707                                      | 101928707 | 28.92426364 | 0.670643307 | 0.91470586  | 0.733179196 | 0.463449142 | 0.998677884 | Not Sig |
| ENSG00000260101 | LOC101927402 | uncharacterized LOC101927402                                      | 101927402 | 9.935988676 | 0.676792153 | 1.209771946 | 0.559437798 | 0.575862972 | 0.998677884 | Not Sig |
| ENSG00000226822 | NA           | NA                                                                | NA        | 9.421215777 | 0.67853339  | 1.353201942 | 0.501428035 | 0.616069914 | 0.998677884 | Not Sig |
| ENSG00000253522 | MIR3142HG    | MIR3142 host gene                                                 | 107075116 | 47.95979486 | 0.6787979   | 0.974231996 | 0.696751803 | 0.485958133 | 0.998677884 | Not Sig |
| ENSG00000272511 | NA           | NA                                                                | NA        | 3.705604064 | 0.681164769 | 1.645076799 | 0.414062595 | 0.678828265 | 0.998677884 | Not Sig |
| ENSG00000234350 | NA           | NA                                                                | NA        | 49.80589347 | 0.682104213 | 1.083551385 | 0.629507952 | 0.529016565 | 0.998677884 | Not Sig |
| ENSG00000269923 | NA           | NA                                                                | NA        | 8.770589424 | 0.685501265 | 0.99088507  | 0.691807038 | 0.489058516 | 0.998677884 | Not Sig |
| ENSG00000240618 | NA           | NA                                                                | NA        | 18.516327   | 0.691994591 | 0.957947296 | 0.7223723   | 0.470065613 | 0.998677884 | Not Sig |
| ENSG00000271751 | NA           | NA                                                                | NA        | 5.07999024  | 0.692390535 | 1.11580454  | 0.620530309 | 0.534908706 | 0.998677884 | Not Sig |
| ENSG00000228561 | NA           | NA                                                                | NA        | 52.79774615 | 0.692814558 | 1.145374544 | 0.604880353 | 0.545258499 | 0.998677884 | Not Sig |
| ENSG00000272235 | NA           | NA                                                                | NA        | 4.079403159 | 0.693564321 | 1.317772023 | 0.526315864 | 0.598668763 | 0.998677884 | Not Sig |
| ENSG00000256576 | LINC02361    | long intergenic non-protein coding RNA 2361                       | 100996246 | 27.56684411 | 0.694862989 | 1.057183859 | 0.657277334 | 0.511002608 | 0.998677884 | Not Sig |
| ENSG00000272564 | NA           | NA                                                                | NA        | 15.69840697 | 0.698618955 | 0.925883956 | 0.754542673 | 0.450523432 | 0.998677884 | Not Sig |
| ENSG00000263350 | NA           | NA                                                                | NA        | 5.528105326 | 0.700361005 | 1.372879637 | 0.510140136 | 0.609953288 | 0.998677884 | Not Sig |



|                 |              |                                                     |           |             |             |             |             |             |             |         |
|-----------------|--------------|-----------------------------------------------------|-----------|-------------|-------------|-------------|-------------|-------------|-------------|---------|
| ENSG00000263884 | NA           | NA                                                  | NA        | 13.87273551 | 0.702388882 | 1.041537277 | 0.674377094 | 0.500071602 | 0.998677884 | Not Sig |
| ENSG00000263105 | NA           | NA                                                  | NA        | 7.533935142 | 0.705932256 | 1.407835924 | 0.501430774 | 0.616067987 | 0.998677884 | Not Sig |
| ENSG00000254140 | NA           | NA                                                  | NA        | 0.784371998 | 0.707752216 | 3.011451528 | 0.235020292 | 0.814192984 | 0.998677884 | Not Sig |
| ENSG00000233060 | NA           | NA                                                  | NA        | 2.017325027 | 0.712636628 | 1.712077675 | 0.416240827 | 0.677233787 | 0.998677884 | Not Sig |
| ENSG00000204241 | LOC100128239 | uncharacterized LOC100128239                        | 100128239 | 10.9405495  | 0.713289517 | 1.028297874 | 0.693660403 | 0.487895204 | 0.998677884 | Not Sig |
| ENSG00000257859 | CASC18       | cancer susceptibility 18 (non-protein coding)       | 101929110 | 0.787419568 | 0.715359798 | 3.009499491 | 0.237700588 | 0.812113328 | 0.998677884 | Not Sig |
| ENSG00000254533 | NA           | NA                                                  | NA        | 7.080383131 | 0.716094582 | 1.230177253 | 0.582106831 | 0.560494725 | 0.998677884 | Not Sig |
| ENSG00000249159 | NA           | NA                                                  | NA        | 1.234476815 | 0.724245824 | 2.320804306 | 0.312066736 | 0.754989806 | 0.998677884 | Not Sig |
| ENSG00000234035 | NA           | NA                                                  | NA        | 18.37675735 | 0.724305026 | 1.604756486 | 0.45134887  | 0.651738128 | 0.998677884 | Not Sig |
| ENSG00000230906 | NA           | NA                                                  | NA        | 0.829904117 | 0.725755177 | 2.572367994 | 0.282135051 | 0.777839957 | 0.998677884 | Not Sig |
| ENSG00000232606 | NA           | NA                                                  | NA        | 0.831427902 | 0.729217341 | 2.57184866  | 0.283538201 | 0.776764303 | 0.998677884 | Not Sig |
| ENSG00000237477 | NA           | NA                                                  | NA        | 0.831427902 | 0.729217341 | 2.57184866  | 0.283538201 | 0.776764303 | 0.998677884 | Not Sig |
| ENSG00000251152 | NA           | NA                                                  | NA        | 10.32584221 | 0.738261754 | 1.363404032 | 0.541484209 | 0.588173879 | 0.998677884 | Not Sig |
| ENSG00000230773 | NA           | NA                                                  | NA        | 2.050401429 | 0.739919621 | 1.653152481 | 0.447580988 | 0.654455626 | 0.998677884 | Not Sig |
| ENSG00000272556 | NA           | NA                                                  | NA        | 22.21196971 | 0.748052734 | 1.055293357 | 0.708857617 | 0.478412839 | 0.998677884 | Not Sig |
| ENSG00000232504 | NA           | NA                                                  | NA        | 53.86841019 | 0.749071933 | 0.875671727 | 0.855425509 | 0.392315627 | 0.998677884 | Not Sig |
| ENSG00000253115 | NA           | NA                                                  | NA        | 1.262981861 | 0.760520173 | 2.007266828 | 0.378883446 | 0.704774418 | 0.998677884 | Not Sig |
| ENSG00000259372 | NA           | NA                                                  | NA        | 3.35715865  | 0.76072358  | 1.423761091 | 0.53430564  | 0.593130091 | 0.998677884 | Not Sig |
| ENSG00000242268 | LINC02082    | long intergenic non-protein coding RNA 2082         | 100507661 | 6.922982532 | 0.76914337  | 1.460886072 | 0.526491001 | 0.598547103 | 0.998677884 | Not Sig |
| ENSG00000268751 | NA           | NA                                                  | NA        | 8.266972904 | 0.769444215 | 1.173971956 | 0.655419587 | 0.512197644 | 0.998677884 | Not Sig |
| ENSG00000258807 | NA           | NA                                                  | NA        | 1.817897444 | 0.772312138 | 2.140067976 | 0.360882059 | 0.718187616 | 0.998677884 | Not Sig |
| ENSG00000267939 | NA           | NA                                                  | NA        | 5.325398979 | 0.772336331 | 1.107088874 | 0.697628121 | 0.48540979  | 0.998677884 | Not Sig |
| ENSG00000261504 | LINC01686    | long intergenic non-protein coding RNA 1686         | 284648    | 8.921622701 | 0.772917852 | 1.111563241 | 0.69534312  | 0.486840297 | 0.998677884 | Not Sig |
| ENSG00000273319 | NA           | NA                                                  | NA        | 8.31048943  | 0.777092302 | 1.601618173 | 0.485191986 | 0.627540166 | 0.998677884 | Not Sig |
| ENSG00000272764 | NA           | NA                                                  | NA        | 9.493867789 | 0.784083167 | 1.036166177 | 0.756715654 | 0.449220234 | 0.998677884 | Not Sig |
| ENSG00000224610 | NA           | NA                                                  | NA        | 0.8174484   | 0.786377812 | 2.991760617 | 0.262847839 | 0.792667862 | 0.998677884 | Not Sig |
| ENSG00000266950 | NA           | NA                                                  | NA        | 1.252049929 | 0.78745193  | 1.967180509 | 0.400294699 | 0.688939472 | 0.998677884 | Not Sig |
| ENSG00000224532 | NA           | NA                                                  | NA        | 2.723129538 | 0.790338698 | 1.462945935 | 0.540237803 | 0.589033045 | 0.998677884 | Not Sig |
| ENSG00000271334 | LINC02104    | long intergenic non-protein coding RNA 2104         | 101926940 | 3.439175113 | 0.790684474 | 1.690982511 | 0.467588795 | 0.64007868  | 0.998677884 | Not Sig |
| ENSG00000249335 | NA           | NA                                                  | NA        | 2.952680889 | 0.792727561 | 1.603726413 | 0.494303489 | 0.621091862 | 0.998677884 | Not Sig |
| ENSG00000228536 | NA           | NA                                                  | NA        | 0.452174643 | 0.79342899  | 4.04597144  | 0.196103458 | 0.84452919  | 0.998677884 | Not Sig |
| ENSG00000236921 | NA           | NA                                                  | NA        | 0.452174643 | 0.79342899  | 4.04597144  | 0.196103458 | 0.84452919  | 0.998677884 | Not Sig |
| ENSG00000244247 | LINC01995    | long intergenic non-protein coding RNA 1995         | 105374244 | 0.452174643 | 0.79342899  | 4.04597144  | 0.196103458 | 0.84452919  | 0.998677884 | Not Sig |
| ENSG00000250366 | TUNAR        | TCL1 upstream neural differentiation-associated RNA | 100507043 | 0.452174643 | 0.79342899  | 4.04597144  | 0.196103458 | 0.84452919  | 0.998677884 | Not Sig |
| ENSG00000251458 | NA           | NA                                                  | NA        | 0.452174643 | 0.79342899  | 4.04597144  | 0.196103458 | 0.84452919  | 0.998677884 | Not Sig |

|                 |              |                                             |           |             |             |             |             |             |             |         |
|-----------------|--------------|---------------------------------------------|-----------|-------------|-------------|-------------|-------------|-------------|-------------|---------|
| ENSG00000254084 | NA           | NA                                          | NA        | 0.452174643 | 0.79342899  | 4.04597144  | 0.196103458 | 0.84452919  | 0.998677884 | Not Sig |
| ENSG00000254223 | NA           | NA                                          | NA        | 0.503288324 | 0.79342899  | 4.04597144  | 0.196103458 | 0.84452919  | 0.998677884 | Not Sig |
| ENSG00000258502 | NA           | NA                                          | NA        | 0.503288324 | 0.79342899  | 4.04597144  | 0.196103458 | 0.84452919  | 0.998677884 | Not Sig |
| ENSG00000260569 | NA           | NA                                          | NA        | 0.46463036  | 0.79342899  | 4.04597144  | 0.196103458 | 0.84452919  | 0.998677884 | Not Sig |
| ENSG00000244620 | NA           | NA                                          | NA        | 8.784972441 | 0.795126722 | 1.166377398 | 0.681706216 | 0.495424736 | 0.998677884 | Not Sig |
| ENSG00000272138 | LINC01607    | long intergenic non-protein coding RNA 1607 | 101927067 | 17.94659857 | 0.796076986 | 0.922265072 | 0.863175903 | 0.38804076  | 0.998677884 | Not Sig |
| ENSG00000263033 | NA           | NA                                          | NA        | 3.487521829 | 0.79666874  | 1.303445772 | 0.611202059 | 0.54106582  | 0.998677884 | Not Sig |
| ENSG00000271234 | NA           | NA                                          | NA        | 2.2354719   | 0.799158303 | 1.544266193 | 0.517500355 | 0.604806921 | 0.998677884 | Not Sig |
| ENSG00000260274 | NA           | NA                                          | NA        | 41.55607113 | 0.799578788 | 0.81717494  | 0.978467093 | 0.327843359 | 0.998677884 | Not Sig |
| ENSG00000270081 | NA           | NA                                          | NA        | 193.1027781 | 0.799703481 | 0.649236993 | 1.231758956 | 0.218039139 | 0.998677884 | Not Sig |
| ENSG00000228784 | LINC00954    | long intergenic non-protein coding RNA 954  | 400946    | 38.71198162 | 0.803623325 | 0.818180364 | 0.982208031 | 0.325997372 | 0.998677884 | Not Sig |
| ENSG00000234597 | NA           | NA                                          | NA        | 2.54685663  | 0.803747962 | 2.103389304 | 0.3821204   | 0.702372061 | 0.998677884 | Not Sig |
| ENSG00000223751 | NA           | NA                                          | NA        | 0.453698429 | 0.803968366 | 3.492108422 | 0.230224343 | 0.817917447 | 0.998677884 | Not Sig |
| ENSG00000224174 | NA           | NA                                          | NA        | 0.453698429 | 0.803968366 | 3.492108422 | 0.230224343 | 0.817917447 | 0.998677884 | Not Sig |
| ENSG00000232470 | NA           | NA                                          | NA        | 0.453698429 | 0.803968366 | 3.492108422 | 0.230224343 | 0.817917447 | 0.998677884 | Not Sig |
| ENSG00000227386 | NA           | NA                                          | NA        | 0.466154146 | 0.804232429 | 3.46540012  | 0.232074912 | 0.81647983  | 0.998677884 | Not Sig |
| ENSG00000236544 | NA           | NA                                          | NA        | 0.466154146 | 0.804232429 | 3.46540012  | 0.232074912 | 0.81647983  | 0.998677884 | Not Sig |
| ENSG00000273481 | NA           | NA                                          | NA        | 0.466154146 | 0.804232429 | 3.46540012  | 0.232074912 | 0.81647983  | 0.998677884 | Not Sig |
| ENSG00000272081 | NA           | NA                                          | NA        | 21.19566436 | 0.804730969 | 0.918664956 | 0.875978738 | 0.381041593 | 0.998677884 | Not Sig |
| ENSG00000226375 | NA           | NA                                          | NA        | 1.685127673 | 0.804907967 | 2.064508905 | 0.389878661 | 0.696626274 | 0.998677884 | Not Sig |
| ENSG00000223859 | NA           | NA                                          | NA        | 0.467677931 | 0.805777876 | 4.044806324 | 0.199212969 | 0.842096155 | 0.998677884 | Not Sig |
| ENSG00000235725 | NA           | NA                                          | NA        | 0.506335894 | 0.805777876 | 4.044806324 | 0.199212969 | 0.842096155 | 0.998677884 | Not Sig |
| ENSG00000258354 | NA           | NA                                          | NA        | 0.467677931 | 0.805777876 | 4.044806324 | 0.199212969 | 0.842096155 | 0.998677884 | Not Sig |
| ENSG00000260492 | CISTR        | chondrogenesis-associated transcript        | 102216268 | 0.467677931 | 0.805777876 | 4.044806324 | 0.199212969 | 0.842096155 | 0.998677884 | Not Sig |
| ENSG00000263041 | NA           | NA                                          | NA        | 0.455222214 | 0.805777876 | 4.044806324 | 0.199212969 | 0.842096155 | 0.998677884 | Not Sig |
| ENSG00000267683 | NA           | NA                                          | NA        | 0.467677931 | 0.805777876 | 4.044806324 | 0.199212969 | 0.842096155 | 0.998677884 | Not Sig |
| ENSG00000270090 | NA           | NA                                          | NA        | 0.455222214 | 0.805777876 | 4.044806324 | 0.199212969 | 0.842096155 | 0.998677884 | Not Sig |
| ENSG00000271742 | NA           | NA                                          | NA        | 0.467677931 | 0.805777876 | 4.044806324 | 0.199212969 | 0.842096155 | 0.998677884 | Not Sig |
| ENSG00000261219 | NA           | NA                                          | NA        | 3.739627911 | 0.810549781 | 1.263121688 | 0.641703637 | 0.521065627 | 0.998677884 | Not Sig |
| ENSG00000249352 | NA           | NA                                          | NA        | 16.85214103 | 0.814390328 | 0.954952499 | 0.85280716  | 0.393766253 | 0.998677884 | Not Sig |
| ENSG00000248489 | NA           | NA                                          | NA        | 13.18796536 | 0.816513214 | 0.990196207 | 0.824597396 | 0.4096002   | 0.998677884 | Not Sig |
| ENSG00000240006 | LINC02004    | long intergenic non-protein coding RNA 2004 | 105374119 | 9.543645134 | 0.816884788 | 1.007335455 | 0.810936202 | 0.417402309 | 0.998677884 | Not Sig |
| ENSG00000272799 | NA           | NA                                          | NA        | 2.538700044 | 0.821588424 | 1.596795083 | 0.514523393 | 0.606886109 | 0.998677884 | Not Sig |
| ENSG00000240770 | C21orf91-OT1 | C21orf91 overlapping transcript 1           | 246312    | 3.193982438 | 0.822450952 | 1.367313707 | 0.601508599 | 0.547501286 | 0.998677884 | Not Sig |
| ENSG00000270332 | SMC2-AS1     | SMC2 antisense RNA 1 (head to head)         | 101928550 | 26.45965279 | 0.827742581 | 0.94271792  | 0.87803845  | 0.379922853 | 0.998677884 | Not Sig |

|                 |              |                                             |           |             |             |             |             |             |             |         |
|-----------------|--------------|---------------------------------------------|-----------|-------------|-------------|-------------|-------------|-------------|-------------|---------|
| ENSG00000204837 | NA           | NA                                          | NA        | 9.239656994 | 0.828032441 | 1.368320203 | 0.605145228 | 0.545082505 | 0.998677884 | Not Sig |
| ENSG00000258867 | LINC01146    | long intergenic non-protein coding RNA 1146 | 283587    | 11.34401434 | 0.833928343 | 1.237354183 | 0.673960903 | 0.50033617  | 0.998677884 | Not Sig |
| ENSG00000223764 | LOC100130417 | uncharacterized LOC100130417                | 100130417 | 125.4779987 | 0.835100128 | 0.953167367 | 0.876131681 | 0.380958452 | 0.998677884 | Not Sig |
| ENSG00000250829 | NA           | NA                                          | NA        | 4.193326339 | 0.835388752 | 1.178773602 | 0.708693128 | 0.47851493  | 0.998677884 | Not Sig |
| ENSG00000206113 | CFAP99       | cilia and flagella associated protein 99    | 402160    | 40.70538296 | 0.838203422 | 1.323000244 | 0.63356256  | 0.526366341 | 0.998677884 | Not Sig |
| ENSG00000250271 | NA           | NA                                          | NA        | 2.897395477 | 0.840049319 | 1.676546733 | 0.501059292 | 0.616329395 | 0.998677884 | Not Sig |
| ENSG00000259780 | NA           | NA                                          | NA        | 6.492165061 | 0.840915134 | 1.249496399 | 0.673003247 | 0.500945225 | 0.998677884 | Not Sig |
| ENSG00000230943 | LINC02541    | long intergenic non-protein coding RNA 2541 | 101927686 | 12.89634292 | 0.842941952 | 1.146765043 | 0.735060732 | 0.462302508 | 0.998677884 | Not Sig |
| ENSG00000248360 | LINC00504    | long intergenic non-protein coding RNA 504  | 201853    | 16.3183245  | 0.844713459 | 0.835948515 | 1.010485028 | 0.312262969 | 0.998677884 | Not Sig |
| ENSG00000255666 | NA           | NA                                          | NA        | 2.686228332 | 0.851711982 | 2.378173741 | 0.358136989 | 0.7202408   | 0.998677884 | Not Sig |
| ENSG00000270066 | NA           | NA                                          | NA        | 15686.1047  | 0.851745926 | 0.894450845 | 0.952255711 | 0.340967313 | 0.998677884 | Not Sig |
| ENSG00000224995 | LINC01526    | long intergenic non-protein coding RNA 1526 | 101928770 | 2.239065512 | 0.852702668 | 1.586305619 | 0.537539966 | 0.590894686 | 0.998677884 | Not Sig |
| ENSG00000259278 | NA           | NA                                          | NA        | 3.091114099 | 0.853187757 | 1.42525187  | 0.598622443 | 0.549424686 | 0.998677884 | Not Sig |
| ENSG00000243819 | NA           | NA                                          | NA        | 5.089372622 | 0.853993572 | 1.277842789 | 0.668308793 | 0.503936502 | 0.998677884 | Not Sig |
| ENSG00000263931 | NA           | NA                                          | NA        | 6.956395797 | 0.855990663 | 1.045754421 | 0.81853889  | 0.413049545 | 0.998677884 | Not Sig |
| ENSG00000239467 | NA           | NA                                          | NA        | 123.7681417 | 0.85859435  | 0.894843702 | 0.959490857 | 0.337311524 | 0.998677884 | Not Sig |
| ENSG00000260604 | NA           | NA                                          | NA        | 35.44168788 | 0.866585516 | 0.875592253 | 0.989713549 | 0.322314151 | 0.998677884 | Not Sig |
| ENSG00000261340 | LINC01616    | long intergenic non-protein coding RNA 1616 | 106456574 | 1.74670912  | 0.872239333 | 2.093583163 | 0.416625118 | 0.676952634 | 0.998677884 | Not Sig |
| ENSG00000270035 | NA           | NA                                          | NA        | 6.162248491 | 0.872376254 | 1.143548959 | 0.762867429 | 0.445542463 | 0.998677884 | Not Sig |
| ENSG00000272432 | NA           | NA                                          | NA        | 2.394107153 | 0.872402322 | 1.712017906 | 0.509575466 | 0.610348916 | 0.998677884 | Not Sig |
| ENSG00000230914 | NA           | NA                                          | NA        | 4.758731516 | 0.877151948 | 1.537367536 | 0.570554489 | 0.568301676 | 0.998677884 | Not Sig |
| ENSG00000253557 | NA           | NA                                          | NA        | 9.49652647  | 0.879882577 | 1.026337004 | 0.857303765 | 0.391277029 | 0.998677884 | Not Sig |
| ENSG00000259225 | LINC02345    | long intergenic non-protein coding RNA 2345 | 101928227 | 37.39407489 | 0.879936535 | 1.284593098 | 0.68499242  | 0.493348704 | 0.998677884 | Not Sig |
| ENSG00000230794 | NA           | NA                                          | NA        | 2.689821944 | 0.888567285 | 1.726313701 | 0.514719477 | 0.606749061 | 0.998677884 | Not Sig |
| ENSG00000236377 | NA           | NA                                          | NA        | 1.541931167 | 0.889517802 | 1.914277292 | 0.464675523 | 0.642163839 | 0.998677884 | Not Sig |
| ENSG00000240754 | NA           | NA                                          | NA        | 15.72942142 | 0.890960075 | 1.147316889 | 0.776559714 | 0.437418578 | 0.998677884 | Not Sig |
| ENSG00000233791 | LINC01136    | long intergenic non-protein coding RNA 1136 | 730227    | 13.50423461 | 0.893241596 | 0.850198034 | 1.050627689 | 0.293429619 | 0.998677884 | Not Sig |
| ENSG00000197503 | LINC00477    | long intergenic non-protein coding RNA 477  | 144360    | 1.781309307 | 0.897152243 | 1.782119281 | 0.50341874  | 0.614669899 | 0.998677884 | Not Sig |
| ENSG00000260136 | NA           | NA                                          | NA        | 31.08283972 | 0.899973222 | 0.754925157 | 1.192135689 | 0.233208045 | 0.998677884 | Not Sig |
| ENSG00000261889 | NA           | NA                                          | NA        | 13.72161746 | 0.901385118 | 1.027775291 | 0.87702548  | 0.380472798 | 0.998677884 | Not Sig |
| ENSG00000259705 | LOC105370809 | uncharacterized LOC105370809                | 105370809 | 1.465625446 | 0.907438134 | 2.279378394 | 0.398107719 | 0.690550784 | 0.998677884 | Not Sig |
| ENSG00000272715 | NA           | NA                                          | NA        | 1.002518871 | 0.909000585 | 2.168989751 | 0.419089387 | 0.675150807 | 0.998677884 | Not Sig |
| ENSG00000226900 | NA           | NA                                          | NA        | 1.828365211 | 0.913776742 | 1.843736638 | 0.495611316 | 0.620168667 | 0.998677884 | Not Sig |
| ENSG00000258001 | NA           | NA                                          | NA        | 0.536364726 | 0.916913174 | 3.345832086 | 0.274046381 | 0.784048979 | 0.998677884 | Not Sig |
| ENSG00000272265 | NA           | NA                                          | NA        | 0.536364726 | 0.916913174 | 3.345832086 | 0.274046381 | 0.784048979 | 0.998677884 | Not Sig |

|                 |              |                                             |           |             |             |             |             |             |             |         |
|-----------------|--------------|---------------------------------------------|-----------|-------------|-------------|-------------|-------------|-------------|-------------|---------|
| ENSG00000264215 | NA           | NA                                          | NA        | 0.497706762 | 0.91736064  | 3.415509229 | 0.268586784 | 0.788247683 | 0.998677884 | Not Sig |
| ENSG00000272545 | NA           | NA                                          | NA        | 0.497706762 | 0.91736064  | 3.415509229 | 0.268586784 | 0.788247683 | 0.998677884 | Not Sig |
| ENSG00000273396 | LINC01396    | long intergenic non-protein coding RNA 1396 | 103695434 | 0.497706762 | 0.91736064  | 3.415509229 | 0.268586784 | 0.788247683 | 0.998677884 | Not Sig |
| ENSG00000241084 | NA           | NA                                          | NA        | 0.485251045 | 0.917509528 | 3.439717358 | 0.266739802 | 0.789669506 | 0.998677884 | Not Sig |
| ENSG00000256166 | NA           | NA                                          | NA        | 0.485251045 | 0.917509528 | 3.439717358 | 0.266739802 | 0.789669506 | 0.998677884 | Not Sig |
| ENSG00000225791 | TRAM2-AS1    | TRAM2 antisense RNA 1 (head to head)        | 401264    | 138.8214217 | 0.918535399 | 0.712498062 | 1.289175996 | 0.197336908 | 0.998677884 | Not Sig |
| ENSG00000204929 | LOC101927533 | uncharacterized LOC101927533                | 101927533 | 32.2687915  | 0.920114071 | 0.819778853 | 1.122393031 | 0.261695366 | 0.998677884 | Not Sig |
| ENSG00000272506 | NA           | NA                                          | NA        | 13.67013001 | 0.920209735 | 0.901067469 | 1.021243988 | 0.307138857 | 0.998677884 | Not Sig |
| ENSG00000272733 | NA           | NA                                          | NA        | 7.067743953 | 0.920455294 | 1.045889362 | 0.880069467 | 0.378821678 | 0.998677884 | Not Sig |
| ENSG00000232347 | NA           | NA                                          | NA        | 0.537888511 | 0.922363222 | 3.34388924  | 0.275835459 | 0.782674448 | 0.998677884 | Not Sig |
| ENSG00000262477 | NA           | NA                                          | NA        | 0.537888511 | 0.922363222 | 3.34388924  | 0.275835459 | 0.782674448 | 0.998677884 | Not Sig |
| ENSG00000273006 | NA           | NA                                          | NA        | 0.537888511 | 0.922363222 | 3.34388924  | 0.275835459 | 0.782674448 | 0.998677884 | Not Sig |
| ENSG00000227292 | NA           | NA                                          | NA        | 0.499230547 | 0.922853602 | 3.41326235  | 0.270372889 | 0.786873395 | 0.998677884 | Not Sig |
| ENSG00000256654 | NA           | NA                                          | NA        | 0.499230547 | 0.922853602 | 3.41326235  | 0.270372889 | 0.786873395 | 0.998677884 | Not Sig |
| ENSG00000260107 | NA           | NA                                          | NA        | 0.499230547 | 0.922853602 | 3.41326235  | 0.270372889 | 0.786873395 | 0.998677884 | Not Sig |
| ENSG00000260256 | NA           | NA                                          | NA        | 0.48677483  | 0.923016712 | 3.437359367 | 0.268524938 | 0.788295282 | 0.998677884 | Not Sig |
| ENSG00000273406 | NA           | NA                                          | NA        | 0.48677483  | 0.923016712 | 3.437359367 | 0.268524938 | 0.788295282 | 0.998677884 | Not Sig |
| ENSG00000264448 | NA           | NA                                          | NA        | 7.093102645 | 0.931725082 | 1.189792385 | 0.783098878 | 0.43356905  | 0.998677884 | Not Sig |
| ENSG00000235049 | LINC00940    | long intergenic non-protein coding RNA 940  | 100271702 | 9.387342987 | 0.933615612 | 1.554094953 | 0.60074554  | 0.548009482 | 0.998677884 | Not Sig |
| ENSG00000175773 | NA           | NA                                          | NA        | 14.29494821 | 0.938795911 | 0.985481126 | 0.952626981 | 0.340779102 | 0.998677884 | Not Sig |
| ENSG00000231808 | NA           | NA                                          | NA        | 1.873897329 | 0.944505458 | 2.5144386   | 0.375632739 | 0.707189948 | 0.998677884 | Not Sig |
| ENSG00000223403 | MEG9         | maternally expressed 9 (non-protein coding) | 100507257 | 9.116682773 | 0.951569852 | 1.600183204 | 0.594663067 | 0.552068714 | 0.998677884 | Not Sig |
| ENSG00000232618 | NA           | NA                                          | NA        | 11.84160551 | 0.951606681 | 1.158970731 | 0.821079131 | 0.411601196 | 0.998677884 | Not Sig |
| ENSG00000263312 | NA           | NA                                          | NA        | 0.932308291 | 0.952524557 | 2.844818798 | 0.334827848 | 0.737754952 | 0.998677884 | Not Sig |
| ENSG00000255322 | NA           | NA                                          | NA        | 15.33141103 | 0.954267189 | 1.065399985 | 0.895689133 | 0.370418816 | 0.998677884 | Not Sig |
| ENSG00000233852 | NA           | NA                                          | NA        | 1.037119058 | 0.960535889 | 2.426654643 | 0.39582719  | 0.692232517 | 0.998677884 | Not Sig |
| ENSG00000255856 | NA           | NA                                          | NA        | 8.403455258 | 0.968525715 | 0.930934624 | 1.040379947 | 0.298163414 | 0.998677884 | Not Sig |
| ENSG00000250344 | NA           | NA                                          | NA        | 20.54456106 | 0.973345996 | 1.268191568 | 0.767507071 | 0.442780091 | 0.998677884 | Not Sig |
| ENSG00000271780 | NA           | NA                                          | NA        | 50.68888756 | 0.97486998  | 0.848905854 | 1.148384094 | 0.250810037 | 0.998677884 | Not Sig |
| ENSG00000175772 | NA           | NA                                          | NA        | 150.4156257 | 0.975122716 | 0.891243256 | 1.094115114 | 0.273904495 | 0.998677884 | Not Sig |
| ENSG00000226913 | BSN-AS2      | BSN antisense RNA 2 (head to head)          | 100132677 | 4.176338044 | 0.976814118 | 1.577842965 | 0.619081962 | 0.535862366 | 0.998677884 | Not Sig |
| ENSG00000272894 | NA           | NA                                          | NA        | 103.3142421 | 0.978115618 | 0.684527168 | 1.428892327 | 0.153035183 | 0.998677884 | Not Sig |
| ENSG00000272438 | NA           | NA                                          | NA        | 2.866291898 | 0.982257211 | 2.006594463 | 0.489514563 | 0.624477447 | 0.998677884 | Not Sig |
| ENSG00000235304 | LINC01281    | long intergenic non-protein coding RNA 1281 | 286442    | 7.021259898 | 0.983257327 | 1.608200236 | 0.611402303 | 0.540933279 | 0.998677884 | Not Sig |
| ENSG00000271869 | NA           | NA                                          | NA        | 13.41412573 | 0.987659996 | 1.379002638 | 0.716213275 | 0.473859668 | 0.998677884 | Not Sig |

|                 |             |                                             |           |             |             |             |             |             |             |         |
|-----------------|-------------|---------------------------------------------|-----------|-------------|-------------|-------------|-------------|-------------|-------------|---------|
| ENSG00000253764 | NA          | NA                                          | NA        | 4.098381138 | 0.990956753 | 1.408334205 | 0.703637496 | 0.481658554 | 0.998677884 | Not Sig |
| ENSG00000203721 | LINC00862   | long intergenic non-protein coding RNA 862  | 554279    | 35.61916868 | 0.99105393  | 1.386344964 | 0.7148682   | 0.474690488 | 0.998677884 | Not Sig |
| ENSG00000214407 | LINC02085   | long intergenic non-protein coding RNA 2085 | 152225    | 1.426967482 | 0.991320163 | 2.669148147 | 0.371399454 | 0.710340032 | 0.998677884 | Not Sig |
| ENSG00000272456 | NA          | NA                                          | NA        | 0.919852574 | 0.992020288 | 2.456340433 | 0.403861075 | 0.686314881 | 0.998677884 | Not Sig |
| ENSG00000246283 | NA          | NA                                          | NA        | 3.417015516 | 0.99802353  | 1.364266814 | 0.731545706 | 0.464445897 | 0.998677884 | Not Sig |
| ENSG00000272913 | NA          | NA                                          | NA        | 140.7913316 | 1.005848576 | 0.815858603 | 1.232871202 | 0.217623821 | 0.998677884 | Not Sig |
| ENSG00000226853 | NA          | NA                                          | NA        | 4.186797429 | 1.007144962 | 1.240529683 | 0.811866879 | 0.416868021 | 0.998677884 | Not Sig |
| ENSG00000224222 | NA          | NA                                          | NA        | 1.373551003 | 1.0089009   | 2.196016516 | 0.459423184 | 0.645930303 | 0.998677884 | Not Sig |
| ENSG00000257137 | NA          | NA                                          | NA        | 1.067147889 | 1.011368254 | 2.462895559 | 0.410641958 | 0.681335093 | 0.998677884 | Not Sig |
| ENSG00000262898 | NA          | NA                                          | NA        | 0.965384693 | 1.011713051 | 2.444267787 | 0.413912525 | 0.678938171 | 0.998677884 | Not Sig |
| ENSG00000264707 | L3MBTL4-AS1 | L3MBTL4 antisense RNA 1                     | 101927150 | 5.028187901 | 1.01565075  | 1.457079023 | 0.697045757 | 0.485774159 | 0.998677884 | Not Sig |
| ENSG00000270168 | NA          | NA                                          | NA        | 6.438128311 | 1.027082567 | 1.82321509  | 0.563335929 | 0.573206157 | 0.998677884 | Not Sig |
| ENSG00000231459 | NA          | NA                                          | NA        | 12.06484069 | 1.028381669 | 1.048917439 | 0.980421939 | 0.326877885 | 0.998677884 | Not Sig |
| ENSG00000260637 | NA          | NA                                          | NA        | 2.542324052 | 1.028752742 | 1.7692064   | 0.581476951 | 0.560919048 | 0.998677884 | Not Sig |
| ENSG00000231367 | NA          | NA                                          | NA        | 11.53472712 | 1.032845481 | 0.88178925  | 1.171306501 | 0.241475599 | 0.998677884 | Not Sig |
| ENSG00000223929 | MIR4432HG   | MIR4432 host gene                           | 106660609 | 0.569441127 | 1.039252287 | 4.001919149 | 0.259688476 | 0.795104082 | 0.998677884 | Not Sig |
| ENSG00000229983 | NA          | NA                                          | NA        | 0.569441127 | 1.039252287 | 4.001919149 | 0.259688476 | 0.795104082 | 0.998677884 | Not Sig |
| ENSG00000258390 | LINC02318   | long intergenic non-protein coding RNA 2318 | 100506999 | 0.569441127 | 1.039252287 | 4.001919149 | 0.259688476 | 0.795104082 | 0.998677884 | Not Sig |
| ENSG00000261817 | NA          | NA                                          | NA        | 0.569441127 | 1.039252287 | 4.001919149 | 0.259688476 | 0.795104082 | 0.998677884 | Not Sig |
| ENSG00000267337 | LINC01478   | long intergenic non-protein coding RNA 1478 | 101927921 | 0.569441127 | 1.039252287 | 4.001919149 | 0.259688476 | 0.795104082 | 0.998677884 | Not Sig |
| ENSG00000233017 | NA          | NA                                          | NA        | 0.518327446 | 1.039516703 | 4.024477086 | 0.258298577 | 0.796176485 | 0.998677884 | Not Sig |
| ENSG00000246863 | NA          | NA                                          | NA        | 0.518327446 | 1.039516703 | 4.024477086 | 0.258298577 | 0.796176485 | 0.998677884 | Not Sig |
| ENSG00000250706 | NA          | NA                                          | NA        | 0.518327446 | 1.039516703 | 4.024477086 | 0.258298577 | 0.796176485 | 0.998677884 | Not Sig |
| ENSG00000251244 | NA          | NA                                          | NA        | 0.518327446 | 1.039516703 | 4.024477086 | 0.258298577 | 0.796176485 | 0.998677884 | Not Sig |
| ENSG00000254820 | NA          | NA                                          | NA        | 0.518327446 | 1.039516703 | 4.024477086 | 0.258298577 | 0.796176485 | 0.998677884 | Not Sig |
| ENSG00000258969 | NA          | NA                                          | NA        | 0.530783163 | 1.039516703 | 4.024477086 | 0.258298577 | 0.796176485 | 0.998677884 | Not Sig |
| ENSG00000266578 | NA          | NA                                          | NA        | 0.530783163 | 1.039516703 | 4.024477086 | 0.258298577 | 0.796176485 | 0.998677884 | Not Sig |
| ENSG00000267808 | NA          | NA                                          | NA        | 0.518327446 | 1.039516703 | 4.024477086 | 0.258298577 | 0.796176485 | 0.998677884 | Not Sig |
| ENSG00000270036 | NA          | NA                                          | NA        | 0.530783163 | 1.039516703 | 4.024477086 | 0.258298577 | 0.796176485 | 0.998677884 | Not Sig |
| ENSG00000270777 | NA          | NA                                          | NA        | 0.530783163 | 1.039516703 | 4.024477086 | 0.258298577 | 0.796176485 | 0.998677884 | Not Sig |
| ENSG00000226308 | NA          | NA                                          | NA        | 0.907396857 | 1.040877928 | 2.856381908 | 0.364404328 | 0.715556104 | 0.998677884 | Not Sig |
| ENSG00000226791 | NA          | NA                                          | NA        | 13.00131725 | 1.041334161 | 0.872747555 | 1.193167663 | 0.232803716 | 0.998677884 | Not Sig |
| ENSG00000224177 | LINC00570   | long intergenic non-protein coding RNA 570  | 100874055 | 0.952928976 | 1.043038709 | 2.182903837 | 0.477821648 | 0.632777152 | 0.998677884 | Not Sig |
| ENSG00000260448 | NA          | NA                                          | NA        | 4.979230602 | 1.044386147 | 1.172046435 | 0.891079155 | 0.372886707 | 0.998677884 | Not Sig |
| ENSG00000264345 | NA          | NA                                          | NA        | 3.018304986 | 1.048460138 | 1.559520857 | 0.672296323 | 0.50139507  | 0.998677884 | Not Sig |

|                 |              |                                             |           |             |             |             |             |             |             |         |
|-----------------|--------------|---------------------------------------------|-----------|-------------|-------------|-------------|-------------|-------------|-------------|---------|
| ENSG00000267922 | NA           | NA                                          | NA        | 1.362619071 | 1.048746012 | 2.606780894 | 0.4023146   | 0.687452511 | 0.998677884 | Not Sig |
| ENSG00000258701 | LINC00638    | long intergenic non-protein coding RNA 638  | 196872    | 48.50978005 | 1.048817947 | 0.856413579 | 1.224662912 | 0.220702254 | 0.998677884 | Not Sig |
| ENSG00000260874 | LOC105371050 | uncharacterized LOC105371050                | 105371050 | 13.98578436 | 1.048882033 | 1.034235021 | 1.014162169 | 0.310505377 | 0.998677884 | Not Sig |
| ENSG00000262179 | MYMX         | myomixer, myoblast fusion factor            | 101929726 | 8.852242757 | 1.052928821 | 1.487209741 | 0.707989459 | 0.478951803 | 0.998677884 | Not Sig |
| ENSG00000237310 | GS1-124K5.4  | uncharacterized LOC100289098                | 100289098 | 18.61873599 | 1.054328907 | 0.981775416 | 1.073900292 | 0.282867372 | 0.998677884 | Not Sig |
| ENSG00000270673 | YTHDF3-AS1   | YTHDF3 antisense RNA 1 (head to head)       | 101410533 | 17.62542476 | 1.056648154 | 0.961521956 | 1.098932944 | 0.271797316 | 0.998677884 | Not Sig |
| ENSG00000237489 | NA           | NA                                          | NA        | 43.79333745 | 1.058023335 | 0.927529554 | 1.140689621 | 0.253999107 | 0.998677884 | Not Sig |
| ENSG00000253317 | NA           | NA                                          | NA        | 4.255020059 | 1.064181147 | 1.325815178 | 0.802661762 | 0.42217026  | 0.998677884 | Not Sig |
| ENSG00000269961 | NA           | NA                                          | NA        | 4.50976345  | 1.066635738 | 1.171435771 | 0.910537107 | 0.362539322 | 0.998677884 | Not Sig |
| ENSG00000224017 | LINC01449    | long intergenic non-protein coding RNA 1449 | 101928773 | 1.661908456 | 1.068751871 | 1.865192242 | 0.572998239 | 0.566645886 | 0.998677884 | Not Sig |
| ENSG00000237471 | NA           | NA                                          | NA        | 2.84633121  | 1.070306496 | 1.536799633 | 0.696451556 | 0.486146085 | 0.998677884 | Not Sig |
| ENSG00000259834 | NA           | NA                                          | NA        | 241.3511622 | 1.070493416 | 1.114965165 | 0.960113777 | 0.336997955 | 0.998677884 | Not Sig |
| ENSG00000255775 | NA           | NA                                          | NA        | 0.995413524 | 1.071715391 | 2.819736916 | 0.380076377 | 0.703888721 | 0.998677884 | Not Sig |
| ENSG00000272828 | NA           | NA                                          | NA        | 0.998461094 | 1.077442745 | 2.818630645 | 0.382257515 | 0.702270365 | 0.998677884 | Not Sig |
| ENSG00000261997 | NA           | NA                                          | NA        | 46.00358701 | 1.077613194 | 0.863147192 | 1.248469791 | 0.211859065 | 0.998677884 | Not Sig |
| ENSG00000251085 | LINC01969    | long intergenic non-protein coding RNA 1969 | 101927230 | 1.19270674  | 1.07934695  | 2.776098428 | 0.388799957 | 0.697424132 | 0.998677884 | Not Sig |
| ENSG00000258777 | HIF1A-AS1    | HIF1A antisense RNA 1                       | 100750246 | 3.248907576 | 1.079445669 | 1.361138212 | 0.793046334 | 0.427750828 | 0.998677884 | Not Sig |
| ENSG00000235576 | NA           | NA                                          | NA        | 8.973605795 | 1.080804654 | 1.345173259 | 0.803468733 | 0.421703862 | 0.998677884 | Not Sig |
| ENSG00000259652 | NA           | NA                                          | NA        | 4.086093853 | 1.08266984  | 1.175554331 | 0.920986645 | 0.357057399 | 0.998677884 | Not Sig |
| ENSG00000236427 | NA           | NA                                          | NA        | 6.874357516 | 1.090680591 | 1.49412543  | 0.72997927  | 0.465402856 | 0.998677884 | Not Sig |
| ENSG00000228798 | NA           | NA                                          | NA        | 6.804725055 | 1.091425456 | 1.337578479 | 0.815971155 | 0.414516634 | 0.998677884 | Not Sig |
| ENSG00000227681 | NA           | NA                                          | NA        | 10.67039963 | 1.097998318 | 0.980019627 | 1.120384009 | 0.262550156 | 0.998677884 | Not Sig |
| ENSG00000259783 | LINC02259    | long intergenic non-protein coding RNA 2259 | 102723640 | 0.937425688 | 1.099480214 | 2.888442923 | 0.380648066 | 0.70346441  | 0.998677884 | Not Sig |
| ENSG00000270117 | NA           | NA                                          | NA        | 4.405604298 | 1.103653469 | 1.392354461 | 0.792652576 | 0.427980267 | 0.998677884 | Not Sig |
| ENSG00000271991 | NA           | NA                                          | NA        | 0.986005377 | 1.108673013 | 2.440542336 | 0.454273215 | 0.649632192 | 0.998677884 | Not Sig |
| ENSG00000226472 | NA           | NA                                          | NA        | 7.307821439 | 1.108845144 | 1.035675331 | 1.070649374 | 0.284327114 | 0.998677884 | Not Sig |
| ENSG00000233643 | NA           | NA                                          | NA        | 10.55164787 | 1.112876034 | 1.705496675 | 0.652523133 | 0.514063754 | 0.998677884 | Not Sig |
| ENSG00000265055 | NA           | NA                                          | NA        | 12.27121878 | 1.119102598 | 0.886575552 | 1.2622755   | 0.206849669 | 0.998677884 | Not Sig |
| ENSG00000232931 | NA           | NA                                          | NA        | 358.2164864 | 1.121182248 | 0.756627015 | 1.481816306 | 0.138389179 | 0.998677884 | Not Sig |
| ENSG00000234840 | LINC01239    | long intergenic non-protein coding RNA 1239 | 441389    | 29.65273954 | 1.122999728 | 1.398118215 | 0.8032223   | 0.421846258 | 0.998677884 | Not Sig |
| ENSG00000259577 | NA           | NA                                          | NA        | 14.27426631 | 1.124302747 | 0.936453958 | 1.200595862 | 0.229908007 | 0.998677884 | Not Sig |
| ENSG00000230415 | NA           | NA                                          | NA        | 23.81307654 | 1.12451681  | 0.972349994 | 1.156493873 | 0.247479204 | 0.998677884 | Not Sig |
| ENSG00000257139 | NA           | NA                                          | NA        | 2.502921317 | 1.127469595 | 1.716360577 | 0.656895532 | 0.511248091 | 0.998677884 | Not Sig |
| ENSG00000231816 | NA           | NA                                          | NA        | 7.328819921 | 1.127775056 | 1.592526118 | 0.708167384 | 0.478841318 | 0.998677884 | Not Sig |
| ENSG00000237423 | NA           | NA                                          | NA        | 1.028489925 | 1.132405843 | 2.851677101 | 0.397101706 | 0.691292462 | 0.998677884 | Not Sig |

|                 |              |                                             |           |             |             |             |             |             |             |         |
|-----------------|--------------|---------------------------------------------|-----------|-------------|-------------|-------------|-------------|-------------|-------------|---------|
| ENSG00000272566 | NA           | NA                                          | NA        | 2.440234726 | 1.140140049 | 1.733562377 | 0.657686199 | 0.510739793 | 0.998677884 | Not Sig |
| ENSG00000260052 | NA           | NA                                          | NA        | 2.111549107 | 1.14109865  | 1.554677117 | 0.733977903 | 0.462962206 | 0.998677884 | Not Sig |
| ENSG00000224810 | NA           | NA                                          | NA        | 0.972025875 | 1.145638185 | 2.445680118 | 0.468433372 | 0.639474708 | 0.998677884 | Not Sig |
| ENSG00000237484 | LINC01684    | long intergenic non-protein coding RNA 1684 | 105372751 | 14.00726037 | 1.14734336  | 1.314029009 | 0.873149186 | 0.382581767 | 0.998677884 | Not Sig |
| ENSG00000272849 | NA           | NA                                          | NA        | 2.73468732  | 1.161832954 | 1.707713662 | 0.680344123 | 0.496286592 | 0.998677884 | Not Sig |
| ENSG00000261435 | NA           | NA                                          | NA        | 2.476358698 | 1.167443441 | 1.752249733 | 0.666254027 | 0.505248745 | 0.998677884 | Not Sig |
| ENSG00000272381 | NA           | NA                                          | NA        | 4.819928608 | 1.168008948 | 1.172279183 | 0.996357323 | 0.319076561 | 0.998677884 | Not Sig |
| ENSG00000272659 | NA           | NA                                          | NA        | 1.258859543 | 1.183135224 | 2.699870632 | 0.438219228 | 0.661227371 | 0.998677884 | Not Sig |
| ENSG00000267898 | NA           | NA                                          | NA        | 2.176178125 | 1.190148107 | 1.58540268  | 0.750691368 | 0.452838419 | 0.998677884 | Not Sig |
| ENSG00000262585 | LINC01979    | long intergenic non-protein coding RNA 1979 | 101928766 | 4.626229004 | 1.192193786 | 1.223346892 | 0.974534528 | 0.329791204 | 0.998677884 | Not Sig |
| ENSG00000230010 | NA           | NA                                          | NA        | 1.111564228 | 1.201287898 | 2.36641053  | 0.507641376 | 0.611704868 | 0.998677884 | Not Sig |
| ENSG00000259124 | NA           | NA                                          | NA        | 6.804436111 | 1.202583626 | 1.1813029   | 1.018014622 | 0.308671007 | 0.998677884 | Not Sig |
| ENSG00000270361 | NA           | NA                                          | NA        | 2.800967523 | 1.205833946 | 1.382820165 | 0.872010675 | 0.383202554 | 0.998677884 | Not Sig |
| ENSG00000247134 | NA           | NA                                          | NA        | 35.14312792 | 1.206968442 | 0.895495219 | 1.347822318 | 0.177715538 | 0.998677884 | Not Sig |
| ENSG00000225339 | NA           | NA                                          | NA        | 17.55144119 | 1.214053336 | 0.835030143 | 1.453903606 | 0.145973033 | 0.998677884 | Not Sig |
| ENSG00000254526 | NA           | NA                                          | NA        | 1.626844104 | 1.215916458 | 2.178595688 | 0.558119372 | 0.576762873 | 0.998677884 | Not Sig |
| ENSG00000271743 | NA           | NA                                          | NA        | 1.155572561 | 1.219975617 | 2.108271223 | 0.578661609 | 0.562817525 | 0.998677884 | Not Sig |
| ENSG00000269921 | NA           | NA                                          | NA        | 11.10878892 | 1.221859859 | 1.007794625 | 1.212409581 | 0.225355635 | 0.998677884 | Not Sig |
| ENSG00000236833 | NA           | NA                                          | NA        | 11.42934901 | 1.224838215 | 1.205439974 | 1.01609225  | 0.309585459 | 0.998677884 | Not Sig |
| ENSG00000225329 | LHFPL3-AS2   | LHFPL3 antisense RNA 2                      | 723809    | 133.6996605 | 1.225501557 | 1.242562659 | 0.986269423 | 0.32400092  | 0.998677884 | Not Sig |
| ENSG00000226530 | NA           | NA                                          | NA        | 1.675423793 | 1.226503911 | 1.673723405 | 0.732799642 | 0.46368064  | 0.998677884 | Not Sig |
| ENSG00000249534 | LINC01258    | long intergenic non-protein coding RNA 1258 | 101928776 | 1.570613026 | 1.22942289  | 1.88094752  | 0.653618921 | 0.513357351 | 0.998677884 | Not Sig |
| ENSG00000267147 | LINC01842    | long intergenic non-protein coding RNA 1842 | 101928845 | 1.291935944 | 1.229825668 | 2.753045672 | 0.44671459  | 0.655081146 | 0.998677884 | Not Sig |
| ENSG00000272079 | LOC107984895 | uncharacterized LOC107984895                | 107984895 | 35.5822448  | 1.23174456  | 0.792948502 | 1.553372707 | 0.120334119 | 0.998677884 | Not Sig |
| ENSG00000224549 | NA           | NA                                          | NA        | 6.692152836 | 1.233370739 | 1.43871061  | 0.85727507  | 0.391292883 | 0.998677884 | Not Sig |
| ENSG00000233559 | NA           | NA                                          | NA        | 23.46715639 | 1.238914902 | 1.302589632 | 0.951116815 | 0.34154508  | 0.998677884 | Not Sig |
| ENSG00000260868 | LINC01960    | long intergenic non-protein coding RNA 1960 | 100128905 | 2.242458328 | 1.239639725 | 1.747471613 | 0.709390479 | 0.478082194 | 0.998677884 | Not Sig |
| ENSG00000257398 | NA           | NA                                          | NA        | 1.614621359 | 1.241029871 | 2.15206337  | 0.576669762 | 0.564162563 | 0.998677884 | Not Sig |
| ENSG00000269978 | NA           | NA                                          | NA        | 4.584385434 | 1.242474649 | 1.798029789 | 0.691020058 | 0.489552936 | 0.998677884 | Not Sig |
| ENSG00000249125 | NA           | NA                                          | NA        | 1.141593059 | 1.244549386 | 2.420957894 | 0.514073123 | 0.607200868 | 0.998677884 | Not Sig |
| ENSG00000237476 | LINC01637    | long intergenic non-protein coding RNA 1637 | 101928891 | 24.73027124 | 1.246394958 | 1.169754512 | 1.065518401 | 0.286641403 | 0.998677884 | Not Sig |
| ENSG00000258476 | NA           | NA                                          | NA        | 4.364475202 | 1.252831738 | 1.231759747 | 1.017107225 | 0.309102424 | 0.998677884 | Not Sig |
| ENSG00000255651 | NA           | NA                                          | NA        | 4.877107131 | 1.254717191 | 1.523258343 | 0.823706101 | 0.410106572 | 0.998677884 | Not Sig |
| ENSG00000271265 | NA           | NA                                          | NA        | 4.888897789 | 1.257385559 | 1.213350933 | 1.036291748 | 0.300066055 | 0.998677884 | Not Sig |
| ENSG00000258082 | NA           | NA                                          | NA        | 10.22679525 | 1.257696684 | 1.065399485 | 1.180493047 | 0.237804174 | 0.998677884 | Not Sig |

|                 |            |                                                                              |           |                  |             |                  |                 |             |             |         |
|-----------------|------------|------------------------------------------------------------------------------|-----------|------------------|-------------|------------------|-----------------|-------------|-------------|---------|
| ENSG00000236140 | NA         | NA                                                                           | NA        | 1.083838196      | 1.268290465 | 2.803308788      | 0.452426244     | 0.650961944 | 0.998677884 | Not Sig |
| ENSG00000261598 | NA         | NA                                                                           | NA        | 1.083838196      | 1.268290465 | 2.803308788      | 0.452426244     | 0.650961944 | 0.998677884 | Not Sig |
| ENSG00000262890 | NA         | NA                                                                           | NA        | 2.602558527      | 1.269619845 | 1.914165448      | 0.663275918     | 0.507153857 | 0.998677884 | Not Sig |
| ENSG00000215386 | NA         | NA                                                                           | NA        | 142.1643111      | 1.272331347 | 0.898188849      | 1.416552152     | 0.156613906 | 0.998677884 | Not Sig |
| ENSG00000258460 | NA         | NA                                                                           | NA        | 1.086885766      | 1.273184484 | 2.740880391      | 0.464516616     | 0.642277658 | 0.998677884 | Not Sig |
| ENSG00000226137 | BAIAP2-AS1 | BAIAP2 antisense RNA 1 (head to head)                                        | 440465    | 1859.214565      | 1.277228991 | 0.935882879      | 1.364731655     | 0.172337407 | 0.998677884 | Not Sig |
| ENSG00000224790 | NA         | NA                                                                           | NA        | 14.24394816      | 1.277961538 | 1.173699214      | 1.088832235     | 0.276227874 | 0.998677884 | Not Sig |
| ENSG00000267666 | NA         | NA                                                                           | NA        | 1.802506429      | 1.28124723  | 1.833679107      | 0.698730342     | 0.484720568 | 0.998677884 | Not Sig |
| ENSG00000255227 | NA         | NA                                                                           | NA        | 1.174669461      | 1.293948417 | 2.35719778       | 0.548935023     | 0.583050042 | 0.998677884 | Not Sig |
| ENSG00000270141 | NA         | NA                                                                           | NA        | 2305.375378      | 1.298073033 | 0.87020301       | 1.491689891     | 0.13578046  | 0.998677884 | Not Sig |
| ENSG00000271086 | NAMA       | non-protein coding RNA, associated with MAP kinase pathway and growth arrest | 100996569 | 4.416510466      | 1.301037186 | 1.316276887      | 0.988422116     | 0.322945961 | 0.998677884 | Not Sig |
| ENSG00000273102 | NA         | NA                                                                           | NA        | 1.223249149      | 1.30768085  | 2.350722105      | <b>0.556289</b> | 0.578013306 | 0.998677884 | Not Sig |
| ENSG00000267581 | NA         | NA                                                                           | NA        | 2.296155414      | 1.309051325 | 1.487722965      | 0.879902614     | 0.378912069 | 0.998677884 | Not Sig |
| ENSG00000228221 | NA         | NA                                                                           | NA        | 118.1611427      | 1.310562965 | 0.964490246      | 1.35881412      | 0.174205498 | 0.998677884 | Not Sig |
| ENSG00000250081 | NA         | NA                                                                           | NA        | 2.69152086       | 1.311269356 | 2.428757196      | 0.539893143     | 0.589270727 | 0.998677884 | Not Sig |
| ENSG00000228139 | LINC01402  | long intergenic non-protein coding RNA 1402                                  | 104797536 | 1.116914598      | 1.316970575 | 2.367181258      | 0.556345472     | 0.577974707 | 0.998677884 | Not Sig |
| ENSG00000253521 | HPYR1      | Helicobacter pylori responsive 1 (non-protein coding)                        | 93668     | 1.116914598      | 1.316970575 | 2.367181258      | 0.556345472     | 0.577974707 | 0.998677884 | Not Sig |
| ENSG00000233975 | LINC02574  | long intergenic non-protein coding RNA 2574                                  | 111216282 | 1.118438383      | 1.318785281 | 2.322609886      | 0.567803181     | 0.57016862  | 0.998677884 | Not Sig |
| ENSG00000262681 | NA         | NA                                                                           | NA        | 1.118438383      | 1.318785281 | 2.322609886      | 0.567803181     | 0.57016862  | 0.998677884 | Not Sig |
| ENSG00000271874 | NA         | NA                                                                           | NA        | 2.233596222      | 1.321005985 | <b>1.7988094</b> | 0.734377964     | 0.462718413 | 0.998677884 | Not Sig |
| ENSG00000234394 | LOC440896  | uncharacterized LOC440896                                                    | 440896    | 1.779351752      | 1.326784795 | 1.860213483      | 0.713243295     | 0.475695219 | 0.998677884 | Not Sig |
| ENSG00000242474 | NA         | NA                                                                           | NA        | 33.67959773      | 1.337070218 | 1.009692459      | 1.324235124     | 0.185424969 | 0.998677884 | Not Sig |
| ENSG00000231107 | LINC01508  | long intergenic non-protein coding RNA 1508                                  | 101927873 | <b>9.9574613</b> | 1.346848842 | 1.316938863      | 1.022711745     | 0.306444157 | 0.998677884 | Not Sig |
| ENSG00000248677 | LINC02102  | long intergenic non-protein coding RNA 2102                                  | 100505625 | 5.382609632      | 1.348817234 | 1.183748069      | 1.139446196     | 0.254517097 | 0.998677884 | Not Sig |
| ENSG00000255571 | MIR9-3HG   | MIR9-3 host gene                                                             | 254559    | 25.17536851      | 1.355334425 | 1.348867578      | 1.004794279     | 0.314995919 | 0.998677884 | Not Sig |
| ENSG00000272525 | NA         | NA                                                                           | NA        | 4.79702424       | 1.366794983 | 1.212871045      | 1.126908742     | 0.259781067 | 0.998677884 | Not Sig |
| ENSG00000236751 | LINC01186  | long intergenic non-protein coding RNA 1186                                  | 101927574 | 7.952005391      | 1.368753782 | 1.142510886      | 1.198022529     | 0.230908246 | 0.998677884 | Not Sig |
| ENSG00000259884 | NA         | NA                                                                           | NA        | 1.148467214      | 1.368790421 | 2.722986297      | 0.502679878     | 0.615189359 | 0.998677884 | Not Sig |
| ENSG00000262202 | NA         | NA                                                                           | NA        | 188.7852573      | 1.373535715 | 1.259060694      | 1.090920971     | 0.275307658 | 0.998677884 | Not Sig |
| ENSG00000269271 | NA         | NA                                                                           | NA        | 1.799972437      | 1.383410167 | 1.706018249      | 0.810899982     | 0.417423111 | 0.998677884 | Not Sig |
| ENSG00000270103 | NA         | NA                                                                           | NA        | 80.58839704      | 1.386669868 | 0.903849471      | 1.534182308     | 0.124984809 | 0.998677884 | Not Sig |
| ENSG00000225790 | NA         | NA                                                                           | NA        | 1.240822264      | 1.387382016 | 2.406794945      | 0.576443796     | 0.564315249 | 0.998677884 | Not Sig |
| ENSG00000230631 | NA         | NA                                                                           | NA        | 0.620731621      | 1.388232926 | 3.18234312       | 0.436229807     | 0.662670004 | 0.998677884 | Not Sig |
| ENSG00000238230 | NA         | NA                                                                           | NA        | 0.659389585      | 1.388718293 | 3.131079732      | 0.443526966     | 0.657384619 | 0.998677884 | Not Sig |
| ENSG00000225506 | NA         | NA                                                                           | NA        | 10.64501955      | 1.393433292 | 1.488202759      | 0.936319519     | 0.349108701 | 0.998677884 | Not Sig |



|                 |              |                                            |           |             |             |             |             |             |             |         |
|-----------------|--------------|--------------------------------------------|-----------|-------------|-------------|-------------|-------------|-------------|-------------|---------|
| ENSG00000272343 | NA           | NA                                         | NA        | 5.632855163 | 1.396320673 | 1.229702429 | 1.135494767 | 0.256168073 | 0.998677884 | Not Sig |
| ENSG00000272931 | NA           | NA                                         | NA        | 5.208006928 | 1.396958883 | 1.167811594 | 1.196219399 | 0.231610953 | 0.998677884 | Not Sig |
| ENSG00000189149 | NA           | NA                                         | NA        | 40.82210264 | 1.401552075 | 0.678383417 | 2.066017593 | 0.038826818 | 0.998677884 | Not Sig |
| ENSG00000237074 | NA           | NA                                         | NA        | 6.385145839 | 1.401630524 | 1.570737063 | 0.892339372 | 0.372211057 | 0.998677884 | Not Sig |
| ENSG00000255606 | NA           | NA                                         | NA        | 4.139672019 | 1.419532075 | 1.247617448 | 1.137794343 | 0.255206368 | 0.998677884 | Not Sig |
| ENSG00000271387 | NA           | NA                                         | NA        | 3.404848884 | 1.422269431 | 1.573518647 | 0.903878345 | 0.366059913 | 0.998677884 | Not Sig |
| ENSG00000257660 | LOC100506125 | uncharacterized LOC100506125               | 100506125 | 3.088396646 | 1.433458888 | 1.669190087 | 0.858775103 | 0.390464606 | 0.998677884 | Not Sig |
| ENSG00000269399 | NA           | NA                                         | NA        | 4.321556884 | 1.436691821 | 1.354432276 | 1.060733598 | 0.288810987 | 0.998677884 | Not Sig |
| ENSG00000231010 | NA           | NA                                         | NA        | 1.170611684 | 1.437803927 | 2.114374844 | 0.680013732 | 0.496495766 | 0.998677884 | Not Sig |
| ENSG00000269927 | NA           | NA                                         | NA        | 15.79045403 | 1.438091195 | 0.930505636 | 1.545494342 | 0.122226737 | 0.998677884 | Not Sig |
| ENSG00000273107 | NA           | NA                                         | NA        | 7.298909586 | 1.442672097 | 1.114786622 | 1.294123978 | 0.1956226   | 0.998677884 | Not Sig |
| ENSG00000226856 | LOC100506797 | uncharacterized LOC100506797               | 100506797 | 2.433705816 | 1.455242654 | 1.50340019  | 0.967967587 | 0.333060558 | 0.998677884 | Not Sig |
| ENSG00000258772 | NA           | NA                                         | NA        | 0.638304735 | 1.463745273 | 3.170089359 | 0.461736282 | 0.644270449 | 0.998677884 | Not Sig |
| ENSG00000273177 | NA           | NA                                         | NA        | 0.638304735 | 1.463745273 | 3.170089359 | 0.461736282 | 0.644270449 | 0.998677884 | Not Sig |
| ENSG00000237862 | LOC100506271 | uncharacterized LOC100506271               | 100506271 | 0.690942201 | 1.466814343 | 2.670569439 | 0.549251527 | 0.582832848 | 0.998677884 | Not Sig |
| ENSG00000261938 | NA           | NA                                         | NA        | 0.652284237 | 1.466887139 | 2.705176633 | 0.542251889 | 0.587644994 | 0.998677884 | Not Sig |
| ENSG00000254639 | NA           | NA                                         | NA        | 0.63982852  | 1.466911274 | 2.716990667 | 0.539902949 | 0.589263964 | 0.998677884 | Not Sig |
| ENSG00000245651 | NA           | NA                                         | NA        | 12.51063931 | 1.468549179 | 1.140029138 | 1.288168109 | 0.197687451 | 0.998677884 | Not Sig |
| ENSG00000272233 | NA           | NA                                         | NA        | 0.641352305 | 1.471489964 | 3.167245211 | 0.46459616  | 0.642220682 | 0.998677884 | Not Sig |
| ENSG00000237372 | UNQ6494      | uncharacterized LOC100129066               | 100129066 | 5.178910317 | 1.480148844 | 1.539973214 | 0.96115233  | 0.336475581 | 0.998677884 | Not Sig |
| ENSG00000237021 | DSE          | dermatan sulfate epimerase                 | 29940     | 5.839605939 | 1.480510418 | 1.16536856  | 1.270422482 | 0.203934179 | 0.998677884 | Not Sig |
| ENSG00000272709 | NA           | NA                                         | NA        | 2.547041923 | 1.494958697 | 1.748044867 | 0.855217578 | 0.392430707 | 0.998677884 | Not Sig |
| ENSG00000227712 | NA           | NA                                         | NA        | 1.156632181 | 1.504363256 | 2.721035185 | 0.552864316 | 0.580356324 | 0.998677884 | Not Sig |
| ENSG00000273257 | NA           | NA                                         | NA        | 3.358578784 | 1.513695155 | 1.646023808 | 0.919607085 | 0.357778123 | 0.998677884 | Not Sig |
| ENSG00000257488 | NA           | NA                                         | NA        | 1.916902155 | 1.518141113 | 1.661337798 | 0.913806401 | 0.360818583 | 0.998677884 | Not Sig |
| ENSG00000273442 | NA           | NA                                         | NA        | 2.537633776 | 1.520112013 | 1.533055028 | 0.991557371 | 0.321413493 | 0.998677884 | Not Sig |
| ENSG00000230310 | NA           | NA                                         | NA        | 3.153666642 | 1.521093133 | 1.346867711 | 1.129356001 | 0.258747686 | 0.998677884 | Not Sig |
| ENSG00000237879 | LINC00398    | long intergenic non-protein coding RNA 398 | 100874158 | 10.0395018  | 1.521819552 | 0.99923342  | 1.522987043 | 0.127761947 | 0.998677884 | Not Sig |
| ENSG00000259380 | NA           | NA                                         | NA        | 5.857241912 | 1.530493199 | 1.970355239 | 0.776760032 | 0.437300361 | 0.998677884 | Not Sig |
| ENSG00000237531 | NA           | NA                                         | NA        | 1.239939457 | 1.532989933 | 2.649936173 | 0.578500701 | 0.562926125 | 0.998677884 | Not Sig |
| ENSG00000236081 | ELFN1-AS1    | ELFN1 antisense RNA 1                      | 101927125 | 0.722494817 | 1.54318954  | 3.080653557 | 0.500929271 | 0.616420902 | 0.998677884 | Not Sig |
| ENSG00000234261 | NA           | NA                                         | NA        | 0.683836854 | 1.543668432 | 3.125146533 | 0.493950737 | 0.621340971 | 0.998677884 | Not Sig |
| ENSG00000248991 | NA           | NA                                         | NA        | 0.683836854 | 1.543668432 | 3.125146533 | 0.493950737 | 0.621340971 | 0.998677884 | Not Sig |
| ENSG00000271868 | NA           | NA                                         | NA        | 0.683836854 | 1.543668432 | 3.125146533 | 0.493950737 | 0.621340971 | 0.998677884 | Not Sig |
| ENSG00000233368 | NA           | NA                                         | NA        | 28.33942531 | 1.544008826 | 0.793976499 | 1.944653056 | 0.051816749 | 0.998677884 | Not Sig |

|                 |           |                                                                    |           |             |             |             |             |             |             |         |
|-----------------|-----------|--------------------------------------------------------------------|-----------|-------------|-------------|-------------|-------------|-------------|-------------|---------|
| ENSG00000260677 | NA        | NA                                                                 | NA        | 0.724018602 | 1.546875655 | 3.079559639 | 0.502304172 | 0.615453575 | 0.998677884 | Not Sig |
| ENSG00000237346 | NA        | NA                                                                 | NA        | 0.672904922 | 1.54753186  | 3.139004137 | 0.493000899 | 0.622011952 | 0.998677884 | Not Sig |
| ENSG00000234917 | NA        | NA                                                                 | NA        | 2.465899411 | 1.554225223 | 1.988805722 | 0.781486701 | 0.434516295 | 0.998677884 | Not Sig |
| ENSG00000254761 | NA        | NA                                                                 | NA        | 12.21431238 | 1.559214732 | 2.003512493 | 0.778240584 | 0.436427196 | 0.998677884 | Not Sig |
| ENSG00000241135 | LINC00881 | long intergenic non-protein coding RNA 881                         | 100498859 | 5.07403501  | 1.562934065 | 1.475190146 | 1.059479735 | 0.289381354 | 0.998677884 | Not Sig |
| ENSG00000271040 | NA        | NA                                                                 | NA        | 1.269968288 | 1.57013649  | 2.314909811 | 0.678271128 | 0.497599801 | 0.998677884 | Not Sig |
| ENSG00000267461 | NA        | NA                                                                 | NA        | 1.274539643 | 1.576050221 | 2.314457042 | 0.680958943 | 0.49589747  | 0.998677884 | Not Sig |
| ENSG00000272209 | NA        | NA                                                                 | NA        | 1.876720406 | 1.581176899 | 1.842883901 | 0.85799051  | 0.390897703 | 0.998677884 | Not Sig |
| ENSG00000257474 | NA        | NA                                                                 | NA        | 22.4039522  | 1.58335216  | 1.331123311 | 1.189485713 | 0.23424859  | 0.998677884 | Not Sig |
| ENSG00000271709 | NA        | NA                                                                 | NA        | 1.260560141 | 1.603660724 | 2.022287741 | 0.792993347 | 0.427781699 | 0.998677884 | Not Sig |
| ENSG00000234692 | NA        | NA                                                                 | NA        | 3.211317712 | 1.614139318 | 1.61646959  | 0.998558419 | 0.318008652 | 0.998677884 | Not Sig |
| ENSG00000227711 | NA        | NA                                                                 | NA        | 6.516542874 | 1.627107632 | 1.390320214 | 1.170311426 | 0.241875665 | 0.998677884 | Not Sig |
| ENSG00000251350 | LINC02475 | long intergenic non-protein coding RNA 2475                        | 100506827 | 7.232426164 | 1.62815805  | 1.846958156 | 0.881534888 | 0.37802838  | 0.998677884 | Not Sig |
| ENSG00000229647 | MYOSLID   | myocardin-induced smooth muscle lncRNA, inducer of differentiation | 105373853 | 3.644203515 | 1.646474869 | 1.508458962 | 1.091494638 | 0.27505529  | 0.998677884 | Not Sig |
| ENSG00000272142 | LYRM4-AS1 | LYRM4 antisense RNA 1                                              | 100129461 | 22.2269355  | 1.649951164 | 0.775925217 | 2.126430651 | 0.033467418 | 0.998677884 | Not Sig |
| ENSG00000273384 | NA        | NA                                                                 | NA        | 1.243533068 | 1.658309999 | 2.73764571  | 0.6057431   | 0.544685359 | 0.998677884 | Not Sig |
| ENSG00000234378 | NA        | NA                                                                 | NA        | 9.578005606 | 1.670348105 | 1.566673769 | 1.066174808 | 0.286344628 | 0.998677884 | Not Sig |
| ENSG00000273012 | NA        | NA                                                                 | NA        | 1.60261468  | 1.673693383 | 2.562053214 | 0.653262537 | 0.51358704  | 0.998677884 | Not Sig |
| ENSG00000271320 | NA        | NA                                                                 | NA        | 2.847671534 | 1.675228575 | 1.54584795  | 1.08369557  | 0.278499801 | 0.998677884 | Not Sig |
| ENSG00000272735 | NA        | NA                                                                 | NA        | 12.52919869 | 1.677111854 | 1.096976748 | 1.528849046 | 0.12630187  | 0.998677884 | Not Sig |
| ENSG00000267011 | NA        | NA                                                                 | NA        | 4.77795099  | 1.679766652 | 1.288059294 | 1.304106619 | 0.192197232 | 0.998677884 | Not Sig |
| ENSG00000272808 | NA        | NA                                                                 | NA        | 5.104629641 | 1.6883307   | 1.550059024 | 1.089204136 | 0.276063875 | 0.998677884 | Not Sig |
| ENSG00000241220 | NA        | NA                                                                 | NA        | 7.426954195 | 1.695255326 | 1.412536881 | 1.200149426 | 0.230081313 | 0.998677884 | Not Sig |
| ENSG00000226684 | NA        | NA                                                                 | NA        | 1.27660947  | 1.699497328 | 2.659642271 | 0.638994705 | 0.522826376 | 0.998677884 | Not Sig |
| ENSG00000266176 | NA        | NA                                                                 | NA        | 2.636526215 | 1.702917569 | 1.696995242 | 1.00348989  | 0.315624552 | 0.998677884 | Not Sig |
| ENSG00000254648 | NA        | NA                                                                 | NA        | 3.327981995 | 1.703205245 | 1.480722674 | 1.150252694 | 0.250039809 | 0.998677884 | Not Sig |
| ENSG00000236682 | NA        | NA                                                                 | NA        | 38.65281455 | 1.714713685 | 0.857674457 | 1.999259359 | 0.045580299 | 0.998677884 | Not Sig |
| ENSG00000260496 | NA        | NA                                                                 | NA        | 1.999617866 | 1.728821274 | 2.083039167 | 0.8299514   | 0.406566262 | 0.998677884 | Not Sig |
| ENSG00000259153 | NA        | NA                                                                 | NA        | 59.52999653 | 1.73356515  | 0.972723231 | 1.782177186 | 0.074720342 | 0.998677884 | Not Sig |
| ENSG00000250331 | LINC01340 | long intergenic non-protein coding RNA 1340                        | 102546227 | 3.146496754 | 1.748674095 | 1.720429893 | 1.016416945 | 0.30943088  | 0.998677884 | Not Sig |
| ENSG00000223695 | NA        | NA                                                                 | NA        | 3.155766864 | 1.749044366 | 1.579553396 | 1.107303096 | 0.268162906 | 0.998677884 | Not Sig |
| ENSG00000182586 | LINC00334 | long intergenic non-protein coding RNA 334                         | 114042    | 0.30610738  | 1.755201995 | 4.045972167 | 0.433814649 | 0.664423043 | 0.998677884 | Not Sig |
| ENSG00000204684 | LOC284788 | uncharacterized LOC284788                                          | 284788    | 0.30610738  | 1.755201995 | 4.045972167 | 0.433814649 | 0.664423043 | 0.998677884 | Not Sig |
| ENSG00000224260 | NA        | NA                                                                 | NA        | 0.30610738  | 1.755201995 | 4.045972167 | 0.433814649 | 0.664423043 | 0.998677884 | Not Sig |
| ENSG00000225044 | NA        | NA                                                                 | NA        | 0.30610738  | 1.755201995 | 4.045972167 | 0.433814649 | 0.664423043 | 0.998677884 | Not Sig |

|                 |              |                                               |           |             |             |             |             |             |             |         |
|-----------------|--------------|-----------------------------------------------|-----------|-------------|-------------|-------------|-------------|-------------|-------------|---------|
| ENSG00000225174 | OSTM1-AS1    | OSTM1 antisense RNA 1                         | 100287366 | 0.30610738  | 1.755201995 | 4.045972167 | 0.433814649 | 0.664423043 | 0.998677884 | Not Sig |
| ENSG00000229424 | NA           | NA                                            | NA        | 0.30610738  | 1.755201995 | 4.045972167 | 0.433814649 | 0.664423043 | 0.998677884 | Not Sig |
| ENSG00000229740 | NA           | NA                                            | NA        | 0.30610738  | 1.755201995 | 4.045972167 | 0.433814649 | 0.664423043 | 0.998677884 | Not Sig |
| ENSG00000233359 | NA           | NA                                            | NA        | 0.30610738  | 1.755201995 | 4.045972167 | 0.433814649 | 0.664423043 | 0.998677884 | Not Sig |
| ENSG00000234169 | NA           | NA                                            | NA        | 0.30610738  | 1.755201995 | 4.045972167 | 0.433814649 | 0.664423043 | 0.998677884 | Not Sig |
| ENSG00000234826 | NA           | NA                                            | NA        | 0.30610738  | 1.755201995 | 4.045972167 | 0.433814649 | 0.664423043 | 0.998677884 | Not Sig |
| ENSG00000236322 | NA           | NA                                            | NA        | 0.30610738  | 1.755201995 | 4.045972167 | 0.433814649 | 0.664423043 | 0.998677884 | Not Sig |
| ENSG00000236856 | NA           | NA                                            | NA        | 0.30610738  | 1.755201995 | 4.045972167 | 0.433814649 | 0.664423043 | 0.998677884 | Not Sig |
| ENSG00000237271 | NA           | NA                                            | NA        | 0.30610738  | 1.755201995 | 4.045972167 | 0.433814649 | 0.664423043 | 0.998677884 | Not Sig |
| ENSG00000237664 | LINC00316    | long intergenic non-protein coding RNA 316    | 388830    | 0.30610738  | 1.755201995 | 4.045972167 | 0.433814649 | 0.664423043 | 0.998677884 | Not Sig |
| ENSG00000240497 | NA           | NA                                            | NA        | 0.30610738  | 1.755201995 | 4.045972167 | 0.433814649 | 0.664423043 | 0.998677884 | Not Sig |
| ENSG00000241180 | NA           | NA                                            | NA        | 0.30610738  | 1.755201995 | 4.045972167 | 0.433814649 | 0.664423043 | 0.998677884 | Not Sig |
| ENSG00000248223 | NA           | NA                                            | NA        | 0.30610738  | 1.755201995 | 4.045972167 | 0.433814649 | 0.664423043 | 0.998677884 | Not Sig |
| ENSG00000254021 | NA           | NA                                            | NA        | 0.30610738  | 1.755201995 | 4.045972167 | 0.433814649 | 0.664423043 | 0.998677884 | Not Sig |
| ENSG00000255427 | NA           | NA                                            | NA        | 0.30610738  | 1.755201995 | 4.045972167 | 0.433814649 | 0.664423043 | 0.998677884 | Not Sig |
| ENSG00000258803 | LOC101927690 | uncharacterized LOC101927690                  | 101927690 | 0.30610738  | 1.755201995 | 4.045972167 | 0.433814649 | 0.664423043 | 0.998677884 | Not Sig |
| ENSG00000258850 | NA           | NA                                            | NA        | 0.30610738  | 1.755201995 | 4.045972167 | 0.433814649 | 0.664423043 | 0.998677884 | Not Sig |
| ENSG00000260450 | NA           | NA                                            | NA        | 0.30610738  | 1.755201995 | 4.045972167 | 0.433814649 | 0.664423043 | 0.998677884 | Not Sig |
| ENSG00000261204 | NA           | NA                                            | NA        | 0.30610738  | 1.755201995 | 4.045972167 | 0.433814649 | 0.664423043 | 0.998677884 | Not Sig |
| ENSG00000261671 | NA           | NA                                            | NA        | 0.30610738  | 1.755201995 | 4.045972167 | 0.433814649 | 0.664423043 | 0.998677884 | Not Sig |
| ENSG00000264023 | NA           | NA                                            | NA        | 0.30610738  | 1.755201995 | 4.045972167 | 0.433814649 | 0.664423043 | 0.998677884 | Not Sig |
| ENSG00000266213 | NA           | NA                                            | NA        | 0.30610738  | 1.755201995 | 4.045972167 | 0.433814649 | 0.664423043 | 0.998677884 | Not Sig |
| ENSG00000270460 | NA           | NA                                            | NA        | 0.30610738  | 1.755201995 | 4.045972167 | 0.433814649 | 0.664423043 | 0.998677884 | Not Sig |
| ENSG00000273313 | RBAKDN       | RBAK downstream neighbor (non-protein coding) | 389458    | 0.30610738  | 1.755201995 | 4.045972167 | 0.433814649 | 0.664423043 | 0.998677884 | Not Sig |
| ENSG00000231482 | NA           | NA                                            | NA        | 6.734005026 | 1.757360772 | 1.276828294 | 1.376348551 | 0.168713748 | 0.998677884 | Not Sig |
| ENSG00000227029 | NA           | NA                                            | NA        | 0.307631165 | 1.761386213 | 4.045387481 | 0.435406057 | 0.663267715 | 0.998677884 | Not Sig |
| ENSG00000228622 | NA           | NA                                            | NA        | 0.307631165 | 1.761386213 | 4.045387481 | 0.435406057 | 0.663267715 | 0.998677884 | Not Sig |
| ENSG00000229925 | NA           | NA                                            | NA        | 0.307631165 | 1.761386213 | 4.045387481 | 0.435406057 | 0.663267715 | 0.998677884 | Not Sig |
| ENSG00000233208 | LINC00642    | long intergenic non-protein coding RNA 642    | 400238    | 0.307631165 | 1.761386213 | 4.045387481 | 0.435406057 | 0.663267715 | 0.998677884 | Not Sig |
| ENSG00000253572 | NA           | NA                                            | NA        | 0.307631165 | 1.761386213 | 4.045387481 | 0.435406057 | 0.663267715 | 0.998677884 | Not Sig |
| ENSG00000257614 | NA           | NA                                            | NA        | 0.307631165 | 1.761386213 | 4.045387481 | 0.435406057 | 0.663267715 | 0.998677884 | Not Sig |
| ENSG00000212930 | NA           | NA                                            | NA        | 0.309154951 | 1.767550881 | 4.044807045 | 0.436992633 | 0.662116691 | 0.998677884 | Not Sig |
| ENSG00000224247 | NA           | NA                                            | NA        | 0.309154951 | 1.767550881 | 4.044807045 | 0.436992633 | 0.662116691 | 0.998677884 | Not Sig |
| ENSG00000225877 | PSG8-AS1     | PSG8 antisense RNA 1                          | 100289650 | 0.309154951 | 1.767550881 | 4.044807045 | 0.436992633 | 0.662116691 | 0.998677884 | Not Sig |
| ENSG00000225960 | NA           | NA                                            | NA        | 0.309154951 | 1.767550881 | 4.044807045 | 0.436992633 | 0.662116691 | 0.998677884 | Not Sig |

|                 |              |                                             |           |             |             |             |             |             |             |         |
|-----------------|--------------|---------------------------------------------|-----------|-------------|-------------|-------------|-------------|-------------|-------------|---------|
| ENSG00000227301 | NA           | NA                                          | NA        | 0.309154951 | 1.767550881 | 4.044807045 | 0.436992633 | 0.662116691 | 0.998677884 | Not Sig |
| ENSG00000227981 | NA           | NA                                          | NA        | 0.309154951 | 1.767550881 | 4.044807045 | 0.436992633 | 0.662116691 | 0.998677884 | Not Sig |
| ENSG00000236461 | LOC101928748 | uncharacterized LOC101928748                | 101928748 | 0.309154951 | 1.767550881 | 4.044807045 | 0.436992633 | 0.662116691 | 0.998677884 | Not Sig |
| ENSG00000249647 | C5orf66-AS2  | C5orf66 antisense RNA 2                     | 340073    | 0.309154951 | 1.767550881 | 4.044807045 | 0.436992633 | 0.662116691 | 0.998677884 | Not Sig |
| ENSG00000251434 | NA           | NA                                          | NA        | 0.309154951 | 1.767550881 | 4.044807045 | 0.436992633 | 0.662116691 | 0.998677884 | Not Sig |
| ENSG00000254186 | NA           | NA                                          | NA        | 0.309154951 | 1.767550881 | 4.044807045 | 0.436992633 | 0.662116691 | 0.998677884 | Not Sig |
| ENSG00000258586 | LINC02274    | long intergenic non-protein coding RNA 2274 | 100506498 | 0.309154951 | 1.767550881 | 4.044807045 | 0.436992633 | 0.662116691 | 0.998677884 | Not Sig |
| ENSG00000264695 | NA           | NA                                          | NA        | 0.309154951 | 1.767550881 | 4.044807045 | 0.436992633 | 0.662116691 | 0.998677884 | Not Sig |
| ENSG00000265843 | LINC01029    | long intergenic non-protein coding RNA 1029 | 101927715 | 0.309154951 | 1.767550881 | 4.044807045 | 0.436992633 | 0.662116691 | 0.998677884 | Not Sig |
| ENSG00000267012 | NA           | NA                                          | NA        | 0.309154951 | 1.767550881 | 4.044807045 | 0.436992633 | 0.662116691 | 0.998677884 | Not Sig |
| ENSG00000262223 | NA           | NA                                          | NA        | 16.89392208 | 1.784213491 | 0.999433033 | 1.785225655 | 0.074224722 | 0.998677884 | Not Sig |
| ENSG00000122043 | NA           | NA                                          | NA        | 1.345809843 | 1.78669932  | 2.645484988 | 0.675376851 | 0.499436369 | 0.998677884 | Not Sig |
| ENSG00000267785 | NA           | NA                                          | NA        | 4.323507791 | 1.789645658 | 1.240495758 | 1.442685835 | 0.149108991 | 0.998677884 | Not Sig |
| ENSG00000233907 | LINC01761    | long intergenic non-protein coding RNA 1761 | 440594    | 0.772261526 | 1.796178927 | 3.016020475 | 0.595545999 | 0.551478561 | 0.998677884 | Not Sig |
| ENSG00000268352 | NA           | NA                                          | NA        | 0.772261526 | 1.796178927 | 3.016020475 | 0.595545999 | 0.551478561 | 0.998677884 | Not Sig |
| ENSG00000237658 | NA           | NA                                          | NA        | 0.810919489 | 1.796532669 | 2.978601174 | 0.603146432 | 0.54641128  | 0.998677884 | Not Sig |
| ENSG00000245522 | LOC440028    | uncharacterized LOC440028                   | 440028    | 5.648969174 | 1.800574403 | 1.301946039 | 1.382986967 | 0.166668862 | 0.998677884 | Not Sig |
| ENSG00000273366 | NA           | NA                                          | NA        | 8.77546214  | 1.808323886 | 1.183707192 | 1.52767838  | 0.12659241  | 0.998677884 | Not Sig |
| ENSG00000251206 | NA           | NA                                          | NA        | 4.643836502 | 1.822241532 | 1.514947168 | 1.202841637 | 0.229037609 | 0.998677884 | Not Sig |
| ENSG00000269930 | NA           | NA                                          | NA        | 3.663477228 | 1.827032554 | 1.406824152 | 1.298692912 | 0.194049338 | 0.998677884 | Not Sig |
| ENSG00000273492 | NA           | NA                                          | NA        | 5.949548897 | 1.844828146 | 1.45882115  | 1.264602002 | 0.206014035 | 0.998677884 | Not Sig |
| ENSG00000259269 | NA           | NA                                          | NA        | 2.196679889 | 1.851742675 | 1.802714242 | 1.027197007 | 0.304327707 | 0.998677884 | Not Sig |
| ENSG00000203635 | NA           | NA                                          | NA        | 38.06827736 | 1.85243499  | 0.847875901 | 2.184794955 | 0.028903884 | 0.998677884 | Not Sig |
| ENSG00000230923 | LINC00309    | long intergenic non-protein coding RNA 309  | 150992    | 3.790527401 | 1.854954904 | 1.700860407 | 1.090597968 | 0.275449824 | 0.998677884 | Not Sig |
| ENSG00000228430 | NA           | NA                                          | NA        | 1.580006045 | 1.85777689  | 2.266190452 | 0.819776157 | 0.412343725 | 0.998677884 | Not Sig |
| ENSG00000258520 | NA           | NA                                          | NA        | 0.803814142 | 1.857855075 | 2.99617124  | 0.6200764   | 0.535207489 | 0.998677884 | Not Sig |
| ENSG00000238837 | NA           | NA                                          | NA        | 0.805337927 | 1.861687647 | 2.54515763  | 0.731462612 | 0.464496634 | 0.998677884 | Not Sig |
| ENSG00000235142 | LINC02532    | long intergenic non-protein coding RNA 2532 | 100422737 | 31.92407061 | 1.871387751 | 1.453177835 | 1.287789908 | 0.197819106 | 0.998677884 | Not Sig |
| ENSG00000258798 | NA           | NA                                          | NA        | 3.723258818 | 1.877699152 | 1.700255527 | 1.104362916 | 0.269435741 | 0.998677884 | Not Sig |
| ENSG00000225532 | NA           | NA                                          | NA        | 0.339183782 | 1.882115991 | 4.034444714 | 0.466511781 | 0.640849217 | 0.998677884 | Not Sig |
| ENSG00000230601 | TEX48        | testis expressed 48                         | 100505478 | 0.339183782 | 1.882115991 | 4.034444714 | 0.466511781 | 0.640849217 | 0.998677884 | Not Sig |
| ENSG00000238062 | SPATA3-AS1   | SPATA3 antisense RNA 1 (head to head)       | 348761    | 0.339183782 | 1.882115991 | 4.034444714 | 0.466511781 | 0.640849217 | 0.998677884 | Not Sig |
| ENSG00000248432 | NA           | NA                                          | NA        | 0.339183782 | 1.882115991 | 4.034444714 | 0.466511781 | 0.640849217 | 0.998677884 | Not Sig |
| ENSG00000251443 | LINC02160    | long intergenic non-protein coding RNA 2160 | 105374716 | 0.339183782 | 1.882115991 | 4.034444714 | 0.466511781 | 0.640849217 | 0.998677884 | Not Sig |
| ENSG00000253879 | NA           | NA                                          | NA        | 0.339183782 | 1.882115991 | 4.034444714 | 0.466511781 | 0.640849217 | 0.998677884 | Not Sig |

|                 |            |                                            |           |             |             |             |             |             |             |         |
|-----------------|------------|--------------------------------------------|-----------|-------------|-------------|-------------|-------------|-------------|-------------|---------|
| ENSG00000253960 | NA         | NA                                         | NA        | 0.339183782 | 1.882115991 | 4.034444714 | 0.466511781 | 0.640849217 | 0.998677884 | Not Sig |
| ENSG00000257345 | NA         | NA                                         | NA        | 0.339183782 | 1.882115991 | 4.034444714 | 0.466511781 | 0.640849217 | 0.998677884 | Not Sig |
| ENSG00000258018 | NA         | NA                                         | NA        | 0.339183782 | 1.882115991 | 4.034444714 | 0.466511781 | 0.640849217 | 0.998677884 | Not Sig |
| ENSG00000271914 | NA         | NA                                         | NA        | 0.339183782 | 1.882115991 | 4.034444714 | 0.466511781 | 0.640849217 | 0.998677884 | Not Sig |
| ENSG00000272243 | NA         | NA                                         | NA        | 0.339183782 | 1.882115991 | 4.034444714 | 0.466511781 | 0.640849217 | 0.998677884 | Not Sig |
| ENSG00000203402 | NA         | NA                                         | NA        | 0.340707567 | 1.887910949 | 4.033941399 | 0.468006538 | 0.639779914 | 0.998677884 | Not Sig |
| ENSG00000225298 | LINC00113  | long intergenic non-protein coding RNA 113 | 54088     | 0.340707567 | 1.887910949 | 4.033941399 | 0.468006538 | 0.639779914 | 0.998677884 | Not Sig |
| ENSG00000230676 | NA         | NA                                         | NA        | 0.340707567 | 1.887910949 | 4.033941399 | 0.468006538 | 0.639779914 | 0.998677884 | Not Sig |
| ENSG00000232638 | NA         | NA                                         | NA        | 0.340707567 | 1.887910949 | 4.033941399 | 0.468006538 | 0.639779914 | 0.998677884 | Not Sig |
| ENSG00000242290 | ZBTB20-AS5 | ZBTB20 antisense RNA 5                     | 101929754 | 0.340707567 | 1.887910949 | 4.033941399 | 0.468006538 | 0.639779914 | 0.998677884 | Not Sig |
| ENSG00000248408 | NA         | NA                                         | NA        | 0.340707567 | 1.887910949 | 4.033941399 | 0.468006538 | 0.639779914 | 0.998677884 | Not Sig |
| ENSG00000253140 | NA         | NA                                         | NA        | 0.340707567 | 1.887910949 | 4.033941399 | 0.468006538 | 0.639779914 | 0.998677884 | Not Sig |
| ENSG00000253449 | NA         | NA                                         | NA        | 0.340707567 | 1.887910949 | 4.033941399 | 0.468006538 | 0.639779914 | 0.998677884 | Not Sig |
| ENSG00000255269 | NA         | NA                                         | NA        | 0.340707567 | 1.887910949 | 4.033941399 | 0.468006538 | 0.639779914 | 0.998677884 | Not Sig |
| ENSG00000260999 | NA         | NA                                         | NA        | 0.340707567 | 1.887910949 | 4.033941399 | 0.468006538 | 0.639779914 | 0.998677884 | Not Sig |
| ENSG00000271849 | NA         | NA                                         | NA        | 0.340707567 | 1.887910949 | 4.033941399 | 0.468006538 | 0.639779914 | 0.998677884 | Not Sig |
| ENSG00000272797 | NA         | NA                                         | NA        | 2.17646721  | 1.890080886 | 1.761237884 | 1.073154798 | 0.283201668 | 0.998677884 | Not Sig |
| ENSG00000245059 | NA         | NA                                         | NA        | 1.481290419 | 1.898259147 | 2.24731501  | 0.844678711 | 0.398290249 | 0.998677884 | Not Sig |
| ENSG00000189196 | LINC00994  | long intergenic non-protein coding RNA 994 | 100287879 | 2.421595344 | 1.919358552 | 1.699372338 | 1.12945145  | 0.258707439 | 0.998677884 | Not Sig |
| ENSG00000225637 | NA         | NA                                         | NA        | 0.877072293 | 1.919655176 | 2.509040862 | 0.765095222 | 0.444214845 | 0.998677884 | Not Sig |
| ENSG00000253111 | NA         | NA                                         | NA        | 0.877072293 | 1.919655176 | 2.509040862 | 0.765095222 | 0.444214845 | 0.998677884 | Not Sig |
| ENSG00000267627 | NA         | NA                                         | NA        | 0.825958612 | 1.91998547  | 2.541460616 | 0.755465364 | 0.449969807 | 0.998677884 | Not Sig |
| ENSG00000258717 | NA         | NA                                         | NA        | 0.824434827 | 1.920188454 | 2.943423234 | 0.652365733 | 0.514165265 | 0.998677884 | Not Sig |
| ENSG00000246379 | LOC283856  | uncharacterized LOC283856                  | 283856    | 6.05444154  | 1.924104043 | 1.158158915 | 1.661347175 | 0.09664374  | 0.998677884 | Not Sig |
| ENSG00000270302 | NA         | NA                                         | NA        | 1.50827168  | 1.926386176 | 2.245843762 | 0.857756095 | 0.391027158 | 0.998677884 | Not Sig |
| ENSG00000272861 | NA         | NA                                         | NA        | 1.464263347 | 1.927075022 | 2.188072664 | 0.880718019 | 0.378470461 | 0.998677884 | Not Sig |
| ENSG00000223749 | MIR503HG   | MIR503 host gene                           | 84848     | 56.52420977 | 1.939322421 | 0.754090869 | 2.571735715 | 0.01011901  | 0.853009137 | Not Sig |
| ENSG00000256155 | NA         | NA                                         | NA        | 2.268077489 | 1.952859436 | 1.766768456 | 1.105328448 | 0.269017295 | 0.998677884 | Not Sig |
| ENSG00000270761 | NA         | NA                                         | NA        | 9.649927428 | 1.953915993 | 1.309436377 | 1.492180931 | 0.13565172  | 0.998677884 | Not Sig |
| ENSG00000263627 | PPP4R1-AS1 | PPP4R1 antisense RNA 1                     | 101927323 | 18.52495717 | 1.960370889 | 0.954951042 | 2.052849625 | 0.040087164 | 0.998677884 | Not Sig |
| ENSG00000234147 | NA         | NA                                         | NA        | 7.783141066 | 1.973868619 | 1.477787591 | 1.3356917   | 0.181650064 | 0.998677884 | Not Sig |
| ENSG00000226423 | NA         | NA                                         | NA        | 0.859035013 | 1.98367368  | 2.968373737 | 0.668269516 | 0.503961569 | 0.998677884 | Not Sig |
| ENSG00000223643 | NA         | NA                                         | NA        | 0.372260183 | 2.001289707 | 4.024477702 | 0.497279363 | 0.618992063 | 0.998677884 | Not Sig |
| ENSG00000224294 | PINCR      | p53-induced noncoding RNA                  | 101927501 | 0.372260183 | 2.001289707 | 4.024477702 | 0.497279363 | 0.618992063 | 0.998677884 | Not Sig |
| ENSG00000224330 | NA         | NA                                         | NA        | 0.372260183 | 2.001289707 | 4.024477702 | 0.497279363 | 0.618992063 | 0.998677884 | Not Sig |

|                 |              |                                                                      |           |             |             |             |             |             |             |         |
|-----------------|--------------|----------------------------------------------------------------------|-----------|-------------|-------------|-------------|-------------|-------------|-------------|---------|
| ENSG00000224535 | NA           | NA                                                                   | NA        | 0.372260183 | 2.001289707 | 4.024477702 | 0.497279363 | 0.618992063 | 0.998677884 | Not Sig |
| ENSG00000229613 | NA           | NA                                                                   | NA        | 0.372260183 | 2.001289707 | 4.024477702 | 0.497279363 | 0.618992063 | 0.998677884 | Not Sig |
| ENSG00000231557 | NA           | NA                                                                   | NA        | 0.372260183 | 2.001289707 | 4.024477702 | 0.497279363 | 0.618992063 | 0.998677884 | Not Sig |
| ENSG00000234019 | NA           | NA                                                                   | NA        | 0.372260183 | 2.001289707 | 4.024477702 | 0.497279363 | 0.618992063 | 0.998677884 | Not Sig |
| ENSG00000235011 | NA           | NA                                                                   | NA        | 0.372260183 | 2.001289707 | 4.024477702 | 0.497279363 | 0.618992063 | 0.998677884 | Not Sig |
| ENSG00000235139 | LOC101927378 | uncharacterized LOC101927378                                         | 101927378 | 0.372260183 | 2.001289707 | 4.024477702 | 0.497279363 | 0.618992063 | 0.998677884 | Not Sig |
| ENSG00000236049 | LINC01920    | long intergenic non-protein coding RNA 1920                          | 101929260 | 0.372260183 | 2.001289707 | 4.024477702 | 0.497279363 | 0.618992063 | 0.998677884 | Not Sig |
| ENSG00000241336 | LINC01487    | long intergenic non-protein coding RNA 1487                          | 101928190 | 0.372260183 | 2.001289707 | 4.024477702 | 0.497279363 | 0.618992063 | 0.998677884 | Not Sig |
| ENSG00000249842 | NA           | NA                                                                   | NA        | 0.372260183 | 2.001289707 | 4.024477702 | 0.497279363 | 0.618992063 | 0.998677884 | Not Sig |
| ENSG00000250313 | LINC02229    | long intergenic non-protein coding RNA 2229                          | 101928769 | 0.372260183 | 2.001289707 | 4.024477702 | 0.497279363 | 0.618992063 | 0.998677884 | Not Sig |
| ENSG00000250447 | LINC02105    | long intergenic non-protein coding RNA 2105                          | 105378966 | 0.372260183 | 2.001289707 | 4.024477702 | 0.497279363 | 0.618992063 | 0.998677884 | Not Sig |
| ENSG00000250544 | NA           | NA                                                                   | NA        | 0.372260183 | 2.001289707 | 4.024477702 | 0.497279363 | 0.618992063 | 0.998677884 | Not Sig |
| ENSG00000254120 | NA           | NA                                                                   | NA        | 0.372260183 | 2.001289707 | 4.024477702 | 0.497279363 | 0.618992063 | 0.998677884 | Not Sig |
| ENSG00000254822 | NA           | NA                                                                   | NA        | 0.372260183 | 2.001289707 | 4.024477702 | 0.497279363 | 0.618992063 | 0.998677884 | Not Sig |
| ENSG00000255970 | LINC02421    | long intergenic non-protein coding RNA 2421                          | 101927901 | 0.372260183 | 2.001289707 | 4.024477702 | 0.497279363 | 0.618992063 | 0.998677884 | Not Sig |
| ENSG00000256732 | LOC100996671 | uncharacterized LOC100996671                                         | 100996671 | 0.372260183 | 2.001289707 | 4.024477702 | 0.497279363 | 0.618992063 | 0.998677884 | Not Sig |
| ENSG00000257849 | NA           | NA                                                                   | NA        | 0.372260183 | 2.001289707 | 4.024477702 | 0.497279363 | 0.618992063 | 0.998677884 | Not Sig |
| ENSG00000259044 | NA           | NA                                                                   | NA        | 0.372260183 | 2.001289707 | 4.024477702 | 0.497279363 | 0.618992063 | 0.998677884 | Not Sig |
| ENSG00000259061 | NA           | NA                                                                   | NA        | 0.372260183 | 2.001289707 | 4.024477702 | 0.497279363 | 0.618992063 | 0.998677884 | Not Sig |
| ENSG00000259730 | NA           | NA                                                                   | NA        | 0.372260183 | 2.001289707 | 4.024477702 | 0.497279363 | 0.618992063 | 0.998677884 | Not Sig |
| ENSG00000261070 | LOC338694    | uncharacterized LOC338694                                            | 338694    | 0.372260183 | 2.001289707 | 4.024477702 | 0.497279363 | 0.618992063 | 0.998677884 | Not Sig |
| ENSG00000261325 | LINC02192    | long intergenic non-protein coding RNA 2192                          | 100507534 | 0.372260183 | 2.001289707 | 4.024477702 | 0.497279363 | 0.618992063 | 0.998677884 | Not Sig |
| ENSG00000267705 | NA           | NA                                                                   | NA        | 0.372260183 | 2.001289707 | 4.024477702 | 0.497279363 | 0.618992063 | 0.998677884 | Not Sig |
| ENSG00000271395 | NA           | NA                                                                   | NA        | 0.372260183 | 2.001289707 | 4.024477702 | 0.497279363 | 0.618992063 | 0.998677884 | Not Sig |
| ENSG00000273059 | NA           | NA                                                                   | NA        | 0.372260183 | 2.001289707 | 4.024477702 | 0.497279363 | 0.618992063 | 0.998677884 | Not Sig |
| ENSG00000223715 | LINC01208    | long intergenic non-protein coding RNA 1208                          | 100505547 | 2.979303609 | 2.001536412 | 2.330408865 | 0.858877788 | 0.390407945 | 0.998677884 | Not Sig |
| ENSG00000233081 | NA           | NA                                                                   | NA        | 1.601267708 | 2.033079098 | 1.894730646 | 1.073017477 | 0.283263275 | 0.998677884 | Not Sig |
| ENSG00000229382 | NA           | NA                                                                   | NA        | 1.646799827 | 2.0381894   | 2.141887956 | 0.951585443 | 0.341307267 | 0.998677884 | Not Sig |
| ENSG00000237438 | CECR7        | cat eye syndrome chromosome region, candidate 7 (non-protein coding) | 100130418 | 52.78632565 | 2.038716363 | 1.029087388 | 1.981091583 | 0.047581004 | 0.998677884 | Not Sig |
| ENSG00000237797 | NA           | NA                                                                   | NA        | 2.392626133 | 2.046598034 | 1.637469704 | 1.249853985 | 0.211352891 | 0.998677884 | Not Sig |
| ENSG00000250635 | NA           | NA                                                                   | NA        | 1.678352443 | 2.067399788 | 2.141306831 | 0.965485076 | 0.334301908 | 0.998677884 | Not Sig |
| ENSG00000254615 | NA           | NA                                                                   | NA        | 42.12102055 | 2.077406402 | 1.19349988  | 1.740600428 | 0.081753642 | 0.998677884 | Not Sig |
| ENSG00000270641 | TSIX         | TSIX transcript, XIST antisense RNA                                  | 9383      | 1.962546546 | 2.094714798 | 2.088899386 | 1.00278396  | 0.31596511  | 0.998677884 | Not Sig |
| ENSG00000230107 | NA           | NA                                                                   | NA        | 6.665143152 | 2.106994041 | 1.29512693  | 1.626862967 | 0.103766205 | 0.998677884 | Not Sig |
| ENSG00000267446 | NA           | NA                                                                   | NA        | 3.395153484 | 2.113778144 | 2.284942581 | 0.925090268 | 0.354918955 | 0.998677884 | Not Sig |

|                 |              |                                             |           |             |             |             |             |             |             |         |
|-----------------|--------------|---------------------------------------------|-----------|-------------|-------------|-------------|-------------|-------------|-------------|---------|
| ENSG00000244953 | NA           | NA                                          | NA        | 3.396444296 | 2.11452195  | 1.967441236 | 1.074757361 | 0.282483375 | 0.998677884 | Not Sig |
| ENSG00000226717 | PTRD-AS2     | PTRD antisense RNA 2 (head to head)         | 101929428 | 0.912859499 | 2.115919832 | 2.911681688 | 0.726700257 | 0.467409596 | 0.998677884 | Not Sig |
| ENSG00000267498 | LOC105372352 | uncharacterized LOC105372352                | 105372352 | 0.925315216 | 2.11600609  | 2.901837739 | 0.729195179 | 0.46588228  | 0.998677884 | Not Sig |
| ENSG00000273056 | NA           | NA                                          | NA        | 0.926839001 | 2.119086156 | 2.83910955  | 0.74639112  | 0.455431182 | 0.998677884 | Not Sig |
| ENSG00000228308 | LINC01209    | long intergenic non-protein coding RNA 1209 | 101928684 | 3.449605977 | 2.121145692 | 1.720769275 | 1.232672923 | 0.217697818 | 0.998677884 | Not Sig |
| ENSG00000250192 | NA           | NA                                          | NA        | 0.928362786 | 2.121597431 | 2.838434014 | 0.747453497 | 0.454789863 | 0.998677884 | Not Sig |
| ENSG00000180279 | LINC01869    | long intergenic non-protein coding RNA 1869 | 284365    | 0.917430855 | 2.123512738 | 2.909291774 | 0.729907105 | 0.465446969 | 0.998677884 | Not Sig |
| ENSG00000224184 | MIR3681HG    | MIR3681 host gene                           | 100506457 | 2.586640586 | 2.155759688 | 1.748676289 | 1.232795173 | 0.217652193 | 0.998677884 | Not Sig |
| ENSG00000236130 | NA           | NA                                          | NA        | 0.944412115 | 2.166477722 | 2.897025564 | 0.747828307 | 0.454563726 | 0.998677884 | Not Sig |
| ENSG00000231019 | LOC105370306 | uncharacterized LOC105370306                | 105370306 | 0.950507256 | 2.176300097 | 2.894361231 | 0.751910326 | 0.452104988 | 0.998677884 | Not Sig |
| ENSG00000258809 | NA           | NA                                          | NA        | 1.793758376 | 2.197813678 | 2.488358327 | 0.88323842  | 0.377107467 | 0.998677884 | Not Sig |
| ENSG00000267659 | LINC01482    | long intergenic non-protein coding RNA 1482 | 101928104 | 11.17045182 | 2.199849764 | 1.249480841 | 1.760611041 | 0.078304259 | 0.998677884 | Not Sig |
| ENSG00000249911 | NA           | NA                                          | NA        | 1.964721946 | 2.202260608 | 2.218484969 | 0.992686738 | 0.32086264  | 0.998677884 | Not Sig |
| ENSG00000272226 | NA           | NA                                          | NA        | 0.989944234 | 2.217824534 | 2.812628992 | 0.78852367  | 0.430390459 | 0.998677884 | Not Sig |
| ENSG00000249430 | NA           | NA                                          | NA        | 70.05113186 | 2.220579139 | 1.200666598 | 1.849455246 | 0.064392104 | 0.998677884 | Not Sig |
| ENSG00000261227 | NA           | NA                                          | NA        | 2.98073039  | 2.233200986 | 1.616859395 | 1.381196777 | 0.167218465 | 0.998677884 | Not Sig |
| ENSG00000249867 | NA           | NA                                          | NA        | 5.404583011 | 2.243853053 | 1.639800093 | 1.368369878 | 0.171196328 | 0.998677884 | Not Sig |
| ENSG00000258736 | NA           | NA                                          | NA        | 1.024544421 | 2.265875209 | 2.436493478 | 0.929973845 | 0.352384626 | 0.998677884 | Not Sig |
| ENSG00000268536 | NA           | NA                                          | NA        | 1.024544421 | 2.265875209 | 2.436493478 | 0.929973845 | 0.352384626 | 0.998677884 | Not Sig |
| ENSG00000205786 | LINC01531    | long intergenic non-protein coding RNA 1531 | 100128682 | 1.023020635 | 2.267505078 | 2.80025491  | 0.809749523 | 0.418084149 | 0.998677884 | Not Sig |
| ENSG00000262152 | NA           | NA                                          | NA        | 7.95793783  | 2.268440653 | 1.806323562 | 1.255832953 | 0.209176541 | 0.998677884 | Not Sig |
| ENSG00000249797 | NA           | NA                                          | NA        | 1.850503032 | 2.271441456 | 1.875698044 | 1.210984605 | 0.225901305 | 0.998677884 | Not Sig |
| ENSG00000233393 | LOC105369306 | uncharacterized LOC105369306                | 105369306 | 1.842746071 | 2.29883954  | 2.144413923 | 1.072012971 | 0.283714206 | 0.998677884 | Not Sig |
| ENSG00000227517 | LINC01483    | long intergenic non-protein coding RNA 1483 | 101928122 | 1.04364132  | 2.316679065 | 2.857246543 | 0.810808248 | 0.417475797 | 0.998677884 | Not Sig |
| ENSG00000257156 | NA           | NA                                          | NA        | 1.04364132  | 2.316679065 | 2.857246543 | 0.810808248 | 0.417475797 | 0.998677884 | Not Sig |
| ENSG00000273264 | NA           | NA                                          | NA        | 1.04364132  | 2.316679065 | 2.857246543 | 0.810808248 | 0.417475797 | 0.998677884 | Not Sig |
| ENSG00000243885 | NA           | NA                                          | NA        | 1.057620822 | 2.318836882 | 2.848886021 | 0.813945123 | 0.415676389 | 0.998677884 | Not Sig |
| ENSG00000249697 | NA           | NA                                          | NA        | 1.045165105 | 2.318932739 | 2.856707926 | 0.811750028 | 0.416935082 | 0.998677884 | Not Sig |
| ENSG00000177757 | FAM87B       | family with sequence similarity 87 member B | 400728    | 2.868814276 | 2.333880057 | 1.589574581 | 1.468241934 | 0.142038517 | 0.998677884 | Not Sig |
| ENSG00000229960 | NA           | NA                                          | NA        | 0.460684856 | 2.340388725 | 4.00012405  | 0.585079037 | 0.558494574 | 0.998677884 | Not Sig |
| ENSG00000257585 | LINC00609    | long intergenic non-protein coding RNA 609  | 101101773 | 0.460684856 | 2.340388725 | 4.00012405  | 0.585079037 | 0.558494574 | 0.998677884 | Not Sig |
| ENSG00000263321 | NA           | NA                                          | NA        | 0.460684856 | 2.340388725 | 4.00012405  | 0.585079037 | 0.558494574 | 0.998677884 | Not Sig |
| ENSG00000225353 | NA           | NA                                          | NA        | 0.462208641 | 2.344698008 | 3.999849029 | 0.586196627 | 0.557743388 | 0.998677884 | Not Sig |
| ENSG00000258813 | NA           | NA                                          | NA        | 3.891834912 | 2.355512277 | 1.454832431 | 1.619095249 | 0.105426771 | 0.998677884 | Not Sig |
| ENSG00000223382 | NA           | NA                                          | NA        | 1.93740392  | 2.360691716 | 1.823193447 | 1.294811431 | 0.195385288 | 0.998677884 | Not Sig |

|                 |              |                                             |           |             |             |             |             |             |             |         |
|-----------------|--------------|---------------------------------------------|-----------|-------------|-------------|-------------|-------------|-------------|-------------|---------|
| ENSG00000249856 | NA           | NA                                          | NA        | 1.984459823 | 2.361102377 | 1.978733601 | 1.193239138 | 0.232775731 | 0.998677884 | Not Sig |
| ENSG00000246331 | LOC645485    | uncharacterized LOC645485                   | 645485    | 3.914106781 | 2.375833525 | 1.550436669 | 1.532364101 | 0.125432611 | 0.998677884 | Not Sig |
| ENSG00000251391 | NA           | NA                                          | NA        | 1.070484545 | 2.384385204 | 2.754298997 | 0.865695847 | 0.386656978 | 0.998677884 | Not Sig |
| ENSG00000248202 | NA           | NA                                          | NA        | 2.951016408 | 2.401235469 | 1.573105286 | 1.526430234 | 0.126902753 | 0.998677884 | Not Sig |
| ENSG00000214797 | NA           | NA                                          | NA        | 6.972236755 | 2.407729162 | 1.284489377 | 1.874464052 | 0.060866492 | 0.998677884 | Not Sig |
| ENSG00000246777 | LOC106699570 | uncharacterized LOC106699570                | 106699570 | 3.155183779 | 2.411110742 | 1.450245706 | 1.662553271 | 0.096401892 | 0.998677884 | Not Sig |
| ENSG00000240567 | LINC02067    | long intergenic non-protein coding RNA 2067 | 101243545 | 1.109921522 | 2.420294187 | 2.808617193 | 0.861738721 | 0.388831313 | 0.998677884 | Not Sig |
| ENSG00000230379 | NA           | NA                                          | NA        | 0.492237472 | 2.425978902 | 3.994809052 | 0.607282819 | 0.543663238 | 0.998677884 | Not Sig |
| ENSG00000253972 | NA           | NA                                          | NA        | 0.492237472 | 2.425978902 | 3.994809052 | 0.607282819 | 0.543663238 | 0.998677884 | Not Sig |
| ENSG00000258487 | NA           | NA                                          | NA        | 0.492237472 | 2.425978902 | 3.994809052 | 0.607282819 | 0.543663238 | 0.998677884 | Not Sig |
| ENSG00000258700 | LINC00871    | long intergenic non-protein coding RNA 871  | 100506412 | 0.492237472 | 2.425978902 | 3.994809052 | 0.607282819 | 0.543663238 | 0.998677884 | Not Sig |
| ENSG00000269945 | NA           | NA                                          | NA        | 0.492237472 | 2.425978902 | 3.994809052 | 0.607282819 | 0.543663238 | 0.998677884 | Not Sig |
| ENSG00000234610 | NA           | NA                                          | NA        | 1.112969093 | 2.426776721 | 2.3270339   | 1.042862642 | 0.297011914 | 0.998677884 | Not Sig |
| ENSG00000258831 | NA           | NA                                          | NA        | 1.112969093 | 2.426776721 | 2.3270339   | 1.042862642 | 0.297011914 | 0.998677884 | Not Sig |
| ENSG00000227260 | NA           | NA                                          | NA        | 0.493761257 | 2.429584352 | 3.331851559 | 0.729199458 | 0.465879663 | 0.998677884 | Not Sig |
| ENSG00000228397 | LINC01635    | long intergenic non-protein coding RNA 1635 | 101928043 | 1.116016663 | 2.430332483 | 2.387288575 | 1.018030459 | 0.308663481 | 0.998677884 | Not Sig |
| ENSG00000223438 | NA           | NA                                          | NA        | 0.495285042 | 2.434182069 | 3.994315634 | 0.609411547 | 0.542251686 | 0.998677884 | Not Sig |
| ENSG00000249094 | NA           | NA                                          | NA        | 0.495285042 | 2.434182069 | 3.994315634 | 0.609411547 | 0.542251686 | 0.998677884 | Not Sig |
| ENSG00000250122 | NA           | NA                                          | NA        | 0.495285042 | 2.434182069 | 3.994315634 | 0.609411547 | 0.542251686 | 0.998677884 | Not Sig |
| ENSG00000254298 | NA           | NA                                          | NA        | 0.495285042 | 2.434182069 | 3.994315634 | 0.609411547 | 0.542251686 | 0.998677884 | Not Sig |
| ENSG00000258711 | NA           | NA                                          | NA        | 1.991101006 | 2.45191842  | 2.012587324 | 1.218291694 | 0.223113145 | 0.998677884 | Not Sig |
| ENSG00000224478 | NA           | NA                                          | NA        | 1.130542207 | 2.46407704  | 2.735350901 | 0.900826669 | 0.367680486 | 0.998677884 | Not Sig |
| ENSG00000256232 | LINC02387    | long intergenic non-protein coding RNA 2387 | 101929027 | 1.133589777 | 2.46740828  | 2.282380306 | 1.081067986 | 0.279666873 | 0.998677884 | Not Sig |
| ENSG00000231533 | NA           | NA                                          | NA        | 1.135113563 | 2.469418093 | 2.326773303 | 1.061305839 | 0.288550933 | 0.998677884 | Not Sig |
| ENSG00000272021 | NA           | NA                                          | NA        | 1.136637348 | 2.47214595  | 2.733573901 | 0.904364045 | 0.365802397 | 0.998677884 | Not Sig |
| ENSG00000253807 | NA           | NA                                          | NA        | 2.068047705 | 2.489709537 | 2.192874843 | 1.135363263 | 0.256223146 | 0.998677884 | Not Sig |
| ENSG00000258551 | CRAT37       | cervical cancer-associated transcript 37    | 101926928 | 6.994534432 | 2.504944577 | 1.687131376 | 1.484735933 | 0.137613789 | 0.998677884 | Not Sig |
| ENSG00000246375 | LOC105369192 | uncharacterized LOC105369192                | 105369192 | 1.179121896 | 2.50741156  | 2.317448197 | 1.081970921 | 0.279265449 | 0.998677884 | Not Sig |
| ENSG00000226897 | NA           | NA                                          | NA        | 0.525313874 | 2.511578996 | 3.989792781 | 0.629501113 | 0.52902104  | 0.998677884 | Not Sig |
| ENSG00000234956 | LINC02539    | long intergenic non-protein coding RNA 2539 | 100507406 | 0.525313874 | 2.511578996 | 3.989792781 | 0.629501113 | 0.52902104  | 0.998677884 | Not Sig |
| ENSG00000248701 | NA           | NA                                          | NA        | 0.525313874 | 2.511578996 | 3.989792781 | 0.629501113 | 0.52902104  | 0.998677884 | Not Sig |
| ENSG00000251399 | NA           | NA                                          | NA        | 0.525313874 | 2.511578996 | 3.989792781 | 0.629501113 | 0.52902104  | 0.998677884 | Not Sig |
| ENSG00000240893 | LINC02042    | long intergenic non-protein coding RNA 2042 | 101929694 | 0.526837659 | 2.515487436 | 3.989570616 | 0.630515832 | 0.528357148 | 0.998677884 | Not Sig |
| ENSG00000267501 | NA           | NA                                          | NA        | 0.526837659 | 2.515487436 | 3.989570616 | 0.630515832 | 0.528357148 | 0.998677884 | Not Sig |
| ENSG00000272542 | NA           | NA                                          | NA        | 0.526837659 | 2.515487436 | 3.989570616 | 0.630515832 | 0.528357148 | 0.998677884 | Not Sig |



|                 |           |                                               |           |             |             |             |             |             |             |         |
|-----------------|-----------|-----------------------------------------------|-----------|-------------|-------------|-------------|-------------|-------------|-------------|---------|
| ENSG00000232461 | NA        | NA                                            | NA        | 3.198727947 | 2.542121878 | 1.713554061 | 1.4835376   | 0.137931634 | 0.998677884 | Not Sig |
| ENSG00000260455 | NBAT1     | neuroblastoma associated transcript 1         | 729177    | 2.31676945  | 2.556277707 | 1.739781006 | 1.469310044 | 0.141748714 | 0.998677884 | Not Sig |
| ENSG00000258954 | NA        | NA                                            | NA        | 2.11564965  | 2.556576246 | 1.972558724 | 1.296071044 | 0.19495101  | 0.998677884 | Not Sig |
| ENSG00000258861 | MIR381HG  | MIR381 host gene                              | 378881    | 5.053854558 | 2.57076216  | 1.88391619  | 1.364584143 | 0.172383791 | 0.998677884 | Not Sig |
| ENSG00000236846 | NA        | NA                                            | NA        | 4.313756231 | 2.59271296  | 1.640682792 | 1.580264615 | 0.11404628  | 0.998677884 | Not Sig |
| ENSG00000272796 | NA        | NA                                            | NA        | 10.1456195  | 2.596344185 | 1.023755399 | 2.53609816  | 0.011209531 | 0.853009137 | Not Sig |
| ENSG00000258088 | NA        | NA                                            | NA        | 20.15835709 | 2.607446297 | 1.219785863 | 2.137626263 | 0.032547088 | 0.998677884 | Not Sig |
| ENSG00000231437 | LINC01750 | long intergenic non-protein coding RNA 1750   | 643355    | 12.66383479 | 2.624617669 | 1.151037376 | 2.280219326 | 0.022594684 | 0.998677884 | Not Sig |
| ENSG00000253339 | NA        | NA                                            | NA        | 5.124451317 | 2.637222416 | 1.47063296  | 1.793256705 | 0.072931887 | 0.998677884 | Not Sig |
| ENSG00000235319 | NA        | NA                                            | NA        | 1.258138422 | 2.646734376 | 2.346087609 | 1.128148142 | 0.259257361 | 0.998677884 | Not Sig |
| ENSG00000259508 | NA        | NA                                            | NA        | 1.302146755 | 2.681091556 | 2.268890072 | 1.181675388 | 0.237334528 | 0.998677884 | Not Sig |
| ENSG00000272829 | NA        | NA                                            | NA        | 7.269313696 | 2.695700192 | 1.303018979 | 2.06881115  | 0.038563812 | 0.998677884 | Not Sig |
| ENSG00000272524 | NA        | NA                                            | NA        | 3.494030795 | 2.697264589 | 1.646822383 | 1.637860049 | 0.101450892 | 0.998677884 | Not Sig |
| ENSG00000260710 | NA        | NA                                            | NA        | 3.438555125 | 2.706371563 | 1.956309431 | 1.383406694 | 0.166540199 | 0.998677884 | Not Sig |
| ENSG00000249574 | LOC442497 | uncharacterized LOC442497                     | 442497    | 64.79334435 | 2.728650976 | 1.284541131 | 2.124222346 | 0.033651556 | 0.998677884 | Not Sig |
| ENSG00000254991 | NA        | NA                                            | NA        | 0.613738546 | 2.752871857 | 3.813009189 | 0.721968325 | 0.470313952 | 0.998677884 | Not Sig |
| ENSG00000258403 | NA        | NA                                            | NA        | 0.613738546 | 2.752871857 | 3.813009189 | 0.721968325 | 0.470313952 | 0.998677884 | Not Sig |
| ENSG00000260785 | CASC17    | cancer susceptibility 17 (non-protein coding) | 101928165 | 0.613738546 | 2.752871857 | 3.813009189 | 0.721968325 | 0.470313952 | 0.998677884 | Not Sig |
| ENSG00000226715 | NA        | NA                                            | NA        | 0.615262331 | 2.756356877 | 3.767273724 | 0.731658244 | 0.464377189 | 0.998677884 | Not Sig |
| ENSG00000267778 | NA        | NA                                            | NA        | 0.615262331 | 2.756356877 | 3.767273724 | 0.731658244 | 0.464377189 | 0.998677884 | Not Sig |
| ENSG00000272912 | NA        | NA                                            | NA        | 0.615262331 | 2.756356877 | 3.767273724 | 0.731658244 | 0.464377189 | 0.998677884 | Not Sig |
| ENSG00000226985 | LINC01203 | long intergenic non-protein coding RNA 1203   | 100133123 | 0.616786116 | 2.75946205  | 3.808134732 | 0.724623009 | 0.468683339 | 0.998677884 | Not Sig |
| ENSG00000224243 | SOX1-OT   | SOX1 overlapping transcript                   | 100505996 | 1.430753176 | 2.799125518 | 2.610433185 | 1.072283916 | 0.283592529 | 0.998677884 | Not Sig |
| ENSG00000228142 | NA        | NA                                            | NA        | 0.646814947 | 2.822561134 | 3.054625673 | 0.924028485 | 0.355471485 | 0.998677884 | Not Sig |
| ENSG00000242317 | NA        | NA                                            | NA        | 0.646814947 | 2.822561134 | 3.054625673 | 0.924028485 | 0.355471485 | 0.998677884 | Not Sig |
| ENSG00000224717 | NA        | NA                                            | NA        | 3.782299626 | 2.824375444 | 1.55070315  | 1.821351458 | 0.068553449 | 0.998677884 | Not Sig |
| ENSG00000256790 | NA        | NA                                            | NA        | 0.649862518 | 2.828194893 | 3.757639505 | 0.752652001 | 0.45165906  | 0.998677884 | Not Sig |
| ENSG00000262412 | NA        | NA                                            | NA        | 4.034196342 | 2.832194077 | 1.74653387  | 1.621608447 | 0.104887213 | 0.998677884 | Not Sig |
| ENSG00000254271 | NA        | NA                                            | NA        | 2.620342839 | 2.855949872 | 1.689965701 | 1.689945465 | 0.091038388 | 0.998677884 | Not Sig |
| ENSG00000259618 | NA        | NA                                            | NA        | 0.678367564 | 2.884825782 | 3.674234117 | 0.785150235 | 0.432365489 | 0.998677884 | Not Sig |
| ENSG00000267593 | LINC01926 | long intergenic non-protein coding RNA 1926   | 105372147 | 0.679891349 | 2.885321144 | 3.024508237 | 0.953980257 | 0.340093636 | 0.998677884 | Not Sig |
| ENSG00000232139 | LINC00867 | long intergenic non-protein coding RNA 867    | 100506126 | 0.681415134 | 2.89086472  | 3.670144863 | 0.787670468 | 0.430889484 | 0.998677884 | Not Sig |
| ENSG00000255931 | NA        | NA                                            | NA        | 0.681415134 | 2.89086472  | 3.670144863 | 0.787670468 | 0.430889484 | 0.998677884 | Not Sig |
| ENSG00000258100 | NA        | NA                                            | NA        | 0.681415134 | 2.89086472  | 3.670144863 | 0.787670468 | 0.430889484 | 0.998677884 | Not Sig |
| ENSG00000226335 | NA        | NA                                            | NA        | 1.485229276 | 2.89183826  | 2.139294117 | 1.351772174 | 0.176448208 | 0.998677884 | Not Sig |

|                 |              |                                                                            |           |             |             |             |             |             |             |         |
|-----------------|--------------|----------------------------------------------------------------------------|-----------|-------------|-------------|-------------|-------------|-------------|-------------|---------|
| ENSG00000248474 | NA           | NA                                                                         | NA        | 8.865116096 | 2.912509279 | 2.171835153 | 1.341036071 | 0.179908742 | 0.998677884 | Not Sig |
| ENSG00000242104 | NA           | NA                                                                         | NA        | 11.31042921 | 2.925668435 | 1.217226169 | 2.403553678 | 0.016236583 | 0.978832402 | Not Sig |
| ENSG00000223979 | SMCR2        | Smith-Magenis syndrome chromosome region, candidate 2 (non-protein coding) | 105371564 | 0.711443965 | 2.948432123 | 3.674817069 | 0.802334393 | 0.422359553 | 0.998677884 | Not Sig |
| ENSG00000234015 | NA           | NA                                                                         | NA        | 0.711443965 | 2.948432123 | 3.674817069 | 0.802334393 | 0.422359553 | 0.998677884 | Not Sig |
| ENSG00000258216 | NA           | NA                                                                         | NA        | 0.711443965 | 2.948432123 | 3.674817069 | 0.802334393 | 0.422359553 | 0.998677884 | Not Sig |
| ENSG00000260611 | NA           | NA                                                                         | NA        | 0.711443965 | 2.948432123 | 3.674817069 | 0.802334393 | 0.422359553 | 0.998677884 | Not Sig |
| ENSG00000230402 | NA           | NA                                                                         | NA        | 0.71296775  | 2.951338045 | 3.672935353 | 0.803536616 | 0.421664642 | 0.998677884 | Not Sig |
| ENSG00000258784 | NA           | NA                                                                         | NA        | 0.71296775  | 2.951338045 | 3.672935353 | 0.803536616 | 0.421664642 | 0.998677884 | Not Sig |
| ENSG00000258826 | LOC101928791 | uncharacterized LOC101928791                                               | 101928791 | 0.71296775  | 2.951338045 | 3.672935353 | 0.803536616 | 0.421664642 | 0.998677884 | Not Sig |
| ENSG00000253361 | NA           | NA                                                                         | NA        | 1.526598045 | 2.961405349 | 2.589622774 | 1.143566306 | 0.252803542 | 0.998677884 | Not Sig |
| ENSG00000260943 | NA           | NA                                                                         | NA        | 16.96922899 | 2.977426462 | 1.76525494  | 1.686683546 | 0.091664218 | 0.998677884 | Not Sig |
| ENSG00000224037 | NA           | NA                                                                         | NA        | 1.592750848 | 3.023592231 | 2.12869189  | 1.420399187 | 0.155491499 | 0.998677884 | Not Sig |
| ENSG00000259334 | NA           | NA                                                                         | NA        | 1.592750848 | 3.023592231 | 2.12869189  | 1.420399187 | 0.155491499 | 0.998677884 | Not Sig |
| ENSG00000224592 | NA           | NA                                                                         | NA        | 2.929625189 | 3.024767436 | 2.279193257 | 1.327121966 | 0.18446834  | 0.998677884 | Not Sig |
| ENSG00000224652 | LINC00885    | long intergenic non-protein coding RNA 885                                 | 401109    | 39.53069539 | 3.041359793 | 1.042526273 | 2.917297984 | 0.003530783 | 0.555274445 | Not Sig |
| ENSG00000227066 | NA           | NA                                                                         | NA        | 121.5983269 | 3.069928483 | 1.26950899  | 2.418201453 | 0.015597439 | 0.978832402 | Not Sig |
| ENSG00000260550 | NA           | NA                                                                         | NA        | 0.766792236 | 3.073541938 | 3.58131963  | 0.858214919 | 0.390773799 | 0.998677884 | Not Sig |
| ENSG00000260100 | NA           | NA                                                                         | NA        | 0.768316021 | 3.076463001 | 3.519030412 | 0.87423598  | 0.381989756 | 0.998677884 | Not Sig |
| ENSG00000258955 | NA           | NA                                                                         | NA        | 1.658903651 | 3.078652724 | 2.09841911  | 1.467129569 | 0.142340812 | 0.998677884 | Not Sig |
| ENSG00000227150 | NA           | NA                                                                         | NA        | 0.769839806 | 3.07910791  | 3.51738077  | 0.875397948 | 0.381357416 | 0.998677884 | Not Sig |
| ENSG00000268184 | NA           | NA                                                                         | NA        | 0.769839806 | 3.07910791  | 3.51738077  | 0.875397948 | 0.381357416 | 0.998677884 | Not Sig |
| ENSG00000227071 | FOCAD-AS1    | FOCAD antisense RNA 1                                                      | 101929548 | 0.771363592 | 3.081499392 | 3.576367915 | 0.861628184 | 0.388892156 | 0.998677884 | Not Sig |
| ENSG00000235881 | NA           | NA                                                                         | NA        | 0.801392423 | 3.133331626 | 2.837562221 | 1.104233628 | 0.269491806 | 0.998677884 | Not Sig |
| ENSG00000264954 | PRR29-AS1    | PRR29 antisense RNA 1                                                      | 400612    | 12.61445609 | 3.142386065 | 1.129855716 | 2.781227744 | 0.005415373 | 0.687720487 | Not Sig |
| ENSG00000223914 | NA           | NA                                                                         | NA        | 19.19428149 | 3.155208545 | 1.735464448 | 1.818077316 | 0.069052316 | 0.998677884 | Not Sig |
| ENSG00000257924 | NA           | NA                                                                         | NA        | 12.50615949 | 3.177785984 | 1.33820046  | 2.374671119 | 0.017564593 | 0.998677884 | Not Sig |
| ENSG00000229191 | NA           | NA                                                                         | NA        | 1.836089761 | 3.199645601 | 2.134804288 | 1.498800438 | 0.133925411 | 0.998677884 | Not Sig |
| ENSG00000226113 | NA           | NA                                                                         | NA        | 0.867545226 | 3.23767091  | 3.422459127 | 0.946007181 | 0.344144924 | 0.998677884 | Not Sig |
| ENSG00000233430 | NA           | NA                                                                         | NA        | 1.881157715 | 3.275355516 | 2.478835017 | 1.321328565 | 0.186391833 | 0.998677884 | Not Sig |
| ENSG00000256249 | NA           | NA                                                                         | NA        | 0.899097842 | 3.285977598 | 3.456275816 | 0.950727828 | 0.341742558 | 0.998677884 | Not Sig |
| ENSG00000257725 | LINC02399    | long intergenic non-protein coding RNA 2399                                | 105369891 | 0.899097842 | 3.285977598 | 3.456275816 | 0.950727828 | 0.341742558 | 0.998677884 | Not Sig |
| ENSG00000258882 | NA           | NA                                                                         | NA        | 5.686709118 | 3.287358063 | 1.564489692 | 2.101233443 | 0.035620479 | 0.998677884 | Not Sig |
| ENSG00000236393 | LOC101927476 | uncharacterized LOC101927476                                               | 101927476 | 32.13896802 | 3.288780264 | 1.438109095 | 2.286878148 | 0.022202936 | 0.998677884 | Not Sig |
| ENSG00000267243 | NA           | NA                                                                         | NA        | 3.439435775 | 3.304843745 | 1.716736286 | 1.925073625 | 0.054220148 | 0.998677884 | Not Sig |
| ENSG00000259359 | NA           | NA                                                                         | NA        | 1.941215377 | 3.321395113 | 2.531567894 | 1.311991324 | 0.189523062 | 0.998677884 | Not Sig |

|                 |              |                                             |           |             |             |             |             |             |             |         |
|-----------------|--------------|---------------------------------------------|-----------|-------------|-------------|-------------|-------------|-------------|-------------|---------|
| ENSG00000231023 | NA           | NA                                          | NA        | 0.919845926 | 3.335619538 | 3.417173979 | 0.976133951 | 0.328998089 | 0.998677884 | Not Sig |
| ENSG00000250048 | NA           | NA                                          | NA        | 0.925941067 | 3.344507842 | 3.41242254  | 0.980097805 | 0.327037842 | 0.998677884 | Not Sig |
| ENSG00000237222 | LINC01968    | long intergenic non-protein coding RNA 1968 | 100507391 | 1.966534816 | 3.349077306 | 1.997479929 | 1.676651293 | 0.09361069  | 0.998677884 | Not Sig |
| ENSG00000234996 | LOC148709    | actin pseudogene                            | 148709    | 1.998087433 | 3.370733123 | 2.02837103  | 1.66179317  | 0.096554252 | 0.998677884 | Not Sig |
| ENSG00000229618 | NA           | NA                                          | NA        | 2.116877702 | 3.417629031 | 2.118166949 | 1.61348426  | 0.10663934  | 0.998677884 | Not Sig |
| ENSG00000258308 | NA           | NA                                          | NA        | 0.990570085 | 3.434516818 | 3.295447604 | 1.042200402 | 0.297318777 | 0.998677884 | Not Sig |
| ENSG00000260088 | LOC101929224 | uncharacterized LOC101929224                | 101929224 | 2.140673356 | 3.447871664 | 1.959482316 | 1.759582945 | 0.078478545 | 0.998677884 | Not Sig |
| ENSG00000256969 | NA           | NA                                          | NA        | 29.12244245 | 3.450560479 | 1.211830207 | 2.847395996 | 0.004407849 | 0.611653931 | Not Sig |
| ENSG00000249378 | LINC01060    | long intergenic non-protein coding RNA 1060 | 401164    | 9.672476267 | 3.479565822 | 1.448940308 | 2.401455603 | 0.016329991 | 0.978832402 | Not Sig |
| ENSG00000273473 | NA           | NA                                          | NA        | 2.198197027 | 3.50844262  | 1.98748686  | 1.76526582  | 0.077519101 | 0.998677884 | Not Sig |
| ENSG00000232448 | NA           | NA                                          | NA        | 1.050627747 | 3.513431444 | 3.256810076 | 1.078795313 | 0.280678985 | 0.998677884 | Not Sig |
| ENSG00000244342 | LINC00698    | long intergenic non-protein coding RNA 698  | 285401    | 1.050627747 | 3.513431444 | 3.256810076 | 1.078795313 | 0.280678985 | 0.998677884 | Not Sig |
| ENSG00000273093 | NA           | NA                                          | NA        | 1.050627747 | 3.513431444 | 3.256810076 | 1.078795313 | 0.280678985 | 0.998677884 | Not Sig |
| ENSG00000227017 | NA           | NA                                          | NA        | 1.053675317 | 3.517388545 | 3.254973401 | 1.080619751 | 0.279866293 | 0.998677884 | Not Sig |
| ENSG00000237588 | NA           | NA                                          | NA        | 1.083704149 | 3.555766328 | 3.30661715  | 1.075348662 | 0.282218657 | 0.998677884 | Not Sig |
| ENSG00000226854 | NA           | NA                                          | NA        | 1.075947187 | 3.56152612  | 3.190566084 | 1.11626778  | 0.264307529 | 0.998677884 | Not Sig |
| ENSG00000253266 | NA           | NA                                          | NA        | 8.492588327 | 3.62476272  | 1.395089118 | 2.598230229 | 0.009370564 | 0.853009137 | Not Sig |
| ENSG00000230945 | NA           | NA                                          | NA        | 1.139052419 | 3.637660862 | 2.601308022 | 1.398396819 | 0.161993938 | 0.998677884 | Not Sig |
| ENSG00000229274 | LOC105375009 | uncharacterized LOC105375009                | 105375009 | 1.143623775 | 3.642898773 | 2.600019685 | 1.401104304 | 0.161182885 | 0.998677884 | Not Sig |
| ENSG00000255029 | NA           | NA                                          | NA        | 1.14514756  | 3.644714772 | 3.179019424 | 1.14649025  | 0.251592359 | 0.998677884 | Not Sig |
| ENSG00000242029 | NA           | NA                                          | NA        | 1.170605036 | 3.674106942 | 3.139931069 | 1.170123439 | 0.241951297 | 0.998677884 | Not Sig |
| ENSG00000250378 | LOC107986453 | uncharacterized LOC107986453                | 107986453 | 1.205205222 | 3.710479149 | 2.58349657  | 1.436223756 | 0.150938681 | 0.998677884 | Not Sig |
| ENSG00000256237 | NA           | NA                                          | NA        | 1.239805409 | 3.751809175 | 3.133928851 | 1.197158376 | 0.23124483  | 0.998677884 | Not Sig |
| ENSG00000224259 | LINC01133    | long intergenic non-protein coding RNA 1133 | 100505633 | 25.66437547 | 3.791235529 | 1.366758845 | 2.773887684 | 0.00553908  | 0.687720487 | Not Sig |
| ENSG00000272461 | NA           | NA                                          | NA        | 2.688259099 | 3.811623103 | 2.005413619 | 1.900666808 | 0.057345669 | 0.998677884 | Not Sig |
| ENSG00000259579 | NA           | NA                                          | NA        | 1.296677465 | 3.825392937 | 2.453536428 | 1.559134355 | 0.118964584 | 0.998677884 | Not Sig |
| ENSG00000260166 | NA           | NA                                          | NA        | 1.29820125  | 3.826842682 | 2.53362955  | 1.510419186 | 0.130936496 | 0.998677884 | Not Sig |
| ENSG00000196096 | NA           | NA                                          | NA        | 1.328230081 | 3.856105142 | 2.427032785 | 1.588814608 | 0.112102254 | 0.998677884 | Not Sig |
| ENSG00000264026 | LINC02003    | long intergenic non-protein coding RNA 2003 | 146795    | 5.040569436 | 3.917337677 | 1.633496916 | 2.398129827 | 0.016479023 | 0.978832402 | Not Sig |
| ENSG00000250446 | NA           | NA                                          | NA        | 7.949079477 | 3.948484585 | 1.746111732 | 2.261301217 | 0.023740611 | 0.998677884 | Not Sig |
| ENSG00000225982 | NA           | NA                                          | NA        | 1.425935501 | 3.953572906 | 3.042494129 | 1.299451285 | 0.193789101 | 0.998677884 | Not Sig |
| ENSG00000231892 | NA           | NA                                          | NA        | 3.219469383 | 4.108117124 | 2.315707192 | 1.774022699 | 0.076059396 | 0.998677884 | Not Sig |
| ENSG00000270074 | NA           | NA                                          | NA        | 1.69896648  | 4.208139456 | 2.306017828 | 1.824851224 | 0.068023483 | 0.998677884 | Not Sig |
| ENSG00000227702 | NA           | NA                                          | NA        | 1.695780873 | 4.216417516 | 2.881951723 | 1.463042383 | 0.143455782 | 0.998677884 | Not Sig |
| ENSG00000223956 | LINC01767    | long intergenic non-protein coding RNA 1767 | 105378744 | 6.670810343 | 4.235858204 | 1.66628696  | 2.542094073 | 0.011019051 | 0.853009137 | Not Sig |

|                 |              |                                             |           |             |                 |             |             |             |             |          |
|-----------------|--------------|---------------------------------------------|-----------|-------------|-----------------|-------------|-------------|-------------|-------------|----------|
| ENSG00000250748 | LOC105369187 | uncharacterized LOC105369187                | 105369187 | 1.749743395 | 4.258583687     | 2.911227247 | 1.462813901 | 0.143518308 | 0.998677884 | Not Sig  |
| ENSG00000226601 | NA           | NA                                          | NA        | 1.75126718  | 4.260962477     | 2.411352009 | 1.767042913 | 0.077221042 | 0.998677884 | Not Sig  |
| ENSG00000261307 | NA           | NA                                          | NA        | 3.66231569  | 4.304907226     | 1.797075871 | 2.395506665 | 0.016597412 | 0.978832402 | Not Sig  |
| ENSG00000233410 | NA           | NA                                          | NA        | 7.223342984 | 4.425791398     | 1.470764556 | 3.009177355 | 0.002619561 | 0.475349657 | Not Sig  |
| ENSG00000231901 | NA           | NA                                          | NA        | 7.156665413 | 4.435269552     | 2.019755194 | 2.195944125 | 0.028095943 | 0.998677884 | Not Sig  |
| ENSG00000248673 | LINC01331    | long intergenic non-protein coding RNA 1331 | 104310351 | 22.29660511 | 4.44206234      | 1.673860914 | 2.653782224 | 0.007959518 | 0.816369677 | Not Sig  |
| ENSG00000256124 | LINC01152    | long intergenic non-protein coding RNA 1152 | 102606463 | 4.019199985 | 4.446888377     | 1.942790517 | 2.288918099 | 0.022084111 | 0.998677884 | Not Sig  |
| ENSG00000236028 | NA           | NA                                          | NA        | 7.744234728 | 4.468313666     | 1.731988817 | 2.579874433 | 0.009883625 | 0.853009137 | Not Sig  |
| ENSG00000227308 | NA           | NA                                          | NA        | 11.26084513 | 4.491637265     | 1.55404302  | 2.890291457 | 0.003848848 | 0.567464532 | Not Sig  |
| ENSG00000259198 | NA           | NA                                          | NA        | 2.13419386  | 4.542412352     | 2.286483794 | 1.986636583 | 0.046962684 | 0.998677884 | Not Sig  |
| ENSG00000236318 | NA           | NA                                          | NA        | 13.64452301 | 4.770058249     | 1.271146093 | 3.752564929 | 0.000175034 | 0.068817722 | Not Sig  |
| ENSG00000267761 | MIR4527HG    | MIR4527 host gene                           | 110175910 | 13.23560799 | 4.783232772     | 1.543992892 | 3.097962949 | 0.001948558 | 0.417877096 | Not Sig  |
| ENSG00000233005 | NA           | NA                                          | NA        | 14.34338441 | ENSG00000233410 | 1.839377039 | 2.62172016  | 0.008748723 | 0.853009137 | Not Sig  |
| ENSG00000257060 | NA           | NA                                          | NA        | 2.618812406 | 4.837894548     | 2.064253319 | 2.343653516 | 0.019095902 | 0.998677884 | Not Sig  |
| ENSG00000257826 | NA           | NA                                          | NA        | 15.19797437 | 5.514375103     | 1.630943604 | 3.381094901 | 0.000721976 | 0.189237939 | Not Sig  |
| ENSG00000257986 | NA           | NA                                          | NA        | 5.322201073 | 5.85706835      | 1.889709462 | 3.099454423 | 0.001938774 | 0.417877096 | Not Sig  |
| ENSG00000248942 | LINC01335    | long intergenic non-protein coding RNA 1335 | 102503429 | 6.366010734 | 6.119710129     | 2.390934256 | 2.559547638 | 0.010480849 | 0.853009137 | Not Sig  |
| ENSG00000231204 | NA           | NA                                          | NA        | 11.09713186 | 6.923590119     | 1.994909894 | 3.470627993 | 0.000519243 | 0.153111725 | Not Sig  |
| ENSG00000260725 | NA           | NA                                          | NA        | 30.93845693 | 7.433180081     | 1.743306356 | 4.263840406 | 2.01E-05    | 0.011850613 | FDR<0.05 |

## Supplementary 2

| mirna            | E19D1 | E19D2 | E19D3 | E19N1 | E19N2 | E19N3 | baseMean      | log2FoldClfcSE | stat     | pvalue   | padj     |          |
|------------------|-------|-------|-------|-------|-------|-------|---------------|----------------|----------|----------|----------|----------|
| hsa-miR-196a-5p  |       | 2     | 2     | 0     | 0     | 240   | 3269 760.7934 | -10.3059       | 1.99469  | -5.16665 | NA       | NA       |
| hsa-miR-196a-3p  |       | 0     | 0     | 0     | 0     | 25    | 320 74.61696  | -9.84333       | 3.907446 | -2.51912 | NA       | NA       |
| hsa-miR-6744-5p  |       | 0     | 0     | 0     | 0     | 86    | 4 12.46898    | -7.26839       | 2.325184 | -3.12594 | NA       | NA       |
| hsa-miR-3182     |       | 2     | 18    | 4     | 2     | 2257  | 628 448.0951  | -6.81745       | 1.528298 | -4.46081 | 8.16E-06 | 0.001436 |
| hsa-miR-4488     |       | 0     | 0     | 0     | 4     | 0     | 27 6.871841   | -6.39715       | 2.462773 | -2.59754 | 0.009389 | 0.342438 |
| hsa-miR-552-5p   |       | 2     | 0     | 2     | 0     | 319   | 0 43.4884     | -6.30195       | 3.714616 | -1.69653 | NA       | NA       |
| hsa-miR-519a-5p  |       | 2     | 0     | 0     | 89    | 0     | 0 19.39255    | -6.15758       | 2.502637 | -2.46044 | NA       | NA       |
| hsa-miR-4652-5p  |       | 0     | 0     | 0     | 0     | 5     | 23 5.794337   | -6.15219       | 2.482675 | -2.47805 | NA       | NA       |
| hsa-miR-6715b-3p |       | 0     | 0     | 0     | 0     | 36    | 2 5.292068    | -6.0366        | 2.55216  | -2.36529 | NA       | NA       |
| hsa-miR-518a-3p  |       | 0     | 0     | 0     | 22    | 0     | 0 4.730133    | -5.86027       | 3.077016 | -1.90453 | NA       | NA       |
| hsa-miR-129-2-3p |       | 0     | 0     | 0     | 9     | 18    | 0 4.358429    | -5.75164       | 2.510349 | -2.29117 | 0.021953 | 0.544446 |
| hsa-miR-552-3p   |       | 0     | 2     | 8     | 21    | 559   | 0 81.25915    | -5.75031       | 1.853635 | -3.10218 | NA       | NA       |
| hsa-miR-194-3p   |       | 0     | 2     | 0     | 0     | 121   | 0 16.64       | -5.61403       | 2.475208 | -2.2681  | NA       | NA       |
| hsa-miR-873-5p   |       | 4     | 0     | 0     | 14    | 94    | 37 24.41792   | -5.4596        | 1.431107 | -3.81495 | 0.000136 | 0.01689  |
| hsa-miR-765      |       | 0     | 0     | 0     | 16    | 0     | 0 3.440097    | -5.40007       | 3.260526 | -1.6562  | NA       | NA       |
| hsa-miR-1246     | 134   |       | 43    | 195   | 119   | 146   | 9018 2105.595 | -5.29158       | 1.458219 | -3.6288  | NA       | NA       |
| hsa-miR-615-3p   |       | 2     | 0     | 2     | 5     | 8     | 87 22.06432   | -5.26734       | 1.583498 | -3.3264  | NA       | NA       |
| hsa-miR-2682-5p  |       | 0     | 0     | 0     | 6     | 0     | 6 2.625996    | -5.00561       | 2.852861 | -1.75459 | NA       | NA       |
| hsa-miR-522-3p   |       | 2     | 0     | 2     | 80    | 2     | 0 18.01057    | -4.98061       | 1.972126 | -2.5255  | NA       | NA       |
| hsa-miR-935      |       | 0     | 0     | 0     | 0     | 0     | 11 2.449259   | -4.90745       | 3.517725 | -1.39506 | NA       | NA       |
| hsa-miR-516b-5p  |       | 5     | 2     | 6     | 251   | 5     | 0 56.48318    | -4.88353       | 1.734633 | -2.81531 | NA       | NA       |
| hsa-miR-124-3p   |       | 0     | 0     | 0     | 11    | 0     | 0 2.365067    | -4.85858       | 3.545318 | -1.37042 | NA       | NA       |
| hsa-miR-2681-5p  |       | 0     | 0     | 0     | 11    | 0     | 0 2.365067    | -4.85858       | 3.545318 | -1.37042 | NA       | NA       |
| hsa-miR-3154     |       | 0     | 0     | 0     | 10    | 0     | 0 2.150061    | -4.72084       | 3.631058 | -1.30013 | NA       | NA       |
| hsa-miR-122-5p   | 31    |       | 20    | 41    | 1563  | 19    | 5 353.023     | -4.67464       | 1.554732 | -3.00672 | NA       | NA       |
| hsa-miR-876-3p   |       | 0     | 0     | 0     | 0     | 0     | 9 2.003939    | -4.61729       | 3.70035  | -1.2478  | NA       | NA       |
| hsa-miR-6762-3p  |       | 0     | 0     | 0     | 9     | 0     | 0 1.935055    | -4.56858       | 3.73268  | -1.22394 | NA       | NA       |
| hsa-miR-1290     |       | 7     | 4     | 23    | 16    | 17    | 479 117.2454  | -4.52721       | 1.403484 | -3.22569 | NA       | NA       |
| hsa-miR-4732-5p  |       | 2     | 0     | 0     | 19    | 15    | 0 6.361602    | -4.49602       | 2.168678 | -2.07316 | 0.038157 | 0.83959  |
| hsa-miR-1298-3p  |       | 0     | 0     | 0     | 8     | 0     | 0 1.720049    | -4.39838       | 3.855694 | -1.14075 | NA       | NA       |
| hsa-miR-6505-3p  |       | 0     | 0     | 0     | 8     | 0     | 0 1.720049    | -4.39838       | 3.855694 | -1.14075 | NA       | NA       |
| hsa-miR-549a     |       | 0     | 2     | 2     | 6     | 8     | 47 13.46546   | -4.37515       | 1.536502 | -2.84747 | NA       | NA       |
| hsa-miR-192-3p   |       | 2     | 0     | 2     | 3     | 75    | 0 11.28323    | -4.28882       | 1.911972 | -2.24314 | NA       | NA       |
| hsa-miR-302b-3p  |       | 0     | 0     | 0     | 7     | 0     | 0 1.505042    | -4.20517       | 3.940486 | -1.06717 | NA       | NA       |

|                   |      |     |     |     |       |      |          |          |          |          |          |          |
|-------------------|------|-----|-----|-----|-------|------|----------|----------|----------|----------|----------|----------|
| hsa-miR-5187-5p   | 0    | 0   | 0   | 7   | 0     | 0    | 1.505042 | -4.20517 | 3.940486 | -1.06717 | NA       | NA       |
| hsa-miR-548q      | 0    | 0   | 0   | 7   | 0     | 0    | 1.505042 | -4.20517 | 3.940486 | -1.06717 | NA       | NA       |
| hsa-miR-874-5p    | 0    | 0   | 0   | 0   | 4     | 4    | 1.429167 | -4.13794 | 3.340668 | -1.23866 | 0.215473 | 0.938786 |
| hsa-miR-6744-3p   | 0    | 0   | 0   | 0   | 10    | 0    | 1.346319 | -4.06831 | 3.94382  | -1.03157 | NA       | NA       |
| hsa-miR-1224-5p   | 0    | 0   | 0   | 5   | 2     | 0    | 1.344294 | -4.04559 | 3.437734 | -1.17682 | 0.239268 | 0.938786 |
| hsa-miR-1252-5p   | 0    | 0   | 0   | 0   | 0     | 6    | 1.335959 | -4.03002 | 3.944811 | -1.0216  | NA       | NA       |
| hsa-miR-3660      | 0    | 0   | 0   | 0   | 0     | 6    | 1.335959 | -4.03002 | 3.944811 | -1.0216  | NA       | NA       |
| hsa-miR-548y      | 0    | 0   | 0   | 0   | 0     | 6    | 1.335959 | -4.03002 | 3.944811 | -1.0216  | NA       | NA       |
| hsa-miR-4532      | 0    | 0   | 0   | 4   | 0     | 2    | 1.305344 | -3.99523 | 3.484507 | -1.14657 | 0.25156  | 0.938786 |
| hsa-miR-129-1-3p  | 0    | 0   | 2   | 8   | 21    | 0    | 4.831132 | -3.99078 | 2.248172 | -1.77512 | 0.075878 | 0.938786 |
| hsa-miR-383-5p    | 0    | 0   | 0   | 6   | 0     | 0    | 1.290036 | -3.98168 | 3.946098 | -1.00902 | NA       | NA       |
| hsa-miR-4657      | 0    | 0   | 0   | 6   | 0     | 0    | 1.290036 | -3.98168 | 3.946098 | -1.00902 | NA       | NA       |
| hsa-miR-4742-5p   | 0    | 0   | 0   | 6   | 0     | 0    | 1.290036 | -3.98168 | 3.946098 | -1.00902 | NA       | NA       |
| hsa-miR-6792-5p   | 0    | 0   | 0   | 6   | 0     | 0    | 1.290036 | -3.98168 | 3.946098 | -1.00902 | NA       | NA       |
| hsa-miR-6855-3p   | 0    | 0   | 0   | 6   | 0     | 0    | 1.290036 | -3.98168 | 3.946098 | -1.00902 | NA       | NA       |
| hsa-miR-129-5p    | 11   | 13  | 6   | 197 | 202   | 5    | 75.20211 | -3.96673 | 1.193302 | -3.32416 | 0.000887 | 0.086124 |
| hsa-miR-194-5p    | 1642 | 695 | 797 | 783 | 45415 | 1848 | 7139.7   | -3.90916 | 1.223158 | -3.19596 | NA       | NA       |
| hsa-miR-4636      | 0    | 0   | 2   | 20  | 0     | 0    | 4.583935 | -3.90216 | 2.787839 | -1.39971 | NA       | NA       |
| hsa-miR-1248      | 0    | 0   | 5   | 9   | 7     | 34   | 11.15745 | -3.85949 | 1.676226 | -2.30249 | NA       | NA       |
| hsa-miR-4700-5p   | 0    | 0   | 0   | 2   | 2     | 2    | 1.144596 | -3.81164 | 3.038541 | -1.25443 | 0.209685 | 0.938786 |
| hsa-miR-1273h-5p  | 0    | 0   | 0   | 5   | 0     | 0    | 1.07503  | -3.71711 | 3.953951 | -0.9401  | NA       | NA       |
| hsa-miR-219a-2-3p | 0    | 0   | 0   | 5   | 0     | 0    | 1.07503  | -3.71711 | 3.953951 | -0.9401  | NA       | NA       |
| hsa-miR-3187-3p   | 0    | 0   | 0   | 5   | 0     | 0    | 1.07503  | -3.71711 | 3.953951 | -0.9401  | NA       | NA       |
| hsa-miR-3192-5p   | 0    | 0   | 0   | 5   | 0     | 0    | 1.07503  | -3.71711 | 3.953951 | -0.9401  | NA       | NA       |
| hsa-miR-3920      | 0    | 0   | 0   | 5   | 0     | 0    | 1.07503  | -3.71711 | 3.953951 | -0.9401  | NA       | NA       |
| hsa-miR-4529-3p   | 0    | 0   | 0   | 5   | 0     | 0    | 1.07503  | -3.71711 | 3.953951 | -0.9401  | NA       | NA       |
| hsa-miR-518e-3p   | 0    | 0   | 0   | 5   | 0     | 0    | 1.07503  | -3.71711 | 3.953951 | -0.9401  | NA       | NA       |
| hsa-miR-610       | 0    | 0   | 0   | 5   | 0     | 0    | 1.07503  | -3.71711 | 3.953951 | -0.9401  | NA       | NA       |
| hsa-miR-636       | 0    | 0   | 0   | 5   | 0     | 0    | 1.07503  | -3.71711 | 3.953951 | -0.9401  | NA       | NA       |
| hsa-miR-6827-5p   | 0    | 0   | 0   | 5   | 0     | 0    | 1.07503  | -3.71711 | 3.953951 | -0.9401  | NA       | NA       |
| hsa-miR-6857-3p   | 0    | 0   | 0   | 5   | 0     | 0    | 1.07503  | -3.71711 | 3.953951 | -0.9401  | NA       | NA       |
| hsa-miR-7846-3p   | 0    | 0   | 0   | 5   | 0     | 0    | 1.07503  | -3.71711 | 3.953951 | -0.9401  | NA       | NA       |
| hsa-miR-767-3p    | 0    | 0   | 2   | 0   | 0     | 16   | 3.846372 | -3.62881 | 2.864576 | -1.26679 | NA       | NA       |
| hsa-miR-518e-5p   | 2    | 0   | 0   | 15  | 0     | 0    | 3.482099 | -3.5966  | 2.909144 | -1.23631 | NA       | NA       |
| hsa-miR-519b-5p   | 2    | 0   | 0   | 15  | 0     | 0    | 3.482099 | -3.5966  | 2.909144 | -1.23631 | NA       | NA       |

|                  |    |    |   |    |     |   |          |          |          |          |          |          |
|------------------|----|----|---|----|-----|---|----------|----------|----------|----------|----------|----------|
| hsa-miR-519c-5p  | 2  | 0  | 0 | 15 | 0   | 0 | 3.482099 | -3.5966  | 2.909144 | -1.23631 | NA       | NA       |
| hsa-miR-522-5p   | 2  | 0  | 0 | 15 | 0   | 0 | 3.482099 | -3.5966  | 2.909144 | -1.23631 | NA       | NA       |
| hsa-miR-523-5p   | 2  | 0  | 0 | 15 | 0   | 0 | 3.482099 | -3.5966  | 2.909144 | -1.23631 | NA       | NA       |
| hsa-miR-1269b    | 5  | 47 | 5 | 0  | 824 | 0 | 120.5028 | -3.53726 | 3.188992 | -1.10921 | NA       | NA       |
| hsa-miR-3118     | 0  | 0  | 0 | 3  | 2   | 0 | 0.914282 | -3.49261 | 3.8823   | -0.89962 | 0.36832  | 0.938786 |
| hsa-miR-5188     | 0  | 0  | 0 | 0  | 0   | 4 | 0.89064  | -3.44025 | 3.963836 | -0.86791 | NA       | NA       |
| hsa-miR-122-3p   | 0  | 0  | 0 | 4  | 0   | 0 | 0.860024 | -3.39292 | 3.96572  | -0.85556 | NA       | NA       |
| hsa-miR-3199     | 0  | 0  | 0 | 4  | 0   | 0 | 0.860024 | -3.39292 | 3.96572  | -0.85556 | NA       | NA       |
| hsa-miR-3202     | 0  | 0  | 0 | 4  | 0   | 0 | 0.860024 | -3.39292 | 3.96572  | -0.85556 | NA       | NA       |
| hsa-miR-3622a-3p | 0  | 0  | 0 | 4  | 0   | 0 | 0.860024 | -3.39292 | 3.96572  | -0.85556 | NA       | NA       |
| hsa-miR-3923     | 0  | 0  | 0 | 4  | 0   | 0 | 0.860024 | -3.39292 | 3.96572  | -0.85556 | NA       | NA       |
| hsa-miR-4436a    | 0  | 0  | 0 | 4  | 0   | 0 | 0.860024 | -3.39292 | 3.96572  | -0.85556 | NA       | NA       |
| hsa-miR-4733-3p  | 0  | 0  | 0 | 4  | 0   | 0 | 0.860024 | -3.39292 | 3.96572  | -0.85556 | NA       | NA       |
| hsa-miR-4744     | 0  | 0  | 0 | 4  | 0   | 0 | 0.860024 | -3.39292 | 3.96572  | -0.85556 | NA       | NA       |
| hsa-miR-4755-5p  | 0  | 0  | 0 | 4  | 0   | 0 | 0.860024 | -3.39292 | 3.96572  | -0.85556 | NA       | NA       |
| hsa-miR-4762-3p  | 0  | 0  | 0 | 4  | 0   | 0 | 0.860024 | -3.39292 | 3.96572  | -0.85556 | NA       | NA       |
| hsa-miR-4772-3p  | 0  | 0  | 0 | 4  | 0   | 0 | 0.860024 | -3.39292 | 3.96572  | -0.85556 | NA       | NA       |
| hsa-miR-512-3p   | 0  | 0  | 0 | 4  | 0   | 0 | 0.860024 | -3.39292 | 3.96572  | -0.85556 | NA       | NA       |
| hsa-miR-517a-3p  | 0  | 0  | 0 | 4  | 0   | 0 | 0.860024 | -3.39292 | 3.96572  | -0.85556 | NA       | NA       |
| hsa-miR-517b-3p  | 0  | 0  | 0 | 4  | 0   | 0 | 0.860024 | -3.39292 | 3.96572  | -0.85556 | NA       | NA       |
| hsa-miR-518d-5p  | 0  | 0  | 0 | 4  | 0   | 0 | 0.860024 | -3.39292 | 3.96572  | -0.85556 | NA       | NA       |
| hsa-miR-518f-5p  | 0  | 0  | 0 | 4  | 0   | 0 | 0.860024 | -3.39292 | 3.96572  | -0.85556 | NA       | NA       |
| hsa-miR-520a-3p  | 0  | 0  | 0 | 4  | 0   | 0 | 0.860024 | -3.39292 | 3.96572  | -0.85556 | NA       | NA       |
| hsa-miR-520c-5p  | 0  | 0  | 0 | 4  | 0   | 0 | 0.860024 | -3.39292 | 3.96572  | -0.85556 | NA       | NA       |
| hsa-miR-526a     | 0  | 0  | 0 | 4  | 0   | 0 | 0.860024 | -3.39292 | 3.96572  | -0.85556 | NA       | NA       |
| hsa-miR-545-5p   | 0  | 0  | 0 | 4  | 0   | 0 | 0.860024 | -3.39292 | 3.96572  | -0.85556 | NA       | NA       |
| hsa-miR-605-3p   | 0  | 0  | 0 | 4  | 0   | 0 | 0.860024 | -3.39292 | 3.96572  | -0.85556 | NA       | NA       |
| hsa-miR-616-3p   | 0  | 0  | 0 | 4  | 0   | 0 | 0.860024 | -3.39292 | 3.96572  | -0.85556 | NA       | NA       |
| hsa-miR-6827-3p  | 0  | 0  | 0 | 4  | 0   | 0 | 0.860024 | -3.39292 | 3.96572  | -0.85556 | NA       | NA       |
| hsa-miR-3121-3p  | 0  | 0  | 0 | 0  | 3   | 2 | 0.849215 | -3.39121 | 3.96579  | -0.85512 | 0.392487 | 0.938786 |
| hsa-miR-3609     | 0  | 0  | 0 | 2  | 3   | 0 | 0.833908 | -3.36728 | 3.966767 | -0.84887 | 0.395952 | 0.938786 |
| hsa-miR-6888-3p  | 0  | 0  | 0 | 2  | 3   | 0 | 0.833908 | -3.36728 | 3.966767 | -0.84887 | 0.395952 | 0.938786 |
| hsa-miR-216a-5p  | 0  | 0  | 0 | 0  | 6   | 0 | 0.807791 | -3.34184 | 3.967823 | -0.84224 | NA       | NA       |
| hsa-miR-3157-5p  | 0  | 0  | 0 | 0  | 6   | 0 | 0.807791 | -3.34184 | 3.967823 | -0.84224 | NA       | NA       |
| hsa-miR-561-5p   | 11 | 0  | 0 | 2  | 98  | 3 | 15.70546 | -3.3217  | 1.874208 | -1.77232 | NA       | NA       |

|                 |      |      |      |      |        |       |          |          |          |          |          |          |
|-----------------|------|------|------|------|--------|-------|----------|----------|----------|----------|----------|----------|
| hsa-miR-519a-3p | 2    | 0    | 0    | 12   | 0      | 0     | 2.837081 | -3.27649 | 3.018369 | -1.08552 | NA       | NA       |
| hsa-miR-9-3p    | 38   | 25   | 16   | 30   | 81     | 422   | 122.8407 | -3.27122 | 1.12441  | -2.90928 | NA       | NA       |
| hsa-miR-3190-3p | 2    | 0    | 2    | 21   | 0      | 3     | 5.723929 | -3.22252 | 2.016737 | -1.59789 | NA       | NA       |
| hsa-miR-1299    | 11   | 95   | 0    | 146  | 953    | 12    | 180.3835 | -3.17518 | 1.642999 | -1.93255 | 0.053291 | 0.89299  |
| hsa-miR-6507-5p | 2    | 0    | 0    | 11   | 0      | 0     | 2.622075 | -3.15168 | 3.06517  | -1.02823 | NA       | NA       |
| hsa-miR-3163    | 0    | 0    | 0    | 0    | 2      | 2     | 0.714584 | -3.13815 | 3.976972 | -0.78908 | 0.430066 | 0.938786 |
| hsa-miR-4732-3p | 0    | 0    | 0    | 2    | 2      | 0     | 0.699276 | -3.10996 | 3.978341 | -0.78172 | 0.434377 | 0.938786 |
| hsa-miR-5588-3p | 0    | 0    | 0    | 2    | 2      | 0     | 0.699276 | -3.10996 | 3.978341 | -0.78172 | 0.434377 | 0.938786 |
| hsa-miR-5588-5p | 0    | 0    | 0    | 0    | 5      | 0     | 0.673159 | -3.08381 | 3.979634 | -0.7749  | NA       | NA       |
| hsa-miR-3960    | 2    | 0    | 0    | 0    | 0      | 10    | 2.483607 | -3.06281 | 3.101465 | -0.98754 | NA       | NA       |
| hsa-miR-192-5p  | 9267 | 4470 | 5012 | 6179 | 141687 | 8525  | 24985.59 | -3.0551  | 1.092328 | -2.79687 | NA       | NA       |
| hsa-miR-1234-3p | 0    | 0    | 0    | 0    | 0      | 3     | 0.66798  | -3.02054 | 3.982859 | -0.75838 | NA       | NA       |
| hsa-miR-548s    | 0    | 0    | 0    | 0    | 0      | 3     | 0.66798  | -3.02054 | 3.982859 | -0.75838 | NA       | NA       |
| hsa-miR-6508-3p | 0    | 0    | 0    | 0    | 0      | 3     | 0.66798  | -3.02054 | 3.982859 | -0.75838 | NA       | NA       |
| hsa-miR-1183    | 0    | 0    | 0    | 3    | 0      | 0     | 0.645018 | -2.97418 | 3.98531  | -0.74629 | NA       | NA       |
| hsa-miR-1249-5p | 0    | 0    | 0    | 3    | 0      | 0     | 0.645018 | -2.97418 | 3.98531  | -0.74629 | NA       | NA       |
| hsa-miR-3667-5p | 0    | 0    | 0    | 3    | 0      | 0     | 0.645018 | -2.97418 | 3.98531  | -0.74629 | NA       | NA       |
| hsa-miR-4477a   | 0    | 0    | 0    | 3    | 0      | 0     | 0.645018 | -2.97418 | 3.98531  | -0.74629 | NA       | NA       |
| hsa-miR-4503    | 0    | 0    | 0    | 3    | 0      | 0     | 0.645018 | -2.97418 | 3.98531  | -0.74629 | NA       | NA       |
| hsa-miR-4725-3p | 0    | 0    | 0    | 3    | 0      | 0     | 0.645018 | -2.97418 | 3.98531  | -0.74629 | NA       | NA       |
| hsa-miR-4757-5p | 0    | 0    | 0    | 3    | 0      | 0     | 0.645018 | -2.97418 | 3.98531  | -0.74629 | NA       | NA       |
| hsa-miR-4773    | 0    | 0    | 0    | 3    | 0      | 0     | 0.645018 | -2.97418 | 3.98531  | -0.74629 | NA       | NA       |
| hsa-miR-5189-5p | 0    | 0    | 0    | 3    | 0      | 0     | 0.645018 | -2.97418 | 3.98531  | -0.74629 | NA       | NA       |
| hsa-miR-6734-5p | 0    | 0    | 0    | 3    | 0      | 0     | 0.645018 | -2.97418 | 3.98531  | -0.74629 | NA       | NA       |
| hsa-miR-6842-5p | 0    | 0    | 0    | 3    | 0      | 0     | 0.645018 | -2.97418 | 3.98531  | -0.74629 | NA       | NA       |
| hsa-miR-6847-5p | 0    | 0    | 0    | 3    | 0      | 0     | 0.645018 | -2.97418 | 3.98531  | -0.74629 | NA       | NA       |
| hsa-miR-6866-3p | 0    | 0    | 0    | 3    | 0      | 0     | 0.645018 | -2.97418 | 3.98531  | -0.74629 | NA       | NA       |
| hsa-miR-5481    | 0    | 0    | 2    | 0    | 5      | 6     | 2.292933 | -2.80653 | 2.612891 | -1.07411 | 0.282774 | 0.938786 |
| hsa-miR-4671-5p | 0    | 0    | 0    | 0    | 4      | 0     | 0.538528 | -2.76908 | 3.997128 | -0.69277 | NA       | NA       |
| hsa-miR-561-3p  | 0    | 0    | 0    | 0    | 4      | 0     | 0.538528 | -2.76908 | 3.997128 | -0.69277 | NA       | NA       |
| hsa-miR-203a-3p | 9349 | 4426 | 5516 | 8899 | 68129  | 30449 | 20623.12 | -2.69564 | 0.83151  | -3.24186 | 0.001188 | 0.086124 |
| hsa-miR-516a-5p | 13   | 5    | 32   | 176  | 26     | 15    | 51.76682 | -2.65191 | 1.214912 | -2.1828  | NA       | NA       |
| hsa-miR-873-3p  | 0    | 2    | 0    | 3    | 4      | 4     | 2.423722 | -2.65105 | 2.192238 | -1.20929 | 0.226552 | 0.938786 |
| hsa-miR-585-3p  | 22   | 20   | 8    | 190  | 7      | 20    | 53.70449 | -2.63248 | 1.283811 | -2.05052 | NA       | NA       |
| hsa-miR-3116    | 0    | 2    | 0    | 0    | 7      | 5     | 2.405259 | -2.62437 | 2.583767 | -1.01572 | NA       | NA       |



|                  |     |     |    |     |      |     |          |          |          |          |          |          |
|------------------|-----|-----|----|-----|------|-----|----------|----------|----------|----------|----------|----------|
| hsa-miR-488-3p   | 4   | 0   | 0  | 15  | 0    | 0   | 3.739108 | -2.61716 | 2.852383 | -0.91753 | NA       | NA       |
| hsa-miR-1255b-5p | 6   | 0   | 2  | 18  | 10   | 6   | 7.607226 | -2.59268 | 1.455792 | -1.78094 | NA       | NA       |
| hsa-miR-1179     | 0   | 0   | 2  | 4   | 3    | 2   | 1.993054 | -2.56558 | 2.321243 | -1.10526 | 0.269047 | 0.938786 |
| hsa-miR-7110-3p  | 2   | 0   | 0  | 6   | 2    | 0   | 1.816308 | -2.54489 | 2.808553 | -0.90612 | 0.364872 | 0.938786 |
| hsa-miR-1304-5p  | 5   | 0   | 6  | 28  | 10   | 6   | 10.19641 | -2.51541 | 1.413073 | -1.7801  | NA       | NA       |
| hsa-miR-767-5p   | 0   | 0   | 44 | 0   | 0    | 160 | 41.86949 | -2.51148 | 3.733082 | -0.67276 | NA       | NA       |
| hsa-miR-3656     | 13  | 0   | 5  | 32  | 2    | 29  | 15.98668 | -2.49335 | 1.510167 | -1.65104 | NA       | NA       |
| hsa-miR-6854-5p  | 0   | 0   | 2  | 2   | 5    | 2   | 1.832305 | -2.43626 | 2.369541 | -1.02816 | 0.303875 | 0.938786 |
| hsa-miR-215-5p   | 521 | 226 | 67 | 276 | 3978 | 136 | 741.1452 | -2.43089 | 1.194376 | -2.03528 | NA       | NA       |
| hsa-miR-1249-3p  | 0   | 0   | 0  | 0   | 0    | 2   | 0.44532  | -2.42659 | 4.020883 | -0.6035  | 0.546178 | 0.938786 |
| hsa-miR-4417     | 0   | 0   | 0  | 0   | 0    | 2   | 0.44532  | -2.42659 | 4.020883 | -0.6035  | 0.546178 | 0.938786 |
| hsa-miR-4758-3p  | 0   | 0   | 0  | 0   | 0    | 2   | 0.44532  | -2.42659 | 4.020883 | -0.6035  | 0.546178 | 0.938786 |
| hsa-miR-4795-3p  | 0   | 0   | 0  | 0   | 0    | 2   | 0.44532  | -2.42659 | 4.020883 | -0.6035  | 0.546178 | 0.938786 |
| hsa-miR-559      | 0   | 0   | 0  | 0   | 0    | 2   | 0.44532  | -2.42659 | 4.020883 | -0.6035  | 0.546178 | 0.938786 |
| hsa-miR-615-5p   | 0   | 0   | 0  | 0   | 0    | 2   | 0.44532  | -2.42659 | 4.020883 | -0.6035  | 0.546178 | 0.938786 |
| hsa-miR-6777-3p  | 0   | 0   | 0  | 0   | 0    | 2   | 0.44532  | -2.42659 | 4.020883 | -0.6035  | 0.546178 | 0.938786 |
| hsa-miR-6783-3p  | 0   | 0   | 0  | 0   | 0    | 2   | 0.44532  | -2.42659 | 4.020883 | -0.6035  | 0.546178 | 0.938786 |
| hsa-miR-483-5p   | 0   | 4   | 0  | 17  | 0    | 0   | 4.354177 | -2.40909 | 2.810732 | -0.8571  | NA       | NA       |
| hsa-miR-1243     | 0   | 0   | 0  | 2   | 0    | 0   | 0.430012 | -2.3821  | 4.024388 | -0.59192 | 0.553907 | 0.938786 |
| hsa-miR-1261     | 0   | 0   | 0  | 2   | 0    | 0   | 0.430012 | -2.3821  | 4.024388 | -0.59192 | 0.553907 | 0.938786 |
| hsa-miR-1273f    | 0   | 0   | 0  | 2   | 0    | 0   | 0.430012 | -2.3821  | 4.024388 | -0.59192 | 0.553907 | 0.938786 |
| hsa-miR-1302     | 0   | 0   | 0  | 2   | 0    | 0   | 0.430012 | -2.3821  | 4.024388 | -0.59192 | 0.553907 | 0.938786 |
| hsa-miR-1323     | 0   | 0   | 0  | 2   | 0    | 0   | 0.430012 | -2.3821  | 4.024388 | -0.59192 | 0.553907 | 0.938786 |
| hsa-miR-138-1-3p | 0   | 0   | 0  | 2   | 0    | 0   | 0.430012 | -2.3821  | 4.024388 | -0.59192 | 0.553907 | 0.938786 |
| hsa-miR-187-5p   | 0   | 0   | 0  | 2   | 0    | 0   | 0.430012 | -2.3821  | 4.024388 | -0.59192 | 0.553907 | 0.938786 |
| hsa-miR-204-3p   | 0   | 0   | 0  | 2   | 0    | 0   | 0.430012 | -2.3821  | 4.024388 | -0.59192 | 0.553907 | 0.938786 |
| hsa-miR-3160-3p  | 0   | 0   | 0  | 2   | 0    | 0   | 0.430012 | -2.3821  | 4.024388 | -0.59192 | 0.553907 | 0.938786 |
| hsa-miR-373-3p   | 0   | 0   | 0  | 2   | 0    | 0   | 0.430012 | -2.3821  | 4.024388 | -0.59192 | 0.553907 | 0.938786 |
| hsa-miR-384      | 0   | 0   | 0  | 2   | 0    | 0   | 0.430012 | -2.3821  | 4.024388 | -0.59192 | 0.553907 | 0.938786 |
| hsa-miR-3938     | 0   | 0   | 0  | 2   | 0    | 0   | 0.430012 | -2.3821  | 4.024388 | -0.59192 | 0.553907 | 0.938786 |
| hsa-miR-4306     | 0   | 0   | 0  | 2   | 0    | 0   | 0.430012 | -2.3821  | 4.024388 | -0.59192 | 0.553907 | 0.938786 |
| hsa-miR-4670-5p  | 0   | 0   | 0  | 2   | 0    | 0   | 0.430012 | -2.3821  | 4.024388 | -0.59192 | 0.553907 | 0.938786 |
| hsa-miR-4688     | 0   | 0   | 0  | 2   | 0    | 0   | 0.430012 | -2.3821  | 4.024388 | -0.59192 | 0.553907 | 0.938786 |
| hsa-miR-4714-5p  | 0   | 0   | 0  | 2   | 0    | 0   | 0.430012 | -2.3821  | 4.024388 | -0.59192 | 0.553907 | 0.938786 |
| hsa-miR-4728-3p  | 0   | 0   | 0  | 2   | 0    | 0   | 0.430012 | -2.3821  | 4.024388 | -0.59192 | 0.553907 | 0.938786 |

|                  |      |      |      |       |       |      |          |          |          |          |          |          |
|------------------|------|------|------|-------|-------|------|----------|----------|----------|----------|----------|----------|
| hsa-miR-4804-5p  | 0    | 0    | 0    | 2     | 0     | 0    | 0.430012 | -2.3821  | 4.024388 | -0.59192 | 0.553907 | 0.938786 |
| hsa-miR-5089-3p  | 0    | 0    | 0    | 2     | 0     | 0    | 0.430012 | -2.3821  | 4.024388 | -0.59192 | 0.553907 | 0.938786 |
| hsa-miR-5583-3p  | 0    | 0    | 0    | 2     | 0     | 0    | 0.430012 | -2.3821  | 4.024388 | -0.59192 | 0.553907 | 0.938786 |
| hsa-miR-5706     | 0    | 0    | 0    | 2     | 0     | 0    | 0.430012 | -2.3821  | 4.024388 | -0.59192 | 0.553907 | 0.938786 |
| hsa-miR-6501-3p  | 0    | 0    | 0    | 2     | 0     | 0    | 0.430012 | -2.3821  | 4.024388 | -0.59192 | 0.553907 | 0.938786 |
| hsa-miR-6738-3p  | 0    | 0    | 0    | 2     | 0     | 0    | 0.430012 | -2.3821  | 4.024388 | -0.59192 | 0.553907 | 0.938786 |
| hsa-miR-6741-5p  | 0    | 0    | 0    | 2     | 0     | 0    | 0.430012 | -2.3821  | 4.024388 | -0.59192 | 0.553907 | 0.938786 |
| hsa-miR-6791-3p  | 0    | 0    | 0    | 2     | 0     | 0    | 0.430012 | -2.3821  | 4.024388 | -0.59192 | 0.553907 | 0.938786 |
| hsa-miR-6809-5p  | 0    | 0    | 0    | 2     | 0     | 0    | 0.430012 | -2.3821  | 4.024388 | -0.59192 | 0.553907 | 0.938786 |
| hsa-miR-6829-3p  | 0    | 0    | 0    | 2     | 0     | 0    | 0.430012 | -2.3821  | 4.024388 | -0.59192 | 0.553907 | 0.938786 |
| hsa-miR-7845-5p  | 0    | 0    | 0    | 2     | 0     | 0    | 0.430012 | -2.3821  | 4.024388 | -0.59192 | 0.553907 | 0.938786 |
| hsa-miR-15b-3p   | 70   | 14   | 72   | 154   | 386   | 123  | 134.1254 | -2.37414 | 0.853544 | -2.7815  | NA       | NA       |
| hsa-miR-2277-3p  | 2    | 0    | 0    | 0     | 2     | 5    | 1.639572 | -2.37035 | 2.878261 | -0.82354 | 0.410203 | 0.938786 |
| hsa-miR-670-3p   | 0    | 0    | 0    | 0     | 3     | 0    | 0.403896 | -2.36536 | 4.025734 | -0.58756 | NA       | NA       |
| hsa-miR-4661-5p  | 2    | 0    | 5    | 19    | 0     | 4    | 5.942298 | -2.34074 | 1.967423 | -1.18975 | 0.234145 | 0.938786 |
| hsa-miR-3158-3p  | 425  | 79   | 255  | 2088  | 250   | 115  | 612.8038 | -2.27986 | 1.184632 | -1.92453 | NA       | NA       |
| hsa-miR-4492     | 3    | 2    | 11   | 17    | 3     | 32   | 13.48014 | -2.27067 | 1.327476 | -1.71052 | 0.08717  | 0.938786 |
| hsa-miR-6859-5p  | 4    | 0    | 0    | 11    | 0     | 0    | 2.879083 | -2.17042 | 2.990798 | -0.7257  | NA       | NA       |
| hsa-miR-9-5p     | 2631 | 1112 | 390  | 587   | 2985  | 9468 | 3224.009 | -2.16506 | 1.13567  | -1.90641 | NA       | NA       |
| hsa-miR-29b-1-5p | 3    | 0    | 3    | 10    | 5     | 4    | 4.525093 | -2.15469 | 1.602532 | -1.34455 | 0.17877  | 0.938786 |
| hsa-miR-203b-3p  | 128  | 83   | 24   | 117   | 665   | 169  | 186.6755 | -2.1494  | 0.933387 | -2.3028  | 0.02129  | 0.544446 |
| hsa-miR-486-5p   | 4847 | 2607 | 4975 | 21712 | 18197 | 1092 | 9145.721 | -2.04444 | 1.024479 | -1.99559 | 0.045978 | 0.889817 |
| hsa-miR-1304-3p  | 6    | 5    | 8    | 16    | 20    | 23   | 14.03404 | -2.01247 | 0.989549 | -2.03372 | 0.04198  | 0.83959  |
| hsa-miR-513b-5p  | 0    | 0    | 3    | 8     | 0     | 0    | 2.14577  | -1.99741 | 3.187805 | -0.62658 | NA       | NA       |
| hsa-miR-2113     | 0    | 2    | 0    | 0     | 0     | 6    | 1.685496 | -1.95933 | 3.396481 | -0.57687 | NA       | NA       |
| hsa-miR-1229-3p  | 2    | 0    | 0    | 0     | 4     | 2    | 1.240856 | -1.90452 | 3.071131 | -0.62014 | 0.535167 | 0.938786 |
| hsa-miR-6780b-3p | 0    | 0    | 2    | 5     | 0     | 0    | 1.358844 | -1.90038 | 3.580332 | -0.53078 | NA       | NA       |
| hsa-miR-6513-3p  | 4    | 0    | 0    | 9     | 0     | 0    | 2.449071 | -1.88126 | 3.090941 | -0.60864 | NA       | NA       |
| hsa-miR-1244     | 0    | 0    | 0    | 0     | 2     | 0    | 0.269264 | -1.8759  | 4.061476 | -0.46188 | 0.644171 | 0.938786 |
| hsa-miR-1257     | 0    | 0    | 0    | 0     | 2     | 0    | 0.269264 | -1.8759  | 4.061476 | -0.46188 | 0.644171 | 0.938786 |
| hsa-miR-1267     | 0    | 0    | 0    | 0     | 2     | 0    | 0.269264 | -1.8759  | 4.061476 | -0.46188 | 0.644171 | 0.938786 |
| hsa-miR-1268a    | 0    | 0    | 0    | 0     | 2     | 0    | 0.269264 | -1.8759  | 4.061476 | -0.46188 | 0.644171 | 0.938786 |
| hsa-miR-1268b    | 0    | 0    | 0    | 0     | 2     | 0    | 0.269264 | -1.8759  | 4.061476 | -0.46188 | 0.644171 | 0.938786 |
| hsa-miR-3612     | 0    | 0    | 0    | 0     | 2     | 0    | 0.269264 | -1.8759  | 4.061476 | -0.46188 | 0.644171 | 0.938786 |
| hsa-miR-4433a-3p | 0    | 0    | 0    | 0     | 2     | 0    | 0.269264 | -1.8759  | 4.061476 | -0.46188 | 0.644171 | 0.938786 |

|                  |        |       |        |         |        |       |          |          |          |          |          |          |
|------------------|--------|-------|--------|---------|--------|-------|----------|----------|----------|----------|----------|----------|
| hsa-miR-4437     | 0      | 0     | 0      | 0       | 2      | 0     | 0.269264 | -1.8759  | 4.061476 | -0.46188 | 0.644171 | 0.938786 |
| hsa-miR-4479     | 0      | 0     | 0      | 0       | 2      | 0     | 0.269264 | -1.8759  | 4.061476 | -0.46188 | 0.644171 | 0.938786 |
| hsa-miR-4491     | 0      | 0     | 0      | 0       | 2      | 0     | 0.269264 | -1.8759  | 4.061476 | -0.46188 | 0.644171 | 0.938786 |
| hsa-miR-4668-5p  | 0      | 0     | 0      | 0       | 2      | 0     | 0.269264 | -1.8759  | 4.061476 | -0.46188 | 0.644171 | 0.938786 |
| hsa-miR-548aa    | 0      | 0     | 0      | 0       | 2      | 0     | 0.269264 | -1.8759  | 4.061476 | -0.46188 | 0.644171 | 0.938786 |
| hsa-miR-548at-5p | 0      | 0     | 0      | 0       | 2      | 0     | 0.269264 | -1.8759  | 4.061476 | -0.46188 | 0.644171 | 0.938786 |
| hsa-miR-548t-3p  | 0      | 0     | 0      | 0       | 2      | 0     | 0.269264 | -1.8759  | 4.061476 | -0.46188 | 0.644171 | 0.938786 |
| hsa-miR-6509-5p  | 0      | 0     | 0      | 0       | 2      | 0     | 0.269264 | -1.8759  | 4.061476 | -0.46188 | 0.644171 | 0.938786 |
| hsa-miR-6514-5p  | 0      | 0     | 0      | 0       | 2      | 0     | 0.269264 | -1.8759  | 4.061476 | -0.46188 | 0.644171 | 0.938786 |
| hsa-miR-6756-3p  | 0      | 0     | 0      | 0       | 2      | 0     | 0.269264 | -1.8759  | 4.061476 | -0.46188 | 0.644171 | 0.938786 |
| hsa-miR-6762-5p  | 0      | 0     | 0      | 0       | 2      | 0     | 0.269264 | -1.8759  | 4.061476 | -0.46188 | 0.644171 | 0.938786 |
| hsa-miR-6805-3p  | 0      | 0     | 0      | 0       | 2      | 0     | 0.269264 | -1.8759  | 4.061476 | -0.46188 | 0.644171 | 0.938786 |
| hsa-miR-7156-5p  | 0      | 0     | 0      | 0       | 2      | 0     | 0.269264 | -1.8759  | 4.061476 | -0.46188 | 0.644171 | 0.938786 |
| hsa-miR-6503-5p  | 2      | 4     | 0      | 13      | 5      | 0     | 4.42432  | -1.87562 | 2.011614 | -0.9324  | 0.351131 | 0.938786 |
| hsa-miR-139-5p   | 2775   | 555   | 1454   | 9694    | 1056   | 766   | 3056.926 | -1.86074 | 1.151519 | -1.6159  | NA       | NA       |
| hsa-miR-139-3p   | 30     | 9     | 14     | 107     | 15     | 9     | 34.4438  | -1.8594  | 1.191289 | -1.56083 | NA       | NA       |
| hsa-miR-597-3p   | 2      | 0     | 2      | 6       | 5      | 0     | 2.504018 | -1.83578 | 2.189548 | -0.83843 | 0.401791 | 0.938786 |
| hsa-miR-1285-5p  | 2      | 2     | 0      | 10      | 0      | 0     | 2.756606 | -1.82424 | 2.622179 | -0.6957  | NA       | NA       |
| hsa-miR-451a     | 358131 | 92523 | 277176 | 1350046 | 434803 | 19445 | 454660.7 | -1.79838 | 1.221628 | -1.47212 | 0.14099  | 0.938786 |
| hsa-miR-5690     | 2      | 0     | 0      | 3       | 2      | 0     | 1.17129  | -1.78818 | 3.136705 | -0.57008 | 0.568622 | 0.938786 |
| hsa-miR-1294     | 6      | 3     | 2      | 17      | 7      | 4     | 7.06731  | -1.7844  | 1.309361 | -1.3628  | NA       | NA       |
| hsa-miR-126-3p   | 265187 | 65800 | 428688 | 1538578 | 97812  | 39196 | 459110.8 | -1.72877 | 1.314931 | -1.31472 | NA       | NA       |
| hsa-miR-3910     | 2      | 0     | 0      | 2       | 0      | 2     | 1.13234  | -1.70618 | 3.197154 | -0.53366 | 0.59358  | 0.938786 |
| hsa-miR-6882-5p  | 2      | 0     | 0      | 2       | 0      | 2     | 1.13234  | -1.70618 | 3.197154 | -0.53366 | 0.59358  | 0.938786 |
| hsa-miR-4662a-5p | 10     | 0     | 5      | 13      | 23     | 3     | 8.554169 | -1.70318 | 1.447452 | -1.17668 | 0.239325 | 0.938786 |
| hsa-miR-105-5p   | 0      | 0     | 61     | 0       | 0      | 126   | 36.71148 | -1.69556 | 3.73164  | -0.45437 | NA       | NA       |
| hsa-miR-548a-3p  | 0      | 0     | 7      | 6       | 3      | 7     | 4.245901 | -1.69289 | 1.963031 | -0.86239 | NA       | NA       |
| hsa-miR-5091     | 6      | 0     | 2      | 16      | 0      | 0     | 4.494936 | -1.68262 | 2.412679 | -0.69741 | NA       | NA       |
| hsa-miR-4508     | 8      | 4     | 0      | 16      | 2      | 8     | 7.217747 | -1.65646 | 1.593291 | -1.03965 | 0.298504 | 0.938786 |
| hsa-miR-378c     | 2      | 0     | 2      | 8       | 0      | 0     | 2.260871 | -1.63879 | 2.709944 | -0.60473 | NA       | NA       |
| hsa-miR-1260b    | 121    | 234   | 792    | 312     | 2286   | 653   | 689.0825 | -1.62383 | 0.991047 | -1.6385  | 0.101317 | 0.938786 |
| hsa-miR-296-3p   | 2      | 0     | 2      | 6       | 3      | 0     | 2.234754 | -1.61835 | 2.271132 | -0.71258 | 0.476109 | 0.938786 |
| hsa-miR-1269a    | 0      | 81    | 141    | 0       | 489    | 174   | 138.7429 | -1.6147  | 1.878399 | -0.85961 | 0.390002 | 0.938786 |
| hsa-miR-4791     | 47     | 5     | 30     | 12      | 119    | 69    | 45.13555 | -1.60083 | 1.077322 | -1.48593 | NA       | NA       |
| hsa-miR-941      | 455    | 681   | 740    | 442     | 3296   | 1415  | 1136.341 | -1.59601 | 0.844879 | -1.88904 | 0.058887 | 0.912748 |

|                  |      |      |       |       |       |       |          |          |          |          |          |          |
|------------------|------|------|-------|-------|-------|-------|----------|----------|----------|----------|----------|----------|
| hsa-miR-548g-3p  | 0    | 0    | 3     | 4     | 0     | 2     | 1.731065 | -1.58979 | 2.842192 | -0.55935 | 0.575921 | 0.938786 |
| hsa-miR-125a-3p  | 22   | 28   | 23    | 82    | 70    | 26    | 43.82835 | -1.58291 | 0.85919  | -1.84233 | 0.065427 | 0.938786 |
| hsa-miR-4640-3p  | 0    | 0    | 2     | 2     | 3     | 0     | 1.117722 | -1.55426 | 3.17089  | -0.49017 | 0.624016 | 0.938786 |
| hsa-miR-212-3p   | 18   | 13   | 27    | 2     | 89    | 55    | 33.0751  | -1.55212 | 1.170533 | -1.32599 | NA       | NA       |
| hsa-miR-1260a    | 134  | 239  | 776   | 285   | 2221  | 605   | 664.1125 | -1.54977 | 0.983136 | -1.57635 | 0.114945 | 0.938786 |
| hsa-miR-2116-3p  | 12   | 8    | 2     | 0     | 14    | 34    | 12.67929 | -1.54931 | 1.544339 | -1.00322 | 0.315755 | 0.938786 |
| hsa-miR-4695-3p  | 0    | 0    | 2     | 0     | 6     | 0     | 1.091605 | -1.53022 | 3.777435 | -0.4051  | NA       | NA       |
| hsa-miR-363-5p   | 0    | 5    | 0     | 9     | 4     | 0     | 3.347424 | -1.52798 | 2.45645  | -0.62203 | 0.533924 | 0.938786 |
| hsa-miR-4454     | 29   | 19   | 26    | 10    | 151   | 37    | 41.45469 | -1.52128 | 1.003472 | -1.51601 | 0.129516 | 0.938786 |
| hsa-miR-204-5p   | 31   | 16   | 25    | 111   | 43    | 0     | 39.98244 | -1.5201  | 1.420278 | -1.07028 | 0.284492 | 0.938786 |
| hsa-miR-584-5p   | 51   | 26   | 44    | 152   | 100   | 14    | 66.60295 | -1.50485 | 0.992015 | -1.51696 | 0.129277 | 0.938786 |
| hsa-miR-578      | 2    | 0    | 3     | 5     | 0     | 4     | 2.648399 | -1.48724 | 2.194022 | -0.67786 | NA       | NA       |
| hsa-miR-4504     | 19   | 0    | 6     | 37    | 5     | 3     | 12.58938 | -1.48074 | 1.587847 | -0.93255 | NA       | NA       |
| hsa-miR-320a     | 3726 | 2277 | 4530  | 11856 | 6598  | 3517  | 5740.101 | -1.47369 | 0.800813 | -1.84025 | NA       | NA       |
| hsa-miR-3622a-5p | 14   | 0    | 3     | 27    | 3     | 0     | 8.433839 | -1.46376 | 1.947681 | -0.75154 | NA       | NA       |
| hsa-miR-92a-3p   | 8446 | 7606 | 11913 | 8377  | 29279 | 24576 | 15320.26 | -1.44992 | 0.755335 | -1.91958 | 0.054911 | 0.895924 |
| hsa-miR-2110     | 48   | 56   | 50    | 147   | 123   | 66    | 85.91175 | -1.44825 | 0.771778 | -1.87651 | NA       | NA       |
| hsa-miR-1283     | 2    | 0    | 2     | 7     | 0     | 0     | 2.045865 | -1.44557 | 2.764507 | -0.5229  | NA       | NA       |
| hsa-miR-1254     | 2    | 3    | 3     | 4     | 0     | 11    | 4.516318 | -1.44367 | 1.751904 | -0.82406 | 0.409906 | 0.938786 |
| hsa-miR-190a-3p  | 2    | 0    | 0     | 0     | 2     | 2     | 0.971592 | -1.43795 | 3.317949 | -0.43339 | 0.664735 | 0.938786 |
| hsa-miR-1306-3p  | 2    | 12   | 0     | 25    | 2     | 3     | 8.666624 | -1.43356 | 1.744247 | -0.82188 | NA       | NA       |
| hsa-miR-579-5p   | 5    | 0    | 0     | 5     | 5     | 0     | 2.390711 | -1.42128 | 2.573536 | -0.55227 | 0.580766 | 0.938786 |
| hsa-miR-106b-3p  | 1468 | 2284 | 2422  | 2542  | 6465  | 4807  | 3418.781 | -1.41697 | 0.729544 | -1.94227 | 0.052105 | 0.89299  |
| hsa-miR-4685-3p  | 2    | 0    | 0     | 2     | 2     | 0     | 0.956284 | -1.41128 | 3.331442 | -0.42362 | 0.671841 | 0.938786 |
| hsa-miR-548aj-5p | 5    | 0    | 0     | 4     | 0     | 4     | 2.393185 | -1.40541 | 2.612872 | -0.53788 | NA       | NA       |
| hsa-miR-548g-5p  | 5    | 0    | 0     | 4     | 0     | 4     | 2.393185 | -1.40541 | 2.612872 | -0.53788 | NA       | NA       |
| hsa-miR-548x-5p  | 5    | 0    | 0     | 4     | 0     | 4     | 2.393185 | -1.40541 | 2.612872 | -0.53788 | NA       | NA       |
| hsa-miR-4800-3p  | 2    | 3    | 3     | 0     | 0     | 14    | 4.324273 | -1.35967 | 2.111351 | -0.64398 | NA       | NA       |
| hsa-miR-93-5p    | 2735 | 2860 | 4266  | 1900  | 7977  | 9849  | 5132.119 | -1.33524 | 0.85052  | -1.5699  | 0.116438 | 0.938786 |
| hsa-miR-6843-3p  | 7    | 0    | 2     | 14    | 0     | 0     | 4.193428 | -1.32469 | 2.435441 | -0.54392 | NA       | NA       |
| hsa-miR-548d-3p  | 0    | 0    | 2     | 0     | 2     | 2     | 0.998398 | -1.32215 | 3.294767 | -0.40129 | 0.688207 | 0.938786 |
| hsa-miR-548d-5p  | 21   | 21   | 15    | 34    | 27    | 45    | 29.46229 | -1.30061 | 0.880182 | -1.47766 | 0.1395   | 0.938786 |
| hsa-miR-1291     | 10   | 2    | 9     | 6     | 32    | 7     | 10.06862 | -1.29966 | 1.180042 | -1.10137 | NA       | NA       |
| hsa-let-7a-2-3p  | 5    | 0    | 4     | 3     | 3     | 9     | 4.263002 | -1.29843 | 1.668046 | -0.77841 | NA       | NA       |
| hsa-miR-132-3p   | 390  | 243  | 667   | 499   | 1072  | 935   | 647.0377 | -1.29593 | 0.747407 | -1.7339  | 0.082936 | 0.938786 |

|                   |       |       |       |        |        |        |          |          |          |          |          |          |
|-------------------|-------|-------|-------|--------|--------|--------|----------|----------|----------|----------|----------|----------|
| hsa-miR-5695      | 0     | 0     | 2     | 2      | 2      | 0      | 0.98309  | -1.29532 | 3.307648 | -0.39161 | 0.695343 | 0.938786 |
| hsa-miR-4448      | 5     | 0     | 0     | 3      | 7      | 0      | 2.229962 | -1.29262 | 2.619218 | -0.49351 | NA       | NA       |
| hsa-miR-6733-5p   | 0     | 2     | 0     | 0      | 6      | 0      | 1.157328 | -1.27137 | 3.723605 | -0.34143 | NA       | NA       |
| hsa-miR-16-2-3p   | 105   | 119   | 292   | 214    | 633    | 229    | 257.9496 | -1.26742 | 0.796334 | -1.59156 | NA       | NA       |
| hsa-miR-30a-3p    | 6391  | 5649  | 3071  | 23658  | 1576   | 276    | 7604.581 | -1.25599 | 1.335876 | -0.9402  | NA       | NA       |
| hsa-miR-10a-5p    | 73835 | 44274 | 74163 | 148838 | 144586 | 62764  | 93192.04 | -1.23772 | 0.708864 | -1.74606 | 0.0808   | 0.938786 |
| hsa-miR-217       | 19    | 23    | 14    | 2      | 115    | 17     | 28.14585 | -1.23155 | 1.221981 | -1.00783 | 0.313537 | 0.938786 |
| hsa-miR-105-3p    | 0     | 0     | 8     | 0      | 0      | 12     | 3.807175 | -1.22198 | 2.878725 | -0.42448 | NA       | NA       |
| hsa-miR-486-3p    | 14    | 9     | 19    | 40     | 41     | 0      | 20.18836 | -1.21905 | 1.375042 | -0.88655 | 0.37532  | 0.938786 |
| hsa-miR-574-5p    | 1523  | 1160  | 621   | 1985   | 2276   | 1781   | 1616.334 | -1.2153  | 0.721078 | -1.68539 | NA       | NA       |
| hsa-miR-6726-3p   | 0     | 4     | 0     | 6      | 2      | 0      | 2.258374 | -1.18281 | 2.685472 | -0.44045 | NA       | NA       |
| hsa-miR-219a-1-3p | 6     | 3     | 0     | 2      | 15     | 2      | 4.19014  | -1.18005 | 1.727473 | -0.68311 | NA       | NA       |
| hsa-miR-7-5p      | 13820 | 6881  | 17154 | 19294  | 43914  | 9642   | 17620.22 | -1.17332 | 0.762085 | -1.53962 | 0.123654 | 0.938786 |
| hsa-miR-100-5p    | 78955 | 41702 | 68063 | 64596  | 161293 | 114411 | 88171.31 | -1.17275 | 0.681216 | -1.72155 | 0.085151 | 0.938786 |
| hsa-miR-423-5p    | 2972  | 4112  | 2814  | 10553  | 4534   | 2164   | 4861.104 | -1.16413 | 0.88309  | -1.31824 | NA       | NA       |
| hsa-miR-576-5p    | 115   | 68    | 103   | 258    | 124    | 90     | 133.484  | -1.15794 | 0.816928 | -1.41743 | NA       | NA       |
| hsa-miR-324-5p    | 117   | 147   | 220   | 66     | 641    | 253    | 228.7679 | -1.12523 | 0.894137 | -1.25846 | 0.208226 | 0.938786 |
| hsa-let-7d-3p     | 384   | 716   | 617   | 819    | 1700   | 747    | 833.3275 | -1.12486 | 0.726984 | -1.5473  | 0.121792 | 0.938786 |
| hsa-miR-4516      | 10    | 3     | 23    | 5      | 2      | 44     | 16.21454 | -1.12314 | 1.410849 | -0.79607 | NA       | NA       |
| hsa-miR-548ay-5p  | 19    | 19    | 22    | 26     | 27     | 45     | 28.12905 | -1.11153 | 0.875377 | -1.26977 | 0.204167 | 0.938786 |
| hsa-miR-6772-3p   | 2     | 2     | 0     | 2      | 0      | 4      | 1.927197 | -1.10848 | 2.398714 | -0.46211 | 0.644    | 0.938786 |
| hsa-let-7b-3p     | 155   | 118   | 196   | 352    | 238    | 172    | 214.3766 | -1.09436 | 0.746051 | -1.46687 | NA       | NA       |
| hsa-miR-6740-3p   | 4     | 0     | 0     | 0      | 0      | 5      | 1.627316 | -1.08014 | 3.40253  | -0.31745 | NA       | NA       |
| hsa-miR-3074-5p   | 2     | 3     | 4     | 8      | 8      | 0      | 4.146045 | -1.06305 | 1.683798 | -0.63134 | 0.527818 | 0.938786 |
| hsa-miR-96-3p     | 0     | 0     | 3     | 0      | 0      | 4      | 1.316361 | -1.04103 | 3.60637  | -0.28866 | NA       | NA       |
| hsa-miR-106a-3p   | 0     | 9     | 0     | 2      | 12     | 5      | 4.73181  | -1.03821 | 1.994069 | -0.52065 | NA       | NA       |
| hsa-miR-23a-3p    | 16703 | 14652 | 14786 | 24488  | 31725  | 19575  | 20700.18 | -1.02981 | 0.639369 | -1.61066 | 0.107254 | 0.938786 |
| hsa-miR-23b-3p    | 24728 | 16680 | 14621 | 26076  | 36008  | 27580  | 24762.89 | -1.02278 | 0.656021 | -1.55907 | 0.118981 | 0.938786 |
| hsa-miR-1292-5p   | 7     | 6     | 0     | 11     | 2      | 6      | 5.918429 | -1.01986 | 1.622329 | -0.62864 | 0.529584 | 0.938786 |
| hsa-miR-18a-3p    | 22    | 13    | 11    | 16     | 44     | 18     | 20.03184 | -1.00971 | 0.895792 | -1.12717 | 0.259672 | 0.938786 |
| hsa-miR-223-3p    | 2434  | 359   | 1304  | 2456   | 1140   | 2008   | 1689.204 | -1.00937 | 0.902679 | -1.1182  | 0.263483 | 0.938786 |
| hsa-miR-708-5p    | 925   | 301   | 431   | 80     | 1778   | 945    | 699.6231 | -1.00535 | 1.021108 | -0.98456 | NA       | NA       |
| hsa-miR-7977      | 12    | 16    | 5     | 5      | 46     | 12     | 14.9879  | -0.99597 | 1.12898  | -0.88219 | 0.377675 | 0.938786 |
| hsa-miR-193b-5p   | 27    | 5     | 30    | 39     | 11     | 33     | 25.81463 | -0.98966 | 1.076024 | -0.91973 | NA       | NA       |
| hsa-miR-550a-5p   | 3     | 10    | 6     | 14     | 8      | 8      | 8.853058 | -0.98181 | 1.18932  | -0.82552 | 0.409076 | 0.938786 |

|                  |       |       |       |        |       |       |          |          |          |          |          |          |
|------------------|-------|-------|-------|--------|-------|-------|----------|----------|----------|----------|----------|----------|
| hsa-miR-3140-3p  | 6     | 0     | 2     | 2      | 9     | 2     | 3.141858 | -0.9766  | 1.802976 | -0.54166 | 0.588055 | 0.938786 |
| hsa-miR-3605-3p  | 32    | 40    | 8     | 53     | 62    | 19    | 36.21116 | -0.97455 | 0.983408 | -0.99099 | 0.321688 | 0.938786 |
| hsa-miR-17-5p    | 4803  | 2265  | 4939  | 2966   | 8061  | 7310  | 5064.554 | -0.96708 | 0.741557 | -1.30412 | 0.192191 | 0.938786 |
| hsa-miR-1285-3p  | 28    | 7     | 21    | 38     | 41    | 7     | 23.0503  | -0.963   | 1.022731 | -0.9416  | 0.346399 | 0.938786 |
| hsa-miR-320d     | 87    | 49    | 15    | 115    | 49    | 51    | 64.55043 | -0.96217 | 0.969806 | -0.99212 | 0.321137 | 0.938786 |
| hsa-miR-4792     | 76    | 37    | 222   | 282    | 196   | 27    | 140.7675 | -0.96199 | 1.061696 | -0.90609 | 0.36489  | 0.938786 |
| hsa-miR-5680     | 2     | 5     | 6     | 18     | 0     | 0     | 5.852402 | -0.96027 | 2.019437 | -0.47551 | NA       | NA       |
| hsa-miR-20a-5p   | 10164 | 3850  | 7929  | 2685   | 12794 | 16774 | 9138.824 | -0.95905 | 0.886992 | -1.08124 | 0.279592 | 0.938786 |
| hsa-miR-365b-5p  | 8     | 3     | 6     | 18     | 3     | 2     | 7.123105 | -0.9545  | 1.393648 | -0.68489 | NA       | NA       |
| hsa-miR-4777-3p  | 2     | 0     | 3     | 5      | 2     | 0     | 2.027024 | -0.95279 | 2.331534 | -0.40866 | 0.682793 | 0.938786 |
| hsa-miR-25-3p    | 7728  | 11139 | 9134  | 14530  | 18896 | 11016 | 12356.87 | -0.93894 | 0.685057 | -1.3706  | NA       | NA       |
| hsa-let-7e-5p    | 3788  | 3756  | 3647  | 7763   | 3470  | 4680  | 4839.052 | -0.9364  | 0.773343 | -1.21085 | 0.225954 | 0.938786 |
| hsa-miR-20a-3p   | 23    | 0     | 11    | 6      | 25    | 18    | 13.18028 | -0.93065 | 1.380055 | -0.67436 | 0.500082 | 0.938786 |
| hsa-miR-6716-3p  | 6     | 4     | 2     | 13     | 4     | 0     | 5.087519 | -0.91973 | 1.68127  | -0.54704 | NA       | NA       |
| hsa-miR-374c-5p  | 2     | 3     | 41    | 9      | 51    | 16    | 18.96334 | -0.90861 | 1.314776 | -0.69108 | NA       | NA       |
| hsa-miR-425-5p   | 9740  | 3282  | 10042 | 22011  | 3382  | 4051  | 9340.07  | -0.90581 | 1.01842  | -0.88943 | NA       | NA       |
| hsa-let-7b-5p    | 68098 | 37678 | 46003 | 125996 | 48030 | 32900 | 62745.73 | -0.90289 | 0.84683  | -1.06621 | NA       | NA       |
| hsa-miR-6808-3p  | 0     | 2     | 0     | 3      | 0     | 0     | 0.994555 | -0.89797 | 3.923681 | -0.22886 | NA       | NA       |
| hsa-miR-149-5p   | 258   | 309   | 123   | 303    | 508   | 272   | 298.7154 | -0.89249 | 0.75723  | -1.17862 | 0.238549 | 0.938786 |
| hsa-miR-548ah-3p | 73    | 20    | 81    | 172    | 4     | 34    | 69.46065 | -0.88454 | 1.266329 | -0.69851 | NA       | NA       |
| hsa-miR-3195     | 12    | 24    | 6     | 40     | 16    | 6     | 18.67825 | -0.87945 | 1.16012  | -0.75807 | NA       | NA       |
| hsa-miR-664a-5p  | 138   | 63    | 86    | 268    | 113   | 11    | 116.2323 | -0.87758 | 1.093777 | -0.80234 | 0.422359 | 0.938786 |
| hsa-miR-191-5p   | 15092 | 14403 | 26356 | 16031  | 43237 | 25941 | 23240.54 | -0.87606 | 0.707318 | -1.23857 | NA       | NA       |
| hsa-miR-548p     | 50    | 14    | 69    | 126    | 4     | 30    | 52.97264 | -0.8742  | 1.249578 | -0.6996  | 0.484177 | 0.938786 |
| hsa-miR-6506-5p  | 5     | 0     | 0     | 3      | 4     | 0     | 1.826067 | -0.86621 | 2.757825 | -0.31409 | NA       | NA       |
| hsa-miR-548am-3p | 85    | 20    | 81    | 178    | 4     | 38    | 73.18337 | -0.86421 | 1.266892 | -0.68215 | 0.495146 | 0.938786 |
| hsa-miR-6854-3p  | 0     | 2     | 2     | 4      | 2     | 0     | 1.762639 | -0.84796 | 2.43107  | -0.3488  | 0.727239 | 0.938786 |
| hsa-miR-548ad-5p | 19    | 19    | 14    | 13     | 18    | 39    | 21.65107 | -0.83896 | 0.974984 | -0.86048 | NA       | NA       |
| hsa-miR-99b-5p   | 19998 | 20814 | 21202 | 23700  | 52281 | 19276 | 25642.49 | -0.83378 | 0.669325 | -1.2457  | 0.212874 | 0.938786 |
| hsa-miR-7976     | 8     | 6     | 7     | 4      | 28    | 3     | 8.36769  | -0.81155 | 1.23066  | -0.65944 | NA       | NA       |
| hsa-miR-342-3p   | 3824  | 2245  | 5532  | 10189  | 3484  | 1171  | 4589.274 | -0.80737 | 0.970992 | -0.83149 | NA       | NA       |
| hsa-miR-342-5p   | 51    | 28    | 47    | 114    | 47    | 4     | 49.84589 | -0.80659 | 1.135524 | -0.71032 | 0.477504 | 0.938786 |
| hsa-miR-548ag    | 7     | 7     | 7     | 17     | 10    | 2     | 8.562999 | -0.8049  | 1.227854 | -0.65553 | 0.512126 | 0.938786 |
| hsa-miR-7706     | 161   | 78    | 134   | 302    | 97    | 68    | 146.4686 | -0.80258 | 0.908683 | -0.88324 | NA       | NA       |
| hsa-miR-7704     | 14    | 3     | 36    | 35     | 19    | 13    | 20.40981 | -0.79586 | 1.127541 | -0.70584 | NA       | NA       |

|                  |        |        |        |       |        |        |          |          |          |          |          |          |
|------------------|--------|--------|--------|-------|--------|--------|----------|----------|----------|----------|----------|----------|
| hsa-miR-4497     | 41     | 37     | 27     | 50    | 48     | 44     | 42.57626 | -0.79378 | 0.786338 | -1.00947 | 0.312751 | 0.938786 |
| hsa-miR-26a-2-3p | 91     | 49     | 82     | 175   | 94     | 22     | 87.07388 | -0.78952 | 0.944662 | -0.83577 | 0.403284 | 0.938786 |
| hsa-miR-335-3p   | 1296   | 611    | 3549   | 2856  | 1751   | 2204   | 2117.493 | -0.78679 | 0.88664  | -0.88738 | NA       | NA       |
| hsa-miR-193b-3p  | 170    | 57     | 531    | 77    | 182    | 646    | 292.0569 | -0.78617 | 1.125281 | -0.69864 | NA       | NA       |
| hsa-miR-200c-3p  | 29065  | 46265  | 48279  | 16529 | 97203  | 69453  | 50776.62 | -0.78193 | 0.841994 | -0.92867 | NA       | NA       |
| hsa-miR-766-3p   | 10     | 14     | 23     | 8     | 54     | 13     | 18.88041 | -0.77783 | 1.025735 | -0.75831 | NA       | NA       |
| hsa-miR-335-5p   | 2190   | 477    | 2259   | 3686  | 1048   | 1083   | 1860.104 | -0.77725 | 0.954851 | -0.814   | NA       | NA       |
| hsa-miR-145-5p   | 8441   | 7580   | 10040  | 15908 | 13354  | 6010   | 10390.57 | -0.77397 | 0.728382 | -1.06258 | 0.28797  | 0.938786 |
| hsa-miR-624-5p   | 32     | 7      | 11     | 12    | 21     | 29     | 18.76097 | -0.77094 | 1.016818 | -0.75818 | NA       | NA       |
| hsa-miR-744-3p   | 32     | 26     | 33     | 14    | 78     | 41     | 35.97947 | -0.7671  | 0.87195  | -0.87975 | NA       | NA       |
| hsa-miR-6130     | 18     | 8      | 3      | 12    | 23     | 6      | 11.14951 | -0.76477 | 1.131653 | -0.6758  | 0.49917  | 0.938786 |
| hsa-miR-4746-5p  | 0      | 3      | 2      | 0     | 5      | 3      | 2.149258 | -0.76283 | 2.282125 | -0.33426 | 0.73818  | 0.938786 |
| hsa-miR-4802-5p  | 3      | 0      | 2      | 0     | 2      | 4      | 1.82923  | -0.76108 | 2.382781 | -0.31941 | 0.749418 | 0.942992 |
| hsa-miR-3064-3p  | 7      | 0      | 7      | 5     | 11     | 3      | 5.116839 | -0.76077 | 1.547558 | -0.49159 | 0.623006 | 0.938786 |
| hsa-miR-3605-5p  | 5      | 0      | 7      | 13    | 0      | 0      | 4.430949 | -0.75592 | 2.379867 | -0.31763 | NA       | NA       |
| hsa-miR-653-5p   | 28     | 41     | 35     | 29    | 92     | 35     | 42.14477 | -0.75467 | 0.818329 | -0.92221 | 0.356417 | 0.938786 |
| hsa-miR-1226-3p  | 8      | 15     | 13     | 14    | 13     | 20     | 14.70785 | -0.74451 | 1.00403  | -0.74152 | 0.45838  | 0.938786 |
| hsa-miR-152-3p   | 10784  | 11903  | 8679   | 10332 | 30162  | 7078   | 12555.86 | -0.74228 | 0.74565  | -0.99548 | 0.319503 | 0.938786 |
| hsa-miR-5000-3p  | 2      | 0      | 0      | 0     | 0      | 2      | 0.702328 | -0.73647 | 3.994432 | -0.18438 | 0.853719 | 0.995744 |
| hsa-miR-23b-5p   | 111    | 43     | 58     | 91    | 109    | 70     | 79.83623 | -0.72918 | 0.745382 | -0.97827 | NA       | NA       |
| hsa-miR-2277-5p  | 23     | 8      | 17     | 6     | 18     | 34     | 18.05001 | -0.72775 | 1.063317 | -0.68442 | NA       | NA       |
| hsa-miR-92a-1-5p | 4      | 2      | 5      | 5     | 8      | 2      | 4.170494 | -0.72633 | 1.400957 | -0.51845 | 0.604141 | 0.938786 |
| hsa-miR-889-5p   | 0      | 3      | 0      | 4     | 0      | 0      | 1.384329 | -0.72399 | 3.569445 | -0.20283 | NA       | NA       |
| hsa-miR-6842-3p  | 158    | 50     | 151    | 339   | 47     | 19     | 133.9153 | -0.72386 | 1.161522 | -0.6232  | NA       | NA       |
| hsa-miR-628-3p   | 11     | 17     | 11     | 27    | 18     | 7      | 15.73274 | -0.72208 | 1.030621 | -0.70063 | NA       | NA       |
| hsa-miR-20b-5p   | 361    | 325    | 255    | 333   | 630    | 327    | 368.6009 | -0.7182  | 0.667656 | -1.0757  | 0.282062 | 0.938786 |
| hsa-miR-6853-3p  | 0      | 6      | 0      | 6     | 3      | 0      | 2.742542 | -0.71201 | 2.573533 | -0.27667 | 0.782037 | 0.962029 |
| hsa-miR-466      | 4      | 0      | 0      | 4     | 0      | 0      | 1.374041 | -0.71074 | 3.555838 | -0.19988 | NA       | NA       |
| hsa-miR-6505-5p  | 4      | 0      | 0      | 4     | 0      | 0      | 1.374041 | -0.71074 | 3.555838 | -0.19988 | NA       | NA       |
| hsa-miR-1247-3p  | 18     | 7      | 5      | 28    | 4      | 2      | 11.25001 | -0.7098  | 1.353255 | -0.52451 | NA       | NA       |
| hsa-miR-148b-5p  | 319    | 259    | 453    | 221   | 875    | 361    | 396.2412 | -0.70724 | 0.73855  | -0.9576  | 0.338262 | 0.938786 |
| hsa-miR-27b-3p   | 178863 | 132356 | 101414 | 28824 | 277108 | 245674 | 158714.3 | -0.6987  | 0.923094 | -0.75691 | 0.449106 | 0.938786 |
| hsa-miR-16-5p    | 11752  | 7520   | 10937  | 10330 | 20380  | 9533   | 11463.9  | -0.69549 | 0.640178 | -1.08641 | 0.277299 | 0.938786 |
| hsa-miR-592      | 20     | 22     | 8      | 38    | 20     | 6      | 19.74907 | -0.69279 | 1.085392 | -0.63828 | NA       | NA       |
| hsa-miR-4678     | 2      | 0      | 0      | 2     | 0      | 0      | 0.68702  | -0.69198 | 3.997961 | -0.17308 | 0.862586 | 0.995744 |

|                  |       |       |       |        |        |       |          |          |          |          |          |          |
|------------------|-------|-------|-------|--------|--------|-------|----------|----------|----------|----------|----------|----------|
| hsa-miR-548as-5p | 2     | 0     | 0     | 2      | 0      | 0     | 0.68702  | -0.69198 | 3.997961 | -0.17308 | 0.862586 | 0.995744 |
| hsa-miR-582-5p   | 111   | 204   | 161   | 77     | 527    | 134   | 190.1066 | -0.6917  | 0.872105 | -0.79314 | 0.427696 | 0.938786 |
| hsa-miR-4301     | 171   | 50    | 74    | 143    | 115    | 91    | 107.7043 | -0.68739 | 0.798693 | -0.86064 | 0.389438 | 0.938786 |
| hsa-let-7d-5p    | 2826  | 4578  | 3231  | 4221   | 8049   | 2760  | 4227.478 | -0.68422 | 0.726998 | -0.94116 | 0.346625 | 0.938786 |
| hsa-miR-214-3p   | 1490  | 923   | 1134  | 983    | 2050   | 1507  | 1336.6   | -0.67973 | 0.659642 | -1.03045 | 0.302799 | 0.938786 |
| hsa-miR-548ae-5p | 19    | 19    | 16    | 9      | 20     | 37    | 20.8988  | -0.67591 | 0.988616 | -0.68369 | NA       | NA       |
| hsa-miR-3691-5p  | 2     | 0     | 0     | 0      | 3      | 0     | 0.660904 | -0.67524 | 3.999316 | -0.16884 | NA       | NA       |
| hsa-miR-7113-5p  | 2     | 0     | 0     | 0      | 3      | 0     | 0.660904 | -0.67524 | 3.999316 | -0.16884 | NA       | NA       |
| hsa-miR-6513-5p  | 0     | 2     | 2     | 0      | 4      | 2     | 1.617198 | -0.67045 | 2.462308 | -0.27228 | 0.785404 | 0.96231  |
| hsa-miR-653-3p   | 7     | 11    | 17    | 13     | 21     | 12    | 13.52867 | -0.6685  | 0.984128 | -0.67929 | 0.496957 | 0.938786 |
| hsa-miR-27b-5p   | 192   | 130   | 128   | 82     | 319    | 195   | 169.5535 | -0.66628 | 0.753223 | -0.88458 | NA       | NA       |
| hsa-miR-548j-5p  | 8     | 2     | 5     | 7      | 7      | 4     | 5.42521  | -0.66069 | 1.285652 | -0.51389 | 0.607327 | 0.938786 |
| hsa-miR-574-3p   | 1911  | 1278  | 926   | 1722   | 2074   | 1340  | 1548.163 | -0.65883 | 0.685488 | -0.96112 | NA       | NA       |
| hsa-miR-10a-3p   | 454   | 284   | 664   | 385    | 1002   | 454   | 520.9675 | -0.65684 | 0.708849 | -0.92663 | 0.354117 | 0.938786 |
| hsa-miR-30b-3p   | 60    | 40    | 65    | 96     | 105    | 13    | 61.59645 | -0.65559 | 0.930685 | -0.70442 | 0.481172 | 0.938786 |
| hsa-miR-643      | 2     | 0     | 2     | 0      | 3      | 2     | 1.390038 | -0.64136 | 2.546132 | -0.2519  | 0.801122 | 0.965675 |
| hsa-let-7f-1-3p  | 189   | 129   | 214   | 317    | 185    | 121   | 197.2062 | -0.63551 | 0.779428 | -0.81535 | NA       | NA       |
| hsa-miR-212-5p   | 16    | 15    | 37    | 6      | 42     | 38    | 25.3338  | -0.63396 | 1.028846 | -0.61618 | 0.537775 | 0.938786 |
| hsa-miR-616-5p   | 0     | 2     | 2     | 0      | 7      | 0     | 1.575774 | -0.62801 | 2.90643  | -0.21608 | NA       | NA       |
| hsa-miR-576-3p   | 371   | 106   | 297   | 517    | 152    | 161   | 275.8173 | -0.62711 | 0.916944 | -0.68392 | NA       | NA       |
| hsa-miR-887-3p   | 7     | 12    | 14    | 20     | 12     | 8     | 12.68043 | -0.62581 | 1.051994 | -0.59488 | NA       | NA       |
| hsa-miR-106a-5p  | 230   | 156   | 170   | 170    | 308    | 209   | 205.4976 | -0.62168 | 0.663649 | -0.93676 | 0.348884 | 0.938786 |
| hsa-miR-550a-3p  | 9     | 8     | 2     | 4      | 11     | 9     | 7.183413 | -0.61952 | 1.24132  | -0.49908 | 0.617724 | 0.938786 |
| hsa-miR-151a-3p  | 75370 | 53390 | 49117 | 135384 | 43093  | 22496 | 65905.32 | -0.61932 | 0.916914 | -0.67544 | NA       | NA       |
| hsa-miR-6747-3p  | 0     | 0     | 2     | 0      | 0      | 2     | 0.729134 | -0.61326 | 3.982413 | -0.15399 | 0.877616 | 0.995744 |
| hsa-miR-26b-3p   | 40    | 39    | 40    | 17     | 98     | 45    | 44.50114 | -0.61256 | 0.856567 | -0.71513 | 0.474528 | 0.938786 |
| hsa-miR-3688-3p  | 16    | 9     | 12    | 8      | 37     | 6     | 13.36925 | -0.60666 | 1.048995 | -0.57833 | NA       | NA       |
| hsa-miR-210-5p   | 7     | 18    | 23    | 6      | 23     | 30    | 18.37559 | -0.59963 | 1.078793 | -0.55583 | 0.578324 | 0.938786 |
| hsa-miR-490-3p   | 12    | 10    | 8     | 30     | 2      | 0     | 11.14444 | -0.59614 | 1.603176 | -0.37185 | NA       | NA       |
| hsa-miR-375      | 33204 | 31072 | 18637 | 3589   | 121000 | 7094  | 30983.64 | -0.59496 | 1.139978 | -0.5219  | NA       | NA       |
| hsa-miR-548v     | 9     | 2     | 2     | 0      | 7      | 8     | 4.513591 | -0.59461 | 1.693052 | -0.35121 | 0.725433 | 0.938786 |
| hsa-miR-489-3p   | 8     | 6     | 22    | 14     | 21     | 9     | 13.03989 | -0.59242 | 1.040423 | -0.5694  | NA       | NA       |
| hsa-miR-1262     | 19    | 9     | 4     | 31     | 2      | 0     | 11.51657 | -0.58971 | 1.64436  | -0.35863 | NA       | NA       |
| hsa-miR-223-5p   | 349   | 56    | 379   | 447    | 227    | 160   | 270.7125 | -0.58099 | 0.93719  | -0.61992 | NA       | NA       |
| hsa-miR-942-5p   | 7     | 5     | 26    | 16     | 14     | 13    | 13.68248 | -0.58096 | 1.090078 | -0.53295 | NA       | NA       |



|                   |        |        |        |       |        |        |          |          |          |          |          |          |
|-------------------|--------|--------|--------|-------|--------|--------|----------|----------|----------|----------|----------|----------|
| hsa-miR-550a-3-5p | 6      | 10     | 4      | 8     | 8      | 8      | 7.66472  | -0.57301 | 1.169299 | -0.49005 | 0.624099 | 0.938786 |
| hsa-miR-1973      | 0      | 0      | 2      | 2     | 0      | 0      | 0.713826 | -0.56876 | 3.985952 | -0.14269 | 0.886534 | 0.995744 |
| hsa-miR-4799-5p   | 0      | 0      | 2      | 2     | 0      | 0      | 0.713826 | -0.56876 | 3.985952 | -0.14269 | 0.886534 | 0.995744 |
| hsa-miR-4999-3p   | 0      | 0      | 2      | 2     | 0      | 0      | 0.713826 | -0.56876 | 3.985952 | -0.14269 | 0.886534 | 0.995744 |
| hsa-miR-4684-3p   | 5      | 3      | 0      | 0     | 3      | 6      | 2.906681 | -0.56841 | 2.137567 | -0.26592 | 0.790303 | 0.96231  |
| hsa-miR-642a-3p   | 13     | 2      | 2      | 9     | 11     | 0      | 5.71991  | -0.56452 | 1.648317 | -0.34249 | NA       | NA       |
| hsa-miR-629-5p    | 405    | 278    | 332    | 287   | 475    | 417    | 366.249  | -0.5643  | 0.666217 | -0.84702 | 0.396984 | 0.938786 |
| hsa-miR-874-3p    | 59     | 33     | 62     | 24    | 112    | 56     | 54.85521 | -0.56421 | 0.820874 | -0.68733 | 0.491874 | 0.938786 |
| hsa-miR-455-3p    | 698    | 475    | 412    | 804   | 716    | 323    | 572.357  | -0.56144 | 0.73433  | -0.76456 | 0.444533 | 0.938786 |
| hsa-miR-182-5p    | 31112  | 27808  | 42161  | 18233 | 39194  | 56866  | 36699.67 | -0.55862 | 0.779246 | -0.71687 | NA       | NA       |
| hsa-miR-548aw     | 7      | 0      | 0      | 5     | 2      | 0      | 2.243823 | -0.55626 | 2.677702 | -0.20774 | NA       | NA       |
| hsa-miR-4680-3p   | 0      | 0      | 2      | 0     | 3      | 0      | 0.68771  | -0.55203 | 3.987311 | -0.13845 | NA       | NA       |
| hsa-miR-1295a     | 5      | 3      | 2      | 10    | 0      | 0      | 3.600701 | -0.55154 | 2.124229 | -0.25964 | NA       | NA       |
| hsa-miR-15b-5p    | 1777   | 817    | 1766   | 1056  | 2923   | 1280   | 1527.326 | -0.54255 | 0.698301 | -0.77696 | 0.437183 | 0.938786 |
| hsa-miR-3913-5p   | 100    | 43     | 101    | 136   | 71     | 52     | 85.07607 | -0.53503 | 0.838053 | -0.63843 | NA       | NA       |
| hsa-miR-1343-3p   | 2      | 4      | 2      | 4     | 2      | 3      | 3.037164 | -0.53207 | 1.593874 | -0.33382 | 0.738512 | 0.938786 |
| hsa-miR-1303      | 28     | 12     | 44     | 3     | 42     | 49     | 29.14914 | -0.52493 | 1.128321 | -0.46523 | 0.641764 | 0.938786 |
| hsa-miR-18a-5p    | 81     | 45     | 80     | 32    | 113    | 92     | 72.20428 | -0.52266 | 0.801245 | -0.65231 | 0.514204 | 0.938786 |
| hsa-miR-28-3p     | 9386   | 7460   | 11921  | 8421  | 15428  | 9585   | 10223.45 | -0.51927 | 0.646107 | -0.8037  | 0.421572 | 0.938786 |
| hsa-miR-324-3p    | 48     | 97     | 56     | 28    | 146    | 82     | 75.00206 | -0.50364 | 0.881773 | -0.57116 | NA       | NA       |
| hsa-miR-99b-3p    | 1203   | 1184   | 1451   | 675   | 2907   | 1203   | 1371.787 | -0.50363 | 0.732975 | -0.6871  | 0.492019 | 0.938786 |
| hsa-miR-627-3p    | 9      | 0      | 2      | 2     | 4      | 5      | 3.522191 | -0.50212 | 1.770406 | -0.28362 | NA       | NA       |
| hsa-let-7g-5p     | 129255 | 170148 | 221493 | 92630 | 398599 | 163972 | 187867.8 | -0.50125 | 0.75694  | -0.66221 | 0.507837 | 0.938786 |
| hsa-miR-652-3p    | 1261   | 774    | 918    | 1006  | 1691   | 720    | 1031.859 | -0.49904 | 0.654387 | -0.76261 | 0.445695 | 0.938786 |
| hsa-miR-1307-3p   | 677    | 479    | 1115   | 362   | 1483   | 840    | 793.4633 | -0.49805 | 0.769727 | -0.64704 | NA       | NA       |
| hsa-miR-3144-3p   | 0      | 0      | 49     | 0     | 2      | 43     | 16.79708 | -0.49704 | 2.3158   | -0.21463 | NA       | NA       |
| hsa-miR-197-3p    | 307    | 568    | 448    | 523   | 608    | 408    | 487.4432 | -0.49552 | 0.729096 | -0.67963 | 0.496739 | 0.938786 |
| hsa-miR-7705      | 9      | 5      | 16     | 0     | 4      | 25     | 10.40592 | -0.4935  | 1.559273 | -0.31649 | NA       | NA       |
| hsa-miR-95-3p     | 2549   | 981    | 652    | 1078  | 3593   | 524    | 1423.711 | -0.49259 | 0.885083 | -0.55655 | 0.577838 | 0.938786 |
| hsa-miR-195-3p    | 281    | 101    | 261    | 446   | 106    | 77     | 218.1075 | -0.4864  | 0.980727 | -0.49596 | NA       | NA       |
| hsa-miR-15a-5p    | 632    | 326    | 473    | 341   | 963    | 379    | 492.6668 | -0.48529 | 0.68988  | -0.70344 | NA       | NA       |
| hsa-miR-548at-3p  | 5      | 0      | 4      | 8     | 0      | 0      | 2.930197 | -0.48328 | 2.531222 | -0.19093 | NA       | NA       |
| hsa-miR-1250-5p   | 8      | 46     | 12     | 2     | 104    | 2      | 25.64731 | -0.47993 | 1.466831 | -0.32719 | NA       | NA       |
| hsa-miR-106b-5p   | 2261   | 1655   | 1637   | 675   | 2570   | 2881   | 1944.708 | -0.47991 | 0.806657 | -0.59494 | 0.551883 | 0.938786 |
| hsa-miR-4286      | 50     | 73     | 63     | 77    | 111    | 34     | 67.19349 | -0.47733 | 0.793809 | -0.60131 | 0.547631 | 0.938786 |

|                   |        |       |        |        |        |       |          |          |          |          |          |          |
|-------------------|--------|-------|--------|--------|--------|-------|----------|----------|----------|----------|----------|----------|
| hsa-miR-1180-3p   | 171    | 271   | 305    | 286    | 264    | 268   | 269.3255 | -0.47647 | 0.740672 | -0.64329 | NA       | NA       |
| hsa-miR-3940-3p   | 23     | 11    | 14     | 15     | 27     | 12    | 16.39682 | -0.47367 | 0.907923 | -0.5217  | 0.601876 | 0.938786 |
| hsa-miR-641       | 11     | 8     | 4      | 14     | 6      | 4     | 8.087837 | -0.46958 | 1.215704 | -0.38626 | NA       | NA       |
| hsa-miR-6806-3p   | 14     | 13    | 7      | 26     | 4      | 4     | 12.08372 | -0.46276 | 1.245064 | -0.37168 | NA       | NA       |
| hsa-miR-125b-1-3p | 93     | 59    | 146    | 91     | 132    | 98    | 102.1383 | -0.45972 | 0.734055 | -0.62628 | NA       | NA       |
| hsa-miR-125a-5p   | 5526   | 6182  | 8399   | 5080   | 12520  | 5870  | 7067.245 | -0.45383 | 0.679892 | -0.6675  | 0.504454 | 0.938786 |
| hsa-miR-2276-3p   | 6      | 0     | 0      | 5      | 0      | 0     | 1.846055 | -0.45275 | 3.302348 | -0.1371  | NA       | NA       |
| hsa-miR-3615      | 296    | 165   | 183    | 326    | 269    | 93    | 219.8583 | -0.45176 | 0.789678 | -0.57208 | 0.567271 | 0.938786 |
| hsa-miR-744-5p    | 345    | 546   | 616    | 260    | 717    | 705   | 536.5801 | -0.44583 | 0.782982 | -0.5694  | 0.569087 | 0.938786 |
| hsa-miR-548ar-5p  | 5      | 0     | 0      | 0      | 0      | 4     | 1.53316  | -0.43732 | 3.458399 | -0.12645 | NA       | NA       |
| hsa-miR-140-3p    | 19986  | 8443  | 26694  | 29838  | 22279  | 5286  | 18423.71 | -0.4355  | 0.88298  | -0.49321 | 0.621862 | 0.938786 |
| hsa-miR-484       | 270    | 413   | 563    | 92     | 943    | 474   | 439.0483 | -0.43428 | 0.912384 | -0.47598 | NA       | NA       |
| hsa-miR-30c-2-3p  | 551    | 961   | 418    | 1481   | 462    | 94    | 699.6293 | -0.42991 | 1.078385 | -0.39866 | NA       | NA       |
| hsa-miR-185-5p    | 1745   | 2391  | 2567   | 3743   | 2574   | 886   | 2354.973 | -0.42227 | 0.824071 | -0.51241 | 0.608361 | 0.938786 |
| hsa-miR-144-5p    | 2060   | 715   | 1954   | 1380   | 3806   | 364   | 1557.13  | -0.41658 | 0.895348 | -0.46527 | 0.64174  | 0.938786 |
| hsa-miR-190b      | 77     | 46    | 59     | 15     | 218    | 10    | 61.10812 | -0.40944 | 1.11109  | -0.3685  | NA       | NA       |
| hsa-miR-30d-5p    | 198680 | 92530 | 185864 | 146857 | 305245 | 79535 | 158458   | -0.40881 | 0.7238   | -0.56482 | 0.572199 | 0.938786 |
| hsa-miR-93-3p     | 9      | 36    | 16     | 21     | 27     | 21    | 22.54476 | -0.40649 | 0.99286  | -0.40941 | NA       | NA       |
| hsa-let-7e-3p     | 49     | 48    | 105    | 37     | 130    | 61    | 68.62545 | -0.40216 | 0.812401 | -0.49503 | 0.620577 | 0.938786 |
| hsa-miR-92b-5p    | 41     | 46    | 24     | 16     | 41     | 59    | 38.81072 | -0.40214 | 0.919242 | -0.43747 | NA       | NA       |
| hsa-miR-425-3p    | 433    | 591   | 786    | 173    | 1281   | 651   | 625.0804 | -0.39114 | 0.852157 | -0.459   | NA       | NA       |
| hsa-miR-3909      | 49     | 93    | 48     | 48     | 58     | 91    | 67.75269 | -0.38673 | 0.860809 | -0.44927 | NA       | NA       |
| hsa-miR-92b-3p    | 2512   | 2656  | 1656   | 733    | 2263   | 3924  | 2357.974 | -0.3865  | 0.880457 | -0.43897 | NA       | NA       |
| hsa-miR-1306-5p   | 10     | 9     | 6      | 4      | 16     | 8     | 8.504813 | -0.38324 | 1.116712 | -0.34319 | 0.731459 | 0.938786 |
| hsa-miR-19b-3p    | 1257   | 664   | 1281   | 498    | 1369   | 1372  | 1056.232 | -0.37767 | 0.751056 | -0.50286 | 0.615065 | 0.938786 |
| hsa-miR-3613-3p   | 9      | 6     | 6      | 7      | 10     | 5     | 7.021251 | -0.37586 | 1.134556 | -0.33128 | 0.74043  | 0.938786 |
| hsa-miR-548av-3p  | 20     | 0     | 14     | 9      | 0      | 18    | 10.49971 | -0.36837 | 1.811147 | -0.20339 | 0.838831 | 0.992375 |
| hsa-let-7i-3p     | 44     | 58    | 81     | 22     | 143    | 48    | 61.95539 | -0.35049 | 0.876163 | -0.40003 | 0.689136 | 0.938786 |
| hsa-miR-6511a-3p  | 2      | 3     | 3      | 0      | 11     | 0     | 2.687985 | -0.34607 | 2.191126 | -0.15794 | NA       | NA       |
| hsa-let-7a-5p     | 106119 | 84806 | 95548  | 89333  | 133110 | 72949 | 95387.88 | -0.34507 | 0.631475 | -0.54645 | 0.584754 | 0.938786 |
| hsa-miR-4796-3p   | 4      | 0     | 0      | 0      | 0      | 3     | 1.181996 | -0.33996 | 3.712451 | -0.09157 | NA       | NA       |
| hsa-miR-199a-5p   | 21823  | 14422 | 25533  | 2850   | 35228  | 26768 | 20263.91 | -0.33866 | 0.9369   | -0.36147 | NA       | NA       |
| hsa-miR-3124-5p   | 2      | 4     | 0      | 3      | 4      | 0     | 2.139628 | -0.33665 | 2.285631 | -0.14729 | 0.882903 | 0.995744 |
| hsa-miR-142-5p    | 2636   | 843   | 14488  | 6019   | 11684  | 1468  | 5736.041 | -0.3294  | 1.111474 | -0.29637 | NA       | NA       |
| hsa-miR-147b      | 43     | 13    | 428    | 54     | 68     | 293   | 154.5385 | -0.32636 | 1.295926 | -0.25183 | NA       | NA       |

|                  |         |        |         |        |         |         |          |          |          |          |          |          |
|------------------|---------|--------|---------|--------|---------|---------|----------|----------|----------|----------|----------|----------|
| hsa-miR-378a-5p  | 67      | 18     | 38      | 38     | 93      | 3       | 38.50705 | -0.3199  | 1.112206 | -0.28762 | 0.773635 | 0.957393 |
| hsa-miR-363-3p   | 1616    | 2429   | 1266    | 2639   | 1844    | 880     | 1823.432 | -0.31742 | 0.812683 | -0.39058 | NA       | NA       |
| hsa-miR-769-5p   | 1661    | 870    | 1095    | 790    | 1423    | 1285    | 1168.436 | -0.3139  | 0.681064 | -0.4609  | 0.644868 | 0.938786 |
| hsa-miR-21-5p    | 1015512 | 842669 | 1904675 | 218719 | 1555548 | 1905153 | 1228710  | -0.31259 | 0.940518 | -0.33236 | 0.73962  | 0.938786 |
| hsa-miR-30b-5p   | 37090   | 19548  | 33790   | 17311  | 70039   | 13232   | 29075.32 | -0.31083 | 0.781225 | -0.39788 | NA       | NA       |
| hsa-miR-2278     | 0       | 2      | 0       | 2      | 0       | 0       | 0.779549 | -0.30588 | 3.963366 | -0.07718 | 0.938483 | 0.99606  |
| hsa-let-7i-5p    | 148774  | 203599 | 256416  | 80518  | 246192  | 277129  | 203250.6 | -0.30025 | 0.800622 | -0.37503 | 0.707641 | 0.938786 |
| hsa-miR-193a-5p  | 191     | 236    | 153     | 289    | 207     | 77      | 194.6518 | -0.29241 | 0.827897 | -0.35319 | 0.723944 | 0.938786 |
| hsa-miR-4429     | 8       | 2      | 2       | 5      | 4       | 2       | 3.720262 | -0.29033 | 1.500795 | -0.19345 | NA       | NA       |
| hsa-miR-126-5p   | 2927    | 1412   | 3752    | 3561   | 2967    | 1080    | 2560.902 | -0.28278 | 0.793727 | -0.35626 | 0.721643 | 0.938786 |
| hsa-miR-128-3p   | 2738    | 1742   | 3613    | 4561   | 1605    | 1005    | 2589.501 | -0.28103 | 0.884387 | -0.31777 | NA       | NA       |
| hsa-miR-22-3p    | 6060    | 4545   | 9014    | 6122   | 10371   | 3353    | 6311.321 | -0.27834 | 0.707221 | -0.39357 | NA       | NA       |
| hsa-miR-659-5p   | 56      | 20     | 45      | 71     | 13      | 17      | 37.87828 | -0.27774 | 1.042764 | -0.26635 | NA       | NA       |
| hsa-miR-25-5p    | 5       | 17     | 7       | 2      | 34      | 2       | 10.05975 | -0.27626 | 1.380254 | -0.20015 | NA       | NA       |
| hsa-miR-548e-3p  | 92      | 46     | 78      | 43     | 76      | 81      | 68.44321 | -0.27566 | 0.761682 | -0.36192 | NA       | NA       |
| hsa-miR-3690     | 2       | 5      | 19      | 14     | 12      | 0       | 8.452751 | -0.27551 | 1.575911 | -0.17482 | 0.861218 | 0.995744 |
| hsa-miR-6515-5p  | 0       | 3      | 7       | 6      | 4       | 0       | 3.346218 | -0.2729  | 2.076901 | -0.1314  | 0.895462 | 0.99606  |
| hsa-miR-26b-5p   | 103938  | 53612  | 73923   | 43054  | 134027  | 56716   | 73145.9  | -0.26556 | 0.688946 | -0.38546 | 0.699895 | 0.938786 |
| hsa-miR-548o-3p  | 697     | 130    | 685     | 709    | 203     | 313     | 458.9557 | -0.25117 | 0.953877 | -0.26332 | 0.792306 | 0.96231  |
| hsa-miR-4742-3p  | 12      | 5      | 10      | 7      | 5       | 11      | 8.462423 | -0.24899 | 1.147366 | -0.21701 | 0.828198 | 0.987466 |
| hsa-miR-24-3p    | 55154   | 23546  | 34721   | 34134  | 38759   | 29586   | 35274.6  | -0.24722 | 0.674762 | -0.36638 | 0.714082 | 0.938786 |
| hsa-miR-10b-5p   | 10662   | 2096   | 4422    | 8509   | 4612    | 1495    | 5147.224 | -0.23555 | 0.941227 | -0.25025 | NA       | NA       |
| hsa-miR-296-5p   | 0       | 2      | 4       | 0      | 3       | 3       | 1.98904  | -0.23382 | 2.330536 | -0.10033 | 0.920082 | 0.99606  |
| hsa-miR-150-5p   | 1581    | 660    | 3005    | 1956   | 2976    | 241     | 1619.82  | -0.23199 | 0.983417 | -0.2359  | NA       | NA       |
| hsa-miR-29c-5p   | 2861    | 617    | 1378    | 3186   | 587     | 101     | 1457.557 | -0.22897 | 1.19053  | -0.19232 | NA       | NA       |
| hsa-miR-664b-5p  | 21      | 5      | 2       | 12     | 8       | 4       | 8.404011 | -0.22474 | 1.295947 | -0.17342 | NA       | NA       |
| hsa-miR-19b-1-5p | 20      | 2      | 3       | 4      | 8       | 9       | 7.28636  | -0.21781 | 1.336595 | -0.16296 | NA       | NA       |
| hsa-miR-625-5p   | 32      | 16     | 17      | 3      | 60      | 9       | 20.04772 | -0.21642 | 1.134925 | -0.19069 | NA       | NA       |
| hsa-miR-4536-3p  | 9       | 0      | 2       | 6      | 3       | 0       | 3.134284 | -0.21416 | 2.128542 | -0.10061 | 0.919859 | 0.99606  |
| hsa-miR-3123     | 0       | 0      | 9       | 0      | 6       | 3       | 2.752934 | -0.21415 | 2.551554 | -0.08393 | NA       | NA       |
| hsa-miR-6837-3p  | 3       | 2      | 0       | 4      | 0       | 0       | 1.595073 | -0.20771 | 2.911234 | -0.07135 | NA       | NA       |
| hsa-let-7f-5p    | 285301  | 271785 | 255304  | 219465 | 385118  | 176338  | 258690.1 | -0.20006 | 0.64741  | -0.30901 | 0.757314 | 0.945667 |
| hsa-miR-200b-5p  | 305     | 439    | 199     | 119    | 607     | 255     | 308.2421 | -0.18795 | 0.830726 | -0.22625 | 0.821009 | 0.980781 |
| hsa-miR-548az-5p | 21      | 12     | 24      | 21     | 10      | 16      | 17.62558 | -0.18762 | 0.967202 | -0.19399 | 0.846187 | 0.993629 |
| hsa-miR-18b-5p   | 2       | 0      | 0       | 0      | 2       | 0       | 0.526272 | -0.18577 | 4.035293 | -0.04604 | 0.963281 | 0.99606  |

|                   |       |       |       |       |       |       |          |          |          |          |          |          |
|-------------------|-------|-------|-------|-------|-------|-------|----------|----------|----------|----------|----------|----------|
| hsa-miR-3170      | 2     | 0     | 0     | 0     | 2     | 0     | 0.526272 | -0.18577 | 4.035293 | -0.04604 | 0.963281 | 0.99606  |
| hsa-miR-23c       | 12    | 14    | 5     | 9     | 4     | 13    | 10.0665  | -0.1813  | 1.181442 | -0.15345 | 0.878041 | 0.995744 |
| hsa-miR-490-5p    | 3     | 7     | 2     | 10    | 0     | 0     | 4.042766 | -0.17683 | 2.100167 | -0.0842  | NA       | NA       |
| hsa-miR-103a-2-5p | 34    | 14    | 23    | 9     | 46    | 14    | 21.32512 | -0.16572 | 0.940661 | -0.17618 | 0.860156 | 0.995744 |
| hsa-miR-1266-5p   | 56    | 14    | 16    | 5     | 40    | 31    | 25.27627 | -0.16381 | 1.061942 | -0.15425 | 0.87741  | 0.995744 |
| hsa-miR-548ap-3p  | 3     | 0     | 0     | 0     | 0     | 2     | 0.830832 | -0.15986 | 3.945745 | -0.04052 | NA       | NA       |
| hsa-miR-218-5p    | 43549 | 7334  | 27658 | 50551 | 5597  | 1995  | 22869.36 | -0.15958 | 1.222671 | -0.13051 | NA       | NA       |
| hsa-miR-103a-3p   | 48679 | 24555 | 51822 | 28411 | 59033 | 26564 | 37871.8  | -0.15788 | 0.67164  | -0.23507 | 0.814157 | 0.976359 |
| hsa-miR-34a-3p    | 24    | 23    | 32    | 12    | 18    | 36    | 24.664   | -0.15435 | 0.940007 | -0.1642  | NA       | NA       |
| hsa-miR-423-3p    | 2026  | 4490  | 4148  | 1483  | 4970  | 3724  | 3450.85  | -0.1536  | 0.804319 | -0.19097 | 0.848552 | 0.994522 |
| hsa-miR-183-5p    | 20473 | 18900 | 25415 | 4238  | 25858 | 27826 | 20128.8  | -0.15031 | 0.873291 | -0.17212 | 0.863343 | 0.995744 |
| hsa-miR-361-5p    | 1009  | 720   | 1347  | 743   | 1270  | 740   | 942.143  | -0.14975 | 0.658836 | -0.2273  | 0.820189 | 0.980781 |
| hsa-miR-7641      | 517   | 300   | 195   | 499   | 93    | 189   | 308.4305 | -0.14289 | 0.954762 | -0.14966 | 0.881035 | 0.995744 |
| hsa-miR-3942-5p   | 0     | 4     | 2     | 3     | 0     | 2     | 2.073226 | -0.14046 | 2.361229 | -0.05949 | 0.952564 | 0.99606  |
| hsa-miR-877-5p    | 180   | 103   | 53    | 149   | 92    | 41    | 102.2041 | -0.13729 | 0.890602 | -0.15415 | NA       | NA       |
| hsa-miR-6833-3p   | 7     | 8     | 5     | 0     | 24    | 0     | 6.238377 | -0.13503 | 1.882835 | -0.07171 | NA       | NA       |
| hsa-miR-199b-5p   | 43647 | 20366 | 21794 | 7531  | 52768 | 21248 | 25715.42 | -0.13403 | 0.823579 | -0.16275 | 0.870718 | 0.995744 |
| hsa-miR-3174      | 5     | 7     | 2     | 7     | 3     | 2     | 4.503971 | -0.12716 | 1.453237 | -0.0875  | 0.930275 | 0.99606  |
| hsa-miR-1301-3p   | 69    | 106   | 185   | 66    | 200   | 77    | 111.9066 | -0.12126 | 0.80306  | -0.151   | 0.879976 | 0.995744 |
| hsa-miR-3150a-5p  | 3     | 0     | 0     | 2     | 0     | 0     | 0.815525 | -0.11537 | 3.949316 | -0.02921 | NA       | NA       |
| hsa-miR-5698      | 3     | 0     | 0     | 2     | 0     | 0     | 0.815525 | -0.11537 | 3.949316 | -0.02921 | NA       | NA       |
| hsa-miR-548aj-3p  | 13    | 0     | 10    | 2     | 7     | 9     | 6.465999 | -0.11251 | 1.558656 | -0.07219 | 0.942454 | 0.99606  |
| hsa-miR-146a-5p   | 33169 | 28661 | 49497 | 31897 | 72621 | 4352  | 33899.53 | -0.11146 | 0.942906 | -0.11821 | 0.905905 | 0.99606  |
| hsa-miR-5001-3p   | 2     | 13    | 7     | 0     | 24    | 2     | 7.198832 | -0.09638 | 1.66877  | -0.05775 | NA       | NA       |
| hsa-miR-210-3p    | 3228  | 3562  | 13170 | 1241  | 6497  | 8784  | 6003.622 | -0.09186 | 0.994337 | -0.09239 | 0.926392 | 0.99606  |
| hsa-miR-22-5p     | 377   | 280   | 566   | 506   | 366   | 138   | 366.496  | -0.0871  | 0.8076   | -0.10785 | NA       | NA       |
| hsa-miR-320b      | 1551  | 737   | 603   | 1170  | 844   | 326   | 851.4577 | -0.0815  | 0.821626 | -0.09919 | NA       | NA       |
| hsa-miR-331-5p    | 75    | 92    | 107   | 66    | 100   | 70    | 84.14034 | -0.08064 | 0.717791 | -0.11235 | 0.910549 | 0.99606  |
| hsa-miR-4781-3p   | 4     | 0     | 2     | 4     | 0     | 0     | 1.657855 | -0.07329 | 2.869797 | -0.02554 | 0.979625 | 0.99606  |
| hsa-miR-454-5p    | 4     | 17    | 8     | 6     | 16    | 6     | 9.400441 | -0.07053 | 1.176079 | -0.05997 | 0.952176 | 0.99606  |
| hsa-miR-361-3p    | 9763  | 7114  | 20448 | 11841 | 14035 | 5441  | 11046.54 | -0.06461 | 0.76776  | -0.08415 | 0.932935 | 0.99606  |
| hsa-miR-2355-5p   | 13    | 0     | 6     | 0     | 0     | 12    | 5.193915 | -0.06315 | 2.326974 | -0.02714 | 0.97835  | 0.99606  |
| hsa-miR-3136-5p   | 0     | 0     | 2     | 0     | 2     | 0     | 0.553078 | -0.06256 | 4.023396 | -0.01555 | 0.987595 | 0.99606  |
| hsa-miR-4522      | 0     | 0     | 2     | 0     | 2     | 0     | 0.553078 | -0.06256 | 4.023396 | -0.01555 | 0.987595 | 0.99606  |
| hsa-miR-31-5p     | 101   | 652   | 42    | 24    | 991   | 0     | 271.4683 | -0.06154 | 1.756476 | -0.03504 | NA       | NA       |

|                  |        |        |        |        |        |        |          |          |          |          |          |         |
|------------------|--------|--------|--------|--------|--------|--------|----------|----------|----------|----------|----------|---------|
| hsa-miR-199a-3p  | 61112  | 45698  | 45891  | 20649  | 77090  | 38054  | 45643.5  | -0.0594  | 0.706552 | -0.08408 | 0.932995 | 0.99606 |
| hsa-miR-199b-3p  | 61112  | 45698  | 45891  | 20649  | 77090  | 38054  | 45643.5  | -0.0594  | 0.706552 | -0.08408 | 0.932995 | 0.99606 |
| hsa-miR-143-3p   | 750465 | 404141 | 465240 | 447840 | 663563 | 251103 | 474625.4 | -0.05135 | 0.680833 | -0.07542 | 0.939883 | 0.99606 |
| hsa-miR-6134     | 2      | 0      | 2      | 0      | 4      | 0      | 1.07935  | -0.03817 | 3.192981 | -0.01195 | NA       | NA      |
| hsa-miR-548ay-3p | 8      | 2      | 2      | 4      | 0      | 4      | 3.412048 | -0.03618 | 1.809669 | -0.01999 | NA       | NA      |
| hsa-miR-26a-5p   | 659206 | 493550 | 582985 | 424411 | 820983 | 258783 | 513099.3 | -0.03208 | 0.674172 | -0.04758 | 0.96205  | 0.99606 |
| hsa-miR-3179     | 0      | 0      | 3      | 0      | 0      | 2      | 0.871041 | -0.03065 | 3.937183 | -0.00778 | NA       | NA      |
| hsa-miR-491-3p   | 2      | 0      | 3      | 2      | 2      | 0      | 1.382005 | -0.02783 | 2.556447 | -0.01089 | 0.991314 | 0.99606 |
| hsa-miR-590-3p   | 600    | 197    | 191    | 113    | 231    | 386    | 279.9785 | -0.02694 | 0.877071 | -0.03072 | NA       | NA      |
| hsa-miR-421      | 123    | 153    | 183    | 65     | 169    | 147    | 137.9737 | -0.02002 | 0.757097 | -0.02645 | 0.978901 | 0.99606 |
| hsa-miR-1296-5p  | 56     | 45     | 66     | 43     | 67     | 29     | 49.14941 | -0.01879 | 0.746394 | -0.02517 | 0.979917 | 0.99606 |
| hsa-miR-548ae-3p | 13     | 2      | 0      | 5      | 4      | 2      | 4.078968 | -0.01131 | 1.761931 | -0.00642 | NA       | NA      |
| hsa-miR-221-3p   | 7912   | 5402   | 7765   | 6661   | 5169   | 4289   | 6145.788 | -0.0095  | 0.686787 | -0.01383 | 0.988963 | 0.99606 |
| hsa-miR-708-3p   | 821    | 179    | 287    | 153    | 738    | 207    | 355.8576 | -0.00718 | 0.869053 | -0.00826 | NA       | NA      |
| hsa-miR-125b-5p  | 11876  | 8583   | 8719   | 10694  | 8122   | 3959   | 8537.705 | -0.00364 | 0.735499 | -0.00495 | NA       | NA      |
| hsa-miR-548n     | 69     | 37     | 18     | 10     | 10     | 65     | 35.85682 | 4.65E-05 | 1.141345 | 4.08E-05 | NA       | NA      |
| hsa-miR-155-5p   | 2517   | 1735   | 10742  | 3579   | 7663   | 1527   | 4292.226 | 0.006591 | 0.943549 | 0.006985 | NA       | NA      |
| hsa-miR-1307-5p  | 67     | 69     | 57     | 5      | 69     | 82     | 57.38024 | 0.006731 | 1.048481 | 0.006419 | 0.994878 | 0.99606 |
| hsa-miR-6894-3p  | 2      | 2      | 5      | 0      | 0      | 6      | 2.65204  | 0.008119 | 2.236892 | 0.00363  | NA       | NA      |
| hsa-miR-6761-5p  | 6      | 2      | 5      | 4      | 7      | 0      | 3.632544 | 0.008303 | 1.681628 | 0.004938 | 0.99606  | 0.99606 |
| hsa-miR-943      | 2      | 3      | 4      | 5      | 2      | 0      | 2.693236 | 0.01091  | 1.875868 | 0.005816 | 0.99536  | 0.99606 |
| hsa-miR-582-3p   | 705    | 642    | 1068   | 920    | 787    | 212    | 705.3182 | 0.013879 | 0.814592 | 0.017038 | 0.986406 | 0.99606 |
| hsa-miR-17-3p    | 35     | 6      | 53     | 5      | 37     | 31     | 26.0262  | 0.014178 | 1.113442 | 0.012734 | 0.98984  | 0.99606 |
| hsa-miR-132-5p   | 768    | 166    | 619    | 606    | 295    | 195    | 428.972  | 0.014905 | 0.886709 | 0.016809 | NA       | NA      |
| hsa-miR-6514-3p  | 4      | 2      | 0      | 2      | 0      | 2      | 1.738885 | 0.015459 | 2.447586 | 0.006316 | 0.994961 | 0.99606 |
| hsa-miR-454-3p   | 1063   | 1283   | 1050   | 775    | 1237   | 768    | 1014.002 | 0.015994 | 0.664935 | 0.024053 | 0.98081  | 0.99606 |
| hsa-miR-339-5p   | 612    | 800    | 632    | 141    | 863    | 708    | 612.2909 | 0.018644 | 0.855438 | 0.021794 | 0.982612 | 0.99606 |
| hsa-miR-4664-3p  | 24     | 46     | 34     | 22     | 16     | 40     | 31.73892 | 0.01868  | 0.947779 | 0.019709 | 0.984275 | 0.99606 |
| hsa-miR-135b-3p  | 102    | 118    | 115    | 0      | 109    | 156    | 99.45922 | 0.018702 | 1.391686 | 0.013438 | 0.989278 | 0.99606 |
| hsa-miR-1287-5p  | 114    | 247    | 97     | 56     | 267    | 101    | 142.0579 | 0.019731 | 0.876092 | 0.022522 | 0.982031 | 0.99606 |
| hsa-miR-505-3p   | 233    | 114    | 175    | 91     | 226    | 106    | 148.2931 | 0.020911 | 0.699125 | 0.029911 | 0.976138 | 0.99606 |
| hsa-miR-330-3p   | 207    | 243    | 202    | 209    | 178    | 122    | 193.7995 | 0.025125 | 0.724217 | 0.034692 | NA       | NA      |
| hsa-miR-4647     | 4      | 2      | 0      | 4      | 0      | 0      | 1.723578 | 0.0285   | 2.851555 | 0.009995 | NA       | NA      |
| hsa-let-7a-3p    | 954    | 659    | 961    | 478    | 817    | 692    | 740.9858 | 0.028545 | 0.659447 | 0.043287 | 0.965473 | 0.99606 |
| hsa-miR-130b-3p  | 111    | 126    | 153    | 59     | 154    | 104    | 114.5719 | 0.034855 | 0.729969 | 0.047748 | 0.961917 | 0.99606 |

|                   |       |       |       |       |        |       |          |          |          |          |          |          |
|-------------------|-------|-------|-------|-------|--------|-------|----------|----------|----------|----------|----------|----------|
| hsa-miR-181b-2-3p | 15    | 2     | 7     | 4     | 17     | 0     | 6.419215 | 0.037247 | 1.579774 | 0.023578 | 0.981189 | 0.99606  |
| hsa-miR-625-3p    | 307   | 138   | 507   | 84    | 602    | 145   | 266.9103 | 0.043469 | 0.894087 | 0.048619 | NA       | NA       |
| hsa-miR-3149      | 7     | 0     | 0     | 0     | 0      | 4     | 1.790169 | 0.045992 | 3.331871 | 0.013804 | NA       | NA       |
| hsa-miR-3177-3p   | 7     | 0     | 0     | 0     | 0      | 4     | 1.790169 | 0.045992 | 3.331871 | 0.013804 | NA       | NA       |
| hsa-miR-224-5p    | 3079  | 1903  | 1836  | 1082  | 330    | 3048  | 1944.522 | 0.049229 | 1.004168 | 0.049025 | 0.9609   | 0.99606  |
| hsa-miR-320c      | 467   | 223   | 68    | 247   | 154    | 140   | 213.6467 | 0.049795 | 0.915008 | 0.054421 | 0.9566   | 0.99606  |
| hsa-miR-619-5p    | 13    | 4     | 2     | 8     | 0      | 4     | 5.26413  | 0.050935 | 1.682759 | 0.030268 | 0.975853 | 0.99606  |
| hsa-miR-4446-3p   | 7     | 15    | 10    | 8     | 14     | 5     | 9.658319 | 0.051028 | 1.09125  | 0.046761 | 0.962703 | 0.99606  |
| hsa-miR-2355-3p   | 86    | 12    | 36    | 7     | 39     | 49    | 35.92325 | 0.052106 | 1.070181 | 0.048689 | 0.961167 | 0.99606  |
| hsa-miR-365a-3p   | 358   | 316   | 588   | 143   | 271    | 498   | 362.7884 | 0.052764 | 0.835358 | 0.063163 | NA       | NA       |
| hsa-miR-365b-3p   | 358   | 316   | 588   | 143   | 271    | 498   | 362.7884 | 0.052764 | 0.835358 | 0.063163 | NA       | NA       |
| hsa-miR-511-5p    | 700   | 104   | 1112  | 1142  | 66     | 8     | 522.1334 | 0.054093 | 1.452584 | 0.037239 | NA       | NA       |
| hsa-miR-195-5p    | 10198 | 2339  | 4005  | 6423  | 3779   | 1407  | 4490.647 | 0.054397 | 0.900015 | 0.060441 | NA       | NA       |
| hsa-miR-1976      | 31    | 45    | 27    | 26    | 50     | 12    | 30.67337 | 0.055958 | 0.884272 | 0.063282 | 0.949542 | 0.99606  |
| hsa-miR-1275      | 4     | 0     | 3     | 3     | 2      | 0     | 1.85402  | 0.056404 | 2.350918 | 0.023992 | 0.980859 | 0.99606  |
| hsa-miR-143-5p    | 3291  | 1545  | 2271  | 669   | 3294   | 1736  | 1989.049 | 0.059919 | 0.766715 | 0.07815  | NA       | NA       |
| hsa-miR-548k      | 201   | 98    | 59    | 12    | 115    | 139   | 100.3416 | 0.067312 | 1.02725  | 0.065526 | 0.947755 | 0.99606  |
| hsa-miR-24-1-5p   | 488   | 58    | 301   | 312   | 166    | 94    | 225.9214 | 0.067603 | 0.956892 | 0.070648 | 0.943678 | 0.99606  |
| hsa-miR-374b-5p   | 4775  | 5130  | 8947  | 3023  | 9929   | 2988  | 5431.842 | 0.06783  | 0.744777 | 0.091074 | 0.927434 | 0.99606  |
| hsa-miR-135a-5p   | 528   | 146   | 55    | 117   | 490    | 22    | 197.1951 | 0.074183 | 1.132392 | 0.06551  | 0.947768 | 0.99606  |
| hsa-miR-4775      | 0     | 8     | 2     | 0     | 5      | 4     | 3.24576  | 0.083066 | 2.127719 | 0.03904  | NA       | NA       |
| hsa-miR-181c-3p   | 252   | 222   | 191   | 46    | 268    | 210   | 191.0161 | 0.083476 | 0.839697 | 0.099412 | 0.920812 | 0.99606  |
| hsa-miR-222-5p    | 4     | 5     | 5     | 8     | 2      | 0     | 4.086706 | 0.086669 | 1.707759 | 0.05075  | NA       | NA       |
| hsa-miR-3667-3p   | 9     | 0     | 7     | 5     | 7      | 0     | 4.16734  | 0.091522 | 1.936082 | 0.047272 | NA       | NA       |
| hsa-miR-1273c     | 3     | 3     | 0     | 4     | 0      | 0     | 1.769842 | 0.097424 | 2.827646 | 0.034454 | NA       | NA       |
| hsa-miR-200b-3p   | 73806 | 93442 | 57377 | 17504 | 124693 | 49888 | 65616.46 | 0.101097 | 0.835031 | 0.12107  | 0.903636 | 0.99606  |
| hsa-miR-6737-3p   | 11    | 2     | 2     | 7     | 0      | 2     | 3.997259 | 0.103914 | 1.813512 | 0.0573   | 0.954306 | 0.99606  |
| hsa-miR-1278      | 49    | 33    | 18    | 31    | 14     | 23    | 28.2896  | 0.104359 | 0.940614 | 0.110947 | 0.911658 | 0.99606  |
| hsa-miR-29a-5p    | 102   | 20    | 63    | 44    | 27     | 48    | 49.32594 | 0.110154 | 0.915066 | 0.120379 | 0.904183 | 0.99606  |
| hsa-let-7c-5p     | 13879 | 16693 | 7178  | 17007 | 9578   | 1566  | 11014.32 | 0.111326 | 0.988179 | 0.112658 | 0.910302 | 0.99606  |
| hsa-miR-664a-3p   | 326   | 253   | 344   | 156   | 413    | 160   | 259.6943 | 0.111914 | 0.683808 | 0.163663 | 0.869996 | 0.995744 |
| hsa-miR-320e      | 2     | 0     | 3     | 3     | 0      | 0     | 1.327748 | 0.118193 | 3.040134 | 0.038878 | NA       | NA       |
| hsa-miR-181a-2-3p | 1111  | 1002  | 1432  | 868   | 1460   | 434   | 1000.919 | 0.118853 | 0.704065 | 0.16881  | NA       | NA       |
| hsa-miR-503-5p    | 124   | 110   | 262   | 50    | 139    | 166   | 138.7644 | 0.123853 | 0.84376  | 0.146787 | 0.8833   | 0.995744 |
| hsa-miR-548w      | 14    | 0     | 7     | 12    | 0      | 0     | 5.37248  | 0.130959 | 2.308204 | 0.056736 | 0.954755 | 0.99606  |

|                 |        |        |        |        |       |       |          |          |          |          |          |          |
|-----------------|--------|--------|--------|--------|-------|-------|----------|----------|----------|----------|----------|----------|
| hsa-miR-99a-5p  | 388955 | 141375 | 156093 | 358991 | 71047 | 7237  | 185202.7 | 0.132207 | 1.21098  | 0.109174 | NA       | NA       |
| hsa-miR-150-3p  | 17     | 0      | 15     | 14     | 7     | 0     | 8.265684 | 0.134026 | 1.809547 | 0.074066 | 0.940958 | 0.99606  |
| hsa-miR-1271-5p | 52     | 61     | 42     | 40     | 65    | 17    | 44.43972 | 0.135844 | 0.827294 | 0.164203 | NA       | NA       |
| hsa-miR-4326    | 57     | 101    | 48     | 19     | 117   | 40    | 60.53132 | 0.138825 | 0.906334 | 0.153172 | 0.878262 | 0.995744 |
| hsa-miR-1468-5p | 7      | 13     | 7      | 15     | 4     | 0     | 7.928486 | 0.14965  | 1.532709 | 0.097637 | NA       | NA       |
| hsa-miR-182-3p  | 0      | 11     | 4      | 0      | 5     | 7     | 4.721859 | 0.14977  | 1.984156 | 0.075483 | 0.93983  | 0.99606  |
| hsa-miR-183-3p  | 12     | 4      | 12     | 5      | 4     | 9     | 7.561505 | 0.150071 | 1.204833 | 0.124557 | 0.900874 | 0.99606  |
| hsa-miR-145-3p  | 4801   | 2109   | 3839   | 3577   | 3248  | 724   | 2897.883 | 0.162241 | 0.829586 | 0.195569 | 0.844948 | 0.993629 |
| hsa-miR-28-5p   | 2217   | 1179   | 1694   | 1058   | 1978  | 704   | 1381.867 | 0.168825 | 0.673717 | 0.250588 | 0.802133 | 0.965675 |
| hsa-miR-24-2-5p | 1698   | 427    | 2060   | 1869   | 414   | 278   | 1104.638 | 0.171995 | 1.033283 | 0.166455 | NA       | NA       |
| hsa-miR-365a-5p | 263    | 15     | 209    | 138    | 29    | 113   | 124.8124 | 0.172549 | 1.128778 | 0.152863 | NA       | NA       |
| hsa-miR-548ba   | 17     | 8      | 5      | 10     | 9     | 2     | 8.09932  | 0.175235 | 1.217118 | 0.143975 | 0.88552  | 0.995744 |
| hsa-miR-328-3p  | 407    | 400    | 446    | 306    | 614   | 70    | 349.5411 | 0.176466 | 0.849068 | 0.207835 | NA       | NA       |
| hsa-miR-138-5p  | 94     | 8      | 86     | 64     | 63    | 2     | 48.36906 | 0.179531 | 1.250006 | 0.143624 | 0.885797 | 0.995744 |
| hsa-miR-23a-5p  | 3      | 0      | 4      | 4      | 0     | 0     | 1.813165 | 0.180272 | 2.793042 | 0.064543 | NA       | NA       |
| hsa-miR-937-3p  | 20     | 18     | 0      | 2      | 11    | 14    | 10.74412 | 0.185122 | 1.531442 | 0.120881 | 0.903785 | 0.99606  |
| hsa-miR-3607-3p | 13     | 0      | 2      | 0      | 3     | 6     | 3.694223 | 0.18934  | 2.093561 | 0.090439 | NA       | NA       |
| hsa-miR-556-3p  | 21     | 2      | 3      | 3      | 0     | 11    | 6.568122 | 0.195264 | 1.716178 | 0.113778 | NA       | NA       |
| hsa-miR-146b-5p | 47379  | 24200  | 136359 | 52070  | 72950 | 21932 | 55568.23 | 0.195958 | 0.875843 | 0.223737 | NA       | NA       |
| hsa-miR-4639-5p | 0      | 2      | 0      | 0      | 2     | 0     | 0.618801 | 0.200325 | 4.001022 | 0.050068 | 0.960068 | 0.99606  |
| hsa-miR-887-5p  | 0      | 2      | 0      | 0      | 2     | 0     | 0.618801 | 0.200325 | 4.001022 | 0.050068 | 0.960068 | 0.99606  |
| hsa-miR-3613-5p | 331    | 128    | 222    | 68     | 186   | 198   | 180.1572 | 0.204059 | 0.791337 | 0.257866 | 0.79651  | 0.964524 |
| hsa-miR-191-3p  | 0      | 4      | 6      | 5      | 2     | 0     | 2.89481  | 0.206768 | 2.160477 | 0.095705 | 0.923755 | 0.99606  |
| hsa-miR-222-3p  | 2119   | 1825   | 2696   | 1744   | 1472  | 1204  | 1815.065 | 0.211286 | 0.685925 | 0.308031 | 0.758058 | 0.945667 |
| hsa-miR-7974    | 0      | 3      | 4      | 0      | 2     | 3     | 2.029177 | 0.218227 | 2.328825 | 0.093707 | 0.925342 | 0.99606  |
| hsa-miR-6866-5p | 15     | 9      | 9      | 16     | 5     | 0     | 8.890898 | 0.224329 | 1.46556  | 0.153067 | NA       | NA       |
| hsa-miR-29a-3p  | 49514  | 14800  | 49314  | 9294   | 37390 | 28850 | 29403.22 | 0.245084 | 0.822094 | 0.298122 | 0.76561  | 0.951259 |
| hsa-miR-30c-5p  | 21560  | 23507  | 25420  | 19180  | 19259 | 9208  | 19253.05 | 0.258336 | 0.697964 | 0.370129 | NA       | NA       |
| hsa-miR-33a-3p  | 73     | 34     | 52     | 15     | 55    | 37    | 41.57036 | 0.266353 | 0.828035 | 0.321669 | 0.747704 | 0.942992 |
| hsa-miR-16-1-3p | 5      | 3      | 14     | 3      | 8     | 4     | 5.766237 | 0.267184 | 1.303167 | 0.205027 | NA       | NA       |
| hsa-miR-148b-3p | 32262  | 45506  | 55386  | 6401   | 64040 | 29473 | 36519.01 | 0.26925  | 0.886682 | 0.30366  | 0.761387 | 0.947912 |
| hsa-miR-196b-5p | 8      | 297    | 5      | 4      | 145   | 108   | 98.07269 | 0.270355 | 1.547592 | 0.174694 | NA       | NA       |
| hsa-miR-181d-5p | 1305   | 728    | 1243   | 304    | 678   | 1051  | 861.9776 | 0.271093 | 0.798555 | 0.33948  | NA       | NA       |
| hsa-miR-378a-3p | 28731  | 4008   | 13961  | 15700  | 11433 | 1637  | 11653.02 | 0.27179  | 1.019598 | 0.266566 | 0.789804 | 0.96231  |
| hsa-miR-3117-3p | 29     | 9      | 13     | 4      | 24    | 8     | 13.0168  | 0.27199  | 1.069576 | 0.254297 | 0.799266 | 0.965675 |

|                  |       |       |       |       |       |       |          |          |          |          |          |          |
|------------------|-------|-------|-------|-------|-------|-------|----------|----------|----------|----------|----------|----------|
| hsa-miR-21-3p    | 2235  | 942   | 6712  | 207   | 3489  | 2896  | 2563.379 | 0.276923 | 1.099824 | 0.251789 | NA       | NA       |
| hsa-miR-532-5p   | 6944  | 8080  | 6468  | 4743  | 7331  | 2883  | 5871.005 | 0.282787 | 0.684847 | 0.41292  | 0.679665 | 0.938786 |
| hsa-miR-5193     | 2     | 5     | 3     | 6     | 0     | 0     | 2.846608 | 0.287125 | 2.189153 | 0.131158 | NA       | NA       |
| hsa-miR-216b-5p  | 0     | 6     | 0     | 4     | 0     | 0     | 1.908634 | 0.287643 | 3.301879 | 0.087115 | NA       | NA       |
| hsa-miR-5582-3p  | 6     | 0     | 0     | 3     | 0     | 0     | 1.416043 | 0.288389 | 3.533316 | 0.08162  | NA       | NA       |
| hsa-miR-3620-3p  | 0     | 8     | 2     | 2     | 2     | 3     | 3.049217 | 0.292237 | 1.907218 | 0.153227 | NA       | NA       |
| hsa-miR-939-5p   | 4     | 0     | 0     | 2     | 0     | 0     | 0.944029 | 0.295195 | 3.924531 | 0.075218 | NA       | NA       |
| hsa-miR-186-5p   | 8095  | 13834 | 10569 | 4287  | 12541 | 6355  | 8982.955 | 0.300626 | 0.733096 | 0.410078 | 0.681749 | 0.938786 |
| hsa-miR-548f-3p  | 185   | 52    | 169   | 124   | 38    | 65    | 103.0932 | 0.301167 | 0.916433 | 0.32863  | 0.742436 | 0.939408 |
| hsa-miR-30e-3p   | 8361  | 5886  | 7165  | 6106  | 4810  | 2499  | 5636.707 | 0.309906 | 0.717235 | 0.432085 | NA       | NA       |
| hsa-miR-598-3p   | 153   | 80    | 149   | 117   | 116   | 15    | 98.89966 | 0.312426 | 0.921401 | 0.339077 | 0.734552 | 0.938786 |
| hsa-miR-151a-5p  | 2727  | 3303  | 1064  | 1785  | 2467  | 684   | 1946.902 | 0.313029 | 0.833712 | 0.375464 | 0.707315 | 0.938786 |
| hsa-miR-338-5p   | 1272  | 514   | 696   | 614   | 1065  | 31    | 634.3547 | 0.318339 | 1.06067  | 0.30013  | NA       | NA       |
| hsa-miR-491-5p   | 11    | 26    | 2     | 0     | 33    | 2     | 11.12951 | 0.326394 | 1.655277 | 0.197184 | NA       | NA       |
| hsa-miR-200a-3p  | 48278 | 64937 | 41229 | 4619  | 80272 | 30614 | 42020.34 | 0.330121 | 0.963976 | 0.342457 | 0.732007 | 0.938786 |
| hsa-miR-339-3p   | 621   | 460   | 424   | 173   | 547   | 289   | 395.5515 | 0.330472 | 0.701359 | 0.471189 | NA       | NA       |
| hsa-miR-1-3p     | 23737 | 8524  | 5560  | 13565 | 8272  | 834   | 9544.963 | 0.338039 | 1.06014  | 0.318862 | 0.749831 | 0.942992 |
| hsa-miR-548bb-5p | 4     | 0     | 2     | 3     | 0     | 0     | 1.442849 | 0.346158 | 2.968121 | 0.116625 | 0.907157 | 0.99606  |
| hsa-miR-590-5p   | 10    | 2     | 2     | 2     | 0     | 5     | 3.461704 | 0.357872 | 1.84008  | 0.194487 | 0.845795 | 0.993629 |
| hsa-miR-7-1-3p   | 361   | 74    | 254   | 87    | 246   | 99    | 169.2356 | 0.368191 | 0.815505 | 0.451488 | 0.651638 | 0.938786 |
| hsa-miR-6502-5p  | 3     | 0     | 3     | 3     | 0     | 0     | 1.456252 | 0.368471 | 2.95115  | 0.124857 | NA       | NA       |
| hsa-miR-3157-3p  | 4     | 0     | 6     | 5     | 0     | 0     | 2.440489 | 0.37291  | 2.606173 | 0.143087 | 0.886221 | 0.995744 |
| hsa-miR-581      | 17    | 2     | 2     | 9     | 2     | 0     | 5.02224  | 0.375644 | 1.78074  | 0.210948 | NA       | NA       |
| hsa-miR-193a-3p  | 2     | 2     | 17    | 5     | 6     | 2     | 5.347106 | 0.37585  | 1.474703 | 0.254865 | NA       | NA       |
| hsa-miR-185-3p   | 37    | 44    | 69    | 33    | 50    | 14    | 39.18008 | 0.388248 | 0.843155 | 0.46047  | 0.645179 | 0.938786 |
| hsa-miR-374a-5p  | 4761  | 2676  | 5583  | 2435  | 3833  | 1729  | 3296.318 | 0.393868 | 0.671957 | 0.586151 | 0.557774 | 0.938786 |
| hsa-miR-330-5p   | 277   | 153   | 196   | 126   | 190   | 70    | 158.406  | 0.40088  | 0.704762 | 0.568816 | 0.569481 | 0.938786 |
| hsa-miR-589-5p   | 259   | 467   | 224   | 187   | 345   | 109   | 257.6106 | 0.401918 | 0.789066 | 0.509359 | NA       | NA       |
| hsa-miR-629-3p   | 4     | 4     | 2     | 0     | 8     | 0     | 2.573959 | 0.409445 | 2.169674 | 0.188713 | NA       | NA       |
| hsa-miR-6874-3p  | 2     | 2     | 5     | 2     | 4     | 0     | 2.28462  | 0.410407 | 1.926338 | 0.21305  | 0.831288 | 0.988059 |
| hsa-miR-769-3p   | 37    | 22    | 25    | 5     | 25    | 21    | 21.26392 | 0.41366  | 0.954542 | 0.43336  | 0.664754 | 0.938786 |
| hsa-miR-3200-5p  | 5     | 0     | 2     | 0     | 5     | 0     | 1.599494 | 0.41594  | 2.855392 | 0.145668 | 0.884183 | 0.995744 |
| hsa-miR-4677-3p  | 68    | 75    | 61    | 42    | 43    | 36    | 53.33742 | 0.41934  | 0.758201 | 0.553072 | 0.580214 | 0.938786 |
| hsa-miR-3173-5p  | 5     | 3     | 8     | 0     | 6     | 4     | 4.000513 | 0.42833  | 1.629528 | 0.262855 | 0.792662 | 0.96231  |
| hsa-miR-181b-5p  | 7022  | 6301  | 8118  | 2912  | 5852  | 4166  | 5497.138 | 0.430428 | 0.653292 | 0.658859 | 0.509986 | 0.938786 |



|                  |       |       |       |       |       |       |          |          |          |          |          |          |
|------------------|-------|-------|-------|-------|-------|-------|----------|----------|----------|----------|----------|----------|
| hsa-miR-133a-5p  | 8     | 5     | 0     | 4     | 4     | 0     | 3.300427 | 0.435909 | 2.053385 | 0.212288 | 0.831882 | 0.988059 |
| hsa-let-7g-3p    | 20    | 11    | 34    | 10    | 23    | 7     | 16.12259 | 0.445976 | 0.974121 | 0.457824 | NA       | NA       |
| hsa-miR-5010-3p  | 171   | 98    | 103   | 97    | 71    | 40    | 93.03878 | 0.452017 | 0.777781 | 0.581162 | NA       | NA       |
| hsa-miR-27a-3p   | 77767 | 45679 | 43579 | 17690 | 42907 | 35860 | 41725.49 | 0.459995 | 0.706008 | 0.651543 | 0.514696 | 0.938786 |
| hsa-miR-326      | 262   | 131   | 253   | 84    | 169   | 118   | 159.5524 | 0.463303 | 0.697497 | 0.664237 | 0.506538 | 0.938786 |
| hsa-miR-146b-3p  | 2334  | 705   | 5725  | 2480  | 1851  | 497   | 2128.639 | 0.468357 | 0.981932 | 0.476975 | 0.63338  | 0.938786 |
| hsa-miR-1827     | 40    | 10    | 9     | 6     | 24    | 6     | 14.02217 | 0.468929 | 1.097853 | 0.427133 | NA       | NA       |
| hsa-miR-26a-1-3p | 9     | 5     | 9     | 8     | 5     | 0     | 5.700751 | 0.47082  | 1.507199 | 0.312381 | 0.754751 | 0.945667 |
| hsa-miR-151b     | 2676  | 3254  | 808   | 1464  | 2216  | 567   | 1766.596 | 0.474288 | 0.871848 | 0.544004 | 0.586439 | 0.938786 |
| hsa-miR-642a-5p  | 29    | 39    | 25    | 13    | 47    | 4     | 24.10368 | 0.475948 | 1.026577 | 0.463627 | 0.642915 | 0.938786 |
| hsa-miR-30d-3p   | 673   | 238   | 463   | 318   | 384   | 85    | 332.7778 | 0.479334 | 0.814832 | 0.588261 | 0.556357 | 0.938786 |
| hsa-miR-214-5p   | 993   | 342   | 944   | 594   | 376   | 234   | 551.7733 | 0.480213 | 0.799305 | 0.600789 | NA       | NA       |
| hsa-miR-3617-5p  | 13    | 8     | 109   | 24    | 29    | 19    | 31.83158 | 0.481856 | 1.140712 | 0.422417 | NA       | NA       |
| hsa-miR-422a     | 144   | 21    | 73    | 79    | 40    | 4     | 55.79534 | 0.486631 | 1.149745 | 0.423252 | 0.672112 | 0.938786 |
| hsa-miR-660-3p   | 17    | 12    | 13    | 8     | 16    | 2     | 10.44606 | 0.487618 | 1.103018 | 0.442076 | 0.658434 | 0.938786 |
| hsa-miR-3687     | 65    | 9     | 30    | 30    | 8     | 12    | 24.38205 | 0.488363 | 1.092583 | 0.44698  | 0.65489  | 0.938786 |
| hsa-miR-29b-3p   | 7760  | 1693  | 6756  | 1359  | 5021  | 2821  | 3848.103 | 0.496341 | 0.822121 | 0.603732 | NA       | NA       |
| hsa-miR-181a-5p  | 32572 | 31948 | 35527 | 10850 | 31287 | 17519 | 25256.49 | 0.503705 | 0.678557 | 0.742319 | NA       | NA       |
| hsa-miR-331-3p   | 378   | 861   | 391   | 388   | 348   | 221   | 434.0179 | 0.503931 | 0.810402 | 0.621827 | NA       | NA       |
| hsa-miR-548aq-3p | 84    | 17    | 45    | 21    | 23    | 30    | 34.44269 | 0.504222 | 0.908547 | 0.554976 | 0.578911 | 0.938786 |
| hsa-miR-548ab    | 65    | 37    | 10    | 10    | 10    | 36    | 27.75041 | 0.504866 | 1.11202  | 0.454008 | NA       | NA       |
| hsa-miR-221-5p   | 2215  | 1660  | 2428  | 1881  | 1039  | 453   | 1564.476 | 0.510969 | 0.816378 | 0.625898 | NA       | NA       |
| hsa-miR-760      | 12    | 23    | 9     | 10    | 8     | 7     | 11.62462 | 0.516702 | 1.077333 | 0.479612 | NA       | NA       |
| hsa-miR-652-5p   | 49    | 13    | 17    | 5     | 8     | 25    | 18.6997  | 0.523506 | 1.115799 | 0.469176 | NA       | NA       |
| hsa-miR-4703-3p  | 5     | 0     | 4     | 4     | 0     | 0     | 2.070173 | 0.526011 | 2.694115 | 0.195244 | NA       | NA       |
| hsa-miR-483-3p   | 0     | 10    | 5     | 6     | 3     | 0     | 4.151151 | 0.530717 | 2.02372  | 0.262248 | 0.79313  | 0.96231  |
| hsa-miR-206      | 310   | 85    | 10    | 172   | 9     | 2     | 94.74872 | 0.540063 | 1.521614 | 0.354928 | 0.722644 | 0.938786 |
| hsa-miR-31-3p    | 8     | 82    | 6     | 0     | 82    | 0     | 27.2503  | 0.543893 | 1.926542 | 0.282315 | NA       | NA       |
| hsa-miR-30c-1-3p | 54    | 67    | 83    | 44    | 53    | 19    | 51.25328 | 0.545211 | 0.801257 | 0.680444 | 0.496223 | 0.938786 |
| hsa-miR-499a-5p  | 352   | 81    | 208   | 162   | 131   | 38    | 149.8352 | 0.546114 | 0.887791 | 0.615138 | 0.538464 | 0.938786 |
| hsa-miR-340-3p   | 563   | 241   | 279   | 312   | 151   | 80    | 259.2832 | 0.551004 | 0.855894 | 0.643775 | NA       | NA       |
| hsa-miR-642b-3p  | 7     | 2     | 0     | 4     | 0     | 0     | 2.10909  | 0.566376 | 2.721753 | 0.208092 | 0.835157 | 0.990052 |
| hsa-let-7f-2-3p  | 298   | 198   | 295   | 20    | 260   | 170   | 191.9175 | 0.572087 | 0.93801  | 0.609895 | NA       | NA       |
| hsa-miR-500a-3p  | 1417  | 1315  | 1029  | 684   | 1223  | 281   | 932.2195 | 0.575616 | 0.745511 | 0.772109 | 0.44005  | 0.938786 |
| hsa-miR-141-3p   | 6817  | 3954  | 9742  | 745   | 8294  | 3098  | 4916.122 | 0.584698 | 0.897923 | 0.651167 | 0.514939 | 0.938786 |

|                  |       |       |       |       |       |       |          |          |          |          |          |          |
|------------------|-------|-------|-------|-------|-------|-------|----------|----------|----------|----------|----------|----------|
| hsa-miR-5705     | 4     | 9     | 56    | 0     | 39    | 6     | 16.62033 | 0.593605 | 1.555915 | 0.381515 | NA       | NA       |
| hsa-miR-628-5p   | 88    | 119   | 59    | 33    | 105   | 23    | 66.83104 | 0.612422 | 0.852018 | 0.71879  | 0.47227  | 0.938786 |
| hsa-miR-19a-3p   | 568   | 208   | 551   | 217   | 224   | 206   | 310.2148 | 0.61322  | 0.729953 | 0.840082 | NA       | NA       |
| hsa-miR-378e     | 245   | 28    | 235   | 83    | 178   | 15    | 114.8751 | 0.625629 | 1.054635 | 0.593218 | NA       | NA       |
| hsa-miR-3928-3p  | 5     | 5     | 0     | 0     | 7     | 0     | 2.458786 | 0.63108  | 2.564972 | 0.246038 | NA       | NA       |
| hsa-miR-96-5p    | 8629  | 3036  | 11164 | 766   | 3465  | 6458  | 5292.841 | 0.639748 | 0.972441 | 0.657878 | 0.510616 | 0.938786 |
| hsa-miR-4796-5p  | 3     | 0     | 2     | 0     | 0     | 2     | 1.114646 | 0.643535 | 3.193925 | 0.201487 | 0.840318 | 0.992375 |
| hsa-miR-3664-5p  | 12    | 0     | 0     | 0     | 4     | 2     | 2.525897 | 0.645663 | 2.622047 | 0.246244 | NA       | NA       |
| hsa-miR-184      | 411   | 40    | 57    | 195   | 9     | 0     | 111.0325 | 0.655904 | 1.655643 | 0.396163 | NA       | NA       |
| hsa-miR-181a-3p  | 1426  | 2193  | 1777  | 990   | 1115  | 700   | 1337.515 | 0.658027 | 0.703524 | 0.935331 | 0.349618 | 0.938786 |
| hsa-miR-34a-5p   | 12477 | 4192  | 8547  | 2065  | 5043  | 5003  | 5785.758 | 0.665887 | 0.760305 | 0.875816 | 0.38113  | 0.938786 |
| hsa-miR-6774-3p  | 3     | 0     | 2     | 0     | 3     | 0     | 1.073222 | 0.667183 | 3.188741 | 0.209231 | NA       | NA       |
| hsa-miR-877-3p   | 12    | 27    | 5     | 0     | 11    | 13    | 11.34586 | 0.667757 | 1.459241 | 0.457606 | 0.647236 | 0.938786 |
| hsa-miR-374a-3p  | 4034  | 2250  | 2907  | 1015  | 1566  | 1813  | 2156.885 | 0.669237 | 0.697824 | 0.959033 | NA       | NA       |
| hsa-miR-378g     | 144   | 18    | 63    | 63    | 42    | 0     | 49.79049 | 0.673219 | 1.39639  | 0.482114 | 0.629725 | 0.938786 |
| hsa-miR-4664-5p  | 2     | 5     | 0     | 0     | 5     | 0     | 1.80401  | 0.677899 | 2.796113 | 0.242443 | 0.808437 | 0.971377 |
| hsa-miR-133a-3p  | 361   | 256   | 185   | 103   | 321   | 34    | 190.3164 | 0.684144 | 0.878838 | 0.778464 | 0.436295 | 0.938786 |
| hsa-miR-548a1    | 6     | 2     | 22    | 4     | 2     | 7     | 6.930424 | 0.686291 | 1.407888 | 0.487461 | NA       | NA       |
| hsa-miR-130b-5p  | 64    | 330   | 166   | 52    | 177   | 92    | 144.9493 | 0.686828 | 0.931813 | 0.737087 | 0.461069 | 0.938786 |
| hsa-miR-424-5p   | 689   | 377   | 559   | 24    | 334   | 426   | 378.7334 | 0.68936  | 1.020595 | 0.67545  | 0.49939  | 0.938786 |
| hsa-miR-152-5p   | 18    | 32    | 51    | 11    | 33    | 11    | 24.4001  | 0.699308 | 0.932433 | 0.749982 | 0.453266 | 0.938786 |
| hsa-miR-98-3p    | 57    | 61    | 99    | 23    | 32    | 47    | 51.75278 | 0.704436 | 0.828978 | 0.849765 | 0.395456 | 0.938786 |
| hsa-miR-98-5p    | 8562  | 9851  | 9809  | 2546  | 8200  | 4183  | 6796.635 | 0.70618  | 0.700699 | 1.007821 | 0.31354  | 0.938786 |
| hsa-miR-4423-3p  | 38    | 4     | 5     | 18    | 0     | 0     | 10.16188 | 0.715044 | 1.906368 | 0.375082 | NA       | NA       |
| hsa-miR-362-5p   | 420   | 262   | 247   | 118   | 221   | 120   | 216.6556 | 0.719681 | 0.675224 | 1.065839 | 0.286496 | 0.938786 |
| hsa-miR-502-3p   | 1452  | 1087  | 803   | 536   | 1028  | 194   | 787.3535 | 0.724178 | 0.780837 | 0.927438 | NA       | NA       |
| hsa-miR-128-1-5p | 6     | 6     | 2     | 0     | 9     | 0     | 3.315136 | 0.731464 | 2.054175 | 0.356087 | NA       | NA       |
| hsa-miR-181c-5p  | 258   | 137   | 205   | 53    | 158   | 86    | 138.0042 | 0.733108 | 0.716609 | 1.023024 | 0.306297 | 0.938786 |
| hsa-miR-500a-5p  | 142   | 108   | 116   | 42    | 91    | 48    | 85.55322 | 0.743458 | 0.699685 | 1.06256  | 0.287982 | 0.938786 |
| hsa-miR-187-3p   | 165   | 72    | 103   | 56    | 113   | 7     | 77.2153  | 0.745044 | 0.975002 | 0.764145 | NA       | NA       |
| hsa-miR-501-3p   | 276   | 376   | 240   | 73    | 305   | 105   | 215.3752 | 0.752726 | 0.783059 | 0.961263 | NA       | NA       |
| hsa-miR-6511b-3p | 0     | 11    | 6     | 3     | 4     | 2     | 4.40276  | 0.755151 | 1.716285 | 0.439992 | 0.659943 | 0.938786 |
| hsa-miR-101-3p   | 91351 | 47093 | 92969 | 30083 | 64102 | 19754 | 52658.93 | 0.766318 | 0.698037 | 1.097818 | 0.272284 | 0.938786 |
| hsa-miR-660-5p   | 2378  | 1780  | 1804  | 324   | 2180  | 668   | 1384.567 | 0.769224 | 0.800577 | 0.960837 | 0.336634 | 0.938786 |
| hsa-miR-190a-5p  | 266   | 74    | 75    | 16    | 77    | 89    | 91.38148 | 0.782122 | 0.959029 | 0.815535 | 0.414766 | 0.938786 |

|                   |      |      |      |      |      |      |          |          |          |          |          |          |
|-------------------|------|------|------|------|------|------|----------|----------|----------|----------|----------|----------|
| hsa-miR-671-3p    | 66   | 166  | 46   | 53   | 71   | 20   | 69.42793 | 0.789704 | 0.935741 | 0.843934 | NA       | NA       |
| hsa-miR-6868-3p   | 22   | 11   | 7    | 7    | 7    | 4    | 9.080998 | 0.789767 | 1.117399 | 0.70679  | 0.479697 | 0.938786 |
| hsa-miR-548i      | 38   | 7    | 15   | 3    | 30   | 0    | 12.91912 | 0.791477 | 1.466579 | 0.539675 | NA       | NA       |
| hsa-miR-627-5p    | 12   | 3    | 3    | 0    | 7    | 2    | 3.879819 | 0.812363 | 1.701962 | 0.47731  | 0.633142 | 0.938786 |
| hsa-miR-34c-3p    | 442  | 97   | 171  | 215  | 71   | 0    | 153.8026 | 0.813939 | 1.459234 | 0.557785 | NA       | NA       |
| hsa-miR-513a-5p   | 2    | 0    | 6    | 3    | 0    | 0    | 1.753469 | 0.816399 | 2.833681 | 0.288105 | 0.773266 | 0.957393 |
| hsa-miR-3934-5p   | 123  | 73   | 63   | 47   | 56   | 16   | 58.71148 | 0.821468 | 0.818647 | 1.003445 | 0.315646 | 0.938786 |
| hsa-miR-29c-3p    | 2232 | 1069 | 1721 | 298  | 1844 | 419  | 1123.498 | 0.823096 | 0.814762 | 1.010229 | NA       | NA       |
| hsa-miR-532-3p    | 213  | 256  | 160  | 76   | 182  | 55   | 147.907  | 0.833949 | 0.754386 | 1.105467 | 0.268957 | 0.938786 |
| hsa-miR-4772-5p   | 0    | 2    | 3    | 0    | 0    | 2    | 1.220578 | 0.837164 | 3.131024 | 0.267377 | 0.789179 | 0.96231  |
| hsa-miR-3912-3p   | 31   | 14   | 15   | 0    | 14   | 13   | 13.33842 | 0.839912 | 1.319002 | 0.636778 | 0.524269 | 0.938786 |
| hsa-miR-577       | 22   | 19   | 7    | 0    | 29   | 0    | 11.04536 | 0.843081 | 1.754515 | 0.480521 | NA       | NA       |
| hsa-miR-130a-3p   | 1849 | 668  | 2136 | 925  | 703  | 320  | 1022.241 | 0.850095 | 0.805527 | 1.055327 | 0.291276 | 0.938786 |
| hsa-miR-664b-3p   | 71   | 20   | 54   | 25   | 32   | 7    | 31.52413 | 0.850384 | 0.930032 | 0.914359 | 0.360528 | 0.938786 |
| hsa-miR-200a-5p   | 8817 | 5278 | 6412 | 1699 | 5119 | 2614 | 4601.865 | 0.857538 | 0.679514 | 1.261986 | NA       | NA       |
| hsa-miR-1273g-3p  | 26   | 12   | 31   | 13   | 13   | 4    | 15.27338 | 0.857957 | 1.002463 | 0.85585  | 0.392081 | 0.938786 |
| hsa-miR-551b-5p   | 2    | 3    | 0    | 0    | 3    | 0    | 1.185209 | 0.86551  | 3.118189 | 0.277568 | 0.781344 | 0.962029 |
| hsa-miR-589-3p    | 2    | 14   | 4    | 3    | 5    | 2    | 5.034891 | 0.868991 | 1.464863 | 0.593223 | NA       | NA       |
| hsa-miR-676-3p    | 8    | 10   | 11   | 0    | 17   | 0    | 6.625437 | 0.877173 | 1.79061  | 0.489874 | NA       | NA       |
| hsa-miR-3196      | 0    | 2    | 3    | 2    | 0    | 0    | 1.20527  | 0.878363 | 3.139789 | 0.279752 | 0.779667 | 0.962029 |
| hsa-miR-5708      | 6    | 0    | 0    | 2    | 0    | 0    | 1.201037 | 0.879005 | 3.706122 | 0.237177 | NA       | NA       |
| hsa-miR-299-3p    | 4    | 44   | 0    | 5    | 2    | 14   | 12.66536 | 0.884133 | 1.713311 | 0.516038 | NA       | NA       |
| hsa-miR-505-5p    | 13   | 2    | 3    | 5    | 2    | 0    | 3.790106 | 0.884198 | 1.770555 | 0.49939  | NA       | NA       |
| hsa-miR-1298-5p   | 16   | 18   | 25   | 16   | 5    | 3    | 13.53081 | 0.884543 | 1.124851 | 0.786365 | NA       | NA       |
| hsa-miR-203b-5p   | 6    | 0    | 0    | 0    | 3    | 0    | 1.174921 | 0.887989 | 3.696366 | 0.240233 | NA       | NA       |
| hsa-miR-6720-3p   | 16   | 6    | 3    | 9    | 0    | 0    | 5.465452 | 0.889904 | 1.936057 | 0.459647 | NA       | NA       |
| hsa-miR-452-5p    | 4211 | 1562 | 2193 | 1527 | 417  | 978  | 1727.538 | 0.902272 | 0.876632 | 1.029249 | 0.303363 | 0.938786 |
| hsa-miR-429       | 6962 | 9758 | 5024 | 771  | 6018 | 3562 | 5082.076 | 0.905061 | 0.881316 | 1.026943 | NA       | NA       |
| hsa-miR-345-5p    | 783  | 712  | 420  | 163  | 417  | 273  | 436.6284 | 0.905088 | 0.725242 | 1.247982 | 0.212038 | 0.938786 |
| hsa-miR-27a-5p    | 128  | 328  | 1372 | 303  | 453  | 76   | 411.5262 | 0.907825 | 1.048776 | 0.865604 | 0.386707 | 0.938786 |
| hsa-miR-502-5p    | 25   | 18   | 14   | 14   | 10   | 0    | 12.70154 | 0.937116 | 1.323803 | 0.707897 | 0.479009 | 0.938786 |
| hsa-miR-95-5p     | 7    | 2    | 0    | 0    | 0    | 3    | 1.917046 | 0.944861 | 2.779963 | 0.339883 | 0.733945 | 0.938786 |
| hsa-miR-1287-3p   | 8    | 5    | 2    | 2    | 5    | 0    | 3.288861 | 0.945401 | 1.746047 | 0.541452 | 0.588196 | 0.938786 |
| hsa-miR-125b-2-3p | 544  | 830  | 311  | 239  | 524  | 55   | 393.277  | 0.948201 | 0.926051 | 1.023918 | 0.305874 | 0.938786 |
| hsa-miR-200c-5p   | 69   | 42   | 37   | 16   | 35   | 13   | 32.50441 | 0.951841 | 0.818697 | 1.162629 | 0.24498  | 0.938786 |

|                  |        |        |        |        |       |       |          |          |          |          |          |          |
|------------------|--------|--------|--------|--------|-------|-------|----------|----------|----------|----------|----------|----------|
| hsa-miR-34b-3p   | 2908   | 204    | 567    | 1037   | 218   | 0     | 742.1152 | 0.957203 | 1.661591 | 0.576076 | NA       | NA       |
| hsa-miR-5683     | 3      | 0      | 3      | 2      | 0     | 0     | 1.241246 | 0.96242  | 3.084977 | 0.31197  | 0.755063 | 0.945667 |
| hsa-miR-934      | 21     | 19     | 75     | 18     | 0     | 21    | 25.20818 | 0.97392  | 1.397271 | 0.697016 | NA       | NA       |
| hsa-miR-548ap-5p | 8      | 2      | 0      | 2      | 2     | 0     | 2.076846 | 0.975307 | 2.339009 | 0.416975 | 0.676697 | 0.938786 |
| hsa-miR-497-5p   | 1949   | 380    | 938    | 327    | 729   | 259   | 676.0979 | 0.992574 | 0.802035 | 1.237569 | 0.215876 | 0.938786 |
| hsa-miR-378f     | 137    | 10     | 43     | 42     | 28    | 0     | 38.2547  | 0.993516 | 1.426174 | 0.696631 | 0.486034 | 0.938786 |
| hsa-miR-504-5p   | 818    | 210    | 203    | 223    | 222   | 34    | 256.03   | 0.998487 | 0.964161 | 1.035601 | 0.300388 | 0.938786 |
| hsa-miR-5701     | 18     | 20     | 12     | 0      | 19    | 5     | 11.18263 | 1.005582 | 1.356072 | 0.74154  | 0.458366 | 0.938786 |
| hsa-miR-548j-3p  | 60     | 4      | 32     | 23     | 5     | 4     | 19.45929 | 1.006261 | 1.255587 | 0.801427 | 0.422885 | 0.938786 |
| hsa-miR-127-5p   | 99     | 644    | 41     | 11     | 73    | 233   | 195.1639 | 1.033214 | 1.32986  | 0.776934 | NA       | NA       |
| hsa-miR-20b-3p   | 0      | 5      | 0      | 2      | 0     | 0     | 1.303854 | 1.034381 | 3.643479 | 0.283899 | NA       | NA       |
| hsa-miR-5699-5p  | 17     | 0      | 0      | 3      | 0     | 2     | 3.274909 | 1.034604 | 2.547711 | 0.406091 | NA       | NA       |
| hsa-miR-3617-3p  | 0      | 2      | 13     | 3      | 0     | 2     | 3.284666 | 1.041486 | 2.187083 | 0.476199 | NA       | NA       |
| hsa-miR-3133     | 11     | 2      | 4      | 0      | 8     | 0     | 3.407766 | 1.051751 | 2.038227 | 0.516013 | NA       | NA       |
| hsa-miR-4473     | 296    | 24     | 122    | 118    | 25    | 0     | 88.28084 | 1.053024 | 1.503912 | 0.700189 | 0.483809 | 0.938786 |
| hsa-miR-618      | 54     | 0      | 38     | 14     | 12    | 6     | 18.29332 | 1.054147 | 1.416268 | 0.744313 | 0.456687 | 0.938786 |
| hsa-miR-141-5p   | 882    | 271    | 672    | 124    | 320   | 238   | 378.8004 | 1.061153 | 0.756272 | 1.403137 | 0.160576 | 0.938786 |
| hsa-miR-140-5p   | 1812   | 458    | 1984   | 626    | 731   | 227   | 877.9905 | 1.067942 | 0.832297 | 1.283127 | 0.199448 | 0.938786 |
| hsa-miR-30a-5p   | 255519 | 136326 | 123624 | 102939 | 67394 | 16633 | 109113.2 | 1.087885 | 0.876646 | 1.240962 | NA       | NA       |
| hsa-miR-548ak    | 14     | 0      | 16     | 9      | 0     | 0     | 6.004625 | 1.091294 | 2.241632 | 0.48683  | NA       | NA       |
| hsa-miR-4485-3p  | 0      | 2      | 14     | 0      | 0     | 5     | 3.449535 | 1.097421 | 2.507132 | 0.437719 | NA       | NA       |
| hsa-miR-1273h-3p | 6      | 4      | 14     | 5      | 4     | 0     | 5.070355 | 1.097794 | 1.560903 | 0.703307 | 0.481864 | 0.938786 |
| hsa-miR-675-3p   | 12     | 17     | 0      | 4      | 9     | 0     | 6.584823 | 1.100636 | 1.85362  | 0.593776 | 0.552662 | 0.938786 |
| hsa-miR-671-5p   | 126    | 176    | 108    | 29     | 106   | 37    | 91.02129 | 1.11009  | 0.799098 | 1.389179 | NA       | NA       |
| hsa-miR-144-3p   | 1284   | 234    | 1172   | 347    | 610   | 68    | 544.0836 | 1.114414 | 0.954579 | 1.16744  | NA       | NA       |
| hsa-miR-4683     | 32     | 8      | 16     | 13     | 6     | 0     | 11.38366 | 1.119323 | 1.391651 | 0.804313 | NA       | NA       |
| hsa-miR-32-3p    | 137    | 69     | 96     | 42     | 44    | 22    | 63.13974 | 1.126428 | 0.758495 | 1.485083 | 0.137522 | 0.938786 |
| hsa-miR-548u     | 123    | 15     | 42     | 14     | 5     | 34    | 35.64131 | 1.127993 | 1.144034 | 0.985979 | 0.324143 | 0.938786 |
| hsa-miR-99a-3p   | 87     | 68     | 66     | 25     | 56    | 8     | 47.12579 | 1.133211 | 0.869841 | 1.302779 | 0.19265  | 0.938786 |
| hsa-miR-4999-5p  | 5      | 5      | 9      | 4      | 3     | 0     | 4.057446 | 1.141437 | 1.615564 | 0.706526 | 0.479861 | 0.938786 |
| hsa-miR-188-5p   | 12     | 6      | 3      | 0      | 5     | 3     | 4.35752  | 1.150784 | 1.612359 | 0.713727 | 0.475396 | 0.938786 |
| hsa-miR-374b-3p  | 100    | 79     | 265    | 12     | 107   | 53    | 93.04914 | 1.155878 | 0.955011 | 1.21033  | NA       | NA       |
| hsa-miR-301a-5p  | 16     | 54     | 29     | 3      | 17    | 18    | 22.5505  | 1.166612 | 1.088233 | 1.072024 | 0.283709 | 0.938786 |
| hsa-miR-30e-5p   | 20384  | 9277   | 24245  | 2087   | 9565  | 7562  | 11101.52 | 1.16726  | 0.81261  | 1.436433 | 0.150879 | 0.938786 |
| hsa-miR-411-3p   | 6      | 70     | 2      | 7      | 3     | 18    | 19.20544 | 1.173557 | 1.475515 | 0.795354 | NA       | NA       |

|                  |       |      |       |      |      |      |          |          |          |          |          |          |
|------------------|-------|------|-------|------|------|------|----------|----------|----------|----------|----------|----------|
| hsa-miR-6739-3p  | 2     | 0    | 5     | 0    | 3    | 0    | 1.370439 | 1.183334 | 2.981659 | 0.396871 | 0.691463 | 0.938786 |
| hsa-miR-455-5p   | 21522 | 6459 | 11666 | 6143 | 5229 | 1864 | 7989.793 | 1.185737 | 0.806782 | 1.469712 | 0.14164  | 0.938786 |
| hsa-miR-135b-5p  | 4899  | 1923 | 5121  | 161  | 1484 | 2238 | 2425.05  | 1.207752 | 1.007369 | 1.198917 | NA       | NA       |
| hsa-miR-378h     | 45    | 9    | 12    | 8    | 16   | 0    | 12.93265 | 1.212527 | 1.366967 | 0.88702  | NA       | NA       |
| hsa-miR-654-3p   | 216   | 1492 | 90    | 128  | 202  | 338  | 431.2584 | 1.212982 | 1.163177 | 1.042818 | NA       | NA       |
| hsa-miR-3616-5p  | 0     | 6    | 0     | 0    | 0    | 2    | 1.49393  | 1.25737  | 3.517512 | 0.35746  | NA       | NA       |
| hsa-miR-29b-2-5p | 208   | 131  | 115   | 20   | 122  | 30   | 93.34784 | 1.260202 | 0.847143 | 1.487589 | NA       | NA       |
| hsa-miR-1255a    | 113   | 4    | 2     | 21   | 0    | 9    | 22.02292 | 1.260634 | 1.709916 | 0.737249 | NA       | NA       |
| hsa-miR-511-3p   | 165   | 24   | 142   | 47   | 55   | 5    | 64.17177 | 1.289395 | 1.065068 | 1.210622 | NA       | NA       |
| hsa-miR-146a-3p  | 39    | 29   | 39    | 17   | 20   | 0    | 21.96206 | 1.292686 | 1.2383   | 1.04392  | NA       | NA       |
| hsa-miR-181b-3p  | 77    | 81   | 32    | 22   | 24   | 16   | 40.11594 | 1.312326 | 0.858539 | 1.528558 | 0.126374 | 0.938786 |
| hsa-miR-32-5p    | 2637  | 772  | 1314  | 282  | 665  | 496  | 920.8537 | 1.341278 | 0.750156 | 1.787998 | 0.073776 | 0.938786 |
| hsa-miR-153-5p   | 2     | 0    | 0     | 0    | 0    | 0    | 0.257008 | 1.351428 | 4.054413 | 0.333323 | 0.738891 | 0.938786 |
| hsa-miR-186-3p   | 2     | 0    | 0     | 0    | 0    | 0    | 0.257008 | 1.351428 | 4.054413 | 0.333323 | 0.738891 | 0.938786 |
| hsa-miR-188-3p   | 2     | 0    | 0     | 0    | 0    | 0    | 0.257008 | 1.351428 | 4.054413 | 0.333323 | 0.738891 | 0.938786 |
| hsa-miR-2116-5p  | 2     | 0    | 0     | 0    | 0    | 0    | 0.257008 | 1.351428 | 4.054413 | 0.333323 | 0.738891 | 0.938786 |
| hsa-miR-216a-3p  | 2     | 0    | 0     | 0    | 0    | 0    | 0.257008 | 1.351428 | 4.054413 | 0.333323 | 0.738891 | 0.938786 |
| hsa-miR-3074-3p  | 2     | 0    | 0     | 0    | 0    | 0    | 0.257008 | 1.351428 | 4.054413 | 0.333323 | 0.738891 | 0.938786 |
| hsa-miR-3150b-3p | 2     | 0    | 0     | 0    | 0    | 0    | 0.257008 | 1.351428 | 4.054413 | 0.333323 | 0.738891 | 0.938786 |
| hsa-miR-3155a    | 2     | 0    | 0     | 0    | 0    | 0    | 0.257008 | 1.351428 | 4.054413 | 0.333323 | 0.738891 | 0.938786 |
| hsa-miR-3677-3p  | 2     | 0    | 0     | 0    | 0    | 0    | 0.257008 | 1.351428 | 4.054413 | 0.333323 | 0.738891 | 0.938786 |
| hsa-miR-3679-3p  | 2     | 0    | 0     | 0    | 0    | 0    | 0.257008 | 1.351428 | 4.054413 | 0.333323 | 0.738891 | 0.938786 |
| hsa-miR-3680-5p  | 2     | 0    | 0     | 0    | 0    | 0    | 0.257008 | 1.351428 | 4.054413 | 0.333323 | 0.738891 | 0.938786 |
| hsa-miR-4511     | 2     | 0    | 0     | 0    | 0    | 0    | 0.257008 | 1.351428 | 4.054413 | 0.333323 | 0.738891 | 0.938786 |
| hsa-miR-4512     | 2     | 0    | 0     | 0    | 0    | 0    | 0.257008 | 1.351428 | 4.054413 | 0.333323 | 0.738891 | 0.938786 |
| hsa-miR-4682     | 2     | 0    | 0     | 0    | 0    | 0    | 0.257008 | 1.351428 | 4.054413 | 0.333323 | 0.738891 | 0.938786 |
| hsa-miR-4729     | 2     | 0    | 0     | 0    | 0    | 0    | 0.257008 | 1.351428 | 4.054413 | 0.333323 | 0.738891 | 0.938786 |
| hsa-miR-4782-5p  | 2     | 0    | 0     | 0    | 0    | 0    | 0.257008 | 1.351428 | 4.054413 | 0.333323 | 0.738891 | 0.938786 |
| hsa-miR-548a-5p  | 2     | 0    | 0     | 0    | 0    | 0    | 0.257008 | 1.351428 | 4.054413 | 0.333323 | 0.738891 | 0.938786 |
| hsa-miR-548f-5p  | 2     | 0    | 0     | 0    | 0    | 0    | 0.257008 | 1.351428 | 4.054413 | 0.333323 | 0.738891 | 0.938786 |
| hsa-miR-548h-5p  | 2     | 0    | 0     | 0    | 0    | 0    | 0.257008 | 1.351428 | 4.054413 | 0.333323 | 0.738891 | 0.938786 |
| hsa-miR-584-3p   | 2     | 0    | 0     | 0    | 0    | 0    | 0.257008 | 1.351428 | 4.054413 | 0.333323 | 0.738891 | 0.938786 |
| hsa-miR-585-5p   | 2     | 0    | 0     | 0    | 0    | 0    | 0.257008 | 1.351428 | 4.054413 | 0.333323 | 0.738891 | 0.938786 |
| hsa-miR-6509-3p  | 2     | 0    | 0     | 0    | 0    | 0    | 0.257008 | 1.351428 | 4.054413 | 0.333323 | 0.738891 | 0.938786 |
| hsa-miR-6718-5p  | 2     | 0    | 0     | 0    | 0    | 0    | 0.257008 | 1.351428 | 4.054413 | 0.333323 | 0.738891 | 0.938786 |

|                  |       |       |      |      |      |      |          |          |          |          |          |          |
|------------------|-------|-------|------|------|------|------|----------|----------|----------|----------|----------|----------|
| hsa-miR-6720-5p  | 2     | 0     | 0    | 0    | 0    | 0    | 0.257008 | 1.351428 | 4.054413 | 0.333323 | 0.738891 | 0.938786 |
| hsa-miR-6721-5p  | 2     | 0     | 0    | 0    | 0    | 0    | 0.257008 | 1.351428 | 4.054413 | 0.333323 | 0.738891 | 0.938786 |
| hsa-miR-6752-3p  | 2     | 0     | 0    | 0    | 0    | 0    | 0.257008 | 1.351428 | 4.054413 | 0.333323 | 0.738891 | 0.938786 |
| hsa-miR-6767-5p  | 2     | 0     | 0    | 0    | 0    | 0    | 0.257008 | 1.351428 | 4.054413 | 0.333323 | 0.738891 | 0.938786 |
| hsa-miR-6785-5p  | 2     | 0     | 0    | 0    | 0    | 0    | 0.257008 | 1.351428 | 4.054413 | 0.333323 | 0.738891 | 0.938786 |
| hsa-miR-6800-3p  | 2     | 0     | 0    | 0    | 0    | 0    | 0.257008 | 1.351428 | 4.054413 | 0.333323 | 0.738891 | 0.938786 |
| hsa-miR-6847-3p  | 2     | 0     | 0    | 0    | 0    | 0    | 0.257008 | 1.351428 | 4.054413 | 0.333323 | 0.738891 | 0.938786 |
| hsa-miR-340-5p   | 10960 | 10975 | 7305 | 1511 | 4280 | 3604 | 6066.684 | 1.356801 | 0.739639 | 1.83441  | 0.066593 | 0.938786 |
| hsa-miR-224-3p   | 97    | 33    | 42   | 17   | 12   | 19   | 33.69358 | 1.361039 | 0.895968 | 1.519071 | NA       | NA       |
| hsa-miR-1247-5p  | 9     | 6     | 0    | 2    | 0    | 2    | 3.08048  | 1.373635 | 2.146944 | 0.639809 | NA       | NA       |
| hsa-miR-378i     | 124   | 13    | 35   | 29   | 20   | 0    | 32.10106 | 1.377824 | 1.380084 | 0.998363 | 0.318103 | 0.938786 |
| hsa-miR-3128     | 24    | 3     | 8    | 0    | 2    | 7    | 6.571544 | 1.405567 | 1.60098  | 0.877942 | NA       | NA       |
| hsa-miR-127-3p   | 2390  | 25635 | 1104 | 1873 | 1862 | 5188 | 6752.528 | 1.450866 | 1.249841 | 1.160841 | NA       | NA       |
| hsa-miR-4645-3p  | 0     | 0     | 18   | 0    | 2    | 3    | 3.49157  | 1.455301 | 2.518732 | 0.577791 | NA       | NA       |
| hsa-miR-3200-3p  | 22    | 119   | 37   | 2    | 54   | 12   | 39.24714 | 1.463179 | 1.210123 | 1.209116 | NA       | NA       |
| hsa-miR-548ar-3p | 64    | 4     | 19   | 6    | 4    | 11   | 15.8974  | 1.463647 | 1.227385 | 1.192492 | 0.233068 | 0.938786 |
| hsa-miR-382-5p   | 62    | 716   | 13   | 56   | 53   | 133  | 183.7358 | 1.468343 | 1.334894 | 1.09997  | NA       | NA       |
| hsa-miR-570-3p   | 12    | 0     | 0    | 0    | 4    | 0    | 2.080577 | 1.469372 | 3.189924 | 0.460629 | NA       | NA       |
| hsa-miR-1245b-3p | 0     | 0     | 2    | 0    | 0    | 0    | 0.283814 | 1.474643 | 4.042572 | 0.364778 | 0.715277 | 0.938786 |
| hsa-miR-1252-3p  | 0     | 0     | 2    | 0    | 0    | 0    | 0.283814 | 1.474643 | 4.042572 | 0.364778 | 0.715277 | 0.938786 |
| hsa-miR-1258     | 0     | 0     | 2    | 0    | 0    | 0    | 0.283814 | 1.474643 | 4.042572 | 0.364778 | 0.715277 | 0.938786 |
| hsa-miR-1281     | 0     | 0     | 2    | 0    | 0    | 0    | 0.283814 | 1.474643 | 4.042572 | 0.364778 | 0.715277 | 0.938786 |
| hsa-miR-1295b-3p | 0     | 0     | 2    | 0    | 0    | 0    | 0.283814 | 1.474643 | 4.042572 | 0.364778 | 0.715277 | 0.938786 |
| hsa-miR-1538     | 0     | 0     | 2    | 0    | 0    | 0    | 0.283814 | 1.474643 | 4.042572 | 0.364778 | 0.715277 | 0.938786 |
| hsa-miR-155-3p   | 0     | 0     | 2    | 0    | 0    | 0    | 0.283814 | 1.474643 | 4.042572 | 0.364778 | 0.715277 | 0.938786 |
| hsa-miR-2114-5p  | 0     | 0     | 2    | 0    | 0    | 0    | 0.283814 | 1.474643 | 4.042572 | 0.364778 | 0.715277 | 0.938786 |
| hsa-miR-219b-5p  | 0     | 0     | 2    | 0    | 0    | 0    | 0.283814 | 1.474643 | 4.042572 | 0.364778 | 0.715277 | 0.938786 |
| hsa-miR-302a-5p  | 0     | 0     | 2    | 0    | 0    | 0    | 0.283814 | 1.474643 | 4.042572 | 0.364778 | 0.715277 | 0.938786 |
| hsa-miR-3140-5p  | 0     | 0     | 2    | 0    | 0    | 0    | 0.283814 | 1.474643 | 4.042572 | 0.364778 | 0.715277 | 0.938786 |
| hsa-miR-3143     | 0     | 0     | 2    | 0    | 0    | 0    | 0.283814 | 1.474643 | 4.042572 | 0.364778 | 0.715277 | 0.938786 |
| hsa-miR-346      | 0     | 0     | 2    | 0    | 0    | 0    | 0.283814 | 1.474643 | 4.042572 | 0.364778 | 0.715277 | 0.938786 |
| hsa-miR-3672     | 0     | 0     | 2    | 0    | 0    | 0    | 0.283814 | 1.474643 | 4.042572 | 0.364778 | 0.715277 | 0.938786 |
| hsa-miR-4477b    | 0     | 0     | 2    | 0    | 0    | 0    | 0.283814 | 1.474643 | 4.042572 | 0.364778 | 0.715277 | 0.938786 |
| hsa-miR-4637     | 0     | 0     | 2    | 0    | 0    | 0    | 0.283814 | 1.474643 | 4.042572 | 0.364778 | 0.715277 | 0.938786 |
| hsa-miR-4638-5p  | 0     | 0     | 2    | 0    | 0    | 0    | 0.283814 | 1.474643 | 4.042572 | 0.364778 | 0.715277 | 0.938786 |

|                  |       |       |       |      |       |      |          |          |          |          |          |          |
|------------------|-------|-------|-------|------|-------|------|----------|----------|----------|----------|----------|----------|
| hsa-miR-4645-5p  | 0     | 0     | 2     | 0    | 0     | 0    | 0.283814 | 1.474643 | 4.042572 | 0.364778 | 0.715277 | 0.938786 |
| hsa-miR-4699-3p  | 0     | 0     | 2     | 0    | 0     | 0    | 0.283814 | 1.474643 | 4.042572 | 0.364778 | 0.715277 | 0.938786 |
| hsa-miR-4701-5p  | 0     | 0     | 2     | 0    | 0     | 0    | 0.283814 | 1.474643 | 4.042572 | 0.364778 | 0.715277 | 0.938786 |
| hsa-miR-4727-3p  | 0     | 0     | 2     | 0    | 0     | 0    | 0.283814 | 1.474643 | 4.042572 | 0.364778 | 0.715277 | 0.938786 |
| hsa-miR-4731-3p  | 0     | 0     | 2     | 0    | 0     | 0    | 0.283814 | 1.474643 | 4.042572 | 0.364778 | 0.715277 | 0.938786 |
| hsa-miR-4748     | 0     | 0     | 2     | 0    | 0     | 0    | 0.283814 | 1.474643 | 4.042572 | 0.364778 | 0.715277 | 0.938786 |
| hsa-miR-506-5p   | 0     | 0     | 2     | 0    | 0     | 0    | 0.283814 | 1.474643 | 4.042572 | 0.364778 | 0.715277 | 0.938786 |
| hsa-miR-520b     | 0     | 0     | 2     | 0    | 0     | 0    | 0.283814 | 1.474643 | 4.042572 | 0.364778 | 0.715277 | 0.938786 |
| hsa-miR-520c-3p  | 0     | 0     | 2     | 0    | 0     | 0    | 0.283814 | 1.474643 | 4.042572 | 0.364778 | 0.715277 | 0.938786 |
| hsa-miR-520g-3p  | 0     | 0     | 2     | 0    | 0     | 0    | 0.283814 | 1.474643 | 4.042572 | 0.364778 | 0.715277 | 0.938786 |
| hsa-miR-548aq-5p | 0     | 0     | 2     | 0    | 0     | 0    | 0.283814 | 1.474643 | 4.042572 | 0.364778 | 0.715277 | 0.938786 |
| hsa-miR-5571-3p  | 0     | 0     | 2     | 0    | 0     | 0    | 0.283814 | 1.474643 | 4.042572 | 0.364778 | 0.715277 | 0.938786 |
| hsa-miR-5590-3p  | 0     | 0     | 2     | 0    | 0     | 0    | 0.283814 | 1.474643 | 4.042572 | 0.364778 | 0.715277 | 0.938786 |
| hsa-miR-6749-3p  | 0     | 0     | 2     | 0    | 0     | 0    | 0.283814 | 1.474643 | 4.042572 | 0.364778 | 0.715277 | 0.938786 |
| hsa-miR-6755-3p  | 0     | 0     | 2     | 0    | 0     | 0    | 0.283814 | 1.474643 | 4.042572 | 0.364778 | 0.715277 | 0.938786 |
| hsa-miR-6793-5p  | 0     | 0     | 2     | 0    | 0     | 0    | 0.283814 | 1.474643 | 4.042572 | 0.364778 | 0.715277 | 0.938786 |
| hsa-miR-6820-3p  | 0     | 0     | 2     | 0    | 0     | 0    | 0.283814 | 1.474643 | 4.042572 | 0.364778 | 0.715277 | 0.938786 |
| hsa-miR-6834-3p  | 0     | 0     | 2     | 0    | 0     | 0    | 0.283814 | 1.474643 | 4.042572 | 0.364778 | 0.715277 | 0.938786 |
| hsa-miR-7851-3p  | 0     | 0     | 2     | 0    | 0     | 0    | 0.283814 | 1.474643 | 4.042572 | 0.364778 | 0.715277 | 0.938786 |
| hsa-miR-501-5p   | 46    | 71    | 51    | 17   | 32    | 5    | 34.63363 | 1.481932 | 0.922401 | 1.606602 | 0.108142 | 0.938786 |
| hsa-miR-33b-3p   | 2     | 4     | 2     | 0    | 3     | 0    | 1.643792 | 1.492368 | 2.428455 | 0.614534 | NA       | NA       |
| hsa-miR-4802-3p  | 9     | 14    | 10    | 2    | 2     | 5    | 6.83494  | 1.498448 | 1.278111 | 1.172393 | 0.241039 | 0.938786 |
| hsa-miR-500b-5p  | 54    | 53    | 12    | 6    | 19    | 11   | 24.20213 | 1.500801 | 1.012265 | 1.482616 | 0.138177 | 0.938786 |
| hsa-miR-338-3p   | 1828  | 300   | 665   | 335  | 449   | 5    | 515.2943 | 1.514395 | 1.230116 | 1.231099 | 0.218286 | 0.938786 |
| hsa-miR-299-5p   | 2     | 23    | 2     | 2    | 2     | 4    | 6.15041  | 1.529728 | 1.579806 | 0.968301 | NA       | NA       |
| hsa-miR-1270     | 11    | 14    | 2     | 2    | 7     | 0    | 5.516552 | 1.542463 | 1.617857 | 0.953398 | 0.340388 | 0.938786 |
| hsa-miR-376c-3p  | 53    | 386   | 12    | 10   | 38    | 82   | 101.4984 | 1.574491 | 1.323961 | 1.189228 | NA       | NA       |
| hsa-miR-506-3p   | 8     | 2     | 35    | 10   | 0     | 0    | 8.494377 | 1.581645 | 1.904889 | 0.830308 | NA       | NA       |
| hsa-miR-107      | 46015 | 22119 | 13356 | 4593 | 13783 | 4535 | 15527.05 | 1.599265 | 0.782805 | 2.042994 | 0.041053 | 0.83959  |
| hsa-miR-4474-3p  | 7     | 0     | 0     | 0    | 2     | 0    | 1.168793 | 1.600361 | 3.727133 | 0.429381 | NA       | NA       |
| hsa-miR-337-3p   | 18    | 95    | 7     | 3    | 17    | 16   | 26.40574 | 1.612001 | 1.260285 | 1.279076 | NA       | NA       |
| hsa-miR-3664-3p  | 44    | 0     | 3     | 0    | 8     | 4    | 8.047599 | 1.619766 | 1.9211   | 0.843145 | NA       | NA       |
| hsa-miR-6741-3p  | 5     | 4     | 0     | 2    | 0     | 0    | 1.771606 | 1.681918 | 2.810497 | 0.598442 | NA       | NA       |
| hsa-miR-655-3p   | 10    | 167   | 5     | 4    | 19    | 28   | 40.8334  | 1.691787 | 1.408753 | 1.200911 | NA       | NA       |
| hsa-miR-142-3p   | 3189  | 667   | 6061  | 913  | 1185  | 325  | 1814.673 | 1.695016 | 0.931367 | 1.819922 | 0.068771 | 0.938786 |

|                  |      |      |      |     |     |     |          |          |          |          |          |          |
|------------------|------|------|------|-----|-----|-----|----------|----------|----------|----------|----------|----------|
| hsa-miR-134-5p   | 203  | 1982 | 46   | 129 | 149 | 311 | 496.0481 | 1.695428 | 1.283856 | 1.320575 | NA       | NA       |
| hsa-miR-3614-5p  | 19   | 6    | 11   | 6   | 2   | 0   | 6.610467 | 1.716901 | 1.497841 | 1.146251 | NA       | NA       |
| hsa-miR-301a-3p  | 73   | 37   | 45   | 5   | 8   | 21  | 29.06099 | 1.718921 | 0.983817 | 1.747196 | NA       | NA       |
| hsa-miR-202-5p   | 47   | 9    | 2    | 8   | 5   | 0   | 10.28963 | 1.727334 | 1.568454 | 1.101298 | 0.270767 | 0.938786 |
| hsa-miR-651-5p   | 1002 | 672  | 1766 | 76  | 322 | 404 | 646.4599 | 1.731467 | 0.881336 | 1.964593 | NA       | NA       |
| hsa-miR-134-3p   | 0    | 2    | 0    | 0   | 0   | 0   | 0.349537 | 1.737524 | 4.020305 | 0.432187 | 0.665605 | 0.938786 |
| hsa-miR-205-3p   | 0    | 2    | 0    | 0   | 0   | 0   | 0.349537 | 1.737524 | 4.020305 | 0.432187 | 0.665605 | 0.938786 |
| hsa-miR-3180     | 0    | 2    | 0    | 0   | 0   | 0   | 0.349537 | 1.737524 | 4.020305 | 0.432187 | 0.665605 | 0.938786 |
| hsa-miR-3180-3p  | 0    | 2    | 0    | 0   | 0   | 0   | 0.349537 | 1.737524 | 4.020305 | 0.432187 | 0.665605 | 0.938786 |
| hsa-miR-3691-3p  | 0    | 2    | 0    | 0   | 0   | 0   | 0.349537 | 1.737524 | 4.020305 | 0.432187 | 0.665605 | 0.938786 |
| hsa-miR-4467     | 0    | 2    | 0    | 0   | 0   | 0   | 0.349537 | 1.737524 | 4.020305 | 0.432187 | 0.665605 | 0.938786 |
| hsa-miR-492      | 0    | 2    | 0    | 0   | 0   | 0   | 0.349537 | 1.737524 | 4.020305 | 0.432187 | 0.665605 | 0.938786 |
| hsa-miR-503-3p   | 0    | 2    | 0    | 0   | 0   | 0   | 0.349537 | 1.737524 | 4.020305 | 0.432187 | 0.665605 | 0.938786 |
| hsa-miR-5094     | 0    | 2    | 0    | 0   | 0   | 0   | 0.349537 | 1.737524 | 4.020305 | 0.432187 | 0.665605 | 0.938786 |
| hsa-miR-544a     | 0    | 2    | 0    | 0   | 0   | 0   | 0.349537 | 1.737524 | 4.020305 | 0.432187 | 0.665605 | 0.938786 |
| hsa-miR-5707     | 0    | 2    | 0    | 0   | 0   | 0   | 0.349537 | 1.737524 | 4.020305 | 0.432187 | 0.665605 | 0.938786 |
| hsa-miR-6133     | 0    | 2    | 0    | 0   | 0   | 0   | 0.349537 | 1.737524 | 4.020305 | 0.432187 | 0.665605 | 0.938786 |
| hsa-miR-6715a-3p | 0    | 2    | 0    | 0   | 0   | 0   | 0.349537 | 1.737524 | 4.020305 | 0.432187 | 0.665605 | 0.938786 |
| hsa-miR-6736-5p  | 0    | 2    | 0    | 0   | 0   | 0   | 0.349537 | 1.737524 | 4.020305 | 0.432187 | 0.665605 | 0.938786 |
| hsa-miR-6798-3p  | 0    | 2    | 0    | 0   | 0   | 0   | 0.349537 | 1.737524 | 4.020305 | 0.432187 | 0.665605 | 0.938786 |
| hsa-miR-6803-3p  | 0    | 2    | 0    | 0   | 0   | 0   | 0.349537 | 1.737524 | 4.020305 | 0.432187 | 0.665605 | 0.938786 |
| hsa-miR-6817-3p  | 0    | 2    | 0    | 0   | 0   | 0   | 0.349537 | 1.737524 | 4.020305 | 0.432187 | 0.665605 | 0.938786 |
| hsa-miR-6818-5p  | 0    | 2    | 0    | 0   | 0   | 0   | 0.349537 | 1.737524 | 4.020305 | 0.432187 | 0.665605 | 0.938786 |
| hsa-miR-6895-3p  | 0    | 2    | 0    | 0   | 0   | 0   | 0.349537 | 1.737524 | 4.020305 | 0.432187 | 0.665605 | 0.938786 |
| hsa-miR-7152-3p  | 0    | 2    | 0    | 0   | 0   | 0   | 0.349537 | 1.737524 | 4.020305 | 0.432187 | 0.665605 | 0.938786 |
| hsa-miR-892a     | 0    | 2    | 0    | 0   | 0   | 0   | 0.349537 | 1.737524 | 4.020305 | 0.432187 | 0.665605 | 0.938786 |
| hsa-miR-940      | 0    | 2    | 0    | 0   | 0   | 0   | 0.349537 | 1.737524 | 4.020305 | 0.432187 | 0.665605 | 0.938786 |
| hsa-miR-370-3p   | 94   | 1691 | 61   | 278 | 44  | 128 | 410.465  | 1.74792  | 1.354226 | 1.290715 | NA       | NA       |
| hsa-miR-5684     | 2    | 2    | 3    | 0   | 2   | 0   | 1.30153  | 1.753773 | 2.608618 | 0.6723   | 0.501393 | 0.938786 |
| hsa-miR-6516-5p  | 23   | 19   | 20   | 0   | 16  | 2   | 11.71377 | 1.762198 | 1.356166 | 1.299397 | NA       | NA       |
| hsa-miR-136-3p   | 279  | 1696 | 69   | 32  | 201 | 300 | 442.7906 | 1.763653 | 1.266299 | 1.392761 | NA       | NA       |
| hsa-miR-4646-3p  | 4    | 3    | 0    | 0   | 2   | 0   | 1.307586 | 1.778531 | 3.037371 | 0.58555  | 0.558178 | 0.938786 |
| hsa-miR-548ai    | 8    | 0    | 0    | 0   | 2   | 0   | 1.297297 | 1.790513 | 3.621694 | 0.494386 | NA       | NA       |
| hsa-miR-570-5p   | 8    | 0    | 0    | 0   | 2   | 0   | 1.297297 | 1.790513 | 3.621694 | 0.494386 | NA       | NA       |
| hsa-miR-153-3p   | 24   | 5    | 7    | 0   | 7   | 2   | 6.339034 | 1.792929 | 1.516509 | 1.182274 | NA       | NA       |



|                   |         |         |         |         |         |       |          |          |          |          |          |          |
|-------------------|---------|---------|---------|---------|---------|-------|----------|----------|----------|----------|----------|----------|
| hsa-miR-758-3p    | 39      | 330     | 8       | 33      | 19      | 39    | 82.15742 | 1.801252 | 1.295239 | 1.390672 | NA       | NA       |
| hsa-miR-4521      | 141     | 12      | 24      | 6       | 12      | 17    | 30.31291 | 1.829064 | 1.127817 | 1.621774 | NA       | NA       |
| hsa-miR-379-5p    | 489     | 5479    | 171     | 295     | 264     | 876   | 1338.68  | 1.829215 | 1.294684 | 1.412866 | NA       | NA       |
| hsa-miR-362-3p    | 64      | 34      | 24      | 4       | 15      | 9     | 22.4556  | 1.840317 | 0.948798 | 1.939629 | 0.052425 | 0.89299  |
| hsa-miR-409-3p    | 72      | 2424    | 39      | 165     | 70      | 344   | 559.9204 | 1.851813 | 1.443069 | 1.283246 | NA       | NA       |
| hsa-miR-6501-5p   | 77      | 12      | 109     | 21      | 16      | 4     | 35.01978 | 1.86414  | 1.079523 | 1.726819 | 0.0842   | 0.938786 |
| hsa-miR-101-5p    | 11      | 4       | 15      | 0       | 5       | 2     | 5.359704 | 1.883221 | 1.528011 | 1.232465 | 0.217775 | 0.938786 |
| hsa-miR-485-5p    | 13      | 149     | 0       | 9       | 10      | 19    | 35.22295 | 1.885568 | 1.597999 | 1.179956 | NA       | NA       |
| hsa-miR-154-5p    | 14      | 145     | 5       | 12      | 12      | 15    | 35.38556 | 1.887768 | 1.30641  | 1.445005 | NA       | NA       |
| hsa-miR-450b-5p   | 2736    | 1856    | 1470    | 184     | 409     | 644   | 1122.579 | 1.894279 | 0.811796 | 2.333443 | NA       | NA       |
| hsa-miR-411-5p    | 532     | 2016    | 153     | 103     | 147     | 346   | 561.3859 | 1.895145 | 1.123256 | 1.687189 | NA       | NA       |
| hsa-miR-424-3p    | 455     | 196     | 605     | 98      | 75      | 75    | 226.4452 | 1.901774 | 0.773446 | 2.458831 | 0.013939 | 0.43211  |
| hsa-miR-100-3p    | 8       | 0       | 4       | 0       | 0       | 2     | 2.040981 | 1.907722 | 2.704548 | 0.705376 | 0.480576 | 0.938786 |
| hsa-miR-1256      | 3       | 0       | 0       | 0       | 0       | 0     | 0.385512 | 1.928035 | 4.006455 | 0.481232 | NA       | NA       |
| hsa-miR-1273e     | 3       | 0       | 0       | 0       | 0       | 0     | 0.385512 | 1.928035 | 4.006455 | 0.481232 | NA       | NA       |
| hsa-miR-15a-3p    | 3       | 0       | 0       | 0       | 0       | 0     | 0.385512 | 1.928035 | 4.006455 | 0.481232 | NA       | NA       |
| hsa-miR-3134      | 3       | 0       | 0       | 0       | 0       | 0     | 0.385512 | 1.928035 | 4.006455 | 0.481232 | NA       | NA       |
| hsa-miR-3138      | 3       | 0       | 0       | 0       | 0       | 0     | 0.385512 | 1.928035 | 4.006455 | 0.481232 | NA       | NA       |
| hsa-miR-3178      | 3       | 0       | 0       | 0       | 0       | 0     | 0.385512 | 1.928035 | 4.006455 | 0.481232 | NA       | NA       |
| hsa-miR-3679-5p   | 3       | 0       | 0       | 0       | 0       | 0     | 0.385512 | 1.928035 | 4.006455 | 0.481232 | NA       | NA       |
| hsa-miR-3943      | 3       | 0       | 0       | 0       | 0       | 0     | 0.385512 | 1.928035 | 4.006455 | 0.481232 | NA       | NA       |
| hsa-miR-8485      | 3       | 0       | 0       | 0       | 0       | 0     | 0.385512 | 1.928035 | 4.006455 | 0.481232 | NA       | NA       |
| hsa-miR-4705      | 9       | 0       | 3       | 2       | 0       | 0     | 2.012271 | 1.934115 | 2.727346 | 0.709157 | 0.478227 | 0.938786 |
| hsa-miR-1185-2-3p | 0       | 39      | 0       | 7       | 2       | 0     | 8.590273 | 1.94472  | 2.320956 | 0.837896 | NA       | NA       |
| hsa-miR-656-3p    | 10      | 195     | 5       | 4       | 15      | 29    | 45.41105 | 1.951775 | 1.435429 | 1.359716 | NA       | NA       |
| hsa-miR-148a-3p   | 3328776 | 4965094 | 1462992 | 1033361 | 1061357 | 95541 | 1889456  | 1.96     | 1.012947 | 1.934949 | 0.052997 | 0.89299  |
| hsa-miR-556-5p    | 131     | 6       | 30      | 16      | 4       | 7     | 27.67711 | 2.015322 | 1.234092 | 1.63304  | 0.102461 | 0.938786 |
| hsa-miR-369-5p    | 12      | 75      | 0       | 4       | 4       | 10    | 18.27483 | 2.021973 | 1.606473 | 1.258641 | NA       | NA       |
| hsa-miR-493-5p    | 407     | 3670    | 82      | 53      | 211     | 588   | 876.0641 | 2.046842 | 1.368167 | 1.496047 | NA       | NA       |
| hsa-miR-487a-3p   | 9       | 134     | 6       | 4       | 8       | 19    | 31.59456 | 2.048365 | 1.386462 | 1.477405 | NA       | NA       |
| hsa-miR-4433b-5p  | 2       | 0       | 7       | 0       | 2       | 0     | 1.519621 | 2.05162  | 2.937808 | 0.698351 | 0.484958 | 0.938786 |
| hsa-miR-3175      | 0       | 0       | 3       | 0       | 0       | 0     | 0.425721 | 2.057251 | 3.998023 | 0.514567 | NA       | NA       |
| hsa-miR-3187-5p   | 0       | 0       | 3       | 0       | 0       | 0     | 0.425721 | 2.057251 | 3.998023 | 0.514567 | NA       | NA       |
| hsa-miR-6810-3p   | 0       | 0       | 3       | 0       | 0       | 0     | 0.425721 | 2.057251 | 3.998023 | 0.514567 | NA       | NA       |
| hsa-miR-6883-3p   | 0       | 0       | 3       | 0       | 0       | 0     | 0.425721 | 2.057251 | 3.998023 | 0.514567 | NA       | NA       |

|                  |      |       |      |      |      |      |          |          |          |          |          |          |
|------------------|------|-------|------|------|------|------|----------|----------|----------|----------|----------|----------|
| hsa-miR-148a-5p  | 4385 | 8421  | 1554 | 552  | 2870 | 139  | 2791.765 | 2.07289  | 1.094592 | 1.893756 | 0.058257 | 0.912748 |
| hsa-miR-382-3p   | 83   | 1277  | 29   | 42   | 75   | 166  | 294.0495 | 2.085473 | 1.344146 | 1.551523 | NA       | NA       |
| hsa-miR-409-5p   | 45   | 921   | 10   | 28   | 56   | 116  | 207.5515 | 2.094641 | 1.425012 | 1.469911 | NA       | NA       |
| hsa-miR-6515-3p  | 4    | 4     | 5    | 0    | 3    | 0    | 2.326521 | 2.108637 | 2.152155 | 0.979779 | NA       | NA       |
| hsa-miR-381-3p   | 3816 | 17206 | 2132 | 1324 | 1020 | 2014 | 4670.412 | 2.126269 | 1.043361 | 2.037903 | NA       | NA       |
| hsa-miR-6733-3p  | 5    | 4     | 0    | 0    | 2    | 0    | 1.610858 | 2.14254  | 2.868484 | 0.746924 | NA       | NA       |
| hsa-miR-6500-3p  | 25   | 23    | 2    | 6    | 3    | 0    | 9.210023 | 2.155214 | 1.54292  | 1.396841 | 0.162461 | 0.938786 |
| hsa-miR-374c-3p  | 7    | 0     | 7    | 0    | 0    | 2    | 2.338198 | 2.156242 | 2.609171 | 0.826409 | NA       | NA       |
| hsa-miR-509-3p   | 5    | 0     | 56   | 6    | 0    | 3    | 10.54733 | 2.156915 | 1.918035 | 1.124544 | NA       | NA       |
| hsa-miR-539-5p   | 9    | 115   | 0    | 20   | 3    | 0    | 25.95892 | 2.179876 | 1.938877 | 1.124298 | NA       | NA       |
| hsa-miR-495-3p   | 102  | 1240  | 30   | 135  | 65   | 62   | 285.6592 | 2.182574 | 1.29651  | 1.683422 | NA       | NA       |
| hsa-miR-891a-5p  | 0    | 28    | 0    | 5    | 0    | 0    | 5.968545 | 2.200133 | 2.724777 | 0.807454 | NA       | NA       |
| hsa-miR-6516-3p  | 46   | 24    | 38   | 0    | 16   | 5    | 18.76551 | 2.216438 | 1.217497 | 1.820487 | NA       | NA       |
| hsa-miR-1251-5p  | 19   | 5     | 0    | 0    | 5    | 0    | 3.98858  | 2.222863 | 2.333846 | 0.952447 | 0.340871 | 0.938786 |
| hsa-miR-33a-5p   | 16   | 6     | 2    | 0    | 2    | 2    | 4.103074 | 2.24454  | 1.73003  | 1.297399 | 0.194494 | 0.938786 |
| hsa-miR-542-3p   | 5186 | 2160  | 1433 | 200  | 352  | 768  | 1508.669 | 2.254914 | 0.905098 | 2.491348 | 0.012726 | 0.43211  |
| hsa-miR-5699-3p  | 16   | 0     | 0    | 0    | 0    | 2    | 2.501386 | 2.257309 | 3.107987 | 0.726293 | NA       | NA       |
| hsa-miR-580-3p   | 17   | 6     | 6    | 2    | 0    | 2    | 4.959955 | 2.298576 | 1.609309 | 1.4283   | NA       | NA       |
| hsa-miR-3064-5p  | 14   | 4     | 7    | 2    | 2    | 0    | 4.190757 | 2.307273 | 1.637614 | 1.408924 | 0.158858 | 0.938786 |
| hsa-miR-3115     | 0    | 3     | 0    | 0    | 0    | 0    | 0.524305 | 2.331664 | 3.982384 | 0.585494 | NA       | NA       |
| hsa-miR-323a-5p  | 0    | 3     | 0    | 0    | 0    | 0    | 0.524305 | 2.331664 | 3.982384 | 0.585494 | NA       | NA       |
| hsa-miR-345-3p   | 0    | 3     | 0    | 0    | 0    | 0    | 0.524305 | 2.331664 | 3.982384 | 0.585494 | NA       | NA       |
| hsa-miR-3917     | 0    | 3     | 0    | 0    | 0    | 0    | 0.524305 | 2.331664 | 3.982384 | 0.585494 | NA       | NA       |
| hsa-miR-4324     | 0    | 3     | 0    | 0    | 0    | 0    | 0.524305 | 2.331664 | 3.982384 | 0.585494 | NA       | NA       |
| hsa-miR-6769b-3p | 0    | 3     | 0    | 0    | 0    | 0    | 0.524305 | 2.331664 | 3.982384 | 0.585494 | NA       | NA       |
| hsa-miR-6815-3p  | 0    | 3     | 0    | 0    | 0    | 0    | 0.524305 | 2.331664 | 3.982384 | 0.585494 | NA       | NA       |
| hsa-miR-3681-5p  | 4    | 0     | 0    | 0    | 0    | 0    | 0.514017 | 2.338601 | 3.982025 | 0.58729  | NA       | NA       |
| hsa-miR-4723-5p  | 4    | 0     | 0    | 0    | 0    | 0    | 0.514017 | 2.338601 | 3.982025 | 0.58729  | NA       | NA       |
| hsa-miR-6128     | 4    | 0     | 0    | 0    | 0    | 0    | 0.514017 | 2.338601 | 3.982025 | 0.58729  | NA       | NA       |
| hsa-miR-6504-5p  | 4    | 0     | 0    | 0    | 0    | 0    | 0.514017 | 2.338601 | 3.982025 | 0.58729  | NA       | NA       |
| hsa-miR-6792-3p  | 4    | 0     | 0    | 0    | 0    | 0    | 0.514017 | 2.338601 | 3.982025 | 0.58729  | NA       | NA       |
| hsa-miR-376b-5p  | 7    | 26    | 0    | 3    | 0    | 2    | 6.533845 | 2.352522 | 1.964934 | 1.197252 | 0.231208 | 0.938786 |
| hsa-miR-376c-5p  | 7    | 26    | 0    | 3    | 0    | 2    | 6.533845 | 2.352522 | 1.964934 | 1.197252 | 0.231208 | 0.938786 |
| hsa-miR-579-3p   | 8    | 3     | 0    | 0    | 2    | 0    | 1.821602 | 2.355294 | 2.791824 | 0.84364  | 0.398871 | 0.938786 |
| hsa-miR-136-5p   | 369  | 500   | 58   | 15   | 11   | 101  | 170.2275 | 2.398627 | 1.209561 | 1.983056 | 0.047361 | 0.889817 |

|                   |      |      |      |     |     |     |          |          |          |          |          |          |
|-------------------|------|------|------|-----|-----|-----|----------|----------|----------|----------|----------|----------|
| hsa-miR-1537-3p   | 2    | 0    | 2    | 0   | 0   | 0   | 0.540822 | 2.406107 | 3.978619 | 0.604759 | 0.545339 | 0.938786 |
| hsa-miR-4443      | 2    | 0    | 2    | 0   | 0   | 0   | 0.540822 | 2.406107 | 3.978619 | 0.604759 | 0.545339 | 0.938786 |
| hsa-miR-4724-5p   | 2    | 0    | 2    | 0   | 0   | 0   | 0.540822 | 2.406107 | 3.978619 | 0.604759 | 0.545339 | 0.938786 |
| hsa-miR-6887-3p   | 2    | 0    | 2    | 0   | 0   | 0   | 0.540822 | 2.406107 | 3.978619 | 0.604759 | 0.545339 | 0.938786 |
| hsa-miR-885-5p    | 2    | 0    | 2    | 0   | 0   | 0   | 0.540822 | 2.406107 | 3.978619 | 0.604759 | 0.545339 | 0.938786 |
| hsa-miR-4697-3p   | 10   | 2    | 0    | 0   | 2   | 0   | 1.903842 | 2.432777 | 2.791045 | 0.871637 | 0.383407 | 0.938786 |
| hsa-miR-10b-3p    | 11   | 4    | 8    | 0   | 4   | 0   | 3.786403 | 2.458345 | 1.88755  | 1.3024   | NA       | NA       |
| hsa-miR-1277-5p   | 50   | 18   | 43   | 0   | 0   | 13  | 18.56762 | 2.462857 | 1.613716 | 1.526202 | NA       | NA       |
| hsa-miR-6818-3p   | 5    | 6    | 4    | 2   | 0   | 0   | 2.688771 | 2.463202 | 2.124017 | 1.15969  | 0.246175 | 0.938786 |
| hsa-miR-372-3p    | 0    | 0    | 4    | 0   | 0   | 0   | 0.567628 | 2.470991 | 3.97549  | 0.621556 | NA       | NA       |
| hsa-miR-4461      | 0    | 0    | 4    | 0   | 0   | 0   | 0.567628 | 2.470991 | 3.97549  | 0.621556 | NA       | NA       |
| hsa-miR-4482-5p   | 0    | 0    | 4    | 0   | 0   | 0   | 0.567628 | 2.470991 | 3.97549  | 0.621556 | NA       | NA       |
| hsa-miR-508-5p    | 0    | 0    | 4    | 0   | 0   | 0   | 0.567628 | 2.470991 | 3.97549  | 0.621556 | NA       | NA       |
| hsa-miR-513c-5p   | 0    | 0    | 4    | 0   | 0   | 0   | 0.567628 | 2.470991 | 3.97549  | 0.621556 | NA       | NA       |
| hsa-let-7c-3p     | 37   | 44   | 12   | 2   | 15  | 0   | 16.59684 | 2.477651 | 1.356203 | 1.826902 | 0.067714 | 0.938786 |
| hsa-miR-337-5p    | 12   | 62   | 2    | 0   | 2   | 9   | 14.93471 | 2.494364 | 1.64586  | 1.515538 | NA       | NA       |
| hsa-miR-494-3p    | 46   | 988  | 36   | 6   | 55  | 104 | 215.5424 | 2.528498 | 1.418872 | 1.782049 | NA       | NA       |
| hsa-miR-6503-3p   | 41   | 9    | 72   | 2   | 18  | 0   | 19.91228 | 2.537035 | 1.386458 | 1.829869 | 0.06727  | 0.938786 |
| hsa-miR-450a-5p   | 3191 | 1219 | 1641 | 191 | 306 | 293 | 1003.472 | 2.53729  | 0.717087 | 3.538329 | NA       | NA       |
| hsa-miR-4690-3p   | 9    | 4    | 4    | 0   | 0   | 2   | 2.868559 | 2.540414 | 2.094862 | 1.212688 | 0.225249 | 0.938786 |
| hsa-miR-137       | 2    | 2    | 0    | 0   | 0   | 0   | 0.606545 | 2.557746 | 3.971516 | 0.644023 | 0.519561 | 0.938786 |
| hsa-miR-3653-3p   | 2    | 2    | 0    | 0   | 0   | 0   | 0.606545 | 2.557746 | 3.971516 | 0.644023 | 0.519561 | 0.938786 |
| hsa-miR-6770-3p   | 2    | 2    | 0    | 0   | 0   | 0   | 0.606545 | 2.557746 | 3.971516 | 0.644023 | 0.519561 | 0.938786 |
| hsa-miR-450a-2-3p | 30   | 4    | 12   | 3   | 3   | 0   | 7.305997 | 2.56728  | 1.484944 | 1.728874 | 0.083832 | 0.938786 |
| hsa-miR-378d      | 6553 | 743  | 602  | 278 | 668 | 125 | 1234.907 | 2.573878 | 1.049126 | 2.453355 | NA       | NA       |
| hsa-miR-4470      | 5    | 4    | 4    | 0   | 2   | 0   | 2.178486 | 2.619536 | 2.229582 | 1.1749   | 0.240035 | 0.938786 |
| hsa-miR-376a-3p   | 24   | 384  | 5    | 6   | 29  | 28  | 82.33353 | 2.63241  | 1.414115 | 1.861525 | NA       | NA       |
| hsa-miR-543       | 27   | 327  | 7    | 29  | 9   | 11  | 71.50834 | 2.642289 | 1.370096 | 1.928544 | NA       | NA       |
| hsa-miR-485-3p    | 6    | 218  | 3    | 5   | 4   | 21  | 45.58567 | 2.650858 | 1.548312 | 1.712096 | NA       | NA       |
| hsa-miR-493-3p    | 260  | 2407 | 140  | 57  | 86  | 231 | 549.2136 | 2.655328 | 1.232177 | 2.154989 | NA       | NA       |
| hsa-miR-3194-3p   | 5    | 0    | 0    | 0   | 0   | 0   | 0.642521 | 2.657717 | 3.967218 | 0.66992  | NA       | NA       |
| hsa-miR-548au-5p  | 5    | 0    | 0    | 0   | 0   | 0   | 0.642521 | 2.657717 | 3.967218 | 0.66992  | NA       | NA       |
| hsa-miR-377-5p    | 0    | 16   | 0    | 0   | 0   | 2   | 3.241614 | 2.690964 | 2.980762 | 0.902777 | NA       | NA       |
| hsa-miR-6510-3p   | 67   | 144  | 147  | 0   | 2   | 37  | 63.14444 | 2.692283 | 1.459476 | 1.844692 | NA       | NA       |
| hsa-miR-380-3p    | 0    | 56   | 0    | 5   | 0   | 2   | 11.30738 | 2.703019 | 2.291661 | 1.179502 | NA       | NA       |

|                  |       |      |       |      |      |     |          |          |          |          |          |          |
|------------------|-------|------|-------|------|------|-----|----------|----------|----------|----------|----------|----------|
| hsa-miR-509-5p   | 12    | 0    | 58    | 4    | 0    | 3   | 11.30066 | 2.710277 | 1.843892 | 1.469867 | 0.141598 | 0.938786 |
| hsa-miR-34c-5p   | 60240 | 8671 | 24386 | 5468 | 5179 | 272 | 14650.53 | 2.717493 | 1.103586 | 2.462421 | 0.0138   | 0.43211  |
| hsa-miR-3148     | 2     | 0    | 3     | 0    | 0    | 0   | 0.682729 | 2.739671 | 3.963906 | 0.691154 | 0.489468 | 0.938786 |
| hsa-miR-4697-5p  | 2     | 0    | 3     | 0    | 0    | 0   | 0.682729 | 2.739671 | 3.963906 | 0.691154 | 0.489468 | 0.938786 |
| hsa-miR-379-3p   | 6     | 54   | 3     | 0    | 2    | 6   | 12.23946 | 2.745604 | 1.643331 | 1.670756 | NA       | NA       |
| hsa-miR-329-3p   | 22    | 323  | 10    | 28   | 6    | 10  | 69.7509  | 2.750217 | 1.379541 | 1.993574 | NA       | NA       |
| hsa-miR-1288-3p  | 0     | 4    | 0     | 0    | 0    | 0   | 0.699073 | 2.751521 | 3.963442 | 0.694225 | NA       | NA       |
| hsa-miR-3139     | 0     | 4    | 0     | 0    | 0    | 0   | 0.699073 | 2.751521 | 3.963442 | 0.694225 | NA       | NA       |
| hsa-miR-487b-5p  | 0     | 4    | 0     | 0    | 0    | 0   | 0.699073 | 2.751521 | 3.963442 | 0.694225 | NA       | NA       |
| hsa-miR-541-3p   | 0     | 4    | 0     | 0    | 0    | 0   | 0.699073 | 2.751521 | 3.963442 | 0.694225 | NA       | NA       |
| hsa-miR-600      | 0     | 4    | 0     | 0    | 0    | 0   | 0.699073 | 2.751521 | 3.963442 | 0.694225 | NA       | NA       |
| hsa-miR-888-5p   | 0     | 4    | 0     | 0    | 0    | 0   | 0.699073 | 2.751521 | 3.963442 | 0.694225 | NA       | NA       |
| hsa-miR-323b-3p  | 0     | 300  | 0     | 0    | 23   | 21  | 60.2029  | 2.753564 | 3.732595 | 0.737708 | NA       | NA       |
| hsa-miR-369-3p   | 68    | 1227 | 27    | 4    | 68   | 105 | 260.4048 | 2.765421 | 1.463734 | 1.889293 | NA       | NA       |
| hsa-miR-376b-3p  | 5     | 42   | 7     | 0    | 6    | 2   | 10.22925 | 2.789895 | 1.543638 | 1.80735  | NA       | NA       |
| hsa-miR-370-5p   | 0     | 27   | 0     | 0    | 0    | 3   | 5.386726 | 2.852934 | 2.752617 | 1.036444 | NA       | NA       |
| hsa-miR-412-5p   | 0     | 84   | 0     | 4    | 0    | 5   | 16.65387 | 2.910098 | 2.244832 | 1.296354 | NA       | NA       |
| hsa-miR-7973     | 0     | 2    | 3     | 0    | 0    | 0   | 0.775258 | 2.911841 | 3.957524 | 0.735773 | 0.461869 | 0.938786 |
| hsa-miR-378b     | 6     | 0    | 0     | 0    | 0    | 0   | 0.771025 | 2.918815 | 3.957281 | 0.737581 | NA       | NA       |
| hsa-miR-548az-3p | 6     | 0    | 0     | 0    | 0    | 0   | 0.771025 | 2.918815 | 3.957281 | 0.737581 | NA       | NA       |
| hsa-miR-6736-3p  | 2     | 3    | 0     | 0    | 0    | 0   | 0.781313 | 2.921654 | 3.957183 | 0.738317 | 0.460322 | 0.938786 |
| hsa-miR-551b-3p  | 290   | 39   | 33    | 7    | 35   | 0   | 54.98226 | 2.954147 | 1.367733 | 2.159885 | NA       | NA       |
| hsa-miR-6755-5p  | 0     | 3    | 2     | 0    | 0    | 0   | 0.808119 | 2.968589 | 3.95558  | 0.750481 | 0.452965 | 0.938786 |
| hsa-miR-944      | 46    | 139  | 53    | 19   | 5    | 0   | 42.48334 | 2.99499  | 1.324534 | 2.261166 | NA       | NA       |
| hsa-miR-1537-5p  | 4     | 2    | 0     | 0    | 0    | 0   | 0.863553 | 3.072447 | 3.952211 | 0.7774   | 0.436923 | 0.938786 |
| hsa-miR-6839-5p  | 4     | 2    | 0     | 0    | 0    | 0   | 0.863553 | 3.072447 | 3.952211 | 0.7774   | 0.436923 | 0.938786 |
| hsa-miR-432-3p   | 0     | 5    | 0     | 0    | 0    | 0   | 0.873842 | 3.07642  | 3.952087 | 0.778429 | NA       | NA       |
| hsa-miR-4421     | 0     | 5    | 0     | 0    | 0    | 0   | 0.873842 | 3.07642  | 3.952087 | 0.778429 | NA       | NA       |
| hsa-miR-665      | 0     | 5    | 0     | 0    | 0    | 0   | 0.873842 | 3.07642  | 3.952087 | 0.778429 | NA       | NA       |
| hsa-miR-154-3p   | 9     | 124  | 2     | 3    | 2    | 8   | 25.80719 | 3.117367 | 1.511338 | 2.062653 | NA       | NA       |
| hsa-miR-548am-5p | 7     | 0    | 0     | 0    | 0    | 0   | 0.899529 | 3.139793 | 3.950151 | 0.794854 | NA       | NA       |
| hsa-miR-548c-5p  | 7     | 0    | 0     | 0    | 0    | 0   | 0.899529 | 3.139793 | 3.950151 | 0.794854 | NA       | NA       |
| hsa-miR-548h-3p  | 7     | 0    | 0     | 0    | 0    | 0   | 0.899529 | 3.139793 | 3.950151 | 0.794854 | NA       | NA       |
| hsa-miR-548o-5p  | 7     | 0    | 0     | 0    | 0    | 0   | 0.899529 | 3.139793 | 3.950151 | 0.794854 | NA       | NA       |
| hsa-miR-548z     | 7     | 0    | 0     | 0    | 0    | 0   | 0.899529 | 3.139793 | 3.950151 | 0.794854 | NA       | NA       |

|                   |      |      |      |     |     |     |          |          |          |          |          |          |
|-------------------|------|------|------|-----|-----|-----|----------|----------|----------|----------|----------|----------|
| hsa-miR-4436b-3p  | 4    | 0    | 3    | 0   | 0   | 0   | 0.939738 | 3.200253 | 3.833389 | 0.834837 | 0.40381  | 0.938786 |
| hsa-miR-654-5p    | 21   | 520  | 4    | 3   | 12  | 35  | 104.1995 | 3.230773 | 1.54571  | 2.090155 | NA       | NA       |
| hsa-miR-432-5p    | 17   | 962  | 5    | 28  | 19  | 43  | 189.1738 | 3.237923 | 1.532017 | 2.113504 | NA       | NA       |
| hsa-miR-508-3p    | 9    | 2    | 108  | 4   | 2   | 3   | 18.6293  | 3.251191 | 1.461767 | 2.224151 | NA       | NA       |
| hsa-miR-3065-5p   | 2226 | 253  | 582  | 117 | 116 | 11  | 456.0788 | 3.255429 | 1.07552  | 3.026842 | 0.002471 | 0.139288 |
| hsa-miR-433-3p    | 7    | 166  | 5    | 4   | 6   | 6   | 33.62439 | 3.352875 | 1.420351 | 2.360597 | NA       | NA       |
| hsa-miR-5696      | 6    | 0    | 2    | 0   | 0   | 0   | 1.054839 | 3.367801 | 3.708023 | 0.908247 | 0.363748 | 0.938786 |
| hsa-miR-219a-5p   | 5    | 0    | 3    | 0   | 0   | 0   | 1.068242 | 3.385294 | 3.673399 | 0.92157  | 0.356753 | 0.938786 |
| hsa-miR-410-3p    | 4    | 260  | 0    | 4   | 8   | 11  | 50.34013 | 3.391822 | 1.744659 | 1.944118 | NA       | NA       |
| hsa-miR-551a      | 115  | 73   | 34   | 8   | 2   | 5   | 35.46352 | 3.417107 | 1.041169 | 3.28199  | 0.001031 | 0.086124 |
| hsa-miR-539-3p    | 2    | 328  | 3    | 0   | 9   | 19  | 63.44898 | 3.417162 | 1.818437 | 1.879175 | NA       | NA       |
| hsa-miR-514a-5p   | 2    | 0    | 6    | 0   | 0   | 0   | 1.108451 | 3.436251 | 3.655838 | 0.939935 | 0.347251 | 0.938786 |
| hsa-miR-301b-3p   | 27   | 38   | 34   | 0   | 5   | 3   | 16.27679 | 3.442082 | 1.198703 | 2.871504 | 0.004085 | 0.180917 |
| hsa-miR-889-3p    | 71   | 3493 | 21   | 35  | 106 | 145 | 676.6516 | 3.52528  | 1.506701 | 2.339734 | NA       | NA       |
| hsa-miR-487b-3p   | 34   | 1084 | 6    | 12  | 49  | 34  | 211.417  | 3.538009 | 1.482608 | 2.386342 | NA       | NA       |
| hsa-miR-4709-3p   | 33   | 18   | 31   | 2   | 4   | 0   | 12.75413 | 3.541626 | 1.246389 | 2.84151  | 0.00449  | 0.185589 |
| hsa-miR-449a      | 538  | 182  | 278  | 18  | 42  | 11  | 152.3671 | 3.542769 | 0.799065 | 4.433644 | 9.27E-06 | 0.001436 |
| hsa-miR-380-5p    | 0    | 59   | 0    | 0   | 0   | 4   | 11.20197 | 3.562713 | 2.571201 | 1.385622 | NA       | NA       |
| hsa-miR-4284      | 5    | 0    | 4    | 0   | 0   | 0   | 1.210149 | 3.564638 | 3.522044 | 1.012093 | 0.311493 | 0.938786 |
| hsa-miR-4425      | 0    | 3    | 5    | 0   | 0   | 0   | 1.23384  | 3.583439 | 3.527644 | 1.015817 | 0.309717 | 0.938786 |
| hsa-miR-509-3-5p  | 199  | 30   | 2263 | 111 | 3   | 21  | 380.8964 | 3.606275 | 1.496034 | 2.410557 | NA       | NA       |
| hsa-miR-548x-3p   | 2    | 0    | 35   | 0   | 0   | 2   | 5.669074 | 3.627201 | 2.370567 | 1.530099 | NA       | NA       |
| hsa-miR-514a-3p   | 1154 | 107  | 8407 | 397 | 55  | 75  | 1469.468 | 3.635728 | 1.358486 | 2.676309 | NA       | NA       |
| hsa-miR-513a-3p   | 0    | 0    | 9    | 0   | 0   | 0   | 1.277163 | 3.638543 | 3.937525 | 0.924069 | NA       | NA       |
| hsa-miR-513c-3p   | 0    | 0    | 9    | 0   | 0   | 0   | 1.277163 | 3.638543 | 3.937525 | 0.924069 | NA       | NA       |
| hsa-miR-378j      | 23   | 5    | 0    | 0   | 2   | 0   | 4.098701 | 3.639488 | 2.383707 | 1.526819 | 0.126806 | 0.938786 |
| hsa-miR-431-5p    | 15   | 448  | 10   | 14  | 0   | 16  | 88.2155  | 3.643544 | 1.653109 | 2.204056 | NA       | NA       |
| hsa-miR-450a-1-3p | 2    | 6    | 0    | 0   | 0   | 0   | 1.305619 | 3.661059 | 3.496019 | 1.047208 | 0.295004 | 0.938786 |
| hsa-miR-514b-3p   | 2    | 0    | 55   | 3   | 0   | 0   | 8.706914 | 3.687881 | 2.268215 | 1.625896 | NA       | NA       |
| hsa-miR-4510      | 8    | 120  | 0    | 5   | 4   | 0   | 23.6138  | 3.76466  | 1.863663 | 2.020033 | NA       | NA       |
| hsa-miR-1297      | 18   | 11   | 0    | 0   | 2   | 0   | 4.504791 | 3.776901 | 2.313035 | 1.632877 | 0.102495 | 0.938786 |
| hsa-miR-4679      | 119  | 13   | 33   | 5   | 4   | 0   | 23.86047 | 3.782935 | 1.29663  | 2.917514 | 0.003528 | 0.180917 |
| hsa-miR-4659a-3p  | 3    | 0    | 8    | 0   | 0   | 0   | 1.520769 | 3.89229  | 3.304411 | 1.177908 | 0.238833 | 0.938786 |
| hsa-miR-34b-5p    | 275  | 12   | 67   | 5   | 15  | 0   | 50.03814 | 3.896565 | 1.353479 | 2.878925 | 0.00399  | 0.180917 |
| hsa-miR-3611      | 9    | 0    | 3    | 0   | 0   | 0   | 1.582259 | 3.951996 | 3.262854 | 1.211208 | 0.225816 | 0.938786 |

|                   |      |       |     |    |     |    |          |          |          |          |          |          |
|-------------------|------|-------|-----|----|-----|----|----------|----------|----------|----------|----------|----------|
| hsa-miR-4798-5p   | 6    | 0     | 6   | 0  | 0   | 0  | 1.622467 | 3.986876 | 3.215149 | 1.240028 | NA       | NA       |
| hsa-miR-548b-3p   | 20   | 22    | 7   | 0  | 3   | 0  | 7.812232 | 3.993447 | 1.667261 | 2.395215 | 0.016611 | 0.490409 |
| hsa-miR-449c-5p   | 287  | 291   | 661 | 21 | 28  | 13 | 192.7182 | 4.020646 | 0.785036 | 5.121609 | 3.03E-07 | 0.000188 |
| hsa-miR-548av-5p  | 11   | 2     | 0   | 0  | 0   | 0  | 1.763083 | 4.105652 | 3.202449 | 1.282035 | 0.19983  | 0.938786 |
| hsa-miR-4527      | 6    | 0     | 7   | 0  | 0   | 0  | 1.764374 | 4.107505 | 3.138439 | 1.308773 | 0.190611 | 0.938786 |
| hsa-miR-3176      | 0    | 3     | 9   | 0  | 0   | 0  | 1.801468 | 4.131518 | 3.164948 | 1.305399 | 0.191757 | 0.938786 |
| hsa-miR-500b-3p   | 9    | 4     | 0   | 0  | 0   | 0  | 1.855611 | 4.176371 | 3.117457 | 1.339673 | 0.180352 | 0.938786 |
| hsa-miR-377-3p    | 8    | 66    | 2   | 2  | 2   | 0  | 13.54584 | 4.177994 | 1.676422 | 2.492209 | NA       | NA       |
| hsa-miR-3065-3p   | 410  | 60    | 81  | 12 | 8   | 2  | 78.76973 | 4.191705 | 1.076182 | 3.894976 | NA       | NA       |
| hsa-miR-548b-5p   | 20   | 52    | 143 | 7  | 2   | 0  | 33.72505 | 4.192667 | 1.326961 | 3.159602 | 0.00158  | 0.097951 |
| hsa-miR-3127-5p   | 6    | 7     | 0   | 0  | 0   | 0  | 1.994404 | 4.276337 | 3.053606 | 1.400422 | 0.161387 | 0.938786 |
| hsa-miR-4677-5p   | 4    | 9     | 0   | 0  | 0   | 0  | 2.086932 | 4.339519 | 3.039763 | 1.427585 | 0.153411 | 0.938786 |
| hsa-miR-487a-5p   | 0    | 12    | 0   | 0  | 0   | 0  | 2.09722  | 4.345831 | 3.683656 | 1.17976  | NA       | NA       |
| hsa-miR-376a-5p   | 10   | 47    | 0   | 0  | 3   | 0  | 9.90305  | 4.412081 | 2.128959 | 2.072413 | 0.038227 | 0.83959  |
| hsa-miR-133b      | 310  | 228   | 9   | 8  | 11  | 2  | 84.60696 | 4.464904 | 1.228012 | 3.635879 | NA       | NA       |
| hsa-miR-4650-5p   | 16   | 2     | 0   | 0  | 0   | 0  | 2.405603 | 4.554247 | 2.973996 | 1.531356 | 0.125681 | 0.938786 |
| hsa-miR-376a-2-5p | 8    | 8     | 0   | 0  | 0   | 0  | 2.42618  | 4.559881 | 2.897935 | 1.573493 | 0.115605 | 0.938786 |
| hsa-miR-4423-5p   | 5    | 11    | 0   | 0  | 0   | 0  | 2.564973 | 4.637557 | 2.883724 | 1.608183 | 0.107795 | 0.938786 |
| hsa-miR-323a-3p   | 12   | 1501  | 2   | 19 | 13  | 21 | 274.6644 | 4.654103 | 1.65622  | 2.810075 | NA       | NA       |
| hsa-miR-6811-5p   | 6    | 7     | 5   | 0  | 0   | 0  | 2.703939 | 4.716106 | 2.303596 | 2.04728  | 0.040631 | 0.83959  |
| hsa-miR-1197      | 0    | 102   | 0   | 0  | 0   | 3  | 18.49435 | 4.780729 | 2.510272 | 1.904466 | NA       | NA       |
| hsa-miR-675-5p    | 0    | 13    | 4   | 0  | 0   | 0  | 2.839617 | 4.783029 | 2.839888 | 1.684231 | 0.092137 | 0.938786 |
| hsa-miR-1185-5p   | 2    | 18    | 0   | 0  | 0   | 0  | 3.402839 | 5.04408  | 2.801058 | 1.800777 | NA       | NA       |
| hsa-miR-1277-3p   | 14   | 2     | 9   | 0  | 0   | 0  | 3.425758 | 5.064753 | 2.235717 | 2.265382 | 0.023489 | 0.560128 |
| hsa-miR-3614-3p   | 9    | 5     | 10  | 0  | 0   | 0  | 3.44945  | 5.071287 | 2.154861 | 2.353417 | 0.018602 | 0.524231 |
| hsa-miR-496       | 0    | 20    | 0   | 0  | 0   | 0  | 3.495367 | 5.084158 | 3.282501 | 1.548867 | NA       | NA       |
| hsa-miR-1185-1-3p | 2    | 63    | 0   | 0  | 2   | 0  | 11.53668 | 5.185044 | 2.296456 | 2.257846 | NA       | NA       |
| hsa-miR-668-3p    | 0    | 24    | 0   | 0  | 0   | 0  | 4.194441 | 5.347669 | 3.17383  | 1.684926 | NA       | NA       |
| hsa-miR-431-3p    | 0    | 103   | 0   | 2  | 0   | 0  | 18.43115 | 5.437244 | 2.5314   | 2.14792  | NA       | NA       |
| hsa-miR-4709-5p   | 13   | 7     | 14  | 0  | 0   | 0  | 4.880631 | 5.571949 | 1.983408 | 2.80928  | 0.004965 | 0.192403 |
| hsa-miR-542-5p    | 27   | 0     | 12  | 0  | 0   | 0  | 5.172497 | 5.658159 | 2.466214 | 2.29427  | 0.021775 | 0.544446 |
| hsa-miR-205-5p    | 1516 | 12483 | 975 | 94 | 164 | 4  | 2557.986 | 5.86253  | 1.309133 | 4.478177 | NA       | NA       |
| hsa-miR-3168      | 0    | 69    | 0   | 0  | 0   | 0  | 12.05902 | 6.87353  | 2.801942 | 2.45313  | NA       | NA       |
| hsa-miR-300       | 20   | 77    | 0   | 0  | 0   | 0  | 16.02725 | 7.284084 | 2.257107 | 3.227177 | 0.00125  | 0.086124 |
| hsa-miR-449b-5p   | 56   | 72    | 14  | 0  | 0   | 0  | 21.76625 | 7.726145 | 1.712282 | 4.512192 | 6.42E-06 | 0.001436 |

### Supplementary 3

| ENSEMBL         | SYMBOL   | GENENAME                                                 | ENTREZID | baseMean    | log2FoldChange | lfcSE       | stat         | pvalue      | padj        | sig      |
|-----------------|----------|----------------------------------------------------------|----------|-------------|----------------|-------------|--------------|-------------|-------------|----------|
| ENSG00000131002 | TXLNGY   | taxilin gamma pseudogene, Y-linked                       | 246126   | 1221.860794 | -12.81431245   | 1.462941697 | -8.759277605 | 1.97E-18    | 4.12E-15    | FDR<0.05 |
| ENSG0000012817  | KDM5D    | lysine demethylase 5D                                    | 8284     | 1156.838431 | -11.85959483   | 1.163670836 | -10.19153738 | 2.16E-24    | 6.81E-21    | FDR<0.05 |
| ENSG00000129824 | RPS4Y1   | ribosomal protein S4, Y-linked 1                         | 6192     | 945.592925  | -10.5638721    | 0.889523967 | -11.87587124 | 1.58E-32    | 1.99E-28    | FDR<0.05 |
| ENSG00000067048 | DDX3Y    | DEAD-box helicase 3, Y-linked                            | 8653     | 936.0813277 | -10.50900049   | 0.901674168 | -11.65498676 | 2.16E-31    | 1.36E-27    | FDR<0.05 |
| ENSG00000114374 | USP9Y    | ubiquitin specific peptidase 9, Y-linked                 | 8287     | 1155.367376 | -10.01159765   | 0.883175386 | -11.33591108 | 8.71E-30    | 3.66E-26    | FDR<0.05 |
| ENSG00000067646 | ZFY      | zinc finger protein, Y-linked                            | 7544     | 307.4351578 | -9.952101811   | 1.177078368 | -8.454918623 | 2.79E-17    | 5.02E-14    | FDR<0.05 |
| ENSG00000165246 | NLG4Y    | neuroligin 4, Y-linked                                   | 22829    | 70.87915064 | -9.668887684   | 1.348650378 | -7.169306327 | 7.54E-13    | 9.49E-10    | FDR<0.05 |
| ENSG00000204019 | CT83     | cancer/testis antigen 83                                 | 203413   | 50.18572431 | -9.170386116   | 3.907698105 | -2.346748871 | 0.018938014 | 0.703499741 | Not Sig  |
| ENSG00000206159 | GYG2P1   | glycogenin 2 pseudogene 1                                | 352887   | 45.48529511 | -9.027183951   | 1.4802249   | -6.098521885 | 1.07E-09    | 1.12E-06    | FDR<0.05 |
| ENSG00000099725 | PRKY     | protein kinase, Y-linked, pseudogene                     | 5616     | 301.0987859 | -8.891406411   | 0.905141436 | -9.823223265 | 8.94E-23    | 2.25E-19    | FDR<0.05 |
| ENSG00000198758 | EPS8L3   | EPS8 like 3                                              | 79574    | 73.33886749 | -8.75234848    | 3.075059113 | -2.846237473 | 0.004423919 | 0.301021826 | Not Sig  |
| ENSG00000256391 | NA       | NA                                                       | NA       | 210.6306377 | -8.459308698   | 2.654504268 | -3.186775324 | 0.001438685 | 0.143788559 | Not Sig  |
| ENSG00000139515 | PDX1     | pancreatic and duodenal homeobox 1                       | 3651     | 26.73299001 | -8.261847614   | 3.908516638 | -2.113806433 | 0.034531803 | 0.965260677 | Not Sig  |
| ENSG00000123388 | HOXC11   | homeobox C11                                             | 3227     | 23.85937908 | -8.097425161   | 3.908728068 | -2.071626631 | 0.038300274 | 0.999371363 | Not Sig  |
| ENSG00000171557 | FGG      | fibrinogen gamma chain                                   | 2266     | 7721.819465 | -8.041482073   | 1.010177049 | -7.960468    | 1.71E-15    | 2.40E-12    | FDR<0.05 |
| ENSG00000267793 | NA       | NA                                                       | NA       | 17.96452516 | -7.684727842   | 1.556994559 | -4.935616376 | 7.99E-07    | 0.000402462 | FDR<0.05 |
| ENSG00000215262 | KCNU1    | potassium calcium-activated channel subfamily U member 1 | 157855   | 17.90178529 | -7.683471254   | 3.909380313 | -1.965393653 | 0.049368694 | 0.999371363 | Not Sig  |
| ENSG00000135346 | CGA      | glycoprotein hormones, alpha polypeptide                 | 1081     | 14.55640666 | -7.384978804   | 3.909981252 | -1.888750438 | 0.058925277 | 0.999371363 | Not Sig  |
| ENSG00000171560 | FGA      | fibrinogen alpha chain                                   | 2243     | 4727.503479 | -7.31809891    | 1.207318236 | -6.061449827 | 1.35E-09    | 1.31E-06    | FDR<0.05 |
| ENSG00000173702 | MUC13    | mucin 13, cell surface associated                        | 56667    | 694.7223789 | -7.023747882   | 1.32564578  | -5.298359477 | 1.17E-07    | 7.74E-05    | FDR<0.05 |
| ENSG00000177138 | FAM9B    | family with sequence similarity 9 member B               | 171483   | 10.42276556 | -6.902028521   | 3.911259306 | -1.764656337 | 0.077621541 | 0.999371363 | Not Sig  |
| ENSG00000053108 | FSTL4    | follicle-stimulating hormone-like 4                      | 23105    | 1648.563366 | -6.527390982   | 1.111631506 | -5.871901749 | 4.31E-09    | 3.62E-06    | FDR<0.05 |
| ENSG00000019186 | CYP24A1  | cytochrome P450 family 24 subfamily A member 1           | 1591     | 4772.832923 | -6.488609353   | 1.300596041 | -4.988950563 | 6.07E-07    | 0.000318541 | FDR<0.05 |
| ENSG00000252196 | NA       | NA                                                       | NA       | 28.66565718 | -6.465215428   | 1.800983893 | -3.589824125 | 0.000330901 | 0.054117378 | Not Sig  |
| ENSG00000170289 | CNGB3    | cyclic nucleotide gated channel beta 3                   | 54714    | 7.281711711 | -6.381508432   | 2.190532485 | -2.913222459 | 0.003577197 | 0.268774977 | Not Sig  |
| ENSG00000167080 | B4GALNT2 | beta-1,4-N-acetyl-galactosaminyltransferase 2            | 124872   | 289.9019778 | -6.221686351   | 1.047087269 | -5.941898577 | 2.82E-09    | 2.53E-06    | FDR<0.05 |
| ENSG00000101210 | EEF1A2   | eukaryotic translation elongation factor 1 alpha 2       | 1917     | 442.8542525 | -6.190493372   | 1.284468156 | -4.819499295 | 1.44E-06    | 0.000624956 | FDR<0.05 |
| ENSG00000271774 | NA       | NA                                                       | NA       | 6.359226598 | -6.188293147   | 2.227969724 | -2.777548133 | 0.005477073 | NA          | NA       |
| ENSG00000122584 | NXPH1    | neurexophilin 1                                          | 30010    | 6.232020707 | -6.161591055   | 2.300944071 | -2.677853466 | 0.007409563 | NA          | NA       |
| ENSG00000226555 | NA       | NA                                                       | NA       | 6.194559371 | -6.14739979    | 1.757730404 | -3.497350774 | 0.000469904 | NA          | NA       |
| ENSG00000261426 | NA       | NA                                                       | NA       | 21.43319032 | -6.128877242   | 1.69666197  | -3.612314857 | 0.000303476 | 0.051644194 | Not Sig  |
| ENSG00000199400 | NA       | NA                                                       | NA       | 11.87015897 | -6.105707929   | 2.038768469 | -2.99480202  | 0.00274623  | 0.232102537 | Not Sig  |
| ENSG00000204610 | TRIM15   | tripartite motif containing 15                           | 89870    | 16.66092622 | -5.736490522   | 1.880893209 | -3.049875716 | 0.002289361 | 0.203204427 | Not Sig  |
| ENSG00000099715 | PCDH11Y  | protocadherin 11 Y-linked                                | 83259    | 4.566731025 | -5.720933177   | 2.016620957 | -2.83689067  | 0.004555521 | NA          | NA       |

|                 |          |                                           |           |             |              |             |              |             |             |          |
|-----------------|----------|-------------------------------------------|-----------|-------------|--------------|-------------|--------------|-------------|-------------|----------|
| ENSG00000188517 | COL25A1  | collagen type XXV alpha 1 chain           | 84570     | 314.599468  | -5.677097307 | 1.059163079 | -5.359984144 | 8.32E-08    | 5.82E-05    | FDR<0.05 |
| ENSG00000200885 | NA       | NA                                        | NA        | 4.015456761 | -5.527019044 | 2.453180952 | -2.253000962 | 0.024259088 | NA          | NA       |
| ENSG00000170689 | HOXB9    | homeobox B9                               | 3219      | 27.52837921 | -5.424275592 | 1.412709543 | -3.839625505 | 0.000123222 | 0.026754073 | FDR<0.05 |
| ENSG00000252766 | NA       | NA                                        | NA        | 3.717136581 | -5.407572832 | 1.973227616 | -2.740470885 | 0.006135122 | NA          | NA       |
| ENSG00000185903 | NA       | NA                                        | NA        | 3.557722587 | -5.344414475 | 2.498732127 | -2.138850506 | 0.032447778 | NA          | NA       |
| ENSG00000134873 | CLDN10   | claudin 10                                | 9071      | 243.7187514 | -5.245134762 | 1.0875445   | -4.822915072 | 1.41E-06    | 0.000624956 | FDR<0.05 |
| ENSG00000021826 | CPS1     | carbamoyl-phosphate synthase 1            | 1373      | 4026.030797 | -5.211941234 | 1.253714134 | -4.157200668 | 3.22E-05    | 0.008819781 | FDR<0.05 |
| ENSG00000265417 | NA       | NA                                        | NA        | 17.85346939 | -5.134076532 | 1.427756692 | -3.595904374 | 0.000323267 | 0.053564415 | Not Sig  |
| ENSG00000255648 | NA       | NA                                        | NA        | 6.050401466 | -5.126016265 | 2.107042577 | -2.432801464 | 0.014982514 | NA          | NA       |
| ENSG00000258624 | NA       | NA                                        | NA        | 3.012845564 | -5.106996366 | 2.548883663 | -2.003620817 | 0.045110694 | NA          | NA       |
| ENSG00000179709 | NLRP8    | NLR family pyrin domain containing 8      | 126205    | 2.969775338 | -5.091746476 | 2.609057256 | -1.951565633 | 0.050989797 | NA          | NA       |
| ENSG00000233854 | NA       | NA                                        | NA        | 2.929712296 | -5.064155894 | 2.588786702 | -1.956188932 | 0.050442902 | NA          | NA       |
| ENSG00000101076 | HNF4A    | hepatocyte nuclear factor 4 alpha         | 3172      | 105.0339462 | -5.045394384 | 1.01099785  | -4.990509509 | 6.02E-07    | 0.000318541 | FDR<0.05 |
| ENSG00000145920 | CPLX2    | complexin 2                               | 10814     | 105.4723001 | -5.025640678 | 1.188742522 | -4.227694883 | 2.36E-05    | 0.006678826 | FDR<0.05 |
| ENSG00000267874 | NA       | NA                                        | NA        | 5.473306812 | -4.96266776  | 1.822760946 | -2.722610319 | 0.00647684  | NA          | NA       |
| ENSG00000106128 | GHRHR    | growth hormone releasing hormone receptor | 2692      | 2.61367745  | -4.914758168 | 2.130717562 | -2.306621138 | 0.02107595  | NA          | NA       |
| ENSG00000261192 | RNF126P1 | ring finger protein 126 pseudogene 1      | 376412    | 2.535797414 | -4.859136975 | 2.25577986  | -2.154082968 | 0.031233666 | NA          | NA       |
| ENSG00000268062 | NA       | NA                                        | NA        | 2.536799809 | -4.851889425 | 2.308130715 | -2.102086071 | 0.035545737 | NA          | NA       |
| ENSG00000226812 | NA       | NA                                        | NA        | 2.487879434 | -4.828661059 | 2.690456938 | -1.794736422 | 0.072695705 | NA          | NA       |
| ENSG00000129990 | SYT5     | synaptotagmin 5                           | 6861      | 13.15650029 | -4.817532315 | 1.698414035 | -2.836488756 | 0.004561258 | 0.307165388 | Not Sig  |
| ENSG00000248282 | NA       | NA                                        | NA        | 8.361723456 | -4.754568842 | 1.971397658 | -2.411775637 | 0.015875047 | 0.646972392 | Not Sig  |
| ENSG00000233070 | ZFY-AS1  | ZFY antisense RNA 1                       | 107987337 | 2.361675939 | -4.754389213 | 2.175898027 | -2.185023909 | 0.028887094 | NA          | NA       |
| ENSG00000197870 | PRB3     | proline rich protein BstNI subfamily 3    | 5544      | 2.343769837 | -4.741463858 | 2.729673902 | -1.737007433 | 0.082385859 | NA          | NA       |
| ENSG00000223972 | DDX11L2  | DEAD/H-box helicase 11 like 2             | 84771     | 2.309151464 | -4.733123787 | 2.777548826 | -1.704065017 | 0.088368941 | NA          | NA       |
| ENSG00000223972 | DDX11L16 | DEAD/H-box helicase 11 like 16            | 727856    | 2.309151464 | -4.733123787 | 2.777548826 | -1.704065017 | 0.088368941 | NA          | NA       |
| ENSG00000223972 | DDX11L1  | DEAD/H-box helicase 11 like 1             | 100287102 | 2.309151464 | -4.733123787 | 2.777548826 | -1.704065017 | 0.088368941 | NA          | NA       |
| ENSG00000223972 | DDX11L5  | DEAD/H-box helicase 11 like 5             | 100287596 | 2.309151464 | -4.733123787 | 2.777548826 | -1.704065017 | 0.088368941 | NA          | NA       |
| ENSG00000204616 | TRIM31   | tripartite motif containing 31            | 11074     | 134.3147646 | -4.694866572 | 1.417700524 | -3.311606712 | 0.000927619 | 0.113412624 | Not Sig  |
| ENSG00000225393 | NA       | NA                                        | NA        | 2.230219211 | -4.684398047 | 2.793871546 | -1.676669084 | 0.093607209 | NA          | NA       |
| ENSG00000110243 | APOA5    | apolipoprotein A5                         | 116519    | 2.220764962 | -4.682611845 | 2.327279586 | -2.012053847 | 0.044214261 | NA          | NA       |
| ENSG00000113249 | HAVCR1   | hepatitis A virus cellular receptor 1     | 26762     | 263.7838192 | -4.655988196 | 1.208700519 | -3.852061055 | 0.000117128 | 0.026202409 | FDR<0.05 |
| ENSG00000200218 | NA       | NA                                        | NA        | 2.176500905 | -4.633551828 | 2.798603967 | -1.655665426 | 0.097789593 | NA          | NA       |
| ENSG00000270716 | NA       | NA                                        | NA        | 2.100817095 | -4.591273598 | 2.284606717 | -2.009656001 | 0.04446761  | NA          | NA       |
| ENSG00000251996 | NA       | NA                                        | NA        | 2.008229578 | -4.523458831 | 2.819600869 | -1.60429048  | 0.108650039 | NA          | NA       |
| ENSG00000176406 | RIMS2    | regulating synaptic membrane exocytosis 2 | 9699      | 62.46799085 | -4.520172587 | 1.188896736 | -3.80198923  | 0.000143539 | 0.029632561 | FDR<0.05 |



|                 |              |                                                           |           |             |              |             |              |             |             |          |
|-----------------|--------------|-----------------------------------------------------------|-----------|-------------|--------------|-------------|--------------|-------------|-------------|----------|
| ENSG00000243316 | GUCY2GP      | guanylate cyclase 2G, pseudogene                          | 390003    | 7.283842087 | -4.514894806 | 2.047947603 | -2.204594883 | 0.027482535 | 0.856652389 | Not Sig  |
| ENSG00000188508 | KRTDAP       | keratinocyte differentiation associated protein           | 388533    | 1.977215305 | -4.511208563 | 2.300224403 | -1.961203679 | 0.049855268 | NA          | NA       |
| ENSG00000174990 | CA5A         | carbonic anhydrase 5A                                     | 763       | 1.949854955 | -4.482376125 | 2.406375436 | -1.862708561 | 0.062503281 | NA          | NA       |
| ENSG00000229637 | PRAC2        | prostate cancer susceptibility candidate 2                | 360205    | 3.951994641 | -4.478458332 | 2.2681691   | -1.974481679 | 0.048326999 | NA          | NA       |
| ENSG00000176153 | GPX2         | glutathione peroxidase 2                                  | 2877      | 289.9847872 | -4.473119268 | 1.220180246 | -3.665949586 | 0.000246422 | 0.044331403 | FDR<0.05 |
| ENSG00000238362 | NA           | NA                                                        | NA        | 1.92669562  | -4.465237508 | 2.311365098 | -1.931861614 | 0.053376589 | NA          | NA       |
| ENSG00000167751 | KLK2         | kallikrein related peptidase 2                            | 3817      | 1.925096309 | -4.457980662 | 2.859219379 | -1.559160061 | 0.118958501 | NA          | NA       |
| ENSG00000196993 | NPIPB9       | nuclear pore complex interacting protein family member B9 | 100507607 | 14.33261892 | -4.451393133 | 1.262235328 | -3.526595266 | 0.00042094  | 0.063866188 | Not Sig  |
| ENSG00000207568 | MIR203A      | microRNA 203a                                             | 406986    | 1.826253165 | -4.3957651   | 2.344019943 | -1.875310452 | 0.060750026 | NA          | NA       |
| ENSG00000239942 | NA           | NA                                                        | NA        | 18.71892701 | -4.370124091 | 3.13550932  | -1.393752544 | 0.163392343 | 0.999371363 | Not Sig  |
| ENSG00000259243 | NA           | NA                                                        | NA        | 1.756824983 | -4.33381472  | 2.963213912 | -1.462538598 | 0.143593675 | NA          | NA       |
| ENSG00000268170 | NA           | NA                                                        | NA        | 1.767281626 | -4.332582752 | 2.973456752 | -1.457086184 | 0.145092592 | NA          | NA       |
| ENSG00000197757 | HOXC6        | homeobox C6                                               | 3223      | 81.25464598 | -4.322372675 | 1.104040663 | -3.915048442 | 9.04E-05    | 0.021375557 | FDR<0.05 |
| ENSG00000251011 | TMEM108-AS1  | TMEM108 antisense RNA 1                                   | 101927455 | 1.693197126 | -4.291178924 | 2.974381343 | -1.442713099 | 0.149101308 | NA          | NA       |
| ENSG00000170616 | NA           | NA                                                        | NA        | 3.406115224 | -4.262394245 | 2.264611737 | -1.882174404 | 0.05981234  | NA          | NA       |
| ENSG00000108176 | DNAJC12      | DnaJ heat shock protein family (Hsp40) member C12         | 56521     | 647.5502068 | -4.249728877 | 1.301998905 | -3.264003418 | 0.001098498 | 0.124839423 | Not Sig  |
| ENSG00000162399 | BSND         | barttin CLCNK type accessory beta subunit                 | 7809      | 3.305672769 | -4.219704099 | 2.026897761 | -2.081853451 | 0.037355858 | NA          | NA       |
| ENSG00000252122 | NA           | NA                                                        | NA        | 3.365322224 | -4.217747707 | 2.30976071  | -1.826053967 | 0.067842133 | NA          | NA       |
| ENSG00000240031 | NA           | NA                                                        | NA        | 1.624771339 | -4.215195427 | 2.437449017 | -1.729347115 | 0.083746989 | NA          | NA       |
| ENSG00000201386 | NA           | NA                                                        | NA        | 1.590558446 | -4.179595605 | 3.054379375 | -1.368394391 | 0.171188659 | NA          | NA       |
| ENSG00000240250 | NA           | NA                                                        | NA        | 1.590558446 | -4.179595605 | 3.054379375 | -1.368394391 | 0.171188659 | NA          | NA       |
| ENSG00000224955 | NA           | NA                                                        | NA        | 1.573249259 | -4.174479201 | 2.554279034 | -1.634308212 | 0.10219415  | NA          | NA       |
| ENSG00000232946 | NA           | NA                                                        | NA        | 1.573249259 | -4.174479201 | 2.554279034 | -1.634308212 | 0.10219415  | NA          | NA       |
| ENSG00000204188 | GGNBP1       | gametogenetin binding protein 1 (pseudogene)              | 449520    | 1.558541778 | -4.171217025 | 3.005227779 | -1.387986978 | 0.16514101  | NA          | NA       |
| ENSG00000264358 | MIR3122      | microRNA 3122                                             | 100422947 | 1.515877031 | -4.109390874 | 2.589962922 | -1.586660118 | 0.112589644 | NA          | NA       |
| ENSG00000187175 | KRTAP12-1    | keratin associated protein 12-1                           | 353332    | 1.506422782 | -4.105411158 | 3.055352522 | -1.34367839  | 0.179052408 | NA          | NA       |
| ENSG00000205579 | NA           | NA                                                        | NA        | 3.022241977 | -4.075515858 | 1.904921212 | -2.139466888 | 0.032397875 | NA          | NA       |
| ENSG00000251095 | NA           | NA                                                        | NA        | 8.785741304 | -4.073712256 | 1.516919756 | -2.685515987 | 0.007241791 | 0.414526701 | Not Sig  |
| ENSG00000264901 | MIR3616      | microRNA 3616                                             | 100500814 | 2.947378655 | -4.034774016 | 2.379486124 | -1.695649315 | 0.089952313 | NA          | NA       |
| ENSG00000229258 | LOC102723727 | uncharacterized LOC102723727                              | 102723727 | 2.988716529 | -4.034676876 | 2.372510325 | -1.700594022 | 0.089019247 | NA          | NA       |
| ENSG00000254988 | NA           | NA                                                        | NA        | 19.41149838 | -4.029724676 | 1.583788318 | -2.544358126 | 0.010947878 | 0.518295571 | Not Sig  |
| ENSG00000188306 | LRRIQ4       | leucine rich repeats and IQ motif containing 4            | 344657    | 18.80029174 | -4.007416965 | 1.040746909 | -3.850520171 | 0.000117867 | 0.026202409 | FDR<0.05 |
| ENSG00000159263 | SIM2         | single-minded family bHLH transcription factor 2          | 6493      | 146.8366155 | -3.989458678 | 2.233095833 | -1.786514765 | 0.074015949 | 0.999371363 | Not Sig  |
| ENSG00000124657 | OR2B6        | olfactory receptor family 2 subfamily B member 6          | 26212     | 2.761798141 | -3.948231069 | 2.090611604 | -1.888553121 | 0.058951734 | NA          | NA       |
| ENSG00000207551 | MIR608       | microRNA 608                                              | 693193    | 1.33915385  | -3.933904926 | 3.170829005 | -1.240655021 | 0.214733217 | NA          | NA       |

|                 |           |                                                |        |              |               |              |               |              |              |         |
|-----------------|-----------|------------------------------------------------|--------|--------------|---------------|--------------|---------------|--------------|--------------|---------|
| ENSG00000185990 | NA        | NA                                             | NA     | 1. 314992121 | -3. 923877132 | 2. 6291505   | -1. 492450558 | 0. 135581069 | NA           | NA      |
| ENSG00000232938 | RPL23AP87 | ribosomal protein L23a pseudogene 87           | 388574 | 1. 314992121 | -3. 923877132 | 2. 6291505   | -1. 492450558 | 0. 135581069 | NA           | NA      |
| ENSG00000226421 | NA        | NA                                             | NA     | 2. 738041891 | -3. 922526738 | 2. 403958148 | -1. 631695103 | 0. 102743732 | NA           | NA      |
| ENSG00000164385 | LINC01600 | long intergenic non-protein coding RNA 1600    | 154386 | 7. 380796356 | -3. 915642964 | 1. 465833997 | -2. 671273127 | 0. 007556413 | 0. 42176576  | Not Sig |
| ENSG00000214280 | NA        | NA                                             | NA     | 1. 306540267 | -3. 896268796 | 2. 68404143  | -1. 451642569 | 0. 146601016 | NA           | NA      |
| ENSG00000199980 | NA        | NA                                             | NA     | 1. 297086019 | -3. 890772033 | 3. 195366418 | -1. 217629381 | 0. 223364844 | NA           | NA      |
| ENSG00000216817 | NA        | NA                                             | NA     | 2. 664959786 | -3. 889403525 | 2. 351239569 | -1. 654192782 | 0. 098088349 | NA           | NA      |
| ENSG00000168126 | NA        | NA                                             | NA     | 2. 694241707 | -3. 884435234 | 2. 370143044 | -1. 638903291 | 0. 101233402 | NA           | NA      |
| ENSG00000203907 | OoEP      | oocyte expressed protein                       | 441161 | 7. 152319366 | -3. 882249014 | 1. 551325704 | -2. 502536381 | 0. 012330695 | 0. 554573015 | Not Sig |
| ENSG00000270523 | NA        | NA                                             | NA     | 2. 652173875 | -3. 861879391 | 2. 398707645 | -1. 609983358 | 0. 107401489 | NA           | NA      |
| ENSG00000223156 | NA        | NA                                             | NA     | 2. 65317627  | -3. 854450427 | 2. 365218146 | -1. 629638448 | 0. 103177933 | NA           | NA      |
| ENSG00000253736 | NA        | NA                                             | NA     | 1. 264472435 | -3. 853276159 | 2. 638757151 | -1. 460261759 | 0. 144218148 | NA           | NA      |
| ENSG00000217862 | NA        | NA                                             | NA     | 1. 255018187 | -3. 846432358 | 3. 244080434 | -1. 185677247 | 0. 235749783 | NA           | NA      |
| ENSG00000257327 | NA        | NA                                             | NA     | 1. 248165644 | -3. 836190253 | 2. 690043356 | -1. 426070046 | 0. 153848124 | NA           | NA      |
| ENSG00000260644 | NA        | NA                                             | NA     | 2. 613710143 | -3. 831800951 | 2. 374496234 | -1. 613732166 | 0. 106585534 | NA           | NA      |
| ENSG00000272647 | NA        | NA                                             | NA     | 1. 238711395 | -3. 827503963 | 2. 710271257 | -1. 41222173  | 0. 157884684 | NA           | NA      |
| ENSG00000121446 | RGSL1     | regulator of G protein signaling like 1        | 353299 | 1. 222404604 | -3. 809770019 | 2. 655651745 | -1. 434589466 | 0. 151404118 | NA           | NA      |
| ENSG00000227494 | NA        | NA                                             | NA     | 1. 222404604 | -3. 809770019 | 2. 655651745 | -1. 434589466 | 0. 151404118 | NA           | NA      |
| ENSG00000171759 | PAH       | phenylalanine hydroxylase                      | 5053   | 25. 70261852 | -3. 808365262 | 1. 453777541 | -2. 61963413  | 0. 008802415 | 0. 471136671 | Not Sig |
| ENSG00000132915 | PDE6A     | phosphodiesterase 6A                           | 5145   | 9. 425467747 | -3. 805246097 | 1. 144382899 | -3. 325151136 | 0. 000883706 | 0. 111285118 | Not Sig |
| ENSG00000147689 | FAM83A    | family with sequence similarity 83 member A    | 84985  | 2458. 716259 | -3. 794649598 | 1. 214535345 | -3. 12436325  | 0. 001781903 | 0. 166218577 | Not Sig |
| ENSG00000249518 | NA        | NA                                             | NA     | 1. 206097812 | -3. 791998654 | 2. 662584135 | -1. 424179843 | 0. 154394418 | NA           | NA      |
| ENSG00000233626 | NA        | NA                                             | NA     | 1. 21395275  | -3. 787637824 | 3. 353565636 | -1. 12943602  | 0. 258713945 | NA           | NA      |
| ENSG00000163993 | S100P     | S100 calcium binding protein P                 | 6286   | 1061. 827561 | -3. 767393394 | 1. 359128868 | -2. 771917721 | 0. 005572712 | 0. 347874159 | Not Sig |
| ENSG00000251884 | NA        | NA                                             | NA     | 2. 487506648 | -3. 758459004 | 1. 974653101 | -1. 903351532 | 0. 056994691 | NA           | NA      |
| ENSG00000207559 | MIR578    | microRNA 578                                   | 693163 | 4. 646458623 | -3. 746836438 | 1. 670827027 | -2. 242504088 | 0. 024928811 | NA           | NA      |
| ENSG00000166111 | SVOP      | SV2 related protein                            | 55530  | 1. 16402998  | -3. 746547606 | 2. 72718099  | -1. 373780332 | 0. 169509889 | NA           | NA      |
| ENSG00000207924 | MIR196A2  | microRNA 196a-2                                | 406973 | 1. 171884918 | -3. 739226276 | 3. 321868307 | -1. 125639529 | 0. 260318129 | NA           | NA      |
| ENSG00000228653 | NA        | NA                                             | NA     | 1. 171884918 | -3. 739226276 | 3. 321868307 | -1. 125639529 | 0. 260318129 | NA           | NA      |
| ENSG00000239344 | NA        | NA                                             | NA     | 1. 171884918 | -3. 739226276 | 3. 321868307 | -1. 125639529 | 0. 260318129 | NA           | NA      |
| ENSG00000266556 | NA        | NA                                             | NA     | 1. 171884918 | -3. 739226276 | 3. 321868307 | -1. 125639529 | 0. 260318129 | NA           | NA      |
| ENSG00000174482 | LINGO2    | leucine rich repeat and Ig domain containing 2 | 158038 | 11. 14400426 | -3. 738570054 | 1. 138205058 | -3. 284619084 | 0. 001021203 | 0. 120199932 | Not Sig |
| ENSG00000248494 | NA        | NA                                             | NA     | 2. 408939168 | -3. 727195263 | 2. 409645192 | -1. 546781773 | 0. 121915877 | NA           | NA      |
| ENSG00000250629 | NA        | NA                                             | NA     | 1. 131416397 | -3. 708552184 | 2. 827157446 | -1. 311760047 | 0. 189601109 | NA           | NA      |
| ENSG00000179826 | MARGPRX3  | MAS related GPR family member X3               | 117195 | 1. 139271335 | -3. 70024985  | 3. 345904798 | -1. 105904105 | 0. 268768028 | NA           | NA      |

|                 |          |                                                         |           |             |              |             |              |             |             |         |
|-----------------|----------|---------------------------------------------------------|-----------|-------------|--------------|-------------|--------------|-------------|-------------|---------|
| ENSG00000243243 | NA       | NA                                                      | NA        | 4.237554294 | -3.686901568 | 1.768185966 | -2.085132242 | 0.037057298 | NA          | NA      |
| ENSG00000127928 | GNGT1    | G protein subunit gamma transducin 1                    | 2792      | 59.54453561 | -3.685989176 | 2.631224402 | -1.400864622 | 0.16125456  | 0.999371363 | Not Sig |
| ENSG00000214243 | NA       | NA                                                      | NA        | 10.36113624 | -3.679428369 | 1.70747468  | -2.154894835 | 0.031170065 | 0.912173933 | Not Sig |
| ENSG00000235926 | NA       | NA                                                      | NA        | 1.105655357 | -3.675783672 | 3.327087337 | -1.104805285 | 0.26924397  | NA          | NA      |
| ENSG00000268163 | NA       | NA                                                      | NA        | 1.105655357 | -3.675783672 | 3.327087337 | -1.104805285 | 0.26924397  | NA          | NA      |
| ENSG00000117983 | MUC5B    | mucin 5B, oligomeric mucus/gel-forming                  | 727897    | 64849.38379 | -3.671162598 | 1.430558638 | -2.566244054 | 0.010280647 | 0.497939162 | Not Sig |
| ENSG00000178828 | RNF186   | ring finger protein 186                                 | 54546     | 24.89153224 | -3.666203314 | 1.406782717 | -2.60609067  | 0.009158221 | 0.473243174 | Not Sig |
| ENSG00000231686 | NA       | NA                                                      | NA        | 1.089348565 | -3.655536496 | 3.363132408 | -1.086943971 | 0.277061572 | NA          | NA      |
| ENSG00000266932 | NA       | NA                                                      | NA        | 1.089348565 | -3.655536496 | 3.363132408 | -1.086943971 | 0.277061572 | NA          | NA      |
| ENSG00000264007 | NA       | NA                                                      | NA        | 1.080896712 | -3.628953446 | 3.376713702 | -1.074699772 | 0.282509166 | NA          | NA      |
| ENSG00000261502 | NA       | NA                                                      | NA        | 17.66886153 | -3.618346391 | 1.573661053 | -2.299317496 | 0.021486917 | 0.747471674 | Not Sig |
| ENSG00000102385 | DRP2     | dystrophin related protein 2                            | 1821      | 29.21000826 | -3.615767587 | 1.099681028 | -3.288014882 | 0.001008965 | 0.120199932 | Not Sig |
| ENSG00000254907 | NA       | NA                                                      | NA        | 2.2352327   | -3.614836351 | 2.451124229 | -1.474766683 | 0.140275281 | NA          | NA      |
| ENSG00000201959 | NA       | NA                                                      | NA        | 2.234817693 | -3.605591403 | 2.161038116 | -1.668453405 | 0.095225754 | NA          | NA      |
| ENSG00000166862 | CACNG2   | calcium voltage-gated channel auxiliary subunit gamma 2 | 10369     | 1.045681423 | -3.585995663 | 3.482333672 | -1.029767966 | 0.303118942 | NA          | NA      |
| ENSG00000261866 | NA       | NA                                                      | NA        | 1.03882888  | -3.575528773 | 2.842858792 | -1.257722959 | 0.208491966 | NA          | NA      |
| ENSG00000253813 | NA       | NA                                                      | NA        | 2.17932674  | -3.569291969 | 2.497140797 | -1.42935151  | 0.152903228 | NA          | NA      |
| ENSG00000254228 | NA       | NA                                                      | NA        | 1.029374632 | -3.565111861 | 2.905966632 | -1.226824776 | 0.219888457 | NA          | NA      |
| ENSG00000231515 | NA       | NA                                                      | NA        | 2.201889159 | -3.561983793 | 2.070551419 | -1.720306852 | 0.085376679 | NA          | NA      |
| ENSG00000201469 | NA       | NA                                                      | NA        | 1.022522088 | -3.554243469 | 3.441806981 | -1.032667866 | 0.301759357 | NA          | NA      |
| ENSG00000126583 | PRKCG    | protein kinase C gamma                                  | 5582      | 11.94636016 | -3.540448951 | 1.034328482 | -3.422944463 | 0.000619467 | 0.083881204 | Not Sig |
| ENSG00000260685 | NA       | NA                                                      | NA        | 3.833173241 | -3.526223586 | 2.242155378 | -1.572693677 | 0.115789765 | NA          | NA      |
| ENSG00000259152 | NA       | NA                                                      | NA        | 2.1100316   | -3.522126169 | 2.510096339 | -1.40318366  | 0.160562079 | NA          | NA      |
| ENSG00000136275 | NA       | NA                                                      | NA        | 1.004615986 | -3.514280267 | 3.539088148 | -0.992990318 | 0.320714673 | NA          | NA      |
| ENSG00000196660 | SLC30A10 | solute carrier family 30 member 10                      | 55532     | 1.004615986 | -3.514280267 | 3.539088148 | -0.992990318 | 0.320714673 | NA          | NA      |
| ENSG00000228120 | NA       | NA                                                      | NA        | 1.004615986 | -3.514280267 | 3.539088148 | -0.992990318 | 0.320714673 | NA          | NA      |
| ENSG00000238902 | NA       | NA                                                      | NA        | 1.004615986 | -3.514280267 | 3.539088148 | -0.992990318 | 0.320714673 | NA          | NA      |
| ENSG00000248965 | NA       | NA                                                      | NA        | 1.004615986 | -3.514280267 | 3.539088148 | -0.992990318 | 0.320714673 | NA          | NA      |
| ENSG00000254589 | NA       | NA                                                      | NA        | 1.004615986 | -3.514280267 | 3.539088148 | -0.992990318 | 0.320714673 | NA          | NA      |
| ENSG00000266151 | MIR3646  | microRNA 3646                                           | 100500813 | 1.004615986 | -3.514280267 | 3.539088148 | -0.992990318 | 0.320714673 | NA          | NA      |
| ENSG00000207010 | NA       | NA                                                      | NA        | 0.9873068   | -3.50884378  | 3.53601385  | -0.992316187 | 0.32104331  | NA          | NA      |
| ENSG00000136002 | ARHGEF4  | Rho guanine nucleotide exchange factor 4                | 50649     | 474.1796292 | -3.504962584 | 1.008245456 | -3.476298914 | 0.000508385 | 0.072751094 | Not Sig |
| ENSG00000225739 | NA       | NA                                                      | NA        | 0.980454257 | -3.50078213  | 2.93679189  | -1.192042971 | 0.233244396 | NA          | NA      |
| ENSG00000228115 | NA       | NA                                                      | NA        | 3.943766917 | -3.495461755 | 1.624006417 | -2.152369423 | 0.03136827  | NA          | NA      |
| ENSG00000250579 | NA       | NA                                                      | NA        | 2.109301642 | -3.492793488 | 2.48742914  | -1.404178086 | 0.160265826 | NA          | NA      |

|                 |              |                                               |           |             |              |             |              |             |             |         |
|-----------------|--------------|-----------------------------------------------|-----------|-------------|--------------|-------------|--------------|-------------|-------------|---------|
| ENSG00000228151 | LOC101928733 | uncharacterized LOC101928733                  | 101928733 | 0.988309195 | -3.491627988 | 3.554501841 | -0.982311487 | 0.325946417 | NA          | NA      |
| ENSG00000273261 | NA           | NA                                            | NA        | 2.075685664 | -3.480928367 | 2.128105757 | -1.635693318 | 0.101903789 | NA          | NA      |
| ENSG00000109047 | RCVRN        | recoverin                                     | 5957      | 2.026077844 | -3.480198284 | 2.473552941 | -1.406963331 | 0.159438263 | NA          | NA      |
| ENSG00000263300 | NA           | NA                                            | NA        | 0.964147465 | -3.475363306 | 3.558559619 | -0.97662079  | 0.328756923 | NA          | NA      |
| ENSG00000268433 | NA           | NA                                            | NA        | 0.964147465 | -3.475363306 | 3.558559619 | -0.97662079  | 0.328756923 | NA          | NA      |
| ENSG00000223107 | NA           | NA                                            | NA        | 8.522941543 | -3.472178491 | 1.549365099 | -2.241033112 | 0.02502393  | 0.816524647 | Not Sig |
| ENSG00000261419 | NA           | NA                                            | NA        | 0.954693217 | -3.463668719 | 3.492362629 | -0.991783811 | 0.321302996 | NA          | NA      |
| ENSG00000270989 | NA           | NA                                            | NA        | 0.954693217 | -3.463668719 | 3.492362629 | -0.991783811 | 0.321302996 | NA          | NA      |
| ENSG00000255316 | NA           | NA                                            | NA        | 2.032333472 | -3.463389588 | 2.498743013 | -1.386052735 | 0.165730801 | NA          | NA      |
| ENSG00000231001 | NA           | NA                                            | NA        | 0.962548155 | -3.456090648 | 3.527347171 | -0.979798835 | 0.327185427 | NA          | NA      |
| ENSG00000243548 | NA           | NA                                            | NA        | 0.962548155 | -3.456090648 | 3.527347171 | -0.979798835 | 0.327185427 | NA          | NA      |
| ENSG00000251439 | NA           | NA                                            | NA        | 0.962548155 | -3.456090648 | 3.527347171 | -0.979798835 | 0.327185427 | NA          | NA      |
| ENSG00000227083 | NA           | NA                                            | NA        | 2.060381267 | -3.453541232 | 2.184407751 | -1.580996603 | 0.113878815 | NA          | NA      |
| ENSG00000203614 | NA           | NA                                            | NA        | 2.002736602 | -3.445781312 | 2.509338634 | -1.373183063 | 0.169695444 | NA          | NA      |
| ENSG00000253840 | NA           | NA                                            | NA        | 0.938386425 | -3.440322072 | 3.523871788 | -0.976290364 | 0.328920594 | NA          | NA      |
| ENSG00000237998 | NA           | NA                                            | NA        | 0.946241363 | -3.428375889 | 2.989617723 | -1.146760625 | 0.251480567 | NA          | NA      |
| ENSG00000232732 | NA           | NA                                            | NA        | 7.590447779 | -3.414474623 | 1.433335574 | -2.382187874 | 0.017210115 | 0.670000634 | Not Sig |
| ENSG00000197825 | NA           | NA                                            | NA        | 0.929934571 | -3.408709163 | 3.56070583  | -0.957312771 | 0.338409411 | NA          | NA      |
| ENSG00000236182 | NA           | NA                                            | NA        | 0.929934571 | -3.408709163 | 3.56070583  | -0.957312771 | 0.338409411 | NA          | NA      |
| ENSG00000236394 | NA           | NA                                            | NA        | 0.929934571 | -3.408709163 | 3.56070583  | -0.957312771 | 0.338409411 | NA          | NA      |
| ENSG00000266995 | NA           | NA                                            | NA        | 0.929934571 | -3.408709163 | 3.56070583  | -0.957312771 | 0.338409411 | NA          | NA      |
| ENSG00000178660 | NA           | NA                                            | NA        | 0.920480323 | -3.396087663 | 3.570689753 | -0.951101299 | 0.341552955 | NA          | NA      |
| ENSG00000207293 | NA           | NA                                            | NA        | 0.920480323 | -3.396087663 | 3.570689753 | -0.951101299 | 0.341552955 | NA          | NA      |
| ENSG00000226918 | NA           | NA                                            | NA        | 0.920480323 | -3.396087663 | 3.570689753 | -0.951101299 | 0.341552955 | NA          | NA      |
| ENSG00000251880 | NA           | NA                                            | NA        | 0.920480323 | -3.396087663 | 3.570689753 | -0.951101299 | 0.341552955 | NA          | NA      |
| ENSG00000255629 | NA           | NA                                            | NA        | 0.920480323 | -3.396087663 | 3.570689753 | -0.951101299 | 0.341552955 | NA          | NA      |
| ENSG00000266247 | NA           | NA                                            | NA        | 1.941345266 | -3.394191835 | 2.102526483 | -1.614339635 | 0.106453778 | NA          | NA      |
| ENSG00000238642 | NA           | NA                                            | NA        | 1.976245604 | -3.394112354 | 2.094027248 | -1.620853958 | 0.105048963 | NA          | NA      |
| ENSG00000239480 | NA           | NA                                            | NA        | 1.942762668 | -3.391908465 | 2.583912235 | -1.31270266  | 0.189283161 | NA          | NA      |
| ENSG00000122133 | PAEP         | progesterone associated endometrial protein   | 5047      | 26.71151014 | -3.3889509   | 1.720265053 | -1.97001671  | 0.048836455 | 0.999371363 | Not Sig |
| ENSG00000260096 | NA           | NA                                            | NA        | 3.678839143 | -3.369098411 | 2.04838362  | -1.644759496 | 0.100019418 | NA          | NA      |
| ENSG00000271907 | SNORA35B     | small nucleolar RNA, H/ACA box 35B            | 109617004 | 1.934177772 | -3.364634782 | 2.096653509 | -1.604764339 | 0.108545677 | NA          | NA      |
| ENSG00000199327 | NA           | NA                                            | NA        | 1.94203271  | -3.359586998 | 2.546379561 | -1.319358295 | 0.187049357 | NA          | NA      |
| ENSG00000198077 | CYP2A7       | cytochrome P450 family 2 subfamily A member 7 | 1549      | 1.910016043 | -3.359530781 | 2.500817457 | -1.343373052 | 0.179151208 | NA          | NA      |
| ENSG00000223012 | NA           | NA                                            | NA        | 0.88786674  | -3.345173102 | 2.992495961 | -1.11785384  | 0.263629422 | NA          | NA      |

|                 |              |                                                   |           |             |              |             |              |             |             |         |
|-----------------|--------------|---------------------------------------------------|-----------|-------------|--------------|-------------|--------------|-------------|-------------|---------|
| ENSG00000236444 | NA           | NA                                                | NA        | 0.88786674  | -3.345173102 | 2.992495961 | -1.11785384  | 0.263629422 | NA          | NA      |
| ENSG00000253310 | NA           | NA                                                | NA        | 0.88786674  | -3.345173102 | 2.992495961 | -1.11785384  | 0.263629422 | NA          | NA      |
| ENSG00000269559 | NA           | NA                                                | NA        | 0.88786674  | -3.345173102 | 2.992495961 | -1.11785384  | 0.263629422 | NA          | NA      |
| ENSG00000270711 | NA           | NA                                                | NA        | 0.88786674  | -3.345173102 | 2.992495961 | -1.11785384  | 0.263629422 | NA          | NA      |
| ENSG00000264322 | NA           | NA                                                | NA        | 1.89082558  | -3.341952017 | 2.253722558 | -1.482858662 | 0.138111966 | NA          | NA      |
| ENSG00000249605 | NA           | NA                                                | NA        | 7.188446229 | -3.341505289 | 1.397293659 | -2.391412333 | 0.016783692 | 0.662561221 | Not Sig |
| ENSG00000112212 | TSP02        | translocator protein 2                            | 222642    | 0.878412491 | -3.333650598 | 3.67049418  | -0.908229365 | 0.363757053 | NA          | NA      |
| ENSG00000172772 | OR10W1       | olfactory receptor family 10 subfamily W member 1 | 81341     | 0.878412491 | -3.333650598 | 3.67049418  | -0.908229365 | 0.363757053 | NA          | NA      |
| ENSG00000175065 | DSG4         | desmoglein 4                                      | 147409    | 0.878412491 | -3.333650598 | 3.67049418  | -0.908229365 | 0.363757053 | NA          | NA      |
| ENSG00000185863 | TMEM210      | transmembrane protein 210                         | 100505993 | 0.878412491 | -3.333650598 | 3.67049418  | -0.908229365 | 0.363757053 | NA          | NA      |
| ENSG00000207637 | MIR595       | microRNA 595                                      | 693180    | 0.878412491 | -3.333650598 | 3.67049418  | -0.908229365 | 0.363757053 | NA          | NA      |
| ENSG00000212428 | NA           | NA                                                | NA        | 0.878412491 | -3.333650598 | 3.67049418  | -0.908229365 | 0.363757053 | NA          | NA      |
| ENSG00000227204 | NA           | NA                                                | NA        | 0.878412491 | -3.333650598 | 3.67049418  | -0.908229365 | 0.363757053 | NA          | NA      |
| ENSG00000231896 | NA           | NA                                                | NA        | 0.878412491 | -3.333650598 | 3.67049418  | -0.908229365 | 0.363757053 | NA          | NA      |
| ENSG00000237636 | NA           | NA                                                | NA        | 0.878412491 | -3.333650598 | 3.67049418  | -0.908229365 | 0.363757053 | NA          | NA      |
| ENSG00000252902 | NA           | NA                                                | NA        | 0.878412491 | -3.333650598 | 3.67049418  | -0.908229365 | 0.363757053 | NA          | NA      |
| ENSG00000257138 | TAS2R38      | taste 2 receptor member 38                        | 5726      | 0.878412491 | -3.333650598 | 3.67049418  | -0.908229365 | 0.363757053 | NA          | NA      |
| ENSG00000247151 | CSTF3-AS1    | CSTF3 antisense RNA 1 (head to head)              | 338739    | 5.460273557 | -3.3277684   | 1.438757857 | -2.312945423 | 0.02072564  | NA          | NA      |
| ENSG00000156194 | PPEF2        | protein phosphatase with EF-hand domain 2         | 5470      | 0.871559948 | -3.321473066 | 3.625835547 | -0.916057285 | 0.35963685  | NA          | NA      |
| ENSG00000219274 | NA           | NA                                                | NA        | 0.871559948 | -3.321473066 | 3.625835547 | -0.916057285 | 0.35963685  | NA          | NA      |
| ENSG00000067715 | SYT1         | synaptotagmin 1                                   | 6857      | 221.9408813 | -3.318515074 | 1.02571786  | -3.235309829 | 0.001215108 | 0.134691726 | Not Sig |
| ENSG00000236242 | MYO16-AS1    | MYO16 antisense RNA 1                             | 100885782 | 36.70715994 | -3.318235962 | 1.277529034 | -2.597385948 | 0.009393631 | 0.476991917 | Not Sig |
| ENSG00000240375 | NA           | NA                                                | NA        | 5.231746331 | -3.311334755 | 1.591379277 | -2.080795447 | 0.037452633 | NA          | NA      |
| ENSG00000233073 | NA           | NA                                                | NA        | 5.224073301 | -3.311046949 | 1.436330137 | -2.305213032 | 0.021154645 | NA          | NA      |
| ENSG00000258136 | LOC101929162 | uncharacterized LOC101929162                      | 101929162 | 0.8621057   | -3.308412599 | 3.054239566 | -1.083219743 | 0.278710898 | NA          | NA      |
| ENSG00000235411 | NA           | NA                                                | NA        | 1.808289227 | -3.297038943 | 2.172391204 | -1.517700374 | 0.12908995  | NA          | NA      |
| ENSG00000255441 | NA           | NA                                                | NA        | 6.811516904 | -3.29633308  | 1.820862711 | -1.810313902 | 0.070247122 | 0.999371363 | Not Sig |
| ENSG00000160886 | LY6K         | lymphocyte antigen 6 family member K              | 54742     | 91.8898965  | -3.286742797 | 1.261381244 | -2.605669627 | 0.009169486 | 0.473243174 | Not Sig |
| ENSG00000267354 | NA           | NA                                                | NA        | 3.44781027  | -3.28511461  | 1.845940875 | -1.779642378 | 0.075134506 | NA          | NA      |
| ENSG00000242100 | NA           | NA                                                | NA        | 0.845798908 | -3.283334776 | 3.02693783  | -1.084705059 | 0.278052307 | NA          | NA      |
| ENSG00000253790 | NA           | NA                                                | NA        | 0.845798908 | -3.283334776 | 3.02693783  | -1.084705059 | 0.278052307 | NA          | NA      |
| ENSG00000266920 | NA           | NA                                                | NA        | 0.845798908 | -3.283334776 | 3.02693783  | -1.084705059 | 0.278052307 | NA          | NA      |
| ENSG00000255319 | NA           | NA                                                | NA        | 1.78938073  | -3.280918543 | 2.599236038 | -1.26226264  | 0.206854295 | NA          | NA      |
| ENSG00000252375 | NA           | NA                                                | NA        | 1.841590255 | -3.277746317 | 2.21480819  | -1.479923332 | 0.138893708 | NA          | NA      |
| ENSG00000163283 | ALPP         | alkaline phosphatase, placental                   | 250       | 61.75865686 | -3.266729226 | 1.147470028 | -2.846897215 | 0.004414761 | 0.301021826 | Not Sig |

|                 |              |                                                                                 |           |             |              |             |              |             |             |          |
|-----------------|--------------|---------------------------------------------------------------------------------|-----------|-------------|--------------|-------------|--------------|-------------|-------------|----------|
| ENSG00000258566 | NA           | NA                                                                              | NA        | 1.790383125 | -3.264177019 | 2.169787592 | -1.504376295 | 0.132484504 | NA          | NA       |
| ENSG00000243384 | NA           | NA                                                                              | NA        | 0.829492116 | -3.257638661 | 3.082191117 | -1.056922993 | 0.290546734 | NA          | NA       |
| ENSG00000265657 | MIR3151      | microRNA 3151                                                                   | 100422992 | 1.750329611 | -3.25455785  | 2.555955992 | -1.273323117 | 0.202903407 | NA          | NA       |
| ENSG00000230291 | NA           | NA                                                                              | NA        | 1.799522424 | -3.245385887 | 2.227859567 | -1.456728213 | 0.145191419 | NA          | NA       |
| ENSG00000253258 | NA           | NA                                                                              | NA        | 8.181900586 | -3.244053729 | 1.562271229 | -2.076498414 | 0.037847878 | 0.999371363 | Not Sig  |
| ENSG00000006047 | YBX2         | Y-box binding protein 2                                                         | 51087     | 21.61197338 | -3.242286075 | 1.446651585 | -2.241234938 | 0.025010861 | 0.816524647 | Not Sig  |
| ENSG00000211798 | NA           | NA                                                                              | NA        | 0.820037868 | -3.241648971 | 3.742643587 | -0.866138839 | 0.386414029 | NA          | NA       |
| ENSG00000223963 | NA           | NA                                                                              | NA        | 0.820037868 | -3.241648971 | 3.742643587 | -0.866138839 | 0.386414029 | NA          | NA       |
| ENSG00000233670 | PIRT         | phosphoinositide interacting regulator of transient receptor potential channels | 644139    | 0.820037868 | -3.241648971 | 3.742643587 | -0.866138839 | 0.386414029 | NA          | NA       |
| ENSG00000261787 | TCF24        | transcription factor 24                                                         | 100129654 | 6.577694889 | -3.234846074 | 1.398396956 | -2.313253086 | 0.020708728 | NA          | NA       |
| ENSG00000128578 | STRIP2       | striatin interacting protein 2                                                  | 57464     | 347.7465532 | -3.232170566 | 0.932826098 | -3.464922963 | 0.000530383 | 0.073396901 | Not Sig  |
| ENSG00000268948 | NA           | NA                                                                              | NA        | 5.005687769 | -3.228739946 | 1.905582156 | -1.694358827 | 0.090197118 | NA          | NA       |
| ENSG00000256803 | LOC102724020 | uncharacterized LOC102724020                                                    | 102724020 | 0.813185325 | -3.228728849 | 3.751458556 | -0.860659608 | 0.389425546 | NA          | NA       |
| ENSG00000256884 | LOC105370024 | uncharacterized LOC105370024                                                    | 105370024 | 0.813185325 | -3.228728849 | 3.751458556 | -0.860659608 | 0.389425546 | NA          | NA       |
| ENSG00000187288 | CIDEC        | cell death inducing DFFA like effector c                                        | 63924     | 0.803731076 | -3.214716312 | 3.712331058 | -0.865956258 | 0.38651415  | NA          | NA       |
| ENSG00000234795 | NA           | NA                                                                              | NA        | 0.803731076 | -3.214716312 | 3.712331058 | -0.865956258 | 0.38651415  | NA          | NA       |
| ENSG00000221201 | NA           | NA                                                                              | NA        | 1.733425904 | -3.213118559 | 2.640410874 | -1.216900972 | 0.223641896 | NA          | NA       |
| ENSG00000207105 | NA           | NA                                                                              | NA        | 3.296848129 | -3.207583263 | 2.081361473 | -1.541098605 | 0.123292789 | NA          | NA       |
| ENSG00000235548 | NA           | NA                                                                              | NA        | 61.78684821 | -3.203253743 | 1.172617886 | -2.731711481 | 0.006300629 | 0.379635506 | Not Sig  |
| ENSG00000169213 | RAB3B        | RAB3B, member RAS oncogene family                                               | 5865      | 115.6138113 | -3.201568003 | 1.072963629 | -2.983855105 | 0.002846415 | 0.235821761 | Not Sig  |
| ENSG00000145850 | TIMD4        | T-cell immunoglobulin and mucin domain containing 4                             | 91937     | 36.63586567 | -3.191764167 | 0.856643733 | -3.725894493 | 0.000194624 | 0.037706117 | FDR<0.05 |
| ENSG00000253426 | NA           | NA                                                                              | NA        | 23.7032029  | -3.188678601 | 1.217917285 | -2.618140525 | 0.008841039 | 0.471136671 | Not Sig  |
| ENSG00000165863 | C10orf82     | chromosome 10 open reading frame 82                                             | 143379    | 0.787424285 | -3.187095834 | 3.734804194 | -0.853350181 | 0.39346514  | NA          | NA       |
| ENSG00000221561 | NA           | NA                                                                              | NA        | 0.787424285 | -3.187095834 | 3.734804194 | -0.853350181 | 0.39346514  | NA          | NA       |
| ENSG00000271529 | NA           | NA                                                                              | NA        | 0.787424285 | -3.187095834 | 3.734804194 | -0.853350181 | 0.39346514  | NA          | NA       |
| ENSG00000236266 | NA           | NA                                                                              | NA        | 1.68994067  | -3.185320941 | 2.18014538  | -1.461058959 | 0.143999262 | NA          | NA       |
| ENSG00000255177 | NA           | NA                                                                              | NA        | 16.24487033 | -3.180255996 | 1.310600253 | -2.426564461 | 0.015242542 | 0.627285408 | Not Sig  |
| ENSG00000201023 | NA           | NA                                                                              | NA        | 0.795279223 | -3.177172271 | 3.801145953 | -0.835845903 | 0.403241599 | NA          | NA       |
| ENSG00000215976 | NA           | NA                                                                              | NA        | 0.795279223 | -3.177172271 | 3.801145953 | -0.835845903 | 0.403241599 | NA          | NA       |
| ENSG00000221180 | NA           | NA                                                                              | NA        | 0.795279223 | -3.177172271 | 3.801145953 | -0.835845903 | 0.403241599 | NA          | NA       |
| ENSG00000230828 | NA           | NA                                                                              | NA        | 0.795279223 | -3.177172271 | 3.801145953 | -0.835845903 | 0.403241599 | NA          | NA       |
| ENSG00000239021 | NA           | NA                                                                              | NA        | 0.795279223 | -3.177172271 | 3.801145953 | -0.835845903 | 0.403241599 | NA          | NA       |
| ENSG00000241791 | NA           | NA                                                                              | NA        | 0.795279223 | -3.177172271 | 3.801145953 | -0.835845903 | 0.403241599 | NA          | NA       |
| ENSG00000243072 | NA           | NA                                                                              | NA        | 0.795279223 | -3.177172271 | 3.801145953 | -0.835845903 | 0.403241599 | NA          | NA       |
| ENSG00000259598 | NA           | NA                                                                              | NA        | 0.795279223 | -3.177172271 | 3.801145953 | -0.835845903 | 0.403241599 | NA          | NA       |

|                 |              |                              |           |             |              |             |              |             |             |         |
|-----------------|--------------|------------------------------|-----------|-------------|--------------|-------------|--------------|-------------|-------------|---------|
| ENSG00000262668 | NA           | NA                           | NA        | 0.795279223 | -3.177172271 | 3.801145953 | -0.835845903 | 0.403241599 | NA          | NA      |
| ENSG00000266185 | NA           | NA                           | NA        | 0.795279223 | -3.177172271 | 3.801145953 | -0.835845903 | 0.403241599 | NA          | NA      |
| ENSG00000134827 | TCN1         | transcobalamin 1             | 6947      | 92.16173589 | -3.167029818 | 1.424428788 | -2.223368303 | 0.026190975 | 0.837114088 | Not Sig |
| ENSG00000225216 | NA           | NA                           | NA        | 0.771117493 | -3.158603146 | 3.810021322 | -0.829025058 | 0.407090228 | NA          | NA      |
| ENSG00000226491 | NA           | NA                           | NA        | 0.771117493 | -3.158603146 | 3.810021322 | -0.829025058 | 0.407090228 | NA          | NA      |
| ENSG00000232730 | NA           | NA                           | NA        | 0.771117493 | -3.158603146 | 3.810021322 | -0.829025058 | 0.407090228 | NA          | NA      |
| ENSG00000254041 | LOC101927392 | uncharacterized LOC101927392 | 101927392 | 0.771117493 | -3.158603146 | 3.810021322 | -0.829025058 | 0.407090228 | NA          | NA      |
| ENSG00000201168 | NA           | NA                           | NA        | 1.716389155 | -3.157369001 | 2.28668714  | -1.380761253 | 0.167352381 | NA          | NA      |
| ENSG00000232803 | SLC04A1-AS1  | SLC04A1 antisense RNA 1      | 100127888 | 11.72253782 | -3.153775462 | 1.332011865 | -2.367678205 | 0.017900097 | 0.674897979 | Not Sig |
| ENSG00000158164 | TMSB15A      | thymosin beta 15a            | 11013     | 13.16436431 | -3.153405965 | 1.291552111 | -2.441563091 | 0.014623833 | 0.612454873 | Not Sig |
| ENSG00000158164 | TMSB15B      | thymosin beta 15B            | 286527    | 13.16436431 | -3.153405965 | 1.291552111 | -2.441563091 | 0.014623833 | 0.612454873 | Not Sig |
| ENSG00000215482 | NA           | NA                           | NA        | 1.641435303 | -3.150905223 | 2.253996274 | -1.397919446 | 0.162137258 | NA          | NA      |
| ENSG00000213549 | NA           | NA                           | NA        | 0.778972431 | -3.14863302  | 3.823856455 | -0.823418206 | 0.410270214 | NA          | NA      |
| ENSG00000239064 | NA           | NA                           | NA        | 0.778972431 | -3.14863302  | 3.823856455 | -0.823418206 | 0.410270214 | NA          | NA      |
| ENSG00000242941 | NA           | NA                           | NA        | 0.778972431 | -3.14863302  | 3.823856455 | -0.823418206 | 0.410270214 | NA          | NA      |
| ENSG00000248996 | NA           | NA                           | NA        | 0.778972431 | -3.14863302  | 3.823856455 | -0.823418206 | 0.410270214 | NA          | NA      |
| ENSG00000254312 | NA           | NA                           | NA        | 0.778972431 | -3.14863302  | 3.823856455 | -0.823418206 | 0.410270214 | NA          | NA      |
| ENSG00000256822 | NA           | NA                           | NA        | 0.778972431 | -3.14863302  | 3.823856455 | -0.823418206 | 0.410270214 | NA          | NA      |
| ENSG00000232293 | NA           | NA                           | NA        | 15.12176432 | -3.143136033 | 1.668406788 | -1.883914676 | 0.059576518 | 0.999371363 | Not Sig |
| ENSG00000270728 | NA           | NA                           | NA        | 1.690628115 | -3.140344426 | 2.606437619 | -1.204841583 | 0.228264464 | NA          | NA      |
| ENSG00000265595 | MIR4756      | microRNA 4756                | 100616225 | 10.43079006 | -3.128972193 | 1.497493863 | -2.089472465 | 0.036665214 | 0.995739028 | Not Sig |
| ENSG00000240253 | NA           | NA                           | NA        | 2.93019354  | -3.122207592 | 2.293755814 | -1.361176972 | 0.17345777  | NA          | NA      |
| ENSG00000267426 | NA           | NA                           | NA        | 1.639420985 | -3.121750599 | 2.278588248 | -1.370037172 | 0.170675298 | NA          | NA      |
| ENSG00000116014 | KISS1R       | KISS1 receptor               | 84634     | 19.79276557 | -3.11555117  | 1.484456187 | -2.098782839 | 0.035836048 | 0.978922681 | Not Sig |
| ENSG00000264357 | MIR4648      | microRNA 4648                | 100616116 | 4.547557643 | -3.10874434  | 1.37357988  | -2.263242483 | 0.023620746 | NA          | NA      |
| ENSG00000213917 | NA           | NA                           | NA        | 1.616676658 | -3.106756116 | 2.243234916 | -1.384944614 | 0.166069404 | NA          | NA      |
| ENSG00000212517 | NA           | NA                           | NA        | 0.753211391 | -3.103995959 | 3.824275548 | -0.811655938 | 0.416989084 | NA          | NA      |
| ENSG00000231222 | NA           | NA                           | NA        | 0.753211391 | -3.103995959 | 3.824275548 | -0.811655938 | 0.416989084 | NA          | NA      |
| ENSG00000251178 | NA           | NA                           | NA        | 0.753211391 | -3.103995959 | 3.824275548 | -0.811655938 | 0.416989084 | NA          | NA      |
| ENSG00000263599 | NA           | NA                           | NA        | 0.753211391 | -3.103995959 | 3.824275548 | -0.811655938 | 0.416989084 | NA          | NA      |
| ENSG00000271455 | NA           | NA                           | NA        | 0.753211391 | -3.103995959 | 3.824275548 | -0.811655938 | 0.416989084 | NA          | NA      |
| ENSG00000272609 | NA           | NA                           | NA        | 0.753211391 | -3.103995959 | 3.824275548 | -0.811655938 | 0.416989084 | NA          | NA      |
| ENSG00000273232 | NA           | NA                           | NA        | 0.753211391 | -3.103995959 | 3.824275548 | -0.811655938 | 0.416989084 | NA          | NA      |
| ENSG00000273394 | NA           | NA                           | NA        | 0.753211391 | -3.103995959 | 3.824275548 | -0.811655938 | 0.416989084 | NA          | NA      |
| ENSG00000224273 | NA           | NA                           | NA        | 1.613659945 | -3.10329162  | 2.639239719 | -1.175827871 | 0.239663667 | NA          | NA      |

|                 |            |                                                   |           |             |              |             |              |             |             |         |
|-----------------|------------|---------------------------------------------------|-----------|-------------|--------------|-------------|--------------|-------------|-------------|---------|
| ENSG00000257743 | MGAM2      | maltase-glucoamylase 2 (putative)                 | 93432     | 6.412174191 | -3.09304734  | 1.466710149 | -2.108833392 | 0.034958965 | NA          | NA      |
| ENSG00000240411 | NA         | NA                                                | NA        | 1.632253492 | -3.085603473 | 2.273160187 | -1.357406966 | 0.174651936 | NA          | NA      |
| ENSG00000238746 | NA         | NA                                                | NA        | 3.338186003 | -3.081993596 | 2.300325926 | -1.339807356 | 0.180307984 | NA          | NA      |
| ENSG00000220793 | NA         | NA                                                | NA        | 0.736904599 | -3.07075449  | 3.216135593 | -0.954796339 | 0.339680699 | NA          | NA      |
| ENSG00000225475 | NA         | NA                                                | NA        | 0.736904599 | -3.07075449  | 3.216135593 | -0.954796339 | 0.339680699 | NA          | NA      |
| ENSG00000227613 | NA         | NA                                                | NA        | 0.736904599 | -3.07075449  | 3.216135593 | -0.954796339 | 0.339680699 | NA          | NA      |
| ENSG00000230194 | NA         | NA                                                | NA        | 0.736904599 | -3.07075449  | 3.216135593 | -0.954796339 | 0.339680699 | NA          | NA      |
| ENSG00000238945 | NA         | NA                                                | NA        | 0.736904599 | -3.07075449  | 3.216135593 | -0.954796339 | 0.339680699 | NA          | NA      |
| ENSG00000251952 | NA         | NA                                                | NA        | 0.736904599 | -3.07075449  | 3.216135593 | -0.954796339 | 0.339680699 | NA          | NA      |
| ENSG00000259125 | LRP1-AS    | LRP1 antisense RNA                                | 105751187 | 0.736904599 | -3.07075449  | 3.216135593 | -0.954796339 | 0.339680699 | NA          | NA      |
| ENSG00000207286 | NA         | NA                                                | NA        | 1.606492452 | -3.065192592 | 2.663488216 | -1.150818905 | 0.249806746 | NA          | NA      |
| ENSG00000145113 | MUC4       | mucin 4, cell surface associated                  | 4585      | 11390.24006 | -3.060494692 | 1.20138178  | -2.547478864 | 0.010850443 | 0.51562122  | Not Sig |
| ENSG00000213590 | NA         | NA                                                | NA        | 16.92259346 | -3.053696409 | 1.087649258 | -2.807611357 | 0.004991042 | 0.327188303 | Not Sig |
| ENSG00000170486 | KRT72      | keratin 72                                        | 140807    | 1.54057784  | -3.050946782 | 2.671908335 | -1.141860573 | 0.253511979 | NA          | NA      |
| ENSG00000253869 | NA         | NA                                                | NA        | 1.548847786 | -3.049015295 | 2.317815044 | -1.315469629 | 0.188352118 | NA          | NA      |
| ENSG00000222596 | NA         | NA                                                | NA        | 0.720597808 | -3.043521234 | 3.875175581 | -0.785389248 | 0.432225383 | NA          | NA      |
| ENSG00000266631 | NA         | NA                                                | NA        | 0.720597808 | -3.043521234 | 3.875175581 | -0.785389248 | 0.432225383 | NA          | NA      |
| ENSG00000180785 | OR51E1     | olfactory receptor family 51 subfamily E member 1 | 143503    | 2.946003474 | -3.030572933 | 1.869255974 | -1.6212723   | 0.104959253 | NA          | NA      |
| ENSG00000120875 | DUSP4      | dual specificity phosphatase 4                    | 1846      | 2302.989935 | -3.02981259  | 0.852788406 | -3.552830419 | 0.00038111  | 0.059991488 | Not Sig |
| ENSG00000204949 | FAM83A-AS1 | FAM83A antisense RNA 1                            | 100131726 | 0.711143559 | -3.027479757 | 3.928104797 | -0.770722756 | 0.44087128  | NA          | NA      |
| ENSG00000206725 | NA         | NA                                                | NA        | 0.711143559 | -3.027479757 | 3.928104797 | -0.770722756 | 0.44087128  | NA          | NA      |
| ENSG00000207960 | MIR153-2   | microRNA 153-2                                    | 406945    | 0.711143559 | -3.027479757 | 3.928104797 | -0.770722756 | 0.44087128  | NA          | NA      |
| ENSG00000214970 | NA         | NA                                                | NA        | 0.711143559 | -3.027479757 | 3.928104797 | -0.770722756 | 0.44087128  | NA          | NA      |
| ENSG00000222800 | NA         | NA                                                | NA        | 0.711143559 | -3.027479757 | 3.928104797 | -0.770722756 | 0.44087128  | NA          | NA      |
| ENSG00000224374 | NA         | NA                                                | NA        | 0.711143559 | -3.027479757 | 3.928104797 | -0.770722756 | 0.44087128  | NA          | NA      |
| ENSG00000225246 | NA         | NA                                                | NA        | 0.711143559 | -3.027479757 | 3.928104797 | -0.770722756 | 0.44087128  | NA          | NA      |
| ENSG00000229184 | NA         | NA                                                | NA        | 0.711143559 | -3.027479757 | 3.928104797 | -0.770722756 | 0.44087128  | NA          | NA      |
| ENSG00000236591 | NA         | NA                                                | NA        | 0.711143559 | -3.027479757 | 3.928104797 | -0.770722756 | 0.44087128  | NA          | NA      |
| ENSG00000244144 | NA         | NA                                                | NA        | 0.711143559 | -3.027479757 | 3.928104797 | -0.770722756 | 0.44087128  | NA          | NA      |
| ENSG00000271555 | NA         | NA                                                | NA        | 2.96331266  | -3.026301254 | 2.066157398 | -1.464700248 | 0.143002717 | NA          | NA      |
| ENSG00000244266 | NA         | NA                                                | NA        | 1.56442462  | -3.026026565 | 2.743978309 | -1.102788078 | 0.270119207 | NA          | NA      |
| ENSG00000231440 | NA         | NA                                                | NA        | 1.529524281 | -3.026009415 | 2.759746735 | -1.096480839 | 0.272868404 | NA          | NA      |
| ENSG00000200042 | NA         | NA                                                | NA        | 7.383886615 | -3.020831886 | 1.730222521 | -1.74592103  | 0.080824675 | 0.999371363 | Not Sig |
| ENSG00000144366 | GULP1      | GULP, engulfment adaptor PTB domain containing 1  | 51454     | 1534.518292 | -3.017497769 | 0.939408113 | -3.21212658  | 0.001317563 | 0.138267267 | Not Sig |
| ENSG00000099617 | EFNA2      | ephrin A2                                         | 1943      | 45.48980062 | -2.99791289  | 1.280960298 | -2.340363629 | 0.019264973 | 0.707299708 | Not Sig |



|                 |        |                                             |        |             |              |             |              |             |             |         |
|-----------------|--------|---------------------------------------------|--------|-------------|--------------|-------------|--------------|-------------|-------------|---------|
| ENSG00000201201 | NA     | NA                                          | NA     | 0.694836768 | -2.995755103 | 3.264622596 | -0.91764209  | 0.358806275 | NA          | NA      |
| ENSG00000216162 | NA     | NA                                          | NA     | 0.694836768 | -2.995755103 | 3.264622596 | -0.91764209  | 0.358806275 | NA          | NA      |
| ENSG00000225178 | NA     | NA                                          | NA     | 0.694836768 | -2.995755103 | 3.264622596 | -0.91764209  | 0.358806275 | NA          | NA      |
| ENSG00000225802 | NA     | NA                                          | NA     | 0.694836768 | -2.995755103 | 3.264622596 | -0.91764209  | 0.358806275 | NA          | NA      |
| ENSG00000260284 | NA     | NA                                          | NA     | 0.694836768 | -2.995755103 | 3.264622596 | -0.91764209  | 0.358806275 | NA          | NA      |
| ENSG00000232934 | NA     | NA                                          | NA     | 1.491475558 | -2.976691041 | 2.720337104 | -1.094236092 | 0.273851446 | NA          | NA      |
| ENSG00000185479 | KRT6B  | keratin 6B                                  | 3854   | 5.79255736  | -2.971302072 | 1.513304145 | -1.963453336 | 0.049593522 | NA          | NA      |
| ENSG00000152463 | OLAH   | oleoyl-ACP hydrolase                        | 55301  | 1.473751363 | -2.969884268 | 2.706286321 | -1.097402091 | 0.27246566  | NA          | NA      |
| ENSG00000224236 | NA     | NA                                          | NA     | 1.488458845 | -2.968050641 | 2.696880988 | -1.100549358 | 0.271092836 | NA          | NA      |
| ENSG00000207087 | NA     | NA                                          | NA     | 0.678529976 | -2.964588921 | 3.284677125 | -0.902551091 | 0.366764194 | NA          | NA      |
| ENSG00000221211 | NA     | NA                                          | NA     | 0.678529976 | -2.964588921 | 3.284677125 | -0.902551091 | 0.366764194 | NA          | NA      |
| ENSG00000229163 | NA     | NA                                          | NA     | 0.678529976 | -2.964588921 | 3.284677125 | -0.902551091 | 0.366764194 | NA          | NA      |
| ENSG00000261240 | NA     | NA                                          | NA     | 0.678529976 | -2.964588921 | 3.284677125 | -0.902551091 | 0.366764194 | NA          | NA      |
| ENSG00000271716 | NA     | NA                                          | NA     | 0.678529976 | -2.964588921 | 3.284677125 | -0.902551091 | 0.366764194 | NA          | NA      |
| ENSG00000249774 | NA     | NA                                          | NA     | 4.115594037 | -2.961404031 | 1.607074479 | -1.842729799 | 0.065368471 | NA          | NA      |
| ENSG00000270880 | NA     | NA                                          | NA     | 1.489743205 | -2.953392536 | 2.695294383 | -1.095758799 | 0.273184343 | NA          | NA      |
| ENSG00000176857 | NA     | NA                                          | NA     | 1.441552788 | -2.948625802 | 2.336294016 | -1.262095345 | 0.20691448  | NA          | NA      |
| ENSG00000232194 | NA     | NA                                          | NA     | 1.472152053 | -2.946689274 | 2.353637552 | -1.251972408 | 0.210579918 | NA          | NA      |
| ENSG00000230251 | NA     | NA                                          | NA     | 2.642976741 | -2.941930417 | 1.931936133 | -1.522788651 | 0.12781159  | NA          | NA      |
| ENSG00000207579 | MIR662 | microRNA 662                                | 724032 | 12.19664266 | -2.940047287 | 1.393854073 | -2.109293466 | 0.034919258 | 0.965260677 | Not Sig |
| ENSG00000165887 | ANKRD2 | ankyrin repeat domain 2                     | 26287  | 2.580766287 | -2.93220553  | 2.132216004 | -1.375191597 | 0.169072053 | NA          | NA      |
| ENSG00000183586 | NA     | NA                                          | NA     | 0.662223185 | -2.930842836 | 3.976580618 | -0.737025882 | 0.46110661  | NA          | NA      |
| ENSG00000233307 | NA     | NA                                          | NA     | 0.662223185 | -2.930842836 | 3.976580618 | -0.737025882 | 0.46110661  | NA          | NA      |
| ENSG00000236575 | NA     | NA                                          | NA     | 0.662223185 | -2.930842836 | 3.976580618 | -0.737025882 | 0.46110661  | NA          | NA      |
| ENSG00000238940 | NA     | NA                                          | NA     | 0.662223185 | -2.930842836 | 3.976580618 | -0.737025882 | 0.46110661  | NA          | NA      |
| ENSG00000240677 | NA     | NA                                          | NA     | 0.662223185 | -2.930842836 | 3.976580618 | -0.737025882 | 0.46110661  | NA          | NA      |
| ENSG00000269296 | NA     | NA                                          | NA     | 0.662223185 | -2.930842836 | 3.976580618 | -0.737025882 | 0.46110661  | NA          | NA      |
| ENSG00000222316 | NA     | NA                                          | NA     | 1.449407726 | -2.930424674 | 2.358948568 | -1.242258824 | 0.214141082 | NA          | NA      |
| ENSG00000212951 | NA     | NA                                          | NA     | 1.455845261 | -2.930385542 | 2.356502803 | -1.243531533 | 0.213672029 | NA          | NA      |
| ENSG00000233448 | NA     | NA                                          | NA     | 1.4907456   | -2.930175037 | 2.343518046 | -1.250331758 | 0.211178382 | NA          | NA      |
| ENSG00000232706 | NA     | NA                                          | NA     | 2.619817406 | -2.928911801 | 1.971913071 | -1.485314867 | 0.137460435 | NA          | NA      |
| ENSG00000145358 | DDIT4L | DNA damage inducible transcript 4 like      | 115265 | 150.3521637 | -2.922501373 | 1.076094143 | -2.715841724 | 0.006610751 | 0.393801452 | Not Sig |
| ENSG00000179564 | LSMEM2 | leucine rich single-pass membrane protein 2 | 132228 | 2.603510615 | -2.921074259 | 2.053525972 | -1.422467648 | 0.154890537 | NA          | NA      |
| ENSG00000270431 | NA     | NA                                          | NA     | 1.474438808 | -2.917600285 | 2.694033565 | -1.08298587  | 0.278814695 | NA          | NA      |
| ENSG00000213421 | NA     | NA                                          | NA     | 0.652768936 | -2.913590085 | 3.977411969 | -0.732534147 | 0.463842608 | NA          | NA      |

|                 |           |                                                           |           |             |              |             |              |             |             |          |
|-----------------|-----------|-----------------------------------------------------------|-----------|-------------|--------------|-------------|--------------|-------------|-------------|----------|
| ENSG00000221181 | NA        | NA                                                        | NA        | 0.652768936 | -2.913590085 | 3.977411969 | -0.732534147 | 0.463842608 | NA          | NA       |
| ENSG00000231188 | NA        | NA                                                        | NA        | 0.652768936 | -2.913590085 | 3.977411969 | -0.732534147 | 0.463842608 | NA          | NA       |
| ENSG00000233668 | NA        | NA                                                        | NA        | 0.652768936 | -2.913590085 | 3.977411969 | -0.732534147 | 0.463842608 | NA          | NA       |
| ENSG00000235389 | NA        | NA                                                        | NA        | 0.652768936 | -2.913590085 | 3.977411969 | -0.732534147 | 0.463842608 | NA          | NA       |
| ENSG00000259091 | LINC00517 | long intergenic non-protein coding RNA 517                | 400208    | 0.652768936 | -2.913590085 | 3.977411969 | -0.732534147 | 0.463842608 | NA          | NA       |
| ENSG00000266261 | NA        | NA                                                        | NA        | 0.652768936 | -2.913590085 | 3.977411969 | -0.732534147 | 0.463842608 | NA          | NA       |
| ENSG00000271620 | NA        | NA                                                        | NA        | 0.652768936 | -2.913590085 | 3.977411969 | -0.732534147 | 0.463842608 | NA          | NA       |
| ENSG00000233024 | NPIPA5    | nuclear pore complex interacting protein family member A5 | 100288332 | 3.87619516  | -2.911859863 | 1.52419288  | -1.910427415 | 0.056078204 | NA          | NA       |
| ENSG00000163501 | IHH       | indian hedgehog                                           | 3549      | 40.4946186  | -2.908998421 | 1.248351362 | -2.330272157 | 0.019791771 | 0.711521581 | Not Sig  |
| ENSG00000112541 | PDE10A    | phosphodiesterase 10A                                     | 10846     | 405.1722368 | -2.906421636 | 0.766381651 | -3.7923946   | 0.000149202 | 0.030304767 | FDR<0.05 |
| ENSG00000267596 | NA        | NA                                                        | NA        | 1.399484956 | -2.903185583 | 2.70155208  | -1.074636171 | 0.282537651 | NA          | NA       |
| ENSG00000125508 | SRMS      | serum retinol-binding protein 4                           | 6725      | 45.73185949 | -2.897644618 | 1.427845262 | -2.029382802 | 0.042419315 | 0.999371363 | Not Sig  |
| ENSG00000222588 | NA        | NA                                                        | NA        | 2.551806626 | -2.895733832 | 2.118014383 | -1.367192714 | 0.171564909 | NA          | NA       |
| ENSG00000105048 | TNNT1     | troponin T1, slow skeletal type                           | 7138      | 144.2321487 | -2.893871627 | 1.023638746 | -2.827043855 | 0.004697989 | 0.31302529  | Not Sig  |
| ENSG00000213854 | NA        | NA                                                        | NA        | 4.236269643 | -2.892161541 | 1.922875702 | -1.504081381 | 0.132560414 | NA          | NA       |
| ENSG00000270951 | NA        | NA                                                        | NA        | 2.576150264 | -2.891443033 | 1.909021628 | -1.514620364 | 0.129868572 | NA          | NA       |
| ENSG00000150556 | LYPD6B    | LY6/PLAUR domain containing 6B                            | 130576    | 114.627388  | -2.887116557 | 0.884664266 | -3.263516646 | 0.001100387 | 0.124839423 | Not Sig  |
| ENSG00000255498 | NA        | NA                                                        | NA        | 3.985776913 | -2.886840159 | 1.409693711 | -2.047849214 | 0.040574776 | NA          | NA       |
| ENSG00000126952 | NXF5      | nuclear RNA export factor 5                               | 55998     | 1.3896157   | -2.885722216 | 2.733476983 | -1.055696548 | 0.291106875 | NA          | NA       |
| ENSG00000249641 | HOXC13-AS | HOXC13 antisense RNA                                      | 100874366 | 1.397885646 | -2.883344918 | 2.750102701 | -1.048449906 | 0.294431371 | NA          | NA       |
| ENSG00000207932 | MIR33A    | microRNA 33a                                              | 407039    | 0.636462144 | -2.879750044 | 3.979071173 | -0.723724185 | 0.469235082 | NA          | NA       |
| ENSG00000225354 | NA        | NA                                                        | NA        | 0.636462144 | -2.879750044 | 3.979071173 | -0.723724185 | 0.469235082 | NA          | NA       |
| ENSG00000225606 | NA        | NA                                                        | NA        | 0.636462144 | -2.879750044 | 3.979071173 | -0.723724185 | 0.469235082 | NA          | NA       |
| ENSG00000237740 | NA        | NA                                                        | NA        | 0.636462144 | -2.879750044 | 3.979071173 | -0.723724185 | 0.469235082 | NA          | NA       |
| ENSG00000260521 | NA        | NA                                                        | NA        | 0.636462144 | -2.879750044 | 3.979071173 | -0.723724185 | 0.469235082 | NA          | NA       |
| ENSG00000268146 | NA        | NA                                                        | NA        | 0.636462144 | -2.879750044 | 3.979071173 | -0.723724185 | 0.469235082 | NA          | NA       |
| ENSG00000270739 | NA        | NA                                                        | NA        | 0.636462144 | -2.879750044 | 3.979071173 | -0.723724185 | 0.469235082 | NA          | NA       |
| ENSG00000258847 | NA        | NA                                                        | NA        | 1.432370977 | -2.872348575 | 2.33785959  | -1.228623219 | 0.219213106 | NA          | NA       |
| ENSG00000207716 | MIR572    | microRNA 572                                              | 693157    | 1.38801639  | -2.864591069 | 2.369919526 | -1.208729257 | 0.226766878 | NA          | NA       |
| ENSG00000269371 | NA        | NA                                                        | NA        | 2.494616306 | -2.85322803  | 2.370418805 | -1.20368098  | 0.228712906 | NA          | NA       |
| ENSG00000157211 | CDCP2     | CUB domain containing protein 2                           | 200008    | 2.454380884 | -2.851235892 | 1.955079201 | -1.4583736   | 0.144737593 | NA          | NA       |
| ENSG00000221115 | NA        | NA                                                        | NA        | 1.365272062 | -2.847391078 | 2.319149188 | -1.227774001 | 0.219531818 | NA          | NA       |
| ENSG00000170162 | VGLL2     | vestigial like family member 2                            | 245806    | 0.620155353 | -2.845206873 | 3.980804632 | -0.714731602 | 0.474774906 | NA          | NA       |
| ENSG00000181741 | NA        | NA                                                        | NA        | 0.620155353 | -2.845206873 | 3.980804632 | -0.714731602 | 0.474774906 | NA          | NA       |
| ENSG00000187550 | SBK2      | SH3 domain binding kinase family member 2                 | 646643    | 0.620155353 | -2.845206873 | 3.980804632 | -0.714731602 | 0.474774906 | NA          | NA       |

|                 |           |                                                  |           |             |              |             |              |             |             |         |
|-----------------|-----------|--------------------------------------------------|-----------|-------------|--------------|-------------|--------------|-------------|-------------|---------|
| ENSG00000204049 | NA        | NA                                               | NA        | 0.620155353 | -2.845206873 | 3.980804632 | -0.714731602 | 0.474774906 | NA          | NA      |
| ENSG00000220993 | NA        | NA                                               | NA        | 0.620155353 | -2.845206873 | 3.980804632 | -0.714731602 | 0.474774906 | NA          | NA      |
| ENSG00000228812 | LAMA5-AS1 | LAMA5 antisense RNA 1                            | 101928158 | 0.620155353 | -2.845206873 | 3.980804632 | -0.714731602 | 0.474774906 | NA          | NA      |
| ENSG00000257065 | NA        | NA                                               | NA        | 0.620155353 | -2.845206873 | 3.980804632 | -0.714731602 | 0.474774906 | NA          | NA      |
| ENSG00000260726 | NA        | NA                                               | NA        | 0.620155353 | -2.845206873 | 3.980804632 | -0.714731602 | 0.474774906 | NA          | NA      |
| ENSG00000263847 | NA        | NA                                               | NA        | 0.620155353 | -2.845206873 | 3.980804632 | -0.714731602 | 0.474774906 | NA          | NA      |
| ENSG00000183971 | NPW       | neuropeptide W                                   | 283869    | 69.99562613 | -2.844194517 | 0.982778366 | -2.89403452  | 0.003803263 | 0.278456377 | Not Sig |
| ENSG00000238721 | NA        | NA                                               | NA        | 1.348965271 | -2.830266416 | 2.322365555 | -1.218699791 | 0.222958158 | NA          | NA      |
| ENSG00000186529 | CYP4F3    | cytochrome P450 family 4 subfamily F member 3    | 4051      | 52.96395737 | -2.829266862 | 0.804840717 | -3.515312784 | 0.000439236 | 0.065848846 | Not Sig |
| ENSG00000226889 | NA        | NA                                               | NA        | 1.380848896 | -2.821959602 | 2.427161758 | -1.162658233 | 0.244968194 | NA          | NA      |
| ENSG00000231863 | NA        | NA                                               | NA        | 1.380848896 | -2.821959602 | 2.427161758 | -1.162658233 | 0.244968194 | NA          | NA      |
| ENSG00000107954 | NEURL1    | neuralized E3 ubiquitin protein ligase 1         | 9148      | 53.18881182 | -2.821404643 | 1.168340877 | -2.414881392 | 0.015740334 | 0.643565034 | Not Sig |
| ENSG00000230267 | NA        | NA                                               | NA        | 16.61683347 | -2.818259641 | 1.588042618 | -1.774675069 | 0.075951554 | 0.999371363 | Not Sig |
| ENSG00000227582 | NA        | NA                                               | NA        | 4.739893526 | -2.81614765  | 1.81196895  | -1.554192003 | 0.120138625 | NA          | NA      |
| ENSG00000173626 | TRAPPC3L  | trafficking protein particle complex 3 like      | 100128327 | 3.80220119  | -2.809181304 | 1.459243819 | -1.925093851 | 0.054217618 | NA          | NA      |
| ENSG00000273108 | NA        | NA                                               | NA        | 2.593741416 | -2.805386771 | 2.090033443 | -1.342268843 | 0.179508842 | NA          | NA      |
| ENSG00000100665 | SERPINA4  | serpin family A member 4                         | 5267      | 22.86252606 | -2.804316186 | 3.481087137 | -0.805586323 | 0.420481414 | 0.999371363 | Not Sig |
| ENSG00000168746 | LINC01620 | long intergenic non-protein coding RNA 1620      | 140834    | 1.348235313 | -2.787196989 | 2.354667307 | -1.183690358 | 0.236535657 | NA          | NA      |
| ENSG00000168746 | LINC01430 | long intergenic non-protein coding RNA 1430      | 101927242 | 1.348235313 | -2.787196989 | 2.354667307 | -1.183690358 | 0.236535657 | NA          | NA      |
| ENSG00000252334 | NA        | NA                                               | NA        | 1.348235313 | -2.787196989 | 2.354667307 | -1.183690358 | 0.236535657 | NA          | NA      |
| ENSG00000234208 | NA        | NA                                               | NA        | 4.892727414 | -2.780332421 | 1.505470503 | -1.846819593 | 0.064773291 | NA          | NA      |
| ENSG00000237621 | NA        | NA                                               | NA        | 1.314752377 | -2.772162436 | 2.801926823 | -0.989377172 | 0.322478639 | NA          | NA      |
| ENSG00000168124 | OR1F1     | olfactory receptor family 1 subfamily F member 1 | 4992      | 1.321189913 | -2.772111312 | 2.798206527 | -0.990674307 | 0.321844641 | NA          | NA      |
| ENSG00000247903 | NA        | NA                                               | NA        | 1.321189913 | -2.772111312 | 2.798206527 | -0.990674307 | 0.321844641 | NA          | NA      |
| ENSG00000242311 | NA        | NA                                               | NA        | 3.918220479 | -2.771783203 | 1.537851003 | -1.802374351 | 0.071486528 | NA          | NA      |
| ENSG00000255496 | NA        | NA                                               | NA        | 1.297028183 | -2.769077842 | 2.389853389 | -1.158681053 | 0.246586217 | NA          | NA      |
| ENSG00000232745 | NA        | NA                                               | NA        | 81.29747587 | -2.768717738 | 0.885345093 | -3.127275182 | 0.001764347 | 0.165809118 | Not Sig |
| ENSG00000143469 | SYT14     | synaptotagmin 14                                 | 255928    | 4.888111391 | -2.766817263 | 1.67116539  | -1.655621449 | 0.097798504 | NA          | NA      |
| ENSG00000226186 | NA        | NA                                               | NA        | 2.545641528 | -2.766439381 | 2.198753717 | -1.258185198 | 0.208324787 | NA          | NA      |
| ENSG00000143452 | HORMAD1   | HORMA domain containing 1                        | 84072     | 276.6139379 | -2.764372455 | 1.306589902 | -2.11571546  | 0.034369015 | 0.964129947 | Not Sig |
| ENSG00000230856 | NA        | NA                                               | NA        | 1.287573935 | -2.756482213 | 2.788858248 | -0.988390936 | 0.322961225 | NA          | NA      |
| ENSG00000213235 | NA        | NA                                               | NA        | 3.501006867 | -2.755157038 | 1.624582808 | -1.695916653 | 0.089901665 | NA          | NA      |
| ENSG00000083782 | EPYC      | epiphycan                                        | 1833      | 1.33978346  | -2.747514591 | 2.458164665 | -1.117709741 | 0.263690981 | NA          | NA      |
| ENSG00000259100 | NA        | NA                                               | NA        | 1.33978346  | -2.747514591 | 2.458164665 | -1.117709741 | 0.263690981 | NA          | NA      |
| ENSG00000179111 | HES7      | hes family bHLH transcription factor 7           | 84667     | 4.7439615   | -2.745996238 | 1.477468736 | -1.85858162  | 0.063086464 | NA          | NA      |

|                 |              |                                                           |           |             |              |             |              |             |             |         |
|-----------------|--------------|-----------------------------------------------------------|-----------|-------------|--------------|-------------|--------------|-------------|-------------|---------|
| ENSG00000150394 | CDH8         | cadherin 8                                                | 1006      | 29.21068306 | -2.739869716 | 1.2887088   | -2.126058048 | 0.033498426 | 0.947967831 | Not Sig |
| ENSG00000229664 | NA           | NA                                                        | NA        | 1.306167481 | -2.737976919 | 2.749612751 | -0.995768192 | 0.319362788 | NA          | NA      |
| ENSG00000271228 | NA           | NA                                                        | NA        | 1.306167481 | -2.737976919 | 2.749612751 | -0.995768192 | 0.319362788 | NA          | NA      |
| ENSG00000113525 | IL5          | interleukin 5                                             | 3567      | 0.585942459 | -2.735673638 | 3.986577754 | -0.686221067 | 0.492573715 | NA          | NA      |
| ENSG00000123165 | ACTRT1       | actin related protein T1                                  | 139741    | 0.585942459 | -2.735673638 | 3.986577754 | -0.686221067 | 0.492573715 | NA          | NA      |
| ENSG00000173389 | IQCF1        | IQ motif containing F1                                    | 132141    | 0.585942459 | -2.735673638 | 3.986577754 | -0.686221067 | 0.492573715 | NA          | NA      |
| ENSG00000180610 | NA           | NA                                                        | NA        | 0.585942459 | -2.735673638 | 3.986577754 | -0.686221067 | 0.492573715 | NA          | NA      |
| ENSG00000199373 | NA           | NA                                                        | NA        | 0.585942459 | -2.735673638 | 3.986577754 | -0.686221067 | 0.492573715 | NA          | NA      |
| ENSG00000199529 | NA           | NA                                                        | NA        | 0.585942459 | -2.735673638 | 3.986577754 | -0.686221067 | 0.492573715 | NA          | NA      |
| ENSG00000202472 | NA           | NA                                                        | NA        | 0.585942459 | -2.735673638 | 3.986577754 | -0.686221067 | 0.492573715 | NA          | NA      |
| ENSG00000206681 | NA           | NA                                                        | NA        | 0.585942459 | -2.735673638 | 3.986577754 | -0.686221067 | 0.492573715 | NA          | NA      |
| ENSG00000210100 | NA           | NA                                                        | NA        | 0.585942459 | -2.735673638 | 3.986577754 | -0.686221067 | 0.492573715 | NA          | NA      |
| ENSG00000213500 | NA           | NA                                                        | NA        | 0.585942459 | -2.735673638 | 3.986577754 | -0.686221067 | 0.492573715 | NA          | NA      |
| ENSG00000216904 | NA           | NA                                                        | NA        | 0.585942459 | -2.735673638 | 3.986577754 | -0.686221067 | 0.492573715 | NA          | NA      |
| ENSG00000222375 | NA           | NA                                                        | NA        | 0.585942459 | -2.735673638 | 3.986577754 | -0.686221067 | 0.492573715 | NA          | NA      |
| ENSG00000224276 | LOC107985210 | uncharacterized LOC107985210                              | 107985210 | 0.585942459 | -2.735673638 | 3.986577754 | -0.686221067 | 0.492573715 | NA          | NA      |
| ENSG00000228360 | NA           | NA                                                        | NA        | 0.585942459 | -2.735673638 | 3.986577754 | -0.686221067 | 0.492573715 | NA          | NA      |
| ENSG00000231203 | NA           | NA                                                        | NA        | 0.585942459 | -2.735673638 | 3.986577754 | -0.686221067 | 0.492573715 | NA          | NA      |
| ENSG00000250268 | NA           | NA                                                        | NA        | 0.585942459 | -2.735673638 | 3.986577754 | -0.686221067 | 0.492573715 | NA          | NA      |
| ENSG00000251821 | NA           | NA                                                        | NA        | 0.585942459 | -2.735673638 | 3.986577754 | -0.686221067 | 0.492573715 | NA          | NA      |
| ENSG00000256306 | NA           | NA                                                        | NA        | 0.585942459 | -2.735673638 | 3.986577754 | -0.686221067 | 0.492573715 | NA          | NA      |
| ENSG00000258083 | OR9A4        | olfactory receptor family 9 subfamily A member 4          | 130075    | 0.585942459 | -2.735673638 | 3.986577754 | -0.686221067 | 0.492573715 | NA          | NA      |
| ENSG00000270423 | NA           | NA                                                        | NA        | 0.585942459 | -2.735673638 | 3.986577754 | -0.686221067 | 0.492573715 | NA          | NA      |
| ENSG00000266507 | MIR4479      | microRNA 4479                                             | 100616480 | 10.42382322 | -2.725759583 | 1.055114342 | -2.583378383 | 0.009783795 | 0.490865881 | Not Sig |
| ENSG00000214940 | NPIPA8       | nuclear pore complex interacting protein family member A8 | 101059953 | 3.441214841 | -2.725226154 | 1.601728306 | -1.701428477 | 0.088862558 | NA          | NA      |
| ENSG00000089116 | LHX5         | LIM homeobox 5                                            | 64211     | 1.272684545 | -2.724151118 | 2.803071594 | -0.971845002 | 0.331127664 | NA          | NA      |
| ENSG00000264263 | NA           | NA                                                        | NA        | 1.254960351 | -2.718625733 | 2.777255907 | -0.978889171 | 0.327634743 | NA          | NA      |
| ENSG00000211692 | NA           | NA                                                        | NA        | 2.413182405 | -2.717905388 | 1.870960289 | -1.452679356 | 0.146312801 | NA          | NA      |
| ENSG00000175868 | CALCB        | calcitonin related polypeptide beta                       | 797       | 30.42833349 | -2.717254889 | 0.97114017  | -2.798004833 | 0.005141934 | 0.33036928  | Not Sig |
| ENSG00000206192 | NA           | NA                                                        | NA        | 3.394945994 | -2.703163907 | 1.763022265 | -1.533255683 | 0.125212869 | NA          | NA      |
| ENSG00000206785 | SNORA15B-1   | small nucleolar RNA, H/ACA box 15B-1                      | 109616962 | 1.256377754 | -2.700441731 | 2.433091124 | -1.10988105  | 0.267050287 | NA          | NA      |
| ENSG00000206785 | SNORA15B-2   | small nucleolar RNA, H/ACA box 15B-2                      | 109617022 | 1.256377754 | -2.700441731 | 2.433091124 | -1.10988105  | 0.267050287 | NA          | NA      |
| ENSG00000223566 | NA           | NA                                                        | NA        | 1.256377754 | -2.700441731 | 2.433091124 | -1.10988105  | 0.267050287 | NA          | NA      |
| ENSG00000235670 | NA           | NA                                                        | NA        | 1.256377754 | -2.700441731 | 2.433091124 | -1.10988105  | 0.267050287 | NA          | NA      |
| ENSG00000144158 | NA           | NA                                                        | NA        | 1.262815289 | -2.700397805 | 2.430071822 | -1.111241972 | 0.266464209 | NA          | NA      |

|                 |           |                                               |           |             |              |             |              |             |             |         |
|-----------------|-----------|-----------------------------------------------|-----------|-------------|--------------|-------------|--------------|-------------|-------------|---------|
| ENSG00000222760 | NA        | NA                                            | NA        | 1.273553898 | -2.69921886  | 2.786669722 | -0.968618146 | 0.332735746 | NA          | NA      |
| ENSG00000203307 | NA        | NA                                            | NA        | 0.569635668 | -2.697096694 | 3.988715244 | -0.67618181  | 0.49892522  | NA          | NA      |
| ENSG00000224163 | NA        | NA                                            | NA        | 0.569635668 | -2.697096694 | 3.988715244 | -0.67618181  | 0.49892522  | NA          | NA      |
| ENSG00000228499 | NA        | NA                                            | NA        | 0.569635668 | -2.697096694 | 3.988715244 | -0.67618181  | 0.49892522  | NA          | NA      |
| ENSG00000236072 | NA        | NA                                            | NA        | 0.569635668 | -2.697096694 | 3.988715244 | -0.67618181  | 0.49892522  | NA          | NA      |
| ENSG00000249690 | LOC729558 | uncharacterized LOC729558                     | 729558    | 0.569635668 | -2.697096694 | 3.988715244 | -0.67618181  | 0.49892522  | NA          | NA      |
| ENSG00000263363 | MIR5702   | microRNA 5702                                 | 100847053 | 0.569635668 | -2.697096694 | 3.988715244 | -0.67618181  | 0.49892522  | NA          | NA      |
| ENSG00000266433 | TBC1D3P5  | TBC1 domain family member 3 pseudogene 5      | 440419    | 0.569635668 | -2.697096694 | 3.988715244 | -0.67618181  | 0.49892522  | NA          | NA      |
| ENSG00000261665 | NA        | NA                                            | NA        | 2.274225983 | -2.684975667 | 2.018317541 | -1.330303886 | 0.183418167 | NA          | NA      |
| ENSG00000239389 | PCDHA13   | protocadherin alpha 13                        | 56136     | 97.35543098 | -2.681597076 | 0.832053897 | -3.22286463  | 0.001269155 | 0.135444671 | Not Sig |
| ENSG00000264491 | NA        | NA                                            | NA        | 1.246508498 | -2.681269582 | 2.434126947 | -1.101532353 | 0.270665032 | NA          | NA      |
| ENSG00000223609 | HBD       | hemoglobin subunit delta                      | 3045      | 8.889308094 | -2.680968172 | 1.978479417 | -1.35506498  | 0.175396855 | 0.999371363 | Not Sig |
| ENSG00000235688 | NA        | NA                                            | NA        | 3.530470695 | -2.679205869 | 1.908853602 | -1.403568019 | 0.160447524 | NA          | NA      |
| ENSG00000213973 | ZNF99     | zinc finger protein 99                        | 7652      | 3.48178342  | -2.678509186 | 1.974784394 | -1.356355253 | 0.174986163 | NA          | NA      |
| ENSG00000207996 | MIR301A   | microRNA 301a                                 | 407027    | 1.271954588 | -2.674868655 | 2.809842411 | -0.951963941 | 0.34111527  | NA          | NA      |
| ENSG00000128573 | FOXP2     | forkhead box P2                               | 93986     | 411.535289  | -2.667463463 | 0.755386672 | -3.531255661 | 0.000413592 | 0.063866188 | Not Sig |
| ENSG00000134765 | DSC1      | desmocollin 1                                 | 1823      | 1.265102045 | -2.664671916 | 2.796768818 | -0.95276803  | 0.340707616 | NA          | NA      |
| ENSG00000273066 | NA        | NA                                            | NA        | 120.482189  | -2.662859135 | 0.794185658 | -3.352942866 | 0.000799572 | 0.105989594 | Not Sig |
| ENSG00000256913 | NA        | NA                                            | NA        | 4.496807742 | -2.662010786 | 1.833541803 | -1.451840793 | 0.146545878 | NA          | NA      |
| ENSG00000238689 | NA        | NA                                            | NA        | 1.214309922 | -2.652918367 | 2.444336241 | -1.085332829 | 0.277774271 | NA          | NA      |
| ENSG00000080031 | PTPRH     | protein tyrosine phosphatase, receptor type H | 5794      | 342.6022685 | -2.643092851 | 1.192802467 | -2.215868029 | 0.026700542 | 0.841215479 | Not Sig |
| ENSG00000207606 | MIR554    | microRNA 554                                  | 693139    | 19.27147679 | -2.640677965 | 1.387901365 | -1.902640945 | 0.057087413 | 0.999371363 | Not Sig |
| ENSG00000248362 | NA        | NA                                            | NA        | 2.586979402 | -2.640111775 | 2.446353453 | -1.079202914 | 0.280497281 | NA          | NA      |
| ENSG00000235261 | NA        | NA                                            | NA        | 15.7135257  | -2.63929216  | 0.984093248 | -2.681953326 | 0.007319367 | 0.417071448 | Not Sig |
| ENSG00000179141 | NA        | NA                                            | NA        | 0.543874627 | -2.637284744 | 3.992141718 | -0.660619019 | 0.508856669 | NA          | NA      |
| ENSG00000188624 | IGFL3     | IGF like family member 3                      | 388555    | 0.543874627 | -2.637284744 | 3.992141718 | -0.660619019 | 0.508856669 | NA          | NA      |
| ENSG00000213708 | NA        | NA                                            | NA        | 0.543874627 | -2.637284744 | 3.992141718 | -0.660619019 | 0.508856669 | NA          | NA      |
| ENSG00000221233 | NA        | NA                                            | NA        | 0.543874627 | -2.637284744 | 3.992141718 | -0.660619019 | 0.508856669 | NA          | NA      |
| ENSG00000239028 | NA        | NA                                            | NA        | 0.543874627 | -2.637284744 | 3.992141718 | -0.660619019 | 0.508856669 | NA          | NA      |
| ENSG00000239069 | NA        | NA                                            | NA        | 0.543874627 | -2.637284744 | 3.992141718 | -0.660619019 | 0.508856669 | NA          | NA      |
| ENSG00000241162 | NA        | NA                                            | NA        | 0.543874627 | -2.637284744 | 3.992141718 | -0.660619019 | 0.508856669 | NA          | NA      |
| ENSG00000254495 | NA        | NA                                            | NA        | 0.543874627 | -2.637284744 | 3.992141718 | -0.660619019 | 0.508856669 | NA          | NA      |
| ENSG00000263784 | NA        | NA                                            | NA        | 0.543874627 | -2.637284744 | 3.992141718 | -0.660619019 | 0.508856669 | NA          | NA      |
| ENSG00000264628 | NA        | NA                                            | NA        | 0.543874627 | -2.637284744 | 3.992141718 | -0.660619019 | 0.508856669 | NA          | NA      |
| ENSG00000266730 | NA        | NA                                            | NA        | 0.543874627 | -2.637284744 | 3.992141718 | -0.660619019 | 0.508856669 | NA          | NA      |

|                 |              |                                                |           |             |              |             |              |             |             |         |
|-----------------|--------------|------------------------------------------------|-----------|-------------|--------------|-------------|--------------|-------------|-------------|---------|
| ENSG00000246323 | NA           | NA                                             | NA        | 3.584097623 | -2.633746515 | 1.568142397 | -1.679532752 | 0.093048261 | NA          | NA      |
| ENSG00000237821 | NA           | NA                                             | NA        | 1.204440666 | -2.633087174 | 2.405009668 | -1.09483434  | 0.273589219 | NA          | NA      |
| ENSG00000273455 | NA           | NA                                             | NA        | 1.204440666 | -2.633087174 | 2.405009668 | -1.09483434  | 0.273589219 | NA          | NA      |
| ENSG00000253931 | NA           | NA                                             | NA        | 4.21232569  | -2.632220595 | 2.135485553 | -1.232609882 | 0.217721348 | NA          | NA      |
| ENSG00000241717 | NA           | NA                                             | NA        | 3.264076653 | -2.629862626 | 1.933289357 | -1.360304714 | 0.173733517 | NA          | NA      |
| ENSG00000236409 | NA           | NA                                             | NA        | 6.912389519 | -2.625040009 | 1.362210694 | -1.927044047 | 0.053974141 | 0.999371363 | Not Sig |
| ENSG00000111732 | AICDA        | activation induced cytidine deaminase          | 57379     | 2.504443049 | -2.624018667 | 1.979018805 | -1.325919016 | 0.184866523 | NA          | NA      |
| ENSG00000235301 | NA           | NA                                             | NA        | 2.317578175 | -2.623426503 | 1.88676304  | -1.390437722 | 0.164395999 | NA          | NA      |
| ENSG00000248543 | NA           | NA                                             | NA        | 6.305395748 | -2.619136731 | 1.845565456 | -1.419151363 | 0.155854892 | NA          | NA      |
| ENSG00000232254 | NA           | NA                                             | NA        | 1.181696339 | -2.613377792 | 2.453348529 | -1.065228915 | 0.286772352 | NA          | NA      |
| ENSG00000243607 | NA           | NA                                             | NA        | 1.181696339 | -2.613377792 | 2.453348529 | -1.065228915 | 0.286772352 | NA          | NA      |
| ENSG00000262678 | NA           | NA                                             | NA        | 1.181696339 | -2.613377792 | 2.453348529 | -1.065228915 | 0.286772352 | NA          | NA      |
| ENSG00000252568 | NA           | NA                                             | NA        | 2.110388772 | -2.608759812 | 2.123426057 | -1.228561646 | 0.219236203 | NA          | NA      |
| ENSG00000237813 | NA           | NA                                             | NA        | 33.47544695 | -2.608739986 | 1.012283931 | -2.577083273 | 0.009963794 | 0.49192078  | Not Sig |
| ENSG00000145526 | CDH18        | cadherin 18                                    | 1016      | 2.293234538 | -2.607431951 | 2.179558629 | -1.196311912 | 0.231574862 | NA          | NA      |
| ENSG00000267776 | NA           | NA                                             | NA        | 2.286381995 | -2.607261749 | 1.814974616 | -1.436527942 | 0.150852171 | NA          | NA      |
| ENSG00000201347 | NA           | NA                                             | NA        | 1.213579964 | -2.604046881 | 2.490421456 | -1.045624979 | 0.295734212 | NA          | NA      |
| ENSG00000086717 | PPEF1        | protein phosphatase with EF-hand domain 1      | 5475      | 17.87107986 | -2.60036315  | 0.88799193  | -2.928363492 | 0.003407514 | 0.261651383 | Not Sig |
| ENSG00000064787 | BCAS1        | breast carcinoma amplified sequence 1          | 8537      | 2810.861806 | -2.600025962 | 1.153766232 | -2.253511925 | 0.02422689  | 0.802589067 | Not Sig |
| ENSG00000151012 | SLC7A11      | solute carrier family 7 member 11              | 23657     | 993.8711943 | -2.598802424 | 1.113119717 | -2.334701636 | 0.019559013 | 0.709667191 | Not Sig |
| ENSG00000122136 | OBP2A        | odorant binding protein 2A                     | 29991     | 2.134317402 | -2.597706502 | 2.460539393 | -1.055746764 | 0.291083926 | NA          | NA      |
| ENSG00000214511 | HIGD1C       | HIG1 hypoxia inducible domain family member 1C | 613227    | 0.527567836 | -2.595788057 | 3.597386961 | -0.72157599  | 0.470555206 | NA          | NA      |
| ENSG00000222426 | NA           | NA                                             | NA        | 0.527567836 | -2.595788057 | 3.597386961 | -0.72157599  | 0.470555206 | NA          | NA      |
| ENSG00000226427 | NA           | NA                                             | NA        | 0.527567836 | -2.595788057 | 3.597386961 | -0.72157599  | 0.470555206 | NA          | NA      |
| ENSG00000226645 | NA           | NA                                             | NA        | 0.527567836 | -2.595788057 | 3.597386961 | -0.72157599  | 0.470555206 | NA          | NA      |
| ENSG00000234297 | NA           | NA                                             | NA        | 0.527567836 | -2.595788057 | 3.597386961 | -0.72157599  | 0.470555206 | NA          | NA      |
| ENSG00000236152 | NA           | NA                                             | NA        | 0.527567836 | -2.595788057 | 3.597386961 | -0.72157599  | 0.470555206 | NA          | NA      |
| ENSG00000240520 | NA           | NA                                             | NA        | 0.527567836 | -2.595788057 | 3.597386961 | -0.72157599  | 0.470555206 | NA          | NA      |
| ENSG00000242017 | NA           | NA                                             | NA        | 0.527567836 | -2.595788057 | 3.597386961 | -0.72157599  | 0.470555206 | NA          | NA      |
| ENSG00000265565 | MIR3143      | microRNA 3143                                  | 100422934 | 7.15296923  | -2.593890038 | 2.036323702 | -1.273810267 | 0.202730666 | 0.999371363 | Not Sig |
| ENSG00000238569 | NA           | NA                                             | NA        | 1.171827083 | -2.592803082 | 2.860206273 | -0.906509124 | 0.364666438 | NA          | NA      |
| ENSG00000272029 | NA           | NA                                             | NA        | 1.171827083 | -2.592803082 | 2.860206273 | -0.906509124 | 0.364666438 | NA          | NA      |
| ENSG00000253983 | LOC105375903 | uncharacterized LOC105375903                   | 105375903 | 1.155935299 | -2.5839173   | 2.461272295 | -1.049829921 | 0.293796316 | NA          | NA      |
| ENSG00000254340 | NA           | NA                                             | NA        | 1.155935299 | -2.5839173   | 2.461272295 | -1.049829921 | 0.293796316 | NA          | NA      |
| ENSG00000070601 | FRMPD1       | FERM and PDZ domain containing 1               | 22844     | 12.28924992 | -2.577037505 | 1.427161697 | -1.805708148 | 0.070963939 | 0.999371363 | Not Sig |

|                 |              |                                                               |           |             |              |             |              |             |             |         |
|-----------------|--------------|---------------------------------------------------------------|-----------|-------------|--------------|-------------|--------------|-------------|-------------|---------|
| ENSG00000200830 | NA           | NA                                                            | NA        | 2.100519516 | -2.565828197 | 1.875238175 | -1.368267899 | 0.171228235 | NA          | NA      |
| ENSG00000269339 | NA           | NA                                                            | NA        | 1.146066043 | -2.563500968 | 2.462727352 | -1.040919518 | 0.297912902 | NA          | NA      |
| ENSG00000239919 | NA           | NA                                                            | NA        | 2.460775907 | -2.56272277  | 2.397003674 | -1.069135937 | 0.28500842  | NA          | NA      |
| ENSG00000212743 | NA           | NA                                                            | NA        | 100.6711457 | -2.560105835 | 0.887321786 | -2.885205654 | 0.00391158  | 0.281664993 | Not Sig |
| ENSG00000229893 | NA           | NA                                                            | NA        | 3.298795084 | -2.557135275 | 1.567950685 | -1.630877361 | 0.1029162   | NA          | NA      |
| ENSG00000213671 | NA           | NA                                                            | NA        | 0.511261044 | -2.554517257 | 3.997117826 | -0.639089806 | 0.522764511 | NA          | NA      |
| ENSG00000229133 | NA           | NA                                                            | NA        | 0.511261044 | -2.554517257 | 3.997117826 | -0.639089806 | 0.522764511 | NA          | NA      |
| ENSG00000235698 | NA           | NA                                                            | NA        | 0.511261044 | -2.554517257 | 3.997117826 | -0.639089806 | 0.522764511 | NA          | NA      |
| ENSG00000238223 | NA           | NA                                                            | NA        | 0.511261044 | -2.554517257 | 3.997117826 | -0.639089806 | 0.522764511 | NA          | NA      |
| ENSG00000250354 | NA           | NA                                                            | NA        | 0.511261044 | -2.554517257 | 3.997117826 | -0.639089806 | 0.522764511 | NA          | NA      |
| ENSG00000267735 | NA           | NA                                                            | NA        | 0.511261044 | -2.554517257 | 3.997117826 | -0.639089806 | 0.522764511 | NA          | NA      |
| ENSG00000268310 | NA           | NA                                                            | NA        | 0.511261044 | -2.554517257 | 3.997117826 | -0.639089806 | 0.522764511 | NA          | NA      |
| ENSG00000269400 | NA           | NA                                                            | NA        | 0.511261044 | -2.554517257 | 3.997117826 | -0.639089806 | 0.522764511 | NA          | NA      |
| ENSG00000104970 | KIR3DX1      | killer cell immunoglobulin like receptor, three Ig domains X1 | 90011     | 10.17914448 | -2.551627898 | 1.415332703 | -1.802846703 | 0.071412293 | 0.999371363 | Not Sig |
| ENSG00000254318 | NA           | NA                                                            | NA        | 1.136611794 | -2.549891332 | 2.939855885 | -0.867352494 | 0.385748903 | NA          | NA      |
| ENSG00000259760 | NA           | NA                                                            | NA        | 4.894333078 | -2.547473655 | 2.124461486 | -1.199115009 | 0.230483229 | NA          | NA      |
| ENSG00000204177 | BMS1P1       | BMS1, ribosome biogenesis factor pseudogene 1                 | 399761    | 44.13722928 | -2.5459833   | 0.955949669 | -2.663302663 | 0.007737778 | 0.429259211 | Not Sig |
| ENSG00000201210 | NA           | NA                                                            | NA        | 1.147483445 | -2.545596562 | 2.956005107 | -0.861161084 | 0.38914933  | NA          | NA      |
| ENSG00000243979 | NA           | NA                                                            | NA        | 1.147483445 | -2.545596562 | 2.956005107 | -0.861161084 | 0.38914933  | NA          | NA      |
| ENSG00000247131 | LOC101928002 | uncharacterized LOC101928002                                  | 101928002 | 1.147483445 | -2.545596562 | 2.956005107 | -0.861161084 | 0.38914933  | NA          | NA      |
| ENSG00000267076 | NA           | NA                                                            | NA        | 1.147483445 | -2.545596562 | 2.956005107 | -0.861161084 | 0.38914933  | NA          | NA      |
| ENSG00000221564 | NA           | NA                                                            | NA        | 1.153920981 | -2.545523508 | 2.951489623 | -0.862453823 | 0.388437833 | NA          | NA      |
| ENSG00000233719 | NA           | NA                                                            | NA        | 1.188821319 | -2.545130907 | 2.927640377 | -0.869345473 | 0.384658198 | NA          | NA      |
| ENSG00000207234 | NA           | NA                                                            | NA        | 17.08107787 | -2.544492154 | 1.278324764 | -1.990489604 | 0.046537028 | 0.999371363 | Not Sig |
| ENSG00000177359 | OVOS2        | ovostatin 2                                                   | 144203    | 35.3244153  | -2.542801642 | 1.294961512 | -1.963611751 | 0.049575134 | 0.999371363 | Not Sig |
| ENSG00000177359 | OVOS         | ovostatin                                                     | 408186    | 35.3244153  | -2.542801642 | 1.294961512 | -1.963611751 | 0.049575134 | 0.999371363 | Not Sig |
| ENSG00000263577 | NA           | NA                                                            | NA        | 2.067905933 | -2.542709122 | 1.87554253  | -1.355719256 | 0.17518851  | NA          | NA      |
| ENSG00000266370 | MIR3657      | microRNA 3657                                                 | 100500889 | 5.660545938 | -2.542698955 | 1.504183454 | -1.690418113 | 0.090947992 | NA          | NA      |
| ENSG00000234801 | NA           | NA                                                            | NA        | 1.16465959  | -2.542425255 | 2.50449166  | -1.015146225 | 0.31003613  | NA          | NA      |
| ENSG00000216009 | MIR874       | microRNA 874                                                  | 100126343 | 1.123321716 | -2.542193364 | 2.526849817 | -1.006072204 | 0.314380839 | NA          | NA      |
| ENSG00000207951 | MIR561       | microRNA 561                                                  | 693146    | 18.1893297  | -2.534558341 | 1.175609847 | -2.15595195  | 0.031087417 | 0.912173933 | Not Sig |
| ENSG00000241395 | NA           | NA                                                            | NA        | 18.82329113 | -2.534157625 | 1.125966678 | -2.250650639 | 0.024407673 | 0.804622595 | Not Sig |
| ENSG00000106536 | POU6F2       | POU class 6 homeobox 2                                        | 11281     | 50.94817682 | -2.532856076 | 1.342846111 | -1.886184914 | 0.059270041 | 0.999371363 | Not Sig |
| ENSG00000133962 | CATSPERB     | cation channel sperm associated auxiliary subunit beta        | 79820     | 369.7458145 | -2.529597699 | 1.16398754  | -2.173217163 | 0.029763977 | 0.897727832 | Not Sig |
| ENSG00000261374 | NA           | NA                                                            | NA        | 1.120305003 | -2.528538859 | 2.88553063  | -0.876282106 | 0.38087669  | NA          | NA      |

|                 |            |                                                                                      |           |             |              |             |              |             |             |         |
|-----------------|------------|--------------------------------------------------------------------------------------|-----------|-------------|--------------|-------------|--------------|-------------|-------------|---------|
| ENSG00000264730 | NA         | NA                                                                                   | NA        | 1.120305003 | -2.528538859 | 2.88553063  | -0.876282106 | 0.38087669  | NA          | NA      |
| ENSG00000243478 | NA         | NA                                                                                   | NA        | 4.617937694 | -2.52799991  | 1.651120771 | -1.531081163 | 0.125749335 | NA          | NA      |
| ENSG00000213608 | NA         | NA                                                                                   | NA        | 2.369787701 | -2.525401421 | 1.995984973 | -1.265240698 | 0.205785057 | NA          | NA      |
| ENSG00000226838 | NA         | NA                                                                                   | NA        | 1.137614189 | -2.523319466 | 2.95941008  | -0.852642722 | 0.393857464 | NA          | NA      |
| ENSG00000207595 | MIR181A2   | microRNA 181a-2                                                                      | 406954    | 1.172514528 | -2.522948565 | 2.935048498 | -0.859593484 | 0.390013168 | NA          | NA      |
| ENSG00000169862 | CTNND2     | catenin delta 2                                                                      | 1501      | 56.53653342 | -2.519660857 | 1.092507788 | -2.306309285 | 0.021093357 | 0.737857335 | Not Sig |
| ENSG00000179399 | GPC5       | glypican 5                                                                           | 2262      | 38.25769181 | -2.511944615 | 0.843792815 | -2.976968482 | 0.002911139 | 0.237473696 | Not Sig |
| ENSG00000224981 | NA         | NA                                                                                   | NA        | 1.977332734 | -2.509573447 | 2.064678318 | -1.21547915  | 0.224183396 | NA          | NA      |
| ENSG00000207333 | NA         | NA                                                                                   | NA        | 2.376640244 | -2.507021368 | 2.414892877 | -1.038150136 | 0.299200163 | NA          | NA      |
| ENSG00000252042 | NA         | NA                                                                                   | NA        | 1.103998211 | -2.506641297 | 2.877806513 | -0.871024958 | 0.383740526 | NA          | NA      |
| ENSG00000237399 | PITRM1-AS1 | PITRM1 antisense RNA 1                                                               | 100507034 | 11.54687483 | -2.505139772 | 1.294198384 | -1.935669062 | 0.052908246 | 0.999371363 | Not Sig |
| ENSG00000123364 | HOXC13     | homeobox C13                                                                         | 3229      | 17.17610312 | -2.501826539 | 3.387109352 | -0.738631759 | 0.460130634 | 0.999371363 | Not Sig |
| ENSG00000174384 | NA         | NA                                                                                   | NA        | 2.996598366 | -2.495385349 | 1.672459877 | -1.492044971 | 0.135687356 | NA          | NA      |
| ENSG00000243772 | KIR2DL3    | killer cell immunoglobulin like receptor, two Ig domains and long cytoplasmic tail 3 | 3804      | 3.983614231 | -2.494741078 | 2.173763879 | -1.147659643 | 0.251109097 | NA          | NA      |
| ENSG00000271153 | NA         | NA                                                                                   | NA        | 2.111258125 | -2.490820076 | 1.909068711 | -1.304730449 | 0.191984649 | NA          | NA      |
| ENSG00000237162 | NA         | NA                                                                                   | NA        | 9.331315372 | -2.490204155 | 1.092220461 | -2.279946443 | 0.022610865 | 0.765426409 | Not Sig |
| ENSG00000114487 | MORC1      | MORC family CW-type zinc finger 1                                                    | 27136     | 0.485500004 | -2.489789488 | 4.001207982 | -0.622259452 | 0.533771279 | NA          | NA      |
| ENSG00000128250 | RFPL1      | ret finger protein like 1                                                            | 5988      | 0.485500004 | -2.489789488 | 4.001207982 | -0.622259452 | 0.533771279 | NA          | NA      |
| ENSG00000171987 | C11orf40   | chromosome 11 open reading frame 40                                                  | 143501    | 0.485500004 | -2.489789488 | 4.001207982 | -0.622259452 | 0.533771279 | NA          | NA      |
| ENSG00000179073 | TAAR3P     | trace amine associated receptor 3, pseudogene                                        | 9288      | 0.485500004 | -2.489789488 | 4.001207982 | -0.622259452 | 0.533771279 | NA          | NA      |
| ENSG00000204653 | ASPDH      | aspartate dehydrogenase domain containing                                            | 554235    | 0.485500004 | -2.489789488 | 4.001207982 | -0.622259452 | 0.533771279 | NA          | NA      |
| ENSG00000207505 | NA         | NA                                                                                   | NA        | 0.485500004 | -2.489789488 | 4.001207982 | -0.622259452 | 0.533771279 | NA          | NA      |
| ENSG00000213016 | NA         | NA                                                                                   | NA        | 0.485500004 | -2.489789488 | 4.001207982 | -0.622259452 | 0.533771279 | NA          | NA      |
| ENSG00000221091 | MIR1302-5  | microRNA 1302-5                                                                      | 100302146 | 0.485500004 | -2.489789488 | 4.001207982 | -0.622259452 | 0.533771279 | NA          | NA      |
| ENSG00000226469 | NA         | NA                                                                                   | NA        | 0.485500004 | -2.489789488 | 4.001207982 | -0.622259452 | 0.533771279 | NA          | NA      |
| ENSG00000235949 | NA         | NA                                                                                   | NA        | 0.485500004 | -2.489789488 | 4.001207982 | -0.622259452 | 0.533771279 | NA          | NA      |
| ENSG00000236234 | NA         | NA                                                                                   | NA        | 0.485500004 | -2.489789488 | 4.001207982 | -0.622259452 | 0.533771279 | NA          | NA      |
| ENSG00000238213 | NA         | NA                                                                                   | NA        | 0.485500004 | -2.489789488 | 4.001207982 | -0.622259452 | 0.533771279 | NA          | NA      |
| ENSG00000239959 | NA         | NA                                                                                   | NA        | 0.485500004 | -2.489789488 | 4.001207982 | -0.622259452 | 0.533771279 | NA          | NA      |
| ENSG00000250137 | NA         | NA                                                                                   | NA        | 0.485500004 | -2.489789488 | 4.001207982 | -0.622259452 | 0.533771279 | NA          | NA      |
| ENSG00000252547 | NA         | NA                                                                                   | NA        | 0.485500004 | -2.489789488 | 4.001207982 | -0.622259452 | 0.533771279 | NA          | NA      |
| ENSG00000257043 | NA         | NA                                                                                   | NA        | 0.485500004 | -2.489789488 | 4.001207982 | -0.622259452 | 0.533771279 | NA          | NA      |
| ENSG00000258531 | NA         | NA                                                                                   | NA        | 0.485500004 | -2.489789488 | 4.001207982 | -0.622259452 | 0.533771279 | NA          | NA      |
| ENSG00000260426 | NA         | NA                                                                                   | NA        | 0.485500004 | -2.489789488 | 4.001207982 | -0.622259452 | 0.533771279 | NA          | NA      |
| ENSG00000270726 | NA         | NA                                                                                   | NA        | 0.485500004 | -2.489789488 | 4.001207982 | -0.622259452 | 0.533771279 | NA          | NA      |



|                 |              |                                             |           |             |              |             |              |             |             |         |
|-----------------|--------------|---------------------------------------------|-----------|-------------|--------------|-------------|--------------|-------------|-------------|---------|
| ENSG00000271150 | NA           | NA                                          | NA        | 0.485500004 | -2.489789488 | 4.001207982 | -0.622259452 | 0.533771279 | NA          | NA      |
| ENSG00000271880 | NA           | NA                                          | NA        | 6.109579836 | -2.487230799 | 1.263862331 | -1.967960227 | 0.049072614 | NA          | NA      |
| ENSG00000154537 | FAM27C       | family with sequence similarity 27 member C | 100132948 | 1.081253884 | -2.48404535  | 2.906691933 | -0.854595329 | 0.392775214 | NA          | NA      |
| ENSG00000154537 | LOC105379444 | uncharacterized LOC105379444                | 105379444 | 1.081253884 | -2.48404535  | 2.906691933 | -0.854595329 | 0.392775214 | NA          | NA      |
| ENSG00000254554 | NA           | NA                                          | NA        | 5.893756672 | -2.476776487 | 1.346411385 | -1.839539174 | 0.065835922 | NA          | NA      |
| ENSG00000169704 | GP9          | glycoprotein IX platelet                    | 2815      | 4.887729926 | -2.464464494 | 2.127911789 | -1.158161023 | 0.246798331 | NA          | NA      |
| ENSG00000238537 | NA           | NA                                          | NA        | 1.089108822 | -2.460923576 | 2.567781391 | -0.958385159 | 0.337868576 | NA          | NA      |
| ENSG00000252739 | NA           | NA                                          | NA        | 1.089108822 | -2.460923576 | 2.567781391 | -0.958385159 | 0.337868576 | NA          | NA      |
| ENSG00000149516 | MS4A3        | membrane spanning 4-domains A3              | 932       | 1.106284966 | -2.460904227 | 2.947387558 | -0.834944227 | 0.403749111 | NA          | NA      |
| ENSG00000227203 | NA           | NA                                          | NA        | 1.071384628 | -2.460544506 | 2.974099948 | -0.827324081 | 0.408053398 | NA          | NA      |
| ENSG00000253945 | NA           | NA                                          | NA        | 1.130446696 | -2.460505482 | 2.544485712 | -0.966995205 | 0.333546431 | NA          | NA      |
| ENSG00000169894 | MUC3A        | mucin 3A, cell surface associated           | 4584      | 521.2595031 | -2.458681252 | 1.053979311 | -2.332760451 | 0.019660721 | 0.709667191 | Not Sig |
| ENSG00000084110 | HAL          | histidine ammonia-lyase                     | 3034      | 149.4614751 | -2.456894197 | 0.744168723 | -3.301528433 | 0.000961596 | 0.116436317 | Not Sig |
| ENSG00000261199 | NA           | NA                                          | NA        | 3.896098038 | -2.451860484 | 1.891700084 | -1.296114805 | 0.194935935 | NA          | NA      |
| ENSG00000239040 | NA           | NA                                          | NA        | 69.71702861 | -2.451245812 | 1.254271862 | -1.954317789 | 0.050663646 | 0.999371363 | Not Sig |
| ENSG00000230789 | ARHGAP26-IT1 | ARHGAP26 intronic transcript 1              | 100874372 | 40.24020654 | -2.45063824  | 0.879139766 | -2.787541112 | 0.005310971 | 0.339497787 | Not Sig |
| ENSG00000224897 | POT1-AS1     | POT1 antisense RNA 1                        | 401398    | 46.30608992 | -2.450138345 | 1.045477289 | -2.343559609 | 0.01910071  | 0.704728852 | Not Sig |
| ENSG00000259984 | NA           | NA                                          | NA        | 6.216368449 | -2.448461788 | 1.41123832  | -1.734973996 | 0.082745411 | NA          | NA      |
| ENSG00000268530 | LOC105372430 | uncharacterized LOC105372430                | 105372430 | 2.905610159 | -2.44636785  | 1.620003901 | -1.510099975 | 0.131017916 | NA          | NA      |
| ENSG00000075891 | PAX2         | paired box 2                                | 5076      | 0.469193213 | -2.445295438 | 4.004125015 | -0.610694079 | 0.541402127 | NA          | NA      |
| ENSG00000149742 | SLC22A9      | solute carrier family 22 member 9           | 114571    | 0.469193213 | -2.445295438 | 4.004125015 | -0.610694079 | 0.541402127 | NA          | NA      |
| ENSG00000155070 | NA           | NA                                          | NA        | 0.469193213 | -2.445295438 | 4.004125015 | -0.610694079 | 0.541402127 | NA          | NA      |
| ENSG00000164326 | CARTPT       | CART prepropeptide                          | 9607      | 0.469193213 | -2.445295438 | 4.004125015 | -0.610694079 | 0.541402127 | NA          | NA      |
| ENSG00000169551 | CT55         | cancer/testis antigen 55                    | 54967     | 0.469193213 | -2.445295438 | 4.004125015 | -0.610694079 | 0.541402127 | NA          | NA      |
| ENSG00000169876 | MUC17        | mucin 17, cell surface associated           | 140453    | 0.469193213 | -2.445295438 | 4.004125015 | -0.610694079 | 0.541402127 | NA          | NA      |
| ENSG00000178172 | SPINK6       | serine peptidase inhibitor, Kazal type 6    | 404203    | 0.469193213 | -2.445295438 | 4.004125015 | -0.610694079 | 0.541402127 | NA          | NA      |
| ENSG00000184811 | TUSC5        | tumor suppressor candidate 5                | 286753    | 0.469193213 | -2.445295438 | 4.004125015 | -0.610694079 | 0.541402127 | NA          | NA      |
| ENSG00000184895 | SRY          | sex determining region Y                    | 6736      | 0.469193213 | -2.445295438 | 4.004125015 | -0.610694079 | 0.541402127 | NA          | NA      |
| ENSG00000199283 | NA           | NA                                          | NA        | 0.469193213 | -2.445295438 | 4.004125015 | -0.610694079 | 0.541402127 | NA          | NA      |
| ENSG00000206813 | NA           | NA                                          | NA        | 0.469193213 | -2.445295438 | 4.004125015 | -0.610694079 | 0.541402127 | NA          | NA      |
| ENSG00000213435 | NA           | NA                                          | NA        | 0.469193213 | -2.445295438 | 4.004125015 | -0.610694079 | 0.541402127 | NA          | NA      |
| ENSG00000213673 | NA           | NA                                          | NA        | 0.469193213 | -2.445295438 | 4.004125015 | -0.610694079 | 0.541402127 | NA          | NA      |
| ENSG00000213970 | NA           | NA                                          | NA        | 0.469193213 | -2.445295438 | 4.004125015 | -0.610694079 | 0.541402127 | NA          | NA      |
| ENSG00000218305 | NA           | NA                                          | NA        | 0.469193213 | -2.445295438 | 4.004125015 | -0.610694079 | 0.541402127 | NA          | NA      |
| ENSG00000227218 | NA           | NA                                          | NA        | 0.469193213 | -2.445295438 | 4.004125015 | -0.610694079 | 0.541402127 | NA          | NA      |

|                 |              |                                             |           |             |              |             |              |             |             |         |
|-----------------|--------------|---------------------------------------------|-----------|-------------|--------------|-------------|--------------|-------------|-------------|---------|
| ENSG00000229965 | NA           | NA                                          | NA        | 0.469193213 | -2.445295438 | 4.004125015 | -0.610694079 | 0.541402127 | NA          | NA      |
| ENSG00000230568 | NA           | NA                                          | NA        | 0.469193213 | -2.445295438 | 4.004125015 | -0.610694079 | 0.541402127 | NA          | NA      |
| ENSG00000231124 | NA           | NA                                          | NA        | 0.469193213 | -2.445295438 | 4.004125015 | -0.610694079 | 0.541402127 | NA          | NA      |
| ENSG00000235036 | NA           | NA                                          | NA        | 0.469193213 | -2.445295438 | 4.004125015 | -0.610694079 | 0.541402127 | NA          | NA      |
| ENSG00000240622 | NA           | NA                                          | NA        | 0.469193213 | -2.445295438 | 4.004125015 | -0.610694079 | 0.541402127 | NA          | NA      |
| ENSG00000252523 | NA           | NA                                          | NA        | 0.469193213 | -2.445295438 | 4.004125015 | -0.610694079 | 0.541402127 | NA          | NA      |
| ENSG00000254527 | NA           | NA                                          | NA        | 0.469193213 | -2.445295438 | 4.004125015 | -0.610694079 | 0.541402127 | NA          | NA      |
| ENSG00000255381 | NA           | NA                                          | NA        | 0.469193213 | -2.445295438 | 4.004125015 | -0.610694079 | 0.541402127 | NA          | NA      |
| ENSG00000261461 | NA           | NA                                          | NA        | 0.469193213 | -2.445295438 | 4.004125015 | -0.610694079 | 0.541402127 | NA          | NA      |
| ENSG00000273444 | NA           | NA                                          | NA        | 0.469193213 | -2.445295438 | 4.004125015 | -0.610694079 | 0.541402127 | NA          | NA      |
| ENSG00000230274 | NA           | NA                                          | NA        | 1.07280203  | -2.442727121 | 2.941035658 | -0.830566986 | 0.406218292 | NA          | NA      |
| ENSG00000071991 | CDH19        | cadherin 19                                 | 28513     | 76.74252988 | -2.441617128 | 1.049825986 | -2.325735083 | 0.020032688 | 0.712847952 | Not Sig |
| ENSG00000223198 | NA           | NA                                          | NA        | 1.949557376 | -2.440218182 | 1.966040811 | -1.24118389  | 0.214537825 | NA          | NA      |
| ENSG00000260412 | NA           | NA                                          | NA        | 2.997882726 | -2.433300357 | 1.675292616 | -1.452462891 | 0.14637294  | NA          | NA      |
| ENSG00000207116 | NA           | NA                                          | NA        | 1.063347782 | -2.431157973 | 2.946508397 | -0.825097928 | 0.409315996 | NA          | NA      |
| ENSG00000228779 | NA           | NA                                          | NA        | 1.104685656 | -2.430929455 | 2.914512503 | -0.834077553 | 0.404237284 | NA          | NA      |
| ENSG00000174945 | AMZ1         | archaelysin family metallopeptidase 1       | 155185    | 131.0745113 | -2.422046037 | 0.900490541 | -2.689696256 | 0.007151708 | 0.414526701 | Not Sig |
| ENSG00000178882 | RFLNA        | refilin A                                   | 144347    | 56.09148288 | -2.408638495 | 1.002689096 | -2.402178806 | 0.01629774  | 0.654298425 | Not Sig |
| ENSG00000178882 | ZNF664-RFLNA | ZNF664-RFLNA readthrough                    | 100533183 | 56.09148288 | -2.408638495 | 1.002689096 | -2.402178806 | 0.01629774  | 0.654298425 | Not Sig |
| ENSG00000223861 | NA           | NA                                          | NA        | 50.82321235 | -2.40828342  | 0.970404109 | -2.481732504 | 0.013074538 | 0.569294502 | Not Sig |
| ENSG00000269574 | NA           | NA                                          | NA        | 1.858984177 | -2.405663153 | 2.210775683 | -1.088153435 | 0.276527377 | NA          | NA      |
| ENSG00000242657 | NA           | NA                                          | NA        | 1.04704099  | -2.404497936 | 2.544167923 | -0.945101899 | 0.344606856 | NA          | NA      |
| ENSG00000267934 | NA           | NA                                          | NA        | 1.04704099  | -2.404497936 | 2.544167923 | -0.945101899 | 0.344606856 | NA          | NA      |
| ENSG00000232079 | LINC01697    | long intergenic non-protein coding RNA 1697 | 284825    | 1.088378864 | -2.404265654 | 2.519478696 | -0.954271079 | 0.339946443 | NA          | NA      |
| ENSG00000244062 | NA           | NA                                          | NA        | 1.088378864 | -2.404265654 | 2.519478696 | -0.954271079 | 0.339946443 | NA          | NA      |
| ENSG00000273155 | NA           | NA                                          | NA        | 1.088378864 | -2.404265654 | 2.519478696 | -0.954271079 | 0.339946443 | NA          | NA      |
| ENSG00000124440 | HIF3A        | hypoxia inducible factor 3 alpha subunit    | 64344     | 864.8443651 | -2.403138672 | 0.937476533 | -2.563412083 | 0.010364895 | 0.500096243 | Not Sig |
| ENSG00000235034 | C19orf81     | chromosome 19 open reading frame 81         | 342918    | 7.459267051 | -2.400029959 | 1.497791745 | -1.602378947 | 0.109071837 | 0.999371363 | Not Sig |
| ENSG00000227248 | NA           | NA                                          | NA        | 29.84830541 | -2.38502378  | 1.144301791 | -2.084261163 | 0.037136418 | 0.999371363 | Not Sig |
| ENSG00000265125 | NA           | NA                                          | NA        | 1.835824842 | -2.383810697 | 2.182022871 | -1.092477411 | 0.274623314 | NA          | NA      |
| ENSG00000272842 | NA           | NA                                          | NA        | 3.128791404 | -2.382059766 | 2.014297768 | -1.182575786 | 0.236977314 | NA          | NA      |
| ENSG00000212190 | NA           | NA                                          | NA        | 1.834225531 | -2.381727809 | 2.559759101 | -0.930449982 | 0.35213815  | NA          | NA      |
| ENSG00000218586 | NA           | NA                                          | NA        | 1.030734199 | -2.381304786 | 2.550260288 | -0.933749703 | 0.35043302  | NA          | NA      |
| ENSG00000182376 | LOC339059    | uncharacterized LOC339059                   | 339059    | 1.037171734 | -2.381279626 | 2.546227648 | -0.935218667 | 0.34967562  | NA          | NA      |
| ENSG00000240963 | NA           | NA                                          | NA        | 1.037171734 | -2.381279626 | 2.546227648 | -0.935218667 | 0.34967562  | NA          | NA      |

|                 |          |                                                     |           |             |              |             |              |             |             |          |
|-----------------|----------|-----------------------------------------------------|-----------|-------------|--------------|-------------|--------------|-------------|-------------|----------|
| ENSG00000241532 | NA       | NA                                                  | NA        | 1.037171734 | -2.381279626 | 2.546227648 | -0.935218667 | 0.34967562  | NA          | NA       |
| ENSG00000184984 | CHRM5    | cholinergic receptor muscarinic 5                   | 1133      | 2.049269873 | -2.379775117 | 2.214493404 | -1.074636354 | 0.282537569 | NA          | NA       |
| ENSG00000204805 | NA       | NA                                                  | NA        | 2.796715851 | -2.377465766 | 1.666598537 | -1.426537773 | 0.153713172 | NA          | NA       |
| ENSG00000095539 | SEMA4G   | semaphorin 4G                                       | 57715     | 408.8226782 | -2.376332125 | 0.634032917 | -3.747963331 | 0.000178276 | 0.035078649 | FDR<0.05 |
| ENSG00000130045 | NXNL2    | nucleoredoxin like 2                                | 158046    | 10.4023602  | -2.374420928 | 1.221742692 | -1.94347054  | 0.051959332 | 0.999371363 | Not Sig  |
| ENSG00000009694 | TENM1    | teneurin transmembrane protein 1                    | 10178     | 376.8914863 | -2.373728483 | 0.831348129 | -2.855276147 | 0.004299942 | 0.29912253  | Not Sig  |
| ENSG00000236434 | NA       | NA                                                  | NA        | 1.02127995  | -2.371384172 | 3.024990304 | -0.783931165 | 0.433080502 | NA          | NA       |
| ENSG00000250451 | HOXC-AS1 | HOXC cluster antisense RNA 1                        | 100874363 | 1.027717486 | -2.371378359 | 3.019611807 | -0.785325568 | 0.432262709 | NA          | NA       |
| ENSG00000272509 | NA       | NA                                                  | NA        | 6.787373211 | -2.371292328 | 1.13946749  | -2.081053079 | 0.037429048 | 0.999371363 | Not Sig  |
| ENSG00000260089 | NA       | NA                                                  | NA        | 2.778991657 | -2.368268122 | 1.668751768 | -1.419185386 | 0.155844975 | NA          | NA       |
| ENSG00000202523 | NA       | NA                                                  | NA        | 2.945348723 | -2.365917272 | 1.828342653 | -1.294022906 | 0.195657509 | NA          | NA       |
| ENSG00000201138 | NA       | NA                                                  | NA        | 3.072836578 | -2.363861415 | 1.675674394 | -1.410692569 | 0.158335283 | NA          | NA       |
| ENSG00000221771 | MIR1205  | microRNA 1205                                       | 100302161 | 10.66341779 | -2.362683756 | 1.116772423 | -2.115635833 | 0.034375792 | 0.964129947 | Not Sig  |
| ENSG00000108511 | HOXB6    | homeobox B6                                         | 3216      | 245.9066867 | -2.360526203 | 0.63857059  | -3.696578326 | 0.000218525 | 0.04128436  | FDR<0.05 |
| ENSG00000220494 | NA       | NA                                                  | NA        | 1.020864943 | -2.358793139 | 2.969112442 | -0.794443856 | 0.426937081 | NA          | NA       |
| ENSG00000267007 | NA       | NA                                                  | NA        | 1.055765281 | -2.358738122 | 2.94027484  | -0.802216885 | 0.422427511 | NA          | NA       |
| ENSG00000199512 | NA       | NA                                                  | NA        | 22.82012806 | -2.358253444 | 1.435197767 | -1.643155736 | 0.100350715 | 0.999371363 | Not Sig  |
| ENSG00000239822 | NA       | NA                                                  | NA        | 3.978369677 | -2.358148232 | 1.498974439 | -1.573174413 | 0.115678438 | NA          | NA       |
| ENSG00000167618 | LAIR2    | leukocyte associated immunoglobulin like receptor 2 | 3904      | 36.08403663 | -2.351742459 | 1.023951443 | -2.296732402 | 0.02163404  | 0.750516428 | Not Sig  |
| ENSG00000054179 | ENTPD2   | ectonucleoside triphosphate diphosphohydrolase 2    | 954       | 87.72169481 | -2.351220912 | 1.151892587 | -2.041180696 | 0.04123287  | 0.999371363 | Not Sig  |
| ENSG00000229887 | NA       | NA                                                  | NA        | 1.832808129 | -2.349021562 | 1.918636036 | -1.224318483 | 0.220832107 | NA          | NA       |
| ENSG00000202400 | SNORD82  | small nucleolar RNA, C/D box 82                     | 25826     | 1.046311033 | -2.347016409 | 2.574131999 | -0.91177003  | 0.36188979  | NA          | NA       |
| ENSG00000197692 | NA       | NA                                                  | NA        | 1.004973158 | -2.346989583 | 2.600317216 | -0.902578181 | 0.366749811 | NA          | NA       |
| ENSG00000229161 | NA       | NA                                                  | NA        | 1.004973158 | -2.346989583 | 2.600317216 | -0.902578181 | 0.366749811 | NA          | NA       |
| ENSG00000172139 | SLC9C1   | solute carrier family 9 member C1                   | 285335    | 21.02793339 | -2.345721095 | 1.269906477 | -1.847160509 | 0.064723881 | 0.999371363 | Not Sig  |
| ENSG00000257159 | NA       | NA                                                  | NA        | 1.7921577   | -2.345183336 | 2.559824367 | -0.916150095 | 0.359588176 | NA          | NA       |
| ENSG00000224201 | NA       | NA                                                  | NA        | 1.953443441 | -2.34490845  | 2.255508581 | -1.039636235 | 0.298508936 | NA          | NA       |
| ENSG00000164929 | BAALC    | BAALC, MAP3K1 and KLF4 binding                      | 79870     | 248.8108905 | -2.343379589 | 0.975676135 | -2.401800665 | 0.016314596 | 0.654298425 | Not Sig  |
| ENSG00000221096 | NA       | NA                                                  | NA        | 7.512469443 | -2.343150554 | 1.230315825 | -1.904511432 | 0.056843609 | 0.999371363 | Not Sig  |
| ENSG00000205277 | MUC12    | mucin 12, cell surface associated                   | 10071     | 32.03600368 | -2.341942143 | 0.669595622 | -3.497546977 | 0.000469558 | 0.068757488 | Not Sig  |
| ENSG00000136943 | CTSV     | cathepsin V                                         | 1515      | 60.89654817 | -2.34040325  | 0.992968472 | -2.356976396 | 0.018424418 | 0.692593119 | Not Sig  |
| ENSG00000218792 | NA       | NA                                                  | NA        | 5.888509792 | -2.339654834 | 1.332893485 | -1.755320182 | 0.079204556 | NA          | NA       |
| ENSG00000259723 | NA       | NA                                                  | NA        | 11.06026174 | -2.338856979 | 1.459962737 | -1.601997723 | 0.109156113 | 0.999371363 | Not Sig  |
| ENSG00000256037 | NA       | NA                                                  | NA        | 1.801611948 | -2.33751228  | 2.236505596 | -1.045162723 | 0.295947769 | NA          | NA       |
| ENSG00000011083 | SLC6A7   | solute carrier family 6 member 7                    | 6534      | 11.53076912 | -2.337334262 | 0.909072935 | -2.571118525 | 0.010137063 | 0.494790816 | Not Sig  |

|                 |            |                                                     |           |             |              |             |              |             |             |         |
|-----------------|------------|-----------------------------------------------------|-----------|-------------|--------------|-------------|--------------|-------------|-------------|---------|
| ENSG00000263615 | MIR4306    | microRNA 4306                                       | 100422861 | 5.647644647 | -2.332286335 | 1.244304248 | -1.874369825 | 0.06087947  | NA          | NA      |
| ENSG00000201555 | NA         | NA                                                  | NA        | 2.725870266 | -2.331205203 | 1.799996399 | -1.295116593 | 0.195280012 | NA          | NA      |
| ENSG00000250778 | NA         | NA                                                  | NA        | 1.984042707 | -2.32788736  | 2.220180986 | -1.04851243  | 0.294402578 | NA          | NA      |
| ENSG00000119547 | ONECUT2    | one cut homeobox 2                                  | 9480      | 132.4548856 | -2.324553424 | 1.355074048 | -1.715443837 | 0.086263884 | 0.999371363 | Not Sig |
| ENSG00000223791 | UBE2E1-AS1 | UBE2E1 antisense RNA 1                              | 100874092 | 0.995103902 | -2.323092637 | 2.563111206 | -0.906356552 | 0.364747161 | NA          | NA      |
| ENSG00000267118 | NA         | NA                                                  | NA        | 2.989885218 | -2.317221918 | 1.703441837 | -1.360317604 | 0.17372944  | NA          | NA      |
| ENSG00000254542 | NA         | NA                                                  | NA        | 1.775850908 | -2.315022728 | 2.214774302 | -1.045263495 | 0.295901204 | NA          | NA      |
| ENSG00000163092 | XIRP2      | xin actin binding repeat containing 2               | 129446    | 3.18419955  | -2.31264782  | 2.264304816 | -1.021350043 | 0.307088625 | NA          | NA      |
| ENSG00000211454 | AKR7L      | aldo-keto reductase family 7 like (gene/pseudogene) | 246181    | 29.21567056 | -2.31190009  | 0.926049398 | -2.496519187 | 0.012541888 | 0.556126761 | Not Sig |
| ENSG00000101203 | COL20A1    | collagen type XX alpha 1 chain                      | 57642     | 2.135692292 | -2.308711881 | 2.525891973 | -0.914018456 | 0.360707148 | NA          | NA      |
| ENSG00000227619 | NA         | NA                                                  | NA        | 26.24237547 | -2.308679699 | 1.210773282 | -1.906781173 | 0.05654893  | 0.999371363 | Not Sig |
| ENSG00000272636 | DOC2B      | double C2 domain beta                               | 8447      | 233.0387666 | -2.306708176 | 0.855538143 | -2.696207288 | 0.007013401 | 0.41078956  | Not Sig |
| ENSG00000232517 | NA         | NA                                                  | NA        | 1.808049484 | -2.306302796 | 2.029451213 | -1.136416969 | 0.255782097 | NA          | NA      |
| ENSG00000235238 | NA         | NA                                                  | NA        | 2.789730265 | -2.304972294 | 1.853176418 | -1.243795395 | 0.213574876 | NA          | NA      |
| ENSG00000264255 | NA         | NA                                                  | NA        | 1.774433506 | -2.304820213 | 1.974210841 | -1.167464064 | 0.243023012 | NA          | NA      |
| ENSG00000207713 | MIR200C    | microRNA 200c                                       | 406985    | 0.978797111 | -2.29850955  | 2.60972838  | -0.880746658 | 0.378454957 | NA          | NA      |
| ENSG00000140506 | LMAN1L     | lectin, mannose binding 1 like                      | 79748     | 0.972359575 | -2.298476706 | 2.614119266 | -0.879254721 | 0.37926318  | NA          | NA      |
| ENSG00000207947 | MIR152     | microRNA 152                                        | 406943    | 0.972359575 | -2.298476706 | 2.614119266 | -0.879254721 | 0.37926318  | NA          | NA      |
| ENSG00000207378 | NA         | NA                                                  | NA        | 5.969952371 | -2.297310734 | 1.477425239 | -1.554942121 | 0.119959855 | NA          | NA      |
| ENSG00000234175 | NA         | NA                                                  | NA        | 1.932520626 | -2.29554638  | 1.909640057 | -1.202083279 | 0.229331264 | NA          | NA      |
| ENSG00000236055 | NA         | NA                                                  | NA        | 10.90372326 | -2.290565521 | 1.47289738  | -1.55514264  | 0.119912102 | 0.999371363 | Not Sig |
| ENSG00000263768 | NA         | NA                                                  | NA        | 11.5540325  | -2.287898628 | 1.622345639 | -1.41024118  | 0.15846848  | 0.999371363 | Not Sig |
| ENSG00000261000 | NA         | NA                                                  | NA        | 3.953477989 | -2.286600205 | 1.4904363   | -1.534181772 | 0.124984941 | NA          | NA      |
| ENSG00000149635 | OCSTAMP    | osteoclast stimulatory transmembrane protein        | 128506    | 1.004243201 | -2.283515101 | 3.025587513 | -0.754734441 | 0.450408337 | NA          | NA      |
| ENSG00000242797 | NA         | NA                                                  | NA        | 1.004243201 | -2.283515101 | 3.025587513 | -0.754734441 | 0.450408337 | NA          | NA      |
| ENSG00000265324 | NA         | NA                                                  | NA        | 1.004243201 | -2.283515101 | 3.025587513 | -0.754734441 | 0.450408337 | NA          | NA      |
| ENSG00000236229 | NA         | NA                                                  | NA        | 0.969342862 | -2.283298261 | 3.056458998 | -0.74704037  | 0.455039193 | NA          | NA      |
| ENSG00000199874 | NA         | NA                                                  | NA        | 0.962905327 | -2.283257818 | 3.062332722 | -0.745594299 | 0.455912528 | NA          | NA      |
| ENSG00000223918 | NA         | NA                                                  | NA        | 1.917631237 | -2.282567128 | 2.287300171 | -0.997930729 | 0.31831295  | NA          | NA      |
| ENSG00000266980 | NA         | NA                                                  | NA        | 5.969122356 | -2.276225614 | 1.562446079 | -1.456834667 | 0.145162024 | NA          | NA      |
| ENSG00000145451 | GLRA3      | glycine receptor alpha 3                            | 8001      | 18.79540977 | -2.274628062 | 1.245167445 | -1.826764803 | 0.06773514  | 0.999371363 | Not Sig |
| ENSG00000225171 | NA         | NA                                                  | NA        | 7.537245339 | -2.274182063 | 1.077783016 | -2.110055575 | 0.034853569 | 0.965260677 | Not Sig |
| ENSG00000104044 | OCA2       | OCA2 melanosomal transmembrane protein              | 4948      | 57.85398351 | -2.273151735 | 0.850240249 | -2.673540493 | 0.007505521 | 0.42176576  | Not Sig |
| ENSG00000249417 | NA         | NA                                                  | NA        | 3.695485566 | -2.273099627 | 1.598286716 | -1.422210173 | 0.154965246 | NA          | NA      |
| ENSG00000266903 | NA         | NA                                                  | NA        | 60.8816806  | -2.263436705 | 1.096725814 | -2.063812738 | 0.039035475 | 0.999371363 | Not Sig |

|                 |           |                                              |        |             |              |             |              |             |             |         |
|-----------------|-----------|----------------------------------------------|--------|-------------|--------------|-------------|--------------|-------------|-------------|---------|
| ENSG00000225349 | NA        | NA                                           | NA     | 13.21267402 | -2.261141558 | 1.245014892 | -1.816156234 | 0.06934641  | 0.999371363 | Not Sig |
| ENSG00000127364 | TAS2R4    | taste 2 receptor member 4                    | 50832  | 29.97978048 | -2.257802451 | 0.831633288 | -2.714901487 | 0.006629549 | 0.393801452 | Not Sig |
| ENSG00000227141 | NA        | NA                                           | NA     | 1.677007763 | -2.257126613 | 2.606766719 | -0.865872115 | 0.386560296 | NA          | NA      |
| ENSG00000258215 | NA        | NA                                           | NA     | 2.01794065  | -2.254722718 | 2.128380536 | -1.059360711 | 0.289435536 | NA          | NA      |
| ENSG00000214077 | NA        | NA                                           | NA     | 1.883600252 | -2.254609241 | 1.971682745 | -1.14349494  | 0.252833155 | NA          | NA      |
| ENSG00000188487 | INSC      | INSC, spindle orientation adaptor protein    | 387755 | 21.96439797 | -2.25441422  | 1.029207115 | -2.190437851 | 0.028492497 | 0.880038778 | Not Sig |
| ENSG00000114378 | HYAL1     | hyaluronoglucosaminidase 1                   | 3373   | 442.6910018 | -2.252369367 | 0.794805813 | -2.833861216 | 0.00459893  | 0.308054923 | Not Sig |
| ENSG00000213253 | NA        | NA                                           | NA     | 1.740220612 | -2.250001534 | 2.010148566 | -1.119321015 | 0.263003213 | NA          | NA      |
| ENSG00000188279 | NA        | NA                                           | NA     | 16.90335107 | -2.247631976 | 1.345696215 | -1.670237272 | 0.094872428 | 0.999371363 | Not Sig |
| ENSG00000231270 | NA        | NA                                           | NA     | 5.841734558 | -2.245555684 | 1.625756364 | -1.381237518 | 0.167205943 | NA          | NA      |
| ENSG00000101306 | MYLK2     | myosin light chain kinase 2                  | 85366  | 2.682253359 | -2.237057212 | 1.776477505 | -1.259265713 | 0.207934373 | NA          | NA      |
| ENSG00000238564 | NA        | NA                                           | NA     | 3.885052202 | -2.235046279 | 1.609605672 | -1.388567597 | 0.164964276 | NA          | NA      |
| ENSG00000109132 | PHOX2B    | paired like homeobox 2b                      | 8929   | 0.418673527 | -2.2340764   | 4.019230315 | -0.555846823 | 0.578315574 | NA          | NA      |
| ENSG00000123569 | H2BFWT    | H2B histone family member W, testis specific | 158983 | 0.418673527 | -2.2340764   | 4.019230315 | -0.555846823 | 0.578315574 | NA          | NA      |
| ENSG00000125788 | DEFB126   | defensin beta 126                            | 81623  | 0.418673527 | -2.2340764   | 4.019230315 | -0.555846823 | 0.578315574 | NA          | NA      |
| ENSG00000128313 | APOL5     | apolipoprotein L5                            | 80831  | 0.418673527 | -2.2340764   | 4.019230315 | -0.555846823 | 0.578315574 | NA          | NA      |
| ENSG00000134940 | ACRV1     | acrosomal vesicle protein 1                  | 56     | 0.418673527 | -2.2340764   | 4.019230315 | -0.555846823 | 0.578315574 | NA          | NA      |
| ENSG00000146383 | TAAR6     | trace amine associated receptor 6            | 319100 | 0.418673527 | -2.2340764   | 4.019230315 | -0.555846823 | 0.578315574 | NA          | NA      |
| ENSG00000154997 | 14-Sep    | septin 14                                    | 346288 | 0.418673527 | -2.2340764   | 4.019230315 | -0.555846823 | 0.578315574 | NA          | NA      |
| ENSG00000158731 | NA        | NA                                           | NA     | 0.418673527 | -2.2340764   | 4.019230315 | -0.555846823 | 0.578315574 | NA          | NA      |
| ENSG00000172497 | ACOT12    | acyl-CoA thioesterase 12                     | 134526 | 0.418673527 | -2.2340764   | 4.019230315 | -0.555846823 | 0.578315574 | NA          | NA      |
| ENSG00000182824 | LINC01662 | long intergenic non-protein coding RNA 1662  | 642643 | 0.418673527 | -2.2340764   | 4.019230315 | -0.555846823 | 0.578315574 | NA          | NA      |
| ENSG00000183072 | NKX2-5    | NK2 homeobox 5                               | 1482   | 0.418673527 | -2.2340764   | 4.019230315 | -0.555846823 | 0.578315574 | NA          | NA      |
| ENSG00000184055 | NA        | NA                                           | NA     | 0.418673527 | -2.2340764   | 4.019230315 | -0.555846823 | 0.578315574 | NA          | NA      |
| ENSG00000184324 | NA        | NA                                           | NA     | 0.418673527 | -2.2340764   | 4.019230315 | -0.555846823 | 0.578315574 | NA          | NA      |
| ENSG00000186328 | NA        | NA                                           | NA     | 0.418673527 | -2.2340764   | 4.019230315 | -0.555846823 | 0.578315574 | NA          | NA      |
| ENSG00000188501 | LCTL      | lactase like                                 | 197021 | 0.418673527 | -2.2340764   | 4.019230315 | -0.555846823 | 0.578315574 | NA          | NA      |
| ENSG00000196406 | SPANXD    | SPANX family member D                        | 64648  | 0.418673527 | -2.2340764   | 4.019230315 | -0.555846823 | 0.578315574 | NA          | NA      |
| ENSG00000200310 | NA        | NA                                           | NA     | 0.418673527 | -2.2340764   | 4.019230315 | -0.555846823 | 0.578315574 | NA          | NA      |
| ENSG00000201041 | NA        | NA                                           | NA     | 0.418673527 | -2.2340764   | 4.019230315 | -0.555846823 | 0.578315574 | NA          | NA      |
| ENSG00000201186 | NA        | NA                                           | NA     | 0.418673527 | -2.2340764   | 4.019230315 | -0.555846823 | 0.578315574 | NA          | NA      |
| ENSG00000202157 | NA        | NA                                           | NA     | 0.418673527 | -2.2340764   | 4.019230315 | -0.555846823 | 0.578315574 | NA          | NA      |
| ENSG00000204296 | C6orf10   | chromosome 6 open reading frame 10           | 10665  | 0.418673527 | -2.2340764   | 4.019230315 | -0.555846823 | 0.578315574 | NA          | NA      |
| ENSG00000207453 | NA        | NA                                           | NA     | 0.418673527 | -2.2340764   | 4.019230315 | -0.555846823 | 0.578315574 | NA          | NA      |
| ENSG00000207818 | MIR105-2  | microRNA 105-2                               | 406898 | 0.418673527 | -2.2340764   | 4.019230315 | -0.555846823 | 0.578315574 | NA          | NA      |

|                 |              |                                                      |           |             |            |             |              |             |    |    |
|-----------------|--------------|------------------------------------------------------|-----------|-------------|------------|-------------|--------------|-------------|----|----|
| ENSG00000207961 | MIR496       | microRNA 496                                         | 574454    | 0.418673527 | -2.2340764 | 4.019230315 | -0.555846823 | 0.578315574 | NA | NA |
| ENSG00000212933 | KRTAP12-4    | keratin associated protein 12-4                      | 386684    | 0.418673527 | -2.2340764 | 4.019230315 | -0.555846823 | 0.578315574 | NA | NA |
| ENSG00000214584 | NA           | NA                                                   | NA        | 0.418673527 | -2.2340764 | 4.019230315 | -0.555846823 | 0.578315574 | NA | NA |
| ENSG00000215450 | NA           | NA                                                   | NA        | 0.418673527 | -2.2340764 | 4.019230315 | -0.555846823 | 0.578315574 | NA | NA |
| ENSG00000215506 | NA           | NA                                                   | NA        | 0.418673527 | -2.2340764 | 4.019230315 | -0.555846823 | 0.578315574 | NA | NA |
| ENSG00000216073 | NA           | NA                                                   | NA        | 0.418673527 | -2.2340764 | 4.019230315 | -0.555846823 | 0.578315574 | NA | NA |
| ENSG00000216740 | NA           | NA                                                   | NA        | 0.418673527 | -2.2340764 | 4.019230315 | -0.555846823 | 0.578315574 | NA | NA |
| ENSG00000217404 | NA           | NA                                                   | NA        | 0.418673527 | -2.2340764 | 4.019230315 | -0.555846823 | 0.578315574 | NA | NA |
| ENSG00000218690 | NA           | NA                                                   | NA        | 0.418673527 | -2.2340764 | 4.019230315 | -0.555846823 | 0.578315574 | NA | NA |
| ENSG00000221082 | NA           | NA                                                   | NA        | 0.418673527 | -2.2340764 | 4.019230315 | -0.555846823 | 0.578315574 | NA | NA |
| ENSG00000222244 | NA           | NA                                                   | NA        | 0.418673527 | -2.2340764 | 4.019230315 | -0.555846823 | 0.578315574 | NA | NA |
| ENSG00000222419 | NA           | NA                                                   | NA        | 0.418673527 | -2.2340764 | 4.019230315 | -0.555846823 | 0.578315574 | NA | NA |
| ENSG00000222805 | NA           | NA                                                   | NA        | 0.418673527 | -2.2340764 | 4.019230315 | -0.555846823 | 0.578315574 | NA | NA |
| ENSG00000223197 | NA           | NA                                                   | NA        | 0.418673527 | -2.2340764 | 4.019230315 | -0.555846823 | 0.578315574 | NA | NA |
| ENSG00000223443 | USP17L2      | ubiquitin specific peptidase 17-like family member 2 | 377630    | 0.418673527 | -2.2340764 | 4.019230315 | -0.555846823 | 0.578315574 | NA | NA |
| ENSG00000223559 | NA           | NA                                                   | NA        | 0.418673527 | -2.2340764 | 4.019230315 | -0.555846823 | 0.578315574 | NA | NA |
| ENSG00000223604 | NA           | NA                                                   | NA        | 0.418673527 | -2.2340764 | 4.019230315 | -0.555846823 | 0.578315574 | NA | NA |
| ENSG00000223710 | NA           | NA                                                   | NA        | 0.418673527 | -2.2340764 | 4.019230315 | -0.555846823 | 0.578315574 | NA | NA |
| ENSG00000223734 | LOC105373463 | uncharacterized LOC105373463                         | 105373463 | 0.418673527 | -2.2340764 | 4.019230315 | -0.555846823 | 0.578315574 | NA | NA |
| ENSG00000223877 | NA           | NA                                                   | NA        | 0.418673527 | -2.2340764 | 4.019230315 | -0.555846823 | 0.578315574 | NA | NA |
| ENSG00000223995 | NA           | NA                                                   | NA        | 0.418673527 | -2.2340764 | 4.019230315 | -0.555846823 | 0.578315574 | NA | NA |
| ENSG00000224040 | NA           | NA                                                   | NA        | 0.418673527 | -2.2340764 | 4.019230315 | -0.555846823 | 0.578315574 | NA | NA |
| ENSG00000224082 | NA           | NA                                                   | NA        | 0.418673527 | -2.2340764 | 4.019230315 | -0.555846823 | 0.578315574 | NA | NA |
| ENSG00000224204 | PHEX-AS1     | PHEX antisense RNA 1                                 | 100873942 | 0.418673527 | -2.2340764 | 4.019230315 | -0.555846823 | 0.578315574 | NA | NA |
| ENSG00000226358 | NA           | NA                                                   | NA        | 0.418673527 | -2.2340764 | 4.019230315 | -0.555846823 | 0.578315574 | NA | NA |
| ENSG00000226745 | NA           | NA                                                   | NA        | 0.418673527 | -2.2340764 | 4.019230315 | -0.555846823 | 0.578315574 | NA | NA |
| ENSG00000227068 | NA           | NA                                                   | NA        | 0.418673527 | -2.2340764 | 4.019230315 | -0.555846823 | 0.578315574 | NA | NA |
| ENSG00000228283 | NA           | NA                                                   | NA        | 0.418673527 | -2.2340764 | 4.019230315 | -0.555846823 | 0.578315574 | NA | NA |
| ENSG00000228837 | NA           | NA                                                   | NA        | 0.418673527 | -2.2340764 | 4.019230315 | -0.555846823 | 0.578315574 | NA | NA |
| ENSG00000229188 | NA           | NA                                                   | NA        | 0.418673527 | -2.2340764 | 4.019230315 | -0.555846823 | 0.578315574 | NA | NA |
| ENSG00000229283 | NA           | NA                                                   | NA        | 0.418673527 | -2.2340764 | 4.019230315 | -0.555846823 | 0.578315574 | NA | NA |
| ENSG00000229882 | NA           | NA                                                   | NA        | 0.418673527 | -2.2340764 | 4.019230315 | -0.555846823 | 0.578315574 | NA | NA |
| ENSG00000229894 | GK3P         | glycerol kinase 3 pseudogene                         | 2713      | 0.418673527 | -2.2340764 | 4.019230315 | -0.555846823 | 0.578315574 | NA | NA |
| ENSG00000229906 | NA           | NA                                                   | NA        | 0.418673527 | -2.2340764 | 4.019230315 | -0.555846823 | 0.578315574 | NA | NA |
| ENSG00000230175 | NA           | NA                                                   | NA        | 0.418673527 | -2.2340764 | 4.019230315 | -0.555846823 | 0.578315574 | NA | NA |

|                 |             |                         |           |             |            |             |              |             |    |    |
|-----------------|-------------|-------------------------|-----------|-------------|------------|-------------|--------------|-------------|----|----|
| ENSG00000230777 | NA          | NA                      | NA        | 0.418673527 | -2.2340764 | 4.019230315 | -0.555846823 | 0.578315574 | NA | NA |
| ENSG00000231351 | NA          | NA                      | NA        | 0.418673527 | -2.2340764 | 4.019230315 | -0.555846823 | 0.578315574 | NA | NA |
| ENSG00000231373 | GNA14-AS1   | GNA14 antisense RNA 1   | 101927422 | 0.418673527 | -2.2340764 | 4.019230315 | -0.555846823 | 0.578315574 | NA | NA |
| ENSG00000231749 | ABCA9-AS1   | ABCA9 antisense RNA 1   | 104355297 | 0.418673527 | -2.2340764 | 4.019230315 | -0.555846823 | 0.578315574 | NA | NA |
| ENSG00000231859 | NA          | NA                      | NA        | 0.418673527 | -2.2340764 | 4.019230315 | -0.555846823 | 0.578315574 | NA | NA |
| ENSG00000233039 | NA          | NA                      | NA        | 0.418673527 | -2.2340764 | 4.019230315 | -0.555846823 | 0.578315574 | NA | NA |
| ENSG00000233774 | NA          | NA                      | NA        | 0.418673527 | -2.2340764 | 4.019230315 | -0.555846823 | 0.578315574 | NA | NA |
| ENSG00000234288 | NA          | NA                      | NA        | 0.418673527 | -2.2340764 | 4.019230315 | -0.555846823 | 0.578315574 | NA | NA |
| ENSG00000234421 | NA          | NA                      | NA        | 0.418673527 | -2.2340764 | 4.019230315 | -0.555846823 | 0.578315574 | NA | NA |
| ENSG00000234515 | NA          | NA                      | NA        | 0.418673527 | -2.2340764 | 4.019230315 | -0.555846823 | 0.578315574 | NA | NA |
| ENSG00000234895 | NA          | NA                      | NA        | 0.418673527 | -2.2340764 | 4.019230315 | -0.555846823 | 0.578315574 | NA | NA |
| ENSG00000238038 | NA          | NA                      | NA        | 0.418673527 | -2.2340764 | 4.019230315 | -0.555846823 | 0.578315574 | NA | NA |
| ENSG00000238267 | NA          | NA                      | NA        | 0.418673527 | -2.2340764 | 4.019230315 | -0.555846823 | 0.578315574 | NA | NA |
| ENSG00000238302 | NA          | NA                      | NA        | 0.418673527 | -2.2340764 | 4.019230315 | -0.555846823 | 0.578315574 | NA | NA |
| ENSG00000238392 | NA          | NA                      | NA        | 0.418673527 | -2.2340764 | 4.019230315 | -0.555846823 | 0.578315574 | NA | NA |
| ENSG00000238997 | NA          | NA                      | NA        | 0.418673527 | -2.2340764 | 4.019230315 | -0.555846823 | 0.578315574 | NA | NA |
| ENSG00000239103 | NA          | NA                      | NA        | 0.418673527 | -2.2340764 | 4.019230315 | -0.555846823 | 0.578315574 | NA | NA |
| ENSG00000239201 | NA          | NA                      | NA        | 0.418673527 | -2.2340764 | 4.019230315 | -0.555846823 | 0.578315574 | NA | NA |
| ENSG00000239210 | NA          | NA                      | NA        | 0.418673527 | -2.2340764 | 4.019230315 | -0.555846823 | 0.578315574 | NA | NA |
| ENSG00000239227 | NA          | NA                      | NA        | 0.418673527 | -2.2340764 | 4.019230315 | -0.555846823 | 0.578315574 | NA | NA |
| ENSG00000239255 | NA          | NA                      | NA        | 0.418673527 | -2.2340764 | 4.019230315 | -0.555846823 | 0.578315574 | NA | NA |
| ENSG00000239595 | NA          | NA                      | NA        | 0.418673527 | -2.2340764 | 4.019230315 | -0.555846823 | 0.578315574 | NA | NA |
| ENSG00000240254 | B4GALT4-AS1 | B4GALT4 antisense RNA 1 | 100874201 | 0.418673527 | -2.2340764 | 4.019230315 | -0.555846823 | 0.578315574 | NA | NA |
| ENSG00000240364 | NA          | NA                      | NA        | 0.418673527 | -2.2340764 | 4.019230315 | -0.555846823 | 0.578315574 | NA | NA |
| ENSG00000241825 | NA          | NA                      | NA        | 0.418673527 | -2.2340764 | 4.019230315 | -0.555846823 | 0.578315574 | NA | NA |
| ENSG00000248377 | NA          | NA                      | NA        | 0.418673527 | -2.2340764 | 4.019230315 | -0.555846823 | 0.578315574 | NA | NA |
| ENSG00000248552 | NA          | NA                      | NA        | 0.418673527 | -2.2340764 | 4.019230315 | -0.555846823 | 0.578315574 | NA | NA |
| ENSG00000250080 | NA          | NA                      | NA        | 0.418673527 | -2.2340764 | 4.019230315 | -0.555846823 | 0.578315574 | NA | NA |
| ENSG00000250140 | NA          | NA                      | NA        | 0.418673527 | -2.2340764 | 4.019230315 | -0.555846823 | 0.578315574 | NA | NA |
| ENSG00000250613 | NA          | NA                      | NA        | 0.418673527 | -2.2340764 | 4.019230315 | -0.555846823 | 0.578315574 | NA | NA |
| ENSG00000250693 | NA          | NA                      | NA        | 0.418673527 | -2.2340764 | 4.019230315 | -0.555846823 | 0.578315574 | NA | NA |
| ENSG00000251577 | NA          | NA                      | NA        | 0.418673527 | -2.2340764 | 4.019230315 | -0.555846823 | 0.578315574 | NA | NA |
| ENSG00000251762 | NA          | NA                      | NA        | 0.418673527 | -2.2340764 | 4.019230315 | -0.555846823 | 0.578315574 | NA | NA |
| ENSG00000251817 | NA          | NA                      | NA        | 0.418673527 | -2.2340764 | 4.019230315 | -0.555846823 | 0.578315574 | NA | NA |
| ENSG00000252255 | NA          | NA                      | NA        | 0.418673527 | -2.2340764 | 4.019230315 | -0.555846823 | 0.578315574 | NA | NA |

|                 |           |                                                      |           |             |            |             |              |             |    |    |
|-----------------|-----------|------------------------------------------------------|-----------|-------------|------------|-------------|--------------|-------------|----|----|
| ENSG00000252329 | NA        | NA                                                   | NA        | 0.418673527 | -2.2340764 | 4.019230315 | -0.555846823 | 0.578315574 | NA | NA |
| ENSG00000253094 | NA        | NA                                                   | NA        | 0.418673527 | -2.2340764 | 4.019230315 | -0.555846823 | 0.578315574 | NA | NA |
| ENSG00000253328 | NA        | NA                                                   | NA        | 0.418673527 | -2.2340764 | 4.019230315 | -0.555846823 | 0.578315574 | NA | NA |
| ENSG00000253415 | NA        | NA                                                   | NA        | 0.418673527 | -2.2340764 | 4.019230315 | -0.555846823 | 0.578315574 | NA | NA |
| ENSG00000253488 | NA        | NA                                                   | NA        | 0.418673527 | -2.2340764 | 4.019230315 | -0.555846823 | 0.578315574 | NA | NA |
| ENSG00000253509 | NA        | NA                                                   | NA        | 0.418673527 | -2.2340764 | 4.019230315 | -0.555846823 | 0.578315574 | NA | NA |
| ENSG00000253859 | NA        | NA                                                   | NA        | 0.418673527 | -2.2340764 | 4.019230315 | -0.555846823 | 0.578315574 | NA | NA |
| ENSG00000254544 | NA        | NA                                                   | NA        | 0.418673527 | -2.2340764 | 4.019230315 | -0.555846823 | 0.578315574 | NA | NA |
| ENSG00000254582 | NA        | NA                                                   | NA        | 0.418673527 | -2.2340764 | 4.019230315 | -0.555846823 | 0.578315574 | NA | NA |
| ENSG00000256235 | SMIM3     | small integral membrane protein 3                    | 85027     | 0.418673527 | -2.2340764 | 4.019230315 | -0.555846823 | 0.578315574 | NA | NA |
| ENSG00000257642 | KCCAT198  | renal clear cell carcinoma-associated transcript 198 | 105369954 | 0.418673527 | -2.2340764 | 4.019230315 | -0.555846823 | 0.578315574 | NA | NA |
| ENSG00000257653 | NA        | NA                                                   | NA        | 0.418673527 | -2.2340764 | 4.019230315 | -0.555846823 | 0.578315574 | NA | NA |
| ENSG00000258292 | LINC02410 | long intergenic non-protein coding RNA 2410          | 105369920 | 0.418673527 | -2.2340764 | 4.019230315 | -0.555846823 | 0.578315574 | NA | NA |
| ENSG00000258510 | NA        | NA                                                   | NA        | 0.418673527 | -2.2340764 | 4.019230315 | -0.555846823 | 0.578315574 | NA | NA |
| ENSG00000258587 | NA        | NA                                                   | NA        | 0.418673527 | -2.2340764 | 4.019230315 | -0.555846823 | 0.578315574 | NA | NA |
| ENSG00000258905 | NA        | NA                                                   | NA        | 0.418673527 | -2.2340764 | 4.019230315 | -0.555846823 | 0.578315574 | NA | NA |
| ENSG00000259360 | NA        | NA                                                   | NA        | 0.418673527 | -2.2340764 | 4.019230315 | -0.555846823 | 0.578315574 | NA | NA |
| ENSG00000259536 | NA        | NA                                                   | NA        | 0.418673527 | -2.2340764 | 4.019230315 | -0.555846823 | 0.578315574 | NA | NA |
| ENSG00000260017 | NA        | NA                                                   | NA        | 0.418673527 | -2.2340764 | 4.019230315 | -0.555846823 | 0.578315574 | NA | NA |
| ENSG00000261314 | NA        | NA                                                   | NA        | 0.418673527 | -2.2340764 | 4.019230315 | -0.555846823 | 0.578315574 | NA | NA |
| ENSG00000261460 | NA        | NA                                                   | NA        | 0.418673527 | -2.2340764 | 4.019230315 | -0.555846823 | 0.578315574 | NA | NA |
| ENSG00000262983 | NA        | NA                                                   | NA        | 0.418673527 | -2.2340764 | 4.019230315 | -0.555846823 | 0.578315574 | NA | NA |
| ENSG00000263364 | NA        | NA                                                   | NA        | 0.418673527 | -2.2340764 | 4.019230315 | -0.555846823 | 0.578315574 | NA | NA |
| ENSG00000264077 | NA        | NA                                                   | NA        | 0.418673527 | -2.2340764 | 4.019230315 | -0.555846823 | 0.578315574 | NA | NA |
| ENSG00000264119 | MIR4795   | microRNA 4795                                        | 100616161 | 0.418673527 | -2.2340764 | 4.019230315 | -0.555846823 | 0.578315574 | NA | NA |
| ENSG00000264736 | NA        | NA                                                   | NA        | 0.418673527 | -2.2340764 | 4.019230315 | -0.555846823 | 0.578315574 | NA | NA |
| ENSG00000265636 | NA        | NA                                                   | NA        | 0.418673527 | -2.2340764 | 4.019230315 | -0.555846823 | 0.578315574 | NA | NA |
| ENSG00000266283 | NA        | NA                                                   | NA        | 0.418673527 | -2.2340764 | 4.019230315 | -0.555846823 | 0.578315574 | NA | NA |
| ENSG00000266293 | NA        | NA                                                   | NA        | 0.418673527 | -2.2340764 | 4.019230315 | -0.555846823 | 0.578315574 | NA | NA |
| ENSG00000266497 | NA        | NA                                                   | NA        | 0.418673527 | -2.2340764 | 4.019230315 | -0.555846823 | 0.578315574 | NA | NA |
| ENSG00000267369 | NA        | NA                                                   | NA        | 0.418673527 | -2.2340764 | 4.019230315 | -0.555846823 | 0.578315574 | NA | NA |
| ENSG00000267579 | NA        | NA                                                   | NA        | 0.418673527 | -2.2340764 | 4.019230315 | -0.555846823 | 0.578315574 | NA | NA |
| ENSG00000267802 | NA        | NA                                                   | NA        | 0.418673527 | -2.2340764 | 4.019230315 | -0.555846823 | 0.578315574 | NA | NA |
| ENSG00000267879 | NA        | NA                                                   | NA        | 0.418673527 | -2.2340764 | 4.019230315 | -0.555846823 | 0.578315574 | NA | NA |
| ENSG00000268545 | NA        | NA                                                   | NA        | 0.418673527 | -2.2340764 | 4.019230315 | -0.555846823 | 0.578315574 | NA | NA |



|                 |           |                                                    |           |             |              |             |              |             |             |         |
|-----------------|-----------|----------------------------------------------------|-----------|-------------|--------------|-------------|--------------|-------------|-------------|---------|
| ENSG00000268894 | PLCE1-AS1 | PLCE1 antisense RNA 1                              | 100128054 | 0.418673527 | -2.2340764   | 4.019230315 | -0.555846823 | 0.578315574 | NA          | NA      |
| ENSG00000268949 | NA        | NA                                                 | NA        | 0.418673527 | -2.2340764   | 4.019230315 | -0.555846823 | 0.578315574 | NA          | NA      |
| ENSG00000269808 | NA        | NA                                                 | NA        | 0.418673527 | -2.2340764   | 4.019230315 | -0.555846823 | 0.578315574 | NA          | NA      |
| ENSG00000270292 | NA        | NA                                                 | NA        | 0.418673527 | -2.2340764   | 4.019230315 | -0.555846823 | 0.578315574 | NA          | NA      |
| ENSG00000270359 | NA        | NA                                                 | NA        | 0.418673527 | -2.2340764   | 4.019230315 | -0.555846823 | 0.578315574 | NA          | NA      |
| ENSG00000270377 | NA        | NA                                                 | NA        | 0.418673527 | -2.2340764   | 4.019230315 | -0.555846823 | 0.578315574 | NA          | NA      |
| ENSG00000271745 | NA        | NA                                                 | NA        | 0.418673527 | -2.2340764   | 4.019230315 | -0.555846823 | 0.578315574 | NA          | NA      |
| ENSG00000258302 | NA        | NA                                                 | NA        | 20.11771248 | -2.232214343 | 1.142665546 | -1.953515052 | 0.050758595 | 0.999371363 | Not Sig |
| ENSG00000110245 | APOC3     | apolipoprotein C3                                  | 345       | 0.971629618 | -2.231634591 | 2.99062337  | -0.74621051  | 0.45554026  | NA          | NA      |
| ENSG00000122859 | NEUROG3   | neurogenin 3                                       | 50674     | 0.936729279 | -2.231244055 | 3.02334953  | -0.738004003 | 0.460512017 | NA          | NA      |
| ENSG00000227135 | NA        | NA                                                 | NA        | 0.936729279 | -2.231244055 | 3.02334953  | -0.738004003 | 0.460512017 | NA          | NA      |
| ENSG00000238908 | NA        | NA                                                 | NA        | 2.009488797 | -2.231039287 | 2.098993179 | -1.06290926  | 0.287823103 | NA          | NA      |
| ENSG00000221714 | NA        | NA                                                 | NA        | 1.882000941 | -2.227533868 | 2.263339492 | -0.98418018  | 0.325026929 | NA          | NA      |
| ENSG00000218274 | NA        | NA                                                 | NA        | 366.9118052 | -2.227283233 | 1.144799016 | -1.94556704  | 0.051706769 | 0.999371363 | Not Sig |
| ENSG00000169836 | TACR3     | tachykinin receptor 3                              | 6870      | 1.706189626 | -2.226814429 | 2.567804216 | -0.867205691 | 0.385829319 | NA          | NA      |
| ENSG00000266805 | NA        | NA                                                 | NA        | 33.24650974 | -2.224953985 | 0.912570166 | -2.43811826  | 0.014763943 | 0.615636874 | Not Sig |
| ENSG00000200840 | NA        | NA                                                 | NA        | 14.42620195 | -2.224427064 | 1.470136346 | -1.513075349 | 0.13026052  | 0.999371363 | Not Sig |
| ENSG00000236754 | NA        | NA                                                 | NA        | 2.679236646 | -2.222748906 | 1.543685881 | -1.439897153 | 0.149896499 | NA          | NA      |
| ENSG00000186481 | NA        | NA                                                 | NA        | 124.539648  | -2.219903389 | 0.732811543 | -3.029296427 | 0.00245124  | 0.212886004 | Not Sig |
| ENSG00000236307 | NA        | NA                                                 | NA        | 4.897150341 | -2.21745424  | 1.85939753  | -1.192565982 | 0.233039395 | NA          | NA      |
| ENSG00000251455 | NA        | NA                                                 | NA        | 3.406762204 | -2.216072157 | 1.608713123 | -1.377543408 | 0.168344304 | NA          | NA      |
| ENSG00000165388 | NA        | NA                                                 | NA        | 5.028228779 | -2.215886104 | 1.438500578 | -1.540413774 | 0.123459526 | NA          | NA      |
| ENSG00000236562 | NA        | NA                                                 | NA        | 6.442641613 | -2.213518627 | 1.403030596 | -1.577669534 | 0.114641549 | NA          | NA      |
| ENSG00000176049 | JAKMIP2   | janus kinase and microtubule interacting protein 2 | 9832      | 137.8165104 | -2.208968572 | 0.816321429 | -2.706003413 | 0.006809835 | 0.402611489 | Not Sig |
| ENSG00000257831 | NA        | NA                                                 | NA        | 9.27996538  | -2.208251411 | 1.17101953  | -1.885751137 | 0.059328498 | 0.999371363 | Not Sig |
| ENSG00000207826 | MIR596    | microRNA 596                                       | 693181    | 1.714044564 | -2.208157155 | 2.162986014 | -1.020883696 | 0.307309545 | NA          | NA      |
| ENSG00000238798 | NA        | NA                                                 | NA        | 0.938146682 | -2.207644864 | 3.105763006 | -0.710822062 | 0.477194507 | NA          | NA      |
| ENSG00000243504 | NA        | NA                                                 | NA        | 0.938146682 | -2.207644864 | 3.105763006 | -0.710822062 | 0.477194507 | NA          | NA      |
| ENSG00000250827 | NA        | NA                                                 | NA        | 0.938146682 | -2.207644864 | 3.105763006 | -0.710822062 | 0.477194507 | NA          | NA      |
| ENSG00000201648 | NA        | NA                                                 | NA        | 0.979484556 | -2.207038212 | 3.06774169  | -0.719434175 | 0.471873446 | NA          | NA      |
| ENSG00000129521 | EGLN3     | egl-9 family hypoxia inducible factor 3            | 112399    | 1059.947576 | -2.204512554 | 0.79465838  | -2.774163856 | 0.00553438  | 0.347874159 | Not Sig |
| ENSG00000205143 | ARID3C    | AT-rich interaction domain 3C                      | 138715    | 0.920422487 | -2.20361844  | 3.090304121 | -0.713074945 | 0.475799383 | NA          | NA      |
| ENSG00000237640 | NA        | NA                                                 | NA        | 0.920422487 | -2.20361844  | 3.090304121 | -0.713074945 | 0.475799383 | NA          | NA      |
| ENSG00000250361 | GYPB      | glycophorin B (MNS blood group)                    | 2994      | 0.920422487 | -2.20361844  | 3.090304121 | -0.713074945 | 0.475799383 | NA          | NA      |
| ENSG00000254550 | OMP       | olfactory marker protein                           | 4975      | 10.22480989 | -2.202863408 | 1.160617657 | -1.89800956  | 0.057694823 | 0.999371363 | Not Sig |

|                 |              |                                                                           |           |             |              |             |              |             |             |          |
|-----------------|--------------|---------------------------------------------------------------------------|-----------|-------------|--------------|-------------|--------------|-------------|-------------|----------|
| ENSG00000268583 | NA           | NA                                                                        | NA        | 1.674993446 | -2.20149028  | 2.290536088 | -0.961124468 | 0.336489588 | NA          | NA       |
| ENSG00000200254 | NA           | NA                                                                        | NA        | 2.525987751 | -2.196728372 | 1.702911949 | -1.289983532 | 0.197056376 | NA          | NA       |
| ENSG00000224474 | NA           | NA                                                                        | NA        | 16.79939929 | -2.192016299 | 0.948869576 | -2.310134453 | 0.020880712 | 0.732453483 | Not Sig  |
| ENSG00000137878 | GCOM1        | GRINL1A complex locus 1                                                   | 145781    | 44.98212165 | -2.191215194 | 0.9511681   | -2.303709716 | 0.021238944 | 0.740892029 | Not Sig  |
| ENSG00000162409 | PRKAA2       | protein kinase AMP-activated catalytic subunit alpha 2                    | 5563      | 731.9813871 | -2.185064681 | 0.909650513 | -2.402092507 | 0.016301585 | 0.654298425 | Not Sig  |
| ENSG00000224573 | NA           | NA                                                                        | NA        | 0.92183989  | -2.17982384  | 3.117279256 | -0.699271275 | 0.484382515 | NA          | NA       |
| ENSG00000236654 | NA           | NA                                                                        | NA        | 0.92183989  | -2.17982384  | 3.117279256 | -0.699271275 | 0.484382515 | NA          | NA       |
| ENSG00000177197 | NA           | NA                                                                        | NA        | 0.928277426 | -2.179736422 | 3.111035246 | -0.70064665  | 0.483523558 | NA          | NA       |
| ENSG00000266149 | LOC100192426 | uncharacterized LOC100192426                                              | 100192426 | 0.928277426 | -2.179736422 | 3.111035246 | -0.70064665  | 0.483523558 | NA          | NA       |
| ENSG00000226232 | NPIPA8       | nuclear pore complex interacting protein family member A8                 | 101059953 | 0.963177764 | -2.179267484 | 3.07826214  | -0.707953834 | 0.478973927 | NA          | NA       |
| ENSG00000135643 | KCNMB4       | potassium calcium-activated channel subfamily M regulatory beta subunit 4 | 27345     | 285.7158961 | -2.177699558 | 0.593230974 | -3.670913444 | 0.000241685 | 0.044109297 | FDR<0.05 |
| ENSG00000261904 | NA           | NA                                                                        | NA        | 1.624888768 | -2.1743738   | 2.62946527  | -0.826926229 | 0.408278876 | NA          | NA       |
| ENSG00000211599 | NA           | NA                                                                        | NA        | 25.25441824 | -2.168869933 | 1.511232365 | -1.435166413 | 0.151239682 | 0.999371363 | Not Sig  |
| ENSG00000147255 | IGSF1        | immunoglobulin superfamily member 1                                       | 3547      | 46.78819301 | -2.167536576 | 1.251311582 | -1.73221171  | 0.083235875 | 0.999371363 | Not Sig  |
| ENSG00000197273 | GUCA2A       | guanylate cyclase activator 2A                                            | 2980      | 2.620447016 | -2.162526867 | 2.061944217 | -1.04878049  | 0.294279159 | NA          | NA       |
| ENSG00000099812 | MISP         | mitotic spindle positioning                                               | 126353    | 970.3279145 | -2.159690135 | 0.452283272 | -4.77508294  | 1.80E-06    | 0.000729716 | FDR<0.05 |
| ENSG00000264754 | NA           | NA                                                                        | NA        | 21.06668111 | -2.158117428 | 0.91768923  | -2.35168656  | 0.018688515 | 0.698351556 | Not Sig  |
| ENSG00000105711 | SCN1B        | sodium voltage-gated channel beta subunit 1                               | 6324      | 270.6730967 | -2.154794959 | 0.666227611 | -3.234322509 | 0.001219317 | 0.134691726 | Not Sig  |
| ENSG00000250654 | LOC100240735 | uncharacterized LOC100240735                                              | 100240735 | 6.204718533 | -2.153585272 | 1.723032709 | -1.249880667 | 0.211343143 | NA          | NA       |
| ENSG00000236358 | NA           | NA                                                                        | NA        | 9.060162445 | -2.153040726 | 1.530138561 | -1.40708873  | 0.159401079 | 0.999371363 | Not Sig  |
| ENSG00000207739 | MIR218-2     | microRNA 218-2                                                            | 407001    | 3.199621666 | -2.147432585 | 1.961741571 | -1.094656206 | 0.273667282 | NA          | NA       |
| ENSG00000182327 | GLTPD2       | glycolipid transfer protein domain containing 2                           | 388323    | 70.90241647 | -2.146685079 | 0.862385051 | -2.489241987 | 0.01280158  | 0.561528648 | Not Sig  |
| ENSG00000204121 | NA           | NA                                                                        | NA        | 9.224725189 | -2.141592306 | 1.290861722 | -1.659040832 | 0.097107565 | 0.999371363 | Not Sig  |
| ENSG00000109472 | CPE          | carboxypeptidase E                                                        | 1363      | 2523.938652 | -2.14123257  | 0.687014859 | -3.116719444 | 0.001828755 | 0.169334662 | Not Sig  |
| ENSG00000259274 | NA           | NA                                                                        | NA        | 3.524065853 | -2.140582356 | 1.404863254 | -1.523694459 | 0.127585054 | NA          | NA       |
| ENSG00000265997 | NA           | NA                                                                        | NA        | 1.89273955  | -2.13765695  | 2.108049066 | -1.014045159 | 0.310561205 | NA          | NA       |
| ENSG00000259344 | NA           | NA                                                                        | NA        | 11.57403049 | -2.137337837 | 1.380813661 | -1.547882888 | 0.121650495 | 0.999371363 | Not Sig  |
| ENSG00000179546 | HTR1D        | 5-hydroxytryptamine receptor 1D                                           | 3352      | 13.52499132 | -2.137333006 | 0.87552958  | -2.441188801 | 0.014638999 | 0.612454873 | Not Sig  |
| ENSG00000112038 | OPRM1        | opioid receptor mu 1                                                      | 4988      | 0.89607885  | -2.13715967  | 3.097528811 | -0.689956349 | 0.490221638 | NA          | NA       |
| ENSG00000264614 | MIR5588      | microRNA 5588                                                             | 100847054 | 0.89607885  | -2.13715967  | 3.097528811 | -0.689956349 | 0.490221638 | NA          | NA       |
| ENSG00000238890 | NA           | NA                                                                        | NA        | 0.902516385 | -2.137094797 | 3.090982107 | -0.69139669  | 0.489316284 | NA          | NA       |
| ENSG00000227177 | NA           | NA                                                                        | NA        | 0.937416724 | -2.136746667 | 3.056652726 | -0.699047899 | 0.484522097 | NA          | NA       |
| ENSG00000254023 | NA           | NA                                                                        | NA        | 0.937416724 | -2.136746667 | 3.056652726 | -0.699047899 | 0.484522097 | NA          | NA       |
| ENSG00000178623 | GPR35        | G protein-coupled receptor 35                                             | 2859      | 143.8221623 | -2.136504918 | 0.78053993  | -2.737214121 | 0.006196195 | 0.375137893 | Not Sig  |
| ENSG00000225338 | NA           | NA                                                                        | NA        | 1.742507367 | -2.13554005  | 1.953041862 | -1.09344305  | 0.274199321 | NA          | NA       |

|                 |           |                                                             |        |             |              |             |              |             |             |         |
|-----------------|-----------|-------------------------------------------------------------|--------|-------------|--------------|-------------|--------------|-------------|-------------|---------|
| ENSG00000212354 | NA        | NA                                                          | NA     | 3.709331417 | -2.13494277  | 1.9946757   | -1.07032074  | 0.284474962 | NA          | NA      |
| ENSG00000259735 | NA        | NA                                                          | NA     | 60.03316748 | -2.134716405 | 0.768801405 | -2.776681198 | 0.005491702 | 0.347522598 | Not Sig |
| ENSG00000204572 | KRTAP5-10 | keratin associated protein 5-10                             | 387273 | 1.629908901 | -2.134374457 | 2.23216918  | -0.956188481 | 0.338977019 | NA          | NA      |
| ENSG00000267105 | NA        | NA                                                          | NA     | 1.765251694 | -2.132508639 | 1.951293228 | -1.092869389 | 0.27445115  | NA          | NA      |
| ENSG00000206676 | NA        | NA                                                          | NA     | 4.128819636 | -2.132300904 | 1.642483932 | -1.298217207 | 0.194212707 | NA          | NA      |
| ENSG00000160318 | CLDND2    | claudin domain containing 2                                 | 125875 | 17.61301785 | -2.130023518 | 1.201209647 | -1.773232111 | 0.076190253 | 0.999371363 | Not Sig |
| ENSG00000201545 | NA        | NA                                                          | NA     | 1.91690128  | -2.118082583 | 2.549627023 | -0.83074213  | 0.406119321 | NA          | NA      |
| ENSG00000165188 | RNF183    | ring finger protein 183                                     | 138065 | 35.95397899 | -2.117694231 | 1.074965568 | -1.970011222 | 0.048837084 | 0.999371363 | Not Sig |
| ENSG00000187753 | C9orf153  | chromosome 9 open reading frame 153                         | 389766 | 6.140362089 | -2.117662973 | 1.216956301 | -1.740130661 | 0.081836078 | NA          | NA      |
| ENSG00000272975 | NA        | NA                                                          | NA     | 1.716746327 | -2.114432248 | 1.970671625 | -1.072950065 | 0.283293521 | NA          | NA      |
| ENSG00000157542 | KCNJ6     | potassium voltage-gated channel subfamily J member 6        | 3763   | 7.892373526 | -2.113909523 | 1.229995464 | -1.718631967 | 0.085681407 | 0.999371363 | Not Sig |
| ENSG00000199153 | MIR30D    | microRNA 30d                                                | 407033 | 2.408641589 | -2.107966721 | 2.107372546 | -1.00028195  | 0.31717408  | NA          | NA      |
| ENSG00000132702 | HAPLN2    | hyaluronan and proteoglycan link protein 2                  | 60484  | 4.062356975 | -2.10620037  | 1.468641882 | -1.434114331 | 0.151539639 | NA          | NA      |
| ENSG00000266543 | NA        | NA                                                          | NA     | 0.879772058 | -2.104059632 | 2.701911979 | -0.778729895 | 0.436138842 | NA          | NA      |
| ENSG00000199411 | NA        | NA                                                          | NA     | 0.886209594 | -2.10399437  | 2.69685439  | -0.780166099 | 0.435293114 | NA          | NA      |
| ENSG00000219329 | NA        | NA                                                          | NA     | 0.886209594 | -2.10399437  | 2.69685439  | -0.780166099 | 0.435293114 | NA          | NA      |
| ENSG00000242113 | NA        | NA                                                          | NA     | 0.886209594 | -2.10399437  | 2.69685439  | -0.780166099 | 0.435293114 | NA          | NA      |
| ENSG00000135002 | RFK       | riboflavin kinase                                           | 55312  | 872.7076663 | -2.101525235 | 0.808347406 | -2.599779772 | 0.00932836  | 0.475595316 | Not Sig |
| ENSG00000214428 | NA        | NA                                                          | NA     | 1.709893784 | -2.100632092 | 2.284239314 | -0.919619971 | 0.357771387 | NA          | NA      |
| ENSG00000174450 | GOLGA6L2  | golgin A6 family-like 2                                     | 283685 | 0.376605696 | -2.097575228 | 4.030196574 | -0.520464744 | 0.602739695 | NA          | NA      |
| ENSG00000199901 | NA        | NA                                                          | NA     | 0.376605696 | -2.097575228 | 4.030196574 | -0.520464744 | 0.602739695 | NA          | NA      |
| ENSG00000200895 | NA        | NA                                                          | NA     | 0.376605696 | -2.097575228 | 4.030196574 | -0.520464744 | 0.602739695 | NA          | NA      |
| ENSG00000202318 | NA        | NA                                                          | NA     | 0.376605696 | -2.097575228 | 4.030196574 | -0.520464744 | 0.602739695 | NA          | NA      |
| ENSG00000203581 | OR1F2P    | olfactory receptor family 1 subfamily F member 2 pseudogene | 26184  | 0.376605696 | -2.097575228 | 4.030196574 | -0.520464744 | 0.602739695 | NA          | NA      |
| ENSG00000206987 | NA        | NA                                                          | NA     | 0.376605696 | -2.097575228 | 4.030196574 | -0.520464744 | 0.602739695 | NA          | NA      |
| ENSG00000210841 | NA        | NA                                                          | NA     | 0.376605696 | -2.097575228 | 4.030196574 | -0.520464744 | 0.602739695 | NA          | NA      |
| ENSG00000211819 | NA        | NA                                                          | NA     | 0.376605696 | -2.097575228 | 4.030196574 | -0.520464744 | 0.602739695 | NA          | NA      |
| ENSG00000213371 | NA        | NA                                                          | NA     | 0.376605696 | -2.097575228 | 4.030196574 | -0.520464744 | 0.602739695 | NA          | NA      |
| ENSG00000217026 | NA        | NA                                                          | NA     | 0.376605696 | -2.097575228 | 4.030196574 | -0.520464744 | 0.602739695 | NA          | NA      |
| ENSG00000219074 | NA        | NA                                                          | NA     | 0.376605696 | -2.097575228 | 4.030196574 | -0.520464744 | 0.602739695 | NA          | NA      |
| ENSG00000219604 | NA        | NA                                                          | NA     | 0.376605696 | -2.097575228 | 4.030196574 | -0.520464744 | 0.602739695 | NA          | NA      |
| ENSG00000221489 | NA        | NA                                                          | NA     | 0.376605696 | -2.097575228 | 4.030196574 | -0.520464744 | 0.602739695 | NA          | NA      |
| ENSG00000222337 | NA        | NA                                                          | NA     | 0.376605696 | -2.097575228 | 4.030196574 | -0.520464744 | 0.602739695 | NA          | NA      |
| ENSG00000224876 | NA        | NA                                                          | NA     | 0.376605696 | -2.097575228 | 4.030196574 | -0.520464744 | 0.602739695 | NA          | NA      |
| ENSG00000224908 | NA        | NA                                                          | NA     | 0.376605696 | -2.097575228 | 4.030196574 | -0.520464744 | 0.602739695 | NA          | NA      |

|                 |              |                                   |           |             |              |             |              |             |             |         |
|-----------------|--------------|-----------------------------------|-----------|-------------|--------------|-------------|--------------|-------------|-------------|---------|
| ENSG00000225951 | NA           | NA                                | NA        | 0.376605696 | -2.097575228 | 4.030196574 | -0.520464744 | 0.602739695 | NA          | NA      |
| ENSG00000227274 | LOC101928418 | uncharacterized LOC101928418      | 101928418 | 0.376605696 | -2.097575228 | 4.030196574 | -0.520464744 | 0.602739695 | NA          | NA      |
| ENSG00000227617 | CERS6-AS1    | CERS6 antisense RNA 1             | 100861402 | 0.376605696 | -2.097575228 | 4.030196574 | -0.520464744 | 0.602739695 | NA          | NA      |
| ENSG00000230621 | NA           | NA                                | NA        | 0.376605696 | -2.097575228 | 4.030196574 | -0.520464744 | 0.602739695 | NA          | NA      |
| ENSG00000233045 | NA           | NA                                | NA        | 0.376605696 | -2.097575228 | 4.030196574 | -0.520464744 | 0.602739695 | NA          | NA      |
| ENSG00000234896 | NA           | NA                                | NA        | 0.376605696 | -2.097575228 | 4.030196574 | -0.520464744 | 0.602739695 | NA          | NA      |
| ENSG00000235010 | NA           | NA                                | NA        | 0.376605696 | -2.097575228 | 4.030196574 | -0.520464744 | 0.602739695 | NA          | NA      |
| ENSG00000235454 | NA           | NA                                | NA        | 0.376605696 | -2.097575228 | 4.030196574 | -0.520464744 | 0.602739695 | NA          | NA      |
| ENSG00000236338 | NA           | NA                                | NA        | 0.376605696 | -2.097575228 | 4.030196574 | -0.520464744 | 0.602739695 | NA          | NA      |
| ENSG00000239169 | SNORD109B    | small nucleolar RNA, C/D box 109B | 338429    | 0.376605696 | -2.097575228 | 4.030196574 | -0.520464744 | 0.602739695 | NA          | NA      |
| ENSG00000239172 | NA           | NA                                | NA        | 0.376605696 | -2.097575228 | 4.030196574 | -0.520464744 | 0.602739695 | NA          | NA      |
| ENSG00000242049 | DNAJB8-AS1   | DNAJB8 antisense RNA 1            | 285224    | 0.376605696 | -2.097575228 | 4.030196574 | -0.520464744 | 0.602739695 | NA          | NA      |
| ENSG00000244076 | NA           | NA                                | NA        | 0.376605696 | -2.097575228 | 4.030196574 | -0.520464744 | 0.602739695 | NA          | NA      |
| ENSG00000244292 | NA           | NA                                | NA        | 0.376605696 | -2.097575228 | 4.030196574 | -0.520464744 | 0.602739695 | NA          | NA      |
| ENSG00000244619 | NA           | NA                                | NA        | 0.376605696 | -2.097575228 | 4.030196574 | -0.520464744 | 0.602739695 | NA          | NA      |
| ENSG00000250020 | NA           | NA                                | NA        | 0.376605696 | -2.097575228 | 4.030196574 | -0.520464744 | 0.602739695 | NA          | NA      |
| ENSG00000251698 | NA           | NA                                | NA        | 0.376605696 | -2.097575228 | 4.030196574 | -0.520464744 | 0.602739695 | NA          | NA      |
| ENSG00000253119 | NA           | NA                                | NA        | 0.376605696 | -2.097575228 | 4.030196574 | -0.520464744 | 0.602739695 | NA          | NA      |
| ENSG00000253215 | NA           | NA                                | NA        | 0.376605696 | -2.097575228 | 4.030196574 | -0.520464744 | 0.602739695 | NA          | NA      |
| ENSG00000254248 | NA           | NA                                | NA        | 0.376605696 | -2.097575228 | 4.030196574 | -0.520464744 | 0.602739695 | NA          | NA      |
| ENSG00000254656 | RTL1         | retrotransposon Gag like 1        | 388015    | 0.376605696 | -2.097575228 | 4.030196574 | -0.520464744 | 0.602739695 | NA          | NA      |
| ENSG00000255181 | CCDC166      | coiled-coil domain containing 166 | 100130274 | 0.376605696 | -2.097575228 | 4.030196574 | -0.520464744 | 0.602739695 | NA          | NA      |
| ENSG00000255851 | NA           | NA                                | NA        | 0.376605696 | -2.097575228 | 4.030196574 | -0.520464744 | 0.602739695 | NA          | NA      |
| ENSG00000257616 | NA           | NA                                | NA        | 0.376605696 | -2.097575228 | 4.030196574 | -0.520464744 | 0.602739695 | NA          | NA      |
| ENSG00000263698 | NA           | NA                                | NA        | 0.376605696 | -2.097575228 | 4.030196574 | -0.520464744 | 0.602739695 | NA          | NA      |
| ENSG00000265460 | NA           | NA                                | NA        | 0.376605696 | -2.097575228 | 4.030196574 | -0.520464744 | 0.602739695 | NA          | NA      |
| ENSG00000265979 | NA           | NA                                | NA        | 0.376605696 | -2.097575228 | 4.030196574 | -0.520464744 | 0.602739695 | NA          | NA      |
| ENSG00000266327 | MIR4503      | microRNA 4503                     | 100616280 | 0.376605696 | -2.097575228 | 4.030196574 | -0.520464744 | 0.602739695 | NA          | NA      |
| ENSG00000266417 | MIR4424      | microRNA 4424                     | 100616328 | 0.376605696 | -2.097575228 | 4.030196574 | -0.520464744 | 0.602739695 | NA          | NA      |
| ENSG00000266721 | MIR5695      | microRNA 5695                     | 100847016 | 0.376605696 | -2.097575228 | 4.030196574 | -0.520464744 | 0.602739695 | NA          | NA      |
| ENSG00000267332 | NA           | NA                                | NA        | 0.376605696 | -2.097575228 | 4.030196574 | -0.520464744 | 0.602739695 | NA          | NA      |
| ENSG00000269103 | NA           | NA                                | NA        | 0.376605696 | -2.097575228 | 4.030196574 | -0.520464744 | 0.602739695 | NA          | NA      |
| ENSG00000271034 | NA           | NA                                | NA        | 0.376605696 | -2.097575228 | 4.030196574 | -0.520464744 | 0.602739695 | NA          | NA      |
| ENSG00000248429 | FAM198B-AS1  | FAM198B antisense RNA 1           | 285505    | 119.9004232 | -2.095063612 | 0.789118493 | -2.654941723 | 0.007932211 | 0.438115501 | Not Sig |
| ENSG00000271002 | NA           | NA                                | NA        | 1.526045623 | -2.093286913 | 2.660975876 | -0.786661364 | 0.431480127 | NA          | NA      |

|                 |              |                                                    |           |             |              |             |              |             |             |         |
|-----------------|--------------|----------------------------------------------------|-----------|-------------|--------------|-------------|--------------|-------------|-------------|---------|
| ENSG00000268987 | NA           | NA                                                 | NA        | 4.869269131 | -2.092594968 | 1.293849867 | -1.617339864 | 0.105804939 | NA          | NA      |
| ENSG00000204421 | LY6G6C       | lymphocyte antigen 6 family member G6C             | 80740     | 2.653748044 | -2.091019678 | 1.71688292  | -1.217916291 | 0.223255785 | NA          | NA      |
| ENSG00000217646 | NA           | NA                                                 | NA        | 1.540753104 | -2.090879212 | 2.675128834 | -0.781599445 | 0.434450013 | NA          | NA      |
| ENSG00000264764 | MIR4772      | microRNA 4772                                      | 100616157 | 1.54878995  | -2.084135488 | 2.310353962 | -0.902084928 | 0.367011755 | NA          | NA      |
| ENSG00000211459 | RNR1         | s-rRNA                                             | 4549      | 76.15960847 | -2.083528923 | 0.808035413 | -2.578511896 | 0.009922688 | 0.49192078  | Not Sig |
| ENSG00000236136 | NA           | NA                                                 | NA        | 1.706877071 | -2.082859456 | 1.954364234 | -1.065747838 | 0.286537646 | NA          | NA      |
| ENSG00000204179 | PTPN20       | protein tyrosine phosphatase, non-receptor type 20 | 26095     | 4.869087223 | -2.082847241 | 1.250092982 | -1.666153854 | 0.095682774 | NA          | NA      |
| ENSG00000226549 | NA           | NA                                                 | NA        | 1.550207353 | -2.082590145 | 2.237736393 | -0.93066822  | 0.352025214 | NA          | NA      |
| ENSG00000267809 | NA           | NA                                                 | NA        | 10.48045635 | -2.079759491 | 0.967317515 | -2.15002774  | 0.031553021 | 0.915546518 | Not Sig |
| ENSG00000185631 | NA           | NA                                                 | NA        | 0.869902802 | -2.078628869 | 3.115915737 | -0.667100475 | 0.504707957 | NA          | NA      |
| ENSG00000232748 | NA           | NA                                                 | NA        | 0.869902802 | -2.078628869 | 3.115915737 | -0.667100475 | 0.504707957 | NA          | NA      |
| ENSG00000256756 | NA           | NA                                                 | NA        | 0.869902802 | -2.078628869 | 3.115915737 | -0.667100475 | 0.504707957 | NA          | NA      |
| ENSG00000236525 | NA           | NA                                                 | NA        | 3.358811239 | -2.076887585 | 1.525905639 | -1.361085202 | 0.173486765 | NA          | NA      |
| ENSG00000202392 | NA           | NA                                                 | NA        | 15.29685071 | -2.07612791  | 0.976156225 | -2.126839799 | 0.033433396 | 0.947967831 | Not Sig |
| ENSG00000153558 | FBXL2        | F-box and leucine rich repeat protein 2            | 25827     | 372.396117  | -2.074650361 | 0.783676621 | -2.647329657 | 0.008113022 | 0.446145365 | Not Sig |
| ENSG00000215478 | NA           | NA                                                 | NA        | 3.015276647 | -2.073805033 | 2.268929997 | -0.914001329 | 0.360716147 | NA          | NA      |
| ENSG00000198406 | NA           | NA                                                 | NA        | 13.36163785 | -2.073229361 | 0.936139985 | -2.214657415 | 0.026783588 | 0.841215479 | Not Sig |
| ENSG00000119919 | NKX2-3       | NK2 homeobox 3                                     | 159296    | 3.404299894 | -2.071614112 | 1.555385578 | -1.331897467 | 0.182893884 | NA          | NA      |
| ENSG00000237707 | LOC101928596 | uncharacterized LOC101928596                       | 101928596 | 1.57295168  | -2.070669924 | 2.054985534 | -1.00763236  | 0.313630988 | NA          | NA      |
| ENSG00000215159 | NA           | NA                                                 | NA        | 2.3196677   | -2.066688401 | 1.724909385 | -1.198143171 | 0.230861284 | NA          | NA      |
| ENSG00000152726 | NA           | NA                                                 | NA        | 61.97155162 | -2.066024068 | 1.173863629 | -1.760020514 | 0.078404328 | 0.999371363 | Not Sig |
| ENSG00000253012 | NA           | NA                                                 | NA        | 2.31806839  | -2.064905506 | 2.089427011 | -0.988264005 | 0.323023369 | NA          | NA      |
| ENSG00000162344 | FGF19        | fibroblast growth factor 19                        | 9965      | 0.854011018 | -2.064332568 | 3.170053019 | -0.651198121 | 0.514918603 | NA          | NA      |
| ENSG00000238263 | NA           | NA                                                 | NA        | 0.854011018 | -2.064332568 | 3.170053019 | -0.651198121 | 0.514918603 | NA          | NA      |
| ENSG00000251452 | NA           | NA                                                 | NA        | 0.854011018 | -2.064332568 | 3.170053019 | -0.651198121 | 0.514918603 | NA          | NA      |
| ENSG00000234369 | NA           | NA                                                 | NA        | 0.860448554 | -2.064314317 | 3.163055495 | -0.652632975 | 0.513992922 | NA          | NA      |
| ENSG00000239944 | NA           | NA                                                 | NA        | 0.860448554 | -2.064314317 | 3.163055495 | -0.652632975 | 0.513992922 | NA          | NA      |
| ENSG00000273369 | NA           | NA                                                 | NA        | 0.860448554 | -2.064314317 | 3.163055495 | -0.652632975 | 0.513992922 | NA          | NA      |
| ENSG00000163515 | RETNLB       | resistin like beta                                 | 84666     | 0.895348892 | -2.06421636  | 3.126420017 | -0.660249214 | 0.509093915 | NA          | NA      |
| ENSG00000187658 | C5orf52      | chromosome 5 open reading frame 52                 | 100190949 | 0.895348892 | -2.06421636  | 3.126420017 | -0.660249214 | 0.509093915 | NA          | NA      |
| ENSG00000253705 | NA           | NA                                                 | NA        | 0.895348892 | -2.06421636  | 3.126420017 | -0.660249214 | 0.509093915 | NA          | NA      |
| ENSG00000265244 | NA           | NA                                                 | NA        | 0.895348892 | -2.06421636  | 3.126420017 | -0.660249214 | 0.509093915 | NA          | NA      |
| ENSG00000212207 | NA           | NA                                                 | NA        | 2.586334179 | -2.064013116 | 1.852697069 | -1.114058607 | 0.265254045 | NA          | NA      |
| ENSG00000202487 | NA           | NA                                                 | NA        | 16.43024856 | -2.063749049 | 0.995697479 | -2.07266674  | 0.038203305 | 0.999371363 | Not Sig |
| ENSG00000207263 | SNORD116-16  | small nucleolar RNA, C/D box 116-16                | 100033428 | 2.332957779 | -2.062441244 | 1.794598146 | -1.149249624 | 0.250453064 | NA          | NA      |

|                 |              |                                            |           |             |              |             |              |             |             |         |
|-----------------|--------------|--------------------------------------------|-----------|-------------|--------------|-------------|--------------|-------------|-------------|---------|
| ENSG00000144130 | NT5DC4       | 5'-nucleotidase domain containing 4        | 284958    | 11.83154276 | -2.062000718 | 1.408633707 | -1.463830311 | 0.143240318 | 0.999371363 | Not Sig |
| ENSG00000272979 | NA           | NA                                         | NA        | 4.015491212 | -2.060853116 | 1.457888359 | -1.413587744 | 0.157482982 | NA          | NA      |
| ENSG00000266063 | MIR4771-2    | microRNA 4771-2                            | 100616165 | 1.524446313 | -2.060637066 | 2.299296203 | -0.896203396 | 0.370144142 | NA          | NA      |
| ENSG00000258466 | NA           | NA                                         | NA        | 3.271376898 | -2.058313477 | 1.50557098  | -1.367131476 | 0.171584099 | NA          | NA      |
| ENSG00000109205 | ODAM         | odontogenic, ameloblast associated         | 54959     | 9.911986074 | -2.055604757 | 1.509866896 | -1.361447663 | 0.173372263 | 0.999371363 | Not Sig |
| ENSG00000265520 | MIR548V      | microRNA 548v                              | 100422850 | 59.82105748 | -2.051935202 | 0.915646334 | -2.240969168 | 0.025028072 | 0.816524647 | Not Sig |
| ENSG00000259358 | NA           | NA                                         | NA        | 5.674865311 | -2.050712931 | 1.183812301 | -1.732295678 | 0.083220931 | NA          | NA      |
| ENSG00000134121 | CHL1         | cell adhesion molecule L1 like             | 10752     | 6195.779798 | -2.049748151 | 1.258654744 | -1.628522962 | 0.103414045 | 0.999371363 | Not Sig |
| ENSG00000252787 | NA           | NA                                         | NA        | 3.101821211 | -2.049565346 | 1.978088141 | -1.036134489 | 0.300139404 | NA          | NA      |
| ENSG00000273262 | NA           | NA                                         | NA        | 3.961317605 | -2.047629222 | 1.384811604 | -1.478633784 | 0.139238218 | NA          | NA      |
| ENSG00000228037 | LOC100996583 | uncharacterized LOC100996583               | 100996583 | 7.605520543 | -2.043811014 | 1.253606103 | -1.630345456 | 0.103028506 | 0.999371363 | Not Sig |
| ENSG00000204794 | NA           | NA                                         | NA        | 12.31619396 | -2.043120703 | 1.045542412 | -1.954125131 | 0.050686421 | 0.999371363 | Not Sig |
| ENSG00000263666 | SNORA70D     | small nucleolar RNA, H/ACA box 70D         | 100379141 | 1.563082424 | -2.042660063 | 2.23503246  | -0.913928589 | 0.36075437  | NA          | NA      |
| ENSG00000225193 | NA           | NA                                         | NA        | 100.1710796 | -2.040570441 | 0.91208519  | -2.237258606 | 0.025269443 | 0.820149731 | Not Sig |
| ENSG00000122375 | OPN4         | opsin 4                                    | 94233     | 0.360298904 | -2.0395095   | 4.035174294 | -0.505432814 | 0.613254876 | NA          | NA      |
| ENSG00000136697 | IL1F10       | interleukin 1 family member 10             | 84639     | 0.360298904 | -2.0395095   | 4.035174294 | -0.505432814 | 0.613254876 | NA          | NA      |
| ENSG00000165120 | SSMEM1       | serine rich single-pass membrane protein 1 | 136263    | 0.360298904 | -2.0395095   | 4.035174294 | -0.505432814 | 0.613254876 | NA          | NA      |
| ENSG00000171532 | NEUROD2      | neuronal differentiation 2                 | 4761      | 0.360298904 | -2.0395095   | 4.035174294 | -0.505432814 | 0.613254876 | NA          | NA      |
| ENSG00000172410 | INSL5        | insulin like 5                             | 10022     | 0.360298904 | -2.0395095   | 4.035174294 | -0.505432814 | 0.613254876 | NA          | NA      |
| ENSG00000177776 | NA           | NA                                         | NA        | 0.360298904 | -2.0395095   | 4.035174294 | -0.505432814 | 0.613254876 | NA          | NA      |
| ENSG00000186452 | TMPRSS12     | transmembrane protease, serine 12          | 283471    | 0.360298904 | -2.0395095   | 4.035174294 | -0.505432814 | 0.613254876 | NA          | NA      |
| ENSG00000201407 | NA           | NA                                         | NA        | 0.360298904 | -2.0395095   | 4.035174294 | -0.505432814 | 0.613254876 | NA          | NA      |
| ENSG00000205445 | KRTAP10-2    | keratin associated protein 10-2            | 386679    | 0.360298904 | -2.0395095   | 4.035174294 | -0.505432814 | 0.613254876 | NA          | NA      |
| ENSG00000206936 | NA           | NA                                         | NA        | 0.360298904 | -2.0395095   | 4.035174294 | -0.505432814 | 0.613254876 | NA          | NA      |
| ENSG00000212901 | KRTAP3-1     | keratin associated protein 3-1             | 83896     | 0.360298904 | -2.0395095   | 4.035174294 | -0.505432814 | 0.613254876 | NA          | NA      |
| ENSG00000213100 | NA           | NA                                         | NA        | 0.360298904 | -2.0395095   | 4.035174294 | -0.505432814 | 0.613254876 | NA          | NA      |
| ENSG00000214914 | NA           | NA                                         | NA        | 0.360298904 | -2.0395095   | 4.035174294 | -0.505432814 | 0.613254876 | NA          | NA      |
| ENSG00000215325 | NA           | NA                                         | NA        | 0.360298904 | -2.0395095   | 4.035174294 | -0.505432814 | 0.613254876 | NA          | NA      |
| ENSG00000215719 | NA           | NA                                         | NA        | 0.360298904 | -2.0395095   | 4.035174294 | -0.505432814 | 0.613254876 | NA          | NA      |
| ENSG00000226908 | NA           | NA                                         | NA        | 0.360298904 | -2.0395095   | 4.035174294 | -0.505432814 | 0.613254876 | NA          | NA      |
| ENSG00000227453 | NA           | NA                                         | NA        | 0.360298904 | -2.0395095   | 4.035174294 | -0.505432814 | 0.613254876 | NA          | NA      |
| ENSG00000230831 | NA           | NA                                         | NA        | 0.360298904 | -2.0395095   | 4.035174294 | -0.505432814 | 0.613254876 | NA          | NA      |
| ENSG00000231588 | NA           | NA                                         | NA        | 0.360298904 | -2.0395095   | 4.035174294 | -0.505432814 | 0.613254876 | NA          | NA      |
| ENSG00000232220 | NA           | NA                                         | NA        | 0.360298904 | -2.0395095   | 4.035174294 | -0.505432814 | 0.613254876 | NA          | NA      |
| ENSG00000232226 | NA           | NA                                         | NA        | 0.360298904 | -2.0395095   | 4.035174294 | -0.505432814 | 0.613254876 | NA          | NA      |

|                 |              |                                                            |           |             |            |             |              |             |    |    |
|-----------------|--------------|------------------------------------------------------------|-----------|-------------|------------|-------------|--------------|-------------|----|----|
| ENSG00000232928 | NA           | NA                                                         | NA        | 0.360298904 | -2.0395095 | 4.035174294 | -0.505432814 | 0.613254876 | NA | NA |
| ENSG00000234080 | NA           | NA                                                         | NA        | 0.360298904 | -2.0395095 | 4.035174294 | -0.505432814 | 0.613254876 | NA | NA |
| ENSG00000234118 | RPL13AP6     | ribosomal protein L13a pseudogene 6                        | 644511    | 0.360298904 | -2.0395095 | 4.035174294 | -0.505432814 | 0.613254876 | NA | NA |
| ENSG00000235308 | NA           | NA                                                         | NA        | 0.360298904 | -2.0395095 | 4.035174294 | -0.505432814 | 0.613254876 | NA | NA |
| ENSG00000235869 | NA           | NA                                                         | NA        | 0.360298904 | -2.0395095 | 4.035174294 | -0.505432814 | 0.613254876 | NA | NA |
| ENSG00000237565 | NA           | NA                                                         | NA        | 0.360298904 | -2.0395095 | 4.035174294 | -0.505432814 | 0.613254876 | NA | NA |
| ENSG00000238166 | LOC646938    | TBC1 domain family member 2B pseudogene                    | 646938    | 0.360298904 | -2.0395095 | 4.035174294 | -0.505432814 | 0.613254876 | NA | NA |
| ENSG00000238809 | NA           | NA                                                         | NA        | 0.360298904 | -2.0395095 | 4.035174294 | -0.505432814 | 0.613254876 | NA | NA |
| ENSG00000239547 | NA           | NA                                                         | NA        | 0.360298904 | -2.0395095 | 4.035174294 | -0.505432814 | 0.613254876 | NA | NA |
| ENSG00000245008 | LOC101929538 | uncharacterized LOC101929538                               | 101929538 | 0.360298904 | -2.0395095 | 4.035174294 | -0.505432814 | 0.613254876 | NA | NA |
| ENSG00000248385 | TARM1        | T-cell-interacting, activating receptor on myeloid cells 1 | 441864    | 0.360298904 | -2.0395095 | 4.035174294 | -0.505432814 | 0.613254876 | NA | NA |
| ENSG00000249580 | NA           | NA                                                         | NA        | 0.360298904 | -2.0395095 | 4.035174294 | -0.505432814 | 0.613254876 | NA | NA |
| ENSG00000250753 | NA           | NA                                                         | NA        | 0.360298904 | -2.0395095 | 4.035174294 | -0.505432814 | 0.613254876 | NA | NA |
| ENSG00000250972 | NA           | NA                                                         | NA        | 0.360298904 | -2.0395095 | 4.035174294 | -0.505432814 | 0.613254876 | NA | NA |
| ENSG00000253661 | ZFHX4-AS1    | ZFHX4 antisense RNA 1                                      | 100192378 | 0.360298904 | -2.0395095 | 4.035174294 | -0.505432814 | 0.613254876 | NA | NA |
| ENSG00000255967 | NA           | NA                                                         | NA        | 0.360298904 | -2.0395095 | 4.035174294 | -0.505432814 | 0.613254876 | NA | NA |
| ENSG00000256097 | NA           | NA                                                         | NA        | 0.360298904 | -2.0395095 | 4.035174294 | -0.505432814 | 0.613254876 | NA | NA |
| ENSG00000256293 | NA           | NA                                                         | NA        | 0.360298904 | -2.0395095 | 4.035174294 | -0.505432814 | 0.613254876 | NA | NA |
| ENSG00000257359 | NA           | NA                                                         | NA        | 0.360298904 | -2.0395095 | 4.035174294 | -0.505432814 | 0.613254876 | NA | NA |
| ENSG00000257904 | NA           | NA                                                         | NA        | 0.360298904 | -2.0395095 | 4.035174294 | -0.505432814 | 0.613254876 | NA | NA |
| ENSG00000259374 | NA           | NA                                                         | NA        | 0.360298904 | -2.0395095 | 4.035174294 | -0.505432814 | 0.613254876 | NA | NA |
| ENSG00000260405 | NA           | NA                                                         | NA        | 0.360298904 | -2.0395095 | 4.035174294 | -0.505432814 | 0.613254876 | NA | NA |
| ENSG00000261401 | NA           | NA                                                         | NA        | 0.360298904 | -2.0395095 | 4.035174294 | -0.505432814 | 0.613254876 | NA | NA |
| ENSG00000262480 | NA           | NA                                                         | NA        | 0.360298904 | -2.0395095 | 4.035174294 | -0.505432814 | 0.613254876 | NA | NA |
| ENSG00000263478 | NA           | NA                                                         | NA        | 0.360298904 | -2.0395095 | 4.035174294 | -0.505432814 | 0.613254876 | NA | NA |
| ENSG00000265353 | NA           | NA                                                         | NA        | 0.360298904 | -2.0395095 | 4.035174294 | -0.505432814 | 0.613254876 | NA | NA |
| ENSG00000265395 | MIR3944      | microRNA 3944                                              | 100500911 | 0.360298904 | -2.0395095 | 4.035174294 | -0.505432814 | 0.613254876 | NA | NA |
| ENSG00000266551 | NA           | NA                                                         | NA        | 0.360298904 | -2.0395095 | 4.035174294 | -0.505432814 | 0.613254876 | NA | NA |
| ENSG00000266632 | NA           | NA                                                         | NA        | 0.360298904 | -2.0395095 | 4.035174294 | -0.505432814 | 0.613254876 | NA | NA |
| ENSG00000266954 | NA           | NA                                                         | NA        | 0.360298904 | -2.0395095 | 4.035174294 | -0.505432814 | 0.613254876 | NA | NA |
| ENSG00000267815 | NA           | NA                                                         | NA        | 0.360298904 | -2.0395095 | 4.035174294 | -0.505432814 | 0.613254876 | NA | NA |
| ENSG00000267889 | NA           | NA                                                         | NA        | 0.360298904 | -2.0395095 | 4.035174294 | -0.505432814 | 0.613254876 | NA | NA |
| ENSG00000268015 | NA           | NA                                                         | NA        | 0.360298904 | -2.0395095 | 4.035174294 | -0.505432814 | 0.613254876 | NA | NA |
| ENSG00000270136 | MINOS1-NBL1  | MINOS1-NBL1 readthrough                                    | 100532736 | 0.360298904 | -2.0395095 | 4.035174294 | -0.505432814 | 0.613254876 | NA | NA |
| ENSG00000271404 | NA           | NA                                                         | NA        | 0.360298904 | -2.0395095 | 4.035174294 | -0.505432814 | 0.613254876 | NA | NA |

|                 |            |                                                        |           |             |              |             |              |             |             |         |
|-----------------|------------|--------------------------------------------------------|-----------|-------------|--------------|-------------|--------------|-------------|-------------|---------|
| ENSG00000163221 | S100A12    | S100 calcium binding protein A12                       | 6283      | 5.674217204 | -2.038119691 | 1.533705218 | -1.328886195 | 0.183885519 | NA          | NA      |
| ENSG00000222493 | NA         | NA                                                     | NA        | 2.403488413 | -2.037845506 | 1.758683094 | -1.158733778 | 0.246564718 | NA          | NA      |
| ENSG00000251722 | NA         | NA                                                     | NA        | 3.482685466 | -2.037773191 | 1.700677834 | -1.198212354 | 0.230834357 | NA          | NA      |
| ENSG00000228157 | NA         | NA                                                     | NA        | 13.58374782 | -2.037038308 | 1.627064459 | -1.251971486 | 0.210580254 | 0.999371363 | Not Sig |
| ENSG00000226786 | NA         | NA                                                     | NA        | 14.16799491 | -2.036994123 | 1.399462258 | -1.455554883 | 0.145515708 | 0.999371363 | Not Sig |
| ENSG00000166143 | PPP1R14D   | protein phosphatase 1 regulatory inhibitor subunit 14D | 54866     | 47.29901516 | -2.034283634 | 1.156042618 | -1.759696055 | 0.078459355 | 0.999371363 | Not Sig |
| ENSG00000121089 | NA         | NA                                                     | NA        | 0.844141762 | -2.033671461 | 2.720250573 | -0.74760446  | 0.454698774 | NA          | NA      |
| ENSG00000225695 | NA         | NA                                                     | NA        | 0.844141762 | -2.033671461 | 2.720250573 | -0.74760446  | 0.454698774 | NA          | NA      |
| ENSG00000241032 | NA         | NA                                                     | NA        | 0.844141762 | -2.033671461 | 2.720250573 | -0.74760446  | 0.454698774 | NA          | NA      |
| ENSG00000253602 | NA         | NA                                                     | NA        | 0.844141762 | -2.033671461 | 2.720250573 | -0.74760446  | 0.454698774 | NA          | NA      |
| ENSG00000202237 | NA         | NA                                                     | NA        | 0.879042101 | -2.033648721 | 2.691819991 | -0.755492094 | 0.449953774 | NA          | NA      |
| ENSG00000231404 | NA         | NA                                                     | NA        | 0.879042101 | -2.033648721 | 2.691819991 | -0.755492094 | 0.449953774 | NA          | NA      |
| ENSG00000259314 | NA         | NA                                                     | NA        | 0.879042101 | -2.033648721 | 2.691819991 | -0.755492094 | 0.449953774 | NA          | NA      |
| ENSG00000260049 | NA         | NA                                                     | NA        | 0.879042101 | -2.033648721 | 2.691819991 | -0.755492094 | 0.449953774 | NA          | NA      |
| ENSG00000266026 | NA         | NA                                                     | NA        | 0.879042101 | -2.033648721 | 2.691819991 | -0.755492094 | 0.449953774 | NA          | NA      |
| ENSG00000060709 | RIMBP2     | RIMS binding protein 2                                 | 23504     | 46.15736696 | -2.032459623 | 1.399967381 | -1.4517907   | 0.146559811 | 0.999371363 | Not Sig |
| ENSG00000253468 | NA         | NA                                                     | NA        | 3.085514419 | -2.030398971 | 1.741263523 | -1.166049219 | 0.243594546 | NA          | NA      |
| ENSG00000206633 | SNORA80B   | small nucleolar RNA, H/ACA box 80B                     | 100302743 | 39.2091134  | -2.030276276 | 0.85719061  | -2.368523701 | 0.017859236 | 0.674897979 | Not Sig |
| ENSG00000259432 | NA         | NA                                                     | NA        | 3.499994653 | -2.030183163 | 2.009741114 | -1.010171484 | 0.312413139 | NA          | NA      |
| ENSG00000263232 | NA         | NA                                                     | NA        | 3.172533753 | -2.026480879 | 1.446000609 | -1.401438468 | 0.161082996 | NA          | NA      |
| ENSG00000203812 | HIST2H2AA3 | histone cluster 2 H2A family member a3                 | 8337      | 2.285454806 | -2.025690773 | 1.781365104 | -1.137156425 | 0.2554729   | NA          | NA      |
| ENSG00000225900 | NA         | NA                                                     | NA        | 16.36713839 | -2.023948561 | 1.204704182 | -1.680037798 | 0.092949962 | 0.999371363 | Not Sig |
| ENSG00000260592 | NA         | NA                                                     | NA        | 5.606985248 | -2.02337051  | 1.755665027 | -1.152480957 | 0.249123491 | NA          | NA      |
| ENSG00000212246 | NA         | NA                                                     | NA        | 1.537321384 | -2.01964431  | 2.296370532 | -0.87949409  | 0.379133436 | NA          | NA      |
| ENSG00000217159 | NA         | NA                                                     | NA        | 2.965759357 | -2.017426182 | 1.883165764 | -1.071295061 | 0.28403678  | NA          | NA      |
| ENSG00000236411 | NA         | NA                                                     | NA        | 4.154720072 | -2.016953686 | 1.417864418 | -1.422529306 | 0.15487265  | NA          | NA      |
| ENSG00000207468 | SNORA19    | small nucleolar RNA, H/ACA box 19                      | 641451    | 17.04270477 | -2.011776391 | 1.174891646 | -1.712308022 | 0.086839919 | 0.999371363 | Not Sig |
| ENSG00000268747 | NA         | NA                                                     | NA        | 2.386766614 | -2.008756406 | 1.67245967  | -1.20107913  | 0.229720508 | NA          | NA      |
| ENSG00000253806 | NA         | NA                                                     | NA        | 0.862735309 | -2.004211543 | 2.700503344 | -0.742162215 | 0.457989059 | NA          | NA      |
| ENSG00000263752 | MIR3133    | microRNA 3133                                          | 100422942 | 0.862735309 | -2.004211543 | 2.700503344 | -0.742162215 | 0.457989059 | NA          | NA      |
| ENSG00000265466 | NA         | NA                                                     | NA        | 0.862735309 | -2.004211543 | 2.700503344 | -0.742162215 | 0.457989059 | NA          | NA      |
| ENSG00000254372 | NA         | NA                                                     | NA        | 0.821397435 | -2.004097113 | 2.735341236 | -0.732668044 | 0.463760919 | NA          | NA      |
| ENSG00000144278 | GALNT13    | polypeptide N-acetylgalactosaminyltransferase 13       | 114805    | 91.2363022  | -2.004096725 | 0.700890445 | -2.859358035 | 0.004244994 | 0.29864361  | Not Sig |
| ENSG00000265874 | MIR4489    | microRNA 4489                                          | 100616284 | 7.737460176 | -2.001833895 | 1.086724122 | -1.842081035 | 0.065463298 | 0.999371363 | Not Sig |
| ENSG00000199603 | NA         | NA                                                     | NA        | 2.401474095 | -2.00174373  | 1.897129131 | -1.055143637 | 0.291359637 | NA          | NA      |



|                 |          |                                                                  |           |             |              |             |              |             |             |         |
|-----------------|----------|------------------------------------------------------------------|-----------|-------------|--------------|-------------|--------------|-------------|-------------|---------|
| ENSG00000238924 | NA       | NA                                                               | NA        | 5.137028534 | -2.001195788 | 1.814618328 | -1.10281912  | 0.270105723 | NA          | NA      |
| ENSG00000233416 | NA       | NA                                                               | NA        | 11.74034738 | -2.001187994 | 0.879792806 | -2.274612819 | 0.022929166 | 0.768580599 | Not Sig |
| ENSG00000207997 | MIR644A  | microRNA 644a                                                    | 693229    | 14.75281722 | -2.000293923 | 1.511019176 | -1.323804459 | 0.185567995 | 0.999371363 | Not Sig |
| ENSG00000167759 | KLK13    | kallikrein related peptidase 13                                  | 26085     | 11.16445926 | -1.996915433 | 1.16813887  | -1.709484621 | 0.087361218 | 0.999371363 | Not Sig |
| ENSG00000168334 | XIRP1    | xin actin binding repeat containing 1                            | 165904    | 29.62751962 | -1.995703941 | 1.078849965 | -1.849843821 | 0.064336063 | 0.999371363 | Not Sig |
| ENSG00000127412 | TRPV5    | transient receptor potential cation channel subfamily V member 5 | 56302     | 2.338261247 | -1.994500796 | 1.758167823 | -1.134420031 | 0.256618401 | NA          | NA      |
| ENSG00000175161 | CADM2    | cell adhesion molecule 2                                         | 253559    | 43.21058106 | -1.99382946  | 0.801249054 | -2.488401638 | 0.012831873 | 0.561528648 | Not Sig |
| ENSG00000272418 | NA       | NA                                                               | NA        | 2.96534435  | -1.99355493  | 1.72633687  | -1.154789059 | 0.248176818 | NA          | NA      |
| ENSG00000259592 | NA       | NA                                                               | NA        | 6.788402505 | -1.99350435  | 1.101447453 | -1.809895102 | 0.070312056 | 0.999371363 | Not Sig |
| ENSG00000166211 | SPIC     | Spi-C transcription factor                                       | 121599    | 2.653433093 | -1.992206731 | 1.965214265 | -1.013735126 | 0.310709158 | NA          | NA      |
| ENSG00000183775 | KCTD16   | potassium channel tetramerization domain containing 16           | 57528     | 137.2365992 | -1.991679744 | 0.617746622 | -3.224104629 | 0.001263672 | 0.135444671 | Not Sig |
| ENSG00000200403 | NA       | NA                                                               | NA        | 6.250698771 | -1.989387011 | 1.322921853 | -1.503782712 | 0.132637324 | NA          | NA      |
| ENSG00000200525 | NA       | NA                                                               | NA        | 3.698992493 | -1.98916919  | 1.898080936 | -1.047989658 | 0.294643372 | NA          | NA      |
| ENSG00000204771 | NA       | NA                                                               | NA        | 7.026596654 | -1.988483008 | 1.165868721 | -1.705580544 | 0.088086204 | 0.999371363 | Not Sig |
| ENSG00000227054 | NA       | NA                                                               | NA        | 1.593144537 | -1.987327633 | 2.398780457 | -0.828474164 | 0.407402021 | NA          | NA      |
| ENSG00000230897 | NA       | NA                                                               | NA        | 2.24982451  | -1.984279473 | 1.772042006 | -1.119769997 | 0.262811788 | NA          | NA      |
| ENSG00000206870 | NA       | NA                                                               | NA        | 1.457619836 | -1.980404027 | 2.721784307 | -0.727612406 | 0.466850884 | NA          | NA      |
| ENSG00000145198 | VWA5B2   | von Willebrand factor A domain containing 5B2                    | 90113     | 21.77182544 | -1.978471378 | 1.222582646 | -1.618272094 | 0.105603972 | 0.999371363 | Not Sig |
| ENSG00000262874 | C19orf84 | chromosome 19 open reading frame 84                              | 147646    | 2.860063669 | -1.978364911 | 2.313711759 | -0.855061096 | 0.392517326 | NA          | NA      |
| ENSG00000262721 | NA       | NA                                                               | NA        | 5.031332847 | -1.977776165 | 1.487830037 | -1.329302485 | 0.183748195 | NA          | NA      |
| ENSG00000235903 | CPB2-AS1 | CPB2 antisense RNA 1                                             | 100509894 | 6.370330319 | -1.977579503 | 1.731111867 | -1.142375338 | 0.253298038 | NA          | NA      |
| ENSG00000252779 | NA       | NA                                                               | NA        | 2.336661937 | -1.974737055 | 1.833887728 | -1.076803681 | 0.281567981 | NA          | NA      |
| ENSG00000264712 | MIR4504  | microRNA 4504                                                    | 100616261 | 2.359406264 | -1.973655428 | 1.892677056 | -1.042785097 | 0.297047835 | NA          | NA      |
| ENSG00000206859 | NA       | NA                                                               | NA        | 10.68394847 | -1.972785054 | 1.26305371  | -1.561916994 | 0.118307544 | 0.999371363 | Not Sig |
| ENSG00000015592 | STMN4    | stathmin 4                                                       | 81551     | 0.846428517 | -1.971582465 | 3.164904256 | -0.622951693 | 0.533316267 | NA          | NA      |
| ENSG00000167131 | CCDC103  | coiled-coil domain containing 103                                | 388389    | 0.846428517 | -1.971582465 | 3.164904256 | -0.622951693 | 0.533316267 | NA          | NA      |
| ENSG00000187902 | SHISA7   | shisa family member 7                                            | 729956    | 0.811528179 | -1.971406473 | 3.204830121 | -0.615136029 | 0.53846489  | NA          | NA      |
| ENSG00000261312 | NA       | NA                                                               | NA        | 0.811528179 | -1.971406473 | 3.204830121 | -0.615136029 | 0.53846489  | NA          | NA      |
| ENSG00000172689 | MS4A10   | membrane spanning 4-domains A10                                  | 341116    | 0.805090643 | -1.971373631 | 3.212471984 | -0.613662513 | 0.539438365 | NA          | NA      |
| ENSG00000207248 | NA       | NA                                                               | NA        | 6.796087683 | -1.968382295 | 1.617355847 | -1.217037239 | 0.223590048 | 0.999371363 | Not Sig |
| ENSG00000259354 | NA       | NA                                                               | NA        | 260.5223693 | -1.967636605 | 1.023625368 | -1.922223371 | 0.054577657 | 0.999371363 | Not Sig |
| ENSG00000250643 | NA       | NA                                                               | NA        | 9.137625933 | -1.965493348 | 1.12890695  | -1.741058772 | 0.081673277 | 0.999371363 | Not Sig |
| ENSG00000101405 | OXT      | oxytocin/neurophysin I prepropeptide                             | 5020      | 2.1944666   | -1.965418757 | 1.835100093 | -1.071014472 | 0.284162923 | NA          | NA      |
| ENSG00000252914 | NA       | NA                                                               | NA        | 12.16475069 | -1.964609105 | 1.746371215 | -1.124966495 | 0.260603233 | 0.999371363 | Not Sig |
| ENSG00000142273 | CBLC     | Cbl proto-oncogene C                                             | 23624     | 440.0014342 | -1.962303876 | 0.951312657 | -2.062732858 | 0.039138016 | 0.999371363 | Not Sig |

|                 |              |                                                     |           |             |              |             |              |             |             |         |
|-----------------|--------------|-----------------------------------------------------|-----------|-------------|--------------|-------------|--------------|-------------|-------------|---------|
| ENSG00000256651 | NA           | NA                                                  | NA        | 7.227477139 | -1.960449161 | 1.362347353 | -1.439022989 | 0.150144009 | 0.999371363 | Not Sig |
| ENSG00000205810 | KLRC3        | killer cell lectin like receptor C3                 | 3823      | 6.641066141 | -1.959582044 | 1.256048181 | -1.560116939 | 0.118732249 | 0.999371363 | Not Sig |
| ENSG00000199035 | MIR103A1     | microRNA 103a-1                                     | 406895    | 0.836974269 | -1.956282666 | 3.173077039 | -0.616525424 | 0.537547798 | NA          | NA      |
| ENSG00000230734 | NA           | NA                                                  | NA        | 0.836974269 | -1.956282666 | 3.173077039 | -0.616525424 | 0.537547798 | NA          | NA      |
| ENSG00000220349 | NA           | NA                                                  | NA        | 0.80207393  | -1.955968447 | 3.213678416 | -0.608638511 | 0.542764072 | NA          | NA      |
| ENSG00000240235 | NA           | NA                                                  | NA        | 0.80207393  | -1.955968447 | 3.213678416 | -0.608638511 | 0.542764072 | NA          | NA      |
| ENSG00000248305 | NA           | NA                                                  | NA        | 0.80207393  | -1.955968447 | 3.213678416 | -0.608638511 | 0.542764072 | NA          | NA      |
| ENSG00000249973 | NA           | NA                                                  | NA        | 0.80207393  | -1.955968447 | 3.213678416 | -0.608638511 | 0.542764072 | NA          | NA      |
| ENSG00000250116 | LOC100506142 | uncharacterized LOC100506142                        | 100506142 | 0.80207393  | -1.955968447 | 3.213678416 | -0.608638511 | 0.542764072 | NA          | NA      |
| ENSG00000253588 | NA           | NA                                                  | NA        | 0.80207393  | -1.955968447 | 3.213678416 | -0.608638511 | 0.542764072 | NA          | NA      |
| ENSG00000236341 | NA           | NA                                                  | NA        | 0.795636395 | -1.955909719 | 3.221453015 | -0.607151403 | 0.543750439 | NA          | NA      |
| ENSG00000243051 | NA           | NA                                                  | NA        | 5.49215894  | -1.95570894  | 1.1301245   | -1.730525212 | 0.083536481 | NA          | NA      |
| ENSG00000264792 | MIR4637      | microRNA 4637                                       | 100616271 | 4.76216472  | -1.951644627 | 1.3455923   | -1.450398183 | 0.146947514 | NA          | NA      |
| ENSG00000064835 | POU1F1       | POU class 1 homeobox 1                              | 5449      | 0.334537864 | -1.950852552 | 4.043157289 | -0.482507212 | 0.629445676 | NA          | NA      |
| ENSG00000091138 | SLC26A3      | solute carrier family 26 member 3                   | 1811      | 0.334537864 | -1.950852552 | 4.043157289 | -0.482507212 | 0.629445676 | NA          | NA      |
| ENSG00000100341 | PNPLA5       | patatin like phospholipase domain containing 5      | 150379    | 0.334537864 | -1.950852552 | 4.043157289 | -0.482507212 | 0.629445676 | NA          | NA      |
| ENSG00000100652 | SLC10A1      | solute carrier family 10 member 1                   | 6554      | 0.334537864 | -1.950852552 | 4.043157289 | -0.482507212 | 0.629445676 | NA          | NA      |
| ENSG00000104499 | GML          | glycosylphosphatidylinositol anchored molecule like | 2765      | 0.334537864 | -1.950852552 | 4.043157289 | -0.482507212 | 0.629445676 | NA          | NA      |
| ENSG00000120094 | HOXB1        | homeobox B1                                         | 3211      | 0.334537864 | -1.950852552 | 4.043157289 | -0.482507212 | 0.629445676 | NA          | NA      |
| ENSG00000133020 | MYH8         | myosin heavy chain 8                                | 4626      | 0.334537864 | -1.950852552 | 4.043157289 | -0.482507212 | 0.629445676 | NA          | NA      |
| ENSG00000142515 | KLK3         | kallikrein related peptidase 3                      | 354       | 0.334537864 | -1.950852552 | 4.043157289 | -0.482507212 | 0.629445676 | NA          | NA      |
| ENSG00000143921 | ABCG8        | ATP binding cassette subfamily G member 8           | 64241     | 0.334537864 | -1.950852552 | 4.043157289 | -0.482507212 | 0.629445676 | NA          | NA      |
| ENSG00000144820 | ADGRG7       | adhesion G protein-coupled receptor G7              | 84873     | 0.334537864 | -1.950852552 | 4.043157289 | -0.482507212 | 0.629445676 | NA          | NA      |
| ENSG00000144962 | SPATA16      | spermatogenesis associated 16                       | 83893     | 0.334537864 | -1.950852552 | 4.043157289 | -0.482507212 | 0.629445676 | NA          | NA      |
| ENSG00000147256 | ARHGAP36     | Rho GTPase activating protein 36                    | 158763    | 0.334537864 | -1.950852552 | 4.043157289 | -0.482507212 | 0.629445676 | NA          | NA      |
| ENSG00000164256 | PRDM9        | PR/SET domain 9                                     | 56979     | 0.334537864 | -1.950852552 | 4.043157289 | -0.482507212 | 0.629445676 | NA          | NA      |
| ENSG00000166787 | SAA3P        | serum amyloid A3 pseudogene                         | 6290      | 0.334537864 | -1.950852552 | 4.043157289 | -0.482507212 | 0.629445676 | NA          | NA      |
| ENSG00000168505 | GBX2         | gastrulation brain homeobox 2                       | 2637      | 0.334537864 | -1.950852552 | 4.043157289 | -0.482507212 | 0.629445676 | NA          | NA      |
| ENSG00000171209 | CSN3         | casein kappa                                        | 1448      | 0.334537864 | -1.950852552 | 4.043157289 | -0.482507212 | 0.629445676 | NA          | NA      |
| ENSG00000174279 | EVX2         | even-skipped homeobox 2                             | 344191    | 0.334537864 | -1.950852552 | 4.043157289 | -0.482507212 | 0.629445676 | NA          | NA      |
| ENSG00000182177 | ASB18        | ankyrin repeat and SOCS box containing 18           | 401036    | 0.334537864 | -1.950852552 | 4.043157289 | -0.482507212 | 0.629445676 | NA          | NA      |
| ENSG00000182814 | NA           | NA                                                  | NA        | 0.334537864 | -1.950852552 | 4.043157289 | -0.482507212 | 0.629445676 | NA          | NA      |
| ENSG00000182854 | OR4F15       | olfactory receptor family 4 subfamily F member 15   | 390649    | 0.334537864 | -1.950852552 | 4.043157289 | -0.482507212 | 0.629445676 | NA          | NA      |
| ENSG00000185176 | AQP12B       | aquaporin 12B                                       | 653437    | 0.334537864 | -1.950852552 | 4.043157289 | -0.482507212 | 0.629445676 | NA          | NA      |
| ENSG00000185940 | KRTAP5-5     | keratin associated protein 5-5                      | 439915    | 0.334537864 | -1.950852552 | 4.043157289 | -0.482507212 | 0.629445676 | NA          | NA      |

|                 |             |                                                        |           |             |              |             |              |             |    |    |
|-----------------|-------------|--------------------------------------------------------|-----------|-------------|--------------|-------------|--------------|-------------|----|----|
| ENSG00000186297 | GABRA5      | gamma-aminobutyric acid type A receptor alpha5 subunit | 2558      | 0.334537864 | -1.950852552 | 4.043157289 | -0.482507212 | 0.629445676 | NA | NA |
| ENSG00000188384 | NA          | NA                                                     | NA        | 0.334537864 | -1.950852552 | 4.043157289 | -0.482507212 | 0.629445676 | NA | NA |
| ENSG00000196472 | NA          | NA                                                     | NA        | 0.334537864 | -1.950852552 | 4.043157289 | -0.482507212 | 0.629445676 | NA | NA |
| ENSG00000196900 | TEX43       | testis expressed 43                                    | 389320    | 0.334537864 | -1.950852552 | 4.043157289 | -0.482507212 | 0.629445676 | NA | NA |
| ENSG00000197476 | NA          | NA                                                     | NA        | 0.334537864 | -1.950852552 | 4.043157289 | -0.482507212 | 0.629445676 | NA | NA |
| ENSG00000197674 | NA          | NA                                                     | NA        | 0.334537864 | -1.950852552 | 4.043157289 | -0.482507212 | 0.629445676 | NA | NA |
| ENSG00000199104 | MIR346      | microRNA 346                                           | 442911    | 0.334537864 | -1.950852552 | 4.043157289 | -0.482507212 | 0.629445676 | NA | NA |
| ENSG00000200222 | NA          | NA                                                     | NA        | 0.334537864 | -1.950852552 | 4.043157289 | -0.482507212 | 0.629445676 | NA | NA |
| ENSG00000200237 | NA          | NA                                                     | NA        | 0.334537864 | -1.950852552 | 4.043157289 | -0.482507212 | 0.629445676 | NA | NA |
| ENSG00000201326 | SNORD115-22 | small nucleolar RNA, C/D box 115-22                    | 100033799 | 0.334537864 | -1.950852552 | 4.043157289 | -0.482507212 | 0.629445676 | NA | NA |
| ENSG00000201813 | NA          | NA                                                     | NA        | 0.334537864 | -1.950852552 | 4.043157289 | -0.482507212 | 0.629445676 | NA | NA |
| ENSG00000202111 | VTRNA1-2    | vault RNA 1-2                                          | 56663     | 0.334537864 | -1.950852552 | 4.043157289 | -0.482507212 | 0.629445676 | NA | NA |
| ENSG00000207390 | NA          | NA                                                     | NA        | 0.334537864 | -1.950852552 | 4.043157289 | -0.482507212 | 0.629445676 | NA | NA |
| ENSG00000207941 | MIR552      | microRNA 552                                           | 693137    | 0.334537864 | -1.950852552 | 4.043157289 | -0.482507212 | 0.629445676 | NA | NA |
| ENSG00000208012 | MIRLET7F2   | microRNA let-7f-2                                      | 406889    | 0.334537864 | -1.950852552 | 4.043157289 | -0.482507212 | 0.629445676 | NA | NA |
| ENSG00000211568 | MIR670      | microRNA 670                                           | 100313777 | 0.334537864 | -1.950852552 | 4.043157289 | -0.482507212 | 0.629445676 | NA | NA |
| ENSG00000218672 | NA          | NA                                                     | NA        | 0.334537864 | -1.950852552 | 4.043157289 | -0.482507212 | 0.629445676 | NA | NA |
| ENSG00000219770 | NA          | NA                                                     | NA        | 0.334537864 | -1.950852552 | 4.043157289 | -0.482507212 | 0.629445676 | NA | NA |
| ENSG00000222788 | NA          | NA                                                     | NA        | 0.334537864 | -1.950852552 | 4.043157289 | -0.482507212 | 0.629445676 | NA | NA |
| ENSG00000223274 | NA          | NA                                                     | NA        | 0.334537864 | -1.950852552 | 4.043157289 | -0.482507212 | 0.629445676 | NA | NA |
| ENSG00000223678 | NA          | NA                                                     | NA        | 0.334537864 | -1.950852552 | 4.043157289 | -0.482507212 | 0.629445676 | NA | NA |
| ENSG00000224443 | NA          | NA                                                     | NA        | 0.334537864 | -1.950852552 | 4.043157289 | -0.482507212 | 0.629445676 | NA | NA |
| ENSG00000224987 | NA          | NA                                                     | NA        | 0.334537864 | -1.950852552 | 4.043157289 | -0.482507212 | 0.629445676 | NA | NA |
| ENSG00000225463 | NA          | NA                                                     | NA        | 0.334537864 | -1.950852552 | 4.043157289 | -0.482507212 | 0.629445676 | NA | NA |
| ENSG00000225858 | NA          | NA                                                     | NA        | 0.334537864 | -1.950852552 | 4.043157289 | -0.482507212 | 0.629445676 | NA | NA |
| ENSG00000227179 | PGCP1       | progastricsin pseudogene 1                             | 441897    | 0.334537864 | -1.950852552 | 4.043157289 | -0.482507212 | 0.629445676 | NA | NA |
| ENSG00000227183 | NA          | NA                                                     | NA        | 0.334537864 | -1.950852552 | 4.043157289 | -0.482507212 | 0.629445676 | NA | NA |
| ENSG00000227882 | NA          | NA                                                     | NA        | 0.334537864 | -1.950852552 | 4.043157289 | -0.482507212 | 0.629445676 | NA | NA |
| ENSG00000228546 | NA          | NA                                                     | NA        | 0.334537864 | -1.950852552 | 4.043157289 | -0.482507212 | 0.629445676 | NA | NA |
| ENSG00000229190 | NA          | NA                                                     | NA        | 0.334537864 | -1.950852552 | 4.043157289 | -0.482507212 | 0.629445676 | NA | NA |
| ENSG00000229303 | NA          | NA                                                     | NA        | 0.334537864 | -1.950852552 | 4.043157289 | -0.482507212 | 0.629445676 | NA | NA |
| ENSG00000229532 | NA          | NA                                                     | NA        | 0.334537864 | -1.950852552 | 4.043157289 | -0.482507212 | 0.629445676 | NA | NA |
| ENSG00000229711 | NA          | NA                                                     | NA        | 0.334537864 | -1.950852552 | 4.043157289 | -0.482507212 | 0.629445676 | NA | NA |
| ENSG00000229797 | NA          | NA                                                     | NA        | 0.334537864 | -1.950852552 | 4.043157289 | -0.482507212 | 0.629445676 | NA | NA |
| ENSG00000231213 | PLSCR5      | phospholipid scramblase family member 5                | 389158    | 0.334537864 | -1.950852552 | 4.043157289 | -0.482507212 | 0.629445676 | NA | NA |

|                 |              |                              |           |             |              |             |              |             |    |    |
|-----------------|--------------|------------------------------|-----------|-------------|--------------|-------------|--------------|-------------|----|----|
| ENSG00000231956 | NA           | NA                           | NA        | 0.334537864 | -1.950852552 | 4.043157289 | -0.482507212 | 0.629445676 | NA | NA |
| ENSG00000233611 | NA           | NA                           | NA        | 0.334537864 | -1.950852552 | 4.043157289 | -0.482507212 | 0.629445676 | NA | NA |
| ENSG00000233635 | NA           | NA                           | NA        | 0.334537864 | -1.950852552 | 4.043157289 | -0.482507212 | 0.629445676 | NA | NA |
| ENSG00000233932 | CTXN2        | cortexin 2                   | 399697    | 0.334537864 | -1.950852552 | 4.043157289 | -0.482507212 | 0.629445676 | NA | NA |
| ENSG00000234450 | NA           | NA                           | NA        | 0.334537864 | -1.950852552 | 4.043157289 | -0.482507212 | 0.629445676 | NA | NA |
| ENSG00000235239 | NA           | NA                           | NA        | 0.334537864 | -1.950852552 | 4.043157289 | -0.482507212 | 0.629445676 | NA | NA |
| ENSG00000235300 | THRA1/BTR    | uncharacterized LOC105371807 | 105371807 | 0.334537864 | -1.950852552 | 4.043157289 | -0.482507212 | 0.629445676 | NA | NA |
| ENSG00000235828 | NA           | NA                           | NA        | 0.334537864 | -1.950852552 | 4.043157289 | -0.482507212 | 0.629445676 | NA | NA |
| ENSG00000236620 | NA           | NA                           | NA        | 0.334537864 | -1.950852552 | 4.043157289 | -0.482507212 | 0.629445676 | NA | NA |
| ENSG00000236669 | NA           | NA                           | NA        | 0.334537864 | -1.950852552 | 4.043157289 | -0.482507212 | 0.629445676 | NA | NA |
| ENSG00000236913 | NA           | NA                           | NA        | 0.334537864 | -1.950852552 | 4.043157289 | -0.482507212 | 0.629445676 | NA | NA |
| ENSG00000237194 | NA           | NA                           | NA        | 0.334537864 | -1.950852552 | 4.043157289 | -0.482507212 | 0.629445676 | NA | NA |
| ENSG00000237293 | NA           | NA                           | NA        | 0.334537864 | -1.950852552 | 4.043157289 | -0.482507212 | 0.629445676 | NA | NA |
| ENSG00000238481 | NA           | NA                           | NA        | 0.334537864 | -1.950852552 | 4.043157289 | -0.482507212 | 0.629445676 | NA | NA |
| ENSG00000238565 | NA           | NA                           | NA        | 0.334537864 | -1.950852552 | 4.043157289 | -0.482507212 | 0.629445676 | NA | NA |
| ENSG00000239007 | NA           | NA                           | NA        | 0.334537864 | -1.950852552 | 4.043157289 | -0.482507212 | 0.629445676 | NA | NA |
| ENSG00000239322 | ATP6V1B1-AS1 | ATP6V1B1 antisense RNA 1     | 101927750 | 0.334537864 | -1.950852552 | 4.043157289 | -0.482507212 | 0.629445676 | NA | NA |
| ENSG00000239881 | NA           | NA                           | NA        | 0.334537864 | -1.950852552 | 4.043157289 | -0.482507212 | 0.629445676 | NA | NA |
| ENSG00000240327 | NA           | NA                           | NA        | 0.334537864 | -1.950852552 | 4.043157289 | -0.482507212 | 0.629445676 | NA | NA |
| ENSG00000241291 | NA           | NA                           | NA        | 0.334537864 | -1.950852552 | 4.043157289 | -0.482507212 | 0.629445676 | NA | NA |
| ENSG00000241293 | NA           | NA                           | NA        | 0.334537864 | -1.950852552 | 4.043157289 | -0.482507212 | 0.629445676 | NA | NA |
| ENSG00000241451 | NA           | NA                           | NA        | 0.334537864 | -1.950852552 | 4.043157289 | -0.482507212 | 0.629445676 | NA | NA |
| ENSG00000243499 | NA           | NA                           | NA        | 0.334537864 | -1.950852552 | 4.043157289 | -0.482507212 | 0.629445676 | NA | NA |
| ENSG00000244056 | NA           | NA                           | NA        | 0.334537864 | -1.950852552 | 4.043157289 | -0.482507212 | 0.629445676 | NA | NA |
| ENSG00000244668 | NA           | NA                           | NA        | 0.334537864 | -1.950852552 | 4.043157289 | -0.482507212 | 0.629445676 | NA | NA |
| ENSG00000246214 | LOC101929524 | uncharacterized LOC101929524 | 101929524 | 0.334537864 | -1.950852552 | 4.043157289 | -0.482507212 | 0.629445676 | NA | NA |
| ENSG00000248113 | NA           | NA                           | NA        | 0.334537864 | -1.950852552 | 4.043157289 | -0.482507212 | 0.629445676 | NA | NA |
| ENSG00000250511 | NA           | NA                           | NA        | 0.334537864 | -1.950852552 | 4.043157289 | -0.482507212 | 0.629445676 | NA | NA |
| ENSG00000250761 | NA           | NA                           | NA        | 0.334537864 | -1.950852552 | 4.043157289 | -0.482507212 | 0.629445676 | NA | NA |
| ENSG00000250850 | NA           | NA                           | NA        | 0.334537864 | -1.950852552 | 4.043157289 | -0.482507212 | 0.629445676 | NA | NA |
| ENSG00000251099 | NA           | NA                           | NA        | 0.334537864 | -1.950852552 | 4.043157289 | -0.482507212 | 0.629445676 | NA | NA |
| ENSG00000251419 | NA           | NA                           | NA        | 0.334537864 | -1.950852552 | 4.043157289 | -0.482507212 | 0.629445676 | NA | NA |
| ENSG00000251447 | NA           | NA                           | NA        | 0.334537864 | -1.950852552 | 4.043157289 | -0.482507212 | 0.629445676 | NA | NA |
| ENSG00000251691 | NA           | NA                           | NA        | 0.334537864 | -1.950852552 | 4.043157289 | -0.482507212 | 0.629445676 | NA | NA |
| ENSG00000252131 | NA           | NA                           | NA        | 0.334537864 | -1.950852552 | 4.043157289 | -0.482507212 | 0.629445676 | NA | NA |

|                 |              |                                               |           |             |              |             |              |             |             |         |
|-----------------|--------------|-----------------------------------------------|-----------|-------------|--------------|-------------|--------------|-------------|-------------|---------|
| ENSG00000252826 | NA           | NA                                            | NA        | 0.334537864 | -1.950852552 | 4.043157289 | -0.482507212 | 0.629445676 | NA          | NA      |
| ENSG00000253325 | NA           | NA                                            | NA        | 0.334537864 | -1.950852552 | 4.043157289 | -0.482507212 | 0.629445676 | NA          | NA      |
| ENSG00000253397 | NA           | NA                                            | NA        | 0.334537864 | -1.950852552 | 4.043157289 | -0.482507212 | 0.629445676 | NA          | NA      |
| ENSG00000255084 | LOC101928896 | uncharacterized LOC101928896                  | 101928896 | 0.334537864 | -1.950852552 | 4.043157289 | -0.482507212 | 0.629445676 | NA          | NA      |
| ENSG00000255394 | C8orf49      | chromosome 8 open reading frame 49 (putative) | 606553    | 0.334537864 | -1.950852552 | 4.043157289 | -0.482507212 | 0.629445676 | NA          | NA      |
| ENSG00000255663 | NA           | NA                                            | NA        | 0.334537864 | -1.950852552 | 4.043157289 | -0.482507212 | 0.629445676 | NA          | NA      |
| ENSG00000256031 | NA           | NA                                            | NA        | 0.334537864 | -1.950852552 | 4.043157289 | -0.482507212 | 0.629445676 | NA          | NA      |
| ENSG00000257582 | LINC01475    | long intergenic non-protein coding RNA 1475   | 101927324 | 0.334537864 | -1.950852552 | 4.043157289 | -0.482507212 | 0.629445676 | NA          | NA      |
| ENSG00000259168 | NA           | NA                                            | NA        | 0.334537864 | -1.950852552 | 4.043157289 | -0.482507212 | 0.629445676 | NA          | NA      |
| ENSG00000259231 | NA           | NA                                            | NA        | 0.334537864 | -1.950852552 | 4.043157289 | -0.482507212 | 0.629445676 | NA          | NA      |
| ENSG00000259280 | NA           | NA                                            | NA        | 0.334537864 | -1.950852552 | 4.043157289 | -0.482507212 | 0.629445676 | NA          | NA      |
| ENSG00000259699 | NA           | NA                                            | NA        | 0.334537864 | -1.950852552 | 4.043157289 | -0.482507212 | 0.629445676 | NA          | NA      |
| ENSG00000261191 | NA           | NA                                            | NA        | 0.334537864 | -1.950852552 | 4.043157289 | -0.482507212 | 0.629445676 | NA          | NA      |
| ENSG00000261292 | NA           | NA                                            | NA        | 0.334537864 | -1.950852552 | 4.043157289 | -0.482507212 | 0.629445676 | NA          | NA      |
| ENSG00000261796 | ISY1-RAB43   | ISY1-RAB43 readthrough                        | 100534599 | 0.334537864 | -1.950852552 | 4.043157289 | -0.482507212 | 0.629445676 | NA          | NA      |
| ENSG00000263644 | NA           | NA                                            | NA        | 0.334537864 | -1.950852552 | 4.043157289 | -0.482507212 | 0.629445676 | NA          | NA      |
| ENSG00000263670 | MIR4457      | microRNA 4457                                 | 100616235 | 0.334537864 | -1.950852552 | 4.043157289 | -0.482507212 | 0.629445676 | NA          | NA      |
| ENSG00000264690 | NA           | NA                                            | NA        | 0.334537864 | -1.950852552 | 4.043157289 | -0.482507212 | 0.629445676 | NA          | NA      |
| ENSG00000265164 | MIR2681      | microRNA 2681                                 | 100616110 | 0.334537864 | -1.950852552 | 4.043157289 | -0.482507212 | 0.629445676 | NA          | NA      |
| ENSG00000268098 | NA           | NA                                            | NA        | 0.334537864 | -1.950852552 | 4.043157289 | -0.482507212 | 0.629445676 | NA          | NA      |
| ENSG00000268674 | FAM231D      | family with sequence similarity 231 member D  | 644634    | 0.334537864 | -1.950852552 | 4.043157289 | -0.482507212 | 0.629445676 | NA          | NA      |
| ENSG00000268674 | FAM231C      | family with sequence similarity 231 member C  | 729587    | 0.334537864 | -1.950852552 | 4.043157289 | -0.482507212 | 0.629445676 | NA          | NA      |
| ENSG00000268674 | LOC100996741 | uncharacterized LOC100996741                  | 100996741 | 0.334537864 | -1.950852552 | 4.043157289 | -0.482507212 | 0.629445676 | NA          | NA      |
| ENSG00000268674 | FAM231A      | protein FAM231A                               | 102723383 | 0.334537864 | -1.950852552 | 4.043157289 | -0.482507212 | 0.629445676 | NA          | NA      |
| ENSG00000268886 | NA           | NA                                            | NA        | 0.334537864 | -1.950852552 | 4.043157289 | -0.482507212 | 0.629445676 | NA          | NA      |
| ENSG00000269811 | NA           | NA                                            | NA        | 0.334537864 | -1.950852552 | 4.043157289 | -0.482507212 | 0.629445676 | NA          | NA      |
| ENSG00000271253 | NA           | NA                                            | NA        | 0.334537864 | -1.950852552 | 4.043157289 | -0.482507212 | 0.629445676 | NA          | NA      |
| ENSG00000272167 | NA           | NA                                            | NA        | 0.334537864 | -1.950852552 | 4.043157289 | -0.482507212 | 0.629445676 | NA          | NA      |
| ENSG00000272333 | KMT2B        | lysine methyltransferase 2B                   | 9757      | 0.334537864 | -1.950852552 | 4.043157289 | -0.482507212 | 0.629445676 | NA          | NA      |
| ENSG00000272634 | NA           | NA                                            | NA        | 0.334537864 | -1.950852552 | 4.043157289 | -0.482507212 | 0.629445676 | NA          | NA      |
| ENSG00000272664 | NA           | NA                                            | NA        | 0.334537864 | -1.950852552 | 4.043157289 | -0.482507212 | 0.629445676 | NA          | NA      |
| ENSG00000272904 | NA           | NA                                            | NA        | 0.334537864 | -1.950852552 | 4.043157289 | -0.482507212 | 0.629445676 | NA          | NA      |
| ENSG00000264633 | MIR4271      | microRNA 4271                                 | 100422952 | 1.417151315 | -1.949294613 | 2.382894756 | -0.818036385 | 0.413336411 | NA          | NA      |
| ENSG00000196138 | NA           | NA                                            | NA        | 23.61211215 | -1.949026978 | 1.190159214 | -1.637618695 | 0.101501261 | 0.999371363 | Not Sig |
| ENSG00000165061 | ZMAT4        | zinc finger matrin-type 4                     | 79698     | 6.473319819 | -1.948253981 | 1.405618398 | -1.386047581 | 0.165732375 | NA          | NA      |

|                 |          |                                                                                              |           |             |              |             |              |             |             |         |
|-----------------|----------|----------------------------------------------------------------------------------------------|-----------|-------------|--------------|-------------|--------------|-------------|-------------|---------|
| ENSG00000207518 | NA       | NA                                                                                           | NA        | 5.524175608 | -1.947394053 | 1.267349755 | -1.536587706 | 0.124394305 | NA          | NA      |
| ENSG00000240409 | NA       | NA                                                                                           | NA        | 1.749632348 | -1.947036238 | 2.62872106  | -0.740678145 | 0.458888614 | NA          | NA      |
| ENSG00000116711 | PLA2G4A  | phospholipase A2 group IVA                                                                   | 5321      | 616.2271779 | -1.945788185 | 0.841000991 | -2.313657422 | 0.020686521 | 0.730537685 | Not Sig |
| ENSG00000244681 | MTHFD2P1 | <small>methylenetetrahydrofolate dehydrogenase (NADP-dependent) 2, cytosolic isoform</small> | 100287639 | 1.573821033 | -1.944358778 | 2.333998474 | -0.833059147 | 0.404811372 | NA          | NA      |
| ENSG00000166349 | RAG1     | recombination activating 1                                                                   | 5896      | 107.2804008 | -1.943527463 | 0.897828644 | -2.164697548 | 0.030410855 | 0.905352003 | Not Sig |
| ENSG00000271767 | NA       | NA                                                                                           | NA        | 1.425006253 | -1.942474101 | 2.731838257 | -0.711050186 | 0.477053137 | NA          | NA      |
| ENSG00000261916 | NA       | NA                                                                                           | NA        | 25.90614603 | -1.942162141 | 0.876259363 | -2.21642384  | 0.026662488 | 0.841215479 | Not Sig |
| ENSG00000169174 | PCSK9    | proprotein convertase subtilisin/kexin type 9                                                | 255738    | 618.2471883 | -1.941943226 | 0.854183476 | -2.273449768 | 0.022999909 | 0.768580599 | Not Sig |
| ENSG00000238818 | NA       | NA                                                                                           | NA        | 3.299109743 | -1.940096507 | 1.651030139 | -1.17508243  | 0.239961739 | NA          | NA      |
| ENSG00000272217 | NA       | NA                                                                                           | NA        | 3.718182955 | -1.936671314 | 1.337718904 | -1.447741606 | 0.147689329 | NA          | NA      |
| ENSG00000264349 | MIR4258  | microRNA 4258                                                                                | 100423020 | 1.470494907 | -1.933778999 | 2.718335681 | -0.711383444 | 0.476846655 | NA          | NA      |
| ENSG00000239132 | NA       | NA                                                                                           | NA        | 7.88728603  | -1.929493265 | 1.29907931  | -1.485277497 | 0.13747033  | 0.999371363 | Not Sig |
| ENSG00000243986 | NA       | NA                                                                                           | NA        | 16.09156184 | -1.928366723 | 0.754732651 | -2.555032859 | 0.010617777 | 0.508401791 | Not Sig |
| ENSG00000239969 | NA       | NA                                                                                           | NA        | 36.78762153 | -1.925924591 | 0.907288257 | -2.122726241 | 0.033776799 | 0.951568739 | Not Sig |
| ENSG00000178631 | NA       | NA                                                                                           | NA        | 22.94979716 | -1.925285637 | 0.935423111 | -2.058197638 | 0.039571165 | 0.999371363 | Not Sig |
| ENSG00000257790 | NA       | NA                                                                                           | NA        | 1.42358885  | -1.924594423 | 2.145610421 | -0.896991553 | 0.369723425 | NA          | NA      |
| ENSG00000235489 | NA       | NA                                                                                           | NA        | 0.820667477 | -1.924373055 | 3.147002544 | -0.611493962 | 0.540872614 | NA          | NA      |
| ENSG00000244301 | NA       | NA                                                                                           | NA        | 0.820667477 | -1.924373055 | 3.147002544 | -0.611493962 | 0.540872614 | NA          | NA      |
| ENSG00000249799 | NA       | NA                                                                                           | NA        | 0.820667477 | -1.924373055 | 3.147002544 | -0.611493962 | 0.540872614 | NA          | NA      |
| ENSG00000271329 | NA       | NA                                                                                           | NA        | 0.820667477 | -1.924373055 | 3.147002544 | -0.611493962 | 0.540872614 | NA          | NA      |
| ENSG00000080644 | CHRNA3   | cholinergic receptor nicotinic alpha 3 subunit                                               | 1136      | 11.96016535 | -1.924227815 | 1.158433158 | -1.66106072  | 0.096701252 | 0.999371363 | Not Sig |
| ENSG00000237402 | NA       | NA                                                                                           | NA        | 0.785767139 | -1.923915796 | 3.189066473 | -0.603284946 | 0.546319146 | NA          | NA      |
| ENSG00000258734 | NA       | NA                                                                                           | NA        | 0.785767139 | -1.923915796 | 3.189066473 | -0.603284946 | 0.546319146 | NA          | NA      |
| ENSG00000271899 | MIR4466  | microRNA 4466                                                                                | 100616154 | 0.785767139 | -1.923915796 | 3.189066473 | -0.603284946 | 0.546319146 | NA          | NA      |
| ENSG00000263709 | NA       | NA                                                                                           | NA        | 0.779329603 | -1.923830379 | 3.197127616 | -0.601737125 | 0.547349134 | NA          | NA      |
| ENSG00000270424 | NA       | NA                                                                                           | NA        | 0.779329603 | -1.923830379 | 3.197127616 | -0.601737125 | 0.547349134 | NA          | NA      |
| ENSG00000136011 | STAB2    | stabilin 2                                                                                   | 55576     | 97.37937974 | -1.922318567 | 0.734508858 | -2.617148242 | 0.008866782 | 0.471136671 | Not Sig |
| ENSG00000179915 | NRXN1    | neurexin 1                                                                                   | 9378      | 28.43981154 | -1.921885116 | 1.090254543 | -1.762785698 | 0.07793664  | 0.999371363 | Not Sig |
| ENSG00000154319 | FAM167A  | family with sequence similarity 167 member A                                                 | 83648     | 476.5759739 | -1.9212057   | 1.005829123 | -1.910071656 | 0.056123988 | 0.999371363 | Not Sig |
| ENSG00000132938 | MTUS2    | microtubule associated scaffold protein 2                                                    | 23281     | 30.56186043 | -1.919770845 | 1.167671468 | -1.644101871 | 0.100155162 | 0.999371363 | Not Sig |
| ENSG00000251756 | NA       | NA                                                                                           | NA        | 2.26983546  | -1.917000048 | 2.165486304 | -0.885251523 | 0.376020989 | NA          | NA      |
| ENSG00000204172 | AGAP9    | <small>ArfGAP with GTPase domain, ankyrin repeat and PH domain 9</small>                     | 642517    | 2.2752706   | -1.91652721  | 1.917218012 | -0.999639685 | 0.31748491  | NA          | NA      |
| ENSG00000260139 | NA       | NA                                                                                           | NA        | 20.17899918 | -1.91641855  | 1.221927145 | -1.568357456 | 0.116797734 | 0.999371363 | Not Sig |
| ENSG00000253114 | NA       | NA                                                                                           | NA        | 9.191866068 | -1.914175509 | 1.174594649 | -1.629647735 | 0.10317597  | 0.999371363 | Not Sig |
| ENSG00000254536 | NA       | NA                                                                                           | NA        | 2.924560878 | -1.913426231 | 1.634314926 | -1.170781836 | 0.241686481 | NA          | NA      |

|                 |              |                                                    |           |             |              |             |              |             |             |         |
|-----------------|--------------|----------------------------------------------------|-----------|-------------|--------------|-------------|--------------|-------------|-------------|---------|
| ENSG00000249595 | NA           | NA                                                 | NA        | 1.44775058  | -1.913110372 | 2.163930807 | -0.884090363 | 0.376647435 | NA          | NA      |
| ENSG00000200304 | NA           | NA                                                 | NA        | 3.24073512  | -1.912679478 | 1.612847649 | -1.18590214  | 0.235660948 | NA          | NA      |
| ENSG00000199571 | NA           | NA                                                 | NA        | 3.9987269   | -1.911033873 | 1.541274565 | -1.239904892 | 0.215010574 | NA          | NA      |
| ENSG00000118520 | ARG1         | arginase 1                                         | 383       | 1.565369179 | -1.909337176 | 2.329470355 | -0.819644333 | 0.412418893 | NA          | NA      |
| ENSG00000273474 | NA           | NA                                                 | NA        | 3.011520449 | -1.907844489 | 1.814544897 | -1.051417627 | 0.293066824 | NA          | NA      |
| ENSG00000259219 | LOC105371022 | uncharacterized LOC105371022                       | 105371022 | 1.430026386 | -1.906988945 | 2.379478672 | -0.801431409 | 0.422881938 | NA          | NA      |
| ENSG00000239017 | NA           | NA                                                 | NA        | 1.431443788 | -1.906984726 | 2.401834113 | -0.793970206 | 0.427212777 | NA          | NA      |
| ENSG00000197723 | NA           | NA                                                 | NA        | 2.071279818 | -1.904103445 | 2.129284626 | -0.894245617 | 0.37119049  | NA          | NA      |
| ENSG00000199645 | NA           | NA                                                 | NA        | 2.560845577 | -1.903269416 | 2.376961034 | -0.800715447 | 0.423296398 | NA          | NA      |
| ENSG00000200792 | SNORA80A     | small nucleolar RNA, H/ACA box 80A                 | 677846    | 22.75822463 | -1.901666045 | 1.245550668 | -1.526767313 | 0.126818882 | 0.999371363 | Not Sig |
| ENSG00000238384 | NA           | NA                                                 | NA        | 4.7255225   | -1.901481304 | 1.819445276 | -1.045088484 | 0.295982076 | NA          | NA      |
| ENSG00000230922 | LOC101927551 | uncharacterized LOC101927551                       | 101927551 | 4.229335928 | -1.900562837 | 1.851940187 | -1.026254979 | 0.304771413 | NA          | NA      |
| ENSG00000273188 | NA           | NA                                                 | NA        | 2.260148112 | -1.898893482 | 2.142237117 | -0.886406769 | 0.375398373 | NA          | NA      |
| ENSG00000259661 | NA           | NA                                                 | NA        | 1.42198954  | -1.897529336 | 2.388767471 | -0.79435498  | 0.426988805 | NA          | NA      |
| ENSG00000139874 | SSTR1        | somatostatin receptor 1                            | 6751      | 197.3569321 | -1.895562792 | 1.004622588 | -1.886840705 | 0.059181754 | 0.999371363 | Not Sig |
| ENSG00000272405 | NA           | NA                                                 | NA        | 305.7471362 | -1.894411407 | 1.159870095 | -1.63329619  | 0.102406718 | 0.999371363 | Not Sig |
| ENSG00000154040 | CABYR        | calcium binding tyrosine phosphorylation regulated | 26256     | 49.1833617  | -1.892145626 | 1.012872653 | -1.868098246 | 0.061748378 | 0.999371363 | Not Sig |
| ENSG00000265106 | NA           | NA                                                 | NA        | 0.804360686 | -1.89093682  | 3.201645304 | -0.590614088 | 0.554779023 | NA          | NA      |
| ENSG00000267214 | NA           | NA                                                 | NA        | 0.804360686 | -1.89093682  | 3.201645304 | -0.590614088 | 0.554779023 | NA          | NA      |
| ENSG00000267641 | NA           | NA                                                 | NA        | 0.804360686 | -1.89093682  | 3.201645304 | -0.590614088 | 0.554779023 | NA          | NA      |
| ENSG00000268030 | NA           | NA                                                 | NA        | 0.804360686 | -1.89093682  | 3.201645304 | -0.590614088 | 0.554779023 | NA          | NA      |
| ENSG00000182601 | HS3ST4       | heparan sulfate-glucosamine 3-sulfotransferase 4   | 9951      | 0.769460347 | -1.890364299 | 3.244790193 | -0.582584447 | 0.560173078 | NA          | NA      |
| ENSG00000224609 | HSD52        | uncharacterized LOC729467                          | 729467    | 0.763022812 | -1.89025729  | 3.253064823 | -0.581069666 | 0.561193502 | NA          | NA      |
| ENSG00000253534 | NA           | NA                                                 | NA        | 0.763022812 | -1.89025729  | 3.253064823 | -0.581069666 | 0.561193502 | NA          | NA      |
| ENSG00000197106 | SLC6A17      | solute carrier family 6 member 17                  | 388662    | 23.9090382  | -1.889090777 | 1.429718731 | -1.32130239  | 0.186400557 | 0.999371363 | Not Sig |
| ENSG00000259867 | NA           | NA                                                 | NA        | 2.210458441 | -1.888963946 | 1.883913478 | -1.002680839 | 0.316014878 | NA          | NA      |
| ENSG00000092607 | TBX15        | T-box 15                                           | 6913      | 219.777387  | -1.888723546 | 1.129318177 | -1.672445893 | 0.094436429 | 0.999371363 | Not Sig |
| ENSG00000124092 | CTCF         | CCCTC-binding factor like                          | 140690    | 0.318231072 | -1.888165458 | 4.049093934 | -0.466318018 | 0.640987884 | NA          | NA      |
| ENSG00000124227 | ANKRD60      | ankyrin repeat domain 60                           | 140731    | 0.318231072 | -1.888165458 | 4.049093934 | -0.466318018 | 0.640987884 | NA          | NA      |
| ENSG00000130182 | ZSCAN10      | zinc finger and SCAN domain containing 10          | 84891     | 0.318231072 | -1.888165458 | 4.049093934 | -0.466318018 | 0.640987884 | NA          | NA      |
| ENSG00000151577 | DRD3         | dopamine receptor D3                               | 1814      | 0.318231072 | -1.888165458 | 4.049093934 | -0.466318018 | 0.640987884 | NA          | NA      |
| ENSG00000168925 | CTRB1        | chymotrypsinogen B1                                | 1504      | 0.318231072 | -1.888165458 | 4.049093934 | -0.466318018 | 0.640987884 | NA          | NA      |
| ENSG00000169953 | HSFY2        | heat shock transcription factor, Y-linked 2        | 159119    | 0.318231072 | -1.888165458 | 4.049093934 | -0.466318018 | 0.640987884 | NA          | NA      |
| ENSG00000181023 | OR56B1       | olfactory receptor family 56 subfamily B member 1  | 387748    | 0.318231072 | -1.888165458 | 4.049093934 | -0.466318018 | 0.640987884 | NA          | NA      |
| ENSG00000181359 | NA           | NA                                                 | NA        | 0.318231072 | -1.888165458 | 4.049093934 | -0.466318018 | 0.640987884 | NA          | NA      |

|                 |          |                                                                                      |           |             |              |             |              |             |    |    |
|-----------------|----------|--------------------------------------------------------------------------------------|-----------|-------------|--------------|-------------|--------------|-------------|----|----|
| ENSG00000189013 | KIR2DL4  | killer cell immunoglobulin like receptor, two Ig domains and long cytoplasmic tail 4 | 3805      | 0.318231072 | -1.888165458 | 4.049093934 | -0.466318018 | 0.640987884 | NA | NA |
| ENSG00000196593 | NA       | NA                                                                                   | NA        | 0.318231072 | -1.888165458 | 4.049093934 | -0.466318018 | 0.640987884 | NA | NA |
| ENSG00000201794 | NA       | NA                                                                                   | NA        | 0.318231072 | -1.888165458 | 4.049093934 | -0.466318018 | 0.640987884 | NA | NA |
| ENSG00000207972 | MIR638   | microRNA 638                                                                         | 693223    | 0.318231072 | -1.888165458 | 4.049093934 | -0.466318018 | 0.640987884 | NA | NA |
| ENSG00000211715 | NA       | NA                                                                                   | NA        | 0.318231072 | -1.888165458 | 4.049093934 | -0.466318018 | 0.640987884 | NA | NA |
| ENSG00000214027 | NA       | NA                                                                                   | NA        | 0.318231072 | -1.888165458 | 4.049093934 | -0.466318018 | 0.640987884 | NA | NA |
| ENSG00000215089 | NA       | NA                                                                                   | NA        | 0.318231072 | -1.888165458 | 4.049093934 | -0.466318018 | 0.640987884 | NA | NA |
| ENSG00000221291 | NA       | NA                                                                                   | NA        | 0.318231072 | -1.888165458 | 4.049093934 | -0.466318018 | 0.640987884 | NA | NA |
| ENSG00000221301 | NA       | NA                                                                                   | NA        | 0.318231072 | -1.888165458 | 4.049093934 | -0.466318018 | 0.640987884 | NA | NA |
| ENSG00000226014 | NA       | NA                                                                                   | NA        | 0.318231072 | -1.888165458 | 4.049093934 | -0.466318018 | 0.640987884 | NA | NA |
| ENSG00000228208 | Clorf143 | chromosome 1 open reading frame 143 (putative)                                       | 440714    | 0.318231072 | -1.888165458 | 4.049093934 | -0.466318018 | 0.640987884 | NA | NA |
| ENSG00000229515 | NA       | NA                                                                                   | NA        | 0.318231072 | -1.888165458 | 4.049093934 | -0.466318018 | 0.640987884 | NA | NA |
| ENSG00000231128 | NA       | NA                                                                                   | NA        | 0.318231072 | -1.888165458 | 4.049093934 | -0.466318018 | 0.640987884 | NA | NA |
| ENSG00000232429 | NA       | NA                                                                                   | NA        | 0.318231072 | -1.888165458 | 4.049093934 | -0.466318018 | 0.640987884 | NA | NA |
| ENSG00000232654 | NA       | NA                                                                                   | NA        | 0.318231072 | -1.888165458 | 4.049093934 | -0.466318018 | 0.640987884 | NA | NA |
| ENSG00000236533 | NA       | NA                                                                                   | NA        | 0.318231072 | -1.888165458 | 4.049093934 | -0.466318018 | 0.640987884 | NA | NA |
| ENSG00000238118 | NA       | NA                                                                                   | NA        | 0.318231072 | -1.888165458 | 4.049093934 | -0.466318018 | 0.640987884 | NA | NA |
| ENSG00000239202 | NA       | NA                                                                                   | NA        | 0.318231072 | -1.888165458 | 4.049093934 | -0.466318018 | 0.640987884 | NA | NA |
| ENSG00000240477 | NA       | NA                                                                                   | NA        | 0.318231072 | -1.888165458 | 4.049093934 | -0.466318018 | 0.640987884 | NA | NA |
| ENSG00000240661 | NA       | NA                                                                                   | NA        | 0.318231072 | -1.888165458 | 4.049093934 | -0.466318018 | 0.640987884 | NA | NA |
| ENSG00000242748 | NA       | NA                                                                                   | NA        | 0.318231072 | -1.888165458 | 4.049093934 | -0.466318018 | 0.640987884 | NA | NA |
| ENSG00000243844 | NA       | NA                                                                                   | NA        | 0.318231072 | -1.888165458 | 4.049093934 | -0.466318018 | 0.640987884 | NA | NA |
| ENSG00000243856 | NA       | NA                                                                                   | NA        | 0.318231072 | -1.888165458 | 4.049093934 | -0.466318018 | 0.640987884 | NA | NA |
| ENSG00000244273 | NA       | NA                                                                                   | NA        | 0.318231072 | -1.888165458 | 4.049093934 | -0.466318018 | 0.640987884 | NA | NA |
| ENSG00000253247 | NA       | NA                                                                                   | NA        | 0.318231072 | -1.888165458 | 4.049093934 | -0.466318018 | 0.640987884 | NA | NA |
| ENSG00000255387 | NA       | NA                                                                                   | NA        | 0.318231072 | -1.888165458 | 4.049093934 | -0.466318018 | 0.640987884 | NA | NA |
| ENSG00000255726 | NA       | NA                                                                                   | NA        | 0.318231072 | -1.888165458 | 4.049093934 | -0.466318018 | 0.640987884 | NA | NA |
| ENSG00000255963 | NA       | NA                                                                                   | NA        | 0.318231072 | -1.888165458 | 4.049093934 | -0.466318018 | 0.640987884 | NA | NA |
| ENSG00000259217 | NA       | NA                                                                                   | NA        | 0.318231072 | -1.888165458 | 4.049093934 | -0.466318018 | 0.640987884 | NA | NA |
| ENSG00000261524 | NA       | NA                                                                                   | NA        | 0.318231072 | -1.888165458 | 4.049093934 | -0.466318018 | 0.640987884 | NA | NA |
| ENSG00000263855 | NA       | NA                                                                                   | NA        | 0.318231072 | -1.888165458 | 4.049093934 | -0.466318018 | 0.640987884 | NA | NA |
| ENSG00000264452 | NA       | NA                                                                                   | NA        | 0.318231072 | -1.888165458 | 4.049093934 | -0.466318018 | 0.640987884 | NA | NA |
| ENSG00000264624 | NA       | NA                                                                                   | NA        | 0.318231072 | -1.888165458 | 4.049093934 | -0.466318018 | 0.640987884 | NA | NA |
| ENSG00000264741 | MIR4505  | microRNA 4505                                                                        | 100616158 | 0.318231072 | -1.888165458 | 4.049093934 | -0.466318018 | 0.640987884 | NA | NA |
| ENSG00000265370 | MIR4682  | microRNA 4682                                                                        | 100616322 | 0.318231072 | -1.888165458 | 4.049093934 | -0.466318018 | 0.640987884 | NA | NA |



|                 |           |                                               |           |             |              |             |              |             |             |         |
|-----------------|-----------|-----------------------------------------------|-----------|-------------|--------------|-------------|--------------|-------------|-------------|---------|
| ENSG00000265635 | MIR3612   | microRNA 3612                                 | 100500817 | 0.318231072 | -1.888165458 | 4.049093934 | -0.466318018 | 0.640987884 | NA          | NA      |
| ENSG00000266276 | MIR4743   | microRNA 4743                                 | 100616366 | 0.318231072 | -1.888165458 | 4.049093934 | -0.466318018 | 0.640987884 | NA          | NA      |
| ENSG00000266522 | NA        | NA                                            | NA        | 0.318231072 | -1.888165458 | 4.049093934 | -0.466318018 | 0.640987884 | NA          | NA      |
| ENSG00000268302 | NA        | NA                                            | NA        | 0.318231072 | -1.888165458 | 4.049093934 | -0.466318018 | 0.640987884 | NA          | NA      |
| ENSG00000268861 | NA        | NA                                            | NA        | 0.318231072 | -1.888165458 | 4.049093934 | -0.466318018 | 0.640987884 | NA          | NA      |
| ENSG00000268938 | NA        | NA                                            | NA        | 0.318231072 | -1.888165458 | 4.049093934 | -0.466318018 | 0.640987884 | NA          | NA      |
| ENSG00000270462 | NA        | NA                                            | NA        | 0.318231072 | -1.888165458 | 4.049093934 | -0.466318018 | 0.640987884 | NA          | NA      |
| ENSG00000272995 | NA        | NA                                            | NA        | 0.318231072 | -1.888165458 | 4.049093934 | -0.466318018 | 0.640987884 | NA          | NA      |
| ENSG00000142233 | NTN5      | netrin 5                                      | 126147    | 16.61297065 | -1.878809707 | 1.070646989 | -1.754835839 | 0.079287391 | 0.999371363 | Not Sig |
| ENSG00000260296 | NA        | NA                                            | NA        | 42.30921956 | -1.876380711 | 1.011400264 | -1.855230592 | 0.063563305 | 0.999371363 | Not Sig |
| ENSG00000197258 | NA        | NA                                            | NA        | 29.69184277 | -1.875694036 | 0.802372728 | -2.337684183 | 0.019403637 | 0.709667191 | Not Sig |
| ENSG00000199933 | NA        | NA                                            | NA        | 8.43823733  | -1.874213952 | 1.140023204 | -1.644013863 | 0.100173339 | 0.999371363 | Not Sig |
| ENSG00000228540 | NA        | NA                                            | NA        | 14.02618156 | -1.867934164 | 1.356534913 | -1.376989376 | 0.168515533 | 0.999371363 | Not Sig |
| ENSG00000012504 | NR1H4     | nuclear receptor subfamily 1 group H member 4 | 9971      | 9.954955952 | -1.867584351 | 1.104442207 | -1.690975173 | 0.090841545 | 0.999371363 | Not Sig |
| ENSG00000266916 | NA        | NA                                            | NA        | 20.14804492 | -1.867435573 | 0.978546507 | -1.908376924 | 0.056342517 | 0.999371363 | Not Sig |
| ENSG00000248731 | NA        | NA                                            | NA        | 2.200589185 | -1.865088103 | 1.673824489 | -1.114267424 | 0.265164478 | NA          | NA      |
| ENSG00000263511 | MIR5699   | microRNA 5699                                 | 100847086 | 9.861793607 | -1.864817296 | 1.083813475 | -1.720607226 | 0.085322121 | 0.999371363 | Not Sig |
| ENSG00000244327 | NA        | NA                                            | NA        | 16.59245275 | -1.862747563 | 1.315037006 | -1.416498209 | 0.156629688 | 0.999371363 | Not Sig |
| ENSG00000252916 | NA        | NA                                            | NA        | 4.543373707 | -1.862396817 | 1.633295593 | -1.140269296 | 0.254174125 | NA          | NA      |
| ENSG00000238754 | SCARNA18B | small Cajal body-specific RNA 18B             | 107397392 | 4.339505069 | -1.861446008 | 1.473059447 | -1.263659802 | 0.206352159 | NA          | NA      |
| ENSG00000168702 | LRP1B     | LDL receptor related protein 1B               | 53353     | 57.82391075 | -1.860221433 | 0.851588012 | -2.184414772 | 0.028931784 | 0.888629151 | Not Sig |
| ENSG00000185950 | IRS2      | insulin receptor substrate 2                  | 8660      | 3835.210055 | -1.859036314 | 0.640540463 | -2.902293332 | 0.003704415 | 0.27347713  | Not Sig |
| ENSG00000010438 | PRSS3     | protease, serine 3                            | 5646      | 7.971377811 | -1.858700714 | 1.706026508 | -1.08949111  | 0.275937373 | 0.999371363 | Not Sig |
| ENSG00000196326 | NA        | NA                                            | NA        | 5.002290379 | -1.858228893 | 1.848244822 | -1.00540192  | 0.314703356 | NA          | NA      |
| ENSG00000163746 | PLSCR2    | phospholipid scramblase 2                     | 57047     | 29.32636376 | -1.858076349 | 1.132092986 | -1.641275382 | 0.100740264 | 0.999371363 | Not Sig |
| ENSG00000265361 | NA        | NA                                            | NA        | 4.995232883 | -1.855896764 | 1.214250372 | -1.528430055 | 0.126405797 | NA          | NA      |
| ENSG00000259799 | NA        | NA                                            | NA        | 11.17898939 | -1.855744598 | 0.895781169 | -2.071649486 | 0.038298141 | 0.999371363 | Not Sig |
| ENSG00000253019 | NA        | NA                                            | NA        | 2.904640458 | -1.855656789 | 1.590861731 | -1.166447563 | 0.243433538 | NA          | NA      |
| ENSG00000223284 | NA        | NA                                            | NA        | 13.49193537 | -1.853149372 | 1.046751234 | -1.770381836 | 0.076663554 | 0.999371363 | Not Sig |
| ENSG00000113924 | HGD       | homogentisate 1,2-dioxygenase                 | 3081      | 347.2686812 | -1.852802372 | 1.179618312 | -1.570679561 | 0.116257099 | 0.999371363 | Not Sig |
| ENSG00000230320 | NA        | NA                                            | NA        | 3.575075753 | -1.851445061 | 1.44964189  | -1.277174089 | 0.201540793 | NA          | NA      |
| ENSG00000265432 | MIR4308   | microRNA 4308                                 | 100422984 | 1.47479598  | -1.850846359 | 2.075538995 | -0.891742513 | 0.372530961 | NA          | NA      |
| ENSG00000184374 | COLEC10   | collectin subfamily member 10                 | 10584     | 24.32972057 | -1.85023131  | 1.049802099 | -1.76245724  | 0.077992075 | 0.999371363 | Not Sig |
| ENSG00000254629 | NA        | NA                                            | NA        | 3.580095886 | -1.844200879 | 1.358706487 | -1.357321023 | 0.17467923  | NA          | NA      |
| ENSG00000248774 | NA        | NA                                            | NA        | 2.730246546 | -1.843479366 | 1.647016454 | -1.119284122 | 0.263018947 | NA          | NA      |

|                 |            |                                                                          |           |             |              |             |              |             |             |         |
|-----------------|------------|--------------------------------------------------------------------------|-----------|-------------|--------------|-------------|--------------|-------------|-------------|---------|
| ENSG00000252494 | NA         | NA                                                                       | NA        | 3.825020433 | -1.841066896 | 1.441414291 | -1.277264217 | 0.201508982 | NA          | NA      |
| ENSG00000240270 | NA         | NA                                                                       | NA        | 1.395813492 | -1.837124588 | 2.354199091 | -0.780360758 | 0.435178559 | NA          | NA      |
| ENSG00000224403 | NA         | NA                                                                       | NA        | 8.069701465 | -1.836095237 | 1.097582382 | -1.672854144 | 0.094356013 | 0.999371363 | Not Sig |
| ENSG00000211907 | NA         | NA                                                                       | NA        | 1.331416341 | -1.83519253  | 2.826324612 | -0.649321215 | 0.516130776 | NA          | NA      |
| ENSG00000240012 | SLC9A9-AS1 | SLC9A9 antisense RNA 1                                                   | 100885796 | 1.465341732 | -1.833416295 | 2.37176605  | -0.773017345 | 0.439512116 | NA          | NA      |
| ENSG00000115593 | SMYD1      | SET and MYND domain containing 1                                         | 150572    | 0.301924281 | -1.829067758 | 4.05411662  | -0.451163084 | 0.651872014 | NA          | NA      |
| ENSG00000123307 | NEUROD4    | neuronal differentiation 4                                               | 58158     | 0.301924281 | -1.829067758 | 4.05411662  | -0.451163084 | 0.651872014 | NA          | NA      |
| ENSG00000123584 | MAGEA9     | MAGE family member A9                                                    | 4108      | 0.301924281 | -1.829067758 | 4.05411662  | -0.451163084 | 0.651872014 | NA          | NA      |
| ENSG00000125492 | BARHL1     | BarH like homeobox 1                                                     | 56751     | 0.301924281 | -1.829067758 | 4.05411662  | -0.451163084 | 0.651872014 | NA          | NA      |
| ENSG00000142698 | Clorf94    | chromosome 1 open reading frame 94                                       | 84970     | 0.301924281 | -1.829067758 | 4.05411662  | -0.451163084 | 0.651872014 | NA          | NA      |
| ENSG00000150175 | NA         | NA                                                                       | NA        | 0.301924281 | -1.829067758 | 4.05411662  | -0.451163084 | 0.651872014 | NA          | NA      |
| ENSG00000157335 | CLEC18C    | C-type lectin domain family 18 member C                                  | 283971    | 0.301924281 | -1.829067758 | 4.05411662  | -0.451163084 | 0.651872014 | NA          | NA      |
| ENSG00000162727 | OR2M5      | olfactory receptor family 2 subfamily M member 5                         | 127059    | 0.301924281 | -1.829067758 | 4.05411662  | -0.451163084 | 0.651872014 | NA          | NA      |
| ENSG00000168333 | PPDPFL     | pancreatic progenitor cell differentiation and proliferation factor like | 492307    | 0.301924281 | -1.829067758 | 4.05411662  | -0.451163084 | 0.651872014 | NA          | NA      |
| ENSG00000168928 | CTRB2      | chymotrypsinogen B2                                                      | 440387    | 0.301924281 | -1.829067758 | 4.05411662  | -0.451163084 | 0.651872014 | NA          | NA      |
| ENSG00000177673 | TEX44      | testis expressed 44                                                      | 165100    | 0.301924281 | -1.829067758 | 4.05411662  | -0.451163084 | 0.651872014 | NA          | NA      |
| ENSG00000178556 | NA         | NA                                                                       | NA        | 0.301924281 | -1.829067758 | 4.05411662  | -0.451163084 | 0.651872014 | NA          | NA      |
| ENSG00000179636 | TPPP2      | tubulin polymerization promoting protein family member 2                 | 122664    | 0.301924281 | -1.829067758 | 4.05411662  | -0.451163084 | 0.651872014 | NA          | NA      |
| ENSG00000188686 | NA         | NA                                                                       | NA        | 0.301924281 | -1.829067758 | 4.05411662  | -0.451163084 | 0.651872014 | NA          | NA      |
| ENSG00000188828 | GLRA4      | glycine receptor alpha 4                                                 | 441509    | 0.301924281 | -1.829067758 | 4.05411662  | -0.451163084 | 0.651872014 | NA          | NA      |
| ENSG00000197416 | FABP12     | fatty acid binding protein 12                                            | 646486    | 0.301924281 | -1.829067758 | 4.05411662  | -0.451163084 | 0.651872014 | NA          | NA      |
| ENSG00000198454 | NA         | NA                                                                       | NA        | 0.301924281 | -1.829067758 | 4.05411662  | -0.451163084 | 0.651872014 | NA          | NA      |
| ENSG00000199201 | NA         | NA                                                                       | NA        | 0.301924281 | -1.829067758 | 4.05411662  | -0.451163084 | 0.651872014 | NA          | NA      |
| ENSG00000199963 | NA         | NA                                                                       | NA        | 0.301924281 | -1.829067758 | 4.05411662  | -0.451163084 | 0.651872014 | NA          | NA      |
| ENSG00000200021 | NA         | NA                                                                       | NA        | 0.301924281 | -1.829067758 | 4.05411662  | -0.451163084 | 0.651872014 | NA          | NA      |
| ENSG00000200141 | NA         | NA                                                                       | NA        | 0.301924281 | -1.829067758 | 4.05411662  | -0.451163084 | 0.651872014 | NA          | NA      |
| ENSG00000201279 | NA         | NA                                                                       | NA        | 0.301924281 | -1.829067758 | 4.05411662  | -0.451163084 | 0.651872014 | NA          | NA      |
| ENSG00000201441 | NA         | NA                                                                       | NA        | 0.301924281 | -1.829067758 | 4.05411662  | -0.451163084 | 0.651872014 | NA          | NA      |
| ENSG00000203902 | NA         | NA                                                                       | NA        | 0.301924281 | -1.829067758 | 4.05411662  | -0.451163084 | 0.651872014 | NA          | NA      |
| ENSG00000205057 | CLLU1OS    | chronic lymphocytic leukemia up-regulated 1 opposite strand              | 574016    | 0.301924281 | -1.829067758 | 4.05411662  | -0.451163084 | 0.651872014 | NA          | NA      |
| ENSG00000206679 | NA         | NA                                                                       | NA        | 0.301924281 | -1.829067758 | 4.05411662  | -0.451163084 | 0.651872014 | NA          | NA      |
| ENSG00000207597 | MIR490     | microRNA 490                                                             | 574443    | 0.301924281 | -1.829067758 | 4.05411662  | -0.451163084 | 0.651872014 | NA          | NA      |
| ENSG00000208022 | MIR618     | microRNA 618                                                             | 693203    | 0.301924281 | -1.829067758 | 4.05411662  | -0.451163084 | 0.651872014 | NA          | NA      |
| ENSG00000209702 | SNORD41    | small nucleolar RNA, C/D box 41                                          | 26810     | 0.301924281 | -1.829067758 | 4.05411662  | -0.451163084 | 0.651872014 | NA          | NA      |
| ENSG00000212237 | NA         | NA                                                                       | NA        | 0.301924281 | -1.829067758 | 4.05411662  | -0.451163084 | 0.651872014 | NA          | NA      |

|                 |           |                                                           |           |             |              |            |              |             |    |    |
|-----------------|-----------|-----------------------------------------------------------|-----------|-------------|--------------|------------|--------------|-------------|----|----|
| ENSG00000213270 | NA        | NA                                                        | NA        | 0.301924281 | -1.829067758 | 4.05411662 | -0.451163084 | 0.651872014 | NA | NA |
| ENSG00000213527 | NA        | NA                                                        | NA        | 0.301924281 | -1.829067758 | 4.05411662 | -0.451163084 | 0.651872014 | NA | NA |
| ENSG00000214161 | NA        | NA                                                        | NA        | 0.301924281 | -1.829067758 | 4.05411662 | -0.451163084 | 0.651872014 | NA | NA |
| ENSG00000214181 | NA        | NA                                                        | NA        | 0.301924281 | -1.829067758 | 4.05411662 | -0.451163084 | 0.651872014 | NA | NA |
| ENSG00000214794 | NA        | NA                                                        | NA        | 0.301924281 | -1.829067758 | 4.05411662 | -0.451163084 | 0.651872014 | NA | NA |
| ENSG00000214967 | NPIPA7    | nuclear pore complex interacting protein family member A7 | 101059938 | 0.301924281 | -1.829067758 | 4.05411662 | -0.451163084 | 0.651872014 | NA | NA |
| ENSG00000214967 | NPIPA8    | nuclear pore complex interacting protein family member A8 | 101059953 | 0.301924281 | -1.829067758 | 4.05411662 | -0.451163084 | 0.651872014 | NA | NA |
| ENSG00000217805 | NA        | NA                                                        | NA        | 0.301924281 | -1.829067758 | 4.05411662 | -0.451163084 | 0.651872014 | NA | NA |
| ENSG00000219016 | NA        | NA                                                        | NA        | 0.301924281 | -1.829067758 | 4.05411662 | -0.451163084 | 0.651872014 | NA | NA |
| ENSG00000221275 | MIR548I2  | microRNA 548i-2                                           | 100302277 | 0.301924281 | -1.829067758 | 4.05411662 | -0.451163084 | 0.651872014 | NA | NA |
| ENSG00000221305 | MIR548I3  | microRNA 548i-3                                           | 100302186 | 0.301924281 | -1.829067758 | 4.05411662 | -0.451163084 | 0.651872014 | NA | NA |
| ENSG00000221443 | NA        | NA                                                        | NA        | 0.301924281 | -1.829067758 | 4.05411662 | -0.451163084 | 0.651872014 | NA | NA |
| ENSG00000223118 | NA        | NA                                                        | NA        | 0.301924281 | -1.829067758 | 4.05411662 | -0.451163084 | 0.651872014 | NA | NA |
| ENSG00000224490 | NA        | NA                                                        | NA        | 0.301924281 | -1.829067758 | 4.05411662 | -0.451163084 | 0.651872014 | NA | NA |
| ENSG00000224927 | NA        | NA                                                        | NA        | 0.301924281 | -1.829067758 | 4.05411662 | -0.451163084 | 0.651872014 | NA | NA |
| ENSG00000226289 | NA        | NA                                                        | NA        | 0.301924281 | -1.829067758 | 4.05411662 | -0.451163084 | 0.651872014 | NA | NA |
| ENSG00000226647 | NA        | NA                                                        | NA        | 0.301924281 | -1.829067758 | 4.05411662 | -0.451163084 | 0.651872014 | NA | NA |
| ENSG00000226780 | NA        | NA                                                        | NA        | 0.301924281 | -1.829067758 | 4.05411662 | -0.451163084 | 0.651872014 | NA | NA |
| ENSG00000227087 | NA        | NA                                                        | NA        | 0.301924281 | -1.829067758 | 4.05411662 | -0.451163084 | 0.651872014 | NA | NA |
| ENSG00000227550 | NA        | NA                                                        | NA        | 0.301924281 | -1.829067758 | 4.05411662 | -0.451163084 | 0.651872014 | NA | NA |
| ENSG00000227881 | NA        | NA                                                        | NA        | 0.301924281 | -1.829067758 | 4.05411662 | -0.451163084 | 0.651872014 | NA | NA |
| ENSG00000228111 | NA        | NA                                                        | NA        | 0.301924281 | -1.829067758 | 4.05411662 | -0.451163084 | 0.651872014 | NA | NA |
| ENSG00000228897 | NA        | NA                                                        | NA        | 0.301924281 | -1.829067758 | 4.05411662 | -0.451163084 | 0.651872014 | NA | NA |
| ENSG00000229616 | NA        | NA                                                        | NA        | 0.301924281 | -1.829067758 | 4.05411662 | -0.451163084 | 0.651872014 | NA | NA |
| ENSG00000230899 | NA        | NA                                                        | NA        | 0.301924281 | -1.829067758 | 4.05411662 | -0.451163084 | 0.651872014 | NA | NA |
| ENSG00000230994 | NA        | NA                                                        | NA        | 0.301924281 | -1.829067758 | 4.05411662 | -0.451163084 | 0.651872014 | NA | NA |
| ENSG00000231712 | NA        | NA                                                        | NA        | 0.301924281 | -1.829067758 | 4.05411662 | -0.451163084 | 0.651872014 | NA | NA |
| ENSG00000232131 | NCOA7-AS1 | NCOA7 antisense RNA 1                                     | 104355145 | 0.301924281 | -1.829067758 | 4.05411662 | -0.451163084 | 0.651872014 | NA | NA |
| ENSG00000232471 | NA        | NA                                                        | NA        | 0.301924281 | -1.829067758 | 4.05411662 | -0.451163084 | 0.651872014 | NA | NA |
| ENSG00000232823 | NA        | NA                                                        | NA        | 0.301924281 | -1.829067758 | 4.05411662 | -0.451163084 | 0.651872014 | NA | NA |
| ENSG00000232873 | NA        | NA                                                        | NA        | 0.301924281 | -1.829067758 | 4.05411662 | -0.451163084 | 0.651872014 | NA | NA |
| ENSG00000233780 | LINC00367 | long intergenic non-protein coding RNA 367                | 101930748 | 0.301924281 | -1.829067758 | 4.05411662 | -0.451163084 | 0.651872014 | NA | NA |
| ENSG00000234637 | NA        | NA                                                        | NA        | 0.301924281 | -1.829067758 | 4.05411662 | -0.451163084 | 0.651872014 | NA | NA |
| ENSG00000235946 | NA        | NA                                                        | NA        | 0.301924281 | -1.829067758 | 4.05411662 | -0.451163084 | 0.651872014 | NA | NA |
| ENSG00000236217 | NA        | NA                                                        | NA        | 0.301924281 | -1.829067758 | 4.05411662 | -0.451163084 | 0.651872014 | NA | NA |

|                 |             |                          |           |             |              |            |              |             |    |    |
|-----------------|-------------|--------------------------|-----------|-------------|--------------|------------|--------------|-------------|----|----|
| ENSG00000236582 | NA          | NA                       | NA        | 0.301924281 | -1.829067758 | 4.05411662 | -0.451163084 | 0.651872014 | NA | NA |
| ENSG00000237385 | NA          | NA                       | NA        | 0.301924281 | -1.829067758 | 4.05411662 | -0.451163084 | 0.651872014 | NA | NA |
| ENSG00000238791 | NA          | NA                       | NA        | 0.301924281 | -1.829067758 | 4.05411662 | -0.451163084 | 0.651872014 | NA | NA |
| ENSG00000238803 | NA          | NA                       | NA        | 0.301924281 | -1.829067758 | 4.05411662 | -0.451163084 | 0.651872014 | NA | NA |
| ENSG00000239012 | NA          | NA                       | NA        | 0.301924281 | -1.829067758 | 4.05411662 | -0.451163084 | 0.651872014 | NA | NA |
| ENSG00000239170 | NA          | NA                       | NA        | 0.301924281 | -1.829067758 | 4.05411662 | -0.451163084 | 0.651872014 | NA | NA |
| ENSG00000239994 | NA          | NA                       | NA        | 0.301924281 | -1.829067758 | 4.05411662 | -0.451163084 | 0.651872014 | NA | NA |
| ENSG00000240733 | NA          | NA                       | NA        | 0.301924281 | -1.829067758 | 4.05411662 | -0.451163084 | 0.651872014 | NA | NA |
| ENSG00000241899 | NA          | NA                       | NA        | 0.301924281 | -1.829067758 | 4.05411662 | -0.451163084 | 0.651872014 | NA | NA |
| ENSG00000242912 | NA          | NA                       | NA        | 0.301924281 | -1.829067758 | 4.05411662 | -0.451163084 | 0.651872014 | NA | NA |
| ENSG00000243977 | NA          | NA                       | NA        | 0.301924281 | -1.829067758 | 4.05411662 | -0.451163084 | 0.651872014 | NA | NA |
| ENSG00000244139 | NA          | NA                       | NA        | 0.301924281 | -1.829067758 | 4.05411662 | -0.451163084 | 0.651872014 | NA | NA |
| ENSG00000244641 | NA          | NA                       | NA        | 0.301924281 | -1.829067758 | 4.05411662 | -0.451163084 | 0.651872014 | NA | NA |
| ENSG00000248560 | NA          | NA                       | NA        | 0.301924281 | -1.829067758 | 4.05411662 | -0.451163084 | 0.651872014 | NA | NA |
| ENSG00000248751 | NA          | NA                       | NA        | 0.301924281 | -1.829067758 | 4.05411662 | -0.451163084 | 0.651872014 | NA | NA |
| ENSG00000248956 | NA          | NA                       | NA        | 0.301924281 | -1.829067758 | 4.05411662 | -0.451163084 | 0.651872014 | NA | NA |
| ENSG00000249562 | NA          | NA                       | NA        | 0.301924281 | -1.829067758 | 4.05411662 | -0.451163084 | 0.651872014 | NA | NA |
| ENSG00000250218 | ALDH1L1-AS1 | ALDH1L1 antisense RNA 1  | 100874204 | 0.301924281 | -1.829067758 | 4.05411662 | -0.451163084 | 0.651872014 | NA | NA |
| ENSG00000250261 | NA          | NA                       | NA        | 0.301924281 | -1.829067758 | 4.05411662 | -0.451163084 | 0.651872014 | NA | NA |
| ENSG00000250816 | NA          | NA                       | NA        | 0.301924281 | -1.829067758 | 4.05411662 | -0.451163084 | 0.651872014 | NA | NA |
| ENSG00000252036 | NA          | NA                       | NA        | 0.301924281 | -1.829067758 | 4.05411662 | -0.451163084 | 0.651872014 | NA | NA |
| ENSG00000252275 | NA          | NA                       | NA        | 0.301924281 | -1.829067758 | 4.05411662 | -0.451163084 | 0.651872014 | NA | NA |
| ENSG00000252793 | NA          | NA                       | NA        | 0.301924281 | -1.829067758 | 4.05411662 | -0.451163084 | 0.651872014 | NA | NA |
| ENSG00000253044 | NA          | NA                       | NA        | 0.301924281 | -1.829067758 | 4.05411662 | -0.451163084 | 0.651872014 | NA | NA |
| ENSG00000253259 | NA          | NA                       | NA        | 0.301924281 | -1.829067758 | 4.05411662 | -0.451163084 | 0.651872014 | NA | NA |
| ENSG00000253309 | SERPINE3    | serpin family E member 3 | 647174    | 0.301924281 | -1.829067758 | 4.05411662 | -0.451163084 | 0.651872014 | NA | NA |
| ENSG00000253886 | NA          | NA                       | NA        | 0.301924281 | -1.829067758 | 4.05411662 | -0.451163084 | 0.651872014 | NA | NA |
| ENSG00000254509 | NA          | NA                       | NA        | 0.301924281 | -1.829067758 | 4.05411662 | -0.451163084 | 0.651872014 | NA | NA |
| ENSG00000254529 | NA          | NA                       | NA        | 0.301924281 | -1.829067758 | 4.05411662 | -0.451163084 | 0.651872014 | NA | NA |
| ENSG00000255120 | OVOL1-AS1   | OVOL1 antisense RNA 1    | 101927828 | 0.301924281 | -1.829067758 | 4.05411662 | -0.451163084 | 0.651872014 | NA | NA |
| ENSG00000256263 | NA          | NA                       | NA        | 0.301924281 | -1.829067758 | 4.05411662 | -0.451163084 | 0.651872014 | NA | NA |
| ENSG00000256817 | NA          | NA                       | NA        | 0.301924281 | -1.829067758 | 4.05411662 | -0.451163084 | 0.651872014 | NA | NA |
| ENSG00000256897 | NA          | NA                       | NA        | 0.301924281 | -1.829067758 | 4.05411662 | -0.451163084 | 0.651872014 | NA | NA |
| ENSG00000257113 | NA          | NA                       | NA        | 0.301924281 | -1.829067758 | 4.05411662 | -0.451163084 | 0.651872014 | NA | NA |
| ENSG00000257346 | NA          | NA                       | NA        | 0.301924281 | -1.829067758 | 4.05411662 | -0.451163084 | 0.651872014 | NA | NA |

|                 |              |                              |           |             |              |             |              |             |             |         |
|-----------------|--------------|------------------------------|-----------|-------------|--------------|-------------|--------------|-------------|-------------|---------|
| ENSG00000257987 | TEX49        | testis expressed 49          | 255411    | 0.301924281 | -1.829067758 | 4.05411662  | -0.451163084 | 0.651872014 | NA          | NA      |
| ENSG00000258759 | NA           | NA                           | NA        | 0.301924281 | -1.829067758 | 4.05411662  | -0.451163084 | 0.651872014 | NA          | NA      |
| ENSG00000259540 | LOC102723335 | uncharacterized LOC102723335 | 102723335 | 0.301924281 | -1.829067758 | 4.05411662  | -0.451163084 | 0.651872014 | NA          | NA      |
| ENSG00000260431 | NA           | NA                           | NA        | 0.301924281 | -1.829067758 | 4.05411662  | -0.451163084 | 0.651872014 | NA          | NA      |
| ENSG00000260989 | LOC105371046 | uncharacterized LOC105371046 | 105371046 | 0.301924281 | -1.829067758 | 4.05411662  | -0.451163084 | 0.651872014 | NA          | NA      |
| ENSG00000261813 | NA           | NA                           | NA        | 0.301924281 | -1.829067758 | 4.05411662  | -0.451163084 | 0.651872014 | NA          | NA      |
| ENSG00000263406 | NA           | NA                           | NA        | 0.301924281 | -1.829067758 | 4.05411662  | -0.451163084 | 0.651872014 | NA          | NA      |
| ENSG00000263459 | NA           | NA                           | NA        | 0.301924281 | -1.829067758 | 4.05411662  | -0.451163084 | 0.651872014 | NA          | NA      |
| ENSG00000264603 | MIR3159      | microRNA 3159                | 100423016 | 0.301924281 | -1.829067758 | 4.05411662  | -0.451163084 | 0.651872014 | NA          | NA      |
| ENSG00000265174 | NA           | NA                           | NA        | 0.301924281 | -1.829067758 | 4.05411662  | -0.451163084 | 0.651872014 | NA          | NA      |
| ENSG00000265289 | NA           | NA                           | NA        | 0.301924281 | -1.829067758 | 4.05411662  | -0.451163084 | 0.651872014 | NA          | NA      |
| ENSG00000266936 | NA           | NA                           | NA        | 0.301924281 | -1.829067758 | 4.05411662  | -0.451163084 | 0.651872014 | NA          | NA      |
| ENSG00000267044 | NA           | NA                           | NA        | 0.301924281 | -1.829067758 | 4.05411662  | -0.451163084 | 0.651872014 | NA          | NA      |
| ENSG00000267638 | LOC105371789 | uncharacterized LOC105371789 | 105371789 | 0.301924281 | -1.829067758 | 4.05411662  | -0.451163084 | 0.651872014 | NA          | NA      |
| ENSG00000267952 | NA           | NA                           | NA        | 0.301924281 | -1.829067758 | 4.05411662  | -0.451163084 | 0.651872014 | NA          | NA      |
| ENSG00000268140 | NA           | NA                           | NA        | 0.301924281 | -1.829067758 | 4.05411662  | -0.451163084 | 0.651872014 | NA          | NA      |
| ENSG00000268275 | NA           | NA                           | NA        | 0.301924281 | -1.829067758 | 4.05411662  | -0.451163084 | 0.651872014 | NA          | NA      |
| ENSG00000269048 | NA           | NA                           | NA        | 0.301924281 | -1.829067758 | 4.05411662  | -0.451163084 | 0.651872014 | NA          | NA      |
| ENSG00000269119 | NA           | NA                           | NA        | 0.301924281 | -1.829067758 | 4.05411662  | -0.451163084 | 0.651872014 | NA          | NA      |
| ENSG00000270356 | NA           | NA                           | NA        | 0.301924281 | -1.829067758 | 4.05411662  | -0.451163084 | 0.651872014 | NA          | NA      |
| ENSG00000271625 | NA           | NA                           | NA        | 0.301924281 | -1.829067758 | 4.05411662  | -0.451163084 | 0.651872014 | NA          | NA      |
| ENSG00000271876 | NA           | NA                           | NA        | 0.301924281 | -1.829067758 | 4.05411662  | -0.451163084 | 0.651872014 | NA          | NA      |
| ENSG00000272154 | NA           | NA                           | NA        | 0.301924281 | -1.829067758 | 4.05411662  | -0.451163084 | 0.651872014 | NA          | NA      |
| ENSG00000272814 | NA           | NA                           | NA        | 0.301924281 | -1.829067758 | 4.05411662  | -0.451163084 | 0.651872014 | NA          | NA      |
| ENSG00000243911 | NA           | NA                           | NA        | 16.1095423  | -1.82726777  | 1.123767259 | -1.626019761 | 0.103945452 | 0.999371363 | Not Sig |
| ENSG00000063015 | SEZ6         | seizure related 6 homolog    | 124925    | 1.379506701 | -1.826754334 | 2.731997993 | -0.668651419 | 0.503717864 | NA          | NA      |
| ENSG00000196774 | NA           | NA                           | NA        | 5.785988539 | -1.826052063 | 1.092178533 | -1.671935501 | 0.094537041 | NA          | NA      |
| ENSG00000120659 | TNFSF11      | TNF superfamily member 11    | 8600      | 35.35109546 | -1.825500978 | 1.265735132 | -1.442245642 | 0.149233089 | 0.999371363 | Not Sig |
| ENSG00000260862 | LOC101928446 | uncharacterized LOC101928446 | 101928446 | 4.583477457 | -1.825445183 | 1.573404062 | -1.160188426 | 0.245972098 | NA          | NA      |
| ENSG00000254965 | NA           | NA                           | NA        | 4.418769523 | -1.822504389 | 1.623092363 | -1.122859321 | 0.261497246 | NA          | NA      |
| ENSG00000228253 | ATP8         | ATP synthase FO subunit 8    | 4509      | 6584.982694 | -1.820091684 | 1.031095028 | -1.765202658 | 0.077529712 | 0.999371363 | Not Sig |
| ENSG00000199674 | NA           | NA                           | NA        | 4.72265608  | -1.820035665 | 1.502837663 | -1.211066045 | 0.225870094 | NA          | NA      |
| ENSG00000178715 | NA           | NA                           | NA        | 2.17583054  | -1.819571699 | 1.725414067 | -1.054571035 | 0.291621557 | NA          | NA      |
| ENSG00000215431 | NA           | NA                           | NA        | 1.482650918 | -1.819197507 | 2.155219107 | -0.844089355 | 0.398619475 | NA          | NA      |
| ENSG00000244061 | NA           | NA                           | NA        | 1.482650918 | -1.819197507 | 2.155219107 | -0.844089355 | 0.398619475 | NA          | NA      |

|                 |            |                                                        |           |             |              |             |              |             |             |         |
|-----------------|------------|--------------------------------------------------------|-----------|-------------|--------------|-------------|--------------|-------------|-------------|---------|
| ENSG00000212529 | NA         | NA                                                     | NA        | 5.825860145 | -1.817794009 | 1.379373664 | -1.31784016  | 0.187557161 | NA          | NA      |
| ENSG00000162878 | PKDCC      | protein kinase domain containing, cytoplasmic          | 91461     | 543.428446  | -1.816871106 | 0.782806785 | -2.320970054 | 0.02028846  | 0.719697403 | Not Sig |
| ENSG00000243899 | NA         | NA                                                     | NA        | 20.1081566  | -1.814945233 | 1.076120186 | -1.686563691 | 0.091687279 | 0.999371363 | Not Sig |
| ENSG00000227658 | NA         | NA                                                     | NA        | 6.611312334 | -1.814738577 | 1.471387378 | -1.233352008 | 0.217444462 | 0.999371363 | Not Sig |
| ENSG00000168676 | KCTD19     | potassium channel tetramerization domain containing 19 | 146212    | 12.04459179 | -1.814533932 | 1.496994305 | -1.212118126 | 0.225467166 | 0.999371363 | Not Sig |
| ENSG00000135253 | KCP        | kielin/chordin-like protein                            | 375616    | 110.7087617 | -1.814124659 | 0.907708529 | -1.998576197 | 0.045654228 | 0.999371363 | Not Sig |
| ENSG00000251463 | NA         | NA                                                     | NA        | 4.656819851 | -1.813404939 | 1.581990568 | -1.146280499 | 0.251679109 | NA          | NA      |
| ENSG00000213519 | NA         | NA                                                     | NA        | 2.12590777  | -1.813082391 | 1.691437149 | -1.071918275 | 0.283756741 | NA          | NA      |
| ENSG00000214067 | NA         | NA                                                     | NA        | 13.51600339 | -1.811948202 | 0.947808703 | -1.911723533 | 0.055911664 | 0.999371363 | Not Sig |
| ENSG00000211767 | NA         | NA                                                     | NA        | 3.503997068 | -1.810776488 | 1.654911582 | -1.094183223 | 0.273874628 | NA          | NA      |
| ENSG00000269937 | NA         | NA                                                     | NA        | 14.43016929 | -1.8100909   | 1.660445934 | -1.090123359 | 0.275658808 | 0.999371363 | Not Sig |
| ENSG00000264395 | MIR3193    | microRNA 3193                                          | 100422904 | 7.38865344  | -1.809673121 | 1.4253149   | -1.269665476 | 0.204203815 | 0.999371363 | Not Sig |
| ENSG00000259771 | NA         | NA                                                     | NA        | 16.14328553 | -1.809228579 | 1.043840669 | -1.733242086 | 0.08305265  | 0.999371363 | Not Sig |
| ENSG00000142102 | PGGHG      | protein-glucosylgalactosylhydroxyllysine glucosidase   | 80162     | 2117.611895 | -1.80887319  | 0.695704878 | -2.600058226 | 0.009320794 | 0.475595316 | Not Sig |
| ENSG00000272660 | NA         | NA                                                     | NA        | 2.159523749 | -1.806646097 | 1.693507039 | -1.066807551 | 0.286058748 | NA          | NA      |
| ENSG00000146469 | VIP        | vasoactive intestinal peptide                          | 7432      | 3.56950757  | -1.806432559 | 1.480196015 | -1.220400907 | 0.222312934 | NA          | NA      |
| ENSG00000254929 | NA         | NA                                                     | NA        | 3.774500748 | -1.804676993 | 1.725329932 | -1.0459895   | 0.29556588  | NA          | NA      |
| ENSG00000227906 | SNAP25-AS1 | SNAP25 antisense RNA 1                                 | 100131208 | 1.337853876 | -1.80420958  | 2.483346968 | -0.726523359 | 0.467517993 | NA          | NA      |
| ENSG00000258608 | NA         | NA                                                     | NA        | 1.315109549 | -1.804196459 | 2.428402843 | -0.742955998 | 0.457508321 | NA          | NA      |
| ENSG00000229806 | NA         | NA                                                     | NA        | 1.442182397 | -1.803527045 | 2.441376755 | -0.738733602 | 0.460068777 | NA          | NA      |
| ENSG00000225378 | NA         | NA                                                     | NA        | 5.467616702 | -1.802192326 | 1.569753933 | -1.14807314  | 0.250938372 | NA          | NA      |
| ENSG00000265500 | NA         | NA                                                     | NA        | 6.389597357 | -1.801698586 | 1.07898248  | -1.669812642 | 0.094956438 | NA          | NA      |
| ENSG00000250588 | NA         | NA                                                     | NA        | 268.0231266 | -1.801549615 | 0.724060869 | -2.488119012 | 0.012842075 | 0.561528648 | Not Sig |
| ENSG00000181626 | ANKRD62    | ankyrin repeat domain 62                               | 342850    | 20.86267942 | -1.801546234 | 1.16896217  | -1.541150159 | 0.123280245 | 0.999371363 | Not Sig |
| ENSG00000259785 | NA         | NA                                                     | NA        | 8.249900807 | -1.797660722 | 1.371124722 | -1.311084756 | 0.18982913  | 0.999371363 | Not Sig |
| ENSG00000248773 | NA         | NA                                                     | NA        | 21.93866814 | -1.796224806 | 1.099180123 | -1.634149644 | 0.102227433 | 0.999371363 | Not Sig |
| ENSG00000161132 | NA         | NA                                                     | NA        | 2.647113277 | -1.795990717 | 2.031092065 | -0.884248798 | 0.376561921 | NA          | NA      |
| ENSG00000183098 | GPC6       | glypican 6                                             | 10082     | 269.1993321 | -1.787023748 | 0.78092117  | -2.288353571 | 0.022116939 | 0.758302843 | Not Sig |
| ENSG00000183929 | NA         | NA                                                     | NA        | 15.3862513  | -1.78701128  | 1.204953886 | -1.483053668 | 0.138060152 | 0.999371363 | Not Sig |
| ENSG00000220600 | NA         | NA                                                     | NA        | 1.331001333 | -1.782938869 | 2.128688079 | -0.837576386 | 0.40226866  | NA          | NA      |
| ENSG00000272963 | NA         | NA                                                     | NA        | 14.5755087  | -1.781453461 | 1.046801013 | -1.701807162 | 0.088791523 | 0.999371363 | Not Sig |
| ENSG00000254370 | NA         | NA                                                     | NA        | 4.269943845 | -1.781407015 | 1.888823692 | -0.943130384 | 0.345614216 | NA          | NA      |
| ENSG00000248347 | NA         | NA                                                     | NA        | 14.93115722 | -1.779737721 | 1.405972773 | -1.265840815 | 0.205570079 | 0.999371363 | Not Sig |
| ENSG00000262712 | NA         | NA                                                     | NA        | 15.39065727 | -1.778407674 | 1.067362139 | -1.666170842 | 0.095679392 | 0.999371363 | Not Sig |
| ENSG00000236187 | NA         | NA                                                     | NA        | 14.01458229 | -1.778331229 | 1.020592001 | -1.742450683 | 0.081429614 | 0.999371363 | Not Sig |

|                 |         |                                                      |           |             |              |             |              |             |             |         |
|-----------------|---------|------------------------------------------------------|-----------|-------------|--------------|-------------|--------------|-------------|-------------|---------|
| ENSG00000162494 | LRRC38  | leucine rich repeat containing 38                    | 126755    | 1.321547085 | -1.776368475 | 2.182012264 | -0.814096467 | 0.41558969  | NA          | NA      |
| ENSG00000187123 | LYPD6   | LY6/PLAUR domain containing 6                        | 130574    | 42.29805702 | -1.773533321 | 1.046399173 | -1.694891746 | 0.090095959 | 0.999371363 | Not Sig |
| ENSG00000237324 | NA      | NA                                                   | NA        | 1.581361021 | -1.772958597 | 2.734735764 | -0.648310751 | 0.516783982 | NA          | NA      |
| ENSG00000266228 | MIR3611 | microRNA 3611                                        | 100500890 | 4.218605042 | -1.771729905 | 1.255268194 | -1.411435352 | 0.158116285 | NA          | NA      |
| ENSG00000130950 | NUTM2F  | NUT family member 2F                                 | 54754     | 1.337438869 | -1.76957191  | 2.366629835 | -0.747718077 | 0.454630225 | NA          | NA      |
| ENSG00000241811 | NA      | NA                                                   | NA        | 0.728809918 | -1.766940071 | 3.327674151 | -0.530983501 | 0.595430212 | NA          | NA      |
| ENSG00000257999 | NA      | NA                                                   | NA        | 0.728809918 | -1.766940071 | 3.327674151 | -0.530983501 | 0.595430212 | NA          | NA      |
| ENSG00000204434 | NA      | NA                                                   | NA        | 0.735247454 | -1.766814915 | 3.318870475 | -0.532354284 | 0.594480642 | NA          | NA      |
| ENSG00000216915 | NA      | NA                                                   | NA        | 0.735247454 | -1.766814915 | 3.318870475 | -0.532354284 | 0.594480642 | NA          | NA      |
| ENSG00000224882 | NA      | NA                                                   | NA        | 0.735247454 | -1.766814915 | 3.318870475 | -0.532354284 | 0.594480642 | NA          | NA      |
| ENSG00000232240 | NA      | NA                                                   | NA        | 0.735247454 | -1.766814915 | 3.318870475 | -0.532354284 | 0.594480642 | NA          | NA      |
| ENSG00000238731 | NA      | NA                                                   | NA        | 0.735247454 | -1.766814915 | 3.318870475 | -0.532354284 | 0.594480642 | NA          | NA      |
| ENSG00000259212 | NA      | NA                                                   | NA        | 0.735247454 | -1.766814915 | 3.318870475 | -0.532354284 | 0.594480642 | NA          | NA      |
| ENSG00000259992 | NA      | NA                                                   | NA        | 0.735247454 | -1.766814915 | 3.318870475 | -0.532354284 | 0.594480642 | NA          | NA      |
| ENSG00000252157 | NA      | NA                                                   | NA        | 3.022946502 | -1.766213182 | 1.783458239 | -0.990330552 | 0.322012578 | NA          | NA      |
| ENSG00000229423 | NA      | NA                                                   | NA        | 0.770147792 | -1.766145139 | 3.273050908 | -0.539602099 | 0.589471469 | NA          | NA      |
| ENSG00000231255 | NA      | NA                                                   | NA        | 0.770147792 | -1.766145139 | 3.273050908 | -0.539602099 | 0.589471469 | NA          | NA      |
| ENSG00000235991 | NA      | NA                                                   | NA        | 0.770147792 | -1.766145139 | 3.273050908 | -0.539602099 | 0.589471469 | NA          | NA      |
| ENSG00000257074 | NA      | NA                                                   | NA        | 0.770147792 | -1.766145139 | 3.273050908 | -0.539602099 | 0.589471469 | NA          | NA      |
| ENSG00000263663 | NA      | NA                                                   | NA        | 0.770147792 | -1.766145139 | 3.273050908 | -0.539602099 | 0.589471469 | NA          | NA      |
| ENSG00000200257 | NA      | NA                                                   | NA        | 5.428556056 | -1.763733862 | 1.213777061 | -1.453095399 | 0.146197268 | NA          | NA      |
| ENSG00000260851 | NA      | NA                                                   | NA        | 1.282495966 | -1.762162632 | 2.380331587 | -0.740301327 | 0.459117176 | NA          | NA      |
| ENSG00000137731 | FXYD2   | FXYD domain containing ion transport regulator 2     | 486       | 32.02195594 | -1.761887814 | 0.969067196 | -1.818127598 | 0.069044633 | 0.999371363 | Not Sig |
| ENSG00000249319 | NA      | NA                                                   | NA        | 1.32798462  | -1.761340163 | 2.424548866 | -0.726460987 | 0.467556215 | NA          | NA      |
| ENSG00000231699 | NA      | NA                                                   | NA        | 9.260396047 | -1.757311941 | 1.120703582 | -1.568043476 | 0.116870986 | 0.999371363 | Not Sig |
| ENSG00000231098 | NA      | NA                                                   | NA        | 1.422858893 | -1.757228068 | 2.380073003 | -0.738308475 | 0.460327018 | NA          | NA      |
| ENSG00000175894 | TSPEAR  | thrombospondin type laminin G domain and EAR repeats | 54084     | 20.33279609 | -1.756765176 | 1.12114668  | -1.566936073 | 0.117129635 | 0.999371363 | Not Sig |
| ENSG00000131941 | RHPN2   | rhopilin Rho GTPase binding protein 2                | 85415     | 582.3144506 | -1.756315832 | 0.699601109 | -2.510453185 | 0.012057631 | 0.550076239 | Not Sig |
| ENSG00000222578 | NA      | NA                                                   | NA        | 2.210730879 | -1.756000829 | 1.872223304 | -0.937922275 | 0.348284111 | NA          | NA      |
| ENSG00000214559 | NA      | NA                                                   | NA        | 1.424276295 | -1.755827855 | 2.112124396 | -0.831308922 | 0.405799136 | NA          | NA      |
| ENSG00000267637 | NA      | NA                                                   | NA        | 7.478024238 | -1.75470505  | 1.568893522 | -1.11843476  | 0.263381355 | 0.999371363 | Not Sig |
| ENSG00000132821 | VSTM2L  | V-set and transmembrane domain containing 2 like     | 128434    | 942.8514006 | -1.752452904 | 0.757578778 | -2.31322861  | 0.020710073 | 0.730537685 | Not Sig |
| ENSG00000164749 | HNF4G   | hepatocyte nuclear factor 4 gamma                    | 3174      | 212.2943947 | -1.751303051 | 1.01201072  | -1.73051828  | 0.083537718 | 0.999371363 | Not Sig |
| ENSG00000235920 | NA      | NA                                                   | NA        | 30.85828766 | -1.750389614 | 0.883833184 | -1.980452471 | 0.047652709 | 0.999371363 | Not Sig |
| ENSG00000263575 | MIR4665 | microRNA 4665                                        | 100616288 | 2.585903849 | -1.749558022 | 2.072027    | -0.844370282 | 0.398462523 | NA          | NA      |

|                 |          |                                               |           |             |              |             |              |             |             |          |
|-----------------|----------|-----------------------------------------------|-----------|-------------|--------------|-------------|--------------|-------------|-------------|----------|
| ENSG00000128918 | ALDH1A2  | aldehyde dehydrogenase 1 family member A2     | 8854      | 136.3858985 | -1.748510579 | 0.846259326 | -2.066164029 | 0.038812994 | 0.999371363 | Not Sig  |
| ENSG00000165449 | SLC16A9  | solute carrier family 16 member 9             | 220963    | 152.0285315 | -1.74728308  | 0.914594062 | -1.91044656  | 0.056075741 | 0.999371363 | Not Sig  |
| ENSG00000126259 | KIRREL2  | kirre like nephrin family adhesion molecule 2 | 84063     | 1.414822047 | -1.745733329 | 2.404043756 | -0.726165372 | 0.467737397 | NA          | NA       |
| ENSG00000212493 | SNORD19  | small nucleolar RNA, C/D box 19               | 692089    | 9.417327425 | -1.744963839 | 1.116031034 | -1.563544189 | 0.11792465  | 0.999371363 | Not Sig  |
| ENSG00000258827 | NA       | NA                                            | NA        | 4.654075575 | -1.741261443 | 1.647268686 | -1.057059761 | 0.290484314 | NA          | NA       |
| ENSG00000253421 | NA       | NA                                            | NA        | 1.311677829 | -1.740357361 | 2.372761753 | -0.733473286 | 0.463269815 | NA          | NA       |
| ENSG00000241535 | NA       | NA                                            | NA        | 4.891145184 | -1.738748274 | 1.817798003 | -0.956513469 | 0.338812883 | NA          | NA       |
| ENSG00000225630 | NA       | NA                                            | NA        | 82.80269118 | -1.736623752 | 0.963513952 | -1.802385682 | 0.071484746 | 0.999371363 | Not Sig  |
| ENSG00000087085 | ACHE     | acetylcholinesterase (Cartwright blood group) | 43        | 258.1379674 | -1.736435138 | 0.809666501 | -2.144630085 | 0.031982435 | 0.919531513 | Not Sig  |
| ENSG00000199065 | MIR101-2 | microRNA 101-2                                | 406894    | 1.288933502 | -1.736163074 | 2.135129979 | -0.813141631 | 0.41613686  | NA          | NA       |
| ENSG00000135960 | EDAR     | ectodysplasin A receptor                      | 10913     | 70.01124259 | -1.735185905 | 1.119740503 | -1.54963217  | 0.121229827 | 0.999371363 | Not Sig  |
| ENSG00000125968 | ID1      | inhibitor of DNA binding 1, HLH protein       | 3397      | 3745.413093 | -1.73436602  | 0.437866996 | -3.960942563 | 7.47E-05    | 0.018079308 | FDR<0.05 |
| ENSG00000123684 | LPGAT1   | lysophosphatidylglycerol acyltransferase 1    | 9926      | 3836.338414 | -1.732841793 | 0.788541322 | -2.1975282   | 0.027982745 | 0.870090628 | Not Sig  |
| ENSG00000252280 | NA       | NA                                            | NA        | 5.07055923  | -1.731740419 | 1.608685911 | -1.076493806 | 0.281706469 | NA          | NA       |
| ENSG00000236772 | NA       | NA                                            | NA        | 3.985421499 | -1.731739263 | 1.614813215 | -1.072408404 | 0.283536635 | NA          | NA       |
| ENSG00000146453 | PNLDC1   | PARN like, ribonuclease domain containing 1   | 154197    | 4.69933113  | -1.731585775 | 1.621869495 | -1.067648032 | 0.285679308 | NA          | NA       |
| ENSG00000197520 | FAM177B  | family with sequence similarity 177 member B  | 400823    | 36.02553442 | -1.731427948 | 1.020770156 | -1.696197657 | 0.089848454 | 0.999371363 | Not Sig  |
| ENSG00000198840 | ND3      | NADH dehydrogenase, subunit 3 (complex I)     | 4537      | 7626.919701 | -1.730868669 | 0.929739245 | -1.861671085 | 0.062649467 | 0.999371363 | Not Sig  |
| ENSG00000263672 | NA       | NA                                            | NA        | 2.791777277 | -1.729794116 | 1.992380134 | -0.86820486  | 0.385282194 | NA          | NA       |
| ENSG00000244153 | NA       | NA                                            | NA        | 0.712503126 | -1.729645853 | 3.345476932 | -0.517010246 | 0.605149006 | NA          | NA       |
| ENSG00000254338 | MAFA-AS1 | MAFA antisense RNA 1                          | 104326051 | 0.712503126 | -1.729645853 | 3.345476932 | -0.517010246 | 0.605149006 | NA          | NA       |
| ENSG00000263986 | NA       | NA                                            | NA        | 0.712503126 | -1.729645853 | 3.345476932 | -0.517010246 | 0.605149006 | NA          | NA       |
| ENSG00000215007 | NA       | NA                                            | NA        | 0.718940662 | -1.729539014 | 3.336372324 | -0.51838909  | 0.604186825 | NA          | NA       |
| ENSG00000226361 | NA       | NA                                            | NA        | 0.718940662 | -1.729539014 | 3.336372324 | -0.51838909  | 0.604186825 | NA          | NA       |
| ENSG00000253649 | NA       | NA                                            | NA        | 0.718940662 | -1.729539014 | 3.336372324 | -0.51838909  | 0.604186825 | NA          | NA       |
| ENSG00000267315 | NA       | NA                                            | NA        | 0.718940662 | -1.729539014 | 3.336372324 | -0.51838909  | 0.604186825 | NA          | NA       |
| ENSG00000267344 | NA       | NA                                            | NA        | 0.718940662 | -1.729539014 | 3.336372324 | -0.51838909  | 0.604186825 | NA          | NA       |
| ENSG00000221743 | NA       | NA                                            | NA        | 0.753841    | -1.728967645 | 3.289030206 | -0.525677034 | 0.599112623 | NA          | NA       |
| ENSG00000237417 | NA       | NA                                            | NA        | 0.753841    | -1.728967645 | 3.289030206 | -0.525677034 | 0.599112623 | NA          | NA       |
| ENSG00000243790 | NA       | NA                                            | NA        | 0.753841    | -1.728967645 | 3.289030206 | -0.525677034 | 0.599112623 | NA          | NA       |
| ENSG00000254270 | NA       | NA                                            | NA        | 0.753841    | -1.728967645 | 3.289030206 | -0.525677034 | 0.599112623 | NA          | NA       |
| ENSG00000259569 | NA       | NA                                            | NA        | 0.753841    | -1.728967645 | 3.289030206 | -0.525677034 | 0.599112623 | NA          | NA       |
| ENSG00000218713 | NA       | NA                                            | NA        | 1.249882383 | -1.728896686 | 2.85813783  | -0.604903188 | 0.545243325 | NA          | NA       |
| ENSG00000120693 | SMAD9    | SMAD family member 9                          | 4093      | 409.3556855 | -1.728676207 | 0.770887831 | -2.24244843  | 0.024932405 | 0.816524647 | Not Sig  |
| ENSG00000112299 | VNN1     | vanin 1                                       | 8876      | 96.49138687 | -1.727093286 | 0.934347035 | -1.848449476 | 0.064537347 | 0.999371363 | Not Sig  |



|                 |              |                                               |           |             |              |             |              |             |             |         |
|-----------------|--------------|-----------------------------------------------|-----------|-------------|--------------|-------------|--------------|-------------|-------------|---------|
| ENSG00000225761 | NA           | NA                                            | NA        | 16.81821278 | -1.726585606 | 1.147140128 | -1.505121792 | 0.132292767 | 0.999371363 | Not Sig |
| ENSG00000127324 | TSPAN8       | tetraspanin 8                                 | 7103      | 848.8451471 | -1.725356759 | 0.899285176 | -1.9185869   | 0.055036635 | 0.999371363 | Not Sig |
| ENSG00000230634 | NA           | NA                                            | NA        | 3.843459262 | -1.725160813 | 1.536733835 | -1.122615234 | 0.261600943 | NA          | NA      |
| ENSG00000259520 | LOC101928414 | uncharacterized LOC101928414                  | 101928414 | 1.421259582 | -1.724895608 | 2.402593546 | -0.717930676 | 0.472800032 | NA          | NA      |
| ENSG00000239300 | NA           | NA                                            | NA        | 4.791603697 | -1.724312456 | 1.374269775 | -1.254711766 | 0.209583413 | NA          | NA      |
| ENSG00000204352 | C9orf129     | chromosome 9 open reading frame 129           | 445577    | 1.957354478 | -1.72366646  | 1.92797754  | -0.894028288 | 0.371306756 | NA          | NA      |
| ENSG00000250568 | NA           | NA                                            | NA        | 22.13027641 | -1.720487512 | 0.927149847 | -1.85567362  | 0.063500093 | 0.999371363 | Not Sig |
| ENSG00000261959 | NA           | NA                                            | NA        | 1.295371037 | -1.720047459 | 2.376514182 | -0.72376907  | 0.469207521 | NA          | NA      |
| ENSG00000138115 | CYP2C8       | cytochrome P450 family 2 subfamily C member 8 | 1558      | 9.608482474 | -1.719959074 | 0.973818628 | -1.766200629 | 0.077362196 | 0.999371363 | Not Sig |
| ENSG00000246792 | NA           | NA                                            | NA        | 11.59244567 | -1.718314072 | 1.13423985  | -1.514947718 | 0.129785645 | 0.999371363 | Not Sig |
| ENSG00000225792 | LOC105375304 | uncharacterized LOC105375304                  | 105375304 | 24.46920058 | -1.716506825 | 1.314746304 | -1.305580262 | 0.191695336 | 0.999371363 | Not Sig |
| ENSG00000162971 | TYW5         | tRNA-yW synthesizing protein 5                | 129450    | 661.6131807 | -1.715844543 | 0.816352618 | -2.101842397 | 0.035567084 | 0.97368758  | Not Sig |
| ENSG00000241233 | KRTAP5-8     | keratin associated protein 5-8                | 57830     | 2.762999524 | -1.715077474 | 1.559616524 | -1.099678958 | 0.271472026 | NA          | NA      |
| ENSG00000268683 | NA           | NA                                            | NA        | 13.91561478 | -1.714920734 | 1.011382203 | -1.695620833 | 0.08995771  | 0.999371363 | Not Sig |
| ENSG00000104419 | NDRG1        | N-myc downstream regulated 1                  | 10397     | 10969.85897 | -1.714875372 | 0.600957262 | -2.853572924 | 0.00432306  | 0.29912253  | Not Sig |
| ENSG00000269832 | NA           | NA                                            | NA        | 1.414407039 | -1.714704148 | 2.388404908 | -0.717928582 | 0.472801324 | NA          | NA      |
| ENSG00000207582 | MIR30B       | microRNA 30b                                  | 407030    | 4.208420836 | -1.713872213 | 1.321416763 | -1.296995967 | 0.194632574 | NA          | NA      |
| ENSG00000169432 | SCN9A        | sodium voltage-gated channel alpha subunit 9  | 6335      | 827.6353127 | -1.712298894 | 0.690599526 | -2.47943827  | 0.013158951 | 0.569452454 | Not Sig |
| ENSG00000221230 | MIR548L      | microRNA 548L                                 | 100302275 | 8.271043605 | -1.711485674 | 1.105343299 | -1.548374767 | 0.121532093 | 0.999371363 | Not Sig |
| ENSG00000257913 | DDN-AS1      | DDN and PRKAG1 antisense RNA 1                | 105369758 | 6.59682263  | -1.711198186 | 1.238904836 | -1.381218424 | 0.167211811 | 0.999371363 | Not Sig |
| ENSG00000252079 | NA           | NA                                            | NA        | 4.44809215  | -1.709136522 | 1.531627708 | -1.115895536 | 0.264466853 | NA          | NA      |
| ENSG00000222629 | NA           | NA                                            | NA        | 7.74582036  | -1.707815017 | 1.483411855 | -1.151275023 | 0.249619109 | 0.999371363 | Not Sig |
| ENSG00000234005 | NA           | NA                                            | NA        | 1.899394862 | -1.707627577 | 2.182013099 | -0.782592725 | 0.433866315 | NA          | NA      |
| ENSG00000236491 | NA           | NA                                            | NA        | 1.540295584 | -1.707111597 | 2.702456617 | -0.631688807 | 0.527590243 | NA          | NA      |
| ENSG00000230479 | NA           | NA                                            | NA        | 10.65761299 | -1.706823025 | 0.961648458 | -1.774892904 | 0.075915572 | 0.999371363 | Not Sig |
| ENSG00000237478 | NA           | NA                                            | NA        | 8.516228442 | -1.702680142 | 1.50323379  | -1.132678199 | 0.257349416 | 0.999371363 | Not Sig |
| ENSG00000267090 | NA           | NA                                            | NA        | 4.47483254  | -1.702028532 | 1.444891694 | -1.177962708 | 0.238811474 | NA          | NA      |
| ENSG00000200105 | NA           | NA                                            | NA        | 19.71208079 | -1.701542271 | 1.693842291 | -1.004545866 | 0.315115575 | 0.999371363 | Not Sig |
| ENSG00000115705 | TPO          | thyroid peroxidase                            | 7173      | 1.279064246 | -1.699931413 | 2.436375845 | -0.697729546 | 0.485346347 | NA          | NA      |
| ENSG00000261582 | NA           | NA                                            | NA        | 29.68349066 | -1.69748508  | 0.71530661  | -2.373087367 | 0.017640091 | 0.673156557 | Not Sig |
| ENSG00000203563 | NA           | NA                                            | NA        | 3.906720976 | -1.69742677  | 1.643496224 | -1.032814524 | 0.301690706 | NA          | NA      |
| ENSG00000223286 | NA           | NA                                            | NA        | 5.950730973 | -1.696484724 | 1.116408251 | -1.519591711 | 0.128613623 | NA          | NA      |
| ENSG00000225192 | NA           | NA                                            | NA        | 43.06688791 | -1.6921553   | 1.112466379 | -1.521084441 | 0.128238648 | 0.999371363 | Not Sig |
| ENSG00000200737 | NA           | NA                                            | NA        | 4.262644679 | -1.69191755  | 1.451685847 | -1.165484635 | 0.243822876 | NA          | NA      |
| ENSG00000236383 | LINC00854    | long intergenic non-protein coding RNA 854    | 100874261 | 7.908074553 | -1.691567286 | 1.176350701 | -1.437978729 | 0.15044009  | 0.999371363 | Not Sig |

|                 |              |                                                                |           |             |              |             |              |             |             |         |
|-----------------|--------------|----------------------------------------------------------------|-----------|-------------|--------------|-------------|--------------|-------------|-------------|---------|
| ENSG00000272033 | NA           | NA                                                             | NA        | 69.67706364 | -1.689827639 | 0.915557857 | -1.845680888 | 0.064938554 | 0.999371363 | Not Sig |
| ENSG00000126542 | NA           | NA                                                             | NA        | 17.10618506 | -1.688381997 | 0.967546424 | -1.745013939 | 0.080982443 | 0.999371363 | Not Sig |
| ENSG00000135333 | EPHA7        | EPH receptor A7                                                | 2045      | 52.0934374  | -1.687902634 | 1.361669708 | -1.239583009 | 0.215129669 | 0.999371363 | Not Sig |
| ENSG00000212458 | NA           | NA                                                             | NA        | 24.89642182 | -1.687752839 | 1.065246023 | -1.584378447 | 0.113107624 | 0.999371363 | Not Sig |
| ENSG00000207967 | MIR620       | microRNA 620                                                   | 693205    | 10.75958505 | -1.687532622 | 1.68042566  | -1.004229263 | 0.31526812  | 0.999371363 | Not Sig |
| ENSG00000219430 | NA           | NA                                                             | NA        | 2.262119917 | -1.687087259 | 2.428375541 | -0.694739026 | 0.487218866 | NA          | NA      |
| ENSG00000260015 | NA           | NA                                                             | NA        | 7.847392457 | -1.684259438 | 1.192089664 | -1.41286305  | 0.157695995 | 0.999371363 | Not Sig |
| ENSG00000248302 | NA           | NA                                                             | NA        | 2.0248684   | -1.683569609 | 1.960640231 | -0.858683598 | 0.390515102 | NA          | NA      |
| ENSG00000240032 | LNCSTR       | lncRNA sorafenib resistance in renal cell carcinoma associated | 109729161 | 40.8856127  | -1.683450338 | 1.203648303 | -1.398623115 | 0.161926031 | 0.999371363 | Not Sig |
| ENSG00000258774 | NA           | NA                                                             | NA        | 14.06419025 | -1.682563017 | 1.173485417 | -1.433816725 | 0.151624571 | 0.999371363 | Not Sig |
| ENSG00000201607 | NA           | NA                                                             | NA        | 2.627474823 | -1.682457853 | 1.807022006 | -0.93106661  | 0.351819109 | NA          | NA      |
| ENSG00000237082 | NA           | NA                                                             | NA        | 8.906694911 | -1.682244077 | 1.058244821 | -1.589654911 | 0.111912612 | 0.999371363 | Not Sig |
| ENSG00000264548 | NA           | NA                                                             | NA        | 5.120791155 | -1.676310232 | 1.159665782 | -1.445511508 | 0.148314263 | NA          | NA      |
| ENSG00000249119 | NA           | NA                                                             | NA        | 28.46275506 | -1.675956241 | 0.897098625 | -1.868196197 | 0.061734729 | 0.999371363 | Not Sig |
| ENSG00000233028 | NA           | NA                                                             | NA        | 3.64618798  | -1.675513789 | 1.917500059 | -0.873801167 | 0.382226545 | NA          | NA      |
| ENSG00000211695 | NA           | NA                                                             | NA        | 9.578801427 | -1.674906932 | 1.195878362 | -1.4005663   | 0.161343804 | 0.999371363 | Not Sig |
| ENSG00000181240 | SLC25A41     | solute carrier family 25 member 41                             | 284427    | 1.207814551 | -1.673213883 | 2.876419093 | -0.581700312 | 0.560768562 | NA          | NA      |
| ENSG00000233737 | NA           | NA                                                             | NA        | 0.686742086 | -1.673085276 | 3.375747773 | -0.49561916  | 0.620163132 | NA          | NA      |
| ENSG00000250983 | NA           | NA                                                             | NA        | 0.686742086 | -1.673085276 | 3.375747773 | -0.49561916  | 0.620163132 | NA          | NA      |
| ENSG00000254898 | NA           | NA                                                             | NA        | 0.686742086 | -1.673085276 | 3.375747773 | -0.49561916  | 0.620163132 | NA          | NA      |
| ENSG00000216195 | MIR941-4     | microRNA 941-4                                                 | 100126330 | 0.693179622 | -1.673035442 | 3.366133118 | -0.497019988 | 0.619174956 | NA          | NA      |
| ENSG00000237137 | NA           | NA                                                             | NA        | 0.693179622 | -1.673035442 | 3.366133118 | -0.497019988 | 0.619174956 | NA          | NA      |
| ENSG00000201180 | NA           | NA                                                             | NA        | 0.72807996  | -1.672768845 | 3.31621595  | -0.504420963 | 0.61396559  | NA          | NA      |
| ENSG00000201620 | NA           | NA                                                             | NA        | 0.72807996  | -1.672768845 | 3.31621595  | -0.504420963 | 0.61396559  | NA          | NA      |
| ENSG00000221145 | NA           | NA                                                             | NA        | 0.72807996  | -1.672768845 | 3.31621595  | -0.504420963 | 0.61396559  | NA          | NA      |
| ENSG00000225480 | NA           | NA                                                             | NA        | 0.72807996  | -1.672768845 | 3.31621595  | -0.504420963 | 0.61396559  | NA          | NA      |
| ENSG00000236496 | NA           | NA                                                             | NA        | 0.72807996  | -1.672768845 | 3.31621595  | -0.504420963 | 0.61396559  | NA          | NA      |
| ENSG00000249710 | LOC101929353 | uncharacterized LOC101929353                                   | 101929353 | 0.72807996  | -1.672768845 | 3.31621595  | -0.504420963 | 0.61396559  | NA          | NA      |
| ENSG00000272510 | NA           | NA                                                             | NA        | 0.72807996  | -1.672768845 | 3.31621595  | -0.504420963 | 0.61396559  | NA          | NA      |
| ENSG00000099194 | SCD          | stearoyl-CoA desaturase                                        | 6319      | 4345.404989 | -1.671193915 | 0.579990415 | -2.881416439 | 0.003958922 | 0.281664993 | Not Sig |
| ENSG00000107831 | FGF8         | fibroblast growth factor 8                                     | 2253      | 1.882673063 | -1.669645721 | 2.17509209  | -0.767620704 | 0.442712558 | NA          | NA      |
| ENSG00000235605 | NA           | NA                                                             | NA        | 1.882673063 | -1.669645721 | 2.17509209  | -0.767620704 | 0.442712558 | NA          | NA      |
| ENSG00000266958 | NA           | NA                                                             | NA        | 1.230558878 | -1.669501799 | 2.449881016 | -0.681462401 | 0.49557895  | NA          | NA      |
| ENSG00000203473 | NA           | NA                                                             | NA        | 3.292464079 | -1.668950364 | 1.967498795 | -0.848259917 | 0.396293235 | NA          | NA      |
| ENSG00000196302 | NA           | NA                                                             | NA        | 1.507682001 | -1.668636429 | 2.711552304 | -0.615380506 | 0.538303462 | NA          | NA      |

|                 |          |                                                                  |           |             |              |             |              |             |             |         |
|-----------------|----------|------------------------------------------------------------------|-----------|-------------|--------------|-------------|--------------|-------------|-------------|---------|
| ENSG00000212907 | ND4L     | NADH dehydrogenase, subunit 4L (complex I)                       | 4539      | 13104.49747 | -1.668495279 | 0.975219249 | -1.710892479 | 0.087100963 | 0.999371363 | Not Sig |
| ENSG00000273432 | NA       | NA                                                               | NA        | 8.749711612 | -1.668238809 | 1.233500761 | -1.352442464 | 0.176233813 | 0.999371363 | Not Sig |
| ENSG00000201178 | NA       | NA                                                               | NA        | 5.505896721 | -1.667837349 | 1.521836023 | -1.09593762  | 0.273106074 | NA          | NA      |
| ENSG00000260173 | NA       | NA                                                               | NA        | 3.113231941 | -1.666836365 | 1.577971547 | -1.056315856 | 0.290823934 | NA          | NA      |
| ENSG00000200070 | NA       | NA                                                               | NA        | 16.33786111 | -1.666160323 | 1.075414976 | -1.549318505 | 0.121305174 | 0.999371363 | Not Sig |
| ENSG00000170075 | GPR37L1  | G protein-coupled receptor 37 like 1                             | 9283      | 10.49759118 | -1.664796495 | 1.419442235 | -1.172852585 | 0.240854926 | 0.999371363 | Not Sig |
| ENSG00000108187 | PBLD     | phenazine biosynthesis like protein domain containing            | 64081     | 383.2029556 | -1.664628591 | 0.864411186 | -1.925736984 | 0.054137223 | 0.999371363 | Not Sig |
| ENSG00000182732 | RGS6     | regulator of G protein signaling 6                               | 9628      | 50.15095246 | -1.664284252 | 0.936451945 | -1.777223338 | 0.075531501 | 0.999371363 | Not Sig |
| ENSG00000220323 | NA       | NA                                                               | NA        | 26.53446445 | -1.663550069 | 0.796258135 | -2.089209512 | 0.036688868 | 0.995739028 | Not Sig |
| ENSG00000224550 | NA       | NA                                                               | NA        | 1.254720608 | -1.662196656 | 2.472715653 | -0.672215042 | 0.501446806 | NA          | NA      |
| ENSG00000233224 | NA       | NA                                                               | NA        | 6.9752029   | -1.661070417 | 1.538996469 | -1.079320486 | 0.280444884 | 0.999371363 | Not Sig |
| ENSG00000229846 | NA       | NA                                                               | NA        | 1.498227752 | -1.659312081 | 2.699550669 | -0.614662321 | 0.538777748 | NA          | NA      |
| ENSG00000254206 | NPIP11   | nuclear pore complex interacting protein family member B11       | 728888    | 65.88960762 | -1.65911563  | 0.752355931 | -2.205227024 | 0.027438168 | 0.856652389 | Not Sig |
| ENSG00000222810 | NA       | NA                                                               | NA        | 3.356557178 | -1.657682003 | 1.720988837 | -0.963214849 | 0.335439715 | NA          | NA      |
| ENSG00000078399 | HOXA9    | homeobox A9                                                      | 3205      | 7.853320031 | -1.657593369 | 1.353066542 | -1.225064191 | 0.220551036 | 0.999371363 | Not Sig |
| ENSG00000253030 | MIR2116  | microRNA 2116                                                    | 100313886 | 11.37076105 | -1.657320676 | 1.118882164 | -1.481228971 | 0.138545569 | 0.999371363 | Not Sig |
| ENSG00000186567 | CEACAM19 | carcinoembryonic antigen related cell adhesion molecule 19       | 56971     | 125.5685903 | -1.65667974  | 0.556730657 | -2.975729321 | 0.002922927 | 0.237473696 | Not Sig |
| ENSG00000132746 | ALDH3B2  | aldehyde dehydrogenase 3 family member B2                        | 222       | 99.92921768 | -1.656503977 | 1.023443127 | -1.618559872 | 0.105541995 | 0.999371363 | Not Sig |
| ENSG00000233885 | NA       | NA                                                               | NA        | 4.339197842 | -1.656231161 | 1.58649011  | -1.043959335 | 0.296504204 | NA          | NA      |
| ENSG00000101132 | PFDN4    | prefoldin subunit 4                                              | 5203      | 360.9436801 | -1.656156529 | 0.764231403 | -2.167087773 | 0.030228162 | 0.902045603 | Not Sig |
| ENSG00000251898 | SCARNA11 | small Cajal body-specific RNA 11                                 | 677780    | 1.215669489 | -1.653292426 | 2.839091546 | -0.582331496 | 0.560343415 | NA          | NA      |
| ENSG00000250948 | NA       | NA                                                               | NA        | 1.481920961 | -1.652985974 | 2.336611695 | -0.707428615 | 0.47930016  | NA          | NA      |
| ENSG00000234203 | NA       | NA                                                               | NA        | 7.269584017 | -1.651661412 | 1.230232902 | -1.342559941 | 0.179414509 | 0.999371363 | Not Sig |
| ENSG00000207404 | NA       | NA                                                               | NA        | 2.878421898 | -1.650303258 | 2.055244426 | -0.802971772 | 0.421991051 | NA          | NA      |
| ENSG00000109072 | VTN      | vitronectin                                                      | 7448      | 14.84367554 | -1.647949839 | 1.410662221 | -1.168210089 | 0.242722032 | 0.999371363 | Not Sig |
| ENSG00000228317 | NA       | NA                                                               | NA        | 1.236996414 | -1.647659751 | 2.801472508 | -0.58814061  | 0.556437917 | NA          | NA      |
| ENSG00000251721 | NA       | NA                                                               | NA        | 14.34468738 | -1.6448638   | 1.273638158 | -1.291468687 | 0.196541206 | 0.999371363 | Not Sig |
| ENSG00000156564 | LRFN2    | leucine rich repeat and fibronectin type III domain containing 2 | 57497     | 7.555832921 | -1.644817777 | 1.136998171 | -1.446631859 | 0.148000058 | 0.999371363 | Not Sig |
| ENSG00000184156 | KCNQ3    | potassium voltage-gated channel subfamily Q member 3             | 3786      | 1481.016669 | -1.643005768 | 1.006757192 | -1.631978178 | 0.102684083 | 0.999371363 | Not Sig |
| ENSG00000088992 | TESC     | tescalcin                                                        | 54997     | 2297.380295 | -1.642641192 | 1.001036583 | -1.640940221 | 0.100809825 | 0.999371363 | Not Sig |
| ENSG00000270209 | NA       | NA                                                               | NA        | 1.206215241 | -1.641935346 | 2.84344551  | -0.577445687 | 0.563638419 | NA          | NA      |
| ENSG00000120075 | HOXB5    | homeobox B5                                                      | 3215      | 125.251755  | -1.641112785 | 0.642855712 | -2.552847794 | 0.010684618 | 0.509664355 | Not Sig |
| ENSG00000116678 | LEPR     | leptin receptor                                                  | 3953      | 1493.487991 | -1.639250409 | 0.817295534 | -2.005700925 | 0.044888166 | 0.999371363 | Not Sig |
| ENSG00000165152 | TMEM246  | transmembrane protein 246                                        | 84302     | 262.8103065 | -1.639000501 | 0.492470784 | -3.328117229 | 0.000874351 | 0.11121917  | Not Sig |
| ENSG00000218208 | NA       | NA                                                               | NA        | 1.834167696 | -1.638076714 | 1.90836471  | -0.858366698 | 0.39069001  | NA          | NA      |

|                 |              |                                                                         |           |             |              |             |              |             |             |         |
|-----------------|--------------|-------------------------------------------------------------------------|-----------|-------------|--------------|-------------|--------------|-------------|-------------|---------|
| ENSG00000105388 | CEACAM5      | carcinoembryonic antigen related cell adhesion molecule 5               | 1048      | 6220.153312 | -1.632498528 | 1.452341083 | -1.124046237 | 0.260993412 | 0.999371363 | Not Sig |
| ENSG00000257769 | NA           | NA                                                                      | NA        | 0.670435295 | -1.632250419 | 2.92533721  | -0.557970005 | 0.576864866 | NA          | NA      |
| ENSG00000263858 | MIR4769      | microRNA 4769                                                           | 100616147 | 0.670435295 | -1.632250419 | 2.92533721  | -0.557970005 | 0.576864866 | NA          | NA      |
| ENSG00000271266 | NA           | NA                                                                      | NA        | 0.670435295 | -1.632250419 | 2.92533721  | -0.557970005 | 0.576864866 | NA          | NA      |
| ENSG00000225580 | NA           | NA                                                                      | NA        | 0.67687283  | -1.632223148 | 2.917876974 | -0.55938724  | 0.575897468 | NA          | NA      |
| ENSG00000251689 | NA           | NA                                                                      | NA        | 0.67687283  | -1.632223148 | 2.917876974 | -0.55938724  | 0.575897468 | NA          | NA      |
| ENSG00000272822 | NA           | NA                                                                      | NA        | 0.67687283  | -1.632223148 | 2.917876974 | -0.55938724  | 0.575897468 | NA          | NA      |
| ENSG00000199630 | NA           | NA                                                                      | NA        | 9.70567937  | -1.632168528 | 1.321128277 | -1.235435314 | 0.216668537 | 0.999371363 | Not Sig |
| ENSG00000149506 | ZP1          | zona pellucida glycoprotein 1                                           | 22917     | 0.711773169 | -1.632077905 | 2.879184018 | -0.566854322 | 0.57081316  | NA          | NA      |
| ENSG00000207922 | MIR566       | microRNA 566                                                            | 693151    | 0.711773169 | -1.632077905 | 2.879184018 | -0.566854322 | 0.57081316  | NA          | NA      |
| ENSG00000214121 | NA           | NA                                                                      | NA        | 0.711773169 | -1.632077905 | 2.879184018 | -0.566854322 | 0.57081316  | NA          | NA      |
| ENSG00000221436 | MIR548F3     | microRNA 548f-3                                                         | 100302159 | 0.711773169 | -1.632077905 | 2.879184018 | -0.566854322 | 0.57081316  | NA          | NA      |
| ENSG00000227887 | NA           | NA                                                                      | NA        | 0.711773169 | -1.632077905 | 2.879184018 | -0.566854322 | 0.57081316  | NA          | NA      |
| ENSG00000261628 | NA           | NA                                                                      | NA        | 0.711773169 | -1.632077905 | 2.879184018 | -0.566854322 | 0.57081316  | NA          | NA      |
| ENSG00000268549 | NA           | NA                                                                      | NA        | 0.711773169 | -1.632077905 | 2.879184018 | -0.566854322 | 0.57081316  | NA          | NA      |
| ENSG00000116191 | RALGPS2      | Ral GEF with PH domain and SH3 binding motif 2                          | 55103     | 1085.077235 | -1.630783205 | 0.964484302 | -1.690834367 | 0.090868441 | 0.999371363 | Not Sig |
| ENSG00000262001 | NA           | NA                                                                      | NA        | 131.1906963 | -1.630520926 | 0.846104354 | -1.927091994 | 0.053968166 | 0.999371363 | Not Sig |
| ENSG00000237870 | LOC102724434 | uncharacterized LOC102724434                                            | 102724434 | 14.6397685  | -1.630129168 | 1.144089785 | -1.424826259 | 0.15420743  | 0.999371363 | Not Sig |
| ENSG00000273407 | NA           | NA                                                                      | NA        | 2.460520841 | -1.629935669 | 1.771722398 | -0.919972379 | 0.357587194 | NA          | NA      |
| ENSG00000262248 | NA           | NA                                                                      | NA        | 32.52483528 | -1.629815496 | 1.039740192 | -1.567521876 | 0.116992757 | 0.999371363 | Not Sig |
| ENSG00000260511 | NA           | NA                                                                      | NA        | 4.52572472  | -1.627541814 | 1.24575494  | -1.306470287 | 0.191392677 | NA          | NA      |
| ENSG00000248159 | NA           | NA                                                                      | NA        | 1.85389531  | -1.625374515 | 2.187631192 | -0.74298379  | 0.457491494 | NA          | NA      |
| ENSG00000270344 | NA           | NA                                                                      | NA        | 70.09324296 | -1.62523728  | 0.548723903 | -2.961848883 | 0.003057978 | 0.243728611 | Not Sig |
| ENSG00000241431 | NA           | NA                                                                      | NA        | 1.330271376 | -1.625224707 | 2.124038134 | -0.76515797  | 0.444177484 | NA          | NA      |
| ENSG00000225527 | NA           | NA                                                                      | NA        | 13.13593186 | -1.624746644 | 0.93320706  | -1.741035526 | 0.081677351 | 0.999371363 | Not Sig |
| ENSG00000090975 | PITPNM2      | phosphatidylinositol transfer protein membrane associated 2             | 57605     | 1051.743117 | -1.623982872 | 0.662834447 | -2.450058048 | 0.014283319 | 0.603590037 | Not Sig |
| ENSG00000221067 | NA           | NA                                                                      | NA        | 6.215864669 | -1.622762457 | 1.219959679 | -1.330177124 | 0.183459919 | NA          | NA      |
| ENSG00000271858 | CYB561D2     | cytochrome b561 family member D2                                        | 11068     | 21.60931809 | -1.621561216 | 0.872951619 | -1.857561382 | 0.063231327 | 0.999371363 | Not Sig |
| ENSG00000265600 | NA           | NA                                                                      | NA        | 3.069149792 | -1.620831977 | 1.706726382 | -0.949673008 | 0.342278429 | NA          | NA      |
| ENSG00000134548 | SPX          | spexin hormone                                                          | 80763     | 15.00835228 | -1.618281938 | 1.026362635 | -1.576715561 | 0.114860988 | 0.999371363 | Not Sig |
| ENSG00000103089 | FA2H         | fatty acid 2-hydroxylase                                                | 79152     | 394.645111  | -1.618265847 | 0.969590957 | -1.669019121 | 0.09511359  | 0.999371363 | Not Sig |
| ENSG00000104941 | RSPH6A       | radial spoke head 6 homolog A                                           | 81492     | 1.222107025 | -1.617613318 | 2.481374214 | -0.651902203 | 0.514464263 | NA          | NA      |
| ENSG00000072133 | RPS6KA6      | ribosomal protein S6 kinase A6                                          | 27330     | 154.5320684 | -1.616887498 | 1.008020368 | -1.604022646 | 0.108709061 | 0.999371363 | Not Sig |
| ENSG00000239827 | SUGT1P3      | SOT1 homolog, MIS12 kinetochore complex assembly cohesione pseudogene 3 | 283507    | 51.68473304 | -1.616827724 | 0.941862181 | -1.716628777 | 0.086047021 | 0.999371363 | Not Sig |
| ENSG00000240399 | NA           | NA                                                                      | NA        | 17.79770986 | -1.612786063 | 0.937665403 | -1.720001674 | 0.085432137 | 0.999371363 | Not Sig |

|                 |              |                                                            |           |             |              |             |              |             |             |         |
|-----------------|--------------|------------------------------------------------------------|-----------|-------------|--------------|-------------|--------------|-------------|-------------|---------|
| ENSG00000221059 | NA           | NA                                                         | NA        | 3.222913752 | -1.612113569 | 1.98549809  | -0.811944155 | 0.416823676 | NA          | NA      |
| ENSG00000177822 | NA           | NA                                                         | NA        | 6.386522809 | -1.610939713 | 1.034312403 | -1.557498207 | 0.119352246 | NA          | NA      |
| ENSG00000260711 | NA           | NA                                                         | NA        | 427.6133568 | -1.61058398  | 0.827340562 | -1.946700131 | 0.051570696 | 0.999371363 | Not Sig |
| ENSG00000262039 | NA           | NA                                                         | NA        | 2.019300217 | -1.61052765  | 1.839278111 | -0.875630303 | 0.381231046 | NA          | NA      |
| ENSG00000264201 | MIR4701      | microRNA 4701                                              | 100616262 | 2.521597227 | -1.610224666 | 1.809080001 | -0.890079303 | 0.373423306 | NA          | NA      |
| ENSG00000201176 | NA           | NA                                                         | NA        | 4.712274644 | -1.608418484 | 1.413456468 | -1.137932805 | 0.255148542 | NA          | NA      |
| ENSG00000225726 | NA           | NA                                                         | NA        | 7.14789165  | -1.607641577 | 1.24646175  | -1.289764068 | 0.197132587 | 0.999371363 | Not Sig |
| ENSG00000230446 | NA           | NA                                                         | NA        | 3.827524965 | -1.607495562 | 1.864983926 | -0.861935344 | 0.388723098 | NA          | NA      |
| ENSG00000249504 | NA           | NA                                                         | NA        | 42.65185216 | -1.607005726 | 0.813988495 | -1.974236412 | 0.048354867 | 0.999371363 | Not Sig |
| ENSG00000263744 | MIR3664      | microRNA 3664                                              | 100500844 | 1.956624521 | -1.606435233 | 1.866855061 | -0.860503457 | 0.389511579 | NA          | NA      |
| ENSG00000130612 | CYP2G1P      | cytochrome P450 family 2 subfamily G member 1, pseudogene  | 22952     | 11.07983776 | -1.605973217 | 0.997927536 | -1.609308451 | 0.107548912 | 0.999371363 | Not Sig |
| ENSG00000132749 | TESMIN       | testis expressed metallothionein like protein              | 9633      | 73.35674701 | -1.605840398 | 0.912040865 | -1.760711016 | 0.078287327 | 0.999371363 | Not Sig |
| ENSG00000213892 | CEACAM16     | carcinoembryonic antigen related cell adhesion molecule 16 | 388551    | 4.658516044 | -1.605737158 | 1.393119769 | -1.152619605 | 0.249066553 | NA          | NA      |
| ENSG00000123870 | NA           | NA                                                         | NA        | 98.10811631 | -1.605683618 | 0.800188726 | -2.006631143 | 0.044788953 | 0.999371363 | Not Sig |
| ENSG00000227922 | NA           | NA                                                         | NA        | 1.22854456  | -1.605543624 | 2.834081067 | -0.566512949 | 0.571045133 | NA          | NA      |
| ENSG00000213667 | NA           | NA                                                         | NA        | 1.2980728   | -1.6055164   | 2.430894958 | -0.660463092 | 0.508956696 | NA          | NA      |
| ENSG00000232951 | NA           | NA                                                         | NA        | 2.417035607 | -1.605260112 | 1.716979172 | -0.934932781 | 0.349822942 | NA          | NA      |
| ENSG00000229056 | LOC101927482 | uncharacterized LOC101927482                               | 101927482 | 14.78793435 | -1.604238538 | 1.101787531 | -1.456032577 | 0.145383614 | 0.999371363 | Not Sig |
| ENSG00000223923 | LOC105373878 | uncharacterized LOC105373878                               | 105373878 | 12.98074056 | -1.599744757 | 0.814315936 | -1.964525912 | 0.049469134 | 0.999371363 | Not Sig |
| ENSG00000222266 | NA           | NA                                                         | NA        | 4.560625058 | -1.598545443 | 1.250524117 | -1.278300372 | 0.201143537 | NA          | NA      |
| ENSG00000249540 | NA           | NA                                                         | NA        | 1.219090312 | -1.594143761 | 2.838364259 | -0.561641712 | 0.574360155 | NA          | NA      |
| ENSG00000081479 | LRP2         | LDL receptor related protein 2                             | 4036      | 1117.682127 | -1.593925659 | 1.194810292 | -1.334040784 | 0.182190491 | 0.999371363 | Not Sig |
| ENSG00000213735 | NA           | NA                                                         | NA        | 6.983916293 | -1.593903135 | 1.253848367 | -1.271208846 | 0.20365436  | 0.999371363 | Not Sig |
| ENSG00000187135 | VSTM2B       | V-set and transmembrane domain containing 2B               | 342865    | 0.695466377 | -1.593183169 | 3.351828491 | -0.475317628 | 0.634560596 | NA          | NA      |
| ENSG00000199751 | NA           | NA                                                         | NA        | 0.695466377 | -1.593183169 | 3.351828491 | -0.475317628 | 0.634560596 | NA          | NA      |
| ENSG00000252821 | NA           | NA                                                         | NA        | 0.695466377 | -1.593183169 | 3.351828491 | -0.475317628 | 0.634560596 | NA          | NA      |
| ENSG00000174407 | NA           | NA                                                         | NA        | 0.660566039 | -1.593133914 | 3.405351303 | -0.467832471 | 0.639904398 | NA          | NA      |
| ENSG00000200064 | NA           | NA                                                         | NA        | 0.660566039 | -1.593133914 | 3.405351303 | -0.467832471 | 0.639904398 | NA          | NA      |
| ENSG00000228132 | NA           | NA                                                         | NA        | 0.660566039 | -1.593133914 | 3.405351303 | -0.467832471 | 0.639904398 | NA          | NA      |
| ENSG00000228347 | NA           | NA                                                         | NA        | 0.660566039 | -1.593133914 | 3.405351303 | -0.467832471 | 0.639904398 | NA          | NA      |
| ENSG00000232406 | NA           | NA                                                         | NA        | 0.660566039 | -1.593133914 | 3.405351303 | -0.467832471 | 0.639904398 | NA          | NA      |
| ENSG00000233613 | NA           | NA                                                         | NA        | 0.660566039 | -1.593133914 | 3.405351303 | -0.467832471 | 0.639904398 | NA          | NA      |
| ENSG00000236480 | NA           | NA                                                         | NA        | 0.660566039 | -1.593133914 | 3.405351303 | -0.467832471 | 0.639904398 | NA          | NA      |
| ENSG00000252002 | NA           | NA                                                         | NA        | 0.660566039 | -1.593133914 | 3.405351303 | -0.467832471 | 0.639904398 | NA          | NA      |
| ENSG00000254867 | NA           | NA                                                         | NA        | 0.660566039 | -1.593133914 | 3.405351303 | -0.467832471 | 0.639904398 | NA          | NA      |

|                 |           |                                                |           |             |              |             |              |             |             |         |
|-----------------|-----------|------------------------------------------------|-----------|-------------|--------------|-------------|--------------|-------------|-------------|---------|
| ENSG00000268906 | NA        | NA                                             | NA        | 0.660566039 | -1.593133914 | 3.405351303 | -0.467832471 | 0.639904398 | NA          | NA      |
| ENSG00000268942 | NA        | NA                                             | NA        | 0.660566039 | -1.593133914 | 3.405351303 | -0.467832471 | 0.639904398 | NA          | NA      |
| ENSG00000271443 | NA        | NA                                             | NA        | 0.660566039 | -1.593133914 | 3.405351303 | -0.467832471 | 0.639904398 | NA          | NA      |
| ENSG00000200648 | NA        | NA                                             | NA        | 0.654128503 | -1.593124735 | 3.4156828   | -0.466414719 | 0.640918678 | NA          | NA      |
| ENSG00000237749 | NA        | NA                                             | NA        | 0.654128503 | -1.593124735 | 3.4156828   | -0.466414719 | 0.640918678 | NA          | NA      |
| ENSG00000242288 | NA        | NA                                             | NA        | 0.654128503 | -1.593124735 | 3.4156828   | -0.466414719 | 0.640918678 | NA          | NA      |
| ENSG00000252101 | NA        | NA                                             | NA        | 0.654128503 | -1.593124735 | 3.4156828   | -0.466414719 | 0.640918678 | NA          | NA      |
| ENSG00000133116 | KL        | klotho                                         | 9365      | 232.3469983 | -1.592465919 | 0.993995941 | -1.602084932 | 0.10913683  | 0.999371363 | Not Sig |
| ENSG00000133110 | POSTN     | periostin                                      | 10631     | 4940.411369 | -1.591795961 | 0.885175342 | -1.798283215 | 0.072132138 | 0.999371363 | Not Sig |
| ENSG00000258474 | NA        | NA                                             | NA        | 4.184631601 | -1.589243912 | 1.72072135  | -0.923591674 | 0.35569895  | NA          | NA      |
| ENSG00000229622 | NA        | NA                                             | NA        | 27.78472745 | -1.588861927 | 1.034903012 | -1.535276165 | 0.124716006 | 0.999371363 | Not Sig |
| ENSG00000178297 | TMPRSS9   | transmembrane protease, serine 9               | 360200    | 1.775793073 | -1.588150271 | 1.936549876 | -0.820092625 | 0.412163306 | NA          | NA      |
| ENSG00000202337 | RNU6-8    | RNA, U6 small nuclear 8                        | 101954278 | 1.338126314 | -1.588045824 | 2.501632616 | -0.634803773 | 0.525556402 | NA          | NA      |
| ENSG00000261635 | NA        | NA                                             | NA        | 11.59195074 | -1.587969451 | 0.938268654 | -1.692446448 | 0.090560883 | 0.999371363 | Not Sig |
| ENSG00000272489 | NA        | NA                                             | NA        | 8.765549986 | -1.587922409 | 1.247339269 | -1.273047717 | 0.20300111  | 0.999371363 | Not Sig |
| ENSG00000186204 | CYP4F12   | cytochrome P450 family 4 subfamily F member 12 | 66002     | 70.33672766 | -1.587456199 | 0.778852804 | -2.038197964 | 0.041530139 | 0.999371363 | Not Sig |
| ENSG00000256069 | A2MP1     | alpha-2-macroglobulin pseudogene 1             | 3         | 4.3779612   | -1.585984335 | 1.245753767 | -1.273112214 | 0.202978226 | NA          | NA      |
| ENSG00000184349 | EFNA5     | ephrin A5                                      | 1946      | 1026.245206 | -1.585916786 | 0.828360027 | -1.914525971 | 0.055552984 | 0.999371363 | Not Sig |
| ENSG00000266761 | MIR3194   | microRNA 3194                                  | 100422889 | 1.281766008 | -1.584859144 | 2.419371337 | -0.655070646 | 0.51242227  | NA          | NA      |
| ENSG00000244357 | NA        | NA                                             | NA        | 9.770630924 | -1.584413781 | 1.079205931 | -1.468129238 | 0.142069121 | 0.999371363 | Not Sig |
| ENSG00000170743 | SYT9      | synaptotagmin 9                                | 143425    | 6.691548537 | -1.583870145 | 1.119894814 | -1.414302598 | 0.157273074 | 0.999371363 | Not Sig |
| ENSG00000150630 | VEGFC     | vascular endothelial growth factor C           | 7424      | 293.0358607 | -1.58362072  | 0.661152496 | -2.395242745 | 0.016609365 | 0.657741302 | Not Sig |
| ENSG00000148600 | CDHR1     | cadherin related family member 1               | 92211     | 20.91592701 | -1.58324054  | 1.177702553 | -1.344346699 | 0.178836301 | 0.999371363 | Not Sig |
| ENSG00000165269 | AQP7      | aquaporin 7                                    | 364       | 90.38338363 | -1.582531887 | 0.878523348 | -1.801354386 | 0.071647041 | 0.999371363 | Not Sig |
| ENSG00000263826 | NA        | NA                                             | NA        | 3.806784058 | -1.582241519 | 1.349477278 | -1.172484743 | 0.241002494 | NA          | NA      |
| ENSG00000266719 | MIR4676   | microRNA 4676                                  | 100616286 | 5.043183556 | -1.582095336 | 1.348770984 | -1.17299034  | 0.240799679 | NA          | NA      |
| ENSG00000259571 | BLID      | BH3-like motif containing, cell death inducer  | 414899    | 14.42411594 | -1.580933107 | 0.93877684  | -1.684035054 | 0.092174894 | 0.999371363 | Not Sig |
| ENSG00000202358 | NA        | NA                                             | NA        | 16.66226914 | -1.580760367 | 1.447938155 | -1.091731965 | 0.274950931 | 0.999371363 | Not Sig |
| ENSG00000237154 | NA        | NA                                             | NA        | 1.898664905 | -1.579083493 | 1.995117961 | -0.791473749 | 0.428667589 | NA          | NA      |
| ENSG00000201228 | NA        | NA                                             | NA        | 4.931023143 | -1.578428956 | 1.890057646 | -0.835122124 | 0.403648951 | NA          | NA      |
| ENSG00000238922 | NA        | NA                                             | NA        | 10.59298824 | -1.577016524 | 1.208840432 | -1.304569637 | 0.192039433 | 0.999371363 | Not Sig |
| ENSG00000207109 | SNORD38C  | small nucleolar RNA, C/D box 38C               | 109617024 | 11.93613469 | -1.574831062 | 1.043259846 | -1.509529067 | 0.131163633 | 0.999371363 | Not Sig |
| ENSG00000213467 | NA        | NA                                             | NA        | 1.196345985 | -1.572955858 | 2.195815133 | -0.716342571 | 0.473779846 | NA          | NA      |
| ENSG00000207688 | MIR548D2  | microRNA 548d-2                                | 693131    | 11.30130664 | -1.571368426 | 1.027164514 | -1.52981183  | 0.126063312 | 0.999371363 | Not Sig |
| ENSG00000207688 | MIR548AA2 | microRNA 548aa-2                               | 100500895 | 11.30130664 | -1.571368426 | 1.027164514 | -1.52981183  | 0.126063312 | 0.999371363 | Not Sig |

|                 |           |                                                          |           |             |              |             |              |             |             |         |
|-----------------|-----------|----------------------------------------------------------|-----------|-------------|--------------|-------------|--------------|-------------|-------------|---------|
| ENSG00000183148 | ANKRD20A2 | ankyrin repeat domain 20 family member A2                | 441430    | 4.74538066  | -1.570488259 | 1.66937337  | -0.940765132 | 0.346825233 | NA          | NA      |
| ENSG00000270599 | NA        | NA                                                       | NA        | 5.704496803 | -1.568569551 | 1.195597398 | -1.311954638 | 0.189535441 | NA          | NA      |
| ENSG00000255883 | NA        | NA                                                       | NA        | 2.454952658 | -1.567762656 | 1.828279407 | -0.857507146 | 0.391164667 | NA          | NA      |
| ENSG00000268201 | NA        | NA                                                       | NA        | 18.03815103 | -1.566712278 | 0.873063981 | -1.794498814 | 0.072733588 | 0.999371363 | Not Sig |
| ENSG00000154217 | PITPNC1   | phosphatidylinositol transfer protein, cytoplasmic 1     | 26207     | 1029.256037 | -1.564939055 | 0.478898384 | -3.267789385 | 0.00108391  | 0.124839423 | Not Sig |
| ENSG00000168874 | ATOH8     | atonal bHLH transcription factor 8                       | 84913     | 1439.768691 | -1.563126919 | 0.626036236 | -2.496863325 | 0.012529724 | 0.556126761 | Not Sig |
| ENSG00000115641 | FHL2      | four and a half LIM domains 2                            | 2274      | 612.9722735 | -1.562266782 | 0.859842422 | -1.816922196 | 0.069229028 | 0.999371363 | Not Sig |
| ENSG00000228275 | NA        | NA                                                       | NA        | 1.20278352  | -1.561663548 | 2.447304418 | -0.638115772 | 0.52339832  | NA          | NA      |
| ENSG00000173281 | PPP1R3B   | protein phosphatase 1 regulatory subunit 3B              | 79660     | 2089.338169 | -1.559901237 | 0.718482411 | -2.17110567  | 0.029923186 | 0.897727832 | Not Sig |
| ENSG00000252230 | NA        | NA                                                       | NA        | 7.792668581 | -1.559009678 | 1.4533114   | -1.072729271 | 0.283392603 | 0.999371363 | Not Sig |
| ENSG00000232872 | NA        | NA                                                       | NA        | 7.535493069 | -1.558891909 | 1.213626859 | -1.284490284 | 0.198970461 | 0.999371363 | Not Sig |
| ENSG00000165935 | SMCO2     | single-pass membrane protein with coiled-coil domains 2  | 341346    | 9.708227665 | -1.558381335 | 1.197263259 | -1.301619608 | 0.193046453 | 0.999371363 | Not Sig |
| ENSG00000251537 | NA        | NA                                                       | NA        | 4.993848174 | -1.557412285 | 1.404874796 | -1.108577283 | 0.267612582 | NA          | NA      |
| ENSG00000272854 | NA        | NA                                                       | NA        | 2.461390194 | -1.556686074 | 1.828643518 | -0.851279136 | 0.394614312 | NA          | NA      |
| ENSG00000260350 | NA        | NA                                                       | NA        | 18.23419233 | -1.555172156 | 0.932938872 | -1.666960401 | 0.095522279 | 0.999371363 | Not Sig |
| ENSG00000137561 | TTPA      | alpha tocopherol transfer protein                        | 7274      | 17.44460122 | -1.554342207 | 0.867764464 | -1.79120288  | 0.073260744 | 0.999371363 | Not Sig |
| ENSG00000250820 | NA        | NA                                                       | NA        | 4.279351155 | -1.554204348 | 1.273704456 | -1.220223688 | 0.222380089 | NA          | NA      |
| ENSG00000207493 | SNORA46   | small nucleolar RNA, H/ACA box 46                        | 677827    | 14.82222382 | -1.553371872 | 1.001054113 | -1.551736168 | 0.120725365 | 0.999371363 | Not Sig |
| ENSG00000226781 | NA        | NA                                                       | NA        | 1.756469568 | -1.55210847  | 1.912623198 | -0.811507709 | 0.417074167 | NA          | NA      |
| ENSG00000236535 | NA        | NA                                                       | NA        | 44.49177901 | -1.550545493 | 0.698831852 | -2.21876763  | 0.026502537 | 0.841215479 | Not Sig |
| ENSG00000146215 | CRIP3     | cysteine rich protein 3                                  | 401262    | 6.012843297 | -1.549949491 | 1.463161763 | -1.059315197 | 0.289456256 | NA          | NA      |
| ENSG00000232519 | NA        | NA                                                       | NA        | 1.787068833 | -1.549745313 | 2.565511295 | -0.604068794 | 0.545797906 | NA          | NA      |
| ENSG00000199646 | NA        | NA                                                       | NA        | 3.852556048 | -1.54883667  | 1.622469515 | -0.954616809 | 0.339771514 | NA          | NA      |
| ENSG00000221555 | NA        | NA                                                       | NA        | 6.5517621   | -1.548769873 | 1.2117526   | -1.27812383  | 0.201205768 | NA          | NA      |
| ENSG00000204150 | NA        | NA                                                       | NA        | 11.45322162 | -1.547098737 | 1.188837934 | -1.301353777 | 0.193137388 | 0.999371363 | Not Sig |
| ENSG00000121904 | CSMD2     | CUB and Sushi multiple domains 2                         | 114784    | 100.5321225 | -1.546102547 | 0.830972744 | -1.860593573 | 0.062801593 | 0.999371363 | Not Sig |
| ENSG00000261051 | NA        | NA                                                       | NA        | 43.79868038 | -1.546029988 | 1.032659119 | -1.497134881 | 0.134358165 | 0.999371363 | Not Sig |
| ENSG00000204152 | TIMM23B   | translocase of inner mitochondrial membrane 23 homolog B | 100652748 | 3.162109804 | -1.543526259 | 1.438477291 | -1.073027894 | 0.283258601 | NA          | NA      |
| ENSG00000250673 | REELD1    | reeler domain containing 1                               | 345051    | 1.271896752 | -1.541939582 | 2.437389293 | -0.63261933  | 0.526982261 | NA          | NA      |
| ENSG00000265677 | NA        | NA                                                       | NA        | 1.991524859 | -1.540382467 | 1.866728827 | -0.825177415 | 0.409270874 | NA          | NA      |
| ENSG00000268745 | NA        | NA                                                       | NA        | 2.433027448 | -1.540233709 | 1.867081416 | -0.82494191  | 0.409404571 | NA          | NA      |
| ENSG00000213996 | TM6SF2    | transmembrane 6 superfamily member 2                     | 53345     | 5.037200366 | -1.539717722 | 1.247383784 | -1.234357654 | 0.217069661 | NA          | NA      |
| ENSG00000225779 | NA        | NA                                                       | NA        | 6.917959169 | -1.53943477  | 1.095203687 | -1.405615037 | 0.159838468 | 0.999371363 | Not Sig |
| ENSG00000243446 | NA        | NA                                                       | NA        | 3.528649012 | -1.53927501  | 1.573886759 | -0.978008743 | 0.32807     | NA          | NA      |
| ENSG00000224420 | ADM5      | adrenomedullin 5 (putative)                              | 199800    | 26.44181179 | -1.538522132 | 0.872083503 | -1.764191304 | 0.077699776 | 0.999371363 | Not Sig |

|                 |              |                                                                  |           |             |              |             |              |             |             |         |
|-----------------|--------------|------------------------------------------------------------------|-----------|-------------|--------------|-------------|--------------|-------------|-------------|---------|
| ENSG00000111799 | COL12A1      | collagen type XII alpha 1 chain                                  | 1303      | 4440.794419 | -1.537998291 | 0.74059     | -2.076720305 | 0.037827381 | 0.999371363 | Not Sig |
| ENSG00000206907 | NA           | NA                                                               | NA        | 1.163732401 | -1.537900976 | 2.498567714 | -0.615513027 | 0.538215969 | NA          | NA      |
| ENSG00000214597 | NA           | NA                                                               | NA        | 1.163732401 | -1.537900976 | 2.498567714 | -0.615513027 | 0.538215969 | NA          | NA      |
| ENSG00000260747 | NA           | NA                                                               | NA        | 1.163732401 | -1.537900976 | 2.498567714 | -0.615513027 | 0.538215969 | NA          | NA      |
| ENSG00000199875 | NA           | NA                                                               | NA        | 4.208223605 | -1.5375399   | 1.329756234 | -1.156256959 | 0.247576068 | NA          | NA      |
| ENSG00000267078 | NA           | NA                                                               | NA        | 1.740162777 | -1.537309741 | 1.938765881 | -0.792932121 | 0.427817372 | NA          | NA      |
| ENSG00000216802 | NA           | NA                                                               | NA        | 31.28973071 | -1.536842643 | 1.070668905 | -1.435404201 | 0.15117195  | 0.999371363 | Not Sig |
| ENSG00000252123 | NA           | NA                                                               | NA        | 2.829186573 | -1.5332801   | 2.342863945 | -0.654446923 | 0.512823912 | NA          | NA      |
| ENSG00000212597 | NA           | NA                                                               | NA        | 5.88439471  | -1.533050036 | 1.580322849 | -0.970086611 | 0.332003322 | NA          | NA      |
| ENSG00000234325 | NA           | NA                                                               | NA        | 8.529472832 | -1.532809101 | 1.243270385 | -1.232884752 | 0.217618765 | 0.999371363 | Not Sig |
| ENSG00000206587 | NA           | NA                                                               | NA        | 0.669705337 | -1.532376733 | 3.383354791 | -0.452916359 | 0.650608971 | NA          | NA      |
| ENSG00000214653 | NA           | NA                                                               | NA        | 0.669705337 | -1.532376733 | 3.383354791 | -0.452916359 | 0.650608971 | NA          | NA      |
| ENSG00000215199 | NA           | NA                                                               | NA        | 0.669705337 | -1.532376733 | 3.383354791 | -0.452916359 | 0.650608971 | NA          | NA      |
| ENSG00000226167 | AP4B1-AS1    | AP4B1 antisense RNA 1                                            | 100287722 | 0.669705337 | -1.532376733 | 3.383354791 | -0.452916359 | 0.650608971 | NA          | NA      |
| ENSG00000243150 | LOC100996447 | uncharacterized LOC100996447                                     | 100996447 | 0.669705337 | -1.532376733 | 3.383354791 | -0.452916359 | 0.650608971 | NA          | NA      |
| ENSG00000261620 | NA           | NA                                                               | NA        | 0.669705337 | -1.532376733 | 3.383354791 | -0.452916359 | 0.650608971 | NA          | NA      |
| ENSG00000264125 | NA           | NA                                                               | NA        | 0.669705337 | -1.532376733 | 3.383354791 | -0.452916359 | 0.650608971 | NA          | NA      |
| ENSG00000268108 | NA           | NA                                                               | NA        | 1.959326283 | -1.532290957 | 1.904674496 | -0.80448967  | 0.421114233 | NA          | NA      |
| ENSG00000078795 | PKD2L2       | polycystin 2 like 2, transient receptor potential cation channel | 27039     | 0.634804999 | -1.531873047 | 3.440046656 | -0.445305893 | 0.65609871  | NA          | NA      |
| ENSG00000229324 | NA           | NA                                                               | NA        | 0.634804999 | -1.531873047 | 3.440046656 | -0.445305893 | 0.65609871  | NA          | NA      |
| ENSG00000251916 | NA           | NA                                                               | NA        | 0.634804999 | -1.531873047 | 3.440046656 | -0.445305893 | 0.65609871  | NA          | NA      |
| ENSG00000252982 | NA           | NA                                                               | NA        | 0.634804999 | -1.531873047 | 3.440046656 | -0.445305893 | 0.65609871  | NA          | NA      |
| ENSG00000254224 | NA           | NA                                                               | NA        | 0.634804999 | -1.531873047 | 3.440046656 | -0.445305893 | 0.65609871  | NA          | NA      |
| ENSG00000255703 | NA           | NA                                                               | NA        | 0.634804999 | -1.531873047 | 3.440046656 | -0.445305893 | 0.65609871  | NA          | NA      |
| ENSG00000258357 | NA           | NA                                                               | NA        | 0.634804999 | -1.531873047 | 3.440046656 | -0.445305893 | 0.65609871  | NA          | NA      |
| ENSG00000264578 | NA           | NA                                                               | NA        | 0.634804999 | -1.531873047 | 3.440046656 | -0.445305893 | 0.65609871  | NA          | NA      |
| ENSG00000268488 | NA           | NA                                                               | NA        | 0.634804999 | -1.531873047 | 3.440046656 | -0.445305893 | 0.65609871  | NA          | NA      |
| ENSG00000207648 | NA           | NA                                                               | NA        | 0.628367463 | -1.531778573 | 3.45100995  | -0.443863853 | 0.65714102  | NA          | NA      |
| ENSG00000213856 | NA           | NA                                                               | NA        | 0.628367463 | -1.531778573 | 3.45100995  | -0.443863853 | 0.65714102  | NA          | NA      |
| ENSG00000236159 | NA           | NA                                                               | NA        | 0.628367463 | -1.531778573 | 3.45100995  | -0.443863853 | 0.65714102  | NA          | NA      |
| ENSG00000269980 | NA           | NA                                                               | NA        | 0.628367463 | -1.531778573 | 3.45100995  | -0.443863853 | 0.65714102  | NA          | NA      |
| ENSG00000270225 | NA           | NA                                                               | NA        | 0.628367463 | -1.531778573 | 3.45100995  | -0.443863853 | 0.65714102  | NA          | NA      |
| ENSG00000264701 | NA           | NA                                                               | NA        | 1.273314155 | -1.531336954 | 2.213845093 | -0.691709171 | 0.489119986 | NA          | NA      |
| ENSG00000241322 | CDRT1        | CMT1A duplicated region transcript 1                             | 374286    | 11.78962296 | -1.530771597 | 0.997217239 | -1.535043256 | 0.124773203 | 0.999371363 | Not Sig |
| ENSG00000213185 | FAM24B       | family with sequence similarity 24 member B                      | 196792    | 8.439656781 | -1.530741503 | 0.968377242 | -1.580728497 | 0.11394013  | 0.999371363 | Not Sig |



|                 |            |                                                         |           |             |              |             |              |             |             |         |
|-----------------|------------|---------------------------------------------------------|-----------|-------------|--------------|-------------|--------------|-------------|-------------|---------|
| ENSG00000273478 | NA         | NA                                                      | NA        | 46.85288392 | -1.529535519 | 1.079212728 | -1.417269718 | 0.156404085 | 0.999371363 | Not Sig |
| ENSG00000257594 | GALNT4     | polypeptide N-acetylgalactosaminyltransferase 4         | 8693      | 113.384674  | -1.528839952 | 0.628963635 | -2.430728687 | 0.015068493 | 0.622155862 | Not Sig |
| ENSG00000207780 | MIR648     | microRNA 648                                            | 693233    | 8.947257259 | -1.528460645 | 1.133747745 | -1.348148785 | 0.177610533 | 0.999371363 | Not Sig |
| ENSG00000250686 | NA         | NA                                                      | NA        | 12.10349693 | -1.528201873 | 1.126404411 | -1.356707998 | 0.17487401  | 0.999371363 | Not Sig |
| ENSG00000206448 | PPIAP30    | peptidylprolyl isomerase A pseudogene 30                | 100192204 | 8.030118298 | -1.528123067 | 1.329699198 | -1.149224629 | 0.250463368 | 0.999371363 | Not Sig |
| ENSG00000243173 | NA         | NA                                                      | NA        | 1.817545954 | -1.527502166 | 1.93472751  | -0.789517985 | 0.429809322 | NA          | NA      |
| ENSG00000259436 | NA         | NA                                                      | NA        | 4.406828113 | -1.527135139 | 1.535105202 | -0.994808132 | 0.31982959  | NA          | NA      |
| ENSG00000147408 | CSGALNACT1 | chondroitin sulfate N-acetylgalactosaminyltransferase 1 | 55790     | 757.1574996 | -1.526293129 | 0.524385718 | -2.910630623 | 0.003607002 | 0.268774977 | Not Sig |
| ENSG00000201747 | NA         | NA                                                      | NA        | 1.982070611 | -1.526225374 | 2.179624539 | -0.700223982 | 0.483787437 | NA          | NA      |
| ENSG00000206997 | NA         | NA                                                      | NA        | 1.982070611 | -1.526225374 | 2.179624539 | -0.700223982 | 0.483787437 | NA          | NA      |
| ENSG00000269986 | NA         | NA                                                      | NA        | 1.982070611 | -1.526225374 | 2.179624539 | -0.700223982 | 0.483787437 | NA          | NA      |
| ENSG00000265474 | NA         | NA                                                      | NA        | 1.865636314 | -1.525950517 | 2.188140444 | -0.697373206 | 0.485569265 | NA          | NA      |
| ENSG00000112319 | EYA4       | EYA transcriptional coactivator and phosphatase 4       | 2070      | 195.8436884 | -1.525829894 | 0.973457478 | -1.567433533 | 0.117013391 | 0.999371363 | Not Sig |
| ENSG00000242229 | NA         | NA                                                      | NA        | 2.637483474 | -1.525817157 | 2.028976327 | -0.752013491 | 0.452042946 | NA          | NA      |
| ENSG00000203489 | NA         | NA                                                      | NA        | 13.38728634 | -1.524951344 | 0.881886572 | -1.729192159 | 0.083774709 | 0.999371363 | Not Sig |
| ENSG00000209042 | SNORD12C   | small nucleolar RNA, C/D box 12C                        | 26765     | 16.20073047 | -1.524888469 | 0.87125197  | -1.75022671  | 0.080079202 | 0.999371363 | Not Sig |
| ENSG00000183671 | GPR1       | G protein-coupled receptor 1                            | 2825      | 5.19958856  | -1.524732237 | 1.275591726 | -1.195313678 | 0.231964498 | NA          | NA      |
| ENSG00000213244 | NA         | NA                                                      | NA        | 19.84921789 | -1.52195283  | 0.945195219 | -1.610199458 | 0.10735432  | 0.999371363 | Not Sig |
| ENSG00000227347 | NA         | NA                                                      | NA        | 1.725273387 | -1.521802871 | 2.225911504 | -0.683676268 | 0.494179612 | NA          | NA      |
| ENSG00000012171 | SEMA3B     | semaphorin 3B                                           | 7869      | 1803.954898 | -1.521257706 | 0.774224323 | -1.964879764 | 0.049428155 | 0.999371363 | Not Sig |
| ENSG00000120645 | IQSEC3     | IQ motif and Sec7 domain 3                              | 440073    | 89.37441817 | -1.517852561 | 1.082371108 | -1.402340242 | 0.160813669 | 0.999371363 | Not Sig |
| ENSG00000174093 | NA         | NA                                                      | NA        | 952.8274296 | -1.516980979 | 0.860543139 | -1.762818052 | 0.077931182 | 0.999371363 | Not Sig |
| ENSG00000270681 | NA         | NA                                                      | NA        | 4.973622332 | -1.516926647 | 1.610013481 | -0.942182575 | 0.346099174 | NA          | NA      |
| ENSG00000196091 | MYBPC1     | myosin binding protein C, slow type                     | 4604      | 9.050362019 | -1.516517999 | 1.440569267 | -1.052721333 | 0.292468728 | 0.999371363 | Not Sig |
| ENSG00000187952 | NA         | NA                                                      | NA        | 1.691657409 | -1.51589429  | 2.206101503 | -0.687137146 | 0.491996308 | NA          | NA      |
| ENSG00000252994 | NA         | NA                                                      | NA        | 4.044126104 | -1.515787363 | 1.612697484 | -0.939908059 | 0.347264723 | NA          | NA      |
| ENSG00000226089 | NA         | NA                                                      | NA        | 8.753916762 | -1.514773635 | 1.389083848 | -1.090483945 | 0.275500022 | 0.999371363 | Not Sig |
| ENSG00000128482 | RNF112     | ring finger protein 112                                 | 7732      | 44.8448395  | -1.513118299 | 0.808875383 | -1.870644515 | 0.06139437  | 0.999371363 | Not Sig |
| ENSG00000240720 | LRRD1      | leucine rich repeats and death domain containing 1      | 401387    | 4.592941354 | -1.512523196 | 1.791810099 | -0.844131416 | 0.398595974 | NA          | NA      |
| ENSG00000235445 | NA         | NA                                                      | NA        | 9.723112629 | -1.510827401 | 1.015852157 | -1.487251261 | 0.136948462 | 0.999371363 | Not Sig |
| ENSG00000216425 | NA         | NA                                                      | NA        | 3.549256877 | -1.510146261 | 1.310623694 | -1.152234824 | 0.249224591 | NA          | NA      |
| ENSG00000143847 | PPFIA4     | PTPRF interacting protein alpha 4                       | 8497      | 189.0201871 | -1.509443021 | 0.813851013 | -1.854692072 | 0.063640212 | 0.999371363 | Not Sig |
| ENSG00000238462 | NA         | NA                                                      | NA        | 9.953706615 | -1.507427552 | 1.377461966 | -1.094351488 | 0.273800852 | 0.999371363 | Not Sig |
| ENSG00000104728 | ARHGEF10   | Rho guanine nucleotide exchange factor 10               | 9639      | 1798.144561 | -1.506347012 | 0.511643715 | -2.944132742 | 0.003238611 | 0.253429647 | Not Sig |
| ENSG00000249026 | NA         | NA                                                      | NA        | 1.160715688 | -1.505387469 | 2.499542023 | -0.602265317 | 0.546997544 | NA          | NA      |

|                 |              |                                        |           |             |              |             |              |             |             |         |
|-----------------|--------------|----------------------------------------|-----------|-------------|--------------|-------------|--------------|-------------|-------------|---------|
| ENSG00000258646 | NA           | NA                                     | NA        | 6.488052394 | -1.504582447 | 1.033104009 | -1.456370737 | 0.145290161 | NA          | NA      |
| ENSG00000182885 | ADGRG3       | adhesion G protein-coupled receptor G3 | 222487    | 65.36751521 | -1.504154102 | 0.840899952 | -1.788743237 | 0.073656176 | 0.999371363 | Not Sig |
| ENSG00000263606 | NA           | NA                                     | NA        | 168.7930762 | -1.50370979  | 0.956567641 | -1.571984798 | 0.115954077 | 0.999371363 | Not Sig |
| ENSG00000253307 | NA           | NA                                     | NA        | 51.28569857 | -1.50343468  | 0.868328223 | -1.731412893 | 0.083378149 | 0.999371363 | Not Sig |
| ENSG00000171587 | DSCAM        | DS cell adhesion molecule              | 1826      | 9.806516965 | -1.503361363 | 0.890237369 | -1.688719678 | 0.091273163 | 0.999371363 | Not Sig |
| ENSG00000148671 | ADIRF        | adipogenesis regulatory factor         | 10974     | 981.3320817 | -1.502577627 | 0.990850705 | -1.516452094 | 0.129405075 | 0.999371363 | Not Sig |
| ENSG00000255342 | NA           | NA                                     | NA        | 1.115227034 | -1.50117494  | 2.514812885 | -0.596933056 | 0.550552077 | NA          | NA      |
| ENSG00000266909 | NA           | NA                                     | NA        | 1.115227034 | -1.50117494  | 2.514812885 | -0.596933056 | 0.550552077 | NA          | NA      |
| ENSG00000240509 | NA           | NA                                     | NA        | 2.275942722 | -1.500954345 | 1.690407587 | -0.887924519 | 0.374581354 | NA          | NA      |
| ENSG00000269018 | NA           | NA                                     | NA        | 2.543196589 | -1.500175339 | 1.776677156 | -0.844371378 | 0.398461911 | NA          | NA      |
| ENSG00000267042 | NA           | NA                                     | NA        | 19.08743185 | -1.499200112 | 1.071210126 | -1.399538779 | 0.161651478 | 0.999371363 | Not Sig |
| ENSG00000237892 | NA           | NA                                     | NA        | 83.39665702 | -1.497567941 | 0.808652935 | -1.851929148 | 0.064035998 | 0.999371363 | Not Sig |
| ENSG00000233178 | LOC105376070 | uncharacterized LOC105376070           | 105376070 | 1.137971361 | -1.496641136 | 2.207547813 | -0.677965445 | 0.497793603 | NA          | NA      |
| ENSG00000257773 | NA           | NA                                     | NA        | 1.137971361 | -1.496641136 | 2.207547813 | -0.677965445 | 0.497793603 | NA          | NA      |
| ENSG00000220685 | NA           | NA                                     | NA        | 2.42557799  | -1.49612327  | 1.891673618 | -0.790899263 | 0.429002779 | NA          | NA      |
| ENSG00000259935 | NA           | NA                                     | NA        | 51.3212836  | -1.496085818 | 1.138799168 | -1.313739824 | 0.188933774 | 0.999371363 | Not Sig |
| ENSG00000234504 | NA           | NA                                     | NA        | 4.988380049 | -1.49607112  | 1.168224429 | -1.280636736 | 0.20032129  | NA          | NA      |
| ENSG00000111666 | CHPT1        | choline phosphotransferase 1           | 56994     | 926.1662587 | -1.49489343  | 0.475848974 | -3.141529163 | 0.001680681 | 0.162078358 | Not Sig |
| ENSG00000251073 | NA           | NA                                     | NA        | 12.16066335 | -1.494616107 | 0.944735041 | -1.582047921 | 0.113638631 | 0.999371363 | Not Sig |
| ENSG00000213560 | NA           | NA                                     | NA        | 3.897352832 | -1.492116137 | 1.580639039 | -0.943995498 | 0.345171949 | NA          | NA      |
| ENSG00000168078 | PBK          | PDZ binding kinase                     | 55872     | 36.65264405 | -1.489891987 | 1.082561812 | -1.376265051 | 0.168739589 | 0.999371363 | Not Sig |
| ENSG00000198681 | MAGEA1       | MAGE family member A1                  | 4100      | 0.653398545 | -1.489623751 | 3.404135495 | -0.437592379 | 0.661681796 | NA          | NA      |
| ENSG00000202508 | NA           | NA                                     | NA        | 0.653398545 | -1.489623751 | 3.404135495 | -0.437592379 | 0.661681796 | NA          | NA      |
| ENSG00000214269 | NA           | NA                                     | NA        | 0.653398545 | -1.489623751 | 3.404135495 | -0.437592379 | 0.661681796 | NA          | NA      |
| ENSG00000226102 | NA           | NA                                     | NA        | 0.653398545 | -1.489623751 | 3.404135495 | -0.437592379 | 0.661681796 | NA          | NA      |
| ENSG00000230449 | NA           | NA                                     | NA        | 0.653398545 | -1.489623751 | 3.404135495 | -0.437592379 | 0.661681796 | NA          | NA      |
| ENSG00000236154 | NA           | NA                                     | NA        | 0.653398545 | -1.489623751 | 3.404135495 | -0.437592379 | 0.661681796 | NA          | NA      |
| ENSG00000253620 | NA           | NA                                     | NA        | 0.653398545 | -1.489623751 | 3.404135495 | -0.437592379 | 0.661681796 | NA          | NA      |
| ENSG00000270492 | NA           | NA                                     | NA        | 0.653398545 | -1.489623751 | 3.404135495 | -0.437592379 | 0.661681796 | NA          | NA      |
| ENSG00000270513 | NA           | NA                                     | NA        | 0.653398545 | -1.489623751 | 3.404135495 | -0.437592379 | 0.661681796 | NA          | NA      |
| ENSG00000179213 | SIGLECL1     | SIGLEC family like 1                   | 284369    | 0.618498207 | -1.488876041 | 3.463007324 | -0.429937306 | 0.667241247 | NA          | NA      |
| ENSG00000184507 | NUTM1        | NUT midline carcinoma family member 1  | 256646    | 0.618498207 | -1.488876041 | 3.463007324 | -0.429937306 | 0.667241247 | NA          | NA      |
| ENSG00000239607 | NA           | NA                                     | NA        | 0.618498207 | -1.488876041 | 3.463007324 | -0.429937306 | 0.667241247 | NA          | NA      |
| ENSG00000240455 | NA           | NA                                     | NA        | 0.618498207 | -1.488876041 | 3.463007324 | -0.429937306 | 0.667241247 | NA          | NA      |
| ENSG00000253409 | NA           | NA                                     | NA        | 0.618498207 | -1.488876041 | 3.463007324 | -0.429937306 | 0.667241247 | NA          | NA      |

|                 |            |                                                                     |           |             |              |             |              |             |             |         |
|-----------------|------------|---------------------------------------------------------------------|-----------|-------------|--------------|-------------|--------------|-------------|-------------|---------|
| ENSG00000271980 | NA         | NA                                                                  | NA        | 0.618498207 | -1.488876041 | 3.463007324 | -0.429937306 | 0.667241247 | NA          | NA      |
| ENSG00000196970 | NXF4       | nuclear RNA export factor 4 pseudogene                              | 55999     | 0.612060671 | -1.488735794 | 3.474406255 | -0.42848639  | 0.66829704  | NA          | NA      |
| ENSG00000223389 | NA         | NA                                                                  | NA        | 0.612060671 | -1.488735794 | 3.474406255 | -0.42848639  | 0.66829704  | NA          | NA      |
| ENSG00000231559 | NA         | NA                                                                  | NA        | 0.612060671 | -1.488735794 | 3.474406255 | -0.42848639  | 0.66829704  | NA          | NA      |
| ENSG00000232285 | NA         | NA                                                                  | NA        | 0.612060671 | -1.488735794 | 3.474406255 | -0.42848639  | 0.66829704  | NA          | NA      |
| ENSG00000238221 | NA         | NA                                                                  | NA        | 0.612060671 | -1.488735794 | 3.474406255 | -0.42848639  | 0.66829704  | NA          | NA      |
| ENSG00000253899 | NA         | NA                                                                  | NA        | 0.612060671 | -1.488735794 | 3.474406255 | -0.42848639  | 0.66829704  | NA          | NA      |
| ENSG00000258375 | NA         | NA                                                                  | NA        | 0.612060671 | -1.488735794 | 3.474406255 | -0.42848639  | 0.66829704  | NA          | NA      |
| ENSG00000239605 | STPG4      | sperm-tail PG-rich repeat containing 4                              | 285051    | 5.485290784 | -1.488229001 | 1.20820859  | -1.231764957 | 0.218036897 | NA          | NA      |
| ENSG00000252213 | SNORA74D   | small nucleolar RNA, H/ACA box 74D                                  | 109616975 | 15.1032526  | -1.48807562  | 1.139179214 | -1.30626999  | 0.191460759 | 0.999371363 | Not Sig |
| ENSG00000268051 | NA         | NA                                                                  | NA        | 19.18902034 | -1.487523097 | 0.918559281 | -1.619408924 | 0.105359308 | 0.999371363 | Not Sig |
| ENSG00000222345 | NA         | NA                                                                  | NA        | 12.47139156 | -1.486417225 | 1.217033342 | -1.221344703 | 0.221955535 | 0.999371363 | Not Sig |
| ENSG00000202222 | NA         | NA                                                                  | NA        | 15.46055204 | -1.486397018 | 0.836627696 | -1.776652895 | 0.075625367 | 0.999371363 | Not Sig |
| ENSG00000004948 | CALCR      | calcitonin receptor                                                 | 799       | 9.553605808 | -1.486053877 | 0.904004861 | -1.643856068 | 0.100205937 | 0.999371363 | Not Sig |
| ENSG00000214612 | NA         | NA                                                                  | NA        | 1.814114234 | -1.485460732 | 1.910095036 | -0.777689436 | 0.436752121 | NA          | NA      |
| ENSG00000224781 | NA         | NA                                                                  | NA        | 1.098920242 | -1.48379127  | 2.949081215 | -0.503136795 | 0.614868099 | NA          | NA      |
| ENSG00000236756 | DNAJC9-AS1 | DNAJC9 antisense RNA 1                                              | 414245    | 3.710045761 | -1.483684763 | 1.533039397 | -0.967806023 | 0.333141255 | NA          | NA      |
| ENSG00000251287 | ALG1L2     | ALG1, chitobiosylidiphosphodolichol beta-mannosyltransferase like 2 | 644974    | 39.8155353  | -1.483536519 | 0.928268469 | -1.59817614  | 0.110003782 | 0.999371363 | Not Sig |
| ENSG00000165389 | SPTSSA     | serine palmitoyltransferase small subunit A                         | 171546    | 1084.131338 | -1.482278243 | 0.711266926 | -2.083997146 | 0.037160427 | 0.999371363 | Not Sig |
| ENSG00000167232 | ZNF91      | zinc finger protein 91                                              | 7644      | 2842.500076 | -1.482189002 | 0.725343921 | -2.043429272 | 0.041009962 | 0.999371363 | Not Sig |
| ENSG00000142405 | NLRP12     | NLR family pyrin domain containing 12                               | 91662     | 114.2471748 | -1.479835568 | 0.745892501 | -1.983979683 | 0.047258105 | 0.999371363 | Not Sig |
| ENSG00000273196 | NA         | NA                                                                  | NA        | 10.23839692 | -1.479832867 | 1.199656512 | -1.233547147 | 0.217371698 | 0.999371363 | Not Sig |
| ENSG00000264558 | NA         | NA                                                                  | NA        | 1.25399065  | -1.478546722 | 2.471314356 | -0.598283548 | 0.549650752 | NA          | NA      |
| ENSG00000267771 | NA         | NA                                                                  | NA        | 1.231246323 | -1.478303968 | 2.185138102 | -0.676526562 | 0.498706387 | NA          | NA      |
| ENSG00000166407 | LMO1       | LIM domain only 1                                                   | 4004      | 2.243329139 | -1.478187259 | 1.733824941 | -0.852558539 | 0.393904163 | NA          | NA      |
| ENSG00000221720 | NA         | NA                                                                  | NA        | 3.491884649 | -1.477528806 | 1.650364954 | -0.895273983 | 0.370640644 | NA          | NA      |
| ENSG00000173809 | TDRD12     | tudor domain containing 12                                          | 91646     | 7.152371456 | -1.477153131 | 1.4071596   | -1.049741004 | 0.293837206 | 0.999371363 | Not Sig |
| ENSG00000221263 | MIR548P    | microRNA 548p                                                       | 100302288 | 1.373026652 | -1.475648961 | 2.835512962 | -0.520416934 | 0.60277301  | NA          | NA      |
| ENSG00000198558 | NA         | NA                                                                  | NA        | 112.0739765 | -1.475350856 | 0.944018036 | -1.56284181  | 0.118089807 | 0.999371363 | Not Sig |
| ENSG00000224821 | NA         | NA                                                                  | NA        | 12.19186464 | -1.47471098  | 1.012168456 | -1.456981761 | 0.145121415 | 0.999371363 | Not Sig |
| ENSG00000236512 | NA         | NA                                                                  | NA        | 1.12166457  | -1.474479066 | 2.247850951 | -0.655950549 | 0.511855942 | NA          | NA      |
| ENSG00000126262 | FFAR2      | free fatty acid receptor 2                                          | 2867      | 62.36006691 | -1.473934464 | 1.056328693 | -1.395336957 | 0.162914252 | 0.999371363 | Not Sig |
| ENSG00000186642 | PDE2A      | phosphodiesterase 2A                                                | 5138      | 342.598733  | -1.473874765 | 0.842410459 | -1.749592195 | 0.080188707 | 0.999371363 | Not Sig |
| ENSG00000183396 | TMEM89     | transmembrane protein 89                                            | 440955    | 1.775063115 | -1.472621446 | 1.776603056 | -0.828897283 | 0.407162533 | NA          | NA      |
| ENSG00000220008 | LINGO3     | leucine rich repeat and Ig domain containing 3                      | 645191    | 2.467512779 | -1.472264361 | 1.73307617  | -0.849509321 | 0.395597946 | NA          | NA      |

|                 |              |                                                            |           |             |              |             |              |             |             |         |
|-----------------|--------------|------------------------------------------------------------|-----------|-------------|--------------|-------------|--------------|-------------|-------------|---------|
| ENSG00000204173 | LRR37A5P     | leucine rich repeat containing 37 member A5, pseudogene    | 652972    | 5.212127005 | -1.471869792 | 1.401132894 | -1.050485503 | 0.293494953 | NA          | NA      |
| ENSG00000173715 | C11orf80     | chromosome 11 open reading frame 80                        | 79703     | 470.8490471 | -1.470856281 | 0.752309035 | -1.955122446 | 0.05056862  | 0.999371363 | Not Sig |
| ENSG00000203870 | SMIM9        | small integral membrane protein 9                          | 100132963 | 1.089465994 | -1.470574298 | 2.8993917   | -0.507200975 | 0.612013811 | NA          | NA      |
| ENSG00000254902 | NA           | NA                                                         | NA        | 1.089465994 | -1.470574298 | 2.8993917   | -0.507200975 | 0.612013811 | NA          | NA      |
| ENSG00000224606 | TGFA-IT1     | TGFA intronic transcript 1                                 | 100874273 | 3.53435659  | -1.466146486 | 1.626370015 | -0.901483963 | 0.367331057 | NA          | NA      |
| ENSG00000163009 | NA           | NA                                                         | NA        | 16.99233254 | -1.466007577 | 1.074740822 | -1.364056847 | 0.172549675 | 0.999371363 | Not Sig |
| ENSG00000212552 | NA           | NA                                                         | NA        | 4.409935356 | -1.465644123 | 1.381711838 | -1.060745145 | 0.288805738 | NA          | NA      |
| ENSG00000144407 | PTH2R        | parathyroid hormone 2 receptor                             | 5746      | 15.22935936 | -1.464626885 | 0.943697661 | -1.5520086   | 0.120660166 | 0.999371363 | Not Sig |
| ENSG00000203507 | NA           | NA                                                         | NA        | 2.328567255 | -1.46293949  | 2.086626313 | -0.701102771 | 0.483238881 | NA          | NA      |
| ENSG00000267784 | NA           | NA                                                         | NA        | 3.517927654 | -1.46247852  | 1.42618323  | -1.025449247 | 0.305151261 | NA          | NA      |
| ENSG00000200788 | NA           | NA                                                         | NA        | 7.318209988 | -1.460151314 | 1.17341005  | -1.244365782 | 0.213364971 | 0.999371363 | Not Sig |
| ENSG00000253336 | NA           | NA                                                         | NA        | 5.330442578 | -1.460070686 | 1.126983616 | -1.295556267 | 0.195128404 | NA          | NA      |
| ENSG00000254213 | NA           | NA                                                         | NA        | 1.237683859 | -1.45913534  | 2.183369951 | -0.668295054 | 0.50394527  | NA          | NA      |
| ENSG00000230947 | NA           | NA                                                         | NA        | 2.185369523 | -1.458724749 | 2.0718624   | -0.704064492 | 0.481392611 | NA          | NA      |
| ENSG00000233251 | LOC100129434 | uncharacterized LOC100129434                               | 100129434 | 75.45144612 | -1.458144635 | 1.051137227 | -1.38720673  | 0.165378734 | 0.999371363 | Not Sig |
| ENSG00000235082 | NA           | NA                                                         | NA        | 1.128102105 | -1.457300357 | 2.509812068 | -0.580641226 | 0.561482281 | NA          | NA      |
| ENSG00000161714 | PLCD3        | phospholipase C delta 3                                    | 113026    | 389.0939477 | -1.45684508  | 0.659362091 | -2.209476552 | 0.027141512 | 0.850231482 | Not Sig |
| ENSG00000139155 | SLC01C1      | solute carrier organic anion transporter family member 1C1 | 53919     | 14.77237046 | -1.456431668 | 0.77636559  | -1.875961128 | 0.060660618 | 0.999371363 | Not Sig |
| ENSG00000263392 | NA           | NA                                                         | NA        | 2.475367717 | -1.456389317 | 1.698127741 | -0.857644147 | 0.39108899  | NA          | NA      |
| ENSG00000265212 | NA           | NA                                                         | NA        | 17.45626451 | -1.456302776 | 1.100186603 | -1.323687066 | 0.185606996 | 0.999371363 | Not Sig |
| ENSG00000213857 | NA           | NA                                                         | NA        | 1.689643091 | -1.45551551  | 1.950432436 | -0.74625272  | 0.455514767 | NA          | NA      |
| ENSG00000244752 | CRYBB2       | crystallin beta B2                                         | 1415      | 1.105357778 | -1.455331265 | 2.571694231 | -0.565903694 | 0.57145925  | NA          | NA      |
| ENSG00000242811 | NA           | NA                                                         | NA        | 1.868338077 | -1.454680319 | 1.870281028 | -0.777787026 | 0.436694578 | NA          | NA      |
| ENSG00000153157 | SYCP2L       | synaptonemal complex protein 2 like                        | 221711    | 51.64561755 | -1.454503044 | 0.784263246 | -1.854610747 | 0.063651832 | 0.999371363 | Not Sig |
| ENSG00000242142 | NA           | NA                                                         | NA        | 5.212823978 | -1.454117348 | 1.177279479 | -1.235150509 | 0.216774494 | NA          | NA      |
| ENSG00000252759 | NA           | NA                                                         | NA        | 46.87673569 | -1.453394744 | 1.041966539 | -1.394857406 | 0.163058844 | 0.999371363 | Not Sig |
| ENSG00000115540 | MOB4         | MOB family member 4, phocein                               | 25843     | 574.0780035 | -1.452546671 | 0.870070155 | -1.669459252 | 0.095026399 | 0.999371363 | Not Sig |
| ENSG00000179603 | GRM8         | glutamate metabotropic receptor 8                          | 2918      | 16.84041466 | -1.449028638 | 1.073399146 | -1.349943908 | 0.177033976 | 0.999371363 | Not Sig |
| ENSG00000270953 | NA           | NA                                                         | NA        | 28.22188395 | -1.44868818  | 0.852995164 | -1.698354506 | 0.089440873 | 0.999371363 | Not Sig |
| ENSG00000181031 | RPH3AL       | rabphilin 3A like (without C2 domains)                     | 9501      | 920.4262615 | -1.448608346 | 0.486684408 | -2.976483984 | 0.002915743 | 0.237473696 | Not Sig |
| ENSG00000252452 | NA           | NA                                                         | NA        | 18.26506056 | -1.448341789 | 1.078372738 | -1.343080864 | 0.179245791 | 0.999371363 | Not Sig |
| ENSG00000272256 | NA           | NA                                                         | NA        | 10.16438847 | -1.447271088 | 1.103978234 | -1.310959803 | 0.189871345 | 0.999371363 | Not Sig |
| ENSG00000063127 | SLC6A16      | solute carrier family 6 member 16                          | 28968     | 208.0871859 | -1.44694395  | 0.819117485 | -1.766466932 | 0.077317545 | 0.999371363 | Not Sig |
| ENSG00000267938 | NA           | NA                                                         | NA        | 3.604472217 | -1.445395944 | 1.889533971 | -0.764948377 | 0.444302285 | NA          | NA      |
| ENSG00000169684 | CHRNA5       | cholinergic receptor nicotinic alpha 5 subunit             | 1138      | 57.43055459 | -1.445331084 | 1.042810031 | -1.38599653  | 0.165747963 | 0.999371363 | Not Sig |

|                 |           |                                                                                                |           |             |              |             |              |             |             |         |
|-----------------|-----------|------------------------------------------------------------------------------------------------|-----------|-------------|--------------|-------------|--------------|-------------|-------------|---------|
| ENSG00000125931 | CITED1    | <small>Chp/p300 interacting transactivator with Glu/Asp rich carboxy-terminal domain 1</small> | 4435      | 5.218846506 | -1.44123283  | 1.135011997 | -1.269795239 | 0.204157577 | NA          | NA      |
| ENSG00000225513 | NA        | NA                                                                                             | NA        | 10.5740382  | -1.441227756 | 0.897828397 | -1.605237438 | 0.108441561 | 0.999371363 | Not Sig |
| ENSG00000249079 | NA        | NA                                                                                             | NA        | 1.323103882 | -1.440619238 | 2.756991226 | -0.522533124 | 0.60129919  | NA          | NA      |
| ENSG00000259932 | NA        | NA                                                                                             | NA        | 1.323103882 | -1.440619238 | 2.756991226 | -0.522533124 | 0.60129919  | NA          | NA      |
| ENSG00000231793 | NA        | NA                                                                                             | NA        | 10.65118828 | -1.440066264 | 0.912495587 | -1.578162443 | 0.114528296 | 0.999371363 | Not Sig |
| ENSG00000232373 | NA        | NA                                                                                             | NA        | 25.90261747 | -1.439529023 | 1.16362804  | -1.237104104 | 0.216048436 | 0.999371363 | Not Sig |
| ENSG00000182600 | SNORC     | <small>secondary ossification center associated regulator of chondrocyte maturation</small>    | 389084    | 27.71600436 | -1.43867234  | 0.689577272 | -2.086310555 | 0.036950501 | 0.999371363 | Not Sig |
| ENSG00000268618 | NA        | NA                                                                                             | NA        | 4.62954106  | -1.438191752 | 1.182260021 | -1.216476686 | 0.223803387 | NA          | NA      |
| ENSG00000254016 | NA        | NA                                                                                             | NA        | 14.00865205 | -1.438048236 | 1.133390638 | -1.268801936 | 0.204511714 | 0.999371363 | Not Sig |
| ENSG00000234699 | NA        | NA                                                                                             | NA        | 3.556148758 | -1.437147172 | 1.911988054 | -0.751650706 | 0.452261141 | NA          | NA      |
| ENSG00000268863 | NA        | NA                                                                                             | NA        | 1.852031285 | -1.436962546 | 1.933500375 | -0.743192277 | 0.457365279 | NA          | NA      |
| ENSG00000238868 | NA        | NA                                                                                             | NA        | 6.132879475 | -1.436632094 | 1.49945357  | -0.958103753 | 0.338010443 | NA          | NA      |
| ENSG00000256564 | NA        | NA                                                                                             | NA        | 36.63581982 | -1.436243019 | 1.145527562 | -1.253783031 | 0.209920879 | 0.999371363 | Not Sig |
| ENSG00000251695 | NA        | NA                                                                                             | NA        | 3.58556372  | -1.435315388 | 1.636533899 | -0.877045925 | 0.380461694 | NA          | NA      |
| ENSG00000182472 | CAPN12    | calpain 12                                                                                     | 147968    | 390.1773519 | -1.435248143 | 0.706955687 | -2.030181198 | 0.042338124 | 0.999371363 | Not Sig |
| ENSG00000174460 | ZCCHC12   | zinc finger CCHC-type containing 12                                                            | 170261    | 6.033630851 | -1.434202865 | 1.265514607 | -1.133296176 | 0.257089897 | NA          | NA      |
| ENSG00000212248 | NA        | NA                                                                                             | NA        | 4.444835694 | -1.433235668 | 1.438348289 | -0.996445491 | 0.319033739 | NA          | NA      |
| ENSG00000266591 | NA        | NA                                                                                             | NA        | 2.972096544 | -1.433134031 | 1.427397834 | -1.004018639 | 0.31536963  | NA          | NA      |
| ENSG00000183779 | ZNF703    | zinc finger protein 703                                                                        | 80139     | 737.5634368 | -1.433040319 | 0.662429778 | -2.163309026 | 0.030517419 | 0.906381749 | Not Sig |
| ENSG00000214184 | GCC2-AS1  | GCC2 antisense RNA 1                                                                           | 644903    | 18.15705064 | -1.432927164 | 0.762918973 | -1.878216711 | 0.060351525 | 0.999371363 | Not Sig |
| ENSG00000202255 | NA        | NA                                                                                             | NA        | 2.552335887 | -1.431064361 | 1.748266876 | -0.818561731 | 0.413036508 | NA          | NA      |
| ENSG00000160796 | NBEAL2    | neurobeachin like 2                                                                            | 23218     | 5031.752785 | -1.431034554 | 0.625555563 | -2.287621573 | 0.022159568 | 0.758302843 | Not Sig |
| ENSG00000273018 | NA        | NA                                                                                             | NA        | 212.1001167 | -1.429299632 | 0.805215049 | -1.775053302 | 0.075889086 | 0.999371363 | Not Sig |
| ENSG00000230565 | ZNF32-AS2 | ZNF32 antisense RNA 2                                                                          | 414208    | 2.962642296 | -1.429223979 | 1.525084104 | -0.937144368 | 0.348684302 | NA          | NA      |
| ENSG00000226438 | NA        | NA                                                                                             | NA        | 1.641137724 | -1.428196633 | 1.91551006  | -0.745595997 | 0.455911502 | NA          | NA      |
| ENSG00000266569 | NA        | NA                                                                                             | NA        | 1.641137724 | -1.428196633 | 1.91551006  | -0.745595997 | 0.455911502 | NA          | NA      |
| ENSG00000175886 | NA        | NA                                                                                             | NA        | 10.37581709 | -1.428060438 | 1.215213738 | -1.175151657 | 0.239934047 | 0.999371363 | Not Sig |
| ENSG00000258337 | NA        | NA                                                                                             | NA        | 77.24520478 | -1.427659058 | 0.895269013 | -1.594670471 | 0.110785945 | 0.999371363 | Not Sig |
| ENSG00000252485 | NA        | NA                                                                                             | NA        | 2.347879862 | -1.427257111 | 2.087460649 | -0.68372887  | 0.49414639  | NA          | NA      |
| ENSG00000208008 | MIR125A   | microRNA 125a                                                                                  | 406910    | 1.766611261 | -1.426539898 | 1.998068498 | -0.713959456 | 0.47525225  | NA          | NA      |
| ENSG00000241404 | EGFL8     | EGF like domain multiple 8                                                                     | 80864     | 20.14093477 | -1.426397233 | 0.820308668 | -1.738854275 | 0.082060399 | 0.999371363 | Not Sig |
| ENSG00000264610 | MIR4685   | microRNA 4685                                                                                  | 100616482 | 3.770734329 | -1.426394466 | 1.63889682  | -0.870338174 | 0.384115623 | NA          | NA      |
| ENSG00000272205 | NA        | NA                                                                                             | NA        | 5.142161671 | -1.425867782 | 1.175765966 | -1.212713945 | 0.225239207 | NA          | NA      |
| ENSG00000157315 | TMED6     | <small>transmembrane p24 trafficking protein 6</small>                                         | 146456    | 38.47947522 | -1.424798994 | 1.161621488 | -1.226560467 | 0.219987836 | 0.999371363 | Not Sig |
| ENSG00000228444 | NA        | NA                                                                                             | NA        | 6.172372791 | -1.42448333  | 1.140856649 | -1.248608518 | 0.211808295 | NA          | NA      |

|                 |                        |                                                                           |           |             |              |             |              |             |             |         |
|-----------------|------------------------|---------------------------------------------------------------------------|-----------|-------------|--------------|-------------|--------------|-------------|-------------|---------|
| ENSG00000258101 | NA                     | NA                                                                        | NA        | 5.386111013 | -1.423644669 | 1.369029573 | -1.039893292 | 0.298389479 | NA          | NA      |
| ENSG00000259205 | NA                     | NA                                                                        | NA        | 50.47736144 | -1.422857987 | 0.699306135 | -2.034671105 | 0.041883977 | 0.999371363 | Not Sig |
| ENSG00000157087 | ATP2B2                 | ATPase plasma membrane Ca <sup>2+</sup> transporting 2                    | 491       | 11.65616337 | -1.422724328 | 1.086325941 | -1.309666164 | 0.190308795 | 0.999371363 | Not Sig |
| ENSG00000268182 | SMIM17                 | small integral membrane protein 17                                        | 147670    | 8.638751503 | -1.42218979  | 0.901942521 | -1.576807565 | 0.114839811 | 0.999371363 | Not Sig |
| ENSG00000180211 | NA                     | NA                                                                        | NA        | 3.309735856 | -1.421795034 | 1.923294068 | -0.739249945 | 0.459755238 | NA          | NA      |
| ENSG00000272469 | NA                     | NA                                                                        | NA        | 14.19724211 | -1.421231175 | 0.785857609 | -1.808509786 | 0.070527195 | 0.999371363 | Not Sig |
| ENSG00000227318 | NA                     | NA                                                                        | NA        | 8.844443023 | -1.420681695 | 1.161183188 | -1.223477664 | 0.221149335 | 0.999371363 | Not Sig |
| ENSG00000256885 | NA                     | NA                                                                        | NA        | 8.830736567 | -1.419777849 | 0.907796612 | -1.563982316 | 0.117821721 | 0.999371363 | Not Sig |
| ENSG00000183454 | GRIN2A                 | glutamate ionotropic receptor NMDA type subunit 2A                        | 2903      | 48.5194113  | -1.419680846 | 1.146965048 | -1.237771672 | 0.215800735 | 0.999371363 | Not Sig |
| ENSG00000204778 | NA                     | NA                                                                        | NA        | 7.216777286 | -1.418868412 | 1.057836711 | -1.341292467 | 0.179825515 | 0.999371363 | Not Sig |
| ENSG00000212526 | NA                     | NA                                                                        | NA        | 3.709315803 | -1.418864589 | 1.561222391 | -0.908816449 | 0.363447022 | NA          | NA      |
| ENSG00000250731 | NA                     | NA                                                                        | NA        | 9.040811011 | -1.418445042 | 1.143238657 | -1.240725226 | 0.214707272 | 0.999371363 | Not Sig |
| ENSG00000206150 | RNASE13                | ribonuclease A family member 13 (inactive)                                | 440163    | 1.056852411 | -1.418339742 | 2.972144401 | -0.477210913 | 0.633211941 | NA          | NA      |
| ENSG00000220392 | NA                     | NA                                                                        | NA        | 4.538110656 | -1.41826241  | 1.691687849 | -0.838371222 | 0.401822247 | NA          | NA      |
| ENSG00000187904 | NA                     | NA                                                                        | NA        | 8.475606161 | -1.417203973 | 1.165486211 | -1.215976612 | 0.223993832 | 0.999371363 | Not Sig |
| ENSG00000238651 | NA                     | NA                                                                        | NA        | 2.192809454 | -1.416782246 | 1.784703236 | -0.793847524 | 0.427284202 | NA          | NA      |
| ENSG00000272752 | STAG3L5P-PVRIG2P-PILRB | STAG3L5P-PVRIG2P-PILRB readthrough                                        | 101752399 | 3.92722214  | -1.415964159 | 1.310269609 | -1.080666261 | 0.279845596 | NA          | NA      |
| ENSG00000258872 | NA                     | NA                                                                        | NA        | 13.56194372 | -1.415794882 | 0.939458488 | -1.507032934 | 0.131802216 | 0.999371363 | Not Sig |
| ENSG00000225912 | NA                     | NA                                                                        | NA        | 2.939482961 | -1.414499479 | 1.450829942 | -0.974958841 | 0.329580677 | NA          | NA      |
| ENSG00000267345 | NA                     | NA                                                                        | NA        | 5.40725603  | -1.413626215 | 1.278135904 | -1.106006185 | 0.268723842 | NA          | NA      |
| ENSG00000266957 | NA                     | NA                                                                        | NA        | 5.742742878 | -1.41346891  | 1.220026292 | -1.158556105 | 0.24663717  | NA          | NA      |
| ENSG00000200175 | NA                     | NA                                                                        | NA        | 2.302391207 | -1.412929586 | 1.617554746 | -0.873497227 | 0.382392117 | NA          | NA      |
| ENSG00000198785 | GRIN3A                 | glutamate ionotropic receptor NMDA type subunit 3A                        | 116443    | 7.494901434 | -1.412758529 | 1.313456356 | -1.07560371  | 0.282104528 | 0.999371363 | Not Sig |
| ENSG00000244289 | NA                     | NA                                                                        | NA        | 2.259320981 | -1.412547726 | 1.881864116 | -0.750610905 | 0.452886857 | NA          | NA      |
| ENSG00000268047 | NA                     | NA                                                                        | NA        | 8.581561183 | -1.412010918 | 1.026411127 | -1.375677718 | 0.168921433 | 0.999371363 | Not Sig |
| ENSG00000272544 | NA                     | NA                                                                        | NA        | 32.48721105 | -1.410656908 | 0.983768833 | -1.433931287 | 0.151591872 | 0.999371363 | Not Sig |
| ENSG00000233797 | NA                     | NA                                                                        | NA        | 11.63853203 | -1.410507126 | 1.088947313 | -1.295294189 | 0.195218763 | 0.999371363 | Not Sig |
| ENSG00000252777 | NA                     | NA                                                                        | NA        | 2.661917641 | -1.410321057 | 2.380338462 | -0.592487615 | 0.553524112 | NA          | NA      |
| ENSG00000269397 | NA                     | NA                                                                        | NA        | 25.36125469 | -1.409495973 | 0.994553173 | -1.4172153   | 0.15641999  | 0.999371363 | Not Sig |
| ENSG00000222679 | NA                     | NA                                                                        | NA        | 2.183355206 | -1.408660654 | 1.729624258 | -0.814431602 | 0.415397741 | NA          | NA      |
| ENSG00000239906 | NA                     | NA                                                                        | NA        | 4.500038887 | -1.408510558 | 1.412536469 | -0.997149871 | 0.318691769 | NA          | NA      |
| ENSG00000211898 | NA                     | NA                                                                        | NA        | 122.3066897 | -1.408391823 | 1.139585332 | -1.235880968 | 0.216502813 | 0.999371363 | Not Sig |
| ENSG00000197584 | KCNMB2                 | potassium calcium-activated channel subfamily M regulatory beta subunit 2 | 10242     | 9.619736826 | -1.407652182 | 1.32270248  | -1.064224347 | 0.28722708  | 0.999371363 | Not Sig |
| ENSG00000199306 | NA                     | NA                                                                        | NA        | 1.314652029 | -1.407321349 | 2.455388372 | -0.573156314 | 0.566538861 | NA          | NA      |
| ENSG00000259402 | NA                     | NA                                                                        | NA        | 29.39747767 | -1.406944556 | 0.871331676 | -1.614706082 | 0.10637436  | 0.999371363 | Not Sig |

|                 |              |                                                                        |           |             |              |             |              |             |             |         |
|-----------------|--------------|------------------------------------------------------------------------|-----------|-------------|--------------|-------------|--------------|-------------|-------------|---------|
| ENSG00000235878 | NA           | NA                                                                     | NA        | 8.775196749 | -1.405311444 | 1.01816503  | -1.380239355 | 0.16751296  | 0.999371363 | Not Sig |
| ENSG00000254485 | NA           | NA                                                                     | NA        | 13.89739424 | -1.404770521 | 1.154002935 | -1.217302382 | 0.223489188 | 0.999371363 | Not Sig |
| ENSG00000112619 | PRPH2        | peripherin 2                                                           | 5961      | 45.25580046 | -1.403661962 | 0.666214365 | -2.10692239  | 0.035124307 | 0.965765073 | Not Sig |
| ENSG00000263978 | MIR4499      | microRNA 4499                                                          | 100616304 | 2.308828743 | -1.402944057 | 1.617826485 | -0.867178322 | 0.385844312 | NA          | NA      |
| ENSG00000271778 | NA           | NA                                                                     | NA        | 8.504068964 | -1.402777362 | 1.202803552 | -1.166256418 | 0.243510788 | 0.999371363 | Not Sig |
| ENSG00000181097 | NA           | NA                                                                     | NA        | 17.79846009 | -1.402659067 | 0.905068015 | -1.549783049 | 0.121193597 | 0.999371363 | Not Sig |
| ENSG00000090539 | CHRD         | chordin                                                                | 8646      | 299.7210725 | -1.401650998 | 0.84402616  | -1.660672459 | 0.096779248 | 0.999371363 | Not Sig |
| ENSG00000236761 | CTAGE9       | CTAGE family member 9                                                  | 643854    | 3.483117845 | -1.400534749 | 1.516413705 | -0.923583547 | 0.355703183 | NA          | NA      |
| ENSG00000242134 | NA           | NA                                                                     | NA        | 9.853339366 | -1.400090085 | 1.336514569 | -1.047568143 | 0.294837621 | 0.999371363 | Not Sig |
| ENSG00000182759 | MAFA         | MAF bZIP transcription factor A                                        | 389692    | 4.086593621 | -1.400073428 | 1.252666182 | -1.117674803 | 0.263705908 | NA          | NA      |
| ENSG00000224186 | NA           | NA                                                                     | NA        | 49.80485453 | -1.399020757 | 1.089545273 | -1.284040959 | 0.199127625 | 0.999371363 | Not Sig |
| ENSG00000240003 | NA           | NA                                                                     | NA        | 7.474837194 | -1.398637404 | 1.115277471 | -1.254071242 | 0.209816112 | 0.999371363 | Not Sig |
| ENSG00000252201 | NA           | NA                                                                     | NA        | 2.496977977 | -1.398369034 | 2.060196766 | -0.678755087 | 0.497293056 | NA          | NA      |
| ENSG00000171757 | LRRC34       | leucine rich repeat containing 34                                      | 151827    | 85.4548239  | -1.396950319 | 0.683151316 | -2.044862223 | 0.040868443 | 0.999371363 | Not Sig |
| ENSG00000117069 | ST6GALNAC5   | ST6 N-acetylgalactosaminide alpha-2,6-sialyltransferase 5              | 81849     | 227.1607477 | -1.395639037 | 0.808338279 | -1.726553193 | 0.084247938 | 0.999371363 | Not Sig |
| ENSG00000165555 | NOXRED1      | NADP dependent oxidoreductase domain containing 1                      | 122945    | 26.47546538 | -1.395428378 | 0.851379076 | -1.639021227 | 0.101208839 | 0.999371363 | Not Sig |
| ENSG00000089356 | FXVD3        | FXVD domain containing ion transport regulator 3                       | 5349      | 1223.089335 | -1.394763866 | 0.435359297 | -3.203707547 | 0.001356702 | 0.138902032 | Not Sig |
| ENSG00000241346 | NA           | NA                                                                     | NA        | 2.685104166 | -1.394735134 | 1.669647844 | -0.83534689  | 0.403522423 | NA          | NA      |
| ENSG00000144339 | TMEFF2       | transmembrane protein with EGF like and two follistatin like domains 2 | 23671     | 2.698394244 | -1.39429703  | 2.02536228  | -0.688418582 | 0.491189225 | NA          | NA      |
| ENSG00000124813 | RUNX2        | runt related transcription factor 2                                    | 860       | 614.7919299 | -1.394294759 | 0.856223422 | -1.628423987 | 0.103435015 | 0.999371363 | Not Sig |
| ENSG00000185100 | ADSSL1       | adenylosuccinate synthase like 1                                       | 122622    | 435.0649924 | -1.393695672 | 0.703923834 | -1.979895557 | 0.047715266 | 0.999371363 | Not Sig |
| ENSG00000166831 | RBPM52       | RNA binding protein with multiple splicing 2                           | 348093    | 176.8842441 | -1.393679955 | 0.845730882 | -1.647900041 | 0.099373185 | 0.999371363 | Not Sig |
| ENSG00000221390 | MIR1295A     | microRNA 1295a                                                         | 100302178 | 1.063289946 | -1.393328566 | 2.58742341  | -0.538500409 | 0.590231622 | NA          | NA      |
| ENSG00000236107 | LOC101929680 | uncharacterized LOC101929680                                           | 101929680 | 16.32170375 | -1.393188755 | 0.900885094 | -1.546466653 | 0.121991908 | 0.999371363 | Not Sig |
| ENSG00000236107 | LOC102724058 | uncharacterized LOC102724058                                           | 102724058 | 16.32170375 | -1.393188755 | 0.900885094 | -1.546466653 | 0.121991908 | 0.999371363 | Not Sig |
| ENSG00000136929 | HEMGN        | hemogen                                                                | 55363     | 15.69293427 | -1.392484229 | 1.252027317 | -1.112183585 | 0.266059224 | 0.999371363 | Not Sig |
| ENSG00000169994 | MYO7B        | myosin VII B                                                           | 4648      | 67.85877663 | -1.391698293 | 0.922488465 | -1.5086349   | 0.13139211  | 0.999371363 | Not Sig |
| ENSG00000216721 | NA           | NA                                                                     | NA        | 1.290490299 | -1.391685628 | 2.846197072 | -0.4889632   | 0.624867751 | NA          | NA      |
| ENSG00000112232 | KHDRBS2      | KH RNA binding domain containing, signal transduction associated 2     | 202559    | 141.070194  | -1.391342512 | 1.026545572 | -1.355363609 | 0.175301738 | 0.999371363 | Not Sig |
| ENSG00000262434 | NA           | NA                                                                     | NA        | 9.685714232 | -1.391163917 | 1.421997304 | -0.978316846 | 0.327917641 | 0.999371363 | Not Sig |
| ENSG00000174343 | CHRNA9       | cholinergic receptor nicotinic alpha 9 subunit                         | 55584     | 5.360268123 | -1.390899316 | 1.87715304  | -0.74096213  | 0.458716402 | NA          | NA      |
| ENSG00000267191 | NA           | NA                                                                     | NA        | 4.179868583 | -1.389848306 | 1.419023502 | -0.979439949 | 0.327362646 | NA          | NA      |
| ENSG00000253008 | MIR2355      | microRNA 2355                                                          | 100423036 | 20.68411571 | -1.389550919 | 0.796331952 | -1.744939302 | 0.080995435 | 0.999371363 | Not Sig |
| ENSG00000230869 | NA           | NA                                                                     | NA        | 1.599069892 | -1.389035349 | 1.957184398 | -0.709711027 | 0.477883353 | NA          | NA      |
| ENSG00000243024 | NA           | NA                                                                     | NA        | 2.25205343  | -1.387859338 | 1.881587078 | -0.737600377 | 0.460757326 | NA          | NA      |

|                 |              |                                                          |           |             |              |             |              |             |             |         |
|-----------------|--------------|----------------------------------------------------------|-----------|-------------|--------------|-------------|--------------|-------------|-------------|---------|
| ENSG00000174469 | CNTNAP2      | contactin associated protein like 2                      | 26047     | 75.06752435 | -1.387553056 | 1.048875326 | -1.322896078 | 0.18586994  | 0.999371363 | Not Sig |
| ENSG00000021461 | CYP3A43      | cytochrome P450 family 3 subfamily A member 43           | 64816     | 3.013434418 | -1.385185109 | 1.464377574 | -0.945920734 | 0.344189017 | NA          | NA      |
| ENSG00000261684 | NA           | NA                                                       | NA        | 4.651140422 | -1.3847998   | 1.218314541 | -1.136652115 | 0.255683744 | NA          | NA      |
| ENSG00000161082 | CELF5        | CUGBP Elav-like family member 5                          | 60680     | 31.8746024  | -1.383925931 | 1.331889623 | -1.039069535 | 0.298772398 | 0.999371363 | Not Sig |
| ENSG00000199319 | NA           | NA                                                       | NA        | 4.749524796 | -1.383350935 | 1.653427883 | -0.836656348 | 0.402785762 | NA          | NA      |
| ENSG00000147687 | TATDN1       | TatD DNase domain containing 1                           | 83940     | 482.6873384 | -1.383274991 | 0.777501621 | -1.779128111 | 0.075218761 | 0.999371363 | Not Sig |
| ENSG00000273017 | NA           | NA                                                       | NA        | 21.79847049 | -1.382720331 | 1.15112612  | -1.201189259 | 0.229677795 | 0.999371363 | Not Sig |
| ENSG00000253257 | NA           | NA                                                       | NA        | 1.087451676 | -1.380751934 | 2.605196909 | -0.529999068 | 0.596112577 | NA          | NA      |
| ENSG00000157214 | STEAP2       | STEAP2 metalloredutase                                   | 261729    | 1276.957622 | -1.380625422 | 0.981326211 | -1.40689753  | 0.159457776 | 0.999371363 | Not Sig |
| ENSG00000234742 | NA           | NA                                                       | NA        | 1.800509205 | -1.380341039 | 2.197826194 | -0.628048315 | 0.529972229 | NA          | NA      |
| ENSG00000244332 | NA           | NA                                                       | NA        | 8.525082309 | -1.377550883 | 1.726281524 | -0.797987387 | 0.424877809 | 0.999371363 | Not Sig |
| ENSG00000200033 | NA           | NA                                                       | NA        | 20.80752731 | -1.377293017 | 1.370839441 | -1.004707755 | 0.315037593 | 0.999371363 | Not Sig |
| ENSG00000230183 | NA           | NA                                                       | NA        | 2.118543047 | -1.376653349 | 1.768228465 | -0.778549478 | 0.43624515  | NA          | NA      |
| ENSG00000263345 | NA           | NA                                                       | NA        | 11.90201522 | -1.375753311 | 1.03158585  | -1.333629489 | 0.182325314 | 0.999371363 | Not Sig |
| ENSG00000205021 | NA           | NA                                                       | NA        | 22.13545191 | -1.37544866  | 0.905661524 | -1.518722639 | 0.128832326 | 0.999371363 | Not Sig |
| ENSG00000268838 | NA           | NA                                                       | NA        | 3.862814091 | -1.373225131 | 1.33260829  | -1.030479205 | 0.302785109 | NA          | NA      |
| ENSG00000164308 | ERAP2        | endoplasmic reticulum aminopeptidase 2                   | 64167     | 923.5371123 | -1.371899989 | 0.674365543 | -2.034356594 | 0.041915655 | 0.999371363 | Not Sig |
| ENSG00000207839 | MIR33B       | microRNA 33b                                             | 693120    | 1.093889212 | -1.371311483 | 2.979055457 | -0.460317541 | 0.645288312 | NA          | NA      |
| ENSG00000226221 | NA           | NA                                                       | NA        | 7.665250138 | -1.369319444 | 1.025396129 | -1.335405318 | 0.181743725 | 0.999371363 | Not Sig |
| ENSG00000267871 | LOC105372476 | uncharacterized LOC105372476                             | 105372476 | 28.26732413 | -1.369236325 | 0.787260041 | -1.739242757 | 0.081992072 | 0.999371363 | Not Sig |
| ENSG00000099251 | HSD17B7P2    | hydroxysteroid 17-beta dehydrogenase 7 pseudogene 2      | 158160    | 107.608181  | -1.36828973  | 0.545303907 | -2.509224146 | 0.012099668 | 0.550076239 | Not Sig |
| ENSG00000146677 | NA           | NA                                                       | NA        | 8.813252237 | -1.366892266 | 1.086283937 | -1.258319505 | 0.20827623  | 0.999371363 | Not Sig |
| ENSG00000255031 | NA           | NA                                                       | NA        | 72.89143938 | -1.366794718 | 0.561747799 | -2.433110943 | 0.014969713 | 0.620110526 | Not Sig |
| ENSG00000142408 | CACNG8       | calcium voltage-gated channel auxiliary subunit gamma 8  | 59283     | 19.12900168 | -1.366005821 | 0.78604374  | -1.737824183 | 0.082241798 | 0.999371363 | Not Sig |
| ENSG00000262621 | NA           | NA                                                       | NA        | 18.00183918 | -1.363859529 | 0.814257826 | -1.674972577 | 0.093939612 | 0.999371363 | Not Sig |
| ENSG00000221946 | FXYD7        | FXYD domain containing ion transport regulator 7         | 53822     | 3.994188012 | -1.363279021 | 1.373218185 | -0.992762138 | 0.320825885 | NA          | NA      |
| ENSG00000144834 | TAGLN3       | transgelin 3                                             | 29114     | 3.425744247 | -1.363263223 | 1.921592685 | -0.709444428 | 0.478048726 | NA          | NA      |
| ENSG00000229659 | NA           | NA                                                       | NA        | 10.20716872 | -1.362901668 | 0.866376437 | -1.573105649 | 0.115694357 | 0.999371363 | Not Sig |
| ENSG00000128591 | FLNC         | filamin C                                                | 2318      | 785.7861858 | -1.361482065 | 0.769553204 | -1.769185103 | 0.076862989 | 0.999371363 | Not Sig |
| ENSG00000207611 | MIR149       | microRNA 149                                             | 406941    | 6.662925622 | -1.360630122 | 1.158349034 | -1.174628788 | 0.240143261 | 0.999371363 | Not Sig |
| ENSG00000176293 | ZNF135       | zinc finger protein 135                                  | 7694      | 129.1304517 | -1.3602549   | 0.68811481  | -1.976784803 | 0.04806596  | 0.999371363 | Not Sig |
| ENSG00000213412 | HNRNPA1P33   | heterogeneous nuclear ribonucleoprotein A1 pseudogene 33 | 728643    | 25.50686991 | -1.358801806 | 0.993728429 | -1.367377409 | 0.171507039 | 0.999371363 | Not Sig |
| ENSG00000126231 | PROZ         | protein Z, vitamin K dependent plasma glycoprotein       | 8858      | 1.14711066  | -1.358331696 | 2.556412921 | -0.531342838 | 0.595181225 | NA          | NA      |
| ENSG00000231795 | NA           | NA                                                       | NA        | 27.26945126 | -1.357555796 | 1.038956509 | -1.306653151 | 0.191330536 | 0.999371363 | Not Sig |
| ENSG00000139200 | PIANP        | PILR alpha associated neural protein                     | 196500    | 7.731993808 | -1.35698119  | 1.137855137 | -1.192578164 | 0.233034622 | 0.999371363 | Not Sig |



|                 |              |                                                           |           |             |              |             |              |             |             |         |
|-----------------|--------------|-----------------------------------------------------------|-----------|-------------|--------------|-------------|--------------|-------------|-------------|---------|
| ENSG00000213901 | SLC23A3      | solute carrier family 23 member 3                         | 151295    | 120.265118  | -1.356478175 | 0.730583511 | -1.85670516  | 0.063353113 | 0.999371363 | Not Sig |
| ENSG00000201367 | NA           | NA                                                        | NA        | 11.36668643 | -1.356055503 | 1.608951098 | -0.842819589 | 0.399329351 | 0.999371363 | Not Sig |
| ENSG00000157224 | CLDN12       | claudin 12                                                | 9069      | 908.851653  | -1.355961346 | 0.797785167 | -1.699657254 | 0.089195414 | 0.999371363 | Not Sig |
| ENSG00000150201 | FXYD4        | FXYD domain containing ion transport regulator 4          | 53828     | 18.70928136 | -1.355063214 | 1.649985137 | -0.821257831 | 0.411499422 | 0.999371363 | Not Sig |
| ENSG00000253284 | NA           | NA                                                        | NA        | 400.8691944 | -1.354746602 | 0.859450389 | -1.576294129 | 0.114958034 | 0.999371363 | Not Sig |
| ENSG00000213865 | C8orf44      | chromosome 8 open reading frame 44                        | 56260     | 166.5631619 | -1.354558305 | 0.796761494 | -1.70008003  | 0.089115873 | 0.999371363 | Not Sig |
| ENSG00000053747 | LAMA3        | laminin subunit alpha 3                                   | 3909      | 3181.78983  | -1.35395578  | 0.674151468 | -2.008385123 | 0.044602383 | 0.999371363 | Not Sig |
| ENSG00000263473 | NA           | NA                                                        | NA        | 2.747182947 | -1.353863111 | 1.502392092 | -0.901138337 | 0.367514772 | NA          | NA      |
| ENSG00000129451 | KLK10        | kallikrein related peptidase 10                           | 5655      | 68.77013516 | -1.353820753 | 1.150242872 | -1.176986865 | 0.239200749 | 0.999371363 | Not Sig |
| ENSG00000241942 | NA           | NA                                                        | NA        | 2.72827445  | -1.351680623 | 1.794069006 | -0.753416183 | 0.451199861 | NA          | NA      |
| ENSG00000100292 | HMOX1        | heme oxygenase 1                                          | 3162      | 1149.941223 | -1.349945838 | 0.769780225 | -1.753676951 | 0.079485877 | 0.999371363 | Not Sig |
| ENSG00000248946 | NA           | NA                                                        | NA        | 1.038946309 | -1.349860893 | 2.969952941 | -0.454505819 | 0.649464805 | NA          | NA      |
| ENSG00000266503 | NA           | NA                                                        | NA        | 3.359931063 | -1.349688363 | 1.572656414 | -0.858222019 | 0.39076988  | NA          | NA      |
| ENSG00000233622 | CYP2T1P      | cytochrome P450 family 2 subfamily T member 1, pseudogene | 171523    | 24.53892015 | -1.349260306 | 0.924624653 | -1.459251927 | 0.144495781 | 0.999371363 | Not Sig |
| ENSG00000198763 | ND2          | MTND2                                                     | 4536      | 47207.01808 | -1.349169756 | 0.903576087 | -1.493144602 | 0.13539934  | 0.999371363 | Not Sig |
| ENSG00000228702 | NA           | NA                                                        | NA        | 3.262221986 | -1.348771298 | 1.380685392 | -0.976885325 | 0.328625928 | NA          | NA      |
| ENSG00000264950 | NA           | NA                                                        | NA        | 4.776337097 | -1.348431298 | 1.347269023 | -1.000862689 | 0.316893197 | NA          | NA      |
| ENSG00000228417 | NA           | NA                                                        | NA        | 1.140258116 | -1.344805269 | 2.558239735 | -0.525676015 | 0.599113331 | NA          | NA      |
| ENSG00000200999 | NA           | NA                                                        | NA        | 4.270387121 | -1.344733139 | 1.469200907 | -0.915281996 | 0.360043608 | NA          | NA      |
| ENSG00000251013 | NA           | NA                                                        | NA        | 5.76202387  | -1.344038984 | 1.248807407 | -1.076258017 | 0.281811879 | NA          | NA      |
| ENSG00000235522 | NA           | NA                                                        | NA        | 1.07758242  | -1.343657616 | 2.987647949 | -0.449737599 | 0.652899657 | NA          | NA      |
| ENSG00000070214 | SLC44A1      | solute carrier family 44 member 1                         | 23446     | 3581.948253 | -1.34283661  | 0.635641454 | -2.112569281 | 0.03463765  | 0.965260677 | Not Sig |
| ENSG00000270137 | NA           | NA                                                        | NA        | 25.29290064 | -1.339905286 | 1.15427682  | -1.160817979 | 0.24571593  | 0.999371363 | Not Sig |
| ENSG00000201863 | NA           | NA                                                        | NA        | 4.024605369 | -1.339333241 | 1.589599284 | -0.842560294 | 0.399474405 | NA          | NA      |
| ENSG00000172399 | MYOZ2        | myozenin 2                                                | 51778     | 1.695765677 | -1.338433877 | 2.32291561  | -0.576187043 | 0.564488762 | NA          | NA      |
| ENSG00000273338 | NA           | NA                                                        | NA        | 5.875319309 | -1.338240383 | 1.329947505 | -1.006235493 | 0.314302303 | NA          | NA      |
| ENSG00000127507 | ADGRE2       | adhesion G protein-coupled receptor E2                    | 30817     | 572.4648603 | -1.338084538 | 0.65888219  | -2.03084035  | 0.042271192 | 0.999371363 | Not Sig |
| ENSG00000132359 | RAP1GAP2     | RAP1 GTPase activating protein 2                          | 23108     | 1055.898776 | -1.336773353 | 0.545164659 | -2.452054311 | 0.014204322 | 0.602272823 | Not Sig |
| ENSG00000188483 | IER5L        | immediate early response 5 like                           | 389792    | 735.029295  | -1.335949177 | 0.643656865 | -2.075561142 | 0.037934558 | 0.999371363 | Not Sig |
| ENSG00000163749 | CCDC158      | coiled-coil domain containing 158                         | 339965    | 17.63931465 | -1.335689792 | 0.855282848 | -1.561693648 | 0.118360176 | 0.999371363 | Not Sig |
| ENSG00000197047 | NA           | NA                                                        | NA        | 2.796972674 | -1.335499926 | 1.449792085 | -0.921166517 | 0.356963496 | NA          | NA      |
| ENSG00000215973 | MIR933       | microRNA 933                                              | 100126350 | 7.690868608 | -1.335015947 | 1.063342272 | -1.255490336 | 0.209300814 | 0.999371363 | Not Sig |
| ENSG00000181781 | ODF3L2       | outer dense fiber of sperm tails 3 like 2                 | 284451    | 2.80500952  | -1.334264203 | 1.779752173 | -0.749691009 | 0.453440824 | NA          | NA      |
| ENSG00000226180 | LOC100129215 | uncharacterized LOC100129215                              | 100129215 | 25.09223245 | -1.331892422 | 0.699542384 | -1.903948141 | 0.056916938 | 0.999371363 | Not Sig |
| ENSG00000272518 | NA           | NA                                                        | NA        | 70.47803447 | -1.331883267 | 0.79430857  | -1.676783202 | 0.093584884 | 0.999371363 | Not Sig |

|                 |              |                                                           |           |             |              |             |              |             |             |         |
|-----------------|--------------|-----------------------------------------------------------|-----------|-------------|--------------|-------------|--------------|-------------|-------------|---------|
| ENSG00000181585 | TMIE         | transmembrane inner ear                                   | 259236    | 28.14528137 | -1.33176425  | 0.937363267 | -1.420755748 | 0.155387779 | 0.999371363 | Not Sig |
| ENSG00000267253 | NA           | NA                                                        | NA        | 4.848871152 | -1.330334265 | 1.317101865 | -1.010046603 | 0.312472963 | NA          | NA      |
| ENSG00000272941 | NA           | NA                                                        | NA        | 109.8919471 | -1.32817164  | 1.073597094 | -1.237122984 | 0.216041428 | 0.999371363 | Not Sig |
| ENSG00000260903 | XKR7         | XK related 7                                              | 343702    | 11.2693961  | -1.327936376 | 1.428700055 | -0.929471775 | 0.352644646 | 0.999371363 | Not Sig |
| ENSG00000216285 | NA           | NA                                                        | NA        | 1.556587053 | -1.326072003 | 2.342941712 | -0.565985912 | 0.571403357 | NA          | NA      |
| ENSG00000270096 | NA           | NA                                                        | NA        | 9.313481227 | -1.325786293 | 1.161821155 | -1.141127692 | 0.253816789 | 0.999371363 | Not Sig |
| ENSG00000227175 | LOC105376421 | uncharacterized LOC105376421                              | 105376421 | 2.167917767 | -1.324763625 | 1.884056076 | -0.703144478 | 0.481965716 | NA          | NA      |
| ENSG00000105997 | HOXA3        | homeobox A3                                               | 3200      | 279.8965567 | -1.32359036  | 0.71047605  | -1.862962671 | 0.062467518 | 0.999371363 | Not Sig |
| ENSG00000257337 | LOC283335    | uncharacterized LOC283335                                 | 283335    | 293.2724387 | -1.322825348 | 0.593460234 | -2.229004191 | 0.025813626 | 0.833515363 | Not Sig |
| ENSG00000243314 | NA           | NA                                                        | NA        | 13.84500088 | -1.322296852 | 0.993217593 | -1.331326449 | 0.183081619 | 0.999371363 | Not Sig |
| ENSG00000224712 | NPIPA3       | nuclear pore complex interacting protein family member A3 | 642778    | 3.021156314 | -1.321589462 | 1.722282641 | -0.767347607 | 0.442874871 | NA          | NA      |
| ENSG00000146674 | IGFBP3       | insulin like growth factor binding protein 3              | 3486      | 3391.352433 | -1.321212113 | 0.933316515 | -1.415609916 | 0.156889746 | 0.999371363 | Not Sig |
| ENSG00000067842 | ATP2B3       | ATPase plasma membrane Ca2+ transporting 3                | 492       | 2.278916923 | -1.321153751 | 1.733282765 | -0.762226324 | 0.445924937 | NA          | NA      |
| ENSG00000248909 | NA           | NA                                                        | NA        | 19.4740068  | -1.320722661 | 0.797539909 | -1.655995702 | 0.097722689 | 0.999371363 | Not Sig |
| ENSG00000224858 | NA           | NA                                                        | NA        | 5.390906726 | -1.31843955  | 1.093240269 | -1.205992486 | 0.227820388 | NA          | NA      |
| ENSG00000122254 | HS3ST2       | heparan sulfate-glucosamine 3-sulfotransferase 2          | 9956      | 394.1004073 | -1.317163829 | 0.996575095 | -1.321690494 | 0.186271236 | 0.999371363 | Not Sig |
| ENSG00000236710 | NA           | NA                                                        | NA        | 5.051435004 | -1.314639602 | 1.763621331 | -0.745420561 | 0.456017518 | NA          | NA      |
| ENSG00000222005 | LINC01118    | long intergenic non-protein coding RNA 1118               | 388948    | 4.864581028 | -1.314400729 | 1.182373166 | -1.111663193 | 0.266282991 | NA          | NA      |
| ENSG00000243234 | NA           | NA                                                        | NA        | 1.137241404 | -1.313570363 | 2.50603417  | -0.52416299  | 0.60016518  | NA          | NA      |
| ENSG00000269549 | NA           | NA                                                        | NA        | 11.44851422 | -1.313020274 | 0.881618795 | -1.489328813 | 0.136400804 | 0.999371363 | Not Sig |
| ENSG00000178127 | NDUFV2       | NADH:ubiquinone oxidoreductase core subunit V2            | 4729      | 313.2356115 | -1.31293763  | 0.800094726 | -1.640977734 | 0.100802037 | 0.999371363 | Not Sig |
| ENSG00000267346 | NA           | NA                                                        | NA        | 10.28567201 | -1.312790283 | 0.918916892 | -1.428627871 | 0.153111219 | 0.999371363 | Not Sig |
| ENSG00000199051 | MIR361       | microRNA 361                                              | 494323    | 2.308098785 | -1.312736305 | 1.734605611 | -0.756792378 | 0.44917426  | NA          | NA      |
| ENSG00000201499 | NA           | NA                                                        | NA        | 7.844317618 | -1.312347511 | 1.31533141  | -0.997731447 | 0.3184096   | 0.999371363 | Not Sig |
| ENSG00000189011 | NA           | NA                                                        | NA        | 6.058000829 | -1.312220349 | 1.317519781 | -0.995977722 | 0.31926097  | NA          | NA      |
| ENSG00000115541 | HSPE1        | heat shock protein family E (Hsp10) member 1              | 3336      | 494.4169522 | -1.311989727 | 0.860425814 | -1.524814464 | 0.127305381 | 0.999371363 | Not Sig |
| ENSG00000231948 | HS1BP3-IT1   | HS1BP3 intronic transcript 1                              | 100874343 | 13.1095449  | -1.311927748 | 0.901778743 | -1.454822215 | 0.145718486 | 0.999371363 | Not Sig |
| ENSG00000198156 | NPIPB6       | nuclear pore complex interacting protein family member B6 | 728741    | 10.60596405 | -1.31149123  | 0.915054794 | -1.433237921 | 0.151789856 | 0.999371363 | Not Sig |
| ENSG00000157404 | KIT          | KIT proto-oncogene receptor tyrosine kinase               | 3815      | 1919.638735 | -1.31141672  | 0.654091421 | -2.004944077 | 0.044969026 | 0.999371363 | Not Sig |
| ENSG00000031544 | NA           | NA                                                        | NA        | 12.56357701 | -1.310466452 | 1.08258838  | -1.210493736 | 0.226089493 | 0.999371363 | Not Sig |
| ENSG00000147378 | FATE1        | fetal and adult testis expressed 1                        | 89885     | 1.74998952  | -1.310359308 | 1.963682673 | -0.667296873 | 0.504582523 | NA          | NA      |
| ENSG00000119522 | DENND1A      | DENN domain containing 1A                                 | 57706     | 835.4072408 | -1.309847585 | 0.431733011 | -3.033929656 | 0.002413907 | 0.212575747 | Not Sig |
| ENSG00000082153 | BZW1         | basic leucine zipper and W2 domains 1                     | 9689      | 5431.006969 | -1.309163092 | 0.71292337  | -1.83633073  | 0.066308758 | 0.999371363 | Not Sig |
| ENSG00000252349 | NA           | NA                                                        | NA        | 13.54534859 | -1.307993563 | 1.02939891  | -1.270638186 | 0.203857396 | 0.999371363 | Not Sig |
| ENSG00000173535 | TNFRSF10C    | TNF receptor superfamily member 10c                       | 8794      | 215.7068944 | -1.307805423 | 0.629391337 | -2.077889137 | 0.037719571 | 0.999371363 | Not Sig |

|                 |             |                                                          |           |             |              |             |              |             |             |         |
|-----------------|-------------|----------------------------------------------------------|-----------|-------------|--------------|-------------|--------------|-------------|-------------|---------|
| ENSG00000173535 | LOC254896   | uncharacterized LOC254896                                | 254896    | 215.7068944 | -1.307805423 | 0.629391337 | -2.077889137 | 0.037719571 | 0.999371363 | Not Sig |
| ENSG00000245534 | RORA-AS1    | RORA antisense RNA 1                                     | 101928784 | 12.52679499 | -1.307140244 | 0.92596772  | -1.411647746 | 0.158053707 | 0.999371363 | Not Sig |
| ENSG00000124920 | MYRF        | myelin regulatory factor                                 | 745       | 1048.835268 | -1.306558519 | 0.853089021 | -1.531561755 | 0.125630616 | 0.999371363 | Not Sig |
| ENSG00000272719 | NA          | NA                                                       | NA        | 2.175772705 | -1.306398948 | 1.648015574 | -0.792710317 | 0.427946618 | NA          | NA      |
| ENSG00000054690 | PLEKHH1     | pleckstrin homology, MyTH4 and FERM domain containing H1 | 57475     | 328.0321287 | -1.30555004  | 0.800142794 | -1.631646313 | 0.102754016 | 0.999371363 | Not Sig |
| ENSG00000222670 | NA          | NA                                                       | NA        | 1.891769849 | -1.305352625 | 2.556444254 | -0.510612591 | 0.609622357 | NA          | NA      |
| ENSG00000233875 | NA          | NA                                                       | NA        | 9.31893403  | -1.303306603 | 1.147353636 | -1.135924062 | 0.255988347 | 0.999371363 | Not Sig |
| ENSG00000205572 | SERF1A      | small EDRK-rich factor 1A                                | 8293      | 12.38403945 | -1.30247841  | 0.803793696 | -1.620413816 | 0.105143414 | 0.999371363 | Not Sig |
| ENSG00000205572 | SERF1B      | small EDRK-rich factor 1B                                | 728492    | 12.38403945 | -1.30247841  | 0.803793696 | -1.620413816 | 0.105143414 | 0.999371363 | Not Sig |
| ENSG00000266745 | MIR3135A    | microRNA 3135a                                           | 100422901 | 1.617663439 | -1.302467391 | 1.971766119 | -0.660558764 | 0.508895321 | NA          | NA      |
| ENSG00000105697 | HAMP        | hepcidin antimicrobial peptide                           | 57817     | 7.119109181 | -1.301202899 | 1.623637936 | -0.801411983 | 0.42289318  | 0.999371363 | Not Sig |
| ENSG00000211513 | MIR320E     | microRNA 320e                                            | 100422913 | 10.0174279  | -1.301127063 | 0.887093568 | -1.466730354 | 0.142449422 | 0.999371363 | Not Sig |
| ENSG00000152253 | SPC25       | SPC25, NDC80 kinetochore complex component               | 57405     | 34.4532108  | -1.300796256 | 1.130842651 | -1.150289348 | 0.250024717 | 0.999371363 | Not Sig |
| ENSG00000221487 | NA          | NA                                                       | NA        | 3.251755814 | -1.300195    | 1.564512215 | -0.831054553 | 0.405942812 | NA          | NA      |
| ENSG00000269965 | NA          | NA                                                       | NA        | 20.66567079 | -1.298936918 | 0.815202403 | -1.593391914 | 0.111072299 | 0.999371363 | Not Sig |
| ENSG00000230898 | NA          | NA                                                       | NA        | 2.756322245 | -1.298411021 | 1.607251027 | -0.807845818 | 0.419179345 | NA          | NA      |
| ENSG00000270917 | NA          | NA                                                       | NA        | 3.774527647 | -1.298232253 | 1.306681411 | -0.99353388  | 0.320449848 | NA          | NA      |
| ENSG00000109738 | GLRB        | glycine receptor beta                                    | 2743      | 160.3829611 | -1.29738619  | 0.855144303 | -1.517154691 | 0.129227633 | 0.999371363 | Not Sig |
| ENSG00000222958 | MIR1913     | microRNA 1913                                            | 100302141 | 8.172564106 | -1.296482245 | 0.972843794 | -1.332672576 | 0.182639277 | 0.999371363 | Not Sig |
| ENSG00000271833 | NA          | NA                                                       | NA        | 9.651303696 | -1.296466592 | 0.930351879 | -1.393522284 | 0.163461743 | 0.999371363 | Not Sig |
| ENSG00000234167 | NA          | NA                                                       | NA        | 14.04071191 | -1.295578173 | 1.110182907 | -1.166995245 | 0.24321229  | 0.999371363 | Not Sig |
| ENSG00000206621 | SNORD116-14 | small nucleolar RNA, C/D box 116-14                      | 100033426 | 29.76141131 | -1.295533692 | 0.646782064 | -2.003045174 | 0.04517244  | 0.999371363 | Not Sig |
| ENSG00000267193 | NA          | NA                                                       | NA        | 1.65629955  | -1.294612241 | 2.262176735 | -0.572286073 | 0.567128183 | NA          | NA      |
| ENSG00000171496 | OR1L8       | olfactory receptor family 1 subfamily L member 8         | 138881    | 2.033992376 | -1.294189219 | 1.8284085   | -0.707822797 | 0.479055307 | NA          | NA      |
| ENSG00000199804 | NA          | NA                                                       | NA        | 4.276836804 | -1.292967846 | 1.62702899  | -0.794680275 | 0.426799509 | NA          | NA      |
| ENSG00000165959 | CLMN        | calmin                                                   | 79789     | 1517.214212 | -1.292712077 | 0.622654242 | -2.076131486 | 0.037881792 | 0.999371363 | Not Sig |
| ENSG00000237075 | NA          | NA                                                       | NA        | 3.27779882  | -1.2926569   | 1.471392579 | -0.878526179 | 0.379658237 | NA          | NA      |
| ENSG00000273402 | NA          | NA                                                       | NA        | 10.06358633 | -1.291371686 | 1.220232116 | -1.058300031 | 0.289918679 | 0.999371363 | Not Sig |
| ENSG00000177943 | MAMDC4      | MAM domain containing 4                                  | 158056    | 335.978168  | -1.290769629 | 0.635910426 | -2.029797871 | 0.042377089 | 0.999371363 | Not Sig |
| ENSG00000233452 | NA          | NA                                                       | NA        | 41.78067773 | -1.290216601 | 0.602826533 | -2.140278389 | 0.032332275 | 0.92747231  | Not Sig |
| ENSG00000254528 | NA          | NA                                                       | NA        | 10.83612645 | -1.290120307 | 0.910245107 | -1.417332867 | 0.15638563  | 0.999371363 | Not Sig |
| ENSG00000248559 | NA          | NA                                                       | NA        | 10.57061709 | -1.289977356 | 0.883645457 | -1.459835894 | 0.144335181 | 0.999371363 | Not Sig |
| ENSG00000228923 | NA          | NA                                                       | NA        | 1.239970614 | -1.289787911 | 2.833246649 | -0.45523319  | 0.648941485 | NA          | NA      |
| ENSG00000230815 | NA          | NA                                                       | NA        | 30.40087524 | -1.289380101 | 0.779506409 | -1.654098139 | 0.098107574 | 0.999371363 | Not Sig |
| ENSG00000133477 | FAM83F      | family with sequence similarity 83 member F              | 113828    | 172.558819  | -1.289356542 | 0.864767011 | -1.490987198 | 0.135964856 | 0.999371363 | Not Sig |

|                 |             |                                                       |           |             |              |             |              |             |             |         |
|-----------------|-------------|-------------------------------------------------------|-----------|-------------|--------------|-------------|--------------|-------------|-------------|---------|
| ENSG00000231125 | NA          | NA                                                    | NA        | 16.53904711 | -1.288286418 | 0.852600051 | -1.51100908  | 0.130786138 | 0.999371363 | Not Sig |
| ENSG00000156453 | PCDH1       | protocadherin 1                                       | 5097      | 2462.747055 | -1.287281419 | 0.603747332 | -2.132152561 | 0.032994307 | 0.944249768 | Not Sig |
| ENSG00000221704 | NA          | NA                                                    | NA        | 2.670902221 | -1.287177074 | 1.598990793 | -0.804993424 | 0.420823474 | NA          | NA      |
| ENSG00000178462 | TUBAL3      | tubulin alpha like 3                                  | 79861     | 5.602791784 | -1.286351246 | 1.362201686 | -0.944317761 | 0.345007293 | NA          | NA      |
| ENSG00000171471 | NA          | NA                                                    | NA        | 2.212687361 | -1.286008852 | 2.055364722 | -0.625684015 | 0.53152222  | NA          | NA      |
| ENSG00000166206 | GABRB3      | gamma-aminobutyric acid type A receptor beta3 subunit | 2562      | 181.1900672 | -1.285622898 | 1.16573526  | -1.102842937 | 0.270095378 | 0.999371363 | Not Sig |
| ENSG00000201343 | NA          | NA                                                    | NA        | 36.88674877 | -1.285243635 | 1.004549638 | -1.279422724 | 0.200748236 | 0.999371363 | Not Sig |
| ENSG00000162426 | SLC45A1     | solute carrier family 45 member 1                     | 50651     | 43.33206839 | -1.285229885 | 0.712828891 | -1.802999151 | 0.071388348 | 0.999371363 | Not Sig |
| ENSG00000154898 | NA          | NA                                                    | NA        | 55.05105506 | -1.284502482 | 0.774849064 | -1.657745413 | 0.097368863 | 0.999371363 | Not Sig |
| ENSG00000189056 | RELN        | reelin                                                | 5649      | 136.1464133 | -1.284105222 | 0.541588871 | -2.370996325 | 0.017740207 | 0.674897979 | Not Sig |
| ENSG00000265056 | MIR548S     | microRNA 548s                                         | 100422862 | 4.740513995 | -1.282771414 | 1.229977239 | -1.042922888 | 0.296984008 | NA          | NA      |
| ENSG00000198899 | ATP6        | ATP synthase F0 subunit 6                             | 4508      | 46903.06917 | -1.279249719 | 0.885328798 | -1.44494308  | 0.148473874 | 0.999371363 | Not Sig |
| ENSG00000113205 | PCDHB3      | protocadherin beta 3                                  | 56132     | 77.31962693 | -1.277326237 | 0.47796307  | -2.67243709  | 0.007530249 | 0.42176576  | Not Sig |
| ENSG00000228672 | PROB1       | proline rich basic protein 1                          | 389333    | 50.67543204 | -1.275774648 | 0.644469468 | -1.97957345  | 0.047751479 | 0.999371363 | Not Sig |
| ENSG00000253520 | NA          | NA                                                    | NA        | 7.560796297 | -1.275259257 | 0.989278275 | -1.289080422 | 0.197370129 | 0.999371363 | Not Sig |
| ENSG00000140263 | SORD        | sorbitol dehydrogenase                                | 6652      | 732.8480844 | -1.274905347 | 0.800192775 | -1.593247762 | 0.11110462  | 0.999371363 | Not Sig |
| ENSG00000240913 | NA          | NA                                                    | NA        | 1.63053851  | -1.274556415 | 1.971065107 | -0.646633341 | 0.517869274 | NA          | NA      |
| ENSG00000252050 | NA          | NA                                                    | NA        | 7.458627284 | -1.27425159  | 1.105269667 | -1.152887507 | 0.248956561 | 0.999371363 | Not Sig |
| ENSG00000224312 | NA          | NA                                                    | NA        | 6.833983447 | -1.273863599 | 1.059541694 | -1.202277934 | 0.229255863 | 0.999371363 | Not Sig |
| ENSG00000261115 | TMEM178B    | transmembrane protein 178B                            | 100507421 | 155.5556579 | -1.273181777 | 0.894762324 | -1.422927343 | 0.154757219 | 0.999371363 | Not Sig |
| ENSG00000222267 | NA          | NA                                                    | NA        | 3.370658774 | -1.272876023 | 1.506241165 | -0.845067877 | 0.398072942 | NA          | NA      |
| ENSG00000164743 | C8orf48     | chromosome 8 open reading frame 48                    | 157773    | 10.16763261 | -1.272386513 | 1.041518571 | -1.221664739 | 0.221834436 | 0.999371363 | Not Sig |
| ENSG00000127325 | BEST3       | bestrophin 3                                          | 144453    | 0.60287886  | -1.272295392 | 4.019229726 | -0.316552046 | 0.751583528 | NA          | NA      |
| ENSG00000135902 | CHRND       | cholinergic receptor nicotinic delta subunit          | 1144      | 0.60287886  | -1.272295392 | 4.019229726 | -0.316552046 | 0.751583528 | NA          | NA      |
| ENSG00000163705 | FANCD20S    | FANCD2 opposite strand                                | 115795    | 0.60287886  | -1.272295392 | 4.019229726 | -0.316552046 | 0.751583528 | NA          | NA      |
| ENSG00000164106 | SCRG1       | stimulator of chondrogenesis 1                        | 11341     | 0.60287886  | -1.272295392 | 4.019229726 | -0.316552046 | 0.751583528 | NA          | NA      |
| ENSG00000169297 | NROB1       | nuclear receptor subfamily 0 group B member 1         | 190       | 0.567978522 | -1.272295392 | 4.019229726 | -0.316552046 | 0.751583528 | NA          | NA      |
| ENSG00000200421 | NA          | NA                                                    | NA        | 0.567978522 | -1.272295392 | 4.019229726 | -0.316552046 | 0.751583528 | NA          | NA      |
| ENSG00000201318 | SNORD114-30 | small nucleolar RNA, C/D box 114-30                   | 767611    | 0.561540986 | -1.272295392 | 4.019229726 | -0.316552046 | 0.751583528 | NA          | NA      |
| ENSG00000201805 | NA          | NA                                                    | NA        | 0.567978522 | -1.272295392 | 4.019229726 | -0.316552046 | 0.751583528 | NA          | NA      |
| ENSG00000203909 | DPPA5       | developmental pluripotency associated 5               | 340168    | 0.60287886  | -1.272295392 | 4.019229726 | -0.316552046 | 0.751583528 | NA          | NA      |
| ENSG00000212447 | SNORD90     | small nucleolar RNA, C/D box 90                       | 692206    | 0.567978522 | -1.272295392 | 4.019229726 | -0.316552046 | 0.751583528 | NA          | NA      |
| ENSG00000213169 | NA          | NA                                                    | NA        | 0.60287886  | -1.272295392 | 4.019229726 | -0.316552046 | 0.751583528 | NA          | NA      |
| ENSG00000214886 | NA          | NA                                                    | NA        | 0.567978522 | -1.272295392 | 4.019229726 | -0.316552046 | 0.751583528 | NA          | NA      |
| ENSG00000215834 | FMO9P       | flavin containing monooxygenase 9 pseudogene          | 116123    | 0.60287886  | -1.272295392 | 4.019229726 | -0.316552046 | 0.751583528 | NA          | NA      |

|                 |              |                              |           |             |              |             |              |             |    |    |
|-----------------|--------------|------------------------------|-----------|-------------|--------------|-------------|--------------|-------------|----|----|
| ENSG00000215966 | MIR876       | microRNA 876                 | 100126310 | 0.561540986 | -1.272295392 | 4.019229726 | -0.316552046 | 0.751583528 | NA | NA |
| ENSG00000219410 | NA           | NA                           | NA        | 0.561540986 | -1.272295392 | 4.019229726 | -0.316552046 | 0.751583528 | NA | NA |
| ENSG00000221075 | NA           | NA                           | NA        | 0.60287886  | -1.272295392 | 4.019229726 | -0.316552046 | 0.751583528 | NA | NA |
| ENSG00000221786 | NA           | NA                           | NA        | 0.60287886  | -1.272295392 | 4.019229726 | -0.316552046 | 0.751583528 | NA | NA |
| ENSG00000223101 | NA           | NA                           | NA        | 0.60287886  | -1.272295392 | 4.019229726 | -0.316552046 | 0.751583528 | NA | NA |
| ENSG00000226789 | NA           | NA                           | NA        | 0.561540986 | -1.272295392 | 4.019229726 | -0.316552046 | 0.751583528 | NA | NA |
| ENSG00000232215 | NA           | NA                           | NA        | 0.567978522 | -1.272295392 | 4.019229726 | -0.316552046 | 0.751583528 | NA | NA |
| ENSG00000232524 | NA           | NA                           | NA        | 0.60287886  | -1.272295392 | 4.019229726 | -0.316552046 | 0.751583528 | NA | NA |
| ENSG00000233786 | NA           | NA                           | NA        | 0.567978522 | -1.272295392 | 4.019229726 | -0.316552046 | 0.751583528 | NA | NA |
| ENSG00000234030 | NA           | NA                           | NA        | 0.567978522 | -1.272295392 | 4.019229726 | -0.316552046 | 0.751583528 | NA | NA |
| ENSG00000236018 | NA           | NA                           | NA        | 0.561540986 | -1.272295392 | 4.019229726 | -0.316552046 | 0.751583528 | NA | NA |
| ENSG00000238965 | NA           | NA                           | NA        | 0.561540986 | -1.272295392 | 4.019229726 | -0.316552046 | 0.751583528 | NA | NA |
| ENSG00000240093 | NA           | NA                           | NA        | 0.561540986 | -1.272295392 | 4.019229726 | -0.316552046 | 0.751583528 | NA | NA |
| ENSG00000241064 | NA           | NA                           | NA        | 0.561540986 | -1.272295392 | 4.019229726 | -0.316552046 | 0.751583528 | NA | NA |
| ENSG00000242214 | NA           | NA                           | NA        | 0.561540986 | -1.272295392 | 4.019229726 | -0.316552046 | 0.751583528 | NA | NA |
| ENSG00000242423 | NA           | NA                           | NA        | 0.561540986 | -1.272295392 | 4.019229726 | -0.316552046 | 0.751583528 | NA | NA |
| ENSG00000242428 | C3orf67-AS1  | C3orf67 antisense RNA 1      | 101929238 | 0.60287886  | -1.272295392 | 4.019229726 | -0.316552046 | 0.751583528 | NA | NA |
| ENSG00000242894 | NA           | NA                           | NA        | 0.60287886  | -1.272295392 | 4.019229726 | -0.316552046 | 0.751583528 | NA | NA |
| ENSG00000248998 | NA           | NA                           | NA        | 0.60287886  | -1.272295392 | 4.019229726 | -0.316552046 | 0.751583528 | NA | NA |
| ENSG00000250599 | NA           | NA                           | NA        | 0.60287886  | -1.272295392 | 4.019229726 | -0.316552046 | 0.751583528 | NA | NA |
| ENSG00000251239 | LOC101927253 | uncharacterized LOC101927253 | 101927253 | 0.561540986 | -1.272295392 | 4.019229726 | -0.316552046 | 0.751583528 | NA | NA |
| ENSG00000251556 | NA           | NA                           | NA        | 0.60287886  | -1.272295392 | 4.019229726 | -0.316552046 | 0.751583528 | NA | NA |
| ENSG00000255401 | NA           | NA                           | NA        | 0.567978522 | -1.272295392 | 4.019229726 | -0.316552046 | 0.751583528 | NA | NA |
| ENSG00000255817 | NA           | NA                           | NA        | 0.561540986 | -1.272295392 | 4.019229726 | -0.316552046 | 0.751583528 | NA | NA |
| ENSG00000255892 | NA           | NA                           | NA        | 0.60287886  | -1.272295392 | 4.019229726 | -0.316552046 | 0.751583528 | NA | NA |
| ENSG00000256569 | NA           | NA                           | NA        | 0.561540986 | -1.272295392 | 4.019229726 | -0.316552046 | 0.751583528 | NA | NA |
| ENSG00000257761 | NA           | NA                           | NA        | 0.561540986 | -1.272295392 | 4.019229726 | -0.316552046 | 0.751583528 | NA | NA |
| ENSG00000258766 | DIO2-AS1     | DIO2 antisense RNA 1         | 100628307 | 0.60287886  | -1.272295392 | 4.019229726 | -0.316552046 | 0.751583528 | NA | NA |
| ENSG00000259607 | NA           | NA                           | NA        | 0.561540986 | -1.272295392 | 4.019229726 | -0.316552046 | 0.751583528 | NA | NA |
| ENSG00000260288 | NA           | NA                           | NA        | 0.60287886  | -1.272295392 | 4.019229726 | -0.316552046 | 0.751583528 | NA | NA |
| ENSG00000262259 | NA           | NA                           | NA        | 0.561540986 | -1.272295392 | 4.019229726 | -0.316552046 | 0.751583528 | NA | NA |
| ENSG00000263591 | NA           | NA                           | NA        | 0.561540986 | -1.272295392 | 4.019229726 | -0.316552046 | 0.751583528 | NA | NA |
| ENSG00000264224 | NA           | NA                           | NA        | 0.60287886  | -1.272295392 | 4.019229726 | -0.316552046 | 0.751583528 | NA | NA |
| ENSG00000266115 | NA           | NA                           | NA        | 0.60287886  | -1.272295392 | 4.019229726 | -0.316552046 | 0.751583528 | NA | NA |
| ENSG00000266339 | NA           | NA                           | NA        | 0.561540986 | -1.272295392 | 4.019229726 | -0.316552046 | 0.751583528 | NA | NA |

|                 |              |                                                                  |           |             |              |             |              |             |             |         |
|-----------------|--------------|------------------------------------------------------------------|-----------|-------------|--------------|-------------|--------------|-------------|-------------|---------|
| ENSG00000267544 | NA           | NA                                                               | NA        | 0.561540986 | -1.272295392 | 4.019229726 | -0.316552046 | 0.751583528 | NA          | NA      |
| ENSG00000268126 | NA           | NA                                                               | NA        | 0.567978522 | -1.272295392 | 4.019229726 | -0.316552046 | 0.751583528 | NA          | NA      |
| ENSG00000065809 | FAM107B      | family with sequence similarity 107 member B                     | 83641     | 5923.918203 | -1.272175781 | 0.750993742 | -1.693989855 | 0.090267211 | 0.999371363 | Not Sig |
| ENSG00000253475 | NA           | NA                                                               | NA        | 24.73353118 | -1.270825501 | 0.895491303 | -1.419137736 | 0.155858864 | 0.999371363 | Not Sig |
| ENSG00000200347 | NA           | NA                                                               | NA        | 1.122352014 | -1.269287074 | 2.591205269 | -0.489844278 | 0.624244096 | NA          | NA      |
| ENSG00000230662 | NA           | NA                                                               | NA        | 1.122352014 | -1.269287074 | 2.591205269 | -0.489844278 | 0.624244096 | NA          | NA      |
| ENSG00000237632 | NA           | NA                                                               | NA        | 1.122352014 | -1.269287074 | 2.591205269 | -0.489844278 | 0.624244096 | NA          | NA      |
| ENSG00000165091 | TMC1         | transmembrane channel like 1                                     | 117531    | 7.131377809 | -1.268727312 | 1.511079756 | -0.839616378 | 0.401123513 | 0.999371363 | Not Sig |
| ENSG00000266126 | NA           | NA                                                               | NA        | 14.26841228 | -1.268702372 | 1.120015026 | -1.132754777 | 0.257317247 | 0.999371363 | Not Sig |
| ENSG00000257880 | NA           | NA                                                               | NA        | 3.225275714 | -1.264697351 | 1.676469952 | -0.754381163 | 0.450620379 | NA          | NA      |
| ENSG00000230148 | HOXB-AS1     | HOXB cluster antisense RNA 1                                     | 100874362 | 47.06094107 | -1.264258377 | 0.588912945 | -2.14676615  | 0.031811903 | 0.917856395 | Not Sig |
| ENSG00000134545 | KLRC1        | killer cell lectin like receptor C1                              | 3821      | 23.82944422 | -1.264156684 | 0.900415687 | -1.40397008  | 0.160327759 | 0.999371363 | Not Sig |
| ENSG00000251175 | LOC101929529 | uncharacterized LOC101929529                                     | 101929529 | 4.95954446  | -1.264058296 | 1.27565908  | -0.990906046 | 0.32173146  | NA          | NA      |
| ENSG00000222511 | NA           | NA                                                               | NA        | 7.099921338 | -1.263553739 | 1.506052629 | -0.838983787 | 0.401478407 | 0.999371363 | Not Sig |
| ENSG00000248795 | NA           | NA                                                               | NA        | 1.035514588 | -1.262829854 | 2.586242861 | -0.48828742  | 0.625346271 | NA          | NA      |
| ENSG00000267138 | NA           | NA                                                               | NA        | 3.214404063 | -1.262650085 | 1.43437613  | -0.880278233 | 0.378708601 | NA          | NA      |
| ENSG00000226359 | NA           | NA                                                               | NA        | 4.018882468 | -1.261919748 | 1.479284818 | -0.853060703 | 0.393625642 | NA          | NA      |
| ENSG00000264572 | MIR4296      | microRNA 4296                                                    | 100423041 | 18.33524639 | -1.260918658 | 0.842428576 | -1.496766246 | 0.134454092 | 0.999371363 | Not Sig |
| ENSG00000248240 | NA           | NA                                                               | NA        | 2.621981847 | -1.260819012 | 1.789536409 | -0.704550634 | 0.481089929 | NA          | NA      |
| ENSG00000125414 | MYH2         | myosin heavy chain 2                                             | 4620      | 20.51621772 | -1.26080244  | 1.075824856 | -1.17194024  | 0.24122105  | 0.999371363 | Not Sig |
| ENSG00000148156 | ACTL7B       | actin like 7B                                                    | 10880     | 1.10462782  | -1.26073673  | 2.57071416  | -0.490422758 | 0.623834775 | NA          | NA      |
| ENSG00000232133 | NA           | NA                                                               | NA        | 2.009648738 | -1.260476746 | 1.806730344 | -0.697656266 | 0.485392185 | NA          | NA      |
| ENSG00000119608 | PROX2        | prospero homeobox 2                                              | 283571    | 5.698950417 | -1.260445168 | 1.361464278 | -0.925801131 | 0.354549339 | NA          | NA      |
| ENSG00000224255 | NA           | NA                                                               | NA        | 10.48892841 | -1.260333785 | 0.876349998 | -1.438162592 | 0.150387926 | 0.999371363 | Not Sig |
| ENSG00000137573 | SULF1        | sulfatase 1                                                      | 23213     | 3864.073023 | -1.258593033 | 0.987627529 | -1.274360016 | 0.202535856 | 0.999371363 | Not Sig |
| ENSG00000258695 | NA           | NA                                                               | NA        | 3.408990833 | -1.258385622 | 1.528149562 | -0.823470198 | 0.410240658 | NA          | NA      |
| ENSG00000197721 | CR1L         | complement C3b/C4b receptor 1 like                               | 1379      | 9.930840822 | -1.258049329 | 0.96027765  | -1.310089149 | 0.190165679 | 0.999371363 | Not Sig |
| ENSG00000254414 | NA           | NA                                                               | NA        | 21.90456616 | -1.257439431 | 1.163487324 | -1.080750434 | 0.279808142 | 0.999371363 | Not Sig |
| ENSG00000202187 | NA           | NA                                                               | NA        | 3.734879613 | -1.256809867 | 1.398832711 | -0.898470459 | 0.368934788 | NA          | NA      |
| ENSG00000212370 | NA           | NA                                                               | NA        | 4.702305039 | -1.256672713 | 1.488025047 | -0.844523898 | 0.398376715 | NA          | NA      |
| ENSG00000173621 | LRFN4        | leucine rich repeat and fibronectin type III domain containing 4 | 78999     | 314.6833865 | -1.255237316 | 0.746164456 | -1.682252895 | 0.092519811 | 0.999371363 | Not Sig |
| ENSG00000152270 | PDE3B        | phosphodiesterase 3B                                             | 5140      | 1103.098829 | -1.254571139 | 0.480264925 | -2.612248103 | 0.008994895 | 0.472053287 | Not Sig |
| ENSG00000221182 | NA           | NA                                                               | NA        | 1.631955913 | -1.252048683 | 1.881443406 | -0.665472413 | 0.505748383 | NA          | NA      |
| ENSG00000183308 | NA           | NA                                                               | NA        | 9.332772997 | -1.251933313 | 1.244248912 | -1.006175935 | 0.314330946 | 0.999371363 | Not Sig |
| ENSG00000271819 | NA           | NA                                                               | NA        | 7.931001576 | -1.251518905 | 1.206288693 | -1.037495346 | 0.299505063 | 0.999371363 | Not Sig |

|                 |              |                                                   |           |             |              |             |              |             |             |         |
|-----------------|--------------|---------------------------------------------------|-----------|-------------|--------------|-------------|--------------|-------------|-------------|---------|
| ENSG00000210135 | NA           | NA                                                | NA        | 4.467691946 | -1.251293698 | 1.7320082   | -0.722452525 | 0.470016303 | NA          | NA      |
| ENSG00000224005 | NA           | NA                                                | NA        | 17.8018196  | -1.251178076 | 1.020025957 | -1.226613958 | 0.219967721 | 0.999371363 | Not Sig |
| ENSG00000232528 | LOC100289473 | cytoskeleton associated protein 2-like pseudogene | 100289473 | 7.894529117 | -1.250994922 | 0.993504036 | -1.259174474 | 0.207967319 | 0.999371363 | Not Sig |
| ENSG00000215142 | NA           | NA                                                | NA        | 30.69260896 | -1.250965033 | 1.023561072 | -1.222169412 | 0.221643568 | 0.999371363 | Not Sig |
| ENSG00000207014 | SNORD116-3   | small nucleolar RNA, C/D box 116-3                | 100033415 | 5.104601792 | -1.250246161 | 1.154427511 | -1.083001011 | 0.278807974 | NA          | NA      |
| ENSG00000238755 | NA           | NA                                                | NA        | 6.005333784 | -1.249024923 | 1.250779275 | -0.998597393 | 0.317989764 | NA          | NA      |
| ENSG00000199881 | NA           | NA                                                | NA        | 6.878177801 | -1.248824671 | 1.276954834 | -0.977970902 | 0.328088716 | 0.999371363 | Not Sig |
| ENSG00000253636 | NA           | NA                                                | NA        | 81.5766107  | -1.248439546 | 0.697755062 | -1.789223202 | 0.073578876 | 0.999371363 | Not Sig |
| ENSG00000201208 | NA           | NA                                                | NA        | 10.77719425 | -1.247664524 | 0.842498186 | -1.480910637 | 0.138630388 | 0.999371363 | Not Sig |
| ENSG00000222974 | NA           | NA                                                | NA        | 1.12878955  | -1.247577941 | 2.588855941 | -0.481903192 | 0.629874719 | NA          | NA      |
| ENSG00000235448 | LURAPIL-AS1  | LURAPIL antisense RNA 1                           | 101929467 | 1.12878955  | -1.247577941 | 2.588855941 | -0.481903192 | 0.629874719 | NA          | NA      |
| ENSG00000239559 | NA           | NA                                                | NA        | 1.003316013 | -1.245510821 | 2.638407806 | -0.472069108 | 0.636877461 | NA          | NA      |
| ENSG00000166856 | GPR182       | G protein-coupled receptor 182                    | 11318     | 6.800379616 | -1.245341149 | 1.275319596 | -0.976493385 | 0.328820024 | 0.999371363 | Not Sig |
| ENSG00000170374 | SP7          | Sp7 transcription factor                          | 121340    | 1.019207797 | -1.242982901 | 2.981611683 | -0.416882892 | 0.676764068 | NA          | NA      |
| ENSG00000237152 | DLEU7-AS1    | DLEU7 antisense RNA 1                             | 100874074 | 37.38689412 | -1.242730726 | 0.98158737  | -1.266041887 | 0.205498086 | 0.999371363 | Not Sig |
| ENSG00000214535 | NA           | NA                                                | NA        | 1.638393448 | -1.242681842 | 2.053536685 | -0.605142266 | 0.545084473 | NA          | NA      |
| ENSG00000251720 | NA           | NA                                                | NA        | 1.106045223 | -1.242286103 | 2.596743669 | -0.478401514 | 0.632364456 | NA          | NA      |
| ENSG00000165591 | FAAH2        | fatty acid amide hydrolase 2                      | 158584    | 394.5576549 | -1.242129833 | 0.806834844 | -1.539509407 | 0.123679983 | 0.999371363 | Not Sig |
| ENSG00000180535 | BHLHA15      | basic helix-loop-helix family member a15          | 168620    | 159.3151046 | -1.242005073 | 1.046628377 | -1.186672463 | 0.235356841 | 0.999371363 | Not Sig |
| ENSG00000266156 | NA           | NA                                                | NA        | 3.089932921 | -1.240577836 | 1.464486158 | -0.847107929 | 0.396934966 | NA          | NA      |
| ENSG00000225521 | NA           | NA                                                | NA        | 18.99681153 | -1.240329689 | 1.093393767 | -1.134385184 | 0.256633011 | 0.999371363 | Not Sig |
| ENSG00000203876 | NA           | NA                                                | NA        | 3.766945146 | -1.240207285 | 1.297301342 | -0.955990135 | 0.339077218 | NA          | NA      |
| ENSG00000260803 | NA           | NA                                                | NA        | 3.174937937 | -1.239875568 | 1.408623265 | -0.880203812 | 0.378748909 | NA          | NA      |
| ENSG00000249453 | NA           | NA                                                | NA        | 0.980571685 | -1.238281681 | 2.60979523  | -0.474474651 | 0.63516147  | NA          | NA      |
| ENSG00000272175 | NA           | NA                                                | NA        | 0.980571685 | -1.238281681 | 2.60979523  | -0.474474651 | 0.63516147  | NA          | NA      |
| ENSG00000229017 | NA           | NA                                                | NA        | 9.263297038 | -1.238214981 | 1.739599803 | -0.711781514 | 0.476600082 | 0.999371363 | Not Sig |
| ENSG00000173867 | NA           | NA                                                | NA        | 12.15972055 | -1.237911658 | 0.907372397 | -1.364281813 | 0.172478888 | 0.999371363 | Not Sig |
| ENSG00000237373 | NA           | NA                                                | NA        | 23.99947269 | -1.237263345 | 1.083741004 | -1.141659622 | 0.253595531 | 0.999371363 | Not Sig |
| ENSG00000269365 | NA           | NA                                                | NA        | 40.45898637 | -1.236943824 | 0.923951727 | -1.338753734 | 0.180650857 | 0.999371363 | Not Sig |
| ENSG00000236814 | NA           | NA                                                | NA        | 2.717260229 | -1.235977397 | 1.607480301 | -0.768891162 | 0.441957924 | NA          | NA      |
| ENSG00000236095 | NA           | NA                                                | NA        | 37.88897419 | -1.23518888  | 1.003348486 | -1.23106667  | 0.21829793  | 0.999371363 | Not Sig |
| ENSG00000233597 | NA           | NA                                                | NA        | 9.0121932   | -1.234919659 | 0.934698995 | -1.321195021 | 0.186436346 | 0.999371363 | Not Sig |
| ENSG00000266850 | LOC101927571 | uncharacterized LOC101927571                      | 101927571 | 8.22053963  | -1.234462651 | 1.278532165 | -0.965531165 | 0.334278834 | 0.999371363 | Not Sig |
| ENSG00000248727 | LINC01948    | long intergenic non-protein coding RNA 1948       | 102467147 | 23.67277599 | -1.233961899 | 0.869850316 | -1.41859108  | 0.156018268 | 0.999371363 | Not Sig |
| ENSG00000264429 | MIR3183      | microRNA 3183                                     | 100422835 | 6.498535936 | -1.233265363 | 1.21942621  | -1.011348905 | 0.311849467 | NA          | NA      |

|                 |               |                                                        |           |             |              |             |              |             |             |         |
|-----------------|---------------|--------------------------------------------------------|-----------|-------------|--------------|-------------|--------------|-------------|-------------|---------|
| ENSG00000096696 | DSP           | desmoplakin                                            | 1832      | 6783.541491 | -1.232907226 | 0.871006877 | -1.415496546 | 0.15692296  | 0.999371363 | Not Sig |
| ENSG00000258643 | BCL2L2-PABPN1 | BCL2L2-PABPN1 readthrough                              | 100529063 | 11.7159584  | -1.231892844 | 0.848491218 | -1.45186281  | 0.146539755 | 0.999371363 | Not Sig |
| ENSG00000251023 | NA            | NA                                                     | NA        | 48.62742467 | -1.231065571 | 0.885432364 | -1.390355289 | 0.164421016 | 0.999371363 | Not Sig |
| ENSG00000266939 | NA            | NA                                                     | NA        | 1.606194873 | -1.230515008 | 2.041758035 | -0.602674257 | 0.54672541  | NA          | NA      |
| ENSG00000254460 | NA            | NA                                                     | NA        | 2.098074577 | -1.229906611 | 1.835699297 | -0.669993508 | 0.502861929 | NA          | NA      |
| ENSG00000151773 | CCDC122       | coiled-coil domain containing 122                      | 160857    | 148.2167646 | -1.228494865 | 0.815944022 | -1.505611698 | 0.132166884 | 0.999371363 | Not Sig |
| ENSG00000233016 | SNHG7         | small nucleolar RNA host gene 7                        | 84973     | 775.2058155 | -1.228058656 | 0.572182216 | -2.146271977 | 0.031851286 | 0.917856395 | Not Sig |
| ENSG00000008300 | CELSR3        | cadherin EGF LAG seven-pass G-type receptor 3          | 1951      | 267.9598324 | -1.227945463 | 0.718971861 | -1.707918669 | 0.087651435 | 0.999371363 | Not Sig |
| ENSG00000187699 | C2orf88       | chromosome 2 open reading frame 88                     | 84281     | 72.69060854 | -1.227286624 | 0.815833213 | -1.504335206 | 0.132495079 | 0.999371363 | Not Sig |
| ENSG00000158825 | CDA           | cytidine deaminase                                     | 978       | 37.20123332 | -1.226900622 | 0.824258644 | -1.488489845 | 0.136621758 | 0.999371363 | Not Sig |
| ENSG00000224985 | NA            | NA                                                     | NA        | 2.718677631 | -1.226100492 | 1.570544313 | -0.780685067 | 0.434987746 | NA          | NA      |
| ENSG00000235833 | NA            | NA                                                     | NA        | 30.26900898 | -1.225820028 | 1.196834564 | -1.024218438 | 0.305732112 | 0.999371363 | Not Sig |
| ENSG00000227536 | NA            | NA                                                     | NA        | 17.17134286 | -1.225674359 | 0.787372939 | -1.556663049 | 0.119550506 | 0.999371363 | Not Sig |
| ENSG00000234626 | NA            | NA                                                     | NA        | 17.12747328 | -1.225465944 | 0.991856386 | -1.235527604 | 0.21663421  | 0.999371363 | Not Sig |
| ENSG00000223356 | NA            | NA                                                     | NA        | 7.412020855 | -1.224393956 | 1.136951059 | -1.076909992 | 0.281520479 | 0.999371363 | Not Sig |
| ENSG00000176124 | DLEU1         | deleted in lymphocytic leukemia 1 (non-protein coding) | 10301     | 606.7112048 | -1.223608379 | 1.025569554 | -1.19310131  | 0.232829698 | 0.999371363 | Not Sig |
| ENSG00000136379 | ABHD17C       | abhydrolase domain containing 17C                      | 58489     | 1432.031473 | -1.222835087 | 0.72511693  | -1.686397099 | 0.09171934  | 0.999371363 | Not Sig |
| ENSG00000264845 | LOC105372179  | uncharacterized LOC105372179                           | 105372179 | 6.300772221 | -1.221879555 | 1.203376183 | -1.015376216 | 0.309926526 | NA          | NA      |
| ENSG00000113389 | NPR3          | natriuretic peptide receptor 3                         | 4883      | 596.9939764 | -1.221154218 | 0.601396429 | -2.03053121  | 0.042302572 | 0.999371363 | Not Sig |
| ENSG00000272477 | NA            | NA                                                     | NA        | 21.5618425  | -1.220902332 | 1.180827658 | -1.033937784 | 0.30116525  | 0.999371363 | Not Sig |
| ENSG00000216331 | NA            | NA                                                     | NA        | 4.470626808 | -1.220394025 | 1.712622695 | -0.712587792 | 0.476100868 | NA          | NA      |
| ENSG00000115942 | ORC2          | origin recognition complex subunit 2                   | 4999      | 1056.501203 | -1.220380122 | 0.685144429 | -1.781201263 | 0.074879577 | 0.999371363 | Not Sig |
| ENSG00000196867 | ZFP28         | ZFP28 zinc finger protein                              | 140612    | 240.777321  | -1.219665976 | 0.518945085 | -2.350279463 | 0.018759321 | 0.698923444 | Not Sig |
| ENSG00000261359 | PYCARD-AS1    | PYCARD antisense RNA 1                                 | 100652740 | 11.02450976 | -1.219304258 | 0.951913361 | -1.280898355 | 0.200229371 | 0.999371363 | Not Sig |
| ENSG00000186973 | FAM183A       | family with sequence similarity 183 member A           | 440585    | 84.02038738 | -1.218811835 | 1.09683411  | -1.111208909 | 0.266478437 | 0.999371363 | Not Sig |
| ENSG00000040731 | CDH10         | cadherin 10                                            | 1008      | 5.161449016 | -1.218016081 | 1.796317212 | -0.678062913 | 0.497731805 | NA          | NA      |
| ENSG00000196550 | FAM72C        | family with sequence similarity 72 member C            | 554282    | 33.87340172 | -1.21798439  | 0.798557416 | -1.52523083  | 0.127201534 | 0.999371363 | Not Sig |
| ENSG00000196550 | FAM72D        | family with sequence similarity 72 member D            | 728833    | 33.87340172 | -1.21798439  | 0.798557416 | -1.52523083  | 0.127201534 | 0.999371363 | Not Sig |
| ENSG00000196550 | FAM72A        | family with sequence similarity 72 member A            | 729533    | 33.87340172 | -1.21798439  | 0.798557416 | -1.52523083  | 0.127201534 | 0.999371363 | Not Sig |
| ENSG00000263338 | NA            | NA                                                     | NA        | 11.27285235 | -1.216760247 | 1.452739745 | -0.837562441 | 0.402276495 | 0.999371363 | Not Sig |
| ENSG00000207701 | MIR597        | microRNA 597                                           | 693182    | 5.323035341 | -1.215040391 | 1.189402617 | -1.021555169 | 0.306991485 | NA          | NA      |
| ENSG00000207988 | MIR576        | microRNA 576                                           | 693161    | 11.68500746 | -1.213771341 | 1.024685044 | -1.184531137 | 0.236202878 | 0.999371363 | Not Sig |
| ENSG00000204904 | LINC01545     | long intergenic non-protein coding RNA 1545            | 724087    | 3.397107259 | -1.213611371 | 1.561829974 | -0.777044487 | 0.437132524 | NA          | NA      |
| ENSG00000273189 | NA            | NA                                                     | NA        | 2.684646645 | -1.213508243 | 1.650513476 | -0.735230739 | 0.462198981 | NA          | NA      |
| ENSG00000214124 | NA            | NA                                                     | NA        | 3.813314051 | -1.212765588 | 1.82891637  | -0.663106093 | 0.507262609 | NA          | NA      |



|                 |         |                                                         |           |             |              |             |              |             |             |         |
|-----------------|---------|---------------------------------------------------------|-----------|-------------|--------------|-------------|--------------|-------------|-------------|---------|
| ENSG00000265943 | NA      | NA                                                      | NA        | 6.84197778  | -1.212199697 | 1.011166479 | -1.198813174 | 0.230600599 | 0.999371363 | Not Sig |
| ENSG00000200385 | NA      | NA                                                      | NA        | 10.48222132 | -1.211790475 | 1.143236835 | -1.059964513 | 0.289160744 | 0.999371363 | Not Sig |
| ENSG00000226124 | FTCDNL1 | formiminotransferase cyclodeaminase N-terminal like     | 348751    | 59.48849073 | -1.211693157 | 0.834705248 | -1.451641953 | 0.146601187 | 0.999371363 | Not Sig |
| ENSG00000212567 | NA      | NA                                                      | NA        | 17.17341514 | -1.210893322 | 0.92473858  | -1.309443931 | 0.190384019 | 0.999371363 | Not Sig |
| ENSG00000253166 | NA      | NA                                                      | NA        | 3.493398934 | -1.20920047  | 1.973211876 | -0.612808226 | 0.540003151 | NA          | NA      |
| ENSG00000226784 | PGAM4   | phosphoglycerate mutase family member 4                 | 441531    | 0.964264894 | -1.209127548 | 2.616888007 | -0.462047877 | 0.644046987 | NA          | NA      |
| ENSG00000196860 | TOMM20L | translocase of outer mitochondrial membrane 20 like     | 387990    | 5.734515155 | -1.208747943 | 1.211674596 | -0.997584621 | 0.318480821 | NA          | NA      |
| ENSG00000261315 | NA      | NA                                                      | NA        | 13.51492721 | -1.208278624 | 1.098651326 | -1.099783521 | 0.271426454 | 0.999371363 | Not Sig |
| ENSG00000151005 | TKTL2   | transketolase like 2                                    | 84076     | 0.987009221 | -1.208248248 | 2.325351535 | -0.519598104 | 0.60334372  | NA          | NA      |
| ENSG00000214216 | IQCJ    | IQ motif containing J                                   | 654502    | 0.987009221 | -1.208248248 | 2.325351535 | -0.519598104 | 0.60334372  | NA          | NA      |
| ENSG00000263475 | NA      | NA                                                      | NA        | 0.987009221 | -1.208248248 | 2.325351535 | -0.519598104 | 0.60334372  | NA          | NA      |
| ENSG00000167780 | SOAT2   | sterol O-acyltransferase 2                              | 8435      | 5.658427235 | -1.207511629 | 1.391960724 | -0.867489728 | 0.385673738 | NA          | NA      |
| ENSG00000207336 | NA      | NA                                                      | NA        | 5.212596382 | -1.205704399 | 1.604240151 | -0.751573509 | 0.452307579 | NA          | NA      |
| ENSG00000268529 | NA      | NA                                                      | NA        | 4.421777386 | -1.205593099 | 1.9029463   | -0.633540263 | 0.526380897 | NA          | NA      |
| ENSG00000213420 | GPC2    | glypican 2                                              | 221914    | 30.84212511 | -1.204182763 | 0.708072951 | -1.70064788  | 0.089009128 | 0.999371363 | Not Sig |
| ENSG00000177202 | SPACA4  | sperm acrosome associated 4                             | 171169    | 1.980455977 | -1.204050113 | 1.824828526 | -0.659815482 | 0.509372247 | NA          | NA      |
| ENSG00000221448 | NA      | NA                                                      | NA        | 1.683163043 | -1.203233123 | 2.283023257 | -0.527034983 | 0.598169295 | NA          | NA      |
| ENSG00000206961 | NA      | NA                                                      | NA        | 1.080284183 | -1.202292497 | 2.568337932 | -0.468120835 | 0.639698181 | NA          | NA      |
| ENSG00000125247 | TMTC4   | transmembrane and tetratricopeptide repeat containing 4 | 84899     | 650.1335119 | -1.201433142 | 0.65773866  | -1.826611714 | 0.067758171 | 0.999371363 | Not Sig |
| ENSG00000204164 | NA      | NA                                                      | NA        | 107.8827562 | -1.200807745 | 0.639692954 | -1.877162689 | 0.0604958   | 0.999371363 | Not Sig |
| ENSG00000207697 | MIR573  | microRNA 573                                            | 693158    | 13.94371621 | -1.200713525 | 0.898966585 | -1.335659796 | 0.181660496 | 0.999371363 | Not Sig |
| ENSG00000263963 | MIR4461 | microRNA 4461                                           | 100616209 | 6.325339431 | -1.200423413 | 1.258449791 | -0.95389059  | 0.340139027 | NA          | NA      |
| ENSG00000261574 | NA      | NA                                                      | NA        | 44.14307262 | -1.200046156 | 0.760199443 | -1.578593838 | 0.114429249 | 0.999371363 | Not Sig |
| ENSG00000203896 | LIME1   | Lck interacting transmembrane adaptor 1                 | 54923     | 49.66577794 | -1.199840971 | 0.68067426  | -1.762724171 | 0.077947022 | 0.999371363 | Not Sig |
| ENSG00000113209 | PCDHB5  | protocadherin beta 5                                    | 26167     | 121.2982568 | -1.199581524 | 0.71056197  | -1.688215207 | 0.091369925 | 0.999371363 | Not Sig |
| ENSG00000199047 | MIR378A | microRNA 378a                                           | 494327    | 3.544349919 | -1.199339464 | 1.969435164 | -0.608976363 | 0.542540106 | NA          | NA      |
| ENSG00000249637 | NA      | NA                                                      | NA        | 11.9631479  | -1.198832612 | 0.924249658 | -1.297087428 | 0.194601107 | 0.999371363 | Not Sig |
| ENSG00000156795 | WDYHV1  | WDYHV motif containing 1                                | 55093     | 258.29436   | -1.198824732 | 0.714108803 | -1.678770415 | 0.093196797 | 0.999371363 | Not Sig |
| ENSG00000230084 | NA      | NA                                                      | NA        | 11.42238591 | -1.19760919  | 0.922064981 | -1.298833829 | 0.194000962 | 0.999371363 | Not Sig |
| ENSG00000254132 | NA      | NA                                                      | NA        | 2.17646015  | -1.196912971 | 1.697373461 | -0.705155936 | 0.4807132   | NA          | NA      |
| ENSG00000157483 | MYO1E   | myosin IE                                               | 4643      | 2723.629541 | -1.196668906 | 0.644944333 | -1.855460766 | 0.063530457 | 0.999371363 | Not Sig |
| ENSG00000199202 | NA      | NA                                                      | NA        | 3.850168944 | -1.196396088 | 1.649805364 | -0.72517408  | 0.468345242 | NA          | NA      |
| ENSG00000269867 | NA      | NA                                                      | NA        | 5.349665734 | -1.195729728 | 1.133535228 | -1.054867726 | 0.291485825 | NA          | NA      |
| ENSG00000260224 | NA      | NA                                                      | NA        | 4.010115665 | -1.194809648 | 1.365336377 | -0.875102772 | 0.381517989 | NA          | NA      |
| ENSG00000234424 | NA      | NA                                                      | NA        | 4.200268319 | -1.194235948 | 1.198081956 | -0.996789862 | 0.31886652  | NA          | NA      |

|                 |           |                                                  |           |             |              |             |              |             |             |         |
|-----------------|-----------|--------------------------------------------------|-----------|-------------|--------------|-------------|--------------|-------------|-------------|---------|
| ENSG00000248734 | NA        | NA                                               | NA        | 32.07027412 | -1.194218374 | 0.676829954 | -1.764428963 | 0.077659785 | 0.999371363 | Not Sig |
| ENSG00000243410 | NA        | NA                                               | NA        | 9.207849848 | -1.193989387 | 0.97259034  | -1.227638541 | 0.219582687 | 0.999371363 | Not Sig |
| ENSG00000141096 | DPEP3     | dipeptidase 3                                    | 64180     | 3.982704123 | -1.193755431 | 1.649518052 | -0.723699525 | 0.469250225 | NA          | NA      |
| ENSG00000198915 | RASGEF1A  | RasGEF domain family member 1A                   | 221002    | 297.2410188 | -1.19354112  | 0.898558449 | -1.328284344 | 0.18408419  | 0.999371363 | Not Sig |
| ENSG00000185296 | NA        | NA                                               | NA        | 0.993446757 | -1.193365187 | 2.603563334 | -0.458358424 | 0.646694956 | NA          | NA      |
| ENSG00000265855 | MIR4514   | microRNA 4514                                    | 100616181 | 0.993446757 | -1.193365187 | 2.603563334 | -0.458358424 | 0.646694956 | NA          | NA      |
| ENSG00000248724 | NPHP3-AS1 | NPHP3 antisense RNA 1                            | 348808    | 6.353984141 | -1.193363518 | 1.029030001 | -1.159697498 | 0.246171989 | NA          | NA      |
| ENSG00000243251 | NA        | NA                                               | NA        | 2.518937686 | -1.19309138  | 1.843457667 | -0.647203026 | 0.517500553 | NA          | NA      |
| ENSG00000106328 | FSCN3     | fascin actin-bundling protein 3                  | 29999     | 7.780654013 | -1.192937296 | 1.218671077 | -0.978883735 | 0.32763743  | 0.999371363 | Not Sig |
| ENSG00000235616 | NA        | NA                                               | NA        | 2.865201231 | -1.192540927 | 1.979397488 | -0.602476731 | 0.546856848 | NA          | NA      |
| ENSG00000206921 | NA        | NA                                               | NA        | 5.430187769 | -1.192024896 | 1.256878211 | -0.948401273 | 0.342925212 | NA          | NA      |
| ENSG00000155265 | GOLGA7B   | golgin A7 family member B                        | 401647    | 190.7642311 | -1.190723859 | 0.8708122   | -1.367371586 | 0.171508864 | 0.999371363 | Not Sig |
| ENSG00000243508 | NA        | NA                                               | NA        | 52.98709921 | -1.189853763 | 0.781845303 | -1.521853183 | 0.128045872 | 0.999371363 | Not Sig |
| ENSG00000264354 | MIR3134   | microRNA 3134                                    | 100422990 | 8.742573347 | -1.189125529 | 1.302568385 | -0.91290833  | 0.361290756 | 0.999371363 | Not Sig |
| ENSG00000137261 | KIAA0319  | KIAA0319                                         | 9856      | 110.4804952 | -1.188645533 | 1.002880799 | -1.185231121 | 0.235926078 | 0.999371363 | Not Sig |
| ENSG00000072182 | ASIC4     | acid sensing ion channel subunit family member 4 | 55515     | 17.97872385 | -1.188448098 | 1.269317785 | -0.936288857 | 0.349124484 | 0.999371363 | Not Sig |
| ENSG00000142178 | SIK1      | salt inducible kinase 1                          | 150094    | 5074.870432 | -1.187139285 | 0.585897864 | -2.026188109 | 0.042745512 | 0.999371363 | Not Sig |
| ENSG00000259738 | NA        | NA                                               | NA        | 0.947958102 | -1.187120352 | 3.065929632 | -0.387197521 | 0.698609986 | NA          | NA      |
| ENSG00000169436 | COL22A1   | collagen type XXII alpha 1 chain                 | 169044    | 65.24326025 | -1.186963871 | 0.893299328 | -1.328741479 | 0.183933275 | 0.999371363 | Not Sig |
| ENSG00000120658 | ENOX1     | ecto-NOX disulfide-thiol exchanger 1             | 55068     | 64.28337703 | -1.186090163 | 0.518938456 | -2.285608531 | 0.022277171 | 0.760261273 | Not Sig |
| ENSG00000149646 | CNBD2     | cyclic nucleotide binding domain containing 2    | 140894    | 4.085666433 | -1.186040761 | 1.220502191 | -0.971764549 | 0.331167696 | NA          | NA      |
| ENSG00000125772 | GPCPD1    | glycerophosphocholine phosphodiesterase 1        | 56261     | 4649.491685 | -1.185670541 | 0.721825841 | -1.64259919  | 0.100465888 | 0.999371363 | Not Sig |
| ENSG00000157884 | CIB4      | calcium and integrin binding family member 4     | 130106    | 4.166652341 | -1.185655743 | 1.504134586 | -0.788264397 | 0.430542068 | NA          | NA      |
| ENSG00000227009 | NA        | NA                                               | NA        | 3.058603698 | -1.185568328 | 1.637839742 | -0.723861009 | 0.46915107  | NA          | NA      |
| ENSG00000264881 | MIR1273D  | microRNA 1273d                                   | 100422970 | 1.649132057 | -1.184835649 | 2.031189855 | -0.583320976 | 0.559677244 | NA          | NA      |
| ENSG00000256361 | NA        | NA                                               | NA        | 28.73521498 | -1.184736727 | 0.84366255  | -1.404277964 | 0.160236094 | 0.999371363 | Not Sig |
| ENSG00000269421 | NA        | NA                                               | NA        | 3.536131165 | -1.184596777 | 1.649009484 | -0.718368687 | 0.472529989 | NA          | NA      |
| ENSG00000178826 | TMEM139   | transmembrane protein 139                        | 135932    | 138.6359901 | -1.183818112 | 0.941301191 | -1.257640087 | 0.208521949 | 0.999371363 | Not Sig |
| ENSG00000264327 | NA        | NA                                               | NA        | 8.149667945 | -1.183684882 | 1.339661231 | -0.883570305 | 0.376928215 | 0.999371363 | Not Sig |
| ENSG00000102837 | OLFM4     | olfactomedin 4                                   | 10562     | 3.654630015 | -1.183579672 | 1.531746054 | -0.772699671 | 0.439700141 | NA          | NA      |
| ENSG00000229953 | NA        | NA                                               | NA        | 99.33123125 | -1.181829275 | 1.106050807 | -1.068512647 | 0.285289329 | 0.999371363 | Not Sig |
| ENSG00000215237 | NA        | NA                                               | NA        | 1.633240273 | -1.181123609 | 2.243340817 | -0.526502081 | 0.598539406 | NA          | NA      |
| ENSG00000233644 | NA        | NA                                               | NA        | 1.633240273 | -1.181123609 | 2.243340817 | -0.526502081 | 0.598539406 | NA          | NA      |
| ENSG00000206878 | NA        | NA                                               | NA        | 1.086721718 | -1.180718167 | 2.565901359 | -0.460157271 | 0.645403339 | NA          | NA      |
| ENSG00000216168 | NA        | NA                                               | NA        | 1.086721718 | -1.180718167 | 2.565901359 | -0.460157271 | 0.645403339 | NA          | NA      |

|                 |              |                                                                |           |             |              |             |              |             |             |         |
|-----------------|--------------|----------------------------------------------------------------|-----------|-------------|--------------|-------------|--------------|-------------|-------------|---------|
| ENSG00000238679 | NA           | NA                                                             | NA        | 1.086721718 | -1.180718167 | 2.565901359 | -0.460157271 | 0.645403339 | NA          | NA      |
| ENSG00000264834 | MIR1273F     | microRNA 1273f                                                 | 100616156 | 1.086721718 | -1.180718167 | 2.565901359 | -0.460157271 | 0.645403339 | NA          | NA      |
| ENSG00000200750 | NA           | NA                                                             | NA        | 0.970702429 | -1.180508646 | 2.330279816 | -0.506595233 | 0.612438854 | NA          | NA      |
| ENSG00000256706 | NA           | NA                                                             | NA        | 0.970702429 | -1.180508646 | 2.330279816 | -0.506595233 | 0.612438854 | NA          | NA      |
| ENSG00000265298 | LOC101929240 | U5 small nuclear ribonucleoprotein 200 kDa helicase pseudogene | 101929240 | 0.970702429 | -1.180508646 | 2.330279816 | -0.506595233 | 0.612438854 | NA          | NA      |
| ENSG00000238329 | NA           | NA                                                             | NA        | 13.34814009 | -1.179982894 | 1.20964866  | -0.975475717 | 0.329324341 | 0.999371363 | Not Sig |
| ENSG00000238835 | SCARNA18     | small Cajal body-specific RNA 18                               | 677765    | 5.821454008 | -1.179776957 | 1.527923229 | -0.772144133 | 0.440029066 | NA          | NA      |
| ENSG00000232901 | NA           | NA                                                             | NA        | 3.99079216  | -1.179723654 | 1.398531854 | -0.843544358 | 0.398924069 | NA          | NA      |
| ENSG00000115607 | IL18RAP      | interleukin 18 receptor accessory protein                      | 8807      | 52.21251878 | -1.178570807 | 0.968611898 | -1.216762678 | 0.223694524 | 0.999371363 | Not Sig |
| ENSG00000198477 | NA           | NA                                                             | NA        | 68.05331007 | -1.177876192 | 0.934939737 | -1.259841833 | 0.207726425 | 0.999371363 | Not Sig |
| ENSG00000231916 | NA           | NA                                                             | NA        | 2.016955626 | -1.177544647 | 1.902116142 | -0.619070845 | 0.535869689 | NA          | NA      |
| ENSG00000256325 | NA           | NA                                                             | NA        | 27.91264114 | -1.177129058 | 0.872089202 | -1.349780567 | 0.17708638  | 0.999371363 | Not Sig |
| ENSG00000178055 | PRSS42       | protease, serine 42                                            | 339906    | 18.99020186 | -1.176796859 | 1.010628799 | -1.164420468 | 0.244253657 | 0.999371363 | Not Sig |
| ENSG00000268484 | NA           | NA                                                             | NA        | 5.131504622 | -1.176510688 | 1.206905033 | -0.974816291 | 0.329651395 | NA          | NA      |
| ENSG00000201988 | NA           | NA                                                             | NA        | 18.73209035 | -1.176458591 | 0.75483397  | -1.55856604  | 0.119099126 | 0.999371363 | Not Sig |
| ENSG00000230633 | NA           | NA                                                             | NA        | 20.5305038  | -1.176282424 | 0.81368278  | -1.445627772 | 0.148281633 | 0.999371363 | Not Sig |
| ENSG00000183066 | WBP2NL       | WBP2 N-terminal like                                           | 164684    | 58.90532204 | -1.176102084 | 0.516324124 | -2.277836788 | 0.022736304 | 0.765556876 | Not Sig |
| ENSG00000202314 | SNORD6       | small nucleolar RNA, C/D box 6                                 | 692075    | 14.06160173 | -1.175888627 | 1.150635137 | -1.021947435 | 0.30680578  | 0.999371363 | Not Sig |
| ENSG00000248919 | ATP5J2-PTCD1 | ATP5J2-PTCD1 readthrough                                       | 100526740 | 5.255560757 | -1.175804881 | 1.371010405 | -0.857619225 | 0.391102756 | NA          | NA      |
| ENSG00000221241 | SNORD88A     | small nucleolar RNA, C/D box 88A                               | 692202    | 3.945303506 | -1.175534586 | 1.384767621 | -0.848903865 | 0.395934788 | NA          | NA      |
| ENSG00000271452 | NA           | NA                                                             | NA        | 20.21625555 | -1.174907079 | 0.751250663 | -1.563934832 | 0.117832873 | 0.999371363 | Not Sig |
| ENSG00000200075 | NA           | NA                                                             | NA        | 16.16547316 | -1.174185452 | 1.220918205 | -0.961723273 | 0.336188629 | 0.999371363 | Not Sig |
| ENSG00000224346 | NA           | NA                                                             | NA        | 1.063977391 | -1.174079803 | 2.299780785 | -0.510518138 | 0.609688511 | NA          | NA      |
| ENSG00000267901 | NA           | NA                                                             | NA        | 1.063977391 | -1.174079803 | 2.299780785 | -0.510518138 | 0.609688511 | NA          | NA      |
| ENSG00000250615 | NA           | NA                                                             | NA        | 3.518406971 | -1.173673847 | 1.383384674 | -0.848407438 | 0.396211102 | NA          | NA      |
| ENSG00000124212 | PTGIS        | prostaglandin I2 synthase                                      | 5740      | 1202.567796 | -1.172885637 | 0.618498545 | -1.896343407 | 0.05791465  | 0.999371363 | Not Sig |
| ENSG00000233688 | NA           | NA                                                             | NA        | 2.448872295 | -1.172013512 | 2.085765071 | -0.561910605 | 0.574176928 | NA          | NA      |
| ENSG00000137077 | CCL21        | C-C motif chemokine ligand 21                                  | 6366      | 600.1859763 | -1.17134212  | 0.573461805 | -2.042580882 | 0.041093945 | 0.999371363 | Not Sig |
| ENSG00000231369 | NA           | NA                                                             | NA        | 3.096824802 | -1.170129761 | 1.707800908 | -0.685167549 | 0.493238199 | NA          | NA      |
| ENSG00000259398 | NA           | NA                                                             | NA        | 25.90593278 | -1.169927716 | 0.86361202  | -1.354691329 | 0.175515922 | 0.999371363 | Not Sig |
| ENSG00000252614 | NA           | NA                                                             | NA        | 8.963169179 | -1.168757626 | 1.069676878 | -1.092626802 | 0.27455769  | 0.999371363 | Not Sig |
| ENSG00000272918 | NA           | NA                                                             | NA        | 30.81618862 | -1.168091262 | 0.835618113 | -1.397876906 | 0.162150035 | 0.999371363 | Not Sig |
| ENSG00000254733 | NA           | NA                                                             | NA        | 2.408940925 | -1.167840484 | 1.662238832 | -0.702570811 | 0.482323258 | NA          | NA      |
| ENSG00000266710 | NA           | NA                                                             | NA        | 2.157136645 | -1.166776257 | 1.825556928 | -0.639134414 | 0.522735494 | NA          | NA      |
| ENSG00000263897 | MIR4669      | microRNA 4669                                                  | 100616236 | 8.524903298 | -1.16655702  | 1.082541389 | -1.077609625 | 0.281208005 | 0.999371363 | Not Sig |

|                 |              |                                             |           |             |              |             |              |             |             |         |
|-----------------|--------------|---------------------------------------------|-----------|-------------|--------------|-------------|--------------|-------------|-------------|---------|
| ENSG00000141748 | ARL5C        | ADP ribosylation factor like GTPase 5C      | 390790    | 0.977139965 | -1.16414319  | 2.610491795 | -0.445947845 | 0.65563492  | NA          | NA      |
| ENSG00000257815 | LINC01481    | long intergenic non-protein coding RNA 1481 | 101928062 | 33.44404201 | -1.16260583  | 0.617032158 | -1.884190014 | 0.059539278 | 0.999371363 | Not Sig |
| ENSG00000184414 | NA           | NA                                          | NA        | 6.097591028 | -1.162403653 | 1.039877974 | -1.117826978 | 0.263640897 | NA          | NA      |
| ENSG00000271757 | NA           | NA                                          | NA        | 3.590355008 | -1.16232902  | 1.430338369 | -0.812625212 | 0.416432972 | NA          | NA      |
| ENSG00000173805 | HAP1         | huntingtin associated protein 1             | 9001      | 23.07519782 | -1.161757474 | 1.215809814 | -0.95554211  | 0.339303621 | 0.999371363 | Not Sig |
| ENSG00000199740 | NA           | NA                                          | NA        | 1.525075922 | -1.161742407 | 1.973843345 | -0.588568698 | 0.556150637 | NA          | NA      |
| ENSG00000273035 | NA           | NA                                          | NA        | 24.11686495 | -1.161243246 | 1.112288213 | -1.044012903 | 0.29647942  | 0.999371363 | Not Sig |
| ENSG00000234134 | NA           | NA                                          | NA        | 9.454308147 | -1.161224559 | 0.941822968 | -1.232954173 | 0.217592862 | 0.999371363 | Not Sig |
| ENSG00000207923 | MIR559       | microRNA 559                                | 693144    | 13.71218441 | -1.160908597 | 1.205394662 | -0.963094191 | 0.335500257 | 0.999371363 | Not Sig |
| ENSG00000226212 | NA           | NA                                          | NA        | 2.664604081 | -1.15999287  | 1.651480869 | -0.702395584 | 0.482432498 | NA          | NA      |
| ENSG00000269696 | NA           | NA                                          | NA        | 15.16507215 | -1.158079595 | 0.792359871 | -1.461557606 | 0.143862479 | 0.999371363 | Not Sig |
| ENSG00000212135 | SNORD67      | small nucleolar RNA, C/D box 67             | 692108    | 3.182062917 | -1.158057194 | 1.431593994 | -0.808928508 | 0.41855627  | NA          | NA      |
| ENSG00000259232 | NA           | NA                                          | NA        | 18.09302899 | -1.15790358  | 0.81707828  | -1.417126863 | 0.15644584  | 0.999371363 | Not Sig |
| ENSG00000239608 | RUVBL1-AS1   | RUVBL1 antisense RNA 1                      | 100874089 | 5.3905886   | -1.157511792 | 1.218231785 | -0.950157274 | 0.342032345 | NA          | NA      |
| ENSG00000232727 | NA           | NA                                          | NA        | 0.954395638 | -1.157441539 | 2.659858261 | -0.435151585 | 0.663452402 | NA          | NA      |
| ENSG00000231145 | NA           | NA                                          | NA        | 1.986174453 | -1.156010829 | 1.808342059 | -0.639265577 | 0.522650178 | NA          | NA      |
| ENSG00000259881 | LOC101927793 | uncharacterized LOC101927793                | 101927793 | 4.326285481 | -1.155030029 | 1.90407193  | -0.606610502 | 0.544109429 | NA          | NA      |
| ENSG00000198886 | ND4          | NADH dehydrogenase, subunit 4 (complex I)   | 4538      | 119208.521  | -1.154309419 | 0.860275544 | -1.341790345 | 0.179663984 | 0.999371363 | Not Sig |
| ENSG00000207605 | MIR191       | microRNA 191                                | 406966    | 1.070414927 | -1.154191576 | 2.297549412 | -0.502357673 | 0.615415947 | NA          | NA      |
| ENSG00000224864 | NA           | NA                                          | NA        | 1.515621674 | -1.154149558 | 2.368502101 | -0.487290916 | 0.626052185 | NA          | NA      |
| ENSG00000252379 | NA           | NA                                          | NA        | 1.515621674 | -1.154149558 | 2.368502101 | -0.487290916 | 0.626052185 | NA          | NA      |
| ENSG00000105792 | CFAP69       | cilia and flagella associated protein 69    | 79846     | 289.7890907 | -1.154030511 | 0.639563127 | -1.804404385 | 0.071167936 | 0.999371363 | Not Sig |
| ENSG00000183117 | CSMD1        | CUB and Sushi multiple domains 1            | 64478     | 45.04428004 | -1.153788191 | 1.080935581 | -1.067397735 | 0.285792271 | 0.999371363 | Not Sig |
| ENSG00000222726 | NA           | NA                                          | NA        | 6.602274851 | -1.153610447 | 1.413327873 | -0.81623696  | 0.414364622 | 0.999371363 | Not Sig |
| ENSG00000273240 | NA           | NA                                          | NA        | 2.867022743 | -1.153056758 | 1.66330442  | -0.693232546 | 0.488163627 | NA          | NA      |
| ENSG00000237818 | NA           | NA                                          | NA        | 5.668973038 | -1.152938118 | 1.310452734 | -0.879801375 | 0.378966919 | NA          | NA      |
| ENSG00000269534 | NA           | NA                                          | NA        | 1.632825266 | -1.152838504 | 2.334178659 | -0.493894715 | 0.621380537 | NA          | NA      |
| ENSG00000229358 | NA           | NA                                          | NA        | 209.6450449 | -1.151400821 | 0.848962935 | -1.356243922 | 0.175021571 | 0.999371363 | Not Sig |
| ENSG00000235065 | NA           | NA                                          | NA        | 1.656986995 | -1.151074919 | 2.286921835 | -0.503329367 | 0.614732723 | NA          | NA      |
| ENSG00000268172 | NA           | NA                                          | NA        | 94.39273899 | -1.150927536 | 0.906044035 | -1.270277704 | 0.203985727 | 0.999371363 | Not Sig |
| ENSG00000250432 | LINC01598    | long intergenic non-protein coding RNA 1598 | 105379478 | 6.248184928 | -1.149706733 | 1.435700122 | -0.800798659 | 0.423248215 | NA          | NA      |
| ENSG00000271347 | NA           | NA                                          | NA        | 71.71381157 | -1.149184536 | 0.783262601 | -1.46717657  | 0.142328029 | 0.999371363 | Not Sig |
| ENSG00000242539 | NA           | NA                                          | NA        | 21.01934015 | -1.148586848 | 0.836403894 | -1.373244262 | 0.169676424 | 0.999371363 | Not Sig |
| ENSG00000253559 | NA           | NA                                          | NA        | 11.73160907 | -1.148299931 | 0.940775981 | -1.220588062 | 0.222242029 | 0.999371363 | Not Sig |
| ENSG00000255089 | NA           | NA                                          | NA        | 2.015356316 | -1.148120984 | 1.639039583 | -0.700483988 | 0.483625101 | NA          | NA      |

|                 |              |                                     |           |             |              |             |              |             |             |         |
|-----------------|--------------|-------------------------------------|-----------|-------------|--------------|-------------|--------------|-------------|-------------|---------|
| ENSG00000252233 | NA           | NA                                  | NA        | 16.57586982 | -1.147164669 | 0.933003577 | -1.229539411 | 0.218869631 | 0.999371363 | Not Sig |
| ENSG00000207352 | NA           | NA                                  | NA        | 7.391028337 | -1.146792234 | 1.407716082 | -0.814647392 | 0.415274175 | 0.999371363 | Not Sig |
| ENSG00000231964 | LOC102724323 | uncharacterized LOC102724323        | 102724323 | 3.029410937 | -1.146565901 | 1.621106626 | -0.707273589 | 0.479396475 | NA          | NA      |
| ENSG00000268265 | NA           | NA                                  | NA        | 1.0476706   | -1.146118607 | 2.580222112 | -0.444193778 | 0.65690249  | NA          | NA      |
| ENSG00000232021 | LEF1-AS1     | LEF1 antisense RNA 1                | 641518    | 8.593054429 | -1.145991496 | 0.909870401 | -1.259510689 | 0.207845932 | 0.999371363 | Not Sig |
| ENSG00000229789 | NA           | NA                                  | NA        | 104.7984981 | -1.145778809 | 0.537604416 | -2.131267481 | 0.033067112 | 0.944249768 | Not Sig |
| ENSG00000216204 | NA           | NA                                  | NA        | 2.234104815 | -1.145548621 | 1.886688826 | -0.607174117 | 0.543735367 | NA          | NA      |
| ENSG00000242028 | HYPK         | huntingtin interacting protein K    | 25764     | 141.183667  | -1.145364466 | 0.491675782 | -2.329511659 | 0.019831976 | 0.711521581 | Not Sig |
| ENSG00000200563 | NA           | NA                                  | NA        | 3.386779233 | -1.145184968 | 1.632027078 | -0.701694833 | 0.482869496 | NA          | NA      |
| ENSG00000201435 | NA           | NA                                  | NA        | 16.02424724 | -1.144967382 | 1.114688307 | -1.027163715 | 0.304343381 | 0.999371363 | Not Sig |
| ENSG00000250343 | NA           | NA                                  | NA        | 12.13568924 | -1.144632453 | 1.471411449 | -0.777914603 | 0.436619359 | 0.999371363 | Not Sig |
| ENSG00000244349 | NA           | NA                                  | NA        | 4.286790795 | -1.144388924 | 1.555832672 | -0.735547559 | 0.462006087 | NA          | NA      |
| ENSG00000252512 | NA           | NA                                  | NA        | 0.944941389 | -1.144193991 | 2.664774519 | -0.429377414 | 0.667648588 | NA          | NA      |
| ENSG00000235529 | AGAP1-IT1    | AGAP1 intronic transcript 1         | 100506749 | 67.09376218 | -1.143388295 | 0.664401251 | -1.720930377 | 0.085263459 | 0.999371363 | Not Sig |
| ENSG00000105663 | NA           | NA                                  | NA        | 21.7565503  | -1.143318299 | 0.960822809 | -1.189936675 | 0.234071282 | 0.999371363 | Not Sig |
| ENSG00000221159 | NA           | NA                                  | NA        | 8.106936963 | -1.143291866 | 1.111357538 | -1.028734523 | 0.303604443 | 0.999371363 | Not Sig |
| ENSG00000089351 | GRAMD1A      | GRAM domain containing 1A           | 57655     | 2934.349377 | -1.142674583 | 0.515433699 | -2.216918654 | 0.026628651 | 0.841215479 | Not Sig |
| ENSG00000204965 | PCDHA5       | protocadherin alpha 5               | 56143     | 20.13668801 | -1.142442114 | 0.777122936 | -1.470091875 | 0.141536873 | 0.999371363 | Not Sig |
| ENSG00000196290 | NIF3L1       | NGG1 interacting factor 3 like 1    | 60491     | 487.7104761 | -1.142165115 | 0.696582033 | -1.639670649 | 0.101073665 | 0.999371363 | Not Sig |
| ENSG00000206699 | NA           | NA                                  | NA        | 4.429573519 | -1.140920502 | 1.623315808 | -0.702833359 | 0.482159606 | NA          | NA      |
| ENSG00000221320 | NA           | NA                                  | NA        | 4.7184146   | -1.138015922 | 1.350000521 | -0.842974431 | 0.399242744 | NA          | NA      |
| ENSG00000104427 | ZC2HC1A      | zinc finger C2HC-type containing 1A | 51101     | 509.3333397 | -1.137971245 | 0.714033483 | -1.593722524 | 0.110998197 | 0.999371363 | Not Sig |
| ENSG00000221100 | NA           | NA                                  | NA        | 10.7099787  | -1.137708054 | 1.125107982 | -1.011198989 | 0.3119212   | 0.999371363 | Not Sig |
| ENSG00000249906 | LOC100288866 | uncharacterized LOC100288866        | 100288866 | 0.960833173 | -1.137492455 | 3.057626129 | -0.372018163 | 0.709879326 | NA          | NA      |
| ENSG00000253133 | NA           | NA                                  | NA        | 0.960833173 | -1.137492455 | 3.057626129 | -0.372018163 | 0.709879326 | NA          | NA      |
| ENSG00000272402 | NA           | NA                                  | NA        | 2.068162756 | -1.136520678 | 1.868845322 | -0.60814058  | 0.54309424  | NA          | NA      |
| ENSG00000216205 | NA           | NA                                  | NA        | 5.772522735 | -1.135036304 | 1.20354878  | -0.943074616 | 0.345642738 | NA          | NA      |
| ENSG00000254821 | NA           | NA                                  | NA        | 2.460148055 | -1.134153703 | 1.48609984  | -0.763174635 | 0.445359254 | NA          | NA      |
| ENSG00000226147 | NA           | NA                                  | NA        | 1.163689889 | -1.133959971 | 2.947161279 | -0.38476346  | 0.700412673 | NA          | NA      |
| ENSG00000253286 | NA           | NA                                  | NA        | 1.163689889 | -1.133959971 | 2.947161279 | -0.38476346  | 0.700412673 | NA          | NA      |
| ENSG00000271970 | NA           | NA                                  | NA        | 1.038216351 | -1.133185186 | 2.62252941  | -0.432096274 | 0.665671443 | NA          | NA      |
| ENSG00000223208 | NA           | NA                                  | NA        | 0.519473154 | -1.132880183 | 3.702751865 | -0.305956279 | 0.759637935 | NA          | NA      |
| ENSG00000240294 | NA           | NA                                  | NA        | 0.519473154 | -1.132880183 | 3.702751865 | -0.305956279 | 0.759637935 | NA          | NA      |
| ENSG00000252400 | NA           | NA                                  | NA        | 0.519473154 | -1.132880183 | 3.702751865 | -0.305956279 | 0.759637935 | NA          | NA      |
| ENSG00000253789 | NA           | NA                                  | NA        | 0.519473154 | -1.132880183 | 3.702751865 | -0.305956279 | 0.759637935 | NA          | NA      |

|                 |          |                                                          |           |             |              |             |              |             |             |         |
|-----------------|----------|----------------------------------------------------------|-----------|-------------|--------------|-------------|--------------|-------------|-------------|---------|
| ENSG00000256192 | NA       | NA                                                       | NA        | 0.519473154 | -1.132880183 | 3.702751865 | -0.305956279 | 0.759637935 | NA          | NA      |
| ENSG00000263829 | NA       | NA                                                       | NA        | 0.519473154 | -1.132880183 | 3.702751865 | -0.305956279 | 0.759637935 | NA          | NA      |
| ENSG00000263888 | NA       | NA                                                       | NA        | 0.519473154 | -1.132880183 | 3.702751865 | -0.305956279 | 0.759637935 | NA          | NA      |
| ENSG00000253356 | NA       | NA                                                       | NA        | 1.139528159 | -1.132823145 | 2.932505844 | -0.386298683 | 0.699275476 | NA          | NA      |
| ENSG00000213177 | NA       | NA                                                       | NA        | 0.52591069  | -1.132733231 | 3.688389857 | -0.307107783 | 0.758761334 | NA          | NA      |
| ENSG00000228948 | NA       | NA                                                       | NA        | 0.52591069  | -1.132733231 | 3.688389857 | -0.307107783 | 0.758761334 | NA          | NA      |
| ENSG00000241243 | NA       | NA                                                       | NA        | 0.52591069  | -1.132733231 | 3.688389857 | -0.307107783 | 0.758761334 | NA          | NA      |
| ENSG00000248245 | NA       | NA                                                       | NA        | 0.52591069  | -1.132733231 | 3.688389857 | -0.307107783 | 0.758761334 | NA          | NA      |
| ENSG00000248576 | NA       | NA                                                       | NA        | 0.52591069  | -1.132733231 | 3.688389857 | -0.307107783 | 0.758761334 | NA          | NA      |
| ENSG00000257222 | NA       | NA                                                       | NA        | 0.52591069  | -1.132733231 | 3.688389857 | -0.307107783 | 0.758761334 | NA          | NA      |
| ENSG00000205022 | PABPN1L  | poly(A) binding protein nuclear 1 like, cytoplasmic      | 390748    | 1.399187377 | -1.132504026 | 2.390107573 | -0.47382973  | 0.635621332 | NA          | NA      |
| ENSG00000213260 | NA       | NA                                                       | NA        | 1.399187377 | -1.132504026 | 2.390107573 | -0.47382973  | 0.635621332 | NA          | NA      |
| ENSG00000267672 | NA       | NA                                                       | NA        | 18.10417819 | -1.132382054 | 0.785906689 | -1.440860688 | 0.149624044 | 0.999371363 | Not Sig |
| ENSG00000152214 | RIT2     | Ras like without CAAX 2                                  | 6014      | 0.560811028 | -1.131951369 | 3.6148508   | -0.313139167 | 0.754174933 | NA          | NA      |
| ENSG00000196115 | ADAM5    | ADAM metalloproteinase domain 5 (pseudogene)             | 255926    | 0.560811028 | -1.131951369 | 3.6148508   | -0.313139167 | 0.754174933 | NA          | NA      |
| ENSG00000200528 | NA       | NA                                                       | NA        | 0.560811028 | -1.131951369 | 3.6148508   | -0.313139167 | 0.754174933 | NA          | NA      |
| ENSG00000222168 | NA       | NA                                                       | NA        | 0.560811028 | -1.131951369 | 3.6148508   | -0.313139167 | 0.754174933 | NA          | NA      |
| ENSG00000224366 | NA       | NA                                                       | NA        | 0.560811028 | -1.131951369 | 3.6148508   | -0.313139167 | 0.754174933 | NA          | NA      |
| ENSG00000243025 | NA       | NA                                                       | NA        | 0.560811028 | -1.131951369 | 3.6148508   | -0.313139167 | 0.754174933 | NA          | NA      |
| ENSG00000255520 | NA       | NA                                                       | NA        | 0.560811028 | -1.131951369 | 3.6148508   | -0.313139167 | 0.754174933 | NA          | NA      |
| ENSG00000264650 | NA       | NA                                                       | NA        | 0.560811028 | -1.131951369 | 3.6148508   | -0.313139167 | 0.754174933 | NA          | NA      |
| ENSG00000267582 | NA       | NA                                                       | NA        | 0.560811028 | -1.131951369 | 3.6148508   | -0.313139167 | 0.754174933 | NA          | NA      |
| ENSG00000271490 | NA       | NA                                                       | NA        | 0.560811028 | -1.131951369 | 3.6148508   | -0.313139167 | 0.754174933 | NA          | NA      |
| ENSG00000272656 | NA       | NA                                                       | NA        | 0.560811028 | -1.131951369 | 3.6148508   | -0.313139167 | 0.754174933 | NA          | NA      |
| ENSG00000213077 | FAM106A  | family with sequence similarity 106 member A             | 80039     | 52.28785163 | -1.13186526  | 0.730070482 | -1.550350668 | 0.121057372 | 0.999371363 | Not Sig |
| ENSG00000213077 | FAM106CP | family with sequence similarity 106 member C, pseudogene | 100129396 | 52.28785163 | -1.13186526  | 0.730070482 | -1.550350668 | 0.121057372 | 0.999371363 | Not Sig |
| ENSG00000213077 | FAM106B  | family with sequence similarity 106 member B             | 100996259 | 52.28785163 | -1.13186526  | 0.730070482 | -1.550350668 | 0.121057372 | 0.999371363 | Not Sig |
| ENSG00000255221 | CARD17   | caspase recruitment domain family member 17              | 440068    | 5.171061278 | -1.129856554 | 1.516311258 | -0.745134977 | 0.456190127 | NA          | NA      |
| ENSG00000254793 | NA       | NA                                                       | NA        | 1.515206666 | -1.129574964 | 1.840602568 | -0.613698461 | 0.539414605 | NA          | NA      |
| ENSG00000242818 | NA       | NA                                                       | NA        | 3.146432621 | -1.128890195 | 1.398393929 | -0.807276241 | 0.419507349 | NA          | NA      |
| ENSG00000196557 | CACNA1H  | calcium voltage-gated channel subunit alpha H            | 8912      | 1017.348934 | -1.128723066 | 0.881841329 | -1.279961632 | 0.20055863  | 0.999371363 | Not Sig |
| ENSG00000187736 | NHEJ1    | non-homologous end joining factor 1                      | 79840     | 21.15529032 | -1.12850942  | 0.916211635 | -1.231712606 | 0.218056459 | 0.999371363 | Not Sig |
| ENSG00000252602 | NA       | NA                                                       | NA        | 3.391617458 | -1.12813239  | 1.735421581 | -0.650062442 | 0.515651889 | NA          | NA      |
| ENSG00000213613 | NA       | NA                                                       | NA        | 58.55357336 | -1.127027047 | 0.554324973 | -2.033152218 | 0.042037147 | 0.999371363 | Not Sig |
| ENSG00000167748 | KLK1     | kallikrein 1                                             | 3816      | 8.821455377 | -1.126829044 | 1.187634942 | -0.948800852 | 0.342721909 | 0.999371363 | Not Sig |

|                 |                 |                                         |           |             |              |             |              |             |             |         |
|-----------------|-----------------|-----------------------------------------|-----------|-------------|--------------|-------------|--------------|-------------|-------------|---------|
| ENSG00000260917 | LOC103344931    | uncharacterized LOC103344931            | 103344931 | 134.6369459 | -1.126296799 | 0.468743196 | -2.40280138  | 0.016270022 | 0.654298425 | Not Sig |
| ENSG00000237481 | NA              | NA                                      | NA        | 18.66805174 | -1.12619442  | 0.837799084 | -1.344229711 | 0.178874117 | 0.999371363 | Not Sig |
| ENSG00000207725 | MIR222          | microRNA 222                            | 407007    | 2.68533409  | -1.124651049 | 1.676779729 | -0.670720805 | 0.502398407 | NA          | NA      |
| ENSG00000259726 | NA              | NA                                      | NA        | 210.5120658 | -1.124552901 | 0.722627817 | -1.556199298 | 0.119660708 | 0.999371363 | Not Sig |
| ENSG00000254996 | ANKHD1-EIF4EBP3 | ANKHD1-EIF4EBP3 readthrough             | 404734    | 76.53482783 | -1.124347883 | 0.712092742 | -1.578934621 | 0.114351054 | 0.999371363 | Not Sig |
| ENSG00000260816 | NA              | NA                                      | NA        | 27.70212943 | -1.124052843 | 1.022064496 | -1.099786606 | 0.271425109 | 0.999371363 | Not Sig |
| ENSG00000183091 | NEB             | nebulin                                 | 4703      | 337.4048884 | -1.123848459 | 0.540277844 | -2.080130568 | 0.037513558 | 0.999371363 | Not Sig |
| ENSG00000095587 | TLL2            | tolloid like 2                          | 7093      | 16.94471909 | -1.123830947 | 1.536601977 | -0.731374139 | 0.464550657 | 0.999371363 | Not Sig |
| ENSG00000206969 | NA              | NA                                      | NA        | 3.491069666 | -1.123593535 | 2.31882701  | -0.484552547 | 0.627993781 | NA          | NA      |
| ENSG00000199483 | NA              | NA                                      | NA        | 1.391150531 | -1.123225984 | 2.742317662 | -0.409590034 | 0.682106709 | NA          | NA      |
| ENSG00000228238 | NA              | NA                                      | NA        | 1.391150531 | -1.123225984 | 2.742317662 | -0.409590034 | 0.682106709 | NA          | NA      |
| ENSG00000250420 | AACSP1          | acetoacetyl-CoA synthetase pseudogene 1 | 729522    | 8.119120165 | -1.122858933 | 0.981816741 | -1.143654295 | 0.252767035 | 0.999371363 | Not Sig |
| ENSG00000253348 | NA              | NA                                      | NA        | 2.512954496 | -1.122338759 | 1.760277425 | -0.637591975 | 0.523739321 | NA          | NA      |
| ENSG00000234999 | NA              | NA                                      | NA        | 17.15922727 | -1.12169644  | 0.9098535   | -1.232831923 | 0.217638479 | 0.999371363 | Not Sig |
| ENSG00000203443 | NA              | NA                                      | NA        | 38.94179292 | -1.121565219 | 0.919975224 | -1.21912546  | 0.222796578 | 0.999371363 | Not Sig |
| ENSG00000256694 | NA              | NA                                      | NA        | 25.38315419 | -1.121173775 | 1.054083896 | -1.063647571 | 0.287488384 | 0.999371363 | Not Sig |
| ENSG00000231981 | NA              | NA                                      | NA        | 34.85552866 | -1.121015106 | 0.720498948 | -1.555887221 | 0.119734913 | 0.999371363 | Not Sig |
| ENSG00000206698 | NA              | NA                                      | NA        | 5.230720261 | -1.120707026 | 1.323399863 | -0.846839309 | 0.397084695 | NA          | NA      |
| ENSG00000202382 | NA              | NA                                      | NA        | 9.127092495 | -1.120543649 | 0.962437639 | -1.164276628 | 0.244311925 | 0.999371363 | Not Sig |
| ENSG00000075073 | TACR2           | tachykinin receptor 2                   | 6865      | 10.64492669 | -1.120007838 | 1.024722417 | -1.092986568 | 0.274399697 | 0.999371363 | Not Sig |
| ENSG00000253552 | NA              | NA                                      | NA        | 150.4134918 | -1.119727683 | 0.722986152 | -1.548753984 | 0.121440871 | 0.999371363 | Not Sig |
| ENSG00000200419 | NA              | NA                                      | NA        | 4.635878247 | -1.119685706 | 1.163306585 | -0.96250268  | 0.335797157 | NA          | NA      |
| ENSG00000188848 | BEND4           | BEN domain containing 4                 | 389206    | 23.74608625 | -1.119116615 | 1.185016152 | -0.944389334 | 0.34497073  | 0.999371363 | Not Sig |
| ENSG00000273219 | NA              | NA                                      | NA        | 8.930491407 | -1.118740482 | 1.203590394 | -0.929502667 | 0.352628644 | 0.999371363 | Not Sig |
| ENSG00000105146 | AURKC           | aurora kinase C                         | 6795      | 17.73977006 | -1.118383425 | 0.713964424 | -1.56644139  | 0.11724532  | 0.999371363 | Not Sig |
| ENSG00000225015 | NA              | NA                                      | NA        | 5.863428135 | -1.118309996 | 1.350944823 | -0.827798425 | 0.407784667 | NA          | NA      |
| ENSG00000226499 | NA              | NA                                      | NA        | 2.872741219 | -1.118109177 | 1.518268942 | -0.736436837 | 0.461464894 | NA          | NA      |
| ENSG00000101489 | CELF4           | CUGBP Elav-like family member 4         | 56853     | 36.11122099 | -1.117514007 | 0.809958718 | -1.379717241 | 0.167673722 | 0.999371363 | Not Sig |
| ENSG00000145014 | TMEM44          | transmembrane protein 44                | 93109     | 415.8392276 | -1.117444355 | 0.568409662 | -1.965913722 | 0.049308578 | 0.999371363 | Not Sig |
| ENSG00000187762 | NA              | NA                                      | NA        | 28.73188758 | -1.116804544 | 0.643518617 | -1.735465787 | 0.082658336 | 0.999371363 | Not Sig |
| ENSG00000215146 | LOC441666       | zinc finger protein 91 pseudogene       | 441666    | 136.2585179 | -1.116443294 | 0.769015966 | -1.451781683 | 0.146562318 | 0.999371363 | Not Sig |
| ENSG00000248506 | NA              | NA                                      | NA        | 1.405624913 | -1.116382087 | 2.389137705 | -0.467274065 | 0.640303809 | NA          | NA      |
| ENSG00000253173 | NA              | NA                                      | NA        | 1.405624913 | -1.116382087 | 2.389137705 | -0.467274065 | 0.640303809 | NA          | NA      |
| ENSG00000248780 | NA              | NA                                      | NA        | 15.95020412 | -1.11615673  | 0.978871395 | -1.140248592 | 0.254182748 | 0.999371363 | Not Sig |
| ENSG00000104290 | FZD3            | frizzled class receptor 3               | 7976      | 516.2049332 | -1.115965285 | 0.836317409 | -1.334380073 | 0.182079327 | 0.999371363 | Not Sig |

|                 |             |                                                     |           |             |              |             |              |             |             |         |
|-----------------|-------------|-----------------------------------------------------|-----------|-------------|--------------|-------------|--------------|-------------|-------------|---------|
| ENSG00000251739 | NA          | NA                                                  | NA        | 6.827915231 | -1.115220793 | 1.074147052 | -1.03825273  | 0.29915241  | 0.999371363 | Not Sig |
| ENSG00000086991 | NOX4        | NADPH oxidase 4                                     | 50507     | 157.2135019 | -1.115220793 | 0.641561342 | -1.738291759 | 0.082159418 | 0.999371363 | Not Sig |
| ENSG00000265413 | NA          | NA                                                  | NA        | 34.30690885 | -1.113860771 | 0.994976336 | -1.119484685 | 0.262933421 | 0.999371363 | Not Sig |
| ENSG00000204978 | ERICH4      | glutamate rich 4                                    | 100170765 | 0.928634598 | -1.113567007 | 2.633466823 | -0.422852112 | 0.672403164 | NA          | NA      |
| ENSG00000225992 | NA          | NA                                                  | NA        | 0.928634598 | -1.113567007 | 2.633466823 | -0.422852112 | 0.672403164 | NA          | NA      |
| ENSG00000232709 | NA          | NA                                                  | NA        | 0.928634598 | -1.113567007 | 2.633466823 | -0.422852112 | 0.672403164 | NA          | NA      |
| ENSG00000262151 | NA          | NA                                                  | NA        | 0.928634598 | -1.113567007 | 2.633466823 | -0.422852112 | 0.672403164 | NA          | NA      |
| ENSG00000267449 | NA          | NA                                                  | NA        | 0.928634598 | -1.113567007 | 2.633466823 | -0.422852112 | 0.672403164 | NA          | NA      |
| ENSG00000228203 | RNF144A-AS1 | RNF144A antisense RNA 1                             | 386597    | 19.85863878 | -1.112855343 | 0.980391704 | -1.135112974 | 0.256327986 | 0.999371363 | Not Sig |
| ENSG00000265526 | MIR4304     | microRNA 4304                                       | 100422931 | 3.472188359 | -1.112455745 | 1.28317688  | -0.866954325 | 0.385967036 | NA          | NA      |
| ENSG00000104722 | NEFM        | neurofilament medium                                | 4741      | 1.418914991 | -1.112213836 | 2.706025775 | -0.411013763 | 0.681062443 | NA          | NA      |
| ENSG00000126217 | MCF2L       | MCF.2 cell line derived transforming sequence like  | 23263     | 1406.641922 | -1.112156575 | 0.467869522 | -2.377065662 | 0.017450981 | 0.670000634 | Not Sig |
| ENSG00000215795 | NA          | NA                                                  | NA        | 20.20735033 | -1.111974424 | 1.209321154 | -0.919502996 | 0.357832539 | 0.999371363 | Not Sig |
| ENSG00000264947 | MIR3181     | microRNA 3181                                       | 100422972 | 9.727921846 | -1.111446562 | 1.355015588 | -0.820246329 | 0.412075696 | 0.999371363 | Not Sig |
| ENSG00000228350 | CELSR3-AS1  | CELSR3 antisense RNA 1 (head to head)               | 102724368 | 2.006904462 | -1.111358385 | 1.936089647 | -0.574022172 | 0.565952798 | NA          | NA      |
| ENSG00000111291 | GPRC5D      | G protein-coupled receptor class C group 5 member D | 55507     | 1.044653887 | -1.111355111 | 2.619853202 | -0.424205108 | 0.671416236 | NA          | NA      |
| ENSG00000186652 | PRG2        | proteoglycan 2, pro eosinophil major basic protein  | 5553      | 1.044653887 | -1.111355111 | 2.619853202 | -0.424205108 | 0.671416236 | NA          | NA      |
| ENSG00000136153 | LMO7        | LIM domain 7                                        | 4008      | 11044.99101 | -1.111202997 | 0.705719772 | -1.574566904 | 0.115356447 | 0.999371363 | Not Sig |
| ENSG00000207550 | MIR99B      | microRNA 99b                                        | 407056    | 12.34611355 | -1.108260733 | 0.986666397 | -1.123237537 | 0.261336624 | 0.999371363 | Not Sig |
| ENSG00000255893 | NA          | NA                                                  | NA        | 66.05779158 | -1.10809988  | 1.016056722 | -1.090588601 | 0.275453948 | 0.999371363 | Not Sig |
| ENSG00000249465 | NA          | NA                                                  | NA        | 2.895070539 | -1.107908106 | 1.432328703 | -0.773501294 | 0.439225763 | NA          | NA      |
| ENSG00000233873 | NA          | NA                                                  | NA        | 0.90589027  | -1.107579478 | 3.095949825 | -0.357751107 | 0.720529583 | NA          | NA      |
| ENSG00000267600 | NA          | NA                                                  | NA        | 0.90589027  | -1.107579478 | 3.095949825 | -0.357751107 | 0.720529583 | NA          | NA      |
| ENSG00000268903 | NA          | NA                                                  | NA        | 0.90589027  | -1.107579478 | 3.095949825 | -0.357751107 | 0.720529583 | NA          | NA      |
| ENSG00000206052 | DOK6        | docking protein 6                                   | 220164    | 217.7718843 | -1.107110612 | 0.722926791 | -1.531428392 | 0.125663552 | 0.999371363 | Not Sig |
| ENSG00000262322 | NA          | NA                                                  | NA        | 1.826488022 | -1.107080256 | 2.567668642 | -0.431161653 | 0.666350834 | NA          | NA      |
| ENSG00000236349 | NA          | NA                                                  | NA        | 3.604099432 | -1.106252505 | 1.494548116 | -0.740191964 | 0.459183523 | NA          | NA      |
| ENSG00000271698 | NA          | NA                                                  | NA        | 1.147383097 | -1.106029311 | 2.954823761 | -0.374313123 | 0.70817137  | NA          | NA      |
| ENSG00000248874 | C5orf17     | chromosome 5 open reading frame 17 (putative)       | 439936    | 6.299584743 | -1.105036666 | 1.245838985 | -0.886981929 | 0.37508863  | NA          | NA      |
| ENSG00000206644 | NA          | NA                                                  | NA        | 2.567715491 | -1.104635459 | 1.792162434 | -0.616370167 | 0.537650238 | NA          | NA      |
| ENSG00000140323 | DISP2       | dispatched RND transporter family member 2          | 85455     | 34.68645534 | -1.104438615 | 0.969643982 | -1.139014562 | 0.25469708  | 0.999371363 | Not Sig |
| ENSG00000212389 | NA          | NA                                                  | NA        | 7.359362488 | -1.104374401 | 1.514430618 | -0.729234069 | 0.465858495 | 0.999371363 | Not Sig |
| ENSG00000198727 | CYTb        | cytochrome b                                        | 4519      | 48902.10004 | -1.102986456 | 0.825007402 | -1.336941285 | 0.181241803 | 0.999371363 | Not Sig |
| ENSG00000207525 | NA          | NA                                                  | NA        | 12.08148539 | -1.102857386 | 0.90604617  | -1.217219852 | 0.223520579 | 0.999371363 | Not Sig |
| ENSG00000119986 | AVPI1       | arginine vasopressin induced 1                      | 60370     | 478.8556049 | -1.102552006 | 0.518979374 | -2.124462093 | 0.033631523 | 0.949600368 | Not Sig |



|                 |              |                                                               |           |             |              |             |              |             |             |         |
|-----------------|--------------|---------------------------------------------------------------|-----------|-------------|--------------|-------------|--------------|-------------|-------------|---------|
| ENSG00000198488 | B3GNT6       | UDP-GlcNAc:betaGal beta-1,3-N-acetylglucosaminyltransferase 6 | 192134    | 328.9591158 | -1.102323678 | 1.443132604 | -0.76384088  | 0.444962072 | 0.999371363 | Not Sig |
| ENSG00000014914 | MTMR11       | myotubularin related protein 11                               | 10903     | 520.2959332 | -1.101105086 | 0.511188498 | -2.1540099   | 0.031239396 | 0.912173933 | Not Sig |
| ENSG00000228363 | NA           | NA                                                            | NA        | 2.527246969 | -1.101097425 | 1.499845512 | -0.734140561 | 0.462863075 | NA          | NA      |
| ENSG00000167711 | SERPINF2     | serpin family F member 2                                      | 5345      | 134.3636611 | -1.10101181  | 0.663587685 | -1.659180596 | 0.097079406 | 0.999371363 | Not Sig |
| ENSG00000200769 | NA           | NA                                                            | NA        | 11.31337939 | -1.100791621 | 1.020611001 | -1.078561392 | 0.2807833   | 0.999371363 | Not Sig |
| ENSG00000224660 | SH3BP5-AS1   | SH3BP5 antisense RNA 1                                        | 100505696 | 684.5055886 | -1.100458098 | 0.687472234 | -1.600730974 | 0.109436518 | 0.999371363 | Not Sig |
| ENSG00000198650 | TAT          | tyrosine aminotransferase                                     | 6898      | 8.442911406 | -1.100432147 | 1.248298606 | -0.881545603 | 0.378022583 | 0.999371363 | Not Sig |
| ENSG00000229587 | NA           | NA                                                            | NA        | 15.22306474 | -1.100281418 | 0.972752937 | -1.131100587 | 0.258012757 | 0.999371363 | Not Sig |
| ENSG00000248477 | NA           | NA                                                            | NA        | 7.636356714 | -1.100098101 | 1.015088359 | -1.083746151 | 0.278477367 | 0.999371363 | Not Sig |
| ENSG00000144218 | AFF3         | AF4/FMR2 family member 3                                      | 3899      | 639.5444462 | -1.099568972 | 1.113580833 | -0.987417293 | 0.32343811  | 0.999371363 | Not Sig |
| ENSG00000102003 | SYP          | synaptophysin                                                 | 6855      | 80.38859338 | -1.099565132 | 0.891954363 | -1.232759408 | 0.21766554  | 0.999371363 | Not Sig |
| ENSG00000227953 | NA           | NA                                                            | NA        | 56.44219931 | -1.099188232 | 0.770766272 | -1.426097992 | 0.153840058 | 0.999371363 | Not Sig |
| ENSG00000239627 | NA           | NA                                                            | NA        | 50.16874841 | -1.098517647 | 0.66580536  | -1.649908086 | 0.098961737 | 0.999371363 | Not Sig |
| ENSG00000230849 | NA           | NA                                                            | NA        | 2.739557933 | -1.098107619 | 2.044977861 | -0.536977754 | 0.59128298  | NA          | NA      |
| ENSG00000107281 | NPDC1        | neural proliferation, differentiation and control 1           | 56654     | 1311.675994 | -1.098079091 | 0.851408648 | -1.289720387 | 0.197147759 | 0.999371363 | Not Sig |
| ENSG00000225623 | AGBL4-IT1    | AGBL4 intronic transcript 1                                   | 100874313 | 10.64078334 | -1.097723957 | 1.154813553 | -0.950563798 | 0.341825853 | 0.999371363 | Not Sig |
| ENSG00000252328 | NA           | NA                                                            | NA        | 4.773922804 | -1.097363448 | 1.423085161 | -0.771115797 | 0.440638298 | NA          | NA      |
| ENSG00000227382 | NA           | NA                                                            | NA        | 14.57637492 | -1.095470024 | 0.992656207 | -1.103574447 | 0.269777781 | 0.999371363 | Not Sig |
| ENSG00000228962 | HCG23        | HLA complex group 23 (non-protein coding)                     | 414764    | 3.538284878 | -1.095246588 | 1.602162927 | -0.683605    | 0.494224626 | NA          | NA      |
| ENSG00000165113 | GKAP1        | G kinase anchoring protein 1                                  | 80318     | 181.3880333 | -1.095114458 | 0.533609224 | -2.052277975 | 0.040142655 | 0.999371363 | Not Sig |
| ENSG00000254577 | NA           | NA                                                            | NA        | 47.52606911 | -1.094987789 | 0.798323913 | -1.371608406 | 0.170185376 | 0.999371363 | Not Sig |
| ENSG00000229127 | NA           | NA                                                            | NA        | 106.3086602 | -1.094580334 | 0.660805094 | -1.656434467 | 0.097633866 | 0.999371363 | Not Sig |
| ENSG00000262038 | NA           | NA                                                            | NA        | 14.9887078  | -1.094040228 | 1.014168197 | -1.078756198 | 0.280696426 | 0.999371363 | Not Sig |
| ENSG00000270808 | NA           | NA                                                            | NA        | 3.121673976 | -1.093905737 | 1.734703135 | -0.630601119 | 0.528301367 | NA          | NA      |
| ENSG00000222421 | NA           | NA                                                            | NA        | 4.759779664 | -1.093383218 | 1.287714126 | -0.84908847  | 0.395832066 | NA          | NA      |
| ENSG00000266340 | NA           | NA                                                            | NA        | 1.972873477 | -1.093133738 | 1.889670815 | -0.578478394 | 0.56294118  | NA          | NA      |
| ENSG00000120784 | ZFP30        | ZFP30 zinc finger protein                                     | 22835     | 301.6184497 | -1.092578944 | 0.505864892 | -2.159823621 | 0.030786326 | 0.910075605 | Not Sig |
| ENSG00000204683 | C10orf113    | chromosome 10 open reading frame 113                          | 387638    | 36.06179799 | -1.091928902 | 0.614274703 | -1.777590543 | 0.075471128 | 0.999371363 | Not Sig |
| ENSG00000204314 | PRRT1        | proline rich transmembrane protein 1                          | 80863     | 46.42595551 | -1.091902258 | 0.809345676 | -1.349117306 | 0.177299291 | 0.999371363 | Not Sig |
| ENSG00000204314 | LOC100507547 | uncharacterized LOC100507547                                  | 100507547 | 46.42595551 | -1.091902258 | 0.809345676 | -1.349117306 | 0.177299291 | 0.999371363 | Not Sig |
| ENSG00000165511 | NA           | NA                                                            | NA        | 33.32028731 | -1.091891823 | 0.846434242 | -1.289990136 | 0.197054083 | 0.999371363 | Not Sig |
| ENSG00000117335 | CD46         | CD46 molecule                                                 | 4179      | 12630.74247 | -1.091284269 | 0.737841594 | -1.479022432 | 0.139134319 | 0.999371363 | Not Sig |
| ENSG00000214711 | CAPN14       | calpain 14                                                    | 440854    | 11.93301371 | -1.09109091  | 1.019744685 | -1.069964792 | 0.284635157 | 0.999371363 | Not Sig |
| ENSG00000165028 | NIPSNAP3B    | nipsnap homolog 3B                                            | 55335     | 60.94373728 | -1.090479934 | 0.700448463 | -1.556831075 | 0.119510597 | 0.999371363 | Not Sig |
| ENSG00000207726 | MIR455       | microRNA 455                                                  | 619556    | 0.935072133 | -1.090458082 | 3.035728671 | -0.359208019 | 0.719439478 | NA          | NA      |

|                 |          |                                                     |           |             |              |             |              |             |             |         |
|-----------------|----------|-----------------------------------------------------|-----------|-------------|--------------|-------------|--------------|-------------|-------------|---------|
| ENSG00000135048 | TMEM2    | transmembrane protein 2                             | 23670     | 5059.108174 | -1.088729552 | 0.42168604  | -2.581848697 | 0.009827266 | 0.491090314 | Not Sig |
| ENSG00000213669 | NA       | NA                                                  | NA        | 1.028347095 | -1.08855406  | 2.309021501 | -0.47143522  | 0.637329969 | NA          | NA      |
| ENSG00000251661 | NA       | NA                                                  | NA        | 41.53356322 | -1.088442752 | 0.664548829 | -1.637867233 | 0.101449393 | 0.999371363 | Not Sig |
| ENSG00000136010 | ALDH1L2  | aldehyde dehydrogenase 1 family member L2           | 160428    | 287.5619389 | -1.086048568 | 0.582659245 | -1.863951491 | 0.062328517 | 0.999371363 | Not Sig |
| ENSG00000162782 | TDRD5    | tudor domain containing 5                           | 163589    | 65.86185136 | -1.084668257 | 1.416980426 | -0.765478646 | 0.443986578 | 0.999371363 | Not Sig |
| ENSG00000140564 | FURIN    | furin, paired basic amino acid cleaving enzyme      | 5045      | 7053.803544 | -1.084284301 | 0.567549623 | -1.910466077 | 0.05607323  | 0.999371363 | Not Sig |
| ENSG00000229372 | SZT2-AS1 | SZT2 antisense RNA 1                                | 100873952 | 9.848846844 | -1.084253005 | 0.942791277 | -1.150045649 | 0.25012507  | 0.999371363 | Not Sig |
| ENSG00000240344 | PPIL3    | peptidylprolyl isomerase like 3                     | 53938     | 359.6035221 | -1.083815562 | 0.737610218 | -1.469360831 | 0.141734945 | 0.999371363 | Not Sig |
| ENSG00000197927 | NA       | NA                                                  | NA        | 68.4899151  | -1.083648957 | 0.585969791 | -1.849325638 | 0.064410806 | 0.999371363 | Not Sig |
| ENSG00000197497 | ZNF665   | zinc finger protein 665                             | 79788     | 84.68890542 | -1.083365102 | 0.521483705 | -2.077466833 | 0.037758493 | 0.999371363 | Not Sig |
| ENSG00000201264 | SNORD73B | small nucleolar RNA, C/D box U73B (pseudogene)      | 114655    | 5.26762402  | -1.083130151 | 1.471604638 | -0.7360198   | 0.461718648 | NA          | NA      |
| ENSG00000047457 | CP       | ceruloplasmin                                       | 1356      | 8296.847688 | -1.08293966  | 1.194617617 | -0.906515729 | 0.364662943 | 0.999371363 | Not Sig |
| ENSG00000165349 | SLC7A3   | solute carrier family 7 member 3                    | 84889     | 0.912327806 | -1.082710156 | 2.680695091 | -0.403891572 | 0.686292454 | NA          | NA      |
| ENSG00000223500 | NA       | NA                                                  | NA        | 0.912327806 | -1.082710156 | 2.680695091 | -0.403891572 | 0.686292454 | NA          | NA      |
| ENSG00000091513 | TF       | transferrin                                         | 7018      | 34.45757942 | -1.082647382 | 0.992462666 | -1.090869631 | 0.275330252 | 0.999371363 | Not Sig |
| ENSG00000234523 | NA       | NA                                                  | NA        | 7.977612273 | -1.082268333 | 1.065794702 | -1.015456665 | 0.309888194 | 0.999371363 | Not Sig |
| ENSG00000200879 | SNORD14E | small nucleolar RNA, C/D box 14E                    | 85391     | 5.447763598 | -1.081870836 | 1.081965925 | -0.999912114 | 0.317353041 | NA          | NA      |
| ENSG00000234741 | GAS5     | growth arrest specific 5 (non-protein coding)       | 60674     | 1791.767172 | -1.081054289 | 0.674345745 | -1.603115755 | 0.1089091   | 0.999371363 | Not Sig |
| ENSG00000203431 | NA       | NA                                                  | NA        | 1.935654768 | -1.079523862 | 1.914693868 | -0.563810163 | 0.572883335 | NA          | NA      |
| ENSG00000244701 | NA       | NA                                                  | NA        | 73.94716456 | -1.07919594  | 0.487291841 | -2.214680916 | 0.026781974 | 0.841215479 | Not Sig |
| ENSG00000264535 | NA       | NA                                                  | NA        | 5.249574098 | -1.077670463 | 1.336767875 | -0.806176213 | 0.420141252 | NA          | NA      |
| ENSG00000211678 | NA       | NA                                                  | NA        | 9.499002244 | -1.077302948 | 1.132187149 | -0.951523738 | 0.341338574 | 0.999371363 | Not Sig |
| ENSG00000230832 | NA       | NA                                                  | NA        | 2.890454515 | -1.077253961 | 1.776548356 | -0.606374691 | 0.544265971 | NA          | NA      |
| ENSG00000179979 | NA       | NA                                                  | NA        | 307.7531394 | -1.076361732 | 0.586773518 | -1.834373397 | 0.066598586 | 0.999371363 | Not Sig |
| ENSG00000267015 | NA       | NA                                                  | NA        | 1.404025602 | -1.076220592 | 2.356804452 | -0.456643991 | 0.647926954 | NA          | NA      |
| ENSG00000196143 | NA       | NA                                                  | NA        | 0.503166363 | -1.076164374 | 3.73503019  | -0.288127356 | 0.773249253 | NA          | NA      |
| ENSG00000203457 | NA       | NA                                                  | NA        | 0.503166363 | -1.076164374 | 3.73503019  | -0.288127356 | 0.773249253 | NA          | NA      |
| ENSG00000212316 | NA       | NA                                                  | NA        | 0.503166363 | -1.076164374 | 3.73503019  | -0.288127356 | 0.773249253 | NA          | NA      |
| ENSG00000214192 | NA       | NA                                                  | NA        | 0.503166363 | -1.076164374 | 3.73503019  | -0.288127356 | 0.773249253 | NA          | NA      |
| ENSG00000223442 | TH2LCRR  | T helper type 2 locus control region associated RNA | 101927761 | 0.503166363 | -1.076164374 | 3.73503019  | -0.288127356 | 0.773249253 | NA          | NA      |
| ENSG00000224794 | NA       | NA                                                  | NA        | 0.503166363 | -1.076164374 | 3.73503019  | -0.288127356 | 0.773249253 | NA          | NA      |
| ENSG00000228986 | NA       | NA                                                  | NA        | 0.503166363 | -1.076164374 | 3.73503019  | -0.288127356 | 0.773249253 | NA          | NA      |
| ENSG00000229828 | NA       | NA                                                  | NA        | 0.503166363 | -1.076164374 | 3.73503019  | -0.288127356 | 0.773249253 | NA          | NA      |
| ENSG00000235428 | NA       | NA                                                  | NA        | 0.503166363 | -1.076164374 | 3.73503019  | -0.288127356 | 0.773249253 | NA          | NA      |
| ENSG00000238025 | NA       | NA                                                  | NA        | 0.503166363 | -1.076164374 | 3.73503019  | -0.288127356 | 0.773249253 | NA          | NA      |

|                 |          |                                                                 |           |             |              |             |              |             |             |         |
|-----------------|----------|-----------------------------------------------------------------|-----------|-------------|--------------|-------------|--------------|-------------|-------------|---------|
| ENSG00000254503 | NA       | NA                                                              | NA        | 0.503166363 | -1.076164374 | 3.73503019  | -0.288127356 | 0.773249253 | NA          | NA      |
| ENSG00000258757 | NA       | NA                                                              | NA        | 0.503166363 | -1.076164374 | 3.73503019  | -0.288127356 | 0.773249253 | NA          | NA      |
| ENSG00000259216 | NA       | NA                                                              | NA        | 0.503166363 | -1.076164374 | 3.73503019  | -0.288127356 | 0.773249253 | NA          | NA      |
| ENSG00000263515 | MIR548AN | microRNA 548an                                                  | 100616144 | 0.503166363 | -1.076164374 | 3.73503019  | -0.288127356 | 0.773249253 | NA          | NA      |
| ENSG00000269804 | NA       | NA                                                              | NA        | 0.503166363 | -1.076164374 | 3.73503019  | -0.288127356 | 0.773249253 | NA          | NA      |
| ENSG00000269907 | NA       | NA                                                              | NA        | 0.503166363 | -1.076164374 | 3.73503019  | -0.288127356 | 0.773249253 | NA          | NA      |
| ENSG00000124194 | GDAP1L1  | ganglioside induced differentiation associated protein 1 like 1 | 78997     | 0.509603898 | -1.076075726 | 3.719976718 | -0.289269479 | 0.772375167 | NA          | NA      |
| ENSG00000183571 | PGPEP1L  | pyroglutamyl-peptidase I-like                                   | 145814    | 0.509603898 | -1.076075726 | 3.719976718 | -0.289269479 | 0.772375167 | NA          | NA      |
| ENSG00000215024 | NA       | NA                                                              | NA        | 0.509603898 | -1.076075726 | 3.719976718 | -0.289269479 | 0.772375167 | NA          | NA      |
| ENSG00000215268 | NA       | NA                                                              | NA        | 0.509603898 | -1.076075726 | 3.719976718 | -0.289269479 | 0.772375167 | NA          | NA      |
| ENSG00000223092 | NA       | NA                                                              | NA        | 0.509603898 | -1.076075726 | 3.719976718 | -0.289269479 | 0.772375167 | NA          | NA      |
| ENSG00000228487 | NA       | NA                                                              | NA        | 0.509603898 | -1.076075726 | 3.719976718 | -0.289269479 | 0.772375167 | NA          | NA      |
| ENSG00000240663 | NA       | NA                                                              | NA        | 0.509603898 | -1.076075726 | 3.719976718 | -0.289269479 | 0.772375167 | NA          | NA      |
| ENSG00000260070 | NA       | NA                                                              | NA        | 0.509603898 | -1.076075726 | 3.719976718 | -0.289269479 | 0.772375167 | NA          | NA      |
| ENSG00000260922 | NA       | NA                                                              | NA        | 0.509603898 | -1.076075726 | 3.719976718 | -0.289269479 | 0.772375167 | NA          | NA      |
| ENSG00000261431 | NA       | NA                                                              | NA        | 0.509603898 | -1.076075726 | 3.719976718 | -0.289269479 | 0.772375167 | NA          | NA      |
| ENSG00000271933 | NA       | NA                                                              | NA        | 0.509603898 | -1.076075726 | 3.719976718 | -0.289269479 | 0.772375167 | NA          | NA      |
| ENSG00000166268 | MYRFL    | myelin regulatory factor-like                                   | 196446    | 35.61469446 | -1.075821209 | 0.992999383 | -1.083405717 | 0.278628379 | 0.999371363 | Not Sig |
| ENSG00000259585 | NA       | NA                                                              | NA        | 22.12227616 | -1.075686095 | 0.750689264 | -1.432931236 | 0.15187749  | 0.999371363 | Not Sig |
| ENSG00000136696 | IL36B    | interleukin 36 beta                                             | 27177     | 0.544504237 | -1.075605203 | 3.643036826 | -0.29524961  | 0.767803207 | NA          | NA      |
| ENSG00000176269 | OR4F21   | olfactory receptor family 4 subfamily F member 21               | 441308    | 0.544504237 | -1.075605203 | 3.643036826 | -0.29524961  | 0.767803207 | NA          | NA      |
| ENSG00000215972 | NA       | NA                                                              | NA        | 0.544504237 | -1.075605203 | 3.643036826 | -0.29524961  | 0.767803207 | NA          | NA      |
| ENSG00000224195 | NA       | NA                                                              | NA        | 0.544504237 | -1.075605203 | 3.643036826 | -0.29524961  | 0.767803207 | NA          | NA      |
| ENSG00000225297 | NA       | NA                                                              | NA        | 0.544504237 | -1.075605203 | 3.643036826 | -0.29524961  | 0.767803207 | NA          | NA      |
| ENSG00000230641 | NA       | NA                                                              | NA        | 0.544504237 | -1.075605203 | 3.643036826 | -0.29524961  | 0.767803207 | NA          | NA      |
| ENSG00000241582 | NA       | NA                                                              | NA        | 0.544504237 | -1.075605203 | 3.643036826 | -0.29524961  | 0.767803207 | NA          | NA      |
| ENSG00000252018 | NA       | NA                                                              | NA        | 0.544504237 | -1.075605203 | 3.643036826 | -0.29524961  | 0.767803207 | NA          | NA      |
| ENSG00000254693 | NA       | NA                                                              | NA        | 0.544504237 | -1.075605203 | 3.643036826 | -0.29524961  | 0.767803207 | NA          | NA      |
| ENSG00000259876 | NA       | NA                                                              | NA        | 0.544504237 | -1.075605203 | 3.643036826 | -0.29524961  | 0.767803207 | NA          | NA      |
| ENSG00000263887 | NA       | NA                                                              | NA        | 0.544504237 | -1.075605203 | 3.643036826 | -0.29524961  | 0.767803207 | NA          | NA      |
| ENSG00000166582 | CENPV    | centromere protein V                                            | 201161    | 105.9343934 | -1.0744603   | 0.528883159 | -2.031564594 | 0.042197754 | 0.999371363 | Not Sig |
| ENSG00000153233 | PTPRR    | protein tyrosine phosphatase, receptor type R                   | 5801      | 15.68987596 | -1.073774165 | 0.811947927 | -1.322466787 | 0.186012762 | 0.999371363 | Not Sig |
| ENSG00000105193 | RPS16    | ribosomal protein S16                                           | 6217      | 5732.44035  | -1.073581164 | 0.532266731 | -2.016998438 | 0.043695676 | 0.999371363 | Not Sig |
| ENSG00000251639 | NA       | NA                                                              | NA        | 14.21804562 | -1.073439984 | 1.24300262  | -0.86358626  | 0.387815215 | 0.999371363 | Not Sig |
| ENSG00000243414 | TICAM2   | toll like receptor adaptor molecule 2                           | 353376    | 38.24227589 | -1.072823266 | 0.819481485 | -1.309148878 | 0.190483925 | 0.999371363 | Not Sig |

|                 |            |                                                                           |           |             |              |             |              |             |             |         |
|-----------------|------------|---------------------------------------------------------------------------|-----------|-------------|--------------|-------------|--------------|-------------|-------------|---------|
| ENSG00000211581 | MIR765     | microRNA 765                                                              | 768220    | 3.321956176 | -1.072262147 | 1.319600512 | -0.812565725 | 0.41646709  | NA          | NA      |
| ENSG00000235369 | NA         | NA                                                                        | NA        | 3.880934794 | -1.071704691 | 1.39177599  | -0.770026713 | 0.441284047 | NA          | NA      |
| ENSG00000074370 | ATP2A3     | ATPase sarcoplasmic/endoplasmic reticulum Ca <sup>2+</sup> transporting 3 | 489       | 1968.281715 | -1.071543071 | 0.626963323 | -1.709100088 | 0.087432411 | 0.999371363 | Not Sig |
| ENSG00000235090 | NA         | NA                                                                        | NA        | 31.85488843 | -1.070117254 | 0.690905024 | -1.548863037 | 0.121414648 | 0.999371363 | Not Sig |
| ENSG00000165929 | TC2N       | tandem C2 domains, nuclear                                                | 123036    | 4161.814637 | -1.069528496 | 0.794872112 | -1.345535313 | 0.178452425 | 0.999371363 | Not Sig |
| ENSG00000260934 | NA         | NA                                                                        | NA        | 60.82792092 | -1.069459184 | 0.868686307 | -1.231122414 | 0.218277084 | 0.999371363 | Not Sig |
| ENSG00000243649 | CFB        | complement factor B                                                       | 629       | 121.6433862 | -1.069047433 | 0.933374269 | -1.145357728 | 0.252061001 | 0.999371363 | Not Sig |
| ENSG00000221808 | MIR1256    | microRNA 1256                                                             | 100302155 | 8.605428218 | -1.068825048 | 0.991790264 | -1.077672454 | 0.281179956 | 0.999371363 | Not Sig |
| ENSG00000221817 | PPP3CB-AS1 | PPP3CB antisense RNA 1 (head to head)                                     | 101929145 | 140.760863  | -1.068798003 | 0.558738833 | -1.912875818 | 0.055763952 | 0.999371363 | Not Sig |
| ENSG00000064886 | CHI3L2     | chitinase 3 like 2                                                        | 1117      | 364.5087063 | -1.067718639 | 0.642887934 | -1.660816112 | 0.096750384 | 0.999371363 | Not Sig |
| ENSG00000238533 | NA         | NA                                                                        | NA        | 24.88481952 | -1.066874209 | 1.140169765 | -0.935715226 | 0.349419829 | 0.999371363 | Not Sig |
| ENSG00000235071 | NA         | NA                                                                        | NA        | 1.474556237 | -1.06659372  | 2.396827474 | -0.445002292 | 0.656318097 | NA          | NA      |
| ENSG00000205217 | NA         | NA                                                                        | NA        | 1.971274166 | -1.066519644 | 2.170910231 | -0.491277635 | 0.623230096 | NA          | NA      |
| ENSG00000236709 | DAPK1-IT1  | DAPK1 intronic transcript 1                                               | 100506897 | 44.26825101 | -1.065964691 | 0.711516047 | -1.498159733 | 0.134091755 | 0.999371363 | Not Sig |
| ENSG00000235141 | NA         | NA                                                                        | NA        | 15.03496738 | -1.065526575 | 1.167668843 | -0.912524627 | 0.361492612 | 0.999371363 | Not Sig |
| ENSG00000266900 | NA         | NA                                                                        | NA        | 38.54181827 | -1.065447421 | 0.740720629 | -1.438393072 | 0.150322557 | 0.999371363 | Not Sig |
| ENSG00000251985 | NA         | NA                                                                        | NA        | 3.653707252 | -1.064608523 | 1.869446265 | -0.569478002 | 0.569031795 | NA          | NA      |
| ENSG00000156787 | TBC1D31    | TBC1 domain family member 31                                              | 93594     | 321.4388374 | -1.064025341 | 0.669321739 | -1.589706833 | 0.111900903 | 0.999371363 | Not Sig |
| ENSG00000235963 | NA         | NA                                                                        | NA        | 2.758128435 | -1.063974091 | 1.624830871 | -0.65482144  | 0.512582725 | NA          | NA      |
| ENSG00000196420 | S100A5     | S100 calcium binding protein A5                                           | 6276      | 1.363557081 | -1.063644094 | 2.398688613 | -0.443427333 | 0.657456669 | NA          | NA      |
| ENSG00000177369 | FLJ40194   | uncharacterized FLJ40194                                                  | 124871    | 1.440940259 | -1.06340431  | 2.320517945 | -0.458261619 | 0.646764495 | NA          | NA      |
| ENSG00000237517 | NA         | NA                                                                        | NA        | 108.730682  | -1.063201432 | 1.068929686 | -0.994641131 | 0.319910835 | 0.999371363 | Not Sig |
| ENSG00000250474 | NA         | NA                                                                        | NA        | 5.12043574  | -1.062876107 | 1.216679786 | -0.87358738  | 0.382343001 | NA          | NA      |
| ENSG00000207189 | NA         | NA                                                                        | NA        | 2.143116609 | -1.062243604 | 2.130186246 | -0.498662315 | 0.618017298 | NA          | NA      |
| ENSG00000165023 | DIRAS2     | DIRAS family GTPase 2                                                     | 54769     | 3.371745904 | -1.061548303 | 1.379486454 | -0.769524267 | 0.441582144 | NA          | NA      |
| ENSG00000265191 | NA         | NA                                                                        | NA        | 4.335413882 | -1.061491005 | 1.221935659 | -0.868696316 | 0.385013257 | NA          | NA      |
| ENSG00000201544 | SNORA16B   | small nucleolar RNA, H/ACA box 16B                                        | 692157    | 14.1011505  | -1.06127274  | 0.817095375 | -1.298835819 | 0.194000279 | 0.999371363 | Not Sig |
| ENSG00000185864 | NPIP4      | nuclear pore complex interacting protein family member B4                 | 440345    | 365.1595292 | -1.06124644  | 0.638421512 | -1.662297431 | 0.096453153 | 0.999371363 | Not Sig |
| ENSG00000231508 | NA         | NA                                                                        | NA        | 4.419234595 | -1.060793583 | 1.337499492 | -0.793116999 | 0.42770966  | NA          | NA      |
| ENSG00000139915 | MDGA2      | MAM domain containing glycosylphosphatidylinositol anchor 2               | 161357    | 2.345231219 | -1.060565581 | 2.116027605 | -0.501205929 | 0.616226202 | NA          | NA      |
| ENSG00000226864 | ATE1-AS1   | ATE1 antisense RNA 1                                                      | 100130887 | 9.895792239 | -1.059870203 | 0.960841769 | -1.103064248 | 0.269999265 | 0.999371363 | Not Sig |
| ENSG00000165972 | CCDC38     | coiled-coil domain containing 38                                          | 120935    | 3.793793316 | -1.059474449 | 1.356466543 | -0.781054612 | 0.434770376 | NA          | NA      |
| ENSG00000115504 | EHBPI      | EH domain binding protein 1                                               | 23301     | 1353.194552 | -1.059466335 | 0.54008115  | -1.961679897 | 0.049799764 | 0.999371363 | Not Sig |
| ENSG00000264546 | NA         | NA                                                                        | NA        | 41.26898086 | -1.058975201 | 0.829352175 | -1.276870349 | 0.201648024 | 0.999371363 | Not Sig |
| ENSG00000213061 | NA         | NA                                                                        | NA        | 1.816618766 | -1.058900856 | 1.918755478 | -0.551868577 | 0.581038399 | NA          | NA      |

|                 |              |                                                                  |           |             |              |             |              |             |             |         |
|-----------------|--------------|------------------------------------------------------------------|-----------|-------------|--------------|-------------|--------------|-------------|-------------|---------|
| ENSG00000206989 | SNORD63      | small nucleolar RNA, C/D box 63                                  | 26785     | 6.724861542 | -1.058857234 | 1.395382804 | -0.758829212 | 0.447954729 | 0.999371363 | Not Sig |
| ENSG00000259462 | CPEB1-AS1    | CPEB1 antisense RNA 1                                            | 283692    | 3.841883676 | -1.058723492 | 1.605806727 | -0.659309414 | 0.509697098 | NA          | NA      |
| ENSG00000226450 | NA           | NA                                                               | NA        | 35.90022365 | -1.058399639 | 0.779753708 | -1.35735121  | 0.174669643 | 0.999371363 | Not Sig |
| ENSG00000212374 | NA           | NA                                                               | NA        | 0.918765342 | -1.057767935 | 3.08693252  | -0.342659883 | 0.731854346 | NA          | NA      |
| ENSG00000230140 | NA           | NA                                                               | NA        | 0.918765342 | -1.057767935 | 3.08693252  | -0.342659883 | 0.731854346 | NA          | NA      |
| ENSG00000269487 | NA           | NA                                                               | NA        | 0.918765342 | -1.057767935 | 3.08693252  | -0.342659883 | 0.731854346 | NA          | NA      |
| ENSG00000182502 | NA           | NA                                                               | NA        | 1.892169534 | -1.056704732 | 1.883342629 | -0.56107939  | 0.574743418 | NA          | NA      |
| ENSG00000223572 | CKMT1A       | creatine kinase, mitochondrial 1A                                | 548596    | 30.31259861 | -1.056040219 | 1.102546077 | -0.957819579 | 0.338153745 | 0.999371363 | Not Sig |
| ENSG00000258454 | NA           | NA                                                               | NA        | 6.263202814 | -1.055414097 | 1.044187666 | -1.010751354 | 0.312135452 | NA          | NA      |
| ENSG00000237827 | NA           | NA                                                               | NA        | 49.90373141 | -1.055099981 | 0.773404049 | -1.364228675 | 0.172495606 | 0.999371363 | Not Sig |
| ENSG00000265815 | MIR1273G     | microRNA 1273g                                                   | 100616145 | 2.285157228 | -1.054945935 | 2.079489852 | -0.50730997  | 0.611937344 | NA          | NA      |
| ENSG00000251988 | NA           | NA                                                               | NA        | 11.81317709 | -1.054823714 | 1.027290738 | -1.026801542 | 0.304513923 | 0.999371363 | Not Sig |
| ENSG00000230305 | NA           | NA                                                               | NA        | 4.168796526 | -1.054807064 | 1.843720135 | -0.572108014 | 0.5672488   | NA          | NA      |
| ENSG00000200922 | NA           | NA                                                               | NA        | 4.557583204 | -1.054777675 | 1.410332081 | -0.747893131 | 0.454524621 | NA          | NA      |
| ENSG00000235821 | IFITM4P      | interferon induced transmembrane protein 4 pseudogene            | 340198    | 9.500225885 | -1.054201693 | 0.972527301 | -1.083981593 | 0.278372961 | 0.999371363 | Not Sig |
| ENSG00000171320 | ESCO2        | establishment of sister chromatid cohesion N-acetyltransferase 2 | 157570    | 56.60844344 | -1.054132641 | 1.074486504 | -0.981057126 | 0.326564572 | 0.999371363 | Not Sig |
| ENSG00000273309 | NA           | NA                                                               | NA        | 2.370577251 | -1.053474856 | 1.602262243 | -0.657492155 | 0.510864513 | NA          | NA      |
| ENSG00000266040 | NA           | NA                                                               | NA        | 12.12526031 | -1.052764448 | 0.840797413 | -1.252102387 | 0.210532558 | 0.999371363 | Not Sig |
| ENSG00000226800 | CACTIN-AS1   | CACTIN antisense RNA 1                                           | 404665    | 11.31587082 | -1.052096019 | 1.03798681  | -1.013592859 | 0.310777066 | 0.999371363 | Not Sig |
| ENSG00000259659 | NA           | NA                                                               | NA        | 36.71811715 | -1.051922796 | 0.782000562 | -1.345168848 | 0.178570714 | 0.999371363 | Not Sig |
| ENSG00000267199 | NA           | NA                                                               | NA        | 17.36655357 | -1.05162835  | 0.70734292  | -1.48673058  | 0.137085983 | 0.999371363 | Not Sig |
| ENSG00000259209 | NA           | NA                                                               | NA        | 4.534838877 | -1.051596281 | 1.311320413 | -0.801936942 | 0.422589436 | NA          | NA      |
| ENSG00000062524 | LTK          | leukocyte receptor tyrosine kinase                               | 4058      | 132.2488885 | -1.051435922 | 0.834102552 | -1.260559531 | 0.207467587 | 0.999371363 | Not Sig |
| ENSG00000213172 | NA           | NA                                                               | NA        | 3.100214009 | -1.05142913  | 1.606024205 | -0.654678259 | 0.512674926 | NA          | NA      |
| ENSG00000258959 | NA           | NA                                                               | NA        | 1.434087716 | -1.051228578 | 2.384003101 | -0.440951011 | 0.659248463 | NA          | NA      |
| ENSG00000206992 | NA           | NA                                                               | NA        | 6.825869298 | -1.050493683 | 1.442587749 | -0.72820089  | 0.466490621 | 0.999371363 | Not Sig |
| ENSG00000266922 | NA           | NA                                                               | NA        | 8.639913548 | -1.049612162 | 0.923601974 | -1.136433433 | 0.25577521  | 0.999371363 | Not Sig |
| ENSG00000240966 | NA           | NA                                                               | NA        | 6.457607676 | -1.048491861 | 1.182684998 | -0.886535183 | 0.375329204 | NA          | NA      |
| ENSG00000234771 | NA           | NA                                                               | NA        | 241.9761697 | -1.048204234 | 0.729041006 | -1.437785016 | 0.150495062 | 0.999371363 | Not Sig |
| ENSG00000244257 | NA           | NA                                                               | NA        | 10.1080923  | -1.048101392 | 1.026345505 | -1.02119743  | 0.30716091  | 0.999371363 | Not Sig |
| ENSG00000239249 | NA           | NA                                                               | NA        | 4.262331777 | -1.047602825 | 1.330229374 | -0.787535478 | 0.430968469 | NA          | NA      |
| ENSG00000197181 | PIWIL2       | piwi like RNA-mediated gene silencing 2                          | 55124     | 15.7251967  | -1.047299242 | 0.81335536  | -1.287628131 | 0.197875442 | 0.999371363 | Not Sig |
| ENSG00000207191 | SNORD116-5   | small nucleolar RNA, C/D box 116-5                               | 100033417 | 1.925785512 | -1.046096869 | 1.720130545 | -0.608149697 | 0.543088194 | NA          | NA      |
| ENSG00000258137 | LOC102724050 | uncharacterized LOC102724050                                     | 102724050 | 0.989295976 | -1.044627405 | 2.642669361 | -0.39529251  | 0.692627026 | NA          | NA      |
| ENSG00000105219 | CNTD2        | cyclin N-terminal domain containing 2                            | 79935     | 22.36866201 | -1.044522515 | 0.972404863 | -1.074164224 | 0.282749084 | 0.999371363 | Not Sig |

|                 |           |                                                                        |           |             |              |             |              |             |             |         |
|-----------------|-----------|------------------------------------------------------------------------|-----------|-------------|--------------|-------------|--------------|-------------|-------------|---------|
| ENSG00000200520 | NA        | NA                                                                     | NA        | 6.840161771 | -1.044165631 | 1.605580179 | -0.650335402 | 0.515475594 | 0.999371363 | Not Sig |
| ENSG00000223584 | NA        | NA                                                                     | NA        | 10.02821975 | -1.043731229 | 0.962597939 | -1.084285751 | 0.278238121 | 0.999371363 | Not Sig |
| ENSG00000175066 | GK5       | glycerol kinase 5 (putative)                                           | 256356    | 666.5185836 | -1.043568715 | 0.62865327  | -1.66000682  | 0.09691308  | 0.999371363 | Not Sig |
| ENSG00000103257 | SLC7A5    | solute carrier family 7 member 5                                       | 8140      | 1133.771219 | -1.0432302   | 0.804949403 | -1.296019595 | 0.194968734 | 0.999371363 | Not Sig |
| ENSG00000106025 | TSPAN12   | tetraspanin 12                                                         | 23554     | 652.9456703 | -1.043156118 | 0.641130841 | -1.627056524 | 0.103725093 | 0.999371363 | Not Sig |
| ENSG00000243071 | NA        | NA                                                                     | NA        | 1.424633467 | -1.042727527 | 2.307586201 | -0.451869372 | 0.65136309  | NA          | NA      |
| ENSG00000207067 | SNORA72   | small nucleolar RNA, H/ACA box 72                                      | 26775     | 26.64259939 | -1.042331421 | 0.828499227 | -1.258095828 | 0.208357102 | 0.999371363 | Not Sig |
| ENSG00000203630 | NA        | NA                                                                     | NA        | 8.82521708  | -1.041548346 | 1.001308795 | -1.040186955 | 0.298253051 | 0.999371363 | Not Sig |
| ENSG00000036473 | OTC       | ornithine carbamoyltransferase                                         | 5009      | 5.505175164 | -1.041463652 | 1.773464033 | -0.587248251 | 0.557036991 | NA          | NA      |
| ENSG00000201047 | NA        | NA                                                                     | NA        | 8.358512398 | -1.041369497 | 1.023720875 | -1.017239681 | 0.309039423 | 0.999371363 | Not Sig |
| ENSG00000252153 | MIR2278   | microRNA 2278                                                          | 100313780 | 17.87210674 | -1.040580049 | 0.720271692 | -1.444704909 | 0.14854079  | 0.999371363 | Not Sig |
| ENSG00000239100 | NA        | NA                                                                     | NA        | 19.81847293 | -1.040431552 | 0.854160496 | -1.218075007 | 0.22319547  | 0.999371363 | Not Sig |
| ENSG00000214264 | NA        | NA                                                                     | NA        | 14.16108192 | -1.040176903 | 0.846798977 | -1.228363437 | 0.219310567 | 0.999371363 | Not Sig |
| ENSG00000132570 | PCBD2     | pterin-4 alpha-carbinolamine dehydratase 2                             | 84105     | 328.605093  | -1.039029737 | 0.666193545 | -1.559651462 | 0.118842268 | 0.999371363 | Not Sig |
| ENSG00000266072 | MIR5693   | microRNA 5693                                                          | 100847003 | 2.251541249 | -1.038901054 | 1.688870631 | -0.615145432 | 0.538458681 | NA          | NA      |
| ENSG00000247345 | NA        | NA                                                                     | NA        | 5.332431754 | -1.038082281 | 1.073450772 | -0.967051595 | 0.333518242 | NA          | NA      |
| ENSG00000232177 | NA        | NA                                                                     | NA        | 5.209532732 | -1.03806923  | 1.428853718 | -0.726504902 | 0.467529304 | NA          | NA      |
| ENSG00000196876 | SCN8A     | sodium voltage-gated channel alpha subunit 8                           | 6334      | 172.567239  | -1.038022593 | 1.082851086 | -0.958601424 | 0.337759575 | 0.999371363 | Not Sig |
| ENSG00000170681 | CAVIN4    | caveolae associated protein 4                                          | 347273    | 12.07748615 | -1.037787033 | 0.910096773 | -1.140304046 | 0.254159653 | 0.999371363 | Not Sig |
| ENSG00000069696 | DRD4      | dopamine receptor D4                                                   | 1815      | 38.92142452 | -1.037493914 | 0.655870811 | -1.581857123 | 0.113682191 | 0.999371363 | Not Sig |
| ENSG00000221760 | MIR548J   | microRNA 548j                                                          | 100313914 | 8.23120645  | -1.037393688 | 0.93917257  | -1.10458261  | 0.26934049  | 0.999371363 | Not Sig |
| ENSG00000268279 | NA        | NA                                                                     | NA        | 29.57240465 | -1.037349759 | 0.745382765 | -1.391700757 | 0.164013033 | 0.999371363 | Not Sig |
| ENSG00000164037 | SLC9B1    | solute carrier family 9 member B1                                      | 150159    | 18.03494281 | -1.037279577 | 0.811984969 | -1.277461549 | 0.201439347 | 0.999371363 | Not Sig |
| ENSG00000203819 | HIST2H2BC | histone cluster 2 H2B family member c (pseudogene)                     | 337873    | 36.53663646 | -1.037194315 | 0.907571984 | -1.142823196 | 0.253112006 | 0.999371363 | Not Sig |
| ENSG00000198888 | ND1       | NADH dehydrogenase, subunit 1 (complex I)                              | 4535      | 63660.64338 | -1.036850625 | 0.860511645 | -1.204923409 | 0.228232871 | 0.999371363 | Not Sig |
| ENSG00000174255 | ZNF80     | zinc finger protein 80                                                 | 7634      | 13.30138681 | -1.03683451  | 1.128016251 | -0.919166287 | 0.358008602 | 0.999371363 | Not Sig |
| ENSG00000224546 | NA        | NA                                                                     | NA        | 19.1606825  | -1.036789444 | 0.823940923 | -1.258329832 | 0.208272496 | 0.999371363 | Not Sig |
| ENSG00000172733 | PURG      | purine rich element binding protein G                                  | 29942     | 6.412167887 | -1.035581365 | 1.216287559 | -0.851428067 | 0.394531606 | NA          | NA      |
| ENSG00000230666 | CEACAM22P | carcinoembryonic antigen related cell adhesion molecule 22, pseudogene | 388550    | 3.043975848 | -1.035320783 | 1.625703351 | -0.636844836 | 0.524225918 | NA          | NA      |
| ENSG00000218730 | NA        | NA                                                                     | NA        | 5.09049673  | -1.035301289 | 1.240756832 | -0.834411113 | 0.404049357 | NA          | NA      |
| ENSG00000267249 | NA        | NA                                                                     | NA        | 9.553343807 | -1.034424061 | 0.994335157 | -1.040317295 | 0.298192512 | 0.999371363 | Not Sig |
| ENSG00000163738 | MTHFD2L   | methylenetetrahydrofolate dehydrogenase (NADP+ dependent) 2 like       | 441024    | 305.8082153 | -1.033796489 | 0.691597936 | -1.494794064 | 0.134968196 | 0.999371363 | Not Sig |
| ENSG00000273275 | NA        | NA                                                                     | NA        | 3.753142887 | -1.03282013  | 1.309975394 | -0.788427122 | 0.430446911 | NA          | NA      |
| ENSG00000197905 | TEAD4     | TEA domain transcription factor 4                                      | 7004      | 253.7021275 | -1.032483593 | 0.732903766 | -1.408757386 | 0.15890692  | 0.999371363 | Not Sig |
| ENSG00000269906 | NA        | NA                                                                     | NA        | 40.07011046 | -1.031965511 | 0.817972771 | -1.261613525 | 0.207087887 | 0.999371363 | Not Sig |

|                 |              |                                                       |           |             |              |             |              |             |             |         |
|-----------------|--------------|-------------------------------------------------------|-----------|-------------|--------------|-------------|--------------|-------------|-------------|---------|
| ENSG00000252532 | NA           | NA                                                    | NA        | 1.524345964 | -1.031503849 | 2.012609793 | -0.512520536 | 0.608286752 | NA          | NA      |
| ENSG00000261118 | NA           | NA                                                    | NA        | 4.878185766 | -1.031397436 | 1.151177979 | -0.895949588 | 0.370279688 | NA          | NA      |
| ENSG00000264616 | MIR4755      | microRNA 4755                                         | 100616434 | 14.65660602 | -1.031300788 | 0.975763236 | -1.056917037 | 0.290549452 | 0.999371363 | Not Sig |
| ENSG00000202070 | NA           | NA                                                    | NA        | 0.979841728 | -1.031262461 | 2.647302188 | -0.389552226 | 0.696867685 | NA          | NA      |
| ENSG00000228853 | NEGR1-IT1    | NEGR1 intronic transcript 1                           | 100852409 | 0.979841728 | -1.031262461 | 2.647302188 | -0.389552226 | 0.696867685 | NA          | NA      |
| ENSG00000200755 | NA           | NA                                                    | NA        | 2.686021535 | -1.03116318  | 2.110131559 | -0.48867246  | 0.625073604 | NA          | NA      |
| ENSG00000238422 | NA           | NA                                                    | NA        | 4.318946858 | -1.030723508 | 1.933443071 | -0.53310259  | 0.593962566 | NA          | NA      |
| ENSG00000272870 | NA           | NA                                                    | NA        | 17.56225908 | -1.03051756  | 0.699210513 | -1.473830185 | 0.140527319 | 0.999371363 | Not Sig |
| ENSG00000238776 | NA           | NA                                                    | NA        | 2.786591238 | -1.030292742 | 1.446036808 | -0.712494133 | 0.476158843 | NA          | NA      |
| ENSG00000057468 | MSH4         | mutS homolog 4                                        | 4438      | 9.931944364 | -1.030156758 | 1.246658753 | -0.826334196 | 0.408614541 | 0.999371363 | Not Sig |
| ENSG00000213221 | DNLZ         | DNL-type zinc finger                                  | 728489    | 12.95607045 | -1.03009861  | 0.942665043 | -1.092751469 | 0.274502935 | 0.999371363 | Not Sig |
| ENSG00000177103 | DSCAML1      | DS cell adhesion molecule like 1                      | 57453     | 69.38692342 | -1.030043525 | 1.028087075 | -1.001903    | 0.316390444 | 0.999371363 | Not Sig |
| ENSG00000207167 | NA           | NA                                                    | NA        | 3.551261376 | -1.029750096 | 1.92222057  | -0.535708603 | 0.592159957 | NA          | NA      |
| ENSG00000149380 | P4HA3        | prolyl 4-hydroxylase subunit alpha 3                  | 283208    | 50.86986514 | -1.029252506 | 0.740399806 | -1.390130707 | 0.16448919  | 0.999371363 | Not Sig |
| ENSG00000078098 | FAP          | fibroblast activation protein alpha                   | 2191      | 501.9970837 | -1.027986791 | 0.909766641 | -1.129945576 | 0.258499158 | 0.999371363 | Not Sig |
| ENSG00000223867 | NA           | NA                                                    | NA        | 47.64818194 | -1.027904418 | 1.339237809 | -0.76752942  | 0.442766808 | 0.999371363 | Not Sig |
| ENSG00000114268 | PFKFB4       | 6-phosphofructo-2-kinase/fructose-2,6-biphosphatase 4 | 5210      | 335.2475005 | -1.027778543 | 0.755842411 | -1.359778874 | 0.17389991  | 0.999371363 | Not Sig |
| ENSG00000167772 | ANGPTL4      | angiopoietin like 4                                   | 51129     | 435.234138  | -1.027574471 | 0.774616405 | -1.326559139 | 0.18465456  | 0.999371363 | Not Sig |
| ENSG00000267595 | NA           | NA                                                    | NA        | 8.896568201 | -1.026660557 | 0.938226669 | -1.094256421 | 0.273842532 | 0.999371363 | Not Sig |
| ENSG00000148090 | AUH          | AU RNA binding methylglutaconyl-CoA hydratase         | 549       | 500.7398363 | -1.026296091 | 0.521783299 | -1.966900997 | 0.049194626 | 0.999371363 | Not Sig |
| ENSG00000182747 | SLC35D3      | solute carrier family 35 member D3                    | 340146    | 2.248524536 | -1.026204907 | 1.787939373 | -0.573959566 | 0.565995163 | NA          | NA      |
| ENSG00000136098 | NEK3         | NIMA related kinase 3                                 | 4752      | 252.4938543 | -1.02541518  | 0.553196218 | -1.853619289 | 0.063793646 | 0.999371363 | Not Sig |
| ENSG00000231154 | NA           | NA                                                    | NA        | 22.05365302 | -1.025324939 | 0.783197421 | -1.309152599 | 0.190482665 | 0.999371363 | Not Sig |
| ENSG00000255358 | NA           | NA                                                    | NA        | 19.95057268 | -1.02510494  | 0.742239835 | -1.381096637 | 0.167249249 | 0.999371363 | Not Sig |
| ENSG00000259415 | NA           | NA                                                    | NA        | 7.876257952 | -1.024628818 | 0.978587407 | -1.047048849 | 0.295077049 | 0.999371363 | Not Sig |
| ENSG00000105793 | GTPBP10      | GTP binding protein 10                                | 85865     | 426.7002464 | -1.024277998 | 0.663469097 | -1.543821715 | 0.122631529 | 0.999371363 | Not Sig |
| ENSG00000105793 | LOC101927446 | uncharacterized LOC101927446                          | 101927446 | 426.7002464 | -1.024277998 | 0.663469097 | -1.543821715 | 0.122631529 | 0.999371363 | Not Sig |
| ENSG00000251815 | SNORD116-26  | small nucleolar RNA, C/D box 116-26                   | 100033438 | 11.17680535 | -1.023102654 | 1.12902087  | -0.906185777 | 0.36483753  | 0.999371363 | Not Sig |
| ENSG00000103489 | XYLT1        | xylosyltransferase 1                                  | 64131     | 833.2247296 | -1.023076809 | 0.470359939 | -2.175093419 | 0.029623117 | 0.897727832 | Not Sig |
| ENSG00000221521 | NA           | NA                                                    | NA        | 0.995733512 | -1.022731551 | 2.639766437 | -0.387432591 | 0.69843598  | NA          | NA      |
| ENSG00000106799 | TGFBR1       | transforming growth factor beta receptor 1            | 7046      | 2881.208532 | -1.022713658 | 0.609994078 | -1.676596042 | 0.093621501 | 0.999371363 | Not Sig |
| ENSG00000201098 | RNY1         | RNA, Ro-associated Y1                                 | 6084      | 3.144130543 | -1.022410396 | 1.629638821 | -0.627384659 | 0.530407121 | NA          | NA      |
| ENSG00000230613 | HM13-AS1     | HM13 antisense RNA 1                                  | 100874042 | 4.759149764 | -1.022144222 | 1.22161546  | -0.836715198 | 0.402752674 | NA          | NA      |
| ENSG00000221988 | PPT2         | palmitoyl-protein thioesterase 2                      | 9374      | 113.458591  | -1.021840017 | 0.566839581 | -1.80269701  | 0.071435812 | 0.999371363 | Not Sig |
| ENSG00000252150 | NA           | NA                                                    | NA        | 22.37503577 | -1.021757464 | 0.64503111  | -1.584043697 | 0.113183775 | 0.999371363 | Not Sig |

|                 |              |                                                   |           |             |              |             |              |             |             |         |
|-----------------|--------------|---------------------------------------------------|-----------|-------------|--------------|-------------|--------------|-------------|-------------|---------|
| ENSG00000212125 | NA           | NA                                                | NA        | 70.94033379 | -1.021439396 | 0.867920701 | -1.176881016 | 0.239243    | 0.999371363 | Not Sig |
| ENSG00000168172 | HOKK3        | hook microtubule tethering protein 3              | 84376     | 3281.100696 | -1.021189576 | 0.621226787 | -1.64382734  | 0.100211872 | 0.999371363 | Not Sig |
| ENSG00000069764 | PLA2G10      | phospholipase A2 group X                          | 8399      | 66.26619478 | -1.021162682 | 0.838256004 | -1.218199068 | 0.223148334 | 0.999371363 | Not Sig |
| ENSG00000248932 | LOC100507291 | uncharacterized LOC100507291                      | 100507291 | 96.43617017 | -1.020786574 | 0.569816074 | -1.791431692 | 0.073224047 | 0.999371363 | Not Sig |
| ENSG00000177350 | RPL13AP3     | ribosomal protein L13a pseudogene 3               | 645683    | 1.446962787 | -1.019972344 | 2.382125219 | -0.428177468 | 0.66852192  | NA          | NA      |
| ENSG00000163584 | RPL22L1      | ribosomal protein L22 like 1                      | 200916    | 257.2161317 | -1.019447969 | 0.666972001 | -1.528471912 | 0.126395412 | 0.999371363 | Not Sig |
| ENSG00000159167 | STC1         | stanniocalcin 1                                   | 6781      | 400.7172133 | -1.01914628  | 0.819298641 | -1.243925266 | 0.213527069 | 0.999371363 | Not Sig |
| ENSG00000269155 | NA           | NA                                                | NA        | 20.34073067 | -1.018321143 | 0.692868638 | -1.469717473 | 0.141638288 | 0.999371363 | Not Sig |
| ENSG00000234585 | CCT6P3       | chaperonin containing TCP1 subunit 6 pseudogene 3 | 643180    | 236.0355073 | -1.01789232  | 0.835106533 | -1.218877208 | 0.222890801 | 0.999371363 | Not Sig |
| ENSG00000231758 | NA           | NA                                                | NA        | 1.982012775 | -1.01764931  | 1.828157905 | -0.556652851 | 0.577764637 | NA          | NA      |
| ENSG00000187546 | AGMO         | alkylglycerol monooxygenase                       | 392636    | 5.877196281 | -1.017139148 | 1.122656158 | -0.906011285 | 0.36492988  | NA          | NA      |
| ENSG00000176853 | FAM91A1      | family with sequence similarity 91 member A1      | 157769    | 2381.981119 | -1.016176148 | 0.658065885 | -1.544186033 | 0.122543272 | 0.999371363 | Not Sig |
| ENSG00000258316 | NA           | NA                                                | NA        | 5.813541234 | -1.015431746 | 1.145559673 | -0.88640668  | 0.375398421 | NA          | NA      |
| ENSG00000151687 | ANKAR        | ankyrin and armadillo repeat containing           | 150709    | 344.8797652 | -1.015150238 | 0.625749897 | -1.622293894 | 0.104740435 | 0.999371363 | Not Sig |
| ENSG00000213842 | NA           | NA                                                | NA        | 31.86808792 | -1.014964598 | 0.843171753 | -1.203745969 | 0.228687779 | 0.999371363 | Not Sig |
| ENSG00000257368 | NA           | NA                                                | NA        | 1.991467024 | -1.014934154 | 2.138066806 | -0.474697119 | 0.635002871 | NA          | NA      |
| ENSG00000267347 | NA           | NA                                                | NA        | 24.88513832 | -1.014813304 | 0.877686756 | -1.156236319 | 0.247584508 | 0.999371363 | Not Sig |
| ENSG00000242683 | NA           | NA                                                | NA        | 13.98731432 | -1.014007807 | 0.808630271 | -1.253982003 | 0.209848547 | 0.999371363 | Not Sig |
| ENSG00000252859 | NA           | NA                                                | NA        | 3.617357895 | -1.013882423 | 1.651608809 | -0.613875645 | 0.539297505 | NA          | NA      |
| ENSG00000203843 | NA           | NA                                                | NA        | 3.428975562 | -1.013792766 | 1.565634719 | -0.647528286 | 0.517290094 | NA          | NA      |
| ENSG00000207092 | NA           | NA                                                | NA        | 12.6130675  | -1.013497907 | 0.839706643 | -1.206966642 | 0.227444991 | 0.999371363 | Not Sig |
| ENSG00000245910 | NA           | NA                                                | NA        | 419.9698972 | -1.013270459 | 0.62835635  | -1.612572961 | 0.106837317 | 0.999371363 | Not Sig |
| ENSG00000167644 | C19orf33     | chromosome 19 open reading frame 33               | 64073     | 7.793283547 | -1.01312607  | 1.091303282 | -0.928363441 | 0.353219076 | 0.999371363 | Not Sig |
| ENSG00000258297 | NA           | NA                                                | NA        | 191.5040904 | -1.013119569 | 0.808126852 | -1.253664033 | 0.209964146 | 0.999371363 | Not Sig |
| ENSG00000255874 | LINC00346    | long intergenic non-protein coding RNA 346        | 283487    | 17.32659183 | -1.013058025 | 0.854574812 | -1.185452707 | 0.235838503 | 0.999371363 | Not Sig |
| ENSG00000164825 | DEFB1        | defensin beta 1                                   | 1672      | 14.69678127 | -1.013051613 | 0.955148986 | -1.060621566 | 0.288861918 | 0.999371363 | Not Sig |
| ENSG00000233846 | NA           | NA                                                | NA        | 1.414764211 | -1.012903265 | 2.077632058 | -0.487527741 | 0.625884388 | NA          | NA      |
| ENSG00000243675 | NA           | NA                                                | NA        | 9.842639233 | -1.012703644 | 0.83842288  | -1.207867376 | 0.22709828  | 0.999371363 | Not Sig |
| ENSG00000271270 | TMCC1-AS1    | TMCC1 antisense RNA 1 (head to head)              | 100507032 | 25.30936969 | -1.012415166 | 0.69146526  | -1.464159118 | 0.143150478 | 0.999371363 | Not Sig |
| ENSG00000222014 | RAB6C        | RAB6C, member RAS oncogene family                 | 84084     | 1.790442718 | -1.011584122 | 1.826174676 | -0.553936124 | 0.579622562 | NA          | NA      |
| ENSG00000259512 | NA           | NA                                                | NA        | 17.74215795 | -1.011334876 | 0.803166315 | -1.259184874 | 0.207963564 | 0.999371363 | Not Sig |
| ENSG00000245552 | LOC101929295 | uncharacterized LOC101929295                      | 101929295 | 67.06859161 | -1.010788857 | 0.641048645 | -1.576774034 | 0.114847528 | 0.999371363 | Not Sig |
| ENSG00000234770 | NA           | NA                                                | NA        | 9.01029494  | -1.009649512 | 1.123269087 | -0.898849193 | 0.368732994 | 0.999371363 | Not Sig |
| ENSG00000207554 | MIR647       | microRNA 647                                      | 693232    | 18.72976948 | -1.009441902 | 0.692605905 | -1.457454945 | 0.14499084  | 0.999371363 | Not Sig |
| ENSG00000263403 | MIR4673      | microRNA 4673                                     | 100616242 | 4.129994799 | -1.007980359 | 1.515820837 | -0.664973284 | 0.506067581 | NA          | NA      |



|                 |              |                                                                  |           |             |              |             |              |             |             |         |
|-----------------|--------------|------------------------------------------------------------------|-----------|-------------|--------------|-------------|--------------|-------------|-------------|---------|
| ENSG00000040341 | STAU2        | staufen double-stranded RNA binding protein 2                    | 27067     | 1306.473915 | -1.007934644 | 0.681138767 | -1.479778708 | 0.138932313 | 0.999371363 | Not Sig |
| ENSG00000121741 | ZMYM2        | zinc finger MYM-type containing 2                                | 7750      | 3735.82694  | -1.007406342 | 0.676530815 | -1.489076801 | 0.136467146 | 0.999371363 | Not Sig |
| ENSG00000256341 | NA           | NA                                                               | NA        | 24.62301045 | -1.00694504  | 0.880674243 | -1.143379687 | 0.252880982 | 0.999371363 | Not Sig |
| ENSG00000258640 | NA           | NA                                                               | NA        | 24.10998544 | -1.006417961 | 0.797331866 | -1.262232208 | 0.206865242 | 0.999371363 | Not Sig |
| ENSG00000164744 | SUN3         | Sad1 and UNC84 domain containing 3                               | 256979    | 2.653407952 | -1.006264641 | 2.111234969 | -0.476623709 | 0.633630098 | NA          | NA      |
| ENSG00000266668 | MIR5692C2    | microRNA 5692c-2                                                 | 100847017 | 13.18113655 | -1.005173733 | 0.923797143 | -1.088089241 | 0.276555713 | 0.999371363 | Not Sig |
| ENSG00000207197 | SNORD116-12  | small nucleolar RNA, C/D box 116-12                              | 100033424 | 2.992453768 | -1.004405838 | 1.677585595 | -0.598721067 | 0.549358906 | NA          | NA      |
| ENSG00000214919 | NA           | NA                                                               | NA        | 20.90689289 | -1.004006611 | 0.987305383 | -1.016915969 | 0.309193406 | 0.999371363 | Not Sig |
| ENSG00000175538 | KCNE3        | potassium voltage-gated channel subfamily E regulatory subunit 3 | 10008     | 371.50923   | -1.003725663 | 0.540739599 | -1.856208915 | 0.063423786 | 0.999371363 | Not Sig |
| ENSG00000138411 | HECW2        | HECT, C2 and WW domain containing E3 ubiquitin protein ligase 2  | 57520     | 1975.988094 | -1.003578993 | 0.629816449 | -1.59344678  | 0.111059998 | 0.999371363 | Not Sig |
| ENSG00000255794 | RMST         | rhabdomyosarcoma 2 associated transcript (non-protein coding)    | 196475    | 109.509107  | -1.003432687 | 1.127896159 | -0.889649884 | 0.373653912 | 0.999371363 | Not Sig |
| ENSG00000267383 | NA           | NA                                                               | NA        | 56.64903987 | -1.002741395 | 0.820478774 | -1.222141787 | 0.221654013 | 0.999371363 | Not Sig |
| ENSG00000220804 | NA           | NA                                                               | NA        | 95.32558706 | -1.002453655 | 0.58130282  | -1.72449474  | 0.084618568 | 0.999371363 | Not Sig |
| ENSG00000256546 | LOC100506691 | uncharacterized LOC100506691                                     | 100506691 | 31.89666105 | -1.002293667 | 0.772212246 | -1.297951012 | 0.194304169 | 0.999371363 | Not Sig |
| ENSG00000196966 | NA           | NA                                                               | NA        | 20.86128585 | -1.002072636 | 0.720997701 | -1.389841652 | 0.164576967 | 0.999371363 | Not Sig |
| ENSG00000251131 | NA           | NA                                                               | NA        | 11.61132775 | -1.001874478 | 0.989585021 | -1.012418799 | 0.311337854 | 0.999371363 | Not Sig |
| ENSG00000109452 | INPP4B       | inositol polyphosphate-4-phosphatase type II B                   | 8821      | 1179.720438 | -1.001278862 | 0.676254729 | -1.480623822 | 0.138706844 | 0.999371363 | Not Sig |
| ENSG00000117400 | MPL          | MPL proto-oncogene, thrombopoietin receptor                      | 4352      | 9.247260067 | -1.001201332 | 1.09473867  | -0.914557382 | 0.360424041 | 0.999371363 | Not Sig |
| ENSG00000267543 | NA           | NA                                                               | NA        | 4.795234406 | -1.000777835 | 1.2920744   | -0.774551245 | 0.438604876 | NA          | NA      |
| ENSG00000167653 | PSCA         | prostate stem cell antigen                                       | 8000      | 28.88984619 | -1.000645605 | 0.838086687 | -1.193964325 | 0.232491923 | 0.999371363 | Not Sig |
| ENSG00000270133 | NA           | NA                                                               | NA        | 10.67880846 | -1.000412921 | 0.927393673 | -1.078735978 | 0.280705442 | 0.999371363 | Not Sig |
| ENSG00000198467 | TPM2         | tropomyosin 2                                                    | 7169      | 2422.334791 | -0.999440382 | 0.621887837 | -1.607107137 | 0.108030868 | 0.999371363 | Not Sig |
| ENSG00000255408 | PCDHA3       | protocadherin alpha 3                                            | 56145     | 27.5379821  | -0.998163359 | 0.894342596 | -1.116086121 | 0.264385273 | 0.999371363 | Not Sig |
| ENSG00000203772 | SPRN         | shadow of prion protein                                          | 503542    | 4.094193493 | -0.997950175 | 1.389579107 | -0.718167228 | 0.472654182 | NA          | NA      |
| ENSG00000139351 | SYCP3        | synaptonemal complex protein 3                                   | 50511     | 6.431581921 | -0.99709577  | 1.124127462 | -0.886995296 | 0.375081433 | NA          | NA      |
| ENSG00000215644 | GCGR         | glucagon receptor                                                | 2642      | 1.787426005 | -0.996981081 | 1.982116065 | -0.502988245 | 0.614972537 | NA          | NA      |
| ENSG00000198523 | PLN          | phospholamban                                                    | 5350      | 125.8226334 | -0.996627682 | 0.776000121 | -1.284313823 | 0.199032172 | 0.999371363 | Not Sig |
| ENSG00000196839 | ADA          | adenosine deaminase                                              | 100       | 132.6323077 | -0.996245225 | 0.541425485 | -1.840041247 | 0.065762182 | 0.999371363 | Not Sig |
| ENSG00000233623 | NA           | NA                                                               | NA        | 17.11827251 | -0.996229748 | 0.788418156 | -1.263580425 | 0.206380663 | 0.999371363 | Not Sig |
| ENSG00000115414 | FN1          | fibronectin 1                                                    | 2335      | 86343.45388 | -0.996118221 | 0.683494358 | -1.457390553 | 0.145008603 | 0.999371363 | Not Sig |
| ENSG00000039537 | C6           | complement C6                                                    | 729       | 134.9419582 | -0.996018649 | 1.179187262 | -0.844665373 | 0.398297698 | 0.999371363 | Not Sig |
| ENSG00000078674 | PCM1         | pericentriolar material 1                                        | 5108      | 6383.894739 | -0.995741668 | 0.584099938 | -1.704745377 | 0.088241923 | 0.999371363 | Not Sig |
| ENSG00000118263 | KLF7         | Kruppel like factor 7                                            | 8609      | 1743.235194 | -0.995597746 | 0.43616254  | -2.28263011  | 0.022452166 | 0.76210276  | Not Sig |
| ENSG00000250539 | NA           | NA                                                               | NA        | 108.5956002 | -0.994689546 | 0.552050434 | -1.801809192 | 0.071575431 | 0.999371363 | Not Sig |
| ENSG00000196873 | CBWD3        | COBW domain containing 3                                         | 445571    | 72.15420243 | -0.993943533 | 0.649598977 | -1.530087899 | 0.125994973 | 0.999371363 | Not Sig |

|                 |             |                                                   |           |             |              |             |              |             |             |         |
|-----------------|-------------|---------------------------------------------------|-----------|-------------|--------------|-------------|--------------|-------------|-------------|---------|
| ENSG00000196873 | CBWD6       | COBW domain containing 6                          | 644019    | 72.15420243 | -0.993943533 | 0.649598977 | -1.530087899 | 0.125994973 | 0.999371363 | Not Sig |
| ENSG00000270704 | NA          | NA                                                | NA        | 69.21369616 | -0.993628222 | 0.739328201 | -1.343960938 | 0.178961019 | 0.999371363 | Not Sig |
| ENSG00000056487 | PHF21B      | PHD finger protein 21B                            | 112885    | 9.953167351 | -0.993201723 | 1.124267791 | -0.883420953 | 0.377008874 | 0.999371363 | Not Sig |
| ENSG00000228057 | NA          | NA                                                | NA        | 1.867410889 | -0.993165262 | 1.70523382  | -0.582421748 | 0.560282636 | NA          | NA      |
| ENSG00000197417 | SHPK        | sedoheptulokinase                                 | 23729     | 75.20826935 | -0.993011993 | 0.651926528 | -1.523196173 | 0.127709633 | 0.999371363 | Not Sig |
| ENSG00000233429 | HOTAIRM1    | HOXA transcript antisense RNA, myeloid-specific 1 | 100506311 | 115.4504723 | -0.992425974 | 0.661694099 | -1.49982594  | 0.133659496 | 0.999371363 | Not Sig |
| ENSG00000201184 | NA          | NA                                                | NA        | 2.511627623 | -0.992179392 | 1.618007282 | -0.613210709 | 0.539737025 | NA          | NA      |
| ENSG00000139998 | RAB15       | RAB15, member RAS oncogene family                 | 376267    | 729.2923543 | -0.991866658 | 0.69814571  | -1.420715825 | 0.15539939  | 0.999371363 | Not Sig |
| ENSG00000221176 | MIR1207     | microRNA 1207                                     | 100302175 | 10.18878284 | -0.991401918 | 1.32393428  | -0.748830159 | 0.45395958  | 0.999371363 | Not Sig |
| ENSG00000188649 | CC2D2B      | coiled-coil and C2 domain containing 2B           | 387707    | 7.266626607 | -0.991316426 | 0.987819641 | -1.003539902 | 0.315600435 | 0.999371363 | Not Sig |
| ENSG00000112773 | FAM46A      | family with sequence similarity 46 member A       | 55603     | 2916.937468 | -0.99094697  | 0.776990925 | -1.275364923 | 0.202180108 | 0.999371363 | Not Sig |
| ENSG00000238061 | NA          | NA                                                | NA        | 18.28499732 | -0.990687236 | 0.870353603 | -1.138258327 | 0.25501263  | 0.999371363 | Not Sig |
| ENSG00000110675 | ELMOD1      | ELMO domain containing 1                          | 55531     | 7.793406649 | -0.990363479 | 0.99833572  | -0.992014468 | 0.321190468 | 0.999371363 | Not Sig |
| ENSG00000247193 | LOC439933   | uncharacterized LOC439933                         | 439933    | 1.398457419 | -0.990274699 | 2.139345014 | -0.462886862 | 0.643445465 | NA          | NA      |
| ENSG00000270409 | NA          | NA                                                | NA        | 1.398457419 | -0.990274699 | 2.139345014 | -0.462886862 | 0.643445465 | NA          | NA      |
| ENSG00000201801 | NA          | NA                                                | NA        | 2.757398477 | -0.99025433  | 1.562046088 | -0.633946935 | 0.526115454 | NA          | NA      |
| ENSG00000151006 | PRSS53      | protease, serine 53                               | 339105    | 38.14148126 | -0.989796627 | 0.79663232  | -1.242476111 | 0.214060949 | 0.999371363 | Not Sig |
| ENSG00000199730 | NA          | NA                                                | NA        | 21.98962531 | -0.989788325 | 0.830372542 | -1.191981039 | 0.23326868  | 0.999371363 | Not Sig |
| ENSG00000128534 | LSM8        | LSM8 homolog, U6 small nuclear RNA associated     | 51691     | 477.7165283 | -0.989455016 | 0.597303164 | -1.656537375 | 0.097613043 | 0.999371363 | Not Sig |
| ENSG00000071677 | PRLH        | prolactin releasing hormone                       | 51052     | 0.477405323 | -0.989071541 | 4.043156577 | -0.244628553 | 0.806744054 | NA          | NA      |
| ENSG00000143627 | PKLR        | pyruvate kinase L/R                               | 5313      | 0.483842858 | -0.989071541 | 4.043156577 | -0.244628553 | 0.806744054 | NA          | NA      |
| ENSG00000170468 | RIOX1       | ribosomal oxygenase 1                             | 79697     | 0.477405323 | -0.989071541 | 4.043156577 | -0.244628553 | 0.806744054 | NA          | NA      |
| ENSG00000174930 | NA          | NA                                                | NA        | 0.477405323 | -0.989071541 | 4.043156577 | -0.244628553 | 0.806744054 | NA          | NA      |
| ENSG00000200949 | SNORD115-32 | small nucleolar RNA, C/D box 115-32               | 100033806 | 0.483842858 | -0.989071541 | 4.043156577 | -0.244628553 | 0.806744054 | NA          | NA      |
| ENSG00000201570 | NA          | NA                                                | NA        | 0.483842858 | -0.989071541 | 4.043156577 | -0.244628553 | 0.806744054 | NA          | NA      |
| ENSG00000201969 | SNORD115-20 | small nucleolar RNA, C/D box 115-20               | 100033460 | 0.518743197 | -0.989071541 | 4.043156577 | -0.244628553 | 0.806744054 | NA          | NA      |
| ENSG00000202017 | NA          | NA                                                | NA        | 0.477405323 | -0.989071541 | 4.043156577 | -0.244628553 | 0.806744054 | NA          | NA      |
| ENSG00000202189 | SNORA30B    | small nucleolar RNA, H/ACA box 30B                | 109616992 | 0.518743197 | -0.989071541 | 4.043156577 | -0.244628553 | 0.806744054 | NA          | NA      |
| ENSG00000205867 | KRTAP5-2    | keratin associated protein 5-2                    | 440021    | 0.483842858 | -0.989071541 | 4.043156577 | -0.244628553 | 0.806744054 | NA          | NA      |
| ENSG00000207222 | NA          | NA                                                | NA        | 0.518743197 | -0.989071541 | 4.043156577 | -0.244628553 | 0.806744054 | NA          | NA      |
| ENSG00000207586 | MIR135A2    | microRNA 135a-2                                   | 406926    | 0.477405323 | -0.989071541 | 4.043156577 | -0.244628553 | 0.806744054 | NA          | NA      |
| ENSG00000213424 | KRT22       | keratin 22                                        | 125113    | 0.477405323 | -0.989071541 | 4.043156577 | -0.244628553 | 0.806744054 | NA          | NA      |
| ENSG00000214917 | NA          | NA                                                | NA        | 0.483842858 | -0.989071541 | 4.043156577 | -0.244628553 | 0.806744054 | NA          | NA      |
| ENSG00000215102 | NA          | NA                                                | NA        | 0.518743197 | -0.989071541 | 4.043156577 | -0.244628553 | 0.806744054 | NA          | NA      |
| ENSG00000215304 | NA          | NA                                                | NA        | 0.518743197 | -0.989071541 | 4.043156577 | -0.244628553 | 0.806744054 | NA          | NA      |

|                 |              |                                                                  |           |             |              |             |              |             |             |         |
|-----------------|--------------|------------------------------------------------------------------|-----------|-------------|--------------|-------------|--------------|-------------|-------------|---------|
| ENSG00000218069 | NA           | NA                                                               | NA        | 0.477405323 | -0.989071541 | 4.043156577 | -0.244628553 | 0.806744054 | NA          | NA      |
| ENSG00000221183 | NA           | NA                                                               | NA        | 0.483842858 | -0.989071541 | 4.043156577 | -0.244628553 | 0.806744054 | NA          | NA      |
| ENSG00000224132 | NA           | NA                                                               | NA        | 0.477405323 | -0.989071541 | 4.043156577 | -0.244628553 | 0.806744054 | NA          | NA      |
| ENSG00000224936 | NA           | NA                                                               | NA        | 0.518743197 | -0.989071541 | 4.043156577 | -0.244628553 | 0.806744054 | NA          | NA      |
| ENSG00000228612 | NA           | NA                                                               | NA        | 0.483842858 | -0.989071541 | 4.043156577 | -0.244628553 | 0.806744054 | NA          | NA      |
| ENSG00000229489 | NA           | NA                                                               | NA        | 0.477405323 | -0.989071541 | 4.043156577 | -0.244628553 | 0.806744054 | NA          | NA      |
| ENSG00000231868 | NA           | NA                                                               | NA        | 0.483842858 | -0.989071541 | 4.043156577 | -0.244628553 | 0.806744054 | NA          | NA      |
| ENSG00000234123 | NA           | NA                                                               | NA        | 0.477405323 | -0.989071541 | 4.043156577 | -0.244628553 | 0.806744054 | NA          | NA      |
| ENSG00000238406 | NA           | NA                                                               | NA        | 0.518743197 | -0.989071541 | 4.043156577 | -0.244628553 | 0.806744054 | NA          | NA      |
| ENSG00000239481 | NA           | NA                                                               | NA        | 0.518743197 | -0.989071541 | 4.043156577 | -0.244628553 | 0.806744054 | NA          | NA      |
| ENSG00000240487 | NA           | NA                                                               | NA        | 0.518743197 | -0.989071541 | 4.043156577 | -0.244628553 | 0.806744054 | NA          | NA      |
| ENSG00000244414 | CFHR1        | complement factor H related 1                                    | 3078      | 0.483842858 | -0.989071541 | 4.043156577 | -0.244628553 | 0.806744054 | NA          | NA      |
| ENSG00000248211 | NA           | NA                                                               | NA        | 0.477405323 | -0.989071541 | 4.043156577 | -0.244628553 | 0.806744054 | NA          | NA      |
| ENSG00000250039 | NA           | NA                                                               | NA        | 0.518743197 | -0.989071541 | 4.043156577 | -0.244628553 | 0.806744054 | NA          | NA      |
| ENSG00000250563 | NA           | NA                                                               | NA        | 0.477405323 | -0.989071541 | 4.043156577 | -0.244628553 | 0.806744054 | NA          | NA      |
| ENSG00000252960 | NA           | NA                                                               | NA        | 0.477405323 | -0.989071541 | 4.043156577 | -0.244628553 | 0.806744054 | NA          | NA      |
| ENSG00000253297 | NA           | NA                                                               | NA        | 0.518743197 | -0.989071541 | 4.043156577 | -0.244628553 | 0.806744054 | NA          | NA      |
| ENSG00000254974 | NA           | NA                                                               | NA        | 0.477405323 | -0.989071541 | 4.043156577 | -0.244628553 | 0.806744054 | NA          | NA      |
| ENSG00000258501 | NA           | NA                                                               | NA        | 0.483842858 | -0.989071541 | 4.043156577 | -0.244628553 | 0.806744054 | NA          | NA      |
| ENSG00000259155 | NA           | NA                                                               | NA        | 0.518743197 | -0.989071541 | 4.043156577 | -0.244628553 | 0.806744054 | NA          | NA      |
| ENSG00000261216 | NA           | NA                                                               | NA        | 0.477405323 | -0.989071541 | 4.043156577 | -0.244628553 | 0.806744054 | NA          | NA      |
| ENSG00000261439 | DKFZP434H168 | uncharacterized LOC26077                                         | 26077     | 0.518743197 | -0.989071541 | 4.043156577 | -0.244628553 | 0.806744054 | NA          | NA      |
| ENSG00000262147 | NA           | NA                                                               | NA        | 0.477405323 | -0.989071541 | 4.043156577 | -0.244628553 | 0.806744054 | NA          | NA      |
| ENSG00000266756 | MIR5680      | microRNA 5680                                                    | 100847001 | 0.477405323 | -0.989071541 | 4.043156577 | -0.244628553 | 0.806744054 | NA          | NA      |
| ENSG00000269050 | NA           | NA                                                               | NA        | 0.477405323 | -0.989071541 | 4.043156577 | -0.244628553 | 0.806744054 | NA          | NA      |
| ENSG00000269810 | NA           | NA                                                               | NA        | 0.518743197 | -0.989071541 | 4.043156577 | -0.244628553 | 0.806744054 | NA          | NA      |
| ENSG00000270317 | NA           | NA                                                               | NA        | 0.483842858 | -0.989071541 | 4.043156577 | -0.244628553 | 0.806744054 | NA          | NA      |
| ENSG00000270889 | NA           | NA                                                               | NA        | 0.477405323 | -0.989071541 | 4.043156577 | -0.244628553 | 0.806744054 | NA          | NA      |
| ENSG00000273331 | NA           | NA                                                               | NA        | 0.477405323 | -0.989071541 | 4.043156577 | -0.244628553 | 0.806744054 | NA          | NA      |
| ENSG00000232341 | NA           | NA                                                               | NA        | 1.345650979 | -0.988866872 | 2.079008838 | -0.475643419 | 0.634328437 | NA          | NA      |
| ENSG00000138792 | ENPEP        | glutamyl aminopeptidase                                          | 2028      | 198.3440773 | -0.988763633 | 0.574115412 | -1.722238444 | 0.085026333 | 0.999371363 | Not Sig |
| ENSG00000221340 | NA           | NA                                                               | NA        | 7.851626555 | -0.988040264 | 0.937274479 | -1.0541632   | 0.291808205 | 0.999371363 | Not Sig |
| ENSG00000267707 | NA           | NA                                                               | NA        | 7.161478969 | -0.987976334 | 1.040197696 | -0.949796695 | 0.342215565 | 0.999371363 | Not Sig |
| ENSG00000107593 | PKD2L1       | polycystin 2 like 1, transient receptor potential cation channel | 9033      | 15.20824545 | -0.987265469 | 0.924198351 | -1.068239809 | 0.285412352 | 0.999371363 | Not Sig |
| ENSG00000013441 | CLK1         | CDC like kinase 1                                                | 1195      | 3333.225144 | -0.986782458 | 0.626872394 | -1.574136089 | 0.115455991 | 0.999371363 | Not Sig |

|                 |                |                                                   |           |             |              |             |              |             |             |         |
|-----------------|----------------|---------------------------------------------------|-----------|-------------|--------------|-------------|--------------|-------------|-------------|---------|
| ENSG00000183111 | ARHGEF37       | Rho guanine nucleotide exchange factor 37         | 389337    | 510.2654975 | -0.986723144 | 0.696141909 | -1.417416666 | 0.156361143 | 0.999371363 | Not Sig |
| ENSG00000176697 | BDNF           | brain derived neurotrophic factor                 | 627       | 50.77316699 | -0.986697935 | 1.109121257 | -0.889621336 | 0.373669246 | 0.999371363 | Not Sig |
| ENSG00000175202 | HIGD2B         | HIG1 hypoxia inducible domain family member 2B    | 123346    | 1.780573462 | -0.986299629 | 1.920705998 | -0.513508902 | 0.607595385 | NA          | NA      |
| ENSG00000243518 | NA             | NA                                                | NA        | 7.613943738 | -0.985222658 | 1.296039303 | -0.760179614 | 0.447147229 | 0.999371363 | Not Sig |
| ENSG00000249158 | PCDHA11        | protocadherin alpha 11                            | 56138     | 25.81586895 | -0.985074787 | 0.873414077 | -1.127843954 | 0.259385827 | 0.999371363 | Not Sig |
| ENSG00000269891 | ARHGAP19-SLIT1 | ARHGAP19-SLIT1 readthrough (NMD candidate)        | 100533184 | 4.277726703 | -0.985000998 | 1.305521638 | -0.75448845  | 0.450555978 | NA          | NA      |
| ENSG00000164241 | C5orf63        | chromosome 5 open reading frame 63                | 401207    | 267.3597667 | -0.984319493 | 0.827720234 | -1.189193464 | 0.234363546 | 0.999371363 | Not Sig |
| ENSG00000249899 | NA             | NA                                                | NA        | 1.416181614 | -0.984101158 | 2.106489453 | -0.467175924 | 0.640374017 | NA          | NA      |
| ENSG00000262484 | CCER2          | coiled-coil glutamate rich protein 2              | 643669    | 7.34959426  | -0.983705126 | 1.00937071  | -0.974572688 | 0.329772267 | 0.999371363 | Not Sig |
| ENSG00000264994 | SNORD92        | small nucleolar RNA, C/D box 92                   | 692209    | 6.333690936 | -0.983207578 | 1.097306252 | -0.896019299 | 0.370242456 | NA          | NA      |
| ENSG00000165105 | RASEF          | RAS and EF-hand domain containing                 | 158158    | 1819.257741 | -0.982941666 | 0.742478071 | -1.323866258 | 0.185547466 | 0.999371363 | Not Sig |
| ENSG00000250197 | NA             | NA                                                | NA        | 8.184795033 | -0.982847745 | 0.955865239 | -1.028228357 | 0.303842422 | 0.999371363 | Not Sig |
| ENSG00000198938 | COX3           | cytochrome c oxidase III                          | 4514      | 79765.73719 | -0.982504686 | 0.839922641 | -1.169756163 | 0.242099109 | 0.999371363 | Not Sig |
| ENSG00000120251 | GRIA2          | glutamate ionotropic receptor AMPA type subunit 2 | 2891      | 3.648803468 | -0.981893115 | 1.772915821 | -0.553829518 | 0.579695525 | NA          | NA      |
| ENSG00000241150 | NA             | NA                                                | NA        | 17.46772155 | -0.98186839  | 1.062854914 | -0.923802842 | 0.355588975 | 0.999371363 | Not Sig |
| ENSG00000273026 | NA             | NA                                                | NA        | 6.195491662 | -0.981857747 | 1.306138904 | -0.751725367 | 0.452216232 | NA          | NA      |
| ENSG00000201003 | NA             | NA                                                | NA        | 0.871677377 | -0.981820499 | 3.161214321 | -0.310583339 | 0.756117395 | NA          | NA      |
| ENSG00000254387 | NA             | NA                                                | NA        | 0.871677377 | -0.981820499 | 3.161214321 | -0.310583339 | 0.756117395 | NA          | NA      |
| ENSG00000242390 | NA             | NA                                                | NA        | 1.322906652 | -0.981496049 | 2.082104287 | -0.4713962   | 0.637357829 | NA          | NA      |
| ENSG00000166123 | GPT2           | glutamic--pyruvic transaminase 2                  | 84706     | 834.1642333 | -0.981372737 | 0.914474085 | -1.073155328 | 0.28320143  | 0.999371363 | Not Sig |
| ENSG00000052802 | MSMO1          | methylsterol monooxygenase 1                      | 6307      | 1037.457849 | -0.98013827  | 0.597936865 | -1.639200268 | 0.101171558 | 0.999371363 | Not Sig |
| ENSG00000272161 | NA             | NA                                                | NA        | 0.969972472 | -0.980047589 | 2.612852255 | -0.375087258 | 0.707595573 | NA          | NA      |
| ENSG00000073910 | FRY            | FRY microtubule binding protein                   | 10129     | 2339.369104 | -0.979914099 | 0.578813045 | -1.692971688 | 0.090460856 | 0.999371363 | Not Sig |
| ENSG00000087495 | PHACTR3        | phosphatase and actin regulator 3                 | 116154    | 95.71304528 | -0.97990019  | 0.635828426 | -1.541139323 | 0.123282881 | 0.999371363 | Not Sig |
| ENSG00000222208 | NA             | NA                                                | NA        | 13.71731204 | -0.979574345 | 1.183548839 | -0.827658575 | 0.407863885 | 0.999371363 | Not Sig |
| ENSG00000263723 | NA             | NA                                                | NA        | 3.804339119 | -0.97887102  | 1.332302751 | -0.734721159 | 0.462509332 | NA          | NA      |
| ENSG00000199165 | MIRLET7A1      | microRNA let-7a-1                                 | 406881    | 13.6696073  | -0.978510161 | 0.865419214 | -1.130677647 | 0.258190793 | 0.999371363 | Not Sig |
| ENSG00000238805 | NA             | NA                                                | NA        | 8.627390546 | -0.97793892  | 1.386731752 | -0.705211313 | 0.480678742 | 0.999371363 | Not Sig |
| ENSG00000231177 | LINC00852      | long intergenic non-protein coding RNA 852        | 84657     | 58.35949209 | -0.977811131 | 0.68961872  | -1.417901085 | 0.156219646 | 0.999371363 | Not Sig |
| ENSG00000145569 | FAM105A        | family with sequence similarity 105 member A      | 54491     | 970.4742723 | -0.97724117  | 0.788717448 | -1.239025676 | 0.21533599  | 0.999371363 | Not Sig |
| ENSG00000139173 | TMEM117        | transmembrane protein 117                         | 84216     | 121.8589063 | -0.977068157 | 0.669614663 | -1.459149881 | 0.14452386  | 0.999371363 | Not Sig |
| ENSG00000237945 | LINC00649      | long intergenic non-protein coding RNA 649        | 100506334 | 225.7357615 | -0.976354876 | 0.723300491 | -1.349860657 | 0.177060684 | 0.999371363 | Not Sig |
| ENSG00000236930 | NA             | NA                                                | NA        | 1.910763081 | -0.976168878 | 2.113431793 | -0.461888045 | 0.644161608 | NA          | NA      |
| ENSG00000002933 | TMEM176A       | transmembrane protein 176A                        | 55365     | 788.7586676 | -0.975449256 | 0.806606062 | -1.209325472 | 0.226537829 | 0.999371363 | Not Sig |
| ENSG00000167971 | CASKIN1        | CASK interacting protein 1                        | 57524     | 35.96449666 | -0.9747651   | 1.089834687 | -0.894415559 | 0.371099591 | 0.999371363 | Not Sig |

|                 |          |                                            |           |             |              |             |              |             |             |         |
|-----------------|----------|--------------------------------------------|-----------|-------------|--------------|-------------|--------------|-------------|-------------|---------|
| ENSG00000252262 | NA       | NA                                         | NA        | 4.662284219 | -0.974387504 | 1.514697529 | -0.643288502 | 0.520036916 | NA          | NA      |
| ENSG00000218428 | NA       | NA                                         | NA        | 3.8393725   | -0.974188099 | 1.597348526 | -0.609878234 | 0.541942472 | NA          | NA      |
| ENSG00000203722 | RAET1G   | retinoic acid early transcript 1G          | 353091    | 12.61357951 | -0.973584059 | 0.901153192 | -1.080375754 | 0.279974888 | 0.999371363 | Not Sig |
| ENSG00000255642 | NA       | NA                                         | NA        | 23.74937232 | -0.972884565 | 0.757710887 | -1.283978601 | 0.199149443 | 0.999371363 | Not Sig |
| ENSG00000267662 | NA       | NA                                         | NA        | 3.302905109 | -0.97255878  | 1.411522425 | -0.689014048 | 0.490814427 | NA          | NA      |
| ENSG00000179967 | NA       | NA                                         | NA        | 58.10325102 | -0.97203892  | 0.619910687 | -1.56803059  | 0.116873994 | 0.999371363 | Not Sig |
| ENSG00000258944 | NA       | NA                                         | NA        | 16.92741667 | -0.971695368 | 0.773567168 | -1.256122813 | 0.209071446 | 0.999371363 | Not Sig |
| ENSG00000134152 | KATNBL1  | katanin regulatory subunit B1 like 1       | 79768     | 916.264287  | -0.970505456 | 0.745047693 | -1.302608498 | 0.192708455 | 0.999371363 | Not Sig |
| ENSG00000234026 | NA       | NA                                         | NA        | 17.32483877 | -0.970295218 | 0.887524379 | -1.093260355 | 0.274279504 | 0.999371363 | Not Sig |
| ENSG00000264281 | NA       | NA                                         | NA        | 8.446413909 | -0.970242958 | 1.029954511 | -0.942025058 | 0.346179811 | 0.999371363 | Not Sig |
| ENSG00000248483 | POU5F2   | POU domain class 5, transcription factor 2 | 134187    | 240.6085477 | -0.969874161 | 0.730517184 | -1.327654136 | 0.184292392 | 0.999371363 | Not Sig |
| ENSG00000254701 | NA       | NA                                         | NA        | 99.77407371 | -0.969504924 | 0.600255084 | -1.615154872 | 0.106277716 | 0.999371363 | Not Sig |
| ENSG00000237492 | NA       | NA                                         | NA        | 0.947228144 | -0.969452079 | 2.662211553 | -0.364152908 | 0.71574383  | NA          | NA      |
| ENSG00000236317 | NA       | NA                                         | NA        | 2.230203427 | -0.969386563 | 1.836666509 | -0.527796722 | 0.597640433 | NA          | NA      |
| ENSG00000229544 | NKX1-2   | NK1 homeobox 2                             | 390010    | 1.749792289 | -0.969275563 | 2.237039634 | -0.433284931 | 0.664807784 | NA          | NA      |
| ENSG00000238286 | NA       | NA                                         | NA        | 25.10664614 | -0.969269168 | 0.808289757 | -1.199160522 | 0.230465534 | 0.999371363 | Not Sig |
| ENSG00000118004 | COLEC11  | collectin subfamily member 11              | 78989     | 37.26501166 | -0.96895377  | 0.619408612 | -1.564320792 | 0.117742252 | 0.999371363 | Not Sig |
| ENSG00000183298 | NA       | NA                                         | NA        | 3.583172192 | -0.968639771 | 1.344916586 | -0.720222935 | 0.471387745 | NA          | NA      |
| ENSG00000104833 | TUBB4A   | tubulin beta 4A class IVa                  | 10382     | 23.50638587 | -0.968134954 | 0.991967362 | -0.975974604 | 0.329077049 | 0.999371363 | Not Sig |
| ENSG00000265178 | MIR4728  | microRNA 4728                              | 100616132 | 2.795315528 | -0.967669541 | 1.398503131 | -0.691932338 | 0.488979821 | NA          | NA      |
| ENSG00000272148 | NA       | NA                                         | NA        | 10.16149991 | -0.967267508 | 0.825571902 | -1.171633271 | 0.241344324 | 0.999371363 | Not Sig |
| ENSG00000237691 | NA       | NA                                         | NA        | 1.404894955 | -0.967052772 | 2.391282436 | -0.404407592 | 0.685913018 | NA          | NA      |
| ENSG00000180581 | NA       | NA                                         | NA        | 5.064266022 | -0.967025851 | 1.251910491 | -0.772440089 | 0.439853818 | NA          | NA      |
| ENSG00000210194 | NA       | NA                                         | NA        | 25.9609452  | -0.966485451 | 0.733138585 | -1.318284797 | 0.187408328 | 0.999371363 | Not Sig |
| ENSG00000210184 | NA       | NA                                         | NA        | 1.319889939 | -0.966423345 | 2.429786428 | -0.397740037 | 0.690821821 | NA          | NA      |
| ENSG00000107262 | BAG1     | BCL2 associated athanogene 1               | 573       | 2014.047699 | -0.965739661 | 0.580602022 | -1.663341883 | 0.096244019 | 0.999371363 | Not Sig |
| ENSG00000116017 | ARID3A   | AT-rich interaction domain 3A              | 1820      | 592.4378988 | -0.964404335 | 0.554146511 | -1.740341796 | 0.081799019 | 0.999371363 | Not Sig |
| ENSG00000206601 | NA       | NA                                         | NA        | 8.973754149 | -0.963898593 | 1.002067685 | -0.961909667 | 0.336094982 | 0.999371363 | Not Sig |
| ENSG00000269189 | NA       | NA                                         | NA        | 65.1706108  | -0.963403337 | 0.652159124 | -1.477251949 | 0.139608113 | 0.999371363 | Not Sig |
| ENSG00000264580 | MIR5692B | microRNA 5692b                             | 100847013 | 4.092583285 | -0.963130555 | 1.700692024 | -0.566316853 | 0.571178406 | NA          | NA      |
| ENSG00000251969 | NA       | NA                                         | NA        | 21.44431437 | -0.963009521 | 0.957872278 | -1.005363182 | 0.314722002 | 0.999371363 | Not Sig |
| ENSG00000157103 | SLC6A1   | solute carrier family 6 member 1           | 6529      | 60.59136434 | -0.962538165 | 0.789662375 | -1.218923676 | 0.222873162 | 0.999371363 | Not Sig |
| ENSG00000266618 | MIR4742  | microRNA 4742                              | 100616468 | 5.213486282 | -0.962416023 | 1.296395423 | -0.742378449 | 0.457858073 | NA          | NA      |
| ENSG00000259746 | NA       | NA                                         | NA        | 8.026968202 | -0.962410835 | 0.988102042 | -0.97399944  | 0.330056817 | 0.999371363 | Not Sig |
| ENSG00000221679 | NA       | NA                                         | NA        | 6.374242942 | -0.9622705   | 1.878375271 | -0.512288739 | 0.608448945 | NA          | NA      |

|                 |         |                                                  |        |             |              |             |              |             |             |         |
|-----------------|---------|--------------------------------------------------|--------|-------------|--------------|-------------|--------------|-------------|-------------|---------|
| ENSG00000105971 | CAV2    | caveolin 2                                       | 858    | 1428.767259 | -0.962166522 | 0.76571218  | -1.256564211 | 0.208911481 | 0.999371363 | Not Sig |
| ENSG00000268397 | NA      | NA                                               | NA     | 63.97810582 | -0.961704789 | 0.899755892 | -1.068850782 | 0.285136913 | 0.999371363 | Not Sig |
| ENSG00000273064 | NA      | NA                                               | NA     | 7.50553539  | -0.960944756 | 1.197691573 | -0.802330732 | 0.42236167  | 0.999371363 | Not Sig |
| ENSG00000176490 | DIRAS1  | DIRAS family GTPase 1                            | 148252 | 28.70434639 | -0.960869181 | 0.700553939 | -1.371584867 | 0.170192708 | 0.999371363 | Not Sig |
| ENSG00000111319 | SCNN1A  | sodium channel epithelial 1 alpha subunit        | 6337   | 4484.133909 | -0.960817418 | 0.472626869 | -2.032930163 | 0.042059579 | 0.999371363 | Not Sig |
| ENSG00000240015 | NA      | NA                                               | NA     | 6.712098396 | -0.960419496 | 1.016518287 | -0.944812807 | 0.344754452 | 0.999371363 | Not Sig |
| ENSG00000161573 | NA      | NA                                               | NA     | 4.045555083 | -0.95994611  | 1.522168651 | -0.630643727 | 0.528273501 | NA          | NA      |
| ENSG00000270532 | NA      | NA                                               | NA     | 2.801753064 | -0.959843153 | 1.432652937 | -0.669976048 | 0.502873059 | NA          | NA      |
| ENSG00000147606 | SLC26A7 | solute carrier family 26 member 7                | 115111 | 20.99851886 | -0.959809475 | 0.991923938 | -0.967624066 | 0.333232154 | 0.999371363 | Not Sig |
| ENSG00000237289 | CKMT1B  | creatine kinase, mitochondrial 1B                | 1159   | 47.68161388 | -0.959398578 | 1.351401927 | -0.709928378 | 0.477748552 | 0.999371363 | Not Sig |
| ENSG00000113083 | LOX     | lysyl oxidase                                    | 4015   | 794.9529392 | -0.959231695 | 0.673966575 | -1.42326301  | 0.154659926 | 0.999371363 | Not Sig |
| ENSG00000104804 | TULP2   | tubby like protein 2                             | 7288   | 6.17846581  | -0.958751028 | 1.183521815 | -0.810083105 | 0.417892414 | NA          | NA      |
| ENSG00000146859 | TMEM140 | transmembrane protein 140                        | 55281  | 601.5884905 | -0.958734883 | 0.873714111 | -1.097309601 | 0.272506075 | 0.999371363 | Not Sig |
| ENSG00000237781 | NA      | NA                                               | NA     | 155.8933117 | -0.958552111 | 0.639052886 | -1.499957408 | 0.133625436 | 0.999371363 | Not Sig |
| ENSG00000138311 | ZNF365  | zinc finger protein 365                          | 22891  | 63.17330793 | -0.958510277 | 0.767118153 | -1.249494975 | 0.21148409  | 0.999371363 | Not Sig |
| ENSG00000273373 | NA      | NA                                               | NA     | 158.4468154 | -0.958427018 | 0.930427991 | -1.030092632 | 0.302966524 | 0.999371363 | Not Sig |
| ENSG00000238858 | NA      | NA                                               | NA     | 7.439693646 | -0.958279762 | 1.211369928 | -0.791071117 | 0.428902493 | 0.999371363 | Not Sig |
| ENSG00000156049 | GNA14   | G protein subunit alpha 14                       | 9630   | 511.7114768 | -0.958278355 | 0.571886088 | -1.675645508 | 0.093807649 | 0.999371363 | Not Sig |
| ENSG00000261643 | NA      | NA                                               | NA     | 15.9491036  | -0.95826817  | 0.743909092 | -1.28815225  | 0.19769297  | 0.999371363 | Not Sig |
| ENSG00000254694 | NA      | NA                                               | NA     | 10.92095711 | -0.958114598 | 1.18644489  | -0.807550865 | 0.419349182 | 0.999371363 | Not Sig |
| ENSG00000188916 | FAM196A | family with sequence similarity 196 member A     | 642938 | 13.68439549 | -0.957838397 | 1.092493928 | -0.876744825 | 0.380625254 | 0.999371363 | Not Sig |
| ENSG00000174353 | TRIM74  | tripartite motif containing 74                   | 378108 | 196.9473386 | -0.957645636 | 0.634948149 | -1.508226519 | 0.131496562 | 0.999371363 | Not Sig |
| ENSG00000105613 | MAST1   | microtubule associated serine/threonine kinase 1 | 22983  | 16.88551265 | -0.957374995 | 0.906314868 | -1.056338177 | 0.29081374  | 0.999371363 | Not Sig |
| ENSG00000231747 | NA      | NA                                               | NA     | 2.273555619 | -0.957273982 | 1.609950212 | -0.594598501 | 0.552111883 | NA          | NA      |
| ENSG00000266236 | NA      | NA                                               | NA     | 36.89658493 | -0.957255801 | 0.679893844 | -1.407948916 | 0.159146197 | 0.999371363 | Not Sig |
| ENSG00000243954 | NA      | NA                                               | NA     | 3.145232996 | -0.957226459 | 1.367177547 | -0.700147879 | 0.483834958 | NA          | NA      |
| ENSG00000253556 | NA      | NA                                               | NA     | 1.598297422 | -0.956956789 | 2.723667724 | -0.351348581 | 0.725326853 | NA          | NA      |
| ENSG00000204860 | NA      | NA                                               | NA     | 50.63234977 | -0.956596631 | 1.060805447 | -0.901764441 | 0.367182013 | 0.999371363 | Not Sig |
| ENSG00000271870 | NA      | NA                                               | NA     | 34.08168698 | -0.956256247 | 0.793356247 | -1.205330205 | 0.228075854 | 0.999371363 | Not Sig |
| ENSG00000233690 | NA      | NA                                               | NA     | 6.320085907 | -0.956245778 | 1.13419172  | -0.843107704 | 0.39916821  | NA          | NA      |
| ENSG00000272755 | NA      | NA                                               | NA     | 40.66950015 | -0.95581209  | 0.695586561 | -1.374109482 | 0.169407696 | 0.999371363 | Not Sig |
| ENSG00000077684 | JADE1   | jade family PHD finger 1                         | 79960  | 1243.707324 | -0.955627747 | 0.410589042 | -2.327455557 | 0.019941032 | 0.712847952 | Not Sig |
| ENSG00000228914 | NA      | NA                                               | NA     | 1.326327474 | -0.955490583 | 2.82010259  | -0.338814122 | 0.734749762 | NA          | NA      |
| ENSG00000136682 | CBWD2   | COBW domain containing 2                         | 150472 | 616.9109819 | -0.955484648 | 0.683333389 | -1.398270102 | 0.162031973 | 0.999371363 | Not Sig |
| ENSG00000131368 | MRPS25  | mitochondrial ribosomal protein S25              | 64432  | 1707.969522 | -0.954872184 | 0.680871313 | -1.402426811 | 0.160787832 | 0.999371363 | Not Sig |

|                 |              |                                                         |           |             |              |             |              |             |             |         |
|-----------------|--------------|---------------------------------------------------------|-----------|-------------|--------------|-------------|--------------|-------------|-------------|---------|
| ENSG00000253854 | NA           | NA                                                      | NA        | 6.046698557 | -0.95484123  | 1.039643779 | -0.918431149 | 0.358393189 | NA          | NA      |
| ENSG00000213754 | NA           | NA                                                      | NA        | 5.660746684 | -0.954826387 | 1.134255091 | -0.841809214 | 0.399894754 | NA          | NA      |
| ENSG00000259635 | NA           | NA                                                      | NA        | 11.51032772 | -0.954721615 | 1.025424672 | -0.931049975 | 0.351827714 | 0.999371363 | Not Sig |
| ENSG00000236943 | NA           | NA                                                      | NA        | 125.4337986 | -0.954560036 | 0.573985215 | -1.663039414 | 0.096304546 | 0.999371363 | Not Sig |
| ENSG00000262402 | NA           | NA                                                      | NA        | 22.33626798 | -0.954392188 | 0.968952376 | -0.984973268 | 0.324637202 | 0.999371363 | Not Sig |
| ENSG00000228960 | NA           | NA                                                      | NA        | 20.50352212 | -0.954307031 | 1.014218283 | -0.940928641 | 0.346741429 | 0.999371363 | Not Sig |
| ENSG00000135437 | RDH5         | retinol dehydrogenase 5                                 | 5959      | 20.59822498 | -0.95419796  | 0.651557548 | -1.464487615 | 0.143060764 | 0.999371363 | Not Sig |
| ENSG00000217783 | NA           | NA                                                      | NA        | 11.6998234  | -0.954155724 | 0.813534317 | -1.17285246  | 0.240854977 | 0.999371363 | Not Sig |
| ENSG00000134138 | MEIS2        | Meis homeobox 2                                         | 4212      | 714.964124  | -0.953873587 | 0.553138666 | -1.724474614 | 0.084622198 | 0.999371363 | Not Sig |
| ENSG00000262769 | NA           | NA                                                      | NA        | 2.050529092 | -0.953487487 | 2.192129971 | -0.434959377 | 0.663591914 | NA          | NA      |
| ENSG00000260526 | NA           | NA                                                      | NA        | 9.516830085 | -0.953441542 | 0.956977352 | -0.996305231 | 0.319101863 | 0.999371363 | Not Sig |
| ENSG00000268230 | NA           | NA                                                      | NA        | 7.129529785 | -0.952902438 | 1.002756365 | -0.950283112 | 0.341968418 | 0.999371363 | Not Sig |
| ENSG00000170054 | SERPINA9     | serpin family A member 9                                | 327657    | 1.923638152 | -0.952811339 | 2.11349092  | -0.450823484 | 0.652116774 | NA          | NA      |
| ENSG00000257511 | NA           | NA                                                      | NA        | 32.4027552  | -0.952717741 | 0.628957674 | -1.514756526 | 0.129834074 | 0.999371363 | Not Sig |
| ENSG00000251000 | NA           | NA                                                      | NA        | 2.86282945  | -0.951621025 | 1.453309855 | -0.654795687 | 0.512599308 | NA          | NA      |
| ENSG00000128342 | LIF          | LIF, interleukin 6 family cytokine                      | 3976      | 737.5989264 | -0.950755228 | 0.624589418 | -1.522208351 | 0.127956883 | 0.999371363 | Not Sig |
| ENSG00000205189 | ZBTB10       | zinc finger and BTB domain containing 10                | 65986     | 1674.746145 | -0.950383657 | 0.609872479 | -1.558331764 | 0.119154623 | 0.999371363 | Not Sig |
| ENSG00000173295 | FAM86B3P     | family with sequence similarity 86, member A pseudogene | 286042    | 122.0964528 | -0.950008505 | 0.711439655 | -1.335332518 | 0.18176754  | 0.999371363 | Not Sig |
| ENSG00000160828 | NA           | NA                                                      | NA        | 304.1425196 | -0.949234877 | 0.571354776 | -1.66137559  | 0.096638037 | 0.999371363 | Not Sig |
| ENSG00000259408 | LOC101929988 | uncharacterized LOC101929988                            | 101929988 | 7.26102585  | -0.948310507 | 1.014780696 | -0.934497977 | 0.350047079 | 0.999371363 | Not Sig |
| ENSG00000176402 | GJC3         | gap junction protein gamma 3                            | 349149    | 2.676279527 | -0.9475092   | 1.689705256 | -0.56075413  | 0.574965161 | NA          | NA      |
| ENSG00000254884 | NA           | NA                                                      | NA        | 30.45877043 | -0.947052379 | 0.710301011 | -1.33331132  | 0.18242966  | 0.999371363 | Not Sig |
| ENSG00000174788 | PCP2         | Purkinje cell protein 2                                 | 126006    | 27.49107129 | -0.946740366 | 0.839383943 | -1.127899067 | 0.259362548 | 0.999371363 | Not Sig |
| ENSG00000260014 | NA           | NA                                                      | NA        | 2.994740523 | -0.946589643 | 1.600550951 | -0.591414876 | 0.554242475 | NA          | NA      |
| ENSG00000166926 | MS4A6E       | membrane spanning 4-domains A6E                         | 245802    | 1.046940642 | -0.94641765  | 2.580326265 | -0.366782163 | 0.713781513 | NA          | NA      |
| ENSG00000227295 | NA           | NA                                                      | NA        | 2.443798751 | -0.946194933 | 1.559069593 | -0.606897175 | 0.543919153 | NA          | NA      |
| ENSG00000148120 | C9orf3       | chromosome 9 open reading frame 3                       | 84909     | 2387.705559 | -0.945488124 | 0.534937595 | -1.767473688 | 0.077148932 | 0.999371363 | Not Sig |
| ENSG00000115368 | WDR75        | WD repeat domain 75                                     | 84128     | 945.108519  | -0.945119972 | 0.692676767 | -1.364445896 | 0.172427271 | 0.999371363 | Not Sig |
| ENSG00000204913 | LRRC3C       | leucine rich repeat containing 3C                       | 100505591 | 0.855370585 | -0.944975805 | 3.17409799  | -0.297714755 | 0.765920881 | NA          | NA      |
| ENSG00000238224 | NA           | NA                                                      | NA        | 0.855370585 | -0.944975805 | 3.17409799  | -0.297714755 | 0.765920881 | NA          | NA      |
| ENSG00000221355 | MIR1288      | microRNA 1288                                           | 100302124 | 2.896445428 | -0.944729116 | 1.540211385 | -0.613376271 | 0.539627572 | NA          | NA      |
| ENSG00000158517 | NCF1         | neutrophil cytosolic factor 1                           | 653361    | 208.6483699 | -0.944657338 | 0.867210441 | -1.08930577  | 0.276019069 | 0.999371363 | Not Sig |
| ENSG00000145390 | USP53        | ubiquitin specific peptidase 53                         | 54532     | 2416.378437 | -0.944348538 | 0.568381996 | -1.661468072 | 0.096619476 | 0.999371363 | Not Sig |
| ENSG00000119041 | GTF3C3       | general transcription factor IIIC subunit 3             | 9330      | 1022.31663  | -0.944267578 | 0.59749052  | -1.580389222 | 0.114017758 | 0.999371363 | Not Sig |
| ENSG00000250522 | NA           | NA                                                      | NA        | 15.07548477 | -0.943772451 | 0.960112066 | -0.982981555 | 0.325616517 | 0.999371363 | Not Sig |

|                 |              |                                                                      |           |             |              |             |              |             |             |         |
|-----------------|--------------|----------------------------------------------------------------------|-----------|-------------|--------------|-------------|--------------|-------------|-------------|---------|
| ENSG00000272337 | NA           | NA                                                                   | NA        | 10.69795226 | -0.943607142 | 1.242588263 | -0.759388424 | 0.447620236 | 0.999371363 | Not Sig |
| ENSG00000244151 | NA           | NA                                                                   | NA        | 7.160716438 | -0.943479477 | 1.198602443 | -0.787149637 | 0.431194275 | 0.999371363 | Not Sig |
| ENSG00000270441 | NA           | NA                                                                   | NA        | 36.31872944 | -0.943030469 | 0.58027772  | -1.625136441 | 0.10413349  | 0.999371363 | Not Sig |
| ENSG00000271659 | NA           | NA                                                                   | NA        | 2.28442727  | -0.942631473 | 1.626065211 | -0.579700904 | 0.562116334 | NA          | NA      |
| ENSG00000101470 | TNNC2        | troponin C2, fast skeletal type                                      | 7125      | 11.38915662 | -0.942486152 | 1.060209527 | -0.88896216  | 0.374023417 | 0.999371363 | Not Sig |
| ENSG00000110841 | PPFIBP1      | PPFIA binding protein 1                                              | 8496      | 2060.664884 | -0.942407354 | 0.569750224 | -1.654071055 | 0.098113076 | 0.999371363 | Not Sig |
| ENSG00000223525 | NA           | NA                                                                   | NA        | 39.45961674 | -0.942389694 | 0.812406388 | -1.159997888 | 0.246049666 | 0.999371363 | Not Sig |
| ENSG00000224142 | NA           | NA                                                                   | NA        | 3.588010417 | -0.942178256 | 1.327324005 | -0.709832906 | 0.477807761 | NA          | NA      |
| ENSG00000229717 | NA           | NA                                                                   | NA        | 0.878114912 | -0.941077406 | 2.738469785 | -0.343650827 | 0.731108896 | NA          | NA      |
| ENSG00000243777 | NA           | NA                                                                   | NA        | 0.878114912 | -0.941077406 | 2.738469785 | -0.343650827 | 0.731108896 | NA          | NA      |
| ENSG00000272812 | NA           | NA                                                                   | NA        | 25.14900835 | -0.940721841 | 0.96966991  | -0.970146471 | 0.331973488 | 0.999371363 | Not Sig |
| ENSG00000121361 | KCNJ8        | potassium voltage-gated channel subfamily J member 8                 | 3764      | 223.2446263 | -0.940558604 | 0.696165914 | -1.351055237 | 0.176677739 | 0.999371363 | Not Sig |
| ENSG00000272072 | NA           | NA                                                                   | NA        | 15.31756498 | -0.940219468 | 1.020014854 | -0.921770369 | 0.356648367 | 0.999371363 | Not Sig |
| ENSG00000251652 | LOC105374344 | uncharacterized LOC105374344                                         | 105374344 | 43.60527449 | -0.940070285 | 0.858898132 | -1.094507311 | 0.273732543 | 0.999371363 | Not Sig |
| ENSG00000250940 | NA           | NA                                                                   | NA        | 1.729051382 | -0.93932646  | 2.217760454 | -0.423547304 | 0.671895993 | NA          | NA      |
| ENSG00000258284 | NA           | NA                                                                   | NA        | 4.299741073 | -0.939311177 | 1.35416614  | -0.693645446 | 0.487904586 | NA          | NA      |
| ENSG00000248019 | FAM13A-AS1   | FAM13A antisense RNA 1                                               | 285512    | 160.5428178 | -0.939048729 | 0.536920806 | -1.748952022 | 0.080299313 | 0.999371363 | Not Sig |
| ENSG00000228828 | NA           | NA                                                                   | NA        | 74.55905863 | -0.938804567 | 0.708105356 | -1.325797862 | 0.184906661 | 0.999371363 | Not Sig |
| ENSG00000259716 | NA           | NA                                                                   | NA        | 11.56453084 | -0.938636973 | 0.860467731 | -1.090845059 | 0.275341066 | 0.999371363 | Not Sig |
| ENSG00000181418 | DDN          | dendrin                                                              | 23109     | 2.862414443 | -0.938473677 | 1.453195616 | -0.645799964 | 0.518408911 | NA          | NA      |
| ENSG00000244945 | LOC101928445 | uncharacterized LOC101928445                                         | 101928445 | 22.63441508 | -0.937845852 | 0.919393754 | -1.020069854 | 0.307695333 | 0.999371363 | Not Sig |
| ENSG00000261428 | NA           | NA                                                                   | NA        | 21.60632581 | -0.937727796 | 0.722488693 | -1.297913455 | 0.194317076 | 0.999371363 | Not Sig |
| ENSG00000253366 | NA           | NA                                                                   | NA        | 9.503961487 | -0.937405489 | 1.090420342 | -0.859673516 | 0.389969038 | 0.999371363 | Not Sig |
| ENSG00000235823 | OLMALINC     | oligodendrocyte maturation-associated long intergenic non-coding RNA | 90271     | 201.2533876 | -0.937398149 | 0.662438053 | -1.41507292  | 0.157047117 | 0.999371363 | Not Sig |
| ENSG00000242853 | NA           | NA                                                                   | NA        | 22.86833259 | -0.937287933 | 0.863482652 | -1.085473959 | 0.277711791 | 0.999371363 | Not Sig |
| ENSG00000234835 | NA           | NA                                                                   | NA        | 7.393451988 | -0.937271814 | 1.116779181 | -0.839263329 | 0.401321557 | 0.999371363 | Not Sig |
| ENSG00000172201 | ID4          | inhibitor of DNA binding 4, HLH protein                              | 3400      | 958.9279639 | -0.937224496 | 0.749818367 | -1.249935368 | 0.211323158 | 0.999371363 | Not Sig |
| ENSG00000226989 | NA           | NA                                                                   | NA        | 17.47559375 | -0.935567911 | 0.756457257 | -1.236775643 | 0.216170387 | 0.999371363 | Not Sig |
| ENSG00000203281 | NA           | NA                                                                   | NA        | 1.93149309  | -0.935147484 | 1.825825396 | -0.512177937 | 0.608526483 | NA          | NA      |
| ENSG00000173988 | LRRC63       | leucine rich repeat containing 63                                    | 220416    | 9.98711815  | -0.93508808  | 0.949331956 | -0.984995895 | 0.324626087 | 0.999371363 | Not Sig |
| ENSG00000253075 | NA           | NA                                                                   | NA        | 5.803302368 | -0.934799916 | 1.337187328 | -0.699079251 | 0.484502505 | NA          | NA      |
| ENSG00000202279 | NA           | NA                                                                   | NA        | 4.957386031 | -0.934584441 | 1.315564141 | -0.710405834 | 0.477452506 | NA          | NA      |
| ENSG00000172172 | MRPL13       | mitochondrial ribosomal protein L13                                  | 28998     | 369.7134674 | -0.934529169 | 0.656465835 | -1.423576244 | 0.154569177 | 0.999371363 | Not Sig |
| ENSG00000259477 | NA           | NA                                                                   | NA        | 2.250396284 | -0.934446161 | 1.860144797 | -0.502351302 | 0.615420428 | NA          | NA      |
| ENSG00000107679 | PLEKHA1      | pleckstrin homology domain containing A1                             | 59338     | 1732.880269 | -0.934280642 | 0.563818094 | -1.657060409 | 0.097507262 | 0.999371363 | Not Sig |



|                 |              |                                             |           |             |              |             |              |             |             |         |
|-----------------|--------------|---------------------------------------------|-----------|-------------|--------------|-------------|--------------|-------------|-------------|---------|
| ENSG00000185033 | SEMA4B       | semaphorin 4B                               | 10509     | 3726.916622 | -0.933967902 | 0.691380257 | -1.350874419 | 0.176735664 | 0.999371363 | Not Sig |
| ENSG00000236935 | NA           | NA                                          | NA        | 1.892856979 | -0.933346707 | 1.880852471 | -0.496236    | 0.619727914 | NA          | NA      |
| ENSG00000100302 | RASD2        | RASD family member 2                        | 23551     | 102.2888406 | -0.933086518 | 0.665679396 | -1.401705572 | 0.161003186 | 0.999371363 | Not Sig |
| ENSG00000223482 | NUTM2A-AS1   | NUTM2A antisense RNA 1                      | 728190    | 609.4597803 | -0.933037267 | 0.557507683 | -1.673586384 | 0.094211916 | 0.999371363 | Not Sig |
| ENSG00000145107 | TM4SF19      | transmembrane 4 L six family member 19      | 116211    | 18.81869092 | -0.932920932 | 1.158315544 | -0.805411735 | 0.420582122 | 0.999371363 | Not Sig |
| ENSG00000130821 | SLC6A8       | solute carrier family 6 member 8            | 6535      | 472.2973278 | -0.932347118 | 0.605013465 | -1.541035318 | 0.12330819  | 0.999371363 | Not Sig |
| ENSG00000256139 | NA           | NA                                          | NA        | 55.34892439 | -0.931913594 | 0.912376275 | -1.021413664 | 0.307058494 | 0.999371363 | Not Sig |
| ENSG00000124429 | POF1B        | POF1B, actin binding protein                | 79983     | 331.6349585 | -0.931828311 | 1.163335061 | -0.800997359 | 0.423133175 | 0.999371363 | Not Sig |
| ENSG00000151338 | MIPOL1       | mirror-image polydactyly 1                  | 145282    | 512.3475927 | -0.931612602 | 0.716906294 | -1.299490059 | 0.193775803 | 0.999371363 | Not Sig |
| ENSG00000253404 | LOC105379194 | uncharacterized LOC105379194                | 105379194 | 5.694793962 | -0.931515816 | 1.322621363 | -0.704295154 | 0.481248984 | NA          | NA      |
| ENSG00000128699 | ORMDL1       | ORMDL sphingolipid biosynthesis regulator 1 | 94101     | 906.2643839 | -0.931013603 | 0.763173107 | -1.219924541 | 0.222493482 | 0.999371363 | Not Sig |
| ENSG00000242951 | NA           | NA                                          | NA        | 1.374113782 | -0.930849465 | 2.074962512 | -0.448610257 | 0.653712833 | NA          | NA      |
| ENSG00000234998 | NA           | NA                                          | NA        | 10.26859217 | -0.930598292 | 1.111917575 | -0.836931004 | 0.402631352 | 0.999371363 | Not Sig |
| ENSG00000222937 | SNORD63B     | small nucleolar RNA, C/D box 63B            | 109617013 | 25.29913357 | -0.930136157 | 0.917018202 | -1.014305011 | 0.310437234 | 0.999371363 | Not Sig |
| ENSG00000183941 | NA           | NA                                          | NA        | 2.693588713 | -0.930130282 | 1.454679183 | -0.639405783 | 0.522558988 | NA          | NA      |
| ENSG00000154065 | ANKRD29      | ankyrin repeat domain 29                    | 147463    | 510.2934345 | -0.929786556 | 1.098143728 | -0.846689311 | 0.397168318 | 0.999371363 | Not Sig |
| ENSG00000122787 | AKR1D1       | aldo-keto reductase family 1 member D1      | 6718      | 0.502436405 | -0.929696407 | 3.723335734 | -0.249694487 | 0.802823622 | NA          | NA      |
| ENSG00000203334 | NA           | NA                                          | NA        | 0.502436405 | -0.929696407 | 3.723335734 | -0.249694487 | 0.802823622 | NA          | NA      |
| ENSG00000211623 | NA           | NA                                          | NA        | 0.502436405 | -0.929696407 | 3.723335734 | -0.249694487 | 0.802823622 | NA          | NA      |
| ENSG00000215174 | NLRP2B       | NLR family pyrin domain containing 2B       | 286430    | 0.502436405 | -0.929696407 | 3.723335734 | -0.249694487 | 0.802823622 | NA          | NA      |
| ENSG00000227487 | NCAM1-AS1    | NCAM1 antisense RNA1                        | 100288346 | 0.502436405 | -0.929696407 | 3.723335734 | -0.249694487 | 0.802823622 | NA          | NA      |
| ENSG00000232175 | NA           | NA                                          | NA        | 0.502436405 | -0.929696407 | 3.723335734 | -0.249694487 | 0.802823622 | NA          | NA      |
| ENSG00000235361 | NA           | NA                                          | NA        | 0.502436405 | -0.929696407 | 3.723335734 | -0.249694487 | 0.802823622 | NA          | NA      |
| ENSG00000236785 | NA           | NA                                          | NA        | 0.502436405 | -0.929696407 | 3.723335734 | -0.249694487 | 0.802823622 | NA          | NA      |
| ENSG00000240568 | NA           | NA                                          | NA        | 0.502436405 | -0.929696407 | 3.723335734 | -0.249694487 | 0.802823622 | NA          | NA      |
| ENSG00000241621 | NA           | NA                                          | NA        | 0.502436405 | -0.929696407 | 3.723335734 | -0.249694487 | 0.802823622 | NA          | NA      |
| ENSG00000255608 | NA           | NA                                          | NA        | 0.502436405 | -0.929696407 | 3.723335734 | -0.249694487 | 0.802823622 | NA          | NA      |
| ENSG00000259192 | NA           | NA                                          | NA        | 0.502436405 | -0.929696407 | 3.723335734 | -0.249694487 | 0.802823622 | NA          | NA      |
| ENSG00000261409 | NA           | NA                                          | NA        | 0.502436405 | -0.929696407 | 3.723335734 | -0.249694487 | 0.802823622 | NA          | NA      |
| ENSG00000263177 | NA           | NA                                          | NA        | 0.502436405 | -0.929696407 | 3.723335734 | -0.249694487 | 0.802823622 | NA          | NA      |
| ENSG00000264028 | NA           | NA                                          | NA        | 0.502436405 | -0.929696407 | 3.723335734 | -0.249694487 | 0.802823622 | NA          | NA      |
| ENSG00000267741 | NA           | NA                                          | NA        | 0.502436405 | -0.929696407 | 3.723335734 | -0.249694487 | 0.802823622 | NA          | NA      |
| ENSG00000182217 | NA           | NA                                          | NA        | 0.467536067 | -0.928729961 | 3.810350737 | -0.243738707 | 0.807433194 | NA          | NA      |
| ENSG00000202354 | RNY3         | RNA, Ro-associated Y3                       | 6085      | 0.467536067 | -0.928729961 | 3.810350737 | -0.243738707 | 0.807433194 | NA          | NA      |
| ENSG00000213755 | NA           | NA                                          | NA        | 0.467536067 | -0.928729961 | 3.810350737 | -0.243738707 | 0.807433194 | NA          | NA      |

|                 |            |                                               |           |             |              |             |              |             |             |         |
|-----------------|------------|-----------------------------------------------|-----------|-------------|--------------|-------------|--------------|-------------|-------------|---------|
| ENSG00000214823 | NA         | NA                                            | NA        | 0.467536067 | -0.928729961 | 3.810350737 | -0.243738707 | 0.807433194 | NA          | NA      |
| ENSG00000226235 | LEMD1-AS1  | LEMD1 antisense RNA 1                         | 284576    | 0.467536067 | -0.928729961 | 3.810350737 | -0.243738707 | 0.807433194 | NA          | NA      |
| ENSG00000226279 | NA         | NA                                            | NA        | 0.467536067 | -0.928729961 | 3.810350737 | -0.243738707 | 0.807433194 | NA          | NA      |
| ENSG00000228170 | NA         | NA                                            | NA        | 0.467536067 | -0.928729961 | 3.810350737 | -0.243738707 | 0.807433194 | NA          | NA      |
| ENSG00000243661 | NA         | NA                                            | NA        | 0.467536067 | -0.928729961 | 3.810350737 | -0.243738707 | 0.807433194 | NA          | NA      |
| ENSG00000244514 | NA         | NA                                            | NA        | 0.467536067 | -0.928729961 | 3.810350737 | -0.243738707 | 0.807433194 | NA          | NA      |
| ENSG00000248828 | NA         | NA                                            | NA        | 0.467536067 | -0.928729961 | 3.810350737 | -0.243738707 | 0.807433194 | NA          | NA      |
| ENSG00000256589 | NA         | NA                                            | NA        | 0.467536067 | -0.928729961 | 3.810350737 | -0.243738707 | 0.807433194 | NA          | NA      |
| ENSG00000259332 | ST20-MTHFS | ST20-MTHFS readthrough                        | 100528021 | 0.467536067 | -0.928729961 | 3.810350737 | -0.243738707 | 0.807433194 | NA          | NA      |
| ENSG00000259948 | NA         | NA                                            | NA        | 0.467536067 | -0.928729961 | 3.810350737 | -0.243738707 | 0.807433194 | NA          | NA      |
| ENSG00000260537 | NA         | NA                                            | NA        | 0.467536067 | -0.928729961 | 3.810350737 | -0.243738707 | 0.807433194 | NA          | NA      |
| ENSG00000267305 | NA         | NA                                            | NA        | 0.467536067 | -0.928729961 | 3.810350737 | -0.243738707 | 0.807433194 | NA          | NA      |
| ENSG00000270864 | NA         | NA                                            | NA        | 0.467536067 | -0.928729961 | 3.810350737 | -0.243738707 | 0.807433194 | NA          | NA      |
| ENSG00000271803 | NA         | NA                                            | NA        | 0.467536067 | -0.928729961 | 3.810350737 | -0.243738707 | 0.807433194 | NA          | NA      |
| ENSG00000214855 | APOC1P1    | apolipoprotein C1 pseudogene 1                | 342       | 3.457123415 | -0.928575903 | 1.699391249 | -0.546416785 | 0.584779475 | NA          | NA      |
| ENSG00000145721 | LIX1       | limb and CNS expressed 1                      | 167410    | 0.461098531 | -0.928547418 | 3.827465403 | -0.242601126 | 0.808314409 | NA          | NA      |
| ENSG00000165462 | PHOX2A     | paired like homeobox 2a                       | 401       | 0.461098531 | -0.928547418 | 3.827465403 | -0.242601126 | 0.808314409 | NA          | NA      |
| ENSG00000167774 | NA         | NA                                            | NA        | 0.461098531 | -0.928547418 | 3.827465403 | -0.242601126 | 0.808314409 | NA          | NA      |
| ENSG00000200545 | NA         | NA                                            | NA        | 0.461098531 | -0.928547418 | 3.827465403 | -0.242601126 | 0.808314409 | NA          | NA      |
| ENSG00000206145 | NA         | NA                                            | NA        | 0.461098531 | -0.928547418 | 3.827465403 | -0.242601126 | 0.808314409 | NA          | NA      |
| ENSG00000213315 | NA         | NA                                            | NA        | 0.461098531 | -0.928547418 | 3.827465403 | -0.242601126 | 0.808314409 | NA          | NA      |
| ENSG00000222862 | NA         | NA                                            | NA        | 0.461098531 | -0.928547418 | 3.827465403 | -0.242601126 | 0.808314409 | NA          | NA      |
| ENSG00000234022 | NA         | NA                                            | NA        | 0.461098531 | -0.928547418 | 3.827465403 | -0.242601126 | 0.808314409 | NA          | NA      |
| ENSG00000238020 | HTR3E-AS1  | HTR3E antisense RNA 1                         | 106478970 | 0.461098531 | -0.928547418 | 3.827465403 | -0.242601126 | 0.808314409 | NA          | NA      |
| ENSG00000261898 | NA         | NA                                            | NA        | 2.147667074 | -0.928062357 | 2.093712102 | -0.443261686 | 0.657576465 | NA          | NA      |
| ENSG00000161970 | RPL26      | ribosomal protein L26                         | 6154      | 437.5313397 | -0.928018632 | 0.711244283 | -1.304781851 | 0.191967141 | 0.999371363 | Not Sig |
| ENSG00000102053 | ZC3H12B    | zinc finger CCH-type containing 12B           | 340554    | 40.9835254  | -0.927800079 | 0.715880846 | -1.296026838 | 0.194966239 | 0.999371363 | Not Sig |
| ENSG00000213385 | NA         | NA                                            | NA        | 12.9293909  | -0.927741001 | 0.887606714 | -1.045216295 | 0.295923014 | 0.999371363 | Not Sig |
| ENSG00000099960 | SLC7A4     | solute carrier family 7 member 4              | 6545      | 16.06790718 | -0.927665328 | 1.301313889 | -0.712868229 | 0.4759273   | 0.999371363 | Not Sig |
| ENSG00000211690 | NA         | NA                                            | NA        | 2.526202062 | -0.927200149 | 2.103925907 | -0.440700001 | 0.659430196 | NA          | NA      |
| ENSG00000268218 | NA         | NA                                            | NA        | 38.52595777 | -0.927056287 | 0.991299441 | -0.935192989 | 0.349688851 | 0.999371363 | Not Sig |
| ENSG00000255248 | MIR100HG   | mir-100-let-7a-2-mir-125b-1 cluster host gene | 399959    | 318.9665022 | -0.926198316 | 0.606196913 | -1.52788359  | 0.126541443 | 0.999371363 | Not Sig |
| ENSG00000178636 | NA         | NA                                            | NA        | 6.68230872  | -0.926080909 | 1.089239995 | -0.850208322 | 0.395209276 | 0.999371363 | Not Sig |
| ENSG00000260583 | LINC00515  | long intergenic non-protein coding RNA 515    | 282566    | 4.4136239   | -0.92579006  | 1.469274538 | -0.630100118 | 0.528629082 | NA          | NA      |
| ENSG00000267260 | NA         | NA                                            | NA        | 3.953100608 | -0.925773322 | 1.38062948  | -0.670544368 | 0.502510833 | NA          | NA      |

|                 |              |                                                         |           |             |              |             |              |             |             |         |
|-----------------|--------------|---------------------------------------------------------|-----------|-------------|--------------|-------------|--------------|-------------|-------------|---------|
| ENSG00000262180 | OCLM         | oculomedin                                              | 10896     | 62.31534159 | -0.925633232 | 0.873236859 | -1.060002475 | 0.289143473 | 0.999371363 | Not Sig |
| ENSG00000162980 | ARL5A        | ADP ribosylation factor like GTPase 5A                  | 26225     | 2085.401475 | -0.925131031 | 0.706211376 | -1.309991687 | 0.190198648 | 0.999371363 | Not Sig |
| ENSG00000213542 | NA           | NA                                                      | NA        | 7.792744176 | -0.925024767 | 1.014752345 | -0.91157687  | 0.361991503 | 0.999371363 | Not Sig |
| ENSG00000267060 | PTGES3L      | prostaglandin E synthase 3 like                         | 100885848 | 4.012759592 | -0.924773272 | 1.287723193 | -0.71814601  | 0.472667264 | NA          | NA      |
| ENSG00000261377 | NA           | NA                                                      | NA        | 19.06598763 | -0.924756729 | 0.916387959 | -1.009132344 | 0.312911168 | 0.999371363 | Not Sig |
| ENSG00000181778 | TMEM252      | transmembrane protein 252                               | 169693    | 1.6608184   | -0.923931233 | 2.602779401 | -0.354978694 | 0.722605553 | NA          | NA      |
| ENSG00000165178 | NCF1C        | neutrophil cytosolic factor 1C pseudogene               | 654817    | 87.39070814 | -0.923914782 | 0.892684491 | -1.034984691 | 0.300676061 | 0.999371363 | Not Sig |
| ENSG00000107242 | PIP5K1B      | phosphatidylinositol-4-phosphate 5-kinase type 1 beta   | 8395      | 294.2654918 | -0.923055585 | 0.549771697 | -1.67897982  | 0.093155977 | 0.999371363 | Not Sig |
| ENSG00000075303 | SLC25A40     | solute carrier family 25 member 40                      | 55972     | 431.4478915 | -0.922640786 | 0.743402263 | -1.2411057   | 0.214566704 | 0.999371363 | Not Sig |
| ENSG00000226253 | NA           | NA                                                      | NA        | 9.270589563 | -0.921300743 | 0.937315438 | -0.982914295 | 0.325649622 | 0.999371363 | Not Sig |
| ENSG00000225964 | NA           | NA                                                      | NA        | 35.17171254 | -0.921113539 | 1.196880263 | -0.769595395 | 0.441539937 | 0.999371363 | Not Sig |
| ENSG00000133687 | TMTC1        | transmembrane and tetratricopeptide repeat containing 1 | 83857     | 470.6522411 | -0.920048308 | 0.799827622 | -1.150308245 | 0.250016936 | 0.999371363 | Not Sig |
| ENSG00000240207 | NA           | NA                                                      | NA        | 116.7600153 | -0.920018201 | 0.509405771 | -1.806061599 | 0.070908718 | 0.999371363 | Not Sig |
| ENSG00000202347 | NA           | NA                                                      | NA        | 13.29253222 | -0.918592957 | 0.894260355 | -1.027209751 | 0.304321708 | 0.999371363 | Not Sig |
| ENSG00000267676 | NA           | NA                                                      | NA        | 6.591917429 | -0.918498618 | 1.071074914 | -0.857548436 | 0.391141858 | 0.999371363 | Not Sig |
| ENSG00000260375 | NA           | NA                                                      | NA        | 5.766116524 | -0.918366333 | 1.752117331 | -0.524146595 | 0.600176582 | NA          | NA      |
| ENSG00000256280 | NA           | NA                                                      | NA        | 1.783275225 | -0.917733201 | 1.706497864 | -0.537787489 | 0.590723771 | NA          | NA      |
| ENSG00000156026 | MCU          | mitochondrial calcium uniporter                         | 90550     | 1201.347049 | -0.917701125 | 0.6531132   | -1.405118019 | 0.159986187 | 0.999371363 | Not Sig |
| ENSG00000156076 | WIF1         | WNT inhibitory factor 1                                 | 11197     | 709.8881516 | -0.9174771   | 0.662775701 | -1.384295017 | 0.166268139 | 0.999371363 | Not Sig |
| ENSG00000207651 | MIR28        | microRNA 28                                             | 407020    | 4.715035999 | -0.917309104 | 1.548402775 | -0.592422798 | 0.553567504 | NA          | NA      |
| ENSG00000188610 | FAM72B       | family with sequence similarity 72 member B             | 653820    | 26.08391347 | -0.917028014 | 0.895391121 | -1.024164739 | 0.30575747  | 0.999371363 | Not Sig |
| ENSG00000238228 | NA           | NA                                                      | NA        | 41.88680346 | -0.916971315 | 0.667938657 | -1.372837619 | 0.169802833 | 0.999371363 | Not Sig |
| ENSG00000263320 | NA           | NA                                                      | NA        | 43.15476816 | -0.91683353  | 0.74462262  | -1.231272735 | 0.218220876 | 0.999371363 | Not Sig |
| ENSG00000094963 | FMO2         | flavin containing monooxygenase 2                       | 2327      | 2325.413917 | -0.916328795 | 1.007881771 | -0.90916298  | 0.363264102 | 0.999371363 | Not Sig |
| ENSG00000213600 | NA           | NA                                                      | NA        | 30.17983148 | -0.915874663 | 0.790735084 | -1.158257274 | 0.246759062 | 0.999371363 | Not Sig |
| ENSG00000144837 | PLA1A        | phospholipase A1 member A                               | 51365     | 159.8379797 | -0.915578249 | 0.956263007 | -0.957454427 | 0.338337939 | 0.999371363 | Not Sig |
| ENSG00000146021 | KLHL3        | kelch like family member 3                              | 26249     | 303.1641682 | -0.915206149 | 0.510711797 | -1.792020771 | 0.073129639 | 0.999371363 | Not Sig |
| ENSG00000216089 | NA           | NA                                                      | NA        | 13.36771349 | -0.914780087 | 0.970993145 | -0.942107667 | 0.34613752  | 0.999371363 | Not Sig |
| ENSG00000261739 | NA           | NA                                                      | NA        | 3.732077501 | -0.914760224 | 1.399681339 | -0.653548917 | 0.513402464 | NA          | NA      |
| ENSG00000162888 | NA           | NA                                                      | NA        | 1.380551317 | -0.91452403  | 1.893860763 | -0.482888736 | 0.62917474  | NA          | NA      |
| ENSG00000212126 | TAS2R50      | taste 2 receptor member 50                              | 259296    | 29.64692867 | -0.914496717 | 0.859886265 | -1.063508924 | 0.28755122  | 0.999371363 | Not Sig |
| ENSG00000265049 | NA           | NA                                                      | NA        | 5.289724494 | -0.914384419 | 1.342005471 | -0.6813567   | 0.495645814 | NA          | NA      |
| ENSG00000234694 | LOC105378687 | uncharacterized LOC105378687                            | 105378687 | 15.66578376 | -0.914368489 | 0.712045666 | -1.284143044 | 0.199091909 | 0.999371363 | Not Sig |
| ENSG00000132356 | PRKAA1       | protein kinase AMP-activated catalytic subunit alpha 1  | 5562      | 2342.736095 | -0.914136043 | 0.667888264 | -1.368696071 | 0.171094299 | 0.999371363 | Not Sig |
| ENSG00000180316 | PNPLA1       | patatin like phospholipase domain containing 1          | 285848    | 3.527803384 | -0.91402148  | 1.526738284 | -0.598675942 | 0.549389003 | NA          | NA      |

|                 |              |                                                               |           |             |              |             |              |             |             |         |
|-----------------|--------------|---------------------------------------------------------------|-----------|-------------|--------------|-------------|--------------|-------------|-------------|---------|
| ENSG00000259467 | NA           | NA                                                            | NA        | 6.058257653 | -0.913978982 | 1.144344653 | -0.798692054 | 0.424468995 | NA          | NA      |
| ENSG00000134297 | PLEKHA8P1    | pleckstrin homology domain containing A8 pseudogene 1         | 51054     | 110.9045565 | -0.913741295 | 0.702331068 | -1.30101221  | 0.193254275 | 0.999371363 | Not Sig |
| ENSG00000243398 | NA           | NA                                                            | NA        | 56.25021398 | -0.913730278 | 0.844122896 | -1.082461195 | 0.279047649 | 0.999371363 | Not Sig |
| ENSG00000042781 | USH2A        | usherin                                                       | 7399      | 6.952220587 | -0.913271969 | 1.27810136  | -0.714553632 | 0.474884905 | 0.999371363 | Not Sig |
| ENSG00000178033 | CALHM5       | calcium homeostasis modulator family member 5                 | 254228    | 163.5393322 | -0.913053929 | 0.55191826  | -1.654328177 | 0.098060851 | 0.999371363 | Not Sig |
| ENSG00000240143 | NA           | NA                                                            | NA        | 7.812703933 | -0.912929835 | 1.169310904 | -0.780741744 | 0.434954403 | 0.999371363 | Not Sig |
| ENSG00000261740 | BOLA2-SMG1P6 | BOLA2-SMG1P6 readthrough                                      | 107282092 | 2.738358308 | -0.912333377 | 1.442005447 | -0.632683724 | 0.5269402   | NA          | NA      |
| ENSG00000231697 | NA           | NA                                                            | NA        | 38.60026389 | -0.912293117 | 0.709247162 | -1.286283774 | 0.198344043 | 0.999371363 | Not Sig |
| ENSG00000203512 | NA           | NA                                                            | NA        | 5.365275262 | -0.91202147  | 1.228379234 | -0.742459205 | 0.45780916  | NA          | NA      |
| ENSG00000176383 | B3GNT4       | UDP-GlcNAc:betaGal beta-1,3-N-acetylglucosaminyltransferase 4 | 79369     | 13.7731995  | -0.911478719 | 1.099548567 | -0.828957215 | 0.407128618 | 0.999371363 | Not Sig |
| ENSG00000273118 | NA           | NA                                                            | NA        | 9.880549641 | -0.910906675 | 1.217258481 | -0.748326415 | 0.454263296 | 0.999371363 | Not Sig |
| ENSG00000244314 | NA           | NA                                                            | NA        | 3.063699038 | -0.910551006 | 1.470363158 | -0.619269465 | 0.535738856 | NA          | NA      |
| ENSG00000235649 | NA           | NA                                                            | NA        | 37.81680224 | -0.910529849 | 1.201659664 | -0.757726897 | 0.448614493 | 0.999371363 | Not Sig |
| ENSG00000199313 | NA           | NA                                                            | NA        | 6.786322291 | -0.910433545 | 1.003534641 | -0.907226824 | 0.364286862 | 0.999371363 | Not Sig |
| ENSG00000217512 | NA           | NA                                                            | NA        | 28.59607478 | -0.910201783 | 0.802837888 | -1.133730479 | 0.256907621 | 0.999371363 | Not Sig |
| ENSG00000248466 | NA           | NA                                                            | NA        | 10.25920996 | -0.910148498 | 1.186466649 | -0.76710837  | 0.443017086 | 0.999371363 | Not Sig |
| ENSG00000259475 | NA           | NA                                                            | NA        | 1.667255936 | -0.909608215 | 2.224571849 | -0.408891363 | 0.682619388 | NA          | NA      |
| ENSG00000273302 | NA           | NA                                                            | NA        | 3.372705786 | -0.909218034 | 1.419316242 | -0.640602853 | 0.521780745 | NA          | NA      |
| ENSG00000227200 | NA           | NA                                                            | NA        | 57.27234619 | -0.909187349 | 0.58594243  | -1.551666687 | 0.120741997 | 0.999371363 | Not Sig |
| ENSG00000169271 | HSPB3        | heat shock protein family B (small) member 3                  | 8988      | 5.037126917 | -0.90882181  | 1.46478457  | -0.620447422 | 0.534963259 | NA          | NA      |
| ENSG00000237249 | NA           | NA                                                            | NA        | 27.31371974 | -0.908659673 | 0.989785617 | -0.918036853 | 0.358599572 | 0.999371363 | Not Sig |
| ENSG00000099864 | PALM         | paralemmin                                                    | 5064      | 775.1625873 | -0.908619013 | 0.836257526 | -1.086530147 | 0.277244511 | 0.999371363 | Not Sig |
| ENSG00000238117 | NA           | NA                                                            | NA        | 3.340922218 | -0.908473494 | 1.899610393 | -0.478242011 | 0.632477965 | NA          | NA      |
| ENSG00000123485 | HJURP        | Holliday junction recognition protein                         | 55355     | 97.68736387 | -0.908041512 | 1.042657647 | -0.870891337 | 0.383813487 | 0.999371363 | Not Sig |
| ENSG00000261324 | NA           | NA                                                            | NA        | 164.8836045 | -0.907266148 | 0.63050554  | -1.438950319 | 0.150164599 | 0.999371363 | Not Sig |
| ENSG00000255398 | HCAR3        | hydroxycarboxylic acid receptor 3                             | 8843      | 124.2854064 | -0.907131079 | 0.663072679 | -1.368071869 | 0.171289581 | 0.999371363 | Not Sig |
| ENSG00000229054 | NA           | NA                                                            | NA        | 10.1392567  | -0.907079356 | 1.047487511 | -0.865957204 | 0.386513631 | 0.999371363 | Not Sig |
| ENSG00000228313 | NA           | NA                                                            | NA        | 1.730053777 | -0.907064279 | 2.240018593 | -0.404936049 | 0.685524519 | NA          | NA      |
| ENSG00000221783 | MIR1183      | microRNA 1183                                                 | 100302122 | 3.142499618 | -0.90681959  | 1.626889237 | -0.557394793 | 0.577257722 | NA          | NA      |
| ENSG00000206784 | NA           | NA                                                            | NA        | 7.023752247 | -0.906493283 | 1.147221531 | -0.790164113 | 0.429431931 | 0.999371363 | Not Sig |
| ENSG00000202078 | NA           | NA                                                            | NA        | 31.37034121 | -0.906458726 | 0.845588359 | -1.071985815 | 0.283726404 | 0.999371363 | Not Sig |
| ENSG00000263593 | MIR4804      | microRNA 4804                                                 | 100616152 | 9.922606575 | -0.906377073 | 1.309802444 | -0.691995253 | 0.48894031  | 0.999371363 | Not Sig |
| ENSG00000199672 | NA           | NA                                                            | NA        | 4.356970731 | -0.90625138  | 1.515381651 | -0.598035075 | 0.549816529 | NA          | NA      |
| ENSG00000198590 | C3orf35      | chromosome 3 open reading frame 35                            | 339883    | 105.9712321 | -0.906142766 | 0.777158572 | -1.165968951 | 0.243626999 | 0.999371363 | Not Sig |
| ENSG00000264772 | NA           | NA                                                            | NA        | 1.264532028 | -0.905786881 | 2.129135124 | -0.425424799 | 0.670527031 | NA          | NA      |

|                 |         |                                                         |        |             |              |             |              |             |             |         |
|-----------------|---------|---------------------------------------------------------|--------|-------------|--------------|-------------|--------------|-------------|-------------|---------|
| ENSG00000228393 | NA      | NA                                                      | NA     | 71.54269671 | -0.905592975 | 0.660650262 | -1.370760033 | 0.170449774 | 0.999371363 | Not Sig |
| ENSG00000064933 | PMS1    | PMS1 homolog 1, mismatch repair system component        | 5378   | 589.018772  | -0.905451757 | 0.689239367 | -1.313697099 | 0.188948158 | 0.999371363 | Not Sig |
| ENSG00000140488 | CELF6   | CUGBP Elav-like family member 6                         | 60677  | 2.55824592  | -0.905341574 | 1.642085221 | -0.551336534 | 0.581402998 | NA          | NA      |
| ENSG00000165066 | NKX6-3  | NK6 homeobox 3                                          | 157848 | 1.784692628 | -0.905261963 | 2.234816854 | -0.405072103 | 0.685424512 | NA          | NA      |
| ENSG00000215529 | EFCAB8  | EF-hand calcium binding domain 8                        | 388795 | 13.69234498 | -0.905045386 | 0.812696058 | -1.113633291 | 0.265436538 | 0.999371363 | Not Sig |
| ENSG00000229677 | NA      | NA                                                      | NA     | 25.6366815  | -0.904485879 | 0.827473482 | -1.093069323 | 0.274363364 | 0.999371363 | Not Sig |
| ENSG00000207631 | MIR641  | microRNA 641                                            | 693226 | 4.371583258 | -0.904267482 | 1.329030757 | -0.680396204 | 0.496253624 | NA          | NA      |
| ENSG00000212371 | NA      | NA                                                      | NA     | 5.064123452 | -0.903803374 | 1.150067919 | -0.785869564 | 0.431943907 | NA          | NA      |
| ENSG00000273289 | NA      | NA                                                      | NA     | 10.6653275  | -0.903592955 | 0.855155042 | -1.056642258 | 0.290674887 | 0.999371363 | Not Sig |
| ENSG00000231613 | NA      | NA                                                      | NA     | 1.952100955 | -0.903338113 | 2.153191367 | -0.419534523 | 0.67482553  | NA          | NA      |
| ENSG00000234981 | NA      | NA                                                      | NA     | 8.047422599 | -0.902326349 | 0.982474343 | -0.918422303 | 0.358397819 | 0.999371363 | Not Sig |
| ENSG00000261765 | NA      | NA                                                      | NA     | 1.386988853 | -0.902173491 | 2.073489032 | -0.435099235 | 0.663490399 | NA          | NA      |
| ENSG00000214357 | NEURL1B | neuritized E3 ubiquitin protein ligase 1B               | 54492  | 1779.960444 | -0.902104723 | 0.697037144 | -1.294198926 | 0.195596718 | 0.999371363 | Not Sig |
| ENSG00000105784 | RUNDC3B | RUN domain containing 3B                                | 154661 | 14.17828995 | -0.901773693 | 1.204337664 | -0.748771478 | 0.453994954 | 0.999371363 | Not Sig |
| ENSG00000186076 | NA      | NA                                                      | NA     | 2.722051516 | -0.90153668  | 1.457184937 | -0.618683777 | 0.5361247   | NA          | NA      |
| ENSG00000180638 | SLC47A2 | solute carrier family 47 member 2                       | 146802 | 2.296583281 | -0.90146899  | 2.053895486 | -0.438906943 | 0.660728965 | NA          | NA      |
| ENSG00000248690 | NA      | NA                                                      | NA     | 11.80636222 | -0.901220049 | 0.866479711 | -1.040093655 | 0.298296391 | 0.999371363 | Not Sig |
| ENSG00000155761 | SPAG17  | sperm associated antigen 17                             | 200162 | 603.3521997 | -0.901105127 | 0.680816676 | -1.323565004 | 0.185647554 | 0.999371363 | Not Sig |
| ENSG00000132744 | ACY3    | aminoacylase 3                                          | 91703  | 33.74182263 | -0.900896653 | 1.015550889 | -0.887101437 | 0.375024291 | 0.999371363 | Not Sig |
| ENSG00000162687 | KCNT2   | potassium sodium-activated channel subfamily T member 2 | 343450 | 126.6767744 | -0.900791809 | 0.671403347 | -1.341655226 | 0.179707811 | 0.999371363 | Not Sig |
| ENSG00000124602 | UNC5CL  | unc-5 family C-terminal like                            | 222643 | 259.3671748 | -0.900762696 | 0.964156601 | -0.934249369 | 0.350175275 | 0.999371363 | Not Sig |
| ENSG00000259926 | NA      | NA                                                      | NA     | 18.43228992 | -0.900646783 | 0.683622387 | -1.317462388 | 0.18768368  | 0.999371363 | Not Sig |
| ENSG00000225067 | NA      | NA                                                      | NA     | 3.569971273 | -0.900566002 | 1.389047066 | -0.648333685 | 0.516769152 | NA          | NA      |
| ENSG00000243554 | NA      | NA                                                      | NA     | 111.054461  | -0.90043271  | 0.599350674 | -1.502347038 | 0.133007507 | 0.999371363 | Not Sig |
| ENSG00000198346 | ZNF813  | zinc finger protein 813                                 | 126017 | 216.3653946 | -0.900205168 | 0.612804476 | -1.468992482 | 0.141834828 | 0.999371363 | Not Sig |
| ENSG00000261215 | NA      | NA                                                      | NA     | 2.937783302 | -0.900191039 | 1.59006867  | -0.566133436 | 0.571303075 | NA          | NA      |
| ENSG00000213965 | NUDT19  | nudix hydrolase 19                                      | 390916 | 397.2441398 | -0.899384646 | 0.434380025 | -2.070501852 | 0.038405373 | 0.999371363 | Not Sig |
| ENSG00000177853 | ZNF518A | zinc finger protein 518A                                | 9849   | 1591.846947 | -0.89864354  | 0.688015888 | -1.306137774 | 0.191505709 | 0.999371363 | Not Sig |
| ENSG00000066629 | EML1    | echinoderm microtubule associated protein like 1        | 2009   | 493.8414391 | -0.898625772 | 0.798268703 | -1.125718406 | 0.26028473  | 0.999371363 | Not Sig |
| ENSG00000188206 | NA      | NA                                                      | NA     | 1721.823103 | -0.898373875 | 0.830839624 | -1.081284342 | 0.279570651 | 0.999371363 | Not Sig |
| ENSG00000225956 | NA      | NA                                                      | NA     | 2.805872229 | -0.898319374 | 1.693344025 | -0.530500218 | 0.595765158 | NA          | NA      |
| ENSG00000237080 | NA      | NA                                                      | NA     | 4.362666162 | -0.898299022 | 1.316989217 | -0.682085328 | 0.495184997 | NA          | NA      |
| ENSG00000230562 | NA      | NA                                                      | NA     | 15.54973149 | -0.898195325 | 0.808842996 | -1.110469312 | 0.266796845 | 0.999371363 | Not Sig |
| ENSG00000271816 | BMS1P4  | BMS1, ribosome biogenesis factor pseudogene 4           | 729096 | 24.00778549 | -0.898038048 | 0.760268225 | -1.181212127 | 0.237518465 | 0.999371363 | Not Sig |
| ENSG00000255346 | NOX5    | NADPH oxidase 5                                         | 79400  | 9.981291723 | -0.897503963 | 1.047672036 | -0.856664999 | 0.391630052 | 0.999371363 | Not Sig |

|                 |         |                                                   |           |             |              |             |              |             |             |         |
|-----------------|---------|---------------------------------------------------|-----------|-------------|--------------|-------------|--------------|-------------|-------------|---------|
| ENSG00000242180 | OR51B5  | olfactory receptor family 51 subfamily B member 5 | 282763    | 1.457519488 | -0.897307739 | 2.101814311 | -0.426920558 | 0.669437191 | NA          | NA      |
| ENSG00000212535 | NA      | NA                                                | NA        | 13.85428683 | -0.897211698 | 1.253160473 | -0.715959143 | 0.474016578 | 0.999371363 | Not Sig |
| ENSG00000234231 | NA      | NA                                                | NA        | 43.61117929 | -0.895963182 | 0.687234413 | -1.303722813 | 0.192328108 | 0.999371363 | Not Sig |
| ENSG00000250159 | NA      | NA                                                | NA        | 38.20820066 | -0.895899885 | 0.916777158 | -0.977227539 | 0.328456517 | 0.999371363 | Not Sig |
| ENSG00000205047 | NA      | NA                                                | NA        | 120.1470103 | -0.895337877 | 0.623648844 | -1.435644251 | 0.151103596 | 0.999371363 | Not Sig |
| ENSG00000236058 | NA      | NA                                                | NA        | 2.619322306 | -0.895075083 | 1.460282531 | -0.612946511 | 0.539911708 | NA          | NA      |
| ENSG00000238460 | NA      | NA                                                | NA        | 6.955014978 | -0.894650896 | 1.127098857 | -0.793764354 | 0.427332628 | 0.999371363 | Not Sig |
| ENSG00000199805 | NA      | NA                                                | NA        | 11.98271716 | -0.894138154 | 0.863822013 | -1.035095356 | 0.300624381 | 0.999371363 | Not Sig |
| ENSG00000176170 | SPHK1   | sphingosine kinase 1                              | 8877      | 268.8204735 | -0.894005337 | 0.781608632 | -1.143801771 | 0.252705855 | 0.999371363 | Not Sig |
| ENSG00000166492 | NA      | NA                                                | NA        | 1.364244526 | -0.893510167 | 1.895284446 | -0.471438559 | 0.637327586 | NA          | NA      |
| ENSG00000169194 | IL13    | interleukin 13                                    | 3596      | 1.364244526 | -0.893510167 | 1.895284446 | -0.471438559 | 0.637327586 | NA          | NA      |
| ENSG00000189166 | NA      | NA                                                | NA        | 1.364244526 | -0.893510167 | 1.895284446 | -0.471438559 | 0.637327586 | NA          | NA      |
| ENSG00000258839 | MC1R    | melanocortin 1 receptor                           | 4157      | 101.4488114 | -0.893413527 | 0.574888304 | -1.554064537 | 0.120169023 | 0.999371363 | Not Sig |
| ENSG00000079459 | FDFT1   | farnesyl-diphosphate farnesyltransferase 1        | 2222      | 2198.475711 | -0.892034272 | 0.493902943 | -1.806092239 | 0.070903933 | 0.999371363 | Not Sig |
| ENSG00000260871 | NA      | NA                                                | NA        | 1.773405969 | -0.891029657 | 1.722072944 | -0.517416908 | 0.60486516  | NA          | NA      |
| ENSG00000263414 | MIR3187 | microRNA 3187                                     | 100422854 | 1.270969564 | -0.890928638 | 2.128031729 | -0.41866323  | 0.675462272 | NA          | NA      |
| ENSG00000260060 | NA      | NA                                                | NA        | 13.29486245 | -0.890440791 | 1.044503624 | -0.852501389 | 0.393935868 | 0.999371363 | Not Sig |
| ENSG00000186340 | THBS2   | thrombospondin 2                                  | 7058      | 3697.785936 | -0.889972115 | 0.875428964 | -1.016612599 | 0.309337758 | 0.999371363 | Not Sig |
| ENSG00000258904 | NA      | NA                                                | NA        | 44.94712192 | -0.889836446 | 0.59040295  | -1.50716802  | 0.131767595 | 0.999371363 | Not Sig |
| ENSG00000249849 | NA      | NA                                                | NA        | 0.829609545 | -0.889586427 | 3.195811754 | -0.278360084 | 0.780735958 | NA          | NA      |
| ENSG00000107362 | ABHD17B | abhydrolase domain containing 17B                 | 51104     | 338.2750047 | -0.889353726 | 0.504771289 | -1.761894437 | 0.078087135 | 0.999371363 | Not Sig |
| ENSG00000251804 | NA      | NA                                                | NA        | 5.717894492 | -0.889338852 | 1.357258974 | -0.655246249 | 0.512309221 | NA          | NA      |
| ENSG00000269190 | FBX017  | F-box protein 17                                  | 115290    | 153.8314056 | -0.889223314 | 0.740475593 | -1.20088133  | 0.229797238 | 0.999371363 | Not Sig |
| ENSG00000173421 | CCDC36  | coiled-coil domain containing 36                  | 339834    | 33.06425144 | -0.888281482 | 0.872517549 | -1.018067182 | 0.30864603  | 0.999371363 | Not Sig |
| ENSG00000144645 | OSBPL10 | oxysterol binding protein like 10                 | 114884    | 1212.131445 | -0.888231971 | 0.635730924 | -1.397182263 | 0.162358769 | 0.999371363 | Not Sig |
| ENSG00000242737 | NA      | NA                                                | NA        | 37.1275097  | -0.88736269  | 0.790478717 | -1.12256367  | 0.261622852 | 0.999371363 | Not Sig |
| ENSG00000243304 | NA      | NA                                                | NA        | 2.209745855 | -0.887237281 | 1.800537864 | -0.492762356 | 0.622180512 | NA          | NA      |
| ENSG00000198121 | LPAR1   | lysophosphatidic acid receptor 1                  | 1902      | 645.3245075 | -0.886786401 | 0.522117533 | -1.698442105 | 0.089424351 | 0.999371363 | Not Sig |
| ENSG00000144161 | ZC3H8   | zinc finger CCCH-type containing 8                | 84524     | 200.4137366 | -0.886785665 | 0.703321183 | -1.260854481 | 0.207361281 | 0.999371363 | Not Sig |
| ENSG00000163535 | SGO2    | shugoshin 2                                       | 151246    | 187.9477406 | -0.886499209 | 0.803240246 | -1.103653873 | 0.269743312 | 0.999371363 | Not Sig |
| ENSG00000259196 | NA      | NA                                                | NA        | 8.44153442  | -0.88635949  | 0.972532441 | -0.911393238 | 0.362088215 | 0.999371363 | Not Sig |
| ENSG00000183549 | ACSM5   | acyl-CoA synthetase medium chain family member 5  | 54988     | 37.91555231 | -0.886263965 | 0.998533203 | -0.887565844 | 0.374774333 | 0.999371363 | Not Sig |
| ENSG00000183607 | GKN2    | gastrokine 2                                      | 200504    | 120.73427   | -0.886148565 | 1.304982282 | -0.679050265 | 0.497106014 | 0.999371363 | Not Sig |
| ENSG00000269815 | NA      | NA                                                | NA        | 7.652420587 | -0.885600768 | 0.990451708 | -0.894138262 | 0.37124792  | 0.999371363 | Not Sig |
| ENSG00000253541 | NA      | NA                                                | NA        | 3.626796821 | -0.885486711 | 1.57493646  | -0.562236467 | 0.573954918 | NA          | NA      |

|                 |              |                                                      |           |             |              |             |              |             |             |         |
|-----------------|--------------|------------------------------------------------------|-----------|-------------|--------------|-------------|--------------|-------------|-------------|---------|
| ENSG00000169495 | HTRA4        | Htra serine peptidase 4                              | 203100    | 86.266904   | -0.885021144 | 0.883984672 | -1.0011725   | 0.316743419 | 0.999371363 | Not Sig |
| ENSG00000206717 | NA           | NA                                                   | NA        | 2.38684153  | -0.884537181 | 2.05345772  | -0.430755001 | 0.666646522 | NA          | NA      |
| ENSG00000239883 | NA           | NA                                                   | NA        | 18.78545845 | -0.88433485  | 0.783217497 | -1.129105075 | 0.258853511 | 0.999371363 | Not Sig |
| ENSG00000267571 | NA           | NA                                                   | NA        | 1.750661642 | -0.884202968 | 1.77973946  | -0.49681596  | 0.61931884  | NA          | NA      |
| ENSG00000263968 | NA           | NA                                                   | NA        | 40.63843242 | -0.884077435 | 0.762096062 | -1.160060364 | 0.24602423  | 0.999371363 | Not Sig |
| ENSG00000235236 | NA           | NA                                                   | NA        | 4.066972537 | -0.884027243 | 1.186346651 | -0.745167732 | 0.456170327 | NA          | NA      |
| ENSG00000179467 | NA           | NA                                                   | NA        | 4.353677156 | -0.883754271 | 1.192052655 | -0.741371841 | 0.458468013 | NA          | NA      |
| ENSG00000238544 | NA           | NA                                                   | NA        | 5.927338077 | -0.883590729 | 1.257619138 | -0.702590078 | 0.482311247 | NA          | NA      |
| ENSG00000145681 | HAPLN1       | hyaluronan and proteoglycan link protein 1           | 1404      | 6.310798244 | -0.882616872 | 1.356192905 | -0.650804814 | 0.515172492 | NA          | NA      |
| ENSG00000156413 | FUT6         | fucosyltransferase 6                                 | 2528      | 44.87257125 | -0.882568416 | 0.969347883 | -0.910476447 | 0.362571298 | 0.999371363 | Not Sig |
| ENSG00000239063 | NA           | NA                                                   | NA        | 9.131196046 | -0.88157748  | 1.018409872 | -0.865641137 | 0.386686989 | 0.999371363 | Not Sig |
| ENSG00000101460 | MAP1LC3A     | microtubule associated protein 1 light chain 3 alpha | 84557     | 249.6379817 | -0.88146541  | 0.583230767 | -1.511349299 | 0.13069948  | 0.999371363 | Not Sig |
| ENSG00000257838 | LOC653786    | otoancorin pseudogene                                | 653786    | 7.406045772 | -0.881435501 | 1.395818032 | -0.631483102 | 0.527724694 | 0.999371363 | Not Sig |
| ENSG00000183060 | LYSMD4       | LysM domain containing 4                             | 145748    | 242.9700296 | -0.881407314 | 0.568357968 | -1.550796088 | 0.120950558 | 0.999371363 | Not Sig |
| ENSG00000207712 | MIR627       | microRNA 627                                         | 693212    | 3.123176113 | -0.881303802 | 1.48112093  | -0.595024879 | 0.551826841 | NA          | NA      |
| ENSG00000255627 | NA           | NA                                                   | NA        | 2.402733314 | -0.881149541 | 1.877185318 | -0.469399336 | 0.638784223 | NA          | NA      |
| ENSG00000253347 | NA           | NA                                                   | NA        | 21.51166614 | -0.880783004 | 0.742049869 | -1.186959315 | 0.235243669 | 0.999371363 | Not Sig |
| ENSG00000198883 | PNMA5        | PNMA family member 5                                 | 114824    | 1.370682061 | -0.880150454 | 2.075329908 | -0.424101465 | 0.671491817 | NA          | NA      |
| ENSG00000183032 | SLC25A21     | solute carrier family 25 member 21                   | 89874     | 29.67050591 | -0.880134251 | 0.77801788  | -1.131251959 | 0.257949058 | 0.999371363 | Not Sig |
| ENSG00000270006 | LOC101928659 | uncharacterized LOC101928659                         | 101928659 | 8.793593453 | -0.879065222 | 1.119687403 | -0.785098787 | 0.432395651 | 0.999371363 | Not Sig |
| ENSG00000170215 | NA           | NA                                                   | NA        | 2.352810544 | -0.877732018 | 1.580474404 | -0.555359844 | 0.578648554 | NA          | NA      |
| ENSG00000221083 | NA           | NA                                                   | NA        | 10.41429995 | -0.877696781 | 1.019957287 | -0.860523075 | 0.389500769 | 0.999371363 | Not Sig |
| ENSG00000224999 | NA           | NA                                                   | NA        | 2.477541977 | -0.877134393 | 1.966394865 | -0.446062187 | 0.655552326 | NA          | NA      |
| ENSG00000251733 | SCARNA8      | small Cajal body-specific RNA 8                      | 677776    | 2.71601809  | -0.876851455 | 1.776433278 | -0.493602246 | 0.621587114 | NA          | NA      |
| ENSG00000243854 | NA           | NA                                                   | NA        | 27.56594026 | -0.876738623 | 0.780898106 | -1.122731143 | 0.261551697 | 0.999371363 | Not Sig |
| ENSG00000133878 | DUSP26       | dual specificity phosphatase 26                      | 78986     | 28.30013373 | -0.876717536 | 1.076991091 | -0.814043443 | 0.415620064 | 0.999371363 | Not Sig |
| ENSG00000180884 | ZNF792       | zinc finger protein 792                              | 126375    | 353.6897466 | -0.876622185 | 0.535913799 | -1.635752216 | 0.101891456 | 0.999371363 | Not Sig |
| ENSG00000256450 | NA           | NA                                                   | NA        | 45.78757701 | -0.876141532 | 0.982439938 | -0.891801624 | 0.372499271 | 0.999371363 | Not Sig |
| ENSG00000113140 | SPARC        | secreted protein acidic and cysteine rich            | 6678      | 15586.33799 | -0.875891282 | 0.442380558 | -1.979949766 | 0.047709174 | 0.999371363 | Not Sig |
| ENSG00000176956 | LY6H         | lymphocyte antigen 6 family member H                 | 4062      | 12.99602003 | -0.875766007 | 0.923624545 | -0.948183991 | 0.343035795 | 0.999371363 | Not Sig |
| ENSG00000238931 | NA           | NA                                                   | NA        | 3.089145128 | -0.875142113 | 1.347907983 | -0.649259537 | 0.516170635 | NA          | NA      |
| ENSG00000238585 | NA           | NA                                                   | NA        | 6.468106541 | -0.87477947  | 1.179389433 | -0.741722323 | 0.458255592 | NA          | NA      |
| ENSG00000138386 | NAB1         | NGFI-A binding protein 1                             | 4664      | 1476.747946 | -0.874041086 | 0.425777541 | -2.052811628 | 0.04009085  | 0.999371363 | Not Sig |
| ENSG00000239005 | NA           | NA                                                   | NA        | 11.65623147 | -0.873395095 | 0.904674325 | -0.965424873 | 0.334332048 | 0.999371363 | Not Sig |
| ENSG00000237550 | NA           | NA                                                   | NA        | 1.797567699 | -0.87321059  | 1.968491808 | -0.443593713 | 0.657336352 | NA          | NA      |

|                 |            |                                                                          |           |             |              |             |              |             |             |         |
|-----------------|------------|--------------------------------------------------------------------------|-----------|-------------|--------------|-------------|--------------|-------------|-------------|---------|
| ENSG00000233889 | NA         | NA                                                                       | NA        | 12.178446   | -0.873199904 | 1.620110165 | -0.538975634 | 0.589903667 | 0.999371363 | Not Sig |
| ENSG00000198518 | NA         | NA                                                                       | NA        | 1010.219757 | -0.872407491 | 0.548848126 | -1.589524406 | 0.111942048 | 0.999371363 | Not Sig |
| ENSG00000008118 | CAMK1G     | calcium/calmodulin dependent protein kinase 1G                           | 57172     | 24.71373075 | -0.872404107 | 0.703602406 | -1.239910635 | 0.21500845  | 0.999371363 | Not Sig |
| ENSG00000174600 | CMKLR1     | chemerin chemokine-like receptor 1                                       | 1240      | 787.6875963 | -0.872272037 | 0.863335864 | -1.010350749 | 0.312327275 | 0.999371363 | Not Sig |
| ENSG00000198887 | SMC5       | structural maintenance of chromosomes 5                                  | 23137     | 1919.88451  | -0.871528484 | 0.615448266 | -1.416087317 | 0.156749941 | 0.999371363 | Not Sig |
| ENSG00000174799 | CEP135     | centrosomal protein 135                                                  | 9662      | 421.4638672 | -0.871437608 | 0.694276574 | -1.255173573 | 0.209415757 | 0.999371363 | Not Sig |
| ENSG00000221042 | NA         | NA                                                                       | NA        | 4.095850348 | -0.871433449 | 1.513691797 | -0.575700715 | 0.564817492 | NA          | NA      |
| ENSG00000198870 | STKLD1     | serine/threonine kinase like domain containing 1                         | 169436    | 37.64372545 | -0.871399083 | 0.808302592 | -1.078060484 | 0.281006765 | 0.999371363 | Not Sig |
| ENSG00000265399 | NA         | NA                                                                       | NA        | 1.840919891 | -0.871216604 | 1.721759706 | -0.506003597 | 0.612854125 | NA          | NA      |
| ENSG00000267747 | NA         | NA                                                                       | NA        | 3.282132587 | -0.871188457 | 1.371995565 | -0.634979062 | 0.525442071 | NA          | NA      |
| ENSG00000268189 | NA         | NA                                                                       | NA        | 7.503483662 | -0.871025227 | 0.978834033 | -0.889859974 | 0.373541078 | 0.999371363 | Not Sig |
| ENSG00000252782 | NA         | NA                                                                       | NA        | 20.7307702  | -0.870420892 | 1.10937886  | -0.784602017 | 0.432686947 | 0.999371363 | Not Sig |
| ENSG00000167766 | ZNF83      | zinc finger protein 83                                                   | 55769     | 1052.788526 | -0.870335069 | 0.577140034 | -1.508013683 | 0.131551025 | 0.999371363 | Not Sig |
| ENSG00000261418 | NA         | NA                                                                       | NA        | 1.254662772 | -0.87014176  | 2.44614448  | -0.355719692 | 0.722050497 | NA          | NA      |
| ENSG00000237350 | NA         | NA                                                                       | NA        | 6.869136184 | -0.870133379 | 1.075948475 | -0.80871287  | 0.418680324 | 0.999371363 | Not Sig |
| ENSG00000171401 | KRT13      | keratin 13                                                               | 3860      | 9.299218951 | -0.870039692 | 0.935052358 | -0.930471631 | 0.352126946 | 0.999371363 | Not Sig |
| ENSG00000120798 | NR2C1      | nuclear receptor subfamily 2 group C member 1                            | 7181      | 693.4061456 | -0.870014619 | 0.670399475 | -1.29775552  | 0.194371359 | 0.999371363 | Not Sig |
| ENSG00000226833 | NA         | NA                                                                       | NA        | 8.10918643  | -0.869913407 | 0.944703534 | -0.920832172 | 0.357138056 | 0.999371363 | Not Sig |
| ENSG00000202414 | NA         | NA                                                                       | NA        | 1.863664218 | -0.869809551 | 1.944096602 | -0.447410664 | 0.654578578 | NA          | NA      |
| ENSG00000248375 | NA         | NA                                                                       | NA        | 1.863664218 | -0.869809551 | 1.944096602 | -0.447410664 | 0.654578578 | NA          | NA      |
| ENSG00000264635 | NA         | NA                                                                       | NA        | 23.9198535  | -0.869717501 | 0.915730465 | -0.949752722 | 0.342237914 | 0.999371363 | Not Sig |
| ENSG00000244004 | NA         | NA                                                                       | NA        | 8.076986484 | -0.869707346 | 1.346156799 | -0.646066897 | 0.518236032 | 0.999371363 | Not Sig |
| ENSG00000263456 | MIR5189    | microRNA 5189                                                            | 100847057 | 4.443520397 | -0.869307328 | 1.165544659 | -0.745837855 | 0.455765369 | NA          | NA      |
| ENSG00000143429 | LOC645166  | lymphocyte-specific protein 1 pseudogene                                 | 645166    | 272.8652682 | -0.868759653 | 0.628124325 | -1.383101432 | 0.166633767 | 0.999371363 | Not Sig |
| ENSG00000257354 | NA         | NA                                                                       | NA        | 44.55277286 | -0.868696575 | 0.7604061   | -1.14241137  | 0.253283068 | 0.999371363 | Not Sig |
| ENSG00000248664 | NA         | NA                                                                       | NA        | 1.804005234 | -0.868606967 | 2.233935961 | -0.388823575 | 0.69740666  | NA          | NA      |
| ENSG00000077063 | CTTNBP2    | cortactin binding protein 2                                              | 83992     | 128.1810746 | -0.868378952 | 0.820977162 | -1.057738256 | 0.290174789 | 0.999371363 | Not Sig |
| ENSG00000229419 | RALGAPA1P1 | Ral GTPase activating protein catalytic alpha subunit 1 pseudogene 1     | 26134     | 80.57288412 | -0.868100289 | 0.54714195  | -1.586608902 | 0.11260125  | 0.999371363 | Not Sig |
| ENSG00000204967 | PCDHA4     | protocadherin alpha 4                                                    | 56144     | 22.69487841 | -0.868022714 | 0.92994281  | -0.933415157 | 0.350605657 | 0.999371363 | Not Sig |
| ENSG00000087116 | ADAMTS2    | ADAM metalloproteinase with thrombospondin type 1 motif 2                | 9509      | 770.216162  | -0.867600066 | 0.574079837 | -1.511289204 | 0.130714783 | 0.999371363 | Not Sig |
| ENSG00000225439 | BOLA3-AS1  | BOLA3 antisense RNA 1 (head to head)                                     | 100507171 | 29.9151927  | -0.867476648 | 0.974562438 | -0.890119107 | 0.373401934 | 0.999371363 | Not Sig |
| ENSG00000118849 | RARRES1    | retinoic acid receptor responder 1                                       | 5918      | 321.4765796 | -0.867451548 | 0.558456035 | -1.553303203 | 0.120350715 | 0.999371363 | Not Sig |
| ENSG00000101892 | ATP1B4     | ATPase Na <sup>+</sup> /K <sup>+</sup> transporting family member beta 4 | 23439     | 0.486129613 | -0.867285152 | 4.054116239 | -0.213927056 | 0.830603941 | NA          | NA      |
| ENSG00000168269 | FOXI1      | forkhead box I1                                                          | 2299      | 0.486129613 | -0.867285152 | 4.054116239 | -0.213927056 | 0.830603941 | NA          | NA      |
| ENSG00000170820 | FSHR       | follicle stimulating hormone receptor                                    | 2492      | 0.486129613 | -0.867285152 | 4.054116239 | -0.213927056 | 0.830603941 | NA          | NA      |



|                 |           |                                                  |           |             |              |             |              |             |    |    |
|-----------------|-----------|--------------------------------------------------|-----------|-------------|--------------|-------------|--------------|-------------|----|----|
| ENSG00000207617 | MIR3074   | microRNA 3074                                    | 100422842 | 0.451229275 | -0.867285152 | 4.054116239 | -0.213927056 | 0.830603941 | NA | NA |
| ENSG00000207755 | MIR450A2  | microRNA 450a-2                                  | 574505    | 0.486129613 | -0.867285152 | 4.054116239 | -0.213927056 | 0.830603941 | NA | NA |
| ENSG00000207807 | MIR95     | microRNA 95                                      | 407052    | 0.451229275 | -0.867285152 | 4.054116239 | -0.213927056 | 0.830603941 | NA | NA |
| ENSG00000208005 | MIR503    | microRNA 503                                     | 574506    | 0.486129613 | -0.867285152 | 4.054116239 | -0.213927056 | 0.830603941 | NA | NA |
| ENSG00000211821 | NA        | NA                                               | NA        | 0.451229275 | -0.867285152 | 4.054116239 | -0.213927056 | 0.830603941 | NA | NA |
| ENSG00000213569 | NA        | NA                                               | NA        | 0.451229275 | -0.867285152 | 4.054116239 | -0.213927056 | 0.830603941 | NA | NA |
| ENSG00000214878 | NA        | NA                                               | NA        | 0.451229275 | -0.867285152 | 4.054116239 | -0.213927056 | 0.830603941 | NA | NA |
| ENSG00000215871 | NA        | NA                                               | NA        | 0.486129613 | -0.867285152 | 4.054116239 | -0.213927056 | 0.830603941 | NA | NA |
| ENSG00000216054 | NA        | NA                                               | NA        | 0.486129613 | -0.867285152 | 4.054116239 | -0.213927056 | 0.830603941 | NA | NA |
| ENSG00000216412 | NA        | NA                                               | NA        | 0.486129613 | -0.867285152 | 4.054116239 | -0.213927056 | 0.830603941 | NA | NA |
| ENSG00000220868 | NA        | NA                                               | NA        | 0.451229275 | -0.867285152 | 4.054116239 | -0.213927056 | 0.830603941 | NA | NA |
| ENSG00000221970 | OR2A1     | olfactory receptor family 2 subfamily A member 1 | 346528    | 0.451229275 | -0.867285152 | 4.054116239 | -0.213927056 | 0.830603941 | NA | NA |
| ENSG00000224079 | NA        | NA                                               | NA        | 0.486129613 | -0.867285152 | 4.054116239 | -0.213927056 | 0.830603941 | NA | NA |
| ENSG00000224334 | NA        | NA                                               | NA        | 0.451229275 | -0.867285152 | 4.054116239 | -0.213927056 | 0.830603941 | NA | NA |
| ENSG00000224632 | NA        | NA                                               | NA        | 0.486129613 | -0.867285152 | 4.054116239 | -0.213927056 | 0.830603941 | NA | NA |
| ENSG00000224773 | NA        | NA                                               | NA        | 0.486129613 | -0.867285152 | 4.054116239 | -0.213927056 | 0.830603941 | NA | NA |
| ENSG00000225979 | NA        | NA                                               | NA        | 0.451229275 | -0.867285152 | 4.054116239 | -0.213927056 | 0.830603941 | NA | NA |
| ENSG00000226872 | NA        | NA                                               | NA        | 0.451229275 | -0.867285152 | 4.054116239 | -0.213927056 | 0.830603941 | NA | NA |
| ENSG00000230550 | ERLNC1    | estrogen receptor responsive lncRNA 1            | 101929441 | 0.486129613 | -0.867285152 | 4.054116239 | -0.213927056 | 0.830603941 | NA | NA |
| ENSG00000231636 | AGBL5-AS1 | AGBL5 antisense RNA 1                            | 100874031 | 0.451229275 | -0.867285152 | 4.054116239 | -0.213927056 | 0.830603941 | NA | NA |
| ENSG00000232699 | NA        | NA                                               | NA        | 0.451229275 | -0.867285152 | 4.054116239 | -0.213927056 | 0.830603941 | NA | NA |
| ENSG00000234152 | NA        | NA                                               | NA        | 0.451229275 | -0.867285152 | 4.054116239 | -0.213927056 | 0.830603941 | NA | NA |
| ENSG00000237328 | RAI1-AS1  | RAI1 antisense RNA 1                             | 100861516 | 0.486129613 | -0.867285152 | 4.054116239 | -0.213927056 | 0.830603941 | NA | NA |
| ENSG00000238041 | NA        | NA                                               | NA        | 0.451229275 | -0.867285152 | 4.054116239 | -0.213927056 | 0.830603941 | NA | NA |
| ENSG00000238596 | NA        | NA                                               | NA        | 0.451229275 | -0.867285152 | 4.054116239 | -0.213927056 | 0.830603941 | NA | NA |
| ENSG00000242531 | NA        | NA                                               | NA        | 0.486129613 | -0.867285152 | 4.054116239 | -0.213927056 | 0.830603941 | NA | NA |
| ENSG00000248409 | NA        | NA                                               | NA        | 0.451229275 | -0.867285152 | 4.054116239 | -0.213927056 | 0.830603941 | NA | NA |
| ENSG00000251066 | NA        | NA                                               | NA        | 0.451229275 | -0.867285152 | 4.054116239 | -0.213927056 | 0.830603941 | NA | NA |
| ENSG00000251257 | NA        | NA                                               | NA        | 0.486129613 | -0.867285152 | 4.054116239 | -0.213927056 | 0.830603941 | NA | NA |
| ENSG00000254019 | NA        | NA                                               | NA        | 0.486129613 | -0.867285152 | 4.054116239 | -0.213927056 | 0.830603941 | NA | NA |
| ENSG00000254311 | NA        | NA                                               | NA        | 0.486129613 | -0.867285152 | 4.054116239 | -0.213927056 | 0.830603941 | NA | NA |
| ENSG00000257452 | NA        | NA                                               | NA        | 0.486129613 | -0.867285152 | 4.054116239 | -0.213927056 | 0.830603941 | NA | NA |
| ENSG00000261103 | NA        | NA                                               | NA        | 0.486129613 | -0.867285152 | 4.054116239 | -0.213927056 | 0.830603941 | NA | NA |
| ENSG00000261276 | NA        | NA                                               | NA        | 0.451229275 | -0.867285152 | 4.054116239 | -0.213927056 | 0.830603941 | NA | NA |
| ENSG00000264574 | MIR1254-2 | microRNA 1254-2                                  | 100616217 | 0.451229275 | -0.867285152 | 4.054116239 | -0.213927056 | 0.830603941 | NA | NA |

|                 |              |                                                      |           |             |              |             |              |             |             |         |
|-----------------|--------------|------------------------------------------------------|-----------|-------------|--------------|-------------|--------------|-------------|-------------|---------|
| ENSG00000265252 | MIR3132      | microRNA 3132                                        | 100423039 | 0.451229275 | -0.867285152 | 4.054116239 | -0.213927056 | 0.830603941 | NA          | NA      |
| ENSG00000267166 | NA           | NA                                                   | NA        | 0.486129613 | -0.867285152 | 4.054116239 | -0.213927056 | 0.830603941 | NA          | NA      |
| ENSG00000267845 | NA           | NA                                                   | NA        | 0.451229275 | -0.867285152 | 4.054116239 | -0.213927056 | 0.830603941 | NA          | NA      |
| ENSG00000268000 | NA           | NA                                                   | NA        | 0.451229275 | -0.867285152 | 4.054116239 | -0.213927056 | 0.830603941 | NA          | NA      |
| ENSG00000268095 | ZNF649-AS1   | ZNF649 antisense RNA 1                               | 101928571 | 0.451229275 | -0.867285152 | 4.054116239 | -0.213927056 | 0.830603941 | NA          | NA      |
| ENSG00000268955 | NA           | NA                                                   | NA        | 0.486129613 | -0.867285152 | 4.054116239 | -0.213927056 | 0.830603941 | NA          | NA      |
| ENSG00000269225 | NA           | NA                                                   | NA        | 0.486129613 | -0.867285152 | 4.054116239 | -0.213927056 | 0.830603941 | NA          | NA      |
| ENSG00000269385 | NA           | NA                                                   | NA        | 0.451229275 | -0.867285152 | 4.054116239 | -0.213927056 | 0.830603941 | NA          | NA      |
| ENSG00000269496 | NA           | NA                                                   | NA        | 0.451229275 | -0.867285152 | 4.054116239 | -0.213927056 | 0.830603941 | NA          | NA      |
| ENSG00000272158 | NA           | NA                                                   | NA        | 0.486129613 | -0.867285152 | 4.054116239 | -0.213927056 | 0.830603941 | NA          | NA      |
| ENSG00000104848 | KCNA7        | potassium voltage-gated channel subfamily A member 7 | 3743      | 0.444791739 | -0.867285152 | 4.054116239 | -0.213927056 | 0.830603941 | NA          | NA      |
| ENSG00000156925 | ZIC3         | Zic family member 3                                  | 7547      | 0.444791739 | -0.867285152 | 4.054116239 | -0.213927056 | 0.830603941 | NA          | NA      |
| ENSG00000218153 | NA           | NA                                                   | NA        | 0.444791739 | -0.867285152 | 4.054116239 | -0.213927056 | 0.830603941 | NA          | NA      |
| ENSG00000229083 | NA           | NA                                                   | NA        | 0.444791739 | -0.867285152 | 4.054116239 | -0.213927056 | 0.830603941 | NA          | NA      |
| ENSG00000231830 | NA           | NA                                                   | NA        | 0.444791739 | -0.867285152 | 4.054116239 | -0.213927056 | 0.830603941 | NA          | NA      |
| ENSG00000234655 | NA           | NA                                                   | NA        | 0.444791739 | -0.867285152 | 4.054116239 | -0.213927056 | 0.830603941 | NA          | NA      |
| ENSG00000235628 | NA           | NA                                                   | NA        | 0.444791739 | -0.867285152 | 4.054116239 | -0.213927056 | 0.830603941 | NA          | NA      |
| ENSG00000236319 | NA           | NA                                                   | NA        | 0.444791739 | -0.867285152 | 4.054116239 | -0.213927056 | 0.830603941 | NA          | NA      |
| ENSG00000237163 | NA           | NA                                                   | NA        | 0.444791739 | -0.867285152 | 4.054116239 | -0.213927056 | 0.830603941 | NA          | NA      |
| ENSG00000237745 | NA           | NA                                                   | NA        | 0.444791739 | -0.867285152 | 4.054116239 | -0.213927056 | 0.830603941 | NA          | NA      |
| ENSG00000237863 | LOC101928358 | uncharacterized LOC101928358                         | 101928358 | 0.444791739 | -0.867285152 | 4.054116239 | -0.213927056 | 0.830603941 | NA          | NA      |
| ENSG00000241282 | NA           | NA                                                   | NA        | 0.444791739 | -0.867285152 | 4.054116239 | -0.213927056 | 0.830603941 | NA          | NA      |
| ENSG00000243859 | NA           | NA                                                   | NA        | 0.444791739 | -0.867285152 | 4.054116239 | -0.213927056 | 0.830603941 | NA          | NA      |
| ENSG00000254498 | NA           | NA                                                   | NA        | 0.444791739 | -0.867285152 | 4.054116239 | -0.213927056 | 0.830603941 | NA          | NA      |
| ENSG00000260188 | NA           | NA                                                   | NA        | 0.444791739 | -0.867285152 | 4.054116239 | -0.213927056 | 0.830603941 | NA          | NA      |
| ENSG00000270300 | NA           | NA                                                   | NA        | 0.444791739 | -0.867285152 | 4.054116239 | -0.213927056 | 0.830603941 | NA          | NA      |
| ENSG00000271146 | NA           | NA                                                   | NA        | 0.444791739 | -0.867285152 | 4.054116239 | -0.213927056 | 0.830603941 | NA          | NA      |
| ENSG00000271196 | NA           | NA                                                   | NA        | 0.444791739 | -0.867285152 | 4.054116239 | -0.213927056 | 0.830603941 | NA          | NA      |
| ENSG00000271304 | NA           | NA                                                   | NA        | 0.444791739 | -0.867285152 | 4.054116239 | -0.213927056 | 0.830603941 | NA          | NA      |
| ENSG00000271543 | NA           | NA                                                   | NA        | 0.444791739 | -0.867285152 | 4.054116239 | -0.213927056 | 0.830603941 | NA          | NA      |
| ENSG00000272351 | NA           | NA                                                   | NA        | 0.444791739 | -0.867285152 | 4.054116239 | -0.213927056 | 0.830603941 | NA          | NA      |
| ENSG00000231906 | NA           | NA                                                   | NA        | 2.845792701 | -0.86705746  | 1.551561121 | -0.558829071 | 0.57627838  | NA          | NA      |
| ENSG00000243702 | NA           | NA                                                   | NA        | 1.658804083 | -0.86561037  | 2.232509788 | -0.387729709 | 0.698216068 | NA          | NA      |
| ENSG00000229589 | ACVR2B-AS1   | ACVR2B antisense RNA 1                               | 100128640 | 27.40381127 | -0.865608442 | 0.867787468 | -0.997488986 | 0.318527217 | 0.999371363 | Not Sig |
| ENSG00000233411 | NA           | NA                                                   | NA        | 12.90486524 | -0.864288949 | 1.032930611 | -0.836734762 | 0.402741675 | 0.999371363 | Not Sig |

|                 |            |                                                     |           |             |              |             |              |             |             |         |
|-----------------|------------|-----------------------------------------------------|-----------|-------------|--------------|-------------|--------------|-------------|-------------|---------|
| ENSG00000221406 | MIR320B2   | microRNA 320b-2                                     | 100313769 | 11.48165565 | -0.864157481 | 1.143849714 | -0.75548166  | 0.449960032 | 0.999371363 | Not Sig |
| ENSG00000267798 | NA         | NA                                                  | NA        | 25.31977508 | -0.864130717 | 0.937137833 | -0.922095647 | 0.356478687 | 0.999371363 | Not Sig |
| ENSG00000199053 | MIR324     | microRNA 324                                        | 442898    | 1.338483486 | -0.864125733 | 1.931523848 | -0.447380307 | 0.654600492 | NA          | NA      |
| ENSG00000212024 | MIR550A3   | microRNA 550a-3                                     | 100616354 | 11.58327151 | -0.863970179 | 0.933753599 | -0.925265701 | 0.354827715 | 0.999371363 | Not Sig |
| ENSG00000271852 | SNORD11B   | small nucleolar RNA, C/D box 11B                    | 100113392 | 7.704559159 | -0.863906627 | 1.48825805  | -0.580481743 | 0.561589795 | 0.999371363 | Not Sig |
| ENSG00000238857 | NA         | NA                                                  | NA        | 3.31131445  | -0.863561677 | 1.541059417 | -0.560368839 | 0.575227882 | NA          | NA      |
| ENSG00000235381 | NA         | NA                                                  | NA        | 67.41755695 | -0.863408538 | 0.617829715 | -1.397486261 | 0.162267395 | 0.999371363 | Not Sig |
| ENSG00000171316 | CHD7       | chromodomain helicase DNA binding protein 7         | 55636     | 2115.301389 | -0.863175424 | 0.585146054 | -1.475145254 | 0.140173496 | 0.999371363 | Not Sig |
| ENSG00000240889 | NDUFB2-AS1 | NDUFB2 antisense RNA 1                              | 100134713 | 18.1672643  | -0.862663776 | 0.807926974 | -1.06774969  | 0.285633438 | 0.999371363 | Not Sig |
| ENSG00000226432 | NA         | NA                                                  | NA        | 2.267805528 | -0.862307368 | 1.811720714 | -0.475960429 | 0.63410257  | NA          | NA      |
| ENSG00000109771 | LRP2BP     | LRP2 binding protein                                | 55805     | 57.06951113 | -0.862284244 | 0.626857012 | -1.375567676 | 0.16895552  | 0.999371363 | Not Sig |
| ENSG00000241913 | NA         | NA                                                  | NA        | 14.51157984 | -0.861776844 | 1.033517249 | -0.833829183 | 0.404377248 | 0.999371363 | Not Sig |
| ENSG00000204882 | GPR20      | G protein-coupled receptor 20                       | 2843      | 32.30292096 | -0.861646221 | 0.942996376 | -0.913732272 | 0.360857542 | 0.999371363 | Not Sig |
| ENSG00000104881 | PPP1R13L   | protein phosphatase 1 regulatory subunit 13 like    | 10848     | 1420.853247 | -0.861585288 | 0.666610395 | -1.292487028 | 0.196188535 | 0.999371363 | Not Sig |
| ENSG00000261611 | NA         | NA                                                  | NA        | 7.168810828 | -0.861195342 | 1.067925113 | -0.806419225 | 0.420001166 | 0.999371363 | Not Sig |
| ENSG00000231952 | NA         | NA                                                  | NA        | 62.64024359 | -0.860815057 | 0.960338817 | -0.896365993 | 0.370057324 | 0.999371363 | Not Sig |
| ENSG00000155903 | RASA2      | RAS p21 protein activator 2                         | 5922      | 1272.843879 | -0.860800954 | 0.77533957  | -1.110224457 | 0.266902316 | 0.999371363 | Not Sig |
| ENSG00000119139 | TJP2       | tight junction protein 2                            | 9414      | 2932.784599 | -0.860500949 | 0.480836745 | -1.789590664 | 0.07351974  | 0.999371363 | Not Sig |
| ENSG00000214021 | TTL3       | tubulin tyrosine ligase like 3                      | 26140     | 605.8541592 | -0.860290213 | 0.541190049 | -1.589626813 | 0.11191895  | 0.999371363 | Not Sig |
| ENSG00000216480 | NA         | NA                                                  | NA        | 1.774823372 | -0.859826652 | 1.800911753 | -0.477439636 | 0.633049096 | NA          | NA      |
| ENSG00000270246 | NA         | NA                                                  | NA        | 35.02460767 | -0.859457074 | 0.779095815 | -1.103146824 | 0.269963409 | 0.999371363 | Not Sig |
| ENSG00000179859 | LINC02581  | long intergenic non-protein coding RNA 2581         | 284023    | 69.85135467 | -0.859434362 | 0.566926849 | -1.515952832 | 0.12953128  | 0.999371363 | Not Sig |
| ENSG00000238294 | NA         | NA                                                  | NA        | 1.742624796 | -0.85902777  | 2.224214967 | -0.386216163 | 0.699336584 | NA          | NA      |
| ENSG00000172167 | MTBP       | MDM2 binding protein                                | 27085     | 154.8130936 | -0.85875082  | 0.760601929 | -1.129041075 | 0.258880507 | 0.999371363 | Not Sig |
| ENSG00000248099 | INSL3      | insulin like 3                                      | 3640      | 1.763536713 | -0.85805651  | 1.984643746 | -0.432347877 | 0.665488595 | NA          | NA      |
| ENSG00000167615 | LENG8      | leukocyte receptor cluster member 8                 | 114823    | 5187.075448 | -0.857865267 | 0.449472404 | -1.908604978 | 0.056313069 | 0.999371363 | Not Sig |
| ENSG00000236375 | NA         | NA                                                  | NA        | 36.9598593  | -0.85783185  | 0.606350169 | -1.414746618 | 0.157142801 | 0.999371363 | Not Sig |
| ENSG00000249784 | SCARNA22   | small Cajal body-specific RNA 22                    | 677770    | 2.283697312 | -0.857343532 | 1.570043631 | -0.546063508 | 0.585022283 | NA          | NA      |
| ENSG00000237506 | NA         | NA                                                  | NA        | 4.070858603 | -0.857204875 | 1.384043897 | -0.619348041 | 0.535687103 | NA          | NA      |
| ENSG00000196263 | ZNF471     | zinc finger protein 471                             | 57573     | 240.2574883 | -0.856986386 | 0.577435696 | -1.484124365 | 0.13777593  | 0.999371363 | Not Sig |
| ENSG00000222767 | NA         | NA                                                  | NA        | 4.219309567 | -0.856711106 | 1.619854922 | -0.52888138  | 0.59688774  | NA          | NA      |
| ENSG00000123009 | NA         | NA                                                  | NA        | 1.35437527  | -0.856599538 | 2.368613352 | -0.361645998 | 0.717616587 | NA          | NA      |
| ENSG00000013588 | GPRC5A     | G protein-coupled receptor class C group 5 member A | 9052      | 14556.95824 | -0.855983329 | 0.683547683 | -1.252265717 | 0.210473057 | 0.999371363 | Not Sig |
| ENSG00000222370 | SNORA36B   | small nucleolar RNA, H/ACA box 36B                  | 677818    | 9.744904045 | -0.855342323 | 1.410681693 | -0.606332617 | 0.544293904 | 0.999371363 | Not Sig |
| ENSG00000214826 | NA         | NA                                                  | NA        | 158.1731214 | -0.855088436 | 0.746480951 | -1.145492641 | 0.252005142 | 0.999371363 | Not Sig |

|                 |            |                                                                                       |           |             |              |             |              |             |             |         |
|-----------------|------------|---------------------------------------------------------------------------------------|-----------|-------------|--------------|-------------|--------------|-------------|-------------|---------|
| ENSG00000224812 | TMEM72-AS1 | TMEM72 antisense RNA 1                                                                | 220980    | 8.171547176 | -0.854926426 | 0.960933563 | -0.889683178 | 0.373636029 | 0.999371363 | Not Sig |
| ENSG00000240869 | NA         | NA                                                                                    | NA        | 2.915470275 | -0.854871843 | 1.984141981 | -0.430852152 | 0.666575876 | NA          | NA      |
| ENSG00000230371 | NA         | NA                                                                                    | NA        | 1.834067348 | -0.854638616 | 1.944675974 | -0.439476101 | 0.660316595 | NA          | NA      |
| ENSG00000177425 | PAWR       | pro-apoptotic Wt1 regulator                                                           | 5074      | 1549.181276 | -0.854494124 | 0.621431339 | -1.375041891 | 0.169118458 | 0.999371363 | Not Sig |
| ENSG00000184599 | FAM19A3    | <small>family with sequence similarity 19 member A3, C-C motif chemokine like</small> | 284467    | 0.836047081 | -0.853917489 | 2.762639    | -0.30909485  | 0.757249376 | NA          | NA      |
| ENSG00000237451 | NA         | NA                                                                                    | NA        | 0.836047081 | -0.853917489 | 2.762639    | -0.30909485  | 0.757249376 | NA          | NA      |
| ENSG00000263909 | MIR5000    | microRNA 5000                                                                         | 100846995 | 0.836047081 | -0.853917489 | 2.762639    | -0.30909485  | 0.757249376 | NA          | NA      |
| ENSG00000261783 | NA         | NA                                                                                    | NA        | 33.97604867 | -0.85229275  | 0.928862696 | -0.917565916 | 0.358846169 | 0.999371363 | Not Sig |
| ENSG00000212429 | NA         | NA                                                                                    | NA        | 6.05263481  | -0.852164702 | 1.105111522 | -0.771111952 | 0.440640577 | NA          | NA      |
| ENSG00000205571 | SMN1       | survival of motor neuron 1, telomeric                                                 | 6606      | 87.38969508 | -0.852077202 | 0.614058611 | -1.387615426 | 0.165254182 | 0.999371363 | Not Sig |
| ENSG00000205571 | SMN2       | survival of motor neuron 2, centromeric                                               | 6607      | 87.38969508 | -0.852077202 | 0.614058611 | -1.387615426 | 0.165254182 | 0.999371363 | Not Sig |
| ENSG00000229585 | NA         | NA                                                                                    | NA        | 18.57974609 | -0.852054504 | 0.848281138 | -1.00444825  | 0.315162603 | 0.999371363 | Not Sig |
| ENSG00000232686 | NA         | NA                                                                                    | NA        | 21.18611422 | -0.852036511 | 1.00401035  | -0.848633195 | 0.39608543  | 0.999371363 | Not Sig |
| ENSG00000186049 | KRT73      | keratin 73                                                                            | 319101    | 1.00487281  | -0.851993338 | 2.993607587 | -0.284604215 | 0.775947381 | NA          | NA      |
| ENSG00000258355 | NA         | NA                                                                                    | NA        | 10.3111937  | -0.851683101 | 0.91123193  | -0.934650195 | 0.349968602 | 0.999371363 | Not Sig |
| ENSG00000273466 | NA         | NA                                                                                    | NA        | 26.92227864 | -0.851471758 | 0.665875777 | -1.278724633 | 0.200994042 | 0.999371363 | Not Sig |
| ENSG00000162849 | KIF26B     | kinesin family member 26B                                                             | 55083     | 1344.456941 | -0.851253609 | 0.892887399 | -0.953371735 | 0.340401757 | 0.999371363 | Not Sig |
| ENSG00000106565 | TMEM176B   | transmembrane protein 176B                                                            | 28959     | 1422.982985 | -0.850951517 | 0.792787003 | -1.073367138 | 0.283106423 | 0.999371363 | Not Sig |
| ENSG00000234073 | NA         | NA                                                                                    | NA        | 10.10957786 | -0.850798653 | 1.025702843 | -0.829478693 | 0.406833589 | 0.999371363 | Not Sig |
| ENSG00000264133 | NA         | NA                                                                                    | NA        | 10.32082571 | -0.850154505 | 0.997979901 | -0.851875378 | 0.394283264 | 0.999371363 | Not Sig |
| ENSG00000139112 | GABARAPL1  | <small>GABA type A receptor associated protein like 1</small>                         | 23710     | 1646.09666  | -0.849964281 | 0.494351313 | -1.719352735 | 0.085550163 | 0.999371363 | Not Sig |
| ENSG00000163357 | DCST1      | DC-STAMP domain containing 1                                                          | 149095    | 5.698001262 | -0.849542413 | 1.0955279   | -0.775463968 | 0.438065549 | NA          | NA      |
| ENSG00000255200 | NA         | NA                                                                                    | NA        | 10.12692542 | -0.849507503 | 1.152947298 | -0.73681382  | 0.461235578 | 0.999371363 | Not Sig |
| ENSG00000241003 | NA         | NA                                                                                    | NA        | 34.81284529 | -0.849384869 | 1.141849758 | -0.743867451 | 0.456956668 | 0.999371363 | Not Sig |
| ENSG00000203427 | NA         | NA                                                                                    | NA        | 2.676551964 | -0.849332275 | 1.464853192 | -0.579807096 | 0.562044712 | NA          | NA      |
| ENSG00000189152 | GRAPL      | GRB2 related adaptor protein like                                                     | 400581    | 3.154826639 | -0.849243064 | 1.673945244 | -0.507330253 | 0.611923115 | NA          | NA      |
| ENSG00000165115 | KIF27      | kinesin family member 27                                                              | 55582     | 388.6473571 | -0.848808796 | 0.5574625   | -1.522629408 | 0.127851448 | 0.999371363 | Not Sig |
| ENSG00000267228 | NA         | NA                                                                                    | NA        | 2.955634744 | -0.848586844 | 1.587507799 | -0.534540268 | 0.592967797 | NA          | NA      |
| ENSG00000177380 | PPFIA3     | PTPRF interacting protein alpha 3                                                     | 8541      | 143.5699896 | -0.848573696 | 0.635840038 | -1.334571033 | 0.182016784 | 0.999371363 | Not Sig |
| ENSG00000236056 | NA         | NA                                                                                    | NA        | 6.293297621 | -0.84807063  | 1.149431105 | -0.737817714 | 0.460625228 | NA          | NA      |
| ENSG00000124785 | NRN1       | neuritin 1                                                                            | 51299     | 142.7686703 | -0.84791451  | 1.029083528 | -0.823951105 | 0.409967341 | 0.999371363 | Not Sig |
| ENSG00000250320 | NA         | NA                                                                                    | NA        | 37.41374757 | -0.847164877 | 0.816996398 | -1.036926085 | 0.299770306 | 0.999371363 | Not Sig |
| ENSG00000269356 | NA         | NA                                                                                    | NA        | 11.20373508 | -0.846891044 | 0.865357261 | -0.978660586 | 0.327747713 | 0.999371363 | Not Sig |
| ENSG00000158373 | HIST1H2BD  | histone cluster 1 H2B family member d                                                 | 3017      | 1190.399258 | -0.846519773 | 0.821943536 | -1.029900153 | 0.303056879 | 0.999371363 | Not Sig |
| ENSG00000127191 | TRAF2      | TNF receptor associated factor 2                                                      | 7186      | 717.6586627 | -0.846170145 | 0.527916815 | -1.602847496 | 0.108968328 | 0.999371363 | Not Sig |

|                 |              |                                                        |           |             |              |             |              |             |             |         |
|-----------------|--------------|--------------------------------------------------------|-----------|-------------|--------------|-------------|--------------|-------------|-------------|---------|
| ENSG00000106701 | FSD1L        | fibronectin type III and SPRY domain containing 1 like | 83856     | 222.2332641 | -0.846129753 | 0.712381798 | -1.187747575 | 0.234932874 | 0.999371363 | Not Sig |
| ENSG00000243679 | NA           | NA                                                     | NA        | 510.6056372 | -0.845490791 | 0.533423548 | -1.58502712  | 0.112960173 | 0.999371363 | Not Sig |
| ENSG00000207297 | SNORD7       | small nucleolar RNA, C/D box 7                         | 692076    | 2.571819333 | -0.845401819 | 1.592277436 | -0.530938767 | 0.595461212 | NA          | NA      |
| ENSG00000113657 | DPYSL3       | dihydropyrimidinase like 3                             | 1809      | 4201.057329 | -0.844868664 | 0.400082788 | -2.111734596 | 0.03470922  | 0.965260677 | Not Sig |
| ENSG00000253180 | NA           | NA                                                     | NA        | 15.4913832  | -0.84461878  | 0.813885818 | -1.037760778 | 0.299381441 | 0.999371363 | Not Sig |
| ENSG00000215067 | ALOX12-AS1   | ALOX12 antisense RNA 1                                 | 100506713 | 128.3955285 | -0.844562155 | 0.54743559  | -1.542760775 | 0.12288883  | 0.999371363 | Not Sig |
| ENSG00000266568 | NA           | NA                                                     | NA        | 2.793988655 | -0.844453467 | 1.792542089 | -0.471092685 | 0.637574548 | NA          | NA      |
| ENSG00000230910 | LOC101928307 | uncharacterized LOC101928307                           | 101928307 | 19.10544645 | -0.844104818 | 0.919496394 | -0.918007752 | 0.358614807 | 0.999371363 | Not Sig |
| ENSG00000153495 | TEX29        | testis expressed 29                                    | 121793    | 5.068258909 | -0.843252774 | 1.220156119 | -0.69110236  | 0.489501217 | NA          | NA      |
| ENSG00000270705 | NA           | NA                                                     | NA        | 4.123045083 | -0.841872998 | 1.432041574 | -0.587883071 | 0.55661078  | NA          | NA      |
| ENSG00000064042 | LIMCH1       | LIM and calponin homology domains 1                    | 22998     | 8120.800846 | -0.841620907 | 0.546344704 | -1.540457702 | 0.123448826 | 0.999371363 | Not Sig |
| ENSG00000246263 | UBR5-AS1     | UBR5 antisense RNA 1                                   | 101927221 | 57.97937467 | -0.841214598 | 0.592729322 | -1.419222175 | 0.155834253 | 0.999371363 | Not Sig |
| ENSG00000241939 | NA           | NA                                                     | NA        | 21.94098026 | -0.841189915 | 0.74324014  | -1.13178752  | 0.257723776 | 0.999371363 | Not Sig |
| ENSG00000124802 | EEF1E1       | eukaryotic translation elongation factor 1 epsilon 1   | 9521      | 91.25411654 | -0.841051098 | 0.903864131 | -0.930506111 | 0.352109101 | 0.999371363 | Not Sig |
| ENSG00000261837 | NA           | NA                                                     | NA        | 21.50469571 | -0.840995181 | 0.698800898 | -1.203483257 | 0.228789367 | 0.999371363 | Not Sig |
| ENSG00000176533 | GNG7         | G protein subunit gamma 7                              | 2788      | 249.8081615 | -0.840564191 | 0.962885132 | -0.87296414  | 0.382682624 | 0.999371363 | Not Sig |
| ENSG00000242457 | NA           | NA                                                     | NA        | 0.813302753 | -0.840199139 | 2.776810176 | -0.302577089 | 0.762212177 | NA          | NA      |
| ENSG00000245711 | NA           | NA                                                     | NA        | 0.813302753 | -0.840199139 | 2.776810176 | -0.302577089 | 0.762212177 | NA          | NA      |
| ENSG00000270978 | NA           | NA                                                     | NA        | 0.813302753 | -0.840199139 | 2.776810176 | -0.302577089 | 0.762212177 | NA          | NA      |
| ENSG00000163681 | SLMAP        | sarcolemma associated protein                          | 7871      | 2523.47139  | -0.840045252 | 0.606748591 | -1.384503013 | 0.166204486 | 0.999371363 | Not Sig |
| ENSG00000204764 | RANBP17      | RAN binding protein 17                                 | 64901     | 872.3332691 | -0.839861789 | 0.727088405 | -1.155102712 | 0.248048368 | 0.999371363 | Not Sig |
| ENSG00000249840 | NA           | NA                                                     | NA        | 7.155647997 | -0.839580122 | 1.006387594 | -0.834251263 | 0.404139409 | 0.999371363 | Not Sig |
| ENSG00000137812 | KNL1         | kinetochore scaffold 1                                 | 57082     | 299.0249906 | -0.839370379 | 1.068172721 | -0.785800238 | 0.431984527 | 0.999371363 | Not Sig |
| ENSG00000108960 | MMD          | monocyte to macrophage differentiation associated      | 23531     | 430.7862695 | -0.839354517 | 0.648599819 | -1.2941023   | 0.195630087 | 0.999371363 | Not Sig |
| ENSG00000181458 | TMEM45A      | transmembrane protein 45A                              | 55076     | 278.7667138 | -0.839278105 | 0.712343202 | -1.178193465 | 0.238719487 | 0.999371363 | Not Sig |
| ENSG00000258645 | NA           | NA                                                     | NA        | 0.842484616 | -0.839020286 | 3.185159693 | -0.263415454 | 0.792230381 | NA          | NA      |
| ENSG00000259377 | NA           | NA                                                     | NA        | 3.539644445 | -0.838576223 | 1.355899423 | -0.618464916 | 0.536268918 | NA          | NA      |
| ENSG00000229387 | NA           | NA                                                     | NA        | 2.05809627  | -0.838504016 | 2.093137487 | -0.400596722 | 0.68871706  | NA          | NA      |
| ENSG00000206638 | NA           | NA                                                     | NA        | 6.816314701 | -0.838287848 | 1.498400326 | -0.559455196 | 0.5758511   | 0.999371363 | Not Sig |
| ENSG00000228807 | NA           | NA                                                     | NA        | 2.135479448 | -0.838160387 | 1.582517281 | -0.529637431 | 0.596363337 | NA          | NA      |
| ENSG00000211553 | NA           | NA                                                     | NA        | 17.51932394 | -0.838137154 | 0.865589571 | -0.968284719 | 0.332902195 | 0.999371363 | Not Sig |
| ENSG00000265694 | MIR4774      | microRNA 4774                                          | 100616356 | 5.470236567 | -0.838119979 | 1.40441862  | -0.596773617 | 0.550658535 | NA          | NA      |
| ENSG00000199977 | NA           | NA                                                     | NA        | 11.92789861 | -0.837988774 | 1.124244625 | -0.745379391 | 0.456042399 | 0.999371363 | Not Sig |
| ENSG00000199856 | NA           | NA                                                     | NA        | 17.23421324 | -0.83796157  | 0.896176083 | -0.935041212 | 0.349767061 | 0.999371363 | Not Sig |
| ENSG00000267512 | NA           | NA                                                     | NA        | 1.840504883 | -0.837903057 | 2.170155755 | -0.386102728 | 0.69942059  | NA          | NA      |

|                 |             |                                                   |           |             |              |             |              |             |             |         |
|-----------------|-------------|---------------------------------------------------|-----------|-------------|--------------|-------------|--------------|-------------|-------------|---------|
| ENSG00000126218 | F10         | coagulation factor X                              | 2159      | 104.0875182 | -0.83784241  | 0.947725594 | -0.884055908 | 0.376666033 | 0.999371363 | Not Sig |
| ENSG00000249007 | NA          | NA                                                | NA        | 83.32186849 | -0.837807629 | 0.693723896 | -1.207696078 | 0.227164187 | 0.999371363 | Not Sig |
| ENSG00000272491 | NA          | NA                                                | NA        | 22.11705021 | -0.837801976 | 0.70776693  | -1.1837258   | 0.236521623 | 0.999371363 | Not Sig |
| ENSG00000183891 | TTC32       | tetratricopeptide repeat domain 32                | 130502    | 150.3696696 | -0.837633152 | 0.47376242  | -1.768044736 | 0.077053425 | 0.999371363 | Not Sig |
| ENSG00000175544 | CABP4       | calcium binding protein 4                         | 57010     | 95.7947684  | -0.837616623 | 0.635825225 | -1.317369287 | 0.187714871 | 0.999371363 | Not Sig |
| ENSG00000091436 | MAP3K20     | mitogen-activated protein kinase kinase kinase 20 | 51776     | 1443.966631 | -0.835920383 | 0.482917167 | -1.730980882 | 0.083455174 | 0.999371363 | Not Sig |
| ENSG00000187118 | CMC1        | C-X9-C motif containing 1                         | 152100    | 383.9965041 | -0.835860421 | 0.643348321 | -1.299234635 | 0.193863419 | 0.999371363 | Not Sig |
| ENSG00000080345 | RIF1        | replication timing regulatory factor 1            | 55183     | 4405.006607 | -0.835741522 | 0.633241303 | -1.319783655 | 0.18690726  | 0.999371363 | Not Sig |
| ENSG00000105186 | ANKRD27     | ankyrin repeat domain 27                          | 84079     | 892.0654051 | -0.835025844 | 0.485077613 | -1.721427297 | 0.085173314 | 0.999371363 | Not Sig |
| ENSG00000173267 | SNCG        | synuclein gamma                                   | 6623      | 130.0440912 | -0.835018411 | 0.699721859 | -1.193357618 | 0.232729346 | 0.999371363 | Not Sig |
| ENSG00000257243 | NA          | NA                                                | NA        | 10.11013267 | -0.834897705 | 1.037854449 | -0.804445851 | 0.42113953  | 0.999371363 | Not Sig |
| ENSG00000260647 | NA          | NA                                                | NA        | 10.47540477 | -0.834706767 | 0.915651613 | -0.911598643 | 0.361980037 | 0.999371363 | Not Sig |
| ENSG00000211840 | NA          | NA                                                | NA        | 3.048494698 | -0.834650608 | 1.393211208 | -0.599084046 | 0.54911684  | NA          | NA      |
| ENSG00000226758 | DISC1-IT1   | DISC1 intronic transcript 1                       | 104472714 | 19.00768226 | -0.834475125 | 0.987102318 | -0.845378548 | 0.397899518 | 0.999371363 | Not Sig |
| ENSG00000213363 | NA          | NA                                                | NA        | 1.228901732 | -0.834117638 | 2.398202718 | -0.347809479 | 0.72798327  | NA          | NA      |
| ENSG00000270813 | NA          | NA                                                | NA        | 1.228901732 | -0.834117638 | 2.398202718 | -0.347809479 | 0.72798327  | NA          | NA      |
| ENSG00000072832 | CRMP1       | collapsin response mediator protein 1             | 1400      | 111.2747713 | -0.833842587 | 0.788684885 | -1.057256963 | 0.290394329 | 0.999371363 | Not Sig |
| ENSG00000236180 | NA          | NA                                                | NA        | 2.235191945 | -0.833502001 | 1.552620467 | -0.536835639 | 0.591381151 | NA          | NA      |
| ENSG00000226763 | SRRM5       | serine/arginine repetitive matrix 5               | 100170229 | 10.93574479 | -0.833224343 | 1.052137751 | -0.791934652 | 0.428398781 | 0.999371363 | Not Sig |
| ENSG00000224165 | DNAJC27-AS1 | DNAJC27 antisense RNA 1                           | 729723    | 55.83153192 | -0.833064996 | 0.664313606 | -1.254023684 | 0.209833397 | 0.999371363 | Not Sig |
| ENSG00000091127 | PUS7        | pseudouridylate synthase 7 (putative)             | 54517     | 383.4045167 | -0.832504751 | 0.661171244 | -1.259136356 | 0.207981085 | 0.999371363 | Not Sig |
| ENSG00000222858 | NA          | NA                                                | NA        | 4.346067465 | -0.831338097 | 1.560922761 | -0.532594    | 0.594314657 | NA          | NA      |
| ENSG00000267277 | NA          | NA                                                | NA        | 9.976942342 | -0.830895305 | 0.948983329 | -0.875563648 | 0.381267295 | 0.999371363 | Not Sig |
| ENSG00000225125 | NA          | NA                                                | NA        | 14.2538073  | -0.830502061 | 0.770717015 | -1.077570684 | 0.281225391 | 0.999371363 | Not Sig |
| ENSG00000243746 | NA          | NA                                                | NA        | 20.67346476 | -0.830406425 | 0.806464574 | -1.029687418 | 0.303156764 | 0.999371363 | Not Sig |
| ENSG00000271842 | NA          | NA                                                | NA        | 1.826030502 | -0.830259682 | 2.194294163 | -0.378372096 | 0.705154194 | NA          | NA      |
| ENSG00000261654 | NA          | NA                                                | NA        | 42.9661089  | -0.830219479 | 0.967651364 | -0.85797376  | 0.390906953 | 0.999371363 | Not Sig |
| ENSG00000263838 | MIR4698     | microRNA 4698                                     | 100616486 | 6.891710751 | -0.829295962 | 1.115689698 | -0.743303414 | 0.457298005 | 0.999371363 | Not Sig |
| ENSG00000213700 | NA          | NA                                                | NA        | 30.61023986 | -0.829069808 | 0.751910848 | -1.102617167 | 0.270193452 | 0.999371363 | Not Sig |
| ENSG00000235001 | NA          | NA                                                | NA        | 1.755499867 | -0.829002691 | 1.955673807 | -0.423896198 | 0.671641517 | NA          | NA      |
| ENSG00000184226 | PCDH9       | protocadherin 9                                   | 5101      | 167.1528566 | -0.828834748 | 0.959791093 | -0.863557449 | 0.387831047 | 0.999371363 | Not Sig |
| ENSG00000177311 | ZBTB38      | zinc finger and BTB domain containing 38          | 253461    | 3840.105897 | -0.82811883  | 0.520312047 | -1.591581118 | 0.111478855 | 0.999371363 | Not Sig |
| ENSG00000148541 | FAM13C      | family with sequence similarity 13 member C       | 220965    | 250.1642976 | -0.828015598 | 0.704793952 | -1.174833575 | 0.240061305 | 0.999371363 | Not Sig |
| ENSG00000172915 | NBEA        | neurobeachin                                      | 26960     | 1219.917024 | -0.827561346 | 0.670877384 | -1.233550819 | 0.217370329 | 0.999371363 | Not Sig |
| ENSG00000265253 | MIR4446     | microRNA 4446                                     | 100616476 | 4.011299677 | -0.826718628 | 1.277140177 | -0.647320195 | 0.517424734 | NA          | NA      |

|                 |             |                                                           |           |             |              |             |              |             |             |         |
|-----------------|-------------|-----------------------------------------------------------|-----------|-------------|--------------|-------------|--------------|-------------|-------------|---------|
| ENSG00000200550 | NA          | NA                                                        | NA        | 6.213412796 | -0.826561409 | 1.40629278  | -0.587759122 | 0.556693986 | NA          | NA      |
| ENSG00000023697 | DERA        | deoxyribose-phosphate aldolase                            | 51071     | 609.6889782 | -0.826305799 | 0.650416543 | -1.270425557 | 0.203933084 | 0.999371363 | Not Sig |
| ENSG00000221628 | MIR1302-4   | microRNA 1302-4                                           | 100302130 | 0.913015251 | -0.826137377 | 2.718587292 | -0.303884808 | 0.761215652 | NA          | NA      |
| ENSG00000120457 | KCNJ5       | potassium voltage-gated channel subfamily J member 5      | 3762      | 342.8345765 | -0.825987748 | 1.031380632 | -0.800856369 | 0.423214801 | 0.999371363 | Not Sig |
| ENSG00000245017 | LINC02453   | long intergenic non-protein coding RNA 2453               | 643770    | 7.526904536 | -0.824664515 | 0.970764452 | -0.849500116 | 0.395603066 | 0.999371363 | Not Sig |
| ENSG00000169246 | NPIP3       | nuclear pore complex interacting protein family member B3 | 23117     | 198.656316  | -0.824004947 | 0.487515561 | -1.690212607 | 0.090987287 | 0.999371363 | Not Sig |
| ENSG00000235376 | RPEL1       | ribulose-5-phosphate-3-epimerase like 1                   | 729020    | 1.662224905 | -0.824002265 | 1.960355206 | -0.420333143 | 0.674242101 | NA          | NA      |
| ENSG00000158089 | GALNT14     | polypeptide N-acetylgalactosaminyltransferase 14          | 79623     | 151.3789845 | -0.823694219 | 1.116494186 | -0.737750567 | 0.460666038 | 0.999371363 | Not Sig |
| ENSG00000254463 | NA          | NA                                                        | NA        | 51.15776171 | -0.823681498 | 0.650424138 | -1.266375968 | 0.20537851  | 0.999371363 | Not Sig |
| ENSG00000200834 | NA          | NA                                                        | NA        | 11.61872625 | -0.823564389 | 0.868584711 | -0.948168185 | 0.343043841 | 0.999371363 | Not Sig |
| ENSG00000207709 | NA          | NA                                                        | NA        | 5.889283559 | -0.823420469 | 1.111626266 | -0.740734988 | 0.45885414  | NA          | NA      |
| ENSG00000272247 | NA          | NA                                                        | NA        | 4.428758256 | -0.822749253 | 1.741574233 | -0.472416987 | 0.636629181 | NA          | NA      |
| ENSG00000266371 | NA          | NA                                                        | NA        | 71.08016009 | -0.822699685 | 1.034092205 | -0.79557672  | 0.426278102 | 0.999371363 | Not Sig |
| ENSG00000248166 | NA          | NA                                                        | NA        | 3.030355497 | -0.821944453 | 1.684932162 | -0.487820502 | 0.625676988 | NA          | NA      |
| ENSG00000104237 | RP1         | RP1, axonemal microtubule associated                      | 6101      | 222.7223433 | -0.821859665 | 0.569067716 | -1.444221209 | 0.148676761 | 0.999371363 | Not Sig |
| ENSG00000198975 | MIRLET7A2   | microRNA let-7a-2                                         | 406882    | 3.59440544  | -0.821651933 | 1.63954298  | -0.501146932 | 0.61626772  | NA          | NA      |
| ENSG00000168993 | CPLX1       | complexin 1                                               | 10815     | 144.567322  | -0.821315938 | 0.617238269 | -1.330630291 | 0.18331069  | 0.999371363 | Not Sig |
| ENSG00000252627 | NA          | NA                                                        | NA        | 16.26565941 | -0.821292585 | 1.565548942 | -0.524603584 | 0.599858795 | 0.999371363 | Not Sig |
| ENSG00000102554 | KLF5        | Kruppel like factor 5                                     | 688       | 2646.434475 | -0.821203825 | 0.583821173 | -1.406601648 | 0.159545544 | 0.999371363 | Not Sig |
| ENSG00000120896 | SORBS3      | sorbin and SH3 domain containing 3                        | 10174     | 1781.297153 | -0.821002819 | 0.89524986  | -0.917065565 | 0.359108284 | 0.999371363 | Not Sig |
| ENSG00000133302 | SLF1        | SMC5-SMC6 complex localization factor 1                   | 84250     | 361.1694216 | -0.820693518 | 0.736735948 | -1.113958835 | 0.265296847 | 0.999371363 | Not Sig |
| ENSG00000122970 | IFT81       | intraflagellar transport 81                               | 28981     | 629.5192394 | -0.820684127 | 0.65362309  | -1.255592313 | 0.20926382  | 0.999371363 | Not Sig |
| ENSG00000207279 | SNORD116-24 | small nucleolar RNA, C/D box 116-24                       | 100033435 | 15.66076334 | -0.820554238 | 0.750288751 | -1.09365126  | 0.274107958 | 0.999371363 | Not Sig |
| ENSG00000226648 | PLCG1-AS1   | PLCG1 antisense RNA 1                                     | 101927117 | 8.278411844 | -0.820390415 | 0.903064151 | -0.908451979 | 0.363639474 | 0.999371363 | Not Sig |
| ENSG00000215946 | NA          | NA                                                        | NA        | 23.01212911 | -0.820164296 | 0.726841892 | -1.128394366 | 0.259153406 | 0.999371363 | Not Sig |
| ENSG00000238829 | NA          | NA                                                        | NA        | 42.11854003 | -0.820101784 | 0.689415969 | -1.18956018  | 0.234219305 | 0.999371363 | Not Sig |
| ENSG00000198695 | ND6         | NADH dehydrogenase, subunit 6 (complex I)                 | 4541      | 4014.959127 | -0.819917798 | 0.757687871 | -1.082131348 | 0.279194168 | 0.999371363 | Not Sig |
| ENSG00000198408 | MGEA5       | meningioma expressed antigen 5 (hyaluronidase)            | 10724     | 4614.716496 | -0.81949225  | 0.512590848 | -1.598725871 | 0.109881527 | 0.999371363 | Not Sig |
| ENSG00000180875 | GREM2       | gremlin 2, DAN family BMP antagonist                      | 64388     | 56.53219742 | -0.819417238 | 0.876963987 | -0.934379575 | 0.35010813  | 0.999371363 | Not Sig |
| ENSG00000236939 | BAALC-AS2   | BAALC antisense RNA 2                                     | 157556    | 4.616431349 | -0.819155758 | 1.686339158 | -0.485759791 | 0.627137486 | NA          | NA      |
| ENSG00000206965 | NA          | NA                                                        | NA        | 2.718304845 | -0.819119089 | 1.500021786 | -0.546071461 | 0.585016816 | NA          | NA      |
| ENSG00000254500 | NA          | NA                                                        | NA        | 3.524755056 | -0.819081411 | 1.27632175  | -0.641751511 | 0.521034538 | NA          | NA      |
| ENSG00000253516 | NA          | NA                                                        | NA        | 27.13973209 | -0.819014376 | 0.868175362 | -0.94337436  | 0.345489453 | 0.999371363 | Not Sig |
| ENSG00000125618 | PAX8        | paired box 8                                              | 7849      | 53.27520576 | -0.818759491 | 0.81874626  | -1.000016161 | 0.317302687 | 0.999371363 | Not Sig |
| ENSG00000230630 | DNM3OS      | DNM3 opposite strand/antisense RNA                        | 100628315 | 81.84673135 | -0.81873109  | 0.759307218 | -1.078260644 | 0.280917455 | 0.999371363 | Not Sig |

|                 |           |                                             |           |             |              |             |              |             |             |         |
|-----------------|-----------|---------------------------------------------|-----------|-------------|--------------|-------------|--------------|-------------|-------------|---------|
| ENSG00000214733 | NA        | NA                                          | NA        | 14.23728602 | -0.818501074 | 0.905648769 | -0.903773187 | 0.366115682 | 0.999371363 | Not Sig |
| ENSG00000243745 | NA        | NA                                          | NA        | 11.62474878 | -0.818473997 | 0.905108806 | -0.904282437 | 0.365845657 | 0.999371363 | Not Sig |
| ENSG00000269415 | NA        | NA                                          | NA        | 3.862201562 | -0.817908051 | 1.584945512 | -0.516048056 | 0.605820846 | NA          | NA      |
| ENSG00000244703 | NA        | NA                                          | NA        | 1.289978118 | -0.817778114 | 2.438151539 | -0.335409059 | 0.737316535 | NA          | NA      |
| ENSG00000213703 | NA        | NA                                          | NA        | 14.69425114 | -0.817722196 | 0.972606469 | -0.8407534   | 0.400486098 | 0.999371363 | Not Sig |
| ENSG00000032742 | IFT88     | intraflagellar transport 88                 | 8100      | 498.6191723 | -0.817641994 | 0.647629943 | -1.262514192 | 0.206763823 | 0.999371363 | Not Sig |
| ENSG00000265939 | NA        | NA                                          | NA        | 3.362781869 | -0.81758289  | 1.437525008 | -0.56874342  | 0.569530277 | NA          | NA      |
| ENSG00000196566 | NA        | NA                                          | NA        | 0.988566019 | -0.817462258 | 3.04261966  | -0.268670537 | 0.788183226 | NA          | NA      |
| ENSG00000207948 | MIR328    | microRNA 328                                | 442901    | 0.988566019 | -0.817462258 | 3.04261966  | -0.268670537 | 0.788183226 | NA          | NA      |
| ENSG00000236047 | NA        | NA                                          | NA        | 45.66714528 | -0.817346642 | 0.639855413 | -1.277392714 | 0.201463636 | 0.999371363 | Not Sig |
| ENSG00000264895 | NA        | NA                                          | NA        | 70.86227697 | -0.816704371 | 0.669930226 | -1.219088704 | 0.222810527 | 0.999371363 | Not Sig |
| ENSG00000252021 | NA        | NA                                          | NA        | 3.726454658 | -0.815569264 | 1.315112759 | -0.620151587 | 0.535157992 | NA          | NA      |
| ENSG00000203815 | NA        | NA                                          | NA        | 24.54910131 | -0.815445601 | 0.707941836 | -1.151853952 | 0.249381093 | 0.999371363 | Not Sig |
| ENSG00000077092 | RARB      | retinoic acid receptor beta                 | 5915      | 240.142377  | -0.815013497 | 0.479108989 | -1.701102497 | 0.088923742 | 0.999371363 | Not Sig |
| ENSG00000204130 | RUFY2     | RUN and FYVE domain containing 2            | 55680     | 668.037615  | -0.814397268 | 0.641914447 | -1.268700638 | 0.204547855 | 0.999371363 | Not Sig |
| ENSG00000159917 | ZNF235    | zinc finger protein 235                     | 9310      | 238.5211145 | -0.814005935 | 0.469049995 | -1.735433336 | 0.082663726 | 0.999371363 | Not Sig |
| ENSG00000265753 | NA        | NA                                          | NA        | 6.925758029 | -0.813505152 | 1.038699809 | -0.78319563  | 0.433512241 | 0.999371363 | Not Sig |
| ENSG00000197343 | ZNF655    | zinc finger protein 655                     | 79027     | 1895.984892 | -0.813163365 | 0.560107236 | -1.451799429 | 0.146557383 | 0.999371363 | Not Sig |
| ENSG00000105996 | HOXA2     | homeobox A2                                 | 3199      | 37.42882243 | -0.81287564  | 0.637320061 | -1.275459051 | 0.202146809 | 0.999371363 | Not Sig |
| ENSG00000228446 | NA        | NA                                          | NA        | 54.9011681  | -0.81257173  | 0.676901488 | -1.200428341 | 0.229973027 | 0.999371363 | Not Sig |
| ENSG00000116285 | ERRFI1    | ERBB receptor feedback inhibitor 1          | 54206     | 4952.015556 | -0.81235351  | 0.836429014 | -0.971216321 | 0.331440568 | 0.999371363 | Not Sig |
| ENSG00000185267 | CDNF      | cerebral dopamine neurotrophic factor       | 441549    | 42.76185272 | -0.812231144 | 0.676948861 | -1.199841217 | 0.230201013 | 0.999371363 | Not Sig |
| ENSG00000266407 | MIR3157   | microRNA 3157                               | 100422892 | 4.961489874 | -0.812189148 | 1.506109091 | -0.539263161 | 0.589705285 | NA          | NA      |
| ENSG00000270281 | NA        | NA                                          | NA        | 2.225322689 | -0.81169128  | 1.55236674  | -0.522873403 | 0.601062355 | NA          | NA      |
| ENSG00000164932 | CTHRC1    | collagen triple helix repeat containing 1   | 115908    | 394.2887347 | -0.811634722 | 0.880006712 | -0.92230515  | 0.356369429 | 0.999371363 | Not Sig |
| ENSG00000182648 | C7orf13   | chromosome 7 open reading frame 13          | 129790    | 36.53226356 | -0.811399185 | 0.715780635 | -1.133586388 | 0.256968086 | 0.999371363 | Not Sig |
| ENSG00000182648 | LINC01006 | long intergenic non-protein coding RNA 1006 | 100506380 | 36.53226356 | -0.811399185 | 0.715780635 | -1.133586388 | 0.256968086 | 0.999371363 | Not Sig |
| ENSG00000189223 | PAX8-AS1  | PAX8 antisense RNA 1                        | 654433    | 439.6517784 | -0.811158952 | 0.781091473 | -1.038494183 | 0.299040042 | 0.999371363 | Not Sig |
| ENSG00000261186 | LINC01238 | long intergenic non-protein coding RNA 1238 | 102723927 | 3.977805843 | -0.811089849 | 1.412679551 | -0.574149919 | 0.565866356 | NA          | NA      |
| ENSG00000204946 | ZNF783    | zinc finger family member 783               | 100289678 | 488.5627427 | -0.811036919 | 0.574660254 | -1.411332895 | 0.158146479 | 0.999371363 | Not Sig |
| ENSG00000181358 | CTAGE10P  | CTAGE family member 10, pseudogene          | 220429    | 0.796995962 | -0.810941561 | 3.224537636 | -0.251490804 | 0.801434671 | NA          | NA      |
| ENSG00000200120 | NA        | NA                                          | NA        | 8.839141022 | -0.810877681 | 1.204927506 | -0.672968023 | 0.500967635 | 0.999371363 | Not Sig |
| ENSG00000213236 | NA        | NA                                          | NA        | 3.789252499 | -0.81080176  | 1.348197487 | -0.601396878 | 0.547575678 | NA          | NA      |
| ENSG00000259326 | NA        | NA                                          | NA        | 20.05941186 | -0.810498981 | 0.837458027 | -0.967808481 | 0.333140028 | 0.999371363 | Not Sig |
| ENSG00000216109 | NA        | NA                                          | NA        | 2.050059424 | -0.810401349 | 1.835084964 | -0.441615165 | 0.658767708 | NA          | NA      |



|                 |            |                                                         |           |             |              |             |              |             |             |         |
|-----------------|------------|---------------------------------------------------------|-----------|-------------|--------------|-------------|--------------|-------------|-------------|---------|
| ENSG00000204957 | NA         | NA                                                      | NA        | 9.560502451 | -0.810309269 | 0.964641655 | -0.840010656 | 0.400902412 | 0.999371363 | Not Sig |
| ENSG00000134668 | SPOCD1     | SPOC domain containing 1                                | 90853     | 161.0163653 | -0.81016885  | 0.919348776 | -0.881242105 | 0.378186795 | 0.999371363 | Not Sig |
| ENSG00000201448 | SNORA63C   | small nucleolar RNA, H/ACA box 63C                      | 109616970 | 1.230319135 | -0.809749846 | 2.480393123 | -0.326460285 | 0.744076133 | NA          | NA      |
| ENSG00000232888 | NA         | NA                                                      | NA        | 3.732892194 | -0.809711043 | 1.28245659  | -0.631375011 | 0.527795351 | NA          | NA      |
| ENSG00000207093 | SNORD116-8 | small nucleolar RNA, C/D box 116-8                      | 100033420 | 5.394702092 | -0.80967125  | 1.151938146 | -0.702877366 | 0.482132177 | NA          | NA      |
| ENSG00000233540 | DNM3-IT1   | DNM3 intronic transcript 1                              | 100874284 | 1.616736251 | -0.809560925 | 1.962826843 | -0.41244643  | 0.680012238 | NA          | NA      |
| ENSG00000188803 | SHISA6     | shisa family member 6                                   | 388336    | 33.30450237 | -0.809555012 | 1.08291108  | -0.747572933 | 0.454717796 | 0.999371363 | Not Sig |
| ENSG00000231035 | NA         | NA                                                      | NA        | 18.3134532  | -0.809433524 | 0.697344648 | -1.160736698 | 0.245748993 | 0.999371363 | Not Sig |
| ENSG00000196417 | ZNF765     | zinc finger protein 765                                 | 91661     | 375.9178366 | -0.80932529  | 0.491301616 | -1.647308424 | 0.099494667 | 0.999371363 | Not Sig |
| ENSG00000226766 | NA         | NA                                                      | NA        | 8.867552633 | -0.809253783 | 1.06713567  | -0.758341986 | 0.448246279 | 0.999371363 | Not Sig |
| ENSG00000022556 | NLRP2      | NLR family pyrin domain containing 2                    | 55655     | 557.7638355 | -0.809139893 | 0.864309143 | -0.93616954  | 0.349185903 | 0.999371363 | Not Sig |
| ENSG00000255185 | NA         | NA                                                      | NA        | 22.50150131 | -0.809138005 | 0.813908491 | -0.994138792 | 0.320155302 | 0.999371363 | Not Sig |
| ENSG00000230257 | NFE4       | nuclear factor, erythroid 4                             | 58160     | 1.721468881 | -0.809091213 | 2.220976624 | -0.36429524  | 0.715637554 | NA          | NA      |
| ENSG00000103375 | AQP8       | aquaporin 8                                             | 343       | 1.4055824   | -0.809030565 | 2.071404914 | -0.39057094  | 0.696114409 | NA          | NA      |
| ENSG00000180221 | NA         | NA                                                      | NA        | 15.37307398 | -0.808545683 | 0.7517843   | -1.075502219 | 0.282149939 | 0.999371363 | Not Sig |
| ENSG00000228501 | NA         | NA                                                      | NA        | 0.819740289 | -0.808191999 | 2.46411463  | -0.327984741 | 0.7429232   | NA          | NA      |
| ENSG00000261174 | NA         | NA                                                      | NA        | 0.819740289 | -0.808191999 | 2.46411463  | -0.327984741 | 0.7429232   | NA          | NA      |
| ENSG00000105339 | DENND3     | DENN domain containing 3                                | 22898     | 2413.031194 | -0.807776971 | 0.673333359 | -1.199668723 | 0.230268025 | 0.999371363 | Not Sig |
| ENSG00000232097 | NA         | NA                                                      | NA        | 6.829577309 | -0.807736873 | 1.041471248 | -0.775572897 | 0.438001208 | 0.999371363 | Not Sig |
| ENSG00000142733 | MAP3K6     | mitogen-activated protein kinase kinase kinase 6        | 9064      | 1576.706538 | -0.807312933 | 0.717269991 | -1.125535633 | 0.260362127 | 0.999371363 | Not Sig |
| ENSG00000252813 | NA         | NA                                                      | NA        | 5.217164219 | -0.807301586 | 1.249716224 | -0.645987921 | 0.518287178 | NA          | NA      |
| ENSG00000029534 | ANK1       | ankyrin 1                                               | 286       | 46.60233229 | -0.807156411 | 0.899709331 | -0.897130199 | 0.369649446 | 0.999371363 | Not Sig |
| ENSG00000035499 | DEPDC1B    | DEP domain containing 1B                                | 55789     | 52.19787196 | -0.806808762 | 1.030332613 | -0.78305661  | 0.43359387  | 0.999371363 | Not Sig |
| ENSG00000212802 | NA         | NA                                                      | NA        | 18.30423205 | -0.806592138 | 0.693032806 | -1.163858524 | 0.24448135  | 0.999371363 | Not Sig |
| ENSG00000200914 | NA         | NA                                                      | NA        | 7.651477106 | -0.806571243 | 1.087057828 | -0.74197639  | 0.458101641 | 0.999371363 | Not Sig |
| ENSG00000233303 | XXYLT1-AS1 | XXYLT1 antisense RNA 1                                  | 100874528 | 1.296415654 | -0.806566623 | 2.175716019 | -0.370713189 | 0.710851166 | NA          | NA      |
| ENSG00000235618 | FAM21EP    | family with sequence similarity 21, member A pseudogene | 100421577 | 17.95284599 | -0.806206965 | 0.845481951 | -0.953547222 | 0.340312882 | 0.999371363 | Not Sig |
| ENSG00000251348 | NA         | NA                                                      | NA        | 85.94589269 | -0.805854885 | 0.762826097 | -1.056407074 | 0.290782275 | 0.999371363 | Not Sig |
| ENSG00000135040 | NAA35      | N(alpha)-acetyltransferase 35, NatC auxiliary subunit   | 60560     | 663.7558284 | -0.80557339  | 0.584374626 | -1.37852219  | 0.168042122 | 0.999371363 | Not Sig |
| ENSG00000170954 | ZNF415     | zinc finger protein 415                                 | 55786     | 162.4191433 | -0.805094459 | 0.647311563 | -1.243751085 | 0.213591188 | 0.999371363 | Not Sig |
| ENSG00000265216 | NA         | NA                                                      | NA        | 4.436170996 | -0.805012299 | 1.333260095 | -0.60379239  | 0.54598168  | NA          | NA      |
| ENSG00000214203 | NA         | NA                                                      | NA        | 5.447630677 | -0.804951852 | 1.338753451 | -0.601269675 | 0.547660384 | NA          | NA      |
| ENSG00000230176 | LINC01433  | long intergenic non-protein coding RNA 1433             | 728228    | 2.828888994 | -0.804569874 | 1.842591107 | -0.436651339 | 0.662364224 | NA          | NA      |
| ENSG00000259081 | NA         | NA                                                      | NA        | 17.17167086 | -0.804499766 | 0.767516936 | -1.048185035 | 0.294553364 | 0.999371363 | Not Sig |
| ENSG00000235733 | NA         | NA                                                      | NA        | 5.561961084 | -0.804446691 | 1.728292083 | -0.465457603 | 0.641603791 | NA          | NA      |

|                 |              |                                                          |           |             |              |             |              |             |             |         |
|-----------------|--------------|----------------------------------------------------------|-----------|-------------|--------------|-------------|--------------|-------------|-------------|---------|
| ENSG00000268729 | NA           | NA                                                       | NA        | 8.920663126 | -0.804389327 | 1.198234944 | -0.671311858 | 0.502021882 | 0.999371363 | Not Sig |
| ENSG00000255524 | NPIP8        | nuclear pore complex interacting protein family member 8 | 728734    | 1.636463865 | -0.804301892 | 2.314441188 | -0.347514508 | 0.728204821 | NA          | NA      |
| ENSG00000002745 | WNT16        | Wnt family member 16                                     | 51384     | 0.919452786 | -0.803955251 | 2.715207737 | -0.296093459 | 0.767158709 | NA          | NA      |
| ENSG00000186075 | ZPBP2        | zona pellucida binding protein 2                         | 124626    | 0.919452786 | -0.803955251 | 2.715207737 | -0.296093459 | 0.767158709 | NA          | NA      |
| ENSG00000263389 | MIR3973      | microRNA 3973                                            | 100616311 | 0.919452786 | -0.803955251 | 2.715207737 | -0.296093459 | 0.767158709 | NA          | NA      |
| ENSG00000273079 | GRIN2B       | glutamate ionotropic receptor NMDA type subunit 2B       | 2904      | 7.105919283 | -0.803365982 | 1.388229946 | -0.578698064 | 0.562792923 | 0.999371363 | Not Sig |
| ENSG00000140107 | SLC25A47     | solute carrier family 25 member 47                       | 283600    | 1.607282002 | -0.80308056  | 2.017270253 | -0.398102613 | 0.690554548 | NA          | NA      |
| ENSG00000180318 | ALX1         | ALX homeobox 1                                           | 8092      | 1.607282002 | -0.80308056  | 2.017270253 | -0.398102613 | 0.690554548 | NA          | NA      |
| ENSG00000228409 | NA           | NA                                                       | NA        | 214.4885735 | -0.80299361  | 0.59767018  | -1.343539691 | 0.179097283 | 0.999371363 | Not Sig |
| ENSG00000234618 | NA           | NA                                                       | NA        | 14.87130198 | -0.802838576 | 0.875079011 | -0.917446956 | 0.358908476 | 0.999371363 | Not Sig |
| ENSG00000202515 | VTRNA1-3     | vault RNA 1-3                                            | 56662     | 1.312307438 | -0.802637133 | 2.121304607 | -0.37836958  | 0.705156063 | NA          | NA      |
| ENSG00000214019 | NA           | NA                                                       | NA        | 1.312307438 | -0.802637133 | 2.121304607 | -0.37836958  | 0.705156063 | NA          | NA      |
| ENSG00000266712 | MIR3149      | microRNA 3149                                            | 100422921 | 2.412132902 | -0.801606143 | 2.086455888 | -0.384195107 | 0.700833845 | NA          | NA      |
| ENSG00000179477 | ALOX12B      | arachidonate 12-lipoxygenase, 12R type                   | 242       | 8.863690289 | -0.801326495 | 1.516982524 | -0.52823713  | 0.597334761 | 0.999371363 | Not Sig |
| ENSG00000207185 | NA           | NA                                                       | NA        | 13.26744755 | -0.801323136 | 1.048435348 | -0.764303815 | 0.444686213 | 0.999371363 | Not Sig |
| ENSG00000180152 | NA           | NA                                                       | NA        | 3.299126823 | -0.801123469 | 1.931986278 | -0.414663126 | 0.67838853  | NA          | NA      |
| ENSG00000198435 | NRARP        | NOTCH regulated ankyrin repeat protein                   | 441478    | 344.1341597 | -0.801089999 | 0.571808627 | -1.400975714 | 0.161221335 | 0.999371363 | Not Sig |
| ENSG00000206538 | VGLL3        | vestigial like family member 3                           | 389136    | 1215.735079 | -0.800774108 | 0.539681971 | -1.483788881 | 0.137864938 | 0.999371363 | Not Sig |
| ENSG00000197566 | ZNF624       | zinc finger protein 624                                  | 57547     | 179.2864413 | -0.800718609 | 0.602044918 | -1.32999812  | 0.183518891 | 0.999371363 | Not Sig |
| ENSG00000270248 | NA           | NA                                                       | NA        | 4.179090438 | -0.800709716 | 1.2802424   | -0.625436024 | 0.531684925 | NA          | NA      |
| ENSG00000269001 | NA           | NA                                                       | NA        | 67.53932614 | -0.800337609 | 0.73007528  | -1.096239841 | 0.272973829 | 0.999371363 | Not Sig |
| ENSG00000080200 | CRYBG3       | crystallin beta-gamma domain containing 3                | 131544    | 1332.122157 | -0.799880288 | 0.643845935 | -1.242347344 | 0.214108434 | 0.999371363 | Not Sig |
| ENSG00000075826 | SEC31B       | SEC31 homolog B, COPII coat complex component            | 25956     | 291.0878675 | -0.799879156 | 0.440537358 | -1.815689729 | 0.06941798  | 0.999371363 | Not Sig |
| ENSG00000243101 | NA           | NA                                                       | NA        | 18.55702368 | -0.799439949 | 0.761288676 | -1.050114069 | 0.293665671 | 0.999371363 | Not Sig |
| ENSG00000122641 | INHBA        | inhibin beta A subunit                                   | 3624      | 2041.077958 | -0.799331459 | 0.664257287 | -1.203346165 | 0.228842391 | 0.999371363 | Not Sig |
| ENSG00000266965 | NA           | NA                                                       | NA        | 40.9184185  | -0.799219607 | 0.85040783  | -0.939807442 | 0.347316341 | 0.999371363 | Not Sig |
| ENSG00000123191 | ATP7B        | ATPase copper transporting beta                          | 540       | 322.2061057 | -0.799170024 | 0.575187608 | -1.389407583 | 0.164708846 | 0.999371363 | Not Sig |
| ENSG00000148346 | LCN2         | lipocalin 2                                              | 3934      | 1289.977501 | -0.799141562 | 0.826550307 | -0.966839592 | 0.333624229 | 0.999371363 | Not Sig |
| ENSG00000232568 | NA           | NA                                                       | NA        | 6.355343417 | -0.798603699 | 1.182338171 | -0.675444403 | 0.499393463 | NA          | NA      |
| ENSG00000227355 | NA           | NA                                                       | NA        | 5.867055666 | -0.798531353 | 1.433457517 | -0.557066633 | 0.577481904 | NA          | NA      |
| ENSG00000224064 | NA           | NA                                                       | NA        | 3.014281805 | -0.798258658 | 1.703475745 | -0.468605825 | 0.639351413 | NA          | NA      |
| ENSG00000259290 | NA           | NA                                                       | NA        | 6.789435886 | -0.798182929 | 1.120396278 | -0.712411264 | 0.476210142 | 0.999371363 | Not Sig |
| ENSG00000207730 | MIR200B      | microRNA 200b                                            | 406984    | 10.38265164 | -0.798168891 | 1.073044642 | -0.74383568  | 0.456975891 | 0.999371363 | Not Sig |
| ENSG00000225649 | LOC100506474 | uncharacterized LOC100506474                             | 100506474 | 5.875092512 | -0.798124045 | 1.243182506 | -0.642000705 | 0.520872725 | NA          | NA      |
| ENSG00000255334 | NA           | NA                                                       | NA        | 3.073940788 | -0.798089332 | 1.673530822 | -0.476889533 | 0.633440786 | NA          | NA      |

|                 |             |                                                         |           |             |              |             |              |             |             |         |
|-----------------|-------------|---------------------------------------------------------|-----------|-------------|--------------|-------------|--------------|-------------|-------------|---------|
| ENSG00000265094 | NA          | NA                                                      | NA        | 5.067086754 | -0.797930618 | 1.466928479 | -0.543946504 | 0.586478286 | NA          | NA      |
| ENSG00000249214 | NA          | NA                                                      | NA        | 4.480829636 | -0.797876296 | 1.815224462 | -0.439546906 | 0.660265303 | NA          | NA      |
| ENSG00000171940 | ZNF217      | zinc finger protein 217                                 | 7764      | 3539.704706 | -0.797387071 | 0.61761439  | -1.291075927 | 0.196677351 | 0.999371363 | Not Sig |
| ENSG00000226360 | NA          | NA                                                      | NA        | 8.811807861 | -0.797159573 | 1.002507781 | -0.795165472 | 0.426517254 | 0.999371363 | Not Sig |
| ENSG00000006634 | DBF4        | DBF4 zinc finger                                        | 10926     | 197.0887435 | -0.797139112 | 0.763726788 | -1.043749053 | 0.296601508 | 0.999371363 | Not Sig |
| ENSG00000233280 | NA          | NA                                                      | NA        | 1378.611295 | -0.797062626 | 0.593217006 | -1.343627404 | 0.179068903 | 0.999371363 | Not Sig |
| ENSG00000070778 | PTPN21      | protein tyrosine phosphatase, non-receptor type 21      | 11099     | 1488.733424 | -0.79688043  | 0.738283998 | -1.079368417 | 0.280423525 | 0.999371363 | Not Sig |
| ENSG00000265195 | MIR4312     | microRNA 4312                                           | 100422971 | 19.79592192 | -0.796816312 | 0.678177199 | -1.174938221 | 0.240019433 | 0.999371363 | Not Sig |
| ENSG00000233924 | NA          | NA                                                      | NA        | 6.653041832 | -0.796811127 | 1.180010815 | -0.675257478 | 0.499512194 | 0.999371363 | Not Sig |
| ENSG00000113369 | ARRDC3      | arrestin domain containing 3                            | 57561     | 7665.862035 | -0.795947023 | 0.700158869 | -1.136809171 | 0.255618069 | 0.999371363 | Not Sig |
| ENSG00000227945 | NA          | NA                                                      | NA        | 1.991839518 | -0.795805007 | 2.552399863 | -0.311786965 | 0.755202431 | NA          | NA      |
| ENSG00000235554 | NA          | NA                                                      | NA        | 5.332464448 | -0.795753423 | 1.224774743 | -0.649714102 | 0.515876913 | NA          | NA      |
| ENSG00000267756 | NA          | NA                                                      | NA        | 6.122451779 | -0.795277754 | 1.198462743 | -0.663581541 | 0.506958175 | NA          | NA      |
| ENSG00000105251 | SHD         | Src homology 2 domain containing transforming protein D | 56961     | 5.161423874 | -0.795206799 | 1.634551659 | -0.48649842  | 0.626613826 | NA          | NA      |
| ENSG00000269938 | NA          | NA                                                      | NA        | 40.62025149 | -0.795181508 | 0.885186047 | -0.898321331 | 0.369014264 | 0.999371363 | Not Sig |
| ENSG00000142279 | WTIP        | WT1 interacting protein                                 | 126374    | 663.2795757 | -0.795134059 | 0.755033407 | -1.053111097 | 0.292290078 | 0.999371363 | Not Sig |
| ENSG00000170801 | HTRA3       | HtrA serine peptidase 3                                 | 94031     | 772.1124923 | -0.794994289 | 0.487712055 | -1.630048471 | 0.103091253 | 0.999371363 | Not Sig |
| ENSG00000207375 | SNORD116-23 | small nucleolar RNA, C/D box 116-23                     | 100033434 | 6.30214916  | -0.794676739 | 1.046769956 | -0.759170374 | 0.447750646 | NA          | NA      |
| ENSG00000264676 | NA          | NA                                                      | NA        | 5.922584587 | -0.794494106 | 1.024979186 | -0.775131942 | 0.438261699 | NA          | NA      |
| ENSG00000197358 | NA          | NA                                                      | NA        | 3.654912101 | -0.794487685 | 1.877252067 | -0.423218437 | 0.672135897 | NA          | NA      |
| ENSG00000123066 | MED13L      | mediator complex subunit 13 like                        | 23389     | 5655.428372 | -0.794386165 | 0.463924456 | -1.71231793  | 0.086838094 | 0.999371363 | Not Sig |
| ENSG00000073008 | PVR         | poliovirus receptor                                     | 5817      | 1042.571551 | -0.794277354 | 0.433814233 | -1.830915847 | 0.067113105 | 0.999371363 | Not Sig |
| ENSG00000198712 | COX2        | cytochrome c oxidase subunit II                         | 4513      | 55716.91751 | -0.794133674 | 0.760706138 | -1.043942771 | 0.296511868 | 0.999371363 | Not Sig |
| ENSG00000216977 | NA          | NA                                                      | NA        | 14.58759336 | -0.793930714 | 0.923469566 | -0.859725911 | 0.389940148 | 0.999371363 | Not Sig |
| ENSG00000259186 | NA          | NA                                                      | NA        | 1.382838073 | -0.793876346 | 2.363666985 | -0.335866411 | 0.736971608 | NA          | NA      |
| ENSG00000182631 | RXFP3       | relaxin/insulin like family peptide receptor 3          | 51289     | 0.826177825 | -0.793603106 | 2.768216424 | -0.286683909 | 0.774354359 | NA          | NA      |
| ENSG00000213228 | NA          | NA                                                      | NA        | 0.826177825 | -0.793603106 | 2.768216424 | -0.286683909 | 0.774354359 | NA          | NA      |
| ENSG00000271608 | NA          | NA                                                      | NA        | 0.826177825 | -0.793603106 | 2.768216424 | -0.286683909 | 0.774354359 | NA          | NA      |
| ENSG00000177710 | SLC35G5     | solute carrier family 35 member G5                      | 83650     | 8.608840191 | -0.793553215 | 1.06673087  | -0.743911362 | 0.456930101 | 0.999371363 | Not Sig |
| ENSG00000138778 | CENPE       | centromere protein E                                    | 1062      | 303.9222447 | -0.793519489 | 0.967098039 | -0.820516077 | 0.411921968 | 0.999371363 | Not Sig |
| ENSG00000135164 | DMTF1       | cyclin D binding myb like transcription factor 1        | 9988      | 1885.379458 | -0.793362964 | 0.578406316 | -1.371636067 | 0.17017676  | 0.999371363 | Not Sig |
| ENSG00000137871 | ZNF280D     | zinc finger protein 280D                                | 54816     | 1757.692378 | -0.793162006 | 0.642171345 | -1.235125192 | 0.216783915 | 0.999371363 | Not Sig |
| ENSG00000137871 | LOC145783   | uncharacterized LOC145783                               | 145783    | 1757.692378 | -0.793162006 | 0.642171345 | -1.235125192 | 0.216783915 | 0.999371363 | Not Sig |
| ENSG00000236534 | NA          | NA                                                      | NA        | 2.492703803 | -0.793148378 | 1.714612297 | -0.462581762 | 0.643664184 | NA          | NA      |
| ENSG00000157741 | UBN2        | ubiquitin 2                                             | 254048    | 2252.684003 | -0.793069225 | 0.602029303 | -1.317326617 | 0.187729167 | 0.999371363 | Not Sig |

|                 |          |                                                    |        |             |              |             |              |             |             |         |
|-----------------|----------|----------------------------------------------------|--------|-------------|--------------|-------------|--------------|-------------|-------------|---------|
| ENSG00000187010 | RHD      | Rh blood group D antigen                           | 6007   | 2.115740935 | -0.792997996 | 1.656425872 | -0.478740407 | 0.632123316 | NA          | NA      |
| ENSG00000223052 | NA       | NA                                                 | NA     | 1.859513438 | -0.792775719 | 1.905409312 | -0.416065836 | 0.677361828 | NA          | NA      |
| ENSG00000138709 | LARP1B   | La ribonucleoprotein domain family member 1B       | 55132  | 831.0466893 | -0.792734079 | 0.641671662 | -1.235420116 | 0.21667419  | 0.999371363 | Not Sig |
| ENSG00000175387 | SMAD2    | SMAD family member 2                               | 4087   | 3588.242402 | -0.792664505 | 0.599124353 | -1.323038365 | 0.18582262  | 0.999371363 | Not Sig |
| ENSG00000212089 | NA       | NA                                                 | NA     | 4.204132418 | -0.792590259 | 1.229383798 | -0.644705308 | 0.519118176 | NA          | NA      |
| ENSG00000110080 | ST3GAL4  | ST3 beta-galactoside alpha-2,3-sialyltransferase 4 | 6484   | 697.1996484 | -0.792090906 | 0.536499244 | -1.476406378 | 0.139834832 | 0.999371363 | Not Sig |
| ENSG00000244380 | NA       | NA                                                 | NA     | 4.928323138 | -0.791885277 | 1.244189754 | -0.636466644 | 0.524472315 | NA          | NA      |
| ENSG00000251745 | NA       | NA                                                 | NA     | 14.1794767  | -0.79184548  | 0.777182187 | -1.018867252 | 0.308265992 | 0.999371363 | Not Sig |
| ENSG00000128609 | NDUFA5   | NADH:ubiquinone oxidoreductase subunit A5          | 4698   | 828.9419087 | -0.791748824 | 0.658232112 | -1.202841383 | 0.229037707 | 0.999371363 | Not Sig |
| ENSG00000212296 | SNORD72  | small nucleolar RNA, C/D box 72                    | 619564 | 6.954475607 | -0.7914855   | 1.226648443 | -0.645242331 | 0.518770158 | 0.999371363 | Not Sig |
| ENSG00000136895 | GARNL3   | GTPase activating Rap/RanGAP domain like 3         | 84253  | 217.2413235 | -0.791231951 | 0.465741637 | -1.698864539 | 0.08934471  | 0.999371363 | Not Sig |
| ENSG00000144026 | ZNF514   | zinc finger protein 514                            | 84874  | 701.4698042 | -0.791115287 | 0.505136826 | -1.56614059  | 0.117315707 | 0.999371363 | Not Sig |
| ENSG00000251703 | NA       | NA                                                 | NA     | 9.999506012 | -0.790999907 | 1.04109856  | -0.759774278 | 0.44738952  | 0.999371363 | Not Sig |
| ENSG00000265942 | NA       | NA                                                 | NA     | 10.00257159 | -0.790929385 | 0.919436381 | -0.860232857 | 0.389660696 | 0.999371363 | Not Sig |
| ENSG00000127955 | GNAI1    | G protein subunit alpha i1                         | 2770   | 606.2721872 | -0.790424486 | 0.488966157 | -1.61652187  | 0.105981529 | 0.999371363 | Not Sig |
| ENSG00000230065 | NA       | NA                                                 | NA     | 1.373383824 | -0.790371997 | 2.112806193 | -0.374086369 | 0.70834006  | NA          | NA      |
| ENSG00000219553 | NA       | NA                                                 | NA     | 1.613719538 | -0.790349992 | 1.979702867 | -0.399226573 | 0.689726265 | NA          | NA      |
| ENSG00000175749 | NA       | NA                                                 | NA     | 4.262496144 | -0.789915982 | 1.252672878 | -0.630584406 | 0.528312298 | NA          | NA      |
| ENSG00000006453 | BAIAP2L1 | BAI1 associated protein 2 like 1                   | 55971  | 1785.557066 | -0.789739237 | 0.688465804 | -1.147100165 | 0.251340226 | 0.999371363 | Not Sig |
| ENSG00000272916 | NDST2    | N-deacetylase and N-sulfotransferase 2             | 8509   | 13.97092455 | -0.789733998 | 0.815879178 | -0.967954594 | 0.333067047 | 0.999371363 | Not Sig |
| ENSG00000238287 | NA       | NA                                                 | NA     | 9.93287234  | -0.789250949 | 0.866827444 | -0.910505262 | 0.362556108 | 0.999371363 | Not Sig |
| ENSG00000198169 | ZNF251   | zinc finger protein 251                            | 90987  | 465.563929  | -0.789205136 | 0.429065361 | -1.839358774 | 0.065862434 | 0.999371363 | Not Sig |
| ENSG00000065613 | SLK      | STE20 like kinase                                  | 9748   | 3927.778245 | -0.789183102 | 0.454540114 | -1.736223225 | 0.082524372 | 0.999371363 | Not Sig |
| ENSG00000259999 | NA       | NA                                                 | NA     | 15.89334679 | -0.788920369 | 0.820550073 | -0.961453048 | 0.336324422 | 0.999371363 | Not Sig |
| ENSG00000143882 | ATP6V1C2 | ATPase H+ transporting V1 subunit C2               | 245973 | 55.56471614 | -0.788822159 | 1.064889649 | -0.740754837 | 0.458842103 | 0.999371363 | Not Sig |
| ENSG00000251869 | SCARNA23 | small Cajal body-specific RNA 23                   | 677773 | 3.699836413 | -0.78866707  | 1.682072488 | -0.46886628  | 0.63916522  | NA          | NA      |
| ENSG00000165637 | VDAC2    | voltage dependent anion channel 2                  | 7417   | 1474.456264 | -0.788170528 | 0.460198026 | -1.7126769   | 0.086771997 | 0.999371363 | Not Sig |
| ENSG00000140795 | MYLK3    | myosin light chain kinase 3                        | 91807  | 13.4043001  | -0.788148026 | 0.859546214 | -0.916935022 | 0.359176691 | 0.999371363 | Not Sig |
| ENSG00000214193 | SH3D21   | SH3 domain containing 21                           | 79729  | 422.729533  | -0.787997008 | 0.65084307  | -1.210732731 | 0.225997854 | 0.999371363 | Not Sig |
| ENSG00000268069 | NA       | NA                                                 | NA     | 14.53505055 | -0.78783453  | 0.816972199 | -0.964334565 | 0.334878217 | 0.999371363 | Not Sig |
| ENSG00000267096 | NA       | NA                                                 | NA     | 7.599567208 | -0.78686563  | 0.997878526 | -0.788538493 | 0.430381792 | 0.999371363 | Not Sig |
| ENSG00000202184 | NA       | NA                                                 | NA     | 11.07928891 | -0.786452337 | 1.293693707 | -0.607912315 | 0.543245631 | 0.999371363 | Not Sig |
| ENSG00000074181 | NOTCH3   | notch 3                                            | 4854   | 6054.382324 | -0.786314773 | 0.602966762 | -1.304076481 | 0.192207507 | 0.999371363 | Not Sig |
| ENSG00000174839 | DENND6A  | DENN domain containing 6A                          | 201627 | 856.4712066 | -0.786184162 | 0.599264199 | -1.311915786 | 0.189548551 | 0.999371363 | Not Sig |
| ENSG00000265665 | NA       | NA                                                 | NA     | 3.180090821 | -0.786080812 | 1.69520007  | -0.463709757 | 0.642855706 | NA          | NA      |

|                 |              |                                                              |           |             |              |             |              |             |             |         |
|-----------------|--------------|--------------------------------------------------------------|-----------|-------------|--------------|-------------|--------------|-------------|-------------|---------|
| ENSG00000065361 | ERBB3        | erb-b2 receptor tyrosine kinase 3                            | 2065      | 5033.239535 | -0.785851655 | 0.633043603 | -1.241386298 | 0.214463078 | 0.999371363 | Not Sig |
| ENSG00000248969 | NA           | NA                                                           | NA        | 2.46326165  | -0.785377464 | 2.443730968 | -0.321384585 | 0.747918963 | NA          | NA      |
| ENSG00000260714 | NA           | NA                                                           | NA        | 3.806428644 | -0.78526549  | 1.221204313 | -0.64302548  | 0.520207567 | NA          | NA      |
| ENSG00000005381 | MPO          | myeloperoxidase                                              | 4353      | 12.16486334 | -0.784870963 | 1.137787911 | -0.689821851 | 0.490306225 | 0.999371363 | Not Sig |
| ENSG00000151743 | AMN1         | antagonist of mitotic exit network 1 homolog                 | 196394    | 162.9152951 | -0.784853151 | 0.765373218 | -1.025451547 | 0.305150177 | 0.999371363 | Not Sig |
| ENSG00000100433 | KCNK10       | potassium two pore domain channel subfamily K member 10      | 54207     | 3.371660878 | -0.784769621 | 1.760626724 | -0.445733108 | 0.655790046 | NA          | NA      |
| ENSG00000168404 | MLKL         | mixed lineage kinase domain like pseudokinase                | 197259    | 580.9417692 | -0.784618854 | 0.524509409 | -1.495909971 | 0.134677118 | 0.999371363 | Not Sig |
| ENSG00000237280 | NA           | NA                                                           | NA        | 23.13619518 | -0.784576485 | 0.830646506 | -0.944537153 | 0.344895226 | 0.999371363 | Not Sig |
| ENSG00000213398 | LCAT         | lecithin-cholesterol acyltransferase                         | 3931      | 155.3511139 | -0.784514734 | 0.654121608 | -1.199340802 | 0.230395456 | 0.999371363 | Not Sig |
| ENSG00000253175 | NA           | NA                                                           | NA        | 4.480525583 | -0.784426797 | 1.3325095   | -0.58868383  | 0.556073387 | NA          | NA      |
| ENSG00000070087 | PFN2         | profilin 2                                                   | 5217      | 761.4262519 | -0.784283106 | 0.67271231  | -1.165852169 | 0.24367422  | 0.999371363 | Not Sig |
| ENSG00000153993 | SEMA3D       | semaphorin 3D                                                | 223117    | 157.3246509 | -0.783952615 | 0.454297142 | -1.725638446 | 0.084412478 | 0.999371363 | Not Sig |
| ENSG00000108785 | NA           | NA                                                           | NA        | 7.783127609 | -0.783933562 | 1.126177771 | -0.696101079 | 0.486365531 | 0.999371363 | Not Sig |
| ENSG00000148634 | HERC4        | HECT and RLD domain containing E3 ubiquitin protein ligase 4 | 26091     | 1849.352011 | -0.78384229  | 0.617009849 | -1.27038862  | 0.203946235 | 0.999371363 | Not Sig |
| ENSG00000267197 | NA           | NA                                                           | NA        | 10.76208317 | -0.783647616 | 1.010826906 | -0.775254014 | 0.438189577 | 0.999371363 | Not Sig |
| ENSG00000177410 | ZFAS1        | ZNF1 antisense RNA 1                                         | 441951    | 561.1594145 | -0.783304565 | 0.627624569 | -1.248046371 | 0.212014076 | 0.999371363 | Not Sig |
| ENSG00000210156 | NA           | NA                                                           | NA        | 5.292815044 | -0.783000388 | 1.187892794 | -0.659150718 | 0.50979899  | NA          | NA      |
| ENSG00000243762 | NA           | NA                                                           | NA        | 8.72053769  | -0.782779833 | 1.001146661 | -0.781883278 | 0.434283173 | 0.999371363 | Not Sig |
| ENSG00000239146 | NA           | NA                                                           | NA        | 8.357302954 | -0.782549956 | 1.288946019 | -0.607123918 | 0.543768679 | 0.999371363 | Not Sig |
| ENSG00000122778 | KIAA1549     | KIAA1549                                                     | 57670     | 746.6188982 | -0.782172652 | 0.439842671 | -1.778300979 | 0.075354436 | 0.999371363 | Not Sig |
| ENSG00000231187 | LOC102724593 | uncharacterized LOC102724593                                 | 102724593 | 25.02603284 | -0.781805534 | 0.744739214 | -1.049770872 | 0.293823471 | 0.999371363 | Not Sig |
| ENSG00000213967 | ZNF726       | zinc finger protein 726                                      | 730087    | 90.5600473  | -0.780857833 | 0.840492562 | -0.92904788  | 0.352864273 | 0.999371363 | Not Sig |
| ENSG00000140297 | GCNT3        | glucosaminyl (N-acetyl) transferase 3, mucin type            | 9245      | 755.9573049 | -0.780781926 | 1.114538004 | -0.700543116 | 0.483588189 | 0.999371363 | Not Sig |
| ENSG00000197701 | NA           | NA                                                           | NA        | 126.899097  | -0.780509195 | 0.515404111 | -1.514363543 | 0.12993366  | 0.999371363 | Not Sig |
| ENSG00000164318 | EGFLAM       | EGF like, fibronectin type III and laminin G domains         | 133584    | 71.5370429  | -0.780425035 | 0.556187645 | -1.403168593 | 0.160566571 | 0.999371363 | Not Sig |
| ENSG00000070950 | RAD18        | RAD18, E3 ubiquitin protein ligase                           | 56852     | 360.893546  | -0.780412697 | 0.643077366 | -1.213559577 | 0.224915951 | 0.999371363 | Not Sig |
| ENSG00000213761 | NA           | NA                                                           | NA        | 3.613259277 | -0.780258814 | 1.841497172 | -0.42370894  | 0.671778095 | NA          | NA      |
| ENSG00000266783 | NA           | NA                                                           | NA        | 14.43036497 | -0.780032072 | 1.340319389 | -0.581974773 | 0.560583674 | 0.999371363 | Not Sig |
| ENSG00000080986 | NDC80        | NDC80, kinetochore complex component                         | 10403     | 112.6544614 | -0.779976053 | 0.999349369 | -0.78048386  | 0.435106124 | 0.999371363 | Not Sig |
| ENSG00000261701 | HPR          | haptoglobin-related protein                                  | 3250      | 2.352080587 | -0.779539251 | 1.818082637 | -0.428769977 | 0.66809063  | NA          | NA      |
| ENSG00000168594 | ADAM29       | ADAM metallopeptidase domain 29                              | 11086     | 2.101266554 | -0.779200232 | 1.87245911  | -0.416137382 | 0.677309477 | NA          | NA      |
| ENSG00000241520 | NA           | NA                                                           | NA        | 2.101266554 | -0.779200232 | 1.87245911  | -0.416137382 | 0.677309477 | NA          | NA      |
| ENSG00000213514 | NA           | NA                                                           | NA        | 0.803433497 | -0.778950139 | 2.782680969 | -0.279927936 | 0.779532794 | NA          | NA      |
| ENSG00000254294 | NA           | NA                                                           | NA        | 0.803433497 | -0.778950139 | 2.782680969 | -0.279927936 | 0.779532794 | NA          | NA      |
| ENSG00000269652 | NA           | NA                                                           | NA        | 0.803433497 | -0.778950139 | 2.782680969 | -0.279927936 | 0.779532794 | NA          | NA      |

|                 |           |                                                           |           |             |              |             |              |             |             |         |
|-----------------|-----------|-----------------------------------------------------------|-----------|-------------|--------------|-------------|--------------|-------------|-------------|---------|
| ENSG00000236901 | MIR600HG  | MIR600 host gene                                          | 81571     | 186.1130433 | -0.778790831 | 0.460337217 | -1.691783332 | 0.090687293 | 0.999371363 | Not Sig |
| ENSG00000166046 | TCP11L2   | t-complex 11 like 2                                       | 255394    | 957.5970909 | -0.778729552 | 0.504573523 | -1.543342082 | 0.122747798 | 0.999371363 | Not Sig |
| ENSG00000214646 | NA        | NA                                                        | NA        | 3.204279741 | -0.778440347 | 1.512201432 | -0.51477292  | 0.60671171  | NA          | NA      |
| ENSG00000163935 | SFMBT1    | Scm like with four mbt domains 1                          | 51460     | 642.5251378 | -0.778406212 | 0.593749378 | -1.311001308 | 0.189857322 | 0.999371363 | Not Sig |
| ENSG00000185518 | SV2B      | synaptic vesicle glycoprotein 2B                          | 9899      | 63.78655729 | -0.778010946 | 0.5884776   | -1.32207402  | 0.186143504 | 0.999371363 | Not Sig |
| ENSG00000131149 | GSE1      | Gsel coiled-coil protein                                  | 23199     | 3782.528834 | -0.777914373 | 0.445916427 | -1.744529528 | 0.081066797 | 0.999371363 | Not Sig |
| ENSG00000220867 | NA        | NA                                                        | NA        | 23.21869855 | -0.777557707 | 0.923303203 | -0.842147741 | 0.399705261 | 0.999371363 | Not Sig |
| ENSG00000243406 | MRPS31P5  | mitochondrial ribosomal protein S31 pseudogene 5          | 100887750 | 40.7926568  | -0.777502477 | 0.6423589   | -1.210386401 | 0.226130658 | 0.999371363 | Not Sig |
| ENSG00000251022 | THAP9-AS1 | THAP9 antisense RNA 1                                     | 100499177 | 483.8517446 | -0.777430763 | 0.646771348 | -1.202017939 | 0.229356578 | 0.999371363 | Not Sig |
| ENSG00000187690 | CXorf67   | chromosome X open reading frame 67                        | 340602    | 2.76124203  | -0.776940075 | 1.955329025 | -0.39734493  | 0.691113119 | NA          | NA      |
| ENSG00000267787 | NA        | NA                                                        | NA        | 2.716290528 | -0.776818595 | 1.975627192 | -0.393201004 | 0.694171028 | NA          | NA      |
| ENSG00000264937 | NA        | NA                                                        | NA        | 3.109145179 | -0.776674044 | 1.559817852 | -0.497926115 | 0.618536119 | NA          | NA      |
| ENSG00000135250 | SRPK2     | SRSF protein kinase 2                                     | 6733      | 1260.495404 | -0.776388302 | 0.487608948 | -1.59223555  | 0.111331788 | 0.999371363 | Not Sig |
| ENSG00000231362 | NA        | NA                                                        | NA        | 2.117158338 | -0.776124437 | 1.860085678 | -0.417251982 | 0.676494107 | NA          | NA      |
| ENSG00000200558 | NA        | NA                                                        | NA        | 4.940894157 | -0.775859712 | 1.250054261 | -0.620660827 | 0.534822809 | NA          | NA      |
| ENSG00000203326 | ZNF525    | zinc finger protein 525                                   | 170958    | 364.7214643 | -0.775753179 | 0.609509226 | -1.272750509 | 0.203106588 | 0.999371363 | Not Sig |
| ENSG00000166704 | ZNF606    | zinc finger protein 606                                   | 80095     | 501.0154427 | -0.775747067 | 0.478608773 | -1.620837541 | 0.105052485 | 0.999371363 | Not Sig |
| ENSG00000233435 | NA        | NA                                                        | NA        | 5.497935469 | -0.775711358 | 1.523030396 | -0.509320996 | 0.610527243 | NA          | NA      |
| ENSG00000152784 | PRDM8     | PR/SET domain 8                                           | 56978     | 79.43003877 | -0.775696643 | 0.527891382 | -1.469424715 | 0.141717628 | 0.999371363 | Not Sig |
| ENSG00000237649 | KIFC1     | kinesin family member C1                                  | 3833      | 212.6744374 | -0.775494393 | 0.850465138 | -0.911847363 | 0.361849074 | 0.999371363 | Not Sig |
| ENSG00000199024 | MIR103A2  | microRNA 103a-2                                           | 406896    | 2.840606952 | -0.775433932 | 1.626214492 | -0.476833736 | 0.633480521 | NA          | NA      |
| ENSG00000166153 | DEPDC4    | DEP domain containing 4                                   | 120863    | 25.62179731 | -0.775166575 | 0.898341826 | -0.862885989 | 0.388200155 | 0.999371363 | Not Sig |
| ENSG00000215126 | CBWD2     | COBW domain containing 2                                  | 150472    | 3.326736566 | -0.775158455 | 1.350678343 | -0.573903075 | 0.566033392 | NA          | NA      |
| ENSG00000215126 | CBWD6     | COBW domain containing 6                                  | 644019    | 3.326736566 | -0.775158455 | 1.350678343 | -0.573903075 | 0.566033392 | NA          | NA      |
| ENSG00000253203 | GUSBP3    | glucuronidase, beta pseudogene 3                          | 653188    | 103.4631004 | -0.77498796  | 0.480552067 | -1.612703418 | 0.106808958 | 0.999371363 | Not Sig |
| ENSG00000271818 | NA        | NA                                                        | NA        | 1.690687708 | -0.773850283 | 1.755256453 | -0.440875908 | 0.659302836 | NA          | NA      |
| ENSG00000183444 | NA        | NA                                                        | NA        | 130.7352171 | -0.773595072 | 0.651911461 | -1.186656652 | 0.23536308  | 0.999371363 | Not Sig |
| ENSG00000236194 | NA        | NA                                                        | NA        | 54.79249088 | -0.773398178 | 0.847871257 | -0.912164637 | 0.361682056 | 0.999371363 | Not Sig |
| ENSG00000243592 | NA        | NA                                                        | NA        | 2.089979895 | -0.773182677 | 1.632018955 | -0.473758393 | 0.635672208 | NA          | NA      |
| ENSG00000169085 | C8orf46   | chromosome 8 open reading frame 46                        | 254778    | 35.27817274 | -0.77312973  | 0.906375787 | -0.852990273 | 0.393664698 | 0.999371363 | Not Sig |
| ENSG00000215952 | MIR921    | microRNA 921                                              | 100126349 | 1.296000646 | -0.772734562 | 2.436749363 | -0.317116965 | 0.751154853 | NA          | NA      |
| ENSG00000162981 | FAM84A    | family with sequence similarity 84 member A               | 151354    | 265.8015007 | -0.772717321 | 0.70154656  | -1.101448378 | 0.27070156  | 0.999371363 | Not Sig |
| ENSG00000235092 | ID2-AS1   | ID2 antisense RNA 1 (head to head)                        | 100506299 | 11.96532392 | -0.772434673 | 0.870873158 | -0.886965761 | 0.375097335 | 0.999371363 | Not Sig |
| ENSG00000154736 | ADAMTS5   | ADAM metalloproteinase with thrombospondin type 1 motif 5 | 11096     | 304.6860241 | -0.772079144 | 0.751533999 | -1.027337612 | 0.304261518 | 0.999371363 | Not Sig |
| ENSG00000272293 | NA        | NA                                                        | NA        | 10.70752257 | -0.771749886 | 1.203343482 | -0.641337987 | 0.521303114 | 0.999371363 | Not Sig |

|                 |              |                                                                       |           |             |              |             |              |             |             |         |
|-----------------|--------------|-----------------------------------------------------------------------|-----------|-------------|--------------|-------------|--------------|-------------|-------------|---------|
| ENSG00000074356 | NCBP3        | nuclear cap binding subunit 3                                         | 55421     | 1146.182597 | -0.771729356 | 0.576338486 | -1.339021035 | 0.180563825 | 0.999371363 | Not Sig |
| ENSG00000258731 | LOC101927620 | uncharacterized LOC101927620                                          | 101927620 | 7.437899033 | -0.771608925 | 1.0447445   | -0.738562323 | 0.46017281  | 0.999371363 | Not Sig |
| ENSG00000154122 | ANKH         | ANKH inorganic pyrophosphate transport regulator                      | 56172     | 1733.65187  | -0.771474847 | 0.566112479 | -1.362758951 | 0.172958492 | 0.999371363 | Not Sig |
| ENSG00000143195 | ILDR2        | immunoglobulin like domain containing receptor 2                      | 387597    | 106.6887522 | -0.771106787 | 0.523894619 | -1.471873845 | 0.141054948 | 0.999371363 | Not Sig |
| ENSG00000224261 | NA           | NA                                                                    | NA        | 6.019867759 | -0.76971362  | 1.161537217 | -0.662668065 | 0.507543167 | NA          | NA      |
| ENSG00000258317 | NA           | NA                                                                    | NA        | 5.140346341 | -0.769420576 | 1.247348234 | -0.616845044 | 0.537336938 | NA          | NA      |
| ENSG00000233554 | B4GALT1-AS1  | B4GALT1 antisense RNA 1                                               | 101929639 | 8.653061736 | -0.769323533 | 1.108209276 | -0.694204199 | 0.48755416  | 0.999371363 | Not Sig |
| ENSG00000020922 | MRE11        | MRE11 homolog, double strand break repair nuclease                    | 4361      | 719.8639234 | -0.769235383 | 0.66440413  | -1.157782362 | 0.246952863 | 0.999371363 | Not Sig |
| ENSG00000250726 | NA           | NA                                                                    | NA        | 1.257364535 | -0.769131008 | 2.391518006 | -0.321607868 | 0.747749782 | NA          | NA      |
| ENSG00000239553 | NA           | NA                                                                    | NA        | 3.448889338 | -0.769016275 | 1.645440026 | -0.467362081 | 0.640240847 | NA          | NA      |
| ENSG00000130529 | TRPM4        | transient receptor potential cation channel subfamily M member 4      | 54795     | 1275.058475 | -0.76881458  | 0.667191245 | -1.15231515  | 0.249191594 | 0.999371363 | Not Sig |
| ENSG00000196917 | HCAR1        | hydroxycarboxylic acid receptor 1                                     | 27198     | 113.2907482 | -0.768466117 | 1.085383326 | -0.708013564 | 0.478936834 | 0.999371363 | Not Sig |
| ENSG00000158683 | PKD1L1       | polycystin 1 like 1, transient receptor potential channel interacting | 168507    | 83.34096724 | -0.76835329  | 0.697697274 | -1.101270306 | 0.270779031 | 0.999371363 | Not Sig |
| ENSG00000214460 | NA           | NA                                                                    | NA        | 0.903145995 | -0.76826848  | 2.723409061 | -0.282098085 | 0.777868302 | NA          | NA      |
| ENSG00000233087 | RAB6D        | RAB6D, member RAS oncogene family                                     | 150786    | 0.903145995 | -0.76826848  | 2.723409061 | -0.282098085 | 0.777868302 | NA          | NA      |
| ENSG00000227189 | NA           | NA                                                                    | NA        | 85.05154307 | -0.767361416 | 0.916699327 | -0.83709172  | 0.402541014 | 0.999371363 | Not Sig |
| ENSG00000165655 | ZNF503       | zinc finger protein 503                                               | 84858     | 1036.216622 | -0.767054685 | 0.501495625 | -1.529534152 | 0.126132079 | 0.999371363 | Not Sig |
| ENSG00000272606 | NA           | NA                                                                    | NA        | 32.33055259 | -0.767045639 | 0.690998719 | -1.110053633 | 0.266975916 | 0.999371363 | Not Sig |
| ENSG00000186523 | FAM86B1      | family with sequence similarity 86 member B1                          | 85002     | 48.91313693 | -0.76694815  | 0.614332768 | -1.248424616 | 0.211875599 | 0.999371363 | Not Sig |
| ENSG00000186523 | FAM86B2      | family with sequence similarity 86 member B2                          | 653333    | 48.91313693 | -0.76694815  | 0.614332768 | -1.248424616 | 0.211875599 | 0.999371363 | Not Sig |
| ENSG00000186523 | FAM86KP      | protein FAM86A-like                                                   | 100287013 | 48.91313693 | -0.76694815  | 0.614332768 | -1.248424616 | 0.211875599 | 0.999371363 | Not Sig |
| ENSG00000257809 | NA           | NA                                                                    | NA        | 6.18395532  | -0.766881615 | 1.070107652 | -0.716639689 | 0.473596449 | NA          | NA      |
| ENSG00000270343 | NA           | NA                                                                    | NA        | 6.366076643 | -0.766827205 | 1.350478768 | -0.567818779 | 0.570158027 | NA          | NA      |
| ENSG00000182310 | SPACA6       | sperm acrosome associated 6                                           | 147650    | 130.5021207 | -0.766757265 | 0.50461963  | -1.519475699 | 0.1286428   | 0.999371363 | Not Sig |
| ENSG00000251881 | NA           | NA                                                                    | NA        | 2.437883045 | -0.766250689 | 2.087144191 | -0.367128775 | 0.713522965 | NA          | NA      |
| ENSG00000260941 | LINC00622    | long intergenic non-protein coding RNA 622                            | 644242    | 20.66530631 | -0.765959904 | 0.932193813 | -0.821674521 | 0.411262164 | 0.999371363 | Not Sig |
| ENSG00000162944 | RFTN2        | raftlin family member 2                                               | 130132    | 156.199911  | -0.765737564 | 0.484192511 | -1.581473374 | 0.113769842 | 0.999371363 | Not Sig |
| ENSG00000267474 | NA           | NA                                                                    | NA        | 13.55178386 | -0.765554249 | 0.970750842 | -0.788620742 | 0.430333704 | 0.999371363 | Not Sig |
| ENSG00000241472 | PTPRG-AS1    | PTPRG antisense RNA 1                                                 | 100506994 | 29.29201365 | -0.76535916  | 1.285906377 | -0.595190423 | 0.551716191 | 0.999371363 | Not Sig |
| ENSG00000170074 | FAM153A      | family with sequence similarity 153 member A                          | 285596    | 25.13872544 | -0.764916067 | 1.062287515 | -0.720065006 | 0.471484972 | 0.999371363 | Not Sig |
| ENSG00000212211 | NA           | NA                                                                    | NA        | 2.402263646 | -0.764897757 | 1.784808637 | -0.428560094 | 0.668243392 | NA          | NA      |
| ENSG00000256650 | NA           | NA                                                                    | NA        | 5.549740884 | -0.76478614  | 1.137068987 | -0.672594318 | 0.501205418 | NA          | NA      |
| ENSG00000125551 | PLGLB2       | plasminogen-like B2                                                   | 5342      | 14.43847992 | -0.764621655 | 0.969173364 | -0.788942086 | 0.430145856 | 0.999371363 | Not Sig |
| ENSG00000180539 | NA           | NA                                                                    | NA        | 20.65482429 | -0.764538178 | 0.994414409 | -0.768832562 | 0.441992716 | 0.999371363 | Not Sig |
| ENSG00000114841 | DNAH1        | dynein axonemal heavy chain 1                                         | 25981     | 1193.0625   | -0.764531168 | 0.45593549  | -1.67684066  | 0.093573644 | 0.999371363 | Not Sig |

|                 |              |                                                                                 |           |             |              |             |              |             |             |         |
|-----------------|--------------|---------------------------------------------------------------------------------|-----------|-------------|--------------|-------------|--------------|-------------|-------------|---------|
| ENSG00000169047 | IRS1         | insulin receptor substrate 1                                                    | 3667      | 1765.966868 | -0.764274668 | 0.563898846 | -1.35534001  | 0.175309253 | 0.999371363 | Not Sig |
| ENSG00000198131 | ZNF544       | zinc finger protein 544                                                         | 27300     | 682.9051023 | -0.764208555 | 0.540251933 | -1.414541082 | 0.157203094 | 0.999371363 | Not Sig |
| ENSG00000236489 | NA           | NA                                                                              | NA        | 15.36470135 | -0.764065294 | 0.837000974 | -0.912860699 | 0.36131581  | 0.999371363 | Not Sig |
| ENSG00000263652 | MIR548AX     | microRNA 548ax                                                                  | 100847063 | 1.849644182 | -0.764031163 | 1.9220508   | -0.397508309 | 0.690992661 | NA          | NA      |
| ENSG00000255326 | LOC105369391 | uncharacterized LOC105369391                                                    | 105369391 | 4.780509383 | -0.763478127 | 1.262483343 | -0.604743129 | 0.545349686 | NA          | NA      |
| ENSG00000157077 | ZFYVE9       | zinc finger FYVE-type containing 9                                              | 9372      | 946.0459993 | -0.763406061 | 0.512724365 | -1.488920972 | 0.13650818  | 0.999371363 | Not Sig |
| ENSG00000104863 | LIN7B        | <small>lin-7 homolog B, crumbs cell polarity complex component</small>          | 64130     | 58.26536172 | -0.76206728  | 0.637034296 | -1.196273552 | 0.231589826 | 0.999371363 | Not Sig |
| ENSG00000182606 | TRAK1        | trafficking kinesin protein 1                                                   | 22906     | 2866.459174 | -0.76174491  | 0.444198714 | -1.714874188 | 0.086368296 | 0.999371363 | Not Sig |
| ENSG00000001631 | KRIT1        | KRIT1, ankyrin repeat containing                                                | 889       | 1089.830238 | -0.76170422  | 0.595075879 | -1.280011923 | 0.200540943 | 0.999371363 | Not Sig |
| ENSG00000272263 | NA           | NA                                                                              | NA        | 4.564777596 | -0.761275217 | 1.182084091 | -0.64401105  | 0.519568268 | NA          | NA      |
| ENSG00000258488 | NA           | NA                                                                              | NA        | 3.929844101 | -0.761198191 | 1.712749158 | -0.444430632 | 0.656731271 | NA          | NA      |
| ENSG00000200345 | NA           | NA                                                                              | NA        | 1.796837741 | -0.760909268 | 2.182307324 | -0.348671912 | 0.727335633 | NA          | NA      |
| ENSG00000207757 | MIR93        | microRNA 93                                                                     | 407050    | 0.809871033 | -0.760227619 | 3.21310684  | -0.236602035 | 0.812965541 | NA          | NA      |
| ENSG00000232952 | NA           | NA                                                                              | NA        | 0.809871033 | -0.760227619 | 3.21310684  | -0.236602035 | 0.812965541 | NA          | NA      |
| ENSG00000267987 | NA           | NA                                                                              | NA        | 0.809871033 | -0.760227619 | 3.21310684  | -0.236602035 | 0.812965541 | NA          | NA      |
| ENSG00000201678 | NA           | NA                                                                              | NA        | 14.09440102 | -0.76012753  | 0.852278795 | -0.891876619 | 0.372459068 | 0.999371363 | Not Sig |
| ENSG00000230715 | NA           | NA                                                                              | NA        | 316.3682337 | -0.759663804 | 0.542992831 | -1.399031001 | 0.161803687 | 0.999371363 | Not Sig |
| ENSG00000100522 | GNPNAT1      | glucosamine-phosphate N-acetyltransferase 1                                     | 64841     | 659.9610126 | -0.759569002 | 0.755044189 | -1.00599278  | 0.314419043 | 0.999371363 | Not Sig |
| ENSG00000176731 | C8orf59      | chromosome 8 open reading frame 59                                              | 401466    | 439.5335054 | -0.759377499 | 0.648813    | -1.170410424 | 0.241835843 | 0.999371363 | Not Sig |
| ENSG00000076554 | TPD52        | tumor protein D52                                                               | 7163      | 1601.750656 | -0.759010202 | 0.764842005 | -0.992375153 | 0.321014555 | 0.999371363 | Not Sig |
| ENSG00000258315 | C17orf49     | chromosome 17 open reading frame 49                                             | 124944    | 18.0839313  | -0.758753147 | 0.751946145 | -1.009052512 | 0.312949451 | 0.999371363 | Not Sig |
| ENSG00000227773 | NA           | NA                                                                              | NA        | 14.46881475 | -0.758610155 | 1.233050985 | -0.61523016  | 0.538402733 | 0.999371363 | Not Sig |
| ENSG00000081277 | PKP1         | plakophilin 1                                                                   | 5317      | 246.1848926 | -0.758135679 | 1.167040042 | -0.64962268  | 0.51593598  | 0.999371363 | Not Sig |
| ENSG00000230289 | NA           | NA                                                                              | NA        | 2.849342141 | -0.758059745 | 1.751245072 | -0.432869024 | 0.665109925 | NA          | NA      |
| ENSG00000203867 | RBM20        | RNA binding motif protein 20                                                    | 282996    | 45.29777695 | -0.757955274 | 0.987798668 | -0.76731757  | 0.442892724 | 0.999371363 | Not Sig |
| ENSG00000051180 | RAD51        | RAD51 recombinase                                                               | 5888      | 48.79776649 | -0.757897098 | 0.957005431 | -0.791946497 | 0.428391874 | 0.999371363 | Not Sig |
| ENSG00000137672 | TRPC6        | <small>transient receptor potential cation channel subfamily C member 6</small> | 7225      | 878.7737326 | -0.757731325 | 0.673133725 | -1.125677256 | 0.260302154 | 0.999371363 | Not Sig |
| ENSG00000269396 | NA           | NA                                                                              | NA        | 6.758489097 | -0.75752802  | 1.075048271 | -0.704645587 | 0.481030821 | 0.999371363 | Not Sig |
| ENSG00000219150 | NA           | NA                                                                              | NA        | 9.620790074 | -0.75750841  | 1.242717307 | -0.609558107 | 0.54215457  | 0.999371363 | Not Sig |
| ENSG00000198959 | TGM2         | transglutaminase 2                                                              | 7052      | 11773.8426  | -0.75746923  | 0.605334378 | -1.251323661 | 0.210816416 | 0.999371363 | Not Sig |
| ENSG00000133812 | SBF2         | SET binding factor 2                                                            | 81846     | 1582.915354 | -0.757294257 | 0.382783196 | -1.978389505 | 0.047884783 | 0.999371363 | Not Sig |
| ENSG00000206634 | SNORA22      | small nucleolar RNA, H/ACA box 22                                               | 677807    | 5.662328453 | -0.756961939 | 1.1871824   | -0.637612164 | 0.523726176 | NA          | NA      |
| ENSG00000152380 | FAM151B      | family with sequence similarity 151 member B                                    | 167555    | 53.53269424 | -0.756743077 | 0.705651456 | -1.072403479 | 0.283538846 | 0.999371363 | Not Sig |
| ENSG00000130699 | TAF4         | TATA-box binding protein associated factor 4                                    | 6874      | 675.2197544 | -0.756564056 | 0.438410763 | -1.72569681  | 0.084401972 | 0.999371363 | Not Sig |
| ENSG00000260425 | NA           | NA                                                                              | NA        | 3.804414326 | -0.756429707 | 1.329029242 | -0.569159567 | 0.569247857 | NA          | NA      |



|                 |              |                                                                              |           |             |              |             |              |             |             |         |
|-----------------|--------------|------------------------------------------------------------------------------|-----------|-------------|--------------|-------------|--------------|-------------|-------------|---------|
| ENSG00000186453 | FAM228A      | family with sequence similarity 228 member A                                 | 653140    | 7.019432676 | -0.756283024 | 1.012155612 | -0.747200347 | 0.454942635 | 0.999371363 | Not Sig |
| ENSG00000156218 | ADAMTSL3     | ADAMTS like 3                                                                | 57188     | 665.3994817 | -0.756191881 | 0.855385167 | -0.884036701 | 0.376676401 | 0.999371363 | Not Sig |
| ENSG00000265145 | SNORD53      | small nucleolar RNA, C/D box 53                                              | 26796     | 13.12405259 | -0.755722262 | 0.922689068 | -0.819043259 | 0.412761733 | 0.999371363 | Not Sig |
| ENSG00000166845 | C18orf54     | chromosome 18 open reading frame 54                                          | 162681    | 105.6572382 | -0.755331468 | 0.770948798 | -0.979742715 | 0.327213135 | 0.999371363 | Not Sig |
| ENSG00000196562 | SULF2        | sulfatase 2                                                                  | 55959     | 635.112364  | -0.75513877  | 0.428507145 | -1.762254795 | 0.078026258 | 0.999371363 | Not Sig |
| ENSG00000100206 | DMC1         | DNA meiotic recombinase 1                                                    | 11144     | 15.35907892 | -0.754817496 | 0.85799076  | -0.879750146 | 0.378994677 | 0.999371363 | Not Sig |
| ENSG00000178404 | CEP295NL     | CEP295 N-terminal like                                                       | 100653515 | 107.6379156 | -0.754712058 | 0.552994595 | -1.364772937 | 0.172324427 | 0.999371363 | Not Sig |
| ENSG00000253771 | NA           | NA                                                                           | NA        | 8.098517233 | -0.754551013 | 0.972054707 | -0.776243361 | 0.437605308 | 0.999371363 | Not Sig |
| ENSG00000259762 | NA           | NA                                                                           | NA        | 11.75143806 | -0.754196353 | 1.119324331 | -0.673796085 | 0.500440964 | 0.999371363 | Not Sig |
| ENSG00000199135 | MIR101-1     | microRNA 101-1                                                               | 406893    | 5.211281086 | -0.75409183  | 1.11470339  | -0.676495502 | 0.498726101 | NA          | NA      |
| ENSG00000127328 | RAB3IP       | RAB3A interacting protein                                                    | 117177    | 947.4010554 | -0.754016343 | 0.617963909 | -1.220162427 | 0.222403307 | 0.999371363 | Not Sig |
| ENSG00000213132 | NA           | NA                                                                           | NA        | 141.2025837 | -0.753243138 | 0.645455187 | -1.16699525  | 0.243212288 | 0.999371363 | Not Sig |
| ENSG00000106723 | SPIN1        | spindlin 1                                                                   | 10927     | 1775.448864 | -0.753169712 | 0.500022452 | -1.506271786 | 0.131997418 | 0.999371363 | Not Sig |
| ENSG00000151725 | CENPU        | centromere protein U                                                         | 79682     | 131.0598023 | -0.753043064 | 0.987652145 | -0.762457782 | 0.445786831 | 0.999371363 | Not Sig |
| ENSG00000268743 | NA           | NA                                                                           | NA        | 27.89308743 | -0.753018976 | 0.663496439 | -1.134925421 | 0.256406568 | 0.999371363 | Not Sig |
| ENSG00000122592 | HOXA7        | homeobox A7                                                                  | 3204      | 43.06442638 | -0.752886781 | 0.667033346 | -1.12870936  | 0.25902046  | 0.999371363 | Not Sig |
| ENSG00000243721 | NA           | NA                                                                           | NA        | 29.85082501 | -0.752437442 | 0.661363697 | -1.137705994 | 0.25524327  | 0.999371363 | Not Sig |
| ENSG00000229521 | NA           | NA                                                                           | NA        | 17.89565135 | -0.752361048 | 0.893687736 | -0.84186122  | 0.39986564  | 0.999371363 | Not Sig |
| ENSG00000270049 | LOC101927837 | uncharacterized LOC101927837                                                 | 101927837 | 39.0968464  | -0.751342328 | 0.588135769 | -1.2774981   | 0.201426451 | 0.999371363 | Not Sig |
| ENSG00000225159 | NA           | NA                                                                           | NA        | 0.771234922 | -0.751290895 | 3.249125236 | -0.231228666 | 0.817137161 | NA          | NA      |
| ENSG00000229305 | NA           | NA                                                                           | NA        | 0.771234922 | -0.751290895 | 3.249125236 | -0.231228666 | 0.817137161 | NA          | NA      |
| ENSG00000237748 | NA           | NA                                                                           | NA        | 0.771234922 | -0.751290895 | 3.249125236 | -0.231228666 | 0.817137161 | NA          | NA      |
| ENSG00000250580 | NA           | NA                                                                           | NA        | 0.771234922 | -0.751290895 | 3.249125236 | -0.231228666 | 0.817137161 | NA          | NA      |
| ENSG00000252751 | NA           | NA                                                                           | NA        | 0.771234922 | -0.751290895 | 3.249125236 | -0.231228666 | 0.817137161 | NA          | NA      |
| ENSG00000206623 | NA           | NA                                                                           | NA        | 5.242433504 | -0.751244415 | 1.328155094 | -0.565630037 | 0.571645304 | NA          | NA      |
| ENSG00000255717 | SNHG1        | small nucleolar RNA host gene 1                                              | 23642     | 647.5932126 | -0.750756331 | 0.577558553 | -1.299879166 | 0.193642387 | 0.999371363 | Not Sig |
| ENSG00000266852 | MIR4482      | microRNA 4482                                                                | 100616323 | 3.647899325 | -0.750595302 | 1.484122903 | -0.505750097 | 0.613032095 | NA          | NA      |
| ENSG00000203880 | PCMTD2       | protein-L-isoaspartate (D-aspartate) O-methyltransferase domain containing 2 | 55251     | 1497.888447 | -0.750522613 | 0.553828613 | -1.355153192 | 0.175368754 | 0.999371363 | Not Sig |
| ENSG00000259006 | NA           | NA                                                                           | NA        | 5.246270704 | -0.750453675 | 1.833039305 | -0.409404028 | 0.682243184 | NA          | NA      |
| ENSG00000174891 | RSRC1        | arginine and serine rich coiled-coil 1                                       | 51319     | 533.6189046 | -0.750210433 | 0.765382845 | -0.980176702 | 0.326998903 | 0.999371363 | Not Sig |
| ENSG00000262160 | NA           | NA                                                                           | NA        | 546.3343893 | -0.750005556 | 0.714166981 | -1.050182347 | 0.293634284 | 0.999371363 | Not Sig |
| ENSG00000178732 | GP5          | glycoprotein V platelet                                                      | 2814      | 11.21675052 | -0.749987733 | 1.159570617 | -0.64678056  | 0.517773976 | 0.999371363 | Not Sig |
| ENSG00000168234 | TTC39C       | tetratricopeptide repeat domain 39C                                          | 125488    | 1036.008327 | -0.749789981 | 0.675354065 | -1.110217618 | 0.266905263 | 0.999371363 | Not Sig |
| ENSG00000183281 | PLGLB1       | plasminogen-like B1                                                          | 5343      | 14.20446527 | -0.74975134  | 0.817149015 | -0.91752095  | 0.35886972  | 0.999371363 | Not Sig |
| ENSG00000135070 | ISCA1        | iron-sulfur cluster assembly 1                                               | 81689     | 452.3197969 | -0.749720454 | 0.461792992 | -1.623498986 | 0.10448278  | 0.999371363 | Not Sig |

|                 |            |                                                                       |           |             |              |             |              |             |             |         |
|-----------------|------------|-----------------------------------------------------------------------|-----------|-------------|--------------|-------------|--------------|-------------|-------------|---------|
| ENSG00000072422 | RHOBTB1    | Rho related BTB domain containing 1                                   | 9886      | 695.4631364 | -0.749433785 | 0.391212118 | -1.915671196 | 0.055406961 | 0.999371363 | Not Sig |
| ENSG00000258405 | ZNF578     | zinc finger protein 578                                               | 147660    | 31.27163276 | -0.749370721 | 0.777619023 | -0.963673339 | 0.335209725 | 0.999371363 | Not Sig |
| ENSG00000265817 | RAD54B     | RAD54 homolog B (S. cerevisiae)                                       | 25788     | 19.39706114 | -0.74917171  | 1.154605582 | -0.648855091 | 0.516432044 | 0.999371363 | Not Sig |
| ENSG00000265817 | FSBP       | fibrinogen silencer binding protein                                   | 100861412 | 19.39706114 | -0.74917171  | 1.154605582 | -0.648855091 | 0.516432044 | 0.999371363 | Not Sig |
| ENSG00000264009 | NA         | NA                                                                    | NA        | 2.490689485 | -0.749084101 | 1.532335178 | -0.488851337 | 0.62494695  | NA          | NA      |
| ENSG00000147206 | NXF3       | nuclear RNA export factor 3                                           | 56000     | 145.0129805 | -0.748969562 | 1.438472659 | -0.520670002 | 0.602596675 | 0.999371363 | Not Sig |
| ENSG00000197808 | ZNF461     | zinc finger protein 461                                               | 92283     | 135.0904551 | -0.748858896 | 0.515259452 | -1.453362753 | 0.146123062 | 0.999371363 | Not Sig |
| ENSG00000129422 | MTUS1      | microtubule associated scaffold protein 1                             | 57509     | 9015.105807 | -0.748547215 | 0.758624445 | -0.986716444 | 0.323781666 | 0.999371363 | Not Sig |
| ENSG00000197182 | MIRLET7BHG | MIRLET7B host gene                                                    | 400931    | 841.7401308 | -0.74848493  | 0.831536867 | -0.900122364 | 0.368055136 | 0.999371363 | Not Sig |
| ENSG00000213137 | NA         | NA                                                                    | NA        | 39.01783366 | -0.748477532 | 0.763726962 | -0.980032878 | 0.32706989  | 0.999371363 | Not Sig |
| ENSG00000161551 | ZNF577     | zinc finger protein 577                                               | 84765     | 369.2440975 | -0.74835038  | 0.642646333 | -1.164482455 | 0.244228549 | 0.999371363 | Not Sig |
| ENSG00000119938 | PPP1R3C    | protein phosphatase 1 regulatory subunit 3C                           | 5507      | 493.8174772 | -0.748043251 | 0.688412936 | -1.086619981 | 0.277204791 | 0.999371363 | Not Sig |
| ENSG00000233343 | NA         | NA                                                                    | NA        | 16.75778669 | -0.74797842  | 0.753845933 | -0.992216561 | 0.321091895 | 0.999371363 | Not Sig |
| ENSG00000069011 | PITX1      | paired like homeodomain 1                                             | 5307      | 201.9149581 | -0.747975277 | 1.023401219 | -0.730871981 | 0.464857351 | 0.999371363 | Not Sig |
| ENSG00000263904 | NA         | NA                                                                    | NA        | 1.988668088 | -0.747962981 | 2.117572876 | -0.353217115 | 0.723925678 | NA          | NA      |
| ENSG00000240935 | PLGLA      | plasminogen-like A (pseudogene)                                       | 285189    | 6.301497584 | -0.747902824 | 1.303299799 | -0.573853249 | 0.566067112 | NA          | NA      |
| ENSG00000264862 | NA         | NA                                                                    | NA        | 3.915280439 | -0.747495108 | 1.234741483 | -0.60538592  | 0.544922604 | NA          | NA      |
| ENSG00000173744 | AGFG1      | ArfGAP with FG repeats 1                                              | 3267      | 2651.037767 | -0.746565171 | 0.627142355 | -1.190423777 | 0.233879872 | 0.999371363 | Not Sig |
| ENSG00000197016 | ZNF470     | zinc finger protein 470                                               | 388566    | 225.0525129 | -0.746376978 | 0.553706393 | -1.347965253 | 0.177669559 | 0.999371363 | Not Sig |
| ENSG00000140859 | KIFC3      | kinesin family member C3                                              | 3801      | 2176.437057 | -0.746232931 | 0.506062332 | -1.474586989 | 0.140323615 | 0.999371363 | Not Sig |
| ENSG00000189042 | ZNF567     | zinc finger protein 567                                               | 163081    | 255.273439  | -0.746018347 | 0.577073623 | -1.292761127 | 0.196093689 | 0.999371363 | Not Sig |
| ENSG00000232034 | NA         | NA                                                                    | NA        | 43.24707951 | -0.74581521  | 0.851763462 | -0.875613058 | 0.381240424 | 0.999371363 | Not Sig |
| ENSG00000256453 | DND1       | DND microRNA-mediated repression inhibitor 1                          | 373863    | 17.21468354 | -0.745710555 | 0.884772689 | -0.842827276 | 0.399325051 | 0.999371363 | Not Sig |
| ENSG00000091879 | ANGPT2     | angiopoietin 2                                                        | 285       | 102.2564457 | -0.745417579 | 0.601909597 | -1.238421157 | 0.21555994  | 0.999371363 | Not Sig |
| ENSG00000180628 | PCGF5      | polycomb group ring finger 5                                          | 84333     | 1547.871217 | -0.745389169 | 0.642731301 | -1.159721283 | 0.246162302 | 0.999371363 | Not Sig |
| ENSG00000229390 | NA         | NA                                                                    | NA        | 13.02795912 | -0.744925255 | 0.848605527 | -0.877822771 | 0.380039905 | 0.999371363 | Not Sig |
| ENSG00000239569 | NA         | NA                                                                    | NA        | 62.09527373 | -0.744821503 | 0.595918691 | -1.249871022 | 0.211346667 | 0.999371363 | Not Sig |
| ENSG00000271971 | NA         | NA                                                                    | NA        | 35.25369572 | -0.744537565 | 0.808534873 | -0.920847807 | 0.357129891 | 0.999371363 | Not Sig |
| ENSG00000165644 | COMTD1     | catechol-O-methyltransferase domain containing 1                      | 118881    | 261.6145644 | -0.744314815 | 0.587890766 | -1.266076723 | 0.205485615 | 0.999371363 | Not Sig |
| ENSG00000243660 | NA         | NA                                                                    | NA        | 128.757875  | -0.744156877 | 0.487229605 | -1.527322785 | 0.126680766 | 0.999371363 | Not Sig |
| ENSG00000241547 | NA         | NA                                                                    | NA        | 20.01411171 | -0.744080902 | 0.904146377 | -0.822965087 | 0.410527848 | 0.999371363 | Not Sig |
| ENSG00000065911 | MTHFD2     | methylenetetrahydrofolate dehydrogenase (NADP-dependent) 2, cytosolic | 10797     | 681.7448198 | -0.743437716 | 0.641499869 | -1.158905484 | 0.246494713 | 0.999371363 | Not Sig |
| ENSG00000230665 | NA         | NA                                                                    | NA        | 1.642182341 | -0.743351357 | 2.014834497 | -0.368939165 | 0.71217307  | NA          | NA      |
| ENSG00000221598 | MIR1249    | microRNA 1249                                                         | 100302149 | 4.873629627 | -0.742900147 | 1.214801864 | -0.611540177 | 0.540842029 | NA          | NA      |
| ENSG00000221044 | NA         | NA                                                                    | NA        | 4.720131339 | -0.742734346 | 1.185836972 | -0.626337653 | 0.531093494 | NA          | NA      |

|                 |           |                                                       |           |             |              |             |              |             |             |         |
|-----------------|-----------|-------------------------------------------------------|-----------|-------------|--------------|-------------|--------------|-------------|-------------|---------|
| ENSG00000215326 | NA        | NA                                                    | NA        | 1.241057744 | -0.742683974 | 2.450925118 | -0.303021895 | 0.761873176 | NA          | NA      |
| ENSG00000215861 | LOC653513 | phosphodiesterase 4D interacting protein-like         | 653513    | 4.34832675  | -0.742364262 | 1.388593591 | -0.534615936 | 0.592915462 | NA          | NA      |
| ENSG00000130958 | SLC35D2   | solute carrier family 35 member D2                    | 11046     | 393.807183  | -0.742046717 | 0.42761897  | -1.735298873 | 0.082687881 | 0.999371363 | Not Sig |
| ENSG00000257506 | NA        | NA                                                    | NA        | 3.430335129 | -0.741617936 | 1.657312491 | -0.447482258 | 0.654526895 | NA          | NA      |
| ENSG00000127989 | MTERF1    | mitochondrial transcription termination factor 1      | 7978      | 254.9792989 | -0.741287844 | 0.565574584 | -1.31068097  | 0.189965571 | 0.999371363 | Not Sig |
| ENSG00000207134 | NA        | NA                                                    | NA        | 2.651478369 | -0.741208637 | 1.542081021 | -0.480654795 | 0.630761865 | NA          | NA      |
| ENSG00000115524 | SF3B1     | splicing factor 3b subunit 1                          | 23451     | 9972.387623 | -0.741185401 | 0.615008006 | -1.205163826 | 0.228140064 | 0.999371363 | Not Sig |
| ENSG00000185201 | IFITM2    | interferon induced transmembrane protein 2            | 10581     | 2548.060451 | -0.740480656 | 0.449516099 | -1.647283951 | 0.099499695 | 0.999371363 | Not Sig |
| ENSG00000120049 | KCNIP2    | potassium voltage-gated channel interacting protein 2 | 30819     | 117.5602021 | -0.739935317 | 0.450702338 | -1.641738362 | 0.100644238 | 0.999371363 | Not Sig |
| ENSG00000232081 | NA        | NA                                                    | NA        | 18.19363683 | -0.739758168 | 0.814631037 | -0.90808984  | 0.363830758 | 0.999371363 | Not Sig |
| ENSG00000203648 | NA        | NA                                                    | NA        | 2.21171766  | -0.739639152 | 1.732485167 | -0.426923801 | 0.669434829 | NA          | NA      |
| ENSG00000222022 | NA        | NA                                                    | NA        | 2.722009003 | -0.739526985 | 1.746063393 | -0.423539597 | 0.671901615 | NA          | NA      |
| ENSG00000228008 | NA        | NA                                                    | NA        | 6.653745569 | -0.739457038 | 1.113947997 | -0.663816479 | 0.506807777 | 0.999371363 | Not Sig |
| ENSG00000257839 | NA        | NA                                                    | NA        | 14.22703279 | -0.738239509 | 0.808097172 | -0.913552893 | 0.360951829 | 0.999371363 | Not Sig |
| ENSG00000238717 | NA        | NA                                                    | NA        | 18.71882999 | -0.738104691 | 1.209129288 | -0.61044315  | 0.541568292 | 0.999371363 | Not Sig |
| ENSG00000238741 | SCARNA7   | small Cajal body-specific RNA 7                       | 677767    | 4513.568834 | -0.738076067 | 0.553067736 | -1.33451297  | 0.182035799 | 0.999371363 | Not Sig |
| ENSG00000140043 | PTGR2     | prostaglandin reductase 2                             | 145482    | 242.2654338 | -0.73781269  | 0.709705833 | -1.039603531 | 0.298524136 | 0.999371363 | Not Sig |
| ENSG00000157259 | GATAD1    | GATA zinc finger domain containing 1                  | 57798     | 1158.801032 | -0.73727165  | 0.516412447 | -1.42767986  | 0.153384026 | 0.999371363 | Not Sig |
| ENSG00000206559 | ZCWPW2    | zinc finger CW-type and PWWP domain containing 2      | 152098    | 55.89443057 | -0.737162693 | 0.534681403 | -1.378695217 | 0.167988745 | 0.999371363 | Not Sig |
| ENSG00000268364 | NA        | NA                                                    | NA        | 108.4242921 | -0.737145641 | 0.666632296 | -1.105775471 | 0.268823714 | 0.999371363 | Not Sig |
| ENSG00000166828 | SCNN1G    | sodium channel epithelial 1 gamma subunit             | 6340      | 226.2536021 | -0.736981987 | 1.012649874 | -0.727775715 | 0.466750893 | 0.999371363 | Not Sig |
| ENSG00000201573 | NA        | NA                                                    | NA        | 7.417536415 | -0.736728612 | 1.405887268 | -0.524031072 | 0.600256928 | 0.999371363 | Not Sig |
| ENSG00000254207 | NA        | NA                                                    | NA        | 9.226119305 | -0.736394893 | 0.873944442 | -0.842610648 | 0.399446234 | 0.999371363 | Not Sig |
| ENSG00000131848 | ZSCAN5A   | zinc finger and SCAN domain containing 5A             | 79149     | 149.8218495 | -0.736220456 | 0.509110232 | -1.446092437 | 0.148151277 | 0.999371363 | Not Sig |
| ENSG00000271959 | FP248     | Putative chemokine-related protein FP248              | 101930072 | 39.5324682  | -0.736204461 | 0.656647439 | -1.121156373 | 0.262221306 | 0.999371363 | Not Sig |
| ENSG00000259410 | NA        | NA                                                    | NA        | 1.757786622 | -0.735448009 | 1.753852753 | -0.419332814 | 0.674972919 | NA          | NA      |
| ENSG00000105245 | NUMBL     | NUMB like, endocytic adaptor protein                  | 9253      | 486.5189242 | -0.735408617 | 0.557855995 | -1.318276804 | 0.187411003 | 0.999371363 | Not Sig |
| ENSG00000179841 | AKAP5     | A-kinase anchoring protein 5                          | 9495      | 140.1290506 | -0.73540847  | 0.648974576 | -1.133185331 | 0.257136433 | 0.999371363 | Not Sig |
| ENSG00000181666 | HKR1      | HKR1, GLI-Kruppel zinc finger family member           | 284459    | 825.2400038 | -0.735338605 | 0.454007655 | -1.619661248 | 0.105305065 | 0.999371363 | Not Sig |
| ENSG00000233994 | NA        | NA                                                    | NA        | 3.205686246 | -0.735036827 | 1.672510212 | -0.439481219 | 0.660312888 | NA          | NA      |
| ENSG00000109832 | DDX25     | DEAD-box helicase 25                                  | 29118     | 3.270659595 | -0.734920622 | 1.908223444 | -0.385133421 | 0.700138568 | NA          | NA      |
| ENSG00000239794 | NA        | NA                                                    | NA        | 12.86337912 | -0.73397753  | 0.984514043 | -0.745522662 | 0.455955816 | 0.999371363 | Not Sig |
| ENSG00000273419 | NA        | NA                                                    | NA        | 3.953639688 | -0.733744515 | 1.612662001 | -0.454989647 | 0.649116687 | NA          | NA      |
| ENSG00000225784 | NA        | NA                                                    | NA        | 8.964018614 | -0.733660391 | 0.932855562 | -0.786467296 | 0.431593772 | 0.999371363 | Not Sig |
| ENSG00000270157 | NA        | NA                                                    | NA        | 158.3674608 | -0.733523249 | 0.475937798 | -1.541216629 | 0.123264072 | 0.999371363 | Not Sig |

|                 |           |                                                               |           |             |              |             |              |             |             |         |
|-----------------|-----------|---------------------------------------------------------------|-----------|-------------|--------------|-------------|--------------|-------------|-------------|---------|
| ENSG00000203441 | LINC00449 | long intergenic non-protein coding RNA 449                    | 106478991 | 3.335875864 | -0.73344975  | 1.320353014 | -0.555495191 | 0.578555998 | NA          | NA      |
| ENSG00000254461 | NA        | NA                                                            | NA        | 2.451638366 | -0.733423781 | 1.750420585 | -0.418998604 | 0.675217153 | NA          | NA      |
| ENSG00000151923 | TIAL1     | TIAL1 cytotoxic granule associated RNA binding protein like 1 | 7073      | 1573.05975  | -0.733350367 | 0.582086883 | -1.259864101 | 0.207718391 | 0.999371363 | Not Sig |
| ENSG00000177879 | AP3S1     | adaptor related protein complex 3 sigma 1 subunit             | 1176      | 617.0985631 | -0.733300404 | 0.66003818  | -1.110996948 | 0.266569663 | 0.999371363 | Not Sig |
| ENSG00000221716 | SNORA11   | small nucleolar RNA, H/ACA box 11                             | 677799    | 5.732986335 | -0.733076993 | 1.079025011 | -0.679388324 | 0.496891846 | NA          | NA      |
| ENSG00000237732 | LOC440934 | uncharacterized LOC440934                                     | 440934    | 4.348448895 | -0.733007654 | 1.416185992 | -0.517592786 | 0.604742416 | NA          | NA      |
| ENSG00000196782 | MAML3     | mastermind like transcriptional coactivator 3                 | 55534     | 1020.280353 | -0.732352982 | 0.494496292 | -1.481008038 | 0.138604432 | 0.999371363 | Not Sig |
| ENSG00000072401 | UBE2D1    | ubiquitin conjugating enzyme E2 D1                            | 7321      | 421.828143  | -0.732104263 | 0.684864816 | -1.068976309 | 0.285080345 | 0.999371363 | Not Sig |
| ENSG00000198276 | UCKL1     | uridine-cytidine kinase 1 like 1                              | 54963     | 590.8717435 | -0.73168089  | 0.419211923 | -1.745372327 | 0.080920079 | 0.999371363 | Not Sig |
| ENSG00000213186 | TRIM59    | tripartite motif containing 59                                | 286827    | 119.2020003 | -0.731399737 | 0.850378899 | -0.860086883 | 0.389741151 | 0.999371363 | Not Sig |
| ENSG00000237296 | SMG1P1    | SMG1 pseudogene 1                                             | 641298    | 519.2953024 | -0.731270706 | 0.50480802  | -1.448611506 | 0.147446106 | 0.999371363 | Not Sig |
| ENSG00000260892 | NA        | NA                                                            | NA        | 28.23573955 | -0.730618456 | 0.712238166 | -1.025806381 | 0.304982858 | 0.999371363 | Not Sig |
| ENSG00000221955 | SLC12A8   | solute carrier family 12 member 8                             | 84561     | 364.9884683 | -0.730448894 | 0.733414476 | -0.995956473 | 0.319271295 | 0.999371363 | Not Sig |
| ENSG00000206560 | ANKRD28   | ankyrin repeat domain 28                                      | 23243     | 2047.738483 | -0.730374316 | 0.705106762 | -1.035835076 | 0.30027909  | 0.999371363 | Not Sig |
| ENSG00000253200 | NA        | NA                                                            | NA        | 73.88348229 | -0.730341566 | 0.684593545 | -1.066825084 | 0.286050829 | 0.999371363 | Not Sig |
| ENSG00000137936 | BCAR3     | BCAR3, NSP family adaptor protein                             | 8412      | 601.9764782 | -0.730338024 | 0.544910734 | -1.340289296 | 0.18015131  | 0.999371363 | Not Sig |
| ENSG00000273132 | NA        | NA                                                            | NA        | 19.74898465 | -0.730209179 | 1.198022745 | -0.609511949 | 0.542185155 | 0.999371363 | Not Sig |
| ENSG00000172940 | SLC22A13  | solute carrier family 22 member 13                            | 9390      | 14.34980151 | -0.730176388 | 1.003330719 | -0.727752449 | 0.466765138 | 0.999371363 | Not Sig |
| ENSG00000167632 | TRAPPC9   | trafficking protein particle complex 9                        | 83696     | 2177.866671 | -0.730071396 | 0.528996837 | -1.380105408 | 0.167554192 | 0.999371363 | Not Sig |
| ENSG00000272579 | NA        | NA                                                            | NA        | 13.96351055 | -0.730053245 | 1.002893375 | -0.727947022 | 0.466646018 | 0.999371363 | Not Sig |
| ENSG00000264508 | NA        | NA                                                            | NA        | 58.29945161 | -0.72976976  | 0.531863405 | -1.372099966 | 0.17003232  | 0.999371363 | Not Sig |
| ENSG00000164941 | INTS8     | integrator complex subunit 8                                  | 55656     | 1285.043821 | -0.729473437 | 0.619583476 | -1.177361025 | 0.239051439 | 0.999371363 | Not Sig |
| ENSG00000221491 | SNORA2C   | small nucleolar RNA, H/ACA box 2C                             | 677815    | 7.612814774 | -0.729217631 | 0.927359973 | -0.786337186 | 0.431669972 | 0.999371363 | Not Sig |
| ENSG00000238793 | SNORD124  | small nucleolar RNA, C/D box 124                              | 101340251 | 4.937174676 | -0.728610649 | 1.177826945 | -0.618605859 | 0.536176041 | NA          | NA      |
| ENSG00000259316 | NA        | NA                                                            | NA        | 26.17265129 | -0.728436708 | 0.824980019 | -0.882974971 | 0.377249795 | 0.999371363 | Not Sig |
| ENSG00000206875 | NA        | NA                                                            | NA        | 7.477626699 | -0.728329113 | 1.060225692 | -0.686956673 | 0.492110032 | 0.999371363 | Not Sig |
| ENSG00000235701 | NA        | NA                                                            | NA        | 6.46187146  | -0.728239722 | 1.102392512 | -0.6605993   | 0.508869318 | NA          | NA      |
| ENSG00000173530 | TNFRSF10D | TNF receptor superfamily member 10d                           | 8793      | 429.0992843 | -0.728223212 | 0.485759468 | -1.499143632 | 0.133836375 | 0.999371363 | Not Sig |
| ENSG00000243385 | NA        | NA                                                            | NA        | 9.051112185 | -0.728078238 | 1.185971672 | -0.613908625 | 0.539275711 | 0.999371363 | Not Sig |
| ENSG00000259529 | NA        | NA                                                            | NA        | 47.03339608 | -0.72789615  | 0.672909491 | -1.081714793 | 0.279379278 | 0.999371363 | Not Sig |
| ENSG00000255143 | NA        | NA                                                            | NA        | 1.542054836 | -0.727380735 | 2.328457416 | -0.31238739  | 0.754746132 | NA          | NA      |
| ENSG00000255374 | TAS2R43   | taste 2 receptor member 43                                    | 259289    | 43.64626901 | -0.727377301 | 1.035514794 | -0.702430622 | 0.482410654 | 0.999371363 | Not Sig |
| ENSG00000255374 | TAS2R45   | taste 2 receptor member 45                                    | 259291    | 43.64626901 | -0.727377301 | 1.035514794 | -0.702430622 | 0.482410654 | 0.999371363 | Not Sig |
| ENSG00000176472 | ZNF575    | zinc finger protein 575                                       | 284346    | 49.81922467 | -0.72647937  | 0.697254353 | -1.041914427 | 0.297451355 | 0.999371363 | Not Sig |
| ENSG00000174483 | BBS1      | Bardet-Biedl syndrome 1                                       | 582       | 65.72135521 | -0.726340471 | 0.497026253 | -1.461372446 | 0.143913258 | 0.999371363 | Not Sig |

|                 |              |                                                   |           |             |              |             |              |             |             |         |
|-----------------|--------------|---------------------------------------------------|-----------|-------------|--------------|-------------|--------------|-------------|-------------|---------|
| ENSG00000185834 | NA           | NA                                                | NA        | 8.968319687 | -0.726196459 | 0.896238584 | -0.810271362 | 0.417784231 | 0.999371363 | Not Sig |
| ENSG00000273486 | NA           | NA                                                | NA        | 25.74755226 | -0.726025127 | 0.822249678 | -0.882974048 | 0.377250293 | 0.999371363 | Not Sig |
| ENSG00000252559 | NA           | NA                                                | NA        | 1.194688839 | -0.725946244 | 2.451950015 | -0.296068941 | 0.767177433 | NA          | NA      |
| ENSG00000226200 | NA           | NA                                                | NA        | 301.8664599 | -0.725933218 | 0.473196129 | -1.534106417 | 0.125003475 | 0.999371363 | Not Sig |
| ENSG00000136842 | TMOD1        | tropomodulin 1                                    | 7111      | 188.8548539 | -0.72563024  | 0.837442797 | -0.86648335  | 0.386225153 | 0.999371363 | Not Sig |
| ENSG00000069431 | ABCC9        | ATP binding cassette subfamily C member 9         | 10060     | 730.3457298 | -0.725571975 | 0.673025522 | -1.078074978 | 0.281000297 | 0.999371363 | Not Sig |
| ENSG00000107562 | CXCL12       | C-X-C motif chemokine ligand 12                   | 6387      | 644.2002092 | -0.725472272 | 0.783000117 | -0.926528945 | 0.354171162 | 0.999371363 | Not Sig |
| ENSG00000269746 | NA           | NA                                                | NA        | 0.777672457 | -0.724068253 | 2.800274359 | -0.258570468 | 0.795966671 | NA          | NA      |
| ENSG00000199032 | MIR425       | microRNA 425                                      | 494337    | 2.918444475 | -0.724046494 | 1.463447658 | -0.49475394  | 0.620773821 | NA          | NA      |
| ENSG00000255112 | CHMP1B       | charged multivesicular body protein 1B            | 57132     | 1562.880361 | -0.723694338 | 0.484361357 | -1.494120716 | 0.13514407  | 0.999371363 | Not Sig |
| ENSG00000169429 | CXCL8        | C-X-C motif chemokine ligand 8                    | 3576      | 688.8351575 | -0.723662631 | 0.787410328 | -0.919041325 | 0.358073958 | 0.999371363 | Not Sig |
| ENSG00000199545 | NA           | NA                                                | NA        | 17.57365431 | -0.723551377 | 0.91631455  | -0.789632095 | 0.429742659 | 0.999371363 | Not Sig |
| ENSG00000184402 | SS18L1       | SS18L1, nBAF chromatin remodeling complex subunit | 26039     | 561.4180719 | -0.722772794 | 0.508369376 | -1.421747313 | 0.15509962  | 0.999371363 | Not Sig |
| ENSG00000233308 | OSTN-AS1     | OSTN antisense RNA 1                              | 106480738 | 1.331315992 | -0.722590014 | 2.429757967 | -0.297391767 | 0.766167429 | NA          | NA      |
| ENSG00000233360 | LOC101927051 | uncharacterized LOC101927051                      | 101927051 | 2.081528042 | -0.722585039 | 1.680162718 | -0.430068488 | 0.667145822 | NA          | NA      |
| ENSG00000221680 | MIR1278      | microRNA 1278                                     | 100302163 | 6.339558455 | -0.72180063  | 1.050401789 | -0.687166223 | 0.491977987 | NA          | NA      |
| ENSG00000028277 | POU2F2       | POU class 2 homeobox 2                            | 5452      | 319.1653909 | -0.721732604 | 0.530700219 | -1.35996289  | 0.173841668 | 0.999371363 | Not Sig |
| ENSG00000180773 | SLC36A4      | solute carrier family 36 member 4                 | 120103    | 518.2362377 | -0.721533543 | 0.739222609 | -0.976070718 | 0.329029421 | 0.999371363 | Not Sig |
| ENSG00000119314 | PTBP3        | polypyrimidine tract binding protein 3            | 9991      | 4579.976138 | -0.72151749  | 0.677313142 | -1.06526427  | 0.286756357 | 0.999371363 | Not Sig |
| ENSG00000196781 | TLE1         | transducin like enhancer of split 1               | 7088      | 1105.981368 | -0.72118014  | 0.461320782 | -1.563294279 | 0.117983393 | 0.999371363 | Not Sig |
| ENSG00000234886 | NA           | NA                                                | NA        | 30.97914448 | -0.721047633 | 1.327992731 | -0.542960527 | 0.58715698  | 0.999371363 | Not Sig |
| ENSG00000105290 | APLP1        | amyloid beta precursor like protein 1             | 333       | 56.08774993 | -0.72098425  | 0.667161084 | -1.080674918 | 0.279841744 | 0.999371363 | Not Sig |
| ENSG00000113600 | C9           | complement C9                                     | 735       | 4.367197159 | -0.720797262 | 1.233614372 | -0.584297069 | 0.559020464 | NA          | NA      |
| ENSG00000254409 | NA           | NA                                                | NA        | 6.022281761 | -0.720248199 | 1.125282546 | -0.640059869 | 0.522133678 | NA          | NA      |
| ENSG00000199471 | NA           | NA                                                | NA        | 5.178485595 | -0.719918315 | 1.227358642 | -0.586559047 | 0.557499894 | NA          | NA      |
| ENSG00000182487 | NCF1B        | neutrophil cytosolic factor 1B pseudogene         | 654816    | 94.11426679 | -0.719711862 | 0.868088175 | -0.82907691  | 0.407060888 | 0.999371363 | Not Sig |
| ENSG00000259279 | NA           | NA                                                | NA        | 2.895700148 | -0.719326424 | 1.484327148 | -0.484614477 | 0.627949843 | NA          | NA      |
| ENSG00000239665 | NA           | NA                                                | NA        | 762.1435343 | -0.71925944  | 0.499335657 | -1.440432764 | 0.149745    | 0.999371363 | Not Sig |
| ENSG00000138772 | ANXA3        | annexin A3                                        | 306       | 1265.420739 | -0.719219749 | 0.745429577 | -0.964839298 | 0.334625309 | 0.999371363 | Not Sig |
| ENSG00000177337 | NA           | NA                                                | NA        | 257.2812659 | -0.718908405 | 0.596520983 | -1.205168679 | 0.228138191 | 0.999371363 | Not Sig |
| ENSG00000265930 | NA           | NA                                                | NA        | 2.74318121  | -0.718660151 | 1.603802513 | -0.448097659 | 0.654082717 | NA          | NA      |
| ENSG00000161638 | ITGA5        | integrin subunit alpha 5                          | 3678      | 2317.360932 | -0.718486257 | 0.717946827 | -1.00075135  | 0.316947035 | 0.999371363 | Not Sig |
| ENSG00000239677 | NA           | NA                                                | NA        | 4.056773008 | -0.718282614 | 1.489801895 | -0.482132971 | 0.629711489 | NA          | NA      |
| ENSG00000266733 | TBC1D29      | TBC1 domain family member 29                      | 26083     | 1.532600587 | -0.717340396 | 2.25122455  | -0.318644533 | 0.74999608  | NA          | NA      |
| ENSG00000162783 | IER5         | immediate early response 5                        | 51278     | 1544.233832 | -0.71729741  | 0.610780145 | -1.174395428 | 0.240236676 | 0.999371363 | Not Sig |

|                 |          |                                                                   |           |             |              |             |              |             |             |         |
|-----------------|----------|-------------------------------------------------------------------|-----------|-------------|--------------|-------------|--------------|-------------|-------------|---------|
| ENSG00000263980 | NA       | NA                                                                | NA        | 8.618375029 | -0.717211154 | 0.931994178 | -0.769544672 | 0.441570036 | 0.999371363 | Not Sig |
| ENSG00000230551 | NA       | NA                                                                | NA        | 1258.841646 | -0.716961144 | 0.747182902 | -0.959552397 | 0.337280537 | 0.999371363 | Not Sig |
| ENSG00000163527 | STT3B    | STT3B, catalytic subunit of the oligosaccharyltransferase complex | 201595    | 4843.188716 | -0.716821368 | 0.637381861 | -1.124634089 | 0.260744122 | 0.999371363 | Not Sig |
| ENSG00000051341 | POLQ     | DNA polymerase theta                                              | 10721     | 174.8991941 | -0.716591048 | 0.887202258 | -0.807697502 | 0.419264742 | 0.999371363 | Not Sig |
| ENSG00000228775 | WEE2-AS1 | WEE2 antisense RNA 1                                              | 285962    | 39.71632116 | -0.716375526 | 0.573575197 | -1.248965315 | 0.21167776  | 0.999371363 | Not Sig |
| ENSG00000230547 | NA       | NA                                                                | NA        | 0.877384955 | -0.716273161 | 2.737488384 | -0.261653407 | 0.793588665 | NA          | NA      |
| ENSG00000257231 | NA       | NA                                                                | NA        | 0.877384955 | -0.716273161 | 2.737488384 | -0.261653407 | 0.793588665 | NA          | NA      |
| ENSG00000115145 | STAM2    | signal transducing adaptor molecule 2                             | 10254     | 1644.946463 | -0.716256782 | 0.676157613 | -1.059304471 | 0.289461139 | 0.999371363 | Not Sig |
| ENSG00000059769 | DNAJC25  | DnaJ heat shock protein family (Hsp40) member C25                 | 548645    | 153.2121737 | -0.716211081 | 0.668113972 | -1.071989378 | 0.283724803 | 0.999371363 | Not Sig |
| ENSG00000197993 | KEL      | Kell blood group, metallo-endopeptidase                           | 3792      | 12.99773234 | -0.716114263 | 0.797544339 | -0.897898998 | 0.369239399 | 0.999371363 | Not Sig |
| ENSG00000140678 | ITGAX    | integrin subunit alpha X                                          | 3687      | 2022.240395 | -0.71590999  | 0.756100203 | -0.946845388 | 0.34371757  | 0.999371363 | Not Sig |
| ENSG00000256197 | NA       | NA                                                                | NA        | 15.50063897 | -0.715736146 | 0.875161686 | -0.817833044 | 0.413452527 | 0.999371363 | Not Sig |
| ENSG00000182782 | HCAR2    | hydroxycarboxylic acid receptor 2                                 | 338442    | 251.299532  | -0.715602667 | 0.862071359 | -0.83009679  | 0.406484062 | 0.999371363 | Not Sig |
| ENSG00000101298 | SNPH     | syntaphilin                                                       | 9751      | 191.9792931 | -0.715450528 | 0.769368912 | -0.929918686 | 0.352413187 | 0.999371363 | Not Sig |
| ENSG00000226769 | NA       | NA                                                                | NA        | 8.191882724 | -0.71495493  | 1.051884377 | -0.679689655 | 0.496700988 | 0.999371363 | Not Sig |
| ENSG00000250959 | GLUD1P3  | glutamate dehydrogenase 1 pseudogene 3                            | 2749      | 97.80407637 | -0.714594549 | 0.523327691 | -1.365482013 | 0.172101603 | 0.999371363 | Not Sig |
| ENSG00000171425 | ZNF581   | zinc finger protein 581                                           | 51545     | 190.8552687 | -0.714525355 | 0.514871732 | -1.387773519 | 0.165206021 | 0.999371363 | Not Sig |
| ENSG00000173611 | SCAI     | suppressor of cancer cell invasion                                | 286205    | 527.659233  | -0.714522085 | 0.449077997 | -1.591086828 | 0.111590036 | 0.999371363 | Not Sig |
| ENSG00000212124 | TAS2R19  | taste 2 receptor member 19                                        | 259294    | 68.08236856 | -0.714209276 | 0.783591361 | -0.911456292 | 0.362055005 | 0.999371363 | Not Sig |
| ENSG00000244480 | NA       | NA                                                                | NA        | 37.00182441 | -0.713769143 | 0.575872313 | -1.239457302 | 0.215176192 | 0.999371363 | Not Sig |
| ENSG00000239912 | NA       | NA                                                                | NA        | 10.22434106 | -0.713716903 | 1.033751095 | -0.690414653 | 0.489933465 | 0.999371363 | Not Sig |
| ENSG00000260586 | NA       | NA                                                                | NA        | 24.26562508 | -0.71357662  | 0.94603807  | -0.754278968 | 0.450681728 | 0.999371363 | Not Sig |
| ENSG00000213885 | NA       | NA                                                                | NA        | 2.733726962 | -0.713540301 | 1.603736415 | -0.444923676 | 0.656374912 | NA          | NA      |
| ENSG00000227398 | NA       | NA                                                                | NA        | 61.8248375  | -0.713274609 | 0.568381007 | -1.25492337  | 0.209506579 | 0.999371363 | Not Sig |
| ENSG00000272677 | NA       | NA                                                                | NA        | 11.92178664 | -0.713197783 | 0.888653054 | -0.802560437 | 0.422228843 | 0.999371363 | Not Sig |
| ENSG00000207574 | MIR661   | microRNA 661                                                      | 724031    | 14.72746164 | -0.713000136 | 0.806345079 | -0.884236979 | 0.3765683   | 0.999371363 | Not Sig |
| ENSG00000158856 | DMTN     | dematin actin binding protein                                     | 2039      | 812.1291019 | -0.712770947 | 0.791576344 | -0.900444982 | 0.367883492 | 0.999371363 | Not Sig |
| ENSG00000207696 | MIR659   | microRNA 659                                                      | 724029    | 2.479220919 | -0.712526304 | 2.087976958 | -0.341251996 | 0.732913883 | NA          | NA      |
| ENSG00000266533 | MIR3619  | microRNA 3619                                                     | 100500828 | 29.9509103  | -0.712262495 | 0.840175846 | -0.847754073 | 0.396574946 | 0.999371363 | Not Sig |
| ENSG00000225511 | NA       | NA                                                                | NA        | 17.24050292 | -0.712129559 | 0.964973457 | -0.73797839  | 0.460527581 | 0.999371363 | Not Sig |
| ENSG00000263165 | NA       | NA                                                                | NA        | 3.259606036 | -0.711623495 | 1.666239811 | -0.427083479 | 0.669318526 | NA          | NA      |
| ENSG00000174721 | FGFBP3   | fibroblast growth factor binding protein 3                        | 143282    | 37.64254744 | -0.711599792 | 0.803848075 | -0.885241645 | 0.376026316 | 0.999371363 | Not Sig |
| ENSG00000213601 | NA       | NA                                                                | NA        | 5.9355281   | -0.711474584 | 1.559821557 | -0.456125626 | 0.648299643 | NA          | NA      |
| ENSG00000131375 | CAPN7    | calpain 7                                                         | 23473     | 1582.473481 | -0.711301769 | 0.648729902 | -1.096452879 | 0.272880634 | 0.999371363 | Not Sig |
| ENSG00000068976 | PYGM     | glycogen phosphorylase, muscle associated                         | 5837      | 51.34648219 | -0.711185338 | 0.902269441 | -0.788218359 | 0.430568992 | 0.999371363 | Not Sig |

|                 |              |                                                         |           |             |              |             |              |             |             |         |
|-----------------|--------------|---------------------------------------------------------|-----------|-------------|--------------|-------------|--------------|-------------|-------------|---------|
| ENSG00000205482 | NA           | NA                                                      | NA        | 11.39187864 | -0.711177451 | 0.803100133 | -0.885540198 | 0.375865349 | 0.999371363 | Not Sig |
| ENSG00000264539 | MIR548AR     | microRNA 548ar                                          | 100847035 | 7.331950776 | -0.710950156 | 1.471970169 | -0.482992231 | 0.629101252 | 0.999371363 | Not Sig |
| ENSG00000124103 | FAM209A      | family with sequence similarity 209 member A            | 200232    | 6.115994776 | -0.710924651 | 1.220427939 | -0.582520793 | 0.56021594  | NA          | NA      |
| ENSG00000128739 | SNRPN        | small nuclear ribonucleoprotein polypeptide N           | 6638      | 132.1094096 | -0.710366972 | 0.567298736 | -1.252192059 | 0.210499889 | 0.999371363 | Not Sig |
| ENSG00000128739 | SNURF        | SNRPN upstream reading frame                            | 8926      | 132.1094096 | -0.710366972 | 0.567298736 | -1.252192059 | 0.210499889 | 0.999371363 | Not Sig |
| ENSG00000127914 | AKAP9        | A-kinase anchoring protein 9                            | 10142     | 6680.53497  | -0.710164368 | 0.536250602 | -1.324314351 | 0.185398666 | 0.999371363 | Not Sig |
| ENSG00000167757 | KLK11        | kallikrein related peptidase 11                         | 11012     | 112.1370328 | -0.71014321  | 1.347377193 | -0.527055982 | 0.598154713 | 0.999371363 | Not Sig |
| ENSG00000164118 | CEP44        | centrosomal protein 44                                  | 80817     | 483.1282174 | -0.709889756 | 0.591700487 | -1.199745094 | 0.230238354 | 0.999371363 | Not Sig |
| ENSG00000157388 | CACNA1D      | calcium voltage-gated channel subunit alpha D           | 776       | 1098.947313 | -0.709527879 | 0.766152894 | -0.926091756 | 0.354398298 | 0.999371363 | Not Sig |
| ENSG00000272574 | NA           | NA                                                      | NA        | 35.92172337 | -0.709468231 | 0.808229311 | -0.877805619 | 0.380049215 | 0.999371363 | Not Sig |
| ENSG00000221063 | MIR1296      | microRNA 1296                                           | 100302150 | 25.86892622 | -0.709279936 | 0.729304413 | -0.972543047 | 0.33078046  | 0.999371363 | Not Sig |
| ENSG00000253124 | NA           | NA                                                      | NA        | 0.75492813  | -0.709211376 | 3.265258926 | -0.217199123 | 0.828053168 | NA          | NA      |
| ENSG00000259603 | NA           | NA                                                      | NA        | 0.75492813  | -0.709211376 | 3.265258926 | -0.217199123 | 0.828053168 | NA          | NA      |
| ENSG00000233469 | NA           | NA                                                      | NA        | 10.31008142 | -0.708694455 | 0.922944196 | -0.767862735 | 0.442568739 | 0.999371363 | Not Sig |
| ENSG00000242445 | NA           | NA                                                      | NA        | 2.726874419 | -0.708620586 | 1.675025365 | -0.42305066  | 0.6722583   | NA          | NA      |
| ENSG00000254109 | RBPMS-AS1    | RBPMS antisense RNA 1                                   | 100128750 | 84.17306833 | -0.708294842 | 0.795296793 | -0.890604424 | 0.373141425 | 0.999371363 | Not Sig |
| ENSG00000252498 | NA           | NA                                                      | NA        | 83.87445874 | -0.708163002 | 0.864004102 | -0.819629213 | 0.412427515 | 0.999371363 | Not Sig |
| ENSG00000184838 | PRR16        | proline rich 16                                         | 51334     | 49.6302353  | -0.707237802 | 0.549538253 | -1.286967374 | 0.19810566  | 0.999371363 | Not Sig |
| ENSG00000252577 | SCARNA20     | small Cajal body-specific RNA 20                        | 677681    | 4.950282847 | -0.707167599 | 1.267629745 | -0.557866051 | 0.576935856 | NA          | NA      |
| ENSG00000179104 | TMTC2        | transmembrane and tetratricopeptide repeat containing 2 | 160335    | 943.8169091 | -0.706818186 | 0.432033853 | -1.636025003 | 0.101834355 | 0.999371363 | Not Sig |
| ENSG00000264505 | NA           | NA                                                      | NA        | 2.20828594  | -0.7068051   | 1.750255149 | -0.403829751 | 0.686337918 | NA          | NA      |
| ENSG00000254324 | MIR151A      | microRNA 151a                                           | 442893    | 11.75920535 | -0.70678941  | 0.871300703 | -0.811188844 | 0.417257231 | 0.999371363 | Not Sig |
| ENSG00000270060 | NA           | NA                                                      | NA        | 28.63304102 | -0.70614905  | 0.638581379 | -1.105809021 | 0.268809189 | 0.999371363 | Not Sig |
| ENSG00000182983 | ZNF662       | zinc finger protein 662                                 | 389114    | 246.9660028 | -0.706057973 | 0.742701119 | -0.950662325 | 0.341775819 | 0.999371363 | Not Sig |
| ENSG00000248383 | PCDHAC1      | protocadherin alpha subfamily C, 1                      | 56135     | 185.0216572 | -0.706055716 | 0.720517642 | -0.979928422 | 0.327121452 | 0.999371363 | Not Sig |
| ENSG00000110900 | TSPAN11      | tetraspanin 11                                          | 441631    | 268.1068018 | -0.70597461  | 0.802773493 | -0.879419433 | 0.379173899 | 0.999371363 | Not Sig |
| ENSG00000231752 | EMBP1        | embigin pseudogene 1                                    | 647121    | 36.75229261 | -0.705396234 | 0.928328016 | -0.759856668 | 0.447340265 | 0.999371363 | Not Sig |
| ENSG00000188707 | ZBED6CL      | ZBED6 C-terminal like                                   | 113763    | 222.5854241 | -0.705230653 | 0.48888286  | -1.442535033 | 0.149151496 | 0.999371363 | Not Sig |
| ENSG00000143190 | POU2F1       | POU class 2 homeobox 1                                  | 5451      | 1772.290324 | -0.705040852 | 0.623760917 | -1.130306232 | 0.258347209 | 0.999371363 | Not Sig |
| ENSG00000261879 | LOC100130950 | uncharacterized LOC100130950                            | 100130950 | 59.03213833 | -0.704834896 | 0.510610602 | -1.38037654  | 0.167470739 | 0.999371363 | Not Sig |
| ENSG00000164406 | LEAP2        | liver enriched antimicrobial peptide 2                  | 116842    | 26.57553118 | -0.704806315 | 0.792578477 | -0.88925745  | 0.373864734 | 0.999371363 | Not Sig |
| ENSG00000232010 | LOC105372833 | uncharacterized LOC105372833                            | 105372833 | 1.539038123 | -0.704663774 | 2.209280058 | -0.318956291 | 0.749759658 | NA          | NA      |
| ENSG00000232010 | LOC105379484 | uncharacterized LOC105379484                            | 105379484 | 1.539038123 | -0.704663774 | 2.209280058 | -0.318956291 | 0.749759658 | NA          | NA      |
| ENSG00000225407 | NA           | NA                                                      | NA        | 3.689497489 | -0.704659467 | 1.562218695 | -0.451063266 | 0.651943952 | NA          | NA      |
| ENSG00000232479 | NA           | NA                                                      | NA        | 20.39348846 | -0.704347218 | 0.659064466 | -1.068707621 | 0.285201436 | 0.999371363 | Not Sig |

|                 |              |                                                                   |           |             |              |             |              |             |             |         |
|-----------------|--------------|-------------------------------------------------------------------|-----------|-------------|--------------|-------------|--------------|-------------|-------------|---------|
| ENSG00000268538 | NA           | NA                                                                | NA        | 16.30653256 | -0.704009557 | 0.844694676 | -0.833448554 | 0.404591801 | 0.999371363 | Not Sig |
| ENSG00000240535 | NA           | NA                                                                | NA        | 0.854640627 | -0.703872485 | 2.445763762 | -0.287792507 | 0.773505573 | NA          | NA      |
| ENSG00000270503 | NA           | NA                                                                | NA        | 0.854640627 | -0.703872485 | 2.445763762 | -0.287792507 | 0.773505573 | NA          | NA      |
| ENSG00000227407 | NA           | NA                                                                | NA        | 10.51250105 | -0.703609798 | 0.866498276 | -0.812015231 | 0.416782892 | 0.999371363 | Not Sig |
| ENSG00000165476 | REEP3        | receptor accessory protein 3                                      | 221035    | 1718.670759 | -0.703569752 | 0.665217781 | -1.057653257 | 0.290213553 | 0.999371363 | Not Sig |
| ENSG00000242412 | DBIL5P2      | diazepam binding inhibitor-like 5 pseudogene 2                    | 100169989 | 4.241308614 | -0.703461895 | 1.193363693 | -0.589478211 | 0.555540524 | NA          | NA      |
| ENSG00000228830 | NA           | NA                                                                | NA        | 11.36387018 | -0.703273031 | 0.881633616 | -0.797693076 | 0.425048623 | 0.999371363 | Not Sig |
| ENSG00000244021 | NA           | NA                                                                | NA        | 7.781585844 | -0.703220184 | 0.957406108 | -0.734505638 | 0.462640625 | 0.999371363 | Not Sig |
| ENSG00000232407 | NA           | NA                                                                | NA        | 10.11973567 | -0.702972231 | 1.045179719 | -0.672585028 | 0.501211329 | 0.999371363 | Not Sig |
| ENSG00000251819 | NA           | NA                                                                | NA        | 10.70788526 | -0.70295724  | 0.816328423 | -0.861120624 | 0.389171612 | 0.999371363 | Not Sig |
| ENSG00000268941 | LINC01711    | long intergenic non-protein coding RNA 1711                       | 79160     | 3.576494913 | -0.702512936 | 1.459668454 | -0.481282536 | 0.630315707 | NA          | NA      |
| ENSG00000253106 | NA           | NA                                                                | NA        | 90.08456942 | -0.702361785 | 0.646492159 | -1.08641965  | 0.277293372 | 0.999371363 | Not Sig |
| ENSG00000085365 | SCAMP1       | secretory carrier membrane protein 1                              | 9522      | 1111.325962 | -0.702321003 | 0.682666571 | -1.028790676 | 0.303578049 | 0.999371363 | Not Sig |
| ENSG00000107643 | MAPK8        | mitogen-activated protein kinase 8                                | 5599      | 845.1494137 | -0.702019392 | 0.638095021 | -1.100180018 | 0.271253695 | 0.999371363 | Not Sig |
| ENSG00000212302 | NA           | NA                                                                | NA        | 1.709281255 | -0.70191301  | 1.882726261 | -0.372817347 | 0.709284391 | NA          | NA      |
| ENSG00000241015 | TPM3P9       | tropomyosin 3 pseudogene 9                                        | 147804    | 287.4549278 | -0.701788763 | 0.457282127 | -1.534695371 | 0.124858673 | 0.999371363 | Not Sig |
| ENSG00000104415 | WISP1        | WNT1 inducible signaling pathway protein 1                        | 8840      | 232.7175437 | -0.701652222 | 0.85107309  | -0.82443239  | 0.409693917 | 0.999371363 | Not Sig |
| ENSG00000199691 | NA           | NA                                                                | NA        | 11.56326799 | -0.701367848 | 0.85774579  | -0.817687311 | 0.413535758 | 0.999371363 | Not Sig |
| ENSG00000235128 | NA           | NA                                                                | NA        | 16.99923025 | -0.70115527  | 1.020715606 | -0.686925199 | 0.492129867 | 0.999371363 | Not Sig |
| ENSG00000166359 | WDR88        | WD repeat domain 88                                               | 126248    | 2.710567627 | -0.701099814 | 1.941729919 | -0.361069687 | 0.718047353 | NA          | NA      |
| ENSG00000267504 | NA           | NA                                                                | NA        | 52.14627676 | -0.701035009 | 0.561207074 | -1.249155688 | 0.211608136 | 0.999371363 | Not Sig |
| ENSG00000112303 | VNN2         | vanin 2                                                           | 8875      | 221.2827134 | -0.700774131 | 0.849733698 | -0.82469853  | 0.409542767 | 0.999371363 | Not Sig |
| ENSG00000229739 | LOC102724919 | uncharacterized LOC102724919                                      | 102724919 | 8.286702336 | -0.700584554 | 1.089856416 | -0.642822801 | 0.520339087 | 0.999371363 | Not Sig |
| ENSG00000231635 | NA           | NA                                                                | NA        | 0.784109993 | -0.700476638 | 3.237153681 | -0.216386587 | 0.82868642  | NA          | NA      |
| ENSG00000237380 | NA           | NA                                                                | NA        | 0.784109993 | -0.700476638 | 3.237153681 | -0.216386587 | 0.82868642  | NA          | NA      |
| ENSG00000257195 | NA           | NA                                                                | NA        | 0.784109993 | -0.700476638 | 3.237153681 | -0.216386587 | 0.82868642  | NA          | NA      |
| ENSG00000266640 | MIR4754      | microRNA 4754                                                     | 100616168 | 0.784109993 | -0.700476638 | 3.237153681 | -0.216386587 | 0.82868642  | NA          | NA      |
| ENSG00000153044 | CENPH        | centromere protein H                                              | 64946     | 88.08847525 | -0.700313054 | 0.794440741 | -0.881517044 | 0.378038033 | 0.999371363 | Not Sig |
| ENSG00000230940 | NA           | NA                                                                | NA        | 4.083354536 | -0.700134869 | 1.577341636 | -0.443870151 | 0.657136467 | NA          | NA      |
| ENSG00000242262 | NA           | NA                                                                | NA        | 3.266043572 | -0.700108034 | 1.470470009 | -0.47611174  | 0.633994774 | NA          | NA      |
| ENSG00000115657 | ABCB6        | ATP binding cassette subfamily B member 6 (Langereis blood group) | 10058     | 23.80017858 | -0.699932661 | 0.78939328  | -0.886671674 | 0.375255693 | 0.999371363 | Not Sig |
| ENSG00000177688 | SUMO4        | small ubiquitin-like modifier 4                                   | 387082    | 46.43736503 | -0.699703598 | 0.69690647  | -1.004013634 | 0.315372042 | 0.999371363 | Not Sig |
| ENSG00000263648 | NA           | NA                                                                | NA        | 25.70509576 | -0.699682185 | 0.955860129 | -0.731992228 | 0.464173312 | 0.999371363 | Not Sig |
| ENSG00000228485 | NA           | NA                                                                | NA        | 40.18865778 | -0.699122501 | 0.728217615 | -0.960046127 | 0.337032    | 0.999371363 | Not Sig |
| ENSG00000230578 | NA           | NA                                                                | NA        | 4.096644614 | -0.698933333 | 1.561823894 | -0.447510975 | 0.654506166 | NA          | NA      |



|                 |           |                                                               |           |             |              |             |              |             |             |         |
|-----------------|-----------|---------------------------------------------------------------|-----------|-------------|--------------|-------------|--------------|-------------|-------------|---------|
| ENSG00000262503 | NA        | NA                                                            | NA        | 9.076425232 | -0.698725192 | 1.069215812 | -0.653493134 | 0.513438415 | 0.999371363 | Not Sig |
| ENSG00000238324 | NA        | NA                                                            | NA        | 3.990494581 | -0.698615842 | 1.41006394  | -0.495449761 | 0.620282676 | NA          | NA      |
| ENSG00000156970 | BUB1B     | BUB1 mitotic checkpoint serine/threonine kinase B             | 701       | 176.0583777 | -0.698514811 | 1.234290619 | -0.565924103 | 0.571445376 | 0.999371363 | Not Sig |
| ENSG00000133401 | PDZD2     | PDZ domain containing 2                                       | 23037     | 2464.014517 | -0.698364779 | 0.778374207 | -0.897209559 | 0.369607105 | 0.999371363 | Not Sig |
| ENSG00000139329 | LUM       | lumican                                                       | 4060      | 7264.962063 | -0.69823581  | 0.617789373 | -1.130216608 | 0.258384963 | 0.999371363 | Not Sig |
| ENSG00000157999 | ANKRD61   | ankyrin repeat domain 61                                      | 100310846 | 2.450039056 | -0.69801157  | 1.590583213 | -0.438840021 | 0.660777459 | NA          | NA      |
| ENSG00000173917 | HOXB2     | homeobox B2                                                   | 3212      | 155.4521576 | -0.69788695  | 0.570933894 | -1.222360342 | 0.22157139  | 0.999371363 | Not Sig |
| ENSG00000153815 | CMIP      | c-Maf inducing protein                                        | 80790     | 3001.964717 | -0.69783561  | 0.415674312 | -1.678803787 | 0.09319029  | 0.999371363 | Not Sig |
| ENSG00000102572 | STK24     | serine/threonine kinase 24                                    | 8428      | 3044.483802 | -0.697754858 | 0.537249692 | -1.298753388 | 0.194028576 | 0.999371363 | Not Sig |
| ENSG00000226696 | LENG8-AS1 | LENG8 antisense RNA 1                                         | 104355426 | 126.031257  | -0.697283807 | 0.564029149 | -1.236254914 | 0.216363824 | 0.999371363 | Not Sig |
| ENSG00000004777 | ARHGAP33  | Rho GTPase activating protein 33                              | 115703    | 173.8959422 | -0.69715838  | 0.546626704 | -1.275382952 | 0.20217373  | 0.999371363 | Not Sig |
| ENSG00000229186 | NA        | NA                                                            | NA        | 83.99534704 | -0.697147472 | 0.470575002 | -1.481480038 | 0.1384787   | 0.999371363 | Not Sig |
| ENSG00000145244 | CORIN     | corin, serine peptidase                                       | 10699     | 89.98015415 | -0.697041555 | 0.624663981 | -1.115866412 | 0.264479321 | 0.999371363 | Not Sig |
| ENSG00000256030 | NA        | NA                                                            | NA        | 10.60474104 | -0.696931017 | 0.824490872 | -0.845286517 | 0.397950887 | 0.999371363 | Not Sig |
| ENSG00000223189 | NA        | NA                                                            | NA        | 8.262995232 | -0.696723454 | 1.584896105 | -0.439601972 | 0.660225412 | 0.999371363 | Not Sig |
| ENSG00000254671 | STT3A-AS1 | STT3A antisense RNA 1                                         | 105369550 | 2.887663302 | -0.696108449 | 1.373284158 | -0.506893235 | 0.612229733 | NA          | NA      |
| ENSG00000227541 | NA        | NA                                                            | NA        | 13.02472984 | -0.696039708 | 0.967956103 | -0.719081895 | 0.472090462 | 0.999371363 | Not Sig |
| ENSG00000196912 | ANKRD36B  | ankyrin repeat domain 36B                                     | 57730     | 883.5635178 | -0.69575645  | 0.620994719 | -1.120390286 | 0.262547483 | 0.999371363 | Not Sig |
| ENSG00000138764 | CCNG2     | cyclin G2                                                     | 901       | 1411.893491 | -0.695393036 | 0.583910172 | -1.190924681 | 0.233683154 | 0.999371363 | Not Sig |
| ENSG00000254598 | CSNK2A3   | casein kinase 2 alpha 3                                       | 283106    | 18.61802788 | -0.695280997 | 0.7675909   | -0.905796301 | 0.36504368  | 0.999371363 | Not Sig |
| ENSG00000153956 | CACNA2D1  | calcium voltage-gated channel auxiliary subunit alpha2delta 1 | 781       | 347.6761603 | -0.695083493 | 0.528093256 | -1.316213539 | 0.188102381 | 0.999371363 | Not Sig |
| ENSG00000256826 | NA        | NA                                                            | NA        | 2.232447669 | -0.695064216 | 2.109281111 | -0.329526592 | 0.741757698 | NA          | NA      |
| ENSG00000104218 | CSPP1     | centrosome and spindle pole associated protein 1              | 79848     | 807.5005423 | -0.695054633 | 0.488123838 | -1.423930935 | 0.154466466 | 0.999371363 | Not Sig |
| ENSG00000154146 | NRGN      | neurogranin                                                   | 4900      | 304.2227578 | -0.694776572 | 1.02769568  | -0.67605283  | 0.499007104 | 0.999371363 | Not Sig |
| ENSG00000105185 | PDCD5     | programmed cell death 5                                       | 9141      | 311.0418688 | -0.694726481 | 0.53452391  | -1.299710768 | 0.193700118 | 0.999371363 | Not Sig |
| ENSG00000143179 | UCK2      | uridine-cytidine kinase 2                                     | 7371      | 453.8680347 | -0.694539693 | 0.583066626 | -1.191184098 | 0.233581321 | 0.999371363 | Not Sig |
| ENSG00000185480 | PARPBP    | PARP1 binding protein                                         | 55010     | 104.6922019 | -0.694536761 | 0.985562605 | -0.704710951 | 0.480990135 | 0.999371363 | Not Sig |
| ENSG00000107485 | GATA3     | GATA binding protein 3                                        | 2625      | 177.6653973 | -0.694171671 | 0.713560375 | -0.972828223 | 0.330638683 | 0.999371363 | Not Sig |
| ENSG00000111713 | GYS2      | glycogen synthase 2                                           | 2998      | 1.715718791 | -0.693689826 | 1.721005922 | -0.403072307 | 0.686895033 | NA          | NA      |
| ENSG00000234589 | NA        | NA                                                            | NA        | 5.041570681 | -0.693671078 | 1.355814656 | -0.511626773 | 0.608912244 | NA          | NA      |
| ENSG00000119138 | KLF9      | Kruppel like factor 9                                         | 687       | 2025.529566 | -0.693626436 | 0.61213719  | -1.133122521 | 0.257162805 | 0.999371363 | Not Sig |
| ENSG00000257178 | NA        | NA                                                            | NA        | 59.40677193 | -0.693565589 | 0.520582583 | -1.332287348 | 0.182765783 | 0.999371363 | Not Sig |
| ENSG00000120992 | LYPLA1    | lysophospholipase I                                           | 10434     | 1407.353784 | -0.693392558 | 0.730012017 | -0.949837184 | 0.342194989 | 0.999371363 | Not Sig |
| ENSG00000229994 | NA        | NA                                                            | NA        | 50.47722163 | -0.693356824 | 0.74214638  | -0.934258851 | 0.350170385 | 0.999371363 | Not Sig |
| ENSG00000114354 | TFG       | TRK-fused gene                                                | 10342     | 1886.062052 | -0.693251813 | 0.724789956 | -0.956486507 | 0.338826498 | 0.999371363 | Not Sig |

|                 |              |                                                     |           |             |              |             |              |             |             |         |
|-----------------|--------------|-----------------------------------------------------|-----------|-------------|--------------|-------------|--------------|-------------|-------------|---------|
| ENSG00000166923 | GREM1        | gremlin 1, DAN family BMP antagonist                | 26585     | 357.5619412 | -0.693142539 | 1.210152997 | -0.57277265  | 0.56679864  | 0.999371363 | Not Sig |
| ENSG00000234420 | ZNF37BP      | zinc finger protein 37B, pseudogene                 | 100129482 | 606.9782986 | -0.693057742 | 0.515860213 | -1.343499119 | 0.179110411 | 0.999371363 | Not Sig |
| ENSG00000213347 | MXD3         | MAX dimerization protein 3                          | 83463     | 199.8611661 | -0.693023701 | 0.505680679 | -1.370476925 | 0.170538074 | 0.999371363 | Not Sig |
| ENSG00000165983 | PTER         | phosphotriesterase related                          | 9317      | 670.437863  | -0.692977634 | 0.747288962 | -0.927322186 | 0.353759279 | 0.999371363 | Not Sig |
| ENSG00000039319 | ZFYVE16      | zinc finger FYVE-type containing 16                 | 9765      | 1889.312886 | -0.692533908 | 0.612986558 | -1.129770138 | 0.258573094 | 0.999371363 | Not Sig |
| ENSG00000221252 | NA           | NA                                                  | NA        | 4.395244955 | -0.692506525 | 1.304705815 | -0.530775993 | 0.595574018 | NA          | NA      |
| ENSG00000133858 | ZFC3H1       | zinc finger C3H1-type containing                    | 196441    | 2511.300206 | -0.692377998 | 0.560024104 | -1.236336067 | 0.21633367  | 0.999371363 | Not Sig |
| ENSG00000156414 | TDRD9        | tudor domain containing 9                           | 122402    | 31.61061714 | -0.692218493 | 0.892110225 | -0.775933818 | 0.437788064 | 0.999371363 | Not Sig |
| ENSG00000268593 | NA           | NA                                                  | NA        | 9.462272623 | -0.691905706 | 0.907961287 | -0.762043179 | 0.446034234 | 0.999371363 | Not Sig |
| ENSG00000182909 | NA           | NA                                                  | NA        | 168.6603643 | -0.691795309 | 0.645533294 | -1.071664801 | 0.283870616 | 0.999371363 | Not Sig |
| ENSG00000249494 | LOC105379143 | uncharacterized LOC105379143                        | 105379143 | 3.864345747 | -0.691623122 | 1.414768327 | -0.488859631 | 0.624941078 | NA          | NA      |
| ENSG00000197880 | MDS2         | myelodysplastic syndrome 2 translocation associated | 259283    | 5.087912396 | -0.691460573 | 1.200590932 | -0.57593353  | 0.564660111 | NA          | NA      |
| ENSG00000226632 | NA           | NA                                                  | NA        | 18.74280499 | -0.691295908 | 0.7464818   | -0.926072019 | 0.354408554 | 0.999371363 | Not Sig |
| ENSG00000008128 | CDK11A       | cyclin dependent kinase 11A                         | 728642    | 56.13872523 | -0.691101182 | 0.594842589 | -1.161821958 | 0.245307793 | 0.999371363 | Not Sig |
| ENSG00000135047 | CTSL         | cathepsin L                                         | 1514      | 2227.999963 | -0.690968351 | 0.417487978 | -1.655061674 | 0.097911988 | 0.999371363 | Not Sig |
| ENSG00000188856 | NA           | NA                                                  | NA        | 10.75287099 | -0.690306959 | 1.642865783 | -0.420184635 | 0.674350579 | 0.999371363 | Not Sig |
| ENSG00000230769 | NA           | NA                                                  | NA        | 18.93996089 | -0.689177971 | 0.708126646 | -0.973241122 | 0.330433478 | 0.999371363 | Not Sig |
| ENSG00000134245 | WNT2B        | Wnt family member 2B                                | 7482      | 282.5848897 | -0.689013531 | 0.528605837 | -1.303454262 | 0.192419722 | 0.999371363 | Not Sig |
| ENSG00000200118 | NA           | NA                                                  | NA        | 10.83044351 | -0.688983313 | 1.085647667 | -0.634628834 | 0.525670518 | 0.999371363 | Not Sig |
| ENSG00000176454 | LPCAT4       | lysophosphatidylcholine acyltransferase 4           | 254531    | 400.5565019 | -0.688667863 | 0.460655149 | -1.494974851 | 0.134921006 | 0.999371363 | Not Sig |
| ENSG00000092345 | DAZL         | deleted in azoospermia like                         | 1618      | 0.954353125 | -0.688508592 | 3.103464543 | -0.221851606 | 0.824429405 | NA          | NA      |
| ENSG00000241709 | NA           | NA                                                  | NA        | 0.954353125 | -0.688508592 | 3.103464543 | -0.221851606 | 0.824429405 | NA          | NA      |
| ENSG00000254774 | NA           | NA                                                  | NA        | 0.954353125 | -0.688508592 | 3.103464543 | -0.221851606 | 0.824429405 | NA          | NA      |
| ENSG00000265986 | MIR4735      | microRNA 4735                                       | 100616363 | 0.954353125 | -0.688508592 | 3.103464543 | -0.221851606 | 0.824429405 | NA          | NA      |
| ENSG00000271142 | NA           | NA                                                  | NA        | 0.954353125 | -0.688508592 | 3.103464543 | -0.221851606 | 0.824429405 | NA          | NA      |
| ENSG00000239382 | ALKBH6       | alkB homolog 6                                      | 84964     | 49.26057478 | -0.688002057 | 0.536386875 | -1.282660127 | 0.199611175 | 0.999371363 | Not Sig |
| ENSG00000153214 | TMEM87B      | transmembrane protein 87B                           | 84910     | 1967.090834 | -0.687964782 | 0.686720431 | -1.00181202  | 0.316434391 | 0.999371363 | Not Sig |
| ENSG00000224667 | NA           | NA                                                  | NA        | 4.994897724 | -0.687950713 | 1.436502627 | -0.478906687 | 0.632005014 | NA          | NA      |
| ENSG00000230793 | NA           | NA                                                  | NA        | 2.010278347 | -0.687421021 | 1.663723107 | -0.413182349 | 0.679473019 | NA          | NA      |
| ENSG00000169435 | RASSF6       | Ras association domain family member 6              | 166824    | 309.1705928 | -0.687333803 | 0.764462308 | -0.89910751  | 0.368595398 | 0.999371363 | Not Sig |
| ENSG00000130702 | LAMA5        | laminin subunit alpha 5                             | 3911      | 6839.795505 | -0.687329583 | 0.619107455 | -1.110194326 | 0.266915297 | 0.999371363 | Not Sig |
| ENSG00000099365 | STX1B        | syntaxin 1B                                         | 112755    | 24.86725701 | -0.68709788  | 0.673669845 | -1.019932665 | 0.307760397 | 0.999371363 | Not Sig |
| ENSG00000144791 | LIMD1        | LIM domains containing 1                            | 8994      | 3524.139002 | -0.687090881 | 0.481618991 | -1.426627466 | 0.153687303 | 0.999371363 | Not Sig |
| ENSG00000198130 | HIBCH        | 3-hydroxyisobutyryl-CoA hydrolase                   | 26275     | 736.3119596 | -0.686770948 | 0.643131285 | -1.067854983 | 0.285585931 | 0.999371363 | Not Sig |
| ENSG00000267796 | LIN37        | lin-37 DREAM MuvB core complex component            | 55957     | 58.6526382  | -0.68629277  | 0.639156109 | -1.073748275 | 0.282935518 | 0.999371363 | Not Sig |

|                 |           |                                                                     |           |             |              |             |              |             |             |         |
|-----------------|-----------|---------------------------------------------------------------------|-----------|-------------|--------------|-------------|--------------|-------------|-------------|---------|
| ENSG00000114857 | NKTR      | natural killer cell triggering receptor                             | 4820      | 4999.222481 | -0.685948538 | 0.691081274 | -0.992572891 | 0.320918141 | 0.999371363 | Not Sig |
| ENSG00000142677 | IL22RA1   | interleukin 22 receptor subunit alpha 1                             | 58985     | 38.84021776 | -0.68578379  | 0.885349339 | -0.774591181 | 0.43858127  | 0.999371363 | Not Sig |
| ENSG00000201616 | NA        | NA                                                                  | NA        | 5.228558657 | -0.685506046 | 1.561965276 | -0.438874063 | 0.660752791 | NA          | NA      |
| ENSG00000219986 | NA        | NA                                                                  | NA        | 7.611487901 | -0.6854284   | 1.064649935 | -0.643806361 | 0.519701008 | 0.999371363 | Not Sig |
| ENSG00000220693 | NA        | NA                                                                  | NA        | 6.782331452 | -0.685417814 | 1.075510548 | -0.637295297 | 0.523932514 | 0.999371363 | Not Sig |
| ENSG00000267207 | NA        | NA                                                                  | NA        | 4.859476548 | -0.685328883 | 1.427158643 | -0.480205117 | 0.631081549 | NA          | NA      |
| ENSG00000229391 | HLA-DRB6  | major histocompatibility complex, class II, DR beta 6 (pseudogene)  | 3128      | 330.4346579 | -0.685075235 | 2.247251879 | -0.304850222 | 0.760480229 | 0.999371363 | Not Sig |
| ENSG00000199530 | NA        | NA                                                                  | NA        | 4.590911131 | -0.684838917 | 1.314059607 | -0.521162749 | 0.602253402 | NA          | NA      |
| ENSG00000268379 | NA        | NA                                                                  | NA        | 6.521973891 | -0.684554932 | 1.057541379 | -0.64730794  | 0.517432663 | NA          | NA      |
| ENSG00000260121 | NA        | NA                                                                  | NA        | 27.82240109 | -0.684453545 | 0.808965003 | -0.846085483 | 0.397505059 | 0.999371363 | Not Sig |
| ENSG00000226268 | NA        | NA                                                                  | NA        | 0.761365666 | -0.684427544 | 2.811654865 | -0.243425163 | 0.807676053 | NA          | NA      |
| ENSG00000244239 | NA        | NA                                                                  | NA        | 0.761365666 | -0.684427544 | 2.811654865 | -0.243425163 | 0.807676053 | NA          | NA      |
| ENSG00000253964 | NA        | NA                                                                  | NA        | 1.522731331 | -0.683755684 | 2.228462911 | -0.306828389 | 0.758973999 | NA          | NA      |
| ENSG00000194270 | NA        | NA                                                                  | NA        | 5.603922215 | -0.683677801 | 1.539784496 | -0.444008758 | 0.657036252 | NA          | NA      |
| ENSG00000104626 | ERI1      | exoribonuclease 1                                                   | 90459     | 408.0930217 | -0.683334582 | 0.590391215 | -1.157426744 | 0.247098053 | 0.999371363 | Not Sig |
| ENSG00000249210 | NA        | NA                                                                  | NA        | 0.861078163 | -0.683256348 | 2.442635201 | -0.279720995 | 0.77969157  | NA          | NA      |
| ENSG00000230036 | NA        | NA                                                                  | NA        | 4.322577858 | -0.682866585 | 1.324722995 | -0.515478774 | 0.606218498 | NA          | NA      |
| ENSG00000211643 | NA        | NA                                                                  | NA        | 4.281318365 | -0.682826356 | 1.501327511 | -0.454815056 | 0.649242298 | NA          | NA      |
| ENSG00000260886 | TAT-AS1   | TAT antisense RNA 1                                                 | 100132529 | 3.063186857 | -0.682183974 | 1.529796365 | -0.44593123  | 0.655646923 | NA          | NA      |
| ENSG00000208772 | SNORD94   | small nucleolar RNA, C/D box 94                                     | 692225    | 27.09220471 | -0.6819148   | 0.697514727 | -0.977634985 | 0.328254888 | 0.999371363 | Not Sig |
| ENSG00000214135 | LOC220729 | succinate dehydrogenase complex flavoprotein subunit A (pseudogene) | 220729    | 527.1365289 | -0.681263696 | 0.493722779 | -1.379850646 | 0.167632635 | 0.999371363 | Not Sig |
| ENSG00000225292 | NA        | NA                                                                  | NA        | 2.060068075 | -0.681083685 | 1.812856404 | -0.375696433 | 0.70714259  | NA          | NA      |
| ENSG00000270948 | NA        | NA                                                                  | NA        | 2.948324681 | -0.681081858 | 1.485990086 | -0.458335398 | 0.646711496 | NA          | NA      |
| ENSG00000272182 | NA        | NA                                                                  | NA        | 7.732992566 | -0.680989931 | 1.135538195 | -0.599706759 | 0.548701683 | 0.999371363 | Not Sig |
| ENSG00000104047 | DTWD1     | DTW domain containing 1                                             | 56986     | 426.2904415 | -0.6808968   | 0.603583284 | -1.128090883 | 0.259281539 | 0.999371363 | Not Sig |
| ENSG00000269924 | NA        | NA                                                                  | NA        | 63.25672878 | -0.680878534 | 0.827044047 | -0.82326756  | 0.410355857 | 0.999371363 | Not Sig |
| ENSG00000235781 | NA        | NA                                                                  | NA        | 13.56305671 | -0.680859231 | 0.975641877 | -0.697857736 | 0.485266168 | 0.999371363 | Not Sig |
| ENSG00000263045 | NA        | NA                                                                  | NA        | 4.146434342 | -0.680711852 | 1.272149727 | -0.535087841 | 0.592589117 | NA          | NA      |
| ENSG00000267430 | NA        | NA                                                                  | NA        | 36.53676693 | -0.680640372 | 0.648221302 | -1.050012349 | 0.293712435 | 0.999371363 | Not Sig |
| ENSG00000199200 | NA        | NA                                                                  | NA        | 7.208641849 | -0.680535922 | 1.003029689 | -0.678480338 | 0.497467186 | 0.999371363 | Not Sig |
| ENSG00000189144 | ZNF573    | zinc finger protein 573                                             | 126231    | 255.1325093 | -0.680042479 | 0.496751867 | -1.368978203 | 0.171006089 | 0.999371363 | Not Sig |
| ENSG00000199075 | MIR26A1   | microRNA 26a-1                                                      | 407015    | 4.022145107 | -0.680004966 | 1.323731443 | -0.513703115 | 0.607459574 | NA          | NA      |
| ENSG00000238878 | NA        | NA                                                                  | NA        | 3.877331773 | -0.679703499 | 1.840810604 | -0.369241408 | 0.711947794 | NA          | NA      |
| ENSG00000168743 | NPNT      | nephronectin                                                        | 255743    | 3137.315857 | -0.679621064 | 0.667810171 | -1.017686003 | 0.308827201 | 0.999371363 | Not Sig |
| ENSG00000168237 | GLYCK     | glycerate kinase                                                    | 132158    | 233.5729174 | -0.67938128  | 0.462819684 | -1.467917858 | 0.142126537 | 0.999371363 | Not Sig |

|                 |          |                                               |           |             |              |             |              |             |             |         |
|-----------------|----------|-----------------------------------------------|-----------|-------------|--------------|-------------|--------------|-------------|-------------|---------|
| ENSG00000167637 | ZNF283   | zinc finger protein 283                       | 284349    | 246.4718025 | -0.67929593  | 0.508508256 | -1.33586018  | 0.181594979 | 0.999371363 | Not Sig |
| ENSG00000186105 | LRRC70   | leucine rich repeat containing 70             | 100130733 | 20.93213452 | -0.679071825 | 1.129511285 | -0.601208535 | 0.5477011   | 0.999371363 | Not Sig |
| ENSG00000261513 | NA       | NA                                            | NA        | 2.937038022 | -0.678569152 | 1.520485586 | -0.446284502 | 0.65539175  | NA          | NA      |
| ENSG00000143367 | TUFT1    | tuftelin 1                                    | 7286      | 756.3343195 | -0.678171673 | 0.676494703 | -1.002478911 | 0.316112347 | 0.999371363 | Not Sig |
| ENSG00000213058 | NA       | NA                                            | NA        | 15.95353158 | -0.678009827 | 1.064890649 | -0.63669432  | 0.524323974 | 0.999371363 | Not Sig |
| ENSG00000204475 | NCR3     | natural cytotoxicity triggering receptor 3    | 259197    | 13.95251705 | -0.677991688 | 1.295464922 | -0.523357813 | 0.600725276 | 0.999371363 | Not Sig |
| ENSG00000180376 | CCDC66   | coiled-coil domain containing 66              | 285331    | 685.4524754 | -0.677727695 | 0.631701038 | -1.072861455 | 0.283333283 | 0.999371363 | Not Sig |
| ENSG00000251002 | NA       | NA                                            | NA        | 6.709637165 | -0.677677391 | 1.136204779 | -0.596439484 | 0.55088167  | 0.999371363 | Not Sig |
| ENSG00000198496 | NBR2     | neighbor of BRCA1 gene 2 (non-protein coding) | 10230     | 162.3670782 | -0.677603791 | 0.499070511 | -1.357731576 | 0.174548874 | 0.999371363 | Not Sig |
| ENSG00000267139 | NA       | NA                                            | NA        | 6.991321942 | -0.677550591 | 1.781052136 | -0.380421537 | 0.70363253  | 0.999371363 | Not Sig |
| ENSG00000182372 | CLN8     | CLN8, transmembrane ER and ERGIC protein      | 2055      | 787.9084204 | -0.677326607 | 0.559002085 | -1.211670986 | 0.22563835  | 0.999371363 | Not Sig |
| ENSG00000261094 | NA       | NA                                            | NA        | 37.61549278 | -0.677304826 | 0.611674209 | -1.10729669  | 0.268165675 | 0.999371363 | Not Sig |
| ENSG00000261131 | NA       | NA                                            | NA        | 6.879027236 | -0.677280799 | 0.972041523 | -0.69676118  | 0.485952264 | 0.999371363 | Not Sig |
| ENSG00000177721 | ANXA2R   | annexin A2 receptor                           | 389289    | 81.99388033 | -0.676355686 | 0.49936907  | -1.354420463 | 0.175602273 | 0.999371363 | Not Sig |
| ENSG00000270802 | NA       | NA                                            | NA        | 4.760739256 | -0.675872968 | 1.22637853  | -0.551112851 | 0.581556316 | NA          | NA      |
| ENSG00000120093 | HOXB3    | homeobox B3                                   | 3213      | 397.662121  | -0.675762357 | 0.506247514 | -1.334845778 | 0.181926827 | 0.999371363 | Not Sig |
| ENSG00000231595 | NA       | NA                                            | NA        | 12.5571612  | -0.675694533 | 0.900269196 | -0.750547209 | 0.452925202 | 0.999371363 | Not Sig |
| ENSG00000128585 | MKLN1    | muskelin 1                                    | 4289      | 3455.222821 | -0.675612221 | 0.597182036 | -1.131333798 | 0.257914624 | 0.999371363 | Not Sig |
| ENSG00000256588 | NA       | NA                                            | NA        | 17.85505529 | -0.675496543 | 1.016599745 | -0.664466567 | 0.50639174  | 0.999371363 | Not Sig |
| ENSG00000196865 | NHLRC2   | NHL repeat containing 2                       | 374354    | 1550.382034 | -0.675369435 | 0.578837257 | -1.166769117 | 0.243303622 | 0.999371363 | Not Sig |
| ENSG00000269944 | NA       | NA                                            | NA        | 2.39024703  | -0.675305634 | 1.587477259 | -0.42539547  | 0.670548408 | NA          | NA      |
| ENSG00000266017 | MIR4477B | microRNA 4477b                                | 100616194 | 20.12636984 | -0.675062721 | 0.682186789 | -0.989557013 | 0.32239069  | 0.999371363 | Not Sig |
| ENSG00000223461 | NA       | NA                                            | NA        | 1.298702409 | -0.675027109 | 2.383006175 | -0.283267042 | 0.77697214  | NA          | NA      |
| ENSG00000267379 | NA       | NA                                            | NA        | 1.298702409 | -0.675027109 | 2.383006175 | -0.283267042 | 0.77697214  | NA          | NA      |
| ENSG00000182484 | NA       | NA                                            | NA        | 48.35485661 | -0.67502645  | 0.619137366 | -1.09026928  | 0.275594543 | 0.999371363 | Not Sig |
| ENSG00000114026 | OGG1     | 8-oxoguanine DNA glycosylase                  | 4968      | 391.0589956 | -0.674950697 | 0.540987665 | -1.247626776 | 0.212167768 | 0.999371363 | Not Sig |
| ENSG00000117318 | ID3      | inhibitor of DNA binding 3, HLH protein       | 3399      | 1437.293343 | -0.674368301 | 0.67927885  | -0.992770939 | 0.320821595 | 0.999371363 | Not Sig |
| ENSG00000113580 | NR3C1    | nuclear receptor subfamily 3 group C member 1 | 2908      | 3914.757267 | -0.673930452 | 0.544437553 | -1.23784711  | 0.215772756 | 0.999371363 | Not Sig |
| ENSG00000268581 | NA       | NA                                            | NA        | 3.559794789 | -0.673674313 | 1.741847116 | -0.386758578 | 0.698934946 | NA          | NA      |
| ENSG00000205583 | NA       | NA                                            | NA        | 114.4861246 | -0.673564306 | 0.46184566  | -1.458418611 | 0.144725194 | 0.999371363 | Not Sig |
| ENSG00000233010 | NA       | NA                                            | NA        | 7.908898555 | -0.673339918 | 1.192970789 | -0.564422804 | 0.572466423 | 0.999371363 | Not Sig |
| ENSG00000259751 | NA       | NA                                            | NA        | 5.744561723 | -0.673185299 | 1.319191888 | -0.510301272 | 0.609840412 | NA          | NA      |
| ENSG00000247728 | NA       | NA                                            | NA        | 35.1041663  | -0.673141899 | 0.701873405 | -0.959064546 | 0.33752623  | 0.999371363 | Not Sig |
| ENSG00000158805 | ZNF276   | zinc finger protein 276                       | 92822     | 1072.624982 | -0.673055477 | 0.52990821  | -1.270135969 | 0.204036201 | 0.999371363 | Not Sig |
| ENSG00000267248 | NA       | NA                                            | NA        | 32.27633381 | -0.672130458 | 0.702874837 | -0.956259099 | 0.338941349 | 0.999371363 | Not Sig |

|                 |              |                                                         |           |             |              |             |              |             |             |         |
|-----------------|--------------|---------------------------------------------------------|-----------|-------------|--------------|-------------|--------------|-------------|-------------|---------|
| ENSG00000186197 | EDARADD      | EDAR associated death domain                            | 128178    | 85.68108709 | -0.672058343 | 0.817294436 | -0.822296486 | 0.410908176 | 0.999371363 | Not Sig |
| ENSG00000226752 | CUTALP       | cutA divalent cation tolerance homolog-like, pseudogene | 253039    | 902.1405241 | -0.671825082 | 0.412881705 | -1.627161181 | 0.10370287  | 0.999371363 | Not Sig |
| ENSG00000175470 | PPP2R2D      | protein phosphatase 2 regulatory subunit Bdelta         | 55844     | 751.3421234 | -0.671821685 | 0.418524253 | -1.605215659 | 0.108446353 | 0.999371363 | Not Sig |
| ENSG00000244502 | HDAC11-AS1   | HDAC11 antisense RNA 1                                  | 100874101 | 4.841570446 | -0.671730815 | 1.171954579 | -0.573171373 | 0.566528665 | NA          | NA      |
| ENSG00000177119 | ANO6         | anoctamin 6                                             | 196527    | 2882.247637 | -0.670819255 | 0.515741328 | -1.300689355 | 0.193364808 | 0.999371363 | Not Sig |
| ENSG00000181444 | ZNF467       | zinc finger protein 467                                 | 168544    | 409.6655577 | -0.670421187 | 0.871568792 | -0.769212015 | 0.441767459 | 0.999371363 | Not Sig |
| ENSG00000238766 | NA           | NA                                                      | NA        | 3.339580022 | -0.670359904 | 1.362723799 | -0.491926467 | 0.622771327 | NA          | NA      |
| ENSG00000070031 | SCT          | secretin                                                | 6343      | 5.100217742 | -0.670339252 | 1.536308281 | -0.436331211 | 0.66259644  | NA          | NA      |
| ENSG00000269918 | NA           | NA                                                      | NA        | 32.19726952 | -0.670334848 | 0.947729693 | -0.707305947 | 0.47937637  | 0.999371363 | Not Sig |
| ENSG00000197008 | ZNF138       | zinc finger protein 138                                 | 7697      | 369.2268237 | -0.670294014 | 0.831496418 | -0.806129768 | 0.420168029 | 0.999371363 | Not Sig |
| ENSG00000106366 | SERPINE1     | serpin family E member 1                                | 5054      | 1584.906981 | -0.670184164 | 0.729701118 | -0.918436531 | 0.358390373 | 0.999371363 | Not Sig |
| ENSG00000269871 | NA           | NA                                                      | NA        | 13.06897886 | -0.669893455 | 0.89041549  | -0.752338052 | 0.45184779  | 0.999371363 | Not Sig |
| ENSG00000234329 | NA           | NA                                                      | NA        | 116.9589942 | -0.669707095 | 0.706864443 | -0.947434768 | 0.343417282 | 0.999371363 | Not Sig |
| ENSG00000261291 | NA           | NA                                                      | NA        | 19.5814455  | -0.669576808 | 0.867345867 | -0.771983627 | 0.440124125 | 0.999371363 | Not Sig |
| ENSG00000107331 | ABCA2        | ATP binding cassette subfamily A member 2               | 20        | 1841.192195 | -0.669539939 | 0.520012304 | -1.287546342 | 0.197903928 | 0.999371363 | Not Sig |
| ENSG00000165650 | PDZD8        | PDZ domain containing 8                                 | 118987    | 1738.030903 | -0.669530189 | 0.526729134 | -1.271109088 | 0.203689843 | 0.999371363 | Not Sig |
| ENSG00000163945 | UVSSA        | UV stimulated scaffold protein A                        | 57654     | 992.962385  | -0.669435137 | 0.472904847 | -1.415581043 | 0.156898205 | 0.999371363 | Not Sig |
| ENSG00000163945 | CRIPAK       | cysteine rich PAK1 inhibitor                            | 285464    | 992.962385  | -0.669435137 | 0.472904847 | -1.415581043 | 0.156898205 | 0.999371363 | Not Sig |
| ENSG00000269837 | NA           | NA                                                      | NA        | 127.77026   | -0.66926169  | 0.490992474 | -1.363079326 | 0.172857512 | 0.999371363 | Not Sig |
| ENSG00000225720 | NA           | NA                                                      | NA        | 3.387952347 | -0.668757544 | 1.609552529 | -0.415492835 | 0.677781159 | NA          | NA      |
| ENSG00000207991 | MIR601       | microRNA 601                                            | 693186    | 6.656676006 | -0.668317803 | 1.152531318 | -0.579869538 | 0.562002599 | 0.999371363 | Not Sig |
| ENSG00000125650 | PSPN         | persephin                                               | 5623      | 46.54508639 | -0.66821997  | 0.6796373   | -0.983200847 | 0.325508598 | 0.999371363 | Not Sig |
| ENSG00000255837 | TAS2R20      | taste 2 receptor member 20                              | 259295    | 56.17638867 | -0.668073351 | 0.935653265 | -0.714018084 | 0.475215997 | 0.999371363 | Not Sig |
| ENSG00000205565 | NA           | NA                                                      | NA        | 12.65792359 | -0.667926364 | 1.061038763 | -0.629502321 | 0.52902025  | 0.999371363 | Not Sig |
| ENSG00000153107 | ANAPC1       | anaphase promoting complex subunit 1                    | 64682     | 1265.398328 | -0.66791309  | 0.588703921 | -1.134548398 | 0.256564584 | 0.999371363 | Not Sig |
| ENSG00000105819 | PMPCB        | peptidase, mitochondrial processing beta subunit        | 9512      | 730.9706697 | -0.66787324  | 0.518636073 | -1.2877493   | 0.197833246 | 0.999371363 | Not Sig |
| ENSG00000238812 | NA           | NA                                                      | NA        | 4.466179699 | -0.666767814 | 1.52354734  | -0.437641678 | 0.661646054 | NA          | NA      |
| ENSG00000165392 | WRN          | Werner syndrome RecQ like helicase                      | 7486      | 633.0142675 | -0.666443459 | 0.539481482 | -1.23534075  | 0.216703714 | 0.999371363 | Not Sig |
| ENSG00000233654 | NA           | NA                                                      | NA        | 15.8820989  | -0.666157572 | 0.83536849  | -0.797441584 | 0.425194617 | 0.999371363 | Not Sig |
| ENSG00000233547 | NA           | NA                                                      | NA        | 11.43817246 | -0.665913292 | 0.911464574 | -0.730597009 | 0.465025339 | 0.999371363 | Not Sig |
| ENSG00000266297 | MIR744       | microRNA 744                                            | 100126313 | 9.283384832 | -0.665858045 | 1.053560173 | -0.632007608 | 0.527381906 | 0.999371363 | Not Sig |
| ENSG00000196381 | ZNF781       | zinc finger protein 781                                 | 163115    | 31.81879884 | -0.6656235   | 0.630017389 | -1.056516078 | 0.290732499 | 0.999371363 | Not Sig |
| ENSG00000104731 | KLHDC4       | kelch domain containing 4                               | 54758     | 593.7359528 | -0.665521624 | 0.460991607 | -1.443674057 | 0.148830682 | 0.999371363 | Not Sig |
| ENSG00000104731 | LOC105371397 | uncharacterized LOC105371397                            | 105371397 | 593.7359528 | -0.665521624 | 0.460991607 | -1.443674057 | 0.148830682 | 0.999371363 | Not Sig |
| ENSG00000232031 | NA           | NA                                                      | NA        | 31.90678314 | -0.665272933 | 0.884727623 | -0.751952257 | 0.452079771 | 0.999371363 | Not Sig |

|                 |            |                                                                        |           |             |              |             |              |             |             |         |
|-----------------|------------|------------------------------------------------------------------------|-----------|-------------|--------------|-------------|--------------|-------------|-------------|---------|
| ENSG00000166398 | KIAA0355   | KIAA0355                                                               | 9710      | 1266.984749 | -0.664906951 | 0.457013106 | -1.454896899 | 0.145697806 | 0.999371363 | Not Sig |
| ENSG00000187726 | DNAJB13    | DnaJ heat shock protein family (Hsp40) member B13                      | 374407    | 244.8761821 | -0.664246075 | 0.814935597 | -0.815090269 | 0.415020642 | 0.999371363 | Not Sig |
| ENSG00000261641 | NA         | NA                                                                     | NA        | 2.029590954 | -0.664029886 | 1.874722225 | -0.354201747 | 0.723187695 | NA          | NA      |
| ENSG00000159899 | NPR2       | natriuretic peptide receptor 2                                         | 4882      | 320.3914113 | -0.664029827 | 0.52270262  | -1.270377845 | 0.203950071 | 0.999371363 | Not Sig |
| ENSG00000222011 | FAM185A    | family with sequence similarity 185 member A                           | 222234    | 180.5677451 | -0.663967221 | 0.522955934 | -1.26964277  | 0.204211907 | 0.999371363 | Not Sig |
| ENSG00000198646 | NCOA6      | nuclear receptor coactivator 6                                         | 23054     | 1802.856304 | -0.663756064 | 0.46176152  | -1.437443431 | 0.150592036 | 0.999371363 | Not Sig |
| ENSG00000134884 | ARGLU1     | arginine and glutamate rich 1                                          | 55082     | 3089.717645 | -0.663690884 | 0.432112027 | -1.53592319  | 0.12455722  | 0.999371363 | Not Sig |
| ENSG00000269337 | NA         | NA                                                                     | NA        | 66.03889217 | -0.663582846 | 0.960493058 | -0.690877296 | 0.489642655 | 0.999371363 | Not Sig |
| ENSG00000216657 | NA         | NA                                                                     | NA        | 0.838333836 | -0.663212044 | 2.759789625 | -0.240312536 | 0.810087977 | NA          | NA      |
| ENSG00000258666 | NA         | NA                                                                     | NA        | 0.838333836 | -0.663212044 | 2.759789625 | -0.240312536 | 0.810087977 | NA          | NA      |
| ENSG00000260939 | NA         | NA                                                                     | NA        | 0.838333836 | -0.663212044 | 2.759789625 | -0.240312536 | 0.810087977 | NA          | NA      |
| ENSG00000163072 | NOSTRIN    | nitric oxide synthase trafficking                                      | 115677    | 797.6072772 | -0.66319893  | 0.641951778 | -1.033097739 | 0.301558161 | 0.999371363 | Not Sig |
| ENSG00000221886 | ZBED8      | zinc finger BED-type containing 8                                      | 63920     | 152.4442284 | -0.663184657 | 0.645167904 | -1.027925681 | 0.303984788 | 0.999371363 | Not Sig |
| ENSG00000138780 | GSTCD      | glutathione S-transferase C-terminal domain containing                 | 79807     | 324.8086152 | -0.663148605 | 0.638315928 | -1.038903427 | 0.298849652 | 0.999371363 | Not Sig |
| ENSG00000236233 | NA         | NA                                                                     | NA        | 2.293369338 | -0.663124733 | 2.143928165 | -0.309303615 | 0.757090581 | NA          | NA      |
| ENSG00000170873 | MTSS1      | MTSS1, I-BAR domain containing                                         | 9788      | 1612.569885 | -0.663010537 | 0.778277538 | -0.851894735 | 0.394272519 | 0.999371363 | Not Sig |
| ENSG00000219438 | FAM19A5    | family with sequence similarity 19 member A5, C-C motif chemokine like | 25817     | 117.023342  | -0.662913251 | 0.505375122 | -1.311725138 | 0.189612892 | 0.999371363 | Not Sig |
| ENSG00000258068 | NA         | NA                                                                     | NA        | 3.524557825 | -0.662888395 | 1.416407585 | -0.46800681  | 0.63977972  | NA          | NA      |
| ENSG00000171448 | ZBTB26     | zinc finger and BTB domain containing 26                               | 57684     | 246.1381056 | -0.662344704 | 0.546085689 | -1.212895188 | 0.225169896 | 0.999371363 | Not Sig |
| ENSG00000153002 | CPB1       | carboxypeptidase B1                                                    | 1360      | 3.734394331 | -0.661835395 | 1.897759109 | -0.348745735 | 0.727280206 | NA          | NA      |
| ENSG00000257298 | NA         | NA                                                                     | NA        | 75.16422861 | -0.661788248 | 0.555469787 | -1.191402779 | 0.233495502 | 0.999371363 | Not Sig |
| ENSG00000197114 | ZGPAT      | zinc finger CCH-type and G-patch domain containing                     | 84619     | 180.1829786 | -0.661713615 | 0.468263223 | -1.413123179 | 0.157619509 | 0.999371363 | Not Sig |
| ENSG00000111596 | CNOT2      | CCR4-NOT transcription complex subunit 2                               | 4848      | 1939.38377  | -0.661442325 | 0.642362782 | -1.029702131 | 0.303149855 | 0.999371363 | Not Sig |
| ENSG00000264237 | NA         | NA                                                                     | NA        | 3.497379383 | -0.660863205 | 1.326248479 | -0.498295165 | 0.618276015 | NA          | NA      |
| ENSG00000272589 | ZSWIM8-AS1 | ZSWIM8 antisense RNA 1                                                 | 100507331 | 1.705849535 | -0.660541597 | 1.921749596 | -0.343718869 | 0.73105772  | NA          | NA      |
| ENSG00000273398 | NA         | NA                                                                     | NA        | 1.705849535 | -0.660541597 | 1.921749596 | -0.343718869 | 0.73105772  | NA          | NA      |
| ENSG00000081913 | PHLPP1     | PH domain and leucine rich repeat protein phosphatase 1                | 23239     | 795.8275459 | -0.660129906 | 0.433493827 | -1.522812703 | 0.127805571 | 0.999371363 | Not Sig |
| ENSG00000103723 | AP3B2      | adaptor related protein complex 3 beta 2 subunit                       | 8120      | 28.48815326 | -0.659906338 | 1.09457762  | -0.602886745 | 0.546584035 | 0.999371363 | Not Sig |
| ENSG00000109805 | NCAPG      | non-SMC condensin I complex subunit G                                  | 64151     | 170.6569017 | -0.659700973 | 1.048315842 | -0.629296006 | 0.529155285 | 0.999371363 | Not Sig |
| ENSG00000164620 | RELL2      | RELT like 2                                                            | 285613    | 80.42633327 | -0.659375033 | 0.834398351 | -0.790240096 | 0.429387564 | 0.999371363 | Not Sig |
| ENSG00000173273 | TNKS       | tankyrase                                                              | 8658      | 1995.274674 | -0.659047304 | 0.515847983 | -1.277599845 | 0.201390555 | 0.999371363 | Not Sig |
| ENSG00000178950 | GAK        | cyclin G associated kinase                                             | 2580      | 3279.457672 | -0.658950993 | 0.397282531 | -1.65864578  | 0.097187191 | 0.999371363 | Not Sig |
| ENSG00000270577 | NA         | NA                                                                     | NA        | 0.767803201 | -0.658332348 | 3.252679256 | -0.202396946 | 0.839606416 | NA          | NA      |
| ENSG00000155508 | CNOT8      | CCR4-NOT transcription complex subunit 8                               | 9337      | 1478.41396  | -0.658201831 | 0.56829757  | -1.15819927  | 0.246782726 | 0.999371363 | Not Sig |
| ENSG00000205090 | TMEM240    | transmembrane protein 240                                              | 339453    | 33.18067251 | -0.658004093 | 0.801843185 | -0.820614436 | 0.411865922 | 0.999371363 | Not Sig |

|                 |          |                                                      |           |             |              |             |              |             |             |         |
|-----------------|----------|------------------------------------------------------|-----------|-------------|--------------|-------------|--------------|-------------|-------------|---------|
| ENSG00000111707 | SUDS3    | SDS3 homolog, SIN3A corepressor complex component    | 64426     | 1638.042002 | -0.6578758   | 0.465630007 | -1.412872429 | 0.157693237 | 0.999371363 | Not Sig |
| ENSG00000178972 | NA       | NA                                                   | NA        | 5.096663877 | -0.656983223 | 1.297028599 | -0.506529481 | 0.612484999 | NA          | NA      |
| ENSG00000260461 | NA       | NA                                                   | NA        | 133.0594918 | -0.656724788 | 0.615083561 | -1.067700114 | 0.285655807 | 0.999371363 | Not Sig |
| ENSG00000227921 | NA       | NA                                                   | NA        | 7.996560202 | -0.656488849 | 1.262177462 | -0.520124047 | 0.602977119 | 0.999371363 | Not Sig |
| ENSG00000266203 | MIR5585  | microRNA 5585                                        | 100847018 | 4.377184135 | -0.656391028 | 1.532760204 | -0.428241173 | 0.668475543 | NA          | NA      |
| ENSG00000164815 | ORC5     | origin recognition complex subunit 5                 | 5001      | 317.7910133 | -0.655950028 | 0.603298926 | -1.087271997 | 0.276916621 | 0.999371363 | Not Sig |
| ENSG00000213471 | TTL13P   | tubulin tyrosine ligase like 13, pseudogene          | 440307    | 1.990954843 | -0.655849522 | 1.596036067 | -0.410923998 | 0.681128265 | NA          | NA      |
| ENSG00000199961 | SNORD1B  | small nucleolar RNA, C/D box 1B                      | 677849    | 3.630707858 | -0.655642953 | 1.379007596 | -0.475445498 | 0.634469472 | NA          | NA      |
| ENSG00000167767 | KRT80    | keratin 80                                           | 144501    | 620.815123  | -0.655234354 | 0.898014562 | -0.729647805 | 0.465605493 | 0.999371363 | Not Sig |
| ENSG00000157014 | TATDN2   | TatD DNase domain containing 2                       | 9797      | 489.5388544 | -0.655224273 | 0.464803005 | -1.409681664 | 0.158633701 | 0.999371363 | Not Sig |
| ENSG00000268225 | NA       | NA                                                   | NA        | 28.54840696 | -0.65506549  | 0.747870932 | -0.875907141 | 0.381080517 | 0.999371363 | Not Sig |
| ENSG00000229431 | NA       | NA                                                   | NA        | 1.601116904 | -0.65493024  | 2.341083001 | -0.279755241 | 0.779665293 | NA          | NA      |
| ENSG00000232485 | NA       | NA                                                   | NA        | 13.96772122 | -0.65492258  | 0.824083008 | -0.794728897 | 0.426771219 | 0.999371363 | Not Sig |
| ENSG00000200674 | NA       | NA                                                   | NA        | 3.519708702 | -0.654546183 | 1.465488617 | -0.446640237 | 0.655134839 | NA          | NA      |
| ENSG00000256274 | NA       | NA                                                   | NA        | 80.21922732 | -0.654207982 | 1.012369094 | -0.646214889 | 0.518140198 | 0.999371363 | Not Sig |
| ENSG00000264864 | MIR3613  | microRNA 3613                                        | 100500908 | 13.97082518 | -0.653907149 | 0.992838856 | -0.658623647 | 0.510137474 | 0.999371363 | Not Sig |
| ENSG00000201096 | NA       | NA                                                   | NA        | 2.328606302 | -0.653434723 | 2.439763467 | -0.267827079 | 0.788832426 | NA          | NA      |
| ENSG00000187848 | P2RX2    | purinergic receptor P2X 2                            | 22953     | 16.10700699 | -0.653426969 | 1.378028605 | -0.474175185 | 0.635374987 | 0.999371363 | Not Sig |
| ENSG00000151553 | FAM160B1 | family with sequence similarity 160 member B1        | 57700     | 1160.261788 | -0.653261585 | 0.54051833  | -1.208583594 | 0.226822863 | 0.999371363 | Not Sig |
| ENSG00000116750 | UCHL5    | ubiquitin C-terminal hydrolase L5                    | 51377     | 917.0975699 | -0.653151129 | 0.680900284 | -0.959246375 | 0.337434643 | 0.999371363 | Not Sig |
| ENSG00000178209 | PLEC     | plectin                                              | 5339      | 33131.18754 | -0.653051866 | 0.61006876  | -1.070456167 | 0.284414029 | 0.999371363 | Not Sig |
| ENSG00000266594 | MIR4766  | microRNA 4766                                        | 100616283 | 5.021085919 | -0.652897575 | 1.301973421 | -0.501467667 | 0.616042027 | NA          | NA      |
| ENSG00000138162 | TACC2    | transforming acidic coiled-coil containing protein 2 | 10579     | 4190.238869 | -0.652752029 | 0.56011753  | -1.165384038 | 0.243863575 | 0.999371363 | Not Sig |
| ENSG00000198133 | TMEM229B | transmembrane protein 229B                           | 161145    | 209.4325512 | -0.652671624 | 0.908530496 | -0.718381636 | 0.472522007 | 0.999371363 | Not Sig |
| ENSG00000272543 | MIR4787  | microRNA 4787                                        | 100616138 | 6.175737536 | -0.652534115 | 1.197271353 | -0.54501773  | 0.585741323 | NA          | NA      |
| ENSG00000269175 | NA       | NA                                                   | NA        | 9.939491493 | -0.65243181  | 0.887241317 | -0.735348768 | 0.462127114 | 0.999371363 | Not Sig |
| ENSG00000130270 | ATP8B3   | ATPase phospholipid transporting 8B3                 | 148229    | 91.93127953 | -0.6520261   | 0.863518821 | -0.755080358 | 0.450200768 | 0.999371363 | Not Sig |
| ENSG00000107731 | UNC5B    | unc-5 netrin receptor B                              | 219699    | 1575.542148 | -0.652024721 | 0.609318116 | -1.070089176 | 0.284579171 | 0.999371363 | Not Sig |
| ENSG00000165480 | SKA3     | spindle and kinetochore associated complex subunit 3 | 221150    | 50.66898568 | -0.651928047 | 1.069688785 | -0.609455812 | 0.542222354 | 0.999371363 | Not Sig |
| ENSG00000189079 | ARID2    | AT-rich interaction domain 2                         | 196528    | 1916.94951  | -0.651921819 | 0.583447111 | -1.117362322 | 0.263839438 | 0.999371363 | Not Sig |
| ENSG00000121716 | PILRB    | paired immunoglobulin-like type 2 receptor beta      | 29990     | 160.9254049 | -0.651727191 | 0.627827026 | -1.038068074 | 0.299238364 | 0.999371363 | Not Sig |
| ENSG00000158315 | RHBDL2   | rhomoid like 2                                       | 54933     | 243.2598069 | -0.65160856  | 0.97439324  | -0.668732637 | 0.503666045 | 0.999371363 | Not Sig |
| ENSG00000173918 | C1QTNF1  | C1q and TNF related 1                                | 114897    | 404.4293451 | -0.651403844 | 0.671776337 | -0.969673696 | 0.332209166 | 0.999371363 | Not Sig |
| ENSG00000242052 | NA       | NA                                                   | NA        | 0.938046333 | -0.651293644 | 3.114394853 | -0.209123658 | 0.834351707 | NA          | NA      |
| ENSG00000263365 | NA       | NA                                                   | NA        | 0.938046333 | -0.651293644 | 3.114394853 | -0.209123658 | 0.834351707 | NA          | NA      |

|                 |              |                                                                     |           |             |              |             |              |             |             |         |
|-----------------|--------------|---------------------------------------------------------------------|-----------|-------------|--------------|-------------|--------------|-------------|-------------|---------|
| ENSG00000267230 | NA           | NA                                                                  | NA        | 0.938046333 | -0.651293644 | 3.114394853 | -0.209123658 | 0.834351707 | NA          | NA      |
| ENSG00000267550 | NA           | NA                                                                  | NA        | 0.938046333 | -0.651293644 | 3.114394853 | -0.209123658 | 0.834351707 | NA          | NA      |
| ENSG00000232303 | NA           | NA                                                                  | NA        | 20.46966884 | -0.650768284 | 0.655306467 | -0.993074717 | 0.320673544 | 0.999371363 | Not Sig |
| ENSG00000239282 | CASTOR1      | cytosolic arginine sensor for mTORC1 subunit 1                      | 652968    | 22.59895572 | -0.650554754 | 0.715529948 | -0.909192907 | 0.363248307 | 0.999371363 | Not Sig |
| ENSG00000260572 | NA           | NA                                                                  | NA        | 16.12870239 | -0.650453978 | 0.753259753 | -0.863518826 | 0.387852273 | 0.999371363 | Not Sig |
| ENSG00000147027 | TMEM47       | transmembrane protein 47                                            | 83604     | 531.134511  | -0.650337792 | 0.606325859 | -1.07258792  | 0.283456047 | 0.999371363 | Not Sig |
| ENSG00000184916 | JAG2         | jagged 2                                                            | 3714      | 988.9604593 | -0.650210353 | 0.729486238 | -0.891326415 | 0.372754082 | 0.999371363 | Not Sig |
| ENSG00000254004 | ZNF260       | zinc finger protein 260                                             | 339324    | 656.3331574 | -0.65014087  | 0.710920822 | -0.914505315 | 0.360451386 | 0.999371363 | Not Sig |
| ENSG00000244921 | NA           | NA                                                                  | NA        | 4.235558523 | -0.650015107 | 1.260979212 | -0.515484396 | 0.606214571 | NA          | NA      |
| ENSG00000225111 | NA           | NA                                                                  | NA        | 20.81307367 | -0.649243474 | 0.907344515 | -0.715542403 | 0.474273949 | 0.999371363 | Not Sig |
| ENSG00000135249 | RINT1        | RAD50 interactor 1                                                  | 60561     | 522.163343  | -0.648738122 | 0.622243732 | -1.042578798 | 0.297143413 | 0.999371363 | Not Sig |
| ENSG00000259994 | NA           | NA                                                                  | NA        | 25.9808542  | -0.648335283 | 0.658535275 | -0.984511093 | 0.32486428  | 0.999371363 | Not Sig |
| ENSG00000232912 | NA           | NA                                                                  | NA        | 8.766522911 | -0.648331299 | 0.877130737 | -0.739150131 | 0.459815839 | 0.999371363 | Not Sig |
| ENSG00000120963 | ZNF706       | zinc finger protein 706                                             | 51123     | 857.2904214 | -0.648166498 | 0.524661626 | -1.235399094 | 0.21668201  | 0.999371363 | Not Sig |
| ENSG00000169607 | CKAP2L       | cytoskeleton associated protein 2 like                              | 150468    | 106.969025  | -0.648154139 | 1.110004456 | -0.583920304 | 0.559273932 | 0.999371363 | Not Sig |
| ENSG00000182700 | IGIP         | IgA inducing protein                                                | 492311    | 369.1863037 | -0.647986543 | 0.41674332  | -1.554881657 | 0.119974257 | 0.999371363 | Not Sig |
| ENSG00000251748 | NA           | NA                                                                  | NA        | 12.30622627 | -0.647972985 | 0.886295106 | -0.731102971 | 0.46471626  | 0.999371363 | Not Sig |
| ENSG00000270696 | NA           | NA                                                                  | NA        | 193.8270854 | -0.647950149 | 0.648547798 | -0.999078481 | 0.317756675 | 0.999371363 | Not Sig |
| ENSG00000112378 | PERP         | PERP, TP53 apoptosis effector                                       | 64065     | 2596.573393 | -0.647862772 | 0.769492548 | -0.841935083 | 0.399824292 | 0.999371363 | Not Sig |
| ENSG00000148672 | GLUD1        | glutamate dehydrogenase 1                                           | 2746      | 2710.565513 | -0.647619462 | 0.418471355 | -1.547583733 | 0.12172255  | 0.999371363 | Not Sig |
| ENSG00000261537 | NA           | NA                                                                  | NA        | 12.85685309 | -0.647526712 | 0.919791792 | -0.703992705 | 0.481437316 | 0.999371363 | Not Sig |
| ENSG00000156802 | ATAD2        | ATPase family, AAA domain containing 2                              | 29028     | 1222.971406 | -0.647451026 | 0.775377023 | -0.835014461 | 0.403709567 | 0.999371363 | Not Sig |
| ENSG00000255369 | NA           | NA                                                                  | NA        | 1.282395618 | -0.64736048  | 2.441593056 | -0.265138565 | 0.790902719 | NA          | NA      |
| ENSG00000254363 | LOC101929719 | uncharacterized LOC101929719                                        | 101929719 | 143.2273958 | -0.646864019 | 0.653541215 | -0.989783053 | 0.32228017  | 0.999371363 | Not Sig |
| ENSG00000270120 | NA           | NA                                                                  | NA        | 10.74521175 | -0.646727287 | 0.854415743 | -0.756923421 | 0.449095743 | 0.999371363 | Not Sig |
| ENSG00000196470 | SIAH1        | siah E3 ubiquitin protein ligase 1                                  | 6477      | 531.7705195 | -0.646625908 | 0.474176634 | -1.363681508 | 0.172667826 | 0.999371363 | Not Sig |
| ENSG00000268475 | NA           | NA                                                                  | NA        | 11.20127386 | -0.646566751 | 1.016842256 | -0.635857477 | 0.524869321 | 0.999371363 | Not Sig |
| ENSG00000267680 | ZNF224       | zinc finger protein 224                                             | 7767      | 578.2720025 | -0.646379324 | 0.396663797 | -1.629539496 | 0.103198861 | 0.999371363 | Not Sig |
| ENSG00000167522 | ANKRD11      | ankyrin repeat domain 11                                            | 29123     | 4548.809825 | -0.646082225 | 0.419301027 | -1.540855335 | 0.123351999 | 0.999371363 | Not Sig |
| ENSG00000138160 | KIF11        | kinesin family member 11                                            | 3832      | 341.4717661 | -0.645747319 | 1.024702224 | -0.63018046  | 0.528576522 | 0.999371363 | Not Sig |
| ENSG00000233602 | ERI3-IT1     | ERI3 intronic transcript 1                                          | 100874278 | 39.28267856 | -0.645663298 | 0.654992697 | -0.985756483 | 0.324252625 | 0.999371363 | Not Sig |
| ENSG00000269514 | NA           | NA                                                                  | NA        | 94.89780124 | -0.645215806 | 0.622631006 | -1.036273169 | 0.30007472  | 0.999371363 | Not Sig |
| ENSG00000107863 | ARHGAP21     | Rho GTPase activating protein 21                                    | 57584     | 2710.835509 | -0.644917908 | 0.445740828 | -1.446845044 | 0.147940328 | 0.999371363 | Not Sig |
| ENSG00000125534 | PPDPF        | pancreatic progenitor cell differentiation and proliferation factor | 79144     | 2693.523302 | -0.644579562 | 0.43844767  | -1.47014024  | 0.141523776 | 0.999371363 | Not Sig |
| ENSG00000256383 | NA           | NA                                                                  | NA        | 60.81624986 | -0.644319291 | 0.593955068 | -1.084794668 | 0.278012608 | 0.999371363 | Not Sig |



|                 |             |                                                                |           |             |              |             |              |             |             |         |
|-----------------|-------------|----------------------------------------------------------------|-----------|-------------|--------------|-------------|--------------|-------------|-------------|---------|
| ENSG00000144744 | UBA3        | ubiquitin like modifier activating enzyme 3                    | 9039      | 971.5828587 | -0.64398681  | 0.694045752 | -0.927873715 | 0.353473081 | 0.999371363 | Not Sig |
| ENSG00000064313 | TAF2        | TATA-box binding protein associated factor 2                   | 6873      | 1073.764896 | -0.643937775 | 0.591955546 | -1.087814414 | 0.276677045 | 0.999371363 | Not Sig |
| ENSG00000237149 | ZNF503-AS2  | ZNF503 antisense RNA 2                                         | 100131213 | 84.62582595 | -0.643242719 | 0.524991811 | -1.225243337 | 0.220483551 | 0.999371363 | Not Sig |
| ENSG00000266139 | MIR4435-2   | microRNA 4435-2                                                | 100616341 | 10.81640168 | -0.642961675 | 1.09595268  | -0.586669194 | 0.557425902 | 0.999371363 | Not Sig |
| ENSG00000060339 | CCAR1       | cell division cycle and apoptosis regulator 1                  | 55749     | 1933.31181  | -0.642899711 | 0.595811758 | -1.079031594 | 0.280573644 | 0.999371363 | Not Sig |
| ENSG00000184825 | NA          | NA                                                             | NA        | 307.7676796 | -0.642898193 | 0.839087046 | -0.766187723 | 0.443564612 | 0.999371363 | Not Sig |
| ENSG00000175061 | LRRC75A-AS1 | LRRC75A antisense RNA 1                                        | 125144    | 2804.927416 | -0.642871354 | 0.497447482 | -1.292340151 | 0.196239373 | 0.999371363 | Not Sig |
| ENSG00000151090 | THRB        | thyroid hormone receptor beta                                  | 7068      | 456.909036  | -0.642671699 | 0.674310197 | -0.953080202 | 0.340549436 | 0.999371363 | Not Sig |
| ENSG00000137831 | UACA        | uveal autoantigen with coiled-coil domains and ankyrin repeats | 55075     | 1924.289439 | -0.642662676 | 0.407614799 | -1.576642159 | 0.114877886 | 0.999371363 | Not Sig |
| ENSG00000229956 | ZRANB2-AS2  | ZRANB2 antisense RNA 2 (head to head)                          | 100852410 | 55.09792997 | -0.642570639 | 0.93901205  | -0.684304998 | 0.493782592 | 0.999371363 | Not Sig |
| ENSG00000207789 | MIR26A2     | microRNA 26a-2                                                 | 407016    | 10.31286792 | -0.642352144 | 0.885412804 | -0.725483233 | 0.468155628 | 0.999371363 | Not Sig |
| ENSG00000252768 | NA          | NA                                                             | NA        | 6.856528156 | -0.642109287 | 1.505224056 | -0.426587181 | 0.669680036 | 0.999371363 | Not Sig |
| ENSG00000253816 | NA          | NA                                                             | NA        | 157.1964391 | -0.642080067 | 0.487337334 | -1.317526942 | 0.187662056 | 0.999371363 | Not Sig |
| ENSG00000232270 | NA          | NA                                                             | NA        | 2.69566734  | -0.642041494 | 2.373383138 | -0.270517425 | 0.786762214 | NA          | NA      |
| ENSG00000110025 | SNX15       | sorting nexin 15                                               | 29907     | 33.66152187 | -0.641904024 | 0.73050683  | -0.878710502 | 0.379558263 | 0.999371363 | Not Sig |
| ENSG00000136149 | NA          | NA                                                             | NA        | 30.77562417 | -0.641890057 | 0.760526463 | -0.844007525 | 0.398665201 | 0.999371363 | Not Sig |
| ENSG00000260196 | NA          | NA                                                             | NA        | 11.45450632 | -0.641721459 | 1.071923996 | -0.598663209 | 0.549397496 | 0.999371363 | Not Sig |
| ENSG00000263766 | NA          | NA                                                             | NA        | 19.76904293 | -0.641566891 | 0.68897257  | -0.931193663 | 0.351753395 | 0.999371363 | Not Sig |
| ENSG00000231074 | NA          | NA                                                             | NA        | 1763.604667 | -0.641491399 | 0.588609555 | -1.089841973 | 0.275782761 | 0.999371363 | Not Sig |
| ENSG00000241597 | NA          | NA                                                             | NA        | 5.502211692 | -0.641276913 | 1.194861421 | -0.536695638 | 0.591477869 | NA          | NA      |
| ENSG00000251692 | PTX4        | pentraxin 4                                                    | 390667    | 1.589830246 | -0.641195969 | 2.04288097  | -0.313868492 | 0.753620922 | NA          | NA      |
| ENSG00000187999 | NA          | NA                                                             | NA        | 0.844771371 | -0.640929541 | 2.755891645 | -0.232567032 | 0.81609763  | NA          | NA      |
| ENSG00000263645 | NA          | NA                                                             | NA        | 0.844771371 | -0.640929541 | 2.755891645 | -0.232567032 | 0.81609763  | NA          | NA      |
| ENSG00000165092 | ALDH1A1     | aldehyde dehydrogenase 1 family member A1                      | 216       | 3349.430643 | -0.64073367  | 0.814241371 | -0.786908764 | 0.431335277 | 0.999371363 | Not Sig |
| ENSG00000180344 | NA          | NA                                                             | NA        | 6.902325966 | -0.640314497 | 0.985104321 | -0.649996638 | 0.515694393 | 0.999371363 | Not Sig |
| ENSG00000265904 | NA          | NA                                                             | NA        | 6.800582858 | -0.640293113 | 1.710067442 | -0.37442565  | 0.708087663 | 0.999371363 | Not Sig |
| ENSG00000105514 | RAB3D       | RAB3D, member RAS oncogene family                              | 9545      | 1191.219368 | -0.640165805 | 0.475285074 | -1.34690913  | 0.178009501 | 0.999371363 | Not Sig |
| ENSG00000196357 | ZNF565      | zinc finger protein 565                                        | 147929    | 92.15852426 | -0.639789887 | 0.522852212 | -1.2236534   | 0.221083006 | 0.999371363 | Not Sig |
| ENSG00000229754 | NA          | NA                                                             | NA        | 42.00108645 | -0.639702725 | 1.270575452 | -0.503474803 | 0.614630491 | 0.999371363 | Not Sig |
| ENSG00000188580 | NKAIN2      | sodium/potassium transporting ATPase interacting 2             | 154215    | 4.774898687 | -0.639674845 | 1.443764492 | -0.44306038  | 0.657722062 | NA          | NA      |
| ENSG00000272474 | SNORD113-5  | small nucleolar RNA, C/D box 113-5                             | 767565    | 1.853608629 | -0.639524029 | 2.577852195 | -0.248084056 | 0.804069371 | NA          | NA      |
| ENSG00000119782 | FKBP1B      | FK506 binding protein 1B                                       | 2281      | 32.64376034 | -0.639498603 | 0.759767661 | -0.841702846 | 0.399954305 | 0.999371363 | Not Sig |
| ENSG00000127993 | RBM48       | RNA binding motif protein 48                                   | 84060     | 242.8686505 | -0.639431814 | 0.519087701 | -1.231837727 | 0.218009707 | 0.999371363 | Not Sig |
| ENSG00000241400 | NA          | NA                                                             | NA        | 3.666023204 | -0.639354036 | 1.372362541 | -0.465878379 | 0.641302558 | NA          | NA      |
| ENSG00000175322 | ZNF519      | zinc finger protein 519                                        | 162655    | 114.8340712 | -0.63933468  | 0.640035302 | -0.998905339 | 0.31784055  | 0.999371363 | Not Sig |

|                 |           |                                                                               |           |             |              |             |              |             |             |         |
|-----------------|-----------|-------------------------------------------------------------------------------|-----------|-------------|--------------|-------------|--------------|-------------|-------------|---------|
| ENSG00000199266 | SNORA60   | small nucleolar RNA, H/ACA box 60                                             | 677837    | 10.84216782 | -0.639119772 | 0.829084896 | -0.770873737 | 0.440781775 | 0.999371363 | Not Sig |
| ENSG00000099219 | ERMP1     | endoplasmic reticulum metalloproteinase 1                                     | 79956     | 843.6485533 | -0.638816965 | 0.469808102 | -1.359740204 | 0.173912151 | 0.999371363 | Not Sig |
| ENSG00000101577 | LPIN2     | lipin 2                                                                       | 9663      | 4511.026659 | -0.638783051 | 0.597682566 | -1.068766412 | 0.285174938 | 0.999371363 | Not Sig |
| ENSG00000196544 | BORCS6    | BLOC-1 related complex subunit 6                                              | 54785     | 276.746096  | -0.63876792  | 0.746611274 | -0.855556221 | 0.392243294 | 0.999371363 | Not Sig |
| ENSG00000197142 | ACSL5     | acyl-CoA synthetase long chain family member 5                                | 51703     | 3116.830327 | -0.63870232  | 0.596840358 | -1.070139295 | 0.284556614 | 0.999371363 | Not Sig |
| ENSG00000200181 | NA        | NA                                                                            | NA        | 11.04216391 | -0.638594219 | 1.011271475 | -0.631476546 | 0.52772898  | 0.999371363 | Not Sig |
| ENSG00000180834 | MAP6D1    | MAP6 domain containing 1                                                      | 79929     | 34.12239432 | -0.638554576 | 0.619468427 | -1.030810528 | 0.30262968  | 0.999371363 | Not Sig |
| ENSG00000188283 | ZNF383    | zinc finger protein 383                                                       | 163087    | 176.3571604 | -0.638336784 | 0.431794067 | -1.478336163 | 0.139317823 | 0.999371363 | Not Sig |
| ENSG00000173064 | HECTD4    | HECT domain E3 ubiquitin protein ligase 4                                     | 283450    | 4136.560673 | -0.638140724 | 0.430918254 | -1.4808858   | 0.138637008 | 0.999371363 | Not Sig |
| ENSG00000231194 | NA        | NA                                                                            | NA        | 2.980208306 | -0.637980158 | 1.447814147 | -0.44065059  | 0.659465972 | NA          | NA      |
| ENSG00000232102 | NA        | NA                                                                            | NA        | 3.566310707 | -0.637936684 | 1.325158407 | -0.481404095 | 0.630229326 | NA          | NA      |
| ENSG00000150051 | MKX       | mohawk homeobox                                                               | 283078    | 26.95332279 | -0.63786096  | 1.006313624 | -0.633859013 | 0.526172837 | 0.999371363 | Not Sig |
| ENSG00000253208 | NA        | NA                                                                            | NA        | 10.11353788 | -0.637756123 | 0.997943728 | -0.639070225 | 0.522777249 | 0.999371363 | Not Sig |
| ENSG00000260316 | NA        | NA                                                                            | NA        | 13.85588115 | -0.637755713 | 0.822672949 | -0.775223877 | 0.438207381 | 0.999371363 | Not Sig |
| ENSG00000200502 | NA        | NA                                                                            | NA        | 27.86255092 | -0.63759837  | 0.812307267 | -0.784922647 | 0.432498923 | 0.999371363 | Not Sig |
| ENSG00000268175 | NA        | NA                                                                            | NA        | 9.036323823 | -0.637372249 | 0.897675146 | -0.710025505 | 0.47768832  | 0.999371363 | Not Sig |
| ENSG00000177570 | SAMD12    | sterile alpha motif domain containing 12                                      | 401474    | 1434.271713 | -0.637351253 | 0.693826001 | -0.918603874 | 0.358302805 | 0.999371363 | Not Sig |
| ENSG00000215223 | NA        | NA                                                                            | NA        | 29.12591908 | -0.637290759 | 0.660456224 | -0.964925056 | 0.334582351 | 0.999371363 | Not Sig |
| ENSG00000266258 | LINC01909 | long intergenic non-protein coding RNA 1909                                   | 101927481 | 12.12528387 | -0.637193011 | 0.873859319 | -0.729171157 | 0.465896972 | 0.999371363 | Not Sig |
| ENSG00000265706 | SNORD53B  | small nucleolar RNA, C/D box 53B                                              | 109617012 | 12.65365975 | -0.636886744 | 1.008556862 | -0.631483229 | 0.527724611 | 0.999371363 | Not Sig |
| ENSG00000105357 | MYH14     | myosin heavy chain 14                                                         | 79784     | 6045.487189 | -0.636577642 | 0.540221115 | -1.178364976 | 0.238651134 | 0.999371363 | Not Sig |
| ENSG00000204217 | BMPR2     | bone morphogenetic protein receptor type 2                                    | 659       | 5541.533209 | -0.636469645 | 0.503236361 | -1.264752897 | 0.205959921 | 0.999371363 | Not Sig |
| ENSG00000251928 | NA        | NA                                                                            | NA        | 9.933537819 | -0.636466569 | 1.330820415 | -0.478251281 | 0.632471367 | 0.999371363 | Not Sig |
| ENSG00000119457 | SLC46A2   | solute carrier family 46 member 2                                             | 57864     | 361.9268239 | -0.636201584 | 1.202598619 | -0.52902238  | 0.596789925 | 0.999371363 | Not Sig |
| ENSG00000236928 | NA        | NA                                                                            | NA        | 16.70575187 | -0.635861086 | 0.943071992 | -0.674244481 | 0.500155895 | 0.999371363 | Not Sig |
| ENSG00000261736 | NA        | NA                                                                            | NA        | 14.07218913 | -0.635689414 | 0.78620987  | -0.808549267 | 0.418774457 | 0.999371363 | Not Sig |
| ENSG00000232442 | MHENCRC   | melanoma highly expressed competing endogenous lncRNA for miR-425 and miR-489 | 100505771 | 86.58389961 | -0.635628745 | 0.536213167 | -1.185403091 | 0.23585811  | 0.999371363 | Not Sig |
| ENSG00000117625 | RCOR3     | REST corepressor 3                                                            | 55758     | 1454.610363 | -0.635419695 | 0.597735115 | -1.063045618 | 0.287761264 | 0.999371363 | Not Sig |
| ENSG00000266237 | NA        | NA                                                                            | NA        | 2.0649063   | -0.634660437 | 1.863046776 | -0.340657275 | 0.733361607 | NA          | NA      |
| ENSG00000224031 | NA        | NA                                                                            | NA        | 10.61767502 | -0.634363898 | 1.024538152 | -0.619170595 | 0.535803981 | 0.999371363 | Not Sig |
| ENSG00000271461 | NA        | NA                                                                            | NA        | 2.151328719 | -0.634144586 | 1.682752874 | -0.376849504 | 0.70628545  | NA          | NA      |
| ENSG00000145782 | ATG12     | autophagy related 12                                                          | 9140      | 876.1965633 | -0.634024255 | 0.63083659  | -1.005053076 | 0.314871293 | 0.999371363 | Not Sig |
| ENSG00000271105 | NA        | NA                                                                            | NA        | 12.40561706 | -0.633703873 | 0.899455681 | -0.70454152  | 0.481095603 | 0.999371363 | Not Sig |
| ENSG00000240311 | NA        | NA                                                                            | NA        | 2.571228771 | -0.633696888 | 1.828532769 | -0.346560312 | 0.728921666 | NA          | NA      |
| ENSG00000238386 | NA        | NA                                                                            | NA        | 7.919034734 | -0.63356036  | 1.717839484 | -0.368812317 | 0.712267623 | 0.999371363 | Not Sig |

|                 |           |                                               |           |             |              |             |              |             |             |         |
|-----------------|-----------|-----------------------------------------------|-----------|-------------|--------------|-------------|--------------|-------------|-------------|---------|
| ENSG00000175115 | PACS1     | phosphofurin acidic cluster sorting protein 1 | 55690     | 2578.597033 | -0.633330919 | 0.416999083 | -1.51878252  | 0.128817247 | 0.999371363 | Not Sig |
| ENSG00000243015 | NA        | NA                                            | NA        | 39.84435787 | -0.633283166 | 0.576593737 | -1.098317802 | 0.272065741 | 0.999371363 | Not Sig |
| ENSG00000258344 | NA        | NA                                            | NA        | 4.061883671 | -0.632863233 | 1.280527227 | -0.494220833 | 0.621150228 | NA          | NA      |
| ENSG00000254634 | SMG1P6    | SMG1 pseudogene 6                             | 100422558 | 66.20840594 | -0.632459602 | 0.694449309 | -0.910735448 | 0.362434782 | 0.999371363 | Not Sig |
| ENSG00000228507 | NA        | NA                                            | NA        | 1.981085587 | -0.632231394 | 1.630024899 | -0.387866096 | 0.698115129 | NA          | NA      |
| ENSG00000211799 | NA        | NA                                            | NA        | 11.07682978 | -0.632166429 | 1.067118264 | -0.592405219 | 0.553579273 | 0.999371363 | Not Sig |
| ENSG00000256552 | NA        | NA                                            | NA        | 1.288833153 | -0.632140001 | 2.440289584 | -0.259043027 | 0.795602042 | NA          | NA      |
| ENSG00000214273 | NA        | NA                                            | NA        | 6.791277944 | -0.632042794 | 1.126543785 | -0.56104592  | 0.574766233 | 0.999371363 | Not Sig |
| ENSG00000139330 | KERA      | keratocan                                     | 11081     | 1.551194134 | -0.631916765 | 2.265951079 | -0.278874849 | 0.780340871 | NA          | NA      |
| ENSG00000256087 | ZNF432    | zinc finger protein 432                       | 9668      | 416.3200271 | -0.631904878 | 0.498273402 | -1.26818906  | 0.204730443 | 0.999371363 | Not Sig |
| ENSG00000250608 | LOC339874 | uncharacterized LOC339874                     | 339874    | 107.4291294 | -0.631329027 | 0.761531668 | -0.82902531  | 0.407090086 | 0.999371363 | Not Sig |
| ENSG00000262381 | NA        | NA                                            | NA        | 1.306557347 | -0.631209086 | 2.462546241 | -0.25632375  | 0.79770086  | NA          | NA      |
| ENSG00000105989 | WNT2      | Wnt family member 2                           | 7472      | 241.1862863 | -0.631137227 | 0.690483136 | -0.914051617 | 0.360689724 | 0.999371363 | Not Sig |
| ENSG00000114796 | KLHL24    | kelch like family member 24                   | 54800     | 2459.769017 | -0.630977652 | 0.54863888  | -1.150078266 | 0.250111637 | 0.999371363 | Not Sig |
| ENSG00000198633 | ZNF534    | zinc finger protein 534                       | 147658    | 6.561424694 | -0.630716471 | 1.240126294 | -0.508590515 | 0.611039279 | NA          | NA      |
| ENSG00000134057 | CCNB1     | cyclin B1                                     | 891       | 205.1916914 | -0.630673086 | 0.874929401 | -0.720827401 | 0.471015715 | 0.999371363 | Not Sig |
| ENSG00000106714 | CNTNAP3   | contactin associated protein like 3           | 79937     | 89.54233571 | -0.630645771 | 0.966470018 | -0.65252492  | 0.514062602 | 0.999371363 | Not Sig |
| ENSG00000128563 | PRKRIP1   | PRKR interacting protein 1                    | 79706     | 554.2917537 | -0.630265765 | 0.468305001 | -1.345844618 | 0.178352633 | 0.999371363 | Not Sig |
| ENSG00000215513 | NA        | NA                                            | NA        | 456.7154937 | -0.630058785 | 1.218279466 | -0.51717098  | 0.605036808 | 0.999371363 | Not Sig |
| ENSG00000198879 | SFMBT2    | Scm like with four mbt domains 2              | 57713     | 745.4958112 | -0.629947674 | 0.608654074 | -1.034984732 | 0.300676042 | 0.999371363 | Not Sig |
| ENSG00000256667 | NA        | NA                                            | NA        | 111.5553162 | -0.629904359 | 0.760846207 | -0.827899716 | 0.407727296 | 0.999371363 | Not Sig |
| ENSG00000207117 | NA        | NA                                            | NA        | 14.44451016 | -0.629893246 | 1.160279046 | -0.542880825 | 0.587211859 | 0.999371363 | Not Sig |
| ENSG00000204389 | HSPA1A    | heat shock protein family A (Hsp70) member 1A | 3303      | 1941.663755 | -0.629456681 | 0.543205041 | -1.158782842 | 0.246544713 | 0.999371363 | Not Sig |
| ENSG00000240729 | NA        | NA                                            | NA        | 34.59059559 | -0.629319648 | 0.769055813 | -0.81830166  | 0.413184959 | 0.999371363 | Not Sig |
| ENSG00000260784 | NA        | NA                                            | NA        | 1.537023805 | -0.628834122 | 2.053173576 | -0.306274213 | 0.759395871 | NA          | NA      |
| ENSG00000239373 | NA        | NA                                            | NA        | 56.19834475 | -0.62867425  | 0.853048782 | -0.736973387 | 0.461138534 | 0.999371363 | Not Sig |
| ENSG00000188388 | GOLGA6L3  | golgin A6 family-like 3                       | 100133220 | 3.435141739 | -0.628443323 | 1.672284227 | -0.375799348 | 0.707066072 | NA          | NA      |
| ENSG00000231703 | NA        | NA                                            | NA        | 1.871918841 | -0.628238848 | 2.126641564 | -0.295413604 | 0.767677943 | NA          | NA      |
| ENSG00000225828 | FAM229A   | family with sequence similarity 229 member A  | 100128071 | 201.1680308 | -0.628026812 | 0.42805481  | -1.467164478 | 0.142331317 | 0.999371363 | Not Sig |
| ENSG00000263835 | NA        | NA                                            | NA        | 1.20684485  | -0.627909937 | 2.182517786 | -0.287699803 | 0.773576541 | NA          | NA      |
| ENSG00000241494 | NA        | NA                                            | NA        | 1.514279478 | -0.627781674 | 2.260684313 | -0.277695417 | 0.781246179 | NA          | NA      |
| ENSG00000089060 | SLC8B1    | solute carrier family 8 member B1             | 80024     | 1107.531853 | -0.627543209 | 0.57454739  | -1.092239249 | 0.274727955 | 0.999371363 | Not Sig |
| ENSG00000164976 | MYORG     | myogenesis regulating glycosidase (putative)  | 57462     | 483.3548143 | -0.627266822 | 0.46882072  | -1.337967362 | 0.180907076 | 0.999371363 | Not Sig |
| ENSG00000115548 | KDM3A     | lysine demethylase 3A                         | 55818     | 2151.192853 | -0.627124351 | 0.426390922 | -1.470773223 | 0.141352456 | 0.999371363 | Not Sig |
| ENSG00000228696 | ARL17A    | ADP ribosylation factor like GTPase 17A       | 51326     | 104.9298494 | -0.626829236 | 0.619398952 | -1.011995957 | 0.311539986 | 0.999371363 | Not Sig |

|                 |              |                                                              |           |             |              |             |              |             |             |         |
|-----------------|--------------|--------------------------------------------------------------|-----------|-------------|--------------|-------------|--------------|-------------|-------------|---------|
| ENSG00000228696 | ARL17B       | ADP ribosylation factor like GTPase 17B                      | 100506084 | 104.9298494 | -0.626829236 | 0.619398952 | -1.011995957 | 0.311539986 | 0.999371363 | Not Sig |
| ENSG00000228696 | LOC100996709 | ADP-ribosylation factor-like protein 17                      | 100996709 | 104.9298494 | -0.626829236 | 0.619398952 | -1.011995957 | 0.311539986 | 0.999371363 | Not Sig |
| ENSG00000227684 | NA           | NA                                                           | NA        | 3.816970022 | -0.626777741 | 1.335672027 | -0.469260214 | 0.63888365  | NA          | NA      |
| ENSG00000273221 | NA           | NA                                                           | NA        | 38.82204945 | -0.626052721 | 0.828981455 | -0.755207148 | 0.4501247   | 0.999371363 | Not Sig |
| ENSG00000249839 | NA           | NA                                                           | NA        | 8.715699173 | -0.625895239 | 0.974244542 | -0.642441618 | 0.520586485 | 0.999371363 | Not Sig |
| ENSG00000258450 | NA           | NA                                                           | NA        | 6.762527381 | -0.625675144 | 1.260001253 | -0.496567081 | 0.619494372 | 0.999371363 | Not Sig |
| ENSG00000219665 | LOC101928464 | uncharacterized LOC101928464                                 | 101928464 | 69.19153495 | -0.625670251 | 0.582041377 | -1.074958372 | 0.282393366 | 0.999371363 | Not Sig |
| ENSG00000265820 | MIR3177      | microRNA 3177                                                | 100423012 | 5.904205642 | -0.625589705 | 1.081099121 | -0.578660821 | 0.562818057 | NA          | NA      |
| ENSG00000187257 | RSNB1L       | round spermatid basic protein 1 like                         | 222194    | 1245.116445 | -0.625322605 | 0.524884112 | -1.191353653 | 0.233514779 | 0.999371363 | Not Sig |
| ENSG00000105499 | PLA2G4C      | phospholipase A2 group IVC                                   | 8605      | 322.4517073 | -0.625295659 | 0.793060664 | -0.7884588   | 0.430428389 | 0.999371363 | Not Sig |
| ENSG00000160799 | CCDC12       | coiled-coil domain containing 12                             | 151903    | 738.5144398 | -0.625185844 | 0.456597001 | -1.369228977 | 0.170927711 | 0.999371363 | Not Sig |
| ENSG00000068383 | INPP5A       | inositol polyphosphate-5-phosphatase A                       | 3632      | 726.3934202 | -0.625134898 | 0.622728676 | -1.003863999 | 0.315444172 | 0.999371363 | Not Sig |
| ENSG00000223044 | NA           | NA                                                           | NA        | 29.83700311 | -0.624900064 | 0.860932677 | -0.725840801 | 0.467936371 | 0.999371363 | Not Sig |
| ENSG00000087266 | SH3BP2       | SH3 domain binding protein 2                                 | 6452      | 1990.841694 | -0.624774524 | 0.612624181 | -1.019833274 | 0.307807539 | 0.999371363 | Not Sig |
| ENSG00000235631 | RNF148       | ring finger protein 148                                      | 378925    | 45.09905431 | -0.624655471 | 0.686500913 | -0.909912076 | 0.362868881 | 0.999371363 | Not Sig |
| ENSG00000135605 | TEC          | tec protein tyrosine kinase                                  | 7006      | 274.1955289 | -0.624307516 | 0.60354737  | -1.03439688  | 0.300950662 | 0.999371363 | Not Sig |
| ENSG00000221265 | MIR1255A     | microRNA 1255a                                               | 100302193 | 12.72637157 | -0.624252818 | 1.084666485 | -0.575525129 | 0.564936201 | 0.999371363 | Not Sig |
| ENSG00000233956 | NA           | NA                                                           | NA        | 6.051826591 | -0.624035154 | 1.503057601 | -0.415177138 | 0.678012233 | NA          | NA      |
| ENSG00000134871 | COL4A2       | collagen type IV alpha 2 chain                               | 1284      | 14762.21948 | -0.623300025 | 0.530596249 | -1.174716231 | 0.240108264 | 0.999371363 | Not Sig |
| ENSG00000176268 | NA           | NA                                                           | NA        | 15.91782703 | -0.623185307 | 0.841123175 | -0.740896607 | 0.458756133 | 0.999371363 | Not Sig |
| ENSG00000163110 | PDLIM5       | PDZ and LIM domain 5                                         | 10611     | 2669.787916 | -0.623091925 | 0.567198947 | -1.098542105 | 0.271967843 | 0.999371363 | Not Sig |
| ENSG00000247809 | NR2F2-AS1    | NR2F2 antisense RNA 1                                        | 644192    | 198.9569855 | -0.622126903 | 0.485725667 | -1.280819493 | 0.200257076 | 0.999371363 | Not Sig |
| ENSG00000254459 | NA           | NA                                                           | NA        | 7.458649588 | -0.622068415 | 0.994077402 | -0.625774627 | 0.531462777 | 0.999371363 | Not Sig |
| ENSG00000230164 | NA           | NA                                                           | NA        | 1.835884435 | -0.62192889  | 2.251274825 | -0.276256316 | 0.782351205 | NA          | NA      |
| ENSG00000231441 | NA           | NA                                                           | NA        | 1.835884435 | -0.62192889  | 2.251274825 | -0.276256316 | 0.782351205 | NA          | NA      |
| ENSG00000125730 | C3           | complement C3                                                | 718       | 34275.88723 | -0.62188613  | 0.778255091 | -0.799077497 | 0.424245477 | 0.999371363 | Not Sig |
| ENSG00000116652 | NA           | NA                                                           | NA        | 15.92028077 | -0.621443461 | 0.955797504 | -0.650183181 | 0.515573904 | 0.999371363 | Not Sig |
| ENSG00000104886 | PLEKHJ1      | pleckstrin homology domain containing J1                     | 55111     | 493.0119869 | -0.621394791 | 0.612076831 | -1.015223513 | 0.309999295 | 0.999371363 | Not Sig |
| ENSG00000250796 | NA           | NA                                                           | NA        | 2.019417646 | -0.621030695 | 1.782962378 | -0.348313965 | 0.727604407 | NA          | NA      |
| ENSG00000260949 | NA           | NA                                                           | NA        | 6.62090177  | -0.620950075 | 1.071084261 | -0.579739707 | 0.562090162 | 0.999371363 | Not Sig |
| ENSG00000258172 | NA           | NA                                                           | NA        | 5.541828111 | -0.620906527 | 1.055519409 | -0.58824738  | 0.556366259 | NA          | NA      |
| ENSG00000170312 | CDK1         | cyclin dependent kinase 1                                    | 983       | 224.7433804 | -0.620904647 | 1.00180851  | -0.619783762 | 0.535400161 | 0.999371363 | Not Sig |
| ENSG00000083223 | ZCCHC6       | zinc finger CCHC-type containing 6                           | 79670     | 1753.4436   | -0.620880393 | 0.485890931 | -1.277818444 | 0.20131345  | 0.999371363 | Not Sig |
| ENSG00000066777 | ARFGEF1      | ADP ribosylation factor guanine nucleotide exchange factor 1 | 10565     | 4155.877052 | -0.619680928 | 0.585165388 | -1.058984248 | 0.289606954 | 0.999371363 | Not Sig |
| ENSG00000163947 | ARHGEF3      | Rho guanine nucleotide exchange factor 3                     | 50650     | 1241.19298  | -0.619461555 | 0.530262362 | -1.168217093 | 0.242719207 | 0.999371363 | Not Sig |

|                 |           |                                                         |    |           |             |              |             |              |             |             |         |
|-----------------|-----------|---------------------------------------------------------|----|-----------|-------------|--------------|-------------|--------------|-------------|-------------|---------|
| ENSG00000123983 | ACSL3     | acyl-CoA synthetase long chain family member 3          |    | 2181      | 2779.923066 | -0.619278064 | 0.550163858 | -1.125624766 | 0.260324381 | 0.999371363 | Not Sig |
| ENSG00000105821 | DNAJC2    | DnaJ heat shock protein family (Hsp40) member C2        |    | 27000     | 553.5470907 | -0.619257487 | 0.542415959 | -1.141665316 | 0.253593163 | 0.999371363 | Not Sig |
| ENSG00000113649 | TCERG1    | transcription elongation regulator 1                    |    | 10915     | 1621.0505   | -0.61925196  | 0.627822265 | -0.986349153 | 0.323961807 | 0.999371363 | Not Sig |
| ENSG00000154258 | ABCA9     | ATP binding cassette subfamily A member 9               |    | 10350     | 393.6935181 | -0.619006515 | 0.697145546 | -0.887915756 | 0.374586068 | 0.999371363 | Not Sig |
| ENSG00000036448 | MYOM2     | myomesin 2                                              |    | 9172      | 46.46878609 | -0.618971165 | 1.255387545 | -0.49305186  | 0.621975944 | 0.999371363 | Not Sig |
| ENSG00000214338 | NA        | NA                                                      | NA |           | 3.513110934 | -0.618677475 | 1.907537679 | -0.32433303  | 0.745685916 | NA          | NA      |
| ENSG00000174953 | DHX36     | DEAH-box helicase 36                                    |    | 170506    | 1897.759264 | -0.61847934  | 0.665563789 | -0.929256294 | 0.35275628  | 0.999371363 | Not Sig |
| ENSG00000267185 | NA        | NA                                                      | NA |           | 5.91389299  | -0.618471595 | 1.172548183 | -0.527459429 | 0.597874583 | NA          | NA      |
| ENSG00000272464 | NA        | NA                                                      | NA |           | 3.234117434 | -0.618026038 | 1.930703572 | -0.320104053 | 0.748889453 | NA          | NA      |
| ENSG00000258366 | RTEL1     | regulator of telomere elongation helicase 1             |    | 51750     | 66.83863453 | -0.617965431 | 0.518706662 | -1.191358193 | 0.233512998 | 0.999371363 | Not Sig |
| ENSG00000139146 | SINHCAF   | SIN3-HDAC complex associated factor                     |    | 58516     | 1045.646781 | -0.617711056 | 0.684724532 | -0.902130751 | 0.366987415 | 0.999371363 | Not Sig |
| ENSG00000232874 | NA        | NA                                                      | NA |           | 6.339666235 | -0.617691585 | 1.162660026 | -0.531274467 | 0.595228596 | NA          | NA      |
| ENSG00000206763 | NA        | NA                                                      | NA |           | 3.066891015 | -0.61761155  | 1.561439495 | -0.395539854 | 0.692444515 | NA          | NA      |
| ENSG00000162994 | CLHC1     | clathrin heavy chain linker domain containing 1         |    | 130162    | 219.2691482 | -0.617170489 | 0.739521314 | -0.834554025 | 0.403968857 | 0.999371363 | Not Sig |
| ENSG00000198826 | ARHGAP11A | Rho GTPase activating protein 11A                       |    | 9824      | 297.8347191 | -0.617006867 | 0.900827965 | -0.684933074 | 0.493386154 | 0.999371363 | Not Sig |
| ENSG00000180257 | ZNF816    | zinc finger protein 816                                 |    | 125893    | 217.6684304 | -0.616769521 | 0.535456775 | -1.151856787 | 0.249379928 | 0.999371363 | Not Sig |
| ENSG00000213096 | ZNF254    | zinc finger protein 254                                 |    | 9534      | 949.5125228 | -0.616708993 | 0.7424051   | -0.830690673 | 0.406148397 | 0.999371363 | Not Sig |
| ENSG00000267526 | NA        | NA                                                      | NA |           | 16.0536693  | -0.616603184 | 0.863676804 | -0.713928151 | 0.475271609 | 0.999371363 | Not Sig |
| ENSG00000148200 | NR6A1     | nuclear receptor subfamily 6 group A member 1           |    | 2649      | 196.1612307 | -0.616370319 | 0.768411866 | -0.802135347 | 0.42247467  | 0.999371363 | Not Sig |
| ENSG00000241343 | RPL36A    | ribosomal protein L36a                                  |    | 6173      | 115.0614673 | -0.616349625 | 0.726580418 | -0.848288241 | 0.396277465 | 0.999371363 | Not Sig |
| ENSG00000251154 | NA        | NA                                                      | NA |           | 1.312994883 | -0.615944079 | 2.46125631  | -0.250255968 | 0.802389406 | NA          | NA      |
| ENSG00000152256 | PDK1      | pyruvate dehydrogenase kinase 1                         |    | 5163      | 1107.157795 | -0.615396816 | 0.856430068 | -0.718560499 | 0.472411759 | 0.999371363 | Not Sig |
| ENSG00000227896 | NA        | NA                                                      | NA |           | 26.40994033 | -0.615275604 | 0.634576529 | -0.969584559 | 0.332253612 | 0.999371363 | Not Sig |
| ENSG00000265012 | NA        | NA                                                      | NA |           | 8.238071649 | -0.615107785 | 1.073057238 | -0.57322924  | 0.566489489 | 0.999371363 | Not Sig |
| ENSG00000148154 | UGCG      | UDP-glucose ceramide glucosyltransferase                |    | 7357      | 2834.074963 | -0.61486463  | 0.665258774 | -0.92424881  | 0.355356788 | 0.999371363 | Not Sig |
| ENSG00000144566 | RAB5A     | RAB5A, member RAS oncogene family                       |    | 5868      | 1577.17325  | -0.614676272 | 0.675934742 | -0.909372212 | 0.363153685 | 0.999371363 | Not Sig |
| ENSG00000111052 | LIN7A     | lin-7 homolog A, crumbs cell polarity complex component |    | 8825      | 134.7123403 | -0.614382209 | 0.829666181 | -0.740517358 | 0.458986132 | 0.999371363 | Not Sig |
| ENSG00000264266 | MIR4322   | microRNA 4322                                           |    | 100422925 | 1.564069205 | -0.614118119 | 1.984778765 | -0.30941389  | 0.757006706 | NA          | NA      |
| ENSG00000257246 | NA        | NA                                                      | NA |           | 61.29564477 | -0.614117122 | 0.57088212  | -1.075733677 | 0.282046382 | 0.999371363 | Not Sig |
| ENSG00000140876 | NUDT7     | nudix hydrolase 7                                       |    | 283927    | 63.45419884 | -0.614004674 | 0.665166751 | -0.923083832 | 0.35596352  | 0.999371363 | Not Sig |
| ENSG00000155100 | OTUD6B    | OTU domain containing 6B                                |    | 51633     | 366.229804  | -0.613976498 | 0.652554367 | -0.940881755 | 0.346765458 | 0.999371363 | Not Sig |
| ENSG00000234841 | NA        | NA                                                      | NA |           | 2.688925752 | -0.612943633 | 1.522180195 | -0.402674818 | 0.687187461 | NA          | NA      |
| ENSG00000218018 | NA        | NA                                                      | NA |           | 4.887054676 | -0.612917393 | 1.512714571 | -0.405177159 | 0.685347293 | NA          | NA      |
| ENSG00000241458 | NA        | NA                                                      | NA |           | 2.706820956 | -0.612513745 | 1.545776248 | -0.39624994  | 0.691920653 | NA          | NA      |
| ENSG00000196267 | ZNF836    | zinc finger protein 836                                 |    | 162962    | 149.8836481 | -0.612509711 | 0.453817492 | -1.349682906 | 0.177117718 | 0.999371363 | Not Sig |

|                 |         |                                                                   |           |             |              |             |              |             |             |         |
|-----------------|---------|-------------------------------------------------------------------|-----------|-------------|--------------|-------------|--------------|-------------|-------------|---------|
| ENSG00000181007 | ZFP82   | ZFP82 zinc finger protein                                         | 284406    | 169.0541059 | -0.611920689 | 0.465795667 | -1.313710564 | 0.188943624 | 0.999371363 | Not Sig |
| ENSG00000131979 | GCH1    | GTP cyclohydrolase 1                                              | 2643      | 443.373375  | -0.611643759 | 0.582864645 | -1.049375296 | 0.294005423 | 0.999371363 | Not Sig |
| ENSG00000240328 | NA      | NA                                                                | NA        | 17.49400985 | -0.611503938 | 0.896267661 | -0.682278258 | 0.495063019 | 0.999371363 | Not Sig |
| ENSG00000185800 | DMWD    | DMI locus, WD repeat containing                                   | 1762      | 756.1773433 | -0.611265559 | 0.605352399 | -1.009768129 | 0.312606393 | 0.999371363 | Not Sig |
| ENSG00000075089 | ACTR6   | ARP6 actin related protein 6 homolog                              | 64431     | 325.2880671 | -0.611084647 | 0.555605841 | -1.099852814 | 0.271396257 | 0.999371363 | Not Sig |
| ENSG00000116991 | SIPAIL2 | signal induced proliferation associated 1 like 2                  | 57568     | 1894.920876 | -0.610990362 | 0.591515829 | -1.032923097 | 0.301639889 | 0.999371363 | Not Sig |
| ENSG00000253966 | NA      | NA                                                                | NA        | 31.57791042 | -0.610986026 | 0.893239794 | -0.684011203 | 0.493968092 | 0.999371363 | Not Sig |
| ENSG00000198625 | MDM4    | MDM4, p53 regulator                                               | 4194      | 2989.582656 | -0.610978064 | 0.577621277 | -1.057748544 | 0.290170097 | 0.999371363 | Not Sig |
| ENSG00000239521 | GATS    | GATS, stromal antigen 3 opposite strand                           | 352954    | 213.9368292 | -0.610814553 | 0.528179462 | -1.156452676 | 0.247496046 | 0.999371363 | Not Sig |
| ENSG00000258790 | NA      | NA                                                                | NA        | 13.13410443 | -0.610800276 | 0.825406906 | -0.739998989 | 0.459300608 | 0.999371363 | Not Sig |
| ENSG00000120837 | NFYB    | nuclear transcription factor Y subunit beta                       | 4801      | 592.065398  | -0.610793731 | 0.449381269 | -1.359188229 | 0.17408695  | 0.999371363 | Not Sig |
| ENSG00000136936 | XPA     | XPA, DNA damage recognition and repair factor                     | 7507      | 278.7388737 | -0.61072438  | 0.42810644  | -1.426571343 | 0.153703489 | 0.999371363 | Not Sig |
| ENSG00000148384 | INPP5E  | inositol polyphosphate-5-phosphatase E                            | 56623     | 435.1242746 | -0.610472238 | 0.595269973 | -1.025538438 | 0.305109198 | 0.999371363 | Not Sig |
| ENSG00000224789 | NA      | NA                                                                | NA        | 5.783187895 | -0.610195758 | 1.393689665 | -0.437827569 | 0.661511284 | NA          | NA      |
| ENSG00000113971 | NPHP3   | nephrocystin 3                                                    | 27031     | 1055.701358 | -0.609625343 | 0.509269363 | -1.197058742 | 0.231283659 | 0.999371363 | Not Sig |
| ENSG00000114021 | NIT2    | nitrilase family member 2                                         | 56954     | 512.0741633 | -0.609602534 | 0.552583004 | -1.103187267 | 0.26994585  | 0.999371363 | Not Sig |
| ENSG00000173166 | RAPH1   | Ras association (RalGDS/AF-6) and pleckstrin homology domains 1   | 65059     | 4804.062717 | -0.609096405 | 0.563252881 | -1.081390661 | 0.279523374 | 0.999371363 | Not Sig |
| ENSG00000242173 | ARHGDI3 | Rho GDP dissociation inhibitor gamma                              | 398       | 5.279727419 | -0.608600279 | 1.158659671 | -0.525262331 | 0.59940084  | NA          | NA      |
| ENSG00000132958 | TPTE2   | transmembrane phosphoinositide 3-phosphatase and tensin homolog 2 | 93492     | 9.568165251 | -0.608531501 | 1.416455835 | -0.429615584 | 0.667475299 | 0.999371363 | Not Sig |
| ENSG00000146707 | POMZP3  | POM121 and ZP3 fusion                                             | 22932     | 135.2910762 | -0.60826243  | 0.599531364 | -1.014563151 | 0.310314112 | 0.999371363 | Not Sig |
| ENSG00000228322 | NA      | NA                                                                | NA        | 0.812572796 | -0.608074242 | 2.776157401 | -0.219034498 | 0.826623175 | NA          | NA      |
| ENSG00000267490 | NA      | NA                                                                | NA        | 0.812572796 | -0.608074242 | 2.776157401 | -0.219034498 | 0.826623175 | NA          | NA      |
| ENSG00000005436 | GCFC2   | GC-rich sequence DNA-binding factor 2                             | 6936      | 420.8239201 | -0.607962895 | 0.555881443 | -1.093691653 | 0.274090236 | 0.999371363 | Not Sig |
| ENSG00000251413 | NA      | NA                                                                | NA        | 2.975619473 | -0.607485817 | 1.620894037 | -0.374784411 | 0.707820809 | NA          | NA      |
| ENSG00000058668 | ATP2B4  | ATPase plasma membrane Ca2+ transporting 4                        | 493       | 6192.533346 | -0.607454281 | 0.504766447 | -1.203436332 | 0.228807516 | 0.999371363 | Not Sig |
| ENSG00000228808 | NA      | NA                                                                | NA        | 34.04955661 | -0.607326822 | 0.600514193 | -1.011344659 | 0.311851498 | 0.999371363 | Not Sig |
| ENSG00000108239 | TBC1D12 | TBC1 domain family member 12                                      | 23232     | 588.2403683 | -0.607289066 | 0.423198816 | -1.434997081 | 0.151287929 | 0.999371363 | Not Sig |
| ENSG00000183807 | FAM162B | family with sequence similarity 162 member B                      | 221303    | 130.0089153 | -0.607226045 | 0.875307835 | -0.693728561 | 0.487852451 | 0.999371363 | Not Sig |
| ENSG00000265917 | MIR3685 | microRNA 3685                                                     | 100500802 | 14.93926427 | -0.607215821 | 1.250102936 | -0.485732657 | 0.627156726 | 0.999371363 | Not Sig |
| ENSG00000185010 | F8      | coagulation factor VIII                                           | 2157      | 885.6828974 | -0.606636311 | 0.872225838 | -0.695503715 | 0.486739684 | 0.999371363 | Not Sig |
| ENSG00000102312 | PORCN   | porcupine O-acyltransferase                                       | 64840     | 170.7523952 | -0.606562672 | 0.666408227 | -0.910196853 | 0.362718703 | 0.999371363 | Not Sig |
| ENSG00000250290 | NA      | NA                                                                | NA        | 24.38712545 | -0.606125075 | 0.870693424 | -0.696140638 | 0.486340759 | 0.999371363 | Not Sig |
| ENSG00000268088 | NA      | NA                                                                | NA        | 2.078661622 | -0.605519079 | 2.0982626   | -0.288581172 | 0.772901906 | NA          | NA      |
| ENSG00000119636 | BBOF1   | basal body orientation factor 1                                   | 80127     | 119.3910745 | -0.60519015  | 0.529986272 | -1.141897784 | 0.25349651  | 0.999371363 | Not Sig |
| ENSG00000112096 | SOD2    | superoxide dismutase 2                                            | 6648      | 10029.2091  | -0.604819116 | 0.593367852 | -1.01929876  | 0.308061152 | 0.999371363 | Not Sig |

|                 |          |                                                     |           |             |              |             |              |             |             |         |
|-----------------|----------|-----------------------------------------------------|-----------|-------------|--------------|-------------|--------------|-------------|-------------|---------|
| ENSG00000112096 | SOD2-OT1 | SOD2 overlapping transcript 1                       | 100129518 | 10029.2091  | -0.604819116 | 0.593367852 | -1.01929876  | 0.308061152 | 0.999371363 | Not Sig |
| ENSG00000089682 | RBM41    | RNA binding motif protein 41                        | 55285     | 632.9511682 | -0.604692954 | 0.718565826 | -0.841527571 | 0.400052446 | 0.999371363 | Not Sig |
| ENSG00000145632 | PLK2     | polo like kinase 2                                  | 10769     | 1490.989185 | -0.604576239 | 0.51826072  | -1.166548448 | 0.243392773 | 0.999371363 | Not Sig |
| ENSG00000179476 | C14orf28 | chromosome 14 open reading frame 28                 | 122525    | 98.78135492 | -0.604393057 | 0.452319946 | -1.336206954 | 0.181481639 | 0.999371363 | Not Sig |
| ENSG00000159164 | SV2A     | synaptic vesicle glycoprotein 2A                    | 9900      | 81.50471028 | -0.604379089 | 0.610704049 | -0.989643168 | 0.322348563 | 0.999371363 | Not Sig |
| ENSG00000197892 | KIF13B   | kinesin family member 13B                           | 23303     | 4571.304034 | -0.603765981 | 0.559231914 | -1.079634345 | 0.280305041 | 0.999371363 | Not Sig |
| ENSG00000225991 | NA       | NA                                                  | NA        | 29.11218073 | -0.603752145 | 0.797396111 | -0.757154614 | 0.448957238 | 0.999371363 | Not Sig |
| ENSG00000172717 | FAM71D   | family with sequence similarity 71 member D         | 161142    | 2.695363288 | -0.603727749 | 1.46457375  | -0.41222079  | 0.6801776   | NA          | NA      |
| ENSG00000131944 | FAAP24   | Fanconi anemia core complex associated protein 24   | 91442     | 33.38888927 | -0.603712008 | 0.616845589 | -0.978708478 | 0.327724042 | 0.999371363 | Not Sig |
| ENSG00000202343 | NA       | NA                                                  | NA        | 6.051804504 | -0.60364708  | 1.070811511 | -0.563728606 | 0.572938846 | NA          | NA      |
| ENSG00000226010 | NA       | NA                                                  | NA        | 5.195879516 | -0.603610409 | 1.171657183 | -0.515176639 | 0.606429592 | NA          | NA      |
| ENSG00000102471 | NDFIP2   | Nedd4 family interacting protein 2                  | 54602     | 685.2436138 | -0.603487773 | 0.55033816  | -1.096576282 | 0.27282666  | 0.999371363 | Not Sig |
| ENSG00000269194 | NA       | NA                                                  | NA        | 13.61746672 | -0.603243807 | 0.967308344 | -0.623631348 | 0.532869718 | 0.999371363 | Not Sig |
| ENSG00000234181 | NA       | NA                                                  | NA        | 2.423548058 | -0.603138972 | 1.772839301 | -0.340210741 | 0.73369783  | NA          | NA      |
| ENSG00000148773 | MKI67    | marker of proliferation Ki-67                       | 4288      | 1446.246772 | -0.602842977 | 1.036409568 | -0.581664812 | 0.560792478 | 0.999371363 | Not Sig |
| ENSG00000260518 | NA       | NA                                                  | NA        | 12.13744151 | -0.602281685 | 1.116261956 | -0.539552282 | 0.589505832 | 0.999371363 | Not Sig |
| ENSG00000256981 | NA       | NA                                                  | NA        | 83.71889676 | -0.60224089  | 0.901591947 | -0.66797501  | 0.504149545 | 0.999371363 | Not Sig |
| ENSG00000128513 | POT1     | protection of telomeres 1                           | 25913     | 391.4699032 | -0.602206079 | 0.676361263 | -0.890361573 | 0.373271769 | 0.999371363 | Not Sig |
| ENSG00000267587 | NA       | NA                                                  | NA        | 28.76598177 | -0.602120365 | 0.747980534 | -0.804994699 | 0.420822739 | 0.999371363 | Not Sig |
| ENSG00000248266 | NA       | NA                                                  | NA        | 1.889228027 | -0.6019136   | 1.925017217 | -0.312679593 | 0.754524101 | NA          | NA      |
| ENSG00000111788 | NA       | NA                                                  | NA        | 263.2108143 | -0.601912128 | 0.572150829 | -1.052016527 | 0.292791967 | 0.999371363 | Not Sig |
| ENSG00000258325 | NA       | NA                                                  | NA        | 22.72508286 | -0.601818734 | 0.759880727 | -0.791991049 | 0.428365895 | 0.999371363 | Not Sig |
| ENSG00000100483 | VCPKMT   | valosin containing protein lysine methyltransferase | 79609     | 223.998211  | -0.60177358  | 0.580190443 | -1.03720009  | 0.299642616 | 0.999371363 | Not Sig |
| ENSG00000170092 | SPDYE5   | speedy/RINGO cell cycle regulator family member E5  | 442590    | 1.365801323 | -0.60174421  | 2.812472356 | -0.2139556   | 0.830581682 | NA          | NA      |
| ENSG00000248527 | NA       | NA                                                  | NA        | 2762.724522 | -0.601739715 | 0.692866019 | -0.868479185 | 0.385132062 | 0.999371363 | Not Sig |
| ENSG00000200571 | NA       | NA                                                  | NA        | 10.20580188 | -0.601047636 | 1.159726073 | -0.5182669   | 0.604272064 | 0.999371363 | Not Sig |
| ENSG00000186466 | NA       | NA                                                  | NA        | 51.17870917 | -0.600842215 | 0.90913258  | -0.660896142 | 0.50867892  | 0.999371363 | Not Sig |
| ENSG00000241627 | NA       | NA                                                  | NA        | 1.948472004 | -0.600051994 | 1.90068526  | -0.315702977 | 0.752227967 | NA          | NA      |
| ENSG00000100985 | MMP9     | matrix metalloproteinase 9                          | 4318      | 671.3898229 | -0.600005974 | 1.019039595 | -0.588795545 | 0.555998434 | 0.999371363 | Not Sig |
| ENSG00000200534 | SNORA33  | small nucleolar RNA, H/ACA box 33                   | 594839    | 24.15684256 | -0.599940743 | 0.77351303  | -0.775605219 | 0.437982118 | 0.999371363 | Not Sig |
| ENSG00000197713 | RPE      | ribulose-5-phosphate-3-epimerase                    | 6120      | 1035.835069 | -0.599908085 | 0.673684121 | -0.890488683 | 0.373203543 | 0.999371363 | Not Sig |
| ENSG00000168904 | LRRC28   | leucine rich repeat containing 28                   | 123355    | 258.3349522 | -0.599746845 | 0.466869343 | -1.284613893 | 0.198927241 | 0.999371363 | Not Sig |
| ENSG00000217648 | NA       | NA                                                  | NA        | 18.97413649 | -0.5995726   | 0.722820107 | -0.829490761 | 0.406826763 | 0.999371363 | Not Sig |
| ENSG00000127922 | SEM1     | SEM1, 26S proteasome complex subunit                | 7979      | 541.1183517 | -0.599554905 | 0.532617049 | -1.125677269 | 0.260302149 | 0.999371363 | Not Sig |
| ENSG00000127311 | HELB     | DNA helicase B                                      | 92797     | 325.6247395 | -0.599295203 | 0.571600204 | -1.048451696 | 0.294430546 | 0.999371363 | Not Sig |

|                 |              |                                                     |           |             |              |             |              |             |             |         |
|-----------------|--------------|-----------------------------------------------------|-----------|-------------|--------------|-------------|--------------|-------------|-------------|---------|
| ENSG00000001629 | ANKIB1       | ankyrin repeat and IBR domain containing 1          | 54467     | 1775.57317  | -0.599087209 | 0.508546259 | -1.178038769 | 0.238781151 | 0.999371363 | Not Sig |
| ENSG00000269376 | NA           | NA                                                  | NA        | 7.255217633 | -0.598784367 | 0.958437097 | -0.624750825 | 0.53213461  | 0.999371363 | Not Sig |
| ENSG00000125753 | VASP         | vasodilator stimulated phosphoprotein               | 7408      | 3016.48351  | -0.598724127 | 0.605177756 | -0.989335978 | 0.322498787 | 0.999371363 | Not Sig |
| ENSG00000148803 | FUOM         | fucose mutarotase                                   | 282969    | 170.8103151 | -0.598721973 | 0.814460087 | -0.73511518  | 0.46226935  | 0.999371363 | Not Sig |
| ENSG00000169291 | SHE          | Src homology 2 domain containing E                  | 126669    | 1231.294982 | -0.598625673 | 0.876224567 | -0.683187502 | 0.494488369 | 0.999371363 | Not Sig |
| ENSG00000187627 | RGPD1        | RANBP2-like and GRIP domain containing 1            | 400966    | 10.4052255  | -0.598590502 | 1.287361697 | -0.464974609 | 0.64194964  | 0.999371363 | Not Sig |
| ENSG00000121289 | CEP89        | centrosomal protein 89                              | 84902     | 406.5622402 | -0.598564439 | 0.40012906  | -1.495928435 | 0.134672305 | 0.999371363 | Not Sig |
| ENSG00000180190 | TDRP         | testis development related protein                  | 157695    | 473.7140197 | -0.598115678 | 0.676940712 | -0.883556961 | 0.376935421 | 0.999371363 | Not Sig |
| ENSG00000196312 | MFSD14C      | major facilitator superfamily domain containing 14C | 84278     | 367.796607  | -0.597655753 | 0.443910749 | -1.34634215  | 0.178192198 | 0.999371363 | Not Sig |
| ENSG00000244018 | NA           | NA                                                  | NA        | 6.663657047 | -0.597502673 | 1.02307246  | -0.584027717 | 0.559201665 | 0.999371363 | Not Sig |
| ENSG00000236155 | LOC101928303 | uncharacterized LOC101928303                        | 101928303 | 5.526602096 | -0.597490293 | 1.571129694 | -0.380293425 | 0.703727616 | NA          | NA      |
| ENSG00000104859 | CLASRP       | CLK4 associating serine/arginine rich protein       | 11129     | 821.5466115 | -0.597029024 | 0.458110455 | -1.303242522 | 0.192491977 | 0.999371363 | Not Sig |
| ENSG00000159882 | ZNF230       | zinc finger protein 230                             | 7773      | 116.7716751 | -0.596948522 | 0.475647857 | -1.255021996 | 0.209470775 | 0.999371363 | Not Sig |
| ENSG00000118491 | ZC2HC1B      | zinc finger C2HC-type containing 1B                 | 153918    | 2.387513652 | -0.596855771 | 1.762232503 | -0.338692976 | 0.734841033 | NA          | NA      |
| ENSG00000227591 | LOC101930114 | uncharacterized LOC101930114                        | 101930114 | 5.152394282 | -0.596808288 | 1.093156069 | -0.545949755 | 0.585100476 | NA          | NA      |
| ENSG00000198464 | ZNF480       | zinc finger protein 480                             | 147657    | 389.9203323 | -0.596551799 | 0.53587487  | -1.11322966  | 0.265609807 | 0.999371363 | Not Sig |
| ENSG00000206957 | NA           | NA                                                  | NA        | 1.909835892 | -0.596265371 | 1.679160439 | -0.355097319 | 0.722516685 | NA          | NA      |
| ENSG00000259032 | NA           | NA                                                  | NA        | 1.120007424 | -0.596198951 | 2.201125984 | -0.270860894 | 0.786498023 | NA          | NA      |
| ENSG00000181751 | C5orf30      | chromosome 5 open reading frame 30                  | 90355     | 126.2523456 | -0.596157648 | 0.609322145 | -0.978394849 | 0.327879075 | 0.999371363 | Not Sig |
| ENSG00000243005 | NA           | NA                                                  | NA        | 22.27560762 | -0.596155566 | 0.739988447 | -0.805628335 | 0.420457183 | 0.999371363 | Not Sig |
| ENSG00000265577 | NA           | NA                                                  | NA        | 3.557310803 | -0.595862461 | 1.293438755 | -0.460680847 | 0.645027598 | NA          | NA      |
| ENSG00000218739 | CEBPZOS      | CEBPZ opposite strand                               | 100505876 | 629.2350616 | -0.595825193 | 0.586805715 | -1.015370467 | 0.309929265 | 0.999371363 | Not Sig |
| ENSG00000131503 | ANKHD1       | ankyrin repeat and KH domain containing 1           | 54882     | 253.362573  | -0.595794164 | 0.688932585 | -0.864807641 | 0.387144377 | 0.999371363 | Not Sig |
| ENSG00000215196 | BASP1-AS1    | BASP1 antisense RNA 1                               | 285696    | 4.323929702 | -0.595743508 | 1.258772016 | -0.473273556 | 0.636018026 | NA          | NA      |
| ENSG00000146910 | CNPY1        | canopy FGF signaling regulator 1                    | 285888    | 0.912285293 | -0.595376807 | 3.132820711 | -0.190044967 | 0.849273894 | NA          | NA      |
| ENSG00000267145 | NA           | NA                                                  | NA        | 0.912285293 | -0.595376807 | 3.132820711 | -0.190044967 | 0.849273894 | NA          | NA      |
| ENSG00000273247 | NA           | NA                                                  | NA        | 298.624886  | -0.595271749 | 0.62325616  | -0.955099664 | 0.339527299 | 0.999371363 | Not Sig |
| ENSG00000183963 | SMTN         | smoothelin                                          | 6525      | 1402.787612 | -0.595147665 | 0.629239132 | -0.945821128 | 0.344239827 | 0.999371363 | Not Sig |
| ENSG00000125255 | SLC10A2      | solute carrier family 10 member 2                   | 6555      | 1.570506741 | -0.595075095 | 2.26414326  | -0.262825726 | 0.792684906 | NA          | NA      |
| ENSG00000267459 | NA           | NA                                                  | NA        | 1.570506741 | -0.595075095 | 2.26414326  | -0.262825726 | 0.792684906 | NA          | NA      |
| ENSG00000254732 | NA           | NA                                                  | NA        | 72.16561763 | -0.595065508 | 0.673870136 | -0.883056655 | 0.377205661 | 0.999371363 | Not Sig |
| ENSG00000257027 | NA           | NA                                                  | NA        | 459.0409912 | -0.59460631  | 0.786417036 | -0.756095409 | 0.449591995 | 0.999371363 | Not Sig |
| ENSG00000147852 | VLDLR        | very low density lipoprotein receptor               | 7436      | 487.968981  | -0.594571499 | 0.502094553 | -1.184182333 | 0.236340894 | 0.999371363 | Not Sig |
| ENSG00000254911 | SCARNA9      | small Cajal body-specific RNA 9                     | 619383    | 971.8737598 | -0.594551621 | 0.718827515 | -0.827113053 | 0.408172986 | 0.999371363 | Not Sig |
| ENSG00000254911 | SCARNA9L     | small Cajal body-specific RNA 9-like                | 100158262 | 971.8737598 | -0.594551621 | 0.718827515 | -0.827113053 | 0.408172986 | 0.999371363 | Not Sig |



|                 |           |                                                                |           |             |              |             |              |             |             |         |
|-----------------|-----------|----------------------------------------------------------------|-----------|-------------|--------------|-------------|--------------|-------------|-------------|---------|
| ENSG00000225401 | NA        | NA                                                             | NA        | 11.10351274 | -0.594241092 | 1.411065778 | -0.421129264 | 0.673660694 | 0.999371363 | Not Sig |
| ENSG00000232587 | NA        | NA                                                             | NA        | 100.2012067 | -0.594072883 | 0.578536674 | -1.02685432  | 0.304489067 | 0.999371363 | Not Sig |
| ENSG00000138315 | OIT3      | oncoprotein induced transcript 3                               | 170392    | 4.369003349 | -0.593882302 | 1.300344402 | -0.456711546 | 0.647878391 | NA          | NA      |
| ENSG00000222482 | NA        | NA                                                             | NA        | 23.17004256 | -0.593855868 | 0.776915194 | -0.764376694 | 0.444642793 | 0.999371363 | Not Sig |
| ENSG00000164124 | TMEM144   | transmembrane protein 144                                      | 55314     | 454.4572985 | -0.593688224 | 0.734548304 | -0.808235783 | 0.418954862 | 0.999371363 | Not Sig |
| ENSG00000156876 | SASS6     | SAS-6 centriolar assembly protein                              | 163786    | 192.8127016 | -0.59345791  | 0.837850782 | -0.708309788 | 0.4787529   | 0.999371363 | Not Sig |
| ENSG00000116141 | MARK1     | microtubule affinity regulating kinase 1                       | 4139      | 331.5923938 | -0.593433671 | 0.746813188 | -0.794621306 | 0.426833821 | 0.999371363 | Not Sig |
| ENSG00000223238 | NA        | NA                                                             | NA        | 9.834119434 | -0.593319731 | 1.005077055 | -0.590322263 | 0.55497437  | 0.999371363 | Not Sig |
| ENSG00000197912 | SPG7      | SPG7, paraplegin matrix AAA peptidase subunit                  | 6687      | 1883.01307  | -0.593228139 | 0.453598145 | -1.307827525 | 0.190931816 | 0.999371363 | Not Sig |
| ENSG00000082515 | MRPL22    | mitochondrial ribosomal protein L22                            | 29093     | 229.5276798 | -0.592906834 | 0.562661362 | -1.053754309 | 0.291995417 | 0.999371363 | Not Sig |
| ENSG00000186094 | AGBL4     | ATP/GTP binding protein like 4                                 | 84871     | 44.93347919 | -0.592825377 | 0.740616052 | -0.800448998 | 0.423450702 | 0.999371363 | Not Sig |
| ENSG00000184588 | PDE4B     | phosphodiesterase 4B                                           | 5142      | 1200.143578 | -0.592559518 | 0.612520412 | -0.967411871 | 0.333338178 | 0.999371363 | Not Sig |
| ENSG00000201622 | NA        | NA                                                             | NA        | 2.778768993 | -0.592513332 | 1.446886775 | -0.409509121 | 0.682166074 | NA          | NA      |
| ENSG00000169856 | ONECUT1   | one cut homeobox 1                                             | 3175      | 50.56110688 | -0.592500759 | 1.258867208 | -0.470661842 | 0.637882238 | 0.999371363 | Not Sig |
| ENSG00000269709 | NA        | NA                                                             | NA        | 1.18108381  | -0.592361832 | 2.495644289 | -0.237358278 | 0.812378854 | NA          | NA      |
| ENSG00000113231 | PDE8B     | phosphodiesterase 8B                                           | 8622      | 227.0785619 | -0.592357361 | 0.873172667 | -0.678396592 | 0.49752027  | 0.999371363 | Not Sig |
| ENSG00000135018 | UBQLN1    | ubiquilin 1                                                    | 29979     | 2784.997503 | -0.592295701 | 0.482799416 | -1.226794568 | 0.219899813 | 0.999371363 | Not Sig |
| ENSG00000214485 | NA        | NA                                                             | NA        | 11.35150893 | -0.592086351 | 0.972657222 | -0.608730741 | 0.542702928 | 0.999371363 | Not Sig |
| ENSG00000188368 | PRR19     | proline rich 19                                                | 284338    | 9.903382001 | -0.591999572 | 0.896692544 | -0.660203517 | 0.509123235 | 0.999371363 | Not Sig |
| ENSG00000134146 | DPH6      | diphthamine biosynthesis 6                                     | 89978     | 253.3747163 | -0.59198952  | 0.772312792 | -0.766515234 | 0.443369791 | 0.999371363 | Not Sig |
| ENSG00000119714 | GPR68     | G protein-coupled receptor 68                                  | 8111      | 193.5825256 | -0.591601052 | 0.686377237 | -0.861918229 | 0.388732517 | 0.999371363 | Not Sig |
| ENSG00000264538 | NA        | NA                                                             | NA        | 584.387171  | -0.591478169 | 0.583312113 | -1.013999463 | 0.310583009 | 0.999371363 | Not Sig |
| ENSG00000128487 | SPECC1    | sperm antigen with calponin homology and coiled-coil domains 1 | 92521     | 1162.877158 | -0.591281248 | 0.433417811 | -1.364229232 | 0.172495431 | 0.999371363 | Not Sig |
| ENSG00000151849 | CENPJ     | centromere protein J                                           | 55835     | 350.9828866 | -0.59104224  | 0.563672707 | -1.048555717 | 0.294382646 | 0.999371363 | Not Sig |
| ENSG00000187997 | C17orf99  | chromosome 17 open reading frame 99                            | 100141515 | 1.356347075 | -0.591001713 | 2.763166851 | -0.213885641 | 0.830636238 | NA          | NA      |
| ENSG00000263065 | NA        | NA                                                             | NA        | 6.806333919 | -0.59075558  | 1.256653342 | -0.470102438 | 0.638281833 | 0.999371363 | Not Sig |
| ENSG00000170549 | IRX1      | iroquois homeobox 1                                            | 79192     | 145.0879706 | -0.59061256  | 1.299283635 | -0.454567844 | 0.649420173 | 0.999371363 | Not Sig |
| ENSG00000213020 | ZNF611    | zinc finger protein 611                                        | 81856     | 596.9808608 | -0.590237762 | 0.444782009 | -1.32702706  | 0.184499732 | 0.999371363 | Not Sig |
| ENSG00000245849 | RAD51-AS1 | RAD51 antisense RNA 1 (head to head)                           | 100505648 | 215.6495839 | -0.590123392 | 0.517340624 | -1.140686356 | 0.254000466 | 0.999371363 | Not Sig |
| ENSG00000169372 | CRADD     | CASP2 and RIPK1 domain containing adaptor with death domain    | 8738      | 212.4546427 | -0.590071972 | 0.463237896 | -1.273799007 | 0.202734657 | 0.999371363 | Not Sig |
| ENSG00000125384 | PTGER2    | prostaglandin E receptor 2                                     | 5732      | 113.3686969 | -0.589849563 | 0.527851718 | -1.117453145 | 0.263800623 | 0.999371363 | Not Sig |
| ENSG00000243609 | NA        | NA                                                             | NA        | 48.96690273 | -0.589829635 | 0.561366879 | -1.050702591 | 0.293395206 | 0.999371363 | Not Sig |
| ENSG00000129195 | PIMREG    | PICALM interacting mitotic regulator                           | 54478     | 26.24343983 | -0.589808979 | 0.982425263 | -0.600360151 | 0.548266239 | 0.999371363 | Not Sig |
| ENSG00000242861 | NA        | NA                                                             | NA        | 102.7996099 | -0.58975515  | 0.730622323 | -0.807195634 | 0.419553781 | 0.999371363 | Not Sig |
| ENSG00000251603 | NA        | NA                                                             | NA        | 42.14202025 | -0.589667521 | 0.895181536 | -0.658712783 | 0.510080223 | 0.999371363 | Not Sig |

|                 |              |                                                          |           |             |              |             |              |             |             |         |
|-----------------|--------------|----------------------------------------------------------|-----------|-------------|--------------|-------------|--------------|-------------|-------------|---------|
| ENSG00000196388 | INCA1        | inhibitor of CDK, cyclin A1 interacting protein 1        | 388324    | 24.50760095 | -0.589477199 | 0.719230906 | -0.81959381  | 0.412447703 | 0.999371363 | Not Sig |
| ENSG00000182611 | NA           | NA                                                       | NA        | 151.127972  | -0.589179278 | 0.888119851 | -0.663400641 | 0.507073996 | 0.999371363 | Not Sig |
| ENSG00000197951 | ZNF71        | zinc finger protein 71                                   | 58491     | 257.7711765 | -0.589145196 | 0.597516881 | -0.985989207 | 0.324138409 | 0.999371363 | Not Sig |
| ENSG00000075391 | RASAL2       | RAS protein activator like 2                             | 9462      | 1678.721722 | -0.58884061  | 0.530870937 | -1.109197299 | 0.267345077 | 0.999371363 | Not Sig |
| ENSG00000201574 | NA           | NA                                                       | NA        | 5.688131715 | -0.588710852 | 1.246693184 | -0.472217912 | 0.636771256 | NA          | NA      |
| ENSG00000230397 | NA           | NA                                                       | NA        | 16.15294028 | -0.58868243  | 0.798922245 | -0.736845522 | 0.461216297 | 0.999371363 | Not Sig |
| ENSG00000138326 | RPS24        | ribosomal protein S24                                    | 6229      | 6461.460019 | -0.588659647 | 0.518857327 | -1.134530854 | 0.256571939 | 0.999371363 | Not Sig |
| ENSG00000249786 | NA           | NA                                                       | NA        | 5.477724114 | -0.588501858 | 1.457921033 | -0.403658253 | 0.686464042 | NA          | NA      |
| ENSG00000105516 | DBP          | D-box binding PAR bZIP transcription factor              | 1628      | 322.67261   | -0.588250662 | 0.751940464 | -0.782310157 | 0.434032319 | 0.999371363 | Not Sig |
| ENSG00000107745 | MICU1        | mitochondrial calcium uptake 1                           | 10367     | 1169.304456 | -0.588217076 | 0.421216487 | -1.396472109 | 0.162572374 | 0.999371363 | Not Sig |
| ENSG00000256351 | NA           | NA                                                       | NA        | 5.719915283 | -0.587575646 | 1.119921945 | -0.524657676 | 0.599821184 | NA          | NA      |
| ENSG00000133135 | RNF128       | ring finger protein 128, E3 ubiquitin protein ligase     | 79589     | 409.260515  | -0.587558304 | 0.560737147 | -1.04783196  | 0.294716035 | 0.999371363 | Not Sig |
| ENSG00000272631 | NA           | NA                                                       | NA        | 46.05109225 | -0.587546402 | 0.53958892  | -1.08887781  | 0.276207773 | 0.999371363 | Not Sig |
| ENSG00000222844 | NA           | NA                                                       | NA        | 1.708551297 | -0.587300139 | 1.960719191 | -0.299533019 | 0.764533382 | NA          | NA      |
| ENSG00000123124 | WWP1         | WW domain containing E3 ubiquitin protein ligase 1       | 11059     | 2072.311778 | -0.587225991 | 0.514572212 | -1.141192582 | 0.253789791 | 0.999371363 | Not Sig |
| ENSG00000250365 | LOC101927124 | uncharacterized LOC101927124                             | 101927124 | 3.861142701 | -0.587203442 | 1.616664269 | -0.363219162 | 0.716441174 | NA          | NA      |
| ENSG00000266570 | MIR5579      | microRNA 5579                                            | 100847000 | 4.805028285 | -0.587127488 | 1.501623999 | -0.390995008 | 0.695800926 | NA          | NA      |
| ENSG00000111665 | CDCA3        | cell division cycle associated 3                         | 83461     | 65.59613679 | -0.58675742  | 0.852085371 | -0.688613419 | 0.491066574 | 0.999371363 | Not Sig |
| ENSG00000245904 | NA           | NA                                                       | NA        | 32.00146389 | -0.58647002  | 0.727615319 | -0.806016592 | 0.420233282 | 0.999371363 | Not Sig |
| ENSG00000260465 | NA           | NA                                                       | NA        | 2.714675894 | -0.586428955 | 1.524442992 | -0.384684083 | 0.700471489 | NA          | NA      |
| ENSG00000223774 | NA           | NA                                                       | NA        | 10.31751029 | -0.586261892 | 1.169088255 | -0.50146932  | 0.616040865 | 0.999371363 | Not Sig |
| ENSG00000079257 | LXN          | latexin                                                  | 56925     | 284.7823112 | -0.586205118 | 0.730803789 | -0.802137491 | 0.42247343  | 0.999371363 | Not Sig |
| ENSG00000122884 | P4HA1        | prolyl 4-hydroxylase subunit alpha 1                     | 5033      | 2179.211465 | -0.5861313   | 0.704533635 | -0.831942254 | 0.40544154  | 0.999371363 | Not Sig |
| ENSG00000248367 | NA           | NA                                                       | NA        | 14.0993325  | -0.586006732 | 1.109681012 | -0.528085752 | 0.59743982  | 0.999371363 | Not Sig |
| ENSG00000214533 | NA           | NA                                                       | NA        | 0.819010331 | -0.585762294 | 2.772048353 | -0.211310273 | 0.832645167 | NA          | NA      |
| ENSG00000264569 | NA           | NA                                                       | NA        | 0.819010331 | -0.585762294 | 2.772048353 | -0.211310273 | 0.832645167 | NA          | NA      |
| ENSG00000166073 | GPR176       | G protein-coupled receptor 176                           | 11245     | 258.4979505 | -0.585200115 | 0.551014471 | -1.062041281 | 0.288216945 | 0.999371363 | Not Sig |
| ENSG00000268983 | NA           | NA                                                       | NA        | 1.488518438 | -0.585141474 | 1.98281292  | -0.295106749 | 0.767912335 | NA          | NA      |
| ENSG00000233101 | HOXB-AS3     | HOXB cluster antisense RNA 3                             | 404266    | 29.482078   | -0.585073265 | 0.931004755 | -0.628432091 | 0.52972092  | 0.999371363 | Not Sig |
| ENSG00000182973 | CNOT10       | CCR4-NOT transcription complex subunit 10                | 25904     | 627.477104  | -0.585043096 | 0.546602616 | -1.070326191 | 0.284472509 | 0.999371363 | Not Sig |
| ENSG00000224078 | NA           | NA                                                       | NA        | 1966.853062 | -0.584810342 | 0.506320347 | -1.155020423 | 0.248082063 | 0.999371363 | Not Sig |
| ENSG00000179152 | TCAIM        | T-cell activation inhibitor, mitochondrial               | 285343    | 748.8154482 | -0.584622089 | 0.642973829 | -0.9092471   | 0.363219707 | 0.999371363 | Not Sig |
| ENSG00000269896 | LOC100129534 | small nuclear ribonucleoprotein polypeptide N pseudogene | 100129534 | 31.24652707 | -0.584081153 | 0.710282885 | -0.822321874 | 0.410893731 | 0.999371363 | Not Sig |
| ENSG00000170153 | RNF150       | ring finger protein 150                                  | 57484     | 335.9620331 | -0.584008353 | 0.926350431 | -0.630439987 | 0.528406756 | 0.999371363 | Not Sig |
| ENSG00000265802 | NA           | NA                                                       | NA        | 10.24455985 | -0.583899917 | 0.924223998 | -0.631773161 | 0.527535114 | 0.999371363 | Not Sig |

|                 |           |                                                        |           |             |              |             |              |             |             |         |
|-----------------|-----------|--------------------------------------------------------|-----------|-------------|--------------|-------------|--------------|-------------|-------------|---------|
| ENSG00000198440 | ZNF583    | zinc finger protein 583                                | 147949    | 125.2897726 | -0.583870726 | 0.517093502 | -1.129139553 | 0.258838968 | 0.999371363 | Not Sig |
| ENSG00000163938 | GNL3      | G protein nucleolar 3                                  | 26354     | 1475.405296 | -0.5837538   | 0.643484816 | -0.907175718 | 0.364313882 | 0.999371363 | Not Sig |
| ENSG00000225808 | NA        | NA                                                     | NA        | 19.41849239 | -0.583627301 | 0.657141111 | -0.888130861 | 0.374470364 | 0.999371363 | Not Sig |
| ENSG00000156831 | NSMCE2    | NSE2/AMS21 homolog, SMC5-SMC6 complex SUMO ligase      | 286053    | 350.3125522 | -0.583519109 | 0.606852883 | -0.961549538 | 0.33627593  | 0.999371363 | Not Sig |
| ENSG00000246225 | NA        | NA                                                     | NA        | 20.45590203 | -0.583250234 | 0.802981167 | -0.726356057 | 0.467620523 | 0.999371363 | Not Sig |
| ENSG00000244754 | N4BP2L2   | NEDD4 binding protein 2 like 2                         | 10443     | 3048.869606 | -0.583081999 | 0.608650431 | -0.957991598 | 0.338066995 | 0.999371363 | Not Sig |
| ENSG00000151532 | VTI1A     | vesicle transport through interaction with t-SNAREs 1A | 143187    | 697.0599676 | -0.583077199 | 0.468766478 | -1.2438543   | 0.213553191 | 0.999371363 | Not Sig |
| ENSG00000093217 | XYLB      | xylulokinase                                           | 9942      | 215.2782991 | -0.582825621 | 0.707320671 | -0.823990652 | 0.40994487  | 0.999371363 | Not Sig |
| ENSG00000005243 | COPZ2     | coatamer protein complex subunit zeta 2                | 51226     | 155.2045037 | -0.582443167 | 0.584908539 | -0.99578503  | 0.319354605 | 0.999371363 | Not Sig |
| ENSG00000170500 | LONRF2    | LON peptidase N-terminal domain and ring finger 2      | 164832    | 964.1017308 | -0.582287227 | 0.749191405 | -0.777220912 | 0.437028446 | 0.999371363 | Not Sig |
| ENSG00000166762 | CATSPER2  | cation channel sperm associated 2                      | 117155    | 149.4816991 | -0.582275003 | 0.569322246 | -1.022751188 | 0.306425502 | 0.999371363 | Not Sig |
| ENSG00000134874 | DZIP1     | DAZ interacting zinc finger protein 1                  | 22873     | 377.9007507 | -0.581898323 | 0.525742978 | -1.106811402 | 0.268375477 | 0.999371363 | Not Sig |
| ENSG00000248966 | NA        | NA                                                     | NA        | 1.993241598 | -0.581666492 | 1.646144514 | -0.353350807 | 0.723825461 | NA          | NA      |
| ENSG00000207563 | MIR23B    | microRNA 23b                                           | 407011    | 20.01627065 | -0.581573572 | 0.943477243 | -0.616415049 | 0.537620623 | 0.999371363 | Not Sig |
| ENSG00000088340 | FER1L4    | fer-1 like family member 4, pseudogene                 | 80307     | 311.5829317 | -0.580788389 | 0.780628939 | -0.744000587 | 0.45687612  | 0.999371363 | Not Sig |
| ENSG00000004864 | SLC25A13  | solute carrier family 25 member 13                     | 10165     | 647.1076988 | -0.580684548 | 0.570234747 | -1.018325436 | 0.308523324 | 0.999371363 | Not Sig |
| ENSG00000148468 | FAM171A1  | family with sequence similarity 171 member A1          | 221061    | 357.9231979 | -0.58067645  | 0.785172922 | -0.739552312 | 0.459571687 | 0.999371363 | Not Sig |
| ENSG00000003402 | CFLAR     | CASP8 and FADD like apoptosis regulator                | 8837      | 7410.357183 | -0.580509401 | 0.517326403 | -1.12213372  | 0.261805589 | 0.999371363 | Not Sig |
| ENSG00000167483 | FAM129C   | family with sequence similarity 129 member C           | 199786    | 39.85797781 | -0.580360612 | 0.911923011 | -0.636414045 | 0.524506589 | 0.999371363 | Not Sig |
| ENSG00000180747 | SMG1P3    | SMG1 pseudogene 3                                      | 100271836 | 764.3725271 | -0.58032504  | 0.524905334 | -1.105580382 | 0.268908185 | 0.999371363 | Not Sig |
| ENSG00000106560 | GIMAP2    | GTPase, IMAP family member 2                           | 26157     | 292.0792973 | -0.580149617 | 0.821476771 | -0.706227659 | 0.480046572 | 0.999371363 | Not Sig |
| ENSG00000270962 | NA        | NA                                                     | NA        | 4.4069204   | -0.580061198 | 1.175664355 | -0.493390138 | 0.621736949 | NA          | NA      |
| ENSG00000256420 | NA        | NA                                                     | NA        | 1.933997622 | -0.579907148 | 1.924049803 | -0.30139924  | 0.763110074 | NA          | NA      |
| ENSG00000216141 | MIR941-2  | microRNA 941-2                                         | 100126339 | 9.700221233 | -0.579640605 | 0.852077912 | -0.68026714  | 0.496335327 | 0.999371363 | Not Sig |
| ENSG00000172602 | RND1      | Rho family GTPase 1                                    | 27289     | 827.2223989 | -0.579572624 | 0.889888529 | -0.651286767 | 0.514861389 | 0.999371363 | Not Sig |
| ENSG00000078177 | N4BP2     | NEDD4 binding protein 2                                | 55728     | 1370.360813 | -0.579324963 | 0.710687712 | -0.815161081 | 0.414980112 | 0.999371363 | Not Sig |
| ENSG00000225113 | NA        | NA                                                     | NA        | 24.34268529 | -0.579238434 | 0.642725941 | -0.901221496 | 0.367470564 | 0.999371363 | Not Sig |
| ENSG00000091844 | RGS17     | regulator of G protein signaling 17                    | 26575     | 175.6279001 | -0.579117517 | 1.105021199 | -0.524078197 | 0.600224153 | 0.999371363 | Not Sig |
| ENSG00000138180 | CEP55     | centrosomal protein 55                                 | 55165     | 126.309747  | -0.578952154 | 1.013760494 | -0.571093624 | 0.567936181 | 0.999371363 | Not Sig |
| ENSG00000196504 | PRPF40A   | pre-mRNA processing factor 40 homolog A                | 55660     | 2920.60486  | -0.578894838 | 0.610167524 | -0.948747376 | 0.342749112 | 0.999371363 | Not Sig |
| ENSG00000117399 | CDC20     | cell division cycle 20                                 | 991       | 128.4814403 | -0.57830606  | 1.046061288 | -0.55284147  | 0.580371969 | 0.999371363 | Not Sig |
| ENSG00000267285 | NA        | NA                                                     | NA        | 5.150412537 | -0.578276382 | 1.783040172 | -0.324320445 | 0.745695443 | NA          | NA      |
| ENSG00000258441 | LINC00641 | long intergenic non-protein coding RNA 641             | 283624    | 425.5942189 | -0.578231108 | 0.522388372 | -1.106898888 | 0.268337647 | 0.999371363 | Not Sig |
| ENSG00000171984 | C20orf196 | chromosome 20 open reading frame 196                   | 149840    | 92.40085317 | -0.578144119 | 0.471623913 | -1.225858364 | 0.220251979 | 0.999371363 | Not Sig |
| ENSG00000162959 | MEMO1     | mediator of cell motility 1                            | 51072     | 194.4337325 | -0.577931352 | 0.585099617 | -0.987748641 | 0.323275766 | 0.999371363 | Not Sig |

|                 |         |                                                    |           |             |              |             |              |             |             |         |
|-----------------|---------|----------------------------------------------------|-----------|-------------|--------------|-------------|--------------|-------------|-------------|---------|
| ENSG00000138379 | MSTN    | myostatin                                          | 2660      | 4.05613358  | -0.577616892 | 1.294129382 | -0.446336278 | 0.655354354 | NA          | NA      |
| ENSG00000163516 | ANKZF1  | ankyrin repeat and zinc finger domain containing 1 | 55139     | 837.4318652 | -0.577576352 | 0.433601739 | -1.332043441 | 0.182845914 | 0.999371363 | Not Sig |
| ENSG00000099326 | MZF1    | myeloid zinc finger 1                              | 7593      | 667.7300548 | -0.577205838 | 0.467321879 | -1.235135491 | 0.216780083 | 0.999371363 | Not Sig |
| ENSG00000231865 | NA      | NA                                                 | NA        | 98.54899282 | -0.57703168  | 0.672569532 | -0.857950967 | 0.390919539 | 0.999371363 | Not Sig |
| ENSG00000138735 | PDE5A   | phosphodiesterase 5A                               | 8654      | 1574.567171 | -0.577013997 | 0.632246832 | -0.912640392 | 0.361431703 | 0.999371363 | Not Sig |
| ENSG00000182477 | NA      | NA                                                 | NA        | 1.187521345 | -0.57579772  | 2.223380821 | -0.258973953 | 0.795655338 | NA          | NA      |
| ENSG00000172794 | RAB37   | RAB37, member RAS oncogene family                  | 326624    | 342.9613238 | -0.575525284 | 0.925181203 | -0.622067636 | 0.533897395 | 0.999371363 | Not Sig |
| ENSG00000059145 | UNKL    | unkempt family like zinc finger                    | 64718     | 795.3918174 | -0.575206937 | 0.475210878 | -1.210424601 | 0.226116007 | 0.999371363 | Not Sig |
| ENSG00000121743 | GJA3    | gap junction protein alpha 3                       | 2700      | 3.413527054 | -0.574752321 | 1.901231061 | -0.30230535  | 0.7624193   | NA          | NA      |
| ENSG00000272700 | NA      | NA                                                 | NA        | 13.44033557 | -0.574614022 | 1.433751806 | -0.400776494 | 0.688584686 | 0.999371363 | Not Sig |
| ENSG00000152767 | FARP1   | FERM, ARH/RhoGEF and pleckstrin domain protein 1   | 10160     | 3855.50657  | -0.574437882 | 0.440536995 | -1.303949246 | 0.192250888 | 0.999371363 | Not Sig |
| ENSG00000248476 | NA      | NA                                                 | NA        | 70.86892565 | -0.57434036  | 0.714405114 | -0.803942117 | 0.421430405 | 0.999371363 | Not Sig |
| ENSG00000229097 | NA      | NA                                                 | NA        | 2.406826259 | -0.574236863 | 2.020922595 | -0.284145897 | 0.776298575 | NA          | NA      |
| ENSG00000214029 | ZNF891  | zinc finger protein 891                            | 101060200 | 180.4724939 | -0.573856673 | 0.555051667 | -1.03387974  | 0.301192387 | 0.999371363 | Not Sig |
| ENSG00000212138 | NA      | NA                                                 | NA        | 4.27616644  | -0.573840515 | 1.354370066 | -0.423695509 | 0.671787891 | NA          | NA      |
| ENSG00000272096 | NA      | NA                                                 | NA        | 5.083719103 | -0.573795723 | 1.570061264 | -0.365460722 | 0.714767521 | NA          | NA      |
| ENSG00000210112 | NA      | NA                                                 | NA        | 12.60486373 | -0.57377824  | 1.158593054 | -0.495237079 | 0.62043278  | 0.999371363 | Not Sig |
| ENSG00000199172 | MIR331  | microRNA 331                                       | 442903    | 4.913475971 | -0.573681877 | 1.239583219 | -0.462802229 | 0.643506133 | NA          | NA      |
| ENSG00000099804 | CDC34   | cell division cycle 34                             | 997       | 755.6048625 | -0.573271502 | 0.557898135 | -1.027555868 | 0.304158793 | 0.999371363 | Not Sig |
| ENSG00000196922 | ZNF252P | zinc finger protein 252, pseudogene                | 286101    | 1082.916016 | -0.573105225 | 0.63406363  | -0.903860745 | 0.366069247 | 0.999371363 | Not Sig |
| ENSG00000204745 | NA      | NA                                                 | NA        | 33.23289046 | -0.573010731 | 0.68712945  | -0.833919622 | 0.404326279 | 0.999371363 | Not Sig |
| ENSG00000236809 | NA      | NA                                                 | NA        | 16.23373543 | -0.572696251 | 0.955433764 | -0.599409684 | 0.548899721 | 0.999371363 | Not Sig |
| ENSG00000207622 | MIR619  | microRNA 619                                       | 693204    | 9.714358989 | -0.572617149 | 1.037987475 | -0.551660943 | 0.581180674 | 0.999371363 | Not Sig |
| ENSG00000196968 | FUT11   | fucosyltransferase 11                              | 170384    | 765.1452147 | -0.57214955  | 0.48307762  | -1.184384303 | 0.236260971 | 0.999371363 | Not Sig |
| ENSG00000225423 | NA      | NA                                                 | NA        | 35.44429177 | -0.572144369 | 0.895127855 | -0.639176143 | 0.52270835  | 0.999371363 | Not Sig |
| ENSG00000252690 | NA      | NA                                                 | NA        | 49.47346891 | -0.571891167 | 0.666729473 | -0.857755942 | 0.391027243 | 0.999371363 | Not Sig |
| ENSG00000263707 | NA      | NA                                                 | NA        | 7.574653555 | -0.571486585 | 0.973409332 | -0.587097911 | 0.55713795  | 0.999371363 | Not Sig |
| ENSG00000105856 | HBP1    | HMG-box transcription factor 1                     | 26959     | 1911.265979 | -0.571427231 | 0.443137093 | -1.2895044   | 0.197222788 | 0.999371363 | Not Sig |
| ENSG00000187536 | NA      | NA                                                 | NA        | 27.54511616 | -0.570662564 | 0.774988271 | -0.736349935 | 0.461517764 | 0.999371363 | Not Sig |
| ENSG00000077458 | FAM76B  | family with sequence similarity 76 member B        | 143684    | 441.9360076 | -0.570173374 | 0.588832879 | -0.968311034 | 0.332889056 | 0.999371363 | Not Sig |
| ENSG00000147059 | SPIN2A  | spindlin family member 2A                          | 54466     | 2.61926447  | -0.570088377 | 1.693638277 | -0.336605747 | 0.736414124 | NA          | NA      |
| ENSG00000153165 | RGPD3   | RANBP2-like and GRIP domain containing 3           | 653489    | 13.91304178 | -0.570077596 | 0.803387092 | -0.709592675 | 0.477956763 | 0.999371363 | Not Sig |
| ENSG00000177426 | TGIF1   | TGFB induced factor homeobox 1                     | 7050      | 1412.489411 | -0.570042785 | 0.551092164 | -1.03438739  | 0.300955097 | 0.999371363 | Not Sig |
| ENSG00000095574 | IKZF5   | IKAROS family zinc finger 5                        | 64376     | 516.9477162 | -0.569942019 | 0.526644197 | -1.082214563 | 0.279157199 | 0.999371363 | Not Sig |
| ENSG00000222722 | NA      | NA                                                 | NA        | 3.248276865 | -0.569883251 | 1.405776164 | -0.405386907 | 0.685193134 | NA          | NA      |

|                 |              |                                                |           |             |              |             |              |             |             |         |
|-----------------|--------------|------------------------------------------------|-----------|-------------|--------------|-------------|--------------|-------------|-------------|---------|
| ENSG00000256845 | NA           | NA                                             | NA        | 17.63192291 | -0.569779932 | 0.872896089 | -0.652746575 | 0.513919671 | 0.999371363 | Not Sig |
| ENSG00000101400 | SNTA1        | syntrophin alpha 1                             | 6640      | 366.0023539 | -0.569460853 | 0.68159339  | -0.835484706 | 0.403444855 | 0.999371363 | Not Sig |
| ENSG00000109381 | ELF2         | E74 like ETS transcription factor 2            | 1998      | 1337.173413 | -0.569396703 | 0.476949803 | -1.193829413 | 0.232544704 | 0.999371363 | Not Sig |
| ENSG00000198388 | NA           | NA                                             | NA        | 6.008879467 | -0.569318704 | 1.370654813 | -0.415362568 | 0.677876504 | NA          | NA      |
| ENSG00000078747 | ITCH         | itchy E3 ubiquitin protein ligase              | 83737     | 2531.302526 | -0.568979341 | 0.558365893 | -1.019008052 | 0.308199144 | 0.999371363 | Not Sig |
| ENSG00000218497 | NA           | NA                                             | NA        | 0.895978502 | -0.568751699 | 2.727062196 | -0.208558389 | 0.834792997 | NA          | NA      |
| ENSG00000272446 | NA           | NA                                             | NA        | 0.895978502 | -0.568751699 | 2.727062196 | -0.208558389 | 0.834792997 | NA          | NA      |
| ENSG00000164327 | RICTOR       | RPTOR independent companion of MTOR complex 2  | 253260    | 2913.17003  | -0.568602229 | 0.677213881 | -0.839619867 | 0.401121556 | 0.999371363 | Not Sig |
| ENSG00000270024 | C8orf44-SGK3 | C8orf44-SGK3 readthrough                       | 100533105 | 4.479128727 | -0.568474226 | 1.41769341  | -0.400985306 | 0.688430942 | NA          | NA      |
| ENSG00000230532 | NA           | NA                                             | NA        | 32.73739697 | -0.568406815 | 0.611766633 | -0.929123597 | 0.352825037 | 0.999371363 | Not Sig |
| ENSG00000160117 | ANKLE1       | ankyrin repeat and LEM domain containing 1     | 126549    | 13.98245368 | -0.568051144 | 1.030667734 | -0.551148663 | 0.581531769 | 0.999371363 | Not Sig |
| ENSG00000168813 | ZNF507       | zinc finger protein 507                        | 22847     | 989.8551077 | -0.567975305 | 0.508653032 | -1.116626205 | 0.264154182 | 0.999371363 | Not Sig |
| ENSG00000134046 | MBD2         | methyl-CpG binding domain protein 2            | 8932      | 1411.585716 | -0.567754179 | 0.433456593 | -1.309829377 | 0.190253563 | 0.999371363 | Not Sig |
| ENSG00000200209 | NA           | NA                                             | NA        | 3.193638015 | -0.567594229 | 1.35896881  | -0.417665383 | 0.676191785 | NA          | NA      |
| ENSG00000272420 | NA           | NA                                             | NA        | 12.36091853 | -0.567199129 | 1.008559578 | -0.562385347 | 0.5738535   | 0.999371363 | Not Sig |
| ENSG00000180089 | TMEM86B      | transmembrane protein 86B                      | 255043    | 130.0758677 | -0.567139532 | 0.577017906 | -0.982880299 | 0.325666355 | 0.999371363 | Not Sig |
| ENSG00000266083 | NA           | NA                                             | NA        | 2.99604543  | -0.566922617 | 1.702288986 | -0.333035473 | 0.739107507 | NA          | NA      |
| ENSG00000262700 | NA           | NA                                             | NA        | 1.990224885 | -0.566911926 | 1.646827117 | -0.344244955 | 0.730662077 | NA          | NA      |
| ENSG00000163539 | CLASP2       | cytoplasmic linker associated protein 2        | 23122     | 1954.597658 | -0.566764625 | 0.489715292 | -1.157334953 | 0.247135538 | 0.999371363 | Not Sig |
| ENSG00000181524 | NA           | NA                                             | NA        | 5.930339176 | -0.566443528 | 1.025298115 | -0.552467151 | 0.580628335 | NA          | NA      |
| ENSG00000153064 | BANK1        | B-cell scaffold protein with ankyrin repeats 1 | 55024     | 328.9953668 | -0.566139755 | 0.60280825  | -0.939170549 | 0.347643187 | 0.999371363 | Not Sig |
| ENSG00000260490 | NA           | NA                                             | NA        | 2.680340856 | -0.56613676  | 1.687721706 | -0.335444379 | 0.737289895 | NA          | NA      |
| ENSG00000213923 | CSNK1E       | casein kinase 1 epsilon                        | 1454      | 2642.728777 | -0.565679478 | 0.570246815 | -0.991990598 | 0.321202112 | 0.999371363 | Not Sig |
| ENSG00000139116 | KIF21A       | kinesin family member 21A                      | 55605     | 1022.166897 | -0.565201597 | 0.590104882 | -0.957798544 | 0.338164353 | 0.999371363 | Not Sig |
| ENSG00000131373 | HACL1        | 2-hydroxyacyl-CoA lyase 1                      | 26061     | 290.8568663 | -0.56513069  | 0.481287877 | -1.174205121 | 0.240312875 | 0.999371363 | Not Sig |
| ENSG00000255882 | NA           | NA                                             | NA        | 2.297659513 | -0.56481203  | 1.560793335 | -0.361874963 | 0.717445471 | NA          | NA      |
| ENSG00000233061 | NA           | NA                                             | NA        | 18.08020818 | -0.564746786 | 0.877678734 | -0.643455018 | 0.519928893 | 0.999371363 | Not Sig |
| ENSG00000188227 | ZNF793       | zinc finger protein 793                        | 390927    | 247.3255938 | -0.564395227 | 0.66041678  | -0.854604613 | 0.392770073 | 0.999371363 | Not Sig |
| ENSG00000249965 | NA           | NA                                             | NA        | 3.170893687 | -0.563793429 | 1.316990131 | -0.428092372 | 0.66858387  | NA          | NA      |
| ENSG00000168291 | PDHB         | pyruvate dehydrogenase E1 beta subunit         | 5162      | 852.8987474 | -0.563725081 | 0.488729526 | -1.15345002  | 0.248725721 | 0.999371363 | Not Sig |
| ENSG00000240634 | NA           | NA                                             | NA        | 4.199458559 | -0.563546051 | 1.244662005 | -0.45277035  | 0.650714116 | NA          | NA      |
| ENSG00000259366 | NA           | NA                                             | NA        | 111.5606016 | -0.563297972 | 0.642356598 | -0.876924085 | 0.380527873 | 0.999371363 | Not Sig |
| ENSG00000235062 | NA           | NA                                             | NA        | 1.63116812  | -0.563101186 | 2.280546537 | -0.246915017 | 0.804973995 | NA          | NA      |
| ENSG00000222078 | NA           | NA                                             | NA        | 4.776715774 | -0.563012594 | 1.18055314  | -0.476905761 | 0.633429229 | NA          | NA      |
| ENSG00000120802 | TMPO         | thymopoietin                                   | 7112      | 1941.969457 | -0.562950704 | 0.56165286  | -1.002310758 | 0.316193528 | 0.999371363 | Not Sig |

|                 |          |                                                      |           |             |              |             |              |             |             |         |
|-----------------|----------|------------------------------------------------------|-----------|-------------|--------------|-------------|--------------|-------------|-------------|---------|
| ENSG00000212534 | SNORD70  | small nucleolar RNA, C/D box 70                      | 692110    | 13.75090326 | -0.562866547 | 1.002933766 | -0.561220059 | 0.57464753  | 0.999371363 | Not Sig |
| ENSG00000224441 | NA       | NA                                                   | NA        | 1.449467319 | -0.562866228 | 2.311473435 | -0.243509711 | 0.807610563 | NA          | NA      |
| ENSG00000126261 | UBA2     | ubiquitin like modifier activating enzyme 2          | 10054     | 1567.107722 | -0.562679766 | 0.45166664  | -1.245785535 | 0.212843141 | 0.999371363 | Not Sig |
| ENSG00000181904 | C5orf24  | chromosome 5 open reading frame 24                   | 134553    | 1139.652994 | -0.562554237 | 0.598066935 | -0.940620863 | 0.346899186 | 0.999371363 | Not Sig |
| ENSG00000233072 | NA       | NA                                                   | NA        | 17.77451901 | -0.562460494 | 0.946012574 | -0.594559215 | 0.552138149 | 0.999371363 | Not Sig |
| ENSG00000255122 | NA       | NA                                                   | NA        | 7.757948151 | -0.562452559 | 1.304219355 | -0.431256105 | 0.666282163 | 0.999371363 | Not Sig |
| ENSG00000249140 | NA       | NA                                                   | NA        | 41.30198054 | -0.5622269   | 0.580053905 | -0.96926664  | 0.332412169 | 0.999371363 | Not Sig |
| ENSG00000267092 | NA       | NA                                                   | NA        | 1.571924144 | -0.561968632 | 1.837634646 | -0.30581086  | 0.759748659 | NA          | NA      |
| ENSG00000203315 | NA       | NA                                                   | NA        | 4.80533881  | -0.561854507 | 1.338815821 | -0.419665273 | 0.674729997 | NA          | NA      |
| ENSG00000264167 | NA       | NA                                                   | NA        | 20.71809492 | -0.561813977 | 0.825980268 | -0.680178449 | 0.496391477 | 0.999371363 | Not Sig |
| ENSG00000136986 | DERL1    | derlin 1                                             | 79139     | 2025.42602  | -0.561777255 | 0.579015689 | -0.970228037 | 0.331932839 | 0.999371363 | Not Sig |
| ENSG00000241120 | NA       | NA                                                   | NA        | 36.18522193 | -0.561093977 | 0.663114283 | -0.846149739 | 0.397469217 | 0.999371363 | Not Sig |
| ENSG00000239060 | NA       | NA                                                   | NA        | 3.637960086 | -0.56106932  | 1.480165362 | -0.379058539 | 0.704644394 | NA          | NA      |
| ENSG00000271011 | NA       | NA                                                   | NA        | 14.21686278 | -0.560859848 | 0.73468667  | -0.76340006  | 0.445224844 | 0.999371363 | Not Sig |
| ENSG00000255857 | PXN-AS1  | PXN antisense RNA 1                                  | 100506649 | 60.26123729 | -0.560853678 | 0.594642359 | -0.943178145 | 0.34558979  | 0.999371363 | Not Sig |
| ENSG00000264290 | NA       | NA                                                   | NA        | 10.86598975 | -0.560806277 | 0.858805117 | -0.65300761  | 0.513751373 | 0.999371363 | Not Sig |
| ENSG00000145495 | 6-Mar    | membrane associated ring-CH-type finger 6            | 10299     | 5585.483963 | -0.560654422 | 0.551008742 | -1.017505492 | 0.308913021 | 0.999371363 | Not Sig |
| ENSG00000260948 | NA       | NA                                                   | NA        | 38.1942145  | -0.560231243 | 0.829217418 | -0.675614418 | 0.499285485 | 0.999371363 | Not Sig |
| ENSG00000117533 | VAMP4    | vesicle associated membrane protein 4                | 8674      | 527.3153037 | -0.560127884 | 0.579146441 | -0.967161056 | 0.333463527 | 0.999371363 | Not Sig |
| ENSG00000253047 | NA       | NA                                                   | NA        | 6.238887154 | -0.559599703 | 1.199655359 | -0.466467055 | 0.640881224 | NA          | NA      |
| ENSG00000144747 | TMF1     | TATA element modulatory factor 1                     | 7110      | 2471.67875  | -0.559542882 | 0.574412817 | -0.974112808 | 0.330000531 | 0.999371363 | Not Sig |
| ENSG00000272529 | NA       | NA                                                   | NA        | 13.99324887 | -0.559532676 | 0.769286822 | -0.727339479 | 0.467018019 | 0.999371363 | Not Sig |
| ENSG00000214439 | NA       | NA                                                   | NA        | 49.54616869 | -0.559481137 | 0.620357932 | -0.901868273 | 0.367126847 | 0.999371363 | Not Sig |
| ENSG00000254184 | NA       | NA                                                   | NA        | 161.2318146 | -0.559463527 | 0.494952736 | -1.130337275 | 0.258334133 | 0.999371363 | Not Sig |
| ENSG00000075142 | SRI      | sorcin                                               | 6717      | 1415.415803 | -0.55938411  | 0.573088082 | -0.976087495 | 0.329021108 | 0.999371363 | Not Sig |
| ENSG00000259581 | NA       | NA                                                   | NA        | 100.6644967 | -0.559335428 | 0.700263624 | -0.798749799 | 0.424435505 | 0.999371363 | Not Sig |
| ENSG00000108443 | RPS6KB1  | ribosomal protein S6 kinase B1                       | 6198      | 1338.909645 | -0.559122061 | 0.640165602 | -0.873402224 | 0.382443879 | 0.999371363 | Not Sig |
| ENSG00000225187 | NA       | NA                                                   | NA        | 32.8506876  | -0.559094769 | 0.642073934 | -0.870763847 | 0.383883109 | 0.999371363 | Not Sig |
| ENSG00000256682 | NA       | NA                                                   | NA        | 20.2111199  | -0.559091798 | 1.063352468 | -0.525782198 | 0.599039545 | 0.999371363 | Not Sig |
| ENSG00000264978 | NA       | NA                                                   | NA        | 7.585364973 | -0.55905971  | 1.025338347 | -0.545244125 | 0.585585627 | 0.999371363 | Not Sig |
| ENSG00000178999 | AURKB    | aurora kinase B                                      | 9212      | 69.23259389 | -0.559052052 | 1.003629174 | -0.557030491 | 0.577506597 | 0.999371363 | Not Sig |
| ENSG00000177669 | MBOAT4   | membrane bound O-acyltransferase domain containing 4 | 619373    | 1.094246384 | -0.558747968 | 2.523684311 | -0.221401689 | 0.824779678 | NA          | NA      |
| ENSG00000180481 | GLIPR1L2 | GLI pathogenesis related 1 like 2                    | 144321    | 15.57916695 | -0.558112425 | 0.795700019 | -0.701410596 | 0.483046811 | 0.999371363 | Not Sig |
| ENSG00000264190 | NA       | NA                                                   | NA        | 1.549179816 | -0.558070544 | 2.01564712  | -0.27686917  | 0.781880567 | NA          | NA      |
| ENSG00000269800 | NA       | NA                                                   | NA        | 7.294408147 | -0.557323299 | 1.070539986 | -0.520600171 | 0.60264533  | 0.999371363 | Not Sig |

|                 |          |                                                                       |        |             |              |             |              |             |             |         |
|-----------------|----------|-----------------------------------------------------------------------|--------|-------------|--------------|-------------|--------------|-------------|-------------|---------|
| ENSG00000250808 | NA       | NA                                                                    | NA     | 2.29263938  | -0.557289398 | 1.819757555 | -0.306243761 | 0.759419055 | NA          | NA      |
| ENSG00000185591 | SP1      | Sp1 transcription factor                                              | 6667   | 3495.401516 | -0.557204373 | 0.449948508 | -1.238373643 | 0.215577549 | 0.999371363 | Not Sig |
| ENSG00000232857 | NA       | NA                                                                    | NA     | 6.883636616 | -0.557189051 | 1.294483288 | -0.430433561 | 0.666880287 | 0.999371363 | Not Sig |
| ENSG00000137225 | CAPN11   | calpain 11                                                            | 11131  | 5.736554275 | -0.55709587  | 1.487116806 | -0.374614736 | 0.707947012 | NA          | NA      |
| ENSG00000257169 | NA       | NA                                                                    | NA     | 34.01918506 | -0.556863026 | 0.703488647 | -0.79157358  | 0.428609357 | 0.999371363 | Not Sig |
| ENSG00000103175 | WFDC1    | WAP four-disulfide core domain 1                                      | 58189  | 338.1830474 | -0.556543592 | 0.862500913 | -0.645267249 | 0.518754012 | 0.999371363 | Not Sig |
| ENSG00000182397 | DNM1P46  | dynamins 1 pseudogene 46                                              | 196968 | 17.62588796 | -0.556533492 | 1.265759541 | -0.439683426 | 0.660166408 | 0.999371363 | Not Sig |
| ENSG00000252274 | NA       | NA                                                                    | NA     | 10.49129597 | -0.556425268 | 0.958842318 | -0.58030946  | 0.561705949 | 0.999371363 | Not Sig |
| ENSG00000166169 | POLL     | DNA polymerase lambda                                                 | 27343  | 601.5152724 | -0.556371707 | 0.391847941 | -1.419866356 | 0.155646592 | 0.999371363 | Not Sig |
| ENSG00000105771 | SMG9     | SMG9, nonsense mediated mRNA decay factor                             | 56006  | 624.6611587 | -0.55617759  | 0.44819476  | -1.240928365 | 0.214632213 | 0.999371363 | Not Sig |
| ENSG00000255471 | NA       | NA                                                                    | NA     | 52.43446416 | -0.555955259 | 0.869504283 | -0.639393353 | 0.522567072 | 0.999371363 | Not Sig |
| ENSG00000231130 | NA       | NA                                                                    | NA     | 9.697215298 | -0.555797164 | 1.146569521 | -0.484747897 | 0.627855186 | 0.999371363 | Not Sig |
| ENSG00000083937 | CHMP2B   | charged multivesicular body protein 2B                                | 25978  | 1137.509552 | -0.555729908 | 0.623150576 | -0.891806779 | 0.372496508 | 0.999371363 | Not Sig |
| ENSG00000111913 | RIPOR2   | RHO family interacting cell polarization regulator 2                  | 9750   | 697.3818952 | -0.555396076 | 0.675232135 | -0.822526133 | 0.41077752  | 0.999371363 | Not Sig |
| ENSG00000170632 | ARMC10   | armadillo repeat containing 10                                        | 83787  | 731.3045707 | -0.555366134 | 0.525357853 | -1.057119695 | 0.290456964 | 0.999371363 | Not Sig |
| ENSG00000170165 | NA       | NA                                                                    | NA     | 6.176858609 | -0.555248981 | 1.444976255 | -0.384261664 | 0.700784518 | NA          | NA      |
| ENSG00000241868 | NA       | NA                                                                    | NA     | 8.065195488 | -0.555237272 | 1.012444452 | -0.548412579 | 0.583408641 | 0.999371363 | Not Sig |
| ENSG00000239494 | NA       | NA                                                                    | NA     | 5.5696831   | -0.555177292 | 1.122028224 | -0.494797974 | 0.620742735 | NA          | NA      |
| ENSG00000138658 | ZGRF1    | zinc finger GRF-type containing 1                                     | 55345  | 198.9066649 | -0.555040204 | 0.66269945  | -0.837544386 | 0.402286638 | 0.999371363 | Not Sig |
| ENSG00000159674 | SPON2    | spondin 2                                                             | 10417  | 853.5908939 | -0.554965408 | 0.854911089 | -0.649149853 | 0.516241521 | 0.999371363 | Not Sig |
| ENSG00000204842 | ATXN2    | ataxin 2                                                              | 6311   | 2254.568972 | -0.554638557 | 0.5395328   | -1.027997846 | 0.303950841 | 0.999371363 | Not Sig |
| ENSG00000004766 | VPS50    | VPS50, EARP/GARPII complex subunit                                    | 55610  | 726.5864149 | -0.554630073 | 0.569277621 | -0.97426994  | 0.329922526 | 0.999371363 | Not Sig |
| ENSG00000087884 | AAMDC    | adipogenesis associated Mth938 domain containing                      | 28971  | 152.2104549 | -0.554548449 | 0.649066849 | -0.85437802  | 0.392895571 | 0.999371363 | Not Sig |
| ENSG00000265349 | NA       | NA                                                                    | NA     | 8.558571935 | -0.554333851 | 1.02195498  | -0.542424922 | 0.587525815 | 0.999371363 | Not Sig |
| ENSG00000075188 | NUP37    | nucleoporin 37                                                        | 79023  | 205.5736725 | -0.554018749 | 0.593502799 | -0.93347285  | 0.350575882 | 0.999371363 | Not Sig |
| ENSG00000110057 | UNC93B1  | unc-93 homolog B1, TLR signaling regulator                            | 81622  | 2350.497153 | -0.553931539 | 0.507138167 | -1.092269474 | 0.274714674 | 0.999371363 | Not Sig |
| ENSG00000228874 | NA       | NA                                                                    | NA     | 1.885492255 | -0.55378054  | 2.189027154 | -0.252980206 | 0.800283509 | NA          | NA      |
| ENSG00000200090 | NA       | NA                                                                    | NA     | 24.62140646 | -0.553660373 | 0.881837639 | -0.627848426 | 0.530103239 | 0.999371363 | Not Sig |
| ENSG00000069424 | KCNAB2   | potassium voltage-gated channel subfamily A regulatory beta subunit 2 | 8514   | 1304.646534 | -0.553351232 | 0.853888584 | -0.648036807 | 0.516961144 | 0.999371363 | Not Sig |
| ENSG00000242798 | NA       | NA                                                                    | NA     | 21.28107732 | -0.553218725 | 0.887914347 | -0.623054157 | 0.533248933 | 0.999371363 | Not Sig |
| ENSG00000075461 | CACNG4   | calcium voltage-gated channel auxiliary subunit gamma 4               | 27092  | 245.6321689 | -0.553135678 | 0.869422276 | -0.636210611 | 0.524639158 | 0.999371363 | Not Sig |
| ENSG00000138336 | TET1     | tet methylcytosine dioxygenase 1                                      | 80312  | 465.4702287 | -0.55296988  | 0.639153051 | -0.865160355 | 0.386950782 | 0.999371363 | Not Sig |
| ENSG00000237541 | HLA-DQA1 | major histocompatibility complex, class II, DQ alpha 1                | 3117   | 641.304494  | -0.552525196 | 1.210030747 | -0.45662079  | 0.647943633 | 0.999371363 | Not Sig |
| ENSG00000237541 | HLA-DQA2 | major histocompatibility complex, class II, DQ alpha 2                | 3118   | 641.304494  | -0.552525196 | 1.210030747 | -0.45662079  | 0.647943633 | 0.999371363 | Not Sig |
| ENSG00000132010 | ZNF20    | zinc finger protein 20                                                | 7568   | 12.82002    | -0.552434215 | 0.802386393 | -0.688489012 | 0.491144888 | 0.999371363 | Not Sig |

|                 |           |                                                   |        |             |              |             |              |             |             |         |
|-----------------|-----------|---------------------------------------------------|--------|-------------|--------------|-------------|--------------|-------------|-------------|---------|
| ENSG00000223224 | SNORD71   | small nucleolar RNA, C/D box 71                   | 692111 | 16.84052328 | -0.552385384 | 0.762094804 | -0.724825023 | 0.468559382 | 0.999371363 | Not Sig |
| ENSG00000241782 | NA        | NA                                                | NA     | 6.535777229 | -0.552381097 | 1.244206972 | -0.443962387 | 0.657069778 | NA          | NA      |
| ENSG00000252234 | NA        | NA                                                | NA     | 6.685417599 | -0.552318961 | 1.095836632 | -0.504015786 | 0.614250284 | 0.999371363 | Not Sig |
| ENSG00000168661 | ZNF30     | zinc finger protein 30                            | 90075  | 91.81726394 | -0.552090846 | 0.475529066 | -1.161003366 | 0.245640531 | 0.999371363 | Not Sig |
| ENSG00000160293 | VAV2      | vav guanine nucleotide exchange factor 2          | 7410   | 1318.582233 | -0.551912169 | 0.56859608  | -0.970657711 | 0.331718757 | 0.999371363 | Not Sig |
| ENSG00000091986 | CCDC80    | coiled-coil domain containing 80                  | 151887 | 1848.72332  | -0.551758684 | 0.705097145 | -0.782528604 | 0.433903982 | 0.999371363 | Not Sig |
| ENSG00000196214 | ZNF766    | zinc finger protein 766                           | 90321  | 472.9116791 | -0.551309292 | 0.493803425 | -1.116454977 | 0.264227432 | 0.999371363 | Not Sig |
| ENSG00000172159 | FRMD3     | FERM domain containing 3                          | 257019 | 197.5417434 | -0.551154335 | 0.875560643 | -0.629487333 | 0.529030059 | 0.999371363 | Not Sig |
| ENSG00000140443 | IGF1R     | insulin like growth factor 1 receptor             | 3480   | 3849.324997 | -0.551117243 | 0.487636544 | -1.130180357 | 0.258400235 | 0.999371363 | Not Sig |
| ENSG00000235076 | NA        | NA                                                | NA     | 2.281352721 | -0.551015429 | 1.575904504 | -0.349650266 | 0.726601182 | NA          | NA      |
| ENSG00000092295 | TGM1      | transglutaminase 1                                | 7051   | 48.7051548  | -0.550963952 | 0.761438555 | -0.723582946 | 0.469321815 | 0.999371363 | Not Sig |
| ENSG00000175029 | CTBP2     | C-terminal binding protein 2                      | 1488   | 1951.629269 | -0.55076683  | 0.397846678 | -1.384369556 | 0.166245326 | 0.999371363 | Not Sig |
| ENSG00000260174 | NA        | NA                                                | NA     | 1.835873537 | -0.550744387 | 2.560094874 | -0.215126554 | 0.829668652 | NA          | NA      |
| ENSG00000231307 | NA        | NA                                                | NA     | 33.90155761 | -0.550342867 | 0.690322721 | -0.797225487 | 0.425320086 | 0.999371363 | Not Sig |
| ENSG00000238437 | NA        | NA                                                | NA     | 7.480388345 | -0.550325595 | 0.955534589 | -0.575934771 | 0.564659272 | 0.999371363 | Not Sig |
| ENSG00000175048 | ZDHHC14   | zinc finger DHHC-type containing 14               | 79683  | 385.4386321 | -0.550262715 | 0.842285574 | -0.653297091 | 0.513564767 | 0.999371363 | Not Sig |
| ENSG00000242435 | NA        | NA                                                | NA     | 16.44166791 | -0.550252081 | 0.835488616 | -0.658599136 | 0.510153218 | 0.999371363 | Not Sig |
| ENSG00000106351 | AGFG2     | ArfGAP with FG repeats 2                          | 3268   | 721.2169144 | -0.550023303 | 0.484970956 | -1.134136585 | 0.25673726  | 0.999371363 | Not Sig |
| ENSG00000174804 | FZD4      | frizzled class receptor 4                         | 8322   | 1380.636682 | -0.549964206 | 0.670132257 | -0.820680097 | 0.41182851  | 0.999371363 | Not Sig |
| ENSG00000239617 | NA        | NA                                                | NA     | 1.270927051 | -0.549827763 | 2.433649671 | -0.225927244 | 0.821258008 | NA          | NA      |
| ENSG00000237135 | NA        | NA                                                | NA     | 51.13682453 | -0.549497087 | 0.681704131 | -0.806063894 | 0.420206009 | 0.999371363 | Not Sig |
| ENSG00000130734 | ATG4D     | autophagy related 4D cysteine peptidase           | 84971  | 320.4023846 | -0.54895953  | 0.519060674 | -1.057601851 | 0.290236998 | 0.999371363 | Not Sig |
| ENSG00000227781 | NA        | NA                                                | NA     | 11.1988267  | -0.548867122 | 0.914420585 | -0.600234871 | 0.548349717 | 0.999371363 | Not Sig |
| ENSG00000088038 | CNOT3     | CCR4-NOT transcription complex subunit 3          | 4849   | 1118.168359 | -0.548722997 | 0.469946046 | -1.167629777 | 0.242956134 | 0.999371363 | Not Sig |
| ENSG00000076650 | GPATCH1   | G-patch domain containing 1                       | 55094  | 331.1763629 | -0.548650044 | 0.427012869 | -1.284855993 | 0.198842611 | 0.999371363 | Not Sig |
| ENSG00000140832 | MARVELD3  | MARVEL domain containing 3                        | 91862  | 314.8534121 | -0.548611088 | 0.664819199 | -0.825203437 | 0.409256103 | 0.999371363 | Not Sig |
| ENSG00000206687 | NA        | NA                                                | NA     | 8.366066291 | -0.54813107  | 1.152460434 | -0.475618124 | 0.634346461 | 0.999371363 | Not Sig |
| ENSG00000241413 | NA        | NA                                                | NA     | 6.455515484 | -0.547947229 | 1.050777233 | -0.521468501 | 0.602040443 | NA          | NA      |
| ENSG00000204103 | MAFB      | MAF bZIP transcription factor B                   | 9935   | 1378.204921 | -0.547837369 | 0.716070351 | -0.765060818 | 0.44423533  | 0.999371363 | Not Sig |
| ENSG00000165669 | FAM204A   | family with sequence similarity 204 member A      | 63877  | 670.5197059 | -0.547596774 | 0.453333894 | -1.207932566 | 0.227073202 | 0.999371363 | Not Sig |
| ENSG00000239556 | NA        | NA                                                | NA     | 60.13174216 | -0.54734141  | 0.603378217 | -0.907128223 | 0.364338995 | 0.999371363 | Not Sig |
| ENSG00000260336 | NA        | NA                                                | NA     | 946.1780895 | -0.547170512 | 0.4592533   | -1.191435122 | 0.233482812 | 0.999371363 | Not Sig |
| ENSG00000138182 | KIF20B    | kinesin family member 20B                         | 9585   | 368.4483239 | -0.546682772 | 0.74195239  | -0.736816512 | 0.46123394  | 0.999371363 | Not Sig |
| ENSG00000256594 | LOC374443 | C-type lectin domain family 2 member D pseudogene | 374443 | 392.4217576 | -0.546592152 | 0.734221567 | -0.744451235 | 0.456603533 | 0.999371363 | Not Sig |
| ENSG00000006459 | KDM7A     | lysine demethylase 7A                             | 80853  | 1898.621842 | -0.546482535 | 0.518674163 | -1.053614339 | 0.292059522 | 0.999371363 | Not Sig |



|                 |          |                                                           |        |             |              |             |              |             |             |         |
|-----------------|----------|-----------------------------------------------------------|--------|-------------|--------------|-------------|--------------|-------------|-------------|---------|
| ENSG00000075239 | ACAT1    | acetyl-CoA acetyltransferase 1                            | 38     | 728.0103449 | -0.546283934 | 0.690017967 | -0.79169523  | 0.428538404 | 0.999371363 | Not Sig |
| ENSG00000184661 | CDCA2    | cell division cycle associated 2                          | 157313 | 78.81007802 | -0.546117387 | 0.864633462 | -0.631617224 | 0.527637029 | 0.999371363 | Not Sig |
| ENSG00000121895 | TMEM156  | transmembrane protein 156                                 | 80008  | 122.3193523 | -0.546040356 | 1.126151396 | -0.484872956 | 0.627766468 | 0.999371363 | Not Sig |
| ENSG00000140274 | DUOXA2   | dual oxidase maturation factor 2                          | 405753 | 0.80270354  | -0.545958117 | 2.782461781 | -0.196214058 | 0.844442625 | NA          | NA      |
| ENSG00000180999 | C1orf105 | chromosome 1 open reading frame 105                       | 92346  | 0.80270354  | -0.545958117 | 2.782461781 | -0.196214058 | 0.844442625 | NA          | NA      |
| ENSG00000234577 | NA       | NA                                                        | NA     | 0.80270354  | -0.545958117 | 2.782461781 | -0.196214058 | 0.844442625 | NA          | NA      |
| ENSG00000241735 | FABP5P3  | fatty acid binding protein 5 pseudogene 3                 | 220832 | 0.80270354  | -0.545958117 | 2.782461781 | -0.196214058 | 0.844442625 | NA          | NA      |
| ENSG00000249539 | NA       | NA                                                        | NA     | 0.80270354  | -0.545958117 | 2.782461781 | -0.196214058 | 0.844442625 | NA          | NA      |
| ENSG00000238887 | NA       | NA                                                        | NA     | 1.616693738 | -0.545857829 | 2.249094913 | -0.242701109 | 0.808236948 | NA          | NA      |
| ENSG00000144868 | TMEM108  | transmembrane protein 108                                 | 66000  | 245.276306  | -0.545422464 | 0.739908408 | -0.737148623 | 0.461031973 | 0.999371363 | Not Sig |
| ENSG00000184925 | LCN12    | lipocalin 12                                              | 286256 | 46.31168688 | -0.545355545 | 0.715499192 | -0.762202748 | 0.445939006 | 0.999371363 | Not Sig |
| ENSG00000010318 | PHF7     | PHD finger protein 7                                      | 51533  | 125.6817831 | -0.545260312 | 0.497283511 | -1.096477764 | 0.272869749 | 0.999371363 | Not Sig |
| ENSG00000198839 | ZNF277   | zinc finger protein 277                                   | 11179  | 473.9171367 | -0.545216208 | 0.44819464  | -1.216471949 | 0.22380519  | 0.999371363 | Not Sig |
| ENSG00000116883 | NA       | NA                                                        | NA     | 72.90091341 | -0.545074877 | 0.70260081  | -0.77579597  | 0.437869464 | 0.999371363 | Not Sig |
| ENSG00000130427 | EPO      | erythropoietin                                            | 2056   | 1.071502056 | -0.545013707 | 2.491692831 | -0.218732301 | 0.826858586 | NA          | NA      |
| ENSG00000259843 | NA       | NA                                                        | NA     | 1.071502056 | -0.545013707 | 2.491692831 | -0.218732301 | 0.826858586 | NA          | NA      |
| ENSG00000231414 | NA       | NA                                                        | NA     | 2.199364418 | -0.544950957 | 1.793143286 | -0.303908205 | 0.761197827 | NA          | NA      |
| ENSG00000112787 | FBRSL1   | fibrosin like 1                                           | 57666  | 1886.017857 | -0.544876413 | 0.470016292 | -1.158845816 | 0.246519038 | 0.999371363 | Not Sig |
| ENSG00000235272 | NA       | NA                                                        | NA     | 18.82999653 | -0.544639967 | 0.758522014 | -0.718027898 | 0.472740086 | 0.999371363 | Not Sig |
| ENSG00000151422 | FER      | FER tyrosine kinase                                       | 2241   | 1078.934681 | -0.54456318  | 0.557133245 | -0.977437956 | 0.32835238  | 0.999371363 | Not Sig |
| ENSG00000002586 | CD99     | CD99 molecule (Xg blood group)                            | 4267   | 3080.673552 | -0.544416942 | 0.565163564 | -0.963290941 | 0.335401538 | 0.999371363 | Not Sig |
| ENSG00000197882 | NA       | NA                                                        | NA     | 2.119999496 | -0.544338561 | 2.151858382 | -0.252962075 | 0.80029752  | NA          | NA      |
| ENSG00000254608 | NA       | NA                                                        | NA     | 63.57909804 | -0.544255378 | 0.6246541   | -0.871290812 | 0.383595386 | 0.999371363 | Not Sig |
| ENSG00000214189 | ZNF788   | zinc finger family member 788                             | 388507 | 13.07179266 | -0.544175717 | 0.838797062 | -0.6487573   | 0.516495261 | 0.999371363 | Not Sig |
| ENSG00000116918 | TSNAX    | translin associated factor X                              | 7257   | 640.3348731 | -0.543992626 | 0.647952116 | -0.839556832 | 0.401156912 | 0.999371363 | Not Sig |
| ENSG00000226761 | TAS2R46  | taste 2 receptor member 46                                | 259292 | 29.43062583 | -0.543939138 | 0.836730817 | -0.650076616 | 0.515642733 | 0.999371363 | Not Sig |
| ENSG00000188783 | PRELP    | proline and arginine rich end leucine rich repeat protein | 5549   | 2519.337842 | -0.543552553 | 0.764593931 | -0.710903567 | 0.477143995 | 0.999371363 | Not Sig |
| ENSG00000256188 | TAS2R30  | taste 2 receptor member 30                                | 259293 | 125.1888132 | -0.543423165 | 0.84866117  | -0.64032995  | 0.521958113 | 0.999371363 | Not Sig |
| ENSG00000230951 | NA       | NA                                                        | NA     | 1.924128366 | -0.543415288 | 1.725871636 | -0.314864256 | 0.752864722 | NA          | NA      |
| ENSG00000243648 | NA       | NA                                                        | NA     | 1.475632469 | -0.543225849 | 2.755673166 | -0.197129999 | 0.843725808 | NA          | NA      |
| ENSG00000120756 | PLS1     | plastin 1                                                 | 5357   | 1478.676495 | -0.543035022 | 0.798630445 | -0.679957827 | 0.496531165 | 0.999371363 | Not Sig |
| ENSG00000243244 | STON1    | stonin 1                                                  | 11037  | 241.6608964 | -0.542878803 | 0.472769662 | -1.148294499 | 0.250847009 | 0.999371363 | Not Sig |
| ENSG00000120675 | DNAJC15  | DnaJ heat shock protein family (Hsp40) member C15         | 29103  | 551.1590101 | -0.542866688 | 0.697829114 | -0.777936428 | 0.436606492 | 0.999371363 | Not Sig |
| ENSG00000237683 | NA       | NA                                                        | NA     | 256.7751283 | -0.542376679 | 0.653228459 | -0.830301668 | 0.406368245 | 0.999371363 | Not Sig |
| ENSG00000107758 | PPP3CB   | protein phosphatase 3 catalytic subunit beta              | 5532   | 1242.394994 | -0.542066563 | 0.485805272 | -1.115810376 | 0.264503311 | 0.999371363 | Not Sig |

|                 |          |                                                                  |        |             |              |             |              |             |             |         |
|-----------------|----------|------------------------------------------------------------------|--------|-------------|--------------|-------------|--------------|-------------|-------------|---------|
| ENSG00000136828 | RALGPS1  | Ral GEF with PH domain and SH3 binding motif 1                   | 9649   | 613.8547144 | -0.541964036 | 0.454915657 | -1.19135059  | 0.233515981 | 0.999371363 | Not Sig |
| ENSG00000111247 | RAD51AP1 | RAD51 associated protein 1                                       | 10635  | 102.0208707 | -0.54194679  | 0.993902223 | -0.545271735 | 0.585566641 | 0.999371363 | Not Sig |
| ENSG00000148842 | CNNM2    | cyclin and CBS domain divalent metal cation transport mediator 2 | 54805  | 618.1860818 | -0.541785052 | 0.543929764 | -0.996057007 | 0.319222448 | 0.999371363 | Not Sig |
| ENSG00000242398 | NA       | NA                                                               | NA     | 32.05625179 | -0.541725031 | 0.726748389 | -0.745409332 | 0.456024304 | 0.999371363 | Not Sig |
| ENSG00000102786 | INTS6    | integrator complex subunit 6                                     | 26512  | 1296.109588 | -0.54160702  | 0.522456516 | -1.036654732 | 0.299896796 | 0.999371363 | Not Sig |
| ENSG00000196597 | ZNF782   | zinc finger protein 782                                          | 158431 | 330.9276756 | -0.541572566 | 0.531428087 | -1.019089091 | 0.308160673 | 0.999371363 | Not Sig |
| ENSG00000138286 | FAM149B1 | family with sequence similarity 149 member B1                    | 317662 | 453.0662697 | -0.541451095 | 0.475155803 | -1.139523272 | 0.254484967 | 0.999371363 | Not Sig |
| ENSG00000101751 | POLI     | DNA polymerase iota                                              | 11201  | 739.9045088 | -0.541265373 | 0.575058175 | -0.941235854 | 0.346584007 | 0.999371363 | Not Sig |
| ENSG00000112877 | CEP72    | centrosomal protein 72                                           | 55722  | 326.0719692 | -0.541032227 | 0.552493948 | -0.979254577 | 0.327454208 | 0.999371363 | Not Sig |
| ENSG00000268375 | NA       | NA                                                               | NA     | 3.436260484 | -0.540816002 | 1.305278021 | -0.414330122 | 0.678632357 | NA          | NA      |
| ENSG00000257307 | NA       | NA                                                               | NA     | 2.704087579 | -0.540624285 | 1.46576464  | -0.368834306 | 0.712251232 | NA          | NA      |
| ENSG00000183808 | RBM12B   | RNA binding motif protein 12B                                    | 389677 | 1721.611304 | -0.540532834 | 0.564413081 | -0.957690125 | 0.338219038 | 0.999371363 | Not Sig |
| ENSG00000168137 | SETD5    | SET domain containing 5                                          | 55209  | 4906.579771 | -0.540433634 | 0.592006723 | -0.912884284 | 0.361303404 | 0.999371363 | Not Sig |
| ENSG00000226742 | HSBP1L1  | heat shock factor binding protein 1 like 1                       | 440498 | 374.6490918 | -0.540305367 | 0.533861086 | -1.012071081 | 0.311504068 | 0.999371363 | Not Sig |
| ENSG00000259924 | NA       | NA                                                               | NA     | 101.9887206 | -0.54015697  | 0.83539931  | -0.646585368 | 0.517900331 | 0.999371363 | Not Sig |
| ENSG00000249240 | NA       | NA                                                               | NA     | 4.254966763 | -0.539874038 | 1.295955292 | -0.416583845 | 0.676982828 | NA          | NA      |
| ENSG00000175895 | PLEKHF2  | pleckstrin homology and FYVE domain containing 2                 | 79666  | 669.4623539 | -0.5398734   | 0.453079336 | -1.191564826 | 0.233431924 | 0.999371363 | Not Sig |
| ENSG00000175106 | TVP23C   | trans-golgi network vesicle protein 23 homolog C                 | 201158 | 370.015134  | -0.539824813 | 0.688517637 | -0.784039194 | 0.433017113 | 0.999371363 | Not Sig |
| ENSG00000225092 | NA       | NA                                                               | NA     | 102.0687165 | -0.539748766 | 0.675646554 | -0.798862604 | 0.424370085 | 0.999371363 | Not Sig |
| ENSG00000073417 | PDE8A    | phosphodiesterase 8A                                             | 5151   | 1365.35593  | -0.539712326 | 0.494652739 | -1.091093374 | 0.275231798 | 0.999371363 | Not Sig |
| ENSG00000004799 | PK4      | pyruvate dehydrogenase kinase 4                                  | 5166   | 1175.878121 | -0.539675326 | 0.832058067 | -0.648602961 | 0.516595041 | 0.999371363 | Not Sig |
| ENSG00000214871 | NA       | NA                                                               | NA     | 3.049854265 | -0.53956257  | 1.485937937 | -0.363112454 | 0.716520882 | NA          | NA      |
| ENSG00000165416 | SUGT1    | SGT1 homolog, MIS12 kinetochore complex assembly co-chaperone    | 10910  | 1468.907513 | -0.539351496 | 0.537301486 | -1.00381538  | 0.31546761  | 0.999371363 | Not Sig |
| ENSG00000205323 | SARNP    | SAP domain containing ribonucleoprotein                          | 84324  | 91.49013619 | -0.539257078 | 0.650081665 | -0.829522054 | 0.406809063 | 0.999371363 | Not Sig |
| ENSG00000252908 | NA       | NA                                                               | NA     | 6.715989675 | -0.539138402 | 1.737545852 | -0.310287295 | 0.756342492 | 0.999371363 | Not Sig |
| ENSG00000206941 | SNORD15A | small nucleolar RNA, C/D box 15A                                 | 6079   | 1.516981241 | -0.539069535 | 2.0185985   | -0.26705139  | 0.789429594 | NA          | NA      |
| ENSG00000178015 | GPR150   | G protein-coupled receptor 150                                   | 285601 | 12.24431253 | -0.538278962 | 1.124772522 | -0.478566956 | 0.632246731 | 0.999371363 | Not Sig |
| ENSG00000253372 | NA       | NA                                                               | NA     | 150.4634728 | -0.538247094 | 0.690511121 | -0.77949084  | 0.435690631 | 0.999371363 | Not Sig |
| ENSG00000143494 | VASH2    | vasohibin 2                                                      | 79805  | 112.3257408 | -0.538124018 | 0.914860427 | -0.588203405 | 0.556395772 | 0.999371363 | Not Sig |
| ENSG00000262576 | PCDHGA4  | protocadherin gamma subfamily A, 4                               | 56111  | 100.0125894 | -0.537913989 | 0.737664031 | -0.729212713 | 0.465871556 | 0.999371363 | Not Sig |
| ENSG00000272750 | NA       | NA                                                               | NA     | 27.32561687 | -0.537842002 | 0.732428112 | -0.73432736  | 0.462749247 | 0.999371363 | Not Sig |
| ENSG00000110931 | CAMKK2   | calcium/calmodulin dependent protein kinase kinase 2             | 10645  | 1459.760604 | -0.537769038 | 0.473982613 | -1.134575454 | 0.256553243 | 0.999371363 | Not Sig |
| ENSG00000141084 | RANBP10  | RAN binding protein 10                                           | 57610  | 811.7027717 | -0.53769538  | 0.464146114 | -1.158461448 | 0.246675776 | 0.999371363 | Not Sig |
| ENSG00000175463 | TBC1D10C | TBC1 domain family member 10C                                    | 374403 | 334.7260263 | -0.53766806  | 0.928773023 | -0.578901461 | 0.562655664 | 0.999371363 | Not Sig |
| ENSG00000254450 | NA       | NA                                                               | NA     | 10.12005158 | -0.537548423 | 1.001934979 | -0.536510287 | 0.591605928 | 0.999371363 | Not Sig |

|                 |           |                                                               |        |             |               |             |              |             |             |         |
|-----------------|-----------|---------------------------------------------------------------|--------|-------------|---------------|-------------|--------------|-------------|-------------|---------|
| ENSG00000258546 | NA        | NA                                                            | NA     | 1.46234239  | -0.537440795  | 2.309759814 | -0.232682546 | 0.816007923 | NA          | NA      |
| ENSG00000163069 | SGCB      | sarcoglycan beta                                              | 6443   | 525.335907  | -0.537361183  | 0.507824305 | -1.058163577 | 0.289980873 | 0.999371363 | Not Sig |
| ENSG00000164404 | GDF9      | growth differentiation factor 9                               | 2661   | 8.774138106 | -0.537226697  | 1.021941965 | -0.525691982 | 0.599102236 | 0.999371363 | Not Sig |
| ENSG00000177169 | ULK1      | unc-51 like autophagy activating kinase 1                     | 8408   | 1595.254022 | -0.537062835  | 0.50961469  | -1.053860584 | 0.291946751 | 0.999371363 | Not Sig |
| ENSG00000072756 | TRNT1     | tRNA nucleotidyl transferase 1                                | 51095  | 537.7998581 | -0.537055411  | 0.580363284 | -0.925377994 | 0.354769321 | 0.999371363 | Not Sig |
| ENSG00000184716 | SERINC4   | serine incorporator 4                                         | 619189 | 2.425834813 | -0.537035234  | 1.518360565 | -0.35369414  | 0.723568115 | NA          | NA      |
| ENSG00000143674 | MAP3K21   | mitogen-activated protein kinase kinase kinase 21             | 84451  | 580.8110736 | -0.536805286  | 0.58204082  | -0.922281166 | 0.356381936 | 0.999371363 | Not Sig |
| ENSG00000171606 | ZNF274    | zinc finger protein 274                                       | 10782  | 754.2878167 | -0.536604666  | 0.493471393 | -1.087407849 | 0.276856604 | 0.999371363 | Not Sig |
| ENSG00000164221 | CCDC112   | coiled-coil domain containing 112                             | 153733 | 210.8418277 | -0.536446893  | 0.63617462  | -0.843238439 | 0.399095105 | 0.999371363 | Not Sig |
| ENSG00000144134 | RABL2A    | RAB, member of RAS oncogene family like 2A                    | 11159  | 346.2923035 | -0.536023402  | 0.482878358 | -1.110058866 | 0.266973661 | 0.999371363 | Not Sig |
| ENSG00000105379 | ETFB      | electron transfer flavoprotein beta subunit                   | 2109   | 322.3934012 | -0.535902245  | 0.531652513 | -1.007993438 | 0.313457613 | 0.999371363 | Not Sig |
| ENSG00000077279 | DCX       | doublecortin                                                  | 1641   | 2.755709716 | -0.535886225  | 1.963992652 | -0.272855514 | 0.784964284 | NA          | NA      |
| ENSG00000251102 | NA        | NA                                                            | NA     | 1.148470227 | -0.535796905  | 2.194592751 | -0.244144115 | 0.807119207 | NA          | NA      |
| ENSG00000267112 | NA        | NA                                                            | NA     | 1.148470227 | -0.535796905  | 2.194592751 | -0.244144115 | 0.807119207 | NA          | NA      |
| ENSG00000207235 | NA        | NA                                                            | NA     | 1.89192979  | -0.53572384   | 1.910168436 | -0.280458953 | 0.779125413 | NA          | NA      |
| ENSG00000189266 | PNRC2     | proline rich nuclear receptor coactivator 2                   | 55629  | 206.6032253 | -0.535632256  | 0.795775797 | -0.673094429 | 0.500887218 | 0.999371363 | Not Sig |
| ENSG00000169087 | HSPBAP1   | HSPB1 associated protein 1                                    | 79663  | 281.8851048 | -0.535299777  | 0.521953961 | -1.025568953 | 0.305094808 | 0.999371363 | Not Sig |
| ENSG00000136897 | MRPL50    | mitochondrial ribosomal protein L50                           | 54534  | 330.4399635 | -0.535118247  | 0.567396254 | -0.943112056 | 0.34562359  | 0.999371363 | Not Sig |
| ENSG00000124596 | OARD1     | 0-acyl-ADP-ribose deacylase 1                                 | 221443 | 652.3940238 | -0.5350575229 | 0.596112716 | -0.897607474 | 0.369394853 | 0.999371363 | Not Sig |
| ENSG00000102387 | TAF7L     | TATA-box binding protein associated factor 7 like             | 54457  | 1.937003437 | -0.53491772   | 1.975518122 | -0.270773381 | 0.786565335 | NA          | NA      |
| ENSG00000123552 | USP45     | ubiquitin specific peptidase 45                               | 85015  | 399.1354731 | -0.534659782  | 0.606382625 | -0.881720154 | 0.377928159 | 0.999371363 | Not Sig |
| ENSG00000213782 | DDX47     | DEAD-box helicase 47                                          | 51202  | 108.8065907 | -0.53451586   | 0.846263434 | -0.631618759 | 0.527636025 | 0.999371363 | Not Sig |
| ENSG00000243317 | STMP1     | short transmembrane mitochondrial protein 1                   | 647087 | 514.2350623 | -0.534433213  | 0.592936489 | -0.901332981 | 0.367411303 | 0.999371363 | Not Sig |
| ENSG00000268927 | NA        | NA                                                            | NA     | 27.31113854 | -0.534375504  | 1.048844909 | -0.509489534 | 0.610409133 | 0.999371363 | Not Sig |
| ENSG00000105865 | DUS4L     | dihydrouridine synthase 4 like                                | 11062  | 153.2153655 | -0.534220946  | 0.618734353 | -0.863409221 | 0.387912511 | 0.999371363 | Not Sig |
| ENSG00000082684 | SEMA5B    | semaphorin 5B                                                 | 54437  | 48.01606823 | -0.534118869  | 0.78858315  | -0.677314585 | 0.498206379 | 0.999371363 | Not Sig |
| ENSG00000243000 | NA        | NA                                                            | NA     | 9.121499958 | -0.534035007  | 1.736575006 | -0.307521993 | 0.758446086 | 0.999371363 | Not Sig |
| ENSG00000261490 | NA        | NA                                                            | NA     | 80.31961612 | -0.533997634  | 0.591473554 | -0.902825884 | 0.366618312 | 0.999371363 | Not Sig |
| ENSG00000232531 | NA        | NA                                                            | NA     | 1.177652089 | -0.533778462  | 2.18870324  | -0.243878865 | 0.807324638 | NA          | NA      |
| ENSG00000231312 | LOC728730 | uncharacterized LOC728730                                     | 728730 | 178.3828606 | -0.533651612  | 0.518621604 | -1.028980682 | 0.303488753 | 0.999371363 | Not Sig |
| ENSG00000108175 | ZMIZ1     | zinc finger MIZ-type containing 1                             | 57178  | 4418.090422 | -0.533528303  | 0.62295473  | -0.856447953 | 0.39175005  | 0.999371363 | Not Sig |
| ENSG00000105204 | DYRK1B    | dual specificity tyrosine phosphorylation regulated kinase 1B | 9149   | 428.1636056 | -0.533470732  | 0.71185738  | -0.749406759 | 0.453612078 | 0.999371363 | Not Sig |
| ENSG00000197841 | ZNF181    | zinc finger protein 181                                       | 339318 | 232.0502845 | -0.533224788  | 0.436386158 | -1.221910407 | 0.221741509 | 0.999371363 | Not Sig |
| ENSG00000233860 | NA        | NA                                                            | NA     | 2.624102695 | -0.533186327  | 1.486491061 | -0.35868788  | 0.719828596 | NA          | NA      |
| ENSG00000100526 | CDKN3     | cyclin dependent kinase inhibitor 3                           | 1033   | 38.31678063 | -0.532864933  | 1.084409475 | -0.491387197 | 0.623152618 | 0.999371363 | Not Sig |

|                 |           |                                                                              |           |             |              |             |              |             |             |         |
|-----------------|-----------|------------------------------------------------------------------------------|-----------|-------------|--------------|-------------|--------------|-------------|-------------|---------|
| ENSG00000069493 | CLEC2D    | C-type lectin domain family 2 member D                                       | 29121     | 637.4998058 | -0.53276091  | 0.788589548 | -0.675587081 | 0.499302846 | 0.999371363 | Not Sig |
| ENSG00000150477 | KIAA1328  | KIAA1328                                                                     | 57536     | 437.1963137 | -0.532755194 | 0.404867792 | -1.315874477 | 0.188216177 | 0.999371363 | Not Sig |
| ENSG00000168300 | PCMTD1    | protein-L-isoaspartate (D-aspartate) O-methyltransferase domain containing 1 | 115294    | 2593.477334 | -0.532666816 | 0.658260892 | -0.809203194 | 0.418398278 | 0.999371363 | Not Sig |
| ENSG00000268387 | NA        | NA                                                                           | NA        | 2.683346671 | -0.532636424 | 1.694649659 | -0.314304742 | 0.753289597 | NA          | NA      |
| ENSG00000101425 | BPI       | bactericidal/permeability-increasing protein                                 | 671       | 10.49016163 | -0.532326938 | 1.123323845 | -0.47388555  | 0.635581524 | 0.999371363 | Not Sig |
| ENSG00000101425 | LOC149684 | uncharacterized LOC149684                                                    | 149684    | 10.49016163 | -0.532326938 | 1.123323845 | -0.47388555  | 0.635581524 | 0.999371363 | Not Sig |
| ENSG00000180011 | ZADH2     | zinc binding alcohol dehydrogenase domain containing 2                       | 284273    | 1073.359682 | -0.532244441 | 0.391399801 | -1.359848523 | 0.173877864 | 0.999371363 | Not Sig |
| ENSG00000164066 | INTU      | inturned planar cell polarity protein                                        | 27152     | 716.8623835 | -0.532070393 | 0.540783246 | -0.983888456 | 0.32517036  | 0.999371363 | Not Sig |
| ENSG00000108582 | CPD       | carboxypeptidase D                                                           | 1362      | 5732.532059 | -0.531960528 | 0.628588636 | -0.846277673 | 0.39739786  | 0.999371363 | Not Sig |
| ENSG00000173915 | USMG5     | up-regulated during skeletal muscle growth 5 homolog (mouse)                 | 84833     | 383.8021168 | -0.53153417  | 0.736641324 | -0.721564421 | 0.47056232  | 0.999371363 | Not Sig |
| ENSG00000210107 | NA        | NA                                                                           | NA        | 7.430958965 | -0.531403541 | 1.053787519 | -0.504279592 | 0.614064916 | 0.999371363 | Not Sig |
| ENSG00000111344 | RASAL1    | RAS protein activator like 1                                                 | 8437      | 198.004484  | -0.53133087  | 0.927798879 | -0.572678931 | 0.566862105 | 0.999371363 | Not Sig |
| ENSG00000121022 | COPS5     | COP9 signalosome subunit 5                                                   | 10987     | 797.9305379 | -0.530958932 | 0.473270151 | -1.121893977 | 0.261907522 | 0.999371363 | Not Sig |
| ENSG00000015153 | YAF2      | YY1 associated factor 2                                                      | 10138     | 478.6026397 | -0.530724806 | 0.578378258 | -0.9176085   | 0.358823866 | 0.999371363 | Not Sig |
| ENSG00000265112 | MIR3153   | microRNA 3153                                                                | 100422936 | 8.034393597 | -0.530562486 | 1.171364521 | -0.452943961 | 0.650589094 | 0.999371363 | Not Sig |
| ENSG00000269343 | ZNF587B   | zinc finger protein 587B                                                     | 100293516 | 543.3866637 | -0.530530793 | 0.554482907 | -0.95680279  | 0.338666804 | 0.999371363 | Not Sig |
| ENSG00000213860 | NA        | NA                                                                           | NA        | 5.015906523 | -0.530483332 | 1.192003944 | -0.44503488  | 0.656294548 | NA          | NA      |
| ENSG00000256448 | NA        | NA                                                                           | NA        | 14.91184542 | -0.530370772 | 0.845163711 | -0.627536139 | 0.530307854 | 0.999371363 | Not Sig |
| ENSG00000203602 | NA        | NA                                                                           | NA        | 12.66333938 | -0.53007292  | 0.823458965 | -0.64371504  | 0.519760235 | 0.999371363 | Not Sig |
| ENSG00000115507 | OTX1      | orthodenticle homeobox 1                                                     | 5013      | 74.85448748 | -0.53005694  | 0.865993378 | -0.612079669 | 0.540485048 | 0.999371363 | Not Sig |
| ENSG00000263220 | NA        | NA                                                                           | NA        | 3.085473664 | -0.529960155 | 1.383061832 | -0.383178931 | 0.701587099 | NA          | NA      |
| ENSG00000199664 | NA        | NA                                                                           | NA        | 2.588068289 | -0.529893098 | 1.726205309 | -0.306969916 | 0.758866271 | NA          | NA      |
| ENSG00000163558 | PRKCI     | protein kinase C iota                                                        | 5584      | 2140.025932 | -0.529718404 | 0.686555043 | -0.771559992 | 0.440375078 | 0.999371363 | Not Sig |
| ENSG00000229728 | NA        | NA                                                                           | NA        | 21.56143657 | -0.529656126 | 0.850473418 | -0.62277799  | 0.533430424 | 0.999371363 | Not Sig |
| ENSG00000231760 | NA        | NA                                                                           | NA        | 8.301359704 | -0.529578616 | 1.118197899 | -0.473600081 | 0.635785118 | 0.999371363 | Not Sig |
| ENSG00000075218 | GTSE1     | G2 and S-phase expressed 1                                                   | 51512     | 116.4902877 | -0.529180036 | 1.001431702 | -0.528423491 | 0.597205437 | 0.999371363 | Not Sig |
| ENSG00000227267 | NA        | NA                                                                           | NA        | 8.457991335 | -0.529047121 | 1.201236286 | -0.440418864 | 0.659633765 | 0.999371363 | Not Sig |
| ENSG00000237788 | NA        | NA                                                                           | NA        | 49.03114624 | -0.529008953 | 0.668982814 | -0.790766134 | 0.429080476 | 0.999371363 | Not Sig |
| ENSG00000232282 | NA        | NA                                                                           | NA        | 13.13700478 | -0.528813723 | 1.300277688 | -0.406692915 | 0.684233545 | 0.999371363 | Not Sig |
| ENSG00000250860 | NA        | NA                                                                           | NA        | 1.077939592 | -0.528651095 | 2.489587635 | -0.212344843 | 0.831838014 | NA          | NA      |
| ENSG00000177736 | NA        | NA                                                                           | NA        | 13.05773868 | -0.528424579 | 0.76307916  | -0.692489859 | 0.488629752 | 0.999371363 | Not Sig |
| ENSG00000260936 | NA        | NA                                                                           | NA        | 71.37345857 | -0.528414475 | 0.574224841 | -0.920222249 | 0.35745663  | 0.999371363 | Not Sig |
| ENSG00000228782 | NA        | NA                                                                           | NA        | 135.5116869 | -0.528403828 | 0.668981821 | -0.789862761 | 0.429607921 | 0.999371363 | Not Sig |
| ENSG00000184068 | NA        | NA                                                                           | NA        | 7.419672306 | -0.528352596 | 1.010809795 | -0.522702291 | 0.601181444 | 0.999371363 | Not Sig |
| ENSG00000242175 | NA        | NA                                                                           | NA        | 13.71596688 | -0.528260359 | 0.911413917 | -0.579605325 | 0.562180801 | 0.999371363 | Not Sig |

|                 |              |                                                                  |           |             |              |             |              |             |             |         |
|-----------------|--------------|------------------------------------------------------------------|-----------|-------------|--------------|-------------|--------------|-------------|-------------|---------|
| ENSG00000237330 | RNF223       | ring finger protein 223                                          | 401934    | 38.79265791 | -0.52807639  | 0.862709504 | -0.612113797 | 0.54046247  | 0.999371363 | Not Sig |
| ENSG00000207029 | NA           | NA                                                               | NA        | 2.287486205 | -0.527946094 | 1.786522649 | -0.295516037 | 0.767599703 | NA          | NA      |
| ENSG00000146963 | LUC7L2       | LUC7 like 2, pre-mRNA splicing factor                            | 51631     | 958.3818256 | -0.527909433 | 0.506534063 | -1.042199274 | 0.297319299 | 0.999371363 | Not Sig |
| ENSG00000186522 | 10-Sep       | septin 10                                                        | 151011    | 1609.8404   | -0.527629385 | 0.554716809 | -0.951168915 | 0.341518636 | 0.999371363 | Not Sig |
| ENSG00000110172 | CHORDC1      | cysteine and histidine rich domain containing 1                  | 26973     | 1053.2741   | -0.52713895  | 0.638822945 | -0.825172224 | 0.40927382  | 0.999371363 | Not Sig |
| ENSG00000155970 | MICU3        | mitochondrial calcium uptake family member 3                     | 286097    | 146.2035966 | -0.527091582 | 0.638636986 | -0.825338327 | 0.409179538 | 0.999371363 | Not Sig |
| ENSG00000170949 | ZNF160       | zinc finger protein 160                                          | 90338     | 1020.724436 | -0.526524782 | 0.444684093 | -1.184042311 | 0.236396315 | 0.999371363 | Not Sig |
| ENSG00000119878 | CRIP1        | CXXC repeat containing interactor of PDZ3 domain                 | 9419      | 335.6654379 | -0.526367531 | 0.614854651 | -0.856084491 | 0.391951047 | 0.999371363 | Not Sig |
| ENSG00000221540 | MIR1180      | microRNA 1180                                                    | 100302256 | 5.395289188 | -0.526348411 | 1.07676534  | -0.488823694 | 0.624966522 | NA          | NA      |
| ENSG00000123178 | SPRYD7       | SPRY domain containing 7                                         | 57213     | 193.6059354 | -0.526243292 | 0.604642124 | -0.870338455 | 0.38411547  | 0.999371363 | Not Sig |
| ENSG00000106397 | PLOD3        | procollagen-lysine,2-oxoglutarate 5-dioxygenase 3                | 8985      | 1186.524368 | -0.526237448 | 0.513776106 | -1.024254422 | 0.30571512  | 0.999371363 | Not Sig |
| ENSG00000253893 | NA           | NA                                                               | NA        | 10.61117523 | -0.526208651 | 0.970480925 | -0.542214316 | 0.587670874 | 0.999371363 | Not Sig |
| ENSG00000151657 | KIN          | Kin17 DNA and RNA binding protein                                | 22944     | 394.7980581 | -0.525860121 | 0.483889469 | -1.086736031 | 0.277153485 | 0.999371363 | Not Sig |
| ENSG00000251474 | RPL32P3      | ribosomal protein L32 pseudogene 3                               | 132241    | 432.7443279 | -0.525818983 | 0.417379722 | -1.259809604 | 0.207738054 | 0.999371363 | Not Sig |
| ENSG00000242352 | NA           | NA                                                               | NA        | 2.892486205 | -0.525723235 | 1.591057352 | -0.330423812 | 0.741079752 | NA          | NA      |
| ENSG00000138623 | SEMA7A       | semaphorin 7A (John Milton Hagen blood group)                    | 8482      | 341.2387447 | -0.525624285 | 0.689827315 | -0.761965022 | 0.446080881 | 0.999371363 | Not Sig |
| ENSG00000111647 | UHRF1BP1L    | UHRF1 binding protein 1 like                                     | 23074     | 882.7571502 | -0.525567779 | 0.514302405 | -1.021904183 | 0.306826253 | 0.999371363 | Not Sig |
| ENSG00000247240 | UBL7-AS1     | UBL7 antisense RNA 1 (head to head)                              | 440288    | 63.72797046 | -0.525500264 | 0.529560062 | -0.992333641 | 0.321034798 | 0.999371363 | Not Sig |
| ENSG00000225083 | NA           | NA                                                               | NA        | 3.424973825 | -0.525384462 | 1.914927983 | -0.274362517 | 0.783806045 | NA          | NA      |
| ENSG00000251405 | LOC102724404 | uncharacterized LOC102724404                                     | 102724404 | 3.917055014 | -0.525294442 | 1.282368111 | -0.409628435 | 0.682078535 | NA          | NA      |
| ENSG00000249249 | NA           | NA                                                               | NA        | 17.63708312 | -0.525142202 | 0.81088188  | -0.647618618 | 0.517231652 | 0.999371363 | Not Sig |
| ENSG00000235655 | NA           | NA                                                               | NA        | 615.0770722 | -0.524647302 | 0.745397509 | -0.703849014 | 0.481526806 | 0.999371363 | Not Sig |
| ENSG00000063169 | BICRA        | BRD4 interacting chromatin remodeling complex associated protein | 29998     | 842.8351692 | -0.524646424 | 0.548088489 | -0.957229416 | 0.338451473 | 0.999371363 | Not Sig |
| ENSG00000265932 | MIR3146      | microRNA 3146                                                    | 100422967 | 4.605875727 | -0.524637309 | 1.217741512 | -0.430828139 | 0.666593338 | NA          | NA      |
| ENSG00000074590 | NUAK1        | NUAK family kinase 1                                             | 9891      | 807.3516278 | -0.524622756 | 0.519255396 | -1.010336648 | 0.312334029 | 0.999371363 | Not Sig |
| ENSG00000100979 | PLTP         | phospholipid transfer protein                                    | 5360      | 1234.10155  | -0.524410335 | 0.413226761 | -1.269061891 | 0.204418991 | 0.999371363 | Not Sig |
| ENSG00000006025 | OSBPL7       | oxysterol binding protein like 7                                 | 114881    | 406.5172061 | -0.524255776 | 0.455379621 | -1.151249972 | 0.249629412 | 0.999371363 | Not Sig |
| ENSG00000118007 | STAG1        | stromal antigen 1                                                | 10274     | 2007.479209 | -0.524078883 | 0.484982575 | -1.080613839 | 0.279868924 | 0.999371363 | Not Sig |
| ENSG00000101558 | VAPA         | VAMP associated protein A                                        | 9218      | 4180.113649 | -0.523986598 | 0.538392488 | -0.973242772 | 0.330432658 | 0.999371363 | Not Sig |
| ENSG00000122477 | LRRC39       | leucine rich repeat containing 39                                | 127495    | 22.17973713 | -0.523956443 | 0.817749338 | -0.640729889 | 0.521698192 | 0.999371363 | Not Sig |
| ENSG00000205500 | NA           | NA                                                               | NA        | 2.509240519 | -0.52204166  | 1.731370285 | -0.30151936  | 0.76301849  | NA          | NA      |
| ENSG00000083857 | FAT1         | FAT atypical cadherin 1                                          | 2195      | 8270.165565 | -0.521577502 | 0.66865824  | -0.780036004 | 0.435369683 | 0.999371363 | Not Sig |
| ENSG00000269378 | NA           | NA                                                               | NA        | 24.94472942 | -0.521187163 | 0.667863476 | -0.780379795 | 0.435167357 | 0.999371363 | Not Sig |
| ENSG00000136891 | TEX10        | testis expressed 10                                              | 54881     | 420.5683173 | -0.521171664 | 0.513961331 | -1.014028941 | 0.310568943 | 0.999371363 | Not Sig |
| ENSG00000238918 | NA           | NA                                                               | NA        | 3.992866071 | -0.521098129 | 1.325212774 | -0.393218462 | 0.694158135 | NA          | NA      |

|                 |               |                                                                           |           |             |              |             |              |             |             |         |
|-----------------|---------------|---------------------------------------------------------------------------|-----------|-------------|--------------|-------------|--------------|-------------|-------------|---------|
| ENSG00000217027 | NA            | NA                                                                        | NA        | 5.121752504 | -0.521071533 | 1.174977112 | -0.443473773 | 0.657423086 | NA          | NA      |
| ENSG00000165659 | NA            | NA                                                                        | NA        | 246.039309  | -0.521071218 | 0.918978232 | -0.567011492 | 0.570706374 | 0.999371363 | Not Sig |
| ENSG00000151806 | GUF1          | GUF1 homolog, GTPase                                                      | 60558     | 669.1546292 | -0.521026784 | 0.556557071 | -0.936160568 | 0.349190522 | 0.999371363 | Not Sig |
| ENSG00000159069 | FBXW5         | F-box and WD repeat domain containing 5                                   | 54461     | 2240.593625 | -0.520975632 | 0.537111226 | -0.969958561 | 0.332067148 | 0.999371363 | Not Sig |
| ENSG00000182685 | BRICD5        | BRICHOS domain containing 5                                               | 283870    | 84.18009023 | -0.520915635 | 0.674130198 | -0.772722594 | 0.439686572 | 0.999371363 | Not Sig |
| ENSG00000116668 | SWT1          | SWT1, RNA endoribonuclease homolog                                        | 54823     | 320.4714137 | -0.520872618 | 0.593757555 | -0.877247984 | 0.380351959 | 0.999371363 | Not Sig |
| ENSG00000164754 | RAD21         | RAD21 cohesin complex component                                           | 5885      | 3994.875283 | -0.520441705 | 0.537470533 | -0.968316722 | 0.332886216 | 0.999371363 | Not Sig |
| ENSG00000100490 | CDKL1         | cyclin dependent kinase like 1                                            | 8814      | 235.999354  | -0.520355973 | 0.550262075 | -0.945651167 | 0.344326537 | 0.999371363 | Not Sig |
| ENSG00000239014 | SNORD108      | small nucleolar RNA, C/D box 108                                          | 338427    | 80.43585179 | -0.520237389 | 0.616947127 | -0.84324469  | 0.399091609 | 0.999371363 | Not Sig |
| ENSG00000265306 | MIR3195       | microRNA 3195                                                             | 100422838 | 2.52397519  | -0.520150031 | 1.749674299 | -0.297283918 | 0.766249758 | NA          | NA      |
| ENSG00000147316 | MCPH1         | microcephalin 1                                                           | 79648     | 667.4264959 | -0.520075355 | 0.512753557 | -1.01427937  | 0.310449465 | 0.999371363 | Not Sig |
| ENSG00000225806 | NA            | NA                                                                        | NA        | 17.13201271 | -0.51995202  | 0.874161895 | -0.5948006   | 0.551976767 | 0.999371363 | Not Sig |
| ENSG00000104643 | MTMR9         | myotubularin related protein 9                                            | 66036     | 620.2468776 | -0.51986162  | 0.516034868 | -1.007415685 | 0.313735057 | 0.999371363 | Not Sig |
| ENSG00000165406 | 8-Mar         | membrane associated ring-CH-type finger 8                                 | 220972    | 1126.055406 | -0.519608757 | 0.5008043   | -1.037548514 | 0.299480298 | 0.999371363 | Not Sig |
| ENSG00000254452 | NA            | NA                                                                        | NA        | 2.149026641 | -0.519512339 | 2.137654765 | -0.243029112 | 0.807982845 | NA          | NA      |
| ENSG00000152926 | ZNF117        | zinc finger protein 117                                                   | 51351     | 1526.863704 | -0.519406848 | 0.844457538 | -0.61507752  | 0.538503527 | 0.999371363 | Not Sig |
| ENSG00000152926 | ERV3-1-ZNF117 | ERV3-1-ZNF117 readthrough                                                 | 109504726 | 1526.863704 | -0.519406848 | 0.844457538 | -0.61507752  | 0.538503527 | 0.999371363 | Not Sig |
| ENSG00000159840 | ZYX           | zyxin                                                                     | 7791      | 4505.917523 | -0.519376172 | 0.662925277 | -0.783461108 | 0.433356384 | 0.999371363 | Not Sig |
| ENSG00000252130 | NA            | NA                                                                        | NA        | 24.19266689 | -0.519299714 | 1.007690488 | -0.515336525 | 0.60631788  | 0.999371363 | Not Sig |
| ENSG00000176909 | MAMSTR        | MEF2 activating motif and SAP domain containing transcriptional regulator | 284358    | 37.51229289 | -0.519173061 | 0.736674114 | -0.704752686 | 0.480964158 | 0.999371363 | Not Sig |
| ENSG00000212127 | TAS2R14       | taste 2 receptor member 14                                                | 50840     | 78.05797078 | -0.51916712  | 0.815613179 | -0.636535963 | 0.524427148 | 0.999371363 | Not Sig |
| ENSG00000211855 | NA            | NA                                                                        | NA        | 3.837070131 | -0.518969484 | 1.594668202 | -0.325440417 | 0.744847771 | NA          | NA      |
| ENSG00000172766 | NAA16         | N(alpha)-acetyltransferase 16, NatA auxiliary subunit                     | 79612     | 612.6180846 | -0.518885667 | 0.586445864 | -0.884797215 | 0.376266012 | 0.999371363 | Not Sig |
| ENSG00000234545 | FAM133B       | family with sequence similarity 133 member B                              | 257415    | 417.7804776 | -0.518498459 | 0.576249481 | -0.899781217 | 0.368236692 | 0.999371363 | Not Sig |
| ENSG00000139645 | ANKRD52       | ankyrin repeat domain 52                                                  | 283373    | 1616.55042  | -0.518367034 | 0.402406049 | -1.28816909  | 0.197687109 | 0.999371363 | Not Sig |
| ENSG00000166508 | MCM7          | minichromosome maintenance complex component 7                            | 4176      | 1240.425436 | -0.51825249  | 0.551024665 | -0.940525032 | 0.346948316 | 0.999371363 | Not Sig |
| ENSG00000254614 | LOC728975     | uncharacterized LOC728975                                                 | 728975    | 58.53876303 | -0.518175939 | 0.798446846 | -0.648979881 | 0.51635138  | 0.999371363 | Not Sig |
| ENSG00000164975 | SNAPC3        | small nuclear RNA activating complex polypeptide 3                        | 6619      | 786.6933908 | -0.51808509  | 0.47737448  | -1.085280241 | 0.277797555 | 0.999371363 | Not Sig |
| ENSG00000101596 | SMCHD1        | structural maintenance of chromosomes flexible hinge domain containing 1  | 23347     | 3990.715865 | -0.518027975 | 0.555643098 | -0.932303446 | 0.351179727 | 0.999371363 | Not Sig |
| ENSG00000131037 | EPS8L1        | EPS8 like 1                                                               | 54869     | 714.4815599 | -0.517839668 | 0.609288706 | -0.84990853  | 0.395375943 | 0.999371363 | Not Sig |
| ENSG00000187164 | SHTN1         | shootin 1                                                                 | 57698     | 1520.34606  | -0.517717199 | 0.534498697 | -0.968603294 | 0.332743159 | 0.999371363 | Not Sig |
| ENSG00000232450 | NA            | NA                                                                        | NA        | 17.69904317 | -0.517695334 | 0.972370557 | -0.532405399 | 0.594445247 | 0.999371363 | Not Sig |
| ENSG00000221829 | FANCG         | Fanconi anemia complementation group G                                    | 2189      | 220.1893799 | -0.517387458 | 0.539265294 | -0.959430292 | 0.337342021 | 0.999371363 | Not Sig |
| ENSG00000166436 | TRIM66        | tripartite motif containing 66                                            | 9866      | 724.8972946 | -0.517363746 | 0.640611405 | -0.807609328 | 0.419315515 | 0.999371363 | Not Sig |
| ENSG00000120306 | CYSTM1        | cysteine rich transmembrane module containing 1                           | 84418     | 701.5315974 | -0.517137691 | 0.582832004 | -0.887284308 | 0.374925852 | 0.999371363 | Not Sig |

|                 |              |                                                                                  |           |             |              |             |              |             |             |         |
|-----------------|--------------|----------------------------------------------------------------------------------|-----------|-------------|--------------|-------------|--------------|-------------|-------------|---------|
| ENSG00000243297 | NA           | NA                                                                               | NA        | 1.500674449 | -0.517127526 | 2.019987343 | -0.25600533  | 0.797946722 | NA          | NA      |
| ENSG00000104408 | EIF3E        | eukaryotic translation initiation factor 3 subunit E                             | 3646      | 3525.045138 | -0.517108215 | 0.568112135 | -0.910222091 | 0.362705396 | 0.999371363 | Not Sig |
| ENSG00000141646 | SMAD4        | SMAD family member 4                                                             | 4089      | 2213.86241  | -0.516590001 | 0.460519722 | -1.121754349 | 0.261966901 | 0.999371363 | Not Sig |
| ENSG00000261136 | LOC105370941 | uncharacterized LOC105370941                                                     | 105370941 | 17.08323048 | -0.516543629 | 0.707620046 | -0.729973144 | 0.465406601 | 0.999371363 | Not Sig |
| ENSG00000136603 | SKIL         | SKI like proto-oncogene                                                          | 6498      | 5272.70223  | -0.516447154 | 0.742223907 | -0.695810455 | 0.486547541 | 0.999371363 | Not Sig |
| ENSG00000133063 | CHIT1        | chitinase 1                                                                      | 1118      | 1276.837072 | -0.516213069 | 1.240629272 | -0.416089706 | 0.677344362 | 0.999371363 | Not Sig |
| ENSG00000224093 | NA           | NA                                                                               | NA        | 108.2508792 | -0.515708789 | 0.84820286  | -0.608001709 | 0.54318634  | 0.999371363 | Not Sig |
| ENSG00000216866 | NA           | NA                                                                               | NA        | 5.170103153 | -0.515636328 | 1.099478132 | -0.468982796 | 0.639081934 | NA          | NA      |
| ENSG00000241685 | ARPC1A       | actin related protein 2/3 complex subunit 1A                                     | 10552     | 1354.113875 | -0.515551639 | 0.47308865  | -1.089756938 | 0.275820227 | 0.999371363 | Not Sig |
| ENSG00000272689 | NA           | NA                                                                               | NA        | 11.63998398 | -0.515502956 | 0.998294129 | -0.51638384  | 0.60558635  | 0.999371363 | Not Sig |
| ENSG00000224043 | NA           | NA                                                                               | NA        | 34.25796465 | -0.515470227 | 0.595764372 | -0.865224997 | 0.386915308 | 0.999371363 | Not Sig |
| ENSG00000203644 | NA           | NA                                                                               | NA        | 121.8283155 | -0.515248208 | 0.894777959 | -0.575839182 | 0.564723887 | 0.999371363 | Not Sig |
| ENSG00000166024 | R3HCC1L      | R3H domain and coiled-coil containing 1 like                                     | 27291     | 575.4480472 | -0.515151285 | 0.548656406 | -0.938932416 | 0.347765445 | 0.999371363 | Not Sig |
| ENSG00000163605 | PPP4R2       | protein phosphatase 4 regulatory subunit 2                                       | 151987    | 1864.939967 | -0.515075602 | 0.543442537 | -0.947801408 | 0.343230563 | 0.999371363 | Not Sig |
| ENSG00000157500 | APPL1        | adaptor protein, phosphotyrosine interacting with PI domain and leucine zipper 1 | 26060     | 1564.380081 | -0.514590795 | 0.611398784 | -0.841661463 | 0.399977475 | 0.999371363 | Not Sig |
| ENSG00000212241 | NA           | NA                                                                               | NA        | 1.766456253 | -0.514418799 | 2.276197616 | -0.225999182 | 0.821202057 | NA          | NA      |
| ENSG00000153234 | NR4A2        | nuclear receptor subfamily 4 group A member 2                                    | 4929      | 1627.961639 | -0.514236447 | 0.577197893 | -0.890918788 | 0.37297274  | 0.999371363 | Not Sig |
| ENSG00000120685 | PROSER1      | proline and serine rich 1                                                        | 80209     | 977.722406  | -0.514222855 | 0.503818169 | -1.020651669 | 0.3074195   | 0.999371363 | Not Sig |
| ENSG00000186088 | GSAP         | gamma-secretase activating protein                                               | 54103     | 1324.409451 | -0.514110101 | 0.535071924 | -0.960824289 | 0.336640524 | 0.999371363 | Not Sig |
| ENSG00000019995 | ZRANB1       | zinc finger RANBP2-type containing 1                                             | 54764     | 998.9180065 | -0.514083448 | 0.440277475 | -1.167635134 | 0.242953972 | 0.999371363 | Not Sig |
| ENSG00000255067 | NA           | NA                                                                               | NA        | 7.386057698 | -0.514024911 | 1.09584188  | -0.469068503 | 0.639020671 | 0.999371363 | Not Sig |
| ENSG00000003147 | ICA1         | islet cell autoantigen 1                                                         | 3382      | 1217.064134 | -0.513585122 | 0.761876009 | -0.674105911 | 0.500243981 | 0.999371363 | Not Sig |
| ENSG00000151276 | MAGI1        | membrane associated guanylate kinase, WW and PDZ domain containing 1             | 9223      | 2042.055442 | -0.513345695 | 0.551638089 | -0.93058421  | 0.352068685 | 0.999371363 | Not Sig |
| ENSG00000257093 | KIAA1147     | KIAA1147                                                                         | 57189     | 2221.230588 | -0.513261383 | 0.395530766 | -1.297652235 | 0.194406864 | 0.999371363 | Not Sig |
| ENSG00000233040 | NA           | NA                                                                               | NA        | 33.57870194 | -0.513219422 | 0.845754396 | -0.606818509 | 0.543971363 | 0.999371363 | Not Sig |
| ENSG00000047849 | MAP4         | microtubule associated protein 4                                                 | 4134      | 6624.001345 | -0.513149841 | 0.454880128 | -1.128099053 | 0.259278089 | 0.999371363 | Not Sig |
| ENSG00000230155 | NA           | NA                                                                               | NA        | 13.64413519 | -0.513101518 | 0.842245549 | -0.609206566 | 0.542387529 | 0.999371363 | Not Sig |
| ENSG00000249992 | TMEM158      | transmembrane protein 158 (gene/pseudogene)                                      | 25907     | 33.18289892 | -0.513089237 | 0.618169577 | -0.830013731 | 0.406531021 | 0.999371363 | Not Sig |
| ENSG00000250222 | NA           | NA                                                                               | NA        | 10.78910631 | -0.512714636 | 0.832480805 | -0.615887638 | 0.537968681 | 0.999371363 | Not Sig |
| ENSG00000254245 | PCDHGA3      | protocadherin gamma subfamily A, 3                                               | 56112     | 33.02017387 | -0.512584664 | 0.936861257 | -0.547129748 | 0.584289596 | 0.999371363 | Not Sig |
| ENSG00000183785 | TUBA8        | tubulin alpha 8                                                                  | 51807     | 11.4014241  | -0.512370253 | 0.889324442 | -0.57613423  | 0.564524456 | 0.999371363 | Not Sig |
| ENSG00000166323 | C11orf65     | chromosome 11 open reading frame 65                                              | 160140    | 26.55270079 | -0.512336017 | 0.67930972  | -0.754200923 | 0.450728584 | 0.999371363 | Not Sig |
| ENSG00000260075 | NA           | NA                                                                               | NA        | 128.1940164 | -0.51212756  | 0.583781179 | -0.877259456 | 0.380345728 | 0.999371363 | Not Sig |
| ENSG00000120925 | RNF170       | ring finger protein 170                                                          | 81790     | 434.8217095 | -0.512062404 | 0.616238623 | -0.830948249 | 0.406002865 | 0.999371363 | Not Sig |
| ENSG00000132196 | HSD17B7      | hydroxysteroid 17-beta dehydrogenase 7                                           | 51478     | 343.9974271 | -0.511990034 | 0.539445124 | -0.949104944 | 0.34256724  | 0.999371363 | Not Sig |

|                 |         |                                                                               |        |             |              |             |              |             |             |         |
|-----------------|---------|-------------------------------------------------------------------------------|--------|-------------|--------------|-------------|--------------|-------------|-------------|---------|
| ENSG00000196209 | SIRPB2  | signal regulatory protein beta 2                                              | 284759 | 109.8807242 | -0.511825724 | 0.718653188 | -0.712201284 | 0.476340142 | 0.999371363 | Not Sig |
| ENSG00000147421 | HMBOX1  | homeobox containing 1                                                         | 79618  | 1255.376037 | -0.511579935 | 0.489656754 | -1.044772549 | 0.296128105 | 0.999371363 | Not Sig |
| ENSG00000254852 | NPIPA2  | nuclear pore complex interacting protein family member A2                     | 642799 | 3.402462598 | -0.511523525 | 1.577361554 | -0.3242906   | 0.745718035 | NA          | NA      |
| ENSG00000152583 | SPARCL1 | SPARC like 1                                                                  | 8404   | 6439.162709 | -0.511471493 | 0.87192858  | -0.586597921 | 0.557473779 | 0.999371363 | Not Sig |
| ENSG00000139372 | TDG     | thymine DNA glycosylase                                                       | 6996   | 686.3183853 | -0.511093889 | 0.582397145 | -0.877569357 | 0.380177465 | 0.999371363 | Not Sig |
| ENSG00000156170 | NDUF6F6 | NADH:ubiquinone oxidoreductase complex assembly factor 6                      | 137682 | 388.9787389 | -0.511058437 | 0.541779168 | -0.943296581 | 0.345529224 | 0.999371363 | Not Sig |
| ENSG00000107672 | NSMCE4A | NSE4 homolog A, SMC5-SMC6 complex component                                   | 54780  | 620.2796601 | -0.511017071 | 0.460371171 | -1.110011015 | 0.26699428  | 0.999371363 | Not Sig |
| ENSG00000108055 | SMC3    | structural maintenance of chromosomes 3                                       | 9126   | 1563.230012 | -0.511012515 | 0.467909526 | -1.092118213 | 0.274781145 | 0.999371363 | Not Sig |
| ENSG00000123901 | GPR83   | G protein-coupled receptor 83                                                 | 10888  | 3.791470521 | -0.510896129 | 1.572249269 | -0.324946011 | 0.745221933 | NA          | NA      |
| ENSG00000164073 | MFS3D8  | major facilitator superfamily domain containing 8                             | 256471 | 492.2092235 | -0.510877729 | 0.645385844 | -0.791584962 | 0.428602718 | 0.999371363 | Not Sig |
| ENSG00000270095 | NA      | NA                                                                            | NA     | 16.46763706 | -0.510627494 | 0.915855414 | -0.557541601 | 0.577157444 | 0.999371363 | Not Sig |
| ENSG00000185324 | CDK10   | cyclin dependent kinase 10                                                    | 8558   | 1149.361854 | -0.510480333 | 0.44986463  | -1.134742095 | 0.256483394 | 0.999371363 | Not Sig |
| ENSG00000204071 | TCEAL6  | transcription elongation factor A like 6                                      | 158931 | 1.430143814 | -0.510475014 | 1.988588839 | -0.256702142 | 0.797408718 | NA          | NA      |
| ENSG00000225183 | NA      | NA                                                                            | NA     | 1.430143814 | -0.510475014 | 1.988588839 | -0.256702142 | 0.797408718 | NA          | NA      |
| ENSG00000120733 | KDM3B   | lysine demethylase 3B                                                         | 51780  | 3733.421993 | -0.510385706 | 0.441850395 | -1.155109764 | 0.24804548  | 0.999371363 | Not Sig |
| ENSG00000257818 | NA      | NA                                                                            | NA     | 26.80061044 | -0.510322485 | 0.72734934  | -0.701619507 | 0.482916483 | 0.999371363 | Not Sig |
| ENSG00000267541 | NA      | NA                                                                            | NA     | 12.53383721 | -0.510269762 | 0.909651082 | -0.560951086 | 0.574830883 | 0.999371363 | Not Sig |
| ENSG00000263531 | NA      | NA                                                                            | NA     | 5.477355873 | -0.510202121 | 1.336297926 | -0.381802673 | 0.702607736 | NA          | NA      |
| ENSG00000214078 | CPNE1   | copine 1                                                                      | 8904   | 987.7916528 | -0.510201366 | 0.45624686  | -1.118257266 | 0.263457133 | 0.999371363 | Not Sig |
| ENSG00000253263 | NA      | NA                                                                            | NA     | 18.67025102 | -0.509831036 | 0.740460511 | -0.688532377 | 0.491117589 | 0.999371363 | Not Sig |
| ENSG00000220205 | VAMP2   | vesicle associated membrane protein 2                                         | 6844   | 1194.729226 | -0.50978585  | 0.472728473 | -1.078390406 | 0.280859567 | 0.999371363 | Not Sig |
| ENSG00000127578 | WFIKKN1 | WIP, follistatin/kazal, immunoglobulin, kunitz and netrin domain containing 1 | 117166 | 69.86444485 | -0.509577451 | 0.680032675 | -0.749342597 | 0.45365074  | 0.999371363 | Not Sig |
| ENSG00000162819 | BROX    | BR01 domain and CAAX motif containing                                         | 148362 | 1858.904611 | -0.509372099 | 0.657248095 | -0.775007342 | 0.438335321 | 0.999371363 | Not Sig |
| ENSG00000215218 | UBE2QL1 | ubiquitin conjugating enzyme E2 Q family like 1                               | 134111 | 12.0573149  | -0.509286024 | 1.494694262 | -0.34072923  | 0.733307432 | 0.999371363 | Not Sig |
| ENSG00000177752 | YIPF7   | Yipl domain family member 7                                                   | 285525 | 2.39322123  | -0.509141147 | 1.565940504 | -0.325134414 | 0.745079344 | NA          | NA      |
| ENSG00000169604 | ANTXR1  | anthrax toxin receptor 1                                                      | 84168  | 4237.473673 | -0.509078884 | 0.413541912 | -1.231021254 | 0.218314915 | 0.999371363 | Not Sig |
| ENSG00000127483 | HP1BP3  | heterochromatin protein 1 binding protein 3                                   | 50809  | 4979.371095 | -0.508868961 | 0.514547173 | -0.988964642 | 0.322680441 | 0.999371363 | Not Sig |
| ENSG00000104973 | MED25   | mediator complex subunit 25                                                   | 81857  | 970.512803  | -0.50863278  | 0.515218895 | -0.98721686  | 0.323536338 | 0.999371363 | Not Sig |
| ENSG00000105220 | GPI     | glucose-6-phosphate isomerase                                                 | 2821   | 2910.934439 | -0.50831101  | 0.431147016 | -1.17897374  | 0.238408633 | 0.999371363 | Not Sig |
| ENSG00000227262 | NA      | NA                                                                            | NA     | 20.56623113 | -0.508110327 | 0.910589223 | -0.558001692 | 0.576843229 | 0.999371363 | Not Sig |
| ENSG00000092020 | PPP2R3C | protein phosphatase 2 regulatory subunit B' gamma                             | 55012  | 351.6258533 | -0.508078371 | 0.480176187 | -1.058108221 | 0.290006107 | 0.999371363 | Not Sig |
| ENSG00000147601 | TERF1   | telomeric repeat binding factor 1                                             | 7013   | 606.357383  | -0.507979408 | 0.493299354 | -1.029758915 | 0.303123191 | 0.999371363 | Not Sig |
| ENSG00000067064 | IDII    | isopentenyl-diphosphate delta isomerase 1                                     | 3422   | 954.8797292 | -0.5077126   | 0.487232409 | -1.042033721 | 0.297396045 | 0.999371363 | Not Sig |
| ENSG00000119929 | CUTC    | cutC copper transporter                                                       | 51076  | 243.5267052 | -0.507531433 | 0.445777485 | -1.138530881 | 0.254898872 | 0.999371363 | Not Sig |
| ENSG00000197776 | KLHDC1  | kelch domain containing 1                                                     | 122773 | 155.8674124 | -0.507208457 | 0.637011079 | -0.796231767 | 0.425897337 | 0.999371363 | Not Sig |



|                 |          |                                                               |           |             |              |             |              |             |             |         |
|-----------------|----------|---------------------------------------------------------------|-----------|-------------|--------------|-------------|--------------|-------------|-------------|---------|
| ENSG00000236992 | NA       | NA                                                            | NA        | 2.293508733 | -0.507110003 | 1.552230932 | -0.326697525 | 0.743896673 | NA          | NA      |
| ENSG00000200651 | NA       | NA                                                            | NA        | 16.66659654 | -0.506735285 | 0.750809554 | -0.674918536 | 0.499727523 | 0.999371363 | Not Sig |
| ENSG00000238083 | LRRC37A2 | leucine rich repeat containing 37 member A2                   | 474170    | 357.8145726 | -0.505580008 | 0.649375298 | -0.778563659 | 0.436236794 | 0.999371363 | Not Sig |
| ENSG00000151702 | FLI1     | Flt-1 proto-oncogene, ETS transcription factor                | 2313      | 1081.348043 | -0.505152121 | 0.838815334 | -0.602220895 | 0.547027109 | 0.999371363 | Not Sig |
| ENSG00000198134 | NA       | NA                                                            | NA        | 3.239276962 | -0.504850322 | 1.666294026 | -0.302977935 | 0.761906677 | NA          | NA      |
| ENSG00000201223 | NA       | NA                                                            | NA        | 1.132163435 | -0.504831807 | 2.510779597 | -0.20106576  | 0.840647155 | NA          | NA      |
| ENSG00000252808 | NA       | NA                                                            | NA        | 13.79701075 | -0.504680336 | 1.034074721 | -0.488050163 | 0.62551431  | 0.999371363 | Not Sig |
| ENSG00000197457 | STMN3    | stathmin 3                                                    | 50861     | 404.6420285 | -0.5045179   | 0.565826127 | -0.891648292 | 0.372581477 | 0.999371363 | Not Sig |
| ENSG00000246922 | UBAP1L   | ubiquitin associated protein 1 like                           | 390595    | 266.9458609 | -0.504483537 | 0.478810446 | -1.053618486 | 0.292057622 | 0.999371363 | Not Sig |
| ENSG00000125731 | SH2D3A   | SH2 domain containing 3A                                      | 10045     | 538.1542741 | -0.50433681  | 0.45877057  | -1.0993225   | 0.271627421 | 0.999371363 | Not Sig |
| ENSG00000259972 | NA       | NA                                                            | NA        | 94.86466927 | -0.504265234 | 0.471008264 | -1.07060804  | 0.284345707 | 0.999371363 | Not Sig |
| ENSG00000181227 | NA       | NA                                                            | NA        | 3.079905481 | -0.504247262 | 1.451754746 | -0.347336396 | 0.728338611 | NA          | NA      |
| ENSG00000259460 | NA       | NA                                                            | NA        | 5.739472857 | -0.504184175 | 1.385284408 | -0.363957157 | 0.715890002 | NA          | NA      |
| ENSG00000265658 | MIR3690  | microRNA 3690                                                 | 100500894 | 3.92094108  | -0.503924288 | 1.349021953 | -0.373547878 | 0.708740718 | NA          | NA      |
| ENSG00000057593 | F7       | coagulation factor VII                                        | 2155      | 5.706864657 | -0.503809582 | 1.236801828 | -0.407348672 | 0.68375192  | NA          | NA      |
| ENSG00000198804 | COX1     | cytochrome c oxidase subunit I                                | 4512      | 206166.8456 | -0.50378185  | 0.750816234 | -0.670978899 | 0.502233972 | 0.999371363 | Not Sig |
| ENSG00000229492 | NA       | NA                                                            | NA        | 25.96225965 | -0.50372371  | 0.839901889 | -0.599741133 | 0.548678771 | 0.999371363 | Not Sig |
| ENSG00000268858 | NA       | NA                                                            | NA        | 54.31510156 | -0.503686058 | 0.556356303 | -0.905330011 | 0.365290582 | 0.999371363 | Not Sig |
| ENSG00000163933 | RFT1     | RFT1 homolog                                                  | 91869     | 483.9145633 | -0.503633432 | 0.461769641 | -1.090659471 | 0.27542275  | 0.999371363 | Not Sig |
| ENSG00000164251 | F2RL1    | F2R like trypsin receptor 1                                   | 2150      | 584.7244222 | -0.503325829 | 0.758868344 | -0.663258434 | 0.507165053 | 0.999371363 | Not Sig |
| ENSG00000124102 | PI3      | peptidase inhibitor 3                                         | 5266      | 7.149368478 | -0.50328503  | 1.700404356 | -0.295979617 | 0.767245648 | 0.999371363 | Not Sig |
| ENSG00000266677 | NA       | NA                                                            | NA        | 5.846353806 | -0.503192691 | 1.169380097 | -0.430307214 | 0.66697218  | NA          | NA      |
| ENSG00000169925 | BRD3     | bromodomain containing 3                                      | 8019      | 1646.22815  | -0.503007878 | 0.497619271 | -1.010828774 | 0.312098389 | 0.999371363 | Not Sig |
| ENSG00000213763 | NA       | NA                                                            | NA        | 4.576145814 | -0.50295123  | 1.428517845 | -0.352079067 | 0.724778967 | NA          | NA      |
| ENSG00000137449 | CPEB2    | cytoplasmic polyadenylation element binding protein 2         | 132864    | 984.7809894 | -0.502827724 | 0.509497791 | -0.986908546 | 0.323687474 | 0.999371363 | Not Sig |
| ENSG00000162877 | PM20D1   | peptidase M20 domain containing 1                             | 148811    | 10.66197813 | -0.502742698 | 0.888969617 | -0.565534174 | 0.571710487 | 0.999371363 | Not Sig |
| ENSG00000259952 | NA       | NA                                                            | NA        | 14.93625212 | -0.502708843 | 0.837986612 | -0.599900804 | 0.548572346 | 0.999371363 | Not Sig |
| ENSG00000104852 | SNRNP70  | small nuclear ribonucleoprotein U1 subunit 70                 | 6625      | 3473.737644 | -0.502614391 | 0.451712529 | -1.112686407 | 0.265843135 | 0.999371363 | Not Sig |
| ENSG00000258890 | CEP95    | centrosomal protein 95                                        | 90799     | 1163.821539 | -0.502481453 | 0.586686722 | -0.856473198 | 0.391736091 | 0.999371363 | Not Sig |
| ENSG00000116001 | TIA1     | TIA1 cytotoxic granule associated RNA binding protein         | 7072      | 2256.009617 | -0.502361483 | 0.624178809 | -0.804835851 | 0.42091441  | 0.999371363 | Not Sig |
| ENSG00000249755 | NA       | NA                                                            | NA        | 1.507111985 | -0.501999999 | 1.807266238 | -0.277767596 | 0.781190767 | NA          | NA      |
| ENSG00000132326 | PER2     | period circadian regulator 2                                  | 8864      | 1876.691888 | -0.501993795 | 0.430286116 | -1.166651157 | 0.243351275 | 0.999371363 | Not Sig |
| ENSG00000154767 | XPC      | XPC complex subunit, DNA damage recognition and repair factor | 7508      | 1362.90185  | -0.501987415 | 0.420204505 | -1.194626447 | 0.232233012 | 0.999371363 | Not Sig |
| ENSG00000261056 | NA       | NA                                                            | NA        | 76.6730054  | -0.501813789 | 0.548354459 | -0.915126668 | 0.360125137 | 0.999371363 | Not Sig |
| ENSG00000163788 | SNRK     | SNF related kinase                                            | 54861     | 1636.648843 | -0.501789348 | 0.564481636 | -0.888938304 | 0.374036238 | 0.999371363 | Not Sig |

|                 |             |                                                   |           |             |              |             |              |             |             |         |
|-----------------|-------------|---------------------------------------------------|-----------|-------------|--------------|-------------|--------------|-------------|-------------|---------|
| ENSG00000257103 | LSM14A      | LSM14A, mRNA processing body assembly factor      | 26065     | 1956.160252 | -0.501710467 | 0.454225912 | -1.104539512 | 0.269359174 | 0.999371363 | Not Sig |
| ENSG00000235831 | BHLHE40-AS1 | BHLHE40 antisense RNA 1                           | 100507582 | 46.43129936 | -0.50169292  | 0.708670618 | -0.707935263 | 0.47898546  | 0.999371363 | Not Sig |
| ENSG00000260576 | NA          | NA                                                | NA        | 13.39172322 | -0.501604645 | 0.893172638 | -0.561598759 | 0.574389426 | 0.999371363 | Not Sig |
| ENSG00000256603 | NA          | NA                                                | NA        | 5.66663475  | -0.501284504 | 1.336062319 | -0.375195451 | 0.707515113 | NA          | NA      |
| ENSG00000272028 | NA          | NA                                                | NA        | 7.432543233 | -0.501142707 | 1.472724119 | -0.340282814 | 0.733643558 | 0.999371363 | Not Sig |
| ENSG00000255872 | NA          | NA                                                | NA        | 4.371977549 | -0.501137984 | 1.315675024 | -0.380897999 | 0.703278937 | NA          | NA      |
| ENSG00000136051 | WASHC4      | WASH complex subunit 4                            | 23325     | 2302.546261 | -0.500892133 | 0.59302986  | -0.844632229 | 0.398316209 | 0.999371363 | Not Sig |
| ENSG00000139734 | DIAPH3      | diaphanous related formin 3                       | 81624     | 128.5312366 | -0.50078049  | 0.79901628  | -0.626746291 | 0.530825555 | 0.999371363 | Not Sig |
| ENSG00000134333 | LDHA        | lactate dehydrogenase A                           | 3939      | 9682.703079 | -0.500619287 | 0.681357946 | -0.734737578 | 0.46249933  | 0.999371363 | Not Sig |
| ENSG00000119772 | DNMT3A      | DNA methyltransferase 3 alpha                     | 1788      | 1345.511048 | -0.50043923  | 0.4410697   | -1.134603509 | 0.256541482 | 0.999371363 | Not Sig |
| ENSG00000145283 | SLC10A6     | solute carrier family 10 member 6                 | 345274    | 5.725618436 | -0.50038078  | 1.141289257 | -0.438434671 | 0.661071218 | NA          | NA      |
| ENSG00000139675 | HNRNPA1L2   | heterogeneous nuclear ribonucleoprotein A1-like 2 | 144983    | 82.98390148 | -0.499939949 | 0.602826457 | -0.82932649  | 0.406919685 | 0.999371363 | Not Sig |
| ENSG00000235151 | NA          | NA                                                | NA        | 8.435157448 | -0.499878114 | 1.40797309  | -0.355033855 | 0.722564229 | 0.999371363 | Not Sig |
| ENSG00000206612 | SNORA2A     | small nucleolar RNA, H/ACA box 2A                 | 677793    | 9.038952707 | -0.49984084  | 1.128230217 | -0.443030892 | 0.65774339  | 0.999371363 | Not Sig |
| ENSG00000235996 | NA          | NA                                                | NA        | 2.964301199 | -0.499712006 | 1.602017493 | -0.311926685 | 0.755096242 | NA          | NA      |
| ENSG00000165338 | HECTD2      | HECT domain E3 ubiquitin protein ligase 2         | 143279    | 372.3904416 | -0.499577599 | 0.491398462 | -1.016644613 | 0.309322523 | 0.999371363 | Not Sig |
| ENSG00000200612 | SNORD114-25 | small nucleolar RNA, C/D box 114-25               | 767605    | 0.704408445 | -0.499576954 | 3.988126748 | -0.125266067 | 0.900312915 | NA          | NA      |
| ENSG00000201565 | NA          | NA                                                | NA        | 0.704408445 | -0.499576954 | 3.988126748 | -0.125266067 | 0.900312915 | NA          | NA      |
| ENSG00000206144 | NA          | NA                                                | NA        | 0.704408445 | -0.499576954 | 3.988126748 | -0.125266067 | 0.900312915 | NA          | NA      |
| ENSG00000233800 | NA          | NA                                                | NA        | 0.704408445 | -0.499576954 | 3.988126748 | -0.125266067 | 0.900312915 | NA          | NA      |
| ENSG00000258964 | NA          | NA                                                | NA        | 0.704408445 | -0.499576954 | 3.988126748 | -0.125266067 | 0.900312915 | NA          | NA      |
| ENSG00000268313 | NA          | NA                                                | NA        | 0.704408445 | -0.499576954 | 3.988126748 | -0.125266067 | 0.900312915 | NA          | NA      |
| ENSG00000144214 | LYG1        | lysozyme g1                                       | 129530    | 13.49520946 | -0.49956235  | 0.811434871 | -0.615653046 | 0.538123533 | 0.999371363 | Not Sig |
| ENSG00000151292 | CSNK1G3     | casein kinase 1 gamma 3                           | 1456      | 881.1065191 | -0.49952925  | 0.524201109 | -0.952934362 | 0.340623329 | 0.999371363 | Not Sig |
| ENSG00000228331 | NA          | NA                                                | NA        | 1.43658135  | -0.499477963 | 2.026636338 | -0.24645663  | 0.805328773 | NA          | NA      |
| ENSG00000185022 | MAFF        | MAF bZIP transcription factor F                   | 23764     | 822.7530164 | -0.49936519  | 0.567048064 | -0.880639971 | 0.378512717 | 0.999371363 | Not Sig |
| ENSG00000131389 | SLC6A6      | solute carrier family 6 member 6                  | 6533      | 3279.38347  | -0.499179753 | 0.453771362 | -1.100068879 | 0.271302112 | 0.999371363 | Not Sig |
| ENSG00000240531 | NA          | NA                                                | NA        | 26.80704689 | -0.498997107 | 0.807346469 | -0.618070588 | 0.536528809 | 0.999371363 | Not Sig |
| ENSG00000137845 | ADAM10      | ADAM metallopeptidase domain 10                   | 102       | 3343.56222  | -0.498634243 | 0.594917982 | -0.83815628  | 0.401942938 | 0.999371363 | Not Sig |
| ENSG00000161912 | ADCY10P1    | adenylate cyclase 10, soluble pseudogene 1        | 221442    | 141.8459481 | -0.498021936 | 0.53485154  | -0.93114051  | 0.351780886 | 0.999371363 | Not Sig |
| ENSG00000179840 | PIK3CD-AS1  | PIK3CD antisense RNA 1                            | 644997    | 1.0616328   | -0.497942025 | 2.535455865 | -0.196391517 | 0.844303735 | NA          | NA      |
| ENSG00000206629 | NA          | NA                                                | NA        | 1.0616328   | -0.497942025 | 2.535455865 | -0.196391517 | 0.844303735 | NA          | NA      |
| ENSG00000243802 | NA          | NA                                                | NA        | 1.0616328   | -0.497942025 | 2.535455865 | -0.196391517 | 0.844303735 | NA          | NA      |
| ENSG00000248873 | NA          | NA                                                | NA        | 1.0616328   | -0.497942025 | 2.535455865 | -0.196391517 | 0.844303735 | NA          | NA      |
| ENSG00000127337 | YEATS4      | YEATS domain containing 4                         | 8089      | 143.317606  | -0.497652545 | 0.62865528  | -0.791614356 | 0.428585573 | 0.999371363 | Not Sig |

|                 |              |                                                                        |           |             |              |             |              |             |             |         |
|-----------------|--------------|------------------------------------------------------------------------|-----------|-------------|--------------|-------------|--------------|-------------|-------------|---------|
| ENSG00000184481 | FOXO4        | forkhead box O4                                                        | 4303      | 516.8756307 | -0.497645515 | 0.655343415 | -0.759366012 | 0.447633639 | 0.999371363 | Not Sig |
| ENSG00000242551 | NA           | NA                                                                     | NA        | 4.628072005 | -0.497580853 | 1.75625888  | -0.283318626 | 0.7769326   | NA          | NA      |
| ENSG00000175054 | ATR          | ATR serine/threonine kinase                                            | 545       | 1682.95216  | -0.497511162 | 0.718776701 | -0.69216373  | 0.488834513 | 0.999371363 | Not Sig |
| ENSG00000260796 | NA           | NA                                                                     | NA        | 10.64448703 | -0.497387598 | 0.866967036 | -0.573709931 | 0.566164107 | 0.999371363 | Not Sig |
| ENSG00000169682 | SPNS1        | sphingolipid transporter 1 (putative)                                  | 83985     | 25.70939059 | -0.497242044 | 0.714759361 | -0.695677554 | 0.486630786 | 0.999371363 | Not Sig |
| ENSG00000132953 | XPO4         | exportin 4                                                             | 64328     | 1360.528462 | -0.497238959 | 0.48201105  | -1.031592448 | 0.30226308  | 0.999371363 | Not Sig |
| ENSG00000181085 | MAPK15       | mitogen-activated protein kinase 15                                    | 225689    | 259.3093537 | -0.497105382 | 0.877050384 | -0.566792274 | 0.57085532  | 0.999371363 | Not Sig |
| ENSG00000234616 | JRK          | Jrk helix-turn-helix protein                                           | 8629      | 851.8130707 | -0.497103194 | 0.551788683 | -0.900894146 | 0.367644604 | 0.999371363 | Not Sig |
| ENSG00000216990 | NA           | NA                                                                     | NA        | 1.497657736 | -0.496959816 | 2.073079672 | -0.239720558 | 0.810546897 | NA          | NA      |
| ENSG00000111790 | FGFR10P2     | FGFR1 oncogene partner 2                                               | 26127     | 830.5783149 | -0.49669599  | 0.539073675 | -0.921387952 | 0.356847917 | 0.999371363 | Not Sig |
| ENSG00000090097 | PCBP4        | poly(rC) binding protein 4                                             | 57060     | 362.6602388 | -0.49651362  | 0.600255044 | -0.827171093 | 0.408140094 | 0.999371363 | Not Sig |
| ENSG00000208308 | SNORA40B     | small nucleolar RNA, H/ACA box 40B                                     | 109616967 | 11.05614666 | -0.496280403 | 1.067371851 | -0.464955491 | 0.641963331 | 0.999371363 | Not Sig |
| ENSG00000240463 | NA           | NA                                                                     | NA        | 23.19987417 | -0.49597145  | 0.671468242 | -0.738637242 | 0.460127304 | 0.999371363 | Not Sig |
| ENSG00000269292 | NA           | NA                                                                     | NA        | 8.500486041 | -0.495856845 | 0.950693331 | -0.521573918 | 0.601967027 | 0.999371363 | Not Sig |
| ENSG00000136141 | LRCH1        | leucine rich repeats and calponin homology domain containing 1         | 23143     | 1085.01975  | -0.495771565 | 0.421072133 | -1.177402935 | 0.239034719 | 0.999371363 | Not Sig |
| ENSG00000174791 | RIN1         | Ras and Rab interactor 1                                               | 9610      | 153.6145897 | -0.495711691 | 0.665513116 | -0.744856381 | 0.456358547 | 0.999371363 | Not Sig |
| ENSG00000164597 | COG5         | component of oligomeric golgi complex 5                                | 10466     | 1260.477702 | -0.495187775 | 0.540445957 | -0.916257709 | 0.359531744 | 0.999371363 | Not Sig |
| ENSG00000096996 | IL12RB1      | interleukin 12 receptor subunit beta 1                                 | 3594      | 155.7467099 | -0.495101939 | 0.911947589 | -0.542906133 | 0.587194433 | 0.999371363 | Not Sig |
| ENSG00000061936 | SFSWAP       | splicing factor SWAP                                                   | 6433      | 1441.381706 | -0.4950691   | 0.416340843 | -1.189095684 | 0.234402017 | 0.999371363 | Not Sig |
| ENSG00000134056 | MRPS36       | mitochondrial ribosomal protein S36                                    | 92259     | 177.6943855 | -0.495038676 | 0.62807674  | -0.788181832 | 0.430590354 | 0.999371363 | Not Sig |
| ENSG00000205209 | SCGB2B2      | secretoglobin family 2B member 2                                       | 284402    | 51.28318579 | -0.494915247 | 0.620567353 | -0.797520599 | 0.425148744 | 0.999371363 | Not Sig |
| ENSG00000104888 | SLC17A7      | solute carrier family 17 member 7                                      | 57030     | 9.087457794 | -0.494888138 | 1.000580413 | -0.494601065 | 0.62088175  | 0.999371363 | Not Sig |
| ENSG00000138449 | SLC40A1      | solute carrier family 40 member 1                                      | 30061     | 5851.957705 | -0.49468897  | 0.756919241 | -0.653555814 | 0.51339802  | 0.999371363 | Not Sig |
| ENSG00000232472 | NA           | NA                                                                     | NA        | 8.820048121 | -0.494631335 | 1.082155396 | -0.457079765 | 0.647613714 | 0.999371363 | Not Sig |
| ENSG00000146094 | DOK3         | docking protein 3                                                      | 79930     | 474.3535366 | -0.49461307  | 0.771926384 | -0.640751606 | 0.521684079 | 0.999371363 | Not Sig |
| ENSG00000206535 | LNP1         | leukemia NUP98 fusion partner 1                                        | 348801    | 86.11595598 | -0.494138946 | 0.51666077  | -0.956408874 | 0.338865703 | 0.999371363 | Not Sig |
| ENSG00000119979 | FAM45A       | family with sequence similarity 45 member A                            | 404636    | 404.4215979 | -0.494133633 | 0.46564298  | -1.061185617 | 0.288605554 | 0.999371363 | Not Sig |
| ENSG00000121390 | PSPC1        | paraspeckle component 1                                                | 55269     | 1145.418786 | -0.494100999 | 0.448168    | -1.102490582 | 0.270248451 | 0.999371363 | Not Sig |
| ENSG00000251201 | TMED7-TICAM2 | TMED7-TICAM2 readthrough                                               | 100302736 | 4.455383255 | -0.493954575 | 1.504314349 | -0.328358614 | 0.742640531 | NA          | NA      |
| ENSG00000213066 | FGFR10P      | FGFR1 oncogene partner                                                 | 11116     | 328.3746396 | -0.493667288 | 0.658543059 | -0.74963555  | 0.453474234 | 0.999371363 | Not Sig |
| ENSG00000137414 | FAM8A1       | family with sequence similarity 8 member A1                            | 51439     | 1659.843338 | -0.493648507 | 0.569737823 | -0.866448544 | 0.386244233 | 0.999371363 | Not Sig |
| ENSG00000103168 | TAF1C        | TATA-box binding protein associated factor, RNA polymerase I subunit C | 9013      | 845.0468518 | -0.493545425 | 0.572217899 | -0.862513085 | 0.388405236 | 0.999371363 | Not Sig |
| ENSG00000103995 | CEP152       | centrosomal protein 152                                                | 22995     | 335.1225283 | -0.493477123 | 0.59164881  | -0.834071014 | 0.404240968 | 0.999371363 | Not Sig |
| ENSG00000132793 | LPIN3        | lipin 3                                                                | 64900     | 601.5801779 | -0.49313566  | 0.634758513 | -0.776887037 | 0.43722542  | 0.999371363 | Not Sig |
| ENSG00000183665 | TRMT12       | tRNA methyltransferase 12 homolog                                      | 55039     | 281.4736208 | -0.493086943 | 0.582387195 | -0.846665152 | 0.397181788 | 0.999371363 | Not Sig |

|                 |              |                                                    |    |        |             |              |             |              |             |             |         |
|-----------------|--------------|----------------------------------------------------|----|--------|-------------|--------------|-------------|--------------|-------------|-------------|---------|
| ENSG00000119509 | INVS         | inversin                                           |    | 27130  | 633.0594061 | -0.492990289 | 0.422576309 | -1.166630211 | 0.243359738 | 0.999371363 | Not Sig |
| ENSG00000147854 | UHRF2        | ubiquitin like with PHD and ring finger domains 2  |    | 115426 | 1164.62263  | -0.492899275 | 0.465417153 | -1.059048366 | 0.289577754 | 0.999371363 | Not Sig |
| ENSG00000147905 | ZCCHC7       | zinc finger CCHC-type containing 7                 |    | 84186  | 683.9210015 | -0.492879676 | 0.542048531 | -0.909290678 | 0.36319671  | 0.999371363 | Not Sig |
| ENSG00000248697 | NA           | NA                                                 | NA |        | 4.13522289  | -0.492830965 | 1.637212613 | -0.301018305 | 0.763400536 | NA          | NA      |
| ENSG00000144228 | SPOPL        | speckle type BTB/POZ protein like                  |    | 339745 | 852.0134798 | -0.492604132 | 0.600806143 | -0.819905285 | 0.412270104 | 0.999371363 | Not Sig |
| ENSG00000236876 | NA           | NA                                                 | NA |        | 1.138600971 | -0.49254196  | 2.23379526  | -0.22049557  | 0.825485222 | NA          | NA      |
| ENSG00000239224 | NA           | NA                                                 | NA |        | 1.138600971 | -0.49254196  | 2.23379526  | -0.22049557  | 0.825485222 | NA          | NA      |
| ENSG00000254791 | NA           | NA                                                 | NA |        | 21.66832416 | -0.492390012 | 0.710077499 | -0.693431369 | 0.488038882 | 0.999371363 | Not Sig |
| ENSG00000081853 | PCDHGA2      | protocadherin gamma subfamily A, 2                 |    | 56113  | 60.56917541 | -0.492302403 | 0.857916385 | -0.573834946 | 0.566079498 | 0.999371363 | Not Sig |
| ENSG00000163251 | FZD5         | frizzled class receptor 5                          |    | 7855   | 1645.476726 | -0.492223462 | 0.490913597 | -1.002668218 | 0.316020969 | 0.999371363 | Not Sig |
| ENSG00000137764 | MAP2K5       | mitogen-activated protein kinase kinase 5          |    | 5607   | 525.5645522 | -0.492166273 | 0.400659944 | -1.228389012 | 0.219300971 | 0.999371363 | Not Sig |
| ENSG00000087206 | UIMC1        | ubiquitin interaction motif containing 1           |    | 51720  | 774.0228765 | -0.492086249 | 0.427050987 | -1.152289222 | 0.249202244 | 0.999371363 | Not Sig |
| ENSG00000138443 | ABI2         | abl interactor 2                                   |    | 10152  | 1478.979335 | -0.492025958 | 0.464216442 | -1.059906357 | 0.289187203 | 0.999371363 | Not Sig |
| ENSG00000240710 | NA           | NA                                                 | NA |        | 14.15408549 | -0.491920624 | 0.739492709 | -0.665213623 | 0.505913869 | 0.999371363 | Not Sig |
| ENSG00000083838 | ZNF446       | zinc finger protein 446                            |    | 55663  | 312.0140023 | -0.491840281 | 0.569588278 | -0.86350141  | 0.387861845 | 0.999371363 | Not Sig |
| ENSG00000172554 | SNTG2        | syntrophin gamma 2                                 |    | 54221  | 19.2200237  | -0.4917171   | 1.012548718 | -0.485623152 | 0.627234379 | 0.999371363 | Not Sig |
| ENSG00000172247 | ClqTNF4      | Clq and TNF related 4                              |    | 114900 | 5.840884722 | -0.491613231 | 1.242954767 | -0.395519808 | 0.692459306 | NA          | NA      |
| ENSG00000187742 | SECISBP2     | SECIS binding protein 2                            |    | 79048  | 2140.166999 | -0.491570291 | 0.422338819 | -1.163924009 | 0.244454809 | 0.999371363 | Not Sig |
| ENSG00000105523 | FAM83E       | family with sequence similarity 83 member E        |    | 54854  | 913.9820765 | -0.491540758 | 0.504478454 | -0.974354315 | 0.329880645 | 0.999371363 | Not Sig |
| ENSG00000174871 | CNIH2        | cornichon family AMPA receptor auxiliary protein 2 |    | 254263 | 25.29839231 | -0.491395028 | 0.676546224 | -0.72632883  | 0.467637209 | 0.999371363 | Not Sig |
| ENSG00000179772 | FOXS1        | forkhead box S1                                    |    | 2307   | 74.73743678 | -0.491183874 | 0.66775651  | -0.735573321 | 0.461990403 | 0.999371363 | Not Sig |
| ENSG00000109445 | ZNF330       | zinc finger protein 330                            |    | 27309  | 739.4435075 | -0.491177766 | 0.528084821 | -0.930111503 | 0.352313356 | 0.999371363 | Not Sig |
| ENSG00000138138 | ATAD1        | ATPase family, AAA domain containing 1             |    | 84896  | 1109.775559 | -0.491035213 | 0.55965949  | -0.87738209  | 0.380279138 | 0.999371363 | Not Sig |
| ENSG00000162461 | SLC25A34     | solute carrier family 25 member 34                 |    | 284723 | 31.93154034 | -0.49072506  | 0.814746002 | -0.602304348 | 0.546971567 | 0.999371363 | Not Sig |
| ENSG00000263335 | NA           | NA                                                 | NA |        | 59.89398565 | -0.490576111 | 0.660146576 | -0.7431321   | 0.457401707 | 0.999371363 | Not Sig |
| ENSG00000123240 | OPTN         | optineurin                                         |    | 10133  | 1695.496171 | -0.49057515  | 0.636220675 | -0.771077032 | 0.440661273 | 0.999371363 | Not Sig |
| ENSG00000266896 | NA           | NA                                                 | NA |        | 32.02681582 | -0.490528026 | 0.710825111 | -0.690082579 | 0.490142258 | 0.999371363 | Not Sig |
| ENSG00000241370 | RPP21        | ribonuclease P/MRP subunit p21                     |    | 79897  | 18.01947489 | -0.49052023  | 0.776363338 | -0.631817869 | 0.527505896 | 0.999371363 | Not Sig |
| ENSG00000241370 | TRIM39-RPP21 | TRIM39-RPP21 readthrough                           |    | 202658 | 18.01947489 | -0.49052023  | 0.776363338 | -0.631817869 | 0.527505896 | 0.999371363 | Not Sig |
| ENSG00000185278 | ZBTB37       | zinc finger and BTB domain containing 37           |    | 84614  | 1735.685253 | -0.490445702 | 0.594980237 | -0.824305871 | 0.409765784 | 0.999371363 | Not Sig |
| ENSG00000257110 | NA           | NA                                                 | NA |        | 7.292207496 | -0.490305655 | 0.967726463 | -0.506657277 | 0.612395312 | 0.999371363 | Not Sig |
| ENSG00000146856 | AGBL3        | ATP/GTP binding protein like 3                     |    | 340351 | 95.39756566 | -0.49018373  | 0.519904154 | -0.942834802 | 0.345765408 | 0.999371363 | Not Sig |
| ENSG00000132170 | PPARG        | peroxisome proliferator activated receptor gamma   |    | 5468   | 539.7274216 | -0.489915954 | 0.721241654 | -0.679267416 | 0.496968438 | 0.999371363 | Not Sig |
| ENSG00000165060 | FXN          | frataxin                                           |    | 2395   | 125.8114214 | -0.489836008 | 0.521818628 | -0.938709318 | 0.347880008 | 0.999371363 | Not Sig |
| ENSG00000076108 | BAZ2A        | bromodomain adjacent to zinc finger domain 2A      |    | 11176  | 4560.90975  | -0.489735949 | 0.409911555 | -1.194735653 | 0.232190328 | 0.999371363 | Not Sig |

|                 |           |                                                                             |        |             |              |             |              |             |             |         |
|-----------------|-----------|-----------------------------------------------------------------------------|--------|-------------|--------------|-------------|--------------|-------------|-------------|---------|
| ENSG00000152492 | CCDC50    | coiled-coil domain containing 50                                            | 152137 | 1798.513904 | -0.489456546 | 0.489376058 | -1.000164471 | 0.31723092  | 0.999371363 | Not Sig |
| ENSG00000272578 | NA        | NA                                                                          | NA     | 132.2949916 | -0.489399545 | 0.576743985 | -0.848555959 | 0.396128422 | 0.999371363 | Not Sig |
| ENSG00000164924 | YWHAZ     | tyrosine 3-monooxygenase/tryptophan 5-monooxygenase activation protein zeta | 7534   | 12218.52585 | -0.489252972 | 0.558654302 | -0.875770527 | 0.381154796 | 0.999371363 | Not Sig |
| ENSG00000065665 | SEC61A2   | Sec61 translocon alpha 2 subunit                                            | 55176  | 143.9295986 | -0.489220959 | 0.633053066 | -0.772796129 | 0.439643044 | 0.999371363 | Not Sig |
| ENSG00000175893 | ZDHHC21   | zinc finger DHHC-type containing 21                                         | 340481 | 1586.686828 | -0.489185178 | 0.771718443 | -0.633890744 | 0.526152126 | 0.999371363 | Not Sig |
| ENSG00000228328 | NA        | NA                                                                          | NA     | 26.47805831 | -0.489153828 | 0.651066075 | -0.751312112 | 0.452464842 | 0.999371363 | Not Sig |
| ENSG00000243175 | NA        | NA                                                                          | NA     | 53.40160434 | -0.488926201 | 0.584862214 | -0.83596818  | 0.403172804 | 0.999371363 | Not Sig |
| ENSG00000163138 | PACRGL    | parkin coregulated like                                                     | 133015 | 300.571155  | -0.488891254 | 0.55326948  | -0.883640381 | 0.376890373 | 0.999371363 | Not Sig |
| ENSG00000135473 | PAN2      | PAN2 poly(A) specific ribonuclease subunit                                  | 9924   | 957.9217597 | -0.48877529  | 0.382574392 | -1.277595419 | 0.201392117 | 0.999371363 | Not Sig |
| ENSG00000150995 | ITPR1     | inositol 1,4,5-trisphosphate receptor type 1                                | 3708   | 3752.131545 | -0.488678018 | 0.557768657 | -0.876130295 | 0.380959205 | 0.999371363 | Not Sig |
| ENSG00000272782 | NA        | NA                                                                          | NA     | 48.74152717 | -0.488677168 | 0.636891325 | -0.767285011 | 0.442912078 | 0.999371363 | Not Sig |
| ENSG00000165300 | SLITRK5   | SLIT and NTRK like family member 5                                          | 26050  | 34.40105605 | -0.488599107 | 0.987939106 | -0.494563991 | 0.620907926 | 0.999371363 | Not Sig |
| ENSG00000228169 | NA        | NA                                                                          | NA     | 6.039723699 | -0.488564628 | 1.098139215 | -0.444902268 | 0.656390383 | NA          | NA      |
| ENSG00000008056 | SYN1      | synapsin I                                                                  | 6853   | 26.23258571 | -0.488547296 | 0.79200016  | -0.616852521 | 0.537332006 | 0.999371363 | Not Sig |
| ENSG00000213397 | HAUS7     | HAUS augmin like complex subunit 7                                          | 55559  | 43.96512233 | -0.488452882 | 0.640042171 | -0.763157342 | 0.445369566 | 0.999371363 | Not Sig |
| ENSG00000181264 | TMEM136   | transmembrane protein 136                                                   | 219902 | 128.4680189 | -0.488396351 | 0.563527626 | -0.866676856 | 0.38611909  | 0.999371363 | Not Sig |
| ENSG00000065243 | PKN2      | protein kinase N2                                                           | 5586   | 2560.29096  | -0.488382627 | 0.630959299 | -0.774031904 | 0.438911925 | 0.999371363 | Not Sig |
| ENSG00000188001 | TPRG1     | tumor protein p63 regulated 1                                               | 285386 | 293.3819045 | -0.488350026 | 0.569312543 | -0.857788981 | 0.391008995 | 0.999371363 | Not Sig |
| ENSG00000175592 | FOSL1     | FOS like 1, AP-1 transcription factor subunit                               | 8061   | 64.94651133 | -0.488280157 | 0.710825329 | -0.686920031 | 0.492133123 | 0.999371363 | Not Sig |
| ENSG00000167525 | PROCA1    | protein interacting with cyclin A1                                          | 147011 | 73.89852069 | -0.488129124 | 0.641042338 | -0.7614616   | 0.446381406 | 0.999371363 | Not Sig |
| ENSG00000145860 | RNF145    | ring finger protein 145                                                     | 153830 | 5083.011925 | -0.488127359 | 0.554729361 | -0.879937845 | 0.378892982 | 0.999371363 | Not Sig |
| ENSG00000122033 | MTIF3     | mitochondrial translational initiation factor 3                             | 219402 | 381.6733213 | -0.488084889 | 0.500574812 | -0.975048839 | 0.329536034 | 0.999371363 | Not Sig |
| ENSG00000272501 | NA        | NA                                                                          | NA     | 67.09990174 | -0.487994448 | 0.716534498 | -0.681048085 | 0.495841065 | 0.999371363 | Not Sig |
| ENSG00000224885 | NA        | NA                                                                          | NA     | 27.42863384 | -0.487758705 | 0.800574728 | -0.609260682 | 0.542351664 | 0.999371363 | Not Sig |
| ENSG00000196110 | ZNF699    | zinc finger protein 699                                                     | 374879 | 173.981697  | -0.487687291 | 0.440871107 | -1.106190184 | 0.26864421  | 0.999371363 | Not Sig |
| ENSG00000254102 | LOC401463 | uncharacterized LOC401463                                                   | 401463 | 5.095421738 | -0.487436063 | 1.136764427 | -0.428792502 | 0.668074236 | NA          | NA      |
| ENSG00000157017 | GHRL      | ghrelin and obestatin prepropeptide                                         | 51738  | 24.06895648 | -0.487354063 | 0.636833137 | -0.765277487 | 0.444106327 | 0.999371363 | Not Sig |
| ENSG00000217624 | NA        | NA                                                                          | NA     | 19.14508569 | -0.487051729 | 0.904167721 | -0.538674096 | 0.590111751 | 0.999371363 | Not Sig |
| ENSG00000200974 | NA        | NA                                                                          | NA     | 6.367323994 | -0.487039226 | 1.438645195 | -0.338540196 | 0.734956141 | NA          | NA      |
| ENSG00000207119 | NA        | NA                                                                          | NA     | 5.987199224 | -0.48703647  | 1.248512199 | -0.390093481 | 0.696467423 | NA          | NA      |
| ENSG00000189320 | FAM180A   | family with sequence similarity 180 member A                                | 389558 | 45.64999621 | -0.486792889 | 0.825399275 | -0.589766558 | 0.555347166 | 0.999371363 | Not Sig |
| ENSG00000241556 | NA        | NA                                                                          | NA     | 2.917932295 | -0.486466821 | 1.402985011 | -0.346737005 | 0.728788907 | NA          | NA      |
| ENSG00000221887 | HMSD      | histocompatibility minor serpin domain containing                           | 284293 | 7.25729626  | -0.486387504 | 0.971844537 | -0.500478714 | 0.616738041 | 0.999371363 | Not Sig |
| ENSG00000121749 | TBC1D15   | TBC1 domain family member 15                                                | 64786  | 1205.521693 | -0.486372499 | 0.540872649 | -0.899236632 | 0.368526632 | 0.999371363 | Not Sig |
| ENSG00000163872 | YEATS2    | YEATS domain containing 2                                                   | 55689  | 1461.452267 | -0.48634138  | 0.459159293 | -1.059199688 | 0.289508847 | 0.999371363 | Not Sig |

|                 |              |                                                       |           |             |              |             |              |             |             |         |
|-----------------|--------------|-------------------------------------------------------|-----------|-------------|--------------|-------------|--------------|-------------|-------------|---------|
| ENSG00000243642 | NA           | NA                                                    | NA        | 3.660976851 | -0.485756059 | 1.320730627 | -0.367793439 | 0.713027262 | NA          | NA      |
| ENSG00000104331 | IMPAD1       | inositol monophosphatase domain containing 1          | 54928     | 2242.118059 | -0.485721291 | 0.545118159 | -0.891038545 | 0.372908492 | 0.999371363 | Not Sig |
| ENSG00000206417 | NA           | NA                                                    | NA        | 169.8851864 | -0.48562681  | 0.664603385 | -0.73070168  | 0.464961389 | 0.999371363 | Not Sig |
| ENSG00000146281 | PM20D2       | peptidase M20 domain containing 2                     | 135293    | 639.9652328 | -0.485595336 | 0.643702824 | -0.754378135 | 0.450622197 | 0.999371363 | Not Sig |
| ENSG00000071243 | ING3         | inhibitor of growth family member 3                   | 54556     | 285.4920053 | -0.485573965 | 0.467331726 | -1.039034882 | 0.298788514 | 0.999371363 | Not Sig |
| ENSG00000154153 | RETREG1      | reticulophagy regulator 1                             | 54463     | 225.6614337 | -0.485527018 | 0.760529839 | -0.63840627  | 0.523209251 | 0.999371363 | Not Sig |
| ENSG00000182404 | NA           | NA                                                    | NA        | 63.1235902  | -0.485351187 | 0.775673073 | -0.625716173 | 0.531501123 | 0.999371363 | Not Sig |
| ENSG00000168852 | NA           | NA                                                    | NA        | 34.96389373 | -0.485275061 | 0.617052745 | -0.786440163 | 0.431609662 | 0.999371363 | Not Sig |
| ENSG00000272967 | NA           | NA                                                    | NA        | 4.009366918 | -0.485217143 | 1.632175402 | -0.297282475 | 0.76625086  | NA          | NA      |
| ENSG00000272100 | NA           | NA                                                    | NA        | 2.542983745 | -0.485124766 | 1.490202131 | -0.325542929 | 0.744770198 | NA          | NA      |
| ENSG00000135597 | REPS1        | RALBP1 associated Eps domain containing 1             | 85021     | 1073.625319 | -0.484840516 | 0.529104477 | -0.916341738 | 0.359487683 | 0.999371363 | Not Sig |
| ENSG00000105173 | CCNE1        | cyclin E1                                             | 898       | 60.02378167 | -0.484774226 | 0.876115377 | -0.553322358 | 0.580042694 | 0.999371363 | Not Sig |
| ENSG00000272017 | NA           | NA                                                    | NA        | 17.04391699 | -0.48451586  | 0.965338043 | -0.501913152 | 0.615728613 | 0.999371363 | Not Sig |
| ENSG00000253256 | NA           | NA                                                    | NA        | 5.986523927 | -0.484507538 | 1.192289866 | -0.406367237 | 0.684472789 | NA          | NA      |
| ENSG00000149243 | KLHL35       | kelch like family member 35                           | 283212    | 55.05757778 | -0.484431249 | 0.668565932 | -0.724582611 | 0.46870813  | 0.999371363 | Not Sig |
| ENSG00000169758 | TMEM266      | transmembrane protein 266                             | 123591    | 34.14599222 | -0.484150942 | 0.888667724 | -0.544805363 | 0.58588739  | 0.999371363 | Not Sig |
| ENSG00000232759 | LOC100506178 | uncharacterized LOC100506178                          | 100506178 | 40.70726134 | -0.484103368 | 0.911829234 | -0.530914506 | 0.595478025 | 0.999371363 | Not Sig |
| ENSG00000166860 | ZBTB39       | zinc finger and BTB domain containing 39              | 9880      | 311.4228184 | -0.483981531 | 0.423718534 | -1.142224124 | 0.253360871 | 0.999371363 | Not Sig |
| ENSG00000114999 | TTL          | tubulin tyrosine ligase                               | 150465    | 860.78325   | -0.483976634 | 0.515266    | -0.939275314 | 0.34758941  | 0.999371363 | Not Sig |
| ENSG00000198000 | NOL8         | nucleolar protein 8                                   | 55035     | 926.9639545 | -0.483767048 | 0.454446388 | -1.064519513 | 0.287093419 | 0.999371363 | Not Sig |
| ENSG00000260167 | NA           | NA                                                    | NA        | 4.887699608 | -0.483765898 | 1.103076718 | -0.438560519 | 0.66098001  | NA          | NA      |
| ENSG00000147604 | RPL7         | ribosomal protein L7                                  | 6129      | 8635.722447 | -0.483689911 | 0.525540214 | -0.920367079 | 0.357380966 | 0.999371363 | Not Sig |
| ENSG00000105672 | ETV2         | ETS variant 2                                         | 2116      | 9.885130303 | -0.483577249 | 0.919194803 | -0.526087884 | 0.598827146 | 0.999371363 | Not Sig |
| ENSG00000114902 | SPCS1        | signal peptidase complex subunit 1                    | 28972     | 709.8571423 | -0.483380573 | 0.656205781 | -0.736629557 | 0.461347656 | 0.999371363 | Not Sig |
| ENSG00000170525 | PFKFB3       | 6-phosphofructo-2-kinase/fructose-2,6-biphosphatase 3 | 5209      | 4111.059128 | -0.483094171 | 0.441086342 | -1.095237201 | 0.273412732 | 0.999371363 | Not Sig |
| ENSG00000107779 | BMPRIA       | bone morphogenetic protein receptor type 1A           | 657       | 998.0670643 | -0.482887416 | 0.468604565 | -1.030479539 | 0.302784952 | 0.999371363 | Not Sig |
| ENSG00000131203 | IDO1         | indoleamine 2,3-dioxygenase 1                         | 3620      | 408.0652004 | -0.48270233  | 1.140757221 | -0.423142034 | 0.672191636 | 0.999371363 | Not Sig |
| ENSG00000133247 | KMT5C        | lysine methyltransferase 5C                           | 84787     | 201.9376299 | -0.482661556 | 0.508708364 | -0.948798153 | 0.342723282 | 0.999371363 | Not Sig |
| ENSG00000213390 | ARHGAP19     | Rho GTPase activating protein 19                      | 84986     | 272.8913618 | -0.482456622 | 0.435101755 | -1.108836303 | 0.267500806 | 0.999371363 | Not Sig |
| ENSG00000083642 | PDS5B        | PDS5 cohesin associated factor B                      | 23047     | 1521.716153 | -0.482154362 | 0.456934663 | -1.055193227 | 0.291336961 | 0.999371363 | Not Sig |
| ENSG00000114405 | C3orf14      | chromosome 3 open reading frame 14                    | 57415     | 186.0551227 | -0.482056289 | 0.919489949 | -0.524264881 | 0.60009432  | 0.999371363 | Not Sig |
| ENSG00000171928 | TVP23B       | trans-golgi network vesicle protein 23 homolog B      | 51030     | 651.8848977 | -0.481873492 | 0.641491988 | -0.751176166 | 0.452546642 | 0.999371363 | Not Sig |
| ENSG00000151164 | RAD9B        | RAD9 checkpoint clamp component B                     | 144715    | 12.99591701 | -0.481784215 | 0.840414215 | -0.573269949 | 0.566461929 | 0.999371363 | Not Sig |
| ENSG00000172987 | HPSE2        | heparanase 2 (inactive)                               | 60495     | 20.08850343 | -0.481734319 | 1.179876968 | -0.408291993 | 0.683059317 | 0.999371363 | Not Sig |
| ENSG00000269940 | NA           | NA                                                    | NA        | 180.4841131 | -0.481430758 | 0.478787356 | -1.005521035 | 0.314646026 | 0.999371363 | Not Sig |

|                 |             |                                                                   |           |             |              |             |              |             |             |         |
|-----------------|-------------|-------------------------------------------------------------------|-----------|-------------|--------------|-------------|--------------|-------------|-------------|---------|
| ENSG00000207181 | SNORA14B    | small nucleolar RNA, H/ACA box 14B                                | 677802    | 11.8905791  | -0.481333135 | 0.964481675 | -0.49905887  | 0.617737912 | 0.999371363 | Not Sig |
| ENSG00000236576 | NA          | NA                                                                | NA        | 35.80431198 | -0.480979809 | 0.910904509 | -0.528024403 | 0.597482399 | 0.999371363 | Not Sig |
| ENSG00000255655 | NA          | NA                                                                | NA        | 4.756092587 | -0.480958827 | 1.229469855 | -0.391192045 | 0.695655288 | NA          | NA      |
| ENSG00000164430 | CGAS        | cyclic GMP-AMP synthase                                           | 115004    | 339.679894  | -0.480952067 | 0.596493301 | -0.806299194 | 0.420070355 | 0.999371363 | Not Sig |
| ENSG00000163507 | CIP2A       | cell proliferation regulating inhibitor of protein phosphatase 2A | 57650     | 157.9201644 | -0.48094118  | 0.852493342 | -0.564158283 | 0.572646416 | 0.999371363 | Not Sig |
| ENSG00000176225 | RTTN        | rotatin                                                           | 25914     | 609.3788945 | -0.48085389  | 0.579994606 | -0.829066142 | 0.407066982 | 0.999371363 | Not Sig |
| ENSG00000273226 | NA          | NA                                                                | NA        | 18.05597441 | -0.480843427 | 0.897996334 | -0.535462572 | 0.592330032 | 0.999371363 | Not Sig |
| ENSG00000150457 | LATS2       | large tumor suppressor kinase 2                                   | 26524     | 1191.014797 | -0.480527247 | 0.537690545 | -0.893687365 | 0.371489188 | 0.999371363 | Not Sig |
| ENSG00000022567 | SLC45A4     | solute carrier family 45 member 4                                 | 57210     | 1249.861522 | -0.48047238  | 0.73297222  | -0.655512401 | 0.512137905 | 0.999371363 | Not Sig |
| ENSG00000221025 | MIR1250     | microRNA 1250                                                     | 100302229 | 2.245003365 | -0.480177585 | 1.584478554 | -0.303050858 | 0.761851104 | NA          | NA      |
| ENSG00000071054 | MAP4K4      | mitogen-activated protein kinase kinase kinase kinase 4           | 9448      | 2712.174764 | -0.480058193 | 0.489798429 | -0.980113785 | 0.327029955 | 0.999371363 | Not Sig |
| ENSG00000196422 | PPP1R26     | protein phosphatase 1 regulatory subunit 26                       | 9858      | 1132.555995 | -0.47970873  | 0.562676369 | -0.852548208 | 0.393909894 | 0.999371363 | Not Sig |
| ENSG00000118369 | USP35       | ubiquitin specific peptidase 35                                   | 57558     | 314.2123832 | -0.479451453 | 0.55735977  | -0.86021898  | 0.389668344 | 0.999371363 | Not Sig |
| ENSG00000132155 | RAF1        | Raf-1 proto-oncogene, serine/threonine kinase                     | 5894      | 2385.941339 | -0.479032526 | 0.421219563 | -1.137251371 | 0.255433217 | 0.999371363 | Not Sig |
| ENSG00000156162 | DPY19L4     | dpy-19 like 4                                                     | 286148    | 950.8184256 | -0.47897631  | 0.651859025 | -0.734785117 | 0.462470372 | 0.999371363 | Not Sig |
| ENSG00000218596 | NA          | NA                                                                | NA        | 83.38224632 | -0.47883911  | 0.691891812 | -0.692072232 | 0.488891969 | 0.999371363 | Not Sig |
| ENSG00000133111 | RFXAP       | regulatory factor X associated protein                            | 5994      | 123.9349011 | -0.478652047 | 0.605584915 | -0.790396253 | 0.42929639  | 0.999371363 | Not Sig |
| ENSG00000099821 | POLRMT      | RNA polymerase mitochondrial                                      | 5442      | 903.6439903 | -0.478602745 | 0.648968678 | -0.73748204  | 0.460829261 | 0.999371363 | Not Sig |
| ENSG00000229200 | NA          | NA                                                                | NA        | 3.960396308 | -0.478475946 | 1.852406786 | -0.258299608 | 0.796175689 | NA          | NA      |
| ENSG00000229221 | NA          | NA                                                                | NA        | 2.54942128  | -0.47845344  | 1.506911792 | -0.317505937 | 0.750859735 | NA          | NA      |
| ENSG00000131484 | NA          | NA                                                                | NA        | 3.240539647 | -0.478375617 | 1.629154239 | -0.293634332 | 0.769037338 | NA          | NA      |
| ENSG00000255449 | NA          | NA                                                                | NA        | 11.93685873 | -0.478358187 | 0.807439986 | -0.59243807  | 0.55355728  | 0.999371363 | Not Sig |
| ENSG00000103534 | TMC5        | transmembrane channel like 5                                      | 79838     | 4812.032497 | -0.478319103 | 0.731754335 | -0.653660772 | 0.513330382 | 0.999371363 | Not Sig |
| ENSG00000204396 | VWA7        | von Willebrand factor A domain containing 7                       | 80737     | 300.8456666 | -0.478307398 | 0.557667403 | -0.857692946 | 0.391062036 | 0.999371363 | Not Sig |
| ENSG00000154589 | LY96        | lymphocyte antigen 96                                             | 23643     | 192.5303852 | -0.478255845 | 0.719584451 | -0.664627819 | 0.506288571 | 0.999371363 | Not Sig |
| ENSG00000207137 | SNORD116-13 | small nucleolar RNA, C/D box 116-13                               | 100033425 | 21.44866243 | -0.478249178 | 0.780313782 | -0.612893414 | 0.539946818 | 0.999371363 | Not Sig |
| ENSG00000171703 | TCEA2       | transcription elongation factor A2                                | 6919      | 422.4213629 | -0.478078707 | 0.659904577 | -0.724466421 | 0.468779435 | 0.999371363 | Not Sig |
| ENSG00000150907 | FOXO1       | forkhead box O1                                                   | 2308      | 1270.8743   | -0.477994351 | 0.408314174 | -1.170653338 | 0.241738148 | 0.999371363 | Not Sig |
| ENSG00000005238 | FAM214B     | family with sequence similarity 214 member B                      | 80256     | 558.8184586 | -0.477991206 | 0.535836587 | -0.8920466   | 0.372367955 | 0.999371363 | Not Sig |
| ENSG00000254505 | CHMP4A      | charged multivesicular body protein 4A                            | 29082     | 38.1823341  | -0.47780169  | 0.627921647 | -0.760925654 | 0.446701475 | 0.999371363 | Not Sig |
| ENSG00000144152 | FBLN7       | fibulin 7                                                         | 129804    | 183.6394553 | -0.477659064 | 0.768511371 | -0.621538056 | 0.534245663 | 0.999371363 | Not Sig |
| ENSG00000187815 | ZFP69       | ZFP69 zinc finger protein                                         | 339559    | 105.4281801 | -0.477595269 | 0.543444863 | -0.878829302 | 0.379493836 | 0.999371363 | Not Sig |
| ENSG00000206754 | SNORD101    | small nucleolar RNA, C/D box 101                                  | 594837    | 18.23499316 | -0.477477923 | 0.900764022 | -0.530081033 | 0.596055749 | 0.999371363 | Not Sig |
| ENSG00000177508 | IRX3        | iroquois homeobox 3                                               | 79191     | 1145.306105 | -0.477463387 | 0.531099761 | -0.899008853 | 0.368647945 | 0.999371363 | Not Sig |
| ENSG00000244692 | NA          | NA                                                                | NA        | 1.756586997 | -0.477305438 | 1.93067706  | -0.24722179  | 0.804736583 | NA          | NA      |

|                 |              |                                                                       |           |             |              |             |              |             |             |         |
|-----------------|--------------|-----------------------------------------------------------------------|-----------|-------------|--------------|-------------|--------------|-------------|-------------|---------|
| ENSG00000231170 | NA           | NA                                                                    | NA        | 6.154918076 | -0.477281737 | 1.383516479 | -0.344977269 | 0.73011146  | NA          | NA      |
| ENSG00000001630 | CYP51A1      | cytochrome P450 family 51 subfamily A member 1                        | 1595      | 243.0103395 | -0.476948196 | 0.767870078 | -0.621131373 | 0.534513188 | 0.999371363 | Not Sig |
| ENSG00000051382 | PIK3CB       | phosphatidylinositol-4,5-bisphosphate 3-kinase catalytic subunit beta | 5291      | 1328.813074 | -0.476695601 | 0.632357795 | -0.75383842  | 0.450946251 | 0.999371363 | Not Sig |
| ENSG00000228124 | NA           | NA                                                                    | NA        | 2.626389451 | -0.476372963 | 1.411438893 | -0.337508741 | 0.735733424 | NA          | NA      |
| ENSG00000244558 | NA           | NA                                                                    | NA        | 2.626389451 | -0.476372963 | 1.411438893 | -0.337508741 | 0.735733424 | NA          | NA      |
| ENSG00000244267 | NA           | NA                                                                    | NA        | 2.258293444 | -0.476229779 | 1.764960754 | -0.269824571 | 0.787295218 | NA          | NA      |
| ENSG00000247828 | TMEM161B-AS1 | TMEM161B antisense RNA 1                                              | 100505894 | 322.0319737 | -0.47611293  | 0.615885102 | -0.773054794 | 0.439489953 | 0.999371363 | Not Sig |
| ENSG00000135407 | AVIL         | advillin                                                              | 10677     | 274.2858136 | -0.476085751 | 0.729889474 | -0.65227102  | 0.514226352 | 0.999371363 | Not Sig |
| ENSG00000269444 | NA           | NA                                                                    | NA        | 3.237937941 | -0.475896716 | 1.415186532 | -0.336278438 | 0.736660908 | NA          | NA      |
| ENSG00000001617 | SEMA3F       | semaphorin 3F                                                         | 6405      | 1127.316389 | -0.475805254 | 0.793839298 | -0.59937226  | 0.548924671 | 0.999371363 | Not Sig |
| ENSG00000261437 | LOC100288748 | uncharacterized LOC100288748                                          | 100288748 | 41.14421948 | -0.475456108 | 0.873491189 | -0.544317006 | 0.586223347 | 0.999371363 | Not Sig |
| ENSG00000267759 | NA           | NA                                                                    | NA        | 14.77955616 | -0.475389442 | 0.814535089 | -0.583632858 | 0.559467349 | 0.999371363 | Not Sig |
| ENSG00000259479 | SORD2P       | sorbitol dehydrogenase 2, pseudogene                                  | 653381    | 17.19285888 | -0.475281569 | 0.942884277 | -0.504072006 | 0.614210778 | 0.999371363 | Not Sig |
| ENSG00000141933 | TPGS1        | tubulin polyglutamylase complex subunit 1                             | 91978     | 284.6201308 | -0.475019799 | 0.695296299 | -0.683190461 | 0.4944865   | 0.999371363 | Not Sig |
| ENSG00000241947 | NA           | NA                                                                    | NA        | 1.206114892 | -0.474821982 | 2.183182358 | -0.217490756 | 0.82782591  | NA          | NA      |
| ENSG00000139437 | TCHP         | trichoplein keratin filament binding                                  | 84260     | 440.4135404 | -0.474797817 | 0.445531645 | -1.065688199 | 0.286564614 | 0.999371363 | Not Sig |
| ENSG00000257122 | NA           | NA                                                                    | NA        | 212.6441469 | -0.47457389  | 0.491778765 | -0.965015009 | 0.334537294 | 0.999371363 | Not Sig |
| ENSG00000264878 | NA           | NA                                                                    | NA        | 18.43526889 | -0.474493955 | 0.725568106 | -0.65396198  | 0.513136301 | 0.999371363 | Not Sig |
| ENSG00000078596 | ITM2A        | integral membrane protein 2A                                          | 9452      | 380.574709  | -0.474456925 | 0.879016014 | -0.539759138 | 0.589363151 | 0.999371363 | Not Sig |
| ENSG00000182118 | FAM89A       | family with sequence similarity 89 member A                           | 375061    | 258.1816416 | -0.474137173 | 0.536540605 | -0.883692992 | 0.376861964 | 0.999371363 | Not Sig |
| ENSG00000262380 | NA           | NA                                                                    | NA        | 22.25454524 | -0.47412175  | 0.735526391 | -0.644601955 | 0.519185168 | 0.999371363 | Not Sig |
| ENSG00000181220 | ZNF746       | zinc finger protein 746                                               | 155061    | 842.8143198 | -0.474079757 | 0.490460413 | -0.966601472 | 0.333743299 | 0.999371363 | Not Sig |
| ENSG00000215158 | NA           | NA                                                                    | NA        | 623.0561589 | -0.474009938 | 0.752371733 | -0.630020929 | 0.528680891 | 0.999371363 | Not Sig |
| ENSG00000113248 | PCDHB15      | protocadherin beta 15                                                 | 56121     | 106.1833993 | -0.473998653 | 0.69026552  | -0.686690323 | 0.492277896 | 0.999371363 | Not Sig |
| ENSG00000244560 | LOC155060    | AI894139 pseudogene                                                   | 155060    | 70.56643639 | -0.473988004 | 0.55723631  | -0.850605022 | 0.394988799 | 0.999371363 | Not Sig |
| ENSG00000231249 | NA           | NA                                                                    | NA        | 18.65706872 | -0.473976731 | 0.750521583 | -0.631529781 | 0.527694183 | 0.999371363 | Not Sig |
| ENSG00000165695 | AK8          | adenylate kinase 8                                                    | 158067    | 65.22942815 | -0.473719193 | 0.608962294 | -0.777912192 | 0.43662078  | 0.999371363 | Not Sig |
| ENSG00000182492 | BGN          | biglycan                                                              | 633       | 7851.028193 | -0.473662331 | 0.407017345 | -1.163739916 | 0.244529428 | 0.999371363 | Not Sig |
| ENSG00000240589 | NA           | NA                                                                    | NA        | 14.66202146 | -0.473607611 | 0.946857545 | -0.500188876 | 0.616942091 | 0.999371363 | Not Sig |
| ENSG00000241158 | ADAMTS9-AS1  | ADAMTS9 antisense RNA 1                                               | 101929335 | 20.48114592 | -0.473332187 | 0.938192819 | -0.504514827 | 0.613899646 | 0.999371363 | Not Sig |
| ENSG00000201728 | NA           | NA                                                                    | NA        | 1.658031612 | -0.473292802 | 2.284268011 | -0.207196704 | 0.835856241 | NA          | NA      |
| ENSG00000106665 | CLIP2        | CAP-Gly domain containing linker protein 2                            | 7461      | 842.1172964 | -0.473175662 | 0.776609635 | -0.60928379  | 0.54233635  | 0.999371363 | Not Sig |
| ENSG00000183016 | NA           | NA                                                                    | NA        | 1.145038506 | -0.47304245  | 2.507069274 | -0.188683438 | 0.850340933 | NA          | NA      |
| ENSG00000265664 | NA           | NA                                                                    | NA        | 1.145038506 | -0.47304245  | 2.507069274 | -0.188683438 | 0.850340933 | NA          | NA      |
| ENSG00000266751 | MIR3661      | microRNA 3661                                                         | 100500905 | 1.998949176 | -0.47303723  | 1.840678629 | -0.256990668 | 0.797185977 | NA          | NA      |



|                 |          |                                                |           |             |              |             |              |             |             |         |
|-----------------|----------|------------------------------------------------|-----------|-------------|--------------|-------------|--------------|-------------|-------------|---------|
| ENSG00000269374 | NA       | NA                                             | NA        | 16.37892444 | -0.473003502 | 0.717581666 | -0.659163305 | 0.509790908 | 0.999371363 | Not Sig |
| ENSG00000005801 | ZNF195   | zinc finger protein 195                        | 7748      | 598.4049696 | -0.472923142 | 0.597982679 | -0.790864281 | 0.429023194 | 0.999371363 | Not Sig |
| ENSG00000095209 | TMEM38B  | transmembrane protein 38B                      | 55151     | 152.7446432 | -0.472712039 | 0.529090379 | -0.893442893 | 0.371620041 | 0.999371363 | Not Sig |
| ENSG00000186352 | ANKRD37  | ankyrin repeat domain 37                       | 353322    | 367.2253605 | -0.472469852 | 0.603770614 | -0.782532043 | 0.433901962 | 0.999371363 | Not Sig |
| ENSG00000114127 | XRN1     | 5'-3' exoribonuclease 1                        | 54464     | 2994.857162 | -0.472433683 | 0.63527564  | -0.743667242 | 0.457077812 | 0.999371363 | Not Sig |
| ENSG00000130177 | CDC16    | cell division cycle 16                         | 8881      | 1225.294136 | -0.472239589 | 0.479026293 | -0.985832295 | 0.324215415 | 0.999371363 | Not Sig |
| ENSG00000168070 | MAJIN    | membrane anchored junction protein             | 283129    | 4.50899361  | -0.472048091 | 1.856611899 | -0.254252432 | 0.799300546 | NA          | NA      |
| ENSG00000229794 | NA       | NA                                             | NA        | 26.16599426 | -0.47199843  | 1.163328522 | -0.405730987 | 0.684940272 | 0.999371363 | Not Sig |
| ENSG00000186298 | PPP1CC   | protein phosphatase 1 catalytic subunit gamma  | 5501      | 1806.46833  | -0.471994421 | 0.511980005 | -0.921900106 | 0.356580684 | 0.999371363 | Not Sig |
| ENSG00000257531 | NA       | NA                                             | NA        | 17.47231361 | -0.471886168 | 0.731252429 | -0.645312274 | 0.51872484  | 0.999371363 | Not Sig |
| ENSG00000230673 | NA       | NA                                             | NA        | 26.19856243 | -0.471859738 | 0.815330765 | -0.578734127 | 0.562768585 | 0.999371363 | Not Sig |
| ENSG00000254272 | NA       | NA                                             | NA        | 21.01226153 | -0.471773626 | 0.736644161 | -0.640436253 | 0.52188902  | 0.999371363 | Not Sig |
| ENSG00000251247 | ZNF345   | zinc finger protein 345                        | 25850     | 186.4593052 | -0.471702965 | 0.525571587 | -0.897504691 | 0.369449671 | 0.999371363 | Not Sig |
| ENSG00000112715 | VEGFA    | vascular endothelial growth factor A           | 7422      | 6032.115714 | -0.471701543 | 0.656289208 | -0.718740362 | 0.472300909 | 0.999371363 | Not Sig |
| ENSG00000160124 | CCDC58   | coiled-coil domain containing 58               | 131076    | 166.4693785 | -0.471687854 | 0.659911516 | -0.714774395 | 0.47474846  | 0.999371363 | Not Sig |
| ENSG00000229206 | NA       | NA                                             | NA        | 84.47590927 | -0.471120924 | 0.714133749 | -0.659709647 | 0.509440174 | 0.999371363 | Not Sig |
| ENSG00000270101 | NA       | NA                                             | NA        | 55.1075447  | -0.471041079 | 0.723491701 | -0.651066319 | 0.515003677 | 0.999371363 | Not Sig |
| ENSG00000107669 | ATE1     | arginyltransferase 1                           | 11101     | 964.7261806 | -0.470798764 | 0.44899023  | -1.048572403 | 0.294374963 | 0.999371363 | Not Sig |
| ENSG00000117298 | ECE1     | endothelin converting enzyme 1                 | 1889      | 3980.555571 | -0.470758297 | 0.609154984 | -0.772805459 | 0.439637522 | 0.999371363 | Not Sig |
| ENSG00000188493 | C19orf54 | chromosome 19 open reading frame 54            | 284325    | 231.9430454 | -0.470699105 | 0.443039158 | -1.062432284 | 0.288039484 | 0.999371363 | Not Sig |
| ENSG00000066697 | MSANTD3  | Myb/SANT DNA binding domain containing 3       | 91283     | 241.8645899 | -0.470579637 | 0.582075449 | -0.808451272 | 0.418830847 | 0.999371363 | Not Sig |
| ENSG00000102595 | UGGT2    | UDP-glucose glycoprotein glucosyltransferase 2 | 55757     | 982.2457886 | -0.470237965 | 0.633533398 | -0.742246528 | 0.457937983 | 0.999371363 | Not Sig |
| ENSG00000142534 | RPS11    | ribosomal protein S11                          | 6205      | 7668.148562 | -0.47004837  | 0.452683413 | -1.038360047 | 0.299102463 | 0.999371363 | Not Sig |
| ENSG00000222019 | URAHP    | urate (hydroxyiso-) hydrolase, pseudogene      | 100130015 | 25.69997452 | -0.469922198 | 0.999785239 | -0.470023141 | 0.638338485 | 0.999371363 | Not Sig |
| ENSG00000196116 | TDRD7    | tudor domain containing 7                      | 23424     | 589.150716  | -0.469886824 | 0.393264152 | -1.194837672 | 0.232150459 | 0.999371363 | Not Sig |
| ENSG00000215515 | NA       | NA                                             | NA        | 4.170538236 | -0.469329992 | 1.293232911 | -0.362912193 | 0.716670478 | NA          | NA      |
| ENSG00000141027 | NCOR1    | nuclear receptor corepressor 1                 | 9611      | 5595.890695 | -0.46911478  | 0.471035582 | -0.995922172 | 0.319287962 | 0.999371363 | Not Sig |
| ENSG00000196642 | RABL6    | RAB, member RAS oncogene family like 6         | 55684     | 1927.908922 | -0.469084007 | 0.545696528 | -0.859605995 | 0.390006269 | 0.999371363 | Not Sig |
| ENSG00000225447 | NA       | NA                                             | NA        | 54.12973406 | -0.468834853 | 0.724483388 | -0.647129887 | 0.517547884 | 0.999371363 | Not Sig |
| ENSG00000213341 | CHUK     | conserved helix-loop-helix ubiquitous kinase   | 1147      | 659.4397871 | -0.468494868 | 0.495159704 | -0.946149019 | 0.344072585 | 0.999371363 | Not Sig |
| ENSG00000263834 | MIR4635  | microRNA 4635                                  | 100616479 | 11.92395619 | -0.468378666 | 0.866762738 | -0.54037702  | 0.588937052 | 0.999371363 | Not Sig |
| ENSG00000203325 | NA       | NA                                             | NA        | 1.833555167 | -0.468281314 | 1.7111718   | -0.273661192 | 0.784345004 | NA          | NA      |
| ENSG00000153707 | PTPRD    | protein tyrosine phosphatase, receptor type D  | 5789      | 561.8834959 | -0.468265125 | 0.667038571 | -0.70200607  | 0.482675378 | 0.999371363 | Not Sig |
| ENSG00000179715 | PCED1B   | PC-esterase domain containing 1B               | 91523     | 278.331517  | -0.468260444 | 0.454163461 | -1.031039449 | 0.302522321 | 0.999371363 | Not Sig |
| ENSG00000119392 | GLE1     | GLE1, RNA export mediator                      | 2733      | 752.688304  | -0.468080764 | 0.413258895 | -1.132657444 | 0.257358135 | 0.999371363 | Not Sig |

|                 |          |                                                             |           |             |              |             |              |             |             |         |
|-----------------|----------|-------------------------------------------------------------|-----------|-------------|--------------|-------------|--------------|-------------|-------------|---------|
| ENSG00000123219 | CENPK    | centromere protein K                                        | 64105     | 117.0694058 | -0.467850697 | 0.985876054 | -0.474553261 | 0.635105427 | 0.999371363 | Not Sig |
| ENSG00000160285 | LSS      | lanosterol synthase                                         | 4047      | 1364.267309 | -0.467754187 | 0.713472981 | -0.655601822 | 0.512080353 | 0.999371363 | Not Sig |
| ENSG00000138463 | DIRC2    | disrupted in renal carcinoma 2                              | 84925     | 568.9568539 | -0.467676857 | 0.506367869 | -0.923591101 | 0.355699249 | 0.999371363 | Not Sig |
| ENSG00000198682 | PAPSS2   | 3'-phosphoadenosine 5'-phosphosulfate synthase 2            | 9060      | 2490.157997 | -0.46741044  | 0.538690028 | -0.867679772 | 0.385569663 | 0.999371363 | Not Sig |
| ENSG00000114861 | FOXP1    | forkhead box P1                                             | 27086     | 3459.623339 | -0.467392668 | 0.443559279 | -1.053732139 | 0.29200557  | 0.999371363 | Not Sig |
| ENSG00000232656 | IDI2-AS1 | IDI2 antisense RNA 1                                        | 55853     | 4.992399665 | -0.467390225 | 1.539751852 | -0.303549058 | 0.761471467 | NA          | NA      |
| ENSG00000133119 | RFC3     | replication factor C subunit 3                              | 5983      | 160.7353961 | -0.467174835 | 0.646684834 | -0.722415016 | 0.470039357 | 0.999371363 | Not Sig |
| ENSG00000259605 | NA       | NA                                                          | NA        | 76.35249858 | -0.46717007  | 0.532761696 | -0.876883743 | 0.380549787 | 0.999371363 | Not Sig |
| ENSG00000244657 | NA       | NA                                                          | NA        | 2.560292931 | -0.466995441 | 1.730349944 | -0.269884969 | 0.787248751 | NA          | NA      |
| ENSG00000081818 | PCDHB4   | protocadherin beta 4                                        | 56131     | 77.86166021 | -0.466943832 | 0.623276772 | -0.749175731 | 0.453751295 | 0.999371363 | Not Sig |
| ENSG00000133641 | C12orf29 | chromosome 12 open reading frame 29                         | 91298     | 238.9609539 | -0.466815894 | 0.526921267 | -0.885931017 | 0.375654701 | 0.999371363 | Not Sig |
| ENSG00000228768 | NA       | NA                                                          | NA        | 9.801565735 | -0.466591154 | 1.044582207 | -0.446677295 | 0.655108078 | 0.999371363 | Not Sig |
| ENSG00000154839 | SKA1     | spindle and kinetochore associated complex subunit 1        | 220134    | 44.56459244 | -0.466528801 | 1.030693101 | -0.452635999 | 0.650810872 | 0.999371363 | Not Sig |
| ENSG00000265287 | NA       | NA                                                          | NA        | 2.893328367 | -0.466040833 | 1.978433793 | -0.23556049  | 0.813773735 | NA          | NA      |
| ENSG00000204520 | MICA     | MHC class I polypeptide-related sequence A                  | 100507436 | 435.0502962 | -0.465950333 | 0.755890843 | -0.616425423 | 0.537613778 | 0.999371363 | Not Sig |
| ENSG00000169871 | TRIM56   | tripartite motif containing 56                              | 81844     | 1742.928253 | -0.465944797 | 0.542602286 | -0.858722509 | 0.390493629 | 0.999371363 | Not Sig |
| ENSG00000164961 | WASHC5   | WASH complex subunit 5                                      | 9897      | 1566.284608 | -0.465895946 | 0.535721295 | -0.869661053 | 0.384485662 | 0.999371363 | Not Sig |
| ENSG00000263214 | NA       | NA                                                          | NA        | 13.88964395 | -0.465860133 | 0.965465435 | -0.482523886 | 0.629433835 | 0.999371363 | Not Sig |
| ENSG00000064393 | HIPK2    | homeodomain interacting protein kinase 2                    | 28996     | 6180.485318 | -0.465803657 | 0.53154328  | -0.876323103 | 0.380854409 | 0.999371363 | Not Sig |
| ENSG00000136122 | BORA     | bora, aurora kinase A activator                             | 79866     | 121.1492571 | -0.465658159 | 0.745984057 | -0.624219988 | 0.532483122 | 0.999371363 | Not Sig |
| ENSG00000242152 | NA       | NA                                                          | NA        | 15.25998688 | -0.465618557 | 1.309906579 | -0.355459362 | 0.722245484 | 0.999371363 | Not Sig |
| ENSG00000092140 | G2E3     | G2/M-phase specific E3 ubiquitin protein ligase             | 55632     | 569.8040784 | -0.465255753 | 0.659961481 | -0.704974102 | 0.480826353 | 0.999371363 | Not Sig |
| ENSG00000075407 | ZNF37A   | zinc finger protein 37A                                     | 7587      | 949.1327367 | -0.464924007 | 0.491918943 | -0.945123203 | 0.344595981 | 0.999371363 | Not Sig |
| ENSG00000247137 | NA       | NA                                                          | NA        | 105.4858837 | -0.464749714 | 0.597503255 | -0.777819553 | 0.436675399 | 0.999371363 | Not Sig |
| ENSG00000188050 | RNF133   | ring finger protein 133                                     | 168433    | 44.21598516 | -0.464628401 | 0.826407268 | -0.562226906 | 0.573961432 | 0.999371363 | Not Sig |
| ENSG00000233230 | NA       | NA                                                          | NA        | 17.95081696 | -0.464473609 | 0.685503809 | -0.677565322 | 0.49804734  | 0.999371363 | Not Sig |
| ENSG00000165813 | CCDC186  | coiled-coil domain containing 186                           | 55088     | 1993.008018 | -0.464461152 | 0.648860147 | -0.715810879 | 0.474108134 | 0.999371363 | Not Sig |
| ENSG00000252549 | NA       | NA                                                          | NA        | 16.99046878 | -0.464414372 | 0.756447686 | -0.613941163 | 0.539254208 | 0.999371363 | Not Sig |
| ENSG00000131061 | ZNF341   | zinc finger protein 341                                     | 84905     | 176.6062048 | -0.464397377 | 0.615313954 | -0.7547324   | 0.450409562 | 0.999371363 | Not Sig |
| ENSG00000164068 | RNF123   | ring finger protein 123                                     | 63891     | 967.9197122 | -0.464362385 | 0.444680837 | -1.044259941 | 0.296365141 | 0.999371363 | Not Sig |
| ENSG00000116254 | CHD5     | chromodomain helicase DNA binding protein 5                 | 26038     | 12.81079097 | -0.464238042 | 0.981629952 | -0.47292571  | 0.636266182 | 0.999371363 | Not Sig |
| ENSG00000158411 | MITD1    | microtubule interacting and trafficking domain containing 1 | 129531    | 253.1470725 | -0.464097182 | 0.662099274 | -0.70094803  | 0.483335448 | 0.999371363 | Not Sig |
| ENSG00000196338 | NLGN3    | neuroligin 3                                                | 54413     | 52.71574226 | -0.463738319 | 0.605516253 | -0.765856105 | 0.443761926 | 0.999371363 | Not Sig |
| ENSG00000251333 | NA       | NA                                                          | NA        | 1.458606617 | -0.463524777 | 2.024441904 | -0.228964228 | 0.81889672  | NA          | NA      |
| ENSG00000248785 | NA       | NA                                                          | NA        | 7.827475262 | -0.463508774 | 1.057593495 | -0.438267422 | 0.661192439 | 0.999371363 | Not Sig |

|                 |              |                                                                                                                      |           |             |              |             |              |             |             |         |
|-----------------|--------------|----------------------------------------------------------------------------------------------------------------------|-----------|-------------|--------------|-------------|--------------|-------------|-------------|---------|
| ENSG00000158292 | GPR153       | G protein-coupled receptor 153                                                                                       | 387509    | 680.4678796 | -0.463436239 | 0.730310553 | -0.634574206 | 0.525706156 | 0.999371363 | Not Sig |
| ENSG00000204514 | ZNF814       | zinc finger protein 814                                                                                              | 730051    | 212.8039524 | -0.463406044 | 0.442215103 | -1.047919983 | 0.294675475 | 0.999371363 | Not Sig |
| ENSG00000241529 | NA           | NA                                                                                                                   | NA        | 5.590679752 | -0.46331815  | 1.250136736 | -0.370613979 | 0.710925069 | NA          | NA      |
| ENSG00000270408 | NA           | NA                                                                                                                   | NA        | 4.725311414 | -0.463280579 | 1.128624883 | -0.410482337 | 0.681452158 | NA          | NA      |
| ENSG00000147485 | PXN1L        | peroxidasin like                                                                                                     | 137902    | 32.36745511 | -0.463269116 | 0.713313549 | -0.649460698 | 0.516040642 | 0.999371363 | Not Sig |
| ENSG00000163508 | EOMES        | eomesodermin                                                                                                         | 8320      | 89.07605723 | -0.463089382 | 0.940204229 | -0.492541267 | 0.622336757 | 0.999371363 | Not Sig |
| ENSG00000120256 | LRP11        | LDL receptor related protein 11                                                                                      | 84918     | 1337.501822 | -0.463009772 | 0.608868138 | -0.760443425 | 0.446989574 | 0.999371363 | Not Sig |
| ENSG00000134759 | ELP2         | elongator acetyltransferase complex subunit 2                                                                        | 55250     | 1487.32531  | -0.462703755 | 0.490144308 | -0.94401536  | 0.345161799 | 0.999371363 | Not Sig |
| ENSG00000155465 | SLC7A7       | solute carrier family 7 member 7                                                                                     | 9056      | 637.0659818 | -0.462549433 | 0.747274814 | -0.618981699 | 0.535928415 | 0.999371363 | Not Sig |
| ENSG00000138380 | CARF         | calcium responsive transcription factor                                                                              | 79800     | 401.8827459 | -0.462308805 | 0.601152326 | -0.769037705 | 0.441870928 | 0.999371363 | Not Sig |
| ENSG00000258603 | NA           | NA                                                                                                                   | NA        | 5.273923918 | -0.4622259   | 1.184488318 | -0.390232553 | 0.696364592 | NA          | NA      |
| ENSG00000038210 | PI4K2B       | phosphatidylinositol 4-kinase type 2 beta                                                                            | 55300     | 1248.273868 | -0.462124774 | 0.546969756 | -0.844881766 | 0.398176856 | 0.999371363 | Not Sig |
| ENSG00000198105 | ZNF248       | zinc finger protein 248                                                                                              | 57209     | 604.6273503 | -0.461895228 | 0.517200228 | -0.893068492 | 0.371820495 | 0.999371363 | Not Sig |
| ENSG00000169857 | AVEN         | apoptosis and caspase activation inhibitor                                                                           | 57099     | 162.4113606 | -0.461772757 | 0.473075894 | -0.976116648 | 0.329006662 | 0.999371363 | Not Sig |
| ENSG00000114744 | COMM2        | COMM domain containing 2                                                                                             | 51122     | 481.1870156 | -0.461654173 | 0.515833252 | -0.894967844 | 0.370804278 | 0.999371363 | Not Sig |
| ENSG00000269533 | NA           | NA                                                                                                                   | NA        | 6.769594526 | -0.461602431 | 1.118979211 | -0.412521007 | 0.679957586 | 0.999371363 | Not Sig |
| ENSG00000242182 | NA           | NA                                                                                                                   | NA        | 7.78340401  | -0.461486417 | 1.263456495 | -0.36525707  | 0.714919521 | 0.999371363 | Not Sig |
| ENSG00000049759 | NEDD4L       | <small>general transcription factor IIId, developmentally down-regulated 4-like, E1 ubiquitin protein ligase</small> | 23327     | 4967.38479  | -0.461461206 | 0.398256768 | -1.158702735 | 0.246577376 | 0.999371363 | Not Sig |
| ENSG00000140307 | GTF2A2       | general transcription factor IIA subunit 2                                                                           | 2958      | 337.5015161 | -0.461447715 | 0.579116162 | -0.796813741 | 0.425559213 | 0.999371363 | Not Sig |
| ENSG00000263585 | NA           | NA                                                                                                                   | NA        | 5.129907069 | -0.461441908 | 1.260308485 | -0.366134096 | 0.714265016 | NA          | NA      |
| ENSG00000196150 | ZNF250       | zinc finger protein 250                                                                                              | 58500     | 430.6414923 | -0.461095894 | 0.446865735 | -1.031844373 | 0.302145029 | 0.999371363 | Not Sig |
| ENSG00000232129 | NA           | NA                                                                                                                   | NA        | 1.503680264 | -0.460893717 | 2.304229754 | -0.20002073  | 0.841464369 | NA          | NA      |
| ENSG00000233382 | NKAPP1       | NFKB activating protein pseudogene 1                                                                                 | 158801    | 121.078286  | -0.460879195 | 0.531558603 | -0.867033649 | 0.385923573 | 0.999371363 | Not Sig |
| ENSG00000270640 | NA           | NA                                                                                                                   | NA        | 98.73029891 | -0.460773829 | 0.709402613 | -0.649523726 | 0.515999916 | 0.999371363 | Not Sig |
| ENSG00000105808 | RASA4        | RAS p21 protein activator 4                                                                                          | 10156     | 76.03354706 | -0.460428603 | 0.526308195 | -0.874826969 | 0.381668061 | 0.999371363 | Not Sig |
| ENSG00000105808 | LOC102724229 | uncharacterized LOC102724229                                                                                         | 102724229 | 76.03354706 | -0.460428603 | 0.526308195 | -0.874826969 | 0.381668061 | 0.999371363 | Not Sig |
| ENSG00000133056 | PIK3C2B      | <small>phosphatidylinositol-4-phosphate 3-kinase catalytic subunit type 2 beta</small>                               | 5287      | 2002.803475 | -0.460379054 | 0.404189969 | -1.139016526 | 0.254696262 | 0.999371363 | Not Sig |
| ENSG00000074276 | CDHR2        | cadherin related family member 2                                                                                     | 54825     | 10.84725072 | -0.460352225 | 1.052630117 | -0.437335221 | 0.661868256 | 0.999371363 | Not Sig |
| ENSG00000211833 | NA           | NA                                                                                                                   | NA        | 1.135584258 | -0.460103493 | 2.510626952 | -0.183262389 | 0.854592144 | NA          | NA      |
| ENSG00000201512 | SNORA71C     | small nucleolar RNA, H/ACA box 71C                                                                                   | 677839    | 15.7354607  | -0.459969966 | 0.812776368 | -0.565924385 | 0.571445184 | 0.999371363 | Not Sig |
| ENSG00000147526 | TACC1        | transforming acidic coiled-coil containing protein 1                                                                 | 6867      | 5633.900548 | -0.459942281 | 0.693039756 | -0.663659302 | 0.506908393 | 0.999371363 | Not Sig |
| ENSG00000199121 | MIR26B       | microRNA 26b                                                                                                         | 407017    | 6.635419743 | -0.459820881 | 1.007712072 | -0.456301848 | 0.648172935 | 0.999371363 | Not Sig |
| ENSG00000188833 | ENTPD8       | ectonucleoside triphosphate diphosphohydrolase 8                                                                     | 377841    | 68.04415069 | -0.459759141 | 1.110508244 | -0.414007859 | 0.678868351 | 0.999371363 | Not Sig |
| ENSG00000110888 | CAPRN2       | caprin family member 2                                                                                               | 65981     | 570.4328304 | -0.459649735 | 0.523953705 | -0.877271657 | 0.380339103 | 0.999371363 | Not Sig |
| ENSG00000145331 | TRMT10A      | tRNA methyltransferase 10A                                                                                           | 93587     | 137.0459484 | -0.45931695  | 0.651261714 | -0.705272459 | 0.480640696 | 0.999371363 | Not Sig |

|                 |              |                                                              |           |             |              |             |              |             |             |         |
|-----------------|--------------|--------------------------------------------------------------|-----------|-------------|--------------|-------------|--------------|-------------|-------------|---------|
| ENSG00000203286 | NA           | NA                                                           | NA        | 20.63895395 | -0.459235005 | 0.780920324 | -0.588068963 | 0.556486005 | 0.999371363 | Not Sig |
| ENSG00000133624 | ZNF767P      | zinc finger family member 767, pseudogene                    | 79970     | 550.5781105 | -0.459045789 | 0.457161988 | -1.004120642 | 0.315320467 | 0.999371363 | Not Sig |
| ENSG00000127334 | DYRK2        | dual specificity tyrosine phosphorylation regulated kinase 2 | 8445      | 1194.149231 | -0.458962103 | 0.510320108 | -0.899361196 | 0.368460301 | 0.999371363 | Not Sig |
| ENSG00000104960 | PTOV1        | prostate tumor overexpressed 1                               | 53635     | 1575.918466 | -0.458750545 | 0.449107272 | -1.021472093 | 0.307030824 | 0.999371363 | Not Sig |
| ENSG00000111605 | CPSF6        | cleavage and polyadenylation specific factor 6               | 11052     | 2216.260207 | -0.458527209 | 0.585456417 | -0.783196146 | 0.433511938 | 0.999371363 | Not Sig |
| ENSG00000124795 | DEK          | DEK proto-oncogene                                           | 7913      | 3108.621769 | -0.4583029   | 0.596323456 | -0.768547499 | 0.442161983 | 0.999371363 | Not Sig |
| ENSG00000232545 | NA           | NA                                                           | NA        | 122.7229202 | -0.457978707 | 0.587125846 | -0.780034997 | 0.435370276 | 0.999371363 | Not Sig |
| ENSG00000265280 | NA           | NA                                                           | NA        | 7.275735089 | -0.457910288 | 1.000879949 | -0.457507704 | 0.647306166 | 0.999371363 | Not Sig |
| ENSG00000266347 | NA           | NA                                                           | NA        | 2.192196925 | -0.457895718 | 1.59136876  | -0.287737029 | 0.773548043 | NA          | NA      |
| ENSG00000257509 | NA           | NA                                                           | NA        | 29.36329364 | -0.457735574 | 0.784803884 | -0.583248355 | 0.559726124 | 0.999371363 | Not Sig |
| ENSG00000218565 | NA           | NA                                                           | NA        | 5.541897803 | -0.457475727 | 1.634982227 | -0.27980471  | 0.779627338 | NA          | NA      |
| ENSG00000127980 | PEX1         | peroxisomal biogenesis factor 1                              | 5189      | 665.4084714 | -0.457155749 | 0.549087056 | -0.832574259 | 0.405084881 | 0.999371363 | Not Sig |
| ENSG00000141098 | GFOD2        | glucose-fructose oxidoreductase domain containing 2          | 81577     | 512.1138202 | -0.45702331  | 0.52473773  | -0.870955687 | 0.383778349 | 0.999371363 | Not Sig |
| ENSG00000177917 | ARL6IP6      | ADP ribosylation factor like GTPase 6 interacting protein 6  | 151188    | 352.567118  | -0.456906571 | 0.406010086 | -1.125357687 | 0.260437494 | 0.999371363 | Not Sig |
| ENSG00000112742 | TTK          | TTK protein kinase                                           | 7272      | 107.5368685 | -0.456876636 | 1.051887919 | -0.434339655 | 0.664041811 | 0.999371363 | Not Sig |
| ENSG00000130429 | ARPC1B       | actin related protein 2/3 complex subunit 1B                 | 10095     | 2359.12975  | -0.456788297 | 0.508469389 | -0.898359483 | 0.36899393  | 0.999371363 | Not Sig |
| ENSG00000252516 | NA           | NA                                                           | NA        | 7.744396654 | -0.456110247 | 1.092633111 | -0.417441355 | 0.676355611 | 0.999371363 | Not Sig |
| ENSG00000115112 | TFCP2L1      | transcription factor CP2 like 1                              | 29842     | 1152.346986 | -0.456077018 | 0.607658996 | -0.750547628 | 0.45292495  | 0.999371363 | Not Sig |
| ENSG00000255231 | NA           | NA                                                           | NA        | 0.85391067  | -0.455999273 | 3.177747828 | -0.143497627 | 0.885897185 | NA          | NA      |
| ENSG00000265536 | NA           | NA                                                           | NA        | 0.85391067  | -0.455999273 | 3.177747828 | -0.143497627 | 0.885897185 | NA          | NA      |
| ENSG00000253392 | NA           | NA                                                           | NA        | 9.773097137 | -0.455907292 | 0.968810243 | -0.470584714 | 0.637937325 | 0.999371363 | Not Sig |
| ENSG00000231066 | NA           | NA                                                           | NA        | 1.993929043 | -0.45572354  | 1.924841546 | -0.23675899  | 0.812843768 | NA          | NA      |
| ENSG00000106633 | GCK          | glucokinase                                                  | 2645      | 10.79727813 | -0.455710187 | 1.141935696 | -0.399068169 | 0.689842976 | 0.999371363 | Not Sig |
| ENSG00000161016 | RPL8         | ribosomal protein L8                                         | 6132      | 11167.29839 | -0.455577166 | 0.492361199 | -0.925290552 | 0.354814792 | 0.999371363 | Not Sig |
| ENSG00000108292 | NA           | NA                                                           | NA        | 5930.740192 | -0.45545292  | 0.479935178 | -0.948988408 | 0.342626508 | 0.999371363 | Not Sig |
| ENSG00000130703 | OSBPL2       | oxysterol binding protein like 2                             | 9885      | 1526.205887 | -0.455428176 | 0.420895029 | -1.082046934 | 0.279231673 | 0.999371363 | Not Sig |
| ENSG00000240291 | NA           | NA                                                           | NA        | 60.62096985 | -0.455378847 | 0.53717146  | -0.847734627 | 0.396585777 | 0.999371363 | Not Sig |
| ENSG00000254003 | LOC102723885 | uncharacterized LOC102723885                                 | 102723885 | 3.206481471 | -0.455135878 | 1.452027062 | -0.313448619 | 0.753939851 | NA          | NA      |
| ENSG00000137804 | NUSAP1       | nucleolar and spindle associated protein 1                   | 51203     | 283.5759261 | -0.45501322  | 1.039230169 | -0.437836808 | 0.661504587 | 0.999371363 | Not Sig |
| ENSG00000272434 | NA           | NA                                                           | NA        | 5.257617127 | -0.454953477 | 1.139442681 | -0.399277194 | 0.689688969 | NA          | NA      |
| ENSG00000170430 | MGMT         | 0-6-methylguanine-DNA methyltransferase                      | 4255      | 342.5056307 | -0.454718066 | 0.527636372 | -0.861801972 | 0.388796499 | 0.999371363 | Not Sig |
| ENSG00000258472 | NA           | NA                                                           | NA        | 73.11708778 | -0.454599416 | 0.622865568 | -0.729851575 | 0.465480915 | 0.999371363 | Not Sig |
| ENSG00000239763 | NA           | NA                                                           | NA        | 44.62477262 | -0.454440364 | 0.543652012 | -0.835903031 | 0.403209457 | 0.999371363 | Not Sig |
| ENSG00000213995 | NAXD         | NAD(P)HX dehydratase                                         | 55739     | 659.9888388 | -0.45439584  | 0.598210917 | -0.759591353 | 0.447498889 | 0.999371363 | Not Sig |
| ENSG00000196724 | ZNF418       | zinc finger protein 418                                      | 147686    | 196.9053937 | -0.454284785 | 0.725663976 | -0.62602637  | 0.531297645 | 0.999371363 | Not Sig |

|                 |         |                                                                        |           |             |              |             |              |             |             |         |
|-----------------|---------|------------------------------------------------------------------------|-----------|-------------|--------------|-------------|--------------|-------------|-------------|---------|
| ENSG00000133250 | ZNF414  | zinc finger protein 414                                                | 84330     | 228.398905  | -0.454229674 | 0.680387231 | -0.667604643 | 0.504385993 | 0.999371363 | Not Sig |
| ENSG00000167595 | PROSER3 | proline and serine rich 3                                              | 148137    | 421.3261824 | -0.454080733 | 0.445689874 | -1.018826677 | 0.308285259 | 0.999371363 | Not Sig |
| ENSG00000243988 | NA      | NA                                                                     | NA        | 1.11283993  | -0.454003064 | 2.203129636 | -0.206071879 | 0.836734764 | NA          | NA      |
| ENSG00000174748 | RPL15   | ribosomal protein L15                                                  | 6138      | 9508.003648 | -0.453922305 | 0.535896689 | -0.847033232 | 0.396976599 | 0.999371363 | Not Sig |
| ENSG00000238317 | SNORD11 | small nucleolar RNA, C/D box 11                                        | 692058    | 12.62562064 | -0.453848761 | 1.009322133 | -0.449656999 | 0.652957782 | 0.999371363 | Not Sig |
| ENSG00000229874 | NA      | NA                                                                     | NA        | 123.5550935 | -0.453724136 | 0.701719507 | -0.646589031 | 0.517897959 | 0.999371363 | Not Sig |
| ENSG00000183793 | NPIPA5  | nuclear pore complex interacting protein family member A5              | 100288332 | 27.89132023 | -0.453625066 | 1.058787996 | -0.428438051 | 0.668332226 | 0.999371363 | Not Sig |
| ENSG00000185028 | LRRC14B | leucine rich repeat containing 14B                                     | 389257    | 0.71084598  | -0.453592027 | 3.387099406 | -0.133917542 | 0.893467779 | NA          | NA      |
| ENSG00000207251 | NA      | NA                                                                     | NA        | 0.71084598  | -0.453592027 | 3.387099406 | -0.133917542 | 0.893467779 | NA          | NA      |
| ENSG00000207499 | NA      | NA                                                                     | NA        | 0.71084598  | -0.453592027 | 3.387099406 | -0.133917542 | 0.893467779 | NA          | NA      |
| ENSG00000213939 | NA      | NA                                                                     | NA        | 0.71084598  | -0.453592027 | 3.387099406 | -0.133917542 | 0.893467779 | NA          | NA      |
| ENSG00000254219 | NA      | NA                                                                     | NA        | 0.71084598  | -0.453592027 | 3.387099406 | -0.133917542 | 0.893467779 | NA          | NA      |
| ENSG00000259713 | NA      | NA                                                                     | NA        | 0.71084598  | -0.453592027 | 3.387099406 | -0.133917542 | 0.893467779 | NA          | NA      |
| ENSG00000261054 | NA      | NA                                                                     | NA        | 6.492222012 | -0.453403124 | 1.065999211 | -0.425331576 | 0.670594978 | NA          | NA      |
| ENSG00000158169 | FANCC   | Fanconi anemia complementation group C                                 | 2176      | 334.1717713 | -0.453290877 | 0.514442896 | -0.881129627 | 0.378247663 | 0.999371363 | Not Sig |
| ENSG00000264160 | MIR4762 | microRNA 4762                                                          | 100616253 | 9.067195234 | -0.453167484 | 1.130812196 | -0.400745133 | 0.688607778 | 0.999371363 | Not Sig |
| ENSG00000273179 | NA      | NA                                                                     | NA        | 29.1757532  | -0.452616229 | 0.826685268 | -0.547507312 | 0.584030248 | 0.999371363 | Not Sig |
| ENSG00000164284 | GRPEL2  | GrpE like 2, mitochondrial                                             | 134266    | 441.4196605 | -0.4525232   | 0.452518839 | -1.000009638 | 0.317305844 | 0.999371363 | Not Sig |
| ENSG00000142046 | TMEM91  | transmembrane protein 91                                               | 641649    | 133.6357752 | -0.45252104  | 0.524681847 | -0.862467498 | 0.388430311 | 0.999371363 | Not Sig |
| ENSG00000187498 | COL4A1  | collagen type IV alpha 1 chain                                         | 1282      | 15167.4246  | -0.452460226 | 0.48886534  | -0.925531408 | 0.354689554 | 0.999371363 | Not Sig |
| ENSG00000198673 | FAM19A2 | family with sequence similarity 19 member A2, C-C motif chemokine like | 338811    | 56.4009578  | -0.452377312 | 0.55947171  | -0.808579422 | 0.418757105 | 0.999371363 | Not Sig |
| ENSG00000145723 | GIN1    | gypsy retrotransposon integrase 1                                      | 54826     | 142.6999501 | -0.452367637 | 0.570275349 | -0.793244242 | 0.427635535 | 0.999371363 | Not Sig |
| ENSG00000226084 | NA      | NA                                                                     | NA        | 15.22797561 | -0.452144216 | 0.74978439  | -0.603032314 | 0.546487193 | 0.999371363 | Not Sig |
| ENSG00000178430 | NA      | NA                                                                     | NA        | 11.49038391 | -0.452006363 | 1.10808886  | -0.407915267 | 0.683335884 | 0.999371363 | Not Sig |
| ENSG00000134574 | DDB2    | damage specific DNA binding protein 2                                  | 1643      | 391.0390933 | -0.451725063 | 0.464721704 | -0.972033496 | 0.331033885 | 0.999371363 | Not Sig |
| ENSG00000078142 | PIK3C3  | phosphatidylinositol 3-kinase catalytic subunit type 3                 | 5289      | 1179.035626 | -0.45137489  | 0.519800387 | -0.868361974 | 0.385196205 | 0.999371363 | Not Sig |
| ENSG00000221909 | FAM200A | family with sequence similarity 200 member A                           | 221786    | 187.4862267 | -0.451359654 | 0.500888325 | -0.901118336 | 0.367525405 | 0.999371363 | Not Sig |
| ENSG00000185839 | NA      | NA                                                                     | NA        | 3.916170338 | -0.451278635 | 1.262267252 | -0.357514334 | 0.720706798 | NA          | NA      |
| ENSG00000167625 | ZNF526  | zinc finger protein 526                                                | 116115    | 367.5895689 | -0.450673553 | 0.466936822 | -0.965170301 | 0.33445952  | 0.999371363 | Not Sig |
| ENSG00000006747 | SCIN    | scinderin                                                              | 85477     | 372.080969  | -0.450640879 | 1.067301769 | -0.422224428 | 0.672861213 | 0.999371363 | Not Sig |
| ENSG00000105723 | GSK3A   | glycogen synthase kinase 3 alpha                                       | 2931      | 669.5796001 | -0.450511966 | 0.416818225 | -1.080835575 | 0.279770261 | 0.999371363 | Not Sig |
| ENSG00000241772 | NA      | NA                                                                     | NA        | 11.95998107 | -0.45051186  | 0.88043945  | -0.51168977  | 0.608868147 | 0.999371363 | Not Sig |
| ENSG00000266555 | MIR3145 | microRNA 3145                                                          | 100423001 | 11.30746043 | -0.450399381 | 0.951712655 | -0.473251436 | 0.636033805 | 0.999371363 | Not Sig |
| ENSG00000218226 | NA      | NA                                                                     | NA        | 2.593775867 | -0.450321029 | 1.500797546 | -0.300054482 | 0.764135599 | NA          | NA      |
| ENSG00000213598 | NA      | NA                                                                     | NA        | 3.95294685  | -0.450206722 | 1.610781146 | -0.279495898 | 0.779864286 | NA          | NA      |

|                 |            |                                                               |        |             |              |             |              |             |             |         |
|-----------------|------------|---------------------------------------------------------------|--------|-------------|--------------|-------------|--------------|-------------|-------------|---------|
| ENSG00000148019 | CEP78      | centrosomal protein 78                                        | 84131  | 441.1341481 | -0.450202216 | 0.462418524 | -0.973581707 | 0.330264273 | 0.999371363 | Not Sig |
| ENSG00000104341 | LAPTM4B    | lysosomal protein transmembrane 4 beta                        | 55353  | 3341.328726 | -0.450001998 | 0.759101924 | -0.592808402 | 0.553309384 | 0.999371363 | Not Sig |
| ENSG00000120800 | UTP20      | UTP20, small subunit processome component                     | 27340  | 1197.436751 | -0.449914119 | 0.530204645 | -0.848566912 | 0.396122325 | 0.999371363 | Not Sig |
| ENSG00000264442 | NA         | NA                                                            | NA     | 12.22578455 | -0.449819374 | 0.813063363 | -0.553240244 | 0.580098913 | 0.999371363 | Not Sig |
| ENSG00000259690 | NA         | NA                                                            | NA     | 2.807371191 | -0.44981338  | 1.745711325 | -0.257667676 | 0.796663395 | NA          | NA      |
| ENSG00000007047 | MARK4      | microtubule affinity regulating kinase 4                      | 57787  | 787.8313425 | -0.449579821 | 0.48522556  | -0.926537797 | 0.354166564 | 0.999371363 | Not Sig |
| ENSG00000109265 | KIAA1211   | KIAA1211                                                      | 57482  | 233.954126  | -0.449569606 | 0.556882437 | -0.807297154 | 0.419495303 | 0.999371363 | Not Sig |
| ENSG00000213753 | CENPB1P1   | CENPB DNA-binding domains containing 1 pseudogene 1           | 65996  | 401.8413077 | -0.449550758 | 0.631074168 | -0.712358042 | 0.476243091 | 0.999371363 | Not Sig |
| ENSG00000105221 | AKT2       | AKT serine/threonine kinase 2                                 | 208    | 1838.246977 | -0.449399825 | 0.465527999 | -0.965355095 | 0.334366985 | 0.999371363 | Not Sig |
| ENSG00000126457 | PRMT1      | protein arginine methyltransferase 1                          | 3276   | 1097.247586 | -0.44912811  | 0.438428968 | -1.024403366 | 0.305644793 | 0.999371363 | Not Sig |
| ENSG00000243659 | NA         | NA                                                            | NA     | 7.566425831 | -0.449126842 | 1.04842015  | -0.428384404 | 0.668371277 | 0.999371363 | Not Sig |
| ENSG00000011422 | PLAUR      | plasminogen activator, urokinase receptor                     | 5329   | 1071.056003 | -0.449112414 | 0.62645478  | -0.716911146 | 0.473428924 | 0.999371363 | Not Sig |
| ENSG00000144362 | PHOSPHO2   | phosphatase, orphan 2                                         | 493911 | 84.26456943 | -0.44900601  | 0.666638317 | -0.673537656 | 0.500605301 | 0.999371363 | Not Sig |
| ENSG00000272189 | NA         | NA                                                            | NA     | 11.11585643 | -0.448873466 | 1.215514235 | -0.369286885 | 0.7119139   | 0.999371363 | Not Sig |
| ENSG00000206561 | COLQ       | collagen like tail subunit of asymmetric acetylcholinesterase | 8292   | 85.61023387 | -0.448770822 | 0.692971938 | -0.647603168 | 0.517241648 | 0.999371363 | Not Sig |
| ENSG00000112972 | HMGCS1     | 3-hydroxy-3-methylglutaryl-CoA synthase 1                     | 3157   | 1191.65704  | -0.448540862 | 0.425645088 | -1.053790764 | 0.291978723 | 0.999371363 | Not Sig |
| ENSG00000197502 | NA         | NA                                                            | NA     | 22.31065365 | -0.448474291 | 0.775509586 | -0.578296257 | 0.563064121 | 0.999371363 | Not Sig |
| ENSG00000218823 | PAPOLB     | poly(A) polymerase beta                                       | 56903  | 8.082280932 | -0.448323523 | 1.064000389 | -0.421356541 | 0.673494749 | 0.999371363 | Not Sig |
| ENSG00000189283 | FHIT       | fragile histidine triad                                       | 2272   | 148.8321211 | -0.448106407 | 0.622018065 | -0.720407384 | 0.471274205 | 0.999371363 | Not Sig |
| ENSG00000169045 | HNRNPH1    | heterogeneous nuclear ribonucleoprotein H1                    | 3187   | 9811.846486 | -0.448010373 | 0.554095157 | -0.808544107 | 0.418777426 | 0.999371363 | Not Sig |
| ENSG00000207162 | NA         | NA                                                            | NA     | 6.954983192 | -0.447772776 | 1.161964681 | -0.385358336 | 0.699971947 | 0.999371363 | Not Sig |
| ENSG00000252192 | NA         | NA                                                            | NA     | 10.63926967 | -0.447729569 | 0.881644492 | -0.50783459  | 0.61156935  | 0.999371363 | Not Sig |
| ENSG00000126247 | CAPNS1     | calpain small subunit 1                                       | 826    | 3260.042115 | -0.447445109 | 0.444021109 | -1.007711346 | 0.313593056 | 0.999371363 | Not Sig |
| ENSG00000231544 | NA         | NA                                                            | NA     | 1.542012323 | -0.4474272   | 1.979358893 | -0.226046525 | 0.821165235 | NA          | NA      |
| ENSG00000101150 | TPD52L2    | tumor protein D52 like 2                                      | 7165   | 2061.337899 | -0.447367385 | 0.38424686  | -1.164270763 | 0.244314301 | 0.999371363 | Not Sig |
| ENSG00000170892 | TSEN34     | tRNA splicing endonuclease subunit 34                         | 79042  | 679.2891901 | -0.447365591 | 0.440502381 | -1.015580416 | 0.309829235 | 0.999371363 | Not Sig |
| ENSG00000267281 | NA         | NA                                                            | NA     | 6.09625059  | -0.447359344 | 1.437868899 | -0.311126657 | 0.755704337 | NA          | NA      |
| ENSG00000240303 | ACAD11     | acyl-CoA dehydrogenase family member 11                       | 84129  | 107.0882329 | -0.447030202 | 0.477467444 | -0.936252739 | 0.349143075 | 0.999371363 | Not Sig |
| ENSG00000141526 | SLC16A3    | solute carrier family 16 member 3                             | 9123   | 2533.679019 | -0.447019504 | 0.548227761 | -0.815390127 | 0.414849034 | 0.999371363 | Not Sig |
| ENSG00000227540 | DNAJC9-AS1 | DNAJC9 antisense RNA 1                                        | 414245 | 15.82891411 | -0.447018409 | 0.762539049 | -0.58622363  | 0.557725244 | 0.999371363 | Not Sig |
| ENSG00000257704 | INAFM1     | InaF motif containing 1                                       | 255783 | 248.6784239 | -0.446668881 | 0.761697158 | -0.586412692 | 0.557598217 | 0.999371363 | Not Sig |
| ENSG00000148737 | TCF7L2     | transcription factor 7 like 2                                 | 6934   | 1402.785533 | -0.446655192 | 0.510611684 | -0.874745342 | 0.381712483 | 0.999371363 | Not Sig |
| ENSG00000125823 | CSTL1      | cystatin like 1                                               | 128817 | 4.950337216 | -0.446531698 | 1.842762116 | -0.242316517 | 0.808534916 | NA          | NA      |
| ENSG00000142583 | SLC2A5     | solute carrier family 2 member 5                              | 6518   | 96.37926961 | -0.446314458 | 0.774435639 | -0.576309296 | 0.56440614  | 0.999371363 | Not Sig |
| ENSG00000262265 | NA         | NA                                                            | NA     | 37.42599378 | -0.446232848 | 0.81902025  | -0.544837381 | 0.585865367 | 0.999371363 | Not Sig |

|                 |           |                                                        |        |             |              |             |              |             |             |         |
|-----------------|-----------|--------------------------------------------------------|--------|-------------|--------------|-------------|--------------|-------------|-------------|---------|
| ENSG00000230383 | NA        | NA                                                     | NA     | 7.525077059 | -0.446126282 | 1.148530251 | -0.388432331 | 0.697696122 | 0.999371363 | Not Sig |
| ENSG00000185129 | PURA      | purine rich element binding protein A                  | 5813   | 833.5306325 | -0.445905711 | 0.511983546 | -0.87093758  | 0.383788236 | 0.999371363 | Not Sig |
| ENSG00000175782 | SLC35E3   | solute carrier family 35 member E3                     | 55508  | 311.4590117 | -0.445661672 | 0.471946094 | -0.944306304 | 0.345013145 | 0.999371363 | Not Sig |
| ENSG00000213443 | NA        | NA                                                     | NA     | 79.28106093 | -0.445113883 | 0.754755833 | -0.589745536 | 0.555361262 | 0.999371363 | Not Sig |
| ENSG00000080819 | CPOX      | coproporphyrinogen oxidase                             | 1371   | 473.3595782 | -0.445044766 | 0.417330555 | -1.066408298 | 0.286239112 | 0.999371363 | Not Sig |
| ENSG00000117525 | F3        | coagulation factor III, tissue factor                  | 2152   | 1601.791696 | -0.44489841  | 0.433589203 | -1.026082768 | 0.304852572 | 0.999371363 | Not Sig |
| ENSG00000259109 | NA        | NA                                                     | NA     | 8.130344102 | -0.444878781 | 0.976430515 | -0.455617449 | 0.648665093 | 0.999371363 | Not Sig |
| ENSG00000180573 | HIST1H2AC | histone cluster 1 H2A family member c                  | 8334   | 1993.848456 | -0.444794986 | 0.462975264 | -0.960731643 | 0.336687117 | 0.999371363 | Not Sig |
| ENSG00000207481 | NA        | NA                                                     | NA     | 0.717283516 | -0.444717674 | 3.982805695 | -0.111659395 | 0.911093476 | NA          | NA      |
| ENSG00000215179 | NA        | NA                                                     | NA     | 0.717283516 | -0.444717674 | 3.982805695 | -0.111659395 | 0.911093476 | NA          | NA      |
| ENSG00000251298 | NA        | NA                                                     | NA     | 0.717283516 | -0.444717674 | 3.982805695 | -0.111659395 | 0.911093476 | NA          | NA      |
| ENSG00000262768 | NA        | NA                                                     | NA     | 0.717283516 | -0.444717674 | 3.982805695 | -0.111659395 | 0.911093476 | NA          | NA      |
| ENSG00000263587 | NA        | NA                                                     | NA     | 0.717283516 | -0.444717674 | 3.982805695 | -0.111659395 | 0.911093476 | NA          | NA      |
| ENSG00000242571 | NA        | NA                                                     | NA     | 1.394513518 | -0.444438677 | 2.323031532 | -0.191318401 | 0.848276146 | NA          | NA      |
| ENSG00000201785 | SNORD117  | small nucleolar RNA, C/D box 117                       | 692233 | 20.96679274 | -0.444146156 | 0.794094664 | -0.559311346 | 0.575949253 | 0.999371363 | Not Sig |
| ENSG00000214413 | BBIP1     | BBSome interacting protein 1                           | 92482  | 297.1822764 | -0.444054908 | 0.651219866 | -0.681881698 | 0.495313759 | 0.999371363 | Not Sig |
| ENSG00000101442 | ACTR5     | ARP5 actin related protein 5 homolog                   | 79913  | 234.5092247 | -0.44402486  | 0.503232457 | -0.882345433 | 0.377590034 | 0.999371363 | Not Sig |
| ENSG00000154781 | CCDC174   | coiled-coil domain containing 174                      | 51244  | 521.6338203 | -0.443862442 | 0.448754061 | -0.989099553 | 0.322614436 | 0.999371363 | Not Sig |
| ENSG00000250462 | NA        | NA                                                     | NA     | 176.6057095 | -0.443836758 | 0.475644073 | -0.933127907 | 0.350753932 | 0.999371363 | Not Sig |
| ENSG00000064419 | TNPO3     | transportin 3                                          | 23534  | 1430.155003 | -0.44371882  | 0.447291342 | -0.992012987 | 0.32119119  | 0.999371363 | Not Sig |
| ENSG00000121152 | NCAPH     | non-SMC condensin I complex subunit H                  | 23397  | 105.9149291 | -0.443641161 | 0.942502002 | -0.470705802 | 0.63785084  | 0.999371363 | Not Sig |
| ENSG00000137817 | PARP6     | poly(ADP-ribose) polymerase family member 6            | 56965  | 1217.829713 | -0.443611906 | 0.452348743 | -0.980685616 | 0.326747799 | 0.999371363 | Not Sig |
| ENSG00000227184 | NA        | NA                                                     | NA     | 3631.899328 | -0.443527956 | 0.710510875 | -0.624238096 | 0.532471231 | 0.999371363 | Not Sig |
| ENSG00000253558 | NA        | NA                                                     | NA     | 25.06512912 | -0.443518529 | 0.661905353 | -0.670063365 | 0.502817397 | 0.999371363 | Not Sig |
| ENSG00000171827 | ZNF570    | zinc finger protein 570                                | 148268 | 142.6330594 | -0.443517202 | 0.449014328 | -0.987757349 | 0.3232715   | 0.999371363 | Not Sig |
| ENSG00000182957 | SPATA13   | spermatogenesis associated 13                          | 221178 | 1252.694583 | -0.4435017   | 0.505703098 | -0.877000163 | 0.380486549 | 0.999371363 | Not Sig |
| ENSG00000174106 | LEMD3     | LEM domain containing 3                                | 23592  | 1150.959984 | -0.442893412 | 0.467907049 | -0.946541441 | 0.343872496 | 0.999371363 | Not Sig |
| ENSG00000121350 | PYROXD1   | pyridine nucleotide-disulphide oxidoreductase domain 1 | 79912  | 489.9646499 | -0.442891346 | 0.5802792   | -0.763238363 | 0.445321254 | 0.999371363 | Not Sig |
| ENSG00000236953 | NA        | NA                                                     | NA     | 13.49784799 | -0.442885976 | 0.85636422  | -0.517170107 | 0.605037417 | 0.999371363 | Not Sig |
| ENSG00000224376 | NA        | NA                                                     | NA     | 13.7652454  | -0.442870763 | 0.795949501 | -0.556405604 | 0.577933609 | 0.999371363 | Not Sig |
| ENSG00000204136 | GGTA1P    | glycoprotein, alpha-galactosyltransferase 1 pseudogene | 2681   | 194.3768176 | -0.442753659 | 0.833266119 | -0.531347248 | 0.595178169 | 0.999371363 | Not Sig |
| ENSG00000188895 | MSL1      | male specific lethal 1 homolog                         | 339287 | 2354.089324 | -0.442712072 | 0.434253318 | -1.019478848 | 0.30797569  | 0.999371363 | Not Sig |
| ENSG00000152332 | UHMK1     | U2AF homology motif kinase 1                           | 127933 | 4896.522579 | -0.442617191 | 0.635532297 | -0.696451137 | 0.486146348 | 0.999371363 | Not Sig |
| ENSG00000131051 | RBM39     | RNA binding motif protein 39                           | 9584   | 6270.867808 | -0.442192386 | 0.498786885 | -0.88653571  | 0.37532892  | 0.999371363 | Not Sig |
| ENSG00000236254 | NA        | NA                                                     | NA     | 22.17651575 | -0.442003062 | 0.89566122  | -0.49349358  | 0.621663875 | 0.999371363 | Not Sig |

|                 |           |                                                                   |        |             |              |             |              |             |             |         |
|-----------------|-----------|-------------------------------------------------------------------|--------|-------------|--------------|-------------|--------------|-------------|-------------|---------|
| ENSG00000235449 | NA        | NA                                                                | NA     | 26.883482   | -0.442001506 | 0.934256254 | -0.473105215 | 0.636138117 | 0.999371363 | Not Sig |
| ENSG00000132952 | USPL1     | ubiquitin specific peptidase like 1                               | 10208  | 609.5908852 | -0.441999868 | 0.545763593 | -0.809874227 | 0.418012466 | 0.999371363 | Not Sig |
| ENSG00000180694 | TMEM64    | transmembrane protein 64                                          | 169200 | 611.3069328 | -0.441831323 | 0.403333931 | -1.095447936 | 0.273320443 | 0.999371363 | Not Sig |
| ENSG00000172508 | CARNS1    | carnosine synthase 1                                              | 57571  | 56.34816272 | -0.441387986 | 0.840638412 | -0.525062833 | 0.599539512 | 0.999371363 | Not Sig |
| ENSG00000245958 | LOC645513 | septin 7 pseudogene                                               | 645513 | 562.8335453 | -0.441290183 | 0.631126913 | -0.699209895 | 0.484420868 | 0.999371363 | Not Sig |
| ENSG00000104714 | ERICH1    | glutamate rich 1                                                  | 157697 | 738.8463105 | -0.441196232 | 0.476373505 | -0.92615611  | 0.354364858 | 0.999371363 | Not Sig |
| ENSG00000241975 | NA        | NA                                                                | NA     | 44.20445642 | -0.441149604 | 0.669595629 | -0.658829875 | 0.510005021 | 0.999371363 | Not Sig |
| ENSG00000218682 | NA        | NA                                                                | NA     | 14.77806368 | -0.441098887 | 0.752697956 | -0.586023761 | 0.557859547 | 0.999371363 | Not Sig |
| ENSG00000198019 | FCGR1B    | Fc fragment of IgG receptor Ib                                    | 2210   | 38.57813638 | -0.440956955 | 1.05837342  | -0.41663646  | 0.676944337 | 0.999371363 | Not Sig |
| ENSG00000168958 | MFF       | mitochondrial fission factor                                      | 56947  | 949.8205392 | -0.44075967  | 0.549297    | -0.802406841 | 0.422317657 | 0.999371363 | Not Sig |
| ENSG00000231043 | NA        | NA                                                                | NA     | 3.613340836 | -0.440693945 | 1.363860885 | -0.323122358 | 0.746602579 | NA          | NA      |
| ENSG00000179912 | R3HDM2    | R3H domain containing 2                                           | 22864  | 1013.253975 | -0.440472315 | 0.45388392  | -0.970451464 | 0.331821507 | 0.999371363 | Not Sig |
| ENSG00000148429 | USP6NL    | USP6 N-terminal like                                              | 9712   | 1249.774652 | -0.440421842 | 0.519534406 | -0.84772411  | 0.396591636 | 0.999371363 | Not Sig |
| ENSG00000172819 | RARG      | retinoic acid receptor gamma                                      | 5916   | 544.0428964 | -0.440355034 | 0.636785691 | -0.691527841 | 0.489233891 | 0.999371363 | Not Sig |
| ENSG00000232702 | NA        | NA                                                                | NA     | 1.823685911 | -0.440287651 | 1.643019741 | -0.267974657 | 0.788718827 | NA          | NA      |
| ENSG00000134909 | ARHGAP32  | Rho GTPase activating protein 32                                  | 9743   | 2028.869989 | -0.440287    | 0.65393351  | -0.673290163 | 0.50076271  | 0.999371363 | Not Sig |
| ENSG00000240211 | NA        | NA                                                                | NA     | 9.153633945 | -0.440265308 | 0.928347355 | -0.474246311 | 0.635324272 | 0.999371363 | Not Sig |
| ENSG00000166104 | NA        | NA                                                                | NA     | 54.84913317 | -0.440230627 | 1.189701628 | -0.370034483 | 0.711356797 | 0.999371363 | Not Sig |
| ENSG00000163909 | HEYL      | hes related family bHLH transcription factor with YRPW motif-like | 26508  | 732.3624928 | -0.439641326 | 0.743415517 | -0.591380346 | 0.554265606 | 0.999371363 | Not Sig |
| ENSG00000152484 | USP12     | ubiquitin specific peptidase 12                                   | 219333 | 1307.793103 | -0.439604663 | 0.590972214 | -0.74386689  | 0.456957008 | 0.999371363 | Not Sig |
| ENSG00000208013 | MIR652    | microRNA 652                                                      | 724022 | 2.320372225 | -0.439577271 | 2.041818064 | -0.215287189 | 0.829543417 | NA          | NA      |
| ENSG00000237757 | NA        | NA                                                                | NA     | 27.25581022 | -0.439542203 | 0.67318199  | -0.652932208 | 0.513799984 | 0.999371363 | Not Sig |
| ENSG00000207195 | NA        | NA                                                                | NA     | 2.408798064 | -0.439426205 | 1.712407188 | -0.256613151 | 0.797477422 | NA          | NA      |
| ENSG00000205155 | PSENEN    | presenilin enhancer gamma-secretase subunit                       | 55851  | 196.4809895 | -0.439301915 | 0.516479348 | -0.850570147 | 0.395008179 | 0.999371363 | Not Sig |
| ENSG00000198498 | TMA16     | translation machinery associated 16 homolog                       | 55319  | 315.1263559 | -0.43904397  | 0.64277791  | -0.683041473 | 0.494580637 | 0.999371363 | Not Sig |
| ENSG00000201649 | NA        | NA                                                                | NA     | 6.779741603 | -0.438983486 | 1.203949108 | -0.364619637 | 0.715395355 | 0.999371363 | Not Sig |
| ENSG00000236474 | NA        | NA                                                                | NA     | 13.06338979 | -0.438725106 | 0.877775466 | -0.499814729 | 0.617205539 | 0.999371363 | Not Sig |
| ENSG00000108100 | CCNY      | cyclin Y                                                          | 219771 | 1515.179048 | -0.438534629 | 0.446215167 | -0.982787367 | 0.325712101 | 0.999371363 | Not Sig |
| ENSG00000255860 | NA        | NA                                                                | NA     | 1.944006273 | -0.43853237  | 2.10060415  | -0.208764878 | 0.83463179  | NA          | NA      |
| ENSG00000096746 | HNRNPH3   | heterogeneous nuclear ribonucleoprotein H3                        | 3189   | 1857.890414 | -0.438499311 | 0.523687077 | -0.837330785 | 0.40240666  | 0.999371363 | Not Sig |
| ENSG00000163995 | ABLIM2    | actin binding LIM protein family member 2                         | 84448  | 185.4586827 | -0.438431719 | 0.720237977 | -0.608731742 | 0.542702263 | 0.999371363 | Not Sig |
| ENSG00000139636 | LMBR1L    | limb development membrane protein 1 like                          | 55716  | 660.9320343 | -0.438391498 | 0.462428068 | -0.948020955 | 0.343118787 | 0.999371363 | Not Sig |
| ENSG00000229668 | NA        | NA                                                                | NA     | 8.505176182 | -0.438320433 | 1.320818545 | -0.331855147 | 0.73999864  | 0.999371363 | Not Sig |
| ENSG00000113391 | FAM172A   | family with sequence similarity 172 member A                      | 83989  | 769.8574374 | -0.438319585 | 0.531870294 | -0.824109919 | 0.409877104 | 0.999371363 | Not Sig |
| ENSG00000124490 | CRISP2    | cysteine rich secretory protein 2                                 | 7180   | 8.226120976 | -0.438160976 | 1.551811289 | -0.282354549 | 0.777671663 | 0.999371363 | Not Sig |



|                 |          |                                                          |           |             |              |             |              |             |             |         |
|-----------------|----------|----------------------------------------------------------|-----------|-------------|--------------|-------------|--------------|-------------|-------------|---------|
| ENSG00000101191 | DID01    | death inducer-obliterator 1                              | 11083     | 3280.480977 | -0.438093139 | 0.398239215 | -1.10007534  | 0.271299297 | 0.999371363 | Not Sig |
| ENSG00000163297 | ANTXR2   | anthrax toxin receptor 2                                 | 118429    | 1658.49558  | -0.438024519 | 0.446244464 | -0.981579726 | 0.32630694  | 0.999371363 | Not Sig |
| ENSG00000152795 | HNRNPDL  | heterogeneous nuclear ribonucleoprotein D like           | 9987      | 3939.471896 | -0.437964724 | 0.500830872 | -0.874476292 | 0.381858926 | 0.999371363 | Not Sig |
| ENSG00000023516 | AKAP11   | A-kinase anchoring protein 11                            | 11215     | 3103.236044 | -0.43795702  | 0.482915674 | -0.906901645 | 0.364458811 | 0.999371363 | Not Sig |
| ENSG00000074657 | ZNF532   | zinc finger protein 532                                  | 55205     | 2518.771426 | -0.437845131 | 0.615592839 | -0.711257675 | 0.476924575 | 0.999371363 | Not Sig |
| ENSG00000198453 | ZNF568   | zinc finger protein 568                                  | 374900    | 216.8874907 | -0.437708181 | 0.505822997 | -0.865338634 | 0.386852952 | 0.999371363 | Not Sig |
| ENSG00000252465 | NA       | NA                                                       | NA        | 8.388554302 | -0.437663102 | 1.10174473  | -0.397245469 | 0.691186455 | 0.999371363 | Not Sig |
| ENSG00000227072 | NA       | NA                                                       | NA        | 3.968794871 | -0.437655473 | 1.574085239 | -0.278037975 | 0.780983207 | NA          | NA      |
| ENSG00000266469 | NA       | NA                                                       | NA        | 23.47298493 | -0.437634891 | 0.862235104 | -0.507558656 | 0.611762891 | 0.999371363 | Not Sig |
| ENSG00000261349 | NA       | NA                                                       | NA        | 55.27785649 | -0.437451783 | 0.688538008 | -0.635334255 | 0.525210437 | 0.999371363 | Not Sig |
| ENSG00000158669 | GPAT4    | glycerol-3-phosphate acyltransferase 4                   | 137964    | 1614.845883 | -0.436856098 | 0.594030501 | -0.735410215 | 0.462089702 | 0.999371363 | Not Sig |
| ENSG00000111300 | NAA25    | N(alpha)-acetyltransferase 25, NatB auxiliary subunit    | 80018     | 1069.799584 | -0.436750491 | 0.591832878 | -0.737962535 | 0.460537216 | 0.999371363 | Not Sig |
| ENSG00000235772 | NA       | NA                                                       | NA        | 2.153145806 | -0.436731631 | 1.639263667 | -0.266419393 | 0.789916231 | NA          | NA      |
| ENSG00000239161 | NA       | NA                                                       | NA        | 5.369485635 | -0.436429306 | 1.13661109  | -0.383974175 | 0.700997588 | NA          | NA      |
| ENSG00000168454 | TXNDC2   | thioredoxin domain containing 2                          | 84203     | 3.52607211  | -0.436357349 | 1.451105623 | -0.300706814 | 0.763638072 | NA          | NA      |
| ENSG00000173862 | NA       | NA                                                       | NA        | 29.25781379 | -0.436348071 | 0.849881895 | -0.513422201 | 0.607656153 | 0.999371363 | Not Sig |
| ENSG00000260300 | NA       | NA                                                       | NA        | 24.39038271 | -0.436196384 | 0.731498174 | -0.596305499 | 0.550971158 | 0.999371363 | Not Sig |
| ENSG00000204920 | ZNF155   | zinc finger protein 155                                  | 7711      | 171.5374458 | -0.436191351 | 0.532910672 | -0.818507442 | 0.413067494 | 0.999371363 | Not Sig |
| ENSG00000061987 | MON2     | MON2 homolog, regulator of endosome-to-Golgi trafficking | 23041     | 2575.998548 | -0.435836066 | 0.599185885 | -0.727380396 | 0.46699296  | 0.999371363 | Not Sig |
| ENSG00000107443 | CCNJ     | cyclin J                                                 | 54619     | 240.0413022 | -0.435772194 | 0.593739072 | -0.733945625 | 0.462981878 | 0.999371363 | Not Sig |
| ENSG00000151692 | RNF144A  | ring finger protein 144A                                 | 9781      | 669.2557172 | -0.435700605 | 0.431131906 | -1.010596987 | 0.312209358 | 0.999371363 | Not Sig |
| ENSG00000162825 | NBPF20   | NBPF member 20                                           | 100288142 | 4.316564978 | -0.435617108 | 1.322698284 | -0.329339739 | 0.74189891  | NA          | NA      |
| ENSG00000219395 | NA       | NA                                                       | NA        | 16.35577378 | -0.43557362  | 0.806872554 | -0.539829516 | 0.58931461  | 0.999371363 | Not Sig |
| ENSG00000145833 | DDX46    | DEAD-box helicase 46                                     | 9879      | 1961.223255 | -0.435486646 | 0.4905488   | -0.887753972 | 0.374673107 | 0.999371363 | Not Sig |
| ENSG00000008083 | JARID2   | jumonji and AT-rich interaction domain containing 2      | 3720      | 1224.099171 | -0.4354622   | 0.426253148 | -1.021604654 | 0.306968054 | 0.999371363 | Not Sig |
| ENSG00000263751 | NA       | NA                                                       | NA        | 1.532558075 | -0.435326306 | 2.316146552 | -0.187952833 | 0.850913626 | NA          | NA      |
| ENSG00000108306 | FBXL20   | F-box and leucine rich repeat protein 20                 | 84961     | 800.2987122 | -0.435023784 | 0.563369543 | -0.772181936 | 0.440006679 | 0.999371363 | Not Sig |
| ENSG00000161265 | U2AF1L4  | U2 small nuclear RNA auxiliary factor 1 like 4           | 199746    | 66.00164391 | -0.434657009 | 0.511772942 | -0.84931612  | 0.395705413 | 0.999371363 | Not Sig |
| ENSG00000243708 | PLA2G4B  | phospholipase A2 group IVB                               | 100137049 | 13.93271611 | -0.434619572 | 0.896965119 | -0.484544564 | 0.627999446 | 0.999371363 | Not Sig |
| ENSG00000197771 | MCMBP    | minichromosome maintenance complex binding protein       | 79892     | 1420.57429  | -0.434546048 | 0.382457364 | -1.136194745 | 0.255875069 | 0.999371363 | Not Sig |
| ENSG00000213326 | NA       | NA                                                       | NA        | 4.226306729 | -0.434167155 | 1.246312329 | -0.348361438 | 0.727568759 | NA          | NA      |
| ENSG00000249602 | NA       | NA                                                       | NA        | 34.3028308  | -0.434078571 | 0.721377799 | -0.601735418 | 0.54735027  | 0.999371363 | Not Sig |
| ENSG00000186073 | C15orf41 | chromosome 15 open reading frame 41                      | 84529     | 192.7014614 | -0.433960237 | 0.656214968 | -0.661308044 | 0.508414784 | 0.999371363 | Not Sig |
| ENSG00000166949 | SMAD3    | SMAD family member 3                                     | 4088      | 2468.872475 | -0.433356531 | 0.45974194  | -0.942608217 | 0.345881335 | 0.999371363 | Not Sig |
| ENSG00000173933 | RBM4     | RNA binding motif protein 4                              | 5936      | 342.6322104 | -0.433312617 | 0.559954441 | -0.773835487 | 0.439028084 | 0.999371363 | Not Sig |

|                 |              |                                                       |           |             |              |             |              |             |             |         |
|-----------------|--------------|-------------------------------------------------------|-----------|-------------|--------------|-------------|--------------|-------------|-------------|---------|
| ENSG00000187534 | NA           | NA                                                    | NA        | 19.19876947 | -0.433143141 | 0.678844836 | -0.638059124 | 0.523435194 | 0.999371363 | Not Sig |
| ENSG00000106400 | ZNHIT1       | zinc finger HIT-type containing 1                     | 10467     | 886.3111694 | -0.433061149 | 0.509066148 | -0.850697204 | 0.394937577 | 0.999371363 | Not Sig |
| ENSG00000225889 | NA           | NA                                                    | NA        | 43.58262809 | -0.432998619 | 0.680789405 | -0.636024321 | 0.52476057  | 0.999371363 | Not Sig |
| ENSG00000255282 | WTAPP1       | Wilms tumor 1 associated protein pseudogene 1         | 100288077 | 41.58617842 | -0.432949808 | 1.134033119 | -0.381778804 | 0.702625442 | 0.999371363 | Not Sig |
| ENSG00000202415 | NA           | NA                                                    | NA        | 9.931242214 | -0.432832287 | 1.159502029 | -0.37329153  | 0.70893148  | 0.999371363 | Not Sig |
| ENSG00000238132 | NA           | NA                                                    | NA        | 4.635895328 | -0.432779356 | 1.169325529 | -0.370110243 | 0.71130035  | NA          | NA      |
| ENSG00000196199 | MPHOSPH8     | M-phase phosphoprotein 8                              | 54737     | 1719.036717 | -0.43268856  | 0.436015591 | -0.992369469 | 0.321017327 | 0.999371363 | Not Sig |
| ENSG00000158748 | HTR6         | 5-hydroxytryptamine receptor 6                        | 3362      | 1.800941584 | -0.432661878 | 1.71118469  | -0.252843472 | 0.800389173 | NA          | NA      |
| ENSG00000222296 | NA           | NA                                                    | NA        | 1.800941584 | -0.432661878 | 1.71118469  | -0.252843472 | 0.800389173 | NA          | NA      |
| ENSG00000148444 | COMMD3       | COMM domain containing 3                              | 23412     | 123.4185656 | -0.432281666 | 0.478288013 | -0.903810372 | 0.366095961 | 0.999371363 | Not Sig |
| ENSG00000229873 | OGFR-AS1     | OGFR antisense RNA 1                                  | 101409261 | 2.209373069 | -0.432263875 | 1.731638238 | -0.249627125 | 0.80287572  | NA          | NA      |
| ENSG00000233825 | NA           | NA                                                    | NA        | 2.209373069 | -0.432263875 | 1.731638238 | -0.249627125 | 0.80287572  | NA          | NA      |
| ENSG00000200942 | NA           | NA                                                    | NA        | 2.492618777 | -0.432095961 | 2.121651509 | -0.203660195 | 0.83861905  | NA          | NA      |
| ENSG00000263535 | NA           | NA                                                    | NA        | 18.83077393 | -0.432093433 | 0.740773915 | -0.583300011 | 0.559691355 | 0.999371363 | Not Sig |
| ENSG00000206848 | NA           | NA                                                    | NA        | 11.42792598 | -0.432075266 | 1.116078746 | -0.3871369   | 0.698654861 | 0.999371363 | Not Sig |
| ENSG00000148660 | CAMK2G       | calcium/calmodulin dependent protein kinase II gamma  | 818       | 1107.767164 | -0.432015354 | 0.388881476 | -1.1109178   | 0.266603733 | 0.999371363 | Not Sig |
| ENSG00000198502 | HLA-DRB5     | major histocompatibility complex, class II, DR beta 5 | 3127      | 1154.891727 | -0.431948166 | 1.149653406 | -0.375720338 | 0.707124816 | 0.999371363 | Not Sig |
| ENSG00000130720 | FIBCD1       | fibrinogen C domain containing 1                      | 84929     | 44.33681482 | -0.431842575 | 0.688785304 | -0.626962527 | 0.530683799 | 0.999371363 | Not Sig |
| ENSG00000184445 | KNTC1        | kinetochore associated 1                              | 9735      | 926.8971249 | -0.431765812 | 0.855944658 | -0.504431926 | 0.613957888 | 0.999371363 | Not Sig |
| ENSG00000251972 | NA           | NA                                                    | NA        | 8.515589062 | -0.431729993 | 1.083531436 | -0.398447132 | 0.690300622 | 0.999371363 | Not Sig |
| ENSG00000066855 | MTFR1        | mitochondrial fission regulator 1                     | 9650      | 498.6700465 | -0.431645847 | 0.606062562 | -0.712213349 | 0.476332672 | 0.999371363 | Not Sig |
| ENSG00000198752 | CDC42BPB     | CDC42 binding protein kinase beta                     | 9578      | 5903.827756 | -0.431561786 | 0.516843423 | -0.834995218 | 0.403720401 | 0.999371363 | Not Sig |
| ENSG00000203415 | NA           | NA                                                    | NA        | 8.871241298 | -0.431197917 | 0.912936709 | -0.472319617 | 0.63669867  | 0.999371363 | Not Sig |
| ENSG00000231006 | NA           | NA                                                    | NA        | 1.090095603 | -0.431019996 | 2.525575317 | -0.170662104 | 0.864489463 | NA          | NA      |
| ENSG00000267326 | NA           | NA                                                    | NA        | 1.090095603 | -0.431019996 | 2.525575317 | -0.170662104 | 0.864489463 | NA          | NA      |
| ENSG00000056586 | RC3H2        | ring finger and CCH-type domains 2                    | 54542     | 2106.480685 | -0.430951819 | 0.454166696 | -0.948884678 | 0.342679268 | 0.999371363 | Not Sig |
| ENSG00000028116 | VRK2         | vaccinia related kinase 2                             | 7444      | 578.5435543 | -0.430933051 | 0.60788064  | -0.708910636 | 0.478379934 | 0.999371363 | Not Sig |
| ENSG00000179253 | LOC100128310 | uncharacterized LOC100128310                          | 100128310 | 1.448737361 | -0.430888505 | 1.845282685 | -0.233508128 | 0.815366859 | NA          | NA      |
| ENSG00000164334 | FAM170A      | family with sequence similarity 170 member A          | 340069    | 1.119277466 | -0.430874237 | 2.476501197 | -0.173985071 | 0.861877195 | NA          | NA      |
| ENSG00000147419 | CCDC25       | coiled-coil domain containing 25                      | 55246     | 525.8655834 | -0.430781614 | 0.658235186 | -0.654449387 | 0.512822325 | 0.999371363 | Not Sig |
| ENSG00000244682 | NA           | NA                                                    | NA        | 650.6509668 | -0.430491625 | 0.782441752 | -0.550189997 | 0.582189064 | 0.999371363 | Not Sig |
| ENSG00000231521 | LOC105376171 | uncharacterized LOC105376171                          | 105376171 | 4.649185406 | -0.430471386 | 1.338639531 | -0.321573789 | 0.747775603 | NA          | NA      |
| ENSG00000176749 | CDK5R1       | cyclin dependent kinase 5 regulatory subunit 1        | 8851      | 60.94003436 | -0.43039169  | 0.567183221 | -0.758823029 | 0.447958428 | 0.999371363 | Not Sig |
| ENSG00000221914 | PPP2R2A      | protein phosphatase 2 regulatory subunit Balpha       | 5520      | 1390.817791 | -0.430308023 | 0.568778176 | -0.756548055 | 0.449320672 | 0.999371363 | Not Sig |
| ENSG00000265421 | MIR4459      | microRNA 4459                                         | 100616233 | 13.10985876 | -0.430224892 | 0.777151397 | -0.553592123 | 0.579858018 | 0.999371363 | Not Sig |

|                 |             |                                                            |           |             |              |             |              |             |             |         |
|-----------------|-------------|------------------------------------------------------------|-----------|-------------|--------------|-------------|--------------|-------------|-------------|---------|
| ENSG00000258199 | NA          | NA                                                         | NA        | 220.5451783 | -0.430197762 | 0.590251433 | -0.728838148 | 0.466100673 | 0.999371363 | Not Sig |
| ENSG00000263002 | ZNF234      | zinc finger protein 234                                    | 10780     | 274.1455538 | -0.430117453 | 0.478852625 | -0.898225112 | 0.369065548 | 0.999371363 | Not Sig |
| ENSG00000169071 | ROR2        | receptor tyrosine kinase like orphan receptor 2            | 4920      | 207.7061803 | -0.430086561 | 0.561013913 | -0.766623698 | 0.443305281 | 0.999371363 | Not Sig |
| ENSG00000120662 | MTRF1       | mitochondrial translation release factor 1                 | 9617      | 214.6775301 | -0.430014486 | 0.665827373 | -0.645834797 | 0.51838635  | 0.999371363 | Not Sig |
| ENSG00000176058 | TPRN        | taperin                                                    | 286262    | 428.8714919 | -0.429987254 | 0.638893933 | -0.673018214 | 0.500935704 | 0.999371363 | Not Sig |
| ENSG00000136861 | CDK5RAP2    | CDK5 regulatory subunit associated protein 2               | 55755     | 1917.01879  | -0.42993358  | 0.412564226 | -1.04210097  | 0.297364869 | 0.999371363 | Not Sig |
| ENSG00000144476 | ACKR3       | atypical chemokine receptor 3                              | 57007     | 253.6623651 | -0.429879001 | 0.531990963 | -0.808056961 | 0.419057792 | 0.999371363 | Not Sig |
| ENSG00000158691 | ZSCAN12     | zinc finger and SCAN domain containing 12                  | 9753      | 273.5153113 | -0.4298645   | 0.467887724 | -0.918734298 | 0.358234565 | 0.999371363 | Not Sig |
| ENSG00000089225 | TBX5        | T-box 5                                                    | 6910      | 502.7193938 | -0.429833093 | 0.663862519 | -0.647473054 | 0.517325829 | 0.999371363 | Not Sig |
| ENSG00000077150 | NFKB2       | nuclear factor kappa B subunit 2                           | 4791      | 1337.453144 | -0.429812713 | 0.454459099 | -0.945767648 | 0.34426711  | 0.999371363 | Not Sig |
| ENSG00000235663 | NA          | NA                                                         | NA        | 42.08205263 | -0.429808474 | 0.733084513 | -0.586301396 | 0.557672993 | 0.999371363 | Not Sig |
| ENSG00000154654 | NCAM2       | neural cell adhesion molecule 2                            | 4685      | 250.4163477 | -0.429706443 | 0.461786386 | -0.930530774 | 0.352096338 | 0.999371363 | Not Sig |
| ENSG00000152749 | GPR180      | G protein-coupled receptor 180                             | 160897    | 488.1293053 | -0.429563483 | 0.632319269 | -0.679345868 | 0.49691874  | 0.999371363 | Not Sig |
| ENSG00000227698 | NA          | NA                                                         | NA        | 10.13280877 | -0.429412716 | 1.042266856 | -0.411998821 | 0.680340287 | 0.999371363 | Not Sig |
| ENSG00000072609 | CHFR        | checkpoint with forkhead and ring finger domains           | 55743     | 971.0067993 | -0.429212451 | 0.462201081 | -0.928627104 | 0.353082371 | 0.999371363 | Not Sig |
| ENSG00000186815 | TPCN1       | two pore segment channel 1                                 | 53373     | 2620.430217 | -0.429203859 | 0.388663686 | -1.104306564 | 0.269460176 | 0.999371363 | Not Sig |
| ENSG00000184357 | HIST1H1B    | histone cluster 1 H1 family member b                       | 3009      | 923.0214918 | -0.429132239 | 0.821587304 | -0.522320923 | 0.601446904 | 0.999371363 | Not Sig |
| ENSG00000107897 | ACBD5       | acyl-CoA binding domain containing 5                       | 91452     | 904.9320904 | -0.428921378 | 0.44255786  | -0.969187122 | 0.332451835 | 0.999371363 | Not Sig |
| ENSG00000196588 | MKL1        | megakaryoblastic leukemia (translocation) 1                | 57591     | 1617.563777 | -0.428858299 | 0.511008628 | -0.839238861 | 0.401335284 | 0.999371363 | Not Sig |
| ENSG00000255867 | DENND5B-AS1 | DENND5B antisense RNA 1                                    | 100874249 | 1.625418029 | -0.428746958 | 2.28835663  | -0.187360201 | 0.851378225 | NA          | NA      |
| ENSG00000205544 | TMEM256     | transmembrane protein 256                                  | 254863    | 90.0274153  | -0.428471009 | 0.586821706 | -0.730155352 | 0.46529523  | 0.999371363 | Not Sig |
| ENSG00000198750 | NA          | NA                                                         | NA        | 39.49653135 | -0.428367737 | 0.724772061 | -0.591037872 | 0.554495046 | 0.999371363 | Not Sig |
| ENSG00000259396 | NA          | NA                                                         | NA        | 2.403777931 | -0.428304304 | 2.080933411 | -0.205823167 | 0.836929044 | NA          | NA      |
| ENSG00000175354 | PTPN2       | protein tyrosine phosphatase, non-receptor type 2          | 5771      | 1016.640303 | -0.428287949 | 0.671311032 | -0.637987354 | 0.523481912 | 0.999371363 | Not Sig |
| ENSG00000238975 | NA          | NA                                                         | NA        | 40.48537766 | -0.428260998 | 0.935816007 | -0.45763376  | 0.647215585 | 0.999371363 | Not Sig |
| ENSG00000130755 | GMFG        | glia maturation factor gamma                               | 9535      | 424.3088349 | -0.428190179 | 0.87789586  | -0.487745982 | 0.625729777 | 0.999371363 | Not Sig |
| ENSG00000242299 | NA          | NA                                                         | NA        | 20.19463891 | -0.428084923 | 0.814136782 | -0.525814498 | 0.599017101 | 0.999371363 | Not Sig |
| ENSG00000196411 | EPHB4       | EPH receptor B4                                            | 2050      | 2730.351383 | -0.427948601 | 0.660980289 | -0.647445329 | 0.517343767 | 0.999371363 | Not Sig |
| ENSG00000266559 | MIR4530     | microRNA 4530                                              | 100616163 | 3.003624756 | -0.427925047 | 1.361296914 | -0.314351001 | 0.753254467 | NA          | NA      |
| ENSG00000176788 | BASP1       | brain abundant membrane attached signal protein 1          | 10409     | 889.4489611 | -0.427893676 | 0.646994628 | -0.66135584  | 0.508384139 | 0.999371363 | Not Sig |
| ENSG00000104856 | RELB        | RELB proto-oncogene, NF-kB subunit                         | 5971      | 598.8014396 | -0.427826592 | 0.534407378 | -0.80056266  | 0.423384875 | 0.999371363 | Not Sig |
| ENSG00000170379 | TCAF2       | TRPM8 channel associated factor 2                          | 285966    | 105.6731752 | -0.427660415 | 0.547065832 | -0.78173483  | 0.434370428 | 0.999371363 | Not Sig |
| ENSG00000207653 | MIR558      | microRNA 558                                               | 693143    | 11.34453657 | -0.427646675 | 0.81270143  | -0.526203915 | 0.598746534 | 0.999371363 | Not Sig |
| ENSG00000007129 | CEACAM21    | carcinoembryonic antigen related cell adhesion molecule 21 | 90273     | 64.40958684 | -0.427643647 | 0.842971872 | -0.507304764 | 0.611940996 | 0.999371363 | Not Sig |
| ENSG00000160908 | ZNF394      | zinc finger protein 394                                    | 84124     | 563.961672  | -0.427607882 | 0.444981146 | -0.960957303 | 0.336573636 | 0.999371363 | Not Sig |

|                 |            |                                                           |           |             |              |             |              |             |             |         |
|-----------------|------------|-----------------------------------------------------------|-----------|-------------|--------------|-------------|--------------|-------------|-------------|---------|
| ENSG00000166669 | ATF7IP2    | activating transcription factor 7 interacting protein 2   | 80063     | 324.8716136 | -0.427489021 | 0.640138664 | -0.667806906 | 0.504256858 | 0.999371363 | Not Sig |
| ENSG00000136940 | PDCL       | phosducin like                                            | 5082      | 539.5259234 | -0.427336527 | 0.402815803 | -1.060873292 | 0.288747489 | 0.999371363 | Not Sig |
| ENSG00000166478 | ZNF143     | zinc finger protein 143                                   | 7702      | 405.0550898 | -0.427202076 | 0.495893416 | -0.86147963  | 0.388973936 | 0.999371363 | Not Sig |
| ENSG00000198035 | NA         | NA                                                        | NA        | 20.22562504 | -0.427158535 | 0.720008731 | -0.593268549 | 0.553001444 | 0.999371363 | Not Sig |
| ENSG00000125505 | MBOAT7     | membrane bound O-acyltransferase domain containing 7      | 79143     | 1509.178162 | -0.427078879 | 0.453490097 | -0.941760099 | 0.346315478 | 0.999371363 | Not Sig |
| ENSG00000115464 | USP34      | ubiquitin specific peptidase 34                           | 9736      | 6170.39156  | -0.427026955 | 0.575760325 | -0.741674854 | 0.458284359 | 0.999371363 | Not Sig |
| ENSG00000185658 | BRWD1      | bromodomain and WD repeat domain containing 1             | 54014     | 4235.009437 | -0.426999922 | 0.565862595 | -0.754600013 | 0.450489016 | 0.999371363 | Not Sig |
| ENSG00000066926 | FECH       | ferrochelatase                                            | 2235      | 552.4521225 | -0.426844963 | 0.425680845 | -1.002734719 | 0.315988874 | 0.999371363 | Not Sig |
| ENSG00000126351 | THRA       | thyroid hormone receptor, alpha                           | 7067      | 1323.542025 | -0.426837097 | 0.82482357  | -0.517488967 | 0.604814869 | 0.999371363 | Not Sig |
| ENSG00000129116 | PALLD      | palladin, cytoskeletal associated protein                 | 23022     | 3505.189682 | -0.426594577 | 0.422002168 | -1.01088243  | 0.312072704 | 0.999371363 | Not Sig |
| ENSG00000122952 | ZWINT      | ZW10 interacting kinetochore protein                      | 11130     | 187.4717751 | -0.426468969 | 0.939150519 | -0.454100765 | 0.649756303 | 0.999371363 | Not Sig |
| ENSG00000170677 | SOCS6      | suppressor of cytokine signaling 6                        | 9306      | 948.9260183 | -0.426450174 | 0.544675932 | -0.782942937 | 0.433660622 | 0.999371363 | Not Sig |
| ENSG00000111725 | PRKAB1     | protein kinase AMP-activated non-catalytic subunit beta 1 | 5564      | 1776.037363 | -0.426353535 | 0.560480217 | -0.760693281 | 0.446840289 | 0.999371363 | Not Sig |
| ENSG00000215022 | NA         | NA                                                        | NA        | 38.27995321 | -0.426335021 | 0.56878821  | -0.74954968  | 0.453525967 | 0.999371363 | Not Sig |
| ENSG00000117020 | AKT3       | AKT serine/threonine kinase 3                             | 10000     | 1024.893726 | -0.426224977 | 0.583243921 | -0.730783403 | 0.464911462 | 0.999371363 | Not Sig |
| ENSG00000170667 | RASA4B     | RAS p21 protein activator 4B                              | 100271927 | 6.618493949 | -0.426029387 | 1.161118234 | -0.366913011 | 0.713683906 | 0.999371363 | Not Sig |
| ENSG00000104064 | GABPB1     | GA binding protein transcription factor beta subunit 1    | 2553      | 409.7770226 | -0.425978703 | 0.56028073  | -0.760295118 | 0.4470782   | 0.999371363 | Not Sig |
| ENSG00000104064 | GABPB1-IT1 | GABPB1 intronic transcript                                | 55056     | 409.7770226 | -0.425978703 | 0.56028073  | -0.760295118 | 0.4470782   | 0.999371363 | Not Sig |
| ENSG00000168944 | CEP120     | centrosomal protein 120                                   | 153241    | 816.2759312 | -0.425916402 | 0.51247853  | -0.831091209 | 0.405922105 | 0.999371363 | Not Sig |
| ENSG00000134508 | CABLES1    | Cdk5 and Abl enzyme substrate 1                           | 91768     | 1038.32243  | -0.42544824  | 0.508083988 | -0.837358094 | 0.402391314 | 0.999371363 | Not Sig |
| ENSG00000255847 | NA         | NA                                                        | NA        | 12.58238922 | -0.425418279 | 1.194233906 | -0.356226931 | 0.721670625 | 0.999371363 | Not Sig |
| ENSG00000254221 | PCDHGB1    | protocadherin gamma subfamily B, 1                        | 56104     | 65.48627364 | -0.425354772 | 0.685642726 | -0.620373783 | 0.535011729 | 0.999371363 | Not Sig |
| ENSG00000132424 | PNISR      | PNN interacting serine and arginine rich protein          | 25957     | 4158.157959 | -0.424646846 | 0.550242029 | -0.771745565 | 0.440265138 | 0.999371363 | Not Sig |
| ENSG00000122359 | ANXA11     | annexin A11                                               | 311       | 5424.21113  | -0.424620934 | 0.47931128  | -0.885898063 | 0.37567246  | 0.999371363 | Not Sig |
| ENSG00000109943 | CRTAM      | cytotoxic and regulatory T-cell molecule                  | 56253     | 45.24196744 | -0.424482224 | 0.823837635 | -0.515249857 | 0.606378433 | 0.999371363 | Not Sig |
| ENSG00000169710 | FASN       | fatty acid synthase                                       | 2194      | 9222.316556 | -0.424457565 | 0.668878942 | -0.634580547 | 0.525702019 | 0.999371363 | Not Sig |
| ENSG00000010244 | ZNF207     | zinc finger protein 207                                   | 7756      | 3911.057967 | -0.424335024 | 0.620765154 | -0.683567725 | 0.494248171 | 0.999371363 | Not Sig |
| ENSG00000198901 | PRC1       | protein regulator of cytokinesis 1                        | 9055      | 342.0907573 | -0.424292566 | 0.916478625 | -0.462959587 | 0.643393335 | 0.999371363 | Not Sig |
| ENSG00000122733 | PHF24      | PHD finger protein 24                                     | 23349     | 11.76342333 | -0.424252181 | 1.011047668 | -0.419616398 | 0.674765707 | 0.999371363 | Not Sig |
| ENSG00000250280 | NA         | NA                                                        | NA        | 40.34844223 | -0.424195311 | 0.723402822 | -0.586388798 | 0.557614271 | 0.999371363 | Not Sig |
| ENSG00000102543 | CDADC1     | cytidine and dCMP deaminase domain containing 1           | 81602     | 166.2021346 | -0.424130115 | 0.441877287 | -0.959836877 | 0.33713732  | 0.999371363 | Not Sig |
| ENSG00000213551 | DNAJC9     | DnaJ heat shock protein family (Hsp40) member C9          | 23234     | 381.8910235 | -0.424079499 | 0.486434978 | -0.871811276 | 0.383311342 | 0.999371363 | Not Sig |
| ENSG00000225573 | NA         | NA                                                        | NA        | 1.096533139 | -0.423961549 | 2.2444441   | -0.188893788 | 0.850176062 | NA          | NA      |
| ENSG00000247675 | LRP4-AS1   | LRP4 antisense RNA 1                                      | 100507401 | 1.096533139 | -0.423961549 | 2.2444441   | -0.188893788 | 0.850176062 | NA          | NA      |
| ENSG00000265529 | NA         | NA                                                        | NA        | 1.096533139 | -0.423961549 | 2.2444441   | -0.188893788 | 0.850176062 | NA          | NA      |

|                 |          |                                                         |           |             |              |             |              |             |             |         |
|-----------------|----------|---------------------------------------------------------|-----------|-------------|--------------|-------------|--------------|-------------|-------------|---------|
| ENSG00000163812 | ZDHH3    | zinc finger DHHC-type containing 3                      | 51304     | 1743.851521 | -0.423612022 | 0.467413672 | -0.906289325 | 0.364782734 | 0.999371363 | Not Sig |
| ENSG00000203276 | NA       | NA                                                      | NA        | 25.27957338 | -0.423494854 | 0.762001064 | -0.555766748 | 0.57837032  | 0.999371363 | Not Sig |
| ENSG00000260938 | NA       | NA                                                      | NA        | 6.568460224 | -0.423462141 | 1.037144968 | -0.408295999 | 0.683056376 | NA          | NA      |
| ENSG00000113504 | SLC12A7  | solute carrier family 12 member 7                       | 10723     | 4205.778195 | -0.423451128 | 0.655470408 | -0.646026309 | 0.518262317 | 0.999371363 | Not Sig |
| ENSG00000122390 | NAA60    | N(alpha)-acetyltransferase 60, NatF catalytic subunit   | 79903     | 138.7431675 | -0.423302347 | 0.482274452 | -0.877720861 | 0.380095221 | 0.999371363 | Not Sig |
| ENSG00000255186 | NA       | NA                                                      | NA        | 18.52209428 | -0.423215969 | 0.775620272 | -0.545648411 | 0.58530764  | 0.999371363 | Not Sig |
| ENSG00000213339 | QTRT1    | queuine tRNA-ribosyltransferase catalytic subunit 1     | 81890     | 330.0238665 | -0.423159515 | 0.548932946 | -0.770876512 | 0.44078013  | 0.999371363 | Not Sig |
| ENSG00000122786 | CALD1    | caldesmon 1                                             | 800       | 5089.314351 | -0.423102145 | 0.388667366 | -1.088597042 | 0.276331622 | 0.999371363 | Not Sig |
| ENSG00000198355 | PIM3     | Pim-3 proto-oncogene, serine/threonine kinase           | 415116    | 3027.909949 | -0.423094605 | 0.515095131 | -0.821391194 | 0.411423478 | 0.999371363 | Not Sig |
| ENSG00000164080 | RAD54L2  | RAD54 like 2                                            | 23132     | 1630.726493 | -0.423027914 | 0.438555684 | -0.96459339  | 0.334748511 | 0.999371363 | Not Sig |
| ENSG00000236842 | NA       | NA                                                      | NA        | 2.439120467 | -0.422923887 | 1.819503388 | -0.232439186 | 0.816196916 | NA          | NA      |
| ENSG00000213999 | MEF2B    | myocyte enhancer factor 2B                              | 100271849 | 8.309482535 | -0.422909834 | 1.030278721 | -0.410480995 | 0.681453142 | 0.999371363 | Not Sig |
| ENSG00000238311 | SNORD13E | small nucleolar RNA, C/D box 13E                        | 109617020 | 14.89392812 | -0.422882395 | 1.420459008 | -0.297708271 | 0.76592583  | 0.999371363 | Not Sig |
| ENSG00000251180 | NA       | NA                                                      | NA        | 61.68625692 | -0.422697469 | 0.78576112  | -0.537946532 | 0.590613962 | 0.999371363 | Not Sig |
| ENSG00000202119 | NA       | NA                                                      | NA        | 5.034850889 | -0.422656925 | 1.316310386 | -0.321092145 | 0.748140563 | NA          | NA      |
| ENSG00000101745 | ANKRD12  | ankyrin repeat domain 12                                | 23253     | 2973.631459 | -0.422580143 | 0.527862932 | -0.800549001 | 0.423392785 | 0.999371363 | Not Sig |
| ENSG00000067900 | ROCK1    | Rho associated coiled-coil containing protein kinase 1  | 6093      | 3675.836508 | -0.422363457 | 0.437987082 | -0.964328571 | 0.334881221 | 0.999371363 | Not Sig |
| ENSG00000198964 | SGMS1    | sphingomyelin synthase 1                                | 259230    | 1342.417993 | -0.422361784 | 0.456736172 | -0.924739073 | 0.35510165  | 0.999371363 | Not Sig |
| ENSG00000213780 | GTF2H4   | general transcription factor IIH subunit 4              | 2968      | 9.864446941 | -0.422330728 | 0.979245143 | -0.431281923 | 0.666263393 | 0.999371363 | Not Sig |
| ENSG00000057704 | TMCC3    | transmembrane and coiled-coil domain family 3           | 57458     | 377.8808924 | -0.422287784 | 0.716204325 | -0.589619148 | 0.555446011 | 0.999371363 | Not Sig |
| ENSG00000111674 | ENO2     | enolase 2                                               | 2026      | 958.5053022 | -0.422115556 | 0.60229068  | -0.700850227 | 0.483396489 | 0.999371363 | Not Sig |
| ENSG00000134824 | FADS2    | fatty acid desaturase 2                                 | 9415      | 1222.119731 | -0.422001128 | 0.556563895 | -0.758225842 | 0.448315793 | 0.999371363 | Not Sig |
| ENSG00000258445 | NA       | NA                                                      | NA        | 12.17332892 | -0.421928076 | 0.968366972 | -0.435710932 | 0.663046473 | 0.999371363 | Not Sig |
| ENSG00000201470 | NA       | NA                                                      | NA        | 14.28319473 | -0.421916407 | 1.065176636 | -0.396099945 | 0.692031299 | 0.999371363 | Not Sig |
| ENSG00000119820 | YIPF4    | Yipl domain family member 4                             | 84272     | 1602.800967 | -0.421870872 | 0.487898598 | -0.864669163 | 0.3872204   | 0.999371363 | Not Sig |
| ENSG00000115159 | GPD2     | glycerol-3-phosphate dehydrogenase 2                    | 2820      | 1781.81356  | -0.421731702 | 0.581379992 | -0.725397689 | 0.46820809  | 0.999371363 | Not Sig |
| ENSG00000239119 | NA       | NA                                                      | NA        | 3.484419286 | -0.421517245 | 1.627196381 | -0.259045097 | 0.795600445 | NA          | NA      |
| ENSG00000052841 | TTC17    | tetratricopeptide repeat domain 17                      | 55761     | 3062.271274 | -0.421484791 | 0.575149978 | -0.732825884 | 0.463664632 | 0.999371363 | Not Sig |
| ENSG00000250130 | NA       | NA                                                      | NA        | 35.11881448 | -0.421305218 | 0.648247138 | -0.649914505 | 0.515747448 | 0.999371363 | Not Sig |
| ENSG00000189014 | FAM35DP  | family with sequence similarity 35, member A pseudogene | 439965    | 4.499268174 | -0.421140874 | 1.194904909 | -0.352447187 | 0.724502919 | NA          | NA      |
| ENSG00000134453 | RBM17    | RNA binding motif protein 17                            | 84991     | 1400.91909  | -0.421124952 | 0.409214267 | -1.029106231 | 0.303429759 | 0.999371363 | Not Sig |
| ENSG00000133243 | BTBD2    | BTB domain containing 2                                 | 55643     | 1227.255924 | -0.421029459 | 0.527214314 | -0.798592617 | 0.42452667  | 0.999371363 | Not Sig |
| ENSG00000243845 | NA       | NA                                                      | NA        | 7.71172841  | -0.42091006  | 1.023767739 | -0.411138234 | 0.680971176 | 0.999371363 | Not Sig |
| ENSG00000104067 | TJP1     | tight junction protein 1                                | 7082      | 5784.660382 | -0.420890649 | 0.468558909 | -0.898266239 | 0.369043627 | 0.999371363 | Not Sig |
| ENSG00000014164 | ZC3H3    | zinc finger CCH-type containing 3                       | 23144     | 711.159223  | -0.420800665 | 0.435419099 | -0.96642675  | 0.333830684 | 0.999371363 | Not Sig |

|                 |           |                                                     |           |             |              |             |              |             |             |         |
|-----------------|-----------|-----------------------------------------------------|-----------|-------------|--------------|-------------|--------------|-------------|-------------|---------|
| ENSG00000229222 | NA        | NA                                                  | NA        | 32.19380001 | -0.420745846 | 0.654474952 | -0.6428754   | 0.520304953 | 0.999371363 | Not Sig |
| ENSG00000108091 | CCDC6     | coiled-coil domain containing 6                     | 8030      | 2845.694487 | -0.420733825 | 0.582864114 | -0.721838614 | 0.470393706 | 0.999371363 | Not Sig |
| ENSG00000241418 | NA        | NA                                                  | NA        | 1.974605538 | -0.420633865 | 1.910287786 | -0.220193977 | 0.825720087 | NA          | NA      |
| ENSG00000170004 | CHD3      | chromodomain helicase DNA binding protein 3         | 1107      | 4801.670706 | -0.420619311 | 0.433140652 | -0.971091743 | 0.331502595 | 0.999371363 | Not Sig |
| ENSG00000077147 | TM9SF3    | transmembrane 9 superfamily member 3                | 56889     | 5679.638701 | -0.420446056 | 0.634067428 | -0.663093605 | 0.507270606 | 0.999371363 | Not Sig |
| ENSG00000101199 | ARFGAP1   | ADP ribosylation factor GTPase activating protein 1 | 55738     | 1587.107672 | -0.420419169 | 0.424536051 | -0.990302633 | 0.32202622  | 0.999371363 | Not Sig |
| ENSG00000070444 | MNT       | MAX network transcriptional repressor               | 4335      | 1142.665319 | -0.420291564 | 0.429791521 | -0.977896358 | 0.328125587 | 0.999371363 | Not Sig |
| ENSG00000115590 | IL1R2     | interleukin 1 receptor type 2                       | 7850      | 44.40031958 | -0.420243621 | 0.751704002 | -0.559054655 | 0.57612442  | 0.999371363 | Not Sig |
| ENSG00000226971 | NA        | NA                                                  | NA        | 1.349024864 | -0.420122678 | 2.387207676 | -0.175989162 | 0.860302457 | NA          | NA      |
| ENSG00000170537 | TMC7      | transmembrane channel like 7                        | 79905     | 302.7917017 | -0.420119902 | 0.637784325 | -0.658717822 | 0.510076986 | 0.999371363 | Not Sig |
| ENSG00000102539 | MLNR      | motilin receptor                                    | 2862      | 1.455174897 | -0.42000899  | 1.844909751 | -0.227658285 | 0.819911905 | NA          | NA      |
| ENSG00000241095 | NA        | NA                                                  | NA        | 2.166020877 | -0.419971854 | 1.590444507 | -0.26405942  | 0.791734133 | NA          | NA      |
| ENSG00000188897 | LOC400499 | vitellogenin                                        | 400499    | 129.8526149 | -0.419874543 | 0.463713277 | -0.90546155  | 0.365220921 | 0.999371363 | Not Sig |
| ENSG00000071794 | HLTF      | helicase like transcription factor                  | 6596      | 1076.716797 | -0.419828363 | 0.685643232 | -0.612313144 | 0.540330595 | 0.999371363 | Not Sig |
| ENSG00000175482 | POLD4     | DNA polymerase delta 4, accessory subunit           | 57804     | 157.0371032 | -0.419739699 | 0.520514294 | -0.806394183 | 0.4200156   | 0.999371363 | Not Sig |
| ENSG00000159335 | PTMS      | parathyrosin                                        | 5763      | 3084.2532   | -0.419584519 | 0.760625072 | -0.551631197 | 0.581201058 | 0.999371363 | Not Sig |
| ENSG00000196511 | TPK1      | thiamin pyrophosphokinase 1                         | 27010     | 236.6841913 | -0.419484338 | 0.665199027 | -0.630614779 | 0.528292433 | 0.999371363 | Not Sig |
| ENSG00000248830 | NA        | NA                                                  | NA        | 1.927699481 | -0.419344938 | 2.127046342 | -0.197148943 | 0.843710984 | NA          | NA      |
| ENSG00000159763 | PIP       | prolactin induced protein                           | 5304      | 6.000396968 | -0.419167457 | 1.374622925 | -0.304932683 | 0.760417423 | NA          | NA      |
| ENSG00000138814 | PPP3CA    | protein phosphatase 3 catalytic subunit alpha       | 5530      | 2159.553179 | -0.418873064 | 0.503320149 | -0.832219939 | 0.405284811 | 0.999371363 | Not Sig |
| ENSG00000119042 | SATB2     | SATB homeobox 2                                     | 23314     | 361.6281565 | -0.418826459 | 0.704538095 | -0.594469571 | 0.552198088 | 0.999371363 | Not Sig |
| ENSG00000132199 | ENOSF1    | enolase superfamily member 1                        | 55556     | 2182.628209 | -0.418768303 | 0.514098891 | -0.814567606 | 0.41531986  | 0.999371363 | Not Sig |
| ENSG00000186026 | ZNF284    | zinc finger protein 284                             | 342909    | 52.18066751 | -0.418724443 | 0.559237716 | -0.748741424 | 0.454013071 | 0.999371363 | Not Sig |
| ENSG00000222489 | SNORA79B  | small nucleolar RNA, H/ACA box 79B                  | 109616976 | 21.27382076 | -0.418516785 | 0.827221763 | -0.505930578 | 0.612905385 | 0.999371363 | Not Sig |
| ENSG00000186017 | ZNF566    | zinc finger protein 566                             | 84924     | 264.453523  | -0.418209973 | 0.524270473 | -0.797698887 | 0.42504525  | 0.999371363 | Not Sig |
| ENSG00000120008 | WDR11     | WD repeat domain 11                                 | 55717     | 1671.049958 | -0.418156973 | 0.493591345 | -0.847172418 | 0.396899025 | 0.999371363 | Not Sig |
| ENSG00000113851 | CRBN      | cereblon                                            | 51185     | 860.3631093 | -0.418156913 | 0.493913748 | -0.846619304 | 0.397207351 | 0.999371363 | Not Sig |
| ENSG00000162929 | KIAA1841  | KIAA1841                                            | 84542     | 477.2368573 | -0.418058722 | 0.449839334 | -0.929351193 | 0.352707113 | 0.999371363 | Not Sig |
| ENSG00000183354 | KIAA2026  | KIAA2026                                            | 158358    | 1592.888259 | -0.417783073 | 0.445615691 | -0.937541207 | 0.348480237 | 0.999371363 | Not Sig |
| ENSG00000134690 | CDCA8     | cell division cycle associated 8                    | 55143     | 102.9551135 | -0.417589763 | 0.861032709 | -0.484987108 | 0.62768549  | 0.999371363 | Not Sig |
| ENSG00000197724 | PHF2      | PHD finger protein 2                                | 5253      | 1908.306145 | -0.417372623 | 0.564816131 | -0.738953086 | 0.459935485 | 0.999371363 | Not Sig |
| ENSG00000227535 | NA        | NA                                                  | NA        | 4.424597656 | -0.417094193 | 1.373847    | -0.30359581  | 0.761435844 | NA          | NA      |
| ENSG00000153339 | TRAPPC8   | trafficking protein particle complex 8              | 22878     | 1488.743743 | -0.41701845  | 0.501242553 | -0.831969368 | 0.405426235 | 0.999371363 | Not Sig |
| ENSG00000197948 | FCHSD1    | FCH and double SH3 domains 1                        | 89848     | 378.1597028 | -0.416145318 | 0.668443857 | -0.62255837  | 0.533574775 | 0.999371363 | Not Sig |
| ENSG00000213015 | ZNF580    | zinc finger protein 580                             | 51157     | 354.0755177 | -0.415926444 | 0.60763465  | -0.684500866 | 0.493658943 | 0.999371363 | Not Sig |

|                 |           |                                                  |           |             |              |             |              |             |             |         |
|-----------------|-----------|--------------------------------------------------|-----------|-------------|--------------|-------------|--------------|-------------|-------------|---------|
| ENSG00000214941 | ZSWIM7    | zinc finger SWIM-type containing 7               | 125150    | 224.8350413 | -0.415737868 | 0.457035535 | -0.90964014  | 0.363012323 | 0.999371363 | Not Sig |
| ENSG00000197937 | ZNF347    | zinc finger protein 347                          | 84671     | 385.8634425 | -0.415728358 | 0.491944822 | -0.845071114 | 0.398071135 | 0.999371363 | Not Sig |
| ENSG00000139651 | ZNF740    | zinc finger protein 740                          | 283337    | 920.9241295 | -0.415607272 | 0.399382221 | -1.040625371 | 0.298049452 | 0.999371363 | Not Sig |
| ENSG00000224451 | NA        | NA                                               | NA        | 17.27262169 | -0.415552565 | 0.781835203 | -0.531509151 | 0.595066002 | 0.999371363 | Not Sig |
| ENSG00000141664 | ZCCHC2    | zinc finger CCHC-type containing 2               | 54877     | 1178.059986 | -0.415507573 | 0.472345322 | -0.879669076 | 0.379038606 | 0.999371363 | Not Sig |
| ENSG00000138759 | FRAS1     | Fraser extracellular matrix complex subunit 1    | 80144     | 1436.277904 | -0.415407039 | 1.005036792 | -0.413325206 | 0.679368365 | 0.999371363 | Not Sig |
| ENSG00000207223 | NA        | NA                                               | NA        | 6.88853688  | -0.415372569 | 1.450831531 | -0.286299656 | 0.774648621 | 0.999371363 | Not Sig |
| ENSG00000273447 | NA        | NA                                               | NA        | 5.073204624 | -0.415294835 | 1.353042067 | -0.306934164 | 0.758893484 | NA          | NA      |
| ENSG00000070756 | PABPC1    | poly(A) binding protein cytoplasmic 1            | 26986     | 18812.00177 | -0.415190999 | 0.54200179  | -0.766032523 | 0.443656951 | 0.999371363 | Not Sig |
| ENSG00000173442 | EHBPL1L1  | EH domain binding protein 1 like 1               | 254102    | 3750.436205 | -0.4151603   | 0.54163446  | -0.766495361 | 0.443381611 | 0.999371363 | Not Sig |
| ENSG00000247853 | NA        | NA                                               | NA        | 11.48997729 | -0.414630454 | 0.947096363 | -0.437791201 | 0.66153765  | 0.999371363 | Not Sig |
| ENSG00000175073 | VCPIP1    | valosin containing protein interacting protein 1 | 80124     | 1887.678903 | -0.414563146 | 0.45869321  | -0.903791765 | 0.366105829 | 0.999371363 | Not Sig |
| ENSG00000168228 | ZCCHC4    | zinc finger CCHC-type containing 4               | 29063     | 328.1999221 | -0.414280873 | 0.566859846 | -0.730834748 | 0.464880096 | 0.999371363 | Not Sig |
| ENSG00000160917 | CPSF4     | cleavage and polyadenylation specific factor 4   | 10898     | 442.9257427 | -0.41397855  | 0.497031435 | -0.832902148 | 0.404899918 | 0.999371363 | Not Sig |
| ENSG00000005206 | SPPL2B    | signal peptide peptidase like 2B                 | 56928     | 973.6755783 | -0.413938834 | 0.521208266 | -0.794190847 | 0.427084336 | 0.999371363 | Not Sig |
| ENSG00000262514 | NA        | NA                                               | NA        | 24.55363264 | -0.413856028 | 0.755056602 | -0.548112587 | 0.583614598 | 0.999371363 | Not Sig |
| ENSG00000182873 | PRKCZ-AS1 | PRKCZ antisense RNA 1                            | 100506504 | 27.65074322 | -0.413669595 | 0.72802712  | -0.568206299 | 0.569894895 | 0.999371363 | Not Sig |
| ENSG00000232859 | LYRM9     | LYR motif containing 9                           | 201229    | 130.5748519 | -0.413657267 | 0.535372899 | -0.772652609 | 0.439728001 | 0.999371363 | Not Sig |
| ENSG00000230113 | NA        | NA                                               | NA        | 0.837603878 | -0.413653033 | 3.191196884 | -0.129623163 | 0.896864577 | NA          | NA      |
| ENSG00000256862 | NA        | NA                                               | NA        | 0.837603878 | -0.413653033 | 3.191196884 | -0.129623163 | 0.896864577 | NA          | NA      |
| ENSG00000196850 | PPTC7     | PTC7 protein phosphatase homolog                 | 160760    | 1314.349453 | -0.413633739 | 0.626083775 | -0.660668357 | 0.508825021 | 0.999371363 | Not Sig |
| ENSG00000174428 | GTF2IRD2B | GTF2I repeat domain containing 2B                | 389524    | 292.1819837 | -0.413607577 | 0.540561554 | -0.765144273 | 0.444185639 | 0.999371363 | Not Sig |
| ENSG00000250988 | SNHG21    | small nucleolar RNA host gene 21                 | 100505616 | 9.732658012 | -0.412905244 | 1.017004275 | -0.406001483 | 0.684741511 | 0.999371363 | Not Sig |
| ENSG00000105122 | RASAL3    | RAS protein activator like 3                     | 64926     | 532.0651856 | -0.41283686  | 0.788023042 | -0.523889326 | 0.600355519 | 0.999371363 | Not Sig |
| ENSG00000235245 | NA        | NA                                               | NA        | 77.64089278 | -0.412777148 | 0.506950217 | -0.814236061 | 0.415509731 | 0.999371363 | Not Sig |
| ENSG00000270061 | NA        | NA                                               | NA        | 36.41545053 | -0.412725037 | 0.714913946 | -0.577307296 | 0.563731886 | 0.999371363 | Not Sig |
| ENSG00000231880 | NA        | NA                                               | NA        | 5.891490512 | -0.412457361 | 1.164539045 | -0.354180792 | 0.723203398 | NA          | NA      |
| ENSG00000232015 | NA        | NA                                               | NA        | 7.571259911 | -0.412368652 | 1.447221467 | -0.284938181 | 0.775691504 | 0.999371363 | Not Sig |
| ENSG00000090238 | YPEL3     | yippee like 3                                    | 83719     | 1181.009479 | -0.412355708 | 0.451372394 | -0.913559875 | 0.360948159 | 0.999371363 | Not Sig |
| ENSG00000265135 | MIR5687   | microRNA 5687                                    | 100847019 | 8.965618712 | -0.412259138 | 0.951677091 | -0.433192248 | 0.66487511  | 0.999371363 | Not Sig |
| ENSG00000268427 | NA        | NA                                               | NA        | 1.684922295 | -0.412152892 | 2.286060487 | -0.180289583 | 0.856925233 | NA          | NA      |
| ENSG00000105053 | VRK3      | vaccinia related kinase 3                        | 51231     | 696.7160298 | -0.411877394 | 0.405904623 | -1.014714717 | 0.310241837 | 0.999371363 | Not Sig |
| ENSG00000266613 | NA        | NA                                               | NA        | 2.508355844 | -0.41187004  | 1.736363194 | -0.237202701 | 0.812499541 | NA          | NA      |
| ENSG00000250305 | KIAA1456  | KIAA1456                                         | 57604     | 225.1158487 | -0.411771495 | 0.688043719 | -0.598467051 | 0.549528338 | 0.999371363 | Not Sig |
| ENSG00000267083 | NA        | NA                                               | NA        | 17.28108001 | -0.411720456 | 0.747706514 | -0.550644469 | 0.581877418 | 0.999371363 | Not Sig |

|                 |               |                                                           |           |             |              |             |              |             |             |         |
|-----------------|---------------|-----------------------------------------------------------|-----------|-------------|--------------|-------------|--------------|-------------|-------------|---------|
| ENSG00000124507 | PACSIN1       | protein kinase C and casein kinase substrate in neurons 1 | 29993     | 22.17988259 | -0.411696553 | 1.026134904 | -0.401210943 | 0.688264825 | 0.999371363 | Not Sig |
| ENSG00000086666 | ZFAND6        | zinc finger AN1-type containing 6                         | 54469     | 1422.500667 | -0.411623763 | 0.551292782 | -0.746651826 | 0.455273756 | 0.999371363 | Not Sig |
| ENSG00000266019 | MIR3609       | microRNA 3609                                             | 100500819 | 59.83518477 | -0.411584133 | 0.54520275  | -0.754919399 | 0.450297345 | 0.999371363 | Not Sig |
| ENSG00000133114 | GPALPP1       | GPALPP motifs containing 1                                | 55425     | 557.748684  | -0.411409147 | 0.468545893 | -0.878055176 | 0.379913776 | 0.999371363 | Not Sig |
| ENSG00000248366 | NA            | NA                                                        | NA        | 4.400994754 | -0.411379938 | 1.454383301 | -0.28285524  | 0.777287807 | NA          | NA      |
| ENSG00000204149 | AGAP6         | ArfGAP with GTPase domain, ankyrin repeat and PH domain 6 | 414189    | 312.4029977 | -0.411308338 | 0.442317913 | -0.929893014 | 0.35242648  | 0.999371363 | Not Sig |
| ENSG00000265532 | NA            | NA                                                        | NA        | 1.545433146 | -0.411303673 | 2.314710363 | -0.177691205 | 0.858965493 | NA          | NA      |
| ENSG00000226819 | NA            | NA                                                        | NA        | 2.072745915 | -0.411191005 | 1.809508304 | -0.227239082 | 0.82023784  | NA          | NA      |
| ENSG00000057935 | MTA3          | metastasis associated 1 family member 3                   | 57504     | 807.43113   | -0.41099961  | 0.517705834 | -0.793886379 | 0.42726158  | 0.999371363 | Not Sig |
| ENSG00000120526 | NUCD1         | NudC domain containing 1                                  | 84955     | 400.8662215 | -0.410542545 | 0.597833644 | -0.686717031 | 0.492261062 | 0.999371363 | Not Sig |
| ENSG00000182568 | SATB1         | SATB homeobox 1                                           | 6304      | 1583.843718 | -0.410443797 | 0.469535322 | -0.874148926 | 0.382037156 | 0.999371363 | Not Sig |
| ENSG00000227345 | PARG          | poly(ADP-ribose) glycohydrolase                           | 8505      | 318.750134  | -0.410376582 | 0.504897632 | -0.812791655 | 0.416337521 | 0.999371363 | Not Sig |
| ENSG00000184163 | CIQTNF12      | CIq and TNF related 12                                    | 388581    | 17.08867857 | -0.409937594 | 0.703989797 | -0.582306159 | 0.560360478 | 0.999371363 | Not Sig |
| ENSG00000207001 | SNORD116-2    | small nucleolar RNA, C/D box 116-2                        | 100033414 | 5.860864056 | -0.409861526 | 1.061337198 | -0.386174655 | 0.699367323 | NA          | NA      |
| ENSG00000256210 | NA            | NA                                                        | NA        | 1.714104157 | -0.40970173  | 1.932744646 | -0.211979234 | 0.832123235 | NA          | NA      |
| ENSG00000095383 | TBC1D2        | TBC1 domain family member 2                               | 55357     | 1856.868366 | -0.409659283 | 0.676864877 | -0.605230523 | 0.545025838 | 0.999371363 | Not Sig |
| ENSG00000067560 | RHOA          | ras homolog family member A                               | 387       | 8086.819641 | -0.409621789 | 0.443819378 | -0.922947057 | 0.356034796 | 0.999371363 | Not Sig |
| ENSG00000264392 | NA            | NA                                                        | NA        | 4.423584364 | -0.409591568 | 1.193938086 | -0.343059304 | 0.731553846 | NA          | NA      |
| ENSG00000270011 | ZNF559-ZNF177 | ZNF559-ZNF177 readthrough                                 | 100529215 | 7.963948947 | -0.409561223 | 0.973224682 | -0.420829055 | 0.673879913 | 0.999371363 | Not Sig |
| ENSG00000252515 | NA            | NA                                                        | NA        | 4.009872455 | -0.409535705 | 1.480727578 | -0.276577347 | 0.782104661 | NA          | NA      |
| ENSG00000268006 | PTOV1-AS1     | PTOV1 antisense RNA 1                                     | 100506033 | 72.18216588 | -0.409513222 | 0.658729188 | -0.621671591 | 0.534157836 | 0.999371363 | Not Sig |
| ENSG00000171798 | KNDC1         | kinase non-catalytic C-lobe domain containing 1           | 85442     | 501.1318013 | -0.409334865 | 1.07606713  | -0.380399005 | 0.703649253 | 0.999371363 | Not Sig |
| ENSG00000258650 | NA            | NA                                                        | NA        | 2.957255851 | -0.409167114 | 1.518198583 | -0.269508296 | 0.787538559 | NA          | NA      |
| ENSG00000268516 | LOC105372482  | uncharacterized LOC105372482                              | 105372482 | 68.27314264 | -0.40913178  | 0.511944387 | -0.799172313 | 0.424190504 | 0.999371363 | Not Sig |
| ENSG00000100814 | CCNB1IP1      | cyclin B1 interacting protein 1                           | 57820     | 369.4547486 | -0.409061679 | 0.466436375 | -0.876993522 | 0.380490157 | 0.999371363 | Not Sig |
| ENSG00000135766 | EGLN1         | egl-9 family hypoxia inducible factor 1                   | 54583     | 1615.593734 | -0.408971984 | 0.461943457 | -0.885329097 | 0.375979161 | 0.999371363 | Not Sig |
| ENSG00000107566 | ERLIN1        | ER lipid raft associated 1                                | 10613     | 645.6047017 | -0.408930246 | 0.478697756 | -0.854255615 | 0.392963374 | 0.999371363 | Not Sig |
| ENSG00000101181 | MTG2          | mitochondrial ribosome associated GTPase 2                | 26164     | 537.6757923 | -0.40886378  | 0.464566476 | -0.880097469 | 0.37880651  | 0.999371363 | Not Sig |
| ENSG00000237101 | LOC101927164  | uncharacterized LOC101927164                              | 101927164 | 1.173501309 | -0.408684016 | 2.498892442 | -0.163546061 | 0.87008851  | NA          | NA      |
| ENSG00000182923 | CEP63         | centrosomal protein 63                                    | 80254     | 628.784663  | -0.408109002 | 0.509884252 | -0.800395384 | 0.423481755 | 0.999371363 | Not Sig |
| ENSG00000261812 | NA            | NA                                                        | NA        | 1.804362406 | -0.408096802 | 1.760918521 | -0.231752234 | 0.816730459 | NA          | NA      |
| ENSG00000076555 | ACACB         | acetyl-CoA carboxylase beta                               | 32        | 1098.473235 | -0.407985146 | 0.785408657 | -0.519455881 | 0.603442871 | 0.999371363 | Not Sig |
| ENSG00000262420 | NA            | NA                                                        | NA        | 8.7436204   | -0.407934067 | 0.900980585 | -0.452766767 | 0.650716696 | 0.999371363 | Not Sig |
| ENSG00000139725 | RHOF          | ras homolog family member F, filopodia associated         | 54509     | 658.1392507 | -0.407754485 | 0.590887346 | -0.690071446 | 0.490149259 | 0.999371363 | Not Sig |
| ENSG00000271147 | NA            | NA                                                        | NA        | 123.4957352 | -0.407670088 | 0.660788358 | -0.616945022 | 0.537270989 | 0.999371363 | Not Sig |



|                 |          |                                                        |           |             |              |             |              |             |             |         |
|-----------------|----------|--------------------------------------------------------|-----------|-------------|--------------|-------------|--------------|-------------|-------------|---------|
| ENSG00000153879 | CEBPG    | CCAAT/enhancer binding protein gamma                   | 1054      | 587.2967129 | -0.407663187 | 0.402498773 | -1.012830881 | 0.311140948 | 0.999371363 | Not Sig |
| ENSG00000156052 | GNAQ     | G protein subunit alpha q                              | 2776      | 2904.517006 | -0.407657867 | 0.481608963 | -0.846449918 | 0.397301802 | 0.999371363 | Not Sig |
| ENSG00000233674 | NA       | NA                                                     | NA        | 6.12095043  | -0.40753223  | 1.140724703 | -0.357257302 | 0.720899192 | NA          | NA      |
| ENSG00000237575 | PYY2     | peptide YY 2 (pseudogene)                              | 23615     | 1.355462399 | -0.407465359 | 2.346550399 | -0.17364441  | 0.862144928 | NA          | NA      |
| ENSG00000253785 | NA       | NA                                                     | NA        | 1.355462399 | -0.407465359 | 2.346550399 | -0.17364441  | 0.862144928 | NA          | NA      |
| ENSG00000269958 | NA       | NA                                                     | NA        | 254.9393045 | -0.407420548 | 0.52366304  | -0.778020438 | 0.436556965 | 0.999371363 | Not Sig |
| ENSG00000253549 | CA3-AS1  | CA3 antisense RNA 1                                    | 100996348 | 6.338254056 | -0.407370526 | 1.070131805 | -0.380673225 | 0.703445739 | NA          | NA      |
| ENSG00000134318 | ROCK2    | Rho associated coiled-coil containing protein kinase 2 | 9475      | 3636.629235 | -0.407247515 | 0.491740911 | -0.828174971 | 0.407571416 | 0.999371363 | Not Sig |
| ENSG00000199179 | MIRLET71 | microRNA let-7i                                        | 406891    | 12.42562689 | -0.407190626 | 1.023157598 | -0.397974493 | 0.690648988 | 0.999371363 | Not Sig |
| ENSG00000161298 | ZNF382   | zinc finger protein 382                                | 84911     | 75.10514833 | -0.407161021 | 0.656574455 | -0.620129245 | 0.535172699 | 0.999371363 | Not Sig |
| ENSG00000124151 | NCOA3    | nuclear receptor coactivator 3                         | 8202      | 2608.021826 | -0.407083161 | 0.533751792 | -0.762682518 | 0.445652759 | 0.999371363 | Not Sig |
| ENSG00000266138 | NA       | NA                                                     | NA        | 14.15411818 | -0.406977347 | 0.779022187 | -0.52242074  | 0.601377419 | 0.999371363 | Not Sig |
| ENSG00000179588 | ZFPM1    | zinc finger protein, FOG family member 1               | 161882    | 333.7534533 | -0.406956555 | 0.511767694 | -0.795197821 | 0.426498439 | 0.999371363 | Not Sig |
| ENSG00000176407 | KCMF1    | potassium channel modulatory factor 1                  | 56888     | 979.787456  | -0.406855049 | 0.440477337 | -0.923668518 | 0.355658928 | 0.999371363 | Not Sig |
| ENSG00000112029 | FBX05    | F-box protein 5                                        | 26271     | 144.8863513 | -0.406659077 | 0.642908884 | -0.632529876 | 0.527040693 | 0.999371363 | Not Sig |
| ENSG00000203760 | CENPW    | centromere protein W                                   | 387103    | 34.29098876 | -0.406588458 | 0.800278423 | -0.508058753 | 0.61141214  | 0.999371363 | Not Sig |
| ENSG00000196605 | ZNF846   | zinc finger protein 846                                | 162993    | 259.5251155 | -0.406554253 | 0.493257023 | -0.824223954 | 0.409812319 | 0.999371363 | Not Sig |
| ENSG00000163611 | SPICE1   | spindle and centriole associated protein 1             | 152185    | 927.845151  | -0.406349756 | 0.666125322 | -0.610019981 | 0.541848572 | 0.999371363 | Not Sig |
| ENSG00000235313 | NA       | NA                                                     | NA        | 35.36590517 | -0.405970328 | 0.654498909 | -0.620276553 | 0.535075729 | 0.999371363 | Not Sig |
| ENSG00000249684 | NA       | NA                                                     | NA        | 17.18813008 | -0.405963672 | 1.271545509 | -0.319267906 | 0.749523368 | 0.999371363 | Not Sig |
| ENSG00000222301 | NA       | NA                                                     | NA        | 5.973451625 | -0.405929233 | 1.048008533 | -0.3873339   | 0.698509032 | NA          | NA      |
| ENSG00000099999 | RNF215   | ring finger protein 215                                | 200312    | 294.8302326 | -0.405761922 | 0.539196674 | -0.752530462 | 0.451732118 | 0.999371363 | Not Sig |
| ENSG00000077943 | ITGA8    | integrin subunit alpha 8                               | 8516      | 1223.60584  | -0.405216528 | 0.959342333 | -0.422389916 | 0.672740437 | 0.999371363 | Not Sig |
| ENSG00000255389 | NA       | NA                                                     | NA        | 24.02633725 | -0.405112387 | 0.629259195 | -0.643792559 | 0.519709959 | 0.999371363 | Not Sig |
| ENSG00000183067 | IGSF5    | immunoglobulin superfamily member 5                    | 150084    | 1.416538786 | -0.404858816 | 2.319324941 | -0.174558902 | 0.861426244 | NA          | NA      |
| ENSG00000240395 | NA       | NA                                                     | NA        | 1.416538786 | -0.404858816 | 2.319324941 | -0.174558902 | 0.861426244 | NA          | NA      |
| ENSG00000166579 | NDEL1    | nudE neurodevelopment protein 1 like 1                 | 81565     | 1575.626093 | -0.404688851 | 0.475934774 | -0.85030318  | 0.395156549 | 0.999371363 | Not Sig |
| ENSG00000229348 | NA       | NA                                                     | NA        | 11.99597943 | -0.404586504 | 0.901862767 | -0.448612049 | 0.65371154  | 0.999371363 | Not Sig |
| ENSG00000124835 | LOC93463 | uncharacterized LOC93463                               | 93463     | 13.61416854 | -0.404564706 | 1.059959611 | -0.38167936  | 0.702699211 | 0.999371363 | Not Sig |
| ENSG00000114126 | TFDP2    | transcription factor Dp-2                              | 7029      | 970.2440092 | -0.404501469 | 0.43811173  | -0.923283814 | 0.355859321 | 0.999371363 | Not Sig |
| ENSG00000238775 | NA       | NA                                                     | NA        | 1.897222361 | -0.404098648 | 2.135313172 | -0.189245612 | 0.84990032  | NA          | NA      |
| ENSG00000101193 | GID8     | GID complex subunit 8 homolog                          | 54994     | 866.0506897 | -0.40408808  | 0.474497384 | -0.851612872 | 0.394428993 | 0.999371363 | Not Sig |
| ENSG00000150938 | CRIMI    | cysteine rich transmembrane BMP regulator 1            | 51232     | 4267.847493 | -0.404077475 | 0.645246489 | -0.626237387 | 0.531159248 | 0.999371363 | Not Sig |
| ENSG00000266458 | MIR4259  | microRNA 4259                                          | 100422852 | 2.453827948 | -0.403977978 | 1.619735495 | -0.249409844 | 0.803043771 | NA          | NA      |
| ENSG00000272572 | NA       | NA                                                     | NA        | 10.41934874 | -0.403822875 | 0.950944829 | -0.424654367 | 0.671088654 | 0.999371363 | Not Sig |

|                 |           |                                                    |    |        |             |              |             |              |             |             |         |
|-----------------|-----------|----------------------------------------------------|----|--------|-------------|--------------|-------------|--------------|-------------|-------------|---------|
| ENSG00000065150 | IPO5      | importin 5                                         |    | 3843   | 2117.451324 | -0.4038108   | 0.446252043 | -0.90489401  | 0.365521541 | 0.999371363 | Not Sig |
| ENSG00000184209 | SNRNP35   | small nuclear ribonucleoprotein U11/U12 subunit 35 |    | 11066  | 328.8618098 | -0.403660919 | 0.421913504 | -0.956738562 | 0.338699229 | 0.999371363 | Not Sig |
| ENSG00000243280 | NA        | NA                                                 | NA |        | 8.919681107 | -0.403623859 | 0.919168643 | -0.439118395 | 0.660575751 | 0.999371363 | Not Sig |
| ENSG00000050426 | LETMD1    | LETM1 domain containing 1                          |    | 25875  | 780.9837825 | -0.403604619 | 0.461472794 | -0.874601113 | 0.381790982 | 0.999371363 | Not Sig |
| ENSG00000259342 | NA        | NA                                                 | NA |        | 21.2672776  | -0.403574519 | 1.434114547 | -0.28141024  | 0.778395765 | 0.999371363 | Not Sig |
| ENSG00000119640 | ACYP1     | acylphosphatase 1                                  |    | 97     | 127.6438817 | -0.403279103 | 0.531721874 | -0.758439934 | 0.448187659 | 0.999371363 | Not Sig |
| ENSG00000261468 | NA        | NA                                                 | NA |        | 47.07150221 | -0.403255434 | 0.653171569 | -0.617380569 | 0.536983736 | 0.999371363 | Not Sig |
| ENSG00000199636 | NA        | NA                                                 | NA |        | 1.014544836 | -0.403119933 | 3.030573081 | -0.133017724 | 0.894179364 | NA          | NA      |
| ENSG00000222741 | NA        | NA                                                 | NA |        | 1.014544836 | -0.403119933 | 3.030573081 | -0.133017724 | 0.894179364 | NA          | NA      |
| ENSG00000198538 | ZNF28     | zinc finger protein 28                             |    | 7576   | 492.5723243 | -0.403070643 | 0.559897064 | -0.719901332 | 0.471585748 | 0.999371363 | Not Sig |
| ENSG00000152804 | HHEX      | hematopoietically expressed homeobox               |    | 3087   | 236.2058949 | -0.40300664  | 0.789239918 | -0.510626276 | 0.609612773 | 0.999371363 | Not Sig |
| ENSG00000236624 | NA        | NA                                                 | NA |        | 36.84609927 | -0.402978319 | 0.740813466 | -0.543967324 | 0.586463959 | 0.999371363 | Not Sig |
| ENSG00000165102 | HGSNAT    | heparan-alpha-glucosaminide N-acetyltransferase    |    | 138050 | 2214.030197 | -0.402912211 | 0.41387127  | -0.97352061  | 0.330294622 | 0.999371363 | Not Sig |
| ENSG00000113441 | LNPEP     | leucyl and cystinyl aminopeptidase                 |    | 4012   | 3294.966464 | -0.402810449 | 0.566417752 | -0.71115435  | 0.476988593 | 0.999371363 | Not Sig |
| ENSG00000186118 | TEX38     | testis expressed 38                                |    | 374973 | 1.995473693 | -0.402638364 | 2.52250416  | -0.159618513 | 0.873181594 | NA          | NA      |
| ENSG00000187187 | ZNF546    | zinc finger protein 546                            |    | 339327 | 122.084978  | -0.402597236 | 0.469148201 | -0.858145113 | 0.390812339 | 0.999371363 | Not Sig |
| ENSG00000240489 | NA        | NA                                                 | NA |        | 11.60100904 | -0.402585267 | 0.879079466 | -0.457962315 | 0.646979516 | 0.999371363 | Not Sig |
| ENSG00000145375 | SPATA5    | spermatogenesis associated 5                       |    | 166378 | 570.201499  | -0.402569704 | 0.499989587 | -0.805156176 | 0.420729562 | 0.999371363 | Not Sig |
| ENSG00000010322 | NISCH     | nischarin                                          |    | 11188  | 2817.064729 | -0.402447847 | 0.467448148 | -0.860946501 | 0.389267509 | 0.999371363 | Not Sig |
| ENSG00000135655 | USP15     | ubiquitin specific peptidase 15                    |    | 9958   | 1757.815142 | -0.402422652 | 0.56236265  | -0.715592779 | 0.474242834 | 0.999371363 | Not Sig |
| ENSG00000181555 | SETD2     | SET domain containing 2                            |    | 29072  | 4011.158283 | -0.402138753 | 0.507610336 | -0.792219396 | 0.428232761 | 0.999371363 | Not Sig |
| ENSG00000134216 | CHIA      | chitinase, acidic                                  |    | 27159  | 45.05620601 | -0.402090225 | 0.78852924  | -0.509924305 | 0.610104493 | 0.999371363 | Not Sig |
| ENSG00000261596 | NA        | NA                                                 | NA |        | 38.68523546 | -0.402005193 | 0.628110903 | -0.640022632 | 0.522157886 | 0.999371363 | Not Sig |
| ENSG00000227077 | NA        | NA                                                 | NA |        | 4.857622172 | -0.401863305 | 1.254919883 | -0.320230044 | 0.748793949 | NA          | NA      |
| ENSG00000231500 | RPS18     | ribosomal protein S18                              |    | 6222   | 9197.502177 | -0.401820952 | 0.604575903 | -0.664632762 | 0.506285409 | 0.999371363 | Not Sig |
| ENSG00000236404 | VLDLR-AS1 | VLDLR antisense RNA 1                              |    | 401491 | 19.05509765 | -0.401679868 | 0.86291662  | -0.465490939 | 0.641579924 | 0.999371363 | Not Sig |
| ENSG00000229299 | NA        | NA                                                 | NA |        | 4.393987493 | -0.401630253 | 1.182372299 | -0.339681717 | 0.734096232 | NA          | NA      |
| ENSG00000224566 | NA        | NA                                                 | NA |        | 5.06887745  | -0.401498789 | 1.827684875 | -0.219676157 | 0.826123375 | NA          | NA      |
| ENSG00000107816 | LZTS2     | leucine zipper tumor suppressor 2                  |    | 84445  | 1509.88583  | -0.401456199 | 0.552871858 | -0.726128837 | 0.467759792 | 0.999371363 | Not Sig |
| ENSG00000236310 | NA        | NA                                                 | NA |        | 2.712081912 | -0.401387023 | 1.734082938 | -0.231469334 | 0.816950206 | NA          | NA      |
| ENSG00000234176 | NA        | NA                                                 | NA |        | 2.156151621 | -0.401385803 | 1.847497879 | -0.217259141 | 0.828006397 | NA          | NA      |
| ENSG00000258565 | NA        | NA                                                 | NA |        | 2.156151621 | -0.401385803 | 1.847497879 | -0.217259141 | 0.828006397 | NA          | NA      |
| ENSG00000023287 | RB1CC1    | RB1 inducible coiled-coil 1                        |    | 9821   | 2811.515474 | -0.401258989 | 0.483626261 | -0.829688174 | 0.406715109 | 0.999371363 | Not Sig |
| ENSG00000234724 | NA        | NA                                                 | NA |        | 12.87035982 | -0.401116267 | 0.848993047 | -0.472461192 | 0.636597636 | 0.999371363 | Not Sig |
| ENSG00000161133 | USP41     | ubiquitin specific peptidase 41                    |    | 373856 | 4.857733127 | -0.400914904 | 1.529775574 | -0.262074327 | 0.793264139 | NA          | NA      |

|                 |              |                                                      |           |             |              |             |              |             |             |         |
|-----------------|--------------|------------------------------------------------------|-----------|-------------|--------------|-------------|--------------|-------------|-------------|---------|
| ENSG00000197046 | SIGLEC15     | sialic acid binding Ig like lectin 15                | 284266    | 16.65347814 | -0.400863287 | 0.899009741 | -0.445894264 | 0.655673626 | 0.999371363 | Not Sig |
| ENSG00000225733 | FGD5-AS1     | FGD5 antisense RNA 1                                 | 100505641 | 2331.259415 | -0.400748906 | 0.409402151 | -0.978863705 | 0.327647328 | 0.999371363 | Not Sig |
| ENSG00000035115 | SH3YL1       | SH3 and SYLF domain containing 1                     | 26751     | 1334.127746 | -0.400733648 | 0.503974716 | -0.795146335 | 0.426528384 | 0.999371363 | Not Sig |
| ENSG00000151491 | EPS8         | epidermal growth factor receptor pathway substrate 8 | 2059      | 3333.068468 | -0.40059472  | 0.712151077 | -0.562513675 | 0.573766089 | 0.999371363 | Not Sig |
| ENSG00000170906 | NDUFA3       | NADH:ubiquinone oxidoreductase subunit A3            | 4696      | 420.9045989 | -0.40044585  | 0.481530951 | -0.831609783 | 0.405629238 | 0.999371363 | Not Sig |
| ENSG00000167378 | IRGQ         | immunity related GTPase Q                            | 126298    | 1089.53775  | -0.400376287 | 0.384560042 | -1.041128155 | 0.297816074 | 0.999371363 | Not Sig |
| ENSG00000233246 | LOC101929464 | uncharacterized LOC101929464                         | 101929464 | 10.8654665  | -0.400093709 | 1.203045319 | -0.332567446 | 0.73946082  | 0.999371363 | Not Sig |
| ENSG00000100802 | C14orf93     | chromosome 14 open reading frame 93                  | 60686     | 200.3639314 | -0.40002281  | 0.494347626 | -0.809193347 | 0.418403941 | 0.999371363 | Not Sig |
| ENSG00000153487 | ING1         | inhibitor of growth family member 1                  | 3621      | 445.7941754 | -0.399878516 | 0.487836452 | -0.819697903 | 0.412388346 | 0.999371363 | Not Sig |
| ENSG00000163554 | SPTA1        | spectrin alpha, erythrocytic 1                       | 6708      | 7.297484744 | -0.399758119 | 1.170030451 | -0.341664713 | 0.73260323  | 0.999371363 | Not Sig |
| ENSG00000232994 | NA           | NA                                                   | NA        | 58.92483652 | -0.399720691 | 0.737716377 | -0.541835188 | 0.587932049 | 0.999371363 | Not Sig |
| ENSG00000155256 | ZFYVE27      | zinc finger FYVE-type containing 27                  | 118813    | 695.6217132 | -0.399513046 | 0.427410288 | -0.934729597 | 0.34992767  | 0.999371363 | Not Sig |
| ENSG00000222650 | NA           | NA                                                   | NA        | 2.546687903 | -0.399325388 | 1.542582967 | -0.258868013 | 0.795737079 | NA          | NA      |
| ENSG00000268485 | NA           | NA                                                   | NA        | 35.94749946 | -0.399225797 | 0.773541321 | -0.51610145  | 0.605783555 | 0.999371363 | Not Sig |
| ENSG00000215630 | NA           | NA                                                   | NA        | 249.3545594 | -0.399192069 | 0.634577489 | -0.629067491 | 0.529304872 | 0.999371363 | Not Sig |
| ENSG00000093183 | SEC22C       | SEC22 homolog C, vesicle trafficking protein         | 9117      | 935.8552792 | -0.398992464 | 0.426988287 | -0.934434212 | 0.350079957 | 0.999371363 | Not Sig |
| ENSG00000130751 | NPAS1        | neuronal PAS domain protein 1                        | 4861      | 25.69747842 | -0.39893367  | 0.87115497  | -0.457936513 | 0.646998053 | 0.999371363 | Not Sig |
| ENSG00000214558 | NA           | NA                                                   | NA        | 5.701492575 | -0.398931717 | 1.095184451 | -0.364259844 | 0.715663983 | NA          | NA      |
| ENSG00000261385 | NA           | NA                                                   | NA        | 3.563236158 | -0.398904324 | 1.270561606 | -0.313959057 | 0.753552135 | NA          | NA      |
| ENSG00000162341 | TPCN2        | two pore segment channel 2                           | 219931    | 546.270258  | -0.398544279 | 0.475257104 | -0.838586684 | 0.401701285 | 0.999371363 | Not Sig |
| ENSG00000069399 | BCL3         | B-cell CLL/lymphoma 3                                | 602       | 1845.46536  | -0.398469821 | 0.546773947 | -0.728765192 | 0.466145307 | 0.999371363 | Not Sig |
| ENSG00000211455 | STK38L       | serine/threonine kinase 38 like                      | 23012     | 990.7321096 | -0.398268174 | 0.620437023 | -0.641915552 | 0.520928016 | 0.999371363 | Not Sig |
| ENSG00000149782 | PLCB3        | phospholipase C beta 3                               | 5331      | 1377.522872 | -0.398238188 | 0.644668674 | -0.617740871 | 0.536746166 | 0.999371363 | Not Sig |
| ENSG00000119899 | SLC17A5      | solute carrier family 17 member 5                    | 26503     | 702.8285389 | -0.398155397 | 0.461659668 | -0.862443537 | 0.388443491 | 0.999371363 | Not Sig |
| ENSG00000160447 | PKN3         | protein kinase N3                                    | 29941     | 385.3839611 | -0.398055938 | 0.814626863 | -0.488635909 | 0.625099486 | 0.999371363 | Not Sig |
| ENSG00000164978 | NUDT2        | nudix hydrolase 2                                    | 318       | 138.1395435 | -0.397924663 | 0.534012757 | -0.74515947  | 0.456175321 | 0.999371363 | Not Sig |
| ENSG00000107372 | ZFAND5       | zinc finger AN1-type containing 5                    | 7763      | 4568.085069 | -0.397706232 | 0.500304862 | -0.794927777 | 0.426655515 | 0.999371363 | Not Sig |
| ENSG00000242852 | ZNF709       | zinc finger protein 709                              | 163051    | 13.96389792 | -0.397498906 | 0.809271732 | -0.491181009 | 0.62329843  | 0.999371363 | Not Sig |
| ENSG00000256591 | NA           | NA                                                   | NA        | 13.21523536 | -0.397224193 | 0.880826878 | -0.450967384 | 0.652013056 | 0.999371363 | Not Sig |
| ENSG00000169359 | SLC33A1      | solute carrier family 33 member 1                    | 9197      | 1135.202362 | -0.396731546 | 0.611127546 | -0.649179616 | 0.516222286 | 0.999371363 | Not Sig |
| ENSG00000021762 | OSBPL5       | oxysterol binding protein like 5                     | 114879    | 929.7008748 | -0.396660173 | 0.773354618 | -0.512908521 | 0.608015313 | 0.999371363 | Not Sig |
| ENSG00000101445 | PPP1R16B     | protein phosphatase 1 regulatory subunit 16B         | 26051     | 678.1952365 | -0.396192919 | 0.817853301 | -0.484430299 | 0.62808052  | 0.999371363 | Not Sig |
| ENSG00000153896 | ZNF599       | zinc finger protein 599                              | 148103    | 120.5090492 | -0.396119637 | 0.435785036 | -0.908979438 | 0.36336098  | 0.999371363 | Not Sig |
| ENSG00000234772 | NA           | NA                                                   | NA        | 6.254406153 | -0.39603746  | 1.046398826 | -0.378476591 | 0.705076581 | NA          | NA      |
| ENSG00000015285 | WAS          | Wiskott-Aldrich syndrome                             | 7454      | 474.0523833 | -0.395991872 | 0.891283535 | -0.444293939 | 0.656830083 | 0.999371363 | Not Sig |

|                 |           |                                                            |           |             |              |             |              |             |             |         |
|-----------------|-----------|------------------------------------------------------------|-----------|-------------|--------------|-------------|--------------|-------------|-------------|---------|
| ENSG00000151092 | NGLY1     | N-glycanase 1                                              | 55768     | 801.3204484 | -0.395983038 | 0.60839836  | -0.65086145  | 0.515135929 | 0.999371363 | Not Sig |
| ENSG00000267395 | DM1-AS    | DM1 locus antisense RNA                                    | 109729182 | 31.25641904 | -0.395727333 | 0.772838209 | -0.512044214 | 0.608620066 | 0.999371363 | Not Sig |
| ENSG00000263911 | NA        | NA                                                         | NA        | 1.164047061 | -0.395725584 | 2.502291258 | -0.158145293 | 0.874342311 | NA          | NA      |
| ENSG00000204388 | HSPA1B    | heat shock protein family A (Hsp70) member 1B              | 3304      | 2231.081338 | -0.395617619 | 0.448748272 | -0.881602546 | 0.377991778 | 0.999371363 | Not Sig |
| ENSG00000172349 | IL16      | interleukin 16                                             | 3603      | 1376.81421  | -0.395609351 | 0.850553966 | -0.465119636 | 0.641845785 | 0.999371363 | Not Sig |
| ENSG00000105372 | RPS19     | ribosomal protein S19                                      | 6223      | 4960.037676 | -0.395526818 | 0.507560195 | -0.779270757 | 0.435820237 | 0.999371363 | Not Sig |
| ENSG00000257591 | ZNF625    | zinc finger protein 625                                    | 90589     | 10.39773433 | -0.395465217 | 0.909333176 | -0.434895842 | 0.663638033 | 0.999371363 | Not Sig |
| ENSG00000198431 | TXNRD1    | thioredoxin reductase 1                                    | 7296      | 3602.464151 | -0.395447817 | 0.776786595 | -0.509081671 | 0.610694979 | 0.999371363 | Not Sig |
| ENSG00000088827 | SIGLEC1   | sialic acid binding Ig like lectin 1                       | 6614      | 1581.288195 | -0.395349604 | 1.070123002 | -0.369443142 | 0.711797446 | 0.999371363 | Not Sig |
| ENSG00000144445 | KANSL1L   | KAT8 regulatory NSL complex subunit 1 like                 | 151050    | 1017.487432 | -0.395348372 | 0.448162484 | -0.882154099 | 0.37769348  | 0.999371363 | Not Sig |
| ENSG00000070366 | SMG6      | SMG6, nonsense mediated mRNA decay factor                  | 23293     | 1532.162221 | -0.395179296 | 0.436178668 | -0.906003263 | 0.364934125 | 0.999371363 | Not Sig |
| ENSG00000123427 | EEF1AKMT3 | EEF1A lysine methyltransferase 3                           | 25895     | 254.0007886 | -0.394895417 | 0.4330041   | -0.911990017 | 0.361773973 | 0.999371363 | Not Sig |
| ENSG00000137970 | NA        | NA                                                         | NA        | 35.61955537 | -0.394871417 | 0.65110659  | -0.606462019 | 0.544207996 | 0.999371363 | Not Sig |
| ENSG00000115425 | PECR      | peroxisomal trans-2-enoyl-CoA reductase                    | 55825     | 148.1496876 | -0.394828377 | 0.566987908 | -0.696361195 | 0.486202658 | 0.999371363 | Not Sig |
| ENSG00000007306 | CEACAM7   | carcinoembryonic antigen related cell adhesion molecule 7  | 1087      | 17.40144468 | -0.394600127 | 1.379093346 | -0.286130107 | 0.774778473 | 0.999371363 | Not Sig |
| ENSG00000075539 | FRYL      | FRY like transcription coactivator                         | 285527    | 3390.552425 | -0.394351467 | 0.483792683 | -0.81512491  | 0.415000815 | 0.999371363 | Not Sig |
| ENSG00000101407 | TTI1      | TELO2 interacting protein 1                                | 9675      | 700.3769663 | -0.394292106 | 0.509129853 | -0.77444311  | 0.438668799 | 0.999371363 | Not Sig |
| ENSG00000213799 | ZNF845    | zinc finger protein 845                                    | 91664     | 354.3672409 | -0.394270022 | 0.442421081 | -0.891164638 | 0.372840852 | 0.999371363 | Not Sig |
| ENSG00000065621 | GSTO2     | glutathione S-transferase omega 2                          | 119391    | 317.4911199 | -0.393938533 | 0.583142153 | -0.6755446   | 0.499329825 | 0.999371363 | Not Sig |
| ENSG00000131016 | AKAP12    | A-kinase anchoring protein 12                              | 9590      | 2020.5592   | -0.393934882 | 0.597608125 | -0.659185954 | 0.509776366 | 0.999371363 | Not Sig |
| ENSG00000129219 | PLD2      | phospholipase D2                                           | 5338      | 723.2080438 | -0.393713246 | 0.511985321 | -0.768993231 | 0.441897329 | 0.999371363 | Not Sig |
| ENSG00000104142 | VPS18     | VPS18, CORVET/HOPS core subunit                            | 57617     | 1061.095385 | -0.39369885  | 0.586387246 | -0.671397363 | 0.501967425 | 0.999371363 | Not Sig |
| ENSG00000082898 | XPO1      | exportin 1                                                 | 7514      | 5033.129403 | -0.393483259 | 0.647705095 | -0.607503726 | 0.543516671 | 0.999371363 | Not Sig |
| ENSG00000107147 | KCNT1     | potassium sodium-activated channel subfamily T member 1    | 57582     | 9.888371146 | -0.393254256 | 1.272925205 | -0.308937442 | 0.757369114 | 0.999371363 | Not Sig |
| ENSG00000169062 | UPF3A     | UPF3A, regulator of nonsense mediated mRNA decay           | 65110     | 687.8828209 | -0.392794543 | 0.496181688 | -0.791634501 | 0.428573824 | 0.999371363 | Not Sig |
| ENSG00000132549 | VPS13B    | vacuolar protein sorting 13 homolog B                      | 157680    | 3681.717179 | -0.392665287 | 0.545476702 | -0.71985712  | 0.471612972 | 0.999371363 | Not Sig |
| ENSG00000105429 | MEGF8     | multiple EGF like domains 8                                | 1954      | 1622.105932 | -0.392540757 | 0.489311997 | -0.802229987 | 0.422419933 | 0.999371363 | Not Sig |
| ENSG00000152229 | PSTPIP2   | proline-serine-threonine phosphatase interacting protein 2 | 9050      | 318.8126262 | -0.392537169 | 0.518541571 | -0.757002313 | 0.449048477 | 0.999371363 | Not Sig |
| ENSG00000163655 | GMPS      | guanine monophosphate synthase                             | 8833      | 1243.054604 | -0.392521072 | 0.573051462 | -0.68496653  | 0.493365042 | 0.999371363 | Not Sig |
| ENSG00000261126 | RBFADN    | RBFA downstream neighbor (non-protein coding)              | 100506070 | 33.57169095 | -0.392474871 | 0.811254908 | -0.483787362 | 0.628536785 | 0.999371363 | Not Sig |
| ENSG00000267682 | NA        | NA                                                         | NA        | 42.92280773 | -0.392326775 | 0.530169769 | -0.740002162 | 0.459298683 | 0.999371363 | Not Sig |
| ENSG00000125611 | CHCHD5    | coiled-coil-helix-coiled-coil-helix domain containing 5    | 84269     | 228.6188901 | -0.392143504 | 0.620131207 | -0.632355701 | 0.527154474 | 0.999371363 | Not Sig |
| ENSG00000272146 | ARF4-AS1  | ARF4 antisense RNA 1                                       | 106144532 | 17.26330145 | -0.392131138 | 0.799178401 | -0.490667838 | 0.623661398 | 0.999371363 | Not Sig |
| ENSG00000240370 | RPL13P5   | ribosomal protein L13 pseudogene 5                         | 283345    | 68.55756975 | -0.392119682 | 0.496822298 | -0.7892554   | 0.429962748 | 0.999371363 | Not Sig |
| ENSG00000270062 | NA        | NA                                                         | NA        | 13.77488609 | -0.392093216 | 1.106373797 | -0.354394886 | 0.723042966 | 0.999371363 | Not Sig |

|                 |          |                                                                                      |           |             |              |             |              |             |             |         |
|-----------------|----------|--------------------------------------------------------------------------------------|-----------|-------------|--------------|-------------|--------------|-------------|-------------|---------|
| ENSG00000105171 | POP4     | POP4 homolog, ribonuclease P/MRP subunit                                             | 10775     | 341.3521984 | -0.392092467 | 0.411350913 | -0.953182439 | 0.340497642 | 0.999371363 | Not Sig |
| ENSG00000136938 | ANP32B   | acidic nuclear phosphoprotein 32 family member B                                     | 10541     | 2373.935913 | -0.391671354 | 0.410306803 | -0.954581673 | 0.339789289 | 0.999371363 | Not Sig |
| ENSG00000134627 | PIWIL4   | piwi like RNA-mediated gene silencing 4                                              | 143689    | 85.98709511 | -0.391003655 | 0.636736394 | -0.614074612 | 0.539166024 | 0.999371363 | Not Sig |
| ENSG00000101353 | MROH8    | maestro heat like repeat family member 8                                             | 140699    | 56.48406057 | -0.390861217 | 0.697035585 | -0.560747866 | 0.574969431 | 0.999371363 | Not Sig |
| ENSG00000270116 | NA       | NA                                                                                   | NA        | 75.07151673 | -0.390754999 | 0.821558019 | -0.475626785 | 0.63434029  | 0.999371363 | Not Sig |
| ENSG00000178789 | CD300LB  | CD300 molecule like family member b                                                  | 124599    | 55.73566053 | -0.390523865 | 1.02359343  | -0.381522442 | 0.702815622 | 0.999371363 | Not Sig |
| ENSG00000175164 | ABO      | ABO, alpha 1-3-N-acetylgalactosaminyltransferase and alpha 1-3-galactosyltransferase | 28        | 244.7883828 | -0.390299788 | 0.637651114 | -0.612089871 | 0.540478298 | 0.999371363 | Not Sig |
| ENSG00000229816 | NA       | NA                                                                                   | NA        | 81.16815302 | -0.390121381 | 0.605521718 | -0.644273144 | 0.519398327 | 0.999371363 | Not Sig |
| ENSG00000230185 | NA       | NA                                                                                   | NA        | 19.54141275 | -0.390094054 | 0.717736528 | -0.543505923 | 0.586781514 | 0.999371363 | Not Sig |
| ENSG00000221930 | NA       | NA                                                                                   | NA        | 1.758873752 | -0.389819953 | 1.711918246 | -0.227709445 | 0.819872129 | NA          | NA      |
| ENSG00000131507 | NDFIP1   | Nedd4 family interacting protein 1                                                   | 80762     | 2648.911897 | -0.389805583 | 0.522251788 | -0.746393965 | 0.455429464 | 0.999371363 | Not Sig |
| ENSG00000019549 | SNAI2    | snail family transcriptional repressor 2                                             | 6591      | 120.013389  | -0.389640237 | 0.581668832 | -0.669866109 | 0.502943146 | 0.999371363 | Not Sig |
| ENSG00000239948 | NA       | NA                                                                                   | NA        | 21.05689435 | -0.389631845 | 0.8867188   | -0.439408576 | 0.660365514 | 0.999371363 | Not Sig |
| ENSG00000006704 | GTF2IRD1 | GTF2I repeat domain containing 1                                                     | 9569      | 695.0096853 | -0.389575144 | 0.562953713 | -0.69201985  | 0.488924863 | 0.999371363 | Not Sig |
| ENSG00000148303 | RPL7A    | ribosomal protein L7a                                                                | 6130      | 9735.840459 | -0.388910867 | 0.451133366 | -0.862075156 | 0.388646162 | 0.999371363 | Not Sig |
| ENSG00000164061 | BSN      | bassoon presynaptic cytomatrix protein                                               | 8927      | 96.98512764 | -0.388861005 | 0.822168269 | -0.472970096 | 0.636234514 | 0.999371363 | Not Sig |
| ENSG00000187808 | SOWAHD   | sosondawah ankyrin repeat domain family member D                                     | 347454    | 49.10453483 | -0.388576611 | 1.000151128 | -0.388517895 | 0.697632814 | 0.999371363 | Not Sig |
| ENSG00000232150 | NA       | NA                                                                                   | NA        | 3.558216025 | -0.388500995 | 1.395023497 | -0.278490646 | 0.780635744 | NA          | NA      |
| ENSG00000215421 | ZNF407   | zinc finger protein 407                                                              | 55628     | 1385.088628 | -0.388483327 | 0.487330313 | -0.797166351 | 0.425354426 | 0.999371363 | Not Sig |
| ENSG00000164096 | C4orf3   | chromosome 4 open reading frame 3                                                    | 401152    | 1527.071225 | -0.388427214 | 0.493409089 | -0.787231574 | 0.431146317 | 0.999371363 | Not Sig |
| ENSG00000179981 | TSHZ1    | teashirt zinc finger homeobox 1                                                      | 10194     | 809.1036581 | -0.388322143 | 0.483746327 | -0.802739207 | 0.422125486 | 0.999371363 | Not Sig |
| ENSG00000159055 | MIS18A   | MIS18 kinetochore protein A                                                          | 54069     | 123.5671782 | -0.388246814 | 0.61731832  | -0.628924821 | 0.529398275 | 0.999371363 | Not Sig |
| ENSG00000115020 | PIKFYVE  | phosphoinositide kinase, FYVE-type zinc finger containing                            | 200576    | 2242.671874 | -0.388150794 | 0.51036949  | -0.760528994 | 0.446938445 | 0.999371363 | Not Sig |
| ENSG00000130528 | HRC      | histidine rich calcium binding protein                                               | 3270      | 28.35815226 | -0.387945521 | 0.786156331 | -0.493471216 | 0.621679673 | 0.999371363 | Not Sig |
| ENSG00000177733 | HNRNPA0  | heterogeneous nuclear ribonucleoprotein A0                                           | 10949     | 2348.253347 | -0.387906942 | 0.453813864 | -0.854771026 | 0.392677921 | 0.999371363 | Not Sig |
| ENSG00000109046 | WSB1     | WD repeat and SOCS box containing 1                                                  | 26118     | 9530.099277 | -0.387580578 | 0.738316589 | -0.52495174  | 0.59961674  | 0.999371363 | Not Sig |
| ENSG00000224531 | SMIM13   | small integral membrane protein 13                                                   | 221710    | 348.9963825 | -0.387455444 | 0.472062553 | -0.820771402 | 0.411776491 | 0.999371363 | Not Sig |
| ENSG00000254838 | GVINP1   | GTPase, very large interferon inducible pseudogene 1                                 | 387751    | 792.6220728 | -0.387164942 | 0.801579983 | -0.483002258 | 0.629094133 | 0.999371363 | Not Sig |
| ENSG00000162490 | DRAXIN   | dorsal inhibitory axon guidance protein                                              | 374946    | 18.31549295 | -0.387152847 | 1.131387493 | -0.34219297  | 0.732205675 | 0.999371363 | Not Sig |
| ENSG00000178386 | ZNF223   | zinc finger protein 223                                                              | 7766      | 29.65814573 | -0.387037235 | 0.780114961 | -0.496128461 | 0.61980378  | 0.999371363 | Not Sig |
| ENSG00000211491 | MIR320D1 | microRNA 320d-1                                                                      | 100313896 | 3.889004043 | -0.386829738 | 1.506991701 | -0.256690026 | 0.797418072 | NA          | NA      |
| ENSG00000154001 | PPP2R5E  | protein phosphatase 2 regulatory subunit B' epsilon                                  | 5529      | 2044.93197  | -0.386756265 | 0.551414044 | -0.701389944 | 0.483059696 | 0.999371363 | Not Sig |
| ENSG00000155868 | MED7     | mediator complex subunit 7                                                           | 9443      | 225.1842347 | -0.386498481 | 0.462058499 | -0.836470884 | 0.40289005  | 0.999371363 | Not Sig |
| ENSG00000228506 | NA       | NA                                                                                   | NA        | 115.8603982 | -0.386206348 | 0.631111674 | -0.611946133 | 0.540573398 | 0.999371363 | Not Sig |
| ENSG00000123685 | BATF3    | basic leucine zipper ATF-like transcription factor 3                                 | 55509     | 65.47762456 | -0.386156853 | 0.615418641 | -0.627470193 | 0.530351069 | 0.999371363 | Not Sig |

|                 |                |                                                                 |           |             |              |             |              |             |             |         |
|-----------------|----------------|-----------------------------------------------------------------|-----------|-------------|--------------|-------------|--------------|-------------|-------------|---------|
| ENSG00000134899 | ERCC5          | ERCC excision repair 5, endonuclease                            | 2073      | 432.4605412 | -0.386156337 | 0.425456192 | -0.907628903 | 0.364074318 | 0.999371363 | Not Sig |
| ENSG00000123415 | SMUG1          | single-strand-selective monofunctional uracil-DNA glycosylase 1 | 23583     | 372.8441866 | -0.385838843 | 0.401627261 | -0.960688877 | 0.336708625 | 0.999371363 | Not Sig |
| ENSG00000152455 | SUV39H2        | suppressor of variegation 3-9 homolog 2                         | 79723     | 152.74994   | -0.385835726 | 0.66419252  | -0.580909472 | 0.561301468 | 0.999371363 | Not Sig |
| ENSG00000204673 | AKT1S1         | AKT1 substrate 1                                                | 84335     | 777.0839425 | -0.385412282 | 0.467050151 | -0.825205348 | 0.409255018 | 0.999371363 | Not Sig |
| ENSG00000106246 | PTCD1          | pentatricopeptide repeat domain 1                               | 26024     | 91.92523713 | -0.385405275 | 0.526138386 | -0.73251693  | 0.463853113 | 0.999371363 | Not Sig |
| ENSG00000261234 | NA             | NA                                                              | NA        | 8.705544486 | -0.385374755 | 0.980923612 | -0.392869282 | 0.69441603  | 0.999371363 | Not Sig |
| ENSG00000241985 | NA             | NA                                                              | NA        | 40.26874119 | -0.385278797 | 0.759289627 | -0.507420072 | 0.611860105 | 0.999371363 | Not Sig |
| ENSG00000177565 | TBL1XR1        | transducin beta like 1 X-linked receptor 1                      | 79718     | 5113.267011 | -0.385258543 | 0.65090986  | -0.591876951 | 0.55393299  | 0.999371363 | Not Sig |
| ENSG00000137968 | SLC44A5        | solute carrier family 44 member 5                               | 204962    | 483.4680309 | -0.384984089 | 1.455969229 | -0.264417737 | 0.791458045 | 0.999371363 | Not Sig |
| ENSG00000160948 | VPS28          | VPS28, ESCRT-I subunit                                          | 51160     | 1244.757446 | -0.384951822 | 0.555738402 | -0.6926853   | 0.488507066 | 0.999371363 | Not Sig |
| ENSG00000186272 | ZNF17          | zinc finger protein 17                                          | 7565      | 180.7974388 | -0.384921493 | 0.426760046 | -0.901962349 | 0.367076869 | 0.999371363 | Not Sig |
| ENSG00000026036 | RTEL1-TNFRSF6B | RTEL1-TNFRSF6B readthrough (NMD candidate)                      | 100533107 | 99.26269915 | -0.384831646 | 0.547992853 | -0.702256688 | 0.482519099 | 0.999371363 | Not Sig |
| ENSG00000137135 | ARHGEF39       | Rho guanine nucleotide exchange factor 39                       | 84904     | 48.72951025 | -0.384829673 | 0.909635933 | -0.423059006 | 0.672252211 | 0.999371363 | Not Sig |
| ENSG00000249633 | NA             | NA                                                              | NA        | 7.753243767 | -0.384753345 | 1.257498521 | -0.305967235 | 0.759629593 | 0.999371363 | Not Sig |
| ENSG00000133657 | ATP13A3        | ATPase 13A3                                                     | 79572     | 3806.504873 | -0.384282064 | 0.543468022 | -0.707092319 | 0.479509109 | 0.999371363 | Not Sig |
| ENSG00000178177 | LCORL          | ligand dependent nuclear receptor corepressor like              | 254251    | 489.0696663 | -0.384266828 | 0.669773659 | -0.573726397 | 0.566152963 | 0.999371363 | Not Sig |
| ENSG00000130726 | TRIM28         | tripartite motif containing 28                                  | 10155     | 3466.952911 | -0.383968304 | 0.474107264 | -0.809876441 | 0.418011193 | 0.999371363 | Not Sig |
| ENSG00000262495 | NA             | NA                                                              | NA        | 4.625711121 | -0.383847764 | 1.312049975 | -0.29255575  | 0.769861741 | NA          | NA      |
| ENSG00000151693 | ASAP2          | ArfGAP with SH3 domain, ankyrin repeat and PH domain 2          | 8853      | 1260.877303 | -0.383654234 | 0.442576173 | -0.866865994 | 0.386015438 | 0.999371363 | Not Sig |
| ENSG00000252147 | NA             | NA                                                              | NA        | 2.230103079 | -0.38358258  | 1.758449241 | -0.218136851 | 0.827322486 | NA          | NA      |
| ENSG00000122417 | ODF2L          | outer dense fiber of sperm tails 2 like                         | 57489     | 1589.966034 | -0.382512021 | 0.756146864 | -0.505870009 | 0.612947908 | 0.999371363 | Not Sig |
| ENSG00000083828 | ZNF586         | zinc finger protein 586                                         | 54807     | 375.1580384 | -0.382301742 | 0.437052448 | -0.874727377 | 0.38172226  | 0.999371363 | Not Sig |
| ENSG00000198015 | MRPL42         | mitochondrial ribosomal protein L42                             | 28977     | 579.1762282 | -0.382292513 | 0.645961701 | -0.591819164 | 0.553971689 | 0.999371363 | Not Sig |
| ENSG00000123607 | TTC21B         | tetratricopeptide repeat domain 21B                             | 79809     | 874.0600964 | -0.382241513 | 0.481201459 | -0.7943482   | 0.426992751 | 0.999371363 | Not Sig |
| ENSG00000173480 | ZNF417         | zinc finger protein 417                                         | 147687    | 429.98935   | -0.382193301 | 0.533831655 | -0.715943497 | 0.474026239 | 0.999371363 | Not Sig |
| ENSG00000207759 | MIR181A1       | microRNA 181a-1                                                 | 406995    | 2.733226929 | -0.381948372 | 1.986681984 | -0.19225441  | 0.847542928 | NA          | NA      |
| ENSG00000043143 | JADE2          | jade family PHD finger 2                                        | 23338     | 2216.624245 | -0.381892571 | 0.60408907  | -0.632179243 | 0.527269759 | 0.999371363 | Not Sig |
| ENSG00000156650 | KAT6B          | lysine acetyltransferase 6B                                     | 23522     | 1756.173129 | -0.381806825 | 0.406368094 | -0.939559062 | 0.347443783 | 0.999371363 | Not Sig |
| ENSG00000139842 | CUL4A          | cullin 4A                                                       | 8451      | 2015.982609 | -0.381396108 | 0.458436842 | -0.831949079 | 0.405437687 | 0.999371363 | Not Sig |
| ENSG00000199477 | SNORA31        | small nucleolar RNA, H/ACA box 31                               | 677814    | 14.25295678 | -0.381301525 | 0.738652202 | -0.516212534 | 0.605705977 | 0.999371363 | Not Sig |
| ENSG00000006740 | ARHGAP44       | Rho GTPase activating protein 44                                | 9912      | 1205.670544 | -0.38117828  | 0.862131974 | -0.44213449  | 0.658391888 | 0.999371363 | Not Sig |
| ENSG00000123610 | TNFAIP6        | TNF alpha induced protein 6                                     | 7130      | 48.37954967 | -0.381177867 | 0.615754934 | -0.619041515 | 0.53588901  | 0.999371363 | Not Sig |
| ENSG00000068305 | MEF2A          | myocyte enhancer factor 2A                                      | 4205      | 1970.276254 | -0.380598948 | 0.436308435 | -0.872316274 | 0.383035862 | 0.999371363 | Not Sig |
| ENSG00000240053 | LY6G5B         | lymphocyte antigen 6 family member G5B                          | 58496     | 53.24726783 | -0.380298772 | 0.531946609 | -0.714919065 | 0.474659056 | 0.999371363 | Not Sig |
| ENSG00000236818 | NA             | NA                                                              | NA        | 1.400231994 | -0.3802147   | 2.322390586 | -0.163716948 | 0.869953975 | NA          | NA      |

|                 |              |                                                                                                                 |           |             |              |             |              |             |             |         |
|-----------------|--------------|-----------------------------------------------------------------------------------------------------------------|-----------|-------------|--------------|-------------|--------------|-------------|-------------|---------|
| ENSG00000270040 | NA           | NA                                                                                                              | NA        | 14.93490451 | -0.380189047 | 1.143877523 | -0.332368667 | 0.739610895 | 0.999371363 | Not Sig |
| ENSG00000152443 | ZNF776       | zinc finger protein 776                                                                                         | 284309    | 476.2762833 | -0.380078853 | 0.503221066 | -0.755292015 | 0.450073789 | 0.999371363 | Not Sig |
| ENSG00000201944 | NA           | NA                                                                                                              | NA        | 26.18916404 | -0.379858409 | 1.055989365 | -0.359718026 | 0.719058011 | 0.999371363 | Not Sig |
| ENSG00000155313 | USP25        | ubiquitin specific peptidase 25                                                                                 | 29761     | 2173.246817 | -0.379796259 | 0.506145756 | -0.750369344 | 0.453032289 | 0.999371363 | Not Sig |
| ENSG00000163818 | LZTFL1       | leucine zipper transcription factor like 1                                                                      | 54585     | 506.1785468 | -0.379652373 | 0.578682123 | -0.656063767 | 0.511783096 | 0.999371363 | Not Sig |
| ENSG00000163701 | IL17RE       | interleukin 17 receptor E                                                                                       | 132014    | 519.7971484 | -0.379595475 | 0.728894696 | -0.520782326 | 0.602518417 | 0.999371363 | Not Sig |
| ENSG00000209482 | SNORD83A     | small nucleolar RNA, C/D box 83A                                                                                | 116937    | 8.563791347 | -0.379491958 | 1.010030257 | -0.375723356 | 0.707122572 | 0.999371363 | Not Sig |
| ENSG00000117859 | OSBPL9       | oxysterol binding protein like 9                                                                                | 114883    | 2601.669587 | -0.379427312 | 0.500708955 | -0.75778016  | 0.448582602 | 0.999371363 | Not Sig |
| ENSG00000241886 | NA           | NA                                                                                                              | NA        | 46.51021651 | -0.379192608 | 1.098522502 | -0.345184197 | 0.729955898 | 0.999371363 | Not Sig |
| ENSG00000264577 | NA           | NA                                                                                                              | NA        | 13.96154698 | -0.379043571 | 0.771467816 | -0.491327782 | 0.623194633 | 0.999371363 | Not Sig |
| ENSG00000139613 | SMARCC2      | <small>SMARCC2 related, active associated, active dependent regulator of chromatin subfamily 2 member 2</small> | 6601      | 2983.131343 | -0.378936448 | 0.420898824 | -0.90030294  | 0.367959057 | 0.999371363 | Not Sig |
| ENSG00000245025 | LOC107986927 | uncharacterized LOC107986927                                                                                    | 107986927 | 88.04334132 | -0.378881995 | 0.809604279 | -0.46798418  | 0.639795903 | 0.999371363 | Not Sig |
| ENSG00000254676 | NA           | NA                                                                                                              | NA        | 14.11632963 | -0.378706835 | 0.737639552 | -0.513403645 | 0.607668996 | 0.999371363 | Not Sig |
| ENSG00000042286 | AIFM2        | apoptosis inducing factor, mitochondria associated 2                                                            | 84883     | 361.4936598 | -0.378638649 | 0.598860616 | -0.63226507  | 0.527213684 | 0.999371363 | Not Sig |
| ENSG00000133773 | CCDC59       | coiled-coil domain containing 59                                                                                | 29080     | 285.5862165 | -0.378539419 | 0.528948964 | -0.715644503 | 0.474210887 | 0.999371363 | Not Sig |
| ENSG00000226688 | ENTPD1-AS1   | ENTPD1 antisense RNA 1                                                                                          | 728558    | 209.951617  | -0.378355901 | 0.528221063 | -0.716283251 | 0.473816466 | 0.999371363 | Not Sig |
| ENSG00000266621 | NA           | NA                                                                                                              | NA        | 6.372712197 | -0.378243457 | 1.098104493 | -0.344451243 | 0.730506958 | NA          | NA      |
| ENSG00000166925 | TSC22D4      | TSC22 domain family member 4                                                                                    | 81628     | 1330.915153 | -0.37819977  | 0.498007275 | -0.759426196 | 0.447597648 | 0.999371363 | Not Sig |
| ENSG00000090989 | EXOC1        | exocyst complex component 1                                                                                     | 55763     | 1243.28571  | -0.378175632 | 0.538007107 | -0.702919398 | 0.482105982 | 0.999371363 | Not Sig |
| ENSG00000196652 | ZKSCAN5      | zinc finger with KRAB and SCAN domains 5                                                                        | 23660     | 392.0788085 | -0.378147996 | 0.445439899 | -0.848931577 | 0.395919367 | 0.999371363 | Not Sig |
| ENSG00000254744 | NA           | NA                                                                                                              | NA        | 1.445305641 | -0.377832141 | 2.368782689 | -0.159504771 | 0.873271199 | NA          | NA      |
| ENSG00000170471 | RALGAPB      | <small>Ral GTPase activating protein non-catalytic beta subunit</small>                                         | 57148     | 2578.467721 | -0.377769294 | 0.458253351 | -0.824367772 | 0.409730621 | 0.999371363 | Not Sig |
| ENSG00000152705 | CATSPER3     | cation channel sperm associated 3                                                                               | 347732    | 9.71646894  | -0.37737901  | 1.015580603 | -0.371589423 | 0.710198565 | 0.999371363 | Not Sig |
| ENSG00000263276 | NA           | NA                                                                                                              | NA        | 28.70098243 | -0.377364139 | 0.928250598 | -0.406532611 | 0.684351301 | 0.999371363 | Not Sig |
| ENSG00000142512 | SIGLEC10     | sialic acid binding Ig like lectin 10                                                                           | 89790     | 184.5054629 | -0.377357822 | 0.753784765 | -0.500617471 | 0.616640365 | 0.999371363 | Not Sig |
| ENSG00000184863 | RBM33        | RNA binding motif protein 33                                                                                    | 155435    | 3491.063095 | -0.377304555 | 0.490584456 | -0.769091949 | 0.441838727 | 0.999371363 | Not Sig |
| ENSG00000204954 | C12orf73     | chromosome 12 open reading frame 73                                                                             | 728568    | 94.51626818 | -0.376782947 | 0.460846963 | -0.817587999 | 0.413592482 | 0.999371363 | Not Sig |
| ENSG00000197747 | S100A10      | S100 calcium binding protein A10                                                                                | 6281      | 3303.917006 | -0.37674219  | 0.606065287 | -0.621619812 | 0.53419189  | 0.999371363 | Not Sig |
| ENSG00000168807 | SNTB2        | syntrophin beta 2                                                                                               | 6645      | 1502.283351 | -0.376733265 | 0.41690832  | -0.903635755 | 0.366188576 | 0.999371363 | Not Sig |
| ENSG00000196172 | ZNF681       | zinc finger protein 681                                                                                         | 148213    | 137.9030294 | -0.376580739 | 0.794476577 | -0.473998541 | 0.635500947 | 0.999371363 | Not Sig |
| ENSG00000139890 | REM2         | RRAD and GEM like GTPase 2                                                                                      | 161253    | 19.4048466  | -0.376579126 | 0.663095609 | -0.567910751 | 0.570095571 | 0.999371363 | Not Sig |
| ENSG00000203575 | NA           | NA                                                                                                              | NA        | 2.710742891 | -0.376041139 | 1.961656314 | -0.19169573  | 0.847980551 | NA          | NA      |
| ENSG00000087338 | GMCL1        | germ cell-less, spermatogenesis associated 1                                                                    | 64395     | 699.1075758 | -0.37594798  | 0.595869931 | -0.630922891 | 0.528090943 | 0.999371363 | Not Sig |
| ENSG00000178764 | ZHX2         | zinc fingers and homeoboxes 2                                                                                   | 22882     | 1416.920604 | -0.375946354 | 0.562485614 | -0.668366168 | 0.503899886 | 0.999371363 | Not Sig |
| ENSG00000227632 | NA           | NA                                                                                                              | NA        | 5.408521431 | -0.375901357 | 1.088943691 | -0.345198159 | 0.729945403 | NA          | NA      |

|                 |          |                                                                                                 |        |             |              |             |              |             |             |         |
|-----------------|----------|-------------------------------------------------------------------------------------------------|--------|-------------|--------------|-------------|--------------|-------------|-------------|---------|
| ENSG00000164074 | ABHD18   | abhydrolase domain containing 18                                                                | 80167  | 420.4662017 | -0.375675247 | 0.611261815 | -0.614589751 | 0.538825685 | 0.999371363 | Not Sig |
| ENSG00000126821 | SGPP1    | sphingosine-1-phosphate phosphatase 1                                                           | 81537  | 844.0432371 | -0.375576627 | 0.541463441 | -0.693632476 | 0.487912722 | 0.999371363 | Not Sig |
| ENSG00000180953 | ST20     | suppressor of tumorigenicity 20                                                                 | 400410 | 47.09705768 | -0.375374504 | 0.760489308 | -0.493596031 | 0.621591504 | 0.999371363 | Not Sig |
| ENSG00000105609 | LILRB5   | leukocyte immunoglobulin like receptor B5                                                       | 10990  | 288.8604396 | -0.3753043   | 0.837432851 | -0.44816047  | 0.654037389 | 0.999371363 | Not Sig |
| ENSG00000079950 | STX7     | syntaxin 7                                                                                      | 8417   | 1959.143352 | -0.375303369 | 0.491922831 | -0.76293139  | 0.445504315 | 0.999371363 | Not Sig |
| ENSG00000269831 | NA       | NA                                                                                              | NA     | 3.823167814 | -0.375140982 | 1.3817542   | -0.271496177 | 0.78600944  | NA          | NA      |
| ENSG00000169692 | AGPAT2   | 1-acylglycerol-3-phosphate O-acyltransferase 2                                                  | 10555  | 1559.185777 | -0.375058471 | 0.57915293  | -0.647598331 | 0.517244777 | 0.999371363 | Not Sig |
| ENSG00000166278 | C2       | complement C2                                                                                   | 717    | 961.7709812 | -0.374899145 | 1.073626732 | -0.349189466 | 0.726947074 | 0.999371363 | Not Sig |
| ENSG00000111196 | MAGOHB   | mago homolog B, exon junction complex core component                                            | 55110  | 263.5534343 | -0.374874888 | 0.689912624 | -0.543365747 | 0.586878004 | 0.999371363 | Not Sig |
| ENSG00000143001 | TMEM61   | transmembrane protein 61                                                                        | 199964 | 75.04707903 | -0.374599728 | 0.899913615 | -0.416261874 | 0.677218388 | 0.999371363 | Not Sig |
| ENSG00000163126 | ANKRD23  | ankyrin repeat domain 23                                                                        | 200539 | 34.5531575  | -0.374543777 | 0.54935407  | -0.681789392 | 0.495372133 | 0.999371363 | Not Sig |
| ENSG00000271335 | NA       | NA                                                                                              | NA     | 70.30271536 | -0.374526349 | 0.476420073 | -0.7861263   | 0.431793498 | 0.999371363 | Not Sig |
| ENSG00000197409 | HIST1H3D | histone cluster 1 H3 family member d                                                            | 8351   | 299.5870729 | -0.374211589 | 0.536730801 | -0.697205355 | 0.485674288 | 0.999371363 | Not Sig |
| ENSG00000111271 | ACAD10   | acyl-CoA dehydrogenase family member 10                                                         | 80724  | 876.4338993 | -0.374035772 | 0.521967013 | -0.716588909 | 0.47362779  | 0.999371363 | Not Sig |
| ENSG00000183054 | RGPD6    | RANBP2-like and GRIP domain containing 6                                                        | 729540 | 2.284326922 | -0.373938665 | 1.797433866 | -0.208040291 | 0.835197508 | NA          | NA      |
| ENSG00000163660 | CCNL1    | cyclin L1                                                                                       | 57018  | 3901.892464 | -0.37388646  | 0.594851594 | -0.628537375 | 0.52965197  | 0.999371363 | Not Sig |
| ENSG00000090372 | STRN4    | striatin 4                                                                                      | 29888  | 1533.026978 | -0.373794522 | 0.574428547 | -0.650724139 | 0.515224578 | 0.999371363 | Not Sig |
| ENSG00000267160 | NA       | NA                                                                                              | NA     | 8.32255909  | -0.373560167 | 1.091042003 | -0.342388438 | 0.732058589 | 0.999371363 | Not Sig |
| ENSG00000225648 | SBDSP1   | SBDS, ribosome maturation factor pseudogene 1                                                   | 155370 | 444.222208  | -0.373267387 | 0.442135811 | -0.844236946 | 0.398537013 | 0.999371363 | Not Sig |
| ENSG00000238279 | NA       | NA                                                                                              | NA     | 5.21594898  | -0.373207989 | 1.239321143 | -0.301139048 | 0.763308466 | NA          | NA      |
| ENSG00000036054 | TBC1D23  | TBC1 domain family member 23                                                                    | 55773  | 1031.635986 | -0.373065592 | 0.594171978 | -0.627874766 | 0.530085982 | 0.999371363 | Not Sig |
| ENSG00000119048 | UBE2B    | ubiquitin conjugating enzyme E2 B                                                               | 7320   | 729.2779582 | -0.372707117 | 0.629416321 | -0.592147208 | 0.553752017 | 0.999371363 | Not Sig |
| ENSG00000185043 | CIB1     | calcium and integrin binding 1                                                                  | 10519  | 1955.869928 | -0.372684681 | 0.511492223 | -0.72862238  | 0.466232685 | 0.999371363 | Not Sig |
| ENSG00000206675 | NA       | NA                                                                                              | NA     | 7.953045681 | -0.372553134 | 1.040242516 | -0.358140653 | 0.720238057 | 0.999371363 | Not Sig |
| ENSG00000136867 | SLC31A2  | solute carrier family 31 member 2                                                               | 1318   | 363.6945861 | -0.372459499 | 0.824164523 | -0.451923723 | 0.651323934 | 0.999371363 | Not Sig |
| ENSG00000083845 | RPS5     | ribosomal protein S5                                                                            | 6193   | 3678.936095 | -0.372201829 | 0.47906375  | -0.776935906 | 0.437196586 | 0.999371363 | Not Sig |
| ENSG00000105699 | LSR      | lipolysis stimulated lipoprotein receptor                                                       | 51599  | 2731.443418 | -0.372161678 | 0.576242312 | -0.645842331 | 0.51838147  | 0.999371363 | Not Sig |
| ENSG00000242085 | NA       | NA                                                                                              | NA     | 29.36531332 | -0.372114085 | 0.790059275 | -0.470995148 | 0.6376442   | 0.999371363 | Not Sig |
| ENSG00000142207 | URB1     | URB1 ribosome biogenesis 1 homolog (S. cerevisiae)                                              | 9875   | 3053.738353 | -0.372080826 | 0.738099067 | -0.504106891 | 0.614186265 | 0.999371363 | Not Sig |
| ENSG00000231563 | NA       | NA                                                                                              | NA     | 36.40059015 | -0.372036687 | 0.696436651 | -0.534200328 | 0.593202942 | 0.999371363 | Not Sig |
| ENSG00000062370 | ZNF112   | zinc finger protein 112                                                                         | 7771   | 130.1745687 | -0.371901049 | 0.551081271 | -0.674856992 | 0.499766627 | 0.999371363 | Not Sig |
| ENSG00000131931 | THAP1    | THAP domain containing 1                                                                        | 55145  | 155.7168546 | -0.371847972 | 0.490633865 | -0.757893    | 0.448515041 | 0.999371363 | Not Sig |
| ENSG00000270108 | NA       | NA                                                                                              | NA     | 75.21236803 | -0.371736973 | 0.614489511 | -0.604952511 | 0.545210551 | 0.999371363 | Not Sig |
| ENSG00000173473 | SMARCC1  | SMARCC1 related, matrix associated, actin dependent regulator of chromatin subfamily 1 member 1 | 6599   | 3602.311795 | -0.371656045 | 0.610258028 | -0.609014594 | 0.542514765 | 0.999371363 | Not Sig |
| ENSG00000254402 | LRRC24   | leucine rich repeat containing 24                                                               | 441381 | 111.2132203 | -0.371435739 | 0.78225018  | -0.474829855 | 0.634908251 | 0.999371363 | Not Sig |



|                 |              |                                                       |           |             |              |             |              |             |             |         |
|-----------------|--------------|-------------------------------------------------------|-----------|-------------|--------------|-------------|--------------|-------------|-------------|---------|
| ENSG00000102804 | TSC22D1      | TSC22 domain family member 1                          | 8848      | 3760.637674 | -0.371397886 | 0.473143465 | -0.784958293 | 0.432478022 | 0.999371363 | Not Sig |
| ENSG00000144230 | GPR17        | G protein-coupled receptor 17                         | 2840      | 3.920483559 | -0.371210243 | 1.656323518 | -0.224116991 | 0.822666272 | NA          | NA      |
| ENSG00000271964 | NA           | NA                                                    | NA        | 18.3697451  | -0.371163222 | 0.887106253 | -0.418397707 | 0.675656363 | 0.999371363 | Not Sig |
| ENSG00000150337 | FCGR1A       | Fc fragment of IgG receptor Ia                        | 2209      | 218.6781115 | -0.37115305  | 0.835268509 | -0.444351781 | 0.656788269 | 0.999371363 | Not Sig |
| ENSG00000226243 | NA           | NA                                                    | NA        | 2.001496221 | -0.371022778 | 1.872968018 | -0.198093493 | 0.842971915 | NA          | NA      |
| ENSG00000111181 | SLC6A12      | solute carrier family 6 member 12                     | 6539      | 57.90849404 | -0.370743077 | 0.906783731 | -0.408855016 | 0.682646063 | 0.999371363 | Not Sig |
| ENSG00000109670 | FBXW7        | F-box and WD repeat domain containing 7               | 55294     | 1509.0163   | -0.370673351 | 0.48111191  | -0.770451413 | 0.441032166 | 0.999371363 | Not Sig |
| ENSG00000118473 | SGIP1        | SH3 domain GRB2 like endophilin interacting protein 1 | 84251     | 335.9984676 | -0.370650836 | 0.456526764 | -0.811892894 | 0.416853092 | 0.999371363 | Not Sig |
| ENSG00000175911 | NA           | NA                                                    | NA        | 59.59942022 | -0.36989674  | 0.693116659 | -0.533671692 | 0.593568698 | 0.999371363 | Not Sig |
| ENSG00000203497 | NA           | NA                                                    | NA        | 18.49014151 | -0.369786317 | 0.743755452 | -0.497188043 | 0.619056453 | 0.999371363 | Not Sig |
| ENSG00000023228 | NDUFS1       | NADH:ubiquinone oxidoreductase core subunit S1        | 4719      | 2328.381877 | -0.369760753 | 0.480758401 | -0.769119691 | 0.44182226  | 0.999371363 | Not Sig |
| ENSG00000119778 | ATAD2B       | ATPase family, AAA domain containing 2B               | 54454     | 1488.956938 | -0.369559168 | 0.584472468 | -0.632295254 | 0.527193964 | 0.999371363 | Not Sig |
| ENSG00000198677 | TTC37        | tetratricopeptide repeat domain 37                    | 9652      | 2285.530669 | -0.369397476 | 0.528919731 | -0.698399878 | 0.484927152 | 0.999371363 | Not Sig |
| ENSG00000201586 | NA           | NA                                                    | NA        | 11.3629057  | -0.36917015  | 1.080489336 | -0.341669407 | 0.732599698 | 0.999371363 | Not Sig |
| ENSG00000236466 | NA           | NA                                                    | NA        | 1.726675176 | -0.369103114 | 2.220774532 | -0.166204677 | 0.867995879 | NA          | NA      |
| ENSG00000150401 | DCUN1D2      | defective in cullin neddylation 1 domain containing 2 | 55208     | 309.5216729 | -0.369029822 | 0.47654187  | -0.774391181 | 0.438699497 | 0.999371363 | Not Sig |
| ENSG00000095564 | BTAFL1       | B-TFL1D TATA-box binding protein associated factor 1  | 9044      | 2192.679914 | -0.36894623  | 0.523814403 | -0.704345334 | 0.481217741 | 0.999371363 | Not Sig |
| ENSG00000180673 | NA           | NA                                                    | NA        | 1.020982371 | -0.368912758 | 2.59202344  | -0.142326166 | 0.886822379 | NA          | NA      |
| ENSG00000232633 | NA           | NA                                                    | NA        | 3.07226832  | -0.36888384  | 1.621395249 | -0.227510127 | 0.820027095 | NA          | NA      |
| ENSG00000163320 | CGGBP1       | CGG triplet repeat binding protein 1                  | 8545      | 1976.294908 | -0.368829285 | 0.546129997 | -0.675350717 | 0.499452969 | 0.999371363 | Not Sig |
| ENSG00000196368 | NUDT11       | nudix hydrolase 11                                    | 55190     | 9.330682683 | -0.368680389 | 0.878737373 | -0.419556969 | 0.674809129 | 0.999371363 | Not Sig |
| ENSG00000234911 | NA           | NA                                                    | NA        | 8.293808527 | -0.368576119 | 0.88138755  | -0.418177133 | 0.675817613 | 0.999371363 | Not Sig |
| ENSG00000087088 | BAX          | BCL2 associated X, apoptosis regulator                | 581       | 534.0681307 | -0.368273618 | 0.505825055 | -0.728065195 | 0.466573678 | 0.999371363 | Not Sig |
| ENSG00000205485 | LOC100133091 | uncharacterized LOC100133091                          | 100133091 | 321.1142517 | -0.368233745 | 0.514366914 | -0.715897029 | 0.474054933 | 0.999371363 | Not Sig |
| ENSG00000120889 | TNFRSF10B    | TNF receptor superfamily member 10b                   | 8795      | 1447.714391 | -0.368171171 | 0.487081937 | -0.755871123 | 0.449726469 | 0.999371363 | Not Sig |
| ENSG00000260669 | NA           | NA                                                    | NA        | 22.96859892 | -0.367989522 | 0.700078976 | -0.525640013 | 0.59913835  | 0.999371363 | Not Sig |
| ENSG00000265684 | NA           | NA                                                    | NA        | 7.572346083 | -0.367974393 | 1.22464909  | -0.300473332 | 0.763816135 | 0.999371363 | Not Sig |
| ENSG00000141012 | GALNS        | galactosamine (N-acetyl)-6-sulfatase                  | 2588      | 624.2771715 | -0.367922278 | 0.60826321  | -0.604874295 | 0.545262524 | 0.999371363 | Not Sig |
| ENSG00000263325 | NA           | NA                                                    | NA        | 14.03314749 | -0.367917628 | 1.013996285 | -0.362839227 | 0.716724987 | 0.999371363 | Not Sig |
| ENSG00000171055 | FEZ2         | fasciculation and elongation protein zeta 2           | 9637      | 1075.845656 | -0.367884204 | 0.495040607 | -0.74313945  | 0.457397258 | 0.999371363 | Not Sig |
| ENSG00000252685 | NA           | NA                                                    | NA        | 3.670084534 | -0.367857513 | 1.61835501  | -0.227303349 | 0.820187869 | NA          | NA      |
| ENSG00000100100 | PIK3IP1      | phosphoinositide-3-kinase interacting protein 1       | 113791    | 1486.242259 | -0.367826027 | 0.629781835 | -0.584053091 | 0.559184593 | 0.999371363 | Not Sig |
| ENSG00000225408 | NA           | NA                                                    | NA        | 1.435851392 | -0.367769556 | 2.316600957 | -0.158753951 | 0.87386273  | NA          | NA      |
| ENSG00000221485 | NA           | NA                                                    | NA        | 29.78869179 | -0.367752549 | 1.438816549 | -0.255593772 | 0.798264528 | 0.999371363 | Not Sig |
| ENSG00000171109 | MFN1         | mitofusin 1                                           | 55669     | 1271.06223  | -0.367607984 | 0.556478094 | -0.660597404 | 0.508870534 | 0.999371363 | Not Sig |

|                 |              |                                                              |           |             |              |             |              |             |             |         |
|-----------------|--------------|--------------------------------------------------------------|-----------|-------------|--------------|-------------|--------------|-------------|-------------|---------|
| ENSG00000267317 | NA           | NA                                                           | NA        | 67.83656011 | -0.367513212 | 0.590708218 | -0.622156931 | 0.533838683 | 0.999371363 | Not Sig |
| ENSG00000223345 | NA           | NA                                                           | NA        | 55.20437425 | -0.367493358 | 0.749676486 | -0.490202594 | 0.623990546 | 0.999371363 | Not Sig |
| ENSG00000139218 | SCAF11       | SR-related CTD associated factor 11                          | 9169      | 4231.148629 | -0.367313004 | 0.49120769  | -0.747775354 | 0.454595671 | 0.999371363 | Not Sig |
| ENSG00000084676 | NCOA1        | nuclear receptor coactivator 1                               | 8648      | 1938.99428  | -0.367228302 | 0.454554045 | -0.807886996 | 0.419155638 | 0.999371363 | Not Sig |
| ENSG00000225721 | NA           | NA                                                           | NA        | 10.05409968 | -0.367163284 | 0.852059166 | -0.430912898 | 0.666531705 | 0.999371363 | Not Sig |
| ENSG00000259298 | NA           | NA                                                           | NA        | 3.699006107 | -0.367129029 | 1.753772373 | -0.209336761 | 0.834185356 | NA          | NA      |
| ENSG00000261052 | SULT1A3      | sulfotransferase family 1A member 3                          | 6818      | 11.25425857 | -0.367077062 | 1.072929507 | -0.342125983 | 0.732256084 | 0.999371363 | Not Sig |
| ENSG00000261052 | LOC105369243 | sulfotransferase 1A3                                         | 105369243 | 11.25425857 | -0.367077062 | 1.072929507 | -0.342125983 | 0.732256084 | 0.999371363 | Not Sig |
| ENSG00000164031 | DNAJB14      | DnaJ heat shock protein family (Hsp40) member B14            | 79982     | 1467.293385 | -0.366926472 | 0.604038792 | -0.607455145 | 0.543548902 | 0.999371363 | Not Sig |
| ENSG00000262803 | NA           | NA                                                           | NA        | 23.79447422 | -0.366908207 | 0.704822557 | -0.520568196 | 0.60266761  | 0.999371363 | Not Sig |
| ENSG00000267370 | NA           | NA                                                           | NA        | 28.03166876 | -0.366710386 | 0.837268604 | -0.43798416  | 0.661397766 | 0.999371363 | Not Sig |
| ENSG00000233766 | NA           | NA                                                           | NA        | 47.8380583  | -0.366632196 | 0.812163663 | -0.451426496 | 0.651682191 | 0.999371363 | Not Sig |
| ENSG00000160953 | MUM1         | melanoma associated antigen (mutated) 1                      | 84939     | 989.5907914 | -0.366564225 | 0.649338823 | -0.564519188 | 0.572400846 | 0.999371363 | Not Sig |
| ENSG00000188167 | TMPPE        | transmembrane protein with metallophosphoesterase domain     | 643853    | 442.5190098 | -0.366517132 | 0.444810219 | -0.823985412 | 0.409947847 | 0.999371363 | Not Sig |
| ENSG00000112701 | SENP6        | SUMO1/sentrin specific peptidase 6                           | 26054     | 3077.589788 | -0.366418204 | 0.518559847 | -0.70660736  | 0.479810514 | 0.999371363 | Not Sig |
| ENSG00000165874 | FAM35BP      | family with sequence similarity 35, member A pseudogene      | 414241    | 0.998238044 | -0.366349143 | 3.040265283 | -0.120499071 | 0.904087815 | NA          | NA      |
| ENSG00000269094 | NA           | NA                                                           | NA        | 0.998238044 | -0.366349143 | 3.040265283 | -0.120499071 | 0.904087815 | NA          | NA      |
| ENSG00000196628 | TCF4         | transcription factor 4                                       | 6925      | 2985.255901 | -0.366264716 | 0.578486018 | -0.633143594 | 0.526639876 | 0.999371363 | Not Sig |
| ENSG00000107036 | RIC1         | RIC1 homolog, RAB6A GEF complex partner 1                    | 57589     | 1215.726537 | -0.366256502 | 0.499509255 | -0.733232664 | 0.463416536 | 0.999371363 | Not Sig |
| ENSG00000252295 | NA           | NA                                                           | NA        | 10.63781101 | -0.36618164  | 1.289172076 | -0.284044036 | 0.776376634 | 0.999371363 | Not Sig |
| ENSG00000197037 | ZSCAN25      | zinc finger and SCAN domain containing 25                    | 221785    | 570.2739271 | -0.365987263 | 0.453802648 | -0.806489923 | 0.419960416 | 0.999371363 | Not Sig |
| ENSG00000227449 | FGF7P6       | fibroblast growth factor 7 pseudogene 6                      | 387628    | 6.8416164   | -0.365980883 | 1.189337127 | -0.307718371 | 0.75829664  | 0.999371363 | Not Sig |
| ENSG00000248098 | BCKDHA       | branched chain keto acid dehydrogenase E1, alpha polypeptide | 593       | 16.4210988  | -0.365941075 | 0.729200043 | -0.501839075 | 0.615780724 | 0.999371363 | Not Sig |
| ENSG00000185432 | METTL7A      | methyltransferase like 7A                                    | 25840     | 1935.673592 | -0.365876356 | 0.915527736 | -0.399634377 | 0.689425833 | 0.999371363 | Not Sig |
| ENSG00000211769 | NA           | NA                                                           | NA        | 2.987003014 | -0.365770033 | 1.442922714 | -0.253492464 | 0.799887684 | NA          | NA      |
| ENSG00000133961 | NUMB         | NUMB, endocytic adaptor protein                              | 8650      | 2750.134099 | -0.365752355 | 0.390244518 | -0.937238932 | 0.348635668 | 0.999371363 | Not Sig |
| ENSG00000133961 | LOC101928143 | uncharacterized LOC101928143                                 | 101928143 | 2750.134099 | -0.365752355 | 0.390244518 | -0.937238932 | 0.348635668 | 0.999371363 | Not Sig |
| ENSG00000239183 | SNORA84      | small nucleolar RNA, H/ACA box 84                            | 100124534 | 3.687979738 | -0.365743442 | 1.250743258 | -0.292420878 | 0.769964847 | NA          | NA      |
| ENSG00000248394 | NA           | NA                                                           | NA        | 20.52534328 | -0.365572653 | 0.734721106 | -0.497566559 | 0.618789579 | 0.999371363 | Not Sig |
| ENSG00000258484 | SPESP1       | sperm equatorial segment protein 1                           | 246777    | 6.250963535 | -0.365471345 | 1.099647777 | -0.332353097 | 0.73962265  | NA          | NA      |
| ENSG00000105829 | BET1         | Bet1 golgi vesicular membrane trafficking protein            | 10282     | 447.4548182 | -0.365199675 | 0.651371895 | -0.560662316 | 0.575027762 | 0.999371363 | Not Sig |
| ENSG00000266758 | MIR3680-2    | microRNA 3680-2                                              | 100847041 | 3.352082307 | -0.364795627 | 1.381682329 | -0.264022792 | 0.791762356 | NA          | NA      |
| ENSG00000152457 | DCLRE1C      | DNA cross-link repair 1C                                     | 64421     | 380.3622021 | -0.364471267 | 0.421614323 | -0.864466046 | 0.387331925 | 0.999371363 | Not Sig |
| ENSG00000104972 | LILRB1       | leukocyte immunoglobulin like receptor B1                    | 10859     | 374.2716162 | -0.364312602 | 0.814970509 | -0.447025504 | 0.654856646 | 0.999371363 | Not Sig |
| ENSG00000224464 | NA           | NA                                                           | NA        | 29.98664302 | -0.364293464 | 0.781879137 | -0.46592043  | 0.641272457 | 0.999371363 | Not Sig |

|                 |          |                                                      |           |             |              |             |              |             |             |         |
|-----------------|----------|------------------------------------------------------|-----------|-------------|--------------|-------------|--------------|-------------|-------------|---------|
| ENSG00000089041 | P2RX7    | purinergic receptor P2X 7                            | 5027      | 265.5487856 | -0.363980708 | 0.870729042 | -0.418018339 | 0.675933709 | 0.999371363 | Not Sig |
| ENSG00000207175 | NA       | NA                                                   | NA        | 8.418114055 | -0.363829536 | 0.933275969 | -0.389841321 | 0.696653887 | 0.999371363 | Not Sig |
| ENSG00000227704 | NA       | NA                                                   | NA        | 14.39730788 | -0.363734848 | 1.006168482 | -0.361504911 | 0.717722034 | 0.999371363 | Not Sig |
| ENSG00000143797 | MBOAT2   | membrane bound O-acyltransferase domain containing 2 | 129642    | 1085.958759 | -0.363733977 | 0.505292141 | -0.71984887  | 0.471618052 | 0.999371363 | Not Sig |
| ENSG00000174529 | TMEM81   | transmembrane protein 81                             | 388730    | 51.63563313 | -0.363377106 | 0.586030422 | -0.620065261 | 0.535214822 | 0.999371363 | Not Sig |
| ENSG00000227543 | NA       | NA                                                   | NA        | 13.93019057 | -0.363277819 | 0.889345575 | -0.408477682 | 0.682923012 | 0.999371363 | Not Sig |
| ENSG00000151466 | SCLT1    | sodium channel and clathrin linker 1                 | 132320    | 421.1830639 | -0.363219816 | 0.495570199 | -0.732933127 | 0.463599217 | 0.999371363 | Not Sig |
| ENSG00000265010 | NA       | NA                                                   | NA        | 6.564116638 | -0.363013255 | 0.993579553 | -0.365359024 | 0.714843424 | NA          | NA      |
| ENSG00000219507 | NA       | NA                                                   | NA        | 22.63970836 | -0.362848455 | 0.866590444 | -0.418708119 | 0.675429461 | 0.999371363 | Not Sig |
| ENSG00000229344 | NA       | NA                                                   | NA        | 74.931788   | -0.362803652 | 0.770191618 | -0.47105635  | 0.637600495 | 0.999371363 | Not Sig |
| ENSG00000092929 | UNC13D   | unc-13 homolog D                                     | 201294    | 1825.82169  | -0.362657908 | 0.753335613 | -0.481402846 | 0.630230214 | 0.999371363 | Not Sig |
| ENSG00000142541 | RPL13A   | ribosomal protein L13a                               | 23521     | 14435.59904 | -0.362616995 | 0.462340858 | -0.784306619 | 0.432860217 | 0.999371363 | Not Sig |
| ENSG00000163352 | LENEP    | lens epithelial protein                              | 55891     | 3.828006039 | -0.362575725 | 1.631851537 | -0.22218671  | 0.824168539 | NA          | NA      |
| ENSG00000100934 | SEC23A   | Sec23 homolog A, coat complex II component           | 10484     | 1591.006454 | -0.36248354  | 0.562655537 | -0.644237045 | 0.519421732 | 0.999371363 | Not Sig |
| ENSG00000272678 | NA       | NA                                                   | NA        | 1.749004496 | -0.362437305 | 1.727629157 | -0.209788833 | 0.833832489 | NA          | NA      |
| ENSG00000170458 | CD14     | CD14 molecule                                        | 929       | 1747.505578 | -0.362417347 | 0.82849482  | -0.437440691 | 0.661791779 | 0.999371363 | Not Sig |
| ENSG00000174886 | NDUFA11  | NADH:ubiquinone oxidoreductase subunit A11           | 126328    | 249.3652014 | -0.362323231 | 0.640628587 | -0.565574559 | 0.571683027 | 0.999371363 | Not Sig |
| ENSG00000144840 | RABL3    | RAB, member of RAS oncogene family like 3            | 285282    | 468.1216639 | -0.362246444 | 0.617754142 | -0.586392578 | 0.557611731 | 0.999371363 | Not Sig |
| ENSG00000265623 | MIR3139  | microRNA 3139                                        | 100423017 | 13.27687262 | -0.362186595 | 0.774312754 | -0.46775233  | 0.639961714 | 0.999371363 | Not Sig |
| ENSG00000267561 | NA       | NA                                                   | NA        | 3.120331489 | -0.362012251 | 1.728718279 | -0.209410784 | 0.834127575 | NA          | NA      |
| ENSG00000135976 | ANKRD36  | ankyrin repeat domain 36                             | 375248    | 1393.566877 | -0.361991266 | 0.594764239 | -0.608629844 | 0.542769818 | 0.999371363 | Not Sig |
| ENSG00000121481 | RNF2     | ring finger protein 2                                | 6045      | 444.5575321 | -0.361846691 | 0.663054798 | -0.545726675 | 0.585253833 | 0.999371363 | Not Sig |
| ENSG00000238523 | NA       | NA                                                   | NA        | 3.091149627 | -0.361823792 | 1.727149243 | -0.209491909 | 0.834064251 | NA          | NA      |
| ENSG00000215297 | NA       | NA                                                   | NA        | 4.592682531 | -0.361763068 | 1.262852135 | -0.286465104 | 0.774521917 | NA          | NA      |
| ENSG00000207008 | SNORA54  | small nucleolar RNA, H/ACA box 54                    | 677833    | 20.28569944 | -0.361687023 | 0.816082792 | -0.443198933 | 0.657621851 | 0.999371363 | Not Sig |
| ENSG00000130244 | FAM98C   | family with sequence similarity 98 member C          | 147965    | 258.2675239 | -0.361642449 | 0.637304483 | -0.567456309 | 0.570404202 | 0.999371363 | Not Sig |
| ENSG00000135870 | RC3H1    | ring finger and CCCH-type domains 1                  | 149041    | 2675.748266 | -0.361614357 | 0.549626657 | -0.657927254 | 0.510584877 | 0.999371363 | Not Sig |
| ENSG00000136770 | DNAJC1   | DnaJ heat shock protein family (Hsp40) member C1     | 64215     | 865.0509781 | -0.361531077 | 0.424524808 | -0.851613544 | 0.39442862  | 0.999371363 | Not Sig |
| ENSG00000246273 | SBF2-AS1 | SBF2 antisense RNA 1                                 | 283104    | 141.0755241 | -0.361456621 | 0.74905496  | -0.4825502   | 0.629415146 | 0.999371363 | Not Sig |
| ENSG00000196369 | SRGAP2B  | SLIT-ROBO Rho GTPase activating protein 2B           | 647135    | 343.4576735 | -0.361322833 | 0.550662738 | -0.656159947 | 0.511172127 | 0.999371363 | Not Sig |
| ENSG00000144644 | GADL1    | glutamate decarboxylase like 1                       | 339896    | 6.671112979 | -0.361168476 | 1.285552433 | -0.280944181 | 0.778753213 | 0.999371363 | Not Sig |
| ENSG00000240914 | NA       | NA                                                   | NA        | 5.932098428 | -0.361041768 | 1.053166395 | -0.342815503 | 0.731737262 | NA          | NA      |
| ENSG00000164715 | LMTK2    | lemur tyrosine kinase 2                              | 22853     | 2647.059339 | -0.36100294  | 0.500382635 | -0.721453773 | 0.470630373 | 0.999371363 | Not Sig |
| ENSG00000225465 | NA       | NA                                                   | NA        | 6.414050071 | -0.360855158 | 1.109738782 | -0.32517126  | 0.745051459 | NA          | NA      |
| ENSG00000187987 | ZSCAN23  | zinc finger and SCAN domain containing 23            | 222696    | 98.40670897 | -0.360804407 | 0.609997378 | -0.591485177 | 0.554195384 | 0.999371363 | Not Sig |

|                 |              |                                                       |           |             |              |             |              |             |             |         |
|-----------------|--------------|-------------------------------------------------------|-----------|-------------|--------------|-------------|--------------|-------------|-------------|---------|
| ENSG00000165097 | KDM1B        | lysine demethylase 1B                                 | 221656    | 855.8979542 | -0.360681522 | 0.461751074 | -0.781116802 | 0.434733801 | 0.999371363 | Not Sig |
| ENSG00000199436 | SNORD9       | small nucleolar RNA, C/D box 9                        | 692053    | 6.771396571 | -0.360679716 | 1.21600034  | -0.296611526 | 0.76676311  | 0.999371363 | Not Sig |
| ENSG00000231995 | NA           | NA                                                    | NA        | 3.046811332 | -0.360616268 | 2.003958312 | -0.179951981 | 0.857190267 | NA          | NA      |
| ENSG00000139370 | SLC15A4      | solute carrier family 15 member 4                     | 121260    | 592.2347395 | -0.360550626 | 0.453930794 | -0.794285454 | 0.42702927  | 0.999371363 | Not Sig |
| ENSG00000268965 | NA           | NA                                                    | NA        | 19.72179111 | -0.360432345 | 0.930280741 | -0.387444703 | 0.698427015 | 0.999371363 | Not Sig |
| ENSG00000148337 | CIZ1         | CDKN1A interacting zinc finger protein 1              | 25792     | 1414.191619 | -0.360055875 | 0.464180509 | -0.775680729 | 0.437937521 | 0.999371363 | Not Sig |
| ENSG00000136636 | KCTD3        | potassium channel tetramerization domain containing 3 | 51133     | 1282.526493 | -0.359832771 | 0.444626478 | -0.809292267 | 0.418347053 | 0.999371363 | Not Sig |
| ENSG00000163162 | RNF149       | ring finger protein 149                               | 284996    | 1842.63447  | -0.359707805 | 0.507584187 | -0.708666296 | 0.478531585 | 0.999371363 | Not Sig |
| ENSG00000173531 | MST1         | macrophage stimulating 1                              | 4485      | 124.943486  | -0.359353663 | 0.474986225 | -0.756555967 | 0.44931593  | 0.999371363 | Not Sig |
| ENSG00000111145 | ELK3         | ELK3, ETS transcription factor                        | 2004      | 1851.998964 | -0.359318792 | 0.514385357 | -0.698540088 | 0.484839496 | 0.999371363 | Not Sig |
| ENSG00000261777 | LOC100506083 | uncharacterized LOC100506083                          | 100506083 | 10.81812364 | -0.359315501 | 0.955069967 | -0.376219034 | 0.706754066 | 0.999371363 | Not Sig |
| ENSG00000112893 | MAN2A1       | mannosidase alpha class 2A member 1                   | 4124      | 2215.2684   | -0.359290966 | 0.555753401 | -0.646493509 | 0.5179598   | 0.999371363 | Not Sig |
| ENSG00000164346 | NSA2         | NSA2, ribosome biogenesis homolog                     | 10412     | 711.7020201 | -0.359274097 | 0.623453856 | -0.576264135 | 0.564436661 | 0.999371363 | Not Sig |
| ENSG00000173926 | 3-Mar        | membrane associated ring-CH-type finger 3             | 115123    | 130.4596278 | -0.359259335 | 0.557292525 | -0.644651272 | 0.519153201 | 0.999371363 | Not Sig |
| ENSG00000083457 | ITGAE        | integrin subunit alpha E                              | 3682      | 287.1462919 | -0.359216174 | 0.467230153 | -0.768820615 | 0.441999809 | 0.999371363 | Not Sig |
| ENSG00000270175 | NA           | NA                                                    | NA        | 22.54613003 | -0.359036006 | 0.651631758 | -0.550979909 | 0.581647448 | 0.999371363 | Not Sig |
| ENSG00000132964 | CDK8         | cyclin dependent kinase 8                             | 1024      | 415.1307341 | -0.358936194 | 0.454176315 | -0.790301437 | 0.429351748 | 0.999371363 | Not Sig |
| ENSG00000234337 | NA           | NA                                                    | NA        | 2.511057606 | -0.358850954 | 1.441696639 | -0.248908782 | 0.803431342 | NA          | NA      |
| ENSG00000160813 | PPP1R35      | protein phosphatase 1 regulatory subunit 35           | 221908    | 359.9786655 | -0.358800696 | 0.575571034 | -0.623382128 | 0.533033439 | 0.999371363 | Not Sig |
| ENSG00000182150 | ERCC6L2      | ERCC excision repair 6 like 2                         | 375748    | 1252.188014 | -0.358621434 | 0.452252478 | -0.792967316 | 0.427796866 | 0.999371363 | Not Sig |
| ENSG00000231185 | SPRY4-AS1    | SPRY4 antisense RNA 1                                 | 101926941 | 50.7519608  | -0.358567164 | 0.771094568 | -0.465010621 | 0.641923851 | 0.999371363 | Not Sig |
| ENSG00000077809 | NA           | NA                                                    | NA        | 4240.963525 | -0.358376422 | 0.498306655 | -0.719188513 | 0.472024776 | 0.999371363 | Not Sig |
| ENSG00000136492 | BRIP1        | BRCA1 interacting protein C-terminal helicase 1       | 83990     | 184.7547982 | -0.358209027 | 1.093336317 | -0.327629313 | 0.743191955 | 0.999371363 | Not Sig |
| ENSG00000101695 | RNF125       | ring finger protein 125                               | 54941     | 240.6919906 | -0.358169754 | 0.662505443 | -0.540629149 | 0.588763222 | 0.999371363 | Not Sig |
| ENSG00000162244 | RPL29        | ribosomal protein L29                                 | 6159      | 4418.1563   | -0.358160031 | 0.46903946  | -0.763603196 | 0.445103744 | 0.999371363 | Not Sig |
| ENSG00000115084 | SLC35F5      | solute carrier family 35 member F5                    | 80255     | 2953.822675 | -0.357963736 | 0.644620319 | -0.555309421 | 0.578683036 | 0.999371363 | Not Sig |
| ENSG00000253582 | LOC105375700 | uncharacterized LOC105375700                          | 105375700 | 13.22741067 | -0.357865888 | 1.044284991 | -0.34268987  | 0.731831784 | 0.999371363 | Not Sig |
| ENSG00000187609 | EXD3         | exonuclease 3'-5' domain containing 3                 | 54932     | 489.5183441 | -0.357762926 | 0.597614272 | -0.59865191  | 0.549405032 | 0.999371363 | Not Sig |
| ENSG00000228661 | LOC105376527 | uncharacterized LOC105376527                          | 105376527 | 1.719822633 | -0.357385157 | 2.28266233  | -0.156565057 | 0.875587644 | NA          | NA      |
| ENSG00000122026 | RPL21        | ribosomal protein L21                                 | 6144      | 4788.95873  | -0.357358714 | 0.60016828  | -0.595430859 | 0.551555503 | 0.999371363 | Not Sig |
| ENSG00000126461 | SCAF1        | SR-related CTD associated factor 1                    | 58506     | 2311.593116 | -0.357171276 | 0.603771629 | -0.591566842 | 0.554140683 | 0.999371363 | Not Sig |
| ENSG00000255409 | NA           | NA                                                    | NA        | 9.499470324 | -0.357164799 | 1.062701709 | -0.3360913   | 0.736802019 | 0.999371363 | Not Sig |
| ENSG00000185596 | NA           | NA                                                    | NA        | 624.6297371 | -0.357093212 | 0.490934356 | -0.727374664 | 0.466996471 | 0.999371363 | Not Sig |
| ENSG00000197961 | ZNF121       | zinc finger protein 121                               | 7675      | 815.0465136 | -0.357031424 | 0.561554224 | -0.635791538 | 0.524912304 | 0.999371363 | Not Sig |
| ENSG00000151151 | IPMK         | inositol polyphosphate multikinase                    | 253430    | 444.7880681 | -0.356916636 | 0.634478107 | -0.562535779 | 0.573751034 | 0.999371363 | Not Sig |

|                 |              |                                                     |           |             |              |             |              |             |             |         |
|-----------------|--------------|-----------------------------------------------------|-----------|-------------|--------------|-------------|--------------|-------------|-------------|---------|
| ENSG00000265584 | MIR3978      | microRNA 3978                                       | 100616491 | 4.38593975  | -0.356763975 | 1.285944766 | -0.277433358 | 0.78144737  | NA          | NA      |
| ENSG00000101146 | RAE1         | ribonucleic acid export 1                           | 8480      | 436.744829  | -0.356733177 | 0.44630381  | -0.799305693 | 0.424113179 | 0.999371363 | Not Sig |
| ENSG00000172932 | ANKRD13D     | ankyrin repeat domain 13D                           | 338692    | 923.3520488 | -0.356504934 | 0.550142785 | -0.648022557 | 0.516970361 | 0.999371363 | Not Sig |
| ENSG00000163645 | ERICH6       | glutamate rich 6                                    | 131831    | 6.320775109 | -0.356433813 | 1.046128987 | -0.340716888 | 0.733316724 | NA          | NA      |
| ENSG00000139620 | KANSL2       | KAT8 regulatory NSL complex subunit 2               | 54934     | 480.4289791 | -0.356303011 | 0.402789694 | -0.884588202 | 0.376378772 | 0.999371363 | Not Sig |
| ENSG00000122122 | SASH3        | SAM and SH3 domain containing 3                     | 54440     | 707.2061214 | -0.356065728 | 0.869838622 | -0.409346882 | 0.682285115 | 0.999371363 | Not Sig |
| ENSG00000101413 | RPRD1B       | regulation of nuclear pre-mRNA domain containing 1B | 58490     | 963.5689427 | -0.355961038 | 0.429826473 | -0.82815057  | 0.407585233 | 0.999371363 | Not Sig |
| ENSG00000177738 | LOC648987    | uncharacterized LOC648987                           | 648987    | 100.9296979 | -0.355231365 | 0.659583017 | -0.538569605 | 0.590183865 | 0.999371363 | Not Sig |
| ENSG00000259049 | NA           | NA                                                  | NA        | 25.31009022 | -0.354886609 | 0.639295973 | -0.555120983 | 0.578811912 | 0.999371363 | Not Sig |
| ENSG00000102265 | TIMP1        | TIMP metalloproteinase inhibitor 1                  | 7076      | 4158.041789 | -0.354499329 | 0.723732325 | -0.489821053 | 0.624260532 | 0.999371363 | Not Sig |
| ENSG00000107164 | FUBP3        | far upstream element binding protein 3              | 8939      | 1269.170244 | -0.354439896 | 0.435230907 | -0.814372073 | 0.415431832 | 0.999371363 | Not Sig |
| ENSG00000213904 | LIPE-AS1     | LIPE antisense RNA 1                                | 100996307 | 32.86953886 | -0.35418221  | 0.608887366 | -0.581687566 | 0.560777148 | 0.999371363 | Not Sig |
| ENSG00000213904 | LOC101930071 | uncharacterized LOC101930071                        | 101930071 | 32.86953886 | -0.35418221  | 0.608887366 | -0.581687566 | 0.560777148 | 0.999371363 | Not Sig |
| ENSG00000263264 | NA           | NA                                                  | NA        | 52.10841368 | -0.35416286  | 0.982182366 | -0.360587679 | 0.718407701 | 0.999371363 | Not Sig |
| ENSG00000219200 | RNASEK       | ribonuclease K                                      | 440400    | 67.13548099 | -0.35415543  | 0.566225673 | -0.625466924 | 0.53166465  | 0.999371363 | Not Sig |
| ENSG00000101473 | ACOT8        | acyl-CoA thioesterase 8                             | 10005     | 328.1845171 | -0.354083645 | 0.541753748 | -0.653587808 | 0.513377401 | 0.999371363 | Not Sig |
| ENSG00000140181 | NA           | NA                                                  | NA        | 1775.193233 | -0.35406762  | 0.582024264 | -0.608338246 | 0.54296316  | 0.999371363 | Not Sig |
| ENSG00000108061 | SHOC2        | SHOC2, leucine rich repeat scaffold protein         | 8036      | 1251.783485 | -0.35393541  | 0.514223746 | -0.688290677 | 0.491269751 | 0.999371363 | Not Sig |
| ENSG00000172775 | FAM192A      | family with sequence similarity 192 member A        | 80011     | 1240.62356  | -0.353929425 | 0.440796822 | -0.802930982 | 0.422014628 | 0.999371363 | Not Sig |
| ENSG00000122965 | RBM19        | RNA binding motif protein 19                        | 9904      | 1112.958551 | -0.353886614 | 0.458790847 | -0.771346282 | 0.440501706 | 0.999371363 | Not Sig |
| ENSG00000154548 | SRSF12       | serine and arginine rich splicing factor 12         | 135295    | 31.63141097 | -0.35388447  | 1.258611574 | -0.281170519 | 0.778579615 | 0.999371363 | Not Sig |
| ENSG00000154229 | PRKCA        | protein kinase C alpha                              | 5578      | 1276.818863 | -0.353653155 | 0.552031477 | -0.640639474 | 0.521756947 | 0.999371363 | Not Sig |
| ENSG00000083896 | YTHDC1       | YTH domain containing 1                             | 91746     | 2320.489251 | -0.353479424 | 0.433142792 | -0.816080588 | 0.414454046 | 0.999371363 | Not Sig |
| ENSG00000137876 | RSL24D1      | ribosomal L24 domain containing 1                   | 51187     | 979.8054152 | -0.353321316 | 0.537420739 | -0.65743893  | 0.510898726 | 0.999371363 | Not Sig |
| ENSG00000183801 | OLFML1       | olfactomedin like 1                                 | 283298    | 249.0828053 | -0.353280316 | 0.86979934  | -0.406163008 | 0.684622832 | 0.999371363 | Not Sig |
| ENSG00000169203 | NA           | NA                                                  | NA        | 72.66532154 | -0.353263591 | 0.65207872  | -0.541749915 | 0.587990799 | 0.999371363 | Not Sig |
| ENSG00000229955 | NA           | NA                                                  | NA        | 40.06127281 | -0.353173754 | 0.773162133 | -0.456791323 | 0.647821043 | 0.999371363 | Not Sig |
| ENSG00000237836 | NA           | NA                                                  | NA        | 22.99777693 | -0.352947572 | 0.715346174 | -0.493394087 | 0.62173416  | 0.999371363 | Not Sig |
| ENSG00000198478 | SH3BGR12     | SH3 domain binding glutamate rich protein like 2    | 83699     | 2181.615499 | -0.352775175 | 0.642500642 | -0.549065872 | 0.582960245 | 0.999371363 | Not Sig |
| ENSG00000188315 | C3orf62      | chromosome 3 open reading frame 62                  | 375341    | 225.0438068 | -0.352758049 | 0.480073224 | -0.734800507 | 0.462460998 | 0.999371363 | Not Sig |
| ENSG00000224020 | MIR181A2HG   | MIR181A2 host gene                                  | 100379345 | 18.95528951 | -0.352751727 | 0.792755729 | -0.444969003 | 0.656342155 | 0.999371363 | Not Sig |
| ENSG00000251805 | NA           | NA                                                  | NA        | 8.902181443 | -0.352589153 | 1.259602314 | -0.279921011 | 0.779538107 | 0.999371363 | Not Sig |
| ENSG00000178467 | P4HTM        | prolyl 4-hydroxylase, transmembrane                 | 54681     | 1153.363526 | -0.352490064 | 0.435693631 | -0.809031941 | 0.418496774 | 0.999371363 | Not Sig |
| ENSG00000073050 | XRCC1        | X-ray repair cross complementing 1                  | 7515      | 434.4829512 | -0.35248642  | 0.460511926 | -0.765423001 | 0.444019701 | 0.999371363 | Not Sig |
| ENSG00000105373 | NOP53        | NOP53 ribosome biogenesis factor                    | 29997     | 3592.176523 | -0.352349129 | 0.525605036 | -0.670368631 | 0.502622826 | 0.999371363 | Not Sig |

|                 |              |                                                                  |           |             |              |             |              |             |             |         |
|-----------------|--------------|------------------------------------------------------------------|-----------|-------------|--------------|-------------|--------------|-------------|-------------|---------|
| ENSG00000181016 | LSMEM1       | leucine rich single-pass membrane protein 1                      | 286006    | 40.82641623 | -0.352335289 | 0.630902795 | -0.558462083 | 0.576528889 | 0.999371363 | Not Sig |
| ENSG00000010256 | UQCRC1       | ubiquinol-cytochrome c reductase core protein 1                  | 7384      | 1756.357626 | -0.352291136 | 0.462803328 | -0.761211328 | 0.446530853 | 0.999371363 | Not Sig |
| ENSG00000141446 | ESCO1        | establishment of sister chromatid cohesion N-acetyltransferase 1 | 114799    | 849.4413572 | -0.352259424 | 0.612131519 | -0.575463627 | 0.564977783 | 0.999371363 | Not Sig |
| ENSG00000240366 | NA           | NA                                                               | NA        | 1.027419907 | -0.352213448 | 2.58957145  | -0.136012253 | 0.891811594 | NA          | NA      |
| ENSG00000089053 | ANAPC5       | anaphase promoting complex subunit 5                             | 51433     | 2037.114856 | -0.352203138 | 0.414884808 | -0.848917894 | 0.395926981 | 0.999371363 | Not Sig |
| ENSG00000162601 | MYSM1        | Myb like, SWIRM and MPN domains 1                                | 114803    | 1784.322872 | -0.351841151 | 0.687293147 | -0.511922973 | 0.60870492  | 0.999371363 | Not Sig |
| ENSG00000204428 | LY6G5C       | lymphocyte antigen 6 family member G5C                           | 80741     | 43.07248954 | -0.35158886  | 0.733328511 | -0.479442508 | 0.631623859 | 0.999371363 | Not Sig |
| ENSG00000269210 | LOC375196    | uncharacterized LOC375196                                        | 375196    | 3.062399064 | -0.351480017 | 1.634932605 | -0.214981349 | 0.82978186  | NA          | NA      |
| ENSG00000260398 | NA           | NA                                                               | NA        | 12.96131187 | -0.351418725 | 0.822174919 | -0.427425742 | 0.669069261 | 0.999371363 | Not Sig |
| ENSG00000164402 | 8-Sep        | septin 8                                                         | 23176     | 1094.118931 | -0.351328622 | 0.414580525 | -0.847431561 | 0.396754619 | 0.999371363 | Not Sig |
| ENSG00000173801 | JUP          | junction plakoglobin                                             | 3728      | 5244.906597 | -0.351256741 | 0.531512323 | -0.660862835 | 0.508700282 | 0.999371363 | Not Sig |
| ENSG00000189362 | NEMP2        | nuclear envelope integral membrane protein 2                     | 100131211 | 267.7099483 | -0.351172912 | 0.563943451 | -0.622709443 | 0.533475476 | 0.999371363 | Not Sig |
| ENSG00000126337 | KRT36        | keratin 36                                                       | 8689      | 0.662340613 | -0.350961244 | 3.445114246 | -0.101872164 | 0.918858145 | NA          | NA      |
| ENSG00000202293 | SNORD114-22  | small nucleolar RNA, C/D box 114-22                              | 767600    | 0.662340613 | -0.350961244 | 3.445114246 | -0.101872164 | 0.918858145 | NA          | NA      |
| ENSG00000265262 | NA           | NA                                                               | NA        | 0.662340613 | -0.350961244 | 3.445114246 | -0.101872164 | 0.918858145 | NA          | NA      |
| ENSG00000273267 | NA           | NA                                                               | NA        | 0.662340613 | -0.350961244 | 3.445114246 | -0.101872164 | 0.918858145 | NA          | NA      |
| ENSG00000250138 | NA           | NA                                                               | NA        | 75.99114796 | -0.350736453 | 0.621289753 | -0.564529596 | 0.572393764 | 0.999371363 | Not Sig |
| ENSG00000156500 | FAM122C      | family with sequence similarity 122C                             | 159091    | 161.2364112 | -0.350636406 | 0.548744056 | -0.638979872 | 0.522836026 | 0.999371363 | Not Sig |
| ENSG00000224471 | NA           | NA                                                               | NA        | 4.169776663 | -0.350551987 | 1.617020094 | -0.216788887 | 0.828372873 | NA          | NA      |
| ENSG00000104883 | PEX11G       | peroxisomal biogenesis factor 11 gamma                           | 92960     | 89.24260025 | -0.350543765 | 0.601759932 | -0.582530917 | 0.560209123 | 0.999371363 | Not Sig |
| ENSG00000265702 | LOC105371855 | uncharacterized LOC105371855                                     | 105371855 | 2.335534052 | -0.350539552 | 1.661581648 | -0.210967395 | 0.832912714 | NA          | NA      |
| ENSG00000259515 | NA           | NA                                                               | NA        | 1.369754873 | -0.350446538 | 2.410397398 | -0.145389527 | 0.884403333 | NA          | NA      |
| ENSG00000206756 | NA           | NA                                                               | NA        | 6.464222233 | -0.350418045 | 1.360914413 | -0.257487202 | 0.796802693 | NA          | NA      |
| ENSG00000110801 | PSMD9        | proteasome 26S subunit, non-ATPase 9                             | 5715      | 126.788693  | -0.350358104 | 0.530406132 | -0.660546857 | 0.508902959 | 0.999371363 | Not Sig |
| ENSG00000253978 | CTB-178M22.2 | uncharacterized LOC101927862                                     | 101927862 | 3.433915893 | -0.350081399 | 1.462582756 | -0.239358353 | 0.810827721 | NA          | NA      |
| ENSG00000234614 | NA           | NA                                                               | NA        | 134.495843  | -0.349934577 | 0.690900806 | -0.506490329 | 0.612512477 | 0.999371363 | Not Sig |
| ENSG00000124635 | HIST1H2BJ    | histone cluster 1 H2B family member j                            | 8970      | 275.8575363 | -0.349884002 | 0.783611895 | -0.446501647 | 0.655234923 | 0.999371363 | Not Sig |
| ENSG00000095787 | WAC          | WW domain containing adaptor with coiled-coil                    | 51322     | 3582.191173 | -0.349828561 | 0.431102057 | -0.811475045 | 0.417092918 | 0.999371363 | Not Sig |
| ENSG00000143198 | MGST3        | microsomal glutathione S-transferase 3                           | 4259      | 811.0600622 | -0.349822539 | 0.431394016 | -0.810911895 | 0.417416269 | 0.999371363 | Not Sig |
| ENSG00000170624 | SGCD         | sarcoglycan delta                                                | 6444      | 387.7476416 | -0.349764657 | 0.614065165 | -0.569588826 | 0.568956609 | 0.999371363 | Not Sig |
| ENSG00000177125 | ZBTB34       | zinc finger and BTB domain containing 34                         | 403341    | 668.9501215 | -0.349677017 | 0.432320246 | -0.80883794  | 0.41860837  | 0.999371363 | Not Sig |
| ENSG00000163932 | PRKCD        | protein kinase C delta                                           | 5580      | 1759.589692 | -0.349484156 | 0.498231813 | -0.701448898 | 0.483022915 | 0.999371363 | Not Sig |
| ENSG00000185532 | PRKG1        | protein kinase, cGMP-dependent, type I                           | 5592      | 568.9487238 | -0.349241295 | 0.540989838 | -0.645559806 | 0.518564475 | 0.999371363 | Not Sig |
| ENSG00000237819 | LOC101927497 | uncharacterized LOC101927497                                     | 101927497 | 1.832410202 | -0.349122827 | 1.891601908 | -0.184564641 | 0.853570522 | NA          | NA      |
| ENSG00000103091 | WDR59        | WD repeat domain 59                                              | 79726     | 946.6935471 | -0.349109361 | 0.423700342 | -0.823953456 | 0.409966005 | 0.999371363 | Not Sig |

|                 |         |                                                        |           |             |              |             |              |             |             |         |
|-----------------|---------|--------------------------------------------------------|-----------|-------------|--------------|-------------|--------------|-------------|-------------|---------|
| ENSG00000070961 | ATP2B1  | ATPase plasma membrane Ca <sup>2+</sup> transporting 1 | 490       | 2156.651352 | -0.348821865 | 0.581574654 | -0.59978863  | 0.548647111 | 0.999371363 | Not Sig |
| ENSG00000152217 | SETBP1  | SET binding protein 1                                  | 26040     | 1086.532412 | -0.348550935 | 0.699852899 | -0.498034566 | 0.618459679 | 0.999371363 | Not Sig |
| ENSG00000197782 | ZNF780A | zinc finger protein 780A                               | 284323    | 560.8589679 | -0.348431561 | 0.468357558 | -0.743943501 | 0.456910657 | 0.999371363 | Not Sig |
| ENSG00000265291 | MIR4710 | microRNA 4710                                          | 100616300 | 1.496512771 | -0.348225273 | 2.021999069 | -0.172218315 | 0.8632659   | NA          | NA      |
| ENSG00000177051 | FBXO46  | F-box protein 46                                       | 23403     | 505.0170806 | -0.348221121 | 0.503877399 | -0.691083033 | 0.489513362 | 0.999371363 | Not Sig |
| ENSG00000139117 | CPNE8   | copine 8                                               | 144402    | 676.5120817 | -0.348154635 | 0.606945291 | -0.573617821 | 0.566226449 | 0.999371363 | Not Sig |
| ENSG00000100281 | HMGXB4  | HMG-box containing 4                                   | 10042     | 763.5651877 | -0.347724159 | 0.556131336 | -0.625255468 | 0.531803402 | 0.999371363 | Not Sig |
| ENSG00000119969 | HELLS   | helicase, lymphoid specific                            | 3070      | 579.711045  | -0.34757682  | 1.024690942 | -0.339201612 | 0.734457855 | 0.999371363 | Not Sig |
| ENSG00000126456 | IRF3    | interferon regulatory factor 3                         | 3661      | 1056.541988 | -0.347523553 | 0.442743626 | -0.784931804 | 0.432493554 | 0.999371363 | Not Sig |
| ENSG00000126214 | KLC1    | kinesin light chain 1                                  | 3831      | 1580.959238 | -0.347484118 | 0.452571913 | -0.76779868  | 0.442606799 | 0.999371363 | Not Sig |
| ENSG00000234358 | NA      | NA                                                     | NA        | 49.5236473  | -0.347357376 | 0.566678343 | -0.612970974 | 0.539895532 | 0.999371363 | Not Sig |
| ENSG00000239961 | LILRA4  | leukocyte immunoglobulin like receptor A4              | 23547     | 16.5827286  | -0.347334494 | 1.3160218   | -0.263927614 | 0.791835697 | 0.999371363 | Not Sig |
| ENSG00000093100 | NA      | NA                                                     | NA        | 13.13747815 | -0.347061618 | 0.815031399 | -0.42582607  | 0.670234589 | 0.999371363 | Not Sig |
| ENSG00000171103 | TRMT61B | tRNA methyltransferase 61B                             | 55006     | 247.148776  | -0.346909789 | 0.489647832 | -0.708488359 | 0.478642039 | 0.999371363 | Not Sig |
| ENSG00000207280 | SNORD20 | small nucleolar RNA, C/D box 20                        | 6082      | 13.26569721 | -0.34667385  | 0.840954864 | -0.412238355 | 0.680164727 | 0.999371363 | Not Sig |
| ENSG00000176623 | RMDN1   | regulator of microtubule dynamics 1                    | 51115     | 673.7874764 | -0.346665659 | 0.449581883 | -0.771084585 | 0.440656797 | 0.999371363 | Not Sig |
| ENSG00000240823 | NA      | NA                                                     | NA        | 9.532947877 | -0.346661052 | 1.053460862 | -0.329068753 | 0.742103722 | 0.999371363 | Not Sig |
| ENSG00000089057 | SLC23A2 | solute carrier family 23 member 2                      | 9962      | 1252.888941 | -0.346642303 | 0.41207728  | -0.841207025 | 0.400231965 | 0.999371363 | Not Sig |
| ENSG00000203483 | NA      | NA                                                     | NA        | 4.637712415 | -0.346504753 | 1.125285609 | -0.30792605  | 0.758138603 | NA          | NA      |
| ENSG00000123352 | SPATS2  | spermatogenesis associated serine rich 2               | 65244     | 601.454231  | -0.346433614 | 0.659681343 | -0.525152966 | 0.599476858 | 0.999371363 | Not Sig |
| ENSG00000184992 | BRI3BP  | BRI3 binding protein                                   | 140707    | 819.3579309 | -0.346375298 | 0.622682605 | -0.556263006 | 0.578031073 | 0.999371363 | Not Sig |
| ENSG00000233012 | NA      | NA                                                     | NA        | 35.40354127 | -0.346293598 | 0.889275428 | -0.38941096  | 0.696972166 | 0.999371363 | Not Sig |
| ENSG00000186648 | CARMIL3 | capping protein regulator and myosin 1 linker 3        | 90668     | 39.93900277 | -0.34601748  | 0.849041385 | -0.407539003 | 0.683612154 | 0.999371363 | Not Sig |
| ENSG00000256019 | NA      | NA                                                     | NA        | 21.99312063 | -0.345835918 | 0.977509988 | -0.35379272  | 0.72349423  | 0.999371363 | Not Sig |
| ENSG00000121931 | LRIF1   | ligand dependent nuclear receptor interacting factor 1 | 55791     | 393.3191716 | -0.345685345 | 0.666203047 | -0.518888869 | 0.60383824  | 0.999371363 | Not Sig |
| ENSG00000078699 | CBFA2T2 | CBFA2/RUNX1 translocation partner 2                    | 9139      | 1071.986534 | -0.345487748 | 0.408400682 | -0.845952915 | 0.397579011 | 0.999371363 | Not Sig |
| ENSG00000104517 | UBR5    | ubiquitin protein ligase E3 component n-recogin 5      | 51366     | 5449.849927 | -0.345476198 | 0.49719045  | -0.694856866 | 0.487145007 | 0.999371363 | Not Sig |
| ENSG00000201579 | NA      | NA                                                     | NA        | 7.522584503 | -0.345471295 | 1.03803256  | -0.332813544 | 0.739275034 | 0.999371363 | Not Sig |
| ENSG00000152433 | ZNF547  | zinc finger protein 547                                | 284306    | 51.06452653 | -0.345256999 | 0.502755158 | -0.6867299   | 0.492252951 | 0.999371363 | Not Sig |
| ENSG00000184348 | NA      | NA                                                     | NA        | 151.9662271 | -0.345135517 | 0.662718104 | -0.520787821 | 0.602514588 | 0.999371363 | Not Sig |
| ENSG00000176920 | FUT2    | fucosyltransferase 2                                   | 2524      | 577.447956  | -0.34511633  | 1.002913809 | -0.344113648 | 0.730760819 | 0.999371363 | Not Sig |
| ENSG00000254783 | NA      | NA                                                     | NA        | 28.13074264 | -0.344933402 | 0.623523321 | -0.553200483 | 0.580126136 | 0.999371363 | Not Sig |
| ENSG00000105176 | URI1    | URI1, prefoldin like chaperone                         | 8725      | 1217.568752 | -0.344887051 | 0.397101471 | -0.868511138 | 0.385114578 | 0.999371363 | Not Sig |
| ENSG00000167555 | ZNF528  | zinc finger protein 528                                | 84436     | 572.3229708 | -0.344523129 | 0.475649968 | -0.724320724 | 0.468868857 | 0.999371363 | Not Sig |
| ENSG00000262429 | NA      | NA                                                     | NA        | 10.01577977 | -0.344490601 | 1.010736368 | -0.34083131  | 0.733230578 | 0.999371363 | Not Sig |

|                 |          |                                                         |        |             |              |             |              |             |             |         |
|-----------------|----------|---------------------------------------------------------|--------|-------------|--------------|-------------|--------------|-------------|-------------|---------|
| ENSG00000031691 | CENPQ    | centromere protein Q                                    | 55166  | 85.25511278 | -0.344444087 | 0.668196606 | -0.515483144 | 0.606215446 | 0.999371363 | Not Sig |
| ENSG00000158865 | SLC5A11  | solute carrier family 5 member 11                       | 115584 | 3.20860261  | -0.344401584 | 1.673062487 | -0.205850999 | 0.836907303 | NA          | NA      |
| ENSG00000145439 | CBR4     | carbonyl reductase 4                                    | 84869  | 591.0216045 | -0.344365761 | 0.591408268 | -0.582280937 | 0.560377463 | 0.999371363 | Not Sig |
| ENSG00000269688 | NA       | NA                                                      | NA     | 53.73282869 | -0.344343916 | 0.554695624 | -0.62077994  | 0.534744423 | 0.999371363 | Not Sig |
| ENSG00000111339 | ART4     | ADP-ribosyltransferase 4 (Dombrock blood group)         | 420    | 71.05048346 | -0.344228948 | 0.851655539 | -0.404187998 | 0.686074479 | 0.999371363 | Not Sig |
| ENSG00000213453 | NA       | NA                                                      | NA     | 21.00996508 | -0.344204551 | 0.744272196 | -0.462471327 | 0.643743359 | 0.999371363 | Not Sig |
| ENSG00000131778 | CHD1L    | chromodomain helicase DNA binding protein 1 like        | 9557   | 1152.765301 | -0.344048007 | 0.542537628 | -0.634145891 | 0.525985616 | 0.999371363 | Not Sig |
| ENSG00000242559 | NA       | NA                                                      | NA     | 7.801241378 | -0.344026572 | 0.911282936 | -0.377518945 | 0.705787988 | 0.999371363 | Not Sig |
| ENSG00000163435 | ELF3     | E74 like ETS transcription factor 3                     | 1999   | 4762.885914 | -0.343640956 | 0.599689351 | -0.573031613 | 0.566623289 | 0.999371363 | Not Sig |
| ENSG00000251959 | NA       | NA                                                      | NA     | 13.43020653 | -0.343629934 | 1.033415827 | -0.332518552 | 0.739497733 | 0.999371363 | Not Sig |
| ENSG00000254141 | NA       | NA                                                      | NA     | 18.17288468 | -0.343502515 | 1.059852283 | -0.324104142 | 0.745859191 | 0.999371363 | Not Sig |
| ENSG00000257489 | NA       | NA                                                      | NA     | 74.56178812 | -0.343496795 | 0.546055829 | -0.629050689 | 0.529315872 | 0.999371363 | Not Sig |
| ENSG00000106028 | SSBP1    | single stranded DNA binding protein 1                   | 6742   | 659.2997077 | -0.343391002 | 0.589367991 | -0.582642775 | 0.560133804 | 0.999371363 | Not Sig |
| ENSG00000196235 | SUPT5H   | SPT5 homolog, DSIF elongation factor subunit            | 6829   | 2623.150837 | -0.343371662 | 0.422753861 | -0.812225964 | 0.416661984 | 0.999371363 | Not Sig |
| ENSG00000135362 | PRR5L    | proline rich 5 like                                     | 79899  | 747.1000786 | -0.343362317 | 0.510631492 | -0.672426832 | 0.501312006 | 0.999371363 | Not Sig |
| ENSG00000116748 | AMPD1    | adenosine monophosphate deaminase 1                     | 270    | 30.16821586 | -0.343261313 | 1.155654327 | -0.297027671 | 0.766445384 | 0.999371363 | Not Sig |
| ENSG00000110066 | KMT5B    | lysine methyltransferase 5B                             | 51111  | 1739.170139 | -0.343195944 | 0.497377121 | -0.690011522 | 0.490186942 | 0.999371363 | Not Sig |
| ENSG00000101115 | SALL4    | spalt like transcription factor 4                       | 57167  | 107.7853583 | -0.34312184  | 1.298522953 | -0.264240104 | 0.79159491  | 0.999371363 | Not Sig |
| ENSG00000131374 | TBC1D5   | TBC1 domain family member 5                             | 9779   | 2445.814441 | -0.343058448 | 0.475197729 | -0.721927794 | 0.470338872 | 0.999371363 | Not Sig |
| ENSG00000238082 | NA       | NA                                                      | NA     | 10.14704341 | -0.342957224 | 1.077128497 | -0.318399545 | 0.750181883 | 0.999371363 | Not Sig |
| ENSG00000218418 | NA       | NA                                                      | NA     | 3.555653658 | -0.342853022 | 1.275968158 | -0.268700296 | 0.788160324 | NA          | NA      |
| ENSG00000076067 | RBMS2    | RNA binding motif single stranded interacting protein 2 | 5939   | 1732.418843 | -0.342730303 | 0.59938454  | -0.571803709 | 0.567454964 | 0.999371363 | Not Sig |
| ENSG00000228252 | NA       | NA                                                      | NA     | 40.00483399 | -0.342716147 | 0.872466926 | -0.392812767 | 0.694457774 | 0.999371363 | Not Sig |
| ENSG00000206728 | NA       | NA                                                      | NA     | 9.446226789 | -0.342538478 | 1.099479443 | -0.31154605  | 0.75538554  | 0.999371363 | Not Sig |
| ENSG00000198837 | DENND4B  | DENN domain containing 4B                               | 9909   | 1717.55315  | -0.342385994 | 0.522250447 | -0.65559732  | 0.51208325  | 0.999371363 | Not Sig |
| ENSG00000272949 | NA       | NA                                                      | NA     | 3.451075745 | -0.342318894 | 1.557307128 | -0.219814633 | 0.826015523 | NA          | NA      |
| ENSG00000166987 | MBD6     | methyl-CpG binding domain protein 6                     | 114785 | 1529.209027 | -0.342227355 | 0.409311898 | -0.836104098 | 0.403096343 | 0.999371363 | Not Sig |
| ENSG00000177182 | CLVS1    | clavesin 1                                              | 157807 | 4.546009573 | -0.342172869 | 1.39298183  | -0.245640583 | 0.805960471 | NA          | NA      |
| ENSG00000177599 | ZNF491   | zinc finger protein 491                                 | 126069 | 42.98408947 | -0.342086628 | 0.667338124 | -0.512613645 | 0.608221606 | 0.999371363 | Not Sig |
| ENSG00000229241 | NA       | NA                                                      | NA     | 18.55164296 | -0.341644694 | 1.058452219 | -0.322777625 | 0.746863659 | 0.999371363 | Not Sig |
| ENSG00000081307 | UBA5     | ubiquitin like modifier activating enzyme 5             | 79876  | 870.717195  | -0.341423476 | 0.596289317 | -0.572580232 | 0.566928947 | 0.999371363 | Not Sig |
| ENSG00000133639 | BTG1     | BTG anti-proliferation factor 1                         | 694    | 3575.60332  | -0.341206374 | 0.516841932 | -0.660175487 | 0.509141221 | 0.999371363 | Not Sig |
| ENSG00000176083 | ZNF683   | zinc finger protein 683                                 | 257101 | 33.10960339 | -0.340994677 | 0.772750421 | -0.44127401  | 0.659014639 | 0.999371363 | Not Sig |
| ENSG00000129595 | EPB41L4A | erythrocyte membrane protein band 4.1 like 4A           | 64097  | 863.6602542 | -0.340483894 | 0.510759865 | -0.666622257 | 0.505013448 | 0.999371363 | Not Sig |
| ENSG00000185619 | PCGF3    | polycomb group ring finger 3                            | 10336  | 1507.052658 | -0.340297923 | 0.427916011 | -0.795244661 | 0.426471197 | 0.999371363 | Not Sig |



|                 |              |                                                                           |           |             |              |             |              |             |             |         |
|-----------------|--------------|---------------------------------------------------------------------------|-----------|-------------|--------------|-------------|--------------|-------------|-------------|---------|
| ENSG00000124370 | MCEE         | methylmalonyl-CoA epimerase                                               | 84693     | 231.4005857 | -0.340242572 | 0.552260347 | -0.616090896 | 0.53783453  | 0.999371363 | Not Sig |
| ENSG00000131183 | SLC34A1      | solute carrier family 34 member 1                                         | 6569      | 1.732697704 | -0.340175045 | 1.957135754 | -0.173812698 | 0.862012665 | NA          | NA      |
| ENSG00000060971 | ACAA1        | acetyl-CoA acyltransferase 1                                              | 30        | 1569.991269 | -0.340143168 | 0.42967924  | -0.791621137 | 0.428581619 | 0.999371363 | Not Sig |
| ENSG00000155330 | C16orf87     | chromosome 16 open reading frame 87                                       | 388272    | 205.5912071 | -0.340117811 | 0.628097847 | -0.541504501 | 0.588159896 | 0.999371363 | Not Sig |
| ENSG00000252242 | NA           | NA                                                                        | NA        | 5.754975563 | -0.340116848 | 1.035244506 | -0.3285377   | 0.742505145 | NA          | NA      |
| ENSG00000253586 | NA           | NA                                                                        | NA        | 25.21673755 | -0.340058004 | 0.790332147 | -0.430272267 | 0.666997598 | 0.999371363 | Not Sig |
| ENSG00000236552 | RPL13AP5     | ribosomal protein L13a pseudogene 5                                       | 728658    | 60.71339901 | -0.339944658 | 0.621367548 | -0.547091104 | 0.584316144 | 0.999371363 | Not Sig |
| ENSG00000172890 | NADSYN1      | NAD synthetase 1                                                          | 55191     | 1493.111094 | -0.339913682 | 0.472540701 | -0.719332073 | 0.471936339 | 0.999371363 | Not Sig |
| ENSG00000171033 | PKIA         | cAMP-dependent protein kinase inhibitor alpha                             | 5569      | 156.9067749 | -0.33982177  | 0.476401105 | -0.713310205 | 0.475653824 | 0.999371363 | Not Sig |
| ENSG00000253919 | NA           | NA                                                                        | NA        | 45.91609652 | -0.339804326 | 0.757105293 | -0.448820434 | 0.653561197 | 0.999371363 | Not Sig |
| ENSG00000167600 | CYP2S1       | cytochrome P450 family 2 subfamily S member 1                             | 29785     | 294.4844024 | -0.339764294 | 0.568973931 | -0.597152657 | 0.550405465 | 0.999371363 | Not Sig |
| ENSG00000200274 | NA           | NA                                                                        | NA        | 7.042348801 | -0.339724802 | 1.019681948 | -0.333167419 | 0.739007911 | 0.999371363 | Not Sig |
| ENSG00000234028 | LOC101928403 | uncharacterized LOC101928403                                              | 101928403 | 46.05416819 | -0.339713191 | 0.583596686 | -0.582102673 | 0.560497525 | 0.999371363 | Not Sig |
| ENSG00000232559 | NA           | NA                                                                        | NA        | 279.3446367 | -0.339622665 | 0.541561773 | -0.62711713  | 0.530582459 | 0.999371363 | Not Sig |
| ENSG00000107021 | TBC1D13      | TBC1 domain family member 13                                              | 54662     | 711.4762379 | -0.339475295 | 0.592586213 | -0.572870728 | 0.566732226 | 0.999371363 | Not Sig |
| ENSG00000235488 | JARID2-AS1   | JARID2 antisense RNA 1                                                    | 100506681 | 4.748163521 | -0.339470787 | 1.200256287 | -0.282831917 | 0.777305687 | NA          | NA      |
| ENSG00000072415 | MPP5         | membrane palmitoylated protein 5                                          | 64398     | 1161.321453 | -0.339384807 | 0.498073304 | -0.681395297 | 0.495621398 | 0.999371363 | Not Sig |
| ENSG00000177150 | FAM210A      | family with sequence similarity 210 member A                              | 125228    | 236.970826  | -0.339350205 | 0.59745735  | -0.567990678 | 0.570041298 | 0.999371363 | Not Sig |
| ENSG00000233524 | NA           | NA                                                                        | NA        | 7.009126155 | -0.33930277  | 0.982764327 | -0.345253445 | 0.729903843 | 0.999371363 | Not Sig |
| ENSG00000243477 | NAT6         | N-acetyltransferase 6                                                     | 24142     | 134.5547815 | -0.339172271 | 0.455968852 | -0.743849651 | 0.456967439 | 0.999371363 | Not Sig |
| ENSG00000240225 | ZNF542P      | zinc finger protein 542, pseudogene                                       | 147947    | 277.1312564 | -0.33910564  | 0.546293385 | -0.620739055 | 0.534771328 | 0.999371363 | Not Sig |
| ENSG00000189298 | ZKSCAN3      | zinc finger with KRAB and SCAN domains 3                                  | 80317     | 307.5150567 | -0.338937512 | 0.463458335 | -0.731322507 | 0.464582186 | 0.999371363 | Not Sig |
| ENSG00000147394 | ZNF185       | zinc finger protein 185 with LIM domain                                   | 7739      | 717.9206745 | -0.338894077 | 0.639463777 | -0.529966027 | 0.596135486 | 0.999371363 | Not Sig |
| ENSG00000178149 | DALRD3       | DALR anticodon binding domain containing 3                                | 55152     | 404.6860827 | -0.338655298 | 0.406437441 | -0.833228594 | 0.404715819 | 0.999371363 | Not Sig |
| ENSG00000166295 | ANAPC16      | anaphase promoting complex subunit 16                                     | 119504    | 1453.924578 | -0.33848124  | 0.441198826 | -0.767185269 | 0.44297137  | 0.999371363 | Not Sig |
| ENSG00000089335 | ZNF302       | zinc finger protein 302                                                   | 55900     | 703.5370249 | -0.338368994 | 0.442268715 | -0.76507558  | 0.44422654  | 0.999371363 | Not Sig |
| ENSG00000111727 | HCFC2        | host cell factor C2                                                       | 29915     | 445.9712937 | -0.338060546 | 0.479557785 | -0.704942255 | 0.480846173 | 0.999371363 | Not Sig |
| ENSG00000075292 | ZNF638       | zinc finger protein 638                                                   | 27332     | 5557.689339 | -0.337972992 | 0.522931313 | -0.646304751 | 0.518082012 | 0.999371363 | Not Sig |
| ENSG00000091140 | DLD          | dihydrolipoamide dehydrogenase                                            | 1738      | 1081.749278 | -0.337873611 | 0.479499211 | -0.704638512 | 0.481035226 | 0.999371363 | Not Sig |
| ENSG00000174437 | ATP2A2       | ATPase sarcoplasmic/endoplasmic reticulum Ca <sup>2+</sup> transporting 2 | 488       | 9796.072299 | -0.337766307 | 0.551132709 | -0.612858393 | 0.539969977 | 0.999371363 | Not Sig |
| ENSG00000213462 | ERV3-1       | endogenous retrovirus group 3 member 1, envelope                          | 2086      | 1117.174533 | -0.337742839 | 0.763295033 | -0.442480069 | 0.65814185  | 0.999371363 | Not Sig |
| ENSG00000109787 | KLF3         | Kruppel like factor 3                                                     | 51274     | 2465.11781  | -0.337645923 | 0.39986727  | -0.844394999 | 0.398448716 | 0.999371363 | Not Sig |
| ENSG00000188811 | NHLRC3       | NHL repeat containing 3                                                   | 387921    | 932.1694746 | -0.33745147  | 0.552972784 | -0.61024969  | 0.541696418 | 0.999371363 | Not Sig |
| ENSG00000174564 | IL20RB       | interleukin 20 receptor subunit beta                                      | 53833     | 31.61309353 | -0.337432503 | 0.714271809 | -0.4724147   | 0.636630814 | 0.999371363 | Not Sig |
| ENSG00000033030 | ZCCHC8       | zinc finger CCHC-type containing 8                                        | 55596     | 647.1441276 | -0.337381831 | 0.455086779 | -0.741357135 | 0.458476927 | 0.999371363 | Not Sig |

|                 |           |                                                  |           |             |              |             |              |             |             |         |
|-----------------|-----------|--------------------------------------------------|-----------|-------------|--------------|-------------|--------------|-------------|-------------|---------|
| ENSG00000227392 | HPN-AS1   | HPN antisense RNA 1                              | 100128675 | 1.800211626 | -0.336973868 | 1.677946141 | -0.200825199 | 0.840835258 | NA          | NA      |
| ENSG00000239160 | NA        | NA                                               | NA        | 2.120217273 | -0.336890403 | 1.811288117 | -0.185994928 | 0.852448739 | NA          | NA      |
| ENSG00000211792 | NA        | NA                                               | NA        | 4.94341469  | -0.3367939   | 1.388992958 | -0.242473439 | 0.808413335 | NA          | NA      |
| ENSG00000222881 | NA        | NA                                               | NA        | 1.408086932 | -0.336760502 | 2.402956735 | -0.140144222 | 0.888546041 | NA          | NA      |
| ENSG00000252283 | NA        | NA                                               | NA        | 6.130622455 | -0.336415998 | 1.22707481  | -0.274160952 | 0.783960934 | NA          | NA      |
| ENSG00000182841 | RRP7BP    | ribosomal RNA processing 7 homolog B, pseudogene | 91695     | 291.826021  | -0.336319115 | 0.477097203 | -0.704927871 | 0.480855124 | 0.999371363 | Not Sig |
| ENSG00000221736 | NA        | NA                                               | NA        | 5.314085212 | -0.336307441 | 1.202018618 | -0.279785551 | 0.779642038 | NA          | NA      |
| ENSG00000270362 | HMG3-AS1  | HMG3 antisense RNA 1                             | 100288198 | 68.50002299 | -0.336302742 | 0.57212103  | -0.587817481 | 0.556654809 | 0.999371363 | Not Sig |
| ENSG00000240775 | NA        | NA                                               | NA        | 4.466793986 | -0.33627504  | 1.33405311  | -0.252070205 | 0.8009868   | NA          | NA      |
| ENSG00000264653 | MIR5194   | microRNA 5194                                    | 100847051 | 21.23212322 | -0.336181918 | 0.683758722 | -0.491667465 | 0.622954442 | 0.999371363 | Not Sig |
| ENSG00000250878 | METTL21EP | methyltransferase like 21E, pseudogene           | 121952    | 5.981030951 | -0.336138558 | 1.149867862 | -0.292327987 | 0.770035862 | NA          | NA      |
| ENSG00000083544 | TDRD3     | tudor domain containing 3                        | 81550     | 624.8058692 | -0.336028356 | 0.409012528 | -0.821560057 | 0.41132733  | 0.999371363 | Not Sig |
| ENSG00000183309 | ZNF623    | zinc finger protein 623                          | 9831      | 785.5784356 | -0.335912579 | 0.473712116 | -0.709107005 | 0.478258076 | 0.999371363 | Not Sig |
| ENSG00000215006 | NA        | NA                                               | NA        | 1.331118762 | -0.335814993 | 2.379923397 | -0.141103278 | 0.887788354 | NA          | NA      |
| ENSG00000221739 | MIR1203   | microRNA 1203                                    | 100302211 | 2.904599703 | -0.335756234 | 1.383243594 | -0.242731096 | 0.808213716 | NA          | NA      |
| ENSG00000124006 | OBSL1     | obscurin like 1                                  | 23363     | 1943.179308 | -0.335745611 | 0.544323548 | -0.616812579 | 0.537358354 | 0.999371363 | Not Sig |
| ENSG00000135049 | AGTPBP1   | ATP/GTP binding protein 1                        | 23287     | 664.1193563 | -0.335717361 | 0.536827695 | -0.625372655 | 0.531726505 | 0.999371363 | Not Sig |
| ENSG00000120832 | MTERF2    | mitochondrial transcription termination factor 2 | 80298     | 234.1761578 | -0.33569424  | 0.434617077 | -0.772390819 | 0.43988299  | 0.999371363 | Not Sig |
| ENSG00000203546 | NA        | NA                                               | NA        | 7.809096317 | -0.33553106  | 0.95991377  | -0.349542918 | 0.726681757 | 0.999371363 | Not Sig |
| ENSG00000179331 | RAB39A    | RAB39A, member RAS oncogene family               | 54734     | 41.64487397 | -0.335254916 | 0.642284593 | -0.521972533 | 0.601689455 | 0.999371363 | Not Sig |
| ENSG00000100575 | TIMM9     | translocase of inner mitochondrial membrane 9    | 26520     | 227.464688  | -0.335232976 | 0.588252389 | -0.569879498 | 0.568759431 | 0.999371363 | Not Sig |
| ENSG00000239552 | NA        | NA                                               | NA        | 4.346473623 | -0.335141947 | 1.376848156 | -0.243412424 | 0.80768592  | NA          | NA      |
| ENSG00000229692 | NA        | NA                                               | NA        | 82.04127191 | -0.334911285 | 0.704343429 | -0.475494298 | 0.634434696 | 0.999371363 | Not Sig |
| ENSG00000104413 | ESRP1     | epithelial splicing regulatory protein 1         | 54845     | 1967.203922 | -0.334859304 | 0.735855056 | -0.455061498 | 0.649064996 | 0.999371363 | Not Sig |
| ENSG00000088986 | DYNLL1    | dynein light chain LC8-type 1                    | 8655      | 1324.700862 | -0.334720053 | 0.391065165 | -0.855918869 | 0.392042657 | 0.999371363 | Not Sig |
| ENSG00000255399 | TBX5-AS1  | TBX5 antisense RNA 1                             | 255480    | 264.1862078 | -0.334653626 | 0.864956709 | -0.386902168 | 0.698828636 | 0.999371363 | Not Sig |
| ENSG00000261659 | NA        | NA                                               | NA        | 90.64943876 | -0.334588172 | 0.590121307 | -0.566982023 | 0.570726396 | 0.999371363 | Not Sig |
| ENSG00000162630 | B3GALT2   | beta-1,3-galactosyltransferase 2                 | 8707      | 63.0546527  | -0.33452338  | 0.761371804 | -0.439369279 | 0.660393983 | 0.999371363 | Not Sig |
| ENSG00000111215 | PRR4      | proline rich 4 (lacrimal)                        | 11272     | 178.6775829 | -0.334411393 | 0.660254292 | -0.506488782 | 0.612513563 | 0.999371363 | Not Sig |
| ENSG00000188566 | NDOR1     | NADPH dependent diflavin oxidoreductase 1        | 27158     | 343.702688  | -0.334323723 | 0.539561012 | -0.619621721 | 0.535506863 | 0.999371363 | Not Sig |
| ENSG00000108381 | ASPA      | aspartoacylase                                   | 443       | 69.48006825 | -0.33416094  | 1.071167    | -0.311959704 | 0.755071148 | 0.999371363 | Not Sig |
| ENSG00000176387 | HSD11B2   | hydroxysteroid 11-beta dehydrogenase 2           | 3291      | 96.42371508 | -0.334138682 | 0.886188519 | -0.377051468 | 0.706135357 | 0.999371363 | Not Sig |
| ENSG00000229273 | NA        | NA                                               | NA        | 8.41994204  | -0.334014124 | 1.007442927 | -0.331546448 | 0.740231763 | 0.999371363 | Not Sig |
| ENSG00000085999 | RAD54L    | RAD54 like                                       | 8438      | 77.38685339 | -0.333956673 | 1.070349039 | -0.312007262 | 0.755035004 | 0.999371363 | Not Sig |
| ENSG00000212348 | NA        | NA                                               | NA        | 1.00467558  | -0.333692444 | 2.598592733 | -0.128412752 | 0.89782234  | NA          | NA      |

|                 |           |                                                                                |           |             |              |             |              |             |             |         |
|-----------------|-----------|--------------------------------------------------------------------------------|-----------|-------------|--------------|-------------|--------------|-------------|-------------|---------|
| ENSG00000245148 | ARAP1-AS2 | ARAP1 antisense RNA 2                                                          | 100506020 | 1.00467558  | -0.333692444 | 2.598592733 | -0.128412752 | 0.89782234  | NA          | NA      |
| ENSG00000079102 | RUNX1T1   | RUNX1 translocation partner 1                                                  | 862       | 573.3917049 | -0.333689638 | 0.568982929 | -0.586466871 | 0.557561818 | 0.999371363 | Not Sig |
| ENSG00000044115 | CTNNA1    | catenin alpha 1                                                                | 1495      | 9611.752993 | -0.333574392 | 0.498475086 | -0.669189696 | 0.503374478 | 0.999371363 | Not Sig |
| ENSG00000168769 | TET2      | tet methylcytosine dioxygenase 2                                               | 54790     | 2409.392029 | -0.333175463 | 0.458151849 | -0.727216235 | 0.467093502 | 0.999371363 | Not Sig |
| ENSG00000154814 | OXNAD1    | oxidoreductase NAD binding domain containing 1                                 | 92106     | 414.430848  | -0.333165483 | 0.547281168 | -0.60876475  | 0.542680382 | 0.999371363 | Not Sig |
| ENSG00000140931 | CMTM3     | CKLF like MARVEL transmembrane domain containing 3                             | 123920    | 679.9254857 | -0.333074328 | 0.515619936 | -0.645968676 | 0.518299642 | 0.999371363 | Not Sig |
| ENSG00000171097 | KYAT1     | kynurenine aminotransferase 1                                                  | 883       | 119.9322783 | -0.33305664  | 0.502707536 | -0.662525657 | 0.507634397 | 0.999371363 | Not Sig |
| ENSG00000258111 | NA        | NA                                                                             | NA        | 30.98574116 | -0.332982005 | 0.681798207 | -0.488387916 | 0.6252751   | 0.999371363 | Not Sig |
| ENSG00000241468 | ATP5J2    | ATP synthase, H <sup>+</sup> transporting, mitochondrial Fo complex subunit F2 | 9551      | 515.2492865 | -0.332912541 | 0.491746315 | -0.67700058  | 0.498405586 | 0.999371363 | Not Sig |
| ENSG00000198974 | MIR30E    | microRNA 30e                                                                   | 407034    | 6.847357921 | -0.332834114 | 0.978422449 | -0.340174241 | 0.733725315 | 0.999371363 | Not Sig |
| ENSG00000113361 | CDH6      | cadherin 6                                                                     | 1004      | 311.8792597 | -0.332792569 | 0.531994553 | -0.625556346 | 0.53160598  | 0.999371363 | Not Sig |
| ENSG00000137338 | PGBD1     | piggyBac transposable element derived 1                                        | 84547     | 112.3916714 | -0.332745322 | 0.570349132 | -0.583406379 | 0.559619764 | 0.999371363 | Not Sig |
| ENSG00000139914 | FITM1     | fat storage inducing transmembrane protein 1                                   | 161247    | 7.296689228 | -0.332687585 | 1.079782796 | -0.308106025 | 0.758001657 | 0.999371363 | Not Sig |
| ENSG00000163633 | C4orf36   | chromosome 4 open reading frame 36                                             | 132989    | 114.7792326 | -0.332623531 | 0.461761522 | -0.72033618  | 0.471318034 | 0.999371363 | Not Sig |
| ENSG00000163633 | AFF1-AS1  | AFF1 antisense RNA 1                                                           | 100506746 | 114.7792326 | -0.332623531 | 0.461761522 | -0.72033618  | 0.471318034 | 0.999371363 | Not Sig |
| ENSG00000167196 | FBX022    | F-box protein 22                                                               | 26263     | 529.1432395 | -0.332539392 | 0.516239911 | -0.644156689 | 0.519473833 | 0.999371363 | Not Sig |
| ENSG00000111860 | CEP85L    | centrosomal protein 85 like                                                    | 387119    | 532.5965702 | -0.332495235 | 0.452251112 | -0.735200482 | 0.462217406 | 0.999371363 | Not Sig |
| ENSG00000140471 | LINS1     | lines homolog 1                                                                | 55180     | 415.5285931 | -0.332482348 | 0.471728021 | -0.704817888 | 0.480923575 | 0.999371363 | Not Sig |
| ENSG00000173275 | ZNF449    | zinc finger protein 449                                                        | 203523    | 259.4892519 | -0.332189422 | 0.578793053 | -0.573934708 | 0.566011985 | 0.999371363 | Not Sig |
| ENSG00000046604 | DSG2      | desmoglein 2                                                                   | 1829      | 2774.568972 | -0.332044057 | 0.756156526 | -0.439120798 | 0.66057401  | 0.999371363 | Not Sig |
| ENSG00000266803 | NA        | NA                                                                             | NA        | 3.434768953 | -0.331956017 | 1.546445411 | -0.214657443 | 0.830034405 | NA          | NA      |
| ENSG00000199683 | NA        | NA                                                                             | NA        | 3.867926511 | -0.331918905 | 1.292419523 | -0.256819786 | 0.797317895 | NA          | NA      |
| ENSG00000047365 | ARAP2     | ArFGAP with RhoGAP domain, ankyrin repeat and PH domain 2                      | 116984    | 2273.033731 | -0.331832514 | 0.449162668 | -0.738780263 | 0.460040438 | 0.999371363 | Not Sig |
| ENSG00000144048 | DUSP11    | dual specificity phosphatase 11                                                | 8446      | 394.0186267 | -0.331739077 | 0.495633288 | -0.669323642 | 0.503289049 | 0.999371363 | Not Sig |
| ENSG00000265073 | NA        | NA                                                                             | NA        | 2.895145454 | -0.331710048 | 1.441787691 | -0.230068581 | 0.818038479 | NA          | NA      |
| ENSG00000140396 | NCOA2     | nuclear receptor coactivator 2                                                 | 10499     | 3492.131278 | -0.331679348 | 0.535738435 | -0.619106874 | 0.535845955 | 0.999371363 | Not Sig |
| ENSG00000136874 | STX17     | syntaxin 17                                                                    | 55014     | 858.4821606 | -0.331530937 | 0.427076963 | -0.776279138 | 0.437584188 | 0.999371363 | Not Sig |
| ENSG00000207444 | SNORD56B  | small nucleolar RNA, C/D box 56B                                               | 319139    | 7.194099813 | -0.331508937 | 1.571694335 | -0.210924561 | 0.832946139 | 0.999371363 | Not Sig |
| ENSG00000108039 | XPNPEP1   | X-prolyl aminopeptidase 1                                                      | 7511      | 972.0467068 | -0.33149898  | 0.389618042 | -0.850830672 | 0.394863421 | 0.999371363 | Not Sig |
| ENSG00000137145 | DENND4C   | DENN domain containing 4C                                                      | 55667     | 2484.286216 | -0.331423404 | 0.542854805 | -0.610519426 | 0.541517779 | 0.999371363 | Not Sig |
| ENSG00000249188 | NA        | NA                                                                             | NA        | 10.13737774 | -0.331391547 | 1.302994479 | -0.254330738 | 0.799240055 | 0.999371363 | Not Sig |
| ENSG00000105568 | PPP2R1A   | protein phosphatase 2 scaffold subunit Aalpha                                  | 5518      | 3147.68298  | -0.331296673 | 0.457755822 | -0.723741038 | 0.469224734 | 0.999371363 | Not Sig |
| ENSG00000233892 | NA        | NA                                                                             | NA        | 39.3439932  | -0.331227861 | 0.597021485 | -0.554800571 | 0.579031077 | 0.999371363 | Not Sig |
| ENSG00000239653 | PSMD6-AS2 | PSMD6 antisense RNA 2                                                          | 100507062 | 157.8092022 | -0.330966413 | 0.636292878 | -0.520147914 | 0.602960485 | 0.999371363 | Not Sig |
| ENSG00000111859 | NEDD9     | neural precursor cell expressed, developmentally down-regulated 9              | 4739      | 5013.445448 | -0.330521654 | 0.770252288 | -0.429108305 | 0.667844409 | 0.999371363 | Not Sig |

|                 |              |                                                        |           |             |              |             |              |             |             |         |
|-----------------|--------------|--------------------------------------------------------|-----------|-------------|--------------|-------------|--------------|-------------|-------------|---------|
| ENSG00000137547 | MRPL15       | mitochondrial ribosomal protein L15                    | 29088     | 448.5663385 | -0.330392885 | 0.534497386 | -0.618137514 | 0.536484696 | 0.999371363 | Not Sig |
| ENSG00000232445 | NA           | NA                                                     | NA        | 5.591126204 | -0.330316462 | 1.42217436  | -0.232261579 | 0.816334852 | NA          | NA      |
| ENSG00000162733 | DDR2         | discoidin domain receptor tyrosine kinase 2            | 4921      | 1695.02224  | -0.330205781 | 0.583171261 | -0.566224371 | 0.571241265 | 0.999371363 | Not Sig |
| ENSG00000182993 | C12orf60     | chromosome 12 open reading frame 60                    | 144608    | 20.82401274 | -0.330204161 | 0.782576176 | -0.421945073 | 0.67306511  | 0.999371363 | Not Sig |
| ENSG00000065675 | PRKCG        | protein kinase C theta                                 | 5588      | 161.2375935 | -0.330142203 | 0.784360713 | -0.420906093 | 0.673823656 | 0.999371363 | Not Sig |
| ENSG00000242252 | BGLAP        | bone gamma-carboxyglutamate protein                    | 632       | 14.45029884 | -0.330120026 | 0.8646101   | -0.381813752 | 0.702599518 | 0.999371363 | Not Sig |
| ENSG00000196072 | BLOC1S2      | biogenesis of lysosomal organelles complex 1 subunit 2 | 282991    | 391.5586576 | -0.330066421 | 0.565422389 | -0.583751949 | 0.559387211 | 0.999371363 | Not Sig |
| ENSG00000267348 | LOC105372419 | uncharacterized LOC105372419                           | 105372419 | 9.18600199  | -0.329935984 | 1.302128631 | -0.253382021 | 0.79997302  | 0.999371363 | Not Sig |
| ENSG00000185122 | HSF1         | heat shock transcription factor 1                      | 3297      | 1828.429621 | -0.32985205  | 0.49502937  | -0.666328242 | 0.505201317 | 0.999371363 | Not Sig |
| ENSG00000083535 | PIBF1        | progesterone immunomodulatory binding factor 1         | 10464     | 750.5216661 | -0.329719976 | 0.547246069 | -0.602507711 | 0.546836232 | 0.999371363 | Not Sig |
| ENSG00000183735 | TBK1         | TANK binding kinase 1                                  | 29110     | 784.3849069 | -0.329711183 | 0.595393098 | -0.553770583 | 0.579735863 | 0.999371363 | Not Sig |
| ENSG00000169908 | TM4SF1       | transmembrane 4 L six family member 1                  | 4071      | 4832.932798 | -0.329535337 | 0.626255619 | -0.52619941  | 0.598749664 | 0.999371363 | Not Sig |
| ENSG00000120647 | CCDC77       | coiled-coil domain containing 77                       | 84318     | 170.8190532 | -0.329445273 | 0.517539189 | -0.636561018 | 0.524410824 | 0.999371363 | Not Sig |
| ENSG00000118156 | ZNF541       | zinc finger protein 541                                | 84215     | 22.53123826 | -0.329382053 | 0.919855284 | -0.358080296 | 0.720283224 | 0.999371363 | Not Sig |
| ENSG00000196331 | NA           | NA                                                     | NA        | 205.0974115 | -0.329303283 | 0.99970072  | -0.329401866 | 0.741851958 | 0.999371363 | Not Sig |
| ENSG00000164048 | ZNF589       | zinc finger protein 589                                | 51385     | 370.0691342 | -0.329043324 | 0.441559493 | -0.745184576 | 0.456160146 | 0.999371363 | Not Sig |
| ENSG00000232623 | NA           | NA                                                     | NA        | 22.61633674 | -0.328732199 | 0.905934248 | -0.362865406 | 0.71670543  | 0.999371363 | Not Sig |
| ENSG00000117262 | GPR89B       | G protein-coupled receptor 89B                         | 51463     | 184.772667  | -0.328689636 | 0.660968967 | -0.497284521 | 0.618988426 | 0.999371363 | Not Sig |
| ENSG00000117262 | GPR89A       | G protein-coupled receptor 89A                         | 653519    | 184.772667  | -0.328689636 | 0.660968967 | -0.497284521 | 0.618988426 | 0.999371363 | Not Sig |
| ENSG00000111058 | ACSS3        | acyl-CoA synthetase short chain family member 3        | 79611     | 317.2440163 | -0.328626863 | 0.656617963 | -0.50048412  | 0.616734235 | 0.999371363 | Not Sig |
| ENSG00000179387 | ELMOD2       | ELMO domain containing 2                               | 255520    | 750.4667187 | -0.32856538  | 0.634417756 | -0.517900668 | 0.604527576 | 0.999371363 | Not Sig |
| ENSG00000136514 | RTP4         | receptor transporter protein 4                         | 64108     | 125.7108795 | -0.328149648 | 1.020033191 | -0.321704872 | 0.747676286 | 0.999371363 | Not Sig |
| ENSG00000182796 | TMEM198B     | transmembrane protein 198B (pseudogene)                | 440104    | 465.9967959 | -0.327967284 | 0.427592404 | -0.767009143 | 0.443076079 | 0.999371363 | Not Sig |
| ENSG00000163219 | ARHGAP25     | Rho GTPase activating protein 25                       | 9938      | 799.6890151 | -0.327856924 | 0.70216457  | -0.466923194 | 0.64055483  | 0.999371363 | Not Sig |
| ENSG00000179397 | CATSPERE     | catsper channel auxiliary subunit epsilon              | 257044    | 54.81506588 | -0.327694095 | 0.749272141 | -0.437349898 | 0.661857613 | 0.999371363 | Not Sig |
| ENSG00000252656 | NA           | NA                                                     | NA        | 4.06019491  | -0.32759703  | 1.31104632  | -0.24987449  | 0.802684412 | NA          | NA      |
| ENSG00000236086 | NA           | NA                                                     | NA        | 33.40959849 | -0.327415207 | 0.717896019 | -0.456076086 | 0.648335266 | 0.999371363 | Not Sig |
| ENSG00000188133 | TMEM215      | transmembrane protein 215                              | 401498    | 1.694061593 | -0.327282674 | 2.224325088 | -0.147137968 | 0.883023122 | NA          | NA      |
| ENSG00000262312 | NA           | NA                                                     | NA        | 9.297002516 | -0.326953284 | 1.044057006 | -0.313156544 | 0.754161732 | 0.999371363 | Not Sig |
| ENSG00000147155 | EBP          | emopamil binding protein (sterol isomerase)            | 10682     | 407.2782496 | -0.326923016 | 0.473199586 | -0.690877645 | 0.489642436 | 0.999371363 | Not Sig |
| ENSG00000240808 | NA           | NA                                                     | NA        | 21.23281605 | -0.326776415 | 0.679218386 | -0.48110655  | 0.630440773 | 0.999371363 | Not Sig |
| ENSG00000169635 | HIC2         | HIC ZBTB transcriptional repressor 2                   | 23119     | 369.8296331 | -0.326740529 | 0.610286527 | -0.53538873  | 0.592381081 | 0.999371363 | Not Sig |
| ENSG00000124181 | PLCG1        | phospholipase C gamma 1                                | 5335      | 1915.671728 | -0.326715557 | 0.613434568 | -0.532600498 | 0.594310157 | 0.999371363 | Not Sig |
| ENSG00000177418 | NA           | NA                                                     | NA        | 11.8477203  | -0.326673414 | 0.880716059 | -0.370917971 | 0.710698629 | 0.999371363 | Not Sig |
| ENSG00000273320 | NA           | NA                                                     | NA        | 26.72699504 | -0.326637625 | 0.761542801 | -0.428915649 | 0.667984611 | 0.999371363 | Not Sig |

|                 |            |                                                            |        |             |              |             |              |             |             |         |
|-----------------|------------|------------------------------------------------------------|--------|-------------|--------------|-------------|--------------|-------------|-------------|---------|
| ENSG00000156384 | SFR1       | SWI5 dependent homologous recombination repair protein 1   | 119392 | 112.9058393 | -0.326537846 | 0.523153414 | -0.624172254 | 0.532514466 | 0.999371363 | Not Sig |
| ENSG00000068615 | REEP1      | receptor accessory protein 1                               | 65055  | 95.39989316 | -0.326491432 | 0.878984274 | -0.371441721 | 0.710308556 | 0.999371363 | Not Sig |
| ENSG00000183458 | NA         | NA                                                         | NA     | 393.1666382 | -0.326380556 | 0.683379196 | -0.477598028 | 0.632936335 | 0.999371363 | Not Sig |
| ENSG00000260831 | NA         | NA                                                         | NA     | 6.966493981 | -0.326355521 | 1.114912929 | -0.292718393 | 0.76973741  | 0.999371363 | Not Sig |
| ENSG00000145730 | PAM        | peptidylglycine alpha-amidating monooxygenase              | 5066   | 4661.40972  | -0.32630446  | 0.564212283 | -0.578336328 | 0.563037072 | 0.999371363 | Not Sig |
| ENSG00000148950 | IMMP1L     | inner mitochondrial membrane peptidase subunit 1           | 196294 | 160.5548875 | -0.326204577 | 0.630279209 | -0.517555669 | 0.604768319 | 0.999371363 | Not Sig |
| ENSG00000238105 | GOLGA2P5   | golgin A2 pseudogene 5                                     | 55592  | 452.2071318 | -0.32614989  | 0.543099892 | -0.60053389  | 0.548150482 | 0.999371363 | Not Sig |
| ENSG00000148688 | RPP30      | ribonuclease P/MRP subunit p30                             | 10556  | 290.0729973 | -0.326137426 | 0.491404552 | -0.663684177 | 0.506892469 | 0.999371363 | Not Sig |
| ENSG00000271430 | NA         | NA                                                         | NA     | 1218.755347 | -0.325894233 | 0.744253629 | -0.43788061  | 0.661472832 | 0.999371363 | Not Sig |
| ENSG00000176894 | PXMP2      | peroxisomal membrane protein 2                             | 5827   | 70.56646427 | -0.325471271 | 0.542421332 | -0.600034055 | 0.54848354  | 0.999371363 | Not Sig |
| ENSG00000139197 | PEX5       | peroxisomal biogenesis factor 5                            | 5830   | 734.3815084 | -0.325406835 | 0.494421749 | -0.658156392 | 0.510437643 | 0.999371363 | Not Sig |
| ENSG00000240382 | NA         | NA                                                         | NA     | 78.8588125  | -0.325303981 | 0.910238996 | -0.357383042 | 0.72080507  | 0.999371363 | Not Sig |
| ENSG00000196466 | ZNF799     | zinc finger protein 799                                    | 90576  | 122.4839047 | -0.325266137 | 0.492684155 | -0.660191998 | 0.509130627 | 0.999371363 | Not Sig |
| ENSG00000204791 | NA         | NA                                                         | NA     | 5.261145729 | -0.325261298 | 1.2152386   | -0.267652211 | 0.788967038 | NA          | NA      |
| ENSG00000182899 | RPL35A     | ribosomal protein L35a                                     | 6165   | 3395.074021 | -0.325171321 | 0.558126345 | -0.582612386 | 0.560154265 | 0.999371363 | Not Sig |
| ENSG00000170011 | MYRIP      | myosin VIIA and Rab interacting protein                    | 25924  | 71.66158765 | -0.32515694  | 0.880968106 | -0.369090478 | 0.712060286 | 0.999371363 | Not Sig |
| ENSG00000145592 | RPL37      | ribosomal protein L37                                      | 6167   | 3736.26419  | -0.325135126 | 0.581321741 | -0.559303228 | 0.575954793 | 0.999371363 | Not Sig |
| ENSG00000144034 | TPRKB      | TP53RK binding protein                                     | 51002  | 149.3690419 | -0.3246383   | 0.668621258 | -0.48553392  | 0.627297658 | 0.999371363 | Not Sig |
| ENSG00000155850 | SLC26A2    | solute carrier family 26 member 2                          | 1836   | 992.6413794 | -0.324624279 | 0.549301349 | -0.590976664 | 0.554536057 | 0.999371363 | Not Sig |
| ENSG00000196756 | SNHG17     | small nucleolar RNA host gene 17                           | 388796 | 323.5365488 | -0.32453335  | 0.53122604  | -0.61091386  | 0.541256609 | 0.999371363 | Not Sig |
| ENSG00000198298 | ZNF485     | zinc finger protein 485                                    | 220992 | 74.88848347 | -0.324413092 | 0.58148784  | -0.557901764 | 0.576911467 | 0.999371363 | Not Sig |
| ENSG00000100139 | MICALL1    | MICAL like 1                                               | 85377  | 1187.801719 | -0.324237818 | 0.698960135 | -0.463885995 | 0.642729427 | 0.999371363 | Not Sig |
| ENSG00000227331 | NA         | NA                                                         | NA     | 64.41359751 | -0.324198596 | 0.707717426 | -0.458090452 | 0.646887458 | 0.999371363 | Not Sig |
| ENSG00000112245 | PTP4A1     | protein tyrosine phosphatase type IVA, member 1            | 7803   | 7326.120307 | -0.324082076 | 0.699312239 | -0.463429722 | 0.643056378 | 0.999371363 | Not Sig |
| ENSG00000129691 | ASH2L      | ASH2 like histone lysine methyltransferase complex subunit | 9070   | 890.3488089 | -0.324073359 | 0.560427321 | -0.578261171 | 0.563087805 | 0.999371363 | Not Sig |
| ENSG00000112592 | TBP        | TATA-box binding protein                                   | 6908   | 247.0712182 | -0.323957542 | 0.478588625 | -0.676901884 | 0.498468209 | 0.999371363 | Not Sig |
| ENSG00000185973 | TMLHE      | trimethyllysine hydroxylase, epsilon                       | 55217  | 179.5073728 | -0.323938231 | 0.525216469 | -0.616770894 | 0.537385852 | 0.999371363 | Not Sig |
| ENSG00000203865 | ATP1A1-AS1 | ATP1A1 antisense RNA 1                                     | 84852  | 60.41868593 | -0.32387277  | 0.538279148 | -0.601681807 | 0.547385963 | 0.999371363 | Not Sig |
| ENSG00000212978 | LOC339803  | uncharacterized LOC339803                                  | 339803 | 109.6219903 | -0.323850002 | 0.465902511 | -0.695102504 | 0.486991066 | 0.999371363 | Not Sig |
| ENSG00000164330 | EBF1       | early B-cell factor 1                                      | 1879   | 206.5464557 | -0.323661192 | 0.586131003 | -0.552199407 | 0.58081174  | 0.999371363 | Not Sig |
| ENSG00000152595 | MEPE       | matrix extracellular phosphoglycoprotein                   | 56955  | 0.745746319 | -0.323356307 | 3.349891111 | -0.096527408 | 0.923101707 | NA          | NA      |
| ENSG00000163833 | FBXO40     | F-box protein 40                                           | 51725  | 0.745746319 | -0.323356307 | 3.349891111 | -0.096527408 | 0.923101707 | NA          | NA      |
| ENSG00000212176 | NA         | NA                                                         | NA     | 0.745746319 | -0.323356307 | 3.349891111 | -0.096527408 | 0.923101707 | NA          | NA      |
| ENSG00000229442 | NA         | NA                                                         | NA     | 0.745746319 | -0.323356307 | 3.349891111 | -0.096527408 | 0.923101707 | NA          | NA      |
| ENSG00000237003 | NA         | NA                                                         | NA     | 0.745746319 | -0.323356307 | 3.349891111 | -0.096527408 | 0.923101707 | NA          | NA      |

|                 |              |                                                          |           |             |              |             |              |             |             |         |
|-----------------|--------------|----------------------------------------------------------|-----------|-------------|--------------|-------------|--------------|-------------|-------------|---------|
| ENSG00000239272 | NA           | NA                                                       | NA        | 17.58927479 | -0.323345577 | 0.896596026 | -0.360636862 | 0.718370929 | 0.999371363 | Not Sig |
| ENSG00000113522 | RAD50        | RAD50 double strand break repair protein                 | 10111     | 2050.831045 | -0.323221661 | 0.569296907 | -0.567755871 | 0.570200748 | 0.999371363 | Not Sig |
| ENSG00000175899 | A2M          | alpha-2-macroglobulin                                    | 2         | 50489.84822 | -0.323197138 | 0.772595954 | -0.418326211 | 0.675708628 | 0.999371363 | Not Sig |
| ENSG00000172830 | SSH3         | slingshot protein phosphatase 3                          | 54961     | 983.2891408 | -0.322966871 | 0.458297842 | -0.70470956  | 0.480991001 | 0.999371363 | Not Sig |
| ENSG00000140463 | BBS4         | Bardet-Biedl syndrome 4                                  | 585       | 482.6539047 | -0.322675896 | 0.565165622 | -0.570940417 | 0.568040033 | 0.999371363 | Not Sig |
| ENSG00000155744 | FAM126B      | family with sequence similarity 126 member B             | 285172    | 1044.951138 | -0.322650418 | 0.544374617 | -0.592699232 | 0.553382455 | 0.999371363 | Not Sig |
| ENSG00000113108 | APBB3        | amyloid beta precursor protein binding family B member 3 | 10307     | 347.0047344 | -0.322629999 | 0.476974084 | -0.676409913 | 0.498780425 | 0.999371363 | Not Sig |
| ENSG00000121406 | ZNF549       | zinc finger protein 549                                  | 256051    | 227.2023886 | -0.322601567 | 0.629115298 | -0.512786079 | 0.608100969 | 0.999371363 | Not Sig |
| ENSG00000133731 | IMPA1        | inositol monophosphatase 1                               | 3612      | 342.0732809 | -0.322534717 | 0.498522341 | -0.64698147  | 0.517643936 | 0.999371363 | Not Sig |
| ENSG00000156017 | CARNMT1      | carnosine N-methyltransferase 1                          | 138199    | 482.890222  | -0.322367752 | 0.591124028 | -0.545347062 | 0.585514842 | 0.999371363 | Not Sig |
| ENSG00000172687 | NA           | NA                                                       | NA        | 104.3679748 | -0.322259381 | 0.605223687 | -0.532463266 | 0.594405178 | 0.999371363 | Not Sig |
| ENSG00000152402 | GUCY1A2      | guanylate cyclase 1 soluble subunit alpha 2              | 2977      | 1483.479546 | -0.322225467 | 0.700039593 | -0.460296061 | 0.645303728 | 0.999371363 | Not Sig |
| ENSG00000225177 | NA           | NA                                                       | NA        | 27.6168081  | -0.322015932 | 0.8003348   | -0.402351531 | 0.687425335 | 0.999371363 | Not Sig |
| ENSG00000131943 | C19orf12     | chromosome 19 open reading frame 12                      | 83636     | 332.2465135 | -0.32189632  | 0.428015869 | -0.75206632  | 0.452011177 | 0.999371363 | Not Sig |
| ENSG00000153922 | CHD1         | chromodomain helicase DNA binding protein 1              | 1105      | 2590.89726  | -0.321853861 | 0.581429694 | -0.553555941 | 0.579882786 | 0.999371363 | Not Sig |
| ENSG00000107854 | TNKS2        | tankyrase 2                                              | 80351     | 2671.10209  | -0.321802979 | 0.505312381 | -0.636839687 | 0.524229272 | 0.999371363 | Not Sig |
| ENSG00000127184 | COX7C        | cytochrome c oxidase subunit 7C                          | 1350      | 1406.708231 | -0.321668145 | 0.620388915 | -0.518494346 | 0.604113404 | 0.999371363 | Not Sig |
| ENSG00000174606 | ANGEL2       | angel homolog 2                                          | 90806     | 861.1715004 | -0.321631788 | 0.611069939 | -0.526342022 | 0.598650591 | 0.999371363 | Not Sig |
| ENSG00000157212 | PAXIP1       | PAX interacting protein 1                                | 22976     | 622.4567886 | -0.321485037 | 0.633950294 | -0.50711395  | 0.612074868 | 0.999371363 | Not Sig |
| ENSG00000233058 | NA           | NA                                                       | NA        | 67.57372532 | -0.32144767  | 0.846339182 | -0.37980951  | 0.704086823 | 0.999371363 | Not Sig |
| ENSG00000149311 | ATM          | ATM serine/threonine kinase                              | 472       | 4428.671125 | -0.321269166 | 0.578428631 | -0.555417122 | 0.578609384 | 0.999371363 | Not Sig |
| ENSG00000245680 | ZNF585B      | zinc finger protein 585B                                 | 92285     | 360.6877629 | -0.321193899 | 0.482082054 | -0.666263961 | 0.505242396 | 0.999371363 | Not Sig |
| ENSG00000186130 | ZBTB6        | zinc finger and BTB domain containing 6                  | 10773     | 323.0593229 | -0.32117871  | 0.531844732 | -0.603895631 | 0.545913034 | 0.999371363 | Not Sig |
| ENSG00000212884 | NA           | NA                                                       | NA        | 181.6746998 | -0.321138611 | 0.943858549 | -0.340240188 | 0.733675656 | 0.999371363 | Not Sig |
| ENSG00000115255 | REEP6        | receptor accessory protein 6                             | 92840     | 133.087672  | -0.321130536 | 0.840685915 | -0.38198634  | 0.702471497 | 0.999371363 | Not Sig |
| ENSG00000130775 | THEMIS2      | thymocyte selection associated family member 2           | 9473      | 1340.378958 | -0.321063964 | 0.717904096 | -0.447224032 | 0.654713311 | 0.999371363 | Not Sig |
| ENSG00000243199 | NA           | NA                                                       | NA        | 17.11802577 | -0.320947274 | 0.924380768 | -0.347202457 | 0.728439225 | 0.999371363 | Not Sig |
| ENSG00000263307 | LOC105371084 | uncharacterized LOC105371084                             | 105371084 | 16.47398045 | -0.320744878 | 0.774286533 | -0.414245714 | 0.678694166 | 0.999371363 | Not Sig |
| ENSG00000104412 | EMC2         | ER membrane protein complex subunit 2                    | 9694      | 706.6432983 | -0.320635399 | 0.560715665 | -0.571832441 | 0.567435497 | 0.999371363 | Not Sig |
| ENSG00000101152 | DNAJC5       | DnaJ heat shock protein family (Hsp40) member C5         | 80331     | 2391.624874 | -0.320614386 | 0.448760871 | -0.71444372  | 0.474952845 | 0.999371363 | Not Sig |
| ENSG00000236269 | NA           | NA                                                       | NA        | 83.83378544 | -0.320484886 | 0.86006387  | -0.37262917  | 0.709424459 | 0.999371363 | Not Sig |
| ENSG00000166780 | C16orf45     | chromosome 16 open reading frame 45                      | 89927     | 202.8182957 | -0.320402085 | 0.646191269 | -0.495831653 | 0.620013191 | 0.999371363 | Not Sig |
| ENSG00000066427 | ATXN3        | ataxin 3                                                 | 4287      | 687.0249034 | -0.320145525 | 0.45387078  | -0.705367119 | 0.480581801 | 0.999371363 | Not Sig |
| ENSG00000114745 | GORASP1      | golgi reassembly stacking protein 1                      | 64689     | 1146.735357 | -0.32007459  | 0.489132645 | -0.654371759 | 0.512872324 | 0.999371363 | Not Sig |
| ENSG00000241634 | NA           | NA                                                       | NA        | 8.718089284 | -0.320030385 | 0.896431651 | -0.357004781 | 0.721088227 | 0.999371363 | Not Sig |

|                 |              |                                                       |           |             |              |             |              |             |             |         |
|-----------------|--------------|-------------------------------------------------------|-----------|-------------|--------------|-------------|--------------|-------------|-------------|---------|
| ENSG00000264961 | MIR4730      | microRNA 4730                                         | 100616359 | 4.380216849 | -0.319976374 | 1.320412971 | -0.24233053  | 0.808524059 | NA          | NA      |
| ENSG00000134086 | VHL          | von Hippel-Lindau tumor suppressor                    | 7428      | 1269.448394 | -0.319935111 | 0.491703478 | -0.650666763 | 0.515261623 | 0.999371363 | Not Sig |
| ENSG00000174233 | ADCY6        | adenylate cyclase 6                                   | 112       | 1426.302612 | -0.319848719 | 0.435508883 | -0.734425248 | 0.462689604 | 0.999371363 | Not Sig |
| ENSG00000104388 | RAB2A        | RAB2A, member RAS oncogene family                     | 5862      | 2338.424601 | -0.319669792 | 0.559130437 | -0.571726687 | 0.567507152 | 0.999371363 | Not Sig |
| ENSG00000258458 | NA           | NA                                                    | NA        | 13.62886872 | -0.319619816 | 0.768071067 | -0.416133128 | 0.67731259  | 0.999371363 | Not Sig |
| ENSG00000137496 | IL18BP       | interleukin 18 binding protein                        | 10068     | 532.1888674 | -0.319614969 | 0.57035462  | -0.560379381 | 0.575220692 | 0.999371363 | Not Sig |
| ENSG0000013561  | RNF14        | ring finger protein 14                                | 9604      | 769.6843112 | -0.319611365 | 0.494003569 | -0.646981896 | 0.517643661 | 0.999371363 | Not Sig |
| ENSG00000166783 | MARF1        | meiosis regulator and mRNA stability factor 1         | 9665      | 3485.003064 | -0.319545353 | 0.463296126 | -0.689721616 | 0.49036927  | 0.999371363 | Not Sig |
| ENSG00000141380 | SS18         | SS18, nBAF chromatin remodeling complex subunit       | 6760      | 1674.020899 | -0.319504209 | 0.644462414 | -0.495768569 | 0.620057703 | 0.999371363 | Not Sig |
| ENSG00000168283 | BMI1         | BMI1 proto-oncogene, polycomb ring finger             | 648       | 555.7119727 | -0.319476597 | 0.530268751 | -0.602480528 | 0.546854321 | 0.999371363 | Not Sig |
| ENSG00000112425 | EPM2A        | EPM2A, laforin glucan phosphatase                     | 7957      | 132.173537  | -0.319406344 | 0.596399364 | -0.535557821 | 0.592264186 | 0.999371363 | Not Sig |
| ENSG00000120158 | RCL1         | RNA terminal phosphate cyclase like 1                 | 10171     | 338.2597504 | -0.319295873 | 0.553651466 | -0.576709161 | 0.564135943 | 0.999371363 | Not Sig |
| ENSG00000103150 | MLYCD        | malonyl-CoA decarboxylase                             | 23417     | 386.8310412 | -0.319248669 | 0.5255993   | -0.607399341 | 0.543585926 | 0.999371363 | Not Sig |
| ENSG00000163636 | PSMD6        | proteasome 26S subunit, non-ATPase 6                  | 9861      | 882.5886997 | -0.319201346 | 0.502412278 | -0.63533747  | 0.52520834  | 0.999371363 | Not Sig |
| ENSG00000131558 | EXOC4        | exocyst complex component 4                           | 60412     | 2010.877654 | -0.319178218 | 0.462694568 | -0.689824866 | 0.49030433  | 0.999371363 | Not Sig |
| ENSG00000061337 | LZTS1        | leucine zipper tumor suppressor 1                     | 11178     | 255.4819783 | -0.319121437 | 0.522615358 | -0.610623916 | 0.541448586 | 0.999371363 | Not Sig |
| ENSG00000075975 | MKRN2        | makorin ring finger protein 2                         | 23609     | 581.0104215 | -0.318717718 | 0.426051208 | -0.748073734 | 0.454415684 | 0.999371363 | Not Sig |
| ENSG00000214367 | HAUS3        | HAUS augmin like complex subunit 3                    | 79441     | 392.6111211 | -0.318661225 | 0.474051904 | -0.672207458 | 0.501451634 | 0.999371363 | Not Sig |
| ENSG00000117569 | PTBP2        | polypyrimidine tract binding protein 2                | 58155     | 712.6964526 | -0.318647618 | 0.738577072 | -0.431434485 | 0.66615248  | 0.999371363 | Not Sig |
| ENSG00000130725 | UBE2M        | ubiquitin conjugating enzyme E2 M                     | 9040      | 815.4044364 | -0.318565669 | 0.462060933 | -0.689445149 | 0.490543179 | 0.999371363 | Not Sig |
| ENSG00000246174 | KCTD21-AS1   | KCTD21 antisense RNA 1                                | 100289388 | 32.5223488  | -0.318520775 | 0.917615228 | -0.347118013 | 0.728502661 | 0.999371363 | Not Sig |
| ENSG00000143952 | VPS54        | VPS54, GARP complex subunit                           | 51542     | 1418.62332  | -0.317949979 | 0.559802523 | -0.567968106 | 0.570056624 | 0.999371363 | Not Sig |
| ENSG00000205038 | PKHD1L1      | PKHD1 like 1                                          | 93035     | 163.2109745 | -0.317774199 | 1.168779444 | -0.271885513 | 0.785710051 | 0.999371363 | Not Sig |
| ENSG00000229132 | NA           | NA                                                    | NA        | 6.846189911 | -0.317772369 | 1.04822624  | -0.303152466 | 0.761773672 | 0.999371363 | Not Sig |
| ENSG00000167306 | MYO5B        | myosin VB                                             | 4645      | 1757.601201 | -0.317653416 | 0.427137489 | -0.74367955  | 0.457070364 | 0.999371363 | Not Sig |
| ENSG00000264324 | NA           | NA                                                    | NA        | 8.414650719 | -0.317614037 | 0.879494983 | -0.36113229  | 0.718000556 | 0.999371363 | Not Sig |
| ENSG00000125637 | PSD4         | pleckstrin and Sec7 domain containing 4               | 23550     | 3150.550446 | -0.317416858 | 0.672090953 | -0.472282593 | 0.636725093 | 0.999371363 | Not Sig |
| ENSG00000178971 | CTC1         | CST telomere replication complex component 1          | 80169     | 989.8937038 | -0.317222145 | 0.379292697 | -0.836351839 | 0.402956998 | 0.999371363 | Not Sig |
| ENSG00000257207 | NA           | NA                                                    | NA        | 21.83082604 | -0.317209821 | 0.654934799 | -0.484338015 | 0.628146001 | 0.999371363 | Not Sig |
| ENSG00000203739 | LOC101928673 | uncharacterized LOC101928673                          | 101928673 | 71.96467504 | -0.317159183 | 0.508121449 | -0.624179875 | 0.532509462 | 0.999371363 | Not Sig |
| ENSG00000256723 | NA           | NA                                                    | NA        | 1.011113115 | -0.316982048 | 2.596059683 | -0.122101218 | 0.902818858 | NA          | NA      |
| ENSG00000159496 | RGL4         | ral guanine nucleotide dissociation stimulator like 4 | 266747    | 13.19643532 | -0.316965133 | 1.055287321 | -0.300359084 | 0.76390327  | 0.999371363 | Not Sig |
| ENSG00000260165 | NA           | NA                                                    | NA        | 1.403237809 | -0.316750729 | 2.377532133 | -0.133226687 | 0.894014106 | NA          | NA      |
| ENSG00000148834 | GSTO1        | glutathione S-transferase omega 1                     | 9446      | 800.684463  | -0.316730369 | 0.544570981 | -0.581614481 | 0.560826387 | 0.999371363 | Not Sig |
| ENSG00000166377 | ATP9B        | ATPase phospholipid transporting 9B (putative)        | 374868    | 1422.031446 | -0.316633689 | 0.412561643 | -0.767482131 | 0.442794913 | 0.999371363 | Not Sig |

|                 |          |                                                               |    |        |             |              |             |              |             |             |         |
|-----------------|----------|---------------------------------------------------------------|----|--------|-------------|--------------|-------------|--------------|-------------|-------------|---------|
| ENSG00000165029 | ABCA1    | ATP binding cassette subfamily A member 1                     |    | 19     | 5329.798707 | -0.316573438 | 0.44911589  | -0.704881401 | 0.480884045 | 0.999371363 | Not Sig |
| ENSG00000130787 | HIP1R    | huntingtin interacting protein 1 related                      |    | 9026   | 1305.055833 | -0.316516365 | 0.443375362 | -0.713879012 | 0.475301996 | 0.999371363 | Not Sig |
| ENSG00000144827 | ABHD10   | abhydrolase domain containing 10                              |    | 55347  | 343.6263494 | -0.316462534 | 0.49108584  | -0.644413884 | 0.519307084 | 0.999371363 | Not Sig |
| ENSG00000089234 | BRAP     | BRCA1 associated protein                                      |    | 8315   | 551.108728  | -0.316262763 | 0.407387038 | -0.776320142 | 0.437559983 | 0.999371363 | Not Sig |
| ENSG00000260824 | NA       | NA                                                            | NA |        | 13.80076745 | -0.316256738 | 0.846045493 | -0.37380583  | 0.708548782 | 0.999371363 | Not Sig |
| ENSG00000138698 | RAP1GDS1 | Rap1 GTPase-GDP dissociation stimulator 1                     |    | 5910   | 621.5321972 | -0.316129344 | 0.520166316 | -0.607746665 | 0.543355508 | 0.999371363 | Not Sig |
| ENSG00000230026 | NA       | NA                                                            | NA |        | 1.745572776 | -0.316124035 | 2.280526106 | -0.138618906 | 0.889751302 | NA          | NA      |
| ENSG00000168297 | PXK      | PX domain containing serine/threonine kinase like             |    | 54899  | 468.2462828 | -0.316073276 | 0.447092992 | -0.706951981 | 0.479596319 | 0.999371363 | Not Sig |
| ENSG00000089022 | MAPKAPK5 | mitogen-activated protein kinase-activated protein kinase 5   |    | 8550   | 736.6724868 | -0.316008417 | 0.394025201 | -0.802000523 | 0.422552656 | 0.999371363 | Not Sig |
| ENSG00000074603 | DPP8     | dipeptidyl peptidase 8                                        |    | 54878  | 1373.15747  | -0.315987906 | 0.516118124 | -0.612239507 | 0.540379307 | 0.999371363 | Not Sig |
| ENSG00000142330 | CAPN10   | calpain 10                                                    |    | 11132  | 613.8238169 | -0.315795526 | 0.539238787 | -0.585632068 | 0.558122794 | 0.999371363 | Not Sig |
| ENSG00000168522 | FNTA     | farnesyltransferase, CAAX box, alpha                          |    | 2339   | 830.196526  | -0.315659579 | 0.463750603 | -0.680666671 | 0.49608243  | 0.999371363 | Not Sig |
| ENSG00000163714 | U2SURP   | U2 snRNP associated SURP domain containing                    |    | 23350  | 2989.453873 | -0.315564816 | 0.589432625 | -0.535370461 | 0.592393712 | 0.999371363 | Not Sig |
| ENSG00000125648 | SLC25A23 | solute carrier family 25 member 23                            |    | 79085  | 1139.183877 | -0.315490746 | 0.508108373 | -0.620912314 | 0.534657319 | 0.999371363 | Not Sig |
| ENSG00000137269 | LRRC1    | leucine rich repeat containing 1                              |    | 55227  | 525.7842795 | -0.315435442 | 0.604983544 | -0.521395078 | 0.60209158  | 0.999371363 | Not Sig |
| ENSG00000267221 | ZNF385C  | zinc finger protein 385C                                      |    | 201181 | 28.05110955 | -0.31535834  | 0.660977817 | -0.47710881  | 0.633284641 | 0.999371363 | Not Sig |
| ENSG00000230092 | NA       | NA                                                            | NA |        | 46.05834695 | -0.315352292 | 0.58056148  | -0.543185007 | 0.587002429 | 0.999371363 | Not Sig |
| ENSG00000047188 | YTHDC2   | YTH domain containing 2                                       |    | 64848  | 1170.660836 | -0.315200215 | 0.552672919 | -0.570319631 | 0.568460929 | 0.999371363 | Not Sig |
| ENSG00000154265 | ABCA5    | ATP binding cassette subfamily A member 5                     |    | 23461  | 913.0056828 | -0.315135563 | 0.65555028  | -0.480719134 | 0.63071613  | 0.999371363 | Not Sig |
| ENSG00000206651 | NA       | NA                                                            | NA |        | 17.22913174 | -0.315134165 | 0.698138571 | -0.451391998 | 0.651707049 | 0.999371363 | Not Sig |
| ENSG00000130997 | POLN     | DNA polymerase nu                                             |    | 353497 | 61.88328294 | -0.315089438 | 0.525874153 | -0.599172703 | 0.549057724 | 0.999371363 | Not Sig |
| ENSG00000166855 | CLPX     | caseinolytic mitochondrial matrix peptidase chaperone subunit |    | 10845  | 1188.702134 | -0.315041323 | 0.437769699 | -0.719650822 | 0.471740013 | 0.999371363 | Not Sig |
| ENSG00000148341 | SH3GLB2  | SH3 domain containing GREB2 like, endophilin B2               |    | 56904  | 1411.887682 | -0.31500462  | 0.577231331 | -0.545716427 | 0.585260878 | 0.999371363 | Not Sig |
| ENSG00000214982 | NA       | NA                                                            | NA |        | 238.9115645 | -0.314755516 | 0.457770021 | -0.68758438  | 0.491714547 | 0.999371363 | Not Sig |
| ENSG00000070814 | TCOF1    | treacle ribosome biogenesis factor 1                          |    | 6949   | 1135.802378 | -0.314472439 | 0.480436789 | -0.654555285 | 0.512754122 | 0.999371363 | Not Sig |
| ENSG00000162496 | DHRS3    | dehydrogenase/reductase 3                                     |    | 9249   | 1816.651325 | -0.31439029  | 0.530141083 | -0.593031365 | 0.553160162 | 0.999371363 | Not Sig |
| ENSG00000108106 | UBE2S    | ubiquitin conjugating enzyme E2 S                             |    | 27338  | 319.0173969 | -0.314357517 | 0.454569868 | -0.691549394 | 0.489220351 | 0.999371363 | Not Sig |
| ENSG00000165661 | QSOX2    | quiescin sulphydryl oxidase 2                                 |    | 169714 | 492.0535361 | -0.314314504 | 0.463206556 | -0.678562294 | 0.497415241 | 0.999371363 | Not Sig |
| ENSG00000186432 | KPNA4    | karyopherin subunit alpha 4                                   |    | 3840   | 2510.630683 | -0.314267638 | 0.491577633 | -0.639304185 | 0.522625066 | 0.999371363 | Not Sig |
| ENSG00000091009 | RBM27    | RNA binding motif protein 27                                  |    | 54439  | 1442.810721 | -0.313812807 | 0.502731163 | -0.624215944 | 0.532485778 | 0.999371363 | Not Sig |
| ENSG00000233585 | NA       | NA                                                            | NA |        | 6.6622254   | -0.31362482  | 0.998268273 | -0.314168875 | 0.753392781 | 0.999371363 | Not Sig |
| ENSG00000129158 | SERGEF   | secretion regulating guanine nucleotide exchange factor       |    | 26297  | 297.0007072 | -0.313610364 | 0.443861822 | -0.706549535 | 0.479846459 | 0.999371363 | Not Sig |
| ENSG00000080802 | CNOT4    | CCR4-NOT transcription complex subunit 4                      |    | 4850   | 943.4822277 | -0.313539244 | 0.531073521 | -0.590387643 | 0.554930793 | 0.999371363 | Not Sig |
| ENSG00000206783 | NA       | NA                                                            | NA |        | 4.300957779 | -0.31349697  | 1.696166634 | -0.184826752 | 0.853364924 | NA          | NA      |
| ENSG00000148516 | ZEB1     | zinc finger E-box binding homeobox 1                          |    | 6935   | 1269.209466 | -0.313390798 | 0.547473225 | -0.572431278 | 0.567029831 | 0.999371363 | Not Sig |



|                 |              |                                                       |           |             |              |             |              |             |             |         |
|-----------------|--------------|-------------------------------------------------------|-----------|-------------|--------------|-------------|--------------|-------------|-------------|---------|
| ENSG00000145817 | YIPF5        | Yipl domain family member 5                           | 81555     | 982.7847973 | -0.312869004 | 0.594534634 | -0.526241846 | 0.598720183 | 0.999371363 | Not Sig |
| ENSG00000252585 | NA           | NA                                                    | NA        | 3.145362572 | -0.312833539 | 1.758812635 | -0.177866324 | 0.858827958 | NA          | NA      |
| ENSG00000101216 | GMEB2        | glucocorticoid modulatory element binding protein 2   | 26205     | 513.6598519 | -0.312766344 | 0.481623416 | -0.649400203 | 0.516079733 | 0.999371363 | Not Sig |
| ENSG00000090054 | SPTLC1       | serine palmitoyltransferase long chain base subunit 1 | 10558     | 1117.022362 | -0.312756377 | 0.438293357 | -0.713577727 | 0.475488335 | 0.999371363 | Not Sig |
| ENSG00000188394 | NA           | NA                                                    | NA        | 27.30055576 | -0.31275203  | 0.815773692 | -0.383380873 | 0.701437383 | 0.999371363 | Not Sig |
| ENSG00000185917 | SETD4        | SET domain containing 4                               | 54093     | 509.4509389 | -0.312587888 | 0.479166867 | -0.652357059 | 0.514170859 | 0.999371363 | Not Sig |
| ENSG00000132330 | SCLY         | selenocysteine lyase                                  | 51540     | 92.10316081 | -0.312210631 | 0.447624447 | -0.69748342  | 0.485500312 | 0.999371363 | Not Sig |
| ENSG00000166435 | XRRA1        | X-ray radiation resistance associated 1               | 143570    | 918.0667703 | -0.312204231 | 0.509046838 | -0.613311404 | 0.539670454 | 0.999371363 | Not Sig |
| ENSG00000264480 | MIR4714      | microRNA 4714                                         | 100616432 | 10.46805241 | -0.312183009 | 0.876369722 | -0.356222952 | 0.721673605 | 0.999371363 | Not Sig |
| ENSG00000203875 | SNHG5        | small nucleolar RNA host gene 5                       | 387066    | 804.5862567 | -0.312153893 | 0.495921046 | -0.62944272  | 0.529059257 | 0.999371363 | Not Sig |
| ENSG00000162290 | NA           | NA                                                    | NA        | 1014.3391   | -0.312114606 | 0.476816867 | -0.654579625 | 0.512738446 | 0.999371363 | Not Sig |
| ENSG00000136146 | MED4         | mediator complex subunit 4                            | 29079     | 598.5570377 | -0.311939447 | 0.576830738 | -0.540781596 | 0.588658129 | 0.999371363 | Not Sig |
| ENSG00000258578 | NA           | NA                                                    | NA        | 8.694160654 | -0.311857615 | 0.952146557 | -0.327531106 | 0.74326622  | 0.999371363 | Not Sig |
| ENSG00000213509 | NA           | NA                                                    | NA        | 2.037813962 | -0.311844973 | 2.176664839 | -0.143267336 | 0.886079052 | NA          | NA      |
| ENSG00000152382 | TADA1        | transcriptional adaptor 1                             | 117143    | 263.8515321 | -0.31112061  | 0.568460618 | -0.547303719 | 0.584170089 | 0.999371363 | Not Sig |
| ENSG00000083168 | KAT6A        | lysine acetyltransferase 6A                           | 7994      | 3059.205507 | -0.310896052 | 0.507205652 | -0.61295857  | 0.539903734 | 0.999371363 | Not Sig |
| ENSG00000095485 | CWF19L1      | CWF19 like 1, cell cycle control (S. pombe)           | 55280     | 411.7856069 | -0.310855088 | 0.437948191 | -0.709798772 | 0.477828931 | 0.999371363 | Not Sig |
| ENSG00000136147 | PHF11        | PHD finger protein 11                                 | 51131     | 621.4711718 | -0.310853823 | 0.538196434 | -0.577584324 | 0.563544793 | 0.999371363 | Not Sig |
| ENSG00000225541 | NA           | NA                                                    | NA        | 3.225474702 | -0.310791056 | 1.440446361 | -0.215760242 | 0.82917464  | NA          | NA      |
| ENSG00000122912 | SLC25A16     | solute carrier family 25 member 16                    | 8034      | 849.1642081 | -0.310562214 | 0.599234039 | -0.518265309 | 0.604273174 | 0.999371363 | Not Sig |
| ENSG00000241539 | NA           | NA                                                    | NA        | 0.668778149 | -0.310553085 | 2.963217016 | -0.10480268  | 0.916532383 | NA          | NA      |
| ENSG00000217733 | NA           | NA                                                    | NA        | 8.538652194 | -0.310475543 | 0.929505077 | -0.334022429 | 0.738362634 | 0.999371363 | Not Sig |
| ENSG00000269019 | LOC102724360 | uncharacterized LOC102724360                          | 102724360 | 4.553576751 | -0.310124319 | 1.18258772  | -0.262242127 | 0.793134777 | NA          | NA      |
| ENSG00000113384 | GOLPH3       | golgi phosphoprotein 3                                | 64083     | 3103.476105 | -0.310037539 | 0.507334045 | -0.611111244 | 0.541125936 | 0.999371363 | Not Sig |
| ENSG00000112695 | COX7A2       | cytochrome c oxidase subunit 7A2                      | 1347      | 814.9718906 | -0.309853782 | 0.587512272 | -0.527399677 | 0.597916068 | 0.999371363 | Not Sig |
| ENSG00000141562 | NARF         | nuclear prelamin A recognition factor                 | 26502     | 1072.973553 | -0.309502715 | 0.463065161 | -0.668378321 | 0.50389213  | 0.999371363 | Not Sig |
| ENSG00000269067 | ZNF728       | zinc finger protein 728                               | 388523    | 9.858069289 | -0.309492601 | 0.927892829 | -0.333543478 | 0.738724076 | 0.999371363 | Not Sig |
| ENSG00000160633 | SAFB         | scaffold attachment factor B                          | 6294      | 1884.253678 | -0.309486382 | 0.473277757 | -0.65392125  | 0.513162543 | 0.999371363 | Not Sig |
| ENSG00000246082 | NUDT16P1     | nudix hydrolase 16 pseudogene 1                       | 152195    | 195.1273606 | -0.309356705 | 0.535730581 | -0.577448285 | 0.563636664 | 0.999371363 | Not Sig |
| ENSG00000166734 | CASC4        | cancer susceptibility 4                               | 113201    | 3601.307459 | -0.309117231 | 0.528138711 | -0.585295538 | 0.558349015 | 0.999371363 | Not Sig |
| ENSG00000256712 | NA           | NA                                                    | NA        | 81.59681369 | -0.30900517  | 0.58159145  | -0.531309685 | 0.595204195 | 0.999371363 | Not Sig |
| ENSG00000174652 | ZNF266       | zinc finger protein 266                               | 10781     | 619.3339607 | -0.30899687  | 0.592839306 | -0.521215221 | 0.602216852 | 0.999371363 | Not Sig |
| ENSG00000250132 | NA           | NA                                                    | NA        | 55.6057209  | -0.308988889 | 0.554788144 | -0.556949336 | 0.577562045 | 0.999371363 | Not Sig |
| ENSG00000144455 | SUMF1        | sulfatase modifying factor 1                          | 285362    | 1160.407576 | -0.308908086 | 0.460578387 | -0.670696008 | 0.502414207 | 0.999371363 | Not Sig |
| ENSG00000135862 | LAMC1        | laminin subunit gamma 1                               | 3915      | 6172.194178 | -0.30878081  | 0.524101348 | -0.589162404 | 0.555752335 | 0.999371363 | Not Sig |

|                 |          |                                                          |           |             |              |             |              |             |             |         |
|-----------------|----------|----------------------------------------------------------|-----------|-------------|--------------|-------------|--------------|-------------|-------------|---------|
| ENSG00000122085 | MTERF4   | mitochondrial transcription termination factor 4         | 130916    | 743.3839812 | -0.30848918  | 0.436891791 | -0.70609974  | 0.480126113 | 0.999371363 | Not Sig |
| ENSG00000166135 | HIF1AN   | hypoxia inducible factor 1 alpha subunit inhibitor       | 55662     | 1535.019299 | -0.308441147 | 0.415620825 | -0.742121492 | 0.458013729 | 0.999371363 | Not Sig |
| ENSG00000261168 | NA       | NA                                                       | NA        | 3.461659636 | -0.308374196 | 1.47023014  | -0.209745527 | 0.83386629  | NA          | NA      |
| ENSG00000132388 | UBE2G1   | ubiquitin conjugating enzyme E2 G1                       | 7326      | 1026.01179  | -0.30836008  | 0.475776735 | -0.64811929  | 0.516907798 | 0.999371363 | Not Sig |
| ENSG00000137710 | RDX      | radixin                                                  | 5962      | 2811.048797 | -0.308302914 | 0.531555556 | -0.580001296 | 0.561913744 | 0.999371363 | Not Sig |
| ENSG00000114115 | RBP1     | retinol binding protein 1                                | 5947      | 146.5533486 | -0.308258327 | 0.718935054 | -0.428770757 | 0.668090062 | 0.999371363 | Not Sig |
| ENSG00000104812 | GYS1     | glycogen synthase 1                                      | 2997      | 873.2117044 | -0.308076987 | 0.393571618 | -0.782772366 | 0.433760798 | 0.999371363 | Not Sig |
| ENSG00000267219 | NA       | NA                                                       | NA        | 9.46651569  | -0.308003616 | 1.025882407 | -0.300232867 | 0.763999537 | 0.999371363 | Not Sig |
| ENSG00000205208 | C4orf46  | chromosome 4 open reading frame 46                       | 201725    | 131.2417458 | -0.307889913 | 0.571469057 | -0.538769176 | 0.590046135 | 0.999371363 | Not Sig |
| ENSG00000155858 | LSM11    | LSM11, U7 small nuclear RNA associated                   | 134353    | 161.830235  | -0.3078124   | 0.423462295 | -0.726894469 | 0.467290606 | 0.999371363 | Not Sig |
| ENSG00000078043 | PIAS2    | protein inhibitor of activated STAT 2                    | 9063      | 744.9802834 | -0.307705679 | 0.603359616 | -0.509987197 | 0.610060431 | 0.999371363 | Not Sig |
| ENSG00000198093 | ZNF649   | zinc finger protein 649                                  | 65251     | 351.6358589 | -0.307640631 | 0.597844858 | -0.514582717 | 0.606844645 | 0.999371363 | Not Sig |
| ENSG00000198911 | SREBF2   | sterol regulatory element binding transcription factor 2 | 6721      | 4755.133728 | -0.307452971 | 0.502845776 | -0.61142598  | 0.540917608 | 0.999371363 | Not Sig |
| ENSG00000163939 | PBRM1    | polybromo 1                                              | 55193     | 3138.6096   | -0.307445199 | 0.578083503 | -0.531835276 | 0.594840088 | 0.999371363 | Not Sig |
| ENSG00000135838 | NPL      | N-acetylneuraminate pyruvate lyase                       | 80896     | 651.3503218 | -0.307291136 | 0.710982153 | -0.432206539 | 0.665591307 | 0.999371363 | Not Sig |
| ENSG00000257663 | NA       | NA                                                       | NA        | 2.801455485 | -0.306868785 | 1.450432218 | -0.21157058  | 0.832442064 | NA          | NA      |
| ENSG00000103202 | NME4     | NME/NM23 nucleoside diphosphate kinase 4                 | 4833      | 730.8100061 | -0.306781718 | 0.539201172 | -0.568955955 | 0.569386031 | 0.999371363 | Not Sig |
| ENSG00000164930 | FZD6     | frizzled class receptor 6                                | 8323      | 860.1727917 | -0.306742717 | 0.478208271 | -0.64144168  | 0.521235761 | 0.999371363 | Not Sig |
| ENSG00000144891 | AGTR1    | angiotensin II receptor type 1                           | 185       | 61.45644164 | -0.306554083 | 0.800940845 | -0.382742476 | 0.701910717 | 0.999371363 | Not Sig |
| ENSG00000216077 | MIR887   | microRNA 887                                             | 100126347 | 2.352970486 | -0.306499005 | 1.558558937 | -0.196655383 | 0.844097227 | NA          | NA      |
| ENSG00000175730 | NA       | NA                                                       | NA        | 31.66021225 | -0.306496405 | 0.682124236 | -0.449326367 | 0.65319624  | 0.999371363 | Not Sig |
| ENSG00000181790 | ADGRB1   | adhesion G protein-coupled receptor B1                   | 575       | 107.3904643 | -0.306068712 | 0.689601732 | -0.443834024 | 0.657162587 | 0.999371363 | Not Sig |
| ENSG00000240718 | NA       | NA                                                       | NA        | 8.80286863  | -0.306001442 | 1.003822278 | -0.304836272 | 0.760490854 | 0.999371363 | Not Sig |
| ENSG00000145020 | AMT      | aminomethyltransferase                                   | 275       | 239.7415636 | -0.305826318 | 0.46116949  | -0.66315384  | 0.507232032 | 0.999371363 | Not Sig |
| ENSG00000167840 | ZNF232   | zinc finger protein 232                                  | 7775      | 148.1683323 | -0.305565545 | 0.465636271 | -0.656232267 | 0.511674691 | 0.999371363 | Not Sig |
| ENSG00000213971 | NA       | NA                                                       | NA        | 224.7081815 | -0.305471707 | 0.50322941  | -0.607022764 | 0.543835805 | 0.999371363 | Not Sig |
| ENSG00000257923 | CUX1     | cut like homeobox 1                                      | 1523      | 4350.943739 | -0.305428975 | 0.4689851   | -0.651255179 | 0.514881776 | 0.999371363 | Not Sig |
| ENSG00000183657 | NA       | NA                                                       | NA        | 59.49432702 | -0.305333006 | 0.687048555 | -0.444412559 | 0.656744335 | 0.999371363 | Not Sig |
| ENSG00000236493 | NA       | NA                                                       | NA        | 7.654296976 | -0.305312344 | 1.094454081 | -0.278963137 | 0.780273114 | 0.999371363 | Not Sig |
| ENSG00000132313 | MRPL35   | mitochondrial ribosomal protein L35                      | 51318     | 330.6299049 | -0.305268701 | 0.514910498 | -0.592857792 | 0.553276327 | 0.999371363 | Not Sig |
| ENSG00000157110 | RBPMS    | RNA binding protein with multiple splicing               | 11030     | 2784.832849 | -0.305175893 | 0.641116571 | -0.476006871 | 0.634069483 | 0.999371363 | Not Sig |
| ENSG00000063046 | EIF4B    | eukaryotic translation initiation factor 4B              | 1975      | 9344.318921 | -0.305159066 | 0.457071181 | -0.667640137 | 0.504363331 | 0.999371363 | Not Sig |
| ENSG00000262533 | NA       | NA                                                       | NA        | 11.43638846 | -0.305116408 | 0.820311516 | -0.371951876 | 0.70992868  | 0.999371363 | Not Sig |
| ENSG00000051825 | MPHOSPH9 | M-phase phosphoprotein 9                                 | 10198     | 651.4364526 | -0.305095887 | 0.663321242 | -0.459951933 | 0.645550723 | 0.999371363 | Not Sig |
| ENSG00000171497 | PPID     | peptidylprolyl isomerase D                               | 5481      | 402.098262  | -0.305083568 | 0.512936594 | -0.594778325 | 0.551991658 | 0.999371363 | Not Sig |

|                 |          |                                                         |        |             |              |             |              |             |             |         |
|-----------------|----------|---------------------------------------------------------|--------|-------------|--------------|-------------|--------------|-------------|-------------|---------|
| ENSG00000214719 | NA       | NA                                                      | NA     | 11.74437209 | -0.304928282 | 0.827853023 | -0.368336255 | 0.712622522 | 0.999371363 | Not Sig |
| ENSG00000117407 | ARTN     | artemin                                                 | 9048   | 38.71165556 | -0.304902284 | 0.704619314 | -0.432719169 | 0.665218802 | 0.999371363 | Not Sig |
| ENSG00000252629 | NA       | NA                                                      | NA     | 4.529952174 | -0.304863182 | 1.47615791  | -0.206524776 | 0.836381013 | NA          | NA      |
| ENSG00000271913 | NA       | NA                                                      | NA     | 17.00601093 | -0.304852327 | 0.88571315  | -0.344188552 | 0.730704491 | 0.999371363 | Not Sig |
| ENSG00000176261 | ZBTB80S  | zinc finger and BTB domain containing 8 opposite strand | 339487 | 370.5039688 | -0.304832779 | 0.555594932 | -0.548660114 | 0.583238723 | 0.999371363 | Not Sig |
| ENSG00000201821 | NA       | NA                                                      | NA     | 7.578485919 | -0.304821539 | 1.012402487 | -0.301087308 | 0.763347919 | 0.999371363 | Not Sig |
| ENSG00000132153 | DHX30    | DEXH-box helicase 30                                    | 22907  | 1837.545217 | -0.304811025 | 0.466364123 | -0.65359021  | 0.513375853 | 0.999371363 | Not Sig |
| ENSG00000120686 | UFM1     | ubiquitin fold modifier 1                               | 51569  | 1661.613488 | -0.304632953 | 0.601024115 | -0.506856457 | 0.612255554 | 0.999371363 | Not Sig |
| ENSG00000128438 | NA       | NA                                                      | NA     | 15.85424979 | -0.304604063 | 1.112353393 | -0.273837492 | 0.78420951  | 0.999371363 | Not Sig |
| ENSG00000075914 | EXOSC7   | exosome component 7                                     | 23016  | 460.529563  | -0.304482954 | 0.416675383 | -0.730743802 | 0.464935655 | 0.999371363 | Not Sig |
| ENSG00000207821 | MIR640   | microRNA 640                                            | 693225 | 9.332926925 | -0.304415027 | 0.919277183 | -0.33114607  | 0.740534154 | 0.999371363 | Not Sig |
| ENSG00000272914 | NA       | NA                                                      | NA     | 11.47618168 | -0.304359036 | 0.914608371 | -0.332775258 | 0.739303936 | 0.999371363 | Not Sig |
| ENSG00000103037 | SETD6    | SET domain containing 6                                 | 79918  | 278.3129228 | -0.30435409  | 0.452573345 | -0.67249672  | 0.501267528 | 0.999371363 | Not Sig |
| ENSG00000157869 | RAB28    | RAB28, member RAS oncogene family                       | 9364   | 423.3750926 | -0.304089479 | 0.425825799 | -0.714117086 | 0.475154781 | 0.999371363 | Not Sig |
| ENSG00000198182 | ZNF607   | zinc finger protein 607                                 | 84775  | 189.1732141 | -0.30386952  | 0.496888672 | -0.61154447  | 0.540839187 | 0.999371363 | Not Sig |
| ENSG00000179299 | NSUN7    | NOP2/Sun RNA methyltransferase family member 7          | 79730  | 452.4091904 | -0.303723652 | 0.636398453 | -0.477253914 | 0.633181324 | 0.999371363 | Not Sig |
| ENSG00000163687 | DNASE1L3 | deoxyribonuclease 1 like 3                              | 1776   | 46.39837385 | -0.303683785 | 0.991107399 | -0.306408554 | 0.759293596 | 0.999371363 | Not Sig |
| ENSG00000234518 | NA       | NA                                                      | NA     | 45.8549985  | -0.303626568 | 0.650853174 | -0.466505473 | 0.640853731 | 0.999371363 | Not Sig |
| ENSG00000114698 | PLSCR4   | phospholipid scramblase 4                               | 57088  | 896.3524211 | -0.303618122 | 0.520249879 | -0.583600563 | 0.559489081 | 0.999371363 | Not Sig |
| ENSG00000166822 | TMEM170A | transmembrane protein 170A                              | 124491 | 589.965902  | -0.303202874 | 0.533859598 | -0.56794497  | 0.570072335 | 0.999371363 | Not Sig |
| ENSG00000178460 | MCMDC2   | minichromosome maintenance domain containing 2          | 157777 | 32.0006325  | -0.302837761 | 1.044763757 | -0.289862429 | 0.771921485 | 0.999371363 | Not Sig |
| ENSG00000040199 | PHLPP2   | PH domain and leucine rich repeat protein phosphatase 2 | 23035  | 415.1090477 | -0.302765942 | 0.511262642 | -0.592192578 | 0.553721639 | 0.999371363 | Not Sig |
| ENSG00000156983 | BRPF1    | bromodomain and PHD finger containing 1                 | 7862   | 775.5383655 | -0.302541699 | 0.510196876 | -0.592990104 | 0.553187775 | 0.999371363 | Not Sig |
| ENSG00000253710 | ALG11    | ALG11, alpha-1,2-mannosyltransferase                    | 440138 | 252.0860818 | -0.302423346 | 0.543127736 | -0.556818086 | 0.577651725 | 0.999371363 | Not Sig |
| ENSG00000172748 | ZNF596   | zinc finger protein 596                                 | 169270 | 113.6473699 | -0.302308317 | 0.635634039 | -0.475601208 | 0.634358514 | 0.999371363 | Not Sig |
| ENSG00000103111 | MON1B    | MON1 homolog B, secretory trafficking associated        | 22879  | 1314.430344 | -0.302299582 | 0.445169433 | -0.67906635  | 0.497095823 | 0.999371363 | Not Sig |
| ENSG00000203260 | NA       | NA                                                      | NA     | 7.076652224 | -0.302273806 | 1.109054428 | -0.272550921 | 0.785198443 | 0.999371363 | Not Sig |
| ENSG00000188747 | NOXA1    | NADPH oxidase activator 1                               | 10811  | 488.4357404 | -0.302256478 | 0.623037484 | -0.485133696 | 0.627581511 | 0.999371363 | Not Sig |
| ENSG00000135213 | NA       | NA                                                      | NA     | 1426.776622 | -0.3022396   | 0.457991073 | -0.659924652 | 0.509302183 | 0.999371363 | Not Sig |
| ENSG00000143199 | ADCY10   | adenylate cyclase 10                                    | 55811  | 12.39787303 | -0.302053423 | 0.836149873 | -0.361243161 | 0.71791768  | 0.999371363 | Not Sig |
| ENSG00000213830 | NA       | NA                                                      | NA     | 28.4555415  | -0.301722771 | 0.651719619 | -0.462964075 | 0.643390118 | 0.999371363 | Not Sig |
| ENSG00000106459 | NRF1     | nuclear respiratory factor 1                            | 4899   | 498.7077107 | -0.30169061  | 0.423596328 | -0.712212524 | 0.476333183 | 0.999371363 | Not Sig |
| ENSG00000186020 | ZNF529   | zinc finger protein 529                                 | 57711  | 359.7498819 | -0.301561756 | 0.486589874 | -0.619745235 | 0.53542553  | 0.999371363 | Not Sig |
| ENSG00000107077 | KDM4C    | lysine demethylase 4C                                   | 23081  | 1225.419295 | -0.30140607  | 0.448567083 | -0.671930869 | 0.501627707 | 0.999371363 | Not Sig |
| ENSG00000161570 | NA       | NA                                                      | NA     | 533.1576742 | -0.301294754 | 0.882177615 | -0.341535252 | 0.732700671 | 0.999371363 | Not Sig |

|                 |              |                                                  |           |             |              |             |              |             |             |         |
|-----------------|--------------|--------------------------------------------------|-----------|-------------|--------------|-------------|--------------|-------------|-------------|---------|
| ENSG00000111615 | KRR1         | KRR1, small subunit processome component homolog | 11103     | 871.4868107 | -0.301129909 | 0.547758818 | -0.549749086 | 0.582491484 | 0.999371363 | Not Sig |
| ENSG00000115361 | ACADL        | acyl-CoA dehydrogenase long chain                | 33        | 246.3179678 | -0.301128813 | 0.844079494 | -0.356754092 | 0.721275907 | 0.999371363 | Not Sig |
| ENSG00000267855 | NDUFA7       | NADH:ubiquinone oxidoreductase subunit A7        | 4701      | 14.90444186 | -0.301064737 | 0.782215222 | -0.384887341 | 0.700320885 | 0.999371363 | Not Sig |
| ENSG00000252206 | NA           | NA                                               | NA        | 10.07880049 | -0.300888772 | 0.842206216 | -0.357262587 | 0.720895235 | 0.999371363 | Not Sig |
| ENSG00000115392 | FANCL        | Fanconi anemia complementation group L           | 55120     | 393.4160356 | -0.300681434 | 0.667122462 | -0.450714001 | 0.65219569  | 0.999371363 | Not Sig |
| ENSG00000139343 | SNRPF        | small nuclear ribonucleoprotein polypeptide F    | 6636      | 283.8768268 | -0.300639937 | 0.587293882 | -0.51190715  | 0.608715994 | 0.999371363 | Not Sig |
| ENSG00000258626 | NA           | NA                                               | NA        | 5.57872205  | -0.30035546  | 1.157852566 | -0.259407345 | 0.795320963 | NA          | NA      |
| ENSG00000131116 | ZNF428       | zinc finger protein 428                          | 126299    | 423.7232416 | -0.300214982 | 0.597465888 | -0.502480539 | 0.615329538 | 0.999371363 | Not Sig |
| ENSG00000155329 | ZCCHC10      | zinc finger CCHC-type containing 10              | 54819     | 240.4195619 | -0.300179431 | 0.610346959 | -0.491817689 | 0.622848231 | 0.999371363 | Not Sig |
| ENSG00000151233 | GXYLT1       | glucoside xylosyltransferase 1                   | 283464    | 710.4868606 | -0.300043583 | 0.53205827  | -0.56392993  | 0.57280182  | 0.999371363 | Not Sig |
| ENSG00000179021 | C3orf38      | chromosome 3 open reading frame 38               | 285237    | 457.1757691 | -0.299943031 | 0.498602581 | -0.601567344 | 0.547462172 | 0.999371363 | Not Sig |
| ENSG00000138668 | HNRNPD       | heterogeneous nuclear ribonucleoprotein D        | 3184      | 3075.26332  | -0.29992567  | 0.552699719 | -0.542655731 | 0.587366859 | 0.999371363 | Not Sig |
| ENSG00000156265 | MAP3K7CL     | MAP3K7 C-terminal like                           | 56911     | 145.7215435 | -0.299863452 | 0.478117643 | -0.627175041 | 0.530544502 | 0.999371363 | Not Sig |
| ENSG00000125676 | THOC2        | THO complex 2                                    | 57187     | 2826.172758 | -0.299741381 | 0.595989824 | -0.502930367 | 0.61501323  | 0.999371363 | Not Sig |
| ENSG00000160746 | ANO10        | anoctamin 10                                     | 55129     | 495.5336447 | -0.299727718 | 0.534646633 | -0.560609007 | 0.57506411  | 0.999371363 | Not Sig |
| ENSG00000131732 | ZCCHC9       | zinc finger CCHC-type containing 9               | 84240     | 343.5396153 | -0.29967324  | 0.523850828 | -0.572058349 | 0.567282445 | 0.999371363 | Not Sig |
| ENSG00000139697 | SBNO1        | strawberry notch homolog 1                       | 55206     | 2252.403326 | -0.299642652 | 0.484286821 | -0.618729727 | 0.536094423 | 0.999371363 | Not Sig |
| ENSG00000169679 | BUB1         | BUB1 mitotic checkpoint serine/threonine kinase  | 699       | 210.3519373 | -0.299531296 | 0.861611779 | -0.34764067  | 0.728110059 | 0.999371363 | Not Sig |
| ENSG00000184220 | CMSS1        | cms1 ribosomal small subunit homolog (yeast)     | 84319     | 197.1638607 | -0.299304165 | 0.463782537 | -0.645354538 | 0.518697457 | 0.999371363 | Not Sig |
| ENSG00000228315 | GUSBP11      | glucuronidase, beta pseudogene 11                | 91316     | 8.488608649 | -0.299271003 | 1.087101008 | -0.275292728 | 0.783091351 | 0.999371363 | Not Sig |
| ENSG00000224777 | NA           | NA                                               | NA        | 0.752183855 | -0.299100457 | 3.343456887 | -0.089458446 | 0.928717576 | NA          | NA      |
| ENSG00000250848 | NA           | NA                                               | NA        | 0.752183855 | -0.299100457 | 3.343456887 | -0.089458446 | 0.928717576 | NA          | NA      |
| ENSG00000249437 | NAIP         | NLR family apoptosis inhibitory protein          | 4671      | 167.5920711 | -0.298984683 | 0.646225428 | -0.462663136 | 0.643605846 | 0.999371363 | Not Sig |
| ENSG00000235138 | LOC100130548 | uncharacterized LOC100130548                     | 100130548 | 0.675215684 | -0.298821015 | 3.429250311 | -0.087138875 | 0.930561125 | NA          | NA      |
| ENSG00000242696 | NA           | NA                                               | NA        | 0.675215684 | -0.298821015 | 3.429250311 | -0.087138875 | 0.930561125 | NA          | NA      |
| ENSG00000250471 | NA           | NA                                               | NA        | 0.675215684 | -0.298821015 | 3.429250311 | -0.087138875 | 0.930561125 | NA          | NA      |
| ENSG00000211856 | NA           | NA                                               | NA        | 5.463272487 | -0.298604615 | 1.469483701 | -0.203203761 | 0.838975773 | NA          | NA      |
| ENSG00000104219 | ZDHHC2       | zinc finger DHHC-type containing 2               | 51201     | 1209.731375 | -0.298574328 | 0.618824366 | -0.48248638  | 0.629460472 | 0.999371363 | Not Sig |
| ENSG00000121075 | TBX4         | T-box 4                                          | 9496      | 914.5449255 | -0.298533381 | 0.950885476 | -0.313953034 | 0.75355671  | 0.999371363 | Not Sig |
| ENSG00000196313 | POM121       | POM121 transmembrane nucleoporin                 | 9883      | 1652.671684 | -0.298495024 | 0.464721473 | -0.642309515 | 0.520672238 | 0.999371363 | Not Sig |
| ENSG00000268034 | NA           | NA                                               | NA        | 3.453926842 | -0.298471752 | 1.361805144 | -0.219173612 | 0.826514811 | NA          | NA      |
| ENSG00000235683 | NA           | NA                                               | NA        | 30.48593348 | -0.298327122 | 0.71971956  | -0.414504675 | 0.678504544 | 0.999371363 | Not Sig |
| ENSG00000136942 | RPL35        | ribosomal protein L35                            | 11224     | 3748.683633 | -0.298051032 | 0.43399516  | -0.686761187 | 0.492233232 | 0.999371363 | Not Sig |
| ENSG00000135926 | TMBIM1       | transmembrane BAX inhibitor motif containing 1   | 64114     | 3634.497303 | -0.297932807 | 0.532805711 | -0.559177203 | 0.57604079  | 0.999371363 | Not Sig |
| ENSG00000136045 | PWP1         | PWP1 homolog, endonuclein                        | 11137     | 611.9754538 | -0.297867891 | 0.486277656 | -0.612546941 | 0.540175951 | 0.999371363 | Not Sig |

|                 |           |                                                             |           |             |              |             |              |             |             |         |
|-----------------|-----------|-------------------------------------------------------------|-----------|-------------|--------------|-------------|--------------|-------------|-------------|---------|
| ENSG00000118707 | TGIF2     | TGFB induced factor homeobox 2                              | 60436     | 499.5617957 | -0.297817486 | 0.393778281 | -0.756307546 | 0.449464825 | 0.999371363 | Not Sig |
| ENSG00000260879 | NA        | NA                                                          | NA        | 14.96829097 | -0.297737015 | 0.862883069 | -0.345049087 | 0.730057468 | 0.999371363 | Not Sig |
| ENSG00000070423 | RNF126    | ring finger protein 126                                     | 55658     | 685.029891  | -0.297451395 | 0.518927128 | -0.573204559 | 0.566506198 | 0.999371363 | Not Sig |
| ENSG00000151240 | DIP2C     | disco interacting protein 2 homolog C                       | 22982     | 1220.584491 | -0.297278767 | 0.540612548 | -0.549892467 | 0.582393131 | 0.999371363 | Not Sig |
| ENSG00000128891 | CCDC32    | coiled-coil domain containing 32                            | 90416     | 527.37814   | -0.297204506 | 0.435828146 | -0.681930501 | 0.495282898 | 0.999371363 | Not Sig |
| ENSG00000206549 | NA        | NA                                                          | NA        | 12.63132487 | -0.297056013 | 1.173092805 | -0.253224648 | 0.800094621 | 0.999371363 | Not Sig |
| ENSG00000183647 | ZNF530    | zinc finger protein 530                                     | 348327    | 73.12127583 | -0.296995579 | 0.516077658 | -0.575486216 | 0.56496251  | 0.999371363 | Not Sig |
| ENSG00000167565 | SERTAD3   | SERTA domain containing 3                                   | 29946     | 501.3463961 | -0.296986813 | 0.443396248 | -0.669800014 | 0.502985285 | 0.999371363 | Not Sig |
| ENSG00000183495 | EP400     | E1A binding protein p400                                    | 57634     | 3367.605641 | -0.296982955 | 0.406586908 | -0.730429213 | 0.465127867 | 0.999371363 | Not Sig |
| ENSG00000198680 | TUSC1     | tumor suppressor candidate 1                                | 286319    | 232.624842  | -0.296899122 | 0.759710426 | -0.390805644 | 0.695940903 | 0.999371363 | Not Sig |
| ENSG00000259953 | NA        | NA                                                          | NA        | 148.7114882 | -0.296891669 | 0.525743836 | -0.564707845 | 0.572272497 | 0.999371363 | Not Sig |
| ENSG00000204387 | C6orf48   | chromosome 6 open reading frame 48                          | 50854     | 947.1446083 | -0.296807133 | 0.532175085 | -0.557724593 | 0.577032461 | 0.999371363 | Not Sig |
| ENSG00000073849 | ST6GAL1   | ST6 beta-galactoside alpha-2,6-sialyltransferase 1          | 6480      | 2919.127641 | -0.296806962 | 0.68746875  | -0.431738843 | 0.665931233 | 0.999371363 | Not Sig |
| ENSG00000252992 | NA        | NA                                                          | NA        | 2.936483329 | -0.296780785 | 1.461380716 | -0.203082456 | 0.839070584 | NA          | NA      |
| ENSG00000265681 | RPL17     | ribosomal protein L17                                       | 6139      | 189.6533943 | -0.296727482 | 0.590368188 | -0.50261428  | 0.615235487 | 0.999371363 | Not Sig |
| ENSG00000182196 | ARL6IP4   | ADP ribosylation factor like GTPase 6 interacting protein 4 | 51329     | 15.43948772 | -0.296674189 | 0.896047743 | -0.331091944 | 0.740575036 | 0.999371363 | Not Sig |
| ENSG00000171150 | SOCS5     | suppressor of cytokine signaling 5                          | 9655      | 899.2211912 | -0.29655635  | 0.421371551 | -0.703788258 | 0.481564647 | 0.999371363 | Not Sig |
| ENSG00000181090 | EHMT1     | euchromatic histone lysine methyltransferase 1              | 79813     | 2117.291169 | -0.296549981 | 0.453925392 | -0.653301151 | 0.513562151 | 0.999371363 | Not Sig |
| ENSG00000081154 | PCNP      | PEST proteolytic signal containing nuclear protein          | 57092     | 1665.965532 | -0.296475873 | 0.598992174 | -0.494957841 | 0.62062988  | 0.999371363 | Not Sig |
| ENSG00000178700 | DHFR2     | dihydrofolate reductase 2                                   | 200895    | 234.2532369 | -0.296447983 | 0.465080087 | -0.637412763 | 0.523856017 | 0.999371363 | Not Sig |
| ENSG00000269997 | NA        | NA                                                          | NA        | 54.4563595  | -0.2962828   | 0.633235019 | -0.467887579 | 0.639864987 | 0.999371363 | Not Sig |
| ENSG00000140153 | WDR20     | WD repeat domain 20                                         | 91833     | 665.7933879 | -0.296089366 | 0.433432929 | -0.683126144 | 0.494527136 | 0.999371363 | Not Sig |
| ENSG00000138802 | SEC24B    | SEC24 homolog B, COPII coat complex component               | 10427     | 1506.264438 | -0.295972456 | 0.536792618 | -0.551372068 | 0.581378645 | 0.999371363 | Not Sig |
| ENSG00000137218 | FRS3      | fibroblast growth factor receptor substrate 3               | 10817     | 146.3412262 | -0.295822396 | 0.550524225 | -0.537346737 | 0.591028128 | 0.999371363 | Not Sig |
| ENSG00000180957 | PITPNB    | phosphatidylinositol transfer protein beta                  | 23760     | 600.3822113 | -0.295731571 | 0.530148011 | -0.557828314 | 0.576961626 | 0.999371363 | Not Sig |
| ENSG00000108641 | B9D1      | B9 domain containing 1                                      | 27077     | 213.1471345 | -0.295610151 | 0.462273604 | -0.639470107 | 0.522517154 | 0.999371363 | Not Sig |
| ENSG00000143079 | CTTNBP2NL | CTTNBP2 N-terminal like                                     | 55917     | 1408.613352 | -0.295584268 | 0.52521128  | -0.562791165 | 0.573577097 | 0.999371363 | Not Sig |
| ENSG00000269353 | NA        | NA                                                          | NA        | 28.0464574  | -0.295496296 | 1.228858663 | -0.240464022 | 0.809970552 | 0.999371363 | Not Sig |
| ENSG00000237539 | NA        | NA                                                          | NA        | 0.646033822 | -0.295454349 | 3.466086889 | -0.085241472 | 0.93206942  | NA          | NA      |
| ENSG00000264984 | MIR5691   | microRNA 5691                                               | 100847015 | 0.646033822 | -0.295454349 | 3.466086889 | -0.085241472 | 0.93206942  | NA          | NA      |
| ENSG00000265230 | NA        | NA                                                          | NA        | 0.646033822 | -0.295454349 | 3.466086889 | -0.085241472 | 0.93206942  | NA          | NA      |
| ENSG00000265422 | MIR4684   | microRNA 4684                                               | 100616391 | 0.646033822 | -0.295454349 | 3.466086889 | -0.085241472 | 0.93206942  | NA          | NA      |
| ENSG00000266975 | NA        | NA                                                          | NA        | 0.646033822 | -0.295454349 | 3.466086889 | -0.085241472 | 0.93206942  | NA          | NA      |
| ENSG00000264620 | NA        | NA                                                          | NA        | 3.924852116 | -0.295439964 | 1.218231315 | -0.24251549  | 0.808380756 | NA          | NA      |
| ENSG00000147614 | ATP6VOD2  | ATPase H+ transporting VO subunit d2                        | 245972    | 74.56687364 | -0.295426417 | 1.073494592 | -0.275200657 | 0.783162082 | 0.999371363 | Not Sig |

|                 |            |                                                                     |           |             |              |             |              |             |             |         |
|-----------------|------------|---------------------------------------------------------------------|-----------|-------------|--------------|-------------|--------------|-------------|-------------|---------|
| ENSG00000182836 | PLCXD3     | phosphatidylinositol specific phospholipase C X domain containing 3 | 345557    | 67.2367053  | -0.295412144 | 1.15224888  | -0.256378764 | 0.797658384 | 0.999371363 | Not Sig |
| ENSG00000186446 | ZNF501     | zinc finger protein 501                                             | 115560    | 107.2026338 | -0.295398814 | 0.52745002  | -0.560050816 | 0.575444777 | 0.999371363 | Not Sig |
| ENSG00000198218 | QRICH1     | glutamine rich 1                                                    | 54870     | 1674.472804 | -0.295287163 | 0.434148453 | -0.680152516 | 0.496407895 | 0.999371363 | Not Sig |
| ENSG00000176401 | EID2B      | EP300 interacting inhibitor of differentiation 2B                   | 126272    | 39.66416293 | -0.295231848 | 0.693662754 | -0.425612946 | 0.670389905 | 0.999371363 | Not Sig |
| ENSG00000207133 | SNORD116-7 | small nucleolar RNA, C/D box 116-7                                  | 100033419 | 8.584424183 | -0.294824912 | 0.885198678 | -0.333060724 | 0.739088446 | 0.999371363 | Not Sig |
| ENSG00000175600 | SUGCT      | succinyl-CoA:glutarate-CoA transferase                              | 79783     | 59.43386885 | -0.29472605  | 0.816318974 | -0.361042753 | 0.718067487 | 0.999371363 | Not Sig |
| ENSG00000207737 | MIR181B2   | microRNA 181b-2                                                     | 406956    | 3.58251715  | -0.29463926  | 1.300070585 | -0.226633279 | 0.820708912 | NA          | NA      |
| ENSG00000220981 | NA         | NA                                                                  | NA        | 9.583066337 | -0.294532661 | 0.912788716 | -0.322673425 | 0.74694258  | 0.999371363 | Not Sig |
| ENSG00000100749 | VRK1       | vaccinia related kinase 1                                           | 7443      | 198.0630253 | -0.294406959 | 0.527797985 | -0.557802354 | 0.576979355 | 0.999371363 | Not Sig |
| ENSG00000111581 | NUP107     | nucleoporin 107                                                     | 57122     | 726.7824224 | -0.294379744 | 0.486721879 | -0.604821269 | 0.54529776  | 0.999371363 | Not Sig |
| ENSG00000035664 | DAPK2      | death associated protein kinase 2                                   | 23604     | 827.3357009 | -0.294336882 | 0.882027236 | -0.333704981 | 0.738602191 | 0.999371363 | Not Sig |
| ENSG00000264678 | MIR3140    | microRNA 3140                                                       | 100422896 | 21.71369254 | -0.294230476 | 1.043097071 | -0.282073916 | 0.777886833 | 0.999371363 | Not Sig |
| ENSG00000048405 | ZNF800     | zinc finger protein 800                                             | 168850    | 1168.48838  | -0.294059581 | 0.469431445 | -0.626416454 | 0.53104182  | 0.999371363 | Not Sig |
| ENSG00000180855 | ZNF443     | zinc finger protein 443                                             | 10224     | 101.6291465 | -0.294009225 | 0.482750758 | -0.609029027 | 0.542505199 | 0.999371363 | Not Sig |
| ENSG00000145241 | CENPC      | centromere protein C                                                | 1060      | 984.3655098 | -0.293974141 | 0.58875395  | -0.499315785 | 0.617556936 | 0.999371363 | Not Sig |
| ENSG00000232437 | NA         | NA                                                                  | NA        | 8.408640339 | -0.293963658 | 0.950758567 | -0.309188545 | 0.757178107 | 0.999371363 | Not Sig |
| ENSG00000272599 | NA         | NA                                                                  | NA        | 28.02254433 | -0.293848916 | 0.723120234 | -0.406362458 | 0.6844763   | 0.999371363 | Not Sig |
| ENSG00000163517 | HDAC11     | histone deacetylase 11                                              | 79885     | 450.2937507 | -0.293809206 | 0.503531646 | -0.583497003 | 0.559558774 | 0.999371363 | Not Sig |
| ENSG00000075568 | TMEM131    | transmembrane protein 131                                           | 23505     | 2823.810352 | -0.293525688 | 0.507604096 | -0.57825713  | 0.563090533 | 0.999371363 | Not Sig |
| ENSG00000124786 | SLC35B3    | solute carrier family 35 member B3                                  | 51000     | 467.935155  | -0.293422253 | 0.566146585 | -0.518280138 | 0.604262829 | 0.999371363 | Not Sig |
| ENSG00000146067 | FAM193B    | family with sequence similarity 193 member B                        | 54540     | 1260.815519 | -0.293312815 | 0.564076335 | -0.519987805 | 0.603072075 | 0.999371363 | Not Sig |
| ENSG00000186184 | POLR1D     | RNA polymerase I subunit D                                          | 51082     | 1046.696489 | -0.293269015 | 0.523475759 | -0.560234185 | 0.575319713 | 0.999371363 | Not Sig |
| ENSG00000067177 | PHKA1      | phosphorylase kinase regulatory subunit alpha 1                     | 5255      | 506.370838  | -0.293079318 | 0.664111859 | -0.44131017  | 0.658988464 | 0.999371363 | Not Sig |
| ENSG00000122729 | ACO1       | aconitase 1                                                         | 48        | 1354.481244 | -0.293061447 | 0.453359024 | -0.646422442 | 0.518005811 | 0.999371363 | Not Sig |
| ENSG00000259162 | NA         | NA                                                                  | NA        | 3.969543329 | -0.292938707 | 1.979219332 | -0.148007198 | 0.882337088 | NA          | NA      |
| ENSG00000227671 | NA         | NA                                                                  | NA        | 827.4010894 | -0.292847014 | 0.595284271 | -0.49194482  | 0.622758352 | 0.999371363 | Not Sig |
| ENSG00000254469 | NA         | NA                                                                  | NA        | 160.6338278 | -0.292806513 | 0.531795314 | -0.550600025 | 0.581907892 | 0.999371363 | Not Sig |
| ENSG00000105619 | TFPT       | TCF3 fusion partner                                                 | 29844     | 192.8154072 | -0.292594559 | 0.589860805 | -0.49604001  | 0.619866183 | 0.999371363 | Not Sig |
| ENSG00000101574 | METTL4     | methyltransferase like 4                                            | 64863     | 272.6612972 | -0.292510283 | 0.526009344 | -0.556093321 | 0.57814706  | 0.999371363 | Not Sig |
| ENSG00000148700 | ADD3       | adducin 3                                                           | 120       | 1749.557365 | -0.292485064 | 0.451908661 | -0.647221638 | 0.517488509 | 0.999371363 | Not Sig |
| ENSG00000125971 | DYNLRB1    | dynein light chain roadblock-type 1                                 | 83658     | 914.5821829 | -0.292330242 | 0.397083634 | -0.736193128 | 0.461613174 | 0.999371363 | Not Sig |
| ENSG00000205940 | NA         | NA                                                                  | NA        | 2.37069468  | -0.292306886 | 1.640881525 | -0.178140153 | 0.858612909 | NA          | NA      |
| ENSG00000107872 | FBXL15     | F-box and leucine rich repeat protein 15                            | 79176     | 328.5520245 | -0.292260146 | 0.73621158  | -0.396978469 | 0.691383338 | 0.999371363 | Not Sig |
| ENSG00000004975 | DVL2       | dishevelled segment polarity protein 2                              | 1856      | 731.6307821 | -0.292208192 | 0.41873963  | -0.69782789  | 0.485284835 | 0.999371363 | Not Sig |
| ENSG00000141480 | ARRB2      | arrestin beta 2                                                     | 409       | 1403.934624 | -0.292152129 | 0.708096961 | -0.412587745 | 0.679908681 | 0.999371363 | Not Sig |

|                 |              |                                                                  |           |             |              |             |              |             |             |         |
|-----------------|--------------|------------------------------------------------------------------|-----------|-------------|--------------|-------------|--------------|-------------|-------------|---------|
| ENSG00000186354 | C9orf47      | chromosome 9 open reading frame 47                               | 286223    | 37.58973587 | -0.292119367 | 0.62813565  | -0.465057774 | 0.641890084 | 0.999371363 | Not Sig |
| ENSG00000154370 | TRIM11       | tripartite motif containing 11                                   | 81559     | 809.8796829 | -0.29202481  | 0.543908574 | -0.536900545 | 0.591336315 | 0.999371363 | Not Sig |
| ENSG00000141425 | RPRD1A       | regulation of nuclear pre-mRNA domain containing 1A              | 55197     | 1151.712528 | -0.292003537 | 0.542918752 | -0.537840212 | 0.590687368 | 0.999371363 | Not Sig |
| ENSG00000224975 | INE1         | inactivation escape 1 (non-protein coding)                       | 8552      | 61.39977298 | -0.291990502 | 0.697809754 | -0.41843855  | 0.675626506 | 0.999371363 | Not Sig |
| ENSG00000184508 | HDDC3        | HD domain containing 3                                           | 374659    | 179.921992  | -0.291705087 | 0.540624213 | -0.539570889 | 0.589492997 | 0.999371363 | Not Sig |
| ENSG00000127511 | SIN3B        | SIN3 transcription regulator family member B                     | 23309     | 1630.396293 | -0.291407008 | 0.562323977 | -0.51821907  | 0.604305431 | 0.999371363 | Not Sig |
| ENSG00000166165 | CKB          | creatine kinase B                                                | 1152      | 1721.173067 | -0.291262928 | 0.578782867 | -0.5032335   | 0.614800114 | 0.999371363 | Not Sig |
| ENSG00000104904 | OAZ1         | ornithine decarboxylase antizyme 1                               | 4946      | 5714.169272 | -0.291244414 | 0.663470268 | -0.438971312 | 0.660682324 | 0.999371363 | Not Sig |
| ENSG00000170390 | DCLK2        | doublecortin like kinase 2                                       | 166614    | 214.8089224 | -0.29123223  | 0.563813338 | -0.516540157 | 0.6054772   | 0.999371363 | Not Sig |
| ENSG00000163016 | ALMS1P1      | ALMS1, centrosome and basal body associated protein pseudogene 1 | 200420    | 11.04987639 | -0.290970095 | 1.281893809 | -0.226984555 | 0.820435752 | 0.999371363 | Not Sig |
| ENSG00000204611 | ZNF616       | zinc finger protein 616                                          | 90317     | 312.1344551 | -0.290969381 | 0.539924501 | -0.538907533 | 0.589950659 | 0.999371363 | Not Sig |
| ENSG00000153561 | RMND5A       | required for meiotic nuclear division 5 homolog A                | 64795     | 1790.479724 | -0.290939707 | 0.421919601 | -0.689561961 | 0.490469696 | 0.999371363 | Not Sig |
| ENSG00000152242 | C18orf25     | chromosome 18 open reading frame 25                              | 147339    | 883.0370601 | -0.290766855 | 0.47496632  | -0.612184155 | 0.540415924 | 0.999371363 | Not Sig |
| ENSG00000198858 | R3HDM4       | R3H domain containing 4                                          | 91300     | 978.677025  | -0.290676894 | 0.4055256   | -0.716790492 | 0.473503379 | 0.999371363 | Not Sig |
| ENSG00000112234 | FBXL4        | F-box and leucine rich repeat protein 4                          | 26235     | 1015.617972 | -0.290408032 | 0.566789772 | -0.512373452 | 0.608389667 | 0.999371363 | Not Sig |
| ENSG00000105419 | MEIS3        | Meis homeobox 3                                                  | 56917     | 133.3310125 | -0.29035272  | 0.620090241 | -0.468242686 | 0.639611105 | 0.999371363 | Not Sig |
| ENSG00000230408 | LOC101927795 | uncharacterized LOC101927795                                     | 101927795 | 1.967283327 | -0.290318037 | 1.843340236 | -0.157495633 | 0.874854249 | NA          | NA      |
| ENSG00000229644 | NA           | NA                                                               | NA        | 8.374609353 | -0.290245627 | 0.979370223 | -0.296359457 | 0.766955584 | 0.999371363 | Not Sig |
| ENSG00000211456 | SACMIL       | SAC1 like phosphatidylinositide phosphatase                      | 22908     | 1424.86178  | -0.290234436 | 0.547834865 | -0.52978453  | 0.596261332 | 0.999371363 | Not Sig |
| ENSG00000260549 | MT1L         | metallothionein 1L, pseudogene                                   | 4500      | 56.690128   | -0.290129378 | 0.624114794 | -0.464865408 | 0.642027844 | 0.999371363 | Not Sig |
| ENSG00000231344 | NA           | NA                                                               | NA        | 6.141195448 | -0.29006369  | 1.049314515 | -0.276431599 | 0.782216589 | NA          | NA      |
| ENSG00000058866 | DGKG         | diacylglycerol kinase gamma                                      | 1608      | 226.6933581 | -0.290029493 | 1.009895987 | -0.28718749  | 0.773968765 | 0.999371363 | Not Sig |
| ENSG00000177084 | POLE         | DNA polymerase epsilon, catalytic subunit                        | 5426      | 1071.535239 | -0.289991423 | 0.52148971  | -0.556082732 | 0.578154299 | 0.999371363 | Not Sig |
| ENSG00000162836 | ACP6         | acid phosphatase 6, lysophosphatidic                             | 51205     | 669.5036137 | -0.289935439 | 0.687223951 | -0.421893676 | 0.673102626 | 0.999371363 | Not Sig |
| ENSG00000235843 | NA           | NA                                                               | NA        | 4.607662449 | -0.289924774 | 1.632985756 | -0.177542745 | 0.859082093 | NA          | NA      |
| ENSG00000104213 | PDGFRL       | platelet derived growth factor receptor like                     | 5157      | 130.2468686 | -0.289488948 | 0.852106103 | -0.339733452 | 0.734057267 | 0.999371363 | Not Sig |
| ENSG00000267655 | NA           | NA                                                               | NA        | 16.54284207 | -0.289079198 | 0.851625205 | -0.339444155 | 0.73427516  | 0.999371363 | Not Sig |
| ENSG00000264584 | NA           | NA                                                               | NA        | 72.81221765 | -0.289059599 | 0.630455369 | -0.458493358 | 0.646598033 | 0.999371363 | Not Sig |
| ENSG00000219626 | FAM228B      | family with sequence similarity 228 member B                     | 375190    | 188.3352818 | -0.288781385 | 0.475419869 | -0.607423888 | 0.54356964  | 0.999371363 | Not Sig |
| ENSG00000106244 | PDAP1        | PDGFA associated protein 1                                       | 11333     | 1398.16839  | -0.288741697 | 0.466431309 | -0.619044416 | 0.535887099 | 0.999371363 | Not Sig |
| ENSG00000059588 | TARBP1       | TAR (HIV-1) RNA binding protein 1                                | 6894      | 1859.285593 | -0.288699932 | 0.672197248 | -0.42948693  | 0.667568904 | 0.999371363 | Not Sig |
| ENSG00000126249 | PDCD2L       | programmed cell death 2 like                                     | 84306     | 39.7820294  | -0.288618279 | 0.607522326 | -0.475074358 | 0.634733975 | 0.999371363 | Not Sig |
| ENSG00000104695 | PPP2CB       | protein phosphatase 2 catalytic subunit beta                     | 5516      | 1445.649673 | -0.28860176  | 0.665081688 | -0.433934305 | 0.664336148 | 0.999371363 | Not Sig |
| ENSG00000047056 | WDR37        | WD repeat domain 37                                              | 22884     | 686.6628621 | -0.288582565 | 0.424209058 | -0.680283836 | 0.496324757 | 0.999371363 | Not Sig |
| ENSG00000256660 | CLEC12B      | C-type lectin domain family 12 member B                          | 387837    | 13.15807732 | -0.288580967 | 0.877688406 | -0.328796603 | 0.742309431 | 0.999371363 | Not Sig |

|                 |           |                                                                     |        |             |              |             |              |             |             |         |
|-----------------|-----------|---------------------------------------------------------------------|--------|-------------|--------------|-------------|--------------|-------------|-------------|---------|
| ENSG00000164035 | EMCN      | endomucin                                                           | 51705  | 412.077062  | -0.28852504  | 0.898400057 | -0.321154299 | 0.748093463 | 0.999371363 | Not Sig |
| ENSG00000106245 | BUD31     | BUD31 homolog                                                       | 8896   | 580.004559  | -0.288326652 | 0.46443944  | -0.620805701 | 0.534727472 | 0.999371363 | Not Sig |
| ENSG00000230149 | NA        | NA                                                                  | NA     | 18.59742778 | -0.288245944 | 0.819843987 | -0.351586337 | 0.725148513 | 0.999371363 | Not Sig |
| ENSG00000272389 | NA        | NA                                                                  | NA     | 3.315578234 | -0.288174065 | 1.366055811 | -0.210953361 | 0.832923665 | NA          | NA      |
| ENSG00000227032 | NA        | NA                                                                  | NA     | 15.45382462 | -0.287900728 | 0.874311261 | -0.329288597 | 0.741937563 | 0.999371363 | Not Sig |
| ENSG00000170946 | DNAJC24   | DnaJ heat shock protein family (Hsp40) member C24                   | 120526 | 261.3843309 | -0.287738919 | 0.606531948 | -0.474400268 | 0.635214502 | 0.999371363 | Not Sig |
| ENSG00000239581 | NA        | NA                                                                  | NA     | 21.37114281 | -0.287625071 | 0.881106538 | -0.326436202 | 0.744094351 | 0.999371363 | Not Sig |
| ENSG00000197980 | LEKR1     | leucine, glutamate and lysine rich 1                                | 389170 | 73.23047512 | -0.287402781 | 0.612778413 | -0.469015837 | 0.639058316 | 0.999371363 | Not Sig |
| ENSG00000148362 | PAXX      | PAXX, non-homologous end joining factor                             | 286257 | 450.0539127 | -0.287349884 | 0.659972281 | -0.435396898 | 0.663274361 | 0.999371363 | Not Sig |
| ENSG00000223006 | NA        | NA                                                                  | NA     | 29.31628021 | -0.287142027 | 0.929395356 | -0.308955737 | 0.757355197 | 0.999371363 | Not Sig |
| ENSG00000272638 | NA        | NA                                                                  | NA     | 13.78812135 | -0.287105233 | 0.920030515 | -0.312060554 | 0.754994504 | 0.999371363 | Not Sig |
| ENSG00000138050 | THUMP2    | THUMP domain containing 2                                           | 80745  | 304.0600725 | -0.287099606 | 0.54822951  | -0.523685063 | 0.600497606 | 0.999371363 | Not Sig |
| ENSG00000205537 | NA        | NA                                                                  | NA     | 1.751706259 | -0.287040341 | 2.146863769 | -0.133702168 | 0.89363809  | NA          | NA      |
| ENSG00000106610 | STAG3L4   | stromal antigen 3-like 4 (pseudogene)                               | 64940  | 228.8230368 | -0.287019678 | 0.555311763 | -0.516862234 | 0.605252333 | 0.999371363 | Not Sig |
| ENSG00000237214 | NA        | NA                                                                  | NA     | 5.046676627 | -0.286997969 | 1.117595575 | -0.256799486 | 0.797333567 | NA          | NA      |
| ENSG00000144677 | CTDSPL    | CTD small phosphatase like                                          | 10217  | 1605.790577 | -0.286880241 | 0.446631341 | -0.642319995 | 0.520665434 | 0.999371363 | Not Sig |
| ENSG00000133606 | MKRN1     | makorin ring finger protein 1                                       | 23608  | 2013.191941 | -0.286617988 | 0.401489733 | -0.713886221 | 0.475297538 | 0.999371363 | Not Sig |
| ENSG00000224997 | NA        | NA                                                                  | NA     | 27.79192773 | -0.286609717 | 1.009798792 | -0.28382854  | 0.776541782 | 0.999371363 | Not Sig |
| ENSG00000099256 | PRTFDC1   | phosphoribosyl transferase domain containing 1                      | 56952  | 128.2850686 | -0.286444239 | 0.631063399 | -0.453907229 | 0.649895601 | 0.999371363 | Not Sig |
| ENSG00000123106 | CCDC91    | coiled-coil domain containing 91                                    | 55297  | 736.1657682 | -0.286424767 | 0.571086526 | -0.501543556 | 0.615988632 | 0.999371363 | Not Sig |
| ENSG00000202125 | NA        | NA                                                                  | NA     | 10.03487306 | -0.286423927 | 0.852243415 | -0.336082299 | 0.736808806 | 0.999371363 | Not Sig |
| ENSG00000005075 | POLR2J    | RNA polymerase II subunit J                                         | 5439   | 333.8735197 | -0.286394433 | 0.459299202 | -0.623546549 | 0.532925423 | 0.999371363 | Not Sig |
| ENSG00000003509 | NDUFAF7   | NADH:ubiquinone oxidoreductase complex assembly factor 7            | 55471  | 317.3143297 | -0.286365866 | 0.515874579 | -0.555107535 | 0.578821109 | 0.999371363 | Not Sig |
| ENSG00000083844 | ZNF264    | zinc finger protein 264                                             | 9422   | 777.4411942 | -0.2863501   | 0.452521221 | -0.632788224 | 0.526871948 | 0.999371363 | Not Sig |
| ENSG00000151093 | OXSM      | 3-oxoacyl-ACP synthase, mitochondrial                               | 54995  | 114.1868987 | -0.286304962 | 0.481165967 | -0.595023301 | 0.551827896 | 0.999371363 | Not Sig |
| ENSG00000077097 | TOP2B     | DNA topoisomerase II beta                                           | 7155   | 4513.103751 | -0.286254686 | 0.526531212 | -0.543661381 | 0.586674512 | 0.999371363 | Not Sig |
| ENSG00000185485 | SDHAP1    | succinate dehydrogenase complex flavoprotein subunit A pseudogene 1 | 255812 | 622.8510368 | -0.286192905 | 0.494982651 | -0.578187749 | 0.563137369 | 0.999371363 | Not Sig |
| ENSG00000271895 | NA        | NA                                                                  | NA     | 66.32168057 | -0.285919909 | 0.591087983 | -0.483718021 | 0.628586002 | 0.999371363 | Not Sig |
| ENSG00000136319 | TTC5      | tetratricopeptide repeat domain 5                                   | 91875  | 474.0001148 | -0.285811792 | 0.474503483 | -0.602338661 | 0.546948731 | 0.999371363 | Not Sig |
| ENSG00000249915 | PDCD6     | programmed cell death 6                                             | 10016  | 1375.236869 | -0.285577327 | 0.48268398  | -0.591644511 | 0.554088661 | 0.999371363 | Not Sig |
| ENSG00000204267 | TAP2      | transporter 2, ATP binding cassette subfamily B member              | 6891   | 656.2037713 | -0.285566362 | 0.694008056 | -0.411474131 | 0.680724906 | 0.999371363 | Not Sig |
| ENSG00000076685 | NT5C2     | 5'-nucleotidase, cytosolic II                                       | 22978  | 2557.837011 | -0.285539808 | 0.591646422 | -0.482619005 | 0.629366282 | 0.999371363 | Not Sig |
| ENSG00000215817 | LOC441155 | zinc finger CCCH-type domain-containing-like                        | 441155 | 5.09818781  | -0.285408748 | 1.171544948 | -0.243617412 | 0.807527142 | NA          | NA      |
| ENSG00000196547 | MAN2A2    | mannosidase alpha class 2A member 2                                 | 4122   | 1838.874547 | -0.285341652 | 0.534342767 | -0.534004892 | 0.593338149 | 0.999371363 | Not Sig |
| ENSG00000133433 | GSTT2B    | glutathione S-transferase theta 2B (gene/pseudogene)                | 653689 | 17.05091357 | -0.285322182 | 1.194434561 | -0.238876362 | 0.811201456 | 0.999371363 | Not Sig |



|                 |             |                                                  |           |             |              |             |              |             |             |         |
|-----------------|-------------|--------------------------------------------------|-----------|-------------|--------------|-------------|--------------|-------------|-------------|---------|
| ENSG00000104299 | INTS9       | integrator complex subunit 9                     | 55756     | 345.3183109 | -0.285124681 | 0.51962477  | -0.548712643 | 0.583202668 | 0.999371363 | Not Sig |
| ENSG00000198053 | SIRPA       | signal regulatory protein alpha                  | 140885    | 1991.227509 | -0.285102248 | 0.766678971 | -0.371866529 | 0.709992227 | 0.999371363 | Not Sig |
| ENSG00000132837 | DMGDH       | dimethylglycine dehydrogenase                    | 29958     | 32.31259318 | -0.28509822  | 0.569134662 | -0.500932802 | 0.616418417 | 0.999371363 | Not Sig |
| ENSG00000164306 | PRIMPOL     | primase and DNA directed polymerase              | 201973    | 256.7938266 | -0.28492404  | 0.425372394 | -0.669822595 | 0.502970888 | 0.999371363 | Not Sig |
| ENSG00000139192 | TAPBPL      | TAP binding protein like                         | 55080     | 736.2618358 | -0.284906904 | 0.649057015 | -0.438955126 | 0.660694052 | 0.999371363 | Not Sig |
| ENSG00000101182 | PSMA7       | proteasome subunit alpha 7                       | 5688      | 1889.699123 | -0.284868528 | 0.490241482 | -0.581077975 | 0.561187902 | 0.999371363 | Not Sig |
| ENSG00000201221 | NA          | NA                                               | NA        | 6.740296023 | -0.284647873 | 1.104411801 | -0.25773708  | 0.796609827 | 0.999371363 | Not Sig |
| ENSG00000140379 | BCL2A1      | BCL2 related protein A1                          | 597       | 206.1150755 | -0.284586931 | 0.761395006 | -0.373770419 | 0.708575129 | 0.999371363 | Not Sig |
| ENSG00000267213 | LOC400684   | uncharacterized LOC400684                        | 400684    | 13.48117268 | -0.284540594 | 0.838369112 | -0.339397754 | 0.73431011  | 0.999371363 | Not Sig |
| ENSG00000165632 | TAF3        | TATA-box binding protein associated factor 3     | 83860     | 578.213446  | -0.284462215 | 0.436780839 | -0.651269902 | 0.514872274 | 0.999371363 | Not Sig |
| ENSG00000201689 | SNORD114-29 | small nucleolar RNA, C/D box 114-29              | 767610    | 1.05588271  | -0.284399695 | 2.578812331 | -0.110283207 | 0.912184774 | NA          | NA      |
| ENSG00000244582 | NA          | NA                                               | NA        | 1.05588271  | -0.284399695 | 2.578812331 | -0.110283207 | 0.912184774 | NA          | NA      |
| ENSG00000136813 | KIAA0368    | KIAA0368                                         | 23392     | 4062.187284 | -0.284366555 | 0.427062226 | -0.665866793 | 0.505496248 | 0.999371363 | Not Sig |
| ENSG00000178573 | MAF         | MAF bZIP transcription factor                    | 4094      | 1955.471305 | -0.284331231 | 0.593810775 | -0.47882464  | 0.632063386 | 0.999371363 | Not Sig |
| ENSG00000110934 | BIN2        | bridging integrator 2                            | 51411     | 479.7332242 | -0.284250315 | 0.82497542  | -0.344556102 | 0.730428113 | 0.999371363 | Not Sig |
| ENSG00000111011 | RSRC2       | arginine and serine rich coiled-coil 2           | 65117     | 1513.505656 | -0.284175078 | 0.510460205 | -0.556703686 | 0.577729898 | 0.999371363 | Not Sig |
| ENSG00000165806 | CASP7       | caspase 7                                        | 840       | 633.1369686 | -0.284037193 | 0.544127323 | -0.522005017 | 0.601666837 | 0.999371363 | Not Sig |
| ENSG00000084092 | NOA1        | nitric oxide associated 1                        | 84273     | 540.7923669 | -0.284028239 | 0.42260182  | -0.672094217 | 0.501523718 | 0.999371363 | Not Sig |
| ENSG00000251215 | NA          | NA                                               | NA        | 11.67859688 | -0.283926427 | 0.875713761 | -0.324222868 | 0.74576931  | 0.999371363 | Not Sig |
| ENSG00000135486 | HNRNPA1     | heterogeneous nuclear ribonucleoprotein A1       | 3178      | 9652.692614 | -0.28381532  | 0.404222987 | -0.702125633 | 0.482600818 | 0.999371363 | Not Sig |
| ENSG00000202129 | NA          | NA                                               | NA        | 1.321249506 | -0.283803806 | 2.085595181 | -0.136078089 | 0.891759549 | NA          | NA      |
| ENSG00000232160 | RAP2C-AS1   | RAP2C antisense RNA 1                            | 101928578 | 62.1360653  | -0.2836666   | 0.7149443   | -0.396767413 | 0.691538983 | 0.999371363 | Not Sig |
| ENSG00000114544 | SLC41A3     | solute carrier family 41 member 3                | 54946     | 543.9325668 | -0.283570975 | 0.461854561 | -0.613983275 | 0.53922638  | 0.999371363 | Not Sig |
| ENSG00000244313 | NA          | NA                                               | NA        | 44.97558555 | -0.283505844 | 0.556496095 | -0.509448039 | 0.610438211 | 0.999371363 | Not Sig |
| ENSG00000248544 | NA          | NA                                               | NA        | 6.95731217  | -0.283401842 | 1.190442008 | -0.238064383 | 0.811831159 | 0.999371363 | Not Sig |
| ENSG00000124222 | STX16       | syntaxin 16                                      | 8675      | 1318.282961 | -0.283287421 | 0.456100539 | -0.621107404 | 0.534528958 | 0.999371363 | Not Sig |
| ENSG00000160961 | ZNF333      | zinc finger protein 333                          | 84449     | 369.0978824 | -0.283281868 | 0.480503712 | -0.589551882 | 0.555491119 | 0.999371363 | Not Sig |
| ENSG00000252792 | NA          | NA                                               | NA        | 3.822122906 | -0.283252168 | 1.263098649 | -0.224251818 | 0.822561365 | NA          | NA      |
| ENSG00000164488 | DACT2       | dishevelled binding antagonist of beta catenin 2 | 168002    | 194.7526868 | -0.283220141 | 1.043955006 | -0.271295352 | 0.786163881 | 0.999371363 | Not Sig |
| ENSG00000263412 | NA          | NA                                               | NA        | 16.40016491 | -0.283077416 | 0.783705499 | -0.361203815 | 0.717947091 | 0.999371363 | Not Sig |
| ENSG00000072858 | SIDT1       | SID1 transmembrane family member 1               | 54847     | 613.8270031 | -0.283070405 | 0.631421487 | -0.448306576 | 0.653931955 | 0.999371363 | Not Sig |
| ENSG00000136935 | GOLGA1      | golgin A1                                        | 2800      | 807.8790069 | -0.282953918 | 0.431754115 | -0.655358937 | 0.512236683 | 0.999371363 | Not Sig |
| ENSG00000214435 | AS3MT       | arsenite methyltransferase                       | 57412     | 5.997997717 | -0.282947172 | 1.09983985  | -0.257262157 | 0.796976404 | NA          | NA      |
| ENSG00000171804 | WDR87       | WD repeat domain 87                              | 83889     | 0.978914539 | -0.282852655 | 2.609994201 | -0.108372906 | 0.913699893 | NA          | NA      |
| ENSG00000252985 | NA          | NA                                               | NA        | 11.89231434 | -0.282612943 | 0.822280821 | -0.34369395  | 0.731076462 | 0.999371363 | Not Sig |

|                 |              |                                                        |           |             |              |             |              |             |             |         |
|-----------------|--------------|--------------------------------------------------------|-----------|-------------|--------------|-------------|--------------|-------------|-------------|---------|
| ENSG00000155666 | KDM8         | lysine demethylase 8                                   | 79831     | 139.7190907 | -0.282451847 | 0.56000333  | -0.504375298 | 0.613997673 | 0.999371363 | Not Sig |
| ENSG00000183150 | GPR19        | G protein-coupled receptor 19                          | 2842      | 8.762251066 | -0.282361656 | 1.046490085 | -0.269817803 | 0.787300426 | 0.999371363 | Not Sig |
| ENSG00000242871 | NA           | NA                                                     | NA        | 15.0757056  | -0.282142671 | 1.280750294 | -0.220294832 | 0.825641545 | 0.999371363 | Not Sig |
| ENSG00000260942 | CAPN10-AS1   | CAPN10 antisense RNA 1 (head to head)                  | 101752400 | 87.86016387 | -0.282041306 | 0.606658272 | -0.464909685 | 0.641996135 | 0.999371363 | Not Sig |
| ENSG00000127445 | PIN1         | peptidylprolyl cis/trans isomerase, NIMA-interacting 1 | 5300      | 512.8821766 | -0.282022416 | 0.600829322 | -0.46938857  | 0.638791917 | 0.999371363 | Not Sig |
| ENSG00000223652 | NA           | NA                                                     | NA        | 3.654896487 | -0.281979075 | 1.303004537 | -0.216406825 | 0.828670646 | NA          | NA      |
| ENSG00000221216 | NA           | NA                                                     | NA        | 5.72948696  | -0.281950974 | 1.109032672 | -0.254231441 | 0.799316762 | NA          | NA      |
| ENSG00000070269 | TMEM260      | transmembrane protein 260                              | 54916     | 658.7992951 | -0.281936607 | 0.555207099 | -0.507804399 | 0.611590524 | 0.999371363 | Not Sig |
| ENSG00000233695 | NA           | NA                                                     | NA        | 73.06698441 | -0.281831433 | 0.732405932 | -0.384802226 | 0.700383949 | 0.999371363 | Not Sig |
| ENSG00000187954 | CYHR1        | cysteine and histidine rich 1                          | 50626     | 1178.729564 | -0.281549393 | 0.561941228 | -0.501029963 | 0.616350036 | 0.999371363 | Not Sig |
| ENSG00000197958 | RPL12        | ribosomal protein L12                                  | 6136      | 6535.757818 | -0.281330541 | 0.482406864 | -0.583181049 | 0.559771427 | 0.999371363 | Not Sig |
| ENSG00000253537 | PCDHGA7      | protocadherin gamma subfamily A, 7                     | 56108     | 96.50895147 | -0.281281976 | 0.574928682 | -0.489246727 | 0.624667032 | 0.999371363 | Not Sig |
| ENSG00000134324 | LPIN1        | lipin 1                                                | 23175     | 1089.723626 | -0.281180305 | 0.407612174 | -0.689823129 | 0.490305422 | 0.999371363 | Not Sig |
| ENSG00000223621 | NA           | NA                                                     | NA        | 2.439797014 | -0.281078526 | 1.538713644 | -0.182671108 | 0.855056087 | NA          | NA      |
| ENSG00000226210 | LOC100288778 | WASH complex subunit 1 pseudogene                      | 100288778 | 280.1205995 | -0.281004811 | 0.659807848 | -0.425888858 | 0.670188834 | 0.999371363 | Not Sig |
| ENSG00000119684 | MLH3         | mutL homolog 3                                         | 27030     | 941.8026325 | -0.280992323 | 0.431447462 | -0.651278192 | 0.514866923 | 0.999371363 | Not Sig |
| ENSG00000242125 | SNHG3        | small nucleolar RNA host gene 3                        | 8420      | 1103.31106  | -0.280982487 | 0.671309354 | -0.418558874 | 0.675538551 | 0.999371363 | Not Sig |
| ENSG00000160199 | PKNOX1       | PBX/knotted 1 homeobox 1                               | 5316      | 474.0995969 | -0.280820264 | 0.424846737 | -0.660991928 | 0.50861749  | 0.999371363 | Not Sig |
| ENSG00000008513 | ST3GAL1      | ST3 beta-galactoside alpha-2,3-sialyltransferase 1     | 6482      | 2604.408917 | -0.280795072 | 0.525095573 | -0.534750408 | 0.592822459 | 0.999371363 | Not Sig |
| ENSG00000145715 | RASA1        | RAS p21 protein activator 1                            | 5921      | 1567.045961 | -0.280718198 | 0.528985159 | -0.530673107 | 0.595645325 | 0.999371363 | Not Sig |
| ENSG00000199072 | MIRLET7F1    | microRNA let-7f-1                                      | 406888    | 9.977046486 | -0.280473655 | 0.939192921 | -0.298632633 | 0.765220363 | 0.999371363 | Not Sig |
| ENSG00000127995 | CASD1        | CAS1 domain containing 1                               | 64921     | 1089.382232 | -0.280425914 | 0.576128641 | -0.486741839 | 0.626441292 | 0.999371363 | Not Sig |
| ENSG00000196074 | SYCP2        | synaptonemal complex protein 2                         | 10388     | 110.5627205 | -0.279977364 | 0.633676979 | -0.441829786 | 0.658612383 | 0.999371363 | Not Sig |
| ENSG00000011465 | DCN          | decorin                                                | 1634      | 9442.242108 | -0.279861396 | 0.744051101 | -0.376131956 | 0.706818798 | 0.999371363 | Not Sig |
| ENSG00000126838 | PZP          | PZP, alpha-2-macroglobulin like                        | 5858      | 66.45477028 | -0.27984219  | 1.115328812 | -0.250905551 | 0.801887132 | 0.999371363 | Not Sig |
| ENSG00000118785 | SPP1         | secreted phosphoprotein 1                              | 6696      | 4253.948357 | -0.279747069 | 1.369880256 | -0.20421279  | 0.838187217 | 0.999371363 | Not Sig |
| ENSG00000234769 | NA           | NA                                                     | NA        | 119.5501527 | -0.279729517 | 0.544535186 | -0.513703291 | 0.607459451 | 0.999371363 | Not Sig |
| ENSG00000169570 | DTWD2        | DTW domain containing 2                                | 285605    | 265.9096176 | -0.279713226 | 0.604604335 | -0.462638473 | 0.643623527 | 0.999371363 | Not Sig |
| ENSG00000232860 | SMG7-AS1     | SMG7 antisense RNA 1                                   | 284649    | 5.895141259 | -0.27964165  | 1.059334055 | -0.263978722 | 0.791796315 | NA          | NA      |
| ENSG00000079435 | LIPE         | lipase E, hormone sensitive type                       | 3991      | 117.3239623 | -0.279584191 | 0.692969293 | -0.403458268 | 0.686611129 | 0.999371363 | Not Sig |
| ENSG00000224066 | NA           | NA                                                     | NA        | 82.54070276 | -0.279541841 | 0.550674435 | -0.507635406 | 0.611709056 | 0.999371363 | Not Sig |
| ENSG00000261188 | NA           | NA                                                     | NA        | 39.769724   | -0.279414495 | 0.76683525  | -0.364373567 | 0.715579071 | 0.999371363 | Not Sig |
| ENSG00000164576 | SAP30L       | SAP30 like                                             | 79685     | 966.5519079 | -0.279375465 | 0.616045955 | -0.453497768 | 0.650190351 | 0.999371363 | Not Sig |
| ENSG00000154832 | CXXC1        | CXXC finger protein 1                                  | 30827     | 806.4015435 | -0.279222856 | 0.449579317 | -0.621075848 | 0.534549719 | 0.999371363 | Not Sig |
| ENSG00000106404 | CLDN15       | claudin 15                                             | 24146     | 176.8170101 | -0.27919069  | 0.715502052 | -0.3902025   | 0.696386813 | 0.999371363 | Not Sig |

|                 |          |                                                              |           |             |              |             |              |             |             |         |
|-----------------|----------|--------------------------------------------------------------|-----------|-------------|--------------|-------------|--------------|-------------|-------------|---------|
| ENSG00000234964 | NA       | NA                                                           | NA        | 1.425263076 | -0.27917271  | 2.334744256 | -0.119573143 | 0.904821296 | NA          | NA      |
| ENSG00000239089 | NA       | NA                                                           | NA        | 7.440104737 | -0.279096965 | 1.005729792 | -0.277506908 | 0.781390902 | 0.999371363 | Not Sig |
| ENSG00000204371 | EHMT2    | euchromatic histone lysine methyltransferase 2               | 10919     | 1446.466985 | -0.278804698 | 0.442272993 | -0.63039051  | 0.528439118 | 0.999371363 | Not Sig |
| ENSG00000134371 | CDC73    | cell division cycle 73                                       | 79577     | 1620.789727 | -0.278604535 | 0.560083834 | -0.497433632 | 0.618883294 | 0.999371363 | Not Sig |
| ENSG00000144635 | DYNC1LI1 | dynein cytoplasmic 1 light intermediate chain 1              | 51143     | 727.1920873 | -0.278505311 | 0.443394159 | -0.62812129  | 0.529924487 | 0.999371363 | Not Sig |
| ENSG00000116199 | FAM20B   | FAM20B, glycosaminoglycan xylosylkinase                      | 9917      | 1621.907392 | -0.278439448 | 0.414129784 | -0.67234828  | 0.501362    | 0.999371363 | Not Sig |
| ENSG00000189403 | HMG1     | high mobility group box 1                                    | 3146      | 3927.802564 | -0.278292616 | 0.462887464 | -0.601210094 | 0.547700062 | 0.999371363 | Not Sig |
| ENSG00000062650 | WAPL     | WAPL cohesin release factor                                  | 23063     | 2084.53151  | -0.277942635 | 0.465529582 | -0.59704613  | 0.550476583 | 0.999371363 | Not Sig |
| ENSG00000107521 | HPS1     | HPS1, biogenesis of lysosomal organelles complex 3 subunit 1 | 3257      | 1202.426635 | -0.277936811 | 0.528222199 | -0.526174045 | 0.598767286 | 0.999371363 | Not Sig |
| ENSG00000145907 | G3BP1    | G3BP stress granule assembly factor 1                        | 10146     | 4160.147498 | -0.277861199 | 0.481596242 | -0.576958818 | 0.563967275 | 0.999371363 | Not Sig |
| ENSG00000230409 | NA       | NA                                                           | NA        | 65.16900627 | -0.277783023 | 0.631436301 | -0.439922479 | 0.659993254 | 0.999371363 | Not Sig |
| ENSG00000255103 | NA       | NA                                                           | NA        | 1176.70662  | -0.277738142 | 0.559722826 | -0.496206567 | 0.619748678 | 0.999371363 | Not Sig |
| ENSG00000196247 | ZNF107   | zinc finger protein 107                                      | 51427     | 720.1742783 | -0.277638224 | 0.780118208 | -0.355892506 | 0.721921068 | 0.999371363 | Not Sig |
| ENSG00000215712 | TMEM242  | transmembrane protein 242                                    | 729515    | 245.9601788 | -0.277360711 | 0.424595781 | -0.65323473  | 0.513604963 | 0.999371363 | Not Sig |
| ENSG00000237015 | NA       | NA                                                           | NA        | 7.278474649 | -0.277246992 | 1.185872522 | -0.233791565 | 0.815146799 | 0.999371363 | Not Sig |
| ENSG00000085415 | SEH1L    | SEH1 like nucleoporin                                        | 81929     | 787.8110976 | -0.277072312 | 0.584850576 | -0.47374889  | 0.635678985 | 0.999371363 | Not Sig |
| ENSG00000244501 | NA       | NA                                                           | NA        | 2.354387888 | -0.277070719 | 1.64025004  | -0.168919806 | 0.86585972  | NA          | NA      |
| ENSG00000171135 | JAGN1    | jagunal homolog 1                                            | 84522     | 345.6638399 | -0.277040019 | 0.418691167 | -0.66168107  | 0.508175639 | 0.999371363 | Not Sig |
| ENSG00000157873 | TNFRSF14 | TNF receptor superfamily member 14                           | 8764      | 1607.595093 | -0.276969701 | 0.638787492 | -0.433586606 | 0.664588663 | 0.999371363 | Not Sig |
| ENSG00000242860 | NA       | NA                                                           | NA        | 14.22511706 | -0.276784817 | 1.112771836 | -0.248734564 | 0.803566111 | 0.999371363 | Not Sig |
| ENSG00000126226 | PCID2    | PCI domain containing 2                                      | 55795     | 820.7189532 | -0.276597911 | 0.505378217 | -0.547308732 | 0.584166646 | 0.999371363 | Not Sig |
| ENSG00000226976 | NA       | NA                                                           | NA        | 4.634968139 | -0.276593568 | 1.156639066 | -0.239135592 | 0.811000444 | NA          | NA      |
| ENSG00000118496 | FBX030   | F-box protein 30                                             | 84085     | 580.1116164 | -0.276542015 | 0.482713377 | -0.572890722 | 0.566718687 | 0.999371363 | Not Sig |
| ENSG00000124374 | PAIP2B   | poly(A) binding protein interacting protein 2B               | 400961    | 445.7128643 | -0.276505715 | 0.70183958  | -0.393972814 | 0.693601111 | 0.999371363 | Not Sig |
| ENSG00000072364 | AFF4     | AF4/FMR2 family member 4                                     | 27125     | 5580.826485 | -0.276190973 | 0.551201636 | -0.50107067  | 0.616321388 | 0.999371363 | Not Sig |
| ENSG00000148057 | IDNK     | IDNK, gluconokinase                                          | 414328    | 100.3180636 | -0.276030804 | 0.628075548 | -0.439486628 | 0.660308969 | 0.999371363 | Not Sig |
| ENSG00000188199 | NUTM2B   | NUT family member 2B                                         | 729262    | 2.65323762  | -0.275966689 | 1.505738615 | -0.183276623 | 0.854580975 | NA          | NA      |
| ENSG00000081386 | ZNF510   | zinc finger protein 510                                      | 22869     | 465.5370986 | -0.275913329 | 0.438306111 | -0.629499161 | 0.529022318 | 0.999371363 | Not Sig |
| ENSG00000255434 | NA       | NA                                                           | NA        | 2.632629756 | -0.275788376 | 1.701561331 | -0.162079598 | 0.871243173 | NA          | NA      |
| ENSG00000165185 | KIAA1958 | KIAA1958                                                     | 158405    | 751.9465609 | -0.275650834 | 0.558742123 | -0.493341782 | 0.621771111 | 0.999371363 | Not Sig |
| ENSG00000080298 | RFX3     | regulatory factor X3                                         | 5991      | 633.8850877 | -0.27550521  | 0.4478709   | -0.615144253 | 0.53845946  | 0.999371363 | Not Sig |
| ENSG00000206903 | SNORA24B | small nucleolar RNA, H/ACA box 24B                           | 109617003 | 1.404655212 | -0.275450254 | 2.111978707 | -0.130422837 | 0.8962319   | NA          | NA      |
| ENSG00000255256 | NA       | NA                                                           | NA        | 1.404655212 | -0.275450254 | 2.111978707 | -0.130422837 | 0.8962319   | NA          | NA      |
| ENSG00000102763 | VWA8     | von Willebrand factor A domain containing 8                  | 23078     | 1203.346025 | -0.275352977 | 0.489417385 | -0.562613805 | 0.573697889 | 0.999371363 | Not Sig |
| ENSG00000128272 | ATF4     | activating transcription factor 4                            | 468       | 3879.946859 | -0.275231942 | 0.42841584  | -0.642441098 | 0.520586823 | 0.999371363 | Not Sig |

|                 |              |                                                           |           |             |              |             |              |             |             |         |
|-----------------|--------------|-----------------------------------------------------------|-----------|-------------|--------------|-------------|--------------|-------------|-------------|---------|
| ENSG00000206609 | SNORD116-11  | small nucleolar RNA, C/D box 116-11                       | 100033423 | 3.518009044 | -0.27480005  | 1.368238717 | -0.200842183 | 0.840821978 | NA          | NA      |
| ENSG00000100519 | PSMC6        | proteasome 26S subunit, ATPase 6                          | 5706      | 1385.900962 | -0.274737757 | 0.585439988 | -0.469284235 | 0.638866483 | 0.999371363 | Not Sig |
| ENSG00000114391 | RPL24        | ribosomal protein L24                                     | 6152      | 4324.154818 | -0.274681397 | 0.433789481 | -0.633213597 | 0.526594168 | 0.999371363 | Not Sig |
| ENSG00000243926 | NA           | NA                                                        | NA        | 11.25622816 | -0.274613331 | 0.879895412 | -0.312097697 | 0.754966277 | 0.999371363 | Not Sig |
| ENSG00000136546 | SCN7A        | sodium voltage-gated channel alpha subunit 7              | 6332      | 2248.332131 | -0.274558703 | 0.898631082 | -0.305529943 | 0.759962568 | 0.999371363 | Not Sig |
| ENSG00000158195 | WASF2        | WAS protein family member 2                               | 10163     | 5277.188076 | -0.27440563  | 0.485242409 | -0.565502159 | 0.571732256 | 0.999371363 | Not Sig |
| ENSG00000272948 | NA           | NA                                                        | NA        | 5.276120265 | -0.273503872 | 1.830022905 | -0.149453797 | 0.881195564 | NA          | NA      |
| ENSG00000120549 | KIAA1217     | KIAA1217                                                  | 56243     | 3238.479572 | -0.273484842 | 0.392633631 | -0.696539524 | 0.486091014 | 0.999371363 | Not Sig |
| ENSG00000100813 | ACIN1        | apoptotic chromatin condensation inducer 1                | 22985     | 5844.587058 | -0.273407552 | 0.51283207  | -0.53313271  | 0.593941718 | 0.999371363 | Not Sig |
| ENSG00000239704 | CDRT4        | CMT1A duplicated region transcript 4                      | 284040    | 63.20252362 | -0.273328089 | 0.699345762 | -0.390833983 | 0.695919954 | 0.999371363 | Not Sig |
| ENSG00000272195 | NA           | NA                                                        | NA        | 47.87650444 | -0.273280903 | 0.717131329 | -0.381075115 | 0.703147512 | 0.999371363 | Not Sig |
| ENSG00000207820 | MIR545       | microRNA 545                                              | 664614    | 4.911073544 | -0.273070502 | 1.106032205 | -0.246891999 | 0.804991809 | NA          | NA      |
| ENSG00000134901 | KDELCL1      | KDEL motif containing 1                                   | 79070     | 87.20326444 | -0.272874145 | 0.527276258 | -0.517516465 | 0.604795678 | 0.999371363 | Not Sig |
| ENSG00000204758 | LOC100268168 | uncharacterized LOC100268168                              | 100268168 | 13.83996473 | -0.272828725 | 0.817119676 | -0.333890779 | 0.738461978 | 0.999371363 | Not Sig |
| ENSG00000161664 | ASB16        | ankyrin repeat and SOCS box containing 16                 | 92591     | 9.254432032 | -0.272813696 | 1.042675336 | -0.261647789 | 0.793592997 | 0.999371363 | Not Sig |
| ENSG00000189046 | ALKBH2       | alkB homolog 2, alpha-ketoglutarate dependent dioxygenase | 121642    | 89.18499043 | -0.272707973 | 0.539662331 | -0.505330754 | 0.613326545 | 0.999371363 | Not Sig |
| ENSG00000122042 | UBL3         | ubiquitin like 3                                          | 5412      | 1915.441624 | -0.272702986 | 0.590733839 | -0.461634272 | 0.644343613 | 0.999371363 | Not Sig |
| ENSG00000242960 | NA           | NA                                                        | NA        | 18.50057744 | -0.27263757  | 0.731075645 | -0.372926621 | 0.709203058 | 0.999371363 | Not Sig |
| ENSG00000102974 | CTCF         | CCCTC-binding factor                                      | 10664     | 1399.266681 | -0.27254262  | 0.395283717 | -0.689486079 | 0.490517431 | 0.999371363 | Not Sig |
| ENSG00000100902 | PSMA6        | proteasome subunit alpha 6                                | 5687      | 212.4663982 | -0.272486224 | 0.611658664 | -0.445487394 | 0.655967567 | 0.999371363 | Not Sig |
| ENSG00000116754 | SRSF11       | serine and arginine rich splicing factor 11               | 9295      | 3597.170801 | -0.27248427  | 0.652681496 | -0.417484289 | 0.676324214 | 0.999371363 | Not Sig |
| ENSG00000101901 | ALG13        | ALG13, UDP-N-acetylglucosaminyltransferase subunit        | 79868     | 1212.738175 | -0.272279225 | 0.681661939 | -0.399434396 | 0.689573154 | 0.999371363 | Not Sig |
| ENSG00000256011 | NA           | NA                                                        | NA        | 3.723290659 | -0.272259205 | 1.84200458  | -0.147805933 | 0.882495927 | NA          | NA      |
| ENSG00000184381 | PLA2G6       | phospholipase A2 group VI                                 | 8398      | 539.2796856 | -0.271929851 | 0.469804127 | -0.578815373 | 0.562713757 | 0.999371363 | Not Sig |
| ENSG00000130254 | SAFB2        | scaffold attachment factor B2                             | 9667      | 1367.772501 | -0.271851219 | 0.443799036 | -0.612554776 | 0.540170769 | 0.999371363 | Not Sig |
| ENSG00000114554 | PLXNA1       | plexin A1                                                 | 5361      | 2668.80786  | -0.271802872 | 0.599818491 | -0.453141869 | 0.650446588 | 0.999371363 | Not Sig |
| ENSG00000138468 | SENP7        | SUMO1/sentrin specific peptidase 7                        | 57337     | 871.5547879 | -0.271755697 | 0.638590782 | -0.425555308 | 0.670431912 | 0.999371363 | Not Sig |
| ENSG00000175564 | UCP3         | uncoupling protein 3                                      | 7352      | 42.17876295 | -0.271734359 | 0.607432003 | -0.447349427 | 0.654622784 | 0.999371363 | Not Sig |
| ENSG00000223599 | NA           | NA                                                        | NA        | 78.84130877 | -0.271707124 | 0.57632883  | -0.471444617 | 0.637323261 | 0.999371363 | Not Sig |
| ENSG00000109536 | FRG1         | FSHD region gene 1                                        | 2483      | 318.5443708 | -0.271595876 | 0.417346452 | -0.650768382 | 0.515196013 | 0.999371363 | Not Sig |
| ENSG00000225450 | NA           | NA                                                        | NA        | 17.26015374 | -0.271595007 | 0.903393773 | -0.300638565 | 0.763690121 | 0.999371363 | Not Sig |
| ENSG00000126216 | TUBGCP3      | tubulin gamma complex associated protein 3                | 10426     | 838.6051169 | -0.271548013 | 0.441192421 | -0.615486577 | 0.538233431 | 0.999371363 | Not Sig |
| ENSG00000135457 | TFCP2        | transcription factor CP2                                  | 7024      | 767.6087435 | -0.271525802 | 0.453900436 | -0.598205643 | 0.549702727 | 0.999371363 | Not Sig |
| ENSG00000136250 | AOAH         | acyloxyacyl hydrolase                                     | 313       | 431.6009022 | -0.271480281 | 0.72325702  | -0.375357963 | 0.707394264 | 0.999371363 | Not Sig |
| ENSG00000120533 | ENY2         | ENY2, transcription and export complex 2 subunit          | 56943     | 511.9010957 | -0.27146391  | 0.481657235 | -0.563603928 | 0.573023713 | 0.999371363 | Not Sig |

|                 |          |                                                                                  |        |             |              |             |              |             |             |         |
|-----------------|----------|----------------------------------------------------------------------------------|--------|-------------|--------------|-------------|--------------|-------------|-------------|---------|
| ENSG0000006652  | IFRD1    | interferon related developmental regulator 1                                     | 3475   | 917.2384268 | -0.271168875 | 0.480705454 | -0.564106093 | 0.572681931 | 0.999371363 | Not Sig |
| ENSG00000101544 | ADNP2    | ADNP homeobox 2                                                                  | 22850  | 884.2390642 | -0.271139828 | 0.430756561 | -0.629450257 | 0.529054325 | 0.999371363 | Not Sig |
| ENSG00000136044 | APPL2    | adaptor protein, phosphotyrosine interacting with PH domain and leucine zipper 2 | 55198  | 821.3076409 | -0.270914522 | 0.41009687  | -0.660611046 | 0.508861783 | 0.999371363 | Not Sig |
| ENSG00000251369 | ZNF550   | zinc finger protein 550                                                          | 162972 | 275.7248923 | -0.270871034 | 0.555256191 | -0.487830732 | 0.625669742 | 0.999371363 | Not Sig |
| ENSG00000109586 | GALNT7   | polypeptide N-acetylgalactosaminyltransferase 7                                  | 51809  | 1785.610076 | -0.270866156 | 0.780210326 | -0.347170688 | 0.72846309  | 0.999371363 | Not Sig |
| ENSG00000232833 | NA       | NA                                                                               | NA     | 21.73589597 | -0.270810172 | 0.820947211 | -0.329875256 | 0.741494221 | 0.999371363 | Not Sig |
| ENSG00000143387 | CTSK     | cathepsin K                                                                      | 1513   | 805.0473616 | -0.270770987 | 0.524250849 | -0.51649127  | 0.605511335 | 0.999371363 | Not Sig |
| ENSG00000055950 | MRPL43   | mitochondrial ribosomal protein L43                                              | 84545  | 493.9105352 | -0.270552536 | 0.416570541 | -0.649475921 | 0.516030805 | 0.999371363 | Not Sig |
| ENSG00000258230 | NA       | NA                                                                               | NA     | 26.34806336 | -0.270032949 | 0.670919663 | -0.402481792 | 0.687329486 | 0.999371363 | Not Sig |
| ENSG00000109680 | TBC1D19  | TBC1 domain family member 19                                                     | 55296  | 287.4383328 | -0.269899799 | 0.492518666 | -0.547999127 | 0.583692502 | 0.999371363 | Not Sig |
| ENSG00000127472 | PLA2G5   | phospholipase A2 group V                                                         | 5322   | 36.32776566 | -0.269813531 | 0.855046236 | -0.315554317 | 0.752340817 | 0.999371363 | Not Sig |
| ENSG00000186591 | UBE2H    | ubiquitin conjugating enzyme E2 H                                                | 7328   | 3321.832965 | -0.269789193 | 0.487487993 | -0.553427359 | 0.579970809 | 0.999371363 | Not Sig |
| ENSG00000150760 | DOCK1    | dedicator of cytokinesis 1                                                       | 1793   | 3216.976282 | -0.269567498 | 0.411602783 | -0.654921467 | 0.512518318 | 0.999371363 | Not Sig |
| ENSG00000137819 | PAQR5    | progesterin and adipoQ receptor family member 5                                  | 54852  | 384.7904416 | -0.269486988 | 0.762364001 | -0.353488606 | 0.723722169 | 0.999371363 | Not Sig |
| ENSG00000116815 | CD58     | CD58 molecule                                                                    | 965    | 339.3006778 | -0.269300964 | 0.726882463 | -0.370487634 | 0.711019188 | 0.999371363 | Not Sig |
| ENSG00000214655 | ZSWIM8   | zinc finger SWIM-type containing 8                                               | 23053  | 2175.872401 | -0.269246676 | 0.493913304 | -0.545129426 | 0.585664505 | 0.999371363 | Not Sig |
| ENSG00000113739 | STC2     | stanniocalcin 2                                                                  | 8614   | 188.3482268 | -0.269241839 | 0.622891753 | -0.432244988 | 0.665563365 | 0.999371363 | Not Sig |
| ENSG00000132824 | SERINC3  | serine incorporator 3                                                            | 10955  | 3097.655998 | -0.269155316 | 0.452354951 | -0.595009107 | 0.551837383 | 0.999371363 | Not Sig |
| ENSG00000143633 | C1orf131 | chromosome 1 open reading frame 131                                              | 128061 | 211.9296635 | -0.269151458 | 0.552292596 | -0.487334902 | 0.626021018 | 0.999371363 | Not Sig |
| ENSG00000100055 | CYTH4    | cytohesin 4                                                                      | 27128  | 810.2279156 | -0.269149206 | 0.768516719 | -0.350219064 | 0.726174301 | 0.999371363 | Not Sig |
| ENSG00000114520 | SNX4     | sorting nexin 4                                                                  | 8723   | 727.8767097 | -0.269072345 | 0.512443033 | -0.525077574 | 0.599529265 | 0.999371363 | Not Sig |
| ENSG00000205436 | EXOC3L4  | exocyst complex component 3 like 4                                               | 91828  | 93.1807415  | -0.268991339 | 0.89961557  | -0.299006985 | 0.764934716 | 0.999371363 | Not Sig |
| ENSG00000166575 | TMEM135  | transmembrane protein 135                                                        | 65084  | 611.9241845 | -0.268986835 | 0.658425014 | -0.408530705 | 0.682884093 | 0.999371363 | Not Sig |
| ENSG00000168884 | TNIP2    | TNFAIP3 interacting protein 2                                                    | 79155  | 711.4258075 | -0.268963433 | 0.598661066 | -0.449274971 | 0.65323331  | 0.999371363 | Not Sig |
| ENSG00000145431 | PDGFC    | platelet derived growth factor C                                                 | 56034  | 995.2159784 | -0.268568481 | 0.509714984 | -0.526899326 | 0.598263502 | 0.999371363 | Not Sig |
| ENSG00000237950 | NA       | NA                                                                               | NA     | 10.24752809 | -0.268553085 | 0.978343172 | -0.274497838 | 0.783702065 | 0.999371363 | Not Sig |
| ENSG00000152661 | GJA1     | gap junction protein alpha 1                                                     | 2697   | 2800.955489 | -0.268488164 | 0.74049035  | -0.362581584 | 0.716917469 | 0.999371363 | Not Sig |
| ENSG00000143878 | RHOB     | ras homolog family member B                                                      | 388    | 9256.005541 | -0.268461761 | 0.569846455 | -0.471112452 | 0.637560433 | 0.999371363 | Not Sig |
| ENSG00000167264 | DUS2     | dihydrouridine synthase 2                                                        | 54920  | 237.5800557 | -0.268302211 | 0.424906577 | -0.631438122 | 0.527754097 | 0.999371363 | Not Sig |
| ENSG00000152291 | TGOLN2   | trans-golgi network protein 2                                                    | 10618  | 7611.210415 | -0.268082381 | 0.437913768 | -0.612180755 | 0.540418173 | 0.999371363 | Not Sig |
| ENSG00000070718 | AP3M2    | adaptor related protein complex 3 mu 2 subunit                                   | 10947  | 467.5776239 | -0.268016636 | 0.558456947 | -0.479923541 | 0.631281761 | 0.999371363 | Not Sig |
| ENSG00000050820 | BCAR1    | BCAR1, Cas family scaffolding protein                                            | 9564   | 2127.936536 | -0.26791954  | 0.577663048 | -0.463798993 | 0.642791765 | 0.999371363 | Not Sig |
| ENSG00000155130 | NA       | NA                                                                               | NA     | 5430.270239 | -0.267906164 | 0.547654893 | -0.48918793  | 0.624708654 | 0.999371363 | Not Sig |
| ENSG00000233175 | NA       | NA                                                                               | NA     | 22.45440341 | -0.267692595 | 0.792435442 | -0.337809973 | 0.735506394 | 0.999371363 | Not Sig |
| ENSG00000259407 | NA       | NA                                                                               | NA     | 12.70592955 | -0.267625458 | 0.813895208 | -0.328820535 | 0.742291341 | 0.999371363 | Not Sig |

|                 |              |                                                                        |           |             |              |             |              |             |             |         |
|-----------------|--------------|------------------------------------------------------------------------|-----------|-------------|--------------|-------------|--------------|-------------|-------------|---------|
| ENSG00000150787 | PTS          | 6-pyruvoyltetrahydropterin synthase                                    | 5805      | 240.1415365 | -0.267422558 | 0.564088021 | -0.474079485 | 0.635443228 | 0.999371363 | Not Sig |
| ENSG00000126746 | ZNF384       | zinc finger protein 384                                                | 171017    | 864.2574617 | -0.267293375 | 0.408558698 | -0.65423494  | 0.512960454 | 0.999371363 | Not Sig |
| ENSG00000255529 | POLR2M       | RNA polymerase II subunit M                                            | 81488     | 430.3672817 | -0.267154031 | 0.614595381 | -0.434682784 | 0.663792697 | 0.999371363 | Not Sig |
| ENSG00000130713 | EXOSC2       | exosome component 2                                                    | 23404     | 398.0800325 | -0.267058051 | 0.45222833  | -0.590538082 | 0.554829962 | 0.999371363 | Not Sig |
| ENSG00000164091 | WDR82        | WD repeat domain 82                                                    | 80335     | 2442.671469 | -0.266897189 | 0.391487444 | -0.681751594 | 0.495396037 | 0.999371363 | Not Sig |
| ENSG00000188177 | ZC3H6        | zinc finger CCH-type containing 6                                      | 376940    | 1312.731075 | -0.266869759 | 0.579151145 | -0.460794667 | 0.644945928 | 0.999371363 | Not Sig |
| ENSG00000196526 | AFAP1        | actin filament associated protein 1                                    | 60312     | 1505.568258 | -0.266789329 | 0.492561053 | -0.541637076 | 0.588068545 | 0.999371363 | Not Sig |
| ENSG00000165507 | DEPP1        | DEPP1, autophagy regulator                                             | 11067     | 3194.892074 | -0.26668752  | 0.836103015 | -0.318964907 | 0.749753124 | 0.999371363 | Not Sig |
| ENSG00000153094 | BCL2L11      | BCL2 like 11                                                           | 10018     | 964.5807145 | -0.266589462 | 0.509703134 | -0.523028885 | 0.600954152 | 0.999371363 | Not Sig |
| ENSG00000152422 | XRCC4        | X-ray repair cross complementing 4                                     | 7518      | 200.2974175 | -0.266473634 | 0.598468299 | -0.445259396 | 0.656132307 | 0.999371363 | Not Sig |
| ENSG00000261544 | NA           | NA                                                                     | NA        | 45.12760159 | -0.266449917 | 0.915810192 | -0.290944477 | 0.771093784 | 0.999371363 | Not Sig |
| ENSG00000102738 | MRPS31       | mitochondrial ribosomal protein S31                                    | 10240     | 304.40212   | -0.266345638 | 0.527783916 | -0.504649024 | 0.613805371 | 0.999371363 | Not Sig |
| ENSG00000108107 | RPL28        | ribosomal protein L28                                                  | 6158      | 4681.392327 | -0.266209749 | 0.417886129 | -0.637038971 | 0.52409946  | 0.999371363 | Not Sig |
| ENSG00000012983 | MAP4K5       | mitogen-activated protein kinase kinase kinase 5                       | 11183     | 1646.436532 | -0.266148837 | 0.552291746 | -0.481898993 | 0.629877701 | 0.999371363 | Not Sig |
| ENSG00000231395 | NA           | NA                                                                     | NA        | 0.985352075 | -0.266126424 | 2.607323777 | -0.102068806 | 0.918702061 | NA          | NA      |
| ENSG00000253848 | LOC105375645 | uncharacterized LOC105375645                                           | 105375645 | 0.985352075 | -0.266126424 | 2.607323777 | -0.102068806 | 0.918702061 | NA          | NA      |
| ENSG00000103769 | RAB11A       | RAB11A, member RAS oncogene family                                     | 8766      | 2295.462094 | -0.265887859 | 0.49443971  | -0.537755875 | 0.590745598 | 0.999371363 | Not Sig |
| ENSG00000204971 | NA           | NA                                                                     | NA        | 1.735399467 | -0.26581898  | 2.164944261 | -0.12278329  | 0.902278706 | NA          | NA      |
| ENSG00000248008 | NRAV         | negative regulator of antiviral response (non-protein coding)          | 100506668 | 172.9301779 | -0.265759498 | 0.428150729 | -0.620714809 | 0.534787284 | 0.999371363 | Not Sig |
| ENSG00000068024 | HDAC4        | histone deacetylase 4                                                  | 9759      | 1247.46519  | -0.265675414 | 0.580683445 | -0.457521936 | 0.647295939 | 0.999371363 | Not Sig |
| ENSG00000157827 | FMNL2        | formin like 2                                                          | 114793    | 2482.874062 | -0.265621795 | 0.427708859 | -0.621034119 | 0.534577174 | 0.999371363 | Not Sig |
| ENSG00000150990 | DHX37        | DEAH-box helicase 37                                                   | 57647     | 607.8508981 | -0.265587581 | 0.459691554 | -0.577751708 | 0.563431763 | 0.999371363 | Not Sig |
| ENSG00000163946 | FAM208A      | family with sequence similarity 208 member A                           | 23272     | 2874.975195 | -0.26533645  | 0.557831381 | -0.475657087 | 0.634318698 | 0.999371363 | Not Sig |
| ENSG00000126883 | NUP214       | nucleoporin 214                                                        | 8021      | 1989.216052 | -0.265336019 | 0.397866708 | -0.666896761 | 0.50483808  | 0.999371363 | Not Sig |
| ENSG00000226332 | NA           | NA                                                                     | NA        | 36.4539742  | -0.265303039 | 0.840127402 | -0.315789055 | 0.752162626 | 0.999371363 | Not Sig |
| ENSG00000196951 | SCOC-AS1     | SCOC antisense RNA 1                                                   | 100129858 | 10.09908251 | -0.265227347 | 1.055701745 | -0.251233218 | 0.801633804 | 0.999371363 | Not Sig |
| ENSG00000163002 | NUP35        | nucleoporin 35                                                         | 129401    | 216.5492413 | -0.265217526 | 0.643712085 | -0.412012656 | 0.680330147 | 0.999371363 | Not Sig |
| ENSG00000164332 | UBLCP1       | ubiquitin like domain containing CTD phosphatase 1                     | 134510    | 623.3201747 | -0.265072224 | 0.581619668 | -0.455748384 | 0.648570925 | 0.999371363 | Not Sig |
| ENSG00000168214 | RBPJ         | recombination signal binding protein for immunoglobulin kappa J region | 3516      | 2671.187827 | -0.264945643 | 0.559515928 | -0.473526543 | 0.635837568 | 0.999371363 | Not Sig |
| ENSG00000086062 | B4GALT1      | beta-1,4-galactosyltransferase 1                                       | 2683      | 4074.677983 | -0.264915994 | 0.499344054 | -0.530527984 | 0.595745912 | 0.999371363 | Not Sig |
| ENSG00000136937 | NCBP1        | nuclear cap binding protein subunit 1                                  | 4686      | 998.6997674 | -0.264833304 | 0.494340097 | -0.535730978 | 0.592144491 | 0.999371363 | Not Sig |
| ENSG00000152409 | JMY          | junction mediating and regulatory protein, p53 cofactor                | 133746    | 1185.881189 | -0.264794595 | 0.47862783  | -0.553236938 | 0.580101177 | 0.999371363 | Not Sig |
| ENSG00000133706 | LARS         | leucyl-tRNA synthetase                                                 | 51520     | 2390.706124 | -0.264737927 | 0.499953195 | -0.529525422 | 0.596441014 | 0.999371363 | Not Sig |
| ENSG00000213953 | NA           | NA                                                                     | NA        | 13.99585011 | -0.264722086 | 0.981958059 | -0.26958594  | 0.787478818 | 0.999371363 | Not Sig |
| ENSG00000118596 | SLC16A7      | solute carrier family 16 member 7                                      | 9194      | 593.2065994 | -0.264613522 | 0.747149222 | -0.354164221 | 0.723215816 | 0.999371363 | Not Sig |

|                 |         |                                                                        |        |             |              |             |              |             |             |         |
|-----------------|---------|------------------------------------------------------------------------|--------|-------------|--------------|-------------|--------------|-------------|-------------|---------|
| ENSG00000197506 | SLC28A3 | solute carrier family 28 member 3                                      | 64078  | 96.62585123 | -0.264500263 | 0.981056819 | -0.269607486 | 0.78746224  | 0.999371363 | Not Sig |
| ENSG00000038219 | BOD1L1  | biorientation of chromosomes in cell division 1 like 1                 | 259282 | 3630.41978  | -0.264360973 | 0.420494837 | -0.628690175 | 0.529551912 | 0.999371363 | Not Sig |
| ENSG00000109171 | SLAIN2  | SLAIN motif family member 2                                            | 57606  | 1705.097062 | -0.264243865 | 0.487488603 | -0.542051369 | 0.587783119 | 0.999371363 | Not Sig |
| ENSG00000065357 | DGKA    | diacylglycerol kinase alpha                                            | 1606   | 710.6059761 | -0.264123775 | 0.538056448 | -0.49088488  | 0.623507872 | 0.999371363 | Not Sig |
| ENSG00000173402 | DAG1    | dystroglycan 1                                                         | 1605   | 3505.619123 | -0.263911424 | 0.510202742 | -0.517267749 | 0.604969264 | 0.999371363 | Not Sig |
| ENSG00000176208 | ATAD5   | ATPase family, AAA domain containing 5                                 | 79915  | 277.6151114 | -0.263895905 | 0.928721212 | -0.284149755 | 0.776295619 | 0.999371363 | Not Sig |
| ENSG00000188785 | ZNF548  | zinc finger protein 548                                                | 147694 | 305.3103397 | -0.263711199 | 0.413078522 | -0.638404528 | 0.523210384 | 0.999371363 | Not Sig |
| ENSG00000259378 | NA      | NA                                                                     | NA     | 25.23965755 | -0.263675259 | 0.712858429 | -0.369884465 | 0.711468577 | 0.999371363 | Not Sig |
| ENSG00000107371 | EXOSC3  | exosome component 3                                                    | 51010  | 248.2390901 | -0.263629892 | 0.490609333 | -0.537351971 | 0.591024512 | 0.999371363 | Not Sig |
| ENSG00000261644 | NA      | NA                                                                     | NA     | 10.76775509 | -0.26355261  | 1.18103936  | -0.223153113 | 0.823416342 | 0.999371363 | Not Sig |
| ENSG00000183621 | ZNF438  | zinc finger protein 438                                                | 220929 | 364.120896  | -0.263547341 | 0.438265004 | -0.601342426 | 0.547611937 | 0.999371363 | Not Sig |
| ENSG00000173914 | RBM4B   | RNA binding motif protein 4B                                           | 83759  | 263.4496816 | -0.263540365 | 0.493233049 | -0.534312056 | 0.593125652 | 0.999371363 | Not Sig |
| ENSG00000083814 | ZNF671  | zinc finger protein 671                                                | 79891  | 168.1025901 | -0.263525818 | 0.55243808  | -0.477023268 | 0.633345553 | 0.999371363 | Not Sig |
| ENSG00000079805 | DNM2    | dynamain 2                                                             | 1785   | 3976.91412  | -0.263522291 | 0.573184044 | -0.459751616 | 0.645694516 | 0.999371363 | Not Sig |
| ENSG00000200154 | NA      | NA                                                                     | NA     | 8.819436961 | -0.263497774 | 0.975928297 | -0.269997063 | 0.787162513 | 0.999371363 | Not Sig |
| ENSG00000189164 | ZNF527  | zinc finger protein 527                                                | 84503  | 154.4463687 | -0.263405688 | 0.468931746 | -0.561714344 | 0.57431066  | 0.999371363 | Not Sig |
| ENSG00000180921 | FAM83H  | family with sequence similarity 83 member H                            | 286077 | 2851.166442 | -0.263360735 | 0.624946691 | -0.42141312  | 0.673453441 | 0.999371363 | Not Sig |
| ENSG00000101639 | CEP192  | centrosomal protein 192                                                | 55125  | 1803.192231 | -0.263343182 | 0.499738531 | -0.526961932 | 0.598220025 | 0.999371363 | Not Sig |
| ENSG00000188313 | PLSCR1  | phospholipid scramblase 1                                              | 5359   | 1892.006598 | -0.263282478 | 0.550731861 | -0.478059282 | 0.632608012 | 0.999371363 | Not Sig |
| ENSG00000244384 | NA      | NA                                                                     | NA     | 2.949203682 | -0.263248914 | 1.607347666 | -0.163778453 | 0.869905555 | NA          | NA      |
| ENSG00000197223 | C1D     | C1D nuclear receptor corepressor                                       | 10438  | 291.546715  | -0.263057359 | 0.652166788 | -0.403359024 | 0.686684126 | 0.999371363 | Not Sig |
| ENSG00000178035 | IMPDH2  | inosine monophosphate dehydrogenase 2                                  | 3615   | 1625.487551 | -0.263047853 | 0.457364576 | -0.575138231 | 0.565197814 | 0.999371363 | Not Sig |
| ENSG00000188312 | CENPP   | centromere protein P                                                   | 401541 | 136.111302  | -0.263044162 | 0.588493482 | -0.446978888 | 0.654890303 | 0.999371363 | Not Sig |
| ENSG00000167257 | RNF214  | ring finger protein 214                                                | 257160 | 600.0607294 | -0.263012022 | 0.476699686 | -0.551735253 | 0.581129753 | 0.999371363 | Not Sig |
| ENSG00000101955 | SRPX    | sushi repeat containing protein, X-linked                              | 8406   | 164.9463858 | -0.262926088 | 0.794332143 | -0.331002705 | 0.740642442 | 0.999371363 | Not Sig |
| ENSG00000006607 | FARP2   | FERM, ARH/RhoGEF and pleckstrin domain protein 2                       | 9855   | 1291.326099 | -0.262883484 | 0.414933649 | -0.633555472 | 0.526370968 | 0.999371363 | Not Sig |
| ENSG00000251664 | PCDHA12 | protocadherin alpha 12                                                 | 56137  | 160.9271536 | -0.262863606 | 0.872251426 | -0.301362197 | 0.763138317 | 0.999371363 | Not Sig |
| ENSG00000196367 | TRRAP   | transformation/transcription domain associated protein                 | 8295   | 4328.002549 | -0.262746252 | 0.436044924 | -0.602566932 | 0.546796824 | 0.999371363 | Not Sig |
| ENSG00000134996 | OSTF1   | osteoclast stimulating factor 1                                        | 26578  | 775.5661181 | -0.262669927 | 0.482077531 | -0.54487071  | 0.585842443 | 0.999371363 | Not Sig |
| ENSG00000166012 | TAF1D   | TATA-box binding protein associated factor, RNA polymerase I subunit D | 79101  | 1901.248621 | -0.262602131 | 0.683233615 | -0.38435189  | 0.700717653 | 0.999371363 | Not Sig |
| ENSG00000238098 | ABCA17P | ATP binding cassette subfamily A member 17, pseudogene                 | 650655 | 10.3931052  | -0.262581348 | 1.115959622 | -0.235296459 | 0.813978643 | 0.999371363 | Not Sig |
| ENSG00000251682 | NA      | NA                                                                     | NA     | 129.4613804 | -0.262565934 | 0.62411404  | -0.420701854 | 0.673972807 | 0.999371363 | Not Sig |
| ENSG00000241112 | NA      | NA                                                                     | NA     | 68.61663419 | -0.262333056 | 0.469624009 | -0.558602309 | 0.576433164 | 0.999371363 | Not Sig |
| ENSG00000235279 | NA      | NA                                                                     | NA     | 16.88726627 | -0.262177754 | 0.910331302 | -0.288002569 | 0.773344772 | 0.999371363 | Not Sig |
| ENSG00000101350 | KIF3B   | kinesin family member 3B                                               | 9371   | 1539.299235 | -0.262124375 | 0.464096363 | -0.564805925 | 0.572205777 | 0.999371363 | Not Sig |

|                 |           |                                                       |           |             |              |             |              |             |             |         |
|-----------------|-----------|-------------------------------------------------------|-----------|-------------|--------------|-------------|--------------|-------------|-------------|---------|
| ENSG00000156958 | GALK2     | galactokinase 2                                       | 2585      | 630.6346818 | -0.261729017 | 0.424749174 | -0.616196647 | 0.537764741 | 0.999371363 | Not Sig |
| ENSG00000024862 | CCDC28A   | coiled-coil domain containing 28A                     | 25901     | 384.9909348 | -0.261672275 | 0.528640152 | -0.494991299 | 0.620606262 | 0.999371363 | Not Sig |
| ENSG00000103248 | MTHFSD    | methenyltetrahydrofolate synthetase domain containing | 64779     | 425.1464905 | -0.261599109 | 0.424483207 | -0.616276696 | 0.537711917 | 0.999371363 | Not Sig |
| ENSG00000038382 | TRIO      | trio Rho guanine nucleotide exchange factor           | 7204      | 5625.276752 | -0.26146148  | 0.405186299 | -0.64528707  | 0.51874117  | 0.999371363 | Not Sig |
| ENSG00000187605 | TET3      | tet methylcytosine dioxygenase 3                      | 200424    | 1528.315005 | -0.261429158 | 0.419119268 | -0.623758386 | 0.532786273 | 0.999371363 | Not Sig |
| ENSG00000239884 | NA        | NA                                                    | NA        | 21.88611754 | -0.261344489 | 0.730970634 | -0.357530763 | 0.7206945   | 0.999371363 | Not Sig |
| ENSG00000181788 | SIAH2     | siah E3 ubiquitin protein ligase 2                    | 6478      | 497.5174843 | -0.261310335 | 0.396003857 | -0.659868157 | 0.50933844  | 0.999371363 | Not Sig |
| ENSG00000239523 | MYLK-AS1  | MYLK antisense RNA 1                                  | 100506826 | 18.27462858 | -0.26130469  | 0.686266254 | -0.380762843 | 0.703379233 | 0.999371363 | Not Sig |
| ENSG00000243353 | NA        | NA                                                    | NA        | 2.131078026 | -0.261007037 | 1.844568108 | -0.141500352 | 0.887474682 | NA          | NA      |
| ENSG00000213694 | S1PR3     | sphingosine-1-phosphate receptor 3                    | 1903      | 273.5009354 | -0.261005872 | 0.428285309 | -0.609420557 | 0.542245715 | 0.999371363 | Not Sig |
| ENSG00000165832 | TRUB1     | TruB pseudouridine synthase family member 1           | 142940    | 373.914789  | -0.261004204 | 0.513017276 | -0.508762991 | 0.610918363 | 0.999371363 | Not Sig |
| ENSG00000172954 | LCLAT1    | lysocardiolipin acyltransferase 1                     | 253558    | 666.2058824 | -0.260929596 | 0.522975434 | -0.498932797 | 0.617826728 | 0.999371363 | Not Sig |
| ENSG00000102606 | ARHGEF7   | Rho guanine nucleotide exchange factor 7              | 8874      | 1959.803614 | -0.260922185 | 0.39141374  | -0.666614783 | 0.505018224 | 0.999371363 | Not Sig |
| ENSG00000171169 | NAIF1     | nuclear apoptosis inducing factor 1                   | 203245    | 165.7161307 | -0.260794336 | 0.617481732 | -0.422351501 | 0.672768472 | 0.999371363 | Not Sig |
| ENSG00000149657 | LSM14B    | LSM family member 14B                                 | 149986    | 1023.061205 | -0.260745721 | 0.444289536 | -0.586882426 | 0.557282674 | 0.999371363 | Not Sig |
| ENSG00000139178 | C1RL      | complement C1r subcomponent like                      | 51279     | 1830.912804 | -0.260717451 | 0.485300867 | -0.537228488 | 0.591109795 | 0.999371363 | Not Sig |
| ENSG00000154096 | THY1      | Thy-1 cell surface antigen                            | 7070      | 663.4112757 | -0.260650444 | 0.589964697 | -0.44180685  | 0.658628981 | 0.999371363 | Not Sig |
| ENSG00000200795 | RNU4-1    | RNA, U4 small nuclear 1                               | 26835     | 11.70743121 | -0.260469142 | 0.782455478 | -0.332886854 | 0.739219693 | 0.999371363 | Not Sig |
| ENSG00000241420 | NA        | NA                                                    | NA        | 9.183797195 | -0.260387361 | 0.984158669 | -0.264578639 | 0.791334077 | 0.999371363 | Not Sig |
| ENSG00000272330 | NA        | NA                                                    | NA        | 10.86612993 | -0.260190611 | 0.97266522  | -0.267502739 | 0.789082105 | 0.999371363 | Not Sig |
| ENSG00000229927 | NA        | NA                                                    | NA        | 1.062320245 | -0.259964035 | 2.29377679  | -0.113334495 | 0.90976537  | NA          | NA      |
| ENSG00000242952 | NA        | NA                                                    | NA        | 1.062320245 | -0.259964035 | 2.29377679  | -0.113334495 | 0.90976537  | NA          | NA      |
| ENSG00000135968 | GCC2      | GRIP and coiled-coil domain containing 2              | 9648      | 2818.192464 | -0.259686745 | 0.583972225 | -0.444690234 | 0.656543628 | 0.999371363 | Not Sig |
| ENSG00000159399 | HK2       | hexokinase 2                                          | 3099      | 1810.353819 | -0.259538823 | 0.493589809 | -0.525818844 | 0.599014081 | 0.999371363 | Not Sig |
| ENSG00000134283 | PPHLN1    | periphilin 1                                          | 51535     | 865.1500111 | -0.259463227 | 0.571320768 | -0.454146325 | 0.649723512 | 0.999371363 | Not Sig |
| ENSG00000185246 | PRPF39    | pre-mRNA processing factor 39                         | 55015     | 681.8100473 | -0.259235111 | 0.584680483 | -0.443379107 | 0.657491545 | 0.999371363 | Not Sig |
| ENSG00000167984 | NLRC3     | NLR family CARD domain containing 3                   | 197358    | 376.144543  | -0.259142008 | 0.71456956  | -0.362654698 | 0.716862845 | 0.999371363 | Not Sig |
| ENSG00000116962 | NID1      | nidogen 1                                             | 4811      | 2027.72699  | -0.258949381 | 0.480119773 | -0.539343295 | 0.58965     | 0.999371363 | Not Sig |
| ENSG00000204856 | FAM216A   | family with sequence similarity 216 member A          | 29902     | 41.70911345 | -0.258492545 | 0.663338879 | -0.389683995 | 0.696770233 | 0.999371363 | Not Sig |
| ENSG00000076248 | UNG       | uracil DNA glycosylase                                | 7374      | 397.1474081 | -0.258449742 | 0.504905947 | -0.511877001 | 0.608737095 | 0.999371363 | Not Sig |
| ENSG00000233514 | NA        | NA                                                    | NA        | 0.652471357 | -0.258143101 | 2.978556616 | -0.08666718  | 0.930936065 | NA          | NA      |
| ENSG00000269177 | NA        | NA                                                    | NA        | 0.652471357 | -0.258143101 | 2.978556616 | -0.08666718  | 0.930936065 | NA          | NA      |
| ENSG00000262587 | LOC554206 | leucine carboxyl methyltransferase 1 pseudogene       | 554206    | 20.57414962 | -0.258069014 | 0.986190061 | -0.261682838 | 0.793565973 | 0.999371363 | Not Sig |
| ENSG00000222297 | NA        | NA                                                    | NA        | 2.715731409 | -0.25801692  | 1.737018328 | -0.148540125 | 0.881916522 | NA          | NA      |
| ENSG00000211904 | NA        | NA                                                    | NA        | 2.545642995 | -0.257990198 | 2.087088689 | -0.123612475 | 0.901622115 | NA          | NA      |



|                 |          |                                                                        |        |             |              |             |              |             |             |         |
|-----------------|----------|------------------------------------------------------------------------|--------|-------------|--------------|-------------|--------------|-------------|-------------|---------|
| ENSG00000177855 | NA       | NA                                                                     | NA     | 4.292478455 | -0.257676154 | 1.267403392 | -0.203310292 | 0.838892512 | NA          | NA      |
| ENSG00000172171 | TEFM     | transcription elongation factor, mitochondrial                         | 79736  | 181.9789501 | -0.257663389 | 0.568944845 | -0.452879381 | 0.650635599 | 0.999371363 | Not Sig |
| ENSG00000121879 | PIK3CA   | phosphatidylinositol-4,5-bisphosphate 3-kinase catalytic subunit alpha | 5290   | 1419.814746 | -0.257593976 | 0.466050836 | -0.552716476 | 0.580457569 | 0.999371363 | Not Sig |
| ENSG00000105939 | ZC3HAV1  | zinc finger CCCH-type containing, antiviral 1                          | 56829  | 2378.865332 | -0.257396098 | 0.430163428 | -0.598368158 | 0.549594307 | 0.999371363 | Not Sig |
| ENSG00000171163 | ZNF692   | zinc finger protein 692                                                | 55657  | 513.6612667 | -0.257286029 | 0.602455005 | -0.427062647 | 0.669333698 | 0.999371363 | Not Sig |
| ENSG00000170113 | NIPA1    | non imprinted in Prader-Willi/Angelman syndrome 1                      | 123606 | 793.0059605 | -0.257165747 | 0.515485299 | -0.498880856 | 0.617863322 | 0.999371363 | Not Sig |
| ENSG00000185049 | NELFA    | negative elongation factor complex member A                            | 7469   | 672.9289968 | -0.256998352 | 0.439198369 | -0.585153248 | 0.558444678 | 0.999371363 | Not Sig |
| ENSG00000207231 | NA       | NA                                                                     | NA     | 4.920500603 | -0.256914943 | 1.572188979 | -0.163412253 | 0.870193856 | NA          | NA      |
| ENSG00000166313 | APBB1    | amyloid beta precursor protein binding family B member 1               | 322    | 675.4030697 | -0.256913947 | 0.823772219 | -0.311874984 | 0.755135535 | 0.999371363 | Not Sig |
| ENSG00000204120 | GIGYF2   | GRB10 interacting GYF protein 2                                        | 26058  | 2992.291906 | -0.256856037 | 0.438481997 | -0.585784682 | 0.558020219 | 0.999371363 | Not Sig |
| ENSG00000183474 | GTF2H2C  | GTF2H2 family member C                                                 | 728340 | 212.3660127 | -0.256836847 | 0.551867704 | -0.465395683 | 0.641648125 | 0.999371363 | Not Sig |
| ENSG00000129048 | ACKR4    | atypical chemokine receptor 4                                          | 51554  | 46.72425943 | -0.256776689 | 1.043663123 | -0.246034073 | 0.805655856 | 0.999371363 | Not Sig |
| ENSG00000165699 | TSC1     | TSC complex subunit 1                                                  | 7248   | 1409.974858 | -0.256776158 | 0.426497257 | -0.60205817  | 0.547135418 | 0.999371363 | Not Sig |
| ENSG00000167693 | NXN      | nucleoredoxin                                                          | 64359  | 1322.225097 | -0.256603359 | 0.668659201 | -0.383758062 | 0.701157774 | 0.999371363 | Not Sig |
| ENSG00000227694 | NA       | NA                                                                     | NA     | 8.389107456 | -0.256528398 | 0.940354532 | -0.272799661 | 0.78500722  | 0.999371363 | Not Sig |
| ENSG00000154727 | GABPA    | GA binding protein transcription factor alpha subunit                  | 2551   | 860.0660882 | -0.256484125 | 0.548483341 | -0.467624276 | 0.640053302 | 0.999371363 | Not Sig |
| ENSG00000158545 | ZC3H18   | zinc finger CCCH-type containing 18                                    | 124245 | 1419.837785 | -0.256465058 | 0.488729479 | -0.524758725 | 0.599750928 | 0.999371363 | Not Sig |
| ENSG00000226329 | NA       | NA                                                                     | NA     | 5.224348792 | -0.256395494 | 1.298680624 | -0.197427673 | 0.843492876 | NA          | NA      |
| ENSG00000154710 | RABGEF1  | RAB guanine nucleotide exchange factor 1                               | 27342  | 106.4719803 | -0.256285522 | 0.601317693 | -0.426206522 | 0.669957366 | 0.999371363 | Not Sig |
| ENSG00000213090 | NA       | NA                                                                     | NA     | 52.8294578  | -0.256261901 | 0.573344955 | -0.446959372 | 0.654904395 | 0.999371363 | Not Sig |
| ENSG00000254364 | NA       | NA                                                                     | NA     | 2.579104255 | -0.256240286 | 2.105467038 | -0.12170235  | 0.903134752 | NA          | NA      |
| ENSG00000231787 | NA       | NA                                                                     | NA     | 1.499214534 | -0.256203747 | 2.307750073 | -0.111018845 | 0.911601403 | NA          | NA      |
| ENSG00000218422 | NA       | NA                                                                     | NA     | 25.42909115 | -0.256034923 | 0.66127531  | -0.387183551 | 0.698620327 | 0.999371363 | Not Sig |
| ENSG00000260865 | NA       | NA                                                                     | NA     | 20.06968761 | -0.255981701 | 0.905341282 | -0.282746083 | 0.777371488 | 0.999371363 | Not Sig |
| ENSG00000115808 | STRN     | striatin                                                               | 6801   | 1568.782447 | -0.255927726 | 0.477533937 | -0.535936206 | 0.592002641 | 0.999371363 | Not Sig |
| ENSG00000173960 | UBXN2A   | UBX domain protein 2A                                                  | 165324 | 449.0069991 | -0.255903626 | 0.401058367 | -0.638070783 | 0.523427604 | 0.999371363 | Not Sig |
| ENSG00000122696 | SLC25A51 | solute carrier family 25 member 51                                     | 92014  | 278.8279125 | -0.255836705 | 0.523096209 | -0.489081551 | 0.624783962 | 0.999371363 | Not Sig |
| ENSG00000185900 | POMK     | protein-O-mannose kinase                                               | 84197  | 373.5862317 | -0.255783807 | 0.445941078 | -0.573582072 | 0.566250646 | 0.999371363 | Not Sig |
| ENSG00000187266 | EPOR     | erythropoietin receptor                                                | 2057   | 229.8977063 | -0.255632061 | 0.592101362 | -0.431736993 | 0.665932578 | 0.999371363 | Not Sig |
| ENSG00000213104 | NA       | NA                                                                     | NA     | 1.295488466 | -0.255527018 | 2.388374787 | -0.106987823 | 0.91479864  | NA          | NA      |
| ENSG00000115421 | PAPOLG   | poly(A) polymerase gamma                                               | 64895  | 587.9426236 | -0.255447543 | 0.550309592 | -0.46418879  | 0.642512492 | 0.999371363 | Not Sig |
| ENSG00000152944 | MED21    | mediator complex subunit 21                                            | 9412   | 414.5292003 | -0.255323426 | 0.456585043 | -0.559202344 | 0.576023634 | 0.999371363 | Not Sig |
| ENSG00000174715 | NA       | NA                                                                     | NA     | 5.976399605 | -0.255304695 | 1.104833564 | -0.231079778 | 0.817252825 | NA          | NA      |
| ENSG00000134533 | RERG     | RAS like estrogen regulated growth inhibitor                           | 85004  | 307.8195664 | -0.255224939 | 0.509656458 | -0.500778387 | 0.616527098 | 0.999371363 | Not Sig |
| ENSG00000185551 | NR2F2    | nuclear receptor subfamily 2 group F member 2                          | 7026   | 1885.987995 | -0.255223288 | 0.584640412 | -0.436547461 | 0.662439572 | 0.999371363 | Not Sig |

|                 |            |                                                             |           |             |              |             |              |             |             |         |
|-----------------|------------|-------------------------------------------------------------|-----------|-------------|--------------|-------------|--------------|-------------|-------------|---------|
| ENSG00000070010 | UFD1       | ubiquitin recognition factor in ER associated degradation 1 | 7353      | 790.6788162 | -0.25521476  | 0.483074067 | -0.528313932 | 0.597281463 | 0.999371363 | Not Sig |
| ENSG00000232352 | SEMA3B-AS1 | SEMA3B antisense RNA 1 (head to head)                       | 101928931 | 10.97124942 | -0.254947169 | 1.220396687 | -0.208905163 | 0.834522273 | 0.999371363 | Not Sig |
| ENSG00000182919 | C11orf54   | chromosome 11 open reading frame 54                         | 28970     | 856.8871858 | -0.254841942 | 0.465893783 | -0.546995799 | 0.584381618 | 0.999371363 | Not Sig |
| ENSG00000216099 | MIR889     | microRNA 889                                                | 100126345 | 1.31138025  | -0.254745898 | 2.38447289  | -0.106835309 | 0.914919635 | NA          | NA      |
| ENSG00000121440 | PDZRN3     | PDZ domain containing ring finger 3                         | 23024     | 492.8182686 | -0.254422496 | 0.634899679 | -0.400728658 | 0.688619909 | 0.999371363 | Not Sig |
| ENSG00000176095 | IP6K1      | inositol hexakisphosphate kinase 1                          | 9807      | 1392.114283 | -0.254258005 | 0.486177487 | -0.52297363  | 0.600992604 | 0.999371363 | Not Sig |
| ENSG00000099338 | CATSPERG   | cation channel sperm associated auxiliary subunit gamma     | 57828     | 131.1826674 | -0.254051937 | 0.578754548 | -0.43896318  | 0.660688216 | 0.999371363 | Not Sig |
| ENSG00000160752 | FDPS       | farnesyl diphosphate synthase                               | 2224      | 1848.534042 | -0.25394715  | 0.559681046 | -0.453735483 | 0.650019224 | 0.999371363 | Not Sig |
| ENSG00000138495 | COX17      | COX17, cytochrome c oxidase copper chaperone                | 10063     | 421.9533059 | -0.253745131 | 0.470139721 | -0.539722809 | 0.589388208 | 0.999371363 | Not Sig |
| ENSG00000236869 | NA         | NA                                                          | NA        | 5.007614611 | -0.25370084  | 1.126402438 | -0.225231082 | 0.82179951  | NA          | NA      |
| ENSG00000186812 | ZNF397     | zinc finger protein 397                                     | 84307     | 723.0133592 | -0.253693557 | 0.414398659 | -0.61219686  | 0.540407519 | 0.999371363 | Not Sig |
| ENSG00000069535 | MAOB       | monoamine oxidase B                                         | 4129      | 571.9378981 | -0.253457846 | 0.91100987  | -0.278216355 | 0.780846281 | 0.999371363 | Not Sig |
| ENSG00000139436 | GIT2       | GIT ArfGAP 2                                                | 9815      | 1510.415995 | -0.253301336 | 0.445025314 | -0.569184108 | 0.569231204 | 0.999371363 | Not Sig |
| ENSG00000110851 | PRDM4      | PR/SET domain 4                                             | 11108     | 793.841124  | -0.253295201 | 0.474333604 | -0.534002226 | 0.593339994 | 0.999371363 | Not Sig |
| ENSG00000158985 | CDC42SE2   | CDC42 small effector 2                                      | 56990     | 1895.53604  | -0.252705422 | 0.638277893 | -0.395917554 | 0.692165851 | 0.999371363 | Not Sig |
| ENSG00000135956 | TMEM127    | transmembrane protein 127                                   | 55654     | 2381.306996 | -0.252237661 | 0.489265304 | -0.515543731 | 0.606173119 | 0.999371363 | Not Sig |
| ENSG00000238403 | NA         | NA                                                          | NA        | 7.969129022 | -0.2521745   | 0.905641582 | -0.278448456 | 0.780668127 | 0.999371363 | Not Sig |
| ENSG00000132823 | OSER1      | oxidative stress responsive serine rich 1                   | 51526     | 362.2060827 | -0.252152523 | 0.446692022 | -0.564488532 | 0.572421703 | 0.999371363 | Not Sig |
| ENSG00000179082 | NA         | NA                                                          | NA        | 51.11578611 | -0.252033533 | 0.829208121 | -0.303944843 | 0.761169913 | 0.999371363 | Not Sig |
| ENSG00000128683 | GAD1       | glutamate decarboxylase 1                                   | 2571      | 111.7576293 | -0.251893948 | 1.169032591 | -0.215472135 | 0.829399235 | 0.999371363 | Not Sig |
| ENSG00000100811 | YY1        | YY1 transcription factor                                    | 7528      | 2788.427727 | -0.251821847 | 0.38553289  | -0.653178636 | 0.513641121 | 0.999371363 | Not Sig |
| ENSG00000144815 | NXPE3      | neurexophilin and PC-esterase domain family member 3        | 91775     | 561.392495  | -0.251819673 | 0.721984908 | -0.348788001 | 0.727248472 | 0.999371363 | Not Sig |
| ENSG00000106803 | SEC61B     | Sec61 translocon beta subunit                               | 10952     | 622.1069212 | -0.251800953 | 0.513143906 | -0.490702414 | 0.623636939 | 0.999371363 | Not Sig |
| ENSG00000119707 | RBM25      | RNA binding motif protein 25                                | 58517     | 3493.83871  | -0.251698175 | 0.529008626 | -0.475792194 | 0.634222432 | 0.999371363 | Not Sig |
| ENSG00000118420 | UBE3D      | ubiquitin protein ligase E3D                                | 90025     | 175.9466176 | -0.25156891  | 0.543037251 | -0.463262712 | 0.64317607  | 0.999371363 | Not Sig |
| ENSG00000180817 | PPA1       | pyrophosphatase (inorganic) 1                               | 5464      | 1823.995646 | -0.251413934 | 0.444287184 | -0.56588158  | 0.571474284 | 0.999371363 | Not Sig |
| ENSG00000159884 | CCDC107    | coiled-coil domain containing 107                           | 203260    | 365.5136486 | -0.251384655 | 0.590648594 | -0.425607811 | 0.670393648 | 0.999371363 | Not Sig |
| ENSG00000199023 | MIR339     | microRNA 339                                                | 442907    | 4.99104753  | -0.251382824 | 1.252139456 | -0.200762641 | 0.840884177 | NA          | NA      |
| ENSG00000128595 | CALU       | calumenin                                                   | 813       | 3761.841072 | -0.251020493 | 0.626465908 | -0.400692982 | 0.688646178 | 0.999371363 | Not Sig |
| ENSG00000163444 | TMEM183A   | transmembrane protein 183A                                  | 92703     | 913.9743704 | -0.251009214 | 0.403737269 | -0.621714251 | 0.534129779 | 0.999371363 | Not Sig |
| ENSG00000163444 | TMEM183B   | transmembrane protein 183B                                  | 653659    | 913.9743704 | -0.251009214 | 0.403737269 | -0.621714251 | 0.534129779 | 0.999371363 | Not Sig |
| ENSG00000077616 | NAALAD2    | N-acetylated alpha-linked acidic dipeptidase 2              | 10003     | 45.29556309 | -0.250594336 | 0.79995953  | -0.313258767 | 0.754084074 | 0.999371363 | Not Sig |
| ENSG00000185869 | ZNF829     | zinc finger protein 829                                     | 374899    | 82.15154566 | -0.250430728 | 0.606725273 | -0.412758028 | 0.679783905 | 0.999371363 | Not Sig |
| ENSG00000110330 | BIRC2      | baculoviral IAP repeat containing 2                         | 329       | 1406.608779 | -0.250250894 | 0.527765525 | -0.474170597 | 0.635378259 | 0.999371363 | Not Sig |
| ENSG00000224738 | NA         | NA                                                          | NA        | 7.201977396 | -0.250197615 | 1.15313255  | -0.216972121 | 0.828230072 | 0.999371363 | Not Sig |

|                 |           |                                                                             |           |             |              |             |              |             |             |         |
|-----------------|-----------|-----------------------------------------------------------------------------|-----------|-------------|--------------|-------------|--------------|-------------|-------------|---------|
| ENSG00000171456 | ASXL1     | additional sex combs like 1, transcriptional regulator                      | 171023    | 2674.592421 | -0.25014097  | 0.410820774 | -0.608881016 | 0.542603309 | 0.999371363 | Not Sig |
| ENSG00000125482 | TTF1      | transcription termination factor 1                                          | 7270      | 380.377436  | -0.249911584 | 0.449676037 | -0.555759177 | 0.578375496 | 0.999371363 | Not Sig |
| ENSG00000259744 | NA        | NA                                                                          | NA        | 1.615079105 | -0.249896938 | 1.930927604 | -0.129418078 | 0.897026844 | NA          | NA      |
| ENSG00000256294 | ZNF225    | zinc finger protein 225                                                     | 7768      | 153.2854959 | -0.249706109 | 0.453866822 | -0.550174847 | 0.582199454 | 0.999371363 | Not Sig |
| ENSG00000145685 | LHFPL2    | LHFPL tetraspan subfamily member 2                                          | 10184     | 1482.304832 | -0.249642982 | 0.48368577  | -0.516126373 | 0.605766149 | 0.999371363 | Not Sig |
| ENSG00000227161 | NA        | NA                                                                          | NA        | 9.180232432 | -0.249439766 | 0.875102415 | -0.285040655 | 0.775612995 | 0.999371363 | Not Sig |
| ENSG00000134897 | BIVM      | basic, immunoglobulin-like variable motif containing                        | 54841     | 305.3003911 | -0.249317228 | 0.434352081 | -0.573998006 | 0.565969151 | 0.999371363 | Not Sig |
| ENSG00000243532 | NA        | NA                                                                          | NA        | 7.37327826  | -0.249215766 | 1.040453284 | -0.239526147 | 0.810697624 | 0.999371363 | Not Sig |
| ENSG00000150756 | FAM173B   | family with sequence similarity 173 member B                                | 134145    | 268.9230487 | -0.24911289  | 0.622634697 | -0.400094776 | 0.689086712 | 0.999371363 | Not Sig |
| ENSG00000106078 | COBL      | cordon-bleu WH2 repeat protein                                              | 23242     | 1654.533375 | -0.249106286 | 0.52474195  | -0.474721501 | 0.634985491 | 0.999371363 | Not Sig |
| ENSG00000125337 | KIF25     | kinesin family member 25                                                    | 3834      | 13.79242877 | -0.249090766 | 0.785991203 | -0.316912919 | 0.751309679 | 0.999371363 | Not Sig |
| ENSG00000183160 | TMEM119   | transmembrane protein 119                                                   | 338773    | 662.3935335 | -0.249006801 | 0.58240089  | -0.427552233 | 0.668977149 | 0.999371363 | Not Sig |
| ENSG00000156232 | WHAMM     | WAS protein homolog associated with actin, golgi membranes and microtubules | 123720    | 541.8536751 | -0.24900167  | 0.432485937 | -0.575745125 | 0.564787469 | 0.999371363 | Not Sig |
| ENSG00000134107 | BHLHE40   | basic helix-loop-helix family member e40                                    | 8553      | 8200.09858  | -0.248836823 | 0.537471011 | -0.462977198 | 0.643380712 | 0.999371363 | Not Sig |
| ENSG00000136169 | SETDB2    | SET domain bifurcated 2                                                     | 83852     | 636.0433718 | -0.248828843 | 0.520469442 | -0.478085403 | 0.632589421 | 0.999371363 | Not Sig |
| ENSG00000120539 | MASTL     | microtubule associated serine/threonine kinase like                         | 84930     | 313.5692302 | -0.248796912 | 0.607562941 | -0.409499815 | 0.682172903 | 0.999371363 | Not Sig |
| ENSG00000170860 | LSM3      | LSM3 homolog, U6 small nuclear RNA and mRNA degradation associated          | 27258     | 382.3002248 | -0.24855149  | 0.562975233 | -0.441496314 | 0.658853729 | 0.999371363 | Not Sig |
| ENSG00000140650 | PMM2      | phosphomannomutase 2                                                        | 5373      | 973.0712329 | -0.248524995 | 0.655097359 | -0.379371084 | 0.70441232  | 0.999371363 | Not Sig |
| ENSG00000171160 | MORN4     | MORN repeat containing 4                                                    | 118812    | 105.3726793 | -0.24827905  | 0.490699499 | -0.505969643 | 0.612877961 | 0.999371363 | Not Sig |
| ENSG00000260285 | NA        | NA                                                                          | NA        | 44.43930381 | -0.248199655 | 0.590873189 | -0.420055707 | 0.674444759 | 0.999371363 | Not Sig |
| ENSG00000249850 | NA        | NA                                                                          | NA        | 148.2254042 | -0.248168794 | 0.459214528 | -0.540420173 | 0.588907299 | 0.999371363 | Not Sig |
| ENSG00000170296 | GABARAP   | GABA type A receptor-associated protein                                     | 11337     | 145.8611916 | -0.248158549 | 0.493797416 | -0.502551333 | 0.615279753 | 0.999371363 | Not Sig |
| ENSG00000147679 | UTP23     | UTP23, small subunit processome component                                   | 84294     | 454.07025   | -0.24808474  | 0.510556631 | -0.485910329 | 0.627030745 | 0.999371363 | Not Sig |
| ENSG00000197903 | HIST1H2BK | histone cluster 1 H2B family member k                                       | 85236     | 1546.360501 | -0.247736047 | 0.641229385 | -0.386345437 | 0.699240854 | 0.999371363 | Not Sig |
| ENSG00000089685 | BIRC5     | baculoviral IAP repeat containing 5                                         | 332       | 151.9693787 | -0.247612003 | 0.932891583 | -0.265424201 | 0.790682695 | 0.999371363 | Not Sig |
| ENSG00000113594 | LIFR      | LIF receptor alpha                                                          | 3977      | 3190.19572  | -0.247486387 | 0.835703745 | -0.296141292 | 0.767122181 | 0.999371363 | Not Sig |
| ENSG00000031823 | RANBP3    | RAN binding protein 3                                                       | 8498      | 1178.221676 | -0.247429645 | 0.56869127  | -0.435086062 | 0.66349996  | 0.999371363 | Not Sig |
| ENSG00000264931 | MIR3138   | microRNA 3138                                                               | 100423011 | 8.921479696 | -0.247295171 | 1.236245937 | -0.200037196 | 0.841451491 | 0.999371363 | Not Sig |
| ENSG00000158528 | PPP1R9A   | protein phosphatase 1 regulatory subunit 9A                                 | 55607     | 1505.07216  | -0.247122175 | 0.518514733 | -0.476596245 | 0.633649658 | 0.999371363 | Not Sig |
| ENSG00000029639 | TFB1M     | transcription factor B1, mitochondrial                                      | 51106     | 249.9229221 | -0.24708997  | 0.557335275 | -0.443341702 | 0.657518596 | 0.999371363 | Not Sig |
| ENSG00000177192 | PUS1      | pseudouridylate synthase 1                                                  | 80324     | 319.5838562 | -0.24698694  | 0.449088725 | -0.549973594 | 0.582337485 | 0.999371363 | Not Sig |
| ENSG00000197191 | CYSRT1    | cysteine rich tail 1                                                        | 375791    | 12.62935596 | -0.246952061 | 0.961639266 | -0.256803221 | 0.797330683 | 0.999371363 | Not Sig |
| ENSG00000197140 | ADAM32    | ADAM metallopeptidase domain 32                                             | 203102    | 57.86892819 | -0.246683534 | 0.566968862 | -0.435091855 | 0.663495755 | 0.999371363 | Not Sig |
| ENSG00000175221 | MED16     | mediator complex subunit 16                                                 | 10025     | 1087.105072 | -0.246562066 | 0.597724544 | -0.412501156 | 0.679972134 | 0.999371363 | Not Sig |
| ENSG00000240616 | NA        | NA                                                                          | NA        | 17.87205401 | -0.246358017 | 0.710446058 | -0.346765267 | 0.728767672 | 0.999371363 | Not Sig |

|                 |          |                                                                                     |           |             |              |             |              |             |             |         |
|-----------------|----------|-------------------------------------------------------------------------------------|-----------|-------------|--------------|-------------|--------------|-------------|-------------|---------|
| ENSG00000135093 | USP30    | ubiquitin specific peptidase 30                                                     | 84749     | 319.0203065 | -0.246160227 | 0.43457327  | -0.566441253 | 0.571093858 | 0.999371363 | Not Sig |
| ENSG00000269952 | NA       | NA                                                                                  | NA        | 18.247108   | -0.246147874 | 0.810323911 | -0.303764791 | 0.761307092 | 0.999371363 | Not Sig |
| ENSG00000168152 | THAP9    | THAP domain containing 9                                                            | 79725     | 144.8337918 | -0.245958292 | 0.52814426  | -0.465702859 | 0.641428205 | 0.999371363 | Not Sig |
| ENSG00000105287 | PRKD2    | protein kinase D2                                                                   | 25865     | 1405.780464 | -0.245913591 | 0.535888861 | -0.458889163 | 0.646313762 | 0.999371363 | Not Sig |
| ENSG00000088387 | DOCK9    | dedicator of cytokinesis 9                                                          | 23348     | 4531.840885 | -0.24567165  | 0.498165625 | -0.493152552 | 0.621904801 | 0.999371363 | Not Sig |
| ENSG00000207975 | MIR181B1 | microRNA 181b-1                                                                     | 406955    | 2.584124388 | -0.245533569 | 1.634180219 | -0.150248771 | 0.880568349 | NA          | NA      |
| ENSG00000198563 | DDX39B   | DEXD-box helicase 39B                                                               | 7919      | 2776.265754 | -0.245510297 | 0.429205428 | -0.572011166 | 0.56731441  | 0.999371363 | Not Sig |
| ENSG00000249212 | NA       | NA                                                                                  | NA        | 37.66224989 | -0.245503293 | 0.664454161 | -0.369481159 | 0.711769114 | 0.999371363 | Not Sig |
| ENSG00000200170 | NA       | NA                                                                                  | NA        | 19.833033   | -0.245493085 | 0.919943925 | -0.266856575 | 0.789579592 | 0.999371363 | Not Sig |
| ENSG00000105404 | RABAC1   | Rab acceptor 1                                                                      | 10567     | 1221.86117  | -0.2454835   | 0.703551548 | -0.348920417 | 0.727149057 | 0.999371363 | Not Sig |
| ENSG00000140367 | UBE2Q2   | ubiquitin conjugating enzyme E2 Q2                                                  | 92912     | 835.1095016 | -0.245364897 | 0.51258363  | -0.478682663 | 0.632164401 | 0.999371363 | Not Sig |
| ENSG00000156976 | EIF4A2   | eukaryotic translation initiation factor 4A2                                        | 1974      | 5747.293112 | -0.24531402  | 0.447732206 | -0.547903449 | 0.5837582   | 0.999371363 | Not Sig |
| ENSG00000271795 | NA       | NA                                                                                  | NA        | 15.72196192 | -0.245213688 | 0.719833775 | -0.340653213 | 0.733364665 | 0.999371363 | Not Sig |
| ENSG00000074695 | LMAN1    | lectin, mannose binding 1                                                           | 3998      | 5293.627159 | -0.245013006 | 0.642398652 | -0.381403362 | 0.702903967 | 0.999371363 | Not Sig |
| ENSG00000134982 | APC      | APC, WNT signaling pathway regulator                                                | 324       | 1609.049366 | -0.244970714 | 0.476795268 | -0.513785959 | 0.607401645 | 0.999371363 | Not Sig |
| ENSG00000113638 | TTC33    | tetratricopeptide repeat domain 33                                                  | 23548     | 286.8071218 | -0.244817233 | 0.445043325 | -0.550097528 | 0.582252482 | 0.999371363 | Not Sig |
| ENSG00000222268 | NA       | NA                                                                                  | NA        | 1.842966903 | -0.2446871   | 2.24071935  | -0.109200244 | 0.913043667 | NA          | NA      |
| ENSG00000250061 | NA       | NA                                                                                  | NA        | 1.842966903 | -0.2446871   | 2.24071935  | -0.109200244 | 0.913043667 | NA          | NA      |
| ENSG00000264295 | MIR3922  | microRNA 3922                                                                       | 100500843 | 1.842966903 | -0.2446871   | 2.24071935  | -0.109200244 | 0.913043667 | NA          | NA      |
| ENSG00000145506 | NKD2     | naked cuticle homolog 2                                                             | 85409     | 586.3454093 | -0.244606455 | 1.08379796  | -0.225693777 | 0.821439599 | 0.999371363 | Not Sig |
| ENSG00000253716 | MINCR    | MYC-induced long non-coding RNA                                                     | 100507316 | 46.26708539 | -0.244574868 | 0.713722691 | -0.342674923 | 0.73184303  | 0.999371363 | Not Sig |
| ENSG00000107581 | EIF3A    | eukaryotic translation initiation factor 3 subunit A                                | 8661      | 6929.835845 | -0.244499194 | 0.38299248  | -0.638391631 | 0.523218777 | 0.999371363 | Not Sig |
| ENSG00000146555 | SDK1     | sidekick cell adhesion molecule 1                                                   | 221935    | 1148.35349  | -0.244489531 | 0.946822981 | -0.258220951 | 0.796236389 | 0.999371363 | Not Sig |
| ENSG00000105738 | SIPA1L3  | signal induced proliferation associated 1 like 3                                    | 23094     | 2952.946538 | -0.244481139 | 0.432492595 | -0.565283988 | 0.571880618 | 0.999371363 | Not Sig |
| ENSG00000145734 | BDP1     | B double prime 1, subunit of RNA polymerase III transcription initiation factor 11B | 55814     | 3451.830536 | -0.244443331 | 0.422695791 | -0.578296109 | 0.563064221 | 0.999371363 | Not Sig |
| ENSG00000100852 | ARHGAP5  | Rho GTPase activating protein 5                                                     | 394       | 4492.859308 | -0.244396372 | 0.559017997 | -0.437188736 | 0.661974478 | 0.999371363 | Not Sig |
| ENSG00000238045 | NA       | NA                                                                                  | NA        | 92.78106885 | -0.244395881 | 0.556440793 | -0.439212732 | 0.660507401 | 0.999371363 | Not Sig |
| ENSG00000223225 | NA       | NA                                                                                  | NA        | 4.727513143 | -0.244313136 | 1.238020535 | -0.197341747 | 0.843560112 | NA          | NA      |
| ENSG00000140067 | FAM181A  | family with sequence similarity 181 member A                                        | 90050     | 4.59562926  | -0.244263872 | 1.465068281 | -0.166725248 | 0.867586239 | NA          | NA      |
| ENSG00000096060 | FKBP5    | FK506 binding protein 5                                                             | 2289      | 1228.747341 | -0.244180156 | 0.517461169 | -0.47188112  | 0.637011645 | 0.999371363 | Not Sig |
| ENSG00000104660 | LEPROTL1 | leptin receptor overlapping transcript like 1                                       | 23484     | 751.8756848 | -0.244057481 | 0.621247351 | -0.392850738 | 0.694429727 | 0.999371363 | Not Sig |
| ENSG00000130803 | ZNF317   | zinc finger protein 317                                                             | 57693     | 624.5824449 | -0.244020738 | 0.472696469 | -0.516231353 | 0.605692835 | 0.999371363 | Not Sig |
| ENSG00000196227 | FAM217B  | family with sequence similarity 217 member B                                        | 63939     | 422.1691436 | -0.24396537  | 0.525839648 | -0.463953928 | 0.642680754 | 0.999371363 | Not Sig |
| ENSG00000186230 | ZNF749   | zinc finger protein 749                                                             | 388567    | 164.7604965 | -0.243798451 | 0.485889378 | -0.501757112 | 0.615838385 | 0.999371363 | Not Sig |
| ENSG00000120688 | WBP4     | WW domain binding protein 4                                                         | 11193     | 316.1437271 | -0.243715173 | 0.473240007 | -0.514992752 | 0.606558085 | 0.999371363 | Not Sig |

|                 |           |                                                                            |           |             |              |             |              |             |             |         |
|-----------------|-----------|----------------------------------------------------------------------------|-----------|-------------|--------------|-------------|--------------|-------------|-------------|---------|
| ENSG00000197818 | SLC9A8    | solute carrier family 9 member A8                                          | 23315     | 667.8602153 | -0.243690436 | 0.521345083 | -0.467426364 | 0.640194864 | 0.999371363 | Not Sig |
| ENSG00000197461 | PDGFA     | platelet derived growth factor subunit A                                   | 5154      | 1008.500074 | -0.243632185 | 0.549955504 | -0.443003449 | 0.65776324  | 0.999371363 | Not Sig |
| ENSG00000135596 | MICAL1    | microtubule associated monooxygenase, calponin and LIM domain containing 1 | 64780     | 1357.302365 | -0.243374403 | 0.628733579 | -0.387086695 | 0.698692027 | 0.999371363 | Not Sig |
| ENSG00000226881 | NA        | NA                                                                         | NA        | 0.658908893 | -0.243259071 | 3.449691654 | -0.070516178 | 0.943782824 | NA          | NA      |
| ENSG00000252755 | NA        | NA                                                                         | NA        | 0.658908893 | -0.243259071 | 3.449691654 | -0.070516178 | 0.943782824 | NA          | NA      |
| ENSG00000260298 | NA        | NA                                                                         | NA        | 0.658908893 | -0.243259071 | 3.449691654 | -0.070516178 | 0.943782824 | NA          | NA      |
| ENSG00000239779 | WBP1      | WW domain binding protein 1                                                | 23559     | 167.2487038 | -0.24291791  | 0.51579222  | -0.470960787 | 0.637668738 | 0.999371363 | Not Sig |
| ENSG00000148719 | DNAJB12   | DnaJ heat shock protein family (Hsp40) member B12                          | 54788     | 1014.597058 | -0.242886259 | 0.490540649 | -0.495139923 | 0.620501355 | 0.999371363 | Not Sig |
| ENSG00000184270 | HIST2H2AB | histone cluster 2 H2A family member b                                      | 317772    | 363.6253919 | -0.242785756 | 0.457296338 | -0.530915592 | 0.595477273 | 0.999371363 | Not Sig |
| ENSG00000129277 | NA        | NA                                                                         | NA        | 175.3735468 | -0.242738129 | 0.980244448 | -0.247630201 | 0.804420541 | 0.999371363 | Not Sig |
| ENSG00000217767 | NA        | NA                                                                         | NA        | 12.95198499 | -0.242367664 | 0.781296645 | -0.310212088 | 0.756399678 | 0.999371363 | Not Sig |
| ENSG00000271871 | NA        | NA                                                                         | NA        | 16.01166145 | -0.242365308 | 0.795271313 | -0.304758017 | 0.760550459 | 0.999371363 | Not Sig |
| ENSG00000196792 | STRN3     | striatin 3                                                                 | 29966     | 1443.009219 | -0.242345968 | 0.553840274 | -0.437573755 | 0.6616953   | 0.999371363 | Not Sig |
| ENSG00000198237 | NA        | NA                                                                         | NA        | 27.83014949 | -0.242310619 | 0.618685481 | -0.391653961 | 0.695313912 | 0.999371363 | Not Sig |
| ENSG00000105486 | LIG1      | DNA ligase 1                                                               | 3978      | 553.6992443 | -0.242279495 | 0.629468719 | -0.384895211 | 0.700315054 | 0.999371363 | Not Sig |
| ENSG00000230510 | PPP5D1    | PPP5 tetratricopeptide repeat domain containing 1                          | 100506012 | 21.15887754 | -0.242211288 | 0.681418064 | -0.355451815 | 0.722251137 | 0.999371363 | Not Sig |
| ENSG00000165487 | MICU2     | mitochondrial calcium uptake 2                                             | 221154    | 742.1470589 | -0.24204084  | 0.519500506 | -0.465910691 | 0.641279428 | 0.999371363 | Not Sig |
| ENSG00000112305 | SMAP1     | small ArfGAP 1                                                             | 60682     | 801.4356634 | -0.241965945 | 0.448958479 | -0.538949494 | 0.589921705 | 0.999371363 | Not Sig |
| ENSG00000169139 | UBE2V2    | ubiquitin conjugating enzyme E2 V2                                         | 7336      | 681.1123215 | -0.241752458 | 0.637806863 | -0.379037092 | 0.70466032  | 0.999371363 | Not Sig |
| ENSG00000163486 | NA        | NA                                                                         | NA        | 1275.640304 | -0.241745467 | 0.536418199 | -0.450666043 | 0.65223026  | 0.999371363 | Not Sig |
| ENSG00000243517 | NA        | NA                                                                         | NA        | 2.031365529 | -0.241723436 | 1.635820352 | -0.147768938 | 0.882525124 | NA          | NA      |
| ENSG00000232041 | NA        | NA                                                                         | NA        | 1.455862342 | -0.241657388 | 2.106101832 | -0.11474155  | 0.90864998  | NA          | NA      |
| ENSG00000206127 | GOLGA80   | golgin A8 family member 0                                                  | 728047    | 12.62625615 | -0.241550802 | 0.949222968 | -0.254472142 | 0.799130823 | 0.999371363 | Not Sig |
| ENSG00000197563 | PIGN      | phosphatidylinositol glycan anchor biosynthesis class N                    | 23556     | 736.3139456 | -0.241450445 | 0.613367546 | -0.393647246 | 0.693841495 | 0.999371363 | Not Sig |
| ENSG00000262470 | NA        | NA                                                                         | NA        | 23.93616715 | -0.241267915 | 0.755984063 | -0.319144182 | 0.749617182 | 0.999371363 | Not Sig |
| ENSG00000079999 | KEAP1     | kelch like ECH associated protein 1                                        | 9817      | 1003.239632 | -0.241104431 | 0.509668068 | -0.473061677 | 0.636169177 | 0.999371363 | Not Sig |
| ENSG00000134452 | FBXO18    | F-box protein, helicase, 18                                                | 84893     | 1625.950436 | -0.241034284 | 0.448562595 | -0.537348158 | 0.591027146 | 0.999371363 | Not Sig |
| ENSG00000160991 | ORAI2     | ORAI calcium release-activated calcium modulator 2                         | 80228     | 822.2709023 | -0.240605077 | 0.440527194 | -0.546175312 | 0.584945435 | 0.999371363 | Not Sig |
| ENSG00000141258 | SGSM2     | small G protein signaling modulator 2                                      | 9905      | 1957.915704 | -0.240490435 | 0.480092571 | -0.500925132 | 0.616423815 | 0.999371363 | Not Sig |
| ENSG00000198018 | ENTPD7    | ectonucleoside triphosphate diphosphohydrolase 7                           | 57089     | 516.2564059 | -0.240315869 | 0.591928041 | -0.405988317 | 0.684751185 | 0.999371363 | Not Sig |
| ENSG00000238948 | NA        | NA                                                                         | NA        | 4.0139654   | -0.240036018 | 1.319416767 | -0.181925851 | 0.855640917 | NA          | NA      |
| ENSG00000176890 | TYMS      | thymidylate synthetase                                                     | 7298      | 269.4181645 | -0.239977077 | 0.864637331 | -0.277546514 | 0.781360495 | 0.999371363 | Not Sig |
| ENSG00000198722 | UNC13B    | unc-13 homolog B                                                           | 10497     | 4230.779279 | -0.239871444 | 0.647492532 | -0.370462101 | 0.71103821  | 0.999371363 | Not Sig |
| ENSG00000065882 | TBC1D1    | TBC1 domain family member 1                                                | 23216     | 1238.518048 | -0.239842146 | 0.580307676 | -0.413301694 | 0.679385589 | 0.999371363 | Not Sig |
| ENSG00000212017 | MIR548U   | microRNA 548u                                                              | 100422884 | 6.753139479 | -0.239627988 | 1.51728111  | -0.157932493 | 0.874509994 | 0.999371363 | Not Sig |

|                 |              |                                                             |           |             |              |             |              |             |             |         |
|-----------------|--------------|-------------------------------------------------------------|-----------|-------------|--------------|-------------|--------------|-------------|-------------|---------|
| ENSG00000233476 | NA           | NA                                                          | NA        | 72.94638874 | -0.239573614 | 0.50036117  | -0.478801371 | 0.632079941 | 0.999371363 | Not Sig |
| ENSG00000230424 | LOC101927895 | uncharacterized LOC101927895                                | 101927895 | 16.96521476 | -0.239430436 | 0.739883998 | -0.323605371 | 0.746236821 | 0.999371363 | Not Sig |
| ENSG00000100344 | PNPLA3       | patatin like phospholipase domain containing 3              | 80339     | 52.24571285 | -0.239418944 | 0.855104103 | -0.279988066 | 0.779486661 | 0.999371363 | Not Sig |
| ENSG00000167302 | TEPSIN       | TEPSIN, adaptor related protein complex 4 accessory protein | 146705    | 519.536123  | -0.239299018 | 0.558817153 | -0.428224181 | 0.668487913 | 0.999371363 | Not Sig |
| ENSG00000172046 | USP19        | ubiquitin specific peptidase 19                             | 10869     | 1700.678027 | -0.239273008 | 0.488501916 | -0.489809764 | 0.624268521 | 0.999371363 | Not Sig |
| ENSG00000129295 | LRRC6        | leucine rich repeat containing 6                            | 23639     | 190.4836292 | -0.239245946 | 0.580796357 | -0.411927422 | 0.680392621 | 0.999371363 | Not Sig |
| ENSG00000182359 | KBTBD3       | kelch repeat and BTB domain containing 3                    | 143879    | 144.322053  | -0.239224736 | 0.508140002 | -0.470785089 | 0.637794214 | 0.999371363 | Not Sig |
| ENSG00000091527 | CDV3         | CDV3 homolog                                                | 55573     | 4130.552703 | -0.239173107 | 0.509093653 | -0.469801785 | 0.638496639 | 0.999371363 | Not Sig |
| ENSG00000129484 | PARP2        | poly(ADP-ribose) polymerase 2                               | 10038     | 288.7610618 | -0.239136836 | 0.550576967 | -0.434338612 | 0.664042569 | 0.999371363 | Not Sig |
| ENSG00000008869 | HEATR5B      | HEAT repeat containing 5B                                   | 54497     | 1485.939073 | -0.239092241 | 0.417290522 | -0.572963506 | 0.566669404 | 0.999371363 | Not Sig |
| ENSG00000207652 | MIR621       | microRNA 621                                                | 693206    | 28.59183742 | -0.238980511 | 0.726630007 | -0.328888855 | 0.742239698 | 0.999371363 | Not Sig |
| ENSG00000137100 | DCTN3        | dynactin subunit 3                                          | 11258     | 387.3481051 | -0.238964067 | 0.543494144 | -0.439681034 | 0.660168141 | 0.999371363 | Not Sig |
| ENSG00000198561 | CTNND1       | catenin delta 1                                             | 1500      | 10434.35059 | -0.238960009 | 0.390509513 | -0.611918534 | 0.540591659 | 0.999371363 | Not Sig |
| ENSG00000233672 | NA           | NA                                                          | NA        | 8.17099549  | -0.238933963 | 1.152747562 | -0.207273449 | 0.835796309 | 0.999371363 | Not Sig |
| ENSG00000238716 | NA           | NA                                                          | NA        | 9.303387599 | -0.238873653 | 0.994681063 | -0.240151002 | 0.810213197 | 0.999371363 | Not Sig |
| ENSG00000250404 | NA           | NA                                                          | NA        | 55.33821898 | -0.238652063 | 0.626069249 | -0.381191116 | 0.703061408 | 0.999371363 | Not Sig |
| ENSG00000228395 | NA           | NA                                                          | NA        | 11.11305887 | -0.238638829 | 0.887212744 | -0.26897588  | 0.787948244 | 0.999371363 | Not Sig |
| ENSG00000104320 | NBN          | nibrin                                                      | 4683      | 1246.208811 | -0.238608536 | 0.452124906 | -0.527749153 | 0.597673453 | 0.999371363 | Not Sig |
| ENSG00000136143 | SUCLA2       | succinate-CoA ligase ADP-forming beta subunit               | 8803      | 556.4616585 | -0.238579827 | 0.527322824 | -0.452435996 | 0.65095492  | 0.999371363 | Not Sig |
| ENSG00000223750 | NA           | NA                                                          | NA        | 2.868239449 | -0.238444919 | 1.431782312 | -0.166537131 | 0.867734265 | NA          | NA      |
| ENSG00000101019 | UQCC1        | ubiquinol-cytochrome c reductase complex assembly factor 1  | 55245     | 719.9137866 | -0.238113962 | 0.417862339 | -0.569838293 | 0.568787381 | 0.999371363 | Not Sig |
| ENSG00000199279 | NA           | NA                                                          | NA        | 1.378894172 | -0.238059164 | 2.078570554 | -0.11453023  | 0.908817484 | NA          | NA      |
| ENSG00000263916 | NA           | NA                                                          | NA        | 7.860704381 | -0.238025298 | 1.009285014 | -0.235835562 | 0.813560272 | 0.999371363 | Not Sig |
| ENSG00000101440 | ASIP         | agouti signaling protein                                    | 434       | 0.962607748 | -0.237964332 | 2.324184946 | -0.102386143 | 0.918450182 | NA          | NA      |
| ENSG00000240299 | NA           | NA                                                          | NA        | 0.962607748 | -0.237964332 | 2.324184946 | -0.102386143 | 0.918450182 | NA          | NA      |
| ENSG00000245688 | NA           | NA                                                          | NA        | 0.962607748 | -0.237964332 | 2.324184946 | -0.102386143 | 0.918450182 | NA          | NA      |
| ENSG00000141002 | TCF25        | transcription factor 25                                     | 22980     | 2071.840898 | -0.237937587 | 0.421749762 | -0.564167684 | 0.572640018 | 0.999371363 | Not Sig |
| ENSG00000127399 | LRRC61       | leucine rich repeat containing 61                           | 65999     | 243.4607253 | -0.237896403 | 0.587838444 | -0.404696912 | 0.685700313 | 0.999371363 | Not Sig |
| ENSG00000100941 | PNN          | pinin, desmosome associated protein                         | 5411      | 2010.75538  | -0.237613245 | 0.458690578 | -0.518025127 | 0.604440738 | 0.999371363 | Not Sig |
| ENSG00000110092 | CCND1        | cyclin D1                                                   | 595       | 8569.260696 | -0.237580821 | 0.56765748  | -0.418528478 | 0.67556077  | 0.999371363 | Not Sig |
| ENSG00000260236 | NA           | NA                                                          | NA        | 29.93626835 | -0.23722518  | 0.672032201 | -0.352996746 | 0.72409088  | 0.999371363 | Not Sig |
| ENSG00000106483 | SFRP4        | secreted frizzled related protein 4                         | 6424      | 923.4477625 | -0.23721238  | 0.823424173 | -0.288080418 | 0.773285182 | 0.999371363 | Not Sig |
| ENSG00000223508 | NA           | NA                                                          | NA        | 93.67764927 | -0.237156372 | 0.609956445 | -0.3888087   | 0.697417665 | 0.999371363 | Not Sig |
| ENSG00000227962 | NA           | NA                                                          | NA        | 9.650864843 | -0.237056924 | 0.998524168 | -0.237407297 | 0.812340829 | 0.999371363 | Not Sig |
| ENSG00000165244 | ZNF367       | zinc finger protein 367                                     | 195828    | 120.9573795 | -0.236777947 | 0.85712287  | -0.27624738  | 0.782358069 | 0.999371363 | Not Sig |

|                 |           |                                                                                                                                                                                                                                                                                                                                                                                                                                                                                                                                                                                                                                                                                                                                                                                                                                                                                                                                                                                                                                                                                                                                                                                                                                                                                                                                                                                                                                                                                                                                                                                                                                                                                                                                                                   |           |             |              |             |              |             |             |         |
|-----------------|-----------|-------------------------------------------------------------------------------------------------------------------------------------------------------------------------------------------------------------------------------------------------------------------------------------------------------------------------------------------------------------------------------------------------------------------------------------------------------------------------------------------------------------------------------------------------------------------------------------------------------------------------------------------------------------------------------------------------------------------------------------------------------------------------------------------------------------------------------------------------------------------------------------------------------------------------------------------------------------------------------------------------------------------------------------------------------------------------------------------------------------------------------------------------------------------------------------------------------------------------------------------------------------------------------------------------------------------------------------------------------------------------------------------------------------------------------------------------------------------------------------------------------------------------------------------------------------------------------------------------------------------------------------------------------------------------------------------------------------------------------------------------------------------|-----------|-------------|--------------|-------------|--------------|-------------|-------------|---------|
| ENSG00000165525 | NEMF      | nuclear export mediator factor                                                                                                                                                                                                                                                                                                                                                                                                                                                                                                                                                                                                                                                                                                                                                                                                                                                                                                                                                                                                                                                                                                                                                                                                                                                                                                                                                                                                                                                                                                                                                                                                                                                                                                                                    | 9147      | 1860.187812 | -0.236720869 | 0.545032624 | -0.434324219 | 0.664053019 | 0.999371363 | Not Sig |
| ENSG00000170448 | NFXL1     | nuclear transcription factor, X-box binding like 1                                                                                                                                                                                                                                                                                                                                                                                                                                                                                                                                                                                                                                                                                                                                                                                                                                                                                                                                                                                                                                                                                                                                                                                                                                                                                                                                                                                                                                                                                                                                                                                                                                                                                                                | 152518    | 599.8655232 | -0.236589564 | 0.596425026 | -0.396679471 | 0.69160384  | 0.999371363 | Not Sig |
| ENSG00000104679 | R3HCC1    | R3H domain and coiled-coil containing 1                                                                                                                                                                                                                                                                                                                                                                                                                                                                                                                                                                                                                                                                                                                                                                                                                                                                                                                                                                                                                                                                                                                                                                                                                                                                                                                                                                                                                                                                                                                                                                                                                                                                                                                           | 203069    | 443.2419471 | -0.236344786 | 0.698082617 | -0.338562772 | 0.734939131 | 0.999371363 | Not Sig |
| ENSG00000158941 | CCAR2     | cell cycle and apoptosis regulator 2                                                                                                                                                                                                                                                                                                                                                                                                                                                                                                                                                                                                                                                                                                                                                                                                                                                                                                                                                                                                                                                                                                                                                                                                                                                                                                                                                                                                                                                                                                                                                                                                                                                                                                                              | 57805     | 1876.043037 | -0.2363204   | 0.625013483 | -0.378104483 | 0.705352978 | 0.999371363 | Not Sig |
| ENSG00000170759 | KIF5B     | kinesin family member 5B                                                                                                                                                                                                                                                                                                                                                                                                                                                                                                                                                                                                                                                                                                                                                                                                                                                                                                                                                                                                                                                                                                                                                                                                                                                                                                                                                                                                                                                                                                                                                                                                                                                                                                                                          | 3799      | 6075.285508 | -0.2363038   | 0.437942674 | -0.539577012 | 0.589488773 | 0.999371363 | Not Sig |
| ENSG00000228737 | NA        | NA                                                                                                                                                                                                                                                                                                                                                                                                                                                                                                                                                                                                                                                                                                                                                                                                                                                                                                                                                                                                                                                                                                                                                                                                                                                                                                                                                                                                                                                                                                                                                                                                                                                                                                                                                                | NA        | 1.308363537 | -0.236267386 | 2.836392369 | -0.083298555 | 0.933614149 | NA          | NA      |
| ENSG00000113575 | PPP2CA    | protein phosphatase 2 catalytic subunit alpha                                                                                                                                                                                                                                                                                                                                                                                                                                                                                                                                                                                                                                                                                                                                                                                                                                                                                                                                                                                                                                                                                                                                                                                                                                                                                                                                                                                                                                                                                                                                                                                                                                                                                                                     | 5515      | 1372.750426 | -0.236266657 | 0.554791981 | -0.425865306 | 0.670205997 | 0.999371363 | Not Sig |
| ENSG00000224019 | NA        | NA                                                                                                                                                                                                                                                                                                                                                                                                                                                                                                                                                                                                                                                                                                                                                                                                                                                                                                                                                                                                                                                                                                                                                                                                                                                                                                                                                                                                                                                                                                                                                                                                                                                                                                                                                                | NA        | 12.18242099 | -0.235950892 | 0.980947552 | -0.240533646 | 0.809916583 | 0.999371363 | Not Sig |
| ENSG00000196636 | SDHAF3    | succinate dehydrogenase complex assembly factor 3                                                                                                                                                                                                                                                                                                                                                                                                                                                                                                                                                                                                                                                                                                                                                                                                                                                                                                                                                                                                                                                                                                                                                                                                                                                                                                                                                                                                                                                                                                                                                                                                                                                                                                                 | 57001     | 120.1540242 | -0.235643611 | 0.673908861 | -0.349666884 | 0.72658871  | 0.999371363 | Not Sig |
| ENSG00000176105 | YES1      | YES proto-oncogene 1, Src family tyrosine kinase                                                                                                                                                                                                                                                                                                                                                                                                                                                                                                                                                                                                                                                                                                                                                                                                                                                                                                                                                                                                                                                                                                                                                                                                                                                                                                                                                                                                                                                                                                                                                                                                                                                                                                                  | 7525      | 1370.790382 | -0.235614147 | 0.564353029 | -0.417494254 | 0.676316926 | 0.999371363 | Not Sig |
| ENSG00000197050 | ZNF420    | zinc finger protein 420                                                                                                                                                                                                                                                                                                                                                                                                                                                                                                                                                                                                                                                                                                                                                                                                                                                                                                                                                                                                                                                                                                                                                                                                                                                                                                                                                                                                                                                                                                                                                                                                                                                                                                                                           | 147923    | 206.6435034 | -0.235549371 | 0.434258636 | -0.542417242 | 0.587531105 | 0.999371363 | Not Sig |
| ENSG00000230306 | NA        | NA                                                                                                                                                                                                                                                                                                                                                                                                                                                                                                                                                                                                                                                                                                                                                                                                                                                                                                                                                                                                                                                                                                                                                                                                                                                                                                                                                                                                                                                                                                                                                                                                                                                                                                                                                                | NA        | 5.024204738 | -0.235448349 | 1.42742361  | -0.164946374 | 0.868986191 | NA          | NA      |
| ENSG00000263660 | NA        | NA                                                                                                                                                                                                                                                                                                                                                                                                                                                                                                                                                                                                                                                                                                                                                                                                                                                                                                                                                                                                                                                                                                                                                                                                                                                                                                                                                                                                                                                                                                                                                                                                                                                                                                                                                                | NA        | 3.966439383 | -0.235430424 | 1.416069489 | -0.166256265 | 0.867955283 | NA          | NA      |
| ENSG00000139239 | NA        | NA                                                                                                                                                                                                                                                                                                                                                                                                                                                                                                                                                                                                                                                                                                                                                                                                                                                                                                                                                                                                                                                                                                                                                                                                                                                                                                                                                                                                                                                                                                                                                                                                                                                                                                                                                                | NA        | 14.02366106 | -0.235400425 | 0.885911752 | -0.265715433 | 0.790458377 | 0.999371363 | Not Sig |
| ENSG00000204104 | TRAF3IP1  | TRAF3 interacting protein 1                                                                                                                                                                                                                                                                                                                                                                                                                                                                                                                                                                                                                                                                                                                                                                                                                                                                                                                                                                                                                                                                                                                                                                                                                                                                                                                                                                                                                                                                                                                                                                                                                                                                                                                                       | 26146     | 644.9577225 | -0.235294295 | 0.413500821 | -0.569029812 | 0.569335909 | 0.999371363 | Not Sig |
| ENSG00000211790 | NA        | NA                                                                                                                                                                                                                                                                                                                                                                                                                                                                                                                                                                                                                                                                                                                                                                                                                                                                                                                                                                                                                                                                                                                                                                                                                                                                                                                                                                                                                                                                                                                                                                                                                                                                                                                                                                | NA        | 5.585713989 | -0.235288928 | 1.458669733 | -0.16130377  | 0.871854154 | NA          | NA      |
| ENSG00000005812 | FBXL3     | F-box and leucine rich repeat protein 3                                                                                                                                                                                                                                                                                                                                                                                                                                                                                                                                                                                                                                                                                                                                                                                                                                                                                                                                                                                                                                                                                                                                                                                                                                                                                                                                                                                                                                                                                                                                                                                                                                                                                                                           | 26224     | 1270.610144 | -0.235227129 | 0.463593799 | -0.507399214 | 0.611874737 | 0.999371363 | Not Sig |
| ENSG00000265102 | MIR3942   | microRNA 3942                                                                                                                                                                                                                                                                                                                                                                                                                                                                                                                                                                                                                                                                                                                                                                                                                                                                                                                                                                                                                                                                                                                                                                                                                                                                                                                                                                                                                                                                                                                                                                                                                                                                                                                                                     | 100500904 | 7.081691653 | -0.235108374 | 1.247776692 | -0.188421835 | 0.850545984 | 0.999371363 | Not Sig |
| ENSG00000197122 | SRC       | SRC proto-oncogene, non-receptor tyrosine kinase                                                                                                                                                                                                                                                                                                                                                                                                                                                                                                                                                                                                                                                                                                                                                                                                                                                                                                                                                                                                                                                                                                                                                                                                                                                                                                                                                                                                                                                                                                                                                                                                                                                                                                                  | 6714      | 1541.896327 | -0.235025657 | 0.520908375 | -0.451184255 | 0.651856757 | 0.999371363 | Not Sig |
| ENSG00000170515 | PA2G4     | proliferation-associated 2G4                                                                                                                                                                                                                                                                                                                                                                                                                                                                                                                                                                                                                                                                                                                                                                                                                                                                                                                                                                                                                                                                                                                                                                                                                                                                                                                                                                                                                                                                                                                                                                                                                                                                                                                                      | 5036      | 990.0255908 | -0.234938683 | 0.394014033 | -0.596269837 | 0.550994978 | 0.999371363 | Not Sig |
| ENSG00000212443 | SNORA53   | small nucleolar RNA, H/ACA box 53                                                                                                                                                                                                                                                                                                                                                                                                                                                                                                                                                                                                                                                                                                                                                                                                                                                                                                                                                                                                                                                                                                                                                                                                                                                                                                                                                                                                                                                                                                                                                                                                                                                                                                                                 | 677832    | 102.1364444 | -0.234923128 | 0.481812095 | -0.487582463 | 0.62584562  | 0.999371363 | Not Sig |
| ENSG00000121542 | SEC22A    | SEC22 homolog A, vesicle trafficking protein                                                                                                                                                                                                                                                                                                                                                                                                                                                                                                                                                                                                                                                                                                                                                                                                                                                                                                                                                                                                                                                                                                                                                                                                                                                                                                                                                                                                                                                                                                                                                                                                                                                                                                                      | 26984     | 214.4268829 | -0.234487189 | 0.545440466 | -0.429904278 | 0.667265274 | 0.999371363 | Not Sig |
| ENSG00000149716 | ORAOV1    | oral cancer overexpressed 1                                                                                                                                                                                                                                                                                                                                                                                                                                                                                                                                                                                                                                                                                                                                                                                                                                                                                                                                                                                                                                                                                                                                                                                                                                                                                                                                                                                                                                                                                                                                                                                                                                                                                                                                       | 220064    | 366.5472899 | -0.234397403 | 0.466718498 | -0.502224369 | 0.615509703 | 0.999371363 | Not Sig |
| ENSG00000269620 | NA        | NA                                                                                                                                                                                                                                                                                                                                                                                                                                                                                                                                                                                                                                                                                                                                                                                                                                                                                                                                                                                                                                                                                                                                                                                                                                                                                                                                                                                                                                                                                                                                                                                                                                                                                                                                                                | NA        | 10.46627312 | -0.234356503 | 0.985339622 | -0.237843377 | 0.812002574 | 0.999371363 | Not Sig |
| ENSG00000132205 | EMILIN2   | elastin microfibril interfacier 2                                                                                                                                                                                                                                                                                                                                                                                                                                                                                                                                                                                                                                                                                                                                                                                                                                                                                                                                                                                                                                                                                                                                                                                                                                                                                                                                                                                                                                                                                                                                                                                                                                                                                                                                 | 84034     | 1306.331074 | -0.234326515 | 0.791295867 | -0.296130088 | 0.767130737 | 0.999371363 | Not Sig |
| ENSG00000257242 | LINC01619 | long intergenic non-protein coding RNA 1619                                                                                                                                                                                                                                                                                                                                                                                                                                                                                                                                                                                                                                                                                                                                                                                                                                                                                                                                                                                                                                                                                                                                                                                                                                                                                                                                                                                                                                                                                                                                                                                                                                                                                                                       | 256021    | 87.68767801 | -0.234267619 | 0.667816382 | -0.350796454 | 0.725741058 | 0.999371363 | Not Sig |
| ENSG00000080503 | SMARCA2   | SMARCA2, SMARCA2-like, SMARCA2-like 2, SMARCA2-like 3, SMARCA2-like 4, SMARCA2-like 5, SMARCA2-like 6, SMARCA2-like 7, SMARCA2-like 8, SMARCA2-like 9, SMARCA2-like 10, SMARCA2-like 11, SMARCA2-like 12, SMARCA2-like 13, SMARCA2-like 14, SMARCA2-like 15, SMARCA2-like 16, SMARCA2-like 17, SMARCA2-like 18, SMARCA2-like 19, SMARCA2-like 20, SMARCA2-like 21, SMARCA2-like 22, SMARCA2-like 23, SMARCA2-like 24, SMARCA2-like 25, SMARCA2-like 26, SMARCA2-like 27, SMARCA2-like 28, SMARCA2-like 29, SMARCA2-like 30, SMARCA2-like 31, SMARCA2-like 32, SMARCA2-like 33, SMARCA2-like 34, SMARCA2-like 35, SMARCA2-like 36, SMARCA2-like 37, SMARCA2-like 38, SMARCA2-like 39, SMARCA2-like 40, SMARCA2-like 41, SMARCA2-like 42, SMARCA2-like 43, SMARCA2-like 44, SMARCA2-like 45, SMARCA2-like 46, SMARCA2-like 47, SMARCA2-like 48, SMARCA2-like 49, SMARCA2-like 50, SMARCA2-like 51, SMARCA2-like 52, SMARCA2-like 53, SMARCA2-like 54, SMARCA2-like 55, SMARCA2-like 56, SMARCA2-like 57, SMARCA2-like 58, SMARCA2-like 59, SMARCA2-like 60, SMARCA2-like 61, SMARCA2-like 62, SMARCA2-like 63, SMARCA2-like 64, SMARCA2-like 65, SMARCA2-like 66, SMARCA2-like 67, SMARCA2-like 68, SMARCA2-like 69, SMARCA2-like 70, SMARCA2-like 71, SMARCA2-like 72, SMARCA2-like 73, SMARCA2-like 74, SMARCA2-like 75, SMARCA2-like 76, SMARCA2-like 77, SMARCA2-like 78, SMARCA2-like 79, SMARCA2-like 80, SMARCA2-like 81, SMARCA2-like 82, SMARCA2-like 83, SMARCA2-like 84, SMARCA2-like 85, SMARCA2-like 86, SMARCA2-like 87, SMARCA2-like 88, SMARCA2-like 89, SMARCA2-like 90, SMARCA2-like 91, SMARCA2-like 92, SMARCA2-like 93, SMARCA2-like 94, SMARCA2-like 95, SMARCA2-like 96, SMARCA2-like 97, SMARCA2-like 98, SMARCA2-like 99, SMARCA2-like 100 | 6595      | 3100.354863 | -0.233979853 | 0.58473387  | -0.400147598 | 0.689047808 | 0.999371363 | Not Sig |
| ENSG00000137713 | PPP2R1B   | protein phosphatase 2 scaffold subunit Abeta                                                                                                                                                                                                                                                                                                                                                                                                                                                                                                                                                                                                                                                                                                                                                                                                                                                                                                                                                                                                                                                                                                                                                                                                                                                                                                                                                                                                                                                                                                                                                                                                                                                                                                                      | 5519      | 952.0562658 | -0.233924092 | 0.491566965 | -0.475874314 | 0.634163923 | 0.999371363 | Not Sig |
| ENSG00000223509 | NA        | NA                                                                                                                                                                                                                                                                                                                                                                                                                                                                                                                                                                                                                                                                                                                                                                                                                                                                                                                                                                                                                                                                                                                                                                                                                                                                                                                                                                                                                                                                                                                                                                                                                                                                                                                                                                | NA        | 215.3043189 | -0.233860805 | 0.538557389 | -0.434235625 | 0.664117345 | 0.999371363 | Not Sig |
| ENSG00000207642 | MIR571    | microRNA 571                                                                                                                                                                                                                                                                                                                                                                                                                                                                                                                                                                                                                                                                                                                                                                                                                                                                                                                                                                                                                                                                                                                                                                                                                                                                                                                                                                                                                                                                                                                                                                                                                                                                                                                                                      | 693156    | 7.375719733 | -0.233846381 | 1.005215227 | -0.232633146 | 0.816046287 | 0.999371363 | Not Sig |
| ENSG00000149054 | ZNF215    | zinc finger protein 215                                                                                                                                                                                                                                                                                                                                                                                                                                                                                                                                                                                                                                                                                                                                                                                                                                                                                                                                                                                                                                                                                                                                                                                                                                                                                                                                                                                                                                                                                                                                                                                                                                                                                                                                           | 7762      | 77.44145782 | -0.233809971 | 0.913033637 | -0.256080347 | 0.797888797 | 0.999371363 | Not Sig |
| ENSG00000198807 | PAX9      | paired box 9                                                                                                                                                                                                                                                                                                                                                                                                                                                                                                                                                                                                                                                                                                                                                                                                                                                                                                                                                                                                                                                                                                                                                                                                                                                                                                                                                                                                                                                                                                                                                                                                                                                                                                                                                      | 5083      | 150.9958112 | -0.233530289 | 0.805081789 | -0.290070267 | 0.771762482 | 0.999371363 | Not Sig |
| ENSG00000170889 | RPS9      | ribosomal protein S9                                                                                                                                                                                                                                                                                                                                                                                                                                                                                                                                                                                                                                                                                                                                                                                                                                                                                                                                                                                                                                                                                                                                                                                                                                                                                                                                                                                                                                                                                                                                                                                                                                                                                                                                              | 6203      | 5838.049187 | -0.233419658 | 0.55766654  | -0.418564932 | 0.675534123 | 0.999371363 | Not Sig |
| ENSG00000077312 | SNRPA     | small nuclear ribonucleoprotein polypeptide A                                                                                                                                                                                                                                                                                                                                                                                                                                                                                                                                                                                                                                                                                                                                                                                                                                                                                                                                                                                                                                                                                                                                                                                                                                                                                                                                                                                                                                                                                                                                                                                                                                                                                                                     | 6626      | 537.7302749 | -0.233402661 | 0.415575788 | -0.561636813 | 0.574363494 | 0.999371363 | Not Sig |
| ENSG00000268050 | NA        | NA                                                                                                                                                                                                                                                                                                                                                                                                                                                                                                                                                                                                                                                                                                                                                                                                                                                                                                                                                                                                                                                                                                                                                                                                                                                                                                                                                                                                                                                                                                                                                                                                                                                                                                                                                                | NA        | 8.126027415 | -0.233391553 | 0.907670108 | -0.257132576 | 0.79707643  | 0.999371363 | Not Sig |

|                 |          |                                                                                                                  |           |             |              |             |              |             |             |         |
|-----------------|----------|------------------------------------------------------------------------------------------------------------------|-----------|-------------|--------------|-------------|--------------|-------------|-------------|---------|
| ENSG00000138036 | DYNC2LI1 | dynein cytoplasmic 2 light intermediate chain 1                                                                  | 51626     | 382.1359809 | -0.233367086 | 0.431558112 | -0.54075472  | 0.588676656 | 0.999371363 | Not Sig |
| ENSG00000123200 | ZC3H13   | zinc finger CCCH-type containing 13                                                                              | 23091     | 2488.820891 | -0.233225968 | 0.403542269 | -0.577946814 | 0.563300028 | 0.999371363 | Not Sig |
| ENSG00000113712 | CSNK1A1  | casein kinase 1 alpha 1                                                                                          | 1452      | 3052.899315 | -0.233157593 | 0.459385983 | -0.50754181  | 0.611774708 | 0.999371363 | Not Sig |
| ENSG00000204186 | ZDBF2    | zinc finger DBF-type containing 2                                                                                | 57683     | 530.5161639 | -0.233102863 | 0.494876374 | -0.471032514 | 0.637617517 | 0.999371363 | Not Sig |
| ENSG00000164024 | METAP1   | methionyl aminopeptidase 1                                                                                       | 23173     | 856.4017253 | -0.23300222  | 0.518650947 | -0.449246688 | 0.653253711 | 0.999371363 | Not Sig |
| ENSG00000225224 | NA       | NA                                                                                                               | NA        | 75.85350739 | -0.232921638 | 0.717338345 | -0.324702618 | 0.745406153 | 0.999371363 | Not Sig |
| ENSG00000243738 | NA       | NA                                                                                                               | NA        | 5.313904274 | -0.232903474 | 1.316905405 | -0.176856647 | 0.859620993 | NA          | NA      |
| ENSG00000130559 | CAMSAP1  | calmodulin regulated spectrin associated protein 1                                                               | 157922    | 1414.672094 | -0.232868305 | 0.430145887 | -0.541370525 | 0.588252219 | 0.999371363 | Not Sig |
| ENSG00000095380 | NANS     | N-acetylneuraminate synthase                                                                                     | 54187     | 822.2938071 | -0.232865941 | 0.514960985 | -0.452201133 | 0.651124092 | 0.999371363 | Not Sig |
| ENSG00000101158 | NELFCD   | negative elongation factor complex member C/D                                                                    | 51497     | 857.8267471 | -0.232864029 | 0.42717199  | -0.545129443 | 0.585664494 | 0.999371363 | Not Sig |
| ENSG00000073584 | SMARCE1  | <small>SMARCE1 related, matrix associated, actin dependent regulator of chromatin, subfamily 1, member 1</small> | 6605      | 928.8479447 | -0.232387489 | 0.546452464 | -0.425265699 | 0.670642995 | 0.999371363 | Not Sig |
| ENSG00000168818 | STX18    | syntaxin 18                                                                                                      | 53407     | 667.8176565 | -0.232166464 | 0.386615752 | -0.600509582 | 0.548166677 | 0.999371363 | Not Sig |
| ENSG00000213997 | NA       | NA                                                                                                               | NA        | 12.65025254 | -0.232117896 | 0.9289206   | -0.249879157 | 0.802680802 | 0.999371363 | Not Sig |
| ENSG00000163781 | TOPBP1   | DNA topoisomerase II binding protein 1                                                                           | 11073     | 1032.31158  | -0.232090983 | 0.588724505 | -0.39422681  | 0.693413594 | 0.999371363 | Not Sig |
| ENSG00000211997 | MIR708   | microRNA 708                                                                                                     | 100126333 | 1.999166953 | -0.232063287 | 1.844315109 | -0.125826268 | 0.899869448 | NA          | NA      |
| ENSG00000141127 | PRPSAP2  | phosphoribosyl pyrophosphate synthetase associated protein 2                                                     | 5636      | 514.9571528 | -0.232038559 | 0.436262955 | -0.531877749 | 0.594810669 | 0.999371363 | Not Sig |
| ENSG00000147324 | MFHAS1   | malignant fibrous histiocytoma amplified sequence 1                                                              | 9258      | 1713.764052 | -0.232021111 | 0.509521918 | -0.455370227 | 0.648842911 | 0.999371363 | Not Sig |
| ENSG00000237631 | NA       | NA                                                                                                               | NA        | 13.55029017 | -0.231937715 | 0.96697895  | -0.23985808  | 0.810440279 | 0.999371363 | Not Sig |
| ENSG00000144468 | RHBDD1   | rhomboid domain containing 1                                                                                     | 84236     | 727.8855972 | -0.231896257 | 0.491526911 | -0.471787509 | 0.637078468 | 0.999371363 | Not Sig |
| ENSG00000244265 | NA       | NA                                                                                                               | NA        | 4.652393676 | -0.231877435 | 1.240928384 | -0.186858032 | 0.851771946 | NA          | NA      |
| ENSG00000129566 | TEP1     | telomerase associated protein 1                                                                                  | 7011      | 2310.975983 | -0.231863974 | 0.46427702  | -0.499408682 | 0.617491504 | 0.999371363 | Not Sig |
| ENSG00000091039 | OSBPL8   | oxysterol binding protein like 8                                                                                 | 114882    | 2681.09465  | -0.231810317 | 0.548979644 | -0.422256671 | 0.672837681 | 0.999371363 | Not Sig |
| ENSG00000197714 | ZNF460   | zinc finger protein 460                                                                                          | 10794     | 1754.139033 | -0.231636085 | 0.464493584 | -0.49868522  | 0.618001159 | 0.999371363 | Not Sig |
| ENSG00000132849 | PATJ     | PATJ, crumbs cell polarity complex component                                                                     | 10207     | 4291.905512 | -0.231626685 | 0.658433929 | -0.351784249 | 0.725000072 | 0.999371363 | Not Sig |
| ENSG00000266368 | NA       | NA                                                                                                               | NA        | 1.482907742 | -0.231537445 | 2.310369826 | -0.100216616 | 0.920172355 | NA          | NA      |
| ENSG00000104518 | GSDMD    | gasdermin D                                                                                                      | 79792     | 1552.966707 | -0.231535966 | 0.654782128 | -0.353607644 | 0.723632945 | 0.999371363 | Not Sig |
| ENSG00000172869 | DMXL1    | Dmx like 1                                                                                                       | 1657      | 2358.239133 | -0.231483215 | 0.498477381 | -0.46438058  | 0.642375101 | 0.999371363 | Not Sig |
| ENSG00000182197 | EXT1     | exostosin glycosyltransferase 1                                                                                  | 2131      | 1680.231479 | -0.231362502 | 0.413948455 | -0.558916211 | 0.576218905 | 0.999371363 | Not Sig |
| ENSG00000228972 | NA       | NA                                                                                                               | NA        | 48.54094937 | -0.23106655  | 0.930956044 | -0.248203502 | 0.803976957 | 0.999371363 | Not Sig |
| ENSG00000174738 | NR1D2    | nuclear receptor subfamily 1 group D member 2                                                                    | 9975      | 1417.821601 | -0.231058812 | 0.460980565 | -0.501233305 | 0.616206938 | 0.999371363 | Not Sig |
| ENSG00000147592 | LACTB2   | lactamase beta 2                                                                                                 | 51110     | 517.0606538 | -0.230723276 | 0.72139497  | -0.319829338 | 0.749097706 | 0.999371363 | Not Sig |
| ENSG00000232838 | PET117   | PET117 homolog                                                                                                   | 100303755 | 30.16783175 | -0.230679468 | 0.624060124 | -0.369643019 | 0.711648493 | 0.999371363 | Not Sig |
| ENSG00000074201 | CLNS1A   | chloride nucleotide-sensitive channel 1A                                                                         | 1207      | 997.5641879 | -0.230512516 | 0.47540877  | -0.484872241 | 0.627766975 | 0.999371363 | Not Sig |
| ENSG00000177335 | C8orf31  | chromosome 8 open reading frame 31 (putative)                                                                    | 286122    | 84.04628393 | -0.23045477  | 0.500741555 | -0.460226974 | 0.645353312 | 0.999371363 | Not Sig |
| ENSG00000230629 | NA       | NA                                                                                                               | NA        | 17.48413089 | -0.230398455 | 0.933281203 | -0.246869276 | 0.805009395 | 0.999371363 | Not Sig |



|                 |            |                                                                      |           |             |              |             |              |             |             |         |
|-----------------|------------|----------------------------------------------------------------------|-----------|-------------|--------------|-------------|--------------|-------------|-------------|---------|
| ENSG00000112679 | DUSP22     | dual specificity phosphatase 22                                      | 56940     | 1076.540922 | -0.230324065 | 0.453617441 | -0.50774958  | 0.611628973 | 0.999371363 | Not Sig |
| ENSG00000138032 | PPM1B      | protein phosphatase, Mg <sup>2+</sup> /Mn <sup>2+</sup> dependent 1B | 5495      | 1041.64811  | -0.230299792 | 0.524904064 | -0.438746445 | 0.660845269 | 0.999371363 | Not Sig |
| ENSG00000187186 | LOC730098  | uncharacterized LOC730098                                            | 730098    | 4.889735722 | -0.230292055 | 1.152774519 | -0.199771986 | 0.841658912 | NA          | NA      |
| ENSG00000112079 | STK38      | serine/threonine kinase 38                                           | 11329     | 1520.312544 | -0.230205241 | 0.562553397 | -0.409214915 | 0.68238195  | 0.999371363 | Not Sig |
| ENSG00000147202 | DIAPH2     | diaphanous related formin 2                                          | 1730      | 1142.552741 | -0.230171812 | 0.429334743 | -0.53611271  | 0.591880657 | 0.999371363 | Not Sig |
| ENSG00000074527 | NTN4       | netrin 4                                                             | 59277     | 1605.661436 | -0.230159832 | 0.559136095 | -0.411634723 | 0.680607177 | 0.999371363 | Not Sig |
| ENSG00000205517 | RGL3       | ral guanine nucleotide dissociation stimulator like 3                | 57139     | 553.1709036 | -0.230129464 | 0.63659928  | -0.361498152 | 0.717727086 | 0.999371363 | Not Sig |
| ENSG00000055955 | ITIH4      | inter-alpha-trypsin inhibitor heavy chain family member 4            | 3700      | 15.47223309 | -0.230055804 | 0.907945696 | -0.253380576 | 0.799974136 | 0.999371363 | Not Sig |
| ENSG00000101079 | NDRG3      | NDRG family member 3                                                 | 57446     | 499.8171352 | -0.229998    | 0.453957385 | -0.50665108  | 0.612399661 | 0.999371363 | Not Sig |
| ENSG00000176973 | FAM89B     | family with sequence similarity 89 member B                          | 23625     | 149.8690508 | -0.229988744 | 0.46851164  | -0.490892272 | 0.623502643 | 0.999371363 | Not Sig |
| ENSG00000042429 | MED17      | mediator complex subunit 17                                          | 9440      | 698.3273769 | -0.229964476 | 0.455863295 | -0.504459293 | 0.61393866  | 0.999371363 | Not Sig |
| ENSG00000106089 | STX1A      | syntaxin 1A                                                          | 6804      | 222.3680342 | -0.229954845 | 0.790846539 | -0.290770501 | 0.771226848 | 0.999371363 | Not Sig |
| ENSG00000140577 | CRTC3      | CREB regulated transcription coactivator 3                           | 64784     | 1563.597964 | -0.229919324 | 0.469971332 | -0.489219891 | 0.624686029 | 0.999371363 | Not Sig |
| ENSG00000269834 | ZNF528-AS1 | ZNF528 antisense RNA 1                                               | 102724105 | 102.086426  | -0.229855852 | 0.519089135 | -0.442806132 | 0.657905967 | 0.999371363 | Not Sig |
| ENSG00000263621 | NA         | NA                                                                   | NA        | 13.08014939 | -0.229696552 | 0.825164993 | -0.278364393 | 0.78073265  | 0.999371363 | Not Sig |
| ENSG00000261758 | NA         | NA                                                                   | NA        | 5.280117285 | -0.229656928 | 1.144036888 | -0.20074259  | 0.840899855 | NA          | NA      |
| ENSG00000205639 | MFSD2B     | major facilitator superfamily domain containing 2B                   | 388931    | 12.4257181  | -0.229501468 | 1.12864481  | -0.20334251  | 0.838867331 | 0.999371363 | Not Sig |
| ENSG00000100211 | CBY1       | chibby family member 1, beta catenin antagonist                      | 25776     | 410.1467464 | -0.2294857   | 0.481959134 | -0.476151782 | 0.633966249 | 0.999371363 | Not Sig |
| ENSG00000145901 | TNIP1      | TNFAIP3 interacting protein 1                                        | 10318     | 3168.660465 | -0.229425961 | 0.579476905 | -0.395919076 | 0.692164728 | 0.999371363 | Not Sig |
| ENSG00000251485 | NA         | NA                                                                   | NA        | 7.116098603 | -0.229309586 | 1.006238421 | -0.227887925 | 0.81973337  | 0.999371363 | Not Sig |
| ENSG00000247708 | STX18-AS1  | STX18 antisense RNA 1 (head to head)                                 | 100507266 | 84.95164355 | -0.229300288 | 0.487732834 | -0.470135025 | 0.638258552 | 0.999371363 | Not Sig |
| ENSG00000165752 | STK32C     | serine/threonine kinase 32C                                          | 282974    | 212.9190045 | -0.229204985 | 0.733441449 | -0.312506179 | 0.754655868 | 0.999371363 | Not Sig |
| ENSG00000138660 | AP1AR      | adaptor related protein complex 1 associated regulatory protein      | 55435     | 435.3244012 | -0.229189238 | 0.554821691 | -0.413086297 | 0.679543388 | 0.999371363 | Not Sig |
| ENSG00000221949 | LINC01465  | long intergenic non-protein coding RNA 1465                          | 283416    | 12.43655137 | -0.229052038 | 0.785827546 | -0.29147876  | 0.770685186 | 0.999371363 | Not Sig |
| ENSG00000147789 | ZNF7       | zinc finger protein 7                                                | 7553      | 736.7332445 | -0.229021471 | 0.477261412 | -0.479865887 | 0.631322759 | 0.999371363 | Not Sig |
| ENSG00000251634 | NA         | NA                                                                   | NA        | 49.23422348 | -0.228793573 | 0.586831127 | -0.38987975  | 0.696625469 | 0.999371363 | Not Sig |
| ENSG00000263712 | MIR4639    | microRNA 4639                                                        | 100616269 | 5.80041728  | -0.228771652 | 1.032331769 | -0.221606715 | 0.824620055 | NA          | NA      |
| ENSG00000185482 | STAC3      | SH3 and cysteine rich domain 3                                       | 246329    | 72.36502665 | -0.228744216 | 0.845382392 | -0.270580767 | 0.78671349  | 0.999371363 | Not Sig |
| ENSG00000196741 | NA         | NA                                                                   | NA        | 29.36313569 | -0.228650367 | 0.572652259 | -0.399283097 | 0.68968462  | 0.999371363 | Not Sig |
| ENSG00000183856 | IQGAP3     | IQ motif containing GTPase activating protein 3                      | 128239    | 343.3920616 | -0.228614842 | 1.025381322 | -0.222955926 | 0.823569809 | 0.999371363 | Not Sig |
| ENSG00000268849 | NA         | NA                                                                   | NA        | 17.90163351 | -0.228560053 | 0.992159676 | -0.230366199 | 0.817807224 | 0.999371363 | Not Sig |
| ENSG00000100342 | APOL1      | apolipoprotein L1                                                    | 8542      | 2023.331895 | -0.22848719  | 0.601214162 | -0.380042928 | 0.70391355  | 0.999371363 | Not Sig |
| ENSG00000205771 | CATSPER2P1 | cation channel sperm associated 2 pseudogene 1                       | 440278    | 62.95854194 | -0.228375805 | 0.683070115 | -0.334337281 | 0.738125061 | 0.999371363 | Not Sig |
| ENSG00000138758 | 11-Sep     | septin 11                                                            | 55752     | 2749.365063 | -0.22836321  | 0.44921095  | -0.508365189 | 0.611197261 | 0.999371363 | Not Sig |
| ENSG00000164587 | RPS14      | ribosomal protein S14                                                | 6208      | 5705.196003 | -0.228358955 | 0.517711487 | -0.441093081 | 0.659145612 | 0.999371363 | Not Sig |

|                 |           |                                                                                            |           |             |              |             |              |             |             |         |
|-----------------|-----------|--------------------------------------------------------------------------------------------|-----------|-------------|--------------|-------------|--------------|-------------|-------------|---------|
| ENSG00000064666 | CNN2      | calponin 2                                                                                 | 1265      | 2954.944393 | -0.228240312 | 0.469596862 | -0.486034577 | 0.626942651 | 0.999371363 | Not Sig |
| ENSG00000125046 | SSUH2     | ssu-2 homolog (C. elegans)                                                                 | 51066     | 11.34484431 | -0.228227451 | 0.937722175 | -0.243384935 | 0.807707213 | 0.999371363 | Not Sig |
| ENSG00000138785 | INTS12    | integrator complex subunit 12                                                              | 57117     | 353.5263305 | -0.228153815 | 0.428806801 | -0.532066669 | 0.594679807 | 0.999371363 | Not Sig |
| ENSG00000268565 | NA        | NA                                                                                         | NA        | 11.6693607  | -0.227948748 | 0.970214758 | -0.234946692 | 0.814250108 | 0.999371363 | Not Sig |
| ENSG00000134285 | FKBP11    | FK506 binding protein 11                                                                   | 51303     | 422.0524822 | -0.227923712 | 0.532136122 | -0.428318437 | 0.668419298 | 0.999371363 | Not Sig |
| ENSG00000130640 | TUBGCP2   | tubulin gamma complex associated protein 2                                                 | 10844     | 1486.434665 | -0.227876716 | 0.416459437 | -0.547176259 | 0.584257645 | 0.999371363 | Not Sig |
| ENSG00000170325 | PRDM10    | PR/SET domain 10                                                                           | 56980     | 389.1196279 | -0.227822566 | 0.429987164 | -0.529835737 | 0.596225825 | 0.999371363 | Not Sig |
| ENSG00000166501 | PRKCB     | protein kinase C beta                                                                      | 5579      | 688.3728475 | -0.227790513 | 0.868390981 | -0.262313311 | 0.793079901 | 0.999371363 | Not Sig |
| ENSG00000228323 | NA        | NA                                                                                         | NA        | 10.40288819 | -0.227730564 | 0.888668395 | -0.256260451 | 0.797749733 | 0.999371363 | Not Sig |
| ENSG00000198816 | ZNF358    | zinc finger protein 358                                                                    | 140467    | 671.6383019 | -0.227470905 | 0.767949726 | -0.296205465 | 0.767073176 | 0.999371363 | Not Sig |
| ENSG00000122873 | CISD1     | CDGSH iron sulfur domain 1                                                                 | 55847     | 223.0313549 | -0.227446226 | 0.522500878 | -0.43530305  | 0.663342471 | 0.999371363 | Not Sig |
| ENSG00000173581 | CCDC106   | coiled-coil domain containing 106                                                          | 29903     | 189.7987459 | -0.227335814 | 0.770565199 | -0.295024762 | 0.767974964 | 0.999371363 | Not Sig |
| ENSG00000169554 | ZEB2      | zinc finger E-box binding homeobox 2                                                       | 9839      | 3953.360802 | -0.227227109 | 0.664259616 | -0.342075754 | 0.732293883 | 0.999371363 | Not Sig |
| ENSG00000156273 | BACH1     | BTB domain and CNC homolog 1                                                               | 571       | 2386.244065 | -0.227189271 | 0.431489007 | -0.526523891 | 0.598524257 | 0.999371363 | Not Sig |
| ENSG00000156273 | GRIK1-AS2 | GRIK1 antisense RNA 2                                                                      | 100379661 | 2386.244065 | -0.227189271 | 0.431489007 | -0.526523891 | 0.598524257 | 0.999371363 | Not Sig |
| ENSG00000078246 | TULP3     | tubby like protein 3                                                                       | 7289      | 462.9475704 | -0.227141075 | 0.490107564 | -0.463451479 | 0.643040786 | 0.999371363 | Not Sig |
| ENSG00000225079 | NA        | NA                                                                                         | NA        | 14.08359043 | -0.227126048 | 0.935761176 | -0.242717964 | 0.80822389  | 0.999371363 | Not Sig |
| ENSG00000196757 | ZNF700    | zinc finger protein 700                                                                    | 90592     | 325.0125302 | -0.227049327 | 0.449492009 | -0.505124278 | 0.61347155  | 0.999371363 | Not Sig |
| ENSG00000261652 | C15orf65  | chromosome 15 open reading frame 65                                                        | 145788    | 21.93681855 | -0.226943366 | 0.86776633  | -0.261525895 | 0.793686983 | 0.999371363 | Not Sig |
| ENSG00000204822 | MRPL53    | mitochondrial ribosomal protein L53                                                        | 116540    | 35.54033932 | -0.226822737 | 0.570707353 | -0.397441413 | 0.691041982 | 0.999371363 | Not Sig |
| ENSG00000198420 | TCAF1     | TRPM8 channel associated factor 1                                                          | 9747      | 986.2272779 | -0.226794412 | 0.489462266 | -0.463354231 | 0.643110479 | 0.999371363 | Not Sig |
| ENSG00000086730 | LAT2      | linker for activation of T-cells family member 2                                           | 7462      | 444.265438  | -0.226536176 | 0.685421265 | -0.330506489 | 0.741017291 | 0.999371363 | Not Sig |
| ENSG00000161091 | MFSD12    | major facilitator superfamily domain containing 12                                         | 126321    | 1146.76328  | -0.226488901 | 0.524225967 | -0.432044415 | 0.665709133 | 0.999371363 | Not Sig |
| ENSG00000100413 | POLR3H    | RNA polymerase III subunit H                                                               | 171568    | 1005.894374 | -0.226469205 | 0.573723067 | -0.394736098 | 0.693037659 | 0.999371363 | Not Sig |
| ENSG00000152439 | ZNF773    | zinc finger protein 773                                                                    | 374928    | 152.4830096 | -0.226446182 | 0.469213275 | -0.482608217 | 0.629373943 | 0.999371363 | Not Sig |
| ENSG00000179933 | C14orf119 | chromosome 14 open reading frame 119                                                       | 55017     | 709.0003403 | -0.226435587 | 0.49993251  | -0.452932312 | 0.650597483 | 0.999371363 | Not Sig |
| ENSG00000063177 | RPL18     | ribosomal protein L18                                                                      | 6141      | 5077.777153 | -0.226360992 | 0.48821124  | -0.46365379  | 0.642895809 | 0.999371363 | Not Sig |
| ENSG00000152193 | RNF219    | ring finger protein 219                                                                    | 79596     | 349.8014552 | -0.226283086 | 0.472571209 | -0.478833838 | 0.632056842 | 0.999371363 | Not Sig |
| ENSG00000251535 | NA        | NA                                                                                         | NA        | 14.83746827 | -0.226198678 | 0.923979112 | -0.244809298 | 0.806604094 | 0.999371363 | Not Sig |
| ENSG00000167550 | RHEBL1    | RHEB like 1                                                                                | 121268    | 17.73983241 | -0.226156713 | 1.044113815 | -0.21660159  | 0.828518846 | 0.999371363 | Not Sig |
| ENSG00000119906 | SLF2      | SMC5-SMC6 complex localization factor 2                                                    | 55719     | 1383.782873 | -0.225723728 | 0.459718999 | -0.491003696 | 0.623423833 | 0.999371363 | Not Sig |
| ENSG00000174796 | THAP6     | THAP domain containing 6                                                                   | 152815    | 377.3314345 | -0.225566459 | 0.590045257 | -0.382286708 | 0.702248713 | 0.999371363 | Not Sig |
| ENSG00000163884 | KLF15     | Kruppel like factor 15                                                                     | 28999     | 386.8799377 | -0.225490736 | 1.08783534  | -0.207283885 | 0.835788159 | 0.999371363 | Not Sig |
| ENSG00000135390 | ATP5G2    | ATP synthase, H <sup>+</sup> transporting, mitochondrial Fo complex subunit C2 (subunit 9) | 517       | 1637.350989 | -0.22548212  | 0.394000831 | -0.572288438 | 0.567126581 | 0.999371363 | Not Sig |
| ENSG00000165802 | NSMF      | NMDA receptor synaptic/lear signaling and neuronal migration factor                        | 26012     | 793.3493183 | -0.225468609 | 0.551494099 | -0.408832315 | 0.682662723 | 0.999371363 | Not Sig |

|                 |               |                                                                   |           |             |              |             |              |             |             |         |
|-----------------|---------------|-------------------------------------------------------------------|-----------|-------------|--------------|-------------|--------------|-------------|-------------|---------|
| ENSG00000104129 | DNAJC17       | DnaJ heat shock protein family (Hsp40) member C17                 | 55192     | 355.8633849 | -0.225440663 | 0.460440832 | -0.489619181 | 0.624403401 | 0.999371363 | Not Sig |
| ENSG00000253953 | PCDHGB4       | protocadherin gamma subfamily B, 4                                | 8641      | 106.5412519 | -0.225431593 | 0.669851996 | -0.336539406 | 0.736464141 | 0.999371363 | Not Sig |
| ENSG00000212864 | RNF208        | ring finger protein 208                                           | 727800    | 155.5790116 | -0.225188373 | 0.612519054 | -0.36764305  | 0.71313941  | 0.999371363 | Not Sig |
| ENSG00000271533 | NA            | NA                                                                | NA        | 859.1923259 | -0.225150487 | 0.894684421 | -0.251653523 | 0.801308884 | 0.999371363 | Not Sig |
| ENSG00000124257 | NEURL2        | neuralized E3 ubiquitin protein ligase 2                          | 140825    | 45.43312495 | -0.224878985 | 0.667436851 | -0.336929232 | 0.736170249 | 0.999371363 | Not Sig |
| ENSG00000197863 | ZNF790        | zinc finger protein 790                                           | 388536    | 159.7846348 | -0.22480005  | 0.430576282 | -0.522091113 | 0.601606894 | 0.999371363 | Not Sig |
| ENSG00000079462 | PAFAH1B3      | platelet activating factor acetylhydrolase 1b catalytic subunit 3 | 5050      | 188.1715768 | -0.224738803 | 0.525956766 | -0.427295203 | 0.669164326 | 0.999371363 | Not Sig |
| ENSG00000233098 | LOC339260     | uncharacterized LOC339260                                         | 339260    | 66.75750389 | -0.224681659 | 0.742025638 | -0.302795007 | 0.762046088 | 0.999371363 | Not Sig |
| ENSG00000233098 | CCDC144NL-AS1 | CCDC144NL antisense RNA 1                                         | 440416    | 66.75750389 | -0.224681659 | 0.742025638 | -0.302795007 | 0.762046088 | 0.999371363 | Not Sig |
| ENSG00000233098 | LOC105369205  | uncharacterized LOC105369205                                      | 105369205 | 66.75750389 | -0.224681659 | 0.742025638 | -0.302795007 | 0.762046088 | 0.999371363 | Not Sig |
| ENSG00000213024 | NUP62         | nucleoporin 62                                                    | 23636     | 942.7673206 | -0.224481231 | 0.407230208 | -0.551239143 | 0.58146975  | 0.999371363 | Not Sig |
| ENSG00000112996 | MRPS30        | mitochondrial ribosomal protein S30                               | 10884     | 848.6910658 | -0.224445835 | 0.445608715 | -0.503683675 | 0.614483682 | 0.999371363 | Not Sig |
| ENSG00000144036 | EXOC6B        | exocyst complex component 6B                                      | 23233     | 1084.643879 | -0.224404692 | 0.418165355 | -0.536641042 | 0.591515589 | 0.999371363 | Not Sig |
| ENSG00000249898 | NA            | NA                                                                | NA        | 16.41086198 | -0.224313163 | 0.820069418 | -0.273529483 | 0.784446232 | 0.999371363 | Not Sig |
| ENSG00000270574 | NA            | NA                                                                | NA        | 37.34649162 | -0.224262059 | 0.561918327 | -0.39910081  | 0.689818925 | 0.999371363 | Not Sig |
| ENSG00000207750 | MIR553        | microRNA 553                                                      | 693138    | 9.036006485 | -0.224087667 | 1.130496824 | -0.198220519 | 0.842872534 | 0.999371363 | Not Sig |
| ENSG00000251902 | NA            | NA                                                                | NA        | 6.809383035 | -0.22407176  | 0.986089853 | -0.227232599 | 0.82024288  | 0.999371363 | Not Sig |
| ENSG00000198918 | RPL39         | ribosomal protein L39                                             | 6170      | 2410.550117 | -0.224052152 | 0.674571704 | -0.332139861 | 0.739783652 | 0.999371363 | Not Sig |
| ENSG00000202058 | NA            | NA                                                                | NA        | 1278.363342 | -0.224038908 | 0.409751703 | -0.546767485 | 0.584538484 | 0.999371363 | Not Sig |
| ENSG00000241553 | ARPC4         | actin related protein 2/3 complex subunit 4                       | 10093     | 1359.981079 | -0.223981785 | 0.447797543 | -0.500185381 | 0.616944551 | 0.999371363 | Not Sig |
| ENSG00000111796 | KLRB1         | killer cell lectin like receptor B1                               | 3820      | 81.55725903 | -0.223904932 | 0.861642459 | -0.259858286 | 0.794973089 | 0.999371363 | Not Sig |
| ENSG00000259315 | ACTG1P17      | actin gamma 1 pseudogene 17                                       | 283693    | 16.09512482 | -0.223701148 | 0.727026762 | -0.307693141 | 0.75831584  | 0.999371363 | Not Sig |
| ENSG00000252947 | SCARNA1       | small Cajal body-specific RNA 1                                   | 677774    | 5.188414444 | -0.223691756 | 1.171758489 | -0.190902611 | 0.848601894 | NA          | NA      |
| ENSG00000214552 | NA            | NA                                                                | NA        | 3.472205439 | -0.223526409 | 1.273412536 | -0.175533382 | 0.860660543 | NA          | NA      |
| ENSG00000213757 | NA            | NA                                                                | NA        | 3.361754333 | -0.223470584 | 1.369078764 | -0.163226974 | 0.870339729 | NA          | NA      |
| ENSG00000140525 | FANCI         | Fanconi anemia complementation group I                            | 55215     | 458.5431347 | -0.223303084 | 0.859329725 | -0.259857279 | 0.794973866 | 0.999371363 | Not Sig |
| ENSG00000230610 | NA            | NA                                                                | NA        | 1.826660111 | -0.223195291 | 2.242111872 | -0.099546902 | 0.92070405  | NA          | NA      |
| ENSG00000213762 | ZNF134        | zinc finger protein 134                                           | 7693      | 454.056686  | -0.223194583 | 0.414363762 | -0.53864407  | 0.590132473 | 0.999371363 | Not Sig |
| ENSG00000123609 | NMI           | N-myc and STAT interactor                                         | 9111      | 525.8071086 | -0.223116271 | 0.532553944 | -0.41895525  | 0.675248837 | 0.999371363 | Not Sig |
| ENSG00000143353 | LYPLAL1       | lysophospholipase like 1                                          | 127018    | 403.6852186 | -0.223071265 | 0.647168761 | -0.344687938 | 0.730328988 | 0.999371363 | Not Sig |
| ENSG00000131845 | ZNF304        | zinc finger protein 304                                           | 57343     | 364.7644371 | -0.22305291  | 0.422039404 | -0.528512049 | 0.597143987 | 0.999371363 | Not Sig |
| ENSG00000069956 | MAPK6         | mitogen-activated protein kinase 6                                | 5597      | 1300.449584 | -0.222884787 | 0.641294962 | -0.347554246 | 0.728174973 | 0.999371363 | Not Sig |
| ENSG00000104228 | TRIM35        | tripartite motif containing 35                                    | 23087     | 473.8452992 | -0.222743399 | 0.680570306 | -0.32728933  | 0.743449062 | 0.999371363 | Not Sig |
| ENSG00000111785 | RIC8B         | RIC8 guanine nucleotide exchange factor B                         | 55188     | 383.3053988 | -0.222688528 | 0.441982542 | -0.5038401   | 0.614373746 | 0.999371363 | Not Sig |
| ENSG00000019102 | VSIG2         | V-set and immunoglobulin domain containing 2                      | 23584     | 457.9121936 | -0.222445278 | 1.013507706 | -0.219480598 | 0.826275692 | 0.999371363 | Not Sig |

|                 |           |                                                                                               |           |             |              |             |              |             |             |         |
|-----------------|-----------|-----------------------------------------------------------------------------------------------|-----------|-------------|--------------|-------------|--------------|-------------|-------------|---------|
| ENSG00000207371 | NA        | NA                                                                                            | NA        | 0.969045283 | -0.222395499 | 2.322080162 | -0.095774256 | 0.923699864 | NA          | NA      |
| ENSG00000213076 | NA        | NA                                                                                            | NA        | 0.969045283 | -0.222395499 | 2.322080162 | -0.095774256 | 0.923699864 | NA          | NA      |
| ENSG00000232801 | NA        | NA                                                                                            | NA        | 0.969045283 | -0.222395499 | 2.322080162 | -0.095774256 | 0.923699864 | NA          | NA      |
| ENSG00000186468 | RPS23     | ribosomal protein S23                                                                         | 6228      | 6577.394259 | -0.222368781 | 0.433894059 | -0.512495565 | 0.608304224 | 0.999371363 | Not Sig |
| ENSG00000067365 | METTL22   | methyltransferase like 22                                                                     | 79091     | 406.3860953 | -0.22236827  | 0.443352054 | -0.501561384 | 0.615976089 | 0.999371363 | Not Sig |
| ENSG00000164638 | SLC29A4   | solute carrier family 29 member 4                                                             | 222962    | 351.5434158 | -0.222293804 | 0.971521278 | -0.228810021 | 0.819016578 | 0.999371363 | Not Sig |
| ENSG00000257226 | NA        | NA                                                                                            | NA        | 1.172771351 | -0.222268164 | 2.914397704 | -0.076265557 | 0.939207828 | NA          | NA      |
| ENSG00000226641 | NA        | NA                                                                                            | NA        | 3.055919015 | -0.222247414 | 1.380850129 | -0.1609497   | 0.872133017 | NA          | NA      |
| ENSG00000111321 | LTBR      | lymphotoxin beta receptor                                                                     | 4055      | 2091.350575 | -0.222234374 | 0.452701448 | -0.490907141 | 0.623492126 | 0.999371363 | Not Sig |
| ENSG00000070770 | CSNK2A2   | casein kinase 2 alpha 2                                                                       | 1459      | 1472.253234 | -0.222231245 | 0.457158542 | -0.486114169 | 0.626886222 | 0.999371363 | Not Sig |
| ENSG00000164219 | PGGT1B    | protein geranylgeranyltransferase type I subunit beta                                         | 5229      | 600.2495415 | -0.222210576 | 0.583902763 | -0.380560925 | 0.703529081 | 0.999371363 | Not Sig |
| ENSG00000130783 | CCDC62    | coiled-coil domain containing 62                                                              | 84660     | 18.27657996 | -0.222065171 | 0.7195113   | -0.308633333 | 0.757600462 | 0.999371363 | Not Sig |
| ENSG00000198961 | PJA2      | praja ring finger ubiquitin ligase 2                                                          | 9867      | 4129.742276 | -0.222050002 | 0.476136471 | -0.466357894 | 0.640959346 | 0.999371363 | Not Sig |
| ENSG00000139324 | TMTC3     | transmembrane and tetratricopeptide repeat containing 3                                       | 160418    | 868.0257488 | -0.221871916 | 0.574520547 | -0.386186216 | 0.699358761 | 0.999371363 | Not Sig |
| ENSG00000234782 | NA        | NA                                                                                            | NA        | 8.805533275 | -0.22187088  | 0.892468435 | -0.248603616 | 0.803667411 | 0.999371363 | Not Sig |
| ENSG00000234456 | MAGI2-AS3 | MAGI2 antisense RNA 3                                                                         | 100505881 | 558.9081336 | -0.221779901 | 0.411165725 | -0.539392969 | 0.589615731 | 0.999371363 | Not Sig |
| ENSG00000139163 | ETNK1     | ethanolamine kinase 1                                                                         | 55500     | 2336.385713 | -0.221776746 | 0.641848545 | -0.345528158 | 0.729697345 | 0.999371363 | Not Sig |
| ENSG00000129244 | ATP1B2    | ATPase Na <sup>+</sup> /K <sup>+</sup> transporting subunit beta 2                            | 482       | 106.0914831 | -0.221591065 | 0.978533524 | -0.226452195 | 0.820849736 | 0.999371363 | Not Sig |
| ENSG00000221500 | SNORD100  | small nucleolar RNA, C/D box 100                                                              | 594838    | 14.35294982 | -0.221514024 | 0.910784458 | -0.243212345 | 0.807840904 | 0.999371363 | Not Sig |
| ENSG00000143365 | RORC      | RAR related orphan receptor C                                                                 | 6097      | 1283.030356 | -0.221474962 | 0.571716366 | -0.38738608  | 0.698470407 | 0.999371363 | Not Sig |
| ENSG00000207962 | MIR30C1   | microRNA 30c-1                                                                                | 407031    | 5.824579009 | -0.221458761 | 1.08791969  | -0.203561681 | 0.83869604  | NA          | NA      |
| ENSG00000172732 | MUS81     | MUS81 structure-specific endonuclease subunit                                                 | 80198     | 715.2264985 | -0.221428421 | 0.563221716 | -0.3931461   | 0.694211577 | 0.999371363 | Not Sig |
| ENSG00000162998 | FRZB      | frizzled related protein                                                                      | 2487      | 248.6738215 | -0.221365181 | 0.739028996 | -0.299535177 | 0.764531736 | 0.999371363 | Not Sig |
| ENSG00000169018 | FEM1B     | fem-1 homolog B                                                                               | 10116     | 2148.655475 | -0.221194938 | 0.448699135 | -0.492969388 | 0.622034217 | 0.999371363 | Not Sig |
| ENSG00000261254 | NA        | NA                                                                                            | NA        | 82.09757217 | -0.22109665  | 0.687082312 | -0.321790629 | 0.747611314 | 0.999371363 | Not Sig |
| ENSG00000091831 | ESR1      | estrogen receptor 1                                                                           | 2099      | 230.9454813 | -0.221040845 | 0.905866111 | -0.244010502 | 0.807222686 | 0.999371363 | Not Sig |
| ENSG00000069869 | NEDD4     | neral precursor cell expressed, developmentally down-regulated 4, E3 ubiquitin protein ligase | 4734      | 611.819636  | -0.220961173 | 0.468014384 | -0.472124747 | 0.636837749 | 0.999371363 | Not Sig |
| ENSG00000087299 | L2HGDH    | L-2-hydroxyglutarate dehydrogenase                                                            | 79944     | 222.9643746 | -0.220929425 | 0.64360326  | -0.343269586 | 0.731395659 | 0.999371363 | Not Sig |
| ENSG00000223922 | NA        | NA                                                                                            | NA        | 13.49855666 | -0.220647391 | 0.760785481 | -0.290025764 | 0.771796527 | 0.999371363 | Not Sig |
| ENSG00000198001 | IRAK4     | interleukin 1 receptor associated kinase 4                                                    | 51135     | 593.3755414 | -0.220488805 | 0.525045059 | -0.419942635 | 0.674527361 | 0.999371363 | Not Sig |
| ENSG00000258891 | NA        | NA                                                                                            | NA        | 3.071810799 | -0.220383927 | 1.418384536 | -0.155376713 | 0.876524342 | NA          | NA      |
| ENSG00000078403 | MLLT10    | MLLT10, histone lysine methyltransferase DOT1L cofactor                                       | 8028      | 1087.355485 | -0.220055278 | 0.466951746 | -0.471259139 | 0.637455691 | 0.999371363 | Not Sig |
| ENSG00000250714 | NA        | NA                                                                                            | NA        | 6.664729933 | -0.220000691 | 1.044159246 | -0.210696493 | 0.833124112 | 0.999371363 | Not Sig |
| ENSG00000253626 | EIF5A1    | eukaryotic translation initiation factor 5A-like 1                                            | 143244    | 6.30439391  | -0.219939177 | 1.577491989 | -0.139423324 | 0.889115643 | NA          | NA      |
| ENSG00000154920 | EME1      | essential meiotic structure-specific endonuclease 1                                           | 146956    | 31.81435773 | -0.219895128 | 0.849525625 | -0.258844609 | 0.795755138 | 0.999371363 | Not Sig |

|                 |          |                                                            |        |             |              |             |              |             |             |         |
|-----------------|----------|------------------------------------------------------------|--------|-------------|--------------|-------------|--------------|-------------|-------------|---------|
| ENSG00000106588 | PSMA2    | proteasome subunit alpha 2                                 | 5683   | 123.9396757 | -0.219816067 | 0.588820274 | -0.373316064 | 0.708913222 | 0.999371363 | Not Sig |
| ENSG00000138279 | ANXA7    | annexin A7                                                 | 310    | 1728.818868 | -0.219813548 | 0.413743747 | -0.531279444 | 0.595225148 | 0.999371363 | Not Sig |
| ENSG00000067955 | CBFB     | core-binding factor beta subunit                           | 865    | 1163.226462 | -0.219807486 | 0.544178139 | -0.403925608 | 0.686267425 | 0.999371363 | Not Sig |
| ENSG00000183605 | SFXN4    | sideroflexin 4                                             | 119559 | 309.2344842 | -0.21960678  | 0.551118138 | -0.398474964 | 0.690280109 | 0.999371363 | Not Sig |
| ENSG00000113593 | PPWD1    | peptidylprolyl isomerase domain and WD repeat containing 1 | 23398  | 770.6102871 | -0.219541964 | 0.576576026 | -0.380768458 | 0.703375066 | 0.999371363 | Not Sig |
| ENSG00000101367 | MAPRE1   | microtubule associated protein RP/EB family member 1       | 22919  | 1890.342367 | -0.21952872  | 0.421694278 | -0.52058738  | 0.602654242 | 0.999371363 | Not Sig |
| ENSG00000181467 | RAP2B    | RAP2B, member of RAS oncogene family                       | 5912   | 1903.129466 | -0.219291202 | 0.424551104 | -0.516524867 | 0.605487876 | 0.999371363 | Not Sig |
| ENSG00000170473 | PYM1     | PYM homolog 1, exon junction complex associated factor     | 84305  | 349.2082463 | -0.21923815  | 0.422423589 | -0.519000729 | 0.603760233 | 0.999371363 | Not Sig |
| ENSG00000186275 | NA       | NA                                                         | NA     | 353.6021874 | -0.21922474  | 0.484335313 | -0.452630099 | 0.650815122 | 0.999371363 | Not Sig |
| ENSG00000254328 | NA       | NA                                                         | NA     | 11.23432697 | -0.219053498 | 0.812799182 | -0.269505067 | 0.787541043 | 0.999371363 | Not Sig |
| ENSG00000163006 | CCDC138  | coiled-coil domain containing 138                          | 165055 | 122.6809133 | -0.218973118 | 0.566870173 | -0.386284424 | 0.699286035 | 0.999371363 | Not Sig |
| ENSG00000125388 | GRK4     | G protein-coupled receptor kinase 4                        | 2868   | 114.5531423 | -0.218926274 | 0.486316375 | -0.450172531 | 0.652586041 | 0.999371363 | Not Sig |
| ENSG00000119383 | PTPA     | protein phosphatase 2 phosphatase activator                | 5524   | 1862.318329 | -0.218841218 | 0.54585987  | -0.400910984 | 0.688485663 | 0.999371363 | Not Sig |
| ENSG00000235917 | NA       | NA                                                         | NA     | 17.2142651  | -0.218808839 | 0.867828158 | -0.252133832 | 0.800937621 | 0.999371363 | Not Sig |
| ENSG00000032389 | EIPR1    | EARP complex and GARP complex interacting protein 1        | 7260   | 430.2585444 | -0.218754922 | 0.522953783 | -0.418306415 | 0.6757231   | 0.999371363 | Not Sig |
| ENSG00000235297 | NA       | NA                                                         | NA     | 1.91534624  | -0.21850367  | 1.827394746 | -0.119571139 | 0.904822884 | NA          | NA      |
| ENSG00000219409 | NA       | NA                                                         | NA     | 17.44544619 | -0.218324551 | 0.725445215 | -0.3009525   | 0.763450716 | 0.999371363 | Not Sig |
| ENSG00000120071 | KANSL1   | KAT8 regulatory NSL complex subunit 1                      | 284058 | 3083.137726 | -0.218252994 | 0.418155376 | -0.521942336 | 0.60171048  | 0.999371363 | Not Sig |
| ENSG00000239932 | NA       | NA                                                         | NA     | 2.668814454 | -0.218182298 | 1.611884773 | -0.135358496 | 0.892328438 | NA          | NA      |
| ENSG00000168209 | DDIT4    | DNA damage inducible transcript 4                          | 54541  | 1879.510187 | -0.217791456 | 0.529844958 | -0.411047521 | 0.68103769  | 0.999371363 | Not Sig |
| ENSG00000232040 | ZBED9    | zinc finger BED-type containing 9                          | 114821 | 135.2832118 | -0.217741129 | 0.804092334 | -0.270791201 | 0.786551628 | 0.999371363 | Not Sig |
| ENSG00000214717 | ZBED1    | zinc finger BED-type containing 1                          | 9189   | 1762.384526 | -0.21757544  | 0.421984719 | -0.515600281 | 0.606133614 | 0.999371363 | Not Sig |
| ENSG00000101363 | MANBAL   | mannosidase beta like                                      | 63905  | 502.5036902 | -0.21750903  | 0.422510384 | -0.514801621 | 0.606691652 | 0.999371363 | Not Sig |
| ENSG00000181873 | IBA57    | IBA57 homolog, iron-sulfur cluster assembly                | 200205 | 577.4890316 | -0.217496798 | 0.743076069 | -0.292697891 | 0.769753082 | 0.999371363 | Not Sig |
| ENSG00000225091 | SNORA71A | small nucleolar RNA, H/ACA box 71A                         | 26777  | 13.23491132 | -0.217056374 | 0.734735416 | -0.295421139 | 0.767672187 | 0.999371363 | Not Sig |
| ENSG00000159905 | ZNF221   | zinc finger protein 221                                    | 7638   | 115.2047605 | -0.217035204 | 0.560164752 | -0.387448877 | 0.698423925 | 0.999371363 | Not Sig |
| ENSG00000178385 | PLEKHM3  | pleckstrin homology domain containing M3                   | 389072 | 535.9392814 | -0.217010787 | 0.445096046 | -0.487559459 | 0.625861917 | 0.999371363 | Not Sig |
| ENSG00000233216 | NA       | NA                                                         | NA     | 1.052450989 | -0.216994265 | 2.580364995 | -0.084094407 | 0.932981371 | NA          | NA      |
| ENSG00000265095 | NA       | NA                                                         | NA     | 1.052450989 | -0.216994265 | 2.580364995 | -0.084094407 | 0.932981371 | NA          | NA      |
| ENSG00000258376 | NA       | NA                                                         | NA     | 16.52641092 | -0.216942984 | 0.973715348 | -0.222799183 | 0.823691804 | 0.999371363 | Not Sig |
| ENSG00000182916 | TCEAL7   | transcription elongation factor A like 7                   | 56849  | 23.52901962 | -0.21684558  | 0.767195058 | -0.282647259 | 0.777447249 | 0.999371363 | Not Sig |
| ENSG00000100485 | SOS2     | SOS Ras/Rho guanine nucleotide exchange factor 2           | 6655   | 1857.220078 | -0.216730318 | 0.465052839 | -0.466033748 | 0.641191344 | 0.999371363 | Not Sig |
| ENSG00000121101 | TEX14    | testis expressed 14, intercellular bridge forming factor   | 56155  | 12.35543242 | -0.21669682  | 0.818064421 | -0.264889677 | 0.791094451 | 0.999371363 | Not Sig |
| ENSG00000124140 | SLC12A5  | solute carrier family 12 member 5                          | 57468  | 27.31396286 | -0.216448806 | 0.8931428   | -0.242345127 | 0.808512749 | 0.999371363 | Not Sig |
| ENSG00000269482 | NA       | NA                                                         | NA     | 4.486020317 | -0.21644251  | 1.163327604 | -0.18605465  | 0.852401905 | NA          | NA      |

|                 |              |                                                                                          |           |             |              |             |              |             |             |         |
|-----------------|--------------|------------------------------------------------------------------------------------------|-----------|-------------|--------------|-------------|--------------|-------------|-------------|---------|
| ENSG00000224616 | NA           | NA                                                                                       | NA        | 22.8039213  | -0.216397441 | 0.870735078 | -0.24852271  | 0.803730001 | 0.999371363 | Not Sig |
| ENSG00000267546 | NA           | NA                                                                                       | NA        | 18.7561902  | -0.216356958 | 0.801089123 | -0.270078512 | 0.787099853 | 0.999371363 | Not Sig |
| ENSG00000130368 | MAS1         | MAS1 proto-oncogene, G protein-coupled receptor                                          | 4142      | 0.620272781 | -0.216353003 | 4.012239229 | -0.053923256 | 0.956996308 | NA          | NA      |
| ENSG00000211914 | NA           | NA                                                                                       | NA        | 0.620272781 | -0.216353003 | 4.012239229 | -0.053923256 | 0.956996308 | NA          | NA      |
| ENSG00000244588 | RAD21L1      | RAD21 cohesin complex component like 1                                                   | 642636    | 0.620272781 | -0.216353003 | 4.012239229 | -0.053923256 | 0.956996308 | NA          | NA      |
| ENSG00000256797 | KLRF2        | killer cell lectin like receptor F2                                                      | 100431172 | 0.620272781 | -0.216353003 | 4.012239229 | -0.053923256 | 0.956996308 | NA          | NA      |
| ENSG00000263279 | LOC105371079 | uncharacterized LOC105371079                                                             | 105371079 | 0.620272781 | -0.216353003 | 4.012239229 | -0.053923256 | 0.956996308 | NA          | NA      |
| ENSG00000270442 | NA           | NA                                                                                       | NA        | 0.620272781 | -0.216353003 | 4.012239229 | -0.053923256 | 0.956996308 | NA          | NA      |
| ENSG00000271092 | TMEM56-RWDD3 | TMEM56-RWDD3 readthrough                                                                 | 100527978 | 0.620272781 | -0.216353003 | 4.012239229 | -0.053923256 | 0.956996308 | NA          | NA      |
| ENSG00000060138 | YBX3         | Y-box binding protein 3                                                                  | 8531      | 4612.797012 | -0.216298432 | 0.446441126 | -0.484494863 | 0.628034709 | 0.999371363 | Not Sig |
| ENSG00000124164 | VAPB         | VAMP associated protein B and C                                                          | 9217      | 1313.126132 | -0.21620122  | 0.388794901 | -0.55608039  | 0.5781559   | 0.999371363 | Not Sig |
| ENSG00000162946 | DISC1        | disrupted in schizoprenia 1                                                              | 27185     | 272.9432982 | -0.216190572 | 0.559433012 | -0.386445862 | 0.69916649  | 0.999371363 | Not Sig |
| ENSG00000134987 | WDR36        | WD repeat domain 36                                                                      | 134430    | 1048.345136 | -0.216174093 | 0.564003893 | -0.383284753 | 0.701508643 | 0.999371363 | Not Sig |
| ENSG00000152404 | CWF19L2      | CWF19 like 2, cell cycle control (S. pombe)                                              | 143884    | 774.9415462 | -0.216140506 | 0.397626709 | -0.543576426 | 0.586732985 | 0.999371363 | Not Sig |
| ENSG00000151552 | QDPR         | quinoid dihydropteridine reductase                                                       | 5860      | 413.3386642 | -0.216065572 | 0.668801406 | -0.323063873 | 0.74664687  | 0.999371363 | Not Sig |
| ENSG00000179134 | SAMD4B       | sterile alpha motif domain containing 4B                                                 | 55095     | 2145.142498 | -0.215991158 | 0.422972369 | -0.510650752 | 0.609595631 | 0.999371363 | Not Sig |
| ENSG00000198707 | CEP290       | centrosomal protein 290                                                                  | 80184     | 1032.648816 | -0.215958032 | 0.614531099 | -0.351419208 | 0.725273874 | 0.999371363 | Not Sig |
| ENSG00000255974 | CYP2A6       | cytochrome P450 family 2 subfamily A member 6                                            | 1548      | 6.775767056 | -0.215913778 | 1.28633553  | -0.167851834 | 0.866699843 | 0.999371363 | Not Sig |
| ENSG00000204581 | ACOXL-AS1    | ACOXL antisense RNA 1                                                                    | 400997    | 8.928904969 | -0.215797148 | 1.243646397 | -0.173519698 | 0.862242946 | 0.999371363 | Not Sig |
| ENSG00000165219 | GAPVD1       | GTPase activating protein and VPS9 domains 1                                             | 26130     | 2297.719027 | -0.215608218 | 0.408069046 | -0.528362101 | 0.597248037 | 0.999371363 | Not Sig |
| ENSG00000224216 | NA           | NA                                                                                       | NA        | 8.845022446 | -0.215569166 | 0.933715421 | -0.230872449 | 0.817413895 | 0.999371363 | Not Sig |
| ENSG00000147162 | OGT          | O-linked N-acetylglucosamine (GlcNAc) transferase                                        | 8473      | 6326.523005 | -0.215487452 | 0.541560378 | -0.397901066 | 0.690703114 | 0.999371363 | Not Sig |
| ENSG00000196363 | WDR5         | WD repeat domain 5                                                                       | 11091     | 706.8749599 | -0.21531626  | 0.528853706 | -0.407137659 | 0.683906886 | 0.999371363 | Not Sig |
| ENSG00000127540 | UQCR11       | ubiquinol-cytochrome c reductase, complex III subunit XI                                 | 10975     | 194.4015298 | -0.214869859 | 0.522173158 | -0.411491582 | 0.680712113 | 0.999371363 | Not Sig |
| ENSG00000181513 | ACBD4        | acyl-CoA binding domain containing 4                                                     | 79777     | 334.5035333 | -0.214844704 | 0.511324246 | -0.42017312  | 0.67435899  | 0.999371363 | Not Sig |
| ENSG00000204147 | ASAH2B       | N-acylsphingosine amidohydrolase 2B                                                      | 653308    | 95.33633742 | -0.214840642 | 0.829815866 | -0.258901584 | 0.795711176 | 0.999371363 | Not Sig |
| ENSG00000260038 | NA           | NA                                                                                       | NA        | 14.9700396  | -0.214829601 | 0.764599251 | -0.280970196 | 0.77873326  | 0.999371363 | Not Sig |
| ENSG00000157657 | ZNF618       | zinc finger protein 618                                                                  | 114991    | 1249.859001 | -0.214754929 | 0.548429    | -0.391582009 | 0.695367083 | 0.999371363 | Not Sig |
| ENSG00000037042 | TUBG2        | tubulin gamma 2                                                                          | 27175     | 332.8635422 | -0.21445768  | 0.525457746 | -0.408134967 | 0.68317459  | 0.999371363 | Not Sig |
| ENSG00000243468 | INGX         | inhibitor of growth family, X-linked (pseudogene)                                        | 27160     | 2.571238419 | -0.214395015 | 1.694306863 | -0.12653848  | 0.899305691 | NA          | NA      |
| ENSG00000172845 | SP3          | Sp3 transcription factor                                                                 | 6670      | 2849.973535 | -0.2143583   | 0.532003515 | -0.402926473 | 0.687002315 | 0.999371363 | Not Sig |
| ENSG00000259917 | NA           | NA                                                                                       | NA        | 19.10228909 | -0.214080603 | 0.790325831 | -0.270876384 | 0.786486109 | 0.999371363 | Not Sig |
| ENSG00000174151 | CYB561D1     | cytochrome b561 family member D1                                                         | 284613    | 290.7511804 | -0.213901018 | 0.679172392 | -0.314943629 | 0.752804455 | 0.999371363 | Not Sig |
| ENSG00000125375 | ATP5S        | ATP synthase, H <sup>+</sup> transporting, mitochondrial Fo complex subunit s (factor B) | 27109     | 293.1137148 | -0.213881109 | 0.503918747 | -0.424435706 | 0.671248085 | 0.999371363 | Not Sig |
| ENSG00000124789 | NUP153       | nucleoporin 153                                                                          | 9972      | 2324.357129 | -0.213872541 | 0.540557123 | -0.395652062 | 0.692361724 | 0.999371363 | Not Sig |

|                 |            |                                                                          |           |             |              |             |              |             |             |         |
|-----------------|------------|--------------------------------------------------------------------------|-----------|-------------|--------------|-------------|--------------|-------------|-------------|---------|
| ENSG00000248936 | NA         | NA                                                                       | NA        | 6.092951621 | -0.213812849 | 1.113270015 | -0.192058392 | 0.847696467 | NA          | NA      |
| ENSG00000265713 | NA         | NA                                                                       | NA        | 47.87144518 | -0.213533901 | 0.791834847 | -0.269669744 | 0.787414339 | 0.999371363 | Not Sig |
| ENSG00000198843 | SELENOT    | selenoprotein T                                                          | 51714     | 1257.460666 | -0.213403492 | 0.560459994 | -0.380764898 | 0.703377708 | 0.999371363 | Not Sig |
| ENSG00000252084 | NA         | NA                                                                       | NA        | 2.226900033 | -0.213258656 | 2.148402015 | -0.09926385  | 0.92092878  | NA          | NA      |
| ENSG00000099337 | KCNK6      | potassium two pore domain channel subfamily K member 6                   | 9424      | 302.4493268 | -0.213233999 | 0.597532163 | -0.356857776 | 0.721198281 | 0.999371363 | Not Sig |
| ENSG00000091164 | TXNL1      | thioredoxin like 1                                                       | 9352      | 929.0825017 | -0.21318006  | 0.574682896 | -0.370952506 | 0.710672907 | 0.999371363 | Not Sig |
| ENSG00000187013 | NA         | NA                                                                       | NA        | 47.00595711 | -0.213088542 | 1.020954016 | -0.208715122 | 0.834670634 | 0.999371363 | Not Sig |
| ENSG00000038945 | MSR1       | macrophage scavenger receptor 1                                          | 4481      | 2555.901302 | -0.212867045 | 0.979608991 | -0.21729797  | 0.827976139 | 0.999371363 | Not Sig |
| ENSG00000101898 | NA         | NA                                                                       | NA        | 33.79636943 | -0.212840129 | 0.748150387 | -0.28448843  | 0.776036099 | 0.999371363 | Not Sig |
| ENSG00000054267 | ARID4B     | AT-rich interaction domain 4B                                            | 51742     | 2655.478965 | -0.212802829 | 0.51105523  | -0.416398887 | 0.677118143 | 0.999371363 | Not Sig |
| ENSG00000220563 | NA         | NA                                                                       | NA        | 14.48183233 | -0.212543935 | 1.002596282 | -0.21199354  | 0.832112074 | 0.999371363 | Not Sig |
| ENSG00000233108 | NA         | NA                                                                       | NA        | 4.953280771 | -0.212480816 | 1.483176344 | -0.143260656 | 0.886084327 | NA          | NA      |
| ENSG00000189007 | ADAT2      | adenosine deaminase, tRNA specific 2                                     | 134637    | 265.7180266 | -0.212455632 | 0.683460129 | -0.310853001 | 0.755912375 | 0.999371363 | Not Sig |
| ENSG00000120899 | PTK2B      | protein tyrosine kinase 2 beta                                           | 2185      | 1701.397624 | -0.212390282 | 0.64517066  | -0.329200157 | 0.742004405 | 0.999371363 | Not Sig |
| ENSG00000240809 | NA         | NA                                                                       | NA        | 19.72310316 | -0.212232054 | 1.121057709 | -0.18931412  | 0.849846629 | 0.999371363 | Not Sig |
| ENSG00000197128 | ZNF772     | zinc finger protein 772                                                  | 400720    | 339.2563968 | -0.21222507  | 0.461878736 | -0.459482227 | 0.645887912 | 0.999371363 | Not Sig |
| ENSG00000205758 | CRYZL1     | crystallin zeta like 1                                                   | 9946      | 446.2478758 | -0.212182095 | 0.457210282 | -0.464079884 | 0.642590513 | 0.999371363 | Not Sig |
| ENSG00000166136 | NDUFB8     | NADH:ubiquinone oxidoreductase subunit B8                                | 4714      | 164.8617939 | -0.211854977 | 0.555344983 | -0.381483552 | 0.702844474 | 0.999371363 | Not Sig |
| ENSG00000179913 | B3GNT3     | UDP-GlcNAc:betaGal beta-1,3-N-acetylglucosaminyltransferase 3            | 10331     | 392.4498899 | -0.211790736 | 1.065022738 | -0.198860295 | 0.842372029 | 0.999371363 | Not Sig |
| ENSG00000175395 | ZNF25      | zinc finger protein 25                                                   | 219749    | 336.6791045 | -0.211671299 | 0.47909485  | -0.441815016 | 0.658623071 | 0.999371363 | Not Sig |
| ENSG00000011405 | PIK3C2A    | phosphatidylinositol-4-phosphate 3-kinase catalytic subunit type 2 alpha | 5286      | 2995.659726 | -0.211613214 | 0.532965184 | -0.397048851 | 0.691331437 | 0.999371363 | Not Sig |
| ENSG00000074755 | ZZEF1      | zinc finger ZZ-type and EF-hand domain containing 1                      | 23140     | 3110.76225  | -0.211599804 | 0.428130073 | -0.494241862 | 0.621135379 | 0.999371363 | Not Sig |
| ENSG00000238197 | PAXBP1-AS1 | PAXBP1 antisense RNA 1                                                   | 100506215 | 65.44877196 | -0.211581747 | 0.501064106 | -0.422264824 | 0.67283173  | 0.999371363 | Not Sig |
| ENSG00000241057 | NA         | NA                                                                       | NA        | 12.50305337 | -0.211529747 | 0.814303181 | -0.259767801 | 0.795042889 | 0.999371363 | Not Sig |
| ENSG00000219608 | NA         | NA                                                                       | NA        | 10.23648764 | -0.211233348 | 0.977273782 | -0.216145518 | 0.82887432  | 0.999371363 | Not Sig |
| ENSG00000236886 | NA         | NA                                                                       | NA        | 2.638752341 | -0.21120315  | 1.759431075 | -0.120040593 | 0.904450992 | NA          | NA      |
| ENSG00000164687 | FABP5      | fatty acid binding protein 5                                             | 2171      | 437.4173359 | -0.211065539 | 0.746473875 | -0.282750068 | 0.777368433 | 0.999371363 | Not Sig |
| ENSG00000228887 | NA         | NA                                                                       | NA        | 4.519896585 | -0.210892794 | 1.37926532  | -0.152902266 | 0.878475349 | NA          | NA      |
| ENSG00000167778 | SPRYD3     | SPRY domain containing 3                                                 | 84926     | 1121.428781 | -0.210832927 | 0.564885409 | -0.37323132  | 0.708976288 | 0.999371363 | Not Sig |
| ENSG00000140262 | TCF12      | transcription factor 12                                                  | 6938      | 2555.02763  | -0.21073793  | 0.462964977 | -0.455191949 | 0.648971152 | 0.999371363 | Not Sig |
| ENSG00000175581 | MRPL48     | mitochondrial ribosomal protein L48                                      | 51642     | 201.0820997 | -0.210524713 | 0.499182421 | -0.421739035 | 0.673215509 | 0.999371363 | Not Sig |
| ENSG00000053900 | ANAPC4     | anaphase promoting complex subunit 4                                     | 29945     | 793.4303209 | -0.210414126 | 0.582231574 | -0.361392503 | 0.717806052 | 0.999371363 | Not Sig |
| ENSG00000236603 | NA         | NA                                                                       | NA        | 3.035311151 | -0.210353299 | 1.358543055 | -0.154837418 | 0.876949491 | NA          | NA      |
| ENSG00000248503 | NA         | NA                                                                       | NA        | 32.13145479 | -0.210326557 | 0.67578804  | -0.311231546 | 0.755624603 | 0.999371363 | Not Sig |
| ENSG00000109220 | CHIC2      | cysteine rich hydrophobic domain 2                                       | 26511     | 317.4605196 | -0.210215455 | 0.433120148 | -0.485351364 | 0.627427126 | 0.999371363 | Not Sig |

|                 |              |                                                   |           |             |              |             |              |             |             |         |
|-----------------|--------------|---------------------------------------------------|-----------|-------------|--------------|-------------|--------------|-------------|-------------|---------|
| ENSG00000170469 | SPATA24      | spermatogenesis associated 24                     | 202051    | 33.4250668  | -0.210178659 | 0.567987562 | -0.370040953 | 0.711351977 | 0.999371363 | Not Sig |
| ENSG00000079277 | MKNK1        | MAP kinase interacting serine/threonine kinase 1  | 8569      | 849.4094885 | -0.210011441 | 0.414538926 | -0.506614525 | 0.612425315 | 0.999371363 | Not Sig |
| ENSG00000170464 | DNAJC18      | DnaJ heat shock protein family (Hsp40) member C18 | 202052    | 222.2663785 | -0.209965214 | 0.602853963 | -0.348285368 | 0.727625881 | 0.999371363 | Not Sig |
| ENSG00000087303 | NID2         | nidogen 2                                         | 22795     | 430.3703351 | -0.209923133 | 0.472477483 | -0.444302937 | 0.656823578 | 0.999371363 | Not Sig |
| ENSG00000243224 | LOC101929054 | uncharacterized LOC101929054                      | 101929054 | 9.693437932 | -0.209862113 | 1.016185778 | -0.206519435 | 0.836385185 | 0.999371363 | Not Sig |
| ENSG00000178295 | GEN1         | GEN1, Holliday junction 5' flap endonuclease      | 348654    | 293.6930434 | -0.209734979 | 0.756183008 | -0.27736008  | 0.781503631 | 0.999371363 | Not Sig |
| ENSG00000168004 | HRASLS5      | HRAS like suppressor family member 5              | 117245    | 26.74014    | -0.2096934   | 0.792889671 | -0.264467312 | 0.79141985  | 0.999371363 | Not Sig |
| ENSG00000229472 | NA           | NA                                                | NA        | 40.37180956 | -0.209659895 | 0.620887223 | -0.337677902 | 0.735605929 | 0.999371363 | Not Sig |
| ENSG00000131788 | PIAS3        | protein inhibitor of activated STAT 3             | 10401     | 1208.681465 | -0.209585146 | 0.581765152 | -0.360257306 | 0.718654724 | 0.999371363 | Not Sig |
| ENSG00000182230 | FAM153B      | family with sequence similarity 153 member B      | 202134    | 27.05022246 | -0.209372541 | 1.238053792 | -0.169114252 | 0.865706775 | 0.999371363 | Not Sig |
| ENSG00000182230 | LOC100507387 | uncharacterized LOC100507387                      | 100507387 | 27.05022246 | -0.209372541 | 1.238053792 | -0.169114252 | 0.865706775 | 0.999371363 | Not Sig |
| ENSG00000089916 | GPATCH2L     | G-patch domain containing 2 like                  | 55668     | 2070.998476 | -0.209348341 | 0.467016366 | -0.448267676 | 0.653960026 | 0.999371363 | Not Sig |
| ENSG00000034713 | GABARAPL2    | GABA type A receptor associated protein like 2    | 11345     | 982.9650848 | -0.209167617 | 0.476687497 | -0.438794008 | 0.660810802 | 0.999371363 | Not Sig |
| ENSG00000145216 | FIP1L1       | factor interacting with PAPOLA and CPSF1          | 81608     | 935.0735884 | -0.20913769  | 0.436268718 | -0.479378147 | 0.631669637 | 0.999371363 | Not Sig |
| ENSG00000151929 | BAG3         | BCL2 associated athanogene 3                      | 9531      | 1354.977064 | -0.209134635 | 0.43184719  | -0.484279255 | 0.628187697 | 0.999371363 | Not Sig |
| ENSG00000179941 | BBS10        | Bardet-Biedl syndrome 10                          | 79738     | 262.566613  | -0.209074617 | 0.523570354 | -0.399324782 | 0.689653909 | 0.999371363 | Not Sig |
| ENSG00000135974 | C2orf49      | chromosome 2 open reading frame 49                | 79074     | 444.7331638 | -0.209050192 | 0.474566989 | -0.440507236 | 0.659569773 | 0.999371363 | Not Sig |
| ENSG00000173566 | NA           | NA                                                | NA        | 193.071035  | -0.209029526 | 0.768274451 | -0.272076633 | 0.785563096 | 0.999371363 | Not Sig |
| ENSG00000152782 | PANK1        | pantothenate kinase 1                             | 53354     | 136.2786672 | -0.208954621 | 0.615976564 | -0.339224953 | 0.734440273 | 0.999371363 | Not Sig |
| ENSG00000270244 | NA           | NA                                                | NA        | 0.946300956 | -0.208786561 | 2.624695755 | -0.079546957 | 0.936597583 | NA          | NA      |
| ENSG00000187630 | DHRS4L2      | dehydrogenase/reductase 4 like 2                  | 317749    | 206.9433216 | -0.208703314 | 0.550018947 | -0.379447499 | 0.704355584 | 0.999371363 | Not Sig |
| ENSG00000213553 | NA           | NA                                                | NA        | 37.44839922 | -0.208664349 | 0.587104241 | -0.355412777 | 0.722280378 | 0.999371363 | Not Sig |
| ENSG00000076944 | STXBP2       | syntaxin binding protein 2                        | 6813      | 734.3041726 | -0.208653759 | 0.584996041 | -0.356675506 | 0.721334744 | 0.999371363 | Not Sig |
| ENSG00000031003 | FAM13B       | family with sequence similarity 13 member B       | 51306     | 1274.067957 | -0.208507786 | 0.453897266 | -0.4593722   | 0.645966908 | 0.999371363 | Not Sig |
| ENSG00000138688 | KIAA1109     | KIAA1109                                          | 84162     | 6867.762546 | -0.208502845 | 0.469057645 | -0.44451433  | 0.65667077  | 0.999371363 | Not Sig |
| ENSG00000163960 | UBXN7        | UBX domain protein 7                              | 26043     | 1960.616468 | -0.208155753 | 0.497959693 | -0.418017274 | 0.675934488 | 0.999371363 | Not Sig |
| ENSG00000129347 | KRI1         | KRI1 homolog                                      | 65095     | 549.9419326 | -0.208020021 | 0.497360326 | -0.41824812  | 0.675765717 | 0.999371363 | Not Sig |
| ENSG00000172974 | NA           | NA                                                | NA        | 5.508874436 | -0.207946781 | 1.128835978 | -0.18421346  | 0.853846001 | NA          | NA      |
| ENSG00000135298 | ADGRB3       | adhesion G protein-coupled receptor B3            | 577       | 131.7735816 | -0.207812602 | 0.817347882 | -0.254252329 | 0.799300626 | 0.999371363 | Not Sig |
| ENSG00000165119 | HNRNPK       | heterogeneous nuclear ribonucleoprotein K         | 3190      | 7892.516006 | -0.207780432 | 0.431107457 | -0.481969006 | 0.629827964 | 0.999371363 | Not Sig |
| ENSG00000187667 | NA           | NA                                                | NA        | 87.73849281 | -0.20771664  | 0.535010275 | -0.388247946 | 0.697832555 | 0.999371363 | Not Sig |
| ENSG00000123810 | B9D2         | B9 domain containing 2                            | 80776     | 66.50514239 | -0.207703739 | 0.549524388 | -0.377970011 | 0.705452872 | 0.999371363 | Not Sig |
| ENSG00000120029 | C10orf76     | chromosome 10 open reading frame 76               | 79591     | 871.0831135 | -0.207641275 | 0.442093978 | -0.469676778 | 0.638585962 | 0.999371363 | Not Sig |
| ENSG00000157796 | WDR19        | WD repeat domain 19                               | 57728     | 794.6680498 | -0.207622326 | 0.461404201 | -0.449979271 | 0.652725387 | 0.999371363 | Not Sig |
| ENSG00000243667 | WDR92        | WD repeat domain 92                               | 116143    | 92.70639168 | -0.207495713 | 0.50222982  | -0.41314893  | 0.679497502 | 0.999371363 | Not Sig |



|                 |           |                                                                                          |           |             |              |             |              |             |             |         |
|-----------------|-----------|------------------------------------------------------------------------------------------|-----------|-------------|--------------|-------------|--------------|-------------|-------------|---------|
| ENSG00000156398 | SFXN2     | sideroflexin 2                                                                           | 118980    | 281.9379736 | -0.207463088 | 0.60174022  | -0.344771849 | 0.730265898 | 0.999371363 | Not Sig |
| ENSG00000268854 | NA        | NA                                                                                       | NA        | 1.805919204 | -0.207422876 | 2.144142419 | -0.096739318 | 0.922933415 | NA          | NA      |
| ENSG00000221823 | PPP3R1    | protein phosphatase 3 regulatory subunit B, alpha                                        | 5534      | 1143.694867 | -0.207415346 | 0.428753145 | -0.483764022 | 0.628553351 | 0.999371363 | Not Sig |
| ENSG00000234648 | NA        | NA                                                                                       | NA        | 6.285347267 | -0.207387867 | 1.002560138 | -0.206858281 | 0.836120538 | NA          | NA      |
| ENSG00000137996 | RTCA      | RNA 3'-terminal phosphate cyclase                                                        | 8634      | 596.8925662 | -0.207387075 | 0.506185964 | -0.409705306 | 0.682022137 | 0.999371363 | Not Sig |
| ENSG00000163785 | RYK       | receptor-like tyrosine kinase                                                            | 6259      | 1442.496727 | -0.207347482 | 0.463976466 | -0.446892239 | 0.654952868 | 0.999371363 | Not Sig |
| ENSG00000265321 | MIR4263   | microRNA 4263                                                                            | 100422965 | 6.178056694 | -0.207191526 | 1.033693078 | -0.200438148 | 0.841137927 | NA          | NA      |
| ENSG00000141504 | SAT2      | spermidine/spermine N1-acetyltransferase family member 2                                 | 112483    | 459.5636348 | -0.207120257 | 0.664918225 | -0.311497337 | 0.755422567 | 0.999371363 | Not Sig |
| ENSG00000011454 | GPR21     | G protein-coupled receptor 21                                                            | 2844      | 2040.088516 | -0.207046071 | 0.410137488 | -0.504821132 | 0.613684472 | 0.999371363 | Not Sig |
| ENSG00000011454 | RABGAP1   | RAB GTPase activating protein 1                                                          | 23637     | 2040.088516 | -0.207046071 | 0.410137488 | -0.504821132 | 0.613684472 | 0.999371363 | Not Sig |
| ENSG00000184677 | ZBTB40    | zinc finger and BTB domain containing 40                                                 | 9923      | 1570.141607 | -0.206945584 | 0.434170236 | -0.476646179 | 0.633614094 | 0.999371363 | Not Sig |
| ENSG00000131747 | TOP2A     | DNA topoisomerase II alpha                                                               | 7153      | 1287.291676 | -0.20684909  | 1.101822975 | -0.187733506 | 0.851085563 | 0.999371363 | Not Sig |
| ENSG00000238946 | NA        | NA                                                                                       | NA        | 5.290568414 | -0.206804853 | 1.457365114 | -0.141903254 | 0.887156424 | NA          | NA      |
| ENSG00000023902 | PLEKH01   | pleckstrin homology domain containing 01                                                 | 51177     | 991.5557933 | -0.206795651 | 0.730957716 | -0.282910553 | 0.777245405 | 0.999371363 | Not Sig |
| ENSG00000165629 | ATP5C1    | ATP synthase, H <sup>+</sup> transporting, mitochondrial F1 complex, gamma polypeptide 1 | 509       | 1398.620328 | -0.206770029 | 0.470685544 | -0.439295473 | 0.660447454 | 0.999371363 | Not Sig |
| ENSG00000230435 | NA        | NA                                                                                       | NA        | 4.718187512 | -0.206704675 | 1.616199952 | -0.127895484 | 0.898231685 | NA          | NA      |
| ENSG00000175582 | RAB6A     | RAB6A, member RAS oncogene family                                                        | 5870      | 2548.87102  | -0.206532177 | 0.475027206 | -0.434779681 | 0.663722355 | 0.999371363 | Not Sig |
| ENSG00000272019 | NA        | NA                                                                                       | NA        | 2.093311267 | -0.206378991 | 1.796220944 | -0.114896217 | 0.908527384 | NA          | NA      |
| ENSG00000166454 | ATMIN     | ATM interactor                                                                           | 23300     | 1072.784538 | -0.20632119  | 0.438861633 | -0.47012811  | 0.638263492 | 0.999371363 | Not Sig |
| ENSG00000183496 | MEX3B     | mex-3 RNA binding family member B                                                        | 84206     | 114.5919039 | -0.206200869 | 0.513901995 | -0.401245512 | 0.688239376 | 0.999371363 | Not Sig |
| ENSG00000164082 | GRM2      | glutamate metabotropic receptor 2                                                        | 2912      | 11.31711918 | -0.206150425 | 0.920561817 | -0.223939795 | 0.82280415  | 0.999371363 | Not Sig |
| ENSG00000186912 | P2RY4     | pyrimidinergic receptor P2Y4                                                             | 5030      | 6.98433135  | -0.20610682  | 1.146695023 | -0.179739875 | 0.857356788 | 0.999371363 | Not Sig |
| ENSG00000121578 | B4GALT4   | beta-1,4-galactosyltransferase 4                                                         | 8702      | 524.3805726 | -0.205993165 | 0.486592644 | -0.423338017 | 0.672048661 | 0.999371363 | Not Sig |
| ENSG00000131015 | ULBP2     | UL16 binding protein 2                                                                   | 80328     | 29.86441493 | -0.205977778 | 0.976584235 | -0.210916551 | 0.832952389 | 0.999371363 | Not Sig |
| ENSG00000106948 | AKNA      | AT-hook transcription factor                                                             | 80709     | 2850.353708 | -0.205956416 | 0.640635918 | -0.321487462 | 0.747841012 | 0.999371363 | Not Sig |
| ENSG00000227558 | NA        | NA                                                                                       | NA        | 3.937246622 | -0.205940651 | 1.539757017 | -0.133748799 | 0.893601216 | NA          | NA      |
| ENSG00000224972 | NA        | NA                                                                                       | NA        | 26.71950452 | -0.205851182 | 0.836134223 | -0.246193944 | 0.805532104 | 0.999371363 | Not Sig |
| ENSG00000264757 | MIR3198-1 | microRNA 3198-1                                                                          | 100423025 | 6.135584753 | -0.205841085 | 1.018320529 | -0.202137814 | 0.839808987 | NA          | NA      |
| ENSG00000066651 | TRMT11    | tRNA methyltransferase 11 homolog                                                        | 60487     | 539.7559076 | -0.205766355 | 0.640214849 | -0.321402034 | 0.747905742 | 0.999371363 | Not Sig |
| ENSG00000213402 | PTPRCAP   | protein tyrosine phosphatase, receptor type C associated protein                         | 5790      | 349.3322446 | -0.205709285 | 0.773749643 | -0.265860265 | 0.790346828 | 0.999371363 | Not Sig |
| ENSG00000257303 | NA        | NA                                                                                       | NA        | 11.183962   | -0.205686396 | 0.840451987 | -0.244733072 | 0.806663119 | 0.999371363 | Not Sig |
| ENSG00000263293 | THCAT158  | thyroid cancer-associated transcript 158                                                 | 102724508 | 3.374214396 | -0.205625428 | 1.477623734 | -0.139159533 | 0.889324086 | NA          | NA      |
| ENSG00000268584 | NA        | NA                                                                                       | NA        | 10.46465202 | -0.205560215 | 0.837755236 | -0.245370254 | 0.806169759 | 0.999371363 | Not Sig |
| ENSG00000243156 | MICAL3    | microtubule associated monoxygenase, calponin and LIM domain containing 3                | 57553     | 1144.548566 | -0.20544292  | 0.499357439 | -0.411414557 | 0.680768582 | 0.999371363 | Not Sig |
| ENSG00000164902 | PHAX      | phosphorylated adaptor for RNA export                                                    | 51808     | 597.4582017 | -0.205415655 | 0.45154873  | -0.454913592 | 0.649171404 | 0.999371363 | Not Sig |

|                 |         |                                                   |           |             |              |             |              |             |             |         |
|-----------------|---------|---------------------------------------------------|-----------|-------------|--------------|-------------|--------------|-------------|-------------|---------|
| ENSG00000105258 | POLR2I  | RNA polymerase II subunit I                       | 5438      | 226.7942311 | -0.205287508 | 0.551753772 | -0.372063625 | 0.709845479 | 0.999371363 | Not Sig |
| ENSG00000118579 | MED28   | mediator complex subunit 28                       | 80306     | 1889.565799 | -0.205268222 | 0.411852266 | -0.498402556 | 0.618200335 | 0.999371363 | Not Sig |
| ENSG00000231274 | SBK3    | SH3 domain binding kinase family member 3         | 100130827 | 11.3272653  | -0.205231034 | 0.826390947 | -0.248346179 | 0.803866572 | 0.999371363 | Not Sig |
| ENSG00000112175 | BMP5    | bone morphogenetic protein 5                      | 653       | 526.6958092 | -0.204881891 | 0.578365847 | -0.35424272  | 0.723156991 | 0.999371363 | Not Sig |
| ENSG00000176542 | USF3    | upstream transcription factor family member 3     | 205717    | 1768.514011 | -0.204731983 | 0.548856704 | -0.373015364 | 0.709137009 | 0.999371363 | Not Sig |
| ENSG00000176155 | CCDC57  | coiled-coil domain containing 57                  | 284001    | 1560.360485 | -0.204714834 | 0.487398301 | -0.420015484 | 0.674474142 | 0.999371363 | Not Sig |
| ENSG00000151353 | TMEM18  | transmembrane protein 18                          | 129787    | 354.1943441 | -0.20447537  | 0.424247199 | -0.481972233 | 0.629825671 | 0.999371363 | Not Sig |
| ENSG00000168826 | ZBTB49  | zinc finger and BTB domain containing 49          | 166793    | 131.8624223 | -0.204357534 | 0.489095127 | -0.417827787 | 0.676073033 | 0.999371363 | Not Sig |
| ENSG00000156136 | DCK     | deoxycytidine kinase                              | 1633      | 375.9354604 | -0.204295605 | 0.566619157 | -0.360551884 | 0.718434464 | 0.999371363 | Not Sig |
| ENSG00000016864 | GLT8D1  | glycosyltransferase 8 domain containing 1         | 55830     | 669.1755753 | -0.204179123 | 0.466690627 | -0.43750423  | 0.661745709 | 0.999371363 | Not Sig |
| ENSG00000168216 | LMBRD1  | LMBR1 domain containing 1                         | 55788     | 1227.829166 | -0.204013181 | 0.498862848 | -0.408956454 | 0.682571618 | 0.999371363 | Not Sig |
| ENSG00000196409 | NA      | NA                                                | NA        | 138.5310425 | -0.203973478 | 0.510913421 | -0.39923296  | 0.689721559 | 0.999371363 | Not Sig |
| ENSG00000143375 | CGN     | cingulin                                          | 57530     | 3520.199909 | -0.203970148 | 0.465906699 | -0.437791833 | 0.661537192 | 0.999371363 | Not Sig |
| ENSG00000270010 | NA      | NA                                                | NA        | 7.407033633 | -0.203862873 | 0.990630494 | -0.205791034 | 0.836954145 | 0.999371363 | Not Sig |
| ENSG00000224945 | NA      | NA                                                | NA        | 77.35301345 | -0.203794448 | 0.801276314 | -0.254337293 | 0.799234992 | 0.999371363 | Not Sig |
| ENSG00000065559 | MAP2K4  | mitogen-activated protein kinase kinase 4         | 6416      | 925.782037  | -0.203771327 | 0.531750691 | -0.383208391 | 0.701565257 | 0.999371363 | Not Sig |
| ENSG00000113811 | SELENOK | selenoprotein K                                   | 58515     | 653.0450487 | -0.203726504 | 0.461860574 | -0.441099578 | 0.659140909 | 0.999371363 | Not Sig |
| ENSG00000138964 | PARVG   | parvin gamma                                      | 64098     | 795.814467  | -0.203659184 | 0.812152524 | -0.2507647   | 0.801996035 | 0.999371363 | Not Sig |
| ENSG00000130810 | PPAN    | peter pan homolog (Drosophila)                    | 56342     | 82.78968607 | -0.203454338 | 0.514584207 | -0.39537618  | 0.692565286 | 0.999371363 | Not Sig |
| ENSG00000033800 | PIAS1   | protein inhibitor of activated STAT 1             | 8554      | 1244.091657 | -0.203070025 | 0.530879423 | -0.382516286 | 0.702078451 | 0.999371363 | Not Sig |
| ENSG00000113272 | THG1L   | tRNA-histidine guanylyltransferase 1 like         | 54974     | 143.2506422 | -0.202969131 | 0.536419437 | -0.378377659 | 0.705150062 | 0.999371363 | Not Sig |
| ENSG00000028203 | VEZT    | vezatin, adherens junctions transmembrane protein | 55591     | 2347.106923 | -0.202902749 | 0.666762721 | -0.304310278 | 0.760891515 | 0.999371363 | Not Sig |
| ENSG00000163882 | POLR2H  | RNA polymerase II subunit H                       | 5437      | 638.6877028 | -0.202854972 | 0.432753198 | -0.468754415 | 0.639245187 | 0.999371363 | Not Sig |
| ENSG00000112983 | BRD8    | bromodomain containing 8                          | 10902     | 1189.464794 | -0.202611102 | 0.422338467 | -0.479736126 | 0.631415036 | 0.999371363 | Not Sig |
| ENSG00000206645 | NA      | NA                                                | NA        | 12.2131936  | -0.202447357 | 1.034983278 | -0.195604472 | 0.84491976  | 0.999371363 | Not Sig |
| ENSG00000253676 | NA      | NA                                                | NA        | 5.228180198 | -0.202442351 | 1.134955583 | -0.178370286 | 0.858432184 | NA          | NA      |
| ENSG00000088766 | CRLS1   | cardiolipin synthase 1                            | 54675     | 893.9605988 | -0.202395334 | 0.419968824 | -0.481929426 | 0.629856082 | 0.999371363 | Not Sig |
| ENSG00000107290 | SETX    | senataxin                                         | 23064     | 5241.644521 | -0.20238198  | 0.39932506  | -0.506810115 | 0.612288058 | 0.999371363 | Not Sig |
| ENSG00000235055 | NA      | NA                                                | NA        | 2.066265867 | -0.202313168 | 1.603301482 | -0.126185356 | 0.899585203 | NA          | NA      |
| ENSG00000177479 | ARIH2   | ariadne RBR E3 ubiquitin protein ligase 2         | 10425     | 1638.371015 | -0.202269789 | 0.459784934 | -0.439922611 | 0.659993159 | 0.999371363 | Not Sig |
| ENSG00000107341 | UBE2R2  | ubiquitin conjugating enzyme E2 R2                | 54926     | 1282.747121 | -0.202250026 | 0.42075455  | -0.480684108 | 0.630741028 | 0.999371363 | Not Sig |
| ENSG00000250067 | YJEFN3  | YjeF N-terminal domain containing 3               | 374887    | 51.99228037 | -0.201929132 | 0.644396353 | -0.313361693 | 0.754005884 | 0.999371363 | Not Sig |
| ENSG00000227208 | NA      | NA                                                | NA        | 2.315325872 | -0.201924182 | 1.566388332 | -0.128910678 | 0.897428327 | NA          | NA      |
| ENSG00000092531 | SNAP23  | synaptosome associated protein 23                 | 8773      | 1165.098857 | -0.20185794  | 0.53023811  | -0.380693005 | 0.70343106  | 0.999371363 | Not Sig |
| ENSG00000176595 | KBTBD11 | kelch repeat and BTB domain containing 11         | 9920      | 318.8303051 | -0.201634041 | 0.716829714 | -0.28128583  | 0.778491178 | 0.999371363 | Not Sig |

|                 |            |                                                              |           |             |              |             |              |             |             |         |
|-----------------|------------|--------------------------------------------------------------|-----------|-------------|--------------|-------------|--------------|-------------|-------------|---------|
| ENSG00000141682 | PMAIP1     | phorbol-12-myristate-13-acetate-induced protein 1            | 5366      | 218.8409401 | -0.201602933 | 0.710623178 | -0.283698786 | 0.776641225 | 0.999371363 | Not Sig |
| ENSG00000207523 | SNORA66    | small nucleolar RNA, H/ACA box 66                            | 26782     | 6.908349282 | -0.20143165  | 1.278488342 | -0.157554546 | 0.874807823 | 0.999371363 | Not Sig |
| ENSG00000048828 | FAM120A    | family with sequence similarity 120A                         | 23196     | 5219.80863  | -0.201425122 | 0.399430351 | -0.504280964 | 0.614063953 | 0.999371363 | Not Sig |
| ENSG00000227855 | DPY19L2P3  | DPY19L2 pseudogene 3                                         | 442524    | 24.0032089  | -0.201392147 | 0.665502737 | -0.302616558 | 0.762182095 | 0.999371363 | Not Sig |
| ENSG00000165025 | SYK        | spleen associated tyrosine kinase                            | 6850      | 1513.484102 | -0.201164782 | 0.449206501 | -0.447822508 | 0.654281298 | 0.999371363 | Not Sig |
| ENSG00000119285 | HEATR1     | HEAT repeat containing 1                                     | 55127     | 1820.070999 | -0.201145513 | 0.623154935 | -0.322785717 | 0.746857531 | 0.999371363 | Not Sig |
| ENSG00000107938 | EDRF1      | erythroid differentiation regulatory factor 1                | 26098     | 789.3614867 | -0.201067268 | 0.512591876 | -0.392256056 | 0.694869029 | 0.999371363 | Not Sig |
| ENSG00000125944 | HNRNPR     | heterogeneous nuclear ribonucleoprotein R                    | 10236     | 3097.17547  | -0.201031737 | 0.524450822 | -0.383318566 | 0.701483575 | 0.999371363 | Not Sig |
| ENSG00000224597 | SVIL-AS1   | SVIL antisense RNA 1                                         | 102724316 | 559.7611576 | -0.200885501 | 0.459999895 | -0.436707711 | 0.662323336 | 0.999371363 | Not Sig |
| ENSG00000120868 | APAF1      | apoptotic peptidase activating factor 1                      | 317       | 1100.288648 | -0.20082837  | 0.542474968 | -0.370207625 | 0.711227795 | 0.999371363 | Not Sig |
| ENSG00000207063 | SNORD116-1 | small nucleolar RNA, C/D box 116-1                           | 100033413 | 8.61538062  | -0.200801378 | 0.9146547   | -0.219537907 | 0.826231055 | 0.999371363 | Not Sig |
| ENSG00000196715 | VKORC1L1   | vitamin K epoxide reductase complex subunit 1 like 1         | 154807    | 2046.885351 | -0.200582189 | 0.639377159 | -0.313714975 | 0.753737526 | 0.999371363 | Not Sig |
| ENSG00000186106 | ANKRD46    | ankyrin repeat domain 46                                     | 157567    | 354.4152323 | -0.200555672 | 0.442747339 | -0.452979961 | 0.650563171 | 0.999371363 | Not Sig |
| ENSG00000125651 | GTF2F1     | general transcription factor IIF subunit 1                   | 2962      | 1059.02634  | -0.200517402 | 0.518073954 | -0.387043975 | 0.698723653 | 0.999371363 | Not Sig |
| ENSG00000228638 | NA         | NA                                                           | NA        | 62.8501921  | -0.200508389 | 0.504456352 | -0.397474207 | 0.691017803 | 0.999371363 | Not Sig |
| ENSG00000166200 | COPS2      | COP9 signalosome subunit 2                                   | 9318      | 1220.034269 | -0.200496664 | 0.523142571 | -0.383254345 | 0.701531187 | 0.999371363 | Not Sig |
| ENSG00000163755 | HPS3       | HPS3, biogenesis of lysosomal organelles complex 2 subunit 1 | 84343     | 893.8739776 | -0.200450062 | 0.57462666  | -0.348835297 | 0.727212963 | 0.999371363 | Not Sig |
| ENSG00000161692 | DBF4B      | DBF4 zinc finger B                                           | 80174     | 145.143749  | -0.200373942 | 0.46428787  | -0.43157264  | 0.666052047 | 0.999371363 | Not Sig |
| ENSG00000113722 | CDX1       | caudal type homeobox 1                                       | 1044      | 2.602457645 | -0.200324494 | 2.012282513 | -0.099550879 | 0.920700893 | NA          | NA      |
| ENSG00000197070 | ARRDC1     | arrestin domain containing 1                                 | 92714     | 815.2056615 | -0.20016316  | 0.543400988 | -0.368352586 | 0.712610346 | 0.999371363 | Not Sig |
| ENSG00000265263 | NA         | NA                                                           | NA        | 24.96454307 | -0.200142448 | 0.618223628 | -0.323737946 | 0.74613644  | 0.999371363 | Not Sig |
| ENSG00000241708 | NA         | NA                                                           | NA        | 8.441152324 | -0.199979299 | 0.94572955  | -0.211455061 | 0.832532196 | 0.999371363 | Not Sig |
| ENSG00000235106 | BRD3OS     | BRD3 opposite strand                                         | 266655    | 350.6877277 | -0.199972338 | 0.549521413 | -0.363902722 | 0.715930652 | 0.999371363 | Not Sig |
| ENSG00000215252 | GOLGA8B    | golgin A8 family member B                                    | 440270    | 609.2653207 | -0.199895517 | 0.658655147 | -0.303490404 | 0.761516159 | 0.999371363 | Not Sig |
| ENSG00000129317 | PUS7L      | pseudouridylylase 7 like                                     | 83448     | 497.9495493 | -0.199849265 | 0.679705093 | -0.294023492 | 0.768739953 | 0.999371363 | Not Sig |
| ENSG00000202533 | NA         | NA                                                           | NA        | 13.2605338  | -0.199814024 | 1.065911163 | -0.187458421 | 0.851301221 | 0.999371363 | Not Sig |
| ENSG00000146247 | PHIP       | pleckstrin homology domain interacting protein               | 55023     | 5000.176298 | -0.199742128 | 0.614112013 | -0.325253576 | 0.744989163 | 0.999371363 | Not Sig |
| ENSG00000100697 | DICER1     | dicer 1, ribonuclease III                                    | 23405     | 3334.314229 | -0.199736737 | 0.435579194 | -0.458554356 | 0.646554221 | 0.999371363 | Not Sig |
| ENSG00000172667 | ZMAT3      | zinc finger matrin-type 3                                    | 64393     | 1034.590921 | -0.199658903 | 0.507669632 | -0.393285101 | 0.694108921 | 0.999371363 | Not Sig |
| ENSG00000154262 | ABCA6      | ATP binding cassette subfamily A member 6                    | 23460     | 916.1923903 | -0.199626561 | 0.627851654 | -0.317951797 | 0.750521502 | 0.999371363 | Not Sig |
| ENSG00000148572 | NRBF2      | nuclear receptor binding factor 2                            | 29982     | 340.7892787 | -0.199623143 | 0.409185204 | -0.487855234 | 0.625652385 | 0.999371363 | Not Sig |
| ENSG00000224578 | NA         | NA                                                           | NA        | 30.94955049 | -0.199585561 | 0.653371639 | -0.305470193 | 0.760008068 | 0.999371363 | Not Sig |
| ENSG00000125734 | GPR108     | G protein-coupled receptor 108                               | 56927     | 949.4966209 | -0.199275209 | 0.522817983 | -0.381155997 | 0.703087499 | 0.999371363 | Not Sig |
| ENSG00000058091 | CDK14      | cyclin dependent kinase 14                                   | 5218      | 658.7869664 | -0.199222449 | 0.456643048 | -0.436276103 | 0.662636418 | 0.999371363 | Not Sig |
| ENSG00000269352 | NA         | NA                                                           | NA        | 157.9213178 | -0.199158022 | 0.555686373 | -0.358400047 | 0.720043957 | 0.999371363 | Not Sig |

|                 |          |                                                     |        |             |              |             |              |             |             |         |
|-----------------|----------|-----------------------------------------------------|--------|-------------|--------------|-------------|--------------|-------------|-------------|---------|
| ENSG00000162745 | OLFML2B  | olfactomedin like 2B                                | 25903  | 415.8676839 | -0.199124688 | 0.447051393 | -0.445417891 | 0.656017785 | 0.999371363 | Not Sig |
| ENSG00000169567 | HINT1    | histidine triad nucleotide binding protein 1        | 3094   | 1260.693622 | -0.199071252 | 0.544732455 | -0.365447754 | 0.7147772   | 0.999371363 | Not Sig |
| ENSG00000211753 | NA       | NA                                                  | NA     | 16.60388865 | -0.198969051 | 1.005042075 | -0.197970867 | 0.843067857 | 0.999371363 | Not Sig |
| ENSG00000253719 | ATXN7L3B | ataxin 7 like 3B                                    | 552889 | 1884.866478 | -0.19886746  | 0.434312266 | -0.457890498 | 0.647031114 | 0.999371363 | Not Sig |
| ENSG00000111144 | LTA4H    | leukotriene A4 hydrolase                            | 4048   | 4168.219437 | -0.198863857 | 0.563909302 | -0.352652202 | 0.724349197 | 0.999371363 | Not Sig |
| ENSG00000126790 | L3HYPDH  | trans-L-3-hydroxyproline dehydratase                | 112849 | 315.4216253 | -0.198849673 | 0.482839128 | -0.411834214 | 0.680460942 | 0.999371363 | Not Sig |
| ENSG00000164109 | MAD2L1   | mitotic arrest deficient 2 like 1                   | 4085   | 111.4773733 | -0.19859308  | 0.875698789 | -0.226782408 | 0.820592943 | 0.999371363 | Not Sig |
| ENSG00000011376 | LARS2    | leucyl-tRNA synthetase 2, mitochondrial             | 23395  | 606.3444525 | -0.198539825 | 0.474022948 | -0.418840113 | 0.675332987 | 0.999371363 | Not Sig |
| ENSG00000132970 | WASF3    | WAS protein family member 3                         | 10810  | 354.2187314 | -0.198451717 | 0.80766911  | -0.245709184 | 0.805907363 | 0.999371363 | Not Sig |
| ENSG00000186162 | CIDECP   | cell death-inducing DFFA-like effector c pseudogene | 152302 | 127.8023185 | -0.198320382 | 0.472096718 | -0.420084222 | 0.674423929 | 0.999371363 | Not Sig |
| ENSG00000080839 | RBL1     | RB transcriptional corepressor like 1               | 5933   | 377.63543   | -0.198261909 | 0.649983741 | -0.305025952 | 0.760346387 | 0.999371363 | Not Sig |
| ENSG00000165732 | DDX21    | DExD-box helicase 21                                | 9188   | 2179.359786 | -0.198257362 | 0.478721346 | -0.41413938  | 0.678772034 | 0.999371363 | Not Sig |
| ENSG00000146701 | MDH2     | malate dehydrogenase 2                              | 4191   | 1826.854886 | -0.198219288 | 0.520230126 | -0.381022317 | 0.703186689 | 0.999371363 | Not Sig |
| ENSG00000202341 | NA       | NA                                                  | NA     | 1.013814878 | -0.198210427 | 2.595632006 | -0.076363069 | 0.93913025  | NA          | NA      |
| ENSG00000229604 | NA       | NA                                                  | NA     | 2.942036189 | -0.198060295 | 1.393458618 | -0.142135757 | 0.886972775 | NA          | NA      |
| ENSG00000006530 | AGK      | acylglycerol kinase                                 | 55750  | 507.669823  | -0.198000136 | 0.506867487 | -0.390634912 | 0.696067116 | 0.999371363 | Not Sig |
| ENSG00000155111 | CDK19    | cyclin dependent kinase 19                          | 23097  | 733.8629954 | -0.197965827 | 0.56613119  | -0.349681894 | 0.726577443 | 0.999371363 | Not Sig |
| ENSG00000061794 | MRPS35   | mitochondrial ribosomal protein S35                 | 60488  | 656.8203666 | -0.197756223 | 0.585512261 | -0.337749073 | 0.735552291 | 0.999371363 | Not Sig |
| ENSG00000179837 | NA       | NA                                                  | NA     | 2018.033629 | -0.197724126 | 0.456420611 | -0.433205953 | 0.664865154 | 0.999371363 | Not Sig |
| ENSG00000253213 | NA       | NA                                                  | NA     | 18.40247691 | -0.197709838 | 0.80354731  | -0.246046295 | 0.805646396 | 0.999371363 | Not Sig |
| ENSG00000185379 | RAD51D   | RAD51 paralog D                                     | 5892   | 149.2803544 | -0.197648371 | 0.483885057 | -0.408461407 | 0.682934958 | 0.999371363 | Not Sig |
| ENSG00000197362 | ZNF786   | zinc finger protein 786                             | 136051 | 269.0722602 | -0.197637081 | 0.524148373 | -0.377063235 | 0.706126612 | 0.999371363 | Not Sig |
| ENSG00000185630 | PBX1     | PBX homeobox 1                                      | 5087   | 2321.916917 | -0.1975622   | 0.490448274 | -0.402819646 | 0.687080908 | 0.999371363 | Not Sig |
| ENSG00000212539 | NA       | NA                                                  | NA     | 4.831057046 | -0.197553052 | 1.186637939 | -0.166481321 | 0.867778182 | NA          | NA      |
| ENSG00000126804 | ZBTB1    | zinc finger and BTB domain containing 1             | 22890  | 1307.725377 | -0.197518045 | 0.483104814 | -0.408851329 | 0.682648769 | 0.999371363 | Not Sig |
| ENSG00000146151 | HMGCLL1  | 3-hydroxymethyl-3-methylglutaryl-CoA lyase like 1   | 54511  | 50.12202217 | -0.197455788 | 1.07421858  | -0.183813418 | 0.85415983  | 0.999371363 | Not Sig |
| ENSG00000154175 | ABI3BP   | ABI family member 3 binding protein                 | 25890  | 1506.595816 | -0.197319149 | 0.752422733 | -0.262245066 | 0.793132511 | 0.999371363 | Not Sig |
| ENSG00000116095 | PLEKHA3  | pleckstrin homology domain containing A3            | 65977  | 1154.109412 | -0.197239747 | 0.468448013 | -0.421049382 | 0.673719022 | 0.999371363 | Not Sig |
| ENSG00000261485 | NA       | NA                                                  | NA     | 28.62638059 | -0.19720342  | 0.713980378 | -0.276202857 | 0.782392263 | 0.999371363 | Not Sig |
| ENSG00000092200 | RPGRIP1  | RPGR interacting protein 1                          | 57096  | 39.42376474 | -0.197083735 | 0.76469463  | -0.257728676 | 0.796616313 | 0.999371363 | Not Sig |
| ENSG00000141141 | NA       | NA                                                  | NA     | 814.6426181 | -0.197007623 | 0.546569238 | -0.360444039 | 0.718515099 | 0.999371363 | Not Sig |
| ENSG00000119446 | RBM18    | RNA binding motif protein 18                        | 92400  | 560.4967551 | -0.196892924 | 0.44667515  | -0.440796682 | 0.659360196 | 0.999371363 | Not Sig |
| ENSG00000086065 | CHMP5    | charged multivesicular body protein 5               | 51510  | 894.6360781 | -0.196713474 | 0.45733931  | -0.430125881 | 0.667104074 | 0.999371363 | Not Sig |
| ENSG00000172053 | QARS     | glutaminyl-tRNA synthetase                          | 5859   | 2215.85289  | -0.196582256 | 0.417892012 | -0.470414008 | 0.638059258 | 0.999371363 | Not Sig |
| ENSG00000249129 | NA       | NA                                                  | NA     | 13.44828637 | -0.196487886 | 0.796137261 | -0.24680152  | 0.805061834 | 0.999371363 | Not Sig |

|                 |              |                                                                |           |             |              |             |              |             |             |         |
|-----------------|--------------|----------------------------------------------------------------|-----------|-------------|--------------|-------------|--------------|-------------|-------------|---------|
| ENSG00000257621 | PSMA3-AS1    | PSMA3 antisense RNA 1                                          | 379025    | 1462.73375  | -0.196363734 | 0.500863432 | -0.39205045  | 0.695020938 | 0.999371363 | Not Sig |
| ENSG00000163806 | SPDYA        | speedy/RINGO cell cycle regulator family member A              | 245711    | 82.6203916  | -0.196241591 | 0.835096377 | -0.234992746 | 0.814214363 | 0.999371363 | Not Sig |
| ENSG00000144597 | EAF1         | ELL associated factor 1                                        | 85403     | 851.3459754 | -0.196203751 | 0.486062668 | -0.40365937  | 0.686463221 | 0.999371363 | Not Sig |
| ENSG00000264279 | MIR4786      | microRNA 4786                                                  | 100616417 | 2.602717935 | -0.195906212 | 1.498056199 | -0.130773607 | 0.895954402 | NA          | NA      |
| ENSG00000076201 | PTPN23       | protein tyrosine phosphatase, non-receptor type 23             | 25930     | 1832.576476 | -0.195887242 | 0.487925185 | -0.401469832 | 0.688074245 | 0.999371363 | Not Sig |
| ENSG00000185245 | GP1BA        | glycoprotein Ib platelet alpha subunit                         | 2811      | 12.73548958 | -0.195737615 | 1.21069414  | -0.161673876 | 0.871562678 | 0.999371363 | Not Sig |
| ENSG00000099860 | GADD45B      | growth arrest and DNA damage inducible beta                    | 4616      | 2091.85209  | -0.19567684  | 0.737445769 | -0.265344041 | 0.79074444  | 0.999371363 | Not Sig |
| ENSG00000105270 | CLIP3        | CAP-Gly domain containing linker protein 3                     | 25999     | 269.8185778 | -0.195645734 | 0.465818854 | -0.420003898 | 0.674482606 | 0.999371363 | Not Sig |
| ENSG00000048991 | R3HDM1       | R3H domain containing 1                                        | 23518     | 635.7413346 | -0.195577978 | 0.660217772 | -0.296232525 | 0.767052512 | 0.999371363 | Not Sig |
| ENSG00000187764 | SEMA4D       | semaphorin 4D                                                  | 10507     | 1574.286664 | -0.195415414 | 0.398207679 | -0.490737432 | 0.623612168 | 0.999371363 | Not Sig |
| ENSG00000145029 | NICN1        | nicolin 1                                                      | 84276     | 351.097213  | -0.19540364  | 0.423297891 | -0.461622051 | 0.644352378 | 0.999371363 | Not Sig |
| ENSG00000069020 | MAST4        | microtubule associated serine/threonine kinase family member 4 | 375449    | 3740.320339 | -0.195391668 | 0.522305224 | -0.3740948   | 0.708333788 | 0.999371363 | Not Sig |
| ENSG00000231889 | TRAF3IP2-AS1 | TRAF3IP2 antisense RNA 1                                       | 643749    | 133.6792171 | -0.195384508 | 0.481558569 | -0.405733634 | 0.684938326 | 0.999371363 | Not Sig |
| ENSG00000273483 | NA           | NA                                                             | NA        | 3.754162362 | -0.195252821 | 1.598384278 | -0.12215637  | 0.902775179 | NA          | NA      |
| ENSG00000232036 | NA           | NA                                                             | NA        | 17.94842168 | -0.195239977 | 0.784052208 | -0.249014    | 0.803349952 | 0.999371363 | Not Sig |
| ENSG00000099341 | PSMD8        | proteasome 26S subunit, non-ATPase 8                           | 5714      | 1225.044838 | -0.195218961 | 0.432123204 | -0.451766903 | 0.651436916 | 0.999371363 | Not Sig |
| ENSG00000168995 | SIGLEC7      | sialic acid binding Ig like lectin 7                           | 27036     | 105.0112456 | -0.195212847 | 0.829808114 | -0.235250589 | 0.814014244 | 0.999371363 | Not Sig |
| ENSG00000214050 | FBXO16       | F-box protein 16                                               | 157574    | 64.6131708  | -0.195179867 | 0.913704733 | -0.21361372  | 0.8308483   | 0.999371363 | Not Sig |
| ENSG00000213079 | SCAF8        | SR-related CTD associated factor 8                             | 22828     | 2110.26174  | -0.195131648 | 0.472877195 | -0.412647617 | 0.679864809 | 0.999371363 | Not Sig |
| ENSG00000035687 | ADSS         | adenylosuccinate synthase                                      | 159       | 1285.981329 | -0.195121201 | 0.499385316 | -0.390722744 | 0.696002185 | 0.999371363 | Not Sig |
| ENSG00000081760 | AACS         | acetoacetyl-CoA synthetase                                     | 65985     | 788.7943944 | -0.19491604  | 0.432027834 | -0.451165468 | 0.651870296 | 0.999371363 | Not Sig |
| ENSG00000237298 | TTN-AS1      | TTN antisense RNA 1                                            | 100506866 | 565.6156311 | -0.194812486 | 0.454300673 | -0.428818396 | 0.66805539  | 0.999371363 | Not Sig |
| ENSG00000237298 | LOC101927055 | uncharacterized LOC101927055                                   | 101927055 | 565.6156311 | -0.194812486 | 0.454300673 | -0.428818396 | 0.66805539  | 0.999371363 | Not Sig |
| ENSG00000261430 | NA           | NA                                                             | NA        | 5.891667026 | -0.194736549 | 1.170441378 | -0.166378729 | 0.867858912 | NA          | NA      |
| ENSG00000213563 | C8orf82      | chromosome 8 open reading frame 82                             | 414919    | 666.3687762 | -0.194663221 | 0.607139289 | -0.320623659 | 0.748495606 | 0.999371363 | Not Sig |
| ENSG00000186153 | WWOX         | WW domain containing oxidoreductase                            | 51741     | 261.6806697 | -0.194499642 | 0.425659767 | -0.456936871 | 0.647716421 | 0.999371363 | Not Sig |
| ENSG00000172183 | ISG20        | interferon stimulated exonuclease gene 20                      | 3669      | 688.318603  | -0.194474715 | 0.50598926  | -0.384345539 | 0.70072236  | 0.999371363 | Not Sig |
| ENSG00000164162 | ANAPC10      | anaphase promoting complex subunit 10                          | 10393     | 193.0945047 | -0.194400491 | 0.594147927 | -0.327192071 | 0.743522617 | 0.999371363 | Not Sig |
| ENSG00000155229 | MMS19        | MMS19 homolog, cytosolic iron-sulfur assembly component        | 64210     | 1205.278827 | -0.19439676  | 0.410376879 | -0.473703003 | 0.635711711 | 0.999371363 | Not Sig |
| ENSG00000228107 | NA           | NA                                                             | NA        | 36.2289901  | -0.194350103 | 0.595780545 | -0.326210892 | 0.744264801 | 0.999371363 | Not Sig |
| ENSG00000250240 | NA           | NA                                                             | NA        | 8.724387134 | -0.194287048 | 1.076524542 | -0.18047619  | 0.856778745 | 0.999371363 | Not Sig |
| ENSG00000119414 | PPP6C        | protein phosphatase 6 catalytic subunit                        | 5537      | 965.0482973 | -0.194239524 | 0.485068745 | -0.400437104 | 0.6888346   | 0.999371363 | Not Sig |
| ENSG00000177000 | MTHFR        | methylenetetrahydrofolate reductase                            | 4524      | 2462.554805 | -0.194197942 | 0.556758987 | -0.348800731 | 0.727238914 | 0.999371363 | Not Sig |
| ENSG00000201012 | NA           | NA                                                             | NA        | 4.92801312  | -0.194136164 | 1.488393215 | -0.130433384 | 0.896223556 | NA          | NA      |
| ENSG00000213240 | NA           | NA                                                             | NA        | 1764.496713 | -0.193987183 | 0.638522567 | -0.303806307 | 0.761275461 | 0.999371363 | Not Sig |

|                 |              |                                                                 |           |             |              |             |              |             |             |         |
|-----------------|--------------|-----------------------------------------------------------------|-----------|-------------|--------------|-------------|--------------|-------------|-------------|---------|
| ENSG00000158987 | RAPGEF6      | Rap guanine nucleotide exchange factor 6                        | 51735     | 363.7447538 | -0.193966488 | 0.606553068 | -0.31978486  | 0.749131426 | 0.999371363 | Not Sig |
| ENSG00000073578 | SDHA         | succinate dehydrogenase complex flavoprotein subunit A          | 6389      | 2082.278361 | -0.193942203 | 0.431342502 | -0.449624607 | 0.652981142 | 0.999371363 | Not Sig |
| ENSG00000084636 | COL16A1      | collagen type XVI alpha 1 chain                                 | 1307      | 1922.814498 | -0.193288593 | 0.577451304 | -0.334727087 | 0.737830967 | 0.999371363 | Not Sig |
| ENSG00000101557 | USP14        | ubiquitin specific peptidase 14                                 | 9097      | 1366.792426 | -0.193242193 | 0.505623486 | -0.382185952 | 0.702323441 | 0.999371363 | Not Sig |
| ENSG00000184009 | ACTG1        | actin gamma 1                                                   | 71        | 28701.86401 | -0.192988717 | 0.399404943 | -0.483190606 | 0.628960405 | 0.999371363 | Not Sig |
| ENSG00000259376 | NA           | NA                                                              | NA        | 1.627235116 | -0.192883941 | 2.262004817 | -0.085271234 | 0.93204576  | NA          | NA      |
| ENSG00000079332 | SAR1A        | secretion associated Ras related GTPase 1A                      | 56681     | 2454.09618  | -0.192752909 | 0.404003781 | -0.477106695 | 0.633286147 | 0.999371363 | Not Sig |
| ENSG00000258365 | NA           | NA                                                              | NA        | 15.0681046  | -0.192717265 | 0.734741206 | -0.262292714 | 0.793095779 | 0.999371363 | Not Sig |
| ENSG00000091732 | ZC3HC1       | zinc finger C3HC-type containing 1                              | 51530     | 219.2485454 | -0.192457042 | 0.474931842 | -0.405230868 | 0.685307817 | 0.999371363 | Not Sig |
| ENSG00000115364 | MRPL19       | mitochondrial ribosomal protein L19                             | 9801      | 803.8367897 | -0.192370919 | 0.50960411  | -0.377490909 | 0.705808819 | 0.999371363 | Not Sig |
| ENSG00000261337 | NA           | NA                                                              | NA        | 0.952738492 | -0.19204423  | 2.621839465 | -0.073247898 | 0.941608852 | NA          | NA      |
| ENSG00000253982 | LOC101927752 | uncharacterized LOC101927752                                    | 101927752 | 171.7263004 | -0.191902118 | 0.675109176 | -0.284253458 | 0.776216151 | 0.999371363 | Not Sig |
| ENSG00000219928 | NA           | NA                                                              | NA        | 26.35666245 | -0.19185585  | 0.720733857 | -0.26619514  | 0.790088926 | 0.999371363 | Not Sig |
| ENSG00000243370 | NA           | NA                                                              | NA        | 11.63656078 | -0.191842233 | 0.946054741 | -0.202781324 | 0.839305956 | 0.999371363 | Not Sig |
| ENSG00000004059 | ARF5         | ADP ribosylation factor 5                                       | 381       | 904.3723536 | -0.191789887 | 0.442313253 | -0.433606466 | 0.664574238 | 0.999371363 | Not Sig |
| ENSG00000173253 | DMRT2        | doublesex and mab-3 related transcription factor 2              | 10655     | 38.04274098 | -0.191785854 | 1.282676348 | -0.149520067 | 0.881143276 | 0.999371363 | Not Sig |
| ENSG00000125652 | ALKBH7       | alkB homolog 7                                                  | 84266     | 399.7615903 | -0.191782408 | 0.640955963 | -0.29921308  | 0.76477747  | 0.999371363 | Not Sig |
| ENSG00000124784 | RIOK1        | RIO kinase 1                                                    | 83732     | 436.402236  | -0.191767479 | 0.458925326 | -0.417862054 | 0.676047978 | 0.999371363 | Not Sig |
| ENSG00000261764 | NA           | NA                                                              | NA        | 3.342015821 | -0.19143435  | 1.334928777 | -0.143404167 | 0.885970992 | NA          | NA      |
| ENSG00000177764 | NA           | NA                                                              | NA        | 130.6070497 | -0.191319092 | 0.784979701 | -0.243724892 | 0.807443894 | 0.999371363 | Not Sig |
| ENSG00000235513 | NA           | NA                                                              | NA        | 42.26433242 | -0.191111861 | 0.853440472 | -0.223931097 | 0.822810918 | 0.999371363 | Not Sig |
| ENSG00000042317 | SPATA7       | spermatogenesis associated 7                                    | 55812     | 269.4731821 | -0.190945057 | 0.496778033 | -0.384366949 | 0.700706494 | 0.999371363 | Not Sig |
| ENSG00000122432 | SPATA1       | spermatogenesis associated 1                                    | 100505741 | 24.85069958 | -0.190846995 | 0.624959937 | -0.305374767 | 0.760080738 | 0.999371363 | Not Sig |
| ENSG00000214541 | NA           | NA                                                              | NA        | 2.29901908  | -0.190827607 | 1.766526143 | -0.108024219 | 0.913976481 | NA          | NA      |
| ENSG00000240441 | NA           | NA                                                              | NA        | 2.183154509 | -0.190738162 | 1.81418697  | -0.105136993 | 0.916267106 | NA          | NA      |
| ENSG00000207281 | NA           | NA                                                              | NA        | 0.703678487 | -0.190658156 | 2.932274227 | -0.065020575 | 0.948157618 | NA          | NA      |
| ENSG00000238830 | NA           | NA                                                              | NA        | 0.703678487 | -0.190658156 | 2.932274227 | -0.065020575 | 0.948157618 | NA          | NA      |
| ENSG00000226419 | SLC16A1-AS1  | SLC16A1 antisense RNA 1                                         | 100506392 | 38.154703   | -0.190647849 | 0.623148563 | -0.305942852 | 0.759648158 | 0.999371363 | Not Sig |
| ENSG00000256905 | NA           | NA                                                              | NA        | 38.69209123 | -0.190638629 | 0.589608876 | -0.323330664 | 0.746444834 | 0.999371363 | Not Sig |
| ENSG00000168310 | IRF2         | interferon regulatory factor 2                                  | 3660      | 1026.396506 | -0.190588661 | 0.420980685 | -0.452725429 | 0.650746466 | 0.999371363 | Not Sig |
| ENSG00000111325 | OGFOD2       | 2-oxoglutarate and iron dependent oxygenase domain containing 2 | 79676     | 36.89336228 | -0.190569585 | 0.540139349 | -0.352815594 | 0.724226693 | 0.999371363 | Not Sig |
| ENSG00000129450 | SIGLEC9      | sialic acid binding Ig like lectin 9                            | 27180     | 206.3975976 | -0.190488205 | 0.838877296 | -0.227075171 | 0.82036529  | 0.999371363 | Not Sig |
| ENSG00000115561 | CHMP3        | charged multivesicular body protein 3                           | 51652     | 1044.486539 | -0.190258962 | 0.498439023 | -0.381709605 | 0.702676775 | 0.999371363 | Not Sig |
| ENSG00000067141 | NEO1         | neogenin 1                                                      | 4756      | 2165.636289 | -0.190161458 | 0.426707934 | -0.445647813 | 0.655851667 | 0.999371363 | Not Sig |
| ENSG00000106113 | CRHR2        | corticotropin releasing hormone receptor 2                      | 1395      | 3.220854254 | -0.190140941 | 1.92497255  | -0.098775923 | 0.921316185 | NA          | NA      |

|                 |          |                                                      |        |             |              |             |              |             |             |         |
|-----------------|----------|------------------------------------------------------|--------|-------------|--------------|-------------|--------------|-------------|-------------|---------|
| ENSG00000111445 | RFC5     | replication factor C subunit 5                       | 5985   | 227.7133416 | -0.190105381 | 0.634877109 | -0.299436502 | 0.764607014 | 0.999371363 | Not Sig |
| ENSG00000136213 | CHST12   | carbohydrate sulfotransferase 12                     | 55501  | 601.9496822 | -0.189890678 | 0.68099631  | -0.278842448 | 0.780365737 | 0.999371363 | Not Sig |
| ENSG00000148218 | ALAD     | aminolevulinic acid dehydratase                      | 210    | 1005.046365 | -0.189814619 | 0.460384739 | -0.412295636 | 0.680122747 | 0.999371363 | Not Sig |
| ENSG00000229930 | NA       | NA                                                   | NA     | 2.414319309 | -0.189677961 | 2.011672567 | -0.094288685 | 0.924879838 | NA          | NA      |
| ENSG00000187720 | THSD4    | thrombospondin type 1 domain containing 4            | 79875  | 1257.032418 | -0.189667805 | 0.510342542 | -0.371648038 | 0.710154918 | 0.999371363 | Not Sig |
| ENSG00000198586 | TLK1     | tousled like kinase 1                                | 9874   | 1892.674282 | -0.189388509 | 0.572955713 | -0.330546507 | 0.740987058 | 0.999371363 | Not Sig |
| ENSG00000114480 | GBE1     | 1,4-alpha-D-glucan branching enzyme 1                | 2632   | 840.842186  | -0.18925444  | 0.529672972 | -0.357304318 | 0.720863998 | 0.999371363 | Not Sig |
| ENSG00000173077 | 1-Dec    | deleted in esophageal cancer 1                       | 50514  | 2.631595746 | -0.189248444 | 1.759074128 | -0.107584121 | 0.914325594 | NA          | NA      |
| ENSG00000103067 | ESRP2    | epithelial splicing regulatory protein 2             | 80004  | 1730.59042  | -0.189235011 | 0.514824825 | -0.367571652 | 0.713192656 | 0.999371363 | Not Sig |
| ENSG00000271936 | NA       | NA                                                   | NA     | 26.7504048  | -0.189144271 | 0.735766243 | -0.257071145 | 0.797123852 | 0.999371363 | Not Sig |
| ENSG00000211791 | NA       | NA                                                   | NA     | 4.701022146 | -0.189022397 | 1.362251076 | -0.138757385 | 0.88964187  | NA          | NA      |
| ENSG00000168242 | NA       | NA                                                   | NA     | 119.8411314 | -0.189003048 | 0.743961375 | -0.254049544 | 0.799457282 | 0.999371363 | Not Sig |
| ENSG00000143947 | RPS27A   | ribosomal protein S27a                               | 6233   | 5911.250411 | -0.18898498  | 0.491876056 | -0.384212603 | 0.700820878 | 0.999371363 | Not Sig |
| ENSG00000250050 | NA       | NA                                                   | NA     | 5.737166343 | -0.188861507 | 1.18294428  | -0.159653764 | 0.873153824 | NA          | NA      |
| ENSG00000254477 | NA       | NA                                                   | NA     | 7.795438847 | -0.188696417 | 1.161390069 | -0.162474626 | 0.870932108 | 0.999371363 | Not Sig |
| ENSG00000124783 | SSR1     | signal sequence receptor subunit 1                   | 6745   | 4698.263709 | -0.188676907 | 0.591913838 | -0.318757385 | 0.749910495 | 0.999371363 | Not Sig |
| ENSG00000236017 | NA       | NA                                                   | NA     | 218.6828177 | -0.18857734  | 0.570853401 | -0.330342852 | 0.741140918 | 0.999371363 | Not Sig |
| ENSG00000160551 | TAOK1    | TAO kinase 1                                         | 57551  | 4830.563983 | -0.1885645   | 0.531017294 | -0.355100488 | 0.722514311 | 0.999371363 | Not Sig |
| ENSG00000079387 | SENP1    | SUMO1/sentrin specific peptidase 1                   | 29843  | 566.431729  | -0.188538975 | 0.468615344 | -0.402332057 | 0.687439665 | 0.999371363 | Not Sig |
| ENSG00000119685 | TTL5     | tubulin tyrosine ligase like 5                       | 23093  | 898.3865619 | -0.188250319 | 0.545269926 | -0.345242438 | 0.729912117 | 0.999371363 | Not Sig |
| ENSG00000085511 | MAP3K4   | mitogen-activated protein kinase kinase kinase 4     | 4216   | 1220.073346 | -0.188157182 | 0.427542257 | -0.440090258 | 0.659871737 | 0.999371363 | Not Sig |
| ENSG00000170634 | ACYP2    | acylphosphatase 2                                    | 98     | 219.2352843 | -0.188114285 | 0.483709366 | -0.388899406 | 0.697350562 | 0.999371363 | Not Sig |
| ENSG00000174944 | P2RY14   | purinergic receptor P2Y14                            | 9934   | 91.68939038 | -0.18786638  | 0.812937779 | -0.231092471 | 0.817242964 | 0.999371363 | Not Sig |
| ENSG00000132842 | AP3B1    | adaptor related protein complex 3 beta 1 subunit     | 8546   | 1635.760102 | -0.187826361 | 0.44284879  | -0.424132041 | 0.671469519 | 0.999371363 | Not Sig |
| ENSG00000182771 | GRID1    | glutamate ionotropic receptor delta type subunit 1   | 2894   | 82.93266523 | -0.187787132 | 0.812907505 | -0.231006764 | 0.817309547 | 0.999371363 | Not Sig |
| ENSG00000129197 | RPAIN    | RPA interacting protein                              | 84268  | 695.0434229 | -0.187642211 | 0.469419255 | -0.399732667 | 0.689353428 | 0.999371363 | Not Sig |
| ENSG00000125746 | EML2     | echinoderm microtubule associated protein like 2     | 24139  | 778.6340656 | -0.187593182 | 0.540398606 | -0.347138538 | 0.728487242 | 0.999371363 | Not Sig |
| ENSG00000231416 | NA       | NA                                                   | NA     | 5.419280586 | -0.187357301 | 1.160199901 | -0.161487086 | 0.871709782 | NA          | NA      |
| ENSG00000164258 | NDUFS4   | NADH:ubiquinone oxidoreductase subunit S4            | 4724   | 338.5872585 | -0.187327594 | 0.436525247 | -0.429133471 | 0.667826095 | 0.999371363 | Not Sig |
| ENSG00000178537 | SLC25A20 | solute carrier family 25 member 20                   | 788    | 322.5048369 | -0.187307036 | 0.608047712 | -0.308046609 | 0.758046866 | 0.999371363 | Not Sig |
| ENSG00000206684 | NA       | NA                                                   | NA     | 1.097220584 | -0.187134964 | 2.564653412 | -0.072966961 | 0.941832409 | NA          | NA      |
| ENSG00000257740 | NA       | NA                                                   | NA     | 1.097220584 | -0.187134964 | 2.564653412 | -0.072966961 | 0.941832409 | NA          | NA      |
| ENSG00000266405 | CBX3P2   | chromobox 3 pseudogene 2                             | 645158 | 26.4081906  | -0.186982375 | 0.677447022 | -0.276010328 | 0.782540134 | 0.999371363 | Not Sig |
| ENSG00000103381 | CPPED1   | calcineurin like phosphoesterase domain containing 1 | 55313  | 419.3853782 | -0.186740879 | 0.765089779 | -0.244077079 | 0.807171124 | 0.999371363 | Not Sig |
| ENSG00000134294 | SLC38A2  | solute carrier family 38 member 2                    | 54407  | 5288.675117 | -0.186632304 | 0.524196541 | -0.356034977 | 0.721814371 | 0.999371363 | Not Sig |

|                 |            |                                                         |        |             |              |             |              |             |             |         |
|-----------------|------------|---------------------------------------------------------|--------|-------------|--------------|-------------|--------------|-------------|-------------|---------|
| ENSG00000180909 | NA         | NA                                                      | NA     | 0.626710317 | -0.186596704 | 3.492996066 | -0.053420245 | 0.957397075 | NA          | NA      |
| ENSG00000203877 | RIPPLY2    | rippy transcriptional repressor 2                       | 134701 | 0.626710317 | -0.186596704 | 3.492996066 | -0.053420245 | 0.957397075 | NA          | NA      |
| ENSG00000221670 | NA         | NA                                                      | NA     | 0.626710317 | -0.186596704 | 3.492996066 | -0.053420245 | 0.957397075 | NA          | NA      |
| ENSG00000230018 | NA         | NA                                                      | NA     | 0.626710317 | -0.186596704 | 3.492996066 | -0.053420245 | 0.957397075 | NA          | NA      |
| ENSG00000231402 | NA         | NA                                                      | NA     | 0.626710317 | -0.186596704 | 3.492996066 | -0.053420245 | 0.957397075 | NA          | NA      |
| ENSG00000259790 | NA         | NA                                                      | NA     | 0.626710317 | -0.186596704 | 3.492996066 | -0.053420245 | 0.957397075 | NA          | NA      |
| ENSG00000112941 | PAPD7      | poly(A) RNA polymerase D7, non-canonical                | 11044  | 986.2881602 | -0.186564057 | 0.398514108 | -0.468149191 | 0.639677904 | 0.999371363 | Not Sig |
| ENSG00000169826 | CSGALNACT2 | chondroitin sulfate N-acetylgalactosaminyltransferase 2 | 55454  | 1114.596569 | -0.186442176 | 0.440981833 | -0.422788792 | 0.672449366 | 0.999371363 | Not Sig |
| ENSG00000156171 | DRAM2      | DNA damage regulated autophagy modulator 2              | 128338 | 699.7650611 | -0.186363067 | 0.546334669 | -0.341115213 | 0.733016849 | 0.999371363 | Not Sig |
| ENSG00000198315 | ZKSCAN8    | zinc finger with KRAB and SCAN domains 8                | 7745   | 1284.209027 | -0.186242728 | 0.581340731 | -0.320367588 | 0.748689693 | 0.999371363 | Not Sig |
| ENSG00000085840 | ORC1       | origin recognition complex subunit 1                    | 4998   | 74.06486207 | -0.18617634  | 0.983157036 | -0.189365822 | 0.84980611  | 0.999371363 | Not Sig |
| ENSG00000259254 | NA         | NA                                                      | NA     | 2.338768541 | -0.186144515 | 2.490454248 | -0.074743198 | 0.940419037 | NA          | NA      |
| ENSG00000108094 | CUL2       | cullin 2                                                | 8453   | 756.4872756 | -0.18588104  | 0.471589107 | -0.394158892 | 0.693463734 | 0.999371363 | Not Sig |
| ENSG00000137101 | CD72       | CD72 molecule                                           | 971    | 76.7463403  | -0.185868883 | 0.64679121  | -0.287370762 | 0.773828446 | 0.999371363 | Not Sig |
| ENSG00000151779 | NBAS       | neuroblastoma amplified sequence                        | 51594  | 2152.840265 | -0.185864187 | 0.396823214 | -0.468380329 | 0.639512633 | 0.999371363 | Not Sig |
| ENSG00000151883 | PARP8      | poly(ADP-ribose) polymerase family member 8             | 79668  | 1640.40335  | -0.185826837 | 0.600641632 | -0.309380547 | 0.757032066 | 0.999371363 | Not Sig |
| ENSG00000163864 | NMNAT3     | nicotinamide nucleotide adenylyltransferase 3           | 349565 | 78.92093158 | -0.185759806 | 0.689379246 | -0.269459528 | 0.787576083 | 0.999371363 | Not Sig |
| ENSG00000047410 | TPR        | translocated promoter region, nuclear basket protein    | 7175   | 6278.081337 | -0.185750496 | 0.578943413 | -0.320843957 | 0.748328646 | 0.999371363 | Not Sig |
| ENSG00000104205 | SGK3       | serum/glucocorticoid regulated kinase family member 3   | 23678  | 196.3674602 | -0.185572478 | 0.538634636 | -0.344523849 | 0.730452364 | 0.999371363 | Not Sig |
| ENSG00000217325 | NA         | NA                                                      | NA     | 1.346280588 | -0.185509412 | 2.082527445 | -0.089078976 | 0.929019146 | NA          | NA      |
| ENSG00000138399 | FASTKD1    | FAST kinase domains 1                                   | 79675  | 397.5853944 | -0.185328554 | 0.548859595 | -0.337661135 | 0.735618566 | 0.999371363 | Not Sig |
| ENSG00000226085 | NA         | NA                                                      | NA     | 17.61976031 | -0.185281329 | 0.900343163 | -0.205789678 | 0.836955205 | 0.999371363 | Not Sig |
| ENSG00000135720 | DYNC1LI2   | dynein cytoplasmic 1 light intermediate chain 2         | 1783   | 4099.728214 | -0.185193388 | 0.385776879 | -0.480053103 | 0.631189634 | 0.999371363 | Not Sig |
| ENSG00000154316 | TDH        | L-threonine dehydrogenase (pseudogene)                  | 157739 | 5.368477566 | -0.185125389 | 1.465084287 | -0.126358183 | 0.899448402 | NA          | NA      |
| ENSG00000118600 | TMEM5      | transmembrane protein 5                                 | 10329  | 231.685468  | -0.185115743 | 0.442917242 | -0.417946571 | 0.675986181 | 0.999371363 | Not Sig |
| ENSG00000164751 | PEX2       | peroxisomal biogenesis factor 2                         | 5828   | 760.126698  | -0.185102107 | 0.468696859 | -0.394929268 | 0.692895089 | 0.999371363 | Not Sig |
| ENSG00000207208 | NA         | NA                                                      | NA     | 7.033242196 | -0.185073826 | 1.168105586 | -0.158439296 | 0.874110651 | 0.999371363 | Not Sig |
| ENSG00000082196 | C1QTNF3    | C1q and TNF related 3                                   | 114899 | 110.4189992 | -0.18505256  | 0.837226002 | -0.221030594 | 0.825068611 | 0.999371363 | Not Sig |
| ENSG00000168461 | RAB31      | RAB31, member RAS oncogene family                       | 11031  | 2210.45256  | -0.185039995 | 0.439708536 | -0.420824205 | 0.673883455 | 0.999371363 | Not Sig |
| ENSG00000093072 | ADA2       | adenosine deaminase 2                                   | 51816  | 1766.798133 | -0.18488891  | 0.780639632 | -0.236842843 | 0.812778713 | 0.999371363 | Not Sig |
| ENSG00000259901 | NA         | NA                                                      | NA     | 60.17761866 | -0.184536269 | 0.543097136 | -0.339785016 | 0.734018432 | 0.999371363 | Not Sig |
| ENSG00000115459 | ELMOD3     | ELMO domain containing 3                                | 84173  | 461.6700548 | -0.184436968 | 0.448072119 | -0.411623399 | 0.680615479 | 0.999371363 | Not Sig |
| ENSG00000183405 | NA         | NA                                                      | NA     | 11.67032568 | -0.18437372  | 0.908815492 | -0.202872554 | 0.839234647 | 0.999371363 | Not Sig |
| ENSG00000236859 | NIFK-AS1   | NIFK antisense RNA 1                                    | 254128 | 77.27878006 | -0.184349673 | 0.516292967 | -0.35706408  | 0.721043834 | 0.999371363 | Not Sig |
| ENSG00000148680 | HTR7       | 5-hydroxytryptamine receptor 7                          | 3363   | 19.21121471 | -0.18432338  | 0.764462479 | -0.241115012 | 0.809465978 | 0.999371363 | Not Sig |



|                 |          |                                                         |           |             |              |             |              |             |             |         |
|-----------------|----------|---------------------------------------------------------|-----------|-------------|--------------|-------------|--------------|-------------|-------------|---------|
| ENSG00000167771 | RCOR2    | REST corepressor 2                                      | 283248    | 61.12800101 | -0.184303611 | 0.887874332 | -0.207578488 | 0.835558103 | 0.999371363 | Not Sig |
| ENSG00000259856 | NA       | NA                                                      | NA        | 4.260419274 | -0.184294277 | 1.24695451  | -0.147795509 | 0.882504154 | NA          | NA      |
| ENSG00000096968 | JAK2     | Janus kinase 2                                          | 3717      | 1036.417912 | -0.18424783  | 0.595309693 | -0.309499127 | 0.756941876 | 0.999371363 | Not Sig |
| ENSG00000238718 | NA       | NA                                                      | NA        | 10.36821238 | -0.184247195 | 1.024749615 | -0.179797281 | 0.857311718 | 0.999371363 | Not Sig |
| ENSG00000234230 | ZFX-AS1  | ZFX antisense RNA 1                                     | 100873922 | 2.839306978 | -0.184176915 | 1.698107265 | -0.108460118 | 0.913630715 | NA          | NA      |
| ENSG00000260742 | NA       | NA                                                      | NA        | 10.41188491 | -0.18403552  | 0.864654365 | -0.212842874 | 0.831449521 | 0.999371363 | Not Sig |
| ENSG00000172113 | NME6     | NME/NM23 nucleoside diphosphate kinase 6                | 10201     | 352.6710364 | -0.184011894 | 0.455174339 | -0.404266844 | 0.686016504 | 0.999371363 | Not Sig |
| ENSG00000100201 | DDX17    | DEAD-box helicase 17                                    | 10521     | 18937.55032 | -0.183879146 | 0.415852344 | -0.442174124 | 0.658363209 | 0.999371363 | Not Sig |
| ENSG00000148606 | POLR3A   | RNA polymerase III subunit A                            | 11128     | 777.2261943 | -0.183754137 | 0.398546804 | -0.461060369 | 0.644755294 | 0.999371363 | Not Sig |
| ENSG00000250995 | NA       | NA                                                      | NA        | 6.088496788 | -0.183436253 | 1.080402185 | -0.169785155 | 0.865179102 | NA          | NA      |
| ENSG00000264796 | MIR5009  | microRNA 5009                                           | 100846993 | 14.65562143 | -0.183373742 | 0.803822138 | -0.22812726  | 0.819547308 | 0.999371363 | Not Sig |
| ENSG00000072778 | ACADVL   | acyl-CoA dehydrogenase very long chain                  | 37        | 4332.90935  | -0.18332613  | 0.410340196 | -0.4467662   | 0.655043878 | 0.999371363 | Not Sig |
| ENSG00000106290 | TAF6     | TATA-box binding protein associated factor 6            | 6878      | 840.8569423 | -0.182705231 | 0.495523988 | -0.368711174 | 0.712343019 | 0.999371363 | Not Sig |
| ENSG00000068489 | PRR11    | proline rich 11                                         | 55771     | 129.616235  | -0.182636901 | 0.771036144 | -0.236872036 | 0.812756065 | 0.999371363 | Not Sig |
| ENSG00000168758 | SEMA4C   | semaphorin 4C                                           | 54910     | 1346.283604 | -0.182595266 | 0.417945726 | -0.436887506 | 0.662192933 | 0.999371363 | Not Sig |
| ENSG00000242441 | GTF2A1L  | general transcription factor IIA subunit 1 like         | 11036     | 1.240130555 | -0.182511598 | 2.440997878 | -0.074769257 | 0.940398303 | NA          | NA      |
| ENSG00000174238 | PITPNA   | phosphatidylinositol transfer protein alpha             | 5306      | 1486.249545 | -0.182370023 | 0.425415877 | -0.428686453 | 0.668151421 | 0.999371363 | Not Sig |
| ENSG00000161960 | EIF4A1   | eukaryotic translation initiation factor 4A1            | 1973      | 255.1887413 | -0.18221796  | 0.460938551 | -0.395319418 | 0.692607171 | 0.999371363 | Not Sig |
| ENSG00000159079 | C21orf59 | chromosome 21 open reading frame 59                     | 56683     | 190.2769696 | -0.182177596 | 0.51318237  | -0.354995819 | 0.722592723 | 0.999371363 | Not Sig |
| ENSG00000207698 | MIR32    | microRNA 32                                             | 407036    | 4.233373874 | -0.18214237  | 1.174615982 | -0.155065462 | 0.87676971  | NA          | NA      |
| ENSG00000124614 | RPS10    | ribosomal protein S10                                   | 6204      | 49.25151286 | -0.182038774 | 0.688784922 | -0.264289719 | 0.791556681 | 0.999371363 | Not Sig |
| ENSG00000172586 | CHCHD1   | coiled-coil-helix-coiled-coil-helix domain containing 1 | 118487    | 243.0829094 | -0.181752327 | 0.480169965 | -0.37851665  | 0.705046828 | 0.999371363 | Not Sig |
| ENSG00000150687 | PRSS23   | protease, serine 23                                     | 11098     | 1626.185163 | -0.181598229 | 0.49101929  | -0.369839297 | 0.711502233 | 0.999371363 | Not Sig |
| ENSG00000087448 | KLHL42   | kelch like family member 42                             | 57542     | 875.6848444 | -0.181321918 | 0.419019816 | -0.432728743 | 0.665211846 | 0.999371363 | Not Sig |
| ENSG00000204435 | CSNK2B   | casein kinase 2 beta                                    | 1460      | 299.2637671 | -0.181317555 | 0.502855418 | -0.36057592  | 0.718416493 | 0.999371363 | Not Sig |
| ENSG00000255046 | NA       | NA                                                      | NA        | 12.18380128 | -0.181084599 | 0.941798959 | -0.192275217 | 0.847526631 | 0.999371363 | Not Sig |
| ENSG00000265770 | NA       | NA                                                      | NA        | 3.500513524 | -0.181003858 | 1.364620093 | -0.132640476 | 0.89447772  | NA          | NA      |
| ENSG00000107223 | EDF1     | endothelial differentiation related factor 1            | 8721      | 1774.292277 | -0.180993319 | 0.468619561 | -0.386226555 | 0.699328889 | 0.999371363 | Not Sig |
| ENSG00000170854 | RIOX2    | ribosomal oxygenase 2                                   | 84864     | 632.608128  | -0.180738004 | 0.497320296 | -0.363423745 | 0.716288367 | 0.999371363 | Not Sig |
| ENSG00000035403 | VCL      | vinculin                                                | 7414      | 3892.46909  | -0.180737402 | 0.542063803 | -0.333424591 | 0.738813804 | 0.999371363 | Not Sig |
| ENSG00000183527 | PSMG1    | proteasome assembly chaperone 1                         | 8624      | 253.0855863 | -0.180551891 | 0.546603066 | -0.330316279 | 0.741160994 | 0.999371363 | Not Sig |
| ENSG00000130844 | ZNF331   | zinc finger protein 331                                 | 55422     | 1324.794572 | -0.180428558 | 0.572415799 | -0.315205412 | 0.752605697 | 0.999371363 | Not Sig |
| ENSG00000179101 | NA       | NA                                                      | NA        | 4.841773979 | -0.180341258 | 1.330723307 | -0.135521229 | 0.892199781 | NA          | NA      |
| ENSG00000083812 | ZNF324   | zinc finger protein 324                                 | 25799     | 310.1170369 | -0.180327645 | 0.616007444 | -0.292736146 | 0.769723839 | 0.999371363 | Not Sig |
| ENSG00000259649 | NA       | NA                                                      | NA        | 6.196346189 | -0.180327564 | 1.143637829 | -0.157678908 | 0.874709821 | NA          | NA      |

|                 |             |                                                                      |           |             |              |             |              |             |             |         |
|-----------------|-------------|----------------------------------------------------------------------|-----------|-------------|--------------|-------------|--------------|-------------|-------------|---------|
| ENSG00000272699 | NA          | NA                                                                   | NA        | 3.438252835 | -0.180293636 | 1.856437371 | -0.097118081 | 0.922632622 | NA          | NA      |
| ENSG00000214479 | NA          | NA                                                                   | NA        | 11.5300795  | -0.180221132 | 0.908477195 | -0.198377167 | 0.842749981 | 0.999371363 | Not Sig |
| ENSG00000139687 | RB1         | RB transcriptional corepressor 1                                     | 5925      | 1297.275063 | -0.180213973 | 0.58046754  | -0.31046348  | 0.756208527 | 0.999371363 | Not Sig |
| ENSG00000133997 | MED6        | mediator complex subunit 6                                           | 10001     | 368.9298882 | -0.180105188 | 0.557656202 | -0.322968142 | 0.746719369 | 0.999371363 | Not Sig |
| ENSG00000163666 | HESX1       | HESX homeobox 1                                                      | 8820      | 11.02368955 | -0.179984719 | 0.896307279 | -0.200806936 | 0.840849539 | 0.999371363 | Not Sig |
| ENSG00000159247 | NA          | NA                                                                   | NA        | 91.98952563 | -0.179978038 | 0.81671618  | -0.220367911 | 0.825584635 | 0.999371363 | Not Sig |
| ENSG00000239077 | NA          | NA                                                                   | NA        | 0.787084193 | -0.179937894 | 3.922592796 | -0.045872183 | 0.963412126 | NA          | NA      |
| ENSG00000244926 | ALKBH3-AS1  | ALKBH3 antisense RNA 1                                               | 100507300 | 0.787084193 | -0.179937894 | 3.922592796 | -0.045872183 | 0.963412126 | NA          | NA      |
| ENSG00000252711 | NA          | NA                                                                   | NA        | 0.787084193 | -0.179937894 | 3.922592796 | -0.045872183 | 0.963412126 | NA          | NA      |
| ENSG00000268964 | ERVV-2      | endogenous retrovirus group V member 2, envelope                     | 100271846 | 0.787084193 | -0.179937894 | 3.922592796 | -0.045872183 | 0.963412126 | NA          | NA      |
| ENSG00000136930 | PSMB7       | proteasome subunit beta 7                                            | 5695      | 880.2556325 | -0.179912805 | 0.394864359 | -0.455631918 | 0.648654687 | 0.999371363 | Not Sig |
| ENSG00000106554 | CHCHD3      | coiled-coil-helix-coiled-coil-helix domain containing 3              | 54927     | 701.7448314 | -0.179678823 | 0.440714788 | -0.407698647 | 0.683494931 | 0.999371363 | Not Sig |
| ENSG00000207245 | SNORD116-29 | small nucleolar RNA, C/D box 116-29                                  | 100033821 | 5.954288062 | -0.17965026  | 1.077006187 | -0.166805225 | 0.867523307 | NA          | NA      |
| ENSG00000117155 | SSX2IP      | SSX family member 2 interacting protein                              | 117178    | 333.8705325 | -0.179459478 | 0.681476818 | -0.263339079 | 0.792289241 | 0.999371363 | Not Sig |
| ENSG00000250182 | NA          | NA                                                                   | NA        | 40.10086091 | -0.179377727 | 0.668646902 | -0.268269734 | 0.788491701 | 0.999371363 | Not Sig |
| ENSG00000135686 | KLHL36      | kelch like family member 36                                          | 79786     | 1536.760983 | -0.179337248 | 0.433842096 | -0.413369864 | 0.67933565  | 0.999371363 | Not Sig |
| ENSG00000172493 | AFF1        | AF4/FMR2 family member 1                                             | 4299      | 5113.586582 | -0.179095366 | 0.392466748 | -0.456332585 | 0.648150835 | 0.999371363 | Not Sig |
| ENSG00000151065 | DCP1B       | decapping mRNA 1B                                                    | 196513    | 285.7153533 | -0.179034142 | 0.430686525 | -0.415694785 | 0.677633358 | 0.999371363 | Not Sig |
| ENSG00000015171 | ZMYND11     | zinc finger MYND-type containing 11                                  | 10771     | 2088.120251 | -0.178933218 | 0.447858999 | -0.399530249 | 0.68950254  | 0.999371363 | Not Sig |
| ENSG00000178719 | GRINA       | glutamate ionotropic receptor NMDA type subunit associated protein 1 | 2907      | 2784.574284 | -0.17892567  | 0.429470446 | -0.416619285 | 0.676956901 | 0.999371363 | Not Sig |
| ENSG00000130711 | PRDM12      | PR/SET domain 12                                                     | 59335     | 0.943284243 | -0.17890694  | 3.076527274 | -0.058152236 | 0.953627366 | NA          | NA      |
| ENSG00000233455 | NA          | NA                                                                   | NA        | 0.943284243 | -0.17890694  | 3.076527274 | -0.058152236 | 0.953627366 | NA          | NA      |
| ENSG00000170871 | KIAA0232    | KIAA0232                                                             | 9778      | 2118.745361 | -0.178879227 | 0.452708538 | -0.39513111  | 0.692746131 | 0.999371363 | Not Sig |
| ENSG00000126653 | NSRP1       | nuclear speckle splicing regulatory protein 1                        | 84081     | 844.0837179 | -0.178830015 | 0.433462756 | -0.412561432 | 0.679927963 | 0.999371363 | Not Sig |
| ENSG00000116266 | STXBP3      | syntaxin binding protein 3                                           | 6814      | 922.7614628 | -0.178775677 | 0.580392734 | -0.308025353 | 0.758063041 | 0.999371363 | Not Sig |
| ENSG00000235423 | NA          | NA                                                                   | NA        | 82.5579253  | -0.178768225 | 0.673521591 | -0.265423154 | 0.790683501 | 0.999371363 | Not Sig |
| ENSG00000105852 | PON3        | paraoxonase 3                                                        | 5446      | 548.6460188 | -0.178634049 | 0.74946976  | -0.238347241 | 0.811611784 | 0.999371363 | Not Sig |
| ENSG00000151704 | KCNJ1       | potassium voltage-gated channel subfamily J member 1                 | 3758      | 5.187811734 | -0.178609673 | 1.387958803 | -0.12868514  | 0.897606794 | NA          | NA      |
| ENSG00000197324 | LRP10       | LDL receptor related protein 10                                      | 26020     | 7118.192538 | -0.1785645   | 0.469171241 | -0.380595579 | 0.703503362 | 0.999371363 | Not Sig |
| ENSG00000250397 | NA          | NA                                                                   | NA        | 14.50707609 | -0.178559417 | 0.891509768 | -0.200288795 | 0.841254725 | 0.999371363 | Not Sig |
| ENSG00000178093 | TSSK6       | testis specific serine kinase 6                                      | 83983     | 43.47007924 | -0.178525076 | 0.818134099 | -0.218210042 | 0.827265462 | 0.999371363 | Not Sig |
| ENSG00000226862 | NA          | NA                                                                   | NA        | 9.235969602 | -0.178517601 | 0.998165924 | -0.178845618 | 0.858058925 | 0.999371363 | Not Sig |
| ENSG00000160050 | CCDC28B     | coiled-coil domain containing 28B                                    | 79140     | 62.87620304 | -0.178403424 | 0.504887543 | -0.353352794 | 0.723823971 | 0.999371363 | Not Sig |
| ENSG00000164733 | CTSB        | cathepsin B                                                          | 1508      | 19279.77633 | -0.178305618 | 0.427702147 | -0.416892033 | 0.676757381 | 0.999371363 | Not Sig |
| ENSG00000197885 | NKIRAS1     | NFKB inhibitor interacting Ras like 1                                | 28512     | 200.9383554 | -0.178179391 | 0.428952379 | -0.415382686 | 0.677861779 | 0.999371363 | Not Sig |

|                 |              |                                                                      |           |             |              |             |              |             |             |         |
|-----------------|--------------|----------------------------------------------------------------------|-----------|-------------|--------------|-------------|--------------|-------------|-------------|---------|
| ENSG00000176101 | SSNA1        | SS nuclear autoantigen 1                                             | 8636      | 525.9932121 | -0.177905047 | 0.633116237 | -0.280999027 | 0.778711146 | 0.999371363 | Not Sig |
| ENSG00000016391 | CHDH         | choline dehydrogenase                                                | 55349     | 571.5228268 | -0.17785172  | 0.50275238  | -0.353756098 | 0.723521677 | 0.999371363 | Not Sig |
| ENSG00000073921 | PICALM       | phosphatidylinositol binding clathrin assembly protein               | 8301      | 4182.621972 | -0.177767759 | 0.567009381 | -0.313518197 | 0.753886998 | 0.999371363 | Not Sig |
| ENSG00000007384 | RHBDF1       | rhomboïd 5 homolog 1                                                 | 64285     | 961.0545897 | -0.177763739 | 0.575499939 | -0.308885765 | 0.757408425 | 0.999371363 | Not Sig |
| ENSG00000001167 | NFYA         | nuclear transcription factor Y subunit alpha                         | 4800      | 983.5805836 | -0.177747562 | 0.503428718 | -0.353073942 | 0.724033007 | 0.999371363 | Not Sig |
| ENSG00000144460 | NYAP2        | neuronal tyrosine-phosphorylated phosphoinositide-3-kinase adaptor 2 | 57624     | 281.1054922 | -0.177692611 | 1.056238063 | -0.168231592 | 0.866401088 | 0.999371363 | Not Sig |
| ENSG00000162869 | PPP1R21      | protein phosphatase 1 regulatory subunit 21                          | 129285    | 724.3223473 | -0.177638267 | 0.420840486 | -0.422103559 | 0.67294943  | 0.999371363 | Not Sig |
| ENSG00000182718 | ANXA2        | annexin A2                                                           | 302       | 12926.37782 | -0.177623154 | 0.464049924 | -0.382767338 | 0.701892281 | 0.999371363 | Not Sig |
| ENSG00000181381 | DDX60L       | DExD/H-box 60 like                                                   | 91351     | 1695.258387 | -0.177287605 | 0.470942322 | -0.376452906 | 0.706580221 | 0.999371363 | Not Sig |
| ENSG00000111653 | ING4         | inhibitor of growth family member 4                                  | 51147     | 470.029497  | -0.177042868 | 0.486887402 | -0.363621789 | 0.716140454 | 0.999371363 | Not Sig |
| ENSG00000185418 | TARSL2       | threonyl-tRNA synthetase like 2                                      | 123283    | 475.612597  | -0.176672944 | 0.470780911 | -0.375276356 | 0.707454949 | 0.999371363 | Not Sig |
| ENSG00000180626 | ZNF594       | zinc finger protein 594                                              | 84622     | 255.707578  | -0.176653147 | 0.484766598 | -0.364408662 | 0.715552868 | 0.999371363 | Not Sig |
| ENSG00000102898 | NUTF2        | nuclear transport factor 2                                           | 10204     | 763.2938594 | -0.176620753 | 0.408424973 | -0.43244357  | 0.665419057 | 0.999371363 | Not Sig |
| ENSG00000225693 | NA           | NA                                                                   | NA        | 15.34713948 | -0.176418656 | 0.815921216 | -0.21622021  | 0.828816101 | 0.999371363 | Not Sig |
| ENSG00000265462 | MIR3680-1    | microRNA 3680-1                                                      | 100500917 | 17.73449512 | -0.176370777 | 0.776852762 | -0.22703243  | 0.820398525 | 0.999371363 | Not Sig |
| ENSG00000107140 | TESK1        | testis-specific kinase 1                                             | 7016      | 710.709881  | -0.176353654 | 0.595976286 | -0.295907165 | 0.767300979 | 0.999371363 | Not Sig |
| ENSG00000104756 | KCTD9        | potassium channel tetramerization domain containing 9                | 54793     | 598.6039643 | -0.176336766 | 0.530160031 | -0.33261045  | 0.739428354 | 0.999371363 | Not Sig |
| ENSG00000235330 | NA           | NA                                                                   | NA        | 9.985487271 | -0.176296428 | 1.406281467 | -0.125363543 | 0.900235749 | 0.999371363 | Not Sig |
| ENSG00000223701 | RAET1E-AS1   | RAET1E antisense RNA 1                                               | 100652739 | 6.927048401 | -0.176170993 | 1.102063991 | -0.159855502 | 0.872994902 | 0.999371363 | Not Sig |
| ENSG00000155545 | MIER3        | MIER family member 3                                                 | 166968    | 742.7551397 | -0.176147248 | 0.496500093 | -0.354777874 | 0.722756006 | 0.999371363 | Not Sig |
| ENSG00000168393 | DTYMK        | deoxythymidylate kinase                                              | 1841      | 298.3717503 | -0.17612106  | 0.517665398 | -0.340221814 | 0.733689492 | 0.999371363 | Not Sig |
| ENSG00000215041 | NEURL4       | neuronalized E3 ubiquitin protein ligase 4                           | 84461     | 605.4599777 | -0.175859706 | 0.49055352  | -0.358492395 | 0.719974858 | 0.999371363 | Not Sig |
| ENSG00000197956 | S100A6       | S100 calcium binding protein A6                                      | 6277      | 8233.649157 | -0.17585515  | 0.588197642 | -0.298972892 | 0.764960729 | 0.999371363 | Not Sig |
| ENSG00000216004 | NA           | NA                                                                   | NA        | 3.130872868 | -0.175778216 | 1.42558555  | -0.123302467 | 0.901867587 | NA          | NA      |
| ENSG00000172661 | WASHC2C      | WASH complex subunit 2C                                              | 253725    | 944.5158387 | -0.17563563  | 0.545390607 | -0.322036404 | 0.747425116 | 0.999371363 | Not Sig |
| ENSG00000249635 | LOC101929577 | uncharacterized LOC101929577                                         | 101929577 | 9.765956944 | -0.175478525 | 1.112997341 | -0.157663023 | 0.87472234  | 0.999371363 | Not Sig |
| ENSG00000259969 | NA           | NA                                                                   | NA        | 7.627710175 | -0.175474573 | 1.11248647  | -0.157731871 | 0.874668085 | 0.999371363 | Not Sig |
| ENSG00000163867 | ZMYM6        | zinc finger MYM-type containing 6                                    | 9204      | 334.9059056 | -0.175430092 | 0.599578849 | -0.292588859 | 0.76983643  | 0.999371363 | Not Sig |
| ENSG00000248643 | RBM14-RBM4   | RBM14-RBM4 readthrough                                               | 100526737 | 5.540603344 | -0.175394769 | 1.133031027 | -0.154801383 | 0.876977901 | NA          | NA      |
| ENSG00000111786 | SRSF9        | serine and arginine rich splicing factor 9                           | 8683      | 1423.757587 | -0.175352258 | 0.383820044 | -0.456860607 | 0.64777124  | 0.999371363 | Not Sig |
| ENSG00000148297 | MED22        | mediator complex subunit 22                                          | 6837      | 750.7594205 | -0.175315235 | 0.5441983   | -0.322153221 | 0.747336621 | 0.999371363 | Not Sig |
| ENSG00000215388 | NA           | NA                                                                   | NA        | 40.51227806 | -0.175253811 | 0.594639819 | -0.294722629 | 0.768205775 | 0.999371363 | Not Sig |
| ENSG00000044446 | PHKA2        | phosphorylase kinase regulatory subunit alpha 2                      | 5256      | 908.9168296 | -0.175101942 | 0.426568421 | -0.410489696 | 0.68144676  | 0.999371363 | Not Sig |
| ENSG00000074266 | EED          | embryonic ectoderm development                                       | 8726      | 421.1115651 | -0.174932056 | 0.540996816 | -0.323351359 | 0.746429162 | 0.999371363 | Not Sig |
| ENSG00000130856 | ZNF236       | zinc finger protein 236                                              | 7776      | 900.9492334 | -0.17492942  | 0.439073058 | -0.398406181 | 0.690330802 | 0.999371363 | Not Sig |

|                 |              |                                                         |           |             |              |             |              |             |             |         |
|-----------------|--------------|---------------------------------------------------------|-----------|-------------|--------------|-------------|--------------|-------------|-------------|---------|
| ENSG00000189339 | SLC35E2B     | solute carrier family 35 member E2B                     | 728661    | 1901.435965 | -0.174879696 | 0.525225625 | -0.332961088 | 0.739163656 | 0.999371363 | Not Sig |
| ENSG00000080815 | PSEN1        | presenilin 1                                            | 5663      | 2237.996602 | -0.174865692 | 0.426931904 | -0.409586845 | 0.682109048 | 0.999371363 | Not Sig |
| ENSG00000106682 | EIF4H        | eukaryotic translation initiation factor 4H             | 7458      | 4207.642088 | -0.174796422 | 0.433293676 | -0.403413278 | 0.68664422  | 0.999371363 | Not Sig |
| ENSG00000140374 | ETF A        | electron transfer flavoprotein alpha subunit            | 2108      | 1059.894272 | -0.174771084 | 0.483380053 | -0.361560398 | 0.717680563 | 0.999371363 | Not Sig |
| ENSG00000188243 | COMMD6       | COMM domain containing 6                                | 170622    | 486.4894863 | -0.174616909 | 0.499151619 | -0.349827392 | 0.726468241 | 0.999371363 | Not Sig |
| ENSG00000185219 | ZNF445       | zinc finger protein 445                                 | 353274    | 1379.755586 | -0.174588337 | 0.449845453 | -0.388107373 | 0.697936576 | 0.999371363 | Not Sig |
| ENSG00000140694 | PARN         | poly(A)-specific ribonuclease                           | 5073      | 1350.220094 | -0.174481038 | 0.522798668 | -0.333744229 | 0.738572571 | 0.999371363 | Not Sig |
| ENSG00000131469 | RPL27        | ribosomal protein L27                                   | 6155      | 2740.851431 | -0.174198765 | 0.454262779 | -0.383475761 | 0.701367039 | 0.999371363 | Not Sig |
| ENSG00000176715 | ACSF3        | acyl-CoA synthetase family member 3                     | 197322    | 798.6730185 | -0.17418101  | 0.517038087 | -0.336882359 | 0.736205584 | 0.999371363 | Not Sig |
| ENSG00000189001 | SBSN         | suprabasin                                              | 374897    | 0.91410238  | -0.174172596 | 3.096335609 | -0.056251201 | 0.955141693 | NA          | NA      |
| ENSG00000179943 | FIZ1         | FLT3 interacting zinc finger 1                          | 84922     | 316.5214528 | -0.174118474 | 0.52116795  | -0.334092828 | 0.738309512 | 0.999371363 | Not Sig |
| ENSG00000126001 | CEP250       | centrosomal protein 250                                 | 11190     | 1143.191521 | -0.174101904 | 0.453238416 | -0.384128745 | 0.700883028 | 0.999371363 | Not Sig |
| ENSG00000174579 | MSL2         | MSL complex subunit 2                                   | 55167     | 1198.415116 | -0.174073554 | 0.409856979 | -0.424717799 | 0.671042407 | 0.999371363 | Not Sig |
| ENSG00000196498 | NCOR2        | nuclear receptor corepressor 2                          | 9612      | 11059.62999 | -0.174011018 | 0.467538901 | -0.372185111 | 0.709755031 | 0.999371363 | Not Sig |
| ENSG00000215039 | CD27-AS1     | CD27 antisense RNA 1                                    | 678655    | 184.888627  | -0.17369819  | 0.456160187 | -0.380783319 | 0.703364038 | 0.999371363 | Not Sig |
| ENSG00000229447 | NA           | NA                                                      | NA        | 20.90473734 | -0.173666249 | 0.871212461 | -0.199338573 | 0.841997908 | 0.999371363 | Not Sig |
| ENSG00000066379 | ZNRD1        | zinc ribbon domain containing 1                         | 30834     | 230.0477917 | -0.173609685 | 0.517638639 | -0.335387801 | 0.737332569 | 0.999371363 | Not Sig |
| ENSG00000123374 | CDK2         | cyclin dependent kinase 2                               | 1017      | 416.415676  | -0.17354989  | 0.527818028 | -0.328806294 | 0.742302105 | 0.999371363 | Not Sig |
| ENSG00000166004 | CEP295       | centrosomal protein 295                                 | 85459     | 814.1625166 | -0.173445135 | 0.624071288 | -0.277925196 | 0.781069782 | 0.999371363 | Not Sig |
| ENSG00000248027 | LOC100128386 | uncharacterized LOC100128386                            | 100128386 | 6.567570155 | -0.173416245 | 1.298780201 | -0.133522397 | 0.893780253 | NA          | NA      |
| ENSG00000146278 | PNRC1        | proline rich nuclear receptor coactivator 1             | 10957     | 6001.415801 | -0.173295998 | 0.538764741 | -0.321654304 | 0.747714599 | 0.999371363 | Not Sig |
| ENSG00000252202 | NA           | NA                                                      | NA        | 8.220693559 | -0.173273453 | 0.898249542 | -0.192901243 | 0.847036312 | 0.999371363 | Not Sig |
| ENSG00000238534 | NA           | NA                                                      | NA        | 5.465207294 | -0.173270275 | 1.084315377 | -0.159796936 | 0.873041038 | NA          | NA      |
| ENSG00000179988 | PSTK         | phosphoseryl-tRNA kinase                                | 118672    | 70.0578068  | -0.173237785 | 0.486125257 | -0.356364502 | 0.72156761  | 0.999371363 | Not Sig |
| ENSG00000172613 | RAD9A        | RAD9 checkpoint clamp component A                       | 5883      | 288.843307  | -0.173220299 | 0.470411491 | -0.368231436 | 0.712700672 | 0.999371363 | Not Sig |
| ENSG00000174373 | RALGAP A1    | Ral GTPase activating protein catalytic alpha subunit 1 | 253959    | 2602.815636 | -0.173106165 | 0.497456636 | -0.347982421 | 0.727853386 | 0.999371363 | Not Sig |
| ENSG00000105426 | PTPRS        | protein tyrosine phosphatase, receptor type S           | 5802      | 3501.994365 | -0.173088115 | 0.73675899  | -0.234931799 | 0.814261668 | 0.999371363 | Not Sig |
| ENSG00000169093 | ASMTL        | acetylserotonin O-methyltransferase like                | 8623      | 594.3594585 | -0.173077623 | 0.525076889 | -0.329623388 | 0.741684548 | 0.999371363 | Not Sig |
| ENSG00000226505 | NA           | NA                                                      | NA        | 5.47636091  | -0.173076308 | 1.153329897 | -0.15006661  | 0.880712063 | NA          | NA      |
| ENSG00000251141 | NA           | NA                                                      | NA        | 16.9193427  | -0.172858375 | 0.764179199 | -0.226201361 | 0.821044812 | 0.999371363 | Not Sig |
| ENSG00000125378 | BMP4         | bone morphogenetic protein 4                            | 652       | 257.0619005 | -0.172792993 | 0.835314018 | -0.206859923 | 0.836119256 | 0.999371363 | Not Sig |
| ENSG00000133985 | TTC9         | tetratricopeptide repeat domain 9                       | 23508     | 508.496067  | -0.172631943 | 0.487572909 | -0.354063853 | 0.723291031 | 0.999371363 | Not Sig |
| ENSG00000145779 | TNFAIP8      | TNF alpha induced protein 8                             | 25816     | 636.4441279 | -0.172499501 | 0.614450746 | -0.28073772  | 0.778911575 | 0.999371363 | Not Sig |
| ENSG00000175203 | DCTN2        | dynactin subunit 2                                      | 10540     | 1300.092641 | -0.172478374 | 0.45984766  | -0.375077202 | 0.707603051 | 0.999371363 | Not Sig |
| ENSG00000054611 | TBC1D22A     | TBC1 domain family member 22A                           | 25771     | 1086.245849 | -0.17230255  | 0.505325051 | -0.340973695 | 0.733123385 | 0.999371363 | Not Sig |

|                 |              |                                                                      |           |             |              |             |              |             |             |         |
|-----------------|--------------|----------------------------------------------------------------------|-----------|-------------|--------------|-------------|--------------|-------------|-------------|---------|
| ENSG00000246560 | LOC105377348 | uncharacterized LOC105377348                                         | 105377348 | 19.53615463 | -0.172093753 | 0.758548335 | -0.226872494 | 0.820522891 | 0.999371363 | Not Sig |
| ENSG00000103018 | CYB5B        | cytochrome b5 type B                                                 | 80777     | 1155.77939  | -0.171979867 | 0.463838766 | -0.370775105 | 0.710805045 | 0.999371363 | Not Sig |
| ENSG00000138685 | FGF2         | fibroblast growth factor 2                                           | 2247      | 241.0448137 | -0.171955701 | 0.727920912 | -0.236228549 | 0.813255328 | 0.999371363 | Not Sig |
| ENSG00000102794 | ACOD1        | aconitate decarboxylase 1                                            | 730249    | 1.843836255 | -0.171911609 | 2.272870234 | -0.07563635  | 0.939708416 | NA          | NA      |
| ENSG00000125834 | STK35        | serine/threonine kinase 35                                           | 140901    | 1259.641868 | -0.171812995 | 0.41353244  | -0.415476463 | 0.677793142 | 0.999371363 | Not Sig |
| ENSG00000138079 | SLC3A1       | solute carrier family 3 member 1                                     | 6519      | 3.987734692 | -0.171763854 | 1.321617476 | -0.129964878 | 0.896594215 | NA          | NA      |
| ENSG00000260082 | NA           | NA                                                                   | NA        | 1.103658119 | -0.171701567 | 2.562623224 | -0.067002267 | 0.946579898 | NA          | NA      |
| ENSG00000105497 | ZNF175       | zinc finger protein 175                                              | 7728      | 221.5733693 | -0.171538714 | 0.494089922 | -0.347181164 | 0.728455221 | 0.999371363 | Not Sig |
| ENSG00000110852 | CLEC2B       | C-type lectin domain family 2 member B                               | 9976      | 391.0165741 | -0.171390771 | 0.573299768 | -0.298954894 | 0.764974462 | 0.999371363 | Not Sig |
| ENSG00000244005 | NFS1         | NFS1, cysteine desulfurase                                           | 9054      | 297.2709872 | -0.171359018 | 0.413628871 | -0.414282053 | 0.678667556 | 0.999371363 | Not Sig |
| ENSG00000213742 | ZNF337-AS1   | ZNF337 antisense RNA 1                                               | 102724826 | 115.717339  | -0.171301018 | 0.6258686   | -0.27370125  | 0.784314217 | 0.999371363 | Not Sig |
| ENSG00000135775 | COG2         | component of oligomeric golgi complex 2                              | 22796     | 958.5836602 | -0.171182468 | 0.535608704 | -0.319603597 | 0.749268848 | 0.999371363 | Not Sig |
| ENSG00000243094 | NA           | NA                                                                   | NA        | 7.457510806 | -0.171071345 | 0.969684536 | -0.176419587 | 0.859964318 | 0.999371363 | Not Sig |
| ENSG00000188782 | CATSPER4     | cation channel sperm associated 4                                    | 378807    | 3.585336632 | -0.171030227 | 1.618056592 | -0.105701017 | 0.915819574 | NA          | NA      |
| ENSG00000268499 | NA           | NA                                                                   | NA        | 7.118303507 | -0.170912118 | 1.17964192  | -0.144884745 | 0.884801871 | 0.999371363 | Not Sig |
| ENSG00000225314 | NA           | NA                                                                   | NA        | 4.448098841 | -0.17052455  | 1.485074692 | -0.114825571 | 0.90858338  | NA          | NA      |
| ENSG00000214113 | LYRM4        | LYR motif containing 4                                               | 57128     | 268.3259069 | -0.17048475  | 0.436402672 | -0.390659271 | 0.696049108 | 0.999371363 | Not Sig |
| ENSG00000185130 | HIST1H2BL    | histone cluster 1 H2B family member 1                                | 8340      | 154.293622  | -0.170456121 | 0.803359446 | -0.212179146 | 0.831967276 | 0.999371363 | Not Sig |
| ENSG00000115896 | PLCL1        | phospholipase C like 1 (inactive)                                    | 5334      | 247.1089395 | -0.170320651 | 0.695138538 | -0.245016845 | 0.806443388 | 0.999371363 | Not Sig |
| ENSG00000174842 | GLMN         | glomulin, FKBP associated protein                                    | 11146     | 180.2231508 | -0.170205411 | 0.720951932 | -0.236084271 | 0.813367279 | 0.999371363 | Not Sig |
| ENSG00000006576 | PHTF2        | putative homeodomain transcription factor 2                          | 57157     | 756.8455832 | -0.170204774 | 0.663577907 | -0.25649554  | 0.797568224 | 0.999371363 | Not Sig |
| ENSG00000272325 | NUDT3        | nudix hydrolase 3                                                    | 11165     | 2689.556284 | -0.170115373 | 0.475729701 | -0.357588294 | 0.72065144  | 0.999371363 | Not Sig |
| ENSG00000067445 | TRO          | trophinin                                                            | 7216      | 98.1753821  | -0.170020346 | 0.568208149 | -0.299221943 | 0.764770708 | 0.999371363 | Not Sig |
| ENSG00000109534 | GAR1         | GAR1 ribonucleoprotein                                               | 54433     | 201.2504219 | -0.169978541 | 0.564658391 | -0.301028982 | 0.763392394 | 0.999371363 | Not Sig |
| ENSG00000171763 | SPATA5L1     | spermatogenesis associated 5 like 1                                  | 79029     | 332.7292292 | -0.169837318 | 0.452313005 | -0.375486258 | 0.707298865 | 0.999371363 | Not Sig |
| ENSG00000143458 | GABPB2       | GA binding protein transcription factor beta subunit 2               | 126626    | 658.6675199 | -0.169821959 | 0.414423241 | -0.409779043 | 0.681968041 | 0.999371363 | Not Sig |
| ENSG00000136824 | SMC2         | structural maintenance of chromosomes 2                              | 10592     | 585.3736637 | -0.169721319 | 0.572292382 | -0.296564003 | 0.766799397 | 0.999371363 | Not Sig |
| ENSG00000144182 | LIPT1        | lipoyltransferase 1                                                  | 51601     | 93.30201397 | -0.169480298 | 0.499588114 | -0.339240052 | 0.734428899 | 0.999371363 | Not Sig |
| ENSG00000100614 | PPM1A        | protein phosphatase, Mg <sup>2+</sup> /Mn <sup>2+</sup> dependent 1A | 5494      | 2213.221358 | -0.169422619 | 0.462062031 | -0.366666396 | 0.713867875 | 0.999371363 | Not Sig |
| ENSG00000174740 | PABPC5       | poly(A) binding protein cytoplasmic 5                                | 140886    | 37.72269707 | -0.169398922 | 0.730531733 | -0.231884413 | 0.816627791 | 0.999371363 | Not Sig |
| ENSG00000253873 | PCDHGA11     | protocadherin gamma subfamily A, 11                                  | 56105     | 110.2601939 | -0.169337507 | 0.651662659 | -0.25985455  | 0.794975971 | 0.999371363 | Not Sig |
| ENSG00000219163 | NA           | NA                                                                   | NA        | 1.246568091 | -0.169165602 | 2.399961393 | -0.070486802 | 0.943806205 | NA          | NA      |
| ENSG00000082258 | CCNT2        | cyclin T2                                                            | 905       | 1479.358992 | -0.169056005 | 0.627050901 | -0.269604915 | 0.787464219 | 0.999371363 | Not Sig |
| ENSG00000197024 | ZNF398       | zinc finger protein 398                                              | 57541     | 694.1719295 | -0.168895204 | 0.410054892 | -0.411884379 | 0.680424171 | 0.999371363 | Not Sig |
| ENSG00000163322 | ABRAXAS1     | abraxas 1, BRCA1 A complex subunit                                   | 84142     | 213.7887606 | -0.168881287 | 0.617005397 | -0.273711199 | 0.78430657  | 0.999371363 | Not Sig |

|                 |              |                                                      |           |             |              |             |              |             |             |         |
|-----------------|--------------|------------------------------------------------------|-----------|-------------|--------------|-------------|--------------|-------------|-------------|---------|
| ENSG00000246705 | H2AFJ        | H2A histone family member J                          | 55766     | 623.7216193 | -0.168835188 | 0.588298078 | -0.286989189 | 0.774120598 | 0.999371363 | Not Sig |
| ENSG00000143434 | SEMA6C       | semaphorin 6C                                        | 10500     | 207.2558414 | -0.168702135 | 0.749765363 | -0.225006574 | 0.82197416  | 0.999371363 | Not Sig |
| ENSG00000055118 | KCNH2        | potassium voltage-gated channel subfamily H member 2 | 3757      | 161.5079201 | -0.168694741 | 1.193439357 | -0.14135175  | 0.88759207  | 0.999371363 | Not Sig |
| ENSG00000011485 | PPP5C        | protein phosphatase 5 catalytic subunit              | 5536      | 877.8104397 | -0.168674132 | 0.457935349 | -0.368336125 | 0.712622619 | 0.999371363 | Not Sig |
| ENSG00000171310 | CHST11       | carbohydrate sulfotransferase 11                     | 50515     | 904.615841  | -0.16848017  | 0.546026036 | -0.308557027 | 0.757658514 | 0.999371363 | Not Sig |
| ENSG00000135365 | PHF21A       | PHD finger protein 21A                               | 51317     | 1293.008072 | -0.168431217 | 0.40678724  | -0.41405236  | 0.678835761 | 0.999371363 | Not Sig |
| ENSG00000254682 | NA           | NA                                                   | NA        | 29.93590146 | -0.168283503 | 0.698051213 | -0.241076156 | 0.809496092 | 0.999371363 | Not Sig |
| ENSG00000051128 | HOMER3       | homer scaffolding protein 3                          | 9454      | 186.7653391 | -0.168257249 | 0.497728361 | -0.338050354 | 0.735325242 | 0.999371363 | Not Sig |
| ENSG00000229019 | NA           | NA                                                   | NA        | 6.086919153 | -0.168178852 | 1.317701911 | -0.127630423 | 0.898441454 | NA          | NA      |
| ENSG00000184731 | FAM110C      | family with sequence similarity 110 member C         | 642273    | 327.2866475 | -0.16802964  | 0.550870321 | -0.305025764 | 0.76034653  | 0.999371363 | Not Sig |
| ENSG00000148225 | WDR31        | WD repeat domain 31                                  | 114987    | 216.8878727 | -0.168013337 | 0.602283158 | -0.27896071  | 0.780274977 | 0.999371363 | Not Sig |
| ENSG00000272502 | NA           | NA                                                   | NA        | 27.33918771 | -0.167983036 | 0.679510087 | -0.247211984 | 0.804744171 | 0.999371363 | Not Sig |
| ENSG00000188611 | ASAH2        | N-acylsphingosine amidohydrolase 2                   | 56624     | 19.90338831 | -0.167966814 | 1.025015931 | -0.163867515 | 0.86983544  | 0.999371363 | Not Sig |
| ENSG00000231652 | LOC101928489 | uncharacterized LOC101928489                         | 101928489 | 3.999486594 | -0.167836105 | 1.580978666 | -0.106159626 | 0.915455703 | NA          | NA      |
| ENSG00000180861 | LINC01559    | long intergenic non-protein coding RNA 1559          | 283422    | 0.710116023 | -0.167818283 | 2.926979718 | -0.057334966 | 0.954278367 | NA          | NA      |
| ENSG00000232389 | NA           | NA                                                   | NA        | 0.710116023 | -0.167818283 | 2.926979718 | -0.057334966 | 0.954278367 | NA          | NA      |
| ENSG00000239351 | NA           | NA                                                   | NA        | 0.710116023 | -0.167818283 | 2.926979718 | -0.057334966 | 0.954278367 | NA          | NA      |
| ENSG00000252393 | NA           | NA                                                   | NA        | 0.710116023 | -0.167818283 | 2.926979718 | -0.057334966 | 0.954278367 | NA          | NA      |
| ENSG00000263669 | NA           | NA                                                   | NA        | 0.710116023 | -0.167818283 | 2.926979718 | -0.057334966 | 0.954278367 | NA          | NA      |
| ENSG00000153037 | SRP19        | signal recognition particle 19                       | 6728      | 157.8046307 | -0.16777482  | 0.625874559 | -0.268064611 | 0.788649586 | 0.999371363 | Not Sig |
| ENSG00000214765 | SEPT7P2      | septin 7 pseudogene 2                                | 641977    | 372.8861121 | -0.167770936 | 0.551664957 | -0.304117443 | 0.761038418 | 0.999371363 | Not Sig |
| ENSG00000252409 | NA           | NA                                                   | NA        | 1.784592279 | -0.167761542 | 1.961834121 | -0.085512603 | 0.931853877 | NA          | NA      |
| ENSG00000252391 | NA           | NA                                                   | NA        | 33.50905035 | -0.16769384  | 0.934722951 | -0.17940486  | 0.857619816 | 0.999371363 | Not Sig |
| ENSG00000187837 | HIST1H1C     | histone cluster 1 H1 family member c                 | 3006      | 4618.75857  | -0.167651598 | 0.445276837 | -0.376510934 | 0.706537088 | 0.999371363 | Not Sig |
| ENSG00000175104 | TRAF6        | TNF receptor associated factor 6                     | 7189      | 498.9275035 | -0.167603924 | 0.406310433 | -0.412502143 | 0.67997141  | 0.999371363 | Not Sig |
| ENSG00000103671 | TRIP4        | thyroid hormone receptor interactor 4                | 9325      | 620.7217616 | -0.167502883 | 0.447839698 | -0.374024197 | 0.708386314 | 0.999371363 | Not Sig |
| ENSG00000130811 | EIF3G        | eukaryotic translation initiation factor 3 subunit G | 8666      | 1448.491434 | -0.167402631 | 0.559906934 | -0.298982957 | 0.76495305  | 0.999371363 | Not Sig |
| ENSG00000203747 | FCGR3A       | Fc fragment of IgG receptor IIIa                     | 2214      | 1495.041365 | -0.167353794 | 0.950998698 | -0.175976891 | 0.860312098 | 0.999371363 | Not Sig |
| ENSG00000123737 | EXOSC9       | exosome component 9                                  | 5393      | 446.3972928 | -0.167308197 | 0.427545425 | -0.391322623 | 0.695558779 | 0.999371363 | Not Sig |
| ENSG00000131143 | COX4I1       | cytochrome c oxidase subunit 4I1                     | 1327      | 2616.099937 | -0.167225272 | 0.466718483 | -0.358300086 | 0.720118754 | 0.999371363 | Not Sig |
| ENSG00000140830 | TXNL4B       | thioredoxin like 4B                                  | 54957     | 197.970285  | -0.167152349 | 0.460471512 | -0.363002584 | 0.716602954 | 0.999371363 | Not Sig |
| ENSG00000199331 | NA           | NA                                                   | NA        | 15.9345112  | -0.166999092 | 0.76890487  | -0.217190837 | 0.828059625 | 0.999371363 | Not Sig |
| ENSG00000200183 | NA           | NA                                                   | NA        | 3.953272407 | -0.166992609 | 1.85030663  | -0.090251317 | 0.928087506 | NA          | NA      |
| ENSG00000207342 | NA           | NA                                                   | NA        | 10.27075269 | -0.166941285 | 0.912878128 | -0.182873573 | 0.854897219 | 0.999371363 | Not Sig |
| ENSG00000165275 | TRMT10B      | tRNA methyltransferase 10B                           | 158234    | 155.5689298 | -0.16685617  | 0.473657536 | -0.352271751 | 0.724634472 | 0.999371363 | Not Sig |

|                 |         |                                                                   |        |             |              |             |              |             |             |         |
|-----------------|---------|-------------------------------------------------------------------|--------|-------------|--------------|-------------|--------------|-------------|-------------|---------|
| ENSG00000126775 | ATG14   | autophagy related 14                                              | 22863  | 735.5432644 | -0.166793426 | 0.517755637 | -0.322147002 | 0.747341332 | 0.999371363 | Not Sig |
| ENSG00000114125 | RNF7    | ring finger protein 7                                             | 9616   | 581.3756405 | -0.166790773 | 0.441700363 | -0.377610677 | 0.705719832 | 0.999371363 | Not Sig |
| ENSG00000136156 | ITM2B   | integral membrane protein 2B                                      | 9445   | 9387.480355 | -0.166568954 | 0.578670853 | -0.287847492 | 0.773463482 | 0.999371363 | Not Sig |
| ENSG00000223361 | NA      | NA                                                                | NA     | 15.32834666 | -0.166567765 | 0.838070957 | -0.198751387 | 0.842457225 | 0.999371363 | Not Sig |
| ENSG00000103194 | USP10   | ubiquitin specific peptidase 10                                   | 9100   | 1386.573921 | -0.166483675 | 0.460508319 | -0.361521536 | 0.717709609 | 0.999371363 | Not Sig |
| ENSG00000108375 | RNF43   | ring finger protein 43                                            | 54894  | 815.303013  | -0.166479207 | 0.638132923 | -0.260884843 | 0.794181314 | 0.999371363 | Not Sig |
| ENSG00000109332 | UBE2D3  | ubiquitin conjugating enzyme E2 D3                                | 7323   | 4969.072571 | -0.166471603 | 0.488958363 | -0.340461716 | 0.733508849 | 0.999371363 | Not Sig |
| ENSG00000173559 | NABP1   | nucleic acid binding protein 1                                    | 64859  | 1992.040012 | -0.166378945 | 0.631161045 | -0.263607752 | 0.792082184 | 0.999371363 | Not Sig |
| ENSG00000128191 | DGCR8   | DGCR8, microprocessor complex subunit                             | 54487  | 1054.707275 | -0.166343056 | 0.52496431  | -0.316865457 | 0.751345694 | 0.999371363 | Not Sig |
| ENSG00000233426 | NA      | NA                                                                | NA     | 3.474752484 | -0.166269121 | 1.346887022 | -0.123446969 | 0.901753165 | NA          | NA      |
| ENSG00000097007 | ABL1    | ABL proto-oncogene 1, non-receptor tyrosine kinase                | 25     | 2592.715446 | -0.166175939 | 0.50331849  | -0.330160608 | 0.74127861  | 0.999371363 | Not Sig |
| ENSG00000196927 | NA      | NA                                                                | NA     | 14.03992012 | -0.166077449 | 0.985310721 | -0.168553376 | 0.866147956 | 0.999371363 | Not Sig |
| ENSG00000211995 | NA      | NA                                                                | NA     | 1.026689949 | -0.16606364  | 2.590793173 | -0.064097606 | 0.948892508 | NA          | NA      |
| ENSG00000158792 | SPATA2L | spermatogenesis associated 2 like                                 | 124044 | 323.991292  | -0.166052653 | 0.56184894  | -0.295546794 | 0.767576212 | 0.999371363 | Not Sig |
| ENSG00000181588 | MEX3D   | mex-3 RNA binding family member D                                 | 399664 | 853.3219741 | -0.16601667  | 0.552094147 | -0.30070355  | 0.763640561 | 0.999371363 | Not Sig |
| ENSG00000130749 | ZC3H4   | zinc finger CCCH-type containing 4                                | 23211  | 2015.321607 | -0.165891141 | 0.560137667 | -0.296161374 | 0.767106846 | 0.999371363 | Not Sig |
| ENSG00000232385 | NA      | NA                                                                | NA     | 1.956684114 | -0.165773474 | 1.634379793 | -0.101428979 | 0.919209933 | NA          | NA      |
| ENSG00000252427 | NA      | NA                                                                | NA     | 1.956684114 | -0.165773474 | 1.634379793 | -0.101428979 | 0.919209933 | NA          | NA      |
| ENSG00000189308 | LIN54   | lin-54 DREAM MuvB core complex component                          | 132660 | 493.708148  | -0.165727041 | 0.533980362 | -0.310361678 | 0.756285932 | 0.999371363 | Not Sig |
| ENSG00000134255 | CEPT1   | choline/ethanolamine phosphotransferase 1                         | 10390  | 838.6369325 | -0.165718902 | 0.573473306 | -0.288974047 | 0.772601238 | 0.999371363 | Not Sig |
| ENSG00000157800 | SLC37A3 | solute carrier family 37 member 3                                 | 84255  | 897.631516  | -0.165643495 | 0.476312727 | -0.34776206  | 0.728018885 | 0.999371363 | Not Sig |
| ENSG00000120314 | WDR55   | WD repeat domain 55                                               | 54853  | 895.9891521 | -0.165626881 | 0.482054994 | -0.343585032 | 0.731158383 | 0.999371363 | Not Sig |
| ENSG00000233232 | NA      | NA                                                                | NA     | 2.809449818 | -0.165475612 | 1.971328536 | -0.083941164 | 0.933103211 | NA          | NA      |
| ENSG00000139350 | NEDD1   | neural precursor cell expressed, developmentally down-regulated 1 | 121441 | 493.492128  | -0.165433192 | 0.628270206 | -0.263315354 | 0.792307526 | 0.999371363 | Not Sig |
| ENSG00000181638 | ZFP41   | ZFP41 zinc finger protein                                         | 286128 | 278.2720797 | -0.165266197 | 0.505304647 | -0.327062492 | 0.74362062  | 0.999371363 | Not Sig |
| ENSG00000271657 | NA      | NA                                                                | NA     | 1.879715943 | -0.165238358 | 1.845068005 | -0.089556785 | 0.928639427 | NA          | NA      |
| ENSG00000234740 | NA      | NA                                                                | NA     | 13.52399958 | -0.165182812 | 0.796807982 | -0.207305669 | 0.835771147 | 0.999371363 | Not Sig |
| ENSG00000101082 | SLA2    | Src like adaptor 2                                                | 84174  | 101.2697322 | -0.165122164 | 0.715908551 | -0.230647006 | 0.817589047 | 0.999371363 | Not Sig |
| ENSG00000172594 | SMPDL3A | sphingomyelin phosphodiesterase acid like 3A                      | 10924  | 363.7755713 | -0.165102777 | 0.657395693 | -0.251146728 | 0.80170067  | 0.999371363 | Not Sig |
| ENSG00000241878 | PISD    | phosphatidylserine decarboxylase                                  | 23761  | 727.9710256 | -0.165058457 | 0.488941961 | -0.337582923 | 0.735677513 | 0.999371363 | Not Sig |
| ENSG00000107625 | DDX50   | DExD-box helicase 50                                              | 79009  | 654.7106    | -0.16497227  | 0.421302956 | -0.39157634  | 0.695371272 | 0.999371363 | Not Sig |
| ENSG00000012048 | BRCA1   | BRCA1, DNA repair associated                                      | 672    | 352.1796029 | -0.164888216 | 0.769260264 | -0.214346462 | 0.830276889 | 0.999371363 | Not Sig |
| ENSG00000147586 | MRPS28  | mitochondrial ribosomal protein S28                               | 28957  | 290.1499732 | -0.164800865 | 0.504259574 | -0.326817523 | 0.743805905 | 0.999371363 | Not Sig |
| ENSG00000223959 | AFG3L1P | AFG3 like matrix AAA peptidase subunit 1, pseudogene              | 172    | 553.3463721 | -0.164771989 | 0.484955733 | -0.33976707  | 0.734031948 | 0.999371363 | Not Sig |
| ENSG00000187961 | KLHL17  | kelch like family member 17                                       | 339451 | 229.8610023 | -0.164548876 | 0.551362476 | -0.298440469 | 0.765367006 | 0.999371363 | Not Sig |

|                 |           |                                                            |           |             |              |             |              |             |             |         |
|-----------------|-----------|------------------------------------------------------------|-----------|-------------|--------------|-------------|--------------|-------------|-------------|---------|
| ENSG00000184371 | CSF1      | colony stimulating factor 1                                | 1435      | 1843.834728 | -0.16448515  | 0.861927355 | -0.190834122 | 0.848655554 | 0.999371363 | Not Sig |
| ENSG00000265539 | MIR3164   | microRNA 3164                                              | 100422846 | 3.980882149 | -0.164452102 | 1.18212602  | -0.139115542 | 0.889358847 | NA          | NA      |
| ENSG00000177340 | FLJ13224  | uncharacterized LOC79857                                   | 79857     | 5.121300207 | -0.164446717 | 1.126310218 | -0.146004817 | 0.883917586 | NA          | NA      |
| ENSG00000184007 | PTP4A2    | protein tyrosine phosphatase type IVA, member 2            | 8073      | 4823.685654 | -0.164333821 | 0.520180836 | -0.315916716 | 0.752065724 | 0.999371363 | Not Sig |
| ENSG00000257557 | NA        | NA                                                         | NA        | 16.18592891 | -0.164125788 | 0.783362492 | -0.209514483 | 0.834046663 | 0.999371363 | Not Sig |
| ENSG00000166257 | SCN3B     | sodium voltage-gated channel beta subunit 3                | 55800     | 32.09564349 | -0.163982344 | 0.81110756  | -0.202170899 | 0.839783123 | 0.999371363 | Not Sig |
| ENSG00000167702 | KIFC2     | kinesin family member C2                                   | 90990     | 743.6514499 | -0.163869975 | 0.557424877 | -0.293976789 | 0.76877564  | 0.999371363 | Not Sig |
| ENSG00000068793 | NA        | NA                                                         | NA        | 4316.540854 | -0.163847606 | 0.429928351 | -0.381104445 | 0.703125749 | 0.999371363 | Not Sig |
| ENSG00000229666 | NA        | NA                                                         | NA        | 9.42028464  | -0.16382271  | 1.020280721 | -0.160566309 | 0.872434992 | 0.999371363 | Not Sig |
| ENSG00000090376 | IRAK3     | interleukin 1 receptor associated kinase 3                 | 11213     | 733.851572  | -0.16356263  | 0.586313179 | -0.278968025 | 0.780269363 | 0.999371363 | Not Sig |
| ENSG00000162704 | ARPC5     | actin related protein 2/3 complex subunit 5                | 10092     | 2700.664558 | -0.163481329 | 0.454862287 | -0.359408405 | 0.719289588 | 0.999371363 | Not Sig |
| ENSG00000108591 | DRG2      | developmentally regulated GTP binding protein 2            | 1819      | 663.3358472 | -0.163468327 | 0.415466911 | -0.39345691  | 0.693982044 | 0.999371363 | Not Sig |
| ENSG00000204256 | BRD2      | bromodomain containing 2                                   | 6046      | 6727.548971 | -0.163369456 | 0.447150244 | -0.365356965 | 0.714844961 | 0.999371363 | Not Sig |
| ENSG00000168288 | MMADHC    | methylmalonic aciduria and homocystinuria, cblD type       | 27249     | 983.5331397 | -0.163295532 | 0.461054814 | -0.354178131 | 0.723205392 | 0.999371363 | Not Sig |
| ENSG00000142252 | GEMIN7    | gem nuclear organelle associated protein 7                 | 79760     | 138.2330933 | -0.16318824  | 0.45616752  | -0.357737527 | 0.720539747 | 0.999371363 | Not Sig |
| ENSG00000109270 | LAMTOR3   | late endosomal/lysosomal adaptor, MAPK and TOR activator 3 | 8649      | 489.8507511 | -0.163071204 | 0.601236292 | -0.271226482 | 0.786216846 | 0.999371363 | Not Sig |
| ENSG00000162604 | TM2D1     | TM2 domain containing 1                                    | 83941     | 600.0107211 | -0.162952781 | 0.620004426 | -0.26282519  | 0.792685319 | 0.999371363 | Not Sig |
| ENSG00000128789 | PSMG2     | proteasome assembly chaperone 2                            | 56984     | 445.3304695 | -0.162761372 | 0.550643347 | -0.295584016 | 0.767547782 | 0.999371363 | Not Sig |
| ENSG00000107949 | BCCIP     | BRCA2 and CDKN1A interacting protein                       | 56647     | 568.5609521 | -0.162704219 | 0.42849981  | -0.379706631 | 0.704163197 | 0.999371363 | Not Sig |
| ENSG00000256060 | TRAPPC2B  | trafficking protein particle complex 2B                    | 10597     | 59.17630941 | -0.162673487 | 0.516373425 | -0.315030711 | 0.752738336 | 0.999371363 | Not Sig |
| ENSG00000164164 | OTUD4     | OTU deubiquitinase 4                                       | 54726     | 2298.619242 | -0.162609042 | 0.432056578 | -0.376360527 | 0.706648887 | 0.999371363 | Not Sig |
| ENSG00000180370 | PAK2      | p21 (RAC1) activated kinase 2                              | 5062      | 2753.399596 | -0.162554758 | 0.466678462 | -0.348322821 | 0.727597757 | 0.999371363 | Not Sig |
| ENSG00000253731 | PCDHGA6   | protocadherin gamma subfamily A, 6                         | 56109     | 147.083717  | -0.162528145 | 0.532824829 | -0.305031102 | 0.760342464 | 0.999371363 | Not Sig |
| ENSG00000174442 | ZWILCH    | zwilch kinetochore protein                                 | 55055     | 227.7437817 | -0.162422471 | 0.669657344 | -0.242545642 | 0.808357395 | 0.999371363 | Not Sig |
| ENSG00000204650 | LINC02210 | long intergenic non-protein coding RNA 2210                | 147081    | 228.7752561 | -0.162390121 | 0.461494541 | -0.351878748 | 0.724929198 | 0.999371363 | Not Sig |
| ENSG00000144535 | DIS3L2    | DIS3 like 3'-5' exoribonuclease 2                          | 129563    | 1010.34446  | -0.162349058 | 0.392122212 | -0.414026682 | 0.678854566 | 0.999371363 | Not Sig |
| ENSG00000166510 | CCDC68    | coiled-coil domain containing 68                           | 80323     | 536.6208136 | -0.162287559 | 0.477098305 | -0.340155389 | 0.733739512 | 0.999371363 | Not Sig |
| ENSG00000201998 | SNORA23   | small nucleolar RNA, H/ACA box 23                          | 677808    | 17.68190645 | -0.162264574 | 0.842500094 | -0.192598879 | 0.847273123 | 0.999371363 | Not Sig |
| ENSG00000168827 | GFMI      | G elongation factor mitochondrial 1                        | 85476     | 1129.758978 | -0.162172731 | 0.548810551 | -0.295498566 | 0.767613048 | 0.999371363 | Not Sig |
| ENSG00000143476 | DTL       | denticleless E3 ubiquitin protein ligase homolog           | 51514     | 218.7764202 | -0.162106664 | 1.025111772 | -0.158135599 | 0.87434995  | 0.999371363 | Not Sig |
| ENSG00000267412 | NA        | NA                                                         | NA        | 5.390862504 | -0.161605822 | 1.493111465 | -0.108234265 | 0.913809865 | NA          | NA      |
| ENSG00000162438 | CTRC      | chymotrypsin C                                             | 11330     | 0.633147853 | -0.161493723 | 4.006950184 | -0.040303402 | 0.967851242 | NA          | NA      |
| ENSG00000174358 | SLC6A19   | solute carrier family 6 member 19                          | 340024    | 0.633147853 | -0.161493723 | 4.006950184 | -0.040303402 | 0.967851242 | NA          | NA      |
| ENSG00000179695 | OR6C2     | olfactory receptor family 6 subfamily C member 2           | 341416    | 0.633147853 | -0.161493723 | 4.006950184 | -0.040303402 | 0.967851242 | NA          | NA      |
| ENSG00000233265 | NA        | NA                                                         | NA        | 0.633147853 | -0.161493723 | 4.006950184 | -0.040303402 | 0.967851242 | NA          | NA      |



|                 |           |                                                          |        |             |              |             |              |             |             |         |
|-----------------|-----------|----------------------------------------------------------|--------|-------------|--------------|-------------|--------------|-------------|-------------|---------|
| ENSG00000257520 | SFTA3     | surfactant associated 3                                  | 253970 | 0.633147853 | -0.161493723 | 4.006950184 | -0.040303402 | 0.967851242 | NA          | NA      |
| ENSG00000260266 | PPIAP46   | peptidylprolyl isomerase A pseudogene 46                 | 729739 | 0.633147853 | -0.161493723 | 4.006950184 | -0.040303402 | 0.967851242 | NA          | NA      |
| ENSG00000261434 | NA        | NA                                                       | NA     | 0.633147853 | -0.161493723 | 4.006950184 | -0.040303402 | 0.967851242 | NA          | NA      |
| ENSG00000109705 | NKX3-2    | NK3 homeobox 2                                           | 579    | 2.771073997 | -0.161471637 | 1.662383645 | -0.097132595 | 0.922621096 | NA          | NA      |
| ENSG00000114098 | ARMC8     | armadillo repeat containing 8                            | 25852  | 970.6573932 | -0.16145556  | 0.473800971 | -0.34076663  | 0.733279274 | 0.999371363 | Not Sig |
| ENSG00000082146 | STRADB    | STE20-related kinase adaptor beta                        | 55437  | 323.9591359 | -0.161441876 | 0.441773734 | -0.365440188 | 0.714782847 | 0.999371363 | Not Sig |
| ENSG00000185158 | LRRC37B   | leucine rich repeat containing 37B                       | 114659 | 393.7661209 | -0.161402396 | 0.444637953 | -0.362997344 | 0.716606869 | 0.999371363 | Not Sig |
| ENSG00000130449 | ZSWIM6    | zinc finger SWIM-type containing 6                       | 57688  | 1244.202925 | -0.161397637 | 0.472399728 | -0.341654805 | 0.732610688 | 0.999371363 | Not Sig |
| ENSG00000229087 | NA        | NA                                                       | NA     | 6.001217164 | -0.161335637 | 1.478867906 | -0.109094015 | 0.913127922 | NA          | NA      |
| ENSG00000163684 | RPP14     | ribonuclease P/MRP subunit p14                           | 11102  | 440.835145  | -0.161311693 | 0.416747541 | -0.387072932 | 0.698702216 | 0.999371363 | Not Sig |
| ENSG00000100296 | THOC5     | THO complex 5                                            | 8563   | 918.1342931 | -0.161292638 | 0.501364972 | -0.321707033 | 0.747674649 | 0.999371363 | Not Sig |
| ENSG00000172660 | NA        | NA                                                       | NA     | 2224.59963  | -0.161254774 | 0.531731968 | -0.303263267 | 0.761689238 | 0.999371363 | Not Sig |
| ENSG00000164104 | HMGB2     | high mobility group box 2                                | 3148   | 785.7078219 | -0.161010168 | 0.478772943 | -0.336297552 | 0.736646496 | 0.999371363 | Not Sig |
| ENSG00000123353 | ORMDL2    | ORMDL sphingolipid biosynthesis regulator 2              | 29095  | 346.6449845 | -0.160965336 | 0.439875589 | -0.365933777 | 0.714414491 | 0.999371363 | Not Sig |
| ENSG00000127083 | OMD       | osteomodulin                                             | 4958   | 40.80195647 | -0.160957176 | 0.568449051 | -0.283151455 | 0.777060739 | 0.999371363 | Not Sig |
| ENSG00000050130 | JKAMP     | JNK1/MAPK8 associated membrane protein                   | 51528  | 712.4537071 | -0.160898905 | 0.543040129 | -0.296292846 | 0.767006449 | 0.999371363 | Not Sig |
| ENSG00000230979 | NA        | NA                                                       | NA     | 5.25632805  | -0.160815916 | 1.098224353 | -0.146432663 | 0.883579844 | NA          | NA      |
| ENSG00000180822 | PSMG4     | proteasome assembly chaperone 4                          | 389362 | 378.5646541 | -0.160348488 | 0.431292    | -0.371786371 | 0.710051912 | 0.999371363 | Not Sig |
| ENSG00000097033 | SH3GLB1   | SH3 domain containing GRB2 like, endophilin B1           | 51100  | 2441.577668 | -0.160341699 | 0.521384207 | -0.307530794 | 0.758439388 | 0.999371363 | Not Sig |
| ENSG00000136152 | COG3      | component of oligomeric golgi complex 3                  | 83548  | 1228.299223 | -0.160327287 | 0.516095321 | -0.310654409 | 0.75606336  | 0.999371363 | Not Sig |
| ENSG00000111452 | ADGRD1    | adhesion G protein-coupled receptor D1                   | 283383 | 1531.593881 | -0.16012971  | 0.640286296 | -0.250090797 | 0.802517133 | 0.999371363 | Not Sig |
| ENSG00000234707 | NA        | NA                                                       | NA     | 0.997508086 | -0.159986881 | 2.312890192 | -0.069171845 | 0.944852834 | NA          | NA      |
| ENSG00000159593 | NAE1      | NEDD8 activating enzyme E1 subunit 1                     | 8883   | 569.7762576 | -0.159959764 | 0.536930121 | -0.297915422 | 0.765767717 | 0.999371363 | Not Sig |
| ENSG00000152219 | ARL14EP   | ADP ribosylation factor like GTPase 14 effector protein  | 120534 | 423.6699211 | -0.159940923 | 0.542724135 | -0.294700222 | 0.768222894 | 0.999371363 | Not Sig |
| ENSG00000204634 | TBC1D8    | TBC1 domain family member 8                              | 11138  | 1161.373477 | -0.159855147 | 0.450996699 | -0.354448595 | 0.723002722 | 0.999371363 | Not Sig |
| ENSG00000242607 | NA        | NA                                                       | NA     | 25.14447772 | -0.159816173 | 1.260745965 | -0.126763184 | 0.899127836 | 0.999371363 | Not Sig |
| ENSG00000216775 | LOC730101 | uncharacterized LOC730101                                | 730101 | 109.7322126 | -0.159717838 | 0.499091077 | -0.320017418 | 0.748955127 | 0.999371363 | Not Sig |
| ENSG00000235863 | B3GALT4   | beta-1,3-galactosyltransferase 4                         | 8705   | 376.2667639 | -0.159690589 | 0.603001369 | -0.264826246 | 0.791143317 | 0.999371363 | Not Sig |
| ENSG00000123329 | ARHGAP9   | Rho GTPase activating protein 9                          | 64333  | 455.252689  | -0.159613241 | 0.7660213   | -0.208366584 | 0.834942746 | 0.999371363 | Not Sig |
| ENSG00000259498 | NA        | NA                                                       | NA     | 18.08179827 | -0.159610916 | 1.083830113 | -0.147265622 | 0.882922366 | 0.999371363 | Not Sig |
| ENSG00000148356 | LRSAM1    | leucine rich repeat and sterile alpha motif containing 1 | 90678  | 663.792802  | -0.159568217 | 0.486131692 | -0.328240721 | 0.742729661 | 0.999371363 | Not Sig |
| ENSG00000177058 | SLC38A9   | solute carrier family 38 member 9                        | 153129 | 514.3965302 | -0.159486012 | 0.650759233 | -0.245076833 | 0.80639694  | 0.999371363 | Not Sig |
| ENSG00000004478 | FKBP4     | FK506 binding protein 4                                  | 2288   | 1210.919882 | -0.159439381 | 0.711736294 | -0.224014683 | 0.822745878 | 0.999371363 | Not Sig |
| ENSG00000139626 | ITGB7     | integrin subunit beta 7                                  | 3695   | 320.5139629 | -0.159381967 | 0.88278148  | -0.180545209 | 0.856724566 | 0.999371363 | Not Sig |
| ENSG00000267981 | NA        | NA                                                       | NA     | 14.51202112 | -0.15935324  | 1.096557477 | -0.145321375 | 0.884457139 | 0.999371363 | Not Sig |

|                 |              |                                                     |           |             |              |             |              |             |             |         |
|-----------------|--------------|-----------------------------------------------------|-----------|-------------|--------------|-------------|--------------|-------------|-------------|---------|
| ENSG00000204406 | MBD5         | methyl-CpG binding domain protein 5                 | 55777     | 866.3824695 | -0.159316605 | 0.431937262 | -0.368842002 | 0.712245495 | 0.999371363 | Not Sig |
| ENSG00000207785 | MIR500A      | microRNA 500a                                       | 574502    | 1.474455889 | -0.15908926  | 2.392355438 | -0.066499007 | 0.946980549 | NA          | NA      |
| ENSG00000099954 | CECR2        | CECR2, histone acetyl-lysine reader                 | 27443     | 622.4892695 | -0.158864371 | 0.573712783 | -0.276905754 | 0.781852474 | 0.999371363 | Not Sig |
| ENSG00000235262 | NA           | NA                                                  | NA        | 10.29009924 | -0.158816817 | 0.920607929 | -0.17251298  | 0.863034258 | 0.999371363 | Not Sig |
| ENSG00000242247 | ARFGAP3      | ADP ribosylation factor GTPase activating protein 3 | 26286     | 1513.424739 | -0.158600323 | 0.529761259 | -0.29938075  | 0.764649548 | 0.999371363 | Not Sig |
| ENSG00000254362 | NA           | NA                                                  | NA        | 7.221171155 | -0.158586299 | 1.026451883 | -0.154499496 | 0.877215908 | 0.999371363 | Not Sig |
| ENSG00000172014 | ANKRD20A4    | ankyrin repeat domain 20 family member A4           | 728747    | 20.43035798 | -0.158571055 | 0.750567501 | -0.211268213 | 0.832677985 | 0.999371363 | Not Sig |
| ENSG00000257607 | NA           | NA                                                  | NA        | 22.13806184 | -0.158510035 | 0.866183949 | -0.18299812  | 0.854799493 | 0.999371363 | Not Sig |
| ENSG00000132485 | ZRANB2       | zinc finger RANBP2-type containing 2                | 9406      | 2444.133828 | -0.158156993 | 0.641823838 | -0.246418072 | 0.805358618 | 0.999371363 | Not Sig |
| ENSG00000111269 | CREBL2       | cAMP responsive element binding protein like 2      | 1389      | 1565.758992 | -0.158033739 | 0.435779612 | -0.362646014 | 0.716869332 | 0.999371363 | Not Sig |
| ENSG00000083817 | ZNF416       | zinc finger protein 416                             | 55659     | 125.3017021 | -0.158032936 | 0.510685025 | -0.309452849 | 0.756977074 | 0.999371363 | Not Sig |
| ENSG00000170653 | ATF7         | activating transcription factor 7                   | 11016     | 1304.219892 | -0.157971211 | 0.470219828 | -0.335951828 | 0.736907193 | 0.999371363 | Not Sig |
| ENSG00000206663 | NA           | NA                                                  | NA        | 2.97835393  | -0.157915774 | 1.66436043  | -0.094880755 | 0.924409543 | NA          | NA      |
| ENSG00000264660 | NA           | NA                                                  | NA        | 5.584315883 | -0.15777021  | 1.555537708 | -0.10142487  | 0.919213195 | NA          | NA      |
| ENSG00000092010 | PSME1        | proteasome activator subunit 1                      | 5720      | 1634.986699 | -0.157746055 | 0.626589305 | -0.251753507 | 0.801231596 | 0.999371363 | Not Sig |
| ENSG00000169242 | EFNA1        | ephrin A1                                           | 1942      | 2215.318285 | -0.157728877 | 0.440228829 | -0.358288388 | 0.720127507 | 0.999371363 | Not Sig |
| ENSG00000110031 | LPXN         | leupaxin                                            | 9404      | 618.9262714 | -0.157689174 | 0.674218726 | -0.233884299 | 0.815074803 | 0.999371363 | Not Sig |
| ENSG00000178567 | EPM2AIP1     | EPM2A interacting protein 1                         | 9852      | 1252.873616 | -0.157662441 | 0.53704364  | -0.293574729 | 0.769082888 | 0.999371363 | Not Sig |
| ENSG00000257176 | LOC100506606 | uncharacterized LOC100506606                        | 100506606 | 44.46560907 | -0.157625094 | 0.701912723 | -0.22456509  | 0.822317626 | 0.999371363 | Not Sig |
| ENSG00000143889 | HNRNPLL      | heterogeneous nuclear ribonucleoprotein L like      | 92906     | 1073.83586  | -0.157528591 | 0.435679142 | -0.361570193 | 0.717673242 | 0.999371363 | Not Sig |
| ENSG00000014919 | COX15        | COX15, cytochrome c oxidase assembly homolog        | 1355      | 758.2744262 | -0.15750142  | 0.480600201 | -0.327718173 | 0.743124761 | 0.999371363 | Not Sig |
| ENSG00000118260 | CREB1        | cAMP responsive element binding protein 1           | 1385      | 1745.784363 | -0.157490554 | 0.525459382 | -0.299719749 | 0.764390934 | 0.999371363 | Not Sig |
| ENSG00000138246 | DNAJC13      | DnaJ heat shock protein family (Hsp40) member C13   | 23317     | 2539.909903 | -0.157430742 | 0.486409785 | -0.323658665 | 0.746196468 | 0.999371363 | Not Sig |
| ENSG00000262766 | NA           | NA                                                  | NA        | 53.04237212 | -0.157420354 | 0.623621081 | -0.252429495 | 0.800709105 | 0.999371363 | Not Sig |
| ENSG00000161048 | NAPEPLD      | N-acyl phosphatidylethanolamine phospholipase D     | 222236    | 379.1238295 | -0.157399685 | 0.479632647 | -0.328167162 | 0.742785275 | 0.999371363 | Not Sig |
| ENSG00000105618 | PRPF31       | pre-mRNA processing factor 31                       | 26121     | 905.4386314 | -0.157393269 | 0.500051873 | -0.314753884 | 0.752948529 | 0.999371363 | Not Sig |
| ENSG00000167978 | SRRM2        | serine/arginine repetitive matrix 2                 | 23524     | 23700.53333 | -0.157349574 | 0.450502844 | -0.349275428 | 0.726882544 | 0.999371363 | Not Sig |
| ENSG00000250604 | NA           | NA                                                  | NA        | 2.856051823 | -0.157237426 | 1.958410185 | -0.080288301 | 0.936007963 | NA          | NA      |
| ENSG00000197323 | TRIM33       | tripartite motif containing 33                      | 51592     | 2149.507594 | -0.157222342 | 0.591456833 | -0.265822176 | 0.790376163 | 0.999371363 | Not Sig |
| ENSG00000179361 | ARID3B       | AT-rich interaction domain 3B                       | 10620     | 404.4575509 | -0.156943666 | 0.522440977 | -0.300404587 | 0.763868565 | 0.999371363 | Not Sig |
| ENSG00000107815 | TWNK         | twinkle mtDNA helicase                              | 56652     | 163.8427817 | -0.156702908 | 0.4576879   | -0.342379398 | 0.732065391 | 0.999371363 | Not Sig |
| ENSG00000178974 | FBX034       | F-box protein 34                                    | 55030     | 1398.378388 | -0.156686379 | 0.508753048 | -0.307981209 | 0.758096631 | 0.999371363 | Not Sig |
| ENSG00000168876 | ANKRD49      | ankyrin repeat domain 49                            | 54851     | 255.0529975 | -0.156602522 | 0.572052416 | -0.273755547 | 0.784272487 | 0.999371363 | Not Sig |
| ENSG00000262251 | NA           | NA                                                  | NA        | 21.17860611 | -0.156601147 | 0.679582304 | -0.230437352 | 0.817751939 | 0.999371363 | Not Sig |
| ENSG00000205318 | NA           | NA                                                  | NA        | 2.854479703 | -0.156191423 | 1.429130156 | -0.109291251 | 0.912971486 | NA          | NA      |

|                 |          |                                                                                                                  |    |        |             |              |             |              |             |             |         |
|-----------------|----------|------------------------------------------------------------------------------------------------------------------|----|--------|-------------|--------------|-------------|--------------|-------------|-------------|---------|
| ENSG00000169814 | BTD      | biotinidase                                                                                                      |    | 686    | 501.3834371 | -0.155994447 | 0.458504824 | -0.340224222 | 0.733687679 | 0.999371363 | Not Sig |
| ENSG00000066117 | SMARCD1  | <small>SMARCD1 related, matrix associated, actin dependent regulator of chromatin, subfamily A, member 1</small> |    | 6602   | 983.0345558 | -0.155990271 | 0.406060909 | -0.384154858 | 0.700863674 | 0.999371363 | Not Sig |
| ENSG00000203709 | NA       | NA                                                                                                               | NA | 3012   | 161473      | -0.155954571 | 0.601700711 | -0.259189607 | 0.79548895  | 0.999371363 | Not Sig |
| ENSG00000131504 | DIAPH1   | diaphanous related formin 1                                                                                      |    | 1729   | 5241.019031 | -0.15592004  | 0.508898541 | -0.30638728  | 0.759309792 | 0.999371363 | Not Sig |
| ENSG00000166526 | ZNF3     | zinc finger protein 3                                                                                            |    | 7551   | 742.4519434 | -0.155818148 | 0.442042616 | -0.35249576  | 0.724466498 | 0.999371363 | Not Sig |
| ENSG00000165630 | PRPF18   | pre-mRNA processing factor 18                                                                                    |    | 8559   | 220.6725623 | -0.155790053 | 0.467624757 | -0.333151851 | 0.739019661 | 0.999371363 | Not Sig |
| ENSG00000118922 | KLF12    | Kruppel like factor 12                                                                                           |    | 11278  | 577.0048667 | -0.155518459 | 0.609275843 | -0.255251314 | 0.798529001 | 0.999371363 | Not Sig |
| ENSG00000222036 | POTEM    | POTE ankyrin domain family member M                                                                              |    | 641455 | 2.451223068 | -0.155466017 | 1.73835185  | -0.089432997 | 0.9287378   | NA          | NA      |
| ENSG00000115598 | IL1RL2   | interleukin 1 receptor like 2                                                                                    |    | 8808   | 86.52498467 | -0.155396025 | 0.827949735 | -0.187687753 | 0.851121431 | 0.999371363 | Not Sig |
| ENSG00000135953 | MFSD9    | <small>major facilitator superfamily domain containing 9</small>                                                 |    | 84804  | 292.0699104 | -0.155328484 | 0.490901837 | -0.316414549 | 0.751687875 | 0.999371363 | Not Sig |
| ENSG00000206418 | RAB12    | RAB12, member RAS oncogene family                                                                                |    | 201475 | 857.1987103 | -0.155312786 | 0.455196869 | -0.341199152 | 0.732953661 | 0.999371363 | Not Sig |
| ENSG00000137154 | RPS6     | ribosomal protein S6                                                                                             |    | 6194   | 9260.086443 | -0.155116865 | 0.524060046 | -0.295990633 | 0.767237235 | 0.999371363 | Not Sig |
| ENSG00000007080 | CCDC124  | coiled-coil domain containing 124                                                                                |    | 115098 | 594.2745284 | -0.155068684 | 0.534312845 | -0.290220768 | 0.771647349 | 0.999371363 | Not Sig |
| ENSG00000187446 | CHP1     | calcineurin like EF-hand protein 1                                                                               |    | 11261  | 2860.504634 | -0.155043564 | 0.49229176  | -0.314942432 | 0.752805363 | 0.999371363 | Not Sig |
| ENSG00000173145 | NOC3L    | NOC3 like DNA replication regulator                                                                              |    | 64318  | 515.7632957 | -0.154848708 | 0.510393981 | -0.303390545 | 0.76159225  | 0.999371363 | Not Sig |
| ENSG00000075415 | SLC25A3  | solute carrier family 25 member 3                                                                                |    | 5250   | 3329.213513 | -0.154782558 | 0.410504853 | -0.377054148 | 0.706133365 | 0.999371363 | Not Sig |
| ENSG00000068796 | KIF2A    | kinesin family member 2A                                                                                         |    | 3796   | 1101.960552 | -0.15475647  | 0.550213458 | -0.281266239 | 0.778506203 | 0.999371363 | Not Sig |
| ENSG00000141376 | BCAS3    | <small>BCAS3, microtubule associated cell migration factor</small>                                               |    | 54828  | 1055.758641 | -0.154619602 | 0.388743568 | -0.397741892 | 0.690820454 | 0.999371363 | Not Sig |
| ENSG00000164117 | FBX08    | F-box protein 8                                                                                                  |    | 26269  | 363.1704895 | -0.154559301 | 0.445539732 | -0.346903521 | 0.728663802 | 0.999371363 | Not Sig |
| ENSG00000198825 | INPP5F   | inositol polyphosphate-5-phosphatase F                                                                           |    | 22876  | 475.9762427 | -0.154386397 | 0.540771074 | -0.285493076 | 0.775266409 | 0.999371363 | Not Sig |
| ENSG00000100523 | DDHD1    | DDHD domain containing 1                                                                                         |    | 80821  | 747.6496458 | -0.154372862 | 0.554073813 | -0.278614254 | 0.780540873 | 0.999371363 | Not Sig |
| ENSG00000163617 | CCDC191  | coiled-coil domain containing 191                                                                                |    | 57577  | 382.2530114 | -0.154364842 | 0.476753729 | -0.323783188 | 0.746102185 | 0.999371363 | Not Sig |
| ENSG00000211882 | NA       | NA                                                                                                               | NA | 9      | 992654644   | -0.154284967 | 1.177375228 | -0.131041458 | 0.895742511 | 0.999371363 | Not Sig |
| ENSG00000213197 | NA       | NA                                                                                                               | NA | 84     | 87706043    | -0.154234948 | 0.519300512 | -0.297005192 | 0.766462546 | 0.999371363 | Not Sig |
| ENSG00000197483 | ZNF628   | zinc finger protein 628                                                                                          |    | 89887  | 224.9167691 | -0.154105771 | 0.554766569 | -0.277784891 | 0.78117749  | 0.999371363 | Not Sig |
| ENSG00000202198 | RN7SK    | RNA, 7SK small nuclear                                                                                           |    | 125050 | 565362.8309 | -0.154040289 | 0.405866288 | -0.379534574 | 0.704290935 | 0.999371363 | Not Sig |
| ENSG00000032219 | ARID4A   | AT-rich interaction domain 4A                                                                                    |    | 5926   | 1454.451973 | -0.153998734 | 0.456029507 | -0.337694669 | 0.735593292 | 0.999371363 | Not Sig |
| ENSG00000155629 | PIK3AP1  | phosphoinositide-3-kinase adaptor protein 1                                                                      |    | 118788 | 1057.999456 | -0.15386691  | 0.858144197 | -0.179301929 | 0.857700632 | 0.999371363 | Not Sig |
| ENSG00000254419 | NA       | NA                                                                                                               | NA | 34     | 47056173    | -0.15382586  | 0.609187852 | -0.252509729 | 0.800647095 | 0.999371363 | Not Sig |
| ENSG00000221995 | TIAF1    | TGFB1-induced anti-apoptotic factor 1                                                                            |    | 9220   | 108.0785317 | -0.153745326 | 0.501955149 | -0.306292956 | 0.759381602 | 0.999371363 | Not Sig |
| ENSG00000167987 | VPS37C   | VPS37C, ESCRT-I subunit                                                                                          |    | 55048  | 772.5302102 | -0.153600264 | 0.458232658 | -0.335201478 | 0.737473107 | 0.999371363 | Not Sig |
| ENSG00000177236 | NA       | NA                                                                                                               | NA | 44     | 50572778    | -0.153461856 | 0.686126771 | -0.223663996 | 0.823018763 | 0.999371363 | Not Sig |
| ENSG00000237039 | NA       | NA                                                                                                               | NA | 5      | 929396375   | -0.153458654 | 1.149089422 | -0.133548052 | 0.893759964 | NA          | NA      |
| ENSG00000162885 | B3GALNT2 | beta-1,3-N-acetylgalactosaminyltransferase 2                                                                     |    | 148789 | 569.9102686 | -0.153335784 | 0.535664189 | -0.286253565 | 0.77468392  | 0.999371363 | Not Sig |
| ENSG00000118762 | PKD2     | <small>polycystin 2, transient receptor potential cation channel</small>                                         |    | 5311   | 1420.405126 | -0.153273887 | 0.450065309 | -0.340559212 | 0.73343544  | 0.999371363 | Not Sig |

|                 |              |                                                       |           |             |              |             |              |             |             |         |
|-----------------|--------------|-------------------------------------------------------|-----------|-------------|--------------|-------------|--------------|-------------|-------------|---------|
| ENSG00000167384 | ZNF180       | zinc finger protein 180                               | 7733      | 252.5042129 | -0.15317108  | 0.430847122 | -0.355511438 | 0.722206478 | 0.999371363 | Not Sig |
| ENSG00000105383 | CD33         | CD33 molecule                                         | 945       | 160.7235468 | -0.153135009 | 0.893732483 | -0.171343228 | 0.863953892 | 0.999371363 | Not Sig |
| ENSG00000103310 | ZP2          | zona pellucida glycoprotein 2                         | 7783      | 0.60396599  | -0.15311512  | 3.524933395 | -0.043437734 | 0.965352598 | NA          | NA      |
| ENSG00000237584 | NA           | NA                                                    | NA        | 0.60396599  | -0.15311512  | 3.524933395 | -0.043437734 | 0.965352598 | NA          | NA      |
| ENSG00000254680 | NA           | NA                                                    | NA        | 0.60396599  | -0.15311512  | 3.524933395 | -0.043437734 | 0.965352598 | NA          | NA      |
| ENSG00000259883 | NA           | NA                                                    | NA        | 0.60396599  | -0.15311512  | 3.524933395 | -0.043437734 | 0.965352598 | NA          | NA      |
| ENSG00000264583 | MIR4487      | microRNA 4487                                         | 100616222 | 0.60396599  | -0.15311512  | 3.524933395 | -0.043437734 | 0.965352598 | NA          | NA      |
| ENSG00000105323 | HNRNPUL1     | heterogeneous nuclear ribonucleoprotein U like 1      | 11100     | 5218.788629 | -0.153014026 | 0.450550638 | -0.339615601 | 0.734146028 | 0.999371363 | Not Sig |
| ENSG00000203813 | NA           | NA                                                    | NA        | 368.9576562 | -0.153002123 | 0.592634339 | -0.258172895 | 0.796273475 | 0.999371363 | Not Sig |
| ENSG00000198954 | KIF1BP       | KIF1 binding protein                                  | 26128     | 539.5206234 | -0.152972194 | 0.393883109 | -0.388369519 | 0.697742598 | 0.999371363 | Not Sig |
| ENSG00000141293 | SKAP1        | src kinase associated phosphoprotein 1                | 8631      | 161.2932029 | -0.152919859 | 0.801872561 | -0.190703444 | 0.84875794  | 0.999371363 | Not Sig |
| ENSG00000204472 | AIF1         | allograft inflammatory factor 1                       | 199       | 562.3293859 | -0.152799595 | 0.97315964  | -0.157013904 | 0.87523389  | 0.999371363 | Not Sig |
| ENSG00000082512 | TRAF5        | TNF receptor associated factor 5                      | 7188      | 588.070509  | -0.152635299 | 0.636433515 | -0.239829134 | 0.81046272  | 0.999371363 | Not Sig |
| ENSG00000164403 | SHROOM1      | shroom family member 1                                | 134549    | 568.0440908 | -0.152424348 | 0.56620402  | -0.269203931 | 0.787772756 | 0.999371363 | Not Sig |
| ENSG00000120616 | EPC1         | enhancer of polycomb homolog 1                        | 80314     | 1366.298968 | -0.152331149 | 0.438219078 | -0.347614143 | 0.728129983 | 0.999371363 | Not Sig |
| ENSG00000134108 | ARL8B        | ADP ribosylation factor like GTPase 8B                | 55207     | 1872.126482 | -0.152276651 | 0.545612022 | -0.279093285 | 0.780173236 | 0.999371363 | Not Sig |
| ENSG00000145741 | BTF3         | basic transcription factor 3                          | 689       | 3147.674426 | -0.152209037 | 0.427095204 | -0.356381985 | 0.721554519 | 0.999371363 | Not Sig |
| ENSG00000185019 | UBOX5        | U-box domain containing 5                             | 22888     | 294.3353257 | -0.152184002 | 0.538128586 | -0.2828023   | 0.777328391 | 0.999371363 | Not Sig |
| ENSG00000172273 | HINFP        | histone H4 transcription factor                       | 25988     | 379.0651824 | -0.152165449 | 0.423313683 | -0.359462629 | 0.71924903  | 0.999371363 | Not Sig |
| ENSG00000108264 | NA           | NA                                                    | NA        | 366.0165969 | -0.152125771 | 0.420232412 | -0.362003898 | 0.717349118 | 0.999371363 | Not Sig |
| ENSG00000254978 | NA           | NA                                                    | NA        | 3.876320529 | -0.151986592 | 1.556794999 | -0.097627878 | 0.922227787 | NA          | NA      |
| ENSG00000207205 | RNVU1-15     | RNA, variant U1 small nuclear 15                      | 101954267 | 35.68153911 | -0.151967882 | 0.821753927 | -0.18493113  | 0.853283054 | 0.999371363 | Not Sig |
| ENSG00000260081 | LOC105373383 | uncharacterized LOC105373383                          | 105373383 | 7.379535816 | -0.15181534  | 1.046013804 | -0.145137033 | 0.884602679 | 0.999371363 | Not Sig |
| ENSG00000162769 | FLVCR1       | feline leukemia virus subgroup C cellular receptor 1  | 28982     | 491.3590807 | -0.151512668 | 0.651296265 | -0.232632484 | 0.8160468   | 0.999371363 | Not Sig |
| ENSG00000170633 | RNF34        | ring finger protein 34                                | 80196     | 629.9746615 | -0.151438089 | 0.424034654 | -0.357136116 | 0.720989908 | 0.999371363 | Not Sig |
| ENSG00000156990 | RPUSD3       | RNA pseudouridylate synthase domain containing 3      | 285367    | 339.1214539 | -0.151348431 | 0.46494167  | -0.325521331 | 0.744786541 | 0.999371363 | Not Sig |
| ENSG00000224003 | NA           | NA                                                    | NA        | 76.82779633 | -0.151341966 | 0.691705337 | -0.218795429 | 0.826809408 | 0.999371363 | Not Sig |
| ENSG00000104689 | TNFRSF10A    | TNF receptor superfamily member 10a                   | 8797      | 550.2282513 | -0.151123337 | 0.522123556 | -0.289439798 | 0.772244843 | 0.999371363 | Not Sig |
| ENSG00000146757 | ZNF92        | zinc finger protein 92                                | 168374    | 277.3297477 | -0.151048746 | 0.70230555  | -0.215075541 | 0.829708423 | 0.999371363 | Not Sig |
| ENSG00000215246 | LOC100506688 | uncharacterized LOC100506688                          | 100506688 | 14.99051192 | -0.150899275 | 1.185594073 | -0.127277353 | 0.898720884 | 0.999371363 | Not Sig |
| ENSG00000160741 | CRTC2        | CREB regulated transcription coactivator 2            | 200186    | 817.9206461 | -0.15087746  | 0.466902876 | -0.32314528  | 0.74658522  | 0.999371363 | Not Sig |
| ENSG00000073614 | KDM5A        | lysine demethylase 5A                                 | 5927      | 3910.22712  | -0.150851902 | 0.448080754 | -0.336662311 | 0.736371478 | 0.999371363 | Not Sig |
| ENSG00000177868 | SVBP         | small vasohibin binding protein                       | 374969    | 116.5942682 | -0.150786717 | 0.460833708 | -0.327204184 | 0.743513457 | 0.999371363 | Not Sig |
| ENSG00000107864 | CPEB3        | cytoplasmic polyadenylation element binding protein 3 | 22849     | 403.2730972 | -0.15060317  | 0.52182036  | -0.288611142 | 0.772878968 | 0.999371363 | Not Sig |
| ENSG00000161558 | TMEM143      | transmembrane protein 143                             | 55260     | 126.7690755 | -0.150494863 | 0.497692994 | -0.302384934 | 0.762358638 | 0.999371363 | Not Sig |

|                 |          |                                                            |        |             |              |             |              |             |             |         |
|-----------------|----------|------------------------------------------------------------|--------|-------------|--------------|-------------|--------------|-------------|-------------|---------|
| ENSG00000174928 | C3orf33  | chromosome 3 open reading frame 33                         | 285315 | 96.66224455 | -0.150164475 | 0.602500803 | -0.249235312 | 0.803178766 | 0.999371363 | Not Sig |
| ENSG00000270490 | NA       | NA                                                         | NA     | 3.83781746  | -0.150109942 | 1.344766227 | -0.111625306 | 0.911120506 | NA          | NA      |
| ENSG00000186532 | SMYD4    | SET and MYND domain containing 4                           | 114826 | 459.0328352 | -0.150070157 | 0.421465512 | -0.356067465 | 0.721790042 | 0.999371363 | Not Sig |
| ENSG00000175906 | ARL4D    | ADP ribosylation factor like GTPase 4D                     | 379    | 212.3734755 | -0.150047366 | 0.632939012 | -0.237064493 | 0.812606758 | 0.999371363 | Not Sig |
| ENSG00000135776 | ABCB10   | ATP binding cassette subfamily B member 10                 | 23456  | 621.3112356 | -0.150039971 | 0.416352398 | -0.360367737 | 0.71857215  | 0.999371363 | Not Sig |
| ENSG00000155849 | ELMO1    | engulfment and cell motility 1                             | 9844   | 1065.297778 | -0.149959169 | 0.746976675 | -0.200754822 | 0.840890291 | 0.999371363 | Not Sig |
| ENSG00000151414 | NEK7     | NIMA related kinase 7                                      | 140609 | 2072.339227 | -0.149888281 | 0.414587771 | -0.361535703 | 0.71769902  | 0.999371363 | Not Sig |
| ENSG00000122643 | NT5C3A   | 5'-nucleotidase, cytosolic IIIA                            | 51251  | 469.0703888 | -0.149861843 | 0.598228952 | -0.250509178 | 0.802193608 | 0.999371363 | Not Sig |
| ENSG00000265683 | NA       | NA                                                         | NA     | 15.54478451 | -0.149815717 | 1.013527666 | -0.14781611  | 0.882487895 | 0.999371363 | Not Sig |
| ENSG00000153130 | SCOC     | short coiled-coil protein                                  | 60592  | 1122.644986 | -0.14978852  | 0.74451232  | -0.201190116 | 0.840549919 | 0.999371363 | Not Sig |
| ENSG00000244462 | RBM12    | RNA binding motif protein 12                               | 10137  | 1793.806694 | -0.149744187 | 0.472092857 | -0.317192231 | 0.751097745 | 0.999371363 | Not Sig |
| ENSG00000014138 | POLA2    | DNA polymerase alpha 2, accessory subunit                  | 23649  | 343.3974547 | -0.149497064 | 0.479966551 | -0.311473921 | 0.755440365 | 0.999371363 | Not Sig |
| ENSG00000100796 | PPP4R3A  | protein phosphatase 4 regulatory subunit 3A                | 55671  | 2743.377778 | -0.149490813 | 0.444658561 | -0.336192364 | 0.736725811 | 0.999371363 | Not Sig |
| ENSG00000182162 | P2RY8    | P2Y receptor family member 8                               | 286530 | 271.6051149 | -0.149415621 | 0.790682713 | -0.188970391 | 0.850116023 | 0.999371363 | Not Sig |
| ENSG00000263895 | NA       | NA                                                         | NA     | 6.11009615  | -0.149266204 | 1.102271256 | -0.135416943 | 0.892282229 | NA          | NA      |
| ENSG00000159733 | ZFYVE28  | zinc finger FYVE-type containing 28                        | 57732  | 592.9038598 | -0.149252329 | 0.505270565 | -0.295390905 | 0.76769528  | 0.999371363 | Not Sig |
| ENSG00000099840 | IZUMO4   | IZUMO family member 4                                      | 113177 | 45.98546396 | -0.149235817 | 0.56863918  | -0.262443782 | 0.792979322 | 0.999371363 | Not Sig |
| ENSG00000124209 | RAB22A   | RAB22A, member RAS oncogene family                         | 57403  | 1569.482167 | -0.149202294 | 0.568519098 | -0.262440249 | 0.792982045 | 0.999371363 | Not Sig |
| ENSG00000105677 | TMEM147  | transmembrane protein 147                                  | 10430  | 679.1056967 | -0.149121318 | 0.439666578 | -0.3391691   | 0.734482345 | 0.999371363 | Not Sig |
| ENSG00000063244 | U2AF2    | U2 small nuclear RNA auxiliary factor 2                    | 11338  | 2635.603814 | -0.148997479 | 0.465084409 | -0.320366532 | 0.748690493 | 0.999371363 | Not Sig |
| ENSG00000184517 | ZFP1     | ZFP1 zinc finger protein                                   | 162239 | 235.5987405 | -0.148977802 | 0.424513226 | -0.350937951 | 0.725634899 | 0.999371363 | Not Sig |
| ENSG00000176624 | MEX3C    | mex-3 RNA binding family member C                          | 51320  | 1039.656401 | -0.148777514 | 0.412761556 | -0.360444212 | 0.718514969 | 0.999371363 | Not Sig |
| ENSG00000200913 | SNORD46  | small nucleolar RNA, C/D box 46                            | 94161  | 15.48416661 | -0.148609781 | 0.920526119 | -0.161440048 | 0.871746827 | 0.999371363 | Not Sig |
| ENSG00000018236 | CNTN1    | contactin 1                                                | 1272   | 258.0905171 | -0.148504674 | 0.989604339 | -0.150064696 | 0.880713573 | 0.999371363 | Not Sig |
| ENSG00000051523 | CYBA     | cytochrome b-245 alpha chain                               | 1535   | 3109.393102 | -0.148375077 | 0.862518542 | -0.172025376 | 0.863417579 | 0.999371363 | Not Sig |
| ENSG00000083750 | RRAGB    | Ras related GTP binding B                                  | 10325  | 351.4857558 | -0.148324177 | 0.417543205 | -0.355230728 | 0.722416746 | 0.999371363 | Not Sig |
| ENSG00000167747 | C19orf48 | chromosome 19 open reading frame 48                        | 84798  | 337.5021811 | -0.148077429 | 0.554693483 | -0.266953613 | 0.789504877 | 0.999371363 | Not Sig |
| ENSG00000115568 | ZNF142   | zinc finger protein 142                                    | 7701   | 787.363139  | -0.147991505 | 0.487950676 | -0.303291936 | 0.761667391 | 0.999371363 | Not Sig |
| ENSG00000055147 | FAM114A2 | family with sequence similarity 114 member A2              | 10827  | 577.7151332 | -0.14795465  | 0.446136245 | -0.331635574 | 0.740164454 | 0.999371363 | Not Sig |
| ENSG00000012061 | ERCC1    | ERCC excision repair 1, endonuclease non-catalytic subunit | 2067   | 818.1847073 | -0.147857055 | 0.475446665 | -0.310985575 | 0.755811587 | 0.999371363 | Not Sig |
| ENSG00000224856 | NA       | NA                                                         | NA     | 2.037073107 | -0.147798772 | 1.84522115  | -0.080098135 | 0.936159206 | NA          | NA      |
| ENSG00000138382 | METTL5   | methyltransferase like 5                                   | 29081  | 201.4191014 | -0.14769818  | 0.624287027 | -0.236586977 | 0.812977225 | 0.999371363 | Not Sig |
| ENSG00000167685 | ZNF444   | zinc finger protein 444                                    | 55311  | 879.597627  | -0.147556991 | 0.562567266 | -0.262292174 | 0.793096195 | 0.999371363 | Not Sig |
| ENSG00000239396 | NA       | NA                                                         | NA     | 7.165663909 | -0.147440325 | 1.005837513 | -0.146584636 | 0.883459882 | 0.999371363 | Not Sig |
| ENSG00000260366 | NA       | NA                                                         | NA     | 5.622121979 | -0.147433691 | 1.205945365 | -0.122255697 | 0.902696517 | NA          | NA      |

|                 |          |                                                        |        |             |              |             |              |             |             |         |
|-----------------|----------|--------------------------------------------------------|--------|-------------|--------------|-------------|--------------|-------------|-------------|---------|
| ENSG00000261691 | NA       | NA                                                     | NA     | 2.340356954 | -0.147343759 | 1.768257909 | -0.083327075 | 0.933591473 | NA          | NA      |
| ENSG00000272054 | NA       | NA                                                     | NA     | 34.15331913 | -0.147309095 | 0.761076486 | -0.193553601 | 0.846525432 | 0.999371363 | Not Sig |
| ENSG00000136536 | 7-Mar    | membrane associated ring-CH-type finger 7              | 64844  | 2111.508367 | -0.147197517 | 0.555514569 | -0.26497508  | 0.791028659 | 0.999371363 | Not Sig |
| ENSG00000170145 | SIK2     | salt inducible kinase 2                                | 23235  | 2238.817365 | -0.147140543 | 0.526206194 | -0.279625259 | 0.779765026 | 0.999371363 | Not Sig |
| ENSG00000243714 | NA       | NA                                                     | NA     | 22.46004639 | -0.146807037 | 0.844504012 | -0.173838175 | 0.861992642 | 0.999371363 | Not Sig |
| ENSG00000149308 | NPAT     | nuclear protein, coactivator of histone transcription  | 4863   | 1001.925922 | -0.146763071 | 0.622518282 | -0.235757045 | 0.813621202 | 0.999371363 | Not Sig |
| ENSG00000123349 | PFDN5    | prefoldin subunit 5                                    | 5204   | 1918.964696 | -0.146730181 | 0.474025393 | -0.309540761 | 0.756910211 | 0.999371363 | Not Sig |
| ENSG00000154035 | NA       | NA                                                     | NA     | 506.2739978 | -0.146682951 | 0.756862028 | -0.193804082 | 0.84632929  | 0.999371363 | Not Sig |
| ENSG00000129351 | ILF3     | interleukin enhancer binding factor 3                  | 3609   | 4899.585568 | -0.146675984 | 0.412871779 | -0.355257955 | 0.722396351 | 0.999371363 | Not Sig |
| ENSG00000136870 | ZNF189   | zinc finger protein 189                                | 7743   | 657.8380977 | -0.14643781  | 0.460846297 | -0.317758461 | 0.750668162 | 0.999371363 | Not Sig |
| ENSG00000196967 | ZNF585A  | zinc finger protein 585A                               | 199704 | 182.3283757 | -0.14643447  | 0.477866624 | -0.306433769 | 0.759274401 | 0.999371363 | Not Sig |
| ENSG00000109756 | RAPGEF2  | Rap guanine nucleotide exchange factor 2               | 9693   | 2515.328015 | -0.146160473 | 0.397312814 | -0.367872538 | 0.712968278 | 0.999371363 | Not Sig |
| ENSG00000166226 | CCT2     | chaperonin containing TCP1 subunit 2                   | 10576  | 1307.971193 | -0.146140447 | 0.406557231 | -0.359458486 | 0.719252128 | 0.999371363 | Not Sig |
| ENSG00000136244 | IL6      | interleukin 6                                          | 3569   | 250.0193424 | -0.145879334 | 0.746581827 | -0.19539631  | 0.845082705 | 0.999371363 | Not Sig |
| ENSG00000137266 | SLC22A23 | solute carrier family 22 member 23                     | 63027  | 1779.676845 | -0.145876363 | 0.530100212 | -0.275186389 | 0.783173043 | 0.999371363 | Not Sig |
| ENSG00000179632 | MAF1     | MAF1 homolog, negative regulator of RNA polymerase III | 84232  | 1703.111757 | -0.145843115 | 0.529800543 | -0.275279286 | 0.783101677 | 0.999371363 | Not Sig |
| ENSG00000255504 | NA       | NA                                                     | NA     | 5.734145205 | -0.145829798 | 1.064523204 | -0.136990718 | 0.891038132 | NA          | NA      |
| ENSG00000226048 | NA       | NA                                                     | NA     | 4.714440842 | -0.145674708 | 1.326193677 | -0.109844218 | 0.912532922 | NA          | NA      |
| ENSG00000132182 | NUP210   | nucleoporin 210                                        | 23225  | 2047.565    | -0.145540803 | 0.504656304 | -0.288395887 | 0.773043715 | 0.999371363 | Not Sig |
| ENSG00000014824 | SLC30A9  | solute carrier family 30 member 9                      | 10463  | 1637.927746 | -0.145487287 | 0.589636965 | -0.246740445 | 0.805109103 | 0.999371363 | Not Sig |
| ENSG00000227908 | FLJ31104 | uncharacterized LOC441072                              | 441072 | 14.97064753 | -0.14509874  | 0.794290546 | -0.182677158 | 0.855051339 | 0.999371363 | Not Sig |
| ENSG00000105483 | CARD8    | caspase recruitment domain family member 8             | 22900  | 1126.935173 | -0.145047043 | 0.506711215 | -0.28625189  | 0.774685204 | 0.999371363 | Not Sig |
| ENSG00000164904 | ALDH7A1  | aldehyde dehydrogenase 7 family member A1              | 501    | 965.3051562 | -0.145013817 | 0.451831006 | -0.320947023 | 0.748250538 | 0.999371363 | Not Sig |
| ENSG00000263809 | NA       | NA                                                     | NA     | 10.32911199 | -0.144924356 | 0.856024716 | -0.169299266 | 0.865561253 | 0.999371363 | Not Sig |
| ENSG00000137074 | APTX     | aprataxin                                              | 54840  | 417.0203876 | -0.1448519   | 0.435116794 | -0.332903491 | 0.739207134 | 0.999371363 | Not Sig |
| ENSG00000229954 | NA       | NA                                                     | NA     | 27.48699647 | -0.144736157 | 1.110638857 | -0.13031793  | 0.896314895 | 0.999371363 | Not Sig |
| ENSG00000180104 | EXOC3    | exocyst complex component 3                            | 11336  | 1492.285896 | -0.144723314 | 0.490131989 | -0.295274166 | 0.76778445  | 0.999371363 | Not Sig |
| ENSG00000189269 | DRICH1   | aspartate rich 1                                       | 51233  | 14.41091399 | -0.144723237 | 0.827339845 | -0.174925985 | 0.861137792 | 0.999371363 | Not Sig |
| ENSG00000196878 | LAMB3    | laminin subunit beta 3                                 | 3914   | 5718.179009 | -0.144634464 | 0.916221283 | -0.157859751 | 0.874567314 | 0.999371363 | Not Sig |
| ENSG00000120341 | SEC16B   | SEC16 homolog B, endoplasmic reticulum export factor   | 89866  | 11.84607377 | -0.144592266 | 0.832982321 | -0.173583835 | 0.862192537 | 0.999371363 | Not Sig |
| ENSG00000135828 | RNASEL   | ribonuclease L                                         | 6041   | 673.310101  | -0.144498591 | 0.464281414 | -0.311230618 | 0.755625308 | 0.999371363 | Not Sig |
| ENSG00000266308 | NA       | NA                                                     | NA     | 1.003945622 | -0.144325508 | 2.101475054 | -0.068678192 | 0.945245777 | NA          | NA      |
| ENSG00000171148 | TADA3    | transcriptional adaptor 3                              | 10474  | 1457.498572 | -0.144299646 | 0.484514091 | -0.297823424 | 0.765837936 | 0.999371363 | Not Sig |
| ENSG00000144040 | SFXN5    | sideroflexin 5                                         | 94097  | 380.5859054 | -0.144257391 | 0.485072408 | -0.29739352  | 0.76616609  | 0.999371363 | Not Sig |
| ENSG00000155380 | SLC16A1  | solute carrier family 16 member 1                      | 6566   | 223.6553516 | -0.144105892 | 0.486066192 | -0.296473803 | 0.766868271 | 0.999371363 | Not Sig |

|                 |            |                                                                  |           |             |              |             |              |             |             |         |
|-----------------|------------|------------------------------------------------------------------|-----------|-------------|--------------|-------------|--------------|-------------|-------------|---------|
| ENSG00000141576 | RNF157     | ring finger protein 157                                          | 114804    | 69.05523761 | -0.144002877 | 0.655664141 | -0.219629027 | 0.826160083 | 0.999371363 | Not Sig |
| ENSG00000141741 | MIEN1      | migration and invasion enhancer 1                                | 84299     | 434.3661719 | -0.143965365 | 0.475187145 | -0.302965614 | 0.761916067 | 0.999371363 | Not Sig |
| ENSG00000119396 | RAB14      | RAB14, member RAS oncogene family                                | 51552     | 2533.720729 | -0.143899067 | 0.381007485 | -0.37768042  | 0.705668015 | 0.999371363 | Not Sig |
| ENSG00000182534 | MXRA7      | matrix remodeling associated 7                                   | 439921    | 2385.099118 | -0.143888721 | 0.667983677 | -0.215407541 | 0.829449591 | 0.999371363 | Not Sig |
| ENSG00000207088 | SNORA7B    | small nucleolar RNA, H/ACA box 7B                                | 677797    | 10.74958853 | -0.143768401 | 0.897396501 | -0.160206109 | 0.872718718 | 0.999371363 | Not Sig |
| ENSG00000197603 | C5orf42    | chromosome 5 open reading frame 42                               | 65250     | 2543.483799 | -0.143719328 | 0.626007325 | -0.229580904 | 0.818417447 | 0.999371363 | Not Sig |
| ENSG00000165660 | ABRAXAS2   | abraxas 2, BRISC complex subunit                                 | 23172     | 365.634904  | -0.143703262 | 0.4440056   | -0.323651913 | 0.746201581 | 0.999371363 | Not Sig |
| ENSG00000251656 | NA         | NA                                                               | NA        | 1.818075215 | -0.143629623 | 2.215091641 | -0.064841391 | 0.948300286 | NA          | NA      |
| ENSG00000172354 | GNB2       | G protein subunit beta 2                                         | 2783      | 3664.04378  | -0.143555451 | 0.550333115 | -0.260851923 | 0.794206702 | 0.999371363 | Not Sig |
| ENSG00000105202 | FBL        | fibrillarin                                                      | 2091      | 791.6297826 | -0.143554676 | 0.519400705 | -0.276385217 | 0.78225221  | 0.999371363 | Not Sig |
| ENSG00000138767 | CNOT6L     | CCR4-NOT transcription complex subunit 6 like                    | 246175    | 1950.038437 | -0.143551647 | 0.594681567 | -0.241392461 | 0.809250955 | 0.999371363 | Not Sig |
| ENSG00000108010 | GLRX3      | glutaredoxin 3                                                   | 10539     | 693.7752586 | -0.143511851 | 0.575710816 | -0.24927767  | 0.803146003 | 0.999371363 | Not Sig |
| ENSG00000186166 | CCDC84     | coiled-coil domain containing 84                                 | 338657    | 784.8069477 | -0.14349061  | 0.476003917 | -0.301448381 | 0.763072607 | 0.999371363 | Not Sig |
| ENSG00000139719 | VPS33A     | VPS33A, CORVET/HOPS core subunit                                 | 65082     | 201.2798383 | -0.143484187 | 0.518560734 | -0.276696976 | 0.782012794 | 0.999371363 | Not Sig |
| ENSG00000100441 | KHNYN      | KH and NYN domain containing                                     | 23351     | 2556.390292 | -0.143322299 | 0.467091085 | -0.30684015  | 0.758965046 | 0.999371363 | Not Sig |
| ENSG00000111490 | TBC1D30    | TBC1 domain family member 30                                     | 23329     | 603.7874696 | -0.143223383 | 0.691529156 | -0.207111127 | 0.835923072 | 0.999371363 | Not Sig |
| ENSG00000086189 | DIMT1      | DIM1 dimethyladenosine transferase 1 homolog                     | 27292     | 255.8165785 | -0.143221833 | 0.503787418 | -0.284290215 | 0.776187985 | 0.999371363 | Not Sig |
| ENSG00000049167 | ERCC8      | ERCC excision repair 8, CSA ubiquitin ligase complex subunit     | 1161      | 219.2748156 | -0.143104644 | 0.601869936 | -0.237766726 | 0.812062027 | 0.999371363 | Not Sig |
| ENSG00000226312 | CFLAR-AS1  | CFLAR antisense RNA 1                                            | 65072     | 4.024976446 | -0.142951114 | 1.855803554 | -0.077029227 | 0.938600294 | NA          | NA      |
| ENSG00000215154 | LOC652276  | potassium channel tetramerization domain containing 5 pseudogene | 652276    | 123.1258818 | -0.142899802 | 0.514937118 | -0.277509227 | 0.781389122 | 0.999371363 | Not Sig |
| ENSG00000110844 | PRPF40B    | pre-mRNA processing factor 40 homolog B                          | 25766     | 437.7363307 | -0.142856557 | 0.421564867 | -0.338872065 | 0.734706109 | 0.999371363 | Not Sig |
| ENSG00000267757 | EML2-AS1   | EML2 antisense RNA 1                                             | 100287177 | 11.18775089 | -0.142820533 | 0.865824418 | -0.164953229 | 0.868980796 | 0.999371363 | Not Sig |
| ENSG00000115446 | UNC50      | unc-50 inner nuclear membrane RNA binding protein                | 25972     | 560.8547893 | -0.14281197  | 0.457142145 | -0.312401672 | 0.75473528  | 0.999371363 | Not Sig |
| ENSG00000164808 | SPIDR      | scaffolding protein involved in DNA repair                       | 23514     | 1643.819303 | -0.142769765 | 0.454559618 | -0.314083696 | 0.753457472 | 0.999371363 | Not Sig |
| ENSG00000244165 | P2RY11     | purinergic receptor P2Y11                                        | 5032      | 83.38991199 | -0.142754006 | 0.615793537 | -0.231821216 | 0.816676878 | 0.999371363 | Not Sig |
| ENSG00000237738 | RNF216-IT1 | RNF216 intronic transcript 1                                     | 100874342 | 21.522123   | -0.142699524 | 0.760579395 | -0.187619498 | 0.85117494  | 0.999371363 | Not Sig |
| ENSG00000179818 | PCBP1-AS1  | PCBP1 antisense RNA 1                                            | 400960    | 573.0488874 | -0.142653099 | 0.463387571 | -0.30784835  | 0.758197729 | 0.999371363 | Not Sig |
| ENSG00000104327 | CALB1      | calbindin 1                                                      | 793       | 0.316573926 | -0.142651885 | 4.080472857 | -0.034959646 | 0.972111919 | NA          | NA      |
| ENSG00000125998 | FAM83C     | family with sequence similarity 83 member C                      | 128876    | 0.316573926 | -0.142651885 | 4.080472857 | -0.034959646 | 0.972111919 | NA          | NA      |
| ENSG00000146809 | ASB15      | ankyrin repeat and SOCS box containing 15                        | 142685    | 0.316573926 | -0.142651885 | 4.080472857 | -0.034959646 | 0.972111919 | NA          | NA      |
| ENSG00000175514 | GPR152     | G protein-coupled receptor 152                                   | 390212    | 0.316573926 | -0.142651885 | 4.080472857 | -0.034959646 | 0.972111919 | NA          | NA      |
| ENSG00000199350 | NA         | NA                                                               | NA        | 0.316573926 | -0.142651885 | 4.080472857 | -0.034959646 | 0.972111919 | NA          | NA      |
| ENSG00000201778 | NA         | NA                                                               | NA        | 0.316573926 | -0.142651885 | 4.080472857 | -0.034959646 | 0.972111919 | NA          | NA      |
| ENSG00000202031 | SNORD38A   | small nucleolar RNA, C/D box 38A                                 | 94162     | 0.316573926 | -0.142651885 | 4.080472857 | -0.034959646 | 0.972111919 | NA          | NA      |
| ENSG00000207218 | NA         | NA                                                               | NA        | 0.316573926 | -0.142651885 | 4.080472857 | -0.034959646 | 0.972111919 | NA          | NA      |

|                 |         |                                                   |        |             |              |             |              |             |    |    |
|-----------------|---------|---------------------------------------------------|--------|-------------|--------------|-------------|--------------|-------------|----|----|
| ENSG00000207244 | NA      | NA                                                | NA     | 0.316573926 | -0.142651885 | 4.080472857 | -0.034959646 | 0.972111919 | NA | NA |
| ENSG00000207782 | MIR150  | microRNA 150                                      | 406942 | 0.316573926 | -0.142651885 | 4.080472857 | -0.034959646 | 0.972111919 | NA | NA |
| ENSG00000213303 | NA      | NA                                                | NA     | 0.316573926 | -0.142651885 | 4.080472857 | -0.034959646 | 0.972111919 | NA | NA |
| ENSG00000213332 | NA      | NA                                                | NA     | 0.316573926 | -0.142651885 | 4.080472857 | -0.034959646 | 0.972111919 | NA | NA |
| ENSG00000213701 | NA      | NA                                                | NA     | 0.316573926 | -0.142651885 | 4.080472857 | -0.034959646 | 0.972111919 | NA | NA |
| ENSG00000214313 | AZGP1P1 | alpha-2-glycoprotein 1, zinc-binding pseudogene 1 | 646282 | 0.316573926 | -0.142651885 | 4.080472857 | -0.034959646 | 0.972111919 | NA | NA |
| ENSG00000216197 | NA      | NA                                                | NA     | 0.316573926 | -0.142651885 | 4.080472857 | -0.034959646 | 0.972111919 | NA | NA |
| ENSG00000222222 | NA      | NA                                                | NA     | 0.316573926 | -0.142651885 | 4.080472857 | -0.034959646 | 0.972111919 | NA | NA |
| ENSG00000223191 | NA      | NA                                                | NA     | 0.316573926 | -0.142651885 | 4.080472857 | -0.034959646 | 0.972111919 | NA | NA |
| ENSG00000223335 | NA      | NA                                                | NA     | 0.316573926 | -0.142651885 | 4.080472857 | -0.034959646 | 0.972111919 | NA | NA |
| ENSG00000223543 | NA      | NA                                                | NA     | 0.316573926 | -0.142651885 | 4.080472857 | -0.034959646 | 0.972111919 | NA | NA |
| ENSG00000223563 | NA      | NA                                                | NA     | 0.316573926 | -0.142651885 | 4.080472857 | -0.034959646 | 0.972111919 | NA | NA |
| ENSG00000224059 | NA      | NA                                                | NA     | 0.316573926 | -0.142651885 | 4.080472857 | -0.034959646 | 0.972111919 | NA | NA |
| ENSG00000224459 | NA      | NA                                                | NA     | 0.316573926 | -0.142651885 | 4.080472857 | -0.034959646 | 0.972111919 | NA | NA |
| ENSG00000225715 | NA      | NA                                                | NA     | 0.316573926 | -0.142651885 | 4.080472857 | -0.034959646 | 0.972111919 | NA | NA |
| ENSG00000226972 | NA      | NA                                                | NA     | 0.316573926 | -0.142651885 | 4.080472857 | -0.034959646 | 0.972111919 | NA | NA |
| ENSG00000229854 | NA      | NA                                                | NA     | 0.316573926 | -0.142651885 | 4.080472857 | -0.034959646 | 0.972111919 | NA | NA |
| ENSG00000230186 | NA      | NA                                                | NA     | 0.316573926 | -0.142651885 | 4.080472857 | -0.034959646 | 0.972111919 | NA | NA |
| ENSG00000232059 | NA      | NA                                                | NA     | 0.316573926 | -0.142651885 | 4.080472857 | -0.034959646 | 0.972111919 | NA | NA |
| ENSG00000232553 | NA      | NA                                                | NA     | 0.316573926 | -0.142651885 | 4.080472857 | -0.034959646 | 0.972111919 | NA | NA |
| ENSG00000233594 | NA      | NA                                                | NA     | 0.316573926 | -0.142651885 | 4.080472857 | -0.034959646 | 0.972111919 | NA | NA |
| ENSG00000236530 | NA      | NA                                                | NA     | 0.316573926 | -0.142651885 | 4.080472857 | -0.034959646 | 0.972111919 | NA | NA |
| ENSG00000236862 | NA      | NA                                                | NA     | 0.316573926 | -0.142651885 | 4.080472857 | -0.034959646 | 0.972111919 | NA | NA |
| ENSG00000237138 | NA      | NA                                                | NA     | 0.316573926 | -0.142651885 | 4.080472857 | -0.034959646 | 0.972111919 | NA | NA |
| ENSG00000238225 | NA      | NA                                                | NA     | 0.316573926 | -0.142651885 | 4.080472857 | -0.034959646 | 0.972111919 | NA | NA |
| ENSG00000238971 | NA      | NA                                                | NA     | 0.316573926 | -0.142651885 | 4.080472857 | -0.034959646 | 0.972111919 | NA | NA |
| ENSG00000240820 | NA      | NA                                                | NA     | 0.316573926 | -0.142651885 | 4.080472857 | -0.034959646 | 0.972111919 | NA | NA |
| ENSG00000251087 | NA      | NA                                                | NA     | 0.316573926 | -0.142651885 | 4.080472857 | -0.034959646 | 0.972111919 | NA | NA |
| ENSG00000251852 | NA      | NA                                                | NA     | 0.316573926 | -0.142651885 | 4.080472857 | -0.034959646 | 0.972111919 | NA | NA |
| ENSG00000252013 | NA      | NA                                                | NA     | 0.316573926 | -0.142651885 | 4.080472857 | -0.034959646 | 0.972111919 | NA | NA |
| ENSG00000253092 | NA      | NA                                                | NA     | 0.316573926 | -0.142651885 | 4.080472857 | -0.034959646 | 0.972111919 | NA | NA |
| ENSG00000253232 | NA      | NA                                                | NA     | 0.316573926 | -0.142651885 | 4.080472857 | -0.034959646 | 0.972111919 | NA | NA |
| ENSG00000253606 | NA      | NA                                                | NA     | 0.316573926 | -0.142651885 | 4.080472857 | -0.034959646 | 0.972111919 | NA | NA |
| ENSG00000256542 | NA      | NA                                                | NA     | 0.316573926 | -0.142651885 | 4.080472857 | -0.034959646 | 0.972111919 | NA | NA |
| ENSG00000256757 | NA      | NA                                                | NA     | 0.316573926 | -0.142651885 | 4.080472857 | -0.034959646 | 0.972111919 | NA | NA |



|                 |          |                                                                        |           |             |              |             |              |             |    |    |
|-----------------|----------|------------------------------------------------------------------------|-----------|-------------|--------------|-------------|--------------|-------------|----|----|
| ENSG00000259102 | NA       | NA                                                                     | NA        | 0.316573926 | -0.142651885 | 4.080472857 | -0.034959646 | 0.972111919 | NA | NA |
| ENSG00000263450 | NA       | NA                                                                     | NA        | 0.316573926 | -0.142651885 | 4.080472857 | -0.034959646 | 0.972111919 | NA | NA |
| ENSG00000263816 | MIR548AW | microRNA 548aw                                                         | 100846992 | 0.316573926 | -0.142651885 | 4.080472857 | -0.034959646 | 0.972111919 | NA | NA |
| ENSG00000264024 | MIR4507  | microRNA 4507                                                          | 100616135 | 0.316573926 | -0.142651885 | 4.080472857 | -0.034959646 | 0.972111919 | NA | NA |
| ENSG00000264857 | MIR5696  | microRNA 5696                                                          | 100847007 | 0.316573926 | -0.142651885 | 4.080472857 | -0.034959646 | 0.972111919 | NA | NA |
| ENSG00000266325 | MIR3665  | microRNA 3665                                                          | 100500861 | 0.316573926 | -0.142651885 | 4.080472857 | -0.034959646 | 0.972111919 | NA | NA |
| ENSG00000267360 | NA       | NA                                                                     | NA        | 0.316573926 | -0.142651885 | 4.080472857 | -0.034959646 | 0.972111919 | NA | NA |
| ENSG00000269360 | NA       | NA                                                                     | NA        | 0.316573926 | -0.142651885 | 4.080472857 | -0.034959646 | 0.972111919 | NA | NA |
| ENSG00000102069 | NA       | NA                                                                     | NA        | 0.335167473 | -0.142651885 | 4.080472857 | -0.034959646 | 0.972111919 | NA | NA |
| ENSG00000115592 | PRKAG3   | protein kinase AMP-activated non-catalytic subunit gamma 3             | 53632     | 0.351474265 | -0.142651885 | 4.080472857 | -0.034959646 | 0.972111919 | NA | NA |
| ENSG00000127530 | OR7C1    | olfactory receptor family 7 subfamily C member 1                       | 26664     | 0.358641758 | -0.142651885 | 4.080472857 | -0.034959646 | 0.972111919 | NA | NA |
| ENSG00000130173 | ANGPTL8  | angiotensinogen-like 8                                                 | 55908     | 0.300267135 | -0.142651885 | 4.080472857 | -0.034959646 | 0.972111919 | NA | NA |
| ENSG00000134438 | RAX      | retina and anterior neural fold homeobox                               | 30062     | 0.393542096 | -0.142651885 | 4.080472857 | -0.034959646 | 0.972111919 | NA | NA |
| ENSG00000138892 | TTL8     | tubulin tyrosine ligase like 8                                         | 164714    | 0.358641758 | -0.142651885 | 4.080472857 | -0.034959646 | 0.972111919 | NA | NA |
| ENSG00000139053 | PDE6H    | phosphodiesterase 6H                                                   | 5149      | 0.293829599 | -0.142651885 | 4.080472857 | -0.034959646 | 0.972111919 | NA | NA |
| ENSG00000143278 | F13B     | coagulation factor XIII B chain                                        | 2165      | 0.393542096 | -0.142651885 | 4.080472857 | -0.034959646 | 0.972111919 | NA | NA |
| ENSG00000144227 | NXPH2    | neurexophilin 2                                                        | 11249     | 0.351474265 | -0.142651885 | 4.080472857 | -0.034959646 | 0.972111919 | NA | NA |
| ENSG00000147869 | CER1     | cerberus 1, DAN family BMP antagonist                                  | 9350      | 0.293829599 | -0.142651885 | 4.080472857 | -0.034959646 | 0.972111919 | NA | NA |
| ENSG00000154611 | PSMA8    | proteasome subunit alpha 8                                             | 143471    | 0.300267135 | -0.142651885 | 4.080472857 | -0.034959646 | 0.972111919 | NA | NA |
| ENSG00000159248 | GJD2     | gap junction protein delta 2                                           | 57369     | 0.310136391 | -0.142651885 | 4.080472857 | -0.034959646 | 0.972111919 | NA | NA |
| ENSG00000162188 | GNG3     | G protein subunit gamma 3                                              | 2785      | 0.293829599 | -0.142651885 | 4.080472857 | -0.034959646 | 0.972111919 | NA | NA |
| ENSG00000163377 | FAM19A4  | family with sequence similarity 19 member A1, C-C motif chemokine like | 151647    | 0.335167473 | -0.142651885 | 4.080472857 | -0.034959646 | 0.972111919 | NA | NA |
| ENSG00000163792 | TCF23    | transcription factor 23                                                | 150921    | 0.358641758 | -0.142651885 | 4.080472857 | -0.034959646 | 0.972111919 | NA | NA |
| ENSG00000165805 | C12orf50 | chromosome 12 open reading frame 50                                    | 160419    | 0.393542096 | -0.142651885 | 4.080472857 | -0.034959646 | 0.972111919 | NA | NA |
| ENSG00000165862 | NA       | NA                                                                     | NA        | 0.293829599 | -0.142651885 | 4.080472857 | -0.034959646 | 0.972111919 | NA | NA |
| ENSG00000166800 | LDHAL6A  | lactate dehydrogenase A like 6A                                        | 160287    | 0.293829599 | -0.142651885 | 4.080472857 | -0.034959646 | 0.972111919 | NA | NA |
| ENSG00000168509 | HFE2     | hemochromatosis type 2 (juvenile)                                      | 148738    | 0.351474265 | -0.142651885 | 4.080472857 | -0.034959646 | 0.972111919 | NA | NA |
| ENSG00000169164 | XAGE-4   | XAGE-4 protein                                                         | 139629    | 0.351474265 | -0.142651885 | 4.080472857 | -0.034959646 | 0.972111919 | NA | NA |
| ENSG00000171431 | KRT20    | keratin 20                                                             | 54474     | 0.351474265 | -0.142651885 | 4.080472857 | -0.034959646 | 0.972111919 | NA | NA |
| ENSG00000172799 | NA       | NA                                                                     | NA        | 0.293829599 | -0.142651885 | 4.080472857 | -0.034959646 | 0.972111919 | NA | NA |
| ENSG00000174521 | TTC9B    | tetratricopeptide repeat domain 9B                                     | 148014    | 0.293829599 | -0.142651885 | 4.080472857 | -0.034959646 | 0.972111919 | NA | NA |
| ENSG00000175319 | NA       | NA                                                                     | NA        | 0.352204222 | -0.142651885 | 4.080472857 | -0.034959646 | 0.972111919 | NA | NA |
| ENSG00000176194 | CIDEA    | cell death-inducing DFFA-like effector a                               | 1149      | 0.335167473 | -0.142651885 | 4.080472857 | -0.034959646 | 0.972111919 | NA | NA |
| ENSG00000176571 | CNBD1    | cyclic nucleotide binding domain containing 1                          | 168975    | 0.351474265 | -0.142651885 | 4.080472857 | -0.034959646 | 0.972111919 | NA | NA |
| ENSG00000177558 | FAM187B  | family with sequence similarity 187 member B                           | 148109    | 0.293829599 | -0.142651885 | 4.080472857 | -0.034959646 | 0.972111919 | NA | NA |

|                 |             |                                                                        |           |             |              |             |              |             |    |    |
|-----------------|-------------|------------------------------------------------------------------------|-----------|-------------|--------------|-------------|--------------|-------------|----|----|
| ENSG00000178233 | TMEM151B    | transmembrane protein 151B                                             | 441151    | 0.335167473 | -0.142651885 | 4.080472857 | -0.034959646 | 0.972111919 | NA | NA |
| ENSG00000178772 | CPN2        | carboxypeptidase N subunit 2                                           | 1370      | 0.393542096 | -0.142651885 | 4.080472857 | -0.034959646 | 0.972111919 | NA | NA |
| ENSG00000179046 | TRIML2      | tripartite motif family like 2                                         | 205860    | 0.335167473 | -0.142651885 | 4.080472857 | -0.034959646 | 0.972111919 | NA | NA |
| ENSG00000179577 | NA          | NA                                                                     | NA        | 0.351474265 | -0.142651885 | 4.080472857 | -0.034959646 | 0.972111919 | NA | NA |
| ENSG00000180083 | WFDC11      | WAP four-disulfide core domain 11                                      | 259239    | 0.393542096 | -0.142651885 | 4.080472857 | -0.034959646 | 0.972111919 | NA | NA |
| ENSG00000180934 | OR56A1      | olfactory receptor family 56 subfamily A member 1                      | 120796    | 0.300267135 | -0.142651885 | 4.080472857 | -0.034959646 | 0.972111919 | NA | NA |
| ENSG00000181017 | NA          | NA                                                                     | NA        | 0.310136391 | -0.142651885 | 4.080472857 | -0.034959646 | 0.972111919 | NA | NA |
| ENSG00000181514 | NA          | NA                                                                     | NA        | 0.352204222 | -0.142651885 | 4.080472857 | -0.034959646 | 0.972111919 | NA | NA |
| ENSG00000181800 | CELF2-AS1   | CELF2 antisense RNA 1                                                  | 414196    | 0.393542096 | -0.142651885 | 4.080472857 | -0.034959646 | 0.972111919 | NA | NA |
| ENSG00000182625 | NA          | NA                                                                     | NA        | 0.300267135 | -0.142651885 | 4.080472857 | -0.034959646 | 0.972111919 | NA | NA |
| ENSG00000183185 | GABRR3      | gamma-aminobutyric acid type A receptor rho3 subunit (gene/pseudogene) | 200959    | 0.352204222 | -0.142651885 | 4.080472857 | -0.034959646 | 0.972111919 | NA | NA |
| ENSG00000184022 | OR2T10      | olfactory receptor family 2 subfamily T member 10                      | 127069    | 0.310136391 | -0.142651885 | 4.080472857 | -0.034959646 | 0.972111919 | NA | NA |
| ENSG00000184188 | NA          | NA                                                                     | NA        | 0.300267135 | -0.142651885 | 4.080472857 | -0.034959646 | 0.972111919 | NA | NA |
| ENSG00000185162 | NA          | NA                                                                     | NA        | 0.310136391 | -0.142651885 | 4.080472857 | -0.034959646 | 0.972111919 | NA | NA |
| ENSG00000186743 | NA          | NA                                                                     | NA        | 0.358641758 | -0.142651885 | 4.080472857 | -0.034959646 | 0.972111919 | NA | NA |
| ENSG00000186895 | FGF3        | fibroblast growth factor 3                                             | 2248      | 0.310136391 | -0.142651885 | 4.080472857 | -0.034959646 | 0.972111919 | NA | NA |
| ENSG00000187243 | MAGED4B     | MAGE family member D4B                                                 | 81557     | 0.393542096 | -0.142651885 | 4.080472857 | -0.034959646 | 0.972111919 | NA | NA |
| ENSG00000187472 | NA          | NA                                                                     | NA        | 0.310136391 | -0.142651885 | 4.080472857 | -0.034959646 | 0.972111919 | NA | NA |
| ENSG00000188280 | NA          | NA                                                                     | NA        | 0.293829599 | -0.142651885 | 4.080472857 | -0.034959646 | 0.972111919 | NA | NA |
| ENSG00000188451 | NA          | NA                                                                     | NA        | 0.310136391 | -0.142651885 | 4.080472857 | -0.034959646 | 0.972111919 | NA | NA |
| ENSG00000188620 | HMX3        | H6 family homeobox 3                                                   | 340784    | 0.310136391 | -0.142651885 | 4.080472857 | -0.034959646 | 0.972111919 | NA | NA |
| ENSG00000188770 | OPTC        | opticin                                                                | 26254     | 0.293829599 | -0.142651885 | 4.080472857 | -0.034959646 | 0.972111919 | NA | NA |
| ENSG00000189089 | NA          | NA                                                                     | NA        | 0.358641758 | -0.142651885 | 4.080472857 | -0.034959646 | 0.972111919 | NA | NA |
| ENSG00000197454 | OR2L5       | olfactory receptor family 2 subfamily L member 5                       | 81466     | 0.293829599 | -0.142651885 | 4.080472857 | -0.034959646 | 0.972111919 | NA | NA |
| ENSG00000197830 | NA          | NA                                                                     | NA        | 0.293829599 | -0.142651885 | 4.080472857 | -0.034959646 | 0.972111919 | NA | NA |
| ENSG00000197978 | GOLGA6L9    | golgin A6 family-like 9                                                | 440295    | 0.300267135 | -0.142651885 | 4.080472857 | -0.034959646 | 0.972111919 | NA | NA |
| ENSG00000199088 | MIR379      | microRNA 379                                                           | 494328    | 0.352204222 | -0.142651885 | 4.080472857 | -0.034959646 | 0.972111919 | NA | NA |
| ENSG00000199476 | NA          | NA                                                                     | NA        | 0.351474265 | -0.142651885 | 4.080472857 | -0.034959646 | 0.972111919 | NA | NA |
| ENSG00000199865 | NA          | NA                                                                     | NA        | 0.358641758 | -0.142651885 | 4.080472857 | -0.034959646 | 0.972111919 | NA | NA |
| ENSG00000199880 | NA          | NA                                                                     | NA        | 0.351474265 | -0.142651885 | 4.080472857 | -0.034959646 | 0.972111919 | NA | NA |
| ENSG00000199899 | NA          | NA                                                                     | NA        | 0.300267135 | -0.142651885 | 4.080472857 | -0.034959646 | 0.972111919 | NA | NA |
| ENSG00000199971 | NA          | NA                                                                     | NA        | 0.293829599 | -0.142651885 | 4.080472857 | -0.034959646 | 0.972111919 | NA | NA |
| ENSG00000200564 | SNORD115-39 | small nucleolar RNA, C/D box 115-39                                    | 100033813 | 0.335167473 | -0.142651885 | 4.080472857 | -0.034959646 | 0.972111919 | NA | NA |
| ENSG00000200833 | NA          | NA                                                                     | NA        | 0.300267135 | -0.142651885 | 4.080472857 | -0.034959646 | 0.972111919 | NA | NA |
| ENSG00000200941 | NA          | NA                                                                     | NA        | 0.352204222 | -0.142651885 | 4.080472857 | -0.034959646 | 0.972111919 | NA | NA |

|                 |         |                                                    |        |             |              |             |              |             |    |    |
|-----------------|---------|----------------------------------------------------|--------|-------------|--------------|-------------|--------------|-------------|----|----|
| ENSG00000202159 | NA      | NA                                                 | NA     | 0.300267135 | -0.142651885 | 4.080472857 | -0.034959646 | 0.972111919 | NA | NA |
| ENSG00000202542 | NA      | NA                                                 | NA     | 0.393542096 | -0.142651885 | 4.080472857 | -0.034959646 | 0.972111919 | NA | NA |
| ENSG00000203469 | NA      | NA                                                 | NA     | 0.352204222 | -0.142651885 | 4.080472857 | -0.034959646 | 0.972111919 | NA | NA |
| ENSG00000203593 | NA      | NA                                                 | NA     | 0.293829599 | -0.142651885 | 4.080472857 | -0.034959646 | 0.972111919 | NA | NA |
| ENSG00000203897 | SPATA42 | spermatogenesis associated 42 (non-protein coding) | 642864 | 0.335167473 | -0.142651885 | 4.080472857 | -0.034959646 | 0.972111919 | NA | NA |
| ENSG00000204518 | AADACL4 | arylacetamide deacetylase like 4                   | 343066 | 0.310136391 | -0.142651885 | 4.080472857 | -0.034959646 | 0.972111919 | NA | NA |
| ENSG00000204655 | MOG     | myelin oligodendrocyte glycoprotein                | 4340   | 0.351474265 | -0.142651885 | 4.080472857 | -0.034959646 | 0.972111919 | NA | NA |
| ENSG00000205281 | NA      | NA                                                 | NA     | 0.393542096 | -0.142651885 | 4.080472857 | -0.034959646 | 0.972111919 | NA | NA |
| ENSG00000206695 | NA      | NA                                                 | NA     | 0.393542096 | -0.142651885 | 4.080472857 | -0.034959646 | 0.972111919 | NA | NA |
| ENSG00000206795 | NA      | NA                                                 | NA     | 0.310136391 | -0.142651885 | 4.080472857 | -0.034959646 | 0.972111919 | NA | NA |
| ENSG00000207007 | NA      | NA                                                 | NA     | 0.310136391 | -0.142651885 | 4.080472857 | -0.034959646 | 0.972111919 | NA | NA |
| ENSG00000207041 | NA      | NA                                                 | NA     | 0.300267135 | -0.142651885 | 4.080472857 | -0.034959646 | 0.972111919 | NA | NA |
| ENSG00000207177 | NA      | NA                                                 | NA     | 0.352204222 | -0.142651885 | 4.080472857 | -0.034959646 | 0.972111919 | NA | NA |
| ENSG00000207720 | NA      | NA                                                 | NA     | 0.335167473 | -0.142651885 | 4.080472857 | -0.034959646 | 0.972111919 | NA | NA |
| ENSG00000209082 | NA      | NA                                                 | NA     | 0.351474265 | -0.142651885 | 4.080472857 | -0.034959646 | 0.972111919 | NA | NA |
| ENSG00000211912 | NA      | NA                                                 | NA     | 0.310136391 | -0.142651885 | 4.080472857 | -0.034959646 | 0.972111919 | NA | NA |
| ENSG00000212076 | NA      | NA                                                 | NA     | 0.310136391 | -0.142651885 | 4.080472857 | -0.034959646 | 0.972111919 | NA | NA |
| ENSG00000212136 | NA      | NA                                                 | NA     | 0.310136391 | -0.142651885 | 4.080472857 | -0.034959646 | 0.972111919 | NA | NA |
| ENSG00000212187 | NA      | NA                                                 | NA     | 0.393542096 | -0.142651885 | 4.080472857 | -0.034959646 | 0.972111919 | NA | NA |
| ENSG00000212336 | NA      | NA                                                 | NA     | 0.393542096 | -0.142651885 | 4.080472857 | -0.034959646 | 0.972111919 | NA | NA |
| ENSG00000212409 | NA      | NA                                                 | NA     | 0.351474265 | -0.142651885 | 4.080472857 | -0.034959646 | 0.972111919 | NA | NA |
| ENSG00000212643 | NA      | NA                                                 | NA     | 0.310136391 | -0.142651885 | 4.080472857 | -0.034959646 | 0.972111919 | NA | NA |
| ENSG00000212769 | NA      | NA                                                 | NA     | 0.293829599 | -0.142651885 | 4.080472857 | -0.034959646 | 0.972111919 | NA | NA |
| ENSG00000212829 | NA      | NA                                                 | NA     | 0.310136391 | -0.142651885 | 4.080472857 | -0.034959646 | 0.972111919 | NA | NA |
| ENSG00000212952 | NA      | NA                                                 | NA     | 0.300267135 | -0.142651885 | 4.080472857 | -0.034959646 | 0.972111919 | NA | NA |
| ENSG00000213130 | NA      | NA                                                 | NA     | 0.293829599 | -0.142651885 | 4.080472857 | -0.034959646 | 0.972111919 | NA | NA |
| ENSG00000213333 | NA      | NA                                                 | NA     | 0.393542096 | -0.142651885 | 4.080472857 | -0.034959646 | 0.972111919 | NA | NA |
| ENSG00000213642 | NA      | NA                                                 | NA     | 0.358641758 | -0.142651885 | 4.080472857 | -0.034959646 | 0.972111919 | NA | NA |
| ENSG00000213938 | NA      | NA                                                 | NA     | 0.358641758 | -0.142651885 | 4.080472857 | -0.034959646 | 0.972111919 | NA | NA |
| ENSG00000214006 | NA      | NA                                                 | NA     | 0.300267135 | -0.142651885 | 4.080472857 | -0.034959646 | 0.972111919 | NA | NA |
| ENSG00000214185 | NA      | NA                                                 | NA     | 0.352204222 | -0.142651885 | 4.080472857 | -0.034959646 | 0.972111919 | NA | NA |
| ENSG00000214556 | NA      | NA                                                 | NA     | 0.293829599 | -0.142651885 | 4.080472857 | -0.034959646 | 0.972111919 | NA | NA |
| ENSG00000214760 | NA      | NA                                                 | NA     | 0.335167473 | -0.142651885 | 4.080472857 | -0.034959646 | 0.972111919 | NA | NA |
| ENSG00000214889 | NA      | NA                                                 | NA     | 0.300267135 | -0.142651885 | 4.080472857 | -0.034959646 | 0.972111919 | NA | NA |
| ENSG00000214998 | NA      | NA                                                 | NA     | 0.293829599 | -0.142651885 | 4.080472857 | -0.034959646 | 0.972111919 | NA | NA |

|                 |          |                                                    |           |             |              |             |              |             |    |    |
|-----------------|----------|----------------------------------------------------|-----------|-------------|--------------|-------------|--------------|-------------|----|----|
| ENSG00000215016 | NA       | NA                                                 | NA        | 0.335167473 | -0.142651885 | 4.080472857 | -0.034959646 | 0.972111919 | NA | NA |
| ENSG00000215029 | TCP11X1  | t-complex 11 family, X-linked 1                    | 100996631 | 0.300267135 | -0.142651885 | 4.080472857 | -0.034959646 | 0.972111919 | NA | NA |
| ENSG00000215029 | TCP11X2  | t-complex 11 family, X-linked 2                    | 100996648 | 0.300267135 | -0.142651885 | 4.080472857 | -0.034959646 | 0.972111919 | NA | NA |
| ENSG00000215156 | NA       | NA                                                 | NA        | 0.300267135 | -0.142651885 | 4.080472857 | -0.034959646 | 0.972111919 | NA | NA |
| ENSG00000215203 | GRXCR1   | glutaredoxin and cysteine rich domain containing 1 | 389207    | 0.293829599 | -0.142651885 | 4.080472857 | -0.034959646 | 0.972111919 | NA | NA |
| ENSG00000215278 | NA       | NA                                                 | NA        | 0.351474265 | -0.142651885 | 4.080472857 | -0.034959646 | 0.972111919 | NA | NA |
| ENSG00000215568 | GAB4     | GRB2 associated binding protein family member 4    | 128954    | 0.293829599 | -0.142651885 | 4.080472857 | -0.034959646 | 0.972111919 | NA | NA |
| ENSG00000216102 | NA       | NA                                                 | NA        | 0.293829599 | -0.142651885 | 4.080472857 | -0.034959646 | 0.972111919 | NA | NA |
| ENSG00000216624 | NA       | NA                                                 | NA        | 0.335167473 | -0.142651885 | 4.080472857 | -0.034959646 | 0.972111919 | NA | NA |
| ENSG00000217874 | NA       | NA                                                 | NA        | 0.293829599 | -0.142651885 | 4.080472857 | -0.034959646 | 0.972111919 | NA | NA |
| ENSG00000217878 | NA       | NA                                                 | NA        | 0.335167473 | -0.142651885 | 4.080472857 | -0.034959646 | 0.972111919 | NA | NA |
| ENSG00000218483 | NA       | NA                                                 | NA        | 0.335167473 | -0.142651885 | 4.080472857 | -0.034959646 | 0.972111919 | NA | NA |
| ENSG00000218698 | NA       | NA                                                 | NA        | 0.293829599 | -0.142651885 | 4.080472857 | -0.034959646 | 0.972111919 | NA | NA |
| ENSG00000219146 | NA       | NA                                                 | NA        | 0.358641758 | -0.142651885 | 4.080472857 | -0.034959646 | 0.972111919 | NA | NA |
| ENSG00000219186 | NA       | NA                                                 | NA        | 0.293829599 | -0.142651885 | 4.080472857 | -0.034959646 | 0.972111919 | NA | NA |
| ENSG00000220377 | NA       | NA                                                 | NA        | 0.300267135 | -0.142651885 | 4.080472857 | -0.034959646 | 0.972111919 | NA | NA |
| ENSG00000220937 | NA       | NA                                                 | NA        | 0.351474265 | -0.142651885 | 4.080472857 | -0.034959646 | 0.972111919 | NA | NA |
| ENSG00000221307 | NA       | NA                                                 | NA        | 0.300267135 | -0.142651885 | 4.080472857 | -0.034959646 | 0.972111919 | NA | NA |
| ENSG00000221594 | MIR548F1 | microRNA 548f-1                                    | 100302192 | 0.310136391 | -0.142651885 | 4.080472857 | -0.034959646 | 0.972111919 | NA | NA |
| ENSG00000221747 | NA       | NA                                                 | NA        | 0.393542096 | -0.142651885 | 4.080472857 | -0.034959646 | 0.972111919 | NA | NA |
| ENSG00000222051 | NA       | NA                                                 | NA        | 0.351474265 | -0.142651885 | 4.080472857 | -0.034959646 | 0.972111919 | NA | NA |
| ENSG00000222102 | NA       | NA                                                 | NA        | 0.310136391 | -0.142651885 | 4.080472857 | -0.034959646 | 0.972111919 | NA | NA |
| ENSG00000222552 | NA       | NA                                                 | NA        | 0.351474265 | -0.142651885 | 4.080472857 | -0.034959646 | 0.972111919 | NA | NA |
| ENSG00000222631 | NA       | NA                                                 | NA        | 0.300267135 | -0.142651885 | 4.080472857 | -0.034959646 | 0.972111919 | NA | NA |
| ENSG00000222915 | NA       | NA                                                 | NA        | 0.352204222 | -0.142651885 | 4.080472857 | -0.034959646 | 0.972111919 | NA | NA |
| ENSG00000223062 | NA       | NA                                                 | NA        | 0.300267135 | -0.142651885 | 4.080472857 | -0.034959646 | 0.972111919 | NA | NA |
| ENSG00000223427 | NA       | NA                                                 | NA        | 0.300267135 | -0.142651885 | 4.080472857 | -0.034959646 | 0.972111919 | NA | NA |
| ENSG00000223503 | NA       | NA                                                 | NA        | 0.393542096 | -0.142651885 | 4.080472857 | -0.034959646 | 0.972111919 | NA | NA |
| ENSG00000223523 | NA       | NA                                                 | NA        | 0.352204222 | -0.142651885 | 4.080472857 | -0.034959646 | 0.972111919 | NA | NA |
| ENSG00000223728 | NA       | NA                                                 | NA        | 0.351474265 | -0.142651885 | 4.080472857 | -0.034959646 | 0.972111919 | NA | NA |
| ENSG00000223837 | NA       | NA                                                 | NA        | 0.352204222 | -0.142651885 | 4.080472857 | -0.034959646 | 0.972111919 | NA | NA |
| ENSG00000224144 | NA       | NA                                                 | NA        | 0.335167473 | -0.142651885 | 4.080472857 | -0.034959646 | 0.972111919 | NA | NA |
| ENSG00000224272 | NA       | NA                                                 | NA        | 0.352204222 | -0.142651885 | 4.080472857 | -0.034959646 | 0.972111919 | NA | NA |
| ENSG00000224763 | NA       | NA                                                 | NA        | 0.352204222 | -0.142651885 | 4.080472857 | -0.034959646 | 0.972111919 | NA | NA |
| ENSG00000224911 | NA       | NA                                                 | NA        | 0.352204222 | -0.142651885 | 4.080472857 | -0.034959646 | 0.972111919 | NA | NA |

|                 |              |                                              |           |             |              |             |              |             |    |    |
|-----------------|--------------|----------------------------------------------|-----------|-------------|--------------|-------------|--------------|-------------|----|----|
| ENSG00000225117 | NA           | NA                                           | NA        | 0.310136391 | -0.142651885 | 4.080472857 | -0.034959646 | 0.972111919 | NA | NA |
| ENSG00000225402 | NA           | NA                                           | NA        | 0.293829599 | -0.142651885 | 4.080472857 | -0.034959646 | 0.972111919 | NA | NA |
| ENSG00000225496 | NA           | NA                                           | NA        | 0.300267135 | -0.142651885 | 4.080472857 | -0.034959646 | 0.972111919 | NA | NA |
| ENSG00000225903 | NA           | NA                                           | NA        | 0.351474265 | -0.142651885 | 4.080472857 | -0.034959646 | 0.972111919 | NA | NA |
| ENSG00000225918 | NA           | NA                                           | NA        | 0.358641758 | -0.142651885 | 4.080472857 | -0.034959646 | 0.972111919 | NA | NA |
| ENSG00000225965 | NA           | NA                                           | NA        | 0.300267135 | -0.142651885 | 4.080472857 | -0.034959646 | 0.972111919 | NA | NA |
| ENSG00000225984 | NA           | NA                                           | NA        | 0.358641758 | -0.142651885 | 4.080472857 | -0.034959646 | 0.972111919 | NA | NA |
| ENSG00000226081 | NA           | NA                                           | NA        | 0.358641758 | -0.142651885 | 4.080472857 | -0.034959646 | 0.972111919 | NA | NA |
| ENSG00000226543 | NA           | NA                                           | NA        | 0.310136391 | -0.142651885 | 4.080472857 | -0.034959646 | 0.972111919 | NA | NA |
| ENSG00000226557 | NA           | NA                                           | NA        | 0.352204222 | -0.142651885 | 4.080472857 | -0.034959646 | 0.972111919 | NA | NA |
| ENSG00000226576 | NA           | NA                                           | NA        | 0.300267135 | -0.142651885 | 4.080472857 | -0.034959646 | 0.972111919 | NA | NA |
| ENSG00000226621 | NA           | NA                                           | NA        | 0.351474265 | -0.142651885 | 4.080472857 | -0.034959646 | 0.972111919 | NA | NA |
| ENSG00000226631 | NA           | NA                                           | NA        | 0.310136391 | -0.142651885 | 4.080472857 | -0.034959646 | 0.972111919 | NA | NA |
| ENSG00000226661 | NA           | NA                                           | NA        | 0.335167473 | -0.142651885 | 4.080472857 | -0.034959646 | 0.972111919 | NA | NA |
| ENSG00000226706 | LOC101928525 | uncharacterized LOC101928525                 | 101928525 | 0.335167473 | -0.142651885 | 4.080472857 | -0.034959646 | 0.972111919 | NA | NA |
| ENSG00000226767 | NA           | NA                                           | NA        | 0.293829599 | -0.142651885 | 4.080472857 | -0.034959646 | 0.972111919 | NA | NA |
| ENSG00000226957 | NA           | NA                                           | NA        | 0.358641758 | -0.142651885 | 4.080472857 | -0.034959646 | 0.972111919 | NA | NA |
| ENSG00000227008 | NA           | NA                                           | NA        | 0.310136391 | -0.142651885 | 4.080472857 | -0.034959646 | 0.972111919 | NA | NA |
| ENSG00000227034 | NA           | NA                                           | NA        | 0.351474265 | -0.142651885 | 4.080472857 | -0.034959646 | 0.972111919 | NA | NA |
| ENSG00000227154 | NA           | NA                                           | NA        | 0.352204222 | -0.142651885 | 4.080472857 | -0.034959646 | 0.972111919 | NA | NA |
| ENSG00000227590 | NA           | NA                                           | NA        | 0.300267135 | -0.142651885 | 4.080472857 | -0.034959646 | 0.972111919 | NA | NA |
| ENSG00000227941 | NA           | NA                                           | NA        | 0.358641758 | -0.142651885 | 4.080472857 | -0.034959646 | 0.972111919 | NA | NA |
| ENSG00000228053 | NA           | NA                                           | NA        | 0.335167473 | -0.142651885 | 4.080472857 | -0.034959646 | 0.972111919 | NA | NA |
| ENSG00000228376 | GAS2L1P2     | growth arrest specific 2 like 1 pseudogene 2 | 340508    | 0.335167473 | -0.142651885 | 4.080472857 | -0.034959646 | 0.972111919 | NA | NA |
| ENSG00000228481 | LOC105374580 | uncharacterized LOC105374580                 | 105374580 | 0.393542096 | -0.142651885 | 4.080472857 | -0.034959646 | 0.972111919 | NA | NA |
| ENSG00000228523 | NA           | NA                                           | NA        | 0.293829599 | -0.142651885 | 4.080472857 | -0.034959646 | 0.972111919 | NA | NA |
| ENSG00000228656 | NA           | NA                                           | NA        | 0.300267135 | -0.142651885 | 4.080472857 | -0.034959646 | 0.972111919 | NA | NA |
| ENSG00000228700 | NA           | NA                                           | NA        | 0.358641758 | -0.142651885 | 4.080472857 | -0.034959646 | 0.972111919 | NA | NA |
| ENSG00000228703 | NA           | NA                                           | NA        | 0.351474265 | -0.142651885 | 4.080472857 | -0.034959646 | 0.972111919 | NA | NA |
| ENSG00000228868 | NA           | NA                                           | NA        | 0.300267135 | -0.142651885 | 4.080472857 | -0.034959646 | 0.972111919 | NA | NA |
| ENSG00000228970 | NA           | NA                                           | NA        | 0.293829599 | -0.142651885 | 4.080472857 | -0.034959646 | 0.972111919 | NA | NA |
| ENSG00000229327 | LOC102031319 | uncharacterized LOC102031319                 | 102031319 | 0.335167473 | -0.142651885 | 4.080472857 | -0.034959646 | 0.972111919 | NA | NA |
| ENSG00000229393 | NA           | NA                                           | NA        | 0.293829599 | -0.142651885 | 4.080472857 | -0.034959646 | 0.972111919 | NA | NA |
| ENSG00000229510 | NA           | NA                                           | NA        | 0.352204222 | -0.142651885 | 4.080472857 | -0.034959646 | 0.972111919 | NA | NA |
| ENSG00000229570 | NA           | NA                                           | NA        | 0.300267135 | -0.142651885 | 4.080472857 | -0.034959646 | 0.972111919 | NA | NA |

|                 |              |                                             |           |             |              |             |              |             |    |    |
|-----------------|--------------|---------------------------------------------|-----------|-------------|--------------|-------------|--------------|-------------|----|----|
| ENSG00000229781 | NA           | NA                                          | NA        | 0.310136391 | -0.142651885 | 4.080472857 | -0.034959646 | 0.972111919 | NA | NA |
| ENSG00000229835 | NA           | NA                                          | NA        | 0.358641758 | -0.142651885 | 4.080472857 | -0.034959646 | 0.972111919 | NA | NA |
| ENSG00000229847 | EMX2OS       | EMX2 opposite strand/antisense RNA          | 196047    | 0.393542096 | -0.142651885 | 4.080472857 | -0.034959646 | 0.972111919 | NA | NA |
| ENSG00000229897 | NA           | NA                                          | NA        | 0.335167473 | -0.142651885 | 4.080472857 | -0.034959646 | 0.972111919 | NA | NA |
| ENSG00000230037 | NA           | NA                                          | NA        | 0.300267135 | -0.142651885 | 4.080472857 | -0.034959646 | 0.972111919 | NA | NA |
| ENSG00000230079 | NA           | NA                                          | NA        | 0.310136391 | -0.142651885 | 4.080472857 | -0.034959646 | 0.972111919 | NA | NA |
| ENSG00000230097 | NA           | NA                                          | NA        | 0.352204222 | -0.142651885 | 4.080472857 | -0.034959646 | 0.972111919 | NA | NA |
| ENSG00000230119 | NA           | NA                                          | NA        | 0.351474265 | -0.142651885 | 4.080472857 | -0.034959646 | 0.972111919 | NA | NA |
| ENSG00000230146 | NA           | NA                                          | NA        | 0.358641758 | -0.142651885 | 4.080472857 | -0.034959646 | 0.972111919 | NA | NA |
| ENSG00000230201 | NA           | NA                                          | NA        | 0.300267135 | -0.142651885 | 4.080472857 | -0.034959646 | 0.972111919 | NA | NA |
| ENSG00000230216 | NA           | NA                                          | NA        | 0.352204222 | -0.142651885 | 4.080472857 | -0.034959646 | 0.972111919 | NA | NA |
| ENSG00000230455 | NA           | NA                                          | NA        | 0.310136391 | -0.142651885 | 4.080472857 | -0.034959646 | 0.972111919 | NA | NA |
| ENSG00000230492 | NA           | NA                                          | NA        | 0.300267135 | -0.142651885 | 4.080472857 | -0.034959646 | 0.972111919 | NA | NA |
| ENSG00000230519 | NA           | NA                                          | NA        | 0.358641758 | -0.142651885 | 4.080472857 | -0.034959646 | 0.972111919 | NA | NA |
| ENSG00000230925 | NA           | NA                                          | NA        | 0.300267135 | -0.142651885 | 4.080472857 | -0.034959646 | 0.972111919 | NA | NA |
| ENSG00000230948 | NA           | NA                                          | NA        | 0.335167473 | -0.142651885 | 4.080472857 | -0.034959646 | 0.972111919 | NA | NA |
| ENSG00000231206 | NA           | NA                                          | NA        | 0.335167473 | -0.142651885 | 4.080472857 | -0.034959646 | 0.972111919 | NA | NA |
| ENSG00000231300 | NA           | NA                                          | NA        | 0.351474265 | -0.142651885 | 4.080472857 | -0.034959646 | 0.972111919 | NA | NA |
| ENSG00000231903 | NA           | NA                                          | NA        | 0.358641758 | -0.142651885 | 4.080472857 | -0.034959646 | 0.972111919 | NA | NA |
| ENSG00000232075 | NA           | NA                                          | NA        | 0.351474265 | -0.142651885 | 4.080472857 | -0.034959646 | 0.972111919 | NA | NA |
| ENSG00000232380 | NA           | NA                                          | NA        | 0.335167473 | -0.142651885 | 4.080472857 | -0.034959646 | 0.972111919 | NA | NA |
| ENSG00000232409 | NA           | NA                                          | NA        | 0.310136391 | -0.142651885 | 4.080472857 | -0.034959646 | 0.972111919 | NA | NA |
| ENSG00000232684 | ATP11A-AS1   | ATP11A antisense RNA 1                      | 100874205 | 0.335167473 | -0.142651885 | 4.080472857 | -0.034959646 | 0.972111919 | NA | NA |
| ENSG00000232692 | NA           | NA                                          | NA        | 0.300267135 | -0.142651885 | 4.080472857 | -0.034959646 | 0.972111919 | NA | NA |
| ENSG00000233111 | NA           | NA                                          | NA        | 0.310136391 | -0.142651885 | 4.080472857 | -0.034959646 | 0.972111919 | NA | NA |
| ENSG00000233153 | UBE2E2-AS1   | UBE2E2 antisense RNA 1 (head to head)       | 100505877 | 0.310136391 | -0.142651885 | 4.080472857 | -0.034959646 | 0.972111919 | NA | NA |
| ENSG00000233311 | NA           | NA                                          | NA        | 0.310136391 | -0.142651885 | 4.080472857 | -0.034959646 | 0.972111919 | NA | NA |
| ENSG00000233544 | NA           | NA                                          | NA        | 0.352204222 | -0.142651885 | 4.080472857 | -0.034959646 | 0.972111919 | NA | NA |
| ENSG00000233708 | NA           | NA                                          | NA        | 0.352204222 | -0.142651885 | 4.080472857 | -0.034959646 | 0.972111919 | NA | NA |
| ENSG00000233729 | LOC101928185 | uncharacterized LOC101928185                | 101928185 | 0.351474265 | -0.142651885 | 4.080472857 | -0.034959646 | 0.972111919 | NA | NA |
| ENSG00000233776 | LINC01251    | long intergenic non-protein coding RNA 1251 | 101929688 | 0.335167473 | -0.142651885 | 4.080472857 | -0.034959646 | 0.972111919 | NA | NA |
| ENSG00000233888 | NA           | NA                                          | NA        | 0.393542096 | -0.142651885 | 4.080472857 | -0.034959646 | 0.972111919 | NA | NA |
| ENSG00000234042 | NA           | NA                                          | NA        | 0.293829599 | -0.142651885 | 4.080472857 | -0.034959646 | 0.972111919 | NA | NA |
| ENSG00000234256 | NA           | NA                                          | NA        | 0.393542096 | -0.142651885 | 4.080472857 | -0.034959646 | 0.972111919 | NA | NA |
| ENSG00000234299 | NA           | NA                                          | NA        | 0.300267135 | -0.142651885 | 4.080472857 | -0.034959646 | 0.972111919 | NA | NA |

|                 |              |                                    |           |             |              |             |              |             |    |    |
|-----------------|--------------|------------------------------------|-----------|-------------|--------------|-------------|--------------|-------------|----|----|
| ENSG00000234537 | NA           | NA                                 | NA        | 0.393542096 | -0.142651885 | 4.080472857 | -0.034959646 | 0.972111919 | NA | NA |
| ENSG00000234569 | NA           | NA                                 | NA        | 0.351474265 | -0.142651885 | 4.080472857 | -0.034959646 | 0.972111919 | NA | NA |
| ENSG00000234972 | NA           | NA                                 | NA        | 0.352204222 | -0.142651885 | 4.080472857 | -0.034959646 | 0.972111919 | NA | NA |
| ENSG00000234982 | NA           | NA                                 | NA        | 0.300267135 | -0.142651885 | 4.080472857 | -0.034959646 | 0.972111919 | NA | NA |
| ENSG00000235045 | NA           | NA                                 | NA        | 0.358641758 | -0.142651885 | 4.080472857 | -0.034959646 | 0.972111919 | NA | NA |
| ENSG00000235266 | NA           | NA                                 | NA        | 0.300267135 | -0.142651885 | 4.080472857 | -0.034959646 | 0.972111919 | NA | NA |
| ENSG00000235267 | NA           | NA                                 | NA        | 0.393542096 | -0.142651885 | 4.080472857 | -0.034959646 | 0.972111919 | NA | NA |
| ENSG00000235275 | NA           | NA                                 | NA        | 0.352204222 | -0.142651885 | 4.080472857 | -0.034959646 | 0.972111919 | NA | NA |
| ENSG00000235438 | LOC105370105 | uncharacterized LOC105370105       | 105370105 | 0.300267135 | -0.142651885 | 4.080472857 | -0.034959646 | 0.972111919 | NA | NA |
| ENSG00000235916 | NA           | NA                                 | NA        | 0.310136391 | -0.142651885 | 4.080472857 | -0.034959646 | 0.972111919 | NA | NA |
| ENSG00000236202 | GRM7-AS1     | GRM7 antisense RNA 1               | 100873937 | 0.351474265 | -0.142651885 | 4.080472857 | -0.034959646 | 0.972111919 | NA | NA |
| ENSG00000236208 | NA           | NA                                 | NA        | 0.335167473 | -0.142651885 | 4.080472857 | -0.034959646 | 0.972111919 | NA | NA |
| ENSG00000236546 | LOC105378668 | uncharacterized LOC105378668       | 105378668 | 0.351474265 | -0.142651885 | 4.080472857 | -0.034959646 | 0.972111919 | NA | NA |
| ENSG00000236741 | NA           | NA                                 | NA        | 0.352204222 | -0.142651885 | 4.080472857 | -0.034959646 | 0.972111919 | NA | NA |
| ENSG00000236852 | NA           | NA                                 | NA        | 0.300267135 | -0.142651885 | 4.080472857 | -0.034959646 | 0.972111919 | NA | NA |
| ENSG00000236857 | NA           | NA                                 | NA        | 0.335167473 | -0.142651885 | 4.080472857 | -0.034959646 | 0.972111919 | NA | NA |
| ENSG00000236980 | C3orf84      | chromosome 3 open reading frame 84 | 646498    | 0.335167473 | -0.142651885 | 4.080472857 | -0.034959646 | 0.972111919 | NA | NA |
| ENSG00000236996 | MLIP-IT1     | MLIP intronic transcript 1         | 100874282 | 0.352204222 | -0.142651885 | 4.080472857 | -0.034959646 | 0.972111919 | NA | NA |
| ENSG00000237020 | NA           | NA                                 | NA        | 0.310136391 | -0.142651885 | 4.080472857 | -0.034959646 | 0.972111919 | NA | NA |
| ENSG00000237234 | NA           | NA                                 | NA        | 0.300267135 | -0.142651885 | 4.080472857 | -0.034959646 | 0.972111919 | NA | NA |
| ENSG00000237321 | NA           | NA                                 | NA        | 0.335167473 | -0.142651885 | 4.080472857 | -0.034959646 | 0.972111919 | NA | NA |
| ENSG00000237341 | SYP-AS1      | SYP antisense RNA 1                | 100873921 | 0.335167473 | -0.142651885 | 4.080472857 | -0.034959646 | 0.972111919 | NA | NA |
| ENSG00000237555 | NA           | NA                                 | NA        | 0.351474265 | -0.142651885 | 4.080472857 | -0.034959646 | 0.972111919 | NA | NA |
| ENSG00000237568 | NA           | NA                                 | NA        | 0.393542096 | -0.142651885 | 4.080472857 | -0.034959646 | 0.972111919 | NA | NA |
| ENSG00000237603 | NA           | NA                                 | NA        | 0.351474265 | -0.142651885 | 4.080472857 | -0.034959646 | 0.972111919 | NA | NA |
| ENSG00000237964 | NA           | NA                                 | NA        | 0.300267135 | -0.142651885 | 4.080472857 | -0.034959646 | 0.972111919 | NA | NA |
| ENSG00000238178 | NA           | NA                                 | NA        | 0.393542096 | -0.142651885 | 4.080472857 | -0.034959646 | 0.972111919 | NA | NA |
| ENSG00000238211 | NA           | NA                                 | NA        | 0.293829599 | -0.142651885 | 4.080472857 | -0.034959646 | 0.972111919 | NA | NA |
| ENSG00000238222 | NA           | NA                                 | NA        | 0.393542096 | -0.142651885 | 4.080472857 | -0.034959646 | 0.972111919 | NA | NA |
| ENSG00000238244 | NA           | NA                                 | NA        | 0.310136391 | -0.142651885 | 4.080472857 | -0.034959646 | 0.972111919 | NA | NA |
| ENSG00000238251 | NA           | NA                                 | NA        | 0.358641758 | -0.142651885 | 4.080472857 | -0.034959646 | 0.972111919 | NA | NA |
| ENSG00000238310 | NA           | NA                                 | NA        | 0.352204222 | -0.142651885 | 4.080472857 | -0.034959646 | 0.972111919 | NA | NA |
| ENSG00000238477 | NA           | NA                                 | NA        | 0.358641758 | -0.142651885 | 4.080472857 | -0.034959646 | 0.972111919 | NA | NA |
| ENSG00000238583 | NA           | NA                                 | NA        | 0.300267135 | -0.142651885 | 4.080472857 | -0.034959646 | 0.972111919 | NA | NA |
| ENSG00000238767 | NA           | NA                                 | NA        | 0.352204222 | -0.142651885 | 4.080472857 | -0.034959646 | 0.972111919 | NA | NA |

|                 |            |                                                |           |             |              |             |              |             |    |    |
|-----------------|------------|------------------------------------------------|-----------|-------------|--------------|-------------|--------------|-------------|----|----|
| ENSG00000238951 | NA         | NA                                             | NA        | 0.300267135 | -0.142651885 | 4.080472857 | -0.034959646 | 0.972111919 | NA | NA |
| ENSG00000239135 | NA         | NA                                             | NA        | 0.293829599 | -0.142651885 | 4.080472857 | -0.034959646 | 0.972111919 | NA | NA |
| ENSG00000239293 | NA         | NA                                             | NA        | 0.351474265 | -0.142651885 | 4.080472857 | -0.034959646 | 0.972111919 | NA | NA |
| ENSG00000239345 | NA         | NA                                             | NA        | 0.335167473 | -0.142651885 | 4.080472857 | -0.034959646 | 0.972111919 | NA | NA |
| ENSG00000239473 | NA         | NA                                             | NA        | 0.358641758 | -0.142651885 | 4.080472857 | -0.034959646 | 0.972111919 | NA | NA |
| ENSG00000239776 | NA         | NA                                             | NA        | 0.358641758 | -0.142651885 | 4.080472857 | -0.034959646 | 0.972111919 | NA | NA |
| ENSG00000239830 | NA         | NA                                             | NA        | 0.310136391 | -0.142651885 | 4.080472857 | -0.034959646 | 0.972111919 | NA | NA |
| ENSG00000240096 | NA         | NA                                             | NA        | 0.293829599 | -0.142651885 | 4.080472857 | -0.034959646 | 0.972111919 | NA | NA |
| ENSG00000240135 | NA         | NA                                             | NA        | 0.335167473 | -0.142651885 | 4.080472857 | -0.034959646 | 0.972111919 | NA | NA |
| ENSG00000240490 | NA         | NA                                             | NA        | 0.310136391 | -0.142651885 | 4.080472857 | -0.034959646 | 0.972111919 | NA | NA |
| ENSG00000240674 | NA         | NA                                             | NA        | 0.300267135 | -0.142651885 | 4.080472857 | -0.034959646 | 0.972111919 | NA | NA |
| ENSG00000240704 | NA         | NA                                             | NA        | 0.293829599 | -0.142651885 | 4.080472857 | -0.034959646 | 0.972111919 | NA | NA |
| ENSG00000241134 | NA         | NA                                             | NA        | 0.300267135 | -0.142651885 | 4.080472857 | -0.034959646 | 0.972111919 | NA | NA |
| ENSG00000241439 | NA         | NA                                             | NA        | 0.352204222 | -0.142651885 | 4.080472857 | -0.034959646 | 0.972111919 | NA | NA |
| ENSG00000241651 | NA         | NA                                             | NA        | 0.335167473 | -0.142651885 | 4.080472857 | -0.034959646 | 0.972111919 | NA | NA |
| ENSG00000241656 | NA         | NA                                             | NA        | 0.300267135 | -0.142651885 | 4.080472857 | -0.034959646 | 0.972111919 | NA | NA |
| ENSG00000242083 | NA         | NA                                             | NA        | 0.352204222 | -0.142651885 | 4.080472857 | -0.034959646 | 0.972111919 | NA | NA |
| ENSG00000242159 | NA         | NA                                             | NA        | 0.293829599 | -0.142651885 | 4.080472857 | -0.034959646 | 0.972111919 | NA | NA |
| ENSG00000242405 | NA         | NA                                             | NA        | 0.335167473 | -0.142651885 | 4.080472857 | -0.034959646 | 0.972111919 | NA | NA |
| ENSG00000242856 | NA         | NA                                             | NA        | 0.293829599 | -0.142651885 | 4.080472857 | -0.034959646 | 0.972111919 | NA | NA |
| ENSG00000242991 | NA         | NA                                             | NA        | 0.352204222 | -0.142651885 | 4.080472857 | -0.034959646 | 0.972111919 | NA | NA |
| ENSG00000243257 | NA         | NA                                             | NA        | 0.352204222 | -0.142651885 | 4.080472857 | -0.034959646 | 0.972111919 | NA | NA |
| ENSG00000243273 | NA         | NA                                             | NA        | 0.300267135 | -0.142651885 | 4.080472857 | -0.034959646 | 0.972111919 | NA | NA |
| ENSG00000243352 | NA         | NA                                             | NA        | 0.300267135 | -0.142651885 | 4.080472857 | -0.034959646 | 0.972111919 | NA | NA |
| ENSG00000243429 | NA         | NA                                             | NA        | 0.300267135 | -0.142651885 | 4.080472857 | -0.034959646 | 0.972111919 | NA | NA |
| ENSG00000243830 | NA         | NA                                             | NA        | 0.393542096 | -0.142651885 | 4.080472857 | -0.034959646 | 0.972111919 | NA | NA |
| ENSG00000244003 | NA         | NA                                             | NA        | 0.393542096 | -0.142651885 | 4.080472857 | -0.034959646 | 0.972111919 | NA | NA |
| ENSG00000244392 | NA         | NA                                             | NA        | 0.293829599 | -0.142651885 | 4.080472857 | -0.034959646 | 0.972111919 | NA | NA |
| ENSG00000244456 | NA         | NA                                             | NA        | 0.310136391 | -0.142651885 | 4.080472857 | -0.034959646 | 0.972111919 | NA | NA |
| ENSG00000244573 | NA         | NA                                             | NA        | 0.293829599 | -0.142651885 | 4.080472857 | -0.034959646 | 0.972111919 | NA | NA |
| ENSG00000244585 | NA         | NA                                             | NA        | 0.300267135 | -0.142651885 | 4.080472857 | -0.034959646 | 0.972111919 | NA | NA |
| ENSG00000246130 | LOC286059  | TNF receptor superfamily member 10d pseudogene | 286059    | 0.358641758 | -0.142651885 | 4.080472857 | -0.034959646 | 0.972111919 | NA | NA |
| ENSG00000248572 | EGFLAM-AS2 | EGFLAM antisense RNA 2                         | 100506475 | 0.293829599 | -0.142651885 | 4.080472857 | -0.034959646 | 0.972111919 | NA | NA |
| ENSG00000248821 | NA         | NA                                             | NA        | 0.358641758 | -0.142651885 | 4.080472857 | -0.034959646 | 0.972111919 | NA | NA |
| ENSG00000249337 | NA         | NA                                             | NA        | 0.335167473 | -0.142651885 | 4.080472857 | -0.034959646 | 0.972111919 | NA | NA |



|                 |       |                    |        |             |              |             |              |             |    |    |
|-----------------|-------|--------------------|--------|-------------|--------------|-------------|--------------|-------------|----|----|
| ENSG00000249780 | NA    | NA                 | NA     | 0.335167473 | -0.142651885 | 4.080472857 | -0.034959646 | 0.972111919 | NA | NA |
| ENSG00000250194 | NA    | NA                 | NA     | 0.310136391 | -0.142651885 | 4.080472857 | -0.034959646 | 0.972111919 | NA | NA |
| ENSG00000250332 | NA    | NA                 | NA     | 0.358641758 | -0.142651885 | 4.080472857 | -0.034959646 | 0.972111919 | NA | NA |
| ENSG00000250348 | NA    | NA                 | NA     | 0.293829599 | -0.142651885 | 4.080472857 | -0.034959646 | 0.972111919 | NA | NA |
| ENSG00000250536 | NA    | NA                 | NA     | 0.393542096 | -0.142651885 | 4.080472857 | -0.034959646 | 0.972111919 | NA | NA |
| ENSG00000251107 | NA    | NA                 | NA     | 0.310136391 | -0.142651885 | 4.080472857 | -0.034959646 | 0.972111919 | NA | NA |
| ENSG00000251304 | NA    | NA                 | NA     | 0.300267135 | -0.142651885 | 4.080472857 | -0.034959646 | 0.972111919 | NA | NA |
| ENSG00000251309 | NA    | NA                 | NA     | 0.358641758 | -0.142651885 | 4.080472857 | -0.034959646 | 0.972111919 | NA | NA |
| ENSG00000251453 | NA    | NA                 | NA     | 0.335167473 | -0.142651885 | 4.080472857 | -0.034959646 | 0.972111919 | NA | NA |
| ENSG00000251493 | FOXD1 | forkhead box D1    | 2297   | 0.310136391 | -0.142651885 | 4.080472857 | -0.034959646 | 0.972111919 | NA | NA |
| ENSG00000251596 | NA    | NA                 | NA     | 0.293829599 | -0.142651885 | 4.080472857 | -0.034959646 | 0.972111919 | NA | NA |
| ENSG00000251627 | NA    | NA                 | NA     | 0.300267135 | -0.142651885 | 4.080472857 | -0.034959646 | 0.972111919 | NA | NA |
| ENSG00000251865 | NA    | NA                 | NA     | 0.351474265 | -0.142651885 | 4.080472857 | -0.034959646 | 0.972111919 | NA | NA |
| ENSG00000252000 | NA    | NA                 | NA     | 0.335167473 | -0.142651885 | 4.080472857 | -0.034959646 | 0.972111919 | NA | NA |
| ENSG00000252211 | NA    | NA                 | NA     | 0.300267135 | -0.142651885 | 4.080472857 | -0.034959646 | 0.972111919 | NA | NA |
| ENSG00000252254 | NA    | NA                 | NA     | 0.352204222 | -0.142651885 | 4.080472857 | -0.034959646 | 0.972111919 | NA | NA |
| ENSG00000252519 | NA    | NA                 | NA     | 0.393542096 | -0.142651885 | 4.080472857 | -0.034959646 | 0.972111919 | NA | NA |
| ENSG00000252521 | NA    | NA                 | NA     | 0.300267135 | -0.142651885 | 4.080472857 | -0.034959646 | 0.972111919 | NA | NA |
| ENSG00000252644 | NA    | NA                 | NA     | 0.351474265 | -0.142651885 | 4.080472857 | -0.034959646 | 0.972111919 | NA | NA |
| ENSG00000252814 | NA    | NA                 | NA     | 0.393542096 | -0.142651885 | 4.080472857 | -0.034959646 | 0.972111919 | NA | NA |
| ENSG00000252883 | NA    | NA                 | NA     | 0.351474265 | -0.142651885 | 4.080472857 | -0.034959646 | 0.972111919 | NA | NA |
| ENSG00000252940 | NA    | NA                 | NA     | 0.335167473 | -0.142651885 | 4.080472857 | -0.034959646 | 0.972111919 | NA | NA |
| ENSG00000253188 | NA    | NA                 | NA     | 0.351474265 | -0.142651885 | 4.080472857 | -0.034959646 | 0.972111919 | NA | NA |
| ENSG00000253332 | NA    | NA                 | NA     | 0.358641758 | -0.142651885 | 4.080472857 | -0.034959646 | 0.972111919 | NA | NA |
| ENSG00000253393 | NA    | NA                 | NA     | 0.351474265 | -0.142651885 | 4.080472857 | -0.034959646 | 0.972111919 | NA | NA |
| ENSG00000253721 | NA    | NA                 | NA     | 0.393542096 | -0.142651885 | 4.080472857 | -0.034959646 | 0.972111919 | NA | NA |
| ENSG00000253831 | ETV3L | ETS variant 3 like | 440695 | 0.300267135 | -0.142651885 | 4.080472857 | -0.034959646 | 0.972111919 | NA | NA |
| ENSG00000253912 | NA    | NA                 | NA     | 0.310136391 | -0.142651885 | 4.080472857 | -0.034959646 | 0.972111919 | NA | NA |
| ENSG00000253971 | NA    | NA                 | NA     | 0.293829599 | -0.142651885 | 4.080472857 | -0.034959646 | 0.972111919 | NA | NA |
| ENSG00000253993 | NA    | NA                 | NA     | 0.310136391 | -0.142651885 | 4.080472857 | -0.034959646 | 0.972111919 | NA | NA |
| ENSG00000254037 | NA    | NA                 | NA     | 0.358641758 | -0.142651885 | 4.080472857 | -0.034959646 | 0.972111919 | NA | NA |
| ENSG00000254129 | NA    | NA                 | NA     | 0.300267135 | -0.142651885 | 4.080472857 | -0.034959646 | 0.972111919 | NA | NA |
| ENSG00000254151 | NA    | NA                 | NA     | 0.393542096 | -0.142651885 | 4.080472857 | -0.034959646 | 0.972111919 | NA | NA |
| ENSG00000254157 | NA    | NA                 | NA     | 0.310136391 | -0.142651885 | 4.080472857 | -0.034959646 | 0.972111919 | NA | NA |
| ENSG00000254244 | NA    | NA                 | NA     | 0.352204222 | -0.142651885 | 4.080472857 | -0.034959646 | 0.972111919 | NA | NA |

|                 |              |                                            |           |             |              |             |              |             |    |    |
|-----------------|--------------|--------------------------------------------|-----------|-------------|--------------|-------------|--------------|-------------|----|----|
| ENSG00000254289 | NA           | NA                                         | NA        | 0.351474265 | -0.142651885 | 4.080472857 | -0.034959646 | 0.972111919 | NA | NA |
| ENSG00000254483 | NA           | NA                                         | NA        | 0.300267135 | -0.142651885 | 4.080472857 | -0.034959646 | 0.972111919 | NA | NA |
| ENSG00000254553 | NA           | NA                                         | NA        | 0.352204222 | -0.142651885 | 4.080472857 | -0.034959646 | 0.972111919 | NA | NA |
| ENSG00000254574 | NA           | NA                                         | NA        | 0.358641758 | -0.142651885 | 4.080472857 | -0.034959646 | 0.972111919 | NA | NA |
| ENSG00000254592 | NA           | NA                                         | NA        | 0.300267135 | -0.142651885 | 4.080472857 | -0.034959646 | 0.972111919 | NA | NA |
| ENSG00000254768 | NA           | NA                                         | NA        | 0.393542096 | -0.142651885 | 4.080472857 | -0.034959646 | 0.972111919 | NA | NA |
| ENSG00000254814 | NA           | NA                                         | NA        | 0.358641758 | -0.142651885 | 4.080472857 | -0.034959646 | 0.972111919 | NA | NA |
| ENSG00000254846 | NA           | NA                                         | NA        | 0.300267135 | -0.142651885 | 4.080472857 | -0.034959646 | 0.972111919 | NA | NA |
| ENSG00000255010 | NA           | NA                                         | NA        | 0.300267135 | -0.142651885 | 4.080472857 | -0.034959646 | 0.972111919 | NA | NA |
| ENSG00000255058 | NA           | NA                                         | NA        | 0.293829599 | -0.142651885 | 4.080472857 | -0.034959646 | 0.972111919 | NA | NA |
| ENSG00000255092 | NA           | NA                                         | NA        | 0.335167473 | -0.142651885 | 4.080472857 | -0.034959646 | 0.972111919 | NA | NA |
| ENSG00000255114 | NA           | NA                                         | NA        | 0.358641758 | -0.142651885 | 4.080472857 | -0.034959646 | 0.972111919 | NA | NA |
| ENSG00000255126 | NA           | NA                                         | NA        | 0.300267135 | -0.142651885 | 4.080472857 | -0.034959646 | 0.972111919 | NA | NA |
| ENSG00000255245 | FXVD6-FXVD2  | FXVD6-FXVD2 readthrough                    | 100533181 | 0.335167473 | -0.142651885 | 4.080472857 | -0.034959646 | 0.972111919 | NA | NA |
| ENSG00000255274 | SMIM35       | small integral membrane protein 35         | 100526771 | 0.300267135 | -0.142651885 | 4.080472857 | -0.034959646 | 0.972111919 | NA | NA |
| ENSG00000255311 | NA           | NA                                         | NA        | 0.300267135 | -0.142651885 | 4.080472857 | -0.034959646 | 0.972111919 | NA | NA |
| ENSG00000255340 | NA           | NA                                         | NA        | 0.351474265 | -0.142651885 | 4.080472857 | -0.034959646 | 0.972111919 | NA | NA |
| ENSG00000255438 | NA           | NA                                         | NA        | 0.393542096 | -0.142651885 | 4.080472857 | -0.034959646 | 0.972111919 | NA | NA |
| ENSG00000255641 | NA           | NA                                         | NA        | 0.351474265 | -0.142651885 | 4.080472857 | -0.034959646 | 0.972111919 | NA | NA |
| ENSG00000255725 | NA           | NA                                         | NA        | 0.358641758 | -0.142651885 | 4.080472857 | -0.034959646 | 0.972111919 | NA | NA |
| ENSG00000255734 | NA           | NA                                         | NA        | 0.293829599 | -0.142651885 | 4.080472857 | -0.034959646 | 0.972111919 | NA | NA |
| ENSG00000255800 | NA           | NA                                         | NA        | 0.293829599 | -0.142651885 | 4.080472857 | -0.034959646 | 0.972111919 | NA | NA |
| ENSG00000255916 | LOC101928416 | uncharacterized LOC101928416               | 101928416 | 0.300267135 | -0.142651885 | 4.080472857 | -0.034959646 | 0.972111919 | NA | NA |
| ENSG00000256049 | NA           | NA                                         | NA        | 0.393542096 | -0.142651885 | 4.080472857 | -0.034959646 | 0.972111919 | NA | NA |
| ENSG00000256282 | NA           | NA                                         | NA        | 0.293829599 | -0.142651885 | 4.080472857 | -0.034959646 | 0.972111919 | NA | NA |
| ENSG00000256835 | NA           | NA                                         | NA        | 0.351474265 | -0.142651885 | 4.080472857 | -0.034959646 | 0.972111919 | NA | NA |
| ENSG00000257275 | NA           | NA                                         | NA        | 0.351474265 | -0.142651885 | 4.080472857 | -0.034959646 | 0.972111919 | NA | NA |
| ENSG00000257376 | NA           | NA                                         | NA        | 0.352204222 | -0.142651885 | 4.080472857 | -0.034959646 | 0.972111919 | NA | NA |
| ENSG00000257675 | NA           | NA                                         | NA        | 0.300267135 | -0.142651885 | 4.080472857 | -0.034959646 | 0.972111919 | NA | NA |
| ENSG00000257852 | NA           | NA                                         | NA        | 0.300267135 | -0.142651885 | 4.080472857 | -0.034959646 | 0.972111919 | NA | NA |
| ENSG00000257918 | NA           | NA                                         | NA        | 0.300267135 | -0.142651885 | 4.080472857 | -0.034959646 | 0.972111919 | NA | NA |
| ENSG00000258401 | NA           | NA                                         | NA        | 0.351474265 | -0.142651885 | 4.080472857 | -0.034959646 | 0.972111919 | NA | NA |
| ENSG00000258509 | NA           | NA                                         | NA        | 0.300267135 | -0.142651885 | 4.080472857 | -0.034959646 | 0.972111919 | NA | NA |
| ENSG00000258597 | SERPINA2     | serpin family A member 2 (gene/pseudogene) | 390502    | 0.300267135 | -0.142651885 | 4.080472857 | -0.034959646 | 0.972111919 | NA | NA |
| ENSG00000258730 | ITPK1-AS1    | ITPK1 antisense RNA 1                      | 319085    | 0.300267135 | -0.142651885 | 4.080472857 | -0.034959646 | 0.972111919 | NA | NA |

|                 |              |                                             |           |             |              |             |              |             |    |    |
|-----------------|--------------|---------------------------------------------|-----------|-------------|--------------|-------------|--------------|-------------|----|----|
| ENSG00000258778 | NA           | NA                                          | NA        | 0.352204222 | -0.142651885 | 4.080472857 | -0.034959646 | 0.972111919 | NA | NA |
| ENSG00000258895 | NA           | NA                                          | NA        | 0.300267135 | -0.142651885 | 4.080472857 | -0.034959646 | 0.972111919 | NA | NA |
| ENSG00000259019 | NA           | NA                                          | NA        | 0.393542096 | -0.142651885 | 4.080472857 | -0.034959646 | 0.972111919 | NA | NA |
| ENSG00000259046 | NA           | NA                                          | NA        | 0.293829599 | -0.142651885 | 4.080472857 | -0.034959646 | 0.972111919 | NA | NA |
| ENSG00000259270 | NA           | NA                                          | NA        | 0.310136391 | -0.142651885 | 4.080472857 | -0.034959646 | 0.972111919 | NA | NA |
| ENSG00000259397 | NA           | NA                                          | NA        | 0.300267135 | -0.142651885 | 4.080472857 | -0.034959646 | 0.972111919 | NA | NA |
| ENSG00000259421 | NA           | NA                                          | NA        | 0.293829599 | -0.142651885 | 4.080472857 | -0.034959646 | 0.972111919 | NA | NA |
| ENSG00000259446 | LOC101928134 | uncharacterized LOC101928134                | 101928134 | 0.300267135 | -0.142651885 | 4.080472857 | -0.034959646 | 0.972111919 | NA | NA |
| ENSG00000259464 | NA           | NA                                          | NA        | 0.352204222 | -0.142651885 | 4.080472857 | -0.034959646 | 0.972111919 | NA | NA |
| ENSG00000259595 | NA           | NA                                          | NA        | 0.352204222 | -0.142651885 | 4.080472857 | -0.034959646 | 0.972111919 | NA | NA |
| ENSG00000259657 | NA           | NA                                          | NA        | 0.335167473 | -0.142651885 | 4.080472857 | -0.034959646 | 0.972111919 | NA | NA |
| ENSG00000259707 | NA           | NA                                          | NA        | 0.351474265 | -0.142651885 | 4.080472857 | -0.034959646 | 0.972111919 | NA | NA |
| ENSG00000259752 | NA           | NA                                          | NA        | 0.300267135 | -0.142651885 | 4.080472857 | -0.034959646 | 0.972111919 | NA | NA |
| ENSG00000259873 | NA           | NA                                          | NA        | 0.352204222 | -0.142651885 | 4.080472857 | -0.034959646 | 0.972111919 | NA | NA |
| ENSG00000259890 | NA           | NA                                          | NA        | 0.310136391 | -0.142651885 | 4.080472857 | -0.034959646 | 0.972111919 | NA | NA |
| ENSG00000259904 | NA           | NA                                          | NA        | 0.293829599 | -0.142651885 | 4.080472857 | -0.034959646 | 0.972111919 | NA | NA |
| ENSG00000259910 | NA           | NA                                          | NA        | 0.293829599 | -0.142651885 | 4.080472857 | -0.034959646 | 0.972111919 | NA | NA |
| ENSG00000260051 | NA           | NA                                          | NA        | 0.393542096 | -0.142651885 | 4.080472857 | -0.034959646 | 0.972111919 | NA | NA |
| ENSG00000260675 | NA           | NA                                          | NA        | 0.300267135 | -0.142651885 | 4.080472857 | -0.034959646 | 0.972111919 | NA | NA |
| ENSG00000261375 | NA           | NA                                          | NA        | 0.352204222 | -0.142651885 | 4.080472857 | -0.034959646 | 0.972111919 | NA | NA |
| ENSG00000261514 | LINC01976    | long intergenic non-protein coding RNA 1976 | 107546764 | 0.310136391 | -0.142651885 | 4.080472857 | -0.034959646 | 0.972111919 | NA | NA |
| ENSG00000261570 | NA           | NA                                          | NA        | 0.351474265 | -0.142651885 | 4.080472857 | -0.034959646 | 0.972111919 | NA | NA |
| ENSG00000261606 | NA           | NA                                          | NA        | 0.335167473 | -0.142651885 | 4.080472857 | -0.034959646 | 0.972111919 | NA | NA |
| ENSG00000261647 | NA           | NA                                          | NA        | 0.300267135 | -0.142651885 | 4.080472857 | -0.034959646 | 0.972111919 | NA | NA |
| ENSG00000261915 | NA           | NA                                          | NA        | 0.310136391 | -0.142651885 | 4.080472857 | -0.034959646 | 0.972111919 | NA | NA |
| ENSG00000262791 | NA           | NA                                          | NA        | 0.335167473 | -0.142651885 | 4.080472857 | -0.034959646 | 0.972111919 | NA | NA |
| ENSG00000262899 | NA           | NA                                          | NA        | 0.358641758 | -0.142651885 | 4.080472857 | -0.034959646 | 0.972111919 | NA | NA |
| ENSG00000263196 | NA           | NA                                          | NA        | 0.293829599 | -0.142651885 | 4.080472857 | -0.034959646 | 0.972111919 | NA | NA |
| ENSG00000263218 | NA           | NA                                          | NA        | 0.352204222 | -0.142651885 | 4.080472857 | -0.034959646 | 0.972111919 | NA | NA |
| ENSG00000263499 | LOC101927539 | uncharacterized LOC101927539                | 101927539 | 0.300267135 | -0.142651885 | 4.080472857 | -0.034959646 | 0.972111919 | NA | NA |
| ENSG00000263542 | NA           | NA                                          | NA        | 0.393542096 | -0.142651885 | 4.080472857 | -0.034959646 | 0.972111919 | NA | NA |
| ENSG00000263643 | MIR4515      | microRNA 4515                               | 100616404 | 0.293829599 | -0.142651885 | 4.080472857 | -0.034959646 | 0.972111919 | NA | NA |
| ENSG00000263810 | NA           | NA                                          | NA        | 0.352204222 | -0.142651885 | 4.080472857 | -0.034959646 | 0.972111919 | NA | NA |
| ENSG00000263846 | NA           | NA                                          | NA        | 0.300267135 | -0.142651885 | 4.080472857 | -0.034959646 | 0.972111919 | NA | NA |
| ENSG00000263877 | NA           | NA                                          | NA        | 0.358641758 | -0.142651885 | 4.080472857 | -0.034959646 | 0.972111919 | NA | NA |

|                 |         |               |           |             |              |             |              |             |    |    |
|-----------------|---------|---------------|-----------|-------------|--------------|-------------|--------------|-------------|----|----|
| ENSG00000263885 | MIR3920 | microRNA 3920 | 100500823 | 0.351474265 | -0.142651885 | 4.080472857 | -0.034959646 | 0.972111919 | NA | NA |
| ENSG00000263928 | NA      | NA            | NA        | 0.351474265 | -0.142651885 | 4.080472857 | -0.034959646 | 0.972111919 | NA | NA |
| ENSG00000263995 | NA      | NA            | NA        | 0.300267135 | -0.142651885 | 4.080472857 | -0.034959646 | 0.972111919 | NA | NA |
| ENSG00000264408 | MIR4470 | microRNA 4470 | 100616484 | 0.358641758 | -0.142651885 | 4.080472857 | -0.034959646 | 0.972111919 | NA | NA |
| ENSG00000264474 | MIR4656 | microRNA 4656 | 100616465 | 0.300267135 | -0.142651885 | 4.080472857 | -0.034959646 | 0.972111919 | NA | NA |
| ENSG00000264541 | NA      | NA            | NA        | 0.393542096 | -0.142651885 | 4.080472857 | -0.034959646 | 0.972111919 | NA | NA |
| ENSG00000264914 | NA      | NA            | NA        | 0.300267135 | -0.142651885 | 4.080472857 | -0.034959646 | 0.972111919 | NA | NA |
| ENSG00000264946 | NA      | NA            | NA        | 0.310136391 | -0.142651885 | 4.080472857 | -0.034959646 | 0.972111919 | NA | NA |
| ENSG00000265009 | NA      | NA            | NA        | 0.310136391 | -0.142651885 | 4.080472857 | -0.034959646 | 0.972111919 | NA | NA |
| ENSG00000265372 | MIR4675 | microRNA 4675 | 100616383 | 0.351474265 | -0.142651885 | 4.080472857 | -0.034959646 | 0.972111919 | NA | NA |
| ENSG00000265597 | NA      | NA            | NA        | 0.300267135 | -0.142651885 | 4.080472857 | -0.034959646 | 0.972111919 | NA | NA |
| ENSG00000266043 | MIR3649 | microRNA 3649 | 100500816 | 0.358641758 | -0.142651885 | 4.080472857 | -0.034959646 | 0.972111919 | NA | NA |
| ENSG00000266597 | NA      | NA            | NA        | 0.310136391 | -0.142651885 | 4.080472857 | -0.034959646 | 0.972111919 | NA | NA |
| ENSG00000266633 | NA      | NA            | NA        | 0.310136391 | -0.142651885 | 4.080472857 | -0.034959646 | 0.972111919 | NA | NA |
| ENSG00000266696 | NA      | NA            | NA        | 0.310136391 | -0.142651885 | 4.080472857 | -0.034959646 | 0.972111919 | NA | NA |
| ENSG00000266728 | NA      | NA            | NA        | 0.293829599 | -0.142651885 | 4.080472857 | -0.034959646 | 0.972111919 | NA | NA |
| ENSG00000266963 | NA      | NA            | NA        | 0.293829599 | -0.142651885 | 4.080472857 | -0.034959646 | 0.972111919 | NA | NA |
| ENSG00000266973 | NA      | NA            | NA        | 0.335167473 | -0.142651885 | 4.080472857 | -0.034959646 | 0.972111919 | NA | NA |
| ENSG00000267142 | NA      | NA            | NA        | 0.293829599 | -0.142651885 | 4.080472857 | -0.034959646 | 0.972111919 | NA | NA |
| ENSG00000267241 | NA      | NA            | NA        | 0.300267135 | -0.142651885 | 4.080472857 | -0.034959646 | 0.972111919 | NA | NA |
| ENSG00000267580 | NA      | NA            | NA        | 0.300267135 | -0.142651885 | 4.080472857 | -0.034959646 | 0.972111919 | NA | NA |
| ENSG00000267713 | NA      | NA            | NA        | 0.352204222 | -0.142651885 | 4.080472857 | -0.034959646 | 0.972111919 | NA | NA |
| ENSG00000267906 | NA      | NA            | NA        | 0.352204222 | -0.142651885 | 4.080472857 | -0.034959646 | 0.972111919 | NA | NA |
| ENSG00000268056 | NA      | NA            | NA        | 0.358641758 | -0.142651885 | 4.080472857 | -0.034959646 | 0.972111919 | NA | NA |
| ENSG00000268173 | NA      | NA            | NA        | 0.300267135 | -0.142651885 | 4.080472857 | -0.034959646 | 0.972111919 | NA | NA |
| ENSG00000268335 | NA      | NA            | NA        | 0.310136391 | -0.142651885 | 4.080472857 | -0.034959646 | 0.972111919 | NA | NA |
| ENSG00000268723 | NA      | NA            | NA        | 0.293829599 | -0.142651885 | 4.080472857 | -0.034959646 | 0.972111919 | NA | NA |
| ENSG00000269053 | NA      | NA            | NA        | 0.351474265 | -0.142651885 | 4.080472857 | -0.034959646 | 0.972111919 | NA | NA |
| ENSG00000269139 | NA      | NA            | NA        | 0.300267135 | -0.142651885 | 4.080472857 | -0.034959646 | 0.972111919 | NA | NA |
| ENSG00000269446 | NA      | NA            | NA        | 0.335167473 | -0.142651885 | 4.080472857 | -0.034959646 | 0.972111919 | NA | NA |
| ENSG00000269763 | NA      | NA            | NA        | 0.358641758 | -0.142651885 | 4.080472857 | -0.034959646 | 0.972111919 | NA | NA |
| ENSG00000270258 | NA      | NA            | NA        | 0.358641758 | -0.142651885 | 4.080472857 | -0.034959646 | 0.972111919 | NA | NA |
| ENSG00000270352 | NA      | NA            | NA        | 0.310136391 | -0.142651885 | 4.080472857 | -0.034959646 | 0.972111919 | NA | NA |
| ENSG00000270521 | NA      | NA            | NA        | 0.293829599 | -0.142651885 | 4.080472857 | -0.034959646 | 0.972111919 | NA | NA |
| ENSG00000270655 | NA      | NA            | NA        | 0.352204222 | -0.142651885 | 4.080472857 | -0.034959646 | 0.972111919 | NA | NA |

|                 |              |                                             |           |             |              |             |              |             |             |         |
|-----------------|--------------|---------------------------------------------|-----------|-------------|--------------|-------------|--------------|-------------|-------------|---------|
| ENSG00000270664 | NA           | NA                                          | NA        | 0.300267135 | -0.142651885 | 4.080472857 | -0.034959646 | 0.972111919 | NA          | NA      |
| ENSG00000270666 | NA           | NA                                          | NA        | 0.358641758 | -0.142651885 | 4.080472857 | -0.034959646 | 0.972111919 | NA          | NA      |
| ENSG00000270729 | NA           | NA                                          | NA        | 0.310136391 | -0.142651885 | 4.080472857 | -0.034959646 | 0.972111919 | NA          | NA      |
| ENSG00000270846 | NA           | NA                                          | NA        | 0.310136391 | -0.142651885 | 4.080472857 | -0.034959646 | 0.972111919 | NA          | NA      |
| ENSG00000270896 | NA           | NA                                          | NA        | 0.335167473 | -0.142651885 | 4.080472857 | -0.034959646 | 0.972111919 | NA          | NA      |
| ENSG00000270906 | NA           | NA                                          | NA        | 0.310136391 | -0.142651885 | 4.080472857 | -0.034959646 | 0.972111919 | NA          | NA      |
| ENSG00000270993 | NA           | NA                                          | NA        | 0.300267135 | -0.142651885 | 4.080472857 | -0.034959646 | 0.972111919 | NA          | NA      |
| ENSG00000271199 | NA           | NA                                          | NA        | 0.393542096 | -0.142651885 | 4.080472857 | -0.034959646 | 0.972111919 | NA          | NA      |
| ENSG00000271207 | NA           | NA                                          | NA        | 0.352204222 | -0.142651885 | 4.080472857 | -0.034959646 | 0.972111919 | NA          | NA      |
| ENSG00000271257 | NA           | NA                                          | NA        | 0.310136391 | -0.142651885 | 4.080472857 | -0.034959646 | 0.972111919 | NA          | NA      |
| ENSG00000271353 | NA           | NA                                          | NA        | 0.335167473 | -0.142651885 | 4.080472857 | -0.034959646 | 0.972111919 | NA          | NA      |
| ENSG00000271379 | NA           | NA                                          | NA        | 0.300267135 | -0.142651885 | 4.080472857 | -0.034959646 | 0.972111919 | NA          | NA      |
| ENSG00000271385 | NA           | NA                                          | NA        | 0.310136391 | -0.142651885 | 4.080472857 | -0.034959646 | 0.972111919 | NA          | NA      |
| ENSG00000271477 | NA           | NA                                          | NA        | 0.293829599 | -0.142651885 | 4.080472857 | -0.034959646 | 0.972111919 | NA          | NA      |
| ENSG00000271612 | NA           | NA                                          | NA        | 0.293829599 | -0.142651885 | 4.080472857 | -0.034959646 | 0.972111919 | NA          | NA      |
| ENSG00000271723 | MROH7-TTC4   | MROH7-TTC4 readthrough (NMD candidate)      | 100527960 | 0.293829599 | -0.142651885 | 4.080472857 | -0.034959646 | 0.972111919 | NA          | NA      |
| ENSG00000272448 | NA           | NA                                          | NA        | 0.358641758 | -0.142651885 | 4.080472857 | -0.034959646 | 0.972111919 | NA          | NA      |
| ENSG00000106346 | USP42        | ubiquitin specific peptidase 42             | 84132     | 782.7446724 | -0.142557823 | 0.444135953 | -0.320977895 | 0.748227143 | 0.999371363 | Not Sig |
| ENSG00000088727 | KIF9         | kinesin family member 9                     | 64147     | 177.9753097 | -0.14249569  | 0.45575771  | -0.312656675 | 0.754541515 | 0.999371363 | Not Sig |
| ENSG00000238713 | NA           | NA                                          | NA        | 13.02908591 | -0.142448487 | 0.885497461 | -0.160868318 | 0.872197115 | 0.999371363 | Not Sig |
| ENSG00000101546 | RBFA         | ribosome binding factor A                   | 79863     | 233.5321623 | -0.142299924 | 0.525198804 | -0.270944874 | 0.786433431 | 0.999371363 | Not Sig |
| ENSG00000261438 | NA           | NA                                          | NA        | 33.95231526 | -0.142208583 | 0.688532866 | -0.206538555 | 0.836370252 | 0.999371363 | Not Sig |
| ENSG00000267222 | NA           | NA                                          | NA        | 6.533933459 | -0.142138445 | 1.287976504 | -0.110357949 | 0.912125501 | NA          | NA      |
| ENSG00000169946 | ZFPM2        | zinc finger protein, FOG family member 2    | 23414     | 292.5211587 | -0.142055496 | 0.460078438 | -0.308763646 | 0.757501325 | 0.999371363 | Not Sig |
| ENSG00000242689 | CNTF         | ciliary neurotrophic factor                 | 1270      | 11.94362705 | -0.141843055 | 0.953139135 | -0.148816736 | 0.881698244 | 0.999371363 | Not Sig |
| ENSG00000206727 | SNORD116-9   | small nucleolar RNA, C/D box 116-9          | 100033421 | 5.170603974 | -0.141740282 | 1.787154805 | -0.079310579 | 0.936785592 | NA          | NA      |
| ENSG00000125484 | GTF3C4       | general transcription factor IIIC subunit 4 | 9329      | 1123.431876 | -0.141715581 | 0.480611569 | -0.294865106 | 0.768096929 | 0.999371363 | Not Sig |
| ENSG00000167765 | NA           | NA                                          | NA        | 11.96139029 | -0.141688371 | 0.802747989 | -0.176504175 | 0.859897869 | 0.999371363 | Not Sig |
| ENSG00000263790 | MIR4473      | microRNA 4473                               | 100616229 | 8.452030327 | -0.141676698 | 1.320003802 | -0.107330523 | 0.914526771 | 0.999371363 | Not Sig |
| ENSG00000215032 | NA           | NA                                          | NA        | 5.526118064 | -0.141565904 | 1.109363795 | -0.127609991 | 0.898457624 | NA          | NA      |
| ENSG00000223478 | LOC100506100 | uncharacterized LOC100506100                | 100506100 | 19.98488447 | -0.141423024 | 0.67991826  | -0.208000038 | 0.835228938 | 0.999371363 | Not Sig |
| ENSG00000166451 | CENPN        | centromere protein N                        | 55839     | 139.411975  | -0.141298335 | 0.518992359 | -0.272255136 | 0.78542585  | 0.999371363 | Not Sig |
| ENSG00000254936 | NA           | NA                                          | NA        | 26.48895843 | -0.141288733 | 0.890340627 | -0.15869065  | 0.873912605 | 0.999371363 | Not Sig |
| ENSG00000116882 | HAO2         | hydroxyacid oxidase 2                       | 51179     | 2.378689013 | -0.141018102 | 1.554330205 | -0.090725961 | 0.927710341 | NA          | NA      |
| ENSG00000267306 | NA           | NA                                          | NA        | 7.772204415 | -0.141016772 | 1.359780672 | -0.103705527 | 0.91740304  | 0.999371363 | Not Sig |

|                 |             |                                                           |           |             |              |             |              |             |             |         |
|-----------------|-------------|-----------------------------------------------------------|-----------|-------------|--------------|-------------|--------------|-------------|-------------|---------|
| ENSG00000271976 | NA          | NA                                                        | NA        | 64.34116091 | -0.140975646 | 0.823349992 | -0.171222016 | 0.864049197 | 0.999371363 | Not Sig |
| ENSG00000162923 | WDR26       | WD repeat domain 26                                       | 80232     | 4247.866162 | -0.140832393 | 0.463751921 | -0.303680451 | 0.761371353 | 0.999371363 | Not Sig |
| ENSG00000267698 | NA          | NA                                                        | NA        | 9.864607961 | -0.140552379 | 0.902169198 | -0.155793813 | 0.876195548 | 0.999371363 | Not Sig |
| ENSG00000089063 | TMEM230     | transmembrane protein 230                                 | 29058     | 1203.737733 | -0.140422853 | 0.526014649 | -0.266956165 | 0.789502912 | 0.999371363 | Not Sig |
| ENSG00000202107 | NA          | NA                                                        | NA        | 29.38901426 | -0.140418806 | 0.785424639 | -0.17878075  | 0.858109861 | 0.999371363 | Not Sig |
| ENSG00000109189 | USP46       | ubiquitin specific peptidase 46                           | 64854     | 429.845143  | -0.140338483 | 0.462082822 | -0.303708505 | 0.761349978 | 0.999371363 | Not Sig |
| ENSG00000175416 | CLTB        | clathrin light chain B                                    | 1212      | 944.242098  | -0.140229535 | 0.596545403 | -0.235069342 | 0.814154914 | 0.999371363 | Not Sig |
| ENSG00000213057 | Clorf220    | chromosome 1 open reading frame 220 (putative)            | 400798    | 8.231948602 | -0.140124959 | 1.084629437 | -0.129191551 | 0.897206082 | 0.999371363 | Not Sig |
| ENSG00000080608 | PUM3        | pumilio RNA binding family member 3                       | 9933      | 651.5131201 | -0.139978802 | 0.459227825 | -0.304813417 | 0.760508263 | 0.999371363 | Not Sig |
| ENSG00000226986 | NA          | NA                                                        | NA        | 1.214369515 | -0.139946362 | 2.408677156 | -0.058100921 | 0.953668241 | NA          | NA      |
| ENSG00000159322 | ADPGK       | ADP dependent glucokinase                                 | 83440     | 1822.955536 | -0.13986061  | 0.390763241 | -0.357916496 | 0.720405805 | 0.999371363 | Not Sig |
| ENSG00000005100 | DHX33       | DEAH-box helicase 33                                      | 56919     | 535.7961687 | -0.139828351 | 0.451247274 | -0.309870794 | 0.756659213 | 0.999371363 | Not Sig |
| ENSG00000168116 | KIAA1586    | KIAA1586                                                  | 57691     | 217.1952079 | -0.13980427  | 0.700309078 | -0.19963224  | 0.841768211 | 0.999371363 | Not Sig |
| ENSG00000033178 | UBA6        | ubiquitin like modifier activating enzyme 6               | 55236     | 1813.582072 | -0.139796011 | 0.709981658 | -0.196900877 | 0.843905107 | 0.999371363 | Not Sig |
| ENSG00000039650 | PNKP        | polynucleotide kinase 3'-phosphatase                      | 11284     | 646.6757944 | -0.139751755 | 0.503750513 | -0.277422557 | 0.781455663 | 0.999371363 | Not Sig |
| ENSG00000166225 | FRS2        | fibroblast growth factor receptor substrate 2             | 10818     | 855.302784  | -0.139751064 | 0.551599359 | -0.253356102 | 0.799993046 | 0.999371363 | Not Sig |
| ENSG00000236699 | ARHGEF38    | Rho guanine nucleotide exchange factor 38                 | 54848     | 1218.529664 | -0.139664047 | 0.666373155 | -0.209588345 | 0.833988977 | 0.999371363 | Not Sig |
| ENSG00000255559 | ZNF252P-AS1 | ZNF252P antisense RNA 1                                   | 286103    | 21.91648421 | -0.139501203 | 0.713356992 | -0.195555949 | 0.844957742 | 0.999371363 | Not Sig |
| ENSG00000125089 | SH3TC1      | SH3 domain and tetratricopeptide repeats 1                | 54436     | 1278.187167 | -0.139437061 | 0.473316423 | -0.294595866 | 0.768302621 | 0.999371363 | Not Sig |
| ENSG00000114023 | FAM162A     | family with sequence similarity 162 member A              | 26355     | 328.1766536 | -0.13942636  | 0.447003425 | -0.311913405 | 0.755106335 | 0.999371363 | Not Sig |
| ENSG00000263857 | MIR4729     | microRNA 4729                                             | 100616204 | 13.95920732 | -0.13931086  | 0.754615411 | -0.184611734 | 0.853533582 | 0.999371363 | Not Sig |
| ENSG00000015475 | BID         | BH3 interacting domain death agonist                      | 637       | 413.0840157 | -0.139289182 | 0.559419888 | -0.248988612 | 0.80336959  | 0.999371363 | Not Sig |
| ENSG00000151748 | SAV1        | salvador family WW domain containing protein 1            | 60485     | 800.3227191 | -0.139251563 | 0.45629262  | -0.305180397 | 0.760228761 | 0.999371363 | Not Sig |
| ENSG00000153006 | SREK1IP1    | SREK1 interacting protein 1                               | 285672    | 715.2082491 | -0.139035638 | 0.562748048 | -0.247065518 | 0.80485752  | 0.999371363 | Not Sig |
| ENSG00000107874 | CUEDC2      | CUE domain containing 2                                   | 79004     | 404.5937501 | -0.138881196 | 0.584633694 | -0.237552502 | 0.812228194 | 0.999371363 | Not Sig |
| ENSG00000119318 | RAD23B      | RAD23 homolog B, nucleotide excision repair protein       | 5887      | 3090.557867 | -0.138744641 | 0.40472872  | -0.342808984 | 0.731742167 | 0.999371363 | Not Sig |
| ENSG00000188234 | AGAP4       | ArFGAP with GTPase domain, ankyrin repeat and PH domain 4 | 119016    | 74.23554128 | -0.138740961 | 0.652107392 | -0.212757841 | 0.831515848 | 0.999371363 | Not Sig |
| ENSG00000161036 | LRWD1       | leucine rich repeats and WD repeat domain containing 1    | 222229    | 387.4691985 | -0.13870336  | 0.681213701 | -0.203612111 | 0.838656628 | 0.999371363 | Not Sig |
| ENSG00000230896 | NA          | NA                                                        | NA        | 33.99011425 | -0.138680326 | 0.621086398 | -0.22328669  | 0.823312386 | 0.999371363 | Not Sig |
| ENSG00000267080 | ASB16-AS1   | ASB16 antisense RNA 1                                     | 339201    | 201.942592  | -0.138598571 | 0.463119574 | -0.299271676 | 0.764732764 | 0.999371363 | Not Sig |
| ENSG00000252311 | NA          | NA                                                        | NA        | 5.161193488 | -0.138575022 | 1.254684542 | -0.110446106 | 0.912055589 | NA          | NA      |
| ENSG00000154144 | TBRG1       | transforming growth factor beta regulator 1               | 84897     | 1004.443779 | -0.138426615 | 0.44861684  | -0.308563128 | 0.757653872 | 0.999371363 | Not Sig |
| ENSG00000237493 | NA          | NA                                                        | NA        | 0.926977452 | -0.138413946 | 2.634727017 | -0.052534454 | 0.958102843 | NA          | NA      |
| ENSG00000251075 | NA          | NA                                                        | NA        | 0.926977452 | -0.138413946 | 2.634727017 | -0.052534454 | 0.958102843 | NA          | NA      |
| ENSG00000254501 | NA          | NA                                                        | NA        | 0.926977452 | -0.138413946 | 2.634727017 | -0.052534454 | 0.958102843 | NA          | NA      |

|                 |               |                                                         |           |             |              |             |              |             |             |         |
|-----------------|---------------|---------------------------------------------------------|-----------|-------------|--------------|-------------|--------------|-------------|-------------|---------|
| ENSG00000187514 | PTMA          | prothymosin, alpha                                      | 5757      | 12492.70642 | -0.138186806 | 0.375732458 | -0.367779793 | 0.713037437 | 0.999371363 | Not Sig |
| ENSG00000187514 | LOC728026     | prothymosin alpha-like                                  | 728026    | 12492.70642 | -0.138186806 | 0.375732458 | -0.367779793 | 0.713037437 | 0.999371363 | Not Sig |
| ENSG00000201229 | SNORA63D      | small nucleolar RNA, H/ACA box 63D                      | 109616971 | 0.687371696 | -0.138127994 | 2.946420868 | -0.046879926 | 0.962608927 | NA          | NA      |
| ENSG00000213376 | NA            | NA                                                      | NA        | 0.687371696 | -0.138127994 | 2.946420868 | -0.046879926 | 0.962608927 | NA          | NA      |
| ENSG00000229758 | NA            | NA                                                      | NA        | 0.687371696 | -0.138127994 | 2.946420868 | -0.046879926 | 0.962608927 | NA          | NA      |
| ENSG00000249245 | NA            | NA                                                      | NA        | 0.687371696 | -0.138127994 | 2.946420868 | -0.046879926 | 0.962608927 | NA          | NA      |
| ENSG00000254707 | NA            | NA                                                      | NA        | 0.687371696 | -0.138127994 | 2.946420868 | -0.046879926 | 0.962608927 | NA          | NA      |
| ENSG00000255549 | NA            | NA                                                      | NA        | 0.687371696 | -0.138127994 | 2.946420868 | -0.046879926 | 0.962608927 | NA          | NA      |
| ENSG00000183386 | FHL3          | four and a half LIM domains 3                           | 2275      | 365.0239403 | -0.138016801 | 0.522806295 | -0.263992232 | 0.791785905 | 0.999371363 | Not Sig |
| ENSG00000114956 | DGUOK         | deoxyguanosine kinase                                   | 1716      | 449.4591266 | -0.13801164  | 0.422343512 | -0.326775802 | 0.743837463 | 0.999371363 | Not Sig |
| ENSG00000124357 | NAGK          | N-acetylglucosamine kinase                              | 55577     | 1067.573007 | -0.137949154 | 0.509972781 | -0.270502975 | 0.786773329 | 0.999371363 | Not Sig |
| ENSG00000145002 | FAM86B2       | family with sequence similarity 86 member B2            | 653333    | 10.89488974 | -0.137906243 | 0.964941419 | -0.1429167   | 0.886355969 | 0.999371363 | Not Sig |
| ENSG00000157837 | SPPL3         | signal peptide peptidase like 3                         | 121665    | 1205.882993 | -0.137786648 | 0.413881069 | -0.332913628 | 0.739199482 | 0.999371363 | Not Sig |
| ENSG00000138722 | MMRN1         | multimerin 1                                            | 22915     | 348.0397221 | -0.137771818 | 0.820164669 | -0.167980679 | 0.866598479 | 0.999371363 | Not Sig |
| ENSG00000095261 | PSMD5         | proteasome 26S subunit, non-ATPase 5                    | 5711      | 901.0031673 | -0.137716358 | 0.429224388 | -0.320849331 | 0.748324573 | 0.999371363 | Not Sig |
| ENSG00000152518 | ZFP36L2       | ZFP36 ring finger protein like 2                        | 678       | 5681.76639  | -0.137698183 | 0.633711732 | -0.217288359 | 0.827983628 | 0.999371363 | Not Sig |
| ENSG00000089775 | ZBTB25        | zinc finger and BTB domain containing 25                | 7597      | 767.9826269 | -0.137610334 | 0.623689229 | -0.220639266 | 0.825373325 | 0.999371363 | Not Sig |
| ENSG00000179240 | GVQW3         | GVQW motif containing 3                                 | 100506127 | 65.93212728 | -0.137543285 | 0.482850467 | -0.284856894 | 0.775753782 | 0.999371363 | Not Sig |
| ENSG00000186448 | ZNF197        | zinc finger protein 197                                 | 10168     | 642.5290444 | -0.137305273 | 0.433784711 | -0.316528614 | 0.75160131  | 0.999371363 | Not Sig |
| ENSG00000186448 | ZNF660-ZNF197 | ZNF660-ZNF197 readthrough                               | 110354863 | 642.5290444 | -0.137305273 | 0.433784711 | -0.316528614 | 0.75160131  | 0.999371363 | Not Sig |
| ENSG00000092978 | GPATCH2       | G-patch domain containing 2                             | 55105     | 775.7957761 | -0.137282796 | 0.626490139 | -0.219130019 | 0.826548767 | 0.999371363 | Not Sig |
| ENSG00000144136 | SLC20A1       | solute carrier family 20 member 1                       | 6574      | 1644.716169 | -0.137274959 | 0.517589902 | -0.265219547 | 0.790840338 | 0.999371363 | Not Sig |
| ENSG00000175137 | SH3BP5L       | SH3 binding domain protein 5 like                       | 80851     | 845.1208073 | -0.137247663 | 0.555006164 | -0.24729034  | 0.804683535 | 0.999371363 | Not Sig |
| ENSG00000119487 | MAPKAP1       | mitogen-activated protein kinase associated protein 1   | 79109     | 1432.255452 | -0.137124713 | 0.421657269 | -0.325204195 | 0.745026534 | 0.999371363 | Not Sig |
| ENSG00000160062 | ZBTB8A        | zinc finger and BTB domain containing 8A                | 653121    | 159.5870811 | -0.136999052 | 0.573336589 | -0.238950477 | 0.811143984 | 0.999371363 | Not Sig |
| ENSG00000171530 | TBCA          | tubulin folding cofactor A                              | 6902      | 658.3927806 | -0.136945602 | 0.500521839 | -0.273605648 | 0.784387693 | 0.999371363 | Not Sig |
| ENSG00000186469 | GNG2          | G protein subunit gamma 2                               | 54331     | 512.1416439 | -0.136913076 | 0.701213662 | -0.19525158  | 0.845196001 | 0.999371363 | Not Sig |
| ENSG00000155640 | NA            | NA                                                      | NA        | 656.401242  | -0.136892348 | 0.467469284 | -0.292837098 | 0.769646671 | 0.999371363 | Not Sig |
| ENSG00000229473 | NA            | NA                                                      | NA        | 46.50443322 | -0.136843269 | 0.697498818 | -0.1961914   | 0.844460359 | 0.999371363 | Not Sig |
| ENSG00000204524 | ZNF805        | zinc finger protein 805                                 | 390980    | 395.4412727 | -0.136787153 | 0.435823675 | -0.313858933 | 0.753628182 | 0.999371363 | Not Sig |
| ENSG00000237886 | NA            | NA                                                      | NA        | 16.73578299 | -0.136782625 | 0.961558664 | -0.142250942 | 0.886881795 | 0.999371363 | Not Sig |
| ENSG00000101782 | RIOK3         | RIO kinase 3                                            | 8780      | 1537.578797 | -0.136644072 | 0.484888729 | -0.281805007 | 0.778093031 | 0.999371363 | Not Sig |
| ENSG00000075856 | SART3         | squamous cell carcinoma antigen recognized by T-cells 3 | 9733      | 1206.666571 | -0.136545319 | 0.379923749 | -0.359401904 | 0.71929445  | 0.999371363 | Not Sig |
| ENSG00000267667 | NA            | NA                                                      | NA        | 12.00318018 | -0.136522833 | 1.304723054 | -0.104637404 | 0.916663533 | 0.999371363 | Not Sig |
| ENSG00000173320 | STOX2         | storkhead box 2                                         | 56977     | 610.908771  | -0.136349657 | 0.530090121 | -0.257219767 | 0.797009125 | 0.999371363 | Not Sig |

|                 |           |                                             |        |             |              |             |              |             |             |         |
|-----------------|-----------|---------------------------------------------|--------|-------------|--------------|-------------|--------------|-------------|-------------|---------|
| ENSG00000100150 | DEPDC5    | DEP domain containing 5                     | 9681   | 607.8935188 | -0.135936877 | 0.484464029 | -0.280592301 | 0.779023122 | 0.999371363 | Not Sig |
| ENSG00000034533 | ASTE1     | asteroid homolog 1                          | 28990  | 168.3960289 | -0.135882135 | 0.532072477 | -0.255382755 | 0.798427489 | 0.999371363 | Not Sig |
| ENSG00000200354 | SNORA71D  | small nucleolar RNA, H/ACA box 71D          | 677840 | 8.365144036 | -0.135856938 | 0.997121731 | -0.136249099 | 0.891624362 | 0.999371363 | Not Sig |
| ENSG00000155636 | RBM45     | RNA binding motif protein 45                | 129831 | 210.8879253 | -0.135809896 | 0.471825325 | -0.287839353 | 0.773469712 | 0.999371363 | Not Sig |
| ENSG00000178904 | DPY19L3   | dpy-19 like C-mannosyltransferase 3         | 147991 | 859.0375536 | -0.135790007 | 0.588809945 | -0.230617721 | 0.8176118   | 0.999371363 | Not Sig |
| ENSG00000183323 | CCDC125   | coiled-coil domain containing 125           | 202243 | 634.5957466 | -0.135683438 | 0.609525424 | -0.22260505  | 0.823842905 | 0.999371363 | Not Sig |
| ENSG00000267127 | NA        | NA                                          | NA     | 12.06697059 | -0.135671476 | 0.992430607 | -0.136706259 | 0.891262982 | 0.999371363 | Not Sig |
| ENSG00000112159 | MDN1      | midasin AAA ATPase 1                        | 23195  | 4877.18857  | -0.135668744 | 0.549968962 | -0.246684365 | 0.805152508 | 0.999371363 | Not Sig |
| ENSG00000113141 | IK        | IK cytokine                                 | 3550   | 1607.131876 | -0.135641804 | 0.488199027 | -0.2778412   | 0.781134263 | 0.999371363 | Not Sig |
| ENSG00000181350 | LRRC75A   | leucine rich repeat containing 75A          | 388341 | 121.0129696 | -0.135626577 | 0.662696106 | -0.20465878  | 0.837838727 | 0.999371363 | Not Sig |
| ENSG00000213719 | CLIC1     | chloride intracellular channel 1            | 1192   | 3809.110782 | -0.135616972 | 0.439037658 | -0.308895991 | 0.757400647 | 0.999371363 | Not Sig |
| ENSG00000104823 | ECH1      | enoyl-CoA hydratase 1                       | 1891   | 840.8008465 | -0.135570689 | 0.520211678 | -0.260606777 | 0.794395763 | 0.999371363 | Not Sig |
| ENSG00000266118 | NA        | NA                                          | NA     | 2.224752673 | -0.135507848 | 1.547017995 | -0.087592936 | 0.930200217 | NA          | NA      |
| ENSG00000086619 | ERO1B     | endoplasmic reticulum oxidoreductase 1 beta | 56605  | 444.4709944 | -0.13540012  | 0.58017028  | -0.233379966 | 0.815466369 | 0.999371363 | Not Sig |
| ENSG00000121897 | LIAS      | lipoic acid synthetase                      | 11019  | 160.9429282 | -0.135396762 | 0.48507673  | -0.279124421 | 0.780149342 | 0.999371363 | Not Sig |
| ENSG00000101654 | RNMT      | RNA guanine-7 methyltransferase             | 8731   | 1231.915422 | -0.135318575 | 0.440714092 | -0.307043905 | 0.758809954 | 0.999371363 | Not Sig |
| ENSG00000115956 | PLEK      | pleckstrin                                  | 5341   | 1081.672656 | -0.135285788 | 0.784711331 | -0.17240198  | 0.863121515 | 0.999371363 | Not Sig |
| ENSG00000151239 | TWF1      | twinfilin actin binding protein 1           | 5756   | 1229.250365 | -0.135266119 | 0.713292979 | -0.189636128 | 0.849594275 | 0.999371363 | Not Sig |
| ENSG00000155090 | KLF10     | Kruppel like factor 10                      | 7071   | 1752.707752 | -0.135206897 | 0.522756235 | -0.258642342 | 0.79591121  | 0.999371363 | Not Sig |
| ENSG00000130159 | ECSIT     | ECSIT signalling integrator                 | 51295  | 328.8462443 | -0.135098789 | 0.674098482 | -0.200414023 | 0.841156793 | 0.999371363 | Not Sig |
| ENSG00000235613 | NA        | NA                                          | NA     | 41.54151747 | -0.135001647 | 0.760035577 | -0.177625431 | 0.859017151 | 0.999371363 | Not Sig |
| ENSG00000158417 | EIF5B     | eukaryotic translation initiation factor 5B | 9669   | 2200.510898 | -0.134998781 | 0.424793045 | -0.317798943 | 0.750637453 | 0.999371363 | Not Sig |
| ENSG00000213972 | NA        | NA                                          | NA     | 5.301966998 | -0.134880379 | 1.236824244 | -0.109053796 | 0.913159822 | NA          | NA      |
| ENSG00000119335 | SET       | SET nuclear proto-oncogene                  | 6418   | 5709.560768 | -0.134638779 | 0.428230651 | -0.314407152 | 0.753211825 | 0.999371363 | Not Sig |
| ENSG00000114416 | FXR1      | FMR1 autosomal homolog 1                    | 8087   | 2104.888027 | -0.134522479 | 0.408318989 | -0.329454379 | 0.741812271 | 0.999371363 | Not Sig |
| ENSG00000259628 | NA        | NA                                          | NA     | 7.52357571  | -0.134485804 | 0.987413046 | -0.136200149 | 0.891663057 | 0.999371363 | Not Sig |
| ENSG00000200488 | NA        | NA                                          | NA     | 299.5294672 | -0.134430153 | 0.554195659 | -0.242568037 | 0.808340045 | 0.999371363 | Not Sig |
| ENSG00000147437 | GNRH1     | gonadotropin releasing hormone 1            | 2796   | 31.38714517 | -0.134401943 | 0.617062064 | -0.217809441 | 0.827577588 | 0.999371363 | Not Sig |
| ENSG00000250802 | NA        | NA                                          | NA     | 106.5911094 | -0.134342721 | 0.536635215 | -0.250342724 | 0.802322319 | 0.999371363 | Not Sig |
| ENSG00000089289 | IGBP1     | immunoglobulin binding protein 1            | 3476   | 701.4226528 | -0.134254245 | 0.443424662 | -0.302766754 | 0.762067622 | 0.999371363 | Not Sig |
| ENSG00000244274 | DBNDD2    | dysbindin domain containing 2               | 55861  | 48.08300135 | -0.134001959 | 0.832855194 | -0.160894667 | 0.872176363 | 0.999371363 | Not Sig |
| ENSG00000107560 | RAB11FIP2 | RAB11 family interacting protein 2          | 22841  | 756.8872878 | -0.133837159 | 0.476384649 | -0.280943476 | 0.778753754 | 0.999371363 | Not Sig |
| ENSG00000273343 | NA        | NA                                          | NA     | 11.79542655 | -0.133807791 | 0.974535687 | -0.137304146 | 0.890790393 | 0.999371363 | Not Sig |
| ENSG00000272582 | NA        | NA                                          | NA     | 4.004341111 | -0.133690736 | 1.612370847 | -0.082915625 | 0.93391863  | NA          | NA      |
| ENSG00000253020 | NA        | NA                                          | NA     | 3.379617922 | -0.133562977 | 1.306663125 | -0.102216841 | 0.918584561 | NA          | NA      |



|                 |           |                                                                |        |             |              |             |              |             |             |         |
|-----------------|-----------|----------------------------------------------------------------|--------|-------------|--------------|-------------|--------------|-------------|-------------|---------|
| ENSG00000231150 | NA        | NA                                                             | NA     | 1.681863069 | -0.133509899 | 1.982654753 | -0.067338955 | 0.946311866 | NA          | NA      |
| ENSG00000104164 | BLOC1S6   | biogenesis of lysosomal organelles complex 1 subunit 6         | 26258  | 1023.733031 | -0.133500798 | 0.555012068 | -0.240536747 | 0.809914179 | 0.999371363 | Not Sig |
| ENSG00000119402 | FBXW2     | F-box and WD repeat domain containing 2                        | 26190  | 2172.886792 | -0.133491382 | 0.405328885 | -0.329340904 | 0.74189803  | 0.999371363 | Not Sig |
| ENSG00000099204 | ABLIM1    | actin binding LIM protein 1                                    | 3983   | 3826.484441 | -0.133389468 | 0.508423143 | -0.262359159 | 0.793044556 | 0.999371363 | Not Sig |
| ENSG00000241030 | NA        | NA                                                             | NA     | 10.70892181 | -0.133186413 | 0.85284102  | -0.156167925 | 0.875900658 | 0.999371363 | Not Sig |
| ENSG00000198546 | ZNF511    | zinc finger protein 511                                        | 118472 | 344.5830389 | -0.133149251 | 0.529432253 | -0.251494409 | 0.801431884 | 0.999371363 | Not Sig |
| ENSG00000162368 | CMPK1     | cytidine/uridine monophosphate kinase 1                        | 51727  | 3187.555941 | -0.133071619 | 0.515582346 | -0.258099642 | 0.796330008 | 0.999371363 | Not Sig |
| ENSG00000118777 | ABCG2     | ATP binding cassette subfamily G member 2 (Junior blood group) | 9429   | 166.0671024 | -0.132913356 | 0.875411083 | -0.151829648 | 0.879321298 | 0.999371363 | Not Sig |
| ENSG00000021574 | SPAST     | spastin                                                        | 6683   | 648.5756435 | -0.132821684 | 0.527284398 | -0.251897618 | 0.801120201 | 0.999371363 | Not Sig |
| ENSG00000138593 | SECISBP2L | SECIS binding protein 2 like                                   | 9728   | 2990.887617 | -0.132735339 | 0.405110063 | -0.327652534 | 0.743174396 | 0.999371363 | Not Sig |
| ENSG00000161860 | SYCE2     | synaptonemal complex central element protein 2                 | 256126 | 4.39000108  | -0.132527735 | 1.177253583 | -0.112573652 | 0.910368575 | NA          | NA      |
| ENSG00000092470 | WDR76     | WD repeat domain 76                                            | 79968  | 234.6269005 | -0.132513965 | 0.784231059 | -0.168973116 | 0.865817788 | 0.999371363 | Not Sig |
| ENSG00000153250 | RBMS1     | RNA binding motif single stranded interacting protein 1        | 5937   | 2311.199866 | -0.132472816 | 0.46429375  | -0.285321127 | 0.775398129 | 0.999371363 | Not Sig |
| ENSG00000111481 | COPZ1     | coatamer protein complex subunit zeta 1                        | 22818  | 1644.816621 | -0.132439267 | 0.444639846 | -0.297857397 | 0.765812005 | 0.999371363 | Not Sig |
| ENSG00000128340 | RAC2      | Rac family small GTPase 2                                      | 5880   | 594.1390526 | -0.132247968 | 0.82174168  | -0.160936181 | 0.872143666 | 0.999371363 | Not Sig |
| ENSG00000124444 | ZNF576    | zinc finger protein 576                                        | 79177  | 141.6465436 | -0.132090914 | 0.508836866 | -0.259593835 | 0.795177092 | 0.999371363 | Not Sig |
| ENSG00000108021 | FAM208B   | family with sequence similarity 208 member B                   | 54906  | 2613.278092 | -0.13200239  | 0.473050941 | -0.279044768 | 0.780210469 | 0.999371363 | Not Sig |
| ENSG00000229091 | NA        | NA                                                             | NA     | 4.345076767 | -0.131852011 | 1.471086335 | -0.089629009 | 0.928582031 | NA          | NA      |
| ENSG00000250101 | NA        | NA                                                             | NA     | 1.908178746 | -0.131689491 | 1.634094009 | -0.080588687 | 0.935769063 | NA          | NA      |
| ENSG00000253459 | NA        | NA                                                             | NA     | 10.86785082 | -0.131557859 | 0.844402905 | -0.155799866 | 0.876190777 | 0.999371363 | Not Sig |
| ENSG00000237628 | NA        | NA                                                             | NA     | 11.3699956  | -0.131466412 | 1.533522297 | -0.0857284   | 0.931682326 | 0.999371363 | Not Sig |
| ENSG00000224861 | NA        | NA                                                             | NA     | 10.61235328 | -0.131459262 | 0.841119133 | -0.156290896 | 0.875803732 | 0.999371363 | Not Sig |
| ENSG00000120697 | ALG5      | ALG5, dolichyl-phosphate beta-glucosyltransferase              | 29880  | 510.1176621 | -0.131162925 | 0.572265861 | -0.229199283 | 0.81871403  | 0.999371363 | Not Sig |
| ENSG00000137500 | CCDC90B   | coiled-coil domain containing 90B                              | 60492  | 466.9998908 | -0.131120954 | 0.449131754 | -0.291943184 | 0.770330065 | 0.999371363 | Not Sig |
| ENSG00000163913 | IFT122    | intraflagellar transport 122                                   | 55764  | 655.4665842 | -0.131069061 | 0.498567405 | -0.262891355 | 0.792634319 | 0.999371363 | Not Sig |
| ENSG00000089472 | HEPH      | hephaestin                                                     | 9843   | 429.7280497 | -0.130946044 | 0.491633131 | -0.266349105 | 0.789970358 | 0.999371363 | Not Sig |
| ENSG00000111276 | CDKN1B    | cyclin dependent kinase inhibitor 1B                           | 1027   | 1717.532776 | -0.130942441 | 0.53335537  | -0.245506932 | 0.806063941 | 0.999371363 | Not Sig |
| ENSG00000175567 | UCP2      | uncoupling protein 2                                           | 7351   | 1705.969194 | -0.130823702 | 0.581665226 | -0.224912365 | 0.82204745  | 0.999371363 | Not Sig |
| ENSG00000164463 | CREBRF    | CREB3 regulatory factor                                        | 153222 | 1730.256494 | -0.130822505 | 0.472546458 | -0.276845807 | 0.781898507 | 0.999371363 | Not Sig |
| ENSG00000112964 | GHR       | growth hormone receptor                                        | 2690   | 135.8914089 | -0.130819826 | 0.75494629  | -0.173283619 | 0.862428499 | 0.999371363 | Not Sig |
| ENSG00000250722 | SELENOP   | selenoprotein P                                                | 6414   | 5161.382964 | -0.130759691 | 0.666401057 | -0.196217713 | 0.844439765 | 0.999371363 | Not Sig |
| ENSG00000005955 | NA        | NA                                                             | NA     | 1517.740171 | -0.130659538 | 0.455526523 | -0.286831899 | 0.774241037 | 0.999371363 | Not Sig |
| ENSG00000073605 | GSDMB     | gasdermin B                                                    | 55876  | 521.2357512 | -0.130511339 | 0.559312389 | -0.233342478 | 0.815495476 | 0.999371363 | Not Sig |
| ENSG00000166272 | WBP1L     | WW domain binding protein 1 like                               | 54838  | 1599.373693 | -0.130361222 | 0.473073741 | -0.27556216  | 0.782884377 | 0.999371363 | Not Sig |
| ENSG00000151148 | UBE3B     | ubiquitin protein ligase E3B                                   | 89910  | 1570.298745 | -0.130317597 | 0.3971393   | -0.328140774 | 0.742805226 | 0.999371363 | Not Sig |

|                 |             |                                                           |           |             |              |             |              |             |             |         |
|-----------------|-------------|-----------------------------------------------------------|-----------|-------------|--------------|-------------|--------------|-------------|-------------|---------|
| ENSG00000152240 | HAUS1       | HAUS augmin like complex subunit 1                        | 115106    | 164.6940476 | -0.130219597 | 0.510213071 | -0.255225914 | 0.798548617 | 0.999371363 | Not Sig |
| ENSG00000166716 | ZNF592      | zinc finger protein 592                                   | 9640      | 1900.30629  | -0.130121682 | 0.479177597 | -0.271552098 | 0.785966436 | 0.999371363 | Not Sig |
| ENSG00000087470 | DNM1L       | dynamins 1 like                                           | 10059     | 1115.450469 | -0.130091376 | 0.546999927 | -0.237827044 | 0.812015242 | 0.999371363 | Not Sig |
| ENSG00000258057 | BCDIN3D-AS1 | BCDIN3D antisense RNA 1                                   | 100286844 | 9.611850563 | -0.129759619 | 1.000265459 | -0.129725183 | 0.896783858 | 0.999371363 | Not Sig |
| ENSG00000226982 | NA          | NA                                                        | NA        | 1.010383157 | -0.129759376 | 2.309179526 | -0.056192849 | 0.955188178 | NA          | NA      |
| ENSG00000136819 | C9orf78     | chromosome 9 open reading frame 78                        | 51759     | 730.5931857 | -0.129754351 | 0.46010805  | -0.282008434 | 0.777937043 | 0.999371363 | Not Sig |
| ENSG00000175105 | ZNF654      | zinc finger protein 654                                   | 55279     | 549.3638408 | -0.129732012 | 0.67266844  | -0.192861749 | 0.847067242 | 0.999371363 | Not Sig |
| ENSG00000251868 | NA          | NA                                                        | NA        | 7.342029627 | -0.129646651 | 1.266910151 | -0.102332948 | 0.918492404 | 0.999371363 | Not Sig |
| ENSG00000146457 | WTAP        | WT1 associated protein                                    | 9589      | 1968.898044 | -0.129621842 | 0.440052721 | -0.294559802 | 0.768330174 | 0.999371363 | Not Sig |
| ENSG00000214922 | HLA-F-AS1   | HLA-F antisense RNA 1                                     | 285830    | 69.67795447 | -0.129491543 | 0.684179739 | -0.189265386 | 0.849884823 | 0.999371363 | Not Sig |
| ENSG00000170275 | CRTAP       | cartilage associated protein                              | 10491     | 2547.787996 | -0.129485847 | 0.527056769 | -0.245677229 | 0.805932101 | 0.999371363 | Not Sig |
| ENSG00000166479 | TMX3        | thioredoxin related transmembrane protein 3               | 54495     | 1273.689389 | -0.129415612 | 0.635271622 | -0.203716973 | 0.838574678 | 0.999371363 | Not Sig |
| ENSG00000234322 | NA          | NA                                                        | NA        | 1.620786683 | -0.129328444 | 1.761206425 | -0.073431735 | 0.941462565 | NA          | NA      |
| ENSG00000169609 | C15orf40    | chromosome 15 open reading frame 40                       | 123207    | 219.4475149 | -0.129320105 | 0.454520301 | -0.284519976 | 0.776011928 | 0.999371363 | Not Sig |
| ENSG00000236144 | TMEM147-AS1 | TMEM147 antisense RNA 1                                   | 100506469 | 176.5980616 | -0.129256676 | 0.518137599 | -0.249463996 | 0.803001888 | 0.999371363 | Not Sig |
| ENSG00000134758 | RNF138      | ring finger protein 138                                   | 51444     | 474.0030524 | -0.129110448 | 0.534872006 | -0.241385689 | 0.809256203 | 0.999371363 | Not Sig |
| ENSG00000258748 | NA          | NA                                                        | NA        | 3.368591553 | -0.129093401 | 1.816770971 | -0.071056508 | 0.943352782 | NA          | NA      |
| ENSG00000134900 | TPP2        | tripeptidyl peptidase 2                                   | 7174      | 1843.61087  | -0.128888749 | 0.525156877 | -0.245429042 | 0.806124244 | 0.999371363 | Not Sig |
| ENSG00000101290 | CDS2        | CDP-diaclyglycerol synthase 2                             | 8760      | 2293.178214 | -0.12884757  | 0.524170984 | -0.245812099 | 0.805827691 | 0.999371363 | Not Sig |
| ENSG00000139354 | GAS2L3      | growth arrest specific 2 like 3                           | 283431    | 255.8864476 | -0.128830944 | 0.613149755 | -0.210113343 | 0.833579212 | 0.999371363 | Not Sig |
| ENSG00000011332 | DPF1        | double PHD fingers 1                                      | 8193      | 7.125660631 | -0.128816236 | 1.524348416 | -0.08450577  | 0.932654316 | 0.999371363 | Not Sig |
| ENSG00000099800 | TIMM13      | translocase of inner mitochondrial membrane 13            | 26517     | 425.4733923 | -0.128741361 | 0.56769043  | -0.226780925 | 0.820594097 | 0.999371363 | Not Sig |
| ENSG00000137504 | CREBZF      | CREB/ATF bZIP transcription factor                        | 58487     | 2151.742936 | -0.12868844  | 0.412535709 | -0.311944972 | 0.755082344 | 0.999371363 | Not Sig |
| ENSG00000075290 | WNT8B       | Wnt family member 8B                                      | 7479      | 2.78536647  | -0.128601583 | 1.637248848 | -0.078547365 | 0.937392655 | NA          | NA      |
| ENSG00000181215 | C4orf50     | chromosome 4 open reading frame 50                        | 389197    | 8.17891984  | -0.12859553  | 1.060819048 | -0.12122287  | 0.90351451  | 0.999371363 | Not Sig |
| ENSG00000268995 | NA          | NA                                                        | NA        | 18.82760203 | -0.128326357 | 0.922632871 | -0.139087129 | 0.889381299 | 0.999371363 | Not Sig |
| ENSG00000148843 | PDCD11      | programmed cell death 11                                  | 22984     | 1270.995941 | -0.128322392 | 0.409614606 | -0.313275917 | 0.754071045 | 0.999371363 | Not Sig |
| ENSG00000111361 | EIF2B1      | eukaryotic translation initiation factor 2B subunit alpha | 1967      | 690.2084706 | -0.128271517 | 0.406679579 | -0.315411749 | 0.752449047 | 0.999371363 | Not Sig |
| ENSG00000201861 | NA          | NA                                                        | NA        | 1.975692668 | -0.1281075   | 1.685010796 | -0.076027703 | 0.939397059 | NA          | NA      |
| ENSG00000198301 | SDAD1       | SDA1 domain containing 1                                  | 55153     | 913.305046  | -0.128098244 | 0.417949981 | -0.306491806 | 0.759230218 | 0.999371363 | Not Sig |
| ENSG00000055208 | TAB2        | TGF-beta activated kinase 1/MAP3K7 binding protein 2      | 23118     | 2079.141356 | -0.128077638 | 0.604824132 | -0.211760132 | 0.832294173 | 0.999371363 | Not Sig |
| ENSG00000169714 | CNBP        | CCNC-type zinc finger nucleic acid binding protein        | 7555      | 4441.378426 | -0.128037319 | 0.421375172 | -0.303855868 | 0.761237701 | 0.999371363 | Not Sig |
| ENSG00000204619 | PPP1R11     | protein phosphatase 1 regulatory inhibitor subunit 11     | 6992      | 1362.555967 | -0.128025402 | 0.421121021 | -0.30401095  | 0.761119549 | 0.999371363 | Not Sig |
| ENSG00000213486 | NA          | NA                                                        | NA        | 0.610403525 | -0.127922938 | 3.02229102  | -0.042326479 | 0.966238437 | NA          | NA      |
| ENSG00000215093 | NA          | NA                                                        | NA        | 0.610403525 | -0.127922938 | 3.02229102  | -0.042326479 | 0.966238437 | NA          | NA      |

|                 |          |                                                               |        |             |              |             |              |             |             |         |
|-----------------|----------|---------------------------------------------------------------|--------|-------------|--------------|-------------|--------------|-------------|-------------|---------|
| ENSG00000228038 | NA       | NA                                                            | NA     | 0.610403525 | -0.127922938 | 3.02229102  | -0.042326479 | 0.966238437 | NA          | NA      |
| ENSG00000228548 | NA       | NA                                                            | NA     | 0.610403525 | -0.127922938 | 3.02229102  | -0.042326479 | 0.966238437 | NA          | NA      |
| ENSG00000231622 | NA       | NA                                                            | NA     | 0.610403525 | -0.127922938 | 3.02229102  | -0.042326479 | 0.966238437 | NA          | NA      |
| ENSG00000239510 | NA       | NA                                                            | NA     | 0.610403525 | -0.127922938 | 3.02229102  | -0.042326479 | 0.966238437 | NA          | NA      |
| ENSG00000250257 | NA       | NA                                                            | NA     | 0.610403525 | -0.127922938 | 3.02229102  | -0.042326479 | 0.966238437 | NA          | NA      |
| ENSG00000254756 | NA       | NA                                                            | NA     | 0.610403525 | -0.127922938 | 3.02229102  | -0.042326479 | 0.966238437 | NA          | NA      |
| ENSG00000256581 | NA       | NA                                                            | NA     | 0.610403525 | -0.127922938 | 3.02229102  | -0.042326479 | 0.966238437 | NA          | NA      |
| ENSG00000257023 | NA       | NA                                                            | NA     | 0.610403525 | -0.127922938 | 3.02229102  | -0.042326479 | 0.966238437 | NA          | NA      |
| ENSG00000272917 | NA       | NA                                                            | NA     | 0.610403525 | -0.127922938 | 3.02229102  | -0.042326479 | 0.966238437 | NA          | NA      |
| ENSG00000133112 | TPT1     | tumor protein, translationally-controlled 1                   | 7178   | 27377.05213 | -0.127824058 | 0.493497696 | -0.259016525 | 0.79562249  | 0.999371363 | Not Sig |
| ENSG00000204560 | DHX16    | DEAH-box helicase 16                                          | 8449   | 1195.619999 | -0.127750913 | 0.45255981  | -0.282285149 | 0.777724872 | 0.999371363 | Not Sig |
| ENSG00000172765 | TMCC1    | transmembrane and coiled-coil domain family 1                 | 23023  | 1173.003219 | -0.12773517  | 0.467490825 | -0.273235673 | 0.784672059 | 0.999371363 | Not Sig |
| ENSG00000141644 | MBD1     | methyl-CpG binding domain protein 1                           | 4152   | 1373.547722 | -0.127719077 | 0.451361446 | -0.282964082 | 0.77720437  | 0.999371363 | Not Sig |
| ENSG00000237136 | C4orf51  | chromosome 4 open reading frame 51                            | 646603 | 1.781160559 | -0.127704903 | 2.19295853  | -0.058234071 | 0.953562182 | NA          | NA      |
| ENSG00000256928 | NA       | NA                                                            | NA     | 1.781160559 | -0.127704903 | 2.19295853  | -0.058234071 | 0.953562182 | NA          | NA      |
| ENSG00000134014 | ELP3     | elongator acetyltransferase complex subunit 3                 | 55140  | 655.4034482 | -0.127703236 | 0.530639033 | -0.240659334 | 0.809819159 | 0.999371363 | Not Sig |
| ENSG00000172530 | BANP     | BTG3 associated nuclear protein                               | 54971  | 532.5152223 | -0.127657002 | 0.484982538 | -0.26321979  | 0.792381178 | 0.999371363 | Not Sig |
| ENSG00000197536 | C5orf56  | chromosome 5 open reading frame 56                            | 441108 | 524.0439081 | -0.127535544 | 0.688491999 | -0.185238963 | 0.85304161  | 0.999371363 | Not Sig |
| ENSG00000117501 | MROH9    | maestro heat like repeat family member 9                      | 80133  | 25.9163885  | -0.127423403 | 1.186549399 | -0.107389885 | 0.914479679 | 0.999371363 | Not Sig |
| ENSG00000143977 | SNRPG    | small nuclear ribonucleoprotein polypeptide G                 | 6637   | 437.2779492 | -0.127292801 | 0.627399001 | -0.202889709 | 0.839221238 | 0.999371363 | Not Sig |
| ENSG00000255946 | NA       | NA                                                            | NA     | 1.220807051 | -0.127143307 | 2.366202716 | -0.053733058 | 0.957147845 | NA          | NA      |
| ENSG00000267673 | FDX1L    | ferredoxin 1 like                                             | 112812 | 1.220807051 | -0.127143307 | 2.366202716 | -0.053733058 | 0.957147845 | NA          | NA      |
| ENSG00000168538 | TRAPPC11 | trafficking protein particle complex 11                       | 60684  | 1259.554961 | -0.1270374   | 0.450955023 | -0.281707473 | 0.778167824 | 0.999371363 | Not Sig |
| ENSG00000143164 | DCAF6    | DDB1 and CUL4 associated factor 6                             | 55827  | 1799.828218 | -0.126973341 | 0.520328939 | -0.244025138 | 0.807211351 | 0.999371363 | Not Sig |
| ENSG00000099622 | CIRBP    | cold inducible RNA binding protein                            | 1153   | 3947.009589 | -0.126955177 | 0.635981048 | -0.199621007 | 0.841776997 | 0.999371363 | Not Sig |
| ENSG00000029993 | HMGB3    | high mobility group box 3                                     | 3149   | 1846.755131 | -0.12671887  | 0.946105419 | -0.133937369 | 0.893452101 | 0.999371363 | Not Sig |
| ENSG00000026559 | KCNQ1    | potassium voltage-gated channel modifier subfamily G member 1 | 3755   | 5.430291632 | -0.126204056 | 1.155148921 | -0.109253494 | 0.913001432 | NA          | NA      |
| ENSG00000120805 | ARL1     | ADP ribosylation factor like GTPase 1                         | 400    | 1410.589195 | -0.12610844  | 0.61138156  | -0.206267981 | 0.836581589 | 0.999371363 | Not Sig |
| ENSG00000100393 | EP300    | E1A binding protein p300                                      | 2033   | 5687.791727 | -0.125934741 | 0.40339562  | -0.312186684 | 0.754898651 | 0.999371363 | Not Sig |
| ENSG00000225215 | NA       | NA                                                            | NA     | 27.73371603 | -0.125860711 | 0.731487076 | -0.172061428 | 0.863389236 | 0.999371363 | Not Sig |
| ENSG00000007944 | MYLIP    | myosin regulatory light chain interacting protein             | 29116  | 1356.638645 | -0.125851068 | 0.602354368 | -0.208931943 | 0.834501368 | 0.999371363 | Not Sig |
| ENSG00000112561 | TFEB     | transcription factor EB                                       | 7942   | 619.8563742 | -0.125684451 | 0.739436407 | -0.169973307 | 0.865031129 | 0.999371363 | Not Sig |
| ENSG00000153767 | GTF2E1   | general transcription factor IIE subunit 1                    | 2960   | 248.2106679 | -0.125564199 | 0.449588079 | -0.279287208 | 0.780024422 | 0.999371363 | Not Sig |
| ENSG00000132604 | TERF2    | telomeric repeat binding factor 2                             | 7014   | 762.7794179 | -0.125515482 | 0.431170624 | -0.291103975 | 0.7709718   | 0.999371363 | Not Sig |
| ENSG00000139826 | ABHD13   | abhydrolase domain containing 13                              | 84945  | 579.7509856 | -0.125507867 | 0.551355337 | -0.227635173 | 0.819929874 | 0.999371363 | Not Sig |

|                 |           |                                                                       |    |        |             |              |             |              |             |             |         |
|-----------------|-----------|-----------------------------------------------------------------------|----|--------|-------------|--------------|-------------|--------------|-------------|-------------|---------|
| ENSG00000100368 | CSF2RB    | colony stimulating factor 2 receptor beta common subunit              |    | 1439   | 1056.369783 | -0.125488224 | 0.854255684 | -0.146897734 | 0.883212741 | 0.999371363 | Not Sig |
| ENSG00000211768 | NA        | NA                                                                    | NA |        | 2.796520087 | -0.125472134 | 1.696599329 | -0.073955077 | 0.941046131 | NA          | NA      |
| ENSG00000100207 | TCF20     | transcription factor 20                                               |    | 6942   | 2547.306352 | -0.125353765 | 0.444034888 | -0.282306118 | 0.777708795 | 0.999371363 | Not Sig |
| ENSG00000131773 | KHDRBS3   | KH RNA binding domain containing, signal transduction associated 3    |    | 10656  | 194.0991039 | -0.12513469  | 0.663395518 | -0.188627578 | 0.850384717 | 0.999371363 | Not Sig |
| ENSG00000078618 | NRDC      | nardilysin convertase                                                 |    | 4898   | 3223.757444 | -0.12493004  | 0.491688343 | -0.254083794 | 0.799430823 | 0.999371363 | Not Sig |
| ENSG00000235354 | NA        | NA                                                                    | NA |        | 9.855437048 | -0.124858972 | 0.992429156 | -0.125811471 | 0.899881162 | 0.999371363 | Not Sig |
| ENSG00000132507 | EIF5A     | eukaryotic translation initiation factor 5A                           |    | 1984   | 3878.869945 | -0.124778447 | 0.39543489  | -0.31554739  | 0.752346075 | 0.999371363 | Not Sig |
| ENSG00000167526 | RPL13     | ribosomal protein L13                                                 |    | 6137   | 13418.61673 | -0.124730867 | 0.410207308 | -0.304067882 | 0.761076176 | 0.999371363 | Not Sig |
| ENSG00000111696 | NT5DC3    | 5'-nucleotidase domain containing 3                                   |    | 51559  | 355.205451  | -0.12471717  | 0.465169861 | -0.268111029 | 0.788613857 | 0.999371363 | Not Sig |
| ENSG00000106479 | ZNF862    | zinc finger protein 862                                               |    | 643641 | 686.7074321 | -0.124623377 | 0.509827079 | -0.244442443 | 0.806888174 | 0.999371363 | Not Sig |
| ENSG00000100890 | KIAA0391  | KIAA0391                                                              |    | 9692   | 16.01673453 | -0.124589902 | 0.799260815 | -0.155881409 | 0.8761265   | 0.999371363 | Not Sig |
| ENSG00000205808 | PLPP6     | phospholipid phosphatase 6                                            |    | 403313 | 161.226805  | -0.124578714 | 0.688995506 | -0.180812084 | 0.856515078 | 0.999371363 | Not Sig |
| ENSG00000116030 | SUMO1     | small ubiquitin-like modifier 1                                       |    | 7341   | 1335.198947 | -0.124521962 | 0.444297213 | -0.28026726  | 0.779272467 | 0.999371363 | Not Sig |
| ENSG00000113716 | HMGXB3    | HMG-box containing 3                                                  |    | 22993  | 1496.20307  | -0.12445768  | 0.487472569 | -0.255312172 | 0.798482    | 0.999371363 | Not Sig |
| ENSG00000107960 | STN1      | STN1, CST complex subunit                                             |    | 79991  | 586.8070244 | -0.124286971 | 0.489731969 | -0.253785702 | 0.79966112  | 0.999371363 | Not Sig |
| ENSG00000088876 | ZNF343    | zinc finger protein 343                                               |    | 79175  | 209.3017795 | -0.124199705 | 0.46182861  | -0.268930296 | 0.787983323 | 0.999371363 | Not Sig |
| ENSG00000164934 | DCAF13    | DDB1 and CUL4 associated factor 13                                    |    | 25879  | 605.4554514 | -0.124177086 | 0.605667791 | -0.205025078 | 0.837552532 | 0.999371363 | Not Sig |
| ENSG00000218014 | NA        | NA                                                                    | NA |        | 0.981201295 | -0.124070245 | 2.609355855 | -0.047548227 | 0.962076294 | NA          | NA      |
| ENSG00000173660 | UQCRH     | ubiquinol-cytochrome c reductase hinge protein                        |    | 7388   | 688.3320614 | -0.124018011 | 0.530921304 | -0.233590196 | 0.81530314  | 0.999371363 | Not Sig |
| ENSG00000238349 | NA        | NA                                                                    | NA |        | 2.739877816 | -0.123881591 | 1.970448861 | -0.062869731 | 0.949870238 | NA          | NA      |
| ENSG00000146243 | IRAK1BP1  | interleukin 1 receptor associated kinase 1 binding protein 1          |    | 134728 | 215.3939789 | -0.123822519 | 0.531155295 | -0.23311924  | 0.815668815 | 0.999371363 | Not Sig |
| ENSG00000201901 | NA        | NA                                                                    | NA |        | 46.11370119 | -0.123627745 | 0.56409437  | -0.219161458 | 0.826524278 | 0.999371363 | Not Sig |
| ENSG00000204231 | RXRβ      | retinoid X receptor beta                                              |    | 6257   | 1328.898491 | -0.123615459 | 0.455640114 | -0.271300651 | 0.786159806 | 0.999371363 | Not Sig |
| ENSG00000101161 | PRPF6     | pre-mRNA processing factor 6                                          |    | 24148  | 2412.713609 | -0.123497486 | 0.458571739 | -0.269308976 | 0.787691925 | 0.999371363 | Not Sig |
| ENSG00000117597 | DIEXF     | digestive organ expansion factor homolog (zebrafish)                  |    | 27042  | 833.607812  | -0.123327274 | 0.547948416 | -0.225070957 | 0.821924074 | 0.999371363 | Not Sig |
| ENSG00000259062 | ACTN1-AS1 | ACTN1 antisense RNA 1                                                 |    | 161159 | 6.485273374 | -0.12329472  | 1.213576577 | -0.10159616  | 0.919077228 | NA          | NA      |
| ENSG00000207940 | MIR567    | microRNA 567                                                          |    | 693152 | 3.10624147  | -0.123074072 | 1.438796395 | -0.085539603 | 0.931832412 | NA          | NA      |
| ENSG00000168556 | ING2      | inhibitor of growth family member 2                                   |    | 3622   | 173.6639728 | -0.123058823 | 0.475103139 | -0.259014965 | 0.795623694 | 0.999371363 | Not Sig |
| ENSG00000232466 | NA        | NA                                                                    | NA |        | 15.52059627 | -0.122936582 | 0.770135921 | -0.15962972  | 0.873172766 | 0.999371363 | Not Sig |
| ENSG00000114388 | NPRL2     | NPRL2 like, GATOR1 complex subunit                                    |    | 10641  | 296.8082825 | -0.122848614 | 0.446538934 | -0.275112883 | 0.783229514 | 0.999371363 | Not Sig |
| ENSG00000231856 | NA        | NA                                                                    | NA |        | 31.03047908 | -0.122842682 | 0.818127029 | -0.15015111  | 0.880645397 | 0.999371363 | Not Sig |
| ENSG00000118292 | C1orf54   | chromosome 1 open reading frame 54                                    |    | 79630  | 99.25765555 | -0.122663354 | 0.740527761 | -0.165643154 | 0.868437785 | 0.999371363 | Not Sig |
| ENSG00000139726 | DENR      | density regulated re-initiation and release factor                    |    | 8562   | 867.0666808 | -0.122524358 | 0.592474927 | -0.206800916 | 0.836165341 | 0.999371363 | Not Sig |
| ENSG00000115183 | TANC1     | tetratricopeptide repeat, ankyrin repeat and coiled-coil containing 1 |    | 85461  | 3150.192268 | -0.122445268 | 0.553628418 | -0.221168683 | 0.824961092 | 0.999371363 | Not Sig |
| ENSG00000150753 | CCT5      | chaperonin containing TCP1 subunit 5                                  |    | 22948  | 2506.469593 | -0.122337438 | 0.424423138 | -0.288244036 | 0.773159943 | 0.999371363 | Not Sig |

|                 |          |                                                                                                                                |        |             |              |             |              |             |             |         |
|-----------------|----------|--------------------------------------------------------------------------------------------------------------------------------|--------|-------------|--------------|-------------|--------------|-------------|-------------|---------|
| ENSG00000170340 | B3GNT2   | UDP-GlcNAc:betaGal beta-1,3-N-acetylglucosaminyltransferase 2                                                                  | 10678  | 836.9441498 | -0.122202162 | 0.57156496  | -0.213802754 | 0.830700877 | 0.999371363 | Not Sig |
| ENSG00000198814 | GK       | glycerol kinase                                                                                                                | 2710   | 1015.865484 | -0.122199757 | 0.715135103 | -0.170876463 | 0.864320904 | 0.999371363 | Not Sig |
| ENSG00000143815 | LBR      | lamin B receptor                                                                                                               | 3930   | 1417.216433 | -0.122176904 | 0.513267697 | -0.238037391 | 0.811852093 | 0.999371363 | Not Sig |
| ENSG00000113812 | ACTR8    | ARP8 actin related protein 8 homolog                                                                                           | 93973  | 546.3959013 | -0.122120182 | 0.461357769 | -0.264697357 | 0.791242614 | 0.999371363 | Not Sig |
| ENSG00000201121 | NA       | NA                                                                                                                             | NA     | 4.784827536 | -0.121963948 | 1.262285907 | -0.096621492 | 0.923026988 | NA          | NA      |
| ENSG00000054654 | SYNE2    | spectrin repeat containing nuclear envelope protein 2                                                                          | 23224  | 13612.74075 | -0.121857178 | 0.47291924  | -0.257670163 | 0.796661475 | 0.999371363 | Not Sig |
| ENSG00000157450 | RNF111   | ring finger protein 111                                                                                                        | 54778  | 1187.804271 | -0.121635755 | 0.452783963 | -0.268639717 | 0.788206946 | 0.999371363 | Not Sig |
| ENSG00000205302 | SNX2     | sorting nexin 2                                                                                                                | 6643   | 1176.355671 | -0.121613371 | 0.566840004 | -0.214546203 | 0.830121141 | 0.999371363 | Not Sig |
| ENSG00000103066 | PLA2G15  | phospholipase A2 group XV                                                                                                      | 23659  | 570.966277  | -0.121448155 | 0.742972073 | -0.163462612 | 0.870154209 | 0.999371363 | Not Sig |
| ENSG00000221157 | NA       | NA                                                                                                                             | NA     | 4.749208138 | -0.121430719 | 1.335353035 | -0.090935293 | 0.927544007 | NA          | NA      |
| ENSG00000218891 | ZNF579   | zinc finger protein 579                                                                                                        | 163033 | 434.7281768 | -0.121327228 | 0.571194849 | -0.212409527 | 0.831787554 | 0.999371363 | Not Sig |
| ENSG00000163104 | SMARCAD1 | <small>SMARCAD1 related, matrix-associated actin-dependent regulator of chromatin, subfamily 1, containing RHD-1 box 1</small> | 56916  | 1054.855844 | -0.121224666 | 0.602866782 | -0.201080344 | 0.840635751 | 0.999371363 | Not Sig |
| ENSG00000154845 | PPP4R1   | protein phosphatase 4 regulatory subunit 1                                                                                     | 9989   | 3636.792425 | -0.121078504 | 0.472992512 | -0.255983976 | 0.79796321  | 0.999371363 | Not Sig |
| ENSG00000124496 | TRERF1   | transcriptional regulating factor 1                                                                                            | 55809  | 504.8523267 | -0.121052807 | 0.473782368 | -0.255502981 | 0.798334642 | 0.999371363 | Not Sig |
| ENSG00000166886 | NAB2     | NGFI-A binding protein 2                                                                                                       | 4665   | 768.8854815 | -0.121041402 | 0.617798803 | -0.195923659 | 0.844669919 | 0.999371363 | Not Sig |
| ENSG00000180263 | FGD6     | FYVE, RhoGEF and PH domain containing 6                                                                                        | 55785  | 3125.840217 | -0.120893472 | 0.784839602 | -0.154035897 | 0.877581432 | 0.999371363 | Not Sig |
| ENSG00000186566 | GPATCH8  | G-patch domain containing 8                                                                                                    | 23131  | 2009.430895 | -0.120842368 | 0.439372473 | -0.275033999 | 0.783290118 | 0.999371363 | Not Sig |
| ENSG00000103061 | SLC7A6OS | <small>solute carrier family 7 member 6 opposite strand</small>                                                                | 84138  | 527.4720908 | -0.120733109 | 0.460028197 | -0.262447192 | 0.792976693 | 0.999371363 | Not Sig |
| ENSG00000184277 | TM2D3    | TM2 domain containing 3                                                                                                        | 80213  | 575.6697573 | -0.120731423 | 0.406948993 | -0.296674583 | 0.766714964 | 0.999371363 | Not Sig |
| ENSG00000222162 | NA       | NA                                                                                                                             | NA     | 12.2491318  | -0.120724623 | 0.856513095 | -0.140948952 | 0.88791027  | 0.999371363 | Not Sig |
| ENSG00000196954 | CASP4    | caspase 4                                                                                                                      | 837    | 1471.172098 | -0.120595208 | 0.489482083 | -0.246373079 | 0.805393444 | 0.999371363 | Not Sig |
| ENSG00000157764 | BRAF     | B-Raf proto-oncogene, serine/threonine kinase                                                                                  | 673    | 1907.969957 | -0.120590708 | 0.486530276 | -0.24785859  | 0.804243821 | 0.999371363 | Not Sig |
| ENSG00000162398 | LEXM     | lymphocyte expansion molecule                                                                                                  | 163747 | 8.660983528 | -0.120568033 | 1.173582782 | -0.102735005 | 0.918173291 | 0.999371363 | Not Sig |
| ENSG00000110955 | ATP5B    | <small>ATP synthase, B<sub>0</sub> transporting, mitochondrial F1 complex, beta polypeptide</small>                            | 506    | 4645.945305 | -0.120506576 | 0.425223078 | -0.283396133 | 0.776873192 | 0.999371363 | Not Sig |
| ENSG00000228570 | NA       | NA                                                                                                                             | NA     | 14.62128861 | -0.120482352 | 0.900606559 | -0.133779119 | 0.893577239 | 0.999371363 | Not Sig |
| ENSG00000229808 | NA       | NA                                                                                                                             | NA     | 50.3637611  | -0.120377897 | 0.549475677 | -0.219077753 | 0.82658948  | 0.999371363 | Not Sig |
| ENSG00000023318 | ERP44    | endoplasmic reticulum protein 44                                                                                               | 23071  | 1232.593383 | -0.120362772 | 0.472412219 | -0.254783359 | 0.798890428 | 0.999371363 | Not Sig |
| ENSG00000166439 | RNF169   | ring finger protein 169                                                                                                        | 254225 | 1489.041066 | -0.120333266 | 0.40229248  | -0.299118856 | 0.764849359 | 0.999371363 | Not Sig |
| ENSG00000100225 | FBX07    | F-box protein 7                                                                                                                | 25793  | 2024.639698 | -0.12026022  | 0.448987587 | -0.267847538 | 0.788816677 | 0.999371363 | Not Sig |
| ENSG00000009954 | BAZ1B    | bromodomain adjacent to zinc finger domain 1B                                                                                  | 9031   | 3484.160574 | -0.120191543 | 0.467344389 | -0.257179814 | 0.797039967 | 0.999371363 | Not Sig |
| ENSG00000177640 | CASC2    | cancer susceptibility 2 (non-protein coding)                                                                                   | 255082 | 104.5232394 | -0.120133054 | 0.608718415 | -0.197354065 | 0.843550473 | 0.999371363 | Not Sig |
| ENSG00000222276 | NA       | NA                                                                                                                             | NA     | 1.448694848 | -0.120084633 | 2.359639993 | -0.050891082 | 0.959412312 | NA          | NA      |
| ENSG00000119787 | ATL2     | atlastin GTPase 2                                                                                                              | 64225  | 2040.971532 | -0.119707948 | 0.718081261 | -0.166705295 | 0.867601939 | 0.999371363 | Not Sig |
| ENSG00000110958 | PTGES3   | prostaglandin E synthase 3                                                                                                     | 10728  | 3474.247823 | -0.119628313 | 0.467546769 | -0.255863842 | 0.798055975 | 0.999371363 | Not Sig |
| ENSG00000165055 | METTL2B  | methyltransferase like 2B                                                                                                      | 55798  | 457.3255231 | -0.119460708 | 0.477606866 | -0.250123515 | 0.802491832 | 0.999371363 | Not Sig |

|                 |           |                                                       |           |             |              |             |              |             |             |         |
|-----------------|-----------|-------------------------------------------------------|-----------|-------------|--------------|-------------|--------------|-------------|-------------|---------|
| ENSG00000177112 | MRVI1-AS1 | MRVI1 antisense RNA 1                                 | 100129827 | 8.420464948 | -0.119439451 | 1.267449656 | -0.094236051 | 0.924921647 | 0.999371363 | Not Sig |
| ENSG00000261270 | NA        | NA                                                    | NA        | 37.73877818 | -0.119382798 | 0.816073891 | -0.146289201 | 0.88369309  | 0.999371363 | Not Sig |
| ENSG00000110315 | RNF141    | ring finger protein 141                               | 50862     | 1235.756924 | -0.119365487 | 0.555586817 | -0.214845787 | 0.829887554 | 0.999371363 | Not Sig |
| ENSG00000105993 | DNAJB6    | DnaJ heat shock protein family (Hsp40) member B6      | 10049     | 2917.188557 | -0.119284424 | 0.546735626 | -0.218175693 | 0.827292223 | 0.999371363 | Not Sig |
| ENSG00000089009 | RPL6      | ribosomal protein L6                                  | 6128      | 7659.490892 | -0.11901988  | 0.461403069 | -0.257952077 | 0.796443893 | 0.999371363 | Not Sig |
| ENSG00000166262 | FAM227B   | family with sequence similarity 227 member B          | 196951    | 76.59637109 | -0.118974812 | 0.589207206 | -0.201923552 | 0.839976489 | 0.999371363 | Not Sig |
| ENSG00000235027 | NA        | NA                                                    | NA        | 14.7840711  | -0.118924006 | 0.817451757 | -0.145481376 | 0.884330819 | 0.999371363 | Not Sig |
| ENSG00000261488 | NA        | NA                                                    | NA        | 115.780777  | -0.118827236 | 0.706785297 | -0.168123526 | 0.866486102 | 0.999371363 | Not Sig |
| ENSG00000035681 | NSMAF     | neutral sphingomyelinase activation associated factor | 8439      | 788.2757256 | -0.118778648 | 0.444217934 | -0.267388232 | 0.789170259 | 0.999371363 | Not Sig |
| ENSG00000246250 | NA        | NA                                                    | NA        | 4.476135738 | -0.118770577 | 1.462305864 | -0.081221432 | 0.935265855 | NA          | NA      |
| ENSG00000187735 | TCEA1     | transcription elongation factor A1                    | 6917      | 2863.334071 | -0.11873242  | 0.555836462 | -0.213610347 | 0.83085093  | 0.999371363 | Not Sig |
| ENSG00000163703 | CRELD1    | cysteine rich with EGF like domains 1                 | 78987     | 916.776746  | -0.118642526 | 0.478933075 | -0.247722558 | 0.804349077 | 0.999371363 | Not Sig |
| ENSG00000138777 | PPA2      | pyrophosphatase (inorganic) 2                         | 27068     | 1023.616819 | -0.118553796 | 0.550001534 | -0.215551755 | 0.829337165 | 0.999371363 | Not Sig |
| ENSG00000235978 | NA        | NA                                                    | NA        | 40.22881978 | -0.118427903 | 0.668398411 | -0.177181605 | 0.859365744 | 0.999371363 | Not Sig |
| ENSG00000140521 | POLG      | DNA polymerase gamma, catalytic subunit               | 5428      | 1664.317806 | -0.118358469 | 0.493806921 | -0.239685723 | 0.810573904 | 0.999371363 | Not Sig |
| ENSG00000231615 | NA        | NA                                                    | NA        | 12.93063705 | -0.118311476 | 0.923168517 | -0.128158049 | 0.898023899 | 0.999371363 | Not Sig |
| ENSG00000198168 | SVIP      | small VCP interacting protein                         | 258010    | 590.2167397 | -0.11822024  | 0.588565756 | -0.200861567 | 0.84080682  | 0.999371363 | Not Sig |
| ENSG00000177302 | TOP3A     | DNA topoisomerase III alpha                           | 7156      | 760.5528282 | -0.118144113 | 0.47227078  | -0.25016181  | 0.802462218 | 0.999371363 | Not Sig |
| ENSG00000242259 | C22orf39  | chromosome 22 open reading frame 39                   | 128977    | 389.482983  | -0.118051216 | 0.494604089 | -0.238678204 | 0.811355119 | 0.999371363 | Not Sig |
| ENSG00000172336 | POP7      | POP7 homolog, ribonuclease P/MRP subunit              | 10248     | 227.8727833 | -0.117984483 | 0.504542376 | -0.233844546 | 0.815105665 | 0.999371363 | Not Sig |
| ENSG00000111252 | SH2B3     | SH2B adaptor protein 3                                | 10019     | 1472.425613 | -0.117976309 | 0.691249411 | -0.170671117 | 0.864482374 | 0.999371363 | Not Sig |
| ENSG00000132640 | BTBD3     | BTB domain containing 3                               | 22903     | 803.5303389 | -0.117897211 | 0.451465898 | -0.261143114 | 0.793982144 | 0.999371363 | Not Sig |
| ENSG00000224543 | NA        | NA                                                    | NA        | 1.77170631  | -0.117822659 | 2.194162029 | -0.053698249 | 0.957175578 | NA          | NA      |
| ENSG00000122574 | WIPF3     | WAS/WASL interacting protein family member 3          | 644150    | 92.1300426  | -0.117817558 | 0.813513779 | -0.144825523 | 0.88484863  | 0.999371363 | Not Sig |
| ENSG00000100650 | SRSF5     | serine and arginine rich splicing factor 5            | 6430      | 4433.272873 | -0.117795545 | 0.426494727 | -0.27619461  | 0.782398597 | 0.999371363 | Not Sig |
| ENSG00000249572 | NA        | NA                                                    | NA        | 25.07408474 | -0.117758929 | 0.839350605 | -0.140297663 | 0.88842481  | 0.999371363 | Not Sig |
| ENSG00000242615 | NA        | NA                                                    | NA        | 17.50771403 | -0.117710599 | 0.739692744 | -0.159134451 | 0.873562946 | 0.999371363 | Not Sig |
| ENSG00000170619 | COMMD5    | COMM domain containing 5                              | 28991     | 299.4605687 | -0.11767882  | 0.563329537 | -0.208898722 | 0.834527302 | 0.999371363 | Not Sig |
| ENSG00000160305 | DIP2A     | disco interacting protein 2 homolog A                 | 23181     | 1798.406098 | -0.117403049 | 0.44863143  | -0.261691538 | 0.793559265 | 0.999371363 | Not Sig |
| ENSG00000212588 | SNORA26   | small nucleolar RNA, H/ACA box 26                     | 677810    | 8.876084456 | -0.117340882 | 0.95968616  | -0.122270057 | 0.902685145 | 0.999371363 | Not Sig |
| ENSG00000270781 | NA        | NA                                                    | NA        | 1.598042356 | -0.117326491 | 1.76181312  | -0.066594175 | 0.946904783 | NA          | NA      |
| ENSG00000156886 | ITGAD     | integrin subunit alpha D                              | 3681      | 20.8632704  | -0.117171086 | 0.959651862 | -0.122097492 | 0.902821808 | 0.999371363 | Not Sig |
| ENSG00000272056 | NA        | NA                                                    | NA        | 8.934653134 | -0.116806509 | 0.884118621 | -0.132116332 | 0.894892278 | 0.999371363 | Not Sig |
| ENSG00000112210 | RAB23     | RAB23, member RAS oncogene family                     | 51715     | 441.1433035 | -0.116796839 | 0.422381441 | -0.276519818 | 0.782148841 | 0.999371363 | Not Sig |
| ENSG00000187607 | ZNF286A   | zinc finger protein 286A                              | 57335     | 107.8689699 | -0.116716677 | 0.597384268 | -0.195379563 | 0.845095814 | 0.999371363 | Not Sig |

|                 |           |                                                    |        |             |              |             |              |             |             |         |
|-----------------|-----------|----------------------------------------------------|--------|-------------|--------------|-------------|--------------|-------------|-------------|---------|
| ENSG00000168298 | HIST1H1E  | histone cluster 1 H1 family member e               | 3008   | 3880.774124 | -0.116672326 | 0.418940231 | -0.278493966 | 0.780633196 | 0.999371363 | Not Sig |
| ENSG00000037749 | MFAP3     | microfibril associated protein 3                   | 4238   | 844.3046682 | -0.116544725 | 0.483969252 | -0.240810184 | 0.809702236 | 0.999371363 | Not Sig |
| ENSG00000155974 | GRIP1     | glutamate receptor interacting protein 1           | 23426  | 86.69146863 | -0.116424167 | 0.965566218 | -0.120576056 | 0.904026835 | 0.999371363 | Not Sig |
| ENSG00000055609 | KMT2C     | lysine methyltransferase 2C                        | 58508  | 10430.12135 | -0.116344771 | 0.540357525 | -0.215310725 | 0.829525068 | 0.999371363 | Not Sig |
| ENSG00000230735 | NA        | NA                                                 | NA     | 16.81556001 | -0.116262757 | 1.021372395 | -0.113829939 | 0.909372605 | 0.999371363 | Not Sig |
| ENSG00000265341 | NA        | NA                                                 | NA     | 1.742524448 | -0.116245978 | 1.926915915 | -0.060327478 | 0.951894818 | NA          | NA      |
| ENSG00000224387 | NA        | NA                                                 | NA     | 0.904233124 | -0.116226045 | 2.646049849 | -0.04392436  | 0.964964698 | NA          | NA      |
| ENSG00000235310 | NA        | NA                                                 | NA     | 0.904233124 | -0.116226045 | 2.646049849 | -0.04392436  | 0.964964698 | NA          | NA      |
| ENSG00000249193 | NA        | NA                                                 | NA     | 0.904233124 | -0.116226045 | 2.646049849 | -0.04392436  | 0.964964698 | NA          | NA      |
| ENSG00000257454 | NA        | NA                                                 | NA     | 0.904233124 | -0.116226045 | 2.646049849 | -0.04392436  | 0.964964698 | NA          | NA      |
| ENSG00000265638 | NA        | NA                                                 | NA     | 0.904233124 | -0.116226045 | 2.646049849 | -0.04392436  | 0.964964698 | NA          | NA      |
| ENSG00000214562 | NUTM2D    | NUT family member 2D                               | 728130 | 67.84736585 | -0.116120296 | 0.721683544 | -0.160901959 | 0.872170619 | 0.999371363 | Not Sig |
| ENSG00000197321 | SVIL      | supervillin                                        | 6840   | 4164.855584 | -0.115961353 | 0.516468628 | -0.224527389 | 0.822346957 | 0.999371363 | Not Sig |
| ENSG00000162337 | LRP5      | LDL receptor related protein 5                     | 4041   | 4502.273291 | -0.115959273 | 0.495602438 | -0.233976397 | 0.815003302 | 0.999371363 | Not Sig |
| ENSG00000139679 | LPAR6     | lysophosphatidic acid receptor 6                   | 10161  | 495.9172561 | -0.115950143 | 0.604634993 | -0.191768827 | 0.84792329  | 0.999371363 | Not Sig |
| ENSG00000141013 | GAS8      | growth arrest specific 8                           | 2622   | 694.6201126 | -0.115923431 | 0.508841625 | -0.227818293 | 0.819787505 | 0.999371363 | Not Sig |
| ENSG00000266978 | NA        | NA                                                 | NA     | 6.141521005 | -0.115868463 | 1.120641859 | -0.10339473  | 0.917649694 | NA          | NA      |
| ENSG00000120279 | MYCT1     | MYC target 1                                       | 80177  | 284.4706882 | -0.115481827 | 0.740766084 | -0.155895133 | 0.876115682 | 0.999371363 | Not Sig |
| ENSG00000227986 | NA        | NA                                                 | NA     | 51.7214103  | -0.115330649 | 0.809183689 | -0.142527155 | 0.886663632 | 0.999371363 | Not Sig |
| ENSG00000135900 | MRPL44    | mitochondrial ribosomal protein L44                | 65080  | 351.8899093 | -0.115281028 | 0.418545658 | -0.275432383 | 0.782984067 | 0.999371363 | Not Sig |
| ENSG00000230273 | NA        | NA                                                 | NA     | 0.693809231 | -0.115279775 | 2.940923778 | -0.039198491 | 0.968732136 | NA          | NA      |
| ENSG00000239011 | NA        | NA                                                 | NA     | 0.693809231 | -0.115279775 | 2.940923778 | -0.039198491 | 0.968732136 | NA          | NA      |
| ENSG00000270837 | NA        | NA                                                 | NA     | 0.693809231 | -0.115279775 | 2.940923778 | -0.039198491 | 0.968732136 | NA          | NA      |
| ENSG00000124588 | NQO2      | N-ribosylidihydrocnicotinamide:quinone reductase 2 | 4835   | 333.3772665 | -0.115115086 | 0.505147903 | -0.227883923 | 0.819736482 | 0.999371363 | Not Sig |
| ENSG00000119411 | BSPRY     | B-box and SPRY domain containing                   | 54836  | 493.3892869 | -0.115070454 | 0.596577327 | -0.19288439  | 0.847049511 | 0.999371363 | Not Sig |
| ENSG00000249006 | NA        | NA                                                 | NA     | 2.958311365 | -0.115068869 | 1.949650648 | -0.05902025  | 0.952935979 | NA          | NA      |
| ENSG00000082701 | GSK3B     | glycogen synthase kinase 3 beta                    | 2932   | 2340.822877 | -0.114986967 | 0.44961817  | -0.255743595 | 0.798148831 | 0.999371363 | Not Sig |
| ENSG00000196455 | PIK3R4    | phosphoinositide-3-kinase regulatory subunit 4     | 30849  | 940.5818348 | -0.114891743 | 0.456154543 | -0.251870215 | 0.801141382 | 0.999371363 | Not Sig |
| ENSG00000164830 | OXR1      | oxidation resistance 1                             | 55074  | 1746.029465 | -0.114828301 | 0.585306772 | -0.196184816 | 0.844465512 | 0.999371363 | Not Sig |
| ENSG00000149292 | TTC12     | tetratricopeptide repeat domain 12                 | 54970  | 579.8168315 | -0.114818683 | 0.440978363 | -0.2603726   | 0.794576377 | 0.999371363 | Not Sig |
| ENSG00000171155 | C1GALT1C1 | C1GALT1 specific chaperone 1                       | 29071  | 435.7686109 | -0.114662215 | 0.602588154 | -0.190282889 | 0.849087461 | 0.999371363 | Not Sig |
| ENSG00000249709 | ZNF564    | zinc finger protein 564                            | 163050 | 41.10680426 | -0.114562313 | 0.570400262 | -0.200845478 | 0.840819401 | 0.999371363 | Not Sig |
| ENSG00000163374 | YY1AP1    | YY1 associated protein 1                           | 55249  | 1413.474392 | -0.114401918 | 0.427258165 | -0.267758295 | 0.788885375 | 0.999371363 | Not Sig |
| ENSG00000159111 | MRPL10    | mitochondrial ribosomal protein L10                | 124995 | 374.8213742 | -0.114263501 | 0.398654054 | -0.2866232   | 0.774400849 | 0.999371363 | Not Sig |
| ENSG00000112406 | HECA      | hdc homolog, cell cycle regulator                  | 51696  | 1702.683121 | -0.114163916 | 0.425154229 | -0.268523534 | 0.788296362 | 0.999371363 | Not Sig |

|                 |              |                                                            |           |             |              |             |              |             |             |         |
|-----------------|--------------|------------------------------------------------------------|-----------|-------------|--------------|-------------|--------------|-------------|-------------|---------|
| ENSG00000228551 | NA           | NA                                                         | NA        | 4.699003403 | -0.114051431 | 1.218549972 | -0.093596023 | 0.925430069 | NA          | NA      |
| ENSG00000183625 | CCR3         | C-C motif chemokine receptor 3                             | 1232      | 18.40152435 | -0.113894067 | 1.452917202 | -0.078389922 | 0.93751789  | 0.999371363 | Not Sig |
| ENSG00000163807 | KIAA1143     | KIAA1143                                                   | 57456     | 882.3635232 | -0.113886632 | 0.513084638 | -0.22196461  | 0.824341433 | 0.999371363 | Not Sig |
| ENSG00000156475 | PPP2R2B      | protein phosphatase 2 regulatory subunit Bbeta             | 5521      | 45.63345667 | -0.113884746 | 0.788258519 | -0.144476391 | 0.885124298 | 0.999371363 | Not Sig |
| ENSG00000173039 | RELA         | RELA proto-oncogene, NF-kB subunit                         | 5970      | 1816.139341 | -0.113829027 | 0.449931745 | -0.252991768 | 0.800274575 | 0.999371363 | Not Sig |
| ENSG00000079785 | DDX1         | DEAD-box helicase 1                                        | 1653      | 1656.213052 | -0.113822493 | 0.443855626 | -0.256440351 | 0.797610833 | 0.999371363 | Not Sig |
| ENSG00000131378 | RFTN1        | raftlin, lipid raft linker 1                               | 23180     | 1716.091521 | -0.113793794 | 0.644050664 | -0.176684538 | 0.859756187 | 0.999371363 | Not Sig |
| ENSG00000188266 | HYKK         | hydroxylysine kinase                                       | 123688    | 66.05842979 | -0.113558674 | 0.655343291 | -0.173281204 | 0.862430397 | 0.999371363 | Not Sig |
| ENSG00000107186 | MPDZ         | multiple PDZ domain crumbs cell polarity complex component | 8777      | 1179.424758 | -0.113484697 | 0.586580745 | -0.193468159 | 0.846592341 | 0.999371363 | Not Sig |
| ENSG00000229727 | LOC100506274 | uncharacterized LOC100506274                               | 100506274 | 1.891871955 | -0.113389103 | 1.683798278 | -0.067341263 | 0.946310028 | NA          | NA      |
| ENSG00000226314 | ZNF192P1     | zinc finger protein 192 pseudogene 1                       | 651302    | 32.79926487 | -0.113356882 | 0.645492401 | -0.175613038 | 0.860597959 | 0.999371363 | Not Sig |
| ENSG00000090447 | TFAP4        | transcription factor AP-4                                  | 7023      | 325.1462065 | -0.113225369 | 0.454016235 | -0.249386167 | 0.803062084 | 0.999371363 | Not Sig |
| ENSG00000153291 | SLC25A27     | solute carrier family 25 member 27                         | 9481      | 229.6198272 | -0.113187428 | 0.468022764 | -0.241841716 | 0.808902813 | 0.999371363 | Not Sig |
| ENSG00000011021 | CLCN6        | chloride voltage-gated channel 6                           | 1185      | 967.7415487 | -0.1131792   | 0.453201554 | -0.249732594 | 0.80279415  | 0.999371363 | Not Sig |
| ENSG00000152359 | POC5         | POC5 centriolar protein                                    | 134359    | 197.7655452 | -0.113036889 | 0.556470577 | -0.203131834 | 0.839031991 | 0.999371363 | Not Sig |
| ENSG00000168038 | ULK4         | unc-51 like kinase 4                                       | 54986     | 387.7700662 | -0.112939822 | 0.442828046 | -0.255042161 | 0.798690536 | 0.999371363 | Not Sig |
| ENSG00000183011 | NAA38        | N(alpha)-acetyltransferase 38, NatC auxiliary subunit      | 84316     | 604.4674537 | -0.112861897 | 0.490900542 | -0.229907867 | 0.818163363 | 0.999371363 | Not Sig |
| ENSG00000151304 | SRFBP1       | serum response factor binding protein 1                    | 153443    | 406.241911  | -0.112847501 | 0.494956602 | -0.227994737 | 0.819650332 | 0.999371363 | Not Sig |
| ENSG00000117523 | PRRC2C       | proline rich coiled-coil 2C                                | 23215     | 10940.27019 | -0.112724785 | 0.587579201 | -0.191846112 | 0.847862749 | 0.999371363 | Not Sig |
| ENSG00000188459 | NA           | NA                                                         | NA        | 3.537700618 | -0.112669775 | 1.635884309 | -0.068873926 | 0.945089973 | NA          | NA      |
| ENSG00000250461 | NA           | NA                                                         | NA        | 116.3084821 | -0.112623055 | 0.795583325 | -0.141560351 | 0.887427286 | 0.999371363 | Not Sig |
| ENSG00000186818 | LILRB4       | leukocyte immunoglobulin like receptor B4                  | 11006     | 486.9392707 | -0.112610896 | 0.778363305 | -0.144676522 | 0.884966277 | 0.999371363 | Not Sig |
| ENSG00000231672 | NA           | NA                                                         | NA        | 43.89027179 | -0.112543212 | 0.595232578 | -0.189074348 | 0.850034546 | 0.999371363 | Not Sig |
| ENSG00000101126 | ADNP         | activity dependent neuroprotector homeobox                 | 23394     | 2912.540145 | -0.112400068 | 0.476756312 | -0.23576     | 0.813618909 | 0.999371363 | Not Sig |
| ENSG00000249471 | ZNF324B      | zinc finger protein 324B                                   | 388569    | 168.7046372 | -0.112363916 | 0.582484342 | -0.192904612 | 0.847033673 | 0.999371363 | Not Sig |
| ENSG00000166946 | CCNDBP1      | cyclin D1 binding protein 1                                | 23582     | 959.3171607 | -0.112222652 | 0.428188235 | -0.262087191 | 0.793254222 | 0.999371363 | Not Sig |
| ENSG00000177106 | EPS8L2       | EPS8 like 2                                                | 64787     | 2975.447458 | -0.112062651 | 0.535895042 | -0.209113057 | 0.834359982 | 0.999371363 | Not Sig |
| ENSG00000007392 | LUC7L        | LUC7 like                                                  | 55692     | 1331.429935 | -0.111986975 | 0.441980773 | -0.253375218 | 0.799978277 | 0.999371363 | Not Sig |
| ENSG00000129465 | RIPK3        | receptor interacting serine/threonine kinase 3             | 11035     | 228.6134308 | -0.111929523 | 0.59505398  | -0.188099781 | 0.850798433 | 0.999371363 | Not Sig |
| ENSG00000151458 | ANKRD50      | ankyrin repeat domain 50                                   | 57182     | 2060.745389 | -0.1119203   | 0.470518077 | -0.2378661   | 0.81198495  | 0.999371363 | Not Sig |
| ENSG00000149554 | CHEK1        | checkpoint kinase 1                                        | 1111      | 178.479474  | -0.111905038 | 0.979419171 | -0.114256532 | 0.909034439 | 0.999371363 | Not Sig |
| ENSG00000112855 | HARS2        | histidyl-tRNA synthetase 2, mitochondrial                  | 23438     | 574.6770133 | -0.111746417 | 0.480536491 | -0.232545123 | 0.816114645 | 0.999371363 | Not Sig |
| ENSG00000116497 | S100BPB      | S100P binding protein                                      | 64766     | 964.9572189 | -0.111735997 | 0.554627545 | -0.20146132  | 0.840337871 | 0.999371363 | Not Sig |
| ENSG00000175741 | NA           | NA                                                         | NA        | 42.6674833  | -0.111693785 | 0.647626935 | -0.172466244 | 0.863070997 | 0.999371363 | Not Sig |
| ENSG00000135912 | TTL4         | tubulin tyrosine ligase like 4                             | 9654      | 671.5013041 | -0.111619765 | 0.430132099 | -0.259501127 | 0.795248613 | 0.999371363 | Not Sig |



|                 |              |                                                       |           |             |              |             |              |             |             |         |
|-----------------|--------------|-------------------------------------------------------|-----------|-------------|--------------|-------------|--------------|-------------|-------------|---------|
| ENSG00000225933 | NA           | NA                                                    | NA        | 3.202522247 | -0.111504149 | 1.348743988 | -0.082672583 | 0.934111886 | NA          | NA      |
| ENSG00000166171 | DPCD         | deleted in primary ciliary dyskinesia homolog (mouse) | 25911     | 143.4370172 | -0.111466158 | 0.45826118  | -0.243237182 | 0.807821665 | 0.999371363 | Not Sig |
| ENSG00000164944 | VIRMA        | vir like m6A methyltransferase associated             | 25962     | 1713.37932  | -0.111457693 | 0.463879488 | -0.24027295  | 0.810118664 | 0.999371363 | Not Sig |
| ENSG00000069667 | RORA         | RAR related orphan receptor A                         | 6095      | 1674.189885 | -0.111388776 | 0.703447386 | -0.15834699  | 0.874183382 | 0.999371363 | Not Sig |
| ENSG00000178691 | SUZ12        | SUZ12 polycomb repressive complex 2 subunit           | 23512     | 1214.830109 | -0.111368761 | 0.652994259 | -0.170550903 | 0.864576906 | 0.999371363 | Not Sig |
| ENSG00000256436 | TAS2R31      | taste 2 receptor member 31                            | 259290    | 82.41663852 | -0.11136622  | 0.732434219 | -0.15204945  | 0.879147934 | 0.999371363 | Not Sig |
| ENSG00000230521 | NA           | NA                                                    | NA        | 86.11013335 | -0.111205012 | 0.766042268 | -0.145168245 | 0.884578037 | 0.999371363 | Not Sig |
| ENSG00000144810 | COL8A1       | collagen type VIII alpha 1 chain                      | 1295      | 3931.905681 | -0.111166737 | 0.393950417 | -0.282184592 | 0.777801973 | 0.999371363 | Not Sig |
| ENSG00000260213 | NA           | NA                                                    | NA        | 1.959385876 | -0.110845787 | 1.635178743 | -0.067788177 | 0.945954255 | NA          | NA      |
| ENSG00000200312 | NA           | NA                                                    | NA        | 287.036804  | -0.110787667 | 0.525446753 | -0.210844707 | 0.833008451 | 0.999371363 | Not Sig |
| ENSG00000085871 | MGST2        | microsomal glutathione S-transferase 2                | 4258      | 394.5492248 | -0.110665428 | 0.481318917 | -0.22992121  | 0.818152994 | 0.999371363 | Not Sig |
| ENSG00000185946 | RNPC3        | RNA binding region (RNPI, RRM) containing 3           | 55599     | 732.7333981 | -0.110455396 | 0.473788629 | -0.233132221 | 0.815658735 | 0.999371363 | Not Sig |
| ENSG00000213963 | LOC100130691 | uncharacterized LOC100130691                          | 100130691 | 87.65774419 | -0.110349775 | 0.726496704 | -0.151893016 | 0.879271317 | 0.999371363 | Not Sig |
| ENSG00000175768 | TOMM5        | translocase of outer mitochondrial membrane 5         | 401505    | 38.09310241 | -0.110317438 | 0.563214072 | -0.195871239 | 0.844710949 | 0.999371363 | Not Sig |
| ENSG00000239930 | LOC101930094 | uncharacterized LOC101930094                          | 101930094 | 2.741620947 | -0.110283203 | 1.937042948 | -0.056933793 | 0.954597935 | NA          | NA      |
| ENSG00000118454 | ANKRD13C     | ankyrin repeat domain 13C                             | 81573     | 807.7446892 | -0.110250236 | 0.486636535 | -0.226555607 | 0.820769315 | 0.999371363 | Not Sig |
| ENSG00000109390 | NDUFC1       | NADH:ubiquinone oxidoreductase subunit C1             | 4717      | 283.2020926 | -0.110240359 | 0.451198357 | -0.244327927 | 0.806976856 | 0.999371363 | Not Sig |
| ENSG00000204947 | ZNF425       | zinc finger protein 425                               | 155054    | 51.05940991 | -0.110140731 | 0.651270526 | -0.169116713 | 0.865704839 | 0.999371363 | Not Sig |
| ENSG00000131381 | RBSN         | rabenosyn, RAB effector                               | 64145     | 1257.612051 | -0.110101351 | 0.415989097 | -0.264673645 | 0.791260882 | 0.999371363 | Not Sig |
| ENSG00000139908 | TSSK4        | testis specific serine kinase 4                       | 283629    | 5.573434704 | -0.110049922 | 1.220205305 | -0.090189677 | 0.928136487 | NA          | NA      |
| ENSG00000263069 | LOC100294362 | uncharacterized LOC100294362                          | 100294362 | 70.43052153 | -0.109906296 | 0.6989002   | -0.157256066 | 0.875043044 | 0.999371363 | Not Sig |
| ENSG00000154025 | SLC5A10      | solute carrier family 5 member 10                     | 125206    | 0.98763883  | -0.10965782  | 2.316183354 | -0.047344188 | 0.962238911 | NA          | NA      |
| ENSG00000201129 | SNORA58B     | small nucleolar RNA, H/ACA box 58B                    | 109617023 | 0.98763883  | -0.10965782  | 2.316183354 | -0.047344188 | 0.962238911 | NA          | NA      |
| ENSG00000187048 | CYP4A11      | cytochrome P450 family 4 subfamily A member 11        | 1579      | 1.198062724 | -0.10955659  | 2.453011678 | -0.044662074 | 0.964376664 | NA          | NA      |
| ENSG00000205871 | NA           | NA                                                    | NA        | 9.679929785 | -0.109544259 | 0.837010702 | -0.130875577 | 0.895873735 | 0.999371363 | Not Sig |
| ENSG00000183161 | FANCF        | Fanconi anemia complementation group F                | 2188      | 331.8871904 | -0.109460481 | 0.474913339 | -0.23048517  | 0.817714786 | 0.999371363 | Not Sig |
| ENSG00000255343 | NA           | NA                                                    | NA        | 2.298289122 | -0.109439045 | 1.582193932 | -0.069169173 | 0.944854961 | NA          | NA      |
| ENSG00000264916 | NA           | NA                                                    | NA        | 9.086298294 | -0.109385679 | 1.116474163 | -0.097974214 | 0.921952769 | 0.999371363 | Not Sig |
| ENSG00000266934 | NA           | NA                                                    | NA        | 31.41007029 | -0.109099617 | 0.840573359 | -0.129791905 | 0.896731068 | 0.999371363 | Not Sig |
| ENSG00000133704 | IP08         | importin 8                                            | 10526     | 1490.627743 | -0.109085316 | 0.43650241  | -0.249907707 | 0.802658723 | 0.999371363 | Not Sig |
| ENSG00000113966 | ARL6         | ADP ribosylation factor like GTPase 6                 | 84100     | 100.0283713 | -0.109084414 | 0.51568629  | -0.211532506 | 0.83247177  | 0.999371363 | Not Sig |
| ENSG00000131653 | TRAF7        | TNF receptor associated factor 7                      | 84231     | 1695.192837 | -0.108957105 | 0.423245202 | -0.257432581 | 0.796844854 | 0.999371363 | Not Sig |
| ENSG00000115825 | PRKD3        | protein kinase D3                                     | 23683     | 1325.925357 | -0.108897453 | 0.570136314 | -0.191002485 | 0.848523646 | 0.999371363 | Not Sig |
| ENSG00000101049 | SGK2         | SGK2, serine/threonine kinase 2                       | 10110     | 85.78433895 | -0.108833168 | 0.819385501 | -0.132822912 | 0.894333434 | 0.999371363 | Not Sig |
| ENSG00000123600 | METTL8       | methyltransferase like 8                              | 79828     | 325.777688  | -0.108790315 | 0.479008818 | -0.227115474 | 0.820333952 | 0.999371363 | Not Sig |

|                 |              |                                                                          |           |             |              |             |              |             |             |         |
|-----------------|--------------|--------------------------------------------------------------------------|-----------|-------------|--------------|-------------|--------------|-------------|-------------|---------|
| ENSG00000109689 | STIM2        | stromal interaction molecule 2                                           | 57620     | 1065.421418 | -0.108588735 | 0.481088436 | -0.225714707 | 0.821423319 | 0.999371363 | Not Sig |
| ENSG00000149273 | RPS3         | ribosomal protein S3                                                     | 6188      | 8592.743182 | -0.108504538 | 0.440745031 | -0.246184371 | 0.805539514 | 0.999371363 | Not Sig |
| ENSG00000131023 | LATS1        | large tumor suppressor kinase 1                                          | 9113      | 1763.146229 | -0.108318105 | 0.514501092 | -0.210530371 | 0.833253751 | 0.999371363 | Not Sig |
| ENSG00000154059 | IMPACT       | impact RWD domain protein                                                | 55364     | 598.0129018 | -0.108308281 | 0.515905285 | -0.209938305 | 0.833715826 | 0.999371363 | Not Sig |
| ENSG00000226435 | ANKRD18DP    | ankyrin repeat domain 18D, pseudogene                                    | 348840    | 2.253215476 | -0.108210917 | 1.564504055 | -0.069166275 | 0.944857268 | NA          | NA      |
| ENSG00000075426 | FOSL2        | FOS like 2, AP-1 transcription factor subunit                            | 2355      | 5748.642302 | -0.108164207 | 0.486837732 | -0.222177124 | 0.824176001 | 0.999371363 | Not Sig |
| ENSG00000199218 | NA           | NA                                                                       | NA        | 6.442607257 | -0.10809987  | 1.399776367 | -0.077226529 | 0.938443338 | NA          | NA      |
| ENSG00000169122 | FAM110B      | family with sequence similarity 110 member B                             | 90362     | 142.5770368 | -0.107942478 | 0.833800783 | -0.129458356 | 0.896994975 | 0.999371363 | Not Sig |
| ENSG00000234287 | NA           | NA                                                                       | NA        | 5.120388341 | -0.107931753 | 1.426729316 | -0.075649776 | 0.939697734 | NA          | NA      |
| ENSG00000188529 | SRSF10       | serine and arginine rich splicing factor 10                              | 10772     | 367.0720727 | -0.107922228 | 0.660758032 | -0.163330936 | 0.870257877 | 0.999371363 | Not Sig |
| ENSG00000123739 | PLA2G12A     | phospholipase A2 group XIIA                                              | 81579     | 830.3166144 | -0.107813663 | 0.520521842 | -0.207126108 | 0.835911373 | 0.999371363 | Not Sig |
| ENSG00000100823 | APEX1        | apurinic/apryrimidinic endodeoxyribonuclease 1                           | 328       | 1266.08269  | -0.107581872 | 0.472622117 | -0.22762767  | 0.819935707 | 0.999371363 | Not Sig |
| ENSG00000027001 | MIPEP        | mitochondrial intermediate peptidase                                     | 4285      | 350.1220461 | -0.107556759 | 0.495434913 | -0.217095639 | 0.828133813 | 0.999371363 | Not Sig |
| ENSG00000167220 | HDHD2        | haloacid dehalogenase like hydrolase domain containing 2                 | 84064     | 571.6223473 | -0.107524908 | 0.484236162 | -0.222050553 | 0.82427453  | 0.999371363 | Not Sig |
| ENSG00000104432 | IL7          | interleukin 7                                                            | 3574      | 137.891253  | -0.107465912 | 0.661065952 | -0.162564585 | 0.870861273 | 0.999371363 | Not Sig |
| ENSG00000215788 | TNFRSF25     | TNF receptor superfamily member 25                                       | 8718      | 200.3241914 | -0.107224994 | 0.474087248 | -0.226171437 | 0.821068085 | 0.999371363 | Not Sig |
| ENSG00000226942 | NA           | NA                                                                       | NA        | 27.81756519 | -0.107217033 | 0.717025393 | -0.149530315 | 0.881135191 | 0.999371363 | Not Sig |
| ENSG00000132694 | ARHGEF11     | Rho guanine nucleotide exchange factor 11                                | 9826      | 2701.19205  | -0.107156861 | 0.507936176 | -0.210965207 | 0.832914421 | 0.999371363 | Not Sig |
| ENSG00000183114 | FAM43B       | family with sequence similarity 43 member B                              | 163933    | 10.91173573 | -0.107076661 | 0.902570373 | -0.11863525  | 0.905564337 | 0.999371363 | Not Sig |
| ENSG00000125744 | RTN2         | reticulon 2                                                              | 6253      | 160.6686531 | -0.107075733 | 0.593260204 | -0.180486964 | 0.856770287 | 0.999371363 | Not Sig |
| ENSG00000261072 | NA           | NA                                                                       | NA        | 34.25502602 | -0.107039786 | 0.785152758 | -0.136329886 | 0.891560499 | 0.999371363 | Not Sig |
| ENSG00000166974 | MAPRE2       | microtubule associated protein RP/EB family member 2                     | 10982     | 1097.821202 | -0.106917172 | 0.596284384 | -0.179305671 | 0.857697694 | 0.999371363 | Not Sig |
| ENSG00000179978 | NA           | NA                                                                       | NA        | 90.58222525 | -0.106703872 | 0.524842669 | -0.203306398 | 0.838895555 | 0.999371363 | Not Sig |
| ENSG00000231113 | NA           | NA                                                                       | NA        | 71.90364256 | -0.106582314 | 0.488572574 | -0.218150423 | 0.827311912 | 0.999371363 | Not Sig |
| ENSG00000046889 | PREX2        | phosphatidylinositol-3,4,5-trisphosphate dependent Rac exchange factor 2 | 80243     | 1072.998902 | -0.106568783 | 0.717642867 | -0.148498352 | 0.881949486 | 0.999371363 | Not Sig |
| ENSG00000164053 | ATRIP        | ATR interacting protein                                                  | 84126     | 169.8457637 | -0.106467162 | 0.487826331 | -0.218248084 | 0.827235822 | 0.999371363 | Not Sig |
| ENSG00000198920 | KIAA0753     | KIAA0753                                                                 | 9851      | 750.4296903 | -0.106411534 | 0.558311635 | -0.190595229 | 0.848842728 | 0.999371363 | Not Sig |
| ENSG00000147874 | HAUS6        | HAUS augmin like complex subunit 6                                       | 54801     | 511.1204561 | -0.106356965 | 0.512112962 | -0.207682627 | 0.835476784 | 0.999371363 | Not Sig |
| ENSG00000163930 | BAP1         | BRCA1 associated protein 1                                               | 8314      | 1447.427879 | -0.106059556 | 0.464896605 | -0.228135793 | 0.819540675 | 0.999371363 | Not Sig |
| ENSG00000022840 | RNF10        | ring finger protein 10                                                   | 9921      | 3250.621367 | -0.106025268 | 0.432172873 | -0.245330688 | 0.806200392 | 0.999371363 | Not Sig |
| ENSG00000151576 | QTRT2        | queuine tRNA-ribosyltransferase accessory subunit 2                      | 79691     | 543.2479287 | -0.105969182 | 0.428499972 | -0.247302659 | 0.804674001 | 0.999371363 | Not Sig |
| ENSG00000174227 | PIGG         | phosphatidylinositol glycan anchor biosynthesis class G                  | 54872     | 1303.172391 | -0.105951343 | 0.400253196 | -0.264710799 | 0.791232258 | 0.999371363 | Not Sig |
| ENSG00000254887 | LOC100505622 | uncharacterized LOC100505622                                             | 100505622 | 3.324260012 | -0.105879863 | 1.317386855 | -0.080371124 | 0.935942092 | NA          | NA      |
| ENSG00000188163 | FAM166A      | family with sequence similarity 166 member A                             | 401565    | 5.189086566 | -0.105816508 | 1.139935048 | -0.092826787 | 0.92604117  | NA          | NA      |
| ENSG00000176102 | CSTF3        | cleavage stimulation factor subunit 3                                    | 1479      | 571.9113948 | -0.105811319 | 0.562627436 | -0.188066405 | 0.850824596 | 0.999371363 | Not Sig |

|                 |         |                                                    |        |             |              |             |              |             |             |         |
|-----------------|---------|----------------------------------------------------|--------|-------------|--------------|-------------|--------------|-------------|-------------|---------|
| ENSG00000186395 | KRT10   | keratin 10                                         | 3858   | 159.0601882 | -0.105801545 | 0.66368337  | -0.159415694 | 0.873341375 | 0.999371363 | Not Sig |
| ENSG00000204344 | STK19   | serine/threonine kinase 19                         | 8859   | 324.8024269 | -0.105794267 | 0.530470203 | -0.199434891 | 0.84192257  | 0.999371363 | Not Sig |
| ENSG00000151694 | ADAM17  | ADAM metallopeptidase domain 17                    | 6868   | 1537.551471 | -0.105775811 | 0.560923254 | -0.188574481 | 0.850426335 | 0.999371363 | Not Sig |
| ENSG00000240849 | TMEM189 | transmembrane protein 189                          | 387521 | 410.6619453 | -0.105651445 | 0.573519443 | -0.184215977 | 0.853844026 | 0.999371363 | Not Sig |
| ENSG00000251795 | NA      | NA                                                 | NA     | 24.52561028 | -0.105604255 | 0.681677122 | -0.154918291 | 0.876885734 | 0.999371363 | Not Sig |
| ENSG00000249002 | NA      | NA                                                 | NA     | 1.281468429 | -0.105489163 | 2.129786146 | -0.049530402 | 0.96049661  | NA          | NA      |
| ENSG00000238227 | TMEM250 | transmembrane protein 250                          | 90120  | 703.3434582 | -0.105400059 | 0.559178037 | -0.188491057 | 0.850491725 | 0.999371363 | Not Sig |
| ENSG00000110274 | CEP164  | centrosomal protein 164                            | 22897  | 945.299644  | -0.105311176 | 0.540914087 | -0.194691132 | 0.845634755 | 0.999371363 | Not Sig |
| ENSG00000133030 | MPRIP   | myosin phosphatase Rho interacting protein         | 23164  | 9466.594932 | -0.105309881 | 0.536416274 | -0.196321189 | 0.844358778 | 0.999371363 | Not Sig |
| ENSG00000154917 | RAB6B   | RAB6B, member RAS oncogene family                  | 51560  | 187.4043999 | -0.105027468 | 0.913974859 | -0.114912863 | 0.90851419  | 0.999371363 | Not Sig |
| ENSG00000214988 | NA      | NA                                                 | NA     | 4.211029232 | -0.104814499 | 1.776339225 | -0.059005902 | 0.952947407 | NA          | NA      |
| ENSG00000226801 | NA      | NA                                                 | NA     | 15.70682171 | -0.104677284 | 0.876672968 | -0.119402888 | 0.904956174 | 0.999371363 | Not Sig |
| ENSG00000122497 | NA      | NA                                                 | NA     | 804.5673934 | -0.104665173 | 0.439196298 | -0.23831069  | 0.811640131 | 0.999371363 | Not Sig |
| ENSG00000230928 | NA      | NA                                                 | NA     | 13.71516979 | -0.104603213 | 1.145156848 | -0.091344005 | 0.927219253 | 0.999371363 | Not Sig |
| ENSG00000010327 | STAB1   | stabilin 1                                         | 23166  | 3146.964958 | -0.10451018  | 0.553579156 | -0.188789947 | 0.850257451 | 0.999371363 | Not Sig |
| ENSG00000100836 | PABPN1  | poly(A) binding protein nuclear 1                  | 8106   | 1436.529973 | -0.104372017 | 0.462026081 | -0.225900704 | 0.82127865  | 0.999371363 | Not Sig |
| ENSG00000103126 | AXIN1   | axin 1                                             | 8312   | 1206.957698 | -0.104239043 | 0.552684602 | -0.188604935 | 0.850402465 | 0.999371363 | Not Sig |
| ENSG00000109920 | FNBP4   | formin binding protein 4                           | 23360  | 2606.898438 | -0.10418788  | 0.487192439 | -0.213853647 | 0.830661189 | 0.999371363 | Not Sig |
| ENSG00000104894 | CD37    | CD37 molecule                                      | 951    | 784.1667023 | -0.104113913 | 0.900741757 | -0.115586862 | 0.907979976 | 0.999371363 | Not Sig |
| ENSG00000086589 | RBM22   | RNA binding motif protein 22                       | 55696  | 823.2999584 | -0.104073514 | 0.45800145  | -0.227234029 | 0.820241769 | 0.999371363 | Not Sig |
| ENSG00000015413 | DPEP1   | dipeptidase 1                                      | 1800   | 59.40014479 | -0.104071442 | 1.116285293 | -0.093230147 | 0.925720725 | 0.999371363 | Not Sig |
| ENSG00000257218 | GATC    | glutamyl-tRNA amidotransferase subunit C           | 283459 | 270.4658271 | -0.10403643  | 0.470556416 | -0.221092363 | 0.825020516 | 0.999371363 | Not Sig |
| ENSG00000140105 | WARS    | tryptophanyl-tRNA synthetase                       | 7453   | 4191.950412 | -0.103938722 | 0.836698354 | -0.124224844 | 0.901137252 | 0.999371363 | Not Sig |
| ENSG00000231925 | TAPBP   | TAP binding protein                                | 6892   | 8943.396053 | -0.10383257  | 0.591207665 | -0.175627915 | 0.86058627  | 0.999371363 | Not Sig |
| ENSG00000163239 | TDRD10  | tudor domain containing 10                         | 126668 | 157.0478424 | -0.103777262 | 0.927866708 | -0.111845011 | 0.910946298 | 0.999371363 | Not Sig |
| ENSG00000267361 | NA      | NA                                                 | NA     | 39.19548127 | -0.103777082 | 0.700130252 | -0.148225394 | 0.882164892 | 0.999371363 | Not Sig |
| ENSG00000003393 | ALS2    | ALS2, alsin Rho guanine nucleotide exchange factor | 57679  | 878.4156922 | -0.103748541 | 0.381802323 | -0.271733657 | 0.78582682  | 0.999371363 | Not Sig |
| ENSG00000161681 | SHANK1  | SH3 and multiple ankyrin repeat domains 1          | 50944  | 27.14298104 | -0.103600466 | 0.683648537 | -0.151540536 | 0.879549337 | 0.999371363 | Not Sig |
| ENSG00000074054 | CLASP1  | cytoplasmic linker associated protein 1            | 23332  | 2721.082559 | -0.10355302  | 0.417979045 | -0.247746918 | 0.804330228 | 0.999371363 | Not Sig |
| ENSG00000257446 | ZNF878  | zinc finger protein 878                            | 729747 | 5.435129858 | -0.103546058 | 1.076391139 | -0.096197427 | 0.923363774 | NA          | NA      |
| ENSG00000111554 | MDM1    | Mdm1 nuclear protein                               | 56890  | 235.8436687 | -0.103467234 | 0.480927492 | -0.215141026 | 0.829657369 | 0.999371363 | Not Sig |
| ENSG00000108963 | DPH1    | diphthamide biosynthesis 1                         | 1801   | 451.8979623 | -0.103355093 | 0.422004048 | -0.244914932 | 0.806522299 | 0.999371363 | Not Sig |
| ENSG00000122299 | ZC3H7A  | zinc finger CCCH-type containing 7A                | 29066  | 1586.877277 | -0.103338735 | 0.440538446 | -0.234573704 | 0.814539622 | 0.999371363 | Not Sig |
| ENSG00000181472 | ZBTB2   | zinc finger and BTB domain containing 2            | 57621  | 399.2295877 | -0.103311172 | 0.416257484 | -0.248190546 | 0.803986981 | 0.999371363 | Not Sig |
| ENSG00000145425 | RPS3A   | ribosomal protein S3A                              | 6189   | 9889.603668 | -0.103278673 | 0.426876127 | -0.241940616 | 0.808826177 | 0.999371363 | Not Sig |

|                 |              |                                                                     |           |             |              |             |              |             |             |         |
|-----------------|--------------|---------------------------------------------------------------------|-----------|-------------|--------------|-------------|--------------|-------------|-------------|---------|
| ENSG00000197355 | UAP1L1       | UDP-N-acetylglucosamine pyrophosphorylase 1 like 1                  | 91373     | 456.3950152 | -0.103236359 | 0.68117679  | -0.151555896 | 0.879537221 | 0.999371363 | Not Sig |
| ENSG00000181004 | BBS12        | Bardet-Biedl syndrome 12                                            | 166379    | 87.16389988 | -0.10313645  | 0.507870618 | -0.20307623  | 0.839075451 | 0.999371363 | Not Sig |
| ENSG00000267749 | NA           | NA                                                                  | NA        | 10.95285679 | -0.103038124 | 1.357140213 | -0.075922976 | 0.939480377 | 0.999371363 | Not Sig |
| ENSG00000165688 | PMPCA        | peptidase, mitochondrial processing alpha subunit                   | 23203     | 720.5976904 | -0.102998468 | 0.434798093 | -0.23688804  | 0.812743649 | 0.999371363 | Not Sig |
| ENSG00000272910 | NA           | NA                                                                  | NA        | 4.182278949 | -0.102906011 | 1.367370024 | -0.075258349 | 0.94000916  | NA          | NA      |
| ENSG00000255142 | NA           | NA                                                                  | NA        | 32.78277728 | -0.102722238 | 0.701596601 | -0.146412109 | 0.883596069 | 0.999371363 | Not Sig |
| ENSG00000066827 | ZFAT         | zinc finger and AT-hook domain containing                           | 57623     | 526.355425  | -0.102676494 | 0.449872845 | -0.228234479 | 0.819463959 | 0.999371363 | Not Sig |
| ENSG00000004700 | RECQL        | RecQ like helicase                                                  | 5965      | 851.0434461 | -0.102598382 | 0.502504914 | -0.204173888 | 0.838217616 | 0.999371363 | Not Sig |
| ENSG00000265967 | NA           | NA                                                                  | NA        | 12.97625325 | -0.102555976 | 0.881497721 | -0.116342871 | 0.90738081  | 0.999371363 | Not Sig |
| ENSG00000177082 | WDR73        | WD repeat domain 73                                                 | 84942     | 602.2570612 | -0.102505944 | 0.443497782 | -0.23113068  | 0.817213281 | 0.999371363 | Not Sig |
| ENSG00000115129 | TP53I3       | tumor protein p53 inducible protein 3                               | 9540      | 456.6017966 | -0.102493975 | 0.436638893 | -0.234733957 | 0.81441523  | 0.999371363 | Not Sig |
| ENSG00000230068 | NA           | NA                                                                  | NA        | 42.82734538 | -0.102315924 | 0.682004916 | -0.150022267 | 0.880747048 | 0.999371363 | Not Sig |
| ENSG00000145649 | GZMA         | granzyme A                                                          | 3001      | 118.9448218 | -0.102313668 | 0.891964031 | -0.114706047 | 0.908678121 | 0.999371363 | Not Sig |
| ENSG00000007168 | PAFAH1B1     | platelet activating factor acetylhydrolase 1b regulatory subunit 1  | 5048      | 3974.00121  | -0.102200661 | 0.422364805 | -0.241972484 | 0.808801484 | 0.999371363 | Not Sig |
| ENSG00000263006 | ROCK1P1      | Rho associated coiled-coil containing protein kinase 1 pseudogene 1 | 727758    | 27.75525386 | -0.101990478 | 0.741942233 | -0.137464176 | 0.890663908 | 0.999371363 | Not Sig |
| ENSG00000171428 | NAT1         | N-acetyltransferase 1                                               | 9         | 108.4987014 | -0.101989736 | 0.491725934 | -0.20741175  | 0.835688307 | 0.999371363 | Not Sig |
| ENSG00000172466 | ZNF24        | zinc finger protein 24                                              | 7572      | 2708.554981 | -0.101921726 | 0.470003422 | -0.216853158 | 0.828322784 | 0.999371363 | Not Sig |
| ENSG00000175792 | RUVBL1       | RuvB like AAA ATPase 1                                              | 8607      | 608.4539833 | -0.101536755 | 0.398839755 | -0.254580326 | 0.799047256 | 0.999371363 | Not Sig |
| ENSG00000140988 | RPS2         | ribosomal protein S2                                                | 6187      | 10749.15304 | -0.101386719 | 0.409507317 | -0.247582192 | 0.804457691 | 0.999371363 | Not Sig |
| ENSG00000198026 | ZNF335       | zinc finger protein 335                                             | 63925     | 811.2287663 | -0.101385399 | 0.507537471 | -0.199759436 | 0.841668728 | 0.999371363 | Not Sig |
| ENSG00000198331 | HYLS1        | HYLS1, centriolar and ciliogenesis associated                       | 219844    | 69.88309772 | -0.101166936 | 0.551178309 | -0.183546656 | 0.854369114 | 0.999371363 | Not Sig |
| ENSG00000101311 | FERMT1       | fermitin family member 1                                            | 55612     | 464.3615407 | -0.101165216 | 0.860540527 | -0.117560083 | 0.906416235 | 0.999371363 | Not Sig |
| ENSG00000163319 | MRPS18C      | mitochondrial ribosomal protein S18C                                | 51023     | 205.4952447 | -0.101126944 | 0.57847591  | -0.174816172 | 0.861224081 | 0.999371363 | Not Sig |
| ENSG00000233223 | LOC100996842 | uncharacterized LOC100996842                                        | 100996842 | 61.6235475  | -0.100987818 | 0.619250842 | -0.163080631 | 0.87045495  | 0.999371363 | Not Sig |
| ENSG00000084733 | RAB10        | RAB10, member RAS oncogene family                                   | 10890     | 2535.802911 | -0.100895484 | 0.504339483 | -0.2000547   | 0.841437802 | 0.999371363 | Not Sig |
| ENSG00000258791 | NA           | NA                                                                  | NA        | 1.055152752 | -0.100869556 | 2.580233222 | -0.039093193 | 0.968816088 | NA          | NA      |
| ENSG00000265768 | MIR4506      | microRNA 4506                                                       | 100616140 | 1.055152752 | -0.100869556 | 2.580233222 | -0.039093193 | 0.968816088 | NA          | NA      |
| ENSG00000206922 | NA           | NA                                                                  | NA        | 0.616841061 | -0.100864174 | 3.507266779 | -0.028758626 | 0.977057099 | NA          | NA      |
| ENSG00000224407 | NA           | NA                                                                  | NA        | 0.616841061 | -0.100864174 | 3.507266779 | -0.028758626 | 0.977057099 | NA          | NA      |
| ENSG00000230495 | NA           | NA                                                                  | NA        | 0.616841061 | -0.100864174 | 3.507266779 | -0.028758626 | 0.977057099 | NA          | NA      |
| ENSG00000234513 | NA           | NA                                                                  | NA        | 0.616841061 | -0.100864174 | 3.507266779 | -0.028758626 | 0.977057099 | NA          | NA      |
| ENSG00000253618 | GRPEL2-AS1   | GRPEL2 antisense RNA 1                                              | 106144529 | 0.616841061 | -0.100864174 | 3.507266779 | -0.028758626 | 0.977057099 | NA          | NA      |
| ENSG00000132825 | PPP1R3D      | protein phosphatase 1 regulatory subunit 3D                         | 5509      | 281.9476304 | -0.100784959 | 0.455126922 | -0.221443633 | 0.824747022 | 0.999371363 | Not Sig |
| ENSG00000116586 | LAMTOR2      | late endosomal/lysosomal adaptor, MAPK and mTOR activator 2         | 28956     | 442.0710801 | -0.100666231 | 0.443375657 | -0.227045011 | 0.820388742 | 0.999371363 | Not Sig |
| ENSG00000198374 | NA           | NA                                                                  | NA        | 214.6649321 | -0.100624627 | 0.802334403 | -0.125414823 | 0.900195154 | 0.999371363 | Not Sig |

|                 |              |                                                           |           |             |              |             |              |             |             |         |
|-----------------|--------------|-----------------------------------------------------------|-----------|-------------|--------------|-------------|--------------|-------------|-------------|---------|
| ENSG00000245322 | LOC256880    | uncharacterized LOC256880                                 | 256880    | 3.507638505 | -0.100600798 | 1.320949624 | -0.076157937 | 0.939293447 | NA          | NA      |
| ENSG00000114993 | RTKN         | rhotekin                                                  | 6242      | 636.1939008 | -0.100563431 | 0.588097923 | -0.170997765 | 0.864225523 | 0.999371363 | Not Sig |
| ENSG00000132510 | KDM6B        | lysine demethylase 6B                                     | 23135     | 2809.126872 | -0.100545523 | 0.463617734 | -0.216871607 | 0.828308405 | 0.999371363 | Not Sig |
| ENSG00000076984 | MAP2K7       | mitogen-activated protein kinase kinase 7                 | 5609      | 993.0701419 | -0.10044368  | 0.552743948 | -0.181718281 | 0.855803819 | 0.999371363 | Not Sig |
| ENSG00000197183 | NOL4L        | nucleolar protein 4 like                                  | 140688    | 1119.053195 | -0.100377805 | 0.398283255 | -0.252026173 | 0.801020834 | 0.999371363 | Not Sig |
| ENSG00000246448 | NA           | NA                                                        | NA        | 9.376252606 | -0.100237061 | 1.085132361 | -0.09237312  | 0.926401596 | 0.999371363 | Not Sig |
| ENSG00000260735 | LOC100505915 | uncharacterized LOC100505915                              | 100505915 | 3.150596057 | -0.100225133 | 1.647506305 | -0.060834446 | 0.951491057 | NA          | NA      |
| ENSG00000138398 | PPIG         | peptidylprolyl isomerase G                                | 9360      | 2052.516545 | -0.100089656 | 0.458866217 | -0.218123828 | 0.827332632 | 0.999371363 | Not Sig |
| ENSG00000226928 | NA           | NA                                                        | NA        | 25.11838485 | -0.100052007 | 0.923343518 | -0.108358379 | 0.913711415 | 0.999371363 | Not Sig |
| ENSG00000144736 | SHQ1         | SHQ1, H/ACA ribonucleoprotein assembly factor             | 55164     | 392.3944648 | -0.100012976 | 0.472053256 | -0.211867992 | 0.832210022 | 0.999371363 | Not Sig |
| ENSG00000200241 | NA           | NA                                                        | NA        | 2.843011136 | -0.09978485  | 1.479990471 | -0.06742263  | 0.946245254 | NA          | NA      |
| ENSG00000213080 | NA           | NA                                                        | NA        | 2.049229118 | -0.099774616 | 1.603625865 | -0.062218138 | 0.950389118 | NA          | NA      |
| ENSG00000211881 | NA           | NA                                                        | NA        | 4.792837192 | -0.099682678 | 1.908346645 | -0.0522351   | 0.958341365 | NA          | NA      |
| ENSG00000272982 | NA           | NA                                                        | NA        | 6.81973699  | -0.099542731 | 1.553910633 | -0.064059496 | 0.948922853 | 0.999371363 | Not Sig |
| ENSG00000152558 | TMEM123      | transmembrane protein 123                                 | 114908    | 5704.755739 | -0.099533083 | 0.590755931 | -0.168484272 | 0.866202316 | 0.999371363 | Not Sig |
| ENSG00000115318 | LOXL3        | lysyl oxidase like 3                                      | 84695     | 155.8778155 | -0.099531236 | 0.579959665 | -0.171617514 | 0.863738238 | 0.999371363 | Not Sig |
| ENSG00000170322 | NFRKB        | nuclear factor related to kappaB binding protein          | 4798      | 910.7438312 | -0.099472531 | 0.42457448  | -0.234287589 | 0.81476172  | 0.999371363 | Not Sig |
| ENSG00000172000 | ZNF556       | zinc finger protein 556                                   | 80032     | 0.91067066  | -0.09947243  | 2.642925366 | -0.037637245 | 0.969976912 | NA          | NA      |
| ENSG00000169084 | DHRXS        | dehydrogenase/reductase X-linked                          | 207063    | 546.9417465 | -0.099331245 | 0.530495183 | -0.187242502 | 0.851470502 | 0.999371363 | Not Sig |
| ENSG00000258451 | NA           | NA                                                        | NA        | 1.64281195  | -0.099234723 | 1.930737787 | -0.051397307 | 0.959008931 | NA          | NA      |
| ENSG00000077380 | DYNC1I2      | dynein cytoplasmic 1 intermediate chain 2                 | 1781      | 1926.494185 | -0.099200657 | 0.457556152 | -0.216805427 | 0.828359983 | 0.999371363 | Not Sig |
| ENSG00000134109 | EDEM1        | ER degradation enhancing alpha-mannosidase like protein 1 | 9695      | 4338.939005 | -0.099125361 | 0.520919025 | -0.190289385 | 0.849082371 | 0.999371363 | Not Sig |
| ENSG00000241014 | LOC653160    | uncharacterized LOC653160                                 | 653160    | 128.5609175 | -0.099084375 | 0.47420962  | -0.208946362 | 0.834490111 | 0.999371363 | Not Sig |
| ENSG00000168495 | POLR3D       | RNA polymerase III subunit D                              | 661       | 600.9256715 | -0.099032601 | 0.489354695 | -0.202373866 | 0.839624458 | 0.999371363 | Not Sig |
| ENSG00000242986 | NA           | NA                                                        | NA        | 3.737114715 | -0.098733606 | 1.344759064 | -0.073421038 | 0.941471077 | NA          | NA      |
| ENSG00000178229 | ZNF543       | zinc finger protein 543                                   | 125919    | 315.4117729 | -0.098722676 | 0.408231877 | -0.241829904 | 0.808911966 | 0.999371363 | Not Sig |
| ENSG00000171045 | TSNARE1      | t-SNARE domain containing 1                               | 203062    | 465.4385179 | -0.098716396 | 0.564262364 | -0.174947689 | 0.861120738 | 0.999371363 | Not Sig |
| ENSG00000160201 | U2AF1        | U2 small nuclear RNA auxiliary factor 1                   | 7307      | 2023.261335 | -0.098620746 | 0.441408266 | -0.223422971 | 0.823206328 | 0.999371363 | Not Sig |
| ENSG00000110921 | MVK          | mevalonate kinase                                         | 4598      | 362.0690859 | -0.098599435 | 0.541729095 | -0.182008749 | 0.85557586  | 0.999371363 | Not Sig |
| ENSG00000270130 | NA           | NA                                                        | NA        | 33.35577603 | -0.098574986 | 0.715106283 | -0.137846622 | 0.890361637 | 0.999371363 | Not Sig |
| ENSG00000266075 | NA           | NA                                                        | NA        | 5.235444573 | -0.09849779  | 1.109801107 | -0.088752651 | 0.929278488 | NA          | NA      |
| ENSG00000205220 | PSMB10       | proteasome subunit beta 10                                | 5699      | 290.6092475 | -0.098381489 | 0.738218765 | -0.133268746 | 0.893980844 | 0.999371363 | Not Sig |
| ENSG00000118816 | CCNI         | cyclin I                                                  | 10983     | 8178.799834 | -0.098242767 | 0.418410585 | -0.234799909 | 0.814364038 | 0.999371363 | Not Sig |
| ENSG00000143437 | ARNT         | aryl hydrocarbon receptor nuclear translocator            | 405       | 1960.826975 | -0.09817131  | 0.39252006  | -0.250105204 | 0.802505991 | 0.999371363 | Not Sig |
| ENSG00000151135 | TMEM263      | transmembrane protein 263                                 | 90488     | 1409.759029 | -0.097936894 | 0.712063762 | -0.137539501 | 0.890604372 | 0.999371363 | Not Sig |

|                 |            |                                                               |           |             |              |             |              |             |             |         |
|-----------------|------------|---------------------------------------------------------------|-----------|-------------|--------------|-------------|--------------|-------------|-------------|---------|
| ENSG00000247498 | GPRC5D-AS1 | GPRC5D and HEBP1 antisense RNA 1                              | 100506314 | 152.9748189 | -0.097851556 | 0.890967168 | -0.10982622  | 0.912547196 | 0.999371363 | Not Sig |
| ENSG00000142875 | PRKACB     | protein kinase cAMP-activated catalytic subunit beta          | 5567      | 1149.775316 | -0.097676531 | 0.553541859 | -0.176457353 | 0.859934651 | 0.999371363 | Not Sig |
| ENSG00000163635 | ATXN7      | ataxin 7                                                      | 6314      | 2115.755898 | -0.097669563 | 0.475428724 | -0.205434712 | 0.837232503 | 0.999371363 | Not Sig |
| ENSG00000254999 | BRK1       | BRICK1, SCAR/WAVE actin nucleating complex subunit            | 55845     | 1326.460948 | -0.09760432  | 0.388386311 | -0.251307312 | 0.801576522 | 0.999371363 | Not Sig |
| ENSG00000171490 | RSL1D1     | ribosomal L1 domain containing 1                              | 26156     | 2070.80002  | -0.097350123 | 0.45712202  | -0.212963102 | 0.831355743 | 0.999371363 | Not Sig |
| ENSG00000181544 | FANCB      | Fanconi anemia complementation group B                        | 2187      | 48.18700381 | -0.097341866 | 0.725957873 | -0.134087486 | 0.893333395 | 0.999371363 | Not Sig |
| ENSG00000199883 | NA         | NA                                                            | NA        | 118.4706196 | -0.097316875 | 0.575894622 | -0.168983823 | 0.865809366 | 0.999371363 | Not Sig |
| ENSG00000064763 | FAR2       | fatty acyl-CoA reductase 2                                    | 55711     | 241.5522916 | -0.0972625   | 0.793117044 | -0.122633224 | 0.902397544 | 0.999371363 | Not Sig |
| ENSG00000114030 | KPNA1      | karyopherin subunit alpha 1                                   | 3836      | 1461.061409 | -0.097156056 | 0.475709116 | -0.204234168 | 0.838170512 | 0.999371363 | Not Sig |
| ENSG00000254208 | NA         | NA                                                            | NA        | 1.904747026 | -0.097110252 | 1.73315411  | -0.056030939 | 0.95531716  | NA          | NA      |
| ENSG00000224707 | NA         | NA                                                            | NA        | 26.65262391 | -0.097037529 | 1.020088895 | -0.095126542 | 0.924214316 | 0.999371363 | Not Sig |
| ENSG00000205981 | DNAJC19    | DnaJ heat shock protein family (Hsp40) member C19             | 131118    | 306.35236   | -0.096928569 | 0.520154299 | -0.186345799 | 0.852173594 | 0.999371363 | Not Sig |
| ENSG00000207627 | MIR581     | microRNA 581                                                  | 693166    | 10.07246534 | -0.096890442 | 1.086203837 | -0.089200976 | 0.92892219  | 0.999371363 | Not Sig |
| ENSG00000271081 | NA         | NA                                                            | NA        | 1.204500259 | -0.096874616 | 2.411513704 | -0.040171705 | 0.967956236 | NA          | NA      |
| ENSG00000244716 | NA         | NA                                                            | NA        | 13.45807832 | -0.096619582 | 0.746135403 | -0.129493363 | 0.896967277 | 0.999371363 | Not Sig |
| ENSG00000121864 | ZNF639     | zinc finger protein 639                                       | 51193     | 481.3319814 | -0.096501282 | 0.511058763 | -0.188826196 | 0.850229039 | 0.999371363 | Not Sig |
| ENSG00000005175 | RPAP3      | RNA polymerase II associated protein 3                        | 79657     | 462.4179253 | -0.096482215 | 0.573709961 | -0.168172459 | 0.866447607 | 0.999371363 | Not Sig |
| ENSG00000108557 | RAI1       | retinoic acid induced 1                                       | 10743     | 2949.297961 | -0.09646033  | 0.439450722 | -0.21950204  | 0.826258991 | 0.999371363 | Not Sig |
| ENSG00000238961 | SNORA47    | small nucleolar RNA, H/ACA box 47                             | 677828    | 9.899492977 | -0.096307253 | 0.833269639 | -0.115577538 | 0.907987366 | 0.999371363 | Not Sig |
| ENSG00000134853 | PDGFRA     | platelet derived growth factor receptor alpha                 | 5156      | 1802.744984 | -0.096274778 | 0.501172598 | -0.192099046 | 0.847664622 | 0.999371363 | Not Sig |
| ENSG00000165494 | PCF11      | PCF11 cleavage and polyadenylation factor subunit             | 51585     | 1944.554784 | -0.096230242 | 0.392670553 | -0.245066102 | 0.80640525  | 0.999371363 | Not Sig |
| ENSG00000198774 | RASSF9     | Ras association domain family member 9                        | 9182      | 251.4825043 | -0.096195127 | 0.626702054 | -0.153494194 | 0.878008569 | 0.999371363 | Not Sig |
| ENSG00000147536 | GINS4      | GINS complex subunit 4                                        | 84296     | 58.620017   | -0.096119004 | 0.666014458 | -0.144319696 | 0.885248026 | 0.999371363 | Not Sig |
| ENSG00000140285 | FGF7       | fibroblast growth factor 7                                    | 2252      | 454.2243102 | -0.096103926 | 0.576192649 | -0.166791308 | 0.867534258 | 0.999371363 | Not Sig |
| ENSG00000269968 | NA         | NA                                                            | NA        | 25.14680157 | -0.096020359 | 0.671109382 | -0.143077062 | 0.88622932  | 0.999371363 | Not Sig |
| ENSG00000205730 | ITPR1L2    | ITPRIP like 2                                                 | 162073    | 3545.81245  | -0.095887523 | 0.435361163 | -0.220248224 | 0.825677842 | 0.999371363 | Not Sig |
| ENSG00000256515 | NA         | NA                                                            | NA        | 11.26496941 | -0.095874149 | 1.369875276 | -0.069987502 | 0.944203607 | 0.999371363 | Not Sig |
| ENSG00000174720 | LARP7      | La ribonucleoprotein domain family member 7                   | 51574     | 805.6809307 | -0.095679113 | 0.438523521 | -0.218184678 | 0.827285223 | 0.999371363 | Not Sig |
| ENSG00000094880 | CDC23      | cell division cycle 23                                        | 8697      | 552.5879396 | -0.09545809  | 0.425918247 | -0.224123035 | 0.822661569 | 0.999371363 | Not Sig |
| ENSG00000183506 | PI4KAP2    | phosphatidylinositol 4-kinase alpha pseudogene 2              | 375133    | 368.8598307 | -0.095351359 | 0.526026089 | -0.181267357 | 0.856157727 | 0.999371363 | Not Sig |
| ENSG00000168175 | MAPK1IP1L  | mitogen-activated protein kinase 1 interacting protein 1 like | 93487     | 2384.7569   | -0.095137741 | 0.576723327 | -0.164962533 | 0.868973472 | 0.999371363 | Not Sig |
| ENSG00000213272 | NA         | NA                                                            | NA        | 2.410572639 | -0.094998523 | 1.58808787  | -0.059819437 | 0.952299445 | NA          | NA      |
| ENSG00000161021 | MAML1      | mastermind like transcriptional coactivator 1                 | 9794      | 2001.47644  | -0.094631616 | 0.472152281 | -0.200426049 | 0.841147388 | 0.999371363 | Not Sig |
| ENSG00000071051 | NCK2       | NCK adaptor protein 2                                         | 8440      | 1041.969472 | -0.094624551 | 0.527549487 | -0.179366207 | 0.857650164 | 0.999371363 | Not Sig |
| ENSG00000189060 | H1FO       | H1 histone family member 0                                    | 3005      | 4805.29102  | -0.094606936 | 0.590938668 | -0.160096032 | 0.872805427 | 0.999371363 | Not Sig |

|                 |           |                                                                |           |             |              |             |              |             |             |         |
|-----------------|-----------|----------------------------------------------------------------|-----------|-------------|--------------|-------------|--------------|-------------|-------------|---------|
| ENSG00000143631 | FLG       | filaggrin                                                      | 2312      | 0.587659198 | -0.094566281 | 4.023283583 | -0.023504751 | 0.981247648 | NA          | NA      |
| ENSG00000166917 | MIR202HG  | MIR202 host gene                                               | 101927671 | 0.587659198 | -0.094566281 | 4.023283583 | -0.023504751 | 0.981247648 | NA          | NA      |
| ENSG00000184459 | BPIFC     | BPI fold containing family C                                   | 254240    | 0.587659198 | -0.094566281 | 4.023283583 | -0.023504751 | 0.981247648 | NA          | NA      |
| ENSG00000189030 | VHLL      | VHL like                                                       | 391104    | 0.587659198 | -0.094566281 | 4.023283583 | -0.023504751 | 0.981247648 | NA          | NA      |
| ENSG00000205449 | NA        | NA                                                             | NA        | 0.587659198 | -0.094566281 | 4.023283583 | -0.023504751 | 0.981247648 | NA          | NA      |
| ENSG00000215838 | LOC440700 | carbonic anhydrase 14 pseudogene                               | 440700    | 0.587659198 | -0.094566281 | 4.023283583 | -0.023504751 | 0.981247648 | NA          | NA      |
| ENSG00000224963 | NA        | NA                                                             | NA        | 0.587659198 | -0.094566281 | 4.023283583 | -0.023504751 | 0.981247648 | NA          | NA      |
| ENSG00000230749 | MEIS1-AS2 | MEIS1 antisense RNA 2                                          | 100873998 | 0.587659198 | -0.094566281 | 4.023283583 | -0.023504751 | 0.981247648 | NA          | NA      |
| ENSG00000237897 | NA        | NA                                                             | NA        | 0.587659198 | -0.094566281 | 4.023283583 | -0.023504751 | 0.981247648 | NA          | NA      |
| ENSG00000244137 | NA        | NA                                                             | NA        | 0.587659198 | -0.094566281 | 4.023283583 | -0.023504751 | 0.981247648 | NA          | NA      |
| ENSG00000250982 | NA        | NA                                                             | NA        | 0.587659198 | -0.094566281 | 4.023283583 | -0.023504751 | 0.981247648 | NA          | NA      |
| ENSG00000259335 | NA        | NA                                                             | NA        | 0.587659198 | -0.094566281 | 4.023283583 | -0.023504751 | 0.981247648 | NA          | NA      |
| ENSG00000264775 | NA        | NA                                                             | NA        | 0.587659198 | -0.094566281 | 4.023283583 | -0.023504751 | 0.981247648 | NA          | NA      |
| ENSG00000266192 | MIR1260B  | microRNA 1260b                                                 | 100422991 | 0.587659198 | -0.094566281 | 4.023283583 | -0.023504751 | 0.981247648 | NA          | NA      |
| ENSG00000267324 | NA        | NA                                                             | NA        | 0.587659198 | -0.094566281 | 4.023283583 | -0.023504751 | 0.981247648 | NA          | NA      |
| ENSG00000166233 | ARIH1     | ariadne RBR E3 ubiquitin protein ligase 1                      | 25820     | 2932.89015  | -0.094497113 | 0.440417372 | -0.214562638 | 0.830108326 | 0.999371363 | Not Sig |
| ENSG00000118946 | PCDH17    | protocadherin 17                                               | 27253     | 1857.151625 | -0.094469847 | 0.688751758 | -0.137160953 | 0.890903574 | 0.999371363 | Not Sig |
| ENSG00000144524 | COPS7B    | COP9 signalosome subunit 7B                                    | 64708     | 566.1761614 | -0.094319695 | 0.394297917 | -0.239209215 | 0.810943357 | 0.999371363 | Not Sig |
| ENSG00000227383 | NA        | NA                                                             | NA        | 54.33196898 | -0.094312903 | 0.707428468 | -0.133317936 | 0.893941944 | 0.999371363 | Not Sig |
| ENSG00000130717 | UCK1      | uridine-cytidine kinase 1                                      | 83549     | 572.4114346 | -0.094300226 | 0.616733765 | -0.152902648 | 0.878475048 | 0.999371363 | Not Sig |
| ENSG00000258725 | PRC1-AS1  | PRC1 antisense RNA 1                                           | 100507118 | 11.90720231 | -0.094093382 | 0.860167233 | -0.109389638 | 0.912893452 | 0.999371363 | Not Sig |
| ENSG00000153936 | HS2ST1    | heparan sulfate 2-O-sulfotransferase 1                         | 9653      | 821.452908  | -0.093990938 | 0.597142869 | -0.157401089 | 0.874928755 | 0.999371363 | Not Sig |
| ENSG00000268744 | NA        | NA                                                             | NA        | 1.56584378  | -0.093884986 | 1.973948153 | -0.047562032 | 0.962065292 | NA          | NA      |
| ENSG00000169288 | MRPL1     | mitochondrial ribosomal protein L1                             | 65008     | 265.2028798 | -0.093853361 | 0.484287968 | -0.193796599 | 0.84633515  | 0.999371363 | Not Sig |
| ENSG00000075420 | FNDC3B    | fibronectin type III domain containing 3B                      | 64778     | 6913.461992 | -0.093840278 | 0.632391032 | -0.148389641 | 0.882035275 | 0.999371363 | Not Sig |
| ENSG00000138385 | SSB       | Sjogren syndrome antigen B                                     | 6741      | 1134.961716 | -0.093834129 | 0.469786025 | -0.199738016 | 0.84168548  | 0.999371363 | Not Sig |
| ENSG00000146918 | NCAPG2    | non-SMC condensin II complex subunit G2                        | 54892     | 657.0402506 | -0.093760912 | 0.878468059 | -0.106732295 | 0.915001361 | 0.999371363 | Not Sig |
| ENSG00000100726 | TELO2     | telomere maintenance 2                                         | 9894      | 728.3533482 | -0.093713215 | 0.529772195 | -0.176893418 | 0.859592109 | 0.999371363 | Not Sig |
| ENSG00000225449 | RAB6C-AS1 | RAB6C antisense RNA 1                                          | 100131320 | 1.287905965 | -0.093673697 | 2.128923143 | -0.044000507 | 0.964904    | NA          | NA      |
| ENSG00000132967 | NA        | NA                                                             | NA        | 38.97531219 | -0.09365447  | 0.582783051 | -0.160702117 | 0.872328022 | 0.999371363 | Not Sig |
| ENSG00000167528 | ZNF641    | zinc finger protein 641                                        | 121274    | 687.4434917 | -0.093596691 | 0.396775291 | -0.235893446 | 0.813515354 | 0.999371363 | Not Sig |
| ENSG00000100578 | KIAA0586  | KIAA0586                                                       | 9786      | 667.0318577 | -0.09350477  | 0.516642433 | -0.180985462 | 0.856378987 | 0.999371363 | Not Sig |
| ENSG00000146001 | PCDHB18P  | protocadherin beta 18 pseudogene                               | 54660     | 36.39919997 | -0.093226806 | 0.705577457 | -0.13212838  | 0.894882749 | 0.999371363 | Not Sig |
| ENSG00000095951 | HIVEP1    | human immunodeficiency virus type 1 enhancer binding protein 1 | 3096      | 1768.517667 | -0.093211309 | 0.502968636 | -0.185322309 | 0.852976241 | 0.999371363 | Not Sig |
| ENSG00000143499 | SMYD2     | SET and MYND domain containing 2                               | 56950     | 734.6555849 | -0.093208297 | 0.457499061 | -0.2037344   | 0.838561059 | 0.999371363 | Not Sig |

|                 |          |                                                         |           |             |              |             |              |             |             |         |
|-----------------|----------|---------------------------------------------------------|-----------|-------------|--------------|-------------|--------------|-------------|-------------|---------|
| ENSG00000111203 | ITFG2    | integrin alpha FG-GAP repeat containing 2               | 55846     | 747.2399101 | -0.093122802 | 0.425660662 | -0.218772393 | 0.826827353 | 0.999371363 | Not Sig |
| ENSG00000203914 | NA       | NA                                                      | NA        | 1.355419887 | -0.093055231 | 1.896492187 | -0.049067026 | 0.960865881 | NA          | NA      |
| ENSG00000248925 | NA       | NA                                                      | NA        | 1.355419887 | -0.093055231 | 1.896492187 | -0.049067026 | 0.960865881 | NA          | NA      |
| ENSG00000183337 | BCOR     | BCL6 corepressor                                        | 54880     | 2025.886842 | -0.09300031  | 0.399009706 | -0.233077813 | 0.815700984 | 0.999371363 | Not Sig |
| ENSG00000266341 | NA       | NA                                                      | NA        | 1.581735564 | -0.092977124 | 1.988326562 | -0.046761496 | 0.962703317 | NA          | NA      |
| ENSG00000118412 | CASP8AP2 | caspase 8 associated protein 2                          | 9994      | 1163.548075 | -0.092799228 | 0.578887442 | -0.16030617  | 0.872639899 | 0.999371363 | Not Sig |
| ENSG00000182179 | UBA7     | ubiquitin like modifier activating enzyme 7             | 7318      | 1670.914131 | -0.092743244 | 0.854120208 | -0.108583363 | 0.913532957 | 0.999371363 | Not Sig |
| ENSG00000157833 | GAREM2   | GRB2 associated regulator of MAPK1 subtype 2            | 150946    | 81.26104118 | -0.092738026 | 0.658335583 | -0.140867406 | 0.887974692 | 0.999371363 | Not Sig |
| ENSG00000135845 | PIGC     | phosphatidylinositol glycan anchor biosynthesis class C | 5279      | 349.4359416 | -0.092720974 | 0.469373159 | -0.197542132 | 0.843403315 | 0.999371363 | Not Sig |
| ENSG00000152223 | EPG5     | ectopic P-granules autophagy protein 5 homolog          | 57724     | 2479.333586 | -0.092628343 | 0.436994817 | -0.211966686 | 0.832133025 | 0.999371363 | Not Sig |
| ENSG00000019991 | HGF      | hepatocyte growth factor                                | 3082      | 710.1054007 | -0.092585057 | 0.588583114 | -0.157301586 | 0.87500717  | 0.999371363 | Not Sig |
| ENSG00000139624 | CERS5    | ceramide synthase 5                                     | 91012     | 497.2643984 | -0.092420565 | 0.475818804 | -0.194234789 | 0.845992044 | 0.999371363 | Not Sig |
| ENSG00000105197 | TIMM50   | translocase of inner mitochondrial membrane 50          | 92609     | 541.3861899 | -0.092418682 | 0.453651735 | -0.203721653 | 0.83857102  | 0.999371363 | Not Sig |
| ENSG00000214975 | NA       | NA                                                      | NA        | 20.92022433 | -0.092187377 | 0.676995113 | -0.136171407 | 0.891685778 | 0.999371363 | Not Sig |
| ENSG00000177873 | ZNF619   | zinc finger protein 619                                 | 285267    | 250.1259568 | -0.092175036 | 0.509291842 | -0.180986672 | 0.856378038 | 0.999371363 | Not Sig |
| ENSG00000122435 | TRMT13   | tRNA methyltransferase 13 homolog                       | 54482     | 455.0040055 | -0.092127438 | 0.659180957 | -0.139760466 | 0.88884925  | 0.999371363 | Not Sig |
| ENSG00000127870 | RNF6     | ring finger protein 6                                   | 6049      | 846.5880046 | -0.09201639  | 0.49582831  | -0.185581155 | 0.852773233 | 0.999371363 | Not Sig |
| ENSG00000202474 | NA       | NA                                                      | NA        | 17.13990471 | -0.092007834 | 1.07284527  | -0.085760582 | 0.931656742 | 0.999371363 | Not Sig |
| ENSG00000070061 | ELP1     | elongator complex protein 1                             | 8518      | 1225.588316 | -0.091831578 | 0.403979036 | -0.227317683 | 0.820176724 | 0.999371363 | Not Sig |
| ENSG00000138433 | CIR1     | corepressor interacting with RBPJ, 1                    | 9541      | 623.3449499 | -0.0914318   | 0.413488454 | -0.221122982 | 0.824996676 | 0.999371363 | Not Sig |
| ENSG00000260083 | MIR762HG | MIR762 host gene                                        | 101928736 | 33.10349947 | -0.091264703 | 0.590061403 | -0.15466984  | 0.877081608 | 0.999371363 | Not Sig |
| ENSG00000136999 | NOV      | nephroblastoma overexpressed                            | 4856      | 68.15776497 | -0.091119811 | 0.791597269 | -0.115108798 | 0.908358886 | 0.999371363 | Not Sig |
| ENSG00000265661 | NA       | NA                                                      | NA        | 3.520209523 | -0.090968821 | 1.638392714 | -0.055523209 | 0.95572164  | NA          | NA      |
| ENSG00000134744 | ZCCHC11  | zinc finger CCHC-type containing 11                     | 23318     | 1886.924173 | -0.090904924 | 0.673208134 | -0.135032421 | 0.892586241 | 0.999371363 | Not Sig |
| ENSG00000128791 | TWSG1    | twisted gastrulation BMP signaling modulator 1          | 57045     | 820.1664155 | -0.090859706 | 0.424005243 | -0.214289111 | 0.830321609 | 0.999371363 | Not Sig |
| ENSG00000272123 | NA       | NA                                                      | NA        | 2.820266809 | -0.090643931 | 1.454187452 | -0.062333045 | 0.950297614 | NA          | NA      |
| ENSG00000089692 | LAG3     | lymphocyte activating 3                                 | 3902      | 165.2697792 | -0.090637912 | 1.058331045 | -0.085642307 | 0.931750766 | 0.999371363 | Not Sig |
| ENSG00000177575 | CD163    | CD163 molecule                                          | 9332      | 2722.544388 | -0.090636027 | 0.798036586 | -0.113573774 | 0.909575678 | 0.999371363 | Not Sig |
| ENSG00000135094 | SDS      | serine dehydratase                                      | 10993     | 162.9798393 | -0.090590194 | 0.905391864 | -0.100056338 | 0.920299599 | 0.999371363 | Not Sig |
| ENSG00000070159 | PTPN3    | protein tyrosine phosphatase, non-receptor type 3       | 5774      | 1673.033819 | -0.09054317  | 0.746606997 | -0.121272866 | 0.903474911 | 0.999371363 | Not Sig |
| ENSG00000075413 | MARK3    | microtubule affinity regulating kinase 3                | 4140      | 2214.028601 | -0.0905244   | 0.417089435 | -0.217038344 | 0.828178463 | 0.999371363 | Not Sig |
| ENSG00000115944 | COX7A2L  | cytochrome c oxidase subunit 7A2 like                   | 9167      | 948.5563029 | -0.09028504  | 0.424445471 | -0.212712931 | 0.83155088  | 0.999371363 | Not Sig |
| ENSG00000100084 | HIRA     | histone cell cycle regulator                            | 7290      | 179.255644  | -0.090284791 | 0.486066756 | -0.185745662 | 0.852644218 | 0.999371363 | Not Sig |
| ENSG00000168517 | HEXIM2   | hexamethylene bisacetamide inducible 2                  | 124790    | 81.2763324  | -0.090142819 | 0.512971008 | -0.175726926 | 0.86050848  | 0.999371363 | Not Sig |
| ENSG00000133106 | EPSTI1   | epithelial stromal interaction 1                        | 94240     | 736.8213041 | -0.089930265 | 0.673538677 | -0.13351908  | 0.893782876 | 0.999371363 | Not Sig |



|                 |          |                                                             |           |             |              |             |              |             |             |         |
|-----------------|----------|-------------------------------------------------------------|-----------|-------------|--------------|-------------|--------------|-------------|-------------|---------|
| ENSG00000152061 | RABGAP1L | RAB GTPase activating protein 1 like                        | 9910      | 2566.474279 | -0.089673453 | 0.583095184 | -0.153788705 | 0.87777634  | 0.999371363 | Not Sig |
| ENSG00000160445 | ZER1     | zyg-11 related cell cycle regulator                         | 10444     | 1305.954035 | -0.089632258 | 0.543200338 | -0.165007735 | 0.868937894 | 0.999371363 | Not Sig |
| ENSG00000134882 | UBAC2    | UBA domain containing 2                                     | 337867    | 1219.587238 | -0.089393725 | 0.403235221 | -0.221691262 | 0.824554232 | 0.999371363 | Not Sig |
| ENSG00000198155 | ZNF876P  | zinc finger protein 876, pseudogene                         | 642280    | 58.47952035 | -0.089215995 | 0.588485006 | -0.151602835 | 0.879500198 | 0.999371363 | Not Sig |
| ENSG00000007237 | GAS7     | growth arrest specific 7                                    | 8522      | 1384.412129 | -0.089215182 | 0.611406276 | -0.145918002 | 0.88398612  | 0.999371363 | Not Sig |
| ENSG00000164933 | SLC25A32 | solute carrier family 25 member 32                          | 81034     | 570.7852446 | -0.089162    | 0.531908362 | -0.167626619 | 0.866877028 | 0.999371363 | Not Sig |
| ENSG00000040633 | PHF23    | PHD finger protein 23                                       | 79142     | 718.4863948 | -0.089158784 | 0.427260535 | -0.208675448 | 0.834701608 | 0.999371363 | Not Sig |
| ENSG00000264623 | MIR4796  | microRNA 4796                                               | 100616166 | 5.946673946 | -0.089154501 | 1.126469743 | -0.079145047 | 0.936917253 | NA          | NA      |
| ENSG00000204681 | GABBR1   | gamma-aminobutyric acid type B receptor subunit 1           | 2550      | 724.2917499 | -0.089032097 | 0.652311277 | -0.136487134 | 0.891436195 | 0.999371363 | Not Sig |
| ENSG00000106211 | HSPB1    | heat shock protein family B (small) member 1                | 3315      | 4046.461242 | -0.088887712 | 0.484361125 | -0.183515372 | 0.854393659 | 0.999371363 | Not Sig |
| ENSG00000111640 | GAPDH    | glyceraldehyde-3-phosphate dehydrogenase                    | 2597      | 16142.57243 | -0.088870118 | 0.502374279 | -0.176900215 | 0.85958677  | 0.999371363 | Not Sig |
| ENSG00000076382 | SPAG5    | sperm associated antigen 5                                  | 10615     | 251.4903067 | -0.088797163 | 0.806134189 | -0.110151838 | 0.912288957 | 0.999371363 | Not Sig |
| ENSG00000201428 | NA       | NA                                                          | NA        | 443.4799397 | -0.088661451 | 0.590370828 | -0.150179256 | 0.880623192 | 0.999371363 | Not Sig |
| ENSG00000141499 | WRAP53   | WD repeat containing antisense to TP53                      | 55135     | 148.5287093 | -0.088585587 | 0.534121716 | -0.165852809 | 0.868272786 | 0.999371363 | Not Sig |
| ENSG00000143742 | SRP9     | signal recognition particle 9                               | 6726      | 2326.344345 | -0.088440334 | 0.639485125 | -0.138299282 | 0.890003893 | 0.999371363 | Not Sig |
| ENSG00000170540 | ARL6IP1  | ADP ribosylation factor like GTPase 6 interacting protein 1 | 23204     | 1705.616781 | -0.088398475 | 0.579010406 | -0.152671651 | 0.878657218 | 0.999371363 | Not Sig |
| ENSG00000148814 | LRRC27   | leucine rich repeat containing 27                           | 80313     | 290.3335694 | -0.088376532 | 0.474529217 | -0.186240443 | 0.85225621  | 0.999371363 | Not Sig |
| ENSG00000207357 | RNU6-2   | RNA, U6 small nuclear 2                                     | 103625684 | 2.272528082 | -0.088286646 | 1.565803177 | -0.056384255 | 0.955035699 | NA          | NA      |
| ENSG00000259488 | NA       | NA                                                          | NA        | 12.81021209 | -0.08788234  | 0.784439174 | -0.112032064 | 0.910797983 | 0.999371363 | Not Sig |
| ENSG00000117242 | PINK1-AS | PINK1 antisense RNA                                         | 100861548 | 214.4551535 | -0.087789564 | 0.472497646 | -0.185798944 | 0.852602433 | 0.999371363 | Not Sig |
| ENSG00000128590 | DNAJB9   | DnaJ heat shock protein family (Hsp40) member B9            | 4189      | 841.6756276 | -0.087741093 | 0.577907416 | -0.151825519 | 0.879324554 | 0.999371363 | Not Sig |
| ENSG00000204356 | NELFE    | negative elongation factor complex member E                 | 7936      | 1032.568684 | -0.087588202 | 0.481989619 | -0.181722176 | 0.855800762 | 0.999371363 | Not Sig |
| ENSG00000147274 | RBMX     | RNA binding motif protein, X-linked                         | 27316     | 3430.836838 | -0.087584157 | 0.479209232 | -0.182768093 | 0.854979985 | 0.999371363 | Not Sig |
| ENSG00000188690 | UROS     | uroporphyrinogen III synthase                               | 7390      | 475.3309267 | -0.087552354 | 0.432540718 | -0.202414133 | 0.83959298  | 0.999371363 | Not Sig |
| ENSG00000177200 | CHD9     | chromodomain helicase DNA binding protein 9                 | 80205     | 4126.228205 | -0.08734489  | 0.462629641 | -0.188800894 | 0.850248871 | 0.999371363 | Not Sig |
| ENSG00000165868 | HSPA12A  | heat shock protein family A (Hsp70) member 12A              | 259217    | 137.8362344 | -0.087326375 | 0.520510007 | -0.16777079  | 0.866763603 | 0.999371363 | Not Sig |
| ENSG00000084463 | WBP11    | WW domain binding protein 11                                | 51729     | 1331.126557 | -0.087323029 | 0.444944982 | -0.196255791 | 0.844409962 | 0.999371363 | Not Sig |
| ENSG00000150764 | DIXDC1   | DIX domain containing 1                                     | 85458     | 550.7131967 | -0.087309455 | 0.553495935 | -0.157741818 | 0.874660247 | 0.999371363 | Not Sig |
| ENSG00000146842 | TMEM209  | transmembrane protein 209                                   | 84928     | 573.175015  | -0.087281777 | 0.612303941 | -0.142546488 | 0.886648362 | 0.999371363 | Not Sig |
| ENSG00000160446 | ZDHHC12  | zinc finger DHHC-type containing 12                         | 84885     | 400.6719869 | -0.08721522  | 0.521766517 | -0.167153731 | 0.867249089 | 0.999371363 | Not Sig |
| ENSG00000136811 | ODF2     | outer dense fiber of sperm tails 2                          | 4957      | 934.2686117 | -0.087188569 | 0.470560779 | -0.18528652  | 0.85300431  | 0.999371363 | Not Sig |
| ENSG00000145348 | TBCK     | TBC1 domain containing kinase                               | 93627     | 1161.923485 | -0.087102093 | 0.590652489 | -0.14746758  | 0.882762967 | 0.999371363 | Not Sig |
| ENSG00000175390 | EIF3F    | eukaryotic translation initiation factor 3 subunit F        | 8665      | 2029.913601 | -0.086999984 | 0.392203178 | -0.221823762 | 0.824451081 | 0.999371363 | Not Sig |
| ENSG00000254512 | NA       | NA                                                          | NA        | 38.53146859 | -0.086991509 | 0.587127487 | -0.148164599 | 0.882212869 | 0.999371363 | Not Sig |
| ENSG00000147383 | NSDHL    | NAD(P) dependent steroid dehydrogenase-like                 | 50814     | 278.2128208 | -0.08687327  | 0.475941751 | -0.182529205 | 0.855167437 | 0.999371363 | Not Sig |

|                 |          |                                                         |        |             |              |             |              |             |             |         |
|-----------------|----------|---------------------------------------------------------|--------|-------------|--------------|-------------|--------------|-------------|-------------|---------|
| ENSG00000136869 | TLR4     | toll like receptor 4                                    | 7099   | 889.3418577 | -0.086596182 | 0.738015028 | -0.11733661  | 0.906593314 | 0.999371363 | Not Sig |
| ENSG00000253653 | NA       | NA                                                      | NA     | 1.94951662  | -0.086418162 | 1.600823671 | -0.053983561 | 0.956948262 | NA          | NA      |
| ENSG00000232561 | NA       | NA                                                      | NA     | 41.46288218 | -0.086390077 | 0.76802535  | -0.112483366 | 0.910440158 | 0.999371363 | Not Sig |
| ENSG00000134262 | AP4B1    | adaptor related protein complex 4 beta 1 subunit        | 10717  | 452.7813654 | -0.086336839 | 0.528985959 | -0.163211967 | 0.870351544 | 0.999371363 | Not Sig |
| ENSG00000254667 | NA       | NA                                                      | NA     | 45.78417585 | -0.086280345 | 0.550409498 | -0.156756644 | 0.875436644 | 0.999371363 | Not Sig |
| ENSG00000135801 | TAF5L    | TATA-box binding protein associated factor 5 like       | 27097  | 655.1255035 | -0.086264035 | 0.421896925 | -0.204467086 | 0.83798851  | 0.999371363 | Not Sig |
| ENSG00000152056 | AP1S3    | adaptor related protein complex 1 sigma 3 subunit       | 130340 | 241.9814676 | -0.086209841 | 0.596295821 | -0.144575624 | 0.885045944 | 0.999371363 | Not Sig |
| ENSG00000252071 | NA       | NA                                                      | NA     | 10.45940429 | -0.08613987  | 0.95271986  | -0.090414689 | 0.927957684 | 0.999371363 | Not Sig |
| ENSG00000198113 | TOR4A    | torsin family 4 member A                                | 54863  | 1248.734198 | -0.086069758 | 0.646965991 | -0.133035986 | 0.894164921 | 0.999371363 | Not Sig |
| ENSG00000023572 | GLRX2    | glutaredoxin 2                                          | 51022  | 83.42014943 | -0.086049862 | 0.535580463 | -0.160666543 | 0.872356041 | 0.999371363 | Not Sig |
| ENSG00000171953 | ATPAF2   | ATP synthase mitochondrial F1 complex assembly factor 2 | 91647  | 342.0777497 | -0.08597134  | 0.415145659 | -0.207087172 | 0.83594178  | 0.999371363 | Not Sig |
| ENSG00000180530 | NRIP1    | nuclear receptor interacting protein 1                  | 8204   | 2157.610091 | -0.085884046 | 0.52129662  | -0.16475082  | 0.869140115 | 0.999371363 | Not Sig |
| ENSG00000242808 | SOX2-OT  | SOX2 overlapping transcript                             | 347689 | 18.33959789 | -0.085874273 | 0.877531354 | -0.097858922 | 0.922044319 | 0.999371363 | Not Sig |
| ENSG00000129951 | PLPPR3   | phospholipid phosphatase related 3                      | 79948  | 106.0781783 | -0.085831662 | 1.152730247 | -0.074459452 | 0.940644804 | 0.999371363 | Not Sig |
| ENSG00000145414 | NAF1     | nuclear assembly factor 1 ribonucleoprotein             | 92345  | 457.7620399 | -0.08581153  | 0.440174652 | -0.194948822 | 0.845433013 | 0.999371363 | Not Sig |
| ENSG00000197928 | ZNF677   | zinc finger protein 677                                 | 342926 | 260.883655  | -0.085737905 | 0.715461564 | -0.119835795 | 0.904613226 | 0.999371363 | Not Sig |
| ENSG00000225300 | NA       | NA                                                      | NA     | 42.85415491 | -0.085713576 | 0.529101701 | -0.1619983   | 0.871307193 | 0.999371363 | Not Sig |
| ENSG00000066422 | ZBTB11   | zinc finger and BTB domain containing 11                | 27107  | 1036.990481 | -0.085647693 | 0.511404998 | -0.167475275 | 0.8669961   | 0.999371363 | Not Sig |
| ENSG00000271303 | SRXN1    | sulfiredoxin 1                                          | 140809 | 125.1052244 | -0.085635064 | 0.898544378 | -0.095304212 | 0.924073197 | 0.999371363 | Not Sig |
| ENSG00000124207 | CSE1L    | chromosome segregation 1 like                           | 1434   | 1126.973473 | -0.085581187 | 0.527265624 | -0.162311335 | 0.871060689 | 0.999371363 | Not Sig |
| ENSG00000248554 | NA       | NA                                                      | NA     | 7.562041781 | -0.085579721 | 1.150534246 | -0.074382594 | 0.940705959 | 0.999371363 | Not Sig |
| ENSG00000164691 | TAGAP    | T-cell activation RhoGTPase activating protein          | 117289 | 764.5254878 | -0.08548186  | 0.837542113 | -0.10206276  | 0.91870686  | 0.999371363 | Not Sig |
| ENSG00000269463 | NA       | NA                                                      | NA     | 11.28280622 | -0.085451867 | 1.122361001 | -0.076135813 | 0.939311048 | 0.999371363 | Not Sig |
| ENSG00000231063 | NA       | NA                                                      | NA     | 1.061590288 | -0.085431493 | 2.578022017 | -0.033138388 | 0.973564231 | NA          | NA      |
| ENSG00000152620 | NADK2    | NAD kinase 2, mitochondrial                             | 133686 | 629.250702  | -0.085311189 | 0.50951774  | -0.167435169 | 0.867027655 | 0.999371363 | Not Sig |
| ENSG00000175575 | PAAF1    | proteasomal ATPase associated factor 1                  | 80227  | 380.9848401 | -0.084976114 | 0.44195987  | -0.192271108 | 0.847529849 | 0.999371363 | Not Sig |
| ENSG00000131115 | ZNF227   | zinc finger protein 227                                 | 7770   | 324.4347835 | -0.084876389 | 0.454833514 | -0.186609795 | 0.851966587 | 0.999371363 | Not Sig |
| ENSG00000144320 | LNPK     | lunapark, ER junction formation factor                  | 80856  | 1099.112299 | -0.084840663 | 0.498650869 | -0.17014041  | 0.864899714 | 0.999371363 | Not Sig |
| ENSG00000110042 | DTX4     | deltex E3 ubiquitin ligase 4                            | 23220  | 2205.894156 | -0.08481008  | 0.490943933 | -0.172749013 | 0.862848716 | 0.999371363 | Not Sig |
| ENSG00000235574 | NA       | NA                                                      | NA     | 2.826704345 | -0.08480739  | 1.445344613 | -0.058676242 | 0.953209983 | NA          | NA      |
| ENSG00000257342 | NA       | NA                                                      | NA     | 1.655687021 | -0.084797057 | 1.726473338 | -0.049115764 | 0.960827041 | NA          | NA      |
| ENSG00000111412 | C12orf49 | chromosome 12 open reading frame 49                     | 79794  | 1462.40245  | -0.084735915 | 0.580300736 | -0.146020692 | 0.883905053 | 0.999371363 | Not Sig |
| ENSG00000174749 | FAM241A  | family with sequence similarity 241 member A            | 132720 | 244.1018099 | -0.084717736 | 0.571288302 | -0.148292439 | 0.882111982 | 0.999371363 | Not Sig |
| ENSG00000104824 | HNRNPL   | heterogeneous nuclear ribonucleoprotein L               | 3191   | 2782.78022  | -0.084695499 | 0.382535223 | -0.221405751 | 0.824776515 | 0.999371363 | Not Sig |
| ENSG00000158796 | DEDD     | death effector domain containing                        | 9191   | 588.8711312 | -0.084601132 | 0.435170324 | -0.19440924  | 0.845855456 | 0.999371363 | Not Sig |

|                 |            |                                                                  |           |             |              |             |              |             |             |         |
|-----------------|------------|------------------------------------------------------------------|-----------|-------------|--------------|-------------|--------------|-------------|-------------|---------|
| ENSG00000124459 | ZNF45      | zinc finger protein 45                                           | 7596      | 331.5636846 | -0.084499757 | 0.435722116 | -0.193930384 | 0.846230392 | 0.999371363 | Not Sig |
| ENSG00000166164 | BRD7       | bromodomain containing 7                                         | 29117     | 1605.475052 | -0.084435987 | 0.406434885 | -0.207747882 | 0.835425829 | 0.999371363 | Not Sig |
| ENSG00000203827 | NA         | NA                                                               | NA        | 44.16580936 | -0.084386802 | 0.636387205 | -0.132602921 | 0.894507423 | 0.999371363 | Not Sig |
| ENSG00000243960 | NA         | NA                                                               | NA        | 18.2340529  | -0.084340044 | 1.023261777 | -0.082422745 | 0.93431055  | 0.999371363 | Not Sig |
| ENSG00000183137 | CEP57L1    | centrosomal protein 57 like 1                                    | 285753    | 250.714653  | -0.08428569  | 0.589539834 | -0.142968609 | 0.886314973 | 0.999371363 | Not Sig |
| ENSG00000260940 | NA         | NA                                                               | NA        | 2.453509823 | -0.084261645 | 1.838820016 | -0.045823759 | 0.963450722 | NA          | NA      |
| ENSG00000176076 | KCNE5      | potassium voltage-gated channel subfamily E regulatory subunit 5 | 23630     | 5.377635485 | -0.084259515 | 1.265843864 | -0.066563908 | 0.946928879 | NA          | NA      |
| ENSG00000113211 | PCDHB6     | protocadherin beta 6                                             | 56130     | 31.11809228 | -0.084170797 | 0.759072881 | -0.110886318 | 0.911706495 | 0.999371363 | Not Sig |
| ENSG00000273045 | C2orf15    | chromosome 2 open reading frame 15                               | 150590    | 45.06955258 | -0.084153571 | 0.77760156  | -0.108221968 | 0.913819619 | 0.999371363 | Not Sig |
| ENSG00000163386 | NA         | NA                                                               | NA        | 1109.549385 | -0.0840485   | 0.491401578 | -0.17103832  | 0.864193634 | 0.999371363 | Not Sig |
| ENSG00000070610 | GBA2       | glucosylceramidase beta 2                                        | 57704     | 1369.85853  | -0.083140045 | 0.583673479 | -0.142442731 | 0.886730312 | 0.999371363 | Not Sig |
| ENSG00000243943 | ZNF512     | zinc finger protein 512                                          | 84450     | 434.1727786 | -0.083121392 | 0.445586177 | -0.186543921 | 0.85201824  | 0.999371363 | Not Sig |
| ENSG00000163520 | FBLN2      | fibulin 2                                                        | 2199      | 1313.300158 | -0.083066251 | 0.618553983 | -0.13429103  | 0.893172446 | 0.999371363 | Not Sig |
| ENSG00000062582 | MRPS24     | mitochondrial ribosomal protein S24                              | 64951     | 5.370317699 | -0.083061531 | 1.070045256 | -0.077624316 | 0.938126899 | NA          | NA      |
| ENSG00000182149 | IST1       | IST1, ESCRT-III associated factor                                | 9798      | 2612.970307 | -0.083057251 | 0.414796165 | -0.200236303 | 0.841295776 | 0.999371363 | Not Sig |
| ENSG00000240230 | COX19      | COX19, cytochrome c oxidase assembly factor                      | 90639     | 480.4080739 | -0.082996592 | 0.531679983 | -0.156102533 | 0.875952202 | 0.999371363 | Not Sig |
| ENSG00000137776 | SLTM       | SAFB like transcription modulator                                | 79811     | 2748.365318 | -0.082903849 | 0.432740424 | -0.191578704 | 0.848072226 | 0.999371363 | Not Sig |
| ENSG00000269106 | NA         | NA                                                               | NA        | 9.626000055 | -0.082870137 | 0.958517878 | -0.086456538 | 0.931103504 | 0.999371363 | Not Sig |
| ENSG00000273259 | NA         | NA                                                               | NA        | 6.138509687 | -0.082867554 | 1.482190001 | -0.05590886  | 0.955414412 | NA          | NA      |
| ENSG00000168259 | DNAJC7     | DnaJ heat shock protein family (Hsp40) member C7                 | 7266      | 1350.141774 | -0.082773905 | 0.393189207 | -0.210519271 | 0.833262412 | 0.999371363 | Not Sig |
| ENSG00000232142 | NA         | NA                                                               | NA        | 3.842545688 | -0.082295026 | 1.404543332 | -0.058592016 | 0.95327707  | NA          | NA      |
| ENSG00000137106 | GRHPR      | glyoxylate and hydroxypyruvate reductase                         | 9380      | 924.7488638 | -0.082225149 | 0.630318868 | -0.130450084 | 0.896210344 | 0.999371363 | Not Sig |
| ENSG00000238390 | NA         | NA                                                               | NA        | 10.95150716 | -0.082215752 | 0.915539407 | -0.089800342 | 0.928445876 | 0.999371363 | Not Sig |
| ENSG00000011523 | CEP68      | centrosomal protein 68                                           | 23177     | 787.6908097 | -0.082081461 | 0.509978471 | -0.160950836 | 0.872132123 | 0.999371363 | Not Sig |
| ENSG00000115514 | TXNDC9     | thioredoxin domain containing 9                                  | 10190     | 427.2902721 | -0.081949763 | 0.509186027 | -0.160942679 | 0.872138547 | 0.999371363 | Not Sig |
| ENSG00000169057 | MECP2      | methyl-CpG binding protein 2                                     | 4204      | 2209.566758 | -0.081938217 | 0.552073768 | -0.148418965 | 0.882012134 | 0.999371363 | Not Sig |
| ENSG00000248275 | TRIM52-AS1 | TRIM52 antisense RNA 1 (head to head)                            | 100507602 | 105.5717548 | -0.081880809 | 0.750682787 | -0.109075112 | 0.913142915 | 0.999371363 | Not Sig |
| ENSG00000259810 | NA         | NA                                                               | NA        | 4.520723425 | -0.081701713 | 1.1686285   | -0.069912477 | 0.944263322 | NA          | NA      |
| ENSG00000125351 | UPF3B      | UPF3B, regulator of nonsense mediated mRNA decay                 | 65109     | 307.0551262 | -0.081665025 | 0.549622455 | -0.148583858 | 0.881882011 | 0.999371363 | Not Sig |
| ENSG00000230753 | ZNF341-AS1 | ZNF341 antisense RNA 1                                           | 101929746 | 3.481462457 | -0.08144531  | 1.533747741 | -0.053102155 | 0.957650515 | NA          | NA      |
| ENSG00000140612 | SEC11A     | SEC11 homolog A, signal peptidase complex subunit                | 23478     | 1277.197034 | -0.08141658  | 0.457603583 | -0.177919455 | 0.858786232 | 0.999371363 | Not Sig |
| ENSG00000164880 | INTS1      | integrator complex subunit 1                                     | 26173     | 5342.496808 | -0.081343657 | 0.632919721 | -0.128521287 | 0.897736453 | 0.999371363 | Not Sig |
| ENSG00000134198 | TSPAN2     | tetraspanin 2                                                    | 10100     | 135.3773476 | -0.081315506 | 0.52036087  | -0.156267526 | 0.875822153 | 0.999371363 | Not Sig |
| ENSG00000138231 | DBR1       | debranching RNA lariats 1                                        | 51163     | 288.3608988 | -0.081253801 | 0.453312928 | -0.179244393 | 0.857745808 | 0.999371363 | Not Sig |
| ENSG00000139131 | YARS2      | tyrosyl-tRNA synthetase 2                                        | 51067     | 260.3606084 | -0.081202552 | 0.430030901 | -0.188829575 | 0.850226391 | 0.999371363 | Not Sig |

|                 |           |                                                           |           |             |              |             |              |             |             |         |
|-----------------|-----------|-----------------------------------------------------------|-----------|-------------|--------------|-------------|--------------|-------------|-------------|---------|
| ENSG00000227695 | NA        | NA                                                        | NA        | 11.25459791 | -0.081188143 | 0.844455765 | -0.096142565 | 0.923407346 | 0.999371363 | Not Sig |
| ENSG00000188820 | CALHM6    | calcium homeostasis modulator family member 6             | 441168    | 70.06988712 | -0.081141624 | 0.885922639 | -0.091589966 | 0.927023824 | 0.999371363 | Not Sig |
| ENSG00000234062 | NA        | NA                                                        | NA        | 73.03506039 | -0.080988841 | 0.589544325 | -0.137375322 | 0.890734137 | 0.999371363 | Not Sig |
| ENSG00000239468 | NA        | NA                                                        | NA        | 3.210377185 | -0.0809484   | 1.4048333   | -0.057621356 | 0.954050238 | NA          | NA      |
| ENSG00000135341 | MAP3K7    | mitogen-activated protein kinase kinase kinase 7          | 6885      | 1468.101876 | -0.080830746 | 0.575198528 | -0.140526692 | 0.888243864 | 0.999371363 | Not Sig |
| ENSG00000184988 | TMEM106A  | transmembrane protein 106A                                | 113277    | 449.3070725 | -0.080799414 | 0.435811849 | -0.185399763 | 0.852915494 | 0.999371363 | Not Sig |
| ENSG00000247081 | BAALC-AS1 | BAALC antisense RNA 1                                     | 100499183 | 75.51350629 | -0.080734498 | 0.659241077 | -0.122465818 | 0.902530116 | 0.999371363 | Not Sig |
| ENSG00000119844 | AFTPH     | aftiphilin                                                | 54812     | 1517.915416 | -0.080726894 | 0.46256095  | -0.174521637 | 0.861455528 | 0.999371363 | Not Sig |
| ENSG00000010310 | GIPR      | gastric inhibitory polypeptide receptor                   | 2696      | 177.1524226 | -0.080725017 | 0.556352543 | -0.145096878 | 0.884634383 | 0.999371363 | Not Sig |
| ENSG00000205085 | FAM71F2   | family with sequence similarity 71 member F2              | 346653    | 31.59921084 | -0.080590311 | 0.744888605 | -0.108191091 | 0.913844112 | 0.999371363 | Not Sig |
| ENSG00000121621 | KIF18A    | kinesin family member 18A                                 | 81930     | 127.5422882 | -0.080585413 | 0.835707641 | -0.096427757 | 0.923180848 | 0.999371363 | Not Sig |
| ENSG00000251411 | NA        | NA                                                        | NA        | 11.60725648 | -0.080507377 | 0.828622555 | -0.097158081 | 0.922600857 | 0.999371363 | Not Sig |
| ENSG00000173088 | NA        | NA                                                        | NA        | 13.04147695 | -0.080393281 | 0.786253825 | -0.102248509 | 0.918559425 | 0.999371363 | Not Sig |
| ENSG00000136560 | TANK      | TRAF family member associated NFKB activator              | 10010     | 1100.473929 | -0.080273331 | 0.580961629 | -0.138173207 | 0.89010353  | 0.999371363 | Not Sig |
| ENSG00000131153 | GINS2     | GINS complex subunit 2                                    | 51659     | 74.52497528 | -0.080106945 | 0.877361729 | -0.091304353 | 0.927250759 | 0.999371363 | Not Sig |
| ENSG00000076662 | ICAM3     | intercellular adhesion molecule 3                         | 3385      | 443.8491765 | -0.080102372 | 0.767933756 | -0.10430896  | 0.916924167 | 0.999371363 | Not Sig |
| ENSG00000197746 | PSAP      | prosaposin                                                | 5660      | 30164.07707 | -0.080005961 | 0.595351505 | -0.13438441  | 0.893098609 | 0.999371363 | Not Sig |
| ENSG00000176055 | MBLAC2    | metallo-beta-lactamase domain containing 2                | 153364    | 172.4249703 | -0.079927889 | 0.504268972 | -0.158502493 | 0.874060857 | 0.999371363 | Not Sig |
| ENSG00000177352 | CCDC71    | coiled-coil domain containing 71                          | 64925     | 409.1754625 | -0.079914268 | 0.465310598 | -0.171743924 | 0.863638852 | 0.999371363 | Not Sig |
| ENSG00000133872 | SARAF     | store-operated calcium entry associated regulatory factor | 51669     | 4700.738838 | -0.079786737 | 0.615516375 | -0.129625693 | 0.896862574 | 0.999371363 | Not Sig |
| ENSG00000147166 | ITGB1BP2  | integrin subunit beta 1 binding protein 2                 | 26548     | 27.81929629 | -0.079404638 | 0.751043534 | -0.105725746 | 0.915799953 | 0.999371363 | Not Sig |
| ENSG00000115687 | PASK      | PAS domain containing serine/threonine kinase             | 23178     | 492.6688771 | -0.079337642 | 0.423168299 | -0.187484844 | 0.851280506 | 0.999371363 | Not Sig |
| ENSG00000172262 | ZNF131    | zinc finger protein 131                                   | 7690      | 827.751363  | -0.079268513 | 0.457957515 | -0.173091413 | 0.862579575 | 0.999371363 | Not Sig |
| ENSG00000134049 | IER3IP1   | immediate early response 3 interacting protein 1          | 51124     | 401.3813932 | -0.079155847 | 0.750724377 | -0.105439292 | 0.916027239 | 0.999371363 | Not Sig |
| ENSG00000008405 | CRY1      | cryptochrome circadian regulator 1                        | 1407      | 630.8300084 | -0.079112529 | 0.411321422 | -0.192337488 | 0.847477856 | 0.999371363 | Not Sig |
| ENSG00000250942 | NA        | NA                                                        | NA        | 6.11576536  | -0.079075053 | 1.473055278 | -0.053680981 | 0.957189336 | NA          | NA      |
| ENSG00000225241 | NA        | NA                                                        | NA        | 885.1080243 | -0.079062815 | 0.451605578 | -0.175070501 | 0.861024237 | 0.999371363 | Not Sig |
| ENSG00000172638 | EFEMP2    | EGF containing fibulin extracellular matrix protein 2     | 30008     | 761.1394662 | -0.078994821 | 0.630615276 | -0.125266266 | 0.900312757 | 0.999371363 | Not Sig |
| ENSG00000168264 | IRF2BP2   | interferon regulatory factor 2 binding protein 2          | 359948    | 7407.341946 | -0.078866656 | 0.478674452 | -0.164760529 | 0.869132472 | 0.999371363 | Not Sig |
| ENSG00000109606 | DHX15     | DEAH-box helicase 15                                      | 1665      | 3067.946429 | -0.078848351 | 0.501411168 | -0.157252881 | 0.875045553 | 0.999371363 | Not Sig |
| ENSG00000265339 | NA        | NA                                                        | NA        | 2.771501152 | -0.078821278 | 1.487003812 | -0.053006776 | 0.957726509 | NA          | NA      |
| ENSG00000106012 | IQCE      | IQ motif containing E                                     | 23288     | 1172.072206 | -0.078427547 | 0.497542142 | -0.157629959 | 0.874748395 | 0.999371363 | Not Sig |
| ENSG00000176531 | PHLDB3    | pleckstrin homology like domain family B member 3         | 653583    | 263.0495965 | -0.078415553 | 0.491542631 | -0.159529505 | 0.873251714 | 0.999371363 | Not Sig |
| ENSG00000140961 | OSGIN1    | oxidative stress induced growth inhibitor 1               | 29948     | 290.8702269 | -0.078399002 | 0.82561284  | -0.094958555 | 0.924347747 | 0.999371363 | Not Sig |
| ENSG00000178761 | FAM219B   | family with sequence similarity 219 member B              | 57184     | 1015.934079 | -0.078372254 | 0.526970339 | -0.148722325 | 0.881772744 | 0.999371363 | Not Sig |

|                 |          |                                                                 |           |             |              |             |              |             |             |         |
|-----------------|----------|-----------------------------------------------------------------|-----------|-------------|--------------|-------------|--------------|-------------|-------------|---------|
| ENSG00000221465 | NA       | NA                                                              | NA        | 1.361857422 | -0.078267514 | 2.081707646 | -0.037597745 | 0.970008406 | NA          | NA      |
| ENSG00000067113 | PLPP1    | phospholipid phosphatase 1                                      | 8611      | 523.6393697 | -0.07822067  | 0.525276287 | -0.148913386 | 0.881621978 | 0.999371363 | Not Sig |
| ENSG00000114648 | KLHL18   | kelch like family member 18                                     | 23276     | 628.1892966 | -0.078143437 | 0.465415941 | -0.167900215 | 0.866661781 | 0.999371363 | Not Sig |
| ENSG00000148730 | EIF4EBP2 | eukaryotic translation initiation factor 4E binding protein 2   | 1979      | 3868.804226 | -0.077968189 | 0.43958209  | -0.177368894 | 0.859218639 | 0.999371363 | Not Sig |
| ENSG00000189184 | PCDH18   | protocadherin 18                                                | 54510     | 380.3572995 | -0.077728152 | 0.545737231 | -0.142427798 | 0.886742106 | 0.999371363 | Not Sig |
| ENSG00000166881 | NEMP1    | nuclear envelope integral membrane protein 1                    | 23306     | 518.8046631 | -0.077715491 | 0.557973939 | -0.139281578 | 0.889227646 | 0.999371363 | Not Sig |
| ENSG00000134825 | TMEM258  | transmembrane protein 258                                       | 746       | 436.1859126 | -0.077591127 | 0.55732665  | -0.139220199 | 0.889276147 | 0.999371363 | Not Sig |
| ENSG00000160213 | CSTB     | cystatin B                                                      | 1476      | 2034.316959 | -0.077589689 | 0.529432121 | -0.146552667 | 0.883485117 | 0.999371363 | Not Sig |
| ENSG00000242071 | NA       | NA                                                              | NA        | 30.50671479 | -0.07755194  | 0.612091791 | -0.126699854 | 0.899177962 | 0.999371363 | Not Sig |
| ENSG00000125633 | CCDC93   | coiled-coil domain containing 93                                | 54520     | 1440.25774  | -0.077526727 | 0.449822879 | -0.172349454 | 0.863162808 | 0.999371363 | Not Sig |
| ENSG00000126453 | BCL2L12  | BCL2 like 12                                                    | 83596     | 178.0029637 | -0.077467051 | 0.525220898 | -0.147494227 | 0.882741936 | 0.999371363 | Not Sig |
| ENSG00000243806 | NA       | NA                                                              | NA        | 7.106393713 | -0.077415633 | 0.947651511 | -0.081692091 | 0.934891568 | 0.999371363 | Not Sig |
| ENSG00000124788 | ATXN1    | ataxin 1                                                        | 6310      | 3088.912047 | -0.07726303  | 0.453129888 | -0.170509675 | 0.864609326 | 0.999371363 | Not Sig |
| ENSG00000129675 | ARHGEF6  | Rac/Cdc42 guanine nucleotide exchange factor 6                  | 9459      | 1169.436753 | -0.076960256 | 0.787925603 | -0.097674521 | 0.922190748 | 0.999371363 | Not Sig |
| ENSG00000130779 | CLIP1    | CAP-Gly domain containing linker protein 1                      | 6249      | 3726.415585 | -0.0769168   | 0.45613455  | -0.168627436 | 0.866089699 | 0.999371363 | Not Sig |
| ENSG00000106541 | AGR2     | anterior gradient 2, protein disulphide isomerase family member | 10551     | 5241.362376 | -0.076831908 | 1.007684525 | -0.076245994 | 0.939223392 | 0.999371363 | Not Sig |
| ENSG00000034152 | MAP2K3   | mitogen-activated protein kinase kinase 3                       | 5606      | 1637.725424 | -0.076812721 | 0.419764672 | -0.18298996  | 0.854805896 | 0.999371363 | Not Sig |
| ENSG00000196371 | FUT4     | fucosyltransferase 4                                            | 2526      | 305.5981356 | -0.076730436 | 0.461703052 | -0.166190012 | 0.868007419 | 0.999371363 | Not Sig |
| ENSG00000162613 | FUBP1    | far upstream element binding protein 1                          | 8880      | 3111.258674 | -0.076700772 | 0.613063367 | -0.125110675 | 0.900435932 | 0.999371363 | Not Sig |
| ENSG00000265201 | MIR4677  | microRNA 4677                                                   | 100616343 | 9.514808214 | -0.076271209 | 0.927729437 | -0.082212772 | 0.934477517 | 0.999371363 | Not Sig |
| ENSG00000198551 | ZNF627   | zinc finger protein 627                                         | 199692    | 353.6090765 | -0.075842073 | 0.460266468 | -0.164778618 | 0.869118234 | 0.999371363 | Not Sig |
| ENSG00000165733 | BMS1     | BMS1, ribosome biogenesis factor                                | 9790      | 1452.895857 | -0.075637422 | 0.416458029 | -0.181620757 | 0.855880358 | 0.999371363 | Not Sig |
| ENSG00000087245 | MMP2     | matrix metalloproteinase 2                                      | 4313      | 6361.385885 | -0.075619624 | 0.455810064 | -0.165901611 | 0.86823438  | 0.999371363 | Not Sig |
| ENSG00000177370 | TIMM22   | translocase of inner mitochondrial membrane 22                  | 29928     | 253.4107007 | -0.075583903 | 0.566355827 | -0.133456565 | 0.893832313 | 0.999371363 | Not Sig |
| ENSG00000196632 | WNK3     | WNK lysine deficient protein kinase 3                           | 65267     | 27.50046886 | -0.075576008 | 0.605498673 | -0.124816142 | 0.900669108 | 0.999371363 | Not Sig |
| ENSG00000069943 | PIGB     | phosphatidylinositol glycan anchor biosynthesis class B         | 9488      | 272.3189789 | -0.075461155 | 0.537686411 | -0.140344173 | 0.888388065 | 0.999371363 | Not Sig |
| ENSG00000071537 | SEL1L    | SEL1L ERAD E3 ligase adaptor subunit                            | 6400      | 4411.097039 | -0.075212703 | 0.617853449 | -0.121732271 | 0.903111055 | 0.999371363 | Not Sig |
| ENSG00000218052 | NA       | NA                                                              | NA        | 10.04286268 | -0.075189237 | 1.157223424 | -0.064973829 | 0.948194838 | 0.999371363 | Not Sig |
| ENSG00000137198 | GMPR     | guanosine monophosphate reductase                               | 2766      | 189.3585988 | -0.075177283 | 0.978626831 | -0.076819152 | 0.938767415 | 0.999371363 | Not Sig |
| ENSG00000186660 | ZFP91    | ZFP91 zinc finger protein                                       | 80829     | 1432.949055 | -0.075095483 | 0.477514162 | -0.157263362 | 0.875037294 | 0.999371363 | Not Sig |
| ENSG00000244346 | NA       | NA                                                              | NA        | 22.89616361 | -0.075080343 | 0.735285929 | -0.102110404 | 0.918669043 | 0.999371363 | Not Sig |
| ENSG00000165678 | GHITM    | growth hormone inducible transmembrane protein                  | 27069     | 2183.073096 | -0.075014248 | 0.527103834 | -0.142313987 | 0.886831999 | 0.999371363 | Not Sig |
| ENSG00000111341 | MGP      | matrix Gla protein                                              | 4256      | 4420.895154 | -0.074965279 | 0.72903476  | -0.102828128 | 0.918099381 | 0.999371363 | Not Sig |
| ENSG00000221051 | NA       | NA                                                              | NA        | 6.741170599 | -0.074799995 | 1.125964    | -0.066431959 | 0.947033927 | 0.999371363 | Not Sig |
| ENSG00000196139 | AKR1C3   | aldo-keto reductase family 1 member C3                          | 8644      | 1098.381373 | -0.074744573 | 0.625825854 | -0.119433502 | 0.904931921 | 0.999371363 | Not Sig |

|                 |          |                                                                        |        |             |              |             |              |             |             |         |
|-----------------|----------|------------------------------------------------------------------------|--------|-------------|--------------|-------------|--------------|-------------|-------------|---------|
| ENSG00000064102 | INTS13   | integrator complex subunit 13                                          | 55726  | 356.0639783 | -0.07471015  | 0.484247263 | -0.154280996 | 0.877388181 | 0.999371363 | Not Sig |
| ENSG00000122515 | ZMIZ2    | zinc finger MIZ-type containing 2                                      | 83637  | 3266.889799 | -0.074664455 | 0.516623054 | -0.144524049 | 0.885086668 | 0.999371363 | Not Sig |
| ENSG00000196923 | PDLIM7   | PDZ and LIM domain 7                                                   | 9260   | 1170.72927  | -0.074528639 | 0.546072978 | -0.136481097 | 0.891440967 | 0.999371363 | Not Sig |
| ENSG00000268162 | NA       | NA                                                                     | NA     | 3.950544423 | -0.074527773 | 1.537676486 | -0.048467785 | 0.961343438 | NA          | NA      |
| ENSG00000166558 | SLC38A8  | solute carrier family 38 member 8                                      | 146167 | 1.578718851 | -0.074525706 | 1.973366186 | -0.037765776 | 0.969874431 | NA          | NA      |
| ENSG00000177706 | FAM20C   | FAM20C, golgi associated secretory pathway kinase                      | 56975  | 1361.207718 | -0.074395486 | 0.568216137 | -0.130928147 | 0.895832148 | 0.999371363 | Not Sig |
| ENSG00000140718 | FTO      | FTO, alpha-ketoglutarate dependent dioxygenase                         | 79068  | 1007.874344 | -0.074352238 | 0.425467831 | -0.174754076 | 0.861272875 | 0.999371363 | Not Sig |
| ENSG00000115750 | TAF1B    | TAF1-box binding protein associated factor, RNA polymerase I subunit B | 9014   | 470.9923946 | -0.074183165 | 0.606174159 | -0.122379293 | 0.902598637 | 0.999371363 | Not Sig |
| ENSG00000137185 | ZSCAN9   | zinc finger and SCAN domain containing 9                               | 7746   | 327.7934779 | -0.074135562 | 0.449411475 | -0.164961436 | 0.868974336 | 0.999371363 | Not Sig |
| ENSG00000124356 | STAMBP   | STAM binding protein                                                   | 10617  | 787.4585017 | -0.07410029  | 0.410458558 | -0.180530503 | 0.85673611  | 0.999371363 | Not Sig |
| ENSG00000228938 | NA       | NA                                                                     | NA     | 1.249269854 | -0.074041131 | 2.40023122  | -0.030847499 | 0.975391159 | NA          | NA      |
| ENSG00000242661 | NA       | NA                                                                     | NA     | 1.249269854 | -0.074041131 | 2.40023122  | -0.030847499 | 0.975391159 | NA          | NA      |
| ENSG00000198939 | ZFP2     | ZFP2 zinc finger protein                                               | 80108  | 34.3411412  | -0.07395343  | 0.686256896 | -0.107763479 | 0.914183314 | 0.999371363 | Not Sig |
| ENSG00000155827 | RNF20    | ring finger protein 20                                                 | 56254  | 1235.503969 | -0.073506064 | 0.435472587 | -0.168796075 | 0.865957045 | 0.999371363 | Not Sig |
| ENSG00000153310 | FAM49B   | family with sequence similarity 49 member B                            | 51571  | 1769.701624 | -0.073478735 | 0.556701019 | -0.131989582 | 0.894992532 | 0.999371363 | Not Sig |
| ENSG00000138794 | CASP6    | caspase 6                                                              | 839    | 291.6832253 | -0.073466116 | 0.572816357 | -0.128254222 | 0.897947791 | 0.999371363 | Not Sig |
| ENSG00000160179 | ABCG1    | ATP binding cassette subfamily G member 1                              | 9619   | 1419.700186 | -0.073447711 | 0.686116588 | -0.107048441 | 0.91475055  | 0.999371363 | Not Sig |
| ENSG00000138134 | STAMBPL1 | STAM binding protein like 1                                            | 57559  | 258.7069849 | -0.073437865 | 0.535587871 | -0.13711637  | 0.890938813 | 0.999371363 | Not Sig |
| ENSG00000150459 | SAP18    | Sin3A associated protein 18                                            | 10284  | 1249.136326 | -0.073284789 | 0.523152044 | -0.140083156 | 0.888594289 | 0.999371363 | Not Sig |
| ENSG00000106034 | CPED1    | cadherin like and PC-esterase domain containing 1                      | 79974  | 842.0875012 | -0.073172159 | 0.754994405 | -0.096917484 | 0.922791924 | 0.999371363 | Not Sig |
| ENSG00000201793 | NA       | NA                                                                     | NA     | 137.5170337 | -0.073128705 | 0.656142222 | -0.111452522 | 0.911257513 | 0.999371363 | Not Sig |
| ENSG00000178921 | PFAS     | phosphoribosylformylglycinamide synthase                               | 5198   | 637.8129203 | -0.072756157 | 0.41905883  | -0.173618002 | 0.862165684 | 0.999371363 | Not Sig |
| ENSG00000100387 | RBX1     | ring-box 1                                                             | 9978   | 242.2525106 | -0.072613755 | 0.51990075  | -0.139668494 | 0.88892192  | 0.999371363 | Not Sig |
| ENSG00000160563 | MED27    | mediator complex subunit 27                                            | 9442   | 183.7214856 | -0.072478845 | 0.452176192 | -0.160288945 | 0.872653467 | 0.999371363 | Not Sig |
| ENSG00000137491 | SLC02B1  | solute carrier organic anion transporter family member 2B1             | 11309  | 3190.766863 | -0.072438411 | 0.78709979  | -0.092032055 | 0.926672572 | 0.999371363 | Not Sig |
| ENSG00000180488 | MIGA1    | mitoguardin 1                                                          | 374986 | 740.5044655 | -0.072397696 | 0.582381958 | -0.124313082 | 0.901067389 | 0.999371363 | Not Sig |
| ENSG00000175155 | YPEL2    | yippee like 2                                                          | 388403 | 1042.777881 | -0.072360185 | 0.436035418 | -0.165950246 | 0.868196105 | 0.999371363 | Not Sig |
| ENSG00000159592 | GPBP1L1  | GC-rich promoter binding protein 1 like 1                              | 60313  | 3441.990213 | -0.072125757 | 0.502173257 | -0.143627236 | 0.885794832 | 0.999371363 | Not Sig |
| ENSG00000257267 | ZNF271P  | zinc finger protein 271, pseudogene                                    | 10778  | 469.361659  | -0.071894332 | 0.42405528  | -0.169539999 | 0.865371913 | 0.999371363 | Not Sig |
| ENSG00000162618 | ADGRL4   | adhesion G protein-coupled receptor L4                                 | 64123  | 288.5970745 | -0.071845668 | 0.594839878 | -0.120781525 | 0.903864084 | 0.999371363 | Not Sig |
| ENSG00000185787 | MORF4L1  | mortality factor 4 like 1                                              | 10933  | 4459.376104 | -0.071740163 | 0.4177119   | -0.171745557 | 0.863637569 | 0.999371363 | Not Sig |
| ENSG00000263873 | NA       | NA                                                                     | NA     | 0.887926333 | -0.071728548 | 3.115731862 | -0.023021412 | 0.981633193 | NA          | NA      |
| ENSG00000089902 | RCOR1    | REST corepressor 1                                                     | 23186  | 1688.189113 | -0.071639943 | 0.429430301 | -0.166825542 | 0.86750732  | 0.999371363 | Not Sig |
| ENSG00000146872 | TLK2     | tousled like kinase 2                                                  | 11011  | 1353.498084 | -0.071348537 | 0.445887539 | -0.160014647 | 0.872869537 | 0.999371363 | Not Sig |
| ENSG00000250472 | NA       | NA                                                                     | NA     | 1.883574819 | -0.071001199 | 2.606999651 | -0.027234833 | 0.978272434 | NA          | NA      |

|                 |              |                                                                      |           |             |              |             |              |             |             |         |
|-----------------|--------------|----------------------------------------------------------------------|-----------|-------------|--------------|-------------|--------------|-------------|-------------|---------|
| ENSG00000170502 | NUDT9        | nudix hydrolase 9                                                    | 53343     | 528.6034223 | -0.070773676 | 0.418057793 | -0.169291607 | 0.865567277 | 0.999371363 | Not Sig |
| ENSG00000087086 | FTL          | ferritin light chain                                                 | 2512      | 43793.28065 | -0.070667026 | 0.743409872 | -0.09505796  | 0.92426879  | 0.999371363 | Not Sig |
| ENSG00000108786 | HSD17B1      | hydroxysteroid 17-beta dehydrogenase 1                               | 3292      | 32.31153012 | -0.070610411 | 0.602237034 | -0.117246877 | 0.906664421 | 0.999371363 | Not Sig |
| ENSG00000230191 | NA           | NA                                                                   | NA        | 0.955440255 | -0.070415588 | 2.621558821 | -0.026860198 | 0.97857124  | NA          | NA      |
| ENSG00000187391 | MAGI2        | membrane associated guanylate kinase, WW and PDZ domain containing 2 | 9863      | 288.7582262 | -0.070401889 | 0.590440513 | -0.11923621  | 0.90508822  | 0.999371363 | Not Sig |
| ENSG00000173137 | ADCK5        | aarF domain containing kinase 5                                      | 203054    | 278.9446222 | -0.070277388 | 0.632579708 | -0.111096495 | 0.911539828 | 0.999371363 | Not Sig |
| ENSG00000071082 | RPL31        | ribosomal protein L31                                                | 6160      | 3832.580524 | -0.070235138 | 0.439461011 | -0.15982109  | 0.87302201  | 0.999371363 | Not Sig |
| ENSG00000264567 | NA           | NA                                                                   | NA        | 2.323735212 | -0.070210236 | 1.568644397 | -0.044758542 | 0.964299771 | NA          | NA      |
| ENSG00000183648 | NDUFB1       | NADH:ubiquinone oxidoreductase subunit B1                            | 4707      | 399.1543899 | -0.070110267 | 0.451508332 | -0.155280117 | 0.87660049  | 0.999371363 | Not Sig |
| ENSG00000160959 | LRRC14       | leucine rich repeat containing 14                                    | 9684      | 747.3495014 | -0.070091499 | 0.568878641 | -0.123209932 | 0.901940861 | 0.999371363 | Not Sig |
| ENSG00000167258 | CDK12        | cyclin dependent kinase 12                                           | 51755     | 2986.822246 | -0.06996949  | 0.444545651 | -0.157395512 | 0.87493315  | 0.999371363 | Not Sig |
| ENSG00000164270 | HTR4         | 5-hydroxytryptamine receptor 4                                       | 3360      | 9.478457488 | -0.069860243 | 1.230113734 | -0.056791694 | 0.95471113  | 0.999371363 | Not Sig |
| ENSG00000103184 | SEC14L5      | SEC14 like lipid binding 5                                           | 9717      | 17.54078389 | -0.069832215 | 1.036841666 | -0.067350896 | 0.94630236  | 0.999371363 | Not Sig |
| ENSG00000110422 | HIPK3        | homeodomain interacting protein kinase 3                             | 10114     | 5859.726387 | -0.069789826 | 0.43382538  | -0.160870776 | 0.87219518  | 0.999371363 | Not Sig |
| ENSG00000164040 | PGRMC2       | progesterone receptor membrane component 2                           | 10424     | 1254.516313 | -0.069720596 | 0.433361106 | -0.160883372 | 0.872185259 | 0.999371363 | Not Sig |
| ENSG00000213809 | KLRK1        | killer cell lectin like receptor K1                                  | 22914     | 15.31470133 | -0.069706609 | 1.100486321 | -0.063341641 | 0.949494458 | 0.999371363 | Not Sig |
| ENSG00000213809 | KLRC4-KLRK1  | KLRC4-KLRK1 readthrough                                              | 100528032 | 15.31470133 | -0.069706609 | 1.100486321 | -0.063341641 | 0.949494458 | 0.999371363 | Not Sig |
| ENSG00000233930 | KRTAP5-AS1   | KRTAP5-1/KRTAP5-2 antisense RNA 1                                    | 338651    | 105.3931322 | -0.06956487  | 0.524753516 | -0.132566753 | 0.894536028 | 0.999371363 | Not Sig |
| ENSG00000165283 | STOML2       | stomatin like 2                                                      | 30968     | 702.3128242 | -0.069351544 | 0.494810042 | -0.140157916 | 0.888535222 | 0.999371363 | Not Sig |
| ENSG00000260954 | NA           | NA                                                                   | NA        | 8.488272982 | -0.069288494 | 0.939837222 | -0.07372393  | 0.941230057 | 0.999371363 | Not Sig |
| ENSG00000254561 | LOC105369520 | uncharacterized LOC105369520                                         | 105369520 | 3.022409859 | -0.069106401 | 1.971013915 | -0.035061346 | 0.972030824 | NA          | NA      |
| ENSG00000272604 | NA           | NA                                                                   | NA        | 13.49265281 | -0.069068368 | 0.794113497 | -0.086975437 | 0.930691037 | 0.999371363 | Not Sig |
| ENSG00000182902 | SLC25A18     | solute carrier family 25 member 18                                   | 83733     | 21.67407122 | -0.069066419 | 1.240059474 | -0.055696054 | 0.955583943 | 0.999371363 | Not Sig |
| ENSG00000013375 | PGM3         | phosphoglucomutase 3                                                 | 5238      | 1469.827448 | -0.069025968 | 0.660370613 | -0.104526106 | 0.916751852 | 0.999371363 | Not Sig |
| ENSG00000198358 | LOC101928372 | uncharacterized LOC101928372                                         | 101928372 | 0.594096734 | -0.068797877 | 3.542046439 | -0.0194232   | 0.984503503 | NA          | NA      |
| ENSG00000239722 | NA           | NA                                                                   | NA        | 0.594096734 | -0.068797877 | 3.542046439 | -0.0194232   | 0.984503503 | NA          | NA      |
| ENSG00000259368 | NA           | NA                                                                   | NA        | 0.594096734 | -0.068797877 | 3.542046439 | -0.0194232   | 0.984503503 | NA          | NA      |
| ENSG00000011600 | TYROBP       | TYRO protein tyrosine kinase binding protein                         | 7305      | 981.8733652 | -0.068733752 | 0.947197466 | -0.072565388 | 0.94215197  | 0.999371363 | Not Sig |
| ENSG00000181104 | F2R          | coagulation factor II thrombin receptor                              | 2149      | 1452.151413 | -0.068729729 | 0.496623843 | -0.138393937 | 0.889929089 | 0.999371363 | Not Sig |
| ENSG00000120159 | CAAP1        | caspase activity and apoptosis inhibitor 1                           | 79886     | 349.7402551 | -0.068563633 | 0.562333088 | -0.121927082 | 0.902956767 | 0.999371363 | Not Sig |
| ENSG00000181929 | PRKAG1       | protein kinase AMP-activated non-catalytic subunit gamma 1           | 5571      | 618.8945159 | -0.068556323 | 0.413255082 | -0.165893478 | 0.86824078  | 0.999371363 | Not Sig |
| ENSG00000164134 | NAA15        | N(alpha)-acetyltransferase 15, NatA auxiliary subunit                | 80155     | 1467.602434 | -0.068493738 | 0.531518286 | -0.128864311 | 0.897465017 | 0.999371363 | Not Sig |
| ENSG00000122034 | GTF3A        | general transcription factor IIIA                                    | 2971      | 1146.154619 | -0.068458465 | 0.538756121 | -0.127067633 | 0.898886869 | 0.999371363 | Not Sig |
| ENSG00000124831 | LRRFIP1      | LRR binding FLII interacting protein 1                               | 9208      | 5015.392979 | -0.068360555 | 0.528699097 | -0.12929955  | 0.897120627 | 0.999371363 | Not Sig |
| ENSG00000222455 | NA           | NA                                                                   | NA        | 12.45199181 | -0.068347017 | 0.973759799 | -0.070188785 | 0.944043401 | 0.999371363 | Not Sig |

|                 |           |                                                           |           |             |              |             |              |             |             |         |
|-----------------|-----------|-----------------------------------------------------------|-----------|-------------|--------------|-------------|--------------|-------------|-------------|---------|
| ENSG00000159210 | SNF8      | SNF8, ESCRT-II complex subunit                            | 11267     | 621.691707  | -0.068300005 | 0.405931323 | -0.168255074 | 0.866382615 | 0.999371363 | Not Sig |
| ENSG00000141627 | DYM       | dymeclin                                                  | 54808     | 911.0667338 | -0.068285488 | 0.432085006 | -0.158037161 | 0.874427516 | 0.999371363 | Not Sig |
| ENSG00000112851 | ERBIN     | erbb2 interacting protein                                 | 55914     | 4874.637055 | -0.068237884 | 0.580078621 | -0.117635578 | 0.906356413 | 0.999371363 | Not Sig |
| ENSG00000139291 | TMEM19    | transmembrane protein 19                                  | 55266     | 411.6593688 | -0.06822542  | 0.448017171 | -0.152283047 | 0.878963695 | 0.999371363 | Not Sig |
| ENSG00000214534 | ZNF705E   | zinc finger protein 705E                                  | 100131539 | 7.34999649  | -0.068190974 | 1.118245776 | -0.06098031  | 0.951374891 | 0.999371363 | Not Sig |
| ENSG00000211665 | NA        | NA                                                        | NA        | 3.48959936  | -0.068132663 | 1.504751779 | -0.04527834  | 0.963885452 | NA          | NA      |
| ENSG00000094914 | AAAS      | aladin WD repeat nucleoporin                              | 8086      | 509.3370095 | -0.068076499 | 0.426001161 | -0.159803554 | 0.873035824 | 0.999371363 | Not Sig |
| ENSG00000226396 | NA        | NA                                                        | NA        | 28.2192766  | -0.067922154 | 0.582660448 | -0.116572447 | 0.907198873 | 0.999371363 | Not Sig |
| ENSG00000100249 | C22orf31  | chromosome 22 open reading frame 31                       | 25770     | 2.766912319 | -0.067895372 | 1.663302927 | -0.040819607 | 0.967439708 | NA          | NA      |
| ENSG00000185909 | KLHDC8B   | kelch domain containing 8B                                | 200942    | 500.0980719 | -0.067893317 | 0.508316048 | -0.133565166 | 0.893746431 | 0.999371363 | Not Sig |
| ENSG00000217128 | FNIP1     | folliculin interacting protein 1                          | 96459     | 1377.710852 | -0.067888454 | 0.557089387 | -0.121862767 | 0.903007703 | 0.999371363 | Not Sig |
| ENSG00000231169 | NA        | NA                                                        | NA        | 1.816321187 | -0.067888232 | 1.931861928 | -0.035141348 | 0.971967031 | NA          | NA      |
| ENSG00000223547 | ZNF844    | zinc finger protein 844                                   | 284391    | 409.249096  | -0.067884819 | 0.554257923 | -0.122478752 | 0.902519873 | 0.999371363 | Not Sig |
| ENSG00000154188 | ANGPT1    | angiopoietin 1                                            | 284       | 649.9185825 | -0.06777557  | 0.725392008 | -0.093433026 | 0.925559555 | 0.999371363 | Not Sig |
| ENSG00000167716 | WDR81     | WD repeat domain 81                                       | 124997    | 1398.110294 | -0.067721377 | 0.619653471 | -0.109289111 | 0.912973183 | 0.999371363 | Not Sig |
| ENSG00000207136 | NA        | NA                                                        | NA        | 4.573087668 | -0.06770711  | 1.842959188 | -0.036738258 | 0.970693704 | NA          | NA      |
| ENSG00000133612 | AGAP3     | ArfGAP with GTPase domain, ankyrin repeat and PH domain 3 | 116988    | 2173.803332 | -0.067565852 | 0.620907327 | -0.108817933 | 0.9133469   | 0.999371363 | Not Sig |
| ENSG00000258634 | NA        | NA                                                        | NA        | 215.1515858 | -0.06750665  | 0.560345874 | -0.120473182 | 0.904108323 | 0.999371363 | Not Sig |
| ENSG00000142528 | ZNF473    | zinc finger protein 473                                   | 25888     | 235.7812118 | -0.067457636 | 0.466178348 | -0.144703494 | 0.884944498 | 0.999371363 | Not Sig |
| ENSG00000101452 | DHX35     | DEAH-box helicase 35                                      | 60625     | 356.0669337 | -0.067338676 | 0.413506491 | -0.16284793  | 0.870638169 | 0.999371363 | Not Sig |
| ENSG00000125675 | GRIA3     | glutamate ionotropic receptor AMPA type subunit 3         | 2892      | 11.82322676 | -0.067331062 | 0.896477616 | -0.075106239 | 0.940130184 | 0.999371363 | Not Sig |
| ENSG00000122862 | SRGN      | serglycin                                                 | 5552      | 2603.062414 | -0.067320067 | 0.588234004 | -0.114444364 | 0.908885548 | 0.999371363 | Not Sig |
| ENSG00000255284 | LOC171391 | uncharacterized LOC171391                                 | 171391    | 74.63326752 | -0.067267339 | 0.550646777 | -0.122160596 | 0.902771832 | 0.999371363 | Not Sig |
| ENSG00000183624 | HMCES     | 5-hydroxymethylcytosine (hmC) binding, ES cell-specific   | 56941     | 611.8840598 | -0.067191718 | 0.43773664  | -0.153498043 | 0.878005533 | 0.999371363 | Not Sig |
| ENSG00000174915 | PTDSS2    | phosphatidylserine synthase 2                             | 81490     | 514.5238925 | -0.067188119 | 0.588733441 | -0.114123157 | 0.909140166 | 0.999371363 | Not Sig |
| ENSG00000179295 | PTPN11    | protein tyrosine phosphatase, non-receptor type 11        | 5781      | 3586.904087 | -0.067125585 | 0.413163206 | -0.162467482 | 0.870937734 | 0.999371363 | Not Sig |
| ENSG00000151893 | CACUL1    | CDK2 associated cullin domain 1                           | 143384    | 1877.570197 | -0.067106838 | 0.537450892 | -0.124861339 | 0.900633326 | 0.999371363 | Not Sig |
| ENSG00000198836 | OPA1      | OPA1, mitochondrial dynamin like GTPase                   | 4976      | 2030.633248 | -0.06709514  | 0.515643788 | -0.130119167 | 0.896472146 | 0.999371363 | Not Sig |
| ENSG00000100439 | ABHD4     | abhydrolase domain containing 4                           | 63874     | 686.5673085 | -0.067086989 | 0.491730403 | -0.136430428 | 0.891481021 | 0.999371363 | Not Sig |
| ENSG00000099917 | MED15     | mediator complex subunit 15                               | 51586     | 2351.195329 | -0.066927732 | 0.493231415 | -0.135692354 | 0.892064492 | 0.999371363 | Not Sig |
| ENSG00000260630 | SNAI3-AS1 | SNAI3 antisense RNA 1                                     | 197187    | 70.80039783 | -0.066921958 | 0.693488044 | -0.096500522 | 0.923123059 | 0.999371363 | Not Sig |
| ENSG00000103187 | COTL1     | coactosin like F-actin binding protein 1                  | 23406     | 2178.82609  | -0.066920118 | 0.805702449 | -0.083058104 | 0.933805339 | 0.999371363 | Not Sig |
| ENSG00000172716 | SLFN11    | schlafen family member 11                                 | 91607     | 1500.568077 | -0.066755622 | 0.578807956 | -0.115332937 | 0.908181233 | 0.999371363 | Not Sig |
| ENSG00000132718 | SYT11     | synaptotagmin 11                                          | 23208     | 477.4339826 | -0.066719761 | 0.716123289 | -0.093167981 | 0.925770111 | 0.999371363 | Not Sig |
| ENSG00000173011 | TADA2B    | transcriptional adaptor 2B                                | 93624     | 888.8601078 | -0.066635793 | 0.486785352 | -0.136889479 | 0.891118155 | 0.999371363 | Not Sig |



|                 |              |                                                              |           |             |              |             |              |             |             |         |
|-----------------|--------------|--------------------------------------------------------------|-----------|-------------|--------------|-------------|--------------|-------------|-------------|---------|
| ENSG00000168781 | PPIP5K1      | diphosphoinositol pentakisphosphate kinase 1                 | 9677      | 280.0416353 | -0.066587219 | 0.510917461 | -0.13032872  | 0.896306359 | 0.999371363 | Not Sig |
| ENSG00000265727 | NA           | NA                                                           | NA        | 185.7040091 | -0.066566311 | 0.634248317 | -0.104953074 | 0.916413044 | 0.999371363 | Not Sig |
| ENSG00000212719 | C17orf51     | chromosome 17 open reading frame 51                          | 339263    | 114.4077416 | -0.066390621 | 0.71209844  | -0.093232364 | 0.925718964 | 0.999371363 | Not Sig |
| ENSG00000176444 | CLK2         | CDC like kinase 2                                            | 1196      | 1084.815077 | -0.066379795 | 0.477666748 | -0.138966748 | 0.889476425 | 0.999371363 | Not Sig |
| ENSG00000263693 | MIR3161      | microRNA 3161                                                | 100423000 | 12.05800105 | -0.066350888 | 0.836584624 | -0.079311628 | 0.936784758 | 0.999371363 | Not Sig |
| ENSG00000182168 | UNC5C        | unc-5 netrin receptor C                                      | 8633      | 358.8789135 | -0.066276881 | 0.487572472 | -0.135932369 | 0.891874746 | 0.999371363 | Not Sig |
| ENSG00000072864 | NDE1         | nudE neurodevelopment protein 1                              | 54820     | 837.4888151 | -0.06622329  | 0.483736965 | -0.136899378 | 0.891110331 | 0.999371363 | Not Sig |
| ENSG00000188599 | NA           | NA                                                           | NA        | 46.02414336 | -0.066145732 | 0.627125628 | -0.105474453 | 0.915999341 | 0.999371363 | Not Sig |
| ENSG00000219902 | NA           | NA                                                           | NA        | 12.43304427 | -0.066143897 | 0.796117289 | -0.083083105 | 0.933785459 | 0.999371363 | Not Sig |
| ENSG00000152092 | ASTN1        | astrotactin 1                                                | 460       | 11.74755385 | -0.066043853 | 1.038198731 | -0.063613884 | 0.949277677 | 0.999371363 | Not Sig |
| ENSG00000146350 | TBC1D32      | TBC1 domain family member 32                                 | 221322    | 327.6469309 | -0.065980762 | 0.797135074 | -0.082772374 | 0.934032536 | 0.999371363 | Not Sig |
| ENSG00000186010 | NDUFA13      | NADH:ubiquinone oxidoreductase subunit A13                   | 51079     | 56.04770034 | -0.065904597 | 0.673835384 | -0.097805189 | 0.922086987 | 0.999371363 | Not Sig |
| ENSG00000229384 | NA           | NA                                                           | NA        | 2.47308272  | -0.065838026 | 1.723476497 | -0.03820071  | 0.969527655 | NA          | NA      |
| ENSG00000204717 | NA           | NA                                                           | NA        | 1.284889252 | -0.065732877 | 2.431386657 | -0.027035139 | 0.978431707 | NA          | NA      |
| ENSG00000213465 | ARL2         | ADP ribosylation factor like GTPase 2                        | 402       | 278.9333565 | -0.065720805 | 0.68917916  | -0.095360987 | 0.924028102 | 0.999371363 | Not Sig |
| ENSG00000130414 | NDUFA10      | NADH:ubiquinone oxidoreductase subunit A10                   | 4705      | 1527.352044 | -0.065669525 | 0.41987735  | -0.156401684 | 0.87571641  | 0.999371363 | Not Sig |
| ENSG00000170779 | CDCA4        | cell division cycle associated 4                             | 55038     | 268.0733728 | -0.065488391 | 0.66824274  | -0.098000902 | 0.921931577 | 0.999371363 | Not Sig |
| ENSG00000047315 | POLR2B       | RNA polymerase II subunit B                                  | 5431      | 2340.246703 | -0.065344163 | 0.493511385 | -0.132406596 | 0.894662698 | 0.999371363 | Not Sig |
| ENSG00000173653 | RCE1         | Ras converting CAAX endopeptidase 1                          | 9986      | 272.58856   | -0.06532951  | 0.587403741 | -0.111217388 | 0.911443963 | 0.999371363 | Not Sig |
| ENSG00000050327 | ARHGEF5      | Rho guanine nucleotide exchange factor 5                     | 7984      | 979.9703735 | -0.065295266 | 0.611959216 | -0.106698722 | 0.915027997 | 0.999371363 | Not Sig |
| ENSG00000050327 | LOC102725117 | rho guanine nucleotide exchange factor 5-like                | 102725117 | 979.9703735 | -0.065295266 | 0.611959216 | -0.106698722 | 0.915027997 | 0.999371363 | Not Sig |
| ENSG00000118939 | UCHL3        | ubiquitin C-terminal hydrolase L3                            | 7347      | 57.42415231 | -0.065127254 | 0.953786721 | -0.068282828 | 0.945560494 | 0.999371363 | Not Sig |
| ENSG00000071127 | WDR1         | WD repeat domain 1                                           | 9948      | 5293.164207 | -0.064981467 | 0.477555415 | -0.136071051 | 0.891765113 | 0.999371363 | Not Sig |
| ENSG00000260766 | NA           | NA                                                           | NA        | 68.46469427 | -0.0649225   | 0.683774745 | -0.094947204 | 0.924356763 | 0.999371363 | Not Sig |
| ENSG00000079691 | CARMIL1      | capping protein regulator and myosin 1 linker 1              | 55604     | 1140.704584 | -0.064685045 | 0.493057758 | -0.131191617 | 0.895623727 | 0.999371363 | Not Sig |
| ENSG00000136816 | TOR1B        | torsin family 1 member B                                     | 27348     | 516.9071491 | -0.064577144 | 0.516570108 | -0.125011384 | 0.900514538 | 0.999371363 | Not Sig |
| ENSG00000136933 | RABEPK       | Rab9 effector protein with kelch motifs                      | 10244     | 225.3083446 | -0.064516469 | 0.496625712 | -0.129909643 | 0.896637915 | 0.999371363 | Not Sig |
| ENSG00000116809 | ZBTB17       | zinc finger and BTB domain containing 17                     | 7709      | 681.6731166 | -0.064159547 | 0.550717359 | -0.11650177  | 0.907254883 | 0.999371363 | Not Sig |
| ENSG00000118181 | RPS25        | ribosomal protein S25                                        | 6230      | 3851.839947 | -0.064042101 | 0.525405065 | -0.121890909 | 0.902985415 | 0.999371363 | Not Sig |
| ENSG00000188290 | HES4         | hes family bHLH transcription factor 4                       | 57801     | 462.4574029 | -0.064022709 | 0.611720111 | -0.104660135 | 0.916645496 | 0.999371363 | Not Sig |
| ENSG00000250220 | NA           | NA                                                           | NA        | 33.59290069 | -0.064006246 | 0.666488686 | -0.096035007 | 0.923492769 | 0.999371363 | Not Sig |
| ENSG00000134698 | AGO4         | argonaute 4, RISC catalytic component                        | 192670    | 1531.077524 | -0.063963487 | 0.428444144 | -0.149292476 | 0.881322852 | 0.999371363 | Not Sig |
| ENSG00000110756 | HPS5         | HPS5, biogenesis of lysosomal organelles complex 2 subunit 2 | 11234     | 1126.993469 | -0.06382897  | 0.510562051 | -0.125017067 | 0.900510039 | 0.999371363 | Not Sig |
| ENSG00000184056 | VPS33B       | VPS33B, late endosome and lysosome associated                | 26276     | 304.8100002 | -0.063824263 | 0.438666774 | -0.145496004 | 0.88431927  | 0.999371363 | Not Sig |
| ENSG00000262172 | NA           | NA                                                           | NA        | 22.98827733 | -0.063818831 | 0.797910143 | -0.079982479 | 0.936251191 | 0.999371363 | Not Sig |

|                 |              |                                                                                     |           |             |              |             |              |             |             |         |
|-----------------|--------------|-------------------------------------------------------------------------------------|-----------|-------------|--------------|-------------|--------------|-------------|-------------|---------|
| ENSG00000198815 | FOXJ3        | forkhead box J3                                                                     | 22887     | 1725.360314 | -0.063732628 | 0.543627092 | -0.11723593  | 0.906673096 | 0.999371363 | Not Sig |
| ENSG00000083067 | TRPM3        | transient receptor potential cation channel subfamily M member 3                    | 80036     | 11.19535933 | -0.063729719 | 1.03184075  | -0.061763134 | 0.950751462 | 0.999371363 | Not Sig |
| ENSG00000168564 | CDKN2AIP     | CDKN2A interacting protein                                                          | 55602     | 376.8367235 | -0.063632449 | 0.437255782 | -0.145526832 | 0.884294932 | 0.999371363 | Not Sig |
| ENSG00000207719 | MIR623       | microRNA 623                                                                        | 693208    | 10.81568931 | -0.063536735 | 0.859253252 | -0.073944131 | 0.94105484  | 0.999371363 | Not Sig |
| ENSG00000130956 | HABP4        | hyaluronan binding protein 4                                                        | 22927     | 335.712646  | -0.063460468 | 0.561565741 | -0.113006302 | 0.910025559 | 0.999371363 | Not Sig |
| ENSG00000233170 | NA           | NA                                                                                  | NA        | 8.245517471 | -0.063459644 | 0.959326278 | -0.066150219 | 0.947258229 | 0.999371363 | Not Sig |
| ENSG00000235257 | ITGA9-AS1    | ITGA9 antisense RNA 1                                                               | 101928153 | 70.36247689 | -0.063306877 | 0.592723201 | -0.106806814 | 0.914942242 | 0.999371363 | Not Sig |
| ENSG00000164197 | RNF180       | ring finger protein 180                                                             | 285671    | 293.9994355 | -0.06324898  | 0.445877336 | -0.14185287  | 0.887196222 | 0.999371363 | Not Sig |
| ENSG00000137522 | RNF121       | ring finger protein 121                                                             | 55298     | 486.8597632 | -0.063033464 | 0.421816143 | -0.149433502 | 0.881211577 | 0.999371363 | Not Sig |
| ENSG00000134780 | DAGLA        | diacylglycerol lipase alpha                                                         | 747       | 343.3283778 | -0.063028046 | 0.687671805 | -0.091654253 | 0.926972745 | 0.999371363 | Not Sig |
| ENSG00000237301 | NA           | NA                                                                                  | NA        | 9.415499826 | -0.062995    | 0.907340049 | -0.069428215 | 0.944648771 | 0.999371363 | Not Sig |
| ENSG00000114982 | KANSL3       | KAT8 regulatory NSL complex subunit 3                                               | 55683     | 2072.823541 | -0.062975073 | 0.42635313  | -0.147706369 | 0.882574505 | 0.999371363 | Not Sig |
| ENSG00000263072 | NA           | NA                                                                                  | NA        | 179.522928  | -0.062786686 | 0.456723969 | -0.137471844 | 0.890657847 | 0.999371363 | Not Sig |
| ENSG00000125835 | SNRPB        | small nuclear ribonucleoprotein polypeptides B and B1                               | 6628      | 995.1004021 | -0.062742423 | 0.479349182 | -0.130890853 | 0.89586165  | 0.999371363 | Not Sig |
| ENSG00000272269 | LOC105374952 | uncharacterized LOC105374952                                                        | 105374952 | 16.21852688 | -0.06252271  | 0.750951234 | -0.083258016 | 0.933646383 | 0.999371363 | Not Sig |
| ENSG00000137273 | FOXF2        | forkhead box F2                                                                     | 2295      | 380.1129297 | -0.062377949 | 0.774103451 | -0.080580895 | 0.935775261 | 0.999371363 | Not Sig |
| ENSG00000244398 | NA           | NA                                                                                  | NA        | 16.11520518 | -0.062323159 | 0.749603102 | -0.083141544 | 0.933738993 | 0.999371363 | Not Sig |
| ENSG00000131724 | IL13RA1      | interleukin 13 receptor subunit alpha 1                                             | 3597      | 2952.541699 | -0.062231357 | 0.560400521 | -0.111047999 | 0.911578284 | 0.999371363 | Not Sig |
| ENSG00000100991 | TRPC4AP      | transient receptor potential cation channel subfamily C member 4 associated protein | 26133     | 2113.711328 | -0.062226413 | 0.420537117 | -0.147968896 | 0.882367315 | 0.999371363 | Not Sig |
| ENSG00000143933 | CALM2        | calmodulin 2                                                                        | 805       | 6027.820515 | -0.062210854 | 0.523887597 | -0.118748477 | 0.905474629 | 0.999371363 | Not Sig |
| ENSG00000241230 | NA           | NA                                                                                  | NA        | 12.07531023 | -0.06216887  | 0.868643379 | -0.071570073 | 0.942944058 | 0.999371363 | Not Sig |
| ENSG00000059573 | ALDH18A1     | aldehyde dehydrogenase 18 family member A1                                          | 5832      | 1591.118442 | -0.062066611 | 0.660346758 | -0.093990938 | 0.925116355 | 0.999371363 | Not Sig |
| ENSG00000048649 | RSF1         | remodeling and spacing factor 1                                                     | 51773     | 2886.638154 | -0.062024809 | 0.435059717 | -0.142566196 | 0.886632796 | 0.999371363 | Not Sig |
| ENSG00000170234 | PWWP2A       | PWWP domain containing 2A                                                           | 114825    | 814.3403712 | -0.061942461 | 0.436400638 | -0.141939437 | 0.887127844 | 0.999371363 | Not Sig |
| ENSG00000144802 | NFKBIZ       | NFKB inhibitor zeta                                                                 | 64332     | 3125.496794 | -0.061824155 | 0.48360089  | -0.127841277 | 0.898274584 | 0.999371363 | Not Sig |
| ENSG00000095585 | BLNK         | B-cell linker                                                                       | 29760     | 253.8913444 | -0.061804415 | 0.747753435 | -0.082653469 | 0.934127085 | 0.999371363 | Not Sig |
| ENSG00000055130 | CUL1         | cullin 1                                                                            | 8454      | 1560.884855 | -0.061766017 | 0.436646967 | -0.141455275 | 0.88751029  | 0.999371363 | Not Sig |
| ENSG00000138834 | MAPK8IP3     | mitogen-activated protein kinase 8 interacting protein 3                            | 23162     | 2252.410084 | -0.061733544 | 0.455240438 | -0.13560646  | 0.892132398 | 0.999371363 | Not Sig |
| ENSG00000135441 | BLOC1S1      | biogenesis of lysosomal organelles complex 1 subunit 1                              | 2647      | 202.133608  | -0.061393568 | 0.541652941 | -0.113344845 | 0.909757165 | 0.999371363 | Not Sig |
| ENSG00000269904 | MAP2K4P1     | mitogen-activated protein kinase kinase 4 pseudogene 1                              | 139201    | 4.494547377 | -0.061305675 | 1.14296533  | -0.053637388 | 0.957224068 | NA          | NA      |
| ENSG00000114395 | CYB561D2     | cytochrome b561 family member D2                                                    | 11068     | 188.0214623 | -0.061210344 | 0.516252011 | -0.118566791 | 0.905618577 | 0.999371363 | Not Sig |
| ENSG00000204604 | ZNF468       | zinc finger protein 468                                                             | 90333     | 536.6559349 | -0.061159977 | 0.636274013 | -0.096122073 | 0.92342362  | 0.999371363 | Not Sig |
| ENSG00000228293 | NA           | NA                                                                                  | NA        | 0.96187779  | -0.061016313 | 2.325443511 | -0.02623857  | 0.979067052 | NA          | NA      |
| ENSG00000258016 | NA           | NA                                                                                  | NA        | 0.96187779  | -0.061016313 | 2.325443511 | -0.02623857  | 0.979067052 | NA          | NA      |
| ENSG00000108352 | RAPGEFL1     | Rap guanine nucleotide exchange factor like 1                                       | 51195     | 212.1938235 | -0.060907466 | 0.64792714  | -0.094003573 | 0.925106318 | 0.999371363 | Not Sig |

|                 |          |                                                                                |        |             |              |             |              |             |             |         |
|-----------------|----------|--------------------------------------------------------------------------------|--------|-------------|--------------|-------------|--------------|-------------|-------------|---------|
| ENSG00000198771 | RCS D1   | RCS D domain containing 1                                                      | 92241  | 659.498513  | -0.060873908 | 0.83837755  | -0.072609182 | 0.94211712  | 0.999371363 | Not Sig |
| ENSG00000121274 | PAPD5    | poly(A) RNA polymerase D5, non-canonical                                       | 64282  | 645.5533702 | -0.06077907  | 0.50586111  | -0.120149719 | 0.904364548 | 0.999371363 | Not Sig |
| ENSG00000013523 | ANGEL1   | angel homolog 1                                                                | 23357  | 823.1134013 | -0.060771256 | 0.487102841 | -0.124760628 | 0.900713058 | 0.999371363 | Not Sig |
| ENSG00000154723 | ATP5J    | ATP synthase, H <sup>+</sup> transporting, mitochondrial Fo complex subunit F6 | 522    | 501.7685003 | -0.060710449 | 0.469727759 | -0.129246032 | 0.897162973 | 0.999371363 | Not Sig |
| ENSG00000162076 | FLYWCH2  | FLYWCH family member 2                                                         | 114984 | 374.2227148 | -0.060656903 | 0.629690678 | -0.096328094 | 0.923259999 | 0.999371363 | Not Sig |
| ENSG00000167721 | TSR1     | TSR1, ribosome maturation factor                                               | 55720  | 955.3558543 | -0.060539721 | 0.445431745 | -0.135912452 | 0.891890491 | 0.999371363 | Not Sig |
| ENSG00000178988 | MRFAP1L1 | Morf4 family associated protein 1 like 1                                       | 114932 | 1094.656417 | -0.060444145 | 0.443594683 | -0.13625985  | 0.891615863 | 0.999371363 | Not Sig |
| ENSG00000200783 | NA       | NA                                                                             | NA     | 14.37212191 | -0.060416726 | 0.81362719  | -0.074256032 | 0.940806662 | 0.999371363 | Not Sig |
| ENSG00000160593 | JAML     | junction adhesion molecule like                                                | 120425 | 809.0559583 | -0.060365652 | 0.904048682 | -0.066772568 | 0.946762763 | 0.999371363 | Not Sig |
| ENSG00000155876 | RRAGA    | Ras related GTP binding A                                                      | 10670  | 789.5783035 | -0.060364288 | 0.582001751 | -0.103718396 | 0.917392827 | 0.999371363 | Not Sig |
| ENSG00000151287 | TEX30    | testis expressed 30                                                            | 93081  | 49.57707976 | -0.060157014 | 0.549537701 | -0.109468403 | 0.912830982 | 0.999371363 | Not Sig |
| ENSG00000165819 | METTL3   | methyltransferase like 3                                                       | 56339  | 864.6976522 | -0.059964113 | 0.422910115 | -0.141789262 | 0.887246466 | 0.999371363 | Not Sig |
| ENSG00000224967 | NA       | NA                                                                             | NA     | 17.68564427 | -0.059873495 | 0.685858729 | -0.087297124 | 0.93043534  | 0.999371363 | Not Sig |
| ENSG00000161057 | PSMC2    | proteasome 26S subunit, ATPase 2                                               | 5701   | 1018.756091 | -0.059646604 | 0.39958379  | -0.149271832 | 0.881339141 | 0.999371363 | Not Sig |
| ENSG00000205089 | CCNI2    | cyclin I family member 2                                                       | 645121 | 23.90396946 | -0.059464369 | 0.791164513 | -0.075160561 | 0.940086963 | 0.999371363 | Not Sig |
| ENSG00000256615 | NA       | NA                                                                             | NA     | 24.17916949 | -0.059361226 | 1.192288768 | -0.049787625 | 0.960291629 | 0.999371363 | Not Sig |
| ENSG00000226803 | NA       | NA                                                                             | NA     | 7.601780344 | -0.059358505 | 1.004147448 | -0.059113335 | 0.952861837 | 0.999371363 | Not Sig |
| ENSG00000167977 | KCTD5    | potassium channel tetramerization domain containing 5                          | 54442  | 614.7403583 | -0.059331215 | 0.490797623 | -0.120887332 | 0.903780277 | 0.999371363 | Not Sig |
| ENSG00000165782 | PIP4P1   | phosphatidylinositol-4,5-bisphosphate 4-phosphatase 1                          | 90809  | 466.4413645 | -0.059313635 | 0.455387511 | -0.130248709 | 0.896369659 | 0.999371363 | Not Sig |
| ENSG00000104497 | SNX16    | sorting nexin 16                                                               | 64089  | 176.4568206 | -0.058957831 | 0.549859291 | -0.107223489 | 0.914611682 | 0.999371363 | Not Sig |
| ENSG00000196914 | ARHGEF12 | Rho guanine nucleotide exchange factor 12                                      | 23365  | 8322.885313 | -0.058932031 | 0.392157897 | -0.150276282 | 0.880546645 | 0.999371363 | Not Sig |
| ENSG00000183955 | KMT5A    | lysine methyltransferase 5A                                                    | 387893 | 796.3006821 | -0.058799291 | 0.407000997 | -0.144469648 | 0.885129623 | 0.999371363 | Not Sig |
| ENSG00000003436 | TFPI     | tissue factor pathway inhibitor                                                | 7035   | 6290.047545 | -0.058681029 | 0.595209909 | -0.098588797 | 0.921464765 | 0.999371363 | Not Sig |
| ENSG00000006695 | COX10    | COX10, heme A:farnesyltransferase cytochrome c oxidase assembly factor         | 1352   | 292.2165617 | -0.058548662 | 0.459655166 | -0.127375185 | 0.898643455 | 0.999371363 | Not Sig |
| ENSG00000140265 | ZSCAN29  | zinc finger and SCAN domain containing 29                                      | 146050 | 768.3769453 | -0.058491463 | 0.409558934 | -0.142815742 | 0.886435704 | 0.999371363 | Not Sig |
| ENSG00000101138 | CSTF1    | cleavage stimulation factor subunit 1                                          | 1477   | 401.4458438 | -0.058377406 | 0.449232814 | -0.129949113 | 0.896606687 | 0.999371363 | Not Sig |
| ENSG00000260992 | NA       | NA                                                                             | NA     | 23.85542409 | -0.058177297 | 0.684730123 | -0.084963835 | 0.932290142 | 0.999371363 | Not Sig |
| ENSG00000233266 | NA       | NA                                                                             | NA     | 17.20668078 | -0.058117165 | 0.806562365 | -0.072055388 | 0.942557829 | 0.999371363 | Not Sig |
| ENSG00000270015 | NA       | NA                                                                             | NA     | 140.5499461 | -0.058061423 | 0.451647988 | -0.128554592 | 0.897710098 | 0.999371363 | Not Sig |
| ENSG00000166887 | VPS39    | VPS39, HOPS complex subunit                                                    | 23339  | 2093.735389 | -0.057888472 | 0.398414746 | -0.145297011 | 0.884476374 | 0.999371363 | Not Sig |
| ENSG00000164111 | ANXA5    | annexin A5                                                                     | 308    | 5051.963645 | -0.057823671 | 0.443317146 | -0.130434095 | 0.896222993 | 0.999371363 | Not Sig |
| ENSG00000130653 | PNPLA7   | patatin like phospholipase domain containing 7                                 | 375775 | 339.4984238 | -0.057761857 | 0.753395896 | -0.076668664 | 0.938887133 | 0.999371363 | Not Sig |
| ENSG00000100678 | SLC8A3   | solute carrier family 8 member A3                                              | 6547   | 55.35577475 | -0.057673971 | 0.93474121  | -0.061700469 | 0.950801366 | 0.999371363 | Not Sig |
| ENSG00000135108 | FBXO21   | F-box protein 21                                                               | 23014  | 1521.745653 | -0.057660805 | 0.436690318 | -0.132040492 | 0.894952264 | 0.999371363 | Not Sig |
| ENSG00000051009 | FAM160A2 | family with sequence similarity 160 member A2                                  | 84067  | 1118.454637 | -0.057255201 | 0.446677236 | -0.128180252 | 0.898006328 | 0.999371363 | Not Sig |

|                 |              |                                                         |           |             |              |             |              |             |             |         |
|-----------------|--------------|---------------------------------------------------------|-----------|-------------|--------------|-------------|--------------|-------------|-------------|---------|
| ENSG00000174780 | SRP72        | signal recognition particle 72                          | 6731      | 2031.374216 | -0.057221006 | 0.504053549 | -0.11352168  | 0.909616976 | 0.999371363 | Not Sig |
| ENSG00000115970 | THADA        | THADA, armadillo repeat containing                      | 63892     | 1701.659185 | -0.057081721 | 0.443117483 | -0.128818481 | 0.897501281 | 0.999371363 | Not Sig |
| ENSG00000134709 | HOOK1        | hook microtubule tethering protein 1                    | 51361     | 996.590136  | -0.057028486 | 0.785458918 | -0.072605307 | 0.942120204 | 0.999371363 | Not Sig |
| ENSG00000130714 | POMT1        | protein O-mannosyltransferase 1                         | 10585     | 669.9958633 | -0.056947854 | 0.510049043 | -0.111651723 | 0.911099559 | 0.999371363 | Not Sig |
| ENSG00000228643 | NA           | NA                                                      | NA        | 6.116048695 | -0.056894227 | 1.257852419 | -0.045231242 | 0.963922992 | NA          | NA      |
| ENSG00000130208 | APOC1        | apolipoprotein C1                                       | 341       | 1505.703424 | -0.056754546 | 0.94775498  | -0.059883142 | 0.952248707 | 0.999371363 | Not Sig |
| ENSG00000250195 | LOC105377448 | uncharacterized LOC105377448                            | 105377448 | 5.265728888 | -0.056725381 | 1.174891713 | -0.04828137  | 0.961492002 | NA          | NA      |
| ENSG00000108669 | CYTH1        | cytohesin 1                                             | 9267      | 3125.47936  | -0.056714621 | 0.492006702 | -0.115272051 | 0.908229491 | 0.999371363 | Not Sig |
| ENSG00000146083 | RNF44        | ring finger protein 44                                  | 22838     | 1824.086118 | -0.056695982 | 0.45938939  | -0.123415958 | 0.901777721 | 0.999371363 | Not Sig |
| ENSG00000163823 | CCR1         | C-C motif chemokine receptor 1                          | 1230      | 695.3154166 | -0.056691716 | 0.858464784 | -0.066038488 | 0.947347184 | 0.999371363 | Not Sig |
| ENSG00000132912 | DCTN4        | dynactin subunit 4                                      | 51164     | 1511.699135 | -0.056475936 | 0.466187373 | -0.121144286 | 0.903576752 | 0.999371363 | Not Sig |
| ENSG00000136738 | STAM         | signal transducing adaptor molecule                     | 8027      | 679.3759864 | -0.056088945 | 0.542701484 | -0.103351376 | 0.917684102 | 0.999371363 | Not Sig |
| ENSG00000155561 | NUP205       | nucleoporin 205                                         | 23165     | 1821.48171  | -0.05588553  | 0.488439377 | -0.114416512 | 0.908907625 | 0.999371363 | Not Sig |
| ENSG00000254612 | NA           | NA                                                      | NA        | 11.47547403 | -0.055851902 | 0.928055228 | -0.060181658 | 0.952010954 | 0.999371363 | Not Sig |
| ENSG00000123636 | BAZ2B        | bromodomain adjacent to zinc finger domain 2B           | 29994     | 3517.587612 | -0.055804845 | 0.538971851 | -0.103539442 | 0.917534848 | 0.999371363 | Not Sig |
| ENSG00000202169 | NA           | NA                                                      | NA        | 0.661610655 | -0.055800099 | 3.447243966 | -0.016186873 | 0.987085308 | NA          | NA      |
| ENSG00000211674 | NA           | NA                                                      | NA        | 0.661610655 | -0.055800099 | 3.447243966 | -0.016186873 | 0.987085308 | NA          | NA      |
| ENSG00000225146 | NA           | NA                                                      | NA        | 0.661610655 | -0.055800099 | 3.447243966 | -0.016186873 | 0.987085308 | NA          | NA      |
| ENSG00000244124 | NA           | NA                                                      | NA        | 0.661610655 | -0.055800099 | 3.447243966 | -0.016186873 | 0.987085308 | NA          | NA      |
| ENSG00000147099 | HDAC8        | histone deacetylase 8                                   | 55869     | 494.8064835 | -0.055717691 | 0.665668577 | -0.083701849 | 0.933293487 | 0.999371363 | Not Sig |
| ENSG00000197921 | HES5         | hes family bHLH transcription factor 5                  | 388585    | 11.24758623 | -0.055659057 | 1.000179012 | -0.055649095 | 0.955621353 | 0.999371363 | Not Sig |
| ENSG00000117472 | TSPAN1       | tetraspanin 1                                           | 10103     | 991.7139998 | -0.055632531 | 0.66717388  | -0.083385355 | 0.933545133 | 0.999371363 | Not Sig |
| ENSG00000101464 | PIGU         | phosphatidylinositol glycan anchor biosynthesis class U | 128869    | 357.264118  | -0.055518248 | 0.489555642 | -0.113405389 | 0.909709167 | 0.999371363 | Not Sig |
| ENSG00000232713 | NA           | NA                                                      | NA        | 9.807924147 | -0.055475582 | 1.02979147  | -0.053870695 | 0.957038185 | 0.999371363 | Not Sig |
| ENSG00000267990 | NA           | NA                                                      | NA        | 4.552113661 | -0.055416283 | 1.873494447 | -0.029579102 | 0.976402733 | NA          | NA      |
| ENSG00000265465 | MIR4768      | microRNA 4768                                           | 100616249 | 6.227866968 | -0.055308347 | 1.138989876 | -0.048559121 | 0.961270648 | NA          | NA      |
| ENSG00000130723 | PRRC2B       | proline rich coiled-coil 2B                             | 84726     | 8839.603504 | -0.055164965 | 0.495525653 | -0.111326153 | 0.911357717 | 0.999371363 | Not Sig |
| ENSG00000050405 | LIMA1        | LIM domain and actin binding 1                          | 51474     | 2029.040298 | -0.054719406 | 0.456226801 | -0.119939043 | 0.904531436 | 0.999371363 | Not Sig |
| ENSG00000256590 | NA           | NA                                                      | NA        | 1.045283496 | -0.054532706 | 2.299451597 | -0.023715527 | 0.981079521 | NA          | NA      |
| ENSG00000265826 | NA           | NA                                                      | NA        | 1.045283496 | -0.054532706 | 2.299451597 | -0.023715527 | 0.981079521 | NA          | NA      |
| ENSG00000269082 | NA           | NA                                                      | NA        | 1.045283496 | -0.054532706 | 2.299451597 | -0.023715527 | 0.981079521 | NA          | NA      |
| ENSG00000170260 | ZNF212       | zinc finger protein 212                                 | 7988      | 315.0003805 | -0.054434371 | 0.49212995  | -0.11060975  | 0.911925816 | 0.999371363 | Not Sig |
| ENSG00000106819 | ASPN         | asporin                                                 | 54829     | 515.5543142 | -0.054394959 | 0.656922695 | -0.082802679 | 0.934008439 | 0.999371363 | Not Sig |
| ENSG00000267340 | NA           | NA                                                      | NA        | 12.36409223 | -0.054371507 | 0.786429696 | -0.069137149 | 0.944880451 | 0.999371363 | Not Sig |
| ENSG00000119760 | SUPT7L       | SPT7 like, STAGA complex gamma subunit                  | 9913      | 927.9719998 | -0.054344548 | 0.416787752 | -0.130389023 | 0.896258651 | 0.999371363 | Not Sig |

|                 |           |                                                             |           |             |              |             |              |             |             |         |
|-----------------|-----------|-------------------------------------------------------------|-----------|-------------|--------------|-------------|--------------|-------------|-------------|---------|
| ENSG00000170899 | GSTA4     | glutathione S-transferase alpha 4                           | 2941      | 256.6752149 | -0.054318204 | 0.578927547 | -0.093825565 | 0.925247723 | 0.999371363 | Not Sig |
| ENSG00000163682 | RPL9      | ribosomal protein L9                                        | 6133      | 6616.78931  | -0.054227931 | 0.426053606 | -0.127279595 | 0.898719109 | 0.999371363 | Not Sig |
| ENSG00000137815 | RTF1      | RTF1 homolog, Paf1/RNA polymerase II complex component      | 23168     | 1780.221181 | -0.053962999 | 0.402804098 | -0.133968347 | 0.893427604 | 0.999371363 | Not Sig |
| ENSG00000168158 | OR2C1     | olfactory receptor family 2 subfamily C member 1            | 4993      | 0.894363868 | -0.053792612 | 3.111114732 | -0.017290462 | 0.986204894 | NA          | NA      |
| ENSG00000239246 | NA        | NA                                                          | NA        | 0.894363868 | -0.053792612 | 3.111114732 | -0.017290462 | 0.986204894 | NA          | NA      |
| ENSG00000239840 | NA        | NA                                                          | NA        | 0.894363868 | -0.053792612 | 3.111114732 | -0.017290462 | 0.986204894 | NA          | NA      |
| ENSG00000197601 | FAR1      | fatty acyl-CoA reductase 1                                  | 84188     | 1599.162312 | -0.053691018 | 0.656441292 | -0.081791043 | 0.934812879 | 0.999371363 | Not Sig |
| ENSG00000117152 | RGS4      | regulator of G protein signaling 4                          | 5999      | 81.38193904 | -0.053564564 | 0.579795346 | -0.092385294 | 0.926391923 | 0.999371363 | Not Sig |
| ENSG00000012124 | CD22      | CD22 molecule                                               | 933       | 142.2973909 | -0.053530945 | 0.827627625 | -0.064679988 | 0.948428797 | 0.999371363 | Not Sig |
| ENSG00000139211 | AMIGO2    | adhesion molecule with Ig like domain 2                     | 347902    | 762.5229599 | -0.053490249 | 0.514597078 | -0.103945886 | 0.917212293 | 0.999371363 | Not Sig |
| ENSG00000211862 | NA        | NA                                                          | NA        | 8.390707725 | -0.053452799 | 1.112355653 | -0.048053694 | 0.96167345  | 0.999371363 | Not Sig |
| ENSG00000225973 | PIGBOS1   | PIGB opposite strand 1                                      | 101928527 | 76.12928415 | -0.053295371 | 0.49296811  | -0.108111193 | 0.913907489 | 0.999371363 | Not Sig |
| ENSG00000239332 | LINC01119 | long intergenic non-protein coding RNA 1119                 | 100134259 | 5.274879084 | -0.053243827 | 1.212268475 | -0.043920821 | 0.964967519 | NA          | NA      |
| ENSG00000100568 | VTI1B     | vesicle transport through interaction with t-SNAREs 1B      | 10490     | 1265.581648 | -0.053221967 | 0.454401005 | -0.117125549 | 0.906760564 | 0.999371363 | Not Sig |
| ENSG00000107968 | MAP3K8    | mitogen-activated protein kinase kinase kinase 8            | 1326      | 899.5216502 | -0.0531216   | 0.531268352 | -0.099990145 | 0.920352149 | 0.999371363 | Not Sig |
| ENSG00000167182 | SP2       | Sp2 transcription factor                                    | 6668      | 602.688321  | -0.053053255 | 0.459749478 | -0.115396009 | 0.908131242 | 0.999371363 | Not Sig |
| ENSG00000222348 | NA        | NA                                                          | NA        | 5.398338304 | -0.052787926 | 1.475678371 | -0.035771972 | 0.971464182 | NA          | NA      |
| ENSG00000254017 | NA        | NA                                                          | NA        | 25.5276883  | -0.05266761  | 0.753832457 | -0.069866467 | 0.944299944 | 0.999371363 | Not Sig |
| ENSG00000030304 | MUSK      | muscle associated receptor tyrosine kinase                  | 4593      | 62.38193255 | -0.052613416 | 1.124956382 | -0.046769294 | 0.962697102 | 0.999371363 | Not Sig |
| ENSG00000123064 | DDX54     | DEAD-box helicase 54                                        | 79039     | 1402.585218 | -0.052554857 | 0.489608876 | -0.10734049  | 0.914518864 | 0.999371363 | Not Sig |
| ENSG00000139946 | PELI2     | pellino E3 ubiquitin protein ligase family member 2         | 57161     | 637.77852   | -0.052468788 | 0.715027389 | -0.073380109 | 0.941503645 | 0.999371363 | Not Sig |
| ENSG00000150403 | TMCO3     | transmembrane and coiled-coil domains 3                     | 55002     | 1446.499598 | -0.052304401 | 0.464754316 | -0.112542046 | 0.910393634 | 0.999371363 | Not Sig |
| ENSG00000217241 | NA        | NA                                                          | NA        | 3.597892328 | -0.052045023 | 1.7346123   | -0.030003836 | 0.976063994 | NA          | NA      |
| ENSG00000264957 | NA        | NA                                                          | NA        | 2.951447924 | -0.051899073 | 1.464536515 | -0.0354372   | 0.971731122 | NA          | NA      |
| ENSG00000136542 | GALNT5    | polypeptide N-acetylgalactosaminyltransferase 5             | 11227     | 1820.826706 | -0.05186075  | 0.88644382  | -0.058504272 | 0.95334696  | 0.999371363 | Not Sig |
| ENSG00000257829 | NA        | NA                                                          | NA        | 64.37263075 | -0.051846374 | 0.937192556 | -0.055320941 | 0.95588278  | 0.999371363 | Not Sig |
| ENSG00000148358 | GPR107    | G protein-coupled receptor 107                              | 57720     | 3087.322322 | -0.051749025 | 0.446138621 | -0.115993153 | 0.907657968 | 0.999371363 | Not Sig |
| ENSG00000163874 | ZC3H12A   | zinc finger CCCH-type containing 12A                        | 80149     | 966.4571673 | -0.051511043 | 0.462244642 | -0.111436755 | 0.911270015 | 0.999371363 | Not Sig |
| ENSG00000134569 | LRP4      | LDL receptor related protein 4                              | 4038      | 764.725201  | -0.051466246 | 0.72850159  | -0.070646718 | 0.943678928 | 0.999371363 | Not Sig |
| ENSG00000155530 | LRGUK     | leucine rich repeats and guanylate kinase domain containing | 136332    | 53.58789535 | -0.05138903  | 0.605858689 | -0.084820158 | 0.932404368 | 0.999371363 | Not Sig |
| ENSG00000071994 | PDCD2     | programmed cell death 2                                     | 5134      | 820.2150903 | -0.051387526 | 0.419281351 | -0.122560963 | 0.902454768 | 0.999371363 | Not Sig |
| ENSG00000151413 | NUBPL     | nucleotide binding protein like                             | 80224     | 326.8001823 | -0.051356005 | 0.58298953  | -0.088090785 | 0.929804521 | 0.999371363 | Not Sig |
| ENSG00000196684 | HSH2D     | hematopoietic SH2 domain containing                         | 84941     | 382.8103044 | -0.051017724 | 0.511900522 | -0.099663357 | 0.920611593 | 0.999371363 | Not Sig |
| ENSG00000100077 | GRK3      | G protein-coupled receptor kinase 3                         | 157       | 1412.42715  | -0.051013382 | 0.604884278 | -0.084335771 | 0.932789472 | 0.999371363 | Not Sig |
| ENSG00000130255 | RPL36     | ribosomal protein L36                                       | 25873     | 2371.486088 | -0.050865261 | 0.507275469 | -0.100271478 | 0.920128801 | 0.999371363 | Not Sig |

|                 |              |                                                          |           |             |              |             |              |             |             |         |
|-----------------|--------------|----------------------------------------------------------|-----------|-------------|--------------|-------------|--------------|-------------|-------------|---------|
| ENSG00000133265 | HSPBP1       | HSPA (Hsp70) binding protein 1                           | 23640     | 420.8846321 | -0.050786445 | 0.591991141 | -0.085789198 | 0.931633994 | 0.999371363 | Not Sig |
| ENSG00000265137 | MIR3192      | microRNA 3192                                            | 100422875 | 4.70153955  | -0.050641504 | 1.13065899  | -0.04478937  | 0.964275198 | NA          | NA      |
| ENSG00000117475 | BLZF1        | basic leucine zipper nuclear factor 1                    | 8548      | 695.6949077 | -0.050637046 | 0.620080984 | -0.081661988 | 0.934915507 | 0.999371363 | Not Sig |
| ENSG00000249661 | NA           | NA                                                       | NA        | 98.44599033 | -0.050284138 | 0.571954219 | -0.087916368 | 0.929943147 | 0.999371363 | Not Sig |
| ENSG00000008277 | ADAM22       | ADAM metalloproteinase domain 22                         | 53616     | 169.5853883 | -0.050210806 | 0.610483886 | -0.082247553 | 0.934449859 | 0.999371363 | Not Sig |
| ENSG00000171311 | EXOSC1       | exosome component 1                                      | 51013     | 306.2563067 | -0.050063007 | 0.409981625 | -0.122110367 | 0.902811611 | 0.999371363 | Not Sig |
| ENSG00000150433 | TMEM218      | transmembrane protein 218                                | 219854    | 277.6229963 | -0.050022933 | 0.412707194 | -0.121206834 | 0.903527211 | 0.999371363 | Not Sig |
| ENSG00000110318 | CEP126       | centrosomal protein 126                                  | 57562     | 387.340804  | -0.050021316 | 0.545398473 | -0.091715175 | 0.92692434  | 0.999371363 | Not Sig |
| ENSG00000272084 | NA           | NA                                                       | NA        | 32.11334806 | -0.049998252 | 0.8061483   | -0.062021159 | 0.950545982 | 0.999371363 | Not Sig |
| ENSG00000160218 | TRAPPC10     | trafficking protein particle complex 10                  | 7109      | 1842.695192 | -0.049915882 | 0.428623307 | -0.116456295 | 0.907290922 | 0.999371363 | Not Sig |
| ENSG00000227992 | NA           | NA                                                       | NA        | 11.84093024 | -0.049749707 | 0.834118969 | -0.059643419 | 0.952439636 | 0.999371363 | Not Sig |
| ENSG00000137822 | TUBGCP4      | tubulin gamma complex associated protein 4               | 27229     | 557.041927  | -0.049568189 | 0.467335139 | -0.106065616 | 0.915530292 | 0.999371363 | Not Sig |
| ENSG00000122378 | FAM213A      | family with sequence similarity 213 member A             | 84293     | 745.6807425 | -0.049403537 | 0.528957237 | -0.09339798  | 0.925587395 | 0.999371363 | Not Sig |
| ENSG00000196418 | ZNF124       | zinc finger protein 124                                  | 7678      | 489.2762412 | -0.049375896 | 0.430138176 | -0.114790779 | 0.908610958 | 0.999371363 | Not Sig |
| ENSG00000187713 | TMEM203      | transmembrane protein 203                                | 94107     | 410.9606526 | -0.049370019 | 0.582457972 | -0.084761513 | 0.932450991 | 0.999371363 | Not Sig |
| ENSG00000188859 | FAM78B       | family with sequence similarity 78 member B              | 149297    | 24.49057122 | -0.049351416 | 0.60374986  | -0.081741494 | 0.934852281 | 0.999371363 | Not Sig |
| ENSG00000166130 | IKBIP        | IKKKB interacting protein                                | 121457    | 389.1295272 | -0.04933326  | 0.550267506 | -0.089653232 | 0.928562782 | 0.999371363 | Not Sig |
| ENSG00000140948 | ZCCHC14      | zinc finger CCHC-type containing 14                      | 23174     | 1442.226865 | -0.049187712 | 0.428187458 | -0.114874247 | 0.908544798 | 0.999371363 | Not Sig |
| ENSG00000197162 | ZNF785       | zinc finger protein 785                                  | 146540    | 352.6892594 | -0.048990439 | 0.43795637  | -0.111861459 | 0.910933256 | 0.999371363 | Not Sig |
| ENSG00000240231 | NA           | NA                                                       | NA        | 2.946294749 | -0.048932347 | 1.402445645 | -0.034890726 | 0.972166876 | NA          | NA      |
| ENSG00000270956 | NA           | NA                                                       | NA        | 21.13916575 | -0.048726279 | 0.681868549 | -0.07145993  | 0.943031714 | 0.999371363 | Not Sig |
| ENSG00000138592 | USP8         | ubiquitin specific peptidase 8                           | 9101      | 2011.387227 | -0.048695083 | 0.448104896 | -0.108668937 | 0.913465081 | 0.999371363 | Not Sig |
| ENSG00000087152 | ATXN7L3      | ataxin 7 like 3                                          | 56970     | 1467.348061 | -0.048644761 | 0.45272149  | -0.10744964  | 0.914432275 | 0.999371363 | Not Sig |
| ENSG00000101384 | JAG1         | jagged 1                                                 | 182       | 1436.06641  | -0.048631469 | 0.573743608 | -0.084761675 | 0.932450863 | 0.999371363 | Not Sig |
| ENSG00000165417 | GTF2A1       | general transcription factor IIA subunit 1               | 2957      | 1201.108955 | -0.048614594 | 0.61850789  | -0.078599796 | 0.93735095  | 0.999371363 | Not Sig |
| ENSG00000258206 | NA           | NA                                                       | NA        | 0.745016361 | -0.048543912 | 3.351943257 | -0.014482319 | 0.988445185 | NA          | NA      |
| ENSG00000139133 | ALG10        | ALG10, alpha-1,2-glucosyltransferase                     | 84920     | 189.6353986 | -0.048524904 | 0.758386861 | -0.063984368 | 0.948982674 | 0.999371363 | Not Sig |
| ENSG00000149532 | CPSF7        | cleavage and polyadenylation specific factor 7           | 79869     | 1894.321715 | -0.048134812 | 0.438069214 | -0.109879467 | 0.912504967 | 0.999371363 | Not Sig |
| ENSG00000119977 | TCTN3        | tectonic family member 3                                 | 26123     | 817.3460826 | -0.048116214 | 0.41367564  | -0.116313869 | 0.907403795 | 0.999371363 | Not Sig |
| ENSG00000103569 | AQP9         | aquaporin 9                                              | 366       | 315.646106  | -0.047804755 | 0.899737021 | -0.053131919 | 0.957626799 | 0.999371363 | Not Sig |
| ENSG00000064270 | ATP2C2       | ATPase secretory pathway Ca <sup>2+</sup> transporting 2 | 9914      | 1279.019003 | -0.047712052 | 0.495567395 | -0.096277626 | 0.92330008  | 0.999371363 | Not Sig |
| ENSG00000167634 | NLRP7        | NLR family pyrin domain containing 7                     | 199713    | 6.125757719 | -0.047572743 | 1.137139857 | -0.041835438 | 0.966629885 | NA          | NA      |
| ENSG00000272009 | LOC102724889 | uncharacterized LOC102724889                             | 102724889 | 14.08243315 | -0.047480974 | 0.740878976 | -0.064087355 | 0.948900671 | 0.999371363 | Not Sig |
| ENSG00000166902 | MRPL16       | mitochondrial ribosomal protein L16                      | 54948     | 379.0518947 | -0.04746986  | 0.417895456 | -0.113592669 | 0.909560699 | 0.999371363 | Not Sig |
| ENSG00000232645 | LINC01431    | long intergenic non-protein coding RNA 1431              | 100505683 | 6.719987495 | -0.047428438 | 0.98842316  | -0.04798394  | 0.961729042 | 0.999371363 | Not Sig |

|                 |           |                                                           |           |             |              |             |              |             |             |         |
|-----------------|-----------|-----------------------------------------------------------|-----------|-------------|--------------|-------------|--------------|-------------|-------------|---------|
| ENSG00000056050 | HPF1      | histone PARylation factor 1                               | 54969     | 201.6328938 | -0.047426403 | 0.462440376 | -0.102556795 | 0.918314735 | 0.999371363 | Not Sig |
| ENSG00000082269 | FAM135A   | family with sequence similarity 135 member A              | 57579     | 1027.021095 | -0.047306457 | 0.624201104 | -0.075787204 | 0.939588396 | 0.999371363 | Not Sig |
| ENSG00000162779 | AXDND1    | axonemal dynein light chain domain containing 1           | 126859    | 16.98959505 | -0.047296752 | 0.879612709 | -0.053769974 | 0.957118432 | 0.999371363 | Not Sig |
| ENSG00000213047 | DENND1B   | DENN domain containing 1B                                 | 163486    | 1346.426727 | -0.047295926 | 0.639671067 | -0.073937885 | 0.94105981  | 0.999371363 | Not Sig |
| ENSG00000181885 | CLDN7     | claudin 7                                                 | 1366      | 1566.473378 | -0.047217682 | 0.551585259 | -0.085603597 | 0.931781539 | 0.999371363 | Not Sig |
| ENSG00000173557 | C2orf70   | chromosome 2 open reading frame 70                        | 339778    | 8.993307224 | -0.047213574 | 1.449870478 | -0.032563995 | 0.974022283 | 0.999371363 | Not Sig |
| ENSG00000007341 | ST7L      | suppression of tumorigenicity 7 like                      | 54879     | 402.0736884 | -0.047202088 | 0.542640905 | -0.086985864 | 0.930682748 | 0.999371363 | Not Sig |
| ENSG00000107829 | FBXW4     | F-box and WD repeat domain containing 4                   | 6468      | 1276.964174 | -0.047089746 | 0.562614834 | -0.083698018 | 0.933296533 | 0.999371363 | Not Sig |
| ENSG00000251389 | NA        | NA                                                        | NA        | 2.161357916 | -0.046754385 | 1.666766764 | -0.028050946 | 0.977621518 | NA          | NA      |
| ENSG00000169398 | PTK2      | protein tyrosine kinase 2                                 | 5747      | 4149.797565 | -0.046662373 | 0.531371168 | -0.087815026 | 0.930023695 | 0.999371363 | Not Sig |
| ENSG00000161929 | SCIMP     | SLP adaptor and CSK interacting membrane protein          | 388325    | 241.0303844 | -0.046605535 | 0.940916994 | -0.049532037 | 0.960495307 | 0.999371363 | Not Sig |
| ENSG00000154608 | NA        | NA                                                        | NA        | 18.9363271  | -0.046505539 | 0.769872057 | -0.060406841 | 0.95183161  | 0.999371363 | Not Sig |
| ENSG00000214114 | MYCBP     | MYC binding protein                                       | 26292     | 233.1162346 | -0.046304019 | 0.611407263 | -0.075733511 | 0.939631114 | 0.999371363 | Not Sig |
| ENSG00000196387 | ZNF140    | zinc finger protein 140                                   | 7699      | 297.2853947 | -0.046161811 | 0.523613122 | -0.08816015  | 0.92974939  | 0.999371363 | Not Sig |
| ENSG00000135324 | MRAP2     | melanocortin 2 receptor accessory protein 2               | 112609    | 19.49010934 | -0.046051127 | 1.237802692 | -0.037203932 | 0.970322404 | 0.999371363 | Not Sig |
| ENSG00000187098 | MITF      | melanogenesis associated transcription factor             | 4286      | 626.3488285 | -0.045946907 | 0.56753752  | -0.080958361 | 0.935475067 | 0.999371363 | Not Sig |
| ENSG00000186654 | PRR5      | proline rich 5                                            | 55615     | 257.6187717 | -0.045726016 | 0.604437811 | -0.075650489 | 0.939697167 | 0.999371363 | Not Sig |
| ENSG00000251963 | NA        | NA                                                        | NA        | 7.378581437 | -0.045655457 | 1.009938946 | -0.045206156 | 0.963942988 | 0.999371363 | Not Sig |
| ENSG00000164032 | H2AFZ     | H2A histone family member Z                               | 3015      | 1117.317833 | -0.045594012 | 0.383381357 | -0.118926001 | 0.905333982 | 0.999371363 | Not Sig |
| ENSG00000261971 | NA        | NA                                                        | NA        | 197.8516901 | -0.045529296 | 0.481644305 | -0.094528879 | 0.924689043 | 0.999371363 | Not Sig |
| ENSG00000223255 | NA        | NA                                                        | NA        | 33.74273609 | -0.045405174 | 0.622499312 | -0.072940119 | 0.941853769 | 0.999371363 | Not Sig |
| ENSG00000130921 | C12orf65  | chromosome 12 open reading frame 65                       | 91574     | 297.3589309 | -0.045159073 | 0.432267677 | -0.10447016  | 0.916796248 | 0.999371363 | Not Sig |
| ENSG00000115760 | BIRC6     | baculoviral IAP repeat containing 6                       | 57448     | 7767.272573 | -0.045133985 | 0.513792553 | -0.087844764 | 0.930000059 | 0.999371363 | Not Sig |
| ENSG00000117614 | SYF2      | SYF2 pre-mRNA splicing factor                             | 25949     | 676.7273213 | -0.045126369 | 0.476569541 | -0.094689998 | 0.924561062 | 0.999371363 | Not Sig |
| ENSG00000176953 | NFATC2IP  | nuclear factor of activated T-cells 2 interacting protein | 84901     | 1288.280981 | -0.045089839 | 0.435220184 | -0.103602361 | 0.917484914 | 0.999371363 | Not Sig |
| ENSG00000166455 | C16orf46  | chromosome 16 open reading frame 46                       | 123775    | 56.43999777 | -0.045044466 | 0.523249515 | -0.086086017 | 0.931398039 | 0.999371363 | Not Sig |
| ENSG00000065970 | FOXJ2     | forkhead box J2                                           | 55810     | 955.6387798 | -0.045015142 | 0.449857126 | -0.10006542  | 0.920292388 | 0.999371363 | Not Sig |
| ENSG00000092853 | CLSPN     | claspin                                                   | 63967     | 225.0534353 | -0.045014819 | 1.036462979 | -0.043431189 | 0.965357816 | 0.999371363 | Not Sig |
| ENSG00000104805 | NUCB1     | nucleobindin 1                                            | 4924      | 5099.071045 | -0.04498379  | 0.562031089 | -0.080037904 | 0.93620711  | 0.999371363 | Not Sig |
| ENSG00000162144 | CYB561A3  | cytochrome b561 family member A3                          | 220002    | 789.6899021 | -0.044979285 | 0.567129978 | -0.079310365 | 0.936785763 | 0.999371363 | Not Sig |
| ENSG00000144848 | ATG3      | autophagy related 3                                       | 64422     | 758.627894  | -0.044936157 | 0.492392467 | -0.091260855 | 0.927285322 | 0.999371363 | Not Sig |
| ENSG00000240024 | LINC00888 | long intergenic non-protein coding RNA 888                | 100505687 | 63.22561823 | -0.044899093 | 0.612743284 | -0.073275536 | 0.941586859 | 0.999371363 | Not Sig |
| ENSG00000119943 | PYROXD2   | pyridine nucleotide-disulphide oxidoreductase domain 2    | 84795     | 421.6057373 | -0.044885065 | 0.478201774 | -0.093862188 | 0.925218631 | 0.999371363 | Not Sig |
| ENSG00000270055 | NA        | NA                                                        | NA        | 80.76867753 | -0.044825336 | 0.515177462 | -0.087009504 | 0.930663957 | 0.999371363 | Not Sig |
| ENSG00000166529 | ZSCAN21   | zinc finger and SCAN domain containing 21                 | 7589      | 148.0800435 | -0.044822601 | 0.542031354 | -0.082693742 | 0.934095061 | 0.999371363 | Not Sig |

|                 |                 |                                                         |           |             |              |             |              |             |             |         |
|-----------------|-----------------|---------------------------------------------------------|-----------|-------------|--------------|-------------|--------------|-------------|-------------|---------|
| ENSG00000213160 | KLHL23          | kelch like family member 23                             | 151230    | 517.8887469 | -0.044734558 | 0.585736531 | -0.076373173 | 0.939122212 | 0.999371363 | Not Sig |
| ENSG00000213160 | PHOSPHO2-KLHL23 | PHOSPHO2-KLHL23 readthrough                             | 100526832 | 517.8887469 | -0.044734558 | 0.585736531 | -0.076373173 | 0.939122212 | 0.999371363 | Not Sig |
| ENSG00000102243 | VGLL1           | vestigial like family member 1                          | 51442     | 13.94551217 | -0.044731656 | 1.163306943 | -0.038452153 | 0.96932718  | 0.999371363 | Not Sig |
| ENSG00000198042 | MAK16           | MAK16 homolog                                           | 84549     | 445.5121018 | -0.044698411 | 0.556590555 | -0.080307527 | 0.935992672 | 0.999371363 | Not Sig |
| ENSG00000125149 | C16orf70        | chromosome 16 open reading frame 70                     | 80262     | 418.400243  | -0.044578143 | 0.417721253 | -0.10671744  | 0.915013147 | 0.999371363 | Not Sig |
| ENSG00000176871 | WSB2            | WD repeat and SOCS box containing 2                     | 55884     | 1366.342267 | -0.044510476 | 0.447024006 | -0.099570662 | 0.920685186 | 0.999371363 | Not Sig |
| ENSG00000141424 | SLC39A6         | solute carrier family 39 member 6                       | 25800     | 1194.818113 | -0.04438664  | 0.477566709 | -0.092943331 | 0.925948582 | 0.999371363 | Not Sig |
| ENSG00000237181 | NA              | NA                                                      | NA        | 25.94819741 | -0.044338737 | 1.00586848  | -0.044080054 | 0.964840592 | 0.999371363 | Not Sig |
| ENSG00000145220 | LYAR            | Lyl antibody reactive                                   | 55646     | 213.5324142 | -0.044174591 | 0.498346061 | -0.088642401 | 0.92936611  | 0.999371363 | Not Sig |
| ENSG00000213693 | SEC14L1P1       | SEC14 like 1 pseudogene 1                               | 729799    | 83.76877876 | -0.044041782 | 0.554770235 | -0.079387427 | 0.936724469 | 0.999371363 | Not Sig |
| ENSG00000105983 | LMBR1           | limb development membrane protein 1                     | 64327     | 1603.72924  | -0.043894512 | 0.591795647 | -0.074171739 | 0.940873733 | 0.999371363 | Not Sig |
| ENSG00000084693 | AGBL5           | ATP/GTP binding protein like 5                          | 60509     | 490.9047267 | -0.043839149 | 0.44485623  | -0.098546781 | 0.921498127 | 0.999371363 | Not Sig |
| ENSG00000130475 | FCH01           | FCH domain only 1                                       | 23149     | 192.6288621 | -0.04367678  | 0.582070154 | -0.075036969 | 0.940185298 | 0.999371363 | Not Sig |
| ENSG00000165672 | PRDX3           | peroxiredoxin 3                                         | 10935     | 1267.188459 | -0.04349854  | 0.515438239 | -0.084391372 | 0.932745267 | 0.999371363 | Not Sig |
| ENSG00000171469 | ZNF561          | zinc finger protein 561                                 | 93134     | 623.627942  | -0.043416764 | 0.561119657 | -0.077375232 | 0.938325044 | 0.999371363 | Not Sig |
| ENSG00000126264 | HCST            | hematopoietic cell signal transducer                    | 10870     | 162.8752782 | -0.043397337 | 0.929116489 | -0.046708176 | 0.962745814 | 0.999371363 | Not Sig |
| ENSG00000237004 | NA              | NA                                                      | NA        | 109.5417979 | -0.043270473 | 0.69423775  | -0.062328033 | 0.950301605 | 0.999371363 | Not Sig |
| ENSG00000100379 | KCTD17          | potassium channel tetramerization domain containing 17  | 79734     | 221.5136218 | -0.043123714 | 0.614067182 | -0.070226378 | 0.94401348  | 0.999371363 | Not Sig |
| ENSG00000104635 | SLC39A14        | solute carrier family 39 member 14                      | 23516     | 776.7258849 | -0.04311218  | 0.584709925 | -0.073732595 | 0.941223162 | 0.999371363 | Not Sig |
| ENSG00000130305 | NSUN5           | NOP2/Sun RNA methyltransferase family member 5          | 55695     | 348.4605058 | -0.042991537 | 0.621644149 | -0.069157792 | 0.944864019 | 0.999371363 | Not Sig |
| ENSG00000110429 | FBX03           | F-box protein 3                                         | 26273     | 983.1292121 | -0.042908161 | 0.449814489 | -0.095390793 | 0.924004429 | 0.999371363 | Not Sig |
| ENSG00000187097 | ENTPD5          | ectonucleoside triphosphate diphosphohydrolase 5        | 957       | 611.2558922 | -0.042864708 | 0.556426201 | -0.077035748 | 0.938595107 | 0.999371363 | Not Sig |
| ENSG00000117592 | PRDX6           | peroxiredoxin 6                                         | 9588      | 2331.353629 | -0.042774692 | 0.437763395 | -0.097711898 | 0.922161068 | 0.999371363 | Not Sig |
| ENSG00000111775 | COX6A1          | cytochrome c oxidase subunit 6A1                        | 1337      | 438.702754  | -0.042479171 | 0.564310991 | -0.075276172 | 0.939994979 | 0.999371363 | Not Sig |
| ENSG00000172197 | MBOAT1          | membrane bound O-acyltransferase domain containing 1    | 154141    | 579.1596294 | -0.042358744 | 0.530100764 | -0.079906967 | 0.936311249 | 0.999371363 | Not Sig |
| ENSG00000128833 | MYO5C           | myosin VC                                               | 55930     | 3795.535008 | -0.042349028 | 0.565077248 | -0.074943786 | 0.940259438 | 0.999371363 | Not Sig |
| ENSG00000011304 | PTBP1           | polypyrimidine tract binding protein 1                  | 5725      | 4462.632212 | -0.041998093 | 0.452423046 | -0.092829252 | 0.926039212 | 0.999371363 | Not Sig |
| ENSG00000111364 | DDX55           | DEAD-box helicase 55                                    | 57696     | 544.4081946 | -0.041885095 | 0.430445442 | -0.097306397 | 0.922483076 | 0.999371363 | Not Sig |
| ENSG00000225514 | NA              | NA                                                      | NA        | 1.928189696 | -0.04177428  | 2.206645301 | -0.018931126 | 0.984896049 | NA          | NA      |
| ENSG00000253923 | NA              | NA                                                      | NA        | 1.928189696 | -0.04177428  | 2.206645301 | -0.018931126 | 0.984896049 | NA          | NA      |
| ENSG00000138686 | BBS7            | Bardet-Biedl syndrome 7                                 | 55212     | 277.0748555 | -0.041551863 | 0.457630557 | -0.090797832 | 0.927653232 | 0.999371363 | Not Sig |
| ENSG00000174175 | SELP            | selectin P                                              | 6403      | 240.3931148 | -0.041512122 | 0.94051538  | -0.044137632 | 0.964794696 | 0.999371363 | Not Sig |
| ENSG00000211771 | NA              | NA                                                      | NA        | 12.99086356 | -0.041451915 | 0.936756837 | -0.044250454 | 0.964704765 | 0.999371363 | Not Sig |
| ENSG00000179833 | SERTAD2         | SERTA domain containing 2                               | 9792      | 1031.221716 | -0.041360682 | 0.411251396 | -0.100572746 | 0.919889632 | 0.999371363 | Not Sig |
| ENSG00000151611 | MMAA            | methylmalonic aciduria (cobalamin deficiency) cblA type | 166785    | 273.0282052 | -0.041355753 | 0.52200367  | -0.079225024 | 0.936853641 | 0.999371363 | Not Sig |



|                 |              |                                                |           |             |              |             |              |             |             |         |
|-----------------|--------------|------------------------------------------------|-----------|-------------|--------------|-------------|--------------|-------------|-------------|---------|
| ENSG00000196705 | ZNF431       | zinc finger protein 431                        | 170959    | 491.7054584 | -0.041340716 | 0.620631676 | -0.06661071  | 0.94689162  | 0.999371363 | Not Sig |
| ENSG00000150768 | DLAT         | dihydrolipoamide S-acetyltransferase           | 1737      | 906.6362166 | -0.041263529 | 0.518607834 | -0.079565958 | 0.936582471 | 0.999371363 | Not Sig |
| ENSG00000117602 | RCAN3        | RCAN family member 3                           | 11123     | 1099.528157 | -0.041253205 | 0.509911181 | -0.080902728 | 0.935519311 | 0.999371363 | Not Sig |
| ENSG00000212664 | NA           | NA                                             | NA        | 5.804467712 | -0.041186742 | 1.018994312 | -0.040419011 | 0.967759074 | NA          | NA      |
| ENSG00000184182 | UBE2F        | ubiquitin conjugating enzyme E2 F (putative)   | 140739    | 198.9093884 | -0.041137232 | 0.477827532 | -0.086092218 | 0.93139311  | 0.999371363 | Not Sig |
| ENSG00000187079 | TEAD1        | TEA domain transcription factor 1              | 7003      | 2689.237039 | -0.041049532 | 0.407884091 | -0.100640189 | 0.919836092 | 0.999371363 | Not Sig |
| ENSG00000171847 | FAM90A1      | family with sequence similarity 90 member A1   | 55138     | 7.00562553  | -0.041046751 | 1.163854236 | -0.035267948 | 0.971866081 | 0.999371363 | Not Sig |
| ENSG00000075945 | KIFAP3       | kinesin associated protein 3                   | 22920     | 775.2488302 | -0.040912359 | 0.451138458 | -0.090686925 | 0.92774136  | 0.999371363 | Not Sig |
| ENSG00000153012 | LGI2         | leucine rich repeat LGI family member 2        | 55203     | 161.4890024 | -0.040796448 | 0.771478547 | -0.052880859 | 0.957826835 | 0.999371363 | Not Sig |
| ENSG00000132323 | ILKAP        | ILK associated serine/threonine phosphatase    | 80895     | 612.7621633 | -0.040764109 | 0.395620935 | -0.103038302 | 0.917932572 | 0.999371363 | Not Sig |
| ENSG00000197857 | ZNF44        | zinc finger protein 44                         | 51710     | 463.5816507 | -0.040739047 | 0.38889124  | -0.104756916 | 0.916568698 | 0.999371363 | Not Sig |
| ENSG00000170089 | LOC728554    | THO complex 3 pseudogene                       | 728554    | 113.1719601 | -0.040703926 | 0.702140875 | -0.057971168 | 0.953771595 | 0.999371363 | Not Sig |
| ENSG00000115239 | ASB3         | ankyrin repeat and SOCS box containing 3       | 51130     | 77.62021351 | -0.040635794 | 0.514158062 | -0.079033661 | 0.93700585  | 0.999371363 | Not Sig |
| ENSG00000116990 | MYCL         | MYCL proto-oncogene, bHLH transcription factor | 4610      | 221.0976772 | -0.040515151 | 0.443450346 | -0.091363444 | 0.927203808 | 0.999371363 | Not Sig |
| ENSG00000139722 | VPS37B       | VPS37B, ESCRT-I subunit                        | 79720     | 1652.733609 | -0.040513919 | 0.430196942 | -0.094175283 | 0.924969919 | 0.999371363 | Not Sig |
| ENSG00000078668 | VDAC3        | voltage dependent anion channel 3              | 7419      | 861.3445352 | -0.040398843 | 0.554418841 | -0.07286701  | 0.941911946 | 0.999371363 | Not Sig |
| ENSG00000090905 | TNRC6A       | trinucleotide repeat containing 6A             | 27327     | 2607.526054 | -0.040397088 | 0.455242581 | -0.0887375   | 0.929290529 | 0.999371363 | Not Sig |
| ENSG00000152475 | ZNF837       | zinc finger protein 837                        | 116412    | 58.24694458 | -0.040391299 | 0.632231453 | -0.063886887 | 0.949060294 | 0.999371363 | Not Sig |
| ENSG00000155893 | PXYLP1       | 2-phosphoxylose phosphatase 1                  | 92370     | 239.7910938 | -0.04034578  | 0.468938921 | -0.086036322 | 0.931437543 | 0.999371363 | Not Sig |
| ENSG00000141569 | TRIM65       | tripartite motif containing 65                 | 201292    | 679.8116312 | -0.040275352 | 0.61514997  | -0.065472412 | 0.947797871 | 0.999371363 | Not Sig |
| ENSG00000212283 | SNORD89      | small nucleolar RNA, C/D box 89                | 692205    | 11.35190953 | -0.040245041 | 0.960647699 | -0.041893653 | 0.966583476 | 0.999371363 | Not Sig |
| ENSG00000177406 | LOC100049716 | uncharacterized LOC100049716                   | 100049716 | 325.5524522 | -0.040089927 | 0.623357401 | -0.064312908 | 0.948721076 | 0.999371363 | Not Sig |
| ENSG00000114650 | SCAP         | SREBF chaperone                                | 22937     | 1732.647814 | -0.040061459 | 0.540301902 | -0.074146433 | 0.940893869 | 0.999371363 | Not Sig |
| ENSG00000155097 | ATP6V1C1     | ATPase H+ transporting V1 subunit C1           | 528       | 1468.130374 | -0.039927775 | 0.472849911 | -0.084440695 | 0.932706053 | 0.999371363 | Not Sig |
| ENSG00000172250 | SERHL        | serine hydrolase-like (pseudogene)             | 94009     | 6.721421189 | -0.039911447 | 1.110693574 | -0.035933806 | 0.97133514  | 0.999371363 | Not Sig |
| ENSG00000164007 | CLDN19       | claudin 19                                     | 149461    | 0.600534269 | -0.039706088 | 0.418009012 | -0.009882031 | 0.992115409 | NA          | NA      |
| ENSG00000184879 | NA           | NA                                             | NA        | 0.600534269 | -0.039706088 | 0.418009012 | -0.009882031 | 0.992115409 | NA          | NA      |
| ENSG00000234055 | NA           | NA                                             | NA        | 0.600534269 | -0.039706088 | 0.418009012 | -0.009882031 | 0.992115409 | NA          | NA      |
| ENSG00000234393 | NA           | NA                                             | NA        | 0.600534269 | -0.039706088 | 0.418009012 | -0.009882031 | 0.992115409 | NA          | NA      |
| ENSG00000235349 | NA           | NA                                             | NA        | 0.600534269 | -0.039706088 | 0.418009012 | -0.009882031 | 0.992115409 | NA          | NA      |
| ENSG00000243020 | NA           | NA                                             | NA        | 0.600534269 | -0.039706088 | 0.418009012 | -0.009882031 | 0.992115409 | NA          | NA      |
| ENSG00000260447 | NA           | NA                                             | NA        | 0.600534269 | -0.039706088 | 0.418009012 | -0.009882031 | 0.992115409 | NA          | NA      |
| ENSG00000264355 | NA           | NA                                             | NA        | 0.600534269 | -0.039706088 | 0.418009012 | -0.009882031 | 0.992115409 | NA          | NA      |
| ENSG00000167005 | NUDT21       | nudix hydrolase 21                             | 11051     | 1692.667218 | -0.039547606 | 0.516941912 | -0.076502999 | 0.939018928 | 0.999371363 | Not Sig |
| ENSG00000204427 | ABHD16A      | abhydrolase domain containing 16A              | 7920      | 83.54275389 | -0.039289421 | 0.470654818 | -0.083478207 | 0.933471305 | 0.999371363 | Not Sig |

|                 |         |                                                       |        |             |              |             |              |             |             |         |
|-----------------|---------|-------------------------------------------------------|--------|-------------|--------------|-------------|--------------|-------------|-------------|---------|
| ENSG00000255541 | NA      | NA                                                    | NA     | 5.25555558  | -0.03926579  | 1.265496989 | -0.03102796  | 0.975247241 | NA          | NA      |
| ENSG00000236297 | NA      | NA                                                    | NA     | 2.291121629 | -0.039159563 | 1.567014569 | -0.024989916 | 0.980063007 | NA          | NA      |
| ENSG00000171466 | ZNF562  | zinc finger protein 562                               | 54811  | 867.0640323 | -0.038816511 | 0.449734001 | -0.086309931 | 0.931220044 | 0.999371363 | Not Sig |
| ENSG00000119537 | KDSR    | 3-ketodihydroshingosine reductase                     | 2531   | 1198.4735   | -0.038783201 | 0.443500928 | -0.087447846 | 0.930315539 | 0.999371363 | Not Sig |
| ENSG00000170265 | ZNF282  | zinc finger protein 282                               | 8427   | 1044.363171 | -0.038729451 | 0.511185953 | -0.07576392  | 0.939606922 | 0.999371363 | Not Sig |
| ENSG00000085832 | EPS15   | epidermal growth factor receptor pathway substrate 15 | 2060   | 2949.933412 | -0.038575874 | 0.435800967 | -0.088517184 | 0.929465627 | 0.999371363 | Not Sig |
| ENSG00000143155 | TIPRL   | TOR signaling pathway regulator                       | 261726 | 551.6433422 | -0.038349867 | 0.497945465 | -0.077016199 | 0.938610658 | 0.999371363 | Not Sig |
| ENSG00000207379 | NA      | NA                                                    | NA     | 0.968315326 | -0.038256658 | 2.616091731 | -0.014623592 | 0.988332478 | NA          | NA      |
| ENSG00000269737 | NA      | NA                                                    | NA     | 0.968315326 | -0.038256658 | 2.616091731 | -0.014623592 | 0.988332478 | NA          | NA      |
| ENSG00000251254 | NA      | NA                                                    | NA     | 11.08975968 | -0.038194534 | 0.932018793 | -0.040980433 | 0.967311495 | 0.999371363 | Not Sig |
| ENSG00000143379 | SETDB1  | SET domain bifurcated 1                               | 9869   | 1309.727954 | -0.038166972 | 0.469154716 | -0.081352633 | 0.935161517 | 0.999371363 | Not Sig |
| ENSG00000163754 | GYG1    | glycogenin 1                                          | 2992   | 492.4891574 | -0.038084549 | 0.456758706 | -0.083380018 | 0.933549376 | 0.999371363 | Not Sig |
| ENSG00000160679 | CHTOP   | chromatin target of PRMT1                             | 26097  | 1617.574352 | -0.038031263 | 0.439588177 | -0.086515664 | 0.931056505 | 0.999371363 | Not Sig |
| ENSG00000164253 | WDR41   | WD repeat domain 41                                   | 55255  | 640.1806088 | -0.037959871 | 0.392111709 | -0.096808817 | 0.922878222 | 0.999371363 | Not Sig |
| ENSG00000236184 | NA      | NA                                                    | NA     | 23.11680304 | -0.037732999 | 0.691069487 | -0.054600876 | 0.956456441 | 0.999371363 | Not Sig |
| ENSG00000169375 | SIN3A   | SIN3 transcription regulator family member A          | 25942  | 2548.672248 | -0.037728091 | 0.405700076 | -0.092995032 | 0.925907508 | 0.999371363 | Not Sig |
| ENSG00000176182 | MYPOP   | Myb related transcription factor, partner of profilin | 339344 | 193.0348266 | -0.037591796 | 0.600715824 | -0.062578335 | 0.950102282 | 0.999371363 | Not Sig |
| ENSG00000144589 | STK11IP | serine/threonine kinase 11 interacting protein        | 114790 | 464.2825596 | -0.037518951 | 0.562284745 | -0.066725891 | 0.946799922 | 0.999371363 | Not Sig |
| ENSG00000112658 | SRF     | serum response factor                                 | 6722   | 1285.687643 | -0.037471068 | 0.616107182 | -0.060819074 | 0.9515033   | 0.999371363 | Not Sig |
| ENSG00000165526 | RPUSD4  | RNA pseudouridylate synthase domain containing 4      | 84881  | 363.224595  | -0.037220043 | 0.474784151 | -0.078393608 | 0.937514958 | 0.999371363 | Not Sig |
| ENSG00000164144 | ARFIP1  | ADP ribosylation factor interacting protein 1         | 27236  | 950.8242705 | -0.037113601 | 0.474222459 | -0.078262006 | 0.937619639 | 0.999371363 | Not Sig |
| ENSG00000077348 | EXOSC5  | exosome component 5                                   | 56915  | 142.3566654 | -0.037025084 | 0.497966807 | -0.074352513 | 0.940729893 | 0.999371363 | Not Sig |
| ENSG00000146833 | TRIM4   | tripartite motif containing 4                         | 89122  | 987.821567  | -0.036640084 | 0.432737668 | -0.084670428 | 0.932523406 | 0.999371363 | Not Sig |
| ENSG00000182866 | LCK     | LCK proto-oncogene, Src family tyrosine kinase        | 3932   | 234.2090435 | -0.036573598 | 0.708768544 | -0.05160161  | 0.958846136 | 0.999371363 | Not Sig |
| ENSG00000264798 | NA      | NA                                                    | NA     | 7.817762481 | -0.036533598 | 0.959601353 | -0.038071641 | 0.969630562 | 0.999371363 | Not Sig |
| ENSG00000061918 | GUCY1B3 | guanylate cyclase 1 soluble subunit beta              | 2983   | 347.1751866 | -0.036427183 | 0.502832613 | -0.072443955 | 0.942248605 | 0.999371363 | Not Sig |
| ENSG00000170085 | SIMC1   | SUMO interacting motifs containing 1                  | 375484 | 354.503577  | -0.036423417 | 0.466467901 | -0.078083436 | 0.937761683 | 0.999371363 | Not Sig |
| ENSG00000258442 | NA      | NA                                                    | NA     | 1.607181654 | -0.036359004 | 1.933458433 | -0.018805165 | 0.984996534 | NA          | NA      |
| ENSG00000165689 | SDCCAG3 | serologically defined colon cancer antigen 3          | 10807  | 575.5088966 | -0.036218697 | 0.509851676 | -0.071037712 | 0.943367741 | 0.999371363 | Not Sig |
| ENSG00000103121 | CMC2    | C-X9-C motif containing 2                             | 56942  | 280.0082009 | -0.036038137 | 0.564889768 | -0.06379676  | 0.949132058 | 0.999371363 | Not Sig |
| ENSG00000228903 | NA      | NA                                                    | NA     | 150.8863076 | -0.035983149 | 0.466320244 | -0.07716403  | 0.938493056 | 0.999371363 | Not Sig |
| ENSG00000158711 | ELK4    | ELK4, ETS transcription factor                        | 2005   | 3044.244655 | -0.035944909 | 0.47645064  | -0.075443091 | 0.939862175 | 0.999371363 | Not Sig |
| ENSG00000147996 | CBWD5   | COBW domain containing 5                              | 220869 | 99.32726231 | -0.035934128 | 0.625785366 | -0.057422448 | 0.954208682 | 0.999371363 | Not Sig |
| ENSG00000147996 | CBWD3   | COBW domain containing 3                              | 445571 | 99.32726231 | -0.035934128 | 0.625785366 | -0.057422448 | 0.954208682 | 0.999371363 | Not Sig |
| ENSG00000147996 | CBWD6   | COBW domain containing 6                              | 644019 | 99.32726231 | -0.035934128 | 0.625785366 | -0.057422448 | 0.954208682 | 0.999371363 | Not Sig |

|                 |              |                                                            |           |             |              |             |              |             |             |         |
|-----------------|--------------|------------------------------------------------------------|-----------|-------------|--------------|-------------|--------------|-------------|-------------|---------|
| ENSG00000162714 | ZNF496       | zinc finger protein 496                                    | 84838     | 950.2238019 | -0.03592946  | 0.500866457 | -0.071734611 | 0.942813112 | 0.999371363 | Not Sig |
| ENSG00000181827 | RFX7         | regulatory factor X7                                       | 64864     | 901.0604408 | -0.035926078 | 0.542212537 | -0.066258294 | 0.947172187 | 0.999371363 | Not Sig |
| ENSG00000227232 | WASH7P       | WAS protein family homolog 7 pseudogene                    | 653635    | 239.2947344 | -0.035898504 | 0.497788003 | -0.072116049 | 0.942509554 | 0.999371363 | Not Sig |
| ENSG00000166971 | AKTIP        | AKT interacting protein                                    | 64400     | 536.9394156 | -0.035893098 | 0.467250415 | -0.076817691 | 0.938768577 | 0.999371363 | Not Sig |
| ENSG00000174444 | RPL4         | ribosomal protein L4                                       | 6124      | 12744.20335 | -0.035829772 | 0.450129577 | -0.079598795 | 0.936556354 | 0.999371363 | Not Sig |
| ENSG00000118961 | LDAH         | lipid droplet associated hydrolase                         | 60526     | 357.4697465 | -0.035803244 | 0.514826762 | -0.069544255 | 0.944556408 | 0.999371363 | Not Sig |
| ENSG00000118217 | ATF6         | activating transcription factor 6                          | 22926     | 2531.880666 | -0.035651163 | 0.439133044 | -0.081185335 | 0.935294562 | 0.999371363 | Not Sig |
| ENSG00000163607 | GTPBP8       | GTP binding protein 8 (putative)                           | 29083     | 191.4589467 | -0.03558725  | 0.470827433 | -0.075584488 | 0.939749678 | 0.999371363 | Not Sig |
| ENSG00000127080 | IPPK         | inositol-pentakisphosphate 2-kinase                        | 64768     | 271.5193981 | -0.03557919  | 0.465345306 | -0.076457611 | 0.939055037 | 0.999371363 | Not Sig |
| ENSG00000106617 | PRKAG2       | protein kinase AMP-activated non-catalytic subunit gamma 2 | 51422     | 666.6081936 | -0.035539871 | 0.466371122 | -0.076205127 | 0.939255904 | 0.999371363 | Not Sig |
| ENSG00000114316 | USP4         | ubiquitin specific peptidase 4                             | 7375      | 1653.950238 | -0.035507049 | 0.434196873 | -0.081776381 | 0.934824538 | 0.999371363 | Not Sig |
| ENSG00000179454 | KLHL28       | kelch like family member 28                                | 54813     | 708.3159174 | -0.035477787 | 0.516579755 | -0.068678237 | 0.945245742 | 0.999371363 | Not Sig |
| ENSG00000264743 | DPRXP4       | divergent-paired related homeobox pseudogene 4             | 503645    | 27.57760276 | -0.035341948 | 0.647948225 | -0.054544401 | 0.956501434 | 0.999371363 | Not Sig |
| ENSG00000263818 | LOC100131347 | RAD52 motif containing 1 pseudogene                        | 100131347 | 12.80229597 | -0.034979992 | 1.13128326  | -0.030920631 | 0.975332837 | 0.999371363 | Not Sig |
| ENSG00000129534 | MIS18BP1     | MIS18 binding protein 1                                    | 55320     | 860.0878461 | -0.034897321 | 0.583316374 | -0.059825719 | 0.952294442 | 0.999371363 | Not Sig |
| ENSG00000257390 | NA           | NA                                                         | NA        | 12.878675   | -0.034792326 | 0.837333949 | -0.041551314 | 0.966856386 | 0.999371363 | Not Sig |
| ENSG00000172803 | SNX32        | sorting nexin 32                                           | 254122    | 6.413011637 | -0.034769544 | 1.132852209 | -0.030692039 | 0.97551514  | NA          | NA      |
| ENSG00000158623 | COPG2        | coatamer protein complex subunit gamma 2                   | 26958     | 221.6712499 | -0.034725121 | 0.600824866 | -0.057795746 | 0.953911327 | 0.999371363 | Not Sig |
| ENSG00000173905 | GOLIM4       | golgi integral membrane protein 4                          | 27333     | 1790.208084 | -0.034672144 | 0.417844388 | -0.082978605 | 0.933868552 | 0.999371363 | Not Sig |
| ENSG00000182307 | C8orf33      | chromosome 8 open reading frame 33                         | 65265     | 752.3825593 | -0.034632055 | 0.524512125 | -0.066027177 | 0.947356189 | 0.999371363 | Not Sig |
| ENSG00000175606 | TMEM70       | transmembrane protein 70                                   | 54968     | 315.1526884 | -0.034517148 | 0.569010053 | -0.060661754 | 0.951628591 | 0.999371363 | Not Sig |
| ENSG00000120438 | TCP1         | t-complex 1                                                | 6950      | 2007.371321 | -0.034338812 | 0.437366985 | -0.078512583 | 0.937420322 | 0.999371363 | Not Sig |
| ENSG00000139514 | SLC7A1       | solute carrier family 7 member 1                           | 6541      | 1193.375506 | -0.034035885 | 0.527562494 | -0.064515362 | 0.948559876 | 0.999371363 | Not Sig |
| ENSG00000109103 | UNC119       | unc-119 lipid binding chaperone                            | 9094      | 378.3837068 | -0.033643079 | 0.470266299 | -0.071540485 | 0.942967605 | 0.999371363 | Not Sig |
| ENSG00000142444 | TIMM29       | translocase of inner mitochondrial membrane 29             | 90580     | 225.3631975 | -0.033638464 | 0.606882844 | -0.055428266 | 0.955797278 | 0.999371363 | Not Sig |
| ENSG00000167658 | EEF2         | eukaryotic translation elongation factor 2                 | 1938      | 31781.41225 | -0.033454378 | 0.572249853 | -0.058461139 | 0.953381316 | 0.999371363 | Not Sig |
| ENSG00000119682 | AREL1        | apoptosis resistant E3 ubiquitin protein ligase 1          | 9870      | 1154.765583 | -0.033407857 | 0.384720623 | -0.086836667 | 0.930801341 | 0.999371363 | Not Sig |
| ENSG00000167081 | PBX3         | PBX homeobox 3                                             | 5090      | 534.0817812 | -0.033320673 | 0.389278404 | -0.085595996 | 0.931787581 | 0.999371363 | Not Sig |
| ENSG00000110700 | RPS13        | ribosomal protein S13                                      | 6207      | 2861.368538 | -0.033129715 | 0.536055393 | -0.061802784 | 0.950719887 | 0.999371363 | Not Sig |
| ENSG00000122779 | TRIM24       | tripartite motif containing 24                             | 8805      | 1376.201437 | -0.033110784 | 0.608275508 | -0.05443386  | 0.956589502 | 0.999371363 | Not Sig |
| ENSG00000101938 | CHRDL1       | chordin like 1                                             | 91851     | 924.6206399 | -0.033073493 | 1.019256094 | -0.032448659 | 0.974114259 | 0.999371363 | Not Sig |
| ENSG00000133398 | MED10        | mediator complex subunit 10                                | 84246     | 336.5667248 | -0.032970842 | 0.423135645 | -0.077920267 | 0.937891478 | 0.999371363 | Not Sig |
| ENSG00000256525 | POLG2        | DNA polymerase gamma 2, accessory subunit                  | 11232     | 333.7410499 | -0.032964002 | 0.494772147 | -0.066624611 | 0.946880553 | 0.999371363 | Not Sig |
| ENSG00000179165 | PXT1         | peroxisomal, testis specific 1                             | 222659    | 2.925686884 | -0.032963152 | 1.437739865 | -0.022927063 | 0.981708453 | NA          | NA      |
| ENSG00000115207 | GTF3C2       | general transcription factor IIIC subunit 2                | 2976      | 1283.994779 | -0.032944929 | 0.398981014 | -0.082572673 | 0.934191331 | 0.999371363 | Not Sig |

|                 |          |                                                       |           |             |              |             |              |             |             |         |
|-----------------|----------|-------------------------------------------------------|-----------|-------------|--------------|-------------|--------------|-------------|-------------|---------|
| ENSG00000036549 | ZZZ3     | zinc finger ZZ-type containing 3                      | 26009     | 1363.547517 | -0.032730364 | 0.601933309 | -0.054375399 | 0.956636079 | 0.999371363 | Not Sig |
| ENSG00000059377 | TBXAS1   | thromboxane A synthase 1                              | 6916      | 681.7853742 | -0.032730062 | 0.7530152   | -0.04346534  | 0.965330593 | 0.999371363 | Not Sig |
| ENSG00000186615 | KTN1-AS1 | KTN1 antisense RNA 1                                  | 100129075 | 32.7503831  | -0.032603614 | 0.714520043 | -0.04563009  | 0.963605086 | 0.999371363 | Not Sig |
| ENSG00000198794 | SCAMP5   | secretory carrier membrane protein 5                  | 192683    | 150.2883551 | -0.032568955 | 0.646724368 | -0.05035987  | 0.959835615 | 0.999371363 | Not Sig |
| ENSG00000267481 | NA       | NA                                                    | NA        | 80.09705255 | -0.032422322 | 0.495873778 | -0.065384224 | 0.947868085 | 0.999371363 | Not Sig |
| ENSG00000186260 | MKL2     | MKL1/myocardin like 2                                 | 57496     | 2395.470996 | -0.03241568  | 0.475766866 | -0.068133539 | 0.945679332 | 0.999371363 | Not Sig |
| ENSG00000137955 | RABGGTB  | Rab geranylgeranyltransferase beta subunit            | 5876      | 1010.837409 | -0.032315236 | 0.562210992 | -0.05747884  | 0.954163762 | 0.999371363 | Not Sig |
| ENSG00000168014 | C2CD3    | C2 calcium dependent domain containing 3              | 26005     | 1236.565655 | -0.031904452 | 0.422299745 | -0.075549305 | 0.93977767  | 0.999371363 | Not Sig |
| ENSG00000248794 | NA       | NA                                                    | NA        | 9.352974422 | -0.031877278 | 0.857345375 | -0.037181372 | 0.970340391 | 0.999371363 | Not Sig |
| ENSG00000068784 | SRBD1    | S1 RNA binding domain 1                               | 55133     | 619.0080888 | -0.031791073 | 0.456161485 | -0.069692585 | 0.944438344 | 0.999371363 | Not Sig |
| ENSG00000250687 | NA       | NA                                                    | NA        | 4.641747524 | -0.031726204 | 1.422936015 | -0.022296297 | 0.982211603 | NA          | NA      |
| ENSG00000185305 | ARL15    | ADP ribosylation factor like GTPase 15                | 54622     | 321.2986186 | -0.031666264 | 0.63652327  | -0.049748792 | 0.960322574 | 0.999371363 | Not Sig |
| ENSG00000163608 | NEPRO    | nucleolus and neural progenitor protein               | 25871     | 594.9224699 | -0.03161654  | 0.496195255 | -0.063717942 | 0.949194818 | 0.999371363 | Not Sig |
| ENSG00000226664 | NA       | NA                                                    | NA        | 0.668048191 | -0.031528082 | 3.439327481 | -0.009166932 | 0.992685949 | NA          | NA      |
| ENSG00000231822 | NA       | NA                                                    | NA        | 0.668048191 | -0.031528082 | 3.439327481 | -0.009166932 | 0.992685949 | NA          | NA      |
| ENSG00000244060 | NA       | NA                                                    | NA        | 0.668048191 | -0.031528082 | 3.439327481 | -0.009166932 | 0.992685949 | NA          | NA      |
| ENSG00000244528 | NA       | NA                                                    | NA        | 0.668048191 | -0.031528082 | 3.439327481 | -0.009166932 | 0.992685949 | NA          | NA      |
| ENSG00000244738 | NA       | NA                                                    | NA        | 0.668048191 | -0.031528082 | 3.439327481 | -0.009166932 | 0.992685949 | NA          | NA      |
| ENSG00000251548 | NA       | NA                                                    | NA        | 0.668048191 | -0.031528082 | 3.439327481 | -0.009166932 | 0.992685949 | NA          | NA      |
| ENSG00000253174 | NA       | NA                                                    | NA        | 0.668048191 | -0.031528082 | 3.439327481 | -0.009166932 | 0.992685949 | NA          | NA      |
| ENSG00000267491 | NA       | NA                                                    | NA        | 0.668048191 | -0.031528082 | 3.439327481 | -0.009166932 | 0.992685949 | NA          | NA      |
| ENSG00000211828 | NA       | NA                                                    | NA        | 0.939133463 | -0.031466744 | 2.629303441 | -0.011967711 | 0.990451376 | NA          | NA      |
| ENSG00000248452 | NA       | NA                                                    | NA        | 0.939133463 | -0.031466744 | 2.629303441 | -0.011967711 | 0.990451376 | NA          | NA      |
| ENSG00000259299 | NA       | NA                                                    | NA        | 0.939133463 | -0.031466744 | 2.629303441 | -0.011967711 | 0.990451376 | NA          | NA      |
| ENSG00000228989 | NA       | NA                                                    | NA        | 52.85967753 | -0.031331058 | 0.535401133 | -0.058518848 | 0.953335349 | 0.999371363 | Not Sig |
| ENSG00000172292 | CERS6    | ceramide synthase 6                                   | 253782    | 1431.779317 | -0.031306811 | 0.547703294 | -0.057160165 | 0.95441761  | 0.999371363 | Not Sig |
| ENSG00000018699 | TTC27    | tetratricopeptide repeat domain 27                    | 55622     | 438.2082055 | -0.031283992 | 0.465072461 | -0.06726692  | 0.946369211 | 0.999371363 | Not Sig |
| ENSG00000140943 | MBTPS1   | membrane bound transcription factor peptidase, site 1 | 8720      | 3472.411309 | -0.031147329 | 0.402874565 | -0.07731272  | 0.938374772 | 0.999371363 | Not Sig |
| ENSG00000099783 | HNRNPM   | heterogeneous nuclear ribonucleoprotein M             | 4670      | 3237.898205 | -0.030931663 | 0.413794669 | -0.074751236 | 0.940412641 | 0.999371363 | Not Sig |
| ENSG00000244080 | NA       | NA                                                    | NA        | 2.636158358 | -0.030430657 | 1.468984064 | -0.020715444 | 0.983472649 | NA          | NA      |
| ENSG00000175309 | PHYKPL   | 5-phosphohydroxy-L-lysine phospho-lyase               | 85007     | 1777.97493  | -0.030360169 | 0.463887215 | -0.065447307 | 0.947817859 | 0.999371363 | Not Sig |
| ENSG00000184489 | PTP4A3   | protein tyrosine phosphatase type IVA, member 3       | 11156     | 856.8901598 | -0.030327939 | 0.538004827 | -0.056371128 | 0.955046157 | 0.999371363 | Not Sig |
| ENSG00000234709 | NA       | NA                                                    | NA        | 43.60741261 | -0.030245295 | 0.567441875 | -0.053301134 | 0.957491977 | 0.999371363 | Not Sig |
| ENSG00000076513 | ANKRD13A | ankyrin repeat domain 13A                             | 88455     | 1717.439919 | -0.030182207 | 0.469338848 | -0.064307924 | 0.948725044 | 0.999371363 | Not Sig |
| ENSG00000125779 | PANK2    | pantothenate kinase 2                                 | 80025     | 951.8196094 | -0.029987372 | 0.437371862 | -0.068562645 | 0.945337754 | 0.999371363 | Not Sig |

|                 |           |                                                                             |        |             |              |             |              |             |             |         |
|-----------------|-----------|-----------------------------------------------------------------------------|--------|-------------|--------------|-------------|--------------|-------------|-------------|---------|
| ENSG00000164663 | USP49     | ubiquitin specific peptidase 49                                             | 25862  | 388.0675559 | -0.029927474 | 0.57867505  | -0.051717235 | 0.958754004 | 0.999371363 | Not Sig |
| ENSG00000126107 | HECTD3    | HECT domain E3 ubiquitin protein ligase 3                                   | 79654  | 1026.817931 | -0.029505464 | 0.545325337 | -0.054106167 | 0.956850579 | 0.999371363 | Not Sig |
| ENSG00000203666 | EFCAB2    | EF-hand calcium binding domain 2                                            | 84288  | 435.377587  | -0.029377985 | 0.517526037 | -0.056766196 | 0.954731442 | 0.999371363 | Not Sig |
| ENSG00000224415 | NA        | NA                                                                          | NA     | 13.16545357 | -0.029294304 | 0.806444783 | -0.036325244 | 0.971023021 | 0.999371363 | Not Sig |
| ENSG00000137656 | BUD13     | BUD13 homolog                                                               | 84811  | 442.3397974 | -0.02897269  | 0.458206491 | -0.063230641 | 0.949582846 | 0.999371363 | Not Sig |
| ENSG00000180902 | D2HGDH    | D-2-hydroxyglutarate dehydrogenase                                          | 728294 | 840.2886371 | -0.028578588 | 0.570938054 | -0.050055498 | 0.960078163 | 0.999371363 | Not Sig |
| ENSG00000204618 | RNF39     | ring finger protein 39                                                      | 80352  | 129.8002246 | -0.028521029 | 0.608536278 | -0.046868248 | 0.962618235 | 0.999371363 | Not Sig |
| ENSG00000062485 | CS        | citrate synthase                                                            | 1431   | 1911.905227 | -0.028520536 | 0.395061621 | -0.072192626 | 0.942448613 | 0.999371363 | Not Sig |
| ENSG00000133316 | WDR74     | WD repeat domain 74                                                         | 54663  | 457.1798811 | -0.028425002 | 0.448284268 | -0.063408432 | 0.949441273 | 0.999371363 | Not Sig |
| ENSG00000163673 | DCLK3     | doublecortin like kinase 3                                                  | 85443  | 7.081525071 | -0.028380748 | 1.149430653 | -0.024691136 | 0.980301326 | 0.999371363 | Not Sig |
| ENSG00000067066 | SP100     | SP100 nuclear antigen                                                       | 6672   | 2439.989841 | -0.02832777  | 0.538259294 | -0.052628482 | 0.958027923 | 0.999371363 | Not Sig |
| ENSG00000066739 | ATG2B     | autophagy related 2B                                                        | 55102  | 1979.391238 | -0.028290075 | 0.486940252 | -0.05809763  | 0.953670862 | 0.999371363 | Not Sig |
| ENSG00000136167 | LCP1      | lymphocyte cytosolic protein 1                                              | 3936   | 5287.833521 | -0.028125163 | 0.887876209 | -0.031676897 | 0.974729719 | 0.999371363 | Not Sig |
| ENSG00000137073 | UBAP2     | ubiquitin associated protein 2                                              | 55833  | 1173.296727 | -0.028090089 | 0.430306304 | -0.065279287 | 0.947951634 | 0.999371363 | Not Sig |
| ENSG00000138029 | HADHB     | hydroxacyl-CoA dehydrogenase trifunctional multienzyme complex subunit beta | 3032   | 1766.433618 | -0.02802171  | 0.416172932 | -0.06733189  | 0.94631749  | 0.999371363 | Not Sig |
| ENSG00000117616 | RSRP1     | arginine and serine rich protein 1                                          | 57035  | 1835.063847 | -0.028013374 | 0.39364864  | -0.071163396 | 0.943267713 | 0.999371363 | Not Sig |
| ENSG00000269999 | NA        | NA                                                                          | NA     | 4.936994526 | -0.028009191 | 1.141561617 | -0.024535856 | 0.980425184 | NA          | NA      |
| ENSG00000262979 | NA        | NA                                                                          | NA     | 89.0664464  | -0.027680259 | 0.814194828 | -0.033997095 | 0.972879467 | 0.999371363 | Not Sig |
| ENSG00000171566 | PLRG1     | pleiotropic regulator 1                                                     | 5356   | 746.6479324 | -0.027656146 | 0.440533062 | -0.062778821 | 0.949942631 | 0.999371363 | Not Sig |
| ENSG00000174013 | FBX045    | F-box protein 45                                                            | 200933 | 366.2221657 | -0.027424871 | 0.450237721 | -0.060911979 | 0.951429309 | 0.999371363 | Not Sig |
| ENSG00000130311 | DDA1      | DET1 and DDB1 associated 1                                                  | 79016  | 611.4662181 | -0.027332851 | 0.504458518 | -0.054182554 | 0.95678972  | 0.999371363 | Not Sig |
| ENSG00000117620 | SLC35A3   | solute carrier family 35 member A3                                          | 23443  | 990.2361925 | -0.027280932 | 0.574249256 | -0.047507126 | 0.962109051 | 0.999371363 | Not Sig |
| ENSG00000176274 | NA        | NA                                                                          | NA     | 123.5831233 | -0.027258415 | 0.473739045 | -0.057538883 | 0.954115933 | 0.999371363 | Not Sig |
| ENSG00000077238 | IL4R      | interleukin 4 receptor                                                      | 3566   | 2769.223458 | -0.027172639 | 0.525398269 | -0.051718173 | 0.958753256 | 0.999371363 | Not Sig |
| ENSG00000174917 | C19orf70  | chromosome 19 open reading frame 70                                         | 125988 | 334.740063  | -0.027089169 | 0.561947199 | -0.048205897 | 0.96155215  | 0.999371363 | Not Sig |
| ENSG00000175764 | TLL11     | tubulin tyrosine ligase like 11                                             | 158135 | 160.313315  | -0.026811253 | 0.643966044 | -0.041634576 | 0.96679001  | 0.999371363 | Not Sig |
| ENSG00000181798 | LINC00471 | long intergenic non-protein coding RNA 471                                  | 151477 | 14.66499145 | -0.026748943 | 0.936083305 | -0.028575387 | 0.977203242 | 0.999371363 | Not Sig |
| ENSG00000213399 | NA        | NA                                                                          | NA     | 1.245838133 | -0.026733884 | 2.136689679 | -0.012511823 | 0.99001727  | NA          | NA      |
| ENSG00000228981 | NA        | NA                                                                          | NA     | 1.245838133 | -0.026733884 | 2.136689679 | -0.012511823 | 0.99001727  | NA          | NA      |
| ENSG00000257210 | NA        | NA                                                                          | NA     | 1.022539169 | -0.02670157  | 2.592908907 | -0.010297921 | 0.991783593 | NA          | NA      |
| ENSG00000171853 | TRAPPC12  | trafficking protein particle complex 12                                     | 51112  | 1627.961137 | -0.02661826  | 0.441983317 | -0.060224581 | 0.951976768 | 0.999371363 | Not Sig |
| ENSG00000132341 | RAN       | RAN, member RAS oncogene family                                             | 5901   | 2132.924001 | -0.026533766 | 0.424978249 | -0.062435586 | 0.950215957 | 0.999371363 | Not Sig |
| ENSG00000198612 | COPS8     | COP9 signalosome subunit 8                                                  | 10920  | 568.6008976 | -0.026479956 | 0.553062463 | -0.047878779 | 0.961812851 | 0.999371363 | Not Sig |
| ENSG00000205744 | DENND1C   | DENN domain containing 1C                                                   | 79958  | 258.3054155 | -0.026211558 | 0.758382236 | -0.034562463 | 0.972428634 | 0.999371363 | Not Sig |
| ENSG00000167554 | ZNF610    | zinc finger protein 610                                                     | 162963 | 82.66959103 | -0.026166986 | 0.774640021 | -0.033779543 | 0.973052949 | 0.999371363 | Not Sig |

|                 |              |                                                               |           |             |              |             |              |             |             |         |
|-----------------|--------------|---------------------------------------------------------------|-----------|-------------|--------------|-------------|--------------|-------------|-------------|---------|
| ENSG00000243069 | ARHGEF26-AS1 | ARHGEF26 antisense RNA 1                                      | 100507524 | 89.98562096 | -0.026155872 | 0.681766918 | -0.038364831 | 0.969396801 | 0.999371363 | Not Sig |
| ENSG00000258092 | NA           | NA                                                            | NA        | 8.602677638 | -0.026151146 | 0.917069409 | -0.028515995 | 0.977250611 | 0.999371363 | Not Sig |
| ENSG00000163900 | TMEM41A      | transmembrane protein 41A                                     | 90407     | 762.115539  | -0.026127371 | 0.491630114 | -0.053144366 | 0.957616883 | 0.999371363 | Not Sig |
| ENSG00000056277 | ZNF280C      | zinc finger protein 280C                                      | 55609     | 229.9128021 | -0.025914654 | 0.700454655 | -0.036996904 | 0.970487474 | 0.999371363 | Not Sig |
| ENSG00000204052 | LRRC73       | leucine rich repeat containing 73                             | 221424    | 37.45644469 | -0.025806912 | 0.959540716 | -0.026895068 | 0.978543428 | 0.999371363 | Not Sig |
| ENSG00000099364 | FBXL19       | F-box and leucine rich repeat protein 19                      | 54620     | 817.1907781 | -0.025772432 | 0.511312603 | -0.050404452 | 0.959800088 | 0.999371363 | Not Sig |
| ENSG00000198718 | TOGARAM1     | TOG array regulator of axonemal microtubules 1                | 23116     | 988.0413677 | -0.025675924 | 0.446717816 | -0.05747683  | 0.954165362 | 0.999371363 | Not Sig |
| ENSG00000221676 | RNU6ATAC     | RNA, U6atac small nuclear (U12-dependent splicing)            | 100151684 | 2.234894366 | -0.025347307 | 1.761697254 | -0.014388004 | 0.98852043  | NA          | NA      |
| ENSG00000119596 | YLPM1        | YLP motif containing 1                                        | 56252     | 3085.229796 | -0.024910023 | 0.429166044 | -0.058042857 | 0.953714491 | 0.999371363 | Not Sig |
| ENSG00000135469 | COQ10A       | coenzyme Q10A                                                 | 93058     | 142.9673141 | -0.024802092 | 0.485721007 | -0.051062424 | 0.959275778 | 0.999371363 | Not Sig |
| ENSG00000249858 | NA           | NA                                                            | NA        | 0.945570999 | -0.024772551 | 2.331298514 | -0.010626074 | 0.991521779 | NA          | NA      |
| ENSG00000104267 | CA2          | carbonic anhydrase 2                                          | 760       | 437.117885  | -0.024700834 | 0.894166762 | -0.027624416 | 0.977961708 | 0.999371363 | Not Sig |
| ENSG00000239213 | NA           | NA                                                            | NA        | 68.19859065 | -0.024397356 | 0.504203649 | -0.048387901 | 0.961407101 | 0.999371363 | Not Sig |
| ENSG00000130363 | RSPH3        | radial spoke head 3 homolog                                   | 83861     | 755.1841271 | -0.024263529 | 0.396357544 | -0.061216265 | 0.951186976 | 0.999371363 | Not Sig |
| ENSG00000175806 | MSRA         | methionine sulfoxide reductase A                              | 4482      | 309.7159445 | -0.023882339 | 0.524657411 | -0.045519874 | 0.963692934 | 0.999371363 | Not Sig |
| ENSG00000231534 | NA           | NA                                                            | NA        | 9.161708418 | -0.023871492 | 0.992247982 | -0.02405799  | 0.980806352 | 0.999371363 | Not Sig |
| ENSG00000141391 | PRELID3A     | PRELI domain containing 3A                                    | 10650     | 44.89437857 | -0.023837791 | 0.554446844 | -0.042993826 | 0.965706456 | 0.999371363 | Not Sig |
| ENSG00000102743 | SLC25A15     | solute carrier family 25 member 15                            | 10166     | 128.8985433 | -0.023761955 | 0.582787584 | -0.040772926 | 0.967476923 | 0.999371363 | Not Sig |
| ENSG00000139233 | LLPH         | LLP homolog, long-term synaptic facilitation                  | 84298     | 128.6270912 | -0.023236723 | 0.530870485 | -0.043770982 | 0.965086958 | 0.999371363 | Not Sig |
| ENSG00000143258 | USP21        | ubiquitin specific peptidase 21                               | 27005     | 616.0508071 | -0.023221898 | 0.479217125 | -0.048457989 | 0.961351245 | 0.999371363 | Not Sig |
| ENSG00000136925 | TSTD2        | thiosulfate sulfurtransferase like domain containing 2        | 158427    | 653.3776121 | -0.023149459 | 0.420978827 | -0.054989604 | 0.956146746 | 0.999371363 | Not Sig |
| ENSG00000095015 | MAP3K1       | mitogen-activated protein kinase kinase kinase 1              | 4214      | 2295.765044 | -0.022980495 | 0.38548498  | -0.059614501 | 0.952462669 | 0.999371363 | Not Sig |
| ENSG00000141428 | C18orf21     | chromosome 18 open reading frame 21                           | 83608     | 149.8463865 | -0.022962067 | 0.50380474  | -0.045577314 | 0.963647151 | 0.999371363 | Not Sig |
| ENSG00000165264 | NDUFB6       | NADH:ubiquinone oxidoreductase subunit B6                     | 4712      | 239.9037052 | -0.022851193 | 0.553247206 | -0.041303767 | 0.96705373  | 0.999371363 | Not Sig |
| ENSG00000115484 | CCT4         | chaperonin containing TCP1 subunit 4                          | 10575     | 1982.660508 | -0.022846543 | 0.437595946 | -0.052209219 | 0.958361987 | 0.999371363 | Not Sig |
| ENSG00000135966 | TGFBRAP1     | transforming growth factor beta receptor associated protein 1 | 9392      | 868.1572738 | -0.022799672 | 0.423099343 | -0.053887279 | 0.957024972 | 0.999371363 | Not Sig |
| ENSG00000008517 | IL32         | interleukin 32                                                | 9235      | 1239.907511 | -0.022769958 | 0.794246739 | -0.02866862  | 0.977128884 | 0.999371363 | Not Sig |
| ENSG00000172469 | MANEA        | mannosidase endo-alpha                                        | 79694     | 470.5923687 | -0.022650926 | 0.756384698 | -0.029946303 | 0.976109878 | 0.999371363 | Not Sig |
| ENSG00000162736 | NCSTN        | nicastrin                                                     | 23385     | 2600.01287  | -0.022634767 | 0.400340245 | -0.056538825 | 0.954912567 | 0.999371363 | Not Sig |
| ENSG00000143971 | ETAA1        | ETAA1, ATR kinase activator                                   | 54465     | 465.5800096 | -0.022592611 | 0.493782575 | -0.045754169 | 0.963506188 | 0.999371363 | Not Sig |
| ENSG00000141698 | NT5C3B       | 5'-nucleotidase, cytosolic IIIB                               | 115024    | 511.4314394 | -0.022399157 | 0.492646782 | -0.045466972 | 0.963735101 | 0.999371363 | Not Sig |
| ENSG00000113648 | H2AFY        | H2A histone family member Y                                   | 9555      | 4219.446608 | -0.022326937 | 0.388276855 | -0.05750262  | 0.954144819 | 0.999371363 | Not Sig |
| ENSG00000239466 | NA           | NA                                                            | NA        | 6.746302937 | -0.022323277 | 0.981412182 | -0.022746077 | 0.981852821 | 0.999371363 | Not Sig |
| ENSG00000146776 | ATXN7L1      | ataxin 7 like 1                                               | 222255    | 402.2348576 | -0.022229278 | 0.400505674 | -0.055503028 | 0.955737717 | 0.999371363 | Not Sig |
| ENSG00000178105 | DDX10        | DEAD-box helicase 10                                          | 1662      | 591.8508254 | -0.022213666 | 0.467928619 | -0.047472338 | 0.962136776 | 0.999371363 | Not Sig |

|                 |              |                                                               |           |             |              |             |              |             |             |         |
|-----------------|--------------|---------------------------------------------------------------|-----------|-------------|--------------|-------------|--------------|-------------|-------------|---------|
| ENSG00000071242 | RPS6KA2      | ribosomal protein S6 kinase A2                                | 6196      | 4332.782239 | -0.022174094 | 0.608494464 | -0.036440914 | 0.970930792 | 0.999371363 | Not Sig |
| ENSG00000149262 | INTS4        | integrator complex subunit 4                                  | 92105     | 732.1153643 | -0.022142351 | 0.45570369  | -0.04858936  | 0.961246549 | 0.999371363 | Not Sig |
| ENSG00000185862 | EVI2B        | ecotropic viral integration site 2B                           | 2124      | 463.4566234 | -0.02207344  | 0.84248241  | -0.026200475 | 0.979097437 | 0.999371363 | Not Sig |
| ENSG00000169504 | CLIC4        | chloride intracellular channel 4                              | 25932     | 3768.361479 | -0.022027509 | 0.461925616 | -0.047686268 | 0.961966278 | 0.999371363 | Not Sig |
| ENSG00000118482 | PHF3         | PHD finger protein 3                                          | 23469     | 4326.7789   | -0.022023366 | 0.50834041  | -0.043324051 | 0.965443219 | 0.999371363 | Not Sig |
| ENSG00000145388 | METTL14      | methyltransferase like 14                                     | 57721     | 665.6257164 | -0.021913119 | 0.422470654 | -0.051868974 | 0.958633096 | 0.999371363 | Not Sig |
| ENSG00000213064 | SFT2D2       | SFT2 domain containing 2                                      | 375035    | 4189.949422 | -0.021835296 | 0.495855838 | -0.044035573 | 0.964876048 | 0.999371363 | Not Sig |
| ENSG00000169992 | NLGN2        | neuroligin 2                                                  | 57555     | 527.5878134 | -0.021824512 | 0.487076666 | -0.04480714  | 0.964261034 | 0.999371363 | Not Sig |
| ENSG00000228172 | NA           | NA                                                            | NA        | 16.70450052 | -0.021789679 | 0.784509278 | -0.027774916 | 0.977841673 | 0.999371363 | Not Sig |
| ENSG00000156345 | CDK20        | cyclin dependent kinase 20                                    | 23552     | 127.8019872 | -0.021558643 | 0.749604047 | -0.028760041 | 0.97705597  | 0.999371363 | Not Sig |
| ENSG00000204348 | DXO          | decapping exoribonuclease                                     | 1797      | 298.0221418 | -0.021540842 | 0.534273314 | -0.04031802  | 0.967839587 | 0.999371363 | Not Sig |
| ENSG00000237441 | RGL2         | ral guanine nucleotide dissociation stimulator like 2         | 5863      | 2491.082147 | -0.021427152 | 0.505991716 | -0.042346843 | 0.966222203 | 0.999371363 | Not Sig |
| ENSG00000263439 | MIR4753      | microRNA 4753                                                 | 100616224 | 6.909073566 | -0.021305528 | 1.032909933 | -0.020626705 | 0.983543438 | 0.999371363 | Not Sig |
| ENSG00000124766 | SOX4         | SRY-box 4                                                     | 6659      | 6253.785977 | -0.021191115 | 0.639411231 | -0.033141607 | 0.973561664 | 0.999371363 | Not Sig |
| ENSG00000075336 | TIMM21       | translocase of inner mitochondrial membrane 21                | 29090     | 217.4089259 | -0.021010417 | 0.453875572 | -0.046291139 | 0.963078202 | 0.999371363 | Not Sig |
| ENSG00000155304 | HSPA13       | heat shock protein family A (Hsp70) member 13                 | 6782      | 865.290827  | -0.020914414 | 0.558669251 | -0.037436129 | 0.970137266 | 0.999371363 | Not Sig |
| ENSG00000109618 | SEPSECS      | Sep (O-phosphoserine) tRNA:Sec (selenocysteine) tRNA synthase | 51091     | 389.7354778 | -0.020907789 | 0.523707899 | -0.039922615 | 0.968154821 | 0.999371363 | Not Sig |
| ENSG00000118898 | PPL          | periplakin                                                    | 5493      | 4002.360412 | -0.020771183 | 0.634205133 | -0.032751522 | 0.973872738 | 0.999371363 | Not Sig |
| ENSG00000104884 | ERCC2        | ERCC excision repair 2, TFIIH core complex helicase subunit   | 2068      | 425.8648778 | -0.020646395 | 0.428836575 | -0.048145135 | 0.961600575 | 0.999371363 | Not Sig |
| ENSG00000101266 | CSNK2A1      | casein kinase 2 alpha 1                                       | 1457      | 1989.383496 | -0.020632485 | 0.459035177 | -0.044947503 | 0.964149154 | 0.999371363 | Not Sig |
| ENSG00000168476 | REEP4        | receptor accessory protein 4                                  | 80346     | 357.6130008 | -0.020554365 | 0.600980082 | -0.034201407 | 0.972716544 | 0.999371363 | Not Sig |
| ENSG00000269553 | NA           | NA                                                            | NA        | 3.859667172 | -0.020464168 | 1.490420871 | -0.013730463 | 0.98904502  | NA          | NA      |
| ENSG00000239791 | NA           | NA                                                            | NA        | 3.097059659 | -0.020448118 | 1.335923849 | -0.01530635  | 0.987787777 | NA          | NA      |
| ENSG00000273002 | LOC107985209 | uncharacterized LOC107985209                                  | 107985209 | 27.22632047 | -0.020444486 | 0.97974591  | -0.020867131 | 0.983351647 | 0.999371363 | Not Sig |
| ENSG00000114450 | GNB4         | G protein subunit beta 4                                      | 59345     | 774.8346057 | -0.020328979 | 0.579414828 | -0.035085363 | 0.972011673 | 0.999371363 | Not Sig |
| ENSG00000188404 | SELL         | selectin L                                                    | 6402      | 353.2832027 | -0.020323956 | 0.8187703   | -0.024822537 | 0.980196515 | 0.999371363 | Not Sig |
| ENSG00000187147 | RNF220       | ring finger protein 220                                       | 55182     | 1233.815617 | -0.020281724 | 0.482984247 | -0.041992517 | 0.966504663 | 0.999371363 | Not Sig |
| ENSG00000255232 | NA           | NA                                                            | NA        | 3.519064558 | -0.02025201  | 1.361216988 | -0.01487787  | 0.988129615 | NA          | NA      |
| ENSG00000201882 | NA           | NA                                                            | NA        | 8.768171705 | -0.020069327 | 0.972010124 | -0.020647241 | 0.983527056 | 0.999371363 | Not Sig |
| ENSG00000072682 | P4HA2        | prolyl 4-hydroxylase subunit alpha 2                          | 8974      | 1218.622497 | -0.020031323 | 0.646882337 | -0.030965945 | 0.975296699 | 0.999371363 | Not Sig |
| ENSG00000173068 | BNC2         | basonuclin 2                                                  | 54796     | 489.1516507 | -0.019904988 | 0.449693113 | -0.044263493 | 0.964694371 | 0.999371363 | Not Sig |
| ENSG00000066933 | MYO9A        | myosin IXA                                                    | 4649      | 3086.893969 | -0.019770346 | 0.394956316 | -0.050057045 | 0.96007693  | 0.999371363 | Not Sig |
| ENSG00000116151 | MORN1        | MORN repeat containing 1                                      | 79906     | 380.892194  | -0.01970972  | 0.497716993 | -0.039600255 | 0.968411824 | 0.999371363 | Not Sig |
| ENSG00000135847 | NA           | NA                                                            | NA        | 558.2254422 | -0.019625396 | 0.442943463 | -0.044306774 | 0.964659872 | 0.999371363 | Not Sig |
| ENSG00000229769 | NA           | NA                                                            | NA        | 1.396757761 | -0.019587151 | 2.114567975 | -0.009262956 | 0.992609336 | NA          | NA      |

|                 |                |                                                                     |           |             |              |             |              |             |             |         |
|-----------------|----------------|---------------------------------------------------------------------|-----------|-------------|--------------|-------------|--------------|-------------|-------------|---------|
| ENSG00000237988 | NA             | NA                                                                  | NA        | 1.396757761 | -0.019587151 | 2.114567975 | -0.009262956 | 0.992609336 | NA          | NA      |
| ENSG00000164347 | GFM2           | G elongation factor mitochondrial 2                                 | 84340     | 525.8817011 | -0.019048132 | 0.47557614  | -0.040052749 | 0.968051072 | 0.999371363 | Not Sig |
| ENSG00000174374 | NA             | NA                                                                  | NA        | 419.3353865 | -0.018874411 | 0.554228787 | -0.034055269 | 0.972833078 | 0.999371363 | Not Sig |
| ENSG00000124214 | STAU1          | staufen double-stranded RNA binding protein 1                       | 6780      | 2395.28591  | -0.018774505 | 0.454776968 | -0.041282883 | 0.967070378 | 0.999371363 | Not Sig |
| ENSG00000196405 | EVL            | Enah/Vasp-like                                                      | 51466     | 2037.233354 | -0.018753642 | 0.600509332 | -0.031229559 | 0.975086467 | 0.999371363 | Not Sig |
| ENSG00000249863 | NA             | NA                                                                  | NA        | 28.46550287 | -0.018737309 | 0.607382527 | -0.030849272 | 0.975389746 | 0.999371363 | Not Sig |
| ENSG00000123297 | TSMF           | Ts translation elongation factor, mitochondrial                     | 10102     | 192.9949306 | -0.018716412 | 0.483684616 | -0.038695487 | 0.969133172 | 0.999371363 | Not Sig |
| ENSG00000184304 | PRKD1          | protein kinase D1                                                   | 5587      | 354.3656092 | -0.018614436 | 0.546570513 | -0.034056788 | 0.972831866 | 0.999371363 | Not Sig |
| ENSG00000115170 | ACVR1          | activin A receptor type 1                                           | 90        | 1072.454723 | -0.018234281 | 0.417116755 | -0.043715054 | 0.965131539 | 0.999371363 | Not Sig |
| ENSG00000123473 | STIL           | STIL, centriolar assembly protein                                   | 6491      | 238.782446  | -0.018233709 | 0.927204044 | -0.019665261 | 0.984310403 | 0.999371363 | Not Sig |
| ENSG00000161996 | WDR90          | WD repeat domain 90                                                 | 197335    | 817.6876052 | -0.018140298 | 0.475897167 | -0.038118104 | 0.969593517 | 0.999371363 | Not Sig |
| ENSG00000118513 | MYB            | MYB proto-oncogene, transcription factor                            | 4602      | 186.5785294 | -0.017908292 | 0.481404729 | -0.037200075 | 0.970325478 | 0.999371363 | Not Sig |
| ENSG00000174456 | C12orf76       | chromosome 12 open reading frame 76                                 | 400073    | 237.9787305 | -0.017877662 | 0.531603696 | -0.03362968  | 0.973172455 | 0.999371363 | Not Sig |
| ENSG00000056097 | ZFR            | zinc finger RNA binding protein                                     | 51663     | 2245.133373 | -0.01776539  | 0.450020952 | -0.039476806 | 0.968510246 | 0.999371363 | Not Sig |
| ENSG00000116117 | PARD3B         | par-3 family cell polarity regulator beta                           | 117583    | 1180.516317 | -0.01766303  | 0.552835656 | -0.031949875 | 0.974512024 | 0.999371363 | Not Sig |
| ENSG00000253341 | NA             | NA                                                                  | NA        | 11.70670619 | -0.017577178 | 0.869002125 | -0.020226852 | 0.983862407 | 0.999371363 | Not Sig |
| ENSG00000186871 | ERCC6L         | ERCC excision repair 6 like, spindle assembly checkpoint helicase   | 54821     | 41.42840291 | -0.017454261 | 1.115880575 | -0.015641692 | 0.987520244 | 0.999371363 | Not Sig |
| ENSG00000153774 | CFDP1          | craniofacial development protein 1                                  | 10428     | 608.8601564 | -0.017121316 | 0.406640979 | -0.042104255 | 0.966415588 | 0.999371363 | Not Sig |
| ENSG00000110324 | IL10RA         | interleukin 10 receptor subunit alpha                               | 3587      | 1421.549111 | -0.017119936 | 0.784223734 | -0.021830423 | 0.982583226 | 0.999371363 | Not Sig |
| ENSG00000085978 | ATG16L1        | autophagy related 16 like 1                                         | 55054     | 781.7887783 | -0.017019468 | 0.415978536 | -0.040914295 | 0.967364221 | 0.999371363 | Not Sig |
| ENSG00000187244 | BCAM           | basal cell adhesion molecule (Lutheran blood group)                 | 4059      | 6270.962331 | -0.016959341 | 0.535973213 | -0.031642143 | 0.974757435 | 0.999371363 | Not Sig |
| ENSG00000248592 | TMEM110-MUSTN1 | TMEM110-MUSTN1 readthrough                                          | 100526772 | 16.72158308 | -0.016905896 | 0.849767517 | -0.01989473  | 0.984127349 | 0.999371363 | Not Sig |
| ENSG00000205138 | SDHAF1         | succinate dehydrogenase complex assembly factor 1                   | 644096    | 209.9966864 | -0.016887439 | 0.672895345 | -0.02509668  | 0.979977849 | 0.999371363 | Not Sig |
| ENSG00000010671 | BTK            | Bruton tyrosine kinase                                              | 695       | 393.6649264 | -0.016742017 | 0.879519967 | -0.019035403 | 0.984812863 | 0.999371363 | Not Sig |
| ENSG00000181450 | ZNF678         | zinc finger protein 678                                             | 339500    | 731.5494438 | -0.016735262 | 0.661350507 | -0.025304679 | 0.979811942 | 0.999371363 | Not Sig |
| ENSG00000261744 | NA             | NA                                                                  | NA        | 14.44633048 | -0.01673178  | 0.93136215  | -0.017964849 | 0.985666896 | 0.999371363 | Not Sig |
| ENSG00000197045 | GMFB           | glia maturation factor beta                                         | 2764      | 1141.453193 | -0.016553601 | 0.620087949 | -0.026695569 | 0.978702547 | 0.999371363 | Not Sig |
| ENSG00000202601 | MIR582         | microRNA 582                                                        | 693167    | 1.674695576 | -0.016536136 | 2.643497642 | -0.0062554   | 0.995008945 | NA          | NA      |
| ENSG00000103855 | CD276          | CD276 molecule                                                      | 80381     | 1483.438531 | -0.016522808 | 0.485831305 | -0.034009353 | 0.972869693 | 0.999371363 | Not Sig |
| ENSG00000049883 | PTCD2          | pentatricopeptide repeat domain 2                                   | 79810     | 162.3237879 | -0.01643156  | 0.475158931 | -0.034581187 | 0.972413703 | 0.999371363 | Not Sig |
| ENSG00000183207 | RUVBL2         | RuvB like AAA ATPase 2                                              | 10856     | 780.8340926 | -0.016409525 | 0.495249234 | -0.033133872 | 0.973567832 | 0.999371363 | Not Sig |
| ENSG00000253542 | SDR16C6P       | short chain dehydrogenase/reductase family 16C member 6, pseudogene | 442388    | 1.674280568 | -0.016376754 | 1.794374565 | -0.00912672  | 0.992718032 | NA          | NA      |
| ENSG00000266146 | MIR5190        | microRNA 5190                                                       | 100847080 | 12.87633454 | -0.016144116 | 0.955703404 | -0.016892392 | 0.986522463 | 0.999371363 | Not Sig |
| ENSG00000165030 | NFIL3          | nuclear factor, interleukin 3 regulated                             | 4783      | 586.1877951 | -0.015823213 | 0.463148034 | -0.034164482 | 0.972745989 | 0.999371363 | Not Sig |
| ENSG00000147118 | ZNF182         | zinc finger protein 182                                             | 7569      | 268.4808554 | -0.015822615 | 0.499731639 | -0.031662223 | 0.974741421 | 0.999371363 | Not Sig |



|                 |          |                                                                        |        |             |              |             |              |             |             |         |
|-----------------|----------|------------------------------------------------------------------------|--------|-------------|--------------|-------------|--------------|-------------|-------------|---------|
| ENSG00000240669 | NA       | NA                                                                     | NA     | 1.329243839 | -0.015761566 | 2.382323979 | -0.006616047 | 0.994721197 | NA          | NA      |
| ENSG00000257752 | NA       | NA                                                                     | NA     | 8.560870096 | -0.015743195 | 0.959562083 | -0.016406646 | 0.986909978 | 0.999371363 | Not Sig |
| ENSG00000204209 | DAXX     | death domain associated protein                                        | 1616   | 943.025756  | -0.015679857 | 0.511292361 | -0.030667105 | 0.975535025 | 0.999371363 | Not Sig |
| ENSG00000187008 | NA       | NA                                                                     | NA     | 15.30693442 | -0.01559188  | 0.825128049 | -0.018896316 | 0.984923818 | 0.999371363 | Not Sig |
| ENSG00000119185 | ITGB1BP1 | integrin subunit beta 1 binding protein 1                              | 9270   | 525.6573289 | -0.015518239 | 0.43608422  | -0.035585417 | 0.971612937 | 0.999371363 | Not Sig |
| ENSG00000262879 | NA       | NA                                                                     | NA     | 276.5187707 | -0.015487288 | 0.462282343 | -0.033501794 | 0.973274435 | 0.999371363 | Not Sig |
| ENSG00000108465 | CDK5RAP3 | CDK5 regulatory subunit associated protein 3                           | 80279  | 1947.420473 | -0.015208213 | 0.451148244 | -0.033710013 | 0.973108394 | 0.999371363 | Not Sig |
| ENSG00000218283 | NA       | NA                                                                     | NA     | 257.3287779 | -0.015188397 | 0.490140423 | -0.030987847 | 0.975279231 | 0.999371363 | Not Sig |
| ENSG00000228205 | NA       | NA                                                                     | NA     | 4.405562591 | -0.015054479 | 1.428956969 | -0.010535292 | 0.991594208 | NA          | NA      |
| ENSG00000088298 | EDEM2    | ER degradation enhancing alpha-mannosidase like protein 2              | 55741  | 853.0129564 | -0.015015648 | 0.483531022 | -0.031054157 | 0.975226349 | 0.999371363 | Not Sig |
| ENSG00000250011 | NA       | NA                                                                     | NA     | 9.658843563 | -0.014891428 | 0.95819212  | -0.015541171 | 0.987600439 | 0.999371363 | Not Sig |
| ENSG00000240682 | ISY1     | ISY1 splicing factor homolog                                           | 57461  | 214.2837353 | -0.014834181 | 0.565912366 | -0.026212859 | 0.97908756  | 0.999371363 | Not Sig |
| ENSG00000212607 | SNORA3B  | small nucleolar RNA, H/ACA box 3B                                      | 677826 | 11.76704184 | -0.014783964 | 0.934831861 | -0.01581457  | 0.987382325 | 0.999371363 | Not Sig |
| ENSG00000198841 | KTI12    | KTI12 chromatin associated homolog                                     | 112970 | 138.9547525 | -0.014719843 | 0.528324368 | -0.027861375 | 0.977772715 | 0.999371363 | Not Sig |
| ENSG00000198818 | SFT2D1   | SFT2 domain containing 1                                               | 113402 | 590.0283307 | -0.014680399 | 0.478033973 | -0.030709949 | 0.975500857 | 0.999371363 | Not Sig |
| ENSG00000168434 | COG7     | component of oligomeric golgi complex 7                                | 91949  | 797.3805723 | -0.014538229 | 0.426543407 | -0.034083821 | 0.97281031  | 0.999371363 | Not Sig |
| ENSG00000197062 | ZSCAN26  | zinc finger and SCAN domain containing 26                              | 7741   | 320.8247875 | -0.014477323 | 0.489631312 | -0.029567804 | 0.976411743 | 0.999371363 | Not Sig |
| ENSG00000198429 | ZNF69    | zinc finger protein 69                                                 | 7620   | 256.942836  | -0.014310612 | 0.489268252 | -0.02924901  | 0.976665994 | 0.999371363 | Not Sig |
| ENSG00000112033 | PPARD    | peroxisome proliferator activated receptor delta                       | 5467   | 1355.104148 | -0.014286392 | 0.47145175  | -0.030302978 | 0.975825422 | 0.999371363 | Not Sig |
| ENSG00000172578 | KLHL6    | kelch like family member 6                                             | 89857  | 730.0801595 | -0.014149751 | 0.800925452 | -0.017666752 | 0.985904705 | 0.999371363 | Not Sig |
| ENSG00000198824 | CHAMP1   | chromosome alignment maintaining phosphoprotein 1                      | 283489 | 561.4949539 | -0.014005659 | 0.424058676 | -0.033027644 | 0.973652543 | 0.999371363 | Not Sig |
| ENSG00000218426 | NA       | NA                                                                     | NA     | 45.47538159 | -0.01400188  | 0.611117936 | -0.022911911 | 0.98172054  | 0.999371363 | Not Sig |
| ENSG00000174775 | HRAS     | HRas proto-oncogene, GTPase                                            | 3265   | 380.696236  | -0.013887053 | 0.618526964 | -0.022451815 | 0.982087548 | 0.999371363 | Not Sig |
| ENSG00000072818 | ACAP1    | ArfGAP with coiled-coil, ankyrin repeat and PH domains 1               | 9744   | 350.1956901 | -0.013836622 | 0.69901008  | -0.019794596 | 0.984207229 | 0.999371363 | Not Sig |
| ENSG00000249055 | NA       | NA                                                                     | NA     | 4.134306309 | -0.013675249 | 1.481166939 | -0.009232754 | 0.992633433 | NA          | NA      |
| ENSG00000174132 | FAM174A  | family with sequence similarity 174 member A                           | 345757 | 374.242933  | -0.013665479 | 0.606931188 | -0.022515698 | 0.98203659  | 0.999371363 | Not Sig |
| ENSG00000151612 | ZNF827   | zinc finger protein 827                                                | 152485 | 943.5194634 | -0.013663047 | 0.509940957 | -0.026793339 | 0.978624526 | 0.999371363 | Not Sig |
| ENSG00000177045 | SIX5     | SIX homeobox 5                                                         | 147912 | 451.1893222 | -0.013294618 | 0.612040238 | -0.021721803 | 0.982669871 | 0.999371363 | Not Sig |
| ENSG00000151640 | DPYSL4   | dihydropyrimidinase like 4                                             | 10570  | 19.73001734 | -0.013256277 | 0.741394569 | -0.017880191 | 0.985734431 | 0.999371363 | Not Sig |
| ENSG00000105750 | ZNF85    | zinc finger protein 85                                                 | 7639   | 117.213556  | -0.013014253 | 0.651341651 | -0.019980685 | 0.98405878  | 0.999371363 | Not Sig |
| ENSG00000092199 | HNRNPC   | heterogeneous nuclear ribonucleoprotein C (C1/C2)                      | 3183   | 7181.162168 | -0.012801703 | 0.450032654 | -0.028446165 | 0.977306305 | 0.999371363 | Not Sig |
| ENSG00000173085 | COQ2     | coenzyme Q2, polyprenyltransferase                                     | 27235  | 297.0346445 | -0.012701623 | 0.487304305 | -0.026065075 | 0.979205434 | 0.999371363 | Not Sig |
| ENSG00000171608 | PIK3CD   | phosphatidylinositol-4,5-bisphosphate 3-kinase catalytic subunit delta | 5293   | 883.9327574 | -0.012603094 | 0.766020884 | -0.016452677 | 0.986873256 | 0.999371363 | Not Sig |
| ENSG00000188958 | UTS2B    | urotensin 2B                                                           | 257313 | 7.364688648 | -0.012466289 | 1.272300781 | -0.009798225 | 0.992182273 | 0.999371363 | Not Sig |
| ENSG00000104177 | MYEF2    | myelin expression factor 2                                             | 50804  | 849.9869307 | -0.012457734 | 0.631337945 | -0.019732274 | 0.984256945 | 0.999371363 | Not Sig |

|                 |           |                                                                                      |        |             |              |             |              |             |             |         |
|-----------------|-----------|--------------------------------------------------------------------------------------|--------|-------------|--------------|-------------|--------------|-------------|-------------|---------|
| ENSG00000174197 | MGA       | MGA, MAX dimerization protein                                                        | 23269  | 3229.503611 | -0.012412108 | 0.496554566 | -0.024996463 | 0.980057785 | 0.999371363 | Not Sig |
| ENSG00000173812 | EIF1      | eukaryotic translation initiation factor 1                                           | 10209  | 5315.277329 | -0.012408727 | 0.427250953 | -0.029043181 | 0.976830152 | 0.999371363 | Not Sig |
| ENSG00000142937 | RPS8      | ribosomal protein S8                                                                 | 6202   | 8887.530822 | -0.012387859 | 0.479123697 | -0.025855242 | 0.979372799 | 0.999371363 | Not Sig |
| ENSG00000124383 | MPHOSPH10 | M-phase phosphoprotein 10                                                            | 10199  | 706.2687191 | -0.012116341 | 0.423008944 | -0.028643226 | 0.977149137 | 0.999371363 | Not Sig |
| ENSG00000140987 | ZSCAN32   | zinc finger and SCAN domain containing 32                                            | 54925  | 322.8628873 | -0.012058747 | 0.44196663  | -0.027284312 | 0.978232969 | 0.999371363 | Not Sig |
| ENSG00000159256 | MORC3     | MORC family CW-type zinc finger 3                                                    | 23515  | 1380.987265 | -0.011932854 | 0.433268628 | -0.027541468 | 0.978027866 | 0.999371363 | Not Sig |
| ENSG00000122692 | SMU1      | SMU1, DNA replication regulator and spliceosomal factor                              | 55234  | 1193.657715 | -0.011906784 | 0.481740428 | -0.024716182 | 0.980281347 | 0.999371363 | Not Sig |
| ENSG00000239159 | NA        | NA                                                                                   | NA     | 12.43230574 | -0.011747828 | 0.902319478 | -0.013019589 | 0.989612165 | 0.999371363 | Not Sig |
| ENSG00000224699 | NA        | NA                                                                                   | NA     | 27.48093705 | -0.011713026 | 0.63102715  | -0.018561841 | 0.985190644 | 0.999371363 | Not Sig |
| ENSG00000154719 | MRPL39    | mitochondrial ribosomal protein L39                                                  | 54148  | 176.1617167 | -0.011624103 | 0.552233711 | -0.021049246 | 0.983206371 | 0.999371363 | Not Sig |
| ENSG00000106511 | MEOX2     | mesenchyme homeobox 2                                                                | 4223   | 195.060907  | -0.011622703 | 0.732820647 | -0.015860228 | 0.987345899 | 0.999371363 | Not Sig |
| ENSG00000163041 | H3F3A     | H3 histone family member 3A                                                          | 3020   | 3323.206943 | -0.011536352 | 0.420194017 | -0.027454821 | 0.978096974 | 0.999371363 | Not Sig |
| ENSG00000119715 | ESRRB     | estrogen related receptor beta                                                       | 2103   | 4.511408571 | -0.011516096 | 1.416288617 | -0.008131179 | 0.993512329 | NA          | NA      |
| ENSG00000100316 | RPL3      | ribosomal protein L3                                                                 | 6122   | 18362.64481 | -0.01148594  | 0.514113892 | -0.022341237 | 0.982175755 | 0.999371363 | Not Sig |
| ENSG00000256323 | NA        | NA                                                                                   | NA     | 48.08196512 | -0.011435838 | 0.951872541 | -0.012014043 | 0.990414411 | 0.999371363 | Not Sig |
| ENSG00000065526 | SPEN      | spen family transcriptional repressor                                                | 23013  | 5291.013773 | -0.011394718 | 0.431770338 | -0.026390693 | 0.978945717 | 0.999371363 | Not Sig |
| ENSG00000164609 | SLU7      | SLU7 homolog, splicing factor                                                        | 10569  | 1115.89821  | -0.011389469 | 0.468714581 | -0.024299371 | 0.980613815 | 0.999371363 | Not Sig |
| ENSG00000124172 | ATP5E     | ATP synthase, H <sup>+</sup> transporting, mitochondrial F1 complex, epsilon subunit | 514    | 1302.972636 | -0.011345279 | 0.485138107 | -0.023385669 | 0.981342636 | 0.999371363 | Not Sig |
| ENSG00000259424 | NA        | NA                                                                                   | NA     | 1.028976704 | -0.011264624 | 2.590545118 | -0.00434836  | 0.996530521 | NA          | NA      |
| ENSG00000268677 | NA        | NA                                                                                   | NA     | 2.798380937 | -0.011246281 | 1.731985577 | -0.006493288 | 0.994819142 | NA          | NA      |
| ENSG00000122882 | ECD       | ecdysoneless cell cycle regulator                                                    | 11319  | 606.9989768 | -0.011210143 | 0.448869829 | -0.024974152 | 0.980075581 | 0.999371363 | Not Sig |
| ENSG00000159618 | ADGRG5    | adhesion G protein-coupled receptor G5                                               | 221188 | 121.7944943 | -0.011185527 | 0.760393601 | -0.014710181 | 0.988263397 | 0.999371363 | Not Sig |
| ENSG00000197363 | ZNF517    | zinc finger protein 517                                                              | 340385 | 215.3174778 | -0.011139872 | 0.553506447 | -0.020126003 | 0.983942857 | 0.999371363 | Not Sig |
| ENSG00000220472 | NA        | NA                                                                                   | NA     | 1.92032386  | -0.011102121 | 2.107110874 | -0.005268883 | 0.995796059 | NA          | NA      |
| ENSG00000223336 | NA        | NA                                                                                   | NA     | 46.53999331 | -0.011041075 | 0.554366496 | -0.019916563 | 0.984109932 | 0.999371363 | Not Sig |
| ENSG00000149633 | KIAA1755  | KIAA1755                                                                             | 85449  | 178.7862241 | -0.010946256 | 0.574695665 | -0.019047049 | 0.984803573 | 0.999371363 | Not Sig |
| ENSG00000140983 | RHOT2     | ras homolog family member T2                                                         | 89941  | 1543.742594 | -0.010915013 | 0.504155729 | -0.021650082 | 0.982727084 | 0.999371363 | Not Sig |
| ENSG00000257513 | NA        | NA                                                                                   | NA     | 1.764538817 | -0.01078483  | 2.301657819 | -0.004685679 | 0.996261383 | NA          | NA      |
| ENSG00000087502 | ERGIC2    | ERGIC and golgi 2                                                                    | 51290  | 1084.697011 | -0.010689292 | 0.671380991 | -0.01592135  | 0.987297138 | 0.999371363 | Not Sig |
| ENSG00000163466 | ARPC2     | actin related protein 2/3 complex subunit 2                                          | 10109  | 3927.73382  | -0.010555179 | 0.443147993 | -0.023818632 | 0.980997278 | 0.999371363 | Not Sig |
| ENSG00000035928 | RFC1      | replication factor C subunit 1                                                       | 5981   | 1740.577023 | -0.010468008 | 0.416063625 | -0.025159633 | 0.979927635 | 0.999371363 | Not Sig |
| ENSG00000133665 | DYDC2     | DPY30 domain containing 2                                                            | 84332  | 17.34990792 | -0.010307858 | 1.241618815 | -0.008301951 | 0.993376078 | 0.999371363 | Not Sig |
| ENSG00000145050 | MANF      | mesencephalic astrocyte derived neurotrophic factor                                  | 7873   | 1082.685609 | -0.010252384 | 0.63092174  | -0.01624985  | 0.987035066 | 0.999371363 | Not Sig |
| ENSG00000163683 | SMIM14    | small integral membrane protein 14                                                   | 201895 | 2663.953382 | -0.010025162 | 0.549234427 | -0.018252974 | 0.985437043 | 0.999371363 | Not Sig |
| ENSG00000130202 | NECTIN2   | nectin cell adhesion molecule 2                                                      | 5819   | 2334.674978 | -0.009792075 | 0.442073613 | -0.022150327 | 0.982328041 | 0.999371363 | Not Sig |

|                 |              |                                                               |           |             |              |             |              |             |             |         |
|-----------------|--------------|---------------------------------------------------------------|-----------|-------------|--------------|-------------|--------------|-------------|-------------|---------|
| ENSG00000259736 | CRTC3-AS1    | CRTC3 antisense RNA 1                                         | 101926895 | 10.83679828 | -0.009586134 | 0.942213803 | -0.010174054 | 0.99188242  | 0.999371363 | Not Sig |
| ENSG00000266305 | MIR4518      | microRNA 4518                                                 | 100616405 | 2.197846667 | -0.009522702 | 1.791947314 | -0.005314164 | 0.99575993  | NA          | NA      |
| ENSG00000066084 | DIP2B        | disco interacting protein 2 homolog B                         | 57609     | 2020.328688 | -0.009491326 | 0.432282814 | -0.021956289 | 0.982482823 | 0.999371363 | Not Sig |
| ENSG00000197448 | GSTK1        | glutathione S-transferase kappa 1                             | 373156    | 1548.732349 | -0.009464029 | 0.543280254 | -0.01742016  | 0.986101426 | 0.999371363 | Not Sig |
| ENSG00000151617 | EDNRA        | endothelin receptor type A                                    | 1909      | 696.5675534 | -0.009429418 | 0.477331729 | -0.019754433 | 0.984239268 | 0.999371363 | Not Sig |
| ENSG00000106624 | AEBP1        | AE binding protein 1                                          | 165       | 7386.034257 | -0.009391259 | 0.499172937 | -0.018813639 | 0.984989773 | 0.999371363 | Not Sig |
| ENSG00000139644 | TMBIM6       | transmembrane BAX inhibitor motif containing 6                | 7009      | 13386.63208 | -0.009156179 | 0.395344222 | -0.023160016 | 0.981522633 | 0.999371363 | Not Sig |
| ENSG00000260475 | NA           | NA                                                            | NA        | 6.065933119 | -0.009129553 | 1.098518611 | -0.008310786 | 0.993369028 | NA          | NA      |
| ENSG00000100376 | FAM118A      | family with sequence similarity 118 member A                  | 55007     | 461.379448  | -0.009058777 | 0.395991539 | -0.022876171 | 0.981749048 | 0.999371363 | Not Sig |
| ENSG00000015568 | RGPD5        | RANBP2-like and GRIP domain containing 5                      | 84220     | 6.578661511 | -0.008950389 | 1.101232501 | -0.008127611 | 0.993515176 | 0.999371363 | Not Sig |
| ENSG00000161179 | YDJC         | YdjC chitoooligosaccharide deacetylase homolog                | 150223    | 292.6902162 | -0.008689947 | 0.502956883 | -0.017277718 | 0.986215062 | 0.999371363 | Not Sig |
| ENSG00000165169 | DYNLT3       | dynein light chain Tctex-type 3                               | 6990      | 444.048761  | -0.008628232 | 0.700046926 | -0.012325219 | 0.990166147 | 0.999371363 | Not Sig |
| ENSG00000120333 | MRPS14       | mitochondrial ribosomal protein S14                           | 63931     | 429.229535  | -0.008532639 | 0.488583305 | -0.017464042 | 0.986066419 | 0.999371363 | Not Sig |
| ENSG00000235088 | NA           | NA                                                            | NA        | 28.21206642 | -0.008444774 | 0.666977825 | -0.012661251 | 0.989898053 | 0.999371363 | Not Sig |
| ENSG00000087008 | ACOX3        | acyl-CoA oxidase 3, pristanoyl                                | 8310      | 557.5257725 | -0.008427643 | 0.478825521 | -0.017600656 | 0.985957433 | 0.999371363 | Not Sig |
| ENSG00000267848 | NA           | NA                                                            | NA        | 12.77490639 | -0.008344377 | 0.809352319 | -0.010309944 | 0.991774001 | 0.999371363 | Not Sig |
| ENSG00000181284 | TMEM102      | transmembrane protein 102                                     | 284114    | 163.9660582 | -0.008301259 | 0.603101125 | -0.01376429  | 0.989018032 | 0.999371363 | Not Sig |
| ENSG00000092094 | OSGEP        | O-sialoglycoprotein endopeptidase                             | 55644     | 529.6930023 | -0.008261356 | 0.398841894 | -0.020713362 | 0.98347431  | 0.999371363 | Not Sig |
| ENSG00000269560 | NA           | NA                                                            | NA        | 20.94427714 | -0.008038656 | 0.691078404 | -0.011632047 | 0.990719179 | 0.999371363 | Not Sig |
| ENSG00000047932 | GOPC         | golgi associated PDZ and coiled-coil motif containing         | 57120     | 1157.151915 | -0.007993958 | 0.516220432 | -0.015485551 | 0.987644812 | 0.999371363 | Not Sig |
| ENSG00000187239 | FNBP1        | formin binding protein 1                                      | 23048     | 1835.991995 | -0.007956984 | 0.493293853 | -0.016130312 | 0.987130431 | 0.999371363 | Not Sig |
| ENSG00000230212 | LOC100133286 | uncharacterized LOC100133286                                  | 100133286 | 7.419880943 | -0.007876468 | 1.440793128 | -0.005466759 | 0.995638179 | 0.999371363 | Not Sig |
| ENSG00000254685 | FPGT         | fucose-1-phosphate guanylyltransferase                        | 8790      | 268.9126623 | -0.007873313 | 0.676277922 | -0.011642127 | 0.990711137 | 0.999371363 | Not Sig |
| ENSG00000225200 | NA           | NA                                                            | NA        | 6.614652154 | -0.007839924 | 1.130554665 | -0.006934582 | 0.994467048 | 0.999371363 | Not Sig |
| ENSG00000264810 | MIR4441      | microRNA 4441                                                 | 100616493 | 1.557391926 | -0.007809378 | 2.055395642 | -0.003799452 | 0.996968483 | NA          | NA      |
| ENSG00000196646 | ZNF136       | zinc finger protein 136                                       | 7695      | 313.5628186 | -0.007804028 | 0.492118029 | -0.015858041 | 0.987347644 | 0.999371363 | Not Sig |
| ENSG00000200871 | NA           | NA                                                            | NA        | 0.645303864 | -0.007793218 | 2.986680675 | -0.002609324 | 0.997918063 | NA          | NA      |
| ENSG00000213994 | NA           | NA                                                            | NA        | 0.645303864 | -0.007793218 | 2.986680675 | -0.002609324 | 0.997918063 | NA          | NA      |
| ENSG00000242276 | NA           | NA                                                            | NA        | 0.645303864 | -0.007793218 | 2.986680675 | -0.002609324 | 0.997918063 | NA          | NA      |
| ENSG00000259516 | ANP32AP1     | acidic nuclear phosphoprotein 32 family member A pseudogene 1 | 723972    | 0.645303864 | -0.007793218 | 2.986680675 | -0.002609324 | 0.997918063 | NA          | NA      |
| ENSG00000259986 | NA           | NA                                                            | NA        | 0.645303864 | -0.007793218 | 2.986680675 | -0.002609324 | 0.997918063 | NA          | NA      |
| ENSG00000179168 | GGN          | gametogenetin                                                 | 199720    | 9.733626125 | -0.007689948 | 0.914415039 | -0.008409691 | 0.993290117 | 0.999371363 | Not Sig |
| ENSG00000261697 | LOC101928682 | uncharacterized LOC101928682                                  | 101928682 | 4.438874517 | -0.00765057  | 1.186766452 | -0.006446567 | 0.994856419 | NA          | NA      |
| ENSG00000105520 | PLPPR2       | phospholipid phosphatase related 2                            | 64748     | 415.5699774 | -0.007590169 | 0.625365408 | -0.012137174 | 0.990316174 | 0.999371363 | Not Sig |
| ENSG00000164713 | BRI3         | brain protein I3                                              | 25798     | 1907.252156 | -0.007484593 | 0.569306316 | -0.013146864 | 0.989510623 | 0.999371363 | Not Sig |

|                 |              |                                                                                |           |             |              |             |              |             |             |         |
|-----------------|--------------|--------------------------------------------------------------------------------|-----------|-------------|--------------|-------------|--------------|-------------|-------------|---------|
| ENSG00000204977 | TRIM13       | tripartite motif containing 13                                                 | 10206     | 737.7074051 | -0.007458447 | 0.467468994 | -0.015954956 | 0.987270327 | 0.999371363 | Not Sig |
| ENSG00000153207 | AHCTF1       | AT-hook containing transcription factor 1                                      | 25909     | 2672.119338 | -0.007443907 | 0.510354659 | -0.014585754 | 0.988362665 | 0.999371363 | Not Sig |
| ENSG00000182362 | YBEY         | ybeY metalloproteinase (putative)                                              | 54059     | 219.2992788 | -0.007262109 | 0.5306594   | -0.013685067 | 0.989081237 | 0.999371363 | Not Sig |
| ENSG00000100461 | RBM23        | RNA binding motif protein 23                                                   | 55147     | 1513.112729 | -0.00726108  | 0.436342342 | -0.016640787 | 0.986723186 | 0.999371363 | Not Sig |
| ENSG00000185187 | SIGIRR       | single Ig and TIR domain containing                                            | 59307     | 902.5463191 | -0.007126902 | 0.621516232 | -0.01146696  | 0.99085089  | 0.999371363 | Not Sig |
| ENSG00000213062 | NA           | NA                                                                             | NA        | 37.64342116 | -0.006866526 | 0.874257394 | -0.007854124 | 0.99373338  | 0.999371363 | Not Sig |
| ENSG00000198924 | DCLRE1A      | DNA cross-link repair 1A                                                       | 9937      | 280.0981559 | -0.006854804 | 0.538684839 | -0.012725072 | 0.989847135 | 0.999371363 | Not Sig |
| ENSG00000107438 | PDLIM1       | PDZ and LIM domain 1                                                           | 9124      | 2041.914127 | -0.006821388 | 0.691526773 | -0.009864243 | 0.9921296   | 0.999371363 | Not Sig |
| ENSG00000119004 | CYP20A1      | cytochrome P450 family 20 subfamily A member 1                                 | 57404     | 546.9977652 | -0.006729001 | 0.404919631 | -0.016618115 | 0.986741273 | 0.999371363 | Not Sig |
| ENSG00000164022 | AIMP1        | aminoacyl tRNA synthetase complex interacting multifunctional protein 1        | 9255      | 736.094643  | -0.006711811 | 0.449837326 | -0.01492053  | 0.988095581 | 0.999371363 | Not Sig |
| ENSG00000143376 | SNX27        | sorting nexin family member 27                                                 | 81609     | 1907.362938 | -0.006684619 | 0.385262538 | -0.017350815 | 0.986156747 | 0.999371363 | Not Sig |
| ENSG00000143970 | ASXL2        | additional sex combs like 2, transcriptional regulator                         | 55252     | 2369.984339 | -0.00654119  | 0.420056521 | -0.015572167 | 0.987575711 | 0.999371363 | Not Sig |
| ENSG00000132406 | TMEM128      | transmembrane protein 128                                                      | 85013     | 344.0575214 | -0.006303199 | 0.488564734 | -0.012901461 | 0.989706409 | 0.999371363 | Not Sig |
| ENSG00000134440 | NARS         | asparaginyl-tRNA synthetase                                                    | 4677      | 2328.203772 | -0.006281432 | 0.430746672 | -0.014582658 | 0.988365134 | 0.999371363 | Not Sig |
| ENSG00000259151 | NA           | NA                                                                             | NA        | 51.12527795 | -0.006265387 | 0.577639695 | -0.010846532 | 0.99134589  | 0.999371363 | Not Sig |
| ENSG00000229917 | NA           | NA                                                                             | NA        | 23.98602265 | -0.006259067 | 0.691945959 | -0.009045601 | 0.992782753 | 0.999371363 | Not Sig |
| ENSG00000212418 | NA           | NA                                                                             | NA        | 4.04378777  | -0.006254085 | 1.37470722  | -0.004549394 | 0.996370121 | NA          | NA      |
| ENSG00000160392 | C19orf47     | chromosome 19 open reading frame 47                                            | 126526    | 270.0141788 | -0.006182163 | 0.554102113 | -0.011157082 | 0.991098121 | 0.999371363 | Not Sig |
| ENSG00000185236 | RAB11B       | RAB11B, member RAS oncogene family                                             | 9230      | 1888.010386 | -0.005928249 | 0.522278398 | -0.011350745 | 0.99094361  | 0.999371363 | Not Sig |
| ENSG00000102125 | TAZ          | tafazzin                                                                       | 6901      | 521.7182878 | -0.005687109 | 0.5797357   | -0.00980983  | 0.992173013 | 0.999371363 | Not Sig |
| ENSG00000157782 | CABP1        | calcium binding protein 1                                                      | 9478      | 9.423793787 | -0.005667935 | 1.070834338 | -0.005293008 | 0.99577681  | 0.999371363 | Not Sig |
| ENSG00000118680 | MYL12B       | myosin light chain 12B                                                         | 103910    | 3807.687672 | -0.005651113 | 0.444389736 | -0.012716569 | 0.98985392  | 0.999371363 | Not Sig |
| ENSG00000237238 | NA           | NA                                                                             | NA        | 172.9028604 | -0.005502161 | 0.550476673 | -0.009995267 | 0.992025064 | 0.999371363 | Not Sig |
| ENSG00000164442 | CITED2       | Cbp/p80 interacting transactivator with Glu/Asp rich carboxy-terminal domain 2 | 10370     | 3126.421284 | -0.005414893 | 0.559195167 | -0.009683368 | 0.992273911 | 0.999371363 | Not Sig |
| ENSG00000256731 | NA           | NA                                                                             | NA        | 41.84046889 | -0.005035642 | 1.049687376 | -0.004797277 | 0.996172341 | 0.999371363 | Not Sig |
| ENSG00000174177 | CTU2         | cytosolic thiouridylase subunit 2                                              | 348180    | 228.901827  | -0.004752438 | 0.586437313 | -0.008103915 | 0.993534082 | 0.999371363 | Not Sig |
| ENSG00000110619 | CARS         | cysteinyl-tRNA synthetase                                                      | 833       | 1010.551658 | -0.004633552 | 0.432687973 | -0.010708761 | 0.991455808 | 0.999371363 | Not Sig |
| ENSG00000162851 | TFB2M        | transcription factor B2, mitochondrial                                         | 64216     | 282.5590356 | -0.004574431 | 0.615830608 | -0.007428067 | 0.994073315 | 0.999371363 | Not Sig |
| ENSG00000259470 | NA           | NA                                                                             | NA        | 1.534647599 | -0.004472633 | 2.356421816 | -0.001898061 | 0.998485567 | NA          | NA      |
| ENSG00000248278 | LOC105371814 | uncharacterized LOC105371814                                                   | 105371814 | 4.278500641 | -0.004343788 | 1.271974384 | -0.003414997 | 0.997275232 | NA          | NA      |
| ENSG00000225611 | LINC02158    | long intergenic non-protein coding RNA 2158                                    | 729083    | 2.542883397 | -0.004163386 | 1.644766523 | -0.002531293 | 0.997980323 | NA          | NA      |
| ENSG00000162642 | C1orf52      | chromosome 1 open reading frame 52                                             | 148423    | 421.0580366 | -0.003987546 | 0.565340878 | -0.007053348 | 0.994372289 | 0.999371363 | Not Sig |
| ENSG00000188554 | NBR1         | NBR1, autophagy cargo receptor                                                 | 4077      | 3674.384778 | -0.003780175 | 0.431416892 | -0.008762232 | 0.99300884  | 0.999371363 | Not Sig |
| ENSG00000147576 | ADHFE1       | alcohol dehydrogenase, iron containing 1                                       | 137872    | 199.3642488 | -0.003736647 | 0.799063373 | -0.004676282 | 0.99626888  | 0.999371363 | Not Sig |
| ENSG00000002549 | LAP3         | leucine aminopeptidase 3                                                       | 51056     | 2137.206258 | -0.003732531 | 0.724374703 | -0.005152763 | 0.995888708 | 0.999371363 | Not Sig |

|                 |          |                                                              |        |             |              |             |              |             |             |         |
|-----------------|----------|--------------------------------------------------------------|--------|-------------|--------------|-------------|--------------|-------------|-------------|---------|
| ENSG00000111231 | GPN3     | GPN-loop GTPase 3                                            | 51184  | 256.414202  | -0.003641035 | 0.46581463  | -0.00781649  | 0.993763407 | 0.999371363 | Not Sig |
| ENSG00000178458 | NA       | NA                                                           | NA     | 7.852757494 | -0.003603    | 0.985088644 | -0.003657539 | 0.997081713 | 0.999371363 | Not Sig |
| ENSG00000184575 | XPOT     | exportin for tRNA                                            | 11260  | 1660.843004 | -0.00332032  | 0.586822973 | -0.005658129 | 0.99548549  | 0.999371363 | Not Sig |
| ENSG00000261597 | NA       | NA                                                           | NA     | 35.72244411 | -0.003267459 | 0.624918914 | -0.005228613 | 0.99582819  | 0.999371363 | Not Sig |
| ENSG00000166261 | ZNF202   | zinc finger protein 202                                      | 7753   | 347.8156835 | -0.00316327  | 0.494726364 | -0.00639398  | 0.994898377 | 0.999371363 | Not Sig |
| ENSG00000154642 | C21orf91 | chromosome 21 open reading frame 91                          | 54149  | 462.3541693 | -0.003146202 | 0.527503422 | -0.005964326 | 0.995241184 | 0.999371363 | Not Sig |
| ENSG00000270571 | NA       | NA                                                           | NA     | 24.90368025 | -0.003021485 | 0.722527914 | -0.004181824 | 0.996663397 | 0.999371363 | Not Sig |
| ENSG00000117758 | STX12    | syntaxin 12                                                  | 23673  | 1286.438083 | -0.00291883  | 0.447237935 | -0.006526348 | 0.994792765 | 0.999371363 | Not Sig |
| ENSG00000092148 | HECTD1   | HECT domain E3 ubiquitin protein ligase 1                    | 25831  | 6842.679966 | -0.002893352 | 0.43365943  | -0.006671945 | 0.994676597 | 0.999371363 | Not Sig |
| ENSG00000235078 | NA       | NA                                                           | NA     | 11.18641267 | -0.002808733 | 1.037038964 | -0.002708416 | 0.997838999 | 0.999371363 | Not Sig |
| ENSG00000258732 | NA       | NA                                                           | NA     | 16.05279641 | -0.002796468 | 1.191658015 | -0.002346704 | 0.998127603 | 0.999371363 | Not Sig |
| ENSG00000240954 | NA       | NA                                                           | NA     | 2.800213347 | -0.002782354 | 1.453763584 | -0.001913898 | 0.998472932 | NA          | NA      |
| ENSG00000088247 | KHSRP    | KH-type splicing regulatory protein                          | 8570   | 2751.151569 | -0.002738335 | 0.523027011 | -0.005235552 | 0.995822653 | 0.999371363 | Not Sig |
| ENSG00000144580 | CNOT9    | CCR4-NOT transcription complex subunit 9                     | 9125   | 1028.009084 | -0.002627047 | 0.481443641 | -0.005456603 | 0.995646282 | 0.999371363 | Not Sig |
| ENSG00000169813 | HNRNPF   | heterogeneous nuclear ribonucleoprotein F                    | 3185   | 3650.322937 | -0.002499379 | 0.397901234 | -0.006281406 | 0.994988196 | 0.999371363 | Not Sig |
| ENSG00000259494 | MRPL46   | mitochondrial ribosomal protein L46                          | 26589  | 179.7037784 | -0.002428708 | 0.440693689 | -0.005511102 | 0.995602799 | 0.999371363 | Not Sig |
| ENSG00000166033 | HTRA1    | HtrA serine peptidase 1                                      | 5654   | 1176.013853 | -0.002360681 | 0.475426672 | -0.004965394 | 0.996038205 | 0.999371363 | Not Sig |
| ENSG00000140937 | CDH11    | cadherin 11                                                  | 1009   | 2773.805055 | -0.002356811 | 0.397623189 | -0.005927246 | 0.995270769 | 0.999371363 | Not Sig |
| ENSG00000075234 | TTC38    | tetratricopeptide repeat domain 38                           | 55020  | 608.4483116 | -0.002324704 | 0.566765839 | -0.004101701 | 0.996727325 | 0.999371363 | Not Sig |
| ENSG00000180354 | MTURN    | maturin, neural progenitor differentiation regulator homolog | 222166 | 1259.969037 | -0.00224867  | 0.620796141 | -0.003622236 | 0.99710988  | 0.999371363 | Not Sig |
| ENSG00000163918 | RFC4     | replication factor C subunit 4                               | 5984   | 160.0502169 | -0.00214682  | 0.653571614 | -0.003284751 | 0.997379153 | 0.999371363 | Not Sig |
| ENSG00000260643 | NA       | NA                                                           | NA     | 2.967024758 | -0.002000828 | 1.489909604 | -0.001342919 | 0.998928506 | NA          | NA      |
| ENSG00000141252 | VPS53    | VPS53, GARP complex subunit                                  | 55275  | 1910.547042 | -0.00195618  | 0.395018873 | -0.004952118 | 0.996048797 | 0.999371363 | Not Sig |
| ENSG00000182541 | LIMK2    | LIM domain kinase 2                                          | 3985   | 1611.373027 | -0.001878273 | 0.599700764 | -0.003132017 | 0.997501016 | 0.999371363 | Not Sig |
| ENSG00000251609 | NA       | NA                                                           | NA     | 12.60251051 | -0.001818567 | 0.759080129 | -0.002395751 | 0.998088469 | 0.999371363 | Not Sig |
| ENSG00000126391 | FRMD8    | FERM domain containing 8                                     | 83786  | 1059.651457 | -0.001781112 | 0.570496795 | -0.003122038 | 0.997508978 | 0.999371363 | Not Sig |
| ENSG00000174292 | TNK1     | tyrosine kinase non receptor 1                               | 8711   | 224.1067275 | -0.001733426 | 0.44320225  | -0.00391114  | 0.99687937  | 0.999371363 | Not Sig |
| ENSG00000129071 | MBD4     | methyl-CpG binding domain 4, DNA glycosylase                 | 8930   | 686.1247349 | -0.001524302 | 0.473536629 | -0.003218973 | 0.997431635 | 0.999371363 | Not Sig |
| ENSG00000182646 | NA       | NA                                                           | NA     | 11.12208675 | -0.001490917 | 0.799204408 | -0.001865501 | 0.998511547 | 0.999371363 | Not Sig |
| ENSG00000176978 | DPP7     | dipeptidyl peptidase 7                                       | 29952  | 1961.995454 | -0.0014503   | 0.603536342 | -0.002403003 | 0.998082683 | 0.999371363 | Not Sig |
| ENSG00000142230 | SAE1     | SUMO1 activating enzyme subunit 1                            | 10055  | 951.6963406 | -0.001449651 | 0.518017143 | -0.002798462 | 0.997767153 | 0.999371363 | Not Sig |
| ENSG00000162511 | LAPTM5   | lysosomal protein transmembrane 5                            | 7805   | 5091.537419 | -0.001383946 | 0.833468418 | -0.001660467 | 0.99867514  | 0.999371363 | Not Sig |
| ENSG00000239713 | APOBEC3G | apolipoprotein B mRNA editing enzyme catalytic subunit 3G    | 60489  | 351.0528648 | -0.001332658 | 0.723353736 | -0.001842332 | 0.998530032 | 0.999371363 | Not Sig |
| ENSG00000120055 | C10orf95 | chromosome 10 open reading frame 95                          | 79946  | 76.2567025  | -0.001258921 | 0.864385904 | -0.001456434 | 0.998837934 | 0.999371363 | Not Sig |
| ENSG00000237646 | NA       | NA                                                           | NA     | 30.77142552 | -0.001228533 | 0.823469052 | -0.001491899 | 0.998809637 | 0.999371363 | Not Sig |

|                 |           |                                                                                                   |           |             |              |             |              |             |             |         |
|-----------------|-----------|---------------------------------------------------------------------------------------------------|-----------|-------------|--------------|-------------|--------------|-------------|-------------|---------|
| ENSG00000225031 | NA        | NA                                                                                                | NA        | 12.07218517 | -0.001192106 | 1.005377909 | -0.001185729 | 0.999053926 | 0.999371363 | Not Sig |
| ENSG00000167674 | HDGFL2    | HDGF like 2                                                                                       | 84717     | 992.7150072 | -0.001131256 | 0.640439994 | -0.001766373 | 0.998590639 | 0.999371363 | Not Sig |
| ENSG00000234800 | NA        | NA                                                                                                | NA        | 6.255046661 | -0.001107952 | 1.752881636 | -0.000632075 | 0.999495677 | NA          | NA      |
| ENSG00000237815 | NA        | NA                                                                                                | NA        | 6.42655758  | -0.001083957 | 0.995145016 | -0.001089245 | 0.999130908 | NA          | NA      |
| ENSG00000122257 | RBBP6     | RB binding protein 6, ubiquitin ligase                                                            | 5930      | 1959.339675 | -0.001029489 | 0.436862141 | -0.002356554 | 0.998119744 | 0.999371363 | Not Sig |
| ENSG00000174989 | FBXW8     | F-box and WD repeat domain containing 8                                                           | 26259     | 608.3597924 | -0.001017584 | 0.398723703 | -0.002552104 | 0.997963718 | 0.999371363 | Not Sig |
| ENSG00000082805 | ERC1      | ELKS/RAB6-interacting/CAST family member 1                                                        | 23085     | 2272.306882 | -0.000743402 | 0.456219272 | -0.001629484 | 0.99869986  | 0.999371363 | Not Sig |
| ENSG00000102984 | ZNF821    | zinc finger protein 821                                                                           | 55565     | 175.1856196 | -0.000676105 | 0.512703316 | -0.001318706 | 0.998947825 | 0.999371363 | Not Sig |
| ENSG00000259392 | NA        | NA                                                                                                | NA        | 17.19641871 | -0.000409107 | 1.065466325 | -0.00038397  | 0.999693637 | 0.999698339 | Not Sig |
| ENSG00000180209 | MYLPF     | myosin light chain, phosphorylatable, fast skeletal muscle                                        | 29895     | 2.499946212 | 4.74E-05     | 1.696043596 | 2.79E-05     | 0.999977708 | NA          | NA      |
| ENSG00000103404 | USP31     | ubiquitin specific peptidase 31                                                                   | 57478     | 876.0918176 | 0.000159654  | 0.422279753 | 0.000378076  | 0.999698339 | 0.999698339 | Not Sig |
| ENSG00000257949 | TEN1      | TEN1, CST complex subunit                                                                         | 100134934 | 3.483738314 | 0.000248468  | 1.629484836 | 0.000152482  | 0.999878337 | NA          | NA      |
| ENSG00000253352 | NA        | NA                                                                                                | NA        | 4808.277789 | 0.000318193  | 0.607910824 | 0.000523421  | 0.99958237  | 0.999698339 | Not Sig |
| ENSG00000048707 | VPS13D    | vacuolar protein sorting 13 homolog D                                                             | 55187     | 6351.221154 | 0.000481136  | 0.388902568 | 0.001237163  | 0.999012887 | 0.999371363 | Not Sig |
| ENSG00000177675 | CD163L1   | CD163 molecule like 1                                                                             | 283316    | 252.2078922 | 0.000599808  | 0.474967667 | 0.00126284   | 0.9989924   | 0.999371363 | Not Sig |
| ENSG00000263563 | UBBP4     | ubiquitin B pseudogene 4                                                                          | 23666     | 12.45804471 | 0.000602246  | 0.907880113 | 0.000663354  | 0.99947072  | 0.999698339 | Not Sig |
| ENSG00000180389 | ATP5EP2   | ATP synthase, H <sup>+</sup> transporting, mitochondrial F1 complex, epsilon subunit pseudogene 2 | 432369    | 0.952008534 | 0.000688512  | 2.623643719 | 0.000262426  | 0.999790614 | NA          | NA      |
| ENSG00000237576 | NA        | NA                                                                                                | NA        | 0.952008534 | 0.000688512  | 2.623643719 | 0.000262426  | 0.999790614 | NA          | NA      |
| ENSG00000269699 | ZIM2      | zinc finger imprinted 2                                                                           | 23619     | 0.952008534 | 0.000688512  | 2.623643719 | 0.000262426  | 0.999790614 | NA          | NA      |
| ENSG00000236308 | NA        | NA                                                                                                | NA        | 1.290607728 | 0.001002882  | 2.350839476 | 0.000426606  | 0.999659618 | NA          | NA      |
| ENSG00000118976 | NA        | NA                                                                                                | NA        | 3.693858155 | 0.001021638  | 1.279072813 | 0.000798733  | 0.999362703 | NA          | NA      |
| ENSG00000116544 | DLGAP3    | DLG associated protein 3                                                                          | 58512     | 14.08637138 | 0.001221072  | 0.793189658 | 0.001539445  | 0.998771701 | 0.999371363 | Not Sig |
| ENSG00000143324 | XPR1      | xenotropic and polytropic retrovirus receptor 1                                                   | 9213      | 2567.860232 | 0.001310462  | 0.696177146 | 0.001882368  | 0.998498088 | 0.999371363 | Not Sig |
| ENSG00000178082 | NA        | NA                                                                                                | NA        | 3.228655782 | 0.001310921  | 1.381909483 | 0.00094863   | 0.999243103 | NA          | NA      |
| ENSG00000136404 | TM6SF1    | transmembrane 6 superfamily member 1                                                              | 53346     | 178.2357966 | 0.001361625  | 0.743875281 | 0.001830448  | 0.998539515 | 0.999371363 | Not Sig |
| ENSG00000122783 | C7orf49   | chromosome 7 open reading frame 49                                                                | 78996     | 659.5984108 | 0.001380334  | 0.428945219 | 0.003217972  | 0.997432434 | 0.999371363 | Not Sig |
| ENSG00000240083 | NA        | NA                                                                                                | NA        | 4.056662841 | 0.001746613  | 1.421788564 | 0.001228462  | 0.99901983  | NA          | NA      |
| ENSG00000187555 | USP7      | ubiquitin specific peptidase 7                                                                    | 7874      | 2975.651478 | 0.002145682  | 0.432397572 | 0.004962289  | 0.996040683 | 0.999371363 | Not Sig |
| ENSG00000196668 | LINC00173 | long intergenic non-protein coding RNA 173                                                        | 100287569 | 17.22203415 | 0.002162399  | 1.004658516 | 0.002152372  | 0.998282657 | 0.999371363 | Not Sig |
| ENSG00000254027 | NA        | NA                                                                                                | NA        | 7.559393137 | 0.002197667  | 1.039881317 | 0.002113382  | 0.998313766 | 0.999371363 | Not Sig |
| ENSG00000215277 | RNF212B   | ring finger protein 212B                                                                          | 100507650 | 3.519468668 | 0.002241003  | 1.578772985 | 0.001419459  | 0.998867436 | NA          | NA      |
| ENSG00000176783 | RUFY1     | RUN and FYVE domain containing 1                                                                  | 80230     | 1521.330049 | 0.002293933  | 0.442850908 | 0.005179922  | 0.995867039 | 0.999371363 | Not Sig |
| ENSG00000122483 | CCDC18    | coiled-coil domain containing 18                                                                  | 343099    | 231.1196312 | 0.002533118  | 0.642885871 | 0.00394023   | 0.996856159 | 0.999371363 | Not Sig |
| ENSG00000165997 | ARL5B     | ADP ribosylation factor like GTPase 5B                                                            | 221079    | 1407.092385 | 0.002596073  | 0.719275168 | 0.003609291  | 0.997120209 | 0.999371363 | Not Sig |
| ENSG00000216613 | NA        | NA                                                                                                | NA        | 16.1901151  | 0.002680526  | 1.040374894 | 0.0025765    | 0.997944253 | 0.999371363 | Not Sig |

|                 |               |                                                            |           |             |             |             |             |             |             |         |
|-----------------|---------------|------------------------------------------------------------|-----------|-------------|-------------|-------------|-------------|-------------|-------------|---------|
| ENSG00000155393 | HEATR3        | HEAT repeat containing 3                                   | 55027     | 486.1082716 | 0.002764218 | 0.459049292 | 0.006021616 | 0.995195475 | 0.999371363 | Not Sig |
| ENSG00000189134 | NKAPL         | NFKB activating protein like                               | 222698    | 10.42246438 | 0.003159785 | 1.260555512 | 0.002506661 | 0.997999976 | 0.999371363 | Not Sig |
| ENSG00000170852 | KBTBD2        | kelch repeat and BTB domain containing 2                   | 25948     | 1550.849739 | 0.003168559 | 0.54580575  | 0.005805287 | 0.995368077 | 0.999371363 | Not Sig |
| ENSG00000255081 | NA            | NA                                                         | NA        | 12.31087299 | 0.003171343 | 0.946846352 | 0.003349375 | 0.997327591 | 0.999371363 | Not Sig |
| ENSG00000100320 | RBFOX2        | RNA binding fox-1 homolog 2                                | 23543     | 2399.905048 | 0.003235943 | 0.470269394 | 0.006881042 | 0.994509766 | 0.999371363 | Not Sig |
| ENSG00000160584 | SIK3          | SIK family kinase 3                                        | 23387     | 1587.424795 | 0.003245939 | 0.430841334 | 0.007533954 | 0.993988831 | 0.999371363 | Not Sig |
| ENSG00000108590 | MED31         | mediator complex subunit 31                                | 51003     | 119.1264397 | 0.003269157 | 0.581160018 | 0.005625226 | 0.995511743 | 0.999371363 | Not Sig |
| ENSG00000156869 | FRRS1         | ferric chelate reductase 1                                 | 391059    | 268.2822764 | 0.003323411 | 0.663434274 | 0.005009404 | 0.99600309  | 0.999371363 | Not Sig |
| ENSG00000137571 | SLC05A1       | solute carrier organic anion transporter family member 5A1 | 81796     | 139.2248639 | 0.003331897 | 0.967329048 | 0.003444443 | 0.997251748 | 0.999371363 | Not Sig |
| ENSG00000173120 | KDM2A         | lysine demethylase 2A                                      | 22992     | 4514.956644 | 0.003825512 | 0.427653166 | 0.008945361 | 0.99286273  | 0.999371363 | Not Sig |
| ENSG00000239039 | SNORD13       | small nucleolar RNA, C/D box 13                            | 692084    | 12.26021793 | 0.003868482 | 1.25767462  | 0.0030759   | 0.99754579  | 0.999371363 | Not Sig |
| ENSG00000270580 | PKD1P6-NPIPP1 | PKD1P6-NPIPP1 readthrough                                  | 105369154 | 12.92470825 | 0.004185133 | 1.046444204 | 0.003999385 | 0.996808961 | 0.999371363 | Not Sig |
| ENSG00000138375 | SMARCA1       | SMARCA1, SMARCA1-like 1, SMARCA1-like 2, SMARCA1-like 3    | 50485     | 487.111704  | 0.004254797 | 0.435905776 | 0.009760819 | 0.992212117 | 0.999371363 | Not Sig |
| ENSG00000189221 | MAOA          | monoamine oxidase A                                        | 4128      | 2528.626411 | 0.004288742 | 0.630405921 | 0.006803143 | 0.994571919 | 0.999371363 | Not Sig |
| ENSG00000196465 | MYL6B         | myosin light chain 6B                                      | 140465    | 255.5089154 | 0.004407955 | 0.43926926  | 0.010034744 | 0.991993567 | 0.999371363 | Not Sig |
| ENSG00000140905 | GCSH          | glycine cleavage system protein H                          | 2653      | 91.54216648 | 0.004695467 | 0.470933396 | 0.009970554 | 0.99204478  | 0.999371363 | Not Sig |
| ENSG00000265396 | MIR3128       | microRNA 3128                                              | 100422824 | 15.02666223 | 0.005089863 | 1.016194315 | 0.005008749 | 0.996003613 | 0.999371363 | Not Sig |
| ENSG00000161202 | DVL3          | dishevelled segment polarity protein 3                     | 1857      | 1989.53465  | 0.0051129   | 0.390699529 | 0.013086527 | 0.98955876  | 0.999371363 | Not Sig |
| ENSG00000163312 | HELQ          | helicase, POLQ like                                        | 113510    | 322.9165923 | 0.005458821 | 0.449146878 | 0.012153756 | 0.990302945 | 0.999371363 | Not Sig |
| ENSG00000223501 | VPS52         | VPS52, GARP complex subunit                                | 6293      | 1387.993876 | 0.00546026  | 0.445152781 | 0.012266035 | 0.990213365 | 0.999371363 | Not Sig |
| ENSG00000247033 | NA            | NA                                                         | NA        | 9.608473212 | 0.005730032 | 1.021370001 | 0.005610144 | 0.995523777 | 0.999371363 | Not Sig |
| ENSG00000131148 | EMC8          | ER membrane protein complex subunit 8                      | 10328     | 363.4407913 | 0.005886919 | 0.411997847 | 0.014288713 | 0.988599644 | 0.999371363 | Not Sig |
| ENSG00000264802 | MIR5191       | microRNA 5191                                              | 100847050 | 2.409427673 | 0.005999314 | 1.796745424 | 0.00333899  | 0.997335877 | NA          | NA      |
| ENSG00000182872 | RBM10         | RNA binding motif protein 10                               | 8241      | 1245.219694 | 0.006145463 | 0.457606291 | 0.013429586 | 0.989285063 | 0.999371363 | Not Sig |
| ENSG00000258620 | NA            | NA                                                         | NA        | 21.72044179 | 0.006181403 | 0.645344103 | 0.009578461 | 0.992357611 | 0.999371363 | Not Sig |
| ENSG00000061656 | SPAG4         | sperm associated antigen 4                                 | 6676      | 148.3510043 | 0.006371864 | 0.664108617 | 0.009594612 | 0.992344725 | 0.999371363 | Not Sig |
| ENSG00000229427 | NA            | NA                                                         | NA        | 11.5413518  | 0.006414124 | 1.010410011 | 0.006348041 | 0.99493503  | 0.999371363 | Not Sig |
| ENSG00000270179 | NA            | NA                                                         | NA        | 28.03966503 | 0.006466438 | 0.593667637 | 0.010892354 | 0.99130933  | 0.999371363 | Not Sig |
| ENSG00000168487 | BMP1          | bone morphogenetic protein 1                               | 649       | 862.3794997 | 0.00649165  | 0.460704776 | 0.014090695 | 0.988757624 | 0.999371363 | Not Sig |
| ENSG00000177646 | ACAD9         | acyl-CoA dehydrogenase family member 9                     | 28976     | 863.8358528 | 0.006496707 | 0.392713636 | 0.016543116 | 0.986801105 | 0.999371363 | Not Sig |
| ENSG00000114948 | ADAM23        | ADAM metalloproteinase domain 23                           | 8745      | 48.30779798 | 0.006587509 | 0.694218827 | 0.009489096 | 0.99242891  | 0.999371363 | Not Sig |
| ENSG00000198522 | GPN1          | GPN-loop GTPase 1                                          | 11321     | 365.6654632 | 0.006655048 | 0.431511384 | 0.015422649 | 0.987694995 | 0.999371363 | Not Sig |
| ENSG00000118965 | WDR35         | WD repeat domain 35                                        | 57539     | 502.4722147 | 0.00672724  | 0.458832878 | 0.014661636 | 0.988302126 | 0.999371363 | Not Sig |
| ENSG00000118363 | SPCS2         | signal peptidase complex subunit 2                         | 9789      | 1101.303411 | 0.006756605 | 0.548497157 | 0.012318395 | 0.990171591 | 0.999371363 | Not Sig |
| ENSG00000103343 | ZNF174        | zinc finger protein 174                                    | 7727      | 168.9527096 | 0.006831245 | 0.48078026  | 0.014208663 | 0.988663509 | 0.999371363 | Not Sig |

|                 |          |                                                         |        |             |             |             |             |             |             |         |
|-----------------|----------|---------------------------------------------------------|--------|-------------|-------------|-------------|-------------|-------------|-------------|---------|
| ENSG00000180008 | SOCS4    | suppressor of cytokine signaling 4                      | 122809 | 787.7726424 | 0.006878188 | 0.547881859 | 0.012554144 | 0.989983505 | 0.999371363 | Not Sig |
| ENSG00000137055 | PLAA     | phospholipase A2 activating protein                     | 9373   | 645.3672368 | 0.006944325 | 0.461901842 | 0.0150342   | 0.988004896 | 0.999371363 | Not Sig |
| ENSG00000175324 | LSM1     | LSM1 homolog, mRNA degradation associated               | 27257  | 306.1305913 | 0.007017367 | 0.582443424 | 0.012048152 | 0.990387198 | 0.999371363 | Not Sig |
| ENSG00000139517 | LNX2     | ligand of numb-protein X 2                              | 222484 | 1409.380327 | 0.007042479 | 0.63094076  | 0.01116187  | 0.991094301 | 0.999371363 | Not Sig |
| ENSG00000139083 | ETV6     | ETS variant 6                                           | 2120   | 2166.328797 | 0.007046471 | 0.440946882 | 0.015980318 | 0.987250094 | 0.999371363 | Not Sig |
| ENSG00000184675 | AMER1    | APC membrane recruitment protein 1                      | 139285 | 342.38716   | 0.007161783 | 0.439316884 | 0.016302089 | 0.986993391 | 0.999371363 | Not Sig |
| ENSG00000198176 | TFDP1    | transcription factor Dp-1                               | 7027   | 1174.459453 | 0.007430827 | 0.422196849 | 0.017600385 | 0.98595765  | 0.999371363 | Not Sig |
| ENSG00000266601 | NA       | NA                                                      | NA     | 1.870534132 | 0.007438942 | 1.762568516 | 0.004220512 | 0.996632529 | NA          | NA      |
| ENSG00000243927 | MRPS6    | mitochondrial ribosomal protein S6                      | 64968  | 452.9846379 | 0.007540861 | 0.694235959 | 0.010862101 | 0.991333468 | 0.999371363 | Not Sig |
| ENSG00000207732 | MIR218-1 | microRNA 218-1                                          | 407000 | 6.112479787 | 0.007595502 | 1.305671667 | 0.005817314 | 0.995358481 | NA          | NA      |
| ENSG00000147403 | RPL10    | ribosomal protein L10                                   | 6134   | 12922.51008 | 0.007608282 | 0.454534805 | 0.016738612 | 0.986645144 | 0.999371363 | Not Sig |
| ENSG00000230534 | NA       | NA                                                      | NA     | 6.955581865 | 0.007661821 | 1.00382453  | 0.007632629 | 0.993910102 | 0.999371363 | Not Sig |
| ENSG00000185885 | IFITM1   | interferon induced transmembrane protein 1              | 8519   | 1254.358812 | 0.007730176 | 0.825103012 | 0.009368741 | 0.992524936 | 0.999371363 | Not Sig |
| ENSG00000157557 | ETS2     | ETS proto-oncogene 2, transcription factor              | 2114   | 7212.20123  | 0.00774381  | 0.636789305 | 0.01216071  | 0.990297397 | 0.999371363 | Not Sig |
| ENSG00000186834 | HEXIM1   | hexamethylene bisacetamide inducible 1                  | 10614  | 1279.519061 | 0.007936067 | 0.556454628 | 0.01426184  | 0.988621084 | 0.999371363 | Not Sig |
| ENSG00000229992 | NA       | NA                                                      | NA     | 47.13337108 | 0.007964908 | 0.677889656 | 0.011749565 | 0.990625419 | 0.999371363 | Not Sig |
| ENSG00000167535 | CACNB3   | calcium voltage-gated channel auxiliary subunit beta 3  | 784    | 426.0192282 | 0.007972485 | 0.473904593 | 0.016822975 | 0.986577841 | 0.999371363 | Not Sig |
| ENSG00000214248 | NA       | NA                                                      | NA     | 20.99704618 | 0.00797466  | 0.855732214 | 0.009319106 | 0.992564536 | 0.999371363 | Not Sig |
| ENSG00000166986 | MARS     | methionyl-tRNA synthetase                               | 4141   | 1445.941787 | 0.0081543   | 0.432836387 | 0.018839219 | 0.984969367 | 0.999371363 | Not Sig |
| ENSG00000115073 | ACTR1B   | ARP1 actin related protein 1 homolog B                  | 10120  | 1230.364004 | 0.008329936 | 0.571941207 | 0.014564322 | 0.988379763 | 0.999371363 | Not Sig |
| ENSG00000070759 | TESK2    | testis-specific kinase 2                                | 10420  | 175.9083541 | 0.008350749 | 0.552332708 | 0.015119056 | 0.987937198 | 0.999371363 | Not Sig |
| ENSG00000115966 | ATF2     | activating transcription factor 2                       | 1386   | 1332.863939 | 0.008462566 | 0.53378554  | 0.015853869 | 0.987350972 | 0.999371363 | Not Sig |
| ENSG00000156172 | C8orf37  | chromosome 8 open reading frame 37                      | 157657 | 116.0383451 | 0.008636211 | 0.600518313 | 0.014381261 | 0.988525809 | 0.999371363 | Not Sig |
| ENSG00000213676 | ATF6B    | activating transcription factor 6 beta                  | 1388   | 1927.063193 | 0.008694733 | 0.451400712 | 0.019261674 | 0.984632358 | 0.999371363 | Not Sig |
| ENSG00000175274 | TP53I11  | tumor protein p53 inducible protein 11                  | 9537   | 2206.988174 | 0.008700247 | 0.401436425 | 0.021672789 | 0.98270897  | 0.999371363 | Not Sig |
| ENSG00000165282 | PIGO     | phosphatidylinositol glycan anchor biosynthesis class 0 | 84720  | 753.9303889 | 0.00871995  | 0.489539106 | 0.017812572 | 0.985788376 | 0.999371363 | Not Sig |
| ENSG00000242060 | NA       | NA                                                      | NA     | 2.438869826 | 0.008790337 | 1.516162895 | 0.005797752 | 0.995374089 | NA          | NA      |
| ENSG00000135722 | FBXL8    | F-box and leucine rich repeat protein 8                 | 55336  | 238.8281627 | 0.009095334 | 0.581320636 | 0.015645986 | 0.987516819 | 0.999371363 | Not Sig |
| ENSG00000153187 | HNRNP1   | heterogeneous nuclear ribonucleoprotein U               | 3192   | 12520.71241 | 0.009217261 | 0.428432741 | 0.021513905 | 0.982835711 | 0.999371363 | Not Sig |
| ENSG00000184939 | ZFP90    | ZFP90 zinc finger protein                               | 146198 | 678.7275152 | 0.009276477 | 0.424248477 | 0.02186567  | 0.982555109 | 0.999371363 | Not Sig |
| ENSG00000008324 | SS18L2   | SS18 like 2                                             | 51188  | 119.3298377 | 0.009332764 | 0.575068183 | 0.016228969 | 0.987051725 | 0.999371363 | Not Sig |
| ENSG00000145781 | COMM10   | COMM domain containing 10                               | 51397  | 365.1160705 | 0.009384137 | 0.569190702 | 0.016486807 | 0.986846027 | 0.999371363 | Not Sig |
| ENSG00000238425 | NA       | NA                                                      | NA     | 9.854766974 | 0.00946568  | 0.995355287 | 0.009509851 | 0.992412351 | 0.999371363 | Not Sig |
| ENSG00000136436 | CALCOCO2 | calcium binding and coiled-coil domain 2                | 10241  | 2664.476411 | 0.009490186 | 0.457683214 | 0.020735272 | 0.983456832 | 0.999371363 | Not Sig |
| ENSG00000083635 | NUFIP1   | NUFIP1, FMR1 interacting protein 1                      | 26747  | 164.5756907 | 0.009501717 | 0.5613025   | 0.016927979 | 0.986494072 | 0.999371363 | Not Sig |



|                 |          |                                                                                                   |           |             |             |             |             |             |             |         |
|-----------------|----------|---------------------------------------------------------------------------------------------------|-----------|-------------|-------------|-------------|-------------|-------------|-------------|---------|
| ENSG00000136371 | MTHFS    | methenyltetrahydrofolate synthetase                                                               | 10588     | 65.29073008 | 0.009576684 | 0.503925182 | 0.019004178 | 0.984837773 | 0.999371363 | Not Sig |
| ENSG00000106993 | CDC37L1  | cell division cycle 37 like 1                                                                     | 55664     | 341.0493309 | 0.009615706 | 0.495720788 | 0.019397423 | 0.984524066 | 0.999371363 | Not Sig |
| ENSG00000266671 | NA       | NA                                                                                                | NA        | 4.863885231 | 0.009705345 | 1.132975589 | 0.008566244 | 0.99316521  | NA          | NA      |
| ENSG00000211884 | NA       | NA                                                                                                | NA        | 8.056782099 | 0.009840054 | 1.369031784 | 0.007187601 | 0.994265174 | 0.999371363 | Not Sig |
| ENSG00000142185 | TRPM2    | transient receptor potential cation channel subfamily M member 2                                  | 7226      | 384.2130838 | 0.009840334 | 0.578938609 | 0.016997198 | 0.986438851 | 0.999371363 | Not Sig |
| ENSG00000158161 | EYA3     | EYA transcriptional coactivator and phosphatase 3                                                 | 2140      | 985.5992447 | 0.009961636 | 0.407578465 | 0.024441027 | 0.980500823 | 0.999371363 | Not Sig |
| ENSG00000226501 | NA       | NA                                                                                                | NA        | 7.582674617 | 0.010153725 | 1.012076228 | 0.01003257  | 0.991995302 | 0.999371363 | Not Sig |
| ENSG00000015479 | MATR3    | matrin 3                                                                                          | 9782      | 6481.319076 | 0.010285133 | 0.413734391 | 0.024859266 | 0.980167218 | 0.999371363 | Not Sig |
| ENSG00000090621 | PABPC4   | poly(A) binding protein cytoplasmic 4                                                             | 8761      | 2971.688994 | 0.010343404 | 0.441464388 | 0.023429759 | 0.981307468 | 0.999371363 | Not Sig |
| ENSG00000204055 | NA       | NA                                                                                                | NA        | 7.970388241 | 0.010535815 | 0.939450436 | 0.01121487  | 0.991052016 | 0.999371363 | Not Sig |
| ENSG00000186174 | BCL9L    | B-cell CLL/lymphoma 9 like                                                                        | 283149    | 4191.901138 | 0.010554675 | 0.5348105   | 0.019735356 | 0.984254486 | 0.999371363 | Not Sig |
| ENSG00000113300 | CNOT6    | CCR4-NOT transcription complex subunit 6                                                          | 57472     | 1590.313238 | 0.01062969  | 0.562470351 | 0.018898222 | 0.984922298 | 0.999371363 | Not Sig |
| ENSG00000226287 | TMEM191A | transmembrane protein 191A (pseudogene)                                                           | 84222     | 46.96379931 | 0.010722559 | 0.82182276  | 0.013047289 | 0.989590065 | 0.999371363 | Not Sig |
| ENSG00000240750 | NA       | NA                                                                                                | NA        | 14.57615724 | 0.010745951 | 0.822482067 | 0.013065271 | 0.989575719 | 0.999371363 | Not Sig |
| ENSG00000273138 | NA       | NA                                                                                                | NA        | 5.121215181 | 0.010759607 | 1.15350014  | 0.00932779  | 0.992557609 | NA          | NA      |
| ENSG00000266245 | MIR4644  | microRNA 4644                                                                                     | 100616430 | 10.82452138 | 0.010978963 | 0.834927349 | 0.013149603 | 0.989508437 | 0.999371363 | Not Sig |
| ENSG00000264781 | MIR4537  | microRNA 4537                                                                                     | 100616422 | 13.83297839 | 0.01105663  | 0.966448554 | 0.011440474 | 0.990872021 | 0.999371363 | Not Sig |
| ENSG00000242660 | NA       | NA                                                                                                | NA        | 2.154494475 | 0.011065656 | 1.860056239 | 0.005949097 | 0.995253335 | NA          | NA      |
| ENSG00000049618 | ARID1B   | AT-rich interaction domain 1B                                                                     | 57492     | 3897.341202 | 0.011091977 | 0.40351733  | 0.02748823  | 0.978070328 | 0.999371363 | Not Sig |
| ENSG00000138801 | PAPSS1   | 3'-phosphoadenosine 5'-phosphosulfate synthase 1                                                  | 9061      | 1275.433033 | 0.011417825 | 0.499510185 | 0.022858042 | 0.981763509 | 0.999371363 | Not Sig |
| ENSG00000123091 | RNF11    | ring finger protein 11                                                                            | 26994     | 1770.812431 | 0.011982981 | 0.424668006 | 0.028217292 | 0.977488846 | 0.999371363 | Not Sig |
| ENSG00000141401 | IMPA2    | inositol monophosphatase 2                                                                        | 3613      | 765.1016162 | 0.012135192 | 0.411459548 | 0.029493037 | 0.976471372 | 0.999371363 | Not Sig |
| ENSG00000123360 | PDE1B    | phosphodiesterase 1B                                                                              | 5153      | 125.1802363 | 0.012136947 | 0.699358799 | 0.017354392 | 0.986153894 | 0.999371363 | Not Sig |
| ENSG00000121774 | KHDRBS1  | KH RNA binding domain containing, signal transduction associated 1                                | 10657     | 3256.536716 | 0.012246651 | 0.399242961 | 0.030674683 | 0.975528982 | 0.999371363 | Not Sig |
| ENSG00000102038 | SMARCA1  | SMARCA1 related, matrix associated, actin dependent regulator of chromatin, subfamily A, member 1 | 6594      | 2293.964892 | 0.012344104 | 0.602464831 | 0.020489335 | 0.98365302  | 0.999371363 | Not Sig |
| ENSG00000126246 | IGFLR1   | IGF like family receptor 1                                                                        | 79713     | 14.99992156 | 0.012436906 | 0.745179936 | 0.016689802 | 0.986684083 | 0.999371363 | Not Sig |
| ENSG00000109099 | PMP22    | peripheral myelin protein 22                                                                      | 5376      | 1478.048001 | 0.012709595 | 0.666650883 | 0.019064843 | 0.984789377 | 0.999371363 | Not Sig |
| ENSG00000129518 | EAPP     | E2F associated phosphoprotein                                                                     | 55837     | 531.8103991 | 0.012727344 | 0.410478332 | 0.031006128 | 0.975264653 | 0.999371363 | Not Sig |
| ENSG00000133027 | PEMT     | phosphatidylethanolamine N-methyltransferase                                                      | 10400     | 273.6395558 | 0.012813866 | 0.485740831 | 0.026380048 | 0.978954208 | 0.999371363 | Not Sig |
| ENSG00000100030 | MAPK1    | mitogen-activated protein kinase 1                                                                | 5594      | 3274.486151 | 0.012918283 | 0.396662928 | 0.032567407 | 0.974019561 | 0.999371363 | Not Sig |
| ENSG00000005700 | IBTK     | inhibitor of Bruton tyrosine kinase                                                               | 25998     | 2591.348128 | 0.012918799 | 0.574247083 | 0.022496934 | 0.982051558 | 0.999371363 | Not Sig |
| ENSG00000150867 | PIP4K2A  | phosphatidylinositol-5-phosphate 4-kinase type 2 alpha                                            | 5305      | 1192.223557 | 0.013062146 | 0.546306697 | 0.023909914 | 0.980924466 | 0.999371363 | Not Sig |
| ENSG00000168385 | 2-Sep    | septin 2                                                                                          | 4735      | 6957.896303 | 0.013211268 | 0.402005633 | 0.03286339  | 0.973783527 | 0.999371363 | Not Sig |
| ENSG00000267226 | NA       | NA                                                                                                | NA        | 3.406466092 | 0.013400463 | 1.268454908 | 0.010564399 | 0.991570986 | NA          | NA      |
| ENSG00000255487 | NA       | NA                                                                                                | NA        | 3.86409039  | 0.013430511 | 1.225769135 | 0.010956803 | 0.991257911 | NA          | NA      |

|                 |          |                                                          |           |             |             |             |             |             |             |         |
|-----------------|----------|----------------------------------------------------------|-----------|-------------|-------------|-------------|-------------|-------------|-------------|---------|
| ENSG00000116120 | FARSB    | phenylalanyl-tRNA synthetase beta subunit                | 10056     | 543.5689835 | 0.013521984 | 0.553736563 | 0.024419525 | 0.980517974 | 0.999371363 | Not Sig |
| ENSG00000136450 | SRSF1    | serine and arginine rich splicing factor 1               | 6426      | 3111.127979 | 0.013546425 | 0.446155212 | 0.030362584 | 0.975777885 | 0.999371363 | Not Sig |
| ENSG00000066557 | LRRC40   | leucine rich repeat containing 40                        | 55631     | 366.9901875 | 0.013834069 | 0.600342388 | 0.023043631 | 0.981615469 | 0.999371363 | Not Sig |
| ENSG00000083123 | BCKDHB   | branched chain keto acid dehydrogenase E1 subunit beta   | 594       | 478.9625199 | 0.013957416 | 0.640164818 | 0.021802848 | 0.982605222 | 0.999371363 | Not Sig |
| ENSG00000106336 | FBX024   | F-box protein 24                                         | 26261     | 21.18163202 | 0.014093158 | 0.742740209 | 0.018974545 | 0.984861412 | 0.999371363 | Not Sig |
| ENSG00000164758 | MED30    | mediator complex subunit 30                              | 90390     | 203.282957  | 0.014462627 | 0.463967792 | 0.031171619 | 0.975132674 | 0.999371363 | Not Sig |
| ENSG00000163950 | SLBP     | stem-loop binding protein                                | 7884      | 745.267374  | 0.014747016 | 0.391487947 | 0.037669145 | 0.969951477 | 0.999371363 | Not Sig |
| ENSG00000180987 | NA       | NA                                                       | NA        | 1.019522456 | 0.014887614 | 3.030576381 | 0.004912469 | 0.996080432 | NA          | NA      |
| ENSG00000257449 | NA       | NA                                                       | NA        | 1.019522456 | 0.014887614 | 3.030576381 | 0.004912469 | 0.996080432 | NA          | NA      |
| ENSG00000264824 | MIR5571  | microRNA 5571                                            | 100847006 | 1.019522456 | 0.014887614 | 3.030576381 | 0.004912469 | 0.996080432 | NA          | NA      |
| ENSG00000006075 | NA       | NA                                                       | NA        | 281.0779868 | 0.01497931  | 1.10721927  | 0.013528766 | 0.989205936 | 0.999371363 | Not Sig |
| ENSG00000161040 | FBXL13   | F-box and leucine rich repeat protein 13                 | 222235    | 66.21744877 | 0.015001021 | 0.501094649 | 0.029936503 | 0.976117694 | 0.999371363 | Not Sig |
| ENSG00000211667 | NA       | NA                                                       | NA        | 0.651741399 | 0.015039353 | 2.980595019 | 0.005045755 | 0.995974087 | NA          | NA      |
| ENSG00000253357 | NA       | NA                                                       | NA        | 0.651741399 | 0.015039353 | 2.980595019 | 0.005045755 | 0.995974087 | NA          | NA      |
| ENSG00000256442 | NA       | NA                                                       | NA        | 0.651741399 | 0.015039353 | 2.980595019 | 0.005045755 | 0.995974087 | NA          | NA      |
| ENSG00000257966 | NA       | NA                                                       | NA        | 0.651741399 | 0.015039353 | 2.980595019 | 0.005045755 | 0.995974087 | NA          | NA      |
| ENSG00000122642 | FKBP9    | FK506 binding protein 9                                  | 11328     | 3326.402446 | 0.015109459 | 0.508047379 | 0.029740256 | 0.976274206 | 0.999371363 | Not Sig |
| ENSG00000204584 | NA       | NA                                                       | NA        | 96.81075056 | 0.0151953   | 0.571208127 | 0.026602037 | 0.978777149 | 0.999371363 | Not Sig |
| ENSG00000169764 | UGP2     | UDP-glucose pyrophosphorylase 2                          | 7360      | 2137.856489 | 0.015255257 | 0.461992633 | 0.033020564 | 0.973658189 | 0.999371363 | Not Sig |
| ENSG00000127720 | METTL25  | methyltransferase like 25                                | 84190     | 271.856681  | 0.015286774 | 0.506015376 | 0.030210098 | 0.975899495 | 0.999371363 | Not Sig |
| ENSG00000261317 | NA       | NA                                                       | NA        | 1.847789805 | 0.015476472 | 1.877739002 | 0.008242079 | 0.993423847 | NA          | NA      |
| ENSG00000017260 | ATP2C1   | ATPase secretory pathway Ca <sup>2+</sup> transporting 1 | 27032     | 2407.519521 | 0.015515073 | 0.477585512 | 0.032486482 | 0.974084096 | 0.999371363 | Not Sig |
| ENSG00000185344 | ATP6VOA2 | ATPase H <sup>+</sup> transporting V0 subunit a2         | 23545     | 752.7447917 | 0.015574755 | 0.394611862 | 0.039468542 | 0.968516834 | 0.999371363 | Not Sig |
| ENSG00000228218 | NA       | NA                                                       | NA        | 6.562604111 | 0.015577505 | 1.137722214 | 0.013691835 | 0.989075837 | NA          | NA      |
| ENSG00000104976 | SNAPC2   | small nuclear RNA activating complex polypeptide 2       | 6618      | 235.6395533 | 0.015607343 | 0.628235197 | 0.024843152 | 0.980180071 | 0.999371363 | Not Sig |
| ENSG00000180353 | HCLS1    | hematopoietic cell-specific Lyn substrate 1              | 3059      | 1315.343335 | 0.015647305 | 0.742653931 | 0.021069444 | 0.98319026  | 0.999371363 | Not Sig |
| ENSG00000166228 | PCBD1    | pterin-4 alpha-carbinolamine dehydratase 1               | 5092      | 617.2591636 | 0.015831884 | 0.436245037 | 0.036291264 | 0.971050115 | 0.999371363 | Not Sig |
| ENSG00000243403 | NA       | NA                                                       | NA        | 14.10569074 | 0.015854454 | 0.794494961 | 0.019955387 | 0.984078961 | 0.999371363 | Not Sig |
| ENSG00000158428 | CATIP    | ciliogenesis associated TTC17 interacting protein        | 375307    | 53.44410788 | 0.016297877 | 0.704092572 | 0.02314735  | 0.981532736 | 0.999371363 | Not Sig |
| ENSG00000145982 | FARS2    | phenylalanyl-tRNA synthetase 2, mitochondrial            | 10667     | 354.138619  | 0.016368634 | 0.404761464 | 0.040440198 | 0.967742183 | 0.999371363 | Not Sig |
| ENSG00000005194 | CIAPIN1  | cytokine induced apoptosis inhibitor 1                   | 57019     | 518.3282803 | 0.016784754 | 0.463273374 | 0.036230776 | 0.971098346 | 0.999371363 | Not Sig |
| ENSG00000146143 | PRIM2    | DNA primase subunit 2                                    | 5558      | 317.3769197 | 0.016836487 | 0.651135979 | 0.025857098 | 0.979371319 | 0.999371363 | Not Sig |
| ENSG00000207773 | MIR642A  | microRNA 642a                                            | 693227    | 3.067866898 | 0.016874033 | 1.333711409 | 0.012651937 | 0.989905484 | NA          | NA      |
| ENSG00000235290 | NA       | NA                                                       | NA        | 4.568223222 | 0.016954453 | 1.369901886 | 0.012376399 | 0.990125314 | NA          | NA      |
| ENSG00000086475 | SEPHS1   | selenophosphate synthetase 1                             | 22929     | 729.192314  | 0.016975743 | 0.445610781 | 0.038095451 | 0.969611579 | 0.999371363 | Not Sig |

|                 |           |                                                           |        |             |             |             |             |             |             |         |
|-----------------|-----------|-----------------------------------------------------------|--------|-------------|-------------|-------------|-------------|-------------|-------------|---------|
| ENSG00000182512 | GLRX5     | glutaredoxin 5                                            | 51218  | 314.5684667 | 0.017069733 | 0.430607244 | 0.039641072 | 0.968379283 | 0.999371363 | Not Sig |
| ENSG00000135378 | PRRG4     | proline rich and Gla domain 4                             | 79056  | 637.0452351 | 0.017138309 | 0.476791402 | 0.035945088 | 0.971326144 | 0.999371363 | Not Sig |
| ENSG00000147912 | FBXO10    | F-box protein 10                                          | 26267  | 86.96806633 | 0.017234533 | 0.646736242 | 0.026648473 | 0.978740111 | 0.999371363 | Not Sig |
| ENSG00000134323 | MYCN      | MYCN proto-oncogene, bHLH transcription factor            | 4613   | 34.98362257 | 0.017298846 | 0.924667962 | 0.018708171 | 0.98507391  | 0.999371363 | Not Sig |
| ENSG00000150873 | C2orf50   | chromosome 2 open reading frame 50                        | 130813 | 34.25383838 | 0.017330175 | 0.894438704 | 0.019375475 | 0.984541575 | 0.999371363 | Not Sig |
| ENSG00000116771 | AGMAT     | agmatinase                                                | 79814  | 21.53112078 | 0.017482016 | 1.054569429 | 0.016577397 | 0.986773757 | 0.999371363 | Not Sig |
| ENSG00000235629 | NA        | NA                                                        | NA     | 3.151272604 | 0.017509164 | 1.341601153 | 0.013050946 | 0.989587148 | NA          | NA      |
| ENSG00000236514 | NA        | NA                                                        | NA     | 10.3724269  | 0.017599579 | 0.980079249 | 0.017957302 | 0.985672916 | 0.999371363 | Not Sig |
| ENSG00000268403 | LOC644656 | uncharacterized LOC644656                                 | 644656 | 16.49377384 | 0.017673222 | 0.783548887 | 0.022555353 | 0.982004958 | 0.999371363 | Not Sig |
| ENSG00000111669 | TPI1      | triosephosphate isomerase 1                               | 7167   | 4764.888784 | 0.017782766 | 0.392092613 | 0.045353484 | 0.963825557 | 0.999371363 | Not Sig |
| ENSG00000240602 | AADACP1   | arylacetamide deacetylase pseudogene 1                    | 201651 | 22.93857919 | 0.017862467 | 0.954053041 | 0.018722719 | 0.985062304 | 0.999371363 | Not Sig |
| ENSG00000129009 | ISLR      | immunoglobulin superfamily containing leucine rich repeat | 3671   | 697.1510667 | 0.017866287 | 0.452126105 | 0.039516158 | 0.968478872 | 0.999371363 | Not Sig |
| ENSG00000109911 | ELP4      | elongator acetyltransferase complex subunit 4             | 26610  | 259.4173081 | 0.017869009 | 0.469039528 | 0.038097021 | 0.969610327 | 0.999371363 | Not Sig |
| ENSG00000102362 | SYTL4     | synaptotagmin like 4                                      | 94121  | 289.518176  | 0.017899133 | 0.627028341 | 0.028545971 | 0.977226704 | 0.999371363 | Not Sig |
| ENSG00000133789 | SWAP70    | switching B-cell complex subunit SWAP70                   | 23075  | 2429.075591 | 0.018115972 | 0.432043904 | 0.041930859 | 0.966553816 | 0.999371363 | Not Sig |
| ENSG00000083307 | GRHL2     | grainyhead like transcription factor 2                    | 79977  | 1565.673663 | 0.018167988 | 0.68013677  | 0.026712257 | 0.978689237 | 0.999371363 | Not Sig |
| ENSG00000101160 | CTSZ      | cathepsin Z                                               | 1522   | 5904.835945 | 0.018261248 | 0.70174087  | 0.02602278  | 0.979239169 | 0.999371363 | Not Sig |
| ENSG00000166816 | LDHD      | lactate dehydrogenase D                                   | 197257 | 271.0730092 | 0.018444815 | 0.641634426 | 0.02874661  | 0.977066682 | 0.999371363 | Not Sig |
| ENSG00000145736 | GTF2H2    | general transcription factor IIH subunit 2                | 2966   | 70.226651   | 0.018533871 | 0.584919685 | 0.031686181 | 0.974722315 | 0.999371363 | Not Sig |
| ENSG00000123095 | BHLHE41   | basic helix-loop-helix family member e41                  | 79365  | 675.2093323 | 0.018546291 | 0.718979228 | 0.025795309 | 0.979420603 | 0.999371363 | Not Sig |
| ENSG00000135074 | ADAM19    | ADAM metallopeptidase domain 19                           | 8728   | 1030.456775 | 0.018600745 | 0.518018171 | 0.035907515 | 0.971356104 | 0.999371363 | Not Sig |
| ENSG00000115998 | C2orf42   | chromosome 2 open reading frame 42                        | 54980  | 208.4301807 | 0.018621738 | 0.414304584 | 0.044946976 | 0.964149573 | 0.999371363 | Not Sig |
| ENSG00000107185 | RGP1      | RGP1 homolog, RAB6A GEF complex partner 1                 | 9827   | 1454.537298 | 0.018685003 | 0.507053981 | 0.036850126 | 0.970604506 | 0.999371363 | Not Sig |
| ENSG00000121579 | NAA50     | N(alpha)-acetyltransferase 50, NatE catalytic subunit     | 80218  | 1897.652755 | 0.0187257   | 0.543000068 | 0.034485631 | 0.9724899   | 0.999371363 | Not Sig |
| ENSG00000252282 | NA        | NA                                                        | NA     | 4.360046746 | 0.018781107 | 1.366586467 | 0.01374308  | 0.989034954 | NA          | NA      |
| ENSG00000058673 | ZC3H11A   | zinc finger CCCH-type containing 11A                      | 9877   | 6840.948386 | 0.018829058 | 0.561388679 | 0.033540146 | 0.973243852 | 0.999371363 | Not Sig |
| ENSG00000079150 | FKBP7     | FK506 binding protein 7                                   | 51661  | 158.5917171 | 0.019009589 | 0.486958758 | 0.03903737  | 0.968860594 | 0.999371363 | Not Sig |
| ENSG00000068308 | OTUD5     | OTU deubiquitinase 5                                      | 55593  | 1241.827182 | 0.019057566 | 0.448111431 | 0.042528632 | 0.966077287 | 0.999371363 | Not Sig |
| ENSG00000135549 | PKIB      | cAMP-dependent protein kinase inhibitor beta              | 5570   | 204.7891387 | 0.019113266 | 0.888523267 | 0.021511273 | 0.982837811 | 0.999371363 | Not Sig |
| ENSG00000124193 | SRSF6     | serine and arginine rich splicing factor 6                | 6431   | 3411.391454 | 0.019339139 | 0.503714437 | 0.03839306  | 0.969374294 | 0.999371363 | Not Sig |
| ENSG00000148290 | SURF1     | SURF1, cytochrome c oxidase assembly factor               | 6834   | 391.898833  | 0.019361978 | 0.586906076 | 0.032989909 | 0.973682635 | 0.999371363 | Not Sig |
| ENSG00000167608 | TMC4      | transmembrane channel like 4                              | 147798 | 1852.677541 | 0.019362556 | 0.682574393 | 0.028366954 | 0.97736948  | 0.999371363 | Not Sig |
| ENSG00000185621 | LMLN      | leishmanolysin like peptidase                             | 89782  | 459.5258532 | 0.01939557  | 0.521803319 | 0.03717027  | 0.970349243 | 0.999371363 | Not Sig |
| ENSG00000186976 | EFCAB6    | EF-hand calcium binding domain 6                          | 64800  | 200.7102145 | 0.019591607 | 0.483732983 | 0.04050087  | 0.967693814 | 0.999371363 | Not Sig |
| ENSG00000106302 | HYAL4     | hyaluronoglucosaminidase 4                                | 23553  | 1.671263855 | 0.019673273 | 2.25920279  | 0.00870806  | 0.993052061 | NA          | NA      |

|                 |          |                                                                |        |             |             |             |             |             |             |         |
|-----------------|----------|----------------------------------------------------------------|--------|-------------|-------------|-------------|-------------|-------------|-------------|---------|
| ENSG00000103042 | SLC38A7  | solute carrier family 38 member 7                              | 55238  | 451.6776205 | 0.019685192 | 0.398067901 | 0.049451845 | 0.960559212 | 0.999371363 | Not Sig |
| ENSG00000179335 | CLK3     | CDC like kinase 3                                              | 1198   | 1268.078385 | 0.019731421 | 0.498646722 | 0.039569941 | 0.968435993 | 0.999371363 | Not Sig |
| ENSG00000253485 | PCDHGA5  | protocadherin gamma subfamily A, 5                             | 56110  | 137.1885706 | 0.019831292 | 0.664583999 | 0.029840158 | 0.976194531 | 0.999371363 | Not Sig |
| ENSG00000160972 | PPP1R16A | protein phosphatase 1 regulatory subunit 16A                   | 84988  | 946.7257972 | 0.020084158 | 0.603926623 | 0.033255957 | 0.973470475 | 0.999371363 | Not Sig |
| ENSG00000152904 | GGPS1    | geranylgeranyl diphosphate synthase 1                          | 9453   | 668.6253989 | 0.020095666 | 0.539947946 | 0.037217784 | 0.970311359 | 0.999371363 | Not Sig |
| ENSG00000125743 | SNRPD2   | small nuclear ribonucleoprotein D2 polypeptide                 | 6633   | 600.8586654 | 0.020296185 | 0.431486297 | 0.047037843 | 0.962483066 | 0.999371363 | Not Sig |
| ENSG00000142676 | RPL11    | ribosomal protein L11                                          | 6135   | 7494.879832 | 0.02032006  | 0.442891054 | 0.045880492 | 0.963405503 | 0.999371363 | Not Sig |
| ENSG00000081665 | ZNF506   | zinc finger protein 506                                        | 440515 | 636.1356802 | 0.020368776 | 0.511428668 | 0.039827209 | 0.968230884 | 0.999371363 | Not Sig |
| ENSG00000143545 | RAB13    | RAB13, member RAS oncogene family                              | 5872   | 1175.227985 | 0.020482649 | 0.398196738 | 0.051438516 | 0.958976094 | 0.999371363 | Not Sig |
| ENSG00000077585 | GPR137B  | G protein-coupled receptor 137B                                | 7107   | 435.9227437 | 0.020526594 | 0.527151989 | 0.038938664 | 0.96893929  | 0.999371363 | Not Sig |
| ENSG00000072110 | ACTN1    | actinin alpha 1                                                | 87     | 4856.242586 | 0.020696256 | 0.441063498 | 0.046923529 | 0.962574175 | 0.999371363 | Not Sig |
| ENSG00000105639 | JAK3     | Janus kinase 3                                                 | 3718   | 819.1629543 | 0.020749293 | 0.489280787 | 0.042407742 | 0.966173657 | 0.999371363 | Not Sig |
| ENSG00000145332 | KLHL8    | kelch like family member 8                                     | 57563  | 552.685695  | 0.020790626 | 0.460129293 | 0.045184313 | 0.963960398 | 0.999371363 | Not Sig |
| ENSG00000064726 | BTBD1    | BTB domain containing 1                                        | 53339  | 1354.099767 | 0.020822321 | 0.417223477 | 0.049906878 | 0.960196596 | 0.999371363 | Not Sig |
| ENSG00000116560 | SFPQ     | splicing factor proline and glutamine rich                     | 6421   | 8001.9277   | 0.020835778 | 0.458233714 | 0.045469763 | 0.963732876 | 0.999371363 | Not Sig |
| ENSG00000010017 | RANBP9   | RAN binding protein 9                                          | 10048  | 1690.703835 | 0.020836181 | 0.533750582 | 0.039037298 | 0.968860652 | 0.999371363 | Not Sig |
| ENSG00000135124 | P2RX4    | purinergic receptor P2X 4                                      | 5025   | 787.3505859 | 0.020938249 | 0.392248598 | 0.053380047 | 0.957429103 | 0.999371363 | Not Sig |
| ENSG00000057608 | GDI2     | GDP dissociation inhibitor 2                                   | 2665   | 3866.765835 | 0.020955942 | 0.476597817 | 0.043969865 | 0.964928425 | 0.999371363 | Not Sig |
| ENSG00000266967 | AARSD1   | alanyl-tRNA synthetase domain containing 1                     | 80755  | 55.66152491 | 0.020992508 | 0.560665841 | 0.037442103 | 0.970132503 | 0.999371363 | Not Sig |
| ENSG00000117151 | CTBS     | chitobiase                                                     | 1486   | 804.4192667 | 0.021024109 | 0.605924126 | 0.034697593 | 0.97232088  | 0.999371363 | Not Sig |
| ENSG00000198223 | CSF2RA   | colony stimulating factor 2 receptor alpha subunit             | 1438   | 441.7004409 | 0.021098489 | 0.60347649  | 0.034961575 | 0.97211038  | 0.999371363 | Not Sig |
| ENSG00000238109 | NA       | NA                                                             | NA     | 3.421062618 | 0.0211231   | 1.948666458 | 0.010839772 | 0.991351283 | NA          | NA      |
| ENSG00000170293 | CMTM8    | CKLF like MARVEL transmembrane domain containing 8             | 152189 | 314.407614  | 0.021272032 | 0.622434067 | 0.034175559 | 0.972737156 | 0.999371363 | Not Sig |
| ENSG00000048392 | RRM2B    | ribonucleotide reductase regulatory TP53 inducible subunit M2B | 50484  | 1000.383817 | 0.021304376 | 0.419608085 | 0.050772082 | 0.959507138 | 0.999371363 | Not Sig |
| ENSG00000004897 | CDC27    | cell division cycle 27                                         | 996    | 1564.546449 | 0.02139173  | 0.568137514 | 0.03765238  | 0.969964844 | 0.999371363 | Not Sig |
| ENSG00000008988 | RPS20    | ribosomal protein S20                                          | 6224   | 7902.748134 | 0.021450983 | 0.516347528 | 0.041543693 | 0.966862461 | 0.999371363 | Not Sig |
| ENSG00000104356 | POP1     | POP1 homolog, ribonuclease P/MRP subunit                       | 10940  | 177.6789177 | 0.021559639 | 0.545569188 | 0.0395177   | 0.968477642 | 0.999371363 | Not Sig |
| ENSG00000240435 | NA       | NA                                                             | NA     | 16.93095146 | 0.021687589 | 0.747488594 | 0.02901394  | 0.976853473 | 0.999371363 | Not Sig |
| ENSG00000272498 | NA       | NA                                                             | NA     | 14.94562677 | 0.021703417 | 0.84028675  | 0.025828584 | 0.979394062 | 0.999371363 | Not Sig |
| ENSG00000144824 | PHLDB2   | pleckstrin homology like domain family B member 2              | 90102  | 1525.232138 | 0.021750883 | 0.567243546 | 0.038344875 | 0.969412712 | 0.999371363 | Not Sig |
| ENSG00000215934 | NA       | NA                                                             | NA     | 3.05841265  | 0.021793209 | 1.425210563 | 0.015291221 | 0.987799847 | NA          | NA      |
| ENSG00000101972 | STAG2    | stromal antigen 2                                              | 10735  | 3431.299092 | 0.021817887 | 0.518126741 | 0.042109169 | 0.966411671 | 0.999371363 | Not Sig |
| ENSG00000082068 | WDR70    | WD repeat domain 70                                            | 55100  | 762.9870308 | 0.021919805 | 0.438982612 | 0.049933196 | 0.960175624 | 0.999371363 | Not Sig |
| ENSG00000196535 | MYO18A   | myosin XVIII A                                                 | 399687 | 2372.203012 | 0.021962794 | 0.462607777 | 0.047476059 | 0.962133811 | 0.999371363 | Not Sig |
| ENSG00000244723 | NA       | NA                                                             | NA     | 27.22726432 | 0.021966577 | 0.688890719 | 0.031886882 | 0.97456226  | 0.999371363 | Not Sig |

|                 |          |                                                                        |        |             |             |             |             |             |             |         |
|-----------------|----------|------------------------------------------------------------------------|--------|-------------|-------------|-------------|-------------|-------------|-------------|---------|
| ENSG00000089154 | GCN1     | GCN1, eIF2 alpha kinase activator homolog                              | 10985  | 4037.796701 | 0.02206558  | 0.461618075 | 0.047800511 | 0.961875229 | 0.999371363 | Not Sig |
| ENSG00000163870 | TPRA1    | transmembrane protein adipocyte associated 1                           | 131601 | 589.3279226 | 0.022136668 | 0.598414912 | 0.036992173 | 0.970491246 | 0.999371363 | Not Sig |
| ENSG00000151465 | CDC123   | cell division cycle 123                                                | 8872   | 686.6984887 | 0.022195949 | 0.439631403 | 0.050487632 | 0.959733805 | 0.999371363 | Not Sig |
| ENSG00000086102 | NFX1     | nuclear transcription factor, X-box binding 1                          | 4799   | 1476.507764 | 0.02232495  | 0.426072746 | 0.052397039 | 0.958212333 | 0.999371363 | Not Sig |
| ENSG00000101004 | NINL     | ninein like                                                            | 22981  | 699.3426922 | 0.022347964 | 0.760640595 | 0.029380452 | 0.976561163 | 0.999371363 | Not Sig |
| ENSG00000124523 | SIRT5    | sirtuin 5                                                              | 23408  | 398.954903  | 0.022414646 | 0.451096244 | 0.049689277 | 0.960370001 | 0.999371363 | Not Sig |
| ENSG00000124256 | ZBP1     | Z-DNA binding protein 1                                                | 81030  | 157.8271147 | 0.02243313  | 0.704140363 | 0.031858889 | 0.974584584 | 0.999371363 | Not Sig |
| ENSG00000211817 | NA       | NA                                                                     | NA     | 4.048492953 | 0.022486452 | 1.425230533 | 0.015777414 | 0.987411967 | NA          | NA      |
| ENSG00000136643 | RPS6KC1  | ribosomal protein S6 kinase C1                                         | 26750  | 848.8615424 | 0.022622476 | 0.49693754  | 0.045523781 | 0.96368982  | 0.999371363 | Not Sig |
| ENSG00000152348 | ATG10    | autophagy related 10                                                   | 83734  | 181.0675374 | 0.022660685 | 0.548580192 | 0.04130788  | 0.967050451 | 0.999371363 | Not Sig |
| ENSG00000149488 | TMC2     | transmembrane channel like 2                                           | 117532 | 6.93494653  | 0.022674349 | 1.652289531 | 0.013722988 | 0.989050984 | 0.999371363 | Not Sig |
| ENSG00000120820 | GLT8D2   | glycosyltransferase 8 domain containing 2                              | 83468  | 165.7401402 | 0.022878855 | 0.475038459 | 0.048162112 | 0.961587046 | 0.999371363 | Not Sig |
| ENSG00000135913 | USP37    | ubiquitin specific peptidase 37                                        | 57695  | 890.4252609 | 0.023079728 | 0.552256392 | 0.04179169  | 0.966664759 | 0.999371363 | Not Sig |
| ENSG00000224470 | ATXN1L   | ataxin 1 like                                                          | 342371 | 1606.646222 | 0.023291725 | 0.461383867 | 0.050482314 | 0.959738043 | 0.999371363 | Not Sig |
| ENSG00000065060 | UHRF1BP1 | UHRF1 binding protein 1                                                | 54887  | 1621.249409 | 0.023302341 | 0.441406057 | 0.052791166 | 0.9578983   | 0.999371363 | Not Sig |
| ENSG00000137478 | FCHSD2   | FCH and double SH3 domains 2                                           | 9873   | 1715.720895 | 0.023311413 | 0.40737333  | 0.05722371  | 0.954366991 | 0.999371363 | Not Sig |
| ENSG00000149313 | AASDHPPT | aminodipate-semialdehyde dehydrogenase-phosphopantetheinyl transferase | 60496  | 723.967356  | 0.02341765  | 0.508687684 | 0.046035419 | 0.96328202  | 0.999371363 | Not Sig |
| ENSG00000137393 | RNF144B  | ring finger protein 144B                                               | 255488 | 1562.046921 | 0.023426932 | 0.712829882 | 0.032864689 | 0.973782492 | 0.999371363 | Not Sig |
| ENSG00000260318 | NA       | NA                                                                     | NA     | 44.1784092  | 0.023580362 | 0.706954155 | 0.033354867 | 0.973391601 | 0.999371363 | Not Sig |
| ENSG00000168256 | NKIRAS2  | NFKB inhibitor interacting Ras like 2                                  | 28511  | 655.7523768 | 0.023596202 | 0.414546704 | 0.056920491 | 0.954608531 | 0.999371363 | Not Sig |
| ENSG00000114166 | KAT2B    | lysine acetyltransferase 2B                                            | 8850   | 1158.577671 | 0.023789334 | 0.581052388 | 0.040941805 | 0.96734229  | 0.999371363 | Not Sig |
| ENSG00000166747 | APIG1    | adaptor related protein complex 1 gamma 1 subunit                      | 164    | 3692.188163 | 0.023789598 | 0.466052022 | 0.051044941 | 0.959289709 | 0.999371363 | Not Sig |
| ENSG00000175224 | ATG13    | autophagy related 13                                                   | 9776   | 1529.370624 | 0.02380576  | 0.406264225 | 0.058596742 | 0.953273306 | 0.999371363 | Not Sig |
| ENSG00000143643 | TTC13    | tetratricopeptide repeat domain 13                                     | 79573  | 703.4147044 | 0.023863745 | 0.546105843 | 0.043698021 | 0.965145116 | 0.999371363 | Not Sig |
| ENSG00000105127 | AKAP8    | A-kinase anchoring protein 8                                           | 10270  | 806.4598669 | 0.024019364 | 0.473399753 | 0.050738015 | 0.959534284 | 0.999371363 | Not Sig |
| ENSG00000139180 | NDUFA9   | NADH:ubiquinone oxidoreductase subunit A9                              | 4704   | 239.651816  | 0.024492058 | 0.446457766 | 0.054858623 | 0.956251096 | 0.999371363 | Not Sig |
| ENSG00000020577 | SAMD4A   | sterile alpha motif domain containing 4A                               | 23034  | 1346.491017 | 0.024683396 | 0.628555662 | 0.039270024 | 0.968675106 | 0.999371363 | Not Sig |
| ENSG00000118873 | RAB3GAP2 | RAB3 GTPase activating non-catalytic protein subunit 2                 | 25782  | 1967.50096  | 0.024801006 | 0.490397771 | 0.050573243 | 0.959665584 | 0.999371363 | Not Sig |
| ENSG00000136518 | ACTL6A   | actin like 6A                                                          | 86     | 547.2107117 | 0.02485222  | 0.522977248 | 0.047520653 | 0.96209827  | 0.999371363 | Not Sig |
| ENSG00000204065 | TCEAL5   | transcription elongation factor A like 5                               | 340543 | 1.303482799 | 0.025012012 | 2.34840651  | 0.010650631 | 0.991502186 | NA          | NA      |
| ENSG00000198795 | ZNF521   | zinc finger protein 521                                                | 25925  | 384.3448534 | 0.025190529 | 0.496132674 | 0.050773776 | 0.959505787 | 0.999371363 | Not Sig |
| ENSG00000130830 | MPP1     | membrane palmitoylated protein 1                                       | 4354   | 518.1319657 | 0.025338192 | 0.733755696 | 0.034532192 | 0.972452772 | 0.999371363 | Not Sig |
| ENSG00000141456 | PELP1    | proline, glutamate and leucine rich protein 1                          | 27043  | 1127.098107 | 0.025364041 | 0.486576048 | 0.052127599 | 0.958427022 | 0.999371363 | Not Sig |
| ENSG00000168411 | RFWD3    | ring finger and WD repeat domain 3                                     | 55159  | 709.5944061 | 0.025366864 | 0.457373495 | 0.055462033 | 0.955770377 | 0.999371363 | Not Sig |
| ENSG00000230823 | NA       | NA                                                                     | NA     | 4.723964502 | 0.02551076  | 1.473053446 | 0.017318286 | 0.986182698 | NA          | NA      |

|                 |                |                                                               |           |             |             |             |             |             |             |         |
|-----------------|----------------|---------------------------------------------------------------|-----------|-------------|-------------|-------------|-------------|-------------|-------------|---------|
| ENSG00000120324 | PCDHB10        | protocadherin beta 10                                         | 56126     | 61.25660905 | 0.025558797 | 0.784958197 | 0.032560711 | 0.974024901 | 0.999371363 | Not Sig |
| ENSG00000221994 | ZNF630         | zinc finger protein 630                                       | 57232     | 116.4741802 | 0.0255751   | 0.602872746 | 0.042422054 | 0.966162248 | 0.999371363 | Not Sig |
| ENSG00000198908 | BHLHB9         | basic helix-loop-helix family member b9                       | 80823     | 147.3894041 | 0.025599237 | 0.478971598 | 0.053446253 | 0.957376353 | 0.999371363 | Not Sig |
| ENSG00000198908 | ARMCX5-GPRASP2 | ARMCX5-GPRASP2 readthrough                                    | 100528062 | 147.3894041 | 0.025599237 | 0.478971598 | 0.053446253 | 0.957376353 | 0.999371363 | Not Sig |
| ENSG00000230102 | LINC02028      | long intergenic non-protein coding RNA 2028                   | 285389    | 23.48512715 | 0.025606864 | 0.695246043 | 0.036831369 | 0.970619462 | 0.999371363 | Not Sig |
| ENSG00000167967 | E4F1           | E4F transcription factor 1                                    | 1877      | 617.814021  | 0.025667311 | 0.569347009 | 0.045082016 | 0.964041936 | 0.999371363 | Not Sig |
| ENSG00000124762 | CDKN1A         | cyclin dependent kinase inhibitor 1A                          | 1026      | 2132.120319 | 0.025689103 | 0.502811509 | 0.05109092  | 0.959253071 | 0.999371363 | Not Sig |
| ENSG00000165895 | ARHGAP42       | Rho GTPase activating protein 42                              | 143872    | 1053.010991 | 0.025810546 | 0.648616871 | 0.039793208 | 0.968257991 | 0.999371363 | Not Sig |
| ENSG00000231665 | NA             | NA                                                            | NA        | 2.232747006 | 0.025888919 | 1.776483745 | 0.014573125 | 0.98837274  | NA          | NA      |
| ENSG00000091136 | LAMB1          | laminin subunit beta 1                                        | 3912      | 4135.442227 | 0.026054995 | 0.459024228 | 0.056761699 | 0.954735025 | 0.999371363 | Not Sig |
| ENSG00000262246 | CORO7          | coronin 7                                                     | 79585     | 216.7837235 | 0.026342858 | 0.565780958 | 0.04656017  | 0.962863777 | 0.999371363 | Not Sig |
| ENSG00000134516 | DOCK2          | dedicator of cytokinesis 2                                    | 1794      | 1810.204614 | 0.026431165 | 0.767518497 | 0.03443717  | 0.972528543 | 0.999371363 | Not Sig |
| ENSG00000232368 | NA             | NA                                                            | NA        | 7.779404202 | 0.026731789 | 1.143253766 | 0.023382201 | 0.981345403 | 0.999371363 | Not Sig |
| ENSG00000247092 | NA             | NA                                                            | NA        | 110.3311242 | 0.026826354 | 0.527661119 | 0.050840119 | 0.959452922 | 0.999371363 | Not Sig |
| ENSG00000147669 | POLR2K         | RNA polymerase II subunit K                                   | 5440      | 434.7875221 | 0.026828824 | 0.512684131 | 0.052330123 | 0.958265651 | 0.999371363 | Not Sig |
| ENSG00000167077 | MEI1           | meiotic double-stranded break formation protein 1             | 150365    | 117.8682497 | 0.027025456 | 0.700297674 | 0.038591383 | 0.969216173 | 0.999371363 | Not Sig |
| ENSG00000160229 | NA             | NA                                                            | NA        | 137.5713196 | 0.027048142 | 0.542648551 | 0.049844678 | 0.960246163 | 0.999371363 | Not Sig |
| ENSG00000103852 | TTC23          | tetratricopeptide repeat domain 23                            | 64927     | 354.3598726 | 0.027067944 | 0.518427332 | 0.052211645 | 0.958360054 | 0.999371363 | Not Sig |
| ENSG00000163840 | DTX3L          | deltex E3 ubiquitin ligase 3L                                 | 151636    | 3062.813502 | 0.027080604 | 0.526655647 | 0.051419944 | 0.958990893 | 0.999371363 | Not Sig |
| ENSG00000156966 | B3GNT7         | UDP-GlcNAc:betaGal beta-1,3-N-acetylglucosaminyltransferase 7 | 93010     | 1310.923531 | 0.027171775 | 0.650898786 | 0.041745009 | 0.966701974 | 0.999371363 | Not Sig |
| ENSG00000263770 | NA             | NA                                                            | NA        | 2.512406276 | 0.02724704  | 1.765043612 | 0.015437035 | 0.987683517 | NA          | NA      |
| ENSG00000166441 | RPL27A         | ribosomal protein L27a                                        | 6157      | 9359.998234 | 0.027414658 | 0.436344058 | 0.062828077 | 0.949903408 | 0.999371363 | Not Sig |
| ENSG00000178695 | KCTD12         | potassium channel tetramerization domain containing 12        | 115207    | 4567.505685 | 0.027486395 | 0.733160738 | 0.037490271 | 0.970094097 | 0.999371363 | Not Sig |
| ENSG00000238057 | ZEB2-AS1       | ZEB2 antisense RNA 1                                          | 100303491 | 20.21658171 | 0.027547633 | 0.835281999 | 0.032980039 | 0.973690506 | 0.999371363 | Not Sig |
| ENSG00000139684 | ESD            | esterase D                                                    | 2098      | 815.3154157 | 0.02757646  | 0.523356347 | 0.052691556 | 0.957977667 | 0.999371363 | Not Sig |
| ENSG00000179409 | GEMIN4         | gem nuclear organelle associated protein 4                    | 50628     | 547.6744473 | 0.027695013 | 0.456878874 | 0.060617846 | 0.951663561 | 0.999371363 | Not Sig |
| ENSG00000201080 | NA             | NA                                                            | NA        | 2.627706505 | 0.027716085 | 1.518696118 | 0.018249921 | 0.985439478 | NA          | NA      |
| ENSG00000273340 | NA             | NA                                                            | NA        | 41.05884553 | 0.027738679 | 0.629049512 | 0.044096178 | 0.964827739 | 0.999371363 | Not Sig |
| ENSG00000255367 | LOC101927708   | uncharacterized LOC101927708                                  | 101927708 | 32.12623541 | 0.027838897 | 0.987493435 | 0.028191476 | 0.977509436 | 0.999371363 | Not Sig |
| ENSG00000115128 | SF3B6          | splicing factor 3b subunit 6                                  | 51639     | 473.3908355 | 0.027861893 | 0.651709081 | 0.04275204  | 0.965899195 | 0.999371363 | Not Sig |
| ENSG00000141452 | WDR98          | WD repeat domain 98                                           | 29919     | 465.4620553 | 0.027940257 | 0.469349447 | 0.059529753 | 0.952530168 | 0.999371363 | Not Sig |
| ENSG00000168096 | ANKS3          | ankyrin repeat and sterile alpha motif domain containing 3    | 124401    | 524.0708658 | 0.028027952 | 0.497884365 | 0.0562941   | 0.955107519 | 0.999371363 | Not Sig |
| ENSG00000207971 | MIR125B1       | microRNA 125b-1                                               | 406911    | 6.035850289 | 0.028235779 | 1.181508363 | 0.023898078 | 0.980933907 | NA          | NA      |
| ENSG00000114491 | UMPS           | uridine monophosphate synthetase                              | 7372      | 351.3285327 | 0.028242936 | 0.412122943 | 0.068530365 | 0.945363449 | 0.999371363 | Not Sig |
| ENSG00000005339 | CREBBP         | CREB binding protein                                          | 1387      | 5394.471551 | 0.028318849 | 0.391749588 | 0.072288139 | 0.942372604 | 0.999371363 | Not Sig |

|                 |              |                                                                                |           |             |             |             |             |             |             |         |
|-----------------|--------------|--------------------------------------------------------------------------------|-----------|-------------|-------------|-------------|-------------|-------------|-------------|---------|
| ENSG0000004487  | KDM1A        | lysine demethylase 1A                                                          | 23028     | 1842.645546 | 0.028325491 | 0.528043007 | 0.053642394 | 0.95722008  | 0.999371363 | Not Sig |
| ENSG00000176386 | CDC26        | cell division cycle 26                                                         | 246184    | 185.5744304 | 0.028468146 | 0.471390518 | 0.06039185  | 0.951843549 | 0.999371363 | Not Sig |
| ENSG00000127774 | EMC6         | ER membrane protein complex subunit 6                                          | 83460     | 206.6000133 | 0.028703975 | 0.496513913 | 0.057811019 | 0.953899161 | 0.999371363 | Not Sig |
| ENSG00000266983 | LOC100128568 | uncharacterized LOC100128568                                                   | 100128568 | 3.464110757 | 0.028705333 | 1.274899041 | 0.02251577  | 0.982036533 | NA          | NA      |
| ENSG00000132294 | EFR3A        | EFR3 homolog A                                                                 | 23167     | 3070.500842 | 0.028795632 | 0.452922904 | 0.063577337 | 0.949306778 | 0.999371363 | Not Sig |
| ENSG00000228998 | NA           | NA                                                                             | NA        | 161.9492127 | 0.028875257 | 0.497302398 | 0.05806378  | 0.953697825 | 0.999371363 | Not Sig |
| ENSG00000249700 | SRD5A3-AS1   | SRD5A3 antisense RNA 1                                                         | 100506462 | 13.52760214 | 0.02890832  | 0.767340328 | 0.037673401 | 0.969948084 | 0.999371363 | Not Sig |
| ENSG00000169967 | MAP3K2       | mitogen-activated protein kinase kinase kinase 2                               | 10746     | 3210.713031 | 0.028997645 | 0.552646955 | 0.052470469 | 0.958153825 | 0.999371363 | Not Sig |
| ENSG00000139168 | ZCRB1        | zinc finger CCHC-type and RNA binding motif containing 1                       | 85437     | 482.2909945 | 0.029019152 | 0.441913506 | 0.065667039 | 0.947642914 | 0.999371363 | Not Sig |
| ENSG00000249492 | NA           | NA                                                                             | NA        | 14.92387945 | 0.029196709 | 0.812384811 | 0.035939506 | 0.971330595 | 0.999371363 | Not Sig |
| ENSG00000224183 | NA           | NA                                                                             | NA        | 6.037853709 | 0.02921402  | 1.088253028 | 0.026844878 | 0.978583459 | NA          | NA      |
| ENSG00000264958 | NA           | NA                                                                             | NA        | 4.064230019 | 0.029226282 | 1.304649543 | 0.022401634 | 0.982127577 | NA          | NA      |
| ENSG00000201812 | NA           | NA                                                                             | NA        | 1.54752267  | 0.029304787 | 2.019791244 | 0.01450882  | 0.988424043 | NA          | NA      |
| ENSG00000162627 | SNX7         | sorting nexin 7                                                                | 51375     | 398.4931863 | 0.029492533 | 0.529295181 | 0.055720388 | 0.955564557 | 0.999371363 | Not Sig |
| ENSG00000112339 | HBS1L        | HBS1 like translational GTPase                                                 | 10767     | 1201.074932 | 0.029520236 | 0.493847527 | 0.059776013 | 0.95233403  | 0.999371363 | Not Sig |
| ENSG00000088356 | PDRG1        | p53 and DNA damage regulated 1                                                 | 81572     | 209.0108733 | 0.029562236 | 0.499621661 | 0.059169245 | 0.952817306 | 0.999371363 | Not Sig |
| ENSG00000118564 | FBXL5        | F-box and leucine rich repeat protein 5                                        | 26234     | 2153.646503 | 0.029683145 | 0.464599149 | 0.063889797 | 0.949057977 | 0.999371363 | Not Sig |
| ENSG00000169231 | THBS3        | thrombospondin 3                                                               | 7059      | 803.3035505 | 0.029912117 | 0.490618062 | 0.060968234 | 0.951384507 | 0.999371363 | Not Sig |
| ENSG00000111540 | RAB5B        | RAB5B, member RAS oncogene family                                              | 5869      | 908.3551467 | 0.030058963 | 0.454581833 | 0.066124426 | 0.947278764 | 0.999371363 | Not Sig |
| ENSG00000168028 | RPSA         | ribosomal protein SA                                                           | 3921      | 6926.292242 | 0.030210266 | 0.497280922 | 0.060750905 | 0.95155759  | 0.999371363 | Not Sig |
| ENSG00000250362 | NA           | NA                                                                             | NA        | 3.269993656 | 0.030213743 | 1.411135046 | 0.021410951 | 0.982917838 | NA          | NA      |
| ENSG00000260552 | LOC101927809 | uncharacterized LOC101927809                                                   | 101927809 | 12.55112782 | 0.030284642 | 0.793237335 | 0.038178538 | 0.969545332 | 0.999371363 | Not Sig |
| ENSG00000273149 | NA           | NA                                                                             | NA        | 46.69882984 | 0.030330498 | 0.589955871 | 0.051411469 | 0.958997646 | 0.999371363 | Not Sig |
| ENSG00000177613 | CSTF2T       | cleavage stimulation factor subunit 2 tau variant                              | 23283     | 649.2416834 | 0.030371101 | 0.406818603 | 0.074655144 | 0.940489098 | 0.999371363 | Not Sig |
| ENSG00000198160 | MIER1        | MIER1 transcriptional regulator                                                | 57708     | 1636.882309 | 0.030391959 | 0.549036964 | 0.055355032 | 0.95585562  | 0.999371363 | Not Sig |
| ENSG00000100503 | NIN          | ninein                                                                         | 51199     | 2541.047198 | 0.030463593 | 0.426319481 | 0.071457193 | 0.943033893 | 0.999371363 | Not Sig |
| ENSG00000108953 | YWHAE        | tyrosine 3-monooxygenase/tryptophan 5-monooxygenase activation protein epsilon | 7531      | 5600.569176 | 0.030484418 | 0.421459686 | 0.072330566 | 0.94233884  | 0.999371363 | Not Sig |
| ENSG00000213281 | NRAS         | NRAS proto-oncogene, GTPase                                                    | 4893      | 1261.076461 | 0.030571742 | 0.606742894 | 0.05038665  | 0.959814275 | 0.999371363 | Not Sig |
| ENSG00000257453 | NA           | NA                                                                             | NA        | 5.157964222 | 0.030606691 | 1.099792769 | 0.027829508 | 0.977798131 | NA          | NA      |
| ENSG00000183558 | NA           | NA                                                                             | NA        | 1.844773092 | 0.030607856 | 1.93158316  | 0.015845995 | 0.987357255 | NA          | NA      |
| ENSG00000028839 | TBPL1        | TATA-box binding protein like 1                                                | 9519      | 223.500639  | 0.030702119 | 0.432287015 | 0.071022534 | 0.943379821 | 0.999371363 | Not Sig |
| ENSG00000136111 | TBC1D4       | TBC1 domain family member 4                                                    | 9882      | 884.2873814 | 0.030711602 | 0.589473717 | 0.052100036 | 0.958448985 | 0.999371363 | Not Sig |
| ENSG00000161911 | TREML1       | triggering receptor expressed on myeloid cells like 1                          | 340205    | 18.89120765 | 0.030780978 | 0.802284038 | 0.038366684 | 0.969395324 | 0.999371363 | Not Sig |
| ENSG00000267333 | NA           | NA                                                                             | NA        | 2.300521217 | 0.030972001 | 2.015020906 | 0.015370561 | 0.98773655  | NA          | NA      |
| ENSG00000140254 | DUOXA1       | dual oxidase maturation factor 1                                               | 90527     | 423.968994  | 0.031090834 | 1.022659374 | 0.030401945 | 0.975746494 | 0.999371363 | Not Sig |

|                 |          |                                                                    |           |             |             |             |             |             |             |         |
|-----------------|----------|--------------------------------------------------------------------|-----------|-------------|-------------|-------------|-------------|-------------|-------------|---------|
| ENSG00000170579 | DLGAP1   | DLG associated protein 1                                           | 9229      | 105.7692156 | 0.031094078 | 0.918442861 | 0.033855213 | 0.972992608 | 0.999371363 | Not Sig |
| ENSG00000237418 | NA       | NA                                                                 | NA        | 4.720820542 | 0.031116978 | 1.166896199 | 0.026666449 | 0.978725773 | NA          | NA      |
| ENSG00000196323 | ZBTB44   | zinc finger and BTB domain containing 44                           | 29068     | 2143.502616 | 0.031226282 | 0.456070526 | 0.068468099 | 0.945413014 | 0.999371363 | Not Sig |
| ENSG00000076924 | XAB2     | XPA binding protein 2                                              | 56949     | 1030.380042 | 0.031238352 | 0.630530017 | 0.049543005 | 0.960486566 | 0.999371363 | Not Sig |
| ENSG00000267881 | NA       | NA                                                                 | NA        | 4.371471842 | 0.031382776 | 1.881015932 | 0.01668395  | 0.986688751 | NA          | NA      |
| ENSG00000205903 | ZNF316   | zinc finger protein 316                                            | 100131017 | 1254.965912 | 0.03147762  | 0.610018861 | 0.05160106  | 0.958846575 | 0.999371363 | Not Sig |
| ENSG00000151366 | NDUFC2   | NADH:ubiquinone oxidoreductase subunit C2                          | 4718      | 329.7796833 | 0.031678022 | 0.49445271  | 0.064066839 | 0.948917006 | 0.999371363 | Not Sig |
| ENSG00000122068 | FYTTD1   | forty-two-three domain containing 1                                | 84248     | 1339.351832 | 0.031742689 | 0.449914887 | 0.070552652 | 0.943753794 | 0.999371363 | Not Sig |
| ENSG00000104361 | NIPAL2   | NIPA like domain containing 2                                      | 79815     | 814.936407  | 0.031972195 | 0.569244975 | 0.056165967 | 0.955209593 | 0.999371363 | Not Sig |
| ENSG00000182318 | ZSCAN22  | zinc finger and SCAN domain containing 22                          | 342945    | 166.1851054 | 0.032500758 | 0.537782562 | 0.060434757 | 0.951809377 | 0.999371363 | Not Sig |
| ENSG00000105088 | OLFM2    | olfactomedin 2                                                     | 93145     | 162.8754909 | 0.032542825 | 0.677066753 | 0.048064427 | 0.961664897 | 0.999371363 | Not Sig |
| ENSG00000173406 | DAB1     | DAB1, reelin adaptor protein                                       | 1600      | 15.92145393 | 0.032709009 | 0.82427791  | 0.039682016 | 0.96834664  | 0.999371363 | Not Sig |
| ENSG00000134644 | PUM1     | pumilio RNA binding family member 1                                | 9698      | 4188.674582 | 0.032977129 | 0.503135886 | 0.065543187 | 0.947741522 | 0.999371363 | Not Sig |
| ENSG00000213639 | PPP1CB   | protein phosphatase 1 catalytic subunit beta                       | 5500      | 5551.248035 | 0.0330104   | 0.456605749 | 0.072295192 | 0.942366991 | 0.999371363 | Not Sig |
| ENSG00000266777 | NA       | NA                                                                 | NA        | 86.32815318 | 0.033030258 | 0.585616861 | 0.056402505 | 0.955021161 | 0.999371363 | Not Sig |
| ENSG00000164776 | PHKG1    | phosphorylase kinase catalytic subunit gamma 1                     | 5260      | 56.58833439 | 0.033218473 | 0.608273492 | 0.054611082 | 0.95644831  | 0.999371363 | Not Sig |
| ENSG00000140319 | SRP14    | signal recognition particle 14                                     | 6727      | 1707.970023 | 0.033481363 | 0.43333599  | 0.077264209 | 0.938413363 | 0.999371363 | Not Sig |
| ENSG00000148459 | PDSS1    | decaprenyl diphosphate synthase subunit 1                          | 23590     | 113.3272764 | 0.033535842 | 0.563197717 | 0.059545416 | 0.952517693 | 0.999371363 | Not Sig |
| ENSG00000140545 | MFG8     | milk fat globule-EGF factor 8 protein                              | 4240      | 1234.412691 | 0.033796704 | 0.541658792 | 0.062394822 | 0.950248418 | 0.999371363 | Not Sig |
| ENSG00000204713 | TRIM27   | tripartite motif containing 27                                     | 5987      | 2007.905612 | 0.033817489 | 0.459022463 | 0.073672841 | 0.94127071  | 0.999371363 | Not Sig |
| ENSG00000130332 | LSM7     | LSM7 homolog, U6 small nuclear RNA and mRNA degradation associated | 51690     | 385.3387586 | 0.033896752 | 0.485612698 | 0.06980203  | 0.944351231 | 0.999371363 | Not Sig |
| ENSG00000122986 | HVCN1    | hydrogen voltage gated channel 1                                   | 84329     | 193.8716027 | 0.033930267 | 0.7590374   | 0.044701706 | 0.964345074 | 0.999371363 | Not Sig |
| ENSG00000266649 | MIR3126  | microRNA 3126                                                      | 100423030 | 4.571733324 | 0.034128071 | 1.315263531 | 0.025947706 | 0.979299049 | NA          | NA      |
| ENSG00000087095 | NLK      | nemo like kinase                                                   | 51701     | 876.9228936 | 0.034159719 | 0.391689147 | 0.087211299 | 0.930503559 | 0.999371363 | Not Sig |
| ENSG00000185811 | IKZF1    | IKAROS family zinc finger 1                                        | 10320     | 1173.704011 | 0.034194527 | 0.783208271 | 0.043659558 | 0.965175776 | 0.999371363 | Not Sig |
| ENSG00000065978 | YBX1     | Y-box binding protein 1                                            | 4904      | 5526.664767 | 0.034298349 | 0.427101946 | 0.08030483  | 0.935994817 | 0.999371363 | Not Sig |
| ENSG00000148334 | PTGES2   | prostaglandin E synthase 2                                         | 80142     | 632.5798984 | 0.034316968 | 0.586169461 | 0.058544449 | 0.953314958 | 0.999371363 | Not Sig |
| ENSG00000139547 | RDH16    | retinol dehydrogenase 16 (all-trans)                               | 8608      | 14.67268809 | 0.034375493 | 0.944559695 | 0.03639314  | 0.970968884 | 0.999371363 | Not Sig |
| ENSG00000132466 | ANKRD17  | ankyrin repeat domain 17                                           | 26057     | 4573.507251 | 0.034453947 | 0.42972175  | 0.080177341 | 0.936096211 | 0.999371363 | Not Sig |
| ENSG00000132463 | GRSF1    | G-rich RNA sequence binding factor 1                               | 2926      | 1809.195422 | 0.034754753 | 0.447737224 | 0.077623103 | 0.938127864 | 0.999371363 | Not Sig |
| ENSG00000163026 | WDCP     | WD repeat and coiled coil containing                               | 80304     | 174.3032366 | 0.034813586 | 0.463021813 | 0.075187789 | 0.9400653   | 0.999371363 | Not Sig |
| ENSG00000101882 | NKAP     | NFKB activating protein                                            | 79576     | 336.9788041 | 0.034907531 | 0.466076399 | 0.074896585 | 0.940296994 | 0.999371363 | Not Sig |
| ENSG00000154102 | C16orf74 | chromosome 16 open reading frame 74                                | 404550    | 47.77830452 | 0.035010129 | 0.730708093 | 0.047912606 | 0.961785893 | 0.999371363 | Not Sig |
| ENSG00000183718 | TRIM52   | tripartite motif containing 52                                     | 84851     | 476.7611719 | 0.035069716 | 0.425808003 | 0.082360398 | 0.934360127 | 0.999371363 | Not Sig |
| ENSG00000196981 | WDR5B    | WD repeat domain 5B                                                | 54554     | 214.2305247 | 0.035135453 | 0.50090927  | 0.070143347 | 0.944079566 | 0.999371363 | Not Sig |



|                 |                 |                                                             |           |             |             |             |                 |             |             |         |
|-----------------|-----------------|-------------------------------------------------------------|-----------|-------------|-------------|-------------|-----------------|-------------|-------------|---------|
| ENSG00000178750 | STX19           | syntaxin 19                                                 | 415117    | 47.77284756 | 0.035262756 | 0.754411393 | 0.046742078     | 0.962718793 | 0.999371363 | Not Sig |
| ENSG00000240764 | PCDHGC5         | protocadherin gamma subfamily C, 5                          | 56097     | 50.4112185  | 0.035355003 | 0.69199486  | 0.051091424     | 0.959252669 | 0.999371363 | Not Sig |
| ENSG00000240098 | NA              | NA                                                          | NA        | 9.185130251 | 0.035366089 | 0.879905476 | 0.040193054     | 0.967939215 | 0.999371363 | Not Sig |
| ENSG00000071564 | TCF3            | transcription factor 3                                      | 6929      | 1067.441624 | 0.035461322 | 0.506267394 | 0.070044649     | 0.944158122 | 0.999371363 | Not Sig |
| ENSG00000252010 | SCARNA5         | small Cajal body-specific RNA 5                             | 677775    | 1910.324672 | 0.035472161 | 0.57367352  | 0.061833359     | 0.950695538 | 0.999371363 | Not Sig |
| ENSG00000116127 | ALMS1           | ALMS1, centrosome and basal body associated protein         | 7840      | 2177.261664 | 0.035700485 | 0.426160125 | 0.083772468     | 0.933237338 | 0.999371363 | Not Sig |
| ENSG00000163156 | SCNM1           | sodium channel modifier 1                                   | 79005     | 281.1356569 | 0.035735868 | 0.46801069  | 0.076356948     | 0.93913512  | 0.999371363 | Not Sig |
| ENSG00000163156 | TNFAIP8L2-SCNM1 | TNFAIP8L2-SCNM1 readthrough                                 | 100534012 | 281.1356569 | 0.035735868 | 0.46801069  | 0.076356948     | 0.93913512  | 0.999371363 | Not Sig |
| ENSG00000236305 | SLC12A9-AS1     | SLC12A9 antisense RNA 1                                     | 105375430 | 3.096329701 | 0.035753125 | 1.309633066 | 0.027300109     | 0.97822037  | NA          | NA      |
| ENSG00000013374 | NUB1            | negative regulator of ubiquitin like proteins 1             | 51667     | 1786.370606 | 0.035823626 | 0.45227896  | 0.079206926     | 0.936868036 | 0.999371363 | Not Sig |
| ENSG00000143514 | TP53BP2         | tumor protein p53 binding protein 2                         | 7159      | 1637.945625 | 0.03592804  | 0.486016561 | 0.07392349      | 0.941071265 | 0.999371363 | Not Sig |
| ENSG00000206596 | NA              | NA                                                          | NA        | 1.235968877 | 0.036105435 | 2.864553893 | 0.012604209     | 0.989943563 | NA          | NA      |
| ENSG00000169981 | ZNF35           | zinc finger protein 35                                      | 7584      | 224.8167079 | 0.036169279 | 0.422154733 | 0.085677777     | 0.931722569 | 0.999371363 | Not Sig |
| ENSG00000124177 | CHD6            | chromodomain helicase DNA binding protein 6                 | 84181     | 3123.599908 | 0.036199083 | 0.457040883 | 0.079203161     | 0.93687103  | 0.999371363 | Not Sig |
| ENSG00000163453 | IGFBP7          | insulin like growth factor binding protein 7                | 3490      | 6000.869491 | 0.036461144 | 0.541696047 | 0.067309231     | 0.946335528 | 0.999371363 | Not Sig |
| ENSG00000000419 | DPM1            | dolichyl-phosphate mannosyltransferase subunit 1, catalytic | 8813      | 461.3773681 | 0.036499097 | 0.485338288 | 0.075203416     | 0.940052867 | 0.999371363 | Not Sig |
| ENSG00000126522 | ASL             | argininosuccinate lyase                                     | 435       | 635.253514  | 0.036717276 | 0.541261105 | 0.067836531     | 0.945915763 | 0.999371363 | Not Sig |
| ENSG00000196081 | NA              | NA                                                          | NA        | 98.26509225 | 0.036796224 | 0.826307969 | 0.044530883     | 0.964481235 | 0.999371363 | Not Sig |
| ENSG00000126777 | KTN1            | kinectin 1                                                  | 3895      | 5951.06953  | 0.036903529 | 0.388274436 | 0.095044962     | 0.924279114 | 0.999371363 | Not Sig |
| ENSG00000105229 | PIAS4           | protein inhibitor of activated STAT 4                       | 51588     | 591.9431727 | 0.036915286 | 0.57083483  | 0.064668945     | 0.94843759  | 0.999371363 | Not Sig |
| ENSG00000130675 | MNX1            | motor neuron and pancreas homeobox 1                        | 3110      | 187.8089605 | 0.037224272 | 1.090098293 | 0.034147629     | 0.972759428 | 0.999371363 | Not Sig |
| ENSG00000171817 | ZNF540          | zinc finger protein 540                                     | 163255    | 100.3858274 | 0.03724996  | 0.668973847 | 0.055682237     | 0.955594951 | 0.999371363 | Not Sig |
| ENSG00000198208 | RPS6KL1         | ribosomal protein S6 kinase like 1                          | 83694     | 77.30015514 | 0.037309354 | 0.819752936 | 0.045512925     | 0.963698473 | 0.999371363 | Not Sig |
| ENSG00000162645 | GBP2            | guanylate binding protein 2                                 | 2634      | 1735.31877  | 0.037320701 | 0.551504558 | 0.067670703     | 0.946047772 | 0.999371363 | Not Sig |
| ENSG00000150347 | ARID5B          | AT-rich interaction domain 5B                               | 84159     | 2733.857908 | 0.037321609 | 0.489054398 | 0.076313819     | 0.939169432 | 0.999371363 | Not Sig |
| ENSG00000165996 | HACD1           | 3-hydroxyacyl-CoA dehydratase 1                             | 9200      | 123.6061637 | 0.037337767 | 0.495636817 | 0.075332916     | 0.939949833 | 0.999371363 | Not Sig |
| ENSG00000266687 | NA              | NA                                                          | NA        | 2.818806894 | 0.037351416 | 1.37970848  | 0.027071962     | 0.978402338 | NA          | NA      |
| ENSG00000241785 | NA              | NA                                                          | NA        | 3.79799387  | 0.037398714 | 1.299597308 | 0.028777156     | 0.97704232  | NA          | NA      |
| ENSG00000112874 | NUDT12          | nudix hydrolase 12                                          | 83594     | 294.8872389 | 0.037410725 | 0.506534678 | 0.073856197     | 0.941124811 | 0.999371363 | Not Sig |
| ENSG00000138080 | EMILIN1         | elastin microfibril interfacer 1                            | 11117     | 2360.038977 | 0.037443432 | 0.512498931 | 0.073060508     | 0.941757968 | 0.999371363 | Not Sig |
| ENSG00000128872 | TMOD2           | tropomodulin 2                                              | 29767     | 459.1089372 | 0.037603072 | 0.569478281 | 0.066030739     | 0.947353353 | 0.999371363 | Not Sig |
| ENSG00000187676 | B3GLCT          | beta 3-glucosyltransferase                                  | 145173    | 299.0797521 | 0.03782916  | 0.446067021 | <b>0.084806</b> | 0.932415624 | 0.999371363 | Not Sig |
| ENSG00000100364 | KIAA0930        | KIAA0930                                                    | 23313     | 1764.454099 | 0.037852439 | 0.558289213 | 0.067800771     | 0.94594423  | 0.999371363 | Not Sig |
| ENSG00000132286 | TIMM10B         | translocase of inner mitochondrial membrane 10B             | 26515     | 620.2252713 | 0.038103217 | 0.452860407 | 0.08413899      | 0.932945925 | 0.999371363 | Not Sig |
| ENSG00000243335 | KCTD7           | potassium channel tetramerization domain containing 7       | 154881    | 508.257465  | 0.038267504 | 0.467960515 | 0.081775071     | 0.93482558  | 0.999371363 | Not Sig |

|                 |           |                                                                  |           |             |             |             |             |             |             |         |
|-----------------|-----------|------------------------------------------------------------------|-----------|-------------|-------------|-------------|-------------|-------------|-------------|---------|
| ENSG00000184619 | KRBA2     | KRAB-A domain containing 2                                       | 124751    | 37.65863779 | 0.038322316 | 0.589549535 | 0.065002707 | 0.948171845 | 0.999371363 | Not Sig |
| ENSG00000239291 | NA        | NA                                                               | NA        | 44.90941227 | 0.038341229 | 0.541001837 | 0.070870793 | 0.943500588 | 0.999371363 | Not Sig |
| ENSG00000229991 | NA        | NA                                                               | NA        | 2.651995482 | 0.038586956 | 1.711205647 | 0.022549573 | 0.982009569 | NA          | NA      |
| ENSG00000162600 | OMA1      | OMA1 zinc metallopeptidase                                       | 115209    | 490.8290703 | 0.038650628 | 0.563013227 | 0.068649592 | 0.945268543 | 0.999371363 | Not Sig |
| ENSG00000259020 | NA        | NA                                                               | NA        | 1.16384983  | 0.038742826 | 2.504188929 | 0.015471207 | 0.987656255 | NA          | NA      |
| ENSG00000115875 | SRSF7     | serine and arginine rich splicing factor 7                       | 6432      | 1879.795217 | 0.038810259 | 0.397109139 | 0.097731972 | 0.922145127 | 0.999371363 | Not Sig |
| ENSG00000101421 | CHMP4B    | charged multivesicular body protein 4B                           | 128866    | 2056.123674 | 0.039002951 | 0.421130446 | 0.092614893 | 0.926209512 | 0.999371363 | Not Sig |
| ENSG00000107862 | GBF1      | golgi brefeldin A resistant guanine nucleotide exchange factor 1 | 8729      | 3058.156827 | 0.039071466 | 0.425218153 | 0.091885697 | 0.926788856 | 0.999371363 | Not Sig |
| ENSG00000196305 | IARS      | isoleucyl-tRNA synthetase                                        | 3376      | 2741.721136 | 0.039084747 | 0.52804554  | 0.074017759 | 0.940996254 | 0.999371363 | Not Sig |
| ENSG00000178531 | CTXN1     | cortexin 1                                                       | 404217    | 168.4982489 | 0.039180586 | 0.7337479   | 0.053397884 | 0.957414891 | 0.999371363 | Not Sig |
| ENSG00000131626 | PPFIA1    | PTPRF interacting protein alpha 1                                | 8500      | 2139.902555 | 0.039267544 | 0.405107716 | 0.096931119 | 0.922781096 | 0.999371363 | Not Sig |
| ENSG00000115661 | STK16     | serine/threonine kinase 16                                       | 8576      | 335.2548466 | 0.039286036 | 0.533797665 | 0.073597242 | 0.941330866 | 0.999371363 | Not Sig |
| ENSG00000182979 | MTA1      | metastasis associated 1                                          | 9112      | 1555.181697 | 0.039302496 | 0.476931664 | 0.082406976 | 0.934323089 | 0.999371363 | Not Sig |
| ENSG00000226823 | NA        | NA                                                               | NA        | 13.49440254 | 0.039316562 | 0.829537404 | 0.047395768 | 0.962197802 | 0.999371363 | Not Sig |
| ENSG00000087460 | GNAS      | GNAS complex locus                                               | 2778      | 10567.76612 | 0.039319503 | 0.440629623 | 0.089234815 | 0.928895297 | 0.999371363 | Not Sig |
| ENSG00000265089 | MIR4655   | microRNA 4655                                                    | 100616160 | 2.473770164 | 0.039421472 | 1.459320001 | 0.02701359  | 0.978448895 | NA          | NA      |
| ENSG00000162300 | ZFPL1     | zinc finger protein like 1                                       | 7542      | 440.4039449 | 0.039565014 | 0.435133751 | 0.090926098 | 0.927551313 | 0.999371363 | Not Sig |
| ENSG00000134001 | EIF2S1    | eukaryotic translation initiation factor 2 subunit alpha         | 1965      | 1148.060362 | 0.039749045 | 0.430815267 | 0.092264708 | 0.926487727 | 0.999371363 | Not Sig |
| ENSG00000259623 | NA        | NA                                                               | NA        | 281.0073852 | 0.039902136 | 0.625232827 | 0.063819644 | 0.949113837 | 0.999371363 | Not Sig |
| ENSG00000200455 | NA        | NA                                                               | NA        | 3.625902036 | 0.040011393 | 1.688007667 | 0.023703324 | 0.981089254 | NA          | NA      |
| ENSG00000229638 | NA        | NA                                                               | NA        | 29.77937619 | 0.04004492  | 0.659504331 | 0.060719722 | 0.951582425 | 0.999371363 | Not Sig |
| ENSG00000154079 | SDHAF4    | succinate dehydrogenase complex assembly factor 4                | 135154    | 138.6692087 | 0.040101925 | 0.507965932 | 0.078946091 | 0.937075502 | 0.999371363 | Not Sig |
| ENSG00000196365 | LONP1     | lon peptidase 1, mitochondrial                                   | 9361      | 1480.830026 | 0.040135432 | 0.496243318 | 0.080878533 | 0.935538552 | 0.999371363 | Not Sig |
| ENSG00000171124 | FUT3      | fucosyltransferase 3 (Lewis blood group)                         | 2525      | 290.4449941 | 0.040299552 | 0.761727851 | 0.052905447 | 0.957807245 | 0.999371363 | Not Sig |
| ENSG00000151376 | ME3       | malic enzyme 3                                                   | 10873     | 493.559761  | 0.040344302 | 0.447920615 | 0.090070205 | 0.928231426 | 0.999371363 | Not Sig |
| ENSG00000145675 | PIK3R1    | phosphoinositide-3-kinase regulatory subunit 1                   | 5295      | 2381.539695 | 0.040345291 | 0.622368775 | 0.064825378 | 0.948313035 | 0.999371363 | Not Sig |
| ENSG00000156113 | KCNMA1    | potassium calcium-activated channel subfamily M alpha 1          | 3778      | 399.4040172 | 0.040446537 | 0.702499534 | 0.05757518  | 0.95408702  | 0.999371363 | Not Sig |
| ENSG00000136758 | YME1L1    | YME1 like 1 ATPase                                               | 10730     | 2951.142402 | 0.040633392 | 0.461572109 | 0.088033742 | 0.929849858 | 0.999371363 | Not Sig |
| ENSG00000259728 | LINC00933 | long intergenic non-protein coding RNA 933                       | 100506874 | 11.12144057 | 0.040962103 | 0.876559004 | 0.046730571 | 0.962727965 | 0.999371363 | Not Sig |
| ENSG00000266531 | MIR4706   | microRNA 4706                                                    | 100616490 | 2.128733435 | 0.040988778 | 1.633127349 | 0.025098336 | 0.979976528 | NA          | NA      |
| ENSG00000116539 | ASH1L     | ASH1 like histone lysine methyltransferase                       | 55870     | 6264.21605  | 0.040999972 | 0.467403182 | 0.087718641 | 0.930100303 | 0.999371363 | Not Sig |
| ENSG00000081014 | AP4E1     | adaptor related protein complex 4 epsilon 1 subunit              | 23431     | 512.9382026 | 0.041082741 | 0.5420199   | 0.075795632 | 0.939581691 | 0.999371363 | Not Sig |
| ENSG00000107959 | PITRM1    | pitrilysin metallopeptidase 1                                    | 10531     | 1548.356153 | 0.041191895 | 0.44702006  | 0.092147756 | 0.926580646 | 0.999371363 | Not Sig |
| ENSG00000007968 | E2F2      | E2F transcription factor 2                                       | 1870      | 122.9761383 | 0.041195927 | 0.718140733 | 0.057364699 | 0.954254683 | 0.999371363 | Not Sig |
| ENSG00000186280 | KDM4D     | lysine demethylase 4D                                            | 55693     | 23.50803971 | 0.041204689 | 0.737118131 | 0.055899709 | 0.955421703 | 0.999371363 | Not Sig |

|                 |           |                                                                  |           |             |             |             |             |             |             |         |
|-----------------|-----------|------------------------------------------------------------------|-----------|-------------|-------------|-------------|-------------|-------------|-------------|---------|
| ENSG00000184227 | ACOT1     | acyl-CoA thioesterase 1                                          | 641371    | 54.49761357 | 0.04125093  | 0.71538208  | 0.057662795 | 0.954017229 | 0.999371363 | Not Sig |
| ENSG00000168917 | SLC35G2   | solute carrier family 35 member G2                               | 80723     | 102.3891934 | 0.041433827 | 0.721480415 | 0.057428901 | 0.954203542 | 0.999371363 | Not Sig |
| ENSG00000148908 | RGS10     | regulator of G protein signaling 10                              | 6001      | 273.6478626 | 0.041434084 | 0.544848604 | 0.076046967 | 0.939381732 | 0.999371363 | Not Sig |
| ENSG00000165280 | VCP       | valosin containing protein                                       | 7415      | 5818.8934   | 0.04150398  | 0.444784846 | 0.093312486 | 0.925655313 | 0.999371363 | Not Sig |
| ENSG00000170965 | PLAC1     | placenta specific 1                                              | 10761     | 2.027172235 | 0.041605162 | 2.201438468 | 0.01889908  | 0.984921613 | NA          | NA      |
| ENSG00000009790 | TRAF3IP3  | TRAF3 interacting protein 3                                      | 80342     | 368.6596857 | 0.041824449 | 0.642417094 | 0.065104819 | 0.948090544 | 0.999371363 | Not Sig |
| ENSG00000197562 | RAB40C    | RAB40C, member RAS oncogene family                               | 57799     | 1109.144474 | 0.041839364 | 0.501529691 | 0.083423503 | 0.933514801 | 0.999371363 | Not Sig |
| ENSG00000109758 | HGFAC     | HGF activator                                                    | 3083      | 10.71906998 | 0.041869864 | 1.061340867 | 0.039449969 | 0.968531642 | 0.999371363 | Not Sig |
| ENSG00000131473 | ACLY      | ATP citrate lyase                                                | 47        | 3243.036167 | 0.042100286 | 0.437174364 | 0.096300902 | 0.923281595 | 0.999371363 | Not Sig |
| ENSG00000261101 | NA        | NA                                                               | NA        | 35.48354111 | 0.042110858 | 0.677616552 | 0.062145557 | 0.950446918 | 0.999371363 | Not Sig |
| ENSG00000104853 | CLPTM1    | CLPTM1, transmembrane protein                                    | 1209      | 1988.503483 | 0.042249769 | 0.456737976 | 0.092503298 | 0.926298171 | 0.999371363 | Not Sig |
| ENSG00000196990 | FAM163B   | family with sequence similarity 163 member B                     | 642968    | 1.003215664 | 0.042372993 | 2.601709311 | 0.016286598 | 0.987005749 | NA          | NA      |
| ENSG00000211765 | NA        | NA                                                               | NA        | 1.003215664 | 0.042372993 | 2.601709311 | 0.016286598 | 0.987005749 | NA          | NA      |
| ENSG00000163625 | WDFY3     | WD repeat and FYVE domain containing 3                           | 23001     | 4951.209279 | 0.042403978 | 0.406998219 | 0.104187135 | 0.917020843 | 0.999371363 | Not Sig |
| ENSG00000166912 | MTMR10    | myotubularin related protein 10                                  | 54893     | 1161.124868 | 0.042413894 | 0.480627168 | 0.088246976 | 0.929680382 | 0.999371363 | Not Sig |
| ENSG00000107937 | GTPBP4    | GTP binding protein 4                                            | 23560     | 1070.854533 | 0.04242331  | 0.496663567 | 0.085416593 | 0.931930202 | 0.999371363 | Not Sig |
| ENSG00000138614 | INTS14    | integrator complex subunit 14                                    | 81556     | 663.5876093 | 0.042453491 | 0.423763394 | 0.100182062 | 0.920199787 | 0.999371363 | Not Sig |
| ENSG00000197479 | PCDHB11   | protocadherin beta 11                                            | 56125     | 108.0361769 | 0.04245617  | 0.817346802 | 0.051943887 | 0.958573405 | 0.999371363 | Not Sig |
| ENSG00000155463 | OXAIL     | OXAIL, mitochondrial inner membrane protein                      | 5018      | 1213.436829 | 0.042458324 | 0.401606262 | 0.105721271 | 0.915803503 | 0.999371363 | Not Sig |
| ENSG00000140350 | ANP32A    | acidic nuclear phosphoprotein 32 family member A                 | 8125      | 2303.758653 | 0.042749471 | 0.404783104 | 0.105610809 | 0.915891148 | 0.999371363 | Not Sig |
| ENSG00000107551 | RASSF4    | Ras association domain family member 4                           | 83937     | 1092.401493 | 0.043518953 | 0.586809184 | 0.074162018 | 0.940881468 | 0.999371363 | Not Sig |
| ENSG00000103326 | CAPN15    | calpain 15                                                       | 6650      | 1548.062528 | 0.043560462 | 0.583951701 | 0.074596001 | 0.940536156 | 0.999371363 | Not Sig |
| ENSG00000147133 | TAF1      | TATA-box binding protein associated factor 1                     | 6872      | 2418.227808 | 0.043874705 | 0.406345083 | 0.107974002 | 0.914016315 | 0.999371363 | Not Sig |
| ENSG00000233806 | LINC01237 | long intergenic non-protein coding RNA 1237                      | 101927289 | 22.21654457 | 0.043930172 | 0.788753474 | 0.055695693 | 0.955584231 | 0.999371363 | Not Sig |
| ENSG00000115339 | GALNT3    | polypeptide N-acetylgalactosaminyltransferase 3                  | 2591      | 1112.370199 | 0.043986607 | 0.729270406 | 0.060315908 | 0.951904032 | 0.999371363 | Not Sig |
| ENSG00000173065 | FAM222B   | family with sequence similarity 222 member B                     | 55731     | 732.2374122 | 0.044027129 | 0.479854559 | 0.091750987 | 0.926895887 | 0.999371363 | Not Sig |
| ENSG00000168763 | CNNM3     | cyclin and CBS domain divalent metal cation transport mediator 3 | 26505     | 869.5688874 | 0.044053839 | 0.515079664 | 0.085528205 | 0.931841473 | 0.999371363 | Not Sig |
| ENSG00000106771 | TMEM245   | transmembrane protein 245                                        | 23731     | 3134.938137 | 0.044110061 | 0.416405942 | 0.10593043  | 0.91563755  | 0.999371363 | Not Sig |
| ENSG00000207588 | MIR593    | microRNA 593                                                     | 693178    | 10.0485748  | 0.044126983 | 1.161788957 | 0.037981927 | 0.969702092 | 0.999371363 | Not Sig |
| ENSG00000087087 | SRRT      | serrate, RNA effector molecule                                   | 51593     | 1706.846991 | 0.044214987 | 0.472431554 | 0.093590249 | 0.925434655 | 0.999371363 | Not Sig |
| ENSG00000093000 | NUP50     | nucleoporin 50                                                   | 10762     | 1890.15025  | 0.044285226 | 0.426576444 | 0.103815451 | 0.917315804 | 0.999371363 | Not Sig |
| ENSG00000132740 | IGHMBP2   | immunoglobulin mu binding protein 2                              | 3508      | 524.9822822 | 0.044564192 | 0.517151676 | 0.086172382 | 0.931329385 | 0.999371363 | Not Sig |
| ENSG00000040531 | CTNS      | cystinosin, lysosomal cystine transporter                        | 1497      | 396.8842237 | 0.044717139 | 0.457043262 | 0.097840058 | 0.922059298 | 0.999371363 | Not Sig |
| ENSG00000166401 | SERPINB8  | serpin family B member 8                                         | 5271      | 314.9350243 | 0.044834363 | 0.569987781 | 0.078658463 | 0.937304285 | 0.999371363 | Not Sig |
| ENSG00000169129 | AFAP1L2   | actin filament associated protein 1 like 2                       | 84632     | 287.512727  | 0.044863357 | 0.742443592 | 0.06042662  | 0.951815857 | 0.999371363 | Not Sig |

|                 |          |                                                                        |           |             |             |             |             |             |             |         |
|-----------------|----------|------------------------------------------------------------------------|-----------|-------------|-------------|-------------|-------------|-------------|-------------|---------|
| ENSG00000227124 | ZNF717   | zinc finger protein 717                                                | 100131827 | 206.0056905 | 0.044908178 | 0.673745411 | 0.066654522 | 0.94685674  | 0.999371363 | Not Sig |
| ENSG00000108270 | NA       | NA                                                                     | NA        | 926.4271692 | 0.045075116 | 0.417932355 | 0.10785266  | 0.91411257  | 0.999371363 | Not Sig |
| ENSG00000124664 | SPDEF    | SAM pointed domain containing ETS transcription factor                 | 25803     | 464.5571156 | 0.045264871 | 0.977981929 | 0.046283954 | 0.963083928 | 0.999371363 | Not Sig |
| ENSG00000173681 | BCLAF3   | BCLAF1 and THRAP3 family member 3                                      | 256643    | 724.7327573 | 0.045328502 | 0.654713633 | 0.069234089 | 0.944803289 | 0.999371363 | Not Sig |
| ENSG00000177888 | ZBTB41   | zinc finger and BTB domain containing 41                               | 360023    | 1538.730677 | 0.0456859   | 0.676767296 | 0.06750607  | 0.94617883  | 0.999371363 | Not Sig |
| ENSG00000159753 | CARMIL2  | capping protein regulator and myosin 1 linker 2                        | 146206    | 147.4374386 | 0.046023349 | 0.488136494 | 0.09428377  | 0.924883742 | 0.999371363 | Not Sig |
| ENSG00000203965 | EFCAB7   | EF-hand calcium binding domain 7                                       | 84455     | 174.2110973 | 0.046091974 | 0.648734009 | 0.07104911  | 0.94335867  | 0.999371363 | Not Sig |
| ENSG00000121848 | NA       | NA                                                                     | NA        | 1063.275362 | 0.046115445 | 0.4421208   | 0.104305079 | 0.916927247 | 0.999371363 | Not Sig |
| ENSG00000203667 | COX20    | COX20, cytochrome c oxidase assembly factor                            | 116228    | 602.0504052 | 0.046202272 | 0.531253515 | 0.086968408 | 0.930696624 | 0.999371363 | Not Sig |
| ENSG00000267091 | NA       | NA                                                                     | NA        | 1.431918389 | 0.04658516  | 2.374040867 | 0.019622729 | 0.984344332 | NA          | NA      |
| ENSG00000226406 | NA       | NA                                                                     | NA        | 2.137883631 | 0.046664765 | 1.785602448 | 0.026133905 | 0.979150534 | NA          | NA      |
| ENSG00000153015 | CWC27    | CWC27 spliceosome associated protein homolog                           | 10283     | 449.7252005 | 0.046686548 | 0.517596851 | 0.090198671 | 0.92812934  | 0.999371363 | Not Sig |
| ENSG00000164405 | UQCRCQ   | ubiquinol-cytochrome c reductase complex III subunit VII               | 27089     | 824.2896314 | 0.046704336 | 0.558710268 | 0.083593123 | 0.933379935 | 0.999371363 | Not Sig |
| ENSG00000128203 | ASPHD2   | aspartate beta-hydroxylase domain containing 2                         | 57168     | 81.73182894 | 0.04685966  | 0.629365098 | 0.074455447 | 0.940647991 | 0.999371363 | Not Sig |
| ENSG00000178922 | HYI      | hydroxypyruvate isomerase (putative)                                   | 81888     | 611.6527039 | 0.046963467 | 0.477747252 | 0.098301909 | 0.921692562 | 0.999371363 | Not Sig |
| ENSG00000253797 | UTP14C   | UTP14C, small subunit processome component                             | 9724      | 872.6979513 | 0.047131545 | 0.460256439 | 0.102402793 | 0.918436967 | 0.999371363 | Not Sig |
| ENSG00000149926 | FAM57B   | family with sequence similarity 57 member B                            | 83723     | 3.964628477 | 0.047209386 | 1.818929769 | 0.025954485 | 0.979293642 | NA          | NA      |
| ENSG00000166959 | MS4A8    | membrane spanning 4-domains A8                                         | 83661     | 176.7249951 | 0.047308326 | 1.17360719  | 0.040310187 | 0.967845832 | 0.999371363 | Not Sig |
| ENSG00000153832 | FBX036   | F-box protein 36                                                       | 130888    | 152.4027467 | 0.047417278 | 0.482019415 | 0.098372133 | 0.921636802 | 0.999371363 | Not Sig |
| ENSG00000180357 | ZNF609   | zinc finger protein 609                                                | 23060     | 3056.076278 | 0.047471196 | 0.42715565  | 0.11113325  | 0.911510682 | 0.999371363 | Not Sig |
| ENSG00000177842 | ZNF620   | zinc finger protein 620                                                | 253639    | 164.7548344 | 0.04797568  | 0.565136969 | 0.084892129 | 0.93234715  | 0.999371363 | Not Sig |
| ENSG00000154553 | PDLIM3   | PDZ and LIM domain 3                                                   | 27295     | 1095.253974 | 0.048022284 | 0.59115363  | 0.081234863 | 0.935255174 | 0.999371363 | Not Sig |
| ENSG00000204599 | TRIM39   | tripartite motif containing 39                                         | 56658     | 382.9780152 | 0.04806301  | 0.505874151 | 0.095009816 | 0.92430703  | 0.999371363 | Not Sig |
| ENSG00000154864 | PIEZO2   | piezo type mechanosensitive ion channel component 2                    | 63895     | 968.1336012 | 0.048140037 | 0.410039925 | 0.117403291 | 0.906540476 | 0.999371363 | Not Sig |
| ENSG00000259248 | USP3-AS1 | USP3 antisense RNA 1                                                   | 100130855 | 42.12503836 | 0.048154784 | 0.837413073 | 0.057504218 | 0.954143546 | 0.999371363 | Not Sig |
| ENSG00000128951 | DUT      | deoxyuridine triphosphatase                                            | 1854      | 919.429095  | 0.048356595 | 0.446365275 | 0.108334134 | 0.913730647 | 0.999371363 | Not Sig |
| ENSG00000205250 | E2F4     | E2F transcription factor 4                                             | 1874      | 984.8965419 | 0.048466243 | 0.548502459 | 0.088361032 | 0.929589732 | 0.999371363 | Not Sig |
| ENSG00000104763 | ASAH1    | N-acylsphingosine amidohydrolase 1                                     | 427       | 6567.305312 | 0.048629713 | 0.661056974 | 0.073563573 | 0.941357657 | 0.999371363 | Not Sig |
| ENSG00000146574 | CCZ1B    | CCZ1 homolog B, vacuolar protein trafficking and biogenesis associated | 221960    | 554.0177121 | 0.048673007 | 0.754016331 | 0.064551661 | 0.948530973 | 0.999371363 | Not Sig |
| ENSG00000228113 | NA       | NA                                                                     | NA        | 25.22582882 | 0.048731959 | 0.855937029 | 0.056934048 | 0.954597732 | 0.999371363 | Not Sig |
| ENSG00000108298 | RPL19    | ribosomal protein L19                                                  | 6143      | 9762.39628  | 0.048810337 | 0.423654454 | 0.115212614 | 0.908276601 | 0.999371363 | Not Sig |
| ENSG00000186564 | FOXD2    | forkhead box D2                                                        | 2306      | 51.96294669 | 0.048841123 | 0.63781249  | 0.076575991 | 0.938960859 | 0.999371363 | Not Sig |
| ENSG00000128908 | INO80    | INO80 complex subunit                                                  | 54617     | 1713.841248 | 0.048885756 | 0.410389544 | 0.119120375 | 0.905179989 | 0.999371363 | Not Sig |
| ENSG00000168675 | LDLRAD4  | low density lipoprotein receptor class A domain containing 4           | 753       | 1233.917274 | 0.048905939 | 0.794039896 | 0.061591287 | 0.950888316 | 0.999371363 | Not Sig |
| ENSG00000049245 | VAMP3    | vesicle associated membrane protein 3                                  | 9341      | 1756.567236 | 0.048972915 | 0.499857025 | 0.097973846 | 0.921953062 | 0.999371363 | Not Sig |

|                 |              |                                                                           |           |             |             |             |             |             |             |         |
|-----------------|--------------|---------------------------------------------------------------------------|-----------|-------------|-------------|-------------|-------------|-------------|-------------|---------|
| ENSG00000259444 | NA           | NA                                                                        | NA        | 4.297387342 | 0.048982551 | 1.58511237  | 0.030901627 | 0.975347993 | NA          | NA      |
| ENSG00000235552 | NA           | NA                                                                        | NA        | 33.70377355 | 0.049123155 | 0.744451971 | 0.06598566  | 0.947389242 | 0.999371363 | Not Sig |
| ENSG00000252378 | NA           | NA                                                                        | NA        | 5.465671287 | 0.049269583 | 1.161618179 | 0.04241461  | 0.966168181 | NA          | NA      |
| ENSG00000255428 | LOC100132078 | uncharacterized LOC100132078                                              | 100132078 | 4.19440874  | 0.049272884 | 1.780736004 | 0.027669954 | 0.977925388 | NA          | NA      |
| ENSG00000150991 | UBC          | ubiquitin C                                                               | 7316      | 15468.10979 | 0.049289271 | 0.491349054 | 0.100314167 | 0.920094911 | 0.999371363 | Not Sig |
| ENSG00000162729 | IGSF8        | immunoglobulin superfamily member 8                                       | 93185     | 1048.314438 | 0.049583264 | 0.643957397 | 0.076997739 | 0.938625343 | 0.999371363 | Not Sig |
| ENSG00000102287 | GABRE        | gamma-aminobutyric acid type A receptor epsilon subunit                   | 2564      | 772.9548025 | 0.049586801 | 0.764265787 | 0.064881618 | 0.948268256 | 0.999371363 | Not Sig |
| ENSG00000111224 | PARP1        | poly(ADP-ribose) polymerase family member 11                              | 57097     | 318.6131597 | 0.049708249 | 0.543956305 | 0.091382797 | 0.92718843  | 0.999371363 | Not Sig |
| ENSG00000237190 | CDKN2AIPNL   | CDKN2A interacting protein N-terminal like                                | 91368     | 184.4486238 | 0.049766349 | 0.480868864 | 0.103492558 | 0.917572056 | 0.999371363 | Not Sig |
| ENSG00000085185 | BCORL1       | BCL6 corepressor like 1                                                   | 63035     | 781.7858043 | 0.049771901 | 0.492302947 | 0.101100148 | 0.919470961 | 0.999371363 | Not Sig |
| ENSG00000159792 | PSKH1        | protein serine kinase H1                                                  | 5681      | 848.2028639 | 0.049774036 | 0.564372748 | 0.08819355  | 0.929722843 | 0.999371363 | Not Sig |
| ENSG00000205403 | CFI          | complement factor I                                                       | 3426      | 1943.060551 | 0.049921342 | 0.641433245 | 0.077827806 | 0.937965028 | 0.999371363 | Not Sig |
| ENSG00000272655 | NA           | NA                                                                        | NA        | 112.7446099 | 0.050012762 | 0.556431774 | 0.089881212 | 0.928381612 | 0.999371363 | Not Sig |
| ENSG00000153827 | TRIP12       | thyroid hormone receptor interactor 12                                    | 9320      | 7088.125675 | 0.050147076 | 0.434996761 | 0.115281492 | 0.908222008 | 0.999371363 | Not Sig |
| ENSG00000181192 | DHTKD1       | dehydrogenase E1 and transketolase domain containing 1                    | 55526     | 1203.806629 | 0.050167777 | 0.555625687 | 0.090290601 | 0.928056289 | 0.999371363 | Not Sig |
| ENSG00000197013 | ZNF429       | zinc finger protein 429                                                   | 353088    | 270.0228485 | 0.050194575 | 0.478181088 | 0.104969805 | 0.916399769 | 0.999371363 | Not Sig |
| ENSG00000167962 | ZNF598       | zinc finger protein 598                                                   | 90850     | 860.2433979 | 0.050218432 | 0.52942732  | 0.094854251 | 0.924430595 | 0.999371363 | Not Sig |
| ENSG00000119231 | SENP5        | SUMO1/sentrin specific peptidase 5                                        | 205564    | 1396.433492 | 0.050249352 | 0.401565439 | 0.125133658 | 0.900417737 | 0.999371363 | Not Sig |
| ENSG00000240466 | NA           | NA                                                                        | NA        | 2.699366782 | 0.05030949  | 1.743091854 | 0.028862214 | 0.976974482 | NA          | NA      |
| ENSG00000067798 | NAV3         | neuron navigator 3                                                        | 89795     | 294.4403837 | 0.050310305 | 0.621014375 | 0.081013108 | 0.935431528 | 0.999371363 | Not Sig |
| ENSG00000228335 | NA           | NA                                                                        | NA        | 7.758775619 | 0.050353891 | 0.925960015 | 0.0543802   | 0.956632253 | 0.999371363 | Not Sig |
| ENSG00000148288 | GBGT1        | glucosyl alpha-1,3-N-acetylgalactosaminyltransferase 1 (FORS blood group) | 26301     | 181.5472365 | 0.050690924 | 0.60881096  | 0.083262173 | 0.933643077 | 0.999371363 | Not Sig |
| ENSG00000181852 | RNF41        | ring finger protein 41                                                    | 10193     | 712.390698  | 0.050773155 | 0.460887462 | 0.110163889 | 0.9122794   | 0.999371363 | Not Sig |
| ENSG00000171121 | KCNMB3       | potassium calcium-activated channel subfamily M regulatory beta subunit 3 | 27094     | 92.62187151 | 0.05080854  | 0.672115373 | 0.075594968 | 0.93974134  | 0.999371363 | Not Sig |
| ENSG00000114302 | PRKAR2A      | protein kinase cAMP-dependent type II regulatory subunit alpha            | 5576      | 1711.091287 | 0.050881396 | 0.389888792 | 0.130502329 | 0.896169011 | 0.999371363 | Not Sig |
| ENSG00000049247 | UTS2         | urotensin 2                                                               | 10911     | 69.78891733 | 0.050951815 | 0.625744653 | 0.08142589  | 0.93510326  | 0.999371363 | Not Sig |
| ENSG00000147234 | FRMPD3       | FERM and PDZ domain containing 3                                          | 84443     | 153.4128262 | 0.051027713 | 1.080427217 | 0.0472292   | 0.962330556 | 0.999371363 | Not Sig |
| ENSG00000137767 | SQOR         | sulfide quinone oxidoreductase                                            | 58472     | 669.2812437 | 0.05109483  | 0.462873282 | 0.110386215 | 0.912103085 | 0.999371363 | Not Sig |
| ENSG00000115042 | FAHD2A       | fumarylacetoacetate hydrolase domain containing 2A                        | 51011     | 401.8942183 | 0.051194293 | 0.479429082 | 0.106781785 | 0.914962098 | 0.999371363 | Not Sig |
| ENSG00000088756 | ARHGAP28     | Rho GTPase activating protein 28                                          | 79822     | 286.6246209 | 0.051269328 | 0.606150222 | 0.084581884 | 0.932593802 | 0.999371363 | Not Sig |
| ENSG00000204574 | ABCF1        | ATP binding cassette subfamily F member 1                                 | 23        | 2136.884339 | 0.051280921 | 0.506016202 | 0.101342448 | 0.919278621 | 0.999371363 | Not Sig |
| ENSG00000197763 | TXNRD3       | thioredoxin reductase 3                                                   | 114112    | 226.4355811 | 0.051300209 | 0.444759812 | 0.115343625 | 0.908172762 | 0.999371363 | Not Sig |
| ENSG00000105640 | RPL18A       | ribosomal protein L18a                                                    | 6142      | 4508.709028 | 0.051316056 | 0.46011998  | 0.111527555 | 0.911198016 | 0.999371363 | Not Sig |
| ENSG00000106330 | MOSPD3       | motile sperm domain containing 3                                          | 64598     | 254.4925681 | 0.051376258 | 0.519237427 | 0.098945598 | 0.921181464 | 0.999371363 | Not Sig |
| ENSG00000223756 | TSSC2        | tumor suppressing subtransferable candidate 2 pseudogene                  | 650368    | 75.90475912 | 0.051393499 | 0.58135962  | 0.088402252 | 0.929556972 | 0.999371363 | Not Sig |

|                 |           |                                                                            |        |             |             |             |             |             |             |         |
|-----------------|-----------|----------------------------------------------------------------------------|--------|-------------|-------------|-------------|-------------|-------------|-------------|---------|
| ENSG00000265401 | NA        | NA                                                                         | NA     | 15.51270212 | 0.05150033  | 0.74454777  | 0.069169948 | 0.944854344 | 0.999371363 | Not Sig |
| ENSG00000080189 | SLC35C2   | solute carrier family 35 member C2                                         | 51006  | 878.8256199 | 0.051576317 | 0.502412915 | 0.102657229 | 0.918235021 | 0.999371363 | Not Sig |
| ENSG00000128463 | EMC4      | ER membrane protein complex subunit 4                                      | 51234  | 768.3568212 | 0.05157773  | 0.40925895  | 0.126026076 | 0.899711284 | 0.999371363 | Not Sig |
| ENSG00000140022 | STON2     | stonin 2                                                                   | 85439  | 804.7897927 | 0.051673454 | 0.465881277 | 0.110915498 | 0.911683356 | 0.999371363 | Not Sig |
| ENSG00000167113 | COQ4      | coenzyme Q4                                                                | 51117  | 664.3063028 | 0.05172082  | 0.445636535 | 0.116060546 | 0.907604557 | 0.999371363 | Not Sig |
| ENSG00000090316 | MAEA      | macrophage erythroblast attacher                                           | 10296  | 1290.477745 | 0.051747138 | 0.503188237 | 0.102838529 | 0.918091126 | 0.999371363 | Not Sig |
| ENSG00000198799 | LRIG2     | leucine rich repeats and immunoglobulin like domains 2                     | 9860   | 1130.192106 | 0.051880042 | 0.581951329 | 0.08914842  | 0.928963957 | 0.999371363 | Not Sig |
| ENSG00000243155 | NA        | NA                                                                         | NA     | 23.19446042 | 0.052035544 | 0.772608863 | 0.067350437 | 0.946302725 | 0.999371363 | Not Sig |
| ENSG00000188732 | FAM221A   | family with sequence similarity 221 member A                               | 340277 | 271.166385  | 0.052092389 | 0.729347015 | 0.071423324 | 0.943060847 | 0.999371363 | Not Sig |
| ENSG00000100284 | TOM1      | target of mybl membrane trafficking protein                                | 10043  | 1829.285821 | 0.052397113 | 0.51875404  | 0.101005697 | 0.919545938 | 0.999371363 | Not Sig |
| ENSG00000049239 | H6PD      | hexose-6-phosphate dehydrogenase/glucose 1-dehydrogenase                   | 9563   | 4640.344518 | 0.052546756 | 0.565340488 | 0.092947095 | 0.925945591 | 0.999371363 | Not Sig |
| ENSG00000070476 | ZXDC      | ZXD family zinc finger C                                                   | 79364  | 1236.280506 | 0.052590859 | 0.443747001 | 0.118515413 | 0.905659283 | 0.999371363 | Not Sig |
| ENSG00000100227 | POLDIP3   | DNA polymerase delta interacting protein 3                                 | 84271  | 1865.044545 | 0.052676745 | 0.585281874 | 0.090002352 | 0.928285346 | 0.999371363 | Not Sig |
| ENSG00000178913 | TAF7      | TATA-box binding protein associated factor 7                               | 6879   | 1221.821829 | 0.052801452 | 0.507703258 | 0.104000616 | 0.917168859 | 0.999371363 | Not Sig |
| ENSG00000114767 | RRP9      | ribosomal RNA processing 9, U3 small nucleolar RNA binding protein         | 9136   | 229.7383445 | 0.052922931 | 0.585779969 | 0.090346091 | 0.928012194 | 0.999371363 | Not Sig |
| ENSG00000158158 | CNNM4     | cyclin and CBS domain divalent metal cation transport mediator 4           | 26504  | 768.5326984 | 0.052996557 | 0.462936146 | 0.114479195 | 0.908857938 | 0.999371363 | Not Sig |
| ENSG00000149679 | CABLES2   | Cdk5 and Abl enzyme substrate 2                                            | 81928  | 200.3620271 | 0.053000098 | 0.523173286 | 0.101305055 | 0.919308304 | 0.999371363 | Not Sig |
| ENSG00000162402 | USP24     | ubiquitin specific peptidase 24                                            | 23358  | 3699.244873 | 0.053005768 | 0.54237856  | 0.097728361 | 0.922147994 | 0.999371363 | Not Sig |
| ENSG00000024048 | UBR2      | ubiquitin protein ligase E3 component n-recogin 2                          | 23304  | 2611.42979  | 0.053018019 | 0.41653461  | 0.127283586 | 0.898715951 | 0.999371363 | Not Sig |
| ENSG00000122705 | CLTA      | clathrin light chain A                                                     | 1211   | 1624.163146 | 0.053033707 | 0.511461023 | 0.103690612 | 0.917414877 | 0.999371363 | Not Sig |
| ENSG00000105576 | TNPO2     | transportin 2                                                              | 30000  | 1285.753742 | 0.053166466 | 0.552578781 | 0.096215179 | 0.923349676 | 0.999371363 | Not Sig |
| ENSG00000103657 | HERC1     | HECT and RLD domain containing E3 ubiquitin protein ligase family member 1 | 8925   | 5072.176976 | 0.053200781 | 0.441118645 | 0.120604244 | 0.904004507 | 0.999371363 | Not Sig |
| ENSG00000264625 | NA        | NA                                                                         | NA     | 4.455453745 | 0.053343673 | 1.250189456 | 0.042668471 | 0.965965813 | NA          | NA      |
| ENSG00000179195 | ZNF664    | zinc finger protein 664                                                    | 144348 | 3109.828832 | 0.053404585 | 0.484384911 | 0.110252372 | 0.912209228 | 0.999371363 | Not Sig |
| ENSG00000272368 | NA        | NA                                                                         | NA     | 21.31466405 | 0.053463922 | 0.686276146 | 0.077904386 | 0.937904111 | 0.999371363 | Not Sig |
| ENSG00000120519 | SLC10A7   | solute carrier family 10 member 7                                          | 84068  | 411.372114  | 0.05348979  | 0.671220886 | 0.079690295 | 0.936483578 | 0.999371363 | Not Sig |
| ENSG00000201457 | SNORA55   | small nucleolar RNA, H/ACA box 55                                          | 677834 | 22.55903147 | 0.053578529 | 0.763226105 | 0.070200074 | 0.944034415 | 0.999371363 | Not Sig |
| ENSG00000203684 | IBA57-AS1 | IBA57 antisense RNA 1 (head to head)                                       | 574432 | 5.855493903 | 0.053637476 | 1.353682626 | 0.039623376 | 0.96839339  | NA          | NA      |
| ENSG00000180549 | FUT7      | fucosyltransferase 7                                                       | 2529   | 27.24011652 | 0.05364479  | 0.947352511 | 0.056626007 | 0.954843117 | 0.999371363 | Not Sig |
| ENSG00000181690 | PLAG1     | PLAG1 zinc finger                                                          | 5324   | 226.2245484 | 0.053660728 | 0.875294017 | 0.061305946 | 0.951115555 | 0.999371363 | Not Sig |
| ENSG00000232848 | NA        | NA                                                                         | NA     | 1.170287366 | 0.053667294 | 2.463445271 | 0.021785462 | 0.982619091 | NA          | NA      |
| ENSG00000260729 | NA        | NA                                                                         | NA     | 24.83355181 | 0.053748802 | 0.877770045 | 0.061233352 | 0.951173368 | 0.999371363 | Not Sig |
| ENSG00000168795 | ZBTB5     | zinc finger and BTB domain containing 5                                    | 9925   | 519.28009   | 0.053778883 | 0.509089686 | 0.105637346 | 0.915870093 | 0.999371363 | Not Sig |
| ENSG00000265451 | NA        | NA                                                                         | NA     | 3.169866151 | 0.053838065 | 1.392632577 | 0.038659203 | 0.9691621   | NA          | NA      |
| ENSG00000102753 | KPNA3     | karyopherin subunit alpha 3                                                | 3839   | 903.6824013 | 0.053965875 | 0.49383643  | 0.109278845 | 0.912981325 | 0.999371363 | Not Sig |

|                 |         |                                                             |           |             |             |             |             |             |             |         |
|-----------------|---------|-------------------------------------------------------------|-----------|-------------|-------------|-------------|-------------|-------------|-------------|---------|
| ENSG00000130943 | PKDREJ  | polycystin family receptor for egg jelly                    | 10343     | 2.374057667 | 0.054028379 | 1.521371707 | 0.035512938 | 0.97167073  | NA          | NA      |
| ENSG00000267458 | NA      | NA                                                          | NA        | 1.792846902 | 0.054121182 | 1.729517916 | 0.03129264  | 0.97503616  | NA          | NA      |
| ENSG00000125245 | GPR18   | G protein-coupled receptor 18                               | 2841      | 15.93960391 | 0.054360154 | 1.136285668 | 0.047840218 | 0.961843584 | 0.999371363 | Not Sig |
| ENSG00000137411 | VARS2   | valyl-tRNA synthetase 2, mitochondrial                      | 57176     | 930.3575063 | 0.054362008 | 0.563618907 | 0.09645171  | 0.923161825 | 0.999371363 | Not Sig |
| ENSG00000224067 | NA      | NA                                                          | NA        | 12.3688464  | 0.054553767 | 0.799715697 | 0.068216451 | 0.945613331 | 0.999371363 | Not Sig |
| ENSG00000164305 | CASP3   | caspase 3                                                   | 836       | 663.7168599 | 0.054663892 | 0.539423692 | 0.101337581 | 0.919282484 | 0.999371363 | Not Sig |
| ENSG00000258875 | NA      | NA                                                          | NA        | 16.74334681 | 0.054702451 | 0.728333955 | 0.075106275 | 0.940130155 | 0.999371363 | Not Sig |
| ENSG00000271941 | NA      | NA                                                          | NA        | 3.988418962 | 0.054843439 | 1.8262781   | 0.030030168 | 0.976042993 | NA          | NA      |
| ENSG00000233369 | GTF2IP4 | general transcription factor III pseudogene 4               | 100093631 | 151.83207   | 0.055097287 | 0.461144138 | 0.119479534 | 0.904895453 | 0.999371363 | Not Sig |
| ENSG00000169118 | CSNK1G1 | casein kinase 1 gamma 1                                     | 53944     | 746.3138893 | 0.055202009 | 0.400465346 | 0.137844658 | 0.890363189 | 0.999371363 | Not Sig |
| ENSG00000143653 | SCCPDH  | saccharopine dehydrogenase (putative)                       | 51097     | 967.0491104 | 0.055292843 | 0.519278769 | 0.106480077 | 0.915201462 | 0.999371363 | Not Sig |
| ENSG00000136932 | TRMO    | tRNA methyltransferase 0                                    | 51531     | 270.3093436 | 0.055428927 | 0.407981537 | 0.13586136  | 0.891930882 | 0.999371363 | Not Sig |
| ENSG00000153140 | CETN3   | centrin 3                                                   | 1070      | 231.7944736 | 0.055652023 | 0.493535834 | 0.112761868 | 0.91021935  | 0.999371363 | Not Sig |
| ENSG00000011275 | RNF216  | ring finger protein 216                                     | 54476     | 1869.829707 | 0.055890198 | 0.445908794 | 0.125339977 | 0.900254404 | 0.999371363 | Not Sig |
| ENSG00000115282 | TTC31   | tetratricopeptide repeat domain 31                          | 64427     | 524.5561326 | 0.055962262 | 0.481721958 | 0.116171292 | 0.907516789 | 0.999371363 | Not Sig |
| ENSG00000166471 | TMEM41B | transmembrane protein 41B                                   | 440026    | 1450.107156 | 0.05610209  | 0.687133214 | 0.0816466   | 0.934927744 | 0.999371363 | Not Sig |
| ENSG00000222255 | NA      | NA                                                          | NA        | 2.730120765 | 0.05614494  | 2.020284545 | 0.02779061  | 0.977829155 | NA          | NA      |
| ENSG00000010292 | NCAPD2  | non-SMC condensin I complex subunit D2                      | 9918      | 1385.201457 | 0.056250708 | 0.552308667 | 0.101846506 | 0.918878511 | 0.999371363 | Not Sig |
| ENSG00000255203 | OR7E2P  | olfactory receptor family 7 subfamily E member 2 pseudogene | 8587      | 1.983687001 | 0.056343374 | 1.884277835 | 0.02990184  | 0.976145339 | NA          | NA      |
| ENSG00000174840 | PDE12   | phosphodiesterase 12                                        | 201626    | 827.7457973 | 0.056477604 | 0.429728766 | 0.131426166 | 0.895438191 | 0.999371363 | Not Sig |
| ENSG00000269425 | NA      | NA                                                          | NA        | 1.287176007 | 0.056539019 | 2.392280625 | 0.023633941 | 0.981144599 | NA          | NA      |
| ENSG00000154447 | SH3RF1  | SH3 domain containing ring finger 1                         | 57630     | 1479.593893 | 0.056816785 | 0.438721626 | 0.129505322 | 0.896957814 | 0.999371363 | Not Sig |
| ENSG00000144674 | GOLGA4  | golgin A4                                                   | 2803      | 6811.325352 | 0.056835645 | 0.58080983  | 0.097855859 | 0.922046751 | 0.999371363 | Not Sig |
| ENSG00000197429 | IPP     | intracisternal A particle-promoted polypeptide              | 3652      | 403.0113881 | 0.05688891  | 0.502433405 | 0.113226768 | 0.909850775 | 0.999371363 | Not Sig |
| ENSG00000107929 | LARP4B  | La ribonucleoprotein domain family member 4B                | 23185     | 3474.809907 | 0.05692395  | 0.4179238   | 0.136206528 | 0.891658015 | 0.999371363 | Not Sig |
| ENSG00000183475 | ASB7    | ankyrin repeat and SOCS box containing 7                    | 140460    | 457.4059406 | 0.056962339 | 0.392514056 | 0.145121782 | 0.88461472  | 0.999371363 | Not Sig |
| ENSG00000176087 | SLC35A4 | solute carrier family 35 member A4                          | 113829    | 1155.219049 | 0.056965198 | 0.610634366 | 0.093288556 | 0.925674324 | 0.999371363 | Not Sig |
| ENSG00000143919 | CAMKMT  | calmodulin-lysine N-methyltransferase                       | 79823     | 184.8248437 | 0.056992311 | 0.563032012 | 0.101223927 | 0.919372703 | 0.999371363 | Not Sig |
| ENSG00000000971 | CFH     | complement factor H                                         | 3075      | 4134.401098 | 0.057060953 | 0.630928342 | 0.090439673 | 0.927937832 | 0.999371363 | Not Sig |
| ENSG00000104154 | SLC30A4 | solute carrier family 30 member 4                           | 7782      | 200.5626032 | 0.057137928 | 0.525951194 | 0.10863732  | 0.913490159 | 0.999371363 | Not Sig |
| ENSG00000164946 | FREMI   | FRAS1 related extracellular matrix 1                        | 158326    | 230.8347683 | 0.057182054 | 0.919745564 | 0.0621716   | 0.950426178 | 0.999371363 | Not Sig |
| ENSG00000135241 | PNPLA8  | patatin like phospholipase domain containing 8              | 50640     | 783.9611769 | 0.057182388 | 0.468222481 | 0.122126532 | 0.90279881  | 0.999371363 | Not Sig |
| ENSG00000205275 | NA      | NA                                                          | NA        | 3.041386798 | 0.057288774 | 1.447301104 | 0.039583176 | 0.96842544  | NA          | NA      |
| ENSG00000163214 | DHX57   | DExH-box helicase 57                                        | 90957     | 649.4868429 | 0.057301169 | 0.423544012 | 0.135289764 | 0.892382778 | 0.999371363 | Not Sig |
| ENSG00000231767 | NA      | NA                                                          | NA        | 7.967616495 | 0.057554151 | 1.052260233 | 0.054695739 | 0.956380864 | 0.999371363 | Not Sig |

|                 |            |                                                                |        |             |             |             |             |             |             |         |
|-----------------|------------|----------------------------------------------------------------|--------|-------------|-------------|-------------|-------------|-------------|-------------|---------|
| ENSG00000172239 | PAIP1      | poly(A) binding protein interacting protein 1                  | 10605  | 1366.816562 | 0.057570394 | 0.411960708 | 0.139747294 | 0.888859657 | 0.999371363 | Not Sig |
| ENSG00000112584 | FAM120B    | family with sequence similarity 120B                           | 84498  | 1430.006439 | 0.057661146 | 0.396072684 | 0.145582234 | 0.884251194 | 0.999371363 | Not Sig |
| ENSG00000072736 | NFATC3     | nuclear factor of activated T-cells 3                          | 4775   | 1679.807013 | 0.05785431  | 0.529155522 | 0.109333283 | 0.912938149 | 0.999371363 | Not Sig |
| ENSG00000114859 | CLCN2      | chloride voltage-gated channel 2                               | 1181   | 148.6982704 | 0.058045253 | 0.487439832 | 0.119081883 | 0.905210484 | 0.999371363 | Not Sig |
| ENSG00000141433 | ADCYAP1    | adenylate cyclase activating polypeptide 1                     | 116    | 36.4180514  | 0.058239179 | 1.15399055  | 0.05046764  | 0.959749736 | 0.999371363 | Not Sig |
| ENSG00000051108 | HERPUD1    | homocysteine inducible ER protein with ubiquitin like domain 1 | 9709   | 3185.469184 | 0.058258014 | 0.630785719 | 0.092357851 | 0.926413726 | 0.999371363 | Not Sig |
| ENSG00000267692 | NA         | NA                                                             | NA     | 5.954471049 | 0.05842076  | 1.12028355  | 0.052148191 | 0.958410615 | NA          | NA      |
| ENSG00000161204 | ABCF3      | ATP binding cassette subfamily F member 3                      | 55324  | 953.7948788 | 0.058468117 | 0.496230153 | 0.117824595 | 0.906206641 | 0.999371363 | Not Sig |
| ENSG00000128607 | KLHDC10    | kelch domain containing 10                                     | 23008  | 1463.389765 | 0.058641436 | 0.419188435 | 0.139892781 | 0.888744705 | 0.999371363 | Not Sig |
| ENSG00000116903 | EXOC8      | exocyst complex component 8                                    | 149371 | 910.2889043 | 0.058651766 | 0.442038179 | 0.132684842 | 0.894442631 | 0.999371363 | Not Sig |
| ENSG00000238806 | NA         | NA                                                             | NA     | 10.53613464 | 0.058786799 | 0.969181425 | 0.060656135 | 0.951633067 | 0.999371363 | Not Sig |
| ENSG00000148204 | CRB2       | crumbs 2, cell polarity complex component                      | 286204 | 15.1227179  | 0.058873946 | 1.098345032 | 0.053602415 | 0.957251932 | 0.999371363 | Not Sig |
| ENSG00000163389 | POGLUT1    | protein O-glucosyltransferase 1                                | 56983  | 322.9805206 | 0.058984697 | 0.522206    | 0.112952928 | 0.910067875 | 0.999371363 | Not Sig |
| ENSG00000211649 | NA         | NA                                                             | NA     | 122.2250754 | 0.059015974 | 0.796312731 | 0.074111554 | 0.940921622 | 0.999371363 | Not Sig |
| ENSG00000185798 | WDR53      | WD repeat domain 53                                            | 348793 | 119.9813455 | 0.059330583 | 0.513751694 | 0.115484938 | 0.908060758 | 0.999371363 | Not Sig |
| ENSG00000136840 | ST6GALNAC4 | ST6 N-acetylgalactosaminide alpha-2,6-sialyltransferase 4      | 27090  | 518.9428281 | 0.059390793 | 0.753206725 | 0.078850588 | 0.937151466 | 0.999371363 | Not Sig |
| ENSG00000196796 | NA         | NA                                                             | NA     | 1.354689929 | 0.059405512 | 2.416660493 | 0.024581654 | 0.980388653 | NA          | NA      |
| ENSG00000183172 | SMDT1      | single-pass membrane protein with aspartate rich tail 1        | 91689  | 526.7753698 | 0.059510413 | 0.563755975 | 0.105560589 | 0.915930995 | 0.999371363 | Not Sig |
| ENSG00000198728 | LDB1       | LIM domain binding 1                                           | 8861   | 1588.123476 | 0.059517826 | 0.459635746 | 0.129489116 | 0.896970637 | 0.999371363 | Not Sig |
| ENSG00000133193 | FAM104A    | family with sequence similarity 104 member A                   | 84923  | 726.3194058 | 0.059586641 | 0.465144834 | 0.128103413 | 0.898067135 | 0.999371363 | Not Sig |
| ENSG00000148343 | MIGA2      | mitoguardin 2                                                  | 84895  | 493.8648812 | 0.059687771 | 0.605850159 | 0.098519032 | 0.92152016  | 0.999371363 | Not Sig |
| ENSG00000187801 | ZFP69B     | ZFP69 zinc finger protein B                                    | 65243  | 57.43594744 | 0.05973884  | 0.765449829 | 0.078044096 | 0.937792976 | 0.999371363 | Not Sig |
| ENSG00000141441 | GAREM1     | GRB2 associated regulator of MAPK1 subtype 1                   | 64762  | 900.8386547 | 0.059834271 | 0.654665399 | 0.091396721 | 0.927177367 | 0.999371363 | Not Sig |
| ENSG00000183655 | KLHL25     | kelch like family member 25                                    | 64410  | 232.8746709 | 0.059859826 | 0.575631326 | 0.103989868 | 0.917177389 | 0.999371363 | Not Sig |
| ENSG00000149806 | FAU        | FAU, ubiquitin like and ribosomal protein S30 fusion           | 2197   | 2838.956426 | 0.060003282 | 0.590109505 | 0.101681606 | 0.919009403 | 0.999371363 | Not Sig |
| ENSG00000145604 | SKP2       | S-phase kinase associated protein 2                            | 6502   | 342.3332637 | 0.060016696 | 0.612810301 | 0.097936827 | 0.921982457 | 0.999371363 | Not Sig |
| ENSG00000184058 | TBX1       | T-box 1                                                        | 6899   | 155.1341798 | 0.060022203 | 0.779391431 | 0.077011628 | 0.938614294 | 0.999371363 | Not Sig |
| ENSG00000139209 | SLC38A4    | solute carrier family 38 member 4                              | 55089  | 42.16013547 | 0.060078065 | 1.02398512  | 0.058670838 | 0.953214287 | 0.999371363 | Not Sig |
| ENSG00000062194 | GPBP1      | GC-rich promoter binding protein 1                             | 65056  | 2284.00063  | 0.060102336 | 0.444092651 | 0.135337381 | 0.892345131 | 0.999371363 | Not Sig |
| ENSG00000236796 | NA         | NA                                                             | NA     | 3.934151356 | 0.060168002 | 1.261595357 | 0.047691997 | 0.961961712 | NA          | NA      |
| ENSG00000248015 | NA         | NA                                                             | NA     | 13.98354636 | 0.060173463 | 0.84665835  | 0.071071717 | 0.943340678 | 0.999371363 | Not Sig |
| ENSG00000130741 | EIF2S3     | eukaryotic translation initiation factor 2 subunit gamma       | 1968   | 3514.327292 | 0.060240578 | 0.619843825 | 0.097186703 | 0.922578128 | 0.999371363 | Not Sig |
| ENSG00000133935 | ERG28      | ergosterol biosynthesis 28 homolog                             | 11161  | 550.3933339 | 0.060532683 | 0.423093086 | 0.143071786 | 0.886233487 | 0.999371363 | Not Sig |
| ENSG00000145191 | EIF2B5     | eukaryotic translation initiation factor 2B subunit epsilon    | 8893   | 1019.563127 | 0.060547025 | 0.444976806 | 0.136067822 | 0.891767665 | 0.999371363 | Not Sig |
| ENSG00000167699 | GLOD4      | glyoxalase domain containing 4                                 | 51031  | 813.9931231 | 0.06057782  | 0.405603705 | 0.149352235 | 0.8812757   | 0.999371363 | Not Sig |



|                 |              |                                                                            |           |             |             |             |             |             |             |         |
|-----------------|--------------|----------------------------------------------------------------------------|-----------|-------------|-------------|-------------|-------------|-------------|-------------|---------|
| ENSG00000163145 | C1QTNF7      | C1q and TNF related 7                                                      | 114905    | 288.5608932 | 0.060584738 | 1.011707999 | 0.059883621 | 0.952248325 | 0.999371363 | Not Sig |
| ENSG00000176896 | TCEANC       | transcription elongation factor A N-terminal and central domain containing | 170082    | 111.3145265 | 0.060946102 | 0.637101618 | 0.095661509 | 0.923789412 | 0.999371363 | Not Sig |
| ENSG00000218175 | NA           | NA                                                                         | NA        | 23.95729013 | 0.060949835 | 0.648502928 | 0.093985442 | 0.925120721 | 0.999371363 | Not Sig |
| ENSG00000168286 | THAP11       | THAP domain containing 11                                                  | 57215     | 549.7983095 | 0.061027956 | 0.642300364 | 0.095014668 | 0.924303176 | 0.999371363 | Not Sig |
| ENSG00000175193 | PARL         | presenilin associated rhomboid like                                        | 55486     | 473.5720479 | 0.061034086 | 0.434325392 | 0.140526175 | 0.888244273 | 0.999371363 | Not Sig |
| ENSG00000108651 | UTP6         | UTP6, small subunit processome component                                   | 55813     | 776.1182274 | 0.061354532 | 0.420909352 | 0.145766616 | 0.884105631 | 0.999371363 | Not Sig |
| ENSG00000132801 | ZSWIM3       | zinc finger SWIM-type containing 3                                         | 140831    | 99.30163321 | 0.06137607  | 0.622620571 | 0.098577003 | 0.92147413  | 0.999371363 | Not Sig |
| ENSG00000253767 | PCDHGA8      | protocadherin gamma subfamily A, 8                                         | 9708      | 63.72278132 | 0.061442783 | 0.542219315 | 0.113317216 | 0.909779069 | 0.999371363 | Not Sig |
| ENSG00000244968 | LIFR-AS1     | LIFR antisense RNA 1                                                       | 100506495 | 56.34121364 | 0.061506297 | 0.754951928 | 0.081470482 | 0.935067799 | 0.999371363 | Not Sig |
| ENSG00000182117 | NOP10        | NOP10 ribonucleoprotein                                                    | 55505     | 471.3687151 | 0.06155357  | 0.398514701 | 0.154457464 | 0.877249048 | 0.999371363 | Not Sig |
| ENSG00000026751 | SLAMF7       | SLAM family member 7                                                       | 57823     | 763.4427504 | 0.061796845 | 0.937995061 | 0.065881845 | 0.947471895 | 0.999371363 | Not Sig |
| ENSG00000204438 | GPANK1       | G-patch domain and ankyrin repeats 1                                       | 7918      | 381.8988732 | 0.061801904 | 0.586172894 | 0.105432892 | 0.916032317 | 0.999371363 | Not Sig |
| ENSG00000178605 | GTPBP6       | GTP binding protein 6 (putative)                                           | 8225      | 694.7350065 | 0.061814302 | 0.548694156 | 0.112657117 | 0.9103024   | 0.999371363 | Not Sig |
| ENSG00000067225 | PKM          | pyruvate kinase M1/2                                                       | 5315      | 14398.64833 | 0.061965393 | 0.380003945 | 0.16306513  | 0.870467154 | 0.999371363 | Not Sig |
| ENSG00000119720 | NRDE2        | NRDE-2, necessary for RNA interference, domain containing                  | 55051     | 806.156739  | 0.061978913 | 0.455915935 | 0.13594373  | 0.891865765 | 0.999371363 | Not Sig |
| ENSG00000143450 | OAZ3         | ornithine decarboxylase antizyme 3                                         | 51686     | 53.02710448 | 0.062079382 | 0.645758967 | 0.096133984 | 0.923414161 | 0.999371363 | Not Sig |
| ENSG00000175110 | MRPS22       | mitochondrial ribosomal protein S22                                        | 56945     | 334.5464729 | 0.062167964 | 0.452520213 | 0.13738163  | 0.890729151 | 0.999371363 | Not Sig |
| ENSG00000162840 | NA           | NA                                                                         | NA        | 0.628997072 | 0.062248313 | 3.492753407 | 0.017822132 | 0.985780749 | NA          | NA      |
| ENSG00000223733 | NA           | NA                                                                         | NA        | 0.628997072 | 0.062248313 | 3.492753407 | 0.017822132 | 0.985780749 | NA          | NA      |
| ENSG00000256661 | NA           | NA                                                                         | NA        | 0.628997072 | 0.062248313 | 3.492753407 | 0.017822132 | 0.985780749 | NA          | NA      |
| ENSG00000261557 | NA           | NA                                                                         | NA        | 0.628997072 | 0.062248313 | 3.492753407 | 0.017822132 | 0.985780749 | NA          | NA      |
| ENSG00000147649 | MTDH         | metadherin                                                                 | 92140     | 3962.991431 | 0.06224896  | 0.417494319 | 0.149101334 | 0.881473673 | 0.999371363 | Not Sig |
| ENSG00000229512 | NA           | NA                                                                         | NA        | 106.4297022 | 0.062302733 | 0.605850147 | 0.10283522  | 0.918093752 | 0.999371363 | Not Sig |
| ENSG00000179364 | PACS2        | phosphofurin acidic cluster sorting protein 2                              | 23241     | 2094.20061  | 0.062469832 | 0.57761978  | 0.108150437 | 0.91387636  | 0.999371363 | Not Sig |
| ENSG00000211770 | NA           | NA                                                                         | NA        | 2.612684073 | 0.0626906   | 1.730140372 | 0.036234401 | 0.971095456 | NA          | NA      |
| ENSG00000167723 | TRPV3        | transient receptor potential cation channel subfamily V member 3           | 162514    | 30.9123249  | 0.062865449 | 0.865730273 | 0.072615514 | 0.942112081 | 0.999371363 | Not Sig |
| ENSG00000169371 | SNUPN        | snurportin 1                                                               | 10073     | 233.4996926 | 0.062958721 | 0.450273859 | 0.139823177 | 0.888799701 | 0.999371363 | Not Sig |
| ENSG00000216895 | LOC100506302 | uncharacterized LOC100506302                                               | 100506302 | 75.10094504 | 0.063203862 | 0.591884003 | 0.106784204 | 0.914960179 | 0.999371363 | Not Sig |
| ENSG00000100711 | ZFYVE21      | zinc finger FYVE-type containing 21                                        | 79038     | 806.3064286 | 0.063208087 | 0.527417284 | 0.119844551 | 0.90460629  | 0.999371363 | Not Sig |
| ENSG00000105894 | PTN          | pleiotrophin                                                               | 5764      | 237.9149692 | 0.063366342 | 0.995203838 | 0.063671722 | 0.949231621 | 0.999371363 | Not Sig |
| ENSG00000226471 | NA           | NA                                                                         | NA        | 125.4196302 | 0.063369603 | 0.488577888 | 0.129702151 | 0.896802081 | 0.999371363 | Not Sig |
| ENSG00000200397 | NA           | NA                                                                         | NA        | 27.101024   | 0.063430478 | 0.641788765 | 0.098833886 | 0.921270163 | 0.999371363 | Not Sig |
| ENSG00000170088 | TMEM192      | transmembrane protein 192                                                  | 201931    | 565.7712663 | 0.063465443 | 0.516773309 | 0.122810993 | 0.902256769 | 0.999371363 | Not Sig |
| ENSG00000088836 | SLC4A11      | solute carrier family 4 member 11                                          | 83959     | 83.89786014 | 0.063471882 | 0.61188556  | 0.103731623 | 0.917382331 | 0.999371363 | Not Sig |
| ENSG00000166037 | CEP57        | centrosomal protein 57                                                     | 9702      | 880.028165  | 0.063487288 | 0.572210298 | 0.11095097  | 0.911655227 | 0.999371363 | Not Sig |

|                 |           |                                                          |           |             |             |             |             |             |             |         |
|-----------------|-----------|----------------------------------------------------------|-----------|-------------|-------------|-------------|-------------|-------------|-------------|---------|
| ENSG00000103707 | MTFMT     | mitochondrial methionyl-tRNA formyltransferase           | 123263    | 247.7299563 | 0.063489582 | 0.443850276 | 0.14304279  | 0.886256387 | 0.999371363 | Not Sig |
| ENSG00000197816 | CCDC180   | coiled-coil domain containing 180                        | 100499483 | 66.49221197 | 0.063621416 | 0.719017103 | 0.08848387  | 0.929492104 | 0.999371363 | Not Sig |
| ENSG00000221102 | SNORA11B  | small nucleolar RNA, H/ACA box 11B                       | 100124539 | 11.26906248 | 0.063682857 | 0.817171549 | 0.077930829 | 0.937883076 | 0.999371363 | Not Sig |
| ENSG00000180139 | ACTA2-AS1 | ACTA2 antisense RNA 1                                    | 100132116 | 22.75032054 | 0.064005995 | 0.723988814 | 0.088407437 | 0.929552851 | 0.999371363 | Not Sig |
| ENSG00000169490 | TM2D2     | TM2 domain containing 2                                  | 83877     | 500.4295028 | 0.064147897 | 0.589186275 | 0.10887541  | 0.913301311 | 0.999371363 | Not Sig |
| ENSG00000111641 | NOP2      | NOP2 nucleolar protein                                   | 4839      | 534.236062  | 0.064242835 | 0.483317825 | 0.132920475 | 0.894256274 | 0.999371363 | Not Sig |
| ENSG00000145916 | RMND5B    | required for meiotic nuclear division 5 homolog B        | 64777     | 857.801872  | 0.064274113 | 0.581856437 | 0.110463869 | 0.912041503 | 0.999371363 | Not Sig |
| ENSG00000069345 | DNAJA2    | DnaJ heat shock protein family (Hsp40) member A2         | 10294     | 1281.338829 | 0.0643609   | 0.446208602 | 0.144239488 | 0.88531136  | 0.999371363 | Not Sig |
| ENSG00000265407 | MIR4324   | microRNA 4324                                            | 100422979 | 4.161624146 | 0.064453673 | 1.288626053 | 0.05001736  | 0.960108555 | NA          | NA      |
| ENSG00000151790 | TDO2      | tryptophan 2,3-dioxygenase                               | 6999      | 87.63437744 | 0.064484491 | 0.943819558 | 0.068322902 | 0.945528593 | 0.999371363 | Not Sig |
| ENSG00000107282 | APBA1     | amyloid beta precursor protein binding family A member 1 | 320       | 273.5712073 | 0.064493381 | 0.497429355 | 0.129653348 | 0.896840694 | 0.999371363 | Not Sig |
| ENSG00000071967 | CYBRD1    | cytochrome b reductase 1                                 | 79901     | 4081.559217 | 0.064575778 | 0.575689777 | 0.112171138 | 0.910687713 | 0.999371363 | Not Sig |
| ENSG00000064652 | SNX24     | sorting nexin 24                                         | 28966     | 385.0545127 | 0.064643843 | 0.564160387 | 0.114584158 | 0.908774737 | 0.999371363 | Not Sig |
| ENSG00000236337 | NA        | NA                                                       | NA        | 12.5000166  | 0.064647689 | 1.119335859 | 0.057755399 | 0.953943465 | 0.999371363 | Not Sig |
| ENSG00000176714 | CCDC121   | coiled-coil domain containing 121                        | 79635     | 105.0520972 | 0.064776506 | 0.480822272 | 0.134720269 | 0.892833047 | 0.999371363 | Not Sig |
| ENSG00000089693 | MLF2      | myeloid leukemia factor 2                                | 8079      | 1952.902077 | 0.065047153 | 0.453754566 | 0.143353164 | 0.88601127  | 0.999371363 | Not Sig |
| ENSG00000064995 | TAF11     | TATA-box binding protein associated factor 11            | 6882      | 349.2561886 | 0.065263026 | 0.424672808 | 0.153678372 | 0.877863339 | 0.999371363 | Not Sig |
| ENSG00000143614 | GATAD2B   | GATA zinc finger domain containing 2B                    | 57459     | 2175.22401  | 0.065414224 | 0.414748161 | 0.157720348 | 0.874677166 | 0.999371363 | Not Sig |
| ENSG00000168591 | TMUB2     | transmembrane and ubiquitin like domain containing 2     | 79089     | 692.6745701 | 0.065501881 | 0.415258805 | 0.157737488 | 0.874663659 | 0.999371363 | Not Sig |
| ENSG00000203930 | LINC00632 | long intergenic non-protein coding RNA 632               | 286411    | 13.98050756 | 0.065582813 | 0.868995612 | 0.075469671 | 0.939841028 | 0.999371363 | Not Sig |
| ENSG00000107789 | MINPP1    | multiple inositol-polyphosphate phosphatase 1            | 9562      | 370.3204651 | 0.065827762 | 0.467969206 | 0.140666866 | 0.888133122 | 0.999371363 | Not Sig |
| ENSG00000113269 | RNF130    | ring finger protein 130                                  | 55819     | 1666.607293 | 0.065840613 | 0.444430393 | 0.148146063 | 0.882227497 | 0.999371363 | Not Sig |
| ENSG00000135248 | FAM71F1   | family with sequence similarity 71 member F1             | 84691     | 0.980471337 | 0.06587316  | 2.611351714 | 0.025225694 | 0.979874943 | NA          | NA      |
| ENSG00000273389 | NA        | NA                                                       | NA        | 0.980471337 | 0.06587316  | 2.611351714 | 0.025225694 | 0.979874943 | NA          | NA      |
| ENSG00000154556 | SORBS2    | sorbin and SH3 domain containing 2                       | 8470      | 1480.714069 | 0.06587703  | 0.640061525 | 0.102922966 | 0.91802411  | 0.999371363 | Not Sig |
| ENSG00000101343 | CRNKL1    | crooked neck pre-mRNA splicing factor 1                  | 51340     | 783.9695368 | 0.065911247 | 0.419480203 | 0.157126002 | 0.875145545 | 0.999371363 | Not Sig |
| ENSG00000114541 | FRMD4B    | FERM domain containing 4B                                | 23150     | 1712.116413 | 0.066030451 | 0.456245263 | 0.144725778 | 0.884927386 | 0.999371363 | Not Sig |
| ENSG00000170144 | HNRNPA3   | heterogeneous nuclear ribonucleoprotein A3               | 220988    | 5857.222886 | 0.066047407 | 0.464340903 | 0.142239045 | 0.886891192 | 0.999371363 | Not Sig |
| ENSG00000112031 | MTRF1L    | mitochondrial translational release factor 1 like        | 54516     | 346.9644316 | 0.066199392 | 0.427246215 | 0.154944361 | 0.876865181 | 0.999371363 | Not Sig |
| ENSG00000236806 | NA        | NA                                                       | NA        | 4.90803044  | 0.066199613 | 1.249008413 | 0.053001735 | 0.957730525 | NA          | NA      |
| ENSG00000152022 | NA        | NA                                                       | NA        | 906.8544723 | 0.066256071 | 0.515784325 | 0.12845693  | 0.897787381 | 0.999371363 | Not Sig |
| ENSG00000271937 | NA        | NA                                                       | NA        | 2.267907634 | 0.066400216 | 1.98903721  | 0.033383094 | 0.973369091 | NA          | NA      |
| ENSG00000131711 | MAP1B     | microtubule associated protein 1B                        | 4131      | 1341.712246 | 0.06659229  | 0.575276488 | 0.115757016 | 0.907845118 | 0.999371363 | Not Sig |
| ENSG00000162616 | DNAJB4    | DnaJ heat shock protein family (Hsp40) member B4         | 11080     | 512.5734364 | 0.066741734 | 0.4745798   | 0.140633321 | 0.888159623 | 0.999371363 | Not Sig |
| ENSG00000213828 | NA        | NA                                                       | NA        | 15.33742795 | 0.066797224 | 0.726817867 | 0.091903663 | 0.926774581 | 0.999371363 | Not Sig |

|                 |          |                                                              |        |             |             |             |             |             |             |         |
|-----------------|----------|--------------------------------------------------------------|--------|-------------|-------------|-------------|-------------|-------------|-------------|---------|
| ENSG00000154529 | CNTNAP3B | contactin associated protein like 3B                         | 728577 | 72.45168483 | 0.066816711 | 0.809414625 | 0.082549424 | 0.934209818 | 0.999371363 | Not Sig |
| ENSG00000255644 | NA       | NA                                                           | NA     | 31.50533169 | 0.06686737  | 1.268953993 | 0.052694873 | 0.957975024 | 0.999371363 | Not Sig |
| ENSG00000269925 | NA       | NA                                                           | NA     | 21.32068753 | 0.067021335 | 0.699157582 | 0.095860128 | 0.923631662 | 0.999371363 | Not Sig |
| ENSG00000125434 | SLC25A35 | solute carrier family 25 member 35                           | 399512 | 177.3070695 | 0.067083918 | 0.433549747 | 0.154731766 | 0.877032786 | 0.999371363 | Not Sig |
| ENSG00000132275 | RRP8     | ribosomal RNA processing 8                                   | 23378  | 526.735317  | 0.067259661 | 0.42139837  | 0.159610633 | 0.873187802 | 0.999371363 | Not Sig |
| ENSG00000114062 | UBE3A    | ubiquitin protein ligase E3A                                 | 7337   | 2735.756646 | 0.067266528 | 0.438428316 | 0.153426514 | 0.878061937 | 0.999371363 | Not Sig |
| ENSG00000179029 | TMEM107  | transmembrane protein 107                                    | 84314  | 214.8856671 | 0.067382221 | 0.556563148 | 0.12106842  | 0.903636842 | 0.999371363 | Not Sig |
| ENSG00000164008 | Clorf50  | chromosome 1 open reading frame 50                           | 79078  | 159.0283076 | 0.067446245 | 0.460610399 | 0.146427968 | 0.88358355  | 0.999371363 | Not Sig |
| ENSG00000128731 | HERC2    | HECT and RLD domain containing E3 ubiquitin protein ligase 2 | 8924   | 4213.416512 | 0.067449488 | 0.426138175 | 0.158280793 | 0.874235542 | 0.999371363 | Not Sig |
| ENSG00000131323 | TRAF3    | TNF receptor associated factor 3                             | 7187   | 1161.530871 | 0.067481174 | 0.463758165 | 0.145509403 | 0.884308692 | 0.999371363 | Not Sig |
| ENSG00000156515 | HK1      | hexokinase 1                                                 | 3098   | 2661.81378  | 0.067519573 | 0.460835827 | 0.14651546  | 0.883514486 | 0.999371363 | Not Sig |
| ENSG00000167470 | MIDN     | midnolin                                                     | 90007  | 4044.661175 | 0.067613191 | 0.50076454  | 0.135019925 | 0.892596121 | 0.999371363 | Not Sig |
| ENSG00000070047 | PHRF1    | PHD and ring finger domains 1                                | 57661  | 2397.188739 | 0.0676918   | 0.536146594 | 0.126256141 | 0.899529173 | 0.999371363 | Not Sig |
| ENSG00000196793 | ZNF239   | zinc finger protein 239                                      | 8187   | 95.14130464 | 0.067754083 | 0.605635854 | 0.111872641 | 0.910924389 | 0.999371363 | Not Sig |
| ENSG00000072518 | MARK2    | microtubule affinity regulating kinase 2                     | 2011   | 2352.071485 | 0.068101839 | 0.475387618 | 0.143255391 | 0.886088485 | 0.999371363 | Not Sig |
| ENSG00000125107 | CNOT1    | CCR4-NOT transcription complex subunit 1                     | 23019  | 6206.985256 | 0.068356195 | 0.441371581 | 0.154872215 | 0.876922058 | 0.999371363 | Not Sig |
| ENSG00000096063 | SRPK1    | SRSF protein kinase 1                                        | 6732   | 1663.969611 | 0.068504235 | 0.69762878  | 0.098195827 | 0.921776796 | 0.999371363 | Not Sig |
| ENSG00000156011 | PSD3     | pleckstrin and Sec7 domain containing 3                      | 23362  | 2220.792712 | 0.068535465 | 0.64199501  | 0.106753891 | 0.914984228 | 0.999371363 | Not Sig |
| ENSG00000135972 | MRPS9    | mitochondrial ribosomal protein S9                           | 64965  | 289.1917044 | 0.068541437 | 0.424956846 | 0.161290347 | 0.871864726 | 0.999371363 | Not Sig |
| ENSG00000169696 | ASPSCR1  | ASPSCR1, UBX domain containing tether for SLC24A             | 79058  | 925.7065326 | 0.068779321 | 0.555212607 | 0.12387925  | 0.901410882 | 0.999371363 | Not Sig |
| ENSG00000041357 | PSMA4    | proteasome subunit alpha 4                                   | 5685   | 1147.202339 | 0.068842907 | 0.440886155 | 0.156146675 | 0.875917408 | 0.999371363 | Not Sig |
| ENSG00000120948 | TARDBP   | TAR DNA binding protein                                      | 23435  | 2741.875228 | 0.068856382 | 0.388287848 | 0.177333343 | 0.859246562 | 0.999371363 | Not Sig |
| ENSG00000058804 | NDC1     | NDC1 transmembrane nucleoporin                               | 55706  | 520.7569364 | 0.068973157 | 0.718820627 | 0.095953224 | 0.923557723 | 0.999371363 | Not Sig |
| ENSG00000130544 | ZNF557   | zinc finger protein 557                                      | 79230  | 321.0144777 | 0.069082405 | 0.498299931 | 0.138636192 | 0.889737642 | 0.999371363 | Not Sig |
| ENSG00000205423 | CNEP1R1  | CTD nuclear envelope phosphatase 1 regulatory subunit 1      | 255919 | 237.28176   | 0.069492782 | 0.575738327 | 0.120702025 | 0.903927055 | 0.999371363 | Not Sig |
| ENSG00000260723 | NA       | NA                                                           | NA     | 12.73934579 | 0.069514412 | 0.873508851 | 0.079580661 | 0.936570776 | 0.999371363 | Not Sig |
| ENSG00000161847 | RAVER1   | ribonucleoprotein, PTB binding 1                             | 125950 | 651.3173032 | 0.069639598 | 0.551843787 | 0.126194405 | 0.89957804  | 0.999371363 | Not Sig |
| ENSG00000182405 | PGBD4    | piggyBac transposable element derived 4                      | 161779 | 72.82022238 | 0.069685516 | 0.518018058 | 0.134523334 | 0.892988761 | 0.999371363 | Not Sig |
| ENSG00000267274 | NA       | NA                                                           | NA     | 20.22512267 | 0.069740108 | 0.72849248  | 0.09573209  | 0.923733354 | 0.999371363 | Not Sig |
| ENSG00000138744 | NAAA     | N-acylethanolamine acid amidase                              | 27163  | 445.3521662 | 0.069870558 | 0.615795087 | 0.113463974 | 0.909662723 | 0.999371363 | Not Sig |
| ENSG00000155366 | RHOC     | ras homolog family member C                                  | 389    | 1237.29377  | 0.069898223 | 0.581766784 | 0.120148185 | 0.904365763 | 0.999371363 | Not Sig |
| ENSG00000116039 | ATP6V1B1 | ATPase H+ transporting V1 subunit B1                         | 525    | 87.46487821 | 0.070103938 | 0.702603669 | 0.099777359 | 0.920521083 | 0.999371363 | Not Sig |
| ENSG00000147416 | ATP6V1B2 | ATPase H+ transporting V1 subunit B2                         | 526    | 2385.293668 | 0.070177331 | 0.628722044 | 0.111619008 | 0.9111255   | 0.999371363 | Not Sig |
| ENSG00000143622 | RIT1     | Ras like without CAAX 1                                      | 6016   | 1128.705176 | 0.070257862 | 0.492034716 | 0.142790458 | 0.886455673 | 0.999371363 | Not Sig |
| ENSG00000164414 | SLC35A1  | solute carrier family 35 member A1                           | 10559  | 170.853067  | 0.070293326 | 0.60823283  | 0.115569766 | 0.907993525 | 0.999371363 | Not Sig |

|                 |         |                                                                            |           |             |             |             |             |             |             |         |
|-----------------|---------|----------------------------------------------------------------------------|-----------|-------------|-------------|-------------|-------------|-------------|-------------|---------|
| ENSG00000138101 | DTNB    | dystrobrevin beta                                                          | 1838      | 590.5299563 | 0.07031556  | 0.594156566 | 0.11834517  | 0.905794168 | 0.999371363 | Not Sig |
| ENSG00000128245 | YWHAH   | tyrosine 3-monooxygenase/tryptophan 5-monooxygenase activation protein eta | 7533      | 2178.06849  | 0.070333948 | 0.44294438  | 0.158787314 | 0.873836444 | 0.999371363 | Not Sig |
| ENSG00000162231 | NXF1    | nuclear RNA export factor 1                                                | 10482     | 1662.452856 | 0.070354515 | 0.451466695 | 0.155835448 | 0.876162729 | 0.999371363 | Not Sig |
| ENSG00000122557 | HERPUD2 | HERPUD family member 2                                                     | 64224     | 1224.704146 | 0.070455683 | 0.482851393 | 0.145915874 | 0.8839878   | 0.999371363 | Not Sig |
| ENSG00000165609 | NUDT5   | nudix hydrolase 5                                                          | 11164     | 850.7572815 | 0.070609199 | 0.460553732 | 0.153313704 | 0.878150894 | 0.999371363 | Not Sig |
| ENSG00000174243 | DDX23   | DEAD-box helicase 23                                                       | 9416      | 2256.390248 | 0.070706747 | 0.427399408 | 0.165434827 | 0.868601744 | 0.999371363 | Not Sig |
| ENSG00000113273 | ARSB    | arylsulfatase B                                                            | 411       | 671.0601327 | 0.070713894 | 0.413774316 | 0.170899669 | 0.864302657 | 0.999371363 | Not Sig |
| ENSG00000165084 | C8orf34 | chromosome 8 open reading frame 34                                         | 116328    | 188.5748866 | 0.070740527 | 0.920983857 | 0.076809736 | 0.938774906 | 0.999371363 | Not Sig |
| ENSG00000143321 | HDFG    | heparin binding growth factor                                              | 3068      | 4249.131571 | 0.07079348  | 0.471183102 | 0.15024622  | 0.880570362 | 0.999371363 | Not Sig |
| ENSG00000160226 | C21orf2 | chromosome 21 open reading frame 2                                         | 755       | 456.972117  | 0.070865287 | 0.53432494  | 0.132625827 | 0.894489306 | 0.999371363 | Not Sig |
| ENSG00000102317 | RBM3    | RNA binding motif protein 3                                                | 5935      | 3289.475785 | 0.071098522 | 0.607187043 | 0.117094926 | 0.90678483  | 0.999371363 | Not Sig |
| ENSG00000090061 | CCNK    | cyclin K                                                                   | 8812      | 1171.072642 | 0.07115061  | 0.410534662 | 0.173312065 | 0.86240614  | 0.999371363 | Not Sig |
| ENSG00000206768 | NA      | NA                                                                         | NA        | 7.747157718 | 0.071441847 | 1.254530748 | 0.056947067 | 0.954587361 | 0.999371363 | Not Sig |
| ENSG00000260128 | ULK4P2  | ULK4 pseudogene 2                                                          | 100288380 | 7.512832385 | 0.071577673 | 1.117794348 | 0.064034742 | 0.948942563 | 0.999371363 | Not Sig |
| ENSG00000270742 | NA      | NA                                                                         | NA        | 39.46696458 | 0.071928336 | 0.743167117 | 0.09678622  | 0.922896168 | 0.999371363 | Not Sig |
| ENSG00000125703 | ATG4C   | autophagy related 4C cysteine peptidase                                    | 84938     | 276.6646077 | 0.072002559 | 0.610471997 | 0.11794572  | 0.906110667 | 0.999371363 | Not Sig |
| ENSG00000125870 | SNRPB2  | small nuclear ribonucleoprotein polypeptide B2                             | 6629      | 452.9293574 | 0.072118991 | 0.489966851 | 0.147191571 | 0.882980813 | 0.999371363 | Not Sig |
| ENSG00000272037 | NA      | NA                                                                         | NA        | 5.398551656 | 0.072350312 | 1.400718259 | 0.051652295 | 0.95880575  | NA          | NA      |
| ENSG00000168615 | ADAM9   | ADAM metallopeptidase domain 9                                             | 8754      | 3673.236407 | 0.072378484 | 0.510259736 | 0.141846355 | 0.887201368 | 0.999371363 | Not Sig |
| ENSG00000173597 | SULT1B1 | sulfotransferase family 1B member 1                                        | 27284     | 53.4399414  | 0.072606455 | 0.760232872 | 0.095505545 | 0.923913286 | 0.999371363 | Not Sig |
| ENSG00000183077 | AFMID   | arylformamidase                                                            | 125061    | 691.744053  | 0.072613618 | 0.625228029 | 0.116139416 | 0.907542051 | 0.999371363 | Not Sig |
| ENSG00000150551 | LYPD1   | LY6/PLAUR domain containing 1                                              | 116372    | 35.38910345 | 0.072804464 | 1.023754167 | 0.071115182 | 0.943306085 | 0.999371363 | Not Sig |
| ENSG00000130592 | LSP1    | lymphocyte-specific protein 1                                              | 4046      | 1678.321391 | 0.073013699 | 0.818399033 | 0.08921528  | 0.928910822 | 0.999371363 | Not Sig |
| ENSG00000100401 | RANGAP1 | Ran GTPase activating protein 1                                            | 5905      | 1607.018134 | 0.073116592 | 0.570051101 | 0.128263224 | 0.897940667 | 0.999371363 | Not Sig |
| ENSG00000110987 | BCL7A   | BCL tumor suppressor 7A                                                    | 605       | 463.1888562 | 0.073143474 | 0.506231067 | 0.14448634  | 0.885116443 | 0.999371363 | Not Sig |
| ENSG00000066322 | ELOVL1  | ELOVL fatty acid elongase 1                                                | 64834     | 1075.131072 | 0.073180537 | 0.463319287 | 0.157948394 | 0.874497464 | 0.999371363 | Not Sig |
| ENSG00000229920 | NA      | NA                                                                         | NA        | 3.265842875 | 0.073369152 | 1.401167031 | 0.052362888 | 0.958239545 | NA          | NA      |
| ENSG00000018610 | CXorf56 | chromosome X open reading frame 56                                         | 63932     | 354.8712809 | 0.073426679 | 0.44963555  | 0.163302654 | 0.870280144 | 0.999371363 | Not Sig |
| ENSG00000135392 | DNAJC14 | DnaJ heat shock protein family (Hsp40) member C14                          | 85406     | 543.7833839 | 0.073434441 | 0.471262735 | 0.155824841 | 0.876171089 | 0.999371363 | Not Sig |
| ENSG00000162882 | HAAO    | 3-hydroxyanthranilate 3,4-dioxygenase                                      | 23498     | 121.5230789 | 0.073552067 | 0.731826315 | 0.100504813 | 0.919943562 | 0.999371363 | Not Sig |
| ENSG00000231449 | NA      | NA                                                                         | NA        | 1.147543038 | 0.073778177 | 2.509096547 | 0.02940428  | 0.97654216  | NA          | NA      |
| ENSG00000130023 | ERMARD  | ER membrane associated RNA degradation                                     | 55780     | 496.7120101 | 0.073814898 | 0.438673861 | 0.168268284 | 0.866372224 | 0.999371363 | Not Sig |
| ENSG00000159063 | ALG8    | ALG8, alpha-1,3-glucosyltransferase                                        | 79053     | 516.865008  | 0.073869283 | 0.529618792 | 0.139476326 | 0.889073762 | 0.999371363 | Not Sig |
| ENSG00000225921 | NOL7    | nucleolar protein 7                                                        | 51406     | 698.76573   | 0.074235867 | 0.464984247 | 0.159652435 | 0.873154871 | 0.999371363 | Not Sig |
| ENSG00000204194 | NA      | NA                                                                         | NA        | 1.528199166 | 0.074583243 | 2.021826169 | 0.036889048 | 0.970573472 | NA          | NA      |

|                 |           |                                                                    |           |             |             |             |             |             |             |         |
|-----------------|-----------|--------------------------------------------------------------------|-----------|-------------|-------------|-------------|-------------|-------------|-------------|---------|
| ENSG00000212329 | NA        | NA                                                                 | NA        | 1.528199166 | 0.074583243 | 2.021826169 | 0.036889048 | 0.970573472 | NA          | NA      |
| ENSG00000167842 | MIS12     | MIS12, kinetochore complex component                               | 79003     | 370.730234  | 0.074699799 | 0.472500642 | 0.158094597 | 0.874382258 | 0.999371363 | Not Sig |
| ENSG00000121039 | RDH10     | retinol dehydrogenase 10                                           | 157506    | 1305.324275 | 0.074887955 | 0.693490832 | 0.107986944 | 0.914006049 | 0.999371363 | Not Sig |
| ENSG00000138587 | MNS1      | meiosis specific nuclear structural 1                              | 55329     | 83.63730395 | 0.075026105 | 0.493592563 | 0.152000073 | 0.879186878 | 0.999371363 | Not Sig |
| ENSG00000168614 | NA        | NA                                                                 | NA        | 458.1996077 | 0.075110874 | 0.48968965  | 0.153384646 | 0.878094952 | 0.999371363 | Not Sig |
| ENSG00000107796 | ACTA2     | actin, alpha 2, smooth muscle, aorta                               | 59        | 4139.092302 | 0.075186564 | 0.569793709 | 0.131954009 | 0.895020669 | 0.999371363 | Not Sig |
| ENSG00000085231 | AK6       | adenylate kinase 6                                                 | 102157402 | 610.5426085 | 0.075661542 | 0.549318156 | 0.137737195 | 0.890448122 | 0.999371363 | Not Sig |
| ENSG00000248350 | NA        | NA                                                                 | NA        | 7.530445624 | 0.075743034 | 0.988528482 | 0.076622005 | 0.938924253 | 0.999371363 | Not Sig |
| ENSG00000082074 | FYB1      | FYN binding protein 1                                              | 2533      | 1200.919912 | 0.07575027  | 0.736480887 | 0.10285436  | 0.918078561 | 0.999371363 | Not Sig |
| ENSG00000129474 | AJUBA     | ajuba LIM protein                                                  | 84962     | 928.6749572 | 0.07582183  | 0.528040912 | 0.143590826 | 0.885823586 | 0.999371363 | Not Sig |
| ENSG00000171314 | PGAM1     | phosphoglycerate mutase 1                                          | 5223      | 1198.686557 | 0.075868946 | 0.432774308 | 0.17530834  | 0.860837359 | 0.999371363 | Not Sig |
| ENSG00000171475 | WIPF2     | WAS/WASL interacting protein family member 2                       | 147179    | 1784.643711 | 0.075995466 | 0.399914584 | 0.190029244 | 0.849286214 | 0.999371363 | Not Sig |
| ENSG00000099995 | SF3A1     | splicing factor 3a subunit 1                                       | 10291     | 3126.474855 | 0.076001491 | 0.465585397 | 0.163238562 | 0.870330605 | 0.999371363 | Not Sig |
| ENSG00000204392 | LSM2      | LSM2 homolog, U6 small nuclear RNA and mRNA degradation associated | 57819     | 287.8835727 | 0.07606316  | 0.458431906 | 0.165920302 | 0.868219671 | 0.999371363 | Not Sig |
| ENSG00000123131 | PRDX4     | peroxiredoxin 4                                                    | 10549     | 1045.65432  | 0.076323786 | 0.587849081 | 0.129835682 | 0.896696432 | 0.999371363 | Not Sig |
| ENSG00000132670 | PTPRA     | protein tyrosine phosphatase, receptor type A                      | 5786      | 1806.86321  | 0.076375877 | 0.413107707 | 0.184881268 | 0.853322164 | 0.999371363 | Not Sig |
| ENSG00000103550 | KNOP1     | lysine rich nucleolar protein 1                                    | 400506    | 562.9044975 | 0.076473105 | 0.424651659 | 0.180084319 | 0.857086373 | 0.999371363 | Not Sig |
| ENSG00000224992 | NA        | NA                                                                 | NA        | 7.615810987 | 0.076473829 | 1.024895973 | 0.074616187 | 0.940520095 | 0.999371363 | Not Sig |
| ENSG00000185238 | PRMT3     | protein arginine methyltransferase 3                               | 10196     | 462.3841394 | 0.076556589 | 0.623923183 | 0.122701947 | 0.902343122 | 0.999371363 | Not Sig |
| ENSG00000198081 | ZBTB14    | zinc finger and BTB domain containing 14                           | 7541      | 408.7145919 | 0.076574568 | 0.45761181  | 0.167335209 | 0.867106302 | 0.999371363 | Not Sig |
| ENSG00000172590 | MRPL52    | mitochondrial ribosomal protein L52                                | 122704    | 344.8362698 | 0.076826668 | 0.453511297 | 0.169404088 | 0.865478808 | 0.999371363 | Not Sig |
| ENSG00000245205 | NA        | NA                                                                 | NA        | 6.010947704 | 0.076832405 | 1.02863221  | 0.074693758 | 0.940458374 | NA          | NA      |
| ENSG00000196872 | KIAA1211L | KIAA1211 like                                                      | 343990    | 532.1964006 | 0.076899592 | 1.012751081 | 0.075931385 | 0.939473687 | 0.999371363 | Not Sig |
| ENSG00000133059 | DSTYK     | dual serine/threonine and tyrosine protein kinase                  | 25778     | 941.6957316 | 0.076942756 | 0.431424517 | 0.178345812 | 0.858451403 | 0.999371363 | Not Sig |
| ENSG00000228305 | NA        | NA                                                                 | NA        | 1.996822362 | 0.0769776   | 2.070977055 | 0.037169702 | 0.970349696 | NA          | NA      |
| ENSG00000183255 | PTTG1IP   | PTTG1 interacting protein                                          | 754       | 6746.015928 | 0.076982698 | 0.520308632 | 0.147955835 | 0.882377623 | 0.999371363 | Not Sig |
| ENSG00000224097 | LOC401127 | WD repeat domain 5 pseudogene                                      | 401127    | 5.201588852 | 0.076999577 | 1.070446055 | 0.071932235 | 0.942655837 | NA          | NA      |
| ENSG00000105136 | ZNF419    | zinc finger protein 419                                            | 79744     | 188.2028066 | 0.077169739 | 0.438023552 | 0.176177145 | 0.860154776 | 0.999371363 | Not Sig |
| ENSG00000078269 | SYNJ2     | synaptojanin 2                                                     | 8871      | 834.7268725 | 0.077300528 | 0.612373235 | 0.126231069 | 0.899549018 | 0.999371363 | Not Sig |
| ENSG00000067596 | DHX8      | DEAH-box helicase 8                                                | 1659      | 1622.593292 | 0.077304531 | 0.416972599 | 0.185394751 | 0.852919425 | 0.999371363 | Not Sig |
| ENSG00000146122 | DAAM2     | dishevelled associated activator of morphogenesis 2                | 23500     | 1183.869118 | 0.077316097 | 0.841584773 | 0.091869648 | 0.926801607 | 0.999371363 | Not Sig |
| ENSG00000173875 | ZNF791    | zinc finger protein 791                                            | 163049    | 701.6152111 | 0.077316905 | 0.434134948 | 0.178094175 | 0.858649016 | 0.999371363 | Not Sig |
| ENSG00000144451 | SPAG16    | sperm associated antigen 16                                        | 79582     | 338.3219498 | 0.077463742 | 0.519719075 | 0.149049258 | 0.881514765 | 0.999371363 | Not Sig |
| ENSG00000197622 | CDC42SE1  | CDC42 small effector 1                                             | 56882     | 3468.84393  | 0.077524015 | 0.452002859 | 0.171512222 | 0.863821021 | 0.999371363 | Not Sig |
| ENSG00000110583 | NAA40     | N(alpha)-acetyltransferase 40, NatD catalytic subunit              | 79829     | 595.1097621 | 0.077593652 | 0.431999097 | 0.179615312 | 0.857454583 | 0.999371363 | Not Sig |

|                 |         |                                                                       |           |             |             |             |             |             |             |         |
|-----------------|---------|-----------------------------------------------------------------------|-----------|-------------|-------------|-------------|-------------|-------------|-------------|---------|
| ENSG00000169032 | MAP2K1  | mitogen-activated protein kinase kinase 1                             | 5604      | 1217.39397  | 0.077604608 | 0.448806504 | 0.172913287 | 0.862719588 | 0.999371363 | Not Sig |
| ENSG00000245146 | MALINC1 | mitosis associated long intergenic non-coding RNA 1                   | 100505636 | 32.11307464 | 0.077773936 | 0.591357228 | 0.13151769  | 0.895365794 | 0.999371363 | Not Sig |
| ENSG00000260774 | NA      | NA                                                                    | NA        | 14.12502899 | 0.077821511 | 0.761850134 | 0.102148058 | 0.918639156 | 0.999371363 | Not Sig |
| ENSG00000254901 | BORCS8  | BLOC-1 related complex subunit 8                                      | 729991    | 250.4313741 | 0.077866837 | 0.561204272 | 0.138749543 | 0.889648067 | 0.999371363 | Not Sig |
| ENSG00000157870 | FAM213B | family with sequence similarity 213 member B                          | 127281    | 656.4742336 | 0.077880654 | 0.586499215 | 0.132789016 | 0.894360242 | 0.999371363 | Not Sig |
| ENSG00000137574 | TGS1    | trimethylguanosine synthase 1                                         | 96764     | 721.0890212 | 0.078319023 | 0.444574091 | 0.176166414 | 0.860163206 | 0.999371363 | Not Sig |
| ENSG00000163235 | TGFA    | transforming growth factor alpha                                      | 7039      | 358.2419391 | 0.078330828 | 0.580451078 | 0.134948199 | 0.892652831 | 0.999371363 | Not Sig |
| ENSG00000109436 | TBC1D9  | TBC1 domain family member 9                                           | 23158     | 1837.662256 | 0.078342626 | 0.597031158 | 0.13122033  | 0.895601014 | 0.999371363 | Not Sig |
| ENSG00000140403 | DNAJA4  | DnaJ heat shock protein family (Hsp40) member A4                      | 55466     | 846.2193061 | 0.078385174 | 0.660004443 | 0.118764615 | 0.905461843 | 0.999371363 | Not Sig |
| ENSG00000081189 | MEF2C   | myocyte enhancer factor 2C                                            | 4208      | 1159.910207 | 0.078470697 | 0.655353322 | 0.119738002 | 0.904690696 | 0.999371363 | Not Sig |
| ENSG00000076826 | CAMSAP3 | calmodulin regulated spectrin associated protein family member 3      | 57662     | 866.5159803 | 0.078625295 | 0.669056951 | 0.117516595 | 0.906450694 | 0.999371363 | Not Sig |
| ENSG00000116350 | SRSF4   | serine and arginine rich splicing factor 4                            | 6429      | 1913.405056 | 0.078807415 | 0.420200562 | 0.187547144 | 0.851231664 | 0.999371363 | Not Sig |
| ENSG00000088930 | XRN2    | 5'-3' exoribonuclease 2                                               | 22803     | 2253.527765 | 0.078815564 | 0.46709408  | 0.168735951 | 0.866004339 | 0.999371363 | Not Sig |
| ENSG00000154277 | UCHL1   | ubiquitin C-terminal hydrolase L1                                     | 7345      | 79.69381082 | 0.078880513 | 0.660549554 | 0.119416496 | 0.904945393 | 0.999371363 | Not Sig |
| ENSG00000130147 | SH3BP4  | SH3 domain binding protein 4                                          | 23677     | 1960.515353 | 0.078997775 | 0.587242256 | 0.134523315 | 0.892988776 | 0.999371363 | Not Sig |
| ENSG00000265517 | NA      | NA                                                                    | NA        | 4.692868379 | 0.079046982 | 1.586389076 | 0.049828244 | 0.960259259 | NA          | NA      |
| ENSG00000139579 | NABP2   | nucleic acid binding protein 2                                        | 79035     | 261.654681  | 0.07915139  | 0.457009461 | 0.173194204 | 0.862498779 | 0.999371363 | Not Sig |
| ENSG00000143771 | CNIH4   | cornichon family AMPA receptor auxiliary protein 4                    | 29097     | 746.3341429 | 0.07915811  | 0.465675413 | 0.16998559  | 0.865021469 | 0.999371363 | Not Sig |
| ENSG00000136827 | TOR1A   | torsin family 1 member A                                              | 1861      | 602.8549557 | 0.079206126 | 0.441855239 | 0.17925809  | 0.857735053 | 0.999371363 | Not Sig |
| ENSG00000140740 | UQCRC2  | ubiquinol-cytochrome c reductase core protein 2                       | 7385      | 2075.255168 | 0.079382983 | 0.405082558 | 0.195967418 | 0.844635668 | 0.999371363 | Not Sig |
| ENSG00000144021 | CIAO1   | cytosolic iron-sulfur assembly component 1                            | 9391      | 1386.518873 | 0.079647543 | 0.44690296  | 0.178221112 | 0.85854933  | 0.999371363 | Not Sig |
| ENSG00000164631 | ZNF12   | zinc finger protein 12                                                | 7559      | 1364.951332 | 0.079695638 | 0.520075667 | 0.153238544 | 0.878210163 | 0.999371363 | Not Sig |
| ENSG00000166197 | NOLC1   | nucleolar and coiled-body phosphoprotein 1                            | 9221      | 1541.543    | 0.079703682 | 0.421327698 | 0.189172661 | 0.849957494 | 0.999371363 | Not Sig |
| ENSG00000271754 | NA      | NA                                                                    | NA        | 4.181197043 | 0.079750831 | 1.264562919 | 0.063065925 | 0.949714008 | NA          | NA      |
| ENSG00000265611 | NA      | NA                                                                    | NA        | 6.955384635 | 0.079818833 | 0.98440856  | 0.081083034 | 0.935375918 | 0.999371363 | Not Sig |
| ENSG00000266933 | NA      | NA                                                                    | NA        | 3.466657802 | 0.080254499 | 1.361410342 | 0.058949529 | 0.952992308 | NA          | NA      |
| ENSG00000134480 | CCNH    | cyclin H                                                              | 902       | 819.6648032 | 0.080264962 | 0.601698593 | 0.133397291 | 0.893879187 | 0.999371363 | Not Sig |
| ENSG00000222720 | NA      | NA                                                                    | NA        | 2.853292225 | 0.080269862 | 1.625430152 | 0.049383766 | 0.960613465 | NA          | NA      |
| ENSG00000252865 | NA      | NA                                                                    | NA        | 1.69957194  | 0.08068178  | 1.936694176 | 0.041659535 | 0.966770112 | NA          | NA      |
| ENSG00000264225 | NA      | NA                                                                    | NA        | 10.07888188 | 0.080767555 | 0.847327709 | 0.095320328 | 0.924060397 | 0.999371363 | Not Sig |
| ENSG00000183762 | KREMEN1 | kringle containing transmembrane protein 1                            | 83999     | 1021.047626 | 0.080825595 | 0.496173362 | 0.162897892 | 0.87059883  | 0.999371363 | Not Sig |
| ENSG00000251666 | NA      | NA                                                                    | NA        | 26.77407414 | 0.080861201 | 0.658790774 | 0.122741853 | 0.90231152  | 0.999371363 | Not Sig |
| ENSG00000117450 | PRDX1   | peroxiredoxin 1                                                       | 5052      | 3484.011002 | 0.08109186  | 0.430022155 | 0.188576004 | 0.850425141 | 0.999371363 | Not Sig |
| ENSG00000139292 | LGR5    | leucine rich repeat containing G protein-coupled receptor 5           | 8549      | 71.52242974 | 0.081117616 | 0.555849407 | 0.145934519 | 0.883973081 | 0.999371363 | Not Sig |
| ENSG00000112624 | BICRAL  | BRD4 interacting chromatin remodeling complex associated protein like | 23506     | 1158.464086 | 0.081308534 | 0.432925224 | 0.187811957 | 0.851024062 | 0.999371363 | Not Sig |

|                 |            |                                                                             |        |             |             |             |             |             |             |         |
|-----------------|------------|-----------------------------------------------------------------------------|--------|-------------|-------------|-------------|-------------|-------------|-------------|---------|
| ENSG00000179532 | DNHD1      | dynein heavy chain domain 1                                                 | 144132 | 698.792999  | 0.081417277 | 0.533472179 | 0.152617663 | 0.878699795 | 0.999371363 | Not Sig |
| ENSG00000238372 | NA         | NA                                                                          | NA     | 6.558576433 | 0.081449885 | 1.08069476  | 0.075368076 | 0.939921858 | NA          | NA      |
| ENSG00000166477 | LEO1       | LEO1 homolog, Paf1/RNA polymerase II complex component                      | 123169 | 542.7944999 | 0.081576129 | 0.538689802 | 0.15143433  | 0.87963311  | 0.999371363 | Not Sig |
| ENSG00000117139 | KDM5B      | lysine demethylase 5B                                                       | 10765  | 3452.482385 | 0.081692163 | 0.635004485 | 0.128648168 | 0.897636051 | 0.999371363 | Not Sig |
| ENSG00000263717 | NA         | NA                                                                          | NA     | 17.24697069 | 0.081719465 | 0.706535015 | 0.1156623   | 0.907920186 | 0.999371363 | Not Sig |
| ENSG00000166913 | YWHAB      | tyrosine 3-monooxygenase/tryptophan 5-monooxygenase activation protein beta | 7529   | 3990.846987 | 0.081908171 | 0.437345184 | 0.187284949 | 0.851437223 | 0.999371363 | Not Sig |
| ENSG00000251400 | NA         | NA                                                                          | NA     | 8.000353181 | 0.081959646 | 0.922680779 | 0.088827737 | 0.929218814 | 0.999371363 | Not Sig |
| ENSG00000171159 | C9orf16    | chromosome 9 open reading frame 16                                          | 79095  | 478.4352909 | 0.081985252 | 0.607104567 | 0.135043049 | 0.892577838 | 0.999371363 | Not Sig |
| ENSG00000171806 | METTL18    | methyltransferase like 18                                                   | 92342  | 119.2135634 | 0.082294928 | 0.514372786 | 0.159990828 | 0.87288883  | 0.999371363 | Not Sig |
| ENSG00000139618 | BRCA2      | BRCA2, DNA repair associated                                                | 675    | 427.8858698 | 0.082508244 | 0.888374656 | 0.092875504 | 0.926002466 | 0.999371363 | Not Sig |
| ENSG00000120458 | MSANTD2    | Myb/SANT DNA binding domain containing 2                                    | 79684  | 346.9918505 | 0.082534359 | 0.448480592 | 0.184031061 | 0.853989088 | 0.999371363 | Not Sig |
| ENSG00000125846 | ZNF133     | zinc finger protein 133                                                     | 7692   | 355.9594184 | 0.08253505  | 0.50540742  | 0.163303993 | 0.87027909  | 0.999371363 | Not Sig |
| ENSG00000258655 | NA         | NA                                                                          | NA     | 46.43698978 | 0.082590911 | 0.599434258 | 0.137781432 | 0.890413159 | 0.999371363 | Not Sig |
| ENSG00000168066 | SF1        | splicing factor 1                                                           | 7536   | 4789.481682 | 0.082765359 | 0.420231696 | 0.196951728 | 0.843865313 | 0.999371363 | Not Sig |
| ENSG00000163159 | VPS72      | vacuolar protein sorting 72 homolog                                         | 6944   | 596.9034087 | 0.082857538 | 0.458618039 | 0.180667856 | 0.856628291 | 0.999371363 | Not Sig |
| ENSG00000163029 | SMC6       | structural maintenance of chromosomes 6                                     | 79677  | 972.7257332 | 0.082859002 | 0.487620638 | 0.169925134 | 0.865069015 | 0.999371363 | Not Sig |
| ENSG00000115232 | ITGA4      | integrin subunit alpha 4                                                    | 3676   | 1190.668227 | 0.082876534 | 0.737643484 | 0.112353102 | 0.910543439 | 0.999371363 | Not Sig |
| ENSG00000068137 | PLEKHH3    | pleckstrin homology, MyTH and FERM domain containing H3                     | 79990  | 700.7322778 | 0.082947481 | 0.6012898   | 0.137949256 | 0.890280522 | 0.999371363 | Not Sig |
| ENSG00000135316 | SYNCRIP    | synaptotagmin binding cytoplasmic RNA interacting protein                   | 10492  | 3584.824033 | 0.083220919 | 0.491924404 | 0.169174203 | 0.86565962  | 0.999371363 | Not Sig |
| ENSG00000271794 | NA         | NA                                                                          | NA     | 4.98313901  | 0.083248184 | 1.239506809 | 0.067162345 | 0.946452462 | NA          | NA      |
| ENSG00000167515 | TRAPPC2L   | trafficking protein particle complex 2 like                                 | 51693  | 355.2008542 | 0.083250402 | 0.512482957 | 0.16244521  | 0.870955271 | 0.999371363 | Not Sig |
| ENSG00000196236 | XPNPEP3    | X-prolyl aminopeptidase 3                                                   | 63929  | 862.4579935 | 0.083256264 | 0.504583042 | 0.165000122 | 0.868943886 | 0.999371363 | Not Sig |
| ENSG00000181234 | TMEM132C   | transmembrane protein 132C                                                  | 92293  | 50.49207302 | 0.083295115 | 1.300756989 | 0.064035877 | 0.94894166  | 0.999371363 | Not Sig |
| ENSG00000070731 | ST6GALNAC2 | ST6 N-acetylgalactosaminide alpha-2,6-sialyltransferase 2                   | 10610  | 385.4272518 | 0.083398708 | 0.867385981 | 0.096149476 | 0.923401857 | 0.999371363 | Not Sig |
| ENSG00000152042 | NA         | NA                                                                          | NA     | 64.46036605 | 0.083738236 | 0.602740423 | 0.138929186 | 0.889506108 | 0.999371363 | Not Sig |
| ENSG00000249961 | TERB1      | telomere repeat binding bouquet formation protein 1                         | 283847 | 2.742841118 | 0.083836134 | 1.671799775 | 0.050147234 | 0.96000506  | NA          | NA      |
| ENSG00000188993 | LRRRC66    | leucine rich repeat containing 66                                           | 339977 | 15.60723187 | 0.08386523  | 0.916204607 | 0.091535482 | 0.927067114 | 0.999371363 | Not Sig |
| ENSG00000257735 | NA         | NA                                                                          | NA     | 6.67999829  | 0.083938812 | 1.004439099 | 0.083567846 | 0.933400033 | 0.999371363 | Not Sig |
| ENSG00000120594 | PLXDC2     | plexin domain containing 2                                                  | 84898  | 4205.466802 | 0.084063283 | 0.493080732 | 0.170485841 | 0.864628069 | 0.999371363 | Not Sig |
| ENSG00000207072 | NA         | NA                                                                          | NA     | 3.500013491 | 0.084236465 | 1.58132715  | 0.053269474 | 0.957517202 | NA          | NA      |
| ENSG00000197604 | NA         | NA                                                                          | NA     | 16.38439657 | 0.084257821 | 0.930589979 | 0.090542369 | 0.927856226 | 0.999371363 | Not Sig |
| ENSG00000109320 | NFKB1      | nuclear factor kappa B subunit 1                                            | 4790   | 2018.169622 | 0.084266569 | 0.420086604 | 0.200593326 | 0.841016577 | 0.999371363 | Not Sig |
| ENSG00000101346 | POFUT1     | protein O-fucosyltransferase 1                                              | 23509  | 1179.219208 | 0.084313317 | 0.444901926 | 0.189509895 | 0.849693201 | 0.999371363 | Not Sig |
| ENSG00000128973 | CLN6       | CLN6, transmembrane ER protein                                              | 54982  | 593.2435626 | 0.084336955 | 0.513346171 | 0.16428866  | 0.869503908 | 0.999371363 | Not Sig |
| ENSG00000132646 | PCNA       | proliferating cell nuclear antigen                                          | 5111   | 677.1795072 | 0.084358513 | 0.474392305 | 0.177824371 | 0.858860907 | 0.999371363 | Not Sig |

|                 |           |                                                              |        |             |             |             |             |             |             |         |
|-----------------|-----------|--------------------------------------------------------------|--------|-------------|-------------|-------------|-------------|-------------|-------------|---------|
| ENSG00000119650 | IFT43     | intraflagellar transport 43                                  | 112752 | 382.3183347 | 0.084406958 | 0.424023635 | 0.199061918 | 0.84221431  | 0.999371363 | Not Sig |
| ENSG00000232486 | NA        | NA                                                           | NA     | 12.3881111  | 0.084537752 | 0.854949116 | 0.098880448 | 0.921233193 | 0.999371363 | Not Sig |
| ENSG00000162139 | NEU3      | neuraminidase 3                                              | 10825  | 307.1027382 | 0.084593833 | 0.406366047 | 0.208171509 | 0.835095054 | 0.999371363 | Not Sig |
| ENSG00000141642 | ELAC1     | elaC ribonuclease Z 1                                        | 55520  | 112.8330616 | 0.084709436 | 0.476949931 | 0.177606559 | 0.859031973 | 0.999371363 | Not Sig |
| ENSG00000177875 | CCDC184   | coiled-coil domain containing 184                            | 387856 | 20.4879325  | 0.084828514 | 0.850203416 | 0.099774374 | 0.920523453 | 0.999371363 | Not Sig |
| ENSG00000196419 | XRCC6     | X-ray repair cross complementing 6                           | 2547   | 4957.347376 | 0.084868959 | 0.468433776 | 0.181176003 | 0.85622943  | 0.999371363 | Not Sig |
| ENSG00000138646 | HERC5     | HECT and RLD domain containing E3 ubiquitin protein ligase 5 | 51191  | 416.1779917 | 0.085109703 | 0.927148676 | 0.091797255 | 0.926859125 | 0.999371363 | Not Sig |
| ENSG00000146376 | ARHGAP18  | Rho GTPase activating protein 18                             | 93663  | 1988.786099 | 0.085202305 | 0.590967751 | 0.144174204 | 0.88536291  | 0.999371363 | Not Sig |
| ENSG00000266844 | NA        | NA                                                           | NA     | 10.25156649 | 0.085333162 | 0.916991246 | 0.093057771 | 0.925857665 | 0.999371363 | Not Sig |
| ENSG00000126858 | RHOT1     | ras homolog family member T1                                 | 55288  | 1114.775603 | 0.085623965 | 0.470450022 | 0.182004382 | 0.855579287 | 0.999371363 | Not Sig |
| ENSG00000177674 | AGTRAP    | angiotensin II receptor associated protein                   | 57085  | 848.0709303 | 0.085651975 | 0.588062756 | 0.145651079 | 0.884196843 | 0.999371363 | Not Sig |
| ENSG00000143194 | MAEL      | maelstrom spermatogenic transposon silencer                  | 84944  | 4.450422715 | 0.08566573  | 1.500318578 | 0.057098359 | 0.954466843 | NA          | NA      |
| ENSG00000090615 | GOLGA3    | golgin A3                                                    | 2802   | 5801.290082 | 0.085731982 | 0.452928862 | 0.189283549 | 0.849870588 | 0.999371363 | Not Sig |
| ENSG00000227963 | RBM15-AS1 | RBM15 antisense RNA 1                                        | 440600 | 7.186953545 | 0.085823446 | 0.948302007 | 0.09050223  | 0.927888122 | 0.999371363 | Not Sig |
| ENSG00000205148 | NA        | NA                                                           | NA     | 5.952168971 | 0.085839894 | 1.109057079 | 0.077398987 | 0.938306147 | NA          | NA      |
| ENSG00000118402 | ELOVL4    | ELOVL fatty acid elongase 4                                  | 6785   | 14.70935653 | 0.085966649 | 0.854606042 | 0.100592138 | 0.919874238 | 0.999371363 | Not Sig |
| ENSG00000108774 | RAB5C     | RAB5C, member RAS oncogene family                            | 5878   | 445.9491243 | 0.085991717 | 0.449521055 | 0.191296304 | 0.848293456 | 0.999371363 | Not Sig |
| ENSG00000138771 | SHROOM3   | shroom family member 3                                       | 57619  | 3223.038959 | 0.086174414 | 0.413893921 | 0.208204106 | 0.835069603 | 0.999371363 | Not Sig |
| ENSG00000169891 | REPS2     | RALBP1 associated Eps domain containing 2                    | 9185   | 829.6410116 | 0.086274831 | 0.590277566 | 0.146159767 | 0.883795266 | 0.999371363 | Not Sig |
| ENSG00000131398 | KCNC3     | potassium voltage-gated channel subfamily C member 3         | 3748   | 486.9311654 | 0.086322104 | 0.439785863 | 0.196282126 | 0.844389351 | 0.999371363 | Not Sig |
| ENSG00000143033 | MTF2      | metal response element binding transcription factor 2        | 22823  | 835.0288731 | 0.086348542 | 0.680884794 | 0.126818138 | 0.89908434  | 0.999371363 | Not Sig |
| ENSG00000261687 | NA        | NA                                                           | NA     | 2.42484979  | 0.086417156 | 1.70921273  | 0.050559626 | 0.959676436 | NA          | NA      |
| ENSG00000197020 | ZNF100    | zinc finger protein 100                                      | 163227 | 306.4330846 | 0.086513199 | 0.79206681  | 0.109224624 | 0.91302433  | 0.999371363 | Not Sig |
| ENSG00000221584 | NA        | NA                                                           | NA     | 0.635434608 | 0.086525066 | 3.484121343 | 0.024834114 | 0.980187281 | NA          | NA      |
| ENSG00000225075 | NA        | NA                                                           | NA     | 0.635434608 | 0.086525066 | 3.484121343 | 0.024834114 | 0.980187281 | NA          | NA      |
| ENSG00000226536 | NA        | NA                                                           | NA     | 0.635434608 | 0.086525066 | 3.484121343 | 0.024834114 | 0.980187281 | NA          | NA      |
| ENSG00000235064 | NA        | NA                                                           | NA     | 0.635434608 | 0.086525066 | 3.484121343 | 0.024834114 | 0.980187281 | NA          | NA      |
| ENSG00000258271 | NA        | NA                                                           | NA     | 0.635434608 | 0.086525066 | 3.484121343 | 0.024834114 | 0.980187281 | NA          | NA      |
| ENSG00000262693 | NA        | NA                                                           | NA     | 0.635434608 | 0.086525066 | 3.484121343 | 0.024834114 | 0.980187281 | NA          | NA      |
| ENSG00000169962 | TAS1R3    | taste 1 receptor member 3                                    | 83756  | 36.42542804 | 0.086565004 | 0.654953947 | 0.132169604 | 0.894850143 | 0.999371363 | Not Sig |
| ENSG00000205129 | C4orf47   | chromosome 4 open reading frame 47                           | 441054 | 32.0992725  | 0.08706372  | 0.662003344 | 0.131515529 | 0.895367503 | 0.999371363 | Not Sig |
| ENSG00000140382 | HMG20A    | high mobility group 20A                                      | 10363  | 943.3147693 | 0.087093508 | 0.400028874 | 0.217718055 | 0.827648795 | 0.999371363 | Not Sig |
| ENSG00000141198 | TOM1L1    | target of mybl like 1 membrane trafficking protein           | 10040  | 908.2047581 | 0.087157978 | 0.627579879 | 0.138879498 | 0.889545372 | 0.999371363 | Not Sig |
| ENSG00000047578 | KIAA0556  | KIAA0556                                                     | 23247  | 1216.588053 | 0.087409012 | 0.416900677 | 0.209663877 | 0.833930021 | 0.999371363 | Not Sig |
| ENSG00000146476 | ARMT1     | acidic residue methyltransferase 1                           | 79624  | 587.6964638 | 0.087420741 | 0.54131258  | 0.161497709 | 0.871701416 | 0.999371363 | Not Sig |



|                 |                     |                                                                  |           |             |             |             |             |             |             |         |
|-----------------|---------------------|------------------------------------------------------------------|-----------|-------------|-------------|-------------|-------------|-------------|-------------|---------|
| ENSG00000105708 | ZNF14               | zinc finger protein 14                                           | 7561      | 227.2467066 | 0.087489233 | 0.438994109 | 0.199294777 | 0.842032164 | 0.999371363 | Not Sig |
| ENSG00000128596 | CCDC136             | coiled-coil domain containing 136                                | 64753     | 66.22514852 | 0.087588435 | 0.624476946 | 0.140258877 | 0.888455455 | 0.999371363 | Not Sig |
| ENSG00000233121 | NA                  | NA                                                               | NA        | 1.499017303 | 0.087593103 | 1.844343499 | 0.047492836 | 0.96212044  | NA          | NA      |
| ENSG00000145979 | TBC1D7              | TBC1 domain family member 7                                      | 51256     | 235.593248  | 0.087607212 | 0.499403247 | 0.175423793 | 0.860746646 | 0.999371363 | Not Sig |
| ENSG00000145979 | TBC1D7-LOC100130357 | TBC1D7-LOC100130357 readthrough                                  | 107080638 | 235.593248  | 0.087607212 | 0.499403247 | 0.175423793 | 0.860746646 | 0.999371363 | Not Sig |
| ENSG00000166128 | RAB8B               | RAB8B, member RAS oncogene family                                | 51762     | 1096.527301 | 0.087841487 | 0.546990457 | 0.160590529 | 0.872415915 | 0.999371363 | Not Sig |
| ENSG00000154124 | OTULIN              | OTU deubiquitinase with linear linkage specificity               | 90268     | 1366.706809 | 0.088008657 | 0.452104274 | 0.194664511 | 0.845655597 | 0.999371363 | Not Sig |
| ENSG00000005156 | LIG3                | DNA ligase 3                                                     | 3980      | 828.0665782 | 0.088013205 | 0.510661086 | 0.172351501 | 0.863161198 | 0.999371363 | Not Sig |
| ENSG00000131781 | FMO5                | flavin containing monooxygenase 5                                | 2330      | 1684.975891 | 0.088124828 | 0.696230834 | 0.126574153 | 0.899277456 | 0.999371363 | Not Sig |
| ENSG00000136155 | SCEL                | sciellin                                                         | 8796      | 2256.656543 | 0.088148709 | 0.95666508  | 0.09214166  | 0.926585489 | 0.999371363 | Not Sig |
| ENSG00000168303 | MPLKIP              | M-phase specific PLK1 interacting protein                        | 136647    | 390.1638509 | 0.088307235 | 0.458850643 | 0.192453115 | 0.84738729  | 0.999371363 | Not Sig |
| ENSG00000034063 | NA                  | NA                                                               | NA        | 282.9324859 | 0.088408346 | 0.942799774 | 0.093772133 | 0.925290168 | 0.999371363 | Not Sig |
| ENSG00000197579 | TOPORS              | TOP1 binding arginine/serine rich protein                        | 10210     | 674.6239216 | 0.088477762 | 0.49549856  | 0.178563106 | 0.858280766 | 0.999371363 | Not Sig |
| ENSG00000224057 | EGFR-AS1            | EGFR antisense RNA 1                                             | 100507500 | 1.989969819 | 0.08847847  | 2.136130583 | 0.041419972 | 0.966961091 | NA          | NA      |
| ENSG00000265334 | NA                  | NA                                                               | NA        | 2.609512643 | 0.088486588 | 1.666993498 | 0.053081543 | 0.957666937 | NA          | NA      |
| ENSG00000179761 | PIPOX               | pipecolic acid and sarcosine oxidase                             | 51268     | 58.71952724 | 0.088518997 | 0.715992862 | 0.123631117 | 0.901607354 | 0.999371363 | Not Sig |
| ENSG00000143119 | CD53                | CD53 molecule                                                    | 963       | 1141.894171 | 0.088681576 | 0.812870574 | 0.109096797 | 0.913125715 | 0.999371363 | Not Sig |
| ENSG00000169427 | KCNK9               | potassium two pore domain channel subfamily K member 9           | 51305     | 1.809142796 | 0.088772295 | 2.27734277  | 0.038980647 | 0.968905818 | NA          | NA      |
| ENSG00000122121 | XPNPEP2             | X-prolyl aminopeptidase 2                                        | 7512      | 12.3276272  | 0.088986941 | 0.876503745 | 0.101524883 | 0.919133805 | 0.999371363 | Not Sig |
| ENSG00000146007 | ZMAT2               | zinc finger matrin-type 2                                        | 153527    | 920.3153337 | 0.089030842 | 0.496884864 | 0.179178011 | 0.857797929 | 0.999371363 | Not Sig |
| ENSG00000150316 | CWC15               | CWC15 spliceosome associated protein homolog                     | 51503     | 642.0506098 | 0.089166072 | 0.441483818 | 0.201969062 | 0.839940911 | 0.999371363 | Not Sig |
| ENSG00000183726 | TMEM50A             | transmembrane protein 50A                                        | 23585     | 1376.260981 | 0.089363585 | 0.435354958 | 0.205266033 | 0.837364281 | 0.999371363 | Not Sig |
| ENSG00000170242 | USP47               | ubiquitin specific peptidase 47                                  | 55031     | 2917.615976 | 0.08946887  | 0.427237096 | 0.209412691 | 0.834126086 | 0.999371363 | Not Sig |
| ENSG00000225302 | NA                  | NA                                                               | NA        | 41.42515336 | 0.089668698 | 0.84032737  | 0.106706863 | 0.915021538 | 0.999371363 | Not Sig |
| ENSG00000265144 | MIR548AM            | microRNA 548am                                                   | 100616428 | 5.168958976 | 0.089714773 | 1.77798212  | 0.05045876  | 0.959756812 | NA          | NA      |
| ENSG00000075275 | CELSR1              | cadherin EGF LAG seven-pass G-type receptor 1                    | 9620      | 6807.036452 | 0.08976421  | 0.680400075 | 0.131928572 | 0.895040789 | 0.999371363 | Not Sig |
| ENSG00000090863 | GLG1                | golgi glycoprotein 1                                             | 2734      | 5100.009617 | 0.089909604 | 0.371674984 | 0.241903835 | 0.808854679 | 0.999371363 | Not Sig |
| ENSG00000168610 | STAT3               | signal transducer and activator of transcription 3               | 6774      | 9562.564928 | 0.08991099  | 0.405192219 | 0.221897129 | 0.824393965 | 0.999371363 | Not Sig |
| ENSG00000176619 | LMNB2               | lamin B2                                                         | 84823     | 1152.16015  | 0.089973646 | 0.485181135 | 0.185443415 | 0.852881259 | 0.999371363 | Not Sig |
| ENSG00000188242 | PP7080              | uncharacterized LOC25845                                         | 25845     | 312.9501611 | 0.090098563 | 0.735795665 | 0.122450522 | 0.902542229 | 0.999371363 | Not Sig |
| ENSG00000264419 | MIR548AC            | microRNA 548ac                                                   | 100616384 | 3.925439213 | 0.090153693 | 1.402523661 | 0.064279624 | 0.948747578 | NA          | NA      |
| ENSG00000205659 | LIN52               | lin-52 DREAM MuvB core complex component                         | 91750     | 262.3867752 | 0.090228684 | 0.432129871 | 0.208799923 | 0.834604432 | 0.999371363 | Not Sig |
| ENSG00000140968 | IRF8                | interferon regulatory factor 8                                   | 3394      | 886.749994  | 0.090298622 | 0.773196224 | 0.116786165 | 0.907029507 | 0.999371363 | Not Sig |
| ENSG00000137103 | TMEM8B              | transmembrane protein 8B                                         | 51754     | 451.2773861 | 0.090356031 | 0.820891933 | 0.110070555 | 0.91235342  | 0.999371363 | Not Sig |
| ENSG00000165379 | LRFN5               | leucine rich repeat and fibronectin type III domain containing 5 | 145581    | 35.67377282 | 0.090412599 | 0.658495639 | 0.137301742 | 0.890792293 | 0.999371363 | Not Sig |

|                 |              |                                                                               |           |             |             |             |             |             |             |         |
|-----------------|--------------|-------------------------------------------------------------------------------|-----------|-------------|-------------|-------------|-------------|-------------|-------------|---------|
| ENSG00000243627 | SMIM34A      | small integral membrane protein 34A                                           | 388820    | 9.061794145 | 0.090678482 | 1.348234042 | 0.067257226 | 0.946376928 | 0.999371363 | Not Sig |
| ENSG00000133805 | AMPD3        | adenosine monophosphate deaminase 3                                           | 272       | 720.482995  | 0.090832666 | 0.540068389 | 0.16818734  | 0.8664359   | 0.999371363 | Not Sig |
| ENSG00000135821 | GLUL         | glutamate-ammonia ligase                                                      | 2752      | 13981.96747 | 0.090927375 | 0.520523506 | 0.174684475 | 0.861327567 | 0.999371363 | Not Sig |
| ENSG00000100053 | CRYBB3       | crystallin beta B3                                                            | 1417      | 16.1674751  | 0.091032981 | 0.960311957 | 0.094795218 | 0.924477486 | 0.999371363 | Not Sig |
| ENSG00000181392 | SYNE4        | spectrin repeat containing nuclear envelope family member 4                   | 163183    | 112.9620277 | 0.091038101 | 0.608911753 | 0.149509515 | 0.881151602 | 0.999371363 | Not Sig |
| ENSG00000126749 | EMG1         | EMG1, N1-specific pseudouridine methyltransferase                             | 10436     | 401.8852598 | 0.091080892 | 0.418017518 | 0.217887739 | 0.82751658  | 0.999371363 | Not Sig |
| ENSG00000143340 | FAM163A      | family with sequence similarity 163 member A                                  | 148753    | 2.29824661  | 0.091233083 | 1.801643475 | 0.050638811 | 0.959613336 | NA          | NA      |
| ENSG00000094804 | CDC6         | cell division cycle 6                                                         | 990       | 140.6965692 | 0.091238042 | 1.051727989 | 0.086750608 | 0.930869749 | 0.999371363 | Not Sig |
| ENSG00000269113 | TRABD2B      | TraB domain containing 2B                                                     | 388630    | 114.5393903 | 0.091366286 | 0.677237291 | 0.1349103   | 0.892682796 | 0.999371363 | Not Sig |
| ENSG00000135930 | EIF4E2       | eukaryotic translation initiation factor 4E family member 2                   | 9470      | 1219.322292 | 0.091394299 | 0.452571226 | 0.201944564 | 0.839960063 | 0.999371363 | Not Sig |
| ENSG00000084754 | HADHA        | hydroxyacyl-CoA dehydrogenase trifunctional multienzyme complex subunit alpha | 3030      | 2908.276303 | 0.091465685 | 0.509184476 | 0.179631723 | 0.857441699 | 0.999371363 | Not Sig |
| ENSG00000100354 | TNRC6B       | trinucleotide repeat containing 6B                                            | 23112     | 5047.955126 | 0.091466362 | 0.409957438 | 0.223111849 | 0.823448457 | 0.999371363 | Not Sig |
| ENSG00000241563 | CORT         | cortistatin                                                                   | 1325      | 4.243142782 | 0.091739776 | 1.150200685 | 0.079759799 | 0.936428298 | NA          | NA      |
| ENSG00000072571 | HMMR         | hyaluronan mediated motility receptor                                         | 3161      | 172.3050739 | 0.091820829 | 1.137713315 | 0.080706473 | 0.935675389 | 0.999371363 | Not Sig |
| ENSG00000149196 | HIKESHI      | Hikeshi, heat shock protein nuclear import factor                             | 51501     | 319.8562002 | 0.092380412 | 0.449099471 | 0.20570145  | 0.837024126 | 0.999371363 | Not Sig |
| ENSG00000213204 | NA           | NA                                                                            | NA        | 39.8402549  | 0.092553103 | 0.635720619 | 0.1455877   | 0.884246878 | 0.999371363 | Not Sig |
| ENSG00000099904 | ZDHHC8       | zinc finger DHHC-type containing 8                                            | 29801     | 928.9476889 | 0.092838831 | 0.638539346 | 0.145392499 | 0.884400987 | 0.999371363 | Not Sig |
| ENSG00000161010 | MRNIP        | MRN complex interacting protein                                               | 51149     | 637.7594752 | 0.092932565 | 0.531112016 | 0.174977335 | 0.861097443 | 0.999371363 | Not Sig |
| ENSG00000172809 | RPL38        | ribosomal protein L38                                                         | 6169      | 2432.598273 | 0.092950697 | 0.479116867 | 0.194004227 | 0.846172572 | 0.999371363 | Not Sig |
| ENSG00000145868 | FBX038       | F-box protein 38                                                              | 81545     | 1651.827185 | 0.0930743   | 0.497589963 | 0.187050196 | 0.851621277 | 0.999371363 | Not Sig |
| ENSG00000149599 | DUSP15       | dual specificity phosphatase 15                                               | 128853    | 20.5652885  | 0.093141903 | 0.975750456 | 0.095456684 | 0.923952094 | 0.999371363 | Not Sig |
| ENSG00000181804 | SLC9A9       | solute carrier family 9 member A9                                             | 285195    | 272.2380877 | 0.093164599 | 0.612534882 | 0.152096806 | 0.879110583 | 0.999371363 | Not Sig |
| ENSG00000254556 | NA           | NA                                                                            | NA        | 22.23148225 | 0.093165101 | 0.872593674 | 0.106768023 | 0.914973017 | 0.999371363 | Not Sig |
| ENSG00000203705 | TATDN3       | TatD DNase domain containing 3                                                | 128387    | 252.2499229 | 0.093258039 | 0.486283458 | 0.191777116 | 0.847916797 | 0.999371363 | Not Sig |
| ENSG00000233609 | NA           | NA                                                                            | NA        | 43.11515147 | 0.093263703 | 0.961098076 | 0.097038695 | 0.922695666 | 0.999371363 | Not Sig |
| ENSG00000116406 | EDEM3        | ER degradation enhancing alpha-mannosidase like protein 3                     | 80267     | 2288.471737 | 0.093265556 | 0.544449001 | 0.171302648 | 0.863985798 | 0.999371363 | Not Sig |
| ENSG00000067167 | TRAM1        | translocation associated membrane protein 1                                   | 23471     | 7276.658382 | 0.093402157 | 0.620234636 | 0.15059165  | 0.880297849 | 0.999371363 | Not Sig |
| ENSG00000168918 | INPP5D       | inositol polyphosphate-5-phosphatase D                                        | 3635      | 1279.45883  | 0.09354347  | 0.73164978  | 0.127852796 | 0.898265467 | 0.999371363 | Not Sig |
| ENSG00000103599 | IQCH         | IQ motif containing H                                                         | 64799     | 95.88381493 | 0.093805072 | 0.515446861 | 0.181987861 | 0.855592253 | 0.999371363 | Not Sig |
| ENSG00000100380 | ST13         | ST13, Hsp70 interacting protein                                               | 6767      | 3835.496537 | 0.09407747  | 0.443795597 | 0.211983784 | 0.832119685 | 0.999371363 | Not Sig |
| ENSG00000165675 | ENOX2        | ecto-NOX disulfide-thiol exchanger 2                                          | 10495     | 309.723055  | 0.09414579  | 0.397812548 | 0.236658674 | 0.812921598 | 0.999371363 | Not Sig |
| ENSG00000185031 | NA           | NA                                                                            | NA        | 27.31961152 | 0.094315001 | 0.757582418 | 0.124494707 | 0.900923591 | 0.999371363 | Not Sig |
| ENSG00000229869 | LOC101927762 | uncharacterized LOC101927762                                                  | 101927762 | 3.057267685 | 0.094484492 | 1.4583105   | 0.06479038  | 0.948340901 | NA          | NA      |
| ENSG00000214190 | NA           | NA                                                                            | NA        | 11.46501296 | 0.094672389 | 0.910275482 | 0.104004107 | 0.917166089 | 0.999371363 | Not Sig |
| ENSG00000265148 | TSPOAP1-AS1  | TSPOAP1 antisense RNA 1                                                       | 100506779 | 110.189801  | 0.094682444 | 0.815572429 | 0.116093237 | 0.907578648 | 0.999371363 | Not Sig |

|                 |           |                                                                                  |           |             |             |             |                 |             |             |         |
|-----------------|-----------|----------------------------------------------------------------------------------|-----------|-------------|-------------|-------------|-----------------|-------------|-------------|---------|
| ENSG00000151445 | VIPAS39   | VPS39 interacting protein, apical-basolateral polarity regulator, spe-39 homolog | 63894     | 485.3625718 | 0.094803486 | 0.410060198 | 0.231194069     | 0.817164038 | 0.999371363 | Not Sig |
| ENSG00000170049 | KCNAB3    | potassium voltage-gated channel subfamily A regulatory beta subunit 3            | 9196      | 51.10915205 | 0.094858925 | 0.574735999 | 0.165047823     | 0.868906341 | 0.999371363 | Not Sig |
| ENSG00000122126 | OCRL      | OCRL, inositol polyphosphate-5-phosphatase                                       | 4952      | 1079.691869 | 0.094882843 | 0.456750868 | 0.207734346     | 0.835436399 | 0.999371363 | Not Sig |
| ENSG00000232558 | KCND3-IT1 | KCND3 intronic transcript 1                                                      | 100874295 | 4.123237427 | 0.094931567 | 1.497144116 | 0.063408436     | 0.94944127  | NA          | NA      |
| ENSG00000263989 | NA        | NA                                                                               | NA        | 2.336578669 | 0.094993346 | 2.071027237 | 0.045867743     | 0.963415664 | NA          | NA      |
| ENSG00000134313 | KIDINS220 | kinase D interacting substrate 220                                               | 57498     | 3713.79372  | 0.095144914 | 0.389675586 | 0.244164421     | 0.807103481 | 0.999371363 | Not Sig |
| ENSG00000123130 | ACOT9     | acyl-CoA thioesterase 9                                                          | 23597     | 846.5481417 | 0.095195389 | 0.541796819 | 0.175703115     | 0.860527188 | 0.999371363 | Not Sig |
| ENSG00000168938 | PPIC      | peptidylprolyl isomerase C                                                       | 5480      | 783.0906149 | 0.095257783 | 0.435036047 | 0.218965265     | 0.826677106 | 0.999371363 | Not Sig |
| ENSG00000144224 | UBXN4     | UBX domain protein 4                                                             | 23190     | 3230.082167 | 0.095294995 | 0.493979325 | 0.192912923     | 0.847027164 | 0.999371363 | Not Sig |
| ENSG00000236104 | ZBTB22    | zinc finger and BTB domain containing 22                                         | 9278      | 596.7474502 | 0.095394038 | 0.635274457 | 0.15016193      | 0.880636861 | 0.999371363 | Not Sig |
| ENSG00000112640 | PPP2R5D   | protein phosphatase 2 regulatory subunit B' delta                                | 5528      | 776.9092218 | 0.09545356  | 0.445580259 | 0.214223045     | 0.830373126 | 0.999371363 | Not Sig |
| ENSG00000169599 | NFU1      | NFU1 iron-sulfur cluster scaffold                                                | 27247     | 340.4437589 | 0.095519756 | 0.485482444 | 0.196752236     | 0.844021431 | 0.999371363 | Not Sig |
| ENSG00000122203 | KIAA1191  | KIAA1191                                                                         | 57179     | 1772.115525 | 0.095701204 | 0.437964781 | 0.218513471     | 0.827029064 | 0.999371363 | Not Sig |
| ENSG00000136021 | SCYL2     | SCY1 like pseudokinase 2                                                         | 55681     | 1744.862285 | 0.095731837 | 0.525311173 | 0.182238342     | 0.855395684 | 0.999371363 | Not Sig |
| ENSG00000114573 | ATP6V1A   | ATPase H+ transporting V1 subunit A                                              | 523       | 2152.075334 | 0.095751578 | 0.571932989 | 0.167417478     | 0.867041574 | 0.999371363 | Not Sig |
| ENSG00000151881 | TMEM267   | transmembrane protein 267                                                        | 64417     | 193.6158685 | 0.095851302 | 0.538361159 | 0.178042752     | 0.858689401 | 0.999371363 | Not Sig |
| ENSG00000122565 | CBX3      | chromobox 3                                                                      | 11335     | 2673.507581 | 0.095906973 | 0.635543992 | 0.150905325     | 0.8800504   | 0.999371363 | Not Sig |
| ENSG00000129515 | SNX6      | sorting nexin 6                                                                  | 58533     | 1134.649158 | 0.095931796 | 0.392992927 | 0.244105655     | 0.807148993 | 0.999371363 | Not Sig |
| ENSG00000235173 | HGH1      | HGH1 homolog                                                                     | 51236     | 39.67357693 | 0.096197728 | 0.712686535 | 0.134979017     | 0.892628464 | 0.999371363 | Not Sig |
| ENSG00000163510 | CWC22     | CWC22 spliceosome associated protein homolog                                     | 57703     | 772.9723822 | 0.096215393 | 0.445854864 | 0.215799805     | 0.829143801 | 0.999371363 | Not Sig |
| ENSG00000161921 | CXCL16    | C-X-C motif chemokine ligand 16                                                  | 58191     | 3003.71644  | 0.096502642 | 0.558652452 | 0.172741822     | 0.862854369 | 0.999371363 | Not Sig |
| ENSG00000163428 | LRRC58    | leucine rich repeat containing 58                                                | 116064    | 1330.709987 | 0.096550535 | 0.570931351 | 0.169110586     | 0.865709658 | 0.999371363 | Not Sig |
| ENSG00000211638 | NA        | NA                                                                               | NA        | 292.446092  | 0.096662243 | 0.863413409 | 0.111953604     | 0.910860194 | 0.999371363 | Not Sig |
| ENSG00000170855 | TRIAP1    | TP53 regulated inhibitor of apoptosis 1                                          | 51499     | 185.7288695 | 0.096672746 | 0.461633377 | 0.209414551     | 0.834124635 | 0.999371363 | Not Sig |
| ENSG00000114686 | MRPL3     | mitochondrial ribosomal protein L3                                               | 11222     | 1156.21698  | 0.097160123 | 0.501577743 | <b>0.193709</b> | 0.846403745 | 0.999371363 | Not Sig |
| ENSG00000103540 | CCP110    | centriolar coiled-coil protein 110                                               | 9738      | 1002.333122 | 0.097264897 | 0.591719768 | 0.164376623     | 0.869434666 | 0.999371363 | Not Sig |
| ENSG00000169564 | PCBP1     | poly(rC) binding protein 1                                                       | 5093      | 4049.215952 | 0.097330183 | 0.471786972 | 0.206301124     | 0.8365557   | 0.999371363 | Not Sig |
| ENSG00000085662 | AKR1B1    | aldo-keto reductase family 1 member B                                            | 231       | 798.6807062 | 0.097560575 | 0.705884729 | 0.13821035      | 0.890074176 | 0.999371363 | Not Sig |
| ENSG00000178031 | ADAMTSL1  | ADAMTS like 1                                                                    | 92949     | 107.9665383 | 0.097641133 | 0.667487839 | 0.146281516     | 0.883699157 | 0.999371363 | Not Sig |
| ENSG00000231841 | NA        | NA                                                                               | NA        | 4.790455603 | 0.097750414 | 1.239756549 | 0.078846459     | 0.93715475  | NA          | NA      |
| ENSG00000153391 | INO80C    | INO80 complex subunit C                                                          | 125476    | 217.9928883 | 0.097752719 | 0.514924218 | 0.189839041     | 0.849435262 | 0.999371363 | Not Sig |
| ENSG00000010165 | METTL13   | methyltransferase like 13                                                        | 51603     | 692.5500472 | 0.097855807 | 0.461176155 | 0.212187482     | 0.831960772 | 0.999371363 | Not Sig |
| ENSG00000134287 | ARF3      | ADP ribosylation factor 3                                                        | 377       | 2590.816879 | 0.097903392 | 0.450046215 | 0.217540752     | 0.827786952 | 0.999371363 | Not Sig |
| ENSG00000174021 | GNG5      | G protein subunit gamma 5                                                        | 2787      | 816.5890556 | 0.097923453 | 0.546625448 | 0.179141775     | 0.857826381 | 0.999371363 | Not Sig |
| ENSG00000150776 | NKAPD1    | NKAP domain containing 1                                                         | 55216     | 583.0635367 | 0.097952013 | 0.390215099 | 0.25102056      | 0.801798214 | 0.999371363 | Not Sig |

|                 |              |                                                                    |           |             |             |             |             |             |             |         |
|-----------------|--------------|--------------------------------------------------------------------|-----------|-------------|-------------|-------------|-------------|-------------|-------------|---------|
| ENSG00000251791 | SCARNA6      | small Cajal body-specific RNA 6                                    | 677772    | 621.8738629 | 0.097981793 | 0.569946383 | 0.171914053 | 0.863505098 | 0.999371363 | Not Sig |
| ENSG00000133627 | ACTR3B       | ARP3 actin related protein 3 homolog B                             | 57180     | 163.6400222 | 0.09800189  | 0.533311957 | 0.183760909 | 0.854201024 | 0.999371363 | Not Sig |
| ENSG00000139546 | TARBP2       | TARBP2, RISC loading complex RNA binding subunit                   | 6895      | 295.5311071 | 0.098081151 | 0.428405796 | 0.2289445   | 0.818912053 | 0.999371363 | Not Sig |
| ENSG00000168090 | COPS6        | COP9 signalosome subunit 6                                         | 10980     | 913.7721642 | 0.098187483 | 0.391365082 | 0.250884629 | 0.801903309 | 0.999371363 | Not Sig |
| ENSG00000107902 | LHPP         | phospholysine phosphohistidine inorganic pyrophosphate phosphatase | 64077     | 400.130542  | 0.098196706 | 0.503962167 | 0.194849361 | 0.845510878 | 0.999371363 | Not Sig |
| ENSG00000155749 | ALS2CR12     | amyotrophic lateral sclerosis 2 chromosome region 12               | 130540    | 60.52678603 | 0.098336971 | 0.688666426 | 0.142793328 | 0.886453407 | 0.999371363 | Not Sig |
| ENSG00000225883 | NA           | NA                                                                 | NA        | 12.06076558 | 0.098462022 | 1.062700632 | 0.092652643 | 0.926179521 | 0.999371363 | Not Sig |
| ENSG00000006114 | NA           | NA                                                                 | NA        | 2210.97617  | 0.09856044  | 0.45606887  | 0.216108676 | 0.828903037 | 0.999371363 | Not Sig |
| ENSG00000187838 | PLSCR3       | phospholipid scramblase 3                                          | 57048     | 5.89936253  | 0.098567233 | 1.08821064  | 0.090577347 | 0.927828433 | NA          | NA      |
| ENSG00000233270 | NA           | NA                                                                 | NA        | 4.612080951 | 0.09868166  | 1.309709813 | 0.075346202 | 0.939939262 | NA          | NA      |
| ENSG00000131089 | ARHGEF9      | Cdc42 guanine nucleotide exchange factor 9                         | 23229     | 603.647448  | 0.098812857 | 0.432760142 | 0.228331696 | 0.819388385 | 0.999371363 | Not Sig |
| ENSG00000174206 | C12orf66     | chromosome 12 open reading frame 66                                | 144577    | 183.7273001 | 0.098833237 | 0.514141218 | 0.192229748 | 0.847562245 | 0.999371363 | Not Sig |
| ENSG00000266501 | NA           | NA                                                                 | NA        | 7.82523925  | 0.098841621 | 1.061237063 | 0.093138117 | 0.925793836 | 0.999371363 | Not Sig |
| ENSG00000116667 | C1orf21      | chromosome 1 open reading frame 21                                 | 81563     | 942.1530888 | 0.098875294 | 0.734643132 | 0.134589557 | 0.892936399 | 0.999371363 | Not Sig |
| ENSG00000130299 | GTPBP3       | GTP binding protein 3, mitochondrial                               | 84705     | 238.2247838 | 0.098913511 | 0.522812071 | 0.189195156 | 0.849939864 | 0.999371363 | Not Sig |
| ENSG00000164151 | ICE1         | interactor of little elongation complex ELL subunit 1              | 23379     | 2218.429555 | 0.09897237  | 0.396001835 | 0.249929068 | 0.802642203 | 0.999371363 | Not Sig |
| ENSG00000241362 | NA           | NA                                                                 | NA        | 7.117840313 | 0.098999798 | 1.035167747 | 0.095636478 | 0.923809292 | 0.999371363 | Not Sig |
| ENSG00000054965 | FAM168A      | family with sequence similarity 168 member A                       | 23201     | 1528.889258 | 0.099485312 | 0.400747296 | 0.24824949  | 0.803941377 | 0.999371363 | Not Sig |
| ENSG00000256802 | LOC100130111 | uncharacterized LOC100130111                                       | 100130111 | 56.15333257 | 0.099543982 | 0.817979875 | 0.121694904 | 0.90314065  | 0.999371363 | Not Sig |
| ENSG00000056661 | NA           | NA                                                                 | NA        | 968.7836615 | 0.099649065 | 0.535945868 | 0.185931213 | 0.852498705 | 0.999371363 | Not Sig |
| ENSG00000160190 | SLC37A1      | solute carrier family 37 member 1                                  | 54020     | 998.7012659 | 0.099725554 | 0.43692039  | 0.228246509 | 0.819454606 | 0.999371363 | Not Sig |
| ENSG00000174628 | IQCK         | IQ motif containing K                                              | 124152    | 236.6469919 | 0.09975479  | 0.434224414 | 0.229730956 | 0.818300838 | 0.999371363 | Not Sig |
| ENSG00000198265 | HELZ         | helicase with zinc finger                                          | 9931      | 3613.340538 | 0.099822988 | 0.507248972 | 0.196792884 | 0.84398962  | 0.999371363 | Not Sig |
| ENSG00000151131 | C12orf45     | chromosome 12 open reading frame 45                                | 121053    | 121.9178957 | 0.099879377 | 0.631538459 | 0.158152485 | 0.874336644 | 0.999371363 | Not Sig |
| ENSG00000168275 | COA6         | cytochrome c oxidase assembly factor 6                             | 388753    | 213.6029358 | 0.099958396 | 0.425697625 | 0.23481079  | 0.814355593 | 0.999371363 | Not Sig |
| ENSG00000198373 | WWP2         | WW domain containing E3 ubiquitin protein ligase 2                 | 11060     | 2144.442414 | 0.10031227  | 0.508844252 | 0.197137473 | 0.84371996  | 0.999371363 | Not Sig |
| ENSG00000171720 | HDAC3        | histone deacetylase 3                                              | 8841      | 689.6786969 | 0.10038331  | 0.464535353 | 0.216094015 | 0.828914465 | 0.999371363 | Not Sig |
| ENSG00000183023 | SLC8A1       | solute carrier family 8 member A1                                  | 6546      | 1244.338406 | 0.100419273 | 0.775914319 | 0.129420569 | 0.897024872 | 0.999371363 | Not Sig |
| ENSG00000028528 | SNX1         | sorting nexin 1                                                    | 6642      | 3588.68857  | 0.100635959 | 0.501454416 | 0.20068815  | 0.840942426 | 0.999371363 | Not Sig |
| ENSG00000179743 | FLJ37453     | uncharacterized LOC729614                                          | 729614    | 129.7655239 | 0.100677659 | 0.615242925 | 0.163638874 | 0.87001544  | 0.999371363 | Not Sig |
| ENSG00000249931 | GOLGA8K      | golgin A8 family member K                                          | 653125    | 5.26353459  | 0.100729962 | 1.34956636  | 0.074638762 | 0.940502133 | NA          | NA      |
| ENSG00000158296 | SLC13A3      | solute carrier family 13 member 3                                  | 64849     | 65.90628578 | 0.101290478 | 0.562847916 | 0.179960652 | 0.857183459 | 0.999371363 | Not Sig |
| ENSG00000204138 | PHACTR4      | phosphatase and actin regulator 4                                  | 65979     | 1648.169437 | 0.101313068 | 0.424957879 | 0.238407318 | 0.811565192 | 0.999371363 | Not Sig |
| ENSG00000127804 | METTL16      | methyltransferase like 16                                          | 79066     | 1109.963796 | 0.101369495 | 0.394303334 | 0.257085056 | 0.797113114 | 0.999371363 | Not Sig |
| ENSG00000211887 | NA           | NA                                                                 | NA        | 5.745475336 | 0.101685773 | 1.508068351 | 0.067427828 | 0.946241116 | NA          | NA      |

|                 |          |                                                                          |           |             |             |             |             |             |             |         |
|-----------------|----------|--------------------------------------------------------------------------|-----------|-------------|-------------|-------------|-------------|-------------|-------------|---------|
| ENSG00000197149 | NA       | NA                                                                       | NA        | 14.54858531 | 0.101716272 | 0.899614864 | 0.113066465 | 0.909977862 | 0.999371363 | Not Sig |
| ENSG00000064199 | SPA17    | sperm autoantigenic protein 17                                           | 53340     | 149.2668005 | 0.101741457 | 0.448508526 | 0.226843974 | 0.820545068 | 0.999371363 | Not Sig |
| ENSG00000213463 | SYNJ2BP  | synaptojanin 2 binding protein                                           | 55333     | 556.7893654 | 0.101800418 | 0.395669449 | 0.257286526 | 0.796957593 | 0.999371363 | Not Sig |
| ENSG00000135211 | TMEM60   | transmembrane protein 60                                                 | 85025     | 155.0407154 | 0.101821367 | 0.510775451 | 0.199346633 | 0.841991603 | 0.999371363 | Not Sig |
| ENSG00000119689 | DLST     | dihydrolipoamide S-succinyltransferase                                   | 1743      | 1687.795569 | 0.101829726 | 0.395788607 | 0.257283114 | 0.796960227 | 0.999371363 | Not Sig |
| ENSG00000078369 | GNB1     | G protein subunit beta 1                                                 | 2782      | 7281.652257 | 0.101873352 | 0.401184316 | 0.253931542 | 0.799548446 | 0.999371363 | Not Sig |
| ENSG00000221916 | C19orf73 | chromosome 19 open reading frame 73                                      | 55150     | 7.858722186 | 0.101930539 | 1.036912087 | 0.098302007 | 0.921692484 | 0.999371363 | Not Sig |
| ENSG00000141497 | ZMYND15  | zinc finger MYND-type containing 15                                      | 84225     | 222.2353101 | 0.101993541 | 0.67795934  | 0.150441974 | 0.880415928 | 0.999371363 | Not Sig |
| ENSG00000137502 | RAB30    | RAB30, member RAS oncogene family                                        | 27314     | 593.8060564 | 0.102002628 | 0.751485087 | 0.135734733 | 0.892030989 | 0.999371363 | Not Sig |
| ENSG00000233328 | NA       | NA                                                                       | NA        | 4.884860207 | 0.102120797 | 1.331150336 | 0.076716201 | 0.938849316 | NA          | NA      |
| ENSG00000135046 | ANXA1    | annexin A1                                                               | 301       | 4948.988366 | 0.102412974 | 0.68726103  | 0.149016123 | 0.881540911 | 0.999371363 | Not Sig |
| ENSG00000164081 | TEX264   | testis expressed 264                                                     | 51368     | 629.7465603 | 0.102610878 | 0.487193375 | 0.210616323 | 0.833186674 | 0.999371363 | Not Sig |
| ENSG00000163001 | CFAP36   | cilia and flagella associated protein 36                                 | 112942    | 516.0386743 | 0.102857335 | 0.512865362 | 0.200554263 | 0.841047124 | 0.999371363 | Not Sig |
| ENSG00000204790 | NA       | NA                                                                       | NA        | 92.91242015 | 0.102879505 | 0.759944452 | 0.135377664 | 0.892313283 | 0.999371363 | Not Sig |
| ENSG00000273311 | DGCR11   | DiGeorge syndrome critical region gene 11 (non-protein coding)           | 25786     | 100.093125  | 0.102886026 | 0.582861101 | 0.176518944 | 0.859886267 | 0.999371363 | Not Sig |
| ENSG00000204463 | BAG6     | BCL2 associated athanogene 6                                             | 7917      | 5133.809366 | 0.102933992 | 0.419211054 | 0.245542169 | 0.806036661 | 0.999371363 | Not Sig |
| ENSG00000144724 | PTPRG    | protein tyrosine phosphatase, receptor type G                            | 5793      | 2108.383765 | 0.102948624 | 0.693611631 | 0.148424016 | 0.882008148 | 0.999371363 | Not Sig |
| ENSG00000207781 | MIR625   | microRNA 625                                                             | 693210    | 0.70294853  | 0.103195471 | 3.983988662 | 0.025902551 | 0.979335065 | NA          | NA      |
| ENSG00000235962 | NA       | NA                                                                       | NA        | 0.70294853  | 0.103195471 | 3.983988662 | 0.025902551 | 0.979335065 | NA          | NA      |
| ENSG00000236877 | NA       | NA                                                                       | NA        | 0.70294853  | 0.103195471 | 3.983988662 | 0.025902551 | 0.979335065 | NA          | NA      |
| ENSG00000249207 | NA       | NA                                                                       | NA        | 0.70294853  | 0.103195471 | 3.983988662 | 0.025902551 | 0.979335065 | NA          | NA      |
| ENSG00000253179 | NA       | NA                                                                       | NA        | 0.70294853  | 0.103195471 | 3.983988662 | 0.025902551 | 0.979335065 | NA          | NA      |
| ENSG00000265691 | MIR4460  | microRNA 4460                                                            | 100616325 | 0.70294853  | 0.103195471 | 3.983988662 | 0.025902551 | 0.979335065 | NA          | NA      |
| ENSG00000271178 | NA       | NA                                                                       | NA        | 0.70294853  | 0.103195471 | 3.983988662 | 0.025902551 | 0.979335065 | NA          | NA      |
| ENSG00000157881 | PANK4    | pantothenate kinase 4                                                    | 55229     | 609.8077383 | 0.103256008 | 0.587497646 | 0.175755611 | 0.860485944 | 0.999371363 | Not Sig |
| ENSG00000178338 | ZNF354B  | zinc finger protein 354B                                                 | 117608    | 329.252093  | 0.103281653 | 0.518115566 | 0.199340958 | 0.841996042 | 0.999371363 | Not Sig |
| ENSG00000207308 | NA       | NA                                                                       | NA        | 1.667373365 | 0.103300491 | 2.23849817  | 0.046147231 | 0.963192901 | NA          | NA      |
| ENSG00000247077 | PGAM5    | PGAM family member 5, mitochondrial serine/threonine protein phosphatase | 192111    | 366.8905797 | 0.103481675 | 0.448217504 | 0.230873793 | 0.817412851 | 0.999371363 | Not Sig |
| ENSG00000213337 | ANKRD39  | ankyrin repeat domain 39                                                 | 51239     | 107.0905587 | 0.103495203 | 0.491948511 | 0.210378121 | 0.833372567 | 0.999371363 | Not Sig |
| ENSG00000158714 | SLAMF8   | SLAM family member 8                                                     | 56833     | 429.3887422 | 0.103604606 | 0.692082781 | 0.14969973  | 0.881001521 | 0.999371363 | Not Sig |
| ENSG00000147654 | EBAG9    | estrogen receptor binding site associated, antigen, 9                    | 9166      | 430.7289829 | 0.10363109  | 0.457397619 | 0.226566746 | 0.820760653 | 0.999371363 | Not Sig |
| ENSG00000224888 | NA       | NA                                                                       | NA        | 12.46407784 | 0.103859598 | 0.879289208 | 0.118117677 | 0.905974418 | 0.999371363 | Not Sig |
| ENSG00000092439 | TRPM7    | transient receptor potential cation channel subfamily M member 7         | 54822     | 2328.799042 | 0.103944576 | 0.548834906 | 0.189391336 | 0.849786114 | 0.999371363 | Not Sig |
| ENSG00000114439 | BBX      | BBX, HMG-box containing                                                  | 56987     | 2579.212569 | 0.104127429 | 0.528102591 | 0.197172728 | 0.843692372 | 0.999371363 | Not Sig |
| ENSG00000166411 | IDH3A    | isocitrate dehydrogenase 3 (NAD(+)) alpha                                | 3419      | 831.4739303 | 0.10415089  | 0.423124876 | 0.246146932 | 0.805568494 | 0.999371363 | Not Sig |

|                 |              |                                                        |           |             |             |             |             |             |             |         |
|-----------------|--------------|--------------------------------------------------------|-----------|-------------|-------------|-------------|-------------|-------------|-------------|---------|
| ENSG00000224281 | SLC25A5-AS1  | SLC25A5 antisense RNA 1                                | 100303728 | 30.57783314 | 0.104372245 | 0.641787156 | 0.162627507 | 0.870811728 | 0.999371363 | Not Sig |
| ENSG00000188092 | GPR89B       | G protein-coupled receptor 89B                         | 51463     | 39.36869258 | 0.104403256 | 0.614424359 | 0.169920437 | 0.865072708 | 0.999371363 | Not Sig |
| ENSG00000103494 | RPGRIP1L     | RPGRIP1 like                                           | 23322     | 306.5583268 | 0.104477785 | 0.657004351 | 0.159021451 | 0.873651973 | 0.999371363 | Not Sig |
| ENSG00000183691 | NOG          | noggin                                                 | 9241      | 45.94703309 | 0.104566009 | 0.854510273 | 0.122369516 | 0.90260638  | 0.999371363 | Not Sig |
| ENSG00000174943 | KCTD13       | potassium channel tetramerization domain containing 13 | 253980    | 398.9983949 | 0.104718288 | 0.478320042 | 0.218929333 | 0.826705097 | 0.999371363 | Not Sig |
| ENSG00000125124 | BBS2         | Bardet-Biedl syndrome 2                                | 583       | 891.5404898 | 0.104760491 | 0.390094644 | 0.268551472 | 0.78827486  | 0.999371363 | Not Sig |
| ENSG00000167315 | ACAA2        | acetyl-CoA acyltransferase 2                           | 10449     | 579.5869655 | 0.104820041 | 0.502553003 | 0.208575095 | 0.834779954 | 0.999371363 | Not Sig |
| ENSG00000243267 | NA           | NA                                                     | NA        | 8.135813694 | 0.10496781  | 1.02571245  | 0.102336488 | 0.918489594 | 0.999371363 | Not Sig |
| ENSG00000168488 | ATXN2L       | ataxin 2 like                                          | 11273     | 3794.878847 | 0.104976091 | 0.414117748 | 0.253493339 | 0.799887008 | 0.999371363 | Not Sig |
| ENSG00000142507 | PSMB6        | proteasome subunit beta 6                              | 5694      | 748.3435006 | 0.105033001 | 0.42352069  | 0.247999693 | 0.804134645 | 0.999371363 | Not Sig |
| ENSG00000211650 | NA           | NA                                                     | NA        | 19.84658648 | 0.105129366 | 1.005254561 | 0.104579845 | 0.916709208 | 0.999371363 | Not Sig |
| ENSG00000187522 | HSPA14       | heat shock protein family A (Hsp70) member 14          | 51182     | 411.4122053 | 0.105240421 | 0.430913176 | 0.244226509 | 0.807055397 | 0.999371363 | Not Sig |
| ENSG00000069248 | NUP133       | nucleoporin 133                                        | 55746     | 1384.128202 | 0.105279833 | 0.422040604 | 0.249454276 | 0.803009406 | 0.999371363 | Not Sig |
| ENSG00000013275 | PSMC4        | proteasome 26S subunit, ATPase 4                       | 5704      | 859.3853654 | 0.105302102 | 0.418349031 | 0.251708726 | 0.801266212 | 0.999371363 | Not Sig |
| ENSG00000105364 | MRPL4        | mitochondrial ribosomal protein L4                     | 51073     | 442.397342  | 0.105364948 | 0.584554233 | 0.180248371 | 0.856957586 | 0.999371363 | Not Sig |
| ENSG00000189043 | NDUFA4       | NDUFA4, mitochondrial complex associated               | 4697      | 1362.649143 | 0.105453873 | 0.53389613  | 0.197517582 | 0.843422524 | 0.999371363 | Not Sig |
| ENSG00000010704 | HFE          | hemochromatosis                                        | 3077      | 390.5835342 | 0.105510497 | 0.469513425 | 0.224723068 | 0.822194718 | 0.999371363 | Not Sig |
| ENSG00000119203 | CPSF3        | cleavage and polyadenylation specific factor 3         | 51692     | 594.948244  | 0.105671637 | 0.559300812 | 0.188935247 | 0.850143568 | 0.999371363 | Not Sig |
| ENSG00000224442 | NA           | NA                                                     | NA        | 21.37423896 | 0.105732499 | 0.742383371 | 0.142423043 | 0.886745862 | 0.999371363 | Not Sig |
| ENSG00000188994 | ZNF292       | zinc finger protein 292                                | 23036     | 3157.364938 | 0.105737088 | 0.628092916 | 0.168346251 | 0.86631089  | 0.999371363 | Not Sig |
| ENSG00000074319 | TSG101       | tumor susceptibility 101                               | 7251      | 1001.230862 | 0.105756717 | 0.406342095 | 0.260265226 | 0.794659194 | 0.999371363 | Not Sig |
| ENSG00000169740 | ZNF32        | zinc finger protein 32                                 | 7580      | 306.8738502 | 0.1058883   | 0.55950552  | 0.189253361 | 0.849894247 | 0.999371363 | Not Sig |
| ENSG00000264235 | LOC104968399 | uncharacterized LOC104968399                           | 104968399 | 5.868752367 | 0.105895687 | 1.07494161  | 0.098512966 | 0.921524976 | NA          | NA      |
| ENSG00000102580 | DNAJC3       | DnaJ heat shock protein family (Hsp40) member C3       | 5611      | 3949.854627 | 0.106001268 | 0.551495519 | 0.192206944 | 0.847580107 | 0.999371363 | Not Sig |
| ENSG00000185000 | DGAT1        | diacylglycerol O-acyltransferase 1                     | 8694      | 1029.801331 | 0.106061045 | 0.595877148 | 0.177991463 | 0.85872968  | 0.999371363 | Not Sig |
| ENSG00000104980 | TIMM44       | translocase of inner mitochondrial membrane 44         | 10469     | 512.0782512 | 0.106150834 | 0.539649478 | 0.196703302 | 0.844059726 | 0.999371363 | Not Sig |
| ENSG00000254741 | NA           | NA                                                     | NA        | 15.50424776 | 0.106235426 | 0.772845833 | 0.137460049 | 0.890667169 | 0.999371363 | Not Sig |
| ENSG00000253051 | SNORA31B     | small nucleolar RNA, H/ACA box 31B                     | 109616966 | 27.80548131 | 0.106257271 | 0.746102875 | 0.14241638  | 0.886751125 | 0.999371363 | Not Sig |
| ENSG00000221479 | MIR1251      | microRNA 1251                                          | 100302289 | 1.702992763 | 0.106266712 | 2.226536355 | 0.047727364 | 0.961933525 | NA          | NA      |
| ENSG00000066382 | MPPED2       | metallophosphoesterase domain containing 2             | 744       | 36.88228497 | 0.106537598 | 0.766322203 | 0.139024548 | 0.889430751 | 0.999371363 | Not Sig |
| ENSG00000143570 | SLC39A1      | solute carrier family 39 member 1                      | 27173     | 2266.131422 | 0.106667434 | 0.512905179 | 0.207967161 | 0.835254608 | 0.999371363 | Not Sig |
| ENSG00000004866 | ST7          | suppression of tumorigenicity 7                        | 7982      | 938.1221959 | 0.106764869 | 0.445797291 | 0.239491965 | 0.810724126 | 0.999371363 | Not Sig |
| ENSG00000004866 | ST7-OT3      | ST7 overlapping transcript 3                           | 93655     | 938.1221959 | 0.106764869 | 0.445797291 | 0.239491965 | 0.810724126 | 0.999371363 | Not Sig |
| ENSG00000211857 | NA           | NA                                                     | NA        | 6.78570033  | 0.106859    | 1.339185787 | 0.079794007 | 0.936401091 | 0.999371363 | Not Sig |
| ENSG00000223813 | NA           | NA                                                     | NA        | 28.72868565 | 0.106868661 | 1.030285059 | 0.103727274 | 0.917385782 | 0.999371363 | Not Sig |

|                 |           |                                                                    |           |             |             |             |             |             |             |         |
|-----------------|-----------|--------------------------------------------------------------------|-----------|-------------|-------------|-------------|-------------|-------------|-------------|---------|
| ENSG00000105967 | TFEC      | transcription factor EC                                            | 22797     | 444.5327859 | 0.107049561 | 0.812053078 | 0.131825817 | 0.895122066 | 0.999371363 | Not Sig |
| ENSG00000249565 | NA        | NA                                                                 | NA        | 5.627989498 | 0.107150392 | 1.472523804 | 0.072766492 | 0.941991935 | NA          | NA      |
| ENSG00000169136 | ATF5      | activating transcription factor 5                                  | 22809     | 405.0752618 | 0.107202365 | 0.442403906 | 0.242317853 | 0.808533882 | 0.999371363 | Not Sig |
| ENSG00000137275 | RIPK1     | receptor interacting serine/threonine kinase 1                     | 8737      | 1220.900481 | 0.107359999 | 0.433313209 | 0.24776535  | 0.804315965 | 0.999371363 | Not Sig |
| ENSG00000065600 | TMEM206   | transmembrane protein 206                                          | 55248     | 185.2379414 | 0.107386784 | 0.447600137 | 0.239916782 | 0.810394771 | 0.999371363 | Not Sig |
| ENSG00000237984 | PTENP1    | phosphatase and tensin homolog pseudogene 1                        | 11191     | 5.517278102 | 0.10743464  | 1.139663109 | 0.094268771 | 0.924895657 | NA          | NA      |
| ENSG00000164062 | APEH      | acylaminoacyl-peptide hydrolase                                    | 327       | 1479.509725 | 0.107492976 | 0.411224248 | 0.261397465 | 0.793786012 | 0.999371363 | Not Sig |
| ENSG00000103429 | BFAR      | bifunctional apoptosis regulator                                   | 51283     | 1359.148505 | 0.107499976 | 0.421554294 | 0.255008613 | 0.798716447 | 0.999371363 | Not Sig |
| ENSG00000118094 | TREH      | trehalase                                                          | 11181     | 12.93929773 | 0.107660964 | 1.524616874 | 0.070615094 | 0.943704097 | 0.999371363 | Not Sig |
| ENSG00000222190 | NA        | NA                                                                 | NA        | 2.63153791  | 0.107715883 | 1.710172121 | 0.062985405 | 0.949778127 | NA          | NA      |
| ENSG00000120555 | NA        | NA                                                                 | NA        | 8.946456906 | 0.10772551  | 0.865076733 | 0.124527115 | 0.900897933 | 0.999371363 | Not Sig |
| ENSG00000204956 | PCDHGA1   | protocadherin gamma subfamily A, 1                                 | 56114     | 26.72028716 | 0.107760112 | 0.907007196 | 0.118808442 | 0.90542712  | 0.999371363 | Not Sig |
| ENSG00000113621 | TXNDC15   | thioredoxin domain containing 15                                   | 79770     | 908.8425032 | 0.107781653 | 0.501313679 | 0.214998427 | 0.829768545 | 0.999371363 | Not Sig |
| ENSG00000197943 | PLCG2     | phospholipase C gamma 2                                            | 5336      | 1071.575365 | 0.107853197 | 0.645093373 | 0.167190055 | 0.867220509 | 0.999371363 | Not Sig |
| ENSG00000240877 | NA        | NA                                                                 | NA        | 6.902567297 | 0.107855985 | 0.982772265 | 0.109746672 | 0.912610285 | 0.999371363 | Not Sig |
| ENSG00000130203 | APOE      | apolipoprotein E                                                   | 348       | 6866.453598 | 0.107890165 | 0.872637257 | 0.123636899 | 0.901602775 | 0.999371363 | Not Sig |
| ENSG00000267088 | NA        | NA                                                                 | NA        | 1.31563881  | 0.107955438 | 2.425222798 | 0.044513617 | 0.964494998 | NA          | NA      |
| ENSG00000172671 | ZFAND4    | zinc finger AN1-type containing 4                                  | 93550     | 329.0596716 | 0.108251361 | 0.419618981 | 0.257975367 | 0.796425918 | 0.999371363 | Not Sig |
| ENSG00000188636 | RTL6      | retrotransposon Gag like 6                                         | 84247     | 1111.524698 | 0.108282752 | 0.526155229 | 0.20580001  | 0.836947133 | 0.999371363 | Not Sig |
| ENSG00000162521 | RBBP4     | RB binding protein 4, chromatin remodeling factor                  | 5928      | 4044.315849 | 0.108382179 | 0.536107585 | 0.202164979 | 0.839787751 | 0.999371363 | Not Sig |
| ENSG00000207044 | NA        | NA                                                                 | NA        | 6.659407676 | 0.108596109 | 1.117666245 | 0.097163272 | 0.922596735 | 0.999371363 | Not Sig |
| ENSG00000207488 | NA        | NA                                                                 | NA        | 4.4584049   | 0.108597746 | 1.264463293 | 0.085884459 | 0.931558266 | NA          | NA      |
| ENSG00000229119 | NA        | NA                                                                 | NA        | 10.66719554 | 0.108780929 | 0.977758458 | 0.111255422 | 0.911413804 | 0.999371363 | Not Sig |
| ENSG00000188112 | C6orf132  | chromosome 6 open reading frame 132                                | 647024    | 973.4423076 | 0.108918068 | 0.523110171 | 0.208212483 | 0.835063062 | 0.999371363 | Not Sig |
| ENSG00000115234 | SNX17     | sorting nexin 17                                                   | 9784      | 1612.62631  | 0.108953227 | 0.607989095 | 0.1792026   | 0.857778622 | 0.999371363 | Not Sig |
| ENSG00000187650 | VMAC      | vimentin type intermediate filament associated coiled-coil protein | 400673    | 148.0639439 | 0.109042701 | 0.617136808 | 0.176691294 | 0.85975088  | 0.999371363 | Not Sig |
| ENSG00000181963 | OR52K2    | olfactory receptor family 52 subfamily K member 2                  | 119774    | 4.895753534 | 0.109140459 | 1.390091735 | 0.078513134 | 0.937419883 | NA          | NA      |
| ENSG00000211716 | NA        | NA                                                                 | NA        | 4.732650705 | 0.109145866 | 1.22755335  | 0.088913338 | 0.929150783 | NA          | NA      |
| ENSG00000234936 | NA        | NA                                                                 | NA        | 8.481558585 | 0.10922532  | 0.943287454 | 0.11579219  | 0.90781724  | 0.999371363 | Not Sig |
| ENSG00000214517 | PPME1     | protein phosphatase methylesterase 1                               | 51400     | 874.3503913 | 0.109245122 | 0.472602231 | 0.231156594 | 0.81719315  | 0.999371363 | Not Sig |
| ENSG00000218416 | PP14571   | uncharacterized LOC100130449                                       | 100130449 | 10.05690338 | 0.109285996 | 1.15451984  | 0.094659262 | 0.924585477 | 0.999371363 | Not Sig |
| ENSG00000122566 | HNRNPA2B1 | heterogeneous nuclear ribonucleoprotein A2/B1                      | 3181      | 12948.79911 | 0.10941784  | 0.458892647 | 0.238438861 | 0.81154073  | 0.999371363 | Not Sig |
| ENSG00000227379 | NA        | NA                                                                 | NA        | 9.513237052 | 0.109501316 | 0.873140305 | 0.125410905 | 0.900198255 | 0.999371363 | Not Sig |
| ENSG00000272888 | NA        | NA                                                                 | NA        | 3184.387872 | 0.109593018 | 0.560747734 | 0.195440857 | 0.845047834 | 0.999371363 | Not Sig |
| ENSG00000258938 | NA        | NA                                                                 | NA        | 18.98152232 | 0.109633318 | 0.786430791 | 0.139406187 | 0.889129183 | 0.999371363 | Not Sig |

|                 |          |                                                             |        |             |             |             |             |             |             |         |
|-----------------|----------|-------------------------------------------------------------|--------|-------------|-------------|-------------|-------------|-------------|-------------|---------|
| ENSG00000164300 | SERINC5  | serine incorporator 5                                       | 256987 | 1169.750155 | 0.109648384 | 0.421005189 | 0.260444259 | 0.794521107 | 0.999371363 | Not Sig |
| ENSG00000205629 | LCMT1    | leucine carboxyl methyltransferase 1                        | 51451  | 395.8699614 | 0.109656355 | 0.404501785 | 0.271089915 | 0.786321878 | 0.999371363 | Not Sig |
| ENSG00000106615 | RHEB     | Ras homolog, mTORC1 binding                                 | 6009   | 1480.306121 | 0.109712616 | 0.415318984 | 0.264164703 | 0.791653008 | 0.999371363 | Not Sig |
| ENSG00000156261 | CCT8     | chaperonin containing TCPI subunit 8                        | 10694  | 1638.52407  | 0.109826162 | 0.482141635 | 0.227788173 | 0.819810921 | 0.999371363 | Not Sig |
| ENSG00000185561 | TLCD2    | TLC domain containing 2                                     | 727910 | 170.6075564 | 0.109848667 | 0.782458164 | 0.140389189 | 0.888352499 | 0.999371363 | Not Sig |
| ENSG00000174684 | B4GAT1   | beta-1,4-glucuronyltransferase 1                            | 11041  | 429.5099504 | 0.110012751 | 0.739625553 | 0.148741145 | 0.881757893 | 0.999371363 | Not Sig |
| ENSG00000226721 | NA       | NA                                                          | NA     | 33.51198472 | 0.110323265 | 0.888018667 | 0.124235299 | 0.901128974 | 0.999371363 | Not Sig |
| ENSG00000198919 | DZIP3    | DAZ interacting zinc finger protein 3                       | 9666   | 573.3881745 | 0.110355111 | 0.476017404 | 0.231829992 | 0.816670061 | 0.999371363 | Not Sig |
| ENSG00000170185 | USP38    | ubiquitin specific peptidase 38                             | 84640  | 1154.878933 | 0.110527226 | 0.47958514  | 0.230464243 | 0.817731046 | 0.999371363 | Not Sig |
| ENSG00000155846 | PPARGC1B | PPARG coactivator 1 beta                                    | 133522 | 432.3826506 | 0.110659265 | 0.871503189 | 0.126975169 | 0.898960052 | 0.999371363 | Not Sig |
| ENSG00000150712 | MTMR12   | myotubularin related protein 12                             | 54545  | 1561.046152 | 0.110733994 | 0.434204972 | 0.255027007 | 0.79870224  | 0.999371363 | Not Sig |
| ENSG00000229931 | NA       | NA                                                          | NA     | 42.49408092 | 0.110736116 | 0.686765575 | 0.161242964 | 0.871902044 | 0.999371363 | Not Sig |
| ENSG00000130684 | ZNF337   | zinc finger protein 337                                     | 26152  | 548.0084239 | 0.110867248 | 0.46277919  | 0.239568352 | 0.810664902 | 0.999371363 | Not Sig |
| ENSG00000110768 | GTF2H1   | general transcription factor IIH subunit 1                  | 2965   | 854.781175  | 0.110891067 | 0.439239947 | 0.252461252 | 0.80068456  | 0.999371363 | Not Sig |
| ENSG00000157020 | SEC13    | SEC13 homolog, nuclear pore and COP1 coat complex component | 6396   | 1610.588351 | 0.110955602 | 0.461484622 | 0.240431852 | 0.809995488 | 0.999371363 | Not Sig |
| ENSG00000178860 | MSC      | musculin                                                    | 9242   | 106.4482784 | 0.110993686 | 0.641275183 | 0.173082772 | 0.862586366 | 0.999371363 | Not Sig |
| ENSG00000067248 | DHX29    | DExH-box helicase 29                                        | 54505  | 1213.004156 | 0.111014318 | 0.46758367  | 0.23742129  | 0.812329975 | 0.999371363 | Not Sig |
| ENSG00000047249 | ATP6V1H  | ATPase H+ transporting V1 subunit H                         | 51606  | 918.2576836 | 0.111245388 | 0.475336808 | 0.234034869 | 0.814957909 | 0.999371363 | Not Sig |
| ENSG00000170396 | ZNF804A  | zinc finger protein 804A                                    | 91752  | 21.62806528 | 0.111246346 | 0.829343939 | 0.13413777  | 0.893293634 | 0.999371363 | Not Sig |
| ENSG00000228502 | NA       | NA                                                          | NA     | 44.56419955 | 0.111332633 | 0.628035695 | 0.177271186 | 0.859295382 | 0.999371363 | Not Sig |
| ENSG00000215302 | NA       | NA                                                          | NA     | 111.5009056 | 0.111353924 | 0.576287276 | 0.193226415 | 0.846781652 | 0.999371363 | Not Sig |
| ENSG00000229497 | NA       | NA                                                          | NA     | 5.327749834 | 0.111844929 | 1.129984364 | 0.098979183 | 0.921154799 | NA          | NA      |
| ENSG00000262026 | NA       | NA                                                          | NA     | 9.190789932 | 0.111890624 | 0.960871458 | 0.116447027 | 0.907298267 | 0.999371363 | Not Sig |
| ENSG00000125450 | NUP85    | nucleoporin 85                                              | 79902  | 824.1252829 | 0.111967633 | 0.473500865 | 0.236467642 | 0.813069814 | 0.999371363 | Not Sig |
| ENSG00000158955 | WNT9B    | Wnt family member 9B                                        | 7484   | 9.831951868 | 0.111984111 | 1.659925043 | 0.067463354 | 0.946212835 | 0.999371363 | Not Sig |
| ENSG00000137203 | TFAP2A   | transcription factor AP-2 alpha                             | 7020   | 301.5274783 | 0.112044678 | 1.01058205  | 0.110871431 | 0.9117183   | 0.999371363 | Not Sig |
| ENSG00000115839 | RAB3GAP1 | RAB3 GTPase activating protein catalytic subunit 1          | 22930  | 1914.683563 | 0.112045158 | 0.415117546 | 0.269911881 | 0.787228047 | 0.999371363 | Not Sig |
| ENSG00000165724 | ZMYND19  | zinc finger MYND-type containing 19                         | 116225 | 299.0754943 | 0.112183387 | 0.551988877 | 0.203234869 | 0.83895146  | 0.999371363 | Not Sig |
| ENSG00000079974 | RABL2B   | RAB, member of RAS oncogene family like 2B                  | 11158  | 512.5423484 | 0.112246471 | 0.623831537 | 0.179930742 | 0.857206941 | 0.999371363 | Not Sig |
| ENSG00000106526 | ACTR3C   | ARP3 actin related protein 3 homolog C                      | 653857 | 312.9669768 | 0.112292514 | 0.537932482 | 0.208748342 | 0.8346447   | 0.999371363 | Not Sig |
| ENSG00000250321 | NA       | NA                                                          | NA     | 5.786918782 | 0.112372266 | 1.041524595 | 0.107892091 | 0.914081291 | NA          | NA      |
| ENSG00000120265 | PCMT1    | protein-L-isoaspartate (D-aspartate) O-methyltransferase    | 5110   | 695.004553  | 0.112412541 | 0.398979074 | 0.281750469 | 0.778134853 | 0.999371363 | Not Sig |
| ENSG00000220023 | NA       | NA                                                          | NA     | 560.5077546 | 0.112449965 | 0.789149827 | 0.142495077 | 0.886688968 | 0.999371363 | Not Sig |
| ENSG00000064961 | HMG20B   | high mobility group 20B                                     | 10362  | 1316.453495 | 0.112484914 | 0.619165789 | 0.181671721 | 0.85584036  | 0.999371363 | Not Sig |
| ENSG00000188643 | S100A16  | S100 calcium binding protein A16                            | 140576 | 1373.019037 | 0.112629262 | 0.557850112 | 0.201898789 | 0.839995849 | 0.999371363 | Not Sig |



|                 |          |                                                                  |        |             |             |             |             |             |             |         |
|-----------------|----------|------------------------------------------------------------------|--------|-------------|-------------|-------------|-------------|-------------|-------------|---------|
| ENSG00000213839 | NA       | NA                                                               | NA     | 2.405526285 | 0.112644506 | 1.564411869 | 0.072004379 | 0.942598423 | NA          | NA      |
| ENSG00000163904 | SENP2    | SUMO1/sentrin/SMT3 specific peptidase 2                          | 59343  | 1136.182356 | 0.112656799 | 0.387456619 | 0.290759773 | 0.771235053 | 0.999371363 | Not Sig |
| ENSG00000185641 | NA       | NA                                                               | NA     | 12.26061234 | 0.112724625 | 0.90022089  | 0.125218851 | 0.900350294 | 0.999371363 | Not Sig |
| ENSG00000160055 | TMEM234  | transmembrane protein 234                                        | 56063  | 401.9309606 | 0.11272957  | 0.432826099 | 0.26045003  | 0.794516656 | 0.999371363 | Not Sig |
| ENSG00000252817 | NA       | NA                                                               | NA     | 43.67841104 | 0.112762848 | 0.55556052  | 0.202971312 | 0.839157455 | 0.999371363 | Not Sig |
| ENSG00000176393 | RNPEP    | arginyl aminopeptidase                                           | 6051   | 2101.555488 | 0.112847761 | 0.571707679 | 0.19738717  | 0.843524569 | 0.999371363 | Not Sig |
| ENSG00000252769 | NA       | NA                                                               | NA     | 1.593161618 | 0.112930363 | 2.660615462 | 0.042445203 | 0.966143794 | NA          | NA      |
| ENSG00000257270 | NA       | NA                                                               | NA     | 3.994343067 | 0.113040484 | 1.367269411 | 0.082676086 | 0.9341091   | NA          | NA      |
| ENSG00000207949 | NA       | NA                                                               | NA     | 12.12618681 | 0.113069595 | 1.010161739 | 0.11193217  | 0.910877189 | 0.999371363 | Not Sig |
| ENSG00000204628 | RACK1    | receptor for activated C kinase 1                                | 10399  | 10475.30486 | 0.113271796 | 0.479942939 | 0.236010964 | 0.813424162 | 0.999371363 | Not Sig |
| ENSG00000221625 | NA       | NA                                                               | NA     | 20.72037201 | 0.113281597 | 0.847565017 | 0.133655347 | 0.893675116 | 0.999371363 | Not Sig |
| ENSG00000198894 | CIPC     | CLOCK interacting pacemaker                                      | 85457  | 660.9628199 | 0.113435119 | 0.420923462 | 0.269491082 | 0.787551804 | 0.999371363 | Not Sig |
| ENSG00000082175 | PGR      | progesterone receptor                                            | 5241   | 220.3437292 | 0.113511966 | 0.636713412 | 0.178277956 | 0.85850469  | 0.999371363 | Not Sig |
| ENSG00000242193 | CRYZL2P  | crystallin zeta like 2, pseudogene                               | 730102 | 276.8257757 | 0.113526685 | 0.551199639 | 0.205962916 | 0.836819879 | 0.999371363 | Not Sig |
| ENSG00000131379 | C3orf20  | chromosome 3 open reading frame 20                               | 84077  | 12.79598126 | 0.113613879 | 1.02136629  | 0.111237154 | 0.91142829  | 0.999371363 | Not Sig |
| ENSG00000212482 | NA       | NA                                                               | NA     | 3.387830032 | 0.113628352 | 1.546872699 | 0.073456822 | 0.941442602 | NA          | NA      |
| ENSG00000123338 | NCKAP1L  | NCK associated protein 1 like                                    | 3071   | 1583.263812 | 0.113642173 | 0.831755899 | 0.136629236 | 0.891323866 | 0.999371363 | Not Sig |
| ENSG00000079335 | CDC14A   | cell division cycle 14A                                          | 8556   | 459.4436257 | 0.11364915  | 0.616740486 | 0.18427386  | 0.85379862  | 0.999371363 | Not Sig |
| ENSG00000136888 | ATP6V1G1 | ATPase H+ transporting V1 subunit G1                             | 9550   | 1253.562391 | 0.113763445 | 0.446412131 | 0.254839501 | 0.798847065 | 0.999371363 | Not Sig |
| ENSG00000169612 | FAM103A1 | family with sequence similarity 103 member A1                    | 83640  | 232.6929421 | 0.113916269 | 0.421791319 | 0.270077321 | 0.787100769 | 0.999371363 | Not Sig |
| ENSG00000053254 | FOXN3    | forkhead box N3                                                  | 1112   | 3000.537868 | 0.114068017 | 0.502522779 | 0.226990739 | 0.820430943 | 0.999371363 | Not Sig |
| ENSG00000128011 | LRFN1    | leucine rich repeat and Fibronectin type III domain containing 1 | 57622  | 63.20534611 | 0.114263648 | 0.893336734 | 0.127906581 | 0.898222903 | 0.999371363 | Not Sig |
| ENSG00000140332 | TLE3     | transducin like enhancer of split 3                              | 7090   | 2865.591986 | 0.11434878  | 0.488178433 | 0.234235624 | 0.81480206  | 0.999371363 | Not Sig |
| ENSG00000270878 | NA       | NA                                                               | NA     | 36.67940071 | 0.114501878 | 0.745972481 | 0.153493435 | 0.878009167 | 0.999371363 | Not Sig |
| ENSG00000115137 | DNAJC27  | DnaJ heat shock protein family (Hsp40) member C27                | 51277  | 209.7206218 | 0.114676353 | 0.434306795 | 0.264044574 | 0.791745572 | 0.999371363 | Not Sig |
| ENSG00000167193 | CRK      | CRK proto-oncogene, adaptor protein                              | 1398   | 1807.67117  | 0.114803729 | 0.440158503 | 0.260823607 | 0.794228538 | 0.999371363 | Not Sig |
| ENSG00000050767 | COL23A1  | collagen type XXIII alpha 1 chain                                | 91522  | 55.91073278 | 0.11490259  | 0.762074453 | 0.150776068 | 0.880152365 | 0.999371363 | Not Sig |
| ENSG00000164172 | MOCS2    | molybdenum cofactor synthesis 2                                  | 4338   | 508.0355159 | 0.114970975 | 0.468843823 | 0.24522233  | 0.806284287 | 0.999371363 | Not Sig |
| ENSG00000125818 | PSMF1    | proteasome inhibitor subunit 1                                   | 9491   | 1646.916254 | 0.115314354 | 0.531748958 | 0.216858636 | 0.828318514 | 0.999371363 | Not Sig |
| ENSG00000116580 | GON4L    | gon-4 like                                                       | 54856  | 2437.264979 | 0.115568255 | 0.459042724 | 0.251759256 | 0.801227152 | 0.999371363 | Not Sig |
| ENSG00000118162 | KPTN     | kaptin, actin binding protein                                    | 11133  | 112.1689894 | 0.115725826 | 0.671237649 | 0.172406637 | 0.863117854 | 0.999371363 | Not Sig |
| ENSG00000170421 | KRT8     | keratin 8                                                        | 3856   | 10277.90117 | 0.11582623  | 0.479429906 | 0.241591584 | 0.809096644 | 0.999371363 | Not Sig |
| ENSG00000205726 | ITSN1    | intersectin 1                                                    | 6453   | 1051.355173 | 0.115928442 | 0.390480862 | 0.296886361 | 0.766553269 | 0.999371363 | Not Sig |
| ENSG00000115594 | IL1R1    | interleukin 1 receptor type 1                                    | 3554   | 3488.926559 | 0.116041117 | 0.475395008 | 0.2440941   | 0.807157942 | 0.999371363 | Not Sig |
| ENSG00000136238 | RAC1     | Rac family small GTPase 1                                        | 5879   | 5627.353883 | 0.116192615 | 0.457593042 | 0.253921288 | 0.799556368 | 0.999371363 | Not Sig |

|                 |              |                                                               |           |             |             |             |             |             |             |         |
|-----------------|--------------|---------------------------------------------------------------|-----------|-------------|-------------|-------------|-------------|-------------|-------------|---------|
| ENSG00000261534 | NA           | NA                                                            | NA        | 61.33894628 | 0.116390499 | 0.825179513 | 0.141048702 | 0.887831469 | 0.999371363 | Not Sig |
| ENSG00000221792 | MIR1282      | microRNA 1282                                                 | 100302254 | 8.827464667 | 0.116432702 | 0.926752995 | 0.125635096 | 0.90002078  | 0.999371363 | Not Sig |
| ENSG00000198862 | LTN1         | listerin E3 ubiquitin protein ligase 1                        | 26046     | 1727.547587 | 0.116540319 | 0.495155245 | 0.235361173 | 0.813928419 | 0.999371363 | Not Sig |
| ENSG00000259288 | BUB1B-PAK6   | BUB1B-PAK6 readthrough                                        | 106821730 | 2.851692914 | 0.116670847 | 1.678651245 | 0.069502732 | 0.944589458 | NA          | NA      |
| ENSG00000229980 | TOB1-AS1     | TOB1 antisense RNA 1                                          | 400604    | 41.18253615 | 0.116777365 | 0.562555881 | 0.207583583 | 0.835554124 | 0.999371363 | Not Sig |
| ENSG00000155008 | APOOL        | apolipoprotein O like                                         | 139322    | 197.1212328 | 0.116788844 | 0.673781376 | 0.173333441 | 0.86238934  | 0.999371363 | Not Sig |
| ENSG00000140057 | AK7          | adenylate kinase 7                                            | 122481    | 150.4105485 | 0.116911209 | 0.560784738 | 0.208477872 | 0.834855859 | 0.999371363 | Not Sig |
| ENSG00000188938 | FAM120AOS    | family with sequence similarity 120A opposite strand          | 158293    | 902.6022081 | 0.1169489   | 0.423131434 | 0.276389062 | 0.782249257 | 0.999371363 | Not Sig |
| ENSG00000124313 | IQSEC2       | IQ motif and Sec7 domain 2                                    | 23096     | 666.8610595 | 0.117400462 | 0.540626932 | 0.217156148 | 0.828086658 | 0.999371363 | Not Sig |
| ENSG00000254418 | NA           | NA                                                            | NA        | 8.974764991 | 0.117486881 | 0.967025603 | 0.121493041 | 0.903300526 | 0.999371363 | Not Sig |
| ENSG00000198554 | WDHD1        | WD repeat and HMG-box DNA binding protein 1                   | 11169     | 300.732568  | 0.11775738  | 0.891202966 | 0.132133065 | 0.894879043 | 0.999371363 | Not Sig |
| ENSG00000181908 | LOC100996455 | uncharacterized LOC100996455                                  | 100996455 | 3.781826474 | 0.11778506  | 1.390878074 | 0.084683957 | 0.93251265  | NA          | NA      |
| ENSG00000175745 | NR2F1        | nuclear receptor subfamily 2 group F member 1                 | 7025      | 1224.218694 | 0.117875879 | 0.724769894 | 0.162639039 | 0.870802648 | 0.999371363 | Not Sig |
| ENSG00000176209 | SMIM19       | small integral membrane protein 19                            | 114926    | 278.4781167 | 0.117923874 | 0.678508169 | 0.173798753 | 0.862023624 | 0.999371363 | Not Sig |
| ENSG00000116213 | WRAP73       | WD repeat containing, antisense to TP73                       | 49856     | 408.2539023 | 0.118069317 | 0.450889546 | 0.261858625 | 0.793430439 | 0.999371363 | Not Sig |
| ENSG00000182704 | TSKU         | tsukushi, small leucine rich proteoglycan                     | 25987     | 823.8300794 | 0.118073955 | 0.718919272 | 0.164238128 | 0.869543687 | 0.999371363 | Not Sig |
| ENSG00000133028 | SCO1         | SCO1, cytochrome c oxidase assembly protein                   | 6341      | 445.8861653 | 0.118198445 | 0.415302865 | 0.284607824 | 0.775944616 | 0.999371363 | Not Sig |
| ENSG00000115840 | SLC25A12     | solute carrier family 25 member 12                            | 8604      | 381.681468  | 0.118219026 | 0.391047807 | 0.302313488 | 0.762413097 | 0.999371363 | Not Sig |
| ENSG00000138760 | SCARB2       | scavenger receptor class B member 2                           | 950       | 6597.048485 | 0.118228899 | 0.418682024 | 0.28238351  | 0.777649458 | 0.999371363 | Not Sig |
| ENSG00000072952 | MRVI1        | murine retrovirus integration site 1 homolog                  | 10335     | 666.3364544 | 0.11866726  | 0.531634934 | 0.223211931 | 0.823370567 | 0.999371363 | Not Sig |
| ENSG00000103275 | UBE2I        | ubiquitin conjugating enzyme E2 I                             | 7329      | 1701.565737 | 0.118716479 | 0.414735023 | 0.286246572 | 0.774689276 | 0.999371363 | Not Sig |
| ENSG00000217555 | CKLF         | chemokine like factor                                         | 51192     | 127.6655875 | 0.118809521 | 0.67646479  | 0.175632971 | 0.860582298 | 0.999371363 | Not Sig |
| ENSG00000233406 | NA           | NA                                                            | NA        | 1.763654142 | 0.118820973 | 1.680748094 | 0.070695289 | 0.94364027  | NA          | NA      |
| ENSG00000149636 | DSN1         | DSN1 homolog, MIS12 kinetochore complex component             | 79980     | 296.7046355 | 0.118838462 | 0.67051795  | 0.177233826 | 0.859324727 | 0.999371363 | Not Sig |
| ENSG00000088812 | ATRNL        | attractin                                                     | 8455      | 2321.937681 | 0.119074694 | 0.386937765 | 0.307736036 | 0.758283196 | 0.999371363 | Not Sig |
| ENSG00000011132 | APBA3        | amyloid beta precursor protein binding family A member 3      | 9546      | 409.337744  | 0.119088655 | 0.62743346  | 0.189802844 | 0.849463628 | 0.999371363 | Not Sig |
| ENSG00000157540 | DYRK1A       | dual specificity tyrosine phosphorylation regulated kinase 1A | 1859      | 3180.890594 | 0.11923373  | 0.378414329 | 0.315087778 | 0.752695008 | 0.999371363 | Not Sig |
| ENSG00000138303 | ASCC1        | activating signal cointegrator 1 complex subunit 1            | 51008     | 429.4272038 | 0.11926563  | 0.406598212 | 0.293325514 | 0.769273353 | 0.999371363 | Not Sig |
| ENSG00000106591 | MRPL32       | mitochondrial ribosomal protein L32                           | 64983     | 485.4175664 | 0.119333533 | 0.5535561   | 0.215576223 | 0.829318092 | 0.999371363 | Not Sig |
| ENSG00000121570 | DPPA4        | developmental pluripotency associated 4                       | 55211     | 1.322076346 | 0.119696721 | 2.423938203 | 0.049381094 | 0.960615594 | NA          | NA      |
| ENSG00000244006 | NA           | NA                                                            | NA        | 1.322076346 | 0.119696721 | 2.423938203 | 0.049381094 | 0.960615594 | NA          | NA      |
| ENSG00000149823 | VPS51        | VPS51, GARP complex subunit                                   | 738       | 1786.684593 | 0.119845868 | 0.628620963 | 0.190648857 | 0.84880071  | 0.999371363 | Not Sig |
| ENSG00000138185 | ENTPDI       | ectonucleoside triphosphate diphosphohydrolase 1              | 953       | 1152.747157 | 0.119896405 | 0.593926443 | 0.201870798 | 0.840017732 | 0.999371363 | Not Sig |
| ENSG00000143436 | MRPL9        | mitochondrial ribosomal protein L9                            | 65005     | 504.9293503 | 0.119912078 | 0.451877316 | 0.265364233 | 0.790728886 | 0.999371363 | Not Sig |
| ENSG00000238964 | NA           | NA                                                            | NA        | 2.410375408 | 0.120050053 | 1.73390298  | 0.069236892 | 0.944801058 | NA          | NA      |

|                 |               |                                                         |           |             |             |             |             |             |             |         |
|-----------------|---------------|---------------------------------------------------------|-----------|-------------|-------------|-------------|-------------|-------------|-------------|---------|
| ENSG00000169715 | MT1E          | metallothionein 1E                                      | 4493      | 798.1506305 | 0.120260045 | 0.872815224 | 0.137784083 | 0.890411064 | 0.999371363 | Not Sig |
| ENSG00000167114 | SLC27A4       | solute carrier family 27 member 4                       | 10999     | 580.4311126 | 0.120271703 | 0.586609791 | 0.205028462 | 0.837549888 | 0.999371363 | Not Sig |
| ENSG00000175198 | PCCA          | propionyl-CoA carboxylase alpha subunit                 | 5095      | 686.7330122 | 0.120291624 | 0.526213079 | 0.228598696 | 0.819180838 | 0.999371363 | Not Sig |
| ENSG00000261288 | NA            | NA                                                      | NA        | 2.092384079 | 0.120311379 | 1.557643023 | 0.077239378 | 0.938433116 | NA          | NA      |
| ENSG00000266155 | NA            | NA                                                      | NA        | 2.092384079 | 0.120311379 | 1.557643023 | 0.077239378 | 0.938433116 | NA          | NA      |
| ENSG00000204469 | PRRC2A        | proline rich coiled-coil 2A                             | 7916      | 8101.121904 | 0.120340045 | 0.454024754 | 0.265051727 | 0.790969614 | 0.999371363 | Not Sig |
| ENSG00000114503 | NCBP2         | nuclear cap binding protein subunit 2                   | 22916     | 1055.076469 | 0.120421087 | 0.478340668 | 0.251747541 | 0.801236207 | 0.999371363 | Not Sig |
| ENSG00000050748 | MAPK9         | mitogen-activated protein kinase 9                      | 5601      | 1290.576263 | 0.120548539 | 0.461427918 | 0.261251073 | 0.793898895 | 0.999371363 | Not Sig |
| ENSG00000186376 | ZNF75D        | zinc finger protein 75D                                 | 7626      | 621.9405187 | 0.120677471 | 0.473191407 | 0.255028872 | 0.7987008   | 0.999371363 | Not Sig |
| ENSG00000090470 | PDCD7         | programmed cell death 7                                 | 10081     | 593.5302807 | 0.120836671 | 0.497049547 | 0.243107899 | 0.807921812 | 0.999371363 | Not Sig |
| ENSG00000198553 | KCNRG         | potassium channel regulator                             | 283518    | 6.326365767 | 0.121029696 | 1.230776978 | 0.098336009 | 0.921665486 | NA          | NA      |
| ENSG00000160714 | UBE2Q1        | ubiquitin conjugating enzyme E2 Q1                      | 55585     | 1539.141042 | 0.121206492 | 0.438761751 | 0.276246715 | 0.78235858  | 0.999371363 | Not Sig |
| ENSG00000253647 | CTD-227OF17.1 | uncharacterized LOC101928033                            | 101928033 | 8.994082981 | 0.121239047 | 1.035004776 | 0.117138635 | 0.906750194 | 0.999371363 | Not Sig |
| ENSG00000138696 | BMPRI1B       | bone morphogenetic protein receptor type 1B             | 658       | 146.7868815 | 0.121247606 | 0.552045624 | 0.219633307 | 0.826156749 | 0.999371363 | Not Sig |
| ENSG00000163125 | RPRD2         | regulation of nuclear pre-mRNA domain containing 2      | 23248     | 2174.95385  | 0.121313025 | 0.438217782 | 0.276832731 | 0.781908547 | 0.999371363 | Not Sig |
| ENSG00000124535 | WRNIP1        | Werner helicase interacting protein 1                   | 56897     | 1308.073722 | 0.121465673 | 0.53260467  | 0.228059722 | 0.819599812 | 0.999371363 | Not Sig |
| ENSG00000137944 | KYAT3         | kynurenine aminotransferase 3                           | 56267     | 354.5468002 | 0.121505385 | 0.683629657 | 0.177735685 | 0.858930559 | 0.999371363 | Not Sig |
| ENSG00000260946 | NA            | NA                                                      | NA        | 5.351363514 | 0.121751866 | 1.174924487 | 0.103625269 | 0.917466734 | NA          | NA      |
| ENSG00000165792 | METTL17       | methyltransferase like 17                               | 64745     | 573.4163509 | 0.121856177 | 0.449406377 | 0.271149194 | 0.786276287 | 0.999371363 | Not Sig |
| ENSG00000108510 | MED13         | mediator complex subunit 13                             | 9969      | 5024.113323 | 0.121931995 | 0.478985804 | 0.254562858 | 0.799060749 | 0.999371363 | Not Sig |
| ENSG00000267549 | NA            | NA                                                      | NA        | 6.340381379 | 0.121959377 | 1.235933413 | 0.098677951 | 0.921393976 | NA          | NA      |
| ENSG00000258900 | NA            | NA                                                      | NA        | 24.70206896 | 0.121967515 | 0.616588205 | 0.197810328 | 0.843193466 | 0.999371363 | Not Sig |
| ENSG00000243646 | IL10RB        | interleukin 10 receptor subunit beta                    | 3588      | 553.8461963 | 0.122062707 | 0.429047751 | 0.284496788 | 0.776029695 | 0.999371363 | Not Sig |
| ENSG00000213368 | NA            | NA                                                      | NA        | 1.817877985 | 0.122070069 | 1.878542955 | 0.06498125  | 0.948188929 | NA          | NA      |
| ENSG00000100911 | PSME2         | proteasome activator subunit 2                          | 5721      | 1566.651207 | 0.12207809  | 0.507502469 | 0.24054679  | 0.809906395 | 0.999371363 | Not Sig |
| ENSG00000206723 | NA            | NA                                                      | NA        | 0.853713439 | 0.122217994 | 3.179985843 | 0.038433502 | 0.96934205  | NA          | NA      |
| ENSG00000221055 | MIR1302-3     | microRNA 1302-3                                         | 100302128 | 0.853713439 | 0.122217994 | 3.179985843 | 0.038433502 | 0.96934205  | NA          | NA      |
| ENSG00000266867 | NA            | NA                                                      | NA        | 0.853713439 | 0.122217994 | 3.179985843 | 0.038433502 | 0.96934205  | NA          | NA      |
| ENSG00000086061 | DNAJA1        | DnaJ heat shock protein family (Hsp40) member A1        | 3301      | 2772.297949 | 0.122229897 | 0.460901985 | 0.265197158 | 0.790857584 | 0.999371363 | Not Sig |
| ENSG00000106018 | VIPR2         | vasoactive intestinal peptide receptor 2                | 7434      | 25.46738274 | 0.122474485 | 1.093615862 | 0.111990406 | 0.910831013 | 0.999371363 | Not Sig |
| ENSG00000136279 | DBNL          | drebrin like                                            | 28988     | 3431.256893 | 0.122507466 | 0.485354195 | 0.25240838  | 0.800725423 | 0.999371363 | Not Sig |
| ENSG00000171970 | ZNF57         | zinc finger protein 57                                  | 126295    | 89.33710764 | 0.122541705 | 0.629604302 | 0.19463289  | 0.845680353 | 0.999371363 | Not Sig |
| ENSG00000185651 | UBE2L3        | ubiquitin conjugating enzyme E2 L3                      | 7332      | 1286.933554 | 0.122611658 | 0.46448033  | 0.263975996 | 0.791798415 | 0.999371363 | Not Sig |
| ENSG00000125977 | EIF2S2        | eukaryotic translation initiation factor 2 subunit beta | 8894      | 1753.840254 | 0.122804471 | 0.413757425 | 0.296803061 | 0.766616868 | 0.999371363 | Not Sig |
| ENSG00000095794 | CREM          | cAMP responsive element modulator                       | 1390      | 469.1831228 | 0.122918474 | 0.425001596 | 0.289218852 | 0.772413906 | 0.999371363 | Not Sig |

|                 |         |                                                                                                      |        |             |             |             |             |             |             |         |
|-----------------|---------|------------------------------------------------------------------------------------------------------|--------|-------------|-------------|-------------|-------------|-------------|-------------|---------|
| ENSG00000122484 | RPAP2   | RNA polymerase II associated protein 2                                                               | 79871  | 800.6062338 | 0.123016742 | 0.542899528 | 0.226592095 | 0.820740939 | 0.999371363 | Not Sig |
| ENSG00000177600 | RPLP2   | ribosomal protein lateral stalk subunit P2                                                           | 6181   | 6483.602054 | 0.123155059 | 0.404612772 | 0.304377585 | 0.760840242 | 0.999371363 | Not Sig |
| ENSG00000269971 | NA      | NA                                                                                                   | NA     | 19.37720859 | 0.123200119 | 0.724082084 | 0.170146619 | 0.864894831 | 0.999371363 | Not Sig |
| ENSG00000160310 | PRMT2   | protein arginine methyltransferase 2                                                                 | 3275   | 1793.299492 | 0.123216953 | 0.520865362 | 0.236562002 | 0.812996602 | 0.999371363 | Not Sig |
| ENSG00000270077 | NA      | NA                                                                                                   | NA     | 7.842515452 | 0.123271013 | 1.108826072 | 0.111172542 | 0.911479525 | 0.999371363 | Not Sig |
| ENSG00000167468 | GPX4    | glutathione peroxidase 4                                                                             | 2879   | 2579.112764 | 0.123505343 | 0.453408805 | 0.272392908 | 0.785319925 | 0.999371363 | Not Sig |
| ENSG00000143369 | ECM1    | extracellular matrix protein 1                                                                       | 1893   | 395.0626201 | 0.123615079 | 0.575460547 | 0.214810693 | 0.829914916 | 0.999371363 | Not Sig |
| ENSG00000171960 | PPIH    | peptidylprolyl isomerase H                                                                           | 10465  | 259.0664459 | 0.123638778 | 0.482517615 | 0.256236817 | 0.797767981 | 0.999371363 | Not Sig |
| ENSG00000126756 | UXT     | ubiquitously expressed prefoldin like chaperone                                                      | 8409   | 396.8068576 | 0.123641689 | 0.493104234 | 0.250741487 | 0.802013983 | 0.999371363 | Not Sig |
| ENSG00000141968 | VAV1    | vav guanine nucleotide exchange factor 1                                                             | 7409   | 628.5095856 | 0.123716826 | 0.66423943  | 0.186253361 | 0.85224608  | 0.999371363 | Not Sig |
| ENSG00000162385 | MAGOH   | mago homolog, exon junction complex core component                                                   | 4116   | 226.6321    | 0.123789828 | 0.57155568  | 0.216584023 | 0.828532538 | 0.999371363 | Not Sig |
| ENSG00000255027 | NA      | NA                                                                                                   | NA     | 0.964164545 | 0.12379371  | 3.064227501 | 0.040399647 | 0.967774512 | NA          | NA      |
| ENSG00000252396 | NA      | NA                                                                                                   | NA     | 6.935176455 | 0.123955331 | 1.051884633 | 0.117841184 | 0.906193497 | 0.999371363 | Not Sig |
| ENSG00000254087 | LYN     | LYN proto-oncogene, Src family tyrosine kinase                                                       | 4067   | 1845.437465 | 0.124038546 | 0.469611268 | 0.264130259 | 0.791679548 | 0.999371363 | Not Sig |
| ENSG00000203756 | TMEM244 | transmembrane protein 244                                                                            | 253582 | 1.121781998 | 0.12404046  | 2.51774211  | 0.049266547 | 0.960706879 | NA          | NA      |
| ENSG00000213609 | NA      | NA                                                                                                   | NA     | 1.121781998 | 0.12404046  | 2.51774211  | 0.049266547 | 0.960706879 | NA          | NA      |
| ENSG00000131584 | ACAP3   | ArfGAP with coiled-coil, ankyrin repeat and PH domains 3                                             | 116983 | 1160.41807  | 0.124062619 | 0.609062356 | 0.203694446 | 0.838592283 | 0.999371363 | Not Sig |
| ENSG00000118242 | MREG    | melanoregulin                                                                                        | 55686  | 330.5737157 | 0.124092903 | 0.537674928 | 0.230795406 | 0.817473751 | 0.999371363 | Not Sig |
| ENSG00000211859 | NA      | NA                                                                                                   | NA     | 9.545307969 | 0.124222331 | 1.400473495 | 0.088700237 | 0.929320144 | 0.999371363 | Not Sig |
| ENSG00000176986 | SEC24C  | SEC24 homolog C, COPII coat complex component                                                        | 9632   | 2769.138118 | 0.124295727 | 0.378494772 | 0.328394833 | 0.742613149 | 0.999371363 | Not Sig |
| ENSG00000099769 | IGFALS  | insulin like growth factor binding protein acid labile subunit                                       | 3483   | 54.42437247 | 0.124316423 | 0.950221044 | 0.130828952 | 0.895910619 | 0.999371363 | Not Sig |
| ENSG00000152234 | ATP5A1  | ATP synthase, H <sup>+</sup> transporting, mitochondrial F1 complex, alpha subunit 1, cardiac muscle | 498    | 4784.158101 | 0.124686058 | 0.412306829 | 0.302410848 | 0.762338886 | 0.999371363 | Not Sig |
| ENSG00000037637 | FBX042  | F-box protein 42                                                                                     | 54455  | 1040.460077 | 0.124698095 | 0.425539518 | 0.293035286 | 0.76949518  | 0.999371363 | Not Sig |
| ENSG00000176903 | PNMA1   | PNMA family member 1                                                                                 | 9240   | 549.5376874 | 0.124702429 | 0.516011829 | 0.241665834 | 0.809039105 | 0.999371363 | Not Sig |
| ENSG00000110200 | ANAPC15 | anaphase promoting complex subunit 15                                                                | 25906  | 206.4592111 | 0.124704341 | 0.596568827 | 0.209035966 | 0.834420162 | 0.999371363 | Not Sig |
| ENSG00000162542 | TMCO4   | transmembrane and coiled-coil domains 4                                                              | 255104 | 859.2405843 | 0.124795305 | 0.477649967 | 0.261269368 | 0.793884787 | 0.999371363 | Not Sig |
| ENSG00000065308 | TRAM2   | translocation associated membrane protein 2                                                          | 9697   | 1322.461819 | 0.125135122 | 0.447068106 | 0.279901699 | 0.779552924 | 0.999371363 | Not Sig |
| ENSG00000125995 | ROMO1   | reactive oxygen species modulator 1                                                                  | 140823 | 477.4291106 | 0.125716242 | 0.515853084 | 0.243705517 | 0.807458901 | 0.999371363 | Not Sig |
| ENSG00000115827 | DCAF17  | DDB1 and CUL4 associated factor 17                                                                   | 80067  | 431.3625903 | 0.12583911  | 0.509003569 | 0.24722638  | 0.80473303  | 0.999371363 | Not Sig |
| ENSG00000074621 | SLC24A1 | solute carrier family 24 member 1                                                                    | 9187   | 438.7610051 | 0.125911451 | 0.398733199 | 0.315778699 | 0.752170487 | 0.999371363 | Not Sig |
| ENSG00000265559 | NA      | NA                                                                                                   | NA     | 5.867153057 | 0.125961472 | 1.067810472 | 0.117962387 | 0.90609746  | NA          | NA      |
| ENSG00000115041 | KCNIP3  | potassium voltage-gated channel interacting protein 3                                                | 30818  | 106.7966626 | 0.126018443 | 0.873836037 | 0.144212916 | 0.885332342 | 0.999371363 | Not Sig |
| ENSG00000143751 | SDE2    | SDE2 telomere maintenance homolog                                                                    | 163859 | 915.6476952 | 0.126075051 | 0.385636905 | 0.326926829 | 0.743723228 | 0.999371363 | Not Sig |
| ENSG00000126088 | UROD    | uroporphyrinogen decarboxylase                                                                       | 7389   | 584.4153831 | 0.126084915 | 0.554347996 | 0.227447229 | 0.820075999 | 0.999371363 | Not Sig |
| ENSG00000188827 | SLX4    | SLX4 structure-specific endonuclease subunit                                                         | 84464  | 530.6514491 | 0.12609031  | 0.483746182 | 0.26065386  | 0.794359451 | 0.999371363 | Not Sig |

|                 |         |                                                                 |           |             |             |             |             |             |             |         |
|-----------------|---------|-----------------------------------------------------------------|-----------|-------------|-------------|-------------|-------------|-------------|-------------|---------|
| ENSG00000266865 | NA      | NA                                                              | NA        | 74.64172581 | 0.126110416 | 0.516519994 | 0.244153987 | 0.807111562 | 0.999371363 | Not Sig |
| ENSG00000233025 | NA      | NA                                                              | NA        | 2.456733415 | 0.126316314 | 1.526599885 | 0.082743563 | 0.934055445 | NA          | NA      |
| ENSG00000049860 | HEXB    | hexosaminidase subunit beta                                     | 3074      | 2662.434709 | 0.126516234 | 0.476896568 | 0.265290719 | 0.790785513 | 0.999371363 | Not Sig |
| ENSG00000133138 | TBC1D8B | TBC1 domain family member 8B                                    | 54885     | 569.7287516 | 0.126928395 | 0.681318033 | 0.186298306 | 0.852210836 | 0.999371363 | Not Sig |
| ENSG00000204315 | FKBPL   | FK506 binding protein like                                      | 63943     | 118.721702  | 0.126951341 | 0.58900607  | 0.215534861 | 0.829350336 | 0.999371363 | Not Sig |
| ENSG00000263432 | NA      | NA                                                              | NA        | 21.94621906 | 0.126968259 | 0.750735534 | 0.169125149 | 0.865698204 | 0.999371363 | Not Sig |
| ENSG00000113845 | TIMMDC1 | translocase of inner mitochondrial membrane domain containing 1 | 51300     | 800.1388424 | 0.126978202 | 0.421993948 | 0.300900529 | 0.763490347 | 0.999371363 | Not Sig |
| ENSG00000169964 | TMEM42  | transmembrane protein 42                                        | 131616    | 207.0200569 | 0.127087078 | 0.422781957 | 0.300597212 | 0.763721658 | 0.999371363 | Not Sig |
| ENSG00000177042 | TMEM80  | transmembrane protein 80                                        | 283232    | 421.2426097 | 0.127088082 | 0.569587309 | 0.223123093 | 0.823439706 | 0.999371363 | Not Sig |
| ENSG00000136715 | SAP130  | Sin3A associated protein 130                                    | 79595     | 656.5809424 | 0.12739643  | 0.461416413 | 0.27609861  | 0.782472328 | 0.999371363 | Not Sig |
| ENSG00000156531 | PHF6    | PHD finger protein 6                                            | 84295     | 719.0485917 | 0.127561223 | 0.634086037 | 0.201173368 | 0.840563015 | 0.999371363 | Not Sig |
| ENSG00000168569 | TMEM223 | transmembrane protein 223                                       | 79064     | 211.4447471 | 0.127816796 | 0.469081246 | 0.272483279 | 0.785250447 | 0.999371363 | Not Sig |
| ENSG00000225264 | NA      | NA                                                              | NA        | 91.01657259 | 0.127895752 | 0.679046607 | 0.188346059 | 0.850605381 | 0.999371363 | Not Sig |
| ENSG00000181938 | GIN3    | GIN5 complex subunit 3                                          | 64785     | 80.14847224 | 0.128022426 | 0.646185068 | 0.198120372 | 0.842950886 | 0.999371363 | Not Sig |
| ENSG00000151208 | DLG5    | discs large MAGUK scaffold protein 5                            | 9231      | 2171.340586 | 0.128031708 | 0.534465184 | 0.239551072 | 0.810678299 | 0.999371363 | Not Sig |
| ENSG00000118690 | ARMC2   | armadillo repeat containing 2                                   | 84071     | 185.0768431 | 0.128186682 | 0.463692694 | 0.276447491 | 0.782204385 | 0.999371363 | Not Sig |
| ENSG00000156304 | SCAF4   | SR-related CTD associated factor 4                              | 57466     | 1474.561384 | 0.128231433 | 0.455556492 | 0.281483054 | 0.778339924 | 0.999371363 | Not Sig |
| ENSG00000135750 | KCNK1   | potassium two pore domain channel subfamily K member 1          | 3775      | 724.5827673 | 0.128233603 | 0.806902726 | 0.158920771 | 0.873731296 | 0.999371363 | Not Sig |
| ENSG00000265996 | MIR3671 | microRNA 3671                                                   | 100500854 | 23.0371357  | 0.128272097 | 0.79884146  | 0.160572658 | 0.872429991 | 0.999371363 | Not Sig |
| ENSG00000172785 | CBWD1   | COBW domain containing 1                                        | 55871     | 377.1474352 | 0.128319508 | 0.453101476 | 0.283202581 | 0.77702155  | 0.999371363 | Not Sig |
| ENSG00000172785 | CBWD2   | COBW domain containing 2                                        | 150472    | 377.1474352 | 0.128319508 | 0.453101476 | 0.283202581 | 0.77702155  | 0.999371363 | Not Sig |
| ENSG00000197056 | ZMYM1   | zinc finger MYM-type containing 1                               | 79830     | 496.7162058 | 0.128403574 | 0.671953308 | 0.191090024 | 0.848455064 | 0.999371363 | Not Sig |
| ENSG00000260793 | NA      | NA                                                              | NA        | 67.68732885 | 0.128431413 | 0.51810775  | 0.247885528 | 0.804222977 | 0.999371363 | Not Sig |
| ENSG00000163961 | RNF168  | ring finger protein 168                                         | 165918    | 1285.867421 | 0.128599868 | 0.485035971 | 0.265134703 | 0.790905694 | 0.999371363 | Not Sig |
| ENSG00000223947 | NA      | NA                                                              | NA        | 2.333407238 | 0.128605555 | 1.752280673 | 0.07339324  | 0.941493197 | NA          | NA      |
| ENSG00000207813 | MIR605  | microRNA 605                                                    | 693190    | 11.22537559 | 0.128652221 | 0.849536438 | 0.151438144 | 0.879630102 | 0.999371363 | Not Sig |
| ENSG00000091542 | ALKBH5  | alkB homolog 5, RNA demethylase                                 | 54890     | 2359.210437 | 0.128810204 | 0.443138634 | 0.290676989 | 0.771298372 | 0.999371363 | Not Sig |
| ENSG00000184635 | ZNF93   | zinc finger protein 93                                          | 81931     | 130.4218408 | 0.128868381 | 0.620998728 | 0.207517947 | 0.835605378 | 0.999371363 | Not Sig |
| ENSG00000259645 | NA      | NA                                                              | NA        | 6.446521592 | 0.128893551 | 1.271871084 | 0.101341679 | 0.919279231 | NA          | NA      |
| ENSG00000149100 | EIF3M   | eukaryotic translation initiation factor 3 subunit M            | 10480     | 1543.408206 | 0.128899683 | 0.3917856   | 0.329005668 | 0.742151404 | 0.999371363 | Not Sig |
| ENSG00000196205 | NA      | NA                                                              | NA        | 383.9014021 | 0.128910928 | 0.459317005 | 0.28065786  | 0.778972833 | 0.999371363 | Not Sig |
| ENSG00000011114 | BTBD7   | BTB domain containing 7                                         | 55727     | 1585.801076 | 0.12894969  | 0.441598599 | 0.292006565 | 0.770281605 | 0.999371363 | Not Sig |
| ENSG00000154380 | ENAH    | ENAH, actin regulator                                           | 55740     | 4423.607527 | 0.129081168 | 0.487112194 | 0.264992684 | 0.791015097 | 0.999371363 | Not Sig |
| ENSG00000135521 | LTV1    | LTV1 ribosome biogenesis factor                                 | 84946     | 445.2906338 | 0.129138285 | 0.433874199 | 0.297639926 | 0.765977998 | 0.999371363 | Not Sig |
| ENSG00000142599 | RERE    | arginine-glutamic acid dipeptide repeats                        | 473       | 5543.047809 | 0.129224452 | 0.502752154 | 0.257034109 | 0.797152443 | 0.999371363 | Not Sig |

|                 |          |                                                                     |           |             |             |             |             |             |             |         |
|-----------------|----------|---------------------------------------------------------------------|-----------|-------------|-------------|-------------|-------------|-------------|-------------|---------|
| ENSG00000155438 | NIFK     | nucleolar protein interacting with the FHA domain of MK167          | 84365     | 438.6364661 | 0.129427351 | 0.545444925 | 0.237287661 | 0.812433634 | 0.999371363 | Not Sig |
| ENSG00000198863 | RUNDC1   | RUN domain containing 1                                             | 146923    | 746.9864368 | 0.129505148 | 0.428645199 | 0.302126673 | 0.76255555  | 0.999371363 | Not Sig |
| ENSG00000186222 | BLOC1S4  | biogenesis of lysosomal organelles complex 1 subunit 4              | 55330     | 220.0317264 | 0.129685716 | 0.460561952 | 0.281581481 | 0.778264442 | 0.999371363 | Not Sig |
| ENSG00000175305 | CCNE2    | cyclin E2                                                           | 9134      | 125.4697018 | 0.129891245 | 1.028715185 | 0.126265508 | 0.899521759 | 0.999371363 | Not Sig |
| ENSG00000237188 | NA       | NA                                                                  | NA        | 92.79567236 | 0.129905564 | 0.563591333 | 0.230496028 | 0.81770635  | 0.999371363 | Not Sig |
| ENSG00000116489 | CAPZA1   | capping actin protein of muscle Z-line alpha subunit 1              | 829       | 2977.72783  | 0.130063547 | 0.617351662 | 0.210679837 | 0.833137109 | 0.999371363 | Not Sig |
| ENSG00000177144 | NA       | NA                                                                  | NA        | 3.730160574 | 0.130173754 | 1.62426116  | 0.080143364 | 0.936123234 | NA          | NA      |
| ENSG00000148396 | SEC16A   | SEC16 homolog A, endoplasmic reticulum export factor                | 9919      | 6204.485403 | 0.130174212 | 0.520287167 | 0.250196854 | 0.802435118 | 0.999371363 | Not Sig |
| ENSG00000155016 | CYP2U1   | cytochrome P450 family 2 subfamily U member 1                       | 113612    | 305.526194  | 0.130442422 | 0.639436766 | 0.203995812 | 0.838356772 | 0.999371363 | Not Sig |
| ENSG00000163113 | NA       | NA                                                                  | NA        | 1762.850251 | 0.130667297 | 0.49275225  | 0.265178489 | 0.790871965 | 0.999371363 | Not Sig |
| ENSG00000137601 | NEK1     | NIMA related kinase 1                                               | 4750      | 663.0167445 | 0.130717715 | 0.414797218 | 0.315136431 | 0.752658069 | 0.999371363 | Not Sig |
| ENSG00000100014 | SPECC1L  | sperm antigen with calponin homology and coiled-coil domains 1 like | 23384     | 834.3523889 | 0.130935122 | 0.578880642 | 0.226186735 | 0.821056187 | 0.999371363 | Not Sig |
| ENSG00000233673 | ANAPC1P1 | anaphase promoting complex subunit 1 pseudogene 1                   | 100286979 | 5.898483238 | 0.130941611 | 1.45898698  | 0.089748307 | 0.928487227 | NA          | NA      |
| ENSG00000125352 | RNF113A  | ring finger protein 113A                                            | 7737      | 200.5608528 | 0.131002731 | 0.584350932 | 0.224185029 | 0.822613332 | 0.999371363 | Not Sig |
| ENSG00000132305 | IMMT     | inner membrane mitochondrial protein                                | 10989     | 1459.678201 | 0.131018928 | 0.388562072 | 0.337189185 | 0.73597429  | 0.999371363 | Not Sig |
| ENSG00000239280 | NA       | NA                                                                  | NA        | 37.65218048 | 0.131125679 | 0.68361682  | 0.191811662 | 0.847889735 | 0.999371363 | Not Sig |
| ENSG00000184319 | NA       | NA                                                                  | NA        | 145.7107778 | 0.131155298 | 0.560601445 | 0.23395462  | 0.815020209 | 0.999371363 | Not Sig |
| ENSG00000115350 | POLE4    | DNA polymerase epsilon 4, accessory subunit                         | 56655     | 306.7157951 | 0.131236833 | 0.635333051 | 0.206563837 | 0.836350505 | 0.999371363 | Not Sig |
| ENSG00000168906 | MAT2A    | methionine adenosyltransferase 2A                                   | 4144      | 4296.702352 | 0.131296987 | 0.46491632  | 0.282409934 | 0.777629199 | 0.999371363 | Not Sig |
| ENSG00000172653 | NA       | NA                                                                  | NA        | 10.42879713 | 0.131378563 | 1.054452994 | 0.124594044 | 0.900844944 | 0.999371363 | Not Sig |
| ENSG00000078487 | ZCWPW1   | zinc finger CW-type and PWWP domain containing 1                    | 55063     | 121.1759041 | 0.131480131 | 0.4802862   | 0.273753713 | 0.784273897 | 0.999371363 | Not Sig |
| ENSG00000162852 | CNST     | consortin, connexin sorting protein                                 | 163882    | 1024.299155 | 0.131511997 | 0.437088144 | 0.300882097 | 0.763504402 | 0.999371363 | Not Sig |
| ENSG00000198399 | ITSN2    | intersectin 2                                                       | 50618     | 3105.917889 | 0.131518498 | 0.491289004 | 0.267700878 | 0.788929574 | 0.999371363 | Not Sig |
| ENSG00000171241 | SHCBP1   | SHC binding and spindle associated 1                                | 79801     | 87.59914126 | 0.131817424 | 0.91645677  | 0.143833761 | 0.885631743 | 0.999371363 | Not Sig |
| ENSG00000198089 | SFI1     | SFI1 centrin binding protein                                        | 9814      | 826.1470448 | 0.131974146 | 0.471563847 | 0.279864851 | 0.779581195 | 0.999371363 | Not Sig |
| ENSG00000099282 | TSPAN15  | tetraspanin 15                                                      | 23555     | 1120.790506 | 0.132044752 | 0.438114263 | 0.30139341  | 0.763114519 | 0.999371363 | Not Sig |
| ENSG00000139433 | GLTP     | glycolipid transfer protein                                         | 51228     | 956.4675964 | 0.132055803 | 0.428427142 | 0.308233979 | 0.757904298 | 0.999371363 | Not Sig |
| ENSG00000147650 | LRP12    | LDL receptor related protein 12                                     | 29967     | 329.8861918 | 0.132119758 | 0.487539408 | 0.270992982 | 0.78639643  | 0.999371363 | Not Sig |
| ENSG00000172943 | PHF8     | PHD finger protein 8                                                | 23133     | 1347.479079 | 0.132156084 | 0.42837571  | 0.308505083 | 0.757698033 | 0.999371363 | Not Sig |
| ENSG00000151715 | TMEM45B  | transmembrane protein 45B                                           | 120224    | 808.235777  | 0.132222527 | 0.937899053 | 0.140977354 | 0.887887833 | 0.999371363 | Not Sig |
| ENSG00000111670 | GNPTAB   | N-acetylglucosamine-1-phosphate transferase alpha and beta subunits | 79158     | 2349.126374 | 0.132335401 | 0.519435795 | 0.254767582 | 0.798902615 | 0.999371363 | Not Sig |
| ENSG00000117862 | TXNDC12  | thioredoxin domain containing 12                                    | 51060     | 1064.892446 | 0.13234321  | 0.495548036 | 0.267064342 | 0.789419622 | 0.999371363 | Not Sig |
| ENSG00000086544 | ITPKC    | inositol-trisphosphate 3-kinase C                                   | 80271     | 1102.052183 | 0.132414893 | 0.548830965 | 0.241267168 | 0.809348056 | 0.999371363 | Not Sig |
| ENSG00000225526 | MKRN2OS  | MKRN2 opposite strand                                               | 100129480 | 27.19159162 | 0.132443832 | 1.122008944 | 0.11804169  | 0.906034625 | 0.999371363 | Not Sig |
| ENSG00000100592 | DAAMI    | dishevelled associated activator of morphogenesis 1                 | 23002     | 1701.382574 | 0.132508228 | 0.442613024 | 0.299377156 | 0.76465229  | 0.999371363 | Not Sig |

|                 |              |                                                                 |           |             |             |             |             |             |             |         |
|-----------------|--------------|-----------------------------------------------------------------|-----------|-------------|-------------|-------------|-------------|-------------|-------------|---------|
| ENSG00000173436 | MINOS1       | mitochondrial inner membrane organizing system 1                | 440574    | 254.6297714 | 0.132660836 | 0.428345377 | 0.309705306 | 0.756785068 | 0.999371363 | Not Sig |
| ENSG00000174125 | TLR1         | toll like receptor 1                                            | 7096      | 420.1852686 | 0.132675894 | 0.633346508 | 0.209483895 | 0.834070506 | 0.999371363 | Not Sig |
| ENSG00000260727 | NA           | NA                                                              | NA        | 23.28027569 | 0.132872438 | 0.653414168 | 0.203351021 | 0.838860679 | 0.999371363 | Not Sig |
| ENSG00000215068 | LOC153684    | uncharacterized LOC153684                                       | 153684    | 298.369597  | 0.133119563 | 0.456200518 | 0.291800553 | 0.770439122 | 0.999371363 | Not Sig |
| ENSG00000148925 | BTBD10       | BTB domain containing 10                                        | 84280     | 527.3355542 | 0.133222506 | 0.433148567 | 0.307567695 | 0.758411305 | 0.999371363 | Not Sig |
| ENSG00000261737 | LOC105378828 | uncharacterized LOC105378828                                    | 105378828 | 23.23248938 | 0.133237606 | 0.631814122 | 0.21088102  | 0.832980115 | 0.999371363 | Not Sig |
| ENSG00000112276 | BVES         | blood vessel epicardial substance                               | 11149     | 82.80579254 | 0.133333151 | 0.646488219 | 0.206242198 | 0.836601727 | 0.999371363 | Not Sig |
| ENSG00000138095 | LRPPRC       | leucine rich pentatricopeptide repeat containing                | 10128     | 3417.933965 | 0.133422914 | 0.527005645 | 0.253171697 | 0.800135536 | 0.999371363 | Not Sig |
| ENSG00000124198 | ARFGEF2      | ADP ribosylation factor guanine nucleotide exchange factor 2    | 10564     | 2750.434798 | 0.133451772 | 0.466845458 | 0.285858563 | 0.774986452 | 0.999371363 | Not Sig |
| ENSG00000132383 | RPA1         | replication protein A1                                          | 6117      | 1241.465537 | 0.133486729 | 0.414081283 | 0.322368421 | 0.747173605 | 0.999371363 | Not Sig |
| ENSG00000179010 | MRFAP1       | Morf4 family associated protein 1                               | 93621     | 3901.613974 | 0.133643527 | 0.559780453 | 0.238742755 | 0.811305062 | 0.999371363 | Not Sig |
| ENSG00000134248 | LAMTOR5      | late endosomal/lysosomal adaptor, MAPK and MTOR activator 5     | 10542     | 600.0412236 | 0.133811658 | 0.592080414 | 0.226002507 | 0.821199471 | 0.999371363 | Not Sig |
| ENSG00000135744 | AGT          | angiotensinogen                                                 | 183       | 204.3893543 | 0.133951379 | 1.212953244 | 0.110434082 | 0.912065125 | 0.999371363 | Not Sig |
| ENSG00000108587 | GOSR1        | golgi SNAP receptor complex member 1                            | 9527      | 1618.83846  | 0.134043629 | 0.389863428 | 0.343822015 | 0.730980143 | 0.999371363 | Not Sig |
| ENSG00000072201 | LNx1         | ligand of numb-protein X 1                                      | 84708     | 226.7588873 | 0.134189418 | 0.519436676 | 0.258336434 | 0.79614727  | 0.999371363 | Not Sig |
| ENSG00000070915 | SLC12A3      | solute carrier family 12 member 3                               | 6559      | 7.561162197 | 0.134304658 | 1.418429082 | 0.094685494 | 0.92456464  | 0.999371363 | Not Sig |
| ENSG00000221573 | NA           | NA                                                              | NA        | 1.97708385  | 0.134313914 | 2.166603463 | 0.061992846 | 0.950568529 | NA          | NA      |
| ENSG00000140199 | SLC12A6      | solute carrier family 12 member 6                               | 9990      | 1226.536857 | 0.134389382 | 0.425476486 | 0.31585619  | 0.752111666 | 0.999371363 | Not Sig |
| ENSG00000132334 | PTPRE        | protein tyrosine phosphatase, receptor type E                   | 5791      | 2671.390367 | 0.134626462 | 0.45027069  | 0.298990063 | 0.764947627 | 0.999371363 | Not Sig |
| ENSG00000101337 | TM9SF4       | transmembrane 9 superfamily member 4                            | 9777      | 1902.477167 | 0.134635177 | 0.393841012 | 0.341851592 | 0.732462581 | 0.999371363 | Not Sig |
| ENSG00000235919 | ASH1L-AS1    | ASH1L antisense RNA 1                                           | 645676    | 71.04927094 | 0.134675243 | 0.517276242 | 0.260354589 | 0.794590268 | 0.999371363 | Not Sig |
| ENSG00000163170 | BOLA3        | bola family member 3                                            | 388962    | 99.76835164 | 0.135173884 | 0.580480379 | 0.232865552 | 0.815865809 | 0.999371363 | Not Sig |
| ENSG00000113240 | CLK4         | CDC like kinase 4                                               | 57396     | 807.485745  | 0.135237595 | 0.458096666 | 0.295216283 | 0.767828664 | 0.999371363 | Not Sig |
| ENSG00000165140 | FBP1         | fructose-bisphosphatase 1                                       | 2203      | 2929.612048 | 0.135412114 | 0.91724375  | 0.147629367 | 0.882635277 | 0.999371363 | Not Sig |
| ENSG00000164548 | TRA2A        | transformer 2 alpha homolog                                     | 29896     | 2151.612281 | 0.135442773 | 0.540651527 | 0.250517692 | 0.802187025 | 0.999371363 | Not Sig |
| ENSG00000167645 | YIF1B        | Yipl interacting factor homolog B, membrane trafficking protein | 90522     | 356.3272638 | 0.13554236  | 0.505127189 | 0.26833313  | 0.788442907 | 0.999371363 | Not Sig |
| ENSG00000258704 | NA           | NA                                                              | NA        | 40.37789223 | 0.135656092 | 0.576647918 | 0.235249427 | 0.814015145 | 0.999371363 | Not Sig |
| ENSG00000106443 | PHF14        | PHD finger protein 14                                           | 9678      | 1999.294814 | 0.135662502 | 0.615044904 | 0.220573329 | 0.82542467  | 0.999371363 | Not Sig |
| ENSG00000110696 | C11orf58     | chromosome 11 open reading frame 58                             | 10944     | 2917.705022 | 0.135817265 | 0.402020067 | 0.33783703  | 0.735486003 | 0.999371363 | Not Sig |
| ENSG00000180917 | CMTR2        | cap methyltransferase 2                                         | 55783     | 749.356032  | 0.135841447 | 0.507661837 | 0.267582547 | 0.789020667 | 0.999371363 | Not Sig |
| ENSG00000148153 | INIP         | INTS3 and NABP interacting protein                              | 58493     | 487.5368531 | 0.136272666 | 0.417126853 | 0.326693583 | 0.743899655 | 0.999371363 | Not Sig |
| ENSG00000199325 | NA           | NA                                                              | NA        | 1.486131334 | 0.136276162 | 2.063082721 | 0.066054628 | 0.947334333 | NA          | NA      |
| ENSG00000204308 | RNF5         | ring finger protein 5                                           | 6048      | 713.5779333 | 0.136402012 | 0.578746335 | 0.235685314 | 0.813676866 | 0.999371363 | Not Sig |
| ENSG00000139266 | 9-Mar        | membrane associated ring-CH-type finger 9                       | 92979     | 509.5455508 | 0.136740795 | 0.524665366 | 0.26062478  | 0.794381879 | 0.999371363 | Not Sig |
| ENSG00000103024 | NME3         | NME/NM23 nucleoside diphosphate kinase 3                        | 4832      | 553.7985491 | 0.136763631 | 0.617932672 | 0.221324486 | 0.824839786 | 0.999371363 | Not Sig |

|                 |              |                                                     |           |             |             |             |             |             |             |         |
|-----------------|--------------|-----------------------------------------------------|-----------|-------------|-------------|-------------|-------------|-------------|-------------|---------|
| ENSG00000107404 | DVL1         | dishevelled segment polarity protein 1              | 1855      | 2056.439103 | 0.137187333 | 0.554895923 | 0.247230747 | 0.804729651 | 0.999371363 | Not Sig |
| ENSG00000169914 | OTUD3        | OTU deubiquitinase 3                                | 23252     | 716.3216816 | 0.137239215 | 0.599538715 | 0.228908011 | 0.818940414 | 0.999371363 | Not Sig |
| ENSG00000177694 | NAALADL2     | N-acetylated alpha-linked acidic dipeptidase like 2 | 254827    | 757.4035252 | 0.137271448 | 0.875390849 | 0.15681161  | 0.875393323 | 0.999371363 | Not Sig |
| ENSG00000111880 | RNGTT        | RNA guanylyltransferase and 5'-phosphatase          | 8732      | 709.8669968 | 0.137647652 | 0.431013599 | 0.319358027 | 0.749455035 | 0.999371363 | Not Sig |
| ENSG00000081087 | OSTM1        | osteopetrosis associated transmembrane protein 1    | 28962     | 744.6154932 | 0.137660347 | 0.507503761 | 0.271249905 | 0.786198833 | 0.999371363 | Not Sig |
| ENSG00000126524 | SBDS         | SBDS, ribosome maturation factor                    | 51119     | 1470.240564 | 0.137676528 | 0.542974073 | 0.253560041 | 0.799835471 | 0.999371363 | Not Sig |
| ENSG00000125952 | MAX          | MYC associated factor X                             | 4149      | 1280.624212 | 0.137803202 | 0.49254803  | 0.279776171 | 0.779649235 | 0.999371363 | Not Sig |
| ENSG00000237187 | NR2F1-AS1    | NR2F1 antisense RNA 1                               | 441094    | 220.7238557 | 0.137846847 | 0.463384361 | 0.297478419 | 0.766101282 | 0.999371363 | Not Sig |
| ENSG00000264966 | MIR5094      | microRNA 5094                                       | 100847059 | 7.803033033 | 0.137878204 | 0.96889693  | 0.142304305 | 0.886839646 | 0.999371363 | Not Sig |
| ENSG00000235410 | NA           | NA                                                  | NA        | 1.038116003 | 0.137942552 | 3.020619552 | 0.045666973 | 0.963575688 | NA          | NA      |
| ENSG00000243725 | TTC4         | tetratricopeptide repeat domain 4                   | 7268      | 30.21185481 | 0.137995933 | 0.638216048 | 0.216221346 | 0.828815215 | 0.999371363 | Not Sig |
| ENSG00000273096 | NA           | NA                                                  | NA        | 12.07363651 | 0.138112078 | 0.863532463 | 0.15993849  | 0.872929528 | 0.999371363 | Not Sig |
| ENSG00000138738 | PRDM5        | PR/SET domain 5                                     | 11107     | 400.2945147 | 0.1381665   | 0.420297799 | 0.328734768 | 0.742356172 | 0.999371363 | Not Sig |
| ENSG00000110497 | AMBRA1       | autophagy and beclin 1 regulator 1                  | 55626     | 1452.834069 | 0.138183923 | 0.40335399  | 0.342587222 | 0.731909016 | 0.999371363 | Not Sig |
| ENSG00000171295 | ZNF440       | zinc finger protein 440                             | 126070    | 494.9068893 | 0.13825102  | 0.424953967 | 0.325331756 | 0.744929999 | 0.999371363 | Not Sig |
| ENSG00000204536 | CCHCR1       | coiled-coil alpha-helical rod protein 1             | 54535     | 455.5473342 | 0.13833066  | 0.466878665 | 0.296288244 | 0.767009963 | 0.999371363 | Not Sig |
| ENSG00000105926 | MPP6         | membrane palmitoylated protein 6                    | 51678     | 633.7291853 | 0.138375584 | 0.617529736 | 0.224079223 | 0.822695659 | 0.999371363 | Not Sig |
| ENSG00000113312 | TTC1         | tetratricopeptide repeat domain 1                   | 7265      | 706.7329489 | 0.138427665 | 0.423854924 | 0.326592088 | 0.743976428 | 0.999371363 | Not Sig |
| ENSG00000152556 | PFKM         | phosphofructokinase, muscle                         | 5213      | 641.3715212 | 0.138444796 | 0.627542704 | 0.220614144 | 0.825392887 | 0.999371363 | Not Sig |
| ENSG00000140836 | ZFHX3        | zinc finger homeobox 3                              | 463       | 3988.654372 | 0.138513398 | 0.457658865 | 0.302656429 | 0.762151706 | 0.999371363 | Not Sig |
| ENSG00000255108 | NA           | NA                                                  | NA        | 14.68397475 | 0.138693097 | 0.742493546 | 0.186793673 | 0.851822408 | 0.999371363 | Not Sig |
| ENSG00000080603 | SRCAP        | Snf2 related CREBBP activator protein               | 10847     | 6055.839092 | 0.139201348 | 0.450739613 | 0.308828742 | 0.757451804 | 0.999371363 | Not Sig |
| ENSG00000145703 | IQGAP2       | IQ motif containing GTPase activating protein 2     | 10788     | 1485.365482 | 0.139314555 | 0.836285064 | 0.166587401 | 0.867694708 | 0.999371363 | Not Sig |
| ENSG00000241061 | NA           | NA                                                  | NA        | 3.733581396 | 0.13941427  | 1.327432245 | 0.105025526 | 0.916355554 | NA          | NA      |
| ENSG00000241155 | ARHGAP31-AS1 | ARHGAP31 antisense RNA 1                            | 100874246 | 6.516332089 | 0.139425079 | 1.111289919 | 0.12546238  | 0.900157506 | NA          | NA      |
| ENSG00000198246 | SLC29A3      | solute carrier family 29 member 3                   | 55315     | 254.3212466 | 0.139456046 | 0.687118067 | 0.202957909 | 0.839167931 | 0.999371363 | Not Sig |
| ENSG00000068120 | COASY        | Coenzyme A synthase                                 | 80347     | 986.291974  | 0.139631296 | 0.42374654  | 0.329516074 | 0.741765647 | 0.999371363 | Not Sig |
| ENSG00000188525 | NA           | NA                                                  | NA        | 0.970602081 | 0.139948248 | 3.060283078 | 0.045730491 | 0.963525061 | NA          | NA      |
| ENSG00000196503 | ARL9         | ADP ribosylation factor like GTPase 9               | 132946    | 2.021853445 | 0.140056166 | 1.797085959 | 0.077935151 | 0.937879638 | NA          | NA      |
| ENSG00000103495 | MAZ          | MYC associated zinc finger protein                  | 4150      | 2600.157064 | 0.140287686 | 0.48973434  | 0.286456706 | 0.774528348 | 0.999371363 | Not Sig |
| ENSG00000254507 | NA           | NA                                                  | NA        | 0.860150975 | 0.140421776 | 3.174993001 | 0.044227429 | 0.964723119 | NA          | NA      |
| ENSG00000178814 | OPLAH        | 5-oxoprolinase, ATP-hydrolysing                     | 26873     | 488.1809646 | 0.140670424 | 0.600202529 | 0.234371595 | 0.814696508 | 0.999371363 | Not Sig |
| ENSG00000090612 | ZNF268       | zinc finger protein 268                             | 10795     | 491.2059181 | 0.140780769 | 0.56216548  | 0.250425852 | 0.80225804  | 0.999371363 | Not Sig |
| ENSG00000265260 | NA           | NA                                                  | NA        | 3.208885655 | 0.140870339 | 1.702666754 | 0.08273512  | 0.934062159 | NA          | NA      |
| ENSG00000171916 | LGALS9C      | galectin 9C                                         | 654346    | 12.79003603 | 0.140949438 | 1.272778777 | 0.110741505 | 0.911821332 | 0.999371363 | Not Sig |



|                 |            |                                                   |           |             |             |             |             |             |             |         |
|-----------------|------------|---------------------------------------------------|-----------|-------------|-------------|-------------|-------------|-------------|-------------|---------|
| ENSG00000137267 | TUBB2A     | tubulin beta 2A class IIa                         | 7280      | 139.5501077 | 0.141009147 | 0.778125642 | 0.181216425 | 0.856197703 | 0.999371363 | Not Sig |
| ENSG00000223810 | NA         | NA                                                | NA        | 1.182443377 | 0.141033216 | 2.498888451 | 0.05643838  | 0.954992583 | NA          | NA      |
| ENSG00000258659 | TRIM34     | tripartite motif containing 34                    | 53840     | 5.307967559 | 0.141339078 | 1.126753697 | 0.125439196 | 0.900175859 | NA          | NA      |
| ENSG00000146909 | NOM1       | nucleolar protein with MIF4G domain 1             | 64434     | 909.3874458 | 0.141581292 | 0.546539669 | 0.259050348 | 0.795596394 | 0.999371363 | Not Sig |
| ENSG00000006071 | ABCC8      | ATP binding cassette subfamily C member 8         | 6833      | 30.64060236 | 0.141892397 | 1.25917277  | 0.112686996 | 0.910278711 | 0.999371363 | Not Sig |
| ENSG00000263235 | NA         | NA                                                | NA        | 6.349238712 | 0.141945618 | 1.420174023 | 0.099949454 | 0.920384454 | NA          | NA      |
| ENSG00000085982 | USP40      | ubiquitin specific peptidase 40                   | 55230     | 1694.493969 | 0.14194712  | 0.423393458 | 0.335260543 | 0.737428556 | 0.999371363 | Not Sig |
| ENSG00000132879 | FBX044     | F-box protein 44                                  | 93611     | 404.0501149 | 0.142012874 | 0.580178336 | 0.24477452  | 0.806631024 | 0.999371363 | Not Sig |
| ENSG00000238260 | NA         | NA                                                | NA        | 9.462258597 | 0.142046749 | 0.88612898  | 0.160300308 | 0.872644516 | 0.999371363 | Not Sig |
| ENSG00000250938 | NA         | NA                                                | NA        | 11.69381687 | 0.142272048 | 0.814572091 | 0.174658633 | 0.861347874 | 0.999371363 | Not Sig |
| ENSG00000231069 | NA         | NA                                                | NA        | 3.982077059 | 0.14246184  | 1.798319917 | 0.079219408 | 0.936858107 | NA          | NA      |
| ENSG00000223803 | NA         | NA                                                | NA        | 9.26341962  | 0.142462273 | 0.99645409  | 0.142969229 | 0.886314483 | 0.999371363 | Not Sig |
| ENSG00000248334 | NA         | NA                                                | NA        | 56.00590587 | 0.142490838 | 0.554026293 | 0.257191472 | 0.797030967 | 0.999371363 | Not Sig |
| ENSG00000197386 | HTT        | huntingtin                                        | 3064      | 4766.431175 | 0.142591895 | 0.430310757 | 0.33136958  | 0.74036534  | 0.999371363 | Not Sig |
| ENSG00000137171 | KLC4       | kinesin light chain 4                             | 89953     | 648.6052131 | 0.142680935 | 0.501074177 | 0.284750127 | 0.775835584 | 0.999371363 | Not Sig |
| ENSG00000266053 | NDUFV2-AS1 | NDUFV2 antisense RNA 1                            | 101927275 | 34.95429293 | 0.14269047  | 0.667440572 | 0.213787528 | 0.830712751 | 0.999371363 | Not Sig |
| ENSG00000104133 | SPG11      | SPG11, spatacsin vesicle trafficking associated   | 80208     | 3588.241454 | 0.142721193 | 0.416236293 | 0.342885028 | 0.731684956 | 0.999371363 | Not Sig |
| ENSG00000135823 | STX6       | syntaxin 6                                        | 10228     | 1269.219532 | 0.142727523 | 0.517071568 | 0.2760305   | 0.782524641 | 0.999371363 | Not Sig |
| ENSG00000073536 | NLE1       | notchless homolog 1                               | 54475     | 234.9520586 | 0.142838833 | 0.468908294 | 0.304619975 | 0.760655605 | 0.999371363 | Not Sig |
| ENSG00000205054 | LINC01121  | long intergenic non-protein coding RNA 1121       | 400952    | 7.097948041 | 0.142991035 | 1.094251262 | 0.130674773 | 0.89603259  | 0.999371363 | Not Sig |
| ENSG00000117133 | RPF1       | ribosome production factor 1 homolog              | 80135     | 388.6218066 | 0.143100131 | 0.472442829 | 0.302894069 | 0.761970591 | 0.999371363 | Not Sig |
| ENSG00000111802 | TDP2       | tyrosyl-DNA phosphodiesterase 2                   | 51567     | 782.7352409 | 0.143139403 | 0.396675546 | 0.360847559 | 0.718213408 | 0.999371363 | Not Sig |
| ENSG00000108961 | RANGRF     | RAN guanine nucleotide release factor             | 29098     | 228.014121  | 0.143155562 | 0.480391528 | 0.297997682 | 0.765704933 | 0.999371363 | Not Sig |
| ENSG00000255163 | NA         | NA                                                | NA        | 14.16533949 | 0.143221886 | 1.075427151 | 0.133176744 | 0.894053603 | 0.999371363 | Not Sig |
| ENSG00000169442 | CD52       | CD52 molecule                                     | 1043      | 494.7432768 | 0.143355241 | 1.033677042 | 0.138684749 | 0.88969927  | 0.999371363 | Not Sig |
| ENSG00000150594 | ADRA2A     | adrenoceptor alpha 2A                             | 150       | 237.495164  | 0.143442424 | 1.000086681 | 0.143429991 | 0.885950598 | 0.999371363 | Not Sig |
| ENSG00000135951 | TSGA10     | testis specific 10                                | 80705     | 206.5241105 | 0.143464056 | 0.470397685 | 0.304984613 | 0.760377871 | 0.999371363 | Not Sig |
| ENSG00000255176 | NA         | NA                                                | NA        | 55.43961775 | 0.143530153 | 0.698422341 | 0.205506245 | 0.837176619 | 0.999371363 | Not Sig |
| ENSG00000169379 | ARL13B     | ADP ribosylation factor like GTPase 13B           | 200894    | 341.1097117 | 0.143878989 | 0.58470298  | 0.246071927 | 0.805626554 | 0.999371363 | Not Sig |
| ENSG00000184634 | MED12      | mediator complex subunit 12                       | 9968      | 1654.169832 | 0.144171154 | 0.446145537 | 0.32314826  | 0.746582963 | 0.999371363 | Not Sig |
| ENSG00000169410 | PTPN9      | protein tyrosine phosphatase, non-receptor type 9 | 5780      | 999.7178821 | 0.144173163 | 0.419268087 | 0.343868678 | 0.730945048 | 0.999371363 | Not Sig |
| ENSG00000203306 | NA         | NA                                                | NA        | 139.3499729 | 0.14436058  | 0.761211296 | 0.189645872 | 0.849586639 | 0.999371363 | Not Sig |
| ENSG00000247572 | CKMT2-AS1  | CKMT2 antisense RNA 1                             | 100131067 | 157.8550486 | 0.144479189 | 0.598476781 | 0.24141152  | 0.809236185 | 0.999371363 | Not Sig |
| ENSG00000267365 | KCNJ2-AS1  | KCNJ2 antisense RNA 1 (head to head)              | 400617    | 22.68881931 | 0.14453185  | 0.844816038 | 0.171080855 | 0.86416019  | 0.999371363 | Not Sig |
| ENSG00000109881 | CCDC34     | coiled-coil domain containing 34                  | 91057     | 151.9425727 | 0.14465006  | 0.757463572 | 0.190966359 | 0.84855195  | 0.999371363 | Not Sig |

|                 |              |                                                    |           |             |             |             |             |             |             |         |
|-----------------|--------------|----------------------------------------------------|-----------|-------------|-------------|-------------|-------------|-------------|-------------|---------|
| ENSG00000171634 | BPTF         | bromodomain PHD finger transcription factor        | 2186      | 6062.033649 | 0.144739373 | 0.438889298 | 0.329785606 | 0.741561964 | 0.999371363 | Not Sig |
| ENSG00000100221 | JOSD1        | Josephin domain containing 1                       | 9929      | 1478.364041 | 0.144874231 | 0.449987826 | 0.321951445 | 0.747489479 | 0.999371363 | Not Sig |
| ENSG00000143157 | POGK         | pogo transposable element derived with KRAB domain | 57645     | 2362.032006 | 0.144962379 | 0.449238909 | 0.32268438  | 0.746934282 | 0.999371363 | Not Sig |
| ENSG00000208883 | SNORD96B     | small nucleolar RNA, C/D box 96B                   | 692226    | 2.026442278 | 0.145000223 | 2.20982255  | 0.065616229 | 0.947683368 | NA          | NA      |
| ENSG00000136243 | NUPL2        | nucleoporin like 2                                 | 11097     | 557.6473978 | 0.145202308 | 0.723130042 | 0.200796952 | 0.840857347 | 0.999371363 | Not Sig |
| ENSG00000206228 | NA           | NA                                                 | NA        | 3.935708154 | 0.145302467 | 1.249990613 | 0.116242847 | 0.90746008  | NA          | NA      |
| ENSG00000215021 | PHB2         | prohibitin 2                                       | 11331     | 2003.6054   | 0.145368653 | 0.445536806 | 0.326277541 | 0.744214379 | 0.999371363 | Not Sig |
| ENSG00000136003 | ISCU         | iron-sulfur cluster assembly enzyme                | 23479     | 1379.754469 | 0.145389664 | 0.532100374 | 0.273237289 | 0.784670818 | 0.999371363 | Not Sig |
| ENSG00000271769 | NA           | NA                                                 | NA        | 8.220172529 | 0.145518819 | 1.229892191 | 0.118318353 | 0.905815416 | 0.999371363 | Not Sig |
| ENSG00000250234 | NA           | NA                                                 | NA        | 4.876812464 | 0.14558437  | 1.259713258 | 0.115569451 | 0.907993775 | NA          | NA      |
| ENSG00000137714 | FDX1         | ferredoxin 1                                       | 2230      | 584.2327695 | 0.145697021 | 0.471790355 | 0.308817294 | 0.757460513 | 0.999371363 | Not Sig |
| ENSG00000043462 | LCP2         | lymphocyte cytosolic protein 2                     | 3937      | 1355.51021  | 0.145706721 | 0.611478045 | 0.238286105 | 0.811659198 | 0.999371363 | Not Sig |
| ENSG00000111897 | SERINC1      | serine incorporator 1                              | 57515     | 4454.175275 | 0.14585455  | 0.450571262 | 0.323710281 | 0.746157386 | 0.999371363 | Not Sig |
| ENSG00000170264 | FAMI61A      | family with sequence similarity 161 member A       | 84140     | 134.3669776 | 0.145989445 | 0.499845236 | 0.292069294 | 0.770233644 | 0.999371363 | Not Sig |
| ENSG00000255443 | NA           | NA                                                 | NA        | 1.456949471 | 0.145995608 | 1.847532441 | 0.079021946 | 0.937015167 | NA          | NA      |
| ENSG00000088179 | PTPN4        | protein tyrosine phosphatase, non-receptor type 4  | 5775      | 1146.143014 | 0.146315629 | 0.43869447  | 0.333525128 | 0.738737925 | 0.999371363 | Not Sig |
| ENSG00000207944 | MIR574       | microRNA 574                                       | 693159    | 4.752938237 | 0.1466438   | 1.507226578 | 0.097293799 | 0.92249308  | NA          | NA      |
| ENSG00000136960 | ENPP2        | ectonucleotide pyrophosphatase/phosphodiesterase 2 | 5168      | 1157.605822 | 0.146647211 | 0.672197519 | 0.218160892 | 0.827303755 | 0.999371363 | Not Sig |
| ENSG00000128626 | MRPS12       | mitochondrial ribosomal protein S12                | 6183      | 230.353665  | 0.146844602 | 0.554667828 | 0.264743319 | 0.791207204 | 0.999371363 | Not Sig |
| ENSG00000143156 | NME7         | NME/NM23 family member 7                           | 29922     | 269.6311713 | 0.146959607 | 0.625378343 | 0.234993118 | 0.814214075 | 0.999371363 | Not Sig |
| ENSG00000219481 | NBPF1        | NBPF member 1                                      | 55672     | 1821.737488 | 0.146969404 | 0.416699276 | 0.352698967 | 0.724314134 | 0.999371363 | Not Sig |
| ENSG00000219481 | LOC101930059 | uncharacterized LOC101930059                       | 101930059 | 1821.737488 | 0.146969404 | 0.416699276 | 0.352698967 | 0.724314134 | 0.999371363 | Not Sig |
| ENSG00000111142 | METAP2       | methionyl aminopeptidase 2                         | 10988     | 1372.029362 | 0.146983651 | 0.468434888 | 0.313776054 | 0.753691132 | 0.999371363 | Not Sig |
| ENSG00000178222 | RNF212       | ring finger protein 212                            | 285498    | 178.4571669 | 0.147101005 | 0.972717378 | 0.15122687  | 0.879796755 | 0.999371363 | Not Sig |
| ENSG00000058799 | YIPF1        | Yipl domain family member 1                        | 54432     | 523.7960557 | 0.147232425 | 0.473830644 | 0.31072795  | 0.756007447 | 0.999371363 | Not Sig |
| ENSG00000123595 | RAB9A        | RAB9A, member RAS oncogene family                  | 9367      | 378.6595428 | 0.147331601 | 0.446232557 | 0.330167753 | 0.741273212 | 0.999371363 | Not Sig |
| ENSG00000133392 | MYH11        | myosin heavy chain 11                              | 4629      | 7847.374215 | 0.147361653 | 0.723473136 | 0.20368642  | 0.838598555 | 0.999371363 | Not Sig |
| ENSG00000196700 | ZNF512B      | zinc finger protein 512B                           | 57473     | 1140.025349 | 0.147544341 | 0.45243116  | 0.326114454 | 0.744337761 | 0.999371363 | Not Sig |
| ENSG00000163702 | IL17RC       | interleukin 17 receptor C                          | 84818     | 600.9339289 | 0.147594683 | 0.528018269 | 0.279525713 | 0.779841408 | 0.999371363 | Not Sig |
| ENSG00000145740 | SLC30A5      | solute carrier family 30 member 5                  | 64924     | 1366.7138   | 0.147682266 | 0.486209569 | 0.303741998 | 0.761324459 | 0.999371363 | Not Sig |
| ENSG00000102524 | TNFSF13B     | TNF superfamily member 13b                         | 10673     | 326.7157419 | 0.147748153 | 0.700792077 | 0.210830228 | 0.83301975  | 0.999371363 | Not Sig |
| ENSG00000113163 | COL4A3BP     | collagen type IV alpha 3 binding protein           | 10087     | 1633.881324 | 0.148011261 | 0.427432031 | 0.346280228 | 0.729132126 | 0.999371363 | Not Sig |
| ENSG00000136144 | RCBTB1       | RCC1 and BTB domain containing protein 1           | 55213     | 593.4337762 | 0.148070254 | 0.480515603 | 0.30814869  | 0.757969193 | 0.999371363 | Not Sig |
| ENSG00000197837 | HIST4H4      | histone cluster 4 H4                               | 121504    | 602.1148859 | 0.14811101  | 0.520558711 | 0.284521414 | 0.776010826 | 0.999371363 | Not Sig |
| ENSG00000215717 | TMEM167B     | transmembrane protein 167B                         | 56900     | 975.2612117 | 0.14838887  | 0.511772777 | 0.28995069  | 0.771853961 | 0.999371363 | Not Sig |

|                 |              |                                                                                  |           |             |             |             |             |             |             |         |
|-----------------|--------------|----------------------------------------------------------------------------------|-----------|-------------|-------------|-------------|-------------|-------------|-------------|---------|
| ENSG00000106268 | NUDT1        | nudix hydrolase 1                                                                | 4521      | 124.8108334 | 0.148405667 | 0.608492212 | 0.243890824 | 0.807315376 | 0.999371363 | Not Sig |
| ENSG00000126106 | TMEM53       | transmembrane protein 53                                                         | 79639     | 230.4915945 | 0.148445615 | 0.448978682 | 0.33062954  | 0.74092433  | 0.999371363 | Not Sig |
| ENSG00000206656 | SNORD116-17  | small nucleolar RNA, C/D box 116-17                                              | 100033429 | 4.276028802 | 0.148797294 | 1.225314968 | 0.121435955 | 0.903345739 | NA          | NA      |
| ENSG00000261471 | NA           | NA                                                                               | NA        | 4.509806086 | 0.148808406 | 1.386808303 | 0.107302794 | 0.914548768 | NA          | NA      |
| ENSG00000102871 | TRADD        | TNFRSF1A associated via death domain                                             | 8717      | 601.7091889 | 0.148830269 | 0.522898267 | 0.284625668 | 0.775930944 | 0.999371363 | Not Sig |
| ENSG00000148840 | PPRC1        | peroxisome proliferator-activated receptor gamma, coactivator-related 1          | 23082     | 1319.063435 | 0.148898614 | 0.432048479 | 0.344634041 | 0.73036951  | 0.999371363 | Not Sig |
| ENSG00000166848 | TERF2IP      | TERF2 interacting protein                                                        | 54386     | 1493.895053 | 0.149276146 | 0.563485671 | 0.264915602 | 0.791074479 | 0.999371363 | Not Sig |
| ENSG00000166848 | LOC105371348 | uncharacterized LOC105371348                                                     | 105371348 | 1493.895053 | 0.149276146 | 0.563485671 | 0.264915602 | 0.791074479 | 0.999371363 | Not Sig |
| ENSG00000261794 | GOLGA8H      | golgin A8 family member H                                                        | 728498    | 19.00594183 | 0.149362111 | 0.898889691 | 0.166162892 | 0.868028761 | 0.999371363 | Not Sig |
| ENSG00000232828 | NA           | NA                                                                               | NA        | 6.37827124  | 0.14937922  | 1.020569591 | 0.14636848  | 0.883630509 | NA          | NA      |
| ENSG00000270820 | NA           | NA                                                                               | NA        | 58.82217872 | 0.149395902 | 0.549966248 | 0.271645583 | 0.785894547 | 0.999371363 | Not Sig |
| ENSG00000219722 | NA           | NA                                                                               | NA        | 0.686641738 | 0.149405277 | 3.417792886 | 0.043713965 | 0.965132408 | NA          | NA      |
| ENSG00000231794 | NA           | NA                                                                               | NA        | 0.686641738 | 0.149405277 | 3.417792886 | 0.043713965 | 0.965132408 | NA          | NA      |
| ENSG00000257553 | NA           | NA                                                                               | NA        | 0.686641738 | 0.149405277 | 3.417792886 | 0.043713965 | 0.965132408 | NA          | NA      |
| ENSG00000260438 | NA           | NA                                                                               | NA        | 0.686641738 | 0.149405277 | 3.417792886 | 0.043713965 | 0.965132408 | NA          | NA      |
| ENSG00000272701 | NA           | NA                                                                               | NA        | 0.686641738 | 0.149405277 | 3.417792886 | 0.043713965 | 0.965132408 | NA          | NA      |
| ENSG00000084774 | CAD          | carbamoyl-phosphate synthetase 2, aspartate transcarbamylase, and dihydroorotase | 790       | 1216.261326 | 0.14951516  | 0.461367521 | 0.324069538 | 0.745885388 | 0.999371363 | Not Sig |
| ENSG00000119688 | ABCD4        | ATP binding cassette subfamily D member 4                                        | 5826      | 897.757098  | 0.14965348  | 0.501323091 | 0.298517029 | 0.765308581 | 0.999371363 | Not Sig |
| ENSG00000047579 | DTNBP1       | dystrobrevin binding protein 1                                                   | 84062     | 367.3415278 | 0.149780614 | 0.451073897 | 0.332053384 | 0.739848949 | 0.999371363 | Not Sig |
| ENSG00000139668 | WDFY2        | WD repeat and FYVE domain containing 2                                           | 115825    | 644.8172167 | 0.149869947 | 0.430518098 | 0.348115323 | 0.727753577 | 0.999371363 | Not Sig |
| ENSG00000175283 | DOLK         | dolichol kinase                                                                  | 22845     | 234.5445028 | 0.149916814 | 0.509725635 | 0.294112762 | 0.76867174  | 0.999371363 | Not Sig |
| ENSG00000159202 | UBE2Z        | ubiquitin conjugating enzyme E2 Z                                                | 65264     | 2085.336862 | 0.149994033 | 0.405336096 | 0.370048547 | 0.711346319 | 0.999371363 | Not Sig |
| ENSG00000103994 | ZNF106       | zinc finger protein 106                                                          | 64397     | 4482.542952 | 0.150003362 | 0.510349415 | 0.293922865 | 0.768816845 | 0.999371363 | Not Sig |
| ENSG00000112306 | RPS12        | ribosomal protein S12                                                            | 6206      | 4368.012587 | 0.150015759 | 0.501074532 | 0.299388113 | 0.764643931 | 0.999371363 | Not Sig |
| ENSG00000143748 | NVL          | nuclear VCP-like                                                                 | 4931      | 771.6116031 | 0.150055875 | 0.505154525 | 0.297049452 | 0.766428755 | 0.999371363 | Not Sig |
| ENSG00000143013 | LMO4         | LIM domain only 4                                                                | 8543      | 1293.898126 | 0.150277542 | 0.467369976 | 0.321538717 | 0.747802177 | 0.999371363 | Not Sig |
| ENSG00000171848 | RRM2         | ribonucleotide reductase regulatory subunit M2                                   | 6241      | 338.0822367 | 0.150491401 | 0.995061894 | 0.151238232 | 0.879787793 | 0.999371363 | Not Sig |
| ENSG00000179562 | GCC1         | GRIP and coiled-coil domain containing 1                                         | 79571     | 636.5521976 | 0.150689681 | 0.516676188 | 0.291652073 | 0.770552657 | 0.999371363 | Not Sig |
| ENSG00000266141 | NA           | NA                                                                               | NA        | 6.682408148 | 0.150743588 | 1.187284776 | 0.12696498  | 0.898968116 | 0.999371363 | Not Sig |
| ENSG00000272839 | NA           | NA                                                                               | NA        | 4.978429282 | 0.150987842 | 1.432877193 | 0.105373889 | 0.916079134 | NA          | NA      |
| ENSG00000143486 | EIF2D        | eukaryotic translation initiation factor 2D                                      | 1939      | 838.6974108 | 0.151249603 | 0.490277001 | 0.308498263 | 0.757703222 | 0.999371363 | Not Sig |
| ENSG00000149294 | NCAM1        | neural cell adhesion molecule 1                                                  | 4684      | 164.39706   | 0.15126239  | 0.907717859 | 0.166640314 | 0.867653071 | 0.999371363 | Not Sig |
| ENSG00000205309 | NT5M         | 5',3'-nucleotidase, mitochondrial                                                | 56953     | 44.13387141 | 0.151339054 | 0.674070573 | 0.224515148 | 0.822356482 | 0.999371363 | Not Sig |
| ENSG00000213985 | NA           | NA                                                                               | NA        | 5.353910559 | 0.151485309 | 1.118610632 | 0.135422733 | 0.892277651 | NA          | NA      |
| ENSG00000125037 | EMC3         | ER membrane protein complex subunit 3                                            | 55831     | 819.3835808 | 0.151696663 | 0.393572208 | 0.385435404 | 0.699914856 | 0.999371363 | Not Sig |

|                 |             |                                                                                                   |           |             |             |             |             |             |             |         |
|-----------------|-------------|---------------------------------------------------------------------------------------------------|-----------|-------------|-------------|-------------|-------------|-------------|-------------|---------|
| ENSG00000182180 | MRPS16      | mitochondrial ribosomal protein S16                                                               | 51021     | 878.2154225 | 0.151781332 | 0.388092932 | 0.391095327 | 0.695726774 | 0.999371363 | Not Sig |
| ENSG00000138002 | IFT172      | intraflagellar transport 172                                                                      | 26160     | 794.5342167 | 0.15180677  | 0.485712952 | 0.312544207 | 0.754626972 | 0.999371363 | Not Sig |
| ENSG00000101868 | POLA1       | DNA polymerase alpha 1, catalytic subunit                                                         | 5422      | 737.1916409 | 0.151843434 | 0.479000356 | 0.317000671 | 0.751243093 | 0.999371363 | Not Sig |
| ENSG00000149600 | COMM7       | COMM domain containing 7                                                                          | 149951    | 616.8827979 | 0.152099407 | 0.540880201 | 0.281207201 | 0.778551482 | 0.999371363 | Not Sig |
| ENSG00000125741 | OPA3        | OPA3, outer mitochondrial membrane lipid metabolism regulator                                     | 80207     | 552.8420696 | 0.152235861 | 0.541840055 | 0.280960885 | 0.778740401 | 0.999371363 | Not Sig |
| ENSG00000156471 | PTDSS1      | phosphatidylserine synthase 1                                                                     | 9791      | 932.0707759 | 0.152297242 | 0.452546745 | 0.336533724 | 0.736468425 | 0.999371363 | Not Sig |
| ENSG00000184014 | DENND5A     | DENN domain containing 5A                                                                         | 23258     | 2229.588664 | 0.152303344 | 0.526166514 | 0.28945845  | 0.772230572 | 0.999371363 | Not Sig |
| ENSG00000156587 | UBE2L6      | ubiquitin conjugating enzyme E2 L6                                                                | 9246      | 1099.975253 | 0.152393085 | 0.88774233  | 0.171663646 | 0.863701968 | 0.999371363 | Not Sig |
| ENSG00000142188 | TMEM50B     | transmembrane protein 50B                                                                         | 757       | 1145.878545 | 0.152431597 | 0.452589061 | 0.336799119 | 0.736268337 | 0.999371363 | Not Sig |
| ENSG00000164010 | ERMAP       | erythroblast membrane associated protein (Sciama blood group)                                     | 114625    | 361.8647651 | 0.152510839 | 0.451564488 | 0.337738778 | 0.735560049 | 0.999371363 | Not Sig |
| ENSG00000197006 | METTL9      | methyltransferase like 9                                                                          | 51108     | 1674.317379 | 0.152644407 | 0.401241317 | 0.380430429 | 0.70362593  | 0.999371363 | Not Sig |
| ENSG00000119812 | FAM98A      | family with sequence similarity 98 member A                                                       | 25940     | 591.0638843 | 0.152675908 | 0.43416282  | 0.351655879 | 0.725096353 | 0.999371363 | Not Sig |
| ENSG00000127481 | UBR4        | ubiquitin protein ligase E3 component n-recognin 4                                                | 23352     | 10429.81677 | 0.152783427 | 0.398731918 | 0.383173306 | 0.701591269 | 0.999371363 | Not Sig |
| ENSG00000185710 | NA          | NA                                                                                                | NA        | 90.75792984 | 0.152857307 | 1.067572273 | 0.143182163 | 0.886146316 | 0.999371363 | Not Sig |
| ENSG00000215840 | NA          | NA                                                                                                | NA        | 28.56200194 | 0.15296531  | 0.620090984 | 0.246682042 | 0.805154306 | 0.999371363 | Not Sig |
| ENSG00000131174 | COX7B       | cytochrome c oxidase subunit 7B                                                                   | 1349      | 646.5778983 | 0.153105867 | 0.64898399  | 0.235916247 | 0.813497661 | 0.999371363 | Not Sig |
| ENSG00000266122 | NA          | NA                                                                                                | NA        | 1.546792713 | 0.153112914 | 1.808669022 | 0.084655021 | 0.932535655 | NA          | NA      |
| ENSG00000121797 | CCRL2       | C-C motif chemokine receptor like 2                                                               | 9034      | 236.165412  | 0.153165602 | 0.900400559 | 0.170108292 | 0.864924972 | 0.999371363 | Not Sig |
| ENSG00000133835 | HSD17B4     | hydroxysteroid 17-beta dehydrogenase 4                                                            | 3295      | 2473.682234 | 0.153193124 | 0.498132293 | 0.307535018 | 0.758436173 | 0.999371363 | Not Sig |
| ENSG00000111358 | GTF2H3      | general transcription factor IIIH subunit 3                                                       | 2967      | 449.4984355 | 0.15322789  | 0.507539159 | 0.301903581 | 0.762725566 | 0.999371363 | Not Sig |
| ENSG00000153147 | SMARCA5     | SMARCA5 related, matrix associated, actin dependent regulator of chromatin, subfamily A, member 1 | 8467      | 3608.865633 | 0.153292174 | 0.424567169 | 0.361055176 | 0.7180582   | 0.999371363 | Not Sig |
| ENSG00000266235 | MIR3176     | microRNA 3176                                                                                     | 100423037 | 11.44899075 | 0.153374092 | 1.235492378 | 0.124140056 | 0.901204384 | 0.999371363 | Not Sig |
| ENSG00000188997 | KCTD21      | potassium channel tetramerization domain containing 21                                            | 283219    | 315.6183844 | 0.153378172 | 0.520652639 | 0.294588293 | 0.768308406 | 0.999371363 | Not Sig |
| ENSG00000077420 | APBB1IP     | amyloid beta precursor protein binding family B member 1 interacting protein                      | 54518     | 535.6831308 | 0.153523763 | 0.795142332 | 0.193077084 | 0.846898599 | 0.999371363 | Not Sig |
| ENSG00000187583 | PLEKHN1     | pleckstrin homology domain containing N1                                                          | 84069     | 153.4891968 | 0.153539351 | 0.777671112 | 0.197434813 | 0.843487289 | 0.999371363 | Not Sig |
| ENSG00000082213 | C5orf22     | chromosome 5 open reading frame 22                                                                | 55322     | 717.3872072 | 0.153609428 | 0.61013122  | 0.251764576 | 0.801223039 | 0.999371363 | Not Sig |
| ENSG00000184203 | PPP1R2      | protein phosphatase 1 regulatory inhibitor subunit 2                                              | 5504      | 1154.677397 | 0.153875955 | 0.467991391 | 0.328800824 | 0.742306241 | 0.999371363 | Not Sig |
| ENSG00000235897 | TM4SF19-AS1 | TM4SF19 antisense RNA 1                                                                           | 100874214 | 15.67326505 | 0.153896045 | 0.84343136  | 0.182464219 | 0.855218432 | 0.999371363 | Not Sig |
| ENSG00000116251 | RPL22       | ribosomal protein L22                                                                             | 6146      | 3605.410645 | 0.153955323 | 0.524495372 | 0.293530375 | 0.769116786 | 0.999371363 | Not Sig |
| ENSG00000075151 | EIF4G3      | eukaryotic translation initiation factor 4 gamma 3                                                | 8672      | 2770.764258 | 0.153961768 | 0.489200249 | 0.314721361 | 0.752973224 | 0.999371363 | Not Sig |
| ENSG00000125686 | MED1        | mediator complex subunit 1                                                                        | 5469      | 1569.669143 | 0.154205419 | 0.412379096 | 0.373940922 | 0.70844827  | 0.999371363 | Not Sig |
| ENSG00000112559 | MDF1        | MyoD family inhibitor                                                                             | 4188      | 440.240748  | 0.15444098  | 0.807262947 | 0.191314343 | 0.848279325 | 0.999371363 | Not Sig |
| ENSG00000240392 | NA          | NA                                                                                                | NA        | 6.013506896 | 0.154472196 | 1.08287503  | 0.142650067 | 0.886566554 | NA          | NA      |
| ENSG00000135577 | NMBR        | neuromedin B receptor                                                                             | 4829      | 1.395873085 | 0.154855359 | 2.326056854 | 0.066574194 | 0.946920691 | NA          | NA      |
| ENSG00000009780 | FAM76A      | family with sequence similarity 76 member A                                                       | 199870    | 355.06262   | 0.155024401 | 0.451305203 | 0.343502358 | 0.731220567 | 0.999371363 | Not Sig |

|                 |              |                                                         |           |             |             |             |             |             |             |         |
|-----------------|--------------|---------------------------------------------------------|-----------|-------------|-------------|-------------|-------------|-------------|-------------|---------|
| ENSG00000126822 | PLEKHG3      | pleckstrin homology and RhoGEF domain containing G3     | 26030     | 1118.00037  | 0.15510981  | 0.594945822 | 0.260712495 | 0.79431423  | 0.999371363 | Not Sig |
| ENSG00000214070 | NA           | NA                                                      | NA        | 1.724603023 | 0.155137533 | 1.935818147 | 0.080140551 | 0.936125471 | NA          | NA      |
| ENSG00000230055 | NA           | NA                                                      | NA        | 384.5716511 | 0.15532493  | 0.588358665 | 0.263997012 | 0.791782221 | 0.999371363 | Not Sig |
| ENSG00000224721 | LOC102724153 | uncharacterized LOC102724153                            | 102724153 | 4.585356854 | 0.155355969 | 1.871815984 | 0.082997458 | 0.93385356  | NA          | NA      |
| ENSG00000096093 | EFHC1        | EF-hand domain containing 1                             | 114327    | 586.6807845 | 0.155428874 | 0.567003298 | 0.274123403 | 0.783989789 | 0.999371363 | Not Sig |
| ENSG00000161217 | PCYT1A       | phosphate cytidylyltransferase 1, choline, alpha        | 5130      | 1422.750325 | 0.155507375 | 0.481249268 | 0.3231327   | 0.746594747 | 0.999371363 | Not Sig |
| ENSG00000168453 | HR           | HR, lysine demethylase and nuclear receptor corepressor | 55806     | 128.435872  | 0.15572177  | 1.009767769 | 0.154215429 | 0.877439877 | 0.999371363 | Not Sig |
| ENSG00000126581 | BECN1        | beclin 1                                                | 8678      | 1650.472664 | 0.155932115 | 0.429423336 | 0.363119798 | 0.716515396 | 0.999371363 | Not Sig |
| ENSG00000175779 | C15orf53     | chromosome 15 open reading frame 53                     | 400359    | 7.174645024 | 0.155992052 | 1.025795833 | 0.152069297 | 0.87913228  | 0.999371363 | Not Sig |
| ENSG00000149136 | SSRP1        | structure specific recognition protein 1                | 6749      | 2065.322902 | 0.156096471 | 0.406347553 | 0.384145221 | 0.700870817 | 0.999371363 | Not Sig |
| ENSG00000184831 | APOO         | apolipoprotein O                                        | 79135     | 107.2931549 | 0.156208349 | 0.610216363 | 0.255988463 | 0.797959746 | 0.999371363 | Not Sig |
| ENSG00000266345 | NA           | NA                                                      | NA        | 6.585728656 | 0.156396727 | 1.34269833  | 0.116479423 | 0.907272593 | 0.999371363 | Not Sig |
| ENSG00000130396 | AFDN         | afadin, adherens junction formation factor              | 4301      | 7297.290523 | 0.156447129 | 0.435921191 | 0.35888856  | 0.719678458 | 0.999371363 | Not Sig |
| ENSG00000250999 | NA           | NA                                                      | NA        | 15.41104801 | 0.156580744 | 0.868423508 | 0.180304589 | 0.856913453 | 0.999371363 | Not Sig |
| ENSG00000030419 | IKZF2        | IKAROS family zinc finger 2                             | 22807     | 1274.291973 | 0.156776452 | 0.636200932 | 0.246426002 | 0.80535248  | 0.999371363 | Not Sig |
| ENSG00000023734 | STRAP        | serine/threonine kinase receptor associated protein     | 11171     | 1359.284049 | 0.156955306 | 0.430359396 | 0.364707515 | 0.715329749 | 0.999371363 | Not Sig |
| ENSG00000261556 | SMG1P7       | SMG1 pseudogene 7                                       | 100506060 | 129.238255  | 0.157010315 | 0.486658276 | 0.322629497 | 0.746975852 | 0.999371363 | Not Sig |
| ENSG00000103363 | ELOB         | elongin B                                               | 6923      | 1316.458979 | 0.157103196 | 0.475935445 | 0.330093499 | 0.741329315 | 0.999371363 | Not Sig |
| ENSG00000213588 | ZBTB9        | zinc finger and BTB domain containing 9                 | 221504    | 229.0991453 | 0.157181013 | 0.481809807 | 0.326230415 | 0.744250032 | 0.999371363 | Not Sig |
| ENSG00000048342 | CC2D2A       | coiled-coil and C2 domain containing 2A                 | 57545     | 559.0886815 | 0.157438861 | 0.536748841 | 0.293319425 | 0.769278008 | 0.999371363 | Not Sig |
| ENSG00000203706 | SERTAD4-AS1  | SERTAD4 antisense RNA 1                                 | 574036    | 87.77980861 | 0.157443734 | 0.620660766 | 0.253671156 | 0.79974962  | 0.999371363 | Not Sig |
| ENSG00000135932 | CAB39        | calcium binding protein 39                              | 51719     | 2754.344267 | 0.157605416 | 0.431910549 | 0.364902909 | 0.715183883 | 0.999371363 | Not Sig |
| ENSG00000118058 | KMT2A        | lysine methyltransferase 2A                             | 4297      | 6015.803768 | 0.157610633 | 0.388690294 | 0.405491559 | 0.685116222 | 0.999371363 | Not Sig |
| ENSG00000240453 | NA           | NA                                                      | NA        | 11.61441938 | 0.157618591 | 0.881159695 | 0.178876305 | 0.858034828 | 0.999371363 | Not Sig |
| ENSG00000255337 | LOC101928424 | uncharacterized LOC101928424                            | 101928424 | 12.56148037 | 0.15781076  | 1.002604639 | 0.157400788 | 0.874928993 | 0.999371363 | Not Sig |
| ENSG00000198805 | PNP          | purine nucleoside phosphorylase                         | 4860      | 687.1603074 | 0.157813634 | 0.403250363 | 0.391353979 | 0.695535605 | 0.999371363 | Not Sig |
| ENSG00000157693 | TMEM268      | transmembrane protein 268                               | 203197    | 624.0435947 | 0.157878737 | 0.598818579 | 0.263650365 | 0.792049346 | 0.999371363 | Not Sig |
| ENSG00000091536 | MYO15A       | myosin XVA                                              | 51168     | 58.37018969 | 0.157969347 | 0.581936586 | 0.271454572 | 0.786041434 | 0.999371363 | Not Sig |
| ENSG00000182141 | ZNF708       | zinc finger protein 708                                 | 7562      | 394.5289409 | 0.158012432 | 0.506645479 | 0.311879685 | 0.755131962 | 0.999371363 | Not Sig |
| ENSG00000137221 | TJAP1        | tight junction associated protein 1                     | 93643     | 687.9192323 | 0.158147741 | 0.555239232 | 0.28482811  | 0.775775835 | 0.999371363 | Not Sig |
| ENSG00000160208 | RRP1B        | ribosomal RNA processing 1B                             | 23076     | 1189.84195  | 0.158166464 | 0.486601457 | 0.325043137 | 0.745148424 | 0.999371363 | Not Sig |
| ENSG00000249020 | NA           | NA                                                      | NA        | 9.083163692 | 0.158183698 | 1.026183141 | 0.154147629 | 0.877493335 | 0.999371363 | Not Sig |
| ENSG00000144909 | OSBPL11      | oxysterol binding protein like 11                       | 114885    | 718.5120215 | 0.158361149 | 0.563412519 | 0.281074957 | 0.778652909 | 0.999371363 | Not Sig |
| ENSG00000188917 | TRMT2B       | tRNA methyltransferase 2 homolog B                      | 79979     | 731.3232175 | 0.158428146 | 0.535660979 | 0.29576197  | 0.767411868 | 0.999371363 | Not Sig |
| ENSG00000085831 | TTC39A       | tetratricopeptide repeat domain 39A                     | 22996     | 855.028163  | 0.158566674 | 0.536965975 | 0.295301157 | 0.767763832 | 0.999371363 | Not Sig |

|                 |              |                                                            |    |           |             |             |             |             |             |             |         |
|-----------------|--------------|------------------------------------------------------------|----|-----------|-------------|-------------|-------------|-------------|-------------|-------------|---------|
| ENSG00000085733 | CTTN         | cortactin                                                  |    | 2017      | 5512.80493  | 0.158610402 | 0.545399072 | 0.290815313 | 0.771192574 | 0.999371363 | Not Sig |
| ENSG00000157895 | C12orf43     | chromosome 12 open reading frame 43                        |    | 64897     | 242.7215257 | 0.158691739 | 0.51838449  | 0.306127483 | 0.759507583 | 0.999371363 | Not Sig |
| ENSG00000224553 | NA           | NA                                                         | NA |           | 5.171340405 | 0.158930018 | 1.249037458 | 0.127241995 | 0.898748868 | NA          | NA      |
| ENSG00000241641 | NA           | NA                                                         | NA |           | 16.59054011 | 0.159018766 | 0.732796052 | 0.21700276  | 0.828206194 | 0.999371363 | Not Sig |
| ENSG00000103932 | RPAP1        | RNA polymerase II associated protein 1                     |    | 26015     | 711.3459866 | 0.159031067 | 0.468150591 | 0.339700666 | 0.73408196  | 0.999371363 | Not Sig |
| ENSG00000143549 | TPM3         | tropomyosin 3                                              |    | 7170      | 5980.704047 | 0.159155308 | 0.432300572 | 0.368158911 | 0.712754746 | 0.999371363 | Not Sig |
| ENSG00000256116 | NA           | NA                                                         | NA |           | 33.71637075 | 0.159564095 | 0.678582636 | 0.235143203 | 0.814097587 | 0.999371363 | Not Sig |
| ENSG00000119801 | YPEL5        | yippee like 5                                              |    | 51646     | 1696.448154 | 0.159587396 | 0.482182751 | 0.330968696 | 0.740668131 | 0.999371363 | Not Sig |
| ENSG00000095319 | NUP188       | nucleoporin 188                                            |    | 23511     | 1405.859031 | 0.159757282 | 0.460388451 | 0.347005407 | 0.728587257 | 0.999371363 | Not Sig |
| ENSG00000253878 | NA           | NA                                                         | NA |           | 64.1567511  | 0.159802336 | 0.628935908 | 0.254083658 | 0.799430928 | 0.999371363 | Not Sig |
| ENSG00000135924 | DNAJB2       | DnaJ heat shock protein family (Hsp40) member B2           |    | 3300      | 1507.744386 | 0.159804486 | 0.603082868 | 0.264979316 | 0.791025396 | 0.999371363 | Not Sig |
| ENSG00000146223 | RPL7L1       | ribosomal protein L7 like 1                                |    | 285855    | 2098.228872 | 0.159937967 | 0.437216553 | 0.365809496 | 0.714507233 | 0.999371363 | Not Sig |
| ENSG00000249673 | NOP14-AS1    | NOP14 antisense RNA 1                                      |    | 317648    | 392.0406189 | 0.160255412 | 0.534347133 | 0.299908808 | 0.764246715 | 0.999371363 | Not Sig |
| ENSG00000211869 | NA           | NA                                                         | NA |           | 7.291068423 | 0.160279905 | 1.183024334 | 0.135483185 | 0.892229858 | 0.999371363 | Not Sig |
| ENSG00000137193 | PIM1         | Pim-1 proto-oncogene, serine/threonine kinase              |    | 5292      | 1387.814527 | 0.160342339 | 0.464208252 | 0.345410359 | 0.729785891 | 0.999371363 | Not Sig |
| ENSG00000109944 | JHY          | junctional cadherin complex regulator                      |    | 79864     | 240.3047965 | 0.160563966 | 0.424983657 | 0.377812097 | 0.705570187 | 0.999371363 | Not Sig |
| ENSG00000014641 | MDH1         | malate dehydrogenase 1                                     |    | 4190      | 1264.334835 | 0.160667016 | 0.405119786 | 0.396591382 | 0.691668808 | 0.999371363 | Not Sig |
| ENSG00000170043 | TRAPPC1      | trafficking protein particle complex 1                     |    | 58485     | 560.7295889 | 0.160671414 | 0.49664471  | 0.323513794 | 0.746306163 | 0.999371363 | Not Sig |
| ENSG00000089091 | DZANK1       | double zinc ribbon and ankyrin repeat domains 1            |    | 55184     | 132.3881639 | 0.16074483  | 0.5049225   | 0.31835545  | 0.750215327 | 0.999371363 | Not Sig |
| ENSG00000158077 | NLRP14       | NLR family pyrin domain containing 14                      |    | 338323    | 17.41683757 | 0.161020348 | 0.837568663 | 0.192247341 | 0.847548464 | 0.999371363 | Not Sig |
| ENSG00000077549 | CAPZB        | capping actin protein of muscle Z-line beta subunit        |    | 832       | 3339.746318 | 0.161066867 | 0.426368183 | 0.377764744 | 0.705605367 | 0.999371363 | Not Sig |
| ENSG00000130701 | RBBP8NL      | RBBP8 N-terminal like                                      |    | 140893    | 113.7288496 | 0.161122661 | 0.770549311 | 0.209101038 | 0.834369364 | 0.999371363 | Not Sig |
| ENSG00000235505 | LOC643733    | caspase 4, apoptosis-related cysteine peptidase pseudogene |    | 643733    | 123.5598054 | 0.161165057 | 0.743905289 | 0.216647279 | 0.828483237 | 0.999371363 | Not Sig |
| ENSG00000063978 | RNF4         | ring finger protein 4                                      |    | 6047      | 1432.961414 | 0.16120891  | 0.410917315 | 0.392314717 | 0.694825691 | 0.999371363 | Not Sig |
| ENSG00000137513 | NARS2        | asparaginyl-tRNA synthetase 2, mitochondrial               |    | 79731     | 372.3807681 | 0.161363032 | 0.416627588 | 0.387307603 | 0.698528498 | 0.999371363 | Not Sig |
| ENSG00000131013 | PP1L4        | peptidylprolyl isomerase like 4                            |    | 85313     | 885.6668441 | 0.161380181 | 0.496347225 | 0.325135657 | 0.745078403 | 0.999371363 | Not Sig |
| ENSG00000256690 | LOC105369332 | uncharacterized LOC105369332                               |    | 105369332 | 10.24905628 | 0.161388348 | 0.905468838 | 0.178237329 | 0.858536594 | 0.999371363 | Not Sig |
| ENSG00000130487 | KLHDC7B      | kelch domain containing 7B                                 |    | 113730    | 49.55192822 | 0.161736916 | 0.734789883 | 0.22011315  | 0.825783034 | 0.999371363 | Not Sig |
| ENSG00000184432 | COPB2        | coatamer protein complex subunit beta 2                    |    | 9276      | 3924.134188 | 0.161747536 | 0.489821325 | 0.330217424 | 0.741235682 | 0.999371363 | Not Sig |
| ENSG00000091157 | WDR7         | WD repeat domain 7                                         |    | 23335     | 1103.117415 | 0.161773715 | 0.484901561 | 0.333621765 | 0.738664992 | 0.999371363 | Not Sig |
| ENSG00000259522 | NA           | NA                                                         | NA |           | 2.246569812 | 0.162002426 | 1.775680307 | 0.091234005 | 0.927306655 | NA          | NA      |
| ENSG00000259706 | HSP90B2P     | heat shock protein 90 beta family member 2, pseudogene     |    | 7190      | 28.14929957 | 0.162083466 | 0.791999589 | 0.204650947 | 0.837844847 | 0.999371363 | Not Sig |
| ENSG00000146282 | RARS2        | arginyl-tRNA synthetase 2, mitochondrial                   |    | 57038     | 867.0397506 | 0.162085036 | 0.515310684 | 0.314538474 | 0.7531121   | 0.999371363 | Not Sig |
| ENSG00000136810 | TXN          | thioredoxin                                                |    | 7295      | 1313.674728 | 0.162196795 | 0.536241702 | 0.302469566 | 0.76229413  | 0.999371363 | Not Sig |
| ENSG00000204498 | NFKBIL1      | NFKB inhibitor like 1                                      |    | 4795      | 372.1863026 | 0.162209301 | 0.617994251 | 0.262477039 | 0.792953685 | 0.999371363 | Not Sig |

|                 |          |                                                    |        |             |             |             |             |             |             |         |
|-----------------|----------|----------------------------------------------------|--------|-------------|-------------|-------------|-------------|-------------|-------------|---------|
| ENSG00000229018 | NA       | NA                                                 | NA     | 18.30309945 | 0.16230152  | 0.752950954 | 0.215553906 | 0.829335488 | 0.999371363 | Not Sig |
| ENSG00000008130 | NADK     | NAD kinase                                         | 65220  | 2048.653391 | 0.162319345 | 0.542289083 | 0.299322539 | 0.764693959 | 0.999371363 | Not Sig |
| ENSG00000163131 | CTSS     | cathepsin S                                        | 1520   | 5362.745594 | 0.162344865 | 0.638431372 | 0.254287104 | 0.799273762 | 0.999371363 | Not Sig |
| ENSG00000100330 | MTMR3    | myotubularin related protein 3                     | 8897   | 2866.024062 | 0.162431855 | 0.50800864  | 0.319742308 | 0.749163685 | 0.999371363 | Not Sig |
| ENSG00000108278 | NA       | NA                                                 | NA     | 296.6333076 | 0.162675114 | 0.398615049 | 0.408100784 | 0.683199684 | 0.999371363 | Not Sig |
| ENSG00000150076 | NA       | NA                                                 | NA     | 83.40725005 | 0.162818206 | 0.628044216 | 0.259246407 | 0.795445127 | 0.999371363 | Not Sig |
| ENSG00000062598 | ELMO2    | engulfment and cell motility 2                     | 63916  | 938.2169385 | 0.162995189 | 0.53922268  | 0.302278067 | 0.762440097 | 0.999371363 | Not Sig |
| ENSG00000153944 | MSI2     | musashi RNA binding protein 2                      | 124540 | 2788.532095 | 0.163047917 | 0.638935485 | 0.255186823 | 0.798578808 | 0.999371363 | Not Sig |
| ENSG00000064607 | SUGP2    | SURP and G-patch domain containing 2               | 10147  | 1723.730784 | 0.163081774 | 0.468957448 | 0.347753885 | 0.728025025 | 0.999371363 | Not Sig |
| ENSG00000205502 | C2CD4B   | C2 calcium dependent domain containing 4B          | 388125 | 200.3865321 | 0.163137236 | 0.835244199 | 0.195316814 | 0.845144935 | 0.999371363 | Not Sig |
| ENSG00000156508 | EEF1A1   | eukaryotic translation elongation factor 1 alpha 1 | 1915   | 110217.8996 | 0.163205032 | 0.451833918 | 0.361205799 | 0.717945607 | 0.999371363 | Not Sig |
| ENSG00000273314 | NA       | NA                                                 | NA     | 54.62756373 | 0.163232597 | 0.604436942 | 0.27005728  | 0.787116187 | 0.999371363 | Not Sig |
| ENSG00000238446 | NA       | NA                                                 | NA     | 5.51797093  | 0.163272385 | 1.852956117 | 0.088114545 | 0.929785636 | NA          | NA      |
| ENSG00000162222 | TTC9C    | tetratricopeptide repeat domain 9C                 | 283237 | 271.7532321 | 0.16355185  | 0.472168165 | 0.346384747 | 0.729053587 | 0.999371363 | Not Sig |
| ENSG00000148948 | LRRRC4C  | leucine rich repeat containing 4C                  | 57689  | 61.39908179 | 0.163564069 | 0.744599224 | 0.219667256 | 0.826130307 | 0.999371363 | Not Sig |
| ENSG00000106603 | COA1     | cytochrome c oxidase assembly factor 1 homolog     | 55744  | 1253.276284 | 0.163568174 | 0.55525073  | 0.294584348 | 0.76831142  | 0.999371363 | Not Sig |
| ENSG00000196532 | NA       | NA                                                 | NA     | 347.2212897 | 0.163588337 | 0.982602199 | 0.166484806 | 0.867775439 | 0.999371363 | Not Sig |
| ENSG00000259782 | NA       | NA                                                 | NA     | 8.272387437 | 0.163622918 | 0.916847726 | 0.178462479 | 0.858359785 | 0.999371363 | Not Sig |
| ENSG00000166452 | AKIP1    | A-kinase interacting protein 1                     | 56672  | 249.2438524 | 0.164359245 | 0.431902959 | 0.380546699 | 0.703539638 | 0.999371363 | Not Sig |
| ENSG00000125967 | NECAB3   | N-terminal EF-hand calcium binding protein 3       | 63941  | 801.5791717 | 0.164385908 | 0.49172256  | 0.334306215 | 0.738148501 | 0.999371363 | Not Sig |
| ENSG00000170385 | SLC30A1  | solute carrier family 30 member 1                  | 7779   | 1614.942391 | 0.164456183 | 0.469074967 | 0.350596801 | 0.725890857 | 0.999371363 | Not Sig |
| ENSG00000258633 | NA       | NA                                                 | NA     | 1.469824543 | 0.164491009 | 1.847076777 | 0.089054776 | 0.929038378 | NA          | NA      |
| ENSG00000239306 | RBM14    | RNA binding motif protein 14                       | 10432  | 1175.389338 | 0.164584942 | 0.447036006 | 0.36816932  | 0.712746985 | 0.999371363 | Not Sig |
| ENSG00000114805 | PLCH1    | phospholipase C eta 1                              | 23007  | 1350.486114 | 0.164662891 | 0.5834104   | 0.282241953 | 0.777757991 | 0.999371363 | Not Sig |
| ENSG00000077157 | PPP1R12B | protein phosphatase 1 regulatory subunit 12B       | 4660   | 3320.022767 | 0.164933836 | 0.461399826 | 0.35746402  | 0.720744457 | 0.999371363 | Not Sig |
| ENSG00000100949 | RABGGTA  | Rab geranylgeranyltransferase alpha subunit        | 5875   | 525.6110895 | 0.164964663 | 0.585027376 | 0.281977681 | 0.777960624 | 0.999371363 | Not Sig |
| ENSG00000081019 | RSBN1    | round spermatid basic protein 1                    | 54665  | 999.1753749 | 0.165037109 | 0.448316015 | 0.36812673  | 0.71277874  | 0.999371363 | Not Sig |
| ENSG00000229932 | NA       | NA                                                 | NA     | 7.131553122 | 0.165111204 | 0.957810581 | 0.172383984 | 0.863135662 | 0.999371363 | Not Sig |
| ENSG00000165006 | UBAP1    | ubiquitin associated protein 1                     | 51271  | 1372.492567 | 0.165174197 | 0.40458109  | 0.408259805 | 0.683082946 | 0.999371363 | Not Sig |
| ENSG00000111602 | TIMELESS | timeless circadian regulator                       | 8914   | 452.1324707 | 0.165252764 | 0.526813808 | 0.313683434 | 0.753761484 | 0.999371363 | Not Sig |
| ENSG00000106266 | SNX8     | sorting nexin 8                                    | 29886  | 815.540865  | 0.165272964 | 0.501071293 | 0.329839219 | 0.741521452 | 0.999371363 | Not Sig |
| ENSG00000142197 | DOPEY2   | dopey family member 2                              | 9980   | 1616.193802 | 0.165293368 | 0.477904222 | 0.345871327 | 0.729439418 | 0.999371363 | Not Sig |
| ENSG00000189067 | LITAF    | lipopolysaccharide induced TNF factor              | 9516   | 3939.219994 | 0.165324217 | 0.448536426 | 0.368585934 | 0.712436382 | 0.999371363 | Not Sig |
| ENSG00000228217 | NA       | NA                                                 | NA     | 1.804992016 | 0.165364466 | 1.681175857 | 0.098362384 | 0.921644543 | NA          | NA      |
| ENSG00000164967 | RPP25L   | ribonuclease P/MRP subunit p25 like                | 138716 | 140.9334246 | 0.165467568 | 0.581395303 | 0.284604239 | 0.775947363 | 0.999371363 | Not Sig |

|                 |           |                                                                       |           |             |             |             |             |             |             |         |
|-----------------|-----------|-----------------------------------------------------------------------|-----------|-------------|-------------|-------------|-------------|-------------|-------------|---------|
| ENSG00000140675 | SLC5A2    | solute carrier family 5 member 2                                      | 6524      | 14.38525903 | 0.165469019 | 0.966083336 | 0.171278204 | 0.864005018 | 0.999371363 | Not Sig |
| ENSG00000201217 | NA        | NA                                                                    | NA        | 41.40469783 | 0.165734272 | 0.909716308 | 0.182182368 | 0.855439609 | 0.999371363 | Not Sig |
| ENSG00000224786 | NA        | NA                                                                    | NA        | 2.095389894 | 0.165913852 | 1.876367146 | 0.088422915 | 0.929540549 | NA          | NA      |
| ENSG00000198286 | CARD11    | caspase recruitment domain family member 11                           | 84433     | 385.5407753 | 0.166318374 | 0.78799664  | 0.211064826 | 0.832836687 | 0.999371363 | Not Sig |
| ENSG00000115241 | PPM1G     | protein phosphatase, Mg2+/Mn2+ dependent 1G                           | 5496      | 1620.176209 | 0.166323776 | 0.456578403 | 0.364283055 | 0.715646652 | 0.999371363 | Not Sig |
| ENSG00000226521 | NA        | NA                                                                    | NA        | 1.508156601 | 0.166328839 | 2.307962448 | 0.072067394 | 0.942548274 | NA          | NA      |
| ENSG00000167136 | ENDOG     | endonuclease G                                                        | 2021      | 211.4634909 | 0.166435074 | 0.726622845 | 0.229052906 | 0.818827796 | 0.999371363 | Not Sig |
| ENSG00000251307 | NA        | NA                                                                    | NA        | 7.207353281 | 0.166446026 | 0.975947895 | 0.170548066 | 0.864579137 | 0.999371363 | Not Sig |
| ENSG00000171307 | ZDHHC16   | zinc finger DHHC-type containing 16                                   | 84287     | 999.0466007 | 0.166449513 | 0.471869122 | 0.352745084 | 0.724279557 | 0.999371363 | Not Sig |
| ENSG00000180385 | NA        | NA                                                                    | NA        | 148.0733462 | 0.166479561 | 0.843068476 | 0.197468612 | 0.843460842 | 0.999371363 | Not Sig |
| ENSG00000137494 | ANKRD42   | ankyrin repeat domain 42                                              | 338699    | 374.2738678 | 0.16651446  | 0.429326587 | 0.387850333 | 0.698126795 | 0.999371363 | Not Sig |
| ENSG00000186141 | POLR3C    | RNA polymerase III subunit C                                          | 10623     | 544.3250119 | 0.166526353 | 0.427264466 | 0.389750064 | 0.696721373 | 0.999371363 | Not Sig |
| ENSG00000088367 | EPB41L1   | erythrocyte membrane protein band 4.1 like 1                          | 2036      | 1648.992705 | 0.166602525 | 0.546915902 | 0.304621834 | 0.760654189 | 0.999371363 | Not Sig |
| ENSG00000081870 | HSPB11    | heat shock protein family B (small) member 11                         | 51668     | 282.8705263 | 0.166690244 | 0.593144844 | 0.281027889 | 0.778689009 | 0.999371363 | Not Sig |
| ENSG00000011295 | TTC19     | tetratricopeptide repeat domain 19                                    | 54902     | 1136.202793 | 0.166708865 | 0.419791643 | 0.397122876 | 0.691276851 | 0.999371363 | Not Sig |
| ENSG00000259519 | NA        | NA                                                                    | NA        | 1.524048386 | 0.166945056 | 1.984288758 | 0.084133449 | 0.932950331 | NA          | NA      |
| ENSG00000227431 | CSE1L-AS1 | CSE1L antisense RNA 1                                                 | 102723483 | 1.769372617 | 0.167023666 | 1.934232157 | 0.086351406 | 0.931187075 | NA          | NA      |
| ENSG00000176884 | GRIN1     | glutamate ionotropic receptor NMDA type subunit 1                     | 2902      | 45.07268894 | 0.167371929 | 1.11904596  | 0.149566627 | 0.88110654  | 0.999371363 | Not Sig |
| ENSG00000126773 | PCNX4     | pecanex homolog 4                                                     | 64430     | 1314.501409 | 0.167413789 | 0.449469587 | 0.37246967  | 0.70954319  | 0.999371363 | Not Sig |
| ENSG00000232533 | NA        | NA                                                                    | NA        | 89.04035411 | 0.167650171 | 0.668311022 | 0.250856511 | 0.801925048 | 0.999371363 | Not Sig |
| ENSG00000173511 | VEGFB     | vascular endothelial growth factor B                                  | 7423      | 1192.79385  | 0.167680631 | 0.606952684 | 0.276266397 | 0.782343463 | 0.999371363 | Not Sig |
| ENSG00000130348 | QRSL1     | glutamyl-tRNA synthase (glutamine-hydrolyzing)-like 1                 | 55278     | 348.2236434 | 0.167923929 | 0.452624    | 0.37100094  | 0.710636831 | 0.999371363 | Not Sig |
| ENSG00000261145 | NA        | NA                                                                    | NA        | 1.105475207 | 0.167937258 | 2.244506378 | 0.074821466 | 0.940356762 | NA          | NA      |
| ENSG00000126003 | PLAGL2    | PLAG1 like zinc finger 2                                              | 5326      | 934.5370567 | 0.167942292 | 0.461560146 | 0.36385787  | 0.715964146 | 0.999371363 | Not Sig |
| ENSG00000156381 | ANKRD9    | ankyrin repeat domain 9                                               | 122416    | 496.9363819 | 0.168019769 | 0.630001754 | 0.266697304 | 0.78970223  | 0.999371363 | Not Sig |
| ENSG00000162702 | ZNF281    | zinc finger protein 281                                               | 23528     | 1264.938263 | 0.168038938 | 0.68257042  | 0.246185496 | 0.805538642 | 0.999371363 | Not Sig |
| ENSG00000105447 | GRWD1     | glutamate rich WD repeat containing 1                                 | 83743     | 602.863545  | 0.168116355 | 0.586411171 | 0.286686822 | 0.774352129 | 0.999371363 | Not Sig |
| ENSG00000117697 | NSL1      | NSL1, MIS12 kinetochore complex component                             | 25936     | 490.126963  | 0.168376358 | 0.509424863 | 0.330522459 | 0.741005226 | 0.999371363 | Not Sig |
| ENSG00000171865 | RNASEH1   | ribonuclease H1                                                       | 246243    | 368.6058771 | 0.168658275 | 0.445846562 | 0.378287711 | 0.705216873 | 0.999371363 | Not Sig |
| ENSG00000160460 | SPTBN4    | spectrin beta, non-erythrocytic 4                                     | 57731     | 60.92207187 | 0.168699923 | 0.819338114 | 0.20589781  | 0.836870737 | 0.999371363 | Not Sig |
| ENSG00000125447 | GGA3      | golgi associated, gamma adaptin ear containing, ADP binding protein 3 | 23163     | 1274.087498 | 0.168721387 | 0.518653686 | 0.325306445 | 0.744949154 | 0.999371363 | Not Sig |
| ENSG00000076003 | MCM6      | minichromosome maintenance complex component 6                        | 4175      | 682.6761458 | 0.168743631 | 0.651494502 | 0.259010062 | 0.795627477 | 0.999371363 | Not Sig |
| ENSG00000125912 | NCLN      | nicalin                                                               | 56926     | 1553.460886 | 0.169108446 | 0.603133083 | 0.280383302 | 0.779183446 | 0.999371363 | Not Sig |
| ENSG00000149182 | ARFGAP2   | ADP ribosylation factor GTPase activating protein 2                   | 84364     | 1769.459457 | 0.16920545  | 0.491176317 | 0.344490246 | 0.73047763  | 0.999371363 | Not Sig |
| ENSG00000088808 | PPP1R13B  | protein phosphatase 1 regulatory subunit 13B                          | 23368     | 1863.278088 | 0.169297541 | 0.477654609 | 0.354435062 | 0.723012862 | 0.999371363 | Not Sig |



|                 |              |                                                                                                                           |           |             |             |             |             |             |             |         |
|-----------------|--------------|---------------------------------------------------------------------------------------------------------------------------|-----------|-------------|-------------|-------------|-------------|-------------|-------------|---------|
| ENSG00000175634 | RPS6KB2      | ribosomal protein S6 kinase B2                                                                                            | 6199      | 691.1874087 | 0.169442555 | 0.530124289 | 0.319627979 | 0.749250362 | 0.999371363 | Not Sig |
| ENSG00000236810 | ELOA-AS1     | ELOA antisense RNA 1                                                                                                      | 100506963 | 53.37787806 | 0.169541431 | 0.526067531 | 0.322280736 | 0.747240026 | 0.999371363 | Not Sig |
| ENSG00000115977 | AAK1         | AP2 associated kinase 1                                                                                                   | 22848     | 1087.851552 | 0.169626043 | 0.441298585 | 0.384379304 | 0.700697338 | 0.999371363 | Not Sig |
| ENSG00000075618 | FSCN1        | fascin actin-bundling protein 1                                                                                           | 6624      | 1601.799781 | 0.169661055 | 0.654712295 | 0.259138336 | 0.795528507 | 0.999371363 | Not Sig |
| ENSG00000177225 | GATD1        | glutamine amidotransferase like class 1 domain containing 1                                                               | 347862    | 1066.525395 | 0.169674271 | 0.477130837 | 0.355613717 | 0.72212987  | 0.999371363 | Not Sig |
| ENSG00000161671 | EMC10        | ER membrane protein complex subunit 10                                                                                    | 284361    | 2400.353141 | 0.169747554 | 0.491312085 | 0.345498429 | 0.729719691 | 0.999371363 | Not Sig |
| ENSG00000100603 | SNW1         | SNW domain containing 1                                                                                                   | 22938     | 1324.949421 | 0.169842739 | 0.396582267 | 0.428266097 | 0.668457399 | 0.999371363 | Not Sig |
| ENSG00000133475 | GGT2         | gamma-glutamyltransferase 2                                                                                               | 728441    | 29.61310022 | 0.169929672 | 0.771677966 | 0.220208013 | 0.825709156 | 0.999371363 | Not Sig |
| ENSG00000133475 | LOC102724197 | inactive gamma-glutamyltranspeptidase 2-like                                                                              | 102724197 | 29.61310022 | 0.169929672 | 0.771677966 | 0.220208013 | 0.825709156 | 0.999371363 | Not Sig |
| ENSG00000269919 | NA           | NA                                                                                                                        | NA        | 20.36319015 | 0.169930475 | 1.105520416 | 0.153710843 | 0.877837735 | 0.999371363 | Not Sig |
| ENSG00000108700 | CCL8         | C-C motif chemokine ligand 8                                                                                              | 6355      | 57.40618293 | 0.170013885 | 0.899261181 | 0.189059518 | 0.850046169 | 0.999371363 | Not Sig |
| ENSG00000108433 | GOSR2        | golgi SNAP receptor complex member 2                                                                                      | 9570      | 748.6392496 | 0.170110058 | 0.405242638 | 0.419773344 | 0.674651039 | 0.999371363 | Not Sig |
| ENSG00000184162 | NR2C2AP      | nuclear receptor 2C2 associated protein                                                                                   | 126382    | 133.6911195 | 0.170156392 | 0.707004951 | 0.240672137 | 0.809809236 | 0.999371363 | Not Sig |
| ENSG00000118900 | UBN1         | ubiquitin 1                                                                                                               | 29855     | 1996.757145 | 0.170319286 | 0.461758374 | 0.368849373 | 0.712240001 | 0.999371363 | Not Sig |
| ENSG00000148935 | GAS2         | growth arrest specific 2                                                                                                  | 2620      | 80.50219721 | 0.170329789 | 1.049875801 | 0.162238037 | 0.871118408 | 0.999371363 | Not Sig |
| ENSG00000243829 | NA           | NA                                                                                                                        | NA        | 2.369895989 | 0.170355291 | 2.020054413 | 0.084332031 | 0.932792446 | NA          | NA      |
| ENSG00000238231 | NA           | NA                                                                                                                        | NA        | 17.33136868 | 0.170447206 | 0.804594034 | 0.211842493 | 0.832229916 | 0.999371363 | Not Sig |
| ENSG00000102900 | NUP93        | nucleoporin 93                                                                                                            | 9688      | 679.2506468 | 0.170520046 | 0.416981361 | 0.408939252 | 0.682584243 | 0.999371363 | Not Sig |
| ENSG00000167112 | TRUB2        | TruB pseudouridine synthase family member 2                                                                               | 26995     | 367.2377785 | 0.170566035 | 0.451565162 | 0.377721865 | 0.705637223 | 0.999371363 | Not Sig |
| ENSG00000076242 | MLH1         | mutL homolog 1                                                                                                            | 4292      | 833.1633422 | 0.170579103 | 0.448978972 | 0.379926709 | 0.70399982  | 0.999371363 | Not Sig |
| ENSG00000271886 | MIR98        | microRNA 98                                                                                                               | 407054    | 6.117205517 | 0.170615906 | 1.042185774 | 0.163709686 | 0.869959692 | NA          | NA      |
| ENSG00000272986 | NA           | NA                                                                                                                        | NA        | 5.124578169 | 0.17073979  | 1.107163833 | 0.154213663 | 0.87744127  | NA          | NA      |
| ENSG00000238058 | NA           | NA                                                                                                                        | NA        | 30.21829718 | 0.170759425 | 0.878241061 | 0.194433434 | 0.845836513 | 0.999371363 | Not Sig |
| ENSG00000164366 | CCDC127      | coiled-coil domain containing 127                                                                                         | 133957    | 425.1785967 | 0.170827369 | 0.480735441 | 0.355345901 | 0.722330472 | 0.999371363 | Not Sig |
| ENSG00000101935 | AMMECR1      | <small>Alport syndrome, mental retardation, mild face hypoplasia and cell-proliferative chromosomal region gene 1</small> | 9949      | 406.4638408 | 0.170901187 | 0.573811273 | 0.297835186 | 0.765828958 | 0.999371363 | Not Sig |
| ENSG00000205336 | ADGRG1       | adhesion G protein-coupled receptor G1                                                                                    | 9289      | 2692.872262 | 0.170987303 | 0.385150478 | 0.443949345 | 0.657079207 | 0.999371363 | Not Sig |
| ENSG00000265393 | NA           | NA                                                                                                                        | NA        | 25.31365316 | 0.171045897 | 0.77078022  | 0.221912671 | 0.824381867 | 0.999371363 | Not Sig |
| ENSG00000162526 | TSSK3        | testis specific serine kinase 3                                                                                           | 81629     | 31.81227763 | 0.171077908 | 0.632044735 | 0.270673734 | 0.78664198  | 0.999371363 | Not Sig |
| ENSG00000123411 | IKZF4        | IKAROS family zinc finger 4                                                                                               | 64375     | 373.224914  | 0.171128227 | 0.491513221 | 0.34816607  | 0.727715467 | 0.999371363 | Not Sig |
| ENSG00000198205 | ZXDA         | zinc finger, X-linked, duplicated A                                                                                       | 7789      | 246.6029289 | 0.171147412 | 0.530473183 | 0.322631601 | 0.746974258 | 0.999371363 | Not Sig |
| ENSG00000103490 | PYCARD       | PYD and CARD domain containing                                                                                            | 29108     | 423.4464143 | 0.171188262 | 0.734023823 | 0.233218946 | 0.815591395 | 0.999371363 | Not Sig |
| ENSG00000116138 | DNAJC16      | DnaJ heat shock protein family (Hsp40) member C16                                                                         | 23341     | 1112.781774 | 0.171308713 | 0.452778426 | 0.37834999  | 0.705170614 | 0.999371363 | Not Sig |
| ENSG00000205060 | SLC35B4      | solute carrier family 35 member B4                                                                                        | 84912     | 423.9663061 | 0.171555477 | 0.489576574 | 0.350416025 | 0.726026501 | 0.999371363 | Not Sig |
| ENSG00000110713 | NUP98        | nucleoporin 98                                                                                                            | 4928      | 3593.502312 | 0.17171572  | 0.451716256 | 0.380140671 | 0.703840997 | 0.999371363 | Not Sig |
| ENSG00000272240 | NA           | NA                                                                                                                        | NA        | 10.34618875 | 0.171866834 | 1.373990979 | 0.125085853 | 0.900455583 | 0.999371363 | Not Sig |

|                 |              |                                                                              |           |             |             |             |             |             |             |         |
|-----------------|--------------|------------------------------------------------------------------------------|-----------|-------------|-------------|-------------|-------------|-------------|-------------|---------|
| ENSG00000105438 | KDELR1       | KDEL endoplasmic reticulum protein retention receptor 1                      | 10945     | 2511.49126  | 0.171989999 | 0.477042123 | 0.360534198 | 0.718447687 | 0.999371363 | Not Sig |
| ENSG00000116704 | SLC35D1      | solute carrier family 35 member D1                                           | 23169     | 649.237983  | 0.172142297 | 0.598480029 | 0.287632483 | 0.773628077 | 0.999371363 | Not Sig |
| ENSG00000162105 | SHANK2       | SH3 and multiple ankyrin repeat domains 2                                    | 22941     | 1844.456968 | 0.172364008 | 0.428650136 | 0.402108838 | 0.687603929 | 0.999371363 | Not Sig |
| ENSG00000264058 | NA           | NA                                                                           | NA        | 1.843324075 | 0.172466748 | 1.916630844 | 0.089984333 | 0.928299665 | NA          | NA      |
| ENSG00000131096 | PYY          | peptide YY                                                                   | 5697      | 4.19732828  | 0.172493823 | 1.458878731 | 0.118237259 | 0.905879668 | NA          | NA      |
| ENSG00000100109 | TFIP11       | tuftelin interacting protein 11                                              | 24144     | 744.4264769 | 0.172677565 | 0.506527755 | 0.340904449 | 0.733175515 | 0.999371363 | Not Sig |
| ENSG00000242272 | NA           | NA                                                                           | NA        | 4.323804212 | 0.172804191 | 1.246792633 | 0.138598983 | 0.889767047 | NA          | NA      |
| ENSG00000165572 | KBTBD6       | kelch repeat and BTB domain containing 6                                     | 89890     | 212.1099838 | 0.17318853  | 0.482660489 | 0.358820607 | 0.719729296 | 0.999371363 | Not Sig |
| ENSG00000203950 | RTL8A        | retrotransposon Gag like 8A                                                  | 26071     | 421.3325701 | 0.173218967 | 0.462790077 | 0.374292742 | 0.708186532 | 0.999371363 | Not Sig |
| ENSG00000136161 | RCBTB2       | RCC1 and BTB domain containing protein 2                                     | 1102      | 346.8612957 | 0.173250153 | 0.610358577 | 0.283849789 | 0.776525497 | 0.999371363 | Not Sig |
| ENSG00000214199 | NA           | NA                                                                           | NA        | 11.85431925 | 0.173261367 | 0.783799571 | 0.221053153 | 0.825051046 | 0.999371363 | Not Sig |
| ENSG00000159658 | EFCAB14      | EF-hand calcium binding domain 14                                            | 9813      | 4724.854328 | 0.173429947 | 0.476347308 | 0.364082979 | 0.715796046 | 0.999371363 | Not Sig |
| ENSG00000197226 | TBC1D9B      | TBC1 domain family member 9B                                                 | 23061     | 3860.666263 | 0.173591844 | 0.55601961  | 0.312204536 | 0.754885085 | 0.999371363 | Not Sig |
| ENSG00000095002 | MSH2         | mutS homolog 2                                                               | 4436      | 673.5041881 | 0.173655514 | 0.554749565 | 0.31303407  | 0.754254778 | 0.999371363 | Not Sig |
| ENSG00000167613 | LAIR1        | leukocyte associated immunoglobulin like receptor 1                          | 3903      | 868.2810162 | 0.173754952 | 0.778945581 | 0.223064301 | 0.823485462 | 0.999371363 | Not Sig |
| ENSG00000100239 | PPP6R2       | protein phosphatase 6 regulatory subunit 2                                   | 9701      | 1939.979583 | 0.173783733 | 0.586669614 | 0.296220784 | 0.767061477 | 0.999371363 | Not Sig |
| ENSG00000119397 | CNTRL        | centriolin                                                                   | 11064     | 1367.865732 | 0.173928129 | 0.408128963 | 0.42615973  | 0.669991459 | 0.999371363 | Not Sig |
| ENSG00000257225 | NA           | NA                                                                           | NA        | 5.205996746 | 0.174154324 | 1.468936923 | 0.118558069 | 0.905625487 | NA          | NA      |
| ENSG00000202459 | NA           | NA                                                                           | NA        | 6.124036384 | 0.174174021 | 1.225089784 | 0.142172454 | 0.886943789 | NA          | NA      |
| ENSG00000165458 | INPPL1       | inositol polyphosphate phosphatase like 1                                    | 3636      | 3276.006347 | 0.174212567 | 0.43325364  | 0.402102951 | 0.687608261 | 0.999371363 | Not Sig |
| ENSG00000225655 | NA           | NA                                                                           | NA        | 3.900227192 | 0.174277238 | 1.839436301 | 0.094744916 | 0.924517441 | NA          | NA      |
| ENSG00000171067 | C11orf24     | chromosome 11 open reading frame 24                                          | 53838     | 591.5565854 | 0.174607173 | 0.424617671 | 0.41121033  | 0.680918314 | 0.999371363 | Not Sig |
| ENSG00000163626 | COX18        | COX18, cytochrome c oxidase assembly factor                                  | 285521    | 394.3195037 | 0.174615605 | 0.465148374 | 0.375397647 | 0.707364755 | 0.999371363 | Not Sig |
| ENSG00000237883 | DGUOK-AS1    | DGUOK antisense RNA 1                                                        | 100874048 | 8.756997092 | 0.174621622 | 1.0317085   | 0.169254806 | 0.865596222 | 0.999371363 | Not Sig |
| ENSG00000222112 | NA           | NA                                                                           | NA        | 53.12047614 | 0.174805889 | 0.704664463 | 0.248069682 | 0.804080492 | 0.999371363 | Not Sig |
| ENSG00000108424 | KPNB1        | karyopherin subunit beta 1                                                   | 3837      | 5259.354578 | 0.174944379 | 0.387424559 | 0.451557277 | 0.651587954 | 0.999371363 | Not Sig |
| ENSG00000111843 | TMEM14C      | transmembrane protein 14C                                                    | 51522     | 976.7995164 | 0.175160613 | 0.50301845  | 0.348219062 | 0.727675673 | 0.999371363 | Not Sig |
| ENSG00000092068 | SLC7A8       | solute carrier family 7 member 8                                             | 23428     | 1275.673167 | 0.17517846  | 0.531122489 | 0.329826854 | 0.741530795 | 0.999371363 | Not Sig |
| ENSG00000182952 | HMGN4        | high mobility group nucleosomal binding domain 4                             | 10473     | 701.1559059 | 0.17521405  | 0.471959281 | 0.371248235 | 0.71045265  | 0.999371363 | Not Sig |
| ENSG00000241258 | CRCP         | CGRP receptor component                                                      | 27297     | 727.884206  | 0.175286004 | 0.412947837 | 0.424474929 | 0.671219486 | 0.999371363 | Not Sig |
| ENSG00000164307 | ERAP1        | endoplasmic reticulum aminopeptidase 1                                       | 51752     | 2651.431102 | 0.175295539 | 0.64458947  | 0.27194912  | 0.785661142 | 0.999371363 | Not Sig |
| ENSG00000246089 | LOC100287015 | uncharacterized LOC100287015                                                 | 100287015 | 51.24178886 | 0.175426689 | 0.716136534 | 0.244962631 | 0.806485366 | 0.999371363 | Not Sig |
| ENSG00000134308 | YWHAQ        | tyrosine 3-monooxygenase/tryptophan 5-monooxygenase activation protein theta | 10971     | 3284.004024 | 0.175458109 | 0.423693034 | 0.414116104 | 0.678789079 | 0.999371363 | Not Sig |
| ENSG00000131100 | ATP6V1E1     | ATPase H <sup>+</sup> transporting V1 subunit E1                             | 529       | 1344.933387 | 0.175462077 | 0.452259551 | 0.387967655 | 0.69803997  | 0.999371363 | Not Sig |
| ENSG00000184470 | TXNRD2       | thioredoxin reductase 2                                                      | 10587     | 756.7563904 | 0.175813386 | 0.470567197 | 0.37362015  | 0.708686941 | 0.999371363 | Not Sig |

|                 |              |                                                           |           |             |             |             |             |             |             |         |
|-----------------|--------------|-----------------------------------------------------------|-----------|-------------|-------------|-------------|-------------|-------------|-------------|---------|
| ENSG00000159189 | C1QC         | complement C1q C chain                                    | 714       | 3121.491031 | 0.175940111 | 0.940505557 | 0.187069719 | 0.851605969 | 0.999371363 | Not Sig |
| ENSG00000127152 | BCL11B       | B-cell CLL/lymphoma 11B                                   | 64919     | 466.6283823 | 0.175947911 | 0.667392116 | 0.263634986 | 0.792061197 | 0.999371363 | Not Sig |
| ENSG00000110367 | DDX6         | DEAD-box helicase 6                                       | 1656      | 4702.842437 | 0.176019474 | 0.389985755 | 0.45134847  | 0.651738416 | 0.999371363 | Not Sig |
| ENSG00000197102 | DYNC1H1      | dynein cytoplasmic 1 heavy chain 1                        | 1778      | 19196.01481 | 0.176058073 | 0.438133395 | 0.40183669  | 0.687804219 | 0.999371363 | Not Sig |
| ENSG00000135439 | AGAP2        | ArFGAP with GTPase domain, ankyrin repeat and PH domain 2 | 116986    | 285.5997439 | 0.176082631 | 0.786476724 | 0.223887911 | 0.822844523 | 0.999371363 | Not Sig |
| ENSG00000185404 | SP140L       | SP140 nuclear body protein like                           | 93349     | 607.3397642 | 0.176262064 | 0.44784004  | 0.393582637 | 0.693889203 | 0.999371363 | Not Sig |
| ENSG00000125304 | TM9SF2       | transmembrane 9 superfamily member 2                      | 9375      | 4584.089698 | 0.176337043 | 0.503744488 | 0.350052279 | 0.726299464 | 0.999371363 | Not Sig |
| ENSG00000174370 | C11orf45     | chromosome 11 open reading frame 45                       | 219833    | 55.56079907 | 0.176398163 | 0.877374436 | 0.201052317 | 0.840657666 | 0.999371363 | Not Sig |
| ENSG00000167720 | SRR          | serine racemase                                           | 63826     | 151.7048769 | 0.176468688 | 0.529202574 | 0.333461508 | 0.73878594  | 0.999371363 | Not Sig |
| ENSG00000182831 | C16orf72     | chromosome 16 open reading frame 72                       | 29035     | 1700.791734 | 0.17647295  | 0.390458446 | 0.45196346  | 0.651295306 | 0.999371363 | Not Sig |
| ENSG00000113889 | KNG1         | kininogen 1                                               | 3827      | 1.514594137 | 0.176606894 | 2.023515067 | 0.087277281 | 0.930451112 | NA          | NA      |
| ENSG00000132274 | TRIM22       | tripartite motif containing 22                            | 10346     | 2434.13738  | 0.17669732  | 0.773761479 | 0.228361484 | 0.81936523  | 0.999371363 | Not Sig |
| ENSG00000171503 | ETFDH        | electron transfer flavoprotein dehydrogenase              | 2110      | 487.8534791 | 0.176876576 | 0.463130306 | 0.381915357 | 0.702524149 | 0.999371363 | Not Sig |
| ENSG00000132664 | POLR3F       | RNA polymerase III subunit F                              | 10621     | 165.6125636 | 0.176898786 | 0.585459831 | 0.302153584 | 0.762534986 | 0.999371363 | Not Sig |
| ENSG00000088833 | NSFL1C       | NSFL1 cofactor                                            | 55968     | 1325.072635 | 0.176960648 | 0.461442704 | 0.383494302 | 0.701353295 | 0.999371363 | Not Sig |
| ENSG00000167642 | SPINT2       | serine peptidase inhibitor, Kunitz type 2                 | 10653     | 4299.612541 | 0.177035698 | 0.476054451 | 0.371881195 | 0.709981307 | 0.999371363 | Not Sig |
| ENSG00000205927 | OLIG2        | oligodendrocyte transcription factor 2                    | 10215     | 2.799755826 | 0.177043294 | 1.528499562 | 0.115828161 | 0.907788731 | NA          | NA      |
| ENSG00000106638 | TBL2         | transducin beta like 2                                    | 26608     | 707.2048255 | 0.177048179 | 0.521850286 | 0.339270063 | 0.734406293 | 0.999371363 | Not Sig |
| ENSG00000092203 | TOX4         | TOX high mobility group box family member 4               | 9878      | 1699.753731 | 0.177070387 | 0.376603791 | 0.470176858 | 0.638228666 | 0.999371363 | Not Sig |
| ENSG00000197620 | CXorf40A     | chromosome X open reading frame 40A                       | 91966     | 192.7029383 | 0.177236108 | 0.556887987 | 0.318261684 | 0.750286446 | 0.999371363 | Not Sig |
| ENSG00000186501 | TMEM222      | transmembrane protein 222                                 | 84065     | 591.3452387 | 0.177266106 | 0.524093184 | 0.338233947 | 0.735186896 | 0.999371363 | Not Sig |
| ENSG00000078304 | PPP2R5C      | protein phosphatase 2 regulatory subunit B' gamma         | 5527      | 3074.39486  | 0.177296749 | 0.425105162 | 0.417065622 | 0.676630409 | 0.999371363 | Not Sig |
| ENSG00000257365 | FNTB         | farnesyltransferase, CAAX box, beta                       | 2342      | 199.8621225 | 0.177442035 | 0.481381965 | 0.368609645 | 0.712418706 | 0.999371363 | Not Sig |
| ENSG00000077463 | SIRT6        | sirtuin 6                                                 | 51548     | 329.6221393 | 0.177505342 | 0.63191424  | 0.280901    | 0.778786333 | 0.999371363 | Not Sig |
| ENSG00000231105 | LOC100506801 | uncharacterized LOC100506801                              | 100506801 | 9.387001942 | 0.177630197 | 0.867968334 | 0.20465055  | 0.837845158 | 0.999371363 | Not Sig |
| ENSG00000265429 | MIR4782      | microRNA 4782                                             | 100616208 | 2.581433232 | 0.177751009 | 2.092989235 | 0.084926863 | 0.932319536 | NA          | NA      |
| ENSG00000050165 | DKK3         | dickkopf WNT signaling pathway inhibitor 3                | 27122     | 2491.574646 | 0.177769462 | 0.762247171 | 0.233217609 | 0.815592433 | 0.999371363 | Not Sig |
| ENSG00000169884 | WNT10B       | Wnt family member 10B                                     | 7480      | 17.86006037 | 0.177964514 | 0.7475962   | 0.238048981 | 0.811843104 | 0.999371363 | Not Sig |
| ENSG00000233937 | NA           | NA                                                        | NA        | 113.4799751 | 0.178026076 | 0.735483351 | 0.242053169 | 0.808738965 | 0.999371363 | Not Sig |
| ENSG00000140854 | KATNB1       | katanin regulatory subunit B1                             | 10300     | 427.9426143 | 0.178108315 | 0.636271017 | 0.279925237 | 0.779534864 | 0.999371363 | Not Sig |
| ENSG00000146409 | SLC18B1      | solute carrier family 18 member B1                        | 116843    | 431.5477202 | 0.178288358 | 0.602531162 | 0.295898983 | 0.767307228 | 0.999371363 | Not Sig |
| ENSG00000184719 | RNLS         | renalase, FAD dependent amine oxidase                     | 55328     | 86.25373858 | 0.178346396 | 0.677150312 | 0.263377853 | 0.792259359 | 0.999371363 | Not Sig |
| ENSG00000134597 | RBMX2        | RNA binding motif protein, X-linked 2                     | 51634     | 306.7618782 | 0.178426623 | 0.479943112 | 0.371766191 | 0.710066938 | 0.999371363 | Not Sig |
| ENSG00000224358 | NA           | NA                                                        | NA        | 18.90343649 | 0.178454696 | 0.806096616 | 0.221381274 | 0.824795572 | 0.999371363 | Not Sig |
| ENSG00000180383 | DEFB124      | defensin beta 124                                         | 245937    | 2.705063462 | 0.178543545 | 1.945897345 | 0.091753835 | 0.926893623 | NA          | NA      |

|                 |              |                                                                      |           |             |             |             |             |             |             |         |
|-----------------|--------------|----------------------------------------------------------------------|-----------|-------------|-------------|-------------|-------------|-------------|-------------|---------|
| ENSG00000232953 | NA           | NA                                                                   | NA        | 2.642398663 | 0.178550802 | 1.452049254 | 0.122964701 | 0.902135051 | NA          | NA      |
| ENSG00000250479 | CHCHD10      | coiled-coil-helix-coiled-coil-helix domain containing 10             | 400916    | 802.2187673 | 0.178578471 | 0.571450825 | 0.312500155 | 0.754660445 | 0.999371363 | Not Sig |
| ENSG00000126953 | TIMM8A       | translocase of inner mitochondrial membrane 8A                       | 1678      | 115.0142475 | 0.178646974 | 0.472102682 | 0.378407032 | 0.705128245 | 0.999371363 | Not Sig |
| ENSG00000184254 | ALDH1A3      | aldehyde dehydrogenase 1 family member A3                            | 220       | 682.9465794 | 0.178747805 | 0.555433713 | 0.32181663  | 0.747591615 | 0.999371363 | Not Sig |
| ENSG00000232894 | NA           | NA                                                                   | NA        | 10.1954924  | 0.178811675 | 1.414089593 | 0.126450032 | 0.8993757   | 0.999371363 | Not Sig |
| ENSG00000100744 | GSKIP        | GSK3B interacting protein                                            | 51527     | 341.7926062 | 0.178952818 | 0.556945868 | 0.321310971 | 0.747974743 | 0.999371363 | Not Sig |
| ENSG00000100731 | PCNX1        | pecanex homolog 1                                                    | 22990     | 3039.646308 | 0.17899989  | 0.429890411 | 0.416384934 | 0.677128351 | 0.999371363 | Not Sig |
| ENSG00000166450 | PRTG         | protogenin                                                           | 283659    | 334.9856834 | 0.17907882  | 0.71241736  | 0.25136785  | 0.801529722 | 0.999371363 | Not Sig |
| ENSG00000239900 | ADSL         | adenylosuccinate lyase                                               | 158       | 639.1399975 | 0.17931826  | 0.411480286 | 0.435788217 | 0.662990393 | 0.999371363 | Not Sig |
| ENSG00000222942 | NA           | NA                                                                   | NA        | 2.391921256 | 0.17942229  | 1.664234842 | 0.107811047 | 0.91414558  | NA          | NA      |
| ENSG00000264176 | NA           | NA                                                                   | NA        | 6.757887974 | 0.179460464 | 1.170678016 | 0.153296177 | 0.878164715 | 0.999371363 | Not Sig |
| ENSG00000095970 | TREM2        | triggering receptor expressed on myeloid cells 2                     | 54209     | 386.9707283 | 0.179518867 | 0.992868858 | 0.180808236 | 0.856518098 | 0.999371363 | Not Sig |
| ENSG00000089048 | ESF1         | ESF1 nucleolar pre-rRNA processing protein homolog                   | 51575     | 541.6159451 | 0.179547725 | 0.441868291 | 0.406337654 | 0.684494522 | 0.999371363 | Not Sig |
| ENSG00000180228 | PRKRA        | protein activator of interferon induced protein kinase EIF2AK2       | 8575      | 592.8892319 | 0.179823018 | 0.554134362 | 0.324511581 | 0.745550756 | 0.999371363 | Not Sig |
| ENSG00000122674 | CCZ1         | CCZ1 homolog, vacuolar protein trafficking and biogenesis associated | 51622     | 418.0959031 | 0.180131758 | 0.491822242 | 0.366253785 | 0.714175711 | 0.999371363 | Not Sig |
| ENSG00000100601 | ALKBH1       | alkB homolog 1, histone H2A dioxygenase                              | 8846      | 213.2417307 | 0.180180574 | 0.476575505 | 0.37807351  | 0.705375986 | 0.999371363 | Not Sig |
| ENSG00000139223 | ANP32D       | acidic nuclear phosphoprotein 32 family member D                     | 23519     | 1.447080215 | 0.180533315 | 1.814317978 | 0.099504782 | 0.920737491 | NA          | NA      |
| ENSG00000183733 | FIGLA        | folliculogenesis specific bHLH transcription factor                  | 344018    | 1.447080215 | 0.180533315 | 1.814317978 | 0.099504782 | 0.920737491 | NA          | NA      |
| ENSG00000188011 | RTP5         | receptor transporter protein 5 (putative)                            | 285093    | 3.647901083 | 0.180905995 | 1.32697627  | 0.136329488 | 0.891560814 | NA          | NA      |
| ENSG00000207445 | SNORD15B     | small nucleolar RNA, C/D box 15B                                     | 114599    | 16.81522486 | 0.1809083   | 0.695082349 | 0.260268873 | 0.794656381 | 0.999371363 | Not Sig |
| ENSG00000134779 | TPGS2        | tubulin polyglutamylase complex subunit 2                            | 25941     | 1151.090535 | 0.18104305  | 0.423286684 | 0.427707879 | 0.668863813 | 0.999371363 | Not Sig |
| ENSG00000162755 | KLHDC9       | kelch domain containing 9                                            | 126823    | 79.37409398 | 0.181199698 | 0.484957952 | 0.373640018 | 0.708672157 | 0.999371363 | Not Sig |
| ENSG00000265714 | NA           | NA                                                                   | NA        | 10.45185929 | 0.181200619 | 1.036643879 | 0.174795437 | 0.861240374 | 0.999371363 | Not Sig |
| ENSG00000158615 | PPP1R15B     | protein phosphatase 1 regulatory subunit 15B                         | 84919     | 2975.217652 | 0.181223225 | 0.407971664 | 0.444205422 | 0.656894073 | 0.999371363 | Not Sig |
| ENSG00000152778 | IFIT5        | interferon induced protein with tetratricopeptide repeats 5          | 24138     | 641.5298647 | 0.181340665 | 0.731646725 | 0.247852766 | 0.804248327 | 0.999371363 | Not Sig |
| ENSG00000254704 | NA           | NA                                                                   | NA        | 1.111912742 | 0.181425511 | 2.205839791 | 0.082247819 | 0.934449648 | NA          | NA      |
| ENSG00000256940 | LOC105369340 | uncharacterized LOC105369340                                         | 105369340 | 16.18083669 | 0.181500012 | 1.329324498 | 0.13653552  | 0.891397946 | 0.999371363 | Not Sig |
| ENSG00000088881 | EBF4         | early B-cell factor 4                                                | 57593     | 498.798682  | 0.181594279 | 0.791312134 | 0.229485018 | 0.818491964 | 0.999371363 | Not Sig |
| ENSG00000178429 | NA           | NA                                                                   | NA        | 7.237537539 | 0.181653282 | 1.00085412  | 0.181498261 | 0.855976498 | 0.999371363 | Not Sig |
| ENSG00000135503 | ACVR1B       | activin A receptor type 1B                                           | 91        | 1374.22152  | 0.181875075 | 0.49081374  | 0.370558239 | 0.710966591 | 0.999371363 | Not Sig |
| ENSG00000243811 | APOBEC3D     | apolipoprotein B mRNA editing enzyme catalytic subunit 3D            | 140564    | 158.241197  | 0.181962506 | 0.688856551 | 0.264151521 | 0.791663165 | 0.999371363 | Not Sig |
| ENSG00000182578 | CSF1R        | colony stimulating factor 1 receptor                                 | 1436      | 2115.240335 | 0.181982751 | 0.791895371 | 0.22980656  | 0.818242087 | 0.999371363 | Not Sig |
| ENSG00000171962 | DRC3         | dynein regulatory complex subunit 3                                  | 83450     | 230.5604326 | 0.182204646 | 0.721279201 | 0.252613198 | 0.80056713  | 0.999371363 | Not Sig |
| ENSG00000044459 | CNTLN        | centlein                                                             | 54875     | 331.1012253 | 0.182238242 | 0.584553261 | 0.311756437 | 0.755225633 | 0.999371363 | Not Sig |
| ENSG00000075035 | WSCD2        | WSC domain containing 2                                              | 9671      | 23.96135243 | 0.182370778 | 0.788570671 | 0.231267513 | 0.817106983 | 0.999371363 | Not Sig |

|                 |          |                                                                  |        |             |             |             |             |             |             |         |
|-----------------|----------|------------------------------------------------------------------|--------|-------------|-------------|-------------|-------------|-------------|-------------|---------|
| ENSG00000159885 | ZNF222   | zinc finger protein 222                                          | 7673   | 51.79384178 | 0.18257723  | 0.544866322 | 0.335086282 | 0.73756     | 0.999371363 | Not Sig |
| ENSG00000172534 | HCFC1    | host cell factor C1                                              | 3054   | 4342.756291 | 0.182596071 | 0.474459494 | 0.384850705 | 0.70034803  | 0.999371363 | Not Sig |
| ENSG00000198363 | ASPH     | aspartate beta-hydroxylase                                       | 444    | 5611.391043 | 0.18263839  | 0.598658409 | 0.305079471 | 0.760305626 | 0.999371363 | Not Sig |
| ENSG00000204394 | VARS     | valyl-tRNA synthetase                                            | 7407   | 1791.923631 | 0.18276379  | 0.481292118 | 0.379735679 | 0.704141632 | 0.999371363 | Not Sig |
| ENSG00000260273 | NA       | NA                                                               | NA     | 3.135183589 | 0.18278069  | 1.447149808 | 0.126303917 | 0.899491355 | NA          | NA      |
| ENSG00000267681 | NA       | NA                                                               | NA     | 11.22504559 | 0.182999016 | 0.945026854 | 0.19364425  | 0.846454447 | 0.999371363 | Not Sig |
| ENSG00000111684 | LPCAT3   | lysophosphatidylcholine acyltransferase 3                        | 10162  | 836.0867004 | 0.183027373 | 0.487685149 | 0.37529823  | 0.707438682 | 0.999371363 | Not Sig |
| ENSG00000134986 | NREP     | neuronal regeneration related protein                            | 9315   | 864.5347092 | 0.183063795 | 0.548492748 | 0.333757914 | 0.738562244 | 0.999371363 | Not Sig |
| ENSG00000101638 | ST8SIA5  | ST8 alpha-N-acetyl-neuraminide alpha-2,8-sialyltransferase 5     | 29906  | 4.521187419 | 0.183193762 | 1.282850995 | 0.142802058 | 0.886446512 | NA          | NA      |
| ENSG00000103502 | CDIPT    | CDP-diacylglycerol--inositol 3-phosphatidyltransferase           | 10423  | 1201.50876  | 0.183266536 | 0.662467458 | 0.276642322 | 0.782054764 | 0.999371363 | Not Sig |
| ENSG00000178498 | DTX3     | deltex E3 ubiquitin ligase 3                                     | 196403 | 529.9732953 | 0.183387091 | 0.643898403 | 0.284807495 | 0.77579163  | 0.999371363 | Not Sig |
| ENSG00000198342 | ZNF442   | zinc finger protein 442                                          | 79973  | 60.2131592  | 0.183401058 | 0.588730945 | 0.31151931  | 0.755405865 | 0.999371363 | Not Sig |
| ENSG00000134748 | PRPF38A  | pre-mRNA processing factor 38A                                   | 84950  | 879.6553948 | 0.183476694 | 0.427146435 | 0.429540501 | 0.667529926 | 0.999371363 | Not Sig |
| ENSG00000168447 | SCNN1B   | sodium channel epithelial 1 beta subunit                         | 6338   | 671.3582423 | 0.183482182 | 0.882851631 | 0.207829012 | 0.835362479 | 0.999371363 | Not Sig |
| ENSG00000168802 | CHTF8    | chromosome transmission fidelity factor 8                        | 54921  | 691.8242739 | 0.18351531  | 0.442051038 | 0.415145072 | 0.678035706 | 0.999371363 | Not Sig |
| ENSG00000152268 | NA       | NA                                                               | NA     | 1390.5125   | 0.183639309 | 0.62180554  | 0.295332379 | 0.767739984 | 0.999371363 | Not Sig |
| ENSG00000128881 | TTBK2    | tau tubulin kinase 2                                             | 146057 | 1025.7394   | 0.184216049 | 0.446398662 | 0.412671598 | 0.679847237 | 0.999371363 | Not Sig |
| ENSG00000251986 | NA       | NA                                                               | NA     | 1.240088042 | 0.184378495 | 2.44519542  | 0.075404401 | 0.939892958 | NA          | NA      |
| ENSG00000144659 | SLC25A38 | solute carrier family 25 member 38                               | 54977  | 542.0511483 | 0.184404487 | 0.482470123 | 0.382209131 | 0.702306249 | 0.999371363 | Not Sig |
| ENSG00000102452 | NALCN    | sodium leak channel, non-selective                               | 259232 | 244.3289298 | 0.184426087 | 0.526620542 | 0.350206785 | 0.726183515 | 0.999371363 | Not Sig |
| ENSG00000117543 | DPH5     | diphthamide biosynthesis 5                                       | 51611  | 240.8733961 | 0.184434943 | 0.553888269 | 0.332982216 | 0.739147708 | 0.999371363 | Not Sig |
| ENSG00000165775 | FUNDC2   | FUN14 domain containing 2                                        | 65991  | 753.4607881 | 0.184485085 | 0.500888901 | 0.368315378 | 0.712638087 | 0.999371363 | Not Sig |
| ENSG00000185024 | BRF1     | BRF1, RNA polymerase III transcription initiation factor subunit | 2972   | 1246.592838 | 0.184580111 | 0.570291268 | 0.323659367 | 0.746195937 | 0.999371363 | Not Sig |
| ENSG00000197647 | ZNF433   | zinc finger protein 433                                          | 163059 | 92.97133448 | 0.184583735 | 0.55548444  | 0.332293259 | 0.739667829 | 0.999371363 | Not Sig |
| ENSG00000170315 | UBB      | ubiquitin B                                                      | 7314   | 6925.774358 | 0.184614031 | 0.535201732 | 0.344942888 | 0.730137307 | 0.999371363 | Not Sig |
| ENSG00000217643 | NA       | NA                                                               | NA     | 2.794602651 | 0.184811064 | 1.64939513  | 0.112047781 | 0.910785521 | NA          | NA      |
| ENSG00000013364 | MVP      | major vault protein                                              | 9961   | 6336.09444  | 0.184833063 | 0.509454162 | 0.362806071 | 0.716749756 | 0.999371363 | Not Sig |
| ENSG00000259138 | NA       | NA                                                               | NA     | 7.420644845 | 0.18490184  | 1.153471195 | 0.160300354 | 0.87264448  | 0.999371363 | Not Sig |
| ENSG00000167695 | FAM57A   | family with sequence similarity 57 member A                      | 79850  | 280.7696181 | 0.185005251 | 0.435866322 | 0.424454109 | 0.671234666 | 0.999371363 | Not Sig |
| ENSG00000119729 | RHOQ     | ras homolog family member Q                                      | 23433  | 1364.176127 | 0.185157758 | 0.55691482  | 0.332470517 | 0.739533999 | 0.999371363 | Not Sig |
| ENSG00000109736 | MFSD10   | major facilitator superfamily domain containing 10               | 10227  | 1292.199594 | 0.185314286 | 0.565687714 | 0.327591144 | 0.743220818 | 0.999371363 | Not Sig |
| ENSG00000114473 | IQCG     | IQ motif containing G                                            | 84223  | 347.473792  | 0.185328496 | 0.403972067 | 0.458765621 | 0.646402485 | 0.999371363 | Not Sig |
| ENSG00000243978 | RTL9     | retrotransposon Gag like 9                                       | 57529  | 5.270344621 | 0.185354521 | 1.43036577  | 0.129585401 | 0.896894454 | NA          | NA      |
| ENSG00000132906 | CASP9    | caspase 9                                                        | 842    | 424.8429857 | 0.185410504 | 0.42634756  | 0.43488112  | 0.663648719 | 0.999371363 | Not Sig |
| ENSG00000172465 | TCEAL1   | transcription elongation factor A like 1                         | 9338   | 201.8900919 | 0.185454377 | 0.593617008 | 0.312414191 | 0.754725767 | 0.999371363 | Not Sig |

|                 |          |                                                            |        |             |             |             |             |             |             |         |
|-----------------|----------|------------------------------------------------------------|--------|-------------|-------------|-------------|-------------|-------------|-------------|---------|
| ENSG00000055332 | EIF2AK2  | eukaryotic translation initiation factor 2 alpha kinase 2  | 5610   | 2959.351004 | 0.185468521 | 0.464093298 | 0.399636284 | 0.689424428 | 0.999371363 | Not Sig |
| ENSG00000113319 | RASGRF2  | Ras protein specific guanine nucleotide releasing factor 2 | 5924   | 397.8736235 | 0.185702232 | 0.536377656 | 0.346215451 | 0.729180804 | 0.999371363 | Not Sig |
| ENSG00000141030 | COP3     | COP9 signalosome subunit 3                                 | 8533   | 579.9005233 | 0.185748479 | 0.420745664 | 0.441474494 | 0.658869523 | 0.999371363 | Not Sig |
| ENSG00000201659 | NA       | NA                                                         | NA     | 2.201081157 | 0.185752974 | 1.774164838 | 0.104698825 | 0.916614794 | NA          | NA      |
| ENSG00000131871 | SELENOS  | selenoprotein S                                            | 55829  | 1008.044256 | 0.185804099 | 0.444192634 | 0.418296219 | 0.675730554 | 0.999371363 | Not Sig |
| ENSG00000146425 | DYNLT1   | dynein light chain Tctex-type 1                            | 6993   | 947.3229929 | 0.185895065 | 0.460145978 | 0.403991503 | 0.686218967 | 0.999371363 | Not Sig |
| ENSG00000029725 | RABEP1   | rabaptin, RAB GTPase binding effector protein 1            | 9135   | 1732.423142 | 0.186125269 | 0.442012048 | 0.421086416 | 0.67369198  | 0.999371363 | Not Sig |
| ENSG00000217314 | NA       | NA                                                         | NA     | 1.521031673 | 0.186150143 | 2.023109851 | 0.092011881 | 0.9266886   | NA          | NA      |
| ENSG00000221066 | SNORD111 | small nucleolar RNA, C/D box 111                           | 692214 | 7.866092414 | 0.186539402 | 1.184025947 | 0.157546718 | 0.874813992 | 0.999371363 | Not Sig |
| ENSG00000087111 | PIGS     | phosphatidylinositol glycan anchor biosynthesis class S    | 94005  | 983.0962373 | 0.186867415 | 0.45442406  | 0.411218135 | 0.680912592 | 0.999371363 | Not Sig |
| ENSG00000065057 | NTHL1    | nth like DNA glycosylase 1                                 | 4913   | 310.1448409 | 0.187019174 | 0.647115875 | 0.289004152 | 0.7725782   | 0.999371363 | Not Sig |
| ENSG00000121671 | CRY2     | cryptochrome circadian regulator 2                         | 1408   | 1838.001392 | 0.187061559 | 0.620694444 | 0.30137463  | 0.763128838 | 0.999371363 | Not Sig |
| ENSG00000091317 | CMTM6    | CKLF like MARVEL transmembrane domain containing 6         | 54918  | 2289.602614 | 0.187342163 | 0.473963741 | 0.395266867 | 0.692645949 | 0.999371363 | Not Sig |
| ENSG00000100784 | RPS6KA5  | ribosomal protein S6 kinase A5                             | 9252   | 351.630455  | 0.187403496 | 0.475416713 | 0.394187859 | 0.693442348 | 0.999371363 | Not Sig |
| ENSG00000240429 | NA       | NA                                                         | NA     | 104.5473202 | 0.187600045 | 0.645817428 | 0.290484643 | 0.771445498 | 0.999371363 | Not Sig |
| ENSG00000065548 | ZC3H15   | zinc finger CCCH-type containing 15                        | 55854  | 1072.323845 | 0.187644577 | 0.4193141   | 0.447503617 | 0.654511477 | 0.999371363 | Not Sig |
| ENSG00000143333 | RGS16    | regulator of G protein signaling 16                        | 6004   | 750.2545817 | 0.188109301 | 0.546503523 | 0.344205101 | 0.730692046 | 0.999371363 | Not Sig |
| ENSG00000127884 | ECHS1    | enoyl-CoA hydratase, short chain 1                         | 1892   | 1174.255927 | 0.188136664 | 0.448359325 | 0.419611356 | 0.674769391 | 0.999371363 | Not Sig |
| ENSG00000217930 | PAM16    | presequence translocase associated motor 16                | 51025  | 145.4128511 | 0.18823768  | 0.51220556  | 0.367504171 | 0.713242981 | 0.999371363 | Not Sig |
| ENSG00000152527 | PLEKHH2  | pleckstrin homology, MyTH4 and FERM domain containing H2   | 130271 | 1486.122496 | 0.188284678 | 0.720432553 | 0.261349487 | 0.793823007 | 0.999371363 | Not Sig |
| ENSG00000220848 | NA       | NA                                                         | NA     | 34.55278022 | 0.188424177 | 0.589254215 | 0.319767212 | 0.749144805 | 0.999371363 | Not Sig |
| ENSG00000115526 | CHST10   | carbohydrate sulfotransferase 10                           | 9486   | 232.7495053 | 0.188508204 | 0.691362112 | 0.272662041 | 0.785113016 | 0.999371363 | Not Sig |
| ENSG00000135677 | GNS      | glucosamine (N-acetyl)-6-sulfatase                         | 2799   | 5507.702985 | 0.188518657 | 0.505196228 | 0.373159273 | 0.709029906 | 0.999371363 | Not Sig |
| ENSG00000182400 | TRAPPC6B | trafficking protein particle complex 6B                    | 122553 | 685.431076  | 0.188554724 | 0.488987074 | 0.385602677 | 0.699790951 | 0.999371363 | Not Sig |
| ENSG00000181027 | FKRP     | fukutin related protein                                    | 79147  | 420.7739874 | 0.188725088 | 0.623207343 | 0.30282873  | 0.762020387 | 0.999371363 | Not Sig |
| ENSG00000248449 | PCDHGB8P | protocadherin gamma subfamily B, 8 pseudogene              | 56120  | 70.42714329 | 0.189041255 | 0.557834763 | 0.338883963 | 0.734697146 | 0.999371363 | Not Sig |
| ENSG00000212385 | NA       | NA                                                         | NA     | 3.201978451 | 0.189111251 | 1.917051242 | 0.098646946 | 0.921418594 | NA          | NA      |
| ENSG00000173950 | XXYLT1   | xyloside xylosyltransferase 1                              | 152002 | 262.5449202 | 0.189249494 | 0.595751009 | 0.317665419 | 0.750738745 | 0.999371363 | Not Sig |
| ENSG00000128045 | RASL11B  | RAS like family 11 member B                                | 65997  | 86.50954946 | 0.189256941 | 0.655046714 | 0.288921288 | 0.772641612 | 0.999371363 | Not Sig |
| ENSG00000200620 | NA       | NA                                                         | NA     | 3.933693836 | 0.189411846 | 1.258385132 | 0.150519774 | 0.880354551 | NA          | NA      |
| ENSG00000223575 | NA       | NA                                                         | NA     | 12.65734199 | 0.189620103 | 0.88502188  | 0.214254706 | 0.830348437 | 0.999371363 | Not Sig |
| ENSG00000211796 | NA       | NA                                                         | NA     | 5.589465592 | 0.189640605 | 1.343906353 | 0.141111473 | 0.88778188  | NA          | NA      |
| ENSG00000162924 | REL      | REL proto-oncogene, NF-kB subunit                          | 5966   | 1276.762375 | 0.189641931 | 0.575478227 | 0.329537977 | 0.741749094 | 0.999371363 | Not Sig |
| ENSG00000083093 | PALB2    | partner and localizer of BRCA2                             | 79728  | 370.9079677 | 0.189683857 | 0.469633538 | 0.403897597 | 0.686288024 | 0.999371363 | Not Sig |
| ENSG00000222009 | BTBD19   | BTB domain containing 19                                   | 149478 | 342.488157  | 0.189692553 | 0.590511213 | 0.321234463 | 0.748032717 | 0.999371363 | Not Sig |

|                 |          |                                                              |        |             |             |             |             |             |             |         |
|-----------------|----------|--------------------------------------------------------------|--------|-------------|-------------|-------------|-------------|-------------|-------------|---------|
| ENSG00000042980 | ADAM28   | ADAM metallopeptidase domain 28                              | 10863  | 835.4330907 | 0.189709354 | 0.88860139  | 0.213492074 | 0.830943171 | 0.999371363 | Not Sig |
| ENSG00000211785 | NA       | NA                                                           | NA     | 6.711540745 | 0.189729844 | 1.226563381 | 0.154684093 | 0.877070371 | 0.999371363 | Not Sig |
| ENSG00000166619 | BLCAP    | bladder cancer associated protein                            | 10904  | 999.5915625 | 0.189768129 | 0.444342709 | 0.42707605  | 0.669323937 | 0.999371363 | Not Sig |
| ENSG00000145293 | ENOPH1   | enolase-phosphatase 1                                        | 58478  | 604.4317618 | 0.190065083 | 0.45144729  | 0.42101279  | 0.673745742 | 0.999371363 | Not Sig |
| ENSG00000257181 | NA       | NA                                                           | NA     | 49.33034726 | 0.190158842 | 0.736584105 | 0.258163108 | 0.796281029 | 0.999371363 | Not Sig |
| ENSG00000184669 | OR7E14P  | olfactory receptor family 7 subfamily E member 14 pseudogene | 10819  | 39.57913076 | 0.190162876 | 0.679424385 | 0.279888212 | 0.779563271 | 0.999371363 | Not Sig |
| ENSG00000269578 | NA       | NA                                                           | NA     | 9.084332672 | 0.190400777 | 1.247840103 | 0.152584275 | 0.878726127 | 0.999371363 | Not Sig |
| ENSG00000185262 | UBALD2   | UBA like domain containing 2                                 | 283991 | 1247.297912 | 0.190550061 | 0.588647804 | 0.323708099 | 0.746159039 | 0.999371363 | Not Sig |
| ENSG00000142409 | ZNF787   | zinc finger protein 787                                      | 126208 | 816.70679   | 0.19066114  | 0.598200078 | 0.318724699 | 0.749935284 | 0.999371363 | Not Sig |
| ENSG00000146826 | C7orf43  | chromosome 7 open reading frame 43                           | 55262  | 441.2508346 | 0.19070392  | 0.533599157 | 0.35739172  | 0.720798575 | 0.999371363 | Not Sig |
| ENSG00000105518 | TMEM205  | transmembrane protein 205                                    | 374882 | 428.806176  | 0.190801912 | 0.533766537 | 0.357463234 | 0.720745046 | 0.999371363 | Not Sig |
| ENSG00000237766 | NA       | NA                                                           | NA     | 3.646866115 | 0.190809104 | 1.685799512 | 0.113186119 | 0.909883001 | NA          | NA      |
| ENSG00000106333 | PCOLCE   | procollagen C-endopeptidase enhancer                         | 5118   | 851.5652125 | 0.190922178 | 0.457153673 | 0.417632383 | 0.676215916 | 0.999371363 | Not Sig |
| ENSG00000179151 | EDC3     | enhancer of mRNA decapping 3                                 | 80153  | 707.2452396 | 0.190956169 | 0.451761539 | 0.422692401 | 0.672519701 | 0.999371363 | Not Sig |
| ENSG00000010626 | LRRC23   | leucine rich repeat containing 23                            | 10233  | 262.6927679 | 0.191130012 | 0.591066321 | 0.323364747 | 0.746419024 | 0.999371363 | Not Sig |
| ENSG00000139220 | PTPRF    | interacting protein alpha 2                                  | 8499   | 64.57075407 | 0.191154187 | 0.835403081 | 0.228816713 | 0.819011376 | 0.999371363 | Not Sig |
| ENSG00000181619 | GPR135   | G protein-coupled receptor 135                               | 64582  | 164.4342746 | 0.191175696 | 0.504610978 | 0.378857583 | 0.704793624 | 0.999371363 | Not Sig |
| ENSG00000173598 | NUDT4    | nudix hydrolase 4                                            | 11163  | 1168.543992 | 0.191201526 | 0.516968744 | 0.36985123  | 0.711493341 | 0.999371363 | Not Sig |
| ENSG00000118960 | HS1BP3   | HCLS1 binding protein 3                                      | 64342  | 930.9600791 | 0.191261932 | 0.642632077 | 0.29762276  | 0.765991102 | 0.999371363 | Not Sig |
| ENSG00000163563 | MNDA     | myeloid cell nuclear differentiation antigen                 | 4332   | 505.3241325 | 0.191296113 | 0.85309084  | 0.224238854 | 0.822571452 | 0.999371363 | Not Sig |
| ENSG00000100564 | PIGH     | phosphatidylinositol glycan anchor biosynthesis class H      | 5283   | 244.6721986 | 0.191542812 | 0.461858997 | 0.414721404 | 0.678345862 | 0.999371363 | Not Sig |
| ENSG00000198034 | RPS4X    | ribosomal protein S4, X-linked                               | 6191   | 8868.860059 | 0.191565656 | 0.428833876 | 0.446712975 | 0.655082312 | 0.999371363 | Not Sig |
| ENSG00000153574 | RPIA     | ribose 5-phosphate isomerase A                               | 22934  | 326.2548246 | 0.191593034 | 0.499143926 | 0.383843265 | 0.701094619 | 0.999371363 | Not Sig |
| ENSG00000254051 | NA       | NA                                                           | NA     | 2.693605793 | 0.191642408 | 1.406207324 | 0.136283182 | 0.891597419 | NA          | NA      |
| ENSG00000213699 | SLC35F6  | solute carrier family 35 member F6                           | 54978  | 1224.304931 | 0.191738942 | 0.497404259 | 0.385479091 | 0.699882495 | 0.999371363 | Not Sig |
| ENSG00000251980 | NA       | NA                                                           | NA     | 2.029708383 | 0.191963771 | 1.845443194 | 0.104020417 | 0.917153146 | NA          | NA      |
| ENSG00000240445 | NA       | NA                                                           | NA     | 44.25271136 | 0.192047611 | 0.741711058 | 0.258925101 | 0.79569303  | 0.999371363 | Not Sig |
| ENSG00000261730 | NA       | NA                                                           | NA     | 15.70630676 | 0.192160046 | 1.048770089 | 0.183224186 | 0.854622118 | 0.999371363 | Not Sig |
| ENSG00000160785 | SLC25A44 | solute carrier family 25 member 44                           | 9673   | 818.576352  | 0.192169899 | 0.414791046 | 0.463293267 | 0.643154171 | 0.999371363 | Not Sig |
| ENSG00000118855 | MFSD1    | major facilitator superfamily domain containing 1            | 64747  | 1665.889921 | 0.192236378 | 0.558407405 | 0.344258289 | 0.73065205  | 0.999371363 | Not Sig |
| ENSG00000127589 | NA       | NA                                                           | NA     | 6.575345969 | 0.192486824 | 1.25473011  | 0.153408946 | 0.878075791 | NA          | NA      |
| ENSG00000155959 | VBP1     | VHL binding protein 1                                        | 7411   | 445.4066809 | 0.19252349  | 0.622674103 | 0.309188208 | 0.757178364 | 0.999371363 | Not Sig |
| ENSG00000264840 | NA       | NA                                                           | NA     | 1.118350278 | 0.192655328 | 2.241675109 | 0.085942574 | 0.931512068 | NA          | NA      |
| ENSG00000157933 | SKI      | SKI proto-oncogene                                           | 6497   | 4732.597382 | 0.19266056  | 0.670491807 | 0.287342154 | 0.773850348 | 0.999371363 | Not Sig |
| ENSG00000099991 | CABIN1   | calcineurin binding protein 1                                | 23523  | 3186.496546 | 0.192747076 | 0.507807246 | 0.3795674   | 0.704266564 | 0.999371363 | Not Sig |

|                 |           |                                                 |           |             |             |             |             |             |             |         |
|-----------------|-----------|-------------------------------------------------|-----------|-------------|-------------|-------------|-------------|-------------|-------------|---------|
| ENSG00000119616 | FCF1      | FCF1, rRNA-processing protein                   | 51077     | 571.4540576 | 0.19291008  | 0.4620054   | 0.417549405 | 0.676276595 | 0.999371363 | Not Sig |
| ENSG00000111678 | C12orf57  | chromosome 12 open reading frame 57             | 113246    | 1000.773492 | 0.192912208 | 0.581104961 | 0.331974808 | 0.739908282 | 0.999371363 | Not Sig |
| ENSG00000228624 | HDAC2-AS2 | HDAC2 and HS3ST5 antisense RNA 2                | 101927768 | 21.27076567 | 0.193194833 | 0.764541443 | 0.252693736 | 0.800504889 | 0.999371363 | Not Sig |
| ENSG00000081721 | DUSP12    | dual specificity phosphatase 12                 | 11266     | 231.7832575 | 0.193305053 | 0.425229856 | 0.454589561 | 0.649404546 | 0.999371363 | Not Sig |
| ENSG00000084090 | STARD7    | StAR related lipid transfer domain containing 7 | 56910     | 3183.087203 | 0.193522046 | 0.534479811 | 0.362075502 | 0.71729561  | 0.999371363 | Not Sig |
| ENSG00000139132 | FGD4      | FYVE, RhoGEF and PH domain containing 4         | 121512    | 1836.718106 | 0.193615403 | 0.603180023 | 0.320991074 | 0.748217155 | 0.999371363 | Not Sig |
| ENSG00000227268 | KLLN      | killin, p53-regulated DNA replication inhibitor | 100144748 | 26.74411084 | 0.19365453  | 0.624854284 | 0.309919505 | 0.75662217  | 0.999371363 | Not Sig |
| ENSG00000237264 | NA        | NA                                              | NA        | 18.551729   | 0.193687915 | 0.805293668 | 0.240518363 | 0.809928429 | 0.999371363 | Not Sig |
| ENSG00000221866 | PLXNA4    | plexin A4                                       | 91584     | 298.3897395 | 0.193863142 | 0.675614055 | 0.286943619 | 0.774155491 | 0.999371363 | Not Sig |
| ENSG00000149187 | CELF1     | CUGBP Elav-like family member 1                 | 10658     | 3690.02954  | 0.194185252 | 0.389619865 | 0.498396692 | 0.618204468 | 0.999371363 | Not Sig |
| ENSG00000197249 | SERPINA1  | serpin family A member 1                        | 5265      | 17634.6467  | 0.194206897 | 0.522605528 | 0.371612787 | 0.710181167 | 0.999371363 | Not Sig |
| ENSG00000145242 | EPHA5     | EPH receptor A5                                 | 2044      | 7.011045057 | 0.194304187 | 1.367594244 | 0.142077365 | 0.887018897 | 0.999371363 | Not Sig |
| ENSG00000103591 | AAGAB     | alpha and gamma adaptin binding protein         | 79719     | 800.8263492 | 0.194333901 | 0.425504921 | 0.456713639 | 0.647876886 | 0.999371363 | Not Sig |
| ENSG00000138459 | SLC35A5   | solute carrier family 35 member A5              | 55032     | 551.3087671 | 0.194365899 | 0.594307138 | 0.327046213 | 0.743632933 | 0.999371363 | Not Sig |
| ENSG00000164591 | MYOZ3     | myozenin 3                                      | 91977     | 46.39393694 | 0.194382099 | 0.722174997 | 0.269162044 | 0.787804987 | 0.999371363 | Not Sig |
| ENSG00000152284 | TCF7L1    | transcription factor 7 like 1                   | 83439     | 490.8204825 | 0.194524529 | 0.762160723 | 0.255227701 | 0.798547237 | 0.999371363 | Not Sig |
| ENSG00000103051 | COG4      | component of oligomeric golgi complex 4         | 25839     | 1096.104111 | 0.19453417  | 0.424920608 | 0.457812981 | 0.647086809 | 0.999371363 | Not Sig |
| ENSG00000242220 | TCP10L    | t-complex 10 like                               | 140290    | 6.38353634  | 0.194611841 | 1.462493479 | 0.133068519 | 0.894139192 | NA          | NA      |
| ENSG00000154429 | CCSAP     | centriole, cilia and spindle associated protein | 126731    | 411.1704172 | 0.194634908 | 0.526487268 | 0.369685877 | 0.711616556 | 0.999371363 | Not Sig |
| ENSG00000196569 | LAMA2     | laminin subunit alpha 2                         | 3908      | 2588.361073 | 0.194721033 | 0.66735613  | 0.291779792 | 0.770454997 | 0.999371363 | Not Sig |
| ENSG00000267419 | NA        | NA                                              | NA        | 28.51397684 | 0.194731407 | 0.582640228 | 0.334222385 | 0.738211754 | 0.999371363 | Not Sig |
| ENSG00000251379 | NA        | NA                                              | NA        | 6.020786595 | 0.194851705 | 1.237933427 | 0.157400794 | 0.874928987 | NA          | NA      |
| ENSG00000160298 | C21orf58  | chromosome 21 open reading frame 58             | 54058     | 235.5116471 | 0.194969928 | 0.677309578 | 0.287859399 | 0.773454367 | 0.999371363 | Not Sig |
| ENSG00000254481 | NA        | NA                                              | NA        | 2.794187644 | 0.195132938 | 1.574710281 | 0.123916723 | 0.901381212 | NA          | NA      |
| ENSG00000179526 | SHARPIN   | SHANK associated RH domain interactor           | 81858     | 972.940127  | 0.195159341 | 0.5907479   | 0.330359771 | 0.741128135 | 0.999371363 | Not Sig |
| ENSG00000188522 | FAM83G    | family with sequence similarity 83 member G     | 644815    | 587.1187441 | 0.195344379 | 0.549854409 | 0.35526564  | 0.722390594 | 0.999371363 | Not Sig |
| ENSG00000199460 | NA        | NA                                              | NA        | 2.329256457 | 0.195709754 | 1.592696431 | 0.122879508 | 0.902202513 | NA          | NA      |
| ENSG00000169302 | STK32A    | serine/threonine kinase 32A                     | 202374    | 523.0677231 | 0.195746521 | 0.922898305 | 0.212099773 | 0.832029196 | 0.999371363 | Not Sig |
| ENSG00000160963 | COL26A1   | collagen type XXVI alpha 1 chain                | 136227    | 15.24394428 | 0.195788265 | 1.181060327 | 0.165773297 | 0.868335361 | 0.999371363 | Not Sig |
| ENSG00000187475 | HIST1H1T  | histone cluster 1 H1 family member t            | 3010      | 3.408710334 | 0.195814577 | 1.374771106 | 0.142434313 | 0.886736961 | NA          | NA      |
| ENSG00000230074 | NA        | NA                                              | NA        | 63.03653582 | 0.196033305 | 0.592570698 | 0.330817994 | 0.740781968 | 0.999371363 | Not Sig |
| ENSG00000160973 | FOXH1     | forkhead box H1                                 | 8928      | 4.526025644 | 0.196101825 | 1.571142125 | 0.124814823 | 0.900670152 | NA          | NA      |
| ENSG00000115762 | PLEKHB2   | pleckstrin homology domain containing B2        | 55041     | 2358.787033 | 0.196106577 | 0.540020657 | 0.363146436 | 0.716495498 | 0.999371363 | Not Sig |
| ENSG00000053770 | AP5M1     | adaptor related protein complex 5 mu 1 subunit  | 55745     | 728.9972888 | 0.196355567 | 0.467553812 | 0.419963567 | 0.674512069 | 0.999371363 | Not Sig |
| ENSG00000221539 | SNORD99   | small nucleolar RNA, C/D box 99                 | 692212    | 13.13999158 | 0.19635763  | 0.839771984 | 0.233822554 | 0.81512274  | 0.999371363 | Not Sig |



|                 |          |                                                           |           |             |             |             |             |             |             |         |
|-----------------|----------|-----------------------------------------------------------|-----------|-------------|-------------|-------------|-------------|-------------|-------------|---------|
| ENSG00000235852 | NA       | NA                                                        | NA        | 21.80029084 | 0.196501772 | 1.164962424 | 0.168676489 | 0.866051113 | 0.999371363 | Not Sig |
| ENSG00000226049 | NA       | NA                                                        | NA        | 2.30651213  | 0.196919437 | 2.052213104 | 0.095954673 | 0.923556572 | NA          | NA      |
| ENSG00000163798 | SLC4A1AP | solute carrier family 4 member 1 adaptor protein          | 22950     | 656.0828051 | 0.196994658 | 0.417765737 | 0.471543355 | 0.637252767 | 0.999371363 | Not Sig |
| ENSG00000161904 | LEMD2    | LEM domain containing 2                                   | 221496    | 1456.568196 | 0.197297996 | 0.493988871 | 0.399397653 | 0.689600223 | 0.999371363 | Not Sig |
| ENSG00000204620 | NA       | NA                                                        | NA        | 5.350036641 | 0.197327304 | 1.405022555 | 0.140444226 | 0.888309017 | NA          | NA      |
| ENSG00000271063 | NA       | NA                                                        | NA        | 1.089168415 | 0.197464491 | 2.528709968 | 0.078089023 | 0.937757239 | NA          | NA      |
| ENSG00000217527 | NA       | NA                                                        | NA        | 39.86145384 | 0.197512679 | 0.584300041 | 0.338032971 | 0.735338341 | 0.999371363 | Not Sig |
| ENSG00000265871 | MIR3174  | microRNA 3174                                             | 100422841 | 29.84116937 | 0.197567531 | 0.673775545 | 0.29322455  | 0.769350521 | 0.999371363 | Not Sig |
| ENSG00000204366 | ZBTB12   | zinc finger and BTB domain containing 12                  | 221527    | 143.7961352 | 0.197586394 | 0.558188033 | 0.353978198 | 0.723355222 | 0.999371363 | Not Sig |
| ENSG00000248593 | DSTNP2   | destrin, actin depolymerizing factor pseudogene 2         | 171220    | 86.34087777 | 0.197647697 | 0.493502417 | 0.400499957 | 0.688788315 | 0.999371363 | Not Sig |
| ENSG00000171208 | NETO2    | neuropilin and tolloid like 2                             | 81831     | 228.3734139 | 0.197869809 | 0.558012945 | 0.354597166 | 0.7228914   | 0.999371363 | Not Sig |
| ENSG00000261662 | NA       | NA                                                        | NA        | 26.92759586 | 0.197932275 | 0.608325064 | 0.325372547 | 0.744899131 | 0.999371363 | Not Sig |
| ENSG00000107018 | RLN1     | relaxin 1                                                 | 6013      | 2.197804155 | 0.197964905 | 1.800043866 | 0.109977823 | 0.912426963 | NA          | NA      |
| ENSG00000156697 | UTP14A   | UTP14A, small subunit processome component                | 10813     | 481.1777209 | 0.198068201 | 0.429423154 | 0.461242481 | 0.644624647 | 0.999371363 | Not Sig |
| ENSG00000204569 | PPP1R10  | protein phosphatase 1 regulatory subunit 10               | 5514      | 2581.979884 | 0.198217898 | 0.441275778 | 0.44919279  | 0.653292588 | 0.999371363 | Not Sig |
| ENSG00000261572 | NA       | NA                                                        | NA        | 54.45137175 | 0.198384785 | 0.793565243 | 0.249991776 | 0.802593708 | 0.999371363 | Not Sig |
| ENSG00000111261 | MANSC1   | MANSC domain containing 1                                 | 54682     | 456.884632  | 0.198486657 | 0.525999804 | 0.377351199 | 0.705912628 | 0.999371363 | Not Sig |
| ENSG00000270149 | NA       | NA                                                        | NA        | 9.651473165 | 0.198816639 | 0.87203609  | 0.227991297 | 0.819653006 | 0.999371363 | Not Sig |
| ENSG00000213790 | NA       | NA                                                        | NA        | 2.198064444 | 0.198841153 | 1.819709528 | 0.109270821 | 0.91298769  | NA          | NA      |
| ENSG00000238137 | NA       | NA                                                        | NA        | 2.198064444 | 0.198841153 | 1.819709528 | 0.109270821 | 0.91298769  | NA          | NA      |
| ENSG00000169248 | CXCL11   | C-X-C motif chemokine ligand 11                           | 6373      | 50.06871339 | 0.198864886 | 1.018616549 | 0.19523037  | 0.845212605 | 0.999371363 | Not Sig |
| ENSG00000188033 | ZNF490   | zinc finger protein 490                                   | 57474     | 124.8149518 | 0.199202302 | 0.480697564 | 0.414402561 | 0.678579313 | 0.999371363 | Not Sig |
| ENSG00000180035 | ZNF48    | zinc finger protein 48                                    | 197407    | 254.0037006 | 0.199358215 | 0.513641013 | 0.388127524 | 0.697921664 | 0.999371363 | Not Sig |
| ENSG00000143294 | PRCC     | papillary renal cell carcinoma (translocation-associated) | 5546      | 1161.136639 | 0.199367576 | 0.492271198 | 0.404995411 | 0.685480884 | 0.999371363 | Not Sig |
| ENSG00000198382 | UVRAG    | UV radiation resistance associated                        | 7405      | 931.1709908 | 0.199451475 | 0.487771016 | 0.408903908 | 0.682610181 | 0.999371363 | Not Sig |
| ENSG00000270714 | NA       | NA                                                        | NA        | 1.79512276  | 0.199732949 | 1.933777601 | 0.103286411 | 0.91773566  | NA          | NA      |
| ENSG00000121988 | ZRANB3   | zinc finger RANBP2-type containing 3                      | 84083     | 114.1352043 | 0.199750029 | 0.572289504 | 0.349036681 | 0.727061772 | 0.999371363 | Not Sig |
| ENSG00000179091 | CYC1     | cytochrome c1                                             | 1537      | 1176.294733 | 0.199873798 | 0.650076089 | 0.30746216  | 0.758491621 | 0.999371363 | Not Sig |
| ENSG00000215274 | GAGE10   | G antigen 10                                              | 102724473 | 1.459955287 | 0.199974444 | 2.080727324 | 0.096107953 | 0.923434835 | NA          | NA      |
| ENSG00000163166 | IWS1     | IWS1, SUPT6H interacting protein                          | 55677     | 1578.632475 | 0.200258711 | 0.524045452 | 0.382139965 | 0.702357549 | 0.999371363 | Not Sig |
| ENSG00000184787 | UBE2G2   | ubiquitin conjugating enzyme E2 G2                        | 7327      | 1848.026521 | 0.200572105 | 0.431586363 | 0.464732259 | 0.642123204 | 0.999371363 | Not Sig |
| ENSG00000160299 | PCNT     | pericentrin                                               | 5116      | 1902.65886  | 0.200691423 | 0.539646614 | 0.371894158 | 0.709971655 | 0.999371363 | Not Sig |
| ENSG00000106392 | C1GALT1  | core 1 synthase, galactose-3-epimerase 1                  | 56913     | 1326.253166 | 0.200692618 | 0.719712386 | 0.278851138 | 0.780359068 | 0.999371363 | Not Sig |
| ENSG00000102805 | CLN5     | CLN5, intracellular trafficking protein                   | 1203      | 669.0592762 | 0.200809079 | 0.428201691 | 0.468959099 | 0.639098872 | 0.999371363 | Not Sig |
| ENSG00000116574 | RHOU     | ras homolog family member U                               | 58480     | 1287.015338 | 0.200856731 | 0.602336186 | 0.333462834 | 0.73878494  | 0.999371363 | Not Sig |

|                 |               |                                                                       |           |             |             |             |             |             |             |         |
|-----------------|---------------|-----------------------------------------------------------------------|-----------|-------------|-------------|-------------|-------------|-------------|-------------|---------|
| ENSG00000228474 | OST4          | oligosaccharyltransferase complex subunit 4, non-catalytic            | 100128731 | 929.4262609 | 0.200857516 | 0.500505984 | 0.40130892  | 0.688192697 | 0.999371363 | Not Sig |
| ENSG00000074935 | TUBE1         | tubulin epsilon 1                                                     | 51175     | 303.7012272 | 0.200983618 | 0.485147336 | 0.414273362 | 0.67867392  | 0.999371363 | Not Sig |
| ENSG00000177409 | SAMD9L        | sterile alpha motif domain containing 9 like                          | 219285    | 1744.241639 | 0.201024319 | 0.802559443 | 0.250479041 | 0.802216911 | 0.999371363 | Not Sig |
| ENSG00000206603 | SNORA22B      | small nucleolar RNA, H/ACA box 22B                                    | 109616964 | 5.82505361  | 0.201291854 | 1.114745741 | 0.180571987 | 0.856703545 | NA          | NA      |
| ENSG00000205791 | LOH12CR2      | loss of heterozygosity, 12, chromosomal region 2 (non-protein coding) | 503693    | 10.70116426 | 0.201433972 | 1.047337248 | 0.192329617 | 0.84748402  | 0.999371363 | Not Sig |
| ENSG00000183576 | SETD3         | SET domain containing 3                                               | 84193     | 1798.361824 | 0.201526587 | 0.48773174  | 0.413191455 | 0.679466348 | 0.999371363 | Not Sig |
| ENSG00000214223 | HNRNPA1P10    | heterogeneous nuclear ribonucleoprotein A1 pseudogene 10              | 664709    | 8.561048538 | 0.201527405 | 1.077045391 | 0.187111339 | 0.851573338 | 0.999371363 | Not Sig |
| ENSG00000219755 | NA            | NA                                                                    | NA        | 15.97164194 | 0.201559262 | 0.956660503 | 0.210690482 | 0.833128802 | 0.999371363 | Not Sig |
| ENSG00000100983 | GSS           | glutathione synthetase                                                | 2937      | 619.4420208 | 0.201572859 | 0.441630181 | 0.456429084 | 0.648081456 | 0.999371363 | Not Sig |
| ENSG00000196586 | MYO6          | myosin VI                                                             | 4646      | 5733.307833 | 0.20161512  | 0.576006944 | 0.35002203  | 0.726322164 | 0.999371363 | Not Sig |
| ENSG00000198604 | BAZ1A         | bromodomain adjacent to zinc finger domain 1A                         | 11177     | 1843.078877 | 0.20186116  | 0.373578929 | 0.540344073 | 0.588959769 | 0.999371363 | Not Sig |
| ENSG00000205106 | DKFZp779M0652 | uncharacterized DKFZp779M0652                                         | 374387    | 4.709432285 | 0.202109778 | 1.500518229 | 0.134693318 | 0.892854357 | NA          | NA      |
| ENSG00000243147 | MRPL33        | mitochondrial ribosomal protein L33                                   | 9553      | 614.3959391 | 0.202388701 | 0.527327768 | 0.383800576 | 0.701126261 | 0.999371363 | Not Sig |
| ENSG00000258412 | NA            | NA                                                                    | NA        | 18.41868051 | 0.202407848 | 0.87594729  | 0.231073092 | 0.817258019 | 0.999371363 | Not Sig |
| ENSG00000128641 | MYO1B         | myosin IB                                                             | 4430      | 5884.154388 | 0.202434563 | 0.568540368 | 0.35606014  | 0.721795528 | 0.999371363 | Not Sig |
| ENSG00000141026 | MED9          | mediator complex subunit 9                                            | 55090     | 281.3512327 | 0.202549351 | 0.402638631 | 0.503054936 | 0.614925649 | 0.999371363 | Not Sig |
| ENSG00000154957 | ZNF18         | zinc finger protein 18                                                | 7566      | 199.559012  | 0.202817195 | 0.452215716 | 0.448496564 | 0.653794865 | 0.999371363 | Not Sig |
| ENSG00000258922 | NA            | NA                                                                    | NA        | 22.2369556  | 0.202845004 | 0.726116548 | 0.279355986 | 0.779971645 | 0.999371363 | Not Sig |
| ENSG00000182827 | ACBD3         | acyl-CoA binding domain containing 3                                  | 64746     | 2595.177867 | 0.202923213 | 0.502342437 | 0.403953954 | 0.68624658  | 0.999371363 | Not Sig |
| ENSG00000119669 | IRF2BPL       | interferon regulatory factor 2 binding protein like                   | 64207     | 2392.945451 | 0.202978359 | 0.516220078 | 0.393201209 | 0.694170877 | 0.999371363 | Not Sig |
| ENSG00000196182 | STK40         | serine/threonine kinase 40                                            | 83931     | 2236.952733 | 0.203030815 | 0.569485672 | 0.356516107 | 0.721454092 | 0.999371363 | Not Sig |
| ENSG00000149269 | PAK1          | p21 (RAC1) activated kinase 1                                         | 5058      | 1349.647478 | 0.203043116 | 0.477026512 | 0.425643252 | 0.670367819 | 0.999371363 | Not Sig |
| ENSG00000062716 | VMP1          | vacuole membrane protein 1                                            | 81671     | 14251.80598 | 0.203047718 | 0.705418154 | 0.287840222 | 0.773469047 | 0.999371363 | Not Sig |
| ENSG00000167383 | NA            | NA                                                                    | NA        | 114.9337774 | 0.203069654 | 0.951696408 | 0.213376506 | 0.831033304 | 0.999371363 | Not Sig |
| ENSG00000254681 | NA            | NA                                                                    | NA        | 201.2026688 | 0.20329463  | 0.611760315 | 0.332310916 | 0.739654498 | 0.999371363 | Not Sig |
| ENSG00000105011 | ASF1B         | anti-silencing function 1B histone chaperone                          | 55723     | 92.81502049 | 0.203588794 | 0.792886376 | 0.256769192 | 0.797356954 | 0.999371363 | Not Sig |
| ENSG00000137364 | TPMT          | thiopurine S-methyltransferase                                        | 7172      | 640.345435  | 0.203858211 | 0.556882333 | 0.366070531 | 0.714312446 | 0.999371363 | Not Sig |
| ENSG00000197043 | ANXA6         | annexin A6                                                            | 309       | 2866.381643 | 0.204014057 | 0.689252439 | 0.295993232 | 0.76723525  | 0.999371363 | Not Sig |
| ENSG00000152822 | GRM1          | glutamate metabotropic receptor 1                                     | 2911      | 5.311112769 | 0.204021954 | 1.11414548  | 0.183119671 | 0.854704121 | NA          | NA      |
| ENSG00000207327 | NA            | NA                                                                    | NA        | 4.371275569 | 0.204176257 | 1.396047596 | 0.146253078 | 0.883721606 | NA          | NA      |
| ENSG00000127054 | INTS11        | integrator complex subunit 11                                         | 54973     | 1417.335332 | 0.204178419 | 0.503431538 | 0.405573357 | 0.685056108 | 0.999371363 | Not Sig |
| ENSG00000027697 | IFNGR1        | interferon gamma receptor 1                                           | 3459      | 2369.851721 | 0.204289233 | 0.513176175 | 0.398087915 | 0.690565382 | 0.999371363 | Not Sig |
| ENSG00000172123 | SLFN12        | schlafen family member 12                                             | 55106     | 338.9423322 | 0.204546854 | 0.637080016 | 0.321069331 | 0.748157851 | 0.999371363 | Not Sig |
| ENSG00000111639 | MRPL51        | mitochondrial ribosomal protein L51                                   | 51258     | 637.6580227 | 0.204555053 | 0.414616955 | 0.493359112 | 0.621758867 | 0.999371363 | Not Sig |
| ENSG00000165502 | RPL36AL       | ribosomal protein L36a like                                           | 6166      | 1007.293261 | 0.204639228 | 0.444640735 | 0.460234999 | 0.645347552 | 0.999371363 | Not Sig |

|                 |             |                                                               |           |             |             |             |             |             |             |         |
|-----------------|-------------|---------------------------------------------------------------|-----------|-------------|-------------|-------------|-------------|-------------|-------------|---------|
| ENSG00000100938 | GMPR2       | guanosine monophosphate reductase 2                           | 51292     | 782.3166376 | 0.204711424 | 0.475153825 | 0.430831897 | 0.666590605 | 0.999371363 | Not Sig |
| ENSG00000265891 | NA          | NA                                                            | NA        | 2.326239745 | 0.204846275 | 1.730748434 | 0.118357048 | 0.905784757 | NA          | NA      |
| ENSG00000162493 | PDPN        | podoplanin                                                    | 10630     | 442.1884249 | 0.204944308 | 0.697173103 | 0.293964737 | 0.768784849 | 0.999371363 | Not Sig |
| ENSG00000183715 | OPCML       | opioid binding protein/cell adhesion molecule like            | 4978      | 4.416194498 | 0.204948765 | 1.440361916 | 0.142289769 | 0.886851127 | NA          | NA      |
| ENSG00000136261 | BZW2        | basic leucine zipper and W2 domains 2                         | 28969     | 1060.963912 | 0.205003459 | 0.622015975 | 0.32957909  | 0.741718024 | 0.999371363 | Not Sig |
| ENSG00000128254 | C22orf24    | chromosome 22 open reading frame 24                           | 25775     | 1.765940897 | 0.205117331 | 1.896668941 | 0.108146091 | 0.913879807 | NA          | NA      |
| ENSG00000228158 | NA          | NA                                                            | NA        | 5.590467987 | 0.205129543 | 1.036666133 | 0.197874259 | 0.843143444 | NA          | NA      |
| ENSG00000128602 | SMO         | smoothed, frizzled class receptor                             | 6608      | 300.8305929 | 0.205137969 | 0.665660177 | 0.308172212 | 0.757951296 | 0.999371363 | Not Sig |
| ENSG00000117899 | MESD        | mesoderm development LRP chaperone                            | 23184     | 1173.728643 | 0.205250561 | 0.411933408 | 0.498261509 | 0.618299734 | 0.999371363 | Not Sig |
| ENSG00000170791 | CHCHD7      | coiled-coil-helix-coiled-coil-helix domain containing 7       | 79145     | 496.9812784 | 0.205287655 | 0.421469456 | 0.487075997 | 0.626204476 | 0.999371363 | Not Sig |
| ENSG00000252277 | SNORD116-30 | small nucleolar RNA, C/D box 116-30                           | 100873856 | 8.652553179 | 0.205320153 | 1.053095322 | 0.194968251 | 0.845417803 | 0.999371363 | Not Sig |
| ENSG00000168394 | TAP1        | transporter 1, ATP binding cassette subfamily B member        | 6890      | 2427.579233 | 0.205897442 | 0.74220936  | 0.27741154  | 0.781464121 | 0.999371363 | Not Sig |
| ENSG00000258741 | NA          | NA                                                            | NA        | 14.85055289 | 0.206127026 | 0.813614859 | 0.253347175 | 0.799999944 | 0.999371363 | Not Sig |
| ENSG00000272661 | NA          | NA                                                            | NA        | 9.392511039 | 0.206343637 | 0.932566532 | 0.221264253 | 0.824886682 | 0.999371363 | Not Sig |
| ENSG00000203710 | CRI         | complement C3b/C4b receptor 1 (Knops blood group)             | 1378      | 304.4867303 | 0.206409533 | 0.657879282 | 0.31374986  | 0.753711028 | 0.999371363 | Not Sig |
| ENSG00000104814 | MAP4K1      | mitogen-activated protein kinase kinase kinase 1              | 11184     | 252.7886849 | 0.206437611 | 0.749242856 | 0.275528301 | 0.782910386 | 0.999371363 | Not Sig |
| ENSG00000265337 | NA          | NA                                                            | NA        | 22.85455711 | 0.206489076 | 0.753303454 | 0.274111416 | 0.783999001 | 0.999371363 | Not Sig |
| ENSG00000224157 | HCG14       | HLA complex group 14 (non-protein coding)                     | 414760    | 4.289458276 | 0.206603811 | 1.296163175 | 0.159396452 | 0.873356534 | NA          | NA      |
| ENSG00000236439 | NA          | NA                                                            | NA        | 2.00052652  | 0.206645834 | 1.685521498 | 0.122600533 | 0.902423432 | NA          | NA      |
| ENSG00000108733 | PEX12       | peroxisomal biogenesis factor 12                              | 5193      | 147.1572469 | 0.206751235 | 0.433722155 | 0.476690509 | 0.633582523 | 0.999371363 | Not Sig |
| ENSG00000215895 | NA          | NA                                                            | NA        | 4.81428706  | 0.206857209 | 1.167355273 | 0.177201589 | 0.859350048 | NA          | NA      |
| ENSG00000181035 | SLC25A42    | solute carrier family 25 member 42                            | 284439    | 262.0713248 | 0.207260325 | 0.757184291 | 0.273725073 | 0.784295908 | 0.999371363 | Not Sig |
| ENSG00000153898 | MCOLN2      | mucolipin 2                                                   | 255231    | 138.9234389 | 0.207282265 | 0.721175188 | 0.287422902 | 0.773788528 | 0.999371363 | Not Sig |
| ENSG00000151746 | BICD1       | BICD cargo adaptor 1                                          | 636       | 659.774529  | 0.207395741 | 0.550265548 | 0.376901192 | 0.706247035 | 0.999371363 | Not Sig |
| ENSG00000182446 | NPLOC4      | NPL4 homolog, ubiquitin recognition factor                    | 55666     | 3663.198666 | 0.20742276  | 0.475062722 | 0.43662184  | 0.662385621 | 0.999371363 | Not Sig |
| ENSG00000150783 | TEX12       | testis expressed 12                                           | 56158     | 3.891780722 | 0.207854925 | 1.692910061 | 0.122779662 | 0.90228158  | NA          | NA      |
| ENSG00000224956 | NA          | NA                                                            | NA        | 26.92797387 | 0.208018338 | 0.660146763 | 0.315109231 | 0.75267872  | 0.999371363 | Not Sig |
| ENSG00000149150 | SLC43A1     | solute carrier family 43 member 1                             | 8501      | 409.2011229 | 0.2080663   | 0.790698203 | 0.263142497 | 0.79244075  | 0.999371363 | Not Sig |
| ENSG00000237133 | NA          | NA                                                            | NA        | 6.594227276 | 0.208123741 | 1.130520013 | 0.184095583 | 0.853938472 | 0.999371363 | Not Sig |
| ENSG00000243056 | EIF4EBP3    | eukaryotic translation initiation factor 4E binding protein 3 | 8637      | 17.0173254  | 0.208269718 | 0.72053521  | 0.289048633 | 0.772544161 | 0.999371363 | Not Sig |
| ENSG00000251450 | RASGRF2-AS1 | RASGRF2 antisense RNA 1                                       | 102524628 | 6.994041292 | 0.208301468 | 1.15244711  | 0.180747096 | 0.85656609  | 0.999371363 | Not Sig |
| ENSG00000118689 | FOXO3       | forkhead box O3                                               | 2309      | 2769.077565 | 0.20844828  | 0.515616455 | 0.404270031 | 0.686014161 | 0.999371363 | Not Sig |
| ENSG00000108561 | C1QBP       | complement C1q binding protein                                | 708       | 958.8845795 | 0.208508389 | 0.385439173 | 0.54096315  | 0.588532982 | 0.999371363 | Not Sig |
| ENSG00000168061 | SAC3D1      | SAC3 domain containing 1                                      | 29901     | 164.6214776 | 0.208619922 | 0.66669519  | 0.312916495 | 0.754344105 | 0.999371363 | Not Sig |
| ENSG00000068878 | PSME4       | proteasome activator subunit 4                                | 23198     | 2846.368148 | 0.208677836 | 0.490038191 | 0.425839945 | 0.670224478 | 0.999371363 | Not Sig |

|                 |          |                                                            |        |             |             |             |             |             |             |         |
|-----------------|----------|------------------------------------------------------------|--------|-------------|-------------|-------------|-------------|-------------|-------------|---------|
| ENSG00000067829 | IDH3G    | isocitrate dehydrogenase 3 (NAD(+)) gamma                  | 3421   | 731.3753434 | 0.209070439 | 0.477696932 | 0.437663348 | 0.661630342 | 0.999371363 | Not Sig |
| ENSG00000095059 | DHPS     | deoxyhypusine synthase                                     | 1725   | 722.8124832 | 0.209122509 | 0.586229618 | 0.356724571 | 0.721298009 | 0.999371363 | Not Sig |
| ENSG00000151116 | UEVLD    | UEV and lactate/malate dehydrogenase domains               | 55293  | 610.3579    | 0.209130086 | 0.567744986 | 0.36835215  | 0.712610672 | 0.999371363 | Not Sig |
| ENSG00000184530 | C6orf58  | chromosome 6 open reading frame 58                         | 352999 | 6.730843532 | 0.209231975 | 0.982133798 | 0.213038157 | 0.8312972   | 0.999371363 | Not Sig |
| ENSG00000235726 | NA       | NA                                                         | NA     | 17.65613196 | 0.209500095 | 0.870054299 | 0.240789678 | 0.80971813  | 0.999371363 | Not Sig |
| ENSG00000132478 | UNK      | unkempt family zinc finger                                 | 85451  | 1130.020807 | 0.209547537 | 0.495481577 | 0.42291691  | 0.672355885 | 0.999371363 | Not Sig |
| ENSG00000204310 | AGPAT1   | 1-acylglycerol-3-phosphate 0-acyltransferase 1             | 10554  | 1540.682087 | 0.209555414 | 0.58157955  | 0.360321153 | 0.718606982 | 0.999371363 | Not Sig |
| ENSG00000197965 | MPZL1    | myelin protein zero like 1                                 | 9019   | 2507.761584 | 0.209659195 | 0.573783707 | 0.36539761  | 0.714814625 | 0.999371363 | Not Sig |
| ENSG00000087269 | NOP14    | NOP14 nucleolar protein                                    | 8602   | 870.0592487 | 0.209672978 | 0.438711068 | 0.477929538 | 0.632700357 | 0.999371363 | Not Sig |
| ENSG00000138430 | OLA1     | Obg like ATPase 1                                          | 29789  | 786.99828   | 0.209732077 | 0.542463924 | 0.386628617 | 0.699031169 | 0.999371363 | Not Sig |
| ENSG00000237161 | NA       | NA                                                         | NA     | 17.01439797 | 0.209978072 | 0.763428304 | 0.275046223 | 0.783280726 | 0.999371363 | Not Sig |
| ENSG00000180979 | LRRC57   | leucine rich repeat containing 57                          | 255252 | 432.1235707 | 0.210002939 | 0.437819712 | 0.479656199 | 0.631471878 | 0.999371363 | Not Sig |
| ENSG00000228572 | NA       | NA                                                         | NA     | 1.637765597 | 0.210004236 | 2.622836085 | 0.080067617 | 0.936183478 | NA          | NA      |
| ENSG00000112062 | MAPK14   | mitogen-activated protein kinase 14                        | 1432   | 1799.618145 | 0.210083022 | 0.451829024 | 0.464961327 | 0.641959151 | 0.999371363 | Not Sig |
| ENSG00000054523 | KIF1B    | kinesin family member 1B                                   | 23095  | 3783.422309 | 0.210116319 | 0.4004956   | 0.524640768 | 0.599832941 | 0.999371363 | Not Sig |
| ENSG00000109111 | SUPT6H   | SPT6 homolog, histone chaperone                            | 6830   | 4151.019367 | 0.210202123 | 0.416022407 | 0.505266349 | 0.613371775 | 0.999371363 | Not Sig |
| ENSG00000138030 | KHK      | ketohexokinase                                             | 3795   | 83.55744162 | 0.210297192 | 0.766979541 | 0.274188789 | 0.783939543 | 0.999371363 | Not Sig |
| ENSG00000188612 | SUMO2    | small ubiquitin-like modifier 2                            | 6613   | 1815.646064 | 0.210315029 | 0.487661137 | 0.431272892 | 0.666269959 | 0.999371363 | Not Sig |
| ENSG00000215565 | NA       | NA                                                         | NA     | 6.505135959 | 0.210403711 | 1.159586134 | 0.181447246 | 0.856016537 | NA          | NA      |
| ENSG00000110871 | COQ5     | coenzyme Q5, methyltransferase                             | 84274  | 301.9496415 | 0.21078129  | 0.453796867 | 0.464483793 | 0.642301168 | 0.999371363 | Not Sig |
| ENSG00000007202 | KIAA0100 | KIAA0100                                                   | 9703   | 5885.721706 | 0.210832598 | 0.431039904 | 0.489125475 | 0.624752867 | 0.999371363 | Not Sig |
| ENSG00000137752 | CASP1    | caspase 1                                                  | 834    | 619.2635308 | 0.210859037 | 0.838778882 | 0.251388109 | 0.80151406  | 0.999371363 | Not Sig |
| ENSG00000160193 | WDR4     | WD repeat domain 4                                         | 10785  | 311.9226875 | 0.210933807 | 0.591071686 | 0.356866709 | 0.721191593 | 0.999371363 | Not Sig |
| ENSG00000180329 | CCDC43   | coiled-coil domain containing 43                           | 124808 | 446.7323006 | 0.210940189 | 0.452641667 | 0.466020263 | 0.641200997 | 0.999371363 | Not Sig |
| ENSG00000118518 | RNF146   | ring finger protein 146                                    | 81847  | 786.3604411 | 0.210962699 | 0.405669743 | 0.520035577 | 0.603038779 | 0.999371363 | Not Sig |
| ENSG00000204381 | LAYN     | layilin                                                    | 143903 | 193.3779051 | 0.210987798 | 0.589502508 | 0.357908227 | 0.720411994 | 0.999371363 | Not Sig |
| ENSG00000103035 | PSMD7    | proteasome 26S subunit, non-ATPase 7                       | 5713   | 1316.018314 | 0.211049511 | 0.466430485 | 0.452477954 | 0.6509247   | 0.999371363 | Not Sig |
| ENSG00000067334 | DNTTIP2  | deoxynucleotidyltransferase terminal interacting protein 2 | 30836  | 926.910548  | 0.211075927 | 0.420829966 | 0.501570573 | 0.615969623 | 0.999371363 | Not Sig |
| ENSG00000104490 | NCALD    | neurocalcin delta                                          | 83988  | 608.5391619 | 0.211132233 | 0.824701716 | 0.25601042  | 0.797942792 | 0.999371363 | Not Sig |
| ENSG00000102054 | RBBP7    | RB binding protein 7, chromatin remodeling factor          | 5931   | 1419.523709 | 0.211136602 | 0.479785857 | 0.440064246 | 0.659890576 | 0.999371363 | Not Sig |
| ENSG00000164323 | CFAP97   | cilia and flagella associated protein 97                   | 57587  | 1059.32811  | 0.211146376 | 0.546924522 | 0.386061271 | 0.699451292 | 0.999371363 | Not Sig |
| ENSG00000155363 | MOV10    | Mov10 RISC complex RNA helicase                            | 4343   | 1426.613214 | 0.211255412 | 0.590722996 | 0.357621784 | 0.720626374 | 0.999371363 | Not Sig |
| ENSG00000100336 | APOL4    | apolipoprotein L4                                          | 80832  | 271.6155433 | 0.211490977 | 0.831404428 | 0.254377978 | 0.799203563 | 0.999371363 | Not Sig |
| ENSG00000055211 | GINM1    | glycoprotein integral membrane 1                           | 116254 | 932.9991449 | 0.211497421 | 0.412906071 | 0.512216787 | 0.608499296 | 0.999371363 | Not Sig |
| ENSG00000070785 | EIF2B3   | eukaryotic translation initiation factor 2B subunit gamma  | 8891   | 302.7141941 | 0.211717555 | 0.415638884 | 0.509378605 | 0.61048687  | 0.999371363 | Not Sig |

|                 |          |                                                      |        |             |             |             |             |             |             |         |
|-----------------|----------|------------------------------------------------------|--------|-------------|-------------|-------------|-------------|-------------|-------------|---------|
| ENSG00000095321 | CRAT     | carnitine O-acetyltransferase                        | 1384   | 660.3125735 | 0.211763422 | 0.57961123  | 0.365354242 | 0.714846994 | 0.999371363 | Not Sig |
| ENSG00000080546 | SESN1    | sestrin 1                                            | 27244  | 688.3882747 | 0.211791724 | 0.61782642  | 0.342801339 | 0.731747918 | 0.999371363 | Not Sig |
| ENSG00000136631 | VPS45    | vacuolar protein sorting 45 homolog                  | 11311  | 815.8394289 | 0.211931841 | 0.508613665 | 0.416685307 | 0.676908603 | 0.999371363 | Not Sig |
| ENSG00000131495 | NDUFA2   | NADH:ubiquinone oxidoreductase subunit A2            | 4695   | 404.8769293 | 0.212186926 | 0.603149786 | 0.351798063 | 0.724989711 | 0.999371363 | Not Sig |
| ENSG00000158122 | AAED1    | AhpC/TSA antioxidant enzyme domain containing 1      | 195827 | 318.4831319 | 0.212311524 | 0.470315352 | 0.451423759 | 0.651684163 | 0.999371363 | Not Sig |
| ENSG00000241218 | NA       | NA                                                   | NA     | 3.023465373 | 0.21237335  | 1.674241901 | 0.12684747  | 0.899061123 | NA          | NA      |
| ENSG00000197976 | AKAP17A  | A-kinase anchoring protein 17A                       | 8227   | 1702.956273 | 0.212497827 | 0.490011077 | 0.43365923  | 0.664535916 | 0.999371363 | Not Sig |
| ENSG00000111729 | CLEC4A   | C-type lectin domain family 4 member A               | 50856  | 84.89990434 | 0.212587493 | 0.723767277 | 0.293723548 | 0.768969159 | 0.999371363 | Not Sig |
| ENSG00000156521 | TYSND1   | trypsin domain containing 1                          | 219743 | 410.4605966 | 0.213005655 | 0.535327483 | 0.397897851 | 0.690705484 | 0.999371363 | Not Sig |
| ENSG00000197442 | MAP3K5   | mitogen-activated protein kinase kinase kinase 5     | 4217   | 1919.578411 | 0.213038109 | 0.455409157 | 0.467794961 | 0.639931225 | 0.999371363 | Not Sig |
| ENSG00000223324 | NA       | NA                                                   | NA     | 9.762346032 | 0.213325712 | 1.170249655 | 0.182290771 | 0.855354541 | 0.999371363 | Not Sig |
| ENSG00000040933 | INPP4A   | inositol polyphosphate-4-phosphatase type I A        | 3631   | 1666.08735  | 0.213381717 | 0.424700578 | 0.502428601 | 0.615366065 | 0.999371363 | Not Sig |
| ENSG00000186625 | KATNA1   | katanin catalytic subunit A1                         | 11104  | 278.9460713 | 0.213564687 | 0.407467521 | 0.524126896 | 0.600190283 | 0.999371363 | Not Sig |
| ENSG00000242349 | NA       | NA                                                   | NA     | 42.94130857 | 0.213620183 | 0.792281117 | 0.269626751 | 0.787447418 | 0.999371363 | Not Sig |
| ENSG00000169855 | ROBO1    | roundabout guidance receptor 1                       | 6091   | 1218.497825 | 0.213852034 | 0.480480342 | 0.445079675 | 0.656262177 | 0.999371363 | Not Sig |
| ENSG00000111875 | ASF1A    | anti-silencing function 1A histone chaperone         | 25842  | 377.6705582 | 0.214109822 | 0.49013594  | 0.436837629 | 0.662229107 | 0.999371363 | Not Sig |
| ENSG00000166181 | API5     | apoptosis inhibitor 5                                | 8539   | 2164.098621 | 0.214190697 | 0.529602499 | 0.404436718 | 0.685891604 | 0.999371363 | Not Sig |
| ENSG00000103351 | CLUAP1   | clusterin associated protein 1                       | 23059  | 498.3110608 | 0.214289556 | 0.390045619 | 0.549396137 | 0.582733625 | 0.999371363 | Not Sig |
| ENSG00000005448 | WDR54    | WD repeat domain 54                                  | 84058  | 155.6997323 | 0.21435836  | 0.735098755 | 0.291604847 | 0.770588769 | 0.999371363 | Not Sig |
| ENSG00000067704 | IARS2    | isoleucyl-tRNA synthetase 2, mitochondrial           | 55699  | 2473.750539 | 0.214423159 | 0.483062196 | 0.443883129 | 0.657127083 | 0.999371363 | Not Sig |
| ENSG00000132361 | CLUH     | clustered mitochondria homolog                       | 23277  | 1879.379303 | 0.214814764 | 0.487040248 | 0.441061628 | 0.659168382 | 0.999371363 | Not Sig |
| ENSG00000110911 | SLC11A2  | solute carrier family 11 member 2                    | 4891   | 1951.027679 | 0.214869896 | 0.572901891 | 0.375055309 | 0.707619333 | 0.999371363 | Not Sig |
| ENSG00000240964 | NA       | NA                                                   | NA     | 11.25390808 | 0.214939986 | 0.905924007 | 0.237260503 | 0.812454701 | 0.999371363 | Not Sig |
| ENSG00000164169 | PRMT9    | protein arginine methyltransferase 9                 | 90826  | 367.1972892 | 0.214943809 | 0.443563332 | 0.484584261 | 0.627971281 | 0.999371363 | Not Sig |
| ENSG00000135409 | AMHR2    | anti-Mullerian hormone receptor type 2               | 269    | 3.787783444 | 0.215078746 | 1.841306237 | 0.1168077   | 0.907012442 | NA          | NA      |
| ENSG00000183307 | TMEM121B | transmembrane protein 121B                           | 27439  | 39.60437288 | 0.21545271  | 0.847956091 | 0.254084748 | 0.799430086 | 0.999371363 | Not Sig |
| ENSG00000168887 | C2orf68  | chromosome 2 open reading frame 68                   | 388969 | 867.7363287 | 0.215553672 | 0.429656693 | 0.501688152 | 0.6158869   | 0.999371363 | Not Sig |
| ENSG00000170647 | TMEM133  | transmembrane protein 133                            | 83935  | 161.731563  | 0.215644065 | 0.652836471 | 0.330318655 | 0.741159199 | 0.999371363 | Not Sig |
| ENSG00000112365 | ZBTB24   | zinc finger and BTB domain containing 24             | 9841   | 450.4196982 | 0.215814525 | 0.445381354 | 0.484561204 | 0.627987639 | 0.999371363 | Not Sig |
| ENSG00000115816 | CEBPZ    | CCAAT/enhancer binding protein zeta                  | 10153  | 1182.140729 | 0.215876748 | 0.413121468 | 0.522550301 | 0.601287234 | 0.999371363 | Not Sig |
| ENSG00000108883 | EFTUD2   | elongation factor Tu GTP binding domain containing 2 | 9343   | 1765.983649 | 0.215928574 | 0.429305549 | 0.502971775 | 0.614984117 | 0.999371363 | Not Sig |
| ENSG00000251034 | NA       | NA                                                   | NA     | 45.72082351 | 0.215934567 | 0.869654133 | 0.248299363 | 0.803902792 | 0.999371363 | Not Sig |
| ENSG00000182810 | DDX28    | DEAD-box helicase 28                                 | 55794  | 175.1148309 | 0.216052462 | 0.590808628 | 0.365689415 | 0.714596845 | 0.999371363 | Not Sig |
| ENSG00000169100 | SLC25A6  | solute carrier family 25 member 6                    | 293    | 5521.33885  | 0.216215724 | 0.474569158 | 0.455604246 | 0.648674589 | 0.999371363 | Not Sig |
| ENSG00000113838 | TBCCD1   | TBCC domain containing 1                             | 55171  | 248.4594351 | 0.216275715 | 0.405535656 | 0.533308754 | 0.593819869 | 0.999371363 | Not Sig |

|                 |          |                                                            |        |             |             |             |             |             |             |         |
|-----------------|----------|------------------------------------------------------------|--------|-------------|-------------|-------------|-------------|-------------|-------------|---------|
| ENSG00000132142 | NA       | NA                                                         | NA     | 3680.602923 | 0.216580864 | 0.498986058 | 0.434041915 | 0.664258004 | 0.999371363 | Not Sig |
| ENSG00000124780 | KCNK17   | potassium two pore domain channel subfamily K member 17    | 89822  | 61.78507757 | 0.217252113 | 0.808990108 | 0.268547304 | 0.788278068 | 0.999371363 | Not Sig |
| ENSG00000258824 | NA       | NA                                                         | NA     | 31.28362793 | 0.217325137 | 0.701336703 | 0.309872757 | 0.756657721 | 0.999371363 | Not Sig |
| ENSG00000171174 | RBKS     | ribokinase                                                 | 64080  | 120.57409   | 0.217344587 | 0.556207767 | 0.390761511 | 0.695973527 | 0.999371363 | Not Sig |
| ENSG00000188229 | TUBB4B   | tubulin beta 4B class IVb                                  | 10383  | 3795.666539 | 0.217439212 | 0.676885478 | 0.321234861 | 0.748032416 | 0.999371363 | Not Sig |
| ENSG00000138085 | ATRAID   | all-trans retinoic acid induced differentiation factor     | 51374  | 1180.638267 | 0.217485165 | 0.44599589  | 0.487639393 | 0.625805288 | 0.999371363 | Not Sig |
| ENSG00000196739 | COL27A1  | collagen type XXVII alpha 1 chain                          | 85301  | 1495.847342 | 0.217519144 | 0.616137637 | 0.353036612 | 0.724060993 | 0.999371363 | Not Sig |
| ENSG00000197580 | BCO2     | beta-carotene oxygenase 2                                  | 83875  | 69.0772641  | 0.217559685 | 0.524050019 | 0.415150611 | 0.678031652 | 0.999371363 | Not Sig |
| ENSG00000133318 | RTN3     | reticulon 3                                                | 10313  | 2505.47084  | 0.217575341 | 0.378902065 | 0.574225799 | 0.565815013 | 0.999371363 | Not Sig |
| ENSG00000138131 | LOXL4    | lysyl oxidase like 4                                       | 84171  | 321.8942573 | 0.217792319 | 0.722598291 | 0.301401653 | 0.763108234 | 0.999371363 | Not Sig |
| ENSG00000160113 | NR2F6    | nuclear receptor subfamily 2 group F member 6              | 2063   | 1156.678508 | 0.217845316 | 0.566037221 | 0.384860408 | 0.700340841 | 0.999371363 | Not Sig |
| ENSG00000132394 | EEFSEC   | eukaryotic elongation factor, selenocysteine-tRNA specific | 60678  | 434.8346274 | 0.217886277 | 0.515710007 | 0.42249767  | 0.672661801 | 0.999371363 | Not Sig |
| ENSG00000183696 | UPP1     | uridine phosphorylase 1                                    | 7378   | 1334.14314  | 0.217955338 | 0.651643217 | 0.334470355 | 0.738024657 | 0.999371363 | Not Sig |
| ENSG00000143158 | MPC2     | mitochondrial pyruvate carrier 2                           | 25874  | 687.9831493 | 0.218036288 | 0.470592984 | 0.463322436 | 0.643133266 | 0.999371363 | Not Sig |
| ENSG00000008394 | MGST1    | microsomal glutathione S-transferase 1                     | 4257   | 1938.622376 | 0.218208514 | 0.74198546  | 0.294087318 | 0.768691182 | 0.999371363 | Not Sig |
| ENSG00000215346 | NA       | NA                                                         | NA     | 33.1045498  | 0.218229609 | 0.818646526 | 0.266573671 | 0.78979743  | 0.999371363 | Not Sig |
| ENSG00000250966 | NA       | NA                                                         | NA     | 1.929995885 | 0.218451603 | 1.845307063 | 0.118382251 | 0.905764789 | NA          | NA      |
| ENSG00000136104 | RNASEH2B | ribonuclease H2 subunit B                                  | 79621  | 507.3638055 | 0.218708616 | 0.466768823 | 0.46855875  | 0.639385068 | 0.999371363 | Not Sig |
| ENSG00000169621 | PROKR1   | prokineticin receptor 1                                    | 10887  | 187.2409258 | 0.218828076 | 0.456259662 | 0.479613022 | 0.631502585 | 0.999371363 | Not Sig |
| ENSG00000169621 | APLF     | aprataxin and PNKP like factor                             | 200558 | 187.2409258 | 0.218828076 | 0.456259662 | 0.479613022 | 0.631502585 | 0.999371363 | Not Sig |
| ENSG00000155926 | SLA      | Src like adaptor                                           | 6503   | 866.7182939 | 0.218910608 | 0.786441915 | 0.278355723 | 0.780739305 | 0.999371363 | Not Sig |
| ENSG00000101361 | NOP56    | NOP56 ribonucleoprotein                                    | 10528  | 1033.615504 | 0.218925569 | 0.484055227 | 0.452273948 | 0.651071641 | 0.999371363 | Not Sig |
| ENSG00000267554 | NA       | NA                                                         | NA     | 43.34508384 | 0.218938627 | 0.728051484 | 0.300718605 | 0.76362908  | 0.999371363 | Not Sig |
| ENSG00000217130 | NA       | NA                                                         | NA     | 4.797415926 | 0.219103431 | 1.141601193 | 0.191926421 | 0.847799841 | NA          | NA      |
| ENSG00000100335 | MIEF1    | mitochondrial elongation factor 1                          | 54471  | 915.6901705 | 0.219161612 | 0.492145098 | 0.445319099 | 0.656089167 | 0.999371363 | Not Sig |
| ENSG00000196655 | TRAPPC4  | trafficking protein particle complex 4                     | 51399  | 430.3647216 | 0.219260074 | 0.50526787  | 0.433948184 | 0.664326069 | 0.999371363 | Not Sig |
| ENSG00000260152 | NA       | NA                                                         | NA     | 15.6327783  | 0.219407577 | 0.95304562  | 0.230217287 | 0.817922293 | 0.999371363 | Not Sig |
| ENSG00000197147 | LRR8B    | leucine rich repeat containing 8 VRAC subunit B            | 23507  | 1042.077069 | 0.219485562 | 0.634734309 | 0.345791237 | 0.729499611 | 0.999371363 | Not Sig |
| ENSG00000007866 | TEAD3    | TEA domain transcription factor 3                          | 7005   | 864.053771  | 0.219585845 | 0.486867671 | 0.451017511 | 0.651976928 | 0.999371363 | Not Sig |
| ENSG00000167103 | PIP5K1L  | phosphatidylinositol-4-phosphate 5-kinase like 1           | 138429 | 120.2520424 | 0.219626607 | 0.702009746 | 0.312854071 | 0.754391533 | 0.999371363 | Not Sig |
| ENSG00000112651 | MRPL2    | mitochondrial ribosomal protein L2                         | 51069  | 324.6816825 | 0.219866608 | 0.453021894 | 0.485333295 | 0.627439941 | 0.999371363 | Not Sig |
| ENSG00000108515 | ENO3     | enolase 3                                                  | 2027   | 106.5583109 | 0.220247137 | 0.538108168 | 0.409299004 | 0.682320246 | 0.999371363 | Not Sig |
| ENSG00000136944 | LMX1B    | LIM homeobox transcription factor 1 beta                   | 4010   | 50.26761143 | 0.220524737 | 1.462481411 | 0.150788062 | 0.880142904 | 0.999371363 | Not Sig |
| ENSG00000130939 | UBE4B    | ubiquitination factor E4B                                  | 10277  | 2048.330388 | 0.220876351 | 0.430667039 | 0.512870341 | 0.608042022 | 0.999371363 | Not Sig |
| ENSG00000168778 | TCTN2    | tectonic family member 2                                   | 79867  | 379.1761664 | 0.220883514 | 0.558818792 | 0.395268586 | 0.692644681 | 0.999371363 | Not Sig |

|                 |           |                                                       |        |             |             |             |             |             |             |         |
|-----------------|-----------|-------------------------------------------------------|--------|-------------|-------------|-------------|-------------|-------------|-------------|---------|
| ENSG00000137821 | LRRC49    | leucine rich repeat containing 49                     | 54839  | 116.2184507 | 0.220935756 | 0.602292712 | 0.366824555 | 0.713749891 | 0.999371363 | Not Sig |
| ENSG00000118620 | ZNF430    | zinc finger protein 430                               | 80264  | 318.3146456 | 0.221098381 | 0.560463544 | 0.394491994 | 0.693217837 | 0.999371363 | Not Sig |
| ENSG00000248654 | NA        | NA                                                    | NA     | 1.169557408 | 0.221114264 | 2.193717682 | 0.100794312 | 0.919713743 | NA          | NA      |
| ENSG00000126215 | XRCC3     | X-ray repair cross complementing 3                    | 7517   | 180.4374062 | 0.221281016 | 0.63652567  | 0.347638793 | 0.728111469 | 0.999371363 | Not Sig |
| ENSG00000052749 | RRP12     | ribosomal RNA processing 12 homolog                   | 23223  | 822.9301286 | 0.221657707 | 0.433930377 | 0.51081399  | 0.609481312 | 0.999371363 | Not Sig |
| ENSG00000233830 | NA        | NA                                                    | NA     | 5.11684095  | 0.221700206 | 1.229332156 | 0.180341989 | 0.856884094 | NA          | NA      |
| ENSG00000139505 | MTMR6     | myotubularin related protein 6                        | 9107   | 965.5732407 | 0.221730421 | 0.542047376 | 0.409060961 | 0.682494924 | 0.999371363 | Not Sig |
| ENSG00000157216 | SSBP3     | single stranded DNA binding protein 3                 | 23648  | 1104.985593 | 0.221873635 | 0.528963576 | 0.41944974  | 0.674887479 | 0.999371363 | Not Sig |
| ENSG00000171791 | BCL2      | BCL2, apoptosis regulator                             | 596    | 570.6133736 | 0.221874527 | 0.703191097 | 0.315525222 | 0.752362904 | 0.999371363 | Not Sig |
| ENSG00000103510 | KAT8      | lysine acetyltransferase 8                            | 84148  | 1043.898602 | 0.222049316 | 0.493799984 | 0.449674613 | 0.652945079 | 0.999371363 | Not Sig |
| ENSG00000272508 | NA        | NA                                                    | NA     | 3.170953281 | 0.222219494 | 1.369813284 | 0.16222612  | 0.871127792 | NA          | NA      |
| ENSG00000260267 | NA        | NA                                                    | NA     | 349.9141493 | 0.222348015 | 0.461257721 | 0.482047247 | 0.629772383 | 0.999371363 | Not Sig |
| ENSG00000167123 | CERCAM    | cerebral endothelial cell adhesion molecule           | 51148  | 616.8467271 | 0.222367993 | 0.637929797 | 0.348577529 | 0.7274065   | 0.999371363 | Not Sig |
| ENSG00000148291 | SURF2     | surfeit 2                                             | 6835   | 164.1226112 | 0.222446576 | 0.68674602  | 0.323913892 | 0.746003227 | 0.999371363 | Not Sig |
| ENSG00000087302 | RTRAF     | RNA transcription, translation and transport factor   | 51637  | 885.2202052 | 0.222477712 | 0.470218788 | 0.473136587 | 0.636115736 | 0.999371363 | Not Sig |
| ENSG00000116791 | CRYZ      | crystallin zeta                                       | 1429   | 695.9367594 | 0.222500259 | 0.583154056 | 0.381546277 | 0.702797939 | 0.999371363 | Not Sig |
| ENSG00000227372 | TP73-AS1  | TP73 antisense RNA 1                                  | 57212  | 844.4473606 | 0.222576977 | 0.503406326 | 0.442141795 | 0.658386602 | 0.999371363 | Not Sig |
| ENSG00000259426 | LOC145694 | uncharacterized LOC145694                             | 145694 | 27.44201063 | 0.222847447 | 0.691845774 | 0.322105671 | 0.747372642 | 0.999371363 | Not Sig |
| ENSG00000158019 | BABAM2    | BRISC and BRCA1 A complex member 2                    | 9577   | 445.6998223 | 0.2228541   | 0.45310444  | 0.491838262 | 0.622833686 | 0.999371363 | Not Sig |
| ENSG00000173418 | NAA20     | N(alpha)-acetyltransferase 20, NatB catalytic subunit | 51126  | 530.5373737 | 0.22293446  | 0.461679715 | 0.48287688  | 0.629183159 | 0.999371363 | Not Sig |
| ENSG00000135506 | OS9       | OS9, endoplasmic reticulum lectin                     | 10956  | 6510.038213 | 0.223136218 | 0.486389533 | 0.458760321 | 0.646406292 | 0.999371363 | Not Sig |
| ENSG00000238368 | NA        | NA                                                    | NA     | 9.587082767 | 0.223159714 | 1.379517185 | 0.161766535 | 0.871489707 | 0.999371363 | Not Sig |
| ENSG00000206190 | ATP10A    | ATPase phospholipid transporting 10A (putative)       | 57194  | 1129.789625 | 0.223430492 | 0.619056271 | 0.360921135 | 0.718158404 | 0.999371363 | Not Sig |
| ENSG00000117395 | EBNA1BP2  | EBNA1 binding protein 2                               | 10969  | 628.6168879 | 0.223439291 | 0.42707689  | 0.523182819 | 0.600847037 | 0.999371363 | Not Sig |
| ENSG00000254912 | NA        | NA                                                    | NA     | 13.72312637 | 0.223561455 | 1.069222325 | 0.209087905 | 0.834379617 | 0.999371363 | Not Sig |
| ENSG00000261614 | NA        | NA                                                    | NA     | 1.102043486 | 0.223677029 | 2.52453646  | 0.088601228 | 0.929398833 | NA          | NA      |
| ENSG00000224728 | NA        | NA                                                    | NA     | 11.93116857 | 0.22372489  | 0.898602683 | 0.248969755 | 0.803384177 | 0.999371363 | Not Sig |
| ENSG00000157349 | DDX19B    | DEAD-box helicase 19B                                 | 11269  | 353.4159103 | 0.223805218 | 0.430483655 | 0.519892487 | 0.603138512 | 0.999371363 | Not Sig |
| ENSG00000137413 | TAF8      | TATA-box binding protein associated factor 8          | 129685 | 965.1841593 | 0.223869456 | 0.418472882 | 0.534967656 | 0.592672223 | 0.999371363 | Not Sig |
| ENSG00000187695 | KIAA1257  | KIAA1257                                              | 57501  | 21.27851465 | 0.223921862 | 1.087658258 | 0.205875201 | 0.836888398 | 0.999371363 | Not Sig |
| ENSG00000141551 | CSNK1D    | casein kinase 1 delta                                 | 1453   | 4076.927581 | 0.223931447 | 0.509320462 | 0.439667093 | 0.66017824  | 0.999371363 | Not Sig |
| ENSG00000166763 | NA        | NA                                                    | NA     | 5.744089377 | 0.22439603  | 1.215985892 | 0.18453835  | 0.853591145 | NA          | NA      |
| ENSG00000100596 | SPTLC2    | serine palmitoyltransferase long chain base subunit 2 | 9517   | 2977.917661 | 0.224397322 | 0.481755858 | 0.465790541 | 0.641365436 | 0.999371363 | Not Sig |
| ENSG00000214174 | AMZ2P1    | archaealysin family metallopeptidase 2 pseudogene 1   | 201283 | 190.9709746 | 0.224472977 | 0.468350014 | 0.479284659 | 0.631736134 | 0.999371363 | Not Sig |
| ENSG00000038274 | MAT2B     | methionine adenosyltransferase 2B                     | 27430  | 1194.94248  | 0.224476561 | 0.473679103 | 0.473900073 | 0.635571167 | 0.999371363 | Not Sig |

|                 |           |                                                                     |           |             |             |             |             |             |             |         |
|-----------------|-----------|---------------------------------------------------------------------|-----------|-------------|-------------|-------------|-------------|-------------|-------------|---------|
| ENSG00000111877 | MCM9      | minichromosome maintenance 9 homologous recombination repair factor | 254394    | 757.8228213 | 0.22462597  | 0.495720844 | 0.453129967 | 0.650455158 | 0.999371363 | Not Sig |
| ENSG00000253910 | PCDHGB2   | protocadherin gamma subfamily B, 2                                  | 56103     | 203.3874141 | 0.224636038 | 0.704292214 | 0.318952891 | 0.749762236 | 0.999371363 | Not Sig |
| ENSG00000197136 | PCNX3     | pecanex homolog 3                                                   | 399909    | 2363.317525 | 0.224813339 | 0.570541651 | 0.394034929 | 0.693555251 | 0.999371363 | Not Sig |
| ENSG00000162378 | ZYG11B    | zyg-11 family member B, cell cycle regulator                        | 79699     | 1472.49947  | 0.224844735 | 0.497444146 | 0.451999962 | 0.65126901  | 0.999371363 | Not Sig |
| ENSG00000104969 | SGTA      | small glutamine rich tetratricopeptide repeat containing alpha      | 6449      | 1070.197283 | 0.224977031 | 0.665823503 | 0.337892895 | 0.735443902 | 0.999371363 | Not Sig |
| ENSG00000151365 | THRSP     | thyroid hormone responsive                                          | 7069      | 0.670334946 | 0.224982651 | 3.995111204 | 0.05631449  | 0.955091276 | NA          | NA      |
| ENSG00000164123 | C4orf45   | chromosome 4 open reading frame 45                                  | 152940    | 0.670334946 | 0.224982651 | 3.995111204 | 0.05631449  | 0.955091276 | NA          | NA      |
| ENSG00000225185 | NA        | NA                                                                  | NA        | 0.670334946 | 0.224982651 | 3.995111204 | 0.05631449  | 0.955091276 | NA          | NA      |
| ENSG00000170915 | PAQR8     | progesterone and adipoQ receptor family member 8                    | 85315     | 337.4697155 | 0.225339066 | 0.529057587 | 0.425925403 | 0.670162204 | 0.999371363 | Not Sig |
| ENSG00000066044 | ELAVL1    | ELAV like RNA binding protein 1                                     | 1994      | 1160.647006 | 0.225635712 | 0.410001521 | 0.550328963 | 0.582093762 | 0.999371363 | Not Sig |
| ENSG00000182095 | TNRC18    | trinucleotide repeat containing 18                                  | 84629     | 13924.19094 | 0.225898699 | 0.559632904 | 0.403655141 | 0.686466331 | 0.999371363 | Not Sig |
| ENSG00000137210 | TMEM14B   | transmembrane protein 14B                                           | 81853     | 584.5130642 | 0.226041305 | 0.556771574 | 0.405985715 | 0.684753097 | 0.999371363 | Not Sig |
| ENSG00000117751 | PPP1R8    | protein phosphatase 1 regulatory subunit 8                          | 5511      | 642.7995818 | 0.226185453 | 0.400872327 | 0.564233144 | 0.572595474 | 0.999371363 | Not Sig |
| ENSG00000235217 | TSPY26P   | testis specific protein, Y-linked 26, pseudogene                    | 128854    | 126.0576052 | 0.226228197 | 0.722044305 | 0.313316227 | 0.754040423 | 0.999371363 | Not Sig |
| ENSG00000254331 | NA        | NA                                                                  | NA        | 5.341407982 | 0.226286601 | 1.131203736 | 0.200040536 | 0.841448879 | NA          | NA      |
| ENSG00000198542 | ITGBL1    | integrin subunit beta like 1                                        | 9358      | 1491.193426 | 0.226394809 | 0.502546378 | 0.450495356 | 0.652353302 | 0.999371363 | Not Sig |
| ENSG00000110079 | MS4A4A    | membrane spanning 4-domains A4A                                     | 51338     | 341.6367625 | 0.226446776 | 0.807695567 | 0.280361544 | 0.779200138 | 0.999371363 | Not Sig |
| ENSG00000106609 | TMEM248   | transmembrane protein 248                                           | 55069     | 3678.294539 | 0.226489361 | 0.398727541 | 0.56803039  | 0.570014333 | 0.999371363 | Not Sig |
| ENSG00000176933 | NA        | NA                                                                  | NA        | 22.98439437 | 0.226594278 | 0.649484109 | 0.348883483 | 0.727176786 | 0.999371363 | Not Sig |
| ENSG00000140264 | SERF2     | small EDRK-rich factor 2                                            | 10169     | 5506.697978 | 0.226702055 | 0.458554765 | 0.494383817 | 0.621035141 | 0.999371363 | Not Sig |
| ENSG00000163832 | ELP6      | elongator acetyltransferase complex subunit 6                       | 54859     | 310.3514654 | 0.226748195 | 0.460637337 | 0.49224884  | 0.622543441 | 0.999371363 | Not Sig |
| ENSG00000196123 | KIAA0895L | KIAA0895 like                                                       | 653319    | 519.3718297 | 0.227079472 | 0.525892832 | 0.431797998 | 0.665888234 | 0.999371363 | Not Sig |
| ENSG00000165359 | INTS6L    | integrator complex subunit 6 like                                   | 203522    | 440.6269638 | 0.227091351 | 0.502453739 | 0.451964696 | 0.651294416 | 0.999371363 | Not Sig |
| ENSG00000112081 | SRSF3     | serine and arginine rich splicing factor 3                          | 6428      | 2840.090933 | 0.227920787 | 0.383640851 | 0.594099368 | 0.552445654 | 0.999371363 | Not Sig |
| ENSG00000104915 | STX10     | syntaxin 10                                                         | 8677      | 710.5530953 | 0.227947301 | 0.611388124 | 0.37283567  | 0.709270753 | 0.999371363 | Not Sig |
| ENSG00000073969 | NSF       | N-ethylmaleimide sensitive factor, vesicle fusing ATPase            | 4905      | 1033.87614  | 0.227966644 | 0.507018608 | 0.44962185  | 0.65298313  | 0.999371363 | Not Sig |
| ENSG00000231651 | DLG3-AS1  | DLG3 antisense RNA 1                                                | 100873930 | 1.549494476 | 0.228091855 | 2.302404718 | 0.099066795 | 0.921085236 | NA          | NA      |
| ENSG00000143409 | MINDY1    | MINDY lysine 48 deubiquitinase 1                                    | 55793     | 746.6098014 | 0.228305777 | 0.53524714  | 0.426542731 | 0.669712418 | 0.999371363 | Not Sig |
| ENSG00000054118 | THRAP3    | thyroid hormone receptor associated protein 3                       | 9967      | 5248.349148 | 0.228600911 | 0.393412026 | 0.581072504 | 0.561191589 | 0.999371363 | Not Sig |
| ENSG00000196169 | KIF19     | kinesin family member 19                                            | 124602    | 110.8360304 | 0.228661385 | 1.049568428 | 0.217862294 | 0.827536407 | 0.999371363 | Not Sig |
| ENSG00000119227 | PIGZ      | phosphatidylinositol glycan anchor biosynthesis class Z             | 80235     | 128.4340388 | 0.229226992 | 0.703611173 | 0.325786459 | 0.744585925 | 0.999371363 | Not Sig |
| ENSG00000223668 | NA        | NA                                                                  | NA        | 1.175994943 | 0.229272647 | 2.5015959   | 0.091650553 | 0.926975685 | NA          | NA      |
| ENSG00000133943 | DGLUCY    | D-glutamate cyclase                                                 | 80017     | 1450.147139 | 0.229367717 | 0.471394915 | 0.486572318 | 0.626561445 | 0.999371363 | Not Sig |
| ENSG00000118308 | LRMP      | lymphoid restricted membrane protein                                | 4033      | 203.7319136 | 0.229565462 | 0.712645012 | 0.322131578 | 0.747353017 | 0.999371363 | Not Sig |
| ENSG00000166896 | ATP23     | ATP23 metalloproteinase and ATP synthase assembly factor homolog    | 91419     | 55.46143569 | 0.229732763 | 0.547246174 | 0.419797842 | 0.674633141 | 0.999371363 | Not Sig |



|                 |         |                                                          |        |             |             |             |             |             |             |         |
|-----------------|---------|----------------------------------------------------------|--------|-------------|-------------|-------------|-------------|-------------|-------------|---------|
| ENSG00000205670 | SMIM11A | small integral membrane protein 11A                      | 54065  | 216.3270462 | 0.22974478  | 0.489254695 | 0.469581144 | 0.638654299 | 0.999371363 | Not Sig |
| ENSG00000157353 | FUK     | fucokinase                                               | 197258 | 651.8070049 | 0.229812655 | 0.513663453 | 0.447399273 | 0.654586801 | 0.999371363 | Not Sig |
| ENSG00000154127 | UBASH3B | ubiquitin associated and SH3 domain containing B         | 84959  | 545.1710074 | 0.229916541 | 0.555019047 | 0.41424982  | 0.678691159 | 0.999371363 | Not Sig |
| ENSG00000133818 | RRAS2   | RAS related 2                                            | 22800  | 655.5924037 | 0.230018948 | 0.502843341 | 0.457436599 | 0.647357263 | 0.999371363 | Not Sig |
| ENSG00000141699 | RETREG3 | reticulophagy regulator family member 3                  | 162427 | 2034.73464  | 0.230066032 | 0.465816785 | 0.493898114 | 0.621378136 | 0.999371363 | Not Sig |
| ENSG00000153714 | LURAP1L | leucine rich adaptor protein 1 like                      | 286343 | 364.4013385 | 0.2302037   | 0.67351767  | 0.341793111 | 0.732506594 | 0.999371363 | Not Sig |
| ENSG00000269097 | NA      | NA                                                       | NA     | 5.714198274 | 0.230226999 | 1.452079164 | 0.158549895 | 0.874023507 | NA          | NA      |
| ENSG00000231741 | NA      | NA                                                       | NA     | 3.496666505 | 0.230296074 | 1.465310022 | 0.157165426 | 0.875114476 | NA          | NA      |
| ENSG00000147804 | SLC39A4 | solute carrier family 39 member 4                        | 55630  | 428.1067627 | 0.230644783 | 0.690993728 | 0.333787087 | 0.738540228 | 0.999371363 | Not Sig |
| ENSG00000165527 | ARF6    | ADP ribosylation factor 6                                | 382    | 1908.578857 | 0.230647206 | 0.462280287 | 0.498933684 | 0.617826103 | 0.999371363 | Not Sig |
| ENSG00000133226 | SRRM1   | serine and arginine repetitive matrix 1                  | 10250  | 3654.814425 | 0.230700003 | 0.454691004 | 0.50737754  | 0.611889942 | 0.999371363 | Not Sig |
| ENSG00000105472 | CLEC11A | C-type lectin domain containing 11A                      | 6320   | 201.0217195 | 0.230707243 | 0.48146908  | 0.479173538 | 0.631815178 | 0.999371363 | Not Sig |
| ENSG00000119431 | HDHD3   | haloacid dehalogenase like hydrolase domain containing 3 | 81932  | 409.499972  | 0.230708703 | 0.590230323 | 0.390879109 | 0.695886596 | 0.999371363 | Not Sig |
| ENSG00000156959 | LHFPL4  | LHFPL tetraspan subfamily member 4                       | 375323 | 1.140375545 | 0.230718381 | 2.236651683 | 0.103153469 | 0.917841169 | NA          | NA      |
| ENSG00000267387 | NA      | NA                                                       | NA     | 1.140375545 | 0.230718381 | 2.236651683 | 0.103153469 | 0.917841169 | NA          | NA      |
| ENSG00000157426 | AASDH   | aminoadipate-semialdehyde dehydrogenase                  | 132949 | 426.4277783 | 0.231131703 | 0.511481277 | 0.451886928 | 0.651350442 | 0.999371363 | Not Sig |
| ENSG00000115053 | NCL     | nucleolin                                                | 4691   | 8414.858451 | 0.231171384 | 0.430049555 | 0.537545921 | 0.590890574 | 0.999371363 | Not Sig |
| ENSG00000211879 | NA      | NA                                                       | NA     | 7.36227118  | 0.231188518 | 1.049952631 | 0.220189474 | 0.825723594 | 0.999371363 | Not Sig |
| ENSG00000140632 | GLYR1   | glyoxylate reductase 1 homolog                           | 84656  | 1649.983559 | 0.231269189 | 0.3950816   | 0.585370689 | 0.558298493 | 0.999371363 | Not Sig |
| ENSG00000251429 | NA      | NA                                                       | NA     | 18.04000049 | 0.231302214 | 0.920827004 | 0.251189651 | 0.801667485 | 0.999371363 | Not Sig |
| ENSG00000243970 | NA      | NA                                                       | NA     | 45.70593073 | 0.231313512 | 0.576078353 | 0.401531338 | 0.688028971 | 0.999371363 | Not Sig |
| ENSG00000164252 | AGGF1   | angiogenic factor with G-patch and FHA domains 1         | 55109  | 1025.197066 | 0.231347594 | 0.413981617 | 0.558835428 | 0.576274042 | 0.999371363 | Not Sig |
| ENSG00000116885 | OSCP1   | organic solute carrier partner 1                         | 127700 | 212.7554078 | 0.231396934 | 0.475748001 | 0.48638551  | 0.626693862 | 0.999371363 | Not Sig |
| ENSG00000127954 | STEAP4  | STEAP4 metalloreductase                                  | 79689  | 8524.128041 | 0.231516471 | 0.710465834 | 0.325865734 | 0.744525942 | 0.999371363 | Not Sig |
| ENSG00000132676 | DAP3    | death associated protein 3                               | 7818   | 1346.017307 | 0.231528152 | 0.425487269 | 0.544148246 | 0.586339462 | 0.999371363 | Not Sig |
| ENSG00000268688 | NA      | NA                                                       | NA     | 12.02205756 | 0.231694486 | 0.888331388 | 0.26081988  | 0.794231413 | 0.999371363 | Not Sig |
| ENSG00000079482 | OPHN1   | oligophrenin 1                                           | 4983   | 1039.707177 | 0.231749665 | 0.434614076 | 0.533230923 | 0.593873738 | 0.999371363 | Not Sig |
| ENSG00000186716 | BCR     | BCR, RhoGEF and GTPase activating protein                | 613    | 3362.625804 | 0.2317761   | 0.639393556 | 0.362493644 | 0.716983172 | 0.999371363 | Not Sig |
| ENSG00000128815 | WDFY4   | WDFY family member 4                                     | 57705  | 1397.605747 | 0.231791281 | 0.758377519 | 0.305641023 | 0.759877982 | 0.999371363 | Not Sig |
| ENSG00000119599 | DCAF4   | DDB1 and CUL4 associated factor 4                        | 26094  | 286.344194  | 0.23200471  | 0.454116571 | 0.51089241  | 0.609426396 | 0.999371363 | Not Sig |
| ENSG00000165521 | EML5    | echinoderm microtubule associated protein like 5         | 161436 | 111.0729661 | 0.232079074 | 0.860444996 | 0.269719826 | 0.787375807 | 0.999371363 | Not Sig |
| ENSG00000106868 | SUSD1   | sushi domain containing 1                                | 64420  | 792.9796885 | 0.232208309 | 0.397109985 | 0.584745582 | 0.5587188   | 0.999371363 | Not Sig |
| ENSG00000245869 | NA      | NA                                                       | NA     | 2.552129517 | 0.232363759 | 2.098789973 | 0.110713203 | 0.911843776 | NA          | NA      |
| ENSG00000100351 | GRAP2   | GRB2-related adaptor protein 2                           | 9402   | 237.3892996 | 0.232464554 | 0.785601001 | 0.295906642 | 0.767301379 | 0.999371363 | Not Sig |
| ENSG00000157379 | DHRS1   | dehydrogenase/reductase 1                                | 115817 | 382.5058697 | 0.232465141 | 0.459594875 | 0.505804467 | 0.612993923 | 0.999371363 | Not Sig |

|                 |              |                                                            |           |             |             |             |             |             |             |         |
|-----------------|--------------|------------------------------------------------------------|-----------|-------------|-------------|-------------|-------------|-------------|-------------|---------|
| ENSG00000168040 | FADD         | Fas associated via death domain                            | 8772      | 469.1298764 | 0.232528719 | 0.504129023 | 0.461248428 | 0.644620381 | 0.999371363 | Not Sig |
| ENSG00000143314 | MRPL24       | mitochondrial ribosomal protein L24                        | 79590     | 643.931389  | 0.232659047 | 0.514374552 | 0.452314459 | 0.651042461 | 0.999371363 | Not Sig |
| ENSG00000141985 | SH3GL1       | SH3 domain containing GRB2 like 1, endophilin A2           | 6455      | 1241.091701 | 0.232677028 | 0.544455862 | 0.427357007 | 0.669119317 | 0.999371363 | Not Sig |
| ENSG00000242163 | NA           | NA                                                         | NA        | 8.144995214 | 0.232762558 | 0.948838486 | 0.24531315  | 0.806213971 | 0.999371363 | Not Sig |
| ENSG00000258796 | NA           | NA                                                         | NA        | 4.389869116 | 0.23276705  | 1.529730495 | 0.15216213  | 0.879059062 | NA          | NA      |
| ENSG00000100271 | TTL1         | tubulin tyrosine ligase like 1                             | 25809     | 139.0846684 | 0.232912005 | 0.50493027  | 0.461275584 | 0.6446009   | 0.999371363 | Not Sig |
| ENSG00000163071 | SPATA18      | spermatogenesis associated 18                              | 132671    | 450.0852372 | 0.233023144 | 0.815560359 | 0.285721519 | 0.775091422 | 0.999371363 | Not Sig |
| ENSG00000227199 | ST7-AS1      | ST7 antisense RNA 1                                        | 93653     | 46.73606966 | 0.233097938 | 0.762191652 | 0.305825887 | 0.759737217 | 0.999371363 | Not Sig |
| ENSG00000188486 | H2AFX        | H2A histone family member X                                | 3014      | 582.9264045 | 0.233430937 | 0.46603094  | 0.5008915   | 0.616447485 | 0.999371363 | Not Sig |
| ENSG00000272277 | NA           | NA                                                         | NA        | 18.73429666 | 0.233570775 | 0.892302499 | 0.261761875 | 0.793505034 | 0.999371363 | Not Sig |
| ENSG00000182504 | CEP97        | centrosomal protein 97                                     | 79598     | 463.0522728 | 0.233693177 | 0.552442981 | 0.423017731 | 0.672282324 | 0.999371363 | Not Sig |
| ENSG00000198783 | ZNF830       | zinc finger protein 830                                    | 91603     | 263.7848355 | 0.233760659 | 0.525021639 | 0.445240048 | 0.656146288 | 0.999371363 | Not Sig |
| ENSG00000204253 | NA           | NA                                                         | NA        | 15.07953764 | 0.233917244 | 0.760524686 | 0.307573506 | 0.758406883 | 0.999371363 | Not Sig |
| ENSG00000119888 | EPCAM        | epithelial cell adhesion molecule                          | 4072      | 5550.507826 | 0.234050509 | 0.604961004 | 0.386885282 | 0.698841138 | 0.999371363 | Not Sig |
| ENSG00000131236 | CAP1         | cyclase associated actin cytoskeleton regulatory protein 1 | 10487     | 5670.065672 | 0.234062246 | 0.406315172 | 0.576061333 | 0.564573726 | 0.999371363 | Not Sig |
| ENSG00000076604 | TRAF4        | TNF receptor associated factor 4                           | 9618      | 1458.856055 | 0.23410349  | 0.566685231 | 0.413110273 | 0.679525823 | 0.999371363 | Not Sig |
| ENSG00000101040 | ZMYND8       | zinc finger MYND-type containing 8                         | 23613     | 1755.31379  | 0.234169224 | 0.405567496 | 0.577386568 | 0.563678346 | 0.999371363 | Not Sig |
| ENSG00000139974 | SLC38A6      | solute carrier family 38 member 6                          | 145389    | 352.3494382 | 0.234244472 | 0.717656115 | 0.326402112 | 0.744120139 | 0.999371363 | Not Sig |
| ENSG00000137094 | DNAJB5       | DnaJ heat shock protein family (Hsp40) member B5           | 25822     | 179.2391057 | 0.234251083 | 0.606025346 | 0.386536775 | 0.699099172 | 0.999371363 | Not Sig |
| ENSG00000216906 | NA           | NA                                                         | NA        | 22.76867552 | 0.234313284 | 0.781720653 | 0.29974043  | 0.764375157 | 0.999371363 | Not Sig |
| ENSG00000186416 | NKRF         | NFKB repressing factor                                     | 55922     | 249.0579708 | 0.234423351 | 0.5304473   | 0.441935233 | 0.658536074 | 0.999371363 | Not Sig |
| ENSG00000226675 | NA           | NA                                                         | NA        | 5.569694507 | 0.234561084 | 1.256686663 | 0.186650412 | 0.851934738 | NA          | NA      |
| ENSG00000269948 | NA           | NA                                                         | NA        | 18.76621421 | 0.234984467 | 0.763962383 | 0.307586436 | 0.758397042 | 0.999371363 | Not Sig |
| ENSG00000260593 | NA           | NA                                                         | NA        | 5.498610428 | 0.23514146  | 1.087373675 | 0.216247152 | 0.828795101 | NA          | NA      |
| ENSG00000159403 | C1R          | complement C1r                                             | 715       | 2659.265077 | 0.23514975  | 0.455439314 | 0.516314122 | 0.605635035 | 0.999371363 | Not Sig |
| ENSG00000174996 | KLC2         | kinesin light chain 2                                      | 64837     | 638.4890414 | 0.235456506 | 0.519160475 | 0.453533189 | 0.65016485  | 0.999371363 | Not Sig |
| ENSG00000100362 | PVALB        | parvalbumin                                                | 5816      | 2.48446626  | 0.235653758 | 1.750389077 | 0.134629358 | 0.892904928 | NA          | NA      |
| ENSG00000064225 | ST3GAL6      | ST3 beta-galactoside alpha-2,3-sialyltransferase 6         | 10402     | 367.434576  | 0.235859422 | 0.582809803 | 0.404693642 | 0.685702716 | 0.999371363 | Not Sig |
| ENSG00000163393 | SLC22A15     | solute carrier family 22 member 15                         | 55356     | 258.6200217 | 0.236186527 | 0.589285278 | 0.400801676 | 0.688566145 | 0.999371363 | Not Sig |
| ENSG00000001497 | LAS1L        | LAS1 like, ribosome biogenesis factor                      | 81887     | 701.1466704 | 0.236552574 | 0.445964532 | 0.53042912  | 0.59581444  | 0.999371363 | Not Sig |
| ENSG00000206755 | SNORA30      | small nucleolar RNA, H/ACA box 30                          | 677813    | 4.319902824 | 0.236574185 | 1.205713463 | 0.196210951 | 0.844445057 | NA          | NA      |
| ENSG00000159352 | PSMD4        | proteasome 26S subunit, non-ATPase 4                       | 5710      | 1690.16711  | 0.236811203 | 0.507425072 | 0.466691963 | 0.640720281 | 0.999371363 | Not Sig |
| ENSG00000117410 | ATP6VOB      | ATPase H+ transporting V0 subunit b                        | 533       | 1400.081064 | 0.236999827 | 0.53214435  | 0.445367554 | 0.656054156 | 0.999371363 | Not Sig |
| ENSG00000100425 | BRD1         | bromodomain containing 1                                   | 23774     | 2018.238022 | 0.237170906 | 0.571905293 | 0.414703115 | 0.678359252 | 0.999371363 | Not Sig |
| ENSG00000264278 | LOC100131655 | uncharacterized LOC100131655                               | 100131655 | 61.03913781 | 0.237341066 | 0.69512629  | 0.341435893 | 0.732775458 | 0.999371363 | Not Sig |

|                 |              |                                                       |           |             |             |             |             |             |             |         |
|-----------------|--------------|-------------------------------------------------------|-----------|-------------|-------------|-------------|-------------|-------------|-------------|---------|
| ENSG00000255182 | NA           | NA                                                    | NA        | 18.76417686 | 0.237346538 | 0.800145173 | 0.296629344 | 0.766749505 | 0.999371363 | Not Sig |
| ENSG00000166595 | FAM96B       | family with sequence similarity 96 member B           | 51647     | 402.1904726 | 0.237412217 | 0.504258667 | 0.470814351 | 0.637773315 | 0.999371363 | Not Sig |
| ENSG00000163866 | SMIM12       | small integral membrane protein 12                    | 113444    | 455.633857  | 0.237542842 | 0.449218837 | 0.52879092  | 0.596950497 | 0.999371363 | Not Sig |
| ENSG00000185115 | NSMCE3       | NSE3 homolog, SMC5-SMC6 complex component             | 56160     | 394.6245806 | 0.237658875 | 0.572257962 | 0.41530025  | 0.677922118 | 0.999371363 | Not Sig |
| ENSG00000256771 | ZNF253       | zinc finger protein 253                               | 56242     | 280.8866731 | 0.237802964 | 0.558896534 | 0.42548656  | 0.670482017 | 0.999371363 | Not Sig |
| ENSG00000176273 | SLC35G1      | solute carrier family 35 member G1                    | 159371    | 70.09637847 | 0.237890589 | 0.571380797 | 0.41634334  | 0.677158783 | 0.999371363 | Not Sig |
| ENSG00000252481 | SCARNA13     | small Cajal body-specific RNA 13                      | 677768    | 1939.769622 | 0.238007032 | 0.533990314 | 0.445714136 | 0.655803752 | 0.999371363 | Not Sig |
| ENSG00000235363 | NA           | NA                                                    | NA        | 14.58387442 | 0.238093866 | 0.801129967 | 0.297197553 | 0.76631569  | 0.999371363 | Not Sig |
| ENSG00000163093 | BBS5         | Bardet-Biedl syndrome 5                               | 129880    | 128.0500803 | 0.238131599 | 0.740886934 | 0.321414224 | 0.747896505 | 0.999371363 | Not Sig |
| ENSG00000260920 | NA           | NA                                                    | NA        | 33.46274368 | 0.238189241 | 1.262618738 | 0.188647003 | 0.850369491 | 0.999371363 | Not Sig |
| ENSG00000105662 | CRTC1        | CREB regulated transcription coactivator 1            | 23373     | 713.5940071 | 0.238220871 | 0.573033844 | 0.415718676 | 0.677615874 | 0.999371363 | Not Sig |
| ENSG00000233621 | LINC01137    | long intergenic non-protein coding RNA 1137           | 728431    | 123.705199  | 0.238250001 | 0.689622875 | 0.34547868  | 0.729734536 | 0.999371363 | Not Sig |
| ENSG00000137692 | DCUN1D5      | defective in cullin neddylation 1 domain containing 5 | 84259     | 391.8138315 | 0.238355728 | 0.418284867 | 0.569840669 | 0.568785769 | 0.999371363 | Not Sig |
| ENSG00000258430 | NA           | NA                                                    | NA        | 12.26970691 | 0.238528424 | 1.066984328 | 0.223553822 | 0.823104499 | 0.999371363 | Not Sig |
| ENSG00000163482 | STK36        | serine/threonine kinase 36                            | 27148     | 601.3016736 | 0.23859862  | 0.421846581 | 0.5656052   | 0.571662192 | 0.999371363 | Not Sig |
| ENSG00000143337 | TOR1AIP1     | torsin 1A interacting protein 1                       | 26092     | 1931.990982 | 0.239072388 | 0.384536762 | 0.621715301 | 0.534129089 | 0.999371363 | Not Sig |
| ENSG00000137054 | POLR1E       | RNA polymerase I subunit E                            | 64425     | 271.635302  | 0.239144464 | 0.534868701 | 0.447108727 | 0.654796558 | 0.999371363 | Not Sig |
| ENSG00000166503 | HDGFL3       | HDGF like 3                                           | 50810     | 376.4892436 | 0.239328388 | 0.649179012 | 0.368663163 | 0.71237881  | 0.999371363 | Not Sig |
| ENSG00000197744 | NA           | NA                                                    | NA        | 16.01676331 | 0.239657893 | 0.766492005 | 0.312668484 | 0.754532542 | 0.999371363 | Not Sig |
| ENSG00000180304 | OAZ2         | ornithine decarboxylase antizyme 2                    | 4947      | 1161.505646 | 0.23968715  | 0.405699418 | 0.590799837 | 0.554654544 | 0.999371363 | Not Sig |
| ENSG00000003249 | DBNDD1       | dysbindin domain containing 1                         | 79007     | 362.3475906 | 0.239720672 | 0.737855278 | 0.324888469 | 0.745265484 | 0.999371363 | Not Sig |
| ENSG00000143702 | CEP170       | centrosomal protein 170                               | 9859      | 1899.865416 | 0.239830081 | 0.433913257 | 0.552714343 | 0.58045903  | 0.999371363 | Not Sig |
| ENSG00000143702 | CEP170P1     | centrosomal protein 170 pseudogene 1                  | 645455    | 1899.865416 | 0.239830081 | 0.433913257 | 0.552714343 | 0.58045903  | 0.999371363 | Not Sig |
| ENSG00000121058 | COIL         | coilin                                                | 8161      | 440.8100966 | 0.239839111 | 0.470943919 | 0.509273187 | 0.610560749 | 0.999371363 | Not Sig |
| ENSG00000112282 | MED23        | mediator complex subunit 23                           | 9439      | 1452.886342 | 0.239856248 | 0.525070484 | 0.456807715 | 0.64780926  | 0.999371363 | Not Sig |
| ENSG00000100105 | PATZ1        | POZ/BTB and AT hook containing zinc finger 1          | 23598     | 1212.21482  | 0.240191587 | 0.530478232 | 0.452783117 | 0.650704922 | 0.999371363 | Not Sig |
| ENSG00000146587 | RBAK         | RB associated KRAB zinc finger                        | 57786     | 933.2187799 | 0.240357785 | 0.708097705 | 0.339441554 | 0.734277119 | 0.999371363 | Not Sig |
| ENSG00000088205 | DDX18        | DEAD-box helicase 18                                  | 8886      | 1607.488659 | 0.24046528  | 0.429550915 | 0.559806233 | 0.575611611 | 0.999371363 | Not Sig |
| ENSG00000138606 | SHF          | Src homology 2 domain containing F                    | 90525     | 189.6017617 | 0.240565152 | 0.675906093 | 0.355915052 | 0.721904183 | 0.999371363 | Not Sig |
| ENSG00000204969 | PCDHA2       | protocadherin alpha 2                                 | 56146     | 8.955472811 | 0.24099157  | 1.095335956 | 0.220016122 | 0.825858599 | 0.999371363 | Not Sig |
| ENSG00000228716 | DHFR         | dihydrofolate reductase                               | 1719      | 465.1794515 | 0.241000461 | 0.504416626 | 0.477780566 | 0.632806395 | 0.999371363 | Not Sig |
| ENSG00000254231 | LOC105375624 | uncharacterized LOC105375624                          | 105375624 | 12.7824197  | 0.241575242 | 0.843433379 | 0.286418878 | 0.774557317 | 0.999371363 | Not Sig |
| ENSG00000173786 | CNP          | 2',3'-cyclic nucleotide 3' phosphodiesterase          | 1267      | 1749.202695 | 0.241593365 | 0.493362366 | 0.489687463 | 0.624355075 | 0.999371363 | Not Sig |
| ENSG00000264745 | TTC39C-AS1   | TTC39C antisense RNA 1                                | 102724246 | 6.115125641 | 0.241658971 | 1.408171907 | 0.171611839 | 0.863742699 | NA          | NA      |
| ENSG00000188996 | HUS1B        | HUS1 checkpoint clamp component B                     | 135458    | 21.54241404 | 0.24182235  | 0.696248007 | 0.347322143 | 0.728349317 | 0.999371363 | Not Sig |

|                 |                |                                                           |           |             |             |             |             |             |             |         |
|-----------------|----------------|-----------------------------------------------------------|-----------|-------------|-------------|-------------|-------------|-------------|-------------|---------|
| ENSG00000160803 | UBQLN4         | ubiquilin 4                                               | 56893     | 1243.146319 | 0.241943217 | 0.559127908 | 0.43271533  | 0.665221591 | 0.999371363 | Not Sig |
| ENSG00000065135 | GNAI3          | G protein subunit alpha i3                                | 2773      | 1352.280912 | 0.241994941 | 0.489637376 | 0.494232982 | 0.621141649 | 0.999371363 | Not Sig |
| ENSG00000059691 | GATB           | glutamyl-tRNA amidotransferase subunit B                  | 5188      | 302.0530248 | 0.242145559 | 0.416657944 | 0.581161508 | 0.561131607 | 0.999371363 | Not Sig |
| ENSG00000164465 | DCBLD1         | discoidin, CUB and LCCL domain containing 1               | 285761    | 892.2082182 | 0.242401552 | 0.540261531 | 0.448674462 | 0.65366651  | 0.999371363 | Not Sig |
| ENSG00000172331 | BPGM           | bisphosphoglycerate mutase                                | 669       | 256.4732009 | 0.242598316 | 0.464124377 | 0.522701086 | 0.601182283 | 0.999371363 | Not Sig |
| ENSG00000217442 | SYCE3          | synaptonemal complex central element protein 3            | 644186    | 5.176318026 | 0.242666546 | 1.137013101 | 0.213424582 | 0.830995808 | NA          | NA      |
| ENSG00000225756 | DBH-AS1        | DBH antisense RNA 1                                       | 138948    | 37.13904077 | 0.242678412 | 0.70597137  | 0.343751067 | 0.731033503 | 0.999371363 | Not Sig |
| ENSG00000159267 | HLCS           | holocarboxylase synthetase                                | 3141      | 891.5442269 | 0.242750678 | 0.482605638 | 0.503000088 | 0.614964211 | 0.999371363 | Not Sig |
| ENSG00000046647 | GEMIN8         | gem nuclear organelle associated protein 8                | 54960     | 345.8337239 | 0.243072499 | 0.440813404 | 0.551418121 | 0.581347081 | 0.999371363 | Not Sig |
| ENSG00000233646 | NA             | NA                                                        | NA        | 13.90710841 | 0.243295804 | 0.770848712 | 0.315620692 | 0.75229043  | 0.999371363 | Not Sig |
| ENSG00000197312 | DDI2           | DNA damage inducible 1 homolog 2                          | 84301     | 2163.683057 | 0.243350261 | 0.502711797 | 0.484075095 | 0.628332576 | 0.999371363 | Not Sig |
| ENSG00000162623 | TYW3           | tRNA-yW synthesizing protein 3 homolog                    | 127253    | 395.4748628 | 0.24350784  | 0.477651185 | 0.509802651 | 0.610189729 | 0.999371363 | Not Sig |
| ENSG00000158301 | GPRASP2        | G protein-coupled receptor associated sorting protein 2   | 114928    | 272.8001712 | 0.243588669 | 0.569747529 | 0.427537912 | 0.668987578 | 0.999371363 | Not Sig |
| ENSG00000158301 | ARMCX5-GPRASP2 | ARMCX5-GPRASP2 readthrough                                | 100528062 | 272.8001712 | 0.243588669 | 0.569747529 | 0.427537912 | 0.668987578 | 0.999371363 | Not Sig |
| ENSG00000137947 | GTF2B          | general transcription factor IIB                          | 2959      | 475.4100105 | 0.243611306 | 0.491736574 | 0.495410182 | 0.620310609 | 0.999371363 | Not Sig |
| ENSG00000237424 | FOX2-AS1       | FOX2 adjacent opposite strand RNA 1                       | 84793     | 91.87467803 | 0.243756847 | 0.641936858 | 0.379720908 | 0.704152598 | 0.999371363 | Not Sig |
| ENSG00000221983 | UBA52          | ubiquitin A-52 residue ribosomal protein fusion product 1 | 7311      | 2746.417508 | 0.243874978 | 0.514683375 | 0.473834964 | 0.635617599 | 0.999371363 | Not Sig |
| ENSG00000197061 | HIST1H4C       | histone cluster 1 H4 family member c                      | 8364      | 754.113715  | 0.244316808 | 0.401558864 | 0.608420906 | 0.542908349 | 0.999371363 | Not Sig |
| ENSG00000177595 | PIDD1          | p53-induced death domain protein 1                        | 55367     | 366.5587894 | 0.244447162 | 0.58861972  | 0.415288774 | 0.677930518 | 0.999371363 | Not Sig |
| ENSG00000092847 | AGO1           | argonaute 1, RISC catalytic component                     | 26523     | 2157.17439  | 0.244448433 | 0.424641689 | 0.575658111 | 0.564846294 | 0.999371363 | Not Sig |
| ENSG00000108671 | PSMD11         | proteasome 26S subunit, non-ATPase 11                     | 5717      | 1673.025232 | 0.244553513 | 0.415097538 | 0.589147106 | 0.555762596 | 0.999371363 | Not Sig |
| ENSG00000089818 | NECAP1         | NECAP endocytosis associated 1                            | 25977     | 718.5143623 | 0.244554769 | 0.444317428 | 0.55040553  | 0.582041256 | 0.999371363 | Not Sig |
| ENSG00000186212 | SOWAHB         | soosondawah ankyrin repeat domain family member B         | 345079    | 234.0783873 | 0.244570864 | 0.64880708  | 0.376954678 | 0.706207286 | 0.999371363 | Not Sig |
| ENSG00000246889 | NA             | NA                                                        | NA        | 22.67928045 | 0.244593493 | 0.835832403 | 0.292634614 | 0.769801453 | 0.999371363 | Not Sig |
| ENSG00000166002 | SMC04          | single-pass membrane protein with coiled-coil domains 4   | 56935     | 270.2721314 | 0.244677714 | 0.460480698 | 0.531352812 | 0.595174314 | 0.999371363 | Not Sig |
| ENSG00000240767 | NA             | NA                                                        | NA        | 9.829860923 | 0.244911849 | 0.920799374 | 0.265977427 | 0.790256594 | 0.999371363 | Not Sig |
| ENSG00000171914 | TLN2           | talin 2                                                   | 83660     | 823.4470717 | 0.244996152 | 0.677224247 | 0.36176518  | 0.717527514 | 0.999371363 | Not Sig |
| ENSG00000197093 | GAL3ST4        | galactose-3-O-sulfotransferase 4                          | 79690     | 153.0589827 | 0.245070308 | 0.546171134 | 0.448706079 | 0.653643699 | 0.999371363 | Not Sig |
| ENSG00000204439 | C6orf47        | chromosome 6 open reading frame 47                        | 57827     | 739.6862245 | 0.245173167 | 0.591761264 | 0.414310942 | 0.678646402 | 0.999371363 | Not Sig |
| ENSG00000164627 | KIF6           | kinesin family member 6                                   | 221458    | 42.55814662 | 0.245197535 | 1.031593541 | 0.237688125 | 0.812122994 | 0.999371363 | Not Sig |
| ENSG00000168792 | ABHD15         | abhydrolase domain containing 15                          | 116236    | 548.8018824 | 0.245315861 | 0.560687956 | 0.43752654  | 0.661729533 | 0.999371363 | Not Sig |
| ENSG00000262061 | LOC100506388   | uncharacterized LOC100506388                              | 100506388 | 4.157132195 | 0.245403195 | 1.443857296 | 0.169963608 | 0.865038757 | NA          | NA      |
| ENSG00000243824 | NA             | NA                                                        | NA        | 1.146813081 | 0.245636186 | 2.000667321 | 0.122777127 | 0.902283587 | NA          | NA      |
| ENSG00000258086 | NA             | NA                                                        | NA        | 1.146813081 | 0.245636186 | 2.000667321 | 0.122777127 | 0.902283587 | NA          | NA      |
| ENSG00000265945 | NA             | NA                                                        | NA        | 1.146813081 | 0.245636186 | 2.000667321 | 0.122777127 | 0.902283587 | NA          | NA      |

|                 |           |                                                               |        |             |             |             |             |             |             |         |
|-----------------|-----------|---------------------------------------------------------------|--------|-------------|-------------|-------------|-------------|-------------|-------------|---------|
| ENSG00000176994 | SMCR8     | Smith-Magenis syndrome chromosome region, candidate 8         | 140775 | 823.1976544 | 0.245664063 | 0.461797233 | 0.531973875 | 0.59474409  | 0.999371363 | Not Sig |
| ENSG00000184428 | TOP1MT    | DNA topoisomerase I mitochondrial                             | 116447 | 337.8104667 | 0.245674852 | 0.506894593 | 0.484666547 | 0.6279129   | 0.999371363 | Not Sig |
| ENSG00000131966 | ACTR10    | actin related protein 10 homolog                              | 55860  | 766.6601588 | 0.245697064 | 0.433810395 | 0.566369701 | 0.571142487 | 0.999371363 | Not Sig |
| ENSG00000157306 | NA        | NA                                                            | NA     | 66.88308483 | 0.245770612 | 0.566207942 | 0.434064225 | 0.664241803 | 0.999371363 | Not Sig |
| ENSG00000129460 | NGDN      | neuroguidin                                                   | 25983  | 366.787666  | 0.245837466 | 0.451905327 | 0.544002143 | 0.586439998 | 0.999371363 | Not Sig |
| ENSG00000141655 | TNFRSF11A | TNF receptor superfamily member 11a                           | 8792   | 258.900302  | 0.245921241 | 0.563397728 | 0.436496686 | 0.662476403 | 0.999371363 | Not Sig |
| ENSG00000068400 | GRIPAP1   | GRIP1 associated protein 1                                    | 56850  | 1358.447247 | 0.246020831 | 0.493766936 | 0.498252947 | 0.618305768 | 0.999371363 | Not Sig |
| ENSG00000178935 | ZNF552    | zinc finger protein 552                                       | 79818  | 338.9179516 | 0.246169371 | 0.584530043 | 0.421140665 | 0.673652369 | 0.999371363 | Not Sig |
| ENSG00000169016 | E2F6      | E2F transcription factor 6                                    | 1876   | 320.6542371 | 0.246320099 | 0.491299559 | 0.501366195 | 0.616113427 | 0.999371363 | Not Sig |
| ENSG00000168924 | LETM1     | leucine zipper and EF-hand containing transmembrane protein 1 | 3954   | 1481.680667 | 0.246456157 | 0.539590888 | 0.456746328 | 0.647853387 | 0.999371363 | Not Sig |
| ENSG00000136451 | VEZF1     | vascular endothelial zinc finger 1                            | 7716   | 1656.318269 | 0.246465195 | 0.3951574   | 0.623713981 | 0.53281544  | 0.999371363 | Not Sig |
| ENSG00000102910 | LONP2     | lon peptidase 2, peroxisomal                                  | 83752  | 2882.535867 | 0.246539242 | 0.408937587 | 0.60287743  | 0.546590231 | 0.999371363 | Not Sig |
| ENSG00000165704 | HPRT1     | hypoxanthine phosphoribosyltransferase 1                      | 3251   | 271.7853632 | 0.246630505 | 0.658657907 | 0.374444005 | 0.708074009 | 0.999371363 | Not Sig |
| ENSG00000154978 | VOPP1     | VOPP1, WBPI/VOPP1 family member                               | 81552  | 1713.108149 | 0.246644713 | 0.513982368 | 0.479869987 | 0.631319843 | 0.999371363 | Not Sig |
| ENSG00000265821 | NA        | NA                                                            | NA     | 12.27634469 | 0.246837696 | 0.782145726 | 0.315590417 | 0.752313413 | 0.999371363 | Not Sig |
| ENSG00000144485 | HES6      | hes family bHLH transcription factor 6                        | 55502  | 137.028699  | 0.247181595 | 0.581155408 | 0.425327876 | 0.670597675 | 0.999371363 | Not Sig |
| ENSG00000145022 | TCTA      | T-cell leukemia translocation altered                         | 6988   | 585.0500457 | 0.247317676 | 0.522345806 | 0.47347499  | 0.63587434  | 0.999371363 | Not Sig |
| ENSG00000137642 | SORL1     | sortilin related receptor 1                                   | 6653   | 8638.794893 | 0.247325867 | 0.563903581 | 0.438596021 | 0.660954281 | 0.999371363 | Not Sig |
| ENSG00000269121 | NA        | NA                                                            | NA     | 1.562369547 | 0.247590715 | 2.300828688 | 0.107609365 | 0.914305568 | NA          | NA      |
| ENSG00000115415 | STAT1     | signal transducer and activator of transcription 1            | 6772   | 7155.333726 | 0.247733613 | 0.662712526 | 0.37381761  | 0.708540017 | 0.999371363 | Not Sig |
| ENSG00000112078 | KCTD20    | potassium channel tetramerization domain containing 20        | 222658 | 1869.376163 | 0.247743475 | 0.445230923 | 0.55643816  | 0.577911358 | 0.999371363 | Not Sig |
| ENSG00000112039 | FANCE     | Fanconi anemia complementation group E                        | 2178   | 178.0925959 | 0.247764818 | 0.754405301 | 0.328424016 | 0.742591087 | 0.999371363 | Not Sig |
| ENSG00000158869 | FCER1G    | Fc fragment of IgE receptor Ig                                | 2207   | 573.1470527 | 0.247799646 | 0.869387372 | 0.285027888 | 0.775622777 | 0.999371363 | Not Sig |
| ENSG00000100926 | TM9SF1    | transmembrane 9 superfamily member 1                          | 10548  | 152.7880249 | 0.247927582 | 0.602056727 | 0.411801032 | 0.680485265 | 0.999371363 | Not Sig |
| ENSG00000138663 | COPS4     | COP9 signalosome subunit 4                                    | 51138  | 459.6115414 | 0.247972414 | 0.432701577 | 0.573079523 | 0.566590851 | 0.999371363 | Not Sig |
| ENSG00000271155 | NA        | NA                                                            | NA     | 24.55236905 | 0.248036624 | 0.713764076 | 0.347505054 | 0.728211923 | 0.999371363 | Not Sig |
| ENSG00000163795 | ZNF513    | zinc finger protein 513                                       | 130557 | 392.6143326 | 0.248134612 | 0.479915072 | 0.517038589 | 0.605129221 | 0.999371363 | Not Sig |
| ENSG00000207508 | NA        | NA                                                            | NA     | 7.482254916 | 0.24892311  | 1.03426151  | 0.240677148 | 0.809805352 | 0.999371363 | Not Sig |
| ENSG00000042445 | RETSAT    | retinol saturase                                              | 54884  | 1255.745379 | 0.249019914 | 0.498908412 | 0.499129516 | 0.617688145 | 0.999371363 | Not Sig |
| ENSG00000164099 | PRSS12    | protease, serine 12                                           | 8492   | 453.2353505 | 0.249044026 | 1.029028641 | 0.242018556 | 0.808765785 | 0.999371363 | Not Sig |
| ENSG00000160224 | AIRE      | autoimmune regulator                                          | 326    | 3.005713989 | 0.24908644  | 1.552852991 | 0.16040568  | 0.872561516 | NA          | NA      |
| ENSG00000189057 | FAM111B   | family with sequence similarity 111 member B                  | 374393 | 145.2426143 | 0.24915139  | 1.101554276 | 0.226181674 | 0.821060123 | 0.999371363 | Not Sig |
| ENSG00000265254 | NA        | NA                                                            | NA     | 4.893946095 | 0.249332458 | 1.164246143 | 0.214157856 | 0.83042396  | NA          | NA      |
| ENSG00000147100 | SLC16A2   | solute carrier family 16 member 2                             | 6567   | 357.5944655 | 0.249383486 | 0.424242315 | 0.587832655 | 0.556644623 | 0.999371363 | Not Sig |
| ENSG00000222040 | NA        | NA                                                            | NA     | 8.645657843 | 0.249642622 | 1.24438522  | 0.200615226 | 0.840999451 | 0.999371363 | Not Sig |

|                 |          |                                                                                                |       |             |             |             |             |             |             |         |
|-----------------|----------|------------------------------------------------------------------------------------------------|-------|-------------|-------------|-------------|-------------|-------------|-------------|---------|
| ENSG00000101347 | SAMHD1   | <small>SAM and HD domain containing deoxynucleoside triphosphate triphosphohydrolase 1</small> | 25939 | 3692.642933 | 0.249761046 | 0.825096592 | 0.30270522  | 0.762114519 | 0.999371363 | Not Sig |
| ENSG00000256347 | NA       | NA                                                                                             | NA    | 0.901488849 | 0.249893167 | 3.144221528 | 0.079476959 | 0.936653257 | NA          | NA      |
| ENSG00000260084 | NA       | NA                                                                                             | NA    | 0.901488849 | 0.249893167 | 3.144221528 | 0.079476959 | 0.936653257 | NA          | NA      |
| ENSG00000240376 | NA       | NA                                                                                             | NA    | 6.513357717 | 0.250008712 | 1.173422636 | 0.213059391 | 0.831280639 | NA          | NA      |
| ENSG00000223343 | NA       | NA                                                                                             | NA    | 16.84560163 | 0.250025846 | 0.683692468 | 0.365699284 | 0.714589481 | 0.999371363 | Not Sig |
| ENSG00000177239 | MAN1B1   | mannosidase alpha class 1B member 1                                                            | 11253 | 1787.060648 | 0.250097463 | 0.475737235 | 0.525705041 | 0.599093161 | 0.999371363 | Not Sig |
| ENSG00000243176 | NA       | NA                                                                                             | NA    | 35.61663199 | 0.250106356 | 0.677994033 | 0.368891678 | 0.712208467 | 0.999371363 | Not Sig |
| ENSG00000197933 | ZNF823   | zinc finger protein 823                                                                        | 55552 | 116.8337601 | 0.25012724  | 0.544707591 | 0.459195436 | 0.646093827 | 0.999371363 | Not Sig |
| ENSG00000223529 | NA       | NA                                                                                             | NA    | 1.063407375 | 0.250196341 | 2.538599515 | 0.098556838 | 0.921490141 | NA          | NA      |
| ENSG00000008018 | PSMB1    | proteasome subunit beta 1                                                                      | 5689  | 1543.417476 | 0.250251898 | 0.426720991 | 0.586453217 | 0.557570991 | 0.999371363 | Not Sig |
| ENSG00000165934 | CPSF2    | <small>cleavage and polyadenylation specific factor 2</small>                                  | 53981 | 1621.610707 | 0.250448015 | 0.441415783 | 0.5673744   | 0.570459839 | 0.999371363 | Not Sig |
| ENSG00000169951 | ZNF764   | zinc finger protein 764                                                                        | 92595 | 233.3312788 | 0.250491203 | 0.561611145 | 0.446022493 | 0.655580998 | 0.999371363 | Not Sig |
| ENSG00000065029 | ZNF76    | zinc finger protein 76                                                                         | 7629  | 816.3012669 | 0.250844926 | 0.40368733  | 0.621384192 | 0.534346871 | 0.999371363 | Not Sig |
| ENSG00000206888 | NA       | NA                                                                                             | NA    | 2.041864394 | 0.250902501 | 1.637490865 | 0.153223756 | 0.878221824 | NA          | NA      |
| ENSG00000108958 | NA       | NA                                                                                             | NA    | 1.623291215 | 0.250923479 | 2.223672718 | 0.112841911 | 0.91015589  | NA          | NA      |
| ENSG00000236456 | NA       | NA                                                                                             | NA    | 1.623291215 | 0.250923479 | 2.223672718 | 0.112841911 | 0.91015589  | NA          | NA      |
| ENSG00000012223 | LTF      | lactotransferrin                                                                               | 4057  | 389.9237822 | 0.251021203 | 0.959485586 | 0.261620609 | 0.793613953 | 0.999371363 | Not Sig |
| ENSG00000235284 | SNORD62A | small nucleolar RNA, C/D box 62A                                                               | 26786 | 5.249854475 | 0.251176068 | 1.137778837 | 0.22076001  | 0.825279303 | NA          | NA      |
| ENSG00000212916 | MAP10    | microtubule associated protein 10                                                              | 54627 | 101.7262912 | 0.251243864 | 0.741434564 | 0.338861818 | 0.734713829 | 0.999371363 | Not Sig |
| ENSG00000264812 | NA       | NA                                                                                             | NA    | 3.291395787 | 0.251261214 | 1.489159604 | 0.168726853 | 0.866011496 | NA          | NA      |
| ENSG00000010270 | STARD3NL | STARD3 N-terminal like                                                                         | 83930 | 624.7487288 | 0.251279231 | 0.410391976 | 0.612290801 | 0.540345375 | 0.999371363 | Not Sig |
| ENSG00000238772 | NA       | NA                                                                                             | NA    | 5.914775957 | 0.25135017  | 1.187817607 | 0.211606705 | 0.832413878 | NA          | NA      |
| ENSG00000132780 | NASP     | nuclear autoantigenic sperm protein                                                            | 4678  | 1920.492448 | 0.2516688   | 0.612969055 | 0.410573417 | 0.681385359 | 0.999371363 | Not Sig |
| ENSG00000232926 | NA       | NA                                                                                             | NA    | 1.459236227 | 0.252000772 | 2.315310254 | 0.108841038 | 0.913328573 | NA          | NA      |
| ENSG00000134160 | TRPM1    | <small>transient receptor potential cation channel subfamily M member 1</small>                | 4308  | 1.71743553  | 0.252440014 | 1.93695364  | 0.130328372 | 0.896306634 | NA          | NA      |
| ENSG00000158864 | NDUFS2   | <small>NADH:ubiquinone oxidoreductase core subunit S2</small>                                  | 4720  | 1533.783064 | 0.252570132 | 0.451275019 | 0.559681173 | 0.575696926 | 0.999371363 | Not Sig |
| ENSG00000196187 | TMEM63A  | transmembrane protein 63A                                                                      | 9725  | 4289.634861 | 0.252818961 | 0.542848593 | 0.465726474 | 0.6414113   | 0.999371363 | Not Sig |
| ENSG00000188295 | ZNF669   | zinc finger protein 669                                                                        | 79862 | 148.9120438 | 0.252851279 | 0.463081446 | 0.546019024 | 0.58505286  | 0.999371363 | Not Sig |
| ENSG00000173992 | CCS      | copper chaperone for superoxide dismutase                                                      | 9973  | 470.1536984 | 0.25299784  | 0.51222867  | 0.493915813 | 0.621365637 | 0.999371363 | Not Sig |
| ENSG00000105298 | CACTIN   | cactin, spliceosome C complex subunit                                                          | 58509 | 645.1462455 | 0.253294541 | 0.680748304 | 0.372082515 | 0.709831415 | 0.999371363 | Not Sig |
| ENSG00000168282 | MGAT2    | <small>mannosyl (alpha-1,6)-glycoprotein beta-1,2-N-acetylglucosaminyltransferase</small>      | 4247  | 783.2436107 | 0.253298016 | 0.48382978  | 0.52352713  | 0.600607476 | 0.999371363 | Not Sig |
| ENSG00000133131 | MORC4    | MORC family CW-type zinc finger 4                                                              | 79710 | 560.0821668 | 0.253486391 | 0.545971565 | 0.464284969 | 0.642443591 | 0.999371363 | Not Sig |
| ENSG00000144852 | NRII2    | nuclear receptor subfamily 1 group I member 2                                                  | 8856  | 7.962324883 | 0.253671039 | 1.150421243 | 0.220502742 | 0.825479637 | 0.999371363 | Not Sig |
| ENSG00000065427 | KARS     | lysyl-tRNA synthetase                                                                          | 3735  | 1738.333566 | 0.253829634 | 0.458135235 | 0.554049579 | 0.579544915 | 0.999371363 | Not Sig |
| ENSG00000267263 | NA       | NA                                                                                             | NA    | 54.40963475 | 0.253942038 | 0.521961674 | 0.486514722 | 0.62660227  | 0.999371363 | Not Sig |

|                 |              |                                                                                                |           |             |             |             |             |             |             |         |
|-----------------|--------------|------------------------------------------------------------------------------------------------|-----------|-------------|-------------|-------------|-------------|-------------|-------------|---------|
| ENSG00000222020 | LOC101928111 | uncharacterized LOC101928111                                                                   | 101928111 | 19.67035018 | 0.254005531 | 0.725701915 | 0.350013588 | 0.7263285   | 0.999371363 | Not Sig |
| ENSG00000269363 | NA           | NA                                                                                             | NA        | 9.376620505 | 0.254086077 | 0.919113136 | 0.276447008 | 0.782204755 | 0.999371363 | Not Sig |
| ENSG00000179862 | CITED4       | <small>Onp/p800 interacting transactivator with Glu/Asp rich carboxy-terminal domain 4</small> | 163732    | 361.4926983 | 0.254152023 | 0.899933094 | 0.282412131 | 0.777627514 | 0.999371363 | Not Sig |
| ENSG00000238919 | NA           | NA                                                                                             | NA        | 4.561491283 | 0.254153734 | 1.15898954  | 0.219289066 | 0.826424879 | NA          | NA      |
| ENSG00000152894 | PTPRK        | protein tyrosine phosphatase, receptor type K                                                  | 5796      | 3193.110315 | 0.254260571 | 0.472974611 | 0.537577631 | 0.590868676 | 0.999371363 | Not Sig |
| ENSG00000141959 | PFKL         | phosphofructokinase, liver type                                                                | 5211      | 3363.855449 | 0.254296027 | 0.586583767 | 0.433520396 | 0.664636752 | 0.999371363 | Not Sig |
| ENSG00000143669 | LYST         | lysosomal trafficking regulator                                                                | 1130      | 2823.584323 | 0.254357937 | 0.402946045 | 0.631245646 | 0.52787992  | 0.999371363 | Not Sig |
| ENSG00000110107 | PRPF19       | pre-mRNA processing factor 19                                                                  | 27339     | 1438.506114 | 0.254458493 | 0.43477063  | 0.58527066  | 0.55836574  | 0.999371363 | Not Sig |
| ENSG00000197555 | SIPAIL1      | signal induced proliferation associated 1 like 1                                               | 26037     | 2189.073088 | 0.25451639  | 0.377149942 | 0.674841385 | 0.499776544 | 0.999371363 | Not Sig |
| ENSG00000178464 | NA           | NA                                                                                             | NA        | 34.0771354  | 0.254563673 | 0.60033643  | 0.424035025 | 0.67154027  | 0.999371363 | Not Sig |
| ENSG00000077800 | FKBP6        | FK506 binding protein 6                                                                        | 8468      | 1.411449919 | 0.254564991 | 2.033974352 | 0.125156441 | 0.900399701 | NA          | NA      |
| ENSG00000162441 | LZIC         | leucine zipper and CTNBP1 domain containing                                                    | 84328     | 547.8315638 | 0.254803819 | 0.429252739 | 0.593598587 | 0.552780626 | 0.999371363 | Not Sig |
| ENSG00000112514 | CUTA         | cutA divalent cation tolerance homolog                                                         | 51596     | 1071.782356 | 0.254818396 | 0.647078269 | 0.393798414 | 0.693729876 | 0.999371363 | Not Sig |
| ENSG00000066136 | NFYC         | nuclear transcription factor Y subunit gamma                                                   | 4802      | 976.1061905 | 0.254928496 | 0.405916285 | 0.628032197 | 0.529982848 | 0.999371363 | Not Sig |
| ENSG00000135148 | TRAFD1       | TRAF-type zinc finger domain containing 1                                                      | 10906     | 1045.167337 | 0.255049524 | 0.538596442 | 0.473544763 | 0.635824573 | 0.999371363 | Not Sig |
| ENSG00000183628 | DGCR6        | DiGeorge syndrome critical region gene 6                                                       | 8214      | 329.2441181 | 0.25511897  | 0.531543244 | 0.479959012 | 0.631256539 | 0.999371363 | Not Sig |
| ENSG00000112685 | EXOC2        | exocyst complex component 2                                                                    | 55770     | 1051.918125 | 0.255270504 | 0.388688733 | 0.656747887 | 0.511343038 | 0.999371363 | Not Sig |
| ENSG00000255301 | NA           | NA                                                                                             | NA        | 4.133767908 | 0.255293901 | 1.355857085 | 0.188289683 | 0.850649572 | NA          | NA      |
| ENSG00000033867 | SLC4A7       | solute carrier family 4 member 7                                                               | 9497      | 1242.429643 | 0.255494927 | 0.709391634 | 0.360160615 | 0.718727026 | 0.999371363 | Not Sig |
| ENSG00000187634 | SAMD11       | sterile alpha motif domain containing 11                                                       | 148398    | 290.5744277 | 0.255514949 | 0.779372993 | 0.32784681  | 0.743027492 | 0.999371363 | Not Sig |
| ENSG00000133313 | CNDP2        | carnosine dipeptidase 2                                                                        | 55748     | 3148.272618 | 0.25577861  | 0.520013804 | 0.491868885 | 0.622812036 | 0.999371363 | Not Sig |
| ENSG00000266352 | NA           | NA                                                                                             | NA        | 7.917096519 | 0.255835863 | 1.079451266 | 0.237005478 | 0.81265254  | 0.999371363 | Not Sig |
| ENSG00000181991 | MRPS11       | mitochondrial ribosomal protein S11                                                            | 64963     | 347.9321081 | 0.256304425 | 0.468435055 | 0.547150395 | 0.584275412 | 0.999371363 | Not Sig |
| ENSG00000101052 | IFT52        | intraflagellar transport 52                                                                    | 51098     | 303.3444917 | 0.256323091 | 0.443759818 | 0.577616721 | 0.563522915 | 0.999371363 | Not Sig |
| ENSG00000145996 | CDKAL1       | <small>CDK5 regulatory subunit associated protein 1 like 1</small>                             | 54901     | 636.3592518 | 0.256419765 | 0.524120596 | 0.489238101 | 0.624673138 | 0.999371363 | Not Sig |
| ENSG00000213073 | LOC729603    | calcineurin like EF-hand protein 1 pseudogene                                                  | 729603    | 119.8254764 | 0.256622066 | 0.53057139  | 0.483671134 | 0.628619282 | 0.999371363 | Not Sig |
| ENSG00000168883 | USP39        | ubiquitin specific peptidase 39                                                                | 10713     | 945.5684757 | 0.257020092 | 0.438677083 | 0.585898152 | 0.557943959 | 0.999371363 | Not Sig |
| ENSG00000182199 | SHMT2        | serine hydroxymethyltransferase 2                                                              | 6472      | 729.0091801 | 0.257121731 | 0.473962462 | 0.542493872 | 0.587478328 | 0.999371363 | Not Sig |
| ENSG00000188352 | FOCAD        | focadhesin                                                                                     | 54914     | 1149.681171 | 0.257154706 | 0.719346772 | 0.357483645 | 0.720729768 | 0.999371363 | Not Sig |
| ENSG00000101457 | DNTTIP1      | <small>deoxynucleotidyltransferase terminal interacting protein 1</small>                      | 116092    | 700.245616  | 0.257219241 | 0.653689755 | 0.393488255 | 0.693958897 | 0.999371363 | Not Sig |
| ENSG00000239577 | NA           | NA                                                                                             | NA        | 4.927562073 | 0.257267836 | 1.246326304 | 0.206420931 | 0.836462123 | NA          | NA      |
| ENSG00000132382 | MYBBP1A      | MYB binding protein 1a                                                                         | 10514     | 1310.414798 | 0.257299537 | 0.439184923 | 0.585856944 | 0.557971653 | 0.999371363 | Not Sig |
| ENSG00000230184 | NA           | NA                                                                                             | NA        | 55.0885454  | 0.257454955 | 0.695803499 | 0.370011009 | 0.711374288 | 0.999371363 | Not Sig |
| ENSG00000165566 | AMER2        | APC membrane recruitment protein 2                                                             | 219287    | 9.119117499 | 0.257551719 | 1.392076362 | 0.185012637 | 0.853219124 | 0.999371363 | Not Sig |
| ENSG00000099385 | BCL7C        | BCL tumor suppressor 7C                                                                        | 9274      | 704.4645052 | 0.25779854  | 0.640856739 | 0.402271715 | 0.687484068 | 0.999371363 | Not Sig |

|                 |              |                                                          |           |             |             |             |             |             |             |         |
|-----------------|--------------|----------------------------------------------------------|-----------|-------------|-------------|-------------|-------------|-------------|-------------|---------|
| ENSG00000168016 | TRANK1       | tetratricopeptide repeat and ankyrin repeat containing 1 | 9881      | 2653.465285 | 0.257840653 | 0.563253149 | 0.45777046  | 0.647117361 | 0.999371363 | Not Sig |
| ENSG00000244389 | NA           | NA                                                       | NA        | 4.280287363 | 0.258005977 | 1.308272502 | 0.19721119  | 0.843662274 | NA          | NA      |
| ENSG00000176700 | NA           | NA                                                       | NA        | 294.8820469 | 0.25808599  | 0.41332141  | 0.6244196   | 0.532352056 | 0.999371363 | Not Sig |
| ENSG00000085872 | CHERP        | calcium homeostasis endoplasmic reticulum protein        | 10523     | 1035.512934 | 0.258160616 | 0.577895231 | 0.446725639 | 0.655073167 | 0.999371363 | Not Sig |
| ENSG00000140598 | EFL1         | elongation factor like GTPase 1                          | 79631     | 652.7748624 | 0.258392261 | 0.416981465 | 0.619673253 | 0.535472928 | 0.999371363 | Not Sig |
| ENSG00000136950 | ARPC5L       | actin related protein 2/3 complex subunit 5 like         | 81873     | 536.9809677 | 0.258418487 | 0.427399203 | 0.60463025  | 0.545424702 | 0.999371363 | Not Sig |
| ENSG00000156603 | MED19        | mediator complex subunit 19                              | 219541    | 211.2969612 | 0.258482078 | 0.447924826 | 0.577065756 | 0.563895036 | 0.999371363 | Not Sig |
| ENSG00000111266 | DUSP16       | dual specificity phosphatase 16                          | 80824     | 1835.008387 | 0.258816244 | 0.435486758 | 0.594314841 | 0.552301554 | 0.999371363 | Not Sig |
| ENSG00000137509 | PRCP         | prolylcarboxypeptidase                                   | 5547      | 1223.144098 | 0.258941181 | 0.489395481 | 0.529104152 | 0.596733201 | 0.999371363 | Not Sig |
| ENSG00000060688 | SNRNP40      | small nuclear ribonucleoprotein U5 subunit 40            | 9410      | 728.9684974 | 0.259136583 | 0.446046135 | 0.580963633 | 0.561264964 | 0.999371363 | Not Sig |
| ENSG00000112146 | FBXO9        | F-box protein 9                                          | 26268     | 1206.176185 | 0.259264105 | 0.432919863 | 0.598873202 | 0.549257443 | 0.999371363 | Not Sig |
| ENSG00000173821 | RNF213       | ring finger protein 213                                  | 57674     | 22940.25214 | 0.259466447 | 0.522219455 | 0.496853275 | 0.619292523 | 0.999371363 | Not Sig |
| ENSG00000152213 | ARL11        | ADP ribosylation factor like GTPase 11                   | 115761    | 115.4661575 | 0.259497748 | 0.772719453 | 0.335824013 | 0.737003581 | 0.999371363 | Not Sig |
| ENSG00000229106 | NA           | NA                                                       | NA        | 5.486593811 | 0.259563051 | 1.072308254 | 0.242060107 | 0.808733589 | NA          | NA      |
| ENSG00000137274 | BPHL         | biphenyl hydrolase like                                  | 670       | 359.5990541 | 0.259751966 | 0.542201363 | 0.479069187 | 0.63188941  | 0.999371363 | Not Sig |
| ENSG00000183914 | DNAH2        | dynein axonemal heavy chain 2                            | 146754    | 607.1159632 | 0.259873692 | 0.453807801 | 0.572651443 | 0.566880721 | 0.999371363 | Not Sig |
| ENSG00000125966 | MMP24        | matrix metalloproteinase 24                              | 10893     | 274.6210082 | 0.259901854 | 0.899744445 | 0.28886186  | 0.772687092 | 0.999371363 | Not Sig |
| ENSG00000116044 | NFE2L2       | nuclear factor, erythroid 2 like 2                       | 4780      | 2385.904918 | 0.260005138 | 0.414632936 | 0.627073044 | 0.530611356 | 0.999371363 | Not Sig |
| ENSG00000254154 | NA           | NA                                                       | NA        | 22.76944163 | 0.260031422 | 0.803417059 | 0.323656835 | 0.746197854 | 0.999371363 | Not Sig |
| ENSG00000246985 | SOCS2-AS1    | SOCS2 antisense RNA 1                                    | 144481    | 33.72325928 | 0.260048382 | 0.605734856 | 0.42931058  | 0.667697218 | 0.999371363 | Not Sig |
| ENSG00000143373 | ZNF687       | zinc finger protein 687                                  | 57592     | 1321.674219 | 0.260091307 | 0.486696146 | 0.534401821 | 0.593063559 | 0.999371363 | Not Sig |
| ENSG00000142621 | FHAD1        | forkhead associated phosphopeptide binding domain 1      | 114827    | 337.4140672 | 0.260303335 | 0.760322552 | 0.342359087 | 0.732080674 | 0.999371363 | Not Sig |
| ENSG00000058600 | POLR3E       | RNA polymerase III subunit E                             | 55718     | 1191.68239  | 0.260647082 | 0.395109473 | 0.659683201 | 0.509457149 | 0.999371363 | Not Sig |
| ENSG00000058600 | LOC101060521 | DNA-directed RNA polymerase III subunit RPC5             | 101060521 | 1191.68239  | 0.260647082 | 0.395109473 | 0.659683201 | 0.509457149 | 0.999371363 | Not Sig |
| ENSG00000230207 | NA           | NA                                                       | NA        | 5.660103048 | 0.260671947 | 1.035938691 | 0.251628739 | 0.801328043 | NA          | NA      |
| ENSG00000229886 | NA           | NA                                                       | NA        | 18.36060017 | 0.260722025 | 0.886784237 | 0.294008412 | 0.768751476 | 0.999371363 | Not Sig |
| ENSG00000116198 | CEP104       | centrosomal protein 104                                  | 9731      | 1348.670784 | 0.260799197 | 0.426550676 | 0.611414332 | 0.540925317 | 0.999371363 | Not Sig |
| ENSG00000113758 | DBN1         | drebrin 1                                                | 1627      | 1477.591481 | 0.260887625 | 0.624310194 | 0.417881412 | 0.676033824 | 0.999371363 | Not Sig |
| ENSG00000255517 | LOC101928069 | uncharacterized LOC101928069                             | 101928069 | 72.21888944 | 0.260921465 | 0.565096995 | 0.461728636 | 0.644275933 | 0.999371363 | Not Sig |
| ENSG00000218350 | NA           | NA                                                       | NA        | 2.312938768 | 0.260995516 | 1.559101697 | 0.167401214 | 0.86705437  | NA          | NA      |
| ENSG00000213246 | SUPT4H1      | SPT4 homolog, DSIF elongation factor subunit             | 6827      | 645.4502427 | 0.26115369  | 0.468624772 | 0.55727675  | 0.577338359 | 0.999371363 | Not Sig |
| ENSG00000182093 | WRB          | tryptophan rich basic protein                            | 7485      | 376.926893  | 0.26117519  | 0.413786492 | 0.631183461 | 0.527920575 | 0.999371363 | Not Sig |
| ENSG00000122367 | LDB3         | LIM domain binding 3                                     | 11155     | 67.68809532 | 0.261388414 | 0.926818807 | 0.282027525 | 0.777922405 | 0.999371363 | Not Sig |
| ENSG00000143569 | UBAP2L       | ubiquitin associated protein 2 like                      | 9898      | 3571.459245 | 0.2614351   | 0.426779563 | 0.612576428 | 0.540156449 | 0.999371363 | Not Sig |
| ENSG00000229007 | NA           | NA                                                       | NA        | 23.16950259 | 0.261496933 | 0.805269126 | 0.324732346 | 0.745383651 | 0.999371363 | Not Sig |



|                 |          |                                                       |           |             |             |             |             |             |             |         |
|-----------------|----------|-------------------------------------------------------|-----------|-------------|-------------|-------------|-------------|-------------|-------------|---------|
| ENSG00000135297 | MT01     | mitochondrial tRNA translation optimization 1         | 25821     | 563.8806608 | 0.261543088 | 0.410564534 | 0.637032833 | 0.524103458 | 0.999371363 | Not Sig |
| ENSG00000087077 | TRIP6    | thyroid hormone receptor interactor 6                 | 7205      | 1197.982882 | 0.2616947   | 0.530135218 | 0.493637644 | 0.62156211  | 0.999371363 | Not Sig |
| ENSG00000134955 | SLC37A2  | solute carrier family 37 member 2                     | 219855    | 345.2603048 | 0.261727752 | 0.781765105 | 0.334790784 | 0.737782913 | 0.999371363 | Not Sig |
| ENSG00000173692 | PSMD1    | proteasome 26S subunit, non-ATPase 1                  | 5707      | 1761.292386 | 0.261762699 | 0.434815025 | 0.602009323 | 0.547167932 | 0.999371363 | Not Sig |
| ENSG00000048028 | USP28    | ubiquitin specific peptidase 28                       | 57646     | 786.0536306 | 0.261783896 | 0.525069406 | 0.49857008  | 0.618082288 | 0.999371363 | Not Sig |
| ENSG00000236801 | NA       | NA                                                    | NA        | 17.72303528 | 0.261826357 | 0.77928125  | 0.335984417 | 0.736882617 | 0.999371363 | Not Sig |
| ENSG00000189091 | SF3B3    | splicing factor 3b subunit 3                          | 23450     | 3227.911093 | 0.26190665  | 0.391691018 | 0.668656257 | 0.503714777 | 0.999371363 | Not Sig |
| ENSG00000229196 | NA       | NA                                                    | NA        | 8.733391014 | 0.262013249 | 1.30614738  | 0.200600065 | 0.841011307 | 0.999371363 | Not Sig |
| ENSG00000213533 | STIMATE  | STIM activating enhancer                              | 375346    | 70.8638375  | 0.262447893 | 0.580268657 | 0.452286868 | 0.651062335 | 0.999371363 | Not Sig |
| ENSG00000076321 | KLHL20   | kelch like family member 20                           | 27252     | 659.6876773 | 0.262500156 | 0.470205216 | 0.558267214 | 0.57666193  | 0.999371363 | Not Sig |
| ENSG00000165186 | PTCHD1   | patched domain containing 1                           | 139411    | 16.42920426 | 0.262991561 | 0.798444991 | 0.329379687 | 0.741868719 | 0.999371363 | Not Sig |
| ENSG00000144550 | CPNE9    | copine family member 9                                | 151835    | 7.914417801 | 0.263155625 | 0.946538588 | 0.278018908 | 0.780997844 | 0.999371363 | Not Sig |
| ENSG00000176428 | VPS37D   | VPS37D, ESCRT-I subunit                               | 155382    | 59.49936308 | 0.263300284 | 0.829251303 | 0.317515671 | 0.75085235  | 0.999371363 | Not Sig |
| ENSG00000137133 | HINT2    | histidine triad nucleotide binding protein 2          | 84681     | 269.8524955 | 0.263302338 | 0.679334891 | 0.387588422 | 0.698320638 | 0.999371363 | Not Sig |
| ENSG00000120217 | CD274    | CD274 molecule                                        | 29126     | 223.3483838 | 0.26352934  | 0.834862683 | 0.31565591  | 0.752263695 | 0.999371363 | Not Sig |
| ENSG00000159140 | SON      | SON DNA binding protein                               | 6651      | 13031.03845 | 0.263732354 | 0.423834843 | 0.622252648 | 0.533775752 | 0.999371363 | Not Sig |
| ENSG00000125869 | LAMP5    | lysosomal associated membrane protein family member 5 | 24141     | 57.18284684 | 0.264025511 | 0.548435579 | 0.481415723 | 0.630221064 | 0.999371363 | Not Sig |
| ENSG00000129680 | MAP7D3   | MAP7 domain containing 3                              | 79649     | 219.5823929 | 0.264105203 | 0.573988431 | 0.460122868 | 0.64542803  | 0.999371363 | Not Sig |
| ENSG00000113742 | CPEB4    | cytoplasmic polyadenylation element binding protein 4 | 80315     | 2610.150925 | 0.264197593 | 0.461301291 | 0.572722423 | 0.566832653 | 0.999371363 | Not Sig |
| ENSG00000077232 | DNAJC10  | DnaJ heat shock protein family (Hsp40) member C10     | 54431     | 2384.786591 | 0.264207432 | 0.465501023 | 0.56757648  | 0.570322582 | 0.999371363 | Not Sig |
| ENSG00000084207 | GSTP1    | glutathione S-transferase pi 1                        | 2950      | 6800.676474 | 0.264222686 | 0.513537934 | 0.514514446 | 0.606892363 | 0.999371363 | Not Sig |
| ENSG00000121210 | TMEM131L | transmembrane 131 like                                | 23240     | 794.2022273 | 0.264404401 | 0.627902707 | 0.421091354 | 0.673688375 | 0.999371363 | Not Sig |
| ENSG00000013306 | SLC25A39 | solute carrier family 25 member 39                    | 51629     | 1442.892018 | 0.26448584  | 0.469510007 | 0.563323115 | 0.573214881 | 0.999371363 | Not Sig |
| ENSG00000163430 | FSTL1    | follistatin like 1                                    | 11167     | 4399.355818 | 0.264592762 | 0.395302059 | 0.669343245 | 0.503276547 | 0.999371363 | Not Sig |
| ENSG00000197208 | SLC22A4  | solute carrier family 22 member 4                     | 6583      | 105.1285041 | 0.264730596 | 0.794268861 | 0.333300987 | 0.738907094 | 0.999371363 | Not Sig |
| ENSG00000145337 | PYURF    | PIGY upstream reading frame                           | 100996939 | 559.2070922 | 0.26476536  | 0.544078738 | 0.486630595 | 0.626520138 | 0.999371363 | Not Sig |
| ENSG00000261546 | NA       | NA                                                    | NA        | 2.928330812 | 0.26480037  | 1.38411785  | 0.191313456 | 0.848280019 | NA          | NA      |
| ENSG00000214022 | REPIN1   | replication initiator 1                               | 29803     | 2004.579249 | 0.264845997 | 0.478572144 | 0.553408718 | 0.57998357  | 0.999371363 | Not Sig |
| ENSG00000089248 | ERP29    | endoplasmic reticulum protein 29                      | 10961     | 2052.184326 | 0.264857465 | 0.46717899  | 0.566929315 | 0.570762206 | 0.999371363 | Not Sig |
| ENSG00000173258 | ZNF483   | zinc finger protein 483                               | 158399    | 556.6793872 | 0.265022682 | 0.721288678 | 0.367429421 | 0.713298729 | 0.999371363 | Not Sig |
| ENSG00000142606 | MMEL1    | membrane metalloendopeptidase like 1                  | 79258     | 85.64912516 | 0.265099626 | 0.762848085 | 0.347512999 | 0.728205954 | 0.999371363 | Not Sig |
| ENSG00000170545 | SMAGP    | small cell adhesion glycoprotein                      | 57228     | 254.4808725 | 0.265134634 | 0.598486496 | 0.443008549 | 0.657759551 | 0.999371363 | Not Sig |
| ENSG00000205755 | CRLF2    | cytokine receptor like factor 2                       | 64109     | 9.17064702  | 0.265243897 | 0.895487139 | 0.296200678 | 0.767076831 | 0.999371363 | Not Sig |
| ENSG00000167272 | POP5     | POP5 homolog, ribonuclease P/MRP subunit              | 51367     | 200.993104  | 0.265259405 | 0.436888926 | 0.60715525  | 0.543747887 | 0.999371363 | Not Sig |
| ENSG00000142856 | ITGB3BP  | integrin subunit beta 3 binding protein               | 23421     | 200.1521635 | 0.265392577 | 0.666013783 | 0.398479106 | 0.690277057 | 0.999371363 | Not Sig |

|                 |              |                                                                      |           |             |             |             |             |             |             |         |
|-----------------|--------------|----------------------------------------------------------------------|-----------|-------------|-------------|-------------|-------------|-------------|-------------|---------|
| ENSG00000127863 | TNFRSF19     | TNF receptor superfamily member 19                                   | 55504     | 737.829163  | 0.265493682 | 0.714854691 | 0.371395313 | 0.710343116 | 0.999371363 | Not Sig |
| ENSG00000153989 | NUS1         | NUS1 dehydrodolichyl diphosphate synthase subunit                    | 116150    | 1313.615309 | 0.265536483 | 0.458611506 | 0.579000919 | 0.562588553 | 0.999371363 | Not Sig |
| ENSG00000220771 | NA           | NA                                                                   | NA        | 5.257421653 | 0.265570662 | 1.1493179   | 0.231068064 | 0.817261925 | NA          | NA      |
| ENSG00000160172 | FAM86C2P     | family with sequence similarity 86, member A pseudogene              | 645332    | 91.70307462 | 0.265717651 | 0.604351132 | 0.439674284 | 0.660173031 | 0.999371363 | Not Sig |
| ENSG00000170890 | PLA2G1B      | phospholipase A2 group IB                                            | 5319      | 199.8964959 | 0.265821457 | 1.211534582 | 0.219408889 | 0.826331546 | 0.999371363 | Not Sig |
| ENSG00000185896 | LAMP1        | lysosomal associated membrane protein 1                              | 3916      | 6334.540834 | 0.265862575 | 0.521498018 | 0.509805533 | 0.610187709 | 0.999371363 | Not Sig |
| ENSG00000100241 | SBF1         | SET binding factor 1                                                 | 6305      | 3199.640563 | 0.265977969 | 0.624995481 | 0.425567826 | 0.670422788 | 0.999371363 | Not Sig |
| ENSG00000268598 | NA           | NA                                                                   | NA        | 3.085687975 | 0.266581942 | 1.454598808 | 0.183268363 | 0.854587457 | NA          | NA      |
| ENSG00000184545 | DUSP8        | dual specificity phosphatase 8                                       | 1850      | 566.0882143 | 0.266811072 | 0.624873809 | 0.426983925 | 0.669391036 | 0.999371363 | Not Sig |
| ENSG00000187626 | ZKSCAN4      | zinc finger with KRAB and SCAN domains 4                             | 387032    | 204.676012  | 0.266973117 | 0.458504249 | 0.582269668 | 0.560385053 | 0.999371363 | Not Sig |
| ENSG00000258727 | LOC102724814 | uncharacterized LOC102724814                                         | 102724814 | 244.308727  | 0.267018135 | 0.494882788 | 0.539558338 | 0.589501655 | 0.999371363 | Not Sig |
| ENSG00000213896 | NA           | NA                                                                   | NA        | 1.456219514 | 0.267057726 | 2.029476807 | 0.131589445 | 0.895309035 | NA          | NA      |
| ENSG00000264525 | MIR4778      | microRNA 4778                                                        | 100616464 | 1.456219514 | 0.267057726 | 2.029476807 | 0.131589445 | 0.895309035 | NA          | NA      |
| ENSG00000116830 | TTF2         | transcription termination factor 2                                   | 8458      | 565.3636803 | 0.267427953 | 0.547401704 | 0.488540592 | 0.625166981 | 0.999371363 | Not Sig |
| ENSG00000168005 | C11orf84     | chromosome 11 open reading frame 84                                  | 144097    | 398.008412  | 0.267551871 | 0.582750654 | 0.459118955 | 0.646148746 | 0.999371363 | Not Sig |
| ENSG00000130313 | PGLS         | 6-phosphogluconolactonase                                            | 25796     | 775.7128031 | 0.267573461 | 0.667305196 | 0.400976139 | 0.688437692 | 0.999371363 | Not Sig |
| ENSG00000069275 | NUCKS1       | nuclear casein kinase and cyclin dependent kinase substrate 1        | 64710     | 8343.019319 | 0.268086    | 0.458555804 | 0.584631135 | 0.558795768 | 0.999371363 | Not Sig |
| ENSG00000198417 | MT1F         | metallothionein 1F                                                   | 4494      | 126.236853  | 0.268123862 | 0.68712017  | 0.39021393  | 0.696378362 | 0.999371363 | Not Sig |
| ENSG00000182308 | DCAF4L1      | DDB1 and CUL4 associated factor 4 like 1                             | 285429    | 16.66118847 | 0.268270175 | 0.975392891 | 0.275038067 | 0.783286992 | 0.999371363 | Not Sig |
| ENSG00000243770 | NA           | NA                                                                   | NA        | 4.756610779 | 0.268285089 | 1.264511728 | 0.212164967 | 0.831978337 | NA          | NA      |
| ENSG00000181982 | CCDC149      | coiled-coil domain containing 149                                    | 91050     | 690.0518809 | 0.268325668 | 0.483303345 | 0.555191002 | 0.578764023 | 0.999371363 | Not Sig |
| ENSG00000119514 | GALNT12      | polypeptide N-acetylgalactosaminyltransferase 12                     | 79695     | 948.8165438 | 0.268481537 | 0.541136572 | 0.496143766 | 0.619792982 | 0.999371363 | Not Sig |
| ENSG00000204351 | SKIV2L       | Ski2 like RNA helicase                                               | 6499      | 1304.925536 | 0.268498184 | 0.448594288 | 0.59853233  | 0.549484794 | 0.999371363 | Not Sig |
| ENSG00000114786 | ABHD14A-ACY1 | ABHD14A-ACY1 readthrough                                             | 100526760 | 3.324419953 | 0.268680634 | 1.340347444 | 0.20045596  | 0.841123998 | NA          | NA      |
| ENSG00000102893 | PHKB         | phosphorylase kinase regulatory subunit beta                         | 5257      | 2870.202512 | 0.268767634 | 0.476889952 | 0.563584183 | 0.573037154 | 0.999371363 | Not Sig |
| ENSG00000118655 | DCLRE1B      | DNA cross-link repair 1B                                             | 64858     | 203.6557778 | 0.268863374 | 0.59183682  | 0.454286326 | 0.649622757 | 0.999371363 | Not Sig |
| ENSG00000112130 | RNF8         | ring finger protein 8                                                | 9025      | 342.7467291 | 0.268952879 | 0.509062249 | 0.528330042 | 0.597270284 | 0.999371363 | Not Sig |
| ENSG00000155367 | PPM1J        | protein phosphatase, Mg <sup>2+</sup> /Mn <sup>2+</sup> dependent 1J | 333926    | 30.9870271  | 0.269308502 | 0.726217438 | 0.370837284 | 0.71075873  | 0.999371363 | Not Sig |
| ENSG00000172301 | COPRS        | coordinator of PRMT5 and differentiation stimulator                  | 55352     | 411.3568946 | 0.26951705  | 0.567157303 | 0.475206876 | 0.634639527 | 0.999371363 | Not Sig |
| ENSG00000076641 | PAG1         | phosphoprotein membrane anchor with glycosphingolipid microdomains 1 | 55824     | 2175.884965 | 0.269696327 | 0.500625247 | 0.53871899  | 0.590080768 | 0.999371363 | Not Sig |
| ENSG00000120705 | ETF1         | eukaryotic translation termination factor 1                          | 2107      | 2353.771234 | 0.269962891 | 0.48988206  | 0.551077317 | 0.581580674 | 0.999371363 | Not Sig |
| ENSG00000112110 | MRPL18       | mitochondrial ribosomal protein L18                                  | 29074     | 677.7938806 | 0.269991502 | 0.410561207 | 0.657615715 | 0.510785094 | 0.999371363 | Not Sig |
| ENSG00000266294 | NA           | NA                                                                   | NA        | 1.287863452 | 0.270264182 | 2.472144609 | 0.109323776 | 0.912945689 | NA          | NA      |
| ENSG00000157470 | FAM81A       | family with sequence similarity 81 member A                          | 145773    | 92.03263995 | 0.270368886 | 0.748435747 | 0.361245286 | 0.717916091 | 0.999371363 | Not Sig |
| ENSG00000213866 | NA           | NA                                                                   | NA        | 6.71849029  | 0.270428391 | 1.021663636 | 0.264694153 | 0.791245082 | 0.999371363 | Not Sig |

|                 |              |                                                                    |           |             |             |             |             |             |             |         |
|-----------------|--------------|--------------------------------------------------------------------|-----------|-------------|-------------|-------------|-------------|-------------|-------------|---------|
| ENSG00000070413 | DGCR2        | DiGeorge syndrome critical region gene 2                           | 9993      | 3058.345327 | 0.270540132 | 0.552716548 | 0.489473552 | 0.624506474 | 0.999371363 | Not Sig |
| ENSG00000110063 | DCPS         | decapping enzyme, scavenger                                        | 28960     | 262.6678558 | 0.270644072 | 0.532128672 | 0.508606444 | 0.611028111 | 0.999371363 | Not Sig |
| ENSG00000123505 | AMD1         | adenosylmethionine decarboxylase 1                                 | 262       | 1542.444716 | 0.270823041 | 0.412465609 | 0.656595446 | 0.511441078 | 0.999371363 | Not Sig |
| ENSG00000178449 | COX14        | COX14, cytochrome c oxidase assembly factor                        | 84987     | 266.5465576 | 0.270929588 | 0.553621523 | 0.489376906 | 0.624574883 | 0.999371363 | Not Sig |
| ENSG00000149483 | TMEM138      | transmembrane protein 138                                          | 51524     | 470.2990695 | 0.271109139 | 0.466857672 | 0.580710471 | 0.561435603 | 0.999371363 | Not Sig |
| ENSG00000114670 | NEK11        | NIMA related kinase 11                                             | 79858     | 301.7683087 | 0.271160038 | 0.461063147 | 0.588119088 | 0.556452362 | 0.999371363 | Not Sig |
| ENSG00000068438 | FTSJ1        | FtsJ RNA methyltransferase homolog 1                               | 24140     | 590.6397235 | 0.271216299 | 0.441665311 | 0.614076524 | 0.539164761 | 0.999371363 | Not Sig |
| ENSG00000169180 | XP06         | exportin 6                                                         | 23214     | 2232.843985 | 0.271233695 | 0.390262962 | 0.695002401 | 0.487053797 | 0.999371363 | Not Sig |
| ENSG00000077044 | DGKD         | diacylglycerol kinase delta                                        | 8527      | 1600.415502 | 0.271298814 | 0.585929597 | 0.463022889 | 0.643347961 | 0.999371363 | Not Sig |
| ENSG00000171421 | MRPL36       | mitochondrial ribosomal protein L36                                | 64979     | 158.9540965 | 0.271514061 | 0.538559192 | 0.504148969 | 0.614156698 | 0.999371363 | Not Sig |
| ENSG00000159110 | IFNAR2       | interferon alpha and beta receptor subunit 2                       | 3455      | 1217.985748 | 0.271522304 | 0.436654086 | 0.621824719 | 0.534057131 | 0.999371363 | Not Sig |
| ENSG00000143185 | XCL2         | X-C motif chemokine ligand 2                                       | 6846      | 12.74271053 | 0.271775139 | 0.963323748 | 0.282122328 | 0.777849713 | 0.999371363 | Not Sig |
| ENSG00000138617 | PARP16       | poly(ADP-ribose) polymerase family member 16                       | 54956     | 299.2741551 | 0.27177628  | 0.481791093 | 0.564095691 | 0.57268901  | 0.999371363 | Not Sig |
| ENSG00000221634 | MIR1276      | microRNA 1276                                                      | 100302121 | 4.445211704 | 0.271830584 | 1.193505297 | 0.227758171 | 0.819834247 | NA          | NA      |
| ENSG00000136653 | NA           | NA                                                                 | NA        | 1404.026554 | 0.271962841 | 0.635917144 | 0.427670246 | 0.668891215 | 0.999371363 | Not Sig |
| ENSG00000013392 | RWDD2A       | RWD domain containing 2A                                           | 112611    | 202.2386903 | 0.272005312 | 0.585336355 | 0.46469916  | 0.64214691  | 0.999371363 | Not Sig |
| ENSG00000126945 | HNRNPH2      | heterogeneous nuclear ribonucleoprotein H2                         | 3188      | 1430.091886 | 0.273103888 | 0.484833336 | 0.563294369 | 0.573234452 | 0.999371363 | Not Sig |
| ENSG00000135077 | HAVCR2       | hepatitis A virus cellular receptor 2                              | 84868     | 526.4540647 | 0.273235264 | 0.785836743 | 0.347699782 | 0.72806566  | 0.999371363 | Not Sig |
| ENSG00000115539 | PDCL3        | phosducin like 3                                                   | 79031     | 278.1447549 | 0.273279067 | 0.5149331   | 0.530707906 | 0.595621206 | 0.999371363 | Not Sig |
| ENSG00000141385 | AFG3L2       | AFG3 like matrix AAA peptidase subunit 2                           | 10939     | 1452.923417 | 0.273601893 | 0.526975444 | 0.519192869 | 0.603626251 | 0.999371363 | Not Sig |
| ENSG00000166199 | ALKBH3       | alkB homolog 3, alpha-ketoglutaratedependent dioxygenase           | 221120    | 343.2385391 | 0.273605007 | 0.407701043 | 0.671092243 | 0.502161768 | 0.999371363 | Not Sig |
| ENSG00000198721 | ECI2         | enoyl-CoA delta isomerase 2                                        | 10455     | 610.1789596 | 0.273649391 | 0.576438431 | 0.474724406 | 0.63498342  | 0.999371363 | Not Sig |
| ENSG00000207973 | MIR589       | microRNA 589                                                       | 693174    | 12.41451236 | 0.274067519 | 0.954412977 | 0.287158207 | 0.773991186 | 0.999371363 | Not Sig |
| ENSG00000086758 | HUWE1        | HECT, UBA and WWE domain containing 1, E3 ubiquitin protein ligase | 10075     | 12762.10627 | 0.274223423 | 0.396845747 | 0.691007589 | 0.489560772 | 0.999371363 | Not Sig |
| ENSG00000145780 | FEM1C        | fem-1 homolog C                                                    | 56929     | 913.2125461 | 0.274392203 | 0.516055995 | 0.531710136 | 0.594926771 | 0.999371363 | Not Sig |
| ENSG00000148229 | POLE3        | DNA polymerase epsilon 3, accessory subunit                        | 54107     | 585.7943169 | 0.274525265 | 0.45708926  | 0.600594434 | 0.548110146 | 0.999371363 | Not Sig |
| ENSG00000167671 | UBXN6        | UBX domain protein 6                                               | 80700     | 2065.813686 | 0.274535417 | 0.694519587 | 0.395288228 | 0.692630186 | 0.999371363 | Not Sig |
| ENSG00000225850 | NA           | NA                                                                 | NA        | 2.770973648 | 0.274629506 | 1.624879422 | 0.169015314 | 0.865784596 | NA          | NA      |
| ENSG00000124541 | RRP36        | ribosomal RNA processing 36                                        | 88745     | 622.4787302 | 0.274692508 | 0.455816816 | 0.602637943 | 0.546749573 | 0.999371363 | Not Sig |
| ENSG00000241525 | LOC105371430 | uncharacterized LOC105371430                                       | 105371430 | 4.665078948 | 0.274793345 | 1.238610018 | 0.221856226 | 0.824425808 | NA          | NA      |
| ENSG00000142166 | IFNAR1       | interferon alpha and beta receptor subunit 1                       | 3454      | 2333.285001 | 0.274953345 | 0.453698324 | 0.606026803 | 0.544496955 | 0.999371363 | Not Sig |
| ENSG00000166900 | STX3         | syntaxin 3                                                         | 6809      | 1447.156776 | 0.275074385 | 0.580911467 | 0.473522043 | 0.635840778 | 0.999371363 | Not Sig |
| ENSG00000168916 | ZNF608       | zinc finger protein 608                                            | 57507     | 1134.344989 | 0.275222121 | 0.519118028 | 0.530172535 | 0.595992312 | 0.999371363 | Not Sig |
| ENSG00000102271 | KLHL4        | kelch like family member 4                                         | 56062     | 37.41281055 | 0.275539328 | 0.605128375 | 0.455340287 | 0.648864447 | 0.999371363 | Not Sig |
| ENSG00000269275 | NA           | NA                                                                 | NA        | 6.656118646 | 0.275803279 | 1.211631375 | 0.227629694 | 0.819934133 | 0.999371363 | Not Sig |

|                 |          |                                                                        |           |             |             |             |             |             |             |         |
|-----------------|----------|------------------------------------------------------------------------|-----------|-------------|-------------|-------------|-------------|-------------|-------------|---------|
| ENSG00000273076 | NA       | NA                                                                     | NA        | 6.562306532 | 0.276207635 | 1.249963502 | 0.22097256  | 0.825113799 | NA          | NA      |
| ENSG00000205531 | NAP1L4   | nucleosome assembly protein 1 like 4                                   | 4676      | 2641.493473 | 0.276259016 | 0.422984336 | 0.653118786 | 0.513679702 | 0.999371363 | Not Sig |
| ENSG00000267322 | SCARNA17 | small Cajal body-specific RNA 17                                       | 677769    | 7.933531927 | 0.2764278   | 1.003114886 | 0.275569432 | 0.78287879  | 0.999371363 | Not Sig |
| ENSG00000267322 | SNHG22   | small nucleolar RNA host gene 22                                       | 103091864 | 7.933531927 | 0.2764278   | 1.003114886 | 0.275569432 | 0.78287879  | 0.999371363 | Not Sig |
| ENSG00000144357 | UBR3     | ubiquitin protein ligase E3 component n-recognin 3 (putative)          | 130507    | 2308.911868 | 0.276525608 | 0.443620664 | 0.623337979 | 0.533062446 | 0.999371363 | Not Sig |
| ENSG00000126460 | PRRG2    | proline rich and Gla domain 2                                          | 5639      | 156.1669333 | 0.276682779 | 0.525593412 | 0.526419799 | 0.598596562 | 0.999371363 | Not Sig |
| ENSG00000230042 | NA       | NA                                                                     | NA        | 21.88619881 | 0.276806988 | 0.82514046  | 0.335466508 | 0.737273206 | 0.999371363 | Not Sig |
| ENSG00000185052 | SLC24A3  | solute carrier family 24 member 3                                      | 57419     | 417.9875116 | 0.276821118 | 0.86303746  | 0.320752146 | 0.748398227 | 0.999371363 | Not Sig |
| ENSG00000110074 | FOXRED1  | FAD dependent oxidoreductase domain containing 1                       | 55572     | 386.5016835 | 0.276855816 | 0.459043802 | 0.603114158 | 0.546432748 | 0.999371363 | Not Sig |
| ENSG00000023608 | SNAPC1   | small nuclear RNA activating complex polypeptide 1                     | 6617      | 169.7691605 | 0.27697858  | 0.450707634 | 0.614541578 | 0.538857507 | 0.999371363 | Not Sig |
| ENSG00000161267 | BDH1     | 3-hydroxybutyrate dehydrogenase 1                                      | 622       | 566.2296443 | 0.277098727 | 0.769832499 | 0.359946777 | 0.718886935 | 0.999371363 | Not Sig |
| ENSG00000162062 | TEDC2    | tubulin epsilon and delta complex 2                                    | 80178     | 45.4850918  | 0.277124919 | 0.92117113  | 0.300839779 | 0.763536674 | 0.999371363 | Not Sig |
| ENSG00000089006 | SNX5     | sorting nexin 5                                                        | 27131     | 1796.448255 | 0.277127589 | 0.443522556 | 0.624833136 | 0.532080581 | 0.999371363 | Not Sig |
| ENSG00000156599 | ZDHHC5   | zinc finger DHHC-type containing 5                                     | 25921     | 2651.950291 | 0.277425671 | 0.418907458 | 0.662260043 | 0.507804579 | 0.999371363 | Not Sig |
| ENSG00000204622 | HLA-J    | major histocompatibility complex, class I, J (pseudogene)              | 3137      | 50.53046419 | 0.277555466 | 1.136378171 | 0.244245686 | 0.807040546 | 0.999371363 | Not Sig |
| ENSG00000129562 | DAD1     | defender against cell death 1                                          | 1603      | 1112.158855 | 0.277559411 | 0.451586767 | 0.614631409 | 0.538798167 | 0.999371363 | Not Sig |
| ENSG00000146463 | ZMYM4    | zinc finger MYM-type containing 4                                      | 9202      | 2720.099145 | 0.277638666 | 0.523663233 | 0.530185526 | 0.595983306 | 0.999371363 | Not Sig |
| ENSG00000268865 | NA       | NA                                                                     | NA        | 2.995429726 | 0.277644729 | 1.441009557 | 0.19267376  | 0.847214475 | NA          | NA      |
| ENSG00000117222 | RBBP5    | Rb binding protein 5, histone lysine methyltransferase complex subunit | 5929      | 893.8080017 | 0.277803624 | 0.436898486 | 0.63585394  | 0.524871626 | 0.999371363 | Not Sig |
| ENSG00000243704 | NA       | NA                                                                     | NA        | 5.413799467 | 0.277999165 | 1.153873179 | 0.240926967 | 0.809611721 | NA          | NA      |
| ENSG00000100365 | NCF4     | neutrophil cytosolic factor 4                                          | 4689      | 443.154131  | 0.278302878 | 0.849595711 | 0.327570955 | 0.743236086 | 0.999371363 | Not Sig |
| ENSG00000204070 | SYS1     | SYS1, golgi trafficking protein                                        | 90196     | 520.0222532 | 0.278331973 | 0.486825603 | 0.571728297 | 0.567506061 | 0.999371363 | Not Sig |
| ENSG00000205413 | SAMD9    | sterile alpha motif domain containing 9                                | 54809     | 1044.276799 | 0.279036966 | 0.654938517 | 0.426050627 | 0.670070956 | 0.999371363 | Not Sig |
| ENSG00000258780 | NA       | NA                                                                     | NA        | 9.312057738 | 0.27909704  | 0.986730119 | 0.282850432 | 0.777291493 | 0.999371363 | Not Sig |
| ENSG00000174669 | SLC29A2  | solute carrier family 29 member 2                                      | 3177      | 434.5318728 | 0.279102012 | 0.547805061 | 0.509491481 | 0.610407768 | 0.999371363 | Not Sig |
| ENSG00000127125 | PPCS     | phosphopantothienoylcysteine synthetase                                | 79717     | 833.1305692 | 0.27925667  | 0.511239191 | 0.546234864 | 0.584904504 | 0.999371363 | Not Sig |
| ENSG00000132423 | COQ3     | coenzyme Q3, methyltransferase                                         | 51805     | 68.11858356 | 0.279259134 | 0.512011539 | 0.545415705 | 0.585467642 | 0.999371363 | Not Sig |
| ENSG00000180764 | PIPSL    | PIP5K1A and PSMD4-like, pseudogene                                     | 266971    | 6.607032364 | 0.279426156 | 1.367022201 | 0.204404987 | 0.838037033 | 0.999371363 | Not Sig |
| ENSG00000229534 | NA       | NA                                                                     | NA        | 17.60752705 | 0.279449973 | 0.8676863   | 0.322063369 | 0.747404688 | 0.999371363 | Not Sig |
| ENSG00000250133 | HOXC-AS2 | HOXC cluster antisense RNA 2                                           | 100874364 | 4.997517468 | 0.279469994 | 1.786543022 | 0.156430598 | 0.87569362  | NA          | NA      |
| ENSG00000087263 | OGFOD1   | 2-oxoglutarate and iron dependent oxygenase domain containing 1        | 55239     | 717.958357  | 0.279503218 | 0.405360111 | 0.68951831  | 0.490497155 | 0.999371363 | Not Sig |
| ENSG00000170734 | POLH     | DNA polymerase eta                                                     | 5429      | 363.085911  | 0.279911709 | 0.459064882 | 0.609743241 | 0.542031906 | 0.999371363 | Not Sig |
| ENSG00000244268 | NA       | NA                                                                     | NA        | 0.818083143 | 0.279991179 | 2.775417539 | 0.100882543 | 0.919643701 | NA          | NA      |
| ENSG00000271509 | NA       | NA                                                                     | NA        | 0.818083143 | 0.279991179 | 2.775417539 | 0.100882543 | 0.919643701 | NA          | NA      |
| ENSG00000112578 | BYSL     | bystin like                                                            | 705       | 252.0378754 | 0.280089249 | 0.582685808 | 0.480686582 | 0.630739269 | 0.999371363 | Not Sig |

|                 |              |                                                       |           |             |             |             |             |             |             |         |
|-----------------|--------------|-------------------------------------------------------|-----------|-------------|-------------|-------------|-------------|-------------|-------------|---------|
| ENSG00000125898 | FAM110A      | family with sequence similarity 110 member A          | 83541     | 372.8399586 | 0.280131213 | 0.683175059 | 0.410043091 | 0.681774338 | 0.999371363 | Not Sig |
| ENSG00000205937 | RNPS1        | RNA binding protein with serine rich domain 1         | 10921     | 2160.014899 | 0.2801505   | 0.447838398 | 0.62556159  | 0.531602539 | 0.999371363 | Not Sig |
| ENSG00000255561 | FDXACB1      | ferredoxin-fold anticodon binding domain containing 1 | 91893     | 21.17833798 | 0.280222069 | 0.688563777 | 0.406966033 | 0.684032936 | 0.999371363 | Not Sig |
| ENSG00000116035 | VAX2         | ventral anterior homeobox 2                           | 25806     | 33.46264001 | 0.280240915 | 0.769571136 | 0.36415206  | 0.715744463 | 0.999371363 | Not Sig |
| ENSG00000140548 | ZNF710       | zinc finger protein 710                               | 374655    | 1193.121355 | 0.280390901 | 0.475489339 | 0.589689142 | 0.555399076 | 0.999371363 | Not Sig |
| ENSG00000114988 | LMAN2L       | lectin, mannose binding 2 like                        | 81562     | 443.9381976 | 0.280622217 | 0.465164915 | 0.603274682 | 0.546325973 | 0.999371363 | Not Sig |
| ENSG00000256073 | URB1-AS1     | URB1 antisense RNA 1 (head to head)                   | 84996     | 46.9693208  | 0.280662609 | 0.583094694 | 0.481332812 | 0.63027998  | 0.999371363 | Not Sig |
| ENSG00000231728 | LOC100128594 | uncharacterized LOC100128594                          | 100128594 | 12.56000223 | 0.281107541 | 0.78736562  | 0.35702288  | 0.721074678 | 0.999371363 | Not Sig |
| ENSG00000122545 | 7-Sep        | septin 7                                              | 989       | 3233.757876 | 0.2811393   | 0.431776577 | 0.651122165 | 0.514967629 | 0.999371363 | Not Sig |
| ENSG00000142655 | PEX14        | peroxisomal biogenesis factor 14                      | 5195      | 525.3369286 | 0.281285558 | 0.523984474 | 0.536820406 | 0.591391675 | 0.999371363 | Not Sig |
| ENSG00000250734 | NA           | NA                                                    | NA        | 3.842540014 | 0.281532755 | 1.584778746 | 0.177647987 | 0.858999435 | NA          | NA      |
| ENSG00000271615 | NA           | NA                                                    | NA        | 1.114614505 | 0.281540487 | 2.942372303 | 0.095684862 | 0.923770864 | NA          | NA      |
| ENSG00000175213 | ZNF408       | zinc finger protein 408                               | 79797     | 183.7108127 | 0.281636537 | 0.542368877 | 0.519271199 | 0.603571635 | 0.999371363 | Not Sig |
| ENSG00000123570 | RAB9B        | RAB9B, member RAS oncogene family                     | 51209     | 32.18464443 | 0.281711935 | 0.744448578 | 0.378416916 | 0.705120904 | 0.999371363 | Not Sig |
| ENSG00000132635 | PCED1A       | PC-esterase domain containing 1A                      | 64773     | 750.929944  | 0.28209347  | 0.513646017 | 0.549198203 | 0.582869437 | 0.999371363 | Not Sig |
| ENSG00000108468 | CBX1         | chromobox 1                                           | 10951     | 1101.998546 | 0.282189524 | 0.414963492 | 0.68003458  | 0.496482566 | 0.999371363 | Not Sig |
| ENSG00000146285 | SCML4        | Scm polycomb group protein like 4                     | 256380    | 93.30684199 | 0.28239424  | 0.742666084 | 0.380243889 | 0.703764383 | 0.999371363 | Not Sig |
| ENSG00000238172 | NA           | NA                                                    | NA        | 2.213226271 | 0.282530554 | 1.588523656 | 0.177857316 | 0.858835033 | NA          | NA      |
| ENSG00000143162 | CREG1        | cellular repressor of E1A stimulated genes 1          | 8804      | 2046.753437 | 0.282718976 | 0.49533727  | 0.570760556 | 0.568161964 | 0.999371363 | Not Sig |
| ENSG00000198876 | DCAF12       | DDB1 and CUL4 associated factor 12                    | 25853     | 1453.104488 | 0.282834693 | 0.427277055 | 0.661946833 | 0.508005296 | 0.999371363 | Not Sig |
| ENSG00000125166 | GOT2         | glutamic-oxaloacetic transaminase 2                   | 2806      | 1075.551941 | 0.282900358 | 0.413459547 | 0.684227417 | 0.493831572 | 0.999371363 | Not Sig |
| ENSG00000013503 | POLR3B       | RNA polymerase III subunit B                          | 55703     | 405.109468  | 0.283128933 | 0.48222838  | 0.587126234 | 0.55711893  | 0.999371363 | Not Sig |
| ENSG00000139921 | TMX1         | thioredoxin related transmembrane protein 1           | 81542     | 913.5414957 | 0.283225504 | 0.538487708 | 0.525964659 | 0.598912762 | 0.999371363 | Not Sig |
| ENSG00000099203 | TMED1        | transmembrane p24 trafficking protein 1               | 11018     | 319.9082825 | 0.283336614 | 0.609829582 | 0.464616054 | 0.642206434 | 0.999371363 | Not Sig |
| ENSG00000272183 | NA           | NA                                                    | NA        | 24.27597055 | 0.283339263 | 0.781335571 | 0.362634537 | 0.716877907 | 0.999371363 | Not Sig |
| ENSG00000137033 | IL33         | interleukin 33                                        | 90865     | 732.1516961 | 0.283388563 | 0.730101054 | 0.38814978  | 0.697905195 | 0.999371363 | Not Sig |
| ENSG00000189316 | NA           | NA                                                    | NA        | 5.978952832 | 0.283533888 | 1.112856761 | 0.254780218 | 0.798892855 | NA          | NA      |
| ENSG00000102225 | CDK16        | cyclin dependent kinase 16                            | 5127      | 1696.158302 | 0.283847941 | 0.45040482  | 0.630206269 | 0.528559638 | 0.999371363 | Not Sig |
| ENSG00000113456 | RAD1         | RAD1 checkpoint DNA exonuclease                       | 5810      | 692.7115788 | 0.28391255  | 0.455709454 | 0.6230122   | 0.533276505 | 0.999371363 | Not Sig |
| ENSG00000172893 | DHCR7        | 7-dehydrocholesterol reductase                        | 1717      | 786.8155226 | 0.283944084 | 0.56341743  | 0.503967517 | 0.614284203 | 0.999371363 | Not Sig |
| ENSG00000161547 | SRSF2        | serine and arginine rich splicing factor 2            | 6427      | 2727.597143 | 0.284130478 | 0.417515688 | 0.680526471 | 0.496171166 | 0.999371363 | Not Sig |
| ENSG00000204852 | TCTN1        | tectonic family member 1                              | 79600     | 568.1956357 | 0.284186497 | 0.536360458 | 0.529842371 | 0.596221225 | 0.999371363 | Not Sig |
| ENSG00000171282 | NA           | NA                                                    | NA        | 1329.30223  | 0.2842582   | 0.647825561 | 0.438788182 | 0.660815024 | 0.999371363 | Not Sig |
| ENSG00000161920 | MED11        | mediator complex subunit 11                           | 400569    | 228.6213508 | 0.284288105 | 0.475225862 | 0.598216822 | 0.549695268 | 0.999371363 | Not Sig |
| ENSG00000229417 | NA           | NA                                                    | NA        | 10.62884924 | 0.284315157 | 0.812365799 | 0.349984154 | 0.726350589 | 0.999371363 | Not Sig |

|                 |         |                                                                                |        |             |             |             |             |             |             |         |
|-----------------|---------|--------------------------------------------------------------------------------|--------|-------------|-------------|-------------|-------------|-------------|-------------|---------|
| ENSG00000249222 | ATP5L2  | ATP synthase, H <sup>+</sup> transporting, mitochondrial Fo complex subunit G2 | 267020 | 7.338476561 | 0.284444653 | 0.993859414 | 0.286202101 | 0.774723335 | 0.999371363 | Not Sig |
| ENSG00000119698 | PPP4R4  | protein phosphatase 4 regulatory subunit 4                                     | 57718  | 55.37239726 | 0.284454424 | 0.969527962 | 0.29339476  | 0.76922043  | 0.999371363 | Not Sig |
| ENSG00000258978 | NA      | NA                                                                             | NA     | 4.134770303 | 0.284662178 | 1.373899665 | 0.207192843 | 0.835859256 | NA          | NA      |
| ENSG00000108296 | NA      | NA                                                                             | NA     | 723.6539041 | 0.284802164 | 0.467684313 | 0.608962405 | 0.542549358 | 0.999371363 | Not Sig |
| ENSG00000115165 | CYTIP   | cytohesin 1 interacting protein                                                | 9595   | 825.268746  | 0.284807704 | 0.853140154 | 0.333834602 | 0.738504371 | 0.999371363 | Not Sig |
| ENSG00000100347 | SAMM50  | SAMM50 sorting and assembly machinery component                                | 25813  | 615.5451659 | 0.285029031 | 0.44116452  | 0.646083305 | 0.518225407 | 0.999371363 | Not Sig |
| ENSG00000103353 | UBFD1   | ubiquitin family domain containing 1                                           | 56061  | 1451.095261 | 0.285076077 | 0.434710068 | 0.655784392 | 0.51196286  | 0.999371363 | Not Sig |
| ENSG00000099139 | PCSK5   | proprotein convertase subtilisin/kexin type 5                                  | 5125   | 568.1752934 | 0.285095286 | 0.653979789 | 0.435938986 | 0.662880998 | 0.999371363 | Not Sig |
| ENSG00000230747 | NA      | NA                                                                             | NA     | 15.03226322 | 0.285229625 | 0.856064826 | 0.333186946 | 0.738993171 | 0.999371363 | Not Sig |
| ENSG00000229326 | NA      | NA                                                                             | NA     | 5.555370418 | 0.285478899 | 1.094713001 | 0.260779673 | 0.794262421 | NA          | NA      |
| ENSG00000058262 | SEC61A1 | Sec61 translocon alpha 1 subunit                                               | 29927  | 5416.929252 | 0.285496975 | 0.41958645  | 0.680424676 | 0.496235601 | 0.999371363 | Not Sig |
| ENSG00000227191 | NA      | NA                                                                             | NA     | 63.04974423 | 0.285531853 | 0.86562449  | 0.329856487 | 0.741508403 | 0.999371363 | Not Sig |
| ENSG00000159714 | ZDHHC1  | zinc finger DHHC-type containing 1                                             | 29800  | 393.5108057 | 0.28575139  | 0.673847021 | 0.424059737 | 0.671522248 | 0.999371363 | Not Sig |
| ENSG00000162641 | AKNAD1  | AKNA domain containing 1                                                       | 254268 | 2.561268815 | 0.285797569 | 1.766894756 | 0.161751325 | 0.871501685 | NA          | NA      |
| ENSG00000160058 | BSDC1   | BSD domain containing 1                                                        | 55108  | 2044.671726 | 0.285938108 | 0.430372715 | 0.664396459 | 0.506436599 | 0.999371363 | Not Sig |
| ENSG00000154114 | TBCEL   | tubulin folding cofactor E like                                                | 219899 | 814.9334446 | 0.286033558 | 0.474093294 | 0.603327575 | 0.546290792 | 0.999371363 | Not Sig |
| ENSG00000121905 | HPCA    | hippocalcin                                                                    | 3208   | 5.999544405 | 0.28603518  | 1.218285881 | 0.234784942 | 0.814375656 | NA          | NA      |
| ENSG00000044090 | CUL7    | cullin 7                                                                       | 9820   | 1456.528901 | 0.286287036 | 0.488783992 | 0.585712791 | 0.558068537 | 0.999371363 | Not Sig |
| ENSG00000268926 | NA      | NA                                                                             | NA     | 6.927940228 | 0.286300946 | 1.337178004 | 0.214108327 | 0.830462582 | 0.999371363 | Not Sig |
| ENSG00000253683 | NA      | NA                                                                             | NA     | 2.532086952 | 0.286313093 | 1.54562088  | 0.185241476 | 0.853039639 | NA          | NA      |
| ENSG00000100124 | ANKRD54 | ankyrin repeat domain 54                                                       | 129138 | 409.0393315 | 0.286330549 | 0.568424171 | 0.503726906 | 0.614453298 | 0.999371363 | Not Sig |
| ENSG00000143256 | PFDN2   | prefoldin subunit 2                                                            | 5202   | 316.6486662 | 0.286380263 | 0.466686919 | 0.613645362 | 0.539449701 | 0.999371363 | Not Sig |
| ENSG00000167930 | FAM234A | family with sequence similarity 234 member A                                   | 83986  | 590.4649834 | 0.286395899 | 0.422293323 | 0.678191872 | 0.497650046 | 0.999371363 | Not Sig |
| ENSG00000174231 | PRPF8   | pre-mRNA processing factor 8                                                   | 10594  | 10291.11069 | 0.286501549 | 0.390581198 | 0.733526217 | 0.463237544 | 0.999371363 | Not Sig |
| ENSG00000225568 | NA      | NA                                                                             | NA     | 9.140873625 | 0.286673969 | 1.191886343 | 0.240521229 | 0.809926207 | 0.999371363 | Not Sig |
| ENSG00000201592 | NA      | NA                                                                             | NA     | 25.28200568 | 0.28685317  | 0.831058423 | 0.34516607  | 0.729969525 | 0.999371363 | Not Sig |
| ENSG00000124334 | IL9R    | interleukin 9 receptor                                                         | 3581   | 13.25749355 | 0.287333414 | 0.941145649 | 0.30530175  | 0.760136343 | 0.999371363 | Not Sig |
| ENSG00000130772 | MED18   | mediator complex subunit 18                                                    | 54797  | 212.2015029 | 0.287422209 | 0.508232501 | 0.565532918 | 0.571711341 | 0.999371363 | Not Sig |
| ENSG00000272658 | NA      | NA                                                                             | NA     | 32.55293792 | 0.287427257 | 0.693228019 | 0.414621523 | 0.678418989 | 0.999371363 | Not Sig |
| ENSG00000116731 | PRDM2   | PR/SET domain 2                                                                | 7799   | 2385.452674 | 0.28753417  | 0.380225526 | 0.75622006  | 0.449517267 | 0.999371363 | Not Sig |
| ENSG00000130119 | GNL3L   | G protein nucleolar 3 like                                                     | 54552  | 794.9277049 | 0.287722152 | 0.436548698 | 0.659083748 | 0.509841991 | 0.999371363 | Not Sig |
| ENSG00000010404 | IDS     | iduronate 2-sulfatase                                                          | 3423   | 2304.62945  | 0.287859133 | 0.594470714 | 0.484227609 | 0.628224345 | 0.999371363 | Not Sig |
| ENSG00000204311 | PJVK    | pejvakin                                                                       | 494513 | 33.31621658 | 0.288000317 | 0.697658532 | 0.412809855 | 0.67974593  | 0.999371363 | Not Sig |
| ENSG00000089597 | GANAB   | glucosidase II alpha subunit                                                   | 23193  | 6497.335327 | 0.288427033 | 0.392913361 | 0.734072856 | 0.462904336 | 0.999371363 | Not Sig |
| ENSG00000175189 | INHBC   | inhibin beta C subunit                                                         | 3626   | 1.047100583 | 0.288628805 | 2.544802113 | 0.113418958 | 0.90969841  | NA          | NA      |

|                 |              |                                                          |           |             |             |             |             |             |             |         |
|-----------------|--------------|----------------------------------------------------------|-----------|-------------|-------------|-------------|-------------|-------------|-------------|---------|
| ENSG00000171617 | ENC1         | ectodermal-neural cortex 1                               | 8507      | 2890.021505 | 0.28869559  | 0.717119846 | 0.402576489 | 0.687259809 | 0.999371363 | Not Sig |
| ENSG00000227598 | NA           | NA                                                       | NA        | 21.01590064 | 0.288818305 | 0.651007743 | 0.443648033 | 0.657297073 | 0.999371363 | Not Sig |
| ENSG00000230580 | NA           | NA                                                       | NA        | 1.955026968 | 0.289260878 | 1.651233436 | 0.17517867  | 0.860939244 | NA          | NA      |
| ENSG00000105778 | AVL9         | AVL9 cell migration associated                           | 23080     | 2519.904743 | 0.289298559 | 0.610280183 | 0.474042198 | 0.635469816 | 0.999371363 | Not Sig |
| ENSG00000240038 | AMY2B        | amylase, alpha 2B (pancreatic)                           | 280       | 227.4496623 | 0.289301301 | 0.589798244 | 0.490508923 | 0.623773817 | 0.999371363 | Not Sig |
| ENSG00000185652 | NTF3         | neurotrophin 3                                           | 4908      | 24.78149996 | 0.289327739 | 0.864733005 | 0.33458621  | 0.737937249 | 0.999371363 | Not Sig |
| ENSG00000213943 | NA           | NA                                                       | NA        | 2.521348344 | 0.289349047 | 1.630503804 | 0.177459903 | 0.859147158 | NA          | NA      |
| ENSG00000211776 | NA           | NA                                                       | NA        | 4.327155052 | 0.28937033  | 1.530104734 | 0.189117989 | 0.850000343 | NA          | NA      |
| ENSG00000082438 | COBLL1       | cordon-bleu WH2 repeat protein like 1                    | 22837     | 1781.48794  | 0.289660106 | 0.43261688  | 0.669553406 | 0.503142525 | 0.999371363 | Not Sig |
| ENSG00000188343 | FAM92A       | family with sequence similarity 92 member A              | 137392    | 185.4719122 | 0.289759331 | 0.497779727 | 0.58210352  | 0.560496954 | 0.999371363 | Not Sig |
| ENSG00000272573 | MUSTN1       | musculoskeletal, embryonic nuclear protein 1             | 389125    | 3.06278893  | 0.289799001 | 1.570094669 | 0.184574221 | 0.853563007 | NA          | NA      |
| ENSG00000251279 | NA           | NA                                                       | NA        | 5.255562053 | 0.289822328 | 1.151758439 | 0.251634647 | 0.801323476 | NA          | NA      |
| ENSG00000155755 | TMEM237      | transmembrane protein 237                                | 65062     | 339.1333616 | 0.290343362 | 0.425929521 | 0.681669966 | 0.495447663 | 0.999371363 | Not Sig |
| ENSG00000075884 | ARHGAP15     | Rho GTPase activating protein 15                         | 55843     | 428.1374775 | 0.290419317 | 0.744554025 | 0.390058085 | 0.696493596 | 0.999371363 | Not Sig |
| ENSG00000225014 | NA           | NA                                                       | NA        | 7.956581265 | 0.290649304 | 1.038614047 | 0.279843417 | 0.77959764  | 0.999371363 | Not Sig |
| ENSG00000172986 | GXYLT2       | glucoside xylosyltransferase 2                           | 727936    | 523.3647886 | 0.29091384  | 0.472447602 | 0.615758951 | 0.538053623 | 0.999371363 | Not Sig |
| ENSG00000173614 | NMNAT1       | nicotinamide nucleotide adenylyltransferase 1            | 64802     | 184.3032004 | 0.29103387  | 0.495229119 | 0.587675197 | 0.556750327 | 0.999371363 | Not Sig |
| ENSG00000117036 | ETV3         | ETS variant 3                                            | 2117      | 1522.069504 | 0.291272372 | 0.461299309 | 0.631417318 | 0.527767695 | 0.999371363 | Not Sig |
| ENSG00000167992 | VWCE         | von Willebrand factor C and EGF domains                  | 220001    | 21.09840509 | 0.291326157 | 0.832345448 | 0.350006308 | 0.726333964 | 0.999371363 | Not Sig |
| ENSG00000160072 | ATAD3B       | ATPase family, AAA domain containing 3B                  | 83858     | 780.7131888 | 0.291335718 | 0.520888513 | 0.559305324 | 0.575953362 | 0.999371363 | Not Sig |
| ENSG00000245213 | LOC101930370 | uncharacterized LOC101930370                             | 101930370 | 56.88435002 | 0.291517752 | 0.5874272   | 0.496261923 | 0.619709627 | 0.999371363 | Not Sig |
| ENSG00000115295 | CLIP4        | CAP-Gly domain containing linker protein family member 4 | 79745     | 1294.240951 | 0.291595705 | 0.610853512 | 0.477357827 | 0.63310734  | 0.999371363 | Not Sig |
| ENSG00000147140 | NONO         | non-POU domain containing octamer binding                | 4841      | 4326.204455 | 0.291666292 | 0.394662777 | 0.739026604 | 0.459890843 | 0.999371363 | Not Sig |
| ENSG00000222346 | NA           | NA                                                       | NA        | 11.65232524 | 0.291686336 | 0.782157967 | 0.372925098 | 0.709204192 | 0.999371363 | Not Sig |
| ENSG00000197498 | RPF2         | ribosome production factor 2 homolog                     | 84154     | 310.5067807 | 0.291706982 | 0.47184715  | 0.618223469 | 0.536428041 | 0.999371363 | Not Sig |
| ENSG00000204397 | CARD16       | caspase recruitment domain family member 16              | 114769    | 187.0619865 | 0.291999592 | 0.943069647 | 0.309626753 | 0.75684481  | 0.999371363 | Not Sig |
| ENSG00000167034 | NKX3-1       | NK3 homeobox 1                                           | 4824      | 59.59066056 | 0.292364918 | 0.565272053 | 0.51721099  | 0.605008881 | 0.999371363 | Not Sig |
| ENSG00000273007 | NA           | NA                                                       | NA        | 6.612905557 | 0.292697676 | 1.187392689 | 0.246504529 | 0.805291699 | 0.999371363 | Not Sig |
| ENSG00000151876 | FBX04        | F-box protein 4                                          | 26272     | 177.0696831 | 0.292767106 | 0.464096481 | 0.630832419 | 0.528150104 | 0.999371363 | Not Sig |
| ENSG00000085117 | CD82         | CD82 molecule                                            | 3732      | 1779.176196 | 0.292925923 | 0.771565555 | 0.379651375 | 0.70420422  | 0.999371363 | Not Sig |
| ENSG00000147123 | NDUFB11      | NADH:ubiquinone oxidoreductase subunit B11               | 54539     | 932.5373792 | 0.292990668 | 0.48875199  | 0.599466956 | 0.548861539 | 0.999371363 | Not Sig |
| ENSG00000137814 | HAUS2        | HAUS augmin like complex subunit 2                       | 55142     | 384.3410974 | 0.29318557  | 0.403011162 | 0.727487468 | 0.46692739  | 0.999371363 | Not Sig |
| ENSG00000186479 | RGS7BP       | regulator of G protein signaling 7 binding protein       | 401190    | 101.025992  | 0.293503717 | 0.878107614 | 0.334245727 | 0.738194141 | 0.999371363 | Not Sig |
| ENSG00000099977 | DDT          | D-dopachrome tautomerase                                 | 1652      | 357.3824728 | 0.293836432 | 0.576254053 | 0.509907792 | 0.610116063 | 0.999371363 | Not Sig |
| ENSG00000099977 | DDTL         | D-dopachrome tautomerase like                            | 100037417 | 357.3824728 | 0.293836432 | 0.576254053 | 0.509907792 | 0.610116063 | 0.999371363 | Not Sig |

|                 |              |                                                           |           |             |             |             |             |             |             |         |
|-----------------|--------------|-----------------------------------------------------------|-----------|-------------|-------------|-------------|-------------|-------------|-------------|---------|
| ENSG00000226179 | NA           | NA                                                        | NA        | 13.12382305 | 0.293919152 | 0.847559811 | 0.346782786 | 0.72875451  | 0.999371363 | Not Sig |
| ENSG00000272779 | NA           | NA                                                        | NA        | 37.35560143 | 0.293923366 | 0.845456355 | 0.34765055  | 0.728102638 | 0.999371363 | Not Sig |
| ENSG00000128692 | NA           | NA                                                        | NA        | 5.893283416 | 0.294018558 | 1.143531616 | 0.257114498 | 0.797090386 | NA          | NA      |
| ENSG00000138757 | G3BP2        | G3BP stress granule assembly factor 2                     | 9908      | 3384.366143 | 0.294019831 | 0.416229178 | 0.706389284 | 0.479946083 | 0.999371363 | Not Sig |
| ENSG00000204959 | NA           | NA                                                        | NA        | 557.2672117 | 0.294032984 | 0.545913745 | 0.538607036 | 0.590158032 | 0.999371363 | Not Sig |
| ENSG00000128829 | EIF2AK4      | eukaryotic translation initiation factor 2 alpha kinase 4 | 440275    | 1822.370887 | 0.294067446 | 0.394279682 | 0.745834642 | 0.45576731  | 0.999371363 | Not Sig |
| ENSG00000157538 | DSCR3        | DSCR3 arrestin fold containing                            | 10311     | 1164.254682 | 0.294119712 | 0.440087607 | 0.668320824 | 0.503928823 | 0.999371363 | Not Sig |
| ENSG00000197702 | PARVA        | parvin alpha                                              | 55742     | 1980.294095 | 0.294208363 | 0.488516791 | 0.602248211 | 0.547008928 | 0.999371363 | Not Sig |
| ENSG00000266921 | LOC101928063 | uncharacterized LOC101928063                              | 101928063 | 6.328988977 | 0.294408431 | 1.027525225 | 0.286521853 | 0.774478459 | NA          | NA      |
| ENSG00000172428 | COPS9        | COP9 signalosome subunit 9                                | 150678    | 310.6765768 | 0.294460646 | 0.499823146 | 0.589129671 | 0.555774291 | 0.999371363 | Not Sig |
| ENSG00000145362 | ANK2         | ankyrin 2                                                 | 287       | 681.6669626 | 0.294704521 | 0.715051935 | 0.412144219 | 0.68023372  | 0.999371363 | Not Sig |
| ENSG00000251364 | LOC100506258 | uncharacterized LOC100506258                              | 100506258 | 100.9586962 | 0.294754692 | 0.68189661  | 0.43225716  | 0.66555452  | 0.999371363 | Not Sig |
| ENSG00000167797 | CDK2AP2      | cyclin dependent kinase 2 associated protein 2            | 10263     | 1093.936306 | 0.294774136 | 0.520856167 | 0.56594153  | 0.571433528 | 0.999371363 | Not Sig |
| ENSG00000158793 | NIT1         | nitrilase 1                                               | 4817      | 635.1532256 | 0.294797635 | 0.48707764  | 0.605237464 | 0.545021227 | 0.999371363 | Not Sig |
| ENSG00000080824 | HSP90AA1     | heat shock protein 90 alpha family class A member 1       | 3320      | 16717.10894 | 0.294979314 | 0.397575514 | 0.741945376 | 0.458120432 | 0.999371363 | Not Sig |
| ENSG00000126767 | ELK1         | ELK1, ETS transcription factor                            | 2002      | 537.6196783 | 0.295030378 | 0.438533344 | 0.672766125 | 0.501096092 | 0.999371363 | Not Sig |
| ENSG00000135387 | CAPRIN1      | cell cycle associated protein 1                           | 4076      | 6190.16165  | 0.295328858 | 0.447118301 | 0.660516148 | 0.508922659 | 0.999371363 | Not Sig |
| ENSG00000223776 | LGALS8-AS1   | LGALS8 antisense RNA 1                                    | 100287902 | 10.35773649 | 0.295737635 | 1.067475085 | 0.277044063 | 0.781746272 | 0.999371363 | Not Sig |
| ENSG00000161326 | NA           | NA                                                        | NA        | 155.6599515 | 0.295751541 | 0.512612475 | 0.576949558 | 0.563973531 | 0.999371363 | Not Sig |
| ENSG00000086827 | ZW10         | zw10 kinetochore protein                                  | 9183      | 357.0875084 | 0.295914602 | 0.442423597 | 0.668849049 | 0.503591774 | 0.999371363 | Not Sig |
| ENSG00000198947 | DMD          | dystrophin                                                | 1756      | 1038.244693 | 0.296151308 | 0.483410353 | 0.61262922  | 0.540121533 | 0.999371363 | Not Sig |
| ENSG00000117791 | 2-Mar        | mitochondrial amidoxime reducing component 2              | 54996     | 641.6453708 | 0.296489951 | 0.472758696 | 0.627148592 | 0.530561837 | 0.999371363 | Not Sig |
| ENSG00000143418 | CERS2        | ceramide synthase 2                                       | 29956     | 4075.281972 | 0.296640354 | 0.386846558 | 0.76681658  | 0.443190577 | 0.999371363 | Not Sig |
| ENSG00000131795 | NA           | NA                                                        | NA        | 1878.369744 | 0.296685027 | 0.402070722 | 0.737892642 | 0.46057969  | 0.999371363 | Not Sig |
| ENSG00000085377 | PREP         | prolyl endopeptidase                                      | 5550      | 764.729966  | 0.296691052 | 0.412677985 | 0.718940827 | 0.47217738  | 0.999371363 | Not Sig |
| ENSG00000141577 | CEP131       | centrosomal protein 131                                   | 22994     | 538.9319474 | 0.296837617 | 0.566419824 | 0.524059372 | 0.600237246 | 0.999371363 | Not Sig |
| ENSG00000214946 | TBC1D26      | TBC1 domain family member 26                              | 353149    | 1.613421959 | 0.296867727 | 1.970809546 | 0.150632377 | 0.88026572  | NA          | NA      |
| ENSG00000172548 | NIPAL4       | NIPA like domain containing 4                             | 348938    | 3.929217208 | 0.296907096 | 1.588879841 | 0.18686567  | 0.851765956 | NA          | NA      |
| ENSG00000214706 | IFRD2        | interferon related developmental regulator 2              | 7866      | 795.6857363 | 0.296931311 | 0.528675459 | 0.561651399 | 0.574353554 | 0.999371363 | Not Sig |
| ENSG00000165434 | PGM2L1       | phosphoglucomutase 2 like 1                               | 283209    | 964.0385568 | 0.297003068 | 0.718490528 | 0.413370888 | 0.6793349   | 0.999371363 | Not Sig |
| ENSG00000178188 | SH2B1        | SH2B adaptor protein 1                                    | 25970     | 1400.879859 | 0.297024162 | 0.488844389 | 0.607604728 | 0.543449664 | 0.999371363 | Not Sig |
| ENSG00000158270 | COLEC12      | collectin subfamily member 12                             | 81035     | 1763.187564 | 0.297061502 | 0.940122028 | 0.315981854 | 0.752016281 | 0.999371363 | Not Sig |
| ENSG00000162607 | USP1         | ubiquitin specific peptidase 1                            | 7398      | 1141.013868 | 0.297204351 | 0.530024101 | 0.560737427 | 0.574976549 | 0.999371363 | Not Sig |
| ENSG00000139531 | SUOX         | sulfite oxidase                                           | 6821      | 554.4296121 | 0.297335538 | 0.420705549 | 0.706754496 | 0.479719057 | 0.999371363 | Not Sig |
| ENSG00000240137 | ERICH6-AS1   | ERICH6 antisense RNA 1                                    | 101928085 | 26.78413738 | 0.297506665 | 0.672184041 | 0.442597037 | 0.658057228 | 0.999371363 | Not Sig |



|                 |         |                                                                         |           |             |             |             |             |             |             |         |
|-----------------|---------|-------------------------------------------------------------------------|-----------|-------------|-------------|-------------|-------------|-------------|-------------|---------|
| ENSG00000207930 | MIR603  | microRNA 603                                                            | 693188    | 7.661327791 | 0.297686843 | 1.359632753 | 0.218946508 | 0.826691717 | 0.999371363 | Not Sig |
| ENSG00000167191 | GPRC5B  | G protein-coupled receptor class C group 5 member B                     | 51704     | 348.1625731 | 0.297717274 | 0.540831061 | 0.550481092 | 0.581989442 | 0.999371363 | Not Sig |
| ENSG00000099968 | BCL2L13 | BCL2 like 13                                                            | 23786     | 1374.566923 | 0.297770266 | 0.536798246 | 0.554715422 | 0.579089326 | 0.999371363 | Not Sig |
| ENSG00000085382 | HACE1   | HECT domain and ankyrin repeat containing E3 ubiquitin protein ligase 1 | 57531     | 536.3076435 | 0.297866667 | 0.601019206 | 0.495602577 | 0.620174835 | 0.999371363 | Not Sig |
| ENSG00000150779 | TIMM8B  | translocase of inner mitochondrial membrane 8 homolog B                 | 26521     | 294.5686726 | 0.297945097 | 0.505418997 | 0.589501184 | 0.555525118 | 0.999371363 | Not Sig |
| ENSG00000068654 | POLR1A  | RNA polymerase I subunit A                                              | 25885     | 1815.077407 | 0.298038235 | 0.447142805 | 0.666539261 | 0.505066478 | 0.999371363 | Not Sig |
| ENSG00000174010 | KLHL15  | kelch like family member 15                                             | 80311     | 394.3901548 | 0.298107661 | 0.478250818 | 0.62332912  | 0.533068266 | 0.999371363 | Not Sig |
| ENSG00000152207 | CYSLTR2 | cysteinyl leukotriene receptor 2                                        | 57105     | 45.12214618 | 0.298172384 | 0.793011501 | 0.376000076 | 0.70691684  | 0.999371363 | Not Sig |
| ENSG00000234788 | NA      | NA                                                                      | NA        | 8.137108952 | 0.298196809 | 1.042799907 | 0.28595784  | 0.774910412 | 0.999371363 | Not Sig |
| ENSG00000174100 | NA      | NA                                                                      | NA        | 435.51999   | 0.298516272 | 0.434207469 | 0.68749686  | 0.491769679 | 0.999371363 | Not Sig |
| ENSG00000108788 | MLX     | MLX, MAX dimerization protein                                           | 6945      | 998.7645144 | 0.298859143 | 0.413234529 | 0.723219194 | 0.469545228 | 0.999371363 | Not Sig |
| ENSG00000116514 | RNF19B  | ring finger protein 19B                                                 | 127544    | 1402.108376 | 0.299021325 | 0.407744499 | 0.733354653 | 0.463342149 | 0.999371363 | Not Sig |
| ENSG00000243749 | TMEM35B | transmembrane protein 35B                                               | 100506144 | 2.931596916 | 0.299026429 | 1.644029724 | 0.181886267 | 0.855671982 | NA          | NA      |
| ENSG00000165457 | FOLR2   | folate receptor beta                                                    | 2350      | 339.0857705 | 0.299350034 | 0.983473621 | 0.304380338 | 0.760838145 | 0.999371363 | Not Sig |
| ENSG00000117305 | HMGCL   | 3-hydroxymethyl-3-methylglutaryl-CoA lyase                              | 3155      | 754.0129014 | 0.299362033 | 0.421672931 | 0.709938938 | 0.477742003 | 0.999371363 | Not Sig |
| ENSG00000152601 | MBNL1   | muscleblind like splicing regulator 1                                   | 4154      | 6512.82187  | 0.299436977 | 0.50534358  | 0.59254137  | 0.553488126 | 0.999371363 | Not Sig |
| ENSG00000124678 | TCP11   | t-complex 11                                                            | 6954      | 6.356427709 | 0.299549256 | 1.090947194 | 0.274577228 | 0.783641064 | NA          | NA      |
| ENSG00000085433 | WDR47   | WD repeat domain 47                                                     | 22911     | 471.8482647 | 0.299958033 | 0.473347791 | 0.633694799 | 0.52628002  | 0.999371363 | Not Sig |
| ENSG00000168159 | RNF187  | ring finger protein 187                                                 | 149603    | 1834.457873 | 0.300041974 | 0.588328995 | 0.509990119 | 0.610058384 | 0.999371363 | Not Sig |
| ENSG00000158710 | TAGLN2  | transgelin 2                                                            | 8407      | 10963.01279 | 0.300388103 | 0.505551452 | 0.594179092 | 0.552392335 | 0.999371363 | Not Sig |
| ENSG00000155158 | TTC39B  | tetratricopeptide repeat domain 39B                                     | 158219    | 916.1914917 | 0.300731815 | 0.469957646 | 0.639912592 | 0.522229427 | 0.999371363 | Not Sig |
| ENSG00000211721 | NA      | NA                                                                      | NA        | 8.874675444 | 0.301101012 | 1.203411145 | 0.250206269 | 0.802427838 | 0.999371363 | Not Sig |
| ENSG00000257718 | NA      | NA                                                                      | NA        | 4.453326932 | 0.301155563 | 1.218534006 | 0.247145801 | 0.804795389 | NA          | NA      |
| ENSG00000163902 | RPN1    | ribophorin I                                                            | 6184      | 5566.555153 | 0.301557122 | 0.440509707 | 0.68456408  | 0.49361904  | 0.999371363 | Not Sig |
| ENSG00000119718 | EIF2B2  | eukaryotic translation initiation factor 2B subunit beta                | 8892      | 392.032253  | 0.301565151 | 0.452710145 | 0.666132965 | 0.505326116 | 0.999371363 | Not Sig |
| ENSG00000198995 | MIR340  | microRNA 340                                                            | 442908    | 5.845918589 | 0.302025154 | 1.220835786 | 0.247392121 | 0.804604771 | NA          | NA      |
| ENSG00000057252 | SOAT1   | sterol O-acyltransferase 1                                              | 6646      | 2292.031588 | 0.302048213 | 0.529250558 | 0.570709296 | 0.568196717 | 0.999371363 | Not Sig |
| ENSG00000267077 | NA      | NA                                                                      | NA        | 5.041125525 | 0.302186452 | 1.205167298 | 0.250742326 | 0.802013334 | NA          | NA      |
| ENSG00000268970 | NA      | NA                                                                      | NA        | 1.446350258 | 0.302352234 | 1.992372599 | 0.151754865 | 0.879380282 | NA          | NA      |
| ENSG00000177692 | DNAJC28 | DnaJ heat shock protein family (Hsp40) member C28                       | 54943     | 35.94091023 | 0.302361772 | 0.607140484 | 0.498009571 | 0.618477296 | 0.999371363 | Not Sig |
| ENSG00000064651 | SLC12A2 | solute carrier family 12 member 2                                       | 6558      | 2264.991119 | 0.302385448 | 0.568242565 | 0.532141495 | 0.594628    | 0.999371363 | Not Sig |
| ENSG00000244378 | NA      | NA                                                                      | NA        | 13.77515512 | 0.303266209 | 0.823406975 | 0.368306583 | 0.712644645 | 0.999371363 | Not Sig |
| ENSG00000184786 | TCTE3   | t-complex-associated-testis-expressed 3                                 | 6991      | 7.662435758 | 0.303345497 | 0.998884728 | 0.303684187 | 0.761368506 | 0.999371363 | Not Sig |
| ENSG00000241157 | NA      | NA                                                                      | NA        | 20.92889787 | 0.303396871 | 0.772056276 | 0.392972482 | 0.694339806 | 0.999371363 | Not Sig |
| ENSG00000124422 | USP22   | ubiquitin specific peptidase 22                                         | 23326     | 6183.406087 | 0.303550483 | 0.425945026 | 0.712651785 | 0.476061259 | 0.999371363 | Not Sig |

|                 |          |                                                        |           |             |             |             |             |             |             |         |
|-----------------|----------|--------------------------------------------------------|-----------|-------------|-------------|-------------|-------------|-------------|-------------|---------|
| ENSG00000117215 | PLA2G2D  | phospholipase A2 group IID                             | 26279     | 70.20994108 | 0.303803492 | 0.864178079 | 0.351551954 | 0.725174303 | 0.999371363 | Not Sig |
| ENSG00000104979 | C19orf53 | chromosome 19 open reading frame 53                    | 28974     | 296.644062  | 0.303805522 | 0.429090774 | 0.708021567 | 0.478931865 | 0.999371363 | Not Sig |
| ENSG00000177885 | GRB2     | growth factor receptor bound protein 2                 | 2885      | 2067.905925 | 0.303998046 | 0.538838144 | 0.56417321  | 0.572636258 | 0.999371363 | Not Sig |
| ENSG00000242324 | NA       | NA                                                     | NA        | 4.845895073 | 0.304082532 | 1.532978974 | 0.198360537 | 0.842762991 | NA          | NA      |
| ENSG00000224892 | NA       | NA                                                     | NA        | 21.42582916 | 0.304164341 | 0.707796171 | 0.429734369 | 0.667388879 | 0.999371363 | Not Sig |
| ENSG00000234187 | NA       | NA                                                     | NA        | 3.590474194 | 0.304181639 | 1.29753443  | 0.234430495 | 0.814650787 | NA          | NA      |
| ENSG00000156873 | PHKG2    | phosphorylase kinase catalytic subunit gamma 2         | 5261      | 417.2087498 | 0.30444018  | 0.482687288 | 0.630719282 | 0.528224089 | 0.999371363 | Not Sig |
| ENSG00000099899 | TRMT2A   | tRNA methyltransferase 2 homolog A                     | 27037     | 783.8307597 | 0.304496675 | 0.563103991 | 0.540746789 | 0.588682124 | 0.999371363 | Not Sig |
| ENSG00000164951 | PDP1     | pyruvate dehydrogenase phosphatase catalytic subunit 1 | 54704     | 1091.94311  | 0.304533959 | 0.491887876 | 0.619112553 | 0.535842214 | 0.999371363 | Not Sig |
| ENSG00000162775 | RBM15    | RNA binding motif protein 15                           | 64783     | 1063.362178 | 0.304667747 | 0.478344032 | 0.63692181  | 0.524175776 | 0.999371363 | Not Sig |
| ENSG00000122678 | POLM     | DNA polymerase mu                                      | 27434     | 711.6529544 | 0.304730973 | 0.455126983 | 0.669551541 | 0.503143714 | 0.999371363 | Not Sig |
| ENSG00000140280 | LYSMD2   | LysM domain containing 2                               | 256586    | 243.830608  | 0.304939397 | 0.745385838 | 0.409102751 | 0.682464258 | 0.999371363 | Not Sig |
| ENSG00000218632 | NA       | NA                                                     | NA        | 1.271556661 | 0.305291003 | 2.476046447 | 0.123297769 | 0.901871307 | NA          | NA      |
| ENSG00000242692 | NA       | NA                                                     | NA        | 1.271556661 | 0.305291003 | 2.476046447 | 0.123297769 | 0.901871307 | NA          | NA      |
| ENSG00000249428 | NA       | NA                                                     | NA        | 17.75314957 | 0.305348637 | 1.417108675 | 0.215472986 | 0.829398572 | 0.999371363 | Not Sig |
| ENSG00000186409 | CCDC30   | coiled-coil domain containing 30                       | 728621    | 269.4542552 | 0.305439689 | 0.474472573 | 0.643745723 | 0.519740335 | 0.999371363 | Not Sig |
| ENSG00000071553 | ATP6AP1  | ATPase H <sup>+</sup> transporting accessory protein 1 | 537       | 2587.365546 | 0.305878223 | 0.52203386  | 0.585935601 | 0.557918792 | 0.999371363 | Not Sig |
| ENSG00000137942 | FNBP1L   | formin binding protein 1 like                          | 54874     | 2997.587526 | 0.305882036 | 0.719074836 | 0.425382756 | 0.670557674 | 0.999371363 | Not Sig |
| ENSG00000236287 | ZBED5    | zinc finger BED-type containing 5                      | 58486     | 1098.691979 | 0.306151931 | 0.44304461  | 0.691018296 | 0.489554044 | 0.999371363 | Not Sig |
| ENSG00000215771 | NA       | NA                                                     | NA        | 6.254424032 | 0.306296714 | 1.775125001 | 0.172549378 | 0.863005646 | NA          | NA      |
| ENSG00000153790 | C7orf31  | chromosome 7 open reading frame 31                     | 136895    | 138.5053988 | 0.306358335 | 0.531416978 | 0.576493314 | 0.564281788 | 0.999371363 | Not Sig |
| ENSG00000242285 | NA       | NA                                                     | NA        | 2.514191748 | 0.306456785 | 1.77891756  | 0.172271493 | 0.863224094 | NA          | NA      |
| ENSG00000218073 | NA       | NA                                                     | NA        | 4.621267986 | 0.306862067 | 1.219920305 | 0.251542716 | 0.801394541 | NA          | NA      |
| ENSG00000262049 | NA       | NA                                                     | NA        | 97.04578687 | 0.30711578  | 0.721153312 | 0.425867531 | 0.670204376 | 0.999371363 | Not Sig |
| ENSG00000160688 | FLAD1    | flavin adenine dinucleotide synthetase 1               | 80308     | 527.3965458 | 0.307270208 | 0.585735893 | 0.52458832  | 0.599869408 | 0.999371363 | Not Sig |
| ENSG00000100294 | MCAT     | malonyl-CoA-acyl carrier protein transacylase          | 27349     | 243.8754729 | 0.307324688 | 0.550156599 | 0.558613109 | 0.576425792 | 0.999371363 | Not Sig |
| ENSG00000109272 | PF4V1    | platelet factor 4 variant 1                            | 5197      | 1.826287325 | 0.307498717 | 2.160507046 | 0.142327107 | 0.886821636 | NA          | NA      |
| ENSG00000263399 | MIR3170  | microRNA 3170                                          | 100422881 | 3.194385053 | 0.307774226 | 1.317864273 | 0.233540155 | 0.815341993 | NA          | NA      |
| ENSG00000261766 | NA       | NA                                                     | NA        | 13.09533845 | 0.307880428 | 0.85598683  | 0.359678931 | 0.71908725  | 0.999371363 | Not Sig |
| ENSG00000136026 | CKAP4    | cytoskeleton associated protein 4                      | 10970     | 2352.251007 | 0.307917031 | 0.436198083 | 0.705911014 | 0.480243478 | 0.999371363 | Not Sig |
| ENSG00000135317 | SNX14    | sorting nexin 14                                       | 57231     | 1735.240116 | 0.308316759 | 0.487572734 | 0.632350288 | 0.52715801  | 0.999371363 | Not Sig |
| ENSG00000211810 | NA       | NA                                                     | NA        | 5.263853675 | 0.308538411 | 2.184177678 | 0.141260674 | 0.887664016 | NA          | NA      |
| ENSG00000109919 | MTCH2    | mitochondrial carrier 2                                | 23788     | 786.555179  | 0.308566705 | 0.49054023  | 0.629034453 | 0.529326501 | 0.999371363 | Not Sig |
| ENSG00000105281 | SLC1A5   | solute carrier family 1 member 5                       | 6510      | 2120.455496 | 0.308809503 | 0.549107176 | 0.562384753 | 0.573853905 | 0.999371363 | Not Sig |
| ENSG00000152818 | UTRN     | utrophin                                               | 7402      | 14735.2043  | 0.308832699 | 0.512581947 | 0.60250405  | 0.546838668 | 0.999371363 | Not Sig |

|                 |         |                                               |           |             |             |             |             |             |             |         |
|-----------------|---------|-----------------------------------------------|-----------|-------------|-------------|-------------|-------------|-------------|-------------|---------|
| ENSG00000273000 | NA      | NA                                            | NA        | 4.30858455  | 0.308873636 | 1.175109158 | 0.262846761 | 0.792668692 | NA          | NA      |
| ENSG00000164889 | SLC4A2  | solute carrier family 4 member 2              | 6522      | 3022.005433 | 0.309034469 | 0.702687955 | 0.439789051 | 0.660089898 | 0.999371363 | Not Sig |
| ENSG00000251862 | MIR1343 | microRNA 1343                                 | 100616437 | 7.154927058 | 0.309293872 | 0.953863892 | 0.324253674 | 0.745745989 | 0.999371363 | Not Sig |
| ENSG00000205020 | NA      | NA                                            | NA        | 11.25422717 | 0.309668746 | 1.333988612 | 0.232137473 | 0.81643124  | 0.999371363 | Not Sig |
| ENSG00000101974 | ATP11C  | ATPase phospholipid transporting 11C          | 286410    | 801.5249675 | 0.309687365 | 0.509006596 | 0.608415229 | 0.542912113 | 0.999371363 | Not Sig |
| ENSG00000142867 | BCL10   | B-cell CLL/lymphoma 10                        | 8915      | 629.1348255 | 0.309945694 | 0.572166007 | 0.541705887 | 0.588021134 | 0.999371363 | Not Sig |
| ENSG00000225766 | NA      | NA                                            | NA        | 8.299853069 | 0.310058541 | 0.914940738 | 0.338883742 | 0.734697312 | 0.999371363 | Not Sig |
| ENSG00000171402 | XAGE3   | X antigen family member 3                     | 170626    | 2.68228752  | 0.310074723 | 1.72207954  | 0.180058305 | 0.857106795 | NA          | NA      |
| ENSG00000100554 | ATP6V1D | ATPase H+ transporting VI subunit D           | 51382     | 893.2632138 | 0.31038167  | 0.436743815 | 0.710672161 | 0.477287415 | 0.999371363 | Not Sig |
| ENSG00000106683 | LIMK1   | LIM domain kinase 1                           | 3984      | 1246.001327 | 0.310592488 | 0.554259996 | 0.560373273 | 0.575224858 | 0.999371363 | Not Sig |
| ENSG00000080561 | MID2    | midline 2                                     | 11043     | 316.924666  | 0.310662753 | 0.517586808 | 0.600213815 | 0.548363748 | 0.999371363 | Not Sig |
| ENSG00000014257 | ACPP    | acid phosphatase, prostate                    | 55        | 216.6200935 | 0.310728097 | 0.610097273 | 0.509309107 | 0.610535576 | 0.999371363 | Not Sig |
| ENSG00000211850 | NA      | NA                                            | NA        | 10.13773649 | 0.310773875 | 1.104687002 | 0.281323012 | 0.778462661 | 0.999371363 | Not Sig |
| ENSG00000173113 | TRMT112 | tRNA methyltransferase subunit 11-2           | 51504     | 913.8547347 | 0.31093304  | 0.549450713 | 0.565897964 | 0.571463146 | 0.999371363 | Not Sig |
| ENSG00000183291 | SELENOF | selenoprotein F                               | 9403      | 1914.503736 | 0.311026239 | 0.457728607 | 0.679499238 | 0.49682159  | 0.999371363 | Not Sig |
| ENSG00000120656 | TAF12   | TATA-box binding protein associated factor 12 | 6883      | 310.2641958 | 0.311627376 | 0.434193649 | 0.717715187 | 0.472932917 | 0.999371363 | Not Sig |
| ENSG00000162086 | ZNF75A  | zinc finger protein 75a                       | 7627      | 349.3518886 | 0.311650471 | 0.462578722 | 0.673724181 | 0.500486686 | 0.999371363 | Not Sig |
| ENSG00000126814 | TRMT5   | tRNA methyltransferase 5                      | 57570     | 324.948481  | 0.311820267 | 0.440703881 | 0.707550536 | 0.47922442  | 0.999371363 | Not Sig |
| ENSG00000234946 | NA      | NA                                            | NA        | 7.996651352 | 0.311967299 | 1.156153878 | 0.269831988 | 0.787289513 | 0.999371363 | Not Sig |
| ENSG00000132773 | TOE1    | target of EGR1, exonuclease                   | 114034    | 184.4248839 | 0.312127336 | 0.47655846  | 0.654961274 | 0.512492688 | 0.999371363 | Not Sig |
| ENSG00000136197 | C7orf25 | chromosome 7 open reading frame 25            | 79020     | 26.41307961 | 0.312159994 | 0.604024674 | 0.516800071 | 0.605295731 | 0.999371363 | Not Sig |
| ENSG00000213386 | NA      | NA                                            | NA        | 5.11864714  | 0.312437946 | 1.306632177 | 0.239116985 | 0.811014872 | NA          | NA      |
| ENSG00000240065 | PSMB9   | proteasome subunit beta 9                     | 5698      | 743.9139415 | 0.312457533 | 0.923130822 | 0.338475897 | 0.735004588 | 0.999371363 | Not Sig |
| ENSG00000206824 | NA      | NA                                            | NA        | 4.91967552  | 0.312747716 | 1.140365452 | 0.274252184 | 0.783890828 | NA          | NA      |
| ENSG00000260565 | NA      | NA                                            | NA        | 753.4835096 | 0.31285779  | 0.439519837 | 0.711817223 | 0.476577966 | 0.999371363 | Not Sig |
| ENSG00000135205 | CCDC146 | coiled-coil domain containing 146             | 57639     | 275.8647063 | 0.312965394 | 0.480837599 | 0.650875461 | 0.515126883 | 0.999371363 | Not Sig |
| ENSG00000173163 | COMMD1  | copper metabolism domain containing 1         | 150684    | 233.4734592 | 0.312973146 | 0.448603948 | 0.697660257 | 0.485389689 | 0.999371363 | Not Sig |
| ENSG00000228071 | NA      | NA                                            | NA        | 1.188150955 | 0.313060546 | 1.994876643 | 0.156932283 | 0.875298217 | NA          | NA      |
| ENSG00000142082 | SIRT3   | sirtuin 3                                     | 23410     | 466.6811231 | 0.313063809 | 0.471335773 | 0.664205491 | 0.506558799 | 0.999371363 | Not Sig |
| ENSG00000185298 | CCDC137 | coiled-coil domain containing 137             | 339230    | 465.4935415 | 0.313437291 | 0.58382391  | 0.536869569 | 0.591357712 | 0.999371363 | Not Sig |
| ENSG00000103005 | USB1    | U6 snRNA biogenesis phosphodiesterase 1       | 79650     | 807.1295548 | 0.313752456 | 0.547689977 | 0.572865068 | 0.566736058 | 0.999371363 | Not Sig |
| ENSG00000236519 | NA      | NA                                            | NA        | 3.574167402 | 0.31395899  | 1.344543274 | 0.233506051 | 0.815368472 | NA          | NA      |
| ENSG00000185880 | TRIM69  | tripartite motif containing 69                | 140691    | 655.8269224 | 0.314049967 | 0.722491295 | 0.434676472 | 0.663797279 | 0.999371363 | Not Sig |
| ENSG00000138942 | RNF185  | ring finger protein 185                       | 91445     | 912.7223558 | 0.314107768 | 0.48634727  | 0.645850788 | 0.518375993 | 0.999371363 | Not Sig |
| ENSG00000124593 | NA      | NA                                            | NA        | 703.777597  | 0.314173418 | 0.508736608 | 0.617556143 | 0.536867962 | 0.999371363 | Not Sig |

|                 |              |                                                       |           |             |             |             |             |             |             |         |
|-----------------|--------------|-------------------------------------------------------|-----------|-------------|-------------|-------------|-------------|-------------|-------------|---------|
| ENSG00000271022 | NA           | NA                                                    | NA        | 2.286458668 | 0.314225745 | 1.566800731 | 0.200552463 | 0.841048532 | NA          | NA      |
| ENSG00000218890 | NA           | NA                                                    | NA        | 0.795338816 | 0.31429146  | 2.790402212 | 0.112633031 | 0.910321496 | NA          | NA      |
| ENSG00000178502 | KLHL11       | kelch like family member 11                           | 55175     | 371.1628729 | 0.31430216  | 0.44959561  | 0.699077467 | 0.484503619 | 0.999371363 | Not Sig |
| ENSG00000081177 | EXD2         | exonuclease 3'-5' domain containing 2                 | 55218     | 664.2853865 | 0.314386348 | 0.531593722 | 0.591403426 | 0.554250145 | 0.999371363 | Not Sig |
| ENSG00000250001 | NA           | NA                                                    | NA        | 6.846389978 | 0.314687542 | 1.052943103 | 0.298864717 | 0.765043269 | 0.999371363 | Not Sig |
| ENSG00000155099 | PIP4P2       | phosphatidylinositol-4,5-bisphosphate 4-phosphatase 2 | 55529     | 100.9094847 | 0.314793955 | 0.577261114 | 0.545323334 | 0.585531159 | 0.999371363 | Not Sig |
| ENSG00000272843 | NA           | NA                                                    | NA        | 1.059975654 | 0.314816676 | 2.540255561 | 0.123931104 | 0.901369825 | NA          | NA      |
| ENSG00000166170 | BAG5         | BCL2 associated athanogene 5                          | 9529      | 1184.400038 | 0.314888101 | 0.37754233  | 0.83404714  | 0.404254421 | 0.999371363 | Not Sig |
| ENSG00000105875 | WDR91        | WD repeat domain 91                                   | 29062     | 1023.368816 | 0.315013018 | 0.647400839 | 0.486581108 | 0.626555214 | 0.999371363 | Not Sig |
| ENSG00000120051 | CFAP58       | cilia and flagella associated protein 58              | 159686    | 44.86159522 | 0.315074695 | 0.823006325 | 0.382833868 | 0.701842948 | 0.999371363 | Not Sig |
| ENSG00000222939 | NA           | NA                                                    | NA        | 1.848616645 | 0.315230351 | 2.213052874 | 0.1424414   | 0.886731363 | NA          | NA      |
| ENSG00000188959 | C9orf152     | chromosome 9 open reading frame 152                   | 401546    | 461.1986296 | 0.315391324 | 0.764346796 | 0.412628568 | 0.679878767 | 0.999371363 | Not Sig |
| ENSG00000105669 | COPE         | coatomer protein complex subunit epsilon              | 11316     | 892.8091473 | 0.315612745 | 0.540034011 | 0.584431237 | 0.558930216 | 0.999371363 | Not Sig |
| ENSG00000197859 | ADAMTSL2     | ADAMTS like 2                                         | 9719      | 484.4340941 | 0.315624957 | 0.738526862 | 0.427370992 | 0.669109133 | 0.999371363 | Not Sig |
| ENSG00000175220 | ARHGAP1      | Rho GTPase activating protein 1                       | 392       | 2538.292942 | 0.315879005 | 0.435995925 | 0.724499903 | 0.468758887 | 0.999371363 | Not Sig |
| ENSG00000241945 | PWP2         | PWP2, small subunit processome component              | 5822      | 677.4111767 | 0.315932562 | 0.538214578 | 0.587001123 | 0.557202953 | 0.999371363 | Not Sig |
| ENSG00000241945 | LOC102724159 | periodic tryptophan protein 2 homolog                 | 102724159 | 677.4111767 | 0.315932562 | 0.538214578 | 0.587001123 | 0.557202953 | 0.999371363 | Not Sig |
| ENSG00000213261 | NA           | NA                                                    | NA        | 1.929265928 | 0.315951982 | 1.68534798  | 0.187469879 | 0.851292238 | NA          | NA      |
| ENSG00000176473 | WDR25        | WD repeat domain 25                                   | 79446     | 261.9949358 | 0.315963981 | 0.464636563 | 0.680023928 | 0.49648931  | 0.999371363 | Not Sig |
| ENSG00000146005 | PSD2         | pleckstrin and Sec7 domain containing 2               | 84249     | 8.797835891 | 0.316027836 | 0.928529059 | 0.340353199 | 0.733590559 | 0.999371363 | Not Sig |
| ENSG00000132603 | NIP7         | NIP7, nucleolar pre-rRNA processing protein           | 51388     | 401.1771081 | 0.316031318 | 0.520802715 | 0.606815804 | 0.543973159 | 0.999371363 | Not Sig |
| ENSG00000253729 | PRKDC        | protein kinase, DNA-activated, catalytic polypeptide  | 5591      | 8589.046004 | 0.316265843 | 0.558371007 | 0.566408067 | 0.571116412 | 0.999371363 | Not Sig |
| ENSG00000099984 | GSTT2        | glutathione S-transferase theta 2 (gene/pseudogene)   | 2953      | 58.84094445 | 0.316278582 | 0.918428547 | 0.344369285 | 0.730568585 | 0.999371363 | Not Sig |
| ENSG00000251934 | NA           | NA                                                    | NA        | 6.064170231 | 0.3166705   | 1.453079631 | 0.217930589 | 0.827483193 | NA          | NA      |
| ENSG00000124217 | MOC53        | molybdenum cofactor synthesis 3                       | 27304     | 144.2506341 | 0.316897846 | 0.488374739 | 0.648882551 | 0.516414294 | 0.999371363 | Not Sig |
| ENSG00000256053 | APOPT1       | apoptogenic 1, mitochondrial                          | 84334     | 242.9310502 | 0.317235067 | 0.447041829 | 0.709631732 | 0.477932537 | 0.999371363 | Not Sig |
| ENSG00000162739 | SLAMF6       | SLAM family member 6                                  | 114836    | 144.5698369 | 0.317292001 | 0.759391175 | 0.417824188 | 0.676075665 | 0.999371363 | Not Sig |
| ENSG00000146066 | HIG1         | HIG1 hypoxia inducible domain family member 2A        | 192286    | 782.303273  | 0.317370145 | 0.487823311 | 0.650584213 | 0.515314924 | 0.999371363 | Not Sig |
| ENSG00000248840 | NA           | NA                                                    | NA        | 6.836204814 | 0.317392015 | 1.21577286  | 0.261061935 | 0.794044746 | 0.999371363 | Not Sig |
| ENSG00000114529 | C3orf52      | chromosome 3 open reading frame 52                    | 79669     | 536.0520184 | 0.317505381 | 0.638533948 | 0.497241191 | 0.619018977 | 0.999371363 | Not Sig |
| ENSG00000177455 | CD19         | CD19 molecule                                         | 930       | 40.38169708 | 0.317567016 | 1.17369115  | 0.270571195 | 0.786720853 | 0.999371363 | Not Sig |
| ENSG00000108294 | NA           | NA                                                    | NA        | 994.8741515 | 0.317599597 | 0.445517865 | 0.712877355 | 0.475921653 | 0.999371363 | Not Sig |
| ENSG00000126602 | TRAP1        | TNF receptor associated protein 1                     | 10131     | 1326.704528 | 0.317705329 | 0.474710823 | 0.669260767 | 0.503329149 | 0.999371363 | Not Sig |
| ENSG00000231359 | NA           | NA                                                    | NA        | 5.837045256 | 0.317760117 | 1.301954369 | 0.244063943 | 0.807181297 | NA          | NA      |
| ENSG00000132386 | SERPINF1     | serpin family F member 1                              | 5176      | 1197.513137 | 0.31787573  | 0.417104479 | 0.762100975 | 0.445999741 | 0.999371363 | Not Sig |

|                 |            |                                                                                            |        |             |             |             |             |             |             |         |
|-----------------|------------|--------------------------------------------------------------------------------------------|--------|-------------|-------------|-------------|-------------|-------------|-------------|---------|
| ENSG00000146070 | PLA2G7     | phospholipase A2 group VII                                                                 | 7941   | 350.7454708 | 0.318052453 | 0.741300906 | 0.429046357 | 0.667889489 | 0.999371363 | Not Sig |
| ENSG00000175166 | PSMD2      | proteasome 26S subunit, non-ATPase 2                                                       | 5708   | 2801.24019  | 0.318428892 | 0.462624133 | 0.688310162 | 0.491257484 | 0.999371363 | Not Sig |
| ENSG00000109917 | ZPR1       | ZPR1 zinc finger                                                                           | 8882   | 619.1911268 | 0.318697273 | 0.522324482 | 0.610151895 | 0.541761192 | 0.999371363 | Not Sig |
| ENSG00000183431 | SF3A3      | splicing factor 3a subunit 3                                                               | 10946  | 1442.595226 | 0.318737627 | 0.422812952 | 0.753850197 | 0.450939179 | 0.999371363 | Not Sig |
| ENSG00000154222 | CC2D1B     | coiled-coil and C2 domain containing 1B                                                    | 200014 | 1642.083182 | 0.318896638 | 0.518001173 | 0.615629182 | 0.538139287 | 0.999371363 | Not Sig |
| ENSG00000169446 | MMGT1      | membrane magnesium transporter 1                                                           | 93380  | 823.1479627 | 0.319026103 | 0.501821282 | 0.635736495 | 0.524948185 | 0.999371363 | Not Sig |
| ENSG00000168872 | DDX19A     | DEAD-box helicase 19A                                                                      | 55308  | 739.5744179 | 0.31912721  | 0.423940597 | 0.752763978 | 0.451591757 | 0.999371363 | Not Sig |
| ENSG00000216809 | NA         | NA                                                                                         | NA     | 26.15694111 | 0.319204424 | 0.653725547 | 0.48828507  | 0.625347935 | 0.999371363 | Not Sig |
| ENSG00000093134 | VNN3       | vanin 3                                                                                    | 55350  | 98.69633423 | 0.319445086 | 0.561765059 | 0.568645346 | 0.569596845 | 0.999371363 | Not Sig |
| ENSG00000149089 | APIP       | APAF1 interacting protein                                                                  | 51074  | 353.0404117 | 0.319502894 | 0.520323361 | 0.614046798 | 0.539184403 | 0.999371363 | Not Sig |
| ENSG00000158473 | CD1D       | CD1d molecule                                                                              | 912    | 75.86245713 | 0.319533058 | 0.784452472 | 0.407332591 | 0.683763729 | 0.999371363 | Not Sig |
| ENSG00000235706 | DICER1-AS1 | DICER1 antisense RNA 1                                                                     | 400242 | 104.0721102 | 0.319548414 | 0.525795586 | 0.607742671 | 0.543358157 | 0.999371363 | Not Sig |
| ENSG00000140092 | FBLN5      | fibulin 5                                                                                  | 10516  | 1439.580682 | 0.319691206 | 0.833470178 | 0.383566461 | 0.701299802 | 0.999371363 | Not Sig |
| ENSG00000066135 | KDM4A      | lysine demethylase 4A                                                                      | 9682   | 1660.964209 | 0.319697366 | 0.501139061 | 0.637941423 | 0.523511812 | 0.999371363 | Not Sig |
| ENSG00000163606 | CD200R1    | CD200 receptor 1                                                                           | 131450 | 68.2657617  | 0.319746937 | 0.851184825 | 0.375649245 | 0.707177675 | 0.999371363 | Not Sig |
| ENSG00000092201 | SUPT16H    | SPT16 homolog, facilitates chromatin remodeling subunit                                    | 11198  | 2651.595829 | 0.319812485 | 0.425673464 | 0.751309424 | 0.452466459 | 0.999371363 | Not Sig |
| ENSG00000149179 | C11orf49   | chromosome 11 open reading frame 49                                                        | 79096  | 631.420437  | 0.319951867 | 0.388547257 | 0.823456765 | 0.410248294 | 0.999371363 | Not Sig |
| ENSG00000211450 | SELENOH    | selenoprotein H                                                                            | 280636 | 766.9812327 | 0.320050111 | 0.543784589 | 0.588560466 | 0.556156161 | 0.999371363 | Not Sig |
| ENSG00000154518 | ATP5G3     | ATP synthase, H <sup>+</sup> transporting, mitochondrial Fo complex subunit C3 (subunit 3) | 518    | 832.4383076 | 0.320304943 | 0.488756177 | 0.655347099 | 0.512244303 | 0.999371363 | Not Sig |
| ENSG00000197894 | ADH5       | alcohol dehydrogenase 5 (class III), chi polypeptide                                       | 128    | 2108.811718 | 0.320345957 | 0.461037253 | 0.694837467 | 0.487157165 | 0.999371363 | Not Sig |
| ENSG00000230797 | YY2        | YY2 transcription factor                                                                   | 404281 | 33.4673303  | 0.32034695  | 0.823585632 | 0.388966172 | 0.697301171 | 0.999371363 | Not Sig |
| ENSG00000139405 | RITA1      | RBPJ interacting and tubulin associated 1                                                  | 84934  | 317.9596552 | 0.320414003 | 0.4497915   | 0.712361179 | 0.476241149 | 0.999371363 | Not Sig |
| ENSG00000068697 | LAPTM4A    | lysosomal protein transmembrane 4 alpha                                                    | 9741   | 3435.791664 | 0.320494147 | 0.416924177 | 0.768710872 | 0.442064969 | 0.999371363 | Not Sig |
| ENSG00000164953 | TMEM67     | transmembrane protein 67                                                                   | 91147  | 347.465751  | 0.320527388 | 0.510334994 | 0.628072524 | 0.529956431 | 0.999371363 | Not Sig |
| ENSG00000261360 | NA         | NA                                                                                         | NA     | 17.39358408 | 0.320634451 | 0.78741867  | 0.407196912 | 0.683863369 | 0.999371363 | Not Sig |
| ENSG00000225704 | NA         | NA                                                                                         | NA     | 4.824418814 | 0.320714493 | 1.35779901  | 0.236201744 | 0.813276127 | NA          | NA      |
| ENSG00000223658 | C1GALT1C1L | C1GALT1-specific chaperone 1 like                                                          | 728819 | 2.731042279 | 0.320775404 | 1.462803214 | 0.219288145 | 0.826425596 | NA          | NA      |
| ENSG00000162460 | TMEM82     | transmembrane protein 82                                                                   | 388595 | 0.929951652 | 0.320780534 | 3.124422516 | 0.102668744 | 0.918225881 | NA          | NA      |
| ENSG00000186442 | KRT3       | keratin 3                                                                                  | 3850   | 0.929951652 | 0.320780534 | 3.124422516 | 0.102668744 | 0.918225881 | NA          | NA      |
| ENSG00000223593 | NA         | NA                                                                                         | NA     | 0.929951652 | 0.320780534 | 3.124422516 | 0.102668744 | 0.918225881 | NA          | NA      |
| ENSG00000234645 | NA         | NA                                                                                         | NA     | 4.797373413 | 0.320784267 | 1.221338523 | 0.262649758 | 0.792820545 | NA          | NA      |
| ENSG00000207227 | NA         | NA                                                                                         | NA     | 2.573424826 | 0.320834756 | 1.581105154 | 0.202918038 | 0.839199095 | NA          | NA      |
| ENSG00000215902 | NA         | NA                                                                                         | NA     | 5.062270542 | 0.321069455 | 1.116075153 | 0.287677271 | 0.77359379  | NA          | NA      |
| ENSG00000175376 | EIF1AD     | eukaryotic translation initiation factor 1A domain containing                              | 84285  | 474.0749758 | 0.32127989  | 0.428945785 | 0.748998829 | 0.453857911 | 0.999371363 | Not Sig |
| ENSG00000168002 | POLR2G     | RNA polymerase II subunit G                                                                | 5436   | 392.0317541 | 0.3213238   | 0.428650412 | 0.749617383 | 0.453485178 | 0.999371363 | Not Sig |

|                 |           |                                                          |           |             |             |             |             |             |             |         |
|-----------------|-----------|----------------------------------------------------------|-----------|-------------|-------------|-------------|-------------|-------------|-------------|---------|
| ENSG00000239070 | NA        | NA                                                       | NA        | 4.585792407 | 0.321494662 | 1.156769511 | 0.277924564 | 0.781070267 | NA          | NA      |
| ENSG00000125868 | DSTN      | destrin, actin depolymerizing factor                     | 11034     | 4584.352588 | 0.321521141 | 0.462576142 | 0.695066416 | 0.487013681 | 0.999371363 | Not Sig |
| ENSG00000147124 | ZNF41     | zinc finger protein 41                                   | 7592      | 480.5415974 | 0.321606291 | 0.460860794 | 0.697838253 | 0.485278354 | 0.999371363 | Not Sig |
| ENSG00000050438 | SLC4A8    | solute carrier family 4 member 8                         | 9498      | 214.4000779 | 0.321640922 | 0.774783081 | 0.41513674  | 0.678041805 | 0.999371363 | Not Sig |
| ENSG00000118705 | RPN2      | ribophorin II                                            | 6185      | 5094.052347 | 0.322017359 | 0.449207491 | 0.716856608 | 0.473462578 | 0.999371363 | Not Sig |
| ENSG00000113013 | HSPA9     | heat shock protein family A (Hsp70) member 9             | 3313      | 3900.368231 | 0.32210997  | 0.573325308 | 0.561827579 | 0.5742335   | 0.999371363 | Not Sig |
| ENSG00000038532 | CLEC16A   | C-type lectin domain containing 16A                      | 23274     | 1754.619243 | 0.322291054 | 0.470696205 | 0.684711393 | 0.493526058 | 0.999371363 | Not Sig |
| ENSG00000110048 | OSBP      | oxysterol binding protein                                | 5007      | 2267.474574 | 0.322493092 | 0.432573994 | 0.745521219 | 0.455956688 | 0.999371363 | Not Sig |
| ENSG00000264374 | NA        | NA                                                       | NA        | 8.263298083 | 0.322494748 | 1.089317533 | 0.296052105 | 0.76719029  | 0.999371363 | Not Sig |
| ENSG00000268423 | NA        | NA                                                       | NA        | 6.030443297 | 0.322508435 | 1.149530312 | 0.280556703 | 0.779050428 | NA          | NA      |
| ENSG00000196505 | GDAP2     | ganglioside induced differentiation associated protein 2 | 54834     | 1391.608279 | 0.322784878 | 0.600429856 | 0.537589653 | 0.590860375 | 0.999371363 | Not Sig |
| ENSG00000135587 | SMPD2     | sphingomyelin phosphodiesterase 2                        | 6610      | 289.2086201 | 0.322989326 | 0.587266762 | 0.549987412 | 0.582328008 | 0.999371363 | Not Sig |
| ENSG00000252305 | NA        | NA                                                       | NA        | 1.850294337 | 0.323343275 | 2.58400445  | 0.125132631 | 0.900418551 | NA          | NA      |
| ENSG00000111652 | COPS7A    | COP9 signalosome subunit 7A                              | 50813     | 911.8953451 | 0.323384192 | 0.490322302 | 0.659533926 | 0.509552968 | 0.999371363 | Not Sig |
| ENSG00000136305 | CIDEB     | cell death-inducing DFFA-like effector b                 | 27141     | 283.1715743 | 0.323514401 | 0.802806931 | 0.402979083 | 0.686963612 | 0.999371363 | Not Sig |
| ENSG00000253210 | NA        | NA                                                       | NA        | 36.7168853  | 0.323579167 | 0.745013749 | 0.434326436 | 0.664051409 | 0.999371363 | Not Sig |
| ENSG00000158406 | HIST1H4H  | histone cluster 1 H4 family member h                     | 8365      | 591.7824234 | 0.323605012 | 0.439683831 | 0.735994797 | 0.461733864 | 0.999371363 | Not Sig |
| ENSG00000240449 | NA        | NA                                                       | NA        | 3.541708537 | 0.323689555 | 1.313995641 | 0.2463399   | 0.805419125 | NA          | NA      |
| ENSG00000112335 | SNX3      | sorting nexin 3                                          | 8724      | 1347.870127 | 0.323711547 | 0.391022705 | 0.827858696 | 0.407750529 | 0.999371363 | Not Sig |
| ENSG00000225591 | NA        | NA                                                       | NA        | 11.93266753 | 0.323777158 | 0.833600292 | 0.388408163 | 0.697714005 | 0.999371363 | Not Sig |
| ENSG00000158769 | F11R      | F11 receptor                                             | 50848     | 2486.265259 | 0.323904645 | 0.406950817 | 0.795930689 | 0.426072322 | 0.999371363 | Not Sig |
| ENSG00000167487 | KLHL26    | kelch like family member 26                              | 55295     | 251.4136503 | 0.324158137 | 0.568578391 | 0.570120395 | 0.568596043 | 0.999371363 | Not Sig |
| ENSG00000233093 | LINC00892 | long intergenic non-protein coding RNA 892               | 100128420 | 10.16994046 | 0.324179221 | 1.253097725 | 0.258702266 | 0.795864971 | 0.999371363 | Not Sig |
| ENSG00000238629 | NA        | NA                                                       | NA        | 6.297792796 | 0.324222068 | 1.097854677 | 0.295323301 | 0.767746918 | NA          | NA      |
| ENSG00000160710 | ADAR      | adenosine deaminase, RNA specific                        | 103       | 10259.61741 | 0.324533598 | 0.44289092  | 0.732761914 | 0.463703654 | 0.999371363 | Not Sig |
| ENSG00000142208 | AKT1      | AKT serine/threonine kinase 1                            | 207       | 3856.107925 | 0.324640888 | 0.545120754 | 0.595539403 | 0.551482969 | 0.999371363 | Not Sig |
| ENSG00000113356 | POLR3G    | RNA polymerase III subunit G                             | 10622     | 32.17936237 | 0.324653804 | 0.707749291 | 0.458713005 | 0.646440274 | 0.999371363 | Not Sig |
| ENSG00000168785 | TSPAN5    | tetraspanin 5                                            | 10098     | 481.121791  | 0.324709437 | 0.56064439  | 0.579171829 | 0.562473237 | 0.999371363 | Not Sig |
| ENSG00000070761 | CFAP20    | cilia and flagella associated protein 20                 | 29105     | 354.0910877 | 0.324821309 | 0.4118117   | 0.788761729 | 0.430251281 | 0.999371363 | Not Sig |
| ENSG00000185627 | PSMD13    | proteasome 26S subunit, non-ATPase 13                    | 5719      | 1480.261255 | 0.325262343 | 0.443259768 | 0.733796223 | 0.463072943 | 0.999371363 | Not Sig |
| ENSG00000140104 | CLBA1     | clathrin binding box of aftiphilin containing 1          | 122616    | 332.6823132 | 0.325269336 | 0.592850512 | 0.548653209 | 0.583243463 | 0.999371363 | Not Sig |
| ENSG00000241007 | NA        | NA                                                       | NA        | 1.587660919 | 0.325287253 | 2.251935204 | 0.144447874 | 0.885146815 | NA          | NA      |
| ENSG00000143801 | PSEN2     | presenilin 2                                             | 5664      | 579.1757156 | 0.325427277 | 0.571898256 | 0.569030022 | 0.569335766 | 0.999371363 | Not Sig |
| ENSG00000130508 | PXDN      | peroxidasin                                              | 7837      | 2388.654345 | 0.325548583 | 0.624442365 | 0.521342882 | 0.602127933 | 0.999371363 | Not Sig |
| ENSG00000166938 | DIS3L     | DIS3 like exosome 3'-5' exoribonuclease                  | 115752    | 741.1713428 | 0.325560708 | 0.46664853  | 0.697657204 | 0.485391598 | 0.999371363 | Not Sig |

|                 |             |                                                    |           |             |             |             |             |             |             |         |
|-----------------|-------------|----------------------------------------------------|-----------|-------------|-------------|-------------|-------------|-------------|-------------|---------|
| ENSG00000136875 | PRPF4       | pre-mRNA processing factor 4                       | 9128      | 504.3799059 | 0.325802975 | 0.426872527 | 0.763232474 | 0.445324765 | 0.999371363 | Not Sig |
| ENSG00000261602 | NA          | NA                                                 | NA        | 3.419970772 | 0.325935599 | 1.295224793 | 0.25164404  | 0.801316215 | NA          | NA      |
| ENSG00000236051 | MYCBP2-AS1  | MYCBP2 antisense RNA 1                             | 100874212 | 3.000267951 | 0.3263845   | 1.686279535 | 0.193553022 | 0.846525885 | NA          | NA      |
| ENSG00000233090 | NA          | NA                                                 | NA        | 1.19458849  | 0.326783549 | 2.189561516 | 0.149246115 | 0.881359433 | NA          | NA      |
| ENSG00000251192 | ZNF674      | zinc finger protein 674                            | 641339    | 131.2392156 | 0.327283358 | 0.567843502 | 0.576361896 | 0.564370594 | 0.999371363 | Not Sig |
| ENSG00000272844 | NA          | NA                                                 | NA        | 1.832570143 | 0.327358558 | 2.167477241 | 0.151032062 | 0.879950424 | NA          | NA      |
| ENSG00000188010 | MORN2       | MORN repeat containing 2                           | 729967    | 108.6000179 | 0.327435543 | 0.460825742 | 0.71054091  | 0.477368771 | 0.999371363 | Not Sig |
| ENSG00000112473 | SLC39A7     | solute carrier family 39 member 7                  | 7922      | 3692.132966 | 0.327455309 | 0.625403507 | 0.523590458 | 0.60056342  | 0.999371363 | Not Sig |
| ENSG00000151348 | EXT2        | exostosin glycosyltransferase 2                    | 2132      | 1425.828358 | 0.327541354 | 0.410652569 | 0.797611848 | 0.425095773 | 0.999371363 | Not Sig |
| ENSG00000198339 | NA          | NA                                                 | NA        | 153.0477577 | 0.327827037 | 0.788820318 | 0.415591523 | 0.677708931 | 0.999371363 | Not Sig |
| ENSG00000087250 | MT3         | metallothionein 3                                  | 4504      | 3.747665742 | 0.327836596 | 1.59115452  | 0.206036932 | 0.836762062 | NA          | NA      |
| ENSG00000211734 | NA          | NA                                                 | NA        | 8.686830262 | 0.327841413 | 1.41161616  | 0.232245437 | 0.816347388 | 0.999371363 | Not Sig |
| ENSG00000228544 | CCDC183-AS1 | CCDC183 antisense RNA 1                            | 100131193 | 93.68357826 | 0.327918003 | 0.684171496 | 0.479292115 | 0.631730831 | 0.999371363 | Not Sig |
| ENSG00000205111 | CDKL4       | cyclin dependent kinase like 4                     | 344387    | 12.2485115  | 0.327958606 | 0.785900362 | 0.417303035 | 0.676456769 | 0.999371363 | Not Sig |
| ENSG00000213983 | APIG2       | adaptor related protein complex 1 gamma 2 subunit  | 8906      | 1366.736687 | 0.328069795 | 0.418993398 | 0.782995142 | 0.433629965 | 0.999371363 | Not Sig |
| ENSG00000230116 | NA          | NA                                                 | NA        | 3.011266849 | 0.328098818 | 1.377368323 | 0.23820703  | 0.811720525 | NA          | NA      |
| ENSG00000181404 | WASHC1      | WASH complex subunit 1                             | 100287171 | 213.8170536 | 0.328192293 | 0.782610378 | 0.419355918 | 0.674956036 | 0.999371363 | Not Sig |
| ENSG00000129255 | MPDU1       | mannose-P-dolichol utilization defect 1            | 9526      | 892.7364503 | 0.328342067 | 0.468880884 | 0.700267549 | 0.483760234 | 0.999371363 | Not Sig |
| ENSG00000237160 | NA          | NA                                                 | NA        | 4.507539877 | 0.328475897 | 1.17509484  | 0.279531393 | 0.77983705  | NA          | NA      |
| ENSG00000258878 | NA          | NA                                                 | NA        | 6.033975075 | 0.328528017 | 1.386208169 | 0.236997605 | 0.812658648 | NA          | NA      |
| ENSG00000236031 | NA          | NA                                                 | NA        | 1.872778375 | 0.328604624 | 2.598764894 | 0.126446461 | 0.899378527 | NA          | NA      |
| ENSG00000109321 | AREG        | amphiregulin                                       | 374       | 157.532332  | 0.328610728 | 0.926546205 | 0.354661998 | 0.722842824 | 0.999371363 | Not Sig |
| ENSG00000132475 | H3F3B       | H3 histone family member 3B                        | 3021      | 8986.962395 | 0.328690045 | 0.510076237 | 0.644393956 | 0.519320003 | 0.999371363 | Not Sig |
| ENSG00000141429 | GALNT1      | polypeptide N-acetylgalactosaminyltransferase 1    | 2589      | 1974.180631 | 0.328827423 | 0.514357989 | 0.639296813 | 0.522629861 | 0.999371363 | Not Sig |
| ENSG00000100403 | ZC3H7B      | zinc finger CCCH-type containing 7B                | 23264     | 4033.03689  | 0.328878391 | 0.622256922 | 0.528525082 | 0.597134943 | 0.999371363 | Not Sig |
| ENSG00000119737 | GPR75       | G protein-coupled receptor 75                      | 10936     | 52.94290654 | 0.328940048 | 0.600810188 | 0.547494126 | 0.584039305 | 0.999371363 | Not Sig |
| ENSG00000164845 | NA          | NA                                                 | NA        | 57.61988746 | 0.329330275 | 0.607300723 | 0.542285333 | 0.587621958 | 0.999371363 | Not Sig |
| ENSG00000180787 | ZFP3        | ZFP3 zinc finger protein                           | 124961    | 303.0217314 | 0.329353271 | 0.693220642 | 0.475105978 | 0.634711438 | 0.999371363 | Not Sig |
| ENSG00000197063 | MAFG        | MAF bZIP transcription factor G                    | 4097      | 1014.299044 | 0.329393792 | 0.62246162  | 0.52917928  | 0.596681089 | 0.999371363 | Not Sig |
| ENSG00000101198 | NKAIN4      | sodium/potassium transporting ATPase interacting 4 | 128414    | 10.77486094 | 0.329604875 | 1.111331032 | 0.296585685 | 0.766782841 | 0.999371363 | Not Sig |
| ENSG00000162433 | AK4         | adenylate kinase 4                                 | 205       | 302.0528405 | 0.329765801 | 0.892872163 | 0.369331484 | 0.711880661 | 0.999371363 | Not Sig |
| ENSG00000211938 | NA          | NA                                                 | NA        | 844.18841   | 0.329916616 | 0.851096079 | 0.387637336 | 0.698284435 | 0.999371363 | Not Sig |
| ENSG00000269176 | NA          | NA                                                 | NA        | 31.14123559 | 0.329927407 | 0.804986862 | 0.4098544   | 0.681912758 | 0.999371363 | Not Sig |
| ENSG00000139990 | DCAF5       | DDB1 and CUL4 associated factor 5                  | 8816      | 2109.480708 | 0.3299956   | 0.430951607 | 0.765737021 | 0.443832794 | 0.999371363 | Not Sig |
| ENSG00000129083 | COPB1       | coatomer protein complex subunit beta 1            | 1315      | 3159.934538 | 0.330606298 | 0.460434905 | 0.718030485 | 0.472738491 | 0.999371363 | Not Sig |

|                 |          |                                               |        |             |             |             |             |             |             |         |
|-----------------|----------|-----------------------------------------------|--------|-------------|-------------|-------------|-------------|-------------|-------------|---------|
| ENSG00000168003 | SLC3A2   | solute carrier family 3 member 2              | 6520   | 2411.041001 | 0.330615063 | 0.583606021 | 0.56650386  | 0.57105131  | 0.999371363 | Not Sig |
| ENSG00000110536 | PTPMT1   | protein tyrosine phosphatase, mitochondrial 1 | 114971 | 153.1753426 | 0.330682527 | 0.447034818 | 0.73972432  | 0.459467288 | 0.999371363 | Not Sig |
| ENSG00000254348 | NA       | NA                                            | NA     | 5.984157877 | 0.330780905 | 1.510796798 | 0.218944669 | 0.82669315  | NA          | NA      |
| ENSG00000123213 | NLN      | neurolysin                                    | 57486  | 765.6208439 | 0.331069715 | 0.619750229 | 0.534198617 | 0.593204126 | 0.999371363 | Not Sig |
| ENSG00000214093 | NA       | NA                                            | NA     | 13.10778318 | 0.331193649 | 0.812028321 | 0.407859727 | 0.683376661 | 0.999371363 | Not Sig |
| ENSG00000170684 | ZNF296   | zinc finger protein 296                       | 162979 | 47.29969074 | 0.331354006 | 0.821668794 | 0.403269552 | 0.686749939 | 0.999371363 | Not Sig |
| ENSG00000264724 | NA       | NA                                            | NA     | 0.801776351 | 0.331422686 | 2.786353609 | 0.118944948 | 0.905318971 | NA          | NA      |
| ENSG00000183473 | NA       | NA                                            | NA     | 6.028971234 | 0.331435203 | 1.066624746 | 0.310732714 | 0.756003825 | NA          | NA      |
| ENSG00000200597 | NA       | NA                                            | NA     | 14.97811594 | 0.331596565 | 1.294124524 | 0.256232348 | 0.797771432 | 0.999371363 | Not Sig |
| ENSG00000167186 | COQ7     | coenzyme Q7, hydroxylase                      | 10229  | 472.1488119 | 0.331820244 | 0.424736959 | 0.781237037 | 0.434663094 | 0.999371363 | Not Sig |
| ENSG00000174547 | MRPL11   | mitochondrial ribosomal protein L11           | 65003  | 348.9620446 | 0.332107796 | 0.549077567 | 0.604846775 | 0.545280811 | 0.999371363 | Not Sig |
| ENSG00000206630 | SNORD60  | small nucleolar RNA, C/D box 60               | 26788  | 4.785051787 | 0.33230632  | 1.179192953 | 0.281808265 | 0.778090533 | NA          | NA      |
| ENSG00000176160 | HSF5     | heat shock transcription factor 5             | 124535 | 6.006381625 | 0.332568666 | 1.147489198 | 0.289822916 | 0.771951715 | NA          | NA      |
| ENSG00000117153 | KLHL12   | kelch like family member 12                   | 59349  | 993.3384522 | 0.33259841  | 0.430200182 | 0.773124754 | 0.439448552 | 0.999371363 | Not Sig |
| ENSG00000198860 | TSEN15   | tRNA splicing endonuclease subunit 15         | 116461 | 387.874595  | 0.332675748 | 0.551300586 | 0.603438045 | 0.546217319 | 0.999371363 | Not Sig |
| ENSG00000223711 | NA       | NA                                            | NA     | 5.245799327 | 0.332985149 | 1.200895766 | 0.277280642 | 0.781564622 | NA          | NA      |
| ENSG00000150054 | MPP7     | membrane palmitoylated protein 7              | 143098 | 1561.94318  | 0.333178706 | 0.620235809 | 0.5371807   | 0.591142801 | 0.999371363 | Not Sig |
| ENSG00000100029 | PES1     | pescadillo ribosomal biogenesis factor 1      | 23481  | 1106.175379 | 0.333278648 | 0.535069211 | 0.622870166 | 0.533369845 | 0.999371363 | Not Sig |
| ENSG00000162777 | DENND2D  | DENN domain containing 2D                     | 79961  | 1245.480005 | 0.333316018 | 0.44486918  | 0.74924502  | 0.453709539 | 0.999371363 | Not Sig |
| ENSG00000140398 | NEIL1    | nei like DNA glycosylase 1                    | 79661  | 440.8242648 | 0.333325032 | 0.576145518 | 0.578543131 | 0.562897487 | 0.999371363 | Not Sig |
| ENSG00000138395 | CDK15    | cyclin dependent kinase 15                    | 65061  | 30.62403445 | 0.333895742 | 0.863900623 | 0.38649786  | 0.699127988 | 0.999371363 | Not Sig |
| ENSG00000122025 | FLT3     | fms related tyrosine kinase 3                 | 2322   | 37.05147309 | 0.333912104 | 0.766457505 | 0.435656382 | 0.663086057 | 0.999371363 | Not Sig |
| ENSG00000162738 | VANGL2   | VANGL planar cell polarity protein 2          | 57216  | 535.2195525 | 0.334629793 | 0.782889993 | 0.42742888  | 0.669066976 | 0.999371363 | Not Sig |
| ENSG00000250423 | KIAA1210 | KIAA1210                                      | 57481  | 4.119909062 | 0.334983207 | 2.231401038 | 0.150122367 | 0.880668073 | NA          | NA      |
| ENSG00000160214 | RRP1     | ribosomal RNA processing 1                    | 8568   | 537.5209427 | 0.335178988 | 0.566785724 | 0.591368084 | 0.55427382  | 0.999371363 | Not Sig |
| ENSG00000237669 | NA       | NA                                            | NA     | 21.9702873  | 0.335345608 | 0.82744811  | 0.405276904 | 0.685273981 | 0.999371363 | Not Sig |
| ENSG00000141854 | MISP3    | MISP family member 3                          | 113230 | 118.9019056 | 0.335346043 | 0.778532795 | 0.430741062 | 0.666656658 | 0.999371363 | Not Sig |
| ENSG00000170727 | NA       | NA                                            | NA     | 65.72730534 | 0.335987061 | 0.670586286 | 0.501034793 | 0.616346637 | 0.999371363 | Not Sig |
| ENSG00000140395 | WDR61    | WD repeat domain 61                           | 80349  | 666.1799324 | 0.336060403 | 0.429132483 | 0.783115742 | 0.433559148 | 0.999371363 | Not Sig |
| ENSG00000171819 | ANGPTL7  | angiopoietin like 7                           | 10218  | 4.819719025 | 0.336579774 | 1.907011371 | 0.176495945 | 0.859904334 | NA          | NA      |
| ENSG00000159377 | PSMB4    | proteasome subunit beta 4                     | 5692   | 1786.681552 | 0.336627047 | 0.43734766  | 0.769701263 | 0.44147712  | 0.999371363 | Not Sig |
| ENSG00000136159 | NUDT15   | nudix hydrolase 15                            | 55270  | 242.0952806 | 0.336829545 | 0.507256552 | 0.664022068 | 0.506676187 | 0.999371363 | Not Sig |
| ENSG00000207200 | NA       | NA                                            | NA     | 0.936389187 | 0.337142054 | 3.120168559 | 0.108052513 | 0.913954037 | NA          | NA      |
| ENSG00000207392 | SNORA20  | small nucleolar RNA, H/ACA box 20             | 677806 | 0.936389187 | 0.337142054 | 3.120168559 | 0.108052513 | 0.913954037 | NA          | NA      |
| ENSG00000244045 | TMEM199  | transmembrane protein 199                     | 147007 | 279.1567346 | 0.337168772 | 0.398656429 | 0.845762786 | 0.397685089 | 0.999371363 | Not Sig |



|                 |           |                                                                               |        |             |             |             |             |             |             |         |
|-----------------|-----------|-------------------------------------------------------------------------------|--------|-------------|-------------|-------------|-------------|-------------|-------------|---------|
| ENSG00000168612 | ZSWIM1    | zinc finger SWIM-type containing 1                                            | 90204  | 168.0827712 | 0.337381086 | 0.474636413 | 0.710820065 | 0.477195745 | 0.999371363 | Not Sig |
| ENSG00000175197 | DDIT3     | DNA damage inducible transcript 3                                             | 1649   | 351.5161127 | 0.337436609 | 0.655690888 | 0.514627571 | 0.606813295 | 0.999371363 | Not Sig |
| ENSG00000110002 | VWA5A     | von Willebrand factor A domain containing 5A                                  | 4013   | 1124.109296 | 0.337482181 | 0.428321455 | 0.787917992 | 0.430744676 | 0.999371363 | Not Sig |
| ENSG00000167283 | ATP5L     | ATP synthase, H <sup>+</sup> transporting, mitochondrial Fo complex subunit 6 | 10632  | 988.7883643 | 0.337494582 | 0.421217858 | 0.801235218 | 0.422995486 | 0.999371363 | Not Sig |
| ENSG00000094631 | HDAC6     | histone deacetylase 6                                                         | 10013  | 1403.791446 | 0.337612394 | 0.487006522 | 0.693239984 | 0.488158959 | 0.999371363 | Not Sig |
| ENSG00000116670 | MAD2L2    | mitotic arrest deficient 2 like 2                                             | 10459  | 297.8999941 | 0.338127723 | 0.703836392 | 0.480406706 | 0.630938227 | 0.999371363 | Not Sig |
| ENSG00000243964 | NA        | NA                                                                            | NA     | 6.251684181 | 0.338366597 | 1.125933972 | 0.300520817 | 0.76377992  | NA          | NA      |
| ENSG00000128606 | LRRC17    | leucine rich repeat containing 17                                             | 10234  | 37.77104222 | 0.338598527 | 0.759776253 | 0.445655581 | 0.655846055 | 0.999371363 | Not Sig |
| ENSG00000136280 | CCM2      | CCM2 scaffolding protein                                                      | 83605  | 1001.576393 | 0.338796292 | 0.513713255 | 0.659504672 | 0.509571747 | 0.999371363 | Not Sig |
| ENSG00000142751 | GPN2      | GPN-loop GTPase 2                                                             | 54707  | 603.8331925 | 0.33886127  | 0.44145971  | 0.767592743 | 0.442729175 | 0.999371363 | Not Sig |
| ENSG00000204525 | HLA-C     | major histocompatibility complex, class I, C                                  | 3107   | 32782.79312 | 0.338885237 | 0.927640882 | 0.365319428 | 0.714872977 | 0.999371363 | Not Sig |
| ENSG00000187134 | AKR1C1    | aldo-keto reductase family 1 member C1                                        | 1645   | 1188.086594 | 0.338972615 | 0.979739951 | 0.345982232 | 0.729356068 | 0.999371363 | Not Sig |
| ENSG00000242372 | EIF6      | eukaryotic translation initiation factor 6                                    | 3692   | 661.5943936 | 0.339050211 | 0.45333563  | 0.747901088 | 0.454519821 | 0.999371363 | Not Sig |
| ENSG00000141040 | ZNF287    | zinc finger protein 287                                                       | 57336  | 121.2801785 | 0.339067387 | 0.564162464 | 0.601010185 | 0.547833203 | 0.999371363 | Not Sig |
| ENSG00000158006 | PAFAH2    | platelet activating factor acetylhydrolase 2                                  | 5051   | 602.6074813 | 0.339080966 | 0.422903681 | 0.801792421 | 0.422673043 | 0.999371363 | Not Sig |
| ENSG00000256229 | ZNF486    | zinc finger protein 486                                                       | 90649  | 599.1126342 | 0.339116885 | 0.933293743 | 0.363354933 | 0.716339763 | 0.999371363 | Not Sig |
| ENSG00000113761 | ZNF346    | zinc finger protein 346                                                       | 23567  | 328.7870998 | 0.339156573 | 0.51969685  | 0.652604635 | 0.514011197 | 0.999371363 | Not Sig |
| ENSG00000101916 | TLR8      | toll like receptor 8                                                          | 51311  | 207.6797612 | 0.339261276 | 0.966407521 | 0.351054052 | 0.725547798 | 0.999371363 | Not Sig |
| ENSG00000182185 | RAD51B    | RAD51 paralog B                                                               | 5890   | 320.4293887 | 0.339319581 | 0.765137302 | 0.443475413 | 0.6574219   | 0.999371363 | Not Sig |
| ENSG00000030066 | NUP160    | nucleoporin 160                                                               | 23279  | 1888.80961  | 0.339519994 | 0.474673074 | 0.715271231 | 0.474441462 | 0.999371363 | Not Sig |
| ENSG00000115677 | HDLBP     | high density lipoprotein binding protein                                      | 3069   | 13339.84451 | 0.339761123 | 0.442153933 | 0.76842271  | 0.442236092 | 0.999371363 | Not Sig |
| ENSG00000100804 | PSMB5     | proteasome subunit beta 5                                                     | 5693   | 844.7546968 | 0.339783523 | 0.423465694 | 0.802387366 | 0.422328919 | 0.999371363 | Not Sig |
| ENSG00000111817 | DSE       | dermatan sulfate epimerase                                                    | 29940  | 1096.308939 | 0.339810583 | 0.474302802 | 0.716442283 | 0.473718294 | 0.999371363 | Not Sig |
| ENSG00000005302 | MSL3      | MSL complex subunit 3                                                         | 10943  | 626.3312812 | 0.33988278  | 0.493497894 | 0.688721845 | 0.490998326 | 0.999371363 | Not Sig |
| ENSG00000158435 | CNOT11    | CCR4-NOT transcription complex subunit 11                                     | 55571  | 1033.286396 | 0.339932123 | 0.461025991 | 0.737338306 | 0.460916643 | 0.999371363 | Not Sig |
| ENSG00000196821 | C6orf106  | chromosome 6 open reading frame 106                                           | 64771  | 3215.357774 | 0.339963013 | 0.529444635 | 0.64211249  | 0.520800147 | 0.999371363 | Not Sig |
| ENSG00000121775 | TMEM39B   | transmembrane protein 39B                                                     | 55116  | 314.5653558 | 0.340378766 | 0.515656934 | 0.660087635 | 0.509197593 | 0.999371363 | Not Sig |
| ENSG00000253616 | NA        | NA                                                                            | NA     | 20.44448421 | 0.34050463  | 0.859078555 | 0.396360296 | 0.691839252 | 0.999371363 | Not Sig |
| ENSG00000124098 | FAM210B   | family with sequence similarity 210 member B                                  | 116151 | 1182.562227 | 0.340644808 | 0.6017376   | 0.566101915 | 0.571324502 | 0.999371363 | Not Sig |
| ENSG00000007933 | FMO3      | flavin containing monooxygenase 3                                             | 2328   | 338.2726705 | 0.340701115 | 0.729203233 | 0.467223813 | 0.640339758 | 0.999371363 | Not Sig |
| ENSG00000106305 | ATMP2     | aminoacyl tRNA synthetase complex interacting multifunctional protein 2       | 7965   | 359.3726568 | 0.340863011 | 0.470359723 | 0.724685797 | 0.46864481  | 0.999371363 | Not Sig |
| ENSG00000013725 | CD6       | CD6 molecule                                                                  | 923    | 340.008481  | 0.34087657  | 0.74319409  | 0.458664264 | 0.64647528  | 0.999371363 | Not Sig |
| ENSG00000247271 | ZBED5-AS1 | ZBED5 antisense RNA 1                                                         | 729013 | 156.3221634 | 0.340974099 | 0.49630648  | 0.687023267 | 0.492068067 | 0.999371363 | Not Sig |
| ENSG00000128159 | TUBGCP6   | tubulin gamma complex associated protein 6                                    | 85378  | 2073.975912 | 0.341155617 | 0.59153037  | 0.5767339   | 0.564119228 | 0.999371363 | Not Sig |
| ENSG00000115963 | RND3      | Rho family GTPase 3                                                           | 390    | 733.7610289 | 0.341704472 | 0.436661931 | 0.782537813 | 0.433898572 | 0.999371363 | Not Sig |

|                 |           |                                                                  |           |             |             |             |             |             |             |         |
|-----------------|-----------|------------------------------------------------------------------|-----------|-------------|-------------|-------------|-------------|-------------|-------------|---------|
| ENSG00000167986 | DDB1      | damage specific DNA binding protein 1                            | 1642      | 4464.487595 | 0.341852224 | 0.39206775  | 0.871921304 | 0.38325131  | 0.999371363 | Not Sig |
| ENSG00000121680 | PEX16     | peroxisomal biogenesis factor 16                                 | 9409      | 390.0994949 | 0.342004656 | 0.578378593 | 0.591316241 | 0.55430855  | 0.999371363 | Not Sig |
| ENSG00000162695 | SLC30A7   | solute carrier family 30 member 7                                | 148867    | 2048.005241 | 0.342070416 | 0.716572587 | 0.477370223 | 0.633098514 | 0.999371363 | Not Sig |
| ENSG00000115685 | PPP1R7    | protein phosphatase 1 regulatory subunit 7                       | 5510      | 836.1934959 | 0.342081209 | 0.507661149 | 0.673837676 | 0.500414519 | 0.999371363 | Not Sig |
| ENSG00000271851 | NA        | NA                                                               | NA        | 23.21234851 | 0.34214511  | 0.706650627 | 0.484178598 | 0.628259124 | 0.999371363 | Not Sig |
| ENSG00000169155 | ZBTB43    | zinc finger and BTB domain containing 43                         | 23099     | 744.7784301 | 0.342161885 | 0.433770745 | 0.788808118 | 0.430224164 | 0.999371363 | Not Sig |
| ENSG00000260037 | NA        | NA                                                               | NA        | 4.178394932 | 0.342258176 | 1.474098146 | 0.232181403 | 0.816397121 | NA          | NA      |
| ENSG00000121310 | ECHDC2    | enoyl-CoA hydratase domain containing 2                          | 55268     | 1587.911955 | 0.342317576 | 0.432864575 | 0.790819105 | 0.429049559 | 0.999371363 | Not Sig |
| ENSG00000125962 | ARMCX5    | armadillo repeat containing, X-linked 5                          | 64860     | 268.663236  | 0.342407933 | 0.501203851 | 0.683170994 | 0.494498799 | 0.999371363 | Not Sig |
| ENSG00000181789 | COPG1     | coatamer protein complex subunit gamma 1                         | 22820     | 4161.13528  | 0.34246083  | 0.424178729 | 0.807350314 | 0.419464684 | 0.999371363 | Not Sig |
| ENSG00000187595 | ZNF385C   | zinc finger protein 385C                                         | 201181    | 35.3488507  | 0.342488672 | 0.680652048 | 0.503177318 | 0.61483961  | 0.999371363 | Not Sig |
| ENSG00000186575 | NF2       | neurofibromin 2                                                  | 4771      | 1635.56878  | 0.342789897 | 0.554009444 | 0.618743779 | 0.536085164 | 0.999371363 | Not Sig |
| ENSG00000183020 | AP2A2     | adaptor related protein complex 2 alpha 2 subunit                | 161       | 2736.168013 | 0.342801099 | 0.50345127  | 0.680902244 | 0.495933348 | 0.999371363 | Not Sig |
| ENSG00000185608 | MRPL40    | mitochondrial ribosomal protein L40                              | 64976     | 276.2671387 | 0.34282822  | 0.487195977 | 0.703676214 | 0.481634437 | 0.999371363 | Not Sig |
| ENSG00000201581 | NA        | NA                                                               | NA        | 9.643695642 | 0.34306994  | 1.047555763 | 0.327495636 | 0.743293043 | 0.999371363 | Not Sig |
| ENSG00000211868 | NA        | NA                                                               | NA        | 10.96886157 | 0.343492316 | 1.247521218 | 0.275339859 | 0.783055144 | 0.999371363 | Not Sig |
| ENSG00000100373 | UPK3A     | uroplakin 3A                                                     | 7380      | 8.549994808 | 0.343698378 | 1.195310538 | 0.287538984 | 0.773699657 | 0.999371363 | Not Sig |
| ENSG00000244720 | NA        | NA                                                               | NA        | 19.85866155 | 0.344394521 | 1.037641297 | 0.331901325 | 0.73996377  | 0.999371363 | Not Sig |
| ENSG00000119121 | TRPM6     | transient receptor potential cation channel subfamily M member 6 | 140803    | 43.75087992 | 0.344408171 | 1.178190419 | 0.292319616 | 0.770042262 | 0.999371363 | Not Sig |
| ENSG00000010278 | CD9       | CD9 molecule                                                     | 928       | 3990.094377 | 0.3447299   | 0.552374266 | 0.624087545 | 0.532570093 | 0.999371363 | Not Sig |
| ENSG00000233473 | NA        | NA                                                               | NA        | 2.047571972 | 0.34473502  | 1.63840456  | 0.210408972 | 0.83334849  | NA          | NA      |
| ENSG00000131828 | PDHA1     | pyruvate dehydrogenase E1 alpha 1 subunit                        | 5160      | 1040.928113 | 0.344897506 | 0.403790078 | 0.854150522 | 0.393021594 | 0.999371363 | Not Sig |
| ENSG00000272407 | NA        | NA                                                               | NA        | 6.555677149 | 0.345352471 | 1.040226313 | 0.331997438 | 0.739891194 | NA          | NA      |
| ENSG00000167037 | SGSM1     | small G protein signaling modulator 1                            | 129049    | 294.2812094 | 0.345695982 | 0.886896094 | 0.38978183  | 0.696697881 | 0.999371363 | Not Sig |
| ENSG00000272760 | NA        | NA                                                               | NA        | 51.21010198 | 0.345881348 | 0.809400918 | 0.427330066 | 0.669138936 | 0.999371363 | Not Sig |
| ENSG00000119927 | GPAM      | glycerol-3-phosphate acyltransferase, mitochondrial              | 57678     | 506.0517332 | 0.345960558 | 0.585220325 | 0.591162922 | 0.554411263 | 0.999371363 | Not Sig |
| ENSG00000270477 | NA        | NA                                                               | NA        | 2.585995845 | 0.3464468   | 1.636201259 | 0.2117385   | 0.83231105  | NA          | NA      |
| ENSG00000185837 | HDHD5-AS1 | HDHD5 antisense RNA 1                                            | 100130717 | 9.30843526  | 0.346658322 | 1.003158954 | 0.345566692 | 0.729668381 | 0.999371363 | Not Sig |
| ENSG00000173567 | ADGRF3    | adhesion G protein-coupled receptor F3                           | 165082    | 10.72523779 | 0.34678935  | 0.899828085 | 0.385395117 | 0.6999447   | 0.999371363 | Not Sig |
| ENSG00000018189 | RUFY3     | RUN and FYVE domain containing 3                                 | 22902     | 2027.841785 | 0.347077288 | 0.453762576 | 0.764887424 | 0.444338583 | 0.999371363 | Not Sig |
| ENSG00000101417 | PXMP4     | peroxisomal membrane protein 4                                   | 11264     | 361.8121272 | 0.347238603 | 0.61281358  | 0.566630072 | 0.570965539 | 0.999371363 | Not Sig |
| ENSG00000122188 | LAX1      | lymphocyte transmembrane adaptor 1                               | 54900     | 186.2984101 | 0.347293036 | 0.764884977 | 0.454046094 | 0.649795651 | 0.999371363 | Not Sig |
| ENSG00000254539 | NA        | NA                                                               | NA        | 17.90430479 | 0.347309185 | 0.716295047 | 0.48486889  | 0.627769351 | 0.999371363 | Not Sig |
| ENSG00000116691 | MIIP      | migration and invasion inhibitory protein                        | 60672     | 441.4425257 | 0.34732582  | 0.711367423 | 0.48825095  | 0.6253721   | 0.999371363 | Not Sig |
| ENSG00000132965 | ALOX5AP   | arachidonate 5-lipoxygenase activating protein                   | 241       | 628.4996808 | 0.34758773  | 0.909718878 | 0.382082573 | 0.702400118 | 0.999371363 | Not Sig |

|                 |             |                                                   |           |             |             |             |             |             |             |         |
|-----------------|-------------|---------------------------------------------------|-----------|-------------|-------------|-------------|-------------|-------------|-------------|---------|
| ENSG00000239899 | NA          | NA                                                | NA        | 28.15365666 | 0.347872634 | 0.828627297 | 0.419817975 | 0.674618432 | 0.999371363 | Not Sig |
| ENSG00000117174 | ZNHIT6      | zinc finger HIT-type containing 6                 | 54680     | 695.0559059 | 0.348244716 | 0.6237254   | 0.558330182 | 0.576618939 | 0.999371363 | Not Sig |
| ENSG00000227376 | NA          | NA                                                | NA        | 26.17623317 | 0.348386911 | 0.652460005 | 0.53395903  | 0.59336988  | 0.999371363 | Not Sig |
| ENSG00000241973 | PI4KA       | phosphatidylinositol 4-kinase alpha               | 5297      | 3169.673541 | 0.348556859 | 0.535781858 | 0.650557411 | 0.51533223  | 0.999371363 | Not Sig |
| ENSG00000085224 | ATRX        | ATRX, chromatin remodeler                         | 546       | 5352.967951 | 0.348797438 | 0.543361855 | 0.641924779 | 0.520922025 | 0.999371363 | Not Sig |
| ENSG00000196664 | TLR7        | toll like receptor 7                              | 51284     | 262.9849429 | 0.348971674 | 0.880957957 | 0.396127501 | 0.692010972 | 0.999371363 | Not Sig |
| ENSG00000072840 | EVC         | EvC ciliary complex subunit 1                     | 2121      | 1516.566299 | 0.348984712 | 0.549464496 | 0.635136055 | 0.525339684 | 0.999371363 | Not Sig |
| ENSG00000237505 | PKN2-AS1    | PKN2 antisense RNA 1                              | 101927891 | 6.865127345 | 0.349021432 | 1.140799855 | 0.305944492 | 0.75964691  | 0.999371363 | Not Sig |
| ENSG00000166016 | ABTB2       | ankyrin repeat and BTB domain containing 2        | 25841     | 297.1782065 | 0.349037446 | 0.690990414 | 0.505126322 | 0.613470115 | 0.999371363 | Not Sig |
| ENSG00000198040 | ZNF84       | zinc finger protein 84                            | 7637      | 12.7542946  | 0.349175427 | 0.839581612 | 0.415892181 | 0.677488902 | 0.999371363 | Not Sig |
| ENSG00000111275 | ALDH2       | aldehyde dehydrogenase 2 family (mitochondrial)   | 217       | 2643.183989 | 0.349223476 | 0.777061393 | 0.449415553 | 0.653131914 | 0.999371363 | Not Sig |
| ENSG00000143384 | MCL1        | MCL1, BCL2 family apoptosis regulator             | 4170      | 14616.73579 | 0.349603537 | 0.435755584 | 0.802292729 | 0.422383647 | 0.999371363 | Not Sig |
| ENSG00000100263 | RHBDD3      | rhomboid domain containing 3                      | 25807     | 374.4204392 | 0.349783239 | 0.577848373 | 0.605320107 | 0.544966324 | 0.999371363 | Not Sig |
| ENSG00000155719 | OTOA        | otoancorin                                        | 146183    | 15.18809803 | 0.349836454 | 1.070533825 | 0.326786922 | 0.743829052 | 0.999371363 | Not Sig |
| ENSG00000231216 | GS1-600G8.3 | unknown transcript                                | 100093698 | 2.911554352 | 0.349843539 | 1.622294763 | 0.215647333 | 0.829262657 | NA          | NA      |
| ENSG00000251807 | NA          | NA                                                | NA        | 7.48091272  | 0.349962695 | 0.996366633 | 0.351238875 | 0.725409148 | 0.999371363 | Not Sig |
| ENSG00000228663 | NA          | NA                                                | NA        | 2.10823335  | 0.349997371 | 1.845596281 | 0.189639183 | 0.849591881 | NA          | NA      |
| ENSG00000103507 | BCKDK       | branched chain ketoacid dehydrogenase kinase      | 10295     | 720.3966326 | 0.350010792 | 0.503361744 | 0.69534643  | 0.486838223 | 0.999371363 | Not Sig |
| ENSG00000171204 | TMEM126B    | transmembrane protein 126B                        | 55863     | 472.188396  | 0.350016298 | 0.614715797 | 0.56939532  | 0.569087892 | 0.999371363 | Not Sig |
| ENSG00000135090 | TAOK3       | TAO kinase 3                                      | 51347     | 1438.656755 | 0.350057725 | 0.45325979  | 0.772311448 | 0.439929987 | 0.999371363 | Not Sig |
| ENSG00000227525 | NA          | NA                                                | NA        | 1.890214809 | 0.350261097 | 1.669313754 | 0.209823406 | 0.833805505 | NA          | NA      |
| ENSG00000151623 | NR3C2       | nuclear receptor subfamily 3 group C member 2     | 4306      | 1151.322481 | 0.350359449 | 0.401307971 | 0.873043832 | 0.382639187 | 0.999371363 | Not Sig |
| ENSG00000197779 | ZNF81       | zinc finger protein 81                            | 347344    | 394.9283735 | 0.350462852 | 0.484387358 | 0.723517751 | 0.469361852 | 0.999371363 | Not Sig |
| ENSG00000121940 | CLCC1       | chloride channel CLIC like 1                      | 23155     | 1215.959956 | 0.350464966 | 0.520606158 | 0.673186362 | 0.500828737 | 0.999371363 | Not Sig |
| ENSG00000167994 | RAB3IL1     | RAB3A interacting protein like 1                  | 5866      | 282.1204892 | 0.350773844 | 0.750436439 | 0.467426455 | 0.640194799 | 0.999371363 | Not Sig |
| ENSG00000184384 | MAML2       | mastermind like transcriptional coactivator 2     | 84441     | 1631.847664 | 0.350848849 | 0.465398141 | 0.753868178 | 0.45092838  | 0.999371363 | Not Sig |
| ENSG00000090530 | P3H2        | prolyl 3-hydroxylase 2                            | 55214     | 1036.621807 | 0.350975171 | 0.738777732 | 0.47507546  | 0.634733189 | 0.999371363 | Not Sig |
| ENSG00000163877 | SNIP1       | Smad nuclear interacting protein 1                | 79753     | 556.4658892 | 0.351063347 | 0.421798064 | 0.832301939 | 0.405238536 | 0.999371363 | Not Sig |
| ENSG00000185127 | C6orf120    | chromosome 6 open reading frame 120               | 387263    | 746.1819352 | 0.351261025 | 0.445235267 | 0.788933517 | 0.430150865 | 0.999371363 | Not Sig |
| ENSG00000232600 | NA          | NA                                                | NA        | 12.757577   | 0.351582507 | 0.813069933 | 0.432413612 | 0.665440827 | 0.999371363 | Not Sig |
| ENSG00000167985 | SDHAF2      | succinate dehydrogenase complex assembly factor 2 | 54949     | 208.64133   | 0.351693365 | 0.482011725 | 0.729636536 | 0.465612383 | 0.999371363 | Not Sig |
| ENSG00000105849 | TWISTNB     | TWIST neighbor                                    | 221830    | 426.1927058 | 0.351911247 | 0.537343506 | 0.654909277 | 0.512526167 | 0.999371363 | Not Sig |
| ENSG00000111907 | TPD52L1     | tumor protein D52 like 1                          | 7164      | 355.4756126 | 0.351953726 | 0.716112672 | 0.491478143 | 0.623088307 | 0.999371363 | Not Sig |
| ENSG00000111012 | CYP27B1     | cytochrome P450 family 27 subfamily B member 1    | 1594      | 46.96018716 | 0.352007955 | 0.710856177 | 0.495188713 | 0.620466917 | 0.999371363 | Not Sig |
| ENSG00000106785 | TRIM14      | tripartite motif containing 14                    | 9830      | 1505.451456 | 0.352141483 | 0.574212646 | 0.613259714 | 0.539704627 | 0.999371363 | Not Sig |

|                 |             |                                                            |           |             |             |             |             |             |             |         |
|-----------------|-------------|------------------------------------------------------------|-----------|-------------|-------------|-------------|-------------|-------------|-------------|---------|
| ENSG00000100764 | PSMC1       | proteasome 26S subunit, ATPase 1                           | 5700      | 1377.935806 | 0.352188668 | 0.423736541 | 0.831150097 | 0.405888842 | 0.999371363 | Not Sig |
| ENSG00000108395 | TRIM37      | tripartite motif containing 37                             | 4591      | 780.2818201 | 0.352249586 | 0.40074465  | 0.87898762  | 0.379407988 | 0.999371363 | Not Sig |
| ENSG00000114656 | KIAA1257    | KIAA1257                                                   | 57501     | 42.41970951 | 0.352339559 | 0.866244153 | 0.406743938 | 0.684196066 | 0.999371363 | Not Sig |
| ENSG00000153237 | CCDC148     | coiled-coil domain containing 148                          | 130940    | 56.75890378 | 0.352557605 | 0.784333916 | 0.449499375 | 0.653071459 | 0.999371363 | Not Sig |
| ENSG00000101986 | ABCD1       | ATP binding cassette subfamily D member 1                  | 215       | 505.0889361 | 0.352622914 | 0.618130522 | 0.570466756 | 0.568361164 | 0.999371363 | Not Sig |
| ENSG00000185504 | FAAP100     | Fanconi anemia core complex associated protein 100         | 80233     | 879.2310042 | 0.352667091 | 0.552406034 | 0.638420055 | 0.52320028  | 0.999371363 | Not Sig |
| ENSG00000100445 | SDR39U1     | short chain dehydrogenase/reductase family 39U member 1    | 56948     | 460.6455207 | 0.352669461 | 0.550960806 | 0.640099001 | 0.522108239 | 0.999371363 | Not Sig |
| ENSG00000170775 | GPR37       | G protein-coupled receptor 37                              | 2861      | 83.66019916 | 0.353127832 | 0.957958855 | 0.36862526  | 0.712407065 | 0.999371363 | Not Sig |
| ENSG00000116209 | TMEM59      | transmembrane protein 59                                   | 9528      | 4788.247183 | 0.353249221 | 0.49620607  | 0.711900242 | 0.476526552 | 0.999371363 | Not Sig |
| ENSG00000124613 | ZNF391      | zinc finger protein 391                                    | 346157    | 187.3063642 | 0.353541671 | 0.76856763  | 0.46000073  | 0.645515696 | 0.999371363 | Not Sig |
| ENSG00000048162 | NOP16       | NOP16 nucleolar protein                                    | 51491     | 201.8243375 | 0.353763816 | 0.508248472 | 0.696045017 | 0.486400638 | 0.999371363 | Not Sig |
| ENSG00000254944 | NA          | NA                                                         | NA        | 19.50612623 | 0.35382174  | 0.814536468 | 0.434384161 | 0.664009498 | 0.999371363 | Not Sig |
| ENSG00000187653 | NA          | NA                                                         | NA        | 88.83444526 | 0.354076432 | 0.705861253 | 0.501623273 | 0.615932545 | 0.999371363 | Not Sig |
| ENSG00000143363 | PRUNE1      | prune exopolyphosphatase 1                                 | 58497     | 575.6930625 | 0.354118061 | 0.481670716 | 0.735187026 | 0.462225599 | 0.999371363 | Not Sig |
| ENSG00000141979 | NA          | NA                                                         | NA        | 4.314292128 | 0.354310122 | 1.183617802 | 0.299345043 | 0.76467679  | NA          | NA      |
| ENSG00000136240 | KDEL2       | KDEL endoplasmic reticulum protein retention receptor 2    | 11014     | 4663.846084 | 0.35446271  | 0.697299071 | 0.508336702 | 0.611217235 | 0.999371363 | Not Sig |
| ENSG00000222085 | NA          | NA                                                         | NA        | 6.496476936 | 0.354567394 | 1.08220967  | 0.327632809 | 0.743189312 | NA          | NA      |
| ENSG00000106009 | BRAT1       | BRCA1 associated ATM activator 1                           | 221927    | 1201.239904 | 0.355214136 | 0.604804761 | 0.587320338 | 0.556988584 | 0.999371363 | Not Sig |
| ENSG00000138600 | SPPL2A      | signal peptide peptidase like 2A                           | 84888     | 1450.440484 | 0.355253372 | 0.420777354 | 0.844278734 | 0.398513666 | 0.999371363 | Not Sig |
| ENSG00000137288 | UQCC2       | ubiquinol-cytochrome c reductase complex assembly factor 2 | 84300     | 534.4411106 | 0.355432245 | 0.523767133 | 0.678607387 | 0.497386661 | 0.999371363 | Not Sig |
| ENSG00000211837 | NA          | NA                                                         | NA        | 1.24579562  | 0.355479204 | 2.482968574 | 0.143167017 | 0.886158278 | NA          | NA      |
| ENSG00000221869 | CEBPD       | CCAAT/enhancer binding protein delta                       | 1052      | 6531.375611 | 0.355523679 | 0.763662538 | 0.465550765 | 0.641537092 | 0.999371363 | Not Sig |
| ENSG00000102316 | MAGED2      | MAGE family member D2                                      | 10916     | 2791.479856 | 0.355541631 | 0.566505522 | 0.627604881 | 0.53026281  | 0.999371363 | Not Sig |
| ENSG00000143753 | DEGS1       | delta 4-desaturase, sphingolipid 1                         | 8560      | 849.9640475 | 0.355690014 | 0.409585173 | 0.868415259 | 0.385167044 | 0.999371363 | Not Sig |
| ENSG00000252615 | NA          | NA                                                         | NA        | 1.082000922 | 0.355786388 | 2.532386869 | 0.140494485 | 0.88826931  | NA          | NA      |
| ENSG00000207174 | SNORD116-15 | small nucleolar RNA, C/D box 116-15                        | 100033427 | 5.244200017 | 0.355842384 | 1.233197538 | 0.288552623 | 0.772923755 | NA          | NA      |
| ENSG00000073169 | SELENOO     | selenoprotein O                                            | 83642     | 591.3225194 | 0.355860736 | 0.646412303 | 0.550516651 | 0.58196506  | 0.999371363 | Not Sig |
| ENSG00000187049 | TMEM216     | transmembrane protein 216                                  | 51259     | 138.532364  | 0.356196098 | 0.47595443  | 0.748382778 | 0.454229307 | 0.999371363 | Not Sig |
| ENSG00000119638 | NEK9        | NIMA related kinase 9                                      | 91754     | 2479.969395 | 0.356227377 | 0.442237634 | 0.805511221 | 0.420524734 | 0.999371363 | Not Sig |
| ENSG00000175449 | RFESD       | Rieske Fe-S domain containing                              | 317671    | 38.62182536 | 0.356228779 | 0.611189152 | 0.582845389 | 0.559997386 | 0.999371363 | Not Sig |
| ENSG00000146233 | CYP39A1     | cytochrome P450 family 39 subfamily A member 1             | 51302     | 96.69924643 | 0.356367495 | 0.638668184 | 0.557985358 | 0.576854383 | 0.999371363 | Not Sig |
| ENSG00000258821 | NA          | NA                                                         | NA        | 1.654759833 | 0.356490871 | 1.761864285 | 0.202337305 | 0.839653038 | NA          | NA      |
| ENSG00000124486 | USP9X       | ubiquitin specific peptidase 9, X-linked                   | 8239      | 7078.025392 | 0.356519736 | 0.502690248 | 0.709223499 | 0.478185793 | 0.999371363 | Not Sig |
| ENSG00000105889 | STEAP1B     | STEAP family member 1B                                     | 256227    | 8.763568337 | 0.356702392 | 1.025476914 | 0.34784049  | 0.72795998  | 0.999371363 | Not Sig |
| ENSG00000174827 | PDZK1       | PDZ domain containing 1                                    | 5174      | 3.674434302 | 0.356790301 | 1.457277033 | 0.244833544 | 0.80658532  | NA          | NA      |

|                 |           |                                               |           |             |             |             |             |             |             |         |
|-----------------|-----------|-----------------------------------------------|-----------|-------------|-------------|-------------|-------------|-------------|-------------|---------|
| ENSG00000138639 | ARHGAP24  | Rho GTPase activating protein 24              | 83478     | 735.3377743 | 0.356805349 | 0.592460635 | 0.602243132 | 0.547012308 | 0.999371363 | Not Sig |
| ENSG00000064703 | DDX20     | DEAD-box helicase 20                          | 11218     | 379.0453689 | 0.357004127 | 0.478524235 | 0.746052344 | 0.455635796 | 0.999371363 | Not Sig |
| ENSG00000009830 | POMT2     | protein O-mannosyltransferase 2               | 29954     | 603.0594674 | 0.357539916 | 0.432242902 | 0.827173597 | 0.408138675 | 0.999371363 | Not Sig |
| ENSG00000170365 | SMAD1     | SMAD family member 1                          | 4086      | 634.3620324 | 0.357868931 | 0.468746064 | 0.763460129 | 0.445189032 | 0.999371363 | Not Sig |
| ENSG00000144061 | NPHP1     | nephrocystin 1                                | 4867      | 174.5129561 | 0.357872864 | 0.583137502 | 0.613702365 | 0.539412026 | 0.999371363 | Not Sig |
| ENSG00000187601 | MAGEH1    | MAGE family member H1                         | 28986     | 273.9968597 | 0.358098659 | 0.680539809 | 0.52619796  | 0.598750671 | 0.999371363 | Not Sig |
| ENSG00000248309 | MEF2C-AS1 | MEF2C antisense RNA 1                         | 101929423 | 33.94447239 | 0.358268586 | 0.742079692 | 0.482789907 | 0.629244918 | 0.999371363 | Not Sig |
| ENSG00000242716 | NA        | NA                                            | NA        | 59.77873988 | 0.358440963 | 0.622177714 | 0.576107043 | 0.564542831 | 0.999371363 | Not Sig |
| ENSG00000162650 | ATXN7L2   | ataxin 7 like 2                               | 127002    | 140.3880986 | 0.358447071 | 0.676013051 | 0.530236909 | 0.595947684 | 0.999371363 | Not Sig |
| ENSG00000224846 | NA        | NA                                            | NA        | 5.14265511  | 0.358503399 | 1.220466594 | 0.293742902 | 0.768954369 | NA          | NA      |
| ENSG00000263244 | NA        | NA                                            | NA        | 2070.859921 | 0.358517807 | 0.457636958 | 0.783410956 | 0.433385824 | 0.999371363 | Not Sig |
| ENSG00000050628 | PTGER3    | prostaglandin E receptor 3                    | 5733      | 38.95145185 | 0.358761967 | 0.720070144 | 0.498231971 | 0.61832055  | 0.999371363 | Not Sig |
| ENSG00000168672 | FAM84B    | family with sequence similarity 84 member B   | 157638    | 2460.927143 | 0.358820226 | 0.652890867 | 0.549586836 | 0.58260279  | 0.999371363 | Not Sig |
| ENSG00000234604 | NA        | NA                                            | NA        | 24.96398216 | 0.358824637 | 1.059973325 | 0.338522328 | 0.734969604 | 0.999371363 | Not Sig |
| ENSG00000162706 | CADM3     | cell adhesion molecule 3                      | 57863     | 122.9727051 | 0.358865942 | 0.856021638 | 0.419225316 | 0.675051472 | 0.999371363 | Not Sig |
| ENSG00000171877 | FRMD5     | FERM domain containing 5                      | 84978     | 185.863743  | 0.358875842 | 1.209645859 | 0.296678436 | 0.766712022 | 0.999371363 | Not Sig |
| ENSG00000156411 | C14orf2   | chromosome 14 open reading frame 2            | 9556      | 416.1208481 | 0.35887995  | 0.520083783 | 0.690042569 | 0.490167418 | 0.999371363 | Not Sig |
| ENSG00000095066 | HOOK2     | hook microtubule tethering protein 2          | 29911     | 965.7021662 | 0.359030961 | 0.540699308 | 0.664012245 | 0.506682474 | 0.999371363 | Not Sig |
| ENSG00000236794 | NA        | NA                                            | NA        | 3.982401657 | 0.359286686 | 1.366365701 | 0.262950603 | 0.792588652 | NA          | NA      |
| ENSG00000173465 | SSSCA1    | Sjogren syndrome/scleroderma autoantigen 1    | 10534     | 249.4817397 | 0.359359292 | 0.614952972 | 0.584368738 | 0.558972255 | 0.999371363 | Not Sig |
| ENSG00000158109 | TPRG1L    | tumor protein p63 regulated 1 like            | 127262    | 1162.815336 | 0.359393511 | 0.540135841 | 0.66537616  | 0.505809929 | 0.999371363 | Not Sig |
| ENSG00000136628 | EPRS      | glutamyl-prolyl-tRNA synthetase               | 2058      | 3557.223655 | 0.359459841 | 0.482977209 | 0.744258392 | 0.456720168 | 0.999371363 | Not Sig |
| ENSG00000168438 | CDC40     | cell division cycle 40                        | 51362     | 682.7923055 | 0.359557687 | 0.463085295 | 0.77643944  | 0.437489565 | 0.999371363 | Not Sig |
| ENSG00000171202 | TMEM126A  | transmembrane protein 126A                    | 84233     | 163.5868134 | 0.35957726  | 0.603994326 | 0.595332182 | 0.551621448 | 0.999371363 | Not Sig |
| ENSG00000175348 | TMEM9B    | TMEM9 domain family member B                  | 56674     | 1040.919513 | 0.359604914 | 0.47206035  | 0.761777417 | 0.446192861 | 0.999371363 | Not Sig |
| ENSG00000067369 | TP53BP1   | tumor protein p53 binding protein 1           | 7158      | 2394.301642 | 0.359765061 | 0.425938745 | 0.844640375 | 0.398311659 | 0.999371363 | Not Sig |
| ENSG00000119705 | SLIRP     | SRA stem-loop interacting RNA binding protein | 81892     | 295.1165157 | 0.359878458 | 0.583742102 | 0.616502488 | 0.53756293  | 0.999371363 | Not Sig |
| ENSG00000112936 | C7        | complement C7                                 | 730       | 4655.725654 | 0.359905592 | 1.094842739 | 0.328728117 | 0.7423612   | 0.999371363 | Not Sig |
| ENSG00000089050 | RBBP9     | RB binding protein 9, serine hydrolase        | 10741     | 505.2334011 | 0.359911163 | 0.449378109 | 0.800909426 | 0.423184083 | 0.999371363 | Not Sig |
| ENSG00000048140 | TSPAN17   | tetraspanin 17                                | 26262     | 854.3539409 | 0.359991961 | 0.516766879 | 0.696623518 | 0.486038434 | 0.999371363 | Not Sig |
| ENSG00000065491 | TBC1D22B  | TBC1 domain family member 22B                 | 55633     | 546.8775966 | 0.360012941 | 0.528489738 | 0.681210844 | 0.495738087 | 0.999371363 | Not Sig |
| ENSG00000091947 | TMEM101   | transmembrane protein 101                     | 84336     | 515.0508146 | 0.360427255 | 0.565818156 | 0.637001926 | 0.524123589 | 0.999371363 | Not Sig |
| ENSG00000114315 | HES1      | hes family bHLH transcription factor 1        | 3280      | 1526.070278 | 0.360431583 | 0.647059502 | 0.557030044 | 0.577506902 | 0.999371363 | Not Sig |
| ENSG00000048052 | HDAC9     | histone deacetylase 9                         | 9734      | 360.7969927 | 0.360782842 | 0.680392242 | 0.530257137 | 0.595933661 | 0.999371363 | Not Sig |
| ENSG00000124641 | MED20     | mediator complex subunit 20                   | 9477      | 375.1686355 | 0.360792343 | 0.430955442 | 0.837191755 | 0.402484791 | 0.999371363 | Not Sig |

|                 |         |                                                                              |        |             |             |             |             |                 |             |         |
|-----------------|---------|------------------------------------------------------------------------------|--------|-------------|-------------|-------------|-------------|-----------------|-------------|---------|
| ENSG00000100426 | ZBED4   | zinc finger BED-type containing 4                                            | 9889   | 1201.981726 | 0.360924205 | 0.597482625 | 0.604074812 | 0.545793905     | 0.999371363 | Not Sig |
| ENSG00000138756 | BMP2K   | BMP2 inducible kinase                                                        | 55589  | 1622.988194 | 0.361495579 | 0.641328801 | 0.563666528 | 0.572981101     | 0.999371363 | Not Sig |
| ENSG00000169957 | ZNF768  | zinc finger protein 768                                                      | 79724  | 699.0387342 | 0.361614067 | 0.5812908   | 0.622088063 | 0.533883964     | 0.999371363 | Not Sig |
| ENSG00000110060 | PUS3    | pseudouridylate synthase 3                                                   | 83480  | 130.2900333 | 0.361663372 | 0.43263763  | 0.835949874 | 0.403183103     | 0.999371363 | Not Sig |
| ENSG00000172339 | ALG14   | ALG14, UDP-N-acetylglucosaminyltransferase subunit                           | 199857 | 161.2333782 | 0.361721165 | 0.505060306 | 0.716194008 | 0.473871562     | 0.999371363 | Not Sig |
| ENSG00000205213 | LGR4    | leucine rich repeat containing G protein-coupled receptor 4                  | 55366  | 2334.302869 | 0.361750374 | 0.853178084 | 0.42400336  | 0.671563363     | 0.999371363 | Not Sig |
| ENSG00000198730 | CTR9    | CTR9 homolog, Paf1/RNA polymerase II complex component                       | 9646   | 1550.462227 | 0.361868477 | 0.380480959 | 0.951081699 | 0.341562904     | 0.999371363 | Not Sig |
| ENSG00000136522 | MRPL47  | mitochondrial ribosomal protein L47                                          | 57129  | 256.6021989 | 0.361923845 | 0.505668392 | 0.715733574 | 0.474155876     | 0.999371363 | Not Sig |
| ENSG00000130935 | NOL11   | nucleolar protein 11                                                         | 25926  | 810.9507161 | 0.362162347 | 0.495978535 | 0.730197622 | 0.465269396     | 0.999371363 | Not Sig |
| ENSG00000096401 | CDC5L   | cell division cycle 5 like                                                   | 988    | 1301.151139 | 0.362199952 | 0.415608233 | 0.871493689 | 0.38348465      | 0.999371363 | Not Sig |
| ENSG00000167325 | RRM1    | ribonucleotide reductase catalytic subunit M1                                | 6240   | 962.4863054 | 0.362238055 | 0.569841125 | 0.635682542 | 0.524983358     | 0.999371363 | Not Sig |
| ENSG00000144043 | TEX261  | testis expressed 261                                                         | 113419 | 1169.017486 | 0.362411083 | 0.574643467 | 0.630671197 | 0.528255536     | 0.999371363 | Not Sig |
| ENSG00000102119 | EMD     | emerin                                                                       | 2010   | 778.9233506 | 0.362904004 | 0.505397386 | 0.71805675  | 0.472722296     | 0.999371363 | Not Sig |
| ENSG00000243284 | VSIG8   | V-set and immunoglobulin domain containing 8                                 | 391123 | 6.358537951 | 0.362948871 | 1.229602705 | 0.295175726 | 0.767859644     | NA          | NA      |
| ENSG00000167208 | SNX20   | sorting nexin 20                                                             | 124460 | 346.4337245 | 0.363225868 | 0.795912431 | 0.45636411  | 0.64812817      | 0.999371363 | Not Sig |
| ENSG00000164611 | PTTG1   | pituitary tumor-transforming 1                                               | 9232   | 129.8518887 | 0.363284915 | 0.71562189  | 0.507649249 | 0.611699346     | 0.999371363 | Not Sig |
| ENSG00000113595 | TRIM23  | tripartite motif containing 23                                               | 373    | 492.3198682 | 0.363334708 | 0.416244586 | 0.872887528 | 0.382724385     | 0.999371363 | Not Sig |
| ENSG00000147883 | CDKN2B  | cyclin dependent kinase inhibitor 2B                                         | 1030   | 678.7706957 | 0.363462447 | 0.785116912 | 0.462940539 | 0.643406989     | 0.999371363 | Not Sig |
| ENSG00000179178 | TMEM125 | transmembrane protein 125                                                    | 128218 | 1543.016301 | 0.363662323 | 0.721311986 | 0.504167863 | 0.614143422     | 0.999371363 | Not Sig |
| ENSG00000157916 | RER1    | retention in endoplasmic reticulum sorting receptor 1                        | 11079  | 2523.993571 | 0.364130361 | 0.440099434 | 0.827382024 | 0.408020566     | 0.999371363 | Not Sig |
| ENSG00000169193 | CCDC126 | coiled-coil domain containing 126                                            | 90693  | 227.4081303 | 0.364164255 | 0.511361948 | 0.712145783 | 0.476374506     | 0.999371363 | Not Sig |
| ENSG00000260625 | NA      | NA                                                                           | NA     | 15.77338341 | 0.364565256 | 0.920447213 | 0.396074051 | 0.692050401     | 0.999371363 | Not Sig |
| ENSG00000187994 | RINL    | Ras and Rab interactor like                                                  | 126432 | 219.2857812 | 0.364611642 | 0.731722336 | 0.498292349 | <b>0.618278</b> | 0.999371363 | Not Sig |
| ENSG00000143793 | Clorf35 | chromosome 1 open reading frame 35                                           | 79169  | 433.5194133 | 0.364830344 | 0.600999212 | 0.607039637 | 0.543824608     | 0.999371363 | Not Sig |
| ENSG00000084070 | SMAP2   | small ArfGAP2                                                                | 64744  | 1501.747989 | 0.365699258 | 0.606033474 | 0.603430789 | 0.546222145     | 0.999371363 | Not Sig |
| ENSG00000100897 | DCAF11  | DDB1 and CUL4 associated factor 11                                           | 80344  | 1457.512623 | 0.365964756 | 0.516596021 | 0.708415747 | 0.478687117     | 0.999371363 | Not Sig |
| ENSG00000254585 | MAGEL2  | MAGE family member L2                                                        | 54551  | 1.867470482 | 0.366196849 | 1.900081561 | 0.192726911 | 0.847172847     | NA          | NA      |
| ENSG00000215883 | CYB5RL  | cytochrome b5 reductase like                                                 | 606495 | 141.788266  | 0.366344819 | 0.458800376 | 0.79848413  | 0.424589599     | 0.999371363 | Not Sig |
| ENSG00000179041 | RRS1    | ribosome biogenesis regulator homolog                                        | 23212  | 283.1497837 | 0.366360644 | 0.546437106 | 0.670453452 | 0.50256877      | 0.999371363 | Not Sig |
| ENSG00000108854 | SMURF2  | SMAD specific E3 ubiquitin protein ligase 2                                  | 64750  | 2290.840043 | 0.366658015 | 0.424008123 | 0.864742901 | 0.387179917     | 0.999371363 | Not Sig |
| ENSG00000159082 | SYNJ1   | synaptojanin 1                                                               | 8867   | 767.7840354 | 0.366709614 | 0.424311029 | 0.864247189 | 0.387452114     | 0.999371363 | Not Sig |
| ENSG00000116205 | TCEANC2 | transcription elongation factor A N-terminal and central domain containing 2 | 127428 | 210.5192531 | 0.366780117 | 0.492474403 | 0.74476991  | 0.456410828     | 0.999371363 | Not Sig |
| ENSG00000204687 | MAS1L   | MAS1 proto-oncogene like, G protein-coupled receptor                         | 116511 | 3.390778012 | 0.3668417   | 1.42716883  | 0.257041558 | 0.797146692     | NA          | NA      |
| ENSG00000225101 | NA      | NA                                                                           | NA     | 13.51481038 | 0.366853603 | 1.2167358   | 0.301506377 | 0.763028388     | 0.999371363 | Not Sig |
| ENSG00000154639 | CXADR   | CXADR, Ig-like cell adhesion molecule                                        | 1525   | 1886.955241 | 0.366914855 | 0.781289194 | 0.469627454 | 0.638621207     | 0.999371363 | Not Sig |

|                 |              |                                                                    |           |             |             |             |             |             |             |         |
|-----------------|--------------|--------------------------------------------------------------------|-----------|-------------|-------------|-------------|-------------|-------------|-------------|---------|
| ENSG00000229766 | NA           | NA                                                                 | NA        | 1.577791663 | 0.366979208 | 1.989480558 | 0.184459811 | 0.853652752 | NA          | NA      |
| ENSG00000224046 | LOC101927420 | uncharacterized LOC101927420                                       | 101927420 | 7.8612329   | 0.366989376 | 1.392130653 | 0.26361705  | 0.792075019 | 0.999371363 | Not Sig |
| ENSG00000055070 | SZRD1        | SUZ RNA binding domain containing 1                                | 26099     | 2574.51628  | 0.367041561 | 0.433812592 | 0.846083235 | 0.397506313 | 0.999371363 | Not Sig |
| ENSG00000258568 | NA           | NA                                                                 | NA        | 10.34968018 | 0.367055874 | 0.86211836  | 0.425760418 | 0.670282432 | 0.999371363 | Not Sig |
| ENSG00000197599 | CCDC154      | coiled-coil domain containing 154                                  | 645811    | 46.06873996 | 0.367117846 | 0.720890686 | 0.509255914 | 0.610572855 | 0.999371363 | Not Sig |
| ENSG00000112357 | PEX7         | peroxisomal biogenesis factor 7                                    | 5191      | 227.4881688 | 0.367320022 | 0.550852139 | 0.66682145  | 0.50488619  | 0.999371363 | Not Sig |
| ENSG00000159388 | BTG2         | BTG anti-proliferation factor 2                                    | 7832      | 5673.385828 | 0.367371464 | 0.863725924 | 0.425333377 | 0.670593666 | 0.999371363 | Not Sig |
| ENSG00000143761 | ARF1         | ADP ribosylation factor 1                                          | 375       | 8007.65418  | 0.367435861 | 0.441165301 | 0.832875705 | 0.404914833 | 0.999371363 | Not Sig |
| ENSG00000141736 | ERBB2        | erb-b2 receptor tyrosine kinase 2                                  | 2064      | 5156.843479 | 0.368030476 | 0.561805331 | 0.65508541  | 0.512412765 | 0.999371363 | Not Sig |
| ENSG00000101773 | RBBP8        | RB binding protein 8, endonuclease                                 | 5932      | 888.7444327 | 0.368095747 | 0.601008769 | 0.612463188 | 0.540231346 | 0.999371363 | Not Sig |
| ENSG00000174680 | NA           | NA                                                                 | NA        | 2.576126589 | 0.368151068 | 1.635500373 | 0.22509996  | 0.821901512 | NA          | NA      |
| ENSG00000180229 | HERC2P3      | hect domain and RLD 2 pseudogene 3                                 | 283755    | 250.6311565 | 0.368179462 | 0.770354223 | 0.477935281 | 0.63269627  | 0.999371363 | Not Sig |
| ENSG00000109016 | DHRS7B       | dehydrogenase/reductase 7B                                         | 25979     | 362.2206101 | 0.368313826 | 0.628327059 | 0.586181703 | 0.557753416 | 0.999371363 | Not Sig |
| ENSG00000160049 | DFFA         | DNA fragmentation factor subunit alpha                             | 1676      | 1012.278524 | 0.368918453 | 0.431797786 | 0.854377826 | 0.392895678 | 0.999371363 | Not Sig |
| ENSG00000120694 | HSPH1        | heat shock protein family H (Hsp110) member 1                      | 10808     | 2426.021662 | 0.368920128 | 0.447218473 | 0.824921488 | 0.409416166 | 0.999371363 | Not Sig |
| ENSG00000116985 | BMP8B        | bone morphogenetic protein 8b                                      | 656       | 117.4621242 | 0.369341097 | 0.71076185  | 0.519641138 | 0.60331372  | 0.999371363 | Not Sig |
| ENSG00000162073 | PAQR4        | progesterin and adipoQ receptor family member 4                    | 124222    | 393.7216423 | 0.369523758 | 0.544292734 | 0.678906286 | 0.497197243 | 0.999371363 | Not Sig |
| ENSG00000173141 | MRPL57       | mitochondrial ribosomal protein L57                                | 78988     | 468.1057889 | 0.369545537 | 0.554222026 | 0.66678248  | 0.504911085 | 0.999371363 | Not Sig |
| ENSG00000100138 | SNU13        | small nuclear ribonucleoprotein 13                                 | 4809      | 1139.017196 | 0.369584545 | 0.448307407 | 0.824399818 | 0.409712418 | 0.999371363 | Not Sig |
| ENSG00000100410 | PHF5A        | PHD finger protein 5A                                              | 84844     | 358.5145263 | 0.369808185 | 0.473717707 | 0.780650964 | 0.435007808 | 0.999371363 | Not Sig |
| ENSG00000199082 | MIR342       | microRNA 342                                                       | 442909    | 8.44244934  | 0.369879965 | 0.945737482 | 0.391102152 | 0.69572173  | 0.999371363 | Not Sig |
| ENSG00000164654 | MIOS         | meiosis regulator for oocyte development                           | 54468     | 851.1797036 | 0.369916052 | 0.50480677  | 0.732787424 | 0.463688093 | 0.999371363 | Not Sig |
| ENSG00000197057 | DTHD1        | death domain containing 1                                          | 401124    | 186.0292792 | 0.369992354 | 0.911977514 | 0.405703374 | 0.684960563 | 0.999371363 | Not Sig |
| ENSG00000091483 | FH           | fumarate hydratase                                                 | 2271      | 707.3292311 | 0.370047579 | 0.420815571 | 0.879358095 | 0.379207145 | 0.999371363 | Not Sig |
| ENSG00000227500 | SCAMP4       | secretory carrier membrane protein 4                               | 113178    | 866.879916  | 0.37022066  | 0.562678791 | 0.657960929 | 0.510563238 | 0.999371363 | Not Sig |
| ENSG00000242020 | NA           | NA                                                                 | NA        | 9.56991724  | 0.370257489 | 0.930215995 | 0.398033888 | 0.690605206 | 0.999371363 | Not Sig |
| ENSG00000011143 | MKS1         | Meckel syndrome, type 1                                            | 54903     | 316.3503614 | 0.370493815 | 0.419912866 | 0.882311176 | 0.377608554 | 0.999371363 | Not Sig |
| ENSG00000169762 | TAPT1        | transmembrane anterior posterior transformation 1                  | 202018    | 1047.798916 | 0.370512854 | 0.429936082 | 0.861785901 | 0.388805345 | 0.999371363 | Not Sig |
| ENSG00000130520 | LSM4         | LSM4 homolog, U6 small nuclear RNA and mRNA degradation associated | 25804     | 770.6963561 | 0.370695974 | 0.605070123 | 0.612649609 | 0.540108049 | 0.999371363 | Not Sig |
| ENSG00000163050 | COQ8A        | coenzyme Q8A                                                       | 56997     | 1001.654314 | 0.370873767 | 0.619654838 | 0.598516696 | 0.549495222 | 0.999371363 | Not Sig |
| ENSG00000234882 | NA           | NA                                                                 | NA        | 25.67122094 | 0.370897322 | 0.84479008  | 0.439040811 | 0.660631966 | 0.999371363 | Not Sig |
| ENSG00000225051 | NA           | NA                                                                 | NA        | 10.64850273 | 0.371043116 | 1.067553034 | 0.347564106 | 0.728167567 | 0.999371363 | Not Sig |
| ENSG00000224424 | PRKAR2A-AS1  | PRKAR2A antisense RNA 1                                            | 100506637 | 30.0633095  | 0.371261894 | 0.603367664 | 0.615316192 | 0.538345926 | 0.999371363 | Not Sig |
| ENSG00000261496 | NA           | NA                                                                 | NA        | 8.322716073 | 0.371378729 | 1.108321012 | 0.335082277 | 0.737563021 | 0.999371363 | Not Sig |
| ENSG00000116984 | MTR          | 5-methyltetrahydrofolate-homocysteine methyltransferase            | 4548      | 2425.380911 | 0.371630557 | 0.494670693 | 0.751268595 | 0.452491025 | 0.999371363 | Not Sig |

|                 |              |                                                             |           |             |             |             |             |             |             |         |
|-----------------|--------------|-------------------------------------------------------------|-----------|-------------|-------------|-------------|-------------|-------------|-------------|---------|
| ENSG00000179119 | SPTY2D1      | SPT2 chromatin protein domain containing 1                  | 144108    | 1333.759542 | 0.371702639 | 0.460796625 | 0.806652258 | 0.419866857 | 0.999371363 | Not Sig |
| ENSG00000111424 | VDR          | vitamin D receptor                                          | 7421      | 902.1758099 | 0.371892299 | 0.485223072 | 0.76643573  | 0.44341708  | 0.999371363 | Not Sig |
| ENSG00000179271 | GADD45GIP1   | GADD45G interacting protein 1                               | 90480     | 543.9174448 | 0.372050897 | 0.74548516  | 0.499072171 | 0.617728542 | 0.999371363 | Not Sig |
| ENSG00000255836 | NA           | NA                                                          | NA        | 11.35417068 | 0.372355619 | 1.085797982 | 0.342932687 | 0.731649101 | 0.999371363 | Not Sig |
| ENSG00000172086 | KRCC1        | lysine rich coiled-coil 1                                   | 51315     | 443.5082525 | 0.372710555 | 0.472947129 | 0.788059663 | 0.430661808 | 0.999371363 | Not Sig |
| ENSG00000137693 | YAP1         | Yes associated protein 1                                    | 10413     | 5186.61129  | 0.372833722 | 0.454610368 | 0.820117067 | 0.412149374 | 0.999371363 | Not Sig |
| ENSG00000100889 | PCK2         | phosphoenolpyruvate carboxykinase 2, mitochondrial          | 5106      | 640.1407824 | 0.373017962 | 0.650537804 | 0.573399362 | 0.566374322 | 0.999371363 | Not Sig |
| ENSG00000177156 | TALDO1       | transaldolase 1                                             | 6888      | 3247.446521 | 0.373020525 | 0.539170857 | 0.691841036 | 0.489037163 | 0.999371363 | Not Sig |
| ENSG00000260799 | NA           | NA                                                          | NA        | 22.97255092 | 0.373232132 | 0.653048619 | 0.571522734 | 0.567645355 | 0.999371363 | Not Sig |
| ENSG00000263179 | NA           | NA                                                          | NA        | 0.852983482 | 0.373250591 | 2.448887085 | 0.152416416 | 0.878858511 | NA          | NA      |
| ENSG00000259375 | NA           | NA                                                          | NA        | 6.807981463 | 0.373308223 | 1.250967414 | 0.298415625 | 0.765385965 | 0.999371363 | Not Sig |
| ENSG00000258056 | LOC105369779 | uncharacterized LOC105369779                                | 105369779 | 170.093645  | 0.373330538 | 0.602593597 | 0.619539504 | 0.535561006 | 0.999371363 | Not Sig |
| ENSG00000183760 | ACP7         | acid phosphatase 7, tartrate resistant (putative)           | 390928    | 1.873908017 | 0.373372373 | 1.883857016 | 0.198195707 | 0.842891946 | NA          | NA      |
| ENSG00000266127 | NA           | NA                                                          | NA        | 53.51834172 | 0.373491201 | 0.755550163 | 0.494330118 | 0.621073058 | 0.999371363 | Not Sig |
| ENSG00000163964 | PIGX         | phosphatidylinositol glycan anchor biosynthesis class X     | 54965     | 339.4574485 | 0.373691798 | 0.455210433 | 0.820920987 | 0.411691276 | 0.999371363 | Not Sig |
| ENSG00000123444 | KBTBD4       | kelch repeat and BTB domain containing 4                    | 55709     | 355.0914849 | 0.373904418 | 0.492391247 | 0.759364468 | 0.447634562 | 0.999371363 | Not Sig |
| ENSG00000248835 | NA           | NA                                                          | NA        | 72.26909513 | 0.374195341 | 0.581467536 | 0.643536084 | 0.519876309 | 0.999371363 | Not Sig |
| ENSG00000175866 | BAIAP2       | BAI1 associated protein 2                                   | 10458     | 1774.335041 | 0.374211133 | 0.73346585  | 0.510195714 | 0.609914355 | 0.999371363 | Not Sig |
| ENSG00000169230 | PRELID1      | PRELI domain containing 1                                   | 27166     | 1192.022965 | 0.374238623 | 0.533030609 | 0.702095934 | 0.482619338 | 0.999371363 | Not Sig |
| ENSG00000022976 | ZNF839       | zinc finger protein 839                                     | 55778     | 450.9737833 | 0.374325667 | 0.490535727 | 0.763095623 | 0.44540637  | 0.999371363 | Not Sig |
| ENSG00000170832 | USP32        | ubiquitin specific peptidase 32                             | 84669     | 2040.566093 | 0.374420525 | 0.470476396 | 0.795832753 | 0.426129252 | 0.999371363 | Not Sig |
| ENSG00000228649 | NA           | NA                                                          | NA        | 74.61980281 | 0.374474848 | 0.545675458 | 0.686259282 | 0.492549621 | 0.999371363 | Not Sig |
| ENSG00000108272 | NA           | NA                                                          | NA        | 140.4918269 | 0.374501223 | 0.449720013 | 0.832743066 | 0.40498965  | 0.999371363 | Not Sig |
| ENSG00000117691 | NENF         | neudesin neurotrophic factor                                | 29937     | 803.8077592 | 0.374773248 | 0.555435268 | 0.674737938 | 0.499842276 | 0.999371363 | Not Sig |
| ENSG00000265344 | NA           | NA                                                          | NA        | 1.223051293 | 0.374799925 | 2.220496881 | 0.168791016 | 0.865961025 | NA          | NA      |
| ENSG00000053372 | MRTO4        | MRT4 homolog, ribosome maturation factor                    | 51154     | 505.6300574 | 0.374864469 | 0.469261138 | 0.79883979  | 0.424383315 | 0.999371363 | Not Sig |
| ENSG00000240183 | NA           | NA                                                          | NA        | 6.229798309 | 0.374922792 | 1.024463275 | 0.365969968 | 0.714387485 | NA          | NA      |
| ENSG00000235934 | NA           | NA                                                          | NA        | 3.270164495 | 0.375210221 | 1.620341441 | 0.231562442 | 0.816877881 | NA          | NA      |
| ENSG00000231827 | LOC343052    | immunoglobulin superfamily DCC subclass member 3 pseudogene | 343052    | 1.541911975 | 0.375274903 | 2.356253368 | 0.159267636 | 0.873458018 | NA          | NA      |
| ENSG00000242732 | RTL5         | retrotransposon Gag like 5                                  | 340526    | 351.3640759 | 0.375288337 | 0.85678111  | 0.438021255 | 0.661370876 | 0.999371363 | Not Sig |
| ENSG00000141076 | UTP4         | UTP4, small subunit processome component                    | 84916     | 514.4466769 | 0.375578593 | 0.502473381 | 0.747459682 | 0.454786131 | 0.999371363 | Not Sig |
| ENSG00000210174 | NA           | NA                                                          | NA        | 4.795348198 | 0.375827869 | 1.790828504 | 0.209862568 | 0.833774938 | NA          | NA      |
| ENSG00000228794 | LINC01128    | long intergenic non-protein coding RNA 1128                 | 643837    | 299.9828611 | 0.376173109 | 0.501843484 | 0.749582531 | 0.453506175 | 0.999371363 | Not Sig |
| ENSG00000232480 | TGFB2-AS1    | TGFB2 antisense RNA 1 (head to head)                        | 728463    | 2.582564125 | 0.376337527 | 1.69185206  | 0.222441156 | 0.823970477 | NA          | NA      |
| ENSG00000106524 | ANKMY2       | ankyrin repeat and MYND domain containing 2                 | 57037     | 518.5920481 | 0.376418262 | 0.444154533 | 0.847493909 | 0.396719881 | 0.999371363 | Not Sig |



|                 |              |                                                              |           |             |             |             |             |             |             |         |
|-----------------|--------------|--------------------------------------------------------------|-----------|-------------|-------------|-------------|-------------|-------------|-------------|---------|
| ENSG00000176422 | SPRYD4       | SPRY domain containing 4                                     | 283377    | 191.2999891 | 0.37670306  | 0.453392038 | 0.830855041 | 0.406055524 | 0.999371363 | Not Sig |
| ENSG00000160219 | GAB3         | GRB2 associated binding protein 3                            | 139716    | 377.0062201 | 0.376814722 | 0.728492662 | 0.517252597 | 0.60497984  | 0.999371363 | Not Sig |
| ENSG00000170485 | NPAS2        | neuronal PAS domain protein 2                                | 4862      | 487.6052171 | 0.377108782 | 0.803780444 | 0.469168893 | 0.638948918 | 0.999371363 | Not Sig |
| ENSG00000263422 | NA           | NA                                                           | NA        | 5.307867211 | 0.377134935 | 1.090341862 | 0.345886871 | 0.729427736 | NA          | NA      |
| ENSG00000169989 | TIGD4        | tigger transposable element derived 4                        | 201798    | 27.22566824 | 0.377319744 | 0.592405818 | 0.636927816 | 0.524171863 | 0.999371363 | Not Sig |
| ENSG00000124693 | NA           | NA                                                           | NA        | 572.3553665 | 0.377433856 | 0.847410036 | 0.445396962 | 0.656032907 | 0.999371363 | Not Sig |
| ENSG00000232487 | NA           | NA                                                           | NA        | 12.31449927 | 0.377488146 | 0.960559426 | 0.392987811 | 0.694328484 | 0.999371363 | Not Sig |
| ENSG00000101294 | HM13         | histocompatibility minor 13                                  | 81502     | 2455.483393 | 0.377534642 | 0.51924101  | 0.727089414 | 0.467171183 | 0.999371363 | Not Sig |
| ENSG00000138678 | GPAT3        | glycerol-3-phosphate acyltransferase 3                       | 84803     | 193.6616083 | 0.377987564 | 0.489459682 | 0.77225475  | 0.43996356  | 0.999371363 | Not Sig |
| ENSG00000237548 | NA           | NA                                                           | NA        | 7.098369522 | 0.378010829 | 0.96283578  | 0.39260156  | 0.694613787 | 0.999371363 | Not Sig |
| ENSG00000270031 | NA           | NA                                                           | NA        | 6.4365139   | 0.378053473 | 1.147495744 | 0.329459586 | 0.741808336 | NA          | NA      |
| ENSG00000166402 | TUB          | tubby bipartite transcription factor                         | 7275      | 236.5646147 | 0.378089135 | 0.848388647 | 0.445655581 | 0.655846055 | 0.999371363 | Not Sig |
| ENSG00000175471 | MCTP1        | multiple C2 and transmembrane domain containing 1            | 79772     | 634.4378292 | 0.37824386  | 0.456613775 | 0.82836717  | 0.407462593 | 0.999371363 | Not Sig |
| ENSG00000263272 | NA           | NA                                                           | NA        | 2.136696153 | 0.378293469 | 2.120658001 | 0.178384949 | 0.858420669 | NA          | NA      |
| ENSG00000247796 | LOC257396    | uncharacterized LOC257396                                    | 257396    | 51.92921521 | 0.378425396 | 0.635871861 | 0.595128389 | 0.551757654 | 0.999371363 | Not Sig |
| ENSG00000245317 | LOC100996419 | uncharacterized LOC100996419                                 | 100996419 | 20.60016294 | 0.378555448 | 0.758361938 | 0.499175168 | 0.617655987 | 0.999371363 | Not Sig |
| ENSG00000147164 | SNX12        | sorting nexin 12                                             | 29934     | 774.1598696 | 0.378635577 | 0.468757512 | 0.807742953 | 0.419238571 | 0.999371363 | Not Sig |
| ENSG00000104450 | SPAG1        | sperm associated antigen 1                                   | 6674      | 314.2581812 | 0.378780813 | 0.450969411 | 0.839925733 | 0.400950029 | 0.999371363 | Not Sig |
| ENSG00000121067 | SPOP         | speckle type BTB/POZ protein                                 | 8405      | 1418.513013 | 0.378805286 | 0.474692456 | 0.798001488 | 0.424869627 | 0.999371363 | Not Sig |
| ENSG00000100122 | CRYBB1       | crystallin beta B1                                           | 1414      | 6.031247092 | 0.378893632 | 1.150926648 | 0.329207454 | 0.741998889 | NA          | NA      |
| ENSG00000197858 | GPAA1        | glycosylphosphatidylinositol anchor attachment 1             | 8733      | 1927.132017 | 0.379160338 | 0.582636581 | 0.650766446 | 0.515197263 | 0.999371363 | Not Sig |
| ENSG00000136908 | DPM2         | dolichyl-phosphate mannosyltransferase subunit 2, regulatory | 8818      | 545.657969  | 0.379218215 | 0.475352493 | 0.797762124 | 0.425008545 | 0.999371363 | Not Sig |
| ENSG00000076043 | REXO2        | RNA exonuclease 2                                            | 25996     | 530.5703263 | 0.379296958 | 0.530065795 | 0.715565806 | 0.474259494 | 0.999371363 | Not Sig |
| ENSG00000100095 | SEZ6L        | seizure related 6 homolog like                               | 23544     | 14.18608217 | 0.379587805 | 1.037846791 | 0.365745511 | 0.714554983 | 0.999371363 | Not Sig |
| ENSG00000226054 | NA           | NA                                                           | NA        | 1.31959236  | 0.380067314 | 2.384252782 | 0.159407306 | 0.873347983 | NA          | NA      |
| ENSG00000130347 | RTN4IP1      | reticulon 4 interacting protein 1                            | 84816     | 99.58219981 | 0.38042057  | 0.458880755 | 0.829018358 | 0.407094019 | 0.999371363 | Not Sig |
| ENSG00000198912 | Clorf174     | chromosome 1 open reading frame 174                          | 339448    | 318.873333  | 0.382067055 | 0.436048223 | 0.876203674 | 0.380919319 | 0.999371363 | Not Sig |
| ENSG00000115275 | MOGS         | mannosyl-oligosaccharide glucosidase                         | 7841      | 1423.683451 | 0.382139424 | 0.438804893 | 0.870864091 | 0.383828365 | 0.999371363 | Not Sig |
| ENSG00000238344 | NA           | NA                                                           | NA        | 3.222117898 | 0.382408684 | 1.379038877 | 0.277300873 | 0.781549089 | NA          | NA      |
| ENSG00000153786 | ZDHHC7       | zinc finger DHHC-type containing 7                           | 55625     | 1775.953068 | 0.382411378 | 0.444010569 | 0.861266385 | 0.389091345 | 0.999371363 | Not Sig |
| ENSG00000229204 | NA           | NA                                                           | NA        | 0.859421017 | 0.382534786 | 2.751445072 | 0.139030501 | 0.889426047 | NA          | NA      |
| ENSG00000233963 | NA           | NA                                                           | NA        | 0.859421017 | 0.382534786 | 2.751445072 | 0.139030501 | 0.889426047 | NA          | NA      |
| ENSG00000167965 | MLST8        | MTOR associated protein, LST8 homolog                        | 64223     | 491.9306514 | 0.38275435  | 0.481778278 | 0.794461618 | 0.426926745 | 0.999371363 | Not Sig |
| ENSG00000161526 | SAP30BP      | SAP30 binding protein                                        | 29115     | 1271.757142 | 0.383341578 | 0.573358103 | 0.668590147 | 0.50375696  | 0.999371363 | Not Sig |
| ENSG00000104783 | KCNN4        | potassium calcium-activated channel subfamily N member 4     | 3783      | 505.9545861 | 0.383369352 | 0.965081484 | 0.397240397 | 0.691190195 | 0.999371363 | Not Sig |

|                 |           |                                                  |        |             |             |             |             |             |             |         |
|-----------------|-----------|--------------------------------------------------|--------|-------------|-------------|-------------|-------------|-------------|-------------|---------|
| ENSG00000198618 | NA        | NA                                               | NA     | 531.8440232 | 0.383393607 | 0.499048509 | 0.768249179 | 0.442339161 | 0.999371363 | Not Sig |
| ENSG00000153363 | NA        | NA                                               | NA     | 164.7960436 | 0.383447303 | 0.656926882 | 0.583698603 | 0.559423108 | 0.999371363 | Not Sig |
| ENSG00000214087 | ARL16     | ADP ribosylation factor like GTPase 16           | 339231 | 329.2143746 | 0.383520305 | 0.450779812 | 0.850792993 | 0.394884355 | 0.999371363 | Not Sig |
| ENSG00000204228 | HSD17B8   | hydroxysteroid 17-beta dehydrogenase 8           | 7923   | 252.1626081 | 0.383758809 | 0.757475913 | 0.506628398 | 0.612415579 | 0.999371363 | Not Sig |
| ENSG00000164494 | PDSS2     | decaprenyl diphosphate synthase subunit 2        | 57107  | 397.8341423 | 0.383881403 | 0.410766481 | 0.934548997 | 0.350020774 | 0.999371363 | Not Sig |
| ENSG00000034693 | PEX3      | peroxisomal biogenesis factor 3                  | 8504   | 270.1109451 | 0.383955841 | 0.488926392 | 0.785303979 | 0.432275363 | 0.999371363 | Not Sig |
| ENSG00000110148 | CCKBR     | cholecystokinin B receptor                       | 887    | 0.769577776 | 0.383968375 | 3.255590038 | 0.117941255 | 0.906114205 | NA          | NA      |
| ENSG00000214702 | NA        | NA                                               | NA     | 0.769577776 | 0.383968375 | 3.255590038 | 0.117941255 | 0.906114205 | NA          | NA      |
| ENSG00000138078 | PREPL     | prolyl endopeptidase-like                        | 9581   | 1974.008638 | 0.384218908 | 0.493857722 | 0.77799514  | 0.436571878 | 0.999371363 | Not Sig |
| ENSG00000122218 | COPA      | coatamer protein complex subunit alpha           | 1314   | 6598.710662 | 0.384361015 | 0.460583619 | 0.834508652 | 0.403994414 | 0.999371363 | Not Sig |
| ENSG00000250410 | NA        | NA                                               | NA     | 35.22883852 | 0.384553081 | 0.685377225 | 0.561082375 | 0.574741383 | 0.999371363 | Not Sig |
| ENSG00000033627 | ATP6VOA1  | ATPase H+ transporting V0 subunit a1             | 535    | 1994.603893 | 0.384783903 | 0.400524243 | 0.960700656 | 0.336702701 | 0.999371363 | Not Sig |
| ENSG00000225673 | NA        | NA                                               | NA     | 16.02550246 | 0.384833018 | 0.94086255  | 0.409021507 | 0.682523878 | 0.999371363 | Not Sig |
| ENSG00000258661 | NA        | NA                                               | NA     | 6.003156904 | 0.384977427 | 1.609809547 | 0.239144703 | 0.810993379 | NA          | NA      |
| ENSG00000143420 | ENSA      | endosulfine alpha                                | 2029   | 3441.75138  | 0.385033281 | 0.453040458 | 0.849887188 | 0.395387809 | 0.999371363 | Not Sig |
| ENSG00000175505 | CLCF1     | cardiotrophin like cytokine factor 1             | 23529  | 234.008338  | 0.385104316 | 0.612205827 | 0.629043858 | 0.529320344 | 0.999371363 | Not Sig |
| ENSG00000167775 | CD320     | CD320 molecule                                   | 51293  | 487.5590612 | 0.385136823 | 0.623394521 | 0.617805915 | 0.536703284 | 0.999371363 | Not Sig |
| ENSG00000126698 | DNAJC8    | DnaJ heat shock protein family (Hsp40) member C8 | 22826  | 1346.244259 | 0.385491738 | 0.456045771 | 0.845291771 | 0.397947954 | 0.999371363 | Not Sig |
| ENSG00000119471 | HSDL2     | hydroxysteroid dehydrogenase like 2              | 84263  | 919.6824178 | 0.385501775 | 0.395037816 | 0.975860435 | 0.329133631 | 0.999371363 | Not Sig |
| ENSG00000269951 | NA        | NA                                               | NA     | 106.8850354 | 0.385732157 | 0.753722239 | 0.511769637 | 0.608812243 | 0.999371363 | Not Sig |
| ENSG00000095139 | ARCN1     | archain 1                                        | 372    | 3443.476009 | 0.386031778 | 0.433229482 | 0.891056113 | 0.372899068 | 0.999371363 | Not Sig |
| ENSG00000160087 | UBE2J2    | ubiquitin conjugating enzyme E2 J2               | 118424 | 1006.31383  | 0.386099717 | 0.458095484 | 0.842836767 | 0.399319742 | 0.999371363 | Not Sig |
| ENSG00000237709 | NA        | NA                                               | NA     | 1.229488829 | 0.386161314 | 2.219431724 | 0.173991076 | 0.861872476 | NA          | NA      |
| ENSG00000107175 | CREB3     | cAMP responsive element binding protein 3        | 10488  | 749.4516085 | 0.386206364 | 0.548048665 | 0.704693559 | 0.481000096 | 0.999371363 | Not Sig |
| ENSG00000235560 | NA        | NA                                               | NA     | 35.95375999 | 0.386209084 | 0.715642349 | 0.539667732 | 0.589426197 | 0.999371363 | Not Sig |
| ENSG00000185104 | FAF1      | Fas associated factor 1                          | 11124  | 1271.137132 | 0.386574783 | 0.550114954 | 0.702716369 | 0.482232524 | 0.999371363 | Not Sig |
| ENSG00000025800 | KPNA6     | karyopherin subunit alpha 6                      | 23633  | 2852.532829 | 0.386664761 | 0.418198925 | 0.924595302 | 0.355176458 | 0.999371363 | Not Sig |
| ENSG00000136504 | KAT7      | lysine acetyltransferase 7                       | 11143  | 1584.635797 | 0.386862947 | 0.416509607 | 0.928821186 | 0.352981763 | 0.999371363 | Not Sig |
| ENSG00000180769 | WDFY3-AS2 | WDFY3 antisense RNA 2                            | 404201 | 72.09960584 | 0.386924633 | 0.589810726 | 0.656014914 | 0.511814528 | 0.999371363 | Not Sig |
| ENSG00000158806 | NPM2      | nucleophosmin/nucleoplasmin 2                    | 10361  | 37.78534401 | 0.386964804 | 0.973521855 | 0.397489591 | 0.691006461 | 0.999371363 | Not Sig |
| ENSG00000117906 | RCN2      | reticulocalbin 2                                 | 5955   | 1288.397022 | 0.387339596 | 0.452469734 | 0.856056365 | 0.391966603 | 0.999371363 | Not Sig |
| ENSG00000258810 | NA        | NA                                               | NA     | 6.145982979 | 0.387435614 | 1.265560303 | 0.306137616 | 0.759499868 | NA          | NA      |
| ENSG00000181817 | LSM10     | LSM10, U7 small nuclear RNA associated           | 84967  | 337.6834654 | 0.387568495 | 0.564948542 | 0.686024418 | 0.492697711 | 0.999371363 | Not Sig |
| ENSG00000160753 | RUSC1     | RUN and SH3 domain containing 1                  | 23623  | 598.7078548 | 0.38805492  | 0.646572025 | 0.600172764 | 0.548391103 | 0.999371363 | Not Sig |
| ENSG00000254986 | DPP3      | dipeptidyl peptidase 3                           | 10072  | 787.8533407 | 0.388468465 | 0.469310561 | 0.827742858 | 0.407816142 | 0.999371363 | Not Sig |

|                 |               |                                                                   |           |             |             |             |             |             |             |         |
|-----------------|---------------|-------------------------------------------------------------------|-----------|-------------|-------------|-------------|-------------|-------------|-------------|---------|
| ENSG00000235875 | ARHGEF7-AS2   | ARHGEF7 antisense RNA 2                                           | 100874238 | 1.683222636 | 0.388531776 | 1.761299967 | 0.220593757 | 0.825408763 | NA          | NA      |
| ENSG00000233961 | NA            | NA                                                                | NA        | 56.0858829  | 0.388838391 | 0.513199416 | 0.757675047 | 0.448645541 | 0.999371363 | Not Sig |
| ENSG00000137992 | DBT           | dihydroipoamide branched chain transacylase E2                    | 1629      | 965.549444  | 0.388848701 | 0.579232002 | 0.67131771  | 0.502018155 | 0.999371363 | Not Sig |
| ENSG00000100664 | EIF5          | eukaryotic translation initiation factor 5                        | 1983      | 4132.429715 | 0.389056733 | 0.411504709 | 0.945449043 | 0.344429674 | 0.999371363 | Not Sig |
| ENSG00000127419 | TMEM175       | transmembrane protein 175                                         | 84286     | 559.3434929 | 0.389211193 | 0.69294311  | 0.561678422 | 0.574335138 | 0.999371363 | Not Sig |
| ENSG00000100532 | CGRRF1        | cell growth regulator with ring finger domain 1                   | 10668     | 173.920461  | 0.389597857 | 0.436790137 | 0.891956627 | 0.372416181 | 0.999371363 | Not Sig |
| ENSG00000162415 | ZSWIM5        | zinc finger SWIM-type containing 5                                | 57643     | 367.9958316 | 0.389740807 | 0.484983355 | 0.803616874 | 0.421618275 | 0.999371363 | Not Sig |
| ENSG00000111328 | CDK2AP1       | cyclin dependent kinase 2 associated protein 1                    | 8099      | 597.2207285 | 0.390667099 | 0.432400662 | 0.903484043 | 0.366269053 | 0.999371363 | Not Sig |
| ENSG00000124562 | SNRPC         | small nuclear ribonucleoprotein polypeptide C                     | 6631      | 555.9878959 | 0.390801824 | 0.418061003 | 0.93479617  | 0.349893354 | 0.999371363 | Not Sig |
| ENSG00000238541 | NA            | NA                                                                | NA        | 17.62411166 | 0.391306782 | 0.741647582 | 0.527618227 | 0.59776434  | 0.999371363 | Not Sig |
| ENSG00000148175 | STOM          | stomatin                                                          | 2040      | 4840.572958 | 0.391333129 | 0.644125069 | 0.607542149 | 0.543491179 | 0.999371363 | Not Sig |
| ENSG00000095397 | WHRN          | whirlin                                                           | 25861     | 378.202715  | 0.391535082 | 0.5520796   | 0.709200416 | 0.478200115 | 0.999371363 | Not Sig |
| ENSG00000168970 | JMJD7-PLA2G4B | JMJD7-PLA2G4B readthrough                                         | 8681      | 200.4274186 | 0.391724432 | 0.646578796 | 0.605841755 | 0.54461984  | 0.999371363 | Not Sig |
| ENSG00000129559 | NEDD8         | neural precursor cell expressed, developmentally down-regulated 8 | 4738      | 364.6768461 | 0.39198493  | 0.451706428 | 0.867786921 | 0.385510991 | 0.999371363 | Not Sig |
| ENSG00000227769 | NA            | NA                                                                | NA        | 5.050825021 | 0.39199586  | 1.51117461  | 0.259398125 | 0.795328076 | NA          | NA      |
| ENSG00000156110 | ADK           | adenosine kinase                                                  | 132       | 690.0685777 | 0.392421547 | 0.461460216 | 0.850390855 | 0.395107819 | 0.999371363 | Not Sig |
| ENSG00000261693 | NA            | NA                                                                | NA        | 6.942142002 | 0.392568281 | 1.321490218 | 0.297064841 | 0.766417006 | 0.999371363 | Not Sig |
| ENSG00000135945 | REV1          | REV1, DNA directed polymerase                                     | 51455     | 1499.312859 | 0.392698137 | 0.422805677 | 0.928791069 | 0.352997374 | 0.999371363 | Not Sig |
| ENSG00000134250 | NOTCH2        | notch 2                                                           | 4853      | 7858.262379 | 0.392765224 | 0.463305145 | 0.847746303 | 0.396579273 | 0.999371363 | Not Sig |
| ENSG00000002330 | BAD           | BCL2 associated agonist of cell death                             | 572       | 700.9257759 | 0.392843365 | 0.707189975 | 0.555499059 | 0.578553354 | 0.999371363 | Not Sig |
| ENSG00000158850 | B4GALT3       | beta-1,4-galactosyltransferase 3                                  | 8703      | 790.6471613 | 0.392958886 | 0.451806881 | 0.86974967  | 0.384437221 | 0.999371363 | Not Sig |
| ENSG00000007516 | BAIAP3        | BAI1 associated protein 3                                         | 8938      | 545.6047923 | 0.393539458 | 0.85853985  | 0.458382285 | 0.646677817 | 0.999371363 | Not Sig |
| ENSG00000201010 | NA            | NA                                                                | NA        | 1.101313529 | 0.393698242 | 2.526104054 | 0.15585195  | 0.876149721 | NA          | NA      |
| ENSG00000102870 | ZNF629        | zinc finger protein 629                                           | 23361     | 1176.181801 | 0.393863681 | 0.504530124 | 0.78065444  | 0.435005763 | 0.999371363 | Not Sig |
| ENSG00000064489 | BORCS8-MEF2B  | BORCS8-MEF2B readthrough                                          | 4207      | 3.379320343 | 0.393967858 | 1.310163861 | 0.30070121  | 0.763642346 | NA          | NA      |
| ENSG00000115289 | PCGF1         | polycomb group ring finger 1                                      | 84759     | 212.1484658 | 0.393985588 | 0.509244787 | 0.773666414 | 0.439128086 | 0.999371363 | Not Sig |
| ENSG00000215375 | MYL5          | myosin light chain 5                                              | 4636      | 152.9684225 | 0.394005492 | 0.652697965 | 0.603656688 | 0.546071915 | 0.999371363 | Not Sig |
| ENSG00000131873 | CHSY1         | chondroitin sulfate synthase 1                                    | 22856     | 1302.047156 | 0.394078803 | 0.492504213 | 0.800153162 | 0.423622063 | 0.999371363 | Not Sig |
| ENSG00000183784 | C9orf66       | chromosome 9 open reading frame 66                                | 157983    | 13.32814604 | 0.394188964 | 0.793802588 | 0.496583117 | 0.619483061 | 0.999371363 | Not Sig |
| ENSG00000256628 | ZBTB11-AS1    | ZBTB11 antisense RNA 1                                            | 100009676 | 154.566184  | 0.394452035 | 0.567384015 | 0.695211751 | 0.486922609 | 0.999371363 | Not Sig |
| ENSG00000148219 | ASTN2         | astrotactin 2                                                     | 23245     | 145.3354977 | 0.394527115 | 0.632851371 | 0.623411962 | 0.533013839 | 0.999371363 | Not Sig |
| ENSG00000265791 | NA            | NA                                                                | NA        | 4.857139219 | 0.394812908 | 1.149582722 | 0.34344019  | 0.731267329 | NA          | NA      |
| ENSG00000068912 | ERLEC1        | endoplasmic reticulum lectin 1                                    | 27248     | 1678.881295 | 0.39560429  | 0.508958462 | 0.777282076 | 0.436992368 | 0.999371363 | Not Sig |
| ENSG00000196934 | NA            | NA                                                                | NA        | 4.217281393 | 0.395712635 | 1.230794063 | 0.321510029 | 0.747823913 | NA          | NA      |
| ENSG00000171714 | ANO5          | anoctamin 5                                                       | 203859    | 311.7284449 | 0.395747507 | 0.95096023  | 0.416155687 | 0.677296083 | 0.999371363 | Not Sig |

|                 |         |                                                   |        |             |             |             |             |             |             |         |
|-----------------|---------|---------------------------------------------------|--------|-------------|-------------|-------------|-------------|-------------|-------------|---------|
| ENSG00000134697 | GNL2    | G protein nucleolar 2                             | 29889  | 1113.999903 | 0.396084446 | 0.446832097 | 0.88642792  | 0.37538698  | 0.999371363 | Not Sig |
| ENSG00000255508 | NA      | NA                                                | NA     | 7.61774137  | 0.396099655 | 1.301884131 | 0.304251081 | 0.760936611 | 0.999371363 | Not Sig |
| ENSG00000261279 | ULK4P1  | ULK4 pseudogene 1                                 | 89838  | 1.841709442 | 0.396295335 | 1.846382587 | 0.21463338  | 0.830053167 | NA          | NA      |
| ENSG00000270578 | NA      | NA                                                | NA     | 3.569745435 | 0.396388484 | 1.868210718 | 0.212175468 | 0.831970144 | NA          | NA      |
| ENSG00000137285 | TUBB2B  | tubulin beta 2B class IIB                         | 347733 | 49.23755953 | 0.396474072 | 0.908109283 | 0.436592908 | 0.662406607 | 0.999371363 | Not Sig |
| ENSG00000134375 | TIMM17A | translocase of inner mitochondrial membrane 17A   | 10440  | 568.6526319 | 0.39713953  | 0.473795123 | 0.838209408 | 0.401913104 | 0.999371363 | Not Sig |
| ENSG00000227939 | NA      | NA                                                | NA     | 9.852588678 | 0.397165528 | 1.027565723 | 0.38651107  | 0.699118205 | 0.999371363 | Not Sig |
| ENSG00000123136 | DDX39A  | DEXD-box helicase 39A                             | 10212  | 594.343536  | 0.397322445 | 0.60351957  | 0.658342273 | 0.51031822  | 0.999371363 | Not Sig |
| ENSG00000213614 | HEXA    | hexosaminidase subunit alpha                      | 3073   | 2035.375664 | 0.397371722 | 0.409515873 | 0.970345104 | 0.331874502 | 0.999371363 | Not Sig |
| ENSG00000267336 | NA      | NA                                                | NA     | 2.430056085 | 0.397588038 | 1.544984334 | 0.257341145 | 0.796915432 | NA          | NA      |
| ENSG00000130638 | ATXN10  | ataxin 10                                         | 25814  | 1799.867529 | 0.397617103 | 0.440462627 | 0.902726085 | 0.366671289 | 0.999371363 | Not Sig |
| ENSG00000202496 | NA      | NA                                                | NA     | 17.92245159 | 0.397620952 | 0.939954273 | 0.423021591 | 0.672279508 | 0.999371363 | Not Sig |
| ENSG00000184857 | TMEM186 | transmembrane protein 186                         | 25880  | 140.777045  | 0.397987346 | 0.463022669 | 0.859541817 | 0.39004166  | 0.999371363 | Not Sig |
| ENSG00000106367 | AP1S1   | adaptor related protein complex 1 sigma 1 subunit | 1174   | 558.0723799 | 0.398042738 | 0.430060195 | 0.925551219 | 0.354679254 | 0.999371363 | Not Sig |
| ENSG00000272869 | NA      | NA                                                | NA     | 2.465675483 | 0.398063296 | 1.491117725 | 0.266956317 | 0.789502795 | NA          | NA      |
| ENSG00000176222 | ZNF404  | zinc finger protein 404                           | 342908 | 44.03085821 | 0.398117256 | 1.008726841 | 0.394673007 | 0.693084226 | 0.999371363 | Not Sig |
| ENSG00000260093 | NA      | NA                                                | NA     | 4.291382185 | 0.398179819 | 1.358143814 | 0.293179423 | 0.769385012 | NA          | NA      |
| ENSG00000100216 | TOMM22  | translocase of outer mitochondrial membrane 22    | 56993  | 738.9412387 | 0.398370734 | 0.53076541  | 0.75055896  | 0.452918128 | 0.999371363 | Not Sig |
| ENSG00000185722 | ANKFY1  | ankyrin repeat and FYVE domain containing 1       | 51479  | 3063.670908 | 0.398397525 | 0.440966688 | 0.903463995 | 0.366279689 | 0.999371363 | Not Sig |
| ENSG00000015133 | CCDC88C | coiled-coil domain containing 88C                 | 440193 | 2152.520062 | 0.398428441 | 0.637310692 | 0.625171436 | 0.531858547 | 0.999371363 | Not Sig |
| ENSG00000273361 | NA      | NA                                                | NA     | 18.70336803 | 0.398463532 | 0.756332176 | 0.526836679 | 0.598307009 | 0.999371363 | Not Sig |
| ENSG00000233862 | NA      | NA                                                | NA     | 3.167739337 | 0.398488809 | 1.376053513 | 0.289588163 | 0.772131324 | NA          | NA      |
| ENSG00000184990 | SIVA1   | SIVA1 apoptosis inducing factor                   | 10572  | 808.8908924 | 0.398662599 | 0.579088901 | 0.688430738 | 0.491181573 | 0.999371363 | Not Sig |
| ENSG00000146535 | GNA12   | G protein subunit alpha 12                        | 2768   | 1990.500717 | 0.398750816 | 0.492918105 | 0.808959564 | 0.418538405 | 0.999371363 | Not Sig |
| ENSG00000096654 | ZNF184  | zinc finger protein 184                           | 7738   | 343.8382121 | 0.398829174 | 0.520874858 | 0.765690968 | 0.443860203 | 0.999371363 | Not Sig |
| ENSG00000271361 | NA      | NA                                                | NA     | 19.84719362 | 0.399068206 | 1.039396131 | 0.383942362 | 0.701021168 | 0.999371363 | Not Sig |
| ENSG00000154240 | CEP112  | centrosomal protein 112                           | 201134 | 668.8530403 | 0.399402756 | 0.515055853 | 0.775455231 | 0.43807071  | 0.999371363 | Not Sig |
| ENSG00000143393 | PI4KB   | phosphatidylinositol 4-kinase beta                | 5298   | 2027.339892 | 0.399876036 | 0.517198068 | 0.77315841  | 0.439428636 | 0.999371363 | Not Sig |
| ENSG00000154640 | BTG3    | BTG anti-proliferation factor 3                   | 10950  | 743.4773112 | 0.399886343 | 0.538911043 | 0.742026627 | 0.458071203 | 0.999371363 | Not Sig |
| ENSG00000125354 | 6-Sep   | septin 6                                          | 23157  | 875.6373808 | 0.400041    | 0.607376749 | 0.65863733  | 0.510128685 | 0.999371363 | Not Sig |
| ENSG00000158470 | B4GALT5 | beta-1,4-galactosyltransferase 5                  | 9334   | 1741.694275 | 0.400127589 | 0.438536074 | 0.91241659  | 0.36154946  | 0.999371363 | Not Sig |
| ENSG00000131467 | PSME3   | proteasome activator subunit 3                    | 10197  | 1469.458858 | 0.400193878 | 0.377535026 | 1.06001788  | 0.289136465 | 0.999371363 | Not Sig |
| ENSG00000106052 | TAX1BP1 | Tax1 binding protein 1                            | 8887   | 4997.329539 | 0.400730677 | 0.558754418 | 0.717185697 | 0.473259523 | 0.999371363 | Not Sig |
| ENSG00000063601 | MTMR1   | myotubularin related protein 1                    | 8776   | 973.0043582 | 0.400980199 | 0.430923078 | 0.930514562 | 0.352104728 | 0.999371363 | Not Sig |
| ENSG00000205100 | NA      | NA                                                | NA     | 0.830239154 | 0.401177583 | 2.768859814 | 0.144889091 | 0.884798439 | NA          | NA      |

|                 |              |                                                                 |           |             |             |             |             |             |             |         |
|-----------------|--------------|-----------------------------------------------------------------|-----------|-------------|-------------|-------------|-------------|-------------|-------------|---------|
| ENSG00000204923 | FBX048       | F-box protein 48                                                | 554251    | 102.3047277 | 0.401211791 | 0.531643426 | 0.754663317 | 0.450451022 | 0.999371363 | Not Sig |
| ENSG00000223960 | LOC101927027 | uncharacterized LOC101927027                                    | 101927027 | 222.8132401 | 0.401240574 | 0.674475796 | 0.594892473 | 0.551915349 | 0.999371363 | Not Sig |
| ENSG00000087157 | PGS1         | phosphatidylglycerophosphate synthase 1                         | 9489      | 1320.139423 | 0.401272312 | 0.572559732 | 0.700839214 | 0.483403363 | 0.999371363 | Not Sig |
| ENSG00000258940 | LOC100288846 | uncharacterized LOC100288846                                    | 100288846 | 9.042482326 | 0.401302846 | 0.882671636 | 0.45464568  | 0.649364166 | 0.999371363 | Not Sig |
| ENSG00000168803 | ADAL         | adenosine deaminase like                                        | 161823    | 145.8433796 | 0.401318257 | 0.464627888 | 0.863741215 | 0.387730067 | 0.999371363 | Not Sig |
| ENSG00000201317 | NA           | NA                                                              | NA        | 3.935208121 | 0.401572136 | 1.475122725 | 0.272229645 | 0.785445449 | NA          | NA      |
| ENSG00000132581 | SDF2         | stromal cell derived factor 2                                   | 6388      | 665.0351494 | 0.401792047 | 0.42164845  | 0.952907682 | 0.340636848 | 0.999371363 | Not Sig |
| ENSG00000163491 | NEK10        | NIMA related kinase 10                                          | 152110    | 145.5586136 | 0.401858431 | 0.490959377 | 0.818516664 | 0.413062231 | 0.999371363 | Not Sig |
| ENSG00000141378 | PTRH2        | peptidyl-tRNA hydrolase 2                                       | 51651     | 266.0441257 | 0.401997223 | 0.577844936 | 0.695683561 | 0.486627023 | 0.999371363 | Not Sig |
| ENSG00000163155 | LYSMD1       | LysM domain containing 1                                        | 388695    | 240.7569866 | 0.401999097 | 0.472505739 | 0.850781407 | 0.394890792 | 0.999371363 | Not Sig |
| ENSG00000229586 | NA           | NA                                                              | NA        | 0.776015311 | 0.402130799 | 3.249547622 | 0.123749779 | 0.901513397 | NA          | NA      |
| ENSG00000213846 | NA           | NA                                                              | NA        | 51.69521468 | 0.402321221 | 0.745194367 | 0.53988763  | 0.589274529 | 0.999371363 | Not Sig |
| ENSG00000272047 | GTF2H5       | general transcription factor IIH subunit 5                      | 404672    | 232.8983246 | 0.402799754 | 0.476360427 | 0.845577701 | 0.39778837  | 0.999371363 | Not Sig |
| ENSG00000117362 | APH1A        | aph-1 homolog A, gamma-secretase subunit                        | 51107     | 2647.570848 | 0.402922861 | 0.488099553 | 0.825493198 | 0.409091643 | 0.999371363 | Not Sig |
| ENSG00000143851 | PTPN7        | protein tyrosine phosphatase, non-receptor type 7               | 5778      | 289.4443617 | 0.402997388 | 0.680491741 | 0.592214959 | 0.553706654 | 0.999371363 | Not Sig |
| ENSG00000206589 | NA           | NA                                                              | NA        | 2.050273735 | 0.403024234 | 1.898273573 | 0.212310933 | 0.831864466 | NA          | NA      |
| ENSG00000138073 | PREB         | prolactin regulatory element binding                            | 10113     | 910.0898171 | 0.403210504 | 0.512919469 | 0.786108791 | 0.431803755 | 0.999371363 | Not Sig |
| ENSG00000168421 | RHOH         | ras homolog family member H                                     | 399       | 303.968653  | 0.403320275 | 0.797498602 | 0.505731639 | 0.613045054 | 0.999371363 | Not Sig |
| ENSG00000254506 | NA           | NA                                                              | NA        | 5.874742989 | 0.403424133 | 1.081535938 | 0.373010382 | 0.709140717 | NA          | NA      |
| ENSG00000205795 | CYS1         | cystin 1                                                        | 192668    | 262.3799277 | 0.403691173 | 1.120332512 | 0.36033157  | 0.718599193 | 0.999371363 | Not Sig |
| ENSG00000108384 | RAD51C       | RAD51 paralog C                                                 | 5889      | 162.7691873 | 0.403817915 | 0.477672678 | 0.845386252 | 0.397895218 | 0.999371363 | Not Sig |
| ENSG00000174327 | SLC16A13     | solute carrier family 16 member 13                              | 201232    | 153.5906685 | 0.40394904  | 0.481318798 | 0.839254652 | 0.401326425 | 0.999371363 | Not Sig |
| ENSG00000250155 | NA           | NA                                                              | NA        | 13.02631216 | 0.404090565 | 0.932816574 | 0.433194023 | 0.66487382  | 0.999371363 | Not Sig |
| ENSG00000174851 | YIF1A        | Yipl interacting factor homolog A, membrane trafficking protein | 10897     | 743.7722252 | 0.404148913 | 0.411759535 | 0.981516828 | 0.32633794  | 0.999371363 | Not Sig |
| ENSG00000140470 | ADAMTS17     | ADAM metalloproteinase with thrombospondin type 1 motif 17      | 170691    | 175.117984  | 0.40433752  | 0.881411476 | 0.45873866  | 0.646421848 | 0.999371363 | Not Sig |
| ENSG00000125629 | INSIG2       | insulin induced gene 2                                          | 51141     | 642.916525  | 0.404597336 | 0.587033494 | 0.689223597 | 0.490682569 | 0.999371363 | Not Sig |
| ENSG00000166794 | PPIB         | peptidylprolyl isomerase B                                      | 5479      | 6151.076551 | 0.404862211 | 0.466206226 | 0.868418714 | 0.385165154 | 0.999371363 | Not Sig |
| ENSG00000146038 | DCDC2        | doublecortin domain containing 2                                | 51473     | 257.7326135 | 0.404955618 | 0.570479054 | 0.709851861 | 0.477796005 | 0.999371363 | Not Sig |
| ENSG00000245614 | DDX11-AS1    | DDX11 antisense RNA 1                                           | 100506660 | 19.39960544 | 0.405153986 | 0.973206424 | 0.416308376 | 0.677184364 | 0.999371363 | Not Sig |
| ENSG00000136634 | IL10         | interleukin 10                                                  | 3586      | 23.3379544  | 0.405232759 | 0.789090079 | 0.51354436  | 0.607570589 | 0.999371363 | Not Sig |
| ENSG00000243794 | NA           | NA                                                              | NA        | 3.337556564 | 0.405269347 | 1.906289596 | 0.212595897 | 0.831642172 | NA          | NA      |
| ENSG00000065413 | ANKRD44      | ankyrin repeat domain 44                                        | 91526     | 1419.981668 | 0.40567773  | 0.641471365 | 0.632417521 | 0.527114088 | 0.999371363 | Not Sig |
| ENSG00000165621 | OXGR1        | oxoglutarate receptor 1                                         | 27199     | 2.662494347 | 0.405860096 | 1.671514581 | 0.242809785 | 0.808152755 | NA          | NA      |
| ENSG00000172432 | GTPBP2       | GTP binding protein 2                                           | 54676     | 1465.064497 | 0.40591576  | 0.528194262 | 0.768497104 | 0.442191911 | 0.999371363 | Not Sig |
| ENSG00000196459 | TRAPPC2      | trafficking protein particle complex 2                          | 6399      | 353.4943492 | 0.406553496 | 0.612345068 | 0.663928751 | 0.506735913 | 0.999371363 | Not Sig |

|                 |           |                                                                                |           |             |             |             |             |             |             |         |
|-----------------|-----------|--------------------------------------------------------------------------------|-----------|-------------|-------------|-------------|-------------|-------------|-------------|---------|
| ENSG00000225131 | NA        | NA                                                                             | NA        | 6.69541694  | 0.406747026 | 1.019329617 | 0.399033855 | 0.689868259 | 0.999371363 | Not Sig |
| ENSG00000116353 | MECR      | mitochondrial trans-2-enoyl-CoA reductase                                      | 51102     | 353.3049973 | 0.407411477 | 0.461592635 | 0.882621269 | 0.377440933 | 0.999371363 | Not Sig |
| ENSG00000259826 | NA        | NA                                                                             | NA        | 24.82906444 | 0.407695363 | 0.769621855 | 0.529734648 | 0.596295922 | 0.999371363 | Not Sig |
| ENSG00000235084 | NA        | NA                                                                             | NA        | 11.95862109 | 0.407745852 | 0.866280047 | 0.470685956 | 0.637865015 | 0.999371363 | Not Sig |
| ENSG00000197935 | ZNF311    | zinc finger protein 311                                                        | 282890    | 70.0063895  | 0.407750192 | 0.750575115 | 0.543250347 | 0.586957446 | 0.999371363 | Not Sig |
| ENSG00000070540 | WIPI1     | WD repeat domain, phosphoinositide interacting 1                               | 55062     | 591.4507468 | 0.40778021  | 0.45848877  | 0.889400649 | 0.373787797 | 0.999371363 | Not Sig |
| ENSG00000153406 | NMRAL1    | NmrA like redox sensor 1                                                       | 57407     | 691.7734416 | 0.408146284 | 0.494255848 | 0.825779373 | 0.408929257 | 0.999371363 | Not Sig |
| ENSG00000180398 | MCFD2     | multiple coagulation factor deficiency 2                                       | 90411     | 2250.352674 | 0.40842157  | 0.44117622  | 0.925756086 | 0.354572753 | 0.999371363 | Not Sig |
| ENSG00000116459 | ATP5F1    | ATP synthase, H <sup>+</sup> transporting, mitochondrial Fo complex subunit B1 | 515       | 1390.41084  | 0.408610903 | 0.468835945 | 0.871543463 | 0.383457485 | 0.999371363 | Not Sig |
| ENSG00000150681 | RGS18     | regulator of G protein signaling 18                                            | 64407     | 63.54777525 | 0.408616267 | 0.768405709 | 0.531771514 | 0.594884254 | 0.999371363 | Not Sig |
| ENSG00000144028 | SNRNP200  | small nuclear ribonucleoprotein U5 subunit 200                                 | 23020     | 7237.378577 | 0.408800076 | 0.428463641 | 0.954106805 | 0.340029582 | 0.999371363 | Not Sig |
| ENSG00000162194 | LBHD1     | LBH domain containing 1                                                        | 79081     | 263.2265983 | 0.408820558 | 0.431843771 | 0.946686245 | 0.343798681 | 0.999371363 | Not Sig |
| ENSG00000198521 | ZNF43     | zinc finger protein 43                                                         | 7594      | 566.8277615 | 0.408826488 | 0.570109054 | 0.717102254 | 0.473311005 | 0.999371363 | Not Sig |
| ENSG00000123094 | RASSF8    | Ras association domain family member 8                                         | 11228     | 788.1170757 | 0.409027577 | 0.680199006 | 0.601335158 | 0.547616777 | 0.999371363 | Not Sig |
| ENSG00000205913 | SRRM2-AS1 | SRRM2 antisense RNA 1                                                          | 100128788 | 64.42946249 | 0.40908357  | 0.661239779 | 0.618661464 | 0.536139402 | 0.999371363 | Not Sig |
| ENSG00000139572 | GPR84     | G protein-coupled receptor 84                                                  | 53831     | 31.51767355 | 0.409138946 | 0.759791607 | 0.538488372 | 0.590239931 | 0.999371363 | Not Sig |
| ENSG00000248668 | OXCT1-AS1 | OXCT1 antisense RNA 1                                                          | 100874002 | 2.58583023  | 0.40929767  | 1.988579297 | 0.205824164 | 0.836928266 | NA          | NA      |
| ENSG00000012660 | ELOVL5    | ELOVL fatty acid elongase 5                                                    | 60481     | 1842.394636 | 0.409599002 | 0.473558234 | 0.864939035 | 0.387072251 | 0.999371363 | Not Sig |
| ENSG00000140575 | IQGAP1    | IQ motif containing GTPase activating protein 1                                | 8826      | 14305.16133 | 0.409637524 | 0.387061946 | 1.05832549  | 0.289907076 | 0.999371363 | Not Sig |
| ENSG00000163468 | CCT3      | chaperonin containing TCP1 subunit 3                                           | 7203      | 2806.29891  | 0.409769209 | 0.529473534 | 0.773918209 | 0.438979161 | 0.999371363 | Not Sig |
| ENSG00000057757 | PITHD1    | PITH domain containing 1                                                       | 57095     | 743.596925  | 0.410273203 | 0.484694003 | 0.846458179 | 0.397297195 | 0.999371363 | Not Sig |
| ENSG00000227057 | WDR46     | WD repeat domain 46                                                            | 9277      | 775.2639397 | 0.410957215 | 0.477705079 | 0.860273907 | 0.389638073 | 0.999371363 | Not Sig |
| ENSG00000161533 | ACOX1     | acyl-CoA oxidase 1                                                             | 51        | 3117.548395 | 0.41101686  | 0.485863794 | 0.84595079  | 0.397580197 | 0.999371363 | Not Sig |
| ENSG00000069998 | HDHD5     | haloacid dehalogenase like hydrolase domain containing 5                       | 27440     | 442.3155832 | 0.411130569 | 0.578257877 | 0.710981356 | 0.477095789 | 0.999371363 | Not Sig |
| ENSG00000272173 | NA        | NA                                                                             | NA        | 15.50333169 | 0.411202648 | 0.971074854 | 0.423451031 | 0.671966219 | 0.999371363 | Not Sig |
| ENSG00000070831 | CDC42     | cell division cycle 42                                                         | 998       | 6015.804633 | 0.411533917 | 0.471931687 | 0.8720201   | 0.383197412 | 0.999371363 | Not Sig |
| ENSG00000144306 | SCRN3     | secernin 3                                                                     | 79634     | 345.3447683 | 0.411640281 | 0.455477875 | 0.903754722 | 0.366125475 | 0.999371363 | Not Sig |
| ENSG00000163348 | PYG02     | pygopus family PHD finger 2                                                    | 90780     | 1235.891648 | 0.411694711 | 0.536812285 | 0.766924906 | 0.443126164 | 0.999371363 | Not Sig |
| ENSG00000182628 | SKA2      | spindle and kinetochore associated complex subunit 2                           | 348235    | 498.4314936 | 0.411773455 | 0.572379455 | 0.71940642  | 0.471890542 | 0.999371363 | Not Sig |
| ENSG00000249493 | NA        | NA                                                                             | NA        | 4.533258404 | 0.411774874 | 1.456512795 | 0.282712844 | 0.77739697  | NA          | NA      |
| ENSG00000177839 | PCDHB9    | protocadherin beta 9                                                           | 56127     | 81.29433272 | 0.411836866 | 0.757980162 | 0.543334624 | 0.586899429 | 0.999371363 | Not Sig |
| ENSG00000102390 | PBDC1     | polysaccharide biosynthesis domain containing 1                                | 51260     | 388.1461286 | 0.411847602 | 0.49577628  | 0.830712599 | 0.406136007 | 0.999371363 | Not Sig |
| ENSG00000143341 | HMCN1     | hemicentin 1                                                                   | 83872     | 4071.519428 | 0.411943122 | 0.562851876 | 0.731885492 | 0.464238462 | 0.999371363 | Not Sig |
| ENSG00000200683 | NA        | NA                                                                             | NA        | 1.341617627 | 0.411965252 | 2.433137136 | 0.16931444  | 0.865549318 | NA          | NA      |
| ENSG00000156127 | BATF      | basic leucine zipper ATP-like transcription factor                             | 10538     | 122.7232016 | 0.411997902 | 0.489820315 | 0.841120487 | 0.400280439 | 0.999371363 | Not Sig |

|                 |           |                                                       |    |           |             |             |             |             |             |             |         |
|-----------------|-----------|-------------------------------------------------------|----|-----------|-------------|-------------|-------------|-------------|-------------|-------------|---------|
| ENSG00000112237 | CCNC      | cyclin C                                              |    | 892       | 1051.696719 | 0.412175236 | 0.677762482 | 0.608141122 | 0.543093881 | 0.999371363 | Not Sig |
| ENSG00000143303 | RRNAD1    | ribosomal RNA adenine dimethylase domain containing 1 |    | 51093     | 754.0139861 | 0.412185726 | 0.553675403 | 0.744453742 | 0.456602017 | 0.999371363 | Not Sig |
| ENSG00000198643 | FAM3D     | family with sequence similarity 3 member D            |    | 131177    | 72.27882263 | 0.412261134 | 1.029654333 | 0.400387897 | 0.688870837 | 0.999371363 | Not Sig |
| ENSG00000116062 | MSH6      | mutS homolog 6                                        |    | 2956      | 1369.777457 | 0.412345783 | 0.43958728  | 0.938029378 | 0.348229313 | 0.999371363 | Not Sig |
| ENSG00000120451 | SNX19     | sorting nexin 19                                      |    | 399979    | 2714.424373 | 0.412349317 | 0.442332886 | 0.932214923 | 0.351225465 | 0.999371363 | Not Sig |
| ENSG00000173349 | SFT2D3    | SFT2 domain containing 3                              |    | 84826     | 284.3385013 | 0.412378849 | 0.533409554 | 0.773099856 | 0.439463287 | 0.999371363 | Not Sig |
| ENSG00000230648 | NA        | NA                                                    | NA |           | 3.469989175 | 0.412399349 | 1.432674474 | 0.287852793 | 0.773459424 | NA          | NA      |
| ENSG00000155984 | NA        | NA                                                    | NA |           | 126.6904161 | 0.41242928  | 0.545260689 | 0.75638917  | 0.449415899 | 0.999371363 | Not Sig |
| ENSG00000173876 | NA        | NA                                                    | NA |           | 7.048818289 | 0.412619654 | 1.193488774 | 0.345725626 | 0.729548924 | 0.999371363 | Not Sig |
| ENSG00000137166 | FOXP4     | forkhead box P4                                       |    | 116113    | 2791.011194 | 0.412727531 | 0.64723188  | 0.637681091 | 0.523681297 | 0.999371363 | Not Sig |
| ENSG00000108179 | PPIF      | peptidylprolyl isomerase F                            |    | 10105     | 662.8758693 | 0.412779218 | 0.401213783 | 1.028826115 | 0.303561392 | 0.999371363 | Not Sig |
| ENSG00000077235 | GTF3C1    | general transcription factor IIIC subunit 1           |    | 2975      | 3569.618643 | 0.412786067 | 0.485366887 | 0.850461944 | 0.39506831  | 0.999371363 | Not Sig |
| ENSG00000213188 | NA        | NA                                                    | NA |           | 5.862310407 | 0.413307701 | 1.45603718  | 0.283857931 | 0.776519257 | NA          | NA      |
| ENSG00000175854 | SWI5      | SWI5 homologous recombination repair protein          |    | 375757    | 191.3674618 | 0.413508682 | 0.562207549 | 0.735508946 | 0.462029594 | 0.999371363 | Not Sig |
| ENSG00000171843 | MLLT3     | MLLT3, super elongation complex subunit               |    | 4300      | 555.16121   | 0.413527304 | 0.801780727 | 0.515761092 | 0.60602128  | 0.999371363 | Not Sig |
| ENSG00000225822 | NA        | NA                                                    | NA |           | 9.777155339 | 0.413553463 | 1.003302248 | 0.412192302 | 0.680198479 | 0.999371363 | Not Sig |
| ENSG00000272831 | NA        | NA                                                    | NA |           | 124.7747189 | 0.413800159 | 0.6559658   | 0.630825813 | 0.528154424 | 0.999371363 | Not Sig |
| ENSG00000198711 | SSBP3-AS1 | SSBP3 antisense RNA 1                                 |    | 619518    | 3.512046109 | 0.413874697 | 1.303858063 | 0.317423122 | 0.750922565 | NA          | NA      |
| ENSG00000211460 | TSN       | translin                                              |    | 7247      | 943.1030824 | 0.414012292 | 0.416064432 | 0.995067736 | 0.319703321 | 0.999371363 | Not Sig |
| ENSG00000258500 | NA        | NA                                                    | NA |           | 3.359996839 | 0.41408166  | 1.351164968 | 0.306462697 | 0.759252378 | NA          | NA      |
| ENSG00000223935 | NA        | NA                                                    | NA |           | 14.06430189 | 0.414266953 | 1.045582446 | 0.396206875 | 0.69195242  | 0.999371363 | Not Sig |
| ENSG00000095906 | NUBP2     | nucleotide binding protein 2                          |    | 10101     | 713.2488291 | 0.414597206 | 0.575137875 | 0.720865767 | 0.470992107 | 0.999371363 | Not Sig |
| ENSG00000162373 | BEND5     | BEN domain containing 5                               |    | 79656     | 90.93124457 | 0.41461486  | 0.763813576 | 0.542822061 | 0.587252322 | 0.999371363 | Not Sig |
| ENSG00000106049 | HIBADH    | 3-hydroxyisobutyrate dehydrogenase                    |    | 11112     | 948.4324871 | 0.414723853 | 0.498674236 | 0.831652856 | 0.405604918 | 0.999371363 | Not Sig |
| ENSG00000213300 | NA        | NA                                                    | NA |           | 13.33599655 | 0.414954413 | 0.836763999 | 0.495903759 | 0.619962314 | 0.999371363 | Not Sig |
| ENSG00000268032 | NA        | NA                                                    | NA |           | 8.75166944  | 0.414968978 | 0.866554094 | 0.478872561 | 0.632029292 | 0.999371363 | Not Sig |
| ENSG00000231784 | DBIL5P    | diazepam binding inhibitor-like 5, pseudogene         |    | 100131454 | 7.957309974 | 0.415373979 | 0.980271873 | 0.423733446 | 0.67176022  | 0.999371363 | Not Sig |
| ENSG00000215190 | GUSBP1    | glucuronidase, beta pseudogene 1                      |    | 728411    | 262.5810112 | 0.415514349 | 0.452953976 | 0.917343419 | 0.358962712 | 0.999371363 | Not Sig |
| ENSG00000215190 | LINC00680 | long intergenic non-protein coding RNA 680            |    | 106660612 | 262.5810112 | 0.415514349 | 0.452953976 | 0.917343419 | 0.358962712 | 0.999371363 | Not Sig |
| ENSG00000183199 | NA        | NA                                                    | NA |           | 12.02611873 | 0.415694652 | 0.995523037 | 0.417564071 | 0.676265871 | 0.999371363 | Not Sig |
| ENSG00000166710 | B2M       | beta-2-microglobulin                                  |    | 567       | 38792.29048 | 0.41579449  | 0.854504837 | 0.486591149 | 0.626548097 | 0.999371363 | Not Sig |
| ENSG00000174446 | SNAPC5    | small nuclear RNA activating complex polypeptide 5    |    | 10302     | 227.3068463 | 0.416021506 | 0.453320674 | 0.917720127 | 0.358765408 | 0.999371363 | Not Sig |
| ENSG00000124529 | NA        | NA                                                    | NA |           | 630.6310128 | 0.41615527  | 0.46851315  | 0.888246724 | 0.374408051 | 0.999371363 | Not Sig |
| ENSG00000163565 | IFI16     | interferon gamma inducible protein 16                 |    | 3428      | 2414.834159 | 0.416164815 | 0.502606959 | 0.828012442 | 0.407663454 | 0.999371363 | Not Sig |
| ENSG00000105501 | SIGLEC5   | sialic acid binding Ig like lectin 5                  |    | 8778      | 9.958845242 | 0.41643879  | 1.187334665 | 0.350734129 | 0.725787819 | 0.999371363 | Not Sig |

|                 |              |                                                                            |           |             |             |             |             |             |             |         |
|-----------------|--------------|----------------------------------------------------------------------------|-----------|-------------|-------------|-------------|-------------|-------------|-------------|---------|
| ENSG00000136485 | DCAF7        | DDB1 and CUL4 associated factor 7                                          | 10238     | 3413.745902 | 0.416511191 | 0.43263564  | 0.962729726 | 0.335683175 | 0.999371363 | Not Sig |
| ENSG00000236137 | LOC101929099 | uncharacterized LOC101929099                                               | 101929099 | 9.900139496 | 0.416674816 | 1.14312746  | 0.364504249 | 0.715481502 | 0.999371363 | Not Sig |
| ENSG00000112167 | SAYS1        | SAYS1 motif domain containing 1                                            | 55776     | 330.8386872 | 0.416877141 | 0.465558812 | 0.895433897 | 0.370555187 | 0.999371363 | Not Sig |
| ENSG00000101844 | ATG4A        | autophagy related 4A cysteine peptidase                                    | 115201    | 279.4656707 | 0.417161792 | 0.607158129 | 0.687072728 | 0.492036899 | 0.999371363 | Not Sig |
| ENSG00000166979 | EVA1C        | eva-1 homolog C                                                            | 59271     | 870.3093164 | 0.417716227 | 0.631375092 | 0.661597572 | 0.508229164 | 0.999371363 | Not Sig |
| ENSG00000241490 | LOC107986115 | uncharacterized LOC107986115                                               | 107986115 | 14.52558549 | 0.417763086 | 1.14735891  | 0.36410846  | 0.715777019 | 0.999371363 | Not Sig |
| ENSG00000063241 | ISOC2        | isochorismatase domain containing 2                                        | 79763     | 441.4475224 | 0.417941761 | 0.586865861 | 0.712158925 | 0.476366369 | 0.999371363 | Not Sig |
| ENSG00000121966 | CXCR4        | C-X-C motif chemokine receptor 4                                           | 7852      | 1146.748962 | 0.418112689 | 0.821397375 | 0.509026084 | 0.610733941 | 0.999371363 | Not Sig |
| ENSG00000152127 | MGAT5        | mannosyl (alpha-1,6)-glycoprotein beta-1,6-N-acetylglucosaminyltransferase | 4249      | 2263.087008 | 0.418117082 | 0.42494393  | 0.983934709 | 0.325147617 | 0.999371363 | Not Sig |
| ENSG00000139182 | CLSTN3       | calsyntenin 3                                                              | 9746      | 1497.179055 | 0.418312278 | 0.464349045 | 0.90085741  | 0.367664138 | 0.999371363 | Not Sig |
| ENSG00000125459 | MSTO1        | misato 1, mitochondrial distribution and morphology regulator              | 55154     | 305.7482478 | 0.418406508 | 0.559053459 | 0.748419496 | 0.454207167 | 0.999371363 | Not Sig |
| ENSG00000269388 | NA           | NA                                                                         | NA        | 17.50580754 | 0.418480834 | 0.795801243 | 0.525860996 | 0.598984791 | 0.999371363 | Not Sig |
| ENSG00000198369 | SPRED2       | sprouty related EVH1 domain containing 2                                   | 200734    | 1543.771854 | 0.418569701 | 0.407392335 | 1.027436369 | 0.304215034 | 0.999371363 | Not Sig |
| ENSG00000174111 | NA           | NA                                                                         | NA        | 434.6983306 | 0.418682714 | 0.569802667 | 0.734785459 | 0.462470164 | 0.999371363 | Not Sig |
| ENSG00000185442 | FAM174B      | family with sequence similarity 174 member B                               | 400451    | 972.1635468 | 0.419156982 | 0.583202506 | 0.718716017 | 0.472315912 | 0.999371363 | Not Sig |
| ENSG00000135525 | MAP7         | microtubule associated protein 7                                           | 9053      | 1432.019362 | 0.41916447  | 0.559874306 | 0.748676025 | 0.454052497 | 0.999371363 | Not Sig |
| ENSG00000110011 | DNAJC4       | DnaJ heat shock protein family (Hsp40) member C4                           | 3338      | 509.7381618 | 0.419201199 | 0.428291787 | 0.978774779 | 0.327691274 | 0.999371363 | Not Sig |
| ENSG00000239614 | NA           | NA                                                                         | NA        | 2.124070474 | 0.419332861 | 1.795646131 | 0.233527561 | 0.815351771 | NA          | NA      |
| ENSG00000224124 | NA           | NA                                                                         | NA        | 2.303298187 | 0.419769401 | 2.13542938  | 0.196573769 | 0.8441611   | NA          | NA      |
| ENSG00000142235 | LMTK3        | lemur tyrosine kinase 3                                                    | 114783    | 350.2080094 | 0.420022991 | 0.55756175  | 0.753321028 | 0.451257026 | 0.999371363 | Not Sig |
| ENSG00000178821 | TMEM52       | transmembrane protein 52                                                   | 339456    | 22.74391438 | 0.420220457 | 0.759806758 | 0.553062278 | 0.580220765 | 0.999371363 | Not Sig |
| ENSG00000136688 | IL36G        | interleukin 36 gamma                                                       | 56300     | 3.034438332 | 0.42043871  | 1.95822566  | 0.214703912 | 0.829998172 | NA          | NA      |
| ENSG00000143222 | UFC1         | ubiquitin-fold modifier conjugating enzyme 1                               | 51506     | 1063.533738 | 0.420488018 | 0.462487679 | 0.909187503 | 0.36325116  | 0.999371363 | Not Sig |
| ENSG00000241229 | NA           | NA                                                                         | NA        | 4.554735622 | 0.420530822 | 1.27670485  | 0.329387659 | 0.741862694 | NA          | NA      |
| ENSG00000211637 | NA           | NA                                                                         | NA        | 108.4336412 | 0.420673168 | 0.875299335 | 0.480604921 | 0.630797318 | 0.999371363 | Not Sig |
| ENSG00000143398 | PIP5K1A      | phosphatidylinositol-4-phosphate 5-kinase type 1 alpha                     | 8394      | 1770.990547 | 0.420864952 | 0.50287452  | 0.836918427 | 0.402638422 | 0.999371363 | Not Sig |
| ENSG00000230001 | NA           | NA                                                                         | NA        | 21.94594883 | 0.420919044 | 0.906180735 | 0.464497895 | 0.642291068 | 0.999371363 | Not Sig |
| ENSG00000168135 | KCNJ4        | potassium voltage-gated channel subfamily J member 4                       | 3761      | 0.83667669  | 0.421022491 | 2.457221061 | 0.171340909 | 0.863955715 | NA          | NA      |
| ENSG00000269145 | NA           | NA                                                                         | NA        | 0.83667669  | 0.421022491 | 2.457221061 | 0.171340909 | 0.863955715 | NA          | NA      |
| ENSG00000140497 | SCAMP2       | secretory carrier membrane protein 2                                       | 10066     | 2645.847693 | 0.421109288 | 0.518702517 | 0.811851252 | 0.416876989 | 0.999371363 | Not Sig |
| ENSG00000201643 | SNORA14A     | small nucleolar RNA, H/ACA box 14A                                         | 677801    | 3.614764421 | 0.421322927 | 1.371640581 | 0.307167149 | 0.758716149 | NA          | NA      |
| ENSG00000128708 | HAT1         | histone acetyltransferase 1                                                | 8520      | 498.8545605 | 0.421385339 | 0.453794672 | 0.928581505 | 0.353106011 | 0.999371363 | Not Sig |
| ENSG00000014216 | CAPN1        | calpain 1                                                                  | 823       | 4112.902727 | 0.421665163 | 0.497958114 | 0.846788415 | 0.397113066 | 0.999371363 | Not Sig |
| ENSG00000116793 | PHTF1        | putative homeodomain transcription factor 1                                | 10745     | 572.5195351 | 0.422103257 | 0.495878673 | 0.85122285  | 0.394645572 | 0.999371363 | Not Sig |
| ENSG00000212232 | SNORD17      | small nucleolar RNA, C/D box 17                                            | 692086    | 1108.621975 | 0.422457851 | 0.674187324 | 0.626617909 | 0.530909726 | 0.999371363 | Not Sig |



|                 |         |                                                               |           |             |             |             |             |             |             |         |
|-----------------|---------|---------------------------------------------------------------|-----------|-------------|-------------|-------------|-------------|-------------|-------------|---------|
| ENSG00000111832 | RWDD1   | RWD domain containing 1                                       | 51389     | 620.0627605 | 0.422512662 | 0.430796188 | 0.98077159  | 0.326705391 | 0.999371363 | Not Sig |
| ENSG00000155115 | GTF3C6  | general transcription factor IIIC subunit 6                   | 112495    | 387.3182894 | 0.42279526  | 0.453528431 | 0.932235403 | 0.351214883 | 0.999371363 | Not Sig |
| ENSG00000204370 | SDHD    | succinate dehydrogenase complex subunit D                     | 6392      | 649.8975922 | 0.422944488 | 0.548174969 | 0.771550165 | 0.4403809   | 0.999371363 | Not Sig |
| ENSG00000131188 | PRR7    | proline rich 7, synaptic                                      | 80758     | 69.59464607 | 0.422965064 | 0.778186769 | 0.543526414 | 0.58676741  | 0.999371363 | Not Sig |
| ENSG00000162927 | PUS10   | pseudouridylate synthase 10                                   | 150962    | 251.1529006 | 0.423065576 | 0.514079254 | 0.822957885 | 0.410531943 | 0.999371363 | Not Sig |
| ENSG00000167553 | TUBA1C  | tubulin alpha 1c                                              | 84790     | 1720.989313 | 0.423065711 | 0.487103702 | 0.868533145 | 0.385102535 | 0.999371363 | Not Sig |
| ENSG00000229700 | NA      | NA                                                            | NA        | 1.309723104 | 0.423261396 | 2.440419239 | 0.173437985 | 0.86230717  | NA          | NA      |
| ENSG00000254400 | NA      | NA                                                            | NA        | 5.816672418 | 0.423485304 | 1.099534699 | 0.385149559 | 0.700126612 | NA          | NA      |
| ENSG00000073756 | PTGS2   | prostaglandin-endoperoxide synthase 2                         | 5743      | 1668.003632 | 0.423584961 | 0.653124021 | 0.648552109 | 0.516627919 | 0.999371363 | Not Sig |
| ENSG00000060558 | GNA15   | G protein subunit alpha 15                                    | 2769      | 539.6962385 | 0.423606514 | 0.660876759 | 0.640976563 | 0.52153791  | 0.999371363 | Not Sig |
| ENSG00000179627 | ZBTB42  | zinc finger and BTB domain containing 42                      | 100128927 | 589.1326925 | 0.423613701 | 0.563879156 | 0.751249086 | 0.452502764 | 0.999371363 | Not Sig |
| ENSG00000173156 | RHOD    | ras homolog family member D                                   | 29984     | 301.7719973 | 0.42370015  | 0.610427658 | 0.694103788 | 0.487617123 | 0.999371363 | Not Sig |
| ENSG00000124107 | SLPI    | secretory leukocyte peptidase inhibitor                       | 6590      | 4217.809833 | 0.423713751 | 0.868597841 | 0.487813498 | 0.625681949 | 0.999371363 | Not Sig |
| ENSG00000143319 | ISG20L2 | interferon stimulated exonuclease gene 20 like 2              | 81875     | 741.6646575 | 0.424038086 | 0.442954357 | 0.957295215 | 0.33841827  | 0.999371363 | Not Sig |
| ENSG00000182636 | NDN     | necdin, MAGE family member                                    | 4692      | 375.2586918 | 0.424212035 | 0.733217227 | 0.578562558 | 0.562884375 | 0.999371363 | Not Sig |
| ENSG00000243444 | PALM2   | paralemmin 2                                                  | 114299    | 81.71229896 | 0.42430377  | 0.706641247 | 0.600451462 | 0.5482054   | 0.999371363 | Not Sig |
| ENSG00000141956 | PRDM15  | PR/SET domain 15                                              | 63977     | 475.7018887 | 0.424384106 | 0.490189795 | 0.865754672 | 0.386624711 | 0.999371363 | Not Sig |
| ENSG00000004779 | NDUFAB1 | NADH:ubiquinone oxidoreductase subunit ABI                    | 4706      | 487.9332502 | 0.424530258 | 0.487210783 | 0.871348238 | 0.383564039 | 0.999371363 | Not Sig |
| ENSG00000171345 | KRT19   | keratin 19                                                    | 3880      | 6041.152094 | 0.424565091 | 0.411104937 | 1.032741407 | 0.30172493  | 0.999371363 | Not Sig |
| ENSG00000114867 | EIF4G1  | eukaryotic translation initiation factor 4 gamma 1            | 1981      | 11181.51637 | 0.425009313 | 0.418520195 | 1.01550491  | 0.309865207 | 0.999371363 | Not Sig |
| ENSG00000156853 | ZNF689  | zinc finger protein 689                                       | 115509    | 274.7675922 | 0.425023395 | 0.647321281 | 0.656588015 | 0.511445857 | 0.999371363 | Not Sig |
| ENSG00000143036 | SLC44A3 | solute carrier family 44 member 3                             | 126969    | 674.2495483 | 0.425198574 | 0.660259513 | 0.643987046 | 0.519583834 | 0.999371363 | Not Sig |
| ENSG00000179954 | SSC5D   | scavenger receptor cysteine rich family member with 5 domains | 284297    | 879.0247891 | 0.425371066 | 0.607304061 | 0.700425197 | 0.483661805 | 0.999371363 | Not Sig |
| ENSG00000068097 | HEATR6  | HEAT repeat containing 6                                      | 63897     | 605.4206592 | 0.425540775 | 0.419458062 | 1.01450136  | 0.310343581 | 0.999371363 | Not Sig |
| ENSG00000163376 | KBTBD8  | kelch repeat and BTB domain containing 8                      | 84541     | 107.1198912 | 0.425695005 | 0.871489287 | 0.488468432 | 0.625218081 | 0.999371363 | Not Sig |
| ENSG00000201376 | NA      | NA                                                            | NA        | 2.652625091 | 0.426070332 | 1.609897325 | 0.264656836 | 0.791273832 | NA          | NA      |
| ENSG00000225203 | NA      | NA                                                            | NA        | 3.327798263 | 0.426076966 | 1.555295416 | 0.273952435 | 0.784121175 | NA          | NA      |
| ENSG00000087842 | PIR     | pirin                                                         | 8544      | 275.0620227 | 0.426230846 | 0.66567235  | 0.640301263 | 0.52197676  | 0.999371363 | Not Sig |
| ENSG00000184216 | IRAK1   | interleukin 1 receptor associated kinase 1                    | 3654      | 2225.672653 | 0.42640454  | 0.598417445 | 0.712553658 | 0.476121997 | 0.999371363 | Not Sig |
| ENSG00000162620 | LRRIQ3  | leucine rich repeats and IQ motif containing 3                | 127255    | 12.67588944 | 0.426436614 | 1.050099794 | 0.406091513 | 0.684675361 | 0.999371363 | Not Sig |
| ENSG00000107099 | DOCK8   | dedicator of cytokinesis 8                                    | 81704     | 3161.386299 | 0.426458778 | 0.756123093 | 0.56400708  | 0.572749314 | 0.999371363 | Not Sig |
| ENSG00000186318 | BACE1   | beta-secretase 1                                              | 23621     | 967.785106  | 0.426660454 | 0.625286503 | 0.682343937 | 0.495021496 | 0.999371363 | Not Sig |
| ENSG00000226849 | NA      | NA                                                            | NA        | 14.77471544 | 0.42682651  | 0.950041553 | 0.449271412 | 0.653235878 | 0.999371363 | Not Sig |
| ENSG00000075131 | TIPIN   | TIMELESS interacting protein                                  | 54962     | 96.74366092 | 0.426835893 | 0.535361864 | 0.79728483  | 0.425285629 | 0.999371363 | Not Sig |
| ENSG00000224331 | NA      | NA                                                            | NA        | 19.87117361 | 0.427082484 | 0.673386667 | 0.634230681 | 0.525930288 | 0.999371363 | Not Sig |

|                 |          |                                                                     |           |             |             |             |             |             |             |         |
|-----------------|----------|---------------------------------------------------------------------|-----------|-------------|-------------|-------------|-------------|-------------|-------------|---------|
| ENSG00000267959 | MIR3188  | microRNA 3188                                                       | 100422833 | 10.01019081 | 0.427186015 | 1.178467193 | 0.362492921 | 0.716983712 | 0.999371363 | Not Sig |
| ENSG00000215271 | HOMEZ    | homeobox and leucine zipper encoding                                | 57594     | 476.2977083 | 0.427274339 | 0.43378327  | 0.98499497  | 0.324626542 | 0.999371363 | Not Sig |
| ENSG00000177465 | ACOT4    | acyl-CoA thioesterase 4                                             | 122970    | 69.83627955 | 0.427297345 | 0.607871171 | 0.702940632 | 0.482092748 | 0.999371363 | Not Sig |
| ENSG00000011478 | QPCTL    | glutaminyl-peptide cyclotransferase like                            | 54814     | 172.5729118 | 0.427644103 | 0.481594046 | 0.887976307 | 0.374553496 | 0.999371363 | Not Sig |
| ENSG00000240087 | NA       | NA                                                                  | NA        | 1.551615615 | 0.427994702 | 2.334323033 | 0.183348532 | 0.854524556 | NA          | NA      |
| ENSG00000155324 | GRAMD2B  | GRAM domain containing 2B                                           | 65983     | 830.4136496 | 0.428187856 | 0.604008159 | 0.708910715 | 0.478379885 | 0.999371363 | Not Sig |
| ENSG00000239953 | NA       | NA                                                                  | NA        | 1.213182037 | 0.428768489 | 2.491710158 | 0.172077995 | 0.863376212 | NA          | NA      |
| ENSG00000256013 | NA       | NA                                                                  | NA        | 1.213182037 | 0.428768489 | 2.491710158 | 0.172077995 | 0.863376212 | NA          | NA      |
| ENSG00000205592 | NA       | NA                                                                  | NA        | 6.477802508 | 0.428776619 | 1.356790229 | 0.316022779 | 0.751985218 | NA          | NA      |
| ENSG00000141384 | TAF4B    | TATA-box binding protein associated factor 4b                       | 6875      | 173.6593775 | 0.428887486 | 0.601171858 | 0.713419101 | 0.475586457 | 0.999371363 | Not Sig |
| ENSG00000126768 | TIMM17B  | translocase of inner mitochondrial membrane 17B                     | 10245     | 479.0560535 | 0.429108118 | 0.46681867  | 0.919217985 | 0.357981566 | 0.999371363 | Not Sig |
| ENSG00000124574 | ABCC10   | ATP binding cassette subfamily C member 10                          | 89845     | 859.3983199 | 0.42956818  | 0.52869008  | 0.812514166 | 0.416496662 | 0.999371363 | Not Sig |
| ENSG00000153201 | RANBP2   | RAN binding protein 2                                               | 5903      | 6544.84781  | 0.429713529 | 0.415316642 | 1.034664846 | 0.300825459 | 0.999371363 | Not Sig |
| ENSG00000224614 | NA       | NA                                                                  | NA        | 5.17339377  | 0.429766243 | 1.350026059 | 0.31833922  | 0.750227637 | NA          | NA      |
| ENSG00000238658 | NA       | NA                                                                  | NA        | 1.589947674 | 0.429803719 | 1.764434229 | 0.243592939 | 0.807546097 | NA          | NA      |
| ENSG00000240891 | PLCXD2   | phosphatidylinositol specific phospholipase C X domain containing 2 | 257068    | 46.9610893  | 0.42981675  | 0.947483038 | 0.453640574 | 0.650087545 | 0.999371363 | Not Sig |
| ENSG00000199787 | SNORA80C | small nucleolar RNA, H/ACA box 80C                                  | 109616959 | 1.791919714 | 0.429849997 | 2.223406076 | 0.193329505 | 0.84670092  | NA          | NA      |
| ENSG00000256238 | NA       | NA                                                                  | NA        | 2.507013357 | 0.430438465 | 1.493918066 | 0.288127224 | 0.773249354 | NA          | NA      |
| ENSG00000112992 | NNT      | nicotinamide nucleotide transhydrogenase                            | 23530     | 1574.786572 | 0.43052549  | 0.480623934 | 0.895763733 | 0.370378963 | 0.999371363 | Not Sig |
| ENSG00000139410 | SDSL     | serine dehydratase like                                             | 113675    | 178.2629357 | 0.430956316 | 0.449883834 | 0.957927989 | 0.338099072 | 0.999371363 | Not Sig |
| ENSG00000161328 | LRRC56   | leucine rich repeat containing 56                                   | 115399    | 163.5103029 | 0.43105239  | 0.619360853 | 0.695963247 | 0.486451847 | 0.999371363 | Not Sig |
| ENSG00000174032 | SLC25A30 | solute carrier family 25 member 30                                  | 253512    | 444.9260138 | 0.43153039  | 0.518804343 | 0.831778677 | 0.405533882 | 0.999371363 | Not Sig |
| ENSG00000249908 | NA       | NA                                                                  | NA        | 19.00864093 | 0.431538061 | 1.169367134 | 0.369035565 | 0.712101216 | 0.999371363 | Not Sig |
| ENSG00000188760 | TMEM198  | transmembrane protein 198                                           | 130612    | 46.98456452 | 0.431778637 | 0.564147429 | 0.765364894 | 0.444054291 | 0.999371363 | Not Sig |
| ENSG00000273254 | NA       | NA                                                                  | NA        | 3.917274548 | 0.431805659 | 1.328967841 | 0.324918065 | 0.745243084 | NA          | NA      |
| ENSG00000187240 | DYNC2H1  | dynein cytoplasmic 2 heavy chain 1                                  | 79659     | 1637.047553 | 0.431851221 | 0.636853066 | 0.678101816 | 0.497707139 | 0.999371363 | Not Sig |
| ENSG00000211694 | NA       | NA                                                                  | NA        | 12.61978942 | 0.432115018 | 1.227268187 | 0.352095021 | 0.724767002 | 0.999371363 | Not Sig |
| ENSG00000124203 | ZNF831   | zinc finger protein 831                                             | 128611    | 225.8450695 | 0.432367445 | 0.864834326 | 0.499942512 | 0.617115557 | 0.999371363 | Not Sig |
| ENSG00000053328 | METTL24  | methyltransferase like 24                                           | 728464    | 44.81700031 | 0.432386452 | 0.739524224 | 0.584681932 | 0.558761605 | 0.999371363 | Not Sig |
| ENSG00000257681 | NA       | NA                                                                  | NA        | 8.117967185 | 0.432534013 | 1.031258776 | 0.419423353 | 0.67490676  | 0.999371363 | Not Sig |
| ENSG00000211714 | NA       | NA                                                                  | NA        | 4.580900772 | 0.432790281 | 1.455880139 | 0.297270544 | 0.766259968 | NA          | NA      |
| ENSG00000204165 | CXorf65  | chromosome X open reading frame 65                                  | 158830    | 11.30025172 | 0.432821778 | 1.348126518 | 0.321054272 | 0.748169263 | 0.999371363 | Not Sig |
| ENSG00000225418 | NA       | NA                                                                  | NA        | 1.972890557 | 0.433178317 | 1.670991548 | 0.259234296 | 0.795454471 | NA          | NA      |
| ENSG00000213013 | NA       | NA                                                                  | NA        | 0.843114226 | 0.433915443 | 2.761525252 | 0.157128907 | 0.875143256 | NA          | NA      |
| ENSG00000230204 | NA       | NA                                                                  | NA        | 0.843114226 | 0.433915443 | 2.761525252 | 0.157128907 | 0.875143256 | NA          | NA      |

|                 |              |                                                                |           |             |             |             |             |             |             |         |
|-----------------|--------------|----------------------------------------------------------------|-----------|-------------|-------------|-------------|-------------|-------------|-------------|---------|
| ENSG00000263969 | NA           | NA                                                             | NA        | 0.843114226 | 0.433915443 | 2.761525252 | 0.157128907 | 0.875143256 | NA          | NA      |
| ENSG00000006715 | VPS41        | VPS41, HOPS complex subunit                                    | 27072     | 2423.062057 | 0.433997082 | 0.406711426 | 1.067088491 | 0.285931879 | 0.999371363 | Not Sig |
| ENSG00000206077 | ZDHC11B      | zinc finger DHHC-type containing 11B                           | 653082    | 294.8065495 | 0.434063428 | 1.037265314 | 0.418469048 | 0.675604212 | 0.999371363 | Not Sig |
| ENSG00000162813 | BPNT1        | 3' (2'), 5'-bisphosphate nucleotidase 1                        | 10380     | 570.9644682 | 0.434311686 | 0.493125825 | 0.880731984 | 0.378462901 | 0.999371363 | Not Sig |
| ENSG00000132470 | ITGB4        | integrin subunit beta 4                                        | 3691      | 4571.16467  | 0.43438517  | 0.564283709 | 0.76979924  | 0.44141899  | 0.999371363 | Not Sig |
| ENSG00000176974 | SHMT1        | serine hydroxymethyltransferase 1                              | 6470      | 554.5423523 | 0.434710442 | 0.489906039 | 0.887334319 | 0.374898934 | 0.999371363 | Not Sig |
| ENSG00000092931 | MFSD11       | major facilitator superfamily domain containing 11             | 79157     | 637.6029633 | 0.434865416 | 0.389753211 | 1.115745563 | 0.264531061 | 0.999371363 | Not Sig |
| ENSG00000240385 | NA           | NA                                                             | NA        | 1.72456051  | 0.435638034 | 1.760978857 | 0.247384023 | 0.804611038 | NA          | NA      |
| ENSG00000201600 | NA           | NA                                                             | NA        | 1.348055163 | 0.435965652 | 2.121997147 | 0.205450631 | 0.837220066 | NA          | NA      |
| ENSG00000150627 | WDR17        | WD repeat domain 17                                            | 116966    | 116.7790713 | 0.436285268 | 0.976979919 | 0.446565236 | 0.655189001 | 0.999371363 | Not Sig |
| ENSG00000181634 | TNFSF15      | TNF superfamily member 15                                      | 9966      | 691.260255  | 0.436313071 | 0.598293324 | 0.729262811 | 0.465840916 | 0.999371363 | Not Sig |
| ENSG00000198663 | C6orf89      | chromosome 6 open reading frame 89                             | 221477    | 2595.896191 | 0.436423929 | 0.440701917 | 0.990292786 | 0.322031032 | 0.999371363 | Not Sig |
| ENSG00000130224 | LRCH2        | leucine rich repeats and calponin homology domain containing 2 | 57631     | 158.6424149 | 0.436464657 | 0.675331283 | 0.646297111 | 0.518086959 | 0.999371363 | Not Sig |
| ENSG00000160325 | CACFD1       | calcium channel flower domain containing 1                     | 11094     | 667.6901113 | 0.43649014  | 0.627666766 | 0.695417001 | 0.486794009 | 0.999371363 | Not Sig |
| ENSG00000226121 | NA           | NA                                                             | NA        | 7.042531046 | 0.436601736 | 1.036333744 | 0.421294529 | 0.673540025 | 0.999371363 | Not Sig |
| ENSG00000266473 | NA           | NA                                                             | NA        | 8.643809142 | 0.436881101 | 0.95797809  | 0.456044983 | 0.648357632 | 0.999371363 | Not Sig |
| ENSG00000224722 | NA           | NA                                                             | NA        | 2.403880037 | 0.436887993 | 1.705251797 | 0.256201456 | 0.797795285 | NA          | NA      |
| ENSG00000178401 | DNAJC22      | DnaJ heat shock protein family (Hsp40) member C22              | 79962     | 85.34737195 | 0.436935296 | 0.908504745 | 0.480938926 | 0.630559906 | 0.999371363 | Not Sig |
| ENSG00000146232 | NFKBIE       | NFKB inhibitor epsilon                                         | 4794      | 464.2857844 | 0.437335879 | 0.459939929 | 0.950854343 | 0.341678321 | 0.999371363 | Not Sig |
| ENSG00000177576 | C18orf32     | chromosome 18 open reading frame 32                            | 497661    | 64.08565819 | 0.437836893 | 0.556299659 | 0.787052241 | 0.431251286 | 0.999371363 | Not Sig |
| ENSG00000113552 | GNPDA1       | glucosamine-6-phosphate deaminase 1                            | 10007     | 517.3544377 | 0.437861514 | 0.440821634 | 0.993284995 | 0.320571088 | 0.999371363 | Not Sig |
| ENSG00000162298 | SYVN1        | synoviolin 1                                                   | 84447     | 2384.728094 | 0.438039177 | 0.470254236 | 0.931494378 | 0.351597892 | 0.999371363 | Not Sig |
| ENSG00000134153 | EMC7         | ER membrane protein complex subunit 7                          | 56851     | 647.5174878 | 0.438082598 | 0.470176884 | 0.931739975 | 0.351470922 | 0.999371363 | Not Sig |
| ENSG00000259429 | UBE2Q2P2     | ubiquitin conjugating enzyme E2 Q2 pseudogene 2                | 100134869 | 7.260273006 | 0.438138351 | 1.439278782 | 0.304415209 | 0.760811582 | 0.999371363 | Not Sig |
| ENSG00000125398 | SOX9         | SRY-box 9                                                      | 6662      | 1700.135058 | 0.438198022 | 1.103147131 | 0.397225365 | 0.691201279 | 0.999371363 | Not Sig |
| ENSG00000233225 | NA           | NA                                                             | NA        | 4.737644447 | 0.438252684 | 1.16145053  | 0.3773322   | 0.705926745 | NA          | NA      |
| ENSG00000229619 | MBNL1-AS1    | MBNL1 antisense RNA 1                                          | 401093    | 175.0419018 | 0.438643618 | 0.676942918 | 0.647977261 | 0.516999657 | 0.999371363 | Not Sig |
| ENSG00000204934 | ATP6VOE2-AS1 | ATP6VOE2 antisense RNA 1                                       | 401431    | 42.57914314 | 0.438659066 | 0.961183225 | 0.456374034 | 0.648121034 | 0.999371363 | Not Sig |
| ENSG00000007255 | TRAPPC6A     | trafficking protein particle complex 6A                        | 79090     | 207.1331326 | 0.438780854 | 0.632077252 | 0.69418865  | 0.487563909 | 0.999371363 | Not Sig |
| ENSG00000023892 | DEF6         | DEF6, guanine nucleotide exchange factor                       | 50619     | 565.022469  | 0.438888565 | 0.534023162 | 0.821853051 | 0.411160536 | 0.999371363 | Not Sig |
| ENSG00000177971 | IMP3         | IMP3, U3 small nucleolar ribonucleoprotein                     | 55272     | 699.9816181 | 0.439165408 | 0.589114791 | 0.745466612 | 0.455989688 | 0.999371363 | Not Sig |
| ENSG00000187210 | GCNT1        | glucosaminyl (N-acetyl) transferase 1, core 2                  | 2650      | 407.6539072 | 0.439343513 | 0.573728506 | 0.765769016 | 0.443813753 | 0.999371363 | Not Sig |
| ENSG00000271984 | NA           | NA                                                             | NA        | 4.062049795 | 0.439581756 | 1.411375079 | 0.311456368 | 0.755453708 | NA          | NA      |
| ENSG00000171161 | ZNF672       | zinc finger protein 672                                        | 79894     | 1145.664676 | 0.439863173 | 0.528667342 | 0.832022595 | 0.405396191 | 0.999371363 | Not Sig |
| ENSG00000262869 | NA           | NA                                                             | NA        | 5.157086978 | 0.439937396 | 1.380606089 | 0.318655263 | 0.749987942 | NA          | NA      |

|                 |              |                                                                              |           |             |             |             |             |             |             |         |
|-----------------|--------------|------------------------------------------------------------------------------|-----------|-------------|-------------|-------------|-------------|-------------|-------------|---------|
| ENSG00000257576 | NA           | NA                                                                           | NA        | 6.358650156 | 0.440014292 | 1.054380967 | 0.417320026 | 0.676444343 | NA          | NA      |
| ENSG00000170035 | UBE2E3       | ubiquitin conjugating enzyme E2 E3                                           | 10477     | 592.2860436 | 0.440090345 | 0.413069142 | 1.06541569  | 0.286687859 | 0.999371363 | Not Sig |
| ENSG00000187189 | TSPYL4       | TSPY like 4                                                                  | 23270     | 562.9608598 | 0.440195789 | 0.507431414 | 0.867498104 | 0.38566915  | 0.999371363 | Not Sig |
| ENSG00000260641 | NA           | NA                                                                           | NA        | 44.83254175 | 0.440209436 | 0.81706511  | 0.538769102 | 0.590046186 | 0.999371363 | Not Sig |
| ENSG00000091704 | CPA1         | carboxypeptidase A1                                                          | 1357      | 0.753270984 | 0.440383198 | 2.82197746  | 0.156054825 | 0.875989807 | NA          | NA      |
| ENSG00000174453 | VWC2L        | von Willebrand factor C domain containing protein 2 like                     | 402117    | 0.753270984 | 0.440383198 | 2.82197746  | 0.156054825 | 0.875989807 | NA          | NA      |
| ENSG00000215198 | NA           | NA                                                                           | NA        | 0.753270984 | 0.440383198 | 2.82197746  | 0.156054825 | 0.875989807 | NA          | NA      |
| ENSG00000225140 | LOC101930421 | uncharacterized LOC101930421                                                 | 101930421 | 0.753270984 | 0.440383198 | 2.82197746  | 0.156054825 | 0.875989807 | NA          | NA      |
| ENSG00000242244 | NA           | NA                                                                           | NA        | 0.753270984 | 0.440383198 | 2.82197746  | 0.156054825 | 0.875989807 | NA          | NA      |
| ENSG00000143344 | RGL1         | ral guanine nucleotide dissociation stimulator like 1                        | 23179     | 1500.433357 | 0.440573886 | 0.529367006 | 0.832265483 | 0.405259109 | 0.999371363 | Not Sig |
| ENSG00000163249 | CCNYL1       | cyclin Y like 1                                                              | 151195    | 684.0062658 | 0.44067368  | 0.445118363 | 0.990014604 | 0.322166981 | 0.999371363 | Not Sig |
| ENSG00000115233 | PSMD14       | proteasome 26S subunit, non-ATPase 14                                        | 10213     | 846.2182526 | 0.440769914 | 0.507031094 | 0.869315352 | 0.384674668 | 0.999371363 | Not Sig |
| ENSG00000108344 | PSMD3        | proteasome 26S subunit, non-ATPase 3                                         | 5709      | 1947.255548 | 0.441378715 | 0.444098416 | 0.993875904 | 0.320283287 | 0.999371363 | Not Sig |
| ENSG00000158715 | SLC45A3      | solute carrier family 45 member 3                                            | 85414     | 299.3852607 | 0.441600657 | 0.636295186 | 0.694018542 | 0.487670581 | 0.999371363 | Not Sig |
| ENSG00000223431 | NA           | NA                                                                           | NA        | 1.506541968 | 0.441957998 | 2.238005948 | 0.197478473 | 0.843453125 | NA          | NA      |
| ENSG00000263740 | NA           | NA                                                                           | NA        | 1023.602025 | 0.442034512 | 0.6419354   | 0.688596566 | 0.491077183 | 0.999371363 | Not Sig |
| ENSG00000105655 | ISYNA1       | inositol-3-phosphate synthase 1                                              | 51477     | 504.4163883 | 0.442097403 | 0.650825124 | 0.679287548 | 0.496955685 | 0.999371363 | Not Sig |
| ENSG00000168374 | ARF4         | ADP ribosylation factor 4                                                    | 378       | 3051.524434 | 0.442098735 | 0.660216361 | 0.669627051 | 0.503095565 | 0.999371363 | Not Sig |
| ENSG00000140259 | MFAP1        | microfibril associated protein 1                                             | 4236      | 635.349609  | 0.442111695 | 0.434813061 | 1.016785683 | 0.309255395 | 0.999371363 | Not Sig |
| ENSG00000112293 | GPLD1        | glycosylphosphatidylinositol specific phospholipase D1                       | 2822      | 146.9680035 | 0.442117679 | 0.687191198 | 0.643369241 | 0.519984537 | 0.999371363 | Not Sig |
| ENSG00000066654 | THUMPD1      | THUMP domain containing 1                                                    | 55623     | 1612.876569 | 0.442145338 | 0.448473209 | 0.985890192 | 0.324187    | 0.999371363 | Not Sig |
| ENSG00000117010 | ZNF684       | zinc finger protein 684                                                      | 127396    | 81.51894318 | 0.442299565 | 0.523260816 | 0.845275534 | 0.397957018 | 0.999371363 | Not Sig |
| ENSG00000178718 | RPP25        | ribonuclease P and MRP subunit p25                                           | 54913     | 255.7960746 | 0.442914354 | 0.729240596 | 0.60736382  | 0.543609494 | 0.999371363 | Not Sig |
| ENSG00000108389 | MTMR4        | myotubularin related protein 4                                               | 9110      | 1707.269607 | 0.442929904 | 0.416536354 | 1.063364336 | 0.28761676  | 0.999371363 | Not Sig |
| ENSG00000189241 | TSPYL1       | TSPY like 1                                                                  | 7259      | 2624.50593  | 0.44297866  | 0.501151864 | 0.883921006 | 0.376738857 | 0.999371363 | Not Sig |
| ENSG00000129925 | TMEM8A       | transmembrane protein 8A                                                     | 58986     | 2027.810879 | 0.443121111 | 0.474235974 | 0.934389493 | 0.350103016 | 0.999371363 | Not Sig |
| ENSG00000164023 | SGMS2        | sphingomyelin synthase 2                                                     | 166929    | 2250.287412 | 0.443137969 | 0.488865623 | 0.906461711 | 0.364691522 | 0.999371363 | Not Sig |
| ENSG00000196262 | PPIA         | peptidylprolyl isomerase A                                                   | 5478      | 10031.16553 | 0.443190838 | 0.424202224 | 1.044763118 | 0.296132465 | 0.999371363 | Not Sig |
| ENSG00000129007 | CALML4       | calmodulin like 4                                                            | 91860     | 228.5574367 | 0.443252181 | 0.532712098 | 0.832067044 | 0.405371103 | 0.999371363 | Not Sig |
| ENSG00000177272 | KCNA3        | potassium voltage-gated channel subfamily A member 3                         | 3738      | 578.3364185 | 0.44325646  | 0.948221819 | 0.467460726 | 0.640170284 | 0.999371363 | Not Sig |
| ENSG00000224802 | NA           | NA                                                                           | NA        | 14.05778387 | 0.443388856 | 0.786545096 | 0.563717018 | 0.572946734 | 0.999371363 | Not Sig |
| ENSG00000132122 | SPATA6       | spermatogenesis associated 6                                                 | 54558     | 506.1799659 | 0.44350098  | 0.549591773 | 0.806964372 | 0.41968701  | 0.999371363 | Not Sig |
| ENSG00000169282 | KCNAB1       | potassium voltage-gated channel subfamily A member regulatory beta subunit 1 | 7881      | 46.19946991 | 0.443569021 | 1.098408379 | 0.403828876 | 0.686338561 | 0.999371363 | Not Sig |
| ENSG00000047230 | CTPS2        | CTP synthase 2                                                               | 56474     | 910.7068326 | 0.444087227 | 0.551349981 | 0.805454326 | 0.420557553 | 0.999371363 | Not Sig |
| ENSG00000062725 | APPBP2       | amyloid beta precursor protein binding protein 2                             | 10513     | 1401.16431  | 0.444169012 | 0.417786905 | 1.063147282 | 0.287715165 | 0.999371363 | Not Sig |

|                 |          |                                                  |        |             |             |             |             |             |             |         |
|-----------------|----------|--------------------------------------------------|--------|-------------|-------------|-------------|-------------|-------------|-------------|---------|
| ENSG00000104043 | ATP8B4   | ATPase phospholipid transporting 8B4 (putative)  | 79895  | 398.0902885 | 0.444174217 | 0.80674542  | 0.550575443 | 0.581924747 | 0.999371363 | Not Sig |
| ENSG00000183684 | ALYREF   | Aly/REF export factor                            | 10189  | 952.1147549 | 0.44432748  | 0.531188794 | 0.836477511 | 0.402886323 | 0.999371363 | Not Sig |
| ENSG00000063180 | CA11     | carbonic anhydrase 11                            | 770    | 129.6000221 | 0.444376036 | 0.872524522 | 0.509299195 | 0.610542522 | 0.999371363 | Not Sig |
| ENSG00000197296 | FITM2    | fat storage inducing transmembrane protein 2     | 128486 | 321.649746  | 0.444661499 | 0.461115086 | 0.964317829 | 0.334886605 | 0.999371363 | Not Sig |
| ENSG00000264219 | NA       | NA                                               | NA     | 8.844048829 | 0.445056831 | 0.880687032 | 0.505351861 | 0.613311723 | 0.999371363 | Not Sig |
| ENSG00000149547 | EI24     | EI24, autophagy associated transmembrane protein | 9538   | 1453.208279 | 0.445371674 | 0.415049827 | 1.07305592  | 0.283246027 | 0.999371363 | Not Sig |
| ENSG00000258684 | NA       | NA                                               | NA     | 4.138453623 | 0.445489422 | 1.464625107 | 0.304166178 | 0.761001291 | NA          | NA      |
| ENSG00000230067 | NA       | NA                                               | NA     | 2.679543244 | 0.445718712 | 1.783529796 | 0.249908195 | 0.802658346 | NA          | NA      |
| ENSG00000110721 | CHKA     | choline kinase alpha                             | 1119   | 878.0726677 | 0.445771941 | 0.457844128 | 0.973632539 | 0.330239024 | 0.999371363 | Not Sig |
| ENSG00000177485 | ZBTB33   | zinc finger and BTB domain containing 33         | 10009  | 873.7854798 | 0.44578411  | 0.602334069 | 0.740094465 | 0.459242677 | 0.999371363 | Not Sig |
| ENSG00000085465 | OVGP1    | oviductal glycoprotein 1                         | 5016   | 88.50899283 | 0.445838136 | 0.739478743 | 0.602908657 | 0.546569456 | 0.999371363 | Not Sig |
| ENSG00000103522 | IL21R    | interleukin 21 receptor                          | 50615  | 319.5201089 | 0.445868113 | 0.59670983  | 0.747210939 | 0.454936242 | 0.999371363 | Not Sig |
| ENSG00000225025 | NA       | NA                                               | NA     | 2.973057893 | 0.445893288 | 1.980482019 | 0.22514382  | 0.821867392 | NA          | NA      |
| ENSG00000188316 | ENO4     | enolase family member 4                          | 387712 | 25.06498784 | 0.446604767 | 0.740531571 | 0.603086734 | 0.546450991 | 0.999371363 | Not Sig |
| ENSG00000231292 | NA       | NA                                               | NA     | 5.549440347 | 0.446696385 | 1.454495728 | 0.307114264 | 0.758756401 | NA          | NA      |
| ENSG00000182518 | FAM104B  | family with sequence similarity 104 member B     | 90736  | 126.1382418 | 0.447174552 | 0.652477288 | 0.685348839 | 0.49312382  | 0.999371363 | Not Sig |
| ENSG00000120053 | GOT1     | glutamic-oxaloacetic transaminase 1              | 2805   | 602.6435199 | 0.447244722 | 0.515995783 | 0.866760421 | 0.386073292 | 0.999371363 | Not Sig |
| ENSG00000267566 | NA       | NA                                               | NA     | 1.567203347 | 0.447374548 | 2.027437165 | 0.22066013  | 0.825357078 | NA          | NA      |
| ENSG00000180425 | C11orf71 | chromosome 11 open reading frame 71              | 54494  | 110.8421149 | 0.447404524 | 0.547231643 | 0.817577948 | 0.413598224 | 0.999371363 | Not Sig |
| ENSG00000129187 | DCTD     | dCMP deaminase                                   | 1635   | 1004.894702 | 0.447795626 | 0.485173971 | 0.922958883 | 0.356028633 | 0.999371363 | Not Sig |
| ENSG00000225907 | NA       | NA                                               | NA     | 17.07057023 | 0.447803356 | 0.816264383 | 0.548600876 | 0.583279384 | 0.999371363 | Not Sig |
| ENSG00000259051 | NA       | NA                                               | NA     | 1.354492698 | 0.447830991 | 2.084097809 | 0.214880026 | 0.829860858 | NA          | NA      |
| ENSG00000168710 | AHCYL1   | adenosylhomocysteinase like 1                    | 10768  | 3104.262583 | 0.447874978 | 0.445410892 | 1.005532164 | 0.31464067  | 0.999371363 | Not Sig |
| ENSG00000225471 | NA       | NA                                               | NA     | 36.74967755 | 0.448143171 | 0.728614352 | 0.615062234 | 0.538513622 | 0.999371363 | Not Sig |
| ENSG00000256020 | NA       | NA                                               | NA     | 6.967754957 | 0.448217456 | 1.088218696 | 0.411881782 | 0.680426074 | 0.999371363 | Not Sig |
| ENSG00000271321 | CTAGE6   | CTAGE family member 6                            | 340307 | 4.666853522 | 0.448306365 | 1.184979304 | 0.378324215 | 0.705189759 | NA          | NA      |
| ENSG00000168439 | STIP1    | stress induced phosphoprotein 1                  | 10963  | 2190.96616  | 0.448433502 | 0.508825717 | 0.881310607 | 0.378149727 | 0.999371363 | Not Sig |
| ENSG00000237846 | NA       | NA                                               | NA     | 1.466361207 | 0.44857393  | 2.735556803 | 0.163979022 | 0.869747658 | NA          | NA      |
| ENSG00000198793 | MTOR     | mechanistic target of rapamycin kinase           | 2475   | 2719.823534 | 0.448661749 | 0.445081527 | 1.008043969 | 0.313433355 | 0.999371363 | Not Sig |
| ENSG00000136271 | DDX56    | DEAD-box helicase 56                             | 54606  | 1074.902862 | 0.448676028 | 0.455946712 | 0.984053654 | 0.325089133 | 0.999371363 | Not Sig |
| ENSG00000229057 | NA       | NA                                               | NA     | 0.88788382  | 0.449137402 | 2.736197677 | 0.164146547 | 0.869615779 | NA          | NA      |
| ENSG00000265359 | NA       | NA                                               | NA     | 0.88788382  | 0.449137402 | 2.736197677 | 0.164146547 | 0.869615779 | NA          | NA      |
| ENSG00000147130 | ZMYM3    | zinc finger MYM-type containing 3                | 9203   | 1216.336353 | 0.449199104 | 0.39540215  | 1.136056299 | 0.255933003 | 0.999371363 | Not Sig |
| ENSG00000230729 | NA       | NA                                               | NA     | 5.176703638 | 0.449311136 | 1.671213403 | 0.268853239 | 0.788042622 | NA          | NA      |
| ENSG00000162069 | BICDL2   | BICD family like cargo adaptor 2                 | 146439 | 791.2448395 | 0.44948995  | 0.579852345 | 0.775180015 | 0.438233296 | 0.999371363 | Not Sig |

|                 |          |                                                             |           |             |             |             |             |             |             |         |
|-----------------|----------|-------------------------------------------------------------|-----------|-------------|-------------|-------------|-------------|-------------|-------------|---------|
| ENSG00000140284 | SLC27A2  | solute carrier family 27 member 2                           | 11001     | 187.0432587 | 0.449706221 | 0.655290858 | 0.686269639 | 0.49254309  | 0.999371363 | Not Sig |
| ENSG00000186310 | NAP1L3   | nucleosome assembly protein 1 like 3                        | 4675      | 48.17327828 | 0.449953858 | 0.670650751 | 0.670921277 | 0.502270681 | 0.999371363 | Not Sig |
| ENSG00000237007 | NA       | NA                                                          | NA        | 3.649510042 | 0.449992175 | 1.416271004 | 0.317730275 | 0.750689545 | NA          | NA      |
| ENSG00000177854 | TMEM187  | transmembrane protein 187                                   | 8269      | 126.010356  | 0.450318439 | 0.584465372 | 0.770479246 | 0.441015662 | 0.999371363 | Not Sig |
| ENSG00000184040 | NA       | NA                                                          | NA        | 12.73254495 | 0.450557588 | 0.988631761 | 0.455738532 | 0.64857801  | 0.999371363 | Not Sig |
| ENSG00000233254 | NA       | NA                                                          | NA        | 1.455074549 | 0.450583652 | 2.71290818  | 0.166088796 | 0.868087071 | NA          | NA      |
| ENSG00000145217 | SLC26A1  | solute carrier family 26 member 1                           | 10861     | 32.06165885 | 0.450608021 | 0.833351292 | 0.540717972 | 0.588701989 | 0.999371363 | Not Sig |
| ENSG00000015676 | NUDCD3   | NudC domain containing 3                                    | 23386     | 2291.037759 | 0.450936611 | 0.525146179 | 0.858687788 | 0.39051279  | 0.999371363 | Not Sig |
| ENSG00000091622 | PITPNM3  | PITPNM family member 3                                      | 83394     | 788.8314744 | 0.451029621 | 0.560815927 | 0.804238253 | 0.421259391 | 0.999371363 | Not Sig |
| ENSG00000166326 | TRIM44   | tripartite motif containing 44                              | 54765     | 2172.169555 | 0.451111661 | 0.4294203   | 1.050513125 | 0.29348226  | 0.999371363 | Not Sig |
| ENSG00000182000 | NA       | NA                                                          | NA        | 2.68598078  | 0.451127947 | 1.783748836 | 0.252910016 | 0.800337749 | NA          | NA      |
| ENSG00000162889 | MAPKAPK2 | mitogen-activated protein kinase-activated protein kinase 2 | 9261      | 3135.028068 | 0.451683598 | 0.491701682 | 0.918613083 | 0.358297987 | 0.999371363 | Not Sig |
| ENSG00000159346 | ADIPOR1  | adiponectin receptor 1                                      | 51094     | 3215.290243 | 0.451793011 | 0.446475136 | 1.011910797 | 0.311580706 | 0.999371363 | Not Sig |
| ENSG00000103356 | EARS2    | glutamyl-tRNA synthetase 2, mitochondrial                   | 124454    | 733.5514676 | 0.45194923  | 0.407905009 | 1.107976661 | 0.267871896 | 0.999371363 | Not Sig |
| ENSG00000102981 | PARD6A   | par-6 family cell polarity regulator alpha                  | 50855     | 69.09871908 | 0.45209331  | 0.76113367  | 0.593973606 | 0.552529767 | 0.999371363 | Not Sig |
| ENSG00000196976 | LAGE3    | L antigen family member 3                                   | 8270      | 166.9828542 | 0.452577682 | 0.548045669 | 0.825802862 | 0.40891593  | 0.999371363 | Not Sig |
| ENSG00000242095 | NA       | NA                                                          | NA        | 6.98302678  | 0.45260235  | 0.945415417 | 0.478733837 | 0.632127991 | 0.999371363 | Not Sig |
| ENSG00000225556 | C2CD4D   | C2 calcium dependent domain containing 4D                   | 100191040 | 26.61130878 | 0.452805451 | 0.707004296 | 0.640456435 | 0.521875903 | 0.999371363 | Not Sig |
| ENSG00000224520 | NA       | NA                                                          | NA        | 4.259881952 | 0.452985565 | 1.267977344 | 0.35725052  | 0.720904269 | NA          | NA      |
| ENSG00000135372 | NAT10    | N-acetyltransferase 10                                      | 55226     | 1307.686135 | 0.453097806 | 0.420636076 | 1.077172957 | 0.281403004 | 0.999371363 | Not Sig |
| ENSG00000125510 | OPRL1    | opioid related nociceptin receptor 1                        | 4987      | 86.45417909 | 0.453395922 | 0.650131546 | 0.697391051 | 0.4855581   | 0.999371363 | Not Sig |
| ENSG00000141431 | ASXL3    | additional sex combs like 3, transcriptional regulator      | 80816     | 60.08902887 | 0.453422371 | 0.628827374 | 0.721060167 | 0.470872497 | 0.999371363 | Not Sig |
| ENSG00000130517 | PGPEP1   | pyroglutamyl-peptidase I                                    | 54858     | 1097.337867 | 0.453438507 | 0.599039435 | 0.756942666 | 0.449084212 | 0.999371363 | Not Sig |
| ENSG00000171467 | ZNF318   | zinc finger protein 318                                     | 24149     | 1109.688756 | 0.453582036 | 0.426178001 | 1.064301853 | 0.287191979 | 0.999371363 | Not Sig |
| ENSG00000150893 | FREM2    | FRAS1 related extracellular matrix protein 2                | 341640    | 1312.052615 | 0.454064554 | 0.85167429  | 0.533143432 | 0.593934296 | 0.999371363 | Not Sig |
| ENSG00000184378 | ACTRT3   | actin related protein T3                                    | 84517     | 35.81825147 | 0.454784348 | 0.695673484 | 0.653732474 | 0.513284178 | 0.999371363 | Not Sig |
| ENSG00000240342 | NA       | NA                                                          | NA        | 417.2346505 | 0.454809558 | 0.524893778 | 0.866479233 | 0.38622741  | 0.999371363 | Not Sig |
| ENSG00000271817 | NA       | NA                                                          | NA        | 5.817631051 | 0.455051652 | 1.061006916 | 0.428886603 | 0.66800575  | NA          | NA      |
| ENSG00000132591 | ERAL1    | Era like 12S mitochondrial rRNA chaperone 1                 | 26284     | 505.5200615 | 0.455383296 | 0.44831248  | 1.015772072 | 0.309737938 | 0.999371363 | Not Sig |
| ENSG00000096080 | MRPS18A  | mitochondrial ribosomal protein S18A                        | 55168     | 406.8331262 | 0.455756711 | 0.481442175 | 0.94664891  | 0.343817712 | 0.999371363 | Not Sig |
| ENSG00000260361 | NA       | NA                                                          | NA        | 45.18975273 | 0.455788587 | 0.545161202 | 0.83606204  | 0.403120002 | 0.999371363 | Not Sig |
| ENSG00000160223 | ICOSLG   | inducible T-cell costimulator ligand                        | 23308     | 558.3173707 | 0.455958508 | 0.690993419 | 0.659859408 | 0.509344055 | 0.999371363 | Not Sig |
| ENSG00000116922 | C1orf109 | chromosome 1 open reading frame 109                         | 54955     | 375.7205788 | 0.456347373 | 0.527694196 | 0.864795134 | 0.387151242 | 0.999371363 | Not Sig |
| ENSG00000214812 | NA       | NA                                                          | NA        | 3.548667902 | 0.457076869 | 1.426511542 | 0.320415823 | 0.748653133 | NA          | NA      |
| ENSG00000186866 | POFUT2   | protein O-fucosyltransferase 2                              | 23275     | 962.2443127 | 0.457205992 | 0.498405315 | 0.917337714 | 0.358965701 | 0.999371363 | Not Sig |

|                 |          |                                                          |        |             |             |             |             |             |             |         |
|-----------------|----------|----------------------------------------------------------|--------|-------------|-------------|-------------|-------------|-------------|-------------|---------|
| ENSG00000141873 | SLC39A3  | solute carrier family 39 member 3                        | 29985  | 307.1146453 | 0.457254184 | 0.784878701 | 0.582579427 | 0.560176458 | 0.999371363 | Not Sig |
| ENSG00000173898 | SPTBN2   | spectrin beta, non-erythrocytic 2                        | 6712   | 1438.997355 | 0.4572876   | 0.741168047 | 0.616982346 | 0.53724637  | 0.999371363 | Not Sig |
| ENSG00000179598 | PLD6     | phospholipase D family member 6                          | 201164 | 86.37304561 | 0.457432548 | 0.616892203 | 0.741511313 | 0.458383475 | 0.999371363 | Not Sig |
| ENSG00000251165 | F11-AS1  | F11 antisense RNA 1                                      | 285441 | 0.75970852  | 0.457470251 | 2.817518914 | 0.162366346 | 0.871017371 | NA          | NA      |
| ENSG00000140990 | NDUFB10  | NADH:ubiquinone oxidoreductase subunit B10               | 4716   | 681.5695854 | 0.457868602 | 0.519482948 | 0.881392938 | 0.378105179 | 0.999371363 | Not Sig |
| ENSG00000182103 | FAM181B  | family with sequence similarity 181 member B             | 220382 | 9.7932649   | 0.457891107 | 0.979082757 | 0.467673548 | 0.64001806  | 0.999371363 | Not Sig |
| ENSG00000004468 | CD38     | CD38 molecule                                            | 952    | 536.3149401 | 0.458028085 | 0.796896388 | 0.574764915 | 0.565450298 | 0.999371363 | Not Sig |
| ENSG00000131475 | VPS25    | vacuolar protein sorting 25 homolog                      | 84313  | 672.2595616 | 0.458072139 | 0.470572491 | 0.973435863 | 0.330336722 | 0.999371363 | Not Sig |
| ENSG00000108773 | KAT2A    | lysine acetyltransferase 2A                              | 2648   | 1016.726302 | 0.458097247 | 0.488226195 | 0.938288955 | 0.348095934 | 0.999371363 | Not Sig |
| ENSG00000196507 | TCEAL3   | transcription elongation factor A like 3                 | 85012  | 392.8121131 | 0.458154684 | 0.692446656 | 0.661646178 | 0.508198006 | 0.999371363 | Not Sig |
| ENSG00000011590 | ZBTB32   | zinc finger and BTB domain containing 32                 | 27033  | 21.92903745 | 0.458209656 | 0.831120438 | 0.551315591 | 0.581417352 | 0.999371363 | Not Sig |
| ENSG00000233057 | NA       | NA                                                       | NA     | 3.434098589 | 0.458222164 | 1.608475059 | 0.284879869 | 0.775736179 | NA          | NA      |
| ENSG00000116874 | WARS2    | tryptophanyl tRNA synthetase 2, mitochondrial            | 10352  | 376.9777175 | 0.458231144 | 0.513176789 | 0.892930378 | 0.371894458 | 0.999371363 | Not Sig |
| ENSG00000115423 | DNAH6    | dynein axonemal heavy chain 6                            | 1768   | 325.7032921 | 0.458274825 | 0.740107719 | 0.61920017  | 0.5357845   | 0.999371363 | Not Sig |
| ENSG00000117481 | NSUN4    | NOP2/Sun RNA methyltransferase family member 4           | 387338 | 688.9091815 | 0.45833981  | 0.526806448 | 0.870034549 | 0.384281524 | 0.999371363 | Not Sig |
| ENSG00000123545 | NDUF4F4  | NADH:ubiquinone oxidoreductase complex assembly factor 4 | 29078  | 125.4294173 | 0.458410835 | 0.493982883 | 0.92798931  | 0.353413115 | 0.999371363 | Not Sig |
| ENSG00000197421 | GGT3P    | gamma-glutamyltransferase 3 pseudogene                   | 2679   | 26.0887499  | 0.458453989 | 0.868706566 | 0.527743207 | 0.59767758  | 0.999371363 | Not Sig |
| ENSG00000135144 | DTX1     | deltex E3 ubiquitin ligase 1                             | 1840   | 92.97824942 | 0.458484584 | 0.698105838 | 0.656755121 | 0.511338386 | 0.999371363 | Not Sig |
| ENSG00000164188 | RANBP3L  | RAN binding protein 3 like                               | 202151 | 57.16509313 | 0.458503571 | 0.548485721 | 0.835944407 | 0.403186179 | 0.999371363 | Not Sig |
| ENSG00000100478 | AP4S1    | adaptor related protein complex 4 sigma 1 subunit        | 11154  | 163.7118927 | 0.458594938 | 0.460015554 | 0.996911809 | 0.318807319 | 0.999371363 | Not Sig |
| ENSG00000137720 | C11orf1  | chromosome 11 open reading frame 1                       | 64776  | 141.6598927 | 0.458606736 | 0.641990909 | 0.714350826 | 0.475010271 | 0.999371363 | Not Sig |
| ENSG00000166750 | SLFN5    | schlafen family member 5                                 | 162394 | 4535.923637 | 0.458678472 | 0.628635132 | 0.729641804 | 0.465609162 | 0.999371363 | Not Sig |
| ENSG00000233762 | NA       | NA                                                       | NA     | 12.88621725 | 0.458934978 | 0.826521758 | 0.555260613 | 0.578716415 | 0.999371363 | Not Sig |
| ENSG00000189227 | C15orf61 | chromosome 15 open reading frame 61                      | 145853 | 100.8484248 | 0.458989633 | 0.682167648 | 0.672839931 | 0.501049131 | 0.999371363 | Not Sig |
| ENSG00000163328 | GPR155   | G protein-coupled receptor 155                           | 151556 | 352.2670421 | 0.459039266 | 0.506858425 | 0.905655788 | 0.36511807  | 0.999371363 | Not Sig |
| ENSG00000111664 | GNB3     | G protein subunit beta 3                                 | 2784   | 49.2765921  | 0.459069859 | 0.863442526 | 0.531673904 | 0.594951869 | 0.999371363 | Not Sig |
| ENSG00000120942 | UBIAD1   | UbiA prenyltransferase domain containing 1               | 29914  | 437.8695656 | 0.459275511 | 0.499960686 | 0.918623251 | 0.358292666 | 0.999371363 | Not Sig |
| ENSG00000204644 | ZFP57    | ZFP57 zinc finger protein                                | 346171 | 33.57888738 | 0.459490091 | 1.644198537 | 0.27946144  | 0.779890726 | 0.999371363 | Not Sig |
| ENSG00000229474 | PATL2    | PAT1 homolog 2                                           | 197135 | 116.4842046 | 0.459495691 | 0.802727416 | 0.572418085 | 0.567038766 | 0.999371363 | Not Sig |
| ENSG00000269802 | NA       | NA                                                       | NA     | 1.708253718 | 0.459498003 | 1.928448841 | 0.23827337  | 0.811669075 | NA          | NA      |
| ENSG00000132256 | TRIM5    | tripartite motif containing 5                            | 85363  | 906.5434407 | 0.45961024  | 0.432594286 | 1.062451019 | 0.288030983 | 0.999371363 | Not Sig |
| ENSG00000160818 | GPATCH4  | G-patch domain containing 4                              | 54865  | 508.1796117 | 0.459685267 | 0.526122272 | 0.87372326  | 0.382268981 | 0.999371363 | Not Sig |
| ENSG00000183741 | CBX6     | chromobox 6                                              | 23466  | 2843.889568 | 0.459865972 | 0.844548797 | 0.544510836 | 0.586089994 | 0.999371363 | Not Sig |
| ENSG00000176998 | NA       | NA                                                       | NA     | 47.25925722 | 0.460168558 | 0.551997251 | 0.833642844 | 0.404482275 | 0.999371363 | Not Sig |
| ENSG00000111845 | PAK1IP1  | PAK1 interacting protein 1                               | 55003  | 259.0595021 | 0.460248978 | 0.453652973 | 1.014539759 | 0.310325268 | 0.999371363 | Not Sig |

|                  |           |                                                       |        |             |             |             |             |             |             |         |
|------------------|-----------|-------------------------------------------------------|--------|-------------|-------------|-------------|-------------|-------------|-------------|---------|
| ENSG00000001461  | NIPAL3    | NIPA like domain containing 3                         | 57185  | 1485.62556  | 0.460255658 | 0.495013162 | 0.929784688 | 0.352482576 | 0.999371363 | Not Sig |
| ENSG000000072803 | FBXW11    | F-box and WD repeat domain containing 11              | 23291  | 2012.73798  | 0.460346459 | 0.430725709 | 1.068769402 | 0.28517359  | 0.999371363 | Not Sig |
| ENSG000000090861 | AARS      | alanyl-tRNA synthetase                                | 16     | 2860.718688 | 0.460379765 | 0.392134244 | 1.174036117 | 0.240380559 | 0.999371363 | Not Sig |
| ENSG000000227825 | SLC9A7P1  | solute carrier family 9 member 7 pseudogene 1         | 121456 | 53.34775094 | 0.460396279 | 0.643923243 | 0.714986272 | 0.474617526 | 0.999371363 | Not Sig |
| ENSG000000202361 | NA        | NA                                                    | NA     | 3.362283594 | 0.460422989 | 1.30149905  | 0.3537636   | 0.723516055 | NA          | NA      |
| ENSG000000145864 | GABRB2    | gamma-aminobutyric acid type A receptor beta2 subunit | 2561   | 49.64479133 | 0.460699463 | 1.150488225 | 0.400438225 | 0.688833775 | 0.999371363 | Not Sig |
| ENSG000000130826 | DKC1      | dyskerin pseudouridine synthase 1                     | 1736   | 697.8180015 | 0.460729342 | 0.420579345 | 1.095463548 | 0.273313607 | 0.999371363 | Not Sig |
| ENSG000000131242 | RAB11FIP4 | RAB11 family interacting protein 4                    | 84440  | 996.4805384 | 0.460935015 | 0.476143831 | 0.968058358 | 0.333015225 | 0.999371363 | Not Sig |
| ENSG000000121644 | DESI2     | desumoylating isopeptidase 2                          | 51029  | 1243.161938 | 0.461042377 | 0.45249737  | 1.018884102 | 0.308257992 | 0.999371363 | Not Sig |
| ENSG000000238262 | NA        | NA                                                    | NA     | 2.00135336  | 0.461306866 | 1.686795205 | 0.273481253 | 0.784483301 | NA          | NA      |
| ENSG000000086289 | EPDR1     | ependymin related 1                                   | 54749  | 1081.604738 | 0.461717768 | 0.688672829 | 0.670445746 | 0.502573681 | 0.999371363 | Not Sig |
| ENSG000000171435 | KSR2      | kinase suppressor of ras 2                            | 283455 | 127.6919921 | 0.461744334 | 1.061337139 | 0.435059056 | 0.663519562 | 0.999371363 | Not Sig |
| ENSG000000140474 | ULK3      | unc-51 like kinase 3                                  | 25989  | 792.9769893 | 0.461779876 | 0.645713393 | 0.715146815 | 0.474518329 | 0.999371363 | Not Sig |
| ENSG000000224185 | NA        | NA                                                    | NA     | 6.300535823 | 0.46181197  | 1.082492393 | 0.426619136 | 0.669656757 | NA          | NA      |
| ENSG000000153485 | TMEM251   | transmembrane protein 251                             | 26175  | 96.34074056 | 0.462378805 | 0.511854325 | 0.903340623 | 0.366345143 | 0.999371363 | Not Sig |
| ENSG000000100997 | ABHD12    | abhydrolase domain containing 12                      | 26090  | 1199.974282 | 0.462608006 | 0.541720067 | 0.853961362 | 0.393126398 | 0.999371363 | Not Sig |
| ENSG000000145934 | TENM2     | teneurin transmembrane protein 2                      | 57451  | 52.98498014 | 0.462633692 | 1.079986666 | 0.428369818 | 0.668381895 | 0.999371363 | Not Sig |
| ENSG000000198937 | CCDC167   | coiled-coil domain containing 167                     | 154467 | 118.161062  | 0.462736113 | 0.476382689 | 0.971353754 | 0.331372149 | 0.999371363 | Not Sig |
| ENSG000000101444 | AHCY      | adenosylhomocysteinase                                | 191    | 1092.912844 | 0.463126272 | 0.464456634 | 0.997135661 | 0.318698665 | 0.999371363 | Not Sig |
| ENSG000000065183 | WDR3      | WD repeat domain 3                                    | 10885  | 853.8807409 | 0.463370959 | 0.506177491 | 0.915431775 | 0.359965004 | 0.999371363 | Not Sig |
| ENSG000000178096 | BOLA1     | bola family member 1                                  | 51027  | 189.5325259 | 0.463565799 | 0.585646193 | 0.791545825 | 0.428625546 | 0.999371363 | Not Sig |
| ENSG000000183258 | DDX41     | DEAD-box helicase 41                                  | 51428  | 1020.199031 | 0.463631747 | 0.473341024 | 0.979487778 | 0.327339025 | 0.999371363 | Not Sig |
| ENSG000000177030 | DEAF1     | DEAF1, transcription factor                           | 10522  | 731.9242051 | 0.463825736 | 0.487414164 | 0.951604959 | 0.341297366 | 0.999371363 | Not Sig |
| ENSG000000265550 | NA        | NA                                                    | NA     | 1.788642711 | 0.463855494 | 2.207561548 | 0.210121206 | 0.833573075 | NA          | NA      |
| ENSG000000130812 | ANGPTL6   | angiopoietin like 6                                   | 83854  | 13.89232873 | 0.463892084 | 1.048101719 | 0.442602159 | 0.658053523 | 0.999371363 | Not Sig |
| ENSG000000231409 | NA        | NA                                                    | NA     | 1.580078418 | 0.463976759 | 1.973306008 | 0.235126614 | 0.814110463 | NA          | NA      |
| ENSG000000187051 | RPS19BP1  | ribosomal protein S19 binding protein 1               | 91582  | 958.3443744 | 0.46428741  | 0.742254166 | 0.62551001  | 0.531636381 | 0.999371363 | Not Sig |
| ENSG000000245261 | NA        | NA                                                    | NA     | 8.102053605 | 0.464319714 | 1.00749009  | 0.460867773 | 0.644893474 | 0.999371363 | Not Sig |
| ENSG000000238735 | NA        | NA                                                    | NA     | 2.323895154 | 0.464371354 | 1.731892221 | 0.268129476 | 0.788599658 | NA          | NA      |
| ENSG000000270504 | NA        | NA                                                    | NA     | 160.3421357 | 0.464393667 | 0.827674714 | 0.561082342 | 0.574741405 | 0.999371363 | Not Sig |
| ENSG000000135535 | CD164     | CD164 molecule                                        | 8763   | 6090.508239 | 0.464503018 | 0.548502739 | 0.846856333 | 0.397075204 | 0.999371363 | Not Sig |
| ENSG000000109113 | RAB34     | RAB34, member RAS oncogene family                     | 83871  | 1089.433003 | 0.464550699 | 0.459775064 | 1.010386894 | 0.312309964 | 0.999371363 | Not Sig |
| ENSG000000109519 | GRPEL1    | GrpE like 1, mitochondrial                            | 80273  | 414.5491423 | 0.464632623 | 0.538410193 | 0.862971446 | 0.388153166 | 0.999371363 | Not Sig |
| ENSG000000235051 | NA        | NA                                                    | NA     | 0.894321356 | 0.464799401 | 2.732966686 | 0.170071375 | 0.864954005 | NA          | NA      |
| ENSG000000182109 | NA        | NA                                                    | NA     | 82.74171417 | 0.465022146 | 0.491218734 | 0.946670219 | 0.343806851 | 0.999371363 | Not Sig |



|                 |         |                                                   |        |             |             |             |             |             |             |         |
|-----------------|---------|---------------------------------------------------|--------|-------------|-------------|-------------|-------------|-------------|-------------|---------|
| ENSG00000198492 | YTHDF2  | YTH N6-methyladenosine RNA binding protein 2      | 51441  | 1971.892373 | 0.465388263 | 0.486767344 | 0.956079467 | 0.339032087 | 0.999371363 | Not Sig |
| ENSG00000134531 | EMP1    | epithelial membrane protein 1                     | 2012   | 2927.636751 | 0.466602065 | 0.467988296 | 0.997037892 | 0.318746118 | 0.999371363 | Not Sig |
| ENSG00000134575 | ACP2    | acid phosphatase 2, lysosomal                     | 53     | 873.2691425 | 0.46676236  | 0.566371812 | 0.824127102 | 0.409867342 | 0.999371363 | Not Sig |
| ENSG00000130985 | UBA1    | ubiquitin like modifier activating enzyme 1       | 7317   | 5565.096073 | 0.466927622 | 0.478706984 | 0.975393376 | 0.329365168 | 0.999371363 | Not Sig |
| ENSG00000227973 | NA      | NA                                                | NA     | 1.84956438  | 0.467010842 | 1.929890957 | 0.241988202 | 0.808789305 | NA          | NA      |
| ENSG00000009307 | CSDE1   | cold shock domain containing E1                   | 7812   | 11892.58014 | 0.467441828 | 0.483660603 | 0.96646662  | 0.333810742 | 0.999371363 | Not Sig |
| ENSG00000223821 | NA      | NA                                                | NA     | 1.714691254 | 0.467466186 | 1.928293411 | 0.242424822 | 0.808451003 | NA          | NA      |
| ENSG00000119723 | COQ6    | coenzyme Q6, monooxygenase                        | 51004  | 354.7739022 | 0.467981654 | 0.405864926 | 1.153047786 | 0.248890771 | 0.999371363 | Not Sig |
| ENSG00000099849 | RASSF7  | Ras association domain family member 7            | 8045   | 1389.001533 | 0.46831649  | 0.471843876 | 0.992524253 | 0.320941855 | 0.999371363 | Not Sig |
| ENSG00000261247 | GOLGA8K | golgin A8 family member K                         | 653125 | 4.408499502 | 0.468570596 | 1.287327897 | 0.363986982 | 0.71586773  | NA          | NA      |
| ENSG00000247934 | NA      | NA                                                | NA     | 17.86717189 | 0.468629348 | 0.840143364 | 0.557796882 | 0.576983092 | 0.999371363 | Not Sig |
| ENSG00000100647 | SUSD6   | sushi domain containing 6                         | 9766   | 3087.274227 | 0.468865468 | 0.509973989 | 0.919390944 | 0.357891124 | 0.999371363 | Not Sig |
| ENSG00000177732 | SOX12   | SRY-box 12                                        | 6666   | 672.0639423 | 0.469349867 | 0.552360051 | 0.849717256 | 0.395482302 | 0.999371363 | Not Sig |
| ENSG00000165240 | ATP7A   | ATPase copper transporting alpha                  | 538    | 987.6833271 | 0.469728764 | 0.52377325  | 0.896817017 | 0.369816566 | 0.999371363 | Not Sig |
| ENSG00000256721 | NA      | NA                                                | NA     | 17.70414649 | 0.469927725 | 0.807304074 | 0.582095075 | 0.560502643 | 0.999371363 | Not Sig |
| ENSG00000162408 | NOL9    | nucleolar protein 9                               | 79707  | 966.4964659 | 0.470735847 | 0.437825494 | 1.075167739 | 0.282299636 | 0.999371363 | Not Sig |
| ENSG00000117528 | ABCD3   | ATP binding cassette subfamily D member 3         | 5825   | 2154.842623 | 0.470772747 | 0.588820987 | 0.799517607 | 0.423990342 | 0.999371363 | Not Sig |
| ENSG00000140157 | NIPA2   | non imprinted in Prader-Willi/Angelman syndrome 2 | 81614  | 1042.950015 | 0.470839098 | 0.41515288  | 1.134134246 | 0.25673824  | 0.999371363 | Not Sig |
| ENSG00000010610 | CD4     | CD4 molecule                                      | 920    | 2152.528324 | 0.470900879 | 0.705829236 | 0.667159781 | 0.504670078 | 0.999371363 | Not Sig |
| ENSG00000171766 | GATM    | glycine amidinotransferase                        | 2628   | 310.6351527 | 0.470934727 | 0.568878619 | 0.827829893 | 0.407766843 | 0.999371363 | Not Sig |
| ENSG00000168589 | DYNLRB2 | dynein light chain roadblock-type 2               | 83657  | 30.02020852 | 0.471179303 | 0.959218379 | 0.491211713 | 0.623276716 | 0.999371363 | Not Sig |
| ENSG00000011260 | UTP18   | UTP18, small subunit processome component         | 51096  | 786.5060473 | 0.471221674 | 0.456155313 | 1.033029014 | 0.301590321 | 0.999371363 | Not Sig |
| ENSG00000005882 | PK2     | pyruvate dehydrogenase kinase 2                   | 5164   | 623.7131418 | 0.471647926 | 0.638236476 | 0.738986166 | 0.459915398 | 0.999371363 | Not Sig |
| ENSG00000141349 | G6PC3   | glucose-6-phosphatase catalytic subunit 3         | 92579  | 611.2918553 | 0.471747493 | 0.539761758 | 0.873992064 | 0.382122576 | 0.999371363 | Not Sig |
| ENSG00000105223 | PLD3    | phospholipase D family member 3                   | 23646  | 5940.805032 | 0.471831761 | 0.6998678   | 0.674172694 | 0.500201527 | 0.999371363 | Not Sig |
| ENSG00000272950 | NA      | NA                                                | NA     | 2.58439211  | 0.472301124 | 2.078085047 | 0.227277091 | 0.820208286 | NA          | NA      |
| ENSG00000207815 | MIR563  | microRNA 563                                      | 693148 | 2.756760806 | 0.472399412 | 1.668824795 | 0.283073102 | 0.7771208   | NA          | NA      |
| ENSG00000269243 | NA      | NA                                                | NA     | 1.586515954 | 0.472735247 | 2.026178303 | 0.233313745 | 0.815517787 | NA          | NA      |
| ENSG00000178409 | BEND3   | BEN domain containing 3                           | 57673  | 311.1199471 | 0.472918454 | 0.643280866 | 0.735166362 | 0.462238183 | 0.999371363 | Not Sig |
| ENSG00000197872 | FAM49A  | family with sequence similarity 49 member A       | 81553  | 625.6169753 | 0.473163532 | 0.764026144 | 0.619302802 | 0.535716899 | 0.999371363 | Not Sig |
| ENSG00000053438 | NNAT    | neuronatin                                        | 4826   | 5.468885739 | 0.473340887 | 1.858879949 | 0.254637685 | 0.79900295  | NA          | NA      |
| ENSG00000183617 | MRPL54  | mitochondrial ribosomal protein L54               | 116541 | 414.7430375 | 0.473427324 | 0.779260818 | 0.607533848 | 0.543496687 | 0.999371363 | Not Sig |
| ENSG00000266946 | NA      | NA                                                | NA     | 43.99879841 | 0.473452468 | 0.589891706 | 0.802609129 | 0.42220069  | 0.999371363 | Not Sig |
| ENSG00000105135 | ILVBL   | ilvB acetolactate synthase like                   | 10994  | 814.0101152 | 0.473839782 | 0.683944956 | 0.692803972 | 0.488432579 | 0.999371363 | Not Sig |
| ENSG00000184281 | TSSC4   | tumor suppressing subtransferable candidate 4     | 10078  | 592.6261213 | 0.474156436 | 0.679416838 | 0.697887379 | 0.485247628 | 0.999371363 | Not Sig |

|                 |              |                                                             |           |             |             |             |             |             |             |         |
|-----------------|--------------|-------------------------------------------------------------|-----------|-------------|-------------|-------------|-------------|-------------|-------------|---------|
| ENSG00000005379 | TSPOAP1      | TSPO associated protein 1                                   | 9256      | 810.478458  | 0.474352697 | 0.862526927 | 0.549956972 | 0.582348887 | 0.999371363 | Not Sig |
| ENSG00000250258 | NA           | NA                                                          | NA        | 2.261230355 | 0.474483047 | 2.082962193 | 0.227792443 | 0.819807602 | NA          | NA      |
| ENSG00000203761 | NA           | NA                                                          | NA        | 44.84196827 | 0.475122894 | 0.563344706 | 0.843396395 | 0.399006788 | 0.999371363 | Not Sig |
| ENSG00000214215 | C12orf74     | chromosome 12 open reading frame 74                         | 338809    | 49.28943027 | 0.475384021 | 0.596887491 | 0.796438236 | 0.425777362 | 0.999371363 | Not Sig |
| ENSG00000267257 | NA           | NA                                                          | NA        | 4.535246502 | 0.475597514 | 1.434185098 | 0.331615155 | 0.740179875 | NA          | NA      |
| ENSG00000235587 | NA           | NA                                                          | NA        | 2.435763662 | 0.475795937 | 1.489250217 | 0.319486901 | 0.749357323 | NA          | NA      |
| ENSG00000175344 | CHRNA7       | cholinergic receptor nicotinic alpha 7 subunit              | 1139      | 12.08934093 | 0.476055643 | 1.060244878 | 0.449005369 | 0.653427783 | 0.999371363 | Not Sig |
| ENSG00000175344 | LOC101929970 | CHRNA7-FAM7A fusion protein                                 | 101929970 | 12.08934093 | 0.476055643 | 1.060244878 | 0.449005369 | 0.653427783 | 0.999371363 | Not Sig |
| ENSG00000110344 | UBE4A        | ubiquitination factor E4A                                   | 9354      | 2442.111034 | 0.476137622 | 0.417538533 | 1.140344148 | 0.254142952 | 0.999371363 | Not Sig |
| ENSG00000161980 | POLR3K       | RNA polymerase III subunit K                                | 51728     | 165.1973324 | 0.47658029  | 0.537379387 | 0.886860012 | 0.375154273 | 0.999371363 | Not Sig |
| ENSG00000257285 | LOC101926933 | uncharacterized LOC101926933                                | 101926933 | 5.495078359 | 0.476745068 | 1.063717512 | 0.448187665 | 0.654017764 | NA          | NA      |
| ENSG00000072501 | SMC1A        | structural maintenance of chromosomes 1A                    | 8243      | 2953.914705 | 0.476759672 | 0.392282422 | 1.215348038 | 0.224233378 | 0.999371363 | Not Sig |
| ENSG00000167178 | ISLR2        | immunoglobulin superfamily containing leucine rich repeat 2 | 57611     | 53.16152491 | 0.476876164 | 0.812715113 | 0.58676916  | 0.557358752 | 0.999371363 | Not Sig |
| ENSG00000124226 | RNF114       | ring finger protein 114                                     | 55905     | 1147.250099 | 0.476953252 | 0.471976052 | 1.01054545  | 0.312234036 | 0.999371363 | Not Sig |
| ENSG00000160588 | MPZL3        | myelin protein zero like 3                                  | 196264    | 551.4438907 | 0.476982811 | 0.590504748 | 0.807754404 | 0.419231978 | 0.999371363 | Not Sig |
| ENSG00000171522 | PTGER4       | prostaglandin E receptor 4                                  | 5734      | 989.7930926 | 0.477059535 | 0.894148355 | 0.533535103 | 0.593663218 | 0.999371363 | Not Sig |
| ENSG00000238815 | NA           | NA                                                          | NA        | 18.00622424 | 0.477381404 | 0.729509554 | 0.654386775 | 0.512862653 | 0.999371363 | Not Sig |
| ENSG00000147400 | CETN2        | centrin 2                                                   | 1069      | 592.41704   | 0.477669278 | 0.501626485 | 0.952240944 | 0.3409748   | 0.999371363 | Not Sig |
| ENSG00000105880 | DLX5         | distal-less homeobox 5                                      | 1749      | 5.934183067 | 0.477886541 | 1.280225833 | 0.373283001 | 0.708937827 | NA          | NA      |
| ENSG00000054392 | HHAT         | hedgehog acyltransferase                                    | 55733     | 387.1614951 | 0.478071389 | 0.545038001 | 0.87713405  | 0.380413832 | 0.999371363 | Not Sig |
| ENSG00000143226 | FCGR2A       | Fc fragment of IgG receptor IIa                             | 2212      | 1362.349164 | 0.478287741 | 0.622847403 | 0.76790517  | 0.442543526 | 0.999371363 | Not Sig |
| ENSG00000143226 | FCGR2C       | Fc fragment of IgG receptor IIc (gene/pseudogene)           | 9103      | 1362.349164 | 0.478287741 | 0.622847403 | 0.76790517  | 0.442543526 | 0.999371363 | Not Sig |
| ENSG00000117118 | SDHB         | succinate dehydrogenase complex iron sulfur subunit B       | 6390      | 802.5443071 | 0.478437491 | 0.412349475 | 1.160271857 | 0.245938139 | 0.999371363 | Not Sig |
| ENSG00000221821 | C6orf226     | chromosome 6 open reading frame 226                         | 441150    | 73.02703389 | 0.478607003 | 0.647257329 | 0.739438522 | 0.459640758 | 0.999371363 | Not Sig |
| ENSG00000237977 | NA           | NA                                                          | NA        | 4.336535172 | 0.479137988 | 1.275586016 | 0.375621857 | 0.707198039 | NA          | NA      |
| ENSG00000196890 | HIST3H2BB    | histone cluster 3 H2B family member b                       | 128312    | 45.73090979 | 0.479155359 | 0.855946729 | 0.559795772 | 0.575618748 | 0.999371363 | Not Sig |
| ENSG00000066294 | CD84         | CD84 molecule                                               | 8832      | 1078.785335 | 0.479220062 | 0.752882977 | 0.636513345 | 0.524441886 | 0.999371363 | Not Sig |
| ENSG00000166352 | C11orf74     | chromosome 11 open reading frame 74                         | 119710    | 135.6672257 | 0.479522291 | 0.478889563 | 1.00132124  | 0.316671527 | 0.999371363 | Not Sig |
| ENSG00000182183 | SHISAL2A     | shisa like 2A                                               | 348378    | 30.54091022 | 0.480070512 | 1.022860763 | 0.469341018 | 0.6388259   | 0.999371363 | Not Sig |
| ENSG00000239203 | NA           | NA                                                          | NA        | 4.006127542 | 0.48014588  | 1.336563421 | 0.35923913  | 0.719416206 | NA          | NA      |
| ENSG00000160216 | AGPAT3       | 1-acylglycerol-3-phosphate 0-acyltransferase 3              | 56894     | 2865.152712 | 0.480195618 | 0.541211855 | 0.887259976 | 0.374938948 | 0.999371363 | Not Sig |
| ENSG00000162576 | MXRA8        | matrix remodeling associated 8                              | 54587     | 1473.037152 | 0.480287202 | 0.471539224 | 1.018551964 | 0.308415719 | 0.999371363 | Not Sig |
| ENSG00000163349 | HIPK1        | homeodomain interacting protein kinase 1                    | 204851    | 3949.424003 | 0.480667746 | 0.489450835 | 0.982055215 | 0.326072647 | 0.999371363 | Not Sig |
| ENSG00000133142 | TCEAL4       | transcription elongation factor A like 4                    | 79921     | 752.6389923 | 0.480875132 | 0.582992383 | 0.824839476 | 0.409462732 | 0.999371363 | Not Sig |
| ENSG00000029364 | SLC39A9      | solute carrier family 39 member 9                           | 55334     | 2562.504294 | 0.480994966 | 0.484251835 | 0.993274432 | 0.320576234 | 0.999371363 | Not Sig |

|                 |              |                                                                   |           |             |             |             |             |             |             |         |
|-----------------|--------------|-------------------------------------------------------------------|-----------|-------------|-------------|-------------|-------------|-------------|-------------|---------|
| ENSG00000223436 | NA           | NA                                                                | NA        | 1.187420997 | 0.481296385 | 2.499683707 | 0.192542914 | 0.847316956 | NA          | NA      |
| ENSG00000102096 | PIM2         | Pim-2 proto-oncogene, serine/threonine kinase                     | 11040     | 1143.686606 | 0.481311685 | 0.732287603 | 0.657271383 | 0.511006434 | 0.999371363 | Not Sig |
| ENSG00000211873 | NA           | NA                                                                | NA        | 8.831451578 | 0.481340018 | 1.092066534 | 0.440760708 | 0.659386242 | 0.999371363 | Not Sig |
| ENSG00000112249 | ASCC3        | activating signal cointegrator 1 complex subunit 3                | 10973     | 2242.831202 | 0.481344881 | 0.546706279 | 0.88044513  | 0.378618217 | 0.999371363 | Not Sig |
| ENSG00000151014 | NOCT         | nocturnin                                                         | 25819     | 111.4361724 | 0.481485912 | 0.455621473 | 1.056767382 | 0.290617764 | 0.999371363 | Not Sig |
| ENSG00000141219 | C17orf80     | chromosome 17 open reading frame 80                               | 55028     | 535.4551229 | 0.481587765 | 0.437709667 | 1.100244755 | 0.271225496 | 0.999371363 | Not Sig |
| ENSG00000179115 | FARSA        | phenylalanyl-tRNA synthetase alpha subunit                        | 2193      | 736.612621  | 0.481682356 | 0.604011697 | 0.7974719   | 0.425177016 | 0.999371363 | Not Sig |
| ENSG00000115252 | PDE1A        | phosphodiesterase 1A                                              | 5136      | 110.9354302 | 0.482082308 | 0.563975446 | 0.854793079 | 0.392665711 | 0.999371363 | Not Sig |
| ENSG00000186714 | CCDC73       | coiled-coil domain containing 73                                  | 493860    | 5.163342606 | 0.482224344 | 1.099100837 | 0.438744406 | 0.660846747 | NA          | NA      |
| ENSG00000140365 | COMM4        | COMM domain containing 4                                          | 54939     | 611.8567416 | 0.482588276 | 0.551924086 | 0.874374372 | 0.38191441  | 0.999371363 | Not Sig |
| ENSG00000198157 | HMGN5        | high mobility group nucleosome binding domain 5                   | 79366     | 149.047554  | 0.483285177 | 0.629924195 | 0.767211643 | 0.442955692 | 0.999371363 | Not Sig |
| ENSG00000143786 | CNIH3        | cornichon family AMPA receptor auxiliary protein 3                | 149111    | 85.53057093 | 0.483383198 | 0.67213408  | 0.719176743 | 0.472032027 | 0.999371363 | Not Sig |
| ENSG00000134910 | STT3A        | STT3A, catalytic subunit of the oligosaccharyltransferase complex | 3703      | 2626.37015  | 0.483537054 | 0.464506662 | 1.04096904  | 0.297889917 | 0.999371363 | Not Sig |
| ENSG00000160767 | FAM189B      | family with sequence similarity 189 member B                      | 10712     | 494.9791451 | 0.483548073 | 0.629603439 | 0.768020064 | 0.442475265 | 0.999371363 | Not Sig |
| ENSG00000041802 | LSG1         | large 60S subunit nuclear export GTPase 1                         | 55341     | 1123.730112 | 0.483632797 | 0.406394217 | 1.190058263 | 0.234023493 | 0.999371363 | Not Sig |
| ENSG00000167106 | FAM102A      | family with sequence similarity 102 member A                      | 399665    | 1538.529773 | 0.483697843 | 0.514936384 | 0.939335144 | 0.3475587   | 0.999371363 | Not Sig |
| ENSG00000259056 | NA           | NA                                                                | NA        | 2.300890537 | 0.483901347 | 1.79294871  | 0.26989135  | 0.787243842 | NA          | NA      |
| ENSG00000124275 | MTRR         | 5-methyltetrahydrofolate-homocysteine methyltransferase reductase | 4552      | 1287.139628 | 0.484143372 | 0.467058312 | 1.036580143 | 0.299931572 | 0.999371363 | Not Sig |
| ENSG00000124275 | LOC107986404 | uncharacterized LOC107986404                                      | 107986404 | 1287.139628 | 0.484143372 | 0.467058312 | 1.036580143 | 0.299931572 | 0.999371363 | Not Sig |
| ENSG00000258288 | NA           | NA                                                                | NA        | 1.541442307 | 0.484254769 | 1.992712738 | 0.243012834 | 0.807995456 | NA          | NA      |
| ENSG00000149016 | TUT1         | terminal uridylyl transferase 1, U6 snRNA-specific                | 64852     | 205.91847   | 0.484338019 | 0.589689379 | 0.821344316 | 0.411450172 | 0.999371363 | Not Sig |
| ENSG00000239087 | NA           | NA                                                                | NA        | 7.538029883 | 0.484708062 | 0.920816196 | 0.526389593 | 0.598617545 | 0.999371363 | Not Sig |
| ENSG00000199133 | MIRLET7D     | microRNA let-7d                                                   | 406886    | 15.69589132 | 0.484741595 | 0.78896829  | 0.614399338 | 0.538951473 | 0.999371363 | Not Sig |
| ENSG00000258486 | NA           | NA                                                                | NA        | 494054.3655 | 0.484817166 | 0.566993527 | 0.855066492 | 0.392514338 | 0.999371363 | Not Sig |
| ENSG00000197153 | HIST1H3J     | histone cluster 1 H3 family member j                              | 8356      | 125.1245208 | 0.485157833 | 0.813861719 | 0.596118261 | 0.551096226 | 0.999371363 | Not Sig |
| ENSG00000038002 | AGA          | aspartylglucosaminidase                                           | 175       | 443.2256962 | 0.485564179 | 0.537873025 | 0.902748709 | 0.366659278 | 0.999371363 | Not Sig |
| ENSG00000146242 | TPBG         | trophoblast glycoprotein                                          | 7162      | 747.4082035 | 0.485569321 | 0.767797791 | 0.632418231 | 0.527113624 | 0.999371363 | Not Sig |
| ENSG00000169330 | KIAA1024     | KIAA1024                                                          | 23251     | 44.97697396 | 0.485774618 | 0.756788263 | 0.641889735 | 0.520944779 | 0.999371363 | Not Sig |
| ENSG00000152672 | CLEC4F       | C-type lectin domain family 4 member F                            | 165530    | 45.57392241 | 0.485871746 | 0.80063956  | 0.606854532 | 0.543947455 | 0.999371363 | Not Sig |
| ENSG00000182890 | GLUD2        | glutamate dehydrogenase 2                                         | 2747      | 31.16391515 | 0.485876718 | 0.932205417 | 0.521212073 | 0.602219044 | 0.999371363 | Not Sig |
| ENSG00000145247 | OCIA2        | OCIA domain containing 2                                          | 132299    | 668.6928653 | 0.486046506 | 0.68030155  | 0.714457443 | 0.474944363 | 0.999371363 | Not Sig |
| ENSG00000223380 | NA           | NA                                                                | NA        | 1772.282717 | 0.486062277 | 0.587921902 | 0.826746334 | 0.408380853 | 0.999371363 | Not Sig |
| ENSG00000184640 | 9-Sep        | septin 9                                                          | 10801     | 8176.962133 | 0.486341919 | 0.544091358 | 0.893860769 | 0.37139639  | 0.999371363 | Not Sig |
| ENSG00000272267 | NA           | NA                                                                | NA        | 3.067036592 | 0.486412783 | 1.634128983 | 0.297658745 | 0.765963633 | NA          | NA      |
| ENSG00000167513 | CDT1         | chromatin licensing and DNA replication factor 1                  | 81620     | 133.2670205 | 0.486747366 | 0.821032558 | 0.592847824 | 0.553282999 | 0.999371363 | Not Sig |

|                 |          |                                                            |           |             |             |             |             |             |             |         |
|-----------------|----------|------------------------------------------------------------|-----------|-------------|-------------|-------------|-------------|-------------|-------------|---------|
| ENSG00000184436 | THAP7    | THAP domain containing 7                                   | 80764     | 451.3916146 | 0.486756376 | 0.651014579 | 0.747688902 | 0.454647827 | 0.999371363 | Not Sig |
| ENSG00000157399 | ARSE     | arylsulfatase E (chondrodysplasia punctata 1)              | 415       | 539.649989  | 0.486888074 | 0.841295576 | 0.578736045 | 0.562767291 | 0.999371363 | Not Sig |
| ENSG00000228089 | NA       | NA                                                         | NA        | 1.711674541 | 0.486925482 | 2.237932475 | 0.217578273 | 0.827757715 | NA          | NA      |
| ENSG00000140993 | TIGD7    | tigger transposable element derived 7                      | 91151     | 142.7336514 | 0.486981978 | 0.626364345 | 0.777473976 | 0.436879183 | 0.999371363 | Not Sig |
| ENSG00000269430 | NA       | NA                                                         | NA        | 59.30867494 | 0.487191131 | 1.042621334 | 0.467275237 | 0.640302971 | 0.999371363 | Not Sig |
| ENSG00000188171 | ZNF626   | zinc finger protein 626                                    | 199777    | 360.2102943 | 0.487268024 | 0.580668884 | 0.839149535 | 0.401385402 | 0.999371363 | Not Sig |
| ENSG00000176410 | DNAJC30  | DnaJ heat shock protein family (Hsp40) member C30          | 84277     | 348.8747002 | 0.487306703 | 0.617770545 | 0.788815049 | 0.430220113 | 0.999371363 | Not Sig |
| ENSG00000160404 | TOR2A    | torsin family 2 member A                                   | 27433     | 234.8061103 | 0.48763438  | 0.628061387 | 0.776411971 | 0.437505778 | 0.999371363 | Not Sig |
| ENSG00000260601 | NA       | NA                                                         | NA        | 21.47649663 | 0.48776246  | 0.711010847 | 0.686012685 | 0.492705109 | 0.999371363 | Not Sig |
| ENSG00000272223 | NA       | NA                                                         | NA        | 8.1677144   | 0.48794881  | 0.926286367 | 0.526779652 | 0.598346615 | 0.999371363 | Not Sig |
| ENSG00000239151 | NA       | NA                                                         | NA        | 7.351933334 | 0.488121901 | 1.236486778 | 0.394765161 | 0.693016209 | 0.999371363 | Not Sig |
| ENSG00000228063 | NA       | NA                                                         | NA        | 3.645470217 | 0.488557701 | 1.471339813 | 0.332049535 | 0.739851855 | NA          | NA      |
| ENSG00000168671 | UGT3A2   | UDP glycosyltransferase family 3 member A2                 | 167127    | 5.773676148 | 0.488595851 | 1.457317852 | 0.335270614 | 0.737420959 | NA          | NA      |
| ENSG00000230679 | ENO1-AS1 | ENO1 antisense RNA 1                                       | 100505975 | 6.438719774 | 0.48862718  | 1.025051578 | 0.476685457 | 0.63358612  | NA          | NA      |
| ENSG00000119681 | LTBP2    | latent transforming growth factor beta binding protein 2   | 4053      | 12998.47974 | 0.48868049  | 0.704514703 | 0.693641293 | 0.487907191 | 0.999371363 | Not Sig |
| ENSG00000100319 | ZMAT5    | zinc finger matrin-type 5                                  | 55954     | 244.337401  | 0.488701825 | 0.576380121 | 0.847881123 | 0.396504178 | 0.999371363 | Not Sig |
| ENSG00000212030 | NA       | NA                                                         | NA        | 4.026868449 | 0.489421386 | 1.344460591 | 0.364028064 | 0.715837053 | NA          | NA      |
| ENSG00000161609 | CCDC155  | coiled-coil domain containing 155                          | 147872    | 9.531493685 | 0.489431545 | 1.830707561 | 0.267345564 | 0.789203108 | 0.999371363 | Not Sig |
| ENSG00000218265 | NA       | NA                                                         | NA        | 0.81091565  | 0.489523135 | 2.7826572   | 0.17591931  | 0.860357334 | NA          | NA      |
| ENSG00000251787 | NA       | NA                                                         | NA        | 0.81091565  | 0.489523135 | 2.7826572   | 0.17591931  | 0.860357334 | NA          | NA      |
| ENSG00000162377 | COA7     | cytochrome c oxidase assembly factor 7 (putative)          | 65260     | 183.4473692 | 0.489676603 | 0.462000685 | 1.059904494 | 0.289188051 | 0.999371363 | Not Sig |
| ENSG00000103342 | GSPT1    | G1 to S phase transition 1                                 | 2935      | 3956.755304 | 0.489993204 | 0.430294373 | 1.138739511 | 0.254811818 | 0.999371363 | Not Sig |
| ENSG00000243103 | NA       | NA                                                         | NA        | 6.080862634 | 0.490057785 | 1.175397399 | 0.416929445 | 0.676730015 | NA          | NA      |
| ENSG00000121005 | CRISPLD1 | cysteine rich secretory protein LCCL domain containing 1   | 83690     | 173.1118805 | 0.490282861 | 0.825282832 | 0.59407859  | 0.55245955  | 0.999371363 | Not Sig |
| ENSG00000121236 | TRIM6    | tripartite motif containing 6                              | 117854    | 61.72454544 | 0.490600862 | 0.795254453 | 0.61691055  | 0.537293728 | 0.999371363 | Not Sig |
| ENSG00000143575 | HAX1     | HCLS1 associated protein X-1                               | 10456     | 988.6353332 | 0.490764065 | 0.490883891 | 0.999755897 | 0.317428654 | 0.999371363 | Not Sig |
| ENSG00000172840 | PDP2     | pyruvate dehydrogenase phosphatase catalytic subunit 2     | 57546     | 273.228306  | 0.491047456 | 0.470355861 | 1.043991363 | 0.296489386 | 0.999371363 | Not Sig |
| ENSG00000115841 | RMDN2    | regulator of microtubule dynamics 2                        | 151393    | 247.3445083 | 0.491114724 | 0.581857842 | 0.844045896 | 0.398643759 | 0.999371363 | Not Sig |
| ENSG00000106636 | YKT6     | YKT6 v-SNARE homolog                                       | 10652     | 1535.835139 | 0.491207008 | 0.466839394 | 1.052196997 | 0.292709177 | 0.999371363 | Not Sig |
| ENSG00000131067 | GGT7     | gamma-glutamyltransferase 7                                | 2686      | 639.261955  | 0.491272534 | 0.508204125 | 0.966683482 | 0.333702287 | 0.999371363 | Not Sig |
| ENSG00000269926 | NA       | NA                                                         | NA        | 2.493408328 | 0.492260059 | 1.542526374 | 0.319125862 | 0.749631073 | NA          | NA      |
| ENSG00000171488 | LRRC8C   | leucine rich repeat containing 8 VRAC subunit C            | 84230     | 680.9021934 | 0.492350275 | 0.615639536 | 0.799737909 | 0.423862664 | 0.999371363 | Not Sig |
| ENSG00000125827 | TMX4     | thioredoxin related transmembrane protein 4                | 56255     | 1738.179226 | 0.492807938 | 0.57188312  | 0.861728421 | 0.388836982 | 0.999371363 | Not Sig |
| ENSG00000204922 | UQCC3    | ubiquinol-cytochrome c reductase complex assembly factor 3 | 790955    | 225.9344285 | 0.492933917 | 0.649006659 | 0.759520585 | 0.447541205 | 0.999371363 | Not Sig |
| ENSG00000186417 | GLDN     | gliomedin                                                  | 342035    | 439.066019  | 0.493083938 | 0.876785915 | 0.562376663 | 0.573859415 | 0.999371363 | Not Sig |

|                 |           |                                                        |        |             |             |             |             |             |             |         |
|-----------------|-----------|--------------------------------------------------------|--------|-------------|-------------|-------------|-------------|-------------|-------------|---------|
| ENSG00000117009 | KMO       | kynurenine 3-monooxygenase                             | 8564   | 106.6881125 | 0.493166944 | 0.761556404 | 0.6475777   | 0.517258125 | 0.999371363 | Not Sig |
| ENSG00000164674 | SYTL3     | synaptotagmin like 3                                   | 94120  | 594.675363  | 0.493190146 | 0.460472838 | 1.071051547 | 0.284146253 | 0.999371363 | Not Sig |
| ENSG00000132432 | SEC61G    | Sec61 translocon gamma subunit                         | 23480  | 591.764284  | 0.493449862 | 0.62214717  | 0.79314009  | 0.427696208 | 0.999371363 | Not Sig |
| ENSG00000178301 | AQP11     | aquaporin 11                                           | 282679 | 19.5434611  | 0.493519343 | 0.687283624 | 0.718072316 | 0.472712699 | 0.999371363 | Not Sig |
| ENSG00000169306 | IL1RAPL1  | interleukin 1 receptor accessory protein like 1        | 11141  | 3.184014514 | 0.493722947 | 1.676284106 | 0.29453417  | 0.768349757 | NA          | NA      |
| ENSG00000175595 | ERCC4     | ERCC excision repair 4, endonuclease catalytic subunit | 2072   | 422.7263866 | 0.493808894 | 0.496049044 | 0.995484016 | 0.319500915 | 0.999371363 | Not Sig |
| ENSG00000111642 | CHD4      | chromodomain helicase DNA binding protein 4            | 1108   | 6998.986224 | 0.493877386 | 0.453602596 | 1.088788713 | 0.27624707  | 0.999371363 | Not Sig |
| ENSG00000185420 | SMYD3     | SET and MYND domain containing 3                       | 64754  | 712.1598343 | 0.493882235 | 0.556612457 | 0.887300003 | 0.374917404 | 0.999371363 | Not Sig |
| ENSG00000106537 | TSPAN13   | tetraspanin 13                                         | 27075  | 3143.457079 | 0.494263411 | 0.527802348 | 0.9364555   | 0.349038714 | 0.999371363 | Not Sig |
| ENSG00000165730 | STOX1     | storkhead box 1                                        | 219736 | 106.5766454 | 0.494591477 | 0.581772329 | 0.8501461   | 0.395243864 | 0.999371363 | Not Sig |
| ENSG00000243989 | ACY1      | aminoacylase 1                                         | 95     | 54.62208675 | 0.494872787 | 0.624073956 | 0.792971382 | 0.427794497 | 0.999371363 | Not Sig |
| ENSG00000054282 | SDCCAG8   | serologically defined colon cancer antigen 8           | 10806  | 1163.921485 | 0.494951083 | 0.427346511 | 1.158196148 | 0.246784    | 0.999371363 | Not Sig |
| ENSG00000149177 | PTPRJ     | protein tyrosine phosphatase, receptor type J          | 5795   | 2022.827669 | 0.495042551 | 0.427444174 | 1.15814551  | 0.24680466  | 0.999371363 | Not Sig |
| ENSG00000182173 | TSEN54    | tRNA splicing endonuclease subunit 54                  | 283989 | 463.9459841 | 0.495228793 | 0.609791397 | 0.812128205 | 0.41671807  | 0.999371363 | Not Sig |
| ENSG00000135631 | RAB11FIP5 | RAB11 family interacting protein 5                     | 26056  | 1012.779487 | 0.495470265 | 0.594739496 | 0.833087879 | 0.404795169 | 0.999371363 | Not Sig |
| ENSG00000178425 | NT5DC1    | 5'-nucleotidase domain containing 1                    | 221294 | 860.2388927 | 0.495737466 | 0.38936391  | 1.273198294 | 0.202947686 | 0.999371363 | Not Sig |
| ENSG00000147144 | CCDC120   | coiled-coil domain containing 120                      | 90060  | 520.0052048 | 0.495887024 | 0.439468011 | 1.128380248 | 0.259159366 | 0.999371363 | Not Sig |
| ENSG00000255966 | NA        | NA                                                     | NA     | 5.546380163 | 0.495949428 | 1.38762591  | 0.357408596 | 0.720785942 | NA          | NA      |
| ENSG00000268059 | NA        | NA                                                     | NA     | 14.25367555 | 0.496142537 | 0.760906031 | 0.652041798 | 0.514374209 | 0.999371363 | Not Sig |
| ENSG00000137310 | TCF19     | transcription factor 19                                | 6941   | 315.2369786 | 0.496418742 | 0.591940222 | 0.838629855 | 0.401677052 | 0.999371363 | Not Sig |
| ENSG00000226636 | NA        | NA                                                     | NA     | 3.902374262 | 0.4965063   | 1.508276712 | 0.329187805 | 0.74201374  | NA          | NA      |
| ENSG00000165948 | IFI27L1   | interferon alpha inducible protein 27 like 1           | 122509 | 148.5678715 | 0.496515462 | 0.567916025 | 0.874276197 | 0.381967859 | 0.999371363 | Not Sig |
| ENSG00000235944 | NA        | NA                                                     | NA     | 102.2827235 | 0.496673135 | 0.52217507  | 0.951162098 | 0.341522095 | 0.999371363 | Not Sig |
| ENSG00000147121 | KRBOX4    | KRAB box domain containing 4                           | 55634  | 324.30194   | 0.496729505 | 0.493903677 | 1.005721417 | 0.314549598 | 0.999371363 | Not Sig |
| ENSG00000157184 | CPT2      | carnitine palmitoyltransferase 2                       | 1376   | 668.1227845 | 0.497005633 | 0.535877694 | 0.927460947 | 0.353687259 | 0.999371363 | Not Sig |
| ENSG00000201297 | NA        | NA                                                     | NA     | 4.144266773 | 0.497193798 | 1.273774656 | 0.39033105  | 0.696291766 | NA          | NA      |
| ENSG00000258896 | NA        | NA                                                     | NA     | 6.038185739 | 0.497536147 | 1.049015    | 0.474288878 | 0.635293922 | NA          | NA      |
| ENSG00000232871 | SEC1P     | secretory blood group 1, pseudogene                    | 653677 | 2.997934258 | 0.497556361 | 1.411850681 | 0.352414294 | 0.724527584 | NA          | NA      |
| ENSG00000215210 | NA        | NA                                                     | NA     | 1.389393037 | 0.497827351 | 2.080089686 | 0.239329753 | 0.810849896 | NA          | NA      |
| ENSG00000256812 | CAPNS2    | calpain small subunit 2                                | 84290  | 8.906516397 | 0.497845883 | 0.926234244 | 0.537494577 | 0.59092603  | 0.999371363 | Not Sig |
| ENSG00000104998 | IL27RA    | interleukin 27 receptor subunit alpha                  | 9466   | 657.2488613 | 0.497926801 | 0.647733254 | 0.768721998 | 0.442058363 | 0.999371363 | Not Sig |
| ENSG00000171864 | PRND      | prion like protein doppel                              | 23627  | 14.15771941 | 0.498006783 | 1.425236135 | 0.349420542 | 0.726773614 | 0.999371363 | Not Sig |
| ENSG00000167700 | MFSD3     | major facilitator superfamily domain containing 3      | 113655 | 352.1520358 | 0.498130385 | 0.689005884 | 0.722969711 | 0.469698493 | 0.999371363 | Not Sig |
| ENSG00000099814 | CEP170B   | centrosomal protein 170B                               | 283638 | 2777.751747 | 0.498335817 | 0.500164708 | 0.996343422 | 0.319083313 | 0.999371363 | Not Sig |
| ENSG00000213619 | NDUFS3    | NADH:ubiquinone oxidoreductase core subunit S3         | 4722   | 583.9446964 | 0.498407027 | 0.503612431 | 0.98966387  | 0.32233844  | 0.999371363 | Not Sig |

|                 |               |                                                                 |           |             |             |             |             |             |             |         |
|-----------------|---------------|-----------------------------------------------------------------|-----------|-------------|-------------|-------------|-------------|-------------|-------------|---------|
| ENSG00000173272 | MZT2A         | mitotic spindle organizing protein 2A                           | 653784    | 433.4865636 | 0.498499144 | 0.551259531 | 0.904291202 | 0.365841011 | 0.999371363 | Not Sig |
| ENSG00000169413 | RNASE6        | ribonuclease A family member k6                                 | 6039      | 159.8425429 | 0.498636375 | 0.877022328 | 0.568556078 | 0.569657439 | 0.999371363 | Not Sig |
| ENSG00000188786 | MTF1          | metal regulatory transcription factor 1                         | 4520      | 895.2072867 | 0.498723214 | 0.443148784 | 1.125408063 | 0.260416156 | 0.999371363 | Not Sig |
| ENSG00000225940 | C5orf67       | chromosome 5 open reading frame 67                              | 101928448 | 0.736964193 | 0.499744531 | 3.291082369 | 0.151848077 | 0.879306761 | NA          | NA      |
| ENSG00000234476 | NA            | NA                                                              | NA        | 0.736964193 | 0.499744531 | 3.291082369 | 0.151848077 | 0.879306761 | NA          | NA      |
| ENSG00000255746 | LOC102723544  | uncharacterized LOC102723544                                    | 102723544 | 0.736964193 | 0.499744531 | 3.291082369 | 0.151848077 | 0.879306761 | NA          | NA      |
| ENSG00000268231 | NA            | NA                                                              | NA        | 0.736964193 | 0.499744531 | 3.291082369 | 0.151848077 | 0.879306761 | NA          | NA      |
| ENSG00000182580 | EPHB3         | EPH receptor B3                                                 | 2049      | 467.5948246 | 0.499933712 | 0.614216819 | 0.813936865 | 0.415681121 | 0.999371363 | Not Sig |
| ENSG00000120278 | PLEKHG1       | pleckstrin homology and RhoGEF domain containing G1             | 57480     | 1182.800243 | 0.500181903 | 0.442794662 | 1.129602378 | 0.258643808 | 0.999371363 | Not Sig |
| ENSG00000235286 | NA            | NA                                                              | NA        | 0.871577028 | 0.500464939 | 2.745749419 | 0.182268977 | 0.855371643 | NA          | NA      |
| ENSG00000261393 | NA            | NA                                                              | NA        | 0.871577028 | 0.500464939 | 2.745749419 | 0.182268977 | 0.855371643 | NA          | NA      |
| ENSG00000182132 | KCNIP1        | potassium voltage-gated channel interacting protein 1           | 30820     | 17.29755173 | 0.500664263 | 0.889939791 | 0.562582175 | 0.573719433 | 0.999371363 | Not Sig |
| ENSG00000135336 | ORC3          | origin recognition complex subunit 3                            | 23595     | 591.7775704 | 0.501061618 | 0.486389391 | 1.030165598 | 0.302932276 | 0.999371363 | Not Sig |
| ENSG00000119632 | IFI27L2       | interferon alpha inducible protein 27 like 2                    | 83982     | 242.2666803 | 0.501194569 | 0.85910058  | 0.583394518 | 0.559627747 | 0.999371363 | Not Sig |
| ENSG00000258820 | NA            | NA                                                              | NA        | 10.39481359 | 0.501497991 | 1.11291499  | 0.45061662  | 0.652265886 | 0.999371363 | Not Sig |
| ENSG00000188389 | PDCD1         | programmed cell death 1                                         | 5133      | 41.196772   | 0.501732083 | 0.69454047  | 0.722394308 | 0.470052085 | 0.999371363 | Not Sig |
| ENSG00000261420 | NA            | NA                                                              | NA        | 12.7024149  | 0.502168264 | 0.988649662 | 0.507933481 | 0.611499994 | 0.999371363 | Not Sig |
| ENSG00000140511 | HAPLN3        | hyaluronan and proteoglycan link protein 3                      | 145864    | 246.1918391 | 0.50241898  | 0.51225933  | 0.980790296 | 0.326696165 | 0.999371363 | Not Sig |
| ENSG00000100577 | GSTZ1         | glutathione S-transferase zeta 1                                | 2954      | 417.5018214 | 0.502539857 | 0.528952894 | 0.950065426 | 0.342079009 | 0.999371363 | Not Sig |
| ENSG00000166068 | SPRED1        | sprouty related EVH1 domain containing 1                        | 161742    | 3170.968279 | 0.502750167 | 0.466501679 | 1.077702803 | 0.281166407 | 0.999371363 | Not Sig |
| ENSG00000103544 | C16orf62      | chromosome 16 open reading frame 62                             | 57020     | 1525.154187 | 0.502754527 | 0.384588108 | 1.30725448  | 0.191126298 | 0.999371363 | Not Sig |
| ENSG00000214772 | NA            | NA                                                              | NA        | 3.949745561 | 0.50277917  | 1.460896796 | 0.344157898 | 0.730727543 | NA          | NA      |
| ENSG00000261183 | SPINT1-AS1    | SPINT1 antisense RNA 1                                          | 102724362 | 230.5178308 | 0.502797214 | 0.650783182 | 0.772603269 | 0.439757209 | 0.999371363 | Not Sig |
| ENSG00000094975 | SUCO          | SUN domain containing ossification factor                       | 51430     | 1931.939671 | 0.502943266 | 0.652958841 | 0.770252632 | 0.441150049 | 0.999371363 | Not Sig |
| ENSG00000002746 | HECW1         | HECT, C2 and WW domain containing E3 ubiquitin protein ligase 1 | 23072     | 88.44227003 | 0.503038413 | 0.914455207 | 0.550096286 | 0.582253334 | 0.999371363 | Not Sig |
| ENSG00000119440 | NA            | NA                                                              | NA        | 5.550724999 | 0.503136593 | 1.512490468 | 0.332654389 | 0.739395182 | NA          | NA      |
| ENSG00000174574 | AKIRIN1       | akirin 1                                                        | 79647     | 1437.778871 | 0.503916296 | 0.443698007 | 1.135719087 | 0.25607415  | 0.999371363 | Not Sig |
| ENSG00000187510 | PLEKHG7       | pleckstrin homology and RhoGEF domain containing G7             | 440107    | 100.3005798 | 0.504022758 | 0.740763315 | 0.680409988 | 0.496244899 | 0.999371363 | Not Sig |
| ENSG00000026103 | FAS           | Fas cell surface death receptor                                 | 355       | 506.3740989 | 0.50403929  | 0.628909584 | 0.80144953  | 0.422871451 | 0.999371363 | Not Sig |
| ENSG00000184178 | SCFD2         | secl family domain containing 2                                 | 152579    | 346.648086  | 0.504188529 | 0.450536843 | 1.119083905 | 0.263104346 | 0.999371363 | Not Sig |
| ENSG00000257950 | P2RX5-TAX1BP3 | P2RX5-TAX1BP3 readthrough (NMD candidate)                       | 100533970 | 4.872684438 | 0.504534759 | 1.267061159 | 0.398192901 | 0.690487998 | NA          | NA      |
| ENSG00000205542 | TMSB4X        | thymosin beta 4, X-linked                                       | 7114      | 19807.89652 | 0.504540049 | 0.748291563 | 0.674255964 | 0.500148595 | 0.999371363 | Not Sig |
| ENSG00000154760 | SLFN13        | schlafen family member 13                                       | 146857    | 1161.662801 | 0.504722867 | 0.720792275 | 0.700233457 | 0.48378152  | 0.999371363 | Not Sig |
| ENSG00000125841 | NRSN2         | neurensin 2                                                     | 80023     | 576.1480066 | 0.50499778  | 0.536394538 | 0.941467044 | 0.34646557  | 0.999371363 | Not Sig |
| ENSG00000178199 | ZC3H12D       | zinc finger CCCH-type containing 12D                            | 340152    | 186.7428265 | 0.505279092 | 0.779839156 | 0.647927317 | 0.517031961 | 0.999371363 | Not Sig |

|                 |          |                                                                   |           |             |             |             |             |             |             |         |
|-----------------|----------|-------------------------------------------------------------------|-----------|-------------|-------------|-------------|-------------|-------------|-------------|---------|
| ENSG00000130338 | TULP4    | tubby like protein 4                                              | 56995     | 3325.203949 | 0.505657019 | 0.422486264 | 1.196860259 | 0.231361026 | 0.999371363 | Not Sig |
| ENSG00000198851 | CD3E     | CD3e molecule                                                     | 916       | 307.7892753 | 0.505832529 | 0.75953372  | 0.665977712 | 0.505425347 | 0.999371363 | Not Sig |
| ENSG00000257830 | NA       | NA                                                                | NA        | 2.002770762 | 0.505926305 | 2.537708484 | 0.199363445 | 0.841978453 | NA          | NA      |
| ENSG00000112186 | CAP2     | cyclase associated actin cytoskeleton regulatory protein 2        | 10486     | 225.1399351 | 0.506025899 | 0.479785612 | 1.054691691 | 0.291566353 | 0.999371363 | Not Sig |
| ENSG00000112149 | CD83     | CD83 molecule                                                     | 9308      | 947.8343236 | 0.506087864 | 0.884655115 | 0.572073632 | 0.567272092 | 0.999371363 | Not Sig |
| ENSG00000243279 | PRAF2    | PRA1 domain family member 2                                       | 11230     | 202.089147  | 0.506454932 | 0.530709159 | 0.954298458 | 0.339932588 | 0.999371363 | Not Sig |
| ENSG00000103064 | SLC7A6   | solute carrier family 7 member 6                                  | 9057      | 925.2687577 | 0.506524611 | 0.420187168 | 1.205473775 | 0.228020456 | 0.999371363 | Not Sig |
| ENSG00000233902 | NA       | NA                                                                | NA        | 2.004619465 | 0.506579295 | 1.857996171 | 0.272648191 | 0.785123664 | NA          | NA      |
| ENSG00000166444 | ST5      | suppression of tumorigenicity 5                                   | 6764      | 2505.184746 | 0.506706514 | 0.486667577 | 1.041175822 | 0.297793955 | 0.999371363 | Not Sig |
| ENSG00000238578 | SNORD4A  | small nucleolar RNA, C/D box 4A                                   | 26773     | 12.42710489 | 0.50725102  | 0.815190325 | 0.622248578 | 0.533778428 | 0.999371363 | Not Sig |
| ENSG00000128965 | CHAC1    | ChaC glutathione specific gamma-glutamylcyclotransferase 1        | 79094     | 39.66465028 | 0.507264408 | 0.678452815 | 0.747678242 | 0.454654258 | 0.999371363 | Not Sig |
| ENSG00000237464 | NA       | NA                                                                | NA        | 1.395830572 | 0.507422477 | 2.07946077  | 0.244016374 | 0.807218138 | NA          | NA      |
| ENSG00000231770 | NA       | NA                                                                | NA        | 48.34935634 | 0.507428922 | 0.580400247 | 0.874274133 | 0.381968983 | 0.999371363 | Not Sig |
| ENSG00000163472 | TMEM79   | transmembrane protein 79                                          | 84283     | 132.2661975 | 0.50757432  | 0.688833431 | 0.736860752 | 0.461207034 | 0.999371363 | Not Sig |
| ENSG00000268278 | NA       | NA                                                                | NA        | 1.599086973 | 0.50813687  | 1.972792054 | 0.257572443 | 0.796736899 | NA          | NA      |
| ENSG00000263628 | MIR3155A | microRNA 3155a                                                    | 100422989 | 9.083087068 | 0.50816375  | 1.020891047 | 0.49776492  | 0.618649744 | 0.999371363 | Not Sig |
| ENSG00000260279 | NA       | NA                                                                | NA        | 13.40294488 | 0.508329199 | 0.801356309 | 0.634336055 | 0.525861532 | 0.999371363 | Not Sig |
| ENSG00000169189 | NSMCE1   | NSE1 homolog, SMC5-SMC6 complex component                         | 197370    | 503.8833952 | 0.508540913 | 0.506848292 | 1.003339504 | 0.315697082 | 0.999371363 | Not Sig |
| ENSG00000187792 | ZNF70    | zinc finger protein 70                                            | 7621      | 369.8465946 | 0.508927815 | 0.590987889 | 0.861147622 | 0.389156744 | 0.999371363 | Not Sig |
| ENSG00000129028 | THAP10   | THAP domain containing 10                                         | 56906     | 38.86882898 | 0.509107058 | 0.705178597 | 0.721954779 | 0.47032228  | 0.999371363 | Not Sig |
| ENSG00000117408 | IPO13    | importin 13                                                       | 9670      | 660.3755318 | 0.50954259  | 0.617800022 | 0.824769459 | 0.409502489 | 0.999371363 | Not Sig |
| ENSG00000257702 | LBX2-AS1 | LBX2 antisense RNA 1                                              | 151534    | 195.398822  | 0.509563953 | 0.592045758 | 0.860683396 | 0.38941244  | 0.999371363 | Not Sig |
| ENSG00000120708 | TGFBI    | transforming growth factor beta induced                           | 7045      | 3989.713172 | 0.509886803 | 0.424652354 | 1.200715827 | 0.229861452 | 0.999371363 | Not Sig |
| ENSG00000100865 | CINP     | cyclin dependent kinase 2 interacting protein                     | 51550     | 382.0499065 | 0.510087469 | 0.486111884 | 1.049321124 | 0.294030347 | 0.999371363 | Not Sig |
| ENSG00000269821 | KCNQ1OT1 | KCNQ1 opposite strand/antisense transcript 1 (non-protein coding) | 10984     | 3972.434398 | 0.510094458 | 0.66626769  | 0.765599872 | 0.443914421 | 0.999371363 | Not Sig |
| ENSG00000188868 | ZNF563   | zinc finger protein 563                                           | 147837    | 74.15779517 | 0.510236894 | 0.523108989 | 0.975393092 | 0.329365309 | 0.999371363 | Not Sig |
| ENSG00000142149 | HUNK     | hormonally up-regulated Neu-associated kinase                     | 30811     | 141.7306282 | 0.510419554 | 0.690749125 | 0.73893623  | 0.459945721 | 0.999371363 | Not Sig |
| ENSG00000273350 | NA       | NA                                                                | NA        | 4.255831229 | 0.510841996 | 1.621268018 | 0.315087937 | 0.752694887 | NA          | NA      |
| ENSG00000104524 | PYCR3    | pyrroline-5-carboxylate reductase 3                               | 65263     | 232.7858529 | 0.511123169 | 0.573735569 | 0.890868889 | 0.372999512 | 0.999371363 | Not Sig |
| ENSG00000248092 | NA       | NA                                                                | NA        | 403.8167226 | 0.511130863 | 0.440875054 | 1.159355374 | 0.246311359 | 0.999371363 | Not Sig |
| ENSG00000232004 | NA       | NA                                                                | NA        | 2.403150079 | 0.511184343 | 1.537124118 | 0.332558924 | 0.739467254 | NA          | NA      |
| ENSG00000201155 | NA       | NA                                                                | NA        | 0.817353185 | 0.511266355 | 3.212512011 | 0.159148465 | 0.873551905 | NA          | NA      |
| ENSG00000237876 | NA       | NA                                                                | NA        | 0.817353185 | 0.511266355 | 3.212512011 | 0.159148465 | 0.873551905 | NA          | NA      |
| ENSG00000254630 | NA       | NA                                                                | NA        | 0.817353185 | 0.511266355 | 3.212512011 | 0.159148465 | 0.873551905 | NA          | NA      |
| ENSG00000118096 | IFT46    | intraflagellar transport 46                                       | 56912     | 285.2552311 | 0.511450004 | 0.61618055  | 0.830032698 | 0.406520297 | 0.999371363 | Not Sig |

|                 |         |                                                                                                 |           |             |             |             |             |             |             |         |
|-----------------|---------|-------------------------------------------------------------------------------------------------|-----------|-------------|-------------|-------------|-------------|-------------|-------------|---------|
| ENSG00000252616 | NA      | NA                                                                                              | NA        | 2.762479282 | 0.511635724 | 1.522292802 | 0.336095476 | 0.73679887  | NA          | NA      |
| ENSG00000254332 | NA      | NA                                                                                              | NA        | 2.393999883 | 0.511708047 | 1.844048852 | 0.27749159  | 0.781402663 | NA          | NA      |
| ENSG00000159128 | IFNGR2  | interferon gamma receptor 2                                                                     | 3460      | 1887.334893 | 0.511818943 | 0.384984465 | 1.329453496 | 0.183698399 | 0.999371363 | Not Sig |
| ENSG00000178234 | GALNT11 | polypeptide N-acetylgalactosaminyltransferase 11                                                | 63917     | 1274.187889 | 0.512300582 | 0.401533954 | 1.275858684 | 0.202005478 | 0.999371363 | Not Sig |
| ENSG00000153066 | TXNDC11 | thioredoxin domain containing 11                                                                | 51061     | 2256.268189 | 0.512630358 | 0.43468118  | 1.179324941 | 0.23826881  | 0.999371363 | Not Sig |
| ENSG00000253144 | NA      | NA                                                                                              | NA        | 1.525135515 | 0.512696056 | 2.031744496 | 0.252342781 | 0.800776123 | NA          | NA      |
| ENSG00000208015 | MIR362  | microRNA 362                                                                                    | 574030    | 1.36664871  | 0.512743261 | 2.374334558 | 0.215952406 | 0.829024847 | NA          | NA      |
| ENSG00000198580 | NA      | NA                                                                                              | NA        | 16.32517365 | 0.51283184  | 0.777195423 | 0.65984928  | 0.509350555 | 0.999371363 | Not Sig |
| ENSG00000106125 | MINDY4  | MINDY lysine 4 deubiquitinase 4                                                                 | 84182     | 127.6838844 | 0.512904858 | 0.766018992 | 0.669571986 | 0.503130677 | 0.999371363 | Not Sig |
| ENSG00000105948 | TTC26   | tetratricopeptide repeat domain 26                                                              | 79989     | 206.1942492 | 0.51318853  | 0.453394644 | 1.131880442 | 0.257684702 | 0.999371363 | Not Sig |
| ENSG00000141905 | NFIC    | nuclear factor I C                                                                              | 4782      | 6967.46503  | 0.513274415 | 0.677333877 | 0.757786422 | 0.448578852 | 0.999371363 | Not Sig |
| ENSG00000270393 | NA      | NA                                                                                              | NA        | 2.251361099 | 0.513285825 | 1.839453583 | 0.279042554 | 0.780212168 | NA          | NA      |
| ENSG00000249693 | THEGL   | theg spermatid protein like                                                                     | 100506564 | 1.232035874 | 0.513523299 | 2.459528697 | 0.20878931  | 0.834612717 | NA          | NA      |
| ENSG00000242899 | NA      | NA                                                                                              | NA        | 1.733699808 | 0.513740988 | 2.250802463 | 0.228247923 | 0.819453507 | NA          | NA      |
| ENSG00000268093 | NA      | NA                                                                                              | NA        | 1.659748351 | 0.513762621 | 1.968704573 | 0.260964813 | 0.794119642 | NA          | NA      |
| ENSG00000234315 | NA      | NA                                                                                              | NA        | 2.627866446 | 0.514080565 | 1.473317196 | 0.348927282 | 0.727143903 | NA          | NA      |
| ENSG00000100600 | LGMN    | legumain                                                                                        | 5641      | 4664.88787  | 0.514116693 | 0.458711748 | 1.120783795 | 0.262379904 | 0.999371363 | Not Sig |
| ENSG00000254286 | NA      | NA                                                                                              | NA        | 48.12592567 | 0.514750166 | 0.845547966 | 0.608777014 | 0.542672252 | 0.999371363 | Not Sig |
| ENSG00000137806 | NDUFAF1 | NADH:ubiquinone oxidoreductase complex assembly factor 1                                        | 51103     | 179.6341321 | 0.51505507  | 0.434116015 | 1.186445677 | 0.235446342 | 0.999371363 | Not Sig |
| ENSG00000200176 | NA      | NA                                                                                              | NA        | 2.184001895 | 0.51559296  | 1.560230376 | 0.330459506 | 0.741052785 | NA          | NA      |
| ENSG00000211751 | NA      | NA                                                                                              | NA        | 1.634706371 | 0.515699433 | 2.641508148 | 0.195229166 | 0.845213547 | NA          | NA      |
| ENSG00000223474 | NA      | NA                                                                                              | NA        | 15.9994821  | 0.515724841 | 0.743078402 | 0.69403826  | 0.487658216 | 0.999371363 | Not Sig |
| ENSG00000132698 | RAB25   | RAB25, member RAS oncogene family                                                               | 57111     | 1207.417363 | 0.515826177 | 0.604993994 | 0.852613715 | 0.393873554 | 0.999371363 | Not Sig |
| ENSG00000236844 | NA      | NA                                                                                              | NA        | 0.878014564 | 0.516113118 | 2.74240592  | 0.188197201 | 0.850722067 | NA          | NA      |
| ENSG00000261427 | NA      | NA                                                                                              | NA        | 0.878014564 | 0.516113118 | 2.74240592  | 0.188197201 | 0.850722067 | NA          | NA      |
| ENSG00000265420 | MIR4779 | microRNA 4779                                                                                   | 100616159 | 0.878014564 | 0.516113118 | 2.74240592  | 0.188197201 | 0.850722067 | NA          | NA      |
| ENSG00000132003 | ZSWIM4  | zinc finger SWIM-type containing 4                                                              | 65249     | 700.2424764 | 0.516434903 | 0.567160228 | 0.91056262  | 0.362525874 | 0.999371363 | Not Sig |
| ENSG00000164989 | CCDC171 | coiled-coil domain containing 171                                                               | 203238    | 249.4099978 | 0.516658257 | 0.556351408 | 0.928654533 | 0.353068151 | 0.999371363 | Not Sig |
| ENSG00000100714 | MTHFD1  | methylenetetrahydrofolate dehydrogenase, cyclohydrolase and formyltetrahydrofolate synthetase 1 | 4522      | 1135.029485 | 0.517213199 | 0.450059664 | 1.149210294 | 0.250469277 | 0.999371363 | Not Sig |
| ENSG00000272320 | NA      | NA                                                                                              | NA        | 3.811855723 | 0.517309274 | 1.246666984 | 0.414953857 | 0.678175682 | NA          | NA      |
| ENSG00000233929 | NA      | NA                                                                                              | NA        | 2.268537243 | 0.517448014 | 1.80322418  | 0.286957118 | 0.774145154 | NA          | NA      |
| ENSG00000109667 | SLC2A9  | solute carrier family 2 member 9                                                                | 56606     | 222.8853419 | 0.517554663 | 0.605952362 | 0.854117741 | 0.393039755 | 0.999371363 | Not Sig |
| ENSG00000157978 | LDLRAP1 | low density lipoprotein receptor adaptor protein 1                                              | 26119     | 1133.616569 | 0.517588598 | 0.635043401 | 0.815044447 | 0.415046869 | 0.999371363 | Not Sig |
| ENSG00000205835 | GMNC    | geminin coiled-coil domain containing                                                           | 647309    | 0.743401728 | 0.517889878 | 3.284551943 | 0.157674437 | 0.874713345 | NA          | NA      |
| ENSG00000229001 | NA      | NA                                                                                              | NA        | 0.743401728 | 0.517889878 | 3.284551943 | 0.157674437 | 0.874713345 | NA          | NA      |



|                 |          |                                              |        |             |             |             |             |             |             |         |
|-----------------|----------|----------------------------------------------|--------|-------------|-------------|-------------|-------------|-------------|-------------|---------|
| ENSG00000197451 | HNRNPAB  | heterogeneous nuclear ribonucleoprotein A/B  | 3182   | 2638.361963 | 0.518064346 | 0.510214389 | 1.015385605 | 0.309922052 | 0.999371363 | Not Sig |
| ENSG00000049449 | RCN1     | reticulocalbin 1                             | 5954   | 2791.224705 | 0.518843459 | 0.454636116 | 1.141227986 | 0.253775061 | 0.999371363 | Not Sig |
| ENSG00000049449 | PAX6-AS1 | PAX6 antisense RNA 1                         | 440034 | 2791.224705 | 0.518843459 | 0.454636116 | 1.141227986 | 0.253775061 | 0.999371363 | Not Sig |
| ENSG00000142530 | FAM71E1  | family with sequence similarity 71 member E1 | 112703 | 31.0868077  | 0.519213061 | 0.684358281 | 0.75868602  | 0.448040401 | 0.999371363 | Not Sig |
| ENSG00000225698 | NA       | NA                                           | NA     | 79.28785735 | 0.519233697 | 0.678632673 | 0.765117446 | 0.444201612 | 0.999371363 | Not Sig |
| ENSG00000158457 | TSPAN33  | tetraspanin 33                               | 340348 | 146.1368869 | 0.519309136 | 0.525479131 | 0.988258345 | 0.32302614  | 0.999371363 | Not Sig |
| ENSG00000260519 | NA       | NA                                           | NA     | 1.531573051 | 0.519543142 | 1.977464575 | 0.262731959 | 0.792757182 | NA          | NA      |
| ENSG00000148357 | HMCN2    | hemicentin 2                                 | 256158 | 175.3588446 | 0.520182439 | 1.026427468 | 0.506789282 | 0.612302678 | 0.999371363 | Not Sig |
| ENSG00000124608 | AARS2    | alanyl-tRNA synthetase 2, mitochondrial      | 57505  | 660.951885  | 0.520778214 | 0.533782845 | 0.97563685  | 0.329244457 | 0.999371363 | Not Sig |
| ENSG00000237470 | NA       | NA                                           | NA     | 3.934877848 | 0.5208088   | 1.5045176   | 0.346163315 | 0.729219983 | NA          | NA      |
| ENSG00000164002 | EXO5     | exonuclease 5                                | 64789  | 196.5121322 | 0.521041796 | 0.478413276 | 1.089103966 | 0.276108041 | 0.999371363 | Not Sig |
| ENSG00000269302 | NA       | NA                                           | NA     | 6.037472074 | 0.521412422 | 1.526272024 | 0.341624831 | 0.732633248 | NA          | NA      |
| ENSG00000132514 | CLEC10A  | C-type lectin domain containing 10A          | 10462  | 224.494442  | 0.521782155 | 0.939469425 | 0.55540089  | 0.578620484 | 0.999371363 | Not Sig |
| ENSG00000101856 | PGRMC1   | progesterone receptor membrane component 1   | 10857  | 1795.69985  | 0.521909186 | 0.544668528 | 0.958214324 | 0.337954696 | 0.999371363 | Not Sig |
| ENSG00000162458 | FBLIM1   | filamin binding LIM protein 1                | 54751  | 1025.567042 | 0.521912549 | 0.555858927 | 0.938929868 | 0.347766753 | 0.999371363 | Not Sig |
| ENSG00000078018 | MAP2     | microtubule associated protein 2             | 4133   | 1150.106101 | 0.522144921 | 0.629036959 | 0.830070337 | 0.406499017 | 0.999371363 | Not Sig |
| ENSG00000067836 | ROGDI    | rogdi homolog                                | 79641  | 495.9490985 | 0.522386316 | 0.626822817 | 0.833387526 | 0.404626208 | 0.999371363 | Not Sig |
| ENSG00000180340 | FZD2     | frizzled class receptor 2                    | 2535   | 234.7806924 | 0.522533893 | 0.78818233  | 0.662960679 | 0.507355738 | 0.999371363 | Not Sig |
| ENSG00000173171 | MTX1     | metaxin 1                                    | 4580   | 236.1713059 | 0.52269962  | 0.490207589 | 1.066282187 | 0.286296099 | 0.999371363 | Not Sig |
| ENSG00000260401 | NA       | NA                                           | NA     | 131.5355686 | 0.522713842 | 0.799169232 | 0.654071529 | 0.513065723 | 0.999371363 | Not Sig |
| ENSG00000197406 | DIO3     | iodothyronine deiodinase 3                   | 1735   | 5.887676695 | 0.522754352 | 1.49828023  | 0.348902923 | 0.727162191 | NA          | NA      |
| ENSG00000146676 | PURB     | purine rich element binding protein B        | 5814   | 2457.556022 | 0.522819347 | 0.532963501 | 0.980966512 | 0.326609256 | 0.999371363 | Not Sig |
| ENSG00000126067 | PSMB2    | proteasome subunit beta 2                    | 5690   | 1217.521375 | 0.523448576 | 0.404168869 | 1.29512344  | 0.19527765  | 0.999371363 | Not Sig |
| ENSG00000156639 | ZFAND3   | zinc finger AN1-type containing 3            | 60685  | 1949.674524 | 0.523708512 | 0.411104104 | 1.273907284 | 0.202696277 | 0.999371363 | Not Sig |
| ENSG00000260719 | NA       | NA                                           | NA     | 11.78842585 | 0.523753849 | 0.991104502 | 0.528454717 | 0.597183769 | 0.999371363 | Not Sig |
| ENSG00000121766 | ZCCHC17  | zinc finger CCHC-type containing 17          | 51538  | 430.3958972 | 0.524240153 | 0.440914749 | 1.188983028 | 0.234446346 | 0.999371363 | Not Sig |
| ENSG00000156219 | ART3     | ADP-ribosyltransferase 3                     | 419    | 1.672623422 | 0.52446848  | 1.763036503 | 0.297480216 | 0.76609991  | NA          | NA      |
| ENSG00000232024 | NA       | NA                                           | NA     | 1.672623422 | 0.52446848  | 1.763036503 | 0.297480216 | 0.76609991  | NA          | NA      |
| ENSG00000260156 | NA       | NA                                           | NA     | 3.446088984 | 0.524640463 | 1.51273536  | 0.34681576  | 0.728729737 | NA          | NA      |
| ENSG00000116741 | RGS2     | regulator of G protein signaling 2           | 5997   | 1162.242336 | 0.524674248 | 0.561274641 | 0.934790581 | 0.349896235 | 0.999371363 | Not Sig |
| ENSG00000124279 | FASTKD3  | FAST kinase domains 3                        | 79072  | 166.2056377 | 0.524762494 | 0.487404459 | 1.076646888 | 0.281638049 | 0.999371363 | Not Sig |
| ENSG00000084652 | TXLNA    | taxilin alpha                                | 200081 | 3038.255995 | 0.525155543 | 0.470771886 | 1.115520189 | 0.264627572 | 0.999371363 | Not Sig |
| ENSG00000146250 | PRSS35   | protease, serine 35                          | 167681 | 20.89687365 | 0.525270427 | 1.01738945  | 0.516292387 | 0.605650213 | 0.999371363 | Not Sig |
| ENSG00000232187 | NA       | NA                                           | NA     | 9.664515609 | 0.525616417 | 0.914697473 | 0.574634163 | 0.565538742 | 0.999371363 | Not Sig |
| ENSG00000137700 | SLC37A4  | solute carrier family 37 member 4            | 2542   | 449.2519092 | 0.525902    | 0.502525053 | 1.046518968 | 0.295321492 | 0.999371363 | Not Sig |

|                 |          |                                                             |           |             |             |             |             |             |             |         |
|-----------------|----------|-------------------------------------------------------------|-----------|-------------|-------------|-------------|-------------|-------------|-------------|---------|
| ENSG00000187037 | GPR141   | G protein-coupled receptor 141                              | 353345    | 59.80498048 | 0.525976826 | 0.742753946 | 0.708144101 | 0.478855775 | 0.999371363 | Not Sig |
| ENSG00000161999 | JMJD8    | jumonji domain containing 8                                 | 339123    | 1235.558597 | 0.525994995 | 0.563835515 | 0.932887307 | 0.350878157 | 0.999371363 | Not Sig |
| ENSG00000004961 | HCCS     | holocytochrome c synthase                                   | 3052      | 302.8679529 | 0.526156537 | 0.544031565 | 0.9671434   | 0.333472352 | 0.999371363 | Not Sig |
| ENSG00000138796 | HADH     | hydroxyacyl-CoA dehydrogenase                               | 3033      | 651.0266708 | 0.526435557 | 0.399709401 | 1.317045756 | 0.187823288 | 0.999371363 | Not Sig |
| ENSG00000186952 | TMEM232  | transmembrane protein 232                                   | 642987    | 77.84849382 | 0.526632205 | 0.666237157 | 0.790457572 | 0.429260591 | 0.999371363 | Not Sig |
| ENSG00000136270 | TBRG4    | transforming growth factor beta regulator 4                 | 9238      | 950.7949782 | 0.526715049 | 0.52542694  | 1.002451548 | 0.316125557 | 0.999371363 | Not Sig |
| ENSG00000223588 | NA       | NA                                                          | NA        | 0.788171323 | 0.527008549 | 2.798307485 | 0.188331179 | 0.850617045 | NA          | NA      |
| ENSG00000127081 | ZNF484   | zinc finger protein 484                                     | 83744     | 406.8804208 | 0.527060682 | 0.447868954 | 1.176818972 | 0.239267769 | 0.999371363 | Not Sig |
| ENSG00000211818 | NA       | NA                                                          | NA        | 2.783076249 | 0.527120408 | 1.672595169 | 0.31515122  | 0.75264684  | NA          | NA      |
| ENSG00000214787 | MS4A4E   | membrane spanning 4-domains A4E                             | 643680    | 66.30888114 | 0.527123173 | 0.782102247 | 0.67398243  | 0.500322484 | 0.999371363 | Not Sig |
| ENSG00000184887 | BTBD6    | BTB domain containing 6                                     | 90135     | 1195.764951 | 0.527492421 | 0.664969426 | 0.793258157 | 0.42762743  | 0.999371363 | Not Sig |
| ENSG00000130816 | DNMT1    | DNA methyltransferase 1                                     | 1786      | 1852.575503 | 0.527556732 | 0.551234297 | 0.957046278 | 0.338543897 | 0.999371363 | Not Sig |
| ENSG00000264380 | NA       | NA                                                          | NA        | 3.343658432 | 0.527627032 | 1.923877026 | 0.274251953 | 0.783891005 | NA          | NA      |
| ENSG00000230091 | NA       | NA                                                          | NA        | 61.97376726 | 0.527868563 | 0.677225325 | 0.779457802 | 0.435710086 | 0.999371363 | Not Sig |
| ENSG00000173540 | GMPPB    | GDP-mannose pyrophosphorylase B                             | 29925     | 5.257266645 | 0.528085826 | 1.31083348  | 0.402862632 | 0.687049282 | NA          | NA      |
| ENSG00000188365 | NA       | NA                                                          | NA        | 3.464228186 | 0.52816156  | 1.548968234 | 0.340976366 | 0.733121374 | NA          | NA      |
| ENSG00000197586 | ENTPD6   | ectonucleoside triphosphate diphosphohydrolase 6 (putative) | 955       | 1355.30945  | 0.528257789 | 0.510531992 | 1.034720248 | 0.300799577 | 0.999371363 | Not Sig |
| ENSG00000264819 | NA       | NA                                                          | NA        | 8.994229929 | 0.528650474 | 1.115655503 | 0.473847413 | 0.635608721 | 0.999371363 | Not Sig |
| ENSG00000116521 | SCAMP3   | secretory carrier membrane protein 3                        | 10067     | 963.3997404 | 0.528839206 | 0.527423277 | 1.002684615 | 0.316013055 | 0.999371363 | Not Sig |
| ENSG00000271699 | NA       | NA                                                          | NA        | 8.341048081 | 0.528950935 | 0.905775087 | 0.583976026 | 0.559236442 | 0.999371363 | Not Sig |
| ENSG00000162129 | CLPB     | ClpB homolog, mitochondrial AAA ATPase chaperonin           | 81570     | 518.1447417 | 0.528955488 | 0.476032379 | 1.111175441 | 0.26649284  | 0.999371363 | Not Sig |
| ENSG00000256167 | NA       | NA                                                          | NA        | 2.664355197 | 0.529273403 | 1.774994863 | 0.298183062 | 0.765563449 | NA          | NA      |
| ENSG00000136868 | SLC31A1  | solute carrier family 31 member 1                           | 1317      | 1209.751103 | 0.529597876 | 0.461475641 | 1.14761827  | 0.251126184 | 0.999371363 | Not Sig |
| ENSG00000249242 | TMEM150C | transmembrane protein 150C                                  | 441027    | 219.1578822 | 0.529708729 | 0.804007405 | 0.658835635 | 0.510001322 | 0.999371363 | Not Sig |
| ENSG00000143374 | TARS2    | threonyl-tRNA synthetase 2, mitochondrial (putative)        | 80222     | 574.1388984 | 0.530363574 | 0.418925224 | 1.266010123 | 0.205509458 | 0.999371363 | Not Sig |
| ENSG00000220201 | ZGLP1    | zinc finger, GATA-like protein 1                            | 100125288 | 17.39472223 | 0.530537434 | 0.752294319 | 0.705225895 | 0.480669669 | 0.999371363 | Not Sig |
| ENSG00000156050 | FAM161B  | family with sequence similarity 161 member B                | 145483    | 183.421532  | 0.530608752 | 0.560648046 | 0.946420408 | 0.3439342   | 0.999371363 | Not Sig |
| ENSG00000065717 | TLE2     | transducin like enhancer of split 2                         | 7089      | 1396.546133 | 0.530662154 | 0.73716395  | 0.71986992  | 0.47160509  | 0.999371363 | Not Sig |
| ENSG00000197150 | ABC8     | ATP binding cassette subfamily B member 8                   | 11194     | 938.7505216 | 0.53080609  | 0.57475014  | 0.92354234  | 0.355724646 | 0.999371363 | Not Sig |
| ENSG00000177951 | BET1L    | Bet1 golgi vesicular membrane trafficking protein like      | 51272     | 1201.245415 | 0.531208718 | 0.540619835 | 0.982591988 | 0.325808289 | 0.999371363 | Not Sig |
| ENSG00000264856 | NA       | NA                                                          | NA        | 7.74268189  | 0.531419359 | 1.027113939 | 0.517390855 | 0.604883343 | 0.999371363 | Not Sig |
| ENSG00000111087 | GLI1     | GLI family zinc finger 1                                    | 2735      | 101.6879649 | 0.531535521 | 0.658024303 | 0.807774909 | 0.419220172 | 0.999371363 | Not Sig |
| ENSG00000198720 | ANKRD13B | ankyrin repeat domain 13B                                   | 124930    | 111.0606972 | 0.532373751 | 0.700394043 | 0.760106052 | 0.447191195 | 0.999371363 | Not Sig |
| ENSG00000060762 | MPC1     | mitochondrial pyruvate carrier 1                            | 51660     | 452.4485477 | 0.532412068 | 0.545202792 | 0.976539511 | 0.328797178 | 0.999371363 | Not Sig |
| ENSG00000216642 | NA       | NA                                                          | NA        | 2.241491843 | 0.532437836 | 2.034202797 | 0.261742751 | 0.793519779 | NA          | NA      |

|                  |              |                                                           |           |             |             |             |             |             |             |         |
|------------------|--------------|-----------------------------------------------------------|-----------|-------------|-------------|-------------|-------------|-------------|-------------|---------|
| ENSG00000025039  | RRAGD        | Ras related GTP binding D                                 | 58528     | 883.5557592 | 0.532544617 | 0.744715199 | 0.715098359 | 0.474548268 | 0.999371363 | Not Sig |
| ENSG000000213862 | NA           | NA                                                        | NA        | 2.309005765 | 0.532812962 | 1.772961098 | 0.300521519 | 0.763779385 | NA          | NA      |
| ENSG000000169083 | AR           | androgen receptor                                         | 367       | 461.5432898 | 0.532991072 | 0.745288721 | 0.715147105 | 0.47451815  | 0.999371363 | Not Sig |
| ENSG000000215807 | NA           | NA                                                        | NA        | 0.996580898 | 0.533105325 | 3.043836009 | 0.175142591 | 0.860967593 | NA          | NA      |
| ENSG000000215954 | NA           | NA                                                        | NA        | 1.318862402 | 0.533403677 | 2.127116716 | 0.250763709 | 0.801996801 | NA          | NA      |
| ENSG000000264500 | MIR3124      | microRNA 3124                                             | 100422879 | 2.782921531 | 0.533492798 | 1.535361824 | 0.347470407 | 0.728237947 | NA          | NA      |
| ENSG000000181847 | TIGIT        | T-cell immunoreceptor with Ig and ITIM domains            | 201633    | 207.246623  | 0.534075925 | 0.794252555 | 0.672425819 | 0.501312651 | 0.999371363 | Not Sig |
| ENSG000000235592 | NA           | NA                                                        | NA        | 0.794608858 | 0.534196867 | 2.480977882 | 0.215317062 | 0.829520128 | NA          | NA      |
| ENSG000000258422 | NA           | NA                                                        | NA        | 0.794608858 | 0.534196867 | 2.480977882 | 0.215317062 | 0.829520128 | NA          | NA      |
| ENSG000000226666 | NA           | NA                                                        | NA        | 2.129363045 | 0.534712958 | 1.820457713 | 0.29372446  | 0.768968462 | NA          | NA      |
| ENSG000000108826 | MRPL27       | mitochondrial ribosomal protein L27                       | 51264     | 437.1213733 | 0.534737252 | 0.45827408  | 1.166850308 | 0.243270826 | 0.999371363 | Not Sig |
| ENSG000000238532 | NA           | NA                                                        | NA        | 3.773064894 | 0.534985894 | 1.384152967 | 0.386507782 | 0.69912064  | NA          | NA      |
| ENSG000000227803 | NA           | NA                                                        | NA        | 2.167695103 | 0.534997418 | 1.559346419 | 0.343090805 | 0.731530149 | NA          | NA      |
| ENSG000000102897 | LYRM1        | LYR motif containing 1                                    | 57149     | 396.9948017 | 0.535150788 | 0.418657372 | 1.278254782 | 0.201159606 | 0.999371363 | Not Sig |
| ENSG000000172345 | STARD5       | StAR related lipid transfer domain containing 5           | 80765     | 140.6402184 | 0.535161036 | 0.551660126 | 0.97009193  | 0.332000671 | 0.999371363 | Not Sig |
| ENSG000000106399 | RPA3         | replication protein A3                                    | 6119      | 246.6537737 | 0.535191704 | 0.551261143 | 0.97084968  | 0.331623139 | 0.999371363 | Not Sig |
| ENSG000000215878 | NA           | NA                                                        | NA        | 2.277111241 | 0.535617612 | 1.872698961 | 0.286013729 | 0.774867607 | NA          | NA      |
| ENSG00000009413  | REV3L        | REV3 like, DNA directed polymerase zeta catalytic subunit | 5980      | 2139.53775  | 0.535678818 | 0.416924011 | 1.284835615 | 0.198849734 | 0.999371363 | Not Sig |
| ENSG000000164187 | LMBRD2       | LMBR1 domain containing 2                                 | 92255     | 867.3676111 | 0.535847293 | 0.507958734 | 1.054903198 | 0.2914696   | 0.999371363 | Not Sig |
| ENSG000000262943 | ALOX12P2     | arachidonate 12-lipoxygenase pseudogene 2                 | 245       | 349.2400615 | 0.53594498  | 0.931835599 | 0.575149716 | 0.565190047 | 0.999371363 | Not Sig |
| ENSG000000134864 | GGACT        | gamma-glutamylamine cyclotransferase                      | 87769     | 79.79762656 | 0.536053291 | 0.698871742 | 0.767026707 | 0.443065637 | 0.999371363 | Not Sig |
| ENSG000000117519 | CNN3         | calponin 3                                                | 1266      | 2877.292397 | 0.536557925 | 0.480992828 | 1.115521675 | 0.264626936 | 0.999371363 | Not Sig |
| ENSG000000176340 | COX8A        | cytochrome c oxidase subunit 8A                           | 1351      | 746.9359179 | 0.536733853 | 0.581605691 | 0.92284835  | 0.35608624  | 0.999371363 | Not Sig |
| ENSG000000170776 | AKAP13       | A-kinase anchoring protein 13                             | 11214     | 16411.54924 | 0.536783566 | 0.477369061 | 1.124462413 | 0.260816907 | 0.999371363 | Not Sig |
| ENSG000000149474 | KAT14        | lysine acetyltransferase 14                               | 57325     | 296.3930632 | 0.53712946  | 0.571432045 | 0.939970841 | 0.347232518 | 0.999371363 | Not Sig |
| ENSG000000254473 | LOC105376114 | uncharacterized LOC105376114                              | 105376114 | 19.16992003 | 0.537299077 | 0.719061089 | 0.747223129 | 0.454928885 | 0.999371363 | Not Sig |
| ENSG000000239149 | SNORA59A     | small nucleolar RNA, H/ACA box 59A                        | 677885    | 15.01179786 | 0.537747894 | 0.86989235  | 0.618177518 | 0.536458328 | 0.999371363 | Not Sig |
| ENSG000000251806 | NA           | NA                                                        | NA        | 1.679060958 | 0.537847764 | 1.96795481  | 0.273302904 | 0.784620383 | NA          | NA      |
| ENSG000000231663 | LOC101927765 | uncharacterized LOC101927765                              | 101927765 | 17.28468643 | 0.53789177  | 0.929945893 | 0.5784119   | 0.562986062 | 0.999371363 | Not Sig |
| ENSG000000183520 | UTP11        | UTP11, small subunit processome component                 | 51118     | 472.5479229 | 0.538084464 | 0.447695302 | 1.201898839 | 0.229402724 | 0.999371363 | Not Sig |
| ENSG000000185133 | INPP5J       | inositol polyphosphate-5-phosphatase J                    | 27124     | 201.0733703 | 0.538416616 | 1.134787878 | 0.474464547 | 0.635168674 | 0.999371363 | Not Sig |
| ENSG000000198221 | AFDN-DT      | AFDN divergent transcript                                 | 653483    | 17.38296591 | 0.539586459 | 0.773475186 | 0.697613148 | 0.485419157 | 0.999371363 | Not Sig |
| ENSG000000175931 | UBE2O        | ubiquitin conjugating enzyme E2 O                         | 63893     | 1278.633188 | 0.539674663 | 0.558277649 | 0.966677895 | 0.333705081 | 0.999371363 | Not Sig |
| ENSG000000236060 | NA           | NA                                                        | NA        | 1.874595462 | 0.539681    | 1.875564102 | 0.287743298 | 0.773543244 | NA          | NA      |
| ENSG000000204282 | TNRC6C-AS1   | TNRC6C antisense RNA 1                                    | 100131096 | 311.3621369 | 0.539896906 | 0.580028342 | 0.93081125  | 0.351951209 | 0.999371363 | Not Sig |

|                 |               |                                                                |           |             |             |             |             |             |             |         |
|-----------------|---------------|----------------------------------------------------------------|-----------|-------------|-------------|-------------|-------------|-------------|-------------|---------|
| ENSG00000232300 | NA            | NA                                                             | NA        | 7.340880745 | 0.539903514 | 0.971541321 | 0.555718529 | 0.578403288 | 0.999371363 | Not Sig |
| ENSG00000134202 | GSTM3         | glutathione S-transferase mu 3                                 | 2947      | 498.4378882 | 0.540093331 | 0.719111614 | 0.751056332 | 0.452618754 | 0.999371363 | Not Sig |
| ENSG00000120498 | TEX11         | testis expressed 11                                            | 56159     | 1.723830552 | 0.54022489  | 1.810071858 | 0.298454941 | 0.765355962 | NA          | NA      |
| ENSG00000183239 | NA            | NA                                                             | NA        | 3.914115265 | 0.540420323 | 1.27736095  | 0.423075657 | 0.672240062 | NA          | NA      |
| ENSG00000127022 | CANX          | calnexin                                                       | 821       | 18510.5337  | 0.54052349  | 0.455249951 | 1.187311472 | 0.235104785 | 0.999371363 | Not Sig |
| ENSG00000179241 | LDLRAD3       | low density lipoprotein receptor class A domain containing 3   | 143458    | 177.9365359 | 0.540683862 | 0.588941423 | 0.918060508 | 0.358587189 | 0.999371363 | Not Sig |
| ENSG00000197798 | FAM118B       | family with sequence similarity 118 member B                   | 79607     | 381.3423857 | 0.540786838 | 0.439395669 | 1.230751408 | 0.218415855 | 0.999371363 | Not Sig |
| ENSG00000258788 | NA            | NA                                                             | NA        | 9.18486065  | 0.541196511 | 0.92566008  | 0.584660096 | 0.55877629  | 0.999371363 | Not Sig |
| ENSG00000160075 | SSU72         | SSU72 homolog, RNA polymerase II CTD phosphatase               | 29101     | 1753.133949 | 0.541363502 | 0.508042277 | 1.065587505 | 0.28661015  | 0.999371363 | Not Sig |
| ENSG00000081148 | IMPG2         | interphotoreceptor matrix proteoglycan 2                       | 50939     | 20.59926815 | 0.541510291 | 0.701690354 | 0.771722581 | 0.440278754 | 0.999371363 | Not Sig |
| ENSG00000271787 | NA            | NA                                                             | NA        | 2.33905698  | 0.542241396 | 1.702880485 | 0.318425985 | 0.75016183  | NA          | NA      |
| ENSG00000137207 | YIPF3         | Yipl domain family member 3                                    | 25844     | 1771.578255 | 0.54242726  | 0.547413233 | 0.990891756 | 0.321738438 | 0.999371363 | Not Sig |
| ENSG00000108784 | NAGLU         | N-acetyl-alpha-glucosaminidase                                 | 4669      | 784.0996483 | 0.542549199 | 0.642102795 | 0.844956918 | 0.398134893 | 0.999371363 | Not Sig |
| ENSG00000134061 | CD180         | CD180 molecule                                                 | 4064      | 168.5659238 | 0.542828561 | 0.848793204 | 0.639529815 | 0.522478324 | 0.999371363 | Not Sig |
| ENSG00000186583 | SPATC1        | spermatogenesis and centriole associated 1                     | 375686    | 12.17093301 | 0.5432956   | 0.872746454 | 0.622512527 | 0.533604909 | 0.999371363 | Not Sig |
| ENSG00000231584 | FAHD2CP       | fumarylacetoacetate hydrolase domain containing 2C, pseudogene | 729234    | 185.0673072 | 0.544054512 | 0.599551925 | 0.907435186 | 0.36417671  | 0.999371363 | Not Sig |
| ENSG00000249825 | CTD-2201118.1 | uncharacterized LOC101929215                                   | 101929215 | 18.99954318 | 0.544224319 | 0.789536977 | 0.689295543 | 0.490637302 | 0.999371363 | Not Sig |
| ENSG00000113088 | GZMK          | granzyme K                                                     | 3003      | 82.12138486 | 0.54430226  | 0.854280625 | 0.637146909 | 0.524029155 | 0.999371363 | Not Sig |
| ENSG00000150961 | SEC24D        | SEC24 homolog D, COPII coat complex component                  | 9871      | 2665.577613 | 0.544306513 | 0.588678936 | 0.924623729 | 0.355161666 | 0.999371363 | Not Sig |
| ENSG00000196118 | CCDC189       | coiled-coil domain containing 189                              | 90835     | 134.0892395 | 0.544426959 | 0.484495787 | 1.123698024 | 0.261141155 | 0.999371363 | Not Sig |
| ENSG00000130988 | RGN           | regucalcin                                                     | 9104      | 229.1765268 | 0.544439341 | 0.918684662 | 0.592629184 | 0.553429344 | 0.999371363 | Not Sig |
| ENSG00000187372 | PCDHB13       | protocadherin beta 13                                          | 56123     | 174.4676594 | 0.544687909 | 0.681340041 | 0.799436222 | 0.424037514 | 0.999371363 | Not Sig |
| ENSG00000127526 | SLC35E1       | solute carrier family 35 member E1                             | 79939     | 1429.437037 | 0.544956919 | 0.50067708  | 1.088439916 | 0.276400948 | 0.999371363 | Not Sig |
| ENSG00000178397 | FAM220A       | family with sequence similarity 220 member A                   | 84792     | 366.3952013 | 0.545165254 | 0.457448195 | 1.191752991 | 0.233358113 | 0.999371363 | Not Sig |
| ENSG00000169313 | P2RY12        | purinergic receptor P2Y12                                      | 64805     | 37.51771269 | 0.545628958 | 1.061780126 | 0.513881306 | 0.607334978 | 0.999371363 | Not Sig |
| ENSG00000123096 | SSPN          | sarcospan                                                      | 8082      | 345.6314404 | 0.545680398 | 0.552982825 | 0.986794478 | 0.323743402 | 0.999371363 | Not Sig |
| ENSG00000084623 | EIF3I         | eukaryotic translation initiation factor 3 subunit I           | 8668      | 1752.728585 | 0.545927368 | 0.409446131 | 1.333331361 | 0.182423086 | 0.999371363 | Not Sig |
| ENSG00000167085 | PHB           | prohibitin                                                     | 5245      | 1487.152176 | 0.546037745 | 0.554417256 | 0.984885911 | 0.324680115 | 0.999371363 | Not Sig |
| ENSG00000233184 | NA            | NA                                                             | NA        | 106.2423525 | 0.546048048 | 0.685123519 | 0.79700672  | 0.425447129 | 0.999371363 | Not Sig |
| ENSG00000170745 | KCNS3         | potassium voltage-gated channel modifier subfamily S member 3  | 3790      | 930.358648  | 0.546230996 | 0.768734818 | 0.710558418 | 0.477357918 | 0.999371363 | Not Sig |
| ENSG00000063660 | GPC1          | glypican 1                                                     | 2817      | 896.8878802 | 0.54672715  | 0.608261767 | 0.898835302 | 0.368740393 | 0.999371363 | Not Sig |
| ENSG00000204444 | APOM          | apolipoprotein M                                               | 55937     | 26.59397973 | 0.546761086 | 0.720947818 | 0.758392039 | 0.448216322 | 0.999371363 | Not Sig |
| ENSG00000161888 | SPC24         | SPC24, NDC80 kinetochore complex component                     | 147841    | 61.09261089 | 0.546994241 | 0.883260428 | 0.619289876 | 0.535725413 | 0.999371363 | Not Sig |
| ENSG00000213654 | GPSM3         | G protein signaling modulator 3                                | 63940     | 863.438322  | 0.547076997 | 0.774835471 | 0.706055695 | 0.480153503 | 0.999371363 | Not Sig |
| ENSG00000248632 | NA            | NA                                                             | NA        | 12.29481263 | 0.547186157 | 0.90664257  | 0.603530184 | 0.546156042 | 0.999371363 | Not Sig |

|                 |              |                                                            |           |             |             |                 |                 |             |             |         |
|-----------------|--------------|------------------------------------------------------------|-----------|-------------|-------------|-----------------|-----------------|-------------|-------------|---------|
| ENSG00000227615 | NA           | NA                                                         | NA        | 18.41286951 | 0.547759054 | 0.73912176      | 0.741094477     | 0.458636158 | 0.999371363 | Not Sig |
| ENSG00000170638 | TRABD        | TraB domain containing                                     | 80305     | 1194.59094  | 0.547799832 | 0.573125575     | 0.955811179     | 0.339167639 | 0.999371363 | Not Sig |
| ENSG00000169955 | ZNF747       | zinc finger protein 747                                    | 65988     | 148.0993485 | 0.548163576 | 0.470402222     | 1.165308221     | 0.243894252 | 0.999371363 | Not Sig |
| ENSG00000248228 | SLIT2-IT1    | SLIT2 intronic transcript 1                                | 100505893 | 22.27605382 | 0.54853649  | 0.873490054     | 0.627982526     | 0.530015387 | 0.999371363 | Not Sig |
| ENSG00000196449 | YRDC         | yrnC N6-threonylcarbamoyltransferase domain containing     | 79693     | 294.9611147 | 0.548645897 | 0.454107842     | 1.20818415      | 0.226976437 | 0.999371363 | Not Sig |
| ENSG00000169660 | HEXDC        | hexosaminidase D                                           | 284004    | 921.7495857 | 0.548736348 | 0.631238578     | 0.869301033     | 0.384682498 | 0.999371363 | Not Sig |
| ENSG00000110442 | COMMD9       | COMM domain containing 9                                   | 29099     | 511.8099113 | 0.548749371 | 0.502727481     | 1.091544409     | 0.275033402 | 0.999371363 | Not Sig |
| ENSG00000166348 | USP54        | ubiquitin specific peptidase 54                            | 159195    | 2055.189948 | 0.548852628 | 0.459165256     | <b>1.195327</b> | 0.231959295 | 0.999371363 | Not Sig |
| ENSG00000200670 | NA           | NA                                                         | NA        | 1.003018434 | 0.548926122 | 3.001348549     | 0.18289316      | 0.85488185  | NA          | NA      |
| ENSG00000262519 | NA           | NA                                                         | NA        | 1.003018434 | 0.548926122 | 3.001348549     | 0.18289316      | 0.85488185  | NA          | NA      |
| ENSG00000159712 | NA           | NA                                                         | NA        | 18.20587704 | 0.549214528 | 1.21760451      | 0.451061509     | 0.651945218 | 0.999371363 | Not Sig |
| ENSG00000159023 | EPB41        | erythrocyte membrane protein band 4.1                      | 2035      | 2845.662168 | 0.549567666 | 0.42069311      | 1.306338642     | 0.191437422 | 0.999371363 | Not Sig |
| ENSG00000264364 | DYNLL2       | dynein light chain LC8-type 2                              | 140735    | 2822.717444 | 0.549725172 | 0.48646828      | 1.130032923     | 0.258462352 | 0.999371363 | Not Sig |
| ENSG00000106066 | CPVL         | carboxypeptidase, vitellogenic like                        | 54504     | 698.8131427 | 0.549746911 | 0.737453218     | 0.745466828     | 0.455989557 | 0.999371363 | Not Sig |
| ENSG00000222831 | MIR1537      | microRNA 1537                                              | 100302139 | 15.62644367 | 0.550018713 | 0.785228842     | 0.700456585     | 0.483642209 | 0.999371363 | Not Sig |
| ENSG00000175984 | DENND2C      | DENN domain containing 2C                                  | 163259    | 164.3768239 | 0.550057516 | 0.614646811     | 0.894916407     | 0.370831776 | 0.999371363 | Not Sig |
| ENSG00000242485 | MRPL20       | mitochondrial ribosomal protein L20                        | 55052     | 834.0481085 | 0.550077401 | 0.439323359     | 1.252101419     | 0.210532911 | 0.999371363 | Not Sig |
| ENSG00000254759 | NA           | NA                                                         | NA        | 2.090726933 | 0.550091703 | 1.556471568     | 0.353422262     | 0.723771899 | NA          | NA      |
| ENSG00000171786 | NHLH1        | nescient helix-loop-helix 1                                | 4807      | 4.043159918 | 0.550237253 | 1.485750225     | 0.370343039     | 0.71112691  | NA          | NA      |
| ENSG00000251866 | SCARNA21B    | small Cajal body-specific RNA 21B                          | 107397391 | 6.14746469  | 0.550639336 | 1.379440694     | 0.399175795     | 0.689763677 | NA          | NA      |
| ENSG00000258429 | PDF          | peptide deformylase, mitochondrial                         | 64146     | 99.46045859 | 0.551439136 | 0.638813361     | 0.863224174     | 0.388014225 | 0.999371363 | Not Sig |
| ENSG00000162814 | SPATA17      | spermatogenesis associated 17                              | 128153    | 96.36625483 | 0.551492579 | 0.72425168      | 0.761465379     | 0.44637915  | 0.999371363 | Not Sig |
| ENSG00000262583 | NA           | NA                                                         | NA        | 8.465886336 | 0.551957936 | 0.927516549     | 0.595092278     | 0.55178179  | 0.999371363 | Not Sig |
| ENSG00000258099 | ATXN2-AS     | ATXN2 antisense RNA                                        | 102723619 | 12.47173287 | 0.552181667 | <b>0.807671</b> | 0.683671528     | 0.494182606 | 0.999371363 | Not Sig |
| ENSG00000207062 | SNORA15B-1   | small nucleolar RNA, H/ACA box 15B-1                       | 109616962 | 1.730268088 | 0.552679757 | 1.980877235     | 0.279007576     | 0.78023901  | NA          | NA      |
| ENSG00000207062 | SNORA15B-2   | small nucleolar RNA, H/ACA box 15B-2                       | 109617022 | 1.730268088 | 0.552679757 | 1.980877235     | 0.279007576     | 0.78023901  | NA          | NA      |
| ENSG00000173674 | EIF1AX       | eukaryotic translation initiation factor 1A, X-linked      | 1964      | 2091.461444 | 0.552893632 | 0.535670125     | 1.032153196     | 0.302000357 | 0.999371363 | Not Sig |
| ENSG00000173674 | LOC107984923 | eukaryotic translation initiation factor 1A, X-chromosomal | 107984923 | 2091.461444 | 0.552893632 | 0.535670125     | 1.032153196     | 0.302000357 | 0.999371363 | Not Sig |
| ENSG00000226445 | LOC101929523 | uncharacterized LOC101929523                               | 101929523 | 9.092864665 | 0.552901333 | 1.13391405      | 0.48760427      | 0.62583017  | 0.999371363 | Not Sig |
| ENSG00000092208 | GEMIN2       | gem nuclear organelle associated protein 2                 | 8487      | 127.7043367 | 0.553000426 | 0.514996897     | 1.073793704     | 0.282915152 | 0.999371363 | Not Sig |
| ENSG00000146955 | RAB19        | RAB19, member RAS oncogene family                          | 401409    | 73.76598569 | 0.553113042 | 0.634417581     | 0.871843811     | 0.38329359  | 0.999371363 | Not Sig |
| ENSG00000170298 | LGALS9B      | galectin 9B                                                | 284194    | 27.00395145 | 0.553381088 | 1.329653041     | 0.416184576     | 0.677274945 | 0.999371363 | Not Sig |
| ENSG00000102967 | DHODH        | dihydroorotate dehydrogenase (quinone)                     | 1723      | 184.3198181 | 0.55339266  | 0.488336977     | 1.133218833     | 0.257122367 | 0.999371363 | Not Sig |
| ENSG00000168350 | DEGS2        | delta 4-desaturase, sphingolipid 2                         | 123099    | 155.641658  | 0.55339499  | 0.756366149     | 0.731649599     | 0.464382467 | 0.999371363 | Not Sig |
| ENSG00000264771 | NA           | NA                                                         | NA        | 2.627855549 | 0.553740533 | 1.571828906     | 0.35229059      | 0.724620344 | NA          | NA      |

|                 |            |                                                          |           |             |             |             |             |             |             |         |
|-----------------|------------|----------------------------------------------------------|-----------|-------------|-------------|-------------|-------------|-------------|-------------|---------|
| ENSG00000138795 | LEF1       | lymphoid enhancer binding factor 1                       | 51176     | 271.4105191 | 0.554594888 | 0.527296932 | 1.051769609 | 0.292905266 | 0.999371363 | Not Sig |
| ENSG00000187185 | NA         | NA                                                       | NA        | 77.22114119 | 0.555083892 | 0.546417293 | 1.01586077  | 0.309695693 | 0.999371363 | Not Sig |
| ENSG00000121057 | AKAP1      | A-kinase anchoring protein 1                             | 8165      | 1981.545072 | 0.555711544 | 0.581472569 | 0.955696921 | 0.339225379 | 0.999371363 | Not Sig |
| ENSG00000273133 | NA         | NA                                                       | NA        | 15.70110867 | 0.555865741 | 0.932563327 | 0.596062192 | 0.55113368  | 0.999371363 | Not Sig |
| ENSG00000184100 | NA         | NA                                                       | NA        | 2.097164469 | 0.556164525 | 1.573025623 | 0.353563551 | 0.723665994 | NA          | NA      |
| ENSG00000160695 | VPS11      | VPS11, CORVET/HOPS core subunit                          | 55823     | 1027.01388  | 0.556196832 | 0.482083108 | 1.153736407 | 0.248608253 | 0.999371363 | Not Sig |
| ENSG00000156253 | RWDD2B     | RWD domain containing 2B                                 | 10069     | 291.7856404 | 0.556543561 | 0.483375433 | 1.151369149 | 0.2495804   | 0.999371363 | Not Sig |
| ENSG00000184828 | ZBTB7C     | zinc finger and BTB domain containing 7C                 | 201501    | 570.0553458 | 0.5569565   | 1.001068107 | 0.556362246 | 0.577963243 | 0.999371363 | Not Sig |
| ENSG00000245888 | FLJ21408   | uncharacterized LOC400512                                | 400512    | 19.98936177 | 0.557071384 | 0.708053796 | 0.786764207 | 0.43141991  | 0.999371363 | Not Sig |
| ENSG00000117682 | DHDDS      | dehydrodolichyl diphosphate synthase subunit             | 79947     | 844.53058   | 0.557279506 | 0.426150073 | 1.307707169 | 0.190972651 | 0.999371363 | Not Sig |
| ENSG00000234161 | PABPC5-AS1 | PABPC5 antisense RNA 1                                   | 102724167 | 4.098048161 | 0.557286905 | 1.241447375 | 0.448900949 | 0.653503111 | NA          | NA      |
| ENSG00000132563 | REEP2      | receptor accessory protein 2                             | 51308     | 14.02026083 | 0.557744211 | 0.820347896 | 0.679887416 | 0.49657575  | 0.999371363 | Not Sig |
| ENSG00000197085 | NPSR1-AS1  | NPSR1 antisense RNA 1                                    | 404744    | 7.850051803 | 0.557979673 | 1.446849844 | 0.385651403 | 0.699754858 | 0.999371363 | Not Sig |
| ENSG00000085721 | RRN3       | RRN3 homolog, RNA polymerase I transcription factor      | 54700     | 1207.331254 | 0.55815861  | 0.420510336 | 1.327336243 | 0.18439748  | 0.999371363 | Not Sig |
| ENSG00000121753 | ADGRB2     | adhesion G protein-coupled receptor B2                   | 576       | 90.29528011 | 0.55828074  | 0.593540099 | 0.940594816 | 0.34691254  | 0.999371363 | Not Sig |
| ENSG00000252087 | NA         | NA                                                       | NA        | 3.476384197 | 0.558884334 | 1.453718416 | 0.384451574 | 0.700643781 | NA          | NA      |
| ENSG00000119900 | OGFRL1     | opioid growth factor receptor like 1                     | 79627     | 1610.95438  | 0.558885781 | 0.620549249 | 0.900630824 | 0.36778464  | 0.999371363 | Not Sig |
| ENSG00000267009 | NA         | NA                                                       | NA        | 15.01421726 | 0.559146492 | 0.988453307 | 0.565678204 | 0.571612554 | 0.999371363 | Not Sig |
| ENSG00000162522 | KIAA1522   | KIAA1522                                                 | 57648     | 4214.83292  | 0.559309361 | 0.530350626 | 1.054603    | 0.291606931 | 0.999371363 | Not Sig |
| ENSG00000117411 | B4GALT2    | beta-1,4-galactosyltransferase 2                         | 8704      | 683.3139825 | 0.55999597  | 0.550384171 | 1.017463801 | 0.308932844 | 0.999371363 | Not Sig |
| ENSG00000169976 | SF3B5      | splicing factor 3b subunit 5                             | 83443     | 629.3293374 | 0.560129098 | 0.487536486 | 1.14889678  | 0.250598546 | 0.999371363 | Not Sig |
| ENSG00000117500 | TMED5      | transmembrane p24 trafficking protein 5                  | 50999     | 2155.887695 | 0.560268576 | 0.61365505  | 0.913002469 | 0.361241243 | 0.999371363 | Not Sig |
| ENSG00000151320 | AKAP6      | A-kinase anchoring protein 6                             | 9472      | 592.5104339 | 0.56050946  | 0.6480824   | 0.864873758 | 0.387108082 | 0.999371363 | Not Sig |
| ENSG00000228863 | NA         | NA                                                       | NA        | 6.593897962 | 0.560549266 | 1.162941978 | 0.482009658 | 0.629799085 | 0.999371363 | Not Sig |
| ENSG00000170006 | TMEM154    | transmembrane protein 154                                | 201799    | 481.1190833 | 0.561030908 | 0.412883267 | 1.358812412 | 0.174206039 | 0.999371363 | Not Sig |
| ENSG00000235421 | NA         | NA                                                       | NA        | 1.009455969 | 0.561191262 | 3.036285501 | 0.184828226 | 0.853363768 | NA          | NA      |
| ENSG00000235559 | NA         | NA                                                       | NA        | 1.009455969 | 0.561191262 | 3.036285501 | 0.184828226 | 0.853363768 | NA          | NA      |
| ENSG00000171603 | CLSTN1     | calsyntenin 1                                            | 22883     | 4889.952486 | 0.561584594 | 0.58784799  | 0.955322811 | 0.339414475 | 0.999371363 | Not Sig |
| ENSG00000219891 | NA         | NA                                                       | NA        | 37.47366445 | 0.561692296 | 0.592348208 | 0.948246805 | 0.343003825 | 0.999371363 | Not Sig |
| ENSG00000005022 | SLC25A5    | solute carrier family 25 member 5                        | 292       | 2449.775196 | 0.561870948 | 0.518900943 | 1.08280965  | 0.278892921 | 0.999371363 | Not Sig |
| ENSG00000149792 | MRPL49     | mitochondrial ribosomal protein L49                      | 740       | 869.2553157 | 0.562066611 | 0.466967809 | 1.203651729 | 0.228724217 | 0.999371363 | Not Sig |
| ENSG00000198744 | NA         | NA                                                       | NA        | 78.32176712 | 0.56216231  | 0.839770365 | 0.669423849 | 0.503225143 | 0.999371363 | Not Sig |
| ENSG00000227507 | LTB        | lymphotoxin beta                                         | 4050      | 238.7590554 | 0.562370046 | 0.720890799 | 0.780104347 | 0.435329458 | 0.999371363 | Not Sig |
| ENSG00000253414 | NA         | NA                                                       | NA        | 4.71801814  | 0.562597544 | 1.250169593 | 0.45001698  | 0.652698197 | NA          | NA      |
| ENSG00000188976 | NOC2L      | NOC2 like nucleolar associated transcriptional repressor | 26155     | 1657.266519 | 0.562676097 | 0.542459143 | 1.037269081 | 0.299610471 | 0.999371363 | Not Sig |

|                 |           |                                                            |           |             |             |             |             |             |             |         |
|-----------------|-----------|------------------------------------------------------------|-----------|-------------|-------------|-------------|-------------|-------------|-------------|---------|
| ENSG00000223551 | NA        | NA                                                         | NA        | 17.06830748 | 0.563000217 | 0.83735176  | 0.672358074 | 0.501355767 | 0.999371363 | Not Sig |
| ENSG00000143850 | PLEKHA6   | pleckstrin homology domain containing A6                   | 22874     | 2079.281119 | 0.5632504   | 0.737054557 | 0.764190921 | 0.444753476 | 0.999371363 | Not Sig |
| ENSG00000255224 | NA        | NA                                                         | NA        | 22.20631689 | 0.563323839 | 0.706470516 | 0.797377705 | 0.425231704 | 0.999371363 | Not Sig |
| ENSG00000250616 | NA        | NA                                                         | NA        | 21.34256018 | 0.56392245  | 0.703796705 | 0.801257588 | 0.422982539 | 0.999371363 | Not Sig |
| ENSG00000261139 | NA        | NA                                                         | NA        | 8.100407357 | 0.564396268 | 0.973439175 | 0.579796132 | 0.562052106 | 0.999371363 | Not Sig |
| ENSG00000149927 | DOC2A     | double C2 domain alpha                                     | 8448      | 63.77582203 | 0.564828199 | 0.992532206 | 0.569077956 | 0.569303238 | 0.999371363 | Not Sig |
| ENSG00000184205 | TSPYL2    | TSPY like 2                                                | 64061     | 788.3773441 | 0.56492423  | 0.53048445  | 1.064921377 | 0.286911511 | 0.999371363 | Not Sig |
| ENSG00000197119 | SLC25A29  | solute carrier family 25 member 29                         | 123096    | 1750.209401 | 0.564925006 | 0.584802607 | 0.966009725 | 0.334039315 | 0.999371363 | Not Sig |
| ENSG00000230069 | NA        | NA                                                         | NA        | 114.9198098 | 0.564989465 | 0.465124957 | 1.214704687 | 0.224478744 | 0.999371363 | Not Sig |
| ENSG00000221430 | MIR1294   | microRNA 1294                                              | 100302181 | 4.926427715 | 0.56512802  | 1.22769966  | 0.460314553 | 0.645290457 | NA          | NA      |
| ENSG00000105246 | EBI3      | Epstein-Barr virus induced 3                               | 10148     | 32.1482025  | 0.565290247 | 0.657469164 | 0.859797353 | 0.389900759 | 0.999371363 | Not Sig |
| ENSG00000135436 | FAM186B   | family with sequence similarity 186 member B               | 84070     | 14.12486717 | 0.565469024 | 0.733242945 | 0.771189179 | 0.440594807 | 0.999371363 | Not Sig |
| ENSG00000135537 | AFG1L     | AFG1 like ATPase                                           | 246269    | 186.2428152 | 0.565487977 | 0.497124756 | 1.137517234 | 0.255322124 | 0.999371363 | Not Sig |
| ENSG00000213123 | TCTEX1D2  | Tctex1 domain containing 2                                 | 255758    | 19.49532063 | 0.565618819 | 0.70783776  | 0.799079749 | 0.424244171 | 0.999371363 | Not Sig |
| ENSG00000117748 | RPA2      | replication protein A2                                     | 6118      | 705.2635487 | 0.566158107 | 0.474311706 | 1.193641438 | 0.232618257 | 0.999371363 | Not Sig |
| ENSG00000164116 | GUCY1A3   | guanylate cyclase 1 soluble subunit alpha                  | 2982      | 1186.37626  | 0.566228732 | 0.611262923 | 0.926325989 | 0.354276594 | 0.999371363 | Not Sig |
| ENSG00000260293 | NA        | NA                                                         | NA        | 6.663238911 | 0.566542    | 1.040699369 | 0.54438584  | 0.586175988 | 0.999371363 | Not Sig |
| ENSG00000250327 | NA        | NA                                                         | NA        | 10.28140441 | 0.566712481 | 1.083976965 | 0.522808601 | 0.601107453 | 0.999371363 | Not Sig |
| ENSG00000125901 | MRPS26    | mitochondrial ribosomal protein S26                        | 64949     | 610.1908489 | 0.566746561 | 0.526699282 | 1.076034429 | 0.281911859 | 0.999371363 | Not Sig |
| ENSG00000056736 | IL17RB    | interleukin 17 receptor B                                  | 55540     | 138.0942533 | 0.566952084 | 0.491464623 | 1.153596937 | 0.248665455 | 0.999371363 | Not Sig |
| ENSG00000231530 | NA        | NA                                                         | NA        | 3.168566177 | 0.567226843 | 1.515749417 | 0.374222043 | 0.708239126 | NA          | NA      |
| ENSG00000235183 | NA        | NA                                                         | NA        | 10.37021806 | 0.56751135  | 0.906762001 | 0.625865828 | 0.53140295  | 0.999371363 | Not Sig |
| ENSG00000100321 | SYNGR1    | synaptogyrin 1                                             | 9145      | 277.3521119 | 0.567842089 | 1.049836092 | 0.540886424 | 0.588585869 | 0.999371363 | Not Sig |
| ENSG00000231967 | NA        | NA                                                         | NA        | 3.316314374 | 0.568073728 | 1.357776935 | 0.418385166 | 0.675665531 | NA          | NA      |
| ENSG00000175857 | GAPT      | GRB2 binding adaptor protein, transmembrane                | 202309    | 61.95624578 | 0.56895338  | 0.86230337  | 0.659806513 | 0.509378003 | 0.999371363 | Not Sig |
| ENSG00000198832 | SELENOM   | selenoprotein M                                            | 140606    | 898.9372083 | 0.568991258 | 0.605176326 | 0.940207397 | 0.347111188 | 0.999371363 | Not Sig |
| ENSG00000053524 | MCF2L2    | MCF.2 cell line derived transforming sequence-like 2       | 23101     | 62.98884094 | 0.569134702 | 0.658586567 | 0.864175996 | 0.387491217 | 0.999371363 | Not Sig |
| ENSG00000131779 | PEX11B    | peroxisomal biogenesis factor 11 beta                      | 8799      | 438.8084163 | 0.569250022 | 0.428057087 | 1.329846041 | 0.183569003 | 0.999371363 | Not Sig |
| ENSG00000214432 | VPS33B-DT | VPS33B divergent transcript                                | 101926911 | 2.553600039 | 0.569669538 | 1.549226737 | 0.367712178 | 0.713087859 | NA          | NA      |
| ENSG00000155066 | PROM2     | prominin 2                                                 | 150696    | 1162.006895 | 0.569669933 | 0.785909516 | 0.724854352 | 0.468541387 | 0.999371363 | Not Sig |
| ENSG00000185222 | TCEAL9    | transcription elongation factor A like 9                   | 51186     | 395.6593847 | 0.570976074 | 0.725818331 | 0.786665271 | 0.431477839 | 0.999371363 | Not Sig |
| ENSG00000151502 | VPS26B    | VPS26, retromer complex component B                        | 112936    | 1293.555829 | 0.571723785 | 0.467587951 | 1.222708548 | 0.221439797 | 0.999371363 | Not Sig |
| ENSG00000179342 | NA        | NA                                                         | NA        | 3.016516907 | 0.572346407 | 1.438691557 | 0.397824262 | 0.690759732 | NA          | NA      |
| ENSG00000143799 | PARP1     | poly(ADP-ribose) polymerase 1                              | 142       | 2922.488761 | 0.572486658 | 0.445808718 | 1.284153126 | 0.199088383 | 0.999371363 | Not Sig |
| ENSG00000160323 | ADAMTS13  | ADAM metalloproteinase with thrombospondin type 1 motif 13 | 11093     | 137.9005406 | 0.572543015 | 0.883468466 | 0.648062763 | 0.516944357 | 0.999371363 | Not Sig |

|                 |          |                                                  |           |             |             |             |             |             |             |         |
|-----------------|----------|--------------------------------------------------|-----------|-------------|-------------|-------------|-------------|-------------|-------------|---------|
| ENSG00000149809 | TM7SF2   | transmembrane 7 superfamily member 2             | 7108      | 593.7759717 | 0.572795381 | 0.611435425 | 0.936804375 | 0.348859195 | 0.999371363 | Not Sig |
| ENSG00000150667 | FSIP1    | fibrous sheath interacting protein 1             | 161835    | 14.51046267 | 0.572981157 | 0.788695864 | 0.7264919   | 0.467537271 | 0.999371363 | Not Sig |
| ENSG00000269793 | ZIM2-AS1 | ZIM2 antisense RNA 1                             | 101929059 | 2.688058157 | 0.572982954 | 1.736909601 | 0.329886457 | 0.741485757 | NA          | NA      |
| ENSG00000165501 | LRR1     | leucine rich repeat protein 1                    | 122769    | 122.4393735 | 0.573280008 | 0.490905657 | 1.167800778 | 0.242887134 | 0.999371363 | Not Sig |
| ENSG00000033100 | CHPF2    | chondroitin polymerizing factor 2                | 54480     | 2119.667563 | 0.573599567 | 0.515288654 | 1.113161649 | 0.26563901  | 0.999371363 | Not Sig |
| ENSG00000100767 | PAPLN    | papilin, proteoglycan like sulfated glycoprotein | 89932     | 916.9820754 | 0.573693779 | 0.458043188 | 1.252488399 | 0.210391953 | 0.999371363 | Not Sig |
| ENSG00000228470 | NA       | NA                                               | NA        | 2.276392181 | 0.574190013 | 1.771296845 | 0.324163629 | 0.745814156 | NA          | NA      |
| ENSG00000234745 | HLA-B    | major histocompatibility complex, class I, B     | 3106      | 41351.15991 | 0.574607843 | 0.948946311 | 0.605521973 | 0.544832229 | 0.999371363 | Not Sig |
| ENSG00000004142 | POLDIP2  | DNA polymerase delta interacting protein 2       | 26073     | 1332.312952 | 0.574654695 | 0.447031436 | 1.28549057  | 0.19862091  | 0.999371363 | Not Sig |
| ENSG00000179918 | SEPHS2   | selenophosphate synthetase 2                     | 22928     | 1334.777697 | 0.57469515  | 0.518907956 | 1.107508844 | 0.268073991 | 0.999371363 | Not Sig |
| ENSG00000120328 | PCDHB12  | protocadherin beta 12                            | 56124     | 107.7708316 | 0.574793296 | 0.661725824 | 0.868627572 | 0.385050868 | 0.999371363 | Not Sig |
| ENSG00000141756 | FKBP10   | FK506 binding protein 10                         | 60681     | 1160.719077 | 0.574880749 | 0.73859464  | 0.778344058 | 0.436366209 | 0.999371363 | Not Sig |
| ENSG00000272186 | NA       | NA                                               | NA        | 2.7408537   | 0.574983253 | 1.673225647 | 0.343637604 | 0.731118841 | NA          | NA      |
| ENSG00000202124 | NA       | NA                                               | NA        | 1.804064827 | 0.574995653 | 1.729895156 | 0.332387573 | 0.739596621 | NA          | NA      |
| ENSG00000131951 | LRRC9    | leucine rich repeat containing 9                 | 341883    | 9.976621426 | 0.575076751 | 1.325874028 | 0.433734079 | 0.664481556 | 0.999371363 | Not Sig |
| ENSG00000196683 | TOMM7    | translocase of outer mitochondrial membrane 7    | 54543     | 1611.601216 | 0.575177797 | 0.515005972 | 1.116837142 | 0.264063965 | 0.999371363 | Not Sig |
| ENSG00000227766 | NA       | NA                                               | NA        | 50.40171128 | 0.575194313 | 0.972433374 | 0.591499971 | 0.554185474 | 0.999371363 | Not Sig |
| ENSG00000157617 | C2CD2    | C2 calcium dependent domain containing 2         | 25966     | 1252.091823 | 0.576173638 | 0.481814358 | 1.19584157  | 0.23175839  | 0.999371363 | Not Sig |
| ENSG00000187678 | SPRY4    | sprouty RTK signaling antagonist 4               | 81848     | 1706.875234 | 0.576320862 | 0.541685522 | 1.063939939 | 0.287355909 | 0.999371363 | Not Sig |
| ENSG00000207865 | NA       | NA                                               | NA        | 20.22571454 | 0.576503285 | 0.745092321 | 0.77373403  | 0.439088091 | 0.999371363 | Not Sig |
| ENSG00000272114 | NA       | NA                                               | NA        | 3.698538197 | 0.57693568  | 1.276382761 | 0.452008361 | 0.651262959 | NA          | NA      |
| ENSG00000213621 | NA       | NA                                               | NA        | 3.698798486 | 0.577552912 | 1.378511747 | 0.418968437 | 0.6752392   | NA          | NA      |
| ENSG00000215251 | FASTKD5  | FAST kinase domains 5                            | 60493     | 411.0488984 | 0.577565103 | 0.433474978 | 1.332407019 | 0.182726477 | 0.999371363 | Not Sig |
| ENSG00000251476 | NA       | NA                                               | NA        | 2.620698953 | 0.578295952 | 1.439252397 | 0.401803015 | 0.687829003 | NA          | NA      |
| ENSG00000163293 | NIPAL1   | NIPA like domain containing 1                    | 152519    | 90.07310954 | 0.578653591 | 0.824088375 | 0.702174195 | 0.482570537 | 0.999371363 | Not Sig |
| ENSG00000175318 | GRAMD2A  | GRAM domain containing 2A                        | 196996    | 677.1367593 | 0.579056967 | 0.98779034  | 0.586214447 | 0.557731415 | 0.999371363 | Not Sig |
| ENSG00000143543 | JTB      | jumping translocation breakpoint                 | 10899     | 1912.13896  | 0.579623716 | 0.477553287 | 1.213736208 | 0.224848473 | 0.999371363 | Not Sig |
| ENSG00000114054 | PCCB     | propionyl-CoA carboxylase beta subunit           | 5096      | 742.7675177 | 0.579781308 | 0.446131803 | 1.299574036 | 0.193747003 | 0.999371363 | Not Sig |
| ENSG00000263053 | NA       | NA                                               | NA        | 50.20126822 | 0.580445203 | 0.634200036 | 0.915239941 | 0.360065681 | 0.999371363 | Not Sig |
| ENSG00000257052 | NA       | NA                                               | NA        | 5.538798621 | 0.580526253 | 1.408544675 | 0.412146141 | 0.680232311 | NA          | NA      |
| ENSG00000141458 | NPC1     | NPC intracellular cholesterol transporter 1      | 4864      | 2153.15164  | 0.58071413  | 0.519946822 | 1.116872159 | 0.26404899  | 0.999371363 | Not Sig |
| ENSG00000108406 | DHX40    | DEAH-box helicase 40                             | 79665     | 1073.422826 | 0.580903285 | 0.422826306 | 1.373857957 | 0.169485784 | 0.999371363 | Not Sig |
| ENSG00000119699 | TGFB3    | transforming growth factor beta 3                | 7043      | 478.4284552 | 0.581224251 | 0.531081728 | 1.094415831 | 0.273772644 | 0.999371363 | Not Sig |
| ENSG00000160602 | NEK8     | NIMA related kinase 8                            | 284086    | 270.2705924 | 0.581365344 | 0.515636529 | 1.127471214 | 0.259543305 | 0.999371363 | Not Sig |
| ENSG00000215045 | GRID2IP  | Grid2 interacting protein                        | 392862    | 63.27468624 | 0.581548497 | 0.587525758 | 0.989826384 | 0.322258986 | 0.999371363 | Not Sig |



|                 |              |                                                    |           |             |             |             |             |             |             |         |
|-----------------|--------------|----------------------------------------------------|-----------|-------------|-------------|-------------|-------------|-------------|-------------|---------|
| ENSG00000211917 | NA           | NA                                                 | NA        | 0.845815988 | 0.581829872 | 3.18885469  | 0.182457317 | 0.855223848 | NA          | NA      |
| ENSG00000221579 | NA           | NA                                                 | NA        | 0.845815988 | 0.581829872 | 3.18885469  | 0.182457317 | 0.855223848 | NA          | NA      |
| ENSG00000236841 | LOC101929532 | uncharacterized LOC101929532                       | 101929532 | 0.845815988 | 0.581829872 | 3.18885469  | 0.182457317 | 0.855223848 | NA          | NA      |
| ENSG00000069974 | RAB27A       | RAB27A, member RAS oncogene family                 | 5873      | 1874.836984 | 0.582530647 | 0.465819184 | 1.250551    | 0.211098337 | 0.999371363 | Not Sig |
| ENSG00000151503 | NCAPD3       | non-SMC condensin II complex subunit D3            | 23310     | 808.713062  | 0.58254076  | 0.524445258 | 1.11077515  | 0.266665145 | 0.999371363 | Not Sig |
| ENSG00000115419 | GLS          | glutaminase                                        | 2744      | 4043.91903  | 0.58270906  | 0.534049227 | 1.091114883 | 0.275222335 | 0.999371363 | Not Sig |
| ENSG00000107798 | LIPA         | lipase A, lysosomal acid type                      | 3988      | 2646.230709 | 0.582903465 | 0.753230524 | 0.773871274 | 0.439006918 | 0.999371363 | Not Sig |
| ENSG00000100280 | AP1B1        | adaptor related protein complex 1 beta 1 subunit   | 162       | 2958.125971 | 0.583122347 | 0.585539278 | 0.995872299 | 0.319312196 | 0.999371363 | Not Sig |
| ENSG00000213225 | NA           | NA                                                 | NA        | 1.624118055 | 0.583410746 | 1.93339402  | 0.301754707 | 0.762839061 | NA          | NA      |
| ENSG00000173852 | DPY19L1      | dpy-19 like C-mannosyltransferase 1                | 23333     | 2384.133295 | 0.583763971 | 0.766972096 | 0.761128044 | 0.446580592 | 0.999371363 | Not Sig |
| ENSG00000264510 | NA           | NA                                                 | NA        | 7.017896754 | 0.583856162 | 1.172970198 | 0.497758735 | 0.618654104 | 0.999371363 | Not Sig |
| ENSG00000110321 | EIF4G2       | eukaryotic translation initiation factor 4 gamma 2 | 1982      | 18525.3394  | 0.583893408 | 0.379568449 | 1.538308596 | 0.123973179 | 0.999371363 | Not Sig |
| ENSG00000143891 | GALM         | galactose mutarotase                               | 130589    | 684.3361752 | 0.584096235 | 0.510629025 | 1.1438759   | 0.252675107 | 0.999371363 | Not Sig |
| ENSG00000228436 | LOC105378663 | uncharacterized LOC105378663                       | 105378663 | 30.57649439 | 0.584364034 | 0.675073615 | 0.86563009  | 0.386693049 | 0.999371363 | Not Sig |
| ENSG00000265650 | NA           | NA                                                 | NA        | 3.038542174 | 0.585026723 | 1.39805789  | 0.418456723 | 0.675613222 | NA          | NA      |
| ENSG00000188693 | CYP51A1-AS1  | CYP51A1 antisense RNA 1                            | 613126    | 3.706957477 | 0.585115938 | 1.849882986 | 0.316298892 | 0.751775652 | NA          | NA      |
| ENSG00000115946 | PNO1         | partner of NOB1 homolog                            | 56902     | 278.6232669 | 0.585643466 | 0.559777117 | 1.046208299 | 0.295464872 | 0.999371363 | Not Sig |
| ENSG00000167286 | CD3D         | CD3d molecule                                      | 915       | 111.9640046 | 0.585695726 | 0.717409206 | 0.816403974 | 0.414269125 | 0.999371363 | Not Sig |
| ENSG00000007923 | DNAJC11      | DnaJ heat shock protein family (Hsp40) member C11  | 55735     | 1004.393279 | 0.586527804 | 0.517143082 | 1.134169293 | 0.256723542 | 0.999371363 | Not Sig |
| ENSG00000054983 | GALC         | galactosylceramidase                               | 2581      | 1081.120225 | 0.58680987  | 0.515995235 | 1.137238931 | 0.255438416 | 0.999371363 | Not Sig |
| ENSG00000185974 | GRK1         | G protein-coupled receptor kinase 1                | 6011      | 8.625724985 | 0.587068438 | 1.347748147 | 0.435592094 | 0.663132708 | 0.999371363 | Not Sig |
| ENSG00000170425 | ADORA2B      | adenosine A2b receptor                             | 136       | 170.7125257 | 0.588491933 | 0.579784833 | 1.015017813 | 0.310097337 | 0.999371363 | Not Sig |
| ENSG00000254806 | SYS1-DBNDD2  | SYS1-DBNDD2 readthrough (NMD candidate)            | 767557    | 1.920234409 | 0.588969065 | 2.527607523 | 0.233014446 | 0.815750189 | NA          | NA      |
| ENSG00000004139 | SARM1        | sterile alpha and TIR motif containing 1           | 23098     | 644.4595825 | 0.589044415 | 0.585029579 | 1.006862619 | 0.314000798 | 0.999371363 | Not Sig |
| ENSG00000146950 | SHROOM2      | shroom family member 2                             | 357       | 823.6534933 | 0.589195018 | 0.767937651 | 0.7672433   | 0.442936873 | 0.999371363 | Not Sig |
| ENSG00000184293 | CLECL1       | C-type lectin like 1                               | 160365    | 25.75920308 | 0.589195141 | 1.015672035 | 0.580103735 | 0.561844666 | 0.999371363 | Not Sig |
| ENSG00000224411 | NA           | NA                                                 | NA        | 14.27156508 | 0.589865137 | 0.796994434 | 0.74011199  | 0.459232044 | 0.999371363 | Not Sig |
| ENSG00000097046 | CDC7         | cell division cycle 7                              | 8317      | 285.3821543 | 0.58994361  | 0.8021456   | 0.735457017 | 0.462061208 | 0.999371363 | Not Sig |
| ENSG00000261441 | NA           | NA                                                 | NA        | 5.431917672 | 0.59036133  | 1.267353944 | 0.465821985 | 0.641342927 | NA          | NA      |
| ENSG00000197822 | OCLN         | occludin                                           | 100506658 | 2062.378489 | 0.59070088  | 0.456373695 | 1.29433595  | 0.195549404 | 0.999371363 | Not Sig |
| ENSG00000166483 | WEE1         | WEE1 G2 checkpoint kinase                          | 7465      | 1217.40938  | 0.590775959 | 0.684883161 | 0.862593787 | 0.388360848 | 0.999371363 | Not Sig |
| ENSG00000197992 | CLEC9A       | C-type lectin domain containing 9A                 | 283420    | 11.78580469 | 0.590951561 | 1.077712579 | 0.548338743 | 0.583459329 | 0.999371363 | Not Sig |
| ENSG00000059915 | PSD          | pleckstrin and Sec7 domain containing              | 5662      | 102.0405857 | 0.59095842  | 0.649841631 | 0.909388367 | 0.36314516  | 0.999371363 | Not Sig |
| ENSG00000232613 | NA           | NA                                                 | NA        | 8.926789844 | 0.590996691 | 0.918081417 | 0.643730153 | 0.519750433 | 0.999371363 | Not Sig |
| ENSG00000168936 | TMEM129      | transmembrane protein 129                          | 92305     | 1095.816094 | 0.591046578 | 0.719685962 | 0.821256228 | 0.411500335 | 0.999371363 | Not Sig |

|                 |         |                                                                                |           |             |             |             |             |             |             |         |
|-----------------|---------|--------------------------------------------------------------------------------|-----------|-------------|-------------|-------------|-------------|-------------|-------------|---------|
| ENSG00000169733 | RFNG    | RFNG 0-fucosylpeptide 3-beta-N-acetylglucosaminyltransferase                   | 5986      | 681.8986009 | 0.591146629 | 0.602685759 | 0.98085382  | 0.326664833 | 0.999371363 | Not Sig |
| ENSG00000259775 | NA      | NA                                                                             | NA        | 8.433406753 | 0.591593045 | 0.96127857  | 0.615423108 | 0.538275335 | 0.999371363 | Not Sig |
| ENSG00000099260 | PALMD   | palmdelphin                                                                    | 54873     | 544.5296792 | 0.591668079 | 0.849683923 | 0.696339031 | 0.486216535 | 0.999371363 | Not Sig |
| ENSG00000234004 | NA      | NA                                                                             | NA        | 4.060829452 | 0.592261138 | 1.512398255 | 0.391603955 | 0.695350865 | NA          | NA      |
| ENSG00000066813 | ACSM2B  | acyl-CoA synthetase medium chain family member 2B                              | 348158    | 0.771864531 | 0.592602777 | 3.256691674 | 0.181964655 | 0.855610464 | NA          | NA      |
| ENSG00000185313 | SCN10A  | sodium voltage-gated channel alpha subunit 10                                  | 6336      | 0.771864531 | 0.592602777 | 3.256691674 | 0.181964655 | 0.855610464 | NA          | NA      |
| ENSG00000236550 | NA      | NA                                                                             | NA        | 0.771864531 | 0.592602777 | 3.256691674 | 0.181964655 | 0.855610464 | NA          | NA      |
| ENSG00000241923 | NA      | NA                                                                             | NA        | 0.771864531 | 0.592602777 | 3.256691674 | 0.181964655 | 0.855610464 | NA          | NA      |
| ENSG00000105866 | SP4     | Sp4 transcription factor                                                       | 6671      | 660.7942141 | 0.593247051 | 0.571094738 | 1.038789209 | 0.298902781 | 0.999371363 | Not Sig |
| ENSG00000183978 | COA3    | cytochrome c oxidase assembly factor 3                                         | 28958     | 680.5706557 | 0.593751254 | 0.636518577 | 0.932810566 | 0.350917785 | 0.999371363 | Not Sig |
| ENSG00000112242 | E2F3    | E2F transcription factor 3                                                     | 1871      | 534.0107775 | 0.593819235 | 0.635639254 | 0.934207935 | 0.350196643 | 0.999371363 | Not Sig |
| ENSG00000084072 | PPIE    | peptidylprolyl isomerase E                                                     | 10450     | 708.6811598 | 0.593917192 | 0.411814098 | 1.442197326 | 0.149246715 | 0.999371363 | Not Sig |
| ENSG00000125457 | MIF4GD  | MIF4G domain containing                                                        | 57409     | 317.2255675 | 0.594214212 | 0.666152205 | 0.892009675 | 0.372387747 | 0.999371363 | Not Sig |
| ENSG00000089737 | DDX24   | DEAD-box helicase 24                                                           | 57062     | 3612.403067 | 0.594344654 | 0.582593066 | 1.020171177 | 0.307647285 | 0.999371363 | Not Sig |
| ENSG00000234160 | NA      | NA                                                                             | NA        | 16.10696548 | 0.594364774 | 0.828234967 | 0.717628207 | 0.472986561 | 0.999371363 | Not Sig |
| ENSG00000237254 | NA      | NA                                                                             | NA        | 3.807389992 | 0.594440738 | 1.315512365 | 0.451870125 | 0.651362547 | NA          | NA      |
| ENSG00000142675 | CNKSR1  | connector enhancer of kinase suppressor of Ras 1                               | 10256     | 713.8573653 | 0.594752811 | 0.634407117 | 0.937493913 | 0.348504554 | 0.999371363 | Not Sig |
| ENSG00000196167 | NA      | NA                                                                             | NA        | 418.9754337 | 0.594994168 | 0.995021434 | 0.597971207 | 0.549859145 | 0.999371363 | Not Sig |
| ENSG00000180185 | FAHD1   | fumarylacetoacetate hydrolase domain containing 1                              | 81889     | 324.1458668 | 0.595329177 | 0.42600626  | 1.397465794 | 0.162273546 | 0.999371363 | Not Sig |
| ENSG00000144867 | SRPRB   | SRP receptor beta subunit                                                      | 58477     | 790.6091759 | 0.595877303 | 0.525937617 | 1.132980954 | 0.257222251 | 0.999371363 | Not Sig |
| ENSG00000264675 | MIR4285 | microRNA 4285                                                                  | 100422858 | 3.541181034 | 0.596158704 | 1.514137931 | 0.393728135 | 0.693781767 | NA          | NA      |
| ENSG00000072274 | TFRC    | transferrin receptor                                                           | 7037      | 3636.360793 | 0.596163311 | 0.595991115 | 1.000288925 | 0.317170705 | 0.999371363 | Not Sig |
| ENSG00000259328 | NA      | NA                                                                             | NA        | 11.1400357  | 0.596732318 | 0.997693037 | 0.598112141 | 0.54976511  | 0.999371363 | Not Sig |
| ENSG00000103460 | TOX3    | TOX high mobility group box family member 3                                    | 27324     | 680.2520065 | 0.59762463  | 0.987269609 | 0.605330727 | 0.544959269 | 0.999371363 | Not Sig |
| ENSG00000225968 | ELFN1   | extracellular leucine rich repeat and fibronectin type III domain containing 1 | 392617    | 53.96608917 | 0.597699172 | 0.663880055 | 0.900311988 | 0.367954243 | 0.999371363 | Not Sig |
| ENSG00000243323 | PTPRVP  | protein tyrosine phosphatase, receptor type V, pseudogene                      | 148713    | 36.56827642 | 0.5979349   | 0.558076857 | 1.071420348 | 0.283980467 | 0.999371363 | Not Sig |
| ENSG00000239184 | NA      | NA                                                                             | NA        | 0.852253524 | 0.598099029 | 3.183770763 | 0.187858698 | 0.850987421 | NA          | NA      |
| ENSG00000186577 | SMIM29  | small integral membrane protein 29                                             | 221491    | 237.916717  | 0.598381843 | 0.733883825 | 0.815363171 | 0.414864459 | 0.999371363 | Not Sig |
| ENSG00000186509 | OR9Q1   | olfactory receptor family 9 subfamily Q member 1                               | 219956    | 0.778302067 | 0.598387809 | 2.80892548  | 0.213030859 | 0.831302893 | NA          | NA      |
| ENSG00000254687 | NA      | NA                                                                             | NA        | 0.778302067 | 0.598387809 | 2.80892548  | 0.213030859 | 0.831302893 | NA          | NA      |
| ENSG00000255292 | NA      | NA                                                                             | NA        | 0.778302067 | 0.598387809 | 2.80892548  | 0.213030859 | 0.831302893 | NA          | NA      |
| ENSG00000187145 | NA      | NA                                                                             | NA        | 576.4090138 | 0.5987855   | 0.450102517 | 1.330331376 | 0.183409114 | 0.999371363 | Not Sig |
| ENSG00000226564 | NA      | NA                                                                             | NA        | 7.183491967 | 0.598962028 | 1.014058355 | 0.590658344 | 0.554749364 | 0.999371363 | Not Sig |
| ENSG00000116237 | ICMT    | isoprenylcysteine carboxyl methyltransferase                                   | 23463     | 1747.739001 | 0.599005957 | 0.458972516 | 1.305102018 | 0.191858112 | 0.999371363 | Not Sig |
| ENSG00000065457 | ADAT1   | adenosine deaminase, tRNA specific 1                                           | 23536     | 773.030384  | 0.599239523 | 0.409739192 | 1.462490127 | 0.143606948 | 0.999371363 | Not Sig |

|                 |              |                                                                                                                  |           |             |                  |                  |                |             |             |         |
|-----------------|--------------|------------------------------------------------------------------------------------------------------------------|-----------|-------------|------------------|------------------|----------------|-------------|-------------|---------|
| ENSG00000254453 | NAV2-AS2     | NAV2 antisense RNA 2                                                                                             | 100874014 | 1.691216969 | 0.599614989      | 2.019220891      | 0.296953638    | 0.766501905 | NA          | NA      |
| ENSG00000139194 | RBP5         | retinol binding protein 5                                                                                        | 83758     | 68.11200363 | 0.600036444      | 1.060128769      | 0.566003359    | 0.571391497 | 0.999371363 | Not Sig |
| ENSG00000119862 | LGALSL       | galectin like                                                                                                    | 29094     | 553.9409034 | 0.60022015       | 0.891354288      | <b>0.67338</b> | 0.500705569 | 0.999371363 | Not Sig |
| ENSG00000163032 | VSNL1        | visinin like 1                                                                                                   | 7447      | 32.99453687 | 0.601303153      | 0.904825843      | 0.664551259    | 0.506337553 | 0.999371363 | Not Sig |
| ENSG00000100325 | ASCC2        | activating signal cointegrator 1 complex subunit 2                                                               | 84164     | 1406.374933 | 0.601333408      | 0.502510522      | 1.196658341    | 0.231439751 | 0.999371363 | Not Sig |
| ENSG00000132661 | NXT1         | nuclear transport factor 2 like export factor 1                                                                  | 29107     | 228.8834453 | 0.60152674       | 0.553211415      | 1.087336096    | 0.276888302 | 0.999371363 | Not Sig |
| ENSG00000170214 | ADRA1B       | adrenoceptor alpha 1B                                                                                            | 147       | 50.83376657 | 0.601620472      | 1.383192548      | 0.434950631    | 0.663598262 | 0.999371363 | Not Sig |
| ENSG00000259416 | NA           | NA                                                                                                               | NA        | 13.49350258 | 0.601770205      | 0.880332398      | 0.683571576    | 0.494245739 | 0.999371363 | Not Sig |
| ENSG00000125821 | DTD1         | D-tyrosyl-tRNA deacylase 1                                                                                       | 92675     | 368.2746681 | 0.60210323       | 0.648299226      | 0.928742787    | 0.353022401 | 0.999371363 | Not Sig |
| ENSG00000227470 | NA           | NA                                                                                                               | NA        | 3.610571128 | 0.602774998      | 1.392083212      | 0.433002131    | 0.665013222 | NA          | NA      |
| ENSG00000108604 | SMARCD2      | <small>SMARCD2 related, matrix associated, actin dependent regulator of chromatin, subfamily 2, member 2</small> | 6603      | 1883.912972 | 0.602794445      | 0.597660438      | 1.008590174    | 0.313171222 | 0.999371363 | Not Sig |
| ENSG00000162692 | VCAM1        | vascular cell adhesion molecule 1                                                                                | 7412      | 836.6804441 | 0.603169733      | 0.62266088       | 0.968697009    | 0.332696385 | 0.999371363 | Not Sig |
| ENSG00000166847 | DCTN5        | dynactin subunit 5                                                                                               | 84516     | 1301.922496 | 0.603220326      | 0.390155822      | 1.546101049    | 0.122080166 | 0.999371363 | Not Sig |
| ENSG00000178021 | TSPYL6       | TSPY like 6                                                                                                      | 388951    | 4.315182027 | 0.603612067      | 1.190039068      | 0.50722038     | 0.612000197 | NA          | NA      |
| ENSG00000158482 | NA           | NA                                                                                                               | NA        | 22.89264147 | 0.60362377       | 0.83474619       | 0.723122522    | 0.469604614 | 0.999371363 | Not Sig |
| ENSG00000096384 | HSP90AB1     | heat shock protein 90 alpha family class B member 1                                                              | 3326      | 15752.29312 | 0.603697367      | 0.411132101      | 1.468378086    | 0.142001551 | 0.999371363 | Not Sig |
| ENSG00000228801 | NA           | NA                                                                                                               | NA        | 82.87462391 | 0.603979866      | 0.800256831      | 0.754732533    | 0.450409482 | 0.999371363 | Not Sig |
| ENSG00000211797 | NA           | NA                                                                                                               | NA        | 8.672891614 | 0.60432507       | 1.03116785       | 0.586058875    | 0.557835951 | 0.999371363 | Not Sig |
| ENSG00000262691 | NA           | NA                                                                                                               | NA        | 22.93623256 | 0.604408732      | <b>0.7376245</b> | 0.819398938    | 0.41255884  | 0.999371363 | Not Sig |
| ENSG00000176108 | CHMP6        | charged multivesicular body protein 6                                                                            | 79643     | 653.0454282 | 0.604452404      | 0.661735994      | 0.913434375    | 0.361014133 | 0.999371363 | Not Sig |
| ENSG00000271075 | NA           | NA                                                                                                               | NA        | 1.944396139 | <b>0.6046102</b> | 2.187058797      | 0.276448992    | 0.782203232 | NA          | NA      |
| ENSG00000092820 | EZR          | ezrin                                                                                                            | 7430      | 12881.40841 | 0.604802425      | 0.404525517      | 1.495090916    | 0.134890716 | 0.999371363 | Not Sig |
| ENSG00000168765 | GSTM4        | glutathione S-transferase mu 4                                                                                   | 2948      | 189.2551534 | 0.604959156      | 0.729100185      | 0.829733922    | 0.406689238 | 0.999371363 | Not Sig |
| ENSG00000258011 | NA           | NA                                                                                                               | NA        | 1.83252763  | 0.605150375      | 1.680762693      | 0.360045102    | 0.718813406 | NA          | NA      |
| ENSG00000251669 | FAM86EP      | <small>family with sequence similarity 86, member A pseudogene</small>                                           | 348926    | 66.12190649 | 0.605301686      | 0.64798636       | 0.934127203    | 0.350238281 | 0.999371363 | Not Sig |
| ENSG00000090273 | NUDC         | nuclear distribution C, dynein complex regulator                                                                 | 10726     | 1538.87852  | 0.605384661      | 0.527419038      | 1.147824818    | 0.25104089  | 0.999371363 | Not Sig |
| ENSG00000228606 | LOC100287049 | uncharacterized LOC100287049                                                                                     | 100287049 | 9.848949617 | 0.605397718      | 0.839775951      | 0.720903851    | 0.470968673 | 0.999371363 | Not Sig |
| ENSG00000252464 | NA           | NA                                                                                                               | NA        | 18.27361676 | 0.605612697      | 0.716230782      | 0.845555249    | 0.397800899 | 0.999371363 | Not Sig |
| ENSG00000236397 | NA           | NA                                                                                                               | NA        | 15.91252265 | 0.605879938      | 0.790789587      | 0.766170861    | 0.443574644 | 0.999371363 | Not Sig |
| ENSG00000114107 | CEP70        | centrosomal protein 70                                                                                           | 80321     | 765.3859153 | 0.605973329      | 0.520592322      | 1.164007425    | 0.244421003 | 0.999371363 | Not Sig |
| ENSG00000105726 | ATP13A1      | ATPase 13A1                                                                                                      | 57130     | 1486.234437 | 0.606015499      | 0.58004054       | 1.044781281    | 0.296124068 | 0.999371363 | Not Sig |
| ENSG00000206762 | NA           | NA                                                                                                               | NA        | 9.795073589 | 0.606053109      | 1.091921582      | 0.555033547    | 0.578871715 | 0.999371363 | Not Sig |
| ENSG00000163013 | FBXO41       | F-box protein 41                                                                                                 | 150726    | 321.1600002 | 0.606250945      | 0.64426347       | 0.940998478    | 0.346705639 | 0.999371363 | Not Sig |
| ENSG00000185920 | PTCH1        | patched 1                                                                                                        | 5727      | 1727.653305 | 0.606282882      | 0.659647476      | 0.919101344    | 0.358042567 | 0.999371363 | Not Sig |
| ENSG00000173334 | TRIB1        | tribbles pseudokinase 1                                                                                          | 10221     | 3530.2529   | 0.606415464      | 0.446998531      | 1.356638604    | 0.174896069 | 0.999371363 | Not Sig |

|                 |          |                                                            |           |             |             |             |             |             |             |         |
|-----------------|----------|------------------------------------------------------------|-----------|-------------|-------------|-------------|-------------|-------------|-------------|---------|
| ENSG00000178802 | MPI      | mannose phosphate isomerase                                | 4351      | 564.3161839 | 0.606536009 | 0.440013295 | 1.37844928  | 0.168064617 | 0.999371363 | Not Sig |
| ENSG00000090487 | SPG21    | SPG21, maspardin                                           | 51324     | 1792.493258 | 0.606682312 | 0.458990421 | 1.321775542 | 0.186242905 | 0.999371363 | Not Sig |
| ENSG00000106809 | OGN      | osteoglycin                                                | 4969      | 76.16058608 | 0.606894102 | 0.854971471 | 0.709841348 | 0.477802525 | 0.999371363 | Not Sig |
| ENSG00000237485 | NA       | NA                                                         | NA        | 4.643486059 | 0.606967945 | 1.467443761 | 0.413622628 | 0.679150499 | NA          | NA      |
| ENSG00000151651 | ADAM8    | ADAM metallopeptidase domain 8                             | 101       | 1626.909373 | 0.60704637  | 0.59707658  | 1.016697675 | 0.309297272 | 0.999371363 | Not Sig |
| ENSG00000103978 | TMEM87A  | transmembrane protein 87A                                  | 25963     | 3018.306126 | 0.607203424 | 0.422426023 | 1.43741955  | 0.150598817 | 0.999371363 | Not Sig |
| ENSG00000143621 | ILF2     | interleukin enhancer binding factor 2                      | 3608      | 2300.755936 | 0.607447024 | 0.506924141 | 1.198299657 | 0.23080038  | 0.999371363 | Not Sig |
| ENSG00000241935 | HOGA1    | 4-hydroxy-2-oxoglutarate aldolase 1                        | 112817    | 23.42099215 | 0.607460877 | 1.407991982 | 0.431437739 | 0.666150114 | 0.999371363 | Not Sig |
| ENSG00000160200 | CBS      | cystathionine-beta-synthase                                | 875       | 521.0841141 | 0.607621573 | 0.756196587 | 0.803523295 | 0.421672338 | 0.999371363 | Not Sig |
| ENSG00000256143 | NA       | NA                                                         | NA        | 9.298171252 | 0.608071563 | 1.055132607 | 0.576298713 | 0.564413293 | 0.999371363 | Not Sig |
| ENSG00000234494 | SP2-AS1  | SP2 antisense RNA 1                                        | 100506325 | 29.78463768 | 0.608216298 | 0.754791363 | 0.805807178 | 0.420354039 | 0.999371363 | Not Sig |
| ENSG00000088280 | ASAP3    | ArfGAP with SH3 domain, ankyrin repeat and PH domain 3     | 55616     | 1018.420083 | 0.608287293 | 0.720186355 | 0.844624851 | 0.398320329 | 0.999371363 | Not Sig |
| ENSG00000118971 | CCND2    | cyclin D2                                                  | 894       | 2980.744772 | 0.608355115 | 0.796084484 | 0.764184113 | 0.444757533 | 0.999371363 | Not Sig |
| ENSG00000081052 | COL4A4   | collagen type IV alpha 4 chain                             | 1286      | 2339.655069 | 0.608521149 | 0.61970452  | 0.981953705 | 0.326122656 | 0.999371363 | Not Sig |
| ENSG00000256745 | NA       | NA                                                         | NA        | 2.527423991 | 0.608575051 | 1.466424738 | 0.415005991 | 0.678137518 | NA          | NA      |
| ENSG00000213366 | GSTM2    | glutathione S-transferase mu 2                             | 2946      | 331.4207359 | 0.6085789   | 0.592789979 | 1.026634932 | 0.304592399 | 0.999371363 | Not Sig |
| ENSG00000264655 | NA       | NA                                                         | NA        | 1.784741323 | 0.608862638 | 1.992449447 | 0.305584987 | 0.759920653 | NA          | NA      |
| ENSG00000116649 | SRM      | spermidine synthase                                        | 6723      | 673.9974143 | 0.609099431 | 0.491224898 | 1.239960421 | 0.214990034 | 0.999371363 | Not Sig |
| ENSG00000177432 | NAP1L5   | nucleosome assembly protein 1 like 5                       | 266812    | 64.01431363 | 0.609166396 | 0.670265067 | 0.908844017 | 0.363432468 | 0.999371363 | Not Sig |
| ENSG00000263675 | MIR5581  | microRNA 5581                                              | 100847010 | 16.69641123 | 0.60962726  | 0.892894148 | 0.682754234 | 0.494762153 | 0.999371363 | Not Sig |
| ENSG00000167397 | VKORC1   | vitamin K epoxide reductase complex subunit 1              | 79001     | 146.248407  | 0.609898053 | 0.530326994 | 1.150041502 | 0.250126778 | 0.999371363 | Not Sig |
| ENSG00000172269 | DPAGT1   | dolichyl-phosphate N-acetylglucosaminophosphotransferase 1 | 1798      | 529.8979147 | 0.610118372 | 0.52165275  | 1.169587186 | 0.242167137 | 0.999371363 | Not Sig |
| ENSG00000176046 | NUPR1    | nuclear protein 1, transcriptional regulator               | 26471     | 1917.42383  | 0.610201859 | 0.856143766 | 0.712732935 | 0.476011032 | 0.999371363 | Not Sig |
| ENSG00000243063 | NA       | NA                                                         | NA        | 1.675325185 | 0.610609416 | 2.256612201 | 0.270586774 | 0.786708869 | NA          | NA      |
| ENSG00000124733 | MEA1     | male-enhanced antigen 1                                    | 4201      | 588.9725102 | 0.610684778 | 0.445776191 | 1.369935834 | 0.170706932 | 0.999371363 | Not Sig |
| ENSG00000113578 | FGF1     | fibroblast growth factor 1                                 | 2246      | 127.6594075 | 0.610901341 | 0.762730074 | 0.800940414 | 0.423166142 | 0.999371363 | Not Sig |
| ENSG00000154655 | L3MBTL4  | L3MBTL4, histone methyl-lysine binding protein             | 91133     | 401.2109704 | 0.611043566 | 0.904396855 | 0.675636545 | 0.499271433 | 0.999371363 | Not Sig |
| ENSG00000171130 | ATP6VOE2 | ATPase H+ transporting VO subunit e2                       | 155066    | 442.4838286 | 0.611117554 | 0.561301665 | 1.088750654 | 0.276263858 | 0.999371363 | Not Sig |
| ENSG00000145391 | SETD7    | SET domain containing lysine methyltransferase 7           | 80854     | 2844.690639 | 0.611406477 | 0.443687866 | 1.378010362 | 0.168200089 | 0.999371363 | Not Sig |
| ENSG00000107104 | KANK1    | KN motif and ankyrin repeat domains 1                      | 23189     | 1333.863036 | 0.611551333 | 0.696522711 | 0.878006306 | 0.379940296 | 0.999371363 | Not Sig |
| ENSG00000204859 | ZBTB48   | zinc finger and BTB domain containing 48                   | 3104      | 552.3302351 | 0.611641019 | 0.645839744 | 0.947047662 | 0.343614492 | 0.999371363 | Not Sig |
| ENSG00000249264 | NA       | NA                                                         | NA        | 48.54219733 | 0.611738224 | 0.712350054 | 0.858760691 | 0.390472559 | 0.999371363 | Not Sig |
| ENSG00000117425 | PTCH2    | patched 2                                                  | 8643      | 49.46144015 | 0.61190706  | 0.603976176 | 1.01313112  | 0.310997536 | 0.999371363 | Not Sig |
| ENSG00000109065 | NAT9     | N-acetyltransferase 9 (putative)                           | 26151     | 564.5729815 | 0.611920471 | 0.612741223 | 0.998660525 | 0.31795917  | 0.999371363 | Not Sig |
| ENSG00000181652 | ATG9B    | autophagy related 9B                                       | 285973    | 74.66506976 | 0.611985855 | 0.83693759  | 0.731220419 | 0.46464453  | 0.999371363 | Not Sig |

|                 |                |                                                                 |           |             |             |             |             |             |             |         |
|-----------------|----------------|-----------------------------------------------------------------|-----------|-------------|-------------|-------------|-------------|-------------|-------------|---------|
| ENSG00000164896 | FASTK          | Fas activated serine/threonine kinase                           | 10922     | 1232.133667 | 0.612024989 | 0.622603447 | 0.983009316 | 0.325602854 | 0.999371363 | Not Sig |
| ENSG00000228403 | NA             | NA                                                              | NA        | 13.12212213 | 0.612089114 | 0.932434032 | 0.656442271 | 0.5115396   | 0.999371363 | Not Sig |
| ENSG00000231167 | NA             | NA                                                              | NA        | 2.668474363 | 0.612220309 | 1.416851062 | 0.432099269 | 0.665669266 | NA          | NA      |
| ENSG00000090659 | CD209          | CD209 molecule                                                  | 30835     | 226.3793423 | 0.612688412 | 0.786529575 | 0.778976954 | 0.435993291 | 0.999371363 | Not Sig |
| ENSG00000050344 | NFE2L3         | nuclear factor, erythroid 2 like 3                              | 9603      | 518.5188247 | 0.612841708 | 0.51170044  | 1.197657183 | 0.231050505 | 0.999371363 | Not Sig |
| ENSG00000075643 | MOCOS          | molybdenum cofactor sulfurase                                   | 55034     | 203.6726965 | 0.613047142 | 0.641268001 | 0.955992098 | 0.339076227 | 0.999371363 | Not Sig |
| ENSG00000147224 | PRPS1          | phosphoribosyl pyrophosphate synthetase 1                       | 5631      | 499.5157145 | 0.613100577 | 0.593904818 | 1.032321272 | 0.301921639 | 0.999371363 | Not Sig |
| ENSG00000241511 | NA             | NA                                                              | NA        | 1.196405578 | 0.613719285 | 2.414749295 | 0.254154453 | 0.799376237 | NA          | NA      |
| ENSG00000234857 | HNRNPUL2-BSCL2 | HNRNPUL2-BSCL2 readthrough (NMD candidate)                      | 100534595 | 4.029804281 | 0.614091613 | 1.412191212 | 0.434850187 | 0.663671174 | NA          | NA      |
| ENSG00000205664 | NA             | NA                                                              | NA        | 276.0467512 | 0.61445894  | 0.600083016 | 1.023956559 | 0.305855794 | 0.999371363 | Not Sig |
| ENSG00000231305 | LOC653712      | intraflagellar transport 122 homolog (Chlamydomonas) pseudogene | 653712    | 10.40430229 | 0.614738333 | 1.12880688  | 0.544591235 | 0.586034684 | 0.999371363 | Not Sig |
| ENSG00000263460 | NA             | NA                                                              | NA        | 5.388416145 | 0.614762574 | 1.117021754 | 0.550358641 | 0.582073411 | NA          | NA      |
| ENSG00000231290 | APCDD1L-AS1    | APCDD1L antisense RNA 1 (head to head)                          | 149773    | 4.686406951 | 0.615017451 | 1.451722297 | 0.423646762 | 0.671823447 | NA          | NA      |
| ENSG00000223722 | NA             | NA                                                              | NA        | 10.80187967 | 0.615135747 | 0.908036681 | 0.67743491  | 0.498130055 | 0.999371363 | Not Sig |
| ENSG00000273112 | NA             | NA                                                              | NA        | 4.309874134 | 0.615164357 | 1.807880615 | 0.340268241 | 0.733654532 | NA          | NA      |
| ENSG00000185607 | NA             | NA                                                              | NA        | 9.953351005 | 0.615194891 | 1.31335907  | 0.468413327 | 0.63948904  | 0.999371363 | Not Sig |
| ENSG00000171867 | PRNP           | prion protein                                                   | 5621      | 1373.280487 | 0.615367864 | 0.512991246 | 1.199567964 | 0.230307175 | 0.999371363 | Not Sig |
| ENSG00000224988 | NA             | NA                                                              | NA        | 2.257068677 | 0.615840277 | 1.577690239 | 0.390342959 | 0.696282961 | NA          | NA      |
| ENSG00000169220 | RGS14          | regulator of G protein signaling 14                             | 10636     | 427.6577522 | 0.615860411 | 0.716085422 | 0.860037633 | 0.389768298 | 0.999371363 | Not Sig |
| ENSG00000131351 | HAUS8          | HAUS augmin like complex subunit 8                              | 93323     | 104.611739  | 0.61632081  | 0.540888448 | 1.139460108 | 0.254511298 | 0.999371363 | Not Sig |
| ENSG00000101443 | WFDC2          | WAP four-disulfide core domain 2                                | 10406     | 2786.454583 | 0.616712329 | 0.805260977 | 0.765853985 | 0.443763188 | 0.999371363 | Not Sig |
| ENSG00000025770 | NCAPH2         | non-SMC condensin II complex subunit H2                         | 29781     | 940.8157808 | 0.616818313 | 0.678563909 | 0.909005481 | 0.363347233 | 0.999371363 | Not Sig |
| ENSG00000008294 | SPAG9          | sperm associated antigen 9                                      | 9043      | 4954.415765 | 0.616916753 | 0.403691519 | 1.528188541 | 0.126465733 | 0.999371363 | Not Sig |
| ENSG00000114738 | MAPKAPK3       | mitogen-activated protein kinase-activated protein kinase 3     | 7867      | 1264.603361 | 0.617075492 | 0.647884654 | 0.952446532 | 0.34087057  | 0.999371363 | Not Sig |
| ENSG00000258122 | NA             | NA                                                              | NA        | 1.749121925 | 0.617200047 | 1.731029949 | 0.356550762 | 0.721428144 | NA          | NA      |
| ENSG00000207633 | MIR505         | microRNA 505                                                    | 574508    | 4.214339887 | 0.619078874 | 1.23366604  | 0.501820472 | 0.615793811 | NA          | NA      |
| ENSG00000231871 | IP09-AS1       | IP09 antisense RNA 1                                            | 100873949 | 11.37549811 | 0.619131792 | 0.984544585 | 0.628850945 | 0.529446644 | 0.999371363 | Not Sig |
| ENSG00000187474 | FPR3           | formyl peptide receptor 3                                       | 2359      | 728.1373841 | 0.619491558 | 0.703309977 | 0.880822935 | 0.378413664 | 0.999371363 | Not Sig |
| ENSG00000137628 | DDX60          | DEXd/H-box helicase 60                                          | 55601     | 1685.079244 | 0.619589561 | 0.657491943 | 0.942353086 | 0.346011898 | 0.999371363 | Not Sig |
| ENSG00000090971 | NAT14          | N-acetyltransferase 14 (putative)                               | 57106     | 237.9852392 | 0.619996631 | 0.517510133 | 1.198037663 | 0.230902355 | 0.999371363 | Not Sig |
| ENSG00000249286 | NA             | NA                                                              | NA        | 15.20888224 | 0.620543986 | 0.805086961 | 0.77077883  | 0.440838037 | 0.999371363 | Not Sig |
| ENSG00000257499 | NA             | NA                                                              | NA        | 14.52367658 | 0.620612045 | 1.032175078 | 0.601266256 | 0.547662661 | 0.999371363 | Not Sig |
| ENSG00000166148 | AVPR1A         | arginine vasopressin receptor 1A                                | 552       | 11.28973294 | 0.620967499 | 0.941626501 | 0.659462641 | 0.509598729 | 0.999371363 | Not Sig |
| ENSG00000181449 | SOX2           | SRY-box 2                                                       | 6657      | 269.2997076 | 0.621296364 | 1.1893275   | 0.522393002 | 0.601396727 | 0.999371363 | Not Sig |
| ENSG00000236830 | CBR3-AS1       | CBR3 antisense RNA 1                                            | 100506428 | 307.8390552 | 0.621494749 | 0.714683736 | 0.869608077 | 0.384514622 | 0.999371363 | Not Sig |

|                 |           |                                                        |           |             |             |             |             |             |             |         |
|-----------------|-----------|--------------------------------------------------------|-----------|-------------|-------------|-------------|-------------|-------------|-------------|---------|
| ENSG00000182934 | SRPRA     | SRP receptor alpha subunit                             | 6734      | 3395.518984 | 0.621622599 | 0.424475065 | 1.464450213 | 0.143070977 | 0.999371363 | Not Sig |
| ENSG00000120262 | CCDC170   | coiled-coil domain containing 170                      | 80129     | 319.6176776 | 0.621643209 | 0.815734528 | 0.762065584 | 0.446020862 | 0.999371363 | Not Sig |
| ENSG00000124688 | MAD2L1BP  | MAD2L1 binding protein                                 | 9587      | 290.1954521 | 0.622288499 | 0.461621204 | 1.348050075 | 0.177642277 | 0.999371363 | Not Sig |
| ENSG00000103423 | DNAJA3    | DnaJ heat shock protein family (Hsp40) member A3       | 9093      | 1037.095493 | 0.622897443 | 0.432519903 | 1.440159028 | 0.149822412 | 0.999371363 | Not Sig |
| ENSG00000130349 | C6orf203  | chromosome 6 open reading frame 203                    | 51250     | 225.8048001 | 0.623187898 | 0.476741712 | 1.307181399 | 0.191151111 | 0.999371363 | Not Sig |
| ENSG00000230513 | THAP7-AS1 | THAP7 antisense RNA 1                                  | 439931    | 50.76687397 | 0.623272843 | 0.891948102 | 0.698777027 | 0.484691387 | 0.999371363 | Not Sig |
| ENSG00000162735 | PEX19     | peroxisomal biogenesis factor 19                       | 5824      | 895.3021684 | 0.6232976   | 0.432574183 | 1.440903374 | 0.149611983 | 0.999371363 | Not Sig |
| ENSG00000169031 | COL4A3    | collagen type IV alpha 3 chain                         | 1285      | 2130.703064 | 0.62359911  | 0.773829457 | 0.805861167 | 0.420322904 | 0.999371363 | Not Sig |
| ENSG00000258513 | NA        | NA                                                     | NA        | 1.896609832 | 0.624351807 | 1.875503359 | 0.332898261 | 0.739211082 | NA          | NA      |
| ENSG00000165923 | AGBL2     | ATP/GTP binding protein like 2                         | 79841     | 73.84991887 | 0.624821807 | 0.554535352 | 1.126748376 | 0.259848883 | 0.999371363 | Not Sig |
| ENSG00000186283 | TOR3A     | torsin family 3 member A                               | 64222     | 775.5500996 | 0.62540161  | 0.528724133 | 1.182850508 | 0.236868399 | 0.999371363 | Not Sig |
| ENSG00000186063 | AIDA      | axin interactor, dorsalization associated              | 64853     | 1393.644192 | 0.625522486 | 0.379625782 | 1.647734467 | 0.099407172 | 0.999371363 | Not Sig |
| ENSG00000112799 | LY86      | lymphocyte antigen 86                                  | 9450      | 114.8967231 | 0.62589218  | 0.800686407 | 0.781694524 | 0.434394121 | 0.999371363 | Not Sig |
| ENSG00000219487 | NA        | NA                                                     | NA        | 0.829509197 | 0.625914923 | 2.772971558 | 0.225719922 | 0.821419263 | NA          | NA      |
| ENSG00000166681 | BEX3      | brain expressed X-linked 3                             | 27018     | 1013.35476  | 0.626057669 | 0.793137344 | 0.789343326 | 0.42991137  | 0.999371363 | Not Sig |
| ENSG00000179428 | LOC541472 | uncharacterized LOC541472                              | 541472    | 4.116215802 | 0.626427646 | 1.364876394 | 0.458962913 | 0.646260799 | NA          | NA      |
| ENSG00000155592 | ZKSCAN2   | zinc finger with KRAB and SCAN domains 2               | 342357    | 375.9066088 | 0.626456626 | 0.457116319 | 1.370453427 | 0.170545404 | 0.999371363 | Not Sig |
| ENSG00000116824 | CD2       | CD2 molecule                                           | 914       | 302.7388396 | 0.626751621 | 0.741529546 | 0.84521463  | 0.397991015 | 0.999371363 | Not Sig |
| ENSG00000231466 | NA        | NA                                                     | NA        | 13.06348251 | 0.626756955 | 0.834533639 | 0.751026592 | 0.452636652 | 0.999371363 | Not Sig |
| ENSG00000174429 | ABRA      | actin binding Rho activating protein                   | 137735    | 0.784739602 | 0.626891672 | 3.244782083 | 0.19319993  | 0.846802393 | NA          | NA      |
| ENSG00000226240 | LINC00381 | long intergenic non-protein coding RNA 381             | 100874151 | 0.784739602 | 0.626891672 | 3.244782083 | 0.19319993  | 0.846802393 | NA          | NA      |
| ENSG00000233485 | NA        | NA                                                     | NA        | 0.784739602 | 0.626891672 | 3.244782083 | 0.19319993  | 0.846802393 | NA          | NA      |
| ENSG00000261543 | NA        | NA                                                     | NA        | 0.784739602 | 0.626891672 | 3.244782083 | 0.19319993  | 0.846802393 | NA          | NA      |
| ENSG00000264582 | NA        | NA                                                     | NA        | 0.784739602 | 0.626891672 | 3.244782083 | 0.19319993  | 0.846802393 | NA          | NA      |
| ENSG00000266617 | MIR3692   | microRNA 3692                                          | 100500899 | 0.784739602 | 0.626891672 | 3.244782083 | 0.19319993  | 0.846802393 | NA          | NA      |
| ENSG00000145919 | BOD1      | biorientation of chromosomes in cell division 1        | 91272     | 679.8960363 | 0.627338862 | 0.531182126 | 1.181024044 | 0.237593172 | 0.999371363 | Not Sig |
| ENSG00000232228 | NA        | NA                                                     | NA        | 9.879699175 | 0.628611417 | 0.8886195   | 0.707402231 | 0.479316551 | 0.999371363 | Not Sig |
| ENSG00000196335 | STK31     | serine/threonine kinase 31                             | 56164     | 153.1246179 | 0.628632023 | 0.871427537 | 0.721381866 | 0.4706746   | 0.999371363 | Not Sig |
| ENSG00000238000 | NA        | NA                                                     | NA        | 8.512656175 | 0.628836182 | 1.125754572 | 0.558590831 | 0.576440999 | 0.999371363 | Not Sig |
| ENSG00000121207 | LRAT      | lecithin retinol acyltransferase                       | 9227      | 134.4372134 | 0.629133253 | 1.033331591 | 0.608839659 | 0.542630724 | 0.999371363 | Not Sig |
| ENSG00000213199 | ASIC3     | acid sensing ion channel subunit 3                     | 9311      | 45.46962099 | 0.62915355  | 0.649438901 | 0.968764806 | 0.33266255  | 0.999371363 | Not Sig |
| ENSG00000271547 | NA        | NA                                                     | NA        | 2.077121904 | 0.629446998 | 1.794169752 | 0.350829121 | 0.725716548 | NA          | NA      |
| ENSG00000081181 | ARG2      | arginase 2                                             | 384       | 141.4207333 | 0.629840269 | 0.784637272 | 0.802715205 | 0.422139362 | 0.999371363 | Not Sig |
| ENSG00000105261 | OVOL3     | ovo like zinc finger 3                                 | 728361    | 0.495071681 | 0.630066679 | 4.049841664 | 0.155578102 | 0.876365587 | NA          | NA      |
| ENSG00000109158 | GABRA4    | gamma-aminobutyric acid type A receptor alpha4 subunit | 2557      | 0.436697058 | 0.630066679 | 4.049841664 | 0.155578102 | 0.876365587 | NA          | NA      |

|                 |           |                                              |        |             |             |             |             |             |    |    |
|-----------------|-----------|----------------------------------------------|--------|-------------|-------------|-------------|-------------|-------------|----|----|
| ENSG00000141668 | CBLN2     | cerebellin 2 precursor                       | 147381 | 0.436697058 | 0.630066679 | 4.049841664 | 0.155578102 | 0.876365587 | NA | NA |
| ENSG00000141977 | CIB3      | calcium and integrin binding family member 3 | 117286 | 0.436697058 | 0.630066679 | 4.049841664 | 0.155578102 | 0.876365587 | NA | NA |
| ENSG00000163217 | BMP10     | bone morphogenetic protein 10                | 27302  | 0.495071681 | 0.630066679 | 4.049841664 | 0.155578102 | 0.876365587 | NA | NA |
| ENSG00000187021 | PNLIPRP1  | pancreatic lipase related protein 1          | 5407   | 0.436697058 | 0.630066679 | 4.049841664 | 0.155578102 | 0.876365587 | NA | NA |
| ENSG00000197734 | C14orf178 | chromosome 14 open reading frame 178         | 283579 | 0.495071681 | 0.630066679 | 4.049841664 | 0.155578102 | 0.876365587 | NA | NA |
| ENSG00000199025 | MIR369    | microRNA 369                                 | 442914 | 0.436697058 | 0.630066679 | 4.049841664 | 0.155578102 | 0.876365587 | NA | NA |
| ENSG00000200150 | NA        | NA                                           | NA     | 0.495071681 | 0.630066679 | 4.049841664 | 0.155578102 | 0.876365587 | NA | NA |
| ENSG00000202560 | MIR539    | microRNA 539                                 | 664612 | 0.453003849 | 0.630066679 | 4.049841664 | 0.155578102 | 0.876365587 | NA | NA |
| ENSG00000203588 | NA        | NA                                           | NA     | 0.436697058 | 0.630066679 | 4.049841664 | 0.155578102 | 0.876365587 | NA | NA |
| ENSG00000208032 | MIR548A3  | microRNA 548a-3                              | 693127 | 0.495071681 | 0.630066679 | 4.049841664 | 0.155578102 | 0.876365587 | NA | NA |
| ENSG00000212335 | NA        | NA                                           | NA     | 0.495071681 | 0.630066679 | 4.049841664 | 0.155578102 | 0.876365587 | NA | NA |
| ENSG00000213063 | NA        | NA                                           | NA     | 0.453003849 | 0.630066679 | 4.049841664 | 0.155578102 | 0.876365587 | NA | NA |
| ENSG00000214883 | NA        | NA                                           | NA     | 0.453003849 | 0.630066679 | 4.049841664 | 0.155578102 | 0.876365587 | NA | NA |
| ENSG00000215306 | NA        | NA                                           | NA     | 0.453003849 | 0.630066679 | 4.049841664 | 0.155578102 | 0.876365587 | NA | NA |
| ENSG00000217289 | NA        | NA                                           | NA     | 0.453003849 | 0.630066679 | 4.049841664 | 0.155578102 | 0.876365587 | NA | NA |
| ENSG00000221413 | NA        | NA                                           | NA     | 0.495071681 | 0.630066679 | 4.049841664 | 0.155578102 | 0.876365587 | NA | NA |
| ENSG00000221767 | NA        | NA                                           | NA     | 0.453003849 | 0.630066679 | 4.049841664 | 0.155578102 | 0.876365587 | NA | NA |
| ENSG00000223910 | ZNF32-AS3 | ZNF32 antisense RNA 3                        | 414201 | 0.453003849 | 0.630066679 | 4.049841664 | 0.155578102 | 0.876365587 | NA | NA |
| ENSG00000224473 | NA        | NA                                           | NA     | 0.453003849 | 0.630066679 | 4.049841664 | 0.155578102 | 0.876365587 | NA | NA |
| ENSG00000224969 | NA        | NA                                           | NA     | 0.495071681 | 0.630066679 | 4.049841664 | 0.155578102 | 0.876365587 | NA | NA |
| ENSG00000225416 | NA        | NA                                           | NA     | 0.453003849 | 0.630066679 | 4.049841664 | 0.155578102 | 0.876365587 | NA | NA |
| ENSG00000225884 | NA        | NA                                           | NA     | 0.436697058 | 0.630066679 | 4.049841664 | 0.155578102 | 0.876365587 | NA | NA |
| ENSG00000227080 | NA        | NA                                           | NA     | 0.495071681 | 0.630066679 | 4.049841664 | 0.155578102 | 0.876365587 | NA | NA |
| ENSG00000227133 | NA        | NA                                           | NA     | 0.436697058 | 0.630066679 | 4.049841664 | 0.155578102 | 0.876365587 | NA | NA |
| ENSG00000229207 | NA        | NA                                           | NA     | 0.453003849 | 0.630066679 | 4.049841664 | 0.155578102 | 0.876365587 | NA | NA |
| ENSG00000230698 | NA        | NA                                           | NA     | 0.495071681 | 0.630066679 | 4.049841664 | 0.155578102 | 0.876365587 | NA | NA |
| ENSG00000233273 | NA        | NA                                           | NA     | 0.453003849 | 0.630066679 | 4.049841664 | 0.155578102 | 0.876365587 | NA | NA |
| ENSG00000234785 | NA        | NA                                           | NA     | 0.495071681 | 0.630066679 | 4.049841664 | 0.155578102 | 0.876365587 | NA | NA |
| ENSG00000235047 | NA        | NA                                           | NA     | 0.495071681 | 0.630066679 | 4.049841664 | 0.155578102 | 0.876365587 | NA | NA |
| ENSG00000238401 | NA        | NA                                           | NA     | 0.495071681 | 0.630066679 | 4.049841664 | 0.155578102 | 0.876365587 | NA | NA |
| ENSG00000238795 | SCARNA12  | small Cajal body-specific RNA 12             | 677777 | 0.453003849 | 0.630066679 | 4.049841664 | 0.155578102 | 0.876365587 | NA | NA |
| ENSG00000241596 | NA        | NA                                           | NA     | 0.453003849 | 0.630066679 | 4.049841664 | 0.155578102 | 0.876365587 | NA | NA |
| ENSG00000244230 | NA        | NA                                           | NA     | 0.495071681 | 0.630066679 | 4.049841664 | 0.155578102 | 0.876365587 | NA | NA |
| ENSG00000251812 | NA        | NA                                           | NA     | 0.453003849 | 0.630066679 | 4.049841664 | 0.155578102 | 0.876365587 | NA | NA |
| ENSG00000252348 | NA        | NA                                           | NA     | 0.436697058 | 0.630066679 | 4.049841664 | 0.155578102 | 0.876365587 | NA | NA |

|                 |           |                                                                              |           |             |             |             |             |             |             |         |
|-----------------|-----------|------------------------------------------------------------------------------|-----------|-------------|-------------|-------------|-------------|-------------|-------------|---------|
| ENSG00000253405 | EVX1-AS   | EVX1 antisense RNA                                                           | 101410536 | 0.453003849 | 0.630066679 | 4.049841664 | 0.155578102 | 0.876365587 | NA          | NA      |
| ENSG00000255028 | NA        | NA                                                                           | NA        | 0.436697058 | 0.630066679 | 4.049841664 | 0.155578102 | 0.876365587 | NA          | NA      |
| ENSG00000255035 | NA        | NA                                                                           | NA        | 0.436697058 | 0.630066679 | 4.049841664 | 0.155578102 | 0.876365587 | NA          | NA      |
| ENSG00000256530 | NA        | NA                                                                           | NA        | 0.436697058 | 0.630066679 | 4.049841664 | 0.155578102 | 0.876365587 | NA          | NA      |
| ENSG00000257501 | LOC643711 | platelet activating factor acetylhydrolase 1b catalytic subunit 2 pseudogene | 643711    | 0.436697058 | 0.630066679 | 4.049841664 | 0.155578102 | 0.876365587 | NA          | NA      |
| ENSG00000263548 | NA        | NA                                                                           | NA        | 0.436697058 | 0.630066679 | 4.049841664 | 0.155578102 | 0.876365587 | NA          | NA      |
| ENSG00000264714 | NA        | NA                                                                           | NA        | 0.453003849 | 0.630066679 | 4.049841664 | 0.155578102 | 0.876365587 | NA          | NA      |
| ENSG00000264779 | NA        | NA                                                                           | NA        | 0.436697058 | 0.630066679 | 4.049841664 | 0.155578102 | 0.876365587 | NA          | NA      |
| ENSG00000265784 | NA        | NA                                                                           | NA        | 0.495071681 | 0.630066679 | 4.049841664 | 0.155578102 | 0.876365587 | NA          | NA      |
| ENSG00000265892 | NA        | NA                                                                           | NA        | 0.495071681 | 0.630066679 | 4.049841664 | 0.155578102 | 0.876365587 | NA          | NA      |
| ENSG00000266306 | NA        | NA                                                                           | NA        | 0.495071681 | 0.630066679 | 4.049841664 | 0.155578102 | 0.876365587 | NA          | NA      |
| ENSG00000266826 | NA        | NA                                                                           | NA        | 0.453003849 | 0.630066679 | 4.049841664 | 0.155578102 | 0.876365587 | NA          | NA      |
| ENSG00000267192 | NA        | NA                                                                           | NA        | 0.495071681 | 0.630066679 | 4.049841664 | 0.155578102 | 0.876365587 | NA          | NA      |
| ENSG00000268036 | NA        | NA                                                                           | NA        | 0.436697058 | 0.630066679 | 4.049841664 | 0.155578102 | 0.876365587 | NA          | NA      |
| ENSG00000270775 | NA        | NA                                                                           | NA        | 0.453003849 | 0.630066679 | 4.049841664 | 0.155578102 | 0.876365587 | NA          | NA      |
| ENSG00000271586 | NA        | NA                                                                           | NA        | 0.495071681 | 0.630066679 | 4.049841664 | 0.155578102 | 0.876365587 | NA          | NA      |
| ENSG00000271786 | NA        | NA                                                                           | NA        | 0.453003849 | 0.630066679 | 4.049841664 | 0.155578102 | 0.876365587 | NA          | NA      |
| ENSG00000273312 | NA        | NA                                                                           | NA        | 0.495071681 | 0.630066679 | 4.049841664 | 0.155578102 | 0.876365587 | NA          | NA      |
| ENSG00000251521 | NA        | NA                                                                           | NA        | 5.931622907 | 0.630197163 | 1.406236551 | 0.448144491 | 0.65404892  | NA          | NA      |
| ENSG00000223772 | NA        | NA                                                                           | NA        | 1.665716219 | 0.630464808 | 2.235142488 | 0.282069179 | 0.777890465 | NA          | NA      |
| ENSG00000078061 | ARAF      | A-Raf proto-oncogene, serine/threonine kinase                                | 369       | 1712.516432 | 0.630523825 | 0.520483017 | 1.211420554 | 0.225734266 | 0.999371363 | Not Sig |
| ENSG00000214013 | GANC      | glucosidase alpha, neutral C                                                 | 2595      | 987.5095599 | 0.630628797 | 0.459360341 | 1.37284119  | 0.169801722 | 0.999371363 | Not Sig |
| ENSG00000102858 | MGRN1     | mahogunin ring finger 1                                                      | 23295     | 3090.083215 | 0.630754183 | 0.460979257 | 1.368291898 | 0.171220726 | 0.999371363 | Not Sig |
| ENSG00000240654 | CIQTNF9   | CIq and TNF related 9                                                        | 338872    | 3.912959402 | 0.631053202 | 1.852161229 | 0.340711809 | 0.733320548 | NA          | NA      |
| ENSG00000240591 | NA        | NA                                                                           | NA        | 3.61353318  | 0.63107535  | 1.516614454 | 0.416107963 | 0.677331004 | NA          | NA      |
| ENSG00000222395 | NA        | NA                                                                           | NA        | 1.761996996 | 0.63109315  | 1.730974656 | 0.364588324 | 0.715418732 | NA          | NA      |
| ENSG00000161395 | PGAP3     | post-GPI attachment to proteins 3                                            | 93210     | 850.1019521 | 0.631378906 | 0.589272782 | 1.071454385 | 0.28396517  | 0.999371363 | Not Sig |
| ENSG00000204237 | OXLD1     | oxidoreductase like domain containing 1                                      | 339229    | 335.7272124 | 0.632000356 | 0.610123833 | 1.035855874 | 0.300269386 | 0.999371363 | Not Sig |
| ENSG00000206838 | SNORA5A   | small nucleolar RNA, H/ACA box 5A                                            | 654319    | 10.0982274  | 0.632092361 | 0.846040188 | 0.7471186   | 0.454991974 | 0.999371363 | Not Sig |
| ENSG00000197646 | PDCD1LG2  | programmed cell death 1 ligand 2                                             | 80380     | 113.2762585 | 0.632250463 | 0.800514211 | 0.78980542  | 0.429641413 | 0.999371363 | Not Sig |
| ENSG00000157343 | ARMC12    | armadillo repeat containing 12                                               | 221481    | 5.623290498 | 0.632414206 | 1.315493409 | 0.480742968 | 0.630699189 | NA          | NA      |
| ENSG00000273451 | NA        | NA                                                                           | NA        | 25.25042616 | 0.632445483 | 0.738264839 | 0.856664776 | 0.391630176 | 0.999371363 | Not Sig |
| ENSG00000174599 | TRAMIL1   | translocation associated membrane protein 1-like 1                           | 133022    | 30.83847565 | 0.632459278 | 0.7465459   | 0.847180701 | 0.396894409 | 0.999371363 | Not Sig |
| ENSG00000092036 | HAUS4     | HAUS augmin like complex subunit 4                                           | 54930     | 354.0488003 | 0.632587065 | 0.474656099 | 1.33272714  | 0.182621363 | 0.999371363 | Not Sig |
| ENSG00000253865 | NA        | NA                                                                           | NA        | 1.388663079 | 0.632882864 | 2.118288987 | 0.298770785 | 0.765114943 | NA          | NA      |



|                 |              |                                                              |           |             |             |             |             |             |             |         |
|-----------------|--------------|--------------------------------------------------------------|-----------|-------------|-------------|-------------|-------------|-------------|-------------|---------|
| ENSG00000145248 | SLC10A4      | solute carrier family 10 member 4                            | 201780    | 8.414067926 | 0.633304768 | 0.964747052 | 0.65644644  | 0.511536918 | 0.999371363 | Not Sig |
| ENSG00000213442 | NA           | NA                                                           | NA        | 33.85474993 | 0.63372799  | 0.588520723 | 1.076815081 | 0.281562887 | 0.999371363 | Not Sig |
| ENSG00000173218 | VANGL1       | VANGL planar cell polarity protein 1                         | 81839     | 619.4945113 | 0.63374783  | 0.682233707 | 0.928930693 | 0.352925005 | 0.999371363 | Not Sig |
| ENSG00000105650 | PDE4C        | phosphodiesterase 4C                                         | 5143      | 158.025981  | 0.634372224 | 0.802806961 | 0.790192729 | 0.429415222 | 0.999371363 | Not Sig |
| ENSG00000105650 | LOC729966    | uncharacterized LOC729966                                    | 729966    | 158.025981  | 0.634372224 | 0.802806961 | 0.790192729 | 0.429415222 | 0.999371363 | Not Sig |
| ENSG00000247199 | LOC102546294 | uncharacterized LOC102546294                                 | 102546294 | 33.00457214 | 0.634546171 | 0.617996498 | 1.026779557 | 0.304524277 | 0.999371363 | Not Sig |
| ENSG00000244256 | NA           | NA                                                           | NA        | 10.76255196 | 0.634818276 | 0.830263785 | 0.764598297 | 0.444510783 | 0.999371363 | Not Sig |
| ENSG00000255390 | NA           | NA                                                           | NA        | 1.209280649 | 0.635838713 | 2.46661789  | 0.257777549 | 0.796578593 | NA          | NA      |
| ENSG00000267858 | MZF1-AS1     | MZF1 antisense RNA 1                                         | 100131691 | 65.60478075 | 0.635911685 | 0.569929872 | 1.11577181  | 0.264519823 | 0.999371363 | Not Sig |
| ENSG00000231123 | NA           | NA                                                           | NA        | 14.07779437 | 0.636271795 | 1.052918411 | 0.604293541 | 0.5456485   | 0.999371363 | Not Sig |
| ENSG00000182584 | ACTL10       | actin like 10                                                | 170487    | 43.91018637 | 0.636419917 | 0.834305562 | 0.762813945 | 0.445574363 | 0.999371363 | Not Sig |
| ENSG00000196810 | NA           | NA                                                           | NA        | 555.6040098 | 0.636575842 | 0.485994626 | 1.309841319 | 0.190249522 | 0.999371363 | Not Sig |
| ENSG00000083097 | DOPEY1       | dopey family member 1                                        | 23033     | 1229.135217 | 0.636787367 | 0.45143161  | 1.410595432 | 0.158363939 | 0.999371363 | Not Sig |
| ENSG00000012963 | UBR7         | ubiquitin protein ligase E3 component n-recogin 7 (putative) | 55148     | 603.7494416 | 0.637469661 | 0.487287529 | 1.308200237 | 0.190805402 | 0.999371363 | Not Sig |
| ENSG00000146540 | C7orf50      | chromosome 7 open reading frame 50                           | 84310     | 1438.736876 | 0.637753681 | 0.571358361 | 1.116206088 | 0.264333929 | 0.999371363 | Not Sig |
| ENSG00000184441 | NA           | NA                                                           | NA        | 83.59325655 | 0.638224638 | 0.743975498 | 0.857857066 | 0.390971394 | 0.999371363 | Not Sig |
| ENSG00000142798 | HSPG2        | heparan sulfate proteoglycan 2                               | 3339      | 20112.504   | 0.638500478 | 0.477426169 | 1.337380561 | 0.181098446 | 0.999371363 | Not Sig |
| ENSG00000230077 | NA           | NA                                                           | NA        | 12.76142781 | 0.638726282 | 1.023003473 | 0.624363747 | 0.532388728 | 0.999371363 | Not Sig |
| ENSG00000076351 | SLC46A1      | solute carrier family 46 member 1                            | 113235    | 787.9190533 | 0.638930783 | 0.501722472 | 1.273474519 | 0.202849709 | 0.999371363 | Not Sig |
| ENSG00000272008 | NA           | NA                                                           | NA        | 7.284445354 | 0.639665219 | 1.046359786 | 0.611324353 | 0.540984872 | 0.999371363 | Not Sig |
| ENSG00000101871 | MID1         | midline 1                                                    | 4281      | 765.8815846 | 0.639702549 | 0.520110898 | 1.229934907 | 0.218721481 | 0.999371363 | Not Sig |
| ENSG00000171224 | FAM241B      | family with sequence similarity 241 member B                 | 219738    | 88.30140818 | 0.639834604 | 0.62167298  | 1.029214113 | 0.303379072 | 0.999371363 | Not Sig |
| ENSG00000196176 | NA           | NA                                                           | NA        | 208.5892288 | 0.639919805 | 0.568202421 | 1.12621802  | 0.260073248 | 0.999371363 | Not Sig |
| ENSG00000205084 | TMEM231      | transmembrane protein 231                                    | 79583     | 180.9182407 | 0.640243387 | 0.924315805 | 0.692667358 | 0.488518329 | 0.999371363 | Not Sig |
| ENSG00000256271 | CACNA1C-AS2  | CACNA1C antisense RNA 2                                      | 100874235 | 2.903763723 | 0.640950405 | 1.759059443 | 0.364371089 | 0.715580921 | NA          | NA      |
| ENSG00000182768 | NGRN         | neugrin, neurite outgrowth associated                        | 51335     | 840.7919431 | 0.64106464  | 0.621418019 | 1.031615789 | 0.302252141 | 0.999371363 | Not Sig |
| ENSG00000175728 | NA           | NA                                                           | NA        | 0.835946732 | 0.641498576 | 2.769307963 | 0.231645806 | 0.816813127 | NA          | NA      |
| ENSG00000140459 | CYP11A1      | cytochrome P450 family 11 subfamily A member 1               | 1583      | 24.31479283 | 0.642409155 | 1.142654358 | 0.562207767 | 0.57397447  | 0.999371363 | Not Sig |
| ENSG00000233347 | NA           | NA                                                           | NA        | 4.008632075 | 0.643307848 | 1.268907702 | 0.506977653 | 0.612170499 | NA          | NA      |
| ENSG00000119535 | CSF3R        | colony stimulating factor 3 receptor                         | 1441      | 1559.130696 | 0.64380663  | 0.872135894 | 0.738195314 | 0.46039577  | 0.999371363 | Not Sig |
| ENSG00000126012 | KDM5C        | lysine demethylase 5C                                        | 8242      | 3665.632968 | 0.644551825 | 0.421625203 | 1.528731728 | 0.126330963 | 0.999371363 | Not Sig |
| ENSG00000115828 | QPCT         | glutaminy-peptide cyclotransferase                           | 25797     | 330.8476405 | 0.644755916 | 0.941828075 | 0.684579207 | 0.493609492 | 0.999371363 | Not Sig |
| ENSG00000211691 | NA           | NA                                                           | NA        | 3.174119037 | 0.64558293  | 1.711119291 | 0.377286922 | 0.70596039  | NA          | NA      |
| ENSG00000033050 | ABCF2        | ATP binding cassette subfamily F member 2                    | 10061     | 965.0299154 | 0.645730167 | 0.504399485 | 1.280195927 | 0.200476238 | 0.999371363 | Not Sig |
| ENSG00000248208 | NA           | NA                                                           | NA        | 2.655588394 | 0.646010088 | 1.572866877 | 0.410721401 | 0.681276832 | NA          | NA      |

|                 |              |                                                          |           |             |             |             |             |             |             |         |
|-----------------|--------------|----------------------------------------------------------|-----------|-------------|-------------|-------------|-------------|-------------|-------------|---------|
| ENSG00000232022 | NA           | NA                                                       | NA        | 16.58177665 | 0.646035042 | 0.742012523 | 0.870652478 | 0.383943933 | 0.999371363 | Not Sig |
| ENSG00000245748 | LOC100129931 | uncharacterized LOC100129931                             | 100129931 | 1.050793843 | 0.64626297  | 3.012939339 | 0.214495845 | 0.830160407 | NA          | NA      |
| ENSG00000162366 | PDZK1IP1     | PDZK1 interacting protein 1                              | 10158     | 520.0543259 | 0.646496623 | 0.532386353 | 1.214337332 | 0.224618936 | 0.999371363 | Not Sig |
| ENSG00000223825 | NA           | NA                                                       | NA        | 3.574786114 | 0.646581918 | 1.345372723 | 0.480596869 | 0.630803041 | NA          | NA      |
| ENSG00000107833 | NPM3         | nucleophosmin/nucleoplasmin 3                            | 10360     | 106.879538  | 0.646799349 | 0.644414762 | 1.003700391 | 0.315523049 | 0.999371363 | Not Sig |
| ENSG00000213082 | NA           | NA                                                       | NA        | 1.260487779 | 0.646884103 | 2.137883296 | 0.302581579 | 0.762208755 | NA          | NA      |
| ENSG00000143553 | SNAPIN       | SNAP associated protein                                  | 23557     | 354.4895243 | 0.646964392 | 0.437478713 | 1.47884771  | 0.139181021 | 0.999371363 | Not Sig |
| ENSG00000124532 | MRS2         | MRS2, magnesium transporter                              | 57380     | 746.3746686 | 0.647194697 | 0.418823069 | 1.545269936 | 0.122280984 | 0.999371363 | Not Sig |
| ENSG00000258591 | NA           | NA                                                       | NA        | 1.819641661 | 0.647267764 | 1.930717675 | 0.335247236 | 0.737438593 | NA          | NA      |
| ENSG00000199667 | NA           | NA                                                       | NA        | 3.798938139 | 0.647644188 | 1.342306102 | 0.482486213 | 0.62946059  | NA          | NA      |
| ENSG00000144231 | POLR2D       | RNA polymerase II subunit D                              | 5433      | 419.2736694 | 0.647897305 | 0.440817074 | 1.469764542 | 0.141625535 | 0.999371363 | Not Sig |
| ENSG00000162065 | TBC1D24      | TBC1 domain family member 24                             | 57465     | 692.255053  | 0.648512539 | 0.647386705 | 1.001739043 | 0.316469645 | 0.999371363 | Not Sig |
| ENSG00000202538 | RNU4-2       | RNA, U4 small nuclear 2                                  | 26834     | 23.15011507 | 0.649154305 | 0.694902821 | 0.934165592 | 0.350218481 | 0.999371363 | Not Sig |
| ENSG00000084073 | ZMPSTE24     | zinc metalloproteinase STE24                             | 10269     | 1174.704075 | 0.64927586  | 0.45103469  | 1.439525328 | 0.150001739 | 0.999371363 | Not Sig |
| ENSG00000104953 | TLE6         | transducin like enhancer of split 6                      | 79816     | 114.8637952 | 0.649428844 | 0.747035491 | 0.869341352 | 0.384660451 | 0.999371363 | Not Sig |
| ENSG00000101000 | PROCR        | protein C receptor                                       | 10544     | 193.0281959 | 0.649617429 | 0.765837662 | 0.848244296 | 0.396301933 | 0.999371363 | Not Sig |
| ENSG00000166133 | RPUSD2       | RNA pseudouridylation synthase domain containing 2       | 27079     | 134.7631046 | 0.649955708 | 0.541761458 | 1.199708282 | 0.230252656 | 0.999371363 | Not Sig |
| ENSG00000249085 | NA           | NA                                                       | NA        | 3.321563182 | 0.650423758 | 1.845716916 | 0.352396271 | 0.724541098 | NA          | NA      |
| ENSG00000159915 | ZNF233       | zinc finger protein 233                                  | 353355    | 24.45328287 | 0.650769392 | 0.879705085 | 0.739758589 | 0.45944649  | 0.999371363 | Not Sig |
| ENSG00000177181 | RIMKLA       | ribosomal modification protein rimk like family member A | 284716    | 271.961141  | 0.651092602 | 0.781254097 | 0.833394159 | 0.404622468 | 0.999371363 | Not Sig |
| ENSG00000211683 | NA           | NA                                                       | NA        | 5.448347566 | 0.651280723 | 1.079280757 | 0.603439576 | 0.546216301 | NA          | NA      |
| ENSG00000237522 | NA           | NA                                                       | NA        | 28.1516425  | 0.651384358 | 0.691894378 | 0.941450572 | 0.346474008 | 0.999371363 | Not Sig |
| ENSG00000175707 | KDF1         | keratinocyte differentiation factor 1                    | 126695    | 267.0128417 | 0.651628841 | 0.596843351 | 1.091792077 | 0.274924502 | 0.999371363 | Not Sig |
| ENSG00000048471 | SNX29        | sorting nexin 29                                         | 92017     | 1543.425902 | 0.651728204 | 0.514317908 | 1.267169963 | 0.205094524 | 0.999371363 | Not Sig |
| ENSG00000129038 | LOXL1        | lysyl oxidase like 1                                     | 4016      | 696.564714  | 0.652159306 | 0.593946321 | 1.098010516 | 0.272199897 | 0.999371363 | Not Sig |
| ENSG00000102226 | USP11        | ubiquitin specific peptidase 11                          | 8237      | 1630.988379 | 0.652544022 | 0.505895601 | 1.289878822 | 0.197092735 | 0.999371363 | Not Sig |
| ENSG00000142920 | AZIN2        | antizyme inhibitor 2                                     | 113451    | 226.2779798 | 0.654044567 | 0.519241774 | 1.25961469  | 0.207808393 | 0.999371363 | Not Sig |
| ENSG00000179813 | FAM216B      | family with sequence similarity 216 member B             | 144809    | 193.6936645 | 0.654048392 | 1.265108377 | 0.51699001  | 0.605163133 | 0.999371363 | Not Sig |
| ENSG00000158023 | WDR66        | WD repeat domain 66                                      | 144406    | 368.2269938 | 0.654717857 | 0.503678354 | 1.299872927 | 0.193644526 | 0.999371363 | Not Sig |
| ENSG00000170891 | CYTL1        | cytokine like 1                                          | 54360     | 14.76542749 | 0.654730906 | 0.865550617 | 0.756432834 | 0.449389728 | 0.999371363 | Not Sig |
| ENSG00000146085 | MUT          | methylmalonyl-CoA mutase                                 | 4594      | 947.6104705 | 0.654843823 | 0.38430808  | 1.703955386 | 0.088389422 | 0.999371363 | Not Sig |
| ENSG00000224090 | LOC100129175 | uncharacterized LOC100129175                             | 100129175 | 12.24610753 | 0.65494354  | 0.937861366 | 0.698337263 | 0.484966301 | 0.999371363 | Not Sig |
| ENSG00000143515 | ATP8B2       | ATPase phospholipid transporting 8B2                     | 57198     | 1472.222204 | 0.655139493 | 0.618213075 | 1.059730891 | 0.289267045 | 0.999371363 | Not Sig |
| ENSG00000186810 | CXCR3        | C-X-C motif chemokine receptor 3                         | 2833      | 71.48067625 | 0.655684345 | 0.694894897 | 0.943573406 | 0.345387688 | 0.999371363 | Not Sig |
| ENSG00000150281 | CTF1         | cardiotrophin 1                                          | 1489      | 203.7299148 | 0.655747454 | 0.714304762 | 0.918021955 | 0.358607372 | 0.999371363 | Not Sig |

|                 |           |                                    |        |             |             |             |             |             |             |     |     |
|-----------------|-----------|------------------------------------|--------|-------------|-------------|-------------|-------------|-------------|-------------|-----|-----|
| ENSG00000112308 | C6orf62   | chromosome 6 open reading frame 62 | 81688  | 4604.742546 | 0.656321965 | 0.394402045 | 1.664093716 | 0.096093703 | 0.999371363 | Not | Sig |
| ENSG00000248487 | ABHD14A   | abhydrolase domain containing 14A  | 25864  | 179.5170048 | 0.657777645 | 0.483534615 | 1.360352753 | 0.173718322 | 0.999371363 | Not | Sig |
| ENSG00000233276 | GPX1      | glutathione peroxidase 1           | 2876   | 2900.125288 | 0.658191882 | 0.641952875 | 1.02529626  | 0.30522342  | 0.999371363 | Not | Sig |
| ENSG00000229153 | EPHA1-AS1 | EPHA1 antisense RNA 1              | 285965 | 47.73835896 | 0.658537984 | 0.865584873 | 0.76080117  | 0.446775836 | 0.999371363 | Not | Sig |
| ENSG00000184613 | NELL2     | neural EGFL like 2                 | 4753   | 152.9806086 | 0.658728059 | 0.633271652 | 1.040198241 | 0.298247808 | 0.999371363 | Not | Sig |
| ENSG00000188641 | DPYD      | dihydropyrimidine dehydrogenase    | 1806   | 2268.148543 | 0.659009245 | 0.521628953 | 1.263367843 | 0.206457015 | 0.999371363 | Not | Sig |
| ENSG00000179673 | RPRML     | reprimo like                       | 388394 | 5.604089138 | 0.659045765 | 1.687605946 | 0.39052112  | 0.696151241 | NA          | NA  |     |
| ENSG00000186051 | TAL2      | TAL bHLH transcription factor 2    | 6887   | 0.443134593 | 0.659073237 | 3.878232799 | 0.169941639 | 0.865056034 | NA          | NA  |     |
| ENSG00000210181 | NA        | NA                                 | NA     | 0.443134593 | 0.659073237 | 3.878232799 | 0.169941639 | 0.865056034 | NA          | NA  |     |
| ENSG00000214362 | NA        | NA                                 | NA     | 0.443134593 | 0.659073237 | 3.878232799 | 0.169941639 | 0.865056034 | NA          | NA  |     |
| ENSG00000215464 | NA        | NA                                 | NA     | 0.443134593 | 0.659073237 | 3.878232799 | 0.169941639 | 0.865056034 | NA          | NA  |     |
| ENSG00000224447 | NA        | NA                                 | NA     | 0.443134593 | 0.659073237 | 3.878232799 | 0.169941639 | 0.865056034 | NA          | NA  |     |
| ENSG00000226072 | NA        | NA                                 | NA     | 0.443134593 | 0.659073237 | 3.878232799 | 0.169941639 | 0.865056034 | NA          | NA  |     |
| ENSG00000230221 | NA        | NA                                 | NA     | 0.443134593 | 0.659073237 | 3.878232799 | 0.169941639 | 0.865056034 | NA          | NA  |     |
| ENSG00000236972 | NA        | NA                                 | NA     | 0.443134593 | 0.659073237 | 3.878232799 | 0.169941639 | 0.865056034 | NA          | NA  |     |
| ENSG00000252478 | NA        | NA                                 | NA     | 0.443134593 | 0.659073237 | 3.878232799 | 0.169941639 | 0.865056034 | NA          | NA  |     |
| ENSG00000253204 | NA        | NA                                 | NA     | 0.443134593 | 0.659073237 | 3.878232799 | 0.169941639 | 0.865056034 | NA          | NA  |     |
| ENSG00000266101 | NA        | NA                                 | NA     | 0.443134593 | 0.659073237 | 3.878232799 | 0.169941639 | 0.865056034 | NA          | NA  |     |
| ENSG00000267304 | NA        | NA                                 | NA     | 0.443134593 | 0.659073237 | 3.878232799 | 0.169941639 | 0.865056034 | NA          | NA  |     |
| ENSG00000270405 | NA        | NA                                 | NA     | 0.443134593 | 0.659073237 | 3.878232799 | 0.169941639 | 0.865056034 | NA          | NA  |     |
| ENSG00000270429 | NA        | NA                                 | NA     | 0.443134593 | 0.659073237 | 3.878232799 | 0.169941639 | 0.865056034 | NA          | NA  |     |
| ENSG00000272442 | NA        | NA                                 | NA     | 0.443134593 | 0.659073237 | 3.878232799 | 0.169941639 | 0.865056034 | NA          | NA  |     |
| ENSG00000176022 | B3GALT6   | beta-1,3-galactosyltransferase 6   | 126792 | 616.1896813 | 0.659375546 | 0.674679645 | 0.977316495 | 0.32841249  | 0.999371363 | Not | Sig |
| ENSG00000049540 | ELN       | elastin                            | 2006   | 4425.328571 | 0.659454749 | 0.880566898 | 0.748897955 | 0.453918713 | 0.999371363 | Not | Sig |
| ENSG00000147873 | IFNA5     | interferon alpha 5                 | 3442   | 0.459441385 | 0.65947461  | 3.832981622 | 0.172052641 | 0.863396145 | NA          | NA  |     |
| ENSG00000166090 | IL25      | interleukin 25                     | 64806  | 0.459441385 | 0.65947461  | 3.832981622 | 0.172052641 | 0.863396145 | NA          | NA  |     |
| ENSG00000198444 | NA        | NA                                 | NA     | 0.459441385 | 0.65947461  | 3.832981622 | 0.172052641 | 0.863396145 | NA          | NA  |     |
| ENSG00000199755 | NA        | NA                                 | NA     | 0.459441385 | 0.65947461  | 3.832981622 | 0.172052641 | 0.863396145 | NA          | NA  |     |
| ENSG00000206958 | NA        | NA                                 | NA     | 0.459441385 | 0.65947461  | 3.832981622 | 0.172052641 | 0.863396145 | NA          | NA  |     |
| ENSG00000211931 | NA        | NA                                 | NA     | 0.459441385 | 0.65947461  | 3.832981622 | 0.172052641 | 0.863396145 | NA          | NA  |     |
| ENSG00000219693 | NA        | NA                                 | NA     | 0.459441385 | 0.65947461  | 3.832981622 | 0.172052641 | 0.863396145 | NA          | NA  |     |
| ENSG00000225057 | NA        | NA                                 | NA     | 0.459441385 | 0.65947461  | 3.832981622 | 0.172052641 | 0.863396145 | NA          | NA  |     |
| ENSG00000226068 | NA        | NA                                 | NA     | 0.459441385 | 0.65947461  | 3.832981622 | 0.172052641 | 0.863396145 | NA          | NA  |     |
| ENSG00000226098 | NA        | NA                                 | NA     | 0.459441385 | 0.65947461  | 3.832981622 | 0.172052641 | 0.863396145 | NA          | NA  |     |
| ENSG00000229468 | NA        | NA                                 | NA     | 0.459441385 | 0.65947461  | 3.832981622 | 0.172052641 | 0.863396145 | NA          | NA  |     |

|                 |         |                                                          |           |             |             |             |             |             |             |         |
|-----------------|---------|----------------------------------------------------------|-----------|-------------|-------------|-------------|-------------|-------------|-------------|---------|
| ENSG00000238010 | NA      | NA                                                       | NA        | 0.459441385 | 0.65947461  | 3.832981622 | 0.172052641 | 0.863396145 | NA          | NA      |
| ENSG00000239719 | NA      | NA                                                       | NA        | 0.459441385 | 0.65947461  | 3.832981622 | 0.172052641 | 0.863396145 | NA          | NA      |
| ENSG00000242979 | NA      | NA                                                       | NA        | 0.459441385 | 0.65947461  | 3.832981622 | 0.172052641 | 0.863396145 | NA          | NA      |
| ENSG00000248781 | NA      | NA                                                       | NA        | 0.459441385 | 0.65947461  | 3.832981622 | 0.172052641 | 0.863396145 | NA          | NA      |
| ENSG00000252983 | NA      | NA                                                       | NA        | 0.459441385 | 0.65947461  | 3.832981622 | 0.172052641 | 0.863396145 | NA          | NA      |
| ENSG00000261303 | NA      | NA                                                       | NA        | 0.459441385 | 0.65947461  | 3.832981622 | 0.172052641 | 0.863396145 | NA          | NA      |
| ENSG00000264046 | NA      | NA                                                       | NA        | 0.459441385 | 0.65947461  | 3.832981622 | 0.172052641 | 0.863396145 | NA          | NA      |
| ENSG00000270945 | NA      | NA                                                       | NA        | 0.459441385 | 0.65947461  | 3.832981622 | 0.172052641 | 0.863396145 | NA          | NA      |
| ENSG00000134686 | PHC2    | polyhomeotic homolog 2                                   | 1912      | 2876.700842 | 0.660224511 | 0.518758718 | 1.272700561 | 0.203124319 | 0.999371363 | Not Sig |
| ENSG00000211845 | NA      | NA                                                       | NA        | 5.493986513 | 0.660247868 | 1.195108829 | 0.552458363 | 0.580634353 | NA          | NA      |
| ENSG00000199187 | NA      | NA                                                       | NA        | 0.501509217 | 0.660475994 | 3.726556862 | 0.177234916 | 0.859323871 | NA          | NA      |
| ENSG00000201421 | NA      | NA                                                       | NA        | 0.501509217 | 0.660475994 | 3.726556862 | 0.177234916 | 0.859323871 | NA          | NA      |
| ENSG00000224072 | NA      | NA                                                       | NA        | 0.501509217 | 0.660475994 | 3.726556862 | 0.177234916 | 0.859323871 | NA          | NA      |
| ENSG00000231158 | NA      | NA                                                       | NA        | 0.501509217 | 0.660475994 | 3.726556862 | 0.177234916 | 0.859323871 | NA          | NA      |
| ENSG00000236592 | NA      | NA                                                       | NA        | 0.501509217 | 0.660475994 | 3.726556862 | 0.177234916 | 0.859323871 | NA          | NA      |
| ENSG00000241204 | NA      | NA                                                       | NA        | 0.501509217 | 0.660475994 | 3.726556862 | 0.177234916 | 0.859323871 | NA          | NA      |
| ENSG00000179583 | CIITA   | class II major histocompatibility complex transactivator | 4261      | 3221.926982 | 0.660564556 | 0.852773398 | 0.774607366 | 0.438571703 | 0.999371363 | Not Sig |
| ENSG00000134684 | YARS    | tyrosyl-tRNA synthetase                                  | 8565      | 1844.607518 | 0.660809359 | 0.446260563 | 1.480770235 | 0.138667811 | 0.999371363 | Not Sig |
| ENSG00000265087 | NA      | NA                                                       | NA        | 2.215000845 | 0.661133446 | 1.610133141 | 0.410607936 | 0.681360043 | NA          | NA      |
| ENSG00000235720 | NA      | NA                                                       | NA        | 2.073690184 | 0.661171814 | 1.737834672 | 0.380457258 | 0.703606019 | NA          | NA      |
| ENSG00000041880 | PARP3   | poly(ADP-ribose) polymerase family member 3              | 10039     | 489.9167444 | 0.66202003  | 0.547066724 | 1.210126666 | 0.226230292 | 0.999371363 | Not Sig |
| ENSG00000116761 | CTH     | cystathionine gamma-lyase                                | 1491      | 114.8918883 | 0.662246983 | 0.703451454 | 0.941425281 | 0.346486963 | 0.999371363 | Not Sig |
| ENSG00000164076 | CAMKV   | CaM kinase like vesicle associated                       | 79012     | 1.439715492 | 0.662389941 | 2.331410953 | 0.28411548  | 0.776321885 | NA          | NA      |
| ENSG00000272080 | MIR502  | microRNA 502                                             | 574504    | 1.439715492 | 0.662389941 | 2.331410953 | 0.28411548  | 0.776321885 | NA          | NA      |
| ENSG00000156709 | AIFM1   | apoptosis inducing factor mitochondria associated 1      | 9131      | 609.6946754 | 0.662502844 | 0.450191309 | 1.471602917 | 0.141128137 | 0.999371363 | Not Sig |
| ENSG00000264711 | NA      | NA                                                       | NA        | 6.464833842 | 0.664184056 | 1.554862117 | 0.427165888 | 0.669258506 | NA          | NA      |
| ENSG00000156427 | FGF18   | fibroblast growth factor 18                              | 8817      | 70.58964923 | 0.664232861 | 0.885243754 | 0.750338941 | 0.453050595 | 0.999371363 | Not Sig |
| ENSG00000173264 | GPR137  | G protein-coupled receptor 137                           | 56834     | 495.514599  | 0.664479162 | 0.614558398 | 1.081230302 | 0.279594682 | 0.999371363 | Not Sig |
| ENSG00000141965 | FEM1A   | fem-1 homolog A                                          | 55527     | 1227.293802 | 0.664487919 | 0.762753836 | 0.871169554 | 0.383661581 | 0.999371363 | Not Sig |
| ENSG00000137078 | SIT1    | signaling threshold regulating transmembrane adaptor 1   | 27240     | 48.30479778 | 0.664625023 | 0.79319102  | 0.837912944 | 0.402079598 | 0.999371363 | Not Sig |
| ENSG00000264720 | MIR3117 | microRNA 3117                                            | 100422871 | 9.27278203  | 0.664676928 | 1.284069277 | 0.51763323  | 0.604714192 | 0.999371363 | Not Sig |
| ENSG00000130300 | PLVAP   | plasmalemma vesicle associated protein                   | 83483     | 853.4873185 | 0.665331029 | 0.57117774  | 1.164840614 | 0.244083516 | 0.999371363 | Not Sig |
| ENSG00000116688 | MFN2    | mitofusin 2                                              | 9927      | 2780.046089 | 0.665603694 | 0.587687409 | 1.13258117  | 0.25739018  | 0.999371363 | Not Sig |
| ENSG00000004455 | AK2     | adenylate kinase 2                                       | 204       | 2681.835124 | 0.665756533 | 0.443554348 | 1.500958191 | 0.133366376 | 0.999371363 | Not Sig |
| ENSG00000120509 | PDZD11  | PDZ domain containing 11                                 | 51248     | 272.855878  | 0.665811418 | 0.535530416 | 1.243274703 | 0.213766623 | 0.999371363 | Not Sig |

|                 |              |                                                             |           |             |             |             |             |             |             |         |
|-----------------|--------------|-------------------------------------------------------------|-----------|-------------|-------------|-------------|-------------|-------------|-------------|---------|
| ENSG00000182054 | IDH2         | isocitrate dehydrogenase (NADP(+)) 2, mitochondrial         | 3418      | 2174.823448 | 0.665932388 | 0.523327424 | 1.272496639 | 0.203196718 | 0.999371363 | Not Sig |
| ENSG00000217334 | NA           | NA                                                          | NA        | 2.020894641 | 0.666027351 | 2.187406687 | 0.304482635 | 0.760760221 | NA          | NA      |
| ENSG00000136352 | NKX2-1       | NK2 homeobox 1                                              | 7080      | 3996.977344 | 0.666715784 | 0.540524845 | 1.233460016 | 0.217404186 | 0.999371363 | Not Sig |
| ENSG00000144355 | DLX1         | distal-less homeobox 1                                      | 1745      | 1.915463668 | 0.667025566 | 2.125551144 | 0.313812993 | 0.753663076 | NA          | NA      |
| ENSG00000231875 | NA           | NA                                                          | NA        | 6.571958799 | 0.667505543 | 1.089396649 | 0.612729573 | 0.540055165 | NA          | NA      |
| ENSG00000105607 | GCDH         | glutaryl-CoA dehydrogenase                                  | 2639      | 356.1770213 | 0.668142235 | 0.570558313 | 1.171032337 | 0.241585779 | 0.999371363 | Not Sig |
| ENSG00000164532 | TBX20        | T-box 20                                                    | 57057     | 1.857558713 | 0.668308042 | 1.837098771 | 0.363784492 | 0.716018944 | NA          | NA      |
| ENSG00000227687 | NA           | NA                                                          | NA        | 10.87123844 | 0.668407719 | 1.243510768 | 0.537516631 | 0.5909108   | 0.999371363 | Not Sig |
| ENSG00000184164 | CRELD2       | cysteine rich with EGF like domains 2                       | 79174     | 1203.047254 | 0.668707989 | 0.620479542 | 1.077727698 | 0.281155294 | 0.999371363 | Not Sig |
| ENSG00000173376 | NDNF         | neuron derived neurotrophic factor                          | 79625     | 4117.274939 | 0.668714321 | 0.883249412 | 0.75710701  | 0.448985755 | 0.999371363 | Not Sig |
| ENSG00000215301 | DDX3X        | DEAD-box helicase 3, X-linked                               | 1654      | 8516.129029 | 0.668949133 | 0.454097925 | 1.473138493 | 0.140713696 | 0.999371363 | Not Sig |
| ENSG00000185803 | SLC52A2      | solute carrier family 52 member 2                           | 79581     | 796.5197056 | 0.668994027 | 0.615568567 | 1.08679043  | 0.277129438 | 0.999371363 | Not Sig |
| ENSG00000197780 | TAF13        | TATA-box binding protein associated factor 13               | 6884      | 420.487981  | 0.669011342 | 0.686879662 | 0.973986244 | 0.330063369 | 0.999371363 | Not Sig |
| ENSG00000186205 | 1-Mar        | mitochondrial amidoxime reducing component 1                | 64757     | 341.4216006 | 0.669049421 | 0.52549722  | 1.273174043 | 0.202956289 | 0.999371363 | Not Sig |
| ENSG00000253943 | NA           | NA                                                          | NA        | 2.504668766 | 0.669681215 | 1.669388423 | 0.401153624 | 0.688307023 | NA          | NA      |
| ENSG00000183155 | RABIF        | RAB interacting factor                                      | 5877      | 305.7726274 | 0.670205627 | 0.454047802 | 1.476068432 | 0.139925522 | 0.999371363 | Not Sig |
| ENSG00000224525 | NA           | NA                                                          | NA        | 1.186536322 | 0.670388814 | 2.828628287 | 0.237001382 | 0.812655718 | NA          | NA      |
| ENSG00000206337 | HCP5         | HLA complex P5 (non-protein coding)                         | 10866     | 1060.47855  | 0.670644785 | 0.915887995 | 0.732234497 | 0.464025452 | 0.999371363 | Not Sig |
| ENSG00000169895 | SYAP1        | synapse associated protein 1                                | 94056     | 2055.020706 | 0.671420289 | 0.431472862 | 1.556112443 | 0.119681357 | 0.999371363 | Not Sig |
| ENSG00000167447 | SMG8         | SMG8, nonsense mediated mRNA decay factor                   | 55181     | 408.2760954 | 0.672382837 | 0.446053474 | 1.507404103 | 0.131707108 | 0.999371363 | Not Sig |
| ENSG00000234899 | SOX9-AS1     | SOX9 antisense RNA 1                                        | 400618    | 45.99656533 | 0.672858795 | 0.987099718 | 0.681652302 | 0.495458835 | 0.999371363 | Not Sig |
| ENSG00000234899 | LOC102723517 | uncharacterized LOC102723517                                | 102723517 | 45.99656533 | 0.672858795 | 0.987099718 | 0.681652302 | 0.495458835 | 0.999371363 | Not Sig |
| ENSG00000167359 | OR51I1       | olfactory receptor family 51 subfamily I member 1           | 390063    | 1.98042612  | 0.672876334 | 2.523842122 | 0.266607934 | 0.789771046 | NA          | NA      |
| ENSG00000186364 | NUDT17       | nudix hydrolase 17                                          | 200035    | 77.79964502 | 0.673013679 | 0.515692279 | 1.305068362 | 0.191869571 | 0.999371363 | Not Sig |
| ENSG00000072506 | HSD17B10     | hydroxysteroid 17-beta dehydrogenase 10                     | 3028      | 471.3363658 | 0.673511125 | 0.614508751 | 1.096015514 | 0.273071985 | 0.999371363 | Not Sig |
| ENSG00000160256 | FAM207A      | family with sequence similarity 207 member A                | 85395     | 250.2923052 | 0.67391796  | 0.597599806 | 1.127707794 | 0.259443345 | 0.999371363 | Not Sig |
| ENSG00000158042 | MRPL17       | mitochondrial ribosomal protein L17                         | 63875     | 484.9328279 | 0.674394306 | 0.414421789 | 1.627313823 | 0.103670463 | 0.999371363 | Not Sig |
| ENSG00000230195 | NA           | NA                                                          | NA        | 2.407103629 | 0.674455065 | 1.800888817 | 0.374512329 | 0.708023186 | NA          | NA      |
| ENSG00000133067 | LGR6         | leucine rich repeat containing G protein-coupled receptor 6 | 59352     | 186.2693854 | 0.674848578 | 0.743683227 | 0.907440902 | 0.364173688 | 0.999371363 | Not Sig |
| ENSG00000229036 | NA           | NA                                                          | NA        | 22.98729653 | 0.674889118 | 0.640563604 | 1.053586424 | 0.292072307 | 0.999371363 | Not Sig |
| ENSG00000127463 | EMC1         | ER membrane protein complex subunit 1                       | 23065     | 1915.805245 | 0.675350986 | 0.417684128 | 1.616894061 | 0.105901151 | 0.999371363 | Not Sig |
| ENSG00000263331 | NA           | NA                                                          | NA        | 1.378793823 | 0.675823077 | 2.119896243 | 0.318800073 | 0.749878123 | NA          | NA      |
| ENSG00000116954 | RRAGC        | Ras related GTP binding C                                   | 64121     | 631.5146247 | 0.676214207 | 0.45852483  | 1.47476028  | 0.140277003 | 0.999371363 | Not Sig |
| ENSG00000237605 | NA           | NA                                                          | NA        | 2.907893786 | 0.676486018 | 1.746889661 | 0.387251716 | 0.698569868 | NA          | NA      |
| ENSG00000231668 | NA           | NA                                                          | NA        | 4.779766648 | 0.676792342 | 1.244450704 | 0.543848254 | 0.5865459   | NA          | NA      |

|                 |              |                                                        |           |             |             |             |             |             |             |         |
|-----------------|--------------|--------------------------------------------------------|-----------|-------------|-------------|-------------|-------------|-------------|-------------|---------|
| ENSG00000228206 | NA           | NA                                                     | NA        | 15.53121    | 0.67685717  | 1.489973636 | 0.454274595 | 0.649631199 | 0.999371363 | Not Sig |
| ENSG00000242525 | NA           | NA                                                     | NA        | 5.21074523  | 0.676888136 | 1.171138671 | 0.57797437  | 0.563281423 | NA          | NA      |
| ENSG00000205593 | DENND6B      | DENN domain containing 6B                              | 414918    | 360.3376243 | 0.677447726 | 0.725107466 | 0.93427217  | 0.350163516 | 0.999371363 | Not Sig |
| ENSG00000261533 | NA           | NA                                                     | NA        | 6.088594179 | 0.677650016 | 1.081003428 | 0.626871292 | 0.530743607 | NA          | NA      |
| ENSG00000213178 | NA           | NA                                                     | NA        | 25.25926675 | 0.677813922 | 0.609978654 | 1.111209249 | 0.266478291 | 0.999371363 | Not Sig |
| ENSG00000125285 | SOX21        | SRY-box 21                                             | 11166     | 26.92743092 | 0.678173364 | 0.801374379 | 0.846262847 | 0.397406129 | 0.999371363 | Not Sig |
| ENSG00000128228 | SDF2L1       | stromal cell derived factor 2 like 1                   | 23753     | 449.8928383 | 0.678269442 | 0.470556902 | 1.441418538 | 0.149466476 | 0.999371363 | Not Sig |
| ENSG00000267745 | NA           | NA                                                     | NA        | 27.45617616 | 0.678568414 | 0.955390082 | 0.71025273  | 0.477547427 | 0.999371363 | Not Sig |
| ENSG00000230330 | NA           | NA                                                     | NA        | 29.07305148 | 0.679238315 | 0.686522349 | 0.989389954 | 0.322472388 | 0.999371363 | Not Sig |
| ENSG00000273210 | NA           | NA                                                     | NA        | 4.540026891 | 0.67924356  | 1.48177526  | 0.458398503 | 0.646666167 | NA          | NA      |
| ENSG00000211451 | GNRHR2       | gonadotropin releasing hormone receptor 2 (pseudogene) | 114814    | 24.44737794 | 0.67939646  | 0.749976708 | 0.905890079 | 0.364994036 | 0.999371363 | Not Sig |
| ENSG00000125454 | SLC25A19     | solute carrier family 25 member 19                     | 60386     | 262.1479143 | 0.679858788 | 0.571897364 | 1.18877762  | 0.234527187 | 0.999371363 | Not Sig |
| ENSG00000160221 | C21orf33     | chromosome 21 open reading frame 33                    | 8209      | 1515.461707 | 0.67992603  | 0.617930126 | 1.100328339 | 0.271189089 | 0.999371363 | Not Sig |
| ENSG00000160221 | LOC102724023 | ES1 protein homolog, mitochondrial                     | 102724023 | 1515.461707 | 0.67992603  | 0.617930126 | 1.100328339 | 0.271189089 | 0.999371363 | Not Sig |
| ENSG00000178053 | MLF1         | myeloid leukemia factor 1                              | 4291      | 248.7710708 | 0.680046814 | 0.554778585 | 1.225798603 | 0.220274473 | 0.999371363 | Not Sig |
| ENSG00000262332 | NA           | NA                                                     | NA        | 2.13133485  | 0.680103411 | 1.794903298 | 0.378908107 | 0.704756104 | NA          | NA      |
| ENSG00000256937 | NA           | NA                                                     | NA        | 17.58202253 | 0.680199298 | 1.006291219 | 0.675946769 | 0.499074442 | 0.999371363 | Not Sig |
| ENSG00000172116 | CD8B         | CD8b molecule                                          | 926       | 39.71292696 | 0.680382563 | 0.880318397 | 0.772882363 | 0.439592003 | 0.999371363 | Not Sig |
| ENSG00000172116 | CD8B2        | CD8b2 molecule                                         | 927       | 39.71292696 | 0.680382563 | 0.880318397 | 0.772882363 | 0.439592003 | 0.999371363 | Not Sig |
| ENSG00000052344 | PRSS8        | protease, serine 8                                     | 5652      | 2883.997105 | 0.680490103 | 0.504681314 | 1.34835605  | 0.177543893 | 0.999371363 | Not Sig |
| ENSG00000225945 | NA           | NA                                                     | NA        | 3.539155818 | 0.680891327 | 1.352334058 | 0.50349344  | 0.614617391 | NA          | NA      |
| ENSG00000160188 | RSPH1        | radial spoke head 1 homolog                            | 89765     | 187.0042146 | 0.681068566 | 0.911417061 | 0.747263349 | 0.454904611 | 0.999371363 | Not Sig |
| ENSG00000234202 | NA           | NA                                                     | NA        | 3.93609802  | 0.681453784 | 1.377932262 | 0.494548102 | 0.620919144 | NA          | NA      |
| ENSG00000149257 | SERPINH1     | serpin family H member 1                               | 871       | 3673.046657 | 0.681466083 | 0.428299067 | 1.591098688 | 0.111587368 | 0.999371363 | Not Sig |
| ENSG00000151117 | TMEM86A      | transmembrane protein 86A                              | 144110    | 262.1226979 | 0.681534623 | 0.74365443  | 0.916466837 | 0.359422094 | 0.999371363 | Not Sig |
| ENSG00000211779 | NA           | NA                                                     | NA        | 4.046538228 | 0.681810575 | 1.286519401 | 0.529965249 | 0.596136025 | NA          | NA      |
| ENSG00000180113 | TDRD6        | tudor domain containing 6                              | 221400    | 29.08656929 | 0.682111064 | 0.958039951 | 0.711986033 | 0.476473425 | 0.999371363 | Not Sig |
| ENSG00000066185 | ZMYND12      | zinc finger MYND-type containing 12                    | 84217     | 49.75698166 | 0.682277112 | 0.575131888 | 1.18629679  | 0.235505114 | 0.999371363 | Not Sig |
| ENSG00000225265 | TAF1A-AS1    | TAF1A antisense RNA 1                                  | 100506161 | 19.84133625 | 0.682388095 | 0.823527896 | 0.82861564  | 0.407321935 | 0.999371363 | Not Sig |
| ENSG00000127580 | WDR24        | WD repeat domain 24                                    | 84219     | 435.4399585 | 0.682622672 | 0.48958962  | 1.394275213 | 0.163234513 | 0.999371363 | Not Sig |
| ENSG00000112320 | SOBP         | sine oculis binding protein homolog                    | 55084     | 253.0970932 | 0.683433002 | 0.908123837 | 0.752576878 | 0.451704216 | 0.999371363 | Not Sig |
| ENSG00000177830 | CHID1        | chitinase domain containing 1                          | 66005     | 1284.006529 | 0.683745204 | 0.439952297 | 1.554134865 | 0.12015225  | 0.999371363 | Not Sig |
| ENSG00000139496 | NUP58        | nucleoporin 58                                         | 9818      | 2463.170475 | 0.684107864 | 0.532958338 | 1.283604768 | 0.199280281 | 0.999371363 | Not Sig |
| ENSG00000234664 | NA           | NA                                                     | NA        | 72.57959589 | 0.684276034 | 0.663032342 | 1.032040205 | 0.302053283 | 0.999371363 | Not Sig |
| ENSG00000221639 | NA           | NA                                                     | NA        | 14.02309092 | 0.684547172 | 0.798088592 | 0.857733314 | 0.39103974  | 0.999371363 | Not Sig |

|                 |                 |                                 |           |             |            |             |             |             |    |    |
|-----------------|-----------------|---------------------------------|-----------|-------------|------------|-------------|-------------|-------------|----|----|
| ENSG00000161939 | RNASEK-C17orf49 | RNASEK-C17orf49 readthrough     | 100529209 | 0.449572129 | 0.68492594 | 4.044601814 | 0.169343231 | 0.865526673 | NA | NA |
| ENSG00000171773 | NXNL1           | nucleoredoxin like 1            | 115861    | 0.449572129 | 0.68492594 | 4.044601814 | 0.169343231 | 0.865526673 | NA | NA |
| ENSG00000173335 | CST9            | cystatin 9                      | 128822    | 0.507946752 | 0.68492594 | 4.044601814 | 0.169343231 | 0.865526673 | NA | NA |
| ENSG00000188662 | NA              | NA                              | NA        | 0.449572129 | 0.68492594 | 4.044601814 | 0.169343231 | 0.865526673 | NA | NA |
| ENSG00000197284 | NA              | NA                              | NA        | 0.449572129 | 0.68492594 | 4.044601814 | 0.169343231 | 0.865526673 | NA | NA |
| ENSG00000197627 | NA              | NA                              | NA        | 0.449572129 | 0.68492594 | 4.044601814 | 0.169343231 | 0.865526673 | NA | NA |
| ENSG00000199508 | NA              | NA                              | NA        | 0.465878921 | 0.68492594 | 4.044601814 | 0.169343231 | 0.865526673 | NA | NA |
| ENSG00000201516 | NA              | NA                              | NA        | 0.465878921 | 0.68492594 | 4.044601814 | 0.169343231 | 0.865526673 | NA | NA |
| ENSG00000201623 | NA              | NA                              | NA        | 0.507946752 | 0.68492594 | 4.044601814 | 0.169343231 | 0.865526673 | NA | NA |
| ENSG00000203395 | NA              | NA                              | NA        | 0.465878921 | 0.68492594 | 4.044601814 | 0.169343231 | 0.865526673 | NA | NA |
| ENSG00000211832 | NA              | NA                              | NA        | 0.449572129 | 0.68492594 | 4.044601814 | 0.169343231 | 0.865526673 | NA | NA |
| ENSG00000212158 | SNORD66         | small nucleolar RNA, C/D box 66 | 692107    | 0.449572129 | 0.68492594 | 4.044601814 | 0.169343231 | 0.865526673 | NA | NA |
| ENSG00000213925 | NA              | NA                              | NA        | 0.507946752 | 0.68492594 | 4.044601814 | 0.169343231 | 0.865526673 | NA | NA |
| ENSG00000214012 | NA              | NA                              | NA        | 0.449572129 | 0.68492594 | 4.044601814 | 0.169343231 | 0.865526673 | NA | NA |
| ENSG00000222306 | NA              | NA                              | NA        | 0.465878921 | 0.68492594 | 4.044601814 | 0.169343231 | 0.865526673 | NA | NA |
| ENSG00000222611 | NA              | NA                              | NA        | 0.449572129 | 0.68492594 | 4.044601814 | 0.169343231 | 0.865526673 | NA | NA |
| ENSG00000223475 | NA              | NA                              | NA        | 0.465878921 | 0.68492594 | 4.044601814 | 0.169343231 | 0.865526673 | NA | NA |
| ENSG00000223822 | NA              | NA                              | NA        | 0.507946752 | 0.68492594 | 4.044601814 | 0.169343231 | 0.865526673 | NA | NA |
| ENSG00000228858 | NA              | NA                              | NA        | 0.449572129 | 0.68492594 | 4.044601814 | 0.169343231 | 0.865526673 | NA | NA |
| ENSG00000229237 | NA              | NA                              | NA        | 0.449572129 | 0.68492594 | 4.044601814 | 0.169343231 | 0.865526673 | NA | NA |
| ENSG00000230154 | NA              | NA                              | NA        | 0.449572129 | 0.68492594 | 4.044601814 | 0.169343231 | 0.865526673 | NA | NA |
| ENSG00000230916 | NA              | NA                              | NA        | 0.465878921 | 0.68492594 | 4.044601814 | 0.169343231 | 0.865526673 | NA | NA |
| ENSG00000231164 | NA              | NA                              | NA        | 0.449572129 | 0.68492594 | 4.044601814 | 0.169343231 | 0.865526673 | NA | NA |
| ENSG00000233894 | NA              | NA                              | NA        | 0.465878921 | 0.68492594 | 4.044601814 | 0.169343231 | 0.865526673 | NA | NA |
| ENSG00000234848 | NA              | NA                              | NA        | 0.507946752 | 0.68492594 | 4.044601814 | 0.169343231 | 0.865526673 | NA | NA |
| ENSG00000235060 | NA              | NA                              | NA        | 0.449572129 | 0.68492594 | 4.044601814 | 0.169343231 | 0.865526673 | NA | NA |
| ENSG00000243008 | NA              | NA                              | NA        | 0.465878921 | 0.68492594 | 4.044601814 | 0.169343231 | 0.865526673 | NA | NA |
| ENSG00000243730 | NA              | NA                              | NA        | 0.449572129 | 0.68492594 | 4.044601814 | 0.169343231 | 0.865526673 | NA | NA |
| ENSG00000244286 | NA              | NA                              | NA        | 0.507946752 | 0.68492594 | 4.044601814 | 0.169343231 | 0.865526673 | NA | NA |
| ENSG00000249971 | NA              | NA                              | NA        | 0.449572129 | 0.68492594 | 4.044601814 | 0.169343231 | 0.865526673 | NA | NA |
| ENSG00000252459 | NA              | NA                              | NA        | 0.449572129 | 0.68492594 | 4.044601814 | 0.169343231 | 0.865526673 | NA | NA |
| ENSG00000256189 | NA              | NA                              | NA        | 0.465878921 | 0.68492594 | 4.044601814 | 0.169343231 | 0.865526673 | NA | NA |
| ENSG00000256462 | NA              | NA                              | NA        | 0.465878921 | 0.68492594 | 4.044601814 | 0.169343231 | 0.865526673 | NA | NA |
| ENSG00000257568 | NA              | NA                              | NA        | 0.449572129 | 0.68492594 | 4.044601814 | 0.169343231 | 0.865526673 | NA | NA |
| ENSG00000257886 | NA              | NA                              | NA        | 0.449572129 | 0.68492594 | 4.044601814 | 0.169343231 | 0.865526673 | NA | NA |

|                 |              |                                                            |           |             |             |             |             |             |             |         |
|-----------------|--------------|------------------------------------------------------------|-----------|-------------|-------------|-------------|-------------|-------------|-------------|---------|
| ENSG00000258177 | NA           | NA                                                         | NA        | 0.507946752 | 0.68492594  | 4.044601814 | 0.169343231 | 0.865526673 | NA          | NA      |
| ENSG00000261731 | NA           | NA                                                         | NA        | 0.449572129 | 0.68492594  | 4.044601814 | 0.169343231 | 0.865526673 | NA          | NA      |
| ENSG00000263600 | MIR3915      | microRNA 3915                                              | 100500915 | 0.507946752 | 0.68492594  | 4.044601814 | 0.169343231 | 0.865526673 | NA          | NA      |
| ENSG00000264647 | NA           | NA                                                         | NA        | 0.449572129 | 0.68492594  | 4.044601814 | 0.169343231 | 0.865526673 | NA          | NA      |
| ENSG00000265250 | NA           | NA                                                         | NA        | 0.449572129 | 0.68492594  | 4.044601814 | 0.169343231 | 0.865526673 | NA          | NA      |
| ENSG00000265433 | MIR4447      | microRNA 4447                                              | 100616485 | 0.449572129 | 0.68492594  | 4.044601814 | 0.169343231 | 0.865526673 | NA          | NA      |
| ENSG00000265617 | MIR548AG2    | microRNA 548ag-2                                           | 100616440 | 0.449572129 | 0.68492594  | 4.044601814 | 0.169343231 | 0.865526673 | NA          | NA      |
| ENSG00000268091 | NA           | NA                                                         | NA        | 0.465878921 | 0.68492594  | 4.044601814 | 0.169343231 | 0.865526673 | NA          | NA      |
| ENSG00000269358 | NA           | NA                                                         | NA        | 0.449572129 | 0.68492594  | 4.044601814 | 0.169343231 | 0.865526673 | NA          | NA      |
| ENSG00000269915 | NA           | NA                                                         | NA        | 0.465878921 | 0.68492594  | 4.044601814 | 0.169343231 | 0.865526673 | NA          | NA      |
| ENSG00000271299 | NA           | NA                                                         | NA        | 0.449572129 | 0.68492594  | 4.044601814 | 0.169343231 | 0.865526673 | NA          | NA      |
| ENSG00000271565 | NA           | NA                                                         | NA        | 0.449572129 | 0.68492594  | 4.044601814 | 0.169343231 | 0.865526673 | NA          | NA      |
| ENSG00000271806 | NA           | NA                                                         | NA        | 0.449572129 | 0.68492594  | 4.044601814 | 0.169343231 | 0.865526673 | NA          | NA      |
| ENSG00000271845 | NA           | NA                                                         | NA        | 0.465878921 | 0.68492594  | 4.044601814 | 0.169343231 | 0.865526673 | NA          | NA      |
| ENSG00000272412 | NA           | NA                                                         | NA        | 0.449572129 | 0.68492594  | 4.044601814 | 0.169343231 | 0.865526673 | NA          | NA      |
| ENSG00000272657 | NA           | NA                                                         | NA        | 0.465878921 | 0.68492594  | 4.044601814 | 0.169343231 | 0.865526673 | NA          | NA      |
| ENSG00000211578 | MIR766       | microRNA 766                                               | 768218    | 2.593792948 | 0.685905308 | 1.494946197 | 0.45881605  | 0.646366268 | NA          | NA      |
| ENSG00000104381 | GDAP1        | ganglioside induced differentiation associated protein 1   | 54332     | 227.2833972 | 0.686169751 | 0.558262642 | 1.229116368 | 0.219028179 | 0.999371363 | Not Sig |
| ENSG00000128655 | PDE11A       | phosphodiesterase 11A                                      | 50940     | 19.65138247 | 0.686905077 | 0.995444829 | 0.690048365 | 0.490163773 | 0.999371363 | Not Sig |
| ENSG00000227527 | NA           | NA                                                         | NA        | 2.205131589 | 0.686929935 | 1.5849195   | 0.433416294 | 0.664712366 | NA          | NA      |
| ENSG00000164309 | CMYA5        | cardiomyopathy associated 5                                | 202333    | 308.8575982 | 0.686984859 | 0.636716637 | 1.078949127 | 0.280610407 | 0.999371363 | Not Sig |
| ENSG00000261351 | NA           | NA                                                         | NA        | 26.42120454 | 0.68724356  | 0.631094527 | 1.088970876 | 0.276166729 | 0.999371363 | Not Sig |
| ENSG00000181616 | OR52H1       | olfactory receptor family 52 subfamily H member 1          | 390067    | 9.597140912 | 0.687335658 | 0.973297128 | 0.70619304  | 0.480068098 | 0.999371363 | Not Sig |
| ENSG00000180423 | HARBI1       | harbinger transposase derived 1                            | 283254    | 72.52504266 | 0.687426146 | 0.474240586 | 1.449530401 | 0.147189517 | 0.999371363 | Not Sig |
| ENSG00000205890 | LOC100128770 | uncharacterized LOC100128770                               | 100128770 | 4.797794894 | 0.687458996 | 1.218219405 | 0.5643146   | 0.572540047 | NA          | NA      |
| ENSG00000113194 | FAF2         | Fas associated factor family member 2                      | 23197     | 1905.655843 | 0.688093735 | 0.511908662 | 1.34417287  | 0.178892492 | 0.999371363 | Not Sig |
| ENSG00000233306 | NA           | NA                                                         | NA        | 6.408307921 | 0.688452718 | 1.052403556 | 0.65417179  | 0.513001134 | NA          | NA      |
| ENSG00000223703 | NA           | NA                                                         | NA        | 5.299974984 | 0.688476241 | 1.186574397 | 0.580221723 | 0.561765106 | NA          | NA      |
| ENSG00000171298 | GAA          | glucosidase alpha, acid                                    | 2548      | 5126.439687 | 0.688501646 | 0.62597395  | 1.099888655 | 0.271380638 | 0.999371363 | Not Sig |
| ENSG00000181523 | SGSH         | N-sulfoglucosamine sulfohydrolase                          | 6448      | 1215.207678 | 0.688574598 | 0.559956163 | 1.229693757 | 0.218811806 | 0.999371363 | Not Sig |
| ENSG00000237953 | NA           | NA                                                         | NA        | 2.390951555 | 0.68868135  | 1.710269225 | 0.402674234 | 0.687187891 | NA          | NA      |
| ENSG00000182871 | COL18A1      | collagen type XVIII alpha 1 chain                          | 80781     | 5232.223957 | 0.688944284 | 0.62208315  | 1.107479417 | 0.268086707 | 0.999371363 | Not Sig |
| ENSG00000162688 | AGL          | amylase-alpha-1, 6-glucosidase, 4-alpha-glucanotransferase | 178       | 1290.764533 | 0.689106996 | 0.577239461 | 1.193797449 | 0.23255721  | 0.999371363 | Not Sig |
| ENSG00000173013 | CCDC96       | coiled-coil domain containing 96                           | 257236    | 99.13402437 | 0.689179694 | 0.8054147   | 0.855683034 | 0.392173127 | 0.999371363 | Not Sig |
| ENSG00000236213 | NA           | NA                                                         | NA        | 13.04490775 | 0.689305316 | 1.066893743 | 0.646086192 | 0.518223537 | 0.999371363 | Not Sig |



|                 |              |                                                 |           |             |             |             |             |             |             |         |
|-----------------|--------------|-------------------------------------------------|-----------|-------------|-------------|-------------|-------------|-------------|-------------|---------|
| ENSG00000198393 | ZNF26        | zinc finger protein 26                          | 7574      | 23.47461028 | 0.689579131 | 0.769916823 | 0.895654064 | 0.370437551 | 0.999371363 | Not Sig |
| ENSG00000267296 | CEBPA-AS1    | CEBPA antisense RNA 1 (head to head)            | 80054     | 16.05816776 | 0.690802265 | 1.083844322 | 0.637362996 | 0.523888426 | 0.999371363 | Not Sig |
| ENSG00000078967 | UBE2D4       | ubiquitin conjugating enzyme E2 D4 (putative)   | 51619     | 486.9554151 | 0.691349438 | 0.464405598 | 1.488675936 | 0.136572725 | 0.999371363 | Not Sig |
| ENSG00000215699 | NA           | NA                                              | NA        | 194.9188291 | 0.691450153 | 0.533389084 | 1.296333528 | 0.194860602 | 0.999371363 | Not Sig |
| ENSG00000229320 | NA           | NA                                              | NA        | 102.9323478 | 0.692202316 | 0.614781269 | 1.125932669 | 0.26019402  | 0.999371363 | Not Sig |
| ENSG00000248399 | NA           | NA                                              | NA        | 4.01905035  | 0.692435549 | 1.890382764 | 0.366293833 | 0.714145831 | NA          | NA      |
| ENSG00000070018 | LRP6         | LDL receptor related protein 6                  | 4040      | 2584.635785 | 0.692478224 | 0.448706019 | 1.543278214 | 0.122763287 | 0.999371363 | Not Sig |
| ENSG00000214160 | ALG3         | ALG3, alpha-1,3- mannosyltransferase            | 10195     | 525.9538257 | 0.692672393 | 0.456346665 | 1.517864481 | 0.129048566 | 0.999371363 | Not Sig |
| ENSG00000249855 | NA           | NA                                              | NA        | 37.27337266 | 0.692776191 | 0.656384758 | 1.055442226 | 0.291223119 | 0.999371363 | Not Sig |
| ENSG00000167880 | EVPL         | envoplakin                                      | 2125      | 3458.099409 | 0.693735876 | 0.708734388 | 0.978837613 | 0.327660222 | 0.999371363 | Not Sig |
| ENSG00000263437 | NA           | NA                                              | NA        | 1.825360137 | 0.694329131 | 1.715609015 | 0.404712918 | 0.685688545 | NA          | NA      |
| ENSG00000241962 | NA           | NA                                              | NA        | 8.167742549 | 0.694419343 | 1.046244335 | 0.663725785 | 0.506865833 | 0.999371363 | Not Sig |
| ENSG00000100399 | CHADL        | chondroadherin like                             | 150356    | 81.08087729 | 0.694495538 | 0.914734338 | 0.759231953 | 0.447713815 | 0.999371363 | Not Sig |
| ENSG00000183675 | NA           | NA                                              | NA        | 7.861451928 | 0.694620722 | 1.050015923 | 0.661533513 | 0.50827023  | 0.999371363 | Not Sig |
| ENSG00000100218 | RSPH14       | radial spoke head 14 homolog                    | 27156     | 22.31802268 | 0.694626162 | 1.279253178 | 0.542993501 | 0.587134277 | 0.999371363 | Not Sig |
| ENSG00000205740 | LOC107984285 | uncharacterized LOC107984285                    | 107984285 | 12.15760456 | 0.694651018 | 0.989114483 | 0.702295871 | 0.482494667 | 0.999371363 | Not Sig |
| ENSG00000163479 | SSR2         | signal sequence receptor subunit 2              | 6746      | 3265.351793 | 0.695034852 | 0.474227157 | 1.465615879 | 0.142752963 | 0.999371363 | Not Sig |
| ENSG00000236946 | NA           | NA                                              | NA        | 20.17651988 | 0.695091976 | 1.199653794 | 0.579410476 | 0.562312237 | 0.999371363 | Not Sig |
| ENSG00000224328 | MDC1-AS1     | MDC1 antisense RNA 1                            | 106478956 | 1.295388117 | 0.695688842 | 2.095122586 | 0.332051617 | 0.739850284 | NA          | NA      |
| ENSG00000259010 | NA           | NA                                              | NA        | 1.295388117 | 0.695688842 | 2.095122586 | 0.332051617 | 0.739850284 | NA          | NA      |
| ENSG00000272170 | NA           | NA                                              | NA        | 1.295388117 | 0.695688842 | 2.095122586 | 0.332051617 | 0.739850284 | NA          | NA      |
| ENSG00000259211 | NA           | NA                                              | NA        | 1.34961196  | 0.695762756 | 2.377966138 | 0.292587327 | 0.769837602 | NA          | NA      |
| ENSG00000201558 | RNVU1-6      | RNA, variant U1 small nuclear 6                 | 101954276 | 13.87804449 | 0.695845092 | 0.767860316 | 0.906213119 | 0.364823061 | 0.999371363 | Not Sig |
| ENSG00000176658 | MYO1D        | myosin ID                                       | 4642      | 4281.704375 | 0.696340029 | 0.429295682 | 1.622052255 | 0.10479216  | 0.999371363 | Not Sig |
| ENSG00000166342 | NETO1        | neuropilin and tolloid like 1                   | 81832     | 7.967442806 | 0.696392507 | 1.482821415 | 0.469640174 | 0.638612117 | 0.999371363 | Not Sig |
| ENSG00000229414 | KCNQ1-AS1    | KCNQ1 antisense RNA 1                           | 338653    | 1.639540171 | 0.696393338 | 2.212694886 | 0.314726329 | 0.752969452 | NA          | NA      |
| ENSG00000181856 | SLC2A4       | solute carrier family 2 member 4                | 6517      | 29.31066761 | 0.696555423 | 0.834650382 | 0.83454754  | 0.40397251  | 0.999371363 | Not Sig |
| ENSG00000242810 | NA           | NA                                              | NA        | 0.813202405 | 0.697320272 | 3.219364842 | 0.216601816 | 0.82851867  | NA          | NA      |
| ENSG00000251933 | NA           | NA                                              | NA        | 0.813202405 | 0.697320272 | 3.219364842 | 0.216601816 | 0.82851867  | NA          | NA      |
| ENSG00000178952 | TUFM         | Tu translation elongation factor, mitochondrial | 7284      | 2157.121671 | 0.697530357 | 0.443093611 | 1.574227972 | 0.115434755 | 0.999371363 | Not Sig |
| ENSG00000168101 | NUDT16L1     | nudix hydrolase 16 like 1                       | 84309     | 489.8303432 | 0.6978235   | 0.535593154 | 1.302898469 | 0.192609427 | 0.999371363 | Not Sig |
| ENSG00000255173 | NA           | NA                                              | NA        | 3.377497582 | 0.69796006  | 1.69959909  | 0.410661587 | 0.681320697 | NA          | NA      |
| ENSG00000228010 | NA           | NA                                              | NA        | 9.004082613 | 0.698036199 | 0.924671258 | 0.754902019 | 0.450307774 | 0.999371363 | Not Sig |
| ENSG00000263812 | LINC00908    | long intergenic non-protein coding RNA 908      | 284276    | 23.83478568 | 0.698052812 | 0.933962639 | 0.747409781 | 0.454816243 | 0.999371363 | Not Sig |
| ENSG00000177679 | SRRM3        | serine/arginine repetitive matrix 3             | 222183    | 54.04191915 | 0.698338104 | 0.880278471 | 0.793314988 | 0.427594327 | 0.999371363 | Not Sig |

|                 |           |                                                           |           |             |             |             |             |             |             |         |
|-----------------|-----------|-----------------------------------------------------------|-----------|-------------|-------------|-------------|-------------|-------------|-------------|---------|
| ENSG00000213740 | NA        | NA                                                        | NA        | 4.515235381 | 0.698882738 | 1.321757129 | 0.528752766 | 0.596976968 | NA          | NA      |
| ENSG00000169223 | LMAN2     | lectin, mannose binding 2                                 | 10960     | 3099.360144 | 0.699186724 | 0.487855384 | 1.433184397 | 0.151805148 | 0.999371363 | Not Sig |
| ENSG00000211849 | NA        | NA                                                        | NA        | 7.158706012 | 0.699194061 | 1.854228855 | 0.377080779 | 0.706113575 | 0.999371363 | Not Sig |
| ENSG00000172817 | CYP7B1    | cytochrome P450 family 7 subfamily B member 1             | 9420      | 318.6447419 | 0.699748181 | 0.428027315 | 1.634821323 | 0.102086509 | 0.999371363 | Not Sig |
| ENSG00000147044 | CASK      | calcium/calmodulin dependent serine protein kinase        | 8573      | 1758.991408 | 0.699748606 | 0.41984045  | 1.666701257 | 0.095573823 | 0.999371363 | Not Sig |
| ENSG00000139055 | ERP27     | endoplasmic reticulum protein 27                          | 121506    | 253.1225461 | 0.699920334 | 0.542212226 | 1.290860479 | 0.196752062 | 0.999371363 | Not Sig |
| ENSG00000207320 | NA        | NA                                                        | NA        | 3.00089756  | 0.700002079 | 1.570215653 | 0.445799962 | 0.655741749 | NA          | NA      |
| ENSG00000242574 | HLA-DMB   | major histocompatibility complex, class II, DM beta       | 3109      | 1002.609194 | 0.700070387 | 0.866757775 | 0.807688615 | 0.419269859 | 0.999371363 | Not Sig |
| ENSG00000119283 | TRIM67    | tripartite motif containing 67                            | 440730    | 8.757961616 | 0.700223613 | 1.338084999 | 0.52330279  | 0.60076356  | 0.999371363 | Not Sig |
| ENSG00000198171 | DDRGK1    | DDRGK domain containing 1                                 | 65992     | 1477.914244 | 0.700461399 | 0.686244515 | 1.020716936 | 0.307388568 | 0.999371363 | Not Sig |
| ENSG00000187730 | GABRD     | gamma-aminobutyric acid type A receptor delta subunit     | 2563      | 17.1025525  | 0.700567505 | 0.86158491  | 0.813114873 | 0.4161522   | 0.999371363 | Not Sig |
| ENSG00000100360 | IFT27     | intraflagellar transport 27                               | 11020     | 694.8300722 | 0.700777498 | 0.559921399 | 1.251564058 | 0.210728758 | 0.999371363 | Not Sig |
| ENSG00000205861 | PCOTH     | Pro-X-Gly collagen triple helix like repeat containing    | 542767    | 17.27353733 | 0.700812701 | 0.845041391 | 0.82932352  | 0.406921365 | 0.999371363 | Not Sig |
| ENSG00000162444 | RBP7      | retinol binding protein 7                                 | 116362    | 26.44781313 | 0.70094953  | 0.723093013 | 0.969376715 | 0.332357266 | 0.999371363 | Not Sig |
| ENSG00000241429 | NA        | NA                                                        | NA        | 8.950833695 | 0.70141854  | 1.045840573 | 0.67067444  | 0.502427949 | 0.999371363 | Not Sig |
| ENSG00000116171 | SCP2      | sterol carrier protein 2                                  | 6342      | 2742.525505 | 0.701634312 | 0.442317425 | 1.586268759 | 0.112678356 | 0.999371363 | Not Sig |
| ENSG00000227258 | SMIM2-AS1 | SMIM2 antisense RNA 1                                     | 101929212 | 16.39742613 | 0.702221556 | 0.904967364 | 0.775963404 | 0.437770594 | 0.999371363 | Not Sig |
| ENSG00000108950 | FAM20A    | FAM20A, golgi associated secretory pathway pseudokinase   | 54757     | 1214.723911 | 0.702525546 | 0.629821859 | 1.115435318 | 0.264663922 | 0.999371363 | Not Sig |
| ENSG00000143870 | PDIA6     | protein disulfide isomerase family A member 6             | 10130     | 5782.509114 | 0.703384678 | 0.444361439 | 1.582911153 | 0.113441716 | 0.999371363 | Not Sig |
| ENSG00000074696 | HACD3     | 3-hydroxyacyl-CoA dehydratase 3                           | 51495     | 1539.67783  | 0.70398418  | 0.465161212 | 1.513419783 | 0.130173063 | 0.999371363 | Not Sig |
| ENSG00000273186 | NA        | NA                                                        | NA        | 5.624543243 | 0.704045805 | 1.123225327 | 0.626807273 | 0.530785575 | NA          | NA      |
| ENSG00000261173 | NA        | NA                                                        | NA        | 11.14885783 | 0.704450134 | 0.828978629 | 0.849780814 | 0.395446958 | 0.999371363 | Not Sig |
| ENSG00000206897 | SNORA9B   | small nucleolar RNA, H/ACA box 9B                         | 109616977 | 4.555443613 | 0.704871181 | 1.473750484 | 0.478283935 | 0.632448129 | NA          | NA      |
| ENSG00000232400 | NA        | NA                                                        | NA        | 216.5370155 | 0.705187648 | 0.586972703 | 1.201397686 | 0.229596973 | 0.999371363 | Not Sig |
| ENSG00000177699 | NA        | NA                                                        | NA        | 5.218600168 | 0.705474551 | 1.193541299 | 0.591076783 | 0.554468975 | NA          | NA      |
| ENSG00000159251 | ACTC1     | actin, alpha, cardiac muscle 1                            | 70        | 5.035492863 | 0.705580853 | 1.208584471 | 0.583807644 | 0.559349735 | NA          | NA      |
| ENSG00000233483 | NA        | NA                                                        | NA        | 29.18638445 | 0.705672478 | 0.670515469 | 1.052432809 | 0.292601023 | 0.999371363 | Not Sig |
| ENSG00000116288 | PARK7     | Parkinsonism associated deglycase                         | 11315     | 1757.131562 | 0.705695481 | 0.460397089 | 1.532797443 | 0.125325771 | 0.999371363 | Not Sig |
| ENSG00000264063 | MIR3687-2 | microRNA 3687-2                                           | 103504728 | 16834.85471 | 0.706117376 | 0.824058293 | 0.856877944 | 0.391512344 | 0.999371363 | Not Sig |
| ENSG00000184867 | ARMCX2    | armadillo repeat containing, X-linked 2                   | 9823      | 556.4710885 | 0.70616978  | 0.596178397 | 1.184494076 | 0.23621754  | 0.999371363 | Not Sig |
| ENSG00000244509 | APOBEC3C  | apolipoprotein B mRNA editing enzyme catalytic subunit 3C | 27350     | 813.0028724 | 0.706205259 | 0.638503388 | 1.106032125 | 0.268712615 | 0.999371363 | Not Sig |
| ENSG00000255045 | NA        | NA                                                        | NA        | 14.98596781 | 0.706295014 | 0.903673256 | 0.781582292 | 0.434460097 | 0.999371363 | Not Sig |
| ENSG00000136237 | RAPGEF5   | Rap guanine nucleotide exchange factor 5                  | 9771      | 3769.667496 | 0.706454888 | 0.675000979 | 1.046598316 | 0.295284879 | 0.999371363 | Not Sig |
| ENSG00000182195 | LDOC1     | LDOC1, regulator of NFkB signaling                        | 23641     | 293.075532  | 0.706973693 | 0.684643881 | 1.032615222 | 0.301784002 | 0.999371363 | Not Sig |
| ENSG00000258572 | NA        | NA                                                        | NA        | 4.306565516 | 0.70716869  | 1.299464803 | 0.544199957 | 0.586303881 | NA          | NA      |

|                 |              |                                                                                        |           |             |             |             |             |             |             |         |
|-----------------|--------------|----------------------------------------------------------------------------------------|-----------|-------------|-------------|-------------|-------------|-------------|-------------|---------|
| ENSG00000219023 | NA           | NA                                                                                     | NA        | 2.313983385 | 0.708673436 | 1.762459275 | 0.40209351  | 0.687615209 | NA          | NA      |
| ENSG00000253633 | LOC107986898 | uncharacterized LOC107986898                                                           | 107986898 | 1.697184837 | 0.709015906 | 1.880452878 | 0.377045293 | 0.706139946 | NA          | NA      |
| ENSG00000121552 | CSTA         | cystatin A                                                                             | 1475      | 74.28134903 | 0.709087999 | 0.946818005 | 0.748916894 | 0.453907297 | 0.999371363 | Not Sig |
| ENSG00000264941 | MIR4474      | microRNA 4474                                                                          | 100616441 | 4.923518782 | 0.709921117 | 1.437526565 | 0.493849042 | 0.621412795 | NA          | NA      |
| ENSG00000241697 | TMEFF1       | transmembrane protein with EGF like and two follistatin like domains 1                 | 8577      | 2.294255771 | 0.710879819 | 1.705440791 | 0.416830548 | 0.676802357 | NA          | NA      |
| ENSG00000257851 | NA           | NA                                                                                     | NA        | 1.757846215 | 0.710926791 | 1.877748697 | 0.378605929 | 0.704980518 | NA          | NA      |
| ENSG00000247570 | NA           | NA                                                                                     | NA        | 1.652415242 | 0.712473926 | 2.236054158 | 0.318629995 | 0.750007105 | NA          | NA      |
| ENSG00000176927 | EFCAB5       | EF-hand calcium binding domain 5                                                       | 374786    | 12.93496837 | 0.712698641 | 0.806147759 | 0.884079417 | 0.376653343 | 0.999371363 | Not Sig |
| ENSG00000180772 | AGTR2        | angiotensin II receptor type 2                                                         | 186       | 15.93673499 | 0.713003945 | 1.351842498 | 0.527431225 | 0.597894164 | 0.999371363 | Not Sig |
| ENSG00000142449 | FBN3         | fibrillin 3                                                                            | 84467     | 85.99658801 | 0.713042247 | 1.047620725 | 0.680630146 | 0.496105547 | 0.999371363 | Not Sig |
| ENSG00000187456 | NA           | NA                                                                                     | NA        | 7.7041959   | 0.71351668  | 1.270204143 | 0.561733863 | 0.574297359 | 0.999371363 | Not Sig |
| ENSG00000157856 | DRC1         | dynein regulatory complex subunit 1                                                    | 92749     | 145.0580984 | 0.713715318 | 1.218068216 | 0.585940351 | 0.5579156   | 0.999371363 | Not Sig |
| ENSG00000170262 | MRAP         | melanocortin 2 receptor accessory protein                                              | 56246     | 2.019051334 | 0.714160504 | 2.516559153 | 0.283784509 | 0.776575527 | NA          | NA      |
| ENSG00000260228 | LOC102724163 | uncharacterized LOC102724163                                                           | 102724163 | 9.061850101 | 0.714306706 | 1.239312055 | 0.576373564 | 0.564362709 | 0.999371363 | Not Sig |
| ENSG00000273090 | NA           | NA                                                                                     | NA        | 3.120333247 | 0.714398249 | 1.565385753 | 0.456372014 | 0.648122487 | NA          | NA      |
| ENSG00000158571 | PFKFB1       | 6-phosphofructo-2-kinase/fructose-2,6-bisphosphatase 1                                 | 5207      | 13.56611944 | 0.714696783 | 0.966378571 | 0.739561911 | 0.45956586  | 0.999371363 | Not Sig |
| ENSG00000159337 | PLA2G4D      | phospholipase A2 group IVD                                                             | 283748    | 16.70425999 | 0.714771564 | 1.177499885 | 0.607024742 | 0.543834492 | 0.999371363 | Not Sig |
| ENSG00000219642 | NA           | NA                                                                                     | NA        | 1.301825653 | 0.714828963 | 2.388911085 | 0.299227948 | 0.764766126 | NA          | NA      |
| ENSG00000256007 | NA           | NA                                                                                     | NA        | 1.362487032 | 0.715320149 | 2.37547407  | 0.301127323 | 0.763317406 | NA          | NA      |
| ENSG00000184601 | C14orf180    | chromosome 14 open reading frame 180                                                   | 400258    | 6.474798741 | 0.715443606 | 1.545257938 | 0.462992998 | 0.643369386 | NA          | NA      |
| ENSG00000247699 | NA           | NA                                                                                     | NA        | 1.085694182 | 0.715847901 | 2.956281145 | 0.24214473  | 0.808668019 | NA          | NA      |
| ENSG00000265168 | NA           | NA                                                                                     | NA        | 1.085694182 | 0.715847901 | 2.956281145 | 0.24214473  | 0.808668019 | NA          | NA      |
| ENSG00000152763 | WDR78        | WD repeat domain 78                                                                    | 79819     | 180.9331181 | 0.716003898 | 0.49672138  | 1.441459793 | 0.149454828 | 0.999371363 | Not Sig |
| ENSG00000260095 | NA           | NA                                                                                     | NA        | 4.981822464 | 0.716033677 | 1.511051693 | 0.473864448 | 0.635596573 | NA          | NA      |
| ENSG00000267200 | MIR132       | microRNA 132                                                                           | 406921    | 7.068326988 | 0.71616753  | 1.392317673 | 0.514370782 | 0.606992783 | 0.999371363 | Not Sig |
| ENSG00000250961 | NA           | NA                                                                                     | NA        | 2.417123178 | 0.716367523 | 2.436254846 | 0.294044576 | 0.768723841 | NA          | NA      |
| ENSG00000123453 | SARDH        | sarcosine dehydrogenase                                                                | 1757      | 135.4329783 | 0.71649738  | 0.677117593 | 1.058157972 | 0.289983428 | 0.999371363 | Not Sig |
| ENSG00000188153 | COL4A5       | collagen type IV alpha 5 chain                                                         | 1287      | 1085.766265 | 0.716509929 | 0.911837724 | 0.785786671 | 0.431992477 | 0.999371363 | Not Sig |
| ENSG00000141510 | TP53         | tumor protein p53                                                                      | 7157      | 1156.402013 | 0.716519307 | 0.437438437 | 1.637988908 | 0.101424008 | 0.999371363 | Not Sig |
| ENSG00000253437 | NA           | NA                                                                                     | NA        | 1.844672744 | 0.717201307 | 1.929784638 | 0.371648366 | 0.710154674 | NA          | NA      |
| ENSG00000143390 | RFX5         | regulatory factor X5                                                                   | 5993      | 1381.191342 | 0.717410893 | 0.478929749 | 1.49794598  | 0.134147286 | 0.999371363 | Not Sig |
| ENSG00000228224 | NACAP1       | nascent polypeptide associated complex alpha subunit pseudogene 1                      | 83955     | 1.340157712 | 0.717515466 | 2.771432372 | 0.258896978 | 0.79571473  | NA          | NA      |
| ENSG00000258999 | NA           | NA                                                                                     | NA        | 10.27912411 | 0.717867743 | 0.896392606 | 0.800840768 | 0.423223834 | 0.999371363 | Not Sig |
| ENSG00000178796 | RIIAD1       | regulatory subunit of type II PKA $\beta$ -subunit (RII $\alpha$ ) domain containing 1 | 284485    | 2.481205379 | 0.718122082 | 1.785265902 | 0.402249369 | 0.687500513 | NA          | NA      |
| ENSG00000106546 | AHR          | aryl hydrocarbon receptor                                                              | 196       | 6937.9829   | 0.718426896 | 0.439564779 | 1.634405054 | 0.102173828 | 0.999371363 | Not Sig |

|                 |              |                                                                                     |           |             |             |             |             |             |             |         |
|-----------------|--------------|-------------------------------------------------------------------------------------|-----------|-------------|-------------|-------------|-------------|-------------|-------------|---------|
| ENSG00000214194 | SMIM30       | small integral membrane protein 30                                                  | 401397    | 396.9122598 | 0.718614707 | 0.414835044 | 1.73229026  | 0.083221895 | 0.999371363 | Not Sig |
| ENSG00000169249 | ZRSR2        | zinc finger CCH-type, RNA binding motif and serine/arginine rich 2                  | 8233      | 316.6467374 | 0.718633213 | 0.461154435 | 1.558335253 | 0.119153796 | 0.999371363 | Not Sig |
| ENSG00000238021 | NA           | NA                                                                                  | NA        | 2.601908176 | 0.718672032 | 2.046271938 | 0.351210423 | 0.725430491 | NA          | NA      |
| ENSG00000130770 | ATPIF1       | ATPase inhibitory factor 1                                                          | 93974     | 866.8177621 | 0.719206337 | 0.550316816 | 1.306895076 | 0.191248349 | 0.999371363 | Not Sig |
| ENSG00000104889 | RNASEH2A     | ribonuclease H2 subunit A                                                           | 10535     | 132.5145177 | 0.719614476 | 0.534324727 | 1.346773674 | 0.178053136 | 0.999371363 | Not Sig |
| ENSG00000273183 | NA           | NA                                                                                  | NA        | 9.364531519 | 0.71974234  | 0.938013314 | 0.767305037 | 0.442900175 | 0.999371363 | Not Sig |
| ENSG00000240668 | NA           | NA                                                                                  | NA        | 10.33165398 | 0.720290163 | 1.051974168 | 0.684703279 | 0.493531179 | 0.999371363 | Not Sig |
| ENSG00000140090 | SLC24A4      | solute carrier family 24 member 4                                                   | 123041    | 119.1912165 | 0.720324718 | 0.884110567 | 0.814745061 | 0.415218254 | 0.999371363 | Not Sig |
| ENSG00000136478 | TEX2         | testis expressed 2                                                                  | 55852     | 1601.409655 | 0.721047837 | 0.666704901 | 1.081509729 | 0.279470435 | 0.999371363 | Not Sig |
| ENSG00000106080 | FKBP14       | FK506 binding protein 14                                                            | 55033     | 555.1478523 | 0.721274888 | 0.71274063  | 1.011973863 | 0.311550551 | 0.999371363 | Not Sig |
| ENSG00000125409 | TEKT3        | tektin 3                                                                            | 64518     | 12.15141199 | 0.721737657 | 1.186528945 | 0.608276486 | 0.543004114 | 0.999371363 | Not Sig |
| ENSG00000207031 | SNORD59A     | small nucleolar RNA, C/D box 59A                                                    | 26789     | 2.612801502 | 0.721833812 | 1.71262935  | 0.42147696  | 0.673406832 | NA          | NA      |
| ENSG00000197582 | NA           | NA                                                                                  | NA        | 401.4351054 | 0.722007307 | 0.663179422 | 1.088705837 | 0.276283627 | 0.999371363 | Not Sig |
| ENSG00000227725 | NA           | NA                                                                                  | NA        | 3.721085293 | 0.722161643 | 1.246095742 | 0.579539451 | 0.562225235 | NA          | NA      |
| ENSG00000213540 | NA           | NA                                                                                  | NA        | 14.22384262 | 0.722192244 | 0.897492766 | 0.80467751  | 0.421005801 | 0.999371363 | Not Sig |
| ENSG00000240625 | NA           | NA                                                                                  | NA        | 0.938206275 | 0.722217963 | 2.673380656 | 0.270151563 | 0.787043655 | NA          | NA      |
| ENSG00000244038 | DDOST        | dolichyl-diphosphooligosaccharide-protein glycosyltransferase non-catalytic subunit | 1650      | 3653.454994 | 0.722499069 | 0.412830361 | 1.750111274 | 0.080099115 | 0.999371363 | Not Sig |
| ENSG00000158882 | TOMM40L      | translocase of outer mitochondrial membrane 40 like                                 | 84134     | 278.9054202 | 0.722744774 | 0.62222936  | 1.161540778 | 0.24542205  | 0.999371363 | Not Sig |
| ENSG00000198270 | TMEM116      | transmembrane protein 116                                                           | 89894     | 245.0672465 | 0.723273866 | 0.439679758 | 1.645001512 | 0.099969499 | 0.999371363 | Not Sig |
| ENSG00000188452 | CERKL        | ceramide kinase like                                                                | 375298    | 146.3394032 | 0.723614476 | 0.712550338 | 1.015527518 | 0.309854436 | 0.999371363 | Not Sig |
| ENSG00000211580 | MIR769       | microRNA 769                                                                        | 768217    | 1.668002974 | 0.724285558 | 1.998781477 | 0.362363553 | 0.717080372 | NA          | NA      |
| ENSG00000227933 | NA           | NA                                                                                  | NA        | 1.668002974 | 0.724285558 | 1.998781477 | 0.362363553 | 0.717080372 | NA          | NA      |
| ENSG00000171453 | POLR1C       | RNA polymerase I subunit C                                                          | 9533      | 319.0458017 | 0.724564225 | 0.49708868  | 1.457615621 | 0.144946522 | 0.999371363 | Not Sig |
| ENSG00000256079 | NA           | NA                                                                                  | NA        | 1.616795844 | 0.725152142 | 2.621328183 | 0.276635389 | 0.782060088 | NA          | NA      |
| ENSG00000243547 | NA           | NA                                                                                  | NA        | 8.491946712 | 0.725525485 | 1.087331243 | 0.667253415 | 0.504610277 | 0.999371363 | Not Sig |
| ENSG00000176681 | LRRC37A      | leucine rich repeat containing 37A                                                  | 9884      | 58.57508548 | 0.725690673 | 0.768182461 | 0.944685293 | 0.344819568 | 0.999371363 | Not Sig |
| ENSG00000055163 | CYFIP2       | cytoplasmic FMR1 interacting protein 2                                              | 26999     | 1200.490611 | 0.725697418 | 0.796056699 | 0.911615239 | 0.361971298 | 0.999371363 | Not Sig |
| ENSG00000246740 | PLA2G4E-AS1  | PLA2G4E antisense RNA 1                                                             | 101928388 | 3.332163645 | 0.726003767 | 1.36133392  | 0.533303223 | 0.593823697 | NA          | NA      |
| ENSG00000213881 | NA           | NA                                                                                  | NA        | 2.365035797 | 0.726045846 | 1.762089006 | 0.412036988 | 0.680312313 | NA          | NA      |
| ENSG00000060237 | WNK1         | WNK lysine deficient protein kinase 1                                               | 65125     | 11958.82158 | 0.72635919  | 0.497510701 | 1.459987069 | 0.144293628 | 0.999371363 | Not Sig |
| ENSG00000185272 | RBM11        | RNA binding motif protein 11                                                        | 54033     | 18.03416668 | 0.726583309 | 0.78419988  | 0.926528208 | 0.354171545 | 0.999371363 | Not Sig |
| ENSG00000239437 | NA           | NA                                                                                  | NA        | 2.856415468 | 0.726613786 | 1.684977443 | 0.431230572 | 0.666300727 | NA          | NA      |
| ENSG00000214401 | KANSL1-AS1   | KANSL1 antisense RNA 1                                                              | 644246    | 29.24133359 | 0.726721659 | 0.725073799 | 1.002272678 | 0.316211914 | 0.999371363 | Not Sig |
| ENSG00000214401 | LOC107984142 | uncharacterized LOC107984142                                                        | 107984142 | 29.24133359 | 0.726721659 | 0.725073799 | 1.002272678 | 0.316211914 | 0.999371363 | Not Sig |
| ENSG00000143443 | Clorf56      | chromosome 1 open reading frame 56                                                  | 54964     | 141.7964529 | 0.726800146 | 0.553557331 | 1.312962732 | 0.189195507 | 0.999371363 | Not Sig |

|                 |              |                                                   |           |             |             |             |             |             |             |         |
|-----------------|--------------|---------------------------------------------------|-----------|-------------|-------------|-------------|-------------|-------------|-------------|---------|
| ENSG00000271380 | NA           | NA                                                | NA        | 42.56528208 | 0.727796457 | 0.809354986 | 0.899230213 | 0.36853005  | 0.999371363 | Not Sig |
| ENSG00000188396 | TCTEX1D4     | Tctex1 domain containing 4                        | 343521    | 55.76555773 | 0.728000676 | 1.0343852   | 0.70380036  | 0.481557109 | 0.999371363 | Not Sig |
| ENSG00000267246 | NA           | NA                                                | NA        | 36.35405693 | 0.728033265 | 0.624524401 | 1.165740304 | 0.243719459 | 0.999371363 | Not Sig |
| ENSG00000181610 | MRPS23       | mitochondrial ribosomal protein S23               | 51649     | 529.0291915 | 0.728169919 | 0.494726428 | 1.471863799 | 0.141057661 | 0.999371363 | Not Sig |
| ENSG00000255446 | NA           | NA                                                | NA        | 5.280529626 | 0.728201897 | 1.580440378 | 0.460758854 | 0.644971625 | NA          | NA      |
| ENSG00000073711 | PPP2R3A      | protein phosphatase 2 regulatory subunit B'alpha  | 5523      | 730.5986662 | 0.728664866 | 0.730131949 | 0.99799066  | 0.318283888 | 0.999371363 | Not Sig |
| ENSG00000228839 | PIK3IP1-AS1  | PIK3IP1 antisense RNA 1 (head to head)            | 101929760 | 11.23689239 | 0.729078652 | 0.876641078 | 0.831672927 | 0.405593586 | 0.999371363 | Not Sig |
| ENSG00000265083 | MIR3691      | microRNA 3691                                     | 100500900 | 4.1198653   | 0.729215809 | 1.267664763 | 0.575243416 | 0.565126684 | NA          | NA      |
| ENSG00000087253 | LPCAT2       | lysophosphatidylcholine acyltransferase 2         | 54947     | 694.2610076 | 0.729548669 | 0.580785799 | 1.256140682 | 0.209064969 | 0.999371363 | Not Sig |
| ENSG00000234235 | NA           | NA                                                | NA        | 6.010874375 | 0.729675432 | 1.366501592 | 0.53397335  | 0.593359973 | NA          | NA      |
| ENSG00000253690 | NA           | NA                                                | NA        | 2.172672724 | 0.729736584 | 2.067978209 | 0.352874407 | 0.724182599 | NA          | NA      |
| ENSG00000255240 | LOC283194    | uncharacterized LOC283194                         | 283194    | 7.539127619 | 0.729886609 | 1.211579133 | 0.602425438 | 0.546890982 | 0.999371363 | Not Sig |
| ENSG00000129682 | FGF13        | fibroblast growth factor 13                       | 2258      | 118.9308405 | 0.729977001 | 0.841150051 | 0.867832083 | 0.385486264 | 0.999371363 | Not Sig |
| ENSG00000269886 | NA           | NA                                                | NA        | 3.027473293 | 0.730099339 | 1.519508143 | 0.480483992 | 0.630883283 | NA          | NA      |
| ENSG00000149050 | ZNF214       | zinc finger protein 214                           | 7761      | 97.27542139 | 0.730657431 | 0.553541866 | 1.319967785 | 0.186845774 | 0.999371363 | Not Sig |
| ENSG00000044574 | HSPA5        | heat shock protein family A (Hsp70) member 5      | 3309      | 15603.41968 | 0.731177499 | 0.505925105 | 1.445228735 | 0.148393648 | 0.999371363 | Not Sig |
| ENSG00000108947 | EFNB3        | ephrin B3                                         | 1949      | 57.11798652 | 0.731188668 | 0.835157327 | 0.875510092 | 0.381296422 | 0.999371363 | Not Sig |
| ENSG00000117643 | MAN1C1       | mannosidase alpha class 1C member 1               | 57134     | 781.659929  | 0.731200197 | 0.736133516 | 0.993298336 | 0.320564588 | 0.999371363 | Not Sig |
| ENSG00000198312 | NA           | NA                                                | NA        | 9.729673871 | 0.731251107 | 0.853665054 | 0.856601899 | 0.391664936 | 0.999371363 | Not Sig |
| ENSG00000053371 | AKR7A2       | aldo-keto reductase family 7 member A2            | 8574      | 745.6458748 | 0.731759903 | 0.491491957 | 1.48885428  | 0.136525745 | 0.999371363 | Not Sig |
| ENSG00000100348 | TXN2         | thioredoxin 2                                     | 25828     | 904.8679654 | 0.732344056 | 0.590160756 | 1.240923    | 0.214634195 | 0.999371363 | Not Sig |
| ENSG00000270670 | NA           | NA                                                | NA        | 2.638811934 | 0.732448679 | 1.754348785 | 0.417504595 | 0.676309364 | NA          | NA      |
| ENSG00000136247 | ZDHHC4       | zinc finger DHHC-type containing 4                | 55146     | 708.3863138 | 0.73257121  | 0.508943949 | 1.439394673 | 0.150038733 | 0.999371363 | Not Sig |
| ENSG00000237773 | NA           | NA                                                | NA        | 39.17848861 | 0.732894796 | 0.741752915 | 0.988057858 | 0.323124313 | 0.999371363 | Not Sig |
| ENSG00000163624 | CDS1         | CDP-diacylglycerol synthase 1                     | 1040      | 1170.912316 | 0.733205914 | 0.570902785 | 1.284292059 | 0.199039784 | 0.999371363 | Not Sig |
| ENSG00000104324 | CPQ          | carboxypeptidase Q                                | 10404     | 751.0460639 | 0.733485234 | 0.697011665 | 1.052328491 | 0.292648864 | 0.999371363 | Not Sig |
| ENSG00000225528 | NA           | NA                                                | NA        | 12.53694125 | 0.733743907 | 0.958836988 | 0.76524364  | 0.444126478 | 0.999371363 | Not Sig |
| ENSG00000231335 | NA           | NA                                                | NA        | 58.57128064 | 0.733907941 | 0.585449134 | 1.253581051 | 0.209994322 | 0.999371363 | Not Sig |
| ENSG00000203797 | DDO          | D-aspartate oxidase                               | 8528      | 108.1091722 | 0.734307628 | 1.020315906 | 0.719686543 | 0.471718013 | 0.999371363 | Not Sig |
| ENSG00000186019 | LOC100379224 | uncharacterized LOC100379224                      | 100379224 | 12.44043924 | 0.734903535 | 0.864787833 | 0.849807903 | 0.395431895 | 0.999371363 | Not Sig |
| ENSG00000144730 | IL17RD       | interleukin 17 receptor D                         | 54756     | 202.1124925 | 0.735217853 | 0.745703457 | 0.985938642 | 0.324163223 | 0.999371363 | Not Sig |
| ENSG00000112304 | ACOT13       | acyl-CoA thioesterase 13                          | 55856     | 396.1561138 | 0.735702613 | 0.4169733   | 1.764387822 | 0.077666707 | 0.999371363 | Not Sig |
| ENSG00000058056 | USP13        | ubiquitin specific peptidase 13                   | 8975      | 1068.366913 | 0.73615993  | 0.47197519  | 1.559742855 | 0.118820661 | 0.999371363 | Not Sig |
| ENSG00000199030 | MIRLET7C     | microRNA let-7c                                   | 406885    | 1.680878045 | 0.736711979 | 1.920026308 | 0.383698898 | 0.701201629 | NA          | NA      |
| ENSG00000139988 | RDH12        | retinol dehydrogenase 12 (all-trans/9-cis/11-cis) | 145226    | 3.387213078 | 0.736911999 | 1.632425526 | 0.451421512 | 0.651685782 | NA          | NA      |

|                 |              |                                                  |           |             |             |             |             |             |             |         |
|-----------------|--------------|--------------------------------------------------|-----------|-------------|-------------|-------------|-------------|-------------|-------------|---------|
| ENSG00000228232 | NA           | NA                                               | NA        | 10.44187942 | 0.737228463 | 0.850383473 | 0.86693649  | 0.385976809 | 0.999371363 | Not Sig |
| ENSG00000226254 | NA           | NA                                               | NA        | 6.046920637 | 0.737369131 | 1.175680263 | 0.627185089 | 0.530537916 | NA          | NA      |
| ENSG00000143924 | EML4         | echinoderm microtubule associated protein like 4 | 27436     | 3941.162435 | 0.737777232 | 0.464915058 | 1.586907583 | 0.112533577 | 0.999371363 | Not Sig |
| ENSG00000207217 | SNORA80D     | small nucleolar RNA, H/ACA box 80D               | 109616999 | 4.80978529  | 0.737934309 | 1.269274764 | 0.581382637 | 0.560982597 | NA          | NA      |
| ENSG00000254010 | NA           | NA                                               | NA        | 3.152477162 | 0.738133891 | 1.383715999 | 0.5334432   | 0.59372682  | NA          | NA      |
| ENSG00000212122 | TSSK1B       | testis specific serine kinase 1B                 | 83942     | 6.627108581 | 0.738272237 | 1.311104744 | 0.563091729 | 0.573372424 | 0.999371363 | Not Sig |
| ENSG00000126705 | AHDC1        | AT-hook DNA binding motif containing 1           | 27245     | 1841.331602 | 0.738551425 | 0.602379925 | 1.226055841 | 0.220177662 | 0.999371363 | Not Sig |
| ENSG00000244184 | LOC101559451 | uncharacterized LOC101559451                     | 101559451 | 3.019751397 | 0.738802312 | 1.456207467 | 0.507346878 | 0.611911452 | NA          | NA      |
| ENSG00000236643 | NA           | NA                                               | NA        | 1.487490901 | 0.739157502 | 2.025343262 | 0.364954186 | 0.715145605 | NA          | NA      |
| ENSG00000210127 | NA           | NA                                               | NA        | 3.592345651 | 0.739526343 | 1.343142639 | 0.550594048 | 0.58191199  | NA          | NA      |
| ENSG00000149922 | TBX6         | T-box 6                                          | 6911      | 48.12717216 | 0.739794103 | 0.550940313 | 1.342784484 | 0.179341769 | 0.999371363 | Not Sig |
| ENSG00000112530 | PACRG        | parkin coregulated                               | 135138    | 37.3347796  | 0.739950142 | 1.186561109 | 0.623608962 | 0.532884423 | 0.999371363 | Not Sig |
| ENSG00000174792 | ODAPH        | odontogenesis associated phosphoprotein          | 152816    | 0.989413405 | 0.740088357 | 2.64974003  | 0.279306026 | 0.780009982 | NA          | NA      |
| ENSG00000254163 | NA           | NA                                               | NA        | 0.989413405 | 0.740088357 | 2.64974003  | 0.279306026 | 0.780009982 | NA          | NA      |
| ENSG00000268272 | NA           | NA                                               | NA        | 0.989413405 | 0.740088357 | 2.64974003  | 0.279306026 | 0.780009982 | NA          | NA      |
| ENSG00000196659 | TTC30B       | tetratricopeptide repeat domain 30B              | 150737    | 183.7049957 | 0.740278967 | 0.441116323 | 1.678194452 | 0.093309144 | 0.999371363 | Not Sig |
| ENSG00000158483 | FAM86C1      | family with sequence similarity 86 member C1     | 55199     | 120.9916037 | 0.740297994 | 0.667294652 | 1.109401959 | 0.267256818 | 0.999371363 | Not Sig |
| ENSG00000166963 | MAP1A        | microtubule associated protein 1A                | 4130      | 762.7736048 | 0.740839973 | 0.575572863 | 1.287134992 | 0.198047241 | 0.999371363 | Not Sig |
| ENSG00000254510 | NA           | NA                                               | NA        | 4.324843155 | 0.740997266 | 1.329540327 | 0.557333426 | 0.577299642 | NA          | NA      |
| ENSG00000226765 | NA           | NA                                               | NA        | 2.564860477 | 0.741600255 | 1.932244126 | 0.383802567 | 0.701124786 | NA          | NA      |
| ENSG00000259755 | NA           | NA                                               | NA        | 2.631959391 | 0.742040859 | 1.54912061  | 0.479007802 | 0.631933078 | NA          | NA      |
| ENSG00000261603 | PRSS46P      | protease, serine 46, pseudogene                  | 100287362 | 6.183874889 | 0.742115278 | 1.510328155 | 0.491360289 | 0.623171646 | NA          | NA      |
| ENSG00000264425 | MIR4653      | microRNA 4653                                    | 100616117 | 5.070382304 | 0.742244046 | 1.172995179 | 0.632776724 | 0.526879459 | NA          | NA      |
| ENSG00000254750 | NA           | NA                                               | NA        | 13.05987234 | 0.743280749 | 0.993184877 | 0.748381058 | 0.454230345 | 0.999371363 | Not Sig |
| ENSG00000109323 | MANBA        | mannosidase beta                                 | 4126      | 1406.209874 | 0.743300724 | 0.621698652 | 1.195596486 | 0.231854063 | 0.999371363 | Not Sig |
| ENSG00000017621 | NA           | NA                                               | NA        | 149.2404231 | 0.743605465 | 0.541253109 | 1.373859018 | 0.169485455 | 0.999371363 | Not Sig |
| ENSG00000113732 | ATP6VOE1     | ATPase H+ transporting V0 subunit e1             | 8992      | 1668.464802 | 0.744552965 | 0.466225884 | 1.59697904  | 0.11027038  | 0.999371363 | Not Sig |
| ENSG00000268149 | NA           | NA                                               | NA        | 1.687315581 | 0.744562299 | 1.936186671 | 0.384550885 | 0.700570189 | NA          | NA      |
| ENSG00000223612 | NA           | NA                                               | NA        | 3.518394194 | 0.744843968 | 1.366309425 | 0.545150282 | 0.585650163 | NA          | NA      |
| ENSG00000185252 | ZNF74        | zinc finger protein 74                           | 7625      | 302.4077222 | 0.744848843 | 0.655701891 | 1.135956527 | 0.255974759 | 0.999371363 | Not Sig |
| ENSG00000089486 | CDIP1        | cell death inducing p53 target 1                 | 29965     | 489.762361  | 0.74549516  | 0.764064052 | 0.975697205 | 0.329214538 | 0.999371363 | Not Sig |
| ENSG00000100036 | SLC35E4      | solute carrier family 35 member E4               | 339665    | 103.7248048 | 0.745760079 | 0.70443576  | 1.058663006 | 0.289753281 | 0.999371363 | Not Sig |
| ENSG00000135749 | PCNX2        | pecanex homolog 2                                | 80003     | 691.0935201 | 0.745808849 | 0.578654815 | 1.288866574 | 0.197444477 | 0.999371363 | Not Sig |
| ENSG00000229539 | NA           | NA                                               | NA        | 31.81931752 | 0.745907529 | 0.739223445 | 1.009042034 | 0.312954476 | 0.999371363 | Not Sig |
| ENSG00000253495 | NA           | NA                                               | NA        | 3.746271094 | 0.745935203 | 1.343737701 | 0.55511965  | 0.578812823 | NA          | NA      |

|                 |              |                                               |           |             |             |             |             |             |             |         |
|-----------------|--------------|-----------------------------------------------|-----------|-------------|-------------|-------------|-------------|-------------|-------------|---------|
| ENSG00000250376 | NA           | NA                                            | NA        | 1.32385092  | 0.746623047 | 2.3839911   | 0.313181977 | 0.75414241  | NA          | NA      |
| ENSG00000187556 | NANOS3       | nanos C2HC-type zinc finger 3                 | 342977    | 13.39071804 | 0.746855377 | 0.985069955 | 0.758174963 | 0.448346247 | 0.999371363 | Not Sig |
| ENSG00000039068 | CDH1         | cadherin 1                                    | 999       | 7720.66476  | 0.748586028 | 0.583252971 | 1.283467149 | 0.199328462 | 0.999371363 | Not Sig |
| ENSG00000100908 | EMC9         | ER membrane protein complex subunit 9         | 51016     | 151.4557729 | 0.748842877 | 0.710619611 | 1.053788645 | 0.291979693 | 0.999371363 | Not Sig |
| ENSG00000226851 | NA           | NA                                            | NA        | 0.951081346 | 0.748866509 | 2.667556517 | 0.280731262 | 0.778916529 | NA          | NA      |
| ENSG00000233296 | LOC105373354 | uncharacterized LOC105373354                  | 105373354 | 0.951081346 | 0.748866509 | 2.667556517 | 0.280731262 | 0.778916529 | NA          | NA      |
| ENSG00000108829 | LRRC59       | leucine rich repeat containing 59             | 55379     | 2454.766168 | 0.748974287 | 0.493607632 | 1.517347461 | 0.129178981 | 0.999371363 | Not Sig |
| ENSG00000170175 | CHRNB1       | cholinergic receptor nicotinic beta 1 subunit | 1140      | 144.7682009 | 0.749636016 | 0.596452899 | 1.256823493 | 0.208817557 | 0.999371363 | Not Sig |
| ENSG00000149218 | ENDOD1       | endonuclease domain containing 1              | 23052     | 1713.259891 | 0.749650435 | 0.593346117 | 1.263428569 | 0.206435202 | 0.999371363 | Not Sig |
| ENSG00000181038 | METTL23      | methyltransferase like 23                     | 124512    | 345.9680752 | 0.749861301 | 0.533250869 | 1.406207368 | 0.159662557 | 0.999371363 | Not Sig |
| ENSG00000102245 | CD40LG       | CD40 ligand                                   | 959       | 44.41654233 | 0.750369096 | 1.049819013 | 0.714760437 | 0.474757086 | 0.999371363 | Not Sig |
| ENSG00000179965 | ZNF771       | zinc finger protein 771                       | 51333     | 121.0111502 | 0.750609974 | 0.659731295 | 1.13775105  | 0.25522445  | 0.999371363 | Not Sig |
| ENSG00000141052 | MYOCD        | myocardin                                     | 93649     | 181.5920471 | 0.750626296 | 0.93867213  | 0.799668246 | 0.423903035 | 0.999371363 | Not Sig |
| ENSG00000260367 | NA           | NA                                            | NA        | 1.234311731 | 0.750995074 | 2.862840516 | 0.262325152 | 0.793070772 | NA          | NA      |
| ENSG00000176244 | ACBD7        | acyl-CoA binding domain containing 7          | 414149    | 8.778897536 | 0.751088974 | 1.153226848 | 0.651293347 | 0.514857142 | 0.999371363 | Not Sig |
| ENSG00000169727 | GPS1         | G protein pathway suppressor 1                | 2873      | 1451.816329 | 0.751162868 | 0.608409379 | 1.23463394  | 0.216966772 | 0.999371363 | Not Sig |
| ENSG00000226520 | NA           | NA                                            | NA        | 21.48001149 | 0.751296851 | 0.737803746 | 1.018288203 | 0.308541013 | 0.999371363 | Not Sig |
| ENSG00000151892 | GFRA1        | GDNF family receptor alpha 1                  | 2674      | 311.7681863 | 0.751672886 | 1.056347101 | 0.711577554 | 0.476726411 | 0.999371363 | Not Sig |
| ENSG00000235121 | NA           | NA                                            | NA        | 4.712940171 | 0.752438786 | 1.188777076 | 0.632951965 | 0.526765012 | NA          | NA      |
| ENSG00000204963 | PCDHA7       | protocadherin alpha 7                         | 56141     | 18.9927673  | 0.753245067 | 0.694748284 | 1.084198528 | 0.278276784 | 0.999371363 | Not Sig |
| ENSG00000254981 | NA           | NA                                            | NA        | 2.156365932 | 0.753420992 | 2.067988288 | 0.36432556  | 0.715614915 | NA          | NA      |
| ENSG00000170629 | DPY19L2P2    | DPY19L2 pseudogene 2                          | 349152    | 80.20431802 | 0.753618457 | 0.941873383 | 0.800127141 | 0.423637138 | 0.999371363 | Not Sig |
| ENSG00000234295 | NA           | NA                                            | NA        | 26.50999112 | 0.75407891  | 0.800198822 | 0.942364434 | 0.34600609  | 0.999371363 | Not Sig |
| ENSG00000214776 | OVOS         | ovostatin                                     | 408186    | 97.30548917 | 0.7546898   | 0.963350514 | 0.783401045 | 0.433391643 | 0.999371363 | Not Sig |
| ENSG00000109794 | FAMI49A      | family with sequence similarity 149 member A  | 25854     | 353.2402448 | 0.754942615 | 0.649476654 | 1.162386069 | 0.24507868  | 0.999371363 | Not Sig |
| ENSG00000004848 | ARX          | aristales related homeobox                    | 170302    | 27.93847921 | 0.755294294 | 1.325902814 | 0.569645291 | 0.568918303 | 0.999371363 | Not Sig |
| ENSG00000157911 | PEX10        | peroxisomal biogenesis factor 10              | 5192      | 448.302117  | 0.755860696 | 0.472771754 | 1.598785649 | 0.109868239 | 0.999371363 | Not Sig |
| ENSG00000221286 | NA           | NA                                            | NA        | 1.551573102 | 0.756004428 | 2.313721393 | 0.326748255 | 0.743858299 | NA          | NA      |
| ENSG00000165259 | HDX          | highly divergent homeobox                     | 139324    | 109.7591786 | 0.75650718  | 0.5802949   | 1.303659881 | 0.192349574 | 0.999371363 | Not Sig |
| ENSG00000131238 | PPT1         | palmitoyl-protein thioesterase 1              | 5538      | 3137.68461  | 0.756710584 | 0.562564134 | 1.345109897 | 0.178589748 | 0.999371363 | Not Sig |
| ENSG00000231233 | NA           | NA                                            | NA        | 5.335761247 | 0.757794291 | 1.203736687 | 0.62953493  | 0.528998908 | NA          | NA      |
| ENSG00000255320 | NA           | NA                                            | NA        | 8.08598292  | 0.758162012 | 0.936547673 | 0.809528478 | 0.418211229 | 0.999371363 | Not Sig |
| ENSG00000117477 | CCDC181      | coiled-coil domain containing 181             | 57821     | 21.40458595 | 0.75851839  | 1.29377881  | 0.586281352 | 0.557686461 | 0.999371363 | Not Sig |
| ENSG00000256164 | CCND2-AS1    | CCND2 antisense RNA 1                         | 103752584 | 3.531423983 | 0.758529211 | 1.617646662 | 0.468909082 | 0.639134624 | NA          | NA      |
| ENSG00000162999 | DUSP19       | dual specificity phosphatase 19               | 142679    | 87.67970485 | 0.759991567 | 0.522040935 | 1.455808381 | 0.145445598 | 0.999371363 | Not Sig |

|                 |              |                                                               |           |             |             |             |             |             |             |         |
|-----------------|--------------|---------------------------------------------------------------|-----------|-------------|-------------|-------------|-------------|-------------|-------------|---------|
| ENSG00000130695 | CEP85        | centrosomal protein 85                                        | 64793     | 481.7171466 | 0.761635796 | 0.560000258 | 1.360063294 | 0.173809895 | 0.999371363 | Not Sig |
| ENSG00000259431 | THTPA        | thiamine triphosphatase                                       | 79178     | 131.2193366 | 0.762133393 | 0.622872001 | 1.22357947  | 0.221110908 | 0.999371363 | Not Sig |
| ENSG00000161405 | IKZF3        | IKAROS family zinc finger 3                                   | 22806     | 346.170648  | 0.762498288 | 0.725402531 | 1.051138169 | 0.293195136 | 0.999371363 | Not Sig |
| ENSG00000215221 | NA           | NA                                                            | NA        | 12.52807064 | 0.762643262 | 0.896168764 | 0.851004066 | 0.394767094 | 0.999371363 | Not Sig |
| ENSG00000254090 | NA           | NA                                                            | NA        | 4.301689203 | 0.762795384 | 1.575113199 | 0.484279724 | 0.628187364 | NA          | NA      |
| ENSG00000106327 | TFR2         | transferrin receptor 2                                        | 7036      | 27.44448132 | 0.762938466 | 0.831119025 | 0.917965349 | 0.358637007 | 0.999371363 | Not Sig |
| ENSG00000237668 | NA           | NA                                                            | NA        | 0.99585094  | 0.763179335 | 2.324531018 | 0.328315402 | 0.7426732   | NA          | NA      |
| ENSG00000181201 | NA           | NA                                                            | NA        | 1.789729841 | 0.763503196 | 1.877653928 | 0.406626154 | 0.684282585 | NA          | NA      |
| ENSG00000174137 | FAM53A       | family with sequence similarity 53 member A                   | 152877    | 51.02358052 | 0.764376995 | 0.628601801 | 1.215995553 | 0.223986616 | 0.999371363 | Not Sig |
| ENSG00000224976 | NA           | NA                                                            | NA        | 1.953369822 | 0.764395907 | 1.707237516 | 0.447738466 | 0.654341957 | NA          | NA      |
| ENSG00000237854 | NA           | NA                                                            | NA        | 403.4044489 | 0.7644383   | 0.480776551 | 1.590007457 | 0.111833124 | 0.999371363 | Not Sig |
| ENSG00000090432 | MUL1         | mitochondrial E3 ubiquitin protein ligase 1                   | 79594     | 661.77606   | 0.764559919 | 0.590283564 | 1.295241754 | 0.195236845 | 0.999371363 | Not Sig |
| ENSG00000110848 | CD69         | CD69 molecule                                                 | 969       | 448.3162642 | 0.766060234 | 0.88088745  | 0.869645984 | 0.3844939   | 0.999371363 | Not Sig |
| ENSG00000168806 | LCMT2        | leucine carboxyl methyltransferase 2                          | 9836      | 280.2270385 | 0.766340725 | 0.531328739 | 1.442309945 | 0.149214956 | 0.999371363 | Not Sig |
| ENSG00000201209 | NA           | NA                                                            | NA        | 2.958110669 | 0.766701234 | 1.723806775 | 0.444772143 | 0.656484427 | NA          | NA      |
| ENSG00000251356 | NA           | NA                                                            | NA        | 5.177236074 | 0.767823696 | 1.35861456  | 0.56515197  | 0.571970402 | NA          | NA      |
| ENSG00000158321 | AUTS2        | AUTS2, activator of transcription and developmental regulator | 26053     | 1709.836014 | 0.767986913 | 0.496524921 | 1.546723801 | 0.121929861 | 0.999371363 | Not Sig |
| ENSG00000106628 | POLD2        | DNA polymerase delta 2, accessory subunit                     | 5425      | 952.9666291 | 0.768140715 | 0.535666531 | 1.433990498 | 0.151574974 | 0.999371363 | Not Sig |
| ENSG00000159363 | ATP13A2      | ATPase 13A2                                                   | 23400     | 1502.56139  | 0.768161254 | 0.606712174 | 1.266104896 | 0.20547553  | 0.999371363 | Not Sig |
| ENSG00000254444 | NA           | NA                                                            | NA        | 1.114156985 | 0.768383202 | 2.980176995 | 0.257831398 | 0.796537031 | NA          | NA      |
| ENSG00000175756 | AURKAIP1     | aurora kinase A interacting protein 1                         | 54998     | 1092.590083 | 0.768985681 | 0.585749482 | 1.312823492 | 0.189242432 | 0.999371363 | Not Sig |
| ENSG00000120885 | CLU          | clusterin                                                     | 1191      | 4764.208835 | 0.769197008 | 0.855187458 | 0.899448421 | 0.368413858 | 0.999371363 | Not Sig |
| ENSG00000237686 | LOC101929705 | uncharacterized LOC101929705                                  | 101929705 | 18.61769701 | 0.769237093 | 0.971470529 | 0.791827514 | 0.428461257 | 0.999371363 | Not Sig |
| ENSG00000255306 | NA           | NA                                                            | NA        | 4.969125156 | 0.769340156 | 1.187388032 | 0.647926487 | 0.517032498 | NA          | NA      |
| ENSG00000122507 | BBS9         | Bardet-Biedl syndrome 9                                       | 27241     | 665.7034966 | 0.769411268 | 0.531474564 | 1.447691611 | 0.147703317 | 0.999371363 | Not Sig |
| ENSG00000197568 | HHLA3        | HERV-H LTR-associating 3                                      | 11147     | 71.04223775 | 0.770256503 | 0.648651715 | 1.187473163 | 0.235041036 | 0.999371363 | Not Sig |
| ENSG00000271746 | NA           | NA                                                            | NA        | 7.185959381 | 0.770385304 | 1.317030359 | 0.584941189 | 0.558587262 | 0.999371363 | Not Sig |
| ENSG00000130707 | ASS1         | argininosuccinate synthase 1                                  | 445       | 1113.346898 | 0.770775924 | 0.641873502 | 1.200822157 | 0.229820195 | 0.999371363 | Not Sig |
| ENSG00000141367 | CLTC         | clathrin heavy chain                                          | 1213      | 13499.59844 | 0.771212124 | 0.445660547 | 1.73049225  | 0.083542365 | 0.999371363 | Not Sig |
| ENSG00000211848 | NA           | NA                                                            | NA        | 4.767413406 | 0.771811875 | 1.144667466 | 0.674267329 | 0.500141371 | NA          | NA      |
| ENSG00000083444 | PLOD1        | procollagen-lysine,2-oxoglutarate 5-dioxygenase 1             | 5351      | 2232.507111 | 0.771839128 | 0.5234604   | 1.474493825 | 0.140348679 | 0.999371363 | Not Sig |
| ENSG00000241829 | NA           | NA                                                            | NA        | 1.715778384 | 0.772473866 | 1.879831006 | 0.410927293 | 0.681125849 | NA          | NA      |
| ENSG00000106415 | GLCCI1       | glucocorticoid induced 1                                      | 113263    | 938.0880197 | 0.772536242 | 0.683448463 | 1.130350399 | 0.258328606 | 0.999371363 | Not Sig |
| ENSG00000212402 | SNORA74B     | small nucleolar RNA, H/ACA box 74B                            | 677841    | 35.27092445 | 0.773703351 | 0.672483494 | 1.150516492 | 0.249931206 | 0.999371363 | Not Sig |
| ENSG00000054116 | TRAPPC3      | trafficking protein particle complex 3                        | 27095     | 877.1971023 | 0.77377299  | 0.479458361 | 1.613848151 | 0.106560367 | 0.999371363 | Not Sig |



|                 |            |                                                          |           |             |             |             |             |             |             |         |
|-----------------|------------|----------------------------------------------------------|-----------|-------------|-------------|-------------|-------------|-------------|-------------|---------|
| ENSG00000231765 | NA         | NA                                                       | NA        | 6.180388508 | 0.773879631 | 1.099981454 | 0.7035388   | 0.481720036 | NA          | NA      |
| ENSG00000240036 | NA         | NA                                                       | NA        | 7.523657607 | 0.77428149  | 0.956439693 | 0.809545543 | 0.418201418 | 0.999371363 | Not Sig |
| ENSG00000167291 | TBC1D16    | TBC1 domain family member 16                             | 125058    | 2075.772514 | 0.775064541 | 0.546127256 | 1.419201354 | 0.155840321 | 0.999371363 | Not Sig |
| ENSG00000173276 | ZBTB21     | zinc finger and BTB domain containing 21                 | 49854     | 847.3925211 | 0.775090382 | 0.448792534 | 1.727057211 | 0.084157389 | 0.999371363 | Not Sig |
| ENSG00000005189 | REXO5      | RNA exonuclease 5                                        | 81691     | 118.1587246 | 0.775259285 | 0.790356726 | 0.98089794  | 0.326643074 | 0.999371363 | Not Sig |
| ENSG00000259704 | NA         | NA                                                       | NA        | 7.148026037 | 0.776190665 | 1.042908157 | 0.744256011 | 0.456721608 | 0.999371363 | Not Sig |
| ENSG00000133808 | MICALCL    | MICAL C-terminal like                                    | 84953     | 436.1271758 | 0.776257151 | 0.76969422  | 1.008526673 | 0.31320169  | 0.999371363 | Not Sig |
| ENSG00000188822 | CNR2       | cannabinoid receptor 2                                   | 1269      | 14.94941571 | 0.777400046 | 1.189687562 | 0.653448915 | 0.513466913 | 0.999371363 | Not Sig |
| ENSG00000124508 | BTN2A2     | butyrophilin subfamily 2 member A2                       | 10385     | 668.4766122 | 0.777683964 | 0.732211041 | 1.062103575 | 0.288188667 | 0.999371363 | Not Sig |
| ENSG00000151136 | BTBD11     | BTB domain containing 11                                 | 121551    | 106.5739426 | 0.778042835 | 0.844612704 | 0.921182965 | 0.35695491  | 0.999371363 | Not Sig |
| ENSG00000184076 | UQCR10     | ubiquinol-cytochrome c reductase, complex III subunit X  | 29796     | 639.566571  | 0.778306961 | 0.540900878 | 1.438908667 | 0.150176401 | 0.999371363 | Not Sig |
| ENSG00000268879 | NA         | NA                                                       | NA        | 1.008726012 | 0.778608377 | 2.641947921 | 0.294709964 | 0.768215451 | NA          | NA      |
| ENSG00000272927 | NA         | NA                                                       | NA        | 12.84879217 | 0.778768122 | 0.866400798 | 0.898854345 | 0.368730249 | 0.999371363 | Not Sig |
| ENSG00000223653 | NA         | NA                                                       | NA        | 8.202429364 | 0.779379936 | 1.178202519 | 0.661499126 | 0.508292275 | 0.999371363 | Not Sig |
| ENSG00000060642 | PIGV       | phosphatidylinositol glycan anchor biosynthesis class V  | 55650     | 404.9673541 | 0.779565503 | 0.582103967 | 1.339220392 | 0.180498936 | 0.999371363 | Not Sig |
| ENSG00000226415 | NA         | NA                                                       | NA        | 9.373013858 | 0.779684362 | 0.971510293 | 0.80254874  | 0.422235606 | 0.999371363 | Not Sig |
| ENSG00000144668 | ITGA9      | integrin subunit alpha 9                                 | 3680      | 2057.923394 | 0.780643647 | 0.642905548 | 1.214243132 | 0.224654894 | 0.999371363 | Not Sig |
| ENSG00000250869 | NA         | NA                                                       | NA        | 1.12059452  | 0.780723385 | 2.97708612  | 0.262244139 | 0.793133226 | NA          | NA      |
| ENSG00000180458 | NA         | NA                                                       | NA        | 1.313981664 | 0.780751173 | 2.130834602 | 0.366406277 | 0.714061937 | NA          | NA      |
| ENSG00000244167 | NA         | NA                                                       | NA        | 1.313981664 | 0.780751173 | 2.130834602 | 0.366406277 | 0.714061937 | NA          | NA      |
| ENSG00000074800 | ENO1       | enolase 1                                                | 2023      | 17809.39627 | 0.781159515 | 0.521797211 | 1.49705575  | 0.134378752 | 0.999371363 | Not Sig |
| ENSG00000148123 | PLPPR1     | phospholipid phosphatase related 1                       | 54886     | 85.26745457 | 0.781774079 | 0.735268862 | 1.063249268 | 0.287668925 | 0.999371363 | Not Sig |
| ENSG00000230756 | NA         | NA                                                       | NA        | 1.381340868 | 0.782360377 | 2.3418602   | 0.334076465 | 0.738321859 | NA          | NA      |
| ENSG00000111536 | IL26       | interleukin 26                                           | 55801     | 1.461729861 | 0.78238706  | 2.028378889 | 0.385720372 | 0.699703773 | NA          | NA      |
| ENSG00000264979 | MIR4436B1  | microRNA 4436b-1                                         | 100616123 | 1.461729861 | 0.78238706  | 2.028378889 | 0.385720372 | 0.699703773 | NA          | NA      |
| ENSG00000230266 | XXYLT1-AS2 | XXYLT1 antisense RNA 2                                   | 101410543 | 4.440437497 | 0.782621849 | 1.43578818  | 0.545081691 | 0.585697335 | NA          | NA      |
| ENSG00000198715 | GLMP       | glycosylated lysosomal membrane protein                  | 112770    | 822.3879478 | 0.78263868  | 0.523620573 | 1.494667551 | 0.135001227 | 0.999371363 | Not Sig |
| ENSG00000221222 | NA         | NA                                                       | NA        | 1.766985514 | 0.782662004 | 1.87818922  | 0.416710944 | 0.676889848 | NA          | NA      |
| ENSG00000231908 | IDH1-AS1   | IDH1 antisense RNA 1                                     | 100507475 | 9.010833558 | 0.783159796 | 0.931782432 | 0.840496418 | 0.400630109 | 0.999371363 | Not Sig |
| ENSG00000056998 | GYG2       | glycogenin 2                                             | 8908      | 266.001164  | 0.783883391 | 0.848342303 | 0.924017802 | 0.355477047 | 0.999371363 | Not Sig |
| ENSG00000185527 | PDE6G      | phosphodiesterase 6G                                     | 5148      | 11.63670419 | 0.784376238 | 0.881904597 | 0.889411668 | 0.373781877 | 0.999371363 | Not Sig |
| ENSG00000184860 | SDR42E1    | short chain dehydrogenase/reductase family 42E, member 1 | 93517     | 164.480021  | 0.784531783 | 0.70427598  | 1.113955048 | 0.265298472 | 0.999371363 | Not Sig |
| ENSG00000123989 | CHPF       | chondroitin polymerizing factor                          | 79586     | 2390.492361 | 0.784689994 | 0.479846611 | 1.635293396 | 0.101987557 | 0.999371363 | Not Sig |
| ENSG00000002587 | HS3ST1     | heparan sulfate-glucosamine 3-sulfotransferase 1         | 9957      | 276.1660635 | 0.785146534 | 0.603032981 | 1.301996007 | 0.192917751 | 0.999371363 | Not Sig |
| ENSG00000183246 | RIMBP3C    | RIMS binding protein 3C                                  | 150221    | 2.740092127 | 0.78610582  | 1.50591546  | 0.522011919 | 0.601662032 | NA          | NA      |

|                 |              |                                                   |           |             |             |             |             |             |             |         |
|-----------------|--------------|---------------------------------------------------|-----------|-------------|-------------|-------------|-------------|-------------|-------------|---------|
| ENSG00000211724 | NA           | NA                                                | NA        | 2.724659113 | 0.786685067 | 2.055373781 | 0.382745501 | 0.701908474 | NA          | NA      |
| ENSG00000231160 | KLF3-AS1     | KLF3 antisense RNA 1                              | 79667     | 79.89908445 | 0.786927892 | 0.651084771 | 1.208641221 | 0.226800713 | 0.999371363 | Not Sig |
| ENSG00000205559 | CHKB-AS1     | CHKB antisense RNA 1 (head to head)               | 100144603 | 31.37124611 | 0.787126514 | 0.894749505 | 0.879717184 | 0.379012538 | 0.999371363 | Not Sig |
| ENSG00000170270 | GON7         | GON7, KEOPS complex subunit                       | 84520     | 142.9692194 | 0.78754171  | 0.446866789 | 1.762363479 | 0.078007905 | 0.999371363 | Not Sig |
| ENSG00000259137 | NA           | NA                                                | NA        | 1.773423049 | 0.787825843 | 1.839197331 | 0.428353081 | 0.668394079 | NA          | NA      |
| ENSG00000236860 | NA           | NA                                                | NA        | 2.226426899 | 0.78869377  | 1.703146724 | 0.463080344 | 0.643306779 | NA          | NA      |
| ENSG00000109066 | TMEM104      | transmembrane protein 104                         | 54868     | 774.6431151 | 0.788990178 | 0.629086973 | 1.254182985 | 0.209775503 | 0.999371363 | Not Sig |
| ENSG00000215692 | NA           | NA                                                | NA        | 4.095106655 | 0.789852778 | 1.349824987 | 0.58515199  | 0.558445523 | NA          | NA      |
| ENSG00000187554 | TLR5         | toll like receptor 5                              | 7100      | 373.9112348 | 0.790085253 | 0.565468576 | 1.397222209 | 0.16234676  | 0.999371363 | Not Sig |
| ENSG00000125812 | GZF1         | GDNF inducible zinc finger protein 1              | 64412     | 535.622096  | 0.790147438 | 0.438790429 | 1.800739913 | 0.071743884 | 0.999371363 | Not Sig |
| ENSG00000152578 | GRIA4        | glutamate ionotropic receptor AMPA type subunit 4 | 2893      | 1.528828775 | 0.79028374  | 2.021965751 | 0.390849222 | 0.695908689 | NA          | NA      |
| ENSG00000254035 | NA           | NA                                                | NA        | 13.35400554 | 0.790389785 | 0.808245518 | 0.977908033 | 0.328119812 | 0.999371363 | Not Sig |
| ENSG00000238363 | SNORA13      | small nucleolar RNA, H/ACA box 13                 | 654322    | 3.984262217 | 0.790478351 | 1.436996937 | 0.550090492 | 0.582257308 | NA          | NA      |
| ENSG00000213280 | NA           | NA                                                | NA        | 0.912445235 | 0.79070615  | 3.099885739 | 0.255075902 | 0.798664476 | NA          | NA      |
| ENSG00000269657 | NA           | NA                                                | NA        | 126.3956126 | 0.790874003 | 0.726755991 | 1.088224951 | 0.276495812 | 0.999371363 | Not Sig |
| ENSG00000114737 | CISH         | cytokine inducible SH2 containing protein         | 1154      | 1095.160494 | 0.790878389 | 0.677324337 | 1.167650925 | 0.2429476   | 0.999371363 | Not Sig |
| ENSG00000186056 | MATN1-AS1    | MATN1 antisense RNA 1                             | 100129196 | 100.3835295 | 0.791282067 | 0.62589765  | 1.264235562 | 0.20614549  | 0.999371363 | Not Sig |
| ENSG00000207016 | SNORA36C     | small nucleolar RNA, H/ACA box 36C                | 100124535 | 1.57359837  | 0.792148699 | 2.018499519 | 0.392444334 | 0.694729934 | NA          | NA      |
| ENSG00000235043 | NA           | NA                                                | NA        | 3.984107499 | 0.79282948  | 1.398723556 | 0.566823571 | 0.570834055 | NA          | NA      |
| ENSG00000184886 | NA           | NA                                                | NA        | 137.0060745 | 0.792905947 | 0.497860338 | 1.592627262 | 0.111243834 | 0.999371363 | Not Sig |
| ENSG00000229151 | NA           | NA                                                | NA        | 2.685868284 | 0.7932748   | 1.603111308 | 0.494834511 | 0.620716941 | NA          | NA      |
| ENSG00000036530 | CYP46A1      | cytochrome P450 family 46 subfamily A member 1    | 10858     | 56.35392692 | 0.793646834 | 0.533551729 | 1.487478704 | 0.136888424 | 0.999371363 | Not Sig |
| ENSG00000117122 | MFAP2        | microfibril associated protein 2                  | 4237      | 266.8403053 | 0.793733142 | 0.620549557 | 1.27908099  | 0.200868537 | 0.999371363 | Not Sig |
| ENSG00000109471 | IL2          | interleukin 2                                     | 3558      | 2.412246865 | 0.793763731 | 2.095830932 | 0.37873462  | 0.704884942 | NA          | NA      |
| ENSG00000228214 | NA           | NA                                                | NA        | 9.554799393 | 0.794404963 | 0.984985293 | 0.806514543 | 0.419946226 | 0.999371363 | Not Sig |
| ENSG00000145192 | AHSG         | alpha 2-HS glycoprotein                           | 197       | 0.536409555 | 0.794523537 | 3.660180895 | 0.217072205 | 0.828152075 | NA          | NA      |
| ENSG00000198153 | NA           | NA                                                | NA        | 0.536409555 | 0.794523537 | 3.660180895 | 0.217072205 | 0.828152075 | NA          | NA      |
| ENSG00000207600 | MIR598       | microRNA 598                                      | 693183    | 0.536409555 | 0.794523537 | 3.660180895 | 0.217072205 | 0.828152075 | NA          | NA      |
| ENSG00000214784 | NA           | NA                                                | NA        | 0.536409555 | 0.794523537 | 3.660180895 | 0.217072205 | 0.828152075 | NA          | NA      |
| ENSG00000221403 | NA           | NA                                                | NA        | 0.536409555 | 0.794523537 | 3.660180895 | 0.217072205 | 0.828152075 | NA          | NA      |
| ENSG00000223625 | NA           | NA                                                | NA        | 0.536409555 | 0.794523537 | 3.660180895 | 0.217072205 | 0.828152075 | NA          | NA      |
| ENSG00000243601 | NA           | NA                                                | NA        | 0.536409555 | 0.794523537 | 3.660180895 | 0.217072205 | 0.828152075 | NA          | NA      |
| ENSG00000250492 | NA           | NA                                                | NA        | 0.536409555 | 0.794523537 | 3.660180895 | 0.217072205 | 0.828152075 | NA          | NA      |
| ENSG00000254607 | LOC101929427 | uncharacterized LOC101929427                      | 101929427 | 0.536409555 | 0.794523537 | 3.660180895 | 0.217072205 | 0.828152075 | NA          | NA      |
| ENSG00000260115 | NA           | NA                                                | NA        | 0.536409555 | 0.794523537 | 3.660180895 | 0.217072205 | 0.828152075 | NA          | NA      |

|                 |              |                                                                   |           |             |             |             |             |             |             |         |
|-----------------|--------------|-------------------------------------------------------------------|-----------|-------------|-------------|-------------|-------------|-------------|-------------|---------|
| ENSG00000266510 | NA           | NA                                                                | NA        | 0.536409555 | 0.794523537 | 3.660180895 | 0.217072205 | 0.828152075 | NA          | NA      |
| ENSG00000270983 | NA           | NA                                                                | NA        | 0.536409555 | 0.794523537 | 3.660180895 | 0.217072205 | 0.828152075 | NA          | NA      |
| ENSG00000111716 | LDHB         | lactate dehydrogenase B                                           | 3945      | 3518.37739  | 0.794611479 | 0.455447319 | 1.744683624 | 0.081039955 | 0.999371363 | Not Sig |
| ENSG00000271369 | NA           | NA                                                                | NA        | 1.37188662  | 0.794897652 | 2.732280528 | 0.290928272 | 0.771106178 | NA          | NA      |
| ENSG00000264898 | NA           | NA                                                                | NA        | 7.499618022 | 0.795016828 | 1.03440816  | 0.76857169  | 0.442147617 | 0.999371363 | Not Sig |
| ENSG00000108878 | CACNG1       | calcium voltage-gated channel auxiliary subunit gamma 1           | 786       | 0.494341724 | 0.795049689 | 3.75611331  | 0.211668186 | 0.83236591  | NA          | NA      |
| ENSG00000134365 | CFHR4        | complement factor H related 4                                     | 10877     | 0.494341724 | 0.795049689 | 3.75611331  | 0.211668186 | 0.83236591  | NA          | NA      |
| ENSG00000175206 | NPPA         | natriuretic peptide A                                             | 4878      | 0.494341724 | 0.795049689 | 3.75611331  | 0.211668186 | 0.83236591  | NA          | NA      |
| ENSG00000187268 | FAM9C        | family with sequence similarity 9 member C                        | 171484    | 0.494341724 | 0.795049689 | 3.75611331  | 0.211668186 | 0.83236591  | NA          | NA      |
| ENSG00000198062 | POTEH        | POTE ankyrin domain family member H                               | 23784     | 0.494341724 | 0.795049689 | 3.75611331  | 0.211668186 | 0.83236591  | NA          | NA      |
| ENSG00000205863 | C1QTNF9B     | C1q and TNF related 9B                                            | 387911    | 0.494341724 | 0.795049689 | 3.75611331  | 0.211668186 | 0.83236591  | NA          | NA      |
| ENSG00000206932 | NA           | NA                                                                | NA        | 0.494341724 | 0.795049689 | 3.75611331  | 0.211668186 | 0.83236591  | NA          | NA      |
| ENSG00000211920 | NA           | NA                                                                | NA        | 0.494341724 | 0.795049689 | 3.75611331  | 0.211668186 | 0.83236591  | NA          | NA      |
| ENSG00000214354 | NA           | NA                                                                | NA        | 0.494341724 | 0.795049689 | 3.75611331  | 0.211668186 | 0.83236591  | NA          | NA      |
| ENSG00000221270 | NA           | NA                                                                | NA        | 0.494341724 | 0.795049689 | 3.75611331  | 0.211668186 | 0.83236591  | NA          | NA      |
| ENSG00000224396 | NA           | NA                                                                | NA        | 0.494341724 | 0.795049689 | 3.75611331  | 0.211668186 | 0.83236591  | NA          | NA      |
| ENSG00000226017 | PRICKLE2-AS3 | PRICKLE2 antisense RNA 3                                          | 100874243 | 0.494341724 | 0.795049689 | 3.75611331  | 0.211668186 | 0.83236591  | NA          | NA      |
| ENSG00000228196 | NA           | NA                                                                | NA        | 0.494341724 | 0.795049689 | 3.75611331  | 0.211668186 | 0.83236591  | NA          | NA      |
| ENSG00000229598 | NA           | NA                                                                | NA        | 0.494341724 | 0.795049689 | 3.75611331  | 0.211668186 | 0.83236591  | NA          | NA      |
| ENSG00000231989 | PPP1R2P3     | protein phosphatase 1 regulatory inhibitor subunit 2 pseudogene 3 | 153743    | 0.494341724 | 0.795049689 | 3.75611331  | 0.211668186 | 0.83236591  | NA          | NA      |
| ENSG00000234818 | NA           | NA                                                                | NA        | 0.494341724 | 0.795049689 | 3.75611331  | 0.211668186 | 0.83236591  | NA          | NA      |
| ENSG00000253359 | NA           | NA                                                                | NA        | 0.494341724 | 0.795049689 | 3.75611331  | 0.211668186 | 0.83236591  | NA          | NA      |
| ENSG00000259513 | NA           | NA                                                                | NA        | 0.494341724 | 0.795049689 | 3.75611331  | 0.211668186 | 0.83236591  | NA          | NA      |
| ENSG00000260021 | NA           | NA                                                                | NA        | 0.494341724 | 0.795049689 | 3.75611331  | 0.211668186 | 0.83236591  | NA          | NA      |
| ENSG00000272234 | NA           | NA                                                                | NA        | 0.494341724 | 0.795049689 | 3.75611331  | 0.211668186 | 0.83236591  | NA          | NA      |
| ENSG00000272030 | NA           | NA                                                                | NA        | 15.24143357 | 0.795058366 | 0.743117249 | 1.069896262 | 0.284666006 | 0.999371363 | Not Sig |
| ENSG00000212605 | NA           | NA                                                                | NA        | 0.478034932 | 0.795259773 | 3.796638165 | 0.209464199 | 0.83408588  | NA          | NA      |
| ENSG00000227512 | NA           | NA                                                                | NA        | 0.478034932 | 0.795259773 | 3.796638165 | 0.209464199 | 0.83408588  | NA          | NA      |
| ENSG00000228941 | NA           | NA                                                                | NA        | 0.478034932 | 0.795259773 | 3.796638165 | 0.209464199 | 0.83408588  | NA          | NA      |
| ENSG00000230691 | NA           | NA                                                                | NA        | 0.478034932 | 0.795259773 | 3.796638165 | 0.209464199 | 0.83408588  | NA          | NA      |
| ENSG00000231448 | NA           | NA                                                                | NA        | 0.478034932 | 0.795259773 | 3.796638165 | 0.209464199 | 0.83408588  | NA          | NA      |
| ENSG00000231907 | NA           | NA                                                                | NA        | 0.478034932 | 0.795259773 | 3.796638165 | 0.209464199 | 0.83408588  | NA          | NA      |
| ENSG00000232337 | NA           | NA                                                                | NA        | 0.478034932 | 0.795259773 | 3.796638165 | 0.209464199 | 0.83408588  | NA          | NA      |
| ENSG00000235876 | NA           | NA                                                                | NA        | 0.478034932 | 0.795259773 | 3.796638165 | 0.209464199 | 0.83408588  | NA          | NA      |
| ENSG00000239544 | NA           | NA                                                                | NA        | 0.478034932 | 0.795259773 | 3.796638165 | 0.209464199 | 0.83408588  | NA          | NA      |

|                 |              |                                                                     |           |             |             |             |             |             |             |         |
|-----------------|--------------|---------------------------------------------------------------------|-----------|-------------|-------------|-------------|-------------|-------------|-------------|---------|
| ENSG00000252327 | NA           | NA                                                                  | NA        | 0.478034932 | 0.795259773 | 3.796638165 | 0.209464199 | 0.83408588  | NA          | NA      |
| ENSG00000255875 | NA           | NA                                                                  | NA        | 0.478034932 | 0.795259773 | 3.796638165 | 0.209464199 | 0.83408588  | NA          | NA      |
| ENSG00000256577 | LOC101929384 | uncharacterized LOC101929384                                        | 101929384 | 0.478034932 | 0.795259773 | 3.796638165 | 0.209464199 | 0.83408588  | NA          | NA      |
| ENSG00000261707 | NA           | NA                                                                  | NA        | 0.478034932 | 0.795259773 | 3.796638165 | 0.209464199 | 0.83408588  | NA          | NA      |
| ENSG00000268656 | NA           | NA                                                                  | NA        | 0.478034932 | 0.795259773 | 3.796638165 | 0.209464199 | 0.83408588  | NA          | NA      |
| ENSG00000135414 | GDF11        | growth differentiation factor 11                                    | 10220     | 164.3480938 | 0.79535048  | 0.519623401 | 1.530628678 | 0.12586119  | 0.999371363 | Not Sig |
| ENSG00000135314 | KHDC1        | KH domain containing 1                                              | 80759     | 45.86449216 | 0.795453964 | 0.771952763 | 1.030443834 | 0.302801705 | 0.999371363 | Not Sig |
| ENSG00000030110 | BAK1         | BCL2 antagonist/killer 1                                            | 578       | 574.7701885 | 0.795460519 | 0.558016264 | 1.425514935 | 0.154008406 | 0.999371363 | Not Sig |
| ENSG00000169902 | TPST1        | tyrosylprotein sulfotransferase 1                                   | 8460      | 409.8546022 | 0.795593815 | 0.465943884 | 1.70748848  | 0.087731297 | 0.999371363 | Not Sig |
| ENSG00000266992 | NA           | NA                                                                  | NA        | 2.405654611 | 0.795677276 | 1.605699844 | 0.49553301  | 0.620223927 | NA          | NA      |
| ENSG00000107165 | TYRP1        | tyrosinase related protein 1                                        | 7306      | 119.3971405 | 0.796491648 | 0.868169902 | 0.917437526 | 0.358913416 | 0.999371363 | Not Sig |
| ENSG00000263080 | LOC105371083 | uncharacterized LOC105371083                                        | 105371083 | 3.145309669 | 0.796565305 | 1.540443752 | 0.517101195 | 0.60508552  | NA          | NA      |
| ENSG00000167536 | DHRS13       | dehydrogenase/reductase 13                                          | 147015    | 329.6273863 | 0.796868117 | 0.670268025 | 1.188879801 | 0.23448697  | 0.999371363 | Not Sig |
| ENSG00000135318 | NT5E         | 5'-nucleotidase ecto                                                | 4907      | 1485.278668 | 0.797074921 | 0.739530334 | 1.077812341 | 0.281117511 | 0.999371363 | Not Sig |
| ENSG00000160282 | FTCD         | formimidoyltransferase cyclodeaminase                               | 10841     | 16.72988849 | 0.79708866  | 0.823830381 | 0.967539773 | 0.333274268 | 0.999371363 | Not Sig |
| ENSG00000213888 | NA           | NA                                                                  | NA        | 60.97186172 | 0.798382541 | 0.795795146 | 1.003251333 | 0.315739611 | 0.999371363 | Not Sig |
| ENSG00000168386 | FILIP1L      | filamin A interacting protein 1 like                                | 11259     | 1206.882186 | 0.798948036 | 0.537778709 | 1.485644604 | 0.13737315  | 0.999371363 | Not Sig |
| ENSG00000104369 | JPH1         | junctionophilin 1                                                   | 56704     | 307.0572446 | 0.798990591 | 0.770675908 | 1.036740066 | 0.299857014 | 0.999371363 | Not Sig |
| ENSG00000106105 | GARS         | glycyl-tRNA synthetase                                              | 2617      | 1783.464797 | 0.799159486 | 0.560170202 | 1.426636909 | 0.15368458  | 0.999371363 | Not Sig |
| ENSG00000184792 | OSBP2        | oxysterol binding protein 2                                         | 23762     | 269.4299284 | 0.799278038 | 0.469011204 | 1.704176854 | 0.088348052 | 0.999371363 | Not Sig |
| ENSG00000163399 | ATP1A1       | ATPase Na <sup>+</sup> /K <sup>+</sup> transporting subunit alpha 1 | 476       | 15845.67268 | 0.801286977 | 0.534112804 | 1.500220498 | 0.133557295 | 0.999371363 | Not Sig |
| ENSG00000268222 | NA           | NA                                                                  | NA        | 5.378019386 | 0.801385448 | 1.218428486 | 0.657720545 | 0.510717718 | NA          | NA      |
| ENSG00000149573 | MPZL2        | myelin protein zero like 2                                          | 10205     | 2552.151926 | 0.801980985 | 0.563776824 | 1.422514994 | 0.154876802 | 0.999371363 | Not Sig |
| ENSG00000227039 | ITGB2-AS1    | ITGB2 antisense RNA 1                                               | 100505746 | 129.7785216 | 0.802465066 | 0.474555118 | 1.690983906 | 0.090839876 | 0.999371363 | Not Sig |
| ENSG00000154511 | FAM69A       | family with sequence similarity 69 member A                         | 388650    | 303.5976087 | 0.802474652 | 0.722005377 | 1.111452459 | 0.266373643 | 0.999371363 | Not Sig |
| ENSG00000118640 | VAMP8        | vesicle associated membrane protein 8                               | 8673      | 1649.077625 | 0.802921769 | 0.579631111 | 1.385228905 | 0.165982485 | 0.999371363 | Not Sig |
| ENSG00000237702 | NA           | NA                                                                  | NA        | 4.160627934 | 0.803198352 | 1.847889336 | 0.434657171 | 0.66381129  | NA          | NA      |
| ENSG00000259626 | NA           | NA                                                                  | NA        | 1.853812042 | 0.803780679 | 2.554305999 | 0.314676738 | 0.753007108 | NA          | NA      |
| ENSG00000160211 | G6PD         | glucose-6-phosphate dehydrogenase                                   | 2539      | 1766.288498 | 0.804110147 | 0.716207077 | 1.122734154 | 0.261550418 | 0.999371363 | Not Sig |
| ENSG00000103260 | METRNL       | meteorin, glial cell differentiation regulator                      | 79006     | 594.1144354 | 0.804211816 | 0.629333274 | 1.277879065 | 0.201292071 | 0.999371363 | Not Sig |
| ENSG00000162396 | PARS2        | prolyl-tRNA synthetase 2, mitochondrial                             | 25973     | 105.8660293 | 0.805833908 | 0.574076337 | 1.403705144 | 0.16040667  | 0.999371363 | Not Sig |
| ENSG00000184208 | C22orf46     | chromosome 22 open reading frame 46                                 | 79640     | 324.8171879 | 0.806311664 | 0.585157301 | 1.377940022 | 0.168221807 | 0.999371363 | Not Sig |
| ENSG00000184924 | PTRHD1       | peptidyl-tRNA hydrolase domain containing 1                         | 391356    | 264.1264658 | 0.806383415 | 0.441533121 | 1.826325989 | 0.067801173 | 0.999371363 | Not Sig |
| ENSG00000185164 | NOMO2        | NODAL modulator 2                                                   | 283820    | 1243.27145  | 0.806390331 | 0.406324817 | 1.984595323 | 0.047189513 | 0.999371363 | Not Sig |
| ENSG00000185164 | LOC102723728 | nodal modulator 3-like                                              | 102723728 | 1243.27145  | 0.806390331 | 0.406324817 | 1.984595323 | 0.047189513 | 0.999371363 | Not Sig |

|                  |              |                                                                     |           |             |             |             |             |             |             |         |
|------------------|--------------|---------------------------------------------------------------------|-----------|-------------|-------------|-------------|-------------|-------------|-------------|---------|
| ENSG00000109576  | AADAT        | aminoadipate aminotransferase                                       | 51166     | 226.9388387 | 0.80818122  | 0.490217845 | 1.648616483 | 0.09922623  | 0.999371363 | Not Sig |
| ENSG00000110218  | PANX1        | pannexin 1                                                          | 24145     | 508.1495005 | 0.809417843 | 0.476749938 | 1.697782796 | 0.089548764 | 0.999371363 | Not Sig |
| ENSG00000259640  | NA           | NA                                                                  | NA        | 4.641679579 | 0.809418054 | 1.252418407 | 0.646284061 | 0.518095409 | NA          | NA      |
| ENSG00000177459  | ERICH5       | glutamate rich 5                                                    | 203111    | 50.29997872 | 0.810050908 | 0.996891872 | 0.8125765   | 0.41646091  | 0.999371363 | Not Sig |
| ENSG00000135119  | RNFT2        | ring finger protein, transmembrane 2                                | 84900     | 88.65679166 | 0.810147218 | 0.653525615 | 1.23965641  | 0.215102507 | 0.999371363 | Not Sig |
| ENSG00000263013  | NA           | NA                                                                  | NA        | 73.83892297 | 0.810330409 | 0.609921966 | 1.328580465 | 0.18398642  | 0.999371363 | Not Sig |
| ENSG00000164885  | CDK5         | cyclin dependent kinase 5                                           | 1020      | 182.1616067 | 0.810407084 | 0.531386462 | 1.525080411 | 0.127239043 | 0.999371363 | Not Sig |
| ENSG00000166340  | TPP1         | tripeptidyl peptidase 1                                             | 1200      | 4816.237707 | 0.810480587 | 0.522929669 | 1.549884497 | 0.121169241 | 0.999371363 | Not Sig |
| ENSG00000163291  | PAQR3        | progesterone and adiponectin receptor family member 3               | 152559    | 271.5834027 | 0.810536573 | 0.492587652 | 1.645466669 | 0.099873606 | 0.999371363 | Not Sig |
| ENSG00000262884  | LOC101927911 | uncharacterized LOC101927911                                        | 101927911 | 12.26233288 | 0.810550437 | 1.260162045 | 0.643211276 | 0.520087017 | 0.999371363 | Not Sig |
| ENSG00000160877  | NACCI        | nucleus accumbens associated 1                                      | 112939    | 1625.820974 | 0.810623037 | 0.620061884 | 1.307326022 | 0.19110201  | 0.999371363 | Not Sig |
| ENSG00000265477  | NA           | NA                                                                  | NA        | 19.58956551 | 0.81084653  | 0.776791358 | 1.043840823 | 0.296559041 | 0.999371363 | Not Sig |
| ENSG00000267342  | NA           | NA                                                                  | NA        | 11.38492614 | 0.811000145 | 1.249235717 | 0.649197052 | 0.516211017 | 0.999371363 | Not Sig |
| ENSG00000186891  | TNFRSF18     | TNF receptor superfamily member 18                                  | 8784      | 96.67203666 | 0.811020686 | 0.646609045 | 1.254267462 | 0.209744806 | 0.999371363 | Not Sig |
| ENSG00000143537  | ADAM15       | ADAM metalloproteinase domain 15                                    | 8751      | 3189.045994 | 0.81132582  | 0.631995663 | 1.283752195 | 0.199228675 | 0.999371363 | Not Sig |
| ENSG00000255647  | LOC731157    | uncharacterized LOC731157                                           | 731157    | 1.844203076 | 0.811460499 | 2.533255069 | 0.320323251 | 0.748723299 | NA          | NA      |
| ENSG00000163739  | CXCL1        | C-X-C motif chemokine ligand 1                                      | 2919      | 265.6073247 | 0.81292071  | 0.462327488 | 1.758322252 | 0.078692694 | 0.999371363 | Not Sig |
| ENSG00000003096  | KLHL13       | kelch like family member 13                                         | 90293     | 50.10686092 | 0.813150397 | 0.863288134 | 0.94192236  | 0.346232391 | 0.999371363 | Not Sig |
| ENSG00000231503  | NA           | NA                                                                  | NA        | 16.0926259  | 0.813242059 | 0.783047645 | 1.038560125 | 0.299009359 | 0.999371363 | Not Sig |
| ENSG00000089101  | CFAP61       | cilia and flagella associated protein 61                            | 26074     | 59.94399426 | 0.813300483 | 1.040716447 | 0.781481339 | 0.434519448 | 0.999371363 | Not Sig |
| ENSG00000256061  | DNAAF4       | dynein axonemal assembly factor 4                                   | 161582    | 27.51254057 | 0.813561994 | 0.687792128 | 1.182860288 | 0.236864522 | 0.999371363 | Not Sig |
| ENSG00000228929  | NA           | NA                                                                  | NA        | 3.350287524 | 0.813967389 | 1.329409205 | 0.612277533 | 0.540354151 | NA          | NA      |
| ENSG000000052795 | FNIP2        | folliculin interacting protein 2                                    | 57600     | 3537.52583  | 0.81409466  | 0.50088764  | 1.62530395  | 0.10409781  | 0.999371363 | Not Sig |
| ENSG00000181074  | OR52N4       | olfactory receptor family 52 subfamily N member 4 (gene/pseudogene) | 390072    | 4.465468579 | 0.815011222 | 1.476167503 | 0.552112968 | 0.580870957 | NA          | NA      |
| ENSG00000037241  | RPL26L1      | ribosomal protein L26 like 1                                        | 51121     | 167.5127015 | 0.817698694 | 0.512467716 | 1.595610158 | 0.110575858 | 0.999371363 | Not Sig |
| ENSG000000000003 | TSPAN6       | tetraspanin 6                                                       | 7105      | 621.7443002 | 0.817994216 | 0.72571213  | 1.127160733 | 0.259674529 | 0.999371363 | Not Sig |
| ENSG00000227726  | NA           | NA                                                                  | NA        | 12.23782334 | 0.818239005 | 0.8287792   | 0.987282264 | 0.323504283 | 0.999371363 | Not Sig |
| ENSG00000013619  | MAMLD1       | mastermind like domain containing 1                                 | 10046     | 252.3298019 | 0.818252038 | 0.531550976 | 1.539367013 | 0.123714722 | 0.999371363 | Not Sig |
| ENSG00000187912  | CLEC17A      | C-type lectin domain containing 17A                                 | 388512    | 9.834476194 | 0.819109644 | 1.285934739 | 0.636976061 | 0.524140437 | 0.999371363 | Not Sig |
| ENSG00000124196  | GTSF1L       | gametocyte specific factor 1 like                                   | 149699    | 0.542847091 | 0.81918162  | 3.648799128 | 0.224507185 | 0.822362677 | NA          | NA      |
| ENSG00000141255  | SPATA22      | spermatogenesis associated 22                                       | 84690     | 0.542847091 | 0.81918162  | 3.648799128 | 0.224507185 | 0.822362677 | NA          | NA      |
| ENSG00000230593  | NA           | NA                                                                  | NA        | 0.542847091 | 0.81918162  | 3.648799128 | 0.224507185 | 0.822362677 | NA          | NA      |
| ENSG00000237955  | NA           | NA                                                                  | NA        | 0.542847091 | 0.81918162  | 3.648799128 | 0.224507185 | 0.822362677 | NA          | NA      |
| ENSG00000249532  | LOC109864269 | uncharacterized LOC109864269                                        | 109864269 | 0.542847091 | 0.81918162  | 3.648799128 | 0.224507185 | 0.822362677 | NA          | NA      |
| ENSG00000252732  | NA           | NA                                                                  | NA        | 0.542847091 | 0.81918162  | 3.648799128 | 0.224507185 | 0.822362677 | NA          | NA      |

|                 |           |                                                                    |           |             |             |             |             |             |             |         |
|-----------------|-----------|--------------------------------------------------------------------|-----------|-------------|-------------|-------------|-------------|-------------|-------------|---------|
| ENSG00000254650 | NA        | NA                                                                 | NA        | 0.542847091 | 0.81918162  | 3.648799128 | 0.224507185 | 0.822362677 | NA          | NA      |
| ENSG00000255808 | NA        | NA                                                                 | NA        | 0.542847091 | 0.81918162  | 3.648799128 | 0.224507185 | 0.822362677 | NA          | NA      |
| ENSG00000259642 | NA        | NA                                                                 | NA        | 0.542847091 | 0.81918162  | 3.648799128 | 0.224507185 | 0.822362677 | NA          | NA      |
| ENSG00000263841 | NA        | NA                                                                 | NA        | 0.542847091 | 0.81918162  | 3.648799128 | 0.224507185 | 0.822362677 | NA          | NA      |
| ENSG00000264737 | MIR4511   | microRNA 4511                                                      | 100616379 | 0.542847091 | 0.81918162  | 3.648799128 | 0.224507185 | 0.822362677 | NA          | NA      |
| ENSG00000269131 | NA        | NA                                                                 | NA        | 0.542847091 | 0.81918162  | 3.648799128 | 0.224507185 | 0.822362677 | NA          | NA      |
| ENSG00000226964 | NA        | NA                                                                 | NA        | 2.328426151 | 0.819599091 | 1.622694494 | 0.505085273 | 0.613498945 | NA          | NA      |
| ENSG00000264797 | NA        | NA                                                                 | NA        | 2.977213897 | 0.819676799 | 1.920714587 | 0.426756169 | 0.669556935 | NA          | NA      |
| ENSG00000201315 | NA        | NA                                                                 | NA        | 0.500779259 | 0.819887157 | 3.742980453 | 0.219046604 | 0.826613744 | NA          | NA      |
| ENSG00000205126 | ACCSL     | l-aminocyclopropane-1-carboxylate synthase homolog (inactive) like | 390110    | 0.500779259 | 0.819887157 | 3.742980453 | 0.219046604 | 0.826613744 | NA          | NA      |
| ENSG00000214857 | NA        | NA                                                                 | NA        | 0.500779259 | 0.819887157 | 3.742980453 | 0.219046604 | 0.826613744 | NA          | NA      |
| ENSG00000224025 | NA        | NA                                                                 | NA        | 0.500779259 | 0.819887157 | 3.742980453 | 0.219046604 | 0.826613744 | NA          | NA      |
| ENSG00000241185 | NA        | NA                                                                 | NA        | 0.500779259 | 0.819887157 | 3.742980453 | 0.219046604 | 0.826613744 | NA          | NA      |
| ENSG00000249876 | NA        | NA                                                                 | NA        | 0.500779259 | 0.819887157 | 3.742980453 | 0.219046604 | 0.826613744 | NA          | NA      |
| ENSG00000252712 | SCARNA14  | small Cajal body-specific RNA 14                                   | 692149    | 0.500779259 | 0.819887157 | 3.742980453 | 0.219046604 | 0.826613744 | NA          | NA      |
| ENSG00000267366 | NA        | NA                                                                 | NA        | 0.500779259 | 0.819887157 | 3.742980453 | 0.219046604 | 0.826613744 | NA          | NA      |
| ENSG00000146722 | LOC541473 | FK506 binding protein 6, 36kDa pseudogene                          | 541473    | 0.484472468 | 0.820168438 | 3.782721794 | 0.216819656 | 0.828348893 | NA          | NA      |
| ENSG00000215120 | NA        | NA                                                                 | NA        | 0.484472468 | 0.820168438 | 3.782721794 | 0.216819656 | 0.828348893 | NA          | NA      |
| ENSG00000225240 | NA        | NA                                                                 | NA        | 0.484472468 | 0.820168438 | 3.782721794 | 0.216819656 | 0.828348893 | NA          | NA      |
| ENSG00000230125 | NA        | NA                                                                 | NA        | 0.484472468 | 0.820168438 | 3.782721794 | 0.216819656 | 0.828348893 | NA          | NA      |
| ENSG00000238756 | NA        | NA                                                                 | NA        | 0.484472468 | 0.820168438 | 3.782721794 | 0.216819656 | 0.828348893 | NA          | NA      |
| ENSG00000239504 | NA        | NA                                                                 | NA        | 0.484472468 | 0.820168438 | 3.782721794 | 0.216819656 | 0.828348893 | NA          | NA      |
| ENSG00000239917 | NA        | NA                                                                 | NA        | 0.484472468 | 0.820168438 | 3.782721794 | 0.216819656 | 0.828348893 | NA          | NA      |
| ENSG00000240480 | RPL29P2   | ribosomal protein L29 pseudogene 2                                 | 118432    | 0.484472468 | 0.820168438 | 3.782721794 | 0.216819656 | 0.828348893 | NA          | NA      |
| ENSG00000255786 | NA        | NA                                                                 | NA        | 0.484472468 | 0.820168438 | 3.782721794 | 0.216819656 | 0.828348893 | NA          | NA      |
| ENSG00000258851 | NA        | NA                                                                 | NA        | 0.484472468 | 0.820168438 | 3.782721794 | 0.216819656 | 0.828348893 | NA          | NA      |
| ENSG00000261002 | NA        | NA                                                                 | NA        | 0.484472468 | 0.820168438 | 3.782721794 | 0.216819656 | 0.828348893 | NA          | NA      |
| ENSG00000266738 | MIR4757   | microRNA 4757                                                      | 100616307 | 0.484472468 | 0.820168438 | 3.782721794 | 0.216819656 | 0.828348893 | NA          | NA      |
| ENSG00000102100 | SLC35A2   | solute carrier family 35 member A2                                 | 7355      | 629.7280208 | 0.820749139 | 0.413262406 | 1.986024199 | 0.047030637 | 0.999371363 | Not Sig |
| ENSG00000260008 | NA        | NA                                                                 | NA        | 3.186647543 | 0.820992629 | 1.525897924 | 0.538039024 | 0.590550108 | NA          | NA      |
| ENSG00000243753 | HLA-L     | major histocompatibility complex, class I, L (pseudogene)          | 3139      | 71.78155534 | 0.821704753 | 0.590693375 | 1.391085099 | 0.164199623 | 0.999371363 | Not Sig |
| ENSG00000231256 | C17orf105 | chromosome 17 open reading frame 105                               | 284067    | 0.985981684 | 0.821710615 | 2.329232167 | 0.352781756 | 0.724252062 | NA          | NA      |
| ENSG00000179528 | LBX2      | ladybird homeobox 2                                                | 85474     | 35.71751998 | 0.823093028 | 0.580452165 | 1.418020429 | 0.1561848   | 0.999371363 | Not Sig |
| ENSG00000113070 | HBEGF     | heparin binding EGF like growth factor                             | 1839      | 982.961102  | 0.823402147 | 0.801455055 | 1.027384058 | 0.304239655 | 0.999371363 | Not Sig |
| ENSG00000211653 | NA        | NA                                                                 | NA        | 1504.941417 | 0.823641703 | 1.197399338 | 0.687858826 | 0.491541687 | 0.999371363 | Not Sig |

|                 |          |                                                               |           |             |             |             |             |             |             |         |
|-----------------|----------|---------------------------------------------------------------|-----------|-------------|-------------|-------------|-------------|-------------|-------------|---------|
| ENSG00000090661 | CERS4    | ceramide synthase 4                                           | 79603     | 938.9019111 | 0.823997441 | 0.823700511 | 1.000360483 | 0.317136087 | 0.999371363 | Not Sig |
| ENSG00000206503 | HLA-A    | major histocompatibility complex, class I, A                  | 3105      | 36279.946   | 0.824225071 | 0.901393451 | 0.914389903 | 0.360512005 | 0.999371363 | Not Sig |
| ENSG00000180964 | TCEAL8   | transcription elongation factor A like 8                      | 90843     | 724.5006866 | 0.824314809 | 0.676382299 | 1.218711385 | 0.222953755 | 0.999371363 | Not Sig |
| ENSG00000186940 | NA       | NA                                                            | NA        | 4.043745765 | 0.824884613 | 1.632581532 | 0.505263962 | 0.613373451 | NA          | NA      |
| ENSG00000269151 | NA       | NA                                                            | NA        | 3.884395001 | 0.825032041 | 1.821757354 | 0.45287702  | 0.650637299 | NA          | NA      |
| ENSG00000239333 | NA       | NA                                                            | NA        | 1.837505251 | 0.825169494 | 2.193025948 | 0.376269827 | 0.706716309 | NA          | NA      |
| ENSG00000237172 | B3GNT9   | UDP-GlcNAc:betaGal beta-1,3-N-acetylglucosaminyltransferase 9 | 84752     | 584.3393796 | 0.826137846 | 0.557174019 | 1.482728588 | 0.138146536 | 0.999371363 | Not Sig |
| ENSG00000256553 | NA       | NA                                                            | NA        | 5.93347036  | 0.827464388 | 1.247227367 | 0.663443098 | 0.507046812 | NA          | NA      |
| ENSG00000100285 | NEFH     | neurofilament heavy                                           | 4744      | 13.86759902 | 0.827961968 | 1.022283202 | 0.80991448  | 0.417989329 | 0.999371363 | Not Sig |
| ENSG00000265521 | MIR5697  | microRNA 5697                                                 | 100847055 | 3.287622725 | 0.828040955 | 1.718866753 | 0.481736559 | 0.629993102 | NA          | NA      |
| ENSG00000150967 | ABCB9    | ATP binding cassette subfamily B member 9                     | 23457     | 204.006471  | 0.828477124 | 0.495772007 | 1.671084919 | 0.094704906 | 0.999371363 | Not Sig |
| ENSG00000215915 | ATAD3C   | ATPase family, AAA domain containing 3C                       | 219293    | 172.2845906 | 0.828934953 | 0.645604568 | 1.283966988 | 0.199153506 | 0.999371363 | Not Sig |
| ENSG00000265510 | MIR4436A | microRNA 4436a                                                | 100616399 | 0.99241922  | 0.829194557 | 2.649578361 | 0.3129534   | 0.754316066 | NA          | NA      |
| ENSG00000211886 | NA       | NA                                                            | NA        | 6.514085168 | 0.829530016 | 1.205942629 | 0.687868557 | 0.491535559 | NA          | NA      |
| ENSG00000093144 | ECHDC1   | ethylmalonyl-CoA decarboxylase 1                              | 55862     | 1410.049729 | 0.829689477 | 0.483114773 | 1.717375505 | 0.085910584 | 0.999371363 | Not Sig |
| ENSG00000135740 | SLC9A5   | solute carrier family 9 member A5                             | 6553      | 110.1933256 | 0.829996824 | 0.548462129 | 1.513316564 | 0.130199267 | 0.999371363 | Not Sig |
| ENSG00000153283 | CD96     | CD96 molecule                                                 | 10225     | 331.1990306 | 0.830002898 | 0.709355054 | 1.170081037 | 0.241968359 | 0.999371363 | Not Sig |
| ENSG00000166927 | MS4A7    | membrane spanning 4-domains A7                                | 58475     | 1100.400568 | 0.830651663 | 0.935441442 | 0.887978259 | 0.374552446 | 0.999371363 | Not Sig |
| ENSG00000197705 | KLHL14   | kelch like family member 14                                   | 57565     | 12.37019953 | 0.831721709 | 1.126111175 | 0.738578684 | 0.460162872 | 0.999371363 | Not Sig |
| ENSG00000214645 | NA       | NA                                                            | NA        | 1.563729114 | 0.832276213 | 2.019336449 | 0.412153316 | 0.680227052 | NA          | NA      |
| ENSG00000133134 | BEX2     | brain expressed X-linked 2                                    | 84707     | 116.463849  | 0.83237684  | 0.961029116 | 0.866130719 | 0.386418481 | 0.999371363 | Not Sig |
| ENSG00000175536 | LIPT2    | lipoyl(octanoyl) transferase 2                                | 387787    | 35.1030234  | 0.832656205 | 0.679066682 | 1.226177381 | 0.220131931 | 0.999371363 | Not Sig |
| ENSG00000015520 | NPC1L1   | NPC1 like intracellular cholesterol transporter 1             | 29881     | 71.08161172 | 0.832937374 | 1.01336528  | 0.821951759 | 0.411104353 | 0.999371363 | Not Sig |
| ENSG00000225936 | NA       | NA                                                            | NA        | 3.489035817 | 0.832977408 | 1.628507758 | 0.511497353 | 0.609002841 | NA          | NA      |
| ENSG00000207005 | RNU1-2   | RNA, U1 small nuclear 2                                       | 26870     | 45.19715365 | 0.833817998 | 0.632349192 | 1.318603721 | 0.187301629 | 0.999371363 | Not Sig |
| ENSG00000182612 | TSPAN10  | tetraspanin 10                                                | 83882     | 98.62314929 | 0.833875687 | 0.691237319 | 1.206352238 | 0.227681704 | 0.999371363 | Not Sig |
| ENSG00000223552 | NA       | NA                                                            | NA        | 37.4631309  | 0.834695924 | 0.806553333 | 1.034892412 | 0.300719159 | 0.999371363 | Not Sig |
| ENSG00000200629 | NA       | NA                                                            | NA        | 1.400349423 | 0.83540347  | 2.784327137 | 0.300037829 | 0.764148301 | NA          | NA      |
| ENSG00000136048 | DRAM1    | DNA damage regulated autophagy modulator 1                    | 55332     | 2981.640086 | 0.835567296 | 0.728923941 | 1.146302444 | 0.251670032 | 0.999371363 | Not Sig |
| ENSG00000110448 | CD5      | CD5 molecule                                                  | 921       | 178.3347517 | 0.835737275 | 0.737078218 | 1.133851543 | 0.256856826 | 0.999371363 | Not Sig |
| ENSG00000135824 | RGS8     | regulator of G protein signaling 8                            | 85397     | 1.037188814 | 0.836483124 | 2.313375971 | 0.361585464 | 0.717661829 | NA          | NA      |
| ENSG00000211717 | NA       | NA                                                            | NA        | 1.037188814 | 0.836483124 | 2.313375971 | 0.361585464 | 0.717661829 | NA          | NA      |
| ENSG00000214207 | NA       | NA                                                            | NA        | 1.037188814 | 0.836483124 | 2.313375971 | 0.361585464 | 0.717661829 | NA          | NA      |
| ENSG00000240534 | NA       | NA                                                            | NA        | 1.037188814 | 0.836483124 | 2.313375971 | 0.361585464 | 0.717661829 | NA          | NA      |
| ENSG00000248565 | NA       | NA                                                            | NA        | 1.037188814 | 0.836483124 | 2.313375971 | 0.361585464 | 0.717661829 | NA          | NA      |

|                 |              |                                                            |           |             |             |             |             |             |             |         |
|-----------------|--------------|------------------------------------------------------------|-----------|-------------|-------------|-------------|-------------|-------------|-------------|---------|
| ENSG00000156463 | SH3RF2       | SH3 domain containing ring finger 2                        | 153769    | 333.117689  | 0.836591504 | 0.510395995 | 1.639102798 | 0.101191852 | 0.999371363 | Not Sig |
| ENSG00000137869 | CYP19A1      | cytochrome P450 family 19 subfamily A member 1             | 1588      | 6.206826095 | 0.836707251 | 1.185929956 | 0.705528389 | 0.480481471 | NA          | NA      |
| ENSG00000160233 | LRRC3        | leucine rich repeat containing 3                           | 81543     | 83.27487113 | 0.837104653 | 0.847457456 | 0.98778369  | 0.323258597 | 0.999371363 | Not Sig |
| ENSG00000257875 | NA           | NA                                                         | NA        | 10.17783932 | 0.837240299 | 1.117177686 | 0.749424473 | 0.453601405 | 0.999371363 | Not Sig |
| ENSG00000039560 | RAI14        | retinoic acid induced 14                                   | 26064     | 3445.859375 | 0.837382793 | 0.538217181 | 1.555845528 | 0.119744829 | 0.999371363 | Not Sig |
| ENSG00000260608 | NA           | NA                                                         | NA        | 3.84421424  | 0.838524965 | 1.463459088 | 0.572974654 | 0.566661856 | NA          | NA      |
| ENSG00000197558 | SSPO         | SCO-spondin                                                | 23145     | 187.2600115 | 0.838610047 | 0.919496485 | 0.912031814 | 0.361751971 | 0.999371363 | Not Sig |
| ENSG00000182858 | ALG12        | ALG12, alpha-1,6-mannosyltransferase                       | 79087     | 849.5692159 | 0.838634459 | 0.594157831 | 1.411467484 | 0.158106817 | 0.999371363 | Not Sig |
| ENSG00000181773 | GPR3         | G protein-coupled receptor 3                               | 2827      | 16.36683458 | 0.839248161 | 0.811499918 | 1.034193771 | 0.301045585 | 0.999371363 | Not Sig |
| ENSG00000167861 | HID1         | HID1 domain containing                                     | 283987    | 1888.585588 | 0.840156279 | 0.656209356 | 1.280317435 | 0.200433518 | 0.999371363 | Not Sig |
| ENSG00000255158 | NA           | NA                                                         | NA        | 2.871522634 | 0.840880277 | 1.495647103 | 0.56221837  | 0.573967247 | NA          | NA      |
| ENSG00000220517 | NA           | NA                                                         | NA        | 19.07397445 | 0.841242256 | 0.922072191 | 0.912338822 | 0.361590384 | 0.999371363 | Not Sig |
| ENSG00000225151 | GOLGA2P7     | golgin A2 pseudogene 7                                     | 388152    | 346.1190467 | 0.841803206 | 0.631066462 | 1.333937481 | 0.182224347 | 0.999371363 | Not Sig |
| ENSG00000254718 | LOC101927702 | uncharacterized LOC101927702                               | 101927702 | 11.97430525 | 0.842534321 | 0.921330155 | 0.914476007 | 0.36046678  | 0.999371363 | Not Sig |
| ENSG00000122861 | PLAU         | plasminogen activator, urokinase                           | 5328      | 1640.955404 | 0.842663714 | 0.633047554 | 1.331122297 | 0.183148774 | 0.999371363 | Not Sig |
| ENSG00000063761 | ADCK1        | aarF domain containing kinase 1                            | 57143     | 223.3441093 | 0.842685936 | 0.469863452 | 1.793469853 | 0.072897827 | 0.999371363 | Not Sig |
| ENSG00000104808 | DHDH         | dihydrodiol dehydrogenase                                  | 27294     | 25.2863277  | 0.842732353 | 0.823112981 | 1.023835577 | 0.305912943 | 0.999371363 | Not Sig |
| ENSG00000165898 | ISCA2        | iron-sulfur cluster assembly 2                             | 122961    | 334.1899446 | 0.843589336 | 0.45973167  | 1.83496024  | 0.066511581 | 0.999371363 | Not Sig |
| ENSG00000076258 | FMO4         | flavin containing monooxygenase 4                          | 2329      | 114.6668453 | 0.843690722 | 0.630313575 | 1.338525388 | 0.18072523  | 0.999371363 | Not Sig |
| ENSG00000176945 | MUC20        | mucin 20, cell surface associated                          | 200958    | 744.8234514 | 0.843913914 | 0.759662945 | 1.110905725 | 0.266608931 | 0.999371363 | Not Sig |
| ENSG00000134376 | CRB1         | crumbs 1, cell polarity complex component                  | 23418     | 9.28701417  | 0.844804337 | 0.91318729  | 0.925116179 | 0.354905478 | 0.999371363 | Not Sig |
| ENSG00000133195 | SLC39A11     | solute carrier family 39 member 11                         | 201266    | 1070.920656 | 0.844981232 | 0.438038508 | 1.929011298 | 0.05372946  | 0.999371363 | Not Sig |
| ENSG00000264333 | NA           | NA                                                         | NA        | 0.896138443 | 0.845307327 | 2.697334447 | 0.313386176 | 0.753987286 | NA          | NA      |
| ENSG00000226284 | NA           | NA                                                         | NA        | 1.939764793 | 0.846196231 | 1.634470759 | 0.517718794 | 0.604654483 | NA          | NA      |
| ENSG00000134042 | MRO          | maestro                                                    | 83876     | 4.351846042 | 0.846557473 | 1.215809826 | 0.696291028 | 0.486246591 | NA          | NA      |
| ENSG00000135905 | DOCK10       | dedicator of cytokinesis 10                                | 55619     | 1996.283814 | 0.847277312 | 0.664071403 | 1.275882847 | 0.201996935 | 0.999371363 | Not Sig |
| ENSG00000172215 | CXCR6        | C-X-C motif chemokine receptor 6                           | 10663     | 106.3056382 | 0.847401939 | 0.723063883 | 1.171959987 | 0.241213121 | 0.999371363 | Not Sig |
| ENSG00000155980 | KIF5A        | kinesin family member 5A                                   | 3798      | 11.8797004  | 0.847607942 | 0.935029389 | 0.906504065 | 0.364669114 | 0.999371363 | Not Sig |
| ENSG00000223969 | NA           | NA                                                         | NA        | 2.860945216 | 0.847686227 | 1.96718835  | 0.43091259  | 0.666531929 | NA          | NA      |
| ENSG00000162757 | Clorf74      | chromosome 1 open reading frame 74                         | 148304    | 79.30668643 | 0.847717865 | 0.70617538  | 1.200435315 | 0.22997032  | 0.999371363 | Not Sig |
| ENSG00000233255 | NA           | NA                                                         | NA        | 7.428817158 | 0.847899181 | 1.118021684 | 0.758392429 | 0.448216089 | 0.999371363 | Not Sig |
| ENSG00000264314 | MIR548AT     | microRNA 548at                                             | 100847030 | 6.745782695 | 0.848210374 | 1.085411998 | 0.781463975 | 0.434529657 | 0.999371363 | Not Sig |
| ENSG00000261594 | TPBGL        | trophoblast glycoprotein like                              | 100507050 | 22.65862603 | 0.848241144 | 0.930016458 | 0.912071111 | 0.361731285 | 0.999371363 | Not Sig |
| ENSG00000114547 | ROPN1B       | rhophilin associated tail protein 1B                       | 152015    | 7.476914666 | 0.848526521 | 1.357041036 | 0.62527698  | 0.531789286 | 0.999371363 | Not Sig |
| ENSG00000163888 | CAMK2N2      | calcium/calmodulin dependent protein kinase II inhibitor 2 | 94032     | 11.32214758 | 0.848619001 | 1.112108442 | 0.763072168 | 0.445420357 | 0.999371363 | Not Sig |



|                 |          |                                                                      |           |             |             |             |             |             |             |         |
|-----------------|----------|----------------------------------------------------------------------|-----------|-------------|-------------|-------------|-------------|-------------|-------------|---------|
| ENSG00000167333 | TRIM68   | tripartite motif containing 68                                       | 55128     | 583.4629818 | 0.849138072 | 0.638765246 | 1.329342943 | 0.183734853 | 0.999371363 | Not Sig |
| ENSG00000204287 | HLA-DRA  | major histocompatibility complex, class II, DR alpha                 | 3122      | 22253.53027 | 0.850416454 | 0.946682796 | 0.898311934 | 0.369019272 | 0.999371363 | Not Sig |
| ENSG00000185437 | SH3BGR   | SH3 domain binding glutamate rich protein                            | 6450      | 51.38873535 | 0.850534532 | 0.62245049  | 1.366429212 | 0.171804285 | 0.999371363 | Not Sig |
| ENSG00000253851 | NA       | NA                                                                   | NA        | 3.575143286 | 0.85113931  | 1.475199246 | 0.576965662 | 0.563962652 | NA          | NA      |
| ENSG00000200888 | NA       | NA                                                                   | NA        | 8.67056882  | 0.851682356 | 0.978708562 | 0.870210386 | 0.384185441 | 0.999371363 | Not Sig |
| ENSG00000065618 | COL17A1  | collagen type XVII alpha 1 chain                                     | 1308      | 322.5712337 | 0.851877893 | 1.164750864 | 0.731382066 | 0.464545816 | 0.999371363 | Not Sig |
| ENSG00000174808 | BTC      | betacellulin                                                         | 685       | 130.0546254 | 0.852753515 | 0.469896022 | 1.814770662 | 0.069559161 | 0.999371363 | Not Sig |
| ENSG00000239316 | NA       | NA                                                                   | NA        | 5.641340249 | 0.852770195 | 1.184050301 | 0.7202145   | 0.471392938 | NA          | NA      |
| ENSG00000175287 | PHYHD1   | phytanoyl-CoA dioxygenase domain containing 1                        | 254295    | 289.4818724 | 0.852799802 | 0.60548256  | 1.408463032 | 0.158994006 | 0.999371363 | Not Sig |
| ENSG00000157851 | DPYSL5   | dihydropyrimidinase like 5                                           | 56896     | 1.139448357 | 0.853063256 | 2.941996871 | 0.289960626 | 0.77184636  | NA          | NA      |
| ENSG00000143578 | CREB3L4  | cAMP responsive element binding protein 3 like 4                     | 148327    | 309.3709922 | 0.853397962 | 0.601398665 | 1.419022042 | 0.15589259  | 0.999371363 | Not Sig |
| ENSG00000175279 | CENPS    | centromere protein S                                                 | 378708    | 85.66892375 | 0.853418802 | 0.583326478 | 1.463020854 | 0.143461673 | 0.999371363 | Not Sig |
| ENSG00000008441 | NFIX     | nuclear factor I X                                                   | 4784      | 5430.06951  | 0.853551859 | 0.93094293  | 0.916868082 | 0.359211771 | 0.999371363 | Not Sig |
| ENSG00000200394 | SNORA38B | small nucleolar RNA, H/ACA box 38B                                   | 100124536 | 3.101697187 | 0.85355393  | 1.443788921 | 0.591190248 | 0.554392956 | NA          | NA      |
| ENSG00000226790 | NA       | NA                                                                   | NA        | 2.131867577 | 0.854614607 | 1.842424201 | 0.463853334 | 0.642752829 | NA          | NA      |
| ENSG00000211777 | NA       | NA                                                                   | NA        | 11.8305476  | 0.854830174 | 1.149737994 | 0.743499979 | 0.457179034 | 0.999371363 | Not Sig |
| ENSG00000228078 | NA       | NA                                                                   | NA        | 7.253930652 | 0.855546677 | 1.217331749 | 0.702804867 | 0.482177364 | 0.999371363 | Not Sig |
| ENSG00000188763 | FZD9     | frizzled class receptor 9                                            | 8326      | 8.122890652 | 0.856634784 | 1.444739742 | 0.592933633 | 0.553225568 | 0.999371363 | Not Sig |
| ENSG00000205838 | TTC23L   | tetratricopeptide repeat domain 23 like                              | 153657    | 24.76169915 | 0.858118484 | 0.810207479 | 1.059134241 | 0.289538648 | 0.999371363 | Not Sig |
| ENSG00000242208 | NA       | NA                                                                   | NA        | 0.902575979 | 0.858253083 | 2.65511606  | 0.323245035 | 0.746509677 | NA          | NA      |
| ENSG00000169258 | GPRIN1   | G protein regulated inducer of neurite outgrowth 1                   | 114787    | 148.4819473 | 0.858440122 | 0.889470471 | 0.965113683 | 0.334487874 | 0.999371363 | Not Sig |
| ENSG00000224251 | NA       | NA                                                                   | NA        | 5.433698879 | 0.858468813 | 1.847264808 | 0.464724283 | 0.642128917 | NA          | NA      |
| ENSG00000057019 | DCBLD2   | discoidin, CUB and LCCL domain containing 2                          | 131566    | 1927.650159 | 0.858617186 | 0.571212816 | 1.503147621 | 0.132800981 | 0.999371363 | Not Sig |
| ENSG00000177542 | SLC25A22 | solute carrier family 25 member 22                                   | 79751     | 609.4409833 | 0.858967692 | 0.628755319 | 1.366139842 | 0.171895075 | 0.999371363 | Not Sig |
| ENSG00000252965 | NA       | NA                                                                   | NA        | 6.272907292 | 0.859020364 | 1.281495541 | 0.670326456 | 0.502649706 | NA          | NA      |
| ENSG00000262413 | NA       | NA                                                                   | NA        | 26.86562412 | 0.859217541 | 0.703299971 | 1.221694265 | 0.221823266 | 0.999371363 | Not Sig |
| ENSG00000271924 | NA       | NA                                                                   | NA        | 2.058070837 | 0.859368729 | 1.65190254  | 0.52022968  | 0.602903501 | NA          | NA      |
| ENSG00000169851 | PCDH7    | protocadherin 7                                                      | 5099      | 750.5231275 | 0.860833302 | 0.744180681 | 1.156753089 | 0.247373253 | 0.999371363 | Not Sig |
| ENSG00000152292 | SH2D6    | SH2 domain containing 6                                              | 284948    | 11.32892204 | 0.860923867 | 0.804808807 | 1.069724709 | 0.284743241 | 0.999371363 | Not Sig |
| ENSG00000269889 | NA       | NA                                                                   | NA        | 10.00330051 | 0.861119779 | 1.12123066  | 0.76801305  | 0.442479432 | 0.999371363 | Not Sig |
| ENSG00000140279 | DUOX2    | dual oxidase 2                                                       | 50506     | 187.8959482 | 0.861228977 | 0.944538379 | 0.911798818 | 0.361874633 | 0.999371363 | Not Sig |
| ENSG00000241832 | CECR3    | cat eye syndrome chromosome region, candidate 3 (non-protein coding) | 27442     | 9.658057864 | 0.86131073  | 1.33860213  | 0.64344043  | 0.519938356 | 0.999371363 | Not Sig |
| ENSG00000102978 | POLR2C   | RNA polymerase II subunit C                                          | 5432      | 1392.892178 | 0.862523888 | 0.47133886  | 1.829944357 | 0.06725826  | 0.999371363 | Not Sig |
| ENSG00000011638 | TMEM159  | transmembrane protein 159                                            | 57146     | 704.3580687 | 0.863274967 | 0.467562692 | 1.846329874 | 0.064844323 | 0.999371363 | Not Sig |
| ENSG00000224536 | NA       | NA                                                                   | NA        | 45.14627816 | 0.863384344 | 0.628480969 | 1.373763704 | 0.169515053 | 0.999371363 | Not Sig |

|                 |           |                                                                 |           |             |             |             |             |             |             |         |
|-----------------|-----------|-----------------------------------------------------------------|-----------|-------------|-------------|-------------|-------------|-------------|-------------|---------|
| ENSG00000177685 | CRACR2B   | calcium release activated channel regulator 2B                  | 283229    | 1020.205706 | 0.863387284 | 0.567365723 | 1.521747348 | 0.128072399 | 0.999371363 | Not Sig |
| ENSG00000228175 | NA        | NA                                                              | NA        | 6.928841813 | 0.863949174 | 1.066766688 | 0.809876408 | 0.418011212 | 0.999371363 | Not Sig |
| ENSG00000266144 | MIR4654   | microRNA 4654                                                   | 100616386 | 6.937874581 | 0.864001263 | 1.139737926 | 0.758070117 | 0.448409008 | 0.999371363 | Not Sig |
| ENSG00000163875 | MEAF6     | MYST/Esal associated factor 6                                   | 64769     | 1074.849772 | 0.864008676 | 0.494157399 | 1.748448323 | 0.080386427 | 0.999371363 | Not Sig |
| ENSG00000101230 | ISM1      | isthmin 1                                                       | 140862    | 182.4242107 | 0.864072995 | 0.648757672 | 1.331888673 | 0.182896774 | 0.999371363 | Not Sig |
| ENSG00000265386 | NA        | NA                                                              | NA        | 2.144742648 | 0.864090295 | 1.881199169 | 0.459329511 | 0.645997558 | NA          | NA      |
| ENSG00000224232 | NA        | NA                                                              | NA        | 4.197245302 | 0.864549485 | 1.455323116 | 0.594060161 | 0.552471876 | NA          | NA      |
| ENSG00000253081 | NA        | NA                                                              | NA        | 2.478876111 | 0.864628382 | 1.791401401 | 0.482654743 | 0.629340903 | NA          | NA      |
| ENSG00000238638 | NA        | NA                                                              | NA        | 7.003501433 | 0.865164991 | 1.11800074  | 0.773850105 | 0.439019438 | 0.999371363 | Not Sig |
| ENSG00000187559 | FOXD4L3   | forkhead box D4 like 3                                          | 286380    | 2.886695359 | 0.865706103 | 1.572053445 | 0.550684905 | 0.581849694 | NA          | NA      |
| ENSG00000147050 | KDM6A     | lysine demethylase 6A                                           | 7403      | 1656.855049 | 0.865778146 | 0.536422422 | 1.613985753 | 0.106530517 | 0.999371363 | Not Sig |
| ENSG00000162694 | EXTL2     | exostosin like glycosyltransferase 2                            | 2135      | 260.2749905 | 0.866485764 | 0.626199875 | 1.383720756 | 0.166443975 | 0.999371363 | Not Sig |
| ENSG00000238708 | NA        | NA                                                              | NA        | 1.145885892 | 0.867102936 | 2.885648864 | 0.300488028 | 0.763804927 | NA          | NA      |
| ENSG00000261071 | NA        | NA                                                              | NA        | 15.71259166 | 0.867327842 | 0.82662628  | 1.049238166 | 0.294068517 | 0.999371363 | Not Sig |
| ENSG00000176532 | PRR15     | proline rich 15                                                 | 222171    | 145.8223618 | 0.867400914 | 0.867010947 | 1.000449784 | 0.317092888 | 0.999371363 | Not Sig |
| ENSG00000182752 | PAPPA     | pappalysin 1                                                    | 5069      | 317.793918  | 0.867455423 | 0.725008964 | 1.196475445 | 0.231511075 | 0.999371363 | Not Sig |
| ENSG00000166347 | CYB5A     | cytochrome b5 type A                                            | 1528      | 2310.425806 | 0.868078777 | 0.617922283 | 1.404834882 | 0.160070384 | 0.999371363 | Not Sig |
| ENSG00000176115 | NA        | NA                                                              | NA        | 1.014444487 | 0.86961924  | 2.602360905 | 0.334165503 | 0.738254674 | NA          | NA      |
| ENSG00000244675 | NA        | NA                                                              | NA        | 1.014444487 | 0.86961924  | 2.602360905 | 0.334165503 | 0.738254674 | NA          | NA      |
| ENSG00000199962 | NA        | NA                                                              | NA        | 3.277189127 | 0.869757897 | 1.919956373 | 0.453009198 | 0.650542118 | NA          | NA      |
| ENSG00000229164 | NA        | NA                                                              | NA        | 390.5757655 | 0.869796667 | 0.739261704 | 1.176574766 | 0.239365274 | 0.999371363 | Not Sig |
| ENSG00000211698 | NA        | NA                                                              | NA        | 4.779841855 | 0.870157141 | 1.423269013 | 0.61137925  | 0.540948537 | NA          | NA      |
| ENSG00000259895 | LOC729652 | uncharacterized LOC729652                                       | 729652    | 8.945414555 | 0.870505697 | 1.231686084 | 0.706759383 | 0.47971602  | 0.999371363 | Not Sig |
| ENSG00000221058 | NA        | NA                                                              | NA        | 0.909013514 | 0.871834569 | 2.690986563 | 0.323983249 | 0.745950716 | NA          | NA      |
| ENSG00000240063 | NA        | NA                                                              | NA        | 0.909013514 | 0.871834569 | 2.690986563 | 0.323983249 | 0.745950716 | NA          | NA      |
| ENSG00000263584 | MIR4480   | microRNA 4480                                                   | 100616151 | 19.78865195 | 0.872992489 | 0.758721303 | 1.150610225 | 0.249892625 | 0.999371363 | Not Sig |
| ENSG00000259357 | NA        | NA                                                              | NA        | 3.914014917 | 0.873039205 | 1.430472815 | 0.610315132 | 0.541653075 | NA          | NA      |
| ENSG00000229251 | NA        | NA                                                              | NA        | 0.953783109 | 0.873280835 | 2.629733628 | 0.332079579 | 0.73982917  | NA          | NA      |
| ENSG00000257252 | NA        | NA                                                              | NA        | 9.204046517 | 0.87381137  | 1.022744478 | 0.854378966 | 0.392895046 | 0.999371363 | Not Sig |
| ENSG00000138308 | PLA2G12B  | phospholipase A2 group XIIB                                     | 84647     | 15.68216919 | 0.874384512 | 1.140999016 | 0.766332398 | 0.443478546 | 0.999371363 | Not Sig |
| ENSG00000181396 | OGFOD3    | 2-oxoglutarate and iron dependent oxygenase domain containing 3 | 79701     | 1009.688073 | 0.875905459 | 0.581380403 | 1.506596119 | 0.131914213 | 0.999371363 | Not Sig |
| ENSG00000255569 | NA        | NA                                                              | NA        | 4.63506553  | 0.876350838 | 1.80361642  | 0.485885373 | 0.627048439 | NA          | NA      |
| ENSG00000196345 | ZKSCAN7   | zinc finger with KRAB and SCAN domains 7                        | 55888     | 138.6095275 | 0.87659913  | 0.590930277 | 1.483422267 | 0.137962255 | 0.999371363 | Not Sig |
| ENSG00000167414 | GNG8      | G protein subunit gamma 8                                       | 94235     | 1.885125942 | 0.877093409 | 1.969763691 | 0.445278494 | 0.656118508 | NA          | NA      |
| ENSG00000235924 | NA        | NA                                                              | NA        | 1.885125942 | 0.877093409 | 1.969763691 | 0.445278494 | 0.656118508 | NA          | NA      |

|                 |              |                                                                        |           |             |             |             |             |             |             |         |
|-----------------|--------------|------------------------------------------------------------------------|-----------|-------------|-------------|-------------|-------------|-------------|-------------|---------|
| ENSG00000100258 | LMF2         | lipase maturation factor 2                                             | 91289     | 1852.278713 | 0.878077002 | 0.731649936 | 1.200132684 | 0.230087814 | 0.999371363 | Not Sig |
| ENSG00000202479 | NA           | NA                                                                     | NA        | 1.152323428 | 0.878494658 | 2.882724606 | 0.304744566 | 0.760560704 | NA          | NA      |
| ENSG00000213574 | NA           | NA                                                                     | NA        | 1.152323428 | 0.878494658 | 2.882724606 | 0.304744566 | 0.760560704 | NA          | NA      |
| ENSG00000168653 | NDUFS5       | NADH:ubiquinone oxidoreductase subunit S5                              | 4725      | 828.1076253 | 0.878526771 | 0.446469027 | 1.967721652 | 0.049100073 | 0.999371363 | Not Sig |
| ENSG00000169972 | PUSL1        | pseudouridylate synthase-like 1                                        | 126789    | 261.0500986 | 0.879043563 | 0.651710698 | 1.348824816 | 0.177393242 | 0.999371363 | Not Sig |
| ENSG00000108753 | NA           | NA                                                                     | NA        | 635.733013  | 0.879421645 | 0.860881133 | 1.021536669 | 0.307000245 | 0.999371363 | Not Sig |
| ENSG00000232542 | NA           | NA                                                                     | NA        | 23.83635773 | 0.880540112 | 0.889628426 | 0.989784146 | 0.322279636 | 0.999371363 | Not Sig |
| ENSG00000122687 | MRM2         | mitochondrial rRNA methyltransferase 2                                 | 29960     | 550.7794786 | 0.880760873 | 0.566623905 | 1.554401189 | 0.12008875  | 0.999371363 | Not Sig |
| ENSG00000231625 | NA           | NA                                                                     | NA        | 1.432537101 | 0.881629616 | 2.774325733 | 0.31778158  | 0.750650624 | NA          | NA      |
| ENSG00000169397 | RNASE3       | ribonuclease A family member 3                                         | 6037      | 1.020882023 | 0.882818113 | 2.319530348 | 0.380602096 | 0.703498526 | NA          | NA      |
| ENSG00000241043 | NA           | NA                                                                     | NA        | 12.70748026 | 0.883042738 | 0.880198641 | 1.003231199 | 0.315749323 | 0.999371363 | Not Sig |
| ENSG00000238621 | NA           | NA                                                                     | NA        | 7.583795907 | 0.883345802 | 1.02932347  | 0.858180959 | 0.390792549 | 0.999371363 | Not Sig |
| ENSG00000139508 | SLC46A3      | solute carrier family 46 member 3                                      | 283537    | 512.6052772 | 0.883417982 | 0.639738528 | 1.380904765 | 0.167308245 | 0.999371363 | Not Sig |
| ENSG00000073905 | NA           | NA                                                                     | NA        | 4.029564538 | 0.883548117 | 1.226704593 | 0.720261522 | 0.471363991 | NA          | NA      |
| ENSG00000115008 | IL1A         | interleukin 1 alpha                                                    | 3552      | 27.29716004 | 0.884359898 | 0.971439746 | 0.910360011 | 0.362632679 | 0.999371363 | Not Sig |
| ENSG00000250073 | LOC101929340 | uncharacterized LOC101929340                                           | 101929340 | 18.84424636 | 0.884485746 | 1.022991227 | 0.864607361 | 0.387254331 | 0.999371363 | Not Sig |
| ENSG00000158106 | RHPN1        | rhophilin Rho GTPase binding protein 1                                 | 114822    | 669.0025459 | 0.885053991 | 0.640381201 | 1.382073661 | 0.166949085 | 0.999371363 | Not Sig |
| ENSG00000133816 | MICAL2       | microtubule associated amoxygase, calponin and LIM domain containing 2 | 9645      | 5146.357735 | 0.885609271 | 0.435063955 | 2.035584105 | 0.041792135 | 0.999371363 | Not Sig |
| ENSG00000106153 | CHCHD2       | coiled-coil-helix-coiled-coil-helix domain containing 2                | 51142     | 2708.096876 | 0.885770351 | 0.480108965 | 1.844936077 | 0.065046838 | 0.999371363 | Not Sig |
| ENSG00000172456 | FGGY         | FGGY carbohydrate kinase domain containing                             | 55277     | 496.8459612 | 0.885830664 | 0.481400125 | 1.840113073 | 0.065751638 | 0.999371363 | Not Sig |
| ENSG00000212587 | SNORA40C     | small nucleolar RNA, H/ACA box 40C                                     | 109616968 | 0.960220644 | 0.885998467 | 2.626969659 | 0.337270156 | 0.735913255 | NA          | NA      |
| ENSG00000240665 | NA           | NA                                                                     | NA        | 0.960220644 | 0.885998467 | 2.626969659 | 0.337270156 | 0.735913255 | NA          | NA      |
| ENSG00000255650 | FAM222A-AS1  | FAM222A antisense RNA 1                                                | 84983     | 0.960220644 | 0.885998467 | 2.626969659 | 0.337270156 | 0.735913255 | NA          | NA      |
| ENSG00000222545 | NA           | NA                                                                     | NA        | 3.926585936 | 0.886691374 | 1.240392357 | 0.714847499 | 0.474703281 | NA          | NA      |
| ENSG00000121653 | MAPK8IP1     | mitogen-activated protein kinase 8 interacting protein 1               | 9479      | 298.1346564 | 0.886716577 | 0.706175538 | 1.255660285 | 0.209239164 | 0.999371363 | Not Sig |
| ENSG00000179218 | CALR         | calreticulin                                                           | 811       | 19283.32958 | 0.887033964 | 0.437400302 | 2.027968338 | 0.04256348  | 0.999371363 | Not Sig |
| ENSG00000091490 | SEL1L3       | SEL1L family member 3                                                  | 23231     | 4018.414512 | 0.887123008 | 0.623014925 | 1.423919352 | 0.154469819 | 0.999371363 | Not Sig |
| ENSG00000103226 | NOMO3        | NODAL modulator 3                                                      | 408050    | 218.7583519 | 0.887212394 | 1.137890165 | 0.779699501 | 0.435567773 | 0.999371363 | Not Sig |
| ENSG00000238408 | NA           | NA                                                                     | NA        | 2.587573189 | 0.887215435 | 1.701944589 | 0.521295136 | 0.602161189 | NA          | NA      |
| ENSG00000176399 | DMRTA1       | DMRT like family A1                                                    | 63951     | 149.0843352 | 0.887321088 | 0.940125817 | 0.943832274 | 0.345255365 | 0.999371363 | Not Sig |
| ENSG00000204869 | LOC400706    | uncharacterized LOC400706                                              | 400706    | 1.158760964 | 0.887391916 | 2.933071219 | 0.302547006 | 0.762235106 | NA          | NA      |
| ENSG00000204869 | IGFL4        | IGF like family member 4                                               | 444882    | 1.158760964 | 0.887391916 | 2.933071219 | 0.302547006 | 0.762235106 | NA          | NA      |
| ENSG00000208023 | MIR185       | microRNA 185                                                           | 406961    | 2.484898639 | 0.887839656 | 1.655216085 | 0.536388973 | 0.591689751 | NA          | NA      |
| ENSG00000235957 | NA           | NA                                                                     | NA        | 1.352148108 | 0.887868464 | 2.348188854 | 0.378107776 | 0.705350532 | NA          | NA      |
| ENSG00000176809 | LRRC37A3     | leucine rich repeat containing 37 member A3                            | 374819    | 157.4303231 | 0.888935685 | 0.453845923 | 1.958672845 | 0.050151113 | 0.999371363 | Not Sig |

|                 |              |                                                       |           |             |             |             |             |             |             |         |
|-----------------|--------------|-------------------------------------------------------|-----------|-------------|-------------|-------------|-------------|-------------|-------------|---------|
| ENSG00000259015 | NA           | NA                                                    | NA        | 8.646319856 | 0.889241191 | 0.933335489 | 0.952756219 | 0.340713602 | 0.999371363 | Not Sig |
| ENSG00000248405 | PRR5-ARHGAP8 | PRR5-ARHGAP8 readthrough                              | 553158    | 35.41143386 | 0.890365412 | 0.838013758 | 1.062471115 | 0.288021864 | 0.999371363 | Not Sig |
| ENSG00000187980 | PLA2G2C      | phospholipase A2 group IIC                            | 391013    | 6.327209516 | 0.890940859 | 1.145163651 | 0.77800309  | 0.436567191 | NA          | NA      |
| ENSG00000240524 | NA           | NA                                                    | NA        | 1.840052296 | 0.891447475 | 1.841455439 | 0.484099401 | 0.628315327 | NA          | NA      |
| ENSG00000188277 | C15orf62     | chromosome 15 open reading frame 62                   | 643338    | 31.26700385 | 0.891726111 | 0.603836632 | 1.476767164 | 0.139738061 | 0.999371363 | Not Sig |
| ENSG00000247311 | NA           | NA                                                    | NA        | 2.82260226  | 0.892068201 | 1.491622161 | 0.598052391 | 0.549804976 | NA          | NA      |
| ENSG00000164535 | DAGLB        | diacylglycerol lipase beta                            | 221955    | 903.932487  | 0.892813112 | 0.524206834 | 1.703169539 | 0.088536345 | 0.999371363 | Not Sig |
| ENSG00000243955 | GSTA1        | glutathione S-transferase alpha 1                     | 2938      | 225.4133212 | 0.893303577 | 0.718072952 | 1.244029    | 0.21348889  | 0.999371363 | Not Sig |
| ENSG00000177700 | POLR2L       | RNA polymerase II subunit L                           | 5441      | 1259.841848 | 0.89400084  | 0.618842992 | 1.444632728 | 0.148561075 | 0.999371363 | Not Sig |
| ENSG00000256968 | NA           | NA                                                    | NA        | 1.027319558 | 0.894204049 | 2.597523835 | 0.34425249  | 0.73065641  | NA          | NA      |
| ENSG00000228013 | LOC101928101 | uncharacterized LOC101928101                          | 101928101 | 8.608553098 | 0.895713778 | 0.917362512 | 0.976401113 | 0.32886573  | 0.999371363 | Not Sig |
| ENSG00000228013 | IL6R-AS1     | IL6R antisense RNA 1                                  | 111216281 | 8.608553098 | 0.895713778 | 0.917362512 | 0.976401113 | 0.32886573  | 0.999371363 | Not Sig |
| ENSG00000211937 | NA           | NA                                                    | NA        | 463.4997545 | 0.895866168 | 1.047326298 | 0.855384009 | 0.392338593 | 0.999371363 | Not Sig |
| ENSG00000188817 | SNTN         | sentan, cilia apical structure protein                | 132203    | 77.25742141 | 0.896176034 | 1.230395637 | 0.728364119 | 0.466390722 | 0.999371363 | Not Sig |
| ENSG00000270593 | NA           | NA                                                    | NA        | 3.51589931  | 0.896288663 | 1.372769985 | 0.652905201 | 0.513817396 | NA          | NA      |
| ENSG00000242013 | NA           | NA                                                    | NA        | 250.0842674 | 0.896679583 | 0.773524778 | 1.159212489 | 0.246369582 | 0.999371363 | Not Sig |
| ENSG00000264667 | NA           | NA                                                    | NA        | 1.993977738 | 0.89689145  | 1.901499043 | 0.471675993 | 0.637158075 | NA          | NA      |
| ENSG00000050393 | MCUR1        | mitochondrial calcium uniporter regulator 1           | 63933     | 755.9915796 | 0.897137379 | 0.43180698  | 2.077635193 | 0.037742972 | 0.999371363 | Not Sig |
| ENSG00000180438 | TPRXL        | tetrapeptide repeat homeobox like                     | 348825    | 3.185502578 | 0.897175341 | 1.53413842  | 0.584807296 | 0.558677298 | NA          | NA      |
| ENSG00000266044 | NA           | NA                                                    | NA        | 1.846489831 | 0.897895086 | 1.841379849 | 0.487620784 | 0.625818471 | NA          | NA      |
| ENSG00000115525 | ST3GAL5      | ST3 beta-galactoside alpha-2,3-sialyltransferase 5    | 8869      | 1535.614579 | 0.898713027 | 0.660313751 | 1.361039394 | 0.173501241 | 0.999371363 | Not Sig |
| ENSG00000269910 | NA           | NA                                                    | NA        | 3.688429197 | 0.8987841   | 1.320099767 | 0.680845586 | 0.495969202 | NA          | NA      |
| ENSG00000188215 | DCUN1D3      | defective in cullin neddylation 1 domain containing 3 | 123879    | 822.8630379 | 0.899813848 | 0.428923599 | 2.097841782 | 0.035919124 | 0.979068249 | Not Sig |
| ENSG00000183439 | TRIM61       | tripartite motif containing 61                        | 391712    | 7.76822691  | 0.902110384 | 1.173331099 | 0.768845541 | 0.44198501  | 0.999371363 | Not Sig |
| ENSG00000189108 | IL1RAPL2     | interleukin 1 receptor accessory protein like 2       | 26280     | 4.921663156 | 0.902355494 | 1.899531623 | 0.475041049 | 0.634757716 | NA          | NA      |
| ENSG00000235189 | NA           | NA                                                    | NA        | 2.54898084  | 0.902611555 | 1.563715989 | 0.577222182 | 0.563789374 | NA          | NA      |
| ENSG00000162009 | SSTR5        | somatostatin receptor 5                               | 6755      | 2.880203163 | 0.90292203  | 2.339606922 | 0.385928944 | 0.699549294 | NA          | NA      |
| ENSG00000225008 | NA           | NA                                                    | NA        | 18.27001402 | 0.90294329  | 0.943893521 | 0.956615624 | 0.3387613   | 0.999371363 | Not Sig |
| ENSG00000213362 | NA           | NA                                                    | NA        | 3.191940114 | 0.90300212  | 1.568966876 | 0.575539314 | 0.56492661  | NA          | NA      |
| ENSG00000134460 | IL2RA        | interleukin 2 receptor subunit alpha                  | 3559      | 136.6582219 | 0.903488955 | 0.578029636 | 1.563049536 | 0.118040944 | 0.999371363 | Not Sig |
| ENSG00000164304 | CAGE1        | cancer antigen 1                                      | 285782    | 2.629215116 | 0.903563326 | 1.703005925 | 0.53056969  | 0.595717004 | NA          | NA      |
| ENSG00000183484 | GPR132       | G protein-coupled receptor 132                        | 29933     | 238.517284  | 0.903675189 | 0.652714272 | 1.384488171 | 0.166209028 | 0.999371363 | Not Sig |
| ENSG00000135931 | ARMC9        | armadillo repeat containing 9                         | 80210     | 677.8805935 | 0.903863331 | 0.514585008 | 1.756489828 | 0.079004807 | 0.999371363 | Not Sig |
| ENSG00000102409 | BEX4         | brain expressed X-linked 4                            | 56271     | 356.0901084 | 0.903990136 | 0.821018882 | 1.101058886 | 0.270871029 | 0.999371363 | Not Sig |
| ENSG00000196963 | NA           | NA                                                    | NA        | 187.2206611 | 0.903990348 | 0.64412171  | 1.403446481 | 0.160483741 | 0.999371363 | Not Sig |

|                 |           |                                               |           |             |             |             |             |             |             |         |
|-----------------|-----------|-----------------------------------------------|-----------|-------------|-------------|-------------|-------------|-------------|-------------|---------|
| ENSG00000169718 | DUS1L     | dihydrouridine synthase 1 like                | 64118     | 1755.087135 | 0.904523181 | 0.589220605 | 1.535118041 | 0.124754836 | 0.999371363 | Not Sig |
| ENSG00000184911 | DMRTC1B   | DMRT like family C1B                          | 728656    | 0.879831651 | 0.904844723 | 3.12675429  | 0.289387857 | 0.772284587 | NA          | NA      |
| ENSG00000233837 | NA        | NA                                            | NA        | 0.879831651 | 0.904844723 | 3.12675429  | 0.289387857 | 0.772284587 | NA          | NA      |
| ENSG00000259384 | GH1       | growth hormone 1                              | 2688      | 0.879831651 | 0.904844723 | 3.12675429  | 0.289387857 | 0.772284587 | NA          | NA      |
| ENSG00000251606 | NA        | NA                                            | NA        | 2.97622365  | 0.905329359 | 1.451252973 | 0.623826015 | 0.532741853 | NA          | NA      |
| ENSG00000251520 | NA        | NA                                            | NA        | 1.769272269 | 0.905540832 | 2.565950079 | 0.352906644 | 0.724158429 | NA          | NA      |
| ENSG00000143811 | PYCR2     | pyrroline-5-carboxylate reductase 2           | 29920     | 765.0806496 | 0.905917607 | 0.586621238 | 1.544297321 | 0.122516321 | 0.999371363 | Not Sig |
| ENSG00000170819 | BFSP2     | beaded filament structural protein 2          | 8419      | 3.243147244 | 0.906096212 | 1.54515419  | 0.586411517 | 0.557599007 | NA          | NA      |
| ENSG00000197932 | NA        | NA                                            | NA        | 169.2079158 | 0.906460722 | 0.534421889 | 1.696151939 | 0.08985711  | 0.999371363 | Not Sig |
| ENSG00000005889 | ZFX       | zinc finger protein, X-linked                 | 7543      | 1844.023139 | 0.907923072 | 0.426235246 | 2.130098533 | 0.033163479 | 0.944859041 | Not Sig |
| ENSG00000056558 | TRAF1     | TNF receptor associated factor 1              | 7185      | 800.0025152 | 0.908344943 | 0.471099455 | 1.928138386 | 0.053837915 | 0.999371363 | Not Sig |
| ENSG00000211870 | NA        | NA                                            | NA        | 10.89233718 | 0.908455988 | 1.099688644 | 0.826102909 | 0.408745718 | 0.999371363 | Not Sig |
| ENSG00000265809 | NA        | NA                                            | NA        | 3.441687563 | 0.908933728 | 1.383780556 | 0.656848172 | 0.511278547 | NA          | NA      |
| ENSG00000007952 | NOX1      | NADPH oxidase 1                               | 27035     | 6.302472547 | 0.909196767 | 1.215849309 | 0.747787378 | 0.454588417 | NA          | NA      |
| ENSG00000226386 | PARD3-AS1 | PARD3 antisense RNA 1                         | 100505601 | 3.758948934 | 0.909351229 | 1.385163662 | 0.656493708 | 0.511506514 | NA          | NA      |
| ENSG00000217539 | NA        | NA                                            | NA        | 1.566430876 | 0.909766224 | 2.31092311  | 0.393680872 | 0.693816666 | NA          | NA      |
| ENSG00000116273 | PHF13     | PHD finger protein 13                         | 148479    | 505.1835267 | 0.910035691 | 0.561967796 | 1.619373384 | 0.10536695  | 0.999371363 | Not Sig |
| ENSG00000272702 | NA        | NA                                            | NA        | 6.644050377 | 0.910166716 | 1.312715212 | 0.693346666 | 0.488092024 | 0.999371363 | Not Sig |
| ENSG00000224530 | NA        | NA                                            | NA        | 5.470782167 | 0.910377258 | 1.30734575  | 0.696355388 | 0.486206294 | NA          | NA      |
| ENSG00000184232 | OAF       | out at first homolog                          | 220323    | 358.7953099 | 0.910746007 | 0.656698435 | 1.386855759 | 0.16548575  | 0.999371363 | Not Sig |
| ENSG00000060656 | PTPRU     | protein tyrosine phosphatase, receptor type U | 10076     | 2412.665288 | 0.910786365 | 0.694869538 | 1.310730022 | 0.189948992 | 0.999371363 | Not Sig |
| ENSG00000188477 | NA        | NA                                            | NA        | 3.961640992 | 0.910973403 | 1.722949114 | 0.52872914  | 0.59699336  | NA          | NA      |
| ENSG00000101255 | TRIB3     | tribbles pseudokinase 3                       | 57761     | 409.8178081 | 0.911311792 | 0.419596699 | 2.171875505 | 0.029865055 | 0.897727832 | Not Sig |
| ENSG00000207963 | MIR569    | microRNA 569                                  | 693154    | 4.963305082 | 0.911336522 | 1.182795264 | 0.770493888 | 0.441006979 | NA          | NA      |
| ENSG00000198753 | PLXNB3    | plexin B3                                     | 5365      | 323.9203405 | 0.911351602 | 0.880311422 | 1.035260453 | 0.300547293 | 0.999371363 | Not Sig |
| ENSG00000206652 | RNU1-1    | RNA, U1 small nuclear 1                       | 26871     | 78.52271127 | 0.911408872 | 0.782583983 | 1.164614779 | 0.244174959 | 0.999371363 | Not Sig |
| ENSG00000177628 | GBA       | glucosylceramidase beta                       | 2629      | 1186.063223 | 0.912730379 | 0.520800999 | 1.752551131 | 0.079679086 | 0.999371363 | Not Sig |
| ENSG00000207587 | MIR544A   | microRNA 544a                                 | 664613    | 1.174348695 | 0.912965851 | 2.925842628 | 0.312035187 | 0.755013782 | NA          | NA      |
| ENSG00000213406 | NA        | NA                                            | NA        | 2.790403684 | 0.913740138 | 1.582402069 | 0.577438665 | 0.563643161 | NA          | NA      |
| ENSG00000256616 | NA        | NA                                            | NA        | 5.361409792 | 0.91406163  | 1.081443679 | 0.845223517 | 0.397986055 | NA          | NA      |
| ENSG00000267390 | NA        | NA                                            | NA        | 19.63933453 | 0.914105451 | 0.871783359 | 1.04854657  | 0.294386858 | 0.999371363 | Not Sig |
| ENSG00000178878 | APOLD1    | apolipoprotein L domain containing 1          | 81575     | 279.1915409 | 0.914755047 | 0.495709567 | 1.84534475  | 0.064987405 | 0.999371363 | Not Sig |
| ENSG00000155542 | SETD9     | SET domain containing 9                       | 133383    | 51.94179638 | 0.914912943 | 0.572609421 | 1.597795827 | 0.110088424 | 0.999371363 | Not Sig |
| ENSG00000125726 | CD70      | CD70 molecule                                 | 970       | 10.19955629 | 0.915597446 | 0.849454542 | 1.077865149 | 0.28109394  | 0.999371363 | Not Sig |
| ENSG00000105953 | OGDH      | oxoglutarate dehydrogenase                    | 4967      | 4212.410557 | 0.915796547 | 0.627708001 | 1.458953123 | 0.14457801  | 0.999371363 | Not Sig |

|                 |              |                                                       |           |             |             |             |             |             |             |         |
|-----------------|--------------|-------------------------------------------------------|-----------|-------------|-------------|-------------|-------------|-------------|-------------|---------|
| ENSG00000221604 | MIR1293      | microRNA 1293                                         | 100302220 | 2.908709728 | 0.915799765 | 1.396064831 | 0.655986559 | 0.511832772 | NA          | NA      |
| ENSG00000242068 | NA           | NA                                                    | NA        | 3.326248897 | 0.916097914 | 1.902118209 | 0.481619864 | 0.630076012 | NA          | NA      |
| ENSG00000260894 | NA           | NA                                                    | NA        | 2.083362209 | 0.916222739 | 1.660436728 | 0.551796237 | 0.581087966 | NA          | NA      |
| ENSG00000225370 | NA           | NA                                                    | NA        | 1.572868412 | 0.916966008 | 2.070652318 | 0.442839196 | 0.65788205  | NA          | NA      |
| ENSG00000233859 | NA           | NA                                                    | NA        | 1.380610911 | 0.917247354 | 2.039273206 | 0.449791304 | 0.652860929 | NA          | NA      |
| ENSG00000265807 | NA           | NA                                                    | NA        | 197.0013613 | 0.917252413 | 0.717800109 | 1.277866082 | 0.201296649 | 0.999371363 | Not Sig |
| ENSG00000257624 | NA           | NA                                                    | NA        | 6.903220168 | 0.917688416 | 1.291944672 | 0.71031557  | 0.477508467 | 0.999371363 | Not Sig |
| ENSG00000231073 | NA           | NA                                                    | NA        | 0.937476317 | 0.91806222  | 2.349763798 | 0.390704045 | 0.696016009 | NA          | NA      |
| ENSG00000211644 | NA           | NA                                                    | NA        | 70.9437758  | 0.918248818 | 0.912962992 | 1.005789748 | 0.31451672  | 0.999371363 | Not Sig |
| ENSG00000208024 | MIR199A2     | microRNA 199a-2                                       | 406977    | 0.886269187 | 0.918351578 | 3.08236181  | 0.297937632 | 0.765750766 | NA          | NA      |
| ENSG00000226080 | NA           | NA                                                    | NA        | 0.886269187 | 0.918351578 | 3.08236181  | 0.297937632 | 0.765750766 | NA          | NA      |
| ENSG00000238728 | MIR1972-1    | microRNA 1972-1                                       | 100302243 | 0.886269187 | 0.918351578 | 3.08236181  | 0.297937632 | 0.765750766 | NA          | NA      |
| ENSG00000135069 | PSAT1        | phosphoserine aminotransferase 1                      | 29968     | 134.5967265 | 0.91983484  | 0.990407874 | 0.928743464 | 0.35302205  | 0.999371363 | Not Sig |
| ENSG00000140526 | ABHD2        | abhydrolase domain containing 2                       | 11057     | 8769.154369 | 0.919868899 | 0.463001423 | 1.986751775 | 0.046949911 | 0.999371363 | Not Sig |
| ENSG00000116833 | NR5A2        | nuclear receptor subfamily 5 group A member 2         | 2494      | 111.5846083 | 0.920734667 | 0.588764868 | 1.563841047 | 0.117854902 | 0.999371363 | Not Sig |
| ENSG00000132561 | MATN2        | matrilin 2                                            | 4147      | 471.5162241 | 0.921285905 | 0.67816237  | 1.358503427 | 0.174303996 | 0.999371363 | Not Sig |
| ENSG00000244242 | IFITM10      | interferon induced transmembrane protein 10           | 402778    | 179.9980125 | 0.921842924 | 0.52532634  | 1.754800501 | 0.079293438 | 0.999371363 | Not Sig |
| ENSG00000100197 | CYP2D6       | cytochrome P450 family 2 subfamily D member 6         | 1565      | 28.3214217  | 0.923567695 | 0.771174235 | 1.197612229 | 0.231068013 | 0.999371363 | Not Sig |
| ENSG00000100197 | LOC107987478 | cytochrome P450 2D6-like                              | 107987478 | 28.3214217  | 0.923567695 | 0.771174235 | 1.197612229 | 0.231068013 | 0.999371363 | Not Sig |
| ENSG00000100197 | LOC107987479 | cytochrome P450 2D6-like                              | 107987479 | 28.3214217  | 0.923567695 | 0.771174235 | 1.197612229 | 0.231068013 | 0.999371363 | Not Sig |
| ENSG00000243449 | C4orf48      | chromosome 4 open reading frame 48                    | 401115    | 155.9532122 | 0.923649645 | 0.653429277 | 1.413541875 | 0.157496458 | 0.999371363 | Not Sig |
| ENSG00000185339 | TCN2         | transcobalamin 2                                      | 6948      | 937.2518348 | 0.923904585 | 0.853998144 | 1.081857838 | 0.279315702 | 0.999371363 | Not Sig |
| ENSG00000207965 | MIR629       | microRNA 629                                          | 693214    | 3.367432053 | 0.925142579 | 1.377439422 | 0.671639395 | 0.501813292 | NA          | NA      |
| ENSG00000123080 | CDKN2C       | cyclin dependent kinase inhibitor 2C                  | 1031      | 257.7497401 | 0.925400604 | 0.497492067 | 1.860131379 | 0.062866941 | 0.999371363 | Not Sig |
| ENSG00000168077 | SCARA3       | scavenger receptor class A member 3                   | 51435     | 656.1110258 | 0.925466833 | 0.859995657 | 1.076129659 | 0.281869273 | 0.999371363 | Not Sig |
| ENSG00000223865 | HLA-DPB1     | major histocompatibility complex, class II, DP beta 1 | 3115      | 8208.352662 | 0.925512462 | 0.960831365 | 0.963241309 | 0.335426439 | 0.999371363 | Not Sig |
| ENSG00000237233 | NA           | NA                                                    | NA        | 1.387048446 | 0.925625257 | 2.038623874 | 0.454044156 | 0.649797045 | NA          | NA      |
| ENSG00000185436 | IFNLR1       | interferon lambda receptor 1                          | 163702    | 333.5733166 | 0.925992558 | 0.641763059 | 1.442888531 | 0.149051875 | 0.999371363 | Not Sig |
| ENSG00000267801 | NA           | NA                                                    | NA        | 34.60722336 | 0.926255575 | 0.725104961 | 1.277408961 | 0.201457903 | 0.999371363 | Not Sig |
| ENSG00000145945 | FAM50B       | family with sequence similarity 50 member B           | 26240     | 215.1575565 | 0.92633481  | 0.749522952 | 1.23589919  | 0.216496038 | 0.999371363 | Not Sig |
| ENSG00000260000 | NA           | NA                                                    | NA        | 25.00249058 | 0.926734458 | 0.672528632 | 1.377985135 | 0.168207878 | 0.999371363 | Not Sig |
| ENSG00000109861 | CTSC         | cathepsin C                                           | 1075      | 3738.787994 | 0.927614564 | 0.650768428 | 1.425414207 | 0.154037504 | 0.999371363 | Not Sig |
| ENSG00000172955 | ADH6         | alcohol dehydrogenase 6 (class V)                     | 130       | 17.38503532 | 0.927638609 | 1.767261116 | 0.524901839 | 0.599651431 | 0.999371363 | Not Sig |
| ENSG00000266232 | MIR3178      | microRNA 3178                                         | 100422974 | 4.497979606 | 0.927828627 | 1.520503253 | 0.610211537 | 0.541721688 | NA          | NA      |
| ENSG00000237349 | NA           | NA                                                    | NA        | 2.259312919 | 0.92783257  | 1.789887228 | 0.518374876 | 0.60419674  | NA          | NA      |

|                 |           |                                       |           |             |             |             |             |             |             |         |
|-----------------|-----------|---------------------------------------|-----------|-------------|-------------|-------------|-------------|-------------|-------------|---------|
| ENSG00000133321 | RARRES3   | retinoic acid receptor responder 3    | 5920      | 926.0859468 | 0.928059397 | 0.975802263 | 0.951073217 | 0.34156721  | 0.999371363 | Not Sig |
| ENSG00000235058 | NA        | NA                                    | NA        | 5.538490144 | 0.928512637 | 1.289006442 | 0.720332038 | 0.471320584 | NA          | NA      |
| ENSG00000228339 | NA        | NA                                    | NA        | 1.88139017  | 0.929024384 | 1.784246949 | 0.520681504 | 0.602588661 | NA          | NA      |
| ENSG00000196095 | NA        | NA                                    | NA        | 1.668690419 | 0.929126602 | 2.275184772 | 0.40837413  | 0.682999023 | NA          | NA      |
| ENSG00000259802 | NA        | NA                                    | NA        | 22.6208637  | 0.929209245 | 0.78080091  | 1.190071929 | 0.234018122 | 0.999371363 | Not Sig |
| ENSG00000239911 | NA        | NA                                    | NA        | 53.12337016 | 0.929581819 | 1.049153804 | 0.88603007  | 0.375601324 | 0.999371363 | Not Sig |
| ENSG00000163344 | PMVK      | phosphomevalonate kinase              | 10654     | 786.9830503 | 0.929590961 | 0.70414492  | 1.320169945 | 0.186778284 | 0.999371363 | Not Sig |
| ENSG00000170236 | USP50     | ubiquitin specific peptidase 50       | 373509    | 7.809393774 | 0.9297182   | 1.005417875 | 0.924708246 | 0.355117689 | 0.999371363 | Not Sig |
| ENSG00000185008 | ROBO2     | roundabout guidance receptor 2        | 6092      | 1089.046867 | 0.930207246 | 0.902505766 | 1.030693964 | 0.302684356 | 0.999371363 | Not Sig |
| ENSG00000266549 | NA        | NA                                    | NA        | 0.892706723 | 0.932691043 | 3.117224015 | 0.299205652 | 0.764783137 | NA          | NA      |
| ENSG00000212789 | NA        | NA                                    | NA        | 2.59701654  | 0.933138211 | 1.495852267 | 0.623817092 | 0.532747713 | NA          | NA      |
| ENSG00000211575 | MIR760    | microRNA 760                          | 100126348 | 1.335841316 | 0.934081501 | 2.742376506 | 0.340610233 | 0.733397025 | NA          | NA      |
| ENSG00000141524 | TMC6      | transmembrane channel like 6          | 11322     | 3889.667739 | 0.934493192 | 0.695572198 | 1.343488418 | 0.179113874 | 0.999371363 | Not Sig |
| ENSG00000266907 | NA        | NA                                    | NA        | 1.778975909 | 0.93493114  | 2.541149031 | 0.36791669  | 0.712935355 | NA          | NA      |
| ENSG00000204539 | CDSN      | corneodesmosin                        | 1041      | 5.104189838 | 0.93504495  | 1.169469318 | 0.799546372 | 0.423973669 | NA          | NA      |
| ENSG00000140391 | TSPAN3    | tetraspanin 3                         | 10099     | 5373.509619 | 0.935366985 | 0.56565005  | 1.653614254 | 0.098205915 | 0.999371363 | Not Sig |
| ENSG00000179958 | DCTPP1    | dCTP pyrophosphatase 1                | 79077     | 303.3798903 | 0.935835426 | 0.4203051   | 2.226562146 | 0.025976551 | 0.836630971 | Not Sig |
| ENSG00000231181 | NA        | NA                                    | NA        | 13.39709478 | 0.936105543 | 0.940549586 | 0.995275058 | 0.319602505 | 0.999371363 | Not Sig |
| ENSG00000129235 | TXNDC17   | thioredoxin domain containing 17      | 84817     | 570.349489  | 0.936189812 | 0.610955759 | 1.532336505 | 0.125439417 | 0.999371363 | Not Sig |
| ENSG00000181019 | NQO1      | NAD(P)H quinone dehydrogenase 1       | 1728      | 1602.614328 | 0.936269859 | 0.926616018 | 1.010418384 | 0.312294884 | 0.999371363 | Not Sig |
| ENSG00000252118 | NA        | NA                                    | NA        | 20.38954765 | 0.936561783 | 0.782924553 | 1.19623504  | 0.231604851 | 0.999371363 | Not Sig |
| ENSG00000169594 | BNC1      | basonuclin 1                          | 646       | 4.613690418 | 0.936770373 | 1.751638653 | 0.534796587 | 0.592790524 | NA          | NA      |
| ENSG00000234478 | NA        | NA                                    | NA        | 7.307280889 | 0.93713885  | 1.171367264 | 0.80003845  | 0.42368852  | 0.999371363 | Not Sig |
| ENSG00000150773 | PIH1D2    | PIH1 domain containing 2              | 120379    | 46.85266097 | 0.937372678 | 0.603504678 | 1.553215264 | 0.120371716 | 0.999371363 | Not Sig |
| ENSG00000112486 | CCR6      | C-C motif chemokine receptor 6        | 1235      | 7.737036113 | 0.937404101 | 1.1929381   | 0.785794419 | 0.431987937 | 0.999371363 | Not Sig |
| ENSG00000161653 | NAGS      | N-acetylglutamate synthase            | 162417    | 125.1839763 | 0.937994591 | 0.61419466  | 1.527194312 | 0.1267127   | 0.999371363 | Not Sig |
| ENSG00000255007 | NA        | NA                                    | NA        | 34.61245235 | 0.938457856 | 1.243169444 | 0.754891347 | 0.450314178 | 0.999371363 | Not Sig |
| ENSG00000204386 | NEU1      | neuraminidase 1                       | 4758      | 1817.753566 | 0.938649858 | 0.66684261  | 1.407603301 | 0.15924857  | 0.999371363 | Not Sig |
| ENSG00000235636 | NA        | NA                                    | NA        | 4.574228716 | 0.938689582 | 1.20974565  | 0.775939622 | 0.437784637 | NA          | NA      |
| ENSG00000264462 | MIR3648-2 | microRNA 3648-2                       | 103504731 | 37828.52546 | 0.939319652 | 0.713536692 | 1.316427961 | 0.188030443 | 0.999371363 | Not Sig |
| ENSG00000042832 | TG        | thyroglobulin                         | 7038      | 51.47721369 | 0.939653676 | 0.715508036 | 1.313267815 | 0.18909272  | 0.999371363 | Not Sig |
| ENSG00000196576 | PLXNB2    | plexin B2                             | 23654     | 13648.54866 | 0.94008199  | 0.683275893 | 1.375845392 | 0.168869505 | 0.999371363 | Not Sig |
| ENSG00000101251 | SEL1L2    | SEL1L2 ERAD E3 ligase adaptor subunit | 80343     | 1.50535449  | 0.941069786 | 2.025308733 | 0.464654979 | 0.642178554 | NA          | NA      |
| ENSG00000142765 | SYTL1     | synaptotagmin like 1                  | 84958     | 1265.373334 | 0.941266672 | 0.570022012 | 1.651281272 | 0.098681155 | 0.999371363 | Not Sig |
| ENSG00000247679 | NA        | NA                                    | NA        | 39.18082247 | 0.941275232 | 0.720075973 | 1.307188779 | 0.191148606 | 0.999371363 | Not Sig |

|                 |              |                                                |           |             |             |             |             |             |             |         |
|-----------------|--------------|------------------------------------------------|-----------|-------------|-------------|-------------|-------------|-------------|-------------|---------|
| ENSG00000243723 | NA           | NA                                             | NA        | 2.057601169 | 0.941776059 | 1.850903753 | 0.508819574 | 0.610878698 | NA          | NA      |
| ENSG00000169131 | ZNF354A      | zinc finger protein 354A                       | 6940      | 346.9980032 | 0.941994323 | 0.488604475 | 1.927928151 | 0.053864064 | 0.999371363 | Not Sig |
| ENSG00000211843 | NA           | NA                                             | NA        | 4.324375695 | 0.942325749 | 1.479790133 | 0.636796886 | 0.524257155 | NA          | NA      |
| ENSG00000256338 | NA           | NA                                             | NA        | 6.651142492 | 0.942676492 | 1.081884752 | 0.871328014 | 0.383575079 | 0.999371363 | Not Sig |
| ENSG00000092009 | CMA1         | chymase 1                                      | 1215      | 1.444693112 | 0.943069134 | 2.032051967 | 0.464096957 | 0.642578282 | NA          | NA      |
| ENSG00000260928 | NA           | NA                                             | NA        | 1.444693112 | 0.943069134 | 2.032051967 | 0.464096957 | 0.642578282 | NA          | NA      |
| ENSG00000252438 | NA           | NA                                             | NA        | 19.92294967 | 0.943519625 | 0.79531124  | 1.186352685 | 0.235483049 | 0.999371363 | Not Sig |
| ENSG00000261575 | NA           | NA                                             | NA        | 2.169469678 | 0.944007086 | 1.813655432 | 0.520499688 | 0.602715345 | NA          | NA      |
| ENSG00000073111 | MCM2         | minichromosome maintenance complex component 2 | 4171      | 597.4781008 | 0.944162385 | 0.764352628 | 1.235244506 | 0.21673952  | 0.999371363 | Not Sig |
| ENSG00000258744 | NA           | NA                                             | NA        | 14.22020026 | 0.944594342 | 0.8669193   | 1.089598931 | 0.275889854 | 0.999371363 | Not Sig |
| ENSG00000214433 | NA           | NA                                             | NA        | 27.04007115 | 0.944784809 | 0.637625079 | 1.481724669 | 0.13841357  | 0.999371363 | Not Sig |
| ENSG00000211835 | NA           | NA                                             | NA        | 0.988683447 | 0.945027983 | 3.010701566 | 0.313889624 | 0.753604871 | NA          | NA      |
| ENSG00000224837 | NA           | NA                                             | NA        | 0.988683447 | 0.945027983 | 3.010701566 | 0.313889624 | 0.753604871 | NA          | NA      |
| ENSG00000259570 | NA           | NA                                             | NA        | 0.988683447 | 0.945027983 | 3.010701566 | 0.313889624 | 0.753604871 | NA          | NA      |
| ENSG00000258471 | LOC101929718 | uncharacterized LOC101929718                   | 101929718 | 1.055782361 | 0.945081746 | 2.624702035 | 0.360072013 | 0.718793281 | NA          | NA      |
| ENSG00000212568 | NA           | NA                                             | NA        | 1.180786231 | 0.945576439 | 2.50166855  | 0.377978305 | 0.70544671  | NA          | NA      |
| ENSG00000153904 | DDAH1        | dimethylarginine dimethylaminohydrolase 1      | 23576     | 3105.167187 | 0.945891923 | 0.498265791 | 1.898368181 | 0.057647598 | 0.999371363 | Not Sig |
| ENSG00000230596 | NA           | NA                                             | NA        | 1.569696981 | 0.945916814 | 2.263785985 | 0.417847279 | 0.676058781 | NA          | NA      |
| ENSG00000185523 | SPATA45      | spermatogenesis associated 45                  | 149643    | 2.516323495 | 0.945929135 | 1.846156786 | 0.512377465 | 0.608386859 | NA          | NA      |
| ENSG00000233250 | NA           | NA                                             | NA        | 1.852208307 | 0.946925831 | 1.90493749  | 0.497090238 | 0.619125418 | NA          | NA      |
| ENSG00000100625 | SIX4         | SIX homeobox 4                                 | 51804     | 420.9406916 | 0.948079055 | 0.790810757 | 1.1988697   | 0.230578615 | 0.999371363 | Not Sig |
| ENSG00000113905 | HRG          | histidine rich glycoprotein                    | 3273      | 0.577747429 | 0.949615041 | 4.021855377 | 0.236113672 | 0.813344465 | NA          | NA      |
| ENSG00000139269 | INHBE        | inhibin beta E subunit                         | 83729     | 0.577747429 | 0.949615041 | 4.021855377 | 0.236113672 | 0.813344465 | NA          | NA      |
| ENSG00000164434 | FABP7        | fatty acid binding protein 7                   | 2173      | 0.577747429 | 0.949615041 | 4.021855377 | 0.236113672 | 0.813344465 | NA          | NA      |
| ENSG00000201296 | NA           | NA                                             | NA        | 0.535679598 | 0.949615041 | 4.021855377 | 0.236113672 | 0.813344465 | NA          | NA      |
| ENSG00000201382 | NA           | NA                                             | NA        | 0.577747429 | 0.949615041 | 4.021855377 | 0.236113672 | 0.813344465 | NA          | NA      |
| ENSG00000207356 | NA           | NA                                             | NA        | 0.577747429 | 0.949615041 | 4.021855377 | 0.236113672 | 0.813344465 | NA          | NA      |
| ENSG00000207416 | NA           | NA                                             | NA        | 0.577747429 | 0.949615041 | 4.021855377 | 0.236113672 | 0.813344465 | NA          | NA      |
| ENSG00000217769 | NA           | NA                                             | NA        | 0.535679598 | 0.949615041 | 4.021855377 | 0.236113672 | 0.813344465 | NA          | NA      |
| ENSG00000221227 | MIR1305      | microRNA 1305                                  | 100302270 | 0.577747429 | 0.949615041 | 4.021855377 | 0.236113672 | 0.813344465 | NA          | NA      |
| ENSG00000222747 | NA           | NA                                             | NA        | 0.577747429 | 0.949615041 | 4.021855377 | 0.236113672 | 0.813344465 | NA          | NA      |
| ENSG00000228237 | EFCAB14-AS1  | EFCAB14 antisense RNA 1                        | 100130197 | 0.577747429 | 0.949615041 | 4.021855377 | 0.236113672 | 0.813344465 | NA          | NA      |
| ENSG00000232258 | TMEM114      | transmembrane protein 114                      | 283953    | 0.535679598 | 0.949615041 | 4.021855377 | 0.236113672 | 0.813344465 | NA          | NA      |
| ENSG00000233996 | NA           | NA                                             | NA        | 0.577747429 | 0.949615041 | 4.021855377 | 0.236113672 | 0.813344465 | NA          | NA      |
| ENSG00000234107 | NA           | NA                                             | NA        | 0.535679598 | 0.949615041 | 4.021855377 | 0.236113672 | 0.813344465 | NA          | NA      |



|                 |           |                                    |           |             |             |             |             |             |             |         |
|-----------------|-----------|------------------------------------|-----------|-------------|-------------|-------------|-------------|-------------|-------------|---------|
| ENSG00000237180 | NA        | NA                                 | NA        | 0.535679598 | 0.949615041 | 4.021855377 | 0.236113672 | 0.813344465 | NA          | NA      |
| ENSG00000238322 | NA        | NA                                 | NA        | 0.577747429 | 0.949615041 | 4.021855377 | 0.236113672 | 0.813344465 | NA          | NA      |
| ENSG00000241710 | NA        | NA                                 | NA        | 0.577747429 | 0.949615041 | 4.021855377 | 0.236113672 | 0.813344465 | NA          | NA      |
| ENSG00000242067 | NA        | NA                                 | NA        | 0.535679598 | 0.949615041 | 4.021855377 | 0.236113672 | 0.813344465 | NA          | NA      |
| ENSG00000251824 | NA        | NA                                 | NA        | 0.535679598 | 0.949615041 | 4.021855377 | 0.236113672 | 0.813344465 | NA          | NA      |
| ENSG00000253040 | NA        | NA                                 | NA        | 0.577747429 | 0.949615041 | 4.021855377 | 0.236113672 | 0.813344465 | NA          | NA      |
| ENSG00000258864 | NA        | NA                                 | NA        | 0.577747429 | 0.949615041 | 4.021855377 | 0.236113672 | 0.813344465 | NA          | NA      |
| ENSG00000263393 | NA        | NA                                 | NA        | 0.577747429 | 0.949615041 | 4.021855377 | 0.236113672 | 0.813344465 | NA          | NA      |
| ENSG00000263436 | MIR3158-1 | microRNA 3158-1                    | 100422900 | 0.535679598 | 0.949615041 | 4.021855377 | 0.236113672 | 0.813344465 | NA          | NA      |
| ENSG00000263436 | MIR3158-2 | microRNA 3158-2                    | 100423033 | 0.535679598 | 0.949615041 | 4.021855377 | 0.236113672 | 0.813344465 | NA          | NA      |
| ENSG00000263960 | NA        | NA                                 | NA        | 0.577747429 | 0.949615041 | 4.021855377 | 0.236113672 | 0.813344465 | NA          | NA      |
| ENSG00000264155 | NA        | NA                                 | NA        | 0.577747429 | 0.949615041 | 4.021855377 | 0.236113672 | 0.813344465 | NA          | NA      |
| ENSG00000264542 | NA        | NA                                 | NA        | 0.535679598 | 0.949615041 | 4.021855377 | 0.236113672 | 0.813344465 | NA          | NA      |
| ENSG00000265496 | NA        | NA                                 | NA        | 0.535679598 | 0.949615041 | 4.021855377 | 0.236113672 | 0.813344465 | NA          | NA      |
| ENSG00000269125 | NA        | NA                                 | NA        | 0.535679598 | 0.949615041 | 4.021855377 | 0.236113672 | 0.813344465 | NA          | NA      |
| ENSG00000269242 | NA        | NA                                 | NA        | 0.535679598 | 0.949615041 | 4.021855377 | 0.236113672 | 0.813344465 | NA          | NA      |
| ENSG00000147183 | CPXCR1    | CPX chromosome region, candidate 1 | 53336     | 0.519372806 | 0.949615041 | 4.021855377 | 0.236113672 | 0.813344465 | NA          | NA      |
| ENSG00000174992 | ZG16      | zymogen granule protein 16         | 653808    | 0.519372806 | 0.949615041 | 4.021855377 | 0.236113672 | 0.813344465 | NA          | NA      |
| ENSG00000198028 | ZNF560    | zinc finger protein 560            | 147741    | 0.519372806 | 0.949615041 | 4.021855377 | 0.236113672 | 0.813344465 | NA          | NA      |
| ENSG00000218976 | NA        | NA                                 | NA        | 0.519372806 | 0.949615041 | 4.021855377 | 0.236113672 | 0.813344465 | NA          | NA      |
| ENSG00000220139 | NA        | NA                                 | NA        | 0.519372806 | 0.949615041 | 4.021855377 | 0.236113672 | 0.813344465 | NA          | NA      |
| ENSG00000229093 | NA        | NA                                 | NA        | 0.519372806 | 0.949615041 | 4.021855377 | 0.236113672 | 0.813344465 | NA          | NA      |
| ENSG00000233125 | NA        | NA                                 | NA        | 0.519372806 | 0.949615041 | 4.021855377 | 0.236113672 | 0.813344465 | NA          | NA      |
| ENSG00000239731 | NA        | NA                                 | NA        | 0.519372806 | 0.949615041 | 4.021855377 | 0.236113672 | 0.813344465 | NA          | NA      |
| ENSG00000242902 | NA        | NA                                 | NA        | 0.519372806 | 0.949615041 | 4.021855377 | 0.236113672 | 0.813344465 | NA          | NA      |
| ENSG00000254269 | NA        | NA                                 | NA        | 0.519372806 | 0.949615041 | 4.021855377 | 0.236113672 | 0.813344465 | NA          | NA      |
| ENSG00000259165 | NA        | NA                                 | NA        | 0.519372806 | 0.949615041 | 4.021855377 | 0.236113672 | 0.813344465 | NA          | NA      |
| ENSG00000260990 | NA        | NA                                 | NA        | 0.519372806 | 0.949615041 | 4.021855377 | 0.236113672 | 0.813344465 | NA          | NA      |
| ENSG00000261759 | NA        | NA                                 | NA        | 0.519372806 | 0.949615041 | 4.021855377 | 0.236113672 | 0.813344465 | NA          | NA      |
| ENSG00000268705 | NA        | NA                                 | NA        | 0.519372806 | 0.949615041 | 4.021855377 | 0.236113672 | 0.813344465 | NA          | NA      |
| ENSG00000270981 | NA        | NA                                 | NA        | 0.519372806 | 0.949615041 | 4.021855377 | 0.236113672 | 0.813344465 | NA          | NA      |
| ENSG00000151500 | THYN1     | thymocyte nuclear protein 1        | 29087     | 375.3783311 | 0.950411873 | 0.474200894 | 2.004238889 | 0.045044477 | 0.999371363 | Not Sig |
| ENSG00000165194 | PCDH19    | protocadherin 19                   | 57526     | 20.51868147 | 0.950453445 | 0.739865237 | 1.284630495 | 0.198921437 | 0.999371363 | Not Sig |
| ENSG00000268112 | NA        | NA                                 | NA        | 1.858645842 | 0.950708182 | 1.840983602 | 0.516413173 | 0.605565868 | NA          | NA      |
| ENSG00000256967 | NA        | NA                                 | NA        | 6.632395186 | 0.950789039 | 1.297865904 | 0.732578794 | 0.463815369 | 0.999371363 | Not Sig |

|                 |              |                                                                 |           |             |             |             |             |             |             |         |
|-----------------|--------------|-----------------------------------------------------------------|-----------|-------------|-------------|-------------|-------------|-------------|-------------|---------|
| ENSG00000211924 | NA           | NA                                                              | NA        | 2.05734088  | 0.950856521 | 1.709162235 | 0.556329003 | 0.577985964 | NA          | NA      |
| ENSG00000251911 | NA           | NA                                                              | NA        | 3.425231437 | 0.950867144 | 2.002574363 | 0.47482239  | 0.634913573 | NA          | NA      |
| ENSG00000224237 | NA           | NA                                                              | NA        | 2.3950445   | 0.951490852 | 1.749871223 | 0.543749071 | 0.586614159 | NA          | NA      |
| ENSG00000196082 | NA           | NA                                                              | NA        | 0.950351388 | 0.951752327 | 2.671449386 | 0.356268149 | 0.72163976  | NA          | NA      |
| ENSG00000102043 | MTMR8        | myotubularin related protein 8                                  | 55613     | 50.08211436 | 0.95201625  | 0.707626966 | 1.345364572 | 0.17850753  | 0.999371363 | Not Sig |
| ENSG00000238141 | BRWD1-AS1    | BRWD1 antisense RNA 1                                           | 100874093 | 3.7008346   | 0.952026997 | 1.345151221 | 0.70774719  | 0.479102266 | NA          | NA      |
| ENSG00000185046 | ANKS1B       | ankyrin repeat and sterile alpha motif domain containing 1B     | 56899     | 122.9816687 | 0.953051381 | 0.688898568 | 1.383442244 | 0.166529305 | 0.999371363 | Not Sig |
| ENSG00000273204 | NA           | NA                                                              | NA        | 13.28627781 | 0.953762518 | 0.923213632 | 1.033089726 | 0.301561911 | 0.999371363 | Not Sig |
| ENSG00000232969 | NA           | NA                                                              | NA        | 2.889231506 | 0.95590873  | 1.725989695 | 0.553832235 | 0.579693665 | NA          | NA      |
| ENSG00000173467 | AGR3         | anterior gradient 3, protein disulphide isomerase family member | 155465    | 1066.341446 | 0.955951777 | 0.626819229 | 1.52508368  | 0.127238227 | 0.999371363 | Not Sig |
| ENSG00000254854 | LOC102724301 | uncharacterized LOC102724301                                    | 102724301 | 5.700072044 | 0.95609301  | 1.133739975 | 0.843308899 | 0.399055707 | NA          | NA      |
| ENSG00000100228 | RAB36        | RAB36, member RAS oncogene family                               | 9609      | 324.4151783 | 0.956700062 | 0.827300862 | 1.156411295 | 0.247512964 | 0.999371363 | Not Sig |
| ENSG00000221890 | NPTXR        | neuronal pentraxin receptor                                     | 23467     | 334.2121844 | 0.956742975 | 0.903997423 | 1.058347016 | 0.289897266 | 0.999371363 | Not Sig |
| ENSG00000235159 | NA           | NA                                                              | NA        | 9.597299604 | 0.957134899 | 0.920853962 | 1.03939923  | 0.298619102 | 0.999371363 | Not Sig |
| ENSG00000260872 | NA           | NA                                                              | NA        | 12.48129417 | 0.957265297 | 1.781354421 | 0.537380594 | 0.591004745 | 0.999371363 | Not Sig |
| ENSG00000256379 | NA           | NA                                                              | NA        | 2.477731146 | 0.957750397 | 1.544481788 | 0.620111162 | 0.535184604 | NA          | NA      |
| ENSG00000186792 | HYAL3        | hyaluronoglucosaminidase 3                                      | 8372      | 64.11705073 | 0.958338112 | 0.584067853 | 1.64079928  | 0.100839088 | 0.999371363 | Not Sig |
| ENSG00000171502 | COL24A1      | collagen type XXIV alpha 1 chain                                | 255631    | 254.058323  | 0.95876439  | 0.763844896 | 1.255182034 | 0.209412686 | 0.999371363 | Not Sig |
| ENSG00000186510 | CLCNKA       | chloride voltage-gated channel Ka                               | 1187      | 27.13816419 | 0.960855633 | 0.943280257 | 1.01863219  | 0.308377616 | 0.999371363 | Not Sig |
| ENSG00000214851 | LINC00612    | long intergenic non-protein coding RNA 612                      | 253128    | 9.609715905 | 0.961461835 | 1.048293679 | 0.917168399 | 0.359054403 | 0.999371363 | Not Sig |
| ENSG00000155875 | SAXO1        | stabilizer of axonemal microtubules 1                           | 158297    | 4.262840539 | 0.961680361 | 1.408449766 | 0.682793511 | 0.494737331 | NA          | NA      |
| ENSG00000178568 | ERBB4        | erb-b2 receptor tyrosine kinase 4                               | 2066      | 169.9522429 | 0.962640837 | 0.904230056 | 1.064597257 | 0.287058222 | 0.999371363 | Not Sig |
| ENSG00000196502 | SULT1A1      | sulfotransferase family 1A member 1                             | 6817      | 731.8016594 | 0.963475607 | 0.736711694 | 1.307805502 | 0.190939287 | 0.999371363 | Not Sig |
| ENSG00000204219 | TCEA3        | transcription elongation factor A3                              | 6920      | 1145.412454 | 0.964361735 | 0.649480096 | 1.484821076 | 0.137591227 | 0.999371363 | Not Sig |
| ENSG00000171365 | CLCN5        | chloride voltage-gated channel 5                                | 1184      | 525.9688926 | 0.964784038 | 0.426243198 | 2.263459084 | 0.023607404 | 0.78440116  | Not Sig |
| ENSG00000119866 | BCL11A       | B-cell CLL/lymphoma 11A                                         | 53335     | 371.6256641 | 0.965011304 | 0.662891338 | 1.45576092  | 0.145458722 | 0.999371363 | Not Sig |
| ENSG00000188596 | CFAP54       | cilia and flagella associated protein 54                        | 144535    | 318.7870944 | 0.966812752 | 0.720229885 | 1.342366892 | 0.179477064 | 0.999371363 | Not Sig |
| ENSG00000122824 | NUDT10       | nudix hydrolase 10                                              | 170685    | 1.922728044 | 0.96739829  | 1.784217532 | 0.542197502 | 0.587682456 | NA          | NA      |
| ENSG00000265062 | NA           | NA                                                              | NA        | 1.983389422 | 0.967459709 | 1.838923125 | 0.526101225 | 0.598817877 | NA          | NA      |
| ENSG00000266107 | MIR4525      | microRNA 4525                                                   | 100616196 | 2.252709768 | 0.967479219 | 2.110010308 | 0.458518717 | 0.646579819 | NA          | NA      |
| ENSG00000207501 | RNVU1-14     | RNA, variant U1 small nuclear 14                                | 101954266 | 124.4040617 | 0.968110558 | 0.602327185 | 1.60728352  | 0.107992188 | 0.999371363 | Not Sig |
| ENSG00000118514 | ALDH8A1      | aldehyde dehydrogenase 8 family member A1                       | 64577     | 12.44707037 | 0.96949133  | 0.802629051 | 1.207894642 | 0.227087791 | 0.999371363 | Not Sig |
| ENSG00000232298 | NA           | NA                                                              | NA        | 12.55711941 | 0.970103213 | 1.198997082 | 0.809095558 | 0.418460183 | 0.999371363 | Not Sig |
| ENSG00000201772 | SNORA5C      | small nucleolar RNA, H/ACA box 5C                               | 677796    | 51.85172679 | 0.97015442  | 0.826688    | 1.17354361  | 0.240577879 | 0.999371363 | Not Sig |
| ENSG00000215447 | NA           | NA                                                              | NA        | 201.6532789 | 0.970248625 | 0.599931892 | 1.617264625 | 0.105821172 | 0.999371363 | Not Sig |

|                 |              |                                                                  |           |             |             |             |             |             |             |         |
|-----------------|--------------|------------------------------------------------------------------|-----------|-------------|-------------|-------------|-------------|-------------|-------------|---------|
| ENSG00000232518 | NA           | NA                                                               | NA        | 1.001558518 | 0.970491763 | 3.003077154 | 0.323165777 | 0.746569697 | NA          | NA      |
| ENSG00000159231 | CBR3         | carbonyl reductase 3                                             | 874       | 125.3560592 | 0.970985816 | 0.765397826 | 1.268602787 | 0.20458277  | 0.999371363 | Not Sig |
| ENSG00000167157 | PRRX2        | paired related homeobox 2                                        | 51450     | 32.82092331 | 0.971134793 | 0.809021524 | 1.200381898 | 0.229991056 | 0.999371363 | Not Sig |
| ENSG00000019582 | CD74         | CD74 molecule                                                    | 972       | 68295.53042 | 0.971645597 | 0.966068635 | 1.005772842 | 0.314524854 | 0.999371363 | Not Sig |
| ENSG00000184840 | TMED9        | transmembrane p24 trafficking protein 9                          | 54732     | 3094.865769 | 0.97193194  | 0.565095402 | 1.719943106 | 0.085442784 | 0.999371363 | Not Sig |
| ENSG00000229836 | NA           | NA                                                               | NA        | 3.342224458 | 0.972351072 | 1.895607242 | 0.512949651 | 0.607986541 | NA          | NA      |
| ENSG00000261664 | TTC39A-AS1   | TTC39A antisense RNA 1                                           | 102724097 | 36.0102406  | 0.972823784 | 0.798491562 | 1.218326944 | 0.223099755 | 0.999371363 | Not Sig |
| ENSG00000264672 | SEPT4-AS1    | SEPT4 antisense RNA 1                                            | 101927688 | 35.38665506 | 0.972947547 | 0.644015881 | 1.510750862 | 0.130851938 | 0.999371363 | Not Sig |
| ENSG00000163263 | Clorf189     | chromosome 1 open reading frame 189                              | 388701    | 9.539427513 | 0.973858985 | 1.067590926 | 0.912202382 | 0.36166219  | 0.999371363 | Not Sig |
| ENSG00000111199 | TRPV4        | transient receptor potential cation channel subfamily V member 4 | 59341     | 244.2037477 | 0.974762004 | 0.565985673 | 1.722237946 | 0.085026423 | 0.999371363 | Not Sig |
| ENSG00000152078 | TMEM56       | transmembrane protein 56                                         | 148534    | 398.7426399 | 0.975104352 | 0.727183813 | 1.340932423 | 0.179942394 | 0.999371363 | Not Sig |
| ENSG00000033011 | ALG1         | ALG1, chitobiosyldiphosphodolichol beta-mannosyltransferase      | 56052     | 618.9279571 | 0.975483434 | 0.531674702 | 1.834737349 | 0.066544616 | 0.999371363 | Not Sig |
| ENSG00000197728 | RPS26        | ribosomal protein S26                                            | 6231      | 1481.488708 | 0.975876101 | 0.626652285 | 1.557284836 | 0.119402874 | 0.999371363 | Not Sig |
| ENSG00000197728 | LOC101929876 | 40S ribosomal protein S26                                        | 101929876 | 1481.488708 | 0.975876101 | 0.626652285 | 1.557284836 | 0.119402874 | 0.999371363 | Not Sig |
| ENSG00000174348 | PODN         | podocan                                                          | 127435    | 1567.494636 | 0.97639959  | 0.720096512 | 1.355928786 | 0.175121828 | 0.999371363 | Not Sig |
| ENSG00000011007 | ELOA         | elongin A                                                        | 6924      | 2841.179426 | 0.976405416 | 0.546056403 | 1.788103594 | 0.073759296 | 0.999371363 | Not Sig |
| ENSG00000217075 | NA           | NA                                                               | NA        | 3.693572433 | 0.976480088 | 1.707139644 | 0.571997781 | 0.567323478 | NA          | NA      |
| ENSG00000254897 | NA           | NA                                                               | NA        | 12.44134747 | 0.976515438 | 0.930175271 | 1.049818747 | 0.293801454 | 0.999371363 | Not Sig |
| ENSG00000207970 | MIR660       | microRNA 660                                                     | 724030    | 1.834771873 | 0.976777225 | 2.603163457 | 0.375227004 | 0.707491649 | NA          | NA      |
| ENSG00000027847 | B4GALT7      | beta-1,4-galactosyltransferase 7                                 | 11285     | 536.1906412 | 0.977831309 | 0.540947895 | 1.807625685 | 0.070664778 | 0.999371363 | Not Sig |
| ENSG00000211787 | NA           | NA                                                               | NA        | 9.760413491 | 0.978307549 | 1.138710703 | 0.859136168 | 0.390265395 | 0.999371363 | Not Sig |
| ENSG00000210140 | NA           | NA                                                               | NA        | 0.921169525 | 0.978661164 | 2.650252463 | 0.36927092  | 0.711925799 | NA          | NA      |
| ENSG00000250037 | NA           | NA                                                               | NA        | 0.921169525 | 0.978661164 | 2.650252463 | 0.36927092  | 0.711925799 | NA          | NA      |
| ENSG00000237637 | NA           | NA                                                               | NA        | 3.196319569 | 0.979350324 | 1.587157943 | 0.617046544 | 0.537204026 | NA          | NA      |
| ENSG00000197445 | NA           | NA                                                               | NA        | 3.758629559 | 0.979774548 | 1.460859366 | 0.670683688 | 0.502422056 | NA          | NA      |
| ENSG00000229901 | LOC101929901 | uncharacterized LOC101929901                                     | 101929901 | 11.20363563 | 0.979952403 | 1.176325473 | 0.833062299 | 0.404809595 | 0.999371363 | Not Sig |
| ENSG00000211885 | NA           | NA                                                               | NA        | 8.374339969 | 0.980870481 | 1.041937744 | 0.941390679 | 0.346504688 | 0.999371363 | Not Sig |
| ENSG00000214222 | NA           | NA                                                               | NA        | 2.054169449 | 0.981967821 | 1.660651405 | 0.591314841 | 0.554309488 | NA          | NA      |
| ENSG00000248568 | NA           | NA                                                               | NA        | 3.267459266 | 0.981990689 | 1.722540642 | 0.57008274  | 0.568621581 | NA          | NA      |
| ENSG00000271607 | NA           | NA                                                               | NA        | 2.564098904 | 0.982004748 | 1.593949166 | 0.616082852 | 0.537839839 | NA          | NA      |
| ENSG00000256720 | NA           | NA                                                               | NA        | 13.82747013 | 0.982262238 | 0.995957111 | 0.986249535 | 0.324010677 | 0.999371363 | Not Sig |
| ENSG00000166557 | TMED3        | transmembrane p24 trafficking protein 3                          | 23423     | 2225.082559 | 0.982281455 | 0.670770657 | 1.464407313 | 0.143082691 | 0.999371363 | Not Sig |
| ENSG00000197785 | ATAD3A       | ATPase family, AAA domain containing 3A                          | 55210     | 544.7675677 | 0.984022355 | 0.577129377 | 1.705029054 | 0.088189006 | 0.999371363 | Not Sig |
| ENSG00000113734 | BNIP1        | BCL2 interacting protein 1                                       | 662       | 184.170141  | 0.984703469 | 0.493015034 | 1.997309212 | 0.045791603 | 0.999371363 | Not Sig |
| ENSG00000202469 | NA           | NA                                                               | NA        | 4.066021674 | 0.984765034 | 1.210064697 | 0.813811887 | 0.415752724 | NA          | NA      |

|                 |              |                                                           |           |             |             |                 |             |             |             |         |
|-----------------|--------------|-----------------------------------------------------------|-----------|-------------|-------------|-----------------|-------------|-------------|-------------|---------|
| ENSG00000169439 | SDC2         | syndecan 2                                                | 6383      | 1480.611078 | 0.985538411 | 0.715402828     | 1.377599266 | 0.168327048 | 0.999371363 | Not Sig |
| ENSG00000259674 | NA           | NA                                                        | NA        | 19.30308305 | 0.986061076 | 1.105205605     | 0.892196956 | 0.372287374 | 0.999371363 | Not Sig |
| ENSG00000238594 | NA           | NA                                                        | NA        | 3.069312279 | 0.986071843 | 2.325476088     | 0.424030093 | 0.671543867 | NA          | NA      |
| ENSG00000247746 | USP51        | ubiquitin specific peptidase 51                           | 158880    | 117.0967229 | 0.986832001 | 0.617764481     | 1.597424311 | 0.110171157 | 0.999371363 | Not Sig |
| ENSG00000082126 | MPP4         | membrane palmitoylated protein 4                          | 58538     | 2.791560797 | 0.987525554 | 1.586448601     | 0.622475597 | 0.533629185 | NA          | NA      |
| ENSG00000235480 | LOC105373496 | uncharacterized LOC105373496                              | 105373496 | 3.25830907  | 0.987606994 | 1.958016925     | 0.504391449 | 0.613986326 | NA          | NA      |
| ENSG00000109929 | SC5D         | sterol-C5-desaturase                                      | 6309      | 835.4231907 | 0.989219561 | 0.601546852     | 1.644459707 | 0.100081281 | 0.999371363 | Not Sig |
| ENSG00000226245 | ZNF32-AS1    | ZNF32 antisense RNA 1                                     | 414197    | 1.097380525 | 0.989472983 | 2.582623324     | 0.383127099 | 0.701625527 | NA          | NA      |
| ENSG00000165912 | PACSLIN3     | protein kinase C and casein kinase substrate in neurons 3 | 29763     | 639.7320603 | 0.989653549 | 0.662046394     | 1.494840176 | 0.134956158 | 0.999371363 | Not Sig |
| ENSG00000268620 | NA           | NA                                                        | NA        | 0.972376656 | 0.990484834 | 2.623140926     | 0.377594976 | 0.705731498 | NA          | NA      |
| ENSG00000268635 | NA           | NA                                                        | NA        | 0.972376656 | 0.990484834 | 2.623140926     | 0.377594976 | 0.705731498 | NA          | NA      |
| ENSG00000185689 | C6orf201     | chromosome 6 open reading frame 201                       | 404220    | 0.927607061 | 0.991326644 | 2.647295003     | 0.374467765 | 0.708056334 | NA          | NA      |
| ENSG00000253327 | RAD21-AS1    | RAD21 antisense RNA 1                                     | 644660    | 3.735015879 | 0.991654898 | 1.300278028     | 0.762648354 | 0.445673139 | NA          | NA      |
| ENSG00000213085 | CFAP45       | cilia and flagella associated protein 45                  | 25790     | 195.3345885 | 0.992206986 | 0.880572692     | 1.126774649 | 0.259837771 | 0.999371363 | Not Sig |
| ENSG00000175985 | PLEKHD1      | pleckstrin homology and coiled-coil domain containing D1  | 400224    | 23.60321665 | 0.992326057 | 0.993198561     | 0.999121521 | 0.317735827 | 0.999371363 | Not Sig |
| ENSG00000229689 | NA           | NA                                                        | NA        | 281.192663  | 0.993243111 | <b>0.705728</b> | 1.40740216  | 0.159308171 | 0.999371363 | Not Sig |
| ENSG00000225778 | PROSER2-AS1  | PROSER2 antisense RNA 1                                   | 219731    | 2.024987586 | 0.994554336 | 1.66004328      | 0.599113498 | 0.549097201 | NA          | NA      |
| ENSG00000138400 | MDH1B        | malate dehydrogenase 1B                                   | 130752    | 54.27162569 | 0.995101081 | 0.954124238     | 1.042947072 | 0.296972807 | 0.999371363 | Not Sig |
| ENSG00000263120 | NA           | NA                                                        | NA        | 19.24263712 | 0.996868604 | 0.693969599     | 1.436473019 | 0.150867789 | 0.999371363 | Not Sig |
| ENSG00000238910 | NA           | NA                                                        | NA        | 7.527925816 | 0.997556706 | 1.123146667     | 0.888180267 | 0.374443792 | 0.999371363 | Not Sig |
| ENSG00000171476 | HOPX         | HOP homeobox                                              | 84525     | 3280.888444 | 0.997679988 | 0.577333794     | 1.728081743 | 0.08397357  | 0.999371363 | Not Sig |
| ENSG00000096070 | BRPF3        | bromodomain and PHD finger containing 3                   | 27154     | 2128.992505 | 0.998484354 | 0.54089261      | 1.845993706 | 0.064893119 | 0.999371363 | Not Sig |
| ENSG00000264663 | NA           | NA                                                        | NA        | 6.992855281 | 0.999325383 | 0.989647625     | 1.009778993 | 0.312601187 | 0.999371363 | Not Sig |
| ENSG00000261335 | LOC105274304 | uncharacterized LOC105274304                              | 105274304 | 9.615412585 | 0.999557011 | 1.037878381     | 0.963077206 | 0.33550878  | 0.999371363 | Not Sig |
| ENSG00000223009 | NA           | NA                                                        | NA        | 2.426773408 | 1.000190759 | 2.007244934     | 0.498290339 | 0.618279416 | NA          | NA      |
| ENSG00000261448 | LOC102723692 | uncharacterized LOC102723692                              | 102723692 | 5.567795109 | 1.000504464 | 1.315604421     | 0.760490348 | 0.446961536 | NA          | NA      |
| ENSG00000152208 | GRID2        | glutamate ionotropic receptor delta type subunit 2        | 2895      | 2.768816469 | 1.001224586 | 1.671624174     | 0.598953163 | 0.549204118 | NA          | NA      |
| ENSG00000119703 | ZC2HC1C      | zinc finger C2HC-type containing 1C                       | 79696     | 94.44750557 | 1.001683372 | 0.63017371      | 1.589535322 | 0.111939586 | 0.999371363 | Not Sig |
| ENSG00000166664 | CHRFAM7A     | CHRNA7 (exons 5-10) and FAM7A (exons A-E) fusion          | 89832     | 10.02897306 | 1.004201939 | 1.211952573     | 0.828581878 | 0.407341046 | 0.999371363 | Not Sig |
| ENSG00000199879 | NA           | NA                                                        | NA        | 12.23872828 | 1.005402869 | 1.046120985     | 0.961077049 | 0.336513428 | 0.999371363 | Not Sig |
| ENSG00000166428 | PLD4         | phospholipase D family member 4                           | 122618    | 124.401187  | 1.007029486 | 0.875083164     | 1.150781466 | 0.249822152 | 0.999371363 | Not Sig |
| ENSG00000231064 | NA           | NA                                                        | NA        | 110.806585  | 1.007157313 | 0.612331459     | 1.644791067 | 0.100012905 | 0.999371363 | Not Sig |
| ENSG00000231848 | NA           | NA                                                        | NA        | 1.530645863 | 1.008586729 | 2.268593173     | 0.444586866 | 0.656618341 | NA          | NA      |
| ENSG00000087076 | HSD17B14     | hydroxysteroid 17-beta dehydrogenase 14                   | 51171     | 205.772457  | 1.008861101 | 0.817106458     | 1.234675226 | 0.2169514   | 0.999371363 | Not Sig |
| ENSG00000196533 | NA           | NA                                                        | NA        | 79.52313126 | 1.010367588 | 0.806211171     | 1.253229458 | 0.210122212 | 0.999371363 | Not Sig |

|                 |              |                                             |           |             |             |             |             |             |             |         |
|-----------------|--------------|---------------------------------------------|-----------|-------------|-------------|-------------|-------------|-------------|-------------|---------|
| ENSG00000253833 | NA           | NA                                          | NA        | 2.515897589 | 1.010981339 | 1.508440777 | 0.67021613  | 0.502720023 | NA          | NA      |
| ENSG00000254719 | NA           | NA                                          | NA        | 3.763218392 | 1.011038839 | 1.631517555 | 0.619692284 | 0.535460397 | NA          | NA      |
| ENSG00000267795 | SMIM22       | small integral membrane protein 22          | 440335    | 400.4687314 | 1.011371863 | 0.603419572 | 1.676067382 | 0.093724995 | 0.999371363 | Not Sig |
| ENSG00000210195 | NA           | NA                                          | NA        | 133.5356522 | 1.011935365 | 0.989801615 | 1.022361804 | 0.306609692 | 0.999371363 | Not Sig |
| ENSG00000239705 | NA           | NA                                          | NA        | 2.685671053 | 1.014530288 | 1.5301882   | 0.663010137 | 0.507324062 | NA          | NA      |
| ENSG00000242318 | NA           | NA                                          | NA        | 4.796964588 | 1.01480077  | 1.32304407  | 0.767019628 | 0.443069846 | NA          | NA      |
| ENSG00000225022 | NA           | NA                                          | NA        | 1.234999176 | 1.015366921 | 2.847274978 | 0.356610067 | 0.72138374  | NA          | NA      |
| ENSG00000126010 | GRPR         | gastrin releasing peptide receptor          | 2925      | 5.121074078 | 1.016126786 | 1.145992786 | 0.88667817  | 0.375252195 | NA          | NA      |
| ENSG00000103200 | NA           | NA                                          | NA        | 0.934044597 | 1.016951271 | 3.087979779 | 0.329325754 | 0.74190948  | NA          | NA      |
| ENSG00000200243 | NA           | NA                                          | NA        | 0.934044597 | 1.016951271 | 3.087979779 | 0.329325754 | 0.74190948  | NA          | NA      |
| ENSG00000238513 | NA           | NA                                          | NA        | 0.934044597 | 1.016951271 | 3.087979779 | 0.329325754 | 0.74190948  | NA          | NA      |
| ENSG00000244538 | NA           | NA                                          | NA        | 0.934044597 | 1.016951271 | 3.087979779 | 0.329325754 | 0.74190948  | NA          | NA      |
| ENSG00000245479 | LINC01585    | long intergenic non-protein coding RNA 1585 | 101929765 | 0.934044597 | 1.016951271 | 3.087979779 | 0.329325754 | 0.74190948  | NA          | NA      |
| ENSG00000211706 | NA           | NA                                          | NA        | 4.117217906 | 1.019358486 | 1.345427268 | 0.757646668 | 0.448662535 | NA          | NA      |
| ENSG00000176723 | ZNF843       | zinc finger protein 843                     | 283933    | 19.63000151 | 1.020337992 | 1.052234006 | 0.969687338 | 0.332202364 | 0.999371363 | Not Sig |
| ENSG00000261798 | LOC101929536 | uncharacterized LOC101929536                | 101929536 | 4.559739012 | 1.020715112 | 1.501977576 | 0.679580793 | 0.496769935 | NA          | NA      |
| ENSG00000270412 | NA           | NA                                          | NA        | 2.52877266  | 1.020865234 | 1.559501329 | 0.654610045 | 0.512718855 | NA          | NA      |
| ENSG00000186047 | DLEU7        | deleted in lymphocytic leukemia, 7          | 220107    | 18.12141644 | 1.021879399 | 0.80278029  | 1.272925372 | 0.203044525 | 0.999371363 | Not Sig |
| ENSG00000188064 | WNT7B        | Wnt family member 7B                        | 7477      | 613.1830674 | 1.022143807 | 0.706929955 | 1.445891208 | 0.148207718 | 0.999371363 | Not Sig |
| ENSG00000234156 | NA           | NA                                          | NA        | 1.116693132 | 1.022281609 | 2.576179631 | 0.396820779 | 0.691499626 | NA          | NA      |
| ENSG00000164543 | STK17A       | serine/threonine kinase 17a                 | 9263      | 1064.357247 | 1.022403422 | 0.406174396 | 2.517153795 | 0.011830717 | 0.545729762 | Not Sig |
| ENSG00000267729 | NA           | NA                                          | NA        | 1.228561641 | 1.022741099 | 2.449872781 | 0.417467024 | 0.67633684  | NA          | NA      |
| ENSG00000227210 | NA           | NA                                          | NA        | 5.752835972 | 1.023314922 | 1.085689715 | 0.942548233 | 0.345912029 | NA          | NA      |
| ENSG00000267195 | MIR212       | microRNA 212                                | 406994    | 6.301849411 | 1.023817273 | 1.0560099   | 0.969514843 | 0.332288378 | NA          | NA      |
| ENSG00000269407 | NA           | NA                                          | NA        | 1.543520934 | 1.024084451 | 2.291208062 | 0.446962661 | 0.65490202  | NA          | NA      |
| ENSG00000225542 | ZNF385D-AS1  | ZNF385D antisense RNA 1                     | 100874216 | 1.030021321 | 1.024265749 | 3.02528391  | 0.338568471 | 0.734934837 | NA          | NA      |
| ENSG00000262445 | NA           | NA                                          | NA        | 1.030021321 | 1.024265749 | 3.02528391  | 0.338568471 | 0.734934837 | NA          | NA      |
| ENSG00000264049 | MIR4737      | microRNA 4737                               | 100616210 | 7.473635739 | 1.024349657 | 1.073243249 | 0.954443141 | 0.339859378 | 0.999371363 | Not Sig |
| ENSG00000134443 | GRP          | gastrin releasing peptide                   | 2922      | 4.865702827 | 1.024391916 | 1.497104874 | 0.684248601 | 0.493818197 | NA          | NA      |
| ENSG00000196933 | NA           | NA                                          | NA        | 4.155134958 | 1.02460621  | 1.255641872 | 0.816001945 | 0.414499023 | NA          | NA      |
| ENSG00000228550 | NA           | NA                                          | NA        | 8.163042298 | 1.024612659 | 0.919176684 | 1.114706973 | 0.264976012 | 0.999371363 | Not Sig |
| ENSG00000206147 | NA           | NA                                          | NA        | 2.303197838 | 1.02467836  | 1.793668486 | 0.571275221 | 0.567813096 | NA          | NA      |
| ENSG00000243536 | NA           | NA                                          | NA        | 19.43971575 | 1.024799986 | 0.86781386  | 1.180898385 | 0.237643093 | 0.999371363 | Not Sig |
| ENSG00000241484 | ARHGAP8      | Rho GTPase activating protein 8             | 23779     | 245.8659106 | 1.024918634 | 0.731933182 | 1.400289889 | 0.161426527 | 0.999371363 | Not Sig |
| ENSG00000105366 | SIGLEC8      | sialic acid binding Ig like lectin 8        | 27181     | 72.7518633  | 1.025419328 | 1.073871024 | 0.954881271 | 0.339637742 | 0.999371363 | Not Sig |

|                 |              |                                                   |           |             |             |             |             |             |             |         |
|-----------------|--------------|---------------------------------------------------|-----------|-------------|-------------|-------------|-------------|-------------|-------------|---------|
| ENSG00000054598 | FOXC1        | forkhead box C1                                   | 2296      | 229.7364018 | 1.026573418 | 0.488061127 | 2.103370583 | 0.035433388 | 0.972140856 | Not Sig |
| ENSG00000132436 | FIGNL1       | fidgetin like 1                                   | 63979     | 347.6438324 | 1.02705079  | 0.822613309 | 1.248521972 | 0.211839967 | 0.999371363 | Not Sig |
| ENSG00000226979 | LTA          | lymphotoxin alpha                                 | 4049      | 17.26335419 | 1.027090938 | 0.947744672 | 1.083721142 | 0.278488459 | 0.999371363 | Not Sig |
| ENSG00000189171 | S100A13      | S100 calcium binding protein A13                  | 6284      | 472.712886  | 1.02797054  | 0.745846848 | 1.378259548 | 0.168123168 | 0.999371363 | Not Sig |
| ENSG00000179163 | FUCA1        | alpha-L-fucosidase 1                              | 2517      | 2421.903229 | 1.028136631 | 0.394536321 | 2.605936581 | 0.009162342 | 0.473243174 | Not Sig |
| ENSG00000171302 | CANT1        | calcium activated nucleotidase 1                  | 124583    | 2572.541344 | 1.028139723 | 0.589779542 | 1.743261084 | 0.08128802  | 0.999371363 | Not Sig |
| ENSG00000167476 | JSRP1        | junctional sarcoplasmic reticulum protein 1       | 126306    | 68.47472423 | 1.028402506 | 0.688836529 | 1.492955822 | 0.135448751 | 0.999371363 | Not Sig |
| ENSG00000167476 | LOC105372240 | uncharacterized LOC105372240                      | 105372240 | 68.47472423 | 1.028402506 | 0.688836529 | 1.492955822 | 0.135448751 | 0.999371363 | Not Sig |
| ENSG00000188051 | TMEM221      | transmembrane protein 221                         | 100130519 | 9.408122833 | 1.028792828 | 1.127423163 | 0.912517023 | 0.361496613 | 0.999371363 | Not Sig |
| ENSG00000235374 | SSR4P1       | signal sequence receptor subunit 4 pseudogene 1   | 728039    | 39.39215839 | 1.029090695 | 1.056360234 | 0.974185379 | 0.329964503 | 0.999371363 | Not Sig |
| ENSG00000265100 | NA           | NA                                                | NA        | 31.10759564 | 1.029122408 | 0.801825742 | 1.283473894 | 0.1993261   | 0.999371363 | Not Sig |
| ENSG00000168502 | MTCL1        | microtubule crosslinking factor 1                 | 23255     | 511.13786   | 1.029383192 | 0.853399106 | 1.206215456 | 0.227734426 | 0.999371363 | Not Sig |
| ENSG00000229368 | NA           | NA                                                | NA        | 57.9493009  | 1.029661783 | 0.65502126  | 1.5719517   | 0.115961753 | 0.999371363 | Not Sig |
| ENSG00000120664 | SPART-AS1    | SPART antisense RNA 1                             | 100507135 | 4.058854181 | 1.029884854 | 1.251992003 | 0.82259699  | 0.410737211 | NA          | NA      |
| ENSG00000167779 | IGFBP6       | insulin like growth factor binding protein 6      | 3489      | 195.5205213 | 1.031102022 | 0.994926244 | 1.036360262 | 0.300034102 | 0.999371363 | Not Sig |
| ENSG00000255153 | TOLLIP-AS1   | TOLLIP antisense RNA 1 (head to head)             | 255512    | 15.41970713 | 1.031513019 | 1.182876424 | 0.872037854 | 0.383187727 | 0.999371363 | Not Sig |
| ENSG00000237276 | NA           | NA                                                | NA        | 68.90107462 | 1.031713656 | 0.585874484 | 1.760980694 | 0.078241671 | 0.999371363 | Not Sig |
| ENSG00000172057 | ORMDL3       | ORMDL sphingolipid biosynthesis regulator 3       | 94103     | 1914.945362 | 1.032443722 | 0.58897031  | 1.752963952 | 0.079608195 | 0.999371363 | Not Sig |
| ENSG00000136689 | IL1RN        | interleukin 1 receptor antagonist                 | 3557      | 324.9298114 | 1.032591905 | 0.794287765 | 1.300022423 | 0.193593284 | 0.999371363 | Not Sig |
| ENSG00000258590 | NA           | NA                                                | NA        | 2.11753259  | 1.033482459 | 1.604050444 | 0.644295485 | 0.519383843 | NA          | NA      |
| ENSG00000252892 | NA           | NA                                                | NA        | 3.160428983 | 1.033675389 | 1.438619668 | 0.718518877 | 0.472437413 | NA          | NA      |
| ENSG00000221740 | SNORD93      | small nucleolar RNA, C/D box 93                   | 692210    | 4.545474009 | 1.033991118 | 1.279973506 | 0.807822281 | 0.419192897 | NA          | NA      |
| ENSG00000207638 | MIR99A       | microRNA 99a                                      | 407055    | 1.036458857 | 1.036502516 | 3.021686371 | 0.34302121  | 0.731582504 | NA          | NA      |
| ENSG00000211725 | NA           | NA                                                | NA        | 1.036458857 | 1.036502516 | 3.021686371 | 0.34302121  | 0.731582504 | NA          | NA      |
| ENSG00000256574 | OR13A1       | olfactory receptor family 13 subfamily A member 1 | 79290     | 1.036458857 | 1.036502516 | 3.021686371 | 0.34302121  | 0.731582504 | NA          | NA      |
| ENSG00000205177 | C11orf91     | chromosome 11 open reading frame 91               | 100131378 | 19.81881936 | 1.037782148 | 1.014406074 | 1.023044099 | 0.306286996 | 0.999371363 | Not Sig |
| ENSG00000163106 | HPGDS        | hematopoietic prostaglandin D synthase            | 27306     | 115.376747  | 1.038046078 | 1.003693023 | 1.034226655 | 0.301030216 | 0.999371363 | Not Sig |
| ENSG00000176236 | NA           | NA                                                | NA        | 7.030856109 | 1.038656263 | 1.227024377 | 0.846483804 | 0.397282905 | 0.999371363 | Not Sig |
| ENSG00000183826 | BTBD9        | BTB domain containing 9                           | 114781    | 2273.433485 | 1.039197595 | 0.445323652 | 2.333578266 | 0.019617816 | 0.709667191 | Not Sig |
| ENSG00000141519 | CCDC40       | coiled-coil domain containing 40                  | 55036     | 371.5539562 | 1.039268628 | 0.672992759 | 1.544249347 | 0.122527938 | 0.999371363 | Not Sig |
| ENSG00000238630 | NA           | NA                                                | NA        | 1.645935194 | 1.039583908 | 1.929074832 | 0.538902842 | 0.589953896 | NA          | NA      |
| ENSG00000239622 | NA           | NA                                                | NA        | 2.012101617 | 1.03966793  | 1.850805024 | 0.561738225 | 0.574294386 | NA          | NA      |
| ENSG00000267882 | LOC100131496 | uncharacterized LOC100131496                      | 100131496 | 9.728881654 | 1.040277983 | 0.951511336 | 1.093290162 | 0.274266421 | 0.999371363 | Not Sig |
| ENSG00000107130 | NCS1         | neuronal calcium sensor 1                         | 23413     | 251.7433132 | 1.040498367 | 0.605477273 | 1.718476339 | 0.085709767 | 0.999371363 | Not Sig |
| ENSG00000203280 | LOC100128531 | uncharacterized LOC100128531                      | 100128531 | 6.443820047 | 1.04052199  | 1.312175922 | 0.792974457 | 0.427792705 | NA          | NA      |

|                 |          |                                                           |        |             |             |             |             |             |             |         |
|-----------------|----------|-----------------------------------------------------------|--------|-------------|-------------|-------------|-------------|-------------|-------------|---------|
| ENSG00000174332 | GLIS1    | GLIS family zinc finger 1                                 | 148979 | 4.527280147 | 1.041445982 | 1.211100658 | 0.859916948 | 0.389834825 | NA          | NA      |
| ENSG00000205923 | CEMP1    | cementum protein 1                                        | 752014 | 33.71798838 | 1.041822664 | 0.864002499 | 1.205809781 | 0.227890843 | 0.999371363 | Not Sig |
| ENSG00000179222 | MAGED1   | MAGE family member D1                                     | 9500   | 4211.090574 | 1.044499375 | 0.632141566 | 1.652318771 | 0.098469585 | 0.999371363 | Not Sig |
| ENSG00000130558 | OLFM1    | olfactomedin 1                                            | 10439  | 297.4018085 | 1.04516224  | 1.02173629  | 1.02292759  | 0.306342084 | 0.999371363 | Not Sig |
| ENSG00000253223 | NA       | NA                                                        | NA     | 6.399398267 | 1.045556424 | 1.82949825  | 0.571499002 | 0.567661437 | NA          | NA      |
| ENSG00000207870 | MIR221   | microRNA 221                                              | 407006 | 14.41901552 | 1.047957404 | 0.96931001  | 1.081137504 | 0.279635953 | 0.999371363 | Not Sig |
| ENSG00000238297 | NA       | NA                                                        | NA     | 6.559767707 | 1.048381642 | 1.297419394 | 0.808051465 | 0.419060956 | NA          | NA      |
| ENSG00000183508 | FAM46C   | family with sequence similarity 46 member C               | 54855  | 3001.353246 | 1.048949132 | 0.776877769 | 1.350211286 | 0.176948219 | 0.999371363 | Not Sig |
| ENSG00000211970 | NA       | NA                                                        | NA     | 147.0679346 | 1.049354809 | 1.152495881 | 0.910506342 | 0.362555539 | 0.999371363 | Not Sig |
| ENSG00000221322 | NA       | NA                                                        | NA     | 1.257024443 | 1.049397808 | 2.838478537 | 0.369704331 | 0.711602805 | NA          | NA      |
| ENSG00000158485 | CD1B     | CD1b molecule                                             | 910    | 25.31698466 | 1.050509193 | 1.342919461 | 0.782257778 | 0.434063095 | 0.999371363 | Not Sig |
| ENSG00000196337 | CGB7     | chorionic gonadotropin beta subunit 7                     | 94027  | 4.584770094 | 1.050627775 | 1.37333011  | 0.765022021 | 0.444258432 | NA          | NA      |
| ENSG00000254858 | MPV17L2  | MPV17 mitochondrial inner membrane protein like 2         | 84769  | 135.6701278 | 1.050810612 | 0.575768761 | 1.82505666  | 0.06799248  | 0.999371363 | Not Sig |
| ENSG00000199733 | NA       | NA                                                        | NA     | 2.248713706 | 1.050850184 | 1.664463029 | 0.631344864 | 0.527815059 | NA          | NA      |
| ENSG00000265047 | NA       | NA                                                        | NA     | 2.248713706 | 1.050850184 | 1.664463029 | 0.631344864 | 0.527815059 | NA          | NA      |
| ENSG00000211804 | NA       | NA                                                        | NA     | 3.195329321 | 1.053839888 | 1.460478585 | 0.721571613 | 0.470557897 | NA          | NA      |
| ENSG00000183048 | SLC25A10 | solute carrier family 25 member 10                        | 1468   | 127.4475708 | 1.054016431 | 0.687916642 | 1.532186267 | 0.125476477 | 0.999371363 | Not Sig |
| ENSG00000116260 | QSOX1    | quiescin sulfhydryl oxidase 1                             | 5768   | 9269.432824 | 1.054032074 | 0.61577703  | 1.711710607 | 0.086950013 | 0.999371363 | Not Sig |
| ENSG00000084764 | MAPRE3   | microtubule associated protein RP/EB family member 3      | 22924  | 418.7395463 | 1.054223407 | 0.671313291 | 1.570389594 | 0.116324502 | 0.999371363 | Not Sig |
| ENSG00000260919 | NA       | NA                                                        | NA     | 7.662650868 | 1.054661184 | 1.426578745 | 0.739294054 | 0.459728459 | 0.999371363 | Not Sig |
| ENSG00000212071 | NA       | NA                                                        | NA     | 7.837855036 | 1.057749962 | 1.288159229 | 0.82113293  | 0.411570555 | 0.999371363 | Not Sig |
| ENSG00000236739 | NA       | NA                                                        | NA     | 4.526976094 | 1.057962373 | 1.562468371 | 0.677109625 | 0.498336403 | NA          | NA      |
| ENSG00000188573 | NA       | NA                                                        | NA     | 0.956069864 | 1.058176346 | 3.03411917  | 0.348758993 | 0.727270252 | NA          | NA      |
| ENSG00000228629 | NA       | NA                                                        | NA     | 1.667960461 | 1.058503823 | 2.250476145 | 0.470346609 | 0.638107403 | NA          | NA      |
| ENSG00000224014 | NA       | NA                                                        | NA     | 9.007626088 | 1.058522655 | 1.00977233  | 1.048278531 | 0.294510298 | 0.999371363 | Not Sig |
| ENSG00000206341 | NA       | NA                                                        | NA     | 937.8523201 | 1.059521199 | 0.756262525 | 1.400996563 | 0.161215101 | 0.999371363 | Not Sig |
| ENSG00000272954 | NA       | NA                                                        | NA     | 6.521641277 | 1.061867198 | 1.175611174 | 0.903246942 | 0.366394849 | NA          | NA      |
| ENSG00000211663 | NA       | NA                                                        | NA     | 798.5005194 | 1.062405137 | 1.150235489 | 0.923641417 | 0.355673043 | 0.999371363 | Not Sig |
| ENSG00000128311 | TST      | thiosulfate sulfurtransferase                             | 7263   | 709.5788121 | 1.062645362 | 0.532029397 | 1.997343321 | 0.0457879   | 0.999371363 | Not Sig |
| ENSG00000273176 | NA       | NA                                                        | NA     | 1.995794826 | 1.064767745 | 1.812525203 | 0.587449897 | 0.556901591 | NA          | NA      |
| ENSG00000252841 | NA       | NA                                                        | NA     | 1.578421272 | 1.065859875 | 1.987798403 | 0.536201193 | 0.591819509 | NA          | NA      |
| ENSG00000160345 | C9orf116 | chromosome 9 open reading frame 116                       | 138162 | 51.32141764 | 1.0673422   | 0.733757671 | 1.454624929 | 0.145773126 | 0.999371363 | Not Sig |
| ENSG00000188818 | ZDHHC11  | zinc finger DHHC-type containing 11                       | 79844  | 323.1754138 | 1.068337578 | 0.904779987 | 1.180770567 | 0.23769388  | 0.999371363 | Not Sig |
| ENSG00000156140 | ADAMTS3  | ADAM metalloproteinase with thrombospondin type 1 motif 3 | 9508   | 66.11016778 | 1.068505439 | 0.713488993 | 1.497578028 | 0.134242919 | 0.999371363 | Not Sig |
| ENSG00000235734 | NA       | NA                                                        | NA     | 1.138718399 | 1.068597267 | 2.248634648 | 0.475220494 | 0.634629821 | NA          | NA      |

|                 |         |                                                 |           |             |             |             |                 |             |             |         |
|-----------------|---------|-------------------------------------------------|-----------|-------------|-------------|-------------|-----------------|-------------|-------------|---------|
| ENSG00000264948 | NA      | NA                                              | NA        | 1.138718399 | 1.068597267 | 2.248634648 | 0.475220494     | 0.634629821 | NA          | NA      |
| ENSG00000211697 | NA      | NA                                              | NA        | 6.476611393 | 1.068608081 | 1.058152817 | 1.009880675     | 0.312552463 | NA          | NA      |
| ENSG00000221669 | MIR548N | microRNA 548n                                   | 100302152 | 5.234150611 | 1.06884494  | 1.406073355 | <b>0.760163</b> | 0.447157158 | NA          | NA      |
| ENSG00000208037 | MIR320A | microRNA 320a                                   | 407037    | 5.527084637 | 1.069054274 | 1.194294889 | 0.895134262     | 0.370715321 | NA          | NA      |
| ENSG00000261663 | NA      | NA                                              | NA        | 1.269899515 | 1.069844473 | 2.833591308 | 0.377557881     | 0.705759058 | NA          | NA      |
| ENSG00000256894 | NA      | NA                                              | NA        | 23.58739138 | 1.070322049 | 0.855643258 | 1.250897542     | 0.210971861 | 0.999371363 | Not Sig |
| ENSG00000204446 | NA      | NA                                              | NA        | 3.868274372 | 1.070624294 | 1.582241221 | 0.676650488     | 0.498627738 | NA          | NA      |
| ENSG00000204930 | FAM221B | family with sequence similarity 221 member B    | 392307    | 12.93201017 | 1.070975259 | 1.376155564 | 0.778237059     | 0.436429273 | 0.999371363 | Not Sig |
| ENSG00000260806 | NA      | NA                                              | NA        | 17.54207811 | 1.070991973 | 0.971562135 | 1.102340173     | 0.27031381  | 0.999371363 | Not Sig |
| ENSG00000107611 | CUBN    | cubilin                                         | 8029      | 130.5636212 | 1.074808453 | 0.611014452 | 1.759055698     | 0.078568049 | 0.999371363 | Not Sig |
| ENSG00000188801 | NA      | NA                                              | NA        | 30.04241215 | 1.075478527 | 0.965137667 | 1.114326551     | 0.265139121 | 0.999371363 | Not Sig |
| ENSG00000178078 | STAP2   | signal transducing adaptor family member 2      | 55620     | 427.2442121 | 1.075756127 | 0.629495179 | 1.70891877      | 0.087465997 | 0.999371363 | Not Sig |
| ENSG00000248571 | NA      | NA                                              | NA        | 10.57063159 | 1.077117214 | 1.617796967 | 0.665792578     | 0.505543689 | 0.999371363 | Not Sig |
| ENSG00000179242 | CDH4    | cadherin 4                                      | 1002      | 12.09450977 | 1.077551579 | 1.133030974 | 0.951034529     | 0.341586848 | 0.999371363 | Not Sig |
| ENSG00000176678 | FOXL1   | forkhead box L1                                 | 2300      | 90.75091865 | 1.078128164 | 0.993962454 | 1.084676951     | 0.27806476  | 0.999371363 | Not Sig |
| ENSG00000214943 | GPR33   | G protein-coupled receptor 33 (gene/pseudogene) | 2856      | 1.020152065 | 1.07882812  | 2.64202179  | 0.408334301     | 0.68302826  | NA          | NA      |
| ENSG00000184221 | OLIG1   | oligodendrocyte transcription factor 1          | 116448    | 34.36504671 | 1.079064047 | 0.79673969  | 1.354349559     | 0.175624882 | 0.999371363 | Not Sig |
| ENSG00000196189 | SEMA4A  | semaphorin 4A                                   | 64218     | 1394.389123 | 1.081667493 | 0.495459476 | 2.18316037      | 0.029024002 | 0.889292599 | Not Sig |
| ENSG00000201518 | NA      | NA                                              | NA        | 1.687273068 | 1.08280331  | 1.964873574 | 0.551080398     | 0.581578562 | NA          | NA      |
| ENSG00000233893 | NA      | NA                                              | NA        | 2.845304074 | 1.082824488 | 1.708400083 | 0.633823715     | 0.526195875 | NA          | NA      |
| ENSG00000204793 | NA      | NA                                              | NA        | 0.968944935 | 1.083553428 | 3.026004818 | 0.358080536     | 0.720283044 | NA          | NA      |
| ENSG00000234200 | NA      | NA                                              | NA        | 0.968944935 | 1.083553428 | 3.026004818 | 0.358080536     | 0.720283044 | NA          | NA      |
| ENSG00000240457 | NA      | NA                                              | NA        | 0.968944935 | 1.083553428 | 3.026004818 | 0.358080536     | 0.720283044 | NA          | NA      |
| ENSG00000233427 | NA      | NA                                              | NA        | 6.207385721 | 1.083680497 | 1.082661886 | 1.000940839     | 0.316855411 | NA          | NA      |
| ENSG00000137460 | FHDC1   | FH2 domain containing 1                         | 85462     | 1007.658717 | 1.084935553 | 0.613182859 | 1.769350752     | 0.076835359 | 0.999371363 | Not Sig |
| ENSG00000144369 | FAM171B | family with sequence similarity 171 member B    | 165215    | 191.1904049 | 1.085624699 | 0.668110935 | 1.624916824     | 0.104180283 | 0.999371363 | Not Sig |
| ENSG00000154310 | TNIK    | TRAF2 and NCK interacting kinase                | 23043     | 1253.307852 | 1.085691348 | 0.721444578 | 1.504885311     | 0.132353565 | 0.999371363 | Not Sig |
| ENSG00000219451 | RPL23P8 | ribosomal protein L23 pseudogene 8              | 222901    | 1.482140495 | 1.086700135 | 2.300998214 | 0.47227335      | 0.63673169  | NA          | NA      |
| ENSG00000265296 | NA      | NA                                              | NA        | 1.482140495 | 1.086700135 | 2.300998214 | 0.47227335      | 0.63673169  | NA          | NA      |
| ENSG00000241399 | CD302   | CD302 molecule                                  | 9936      | 1244.11047  | 1.086896898 | 0.751267776 | 1.446750324     | 0.147966864 | 0.999371363 | Not Sig |
| ENSG00000124159 | MATN4   | matrilin 4                                      | 8785      | 5.262198406 | 1.087037687 | 1.438718137 | 0.755559869     | 0.449913124 | NA          | NA      |
| ENSG00000266876 | NA      | NA                                              | NA        | 1.533347625 | 1.087906105 | 2.054053361 | 0.529638677     | 0.596362473 | NA          | NA      |
| ENSG00000127074 | RGS13   | regulator of G protein signaling 13             | 6003      | 36.81479157 | 1.088271675 | 1.110247684 | 0.980206211     | 0.326984339 | 0.999371363 | Not Sig |
| ENSG00000243562 | NA      | NA                                              | NA        | 1.15159347  | 1.088653837 | 2.246110983 | 0.484683903     | 0.627900587 | NA          | NA      |
| ENSG00000241917 | NA      | NA                                              | NA        | 1.600446539 | 1.089054255 | 1.986221889 | 0.548304427     | 0.583482888 | NA          | NA      |



|                 |              |                                                  |           |             |             |             |             |             |             |         |
|-----------------|--------------|--------------------------------------------------|-----------|-------------|-------------|-------------|-------------|-------------|-------------|---------|
| ENSG00000205683 | DPF3         | double PHD fingers 3                             | 8110      | 41.58168927 | 1.092968412 | 0.700510978 | 1.560244516 | 0.11870211  | 0.999371363 | Not Sig |
| ENSG00000254454 | NA           | NA                                               | NA        | 38.23492422 | 1.094516487 | 0.974761191 | 1.122856036 | 0.261498642 | 0.999371363 | Not Sig |
| ENSG00000265828 | MIR3939      | microRNA 3939                                    | 100500857 | 16.17257303 | 1.094843795 | 0.898288333 | 1.218811104 | 0.222915896 | 0.999371363 | Not Sig |
| ENSG00000169689 | CENPX        | centromere protein X                             | 201254    | 452.4341832 | 1.095778699 | 0.626791864 | 1.748233762 | 0.080423558 | 0.999371363 | Not Sig |
| ENSG00000235848 | NA           | NA                                               | NA        | 3.938688536 | 1.096059857 | 1.53530701  | 0.713902724 | 0.475287333 | NA          | NA      |
| ENSG00000011009 | LYPLA2       | lysophospholipase II                             | 11313     | 1388.87418  | 1.096288939 | 0.636298972 | 1.722914835 | 0.084903927 | 0.999371363 | Not Sig |
| ENSG00000229798 | NA           | NA                                               | NA        | 2.764915081 | 1.096998892 | 1.449956909 | 0.756573444 | 0.449305456 | NA          | NA      |
| ENSG00000174567 | GOLT1A       | golgi transport 1A                               | 127845    | 308.7205003 | 1.09832365  | 0.935151007 | 1.174488016 | 0.240199609 | 0.999371363 | Not Sig |
| ENSG00000213071 | LPAL2        | lipoprotein(a) like 2, pseudogene                | 80350     | 13.88841094 | 1.098327488 | 0.957074675 | 1.147588079 | 0.251138653 | 0.999371363 | Not Sig |
| ENSG00000179846 | NKPD1        | NTase KAP family P-loop domain containing 1      | 284353    | 3.505113763 | 1.098404437 | 1.625576861 | 0.675701324 | 0.499230295 | NA          | NA      |
| ENSG00000197557 | TTC30A       | tetratricopeptide repeat domain 30A              | 92104     | 239.6318755 | 1.098483113 | 0.446760106 | 2.458776191 | 0.01394115  | 0.59512169  | Not Sig |
| ENSG00000230337 | LOC105376736 | uncharacterized LOC105376736                     | 105376736 | 4.628549442 | 1.09876687  | 1.225099554 | 0.896879658 | 0.369783136 | NA          | NA      |
| ENSG00000184986 | TMEM121      | transmembrane protein 121                        | 80757     | 72.99569334 | 1.099115139 | 1.064817319 | 1.032210051 | 0.301973728 | 0.999371363 | Not Sig |
| ENSG00000255680 | NA           | NA                                               | NA        | 1.751200551 | 1.099507017 | 2.246793268 | 0.489367238 | 0.624581726 | NA          | NA      |
| ENSG00000137965 | IFI44        | interferon induced protein 44                    | 10561     | 1073.785594 | 1.099692985 | 0.860482438 | 1.27799585  | 0.20125089  | 0.999371363 | Not Sig |
| ENSG00000189334 | S100A14      | S100 calcium binding protein A14                 | 57402     | 1293.932633 | 1.101244119 | 0.680830239 | 1.617501774 | 0.105770013 | 0.999371363 | Not Sig |
| ENSG00000225243 | NA           | NA                                               | NA        | 2.729295683 | 1.101368524 | 1.609440841 | 0.684317495 | 0.493774702 | NA          | NA      |
| ENSG00000215018 | COL28A1      | collagen type XXVIII alpha 1 chain               | 340267    | 282.7846539 | 1.101654145 | 0.641480541 | 1.71736175  | 0.085913096 | 0.999371363 | Not Sig |
| ENSG00000225094 | NA           | NA                                               | NA        | 2.87632482  | 1.101848215 | 1.757321467 | 0.627004356 | 0.53065638  | NA          | NA      |
| ENSG00000272288 | LOC101929243 | uncharacterized LOC101929243                     | 101929243 | 38.82125668 | 1.103422897 | 0.648605232 | 1.701224171 | 0.088900901 | 0.999371363 | Not Sig |
| ENSG00000131187 | F12          | coagulation factor XII                           | 2161      | 44.66451958 | 1.104387689 | 0.726755122 | 1.519614592 | 0.128607868 | 0.999371363 | Not Sig |
| ENSG00000189045 | ANKDD1B      | ankyrin repeat and death domain containing 1B    | 728780    | 193.4189108 | 1.105317187 | 0.617448456 | 1.790136773 | 0.073431926 | 0.999371363 | Not Sig |
| ENSG00000090382 | LYZ          | lysozyme                                         | 4069      | 6897.031691 | 1.105826426 | 0.842218293 | 1.312992647 | 0.189185426 | 0.999371363 | Not Sig |
| ENSG00000142794 | NBPF3        | NBPF member 3                                    | 84224     | 263.7515392 | 1.106555243 | 0.545695026 | 2.027790597 | 0.042581624 | 0.999371363 | Not Sig |
| ENSG00000134207 | SYT6         | synaptotagmin 6                                  | 148281    | 3.402550169 | 1.106694998 | 1.660255605 | 0.666581094 | 0.505039749 | NA          | NA      |
| ENSG00000146047 | HIST1H2BA    | histone cluster 1 H2B family member a            | 255626    | 1.055312693 | 1.107102706 | 2.98477409  | 0.37091675  | 0.710699539 | NA          | NA      |
| ENSG00000185274 | GALNT17      | polypeptide N-acetylgalactosaminyltransferase 17 | 64409     | 256.0504476 | 1.109348729 | 0.897739532 | 1.235713354 | 0.216565132 | 0.999371363 | Not Sig |
| ENSG00000230783 | NA           | NA                                               | NA        | 7.257982334 | 1.109423071 | 0.968666315 | 1.145309849 | 0.252080828 | 0.999371363 | Not Sig |
| ENSG00000175265 | GOLGA8A      | golgin A8 family member A                        | 23015     | 884.9699723 | 1.110002463 | 0.666158644 | 1.666273452 | 0.095658962 | 0.999371363 | Not Sig |
| ENSG00000233680 | NA           | NA                                               | NA        | 31.5197277  | 1.110254125 | 0.81151666  | 1.368122407 | 0.171273764 | 0.999371363 | Not Sig |
| ENSG00000137699 | TRIM29       | tripartite motif containing 29                   | 23650     | 348.5107124 | 1.110436806 | 0.769326553 | 1.443388118 | 0.148911169 | 0.999371363 | Not Sig |
| ENSG00000132881 | RSG1         | REM2 and RAB like small GTPase 1                 | 79363     | 119.6879974 | 1.111559777 | 0.747069692 | 1.487893016 | 0.13677911  | 0.999371363 | Not Sig |
| ENSG00000254979 | NA           | NA                                               | NA        | 2.257853004 | 1.11218309  | 1.87887653  | 0.591940488 | 0.55389044  | NA          | NA      |
| ENSG00000016082 | ISL1         | ISL LIM homeobox 1                               | 3670      | 2.117062922 | 1.11248176  | 2.45790834  | 0.4526132   | 0.650827292 | NA          | NA      |
| ENSG00000250815 | NA           | NA                                               | NA        | 1.173618738 | 1.112940138 | 2.505400774 | 0.44421641  | 0.656886129 | NA          | NA      |

|                 |           |                                                        |           |             |             |             |             |             |             |         |
|-----------------|-----------|--------------------------------------------------------|-----------|-------------|-------------|-------------|-------------|-------------|-------------|---------|
| ENSG00000263407 | MIR4660   | microRNA 4660                                          | 100616350 | 1.122411608 | 1.114172838 | 2.253952711 | 0.494319527 | 0.621080537 | NA          | NA      |
| ENSG00000269279 | NA        | NA                                                     | NA        | 7.813385121 | 1.115126709 | 0.997713744 | 1.117682016 | 0.263702826 | 0.999371363 | Not Sig |
| ENSG00000196711 | ALKAL1    | ALK and LTK ligand 1                                   | 389658    | 49.04319615 | 1.11582432  | 1.18056327  | 0.945162659 | 0.34457584  | 0.999371363 | Not Sig |
| ENSG00000253194 | NA        | NA                                                     | NA        | 12.20938977 | 1.117090475 | 1.000985319 | 1.115990868 | 0.264426044 | 0.999371363 | Not Sig |
| ENSG00000211851 | NA        | NA                                                     | NA        | 8.330520318 | 1.119987684 | 1.303023092 | 0.859530189 | 0.390048072 | 0.999371363 | Not Sig |
| ENSG00000186312 | CA5BP1    | carbonic anhydrase 5B pseudogene 1                     | 340591    | 331.3486194 | 1.120130557 | 0.46863564  | 2.390194986 | 0.01683943  | 0.662684192 | Not Sig |
| ENSG00000232724 | NA        | NA                                                     | NA        | 5.68415529  | 1.120468986 | 1.210032755 | 0.92598236  | 0.354455148 | NA          | NA      |
| ENSG00000175262 | Clorf127  | chromosome 1 open reading frame 127                    | 148345    | 40.29062114 | 1.120496929 | 1.005926827 | 1.113895065 | 0.265324207 | 0.999371363 | Not Sig |
| ENSG00000167920 | TMEM99    | transmembrane protein 99                               | 147184    | 136.1137758 | 1.121466219 | 0.629074314 | 1.782724543 | 0.074631154 | 0.999371363 | Not Sig |
| ENSG00000261235 | NA        | NA                                                     | NA        | 6.741205719 | 1.124075554 | 1.176744453 | 0.955241855 | 0.339455404 | 0.999371363 | Not Sig |
| ENSG00000242048 | LOC644090 | uncharacterized LOC644090                              | 644090    | 2.982203665 | 1.124461671 | 1.77167571  | 0.634688202 | 0.52563179  | NA          | NA      |
| ENSG00000135447 | PPP1R1A   | protein phosphatase 1 regulatory inhibitor subunit 1A  | 5502      | 11.7899432  | 1.125493721 | 1.620037495 | 0.694733131 | 0.487222561 | 0.999371363 | Not Sig |
| ENSG00000254966 | NA        | NA                                                     | NA        | 9.71191982  | 1.129443041 | 1.036993907 | 1.089151087 | 0.276087265 | 0.999371363 | Not Sig |
| ENSG00000198846 | TOX       | thymocyte selection associated high mobility group box | 9760      | 420.8741359 | 1.12951691  | 0.953659861 | 1.184402276 | 0.23625386  | 0.999371363 | Not Sig |
| ENSG00000165685 | TMEM52B   | transmembrane protein 52B                              | 120939    | 25.04260356 | 1.129677871 | 0.895641861 | 1.261305351 | 0.207198854 | 0.999371363 | Not Sig |
| ENSG00000167183 | PRR15L    | proline rich 15 like                                   | 79170     | 661.6604099 | 1.13072394  | 0.710471607 | 1.591511791 | 0.111494444 | 0.999371363 | Not Sig |
| ENSG00000235481 | NA        | NA                                                     | NA        | 1.180056273 | 1.130912084 | 2.204068332 | 0.513102098 | 0.607879904 | NA          | NA      |
| ENSG00000238824 | NA        | NA                                                     | NA        | 1.180056273 | 1.130912084 | 2.204068332 | 0.513102098 | 0.607879904 | NA          | NA      |
| ENSG00000246731 | MGC16275  | uncharacterized protein MGC16275                       | 85001     | 44.27944957 | 1.131191251 | 0.951578505 | 1.18875242  | 0.234537106 | 0.999371363 | Not Sig |
| ENSG00000211710 | NA        | NA                                                     | NA        | 5.727491189 | 1.131436831 | 1.35591964  | 0.834442395 | 0.404031736 | NA          | NA      |
| ENSG00000224114 | NA        | NA                                                     | NA        | 2.456803906 | 1.132310453 | 2.045977979 | 0.553432376 | 0.579967375 | NA          | NA      |
| ENSG00000205361 | NA        | NA                                                     | NA        | 3.669047857 | 1.133033352 | 1.355273858 | 0.836018009 | 0.403144772 | NA          | NA      |
| ENSG00000200156 | RNU5B-1   | RNA, U5B small nuclear 1                               | 26832     | 6.481434296 | 1.134534949 | 1.017508553 | 1.115012691 | 0.264844984 | NA          | NA      |
| ENSG00000157637 | SLC38A10  | solute carrier family 38 member 10                     | 124565    | 5587.645301 | 1.135109803 | 0.620076431 | 1.830596596 | 0.067160777 | 0.999371363 | Not Sig |
| ENSG00000173083 | HPSE      | heparanase                                             | 10855     | 220.7314012 | 1.135807279 | 0.472488143 | 2.403885251 | 0.016221864 | 0.654298425 | Not Sig |
| ENSG00000148734 | NPFPR1    | neuropeptide FF receptor 1                             | 64106     | 26.55845675 | 1.136221871 | 0.636327426 | 1.785593115 | 0.074165162 | 0.999371363 | Not Sig |
| ENSG00000224982 | TMEM233   | transmembrane protein 233                              | 387890    | 38.42290439 | 1.137160034 | 0.821773531 | 1.383787615 | 0.166423496 | 0.999371363 | Not Sig |
| ENSG00000151023 | ENKUR     | enkurin, TRPC channel interacting protein              | 219670    | 61.88375573 | 1.137916269 | 0.749492751 | 1.518248531 | 0.128951757 | 0.999371363 | Not Sig |
| ENSG00000168348 | INSM2     | INSM transcriptional repressor 2                       | 84684     | 1.141724214 | 1.138526314 | 2.568851607 | 0.443204392 | 0.657617903 | NA          | NA      |
| ENSG00000266690 | MIR4274   | microRNA 4274                                          | 100422826 | 1.488317741 | 1.138839165 | 2.694746734 | 0.422614545 | 0.672576513 | NA          | NA      |
| ENSG00000250746 | NA        | NA                                                     | NA        | 3.31229192  | 1.139362288 | 1.503860565 | 0.757624952 | 0.448675538 | NA          | NA      |
| ENSG00000267359 | NA        | NA                                                     | NA        | 2.196776618 | 1.140419777 | 1.864464176 | 0.611660868 | 0.540762157 | NA          | NA      |
| ENSG00000263011 | NA        | NA                                                     | NA        | 1.0746253   | 1.141147162 | 2.974437436 | 0.383651425 | 0.701236819 | NA          | NA      |
| ENSG00000136193 | SCRN1     | secernin 1                                             | 9805      | 3053.491142 | 1.141411327 | 0.450195897 | 2.535365903 | 0.011232993 | 0.523915097 | Not Sig |
| ENSG00000231419 | LINC00689 | long intergenic non-protein coding RNA 689             | 154822    | 116.9378944 | 1.14200104  | 0.930709906 | 1.227021474 | 0.21981452  | 0.999371363 | Not Sig |

|                 |          |                                                           |        |             |             |             |             |             |             |         |
|-----------------|----------|-----------------------------------------------------------|--------|-------------|-------------|-------------|-------------|-------------|-------------|---------|
| ENSG00000112041 | TULP1    | tubby like protein 1                                      | 7287   | 1.53635344  | 1.142080537 | 1.992831206 | 0.573094467 | 0.566580734 | NA          | NA      |
| ENSG00000229415 | SFTA3    | surfactant associated 3                                   | 253970 | 1091.648013 | 1.14321823  | 0.764992217 | 1.49441812  | 0.135066368 | 0.999371363 | Not Sig |
| ENSG00000134247 | PTGFRN   | prostaglandin F2 receptor inhibitor                       | 5738   | 1907.620875 | 1.14514626  | 0.662167063 | 1.729391757 | 0.083739004 | 0.999371363 | Not Sig |
| ENSG00000154479 | CCDC173  | coiled-coil domain containing 173                         | 129881 | 45.23683222 | 1.145457965 | 1.12060979  | 1.022173798 | 0.30669865  | 0.999371363 | Not Sig |
| ENSG00000124479 | NDP      | NDP, norrin cystine knot growth factor                    | 4693   | 2.174292581 | 1.145528123 | 1.628047962 | 0.703620624 | 0.481669064 | NA          | NA      |
| ENSG00000260773 | NA       | NA                                                        | NA     | 2.107193666 | 1.1464826   | 2.094447624 | 0.547391392 | 0.584109868 | NA          | NA      |
| ENSG00000207561 | MIR635   | microRNA 635                                              | 693220 | 12.550903   | 1.148204657 | 0.987718428 | 1.16248176  | 0.24503983  | 0.999371363 | Not Sig |
| ENSG00000134504 | KCTD1    | potassium channel tetramerization domain containing 1     | 284252 | 474.9957924 | 1.149398267 | 0.642545619 | 1.788819709 | 0.073643856 | 0.999371363 | Not Sig |
| ENSG00000170935 | NCBP2L   | nuclear cap binding protein subunit 2 like                | 392517 | 1.003845274 | 1.14989602  | 3.043535145 | 0.377815916 | 0.705567349 | NA          | NA      |
| ENSG00000266637 | NA       | NA                                                        | NA     | 1.003845274 | 1.14989602  | 3.043535145 | 0.377815916 | 0.705567349 | NA          | NA      |
| ENSG00000151224 | MAT1A    | methionine adenosyltransferase 1A                         | 4143   | 23.68502367 | 1.15038086  | 1.348198977 | 0.853272314 | 0.39350831  | 0.999371363 | Not Sig |
| ENSG00000249604 | NA       | NA                                                        | NA     | 2.809215008 | 1.150702518 | 1.729280106 | 0.665422862 | 0.505780066 | NA          | NA      |
| ENSG00000249309 | NA       | NA                                                        | NA     | 4.303709995 | 1.150886275 | 1.3152664   | 0.875021421 | 0.38156225  | NA          | NA      |
| ENSG00000181408 | UTS2R    | urotensin 2 receptor                                      | 2837   | 2.671336067 | 1.153195373 | 1.699359335 | 0.67860596  | 0.497387566 | NA          | NA      |
| ENSG00000163638 | ADAMTS9  | ADAM metalloproteinase with thrombospondin type 1 motif 9 | 56999  | 813.0229093 | 1.154569693 | 0.490088736 | 2.355838051 | 0.018480973 | 0.692651462 | Not Sig |
| ENSG00000130021 | PUDP     | pseudouridine 5'-phosphatase                              | 8226   | 487.3819423 | 1.155049326 | 0.451455503 | 2.558500936 | 0.010512454 | 0.505279884 | Not Sig |
| ENSG00000169241 | SLC50A1  | solute carrier family 50 member 1                         | 55974  | 1011.927668 | 1.155545807 | 0.564582003 | 2.046728024 | 0.040684796 | 0.999371363 | Not Sig |
| ENSG00000255422 | NA       | NA                                                        | NA     | 3.732826006 | 1.155952736 | 1.492300427 | 0.774611275 | 0.438569393 | NA          | NA      |
| ENSG00000184881 | NA       | NA                                                        | NA     | 1.994815476 | 1.156381771 | 2.53174565  | 0.456752743 | 0.647848776 | NA          | NA      |
| ENSG00000162591 | MEGF6    | multiple EGF like domains 6                               | 1953   | 3036.529001 | 1.157385629 | 0.649327314 | 1.782437923 | 0.074677846 | 0.999371363 | Not Sig |
| ENSG00000224287 | MSL3P1   | MSL complex subunit 3 pseudogene 1                        | 151507 | 64.72376802 | 1.15887166  | 0.775663841 | 1.494038523 | 0.135165551 | 0.999371363 | Not Sig |
| ENSG00000252679 | NA       | NA                                                        | NA     | 1.039005902 | 1.160241994 | 2.608077736 | 0.444864805 | 0.656417458 | NA          | NA      |
| ENSG00000260339 | HEXA-AS1 | HEXA antisense RNA 1                                      | 80072  | 21.43851703 | 1.160337389 | 0.962999762 | 1.204919705 | 0.228234301 | 0.999371363 | Not Sig |
| ENSG00000100196 | KDEL3    | KDEL endoplasmic reticulum protein retention receptor 3   | 11015  | 635.5865606 | 1.160880712 | 0.755589967 | 1.536389792 | 0.124442809 | 0.999371363 | Not Sig |
| ENSG00000108688 | CCL7     | C-C motif chemokine ligand 7                              | 6354   | 2.158140507 | 1.16226852  | 1.812219877 | 0.641350718 | 0.521294844 | NA          | NA      |
| ENSG00000226981 | NA       | NA                                                        | NA     | 9.663050357 | 1.162704911 | 1.432320377 | 0.811763157 | 0.416927546 | 0.999371363 | Not Sig |
| ENSG00000141150 | NA       | NA                                                        | NA     | 44.51998759 | 1.163361059 | 0.92025598  | 1.264171149 | 0.206168604 | 0.999371363 | Not Sig |
| ENSG00000166387 | PPFIBP2  | PPFIA binding protein 2                                   | 8495   | 1446.647072 | 1.165209815 | 0.486449508 | 2.395335578 | 0.01660516  | 0.657741302 | Not Sig |
| ENSG00000269779 | NA       | NA                                                        | NA     | 3.959983846 | 1.165952194 | 1.712040512 | 0.681030727 | 0.495852048 | NA          | NA      |
| ENSG00000020129 | NCDN     | neurochondrin                                             | 23154  | 907.1076631 | 1.167972569 | 0.66807224  | 1.748272866 | 0.080416789 | 0.999371363 | Not Sig |
| ENSG00000229915 | NA       | NA                                                        | NA     | 2.157985789 | 1.16982577  | 1.812664178 | 0.645362657 | 0.518692197 | NA          | NA      |
| ENSG00000228818 | NA       | NA                                                        | NA     | 1.564816243 | 1.170016722 | 1.935971356 | 0.604356422 | 0.545606702 | NA          | NA      |
| ENSG00000267552 | NA       | NA                                                        | NA     | 1.564816243 | 1.170016722 | 1.935971356 | 0.604356422 | 0.545606702 | NA          | NA      |
| ENSG00000251769 | NA       | NA                                                        | NA     | 5.226796785 | 1.170532939 | 1.921831865 | 0.609071459 | 0.542477074 | NA          | NA      |
| ENSG00000230912 | NA       | NA                                                        | NA     | 1.045443437 | 1.170571834 | 2.551712018 | 0.45873979  | 0.646421037 | NA          | NA      |

|                 |           |                                                            |           |             |             |             |             |             |             |         |
|-----------------|-----------|------------------------------------------------------------|-----------|-------------|-------------|-------------|-------------|-------------|-------------|---------|
| ENSG00000177627 | C12orf54  | chromosome 12 open reading frame 54                        | 121273    | 2.603822145 | 1.170582348 | 1.640896365 | 0.713379817 | 0.475610759 | NA          | NA      |
| ENSG00000187773 | FAM69C    | family with sequence similarity 69 member C                | 125704    | 3.075159252 | 1.171096278 | 1.715612959 | 0.682611    | 0.494852681 | NA          | NA      |
| ENSG00000232640 | NA        | NA                                                         | NA        | 2.308894519 | 1.172751661 | 2.103868727 | 0.557426253 | 0.577236233 | NA          | NA      |
| ENSG00000249996 | NA        | NA                                                         | NA        | 13.78243884 | 1.173013323 | 0.870469051 | 1.347564651 | 0.177798446 | 0.999371363 | Not Sig |
| ENSG00000226216 | NA        | NA                                                         | NA        | 17.08517202 | 1.17409727  | 0.800448503 | 1.466799257 | 0.142430672 | 0.999371363 | Not Sig |
| ENSG00000258384 | NA        | NA                                                         | NA        | 1.163749482 | 1.175753946 | 2.209053736 | 0.532243253 | 0.59455753  | NA          | NA      |
| ENSG00000102359 | SRPX2     | sushi repeat containing protein, X-linked 2                | 27286     | 596.63154   | 1.17605298  | 0.88380854  | 1.330664874 | 0.183299306 | 0.999371363 | Not Sig |
| ENSG00000235101 | NA        | NA                                                         | NA        | 1.683122288 | 1.176922171 | 1.981222143 | 0.59403847  | 0.552486383 | NA          | NA      |
| ENSG00000135702 | CHST5     | carbohydrate sulfotransferase 5                            | 23563     | 1.571253779 | 1.177136226 | 1.935640766 | 0.608137753 | 0.543096115 | NA          | NA      |
| ENSG00000140873 | ADAMTS18  | ADAM metalloproteinase with thrombospondin type 1 motif 18 | 170692    | 10.32634563 | 1.178606988 | 1.041506429 | 1.131636786 | 0.257787168 | 0.999371363 | Not Sig |
| ENSG00000205918 | NA        | NA                                                         | NA        | 4.210540605 | 1.179628321 | 1.628998896 | 0.724143106 | 0.468977883 | NA          | NA      |
| ENSG00000206869 | SNORA70F  | small nucleolar RNA, H/ACA box 70F                         | 100337591 | 4.770287258 | 1.17966808  | 1.230047102 | 0.959043014 | 0.337537076 | NA          | NA      |
| ENSG00000263828 | MIR4439   | microRNA 4439                                              | 100616207 | 6.338791086 | 1.179956605 | 1.451548144 | 0.812895259 | 0.416278113 | NA          | NA      |
| ENSG00000258920 | FOXN3-AS1 | FOXN3 antisense RNA 1                                      | 400236    | 53.62464165 | 1.180195272 | 1.032327963 | 1.143236757 | 0.252940305 | 0.999371363 | Not Sig |
| ENSG00000196979 | LOC401554 | uncharacterized LOC401554                                  | 401554    | 1.865770823 | 1.18099836  | 1.869944407 | 0.631568701 | 0.527668744 | NA          | NA      |
| ENSG00000171612 | SLC25A33  | solute carrier family 25 member 33                         | 84275     | 229.5249393 | 1.182011224 | 0.471060222 | 2.509257138 | 0.012098538 | 0.550076239 | Not Sig |
| ENSG00000121871 | SLITRK3   | SLIT and NTRK like family member 3                         | 22865     | 13.5320942  | 1.1838294   | 1.408302936 | 0.840607067 | 0.400568099 | 0.999371363 | Not Sig |
| ENSG00000110811 | P3H3      | prolyl 3-hydroxylase 3                                     | 10536     | 622.8968004 | 1.183852551 | 0.908745855 | 1.302732271 | 0.192666181 | 0.999371363 | Not Sig |
| ENSG00000163762 | TM4SF18   | transmembrane 4 L six family member 18                     | 116441    | 144.8523236 | 1.183899236 | 0.813636285 | 1.455071828 | 0.145649378 | 0.999371363 | Not Sig |
| ENSG00000204632 | HLA-G     | major histocompatibility complex, class I, G               | 3135      | 196.370608  | 1.184157927 | 1.004581871 | 1.178757014 | 0.238494945 | 0.999371363 | Not Sig |
| ENSG00000259502 | NA        | NA                                                         | NA        | 1.753902314 | 1.184570003 | 1.928159488 | 0.614352708 | 0.538982279 | NA          | NA      |
| ENSG00000211514 | MIR454    | microRNA 454                                               | 768216    | 3.468658835 | 1.184936687 | 1.663426217 | 0.712347007 | 0.476249922 | NA          | NA      |
| ENSG00000233728 | NA        | NA                                                         | NA        | 3.561768182 | 1.185124848 | 1.366167889 | 0.867481118 | 0.385678453 | NA          | NA      |
| ENSG00000129214 | SHBG      | sex hormone binding globulin                               | 6462      | 4.152790367 | 1.185311028 | 1.458962574 | 0.812434156 | 0.416542554 | NA          | NA      |
| ENSG00000092850 | TEKT2     | tektin 2                                                   | 27285     | 142.4006523 | 1.186558144 | 1.054441897 | 1.125294952 | 0.260464068 | 0.999371363 | Not Sig |
| ENSG00000256458 | NA        | NA                                                         | NA        | 1.577691315 | 1.186818471 | 1.989812473 | 0.596447397 | 0.550876385 | NA          | NA      |
| ENSG00000235204 | NA        | NA                                                         | NA        | 1.872208359 | 1.187227589 | 1.869860247 | 0.634928514 | 0.525475039 | NA          | NA      |
| ENSG00000211652 | NA        | NA                                                         | NA        | 87.69911306 | 1.187314469 | 0.913312839 | 1.300008517 | 0.19359805  | 0.999371363 | Not Sig |
| ENSG00000256269 | HMBS      | hydroxymethylbilane synthase                               | 3145      | 274.7294806 | 1.187484988 | 0.622671687 | 1.907080428 | 0.056510173 | 0.999371363 | Not Sig |
| ENSG00000263910 | NA        | NA                                                         | NA        | 2.208932629 | 1.190077522 | 1.878081616 | 0.633666563 | 0.526298451 | NA          | NA      |
| ENSG00000103021 | CCDC113   | coiled-coil domain containing 113                          | 29070     | 308.9757124 | 1.190786326 | 0.679244723 | 1.753103537 | 0.079584237 | 0.999371363 | Not Sig |
| ENSG00000211784 | NA        | NA                                                         | NA        | 1.878645894 | 1.190847678 | 1.92334182  | 0.619155506 | 0.53581392  | NA          | NA      |
| ENSG00000134183 | GNAT2     | G protein subunit alpha transducin 2                       | 2780      | 2.568202747 | 1.192132278 | 2.080895407 | 0.572893897 | 0.566716537 | NA          | NA      |
| ENSG00000253722 | NA        | NA                                                         | NA        | 1.058318509 | 1.192823167 | 2.60092151  | 0.458615595 | 0.646510235 | NA          | NA      |
| ENSG00000180543 | TSPYL5    | TSPY like 5                                                | 85453     | 656.3822859 | 1.193790031 | 0.817089713 | 1.461026877 | 0.144008066 | 0.999371363 | Not Sig |

|                 |              |                                                |           |             |             |             |             |             |             |         |
|-----------------|--------------|------------------------------------------------|-----------|-------------|-------------|-------------|-------------|-------------|-------------|---------|
| ENSG00000177453 | NIM1K        | NIM1 serine/threonine protein kinase           | 167359    | 25.23967102 | 1.195211492 | 1.092386732 | 1.094128533 | 0.27389861  | 0.999371363 | Not Sig |
| ENSG00000249593 | NA           | NA                                             | NA        | 1.109525639 | 1.195959685 | 2.528122145 | 0.473062462 | 0.636168617 | NA          | NA      |
| ENSG00000270259 | NA           | NA                                             | NA        | 1.109525639 | 1.195959685 | 2.528122145 | 0.473062462 | 0.636168617 | NA          | NA      |
| ENSG00000180730 | SHISA2       | shisa family member 2                          | 387914    | 448.0816968 | 1.196625432 | 1.032363722 | 1.159112245 | 0.246410435 | 0.999371363 | Not Sig |
| ENSG00000226145 | NA           | NA                                             | NA        | 4.87564729  | 1.197345899 | 1.763668528 | 0.678895087 | 0.497204339 | NA          | NA      |
| ENSG00000164512 | ANKRD55      | ankyrin repeat domain 55                       | 79722     | 8.622328675 | 1.19820047  | 1.187791345 | 1.008763429 | 0.313088104 | 0.999371363 | Not Sig |
| ENSG00000134463 | ECHDC3       | enoyl-CoA hydratase domain containing 3        | 79746     | 391.9639158 | 1.19874154  | 0.819543789 | 1.462693703 | 0.14355121  | 0.999371363 | Not Sig |
| ENSG00000183421 | RIPK4        | receptor interacting serine/threonine kinase 4 | 54101     | 754.9629353 | 1.199040261 | 0.66746661  | 1.79640486  | 0.072430152 | 0.999371363 | Not Sig |
| ENSG00000228049 | NA           | NA                                             | NA        | 3.478362476 | 1.201453716 | 1.305761395 | 0.920117351 | 0.357511438 | NA          | NA      |
| ENSG00000229422 | NA           | NA                                             | NA        | 10.98399706 | 1.201657915 | 0.882951271 | 1.360956096 | 0.173527564 | 0.999371363 | Not Sig |
| ENSG00000236153 | NA           | NA                                             | NA        | 1.843026496 | 1.20332294  | 1.924189694 | 0.625366066 | 0.531730828 | NA          | NA      |
| ENSG00000230818 | NA           | NA                                             | NA        | 3.391690665 | 1.203873024 | 1.493327425 | 0.806168161 | 0.420145894 | NA          | NA      |
| ENSG00000114204 | SERPINI2     | serpin family I member 2                       | 5276      | 36.53852877 | 1.204982069 | 0.997216099 | 1.208345984 | 0.226914207 | 0.999371363 | Not Sig |
| ENSG00000271133 | LOC101927811 | uncharacterized LOC101927811                   | 101927811 | 12.37015639 | 1.206048818 | 0.959993404 | 1.256309485 | 0.209003784 | 0.999371363 | Not Sig |
| ENSG00000207771 | MIR550A1     | microRNA 550a-1                                | 693133    | 5.53250031  | 1.206158658 | 1.19714956  | 1.007525457 | 0.313682331 | NA          | NA      |
| ENSG00000207771 | MIR550B1     | microRNA 550b-1                                | 100500883 | 5.53250031  | 1.206158658 | 1.19714956  | 1.007525457 | 0.313682331 | NA          | NA      |
| ENSG00000204174 | NPY4R        | neuropeptide Y receptor Y4                     | 5540      | 58.82121898 | 1.207570117 | 1.348502076 | 0.895489995 | 0.370525212 | 0.999371363 | Not Sig |
| ENSG00000211746 | NA           | NA                                             | NA        | 12.73564644 | 1.209155631 | 0.949102083 | 1.273999555 | 0.202663574 | 0.999371363 | Not Sig |
| ENSG00000110375 | UPK2         | uroplakin 2                                    | 7379      | 3.183845432 | 1.209328345 | 1.525543445 | 0.792719702 | 0.427941149 | NA          | NA      |
| ENSG00000211640 | NA           | NA                                             | NA        | 331.4729877 | 1.209576686 | 1.059702561 | 1.14143037  | 0.253690873 | 0.999371363 | Not Sig |
| ENSG00000163331 | DAPL1        | death associated protein like 1                | 92196     | 3.844778291 | 1.21033754  | 1.669133283 | 0.725129354 | 0.468372678 | NA          | NA      |
| ENSG00000099953 | MMP11        | matrix metalloproteinase 11                    | 4320      | 347.6739276 | 1.210512009 | 0.930300618 | 1.301205208 | 0.193188223 | 0.999371363 | Not Sig |
| ENSG00000221990 | EXOC3-AS1    | EXOC3 antisense RNA 1                          | 116349    | 69.14760619 | 1.210660052 | 0.78135982  | 1.549427064 | 0.121279092 | 0.999371363 | Not Sig |
| ENSG00000205704 | LINC00634    | long intergenic non-protein coding RNA 634     | 339674    | 1.330091225 | 1.210920715 | 2.38066176  | 0.508648786 | 0.610998426 | NA          | NA      |
| ENSG00000225335 | NA           | NA                                             | NA        | 8.731933473 | 1.211244291 | 0.945137879 | 1.281553007 | 0.199999494 | 0.999371363 | Not Sig |
| ENSG00000115457 | IGFBP2       | insulin like growth factor binding protein 2   | 3485      | 1749.848325 | 1.211460165 | 0.947457322 | 1.278643519 | 0.201022617 | 0.999371363 | Not Sig |
| ENSG00000224775 | NA           | NA                                             | NA        | 14.91589435 | 1.211805704 | 0.986120446 | 1.228861757 | 0.219123642 | 0.999371363 | Not Sig |
| ENSG00000086712 | TXLNG        | taxilin gamma                                  | 55787     | 749.1012595 | 1.213142982 | 0.4542407   | 2.67070516  | 0.00756921  | 0.42176576  | Not Sig |
| ENSG00000167769 | ACER1        | alkaline ceramidase 1                          | 125981    | 1.606154117 | 1.21359523  | 1.933617799 | 0.627629323 | 0.530246795 | NA          | NA      |
| ENSG00000073737 | DHRS9        | dehydrogenase/reductase 9                      | 10170     | 138.2671091 | 1.214190826 | 1.088629058 | 1.115339349 | 0.264705029 | 0.999371363 | Not Sig |
| ENSG00000163959 | SLC51A       | solute carrier family 51 alpha subunit         | 200931    | 10.33793287 | 1.214371593 | 0.902426242 | 1.345674069 | 0.178407653 | 0.999371363 | Not Sig |
| ENSG00000157593 | SLC35B2      | solute carrier family 35 member B2             | 347734    | 808.1797486 | 1.215721042 | 0.470212214 | 2.585473122 | 0.009724545 | 0.489844803 | Not Sig |
| ENSG00000241361 | NA           | NA                                             | NA        | 1.68654311  | 1.216470267 | 2.602984767 | 0.467336683 | 0.640259015 | NA          | NA      |
| ENSG00000232415 | NA           | NA                                             | NA        | 41.16471929 | 1.217400406 | 0.897637599 | 1.356227064 | 0.175026933 | 0.999371363 | Not Sig |
| ENSG00000227450 | NA           | NA                                             | NA        | 12.07302784 | 1.217859707 | 1.012302219 | 1.203059407 | 0.228953332 | 0.999371363 | Not Sig |

|                 |              |                                                                            |           |             |             |             |             |             |             |         |
|-----------------|--------------|----------------------------------------------------------------------------|-----------|-------------|-------------|-------------|-------------|-------------|-------------|---------|
| ENSG00000253349 | NA           | NA                                                                         | NA        | 1.080343776 | 1.21963754  | 2.269409916 | 0.537424963 | 0.590974104 | NA          | NA      |
| ENSG00000266369 | NA           | NA                                                                         | NA        | 1.02269911  | 1.219831601 | 3.005916419 | 0.405810219 | 0.684882049 | NA          | NA      |
| ENSG00000205184 | NA           | NA                                                                         | NA        | 1.336528761 | 1.219832519 | 2.379329008 | 0.512679211 | 0.608175734 | NA          | NA      |
| ENSG00000231386 | NA           | NA                                                                         | NA        | 1.897499731 | 1.220395155 | 2.17051895  | 0.562259617 | 0.573939148 | NA          | NA      |
| ENSG00000164294 | GPX8         | glutathione peroxidase 8 (putative)                                        | 493869    | 454.5471817 | 1.220529604 | 0.766329253 | 1.592696089 | 0.111228385 | 0.999371363 | Not Sig |
| ENSG00000127252 | HRASLS       | HRAS like suppressor                                                       | 57110     | 11.51113178 | 1.222303005 | 1.64672227  | 0.74226421  | 0.457927272 | 0.999371363 | Not Sig |
| ENSG00000189431 | RASSF10      | Ras association domain family member 10                                    | 644943    | 218.4386657 | 1.223305406 | 0.851463543 | 1.436709083 | 0.150800673 | 0.999371363 | Not Sig |
| ENSG00000203652 | NA           | NA                                                                         | NA        | 13.14646707 | 1.223804727 | 0.912545247 | 1.341089367 | 0.179891439 | 0.999371363 | Not Sig |
| ENSG00000174500 | GCSAM        | germinal center associated signaling and motility                          | 257144    | 21.90107187 | 1.22508283  | 1.102026927 | 1.111663245 | 0.266282968 | 0.999371363 | Not Sig |
| ENSG00000171812 | COL8A2       | collagen type VIII alpha 2 chain                                           | 1296      | 759.005461  | 1.226014984 | 0.708678876 | 1.730000747 | 0.083630142 | 0.999371363 | Not Sig |
| ENSG00000179456 | ZBTB18       | zinc finger and BTB domain containing 18                                   | 10472     | 1357.418383 | 1.226050735 | 0.66302781  | 1.849169396 | 0.064433356 | 0.999371363 | Not Sig |
| ENSG00000236334 | PPIAL4G      | peptidylprolyl isomerase A like 4G                                         | 644591    | 1.086781311 | 1.228551861 | 2.231028201 | 0.550666218 | 0.581862507 | NA          | NA      |
| ENSG00000100167 | 3-Sep        | septin 3                                                                   | 55964     | 80.46849146 | 1.229245252 | 0.85813011  | 1.43246955  | 0.152009487 | 0.999371363 | Not Sig |
| ENSG00000178372 | CALML5       | calmodulin like 5                                                          | 51806     | 2.04539822  | 1.229372801 | 2.495696807 | 0.492597016 | 0.622297357 | NA          | NA      |
| ENSG00000199546 | NA           | NA                                                                         | NA        | 1.029136646 | 1.230444962 | 2.947576314 | 0.417442953 | 0.676354442 | NA          | NA      |
| ENSG00000266110 | MIR4423      | microRNA 4423                                                              | 100616481 | 1.029136646 | 1.230444962 | 2.947576314 | 0.417442953 | 0.676354442 | NA          | NA      |
| ENSG00000225986 | UBXN10-AS1   | UBXN10 antisense RNA 1                                                     | 101928017 | 20.83216779 | 1.230512782 | 0.91418225  | 1.346025677 | 0.178294236 | 0.999371363 | Not Sig |
| ENSG00000221782 | MIR548F2     | microRNA 548f-2                                                            | 100313771 | 0.586002052 | 1.232004184 | 3.525608079 | 0.349444452 | 0.726755666 | NA          | NA      |
| ENSG00000226912 | NA           | NA                                                                         | NA        | 0.586002052 | 1.232004184 | 3.525608079 | 0.349444452 | 0.726755666 | NA          | NA      |
| ENSG00000229220 | NA           | NA                                                                         | NA        | 0.586002052 | 1.232004184 | 3.525608079 | 0.349444452 | 0.726755666 | NA          | NA      |
| ENSG00000235248 | NA           | NA                                                                         | NA        | 0.586002052 | 1.232004184 | 3.525608079 | 0.349444452 | 0.726755666 | NA          | NA      |
| ENSG00000268156 | NA           | NA                                                                         | NA        | 0.586002052 | 1.232004184 | 3.525608079 | 0.349444452 | 0.726755666 | NA          | NA      |
| ENSG00000231621 | LOC101927596 | uncharacterized LOC101927596                                               | 101927596 | 15.52332987 | 1.232114355 | 1.256221714 | 0.980809631 | 0.326686628 | 0.999371363 | Not Sig |
| ENSG00000168065 | SLC22A11     | solute carrier family 22 member 11                                         | 55867     | 0.602308844 | 1.23228681  | 3.495197802 | 0.352565686 | 0.724414066 | NA          | NA      |
| ENSG00000227335 | NA           | NA                                                                         | NA        | 0.602308844 | 1.23228681  | 3.495197802 | 0.352565686 | 0.724414066 | NA          | NA      |
| ENSG00000237645 | NA           | NA                                                                         | NA        | 0.602308844 | 1.23228681  | 3.495197802 | 0.352565686 | 0.724414066 | NA          | NA      |
| ENSG00000240652 | NA           | NA                                                                         | NA        | 0.602308844 | 1.23228681  | 3.495197802 | 0.352565686 | 0.724414066 | NA          | NA      |
| ENSG00000254980 | NA           | NA                                                                         | NA        | 0.602308844 | 1.23228681  | 3.495197802 | 0.352565686 | 0.724414066 | NA          | NA      |
| ENSG00000268100 | NA           | NA                                                                         | NA        | 0.602308844 | 1.23228681  | 3.495197802 | 0.352565686 | 0.724414066 | NA          | NA      |
| ENSG00000229795 | NA           | NA                                                                         | NA        | 2.474517202 | 1.232819773 | 1.660527687 | 0.742426508 | 0.457828964 | NA          | NA      |
| ENSG00000176855 | NA           | NA                                                                         | NA        | 0.644376676 | 1.232998702 | 3.422082631 | 0.360306525 | 0.71861792  | NA          | NA      |
| ENSG00000200972 | NA           | NA                                                                         | NA        | 0.644376676 | 1.232998702 | 3.422082631 | 0.360306525 | 0.71861792  | NA          | NA      |
| ENSG00000201899 | SNORD114-24  | small nucleolar RNA, C/D box 114-24                                        | 767604    | 0.644376676 | 1.232998702 | 3.422082631 | 0.360306525 | 0.71861792  | NA          | NA      |
| ENSG00000222035 | NA           | NA                                                                         | NA        | 0.644376676 | 1.232998702 | 3.422082631 | 0.360306525 | 0.71861792  | NA          | NA      |
| ENSG00000226746 | SMCR5        | Smith-Magenis syndrome chromosome region, candidate 5 (non-protein coding) | 140771    | 0.644376676 | 1.232998702 | 3.422082631 | 0.360306525 | 0.71861792  | NA          | NA      |

|                 |              |                                                         |           |             |             |             |             |             |             |         |
|-----------------|--------------|---------------------------------------------------------|-----------|-------------|-------------|-------------|-------------|-------------|-------------|---------|
| ENSG00000242628 | NA           | NA                                                      | NA        | 0.644376676 | 1.232998702 | 3.422082631 | 0.360306525 | 0.71861792  | NA          | NA      |
| ENSG00000264183 | NA           | NA                                                      | NA        | 2.260389151 | 1.233149555 | 2.086816586 | 0.590923785 | 0.554571489 | NA          | NA      |
| ENSG00000211727 | NA           | NA                                                      | NA        | 3.321160031 | 1.233225001 | 1.570796216 | 0.785095475 | 0.432397593 | NA          | NA      |
| ENSG00000235397 | EPN2-AS1     | EPN2 antisense RNA 1                                    | 100874018 | 1.131550906 | 1.233981915 | 2.891639494 | 0.426741272 | 0.669567786 | NA          | NA      |
| ENSG00000006042 | TMEM98       | transmembrane protein 98                                | 26022     | 1383.833863 | 1.23404426  | 0.487182088 | 2.533024694 | 0.011308299 | 0.525481197 | Not Sig |
| ENSG00000243445 | NA           | NA                                                      | NA        | 4.491900492 | 1.234764664 | 1.594589762 | 0.774346289 | 0.438726037 | NA          | NA      |
| ENSG00000273445 | NA           | NA                                                      | NA        | 12.27823703 | 1.238023152 | 0.970759587 | 1.275313856 | 0.202198175 | 0.999371363 | Not Sig |
| ENSG00000137959 | IFI44L       | interferon induced protein 44 like                      | 10964     | 2218.058937 | 1.241322874 | 1.089025843 | 1.139847031 | 0.254350036 | 0.999371363 | Not Sig |
| ENSG00000223564 | NA           | NA                                                      | NA        | 1.035574181 | 1.241698313 | 2.943975835 | 0.421775987 | 0.673188535 | NA          | NA      |
| ENSG00000255119 | NA           | NA                                                      | NA        | 1.035574181 | 1.241698313 | 2.943975835 | 0.421775987 | 0.673188535 | NA          | NA      |
| ENSG00000166391 | MOGAT2       | monoacylglycerol O-acyltransferase 2                    | 80168     | 6.232518111 | 1.241732342 | 1.770011617 | 0.701539092 | 0.482966647 | NA          | NA      |
| ENSG00000132207 | SLX1A        | SLX1 homolog A, structure-specific endonuclease subunit | 548593    | 1.714851195 | 1.241906488 | 1.93013481  | 0.643429921 | 0.519945174 | NA          | NA      |
| ENSG00000132207 | LOC105369236 | structure-specific endonuclease subunit SLX1            | 105369236 | 1.714851195 | 1.241906488 | 1.93013481  | 0.643429921 | 0.519945174 | NA          | NA      |
| ENSG00000260005 | NA           | NA                                                      | NA        | 3.90400155  | 1.244745164 | 1.328091331 | 0.937243648 | 0.348633243 | NA          | NA      |
| ENSG00000105737 | GRIK5        | glutamate ionotropic receptor kainate type subunit 5    | 2901      | 27.03440393 | 1.244978665 | 0.844876254 | 1.473563329 | 0.140599201 | 0.999371363 | Not Sig |
| ENSG00000259449 | NA           | NA                                                      | NA        | 1.262732021 | 1.245891292 | 2.53317122  | 0.491830667 | 0.622839055 | NA          | NA      |
| ENSG00000162572 | SCNN1D       | sodium channel epithelial 1 delta subunit               | 6339      | 104.7205772 | 1.245982281 | 0.701324585 | 1.776612864 | 0.075631958 | 0.999371363 | Not Sig |
| ENSG00000167419 | LPO          | lactoperoxidase                                         | 4025      | 3.82775244  | 1.245983426 | 1.467481212 | 0.849062608 | 0.395846455 | NA          | NA      |
| ENSG00000132932 | ATP8A2       | ATPase phospholipid transporting 8A2                    | 51761     | 150.924649  | 1.24625023  | 1.135271384 | 1.097755345 | 0.272311335 | 0.999371363 | Not Sig |
| ENSG00000257403 | NA           | NA                                                      | NA        | 13.57644185 | 1.246951019 | 1.019934646 | 1.222579333 | 0.221488623 | 0.999371363 | Not Sig |
| ENSG00000253379 | NA           | NA                                                      | NA        | 12.53515566 | 1.247211614 | 1.325573297 | 0.940884685 | 0.346763957 | 0.999371363 | Not Sig |
| ENSG00000210144 | NA           | NA                                                      | NA        | 6.237623099 | 1.2476379   | 1.157123714 | 1.07822343  | 0.280934058 | NA          | NA      |
| ENSG00000255750 | NA           | NA                                                      | NA        | 1.942009035 | 1.248306195 | 1.945392624 | 0.641673141 | 0.521085432 | NA          | NA      |
| ENSG00000197826 | C4orf22      | chromosome 4 open reading frame 22                      | 255119    | 15.86151155 | 1.249341711 | 1.172830378 | 1.065236486 | 0.286768927 | 0.999371363 | Not Sig |
| ENSG00000105877 | DNAH11       | dynein axonemal heavy chain 11                          | 8701      | 1872.114241 | 1.24971652  | 0.68290779  | 1.829993066 | 0.067250976 | 0.999371363 | Not Sig |
| ENSG00000133216 | EPHB2        | EPH receptor B2                                         | 2048      | 464.9543477 | 1.249900469 | 0.677697203 | 1.8443347   | 0.065134377 | 0.999371363 | Not Sig |
| ENSG00000177291 | GJD4         | gap junction protein delta 4                            | 219770    | 0.592439588 | 1.250608038 | 3.515674246 | 0.355723526 | 0.722047625 | NA          | NA      |
| ENSG00000207797 | MIR187       | microRNA 187                                            | 406963    | 0.592439588 | 1.250608038 | 3.515674246 | 0.355723526 | 0.722047625 | NA          | NA      |
| ENSG00000236360 | NA           | NA                                                      | NA        | 0.592439588 | 1.250608038 | 3.515674246 | 0.355723526 | 0.722047625 | NA          | NA      |
| ENSG00000240125 | NA           | NA                                                      | NA        | 0.592439588 | 1.250608038 | 3.515674246 | 0.355723526 | 0.722047625 | NA          | NA      |
| ENSG00000259589 | NA           | NA                                                      | NA        | 0.592439588 | 1.250608038 | 3.515674246 | 0.355723526 | 0.722047625 | NA          | NA      |
| ENSG00000188512 | NA           | NA                                                      | NA        | 0.608746379 | 1.250840534 | 3.485748802 | 0.358844141 | 0.719711689 | NA          | NA      |
| ENSG00000254683 | NA           | NA                                                      | NA        | 0.608746379 | 1.250840534 | 3.485748802 | 0.358844141 | 0.719711689 | NA          | NA      |
| ENSG00000258560 | NA           | NA                                                      | NA        | 0.608746379 | 1.250840534 | 3.485748802 | 0.358844141 | 0.719711689 | NA          | NA      |
| ENSG00000269074 | NA           | NA                                                      | NA        | 0.608746379 | 1.250840534 | 3.485748802 | 0.358844141 | 0.719711689 | NA          | NA      |

|                 |              |                                              |           |             |             |             |             |             |             |         |
|-----------------|--------------|----------------------------------------------|-----------|-------------|-------------|-------------|-------------|-------------|-------------|---------|
| ENSG00000272521 | NA           | NA                                           | NA        | 0.608746379 | 1.250840534 | 3.485748802 | 0.358844141 | 0.719711689 | NA          | NA      |
| ENSG00000184844 | NA           | NA                                           | NA        | 0.650814211 | 1.251426164 | 3.413746073 | 0.366584432 | 0.713929023 | NA          | NA      |
| ENSG00000206790 | NA           | NA                                           | NA        | 0.650814211 | 1.251426164 | 3.413746073 | 0.366584432 | 0.713929023 | NA          | NA      |
| ENSG00000227688 | NA           | NA                                           | NA        | 0.650814211 | 1.251426164 | 3.413746073 | 0.366584432 | 0.713929023 | NA          | NA      |
| ENSG00000260570 | NA           | NA                                           | NA        | 0.650814211 | 1.251426164 | 3.413746073 | 0.366584432 | 0.713929023 | NA          | NA      |
| ENSG00000222920 | NA           | NA                                           | NA        | 4.240011186 | 1.25160479  | 1.836895187 | 0.681369737 | 0.495637567 | NA          | NA      |
| ENSG00000268171 | NA           | NA                                           | NA        | 1.823702991 | 1.252065609 | 1.871272144 | 0.66909862  | 0.50343257  | NA          | NA      |
| ENSG00000110400 | NECTIN1      | nectin cell adhesion molecule 1              | 5818      | 773.1032693 | 1.253630066 | 0.550159381 | 2.278667073 | 0.022686863 | 0.765556876 | Not Sig |
| ENSG00000168754 | FAM178B      | family with sequence similarity 178 member B | 51252     | 16.90621424 | 1.253838338 | 0.738500629 | 1.697816208 | 0.089542456 | 0.999371363 | Not Sig |
| ENSG00000214856 | NA           | NA                                           | NA        | 63.54616055 | 1.253934861 | 1.043189285 | 1.202020458 | 0.229355602 | 0.999371363 | Not Sig |
| ENSG00000160606 | TLCD1        | TLC domain containing 1                      | 116238    | 189.5262661 | 1.254211405 | 0.634687666 | 1.976108048 | 0.048142541 | 0.999371363 | Not Sig |
| ENSG00000267472 | NA           | NA                                           | NA        | 5.934259911 | 1.254236245 | 1.318583224 | 0.951199911 | 0.341502904 | NA          | NA      |
| ENSG00000225745 | NA           | NA                                           | NA        | 2.24408236  | 1.254641926 | 1.827825464 | 0.686412325 | 0.492453135 | NA          | NA      |
| ENSG00000264211 | MIR4492      | microRNA 4492                                | 100616376 | 1.364991564 | 1.257093998 | 2.373333477 | 0.529674405 | 0.596337697 | NA          | NA      |
| ENSG00000126733 | DACH2        | dachshund family transcription factor 2      | 117154    | 6.894665467 | 1.257875848 | 1.355834144 | 0.927750532 | 0.35353699  | 0.999371363 | Not Sig |
| ENSG00000154768 | NA           | NA                                           | NA        | 4.869503867 | 1.258980701 | 1.348545906 | 0.933583867 | 0.350518591 | NA          | NA      |
| ENSG00000183038 | NA           | NA                                           | NA        | 3.122310276 | 1.259263295 | 1.935919475 | 0.650472972 | 0.515386755 | NA          | NA      |
| ENSG00000271714 | NA           | NA                                           | NA        | 2.208462961 | 1.259470241 | 1.691346867 | 0.744655201 | 0.456480188 | NA          | NA      |
| ENSG00000175643 | RMI2         | RecQ mediated genome instability 2           | 116028    | 120.7975229 | 1.262524559 | 0.61949698  | 2.037983396 | 0.041551593 | 0.999371363 | Not Sig |
| ENSG00000218233 | NA           | NA                                           | NA        | 4.408079779 | 1.266178316 | 1.691107281 | 0.748727375 | 0.45402154  | NA          | NA      |
| ENSG00000231360 | NA           | NA                                           | NA        | 27.53473174 | 1.266613461 | 1.133697765 | 1.117240855 | 0.263891356 | 0.999371363 | Not Sig |
| ENSG00000257277 | NA           | NA                                           | NA        | 2.747148374 | 1.266729541 | 1.689944467 | 0.749568738 | 0.453514485 | NA          | NA      |
| ENSG00000253741 | LOC100288181 | uncharacterized LOC100288181                 | 100288181 | 13.47338691 | 1.266730897 | 1.052719605 | 1.203293727 | 0.228862676 | 0.999371363 | Not Sig |
| ENSG00000223516 | NA           | NA                                           | NA        | 1.919264708 | 1.268481001 | 2.200658089 | 0.576409851 | 0.564338188 | NA          | NA      |
| ENSG00000226609 | NA           | NA                                           | NA        | 4.198507696 | 1.268985555 | 1.256115239 | 1.010246122 | 0.312377387 | NA          | NA      |
| ENSG00000269289 | LOC100505851 | uncharacterized LOC100505851                 | 100505851 | 4.278636399 | 1.269155869 | 1.537496047 | 0.825469354 | 0.409105174 | NA          | NA      |
| ENSG00000171408 | PDE7B        | phosphodiesterase 7B                         | 27115     | 159.3812794 | 1.269982057 | 0.831762013 | 1.526857486 | 0.126796453 | 0.999371363 | Not Sig |
| ENSG00000204659 | CBY3         | chibby family member 3                       | 646019    | 1.253123055 | 1.271566875 | 2.43964138  | 0.52121057  | 0.602220092 | NA          | NA      |
| ENSG00000264113 | NA           | NA                                           | NA        | 1.377866635 | 1.274441913 | 2.370837843 | 0.537549169 | 0.590888331 | NA          | NA      |
| ENSG00000084674 | APOB         | apolipoprotein B                             | 338       | 17.2804842  | 1.274584337 | 0.915653271 | 1.391994521 | 0.163924057 | 0.999371363 | Not Sig |
| ENSG00000254997 | KRTAP5-9     | keratin associated protein 5-9               | 3846      | 2.913490118 | 1.275058912 | 1.454490119 | 0.876636352 | 0.380684188 | NA          | NA      |
| ENSG00000255833 | TIFAB        | TIFA inhibitor                               | 497189    | 24.94882952 | 1.275455014 | 0.955165465 | 1.335323628 | 0.181770449 | 0.999371363 | Not Sig |
| ENSG00000269554 | NA           | NA                                           | NA        | 51.29984305 | 1.27570988  | 0.860589349 | 1.482367731 | 0.138242475 | 0.999371363 | Not Sig |
| ENSG00000164621 | SMAD5-AS1    | SMAD5 antisense RNA 1                        | 9597      | 1.727422214 | 1.277952658 | 2.599176492 | 0.491675984 | 0.622948419 | NA          | NA      |
| ENSG00000160951 | PTGER1       | prostaglandin E receptor 1                   | 5731      | 49.88465036 | 1.278755688 | 0.94687982  | 1.350494182 | 0.176857519 | 0.999371363 | Not Sig |



|                 |              |                                                       |           |             |             |             |             |             |             |         |
|-----------------|--------------|-------------------------------------------------------|-----------|-------------|-------------|-------------|-------------|-------------|-------------|---------|
| ENSG00000256799 | NA           | NA                                                    | NA        | 1.12168165  | 1.278909019 | 2.223588809 | 0.575155359 | 0.565186231 | NA          | NA      |
| ENSG00000171495 | MROH2B       | maestro heat like repeat family member 2B             | 133558    | 1.115244114 | 1.280013127 | 2.527550747 | 0.506424304 | 0.612558817 | NA          | NA      |
| ENSG00000228835 | NA           | NA                                                    | NA        | 1.115244114 | 1.280013127 | 2.527550747 | 0.506424304 | 0.612558817 | NA          | NA      |
| ENSG00000184611 | KCNH7        | potassium voltage-gated channel subfamily H member 7  | 90134     | 1.653929527 | 1.281159357 | 2.251097525 | 0.569126545 | 0.569270265 | NA          | NA      |
| ENSG00000185624 | P4HB         | prolyl 4-hydroxylase subunit beta                     | 5034      | 21106.05981 | 1.281733891 | 0.505223664 | 2.536963294 | 0.011181868 | 0.523469371 | Not Sig |
| ENSG00000238298 | NA           | NA                                                    | NA        | 4.08622418  | 1.284393451 | 1.28441489  | 0.999983309 | 0.317318586 | NA          | NA      |
| ENSG00000242841 | NA           | NA                                                    | NA        | 1.989784445 | 1.285821431 | 2.22351205  | 0.578283995 | 0.563072398 | NA          | NA      |
| ENSG00000174502 | SLC26A9      | solute carrier family 26 member 9                     | 115019    | 788.7298206 | 1.286088398 | 0.925492678 | 1.389625688 | 0.164642571 | 0.999371363 | Not Sig |
| ENSG00000266446 | NA           | NA                                                    | NA        | 17.52751904 | 1.286732055 | 1.042092703 | 1.234757763 | 0.216920671 | 0.999371363 | Not Sig |
| ENSG00000006327 | TNFRSF12A    | TNF receptor superfamily member 12A                   | 51330     | 1338.621412 | 1.286912937 | 0.640706086 | 2.008585473 | 0.044581113 | 0.999371363 | Not Sig |
| ENSG00000100346 | CACNA1I      | calcium voltage-gated channel subunit alpha 1         | 8911      | 26.99239568 | 1.2869398   | 0.756755386 | 1.700602102 | 0.089017729 | 0.999371363 | Not Sig |
| ENSG00000271631 | NA           | NA                                                    | NA        | 11.10238909 | 1.290037771 | 0.935660385 | 1.378745741 | 0.167973161 | 0.999371363 | Not Sig |
| ENSG00000184961 | NA           | NA                                                    | NA        | 2.198593705 | 1.291173223 | 1.730430453 | 0.746157247 | 0.455572431 | NA          | NA      |
| ENSG00000005187 | ACSM3        | acyl-CoA synthetase medium chain family member 3      | 6296      | 291.4152968 | 1.291420842 | 0.588099333 | 2.195922981 | 0.028097457 | 0.871505591 | Not Sig |
| ENSG00000202310 | NA           | NA                                                    | NA        | 4.261870838 | 1.293793131 | 1.30027274  | 0.995016731 | 0.319728127 | NA          | NA      |
| ENSG00000168878 | SFTPB        | surfactant protein B                                  | 6439      | 145270.885  | 1.294063519 | 0.882762627 | 1.465924677 | 0.142668808 | 0.999371363 | Not Sig |
| ENSG00000249773 | NA           | NA                                                    | NA        | 4.041150533 | 1.294300945 | 1.272718157 | 1.016958027 | 0.309173397 | NA          | NA      |
| ENSG00000134762 | DSC3         | desmocollin 3                                         | 1825      | 15.96280594 | 1.295295246 | 1.06906505  | 1.211614996 | 0.225659792 | 0.999371363 | Not Sig |
| ENSG00000235335 | NA           | NA                                                    | NA        | 1.24642523  | 1.295576794 | 2.538222854 | 0.510426731 | 0.609752533 | NA          | NA      |
| ENSG00000235802 | NA           | NA                                                    | NA        | 1.24642523  | 1.295576794 | 2.538222854 | 0.510426731 | 0.609752533 | NA          | NA      |
| ENSG00000268790 | NA           | NA                                                    | NA        | 1.24642523  | 1.295576794 | 2.538222854 | 0.510426731 | 0.609752533 | NA          | NA      |
| ENSG00000182985 | CADM1        | cell adhesion molecule 1                              | 23705     | 3431.118985 | 1.295631017 | 0.670568485 | 1.932138246 | 0.053342445 | 0.999371363 | Not Sig |
| ENSG00000168490 | PHYHIP       | phytanoyl-CoA 2-hydroxylase interacting protein       | 9796      | 27.05459552 | 1.295732447 | 0.640060263 | 2.024391331 | 0.042929903 | 0.999371363 | Not Sig |
| ENSG00000171357 | LURAP1       | leucine rich adaptor protein 1                        | 541468    | 65.14598065 | 1.296316904 | 0.789808045 | 1.641306279 | 0.100733853 | 0.999371363 | Not Sig |
| ENSG00000166432 | ZMAT1        | zinc finger matrin-type 1                             | 84460     | 563.8878244 | 1.296407543 | 0.76313513  | 1.698791592 | 0.089358458 | 0.999371363 | Not Sig |
| ENSG00000260442 | ATP2A1-AS1   | ATP2A1 antisense RNA 1                                | 100289092 | 6.210822665 | 1.29754792  | 1.228856814 | 1.05589838  | 0.291014644 | NA          | NA      |
| ENSG00000100612 | DHRS7        | dehydrogenase/reductase 7                             | 51635     | 1380.448787 | 1.298973545 | 0.523618228 | 2.480764564 | 0.013110093 | 0.569294502 | Not Sig |
| ENSG00000212434 | NA           | NA                                                    | NA        | 2.922795032 | 1.299583958 | 2.349902621 | 0.553037367 | 0.580237823 | NA          | NA      |
| ENSG00000135338 | LCA5         | LCA5, lebercilin                                      | 167691    | 439.9736683 | 1.3004671   | 0.541880421 | 2.399915276 | 0.016398867 | 0.655590259 | Not Sig |
| ENSG00000117308 | GALE         | UDP-galactose-4-epimerase                             | 2582      | 1451.748115 | 1.300919663 | 0.705499938 | 1.843968501 | 0.065187731 | 0.999371363 | Not Sig |
| ENSG00000232671 | LOC100507670 | uncharacterized LOC100507670                          | 100507670 | 13.86522095 | 1.30093852  | 0.80116152  | 1.623815531 | 0.104415184 | 0.999371363 | Not Sig |
| ENSG00000103485 | QPRT         | quinolinate phosphoribosyltransferase                 | 23475     | 896.5622024 | 1.302387518 | 0.810788822 | 1.606321502 | 0.108203288 | 0.999371363 | Not Sig |
| ENSG00000103485 | LOC105369247 | leukosialin                                           | 105369247 | 896.5622024 | 1.302387518 | 0.810788822 | 1.606321502 | 0.108203288 | 0.999371363 | Not Sig |
| ENSG00000185899 | TAS2R60      | taste 2 receptor member 60                            | 338398    | 5.978965025 | 1.30549412  | 1.349543116 | 0.967360068 | 0.333364065 | NA          | NA      |
| ENSG00000187486 | KCNJ11       | potassium voltage-gated channel subfamily J member 11 | 3767      | 100.5983776 | 1.30770073  | 0.799516796 | 1.635613832 | 0.101920434 | 0.999371363 | Not Sig |

|                 |              |                                                                                                                 |           |             |             |             |             |             |             |         |
|-----------------|--------------|-----------------------------------------------------------------------------------------------------------------|-----------|-------------|-------------|-------------|-------------|-------------|-------------|---------|
| ENSG00000158014 | SLC30A2      | solute carrier family 30 member 2                                                                               | 7780      | 9.184349776 | 1.307773099 | 1.366965797 | 0.956697747 | 0.338719836 | 0.999371363 | Not Sig |
| ENSG00000229162 | NA           | NA                                                                                                              | NA        | 3.277349068 | 1.307786426 | 1.680280959 | 0.778314138 | 0.436383843 | NA          | NA      |
| ENSG00000125844 | RRBP1        | ribosome binding protein 1                                                                                      | 6238      | 11917.92752 | 1.308681451 | 0.56041534  | 2.335199195 | 0.019533017 | 0.709667191 | Not Sig |
| ENSG00000123836 | PFKFB2       | 6-phosphofructo-2-kinase/fructose-2,6-bisphosphatase 2                                                          | 5208      | 1648.723296 | 1.309744541 | 0.550939653 | 2.3772922   | 0.017440267 | 0.670000634 | Not Sig |
| ENSG00000227857 | LOC101929626 | uncharacterized LOC101929626                                                                                    | 101929626 | 2.291398999 | 1.309830205 | 1.790969491 | 0.731352606 | 0.464563806 | NA          | NA      |
| ENSG00000226478 | NA           | NA                                                                                                              | NA        | 1.134556721 | 1.310338687 | 2.521588023 | 0.519648204 | 0.603308794 | NA          | NA      |
| ENSG00000169885 | CALML6       | calmodulin like 6                                                                                               | 163688    | 10.52463088 | 1.310707484 | 1.114229661 | 1.176335121 | 0.239460986 | 0.999371363 | Not Sig |
| ENSG00000082014 | SMARCD3      | <small>SMR/SM related, matrix associated, actin dependent regulator of chromatin, subfamily A, member 3</small> | 6604      | 762.2299149 | 1.31589028  | 0.735323587 | 1.789539059 | 0.073528043 | 0.999371363 | Not Sig |
| ENSG00000079841 | RIMS1        | regulating synaptic membrane exocytosis 1                                                                       | 22999     | 154.2267468 | 1.316888132 | 0.963342269 | 1.366999221 | 0.17162555  | 0.999371363 | Not Sig |
| ENSG00000228445 | NA           | NA                                                                                                              | NA        | 2.233494044 | 1.317573741 | 1.730958741 | 0.761181482 | 0.446548677 | NA          | NA      |
| ENSG00000212049 | NA           | NA                                                                                                              | NA        | 3.998517401 | 1.319545254 | 1.601237298 | 0.824078515 | 0.409894947 | NA          | NA      |
| ENSG00000234130 | NA           | NA                                                                                                              | NA        | 1.281585858 | 1.319868568 | 2.19488726  | 0.601337751 | 0.54761505  | NA          | NA      |
| ENSG00000105647 | PIK3R2       | phosphoinositide-3-kinase regulatory subunit 2                                                                  | 5296      | 2.486507598 | 1.320253654 | 2.009280847 | 0.657077708 | 0.511130952 | NA          | NA      |
| ENSG00000162670 | BRINP3       | BMP/retinoic acid inducible neural specific 3                                                                   | 339479    | 34.17334322 | 1.32312938  | 1.035979989 | 1.277176581 | 0.201539913 | 0.999371363 | Not Sig |
| ENSG00000077274 | CAPN6        | calpain 6                                                                                                       | 827       | 108.1515912 | 1.324618659 | 1.477483338 | 0.896537122 | 0.369965963 | 0.999371363 | Not Sig |
| ENSG00000237515 | SHISA9       | shisa family member 9                                                                                           | 729993    | 1.615138698 | 1.326968426 | 2.592731993 | 0.51180316  | 0.608788779 | NA          | NA      |
| ENSG00000135903 | PAX3         | paired box 3                                                                                                    | 5077      | 0.679277014 | 1.327406803 | 3.378246565 | 0.392927744 | 0.694372849 | NA          | NA      |
| ENSG00000174576 | NPAS4        | neuronal PAS domain protein 4                                                                                   | 266743    | 0.679277014 | 1.327406803 | 3.378246565 | 0.392927744 | 0.694372849 | NA          | NA      |
| ENSG00000200605 | NA           | NA                                                                                                              | NA        | 0.679277014 | 1.327406803 | 3.378246565 | 0.392927744 | 0.694372849 | NA          | NA      |
| ENSG00000201913 | NA           | NA                                                                                                              | NA        | 0.679277014 | 1.327406803 | 3.378246565 | 0.392927744 | 0.694372849 | NA          | NA      |
| ENSG00000216076 | NA           | NA                                                                                                              | NA        | 0.679277014 | 1.327406803 | 3.378246565 | 0.392927744 | 0.694372849 | NA          | NA      |
| ENSG00000235044 | NA           | NA                                                                                                              | NA        | 0.679277014 | 1.327406803 | 3.378246565 | 0.392927744 | 0.694372849 | NA          | NA      |
| ENSG00000235426 | NA           | NA                                                                                                              | NA        | 0.679277014 | 1.327406803 | 3.378246565 | 0.392927744 | 0.694372849 | NA          | NA      |
| ENSG00000237991 | NA           | NA                                                                                                              | NA        | 0.679277014 | 1.327406803 | 3.378246565 | 0.392927744 | 0.694372849 | NA          | NA      |
| ENSG00000225681 | NA           | NA                                                                                                              | NA        | 0.637209182 | 1.32741336  | 3.445660606 | 0.385242051 | 0.700058091 | NA          | NA      |
| ENSG00000232474 | NA           | NA                                                                                                              | NA        | 0.637209182 | 1.32741336  | 3.445660606 | 0.385242051 | 0.700058091 | NA          | NA      |
| ENSG00000238834 | NA           | NA                                                                                                              | NA        | 0.637209182 | 1.32741336  | 3.445660606 | 0.385242051 | 0.700058091 | NA          | NA      |
| ENSG00000256364 | NA           | NA                                                                                                              | NA        | 0.637209182 | 1.32741336  | 3.445660606 | 0.385242051 | 0.700058091 | NA          | NA      |
| ENSG00000260614 | NA           | NA                                                                                                              | NA        | 0.637209182 | 1.32741336  | 3.445660606 | 0.385242051 | 0.700058091 | NA          | NA      |
| ENSG00000266007 | NA           | NA                                                                                                              | NA        | 0.637209182 | 1.32741336  | 3.445660606 | 0.385242051 | 0.700058091 | NA          | NA      |
| ENSG00000231329 | NA           | NA                                                                                                              | NA        | 0.620902391 | 1.327416005 | 3.473592308 | 0.382145021 | 0.702353799 | NA          | NA      |
| ENSG00000236866 | LOC100996263 | uncharacterized LOC100996263                                                                                    | 100996263 | 0.620902391 | 1.327416005 | 3.473592308 | 0.382145021 | 0.702353799 | NA          | NA      |
| ENSG00000241255 | NA           | NA                                                                                                              | NA        | 0.620902391 | 1.327416005 | 3.473592308 | 0.382145021 | 0.702353799 | NA          | NA      |
| ENSG00000271410 | NA           | NA                                                                                                              | NA        | 0.620902391 | 1.327416005 | 3.473592308 | 0.382145021 | 0.702353799 | NA          | NA      |
| ENSG00000036672 | USP2         | ubiquitin specific peptidase 2                                                                                  | 9099      | 112.8278494 | 1.327746664 | 1.012710466 | 1.311082197 | 0.189829995 | 0.999371363 | Not Sig |

|                 |              |                                                                     |           |             |             |             |             |             |             |         |
|-----------------|--------------|---------------------------------------------------------------------|-----------|-------------|-------------|-------------|-------------|-------------|-------------|---------|
| ENSG00000132681 | ATP1A4       | ATPase Na <sup>+</sup> /K <sup>+</sup> transporting subunit alpha 4 | 480       | 7.026728083 | 1.329559168 | 1.012319962 | 1.313378395 | 0.189055474 | 0.999371363 | Not Sig |
| ENSG00000266701 | NA           | NA                                                                  | NA        | 1.288023394 | 1.330939458 | 2.142478612 | 0.621214817 | 0.534458292 | NA          | NA      |
| ENSG00000112297 | CRYBG1       | crystallin beta-gamma domain containing 1                           | 202       | 1953.443874 | 1.331261908 | 0.441269506 | 3.016890786 | 0.002553818 | 0.21877708  | Not Sig |
| ENSG00000241963 | NA           | NA                                                                  | NA        | 10.37515033 | 1.333963797 | 0.863231597 | 1.545313913 | 0.122270352 | 0.999371363 | Not Sig |
| ENSG00000272414 | FAM47E-STBD1 | FAM47E-STBD1 readthrough                                            | 100631383 | 2.893447553 | 1.335481764 | 1.55468326  | 0.859005688 | 0.390337378 | NA          | NA      |
| ENSG00000130595 | TNNT3        | troponin T3, fast skeletal type                                     | 7140      | 20.44004657 | 1.339096141 | 0.97408543  | 1.374721457 | 0.169217816 | 0.999371363 | Not Sig |
| ENSG00000121957 | GPSM2        | G protein signaling modulator 2                                     | 29899     | 655.2679881 | 1.339389182 | 0.74707769  | 1.792837879 | 0.072998851 | 0.999371363 | Not Sig |
| ENSG00000231484 | NA           | NA                                                                  | NA        | 1.163019524 | 1.339660731 | 2.251961488 | 0.594886164 | 0.551919567 | NA          | NA      |
| ENSG00000166736 | HTR3A        | 5-hydroxytryptamine receptor 3A                                     | 3359      | 16.33489436 | 1.340487508 | 1.351629884 | 0.991756341 | 0.3213164   | 0.999371363 | Not Sig |
| ENSG00000132623 | ANKF1        | ankyrin repeat and EF-hand domain containing 1                      | 63926     | 259.424995  | 1.340497677 | 0.508847222 | 2.63438144  | 0.008429074 | 0.459512221 | Not Sig |
| ENSG00000147223 | RIPPLY1      | rippy transcriptional repressor 1                                   | 92129     | 1.156581988 | 1.342349764 | 2.514760736 | 0.533788263 | 0.593488035 | NA          | NA      |
| ENSG00000248569 | NA           | NA                                                                  | NA        | 1.307336    | 1.343399258 | 2.501772697 | 0.536978943 | 0.591282159 | NA          | NA      |
| ENSG00000222999 | NA           | NA                                                                  | NA        | 0.68571455  | 1.343954924 | 2.907054556 | 0.462308119 | 0.643860378 | NA          | NA      |
| ENSG00000229631 | NA           | NA                                                                  | NA        | 0.68571455  | 1.343954924 | 2.907054556 | 0.462308119 | 0.643860378 | NA          | NA      |
| ENSG00000230199 | NA           | NA                                                                  | NA        | 0.68571455  | 1.343954924 | 2.907054556 | 0.462308119 | 0.643860378 | NA          | NA      |
| ENSG00000238300 | SNORD121B    | small nucleolar RNA, C/D box 121B                                   | 101340252 | 0.68571455  | 1.343954924 | 2.907054556 | 0.462308119 | 0.643860378 | NA          | NA      |
| ENSG00000272742 | NA           | NA                                                                  | NA        | 0.68571455  | 1.343954924 | 2.907054556 | 0.462308119 | 0.643860378 | NA          | NA      |
| ENSG00000207931 | MIR577       | microRNA 577                                                        | 693162    | 0.643646718 | 1.344074271 | 2.956813741 | 0.454568461 | 0.649419729 | NA          | NA      |
| ENSG00000220694 | NA           | NA                                                                  | NA        | 0.643646718 | 1.344074271 | 2.956813741 | 0.454568461 | 0.649419729 | NA          | NA      |
| ENSG00000237263 | NA           | NA                                                                  | NA        | 0.643646718 | 1.344074271 | 2.956813741 | 0.454568461 | 0.649419729 | NA          | NA      |
| ENSG00000255850 | TMEM5-AS1    | TMEM5 antisense RNA 1                                               | 104169670 | 0.643646718 | 1.344074271 | 2.956813741 | 0.454568461 | 0.649419729 | NA          | NA      |
| ENSG00000261864 | NA           | NA                                                                  | NA        | 0.643646718 | 1.344074271 | 2.956813741 | 0.454568461 | 0.649419729 | NA          | NA      |
| ENSG00000270759 | NA           | NA                                                                  | NA        | 0.643646718 | 1.344074271 | 2.956813741 | 0.454568461 | 0.649419729 | NA          | NA      |
| ENSG00000137252 | HCRTR2       | hypocretin receptor 2                                               | 3062      | 0.627339926 | 1.344121752 | 2.977414049 | 0.451439313 | 0.651672955 | NA          | NA      |
| ENSG00000182798 | MAGEB17      | MAGE family member B17                                              | 645864    | 0.627339926 | 1.344121752 | 2.977414049 | 0.451439313 | 0.651672955 | NA          | NA      |
| ENSG00000197403 | OR6N1        | olfactory receptor family 6 subfamily N member 1                    | 128372    | 0.627339926 | 1.344121752 | 2.977414049 | 0.451439313 | 0.651672955 | NA          | NA      |
| ENSG00000231684 | NA           | NA                                                                  | NA        | 0.627339926 | 1.344121752 | 2.977414049 | 0.451439313 | 0.651672955 | NA          | NA      |
| ENSG00000237938 | NA           | NA                                                                  | NA        | 0.627339926 | 1.344121752 | 2.977414049 | 0.451439313 | 0.651672955 | NA          | NA      |
| ENSG00000249646 | NA           | NA                                                                  | NA        | 0.627339926 | 1.344121752 | 2.977414049 | 0.451439313 | 0.651672955 | NA          | NA      |
| ENSG00000255929 | LOC105369438 | uncharacterized LOC105369438                                        | 105369438 | 0.627339926 | 1.344121752 | 2.977414049 | 0.451439313 | 0.651672955 | NA          | NA      |
| ENSG00000259745 | NA           | NA                                                                  | NA        | 0.627339926 | 1.344121752 | 2.977414049 | 0.451439313 | 0.651672955 | NA          | NA      |
| ENSG00000267417 | NA           | NA                                                                  | NA        | 0.627339926 | 1.344121752 | 2.977414049 | 0.451439313 | 0.651672955 | NA          | NA      |
| ENSG00000185332 | TMEM105      | transmembrane protein 105                                           | 284186    | 70.66370497 | 1.34525178  | 0.776281737 | 1.732942712 | 0.083105852 | 0.999371363 | Not Sig |
| ENSG00000073150 | PANX2        | pannexin 2                                                          | 56666     | 382.388635  | 1.345319257 | 0.923954793 | 1.45604446  | 0.145380329 | 0.999371363 | Not Sig |
| ENSG00000211854 | NA           | NA                                                                  | NA        | 4.64318819  | 1.34633293  | 1.376015733 | 0.978428443 | 0.327862467 | NA          | NA      |

|                 |              |                                               |           |             |             |             |             |             |             |         |
|-----------------|--------------|-----------------------------------------------|-----------|-------------|-------------|-------------|-------------|-------------|-------------|---------|
| ENSG00000102962 | CCL22        | C-C motif chemokine ligand 22                 | 6367      | 294.1034548 | 1.346628928 | 0.788911951 | 1.706944515 | 0.087832366 | 0.999371363 | Not Sig |
| ENSG00000235098 | ANKRD65      | ankyrin repeat domain 65                      | 441869    | 644.5577828 | 1.347035562 | 0.680684147 | 1.978943637 | 0.047822352 | 0.999371363 | Not Sig |
| ENSG00000231119 | LOC101927377 | uncharacterized LOC101927377                  | 101927377 | 17.63047914 | 1.347073327 | 0.969735492 | 1.389114185 | 0.164798031 | 0.999371363 | Not Sig |
| ENSG00000259663 | LOC642366    | uncharacterized LOC642366                     | 642366    | 2.230322613 | 1.347255545 | 2.058766801 | 0.654399296 | 0.512854588 | NA          | NA      |
| ENSG00000213539 | NA           | NA                                            | NA        | 1.258841531 | 1.347831559 | 2.514796002 | 0.535960594 | 0.591985785 | NA          | NA      |
| ENSG00000259349 | NA           | NA                                            | NA        | 10.81913356 | 1.34902073  | 0.931376464 | 1.448416169 | 0.147500696 | 0.999371363 | Not Sig |
| ENSG00000159348 | CYB5R1       | cytochrome b5 reductase 1                     | 51706     | 1372.949605 | 1.34926109  | 0.569690418 | 2.368411066 | 0.017864675 | 0.674897979 | Not Sig |
| ENSG00000108379 | WNT3         | Wnt family member 3                           | 7473      | 177.0765222 | 1.349391676 | 0.702867318 | 1.919838412 | 0.054878313 | 0.999371363 | Not Sig |
| ENSG00000108379 | LOC101929777 | uncharacterized LOC101929777                  | 101929777 | 177.0765222 | 1.349391676 | 0.702867318 | 1.919838412 | 0.054878313 | 0.999371363 | Not Sig |
| ENSG00000156006 | NAT2         | N-acetyltransferase 2                         | 10        | 1.111812394 | 1.349982529 | 2.493190643 | 0.541467831 | 0.588185165 | NA          | NA      |
| ENSG00000213304 | NA           | NA                                            | NA        | 1.111812394 | 1.349982529 | 2.493190643 | 0.541467831 | 0.588185165 | NA          | NA      |
| ENSG00000213328 | NA           | NA                                            | NA        | 1.111812394 | 1.349982529 | 2.493190643 | 0.541467831 | 0.588185165 | NA          | NA      |
| ENSG00000233543 | NA           | NA                                            | NA        | 1.111812394 | 1.349982529 | 2.493190643 | 0.541467831 | 0.588185165 | NA          | NA      |
| ENSG00000224389 | C4B          | complement C4B (Chido blood group)            | 721       | 2400.653308 | 1.351200687 | 1.202633911 | 1.123534497 | 0.261210558 | 0.999371363 | Not Sig |
| ENSG00000083720 | OXCT1        | 3-oxoacid CoA-transferase 1                   | 5019      | 460.8698188 | 1.351720588 | 0.716757959 | 1.885881519 | 0.059310923 | 0.999371363 | Not Sig |
| ENSG00000007216 | SLC13A2      | solute carrier family 13 member 2             | 9058      | 13.76245906 | 1.352217937 | 1.65550615  | 0.816800311 | 0.414042555 | 0.999371363 | Not Sig |
| ENSG00000258544 | NA           | NA                                            | NA        | 1.912357505 | 1.35231734  | 2.213844995 | 0.610845539 | 0.541301842 | NA          | NA      |
| ENSG00000168356 | SCN11A       | sodium voltage-gated channel alpha subunit 11 | 11280     | 15.65724373 | 1.354202249 | 0.911679493 | 1.485392904 | 0.137439774 | 0.999371363 | Not Sig |
| ENSG00000260352 | NA           | NA                                            | NA        | 6.785858684 | 1.355493253 | 1.157032383 | 1.171525769 | 0.241387506 | 0.999371363 | Not Sig |
| ENSG00000271021 | NA           | NA                                            | NA        | 3.146200818 | 1.35571928  | 1.507112732 | 0.89954736  | 0.368361181 | NA          | NA      |
| ENSG00000162174 | ASRGL1       | asparaginase like 1                           | 80150     | 833.262287  | 1.355731056 | 0.855181156 | 1.585314465 | 0.112894904 | 0.999371363 | Not Sig |
| ENSG00000221681 | NA           | NA                                            | NA        | 3.415367404 | 1.356167398 | 1.484576562 | 0.913504519 | 0.360977258 | NA          | NA      |
| ENSG00000101890 | GUCY2F       | guanylate cyclase 2F, retinal                 | 2986      | 2.527845472 | 1.35632446  | 1.760914409 | 0.77023872  | 0.4411583   | NA          | NA      |
| ENSG00000100583 | SAMD15       | sterile alpha motif domain containing 15      | 161394    | 55.75907489 | 1.356362665 | 0.631278427 | 2.148596571 | 0.031666394 | 0.916723899 | Not Sig |
| ENSG00000165905 | LARGE2       | LARGE xylosyl- and glucuronyltransferase 2    | 120071    | 375.1666837 | 1.356403268 | 0.684458662 | 1.981716857 | 0.04751094  | 0.999371363 | Not Sig |
| ENSG00000100842 | EFS          | embryonal Fyn-associated substrate            | 10278     | 522.8370073 | 1.357544088 | 0.879100298 | 1.544242552 | 0.122529584 | 0.999371363 | Not Sig |
| ENSG00000103154 | NECAB2       | N-terminal EF-hand calcium binding protein 2  | 54550     | 5.093762714 | 1.35759104  | 1.375757407 | 0.98679537  | 0.323742965 | NA          | NA      |
| ENSG00000176732 | PFN4         | profilin family member 4                      | 375189    | 21.20600861 | 1.358417417 | 0.764094256 | 1.777813936 | 0.075434419 | 0.999371363 | Not Sig |
| ENSG00000006007 | GDE1         | glycerophosphodiester phosphodiesterase 1     | 51573     | 2143.795395 | 1.358471456 | 0.43940418  | 3.091621606 | 0.001990664 | 0.182981277 | Not Sig |
| ENSG00000273174 | NA           | NA                                            | NA        | 10.36053956 | 1.358601909 | 1.44485254  | 0.94030489  | 0.347061192 | 0.999371363 | Not Sig |
| ENSG00000111783 | RFX4         | regulatory factor X4                          | 5992      | 1.659648003 | 1.359115852 | 2.628773305 | 0.517015237 | 0.605145523 | NA          | NA      |
| ENSG00000253326 | NA           | NA                                            | NA        | 2.718925144 | 1.35946836  | 2.093342953 | 0.649424576 | 0.516063983 | NA          | NA      |
| ENSG00000223446 | NA           | NA                                            | NA        | 1.838864818 | 1.35985026  | 1.925107927 | 0.706376116 | 0.47995427  | NA          | NA      |
| ENSG00000092445 | TYRO3        | TYRO3 protein tyrosine kinase                 | 7301      | 406.4278106 | 1.361579686 | 0.698524143 | 1.949223517 | 0.051268738 | 0.999371363 | Not Sig |
| ENSG00000235005 | NA           | NA                                            | NA        | 1.16945706  | 1.361945314 | 2.511057217 | 0.542379244 | 0.587557275 | NA          | NA      |

|                 |            |                                     |           |             |             |             |             |             |             |         |
|-----------------|------------|-------------------------------------|-----------|-------------|-------------|-------------|-------------|-------------|-------------|---------|
| ENSG00000207943 | MIR634     | microRNA 634                        | 693219    | 0.692152085 | 1.362123755 | 3.364083358 | 0.404901903 | 0.685549619 | NA          | NA      |
| ENSG00000250645 | NA         | NA                                  | NA        | 0.692152085 | 1.362123755 | 3.364083358 | 0.404901903 | 0.685549619 | NA          | NA      |
| ENSG00000263271 | NA         | NA                                  | NA        | 0.692152085 | 1.362123755 | 3.364083358 | 0.404901903 | 0.685549619 | NA          | NA      |
| ENSG00000268366 | NA         | NA                                  | NA        | 0.692152085 | 1.362123755 | 3.364083358 | 0.404901903 | 0.685549619 | NA          | NA      |
| ENSG00000138829 | FBN2       | fibrillin 2                         | 2201      | 88.08459963 | 1.36214394  | 0.936187763 | 1.454990114 | 0.145671998 | 0.999371363 | Not Sig |
| ENSG00000168748 | CA7        | carbonic anhydrase 7                | 766       | 0.650084254 | 1.362307032 | 3.429597133 | 0.397220717 | 0.691204706 | NA          | NA      |
| ENSG00000235214 | FAM83C-AS1 | FAM83C antisense RNA 1              | 140846    | 0.650084254 | 1.362307032 | 3.429597133 | 0.397220717 | 0.691204706 | NA          | NA      |
| ENSG00000202216 | NA         | NA                                  | NA        | 0.633777462 | 1.362379517 | 3.456703966 | 0.394126755 | 0.693487459 | NA          | NA      |
| ENSG00000240034 | NA         | NA                                  | NA        | 0.633777462 | 1.362379517 | 3.456703966 | 0.394126755 | 0.693487459 | NA          | NA      |
| ENSG00000259367 | NA         | NA                                  | NA        | 0.633777462 | 1.362379517 | 3.456703966 | 0.394126755 | 0.693487459 | NA          | NA      |
| ENSG00000260830 | NA         | NA                                  | NA        | 0.633777462 | 1.362379517 | 3.456703966 | 0.394126755 | 0.693487459 | NA          | NA      |
| ENSG00000260651 | NA         | NA                                  | NA        | 2.617124371 | 1.364811048 | 1.637698192 | 0.83337153  | 0.404635226 | NA          | NA      |
| ENSG00000167754 | KLK5       | kallikrein related peptidase 5      | 25818     | 2.190860912 | 1.365941608 | 2.503156823 | 0.545687588 | 0.585280706 | NA          | NA      |
| ENSG00000111837 | MAK        | male germ cell associated kinase    | 4117      | 51.13639201 | 1.366704511 | 0.66492939  | 2.055413    | 0.039839131 | 0.999371363 | Not Sig |
| ENSG00000197549 | PRAMENP    | PRAME N-terminal-like, pseudogene   | 649179    | 1.947716613 | 1.367011721 | 2.225811411 | 0.614163318 | 0.539107411 | NA          | NA      |
| ENSG00000162643 | WDR63      | WD repeat domain 63                 | 126820    | 59.42443394 | 1.36895031  | 0.746092855 | 1.834825653 | 0.066531526 | 0.999371363 | Not Sig |
| ENSG00000229875 | NA         | NA                                  | NA        | 3.72204046  | 1.369906357 | 1.444025846 | 0.948671633 | 0.342787646 | NA          | NA      |
| ENSG00000255450 | NA         | NA                                  | NA        | 1.22066419  | 1.372831301 | 2.905313062 | 0.472524396 | 0.636552532 | NA          | NA      |
| ENSG00000196656 | NA         | NA                                  | NA        | 6.205979217 | 1.373293514 | 1.250230133 | 1.098432583 | 0.272015641 | NA          | NA      |
| ENSG00000137501 | SYTL2      | synaptotagmin like 2                | 54843     | 1638.482961 | 1.373643245 | 0.43269748  | 3.174604219 | 0.00150041  | 0.148776874 | Not Sig |
| ENSG00000182531 | NA         | NA                                  | NA        | 1.829410569 | 1.376505207 | 2.183054677 | 0.630540875 | 0.528340768 | NA          | NA      |
| ENSG00000228919 | NA         | NA                                  | NA        | 4.568517672 | 1.376692458 | 1.369709509 | 1.005098124 | 0.314849603 | NA          | NA      |
| ENSG00000254559 | NA         | NA                                  | NA        | 1.118249929 | 1.376740972 | 2.900879201 | 0.474594382 | 0.635076111 | NA          | NA      |
| ENSG00000265181 | MIR4674    | microRNA 4674                       | 100616301 | 1.118249929 | 1.376740972 | 2.900879201 | 0.474594382 | 0.635076111 | NA          | NA      |
| ENSG00000220032 | NA         | NA                                  | NA        | 4.107508592 | 1.377574023 | 1.413807742 | 0.974371537 | 0.329872096 | NA          | NA      |
| ENSG00000273199 | NA         | NA                                  | NA        | 7.92604193  | 1.37865264  | 1.357989605 | 1.015215901 | 0.310002922 | 0.999371363 | Not Sig |
| ENSG00000017373 | NA         | NA                                  | NA        | 253.8869048 | 1.379931104 | 0.841145553 | 1.640537835 | 0.100893388 | 0.999371363 | Not Sig |
| ENSG00000259940 | NA         | NA                                  | NA        | 11.37435444 | 1.380886461 | 0.884127478 | 1.561863527 | 0.118320142 | 0.999371363 | Not Sig |
| ENSG00000264329 | NA         | NA                                  | NA        | 1.278154138 | 1.383391763 | 2.14590649  | 0.644665445 | 0.519144014 | NA          | NA      |
| ENSG00000230833 | NA         | NA                                  | NA        | 6.272160591 | 1.384526578 | 1.078777664 | 1.283421621 | 0.199344403 | NA          | NA      |
| ENSG00000271730 | NA         | NA                                  | NA        | 2.476074    | 1.384709235 | 1.537545777 | 0.900597078 | 0.367802589 | NA          | NA      |
| ENSG00000183395 | PMCH       | pro-melanin concentrating hormone   | 5367      | 1.211055223 | 1.385324696 | 2.811856257 | 0.492672658 | 0.6222439   | NA          | NA      |
| ENSG00000197982 | Clorf122   | chromosome 1 open reading frame 122 | 127687    | 735.5129768 | 1.38694567  | 0.611843424 | 2.266831049 | 0.023400549 | 0.779584944 | Not Sig |
| ENSG00000154118 | JPH3       | junctophilin 3                      | 57338     | 10.73145698 | 1.389436572 | 1.194778694 | 1.162923794 | 0.244860423 | 0.999371363 | Not Sig |
| ENSG00000137877 | SPTBN5     | spectrin beta, non-erythrocytic 5   | 51332     | 307.7684789 | 1.389830165 | 0.699365103 | 1.987274114 | 0.046892029 | 0.999371363 | Not Sig |

|                 |         |                                                                         |        |             |             |             |             |             |             |         |
|-----------------|---------|-------------------------------------------------------------------------|--------|-------------|-------------|-------------|-------------|-------------|-------------|---------|
| ENSG00000219027 | NA      | NA                                                                      | NA     | 1.342236339 | 1.390903135 | 2.433819197 | 0.571489919 | 0.567667592 | NA          | NA      |
| ENSG00000223001 | NA      | NA                                                                      | NA     | 1.217492759 | 1.394826321 | 2.824546886 | 0.493823037 | 0.621431162 | NA          | NA      |
| ENSG00000255920 | NA      | NA                                                                      | NA     | 4.616293082 | 1.395113006 | 1.373187831 | 1.015966625 | 0.30964528  | NA          | NA      |
| ENSG00000164588 | HCN1    | hyperpolarization activated cyclic nucleotide gated potassium channel 1 | 348980 | 6.388712607 | 1.395373345 | 1.462527479 | 0.954083506 | 0.340041374 | NA          | NA      |
| ENSG00000236157 | NA      | NA                                                                      | NA     | 4.053130031 | 1.395624113 | 1.794861809 | 0.777566332 | 0.436824716 | NA          | NA      |
| ENSG00000183303 | OR5P2   | olfactory receptor family 5 subfamily P member 2                        | 120065 | 5.567753395 | 1.397021791 | 1.750131679 | 0.798238103 | 0.42473233  | NA          | NA      |
| ENSG00000259556 | NA      | NA                                                                      | NA     | 3.715592026 | 1.398577387 | 1.302581977 | 1.073696252 | 0.282958842 | NA          | NA      |
| ENSG00000102048 | ASB9    | ankyrin repeat and SOCS box containing 9                                | 140462 | 188.2507373 | 1.399112898 | 0.851419667 | 1.643270589 | 0.100326961 | 0.999371363 | Not Sig |
| ENSG00000166819 | PLIN1   | perilipin 1                                                             | 5346   | 17.02068197 | 1.401131396 | 1.238569969 | 1.131249288 | 0.257950182 | 0.999371363 | Not Sig |
| ENSG00000174572 | NA      | NA                                                                      | NA     | 1.960132914 | 1.401550085 | 1.895521257 | 0.73940088  | 0.459663608 | NA          | NA      |
| ENSG00000183773 | AIFM3   | apoptosis inducing factor, mitochondria associated 3                    | 150209 | 76.57102266 | 1.401946981 | 0.843761453 | 1.661544237 | 0.096604192 | 0.999371363 | Not Sig |
| ENSG00000236708 | NA      | NA                                                                      | NA     | 2.392928584 | 1.403437841 | 2.04773289  | 0.685361771 | 0.493115661 | NA          | NA      |
| ENSG00000221748 | NA      | NA                                                                      | NA     | 6.646332245 | 1.404916093 | 1.112545039 | 1.262794802 | 0.206662933 | 0.999371363 | Not Sig |
| ENSG00000189433 | GJB4    | gap junction protein beta 4                                             | 127534 | 3.668109771 | 1.405075701 | 1.472416358 | 0.954265207 | 0.339949415 | NA          | NA      |
| ENSG00000165238 | WNK2    | WNK lysine deficient protein kinase 2                                   | 65268  | 417.5461799 | 1.405573799 | 0.994593727 | 1.413214021 | 0.157592805 | 0.999371363 | Not Sig |
| ENSG00000165182 | CXorf58 | chromosome X open reading frame 58                                      | 254158 | 3.257599659 | 1.405593169 | 1.378229078 | 1.01985453  | 0.307797457 | NA          | NA      |
| ENSG00000186919 | ZACN    | zinc activated ion channel                                              | 353174 | 3.546078852 | 1.406194689 | 1.456264766 | 0.965617463 | 0.334235634 | NA          | NA      |
| ENSG00000267178 | NA      | NA                                                                      | NA     | 4.471107253 | 1.407226495 | 1.247887534 | 1.127686956 | 0.259452148 | NA          | NA      |
| ENSG00000100146 | SOX10   | SRY-box 10                                                              | 6663   | 2.328586093 | 1.409219756 | 1.735661435 | 0.811920878 | 0.416837034 | NA          | NA      |
| ENSG00000188375 | H3F3C   | H3 histone family member 3C                                             | 440093 | 6.12787698  | 1.410000773 | 1.156579583 | 1.219112627 | 0.222801448 | NA          | NA      |
| ENSG00000266125 | NA      | NA                                                                      | NA     | 1.35782407  | 1.410444891 | 2.415158467 | 0.583996831 | 0.559222444 | NA          | NA      |
| ENSG00000242908 | NA      | NA                                                                      | NA     | 9.453910824 | 1.411136388 | 1.234074152 | 1.143477794 | 0.252840269 | 0.999371363 | Not Sig |
| ENSG00000171236 | LRG1    | leucine rich alpha-2-glycoprotein 1                                     | 116844 | 911.5730665 | 1.413830221 | 0.728165599 | 1.941632813 | 0.052181568 | 0.999371363 | Not Sig |
| ENSG00000223513 | NA      | NA                                                                      | NA     | 2.392668294 | 1.414282637 | 1.654812624 | 0.854648204 | 0.392745933 | NA          | NA      |
| ENSG00000174527 | MYO1H   | myosin IH                                                               | 283446 | 6.508042722 | 1.414872318 | 1.023531472 | 1.382343736 | 0.166866183 | NA          | NA      |
| ENSG00000118307 | CASC1   | cancer susceptibility 1                                                 | 55259  | 81.93826692 | 1.414975333 | 0.714930813 | 1.979177997 | 0.047795969 | 0.999371363 | Not Sig |
| ENSG00000213120 | NA      | NA                                                                      | NA     | 1.870593725 | 1.415976405 | 1.898183963 | 0.745963739 | 0.45568932  | NA          | NA      |
| ENSG00000210164 | NA      | NA                                                                      | NA     | 1.233080491 | 1.416514299 | 2.879837995 | 0.491872911 | 0.622809189 | NA          | NA      |
| ENSG00000182557 | SPNS3   | sphingolipid transporter 3 (putative)                                   | 201305 | 27.58469382 | 1.417064792 | 0.772092976 | 1.835355114 | 0.06645309  | 0.999371363 | Not Sig |
| ENSG00000259319 | NA      | NA                                                                      | NA     | 88.61543567 | 1.417310268 | 0.700458419 | 2.023403858 | 0.043031527 | 0.999371363 | Not Sig |
| ENSG00000264312 | NA      | NA                                                                      | NA     | 2.899000413 | 1.418357277 | 1.632589566 | 0.868777619 | 0.384968777 | NA          | NA      |
| ENSG00000234558 | NA      | NA                                                                      | NA     | 1.30661694  | 1.418404601 | 2.141753816 | 0.662263137 | 0.507802597 | NA          | NA      |
| ENSG00000259845 | NA      | NA                                                                      | NA     | 7.653992632 | 1.42073694  | 1.182523181 | 1.201445319 | 0.229578506 | 0.999371363 | Not Sig |
| ENSG00000239920 | NA      | NA                                                                      | NA     | 6.15603573  | 1.421222449 | 1.098332956 | 1.29398143  | 0.195671835 | NA          | NA      |
| ENSG00000173198 | CYSLTR1 | cysteinyl leukotriene receptor 1                                        | 10800  | 188.2154794 | 1.421643426 | 0.834116338 | 1.704370674 | 0.088311859 | 0.999371363 | Not Sig |

|                 |                 |                                                |           |             |             |             |             |             |             |         |
|-----------------|-----------------|------------------------------------------------|-----------|-------------|-------------|-------------|-------------|-------------|-------------|---------|
| ENSG00000152953 | STK32B          | serine/threonine kinase 32B                    | 55351     | 102.0956116 | 1.42308507  | 0.968582878 | 1.469244503 | 0.141766484 | 0.999371363 | Not Sig |
| ENSG00000205116 | TMEM88B         | transmembrane protein 88B                      | 643965    | 48.00783889 | 1.42440393  | 0.999509328 | 1.425103188 | 0.154127375 | 0.999371363 | Not Sig |
| ENSG00000179431 | FJX1            | four jointed box 1                             | 24147     | 142.2480211 | 1.42453544  | 0.72845221  | 1.955564718 | 0.050516453 | 0.999371363 | Not Sig |
| ENSG00000174912 | NA              | NA                                             | NA        | 6.64218589  | 1.425813401 | 1.101797674 | 1.294079153 | 0.195638082 | 0.999371363 | Not Sig |
| ENSG00000253852 | NA              | NA                                             | NA        | 1.188310896 | 1.426562615 | 2.476411473 | 0.576060413 | 0.564574348 | NA          | NA      |
| ENSG00000272568 | LOC100506497    | uncharacterized LOC100506497                   | 100506497 | 11.12182435 | 1.427145303 | 1.157043429 | 1.233441431 | 0.217411115 | 0.999371363 | Not Sig |
| ENSG00000255986 | MT1JP           | metallothionein 1J, pseudogene                 | 4498      | 4.539628964 | 1.428006363 | 1.788517258 | 0.798430296 | 0.424620828 | NA          | NA      |
| ENSG00000250602 | NA              | NA                                             | NA        | 1.84156658  | 1.428681901 | 1.950492495 | 0.732472391 | 0.463880288 | NA          | NA      |
| ENSG00000167355 | NA              | NA                                             | NA        | 3.593759587 | 1.42933109  | 1.915435108 | 0.746217444 | 0.455536072 | NA          | NA      |
| ENSG00000234038 | NA              | NA                                             | NA        | 1.245955562 | 1.432407301 | 2.403895371 | 0.595869237 | 0.551262586 | NA          | NA      |
| ENSG00000250309 | NA              | NA                                             | NA        | 1.245955562 | 1.432407301 | 2.403895371 | 0.595869237 | 0.551262586 | NA          | NA      |
| ENSG00000257674 | NA              | NA                                             | NA        | 1.245955562 | 1.432407301 | 2.403895371 | 0.595869237 | 0.551262586 | NA          | NA      |
| ENSG00000180697 | C3orf22         | chromosome 3 open reading frame 22             | 152065    | 0.720614888 | 1.433523707 | 3.332313538 | 0.430188724 | 0.667058364 | NA          | NA      |
| ENSG00000253629 | NA              | NA                                             | NA        | 0.720614888 | 1.433523707 | 3.332313538 | 0.430188724 | 0.667058364 | NA          | NA      |
| ENSG00000157021 | NA              | NA                                             | NA        | 0.678547056 | 1.434130585 | 3.393892151 | 0.422562215 | 0.672614699 | NA          | NA      |
| ENSG00000212710 | CTAGE1          | cutaneous T-cell lymphoma-associated antigen 1 | 64693     | 0.678547056 | 1.434130585 | 3.393892151 | 0.422562215 | 0.672614699 | NA          | NA      |
| ENSG00000232944 | NA              | NA                                             | NA        | 0.678547056 | 1.434130585 | 3.393892151 | 0.422562215 | 0.672614699 | NA          | NA      |
| ENSG00000240774 | NA              | NA                                             | NA        | 0.678547056 | 1.434130585 | 3.393892151 | 0.422562215 | 0.672614699 | NA          | NA      |
| ENSG00000251747 | NA              | NA                                             | NA        | 0.678547056 | 1.434130585 | 3.393892151 | 0.422562215 | 0.672614699 | NA          | NA      |
| ENSG00000252957 | NA              | NA                                             | NA        | 0.678547056 | 1.434130585 | 3.393892151 | 0.422562215 | 0.672614699 | NA          | NA      |
| ENSG00000268117 | NA              | NA                                             | NA        | 0.678547056 | 1.434130585 | 3.393892151 | 0.422562215 | 0.672614699 | NA          | NA      |
| ENSG00000181819 | NA              | NA                                             | NA        | 0.662240265 | 1.434370587 | 3.419301427 | 0.41949229  | 0.674856388 | NA          | NA      |
| ENSG00000266657 | NA              | NA                                             | NA        | 0.662240265 | 1.434370587 | 3.419301427 | 0.41949229  | 0.674856388 | NA          | NA      |
| ENSG00000233084 | NA              | NA                                             | NA        | 2.440703994 | 1.434549294 | 1.763076041 | 0.813662747 | 0.415838181 | NA          | NA      |
| ENSG00000258555 | SPECC1L-ADORA2A | SPECC1L-ADORA2A readthrough (NMD candidate)    | 101730217 | 2.539437141 | 1.434746622 | 1.825661671 | 0.785877605 | 0.431939196 | NA          | NA      |
| ENSG00000221030 | NA              | NA                                             | NA        | 1.194748432 | 1.435488356 | 2.459012656 | 0.583766152 | 0.559377654 | NA          | NA      |
| ENSG00000249930 | NA              | NA                                             | NA        | 3.26975567  | 1.437779775 | 1.360621199 | 1.056708344 | 0.290644716 | NA          | NA      |
| ENSG00000225578 | NCBP2-AS1       | NCBP2 antisense RNA 1                          | 100874001 | 3.897814656 | 1.43849879  | 1.306822931 | 1.100760291 | 0.271000998 | NA          | NA      |
| ENSG00000174403 | NA              | NA                                             | NA        | 10.10356917 | 1.438912523 | 1.230037739 | 1.169811687 | 0.242076759 | 0.999371363 | Not Sig |
| ENSG00000204334 | ERICH2          | glutamate rich 2                               | 285141    | 69.58958575 | 1.439511891 | 0.754303426 | 1.908398983 | 0.056339668 | 0.999371363 | Not Sig |
| ENSG00000244245 | NA              | NA                                             | NA        | 2.674144651 | 1.442094735 | 1.572326577 | 0.917172524 | 0.359052242 | NA          | NA      |
| ENSG00000161798 | AQP5            | aquaporin 5                                    | 362       | 2013.446616 | 1.442105383 | 1.357374989 | 1.062422245 | 0.288044039 | 0.999371363 | Not Sig |
| ENSG00000229899 | NA              | NA                                             | NA        | 16.30636095 | 1.443306133 | 0.94781725  | 1.522768374 | 0.127816665 | 0.999371363 | Not Sig |
| ENSG00000211800 | NA              | NA                                             | NA        | 5.069774998 | 1.443879063 | 1.358165606 | 1.063109724 | 0.287732195 | NA          | NA      |
| ENSG00000202077 | NA              | NA                                             | NA        | 40.32609832 | 1.445821736 | 1.160111359 | 1.246278407 | 0.212662202 | 0.999371363 | Not Sig |

|                 |              |                                                             |           |             |             |             |             |             |             |         |
|-----------------|--------------|-------------------------------------------------------------|-----------|-------------|-------------|-------------|-------------|-------------|-------------|---------|
| ENSG00000159212 | CLIC6        | chloride intracellular channel 6                            | 54102     | 2335.430516 | 1.446870212 | 0.903272449 | 1.601809303 | 0.109197785 | 0.999371363 | Not Sig |
| ENSG00000225674 | NA           | NA                                                          | NA        | 2.402371935 | 1.449826739 | 2.006893938 | 0.722423199 | 0.470034328 | NA          | NA      |
| ENSG00000267783 | NA           | NA                                                          | NA        | 1.258830633 | 1.450512307 | 2.456163245 | 0.59056022  | 0.554815125 | NA          | NA      |
| ENSG00000156097 | GPR61        | G protein-coupled receptor 61                               | 83873     | 0.684984592 | 1.450584275 | 3.386238082 | 0.42837634  | 0.668377148 | NA          | NA      |
| ENSG00000224533 | TMLHE-AS1    | TMLHE antisense RNA 1                                       | 100507404 | 0.684984592 | 1.450584275 | 3.386238082 | 0.42837634  | 0.668377148 | NA          | NA      |
| ENSG00000224533 | LOC101927830 | uncharacterized LOC101927830                                | 101927830 | 0.684984592 | 1.450584275 | 3.386238082 | 0.42837634  | 0.668377148 | NA          | NA      |
| ENSG00000226510 | UPK1A-AS1    | UPK1A antisense RNA 1                                       | 100862728 | 0.684984592 | 1.450584275 | 3.386238082 | 0.42837634  | 0.668377148 | NA          | NA      |
| ENSG00000236888 | NA           | NA                                                          | NA        | 0.684984592 | 1.450584275 | 3.386238082 | 0.42837634  | 0.668377148 | NA          | NA      |
| ENSG00000267515 | NA           | NA                                                          | NA        | 0.684984592 | 1.450584275 | 3.386238082 | 0.42837634  | 0.668377148 | NA          | NA      |
| ENSG00000175121 | WFDC5        | WAP four-disulfide core domain 5                            | 149708    | 0.6686778   | 1.450848136 | 3.411286595 | 0.425308193 | 0.670612022 | NA          | NA      |
| ENSG00000205822 | NA           | NA                                                          | NA        | 0.6686778   | 1.450848136 | 3.411286595 | 0.425308193 | 0.670612022 | NA          | NA      |
| ENSG00000223491 | NA           | NA                                                          | NA        | 0.6686778   | 1.450848136 | 3.411286595 | 0.425308193 | 0.670612022 | NA          | NA      |
| ENSG00000223534 | HLA-DQB1-AS1 | HLA-DQB1 antisense RNA 1                                    | 106480429 | 0.6686778   | 1.450848136 | 3.411286595 | 0.425308193 | 0.670612022 | NA          | NA      |
| ENSG00000248725 | NA           | NA                                                          | NA        | 0.6686778   | 1.450848136 | 3.411286595 | 0.425308193 | 0.670612022 | NA          | NA      |
| ENSG00000265747 | NA           | NA                                                          | NA        | 0.6686778   | 1.450848136 | 3.411286595 | 0.425308193 | 0.670612022 | NA          | NA      |
| ENSG00000268833 | NA           | NA                                                          | NA        | 6.351643113 | 1.452256126 | 1.378151078 | 1.053771353 | 0.291987612 | NA          | NA      |
| ENSG00000145824 | CXCL14       | C-X-C motif chemokine ligand 14                             | 9547      | 542.4682731 | 1.452402895 | 1.012336095 | 1.434704246 | 0.151371394 | 0.999371363 | Not Sig |
| ENSG00000246877 | NA           | NA                                                          | NA        | 14.72665679 | 1.453198407 | 1.154246852 | 1.259001403 | 0.208029825 | 0.999371363 | Not Sig |
| ENSG00000175746 | C15orf54     | chromosome 15 open reading frame 54 (putative)              | 400360    | 2.725091492 | 1.454656252 | 1.541132379 | 0.943887931 | 0.34522692  | NA          | NA      |
| ENSG00000226580 | NA           | NA                                                          | NA        | 5.376491816 | 1.455348469 | 1.157392167 | 1.257437634 | 0.208595209 | NA          | NA      |
| ENSG00000259538 | NA           | NA                                                          | NA        | 1.969576265 | 1.456332546 | 1.74208989  | 0.835968657 | 0.403172536 | NA          | NA      |
| ENSG00000200169 | RNU5D-1      | RNA, U5D small nuclear 1                                    | 26830     | 77.34206784 | 1.457398936 | 0.838120958 | 1.738888549 | 0.082054369 | 0.999371363 | Not Sig |
| ENSG00000234006 | DDX39B-AS1   | DDX39B antisense RNA 1                                      | 106478957 | 2.731529027 | 1.457644714 | 1.597071961 | 0.912698206 | 0.361401288 | NA          | NA      |
| ENSG00000203562 | NA           | NA                                                          | NA        | 1.341517279 | 1.45879703  | 2.419425038 | 0.602951944 | 0.546540659 | NA          | NA      |
| ENSG00000179750 | APOBEC3B     | apolipoprotein B mRNA editing enzyme catalytic subunit 3B   | 9582      | 55.08667681 | 1.458890494 | 0.652645571 | 2.2353488   | 0.025394459 | 0.822088476 | Not Sig |
| ENSG00000109062 | SLC9A3R1     | SLC9A3 regulator 1                                          | 9368      | 1941.762034 | 1.459634209 | 0.703218909 | 2.075646985 | 0.037926613 | 0.999371363 | Not Sig |
| ENSG00000153930 | ANKFN1       | ankyrin repeat and fibronectin type III domain containing 1 | 162282    | 122.1987928 | 1.462300991 | 0.772472773 | 1.893012987 | 0.058356142 | 0.999371363 | Not Sig |
| ENSG00000180336 | MEIOC        | meiosis specific with coiled-coil domain                    | 284071    | 1.399161945 | 1.462622223 | 2.421632127 | 0.603982003 | 0.545855607 | NA          | NA      |
| ENSG00000179580 | RNF151       | ring finger protein 151                                     | 146310    | 1.265268169 | 1.462817488 | 2.866885532 | 0.510246214 | 0.609878979 | NA          | NA      |
| ENSG00000241566 | NA           | NA                                                          | NA        | 5.325179114 | 1.463115999 | 1.279240247 | 1.143738249 | 0.252732206 | NA          | NA      |
| ENSG00000196208 | GREB1        | growth regulation by estrogen in breast cancer 1            | 9687      | 229.4599992 | 1.465279368 | 0.903093641 | 1.622511002 | 0.104693979 | 0.999371363 | Not Sig |
| ENSG00000263742 | MIR3165      | microRNA 3165                                               | 100422953 | 1.216773699 | 1.46615012  | 2.529548704 | 0.579609366 | 0.562178076 | NA          | NA      |
| ENSG00000239475 | NA           | NA                                                          | NA        | 5.043548039 | 1.466639176 | 1.464900836 | 1.00118666  | 0.316736574 | NA          | NA      |
| ENSG00000237223 | SULT1C2P1    | sulfotransferase family 1C member 2 pseudogene 1            | 151234    | 9.207148473 | 1.466872316 | 1.033877481 | 1.418806718 | 0.155955373 | 0.999371363 | Not Sig |
| ENSG00000263820 | NA           | NA                                                          | NA        | 1.223211235 | 1.468069421 | 2.212516839 | 0.663529152 | 0.506991716 | NA          | NA      |



|                 |              |                                                   |           |             |             |             |             |             |             |         |
|-----------------|--------------|---------------------------------------------------|-----------|-------------|-------------|-------------|-------------|-------------|-------------|---------|
| ENSG00000168679 | SLC16A4      | solute carrier family 16 member 4                 | 9122      | 498.3370678 | 1.468541627 | 0.767076203 | 1.914466413 | 0.055560587 | 0.999371363 | Not Sig |
| ENSG00000252576 | NA           | NA                                                | NA        | 1.818822253 | 1.469028808 | 2.207611944 | 0.665437969 | 0.505770407 | NA          | NA      |
| ENSG00000176029 | C11orf16     | chromosome 11 open reading frame 16               | 56673     | 99.68321271 | 1.470364713 | 1.183696214 | 1.242180803 | 0.214169861 | 0.999371363 | Not Sig |
| ENSG00000243232 | PCDHAC2      | protocadherin alpha subfamily C, 2                | 56134     | 242.8595768 | 1.472040749 | 0.618656783 | 2.379414224 | 0.017340178 | 0.670000634 | Not Sig |
| ENSG00000260571 | NA           | NA                                                | NA        | 9.256716279 | 1.472457339 | 0.947873205 | 1.553432813 | 0.120319769 | 0.999371363 | Not Sig |
| ENSG00000202140 | NA           | NA                                                | NA        | 3.333273529 | 1.47353085  | 2.010391925 | 0.732957008 | 0.463584652 | NA          | NA      |
| ENSG00000215003 | NA           | NA                                                | NA        | 1.22964877  | 1.47519644  | 2.159550283 | 0.683103539 | 0.494541419 | NA          | NA      |
| ENSG00000181123 | LOC107985579 | uncharacterized LOC107985579                      | 107985579 | 5.189088832 | 1.476128056 | 2.101792023 | 0.702318802 | 0.48248037  | NA          | NA      |
| ENSG00000154928 | EPHB1        | EPH receptor B1                                   | 2047      | 75.41240598 | 1.477480427 | 0.759516776 | 1.945290048 | 0.051740079 | 0.999371363 | Not Sig |
| ENSG00000115353 | TACR1        | tachykinin receptor 1                             | 6869      | 35.79930587 | 1.480483725 | 0.929026385 | 1.593586306 | 0.111028724 | 0.999371363 | Not Sig |
| ENSG00000096433 | ITPR3        | inositol 1,4,5-trisphosphate receptor type 3      | 3710      | 12478.62413 | 1.481595839 | 0.498937252 | 2.969503345 | 0.002982816 | 0.240785881 | Not Sig |
| ENSG00000235721 | NA           | NA                                                | NA        | 22.54519855 | 1.482857824 | 1.213574894 | 1.221892305 | 0.221748356 | 0.999371363 | Not Sig |
| ENSG00000222076 | NA           | NA                                                | NA        | 1.188050606 | 1.484542624 | 2.922107074 | 0.508038407 | 0.611426408 | NA          | NA      |
| ENSG00000233844 | KCNQ5-IT1    | KCNQ5 intronic transcript 1                       | 100507381 | 15.07946894 | 1.484550562 | 1.322349982 | 1.122660856 | 0.261581559 | 0.999371363 | Not Sig |
| ENSG00000250186 | NA           | NA                                                | NA        | 1.520734094 | 1.485070083 | 2.25778277  | 0.657755964 | 0.510694955 | NA          | NA      |
| ENSG00000260681 | NA           | NA                                                | NA        | 5.79956205  | 1.485210885 | 1.228621434 | 1.208843378 | 0.226723023 | NA          | NA      |
| ENSG00000260290 | NA           | NA                                                | NA        | 4.303869936 | 1.486162415 | 1.365555816 | 1.08832052  | 0.276453635 | NA          | NA      |
| ENSG00000237758 | NA           | NA                                                | NA        | 1.172004105 | 1.486217587 | 2.846723035 | 0.522080149 | 0.601614527 | NA          | NA      |
| ENSG00000211846 | NA           | NA                                                | NA        | 6.321083174 | 1.487567596 | 1.428103454 | 1.041638539 | 0.297579294 | NA          | NA      |
| ENSG00000249502 | NA           | NA                                                | NA        | 4.101758501 | 1.487648513 | 1.433889429 | 1.037491792 | 0.299506719 | NA          | NA      |
| ENSG00000211801 | NA           | NA                                                | NA        | 6.875190703 | 1.490267653 | 1.25617858  | 1.186350155 | 0.235484047 | 0.999371363 | Not Sig |
| ENSG00000179023 | KLHDC7A      | kelch domain containing 7A                        | 127707    | 427.5642574 | 1.491521564 | 1.084373851 | 1.37546803  | 0.168986391 | 0.999371363 | Not Sig |
| ENSG00000116661 | FBX02        | F-box protein 2                                   | 26232     | 189.3477022 | 1.492294039 | 0.731710509 | 2.039459624 | 0.041404177 | 0.999371363 | Not Sig |
| ENSG00000241959 | NA           | NA                                                | NA        | 1.17844164  | 1.495450614 | 2.828331234 | 0.528739561 | 0.59698613  | NA          | NA      |
| ENSG00000215475 | SIAH3        | siah E3 ubiquitin protein ligase family member 3  | 283514    | 5.98174739  | 1.496201989 | 1.425138807 | 1.049864043 | 0.293780626 | NA          | NA      |
| ENSG00000203963 | C1orf141     | chromosome 1 open reading frame 141               | 400757    | 4.358343171 | 1.496379311 | 1.383532198 | 1.081564501 | 0.279446086 | NA          | NA      |
| ENSG00000174611 | KY           | kyphoscoliosis peptidase                          | 339855    | 13.17433251 | 1.497502613 | 0.838380751 | 1.786184394 | 0.074069407 | 0.999371363 | Not Sig |
| ENSG00000167580 | AQP2         | aquaporin 2                                       | 359       | 2.459037251 | 1.500702189 | 1.737786393 | 0.863571147 | 0.38782352  | NA          | NA      |
| ENSG00000188888 | NA           | NA                                                | NA        | 14.09557695 | 1.501133991 | 0.92350832  | 1.625468833 | 0.1040627   | 0.999371363 | Not Sig |
| ENSG00000181649 | PHLDA2       | pleckstrin homology like domain family A member 2 | 7262      | 387.6736333 | 1.502464193 | 0.698810947 | 2.15002956  | 0.031552877 | 0.915546518 | Not Sig |
| ENSG00000253142 | NA           | NA                                                | NA        | 22.88378123 | 1.504494824 | 1.343010731 | 1.120240359 | 0.26261135  | 0.999371363 | Not Sig |
| ENSG00000269047 | NA           | NA                                                | NA        | 1.184879176 | 1.505176156 | 2.841063167 | 0.529793274 | 0.596255269 | NA          | NA      |
| ENSG00000244756 | NA           | NA                                                | NA        | 1.300168507 | 1.509712066 | 2.792020533 | 0.540723841 | 0.588697943 | NA          | NA      |
| ENSG00000172538 | FAM170B      | family with sequence similarity 170 member B      | 170370    | 1.382855153 | 1.511074093 | 2.425761422 | 0.622927745 | 0.533332005 | NA          | NA      |
| ENSG00000112655 | PTK7         | protein tyrosine kinase 7 (inactive)              | 5754      | 3653.742933 | 1.511389286 | 0.550890359 | 2.743539182 | 0.006078079 | 0.370900051 | Not Sig |

|                 |              |                                                            |           |             |             |             |             |             |             |         |
|-----------------|--------------|------------------------------------------------------------|-----------|-------------|-------------|-------------|-------------|-------------|-------------|---------|
| ENSG00000171017 | LRRC8E       | leucine rich repeat containing 8 VRAC subunit E            | 80131     | 259.5233255 | 1.512184283 | 0.631217062 | 2.395664461 | 0.01659027  | 0.657741302 | Not Sig |
| ENSG00000258013 | NA           | NA                                                         | NA        | 6.993165516 | 1.518005934 | 1.133500833 | 1.339219072 | 0.180499365 | 0.999371363 | Not Sig |
| ENSG00000239923 | NA           | NA                                                         | NA        | 1.264549109 | 1.518463708 | 2.154093953 | 0.704919907 | 0.480860081 | NA          | NA      |
| ENSG00000105855 | ITGB8        | integrin subunit beta 8                                    | 3696      | 1278.923326 | 1.520969012 | 0.74132854  | 2.051680098 | 0.040200762 | 0.999371363 | Not Sig |
| ENSG00000213023 | SYT3         | synaptotagmin 3                                            | 84258     | 16.09168441 | 1.521880017 | 1.39055974  | 1.094436991 | 0.273763368 | 0.999371363 | Not Sig |
| ENSG00000234636 | MED14OS      | MED14 opposite strand                                      | 100873985 | 4.732104243 | 1.523607586 | 1.243966966 | 1.224797465 | 0.220651541 | NA          | NA      |
| ENSG00000233029 | NA           | NA                                                         | NA        | 3.316801122 | 1.523855913 | 1.421980361 | 1.071643431 | 0.283880218 | NA          | NA      |
| ENSG00000153303 | FRMD1        | FERM domain containing 1                                   | 79981     | 1.94979399  | 1.524836543 | 2.495116774 | 0.611128328 | 0.541114627 | NA          | NA      |
| ENSG00000196136 | SERPINA3     | serpin family A member 3                                   | 12        | 47.13443109 | 1.528187959 | 0.821076057 | 1.861201464 | 0.062715732 | 0.999371363 | Not Sig |
| ENSG00000173262 | SLC2A14      | solute carrier family 2 member 14                          | 144195    | 37.65329055 | 1.529740901 | 0.983169931 | 1.555927264 | 0.119725389 | 0.999371363 | Not Sig |
| ENSG00000231546 | NA           | NA                                                         | NA        | 5.679204397 | 1.530198763 | 1.373989389 | 1.113690378 | 0.265412038 | NA          | NA      |
| ENSG00000262488 | NA           | NA                                                         | NA        | 1.322193774 | 1.531141827 | 2.386230993 | 0.641657003 | 0.521095913 | NA          | NA      |
| ENSG00000108813 | DLX4         | distal-less homeobox 4                                     | 1748      | 55.43282344 | 1.533165208 | 0.669999994 | 2.288306303 | 0.02211969  | 0.758302843 | Not Sig |
| ENSG00000230667 | SETSIP       | SET-like protein                                           | 646817    | 1.379683722 | 1.538211816 | 2.38078314  | 0.646094888 | 0.518217906 | NA          | NA      |
| ENSG00000099625 | CBARP        | CACN beta subunit associated regulatory protein            | 255057    | 79.41079401 | 1.538957193 | 0.744538284 | 2.066995379 | 0.038734589 | 0.999371363 | Not Sig |
| ENSG00000170498 | KISS1        | KiSS-1 metastasis-suppressor                               | 3814      | 13.09526818 | 1.539888436 | 1.088777691 | 1.414327689 | 0.157265711 | 0.999371363 | Not Sig |
| ENSG00000155962 | CLIC2        | chloride intracellular channel 2                           | 1193      | 724.9804651 | 1.539905495 | 0.832362262 | 1.850042421 | 0.064307436 | 0.999371363 | Not Sig |
| ENSG00000238365 | NA           | NA                                                         | NA        | 3.95972878  | 1.540169619 | 1.326920282 | 1.160709984 | 0.24575986  | NA          | NA      |
| ENSG00000237285 | NA           | NA                                                         | NA        | 3.079480871 | 1.546150159 | 1.974381642 | 0.783106025 | 0.433564854 | NA          | NA      |
| ENSG00000241847 | NA           | NA                                                         | NA        | 3.226957881 | 1.546936094 | 1.509623943 | 1.024716189 | 0.305497122 | NA          | NA      |
| ENSG00000160183 | TMPRSS3      | transmembrane protease, serine 3                           | 64699     | 213.6635715 | 1.546996877 | 0.665197261 | 2.325621238 | 0.020038766 | 0.712847952 | Not Sig |
| ENSG00000102996 | MMP15        | matrix metalloproteinase 15                                | 4324      | 2634.150728 | 1.548762688 | 0.481565738 | 3.21609817  | 0.001299464 | 0.137513837 | Not Sig |
| ENSG00000108830 | RND2         | Rho family GTPase 2                                        | 8153      | 31.74684775 | 1.548920103 | 0.93767265  | 1.651877233 | 0.09855958  | 0.999371363 | Not Sig |
| ENSG00000205832 | C16orf96     | chromosome 16 open reading frame 96                        | 342346    | 12.16244046 | 1.549609382 | 0.958057091 | 1.617449938 | 0.105781194 | 0.999371363 | Not Sig |
| ENSG00000263583 | MIR4522      | microRNA 4522                                              | 100616277 | 1.22621705  | 1.551352366 | 2.469980771 | 0.628082771 | 0.529949719 | NA          | NA      |
| ENSG00000006756 | ARSD         | arylsulfatase D                                            | 414       | 4480.00186  | 1.553676515 | 0.436819533 | 3.556792675 | 0.00037541  | 0.059842286 | Not Sig |
| ENSG00000237624 | OXCT2P1      | 3-oxoacid CoA-transferase 2 pseudogene 1                   | 192217    | 10.04810427 | 1.554062069 | 0.964230739 | 1.61171181  | 0.107024667 | 0.999371363 | Not Sig |
| ENSG00000245648 | LOC101928100 | uncharacterized LOC101928100                               | 101928100 | 34.4560669  | 1.55446673  | 0.892696031 | 1.74131695  | 0.081628037 | 0.999371363 | Not Sig |
| ENSG00000176753 | NA           | NA                                                         | NA        | 18.9747088  | 1.554712014 | 0.994557589 | 1.563219699 | 0.118000928 | 0.999371363 | Not Sig |
| ENSG00000254604 | NA           | NA                                                         | NA        | 1.335068846 | 1.555528185 | 2.764282508 | 0.562724027 | 0.57362282  | NA          | NA      |
| ENSG00000127377 | CRYGN        | crystallin gamma N                                         | 155051    | 8.641888577 | 1.556581668 | 1.18575972  | 1.312729419 | 0.189274141 | 0.999371363 | Not Sig |
| ENSG00000236542 | NA           | NA                                                         | NA        | 1.962408772 | 1.55757043  | 1.887686686 | 0.825121267 | 0.409302747 | NA          | NA      |
| ENSG00000204338 | CYP21A1P     | cytochrome P450 family 21 subfamily A member 1, pseudogene | 1590      | 78.34046083 | 1.5591464   | 1.350081701 | 1.154853368 | 0.248150478 | 0.999371363 | Not Sig |
| ENSG00000049656 | CLPTM1L      | CLPTM1 like                                                | 81037     | 5374.606777 | 1.559188243 | 0.680316686 | 2.291856535 | 0.021913923 | 0.756060365 | Not Sig |
| ENSG00000146592 | CREB5        | cAMP responsive element binding protein 5                  | 9586      | 565.077653  | 1.559226934 | 0.761342031 | 2.047997969 | 0.040560198 | 0.999371363 | Not Sig |

|                 |              |                                                       |           |             |             |             |             |             |             |         |
|-----------------|--------------|-------------------------------------------------------|-----------|-------------|-------------|-------------|-------------|-------------|-------------|---------|
| ENSG00000118298 | CA14         | carbonic anhydrase 14                                 | 23632     | 3.364117761 | 1.560378275 | 1.350203613 | 1.155661457 | 0.247819659 | NA          | NA      |
| ENSG00000234332 | NA           | NA                                                    | NA        | 2.064668314 | 1.560720183 | 1.652125359 | 0.944674189 | 0.344825238 | NA          | NA      |
| ENSG00000007001 | UPP2         | uridine phosphorylase 2                               | 151531    | 5.72742768  | 1.561671683 | 1.284685455 | 1.215606261 | 0.224134948 | NA          | NA      |
| ENSG00000205710 | C17orf107    | chromosome 17 open reading frame 107                  | 100130311 | 221.0271467 | 1.562026219 | 0.54826799  | 2.849019546 | 0.004385419 | 0.301021826 | Not Sig |
| ENSG00000168824 | NSG1         | neuronal vesicle trafficking associated 1             | 27065     | 21.50823023 | 1.56225756  | 0.815467794 | 1.915780822 | 0.055393    | 0.999371363 | Not Sig |
| ENSG00000239263 | NA           | NA                                                    | NA        | 9.817574752 | 1.562317085 | 0.988615888 | 1.580307482 | 0.114036467 | 0.999371363 | Not Sig |
| ENSG00000165192 | ASB11        | ankyrin repeat and SOCS box containing 11             | 140456    | 4.702911482 | 1.563083811 | 1.406608114 | 1.111243277 | 0.266463648 | NA          | NA      |
| ENSG00000240747 | KRBOX1       | KRAB box domain containing 1                          | 100506243 | 1.459353655 | 1.563809971 | 2.387917112 | 0.654884528 | 0.512542102 | NA          | NA      |
| ENSG00000207827 | MIR30A       | microRNA 30a                                          | 407029    | 5.204954384 | 1.564883624 | 1.334752993 | 1.172414395 | 0.241030723 | NA          | NA      |
| ENSG00000147647 | DPYS         | dihydropyrimidinase                                   | 1807      | 11.81942247 | 1.569925339 | 1.018049599 | 1.542091211 | 0.123051431 | 0.999371363 | Not Sig |
| ENSG00000243479 | MNX1-AS1     | MNX1 antisense RNA 1 (head to head)                   | 645249    | 32.01792346 | 1.57082801  | 1.339436148 | 1.172753186 | 0.240894796 | 0.999371363 | Not Sig |
| ENSG00000185090 | MANEAL       | mannosidase endo-alpha like                           | 149175    | 350.3778251 | 1.570852641 | 0.60933763  | 2.577967558 | 0.009938333 | 0.49192078  | Not Sig |
| ENSG00000272476 | NA           | NA                                                    | NA        | 15.94257851 | 1.572212713 | 0.999263631 | 1.573371295 | 0.11563287  | 0.999371363 | Not Sig |
| ENSG00000150628 | SPATA4       | spermatogenesis associated 4                          | 132851    | 6.383075691 | 1.573564041 | 1.272972802 | 1.236133277 | 0.216409027 | NA          | NA      |
| ENSG00000217950 | NA           | NA                                                    | NA        | 1.248242317 | 1.576903123 | 2.408658536 | 0.65468106  | 0.512673122 | NA          | NA      |
| ENSG00000238090 | NA           | NA                                                    | NA        | 14.36334668 | 1.576904695 | 1.018300529 | 1.548565133 | 0.121486293 | 0.999371363 | Not Sig |
| ENSG00000186790 | FOXE3        | forkhead box E3                                       | 2301      | 1.408146525 | 1.577842286 | 2.157987367 | 0.73116382  | 0.464679097 | NA          | NA      |
| ENSG00000143858 | SYT2         | synaptotagmin 2                                       | 127833    | 71.89097445 | 1.578009548 | 1.096059577 | 1.439711473 | 0.149949046 | 0.999371363 | Not Sig |
| ENSG00000238375 | NA           | NA                                                    | NA        | 1.625435109 | 1.579789235 | 2.674892128 | 0.590599232 | 0.55478898  | NA          | NA      |
| ENSG00000117507 | FMO6P        | flavin containing monooxygenase 6 pseudogene          | 388714    | 13.98321824 | 1.58191834  | 1.122473757 | 1.40931432  | 0.158742246 | 0.999371363 | Not Sig |
| ENSG00000197565 | COL4A6       | collagen type IV alpha 6 chain                        | 1288      | 139.7928443 | 1.582816355 | 1.116137801 | 1.418119119 | 0.15615599  | 0.999371363 | Not Sig |
| ENSG00000178997 | EXD1         | exonuclease 3'-5' domain containing 1                 | 161829    | 2.041923987 | 1.583187919 | 1.803623449 | 0.877781845 | 0.380062119 | NA          | NA      |
| ENSG00000173212 | MAB21L3      | mab-21 like 3                                         | 126868    | 51.16599166 | 1.583228599 | 0.800366988 | 1.978128313 | 0.047914233 | 0.999371363 | Not Sig |
| ENSG00000230053 | NA           | NA                                                    | NA        | 1.254679853 | 1.583364746 | 2.366033492 | 0.669206396 | 0.503363827 | NA          | NA      |
| ENSG00000268812 | LOC91370     | uncharacterized LOC91370                              | 91370     | 4.692539693 | 1.583450179 | 1.834276823 | 0.86325584  | 0.387996818 | NA          | NA      |
| ENSG00000196431 | CRYBA4       | crystallin beta A4                                    | 1413      | 1.357094113 | 1.583799544 | 2.771725631 | 0.571412815 | 0.567719845 | NA          | NA      |
| ENSG00000205025 | NA           | NA                                                    | NA        | 1.363531648 | 1.58428716  | 2.431747872 | 0.651501407 | 0.514722869 | NA          | NA      |
| ENSG00000211659 | NA           | NA                                                    | NA        | 376.2160541 | 1.587167659 | 1.112715593 | 1.426391136 | 0.153755471 | 0.999371363 | Not Sig |
| ENSG00000214708 | LOC105371730 | uncharacterized LOC105371730                          | 105371730 | 70.98128024 | 1.588237356 | 0.885432715 | 1.793741444 | 0.072854447 | 0.999371363 | Not Sig |
| ENSG00000100116 | GCAT         | glycine C-acetyltransferase                           | 23464     | 241.55519   | 1.590951123 | 0.666739828 | 2.386164822 | 0.017025119 | 0.665830191 | Not Sig |
| ENSG00000254957 | NA           | NA                                                    | NA        | 2.573441907 | 1.591165167 | 1.694202363 | 0.939182474 | 0.347637066 | NA          | NA      |
| ENSG00000022355 | GABRA1       | gamma-aminobutyric acid type A receptor alpha subunit | 2554      | 0.285734918 | 1.591839683 | 4.049842411 | 0.39306213  | 0.694273594 | NA          | NA      |
| ENSG00000143125 | PROK1        | prokineticin 1                                        | 84432     | 0.285734918 | 1.591839683 | 4.049842411 | 0.39306213  | 0.694273594 | NA          | NA      |
| ENSG00000143257 | NR1I3        | nuclear receptor subfamily 1 group I member 3         | 9970      | 0.285734918 | 1.591839683 | 4.049842411 | 0.39306213  | 0.694273594 | NA          | NA      |
| ENSG00000149124 | GLYAT        | glycine-N-acyltransferase                             | 10249     | 0.285734918 | 1.591839683 | 4.049842411 | 0.39306213  | 0.694273594 | NA          | NA      |

|                 |             |                                                                   |        |             |             |             |            |             |    |    |
|-----------------|-------------|-------------------------------------------------------------------|--------|-------------|-------------|-------------|------------|-------------|----|----|
| ENSG00000151631 | NA          | NA                                                                | NA     | 0.285734918 | 1.591839683 | 4.049842411 | 0.39306213 | 0.694273594 | NA | NA |
| ENSG00000161992 | PRR35       | proline rich 35                                                   | 146325 | 0.285734918 | 1.591839683 | 4.049842411 | 0.39306213 | 0.694273594 | NA | NA |
| ENSG00000163209 | SPRR3       | small proline rich protein 3                                      | 6707   | 0.285734918 | 1.591839683 | 4.049842411 | 0.39306213 | 0.694273594 | NA | NA |
| ENSG00000172568 | FNDC9       | fibronectin type III domain containing 9                          | 408263 | 0.285734918 | 1.591839683 | 4.049842411 | 0.39306213 | 0.694273594 | NA | NA |
| ENSG00000176510 | NA          | NA                                                                | NA     | 0.285734918 | 1.591839683 | 4.049842411 | 0.39306213 | 0.694273594 | NA | NA |
| ENSG00000177803 | NA          | NA                                                                | NA     | 0.285734918 | 1.591839683 | 4.049842411 | 0.39306213 | 0.694273594 | NA | NA |
| ENSG00000181518 | OR8D4       | olfactory receptor family 8 subfamily D member 4                  | 338662 | 0.285734918 | 1.591839683 | 4.049842411 | 0.39306213 | 0.694273594 | NA | NA |
| ENSG00000197110 | IFNL3       | interferon lambda 3                                               | 282617 | 0.285734918 | 1.591839683 | 4.049842411 | 0.39306213 | 0.694273594 | NA | NA |
| ENSG00000197915 | HRNR        | hornerin                                                          | 388697 | 0.285734918 | 1.591839683 | 4.049842411 | 0.39306213 | 0.694273594 | NA | NA |
| ENSG00000199020 | MIR381      | microRNA 381                                                      | 494330 | 0.285734918 | 1.591839683 | 4.049842411 | 0.39306213 | 0.694273594 | NA | NA |
| ENSG00000199472 | NA          | NA                                                                | NA     | 0.285734918 | 1.591839683 | 4.049842411 | 0.39306213 | 0.694273594 | NA | NA |
| ENSG00000199975 | NA          | NA                                                                | NA     | 0.285734918 | 1.591839683 | 4.049842411 | 0.39306213 | 0.694273594 | NA | NA |
| ENSG00000200291 | NA          | NA                                                                | NA     | 0.285734918 | 1.591839683 | 4.049842411 | 0.39306213 | 0.694273594 | NA | NA |
| ENSG00000200636 | SNORD114-27 | small nucleolar RNA, C/D box 114-27                               | 767608 | 0.285734918 | 1.591839683 | 4.049842411 | 0.39306213 | 0.694273594 | NA | NA |
| ENSG00000204894 | NA          | NA                                                                | NA     | 0.285734918 | 1.591839683 | 4.049842411 | 0.39306213 | 0.694273594 | NA | NA |
| ENSG00000207762 | MIR329-2    | microRNA 329-2                                                    | 574409 | 0.285734918 | 1.591839683 | 4.049842411 | 0.39306213 | 0.694273594 | NA | NA |
| ENSG00000207989 | MIR493      | microRNA 493                                                      | 574450 | 0.285734918 | 1.591839683 | 4.049842411 | 0.39306213 | 0.694273594 | NA | NA |
| ENSG00000213940 | NA          | NA                                                                | NA     | 0.285734918 | 1.591839683 | 4.049842411 | 0.39306213 | 0.694273594 | NA | NA |
| ENSG00000215498 | FAM230B     | family with sequence similarity 230 member B (non-protein coding) | 642633 | 0.285734918 | 1.591839683 | 4.049842411 | 0.39306213 | 0.694273594 | NA | NA |
| ENSG00000216471 | NA          | NA                                                                | NA     | 0.285734918 | 1.591839683 | 4.049842411 | 0.39306213 | 0.694273594 | NA | NA |
| ENSG00000221474 | NA          | NA                                                                | NA     | 0.285734918 | 1.591839683 | 4.049842411 | 0.39306213 | 0.694273594 | NA | NA |
| ENSG00000223568 | NA          | NA                                                                | NA     | 0.285734918 | 1.591839683 | 4.049842411 | 0.39306213 | 0.694273594 | NA | NA |
| ENSG00000224448 | NA          | NA                                                                | NA     | 0.285734918 | 1.591839683 | 4.049842411 | 0.39306213 | 0.694273594 | NA | NA |
| ENSG00000224984 | NA          | NA                                                                | NA     | 0.285734918 | 1.591839683 | 4.049842411 | 0.39306213 | 0.694273594 | NA | NA |
| ENSG00000225344 | NA          | NA                                                                | NA     | 0.285734918 | 1.591839683 | 4.049842411 | 0.39306213 | 0.694273594 | NA | NA |
| ENSG00000226535 | NA          | NA                                                                | NA     | 0.285734918 | 1.591839683 | 4.049842411 | 0.39306213 | 0.694273594 | NA | NA |
| ENSG00000226840 | NA          | NA                                                                | NA     | 0.285734918 | 1.591839683 | 4.049842411 | 0.39306213 | 0.694273594 | NA | NA |
| ENSG00000227846 | NA          | NA                                                                | NA     | 0.285734918 | 1.591839683 | 4.049842411 | 0.39306213 | 0.694273594 | NA | NA |
| ENSG00000228492 | NA          | NA                                                                | NA     | 0.285734918 | 1.591839683 | 4.049842411 | 0.39306213 | 0.694273594 | NA | NA |
| ENSG00000228564 | NA          | NA                                                                | NA     | 0.285734918 | 1.591839683 | 4.049842411 | 0.39306213 | 0.694273594 | NA | NA |
| ENSG00000228925 | NA          | NA                                                                | NA     | 0.285734918 | 1.591839683 | 4.049842411 | 0.39306213 | 0.694273594 | NA | NA |
| ENSG00000229673 | NA          | NA                                                                | NA     | 0.285734918 | 1.591839683 | 4.049842411 | 0.39306213 | 0.694273594 | NA | NA |
| ENSG00000229972 | IQCF3       | IQ motif containing F3                                            | 401067 | 0.285734918 | 1.591839683 | 4.049842411 | 0.39306213 | 0.694273594 | NA | NA |
| ENSG00000230395 | NA          | NA                                                                | NA     | 0.285734918 | 1.591839683 | 4.049842411 | 0.39306213 | 0.694273594 | NA | NA |
| ENSG00000230444 | NA          | NA                                                                | NA     | 0.285734918 | 1.591839683 | 4.049842411 | 0.39306213 | 0.694273594 | NA | NA |

|                 |              |                                                        |           |             |             |             |            |             |    |    |
|-----------------|--------------|--------------------------------------------------------|-----------|-------------|-------------|-------------|------------|-------------|----|----|
| ENSG00000230782 | LOC340512    | uncharacterized LOC340512                              | 340512    | 0.285734918 | 1.591839683 | 4.049842411 | 0.39306213 | 0.694273594 | NA | NA |
| ENSG00000231858 | LOC105373805 | uncharacterized LOC105373805                           | 105373805 | 0.285734918 | 1.591839683 | 4.049842411 | 0.39306213 | 0.694273594 | NA | NA |
| ENSG00000232037 | NA           | NA                                                     | NA        | 0.285734918 | 1.591839683 | 4.049842411 | 0.39306213 | 0.694273594 | NA | NA |
| ENSG00000232560 | LINC01549    | long intergenic non-protein coding RNA 1549            | 100505929 | 0.285734918 | 1.591839683 | 4.049842411 | 0.39306213 | 0.694273594 | NA | NA |
| ENSG00000232916 | NA           | NA                                                     | NA        | 0.285734918 | 1.591839683 | 4.049842411 | 0.39306213 | 0.694273594 | NA | NA |
| ENSG00000233557 | NA           | NA                                                     | NA        | 0.285734918 | 1.591839683 | 4.049842411 | 0.39306213 | 0.694273594 | NA | NA |
| ENSG00000234185 | NA           | NA                                                     | NA        | 0.285734918 | 1.591839683 | 4.049842411 | 0.39306213 | 0.694273594 | NA | NA |
| ENSG00000234859 | LOC100505782 | uncharacterized LOC100505782                           | 100505782 | 0.285734918 | 1.591839683 | 4.049842411 | 0.39306213 | 0.694273594 | NA | NA |
| ENSG00000235329 | NA           | NA                                                     | NA        | 0.285734918 | 1.591839683 | 4.049842411 | 0.39306213 | 0.694273594 | NA | NA |
| ENSG00000235606 | NA           | NA                                                     | NA        | 0.285734918 | 1.591839683 | 4.049842411 | 0.39306213 | 0.694273594 | NA | NA |
| ENSG00000235880 | NA           | NA                                                     | NA        | 0.285734918 | 1.591839683 | 4.049842411 | 0.39306213 | 0.694273594 | NA | NA |
| ENSG00000235984 | GPC5-AS1     | GPC5 antisense RNA 1                                   | 100873969 | 0.285734918 | 1.591839683 | 4.049842411 | 0.39306213 | 0.694273594 | NA | NA |
| ENSG00000236167 | NA           | NA                                                     | NA        | 0.285734918 | 1.591839683 | 4.049842411 | 0.39306213 | 0.694273594 | NA | NA |
| ENSG00000236326 | NA           | NA                                                     | NA        | 0.285734918 | 1.591839683 | 4.049842411 | 0.39306213 | 0.694273594 | NA | NA |
| ENSG00000236460 | NA           | NA                                                     | NA        | 0.285734918 | 1.591839683 | 4.049842411 | 0.39306213 | 0.694273594 | NA | NA |
| ENSG00000236523 | NA           | NA                                                     | NA        | 0.285734918 | 1.591839683 | 4.049842411 | 0.39306213 | 0.694273594 | NA | NA |
| ENSG00000237307 | NA           | NA                                                     | NA        | 0.285734918 | 1.591839683 | 4.049842411 | 0.39306213 | 0.694273594 | NA | NA |
| ENSG00000238361 | NA           | NA                                                     | NA        | 0.285734918 | 1.591839683 | 4.049842411 | 0.39306213 | 0.694273594 | NA | NA |
| ENSG00000239051 | NA           | NA                                                     | NA        | 0.285734918 | 1.591839683 | 4.049842411 | 0.39306213 | 0.694273594 | NA | NA |
| ENSG00000239230 | NA           | NA                                                     | NA        | 0.285734918 | 1.591839683 | 4.049842411 | 0.39306213 | 0.694273594 | NA | NA |
| ENSG00000239696 | NA           | NA                                                     | NA        | 0.285734918 | 1.591839683 | 4.049842411 | 0.39306213 | 0.694273594 | NA | NA |
| ENSG00000240418 | NA           | NA                                                     | NA        | 0.285734918 | 1.591839683 | 4.049842411 | 0.39306213 | 0.694273594 | NA | NA |
| ENSG00000241577 | NA           | NA                                                     | NA        | 0.285734918 | 1.591839683 | 4.049842411 | 0.39306213 | 0.694273594 | NA | NA |
| ENSG00000242444 | NA           | NA                                                     | NA        | 0.285734918 | 1.591839683 | 4.049842411 | 0.39306213 | 0.694273594 | NA | NA |
| ENSG00000243831 | NA           | NA                                                     | NA        | 0.285734918 | 1.591839683 | 4.049842411 | 0.39306213 | 0.694273594 | NA | NA |
| ENSG00000244281 | NA           | NA                                                     | NA        | 0.285734918 | 1.591839683 | 4.049842411 | 0.39306213 | 0.694273594 | NA | NA |
| ENSG00000244372 | NA           | NA                                                     | NA        | 0.285734918 | 1.591839683 | 4.049842411 | 0.39306213 | 0.694273594 | NA | NA |
| ENSG00000247228 | LOC400541    | uncharacterized LOC400541                              | 400541    | 0.285734918 | 1.591839683 | 4.049842411 | 0.39306213 | 0.694273594 | NA | NA |
| ENSG00000248475 | NA           | NA                                                     | NA        | 0.285734918 | 1.591839683 | 4.049842411 | 0.39306213 | 0.694273594 | NA | NA |
| ENSG00000248684 | NA           | NA                                                     | NA        | 0.285734918 | 1.591839683 | 4.049842411 | 0.39306213 | 0.694273594 | NA | NA |
| ENSG00000250107 | CACNA1G-AS1  | CACNA1G antisense RNA 1                                | 253962    | 0.285734918 | 1.591839683 | 4.049842411 | 0.39306213 | 0.694273594 | NA | NA |
| ENSG00000251557 | HNRNPKP3     | heterogeneous nuclear ribonucleoprotein K pseudogene 3 | 399881    | 0.285734918 | 1.591839683 | 4.049842411 | 0.39306213 | 0.694273594 | NA | NA |
| ENSG00000252995 | NA           | NA                                                     | NA        | 0.285734918 | 1.591839683 | 4.049842411 | 0.39306213 | 0.694273594 | NA | NA |
| ENSG00000253240 | NA           | NA                                                     | NA        | 0.285734918 | 1.591839683 | 4.049842411 | 0.39306213 | 0.694273594 | NA | NA |
| ENSG00000253398 | NA           | NA                                                     | NA        | 0.285734918 | 1.591839683 | 4.049842411 | 0.39306213 | 0.694273594 | NA | NA |

|                 |              |                                                  |           |             |             |             |             |             |             |         |
|-----------------|--------------|--------------------------------------------------|-----------|-------------|-------------|-------------|-------------|-------------|-------------|---------|
| ENSG00000253413 | NA           | NA                                               | NA        | 0.285734918 | 1.591839683 | 4.049842411 | 0.39306213  | 0.694273594 | NA          | NA      |
| ENSG00000254126 | NA           | NA                                               | NA        | 0.285734918 | 1.591839683 | 4.049842411 | 0.39306213  | 0.694273594 | NA          | NA      |
| ENSG00000254422 | NA           | NA                                               | NA        | 0.285734918 | 1.591839683 | 4.049842411 | 0.39306213  | 0.694273594 | NA          | NA      |
| ENSG00000254890 | NA           | NA                                               | NA        | 0.285734918 | 1.591839683 | 4.049842411 | 0.39306213  | 0.694273594 | NA          | NA      |
| ENSG00000255994 | NA           | NA                                               | NA        | 0.285734918 | 1.591839683 | 4.049842411 | 0.39306213  | 0.694273594 | NA          | NA      |
| ENSG00000257237 | NA           | NA                                               | NA        | 0.285734918 | 1.591839683 | 4.049842411 | 0.39306213  | 0.694273594 | NA          | NA      |
| ENSG00000258615 | NA           | NA                                               | NA        | 0.285734918 | 1.591839683 | 4.049842411 | 0.39306213  | 0.694273594 | NA          | NA      |
| ENSG00000259037 | NA           | NA                                               | NA        | 0.285734918 | 1.591839683 | 4.049842411 | 0.39306213  | 0.694273594 | NA          | NA      |
| ENSG00000259259 | NA           | NA                                               | NA        | 0.285734918 | 1.591839683 | 4.049842411 | 0.39306213  | 0.694273594 | NA          | NA      |
| ENSG00000259465 | NA           | NA                                               | NA        | 0.285734918 | 1.591839683 | 4.049842411 | 0.39306213  | 0.694273594 | NA          | NA      |
| ENSG00000259689 | NA           | NA                                               | NA        | 0.285734918 | 1.591839683 | 4.049842411 | 0.39306213  | 0.694273594 | NA          | NA      |
| ENSG00000260779 | LOC101927410 | uncharacterized LOC101927410                     | 101927410 | 0.285734918 | 1.591839683 | 4.049842411 | 0.39306213  | 0.694273594 | NA          | NA      |
| ENSG00000261057 | NA           | NA                                               | NA        | 0.285734918 | 1.591839683 | 4.049842411 | 0.39306213  | 0.694273594 | NA          | NA      |
| ENSG00000261458 | NA           | NA                                               | NA        | 0.285734918 | 1.591839683 | 4.049842411 | 0.39306213  | 0.694273594 | NA          | NA      |
| ENSG00000261538 | NA           | NA                                               | NA        | 0.285734918 | 1.591839683 | 4.049842411 | 0.39306213  | 0.694273594 | NA          | NA      |
| ENSG00000263510 | MIR4497      | microRNA 4497                                    | 100616454 | 0.285734918 | 1.591839683 | 4.049842411 | 0.39306213  | 0.694273594 | NA          | NA      |
| ENSG00000263727 | NA           | NA                                               | NA        | 0.285734918 | 1.591839683 | 4.049842411 | 0.39306213  | 0.694273594 | NA          | NA      |
| ENSG00000264479 | NA           | NA                                               | NA        | 0.285734918 | 1.591839683 | 4.049842411 | 0.39306213  | 0.694273594 | NA          | NA      |
| ENSG00000264668 | NA           | NA                                               | NA        | 0.285734918 | 1.591839683 | 4.049842411 | 0.39306213  | 0.694273594 | NA          | NA      |
| ENSG00000265467 | NA           | NA                                               | NA        | 0.285734918 | 1.591839683 | 4.049842411 | 0.39306213  | 0.694273594 | NA          | NA      |
| ENSG00000265992 | ESRG         | embryonic stem cell related (non-protein coding) | 790952    | 0.285734918 | 1.591839683 | 4.049842411 | 0.39306213  | 0.694273594 | NA          | NA      |
| ENSG00000267024 | NA           | NA                                               | NA        | 0.285734918 | 1.591839683 | 4.049842411 | 0.39306213  | 0.694273594 | NA          | NA      |
| ENSG00000267141 | NA           | NA                                               | NA        | 0.285734918 | 1.591839683 | 4.049842411 | 0.39306213  | 0.694273594 | NA          | NA      |
| ENSG00000270202 | NA           | NA                                               | NA        | 0.285734918 | 1.591839683 | 4.049842411 | 0.39306213  | 0.694273594 | NA          | NA      |
| ENSG00000270955 | NA           | NA                                               | NA        | 0.285734918 | 1.591839683 | 4.049842411 | 0.39306213  | 0.694273594 | NA          | NA      |
| ENSG00000271057 | NA           | NA                                               | NA        | 0.285734918 | 1.591839683 | 4.049842411 | 0.39306213  | 0.694273594 | NA          | NA      |
| ENSG00000271230 | NA           | NA                                               | NA        | 0.285734918 | 1.591839683 | 4.049842411 | 0.39306213  | 0.694273594 | NA          | NA      |
| ENSG00000271377 | NA           | NA                                               | NA        | 0.285734918 | 1.591839683 | 4.049842411 | 0.39306213  | 0.694273594 | NA          | NA      |
| ENSG00000272254 | NA           | NA                                               | NA        | 0.285734918 | 1.591839683 | 4.049842411 | 0.39306213  | 0.694273594 | NA          | NA      |
| ENSG00000272457 | NA           | NA                                               | NA        | 0.285734918 | 1.591839683 | 4.049842411 | 0.39306213  | 0.694273594 | NA          | NA      |
| ENSG00000265445 | NA           | NA                                               | NA        | 1.261117388 | 1.594010285 | 2.405627122 | 0.662617357 | 0.507575651 | NA          | NA      |
| ENSG00000164574 | GALNT10      | polypeptide N-acetylgalactosaminyltransferase 10 | 55568     | 3607.600189 | 1.595880895 | 0.504348965 | 3.164239459 | 0.001554888 | 0.152974262 | Not Sig |
| ENSG00000081842 | PCDHA6       | protocadherin alpha 6                            | 56142     | 50.02182732 | 1.596227637 | 0.806104612 | 1.980174303 | 0.047683946 | 0.999371363 | Not Sig |
| ENSG00000143502 | SUSD4        | sushi domain containing 4                        | 55061     | 160.0939185 | 1.599680022 | 0.887645329 | 1.802161258 | 0.071520038 | 0.999371363 | Not Sig |
| ENSG00000225356 | NA           | NA                                               | NA        | 3.036847739 | 1.60016231  | 1.650444358 | 0.969534236 | 0.332278707 | NA          | NA      |

|                 |            |                                                                     |           |             |             |             |             |             |             |         |
|-----------------|------------|---------------------------------------------------------------------|-----------|-------------|-------------|-------------|-------------|-------------|-------------|---------|
| ENSG00000137843 | PAK6       | p21 (RAC1) activated kinase 6                                       | 56924     | 124.5978579 | 1.600996312 | 0.641286426 | 2.496538595 | 0.012541202 | 0.556126761 | Not Sig |
| ENSG00000137843 | BUB1B-PAK6 | BUB1B-PAK6 readthrough                                              | 106821730 | 124.5978579 | 1.600996312 | 0.641286426 | 2.496538595 | 0.012541202 | 0.556126761 | Not Sig |
| ENSG00000239528 | NA         | NA                                                                  | NA        | 1.491541333 | 1.601829274 | 2.382195997 | 0.672417079 | 0.501318213 | NA          | NA      |
| ENSG00000198535 | C2CD4A     | C2 calcium dependent domain containing 4A                           | 145741    | 102.7571446 | 1.602731873 | 0.999535457 | 1.603476757 | 0.108829437 | 0.999371363 | Not Sig |
| ENSG00000186530 | NA         | NA                                                                  | NA        | 2.73932488  | 1.608052791 | 1.60240723  | 1.003523175 | 0.315608501 | NA          | NA      |
| ENSG00000251836 | NA         | NA                                                                  | NA        | 2.009725411 | 1.617599324 | 1.837149653 | 0.880494042 | 0.378591731 | NA          | NA      |
| ENSG00000157119 | KLHL40     | kelch like family member 40                                         | 131377    | 0.292172453 | 1.619463183 | 4.047179965 | 0.400146076 | 0.689048929 | NA          | NA      |
| ENSG00000167360 | OR51Q1     | olfactory receptor family 51 subfamily Q member 1 (gene/pseudogene) | 390061    | 0.292172453 | 1.619463183 | 4.047179965 | 0.400146076 | 0.689048929 | NA          | NA      |
| ENSG00000172938 | MRGPRD     | MAS related GPR family member D                                     | 116512    | 0.292172453 | 1.619463183 | 4.047179965 | 0.400146076 | 0.689048929 | NA          | NA      |
| ENSG00000183034 | OTOP2      | otopetrin 2                                                         | 92736     | 0.292172453 | 1.619463183 | 4.047179965 | 0.400146076 | 0.689048929 | NA          | NA      |
| ENSG00000183324 | REC114     | REC114 meiotic recombination protein                                | 283677    | 0.292172453 | 1.619463183 | 4.047179965 | 0.400146076 | 0.689048929 | NA          | NA      |
| ENSG00000199092 | MIR410     | microRNA 410                                                        | 574434    | 0.292172453 | 1.619463183 | 4.047179965 | 0.400146076 | 0.689048929 | NA          | NA      |
| ENSG00000202522 | NA         | NA                                                                  | NA        | 0.292172453 | 1.619463183 | 4.047179965 | 0.400146076 | 0.689048929 | NA          | NA      |
| ENSG00000203782 | LOR        | loricrin                                                            | 4014      | 0.292172453 | 1.619463183 | 4.047179965 | 0.400146076 | 0.689048929 | NA          | NA      |
| ENSG00000204449 | TRIM49C    | tripartite motif containing 49C                                     | 642612    | 0.292172453 | 1.619463183 | 4.047179965 | 0.400146076 | 0.689048929 | NA          | NA      |
| ENSG00000207613 | MIR181C    | microRNA 181c                                                       | 406957    | 0.292172453 | 1.619463183 | 4.047179965 | 0.400146076 | 0.689048929 | NA          | NA      |
| ENSG00000207805 | MIR483     | microRNA 483                                                        | 619552    | 0.292172453 | 1.619463183 | 4.047179965 | 0.400146076 | 0.689048929 | NA          | NA      |
| ENSG00000207959 | MIR656     | microRNA 656                                                        | 724026    | 0.292172453 | 1.619463183 | 4.047179965 | 0.400146076 | 0.689048929 | NA          | NA      |
| ENSG00000213750 | NA         | NA                                                                  | NA        | 0.292172453 | 1.619463183 | 4.047179965 | 0.400146076 | 0.689048929 | NA          | NA      |
| ENSG00000214144 | NA         | NA                                                                  | NA        | 0.292172453 | 1.619463183 | 4.047179965 | 0.400146076 | 0.689048929 | NA          | NA      |
| ENSG00000214782 | MS4A18     | membrane spanning 4-domains A18                                     | 728588    | 0.292172453 | 1.619463183 | 4.047179965 | 0.400146076 | 0.689048929 | NA          | NA      |
| ENSG00000218582 | NA         | NA                                                                  | NA        | 0.292172453 | 1.619463183 | 4.047179965 | 0.400146076 | 0.689048929 | NA          | NA      |
| ENSG00000219699 | NA         | NA                                                                  | NA        | 0.292172453 | 1.619463183 | 4.047179965 | 0.400146076 | 0.689048929 | NA          | NA      |
| ENSG00000219932 | NA         | NA                                                                  | NA        | 0.292172453 | 1.619463183 | 4.047179965 | 0.400146076 | 0.689048929 | NA          | NA      |
| ENSG00000221104 | NA         | NA                                                                  | NA        | 0.292172453 | 1.619463183 | 4.047179965 | 0.400146076 | 0.689048929 | NA          | NA      |
| ENSG00000221707 | NA         | NA                                                                  | NA        | 0.292172453 | 1.619463183 | 4.047179965 | 0.400146076 | 0.689048929 | NA          | NA      |
| ENSG00000223650 | NA         | NA                                                                  | NA        | 0.292172453 | 1.619463183 | 4.047179965 | 0.400146076 | 0.689048929 | NA          | NA      |
| ENSG00000223669 | NA         | NA                                                                  | NA        | 0.292172453 | 1.619463183 | 4.047179965 | 0.400146076 | 0.689048929 | NA          | NA      |
| ENSG00000224361 | NA         | NA                                                                  | NA        | 0.292172453 | 1.619463183 | 4.047179965 | 0.400146076 | 0.689048929 | NA          | NA      |
| ENSG00000226342 | NA         | NA                                                                  | NA        | 0.292172453 | 1.619463183 | 4.047179965 | 0.400146076 | 0.689048929 | NA          | NA      |
| ENSG00000227481 | NA         | NA                                                                  | NA        | 0.292172453 | 1.619463183 | 4.047179965 | 0.400146076 | 0.689048929 | NA          | NA      |
| ENSG00000228666 | NA         | NA                                                                  | NA        | 0.292172453 | 1.619463183 | 4.047179965 | 0.400146076 | 0.689048929 | NA          | NA      |
| ENSG00000229224 | NA         | NA                                                                  | NA        | 0.292172453 | 1.619463183 | 4.047179965 | 0.400146076 | 0.689048929 | NA          | NA      |
| ENSG00000230716 | NA         | NA                                                                  | NA        | 0.292172453 | 1.619463183 | 4.047179965 | 0.400146076 | 0.689048929 | NA          | NA      |
| ENSG00000230750 | NA         | NA                                                                  | NA        | 0.292172453 | 1.619463183 | 4.047179965 | 0.400146076 | 0.689048929 | NA          | NA      |

|                 |              |                                     |           |             |             |             |             |             |             |         |
|-----------------|--------------|-------------------------------------|-----------|-------------|-------------|-------------|-------------|-------------|-------------|---------|
| ENSG00000233502 | NA           | NA                                  | NA        | 0.292172453 | 1.619463183 | 4.047179965 | 0.400146076 | 0.689048929 | NA          | NA      |
| ENSG00000234115 | NA           | NA                                  | NA        | 0.292172453 | 1.619463183 | 4.047179965 | 0.400146076 | 0.689048929 | NA          | NA      |
| ENSG00000234588 | NA           | NA                                  | NA        | 0.292172453 | 1.619463183 | 4.047179965 | 0.400146076 | 0.689048929 | NA          | NA      |
| ENSG00000235028 | NA           | NA                                  | NA        | 0.292172453 | 1.619463183 | 4.047179965 | 0.400146076 | 0.689048929 | NA          | NA      |
| ENSG00000235400 | NA           | NA                                  | NA        | 0.292172453 | 1.619463183 | 4.047179965 | 0.400146076 | 0.689048929 | NA          | NA      |
| ENSG00000236484 | NA           | NA                                  | NA        | 0.292172453 | 1.619463183 | 4.047179965 | 0.400146076 | 0.689048929 | NA          | NA      |
| ENSG00000237842 | NA           | NA                                  | NA        | 0.292172453 | 1.619463183 | 4.047179965 | 0.400146076 | 0.689048929 | NA          | NA      |
| ENSG00000239610 | NA           | NA                                  | NA        | 0.292172453 | 1.619463183 | 4.047179965 | 0.400146076 | 0.689048929 | NA          | NA      |
| ENSG00000241456 | NA           | NA                                  | NA        | 0.292172453 | 1.619463183 | 4.047179965 | 0.400146076 | 0.689048929 | NA          | NA      |
| ENSG00000241462 | NA           | NA                                  | NA        | 0.292172453 | 1.619463183 | 4.047179965 | 0.400146076 | 0.689048929 | NA          | NA      |
| ENSG00000243480 | AMY2A        | amylase, alpha 2A (pancreatic)      | 279       | 0.292172453 | 1.619463183 | 4.047179965 | 0.400146076 | 0.689048929 | NA          | NA      |
| ENSG00000243981 | NA           | NA                                  | NA        | 0.292172453 | 1.619463183 | 4.047179965 | 0.400146076 | 0.689048929 | NA          | NA      |
| ENSG00000244705 | NA           | NA                                  | NA        | 0.292172453 | 1.619463183 | 4.047179965 | 0.400146076 | 0.689048929 | NA          | NA      |
| ENSG00000248285 | NA           | NA                                  | NA        | 0.292172453 | 1.619463183 | 4.047179965 | 0.400146076 | 0.689048929 | NA          | NA      |
| ENSG00000248903 | NA           | NA                                  | NA        | 0.292172453 | 1.619463183 | 4.047179965 | 0.400146076 | 0.689048929 | NA          | NA      |
| ENSG00000249215 | NA           | NA                                  | NA        | 0.292172453 | 1.619463183 | 4.047179965 | 0.400146076 | 0.689048929 | NA          | NA      |
| ENSG00000250289 | NA           | NA                                  | NA        | 0.292172453 | 1.619463183 | 4.047179965 | 0.400146076 | 0.689048929 | NA          | NA      |
| ENSG00000250389 | NA           | NA                                  | NA        | 0.292172453 | 1.619463183 | 4.047179965 | 0.400146076 | 0.689048929 | NA          | NA      |
| ENSG00000250893 | NA           | NA                                  | NA        | 0.292172453 | 1.619463183 | 4.047179965 | 0.400146076 | 0.689048929 | NA          | NA      |
| ENSG00000251203 | NA           | NA                                  | NA        | 0.292172453 | 1.619463183 | 4.047179965 | 0.400146076 | 0.689048929 | NA          | NA      |
| ENSG00000251856 | MIR449C      | microRNA 449c                       | 100313923 | 0.292172453 | 1.619463183 | 4.047179965 | 0.400146076 | 0.689048929 | NA          | NA      |
| ENSG00000253085 | NA           | NA                                  | NA        | 0.292172453 | 1.619463183 | 4.047179965 | 0.400146076 | 0.689048929 | NA          | NA      |
| ENSG00000253096 | NA           | NA                                  | NA        | 0.292172453 | 1.619463183 | 4.047179965 | 0.400146076 | 0.689048929 | NA          | NA      |
| ENSG00000254176 | NA           | NA                                  | NA        | 0.292172453 | 1.619463183 | 4.047179965 | 0.400146076 | 0.689048929 | NA          | NA      |
| ENSG00000255309 | NA           | NA                                  | NA        | 0.292172453 | 1.619463183 | 4.047179965 | 0.400146076 | 0.689048929 | NA          | NA      |
| ENSG00000256977 | LIMS3        | LIM zinc finger domain containing 3 | 96626     | 0.292172453 | 1.619463183 | 4.047179965 | 0.400146076 | 0.689048929 | NA          | NA      |
| ENSG00000258926 | NA           | NA                                  | NA        | 0.292172453 | 1.619463183 | 4.047179965 | 0.400146076 | 0.689048929 | NA          | NA      |
| ENSG00000260443 | NA           | NA                                  | NA        | 0.292172453 | 1.619463183 | 4.047179965 | 0.400146076 | 0.689048929 | NA          | NA      |
| ENSG00000263445 | MIR4450      | microRNA 4450                       | 100616299 | 0.292172453 | 1.619463183 | 4.047179965 | 0.400146076 | 0.689048929 | NA          | NA      |
| ENSG00000263724 | DLGAP1-AS3   | DLGAP1 antisense RNA 3              | 201477    | 0.292172453 | 1.619463183 | 4.047179965 | 0.400146076 | 0.689048929 | NA          | NA      |
| ENSG00000263755 | NA           | NA                                  | NA        | 0.292172453 | 1.619463183 | 4.047179965 | 0.400146076 | 0.689048929 | NA          | NA      |
| ENSG00000264982 | NA           | NA                                  | NA        | 0.292172453 | 1.619463183 | 4.047179965 | 0.400146076 | 0.689048929 | NA          | NA      |
| ENSG00000267225 | NA           | NA                                  | NA        | 0.292172453 | 1.619463183 | 4.047179965 | 0.400146076 | 0.689048929 | NA          | NA      |
| ENSG00000267239 | NA           | NA                                  | NA        | 0.292172453 | 1.619463183 | 4.047179965 | 0.400146076 | 0.689048929 | NA          | NA      |
| ENSG00000229267 | LOC101928103 | uncharacterized LOC101928103        | 101928103 | 31.47586008 | 1.620254258 | 0.950408062 | 1.704798521 | 0.088232007 | 0.999371363 | Not Sig |



|                 |               |                                                   |           |             |             |             |             |             |             |         |
|-----------------|---------------|---------------------------------------------------|-----------|-------------|-------------|-------------|-------------|-------------|-------------|---------|
| ENSG00000229272 | NA            | NA                                                | NA        | 2.016162947 | 1.621978635 | 1.804829784 | 0.89868787  | 0.36881894  | NA          | NA      |
| ENSG00000228168 | NA            | NA                                                | NA        | 30.6677063  | 1.622040645 | 0.926267898 | 1.751157142 | 0.079918846 | 0.999371363 | Not Sig |
| ENSG00000137709 | POU2F3        | POU class 2 homeobox 3                            | 25833     | 128.8204791 | 1.622622246 | 0.548361775 | 2.959036023 | 0.00308603  | 0.244417478 | Not Sig |
| ENSG00000174939 | ASPHD1        | aspartate beta-hydroxylase domain containing 1    | 253982    | 77.05172527 | 1.625407835 | 0.850123013 | 1.911967808 | 0.055880323 | 0.999371363 | Not Sig |
| ENSG00000168992 | NA            | NA                                                | NA        | 5.478638862 | 1.631497526 | 1.252563626 | 1.302526667 | 0.192736408 | NA          | NA      |
| ENSG00000197180 | CH17-340M24.3 | uncharacterized protein BC009467                  | 158960    | 23.14921544 | 1.632298305 | 0.872990577 | 1.869777691 | 0.061514696 | 0.999371363 | Not Sig |
| ENSG00000142611 | PRDM16        | PR/SET domain 16                                  | 63976     | 911.4344154 | 1.632453223 | 1.026177042 | 1.590810509 | 0.111652227 | 0.999371363 | Not Sig |
| ENSG00000268856 | NA            | NA                                                | NA        | 7.719502854 | 1.63254389  | 1.444656377 | 1.130056888 | 0.258452254 | 0.999371363 | Not Sig |
| ENSG00000170231 | FABP6         | fatty acid binding protein 6                      | 2172      | 38.17306654 | 1.633079972 | 1.129060808 | 1.446405685 | 0.148063448 | 0.999371363 | Not Sig |
| ENSG00000173947 | PIFO          | primary cilia formation                           | 128344    | 233.8756285 | 1.637804622 | 0.883071225 | 1.85466877  | 0.063643541 | 0.999371363 | Not Sig |
| ENSG00000221662 | MIR1290       | microRNA 1290                                     | 100302276 | 1.296017727 | 1.637984974 | 2.397478363 | 0.683211578 | 0.494473158 | NA          | NA      |
| ENSG00000211852 | NA            | NA                                                | NA        | 5.014269003 | 1.639521287 | 1.509273736 | 1.086298163 | 0.277347099 | NA          | NA      |
| ENSG00000119915 | ELOVL3        | ELOVL fatty acid elongase 3                       | 83401     | 5.68376701  | 1.639561154 | 1.672945215 | 0.980044738 | 0.327064036 | NA          | NA      |
| ENSG00000249688 | NA            | NA                                                | NA        | 0.728869511 | 1.640402049 | 3.303550681 | 0.496557252 | 0.619501305 | NA          | NA      |
| ENSG00000254590 | NA            | NA                                                | NA        | 0.728869511 | 1.640402049 | 3.303550681 | 0.496557252 | 0.619501305 | NA          | NA      |
| ENSG00000265676 | NA            | NA                                                | NA        | 0.728869511 | 1.640402049 | 3.303550681 | 0.496557252 | 0.619501305 | NA          | NA      |
| ENSG00000221203 | MIR1262       | microRNA 1262                                     | 100302279 | 11.75745255 | 1.640541975 | 1.134358879 | 1.446228355 | 0.148113163 | 0.999371363 | Not Sig |
| ENSG00000198173 | FAM47C        | family with sequence similarity 47 member C       | 442444    | 0.745176303 | 1.64060944  | 3.281359228 | 0.499978614 | 0.617090136 | NA          | NA      |
| ENSG00000266875 | NA            | NA                                                | NA        | 0.745176303 | 1.64060944  | 3.281359228 | 0.499978614 | 0.617090136 | NA          | NA      |
| ENSG00000256234 | NA            | NA                                                | NA        | 3.513422756 | 1.644006264 | 1.325719724 | 1.240085844 | 0.214943644 | NA          | NA      |
| ENSG00000235961 | PNMA6A        | PNMA family member 6A                             | 84968     | 5.532808045 | 1.645082185 | 2.091510412 | 0.786552233 | 0.431544031 | NA          | NA      |
| ENSG00000115107 | STEAP3        | STEAP3 metalloredutase                            | 55240     | 1405.872575 | 1.645729804 | 0.474362939 | 3.469347347 | 0.000521724 | 0.073000846 | Not Sig |
| ENSG00000113520 | IL4           | interleukin 4                                     | 3565      | 0.298609989 | 1.646698945 | 4.044602534 | 0.407134924 | 0.683908894 | NA          | NA      |
| ENSG00000155087 | ODF1          | outer dense fiber of sperm tails 1                | 4956      | 0.298609989 | 1.646698945 | 4.044602534 | 0.407134924 | 0.683908894 | NA          | NA      |
| ENSG00000163216 | SPRR2D        | small proline rich protein 2D                     | 6703      | 0.298609989 | 1.646698945 | 4.044602534 | 0.407134924 | 0.683908894 | NA          | NA      |
| ENSG00000171360 | KRT38         | keratin 38                                        | 8687      | 0.298609989 | 1.646698945 | 4.044602534 | 0.407134924 | 0.683908894 | NA          | NA      |
| ENSG00000171561 | OR2AT4        | olfactory receptor family 2 subfamily AT member 4 | 341152    | 0.298609989 | 1.646698945 | 4.044602534 | 0.407134924 | 0.683908894 | NA          | NA      |
| ENSG00000180409 | NA            | NA                                                | NA        | 0.298609989 | 1.646698945 | 4.044602534 | 0.407134924 | 0.683908894 | NA          | NA      |
| ENSG00000182574 | NA            | NA                                                | NA        | 0.298609989 | 1.646698945 | 4.044602534 | 0.407134924 | 0.683908894 | NA          | NA      |
| ENSG00000201142 | NA            | NA                                                | NA        | 0.298609989 | 1.646698945 | 4.044602534 | 0.407134924 | 0.683908894 | NA          | NA      |
| ENSG00000202245 | NA            | NA                                                | NA        | 0.298609989 | 1.646698945 | 4.044602534 | 0.407134924 | 0.683908894 | NA          | NA      |
| ENSG00000202512 | NA            | NA                                                | NA        | 0.298609989 | 1.646698945 | 4.044602534 | 0.407134924 | 0.683908894 | NA          | NA      |
| ENSG00000205897 | NA            | NA                                                | NA        | 0.298609989 | 1.646698945 | 4.044602534 | 0.407134924 | 0.683908894 | NA          | NA      |
| ENSG00000206069 | TMEM211       | transmembrane protein 211                         | 255349    | 0.298609989 | 1.646698945 | 4.044602534 | 0.407134924 | 0.683908894 | NA          | NA      |
| ENSG00000206249 | NA            | NA                                                | NA        | 0.298609989 | 1.646698945 | 4.044602534 | 0.407134924 | 0.683908894 | NA          | NA      |

|                 |            |                                                  |           |             |             |             |             |             |    |    |
|-----------------|------------|--------------------------------------------------|-----------|-------------|-------------|-------------|-------------|-------------|----|----|
| ENSG00000207585 | MIR181D    | microRNA 181d                                    | 574457    | 0.298609989 | 1.646698945 | 4.044602534 | 0.407134924 | 0.683908894 | NA | NA |
| ENSG00000211731 | NA         | NA                                               | NA        | 0.298609989 | 1.646698945 | 4.044602534 | 0.407134924 | 0.683908894 | NA | NA |
| ENSG00000213226 | NA         | NA                                               | NA        | 0.298609989 | 1.646698945 | 4.044602534 | 0.407134924 | 0.683908894 | NA | NA |
| ENSG00000213772 | NA         | NA                                               | NA        | 0.298609989 | 1.646698945 | 4.044602534 | 0.407134924 | 0.683908894 | NA | NA |
| ENSG00000213891 | NA         | NA                                               | NA        | 0.298609989 | 1.646698945 | 4.044602534 | 0.407134924 | 0.683908894 | NA | NA |
| ENSG00000215319 | NA         | NA                                               | NA        | 0.298609989 | 1.646698945 | 4.044602534 | 0.407134924 | 0.683908894 | NA | NA |
| ENSG00000216998 | NA         | NA                                               | NA        | 0.298609989 | 1.646698945 | 4.044602534 | 0.407134924 | 0.683908894 | NA | NA |
| ENSG00000221084 | NA         | NA                                               | NA        | 0.298609989 | 1.646698945 | 4.044602534 | 0.407134924 | 0.683908894 | NA | NA |
| ENSG00000221989 | OR2A2      | olfactory receptor family 2 subfamily A member 2 | 442361    | 0.298609989 | 1.646698945 | 4.044602534 | 0.407134924 | 0.683908894 | NA | NA |
| ENSG00000222705 | NA         | NA                                               | NA        | 0.298609989 | 1.646698945 | 4.044602534 | 0.407134924 | 0.683908894 | NA | NA |
| ENSG00000223718 | NA         | NA                                               | NA        | 0.298609989 | 1.646698945 | 4.044602534 | 0.407134924 | 0.683908894 | NA | NA |
| ENSG00000226239 | NA         | NA                                               | NA        | 0.298609989 | 1.646698945 | 4.044602534 | 0.407134924 | 0.683908894 | NA | NA |
| ENSG00000226247 | NA         | NA                                               | NA        | 0.298609989 | 1.646698945 | 4.044602534 | 0.407134924 | 0.683908894 | NA | NA |
| ENSG00000226926 | NA         | NA                                               | NA        | 0.298609989 | 1.646698945 | 4.044602534 | 0.407134924 | 0.683908894 | NA | NA |
| ENSG00000227965 | NA         | NA                                               | NA        | 0.298609989 | 1.646698945 | 4.044602534 | 0.407134924 | 0.683908894 | NA | NA |
| ENSG00000229500 | NA         | NA                                               | NA        | 0.298609989 | 1.646698945 | 4.044602534 | 0.407134924 | 0.683908894 | NA | NA |
| ENSG00000229752 | NA         | NA                                               | NA        | 0.298609989 | 1.646698945 | 4.044602534 | 0.407134924 | 0.683908894 | NA | NA |
| ENSG00000230322 | NA         | NA                                               | NA        | 0.298609989 | 1.646698945 | 4.044602534 | 0.407134924 | 0.683908894 | NA | NA |
| ENSG00000230657 | PRB4       | proline rich protein BstNI subfamily 4           | 5545      | 0.298609989 | 1.646698945 | 4.044602534 | 0.407134924 | 0.683908894 | NA | NA |
| ENSG00000233020 | NA         | NA                                               | NA        | 0.298609989 | 1.646698945 | 4.044602534 | 0.407134924 | 0.683908894 | NA | NA |
| ENSG00000233278 | NA         | NA                                               | NA        | 0.298609989 | 1.646698945 | 4.044602534 | 0.407134924 | 0.683908894 | NA | NA |
| ENSG00000234335 | NA         | NA                                               | NA        | 0.298609989 | 1.646698945 | 4.044602534 | 0.407134924 | 0.683908894 | NA | NA |
| ENSG00000234497 | ERICH3-AS1 | ERICH3 antisense RNA 1                           | 101927320 | 0.298609989 | 1.646698945 | 4.044602534 | 0.407134924 | 0.683908894 | NA | NA |
| ENSG00000234979 | NA         | NA                                               | NA        | 0.298609989 | 1.646698945 | 4.044602534 | 0.407134924 | 0.683908894 | NA | NA |
| ENSG00000235818 | NA         | NA                                               | NA        | 0.298609989 | 1.646698945 | 4.044602534 | 0.407134924 | 0.683908894 | NA | NA |
| ENSG00000236763 | NA         | NA                                               | NA        | 0.298609989 | 1.646698945 | 4.044602534 | 0.407134924 | 0.683908894 | NA | NA |
| ENSG00000237338 | NA         | NA                                               | NA        | 0.298609989 | 1.646698945 | 4.044602534 | 0.407134924 | 0.683908894 | NA | NA |
| ENSG00000238598 | NA         | NA                                               | NA        | 0.298609989 | 1.646698945 | 4.044602534 | 0.407134924 | 0.683908894 | NA | NA |
| ENSG00000241438 | NA         | NA                                               | NA        | 0.298609989 | 1.646698945 | 4.044602534 | 0.407134924 | 0.683908894 | NA | NA |
| ENSG00000244436 | NA         | NA                                               | NA        | 0.298609989 | 1.646698945 | 4.044602534 | 0.407134924 | 0.683908894 | NA | NA |
| ENSG00000248583 | NA         | NA                                               | NA        | 0.298609989 | 1.646698945 | 4.044602534 | 0.407134924 | 0.683908894 | NA | NA |
| ENSG00000250504 | NA         | NA                                               | NA        | 0.298609989 | 1.646698945 | 4.044602534 | 0.407134924 | 0.683908894 | NA | NA |
| ENSG00000250523 | NA         | NA                                               | NA        | 0.298609989 | 1.646698945 | 4.044602534 | 0.407134924 | 0.683908894 | NA | NA |
| ENSG00000250699 | NA         | NA                                               | NA        | 0.298609989 | 1.646698945 | 4.044602534 | 0.407134924 | 0.683908894 | NA | NA |
| ENSG00000252128 | NA         | NA                                               | NA        | 0.298609989 | 1.646698945 | 4.044602534 | 0.407134924 | 0.683908894 | NA | NA |

|                 |         |                                                                |           |             |             |             |             |             |             |         |
|-----------------|---------|----------------------------------------------------------------|-----------|-------------|-------------|-------------|-------------|-------------|-------------|---------|
| ENSG00000253009 | NA      | NA                                                             | NA        | 0.298609989 | 1.646698945 | 4.044602534 | 0.407134924 | 0.683908894 | NA          | NA      |
| ENSG00000253027 | NA      | NA                                                             | NA        | 0.298609989 | 1.646698945 | 4.044602534 | 0.407134924 | 0.683908894 | NA          | NA      |
| ENSG00000253698 | NA      | NA                                                             | NA        | 0.298609989 | 1.646698945 | 4.044602534 | 0.407134924 | 0.683908894 | NA          | NA      |
| ENSG00000255009 | UBTF1   | upstream binding transcription factor, RNA polymerase I-like 1 | 642623    | 0.298609989 | 1.646698945 | 4.044602534 | 0.407134924 | 0.683908894 | NA          | NA      |
| ENSG00000255014 | NA      | NA                                                             | NA        | 0.298609989 | 1.646698945 | 4.044602534 | 0.407134924 | 0.683908894 | NA          | NA      |
| ENSG00000255253 | NA      | NA                                                             | NA        | 0.298609989 | 1.646698945 | 4.044602534 | 0.407134924 | 0.683908894 | NA          | NA      |
| ENSG00000256518 | NA      | NA                                                             | NA        | 0.298609989 | 1.646698945 | 4.044602534 | 0.407134924 | 0.683908894 | NA          | NA      |
| ENSG00000256681 | NA      | NA                                                             | NA        | 0.298609989 | 1.646698945 | 4.044602534 | 0.407134924 | 0.683908894 | NA          | NA      |
| ENSG00000256944 | NA      | NA                                                             | NA        | 0.298609989 | 1.646698945 | 4.044602534 | 0.407134924 | 0.683908894 | NA          | NA      |
| ENSG00000259236 | NA      | NA                                                             | NA        | 0.298609989 | 1.646698945 | 4.044602534 | 0.407134924 | 0.683908894 | NA          | NA      |
| ENSG00000263380 | NA      | NA                                                             | NA        | 0.298609989 | 1.646698945 | 4.044602534 | 0.407134924 | 0.683908894 | NA          | NA      |
| ENSG00000263381 | MIR5584 | microRNA 5584                                                  | 100847089 | 0.298609989 | 1.646698945 | 4.044602534 | 0.407134924 | 0.683908894 | NA          | NA      |
| ENSG00000263889 | NA      | NA                                                             | NA        | 0.298609989 | 1.646698945 | 4.044602534 | 0.407134924 | 0.683908894 | NA          | NA      |
| ENSG00000263959 | NA      | NA                                                             | NA        | 0.298609989 | 1.646698945 | 4.044602534 | 0.407134924 | 0.683908894 | NA          | NA      |
| ENSG00000264399 | MIR4736 | microRNA 4736                                                  | 100616220 | 0.298609989 | 1.646698945 | 4.044602534 | 0.407134924 | 0.683908894 | NA          | NA      |
| ENSG00000264489 | NA      | NA                                                             | NA        | 0.298609989 | 1.646698945 | 4.044602534 | 0.407134924 | 0.683908894 | NA          | NA      |
| ENSG00000264609 | NA      | NA                                                             | NA        | 0.298609989 | 1.646698945 | 4.044602534 | 0.407134924 | 0.683908894 | NA          | NA      |
| ENSG00000265052 | NA      | NA                                                             | NA        | 0.298609989 | 1.646698945 | 4.044602534 | 0.407134924 | 0.683908894 | NA          | NA      |
| ENSG00000265215 | MIR4269 | microRNA 4269                                                  | 100423043 | 0.298609989 | 1.646698945 | 4.044602534 | 0.407134924 | 0.683908894 | NA          | NA      |
| ENSG00000265907 | NA      | NA                                                             | NA        | 0.298609989 | 1.646698945 | 4.044602534 | 0.407134924 | 0.683908894 | NA          | NA      |
| ENSG00000265936 | NA      | NA                                                             | NA        | 0.298609989 | 1.646698945 | 4.044602534 | 0.407134924 | 0.683908894 | NA          | NA      |
| ENSG00000266366 | NA      | NA                                                             | NA        | 0.298609989 | 1.646698945 | 4.044602534 | 0.407134924 | 0.683908894 | NA          | NA      |
| ENSG00000266605 | NA      | NA                                                             | NA        | 0.298609989 | 1.646698945 | 4.044602534 | 0.407134924 | 0.683908894 | NA          | NA      |
| ENSG00000267668 | NA      | NA                                                             | NA        | 0.298609989 | 1.646698945 | 4.044602534 | 0.407134924 | 0.683908894 | NA          | NA      |
| ENSG00000268424 | NA      | NA                                                             | NA        | 0.298609989 | 1.646698945 | 4.044602534 | 0.407134924 | 0.683908894 | NA          | NA      |
| ENSG00000271056 | NA      | NA                                                             | NA        | 0.298609989 | 1.646698945 | 4.044602534 | 0.407134924 | 0.683908894 | NA          | NA      |
| ENSG00000271286 | NA      | NA                                                             | NA        | 0.298609989 | 1.646698945 | 4.044602534 | 0.407134924 | 0.683908894 | NA          | NA      |
| ENSG00000271360 | NA      | NA                                                             | NA        | 0.298609989 | 1.646698945 | 4.044602534 | 0.407134924 | 0.683908894 | NA          | NA      |
| ENSG00000273471 | NA      | NA                                                             | NA        | 0.298609989 | 1.646698945 | 4.044602534 | 0.407134924 | 0.683908894 | NA          | NA      |
| ENSG00000216475 | NA      | NA                                                             | NA        | 1.650726481 | 1.648067894 | 2.271282882 | 0.725611022 | 0.468077262 | NA          | NA      |
| ENSG00000007314 | SCN4A   | sodium voltage-gated channel alpha subunit 4                   | 6329      | 7.539449551 | 1.64935029  | 1.117077658 | 1.476486686 | 0.139813287 | 0.999371363 | Not Sig |
| ENSG00000241506 | NA      | NA                                                             | NA        | 7.292473847 | 1.650148818 | 1.022627988 | 1.613635493 | 0.106606513 | 0.999371363 | Not Sig |
| ENSG00000207776 | MIR551A | microRNA 551a                                                  | 693135    | 4.325958262 | 1.653489222 | 1.305199872 | 1.266847521 | 0.205209817 | NA          | NA      |
| ENSG00000158516 | CPA2    | carboxypeptidase A2                                            | 1358      | 0.735307047 | 1.654980191 | 3.257223936 | 0.508095306 | 0.611386507 | NA          | NA      |
| ENSG00000228312 | NA      | NA                                                             | NA        | 0.735307047 | 1.654980191 | 3.257223936 | 0.508095306 | 0.611386507 | NA          | NA      |

|                 |          |                                                     |        |             |             |             |             |             |             |         |
|-----------------|----------|-----------------------------------------------------|--------|-------------|-------------|-------------|-------------|-------------|-------------|---------|
| ENSG00000228522 | NA       | NA                                                  | NA     | 0.735307047 | 1.654980191 | 3.257223936 | 0.508095306 | 0.611386507 | NA          | NA      |
| ENSG00000232993 | NA       | NA                                                  | NA     | 0.735307047 | 1.654980191 | 3.257223936 | 0.508095306 | 0.611386507 | NA          | NA      |
| ENSG00000241211 | NA       | NA                                                  | NA     | 0.735307047 | 1.654980191 | 3.257223936 | 0.508095306 | 0.611386507 | NA          | NA      |
| ENSG00000248196 | NA       | NA                                                  | NA     | 0.735307047 | 1.654980191 | 3.257223936 | 0.508095306 | 0.611386507 | NA          | NA      |
| ENSG00000232375 | NA       | NA                                                  | NA     | 0.751613838 | 1.655168764 | 3.235201855 | 0.511612208 | 0.60892244  | NA          | NA      |
| ENSG00000224647 | NA       | NA                                                  | NA     | 0.79368167  | 1.655646435 | 3.181508605 | 0.520396655 | 0.602787141 | NA          | NA      |
| ENSG00000184985 | SORCS2   | sortilin related VPS10 domain containing receptor 2 | 57537  | 427.0473656 | 1.658259358 | 1.058596486 | 1.566469737 | 0.117238688 | 0.999371363 | Not Sig |
| ENSG00000235674 | NA       | NA                                                  | NA     | 1.401698092 | 1.658353523 | 2.338266826 | 0.709223389 | 0.478185861 | NA          | NA      |
| ENSG00000165202 | OR1Q1    | olfactory receptor family 1 subfamily Q member 1    | 158131 | 1.682914159 | 1.659683214 | 2.643864112 | 0.627749061 | 0.530168341 | NA          | NA      |
| ENSG00000159904 | ZNF890P  | zinc finger protein 890, pseudogene                 | 645700 | 10.77569163 | 1.665108211 | 0.890361189 | 1.870149139 | 0.06146311  | 0.999371363 | Not Sig |
| ENSG00000272443 | NA       | NA                                                  | NA     | 2.383027713 | 1.667605967 | 2.146463689 | 0.776908538 | 0.437212733 | NA          | NA      |
| ENSG00000161652 | IZUMO2   | IZUMO family member 2                               | 126123 | 0.741744582 | 1.668775561 | 3.289955225 | 0.507233517 | 0.61199098  | NA          | NA      |
| ENSG00000199360 | NA       | NA                                                  | NA     | 0.741744582 | 1.668775561 | 3.289955225 | 0.507233517 | 0.61199098  | NA          | NA      |
| ENSG00000246451 | NA       | NA                                                  | NA     | 0.741744582 | 1.668775561 | 3.289955225 | 0.507233517 | 0.61199098  | NA          | NA      |
| ENSG00000198452 | NA       | NA                                                  | NA     | 0.758051374 | 1.66893005  | 3.26833175  | 0.510636673 | 0.609605492 | NA          | NA      |
| ENSG00000264449 | NA       | NA                                                  | NA     | 0.758051374 | 1.66893005  | 3.26833175  | 0.510636673 | 0.609605492 | NA          | NA      |
| ENSG00000230592 | NA       | NA                                                  | NA     | 0.800119206 | 1.669321105 | 3.215582717 | 0.519134867 | 0.603666696 | NA          | NA      |
| ENSG00000236782 | NA       | NA                                                  | NA     | 0.800119206 | 1.669321105 | 3.215582717 | 0.519134867 | 0.603666696 | NA          | NA      |
| ENSG00000215835 | NA       | NA                                                  | NA     | 1.490822273 | 1.670424223 | 2.074736493 | 0.805125966 | 0.420746993 | NA          | NA      |
| ENSG00000120332 | TNN      | tenascin N                                          | 63923  | 32.32304223 | 1.671834215 | 1.01013301  | 1.655063441 | 0.09791163  | 0.999371363 | Not Sig |
| ENSG00000181315 | ZNF322   | zinc finger protein 322                             | 79692  | 557.1109894 | 1.672072638 | 0.641457031 | 2.606679104 | 0.0091425   | 0.473243174 | Not Sig |
| ENSG00000225905 | NA       | NA                                                  | NA     | 15.57540844 | 1.672184748 | 0.928740005 | 1.800487477 | 0.071783699 | 0.999371363 | Not Sig |
| ENSG00000253954 | NA       | NA                                                  | NA     | 3.208897061 | 1.673803128 | 1.628721683 | 1.027679035 | 0.304100833 | NA          | NA      |
| ENSG00000140835 | CHST4    | carbohydrate sulfotransferase 4                     | 10164  | 8.370318315 | 1.67588988  | 1.24561604  | 1.345430555 | 0.178486233 | 0.999371363 | Not Sig |
| ENSG00000211647 | NA       | NA                                                  | NA     | 1.359641158 | 1.678355663 | 2.477128041 | 0.677540941 | 0.498062803 | NA          | NA      |
| ENSG00000164530 | PI16     | peptidase inhibitor 16                              | 221476 | 73.50705399 | 1.678915879 | 1.333191509 | 1.259320861 | 0.207914461 | 0.999371363 | Not Sig |
| ENSG00000091128 | LAMB4    | laminin subunit beta 4                              | 22798  | 8.168926898 | 1.679046328 | 1.12990841  | 1.486002151 | 0.137278552 | 0.999371363 | Not Sig |
| ENSG00000201846 | NA       | NA                                                  | NA     | 2.847446718 | 1.686872314 | 1.906044385 | 0.885012084 | 0.376150114 | NA          | NA      |
| ENSG00000258033 | NA       | NA                                                  | NA     | 2.265180439 | 1.688156755 | 1.738533837 | 0.971023238 | 0.331536707 | NA          | NA      |
| ENSG00000164556 | FAM183BP | acyloxyacyl hydrolase (neutrophil)                  | 340286 | 1.430160895 | 1.689760901 | 2.275403305 | 0.742620395 | 0.457711537 | NA          | NA      |
| ENSG00000233338 | TLR8-AS1 | TLR8 antisense RNA 1                                | 349408 | 7.19942012  | 1.690508043 | 1.814908535 | 0.93145633  | 0.351617564 | 0.999371363 | Not Sig |
| ENSG00000133065 | SLC41A1  | solute carrier family 41 member 1                   | 254428 | 1857.654278 | 1.690856742 | 0.579008618 | 2.92026179  | 0.003497375 | 0.266411951 | Not Sig |
| ENSG00000167244 | IGF2     | insulin like growth factor 2                        | 3481   | 544.2639071 | 1.691782122 | 0.855407596 | 1.977749707 | 0.04795695  | 0.999371363 | Not Sig |
| ENSG00000225422 | NA       | NA                                                  | NA     | 1.378953765 | 1.69221314  | 2.092649331 | 0.808646301 | 0.418718624 | NA          | NA      |
| ENSG00000252641 | NA       | NA                                                  | NA     | 1.378953765 | 1.69221314  | 2.092649331 | 0.808646301 | 0.418718624 | NA          | NA      |

|                 |              |                                                   |           |             |             |             |             |             |             |         |
|-----------------|--------------|---------------------------------------------------|-----------|-------------|-------------|-------------|-------------|-------------|-------------|---------|
| ENSG00000200269 | NA           | NA                                                | NA        | 1.32448053  | 1.693294087 | 2.785690584 | 0.607854331 | 0.543284091 | NA          | NA      |
| ENSG00000165376 | CLDN2        | claudin 2                                         | 9075      | 590.2323323 | 1.693502473 | 1.365481994 | 1.240223218 | 0.214892843 | 0.999371363 | Not Sig |
| ENSG00000113946 | CLDN16       | claudin 16                                        | 10686     | 15.50429542 | 1.696954775 | 0.797779233 | 2.127098205 | 0.033411924 | 0.947967831 | Not Sig |
| ENSG00000264666 | NA           | NA                                                | NA        | 2.162766179 | 1.69699474  | 1.834696728 | 0.924945641 | 0.354994184 | NA          | NA      |
| ENSG00000216031 | MIR298       | microRNA 298                                      | 100126296 | 1.558170579 | 1.699923853 | 2.353249511 | 0.722372976 | 0.470065197 | NA          | NA      |
| ENSG00000159166 | LAD1         | ladinin 1                                         | 3898      | 2168.703753 | 1.702390855 | 0.782570941 | 2.175382147 | 0.029601491 | 0.897727832 | Not Sig |
| ENSG00000186628 | FSD2         | fibronectin type III and SPRY domain containing 2 | 123722    | 2.089229729 | 1.704566845 | 2.10436058  | 0.810016525 | 0.417930678 | NA          | NA      |
| ENSG00000211962 | NA           | NA                                                | NA        | 653.3599389 | 1.705359022 | 1.21018563  | 1.409171436 | 0.158784482 | 0.999371363 | Not Sig |
| ENSG00000137691 | C11orf70     | chromosome 11 open reading frame 70               | 85016     | 65.74700803 | 1.707289553 | 0.650038032 | 2.626445637 | 0.008628177 | 0.468338954 | Not Sig |
| ENSG00000176868 | NA           | NA                                                | NA        | 3.026248526 | 1.707739102 | 1.562301262 | 1.093092058 | 0.274353383 | NA          | NA      |
| ENSG00000269890 | NA           | NA                                                | NA        | 40.41981689 | 1.708326668 | 0.824946031 | 2.070834461 | 0.038374269 | 0.999371363 | Not Sig |
| ENSG00000272969 | NA           | NA                                                | NA        | 1.321309099 | 1.710711974 | 2.740964267 | 0.624127791 | 0.532543664 | NA          | NA      |
| ENSG00000207389 | RNU1-4       | RNA, U1 small nuclear 4                           | 6060      | 0.76376985  | 1.714121395 | 3.26753244  | 0.524592005 | 0.599866846 | NA          | NA      |
| ENSG00000269153 | NA           | NA                                                | NA        | 0.76376985  | 1.714121395 | 3.26753244  | 0.524592005 | 0.599866846 | NA          | NA      |
| ENSG00000214985 | NA           | NA                                                | NA        | 0.780076641 | 1.714170741 | 3.246820956 | 0.527953578 | 0.597531556 | NA          | NA      |
| ENSG00000218766 | NA           | NA                                                | NA        | 0.822144473 | 1.714295849 | 3.196216778 | 0.536351558 | 0.591715604 | NA          | NA      |
| ENSG00000228748 | NA           | NA                                                | NA        | 0.822144473 | 1.714295849 | 3.196216778 | 0.536351558 | 0.591715604 | NA          | NA      |
| ENSG00000218048 | NA           | NA                                                | NA        | 38.89652797 | 1.715581516 | 1.162101795 | 1.476274732 | 0.139870154 | 0.999371363 | Not Sig |
| ENSG00000166825 | ANPEP        | alanine aminopeptidase, membrane                  | 290       | 2226.238771 | 1.721640227 | 1.155107095 | 1.4904594   | 0.136103484 | 0.999371363 | Not Sig |
| ENSG00000235109 | ZSCAN31      | zinc finger and SCAN domain containing 31         | 64288     | 856.1195602 | 1.723549999 | 0.594015681 | 2.901522727 | 0.003713538 | 0.27347713  | Not Sig |
| ENSG00000267119 | NA           | NA                                                | NA        | 1.398266371 | 1.725107304 | 2.468780265 | 0.698769076 | 0.484696357 | NA          | NA      |
| ENSG00000224349 | LOC105377849 | uncharacterized LOC105377849                      | 105377849 | 2.124130067 | 1.727022114 | 1.835858114 | 0.940716552 | 0.346850135 | NA          | NA      |
| ENSG00000207763 | MIR617       | microRNA 617                                      | 693202    | 0.770207385 | 1.72861402  | 2.78338675  | 0.621047011 | 0.534568693 | NA          | NA      |
| ENSG00000211812 | NA           | NA                                                | NA        | 0.786514177 | 1.728650818 | 2.767954855 | 0.624522764 | 0.532284325 | NA          | NA      |
| ENSG00000225169 | NA           | NA                                                | NA        | 0.786514177 | 1.728650818 | 2.767954855 | 0.624522764 | 0.532284325 | NA          | NA      |
| ENSG00000242945 | NA           | NA                                                | NA        | 0.786514177 | 1.728650818 | 2.767954855 | 0.624522764 | 0.532284325 | NA          | NA      |
| ENSG00000244757 | NA           | NA                                                | NA        | 0.786514177 | 1.728650818 | 2.767954855 | 0.624522764 | 0.532284325 | NA          | NA      |
| ENSG00000265745 | NA           | NA                                                | NA        | 0.786514177 | 1.728650818 | 2.767954855 | 0.624522764 | 0.532284325 | NA          | NA      |
| ENSG00000267812 | NA           | NA                                                | NA        | 0.786514177 | 1.728650818 | 2.767954855 | 0.624522764 | 0.532284325 | NA          | NA      |
| ENSG00000250762 | NA           | NA                                                | NA        | 1.465061233 | 1.72924297  | 2.310559692 | 0.748408698 | 0.454213678 | NA          | NA      |
| ENSG00000272729 | NA           | NA                                                | NA        | 3.528833974 | 1.730822668 | 1.543692035 | 1.121222775 | 0.262193047 | NA          | NA      |
| ENSG00000258623 | NA           | NA                                                | NA        | 3.618112874 | 1.734679003 | 1.559382243 | 1.112414234 | 0.265960087 | NA          | NA      |
| ENSG00000187066 | TMEM262      | transmembrane protein 262                         | 100130348 | 1.420291639 | 1.735643129 | 2.050932347 | 0.846270298 | 0.397401973 | NA          | NA      |
| ENSG00000183748 | NA           | NA                                                | NA        | 826.7448508 | 1.739279625 | 0.861466728 | 2.018974811 | 0.043489838 | 0.999371363 | Not Sig |
| ENSG00000149295 | DRD2         | dopamine receptor D2                              | 1813      | 3.48406438  | 1.741396248 | 1.645003394 | 1.058597359 | 0.28978319  | NA          | NA      |

|                 |           |                                                 |           |             |             |             |             |             |             |         |
|-----------------|-----------|-------------------------------------------------|-----------|-------------|-------------|-------------|-------------|-------------|-------------|---------|
| ENSG00000207507 | RNU6-9    | RNA, U6 small nuclear 9                         | 101954271 | 0.792951712 | 1.741532311 | 2.763898398 | 0.630099975 | 0.528629176 | NA          | NA      |
| ENSG00000227890 | NA        | NA                                              | NA        | 0.792951712 | 1.741532311 | 2.763898398 | 0.630099975 | 0.528629176 | NA          | NA      |
| ENSG00000223181 | NA        | NA                                              | NA        | 1.739839765 | 1.741751828 | 2.196346483 | 0.79302234  | 0.427764807 | NA          | NA      |
| ENSG00000147117 | ZNF157    | zinc finger protein 157                         | 7712      | 7.639977991 | 1.743056168 | 1.266116473 | 1.376694961 | 0.168606577 | 0.999371363 | Not Sig |
| ENSG00000229228 | LINC00582 | long intergenic non-protein coding RNA 582      | 100287814 | 2.197362465 | 1.743794737 | 2.444275282 | 0.713419945 | 0.475585935 | NA          | NA      |
| ENSG00000227001 | NA        | NA                                              | NA        | 25.34222597 | 1.74392384  | 0.709250257 | 2.458827223 | 0.013939168 | 0.59512169  | Not Sig |
| ENSG00000237311 | NA        | NA                                              | NA        | 1.426729174 | 1.745024771 | 2.102966148 | 0.829792136 | 0.406656318 | NA          | NA      |
| ENSG00000088726 | TMEM40    | transmembrane protein 40                        | 55287     | 41.07560591 | 1.747363732 | 0.809664692 | 2.158132557 | 0.030917527 | 0.911813628 | Not Sig |
| ENSG00000122543 | OCM       | oncomodulin                                     | 654231    | 2.123869778 | 1.747385352 | 1.804921245 | 0.968122768 | 0.33298306  | NA          | NA      |
| ENSG00000172818 | OVOL1     | ovo like transcriptional repressor 1            | 5017      | 74.96285068 | 1.751359785 | 0.736211555 | 2.378881143 | 0.017365274 | 0.670000634 | Not Sig |
| ENSG00000206976 | NA        | NA                                              | NA        | 4.474438625 | 1.752510265 | 1.414223319 | 1.239203343 | 0.215270203 | NA          | NA      |
| ENSG00000183250 | LINC01547 | long intergenic non-protein coding RNA 1547     | 84536     | 65.96983294 | 1.754152082 | 0.716401677 | 2.448559432 | 0.014342877 | 0.604079747 | Not Sig |
| ENSG00000232460 | NA        | NA                                              | NA        | 0.84145708  | 1.754623614 | 3.1801071   | 0.55174985  | 0.581119751 | NA          | NA      |
| ENSG00000236090 | NA        | NA                                              | NA        | 0.84145708  | 1.754623614 | 3.1801071   | 0.55174985  | 0.581119751 | NA          | NA      |
| ENSG00000200278 | NA        | NA                                              | NA        | 0.783082456 | 1.754659651 | 3.248891302 | 0.540079519 | 0.589142195 | NA          | NA      |
| ENSG00000237931 | NA        | NA                                              | NA        | 0.783082456 | 1.754659651 | 3.248891302 | 0.540079519 | 0.589142195 | NA          | NA      |
| ENSG00000244381 | NA        | NA                                              | NA        | 0.783082456 | 1.754659651 | 3.248891302 | 0.540079519 | 0.589142195 | NA          | NA      |
| ENSG00000257885 | NA        | NA                                              | NA        | 0.783082456 | 1.754659651 | 3.248891302 | 0.540079519 | 0.589142195 | NA          | NA      |
| ENSG00000186471 | AKAP14    | A-kinase anchoring protein 14                   | 158798    | 12.22157444 | 1.757352716 | 1.315729423 | 1.335649021 | 0.181664019 | 0.999371363 | Not Sig |
| ENSG00000204788 | NA        | NA                                              | NA        | 1.48437384  | 1.75811705  | 2.686386355 | 0.654454281 | 0.512819173 | NA          | NA      |
| ENSG00000132703 | APCS      | amyloid P component, serum                      | 325       | 0.327072792 | 1.75813826  | 4.034532125 | 0.435772527 | 0.663001778 | NA          | NA      |
| ENSG00000134249 | ADAM30    | ADAM metalloproteinase domain 30                | 11085     | 0.327072792 | 1.75813826  | 4.034532125 | 0.435772527 | 0.663001778 | NA          | NA      |
| ENSG00000147262 | GPR119    | G protein-coupled receptor 119                  | 139760    | 0.327072792 | 1.75813826  | 4.034532125 | 0.435772527 | 0.663001778 | NA          | NA      |
| ENSG00000174448 | STARD6    | StAR related lipid transfer domain containing 6 | 147323    | 0.327072792 | 1.75813826  | 4.034532125 | 0.435772527 | 0.663001778 | NA          | NA      |
| ENSG00000182333 | LIPF      | lipase F, gastric type                          | 8513      | 0.327072792 | 1.75813826  | 4.034532125 | 0.435772527 | 0.663001778 | NA          | NA      |
| ENSG00000187870 | NA        | NA                                              | NA        | 0.327072792 | 1.75813826  | 4.034532125 | 0.435772527 | 0.663001778 | NA          | NA      |
| ENSG00000199520 | NA        | NA                                              | NA        | 0.327072792 | 1.75813826  | 4.034532125 | 0.435772527 | 0.663001778 | NA          | NA      |
| ENSG00000203852 | HIST2H3A  | histone cluster 2 H3 family member a            | 333932    | 0.327072792 | 1.75813826  | 4.034532125 | 0.435772527 | 0.663001778 | NA          | NA      |
| ENSG00000204637 | NA        | NA                                              | NA        | 0.327072792 | 1.75813826  | 4.034532125 | 0.435772527 | 0.663001778 | NA          | NA      |
| ENSG00000207800 | MIR504    | microRNA 504                                    | 574507    | 0.327072792 | 1.75813826  | 4.034532125 | 0.435772527 | 0.663001778 | NA          | NA      |
| ENSG00000212145 | NA        | NA                                              | NA        | 0.327072792 | 1.75813826  | 4.034532125 | 0.435772527 | 0.663001778 | NA          | NA      |
| ENSG00000212254 | NA        | NA                                              | NA        | 0.327072792 | 1.75813826  | 4.034532125 | 0.435772527 | 0.663001778 | NA          | NA      |
| ENSG00000212576 | NA        | NA                                              | NA        | 0.327072792 | 1.75813826  | 4.034532125 | 0.435772527 | 0.663001778 | NA          | NA      |
| ENSG00000212724 | KRTAP2-3  | keratin associated protein 2-3                  | 730755    | 0.327072792 | 1.75813826  | 4.034532125 | 0.435772527 | 0.663001778 | NA          | NA      |
| ENSG00000213343 | NA        | NA                                              | NA        | 0.327072792 | 1.75813826  | 4.034532125 | 0.435772527 | 0.663001778 | NA          | NA      |

|                 |           |                       |           |             |            |             |             |             |    |    |
|-----------------|-----------|-----------------------|-----------|-------------|------------|-------------|-------------|-------------|----|----|
| ENSG00000214754 | NA        | NA                    | NA        | 0.327072792 | 1.75813826 | 4.034532125 | 0.435772527 | 0.663001778 | NA | NA |
| ENSG00000221745 | MIR1197   | microRNA 1197         | 100302250 | 0.327072792 | 1.75813826 | 4.034532125 | 0.435772527 | 0.663001778 | NA | NA |
| ENSG00000222551 | NA        | NA                    | NA        | 0.327072792 | 1.75813826 | 4.034532125 | 0.435772527 | 0.663001778 | NA | NA |
| ENSG00000224825 | NA        | NA                    | NA        | 0.327072792 | 1.75813826 | 4.034532125 | 0.435772527 | 0.663001778 | NA | NA |
| ENSG00000226143 | NA        | NA                    | NA        | 0.327072792 | 1.75813826 | 4.034532125 | 0.435772527 | 0.663001778 | NA | NA |
| ENSG00000227742 | NA        | NA                    | NA        | 0.327072792 | 1.75813826 | 4.034532125 | 0.435772527 | 0.663001778 | NA | NA |
| ENSG00000228015 | NA        | NA                    | NA        | 0.327072792 | 1.75813826 | 4.034532125 | 0.435772527 | 0.663001778 | NA | NA |
| ENSG00000232043 | NA        | NA                    | NA        | 0.327072792 | 1.75813826 | 4.034532125 | 0.435772527 | 0.663001778 | NA | NA |
| ENSG00000232174 | NA        | NA                    | NA        | 0.327072792 | 1.75813826 | 4.034532125 | 0.435772527 | 0.663001778 | NA | NA |
| ENSG00000233243 | NA        | NA                    | NA        | 0.327072792 | 1.75813826 | 4.034532125 | 0.435772527 | 0.663001778 | NA | NA |
| ENSG00000233330 | NA        | NA                    | NA        | 0.327072792 | 1.75813826 | 4.034532125 | 0.435772527 | 0.663001778 | NA | NA |
| ENSG00000233974 | NA        | NA                    | NA        | 0.327072792 | 1.75813826 | 4.034532125 | 0.435772527 | 0.663001778 | NA | NA |
| ENSG00000234213 | NA        | NA                    | NA        | 0.327072792 | 1.75813826 | 4.034532125 | 0.435772527 | 0.663001778 | NA | NA |
| ENSG00000234553 | NA        | NA                    | NA        | 0.327072792 | 1.75813826 | 4.034532125 | 0.435772527 | 0.663001778 | NA | NA |
| ENSG00000234676 | IFT74-AS1 | IFT74 antisense RNA 1 | 101929602 | 0.327072792 | 1.75813826 | 4.034532125 | 0.435772527 | 0.663001778 | NA | NA |
| ENSG00000234677 | NA        | NA                    | NA        | 0.327072792 | 1.75813826 | 4.034532125 | 0.435772527 | 0.663001778 | NA | NA |
| ENSG00000235416 | NA        | NA                    | NA        | 0.327072792 | 1.75813826 | 4.034532125 | 0.435772527 | 0.663001778 | NA | NA |
| ENSG00000236259 | NA        | NA                    | NA        | 0.327072792 | 1.75813826 | 4.034532125 | 0.435772527 | 0.663001778 | NA | NA |
| ENSG00000236290 | NA        | NA                    | NA        | 0.327072792 | 1.75813826 | 4.034532125 | 0.435772527 | 0.663001778 | NA | NA |
| ENSG00000238180 | NA        | NA                    | NA        | 0.327072792 | 1.75813826 | 4.034532125 | 0.435772527 | 0.663001778 | NA | NA |
| ENSG00000241223 | NA        | NA                    | NA        | 0.327072792 | 1.75813826 | 4.034532125 | 0.435772527 | 0.663001778 | NA | NA |
| ENSG00000244203 | FOXP1-AS1 | FOXP1 antisense RNA 1 | 104502416 | 0.327072792 | 1.75813826 | 4.034532125 | 0.435772527 | 0.663001778 | NA | NA |
| ENSG00000248839 | NA        | NA                    | NA        | 0.327072792 | 1.75813826 | 4.034532125 | 0.435772527 | 0.663001778 | NA | NA |
| ENSG00000249163 | NA        | NA                    | NA        | 0.327072792 | 1.75813826 | 4.034532125 | 0.435772527 | 0.663001778 | NA | NA |
| ENSG00000249619 | NA        | NA                    | NA        | 0.327072792 | 1.75813826 | 4.034532125 | 0.435772527 | 0.663001778 | NA | NA |
| ENSG00000249754 | NA        | NA                    | NA        | 0.327072792 | 1.75813826 | 4.034532125 | 0.435772527 | 0.663001778 | NA | NA |
| ENSG00000250304 | NA        | NA                    | NA        | 0.327072792 | 1.75813826 | 4.034532125 | 0.435772527 | 0.663001778 | NA | NA |
| ENSG00000250507 | NA        | NA                    | NA        | 0.327072792 | 1.75813826 | 4.034532125 | 0.435772527 | 0.663001778 | NA | NA |
| ENSG00000250794 | NA        | NA                    | NA        | 0.327072792 | 1.75813826 | 4.034532125 | 0.435772527 | 0.663001778 | NA | NA |
| ENSG00000252730 | NA        | NA                    | NA        | 0.327072792 | 1.75813826 | 4.034532125 | 0.435772527 | 0.663001778 | NA | NA |
| ENSG00000254391 | NA        | NA                    | NA        | 0.327072792 | 1.75813826 | 4.034532125 | 0.435772527 | 0.663001778 | NA | NA |
| ENSG00000254551 | NA        | NA                    | NA        | 0.327072792 | 1.75813826 | 4.034532125 | 0.435772527 | 0.663001778 | NA | NA |
| ENSG00000255168 | NA        | NA                    | NA        | 0.327072792 | 1.75813826 | 4.034532125 | 0.435772527 | 0.663001778 | NA | NA |
| ENSG00000255395 | NA        | NA                    | NA        | 0.327072792 | 1.75813826 | 4.034532125 | 0.435772527 | 0.663001778 | NA | NA |
| ENSG00000256221 | NA        | NA                    | NA        | 0.327072792 | 1.75813826 | 4.034532125 | 0.435772527 | 0.663001778 | NA | NA |

|                 |             |                                                  |           |             |             |             |             |             |             |         |
|-----------------|-------------|--------------------------------------------------|-----------|-------------|-------------|-------------|-------------|-------------|-------------|---------|
| ENSG00000259007 | NA          | NA                                               | NA        | 0.327072792 | 1.75813826  | 4.034532125 | 0.435772527 | 0.663001778 | NA          | NA      |
| ENSG00000259308 | NA          | NA                                               | NA        | 0.327072792 | 1.75813826  | 4.034532125 | 0.435772527 | 0.663001778 | NA          | NA      |
| ENSG00000260185 | NA          | NA                                               | NA        | 0.327072792 | 1.75813826  | 4.034532125 | 0.435772527 | 0.663001778 | NA          | NA      |
| ENSG00000265592 | NA          | NA                                               | NA        | 0.327072792 | 1.75813826  | 4.034532125 | 0.435772527 | 0.663001778 | NA          | NA      |
| ENSG00000265916 | NA          | NA                                               | NA        | 0.327072792 | 1.75813826  | 4.034532125 | 0.435772527 | 0.663001778 | NA          | NA      |
| ENSG00000266140 | MIR4533     | microRNA 4533                                    | 100616362 | 0.327072792 | 1.75813826  | 4.034532125 | 0.435772527 | 0.663001778 | NA          | NA      |
| ENSG00000266499 | NA          | NA                                               | NA        | 0.327072792 | 1.75813826  | 4.034532125 | 0.435772527 | 0.663001778 | NA          | NA      |
| ENSG00000267630 | NA          | NA                                               | NA        | 0.327072792 | 1.75813826  | 4.034532125 | 0.435772527 | 0.663001778 | NA          | NA      |
| ENSG00000269012 | NA          | NA                                               | NA        | 0.327072792 | 1.75813826  | 4.034532125 | 0.435772527 | 0.663001778 | NA          | NA      |
| ENSG00000269583 | NA          | NA                                               | NA        | 0.327072792 | 1.75813826  | 4.034532125 | 0.435772527 | 0.663001778 | NA          | NA      |
| ENSG00000271554 | NA          | NA                                               | NA        | 0.327072792 | 1.75813826  | 4.034532125 | 0.435772527 | 0.663001778 | NA          | NA      |
| ENSG00000249320 | NA          | NA                                               | NA        | 3.310166356 | 1.761013018 | 1.565837149 | 1.12464634  | 0.260738929 | NA          | NA      |
| ENSG00000238988 | NA          | NA                                               | NA        | 2.923424641 | 1.762804273 | 2.040668393 | 0.863836711 | 0.387677598 | NA          | NA      |
| ENSG00000224016 | NA          | NA                                               | NA        | 4.736591478 | 1.764367464 | 1.387596662 | 1.271527608 | 0.203541012 | NA          | NA      |
| ENSG00000060566 | CREB3L3     | cAMP responsive element binding protein 3 like 3 | 84699     | 1.579935557 | 1.764570295 | 2.368036757 | 0.7451617   | 0.456173973 | NA          | NA      |
| ENSG00000151498 | ACAD8       | acyl-CoA dehydrogenase family member 8           | 27034     | 1087.574869 | 1.766379817 | 0.544227947 | 3.245661727 | 0.00117178  | 0.131751998 | Not Sig |
| ENSG00000267293 | NA          | NA                                               | NA        | 1.448754442 | 1.767111534 | 2.085092878 | 0.847497756 | 0.396717738 | NA          | NA      |
| ENSG00000249481 | SPATS1      | spermatogenesis associated serine rich 1         | 221409    | 2.120698347 | 1.767899301 | 1.836299813 | 0.962750902 | 0.335672545 | NA          | NA      |
| ENSG00000162843 | WDR64       | WD repeat domain 64                              | 128025    | 4.63106583  | 1.768696593 | 1.658496293 | 1.066445913 | 0.286222116 | NA          | NA      |
| ENSG00000257322 | NA          | NA                                               | NA        | 8.822694592 | 1.770176082 | 1.132107421 | 1.56361141  | 0.117908854 | 0.999371363 | Not Sig |
| ENSG00000267437 | NA          | NA                                               | NA        | 1.455191977 | 1.772303402 | 2.047678912 | 0.865518218 | 0.386754421 | NA          | NA      |
| ENSG00000211836 | NA          | NA                                               | NA        | 1.499961572 | 1.775236246 | 2.68187868  | 0.661937566 | 0.508011235 | NA          | NA      |
| ENSG00000270987 | NA          | NA                                               | NA        | 2.452662774 | 1.776495823 | 2.069651096 | 0.85835522  | 0.390696346 | NA          | NA      |
| ENSG00000105988 | NA          | NA                                               | NA        | 0.333510327 | 1.783514307 | 4.032342099 | 0.44230233  | 0.658270445 | NA          | NA      |
| ENSG00000182393 | IFNL1       | interferon lambda 1                              | 282618    | 0.333510327 | 1.783514307 | 4.032342099 | 0.44230233  | 0.658270445 | NA          | NA      |
| ENSG00000201182 | NA          | NA                                               | NA        | 0.333510327 | 1.783514307 | 4.032342099 | 0.44230233  | 0.658270445 | NA          | NA      |
| ENSG00000204398 | NA          | NA                                               | NA        | 0.333510327 | 1.783514307 | 4.032342099 | 0.44230233  | 0.658270445 | NA          | NA      |
| ENSG00000207367 | NA          | NA                                               | NA        | 0.333510327 | 1.783514307 | 4.032342099 | 0.44230233  | 0.658270445 | NA          | NA      |
| ENSG00000207863 | MIR125B2    | microRNA 125b-2                                  | 406912    | 0.333510327 | 1.783514307 | 4.032342099 | 0.44230233  | 0.658270445 | NA          | NA      |
| ENSG00000214925 | NA          | NA                                               | NA        | 0.333510327 | 1.783514307 | 4.032342099 | 0.44230233  | 0.658270445 | NA          | NA      |
| ENSG00000219102 | NA          | NA                                               | NA        | 0.333510327 | 1.783514307 | 4.032342099 | 0.44230233  | 0.658270445 | NA          | NA      |
| ENSG00000221971 | NA          | NA                                               | NA        | 0.333510327 | 1.783514307 | 4.032342099 | 0.44230233  | 0.658270445 | NA          | NA      |
| ENSG00000223635 | NA          | NA                                               | NA        | 0.333510327 | 1.783514307 | 4.032342099 | 0.44230233  | 0.658270445 | NA          | NA      |
| ENSG00000224628 | NA          | NA                                               | NA        | 0.333510327 | 1.783514307 | 4.032342099 | 0.44230233  | 0.658270445 | NA          | NA      |
| ENSG00000225376 | TMEM246-AS1 | TMEM246 antisense RNA 1                          | 101928470 | 0.333510327 | 1.783514307 | 4.032342099 | 0.44230233  | 0.658270445 | NA          | NA      |



|                 |              |                                                            |           |             |             |             |                 |             |             |         |
|-----------------|--------------|------------------------------------------------------------|-----------|-------------|-------------|-------------|-----------------|-------------|-------------|---------|
| ENSG00000227770 | NA           | NA                                                         | NA        | 0.333510327 | 1.783514307 | 4.032342099 | 0.44230233      | 0.658270445 | NA          | NA      |
| ENSG00000230489 | VAV3-AS1     | VAV3 antisense RNA 1                                       | 100873946 | 0.333510327 | 1.783514307 | 4.032342099 | 0.44230233      | 0.658270445 | NA          | NA      |
| ENSG00000230927 | TMBIM7P      | transmembrane BAX inhibitor motif containing 7, pseudogene | 105375396 | 0.333510327 | 1.783514307 | 4.032342099 | 0.44230233      | 0.658270445 | NA          | NA      |
| ENSG00000230942 | NA           | NA                                                         | NA        | 0.333510327 | 1.783514307 | 4.032342099 | 0.44230233      | 0.658270445 | NA          | NA      |
| ENSG00000232333 | NA           | NA                                                         | NA        | 0.333510327 | 1.783514307 | 4.032342099 | 0.44230233      | 0.658270445 | NA          | NA      |
| ENSG00000232455 | NA           | NA                                                         | NA        | 0.333510327 | 1.783514307 | 4.032342099 | 0.44230233      | 0.658270445 | NA          | NA      |
| ENSG00000233655 | NA           | NA                                                         | NA        | 0.333510327 | 1.783514307 | 4.032342099 | 0.44230233      | 0.658270445 | NA          | NA      |
| ENSG00000235185 | LOC105378614 | uncharacterized LOC105378614                               | 105378614 | 0.333510327 | 1.783514307 | 4.032342099 | 0.44230233      | 0.658270445 | NA          | NA      |
| ENSG00000237323 | NA           | NA                                                         | NA        | 0.333510327 | 1.783514307 | 4.032342099 | 0.44230233      | 0.658270445 | NA          | NA      |
| ENSG00000238272 | NA           | NA                                                         | NA        | 0.333510327 | 1.783514307 | 4.032342099 | 0.44230233      | 0.658270445 | NA          | NA      |
| ENSG00000238691 | NA           | NA                                                         | NA        | 0.333510327 | 1.783514307 | 4.032342099 | 0.44230233      | 0.658270445 | NA          | NA      |
| ENSG00000239539 | NA           | NA                                                         | NA        | 0.333510327 | 1.783514307 | 4.032342099 | 0.44230233      | 0.658270445 | NA          | NA      |
| ENSG00000249109 | NA           | NA                                                         | NA        | 0.333510327 | 1.783514307 | 4.032342099 | 0.44230233      | 0.658270445 | NA          | NA      |
| ENSG00000250484 | NA           | NA                                                         | NA        | 0.333510327 | 1.783514307 | 4.032342099 | 0.44230233      | 0.658270445 | NA          | NA      |
| ENSG00000250496 | NA           | NA                                                         | NA        | 0.333510327 | 1.783514307 | 4.032342099 | 0.44230233      | 0.658270445 | NA          | NA      |
| ENSG00000251177 | NA           | NA                                                         | NA        | 0.333510327 | 1.783514307 | 4.032342099 | 0.44230233      | 0.658270445 | NA          | NA      |
| ENSG00000251353 | NA           | NA                                                         | NA        | 0.333510327 | 1.783514307 | 4.032342099 | 0.44230233      | 0.658270445 | NA          | NA      |
| ENSG00000254805 | NA           | NA                                                         | NA        | 0.333510327 | 1.783514307 | 4.032342099 | 0.44230233      | 0.658270445 | NA          | NA      |
| ENSG00000255125 | NA           | NA                                                         | NA        | 0.333510327 | 1.783514307 | 4.032342099 | 0.44230233      | 0.658270445 | NA          | NA      |
| ENSG00000255213 | NA           | NA                                                         | NA        | 0.333510327 | 1.783514307 | 4.032342099 | 0.44230233      | 0.658270445 | NA          | NA      |
| ENSG00000256762 | STH          | saitohin                                                   | 246744    | 0.333510327 | 1.783514307 | 4.032342099 | 0.44230233      | 0.658270445 | NA          | NA      |
| ENSG00000259433 | NA           | NA                                                         | NA        | 0.333510327 | 1.783514307 | 4.032342099 | 0.44230233      | 0.658270445 | NA          | NA      |
| ENSG00000260133 | NA           | NA                                                         | NA        | 0.333510327 | 1.783514307 | 4.032342099 | 0.44230233      | 0.658270445 | NA          | NA      |
| ENSG00000260617 | NA           | NA                                                         | NA        | 0.333510327 | 1.783514307 | 4.032342099 | 0.44230233      | 0.658270445 | NA          | NA      |
| ENSG00000263815 | NA           | NA                                                         | NA        | 0.333510327 | 1.783514307 | 4.032342099 | 0.44230233      | 0.658270445 | NA          | NA      |
| ENSG00000264078 | NA           | NA                                                         | NA        | 0.333510327 | 1.783514307 | 4.032342099 | 0.44230233      | 0.658270445 | NA          | NA      |
| ENSG00000265157 | NA           | NA                                                         | NA        | 0.333510327 | 1.783514307 | 4.032342099 | 0.44230233      | 0.658270445 | NA          | NA      |
| ENSG00000269304 | NA           | NA                                                         | NA        | 0.333510327 | 1.783514307 | 4.032342099 | 0.44230233      | 0.658270445 | NA          | NA      |
| ENSG00000224805 | LINC00853    | long intergenic non-protein coding RNA 853                 | 100874253 | 8.16387515  | 1.786703357 | 1.097578284 | 1.627859609     | 0.103554658 | 0.999371363 | Not Sig |
| ENSG00000258072 | NA           | NA                                                         | NA        | 1.38467224  | 1.788077516 | 2.742804088 | 0.651915871     | 0.514455446 | NA          | NA      |
| ENSG00000242136 | NA           | NA                                                         | NA        | 1.643558988 | 1.788313567 | 2.311674321 | <b>0.773601</b> | 0.43916678  | NA          | NA      |
| ENSG00000203711 | NA           | NA                                                         | NA        | 23.00997978 | 1.789531481 | 0.694741208 | 2.575824582     | 0.010000137 | 0.49192078  | Not Sig |
| ENSG00000226031 | FGF13-AS1    | FGF13 antisense RNA 1                                      | 100129662 | 4.995462903 | 1.791364644 | 1.323018914 | 1.353997758     | 0.175737093 | NA          | NA      |
| ENSG00000231086 | NA           | NA                                                         | NA        | 2.069491217 | 1.795585949 | 2.438559669 | 0.736330537     | 0.461529567 | NA          | NA      |
| ENSG00000206704 | NA           | NA                                                         | NA        | 0.863482347 | 1.797235216 | 3.123128823 | 0.575459841     | 0.564980343 | NA          | NA      |

|                 |              |                                                        |           |             |             |             |             |             |             |         |
|-----------------|--------------|--------------------------------------------------------|-----------|-------------|-------------|-------------|-------------|-------------|-------------|---------|
| ENSG00000235095 | NA           | NA                                                     | NA        | 0.863482347 | 1.797235216 | 3.123128823 | 0.575459841 | 0.564980343 | NA          | NA      |
| ENSG00000144771 | LRTM1        | leucine rich repeats and transmembrane domains 1       | 57408     | 0.821414515 | 1.797477592 | 3.170308963 | 0.566972372 | 0.570732953 | NA          | NA      |
| ENSG00000237763 | AMY1A        | amylase, alpha 1A (salivary)                           | 276       | 0.821414515 | 1.797477592 | 3.170308963 | 0.566972372 | 0.570732953 | NA          | NA      |
| ENSG00000238152 | NA           | NA                                                     | NA        | 0.821414515 | 1.797477592 | 3.170308963 | 0.566972372 | 0.570732953 | NA          | NA      |
| ENSG00000216621 | LOC105378052 | uncharacterized LOC105378052                           | 105378052 | 0.805107724 | 1.797573077 | 3.189567287 | 0.56357898  | 0.573040696 | NA          | NA      |
| ENSG00000233539 | LOC730338    | uncharacterized LOC730338                              | 730338    | 15.42326256 | 1.799798119 | 1.279982443 | 1.406111567 | 0.159690998 | 0.999371363 | Not Sig |
| ENSG00000250174 | MYLK-AS2     | MYLK antisense RNA 2                                   | 100873940 | 2.308805068 | 1.80001508  | 1.748841293 | 1.029261538 | 0.303356792 | NA          | NA      |
| ENSG00000163347 | CLDN1        | claudin 1                                              | 9076      | 1141.448822 | 1.803865543 | 0.769957209 | 2.342812721 | 0.019138987 | 0.704728852 | Not Sig |
| ENSG00000258245 | NA           | NA                                                     | NA        | 3.130938643 | 1.804802308 | 1.486810997 | 1.213874737 | 0.224795561 | NA          | NA      |
| ENSG00000144488 | ESPNL        | espin like                                             | 339768    | 37.97958247 | 1.804936649 | 1.42364038  | 1.267831873 | 0.204857997 | 0.999371363 | Not Sig |
| ENSG00000234093 | NA           | NA                                                     | NA        | 0.869919883 | 1.806821575 | 2.707600954 | 0.667314573 | 0.50457122  | NA          | NA      |
| ENSG00000236263 | NA           | NA                                                     | NA        | 0.869919883 | 1.806821575 | 2.707600954 | 0.667314573 | 0.50457122  | NA          | NA      |
| ENSG00000239061 | NA           | NA                                                     | NA        | 0.869919883 | 1.806821575 | 2.707600954 | 0.667314573 | 0.50457122  | NA          | NA      |
| ENSG00000259118 | LOC100506321 | uncharacterized LOC100506321                           | 100506321 | 0.869919883 | 1.806821575 | 2.707600954 | 0.667314573 | 0.50457122  | NA          | NA      |
| ENSG00000269933 | NA           | NA                                                     | NA        | 0.869919883 | 1.806821575 | 2.707600954 | 0.667314573 | 0.50457122  | NA          | NA      |
| ENSG00000196427 | NBPF4        | NBPF member 4                                          | 148545    | 0.827852051 | 1.807169293 | 2.742644016 | 0.658915004 | 0.509950351 | NA          | NA      |
| ENSG00000159289 | GOLGA6A      | golgin A6 family member A                              | 342096    | 0.811545259 | 1.807306706 | 2.756942332 | 0.655547519 | 0.512115302 | NA          | NA      |
| ENSG00000233052 | NA           | NA                                                     | NA        | 0.811545259 | 1.807306706 | 2.756942332 | 0.655547519 | 0.512115302 | NA          | NA      |
| ENSG00000126016 | AMOT         | angiomin                                               | 154796    | 880.3809203 | 1.809495922 | 0.567064613 | 3.190987202 | 0.001417876 | 0.143788559 | Not Sig |
| ENSG00000106927 | AMBP         | alpha-1-microglobulin/bikunin precursor                | 259       | 40.6444773  | 1.815914068 | 1.094740638 | 1.658761907 | 0.097163779 | 0.999371363 | Not Sig |
| ENSG00000165821 | SALL2        | spalt like transcription factor 2                      | 6297      | 626.2548785 | 1.816705378 | 0.678122375 | 2.67902291  | 0.007383734 | 0.418843984 | Not Sig |
| ENSG00000254558 | NA           | NA                                                     | NA        | 3.796694405 | 1.817324415 | 2.21814954  | 0.819297519 | 0.412616688 | NA          | NA      |
| ENSG00000068078 | FGFR3        | fibroblast growth factor receptor 3                    | 2261      | 1440.137453 | 1.820824516 | 0.71694346  | 2.539704478 | 0.011094617 | 0.521322807 | Not Sig |
| ENSG00000188013 | NA           | NA                                                     | NA        | 137.8241152 | 1.820844827 | 1.050627866 | 1.733101592 | 0.083077614 | 0.999371363 | Not Sig |
| ENSG00000224004 | NA           | NA                                                     | NA        | 0.876357418 | 1.822850776 | 3.113289393 | 0.585506372 | 0.558207284 | NA          | NA      |
| ENSG00000242315 | NA           | NA                                                     | NA        | 0.876357418 | 1.822850776 | 3.113289393 | 0.585506372 | 0.558207284 | NA          | NA      |
| ENSG00000251893 | NA           | NA                                                     | NA        | 0.876357418 | 1.822850776 | 3.113289393 | 0.585506372 | 0.558207284 | NA          | NA      |
| ENSG00000243775 | OSTCP1       | oligosaccharyltransferase complex subunit pseudogene 1 | 202459    | 0.834289586 | 1.823171768 | 3.159401323 | 0.577062418 | 0.563897291 | NA          | NA      |
| ENSG00000128262 | POM121L9P    | POM121 transmembrane nucleoporin like 9, pseudogene    | 29774     | 89.10446333 | 1.826180378 | 0.782884769 | 2.332629845 | 0.019667581 | 0.709667191 | Not Sig |
| ENSG00000269934 | NA           | NA                                                     | NA        | 30.51460806 | 1.826427113 | 0.98918552  | 1.846394913 | 0.064834885 | 0.999371363 | Not Sig |
| ENSG00000227117 | NA           | NA                                                     | NA        | 49.47573305 | 1.828877154 | 2.677046524 | 0.683169731 | 0.494499597 | 0.999371363 | Not Sig |
| ENSG00000164867 | NOS3         | nitric oxide synthase 3                                | 4846      | 1196.756953 | 1.832754942 | 1.026612348 | 1.785245372 | 0.074221525 | 0.999371363 | Not Sig |
| ENSG00000159648 | TEPP         | testis, prostate and placenta expressed                | 374739    | 31.08603017 | 1.833914677 | 1.293507974 | 1.41778382  | 0.156253889 | 0.999371363 | Not Sig |
| ENSG00000234286 | NA           | NA                                                     | NA        | 30.91781916 | 1.835940724 | 1.049157546 | 1.749919001 | 0.080132292 | 0.999371363 | Not Sig |
| ENSG00000197410 | DCHS2        | dachsous cadherin-related 2                            | 54798     | 61.86016169 | 1.837966218 | 0.772069466 | 2.380571049 | 0.017285827 | 0.670000634 | Not Sig |

|                 |           |                                                          |           |             |             |             |             |             |             |     |     |
|-----------------|-----------|----------------------------------------------------------|-----------|-------------|-------------|-------------|-------------|-------------|-------------|-----|-----|
| ENSG00000259264 | NA        | NA                                                       | NA        | 10.00776532 | 1.841127014 | 0.959965885 | 1.917908795 | 0.055122577 | 0.999371363 | Not | Sig |
| ENSG00000136014 | USP44     | ubiquitin specific peptidase 44                          | 84101     | 165.8153684 | 1.841581765 | 0.638594813 | 2.883803198 | 0.003929042 | 0.281664993 | Not | Sig |
| ENSG00000199377 | RNU5F-1   | RNA, U5F small nuclear 1                                 | 26828     | 42.15173078 | 1.843985422 | 1.153650044 | 1.598392365 | 0.109955683 | 0.999371363 | Not | Sig |
| ENSG00000266036 | NA        | NA                                                       | NA        | 4.613969037 | 1.8458798   | 1.259141924 | 1.465982321 | 0.142653103 | NA          | NA  | NA  |
| ENSG00000203863 | NA        | NA                                                       | NA        | 2.755893211 | 1.847247202 | 1.919566267 | 0.962325309 | 0.335886219 | NA          | NA  | NA  |
| ENSG00000267766 | NA        | NA                                                       | NA        | 4.834125    | 1.852049308 | 1.618654352 | 1.144190732 | 0.252544546 | NA          | NA  | NA  |
| ENSG00000170367 | CST5      | cystatin D                                               | 1473      | 17.71905526 | 1.854860563 | 1.09659108  | 1.691478799 | 0.090745394 | 0.999371363 | Not | Sig |
| ENSG00000183423 | LRIT3     | leucine rich repeat, Ig-like and transmembrane domains 3 | 345193    | 8.907729974 | 1.85775018  | 0.933964324 | 1.989101866 | 0.04668996  | 0.999371363 | Not | Sig |
| ENSG00000021300 | PLEKHB1   | pleckstrin homology domain containing B1                 | 58473     | 518.8359668 | 1.858190449 | 0.81740435  | 2.27328182  | 0.023009202 | 0.768580599 | Not | Sig |
| ENSG00000207993 | MIR134    | microRNA 134                                             | 406924    | 4.993250104 | 1.858717992 | 1.607207843 | 1.156488876 | 0.247481247 | NA          | NA  | NA  |
| ENSG00000238774 | NA        | NA                                                       | NA        | 3.935587597 | 1.859421247 | 1.322517355 | 1.40597115  | 0.159732692 | NA          | NA  | NA  |
| ENSG00000259048 | NA        | NA                                                       | NA        | 1.499795956 | 1.859827501 | 2.366761535 | 0.785811107 | 0.431978159 | NA          | NA  | NA  |
| ENSG00000067191 | CACNB1    | calcium voltage-gated channel auxiliary subunit beta 1   | 782       | 551.4181303 | 1.859832266 | 0.716509905 | 2.595682562 | 0.009440324 | 0.477437736 | Not | Sig |
| ENSG00000258116 | NA        | NA                                                       | NA        | 3.618550926 | 1.860294342 | 2.011382118 | 0.924883604 | 0.355026456 | NA          | NA  | NA  |
| ENSG00000224367 | NA        | NA                                                       | NA        | 1.726234736 | 1.869818201 | 2.300668822 | 0.8127281   | 0.416373967 | NA          | NA  | NA  |
| ENSG00000100884 | CPNE6     | copine 6                                                 | 9362      | 1.473785524 | 1.871352783 | 2.33050093  | 0.802983066 | 0.421984522 | NA          | NA  | NA  |
| ENSG00000128652 | HOXD3     | homeobox D3                                              | 3232      | 19.4417483  | 1.872136144 | 1.09126032  | 1.715572453 | 0.086240324 | 0.999371363 | Not | Sig |
| ENSG00000238421 | NA        | NA                                                       | NA        | 4.767009805 | 1.876305532 | 1.459111019 | 1.285923763 | 0.19846967  | NA          | NA  | NA  |
| ENSG00000199566 | NA        | NA                                                       | NA        | 0.904820221 | 1.876649996 | 3.131148496 | 0.599348769 | 0.548940333 | NA          | NA  | NA  |
| ENSG00000273388 | NA        | NA                                                       | NA        | 0.904820221 | 1.876649996 | 3.131148496 | 0.599348769 | 0.548940333 | NA          | NA  | NA  |
| ENSG00000200003 | NA        | NA                                                       | NA        | 0.862752389 | 1.877149536 | 3.174820786 | 0.591261574 | 0.554345172 | NA          | NA  | NA  |
| ENSG00000257925 | NA        | NA                                                       | NA        | 0.862752389 | 1.877149536 | 3.174820786 | 0.591261574 | 0.554345172 | NA          | NA  | NA  |
| ENSG00000269345 | NA        | NA                                                       | NA        | 0.862752389 | 1.877149536 | 3.174820786 | 0.591261574 | 0.554345172 | NA          | NA  | NA  |
| ENSG00000159527 | PGLYRP3   | peptidoglycan recognition protein 3                      | 114771    | 0.846445598 | 1.877346259 | 3.192603079 | 0.588029959 | 0.556512184 | NA          | NA  | NA  |
| ENSG00000233235 | NA        | NA                                                       | NA        | 0.846445598 | 1.877346259 | 3.192603079 | 0.588029959 | 0.556512184 | NA          | NA  | NA  |
| ENSG00000237737 | DCTN1-AS1 | DCTN1 antisense RNA 1                                    | 100189589 | 0.846445598 | 1.877346259 | 3.192603079 | 0.588029959 | 0.556512184 | NA          | NA  | NA  |
| ENSG00000064300 | NGFR      | nerve growth factor receptor                             | 4804      | 126.6077039 | 1.880214783 | 0.778453093 | 2.415321874 | 0.01572131  | 0.643565034 | Not | Sig |
| ENSG00000224189 | HAGLR     | HOXD antisense growth-associated long non-coding RNA     | 401022    | 801.0607825 | 1.880576849 | 1.054051699 | 1.784140998 | 0.074400757 | 0.999371363 | Not | Sig |
| ENSG00000252659 | NA        | NA                                                       | NA        | 1.585903425 | 1.881206503 | 2.217347821 | 0.848403884 | 0.396213081 | NA          | NA  | NA  |
| ENSG00000250342 | NA        | NA                                                       | NA        | 2.647196133 | 1.881498956 | 1.691296617 | 1.112459481 | 0.265940642 | NA          | NA  | NA  |
| ENSG00000230626 | NA        | NA                                                       | NA        | 2.25712827  | 1.882210071 | 1.806611762 | 1.041845354 | 0.297483383 | NA          | NA  | NA  |
| ENSG00000101134 | DOK5      | docking protein 5                                        | 55816     | 80.7545257  | 1.883231358 | 0.976959658 | 1.927644956 | 0.053899303 | 0.999371363 | Not | Sig |
| ENSG00000103044 | HAS3      | hyaluronan synthase 3                                    | 3038      | 1250.811299 | 1.886181202 | 0.914403684 | 2.062744534 | 0.039136906 | 0.999371363 | Not | Sig |
| ENSG00000237186 | NA        | NA                                                       | NA        | 1.534696295 | 1.887950636 | 2.069161685 | 0.912422963 | 0.361546106 | NA          | NA  | NA  |
| ENSG00000250906 | NA        | NA                                                       | NA        | 1.534696295 | 1.887950636 | 2.069161685 | 0.912422963 | 0.361546106 | NA          | NA  | NA  |

|                 |            |                                                         |           |             |             |             |             |             |             |         |
|-----------------|------------|---------------------------------------------------------|-----------|-------------|-------------|-------------|-------------|-------------|-------------|---------|
| ENSG00000259609 | NA         | NA                                                      | NA        | 0.852883133 | 1.889675159 | 3.187345211 | 0.592868056 | 0.553269458 | NA          | NA      |
| ENSG00000262810 | NA         | NA                                                      | NA        | 0.852883133 | 1.889675159 | 3.187345211 | 0.592868056 | 0.553269458 | NA          | NA      |
| ENSG00000142632 | ARHGEF19   | Rho guanine nucleotide exchange factor 19               | 128272    | 737.6069479 | 1.891700728 | 0.696311371 | 2.716745422 | 0.00659273  | 0.393801452 | Not Sig |
| ENSG00000205595 | NA         | NA                                                      | NA        | 32.73064096 | 1.894017748 | 1.053309287 | 1.798159164 | 0.072151789 | 0.999371363 | Not Sig |
| ENSG00000226416 | MRPL23-AS1 | MRPL23 antisense RNA 1                                  | 100133545 | 19.70517368 | 1.894338816 | 1.539481698 | 1.230504279 | 0.218508326 | 0.999371363 | Not Sig |
| ENSG00000121270 | ABCC11     | ATP binding cassette subfamily C member 11              | 85320     | 11.15201337 | 1.896748831 | 1.180357622 | 1.606927252 | 0.108070327 | 0.999371363 | Not Sig |
| ENSG00000121769 | FABP3      | fatty acid binding protein 3                            | 2170      | 358.5644205 | 1.897080529 | 1.103645219 | 1.718922436 | 0.085628496 | 0.999371363 | Not Sig |
| ENSG00000179058 | C9orf50    | chromosome 9 open reading frame 50                      | 375759    | 1.464176558 | 1.897368886 | 2.671121173 | 0.710326774 | 0.47750152  | NA          | NA      |
| ENSG00000244998 | NA         | NA                                                      | NA        | 1.464176558 | 1.897368886 | 2.671121173 | 0.710326774 | 0.47750152  | NA          | NA      |
| ENSG00000062038 | CDH3       | cadherin 3                                              | 1001      | 1090.400196 | 1.898704256 | 0.946070995 | 2.006936336 | 0.044756442 | 0.999371363 | Not Sig |
| ENSG00000233849 | NA         | NA                                                      | NA        | 2.675658936 | 1.899309423 | 1.675844405 | 1.133344729 | 0.257069515 | NA          | NA      |
| ENSG00000072041 | SLC6A15    | solute carrier family 6 member 15                       | 55117     | 2.199483604 | 1.90640829  | 2.394773068 | 0.79607054  | 0.425991036 | NA          | NA      |
| ENSG00000133710 | SPINK5     | serine peptidase inhibitor, Kazal type 5                | 11005     | 361.1875416 | 1.909815055 | 0.938842276 | 2.034223536 | 0.041929063 | 0.999371363 | Not Sig |
| ENSG00000075429 | CACNG5     | calcium voltage-gated channel auxiliary subunit gamma 5 | 27091     | 0.368410666 | 1.911388044 | 4.02185598  | 0.475250246 | 0.634608617 | NA          | NA      |
| ENSG00000079557 | AFM        | afamin                                                  | 173       | 0.368410666 | 1.911388044 | 4.02185598  | 0.475250246 | 0.634608617 | NA          | NA      |
| ENSG00000101327 | PDYN       | prodynorphin                                            | 5173      | 0.368410666 | 1.911388044 | 4.02185598  | 0.475250246 | 0.634608617 | NA          | NA      |
| ENSG00000121388 | NA         | NA                                                      | NA        | 0.368410666 | 1.911388044 | 4.02185598  | 0.475250246 | 0.634608617 | NA          | NA      |
| ENSG00000136694 | IL36A      | interleukin 36 alpha                                    | 27179     | 0.368410666 | 1.911388044 | 4.02185598  | 0.475250246 | 0.634608617 | NA          | NA      |
| ENSG00000140522 | RLBP1      | retinaldehyde binding protein 1                         | 6017      | 0.368410666 | 1.911388044 | 4.02185598  | 0.475250246 | 0.634608617 | NA          | NA      |
| ENSG00000147432 | CHRNB3     | cholinergic receptor nicotinic beta 3 subunit           | 1142      | 0.368410666 | 1.911388044 | 4.02185598  | 0.475250246 | 0.634608617 | NA          | NA      |
| ENSG00000147465 | STAR       | steroidogenic acute regulatory protein                  | 6770      | 0.368410666 | 1.911388044 | 4.02185598  | 0.475250246 | 0.634608617 | NA          | NA      |
| ENSG00000168955 | TM4SF20    | transmembrane 4 L six family member 20                  | 79853     | 0.368410666 | 1.911388044 | 4.02185598  | 0.475250246 | 0.634608617 | NA          | NA      |
| ENSG00000169469 | SPRR1B     | small proline rich protein 1B                           | 6699      | 0.368410666 | 1.911388044 | 4.02185598  | 0.475250246 | 0.634608617 | NA          | NA      |
| ENSG00000183130 | NA         | NA                                                      | NA        | 0.368410666 | 1.911388044 | 4.02185598  | 0.475250246 | 0.634608617 | NA          | NA      |
| ENSG00000196350 | ZNF729     | zinc finger protein 729                                 | 100287226 | 0.368410666 | 1.911388044 | 4.02185598  | 0.475250246 | 0.634608617 | NA          | NA      |
| ENSG00000197595 | NA         | NA                                                      | NA        | 0.368410666 | 1.911388044 | 4.02185598  | 0.475250246 | 0.634608617 | NA          | NA      |
| ENSG00000198033 | TUBA3C     | tubulin alpha 3c                                        | 7278      | 0.368410666 | 1.911388044 | 4.02185598  | 0.475250246 | 0.634608617 | NA          | NA      |
| ENSG00000198471 | RTP2       | receptor transporter protein 2                          | 344892    | 0.368410666 | 1.911388044 | 4.02185598  | 0.475250246 | 0.634608617 | NA          | NA      |
| ENSG00000199276 | NA         | NA                                                      | NA        | 0.368410666 | 1.911388044 | 4.02185598  | 0.475250246 | 0.634608617 | NA          | NA      |
| ENSG00000199335 | NA         | NA                                                      | NA        | 0.368410666 | 1.911388044 | 4.02185598  | 0.475250246 | 0.634608617 | NA          | NA      |
| ENSG00000199420 | NA         | NA                                                      | NA        | 0.368410666 | 1.911388044 | 4.02185598  | 0.475250246 | 0.634608617 | NA          | NA      |
| ENSG00000200106 | NA         | NA                                                      | NA        | 0.368410666 | 1.911388044 | 4.02185598  | 0.475250246 | 0.634608617 | NA          | NA      |
| ENSG00000201524 | NA         | NA                                                      | NA        | 0.368410666 | 1.911388044 | 4.02185598  | 0.475250246 | 0.634608617 | NA          | NA      |
| ENSG00000203855 | NA         | NA                                                      | NA        | 0.368410666 | 1.911388044 | 4.02185598  | 0.475250246 | 0.634608617 | NA          | NA      |
| ENSG00000204347 | BTBD17     | BTB domain containing 17                                | 388419    | 0.368410666 | 1.911388044 | 4.02185598  | 0.475250246 | 0.634608617 | NA          | NA      |

|                 |              |                                 |           |             |             |            |             |             |    |    |
|-----------------|--------------|---------------------------------|-----------|-------------|-------------|------------|-------------|-------------|----|----|
| ENSG00000204979 | MS4A13       | membrane spanning 4-domains A13 | 503497    | 0.368410666 | 1.911388044 | 4.02185598 | 0.475250246 | 0.634608617 | NA | NA |
| ENSG00000207414 | NA           | NA                              | NA        | 0.368410666 | 1.911388044 | 4.02185598 | 0.475250246 | 0.634608617 | NA | NA |
| ENSG00000207752 | MIR199A1     | microRNA 199a-1                 | 406976    | 0.368410666 | 1.911388044 | 4.02185598 | 0.475250246 | 0.634608617 | NA | NA |
| ENSG00000212377 | NA           | NA                              | NA        | 0.368410666 | 1.911388044 | 4.02185598 | 0.475250246 | 0.634608617 | NA | NA |
| ENSG00000212623 | NA           | NA                              | NA        | 0.368410666 | 1.911388044 | 4.02185598 | 0.475250246 | 0.634608617 | NA | NA |
| ENSG00000213002 | NA           | NA                              | NA        | 0.368410666 | 1.911388044 | 4.02185598 | 0.475250246 | 0.634608617 | NA | NA |
| ENSG00000213880 | NA           | NA                              | NA        | 0.368410666 | 1.911388044 | 4.02185598 | 0.475250246 | 0.634608617 | NA | NA |
| ENSG00000214024 | NA           | NA                              | NA        | 0.368410666 | 1.911388044 | 4.02185598 | 0.475250246 | 0.634608617 | NA | NA |
| ENSG00000215545 | DEFB116      | defensin beta 116               | 245930    | 0.368410666 | 1.911388044 | 4.02185598 | 0.475250246 | 0.634608617 | NA | NA |
| ENSG00000216020 | NA           | NA                              | NA        | 0.368410666 | 1.911388044 | 4.02185598 | 0.475250246 | 0.634608617 | NA | NA |
| ENSG00000216067 | NA           | NA                              | NA        | 0.368410666 | 1.911388044 | 4.02185598 | 0.475250246 | 0.634608617 | NA | NA |
| ENSG00000221094 | NA           | NA                              | NA        | 0.368410666 | 1.911388044 | 4.02185598 | 0.475250246 | 0.634608617 | NA | NA |
| ENSG00000221128 | NA           | NA                              | NA        | 0.368410666 | 1.911388044 | 4.02185598 | 0.475250246 | 0.634608617 | NA | NA |
| ENSG00000221387 | NA           | NA                              | NA        | 0.368410666 | 1.911388044 | 4.02185598 | 0.475250246 | 0.634608617 | NA | NA |
| ENSG00000222649 | NA           | NA                              | NA        | 0.368410666 | 1.911388044 | 4.02185598 | 0.475250246 | 0.634608617 | NA | NA |
| ENSG00000222658 | NA           | NA                              | NA        | 0.368410666 | 1.911388044 | 4.02185598 | 0.475250246 | 0.634608617 | NA | NA |
| ENSG00000222990 | NA           | NA                              | NA        | 0.368410666 | 1.911388044 | 4.02185598 | 0.475250246 | 0.634608617 | NA | NA |
| ENSG00000224414 | NA           | NA                              | NA        | 0.368410666 | 1.911388044 | 4.02185598 | 0.475250246 | 0.634608617 | NA | NA |
| ENSG00000224509 | LOC102724691 | uncharacterized LOC102724691    | 102724691 | 0.368410666 | 1.911388044 | 4.02185598 | 0.475250246 | 0.634608617 | NA | NA |
| ENSG00000225279 | NA           | NA                              | NA        | 0.368410666 | 1.911388044 | 4.02185598 | 0.475250246 | 0.634608617 | NA | NA |
| ENSG00000225639 | NA           | NA                              | NA        | 0.368410666 | 1.911388044 | 4.02185598 | 0.475250246 | 0.634608617 | NA | NA |
| ENSG00000226485 | NA           | NA                              | NA        | 0.368410666 | 1.911388044 | 4.02185598 | 0.475250246 | 0.634608617 | NA | NA |
| ENSG00000227176 | NA           | NA                              | NA        | 0.368410666 | 1.911388044 | 4.02185598 | 0.475250246 | 0.634608617 | NA | NA |
| ENSG00000227241 | NA           | NA                              | NA        | 0.368410666 | 1.911388044 | 4.02185598 | 0.475250246 | 0.634608617 | NA | NA |
| ENSG00000227776 | NA           | NA                              | NA        | 0.368410666 | 1.911388044 | 4.02185598 | 0.475250246 | 0.634608617 | NA | NA |
| ENSG00000227800 | NA           | NA                              | NA        | 0.368410666 | 1.911388044 | 4.02185598 | 0.475250246 | 0.634608617 | NA | NA |
| ENSG00000228060 | LOC101929516 | uncharacterized LOC101929516    | 101929516 | 0.368410666 | 1.911388044 | 4.02185598 | 0.475250246 | 0.634608617 | NA | NA |
| ENSG00000228399 | NA           | NA                              | NA        | 0.368410666 | 1.911388044 | 4.02185598 | 0.475250246 | 0.634608617 | NA | NA |
| ENSG00000229369 | NA           | NA                              | NA        | 0.368410666 | 1.911388044 | 4.02185598 | 0.475250246 | 0.634608617 | NA | NA |
| ENSG00000229738 | NA           | NA                              | NA        | 0.368410666 | 1.911388044 | 4.02185598 | 0.475250246 | 0.634608617 | NA | NA |
| ENSG00000230668 | NA           | NA                              | NA        | 0.368410666 | 1.911388044 | 4.02185598 | 0.475250246 | 0.634608617 | NA | NA |
| ENSG00000231929 | NA           | NA                              | NA        | 0.368410666 | 1.911388044 | 4.02185598 | 0.475250246 | 0.634608617 | NA | NA |
| ENSG00000232132 | NDFIP2-AS1   | NDFIP2 antisense RNA 1          | 100874208 | 0.368410666 | 1.911388044 | 4.02185598 | 0.475250246 | 0.634608617 | NA | NA |
| ENSG00000232789 | NA           | NA                              | NA        | 0.368410666 | 1.911388044 | 4.02185598 | 0.475250246 | 0.634608617 | NA | NA |
| ENSG00000232794 | NA           | NA                              | NA        | 0.368410666 | 1.911388044 | 4.02185598 | 0.475250246 | 0.634608617 | NA | NA |

|                 |              |                                                   |           |             |             |            |             |             |    |    |
|-----------------|--------------|---------------------------------------------------|-----------|-------------|-------------|------------|-------------|-------------|----|----|
| ENSG00000233069 | NA           | NA                                                | NA        | 0.368410666 | 1.911388044 | 4.02185598 | 0.475250246 | 0.634608617 | NA | NA |
| ENSG00000233231 | NA           | NA                                                | NA        | 0.368410666 | 1.911388044 | 4.02185598 | 0.475250246 | 0.634608617 | NA | NA |
| ENSG00000233711 | NA           | NA                                                | NA        | 0.368410666 | 1.911388044 | 4.02185598 | 0.475250246 | 0.634608617 | NA | NA |
| ENSG00000234158 | NA           | NA                                                | NA        | 0.368410666 | 1.911388044 | 4.02185598 | 0.475250246 | 0.634608617 | NA | NA |
| ENSG00000234702 | NA           | NA                                                | NA        | 0.368410666 | 1.911388044 | 4.02185598 | 0.475250246 | 0.634608617 | NA | NA |
| ENSG00000235298 | NA           | NA                                                | NA        | 0.368410666 | 1.911388044 | 4.02185598 | 0.475250246 | 0.634608617 | NA | NA |
| ENSG00000235447 | NA           | NA                                                | NA        | 0.368410666 | 1.911388044 | 4.02185598 | 0.475250246 | 0.634608617 | NA | NA |
| ENSG00000235857 | NA           | NA                                                | NA        | 0.368410666 | 1.911388044 | 4.02185598 | 0.475250246 | 0.634608617 | NA | NA |
| ENSG00000236957 | LOC105371458 | uncharacterized LOC105371458                      | 105371458 | 0.368410666 | 1.911388044 | 4.02185598 | 0.475250246 | 0.634608617 | NA | NA |
| ENSG00000237042 | NA           | NA                                                | NA        | 0.368410666 | 1.911388044 | 4.02185598 | 0.475250246 | 0.634608617 | NA | NA |
| ENSG00000237202 | NA           | NA                                                | NA        | 0.368410666 | 1.911388044 | 4.02185598 | 0.475250246 | 0.634608617 | NA | NA |
| ENSG00000237934 | NA           | NA                                                | NA        | 0.368410666 | 1.911388044 | 4.02185598 | 0.475250246 | 0.634608617 | NA | NA |
| ENSG00000237952 | NA           | NA                                                | NA        | 0.368410666 | 1.911388044 | 4.02185598 | 0.475250246 | 0.634608617 | NA | NA |
| ENSG00000238561 | NA           | NA                                                | NA        | 0.368410666 | 1.911388044 | 4.02185598 | 0.475250246 | 0.634608617 | NA | NA |
| ENSG00000238734 | NA           | NA                                                | NA        | 0.368410666 | 1.911388044 | 4.02185598 | 0.475250246 | 0.634608617 | NA | NA |
| ENSG00000238816 | NA           | NA                                                | NA        | 0.368410666 | 1.911388044 | 4.02185598 | 0.475250246 | 0.634608617 | NA | NA |
| ENSG00000240359 | NA           | NA                                                | NA        | 0.368410666 | 1.911388044 | 4.02185598 | 0.475250246 | 0.634608617 | NA | NA |
| ENSG00000240787 | NA           | NA                                                | NA        | 0.368410666 | 1.911388044 | 4.02185598 | 0.475250246 | 0.634608617 | NA | NA |
| ENSG00000243438 | NA           | NA                                                | NA        | 0.368410666 | 1.911388044 | 4.02185598 | 0.475250246 | 0.634608617 | NA | NA |
| ENSG00000243488 | NA           | NA                                                | NA        | 0.368410666 | 1.911388044 | 4.02185598 | 0.475250246 | 0.634608617 | NA | NA |
| ENSG00000244652 | NA           | NA                                                | NA        | 0.368410666 | 1.911388044 | 4.02185598 | 0.475250246 | 0.634608617 | NA | NA |
| ENSG00000249851 | NA           | NA                                                | NA        | 0.368410666 | 1.911388044 | 4.02185598 | 0.475250246 | 0.634608617 | NA | NA |
| ENSG00000250129 | NA           | NA                                                | NA        | 0.368410666 | 1.911388044 | 4.02185598 | 0.475250246 | 0.634608617 | NA | NA |
| ENSG00000252027 | NA           | NA                                                | NA        | 0.368410666 | 1.911388044 | 4.02185598 | 0.475250246 | 0.634608617 | NA | NA |
| ENSG00000252105 | NA           | NA                                                | NA        | 0.368410666 | 1.911388044 | 4.02185598 | 0.475250246 | 0.634608617 | NA | NA |
| ENSG00000252408 | NA           | NA                                                | NA        | 0.368410666 | 1.911388044 | 4.02185598 | 0.475250246 | 0.634608617 | NA | NA |
| ENSG00000252886 | NA           | NA                                                | NA        | 0.368410666 | 1.911388044 | 4.02185598 | 0.475250246 | 0.634608617 | NA | NA |
| ENSG00000252968 | NA           | NA                                                | NA        | 0.368410666 | 1.911388044 | 4.02185598 | 0.475250246 | 0.634608617 | NA | NA |
| ENSG00000254420 | NA           | NA                                                | NA        | 0.368410666 | 1.911388044 | 4.02185598 | 0.475250246 | 0.634608617 | NA | NA |
| ENSG00000254458 | NA           | NA                                                | NA        | 0.368410666 | 1.911388044 | 4.02185598 | 0.475250246 | 0.634608617 | NA | NA |
| ENSG00000254668 | NA           | NA                                                | NA        | 0.368410666 | 1.911388044 | 4.02185598 | 0.475250246 | 0.634608617 | NA | NA |
| ENSG00000254722 | NA           | NA                                                | NA        | 0.368410666 | 1.911388044 | 4.02185598 | 0.475250246 | 0.634608617 | NA | NA |
| ENSG00000255307 | OR52B2       | olfactory receptor family 52 subfamily B member 2 | 255725    | 0.368410666 | 1.911388044 | 4.02185598 | 0.475250246 | 0.634608617 | NA | NA |
| ENSG00000257157 | NA           | NA                                                | NA        | 0.368410666 | 1.911388044 | 4.02185598 | 0.475250246 | 0.634608617 | NA | NA |
| ENSG00000257645 | NA           | NA                                                | NA        | 0.368410666 | 1.911388044 | 4.02185598 | 0.475250246 | 0.634608617 | NA | NA |

|                 |              |                                                    |           |             |             |             |             |             |             |         |
|-----------------|--------------|----------------------------------------------------|-----------|-------------|-------------|-------------|-------------|-------------|-------------|---------|
| ENSG00000258039 | LOC101928937 | uncharacterized LOC101928937                       | 101928937 | 0.368410666 | 1.911388044 | 4.02185598  | 0.475250246 | 0.634608617 | NA          | NA      |
| ENSG00000258239 | NA           | NA                                                 | NA        | 0.368410666 | 1.911388044 | 4.02185598  | 0.475250246 | 0.634608617 | NA          | NA      |
| ENSG00000258988 | NA           | NA                                                 | NA        | 0.368410666 | 1.911388044 | 4.02185598  | 0.475250246 | 0.634608617 | NA          | NA      |
| ENSG00000259466 | NA           | NA                                                 | NA        | 0.368410666 | 1.911388044 | 4.02185598  | 0.475250246 | 0.634608617 | NA          | NA      |
| ENSG00000260103 | LOC101929333 | uncharacterized LOC101929333                       | 101929333 | 0.368410666 | 1.911388044 | 4.02185598  | 0.475250246 | 0.634608617 | NA          | NA      |
| ENSG00000260247 | NA           | NA                                                 | NA        | 0.368410666 | 1.911388044 | 4.02185598  | 0.475250246 | 0.634608617 | NA          | NA      |
| ENSG00000262372 | NA           | NA                                                 | NA        | 0.368410666 | 1.911388044 | 4.02185598  | 0.475250246 | 0.634608617 | NA          | NA      |
| ENSG00000264387 | MIR5007      | microRNA 5007                                      | 100846996 | 0.368410666 | 1.911388044 | 4.02185598  | 0.475250246 | 0.634608617 | NA          | NA      |
| ENSG00000264833 | NA           | NA                                                 | NA        | 0.368410666 | 1.911388044 | 4.02185598  | 0.475250246 | 0.634608617 | NA          | NA      |
| ENSG00000265194 | NA           | NA                                                 | NA        | 0.368410666 | 1.911388044 | 4.02185598  | 0.475250246 | 0.634608617 | NA          | NA      |
| ENSG00000265398 | NA           | NA                                                 | NA        | 0.368410666 | 1.911388044 | 4.02185598  | 0.475250246 | 0.634608617 | NA          | NA      |
| ENSG00000265518 | NA           | NA                                                 | NA        | 0.368410666 | 1.911388044 | 4.02185598  | 0.475250246 | 0.634608617 | NA          | NA      |
| ENSG00000266223 | NA           | NA                                                 | NA        | 0.368410666 | 1.911388044 | 4.02185598  | 0.475250246 | 0.634608617 | NA          | NA      |
| ENSG00000266478 | MIR5197      | microRNA 5197                                      | 100846991 | 0.368410666 | 1.911388044 | 4.02185598  | 0.475250246 | 0.634608617 | NA          | NA      |
| ENSG00000266534 | NA           | NA                                                 | NA        | 0.368410666 | 1.911388044 | 4.02185598  | 0.475250246 | 0.634608617 | NA          | NA      |
| ENSG00000266611 | MIR4703      | microRNA 4703                                      | 100616423 | 0.368410666 | 1.911388044 | 4.02185598  | 0.475250246 | 0.634608617 | NA          | NA      |
| ENSG00000266620 | NA           | NA                                                 | NA        | 0.368410666 | 1.911388044 | 4.02185598  | 0.475250246 | 0.634608617 | NA          | NA      |
| ENSG00000267424 | NA           | NA                                                 | NA        | 0.368410666 | 1.911388044 | 4.02185598  | 0.475250246 | 0.634608617 | NA          | NA      |
| ENSG00000267979 | NA           | NA                                                 | NA        | 0.368410666 | 1.911388044 | 4.02185598  | 0.475250246 | 0.634608617 | NA          | NA      |
| ENSG00000268130 | NA           | NA                                                 | NA        | 0.368410666 | 1.911388044 | 4.02185598  | 0.475250246 | 0.634608617 | NA          | NA      |
| ENSG00000268819 | NA           | NA                                                 | NA        | 0.368410666 | 1.911388044 | 4.02185598  | 0.475250246 | 0.634608617 | NA          | NA      |
| ENSG00000269332 | GOLGA2P9     | golgin A2 pseudogene 9                             | 440518    | 0.368410666 | 1.911388044 | 4.02185598  | 0.475250246 | 0.634608617 | NA          | NA      |
| ENSG00000270257 | NA           | NA                                                 | NA        | 0.368410666 | 1.911388044 | 4.02185598  | 0.475250246 | 0.634608617 | NA          | NA      |
| ENSG00000270432 | NA           | NA                                                 | NA        | 0.368410666 | 1.911388044 | 4.02185598  | 0.475250246 | 0.634608617 | NA          | NA      |
| ENSG00000270623 | NA           | NA                                                 | NA        | 0.368410666 | 1.911388044 | 4.02185598  | 0.475250246 | 0.634608617 | NA          | NA      |
| ENSG00000270920 | NA           | NA                                                 | NA        | 0.368410666 | 1.911388044 | 4.02185598  | 0.475250246 | 0.634608617 | NA          | NA      |
| ENSG00000271415 | NA           | NA                                                 | NA        | 0.368410666 | 1.911388044 | 4.02185598  | 0.475250246 | 0.634608617 | NA          | NA      |
| ENSG00000271536 | NA           | NA                                                 | NA        | 0.368410666 | 1.911388044 | 4.02185598  | 0.475250246 | 0.634608617 | NA          | NA      |
| ENSG00000272483 | NA           | NA                                                 | NA        | 0.368410666 | 1.911388044 | 4.02185598  | 0.475250246 | 0.634608617 | NA          | NA      |
| ENSG00000174514 | MFSD4A       | major facilitator superfamily domain containing 4A | 148808    | 1351.889672 | 1.911422045 | 0.88007456  | 2.171886488 | 0.029864226 | 0.897727832 | Not Sig |
| ENSG00000248803 | NA           | NA                                                 | NA        | 11.3159457  | 1.914799657 | 0.991234062 | 1.93173311  | 0.053392456 | 0.999371363 | Not Sig |
| ENSG00000265976 | MIR4725      | microRNA 4725                                      | 100616449 | 2.212358676 | 1.916199534 | 2.393167494 | 0.800695956 | 0.423307684 | NA          | NA      |
| ENSG00000229862 | NA           | NA                                                 | NA        | 1.569596633 | 1.919198126 | 2.005395281 | 0.957017374 | 0.338558486 | NA          | NA      |
| ENSG00000233631 | NA           | NA                                                 | NA        | 35.93632309 | 1.920512161 | 0.950132148 | 2.021310578 | 0.043247625 | 0.999371363 | Not Sig |
| ENSG00000132321 | IQCA1        | IQ motif containing with AAA domain 1              | 79781     | 265.3415242 | 1.920761163 | 1.119227002 | 1.716149771 | 0.086134634 | 0.999371363 | Not Sig |

|                 |              |                                                       |           |             |             |             |             |             |             |         |
|-----------------|--------------|-------------------------------------------------------|-----------|-------------|-------------|-------------|-------------|-------------|-------------|---------|
| ENSG00000181374 | CCL13        | C-C motif chemokine ligand 13                         | 6357      | 154.345993  | 1.922759943 | 1.00361434  | 1.915835463 | 0.055386042 | 0.999371363 | Not Sig |
| ENSG00000152128 | TMEM163      | transmembrane protein 163                             | 81615     | 647.1686212 | 1.92529774  | 0.727755331 | 2.645528872 | 0.008156333 | 0.446576942 | Not Sig |
| ENSG00000273328 | NA           | NA                                                    | NA        | 13.66265425 | 1.926384593 | 1.396168979 | 1.379764644 | 0.167659122 | 0.999371363 | Not Sig |
| ENSG00000153404 | PLEKHG4B     | pleckstrin homology and RhoGEF domain containing G4B  | 153478    | 293.1820289 | 1.93271869  | 1.04578139  | 1.848109661 | 0.06458648  | 0.999371363 | Not Sig |
| ENSG00000109339 | MAPK10       | mitogen-activated protein kinase 10                   | 5602      | 477.6377072 | 1.93617057  | 0.761484122 | 2.542627632 | 0.011002241 | 0.518918434 | Not Sig |
| ENSG00000154252 | GAL3ST2      | galactose-3-O-sulfotransferase 2                      | 64090     | 8.474698706 | 1.936419379 | 1.243014414 | 1.557841452 | 0.119270837 | 0.999371363 | Not Sig |
| ENSG00000215057 | NA           | NA                                                    | NA        | 3.99550812  | 1.943052865 | 1.40567617  | 1.382290534 | 0.166882511 | NA          | NA      |
| ENSG00000242097 | NA           | NA                                                    | NA        | 10.27640883 | 1.94358112  | 1.1436258   | 1.699490446 | 0.089226813 | 0.999371363 | Not Sig |
| ENSG00000259251 | NA           | NA                                                    | NA        | 5.082092201 | 1.947101056 | 1.162703968 | 1.674631814 | 0.094006493 | NA          | NA      |
| ENSG00000201950 | SNORD113-9   | small nucleolar RNA, C/D box 113-9                    | 767569    | 1.936461399 | 1.955044788 | 2.204629754 | 0.88679053  | 0.375191687 | NA          | NA      |
| ENSG00000107105 | ELAVL2       | ELAV like RNA binding protein 2                       | 1993      | 10.75708105 | 1.955963059 | 1.60585426  | 1.218020282 | 0.223216265 | 0.999371363 | Not Sig |
| ENSG00000128040 | SPINK2       | serine peptidase inhibitor, Kazal type 2              | 6691      | 15.46399195 | 1.956463954 | 1.785649566 | 1.095659525 | 0.273227802 | 0.999371363 | Not Sig |
| ENSG00000270326 | NA           | NA                                                    | NA        | 5.052910338 | 1.956708149 | 1.196660655 | 1.635140372 | 0.102019625 | NA          | NA      |
| ENSG00000169668 | NA           | NA                                                    | NA        | 0.87173697  | 1.958041966 | 3.145993739 | 0.622392201 | 0.533684008 | NA          | NA      |
| ENSG00000225043 | NA           | NA                                                    | NA        | 0.87173697  | 1.958041966 | 3.145993739 | 0.622392201 | 0.533684008 | NA          | NA      |
| ENSG00000264473 | NA           | NA                                                    | NA        | 0.87173697  | 1.958041966 | 3.145993739 | 0.622392201 | 0.533684008 | NA          | NA      |
| ENSG00000254578 | NA           | NA                                                    | NA        | 0.888043761 | 1.958200523 | 3.128902324 | 0.62584265  | 0.531418154 | NA          | NA      |
| ENSG00000213409 | NA           | NA                                                    | NA        | 0.930111593 | 1.958603008 | 3.086870643 | 0.634494682 | 0.525758036 | NA          | NA      |
| ENSG00000006283 | CACNA1G      | calcium voltage-gated channel subunit alphas 1G       | 8913      | 27.63965743 | 1.9601021   | 0.666925003 | 2.939014269 | 0.003292579 | 0.254376989 | Not Sig |
| ENSG00000162595 | DIRAS3       | DIRAS family GTPase 3                                 | 9077      | 74.02161612 | 1.960737494 | 0.88136935  | 2.224649058 | 0.026104807 | 0.837114088 | Not Sig |
| ENSG00000137707 | BTG4         | BTG anti-proliferation factor 4                       | 54766     | 3.848584555 | 1.962769333 | 1.860024382 | 1.055238496 | 0.291316262 | NA          | NA      |
| ENSG00000111262 | KCNA1        | potassium voltage-gated channel subfamily A member 1  | 3736      | 12.77107242 | 1.963216591 | 1.430481742 | 1.372416392 | 0.16993385  | 0.999371363 | Not Sig |
| ENSG00000232628 | LOC101927143 | uncharacterized LOC101927143                          | 101927143 | 4.963525867 | 1.965976734 | 1.192593052 | 1.648489173 | 0.099252331 | NA          | NA      |
| ENSG00000264468 | MIR4520-1    | microRNA 4520-1                                       | 100616401 | 4.205640108 | 1.967583376 | 1.460184031 | 1.347489997 | 0.177822473 | NA          | NA      |
| ENSG00000089847 | ANKRD24      | ankyrin repeat domain 24                              | 170961    | 174.8776135 | 1.967642654 | 0.879058322 | 2.238352797 | 0.025198058 | 0.819946097 | Not Sig |
| ENSG00000260018 | NA           | NA                                                    | NA        | 11.38080559 | 1.967684218 | 0.933601926 | 2.107626563 | 0.035063304 | 0.965765073 | Not Sig |
| ENSG00000259038 | NA           | NA                                                    | NA        | 5.225125275 | 1.968935333 | 1.243319066 | 1.583612273 | 0.113281979 | NA          | NA      |
| ENSG00000144648 | ACKR2        | atypical chemokine receptor 2                         | 1238      | 131.9512564 | 1.969025534 | 0.778104678 | 2.530540671 | 0.011388688 | 0.527271136 | Not Sig |
| ENSG00000214514 | KRT42P       | keratin 42 pseudogene                                 | 284116    | 7.597515698 | 1.970017291 | 1.179519428 | 1.670186386 | 0.094882493 | 0.999371363 | Not Sig |
| ENSG00000184612 | NA           | NA                                                    | NA        | 0.878174505 | 1.970074324 | 3.086237536 | 0.638341767 | 0.523251229 | NA          | NA      |
| ENSG00000262636 | NA           | NA                                                    | NA        | 0.878174505 | 1.970074324 | 3.086237536 | 0.638341767 | 0.523251229 | NA          | NA      |
| ENSG00000265450 | MIR4502      | microRNA 4502                                         | 100616227 | 0.878174505 | 1.970074324 | 3.086237536 | 0.638341767 | 0.523251229 | NA          | NA      |
| ENSG00000213683 | NA           | NA                                                    | NA        | 0.894481297 | 1.970226299 | 3.069200579 | 0.641934683 | 0.520915594 | NA          | NA      |
| ENSG00000178395 | CCDC185      | coiled-coil domain containing 185                     | 164127    | 5.78760928  | 1.971038459 | 2.079661128 | 0.947769053 | 0.343247038 | NA          | NA      |
| ENSG00000179344 | HLA-DQB1     | major histocompatibility complex, class II, DQ beta 1 | 3119      | 4665.680458 | 1.973886763 | 0.785945937 | 2.511479059 | 0.012022642 | 0.550076239 | Not Sig |



|                 |            |                                                          |           |             |             |             |             |             |             |         |
|-----------------|------------|----------------------------------------------------------|-----------|-------------|-------------|-------------|-------------|-------------|-------------|---------|
| ENSG00000228991 | NA         | NA                                                       | NA        | 7.212427942 | 1.97868308  | 1.749094329 | 1.131261503 | 0.257945042 | 0.999371363 | Not Sig |
| ENSG00000238826 | NA         | NA                                                       | NA        | 2.531176844 | 1.979160849 | 1.687310152 | 1.172968021 | 0.24080863  | NA          | NA      |
| ENSG00000235508 | NA         | NA                                                       | NA        | 1.748094388 | 1.980743871 | 1.938400789 | 1.021844338 | 0.306854581 | NA          | NA      |
| ENSG00000252546 | NA         | NA                                                       | NA        | 1.748094388 | 1.980743871 | 1.938400789 | 1.021844338 | 0.306854581 | NA          | NA      |
| ENSG00000225419 | NA         | NA                                                       | NA        | 0.884612041 | 1.981508106 | 3.081278582 | 0.64307983  | 0.520172302 | NA          | NA      |
| ENSG00000240606 | NA         | NA                                                       | NA        | 0.884612041 | 1.981508106 | 3.081278582 | 0.64307983  | 0.520172302 | NA          | NA      |
| ENSG00000254727 | NA         | NA                                                       | NA        | 0.884612041 | 1.981508106 | 3.081278582 | 0.64307983  | 0.520172302 | NA          | NA      |
| ENSG00000262211 | NA         | NA                                                       | NA        | 0.884612041 | 1.981508106 | 3.081278582 | 0.64307983  | 0.520172302 | NA          | NA      |
| ENSG00000164756 | SLC30A8    | solute carrier family 30 member 8                        | 169026    | 0.900918833 | 1.981643196 | 3.064427227 | 0.646660224 | 0.517851872 | NA          | NA      |
| ENSG00000252919 | NA         | NA                                                       | NA        | 0.900918833 | 1.981643196 | 3.064427227 | 0.646660224 | 0.517851872 | NA          | NA      |
| ENSG00000261505 | NA         | NA                                                       | NA        | 0.900918833 | 1.981643196 | 3.064427227 | 0.646660224 | 0.517851872 | NA          | NA      |
| ENSG00000261407 | NA         | NA                                                       | NA        | 1.69060444  | 1.983955184 | 2.269361835 | 0.874234842 | 0.381990375 | NA          | NA      |
| ENSG00000260372 | NA         | NA                                                       | NA        | 7.9965691   | 1.984387615 | 1.137981375 | 1.743778642 | 0.081197696 | 0.999371363 | Not Sig |
| ENSG00000176826 | FKBP9P1    | FK506 binding protein 9 pseudogene 1                     | 360132    | 53.55776927 | 1.984657023 | 0.988461205 | 2.007824903 | 0.044661901 | 0.999371363 | Not Sig |
| ENSG00000225147 | NA         | NA                                                       | NA        | 1.684166904 | 1.98537623  | 2.612256952 | 0.760023331 | 0.447240639 | NA          | NA      |
| ENSG00000265345 | MIR5188    | microRNA 5188                                            | 100847004 | 4.531614873 | 1.986197943 | 1.559740852 | 1.273415351 | 0.202870693 | NA          | NA      |
| ENSG00000179934 | CCR8       | C-C motif chemokine receptor 8                           | 1237      | 28.72865568 | 1.988074518 | 0.966201149 | 2.0576197   | 0.039626654 | 0.999371363 | Not Sig |
| ENSG00000146216 | TTBK1      | tau tubulin kinase 1                                     | 84630     | 13.23083271 | 1.988524881 | 0.83791626  | 2.373178533 | 0.017635737 | 0.673156557 | Not Sig |
| ENSG00000229257 | NA         | NA                                                       | NA        | 1.674557938 | 1.988920626 | 2.251765176 | 0.883271776 | 0.377089449 | NA          | NA      |
| ENSG00000244390 | NA         | NA                                                       | NA        | 1.818155355 | 1.990460844 | 2.289665442 | 0.869323879 | 0.384670005 | NA          | NA      |
| ENSG00000211699 | NA         | NA                                                       | NA        | 7.586528655 | 1.990869481 | 1.022048287 | 1.947921156 | 0.051424398 | 0.999371363 | Not Sig |
| ENSG00000205667 | ARSH       | arylsulfatase family member H                            | 347527    | 12.48867045 | 1.991622123 | 1.368376711 | 1.455463328 | 0.145541035 | 0.999371363 | Not Sig |
| ENSG00000095596 | CYP26A1    | cytochrome P450 family 26 subfamily A member 1           | 1592      | 2.59852515  | 1.992448511 | 1.885435993 | 1.056757438 | 0.290622303 | NA          | NA      |
| ENSG00000229780 | UBE2Q1-AS1 | UBE2Q1 antisense RNA 1                                   | 100874097 | 0.891049577 | 1.992488078 | 3.131087248 | 0.636356613 | 0.524544013 | NA          | NA      |
| ENSG00000235974 | NA         | NA                                                       | NA        | 0.891049577 | 1.992488078 | 3.131087248 | 0.636356613 | 0.524544013 | NA          | NA      |
| ENSG00000264115 | MIR3180-4  | microRNA 3180-4                                          | 100500852 | 0.907356368 | 1.992599265 | 3.114544584 | 0.639772272 | 0.522320662 | NA          | NA      |
| ENSG00000215105 | NA         | NA                                                       | NA        | 434.8511061 | 1.993406895 | 0.677742816 | 2.941243859 | 0.003268971 | 0.254112027 | Not Sig |
| ENSG00000273391 | NA         | NA                                                       | NA        | 6.643647563 | 1.993798253 | 1.281124539 | 1.556287615 | 0.119639715 | 0.999371363 | Not Sig |
| ENSG00000208009 | MIR130A    | microRNA 130a                                            | 406919    | 1.581752644 | 2.000344237 | 2.205843181 | 0.906838824 | 0.364492036 | NA          | NA      |
| ENSG00000008735 | MAPK8IP2   | mitogen-activated protein kinase 8 interacting protein 2 | 23542     | 233.2338269 | 2.005053644 | 0.950755161 | 2.1089064   | 0.034952662 | 0.965260677 | Not Sig |
| ENSG00000198597 | ZNF536     | zinc finger protein 536                                  | 9745      | 28.91389969 | 2.011178787 | 1.152762327 | 1.744660404 | 0.081044    | 0.999371363 | Not Sig |
| ENSG00000203724 | Clorf53    | chromosome 1 open reading frame 53                       | 388722    | 55.86975103 | 2.011267007 | 0.673620721 | 2.985755848 | 0.002828784 | 0.235821761 | Not Sig |
| ENSG00000234477 | NA         | NA                                                       | NA        | 1.990674344 | 2.01146978  | 2.068606725 | 0.97237902  | 0.330862025 | NA          | NA      |
| ENSG00000108679 | LGALS3BP   | galectin 3 binding protein                               | 3959      | 21162.62375 | 2.012583385 | 0.715625741 | 2.812340682 | 0.004918238 | 0.324638365 | Not Sig |
| ENSG00000171462 | DLK2       | delta like non-canonical Notch ligand 2                  | 65989     | 11.91677046 | 2.014148865 | 1.128464384 | 1.784858161 | 0.074284326 | 0.999371363 | Not Sig |

|                 |             |                                                                  |           |             |             |             |             |             |             |         |
|-----------------|-------------|------------------------------------------------------------------|-----------|-------------|-------------|-------------|-------------|-------------|-------------|---------|
| ENSG00000169676 | DRD5        | dopamine receptor D5                                             | 1816      | 1.789432262 | 2.016361877 | 1.920614239 | 1.049852613 | 0.293785881 | NA          | NA      |
| ENSG00000261239 | NA          | NA                                                               | NA        | 0.906637308 | 2.018224419 | 3.119258654 | 0.64702054  | 0.51761865  | NA          | NA      |
| ENSG00000263637 | NA          | NA                                                               | NA        | 0.965011932 | 2.018440707 | 3.063411269 | 0.658886623 | 0.509968576 | NA          | NA      |
| ENSG00000227145 | IL21-AS1    | IL21 antisense RNA 1                                             | 100996941 | 3.384214695 | 2.022293707 | 1.715709754 | 1.178692202 | 0.238520762 | NA          | NA      |
| ENSG00000189167 | ZAR1L       | zygote arrest 1 like                                             | 646799    | 1.680735184 | 2.025735173 | 2.058088325 | 0.984279998 | 0.324977861 | NA          | NA      |
| ENSG00000143473 | KCNH1       | potassium voltage-gated channel subfamily H member 1             | 3756      | 2.527441071 | 2.027740372 | 1.688027573 | 1.201248371 | 0.229654871 | NA          | NA      |
| ENSG00000188039 | NWD1        | NACHT and WD repeat domain containing 1                          | 284434    | 305.9211515 | 2.028004643 | 1.048116734 | 1.934903411 | 0.05300215  | 0.999371363 | Not Sig |
| ENSG00000254967 | NA          | NA                                                               | NA        | 2.792610637 | 2.028157921 | 1.750450801 | 1.158648914 | 0.246599322 | NA          | NA      |
| ENSG00000108759 | KRT32       | keratin 32                                                       | 3882      | 1.658251147 | 2.030366315 | 2.040648213 | 0.994961455 | 0.319755012 | NA          | NA      |
| ENSG00000228348 | NA          | NA                                                               | NA        | 0.913074844 | 2.03115982  | 2.659377847 | 0.763772558 | 0.445002793 | NA          | NA      |
| ENSG00000197233 | OR1J2       | olfactory receptor family 1 subfamily J member 2                 | 26740     | 0.929381636 | 2.031222779 | 2.647274759 | 0.767288236 | 0.442910161 | NA          | NA      |
| ENSG00000225235 | INTS6L-AS1  | INTS6L antisense RNA 1                                           | 100874118 | 1.722333348 | 2.032036612 | 2.147838636 | 0.946084393 | 0.344105543 | NA          | NA      |
| ENSG00000119946 | CNNM1       | cyclin and CBS domain divalent metal cation transport mediator 1 | 26507     | 57.00202343 | 2.033917983 | 0.879713944 | 2.312021989 | 0.020776472 | 0.7308327   | Not Sig |
| ENSG00000230098 | TCERG1L-AS1 | TCERG1L antisense RNA 1                                          | 101927489 | 0.91951238  | 2.041917058 | 2.616694848 | 0.780342064 | 0.43518956  | NA          | NA      |
| ENSG00000179930 | ZNF648      | zinc finger protein 648                                          | 127665    | 0.935819171 | 2.041965761 | 2.604694545 | 0.78395594  | 0.433065964 | NA          | NA      |
| ENSG00000264106 | NA          | NA                                                               | NA        | 0.935819171 | 2.041965761 | 2.604694545 | 0.78395594  | 0.433065964 | NA          | NA      |
| ENSG00000139445 | FOXN4       | forkhead box N4                                                  | 121643    | 3.342252436 | 2.046478486 | 1.549930491 | 1.320367912 | 0.186712211 | NA          | NA      |
| ENSG00000250859 | NA          | NA                                                               | NA        | 0.925949915 | 2.052298924 | 2.653261723 | 0.77350037  | 0.43922631  | NA          | NA      |
| ENSG00000184224 | C11orf72    | chromosome 11 open reading frame 72 (putative)                   | 100505621 | 0.942256707 | 2.052328745 | 2.641406018 | 0.776983444 | 0.437168538 | NA          | NA      |
| ENSG00000248713 | LOC285556   | uncharacterized LOC285556                                        | 285556    | 12.56187214 | 2.055442722 | 1.206553553 | 1.703565264 | 0.088462336 | 0.999371363 | Not Sig |
| ENSG00000202408 | NA          | NA                                                               | NA        | 10.0528115  | 2.057694738 | 1.114006772 | 1.847111517 | 0.06473098  | 0.999371363 | Not Sig |
| ENSG00000172264 | MACROD2     | MACRO domain containing 2                                        | 140733    | 978.5034085 | 2.061694177 | 0.706307129 | 2.918976875 | 0.003511823 | 0.266411951 | Not Sig |
| ENSG00000232192 | KIF26B-AS1  | KIF26B antisense RNA 1                                           | 111216275 | 6.741430477 | 2.065727585 | 1.21790772  | 1.696128163 | 0.089861611 | 0.999371363 | Not Sig |
| ENSG00000259405 | NA          | NA                                                               | NA        | 1.834036241 | 2.067194291 | 2.254223299 | 0.91703173  | 0.359126014 | NA          | NA      |
| ENSG00000185275 | NA          | NA                                                               | NA        | 1399.873252 | 2.075068595 | 0.771738728 | 2.688822681 | 0.00717045  | 0.414526701 | Not Sig |
| ENSG00000211935 | NA          | NA                                                               | NA        | 576.35756   | 2.076709676 | 1.155738586 | 1.796867995 | 0.072356579 | 0.999371363 | Not Sig |
| ENSG00000188687 | SLC4A5      | solute carrier family 4 member 5                                 | 57835     | 143.2232112 | 2.078025749 | 0.773108982 | 2.687882043 | 0.007190679 | 0.414526701 | Not Sig |
| ENSG00000143869 | GDF7        | growth differentiation factor 7                                  | 151449    | 47.91684642 | 2.084585834 | 1.03652983  | 2.011119963 | 0.044312787 | 0.999371363 | Not Sig |
| ENSG00000206895 | NA          | NA                                                               | NA        | 1.006349806 | 2.086819671 | 2.983510086 | 0.699451187 | 0.484270108 | NA          | NA      |
| ENSG00000224194 | NA          | NA                                                               | NA        | 1.006349806 | 2.086819671 | 2.983510086 | 0.699451187 | 0.484270108 | NA          | NA      |
| ENSG00000238906 | NA          | NA                                                               | NA        | 1.006349806 | 2.086819671 | 2.983510086 | 0.699451187 | 0.484270108 | NA          | NA      |
| ENSG00000238123 | NA          | NA                                                               | NA        | 0.947975182 | 2.086930893 | 3.036261344 | 0.687335725 | 0.491871191 | NA          | NA      |
| ENSG00000253965 | NA          | NA                                                               | NA        | 0.947975182 | 2.086930893 | 3.036261344 | 0.687335725 | 0.491871191 | NA          | NA      |
| ENSG00000265480 | KRT18P55    | keratin 18 pseudogene 55                                         | 284085    | 0.947975182 | 2.086930893 | 3.036261344 | 0.687335725 | 0.491871191 | NA          | NA      |
| ENSG00000265152 | NA          | NA                                                               | NA        | 2.760151772 | 2.090354769 | 1.526760927 | 1.369143481 | 0.170954429 | NA          | NA      |

|                 |         |                                                               |           |             |             |             |             |             |             |         |
|-----------------|---------|---------------------------------------------------------------|-----------|-------------|-------------|-------------|-------------|-------------|-------------|---------|
| ENSG00000080854 | IGSF9B  | immunoglobulin superfamily member 9B                          | 22997     | 418.5224134 | 2.091428901 | 0.725613014 | 2.882292437 | 0.003947931 | 0.281664993 | Not Sig |
| ENSG00000223991 | NA      | NA                                                            | NA        | 1.012787341 | 2.095802646 | 2.561337616 | 0.81824537  | 0.413217093 | NA          | NA      |
| ENSG00000239626 | NA      | NA                                                            | NA        | 1.012787341 | 2.095802646 | 2.561337616 | 0.81824537  | 0.413217093 | NA          | NA      |
| ENSG00000255123 | NA      | NA                                                            | NA        | 1.012787341 | 2.095802646 | 2.561337616 | 0.81824537  | 0.413217093 | NA          | NA      |
| ENSG00000256339 | NA      | NA                                                            | NA        | 1.012787341 | 2.095802646 | 2.561337616 | 0.81824537  | 0.413217093 | NA          | NA      |
| ENSG00000176716 | NA      | NA                                                            | NA        | 0.954412718 | 2.095996576 | 2.600734804 | 0.805924761 | 0.420286233 | NA          | NA      |
| ENSG00000260410 | NA      | NA                                                            | NA        | 0.954412718 | 2.095996576 | 2.600734804 | 0.805924761 | 0.420286233 | NA          | NA      |
| ENSG00000230160 | NA      | NA                                                            | NA        | 2.903749188 | 2.09616744  | 1.63459649  | 1.28237608  | 0.199710751 | NA          | NA      |
| ENSG00000237260 | NA      | NA                                                            | NA        | 2.821062542 | 2.099077408 | 1.682952147 | 1.247259116 | 0.212302503 | NA          | NA      |
| ENSG00000066230 | SLC9A3  | solute carrier family 9 member A3                             | 6550      | 1.661256962 | 2.099965171 | 2.227806882 | 0.942615443 | 0.345877638 | NA          | NA      |
| ENSG00000240086 | NA      | NA                                                            | NA        | 8.099859466 | 2.104087451 | 1.412702426 | 1.489405987 | 0.136380493 | 0.999371363 | Not Sig |
| ENSG00000273274 | ZBTB8B  | zinc finger and BTB domain containing 8B                      | 728116    | 12.0797072  | 2.105892846 | 1.294575912 | 1.626704797 | 0.103799809 | 0.999371363 | Not Sig |
| ENSG00000226241 | NA      | NA                                                            | NA        | 1.019224877 | 2.105921354 | 2.558962359 | 0.822959098 | 0.410531254 | NA          | NA      |
| ENSG00000234457 | NA      | NA                                                            | NA        | 1.019224877 | 2.105921354 | 2.558962359 | 0.822959098 | 0.410531254 | NA          | NA      |
| ENSG00000264044 | NA      | NA                                                            | NA        | 1.019224877 | 2.105921354 | 2.558962359 | 0.822959098 | 0.410531254 | NA          | NA      |
| ENSG00000235912 | NA      | NA                                                            | NA        | 0.960850254 | 2.106164322 | 2.597975511 | 0.810694448 | 0.417541163 | NA          | NA      |
| ENSG00000237268 | NA      | NA                                                            | NA        | 4.207196906 | 2.107313203 | 1.891701185 | 1.113977842 | 0.265288693 | NA          | NA      |
| ENSG00000211806 | NA      | NA                                                            | NA        | 1.811446632 | 2.111883749 | 2.197164691 | 0.961185913 | 0.336458698 | NA          | NA      |
| ENSG00000121454 | LHX4    | LIM homeobox 4                                                | 89884     | 3.440255626 | 2.113165945 | 1.582394923 | 1.335422602 | 0.181738071 | NA          | NA      |
| ENSG00000062282 | DGAT2   | diacylglycerol O-acyltransferase 2                            | 84649     | 223.2777718 | 2.115272552 | 0.752237462 | 2.811974489 | 0.004923841 | 0.324638365 | Not Sig |
| ENSG00000172738 | TMEM217 | transmembrane protein 217                                     | 221468    | 33.22803462 | 2.115384229 | 0.857643239 | 2.46650837  | 0.013643754 | 0.588410252 | Not Sig |
| ENSG00000228974 | NA      | NA                                                            | NA        | 1.025662413 | 2.118434477 | 2.97233877  | 0.712716363 | 0.476021289 | NA          | NA      |
| ENSG00000264268 | MIR4767 | microRNA 4767                                                 | 100616467 | 40.76722163 | 2.133387182 | 0.724657565 | 2.943993529 | 0.003240068 | 0.253429647 | Not Sig |
| ENSG00000179914 | ITLN1   | intelectin 1                                                  | 55600     | 23.10490519 | 2.139929534 | 1.228488576 | 1.74192058  | 0.081522342 | 0.999371363 | Not Sig |
| ENSG00000186281 | GPAT2   | glycerol-3-phosphate acyltransferase 2, mitochondrial         | 150763    | 209.7517944 | 2.142785237 | 1.146816671 | 1.868463628 | 0.061697475 | 0.999371363 | Not Sig |
| ENSG00000212391 | NA      | NA                                                            | NA        | 1.705766267 | 2.145162773 | 2.638122105 | 0.813140062 | 0.416137759 | NA          | NA      |
| ENSG00000122691 | TWIST1  | twist family bHLH transcription factor 1                      | 7291      | 11.15525131 | 2.150735947 | 1.043920565 | 2.060248661 | 0.039374775 | 0.999371363 | Not Sig |
| ENSG00000183260 | ABHD16B | abhydrolase domain containing 16B                             | 140701    | 1.724620103 | 2.152642322 | 2.152778211 | 0.999936877 | 0.317341057 | NA          | NA      |
| ENSG00000232736 | NA      | NA                                                            | NA        | 1.724620103 | 2.152642322 | 2.152778211 | 0.999936877 | 0.317341057 | NA          | NA      |
| ENSG00000225098 | NA      | NA                                                            | NA        | 0.989313056 | 2.152676279 | 3.00952415  | 0.715287923 | 0.474431149 | NA          | NA      |
| ENSG00000227757 | NA      | NA                                                            | NA        | 5.47117379  | 2.152945673 | 1.244506641 | 1.729959168 | 0.083637571 | NA          | NA      |
| ENSG00000230650 | NA      | NA                                                            | NA        | 61.24166837 | 2.154249134 | 0.86387884  | 2.493693598 | 0.012642162 | 0.558606133 | Not Sig |
| ENSG00000241356 | NA      | NA                                                            | NA        | 2.734130442 | 2.156851683 | 1.824084727 | 1.18242955  | 0.237035304 | NA          | NA      |
| ENSG00000266911 | NA      | NA                                                            | NA        | 2.734130442 | 2.156851683 | 1.824084727 | 1.18242955  | 0.237035304 | NA          | NA      |
| ENSG00000171126 | KCNGB   | potassium voltage-gated channel modifier subfamily G member 3 | 170850    | 34.47631188 | 2.157858451 | 1.096057264 | 1.968746088 | 0.048982256 | 0.999371363 | Not Sig |

|                 |              |                                                  |           |             |             |             |             |             |             |          |
|-----------------|--------------|--------------------------------------------------|-----------|-------------|-------------|-------------|-------------|-------------|-------------|----------|
| ENSG00000233484 | NA           | NA                                               | NA        | 1.054125215 | 2.158396329 | 2.585295419 | 0.834874155 | 0.403788568 | NA          | NA       |
| ENSG00000240452 | NA           | NA                                               | NA        | 1.054125215 | 2.158396329 | 2.585295419 | 0.834874155 | 0.403788568 | NA          | NA       |
| ENSG00000234906 | APOC2        | apolipoprotein C2                                | 344       | 1.012057384 | 2.158758886 | 2.611647514 | 0.826588915 | 0.408470102 | NA          | NA       |
| ENSG00000259262 | NA           | NA                                               | NA        | 1.012057384 | 2.158758886 | 2.611647514 | 0.826588915 | 0.408470102 | NA          | NA       |
| ENSG00000236359 | NA           | NA                                               | NA        | 0.995750592 | 2.158901638 | 2.622300323 | 0.823285426 | 0.4103457   | NA          | NA       |
| ENSG00000245293 | LOC101929595 | uncharacterized LOC101929595                     | 101929595 | 1.711745032 | 2.162113277 | 2.589392665 | 0.834988569 | 0.403724144 | NA          | NA       |
| ENSG00000261202 | NA           | NA                                               | NA        | 2.006085563 | 2.163629142 | 2.258744928 | 0.957889983 | 0.338118238 | NA          | NA       |
| ENSG00000240790 | NA           | NA                                               | NA        | 1.737495174 | 2.164241346 | 2.151611082 | 1.005870143 | 0.31447804  | NA          | NA       |
| ENSG00000100350 | FOXRED2      | FAD dependent oxidoreductase domain containing 2 | 80020     | 700.5330423 | 2.164254716 | 0.652772159 | 3.31548257  | 0.00091485  | 0.112948155 | Not Sig  |
| ENSG00000073734 | ABCB11       | ATP binding cassette subfamily B member 11       | 8647      | 2.737396547 | 2.165419594 | 1.699071517 | 1.274472306 | 0.202496081 | NA          | NA       |
| ENSG00000101278 | NA           | NA                                               | NA        | 2.197458389 | 2.165536438 | 2.50337503  | 0.865046752 | 0.387013129 | NA          | NA       |
| ENSG00000178934 | LGALS7       | galectin 7                                       | 3963      | 2.935467198 | 2.169903999 | 1.748918504 | 1.2407119   | 0.214712197 | NA          | NA       |
| ENSG00000178934 | LGALS7B      | galectin 7B                                      | 653499    | 2.935467198 | 2.169903999 | 1.748918504 | 1.2407119   | 0.214712197 | NA          | NA       |
| ENSG00000258260 | NA           | NA                                               | NA        | 1.002188128 | 2.173054673 | 3.001638715 | 0.723956105 | 0.469092684 | NA          | NA       |
| ENSG00000268400 | NA           | NA                                               | NA        | 1.002188128 | 2.173054673 | 3.001638715 | 0.723956105 | 0.469092684 | NA          | NA       |
| ENSG00000199151 | MIR337       | microRNA 337                                     | 442905    | 2.03082349  | 2.182193011 | 2.256234416 | 0.967183638 | 0.33345224  | NA          | NA       |
| ENSG00000176381 | PRR18        | proline rich 18                                  | 285800    | 31.18130353 | 2.183081606 | 1.00595399  | 2.170160491 | 0.02999469  | 0.897727832 | Not Sig  |
| ENSG00000100867 | DHRS2        | dehydrogenase/reductase 2                        | 10202     | 11.71397333 | 2.187385736 | 1.158156217 | 1.888679354 | 0.058934807 | 0.999371363 | Not Sig  |
| ENSG00000144063 | MALL         | mal, T-cell differentiation protein like         | 7851      | 764.8324868 | 2.189200693 | 0.548900249 | 3.98833977  | 6.65E-05    | 0.01675809  | FDR<0.05 |
| ENSG00000065371 | ROPN1        | rhophilin associated tail protein 1              | 54763     | 0.435039912 | 2.190182037 | 4.001893144 | 0.547286486 | 0.584181927 | NA          | NA       |
| ENSG00000183560 | IZUM01R      | IZUM01 receptor, JUNO                            | 390243    | 0.435039912 | 2.190182037 | 4.001893144 | 0.547286486 | 0.584181927 | NA          | NA       |
| ENSG00000207428 | NA           | NA                                               | NA        | 0.435039912 | 2.190182037 | 4.001893144 | 0.547286486 | 0.584181927 | NA          | NA       |
| ENSG00000207558 | NA           | NA                                               | NA        | 0.435039912 | 2.190182037 | 4.001893144 | 0.547286486 | 0.584181927 | NA          | NA       |
| ENSG00000207937 | NA           | NA                                               | NA        | 0.435039912 | 2.190182037 | 4.001893144 | 0.547286486 | 0.584181927 | NA          | NA       |
| ENSG00000233293 | NA           | NA                                               | NA        | 0.435039912 | 2.190182037 | 4.001893144 | 0.547286486 | 0.584181927 | NA          | NA       |
| ENSG00000236440 | NA           | NA                                               | NA        | 0.435039912 | 2.190182037 | 4.001893144 | 0.547286486 | 0.584181927 | NA          | NA       |
| ENSG00000236555 | NA           | NA                                               | NA        | 0.435039912 | 2.190182037 | 4.001893144 | 0.547286486 | 0.584181927 | NA          | NA       |
| ENSG00000237951 | NA           | NA                                               | NA        | 0.435039912 | 2.190182037 | 4.001893144 | 0.547286486 | 0.584181927 | NA          | NA       |
| ENSG00000239057 | MIR500B      | microRNA 500b                                    | 100422911 | 0.435039912 | 2.190182037 | 4.001893144 | 0.547286486 | 0.584181927 | NA          | NA       |
| ENSG00000240160 | NA           | NA                                               | NA        | 0.435039912 | 2.190182037 | 4.001893144 | 0.547286486 | 0.584181927 | NA          | NA       |
| ENSG00000250299 | NA           | NA                                               | NA        | 0.435039912 | 2.190182037 | 4.001893144 | 0.547286486 | 0.584181927 | NA          | NA       |
| ENSG00000255798 | NA           | NA                                               | NA        | 0.435039912 | 2.190182037 | 4.001893144 | 0.547286486 | 0.584181927 | NA          | NA       |
| ENSG00000257179 | NA           | NA                                               | NA        | 0.435039912 | 2.190182037 | 4.001893144 | 0.547286486 | 0.584181927 | NA          | NA       |
| ENSG00000263616 | NA           | NA                                               | NA        | 0.435039912 | 2.190182037 | 4.001893144 | 0.547286486 | 0.584181927 | NA          | NA       |
| ENSG00000264311 | NA           | NA                                               | NA        | 0.435039912 | 2.190182037 | 4.001893144 | 0.547286486 | 0.584181927 | NA          | NA       |

|                 |          |                                                  |           |             |             |             |             |             |             |         |
|-----------------|----------|--------------------------------------------------|-----------|-------------|-------------|-------------|-------------|-------------|-------------|---------|
| ENSG00000264882 | NA       | NA                                               | NA        | 0.435039912 | 2.190182037 | 4.001893144 | 0.547286486 | 0.584181927 | NA          | NA      |
| ENSG00000265847 | MIR4287  | microRNA 4287                                    | 100422828 | 0.435039912 | 2.190182037 | 4.001893144 | 0.547286486 | 0.584181927 | NA          | NA      |
| ENSG00000266174 | MIR4666A | microRNA 4666a                                   | 100616308 | 0.435039912 | 2.190182037 | 4.001893144 | 0.547286486 | 0.584181927 | NA          | NA      |
| ENSG00000258227 | CLEC5A   | C-type lectin domain containing 5A               | 23601     | 277.185308  | 2.191298058 | 0.782856592 | 2.799105329 | 0.005124442 | 0.33036928  | Not Sig |
| ENSG00000234241 | NA       | NA                                               | NA        | 4.116318696 | 2.20415988  | 1.447669984 | 1.52255687  | 0.127869607 | NA          | NA      |
| ENSG00000078328 | RBFOX1   | RNA binding fox-1 homolog 1                      | 54715     | 0.441477448 | 2.209330207 | 4.000654928 | 0.552242132 | 0.580782472 | NA          | NA      |
| ENSG00000170484 | KRT74    | keratin 74                                       | 121391    | 0.441477448 | 2.209330207 | 4.000654928 | 0.552242132 | 0.580782472 | NA          | NA      |
| ENSG00000201896 | NA       | NA                                               | NA        | 0.441477448 | 2.209330207 | 4.000654928 | 0.552242132 | 0.580782472 | NA          | NA      |
| ENSG00000213078 | NA       | NA                                               | NA        | 0.441477448 | 2.209330207 | 4.000654928 | 0.552242132 | 0.580782472 | NA          | NA      |
| ENSG00000214318 | NA       | NA                                               | NA        | 0.441477448 | 2.209330207 | 4.000654928 | 0.552242132 | 0.580782472 | NA          | NA      |
| ENSG00000215544 | NA       | NA                                               | NA        | 0.441477448 | 2.209330207 | 4.000654928 | 0.552242132 | 0.580782472 | NA          | NA      |
| ENSG00000229827 | NA       | NA                                               | NA        | 0.441477448 | 2.209330207 | 4.000654928 | 0.552242132 | 0.580782472 | NA          | NA      |
| ENSG00000230088 | NA       | NA                                               | NA        | 0.441477448 | 2.209330207 | 4.000654928 | 0.552242132 | 0.580782472 | NA          | NA      |
| ENSG00000230707 | NA       | NA                                               | NA        | 0.441477448 | 2.209330207 | 4.000654928 | 0.552242132 | 0.580782472 | NA          | NA      |
| ENSG00000230946 | NA       | NA                                               | NA        | 0.441477448 | 2.209330207 | 4.000654928 | 0.552242132 | 0.580782472 | NA          | NA      |
| ENSG00000239570 | NA       | NA                                               | NA        | 0.441477448 | 2.209330207 | 4.000654928 | 0.552242132 | 0.580782472 | NA          | NA      |
| ENSG00000252189 | NA       | NA                                               | NA        | 0.441477448 | 2.209330207 | 4.000654928 | 0.552242132 | 0.580782472 | NA          | NA      |
| ENSG00000260798 | NA       | NA                                               | NA        | 0.441477448 | 2.209330207 | 4.000654928 | 0.552242132 | 0.580782472 | NA          | NA      |
| ENSG00000264658 | MIR4798  | microRNA 4798                                    | 100616471 | 0.441477448 | 2.209330207 | 4.000654928 | 0.552242132 | 0.580782472 | NA          | NA      |
| ENSG00000264859 | DSG2-AS1 | DSG2 antisense RNA 1                             | 100652770 | 0.441477448 | 2.209330207 | 4.000654928 | 0.552242132 | 0.580782472 | NA          | NA      |
| ENSG00000265538 | MIR4421  | microRNA 4421                                    | 100616189 | 0.441477448 | 2.209330207 | 4.000654928 | 0.552242132 | 0.580782472 | NA          | NA      |
| ENSG00000266802 | MIR4419A | microRNA 4419a                                   | 100616177 | 0.441477448 | 2.209330207 | 4.000654928 | 0.552242132 | 0.580782472 | NA          | NA      |
| ENSG00000138769 | CDKL2    | cyclin dependent kinase like 2                   | 8999      | 442.1493846 | 2.209817791 | 0.683873885 | 3.231323553 | 0.001232184 | 0.134929477 | Not Sig |
| ENSG00000234521 | NA       | NA                                               | NA        | 1.848894015 | 2.211075664 | 1.91442518  | 1.154955382 | 0.248108698 | NA          | NA      |
| ENSG00000126500 | FLRT1    | fibronectin leucine rich transmembrane protein 1 | 23769     | 1.756349011 | 2.215304703 | 2.546654107 | 0.869888336 | 0.38436143  | NA          | NA      |
| ENSG00000215811 | NA       | NA                                               | NA        | 1.046957722 | 2.216357256 | 3.024368321 | 0.732833115 | 0.463660222 | NA          | NA      |
| ENSG00000239642 | MEIKIN   | meiotic kinetochore factor                       | 728637    | 1.046957722 | 2.216357256 | 3.024368321 | 0.732833115 | 0.463660222 | NA          | NA      |
| ENSG00000252312 | NA       | NA                                               | NA        | 1.046957722 | 2.216357256 | 3.024368321 | 0.732833115 | 0.463660222 | NA          | NA      |
| ENSG00000258915 | NA       | NA                                               | NA        | 1.046957722 | 2.216357256 | 3.024368321 | 0.732833115 | 0.463660222 | NA          | NA      |
| ENSG00000272020 | NA       | NA                                               | NA        | 1.030650931 | 2.216513558 | 3.037682936 | 0.729672453 | 0.465590423 | NA          | NA      |
| ENSG00000224458 | NA       | NA                                               | NA        | 1.014604429 | 2.218030035 | 3.027252483 | 0.732687494 | 0.463749053 | NA          | NA      |
| ENSG00000223893 | NA       | NA                                               | NA        | 1.03091122  | 2.218155193 | 3.013578978 | 0.736053446 | 0.461698172 | NA          | NA      |
| ENSG00000266383 | MIR5002  | microRNA 5002                                    | 100847021 | 3.630439724 | 2.220189974 | 1.663844958 | 1.334373112 | 0.182081608 | NA          | NA      |
| ENSG00000269781 | NA       | NA                                               | NA        | 6.922278046 | 2.223632405 | 1.473677213 | 1.508900583 | 0.131324191 | 0.999371363 | Not Sig |
| ENSG00000226349 | NA       | NA                                               | NA        | 1.095463089 | 2.225797674 | 2.988086097 | 0.744890743 | 0.456337771 | NA          | NA      |

|                 |             |                                                                 |           |             |             |             |             |             |             |         |
|-----------------|-------------|-----------------------------------------------------------------|-----------|-------------|-------------|-------------|-------------|-------------|-------------|---------|
| ENSG00000151952 | TMEM132D    | transmembrane protein 132D                                      | 121256    | 23.38131189 | 2.225824205 | 1.188247534 | 1.873199094 | 0.061040897 | 0.999371363 | Not Sig |
| ENSG00000233309 | NA          | NA                                                              | NA        | 3.845170365 | 2.226031242 | 2.229186692 | 0.998584484 | 0.31799602  | NA          | NA      |
| ENSG00000255005 | NA          | NA                                                              | NA        | 1.053395258 | 2.22621007  | 3.020768563 | 0.736968101 | 0.461141748 | NA          | NA      |
| ENSG00000207978 | MIR154      | microRNA 154                                                    | 406946    | 1.021041964 | 2.228308301 | 2.961457585 | 0.752436338 | 0.451788701 | NA          | NA      |
| ENSG00000216179 | MIR541      | microRNA 541                                                    | 100126308 | 1.021041964 | 2.228308301 | 2.961457585 | 0.752436338 | 0.451788701 | NA          | NA      |
| ENSG00000155918 | RAET1L      | retinoic acid early transcript 1L                               | 154064    | 1.079416588 | 2.228748289 | 2.913908731 | 0.764865511 | 0.444351633 | NA          | NA      |
| ENSG00000238673 | NA          | NA                                                              | NA        | 2.014516699 | 2.228792195 | 2.258433184 | 0.986875419 | 0.323703716 | NA          | NA      |
| ENSG00000104313 | EYA1        | EYA transcriptional coactivator and phosphatase 1               | 2138      | 47.67349999 | 2.230719678 | 0.825020334 | 2.703835997 | 0.006854411 | 0.403353264 | Not Sig |
| ENSG00000128253 | RFPL2       | ret finger protein like 2                                       | 10739     | 7.839195193 | 2.232438799 | 2.018942369 | 1.105746669 | 0.268836184 | 0.999371363 | Not Sig |
| ENSG00000118017 | A4GNT       | alpha-1,4-N-acetylglucosaminyltransferase                       | 51146     | 1.775661618 | 2.233279895 | 2.560136092 | 0.872328585 | 0.383029148 | NA          | NA      |
| ENSG00000231439 | WASIR2      | WASH and IL9R antisense RNA 2                                   | 100132169 | 8.050083531 | 2.234388611 | 1.00893132  | 2.214609229 | 0.026786898 | 0.841215479 | Not Sig |
| ENSG00000223392 | CLDN10-AS1  | CLDN10 antisense RNA 1                                          | 100874194 | 40.91860556 | 2.237598508 | 1.191670935 | 1.877698316 | 0.060422447 | 0.999371363 | Not Sig |
| ENSG00000182389 | CACNB4      | calcium voltage-gated channel auxiliary subunit beta 4          | 785       | 313.1640731 | 2.238017835 | 0.72593756  | 3.082934345 | 0.002049704 | 0.18704289  | Not Sig |
| ENSG00000204807 | NA          | NA                                                              | NA        | 1.0274795   | 2.238073295 | 2.941792946 | 0.760785458 | 0.446785221 | NA          | NA      |
| ENSG00000120669 | SOHLH2      | spermatogenesis and oogenesis specific basic helix-loop-helix 2 | 54937     | 1.043786291 | 2.238188463 | 2.928210128 | 0.764353774 | 0.444656448 | NA          | NA      |
| ENSG00000244623 | OR2AE1      | olfactory receptor family 2 subfamily AE member 1               | 81392     | 3.23471247  | 2.239147805 | 1.638267271 | 1.366778086 | 0.171694874 | NA          | NA      |
| ENSG00000170893 | TRH         | thyrotropin releasing hormone                                   | 7200      | 1.782099153 | 2.240191024 | 2.593699032 | 0.863705078 | 0.387749923 | NA          | NA      |
| ENSG00000144908 | ALDH1L1     | aldehyde dehydrogenase 1 family member L1                       | 10840     | 173.1676996 | 2.243204646 | 0.652852366 | 3.436006001 | 0.000590358 | 0.080808445 | Not Sig |
| ENSG00000186377 | CYP4X1      | cytochrome P450 family 4 subfamily X member 1                   | 260293    | 434.3913717 | 2.244696995 | 0.89794276  | 2.499821921 | 0.012425575 | 0.556126761 | Not Sig |
| ENSG00000214892 | NA          | NA                                                              | NA        | 3.154583767 | 2.248474011 | 1.618072032 | 1.389600689 | 0.164650166 | NA          | NA      |
| ENSG00000225259 | NA          | NA                                                              | NA        | 4.67523823  | 2.255236773 | 1.472613766 | 1.531451644 | 0.125657809 | NA          | NA      |
| ENSG00000231852 | CYP21A2     | cytochrome P450 family 21 subfamily A member 2                  | 1589      | 60.53347106 | 2.255785568 | 1.270277115 | 1.775821623 | 0.075762323 | 0.999371363 | Not Sig |
| ENSG00000260762 | NA          | NA                                                              | NA        | 1.040354571 | 2.256640518 | 3.01206944  | 0.749199367 | 0.453737051 | NA          | NA      |
| ENSG00000231864 | NA          | NA                                                              | NA        | 3.205625282 | 2.26259868  | 1.953218952 | 1.158394801 | 0.24670296  | NA          | NA      |
| ENSG00000092621 | PHGDH       | phosphoglycerate dehydrogenase                                  | 26227     | 563.6179828 | 2.265326327 | 0.966569637 | 2.343676277 | 0.019094737 | 0.704728852 | Not Sig |
| ENSG00000214369 | NA          | NA                                                              | NA        | 2.787260231 | 2.265726207 | 2.002554387 | 1.131418064 | 0.257879172 | NA          | NA      |
| ENSG00000164509 | IL31RA      | interleukin 31 receptor A                                       | 133396    | 105.0092196 | 2.267736916 | 1.245125072 | 1.821292469 | 0.068562411 | 0.999371363 | Not Sig |
| ENSG00000152977 | ZIC1        | Zic family member 1                                             | 7545      | 1.049504767 | 2.268940249 | 3.006659119 | 0.754638341 | 0.450466012 | NA          | NA      |
| ENSG00000250033 | SLC7A11-AS1 | SLC7A11 antisense RNA 1                                         | 641364    | 1.049504767 | 2.268940249 | 3.006659119 | 0.754638341 | 0.450466012 | NA          | NA      |
| ENSG00000223287 | NA          | NA                                                              | NA        | 1.10787939  | 2.269154755 | 2.961433411 | 0.766235279 | 0.44353632  | NA          | NA      |
| ENSG00000227018 | NA          | NA                                                              | NA        | 1.055942303 | 2.280660069 | 2.569976788 | 0.887424384 | 0.37485046  | NA          | NA      |
| ENSG00000251074 | NA          | NA                                                              | NA        | 1.055942303 | 2.280660069 | 2.569976788 | 0.887424384 | 0.37485046  | NA          | NA      |
| ENSG00000105467 | SYNGR4      | synaptogyrin 4                                                  | 23546     | 1.072249094 | 2.280728522 | 2.560167803 | 0.890851185 | 0.373009011 | NA          | NA      |
| ENSG00000184486 | POU3F2      | POU class 3 homeobox 2                                          | 5454      | 18.66002373 | 2.283172244 | 3.47189319  | 0.657615923 | 0.51078496  | 0.999371363 | Not Sig |
| ENSG00000228594 | FNDC10      | fibronectin type III domain containing 10                       | 643988    | 300.907063  | 2.286760303 | 1.052411864 | 2.17287583  | 0.029789664 | 0.897727832 | Not Sig |

|                 |              |                                                                   |           |              |              |              |              |              |              |         |
|-----------------|--------------|-------------------------------------------------------------------|-----------|--------------|--------------|--------------|--------------|--------------|--------------|---------|
| ENSG00000227050 | NA           | NA                                                                | NA        | 1. 986042998 | 2. 287269142 | 2. 1337019   | 1. 071972211 | 0. 283732514 | NA           | NA      |
| ENSG00000175229 | GAL3ST3      | galactose-3-O-sulfotransferase 3                                  | 89792     | 0. 46994025  | 2. 289230995 | 3. 995657665 | 0. 572929712 | 0. 566692286 | NA           | NA      |
| ENSG00000202285 | NA           | NA                                                                | NA        | 0. 46994025  | 2. 289230995 | 3. 995657665 | 0. 572929712 | 0. 566692286 | NA           | NA      |
| ENSG00000222591 | NA           | NA                                                                | NA        | 0. 46994025  | 2. 289230995 | 3. 995657665 | 0. 572929712 | 0. 566692286 | NA           | NA      |
| ENSG00000236068 | NA           | NA                                                                | NA        | 0. 46994025  | 2. 289230995 | 3. 995657665 | 0. 572929712 | 0. 566692286 | NA           | NA      |
| ENSG00000237906 | NA           | NA                                                                | NA        | 0. 46994025  | 2. 289230995 | 3. 995657665 | 0. 572929712 | 0. 566692286 | NA           | NA      |
| ENSG00000241464 | NA           | NA                                                                | NA        | 0. 46994025  | 2. 289230995 | 3. 995657665 | 0. 572929712 | 0. 566692286 | NA           | NA      |
| ENSG00000249197 | NA           | NA                                                                | NA        | 0. 46994025  | 2. 289230995 | 3. 995657665 | 0. 572929712 | 0. 566692286 | NA           | NA      |
| ENSG00000250538 | LOC107986321 | uncharacterized LOC107986321                                      | 107986321 | 0. 46994025  | 2. 289230995 | 3. 995657665 | 0. 572929712 | 0. 566692286 | NA           | NA      |
| ENSG00000252854 | NA           | NA                                                                | NA        | 0. 46994025  | 2. 289230995 | 3. 995657665 | 0. 572929712 | 0. 566692286 | NA           | NA      |
| ENSG00000254095 | NA           | NA                                                                | NA        | 0. 46994025  | 2. 289230995 | 3. 995657665 | 0. 572929712 | 0. 566692286 | NA           | NA      |
| ENSG00000254873 | NA           | NA                                                                | NA        | 0. 46994025  | 2. 289230995 | 3. 995657665 | 0. 572929712 | 0. 566692286 | NA           | NA      |
| ENSG00000260648 | NA           | NA                                                                | NA        | 0. 46994025  | 2. 289230995 | 3. 995657665 | 0. 572929712 | 0. 566692286 | NA           | NA      |
| ENSG00000264566 | MIR23C       | microRNA 23c                                                      | 100500809 | 0. 46994025  | 2. 289230995 | 3. 995657665 | 0. 572929712 | 0. 566692286 | NA           | NA      |
| ENSG00000265086 | NA           | NA                                                                | NA        | 0. 46994025  | 2. 289230995 | 3. 995657665 | 0. 572929712 | 0. 566692286 | NA           | NA      |
| ENSG00000187616 | MYMK         | myomaker, myoblast fusion factor                                  | 389827    | 1. 858337366 | 2. 289689756 | 2. 220033057 | 1. 031376424 | 0. 302364332 | NA           | NA      |
| ENSG00000254373 | NA           | NA                                                                | NA        | 1. 062379838 | 2. 290007158 | 2. 512576435 | 0. 911417908 | 0. 362075221 | NA           | NA      |
| ENSG00000146147 | MLIP         | muscular LMNA interacting protein                                 | 90523     | 1. 07868663  | 2. 290069024 | 2. 502821781 | 0. 914994844 | 0. 360194337 | NA           | NA      |
| ENSG00000164400 | CSF2         | colony stimulating factor 2                                       | 1437      | 18. 9735834  | 2. 297357556 | 1. 210126395 | 1. 898444299 | 0. 057637579 | 0. 999371363 | Not Sig |
| ENSG00000239122 | NA           | NA                                                                | NA        | 1. 068817374 | 2. 298910099 | 2. 510358125 | 0. 915769776 | 0. 359787659 | NA           | NA      |
| ENSG00000102055 | PPP1R2P9     | protein phosphatase 1 regulatory inhibitor subunit 2 pseudogene 9 | 80316     | 0. 476377786 | 2. 307081485 | 3. 719778631 | 0. 620220103 | 0. 535112888 | NA           | NA      |
| ENSG00000159123 | NA           | NA                                                                | NA        | 0. 476377786 | 2. 307081485 | 3. 719778631 | 0. 620220103 | 0. 535112888 | NA           | NA      |
| ENSG00000196778 | OR52K1       | olfactory receptor family 52 subfamily K member 1                 | 390036    | 0. 476377786 | 2. 307081485 | 3. 719778631 | 0. 620220103 | 0. 535112888 | NA           | NA      |
| ENSG00000225988 | LAMP5-AS1    | LAMP5 antisense RNA 1                                             | 101929329 | 0. 476377786 | 2. 307081485 | 3. 719778631 | 0. 620220103 | 0. 535112888 | NA           | NA      |
| ENSG00000231340 | NA           | NA                                                                | NA        | 0. 476377786 | 2. 307081485 | 3. 719778631 | 0. 620220103 | 0. 535112888 | NA           | NA      |
| ENSG00000233205 | NA           | NA                                                                | NA        | 0. 476377786 | 2. 307081485 | 3. 719778631 | 0. 620220103 | 0. 535112888 | NA           | NA      |
| ENSG00000235150 | NA           | NA                                                                | NA        | 0. 476377786 | 2. 307081485 | 3. 719778631 | 0. 620220103 | 0. 535112888 | NA           | NA      |
| ENSG00000239126 | NA           | NA                                                                | NA        | 0. 476377786 | 2. 307081485 | 3. 719778631 | 0. 620220103 | 0. 535112888 | NA           | NA      |
| ENSG00000253355 | NA           | NA                                                                | NA        | 0. 476377786 | 2. 307081485 | 3. 719778631 | 0. 620220103 | 0. 535112888 | NA           | NA      |
| ENSG00000253817 | NA           | NA                                                                | NA        | 0. 476377786 | 2. 307081485 | 3. 719778631 | 0. 620220103 | 0. 535112888 | NA           | NA      |
| ENSG00000257127 | CLLU1        | chronic lymphocytic leukemia up-regulated 1                       | 574028    | 0. 476377786 | 2. 307081485 | 3. 719778631 | 0. 620220103 | 0. 535112888 | NA           | NA      |
| ENSG00000263326 | NA           | NA                                                                | NA        | 0. 476377786 | 2. 307081485 | 3. 719778631 | 0. 620220103 | 0. 535112888 | NA           | NA      |
| ENSG00000266718 | NA           | NA                                                                | NA        | 0. 476377786 | 2. 307081485 | 3. 719778631 | 0. 620220103 | 0. 535112888 | NA           | NA      |
| ENSG00000267623 | NA           | NA                                                                | NA        | 0. 476377786 | 2. 307081485 | 3. 719778631 | 0. 620220103 | 0. 535112888 | NA           | NA      |
| ENSG00000267913 | NA           | NA                                                                | NA        | 0. 476377786 | 2. 307081485 | 3. 719778631 | 0. 620220103 | 0. 535112888 | NA           | NA      |

|                 |           |                                                                  |           |             |             |             |             |             |             |          |
|-----------------|-----------|------------------------------------------------------------------|-----------|-------------|-------------|-------------|-------------|-------------|-------------|----------|
| ENSG00000270538 | NA        | NA                                                               | NA        | 0.476377786 | 2.307081485 | 3.719778631 | 0.620220103 | 0.535112888 | NA          | NA       |
| ENSG00000243187 | NA        | NA                                                               | NA        | 1.075254909 | 2.30756021  | 2.563086736 | 0.900305159 | 0.367957877 | NA          | NA       |
| ENSG00000124143 | ARHGAP40  | Rho GTPase activating protein 40                                 | 343578    | 355.7604155 | 2.308244627 | 1.09417588  | 2.10957367  | 0.034895094 | 0.965260677 | Not Sig  |
| ENSG00000237805 | NA        | NA                                                               | NA        | 2.158103217 | 2.308283607 | 1.911803218 | 1.207385564 | 0.227283692 | NA          | NA       |
| ENSG00000196666 | FAM180B   | family with sequence similarity 180 member B                     | 399888    | 1.081692445 | 2.315587012 | 2.988906883 | 0.77472705  | 0.438500963 | NA          | NA       |
| ENSG00000150676 | CCDC83    | coiled-coil domain containing 83                                 | 220047    | 0.482815322 | 2.325274103 | 3.993490302 | 0.58226612  | 0.560387443 | NA          | NA       |
| ENSG00000163914 | RHO       | rhodopsin                                                        | 6010      | 0.482815322 | 2.325274103 | 3.993490302 | 0.58226612  | 0.560387443 | NA          | NA       |
| ENSG00000170419 | VSTM2A    | V-set and transmembrane domain containing 2A                     | 222008    | 0.482815322 | 2.325274103 | 3.993490302 | 0.58226612  | 0.560387443 | NA          | NA       |
| ENSG00000215160 | NA        | NA                                                               | NA        | 0.482815322 | 2.325274103 | 3.993490302 | 0.58226612  | 0.560387443 | NA          | NA       |
| ENSG00000218986 | NA        | NA                                                               | NA        | 0.482815322 | 2.325274103 | 3.993490302 | 0.58226612  | 0.560387443 | NA          | NA       |
| ENSG00000226723 | NA        | NA                                                               | NA        | 0.482815322 | 2.325274103 | 3.993490302 | 0.58226612  | 0.560387443 | NA          | NA       |
| ENSG00000228149 | NA        | NA                                                               | NA        | 0.482815322 | 2.325274103 | 3.993490302 | 0.58226612  | 0.560387443 | NA          | NA       |
| ENSG00000235241 | NA        | NA                                                               | NA        | 0.482815322 | 2.325274103 | 3.993490302 | 0.58226612  | 0.560387443 | NA          | NA       |
| ENSG00000235472 | NA        | NA                                                               | NA        | 0.482815322 | 2.325274103 | 3.993490302 | 0.58226612  | 0.560387443 | NA          | NA       |
| ENSG00000237126 | NA        | NA                                                               | NA        | 0.482815322 | 2.325274103 | 3.993490302 | 0.58226612  | 0.560387443 | NA          | NA       |
| ENSG00000238110 | NA        | NA                                                               | NA        | 0.482815322 | 2.325274103 | 3.993490302 | 0.58226612  | 0.560387443 | NA          | NA       |
| ENSG00000242976 | NA        | NA                                                               | NA        | 0.482815322 | 2.325274103 | 3.993490302 | 0.58226612  | 0.560387443 | NA          | NA       |
| ENSG00000255237 | NA        | NA                                                               | NA        | 0.482815322 | 2.325274103 | 3.993490302 | 0.58226612  | 0.560387443 | NA          | NA       |
| ENSG00000263417 | NA        | NA                                                               | NA        | 0.482815322 | 2.325274103 | 3.993490302 | 0.58226612  | 0.560387443 | NA          | NA       |
| ENSG00000264062 | NA        | NA                                                               | NA        | 0.482815322 | 2.325274103 | 3.993490302 | 0.58226612  | 0.560387443 | NA          | NA       |
| ENSG00000265064 | MIR4692   | microRNA 4692                                                    | 100616410 | 0.482815322 | 2.325274103 | 3.993490302 | 0.58226612  | 0.560387443 | NA          | NA       |
| ENSG00000265528 | NA        | NA                                                               | NA        | 0.482815322 | 2.325274103 | 3.993490302 | 0.58226612  | 0.560387443 | NA          | NA       |
| ENSG00000265810 | MIR3907   | microRNA 3907                                                    | 100500835 | 0.482815322 | 2.325274103 | 3.993490302 | 0.58226612  | 0.560387443 | NA          | NA       |
| ENSG00000265850 | MIR4797   | microRNA 4797                                                    | 100616216 | 0.482815322 | 2.325274103 | 3.993490302 | 0.58226612  | 0.560387443 | NA          | NA       |
| ENSG00000267125 | NA        | NA                                                               | NA        | 0.482815322 | 2.325274103 | 3.993490302 | 0.58226612  | 0.560387443 | NA          | NA       |
| ENSG00000251193 | NA        | NA                                                               | NA        | 1.107149433 | 2.327459831 | 2.910125439 | 0.7997799   | 0.423838331 | NA          | NA       |
| ENSG00000159197 | KCNE2     | potassium voltage-gated channel subfamily E regulatory subunit 2 | 9992      | 2.36878865  | 2.328270635 | 2.075470251 | 1.121803906 | 0.261945825 | NA          | NA       |
| ENSG00000099998 | GGT5      | gamma-glutamyltransferase 5                                      | 2687      | 1075.26187  | 2.331188365 | 0.587446637 | 3.968340646 | 7.24E-05    | 0.017870906 | FDR<0.05 |
| ENSG00000151364 | KCTD14    | potassium channel tetramerization domain containing 14           | 65987     | 212.8292579 | 2.333647293 | 0.577620495 | 4.040104725 | 5.34E-05    | 0.013730826 | FDR<0.05 |
| ENSG00000258983 | NA        | NA                                                               | NA        | 1.1556548   | 2.336082011 | 2.468233763 | 0.946458981 | 0.343914535 | NA          | NA       |
| ENSG00000196407 | THEM5     | thioesterase superfamily member 5                                | 284486    | 1.113586968 | 2.336112228 | 2.491310675 | 0.937704097 | 0.348396498 | NA          | NA       |
| ENSG00000115616 | SLC9A2    | solute carrier family 9 member A2                                | 6549      | 28.06479472 | 2.3428747   | 1.213682792 | 1.930384706 | 0.053559189 | 0.999371363 | Not Sig  |
| ENSG00000254826 | NA        | NA                                                               | NA        | 5.024043134 | 2.347793283 | 1.358010826 | 1.728847251 | 0.083836437 | NA          | NA       |
| ENSG00000228701 | TNKS2-AS1 | TNKS2 antisense RNA 1 (head to head)                             | 100507633 | 1.110155248 | 2.353426256 | 2.496492267 | 0.942693189 | 0.345837858 | NA          | NA       |
| ENSG00000201763 | NA        | NA                                                               | NA        | 2.077868942 | 2.355747412 | 2.127173694 | 1.107454186 | 0.268097609 | NA          | NA       |



|                 |              |                                                  |           |             |             |             |             |             |             |          |
|-----------------|--------------|--------------------------------------------------|-----------|-------------|-------------|-------------|-------------|-------------|-------------|----------|
| ENSG00000226286 | NA           | NA                                               | NA        | 9.946485742 | 2.3613608   | 1.1847302   | 1.993163339 | 0.046243564 | 0.999371363 | Not Sig  |
| ENSG00000198250 | NA           | NA                                               | NA        | 1.116592784 | 2.363420629 | 2.909396793 | 0.812340425 | 0.41659632  | NA          | NA       |
| ENSG00000188089 | PLA2G4E      | phospholipase A2 group IVE                       | 123745    | 60.52252845 | 2.367680714 | 1.184799244 | 1.998381351 | 0.045675332 | 0.999371363 | Not Sig  |
| ENSG00000172020 | GAP43        | growth associated protein 43                     | 2596      | 2.036270779 | 2.371947775 | 2.237532555 | 1.060072967 | 0.289111405 | NA          | NA       |
| ENSG00000256356 | NA           | NA                                               | NA        | 10.30761937 | 2.375551735 | 1.281070312 | 1.85434922  | 0.063689215 | 0.999371363 | Not Sig  |
| ENSG00000265249 | NA           | NA                                               | NA        | 6.549202654 | 2.378753426 | 1.32592184  | 1.794037443 | 0.072807193 | NA          | NA       |
| ENSG00000179869 | ABCA13       | ATP binding cassette subfamily A member 13       | 154664    | 1008.81451  | 2.387311576 | 0.626609214 | 3.80988904  | 0.000139029 | 0.029179907 | FDR<0.05 |
| ENSG00000200799 | NA           | NA                                               | NA        | 1.196992674 | 2.389244376 | 2.456828338 | 0.972491378 | 0.330806152 | NA          | NA       |
| ENSG00000232936 | NA           | NA                                               | NA        | 1.196992674 | 2.389244376 | 2.456828338 | 0.972491378 | 0.330806152 | NA          | NA       |
| ENSG00000187682 | ERAS         | ES cell expressed Ras                            | 3266      | 1.138618051 | 2.389536867 | 2.487489159 | 0.960622023 | 0.336742251 | NA          | NA       |
| ENSG00000233834 | LOC100506098 | uncharacterized LOC100506098                     | 100506098 | 52.38545311 | 2.389960369 | 0.953796975 | 2.505732803 | 0.012219792 | 0.551555006 | Not Sig  |
| ENSG00000233984 | NA           | NA                                               | NA        | 2.202446907 | 2.39159225  | 1.862460971 | 1.284103284 | 0.199105819 | NA          | NA       |
| ENSG00000162068 | NTN3         | netrin 3                                         | 4917      | 9.003509976 | 2.392675491 | 1.225566454 | 1.952301715 | 0.050902394 | 0.999371363 | Not Sig  |
| ENSG00000213706 | NA           | NA                                               | NA        | 3.124661049 | 2.396568124 | 1.581069228 | 1.515789493 | 0.12957259  | NA          | NA       |
| ENSG00000259683 | NA           | NA                                               | NA        | 1.161362378 | 2.397858835 | 2.47685535  | 0.968106125 | 0.332991371 | NA          | NA       |
| ENSG00000236773 | NA           | NA                                               | NA        | 1.145055586 | 2.397949325 | 2.485576768 | 0.96474563  | 0.334672234 | NA          | NA       |
| ENSG00000254225 | NA           | NA                                               | NA        | 1.145055586 | 2.397949325 | 2.485576768 | 0.96474563  | 0.334672234 | NA          | NA       |
| ENSG00000099399 | MAGEB2       | MAGE family member B2                            | 4113      | 0.511278125 | 2.400295797 | 3.989145173 | 0.601706805 | 0.54736932  | NA          | NA       |
| ENSG00000152592 | DMP1         | dentin matrix acidic phosphoprotein 1            | 1758      | 0.511278125 | 2.400295797 | 3.989145173 | 0.601706805 | 0.54736932  | NA          | NA       |
| ENSG00000165694 | FRMD7        | FERM domain containing 7                         | 90167     | 0.511278125 | 2.400295797 | 3.989145173 | 0.601706805 | 0.54736932  | NA          | NA       |
| ENSG00000186508 | NA           | NA                                               | NA        | 0.511278125 | 2.400295797 | 3.989145173 | 0.601706805 | 0.54736932  | NA          | NA       |
| ENSG00000196240 | OR2T2        | olfactory receptor family 2 subfamily T member 2 | 401992    | 0.511278125 | 2.400295797 | 3.989145173 | 0.601706805 | 0.54736932  | NA          | NA       |
| ENSG00000199867 | NA           | NA                                               | NA        | 0.511278125 | 2.400295797 | 3.989145173 | 0.601706805 | 0.54736932  | NA          | NA       |
| ENSG00000201690 | NA           | NA                                               | NA        | 0.511278125 | 2.400295797 | 3.989145173 | 0.601706805 | 0.54736932  | NA          | NA       |
| ENSG00000211137 | MIR190A      | microRNA 190a                                    | 406965    | 0.511278125 | 2.400295797 | 3.989145173 | 0.601706805 | 0.54736932  | NA          | NA       |
| ENSG00000212485 | NA           | NA                                               | NA        | 0.511278125 | 2.400295797 | 3.989145173 | 0.601706805 | 0.54736932  | NA          | NA       |
| ENSG00000215512 | LOC6444669   | ankyrin repeat domain 30B pseudogene             | 6444669   | 0.511278125 | 2.400295797 | 3.989145173 | 0.601706805 | 0.54736932  | NA          | NA       |
| ENSG00000219549 | NA           | NA                                               | NA        | 0.511278125 | 2.400295797 | 3.989145173 | 0.601706805 | 0.54736932  | NA          | NA       |
| ENSG00000226553 | NA           | NA                                               | NA        | 0.511278125 | 2.400295797 | 3.989145173 | 0.601706805 | 0.54736932  | NA          | NA       |
| ENSG00000230741 | NA           | NA                                               | NA        | 0.511278125 | 2.400295797 | 3.989145173 | 0.601706805 | 0.54736932  | NA          | NA       |
| ENSG00000239542 | NA           | NA                                               | NA        | 0.511278125 | 2.400295797 | 3.989145173 | 0.601706805 | 0.54736932  | NA          | NA       |
| ENSG00000248716 | NA           | NA                                               | NA        | 0.511278125 | 2.400295797 | 3.989145173 | 0.601706805 | 0.54736932  | NA          | NA       |
| ENSG00000250254 | PTTG2        | pituitary tumor-transforming 2                   | 10744     | 0.511278125 | 2.400295797 | 3.989145173 | 0.601706805 | 0.54736932  | NA          | NA       |
| ENSG00000263649 | MIR3135B     | microRNA 3135b                                   | 100616218 | 0.511278125 | 2.400295797 | 3.989145173 | 0.601706805 | 0.54736932  | NA          | NA       |
| ENSG00000265317 | NA           | NA                                               | NA        | 0.511278125 | 2.400295797 | 3.989145173 | 0.601706805 | 0.54736932  | NA          | NA       |

|                 |              |                                            |           |             |             |             |             |             |             |          |
|-----------------|--------------|--------------------------------------------|-----------|-------------|-------------|-------------|-------------|-------------|-------------|----------|
| ENSG00000267958 | NA           | NA                                         | NA        | 0.511278125 | 2.400295797 | 3.989145173 | 0.601706805 | 0.54736932  | NA          | NA       |
| ENSG00000269068 | NA           | NA                                         | NA        | 0.511278125 | 2.400295797 | 3.989145173 | 0.601706805 | 0.54736932  | NA          | NA       |
| ENSG00000253973 | NA           | NA                                         | NA        | 3.478485128 | 2.405691263 | 1.928727334 | 1.247294639 | 0.212289483 | NA          | NA       |
| ENSG00000176136 | MC5R         | melanocortin 5 receptor                    | 4161      | 7.425092341 | 2.408451527 | 1.775258005 | 1.356676901 | 0.174883895 | 0.999371363 | Not Sig  |
| ENSG00000239443 | NA           | NA                                         | NA        | 1.209867745 | 2.40943823  | 2.837340065 | 0.849189091 | 0.395776083 | NA          | NA       |
| ENSG00000243151 | NA           | NA                                         | NA        | 1965.509674 | 2.410192784 | 0.925598774 | 2.603928236 | 0.009216205 | 0.473712948 | Not Sig  |
| ENSG00000201839 | SNORD114-3   | small nucleolar RNA, C/D box 114-3         | 767579    | 2.316558408 | 2.413659001 | 2.215036398 | 1.08967013  | 0.275858478 | NA          | NA       |
| ENSG00000258512 | LINC00239    | long intergenic non-protein coding RNA 239 | 145200    | 24.73736839 | 2.413860805 | 0.876287974 | 2.754643309 | 0.005875615 | 0.362704031 | Not Sig  |
| ENSG00000136099 | PCDH8        | protocadherin 8                            | 5100      | 0.51771566  | 2.417285819 | 3.988191437 | 0.606110779 | 0.544441194 | NA          | NA       |
| ENSG00000200847 | NA           | NA                                         | NA        | 0.51771566  | 2.417285819 | 3.988191437 | 0.606110779 | 0.544441194 | NA          | NA       |
| ENSG00000221468 | NA           | NA                                         | NA        | 0.51771566  | 2.417285819 | 3.988191437 | 0.606110779 | 0.544441194 | NA          | NA       |
| ENSG00000223662 | SAMSN1-AS1   | SAMSN1 antisense RNA 1                     | 100874190 | 0.51771566  | 2.417285819 | 3.988191437 | 0.606110779 | 0.544441194 | NA          | NA       |
| ENSG00000223977 | NA           | NA                                         | NA        | 0.51771566  | 2.417285819 | 3.988191437 | 0.606110779 | 0.544441194 | NA          | NA       |
| ENSG00000224761 | NA           | NA                                         | NA        | 0.51771566  | 2.417285819 | 3.988191437 | 0.606110779 | 0.544441194 | NA          | NA       |
| ENSG00000226753 | NA           | NA                                         | NA        | 0.51771566  | 2.417285819 | 3.988191437 | 0.606110779 | 0.544441194 | NA          | NA       |
| ENSG00000228302 | NA           | NA                                         | NA        | 0.51771566  | 2.417285819 | 3.988191437 | 0.606110779 | 0.544441194 | NA          | NA       |
| ENSG00000228944 | NA           | NA                                         | NA        | 0.51771566  | 2.417285819 | 3.988191437 | 0.606110779 | 0.544441194 | NA          | NA       |
| ENSG00000232578 | NA           | NA                                         | NA        | 0.51771566  | 2.417285819 | 3.988191437 | 0.606110779 | 0.544441194 | NA          | NA       |
| ENSG00000248642 | NA           | NA                                         | NA        | 0.51771566  | 2.417285819 | 3.988191437 | 0.606110779 | 0.544441194 | NA          | NA       |
| ENSG00000252321 | NA           | NA                                         | NA        | 0.51771566  | 2.417285819 | 3.988191437 | 0.606110779 | 0.544441194 | NA          | NA       |
| ENSG00000252354 | NA           | NA                                         | NA        | 0.51771566  | 2.417285819 | 3.988191437 | 0.606110779 | 0.544441194 | NA          | NA       |
| ENSG00000253048 | NA           | NA                                         | NA        | 0.51771566  | 2.417285819 | 3.988191437 | 0.606110779 | 0.544441194 | NA          | NA       |
| ENSG00000255107 | NA           | NA                                         | NA        | 0.51771566  | 2.417285819 | 3.988191437 | 0.606110779 | 0.544441194 | NA          | NA       |
| ENSG00000257545 | LOC100287944 | uncharacterized LOC100287944               | 100287944 | 0.51771566  | 2.417285819 | 3.988191437 | 0.606110779 | 0.544441194 | NA          | NA       |
| ENSG00000266206 | MIR3926-1    | microRNA 3926-1                            | 100500870 | 0.51771566  | 2.417285819 | 3.988191437 | 0.606110779 | 0.544441194 | NA          | NA       |
| ENSG00000272346 | NA           | NA                                         | NA        | 0.51771566  | 2.417285819 | 3.988191437 | 0.606110779 | 0.544441194 | NA          | NA       |
| ENSG00000197635 | DPP4         | dipeptidyl peptidase 4                     | 1803      | 1592.355753 | 2.421793971 | 0.550362011 | 4.400365434 | 1.08E-05    | 0.003489512 | FDR<0.05 |
| ENSG00000188778 | ADRB3        | adrenoceptor beta 3                        | 155       | 10.17870873 | 2.422888314 | 1.314631135 | 1.843017596 | 0.065326441 | 0.999371363 | Not Sig  |
| ENSG00000214128 | TMEM213      | transmembrane protein 213                  | 155006    | 193.4424073 | 2.435670618 | 1.000678724 | 2.434018592 | 0.014932228 | 0.620110526 | Not Sig  |
| ENSG00000214018 | NA           | NA                                         | NA        | 26.59102637 | 2.44863977  | 1.126779603 | 2.173131075 | 0.029770453 | 0.897727832 | Not Sig  |
| ENSG00000168959 | GRM5         | glutamate metabotropic receptor 5          | 2915      | 24.67119291 | 2.453268112 | 1.1207607   | 2.188931244 | 0.028601838 | 0.880642893 | Not Sig  |
| ENSG00000236348 | NA           | NA                                         | NA        | 1.244768084 | 2.454511679 | 2.838129122 | 0.864834394 | 0.387129691 | NA          | NA       |
| ENSG00000140955 | ADAD2        | adenosine deaminase domain containing 2    | 161931    | 1.186393461 | 2.454900956 | 2.87620177  | 0.853521815 | 0.393369995 | NA          | NA       |
| ENSG00000167945 | PRR25        | proline rich 25                            | 388199    | 1.170346959 | 2.455654443 | 2.837963589 | 0.865287508 | 0.386881005 | NA          | NA       |
| ENSG00000227064 | NA           | NA                                         | NA        | 10.56840806 | 2.459432404 | 1.002577899 | 2.453108539 | 0.01416276  | 0.602272823 | Not Sig  |

|                 |             |                                              |           |             |             |             |             |             |             |          |
|-----------------|-------------|----------------------------------------------|-----------|-------------|-------------|-------------|-------------|-------------|-------------|----------|
| ENSG00000185290 | NUPR2       | nuclear protein 2, transcriptional regulator | 389493    | 26.32422463 | 2.460679018 | 1.247800305 | 1.972013477 | 0.048608068 | 0.999371363 | Not Sig  |
| ENSG00000235296 | NA          | NA                                           | NA        | 1.176784494 | 2.46393101  | 2.835036501 | 0.869100278 | 0.384792285 | NA          | NA       |
| ENSG00000236883 | NA          | NA                                           | NA        | 1.176784494 | 2.46393101  | 2.835036501 | 0.869100278 | 0.384792285 | NA          | NA       |
| ENSG00000242421 | NA          | NA                                           | NA        | 1.176784494 | 2.46393101  | 2.835036501 | 0.869100278 | 0.384792285 | NA          | NA       |
| ENSG00000272115 | NA          | NA                                           | NA        | 1.235159118 | 2.464257393 | 2.795427375 | 0.881531538 | 0.378030192 | NA          | NA       |
| ENSG00000230398 | NA          | NA                                           | NA        | 3.050250822 | 2.473315959 | 2.269449508 | 1.089830794 | 0.275787687 | NA          | NA       |
| ENSG00000264148 | NA          | NA                                           | NA        | 2.211127435 | 2.477293345 | 2.450754722 | 1.010828755 | 0.312098398 | NA          | NA       |
| ENSG00000182013 | PNMA8A      | PNMA family member 8A                        | 55228     | 148.625069  | 2.482809019 | 0.884789258 | 2.806102127 | 0.00501448  | 0.327188303 | Not Sig  |
| ENSG00000259052 | NA          | NA                                           | NA        | 5.421011277 | 2.486034124 | 1.387242722 | 1.7920686   | 0.073121978 | NA          | NA       |
| ENSG00000266240 | MIR5091     | microRNA 5091                                | 100847023 | 2.581456786 | 2.487711017 | 1.922431711 | 1.294043894 | 0.19565026  | NA          | NA       |
| ENSG00000076864 | RAP1GAP     | RAP1 GTPase activating protein               | 5909      | 5137.878781 | 2.489286489 | 0.692111727 | 3.596654114 | 0.000322337 | 0.053564415 | Not Sig  |
| ENSG00000185823 | NPAP1       | nuclear pore associated protein 1            | 23742     | 1.198809761 | 2.493000889 | 2.501682032 | 0.996529878 | 0.318992758 | NA          | NA       |
| ENSG00000266441 | NA          | NA                                           | NA        | 1.198809761 | 2.493000889 | 2.501682032 | 0.996529878 | 0.318992758 | NA          | NA       |
| ENSG00000259388 | NA          | NA                                           | NA        | 1.215116553 | 2.493067192 | 2.493531313 | 0.99981387  | 0.317400592 | NA          | NA       |
| ENSG00000231789 | PIK3CD-AS2  | PIK3CD antisense RNA 2                       | 101929074 | 32.13781019 | 2.493976122 | 0.717105735 | 3.477835973 | 0.000505479 | 0.072751094 | Not Sig  |
| ENSG00000151882 | CCL28       | C-C motif chemokine ligand 28                | 56477     | 256.6568588 | 2.494202747 | 0.67497103  | 3.69527378  | 0.00021965  | 0.04128436  | FDR<0.05 |
| ENSG00000124875 | CXCL6       | C-X-C motif chemokine ligand 6               | 6372      | 21.31401613 | 2.49885178  | 0.812864591 | 3.074130437 | 0.002111171 | 0.191266023 | Not Sig  |
| ENSG00000201247 | SNORD114-13 | small nucleolar RNA, C/D box 114-13          | 767591    | 3.563403869 | 2.500805772 | 2.000285899 | 1.250224167 | 0.211217671 | NA          | NA       |
| ENSG00000213962 | NA          | NA                                           | NA        | 1.221554089 | 2.501388167 | 2.428731027 | 1.02991568  | 0.303049589 | NA          | NA       |
| ENSG00000243004 | NA          | NA                                           | NA        | 78.64363475 | 2.504423297 | 0.829671204 | 3.018573244 | 0.00253968  | 0.21877708  | Not Sig  |
| ENSG00000198632 | NA          | NA                                           | NA        | 1.227991624 | 2.509241185 | 2.410957565 | 1.040765388 | 0.297984448 | NA          | NA       |
| ENSG00000251754 | NA          | NA                                           | NA        | 1.227991624 | 2.509241185 | 2.410957565 | 1.040765388 | 0.297984448 | NA          | NA       |
| ENSG00000260439 | LMF1-AS1    | LMF1 antisense RNA 1                         | 101929387 | 4.359383364 | 2.513630364 | 1.882074885 | 1.335563417 | 0.181692014 | NA          | NA       |
| ENSG00000235959 | NA          | NA                                           | NA        | 2.131197212 | 2.514891326 | 2.026535291 | 1.24098077  | 0.214612853 | NA          | NA       |
| ENSG00000253875 | NA          | NA                                           | NA        | 1.218122368 | 2.516791783 | 2.4334668   | 1.034241266 | 0.301023387 | NA          | NA       |
| ENSG00000232842 | NA          | NA                                           | NA        | 1.276496992 | 2.516957632 | 2.405570227 | 1.046303951 | 0.295420722 | NA          | NA       |
| ENSG00000180767 | CHST13      | carbohydrate sulfotransferase 13             | 166012    | 19.61703959 | 2.520127041 | 0.91171158  | 2.76415857  | 0.00570698  | 0.35402954  | Not Sig  |
| ENSG00000183742 | MACC1       | MACC1, MET transcriptional regulator         | 346389    | 3608.588551 | 2.521085538 | 0.71459325  | 3.528000773 | 0.000418711 | 0.063866188 | Not Sig  |
| ENSG00000258856 | NA          | NA                                           | NA        | 1.240866695 | 2.524219378 | 2.486673758 | 1.015098732 | 0.310058766 | NA          | NA       |
| ENSG00000176358 | TAC4        | tachykinin 4 (hemokinin)                     | 255061    | 1.230997439 | 2.530802858 | 2.900858539 | 0.872432359 | 0.382972554 | NA          | NA       |
| ENSG00000249014 | NA          | NA                                           | NA        | 1.250016892 | 2.533328291 | 2.823211584 | 0.897321443 | 0.369547418 | NA          | NA       |
| ENSG00000154493 | C10orf90    | chromosome 10 open reading frame 90          | 118611    | 1.292084723 | 2.53336191  | 2.797464397 | 0.90559219  | 0.365151744 | NA          | NA       |
| ENSG00000174938 | SEZ6L2      | seizure related 6 homolog like 2             | 26470     | 1417.693877 | 2.539102202 | 0.723114898 | 3.511339911 | 0.000445854 | 0.066054568 | Not Sig  |
| ENSG00000082929 | LINC01587   | long intergenic non-protein coding RNA 1587  | 10141     | 1.256454427 | 2.541621721 | 2.41983894  | 1.050326813 | 0.293567882 | NA          | NA       |
| ENSG00000142549 | IGLON5      | IgLON family member 5                        | 402665    | 1.298522259 | 2.541647716 | 2.400446509 | 1.058822893 | 0.289680446 | NA          | NA       |

|                 |             |                                        |           |             |             |             |             |             |             |         |
|-----------------|-------------|----------------------------------------|-----------|-------------|-------------|-------------|-------------|-------------|-------------|---------|
| ENSG00000226278 | NA          | NA                                     | NA        | 95.22796867 | 2.55651862  | 1.185781488 | 2.155977848 | 0.031085395 | 0.912173933 | Not Sig |
| ENSG00000244036 | NA          | NA                                     | NA        | 1.317834866 | 2.564196532 | 2.396329323 | 1.070051811 | 0.284595988 | NA          | NA      |
| ENSG00000183908 | LRRC55      | leucine rich repeat containing 55      | 219527    | 31.30615648 | 2.56700076  | 0.817749187 | 3.139105241 | 0.001694646 | 0.162078358 | Not Sig |
| ENSG00000172828 | CES3        | carboxylesterase 3                     | 23491     | 132.8636058 | 2.573253991 | 1.142331306 | 2.252633694 | 0.024282255 | 0.802589067 | Not Sig |
| ENSG00000200279 | SNORD114-10 | small nucleolar RNA, C/D box 114-10    | 767588    | 3.725583934 | 2.577399699 | 1.927819765 | 1.336950552 | 0.181238778 | NA          | NA      |
| ENSG00000235724 | NA          | NA                                     | NA        | 1.291354766 | 2.582372588 | 2.783635278 | 0.927697895 | 0.353564301 | NA          | NA      |
| ENSG00000244067 | GSTA2       | glutathione S-transferase alpha 2      | 2939      | 58.40150868 | 2.587366794 | 1.133092371 | 2.283456195 | 0.02240351  | 0.76210276  | Not Sig |
| ENSG00000231922 | NA          | NA                                     | NA        | 1.339860133 | 2.588168793 | 2.3755997   | 1.089480182 | 0.27594219  | NA          | NA      |
| ENSG00000242836 | NA          | NA                                     | NA        | 1.339860133 | 2.588168793 | 2.3755997   | 1.089480182 | 0.27594219  | NA          | NA      |
| ENSG00000260577 | NA          | NA                                     | NA        | 5.684001867 | 2.589549611 | 1.392007142 | 1.860299084 | 0.062843223 | NA          | NA      |
| ENSG00000129673 | AANAT       | aralkylamine N-acetyltransferase       | 15        | 1.304229837 | 2.595348503 | 2.352270747 | 1.10333749  | 0.269880632 | NA          | NA      |
| ENSG00000121381 | TAS2R9      | taste 2 receptor member 9              | 50835     | 0.577907371 | 2.597516652 | 3.978723001 | 0.652851845 | 0.513851796 | NA          | NA      |
| ENSG00000173093 | CCDC63      | coiled-coil domain containing 63       | 160762    | 0.577907371 | 2.597516652 | 3.978723001 | 0.652851845 | 0.513851796 | NA          | NA      |
| ENSG00000213713 | NA          | NA                                     | NA        | 0.577907371 | 2.597516652 | 3.978723001 | 0.652851845 | 0.513851796 | NA          | NA      |
| ENSG00000224541 | NA          | NA                                     | NA        | 0.577907371 | 2.597516652 | 3.978723001 | 0.652851845 | 0.513851796 | NA          | NA      |
| ENSG00000237225 | NA          | NA                                     | NA        | 0.577907371 | 2.597516652 | 3.978723001 | 0.652851845 | 0.513851796 | NA          | NA      |
| ENSG00000248578 | NA          | NA                                     | NA        | 0.577907371 | 2.597516652 | 3.978723001 | 0.652851845 | 0.513851796 | NA          | NA      |
| ENSG00000265403 | NA          | NA                                     | NA        | 0.577907371 | 2.597516652 | 3.978723001 | 0.652851845 | 0.513851796 | NA          | NA      |
| ENSG00000269749 | NA          | NA                                     | NA        | 0.577907371 | 2.597516652 | 3.978723001 | 0.652851845 | 0.513851796 | NA          | NA      |
| ENSG00000273110 | NA          | NA                                     | NA        | 0.577907371 | 2.597516652 | 3.978723001 | 0.652851845 | 0.513851796 | NA          | NA      |
| ENSG00000138135 | CH25H       | cholesterol 25-hydroxylase             | 9023      | 242.6562795 | 2.600168049 | 1.055977008 | 2.462333961 | 0.013803607 | 0.593272432 | Not Sig |
| ENSG00000235237 | NA          | NA                                     | NA        | 1.352735204 | 2.602814669 | 2.373076427 | 1.0968103   | 0.272724327 | NA          | NA      |
| ENSG00000261838 | NA          | NA                                     | NA        | 1.310667372 | 2.602958145 | 2.391324443 | 1.088500623 | 0.276374162 | NA          | NA      |
| ENSG00000136872 | ALDOB       | aldolase, fructose-bisphosphate B      | 229       | 8.024766726 | 2.6040724   | 1.374004093 | 1.895243554 | 0.058060142 | 0.999371363 | Not Sig |
| ENSG00000251401 | NA          | NA                                     | NA        | 2.567851757 | 2.604496126 | 1.749740812 | 1.488503959 | 0.136618039 | NA          | NA      |
| ENSG00000185056 | C5orf47     | chromosome 5 open reading frame 47     | 133491    | 0.584344906 | 2.612294019 | 3.97799686  | 0.656685792 | 0.511382972 | NA          | NA      |
| ENSG00000186897 | C1QL4       | complement C1q like 4                  | 338761    | 0.584344906 | 2.612294019 | 3.97799686  | 0.656685792 | 0.511382972 | NA          | NA      |
| ENSG00000199085 | MIR148A     | microRNA 148a                          | 406940    | 0.584344906 | 2.612294019 | 3.97799686  | 0.656685792 | 0.511382972 | NA          | NA      |
| ENSG00000199570 | NA          | NA                                     | NA        | 0.584344906 | 2.612294019 | 3.97799686  | 0.656685792 | 0.511382972 | NA          | NA      |
| ENSG00000230835 | NA          | NA                                     | NA        | 0.584344906 | 2.612294019 | 3.97799686  | 0.656685792 | 0.511382972 | NA          | NA      |
| ENSG00000232241 | NA          | NA                                     | NA        | 0.584344906 | 2.612294019 | 3.97799686  | 0.656685792 | 0.511382972 | NA          | NA      |
| ENSG00000239981 | NA          | NA                                     | NA        | 0.584344906 | 2.612294019 | 3.97799686  | 0.656685792 | 0.511382972 | NA          | NA      |
| ENSG00000249454 | NA          | NA                                     | NA        | 0.584344906 | 2.612294019 | 3.97799686  | 0.656685792 | 0.511382972 | NA          | NA      |
| ENSG00000257150 | PGAMIP5     | phosphoglycerate mutase 1 pseudogene 5 | 100132594 | 0.584344906 | 2.612294019 | 3.97799686  | 0.656685792 | 0.511382972 | NA          | NA      |
| ENSG00000259418 | NA          | NA                                     | NA        | 0.584344906 | 2.612294019 | 3.97799686  | 0.656685792 | 0.511382972 | NA          | NA      |

|                 |              |                                                |           |             |             |             |             |             |             |          |
|-----------------|--------------|------------------------------------------------|-----------|-------------|-------------|-------------|-------------|-------------|-------------|----------|
| ENSG00000266047 | NA           | NA                                             | NA        | 0.584344906 | 2.612294019 | 3.97799686  | 0.656685792 | 0.511382972 | NA          | NA       |
| ENSG00000205879 | NA           | NA                                             | NA        | 1.300798116 | 2.612793785 | 2.783735061 | 0.938592836 | 0.347939832 | NA          | NA       |
| ENSG00000250771 | LOC100419170 | toll like receptor 2 pseudogene                | 100419170 | 41.46692737 | 2.623828807 | 1.020442118 | 2.57126667  | 0.010132727 | 0.494790816 | Not Sig  |
| ENSG00000257017 | HP           | haptoglobin                                    | 3240      | 219.8397446 | 2.625739255 | 0.908583471 | 2.889926284 | 0.003853322 | 0.28049064  | Not Sig  |
| ENSG00000213234 | NA           | NA                                             | NA        | 0.590782442 | 2.626939786 | 3.977284345 | 0.660485788 | 0.508942136 | NA          | NA       |
| ENSG00000213645 | NA           | NA                                             | NA        | 0.590782442 | 2.626939786 | 3.977284345 | 0.660485788 | 0.508942136 | NA          | NA       |
| ENSG00000235711 | ANKRD34C     | ankyrin repeat domain 34C                      | 390616    | 0.590782442 | 2.626939786 | 3.977284345 | 0.660485788 | 0.508942136 | NA          | NA       |
| ENSG00000242814 | NA           | NA                                             | NA        | 0.590782442 | 2.626939786 | 3.977284345 | 0.660485788 | 0.508942136 | NA          | NA       |
| ENSG00000248416 | NA           | NA                                             | NA        | 0.590782442 | 2.626939786 | 3.977284345 | 0.660485788 | 0.508942136 | NA          | NA       |
| ENSG00000248778 | NA           | NA                                             | NA        | 0.590782442 | 2.626939786 | 3.977284345 | 0.660485788 | 0.508942136 | NA          | NA       |
| ENSG00000255440 | NA           | NA                                             | NA        | 0.590782442 | 2.626939786 | 3.977284345 | 0.660485788 | 0.508942136 | NA          | NA       |
| ENSG00000265142 | MIR133A1HG   | MIR133A1 host gene                             | 102723167 | 0.590782442 | 2.626939786 | 3.977284345 | 0.660485788 | 0.508942136 | NA          | NA       |
| ENSG00000269058 | CALR3        | calreticulin 3                                 | 125972    | 0.590782442 | 2.626939786 | 3.977284345 | 0.660485788 | 0.508942136 | NA          | NA       |
| ENSG00000271302 | NA           | NA                                             | NA        | 10.76521853 | 2.629872775 | 1.21196228  | 2.169929558 | 0.030012183 | 0.897727832 | Not Sig  |
| ENSG00000055957 | ITIH1        | inter-alpha-trypsin inhibitor heavy chain 1    | 3697      | 1.33269264  | 2.629954301 | 2.768436797 | 0.94997809  | 0.342123386 | NA          | NA       |
| ENSG00000212161 | NA           | NA                                             | NA        | 1.33269264  | 2.629954301 | 2.768436797 | 0.94997809  | 0.342123386 | NA          | NA       |
| ENSG00000223030 | NA           | NA                                             | NA        | 1.322823384 | 2.634014674 | 2.407977034 | 1.093870347 | 0.274011846 | NA          | NA       |
| ENSG00000230583 | GTF2IRD1P1   | GTF2I repeat domain containing 1 pseudogene 1  | 729156    | 7.109991436 | 2.636499531 | 1.224376448 | 2.153340612 | 0.031291919 | 0.912173933 | Not Sig  |
| ENSG00000167741 | GGT6         | gamma-glutamyltransferase 6                    | 124975    | 420.2360943 | 2.638885808 | 0.624549509 | 4.225262803 | 2.39E-05    | 0.006678826 | FDR<0.05 |
| ENSG00000273216 | NA           | NA                                             | NA        | 4.688251275 | 2.639117938 | 1.797035659 | 1.468595197 | 0.141942618 | NA          | NA       |
| ENSG00000234775 | NA           | NA                                             | NA        | 1.313214417 | 2.644563093 | 2.755701632 | 0.959669604 | 0.337221526 | NA          | NA       |
| ENSG00000204529 | NA           | NA                                             | NA        | 5.502424632 | 2.645541963 | 1.850909242 | 1.429320197 | 0.152912223 | NA          | NA       |
| ENSG00000007062 | PROM1        | prominin 1                                     | 8842      | 670.3168216 | 2.649892757 | 0.874491424 | 3.030210114 | 0.002443837 | 0.212886004 | Not Sig  |
| ENSG00000205076 | LGALS7       | galectin 7                                     | 3963      | 7.15292595  | 2.652253855 | 1.753805953 | 1.512284669 | 0.13046146  | 0.999371363 | Not Sig  |
| ENSG00000205076 | LGALS7B      | galectin 7B                                    | 653499    | 7.15292595  | 2.652253855 | 1.753805953 | 1.512284669 | 0.13046146  | 0.999371363 | Not Sig  |
| ENSG00000269375 | NA           | NA                                             | NA        | 5.242492805 | 2.656224477 | 1.453477174 | 1.827496519 | 0.067625149 | NA          | NA       |
| ENSG00000230162 | NA           | NA                                             | NA        | 2.404776119 | 2.660857432 | 1.867500693 | 1.424822728 | 0.154208451 | NA          | NA       |
| ENSG00000101542 | CDH20        | cadherin 20                                    | 28316     | 13.45569765 | 2.664068012 | 1.216378237 | 2.190164153 | 0.028512334 | 0.880038778 | Not Sig  |
| ENSG00000111245 | MYL2         | myosin light chain 2                           | 4633      | 0.612807709 | 2.674677665 | 3.975010552 | 0.672873098 | 0.501028028 | NA          | NA       |
| ENSG00000135220 | UGT2A3       | UDP glucuronosyltransferase family 2 member A3 | 79799     | 0.612807709 | 2.674677665 | 3.975010552 | 0.672873098 | 0.501028028 | NA          | NA       |
| ENSG00000232208 | NA           | NA                                             | NA        | 0.612807709 | 2.674677665 | 3.975010552 | 0.672873098 | 0.501028028 | NA          | NA       |
| ENSG00000006128 | TAC1         | tachykinin precursor 1                         | 6863      | 0.619245245 | 2.689367549 | 3.384119241 | 0.794702361 | 0.426786659 | NA          | NA       |
| ENSG00000206203 | TSSK2        | testis specific serine kinase 2                | 23617     | 0.619245245 | 2.689367549 | 3.384119241 | 0.794702361 | 0.426786659 | NA          | NA       |
| ENSG00000214109 | NA           | NA                                             | NA        | 0.619245245 | 2.689367549 | 3.384119241 | 0.794702361 | 0.426786659 | NA          | NA       |
| ENSG00000234943 | NA           | NA                                             | NA        | 0.619245245 | 2.689367549 | 3.384119241 | 0.794702361 | 0.426786659 | NA          | NA       |

|                 |              |                                                              |           |             |             |             |             |             |             |          |
|-----------------|--------------|--------------------------------------------------------------|-----------|-------------|-------------|-------------|-------------|-------------|-------------|----------|
| ENSG00000236762 | NA           | NA                                                           | NA        | 0.619245245 | 2.689367549 | 3.384119241 | 0.794702361 | 0.426786659 | NA          | NA       |
| ENSG00000237176 | NA           | NA                                                           | NA        | 0.619245245 | 2.689367549 | 3.384119241 | 0.794702361 | 0.426786659 | NA          | NA       |
| ENSG00000237169 | NA           | NA                                                           | NA        | 1.354552291 | 2.692459714 | 2.35233151  | 1.144591952 | 0.252378228 | NA          | NA       |
| ENSG00000178081 | ULK4P3       | ULK4 pseudogene 3                                            | 89837     | 1.370859083 | 2.69251767  | 2.34546635  | 1.147966872 | 0.25098224  | NA          | NA       |
| ENSG00000183690 | EFHC2        | EF-hand domain containing 2                                  | 80258     | 134.5172194 | 2.694505772 | 0.7324213   | 3.678901435 | 0.000234241 | 0.043379323 | FDR<0.05 |
| ENSG00000167970 | NA           | NA                                                           | NA        | 0.62568278  | 2.702990718 | 3.374828614 | 0.800926811 | 0.423174018 | NA          | NA       |
| ENSG00000208036 | MIR106B      | microRNA 106b                                                | 406900    | 0.62568278  | 2.702990718 | 3.374828614 | 0.800926811 | 0.423174018 | NA          | NA       |
| ENSG00000215493 | NA           | NA                                                           | NA        | 0.62568278  | 2.702990718 | 3.374828614 | 0.800926811 | 0.423174018 | NA          | NA       |
| ENSG00000222357 | NA           | NA                                                           | NA        | 0.62568278  | 2.702990718 | 3.374828614 | 0.800926811 | 0.423174018 | NA          | NA       |
| ENSG00000227073 | NA           | NA                                                           | NA        | 0.62568278  | 2.702990718 | 3.374828614 | 0.800926811 | 0.423174018 | NA          | NA       |
| ENSG00000229531 | LOC101928696 | uncharacterized LOC101928696                                 | 101928696 | 0.62568278  | 2.702990718 | 3.374828614 | 0.800926811 | 0.423174018 | NA          | NA       |
| ENSG00000231802 | NA           | NA                                                           | NA        | 0.62568278  | 2.702990718 | 3.374828614 | 0.800926811 | 0.423174018 | NA          | NA       |
| ENSG00000232186 | NA           | NA                                                           | NA        | 0.62568278  | 2.702990718 | 3.374828614 | 0.800926811 | 0.423174018 | NA          | NA       |
| ENSG00000239462 | LOC105374002 | uncharacterized LOC105374002                                 | 105374002 | 0.62568278  | 2.702990718 | 3.374828614 | 0.800926811 | 0.423174018 | NA          | NA       |
| ENSG00000242477 | NA           | NA                                                           | NA        | 0.62568278  | 2.702990718 | 3.374828614 | 0.800926811 | 0.423174018 | NA          | NA       |
| ENSG00000255059 | NA           | NA                                                           | NA        | 0.62568278  | 2.702990718 | 3.374828614 | 0.800926811 | 0.423174018 | NA          | NA       |
| ENSG00000264242 | NA           | NA                                                           | NA        | 0.62568278  | 2.702990718 | 3.374828614 | 0.800926811 | 0.423174018 | NA          | NA       |
| ENSG00000115194 | SLC30A3      | solute carrier family 30 member 3                            | 7781      | 7.687722122 | 2.706460417 | 1.330985934 | 2.033425258 | 0.042009578 | 0.999371363 | Not Sig  |
| ENSG00000128510 | CPA4         | carboxypeptidase A4                                          | 51200     | 2.69114632  | 2.713059546 | 2.10316298  | 1.289990159 | 0.197054075 | NA          | NA       |
| ENSG00000179284 | DAND5        | DAN domain BMP antagonist family member 5                    | 199699    | 1.39288435  | 2.713279528 | 2.752954351 | 0.985588274 | 0.324335194 | NA          | NA       |
| ENSG00000228476 | NA           | NA                                                           | NA        | 3.693157934 | 2.71363982  | 1.696691056 | 1.599371795 | 0.109738016 | NA          | NA       |
| ENSG00000224839 | NA           | NA                                                           | NA        | 0.632120316 | 2.7166851   | 3.973069874 | 0.68377481  | 0.494117375 | NA          | NA       |
| ENSG00000235862 | NA           | NA                                                           | NA        | 0.632120316 | 2.7166851   | 3.973069874 | 0.68377481  | 0.494117375 | NA          | NA       |
| ENSG00000254152 | NA           | NA                                                           | NA        | 0.632120316 | 2.7166851   | 3.973069874 | 0.68377481  | 0.494117375 | NA          | NA       |
| ENSG00000258599 | NA           | NA                                                           | NA        | 0.632120316 | 2.7166851   | 3.973069874 | 0.68377481  | 0.494117375 | NA          | NA       |
| ENSG00000228431 | NA           | NA                                                           | NA        | 1.399321886 | 2.721223488 | 2.364638037 | 1.150799169 | 0.249814867 | NA          | NA       |
| ENSG00000197632 | SERPINB2     | serpin family B member 2                                     | 5055      | 8.334678879 | 2.724903833 | 1.78534619  | 1.52626076  | 0.126944937 | 0.999371363 | Not Sig  |
| ENSG00000200897 | NA           | NA                                                           | NA        | 1.38945263  | 2.728098132 | 2.304625882 | 1.183748804 | 0.236512514 | NA          | NA       |
| ENSG00000258449 | NA           | NA                                                           | NA        | 1.38945263  | 2.728098132 | 2.304625882 | 1.183748804 | 0.236512514 | NA          | NA       |
| ENSG00000134757 | DSG3         | desmoglein 3                                                 | 1830      | 4.511640591 | 2.732495212 | 1.715397881 | 1.59292211  | 0.111177666 | NA          | NA       |
| ENSG00000229089 | NA           | NA                                                           | NA        | 3.695965269 | 2.735962437 | 1.896906258 | 1.442328753 | 0.149209653 | NA          | NA       |
| ENSG00000215785 | NA           | NA                                                           | NA        | 2.770910927 | 2.738339758 | 1.783467838 | 1.535401816 | 0.124685158 | NA          | NA       |
| ENSG00000187942 | LDLRAD2      | low density lipoprotein receptor class A domain containing 2 | 401944    | 49.64434364 | 2.738730375 | 0.962767771 | 2.844642767 | 0.004446126 | 0.301021826 | Not Sig  |
| ENSG00000213906 | LTB4R2       | leukotriene B4 receptor 2                                    | 56413     | 3.75932841  | 2.747676182 | 1.583473855 | 1.735220429 | 0.082701769 | NA          | NA       |
| ENSG00000182687 | GALR2        | galanin receptor 2                                           | 8811      | 2.538493381 | 2.759985005 | 2.150398409 | 1.28347612  | 0.199325321 | NA          | NA       |

|                 |          |                                                                  |        |             |             |             |             |             |             |         |
|-----------------|----------|------------------------------------------------------------------|--------|-------------|-------------|-------------|-------------|-------------|-------------|---------|
| ENSG00000173452 | TMEM196  | transmembrane protein 196                                        | 256130 | 0.654145583 | 2.762035501 | 3.971036113 | 0.695545299 | 0.486713633 | NA          | NA      |
| ENSG00000219784 | NA       | NA                                                               | NA     | 0.654145583 | 2.762035501 | 3.971036113 | 0.695545299 | 0.486713633 | NA          | NA      |
| ENSG00000226132 | NA       | NA                                                               | NA     | 0.654145583 | 2.762035501 | 3.971036113 | 0.695545299 | 0.486713633 | NA          | NA      |
| ENSG00000234143 | NA       | NA                                                               | NA     | 0.654145583 | 2.762035501 | 3.971036113 | 0.695545299 | 0.486713633 | NA          | NA      |
| ENSG00000252034 | NA       | NA                                                               | NA     | 0.654145583 | 2.762035501 | 3.971036113 | 0.695545299 | 0.486713633 | NA          | NA      |
| ENSG00000256469 | NA       | NA                                                               | NA     | 0.654145583 | 2.762035501 | 3.971036113 | 0.695545299 | 0.486713633 | NA          | NA      |
| ENSG00000258342 | NA       | NA                                                               | NA     | 0.654145583 | 2.762035501 | 3.971036113 | 0.695545299 | 0.486713633 | NA          | NA      |
| ENSG00000272458 | MIR432   | microRNA 432                                                     | 574451 | 0.654145583 | 2.762035501 | 3.971036113 | 0.695545299 | 0.486713633 | NA          | NA      |
| ENSG00000212734 | NA       | NA                                                               | NA     | 1.44065976  | 2.762816666 | 2.332305225 | 1.184586235 | 0.236181082 | NA          | NA      |
| ENSG00000166960 | CCDC178  | coiled-coil domain containing 178                                | 374864 | 3.816254016 | 2.766199875 | 1.530779118 | 1.807053573 | 0.070753926 | NA          | NA      |
| ENSG00000134339 | SAA2     | serum amyloid A2                                                 | 6289   | 18.26267895 | 2.770570015 | 0.996223202 | 2.781073569 | 0.005417946 | 0.344586823 | Not Sig |
| ENSG00000163285 | GABRG1   | gamma-aminobutyric acid type A receptor gamma1 subunit           | 2565   | 0.660583119 | 2.773035225 | 3.326959415 | 0.833504374 | 0.404560332 | NA          | NA      |
| ENSG00000199036 | MIR219A1 | microRNA 219a-1                                                  | 407002 | 0.660583119 | 2.773035225 | 3.326959415 | 0.833504374 | 0.404560332 | NA          | NA      |
| ENSG00000207693 | MIR602   | microRNA 602                                                     | 693187 | 0.660583119 | 2.773035225 | 3.326959415 | 0.833504374 | 0.404560332 | NA          | NA      |
| ENSG00000229502 | NA       | NA                                                               | NA     | 0.660583119 | 2.773035225 | 3.326959415 | 0.833504374 | 0.404560332 | NA          | NA      |
| ENSG00000249942 | NA       | NA                                                               | NA     | 0.660583119 | 2.773035225 | 3.326959415 | 0.833504374 | 0.404560332 | NA          | NA      |
| ENSG00000154438 | ASZ1     | ankyrin repeat, SAM and basic leucine zipper domain containing 1 | 136991 | 3.780894907 | 2.776803741 | 1.95421959  | 1.420927185 | 0.155337929 | NA          | NA      |
| ENSG00000197768 | STPG3    | sperm-tail PG-rich repeat containing 3                           | 441476 | 1.502040199 | 2.782298553 | 2.313436852 | 1.2026689   | 0.229104474 | NA          | NA      |
| ENSG00000200658 | NA       | NA                                                               | NA     | 0.667020654 | 2.788727753 | 3.969868119 | 0.702473651 | 0.482383828 | NA          | NA      |
| ENSG00000224218 | NA       | NA                                                               | NA     | 0.667020654 | 2.788727753 | 3.969868119 | 0.702473651 | 0.482383828 | NA          | NA      |
| ENSG00000239223 | NA       | NA                                                               | NA     | 0.667020654 | 2.788727753 | 3.969868119 | 0.702473651 | 0.482383828 | NA          | NA      |
| ENSG00000241526 | NA       | NA                                                               | NA     | 0.667020654 | 2.788727753 | 3.969868119 | 0.702473651 | 0.482383828 | NA          | NA      |
| ENSG00000250862 | NA       | NA                                                               | NA     | 0.667020654 | 2.788727753 | 3.969868119 | 0.702473651 | 0.482383828 | NA          | NA      |
| ENSG00000261209 | NA       | NA                                                               | NA     | 0.667020654 | 2.788727753 | 3.969868119 | 0.702473651 | 0.482383828 | NA          | NA      |
| ENSG00000263624 | NA       | NA                                                               | NA     | 0.667020654 | 2.788727753 | 3.969868119 | 0.702473651 | 0.482383828 | NA          | NA      |
| ENSG00000271670 | NA       | NA                                                               | NA     | 0.667020654 | 2.788727753 | 3.969868119 | 0.702473651 | 0.482383828 | NA          | NA      |
| ENSG00000252222 | NA       | NA                                                               | NA     | 5.442213162 | 2.789388869 | 1.394480446 | 2.000306907 | 0.045467134 | NA          | NA      |
| ENSG00000162951 | LRRTM1   | leucine rich repeat transmembrane neuronal 1                     | 347730 | 5.652325121 | 2.812344632 | 1.781230873 | 1.578877098 | 0.11436425  | NA          | NA      |
| ENSG00000103316 | CRYM     | crystallin mu                                                    | 1428   | 629.7592658 | 2.833638332 | 0.847625785 | 3.343029885 | 0.00082869  | 0.108481053 | Not Sig |
| ENSG00000125965 | GDF5     | growth differentiation factor 5                                  | 8200   | 28.69873211 | 2.835908691 | 1.082625394 | 2.619473649 | 0.008806558 | 0.471136671 | Not Sig |
| ENSG00000203837 | PNLIPRP3 | pancreatic lipase related protein 3                              | 119548 | 0.695483457 | 2.845060081 | 3.967471762 | 0.717096491 | 0.47331456  | NA          | NA      |
| ENSG00000207186 | NA       | NA                                                               | NA     | 0.695483457 | 2.845060081 | 3.967471762 | 0.717096491 | 0.47331456  | NA          | NA      |
| ENSG00000222686 | NA       | NA                                                               | NA     | 0.695483457 | 2.845060081 | 3.967471762 | 0.717096491 | 0.47331456  | NA          | NA      |
| ENSG00000226565 | NA       | NA                                                               | NA     | 0.695483457 | 2.845060081 | 3.967471762 | 0.717096491 | 0.47331456  | NA          | NA      |
| ENSG00000227437 | NA       | NA                                                               | NA     | 0.695483457 | 2.845060081 | 3.967471762 | 0.717096491 | 0.47331456  | NA          | NA      |

|                 |              |                                                        |           |             |             |             |             |             |             |          |
|-----------------|--------------|--------------------------------------------------------|-----------|-------------|-------------|-------------|-------------|-------------|-------------|----------|
| ENSG00000238007 | NA           | NA                                                     | NA        | 0.695483457 | 2.845060081 | 3.967471762 | 0.717096491 | 0.47331456  | NA          | NA       |
| ENSG00000242547 | NA           | NA                                                     | NA        | 0.695483457 | 2.845060081 | 3.967471762 | 0.717096491 | 0.47331456  | NA          | NA       |
| ENSG00000255151 | NA           | NA                                                     | NA        | 0.695483457 | 2.845060081 | 3.967471762 | 0.717096491 | 0.47331456  | NA          | NA       |
| ENSG00000256372 | NA           | NA                                                     | NA        | 0.695483457 | 2.845060081 | 3.967471762 | 0.717096491 | 0.47331456  | NA          | NA       |
| ENSG00000248485 | PCP4L1       | Purkinje cell protein 4 like 1                         | 654790    | 165.4488762 | 2.845543139 | 0.858252025 | 3.315509962 | 0.000914761 | 0.112948155 | Not Sig  |
| ENSG00000124939 | SCGB2A1      | secretoglobin family 2A member 1                       | 4246      | 40.60157413 | 2.846884632 | 1.316981695 | 2.161673653 | 0.03064334  | 0.907980184 | Not Sig  |
| ENSG00000169474 | SPRR1A       | small proline rich protein 1A                          | 6698      | 0.701920993 | 2.857771195 | 3.961912474 | 0.721311037 | 0.470718168 | NA          | NA       |
| ENSG00000221698 | MIR548H3     | microRNA 548h-3                                        | 100302287 | 0.701920993 | 2.857771195 | 3.961912474 | 0.721311037 | 0.470718168 | NA          | NA       |
| ENSG00000251578 | NA           | NA                                                     | NA        | 0.701920993 | 2.857771195 | 3.961912474 | 0.721311037 | 0.470718168 | NA          | NA       |
| ENSG00000252480 | NA           | NA                                                     | NA        | 0.701920993 | 2.857771195 | 3.961912474 | 0.721311037 | 0.470718168 | NA          | NA       |
| ENSG00000248851 | NA           | NA                                                     | NA        | 1.503857286 | 2.861090383 | 2.29076758  | 1.248965809 | 0.21167758  | NA          | NA       |
| ENSG00000116031 | CD207        | CD207 molecule                                         | 50489     | 192.0716922 | 2.862054847 | 0.934473546 | 3.062745715 | 0.002193163 | 0.197275046 | Not Sig  |
| ENSG00000185915 | KLHL34       | kelch like family member 34                            | 257240    | 2.73184891  | 2.86372322  | 1.761509533 | 1.625721103 | 0.104008999 | NA          | NA       |
| ENSG00000130234 | ACE2         | angiotensin I converting enzyme 2                      | 59272     | 421.5286945 | 2.86825749  | 0.959218567 | 2.990202221 | 0.002787928 | 0.234055858 | Not Sig  |
| ENSG00000162383 | SLC1A7       | solute carrier family 1 member 7                       | 6512      | 114.7103417 | 2.88678105  | 0.973160238 | 2.96639848  | 0.003013098 | 0.241681181 | Not Sig  |
| ENSG00000219682 | NA           | NA                                                     | NA        | 1.532320089 | 2.887059293 | 2.254885319 | 1.280357484 | 0.200419439 | NA          | NA       |
| ENSG00000185156 | MFS6L        | major facilitator superfamily domain containing 6 like | 162387    | 172.3132951 | 2.902690568 | 1.215912711 | 2.387252425 | 0.016974832 | 0.665830191 | Not Sig  |
| ENSG00000233292 | NA           | NA                                                     | NA        | 1.574377023 | 2.910810593 | 2.315723344 | 1.256976832 | 0.208762025 | NA          | NA       |
| ENSG00000181997 | NA           | NA                                                     | NA        | 0.72077483  | 2.914876902 | 3.906212198 | 0.746215708 | 0.45553712  | NA          | NA       |
| ENSG00000231831 | NA           | NA                                                     | NA        | 0.72077483  | 2.914876902 | 3.906212198 | 0.746215708 | 0.45553712  | NA          | NA       |
| ENSG00000251378 | NA           | NA                                                     | NA        | 0.72077483  | 2.914876902 | 3.906212198 | 0.746215708 | 0.45553712  | NA          | NA       |
| ENSG00000267244 | LOC100288123 | uncharacterized LOC100288123                           | 100288123 | 0.72077483  | 2.914876902 | 3.906212198 | 0.746215708 | 0.45553712  | NA          | NA       |
| ENSG00000163064 | EN1          | engrailed homeobox 1                                   | 2019      | 0.727212365 | 2.927138628 | 3.845267172 | 0.761231534 | 0.446518786 | NA          | NA       |
| ENSG00000233256 | NA           | NA                                                     | NA        | 0.727212365 | 2.927138628 | 3.845267172 | 0.761231534 | 0.446518786 | NA          | NA       |
| ENSG00000265017 | NA           | NA                                                     | NA        | 0.727212365 | 2.927138628 | 3.845267172 | 0.761231534 | 0.446518786 | NA          | NA       |
| ENSG00000182175 | RGMA         | repulsive guidance molecule family member a            | 56963     | 220.8743965 | 2.931728523 | 0.804905495 | 3.642326386 | 0.000270185 | 0.047921721 | FDR<0.05 |
| ENSG00000223075 | NA           | NA                                                     | NA        | 0.733649901 | 2.939071106 | 3.834854669 | 0.766410036 | 0.443432363 | NA          | NA       |
| ENSG00000236469 | NA           | NA                                                     | NA        | 0.733649901 | 2.939071106 | 3.834854669 | 0.766410036 | 0.443432363 | NA          | NA       |
| ENSG00000178752 | ERFE         | erythroferrone                                         | 151176    | 46.45023184 | 2.943419642 | 0.911626723 | 3.228755331 | 0.001243302 | 0.134973311 | Not Sig  |
| ENSG00000258584 | FAM181A-AS1  | FAM181A antisense RNA 1                                | 283592    | 2.881153905 | 2.949592513 | 1.747003454 | 1.688372457 | 0.091339754 | NA          | NA       |
| ENSG00000199069 | MIR323A      | microRNA 323a                                          | 442897    | 0.740087436 | 2.950735782 | 3.875736699 | 0.76133546  | 0.446456726 | NA          | NA       |
| ENSG00000236677 | NA           | NA                                                     | NA        | 0.740087436 | 2.950735782 | 3.875736699 | 0.76133546  | 0.446456726 | NA          | NA       |
| ENSG00000269799 | NA           | NA                                                     | NA        | 0.740087436 | 2.950735782 | 3.875736699 | 0.76133546  | 0.446456726 | NA          | NA       |
| ENSG00000236256 | DIAPH2-AS1   | DIAPH2 antisense RNA 1                                 | 10824     | 5.016574088 | 2.963611472 | 1.92480296  | 1.539696028 | 0.123634466 | NA          | NA       |
| ENSG00000235836 | NA           | NA                                                     | NA        | 5.224182765 | 2.965970997 | 1.7472611   | 1.697497299 | 0.089602681 | NA          | NA       |



|                 |         |                                                |           |             |             |             |             |                 |             |          |
|-----------------|---------|------------------------------------------------|-----------|-------------|-------------|-------------|-------------|-----------------|-------------|----------|
| ENSG00000079101 | CLUL1   | clusterin like 1                               | 27098     | 66.21629622 | 2.966726268 | 1.294034428 | 2.292617727 | 0.021870023     | 0.756060365 | Not Sig  |
| ENSG00000255489 | NA      | NA                                             | NA        | 1.6441777   | 2.972218162 | 2.267549513 | 1.310762189 | 0.189938121     | NA          | NA       |
| ENSG00000081138 | CDH7    | cadherin 7                                     | 1005      | 2.810634168 | 2.972314124 | 1.990652745 | 1.49313542  | 0.135401742     | NA          | NA       |
| ENSG00000009765 | IYD     | iodotyrosine deiodinase                        | 389434    | 1317.345701 | 2.976511358 | 1.139470782 | 2.612187522 | 0.008996489     | 0.472053287 | Not Sig  |
| ENSG00000228418 | NA      | NA                                             | NA        | 0.755675168 | 2.978048286 | 3.851965182 | 0.773124404 | 0.439448759     | NA          | NA       |
| ENSG00000252347 | NA      | NA                                             | NA        | 0.755675168 | 2.978048286 | 3.851965182 | 0.773124404 | 0.439448759     | NA          | NA       |
| ENSG00000254713 | NA      | NA                                             | NA        | 0.755675168 | 2.978048286 | 3.851965182 | 0.773124404 | 0.439448759     | NA          | NA       |
| ENSG00000225214 | NA      | NA                                             | NA        | 1.618261942 | 2.978813489 | 2.61158673  | 1.140614422 | 0.254030413     | NA          | NA       |
| ENSG00000250282 | NA      | NA                                             | NA        | 1.624699477 | 2.984524866 | 2.627236503 | 1.135993986 | 0.255959081     | NA          | NA       |
| ENSG00000208004 | MIR323B | microRNA 323b                                  | 574410    | 0.762112704 | 2.990997852 | 3.167701333 | 0.944217127 | 0.345058705     | NA          | NA       |
| ENSG00000228285 | NA      | NA                                             | NA        | 0.762112704 | 2.990997852 | 3.167701333 | 0.944217127 | 0.345058705     | NA          | NA       |
| ENSG00000263640 | NA      | NA                                             | NA        | 0.762112704 | 2.990997852 | 3.167701333 | 0.944217127 | 0.345058705     | NA          | NA       |
| ENSG00000226757 | PP12613 | uncharacterized LOC100192379                   | 100192379 | 0.768550239 | 3.002196631 | 3.12083111  | 0.961986255 | 0.336056509     | NA          | NA       |
| ENSG00000232135 | NA      | NA                                             | NA        | 0.768550239 | 3.002196631 | 3.12083111  | 0.961986255 | 0.336056509     | NA          | NA       |
| ENSG00000267205 | NA      | NA                                             | NA        | 0.768550239 | 3.002196631 | 3.12083111  | 0.961986255 | 0.336056509     | NA          | NA       |
| ENSG00000120729 | MYOT    | myotilin                                       | 9499      | 0.774987775 | 3.01314215  | 3.154749211 | 0.955113053 | 0.339520529     | NA          | NA       |
| ENSG00000199506 | NA      | NA                                             | NA        | 0.774987775 | 3.01314215  | 3.154749211 | 0.955113053 | 0.339520529     | NA          | NA       |
| ENSG00000261195 | NA      | NA                                             | NA        | 0.774987775 | 3.01314215  | 3.154749211 | 0.955113053 | 0.339520529     | NA          | NA       |
| ENSG00000271635 | NA      | NA                                             | NA        | 0.774987775 | 3.01314215  | 3.154749211 | 0.955113053 | 0.339520529     | NA          | NA       |
| ENSG00000263096 | NA      | NA                                             | NA        | 1.662312476 | 3.016899117 | 2.652447337 | 1.137402079 | 0.255370238     | NA          | NA       |
| ENSG00000198797 | BRINP2  | BMP/retinoic acid inducible neural specific 2  | 57795     | 7.525607323 | 3.019274217 | 1.485058538 | 2.033101147 | 0.042042305     | 0.999371363 | Not Sig  |
| ENSG00000243974 | NA      | NA                                             | NA        | 0.78142531  | 3.023739138 | 3.81467391  | 0.792659926 | 0.427975984     | NA          | NA       |
| ENSG00000180251 | SLC9A4  | solute carrier family 9 member A4              | 389015    | 1.668750012 | 3.02417116  | 2.289274432 | 1.321017314 | 0.186495591     | NA          | NA       |
| ENSG00000236459 | NA      | NA                                             | NA        | 3.339114657 | 3.02501633  | 2.032922317 | 1.488013735 | 0.136747272     | NA          | NA       |
| ENSG00000049089 | COL9A2  | collagen type IX alpha 2 chain                 | 1298      | 935.769252  | 3.0319845   | 0.686044798 | 4.419513872 | <b>9.89E-06</b> | 0.003278262 | FDR<0.05 |
| ENSG00000164363 | SLC6A18 | solute carrier family 6 member 18              | 348932    | 12.26741368 | 3.037788631 | 1.708419708 | 1.778127832 | 0.075382862     | 0.999371363 | Not Sig  |
| ENSG00000239365 | NA      | NA                                             | NA        | 0.797013042 | 3.049728946 | 3.741723585 | 0.815059925 | 0.415038009     | NA          | NA       |
| ENSG00000257723 | NA      | NA                                             | NA        | 0.797013042 | 3.049728946 | 3.741723585 | 0.815059925 | 0.415038009     | NA          | NA       |
| ENSG00000263791 | NA      | NA                                             | NA        | 0.797013042 | 3.049728946 | 3.741723585 | 0.815059925 | 0.415038009     | NA          | NA       |
| ENSG00000270380 | NA      | NA                                             | NA        | 0.797013042 | 3.049728946 | 3.741723585 | 0.815059925 | 0.415038009     | NA          | NA       |
| ENSG00000271963 | NA      | NA                                             | NA        | 0.797013042 | 3.049728946 | 3.741723585 | 0.815059925 | 0.415038009     | NA          | NA       |
| ENSG00000166823 | MESP1   | mesoderm posterior bHLH transcription factor 1 | 55897     | 166.1585899 | 3.050111187 | 0.748642454 | 4.074189448 | <b>4.62E-05</b> | 0.012114173 | FDR<0.05 |
| ENSG00000205312 | NA      | NA                                             | NA        | 1.759312313 | 3.05182523  | 2.195292368 | 1.390168013 | 0.164477864     | NA          | NA       |
| ENSG00000165078 | CPA6    | carboxypeptidase A6                            | 57094     | 49.10388474 | 3.054717819 | 1.136962589 | 2.686735562 | 0.007215405     | 0.414526701 | Not Sig  |
| ENSG00000162763 | LRRC52  | leucine rich repeat containing 52              | 440699    | 4.421905129 | 3.059448856 | 1.851196299 | 1.652687431 | 0.098394494     | NA          | NA       |

|                 |         |                                                      |           |             |             |             |             |             |             |         |
|-----------------|---------|------------------------------------------------------|-----------|-------------|-------------|-------------|-------------|-------------|-------------|---------|
| ENSG00000207768 | MIR188  | microRNA 188                                         | 406964    | 0.803450578 | 3.059505732 | 3.087196099 | 0.991030577 | 0.32167065  | NA          | NA      |
| ENSG00000176654 | NA      | NA                                                   | NA        | 3.176663404 | 3.059632618 | 2.269425318 | 1.348197093 | 0.177594999 | NA          | NA      |
| ENSG00000174876 | AMY1B   | amylase, alpha 1B (salivary)                         | 277       | 1.716525422 | 3.063938142 | 2.17870806  | 1.406309637 | 0.1596322   | NA          | NA      |
| ENSG00000174876 | AMY1C   | amylase, alpha 1C (salivary)                         | 278       | 1.716525422 | 3.063938142 | 2.17870806  | 1.406309637 | 0.1596322   | NA          | NA      |
| ENSG00000200713 | NA      | NA                                                   | NA        | 1.739009459 | 3.072055942 | 2.648117172 | 1.160090639 | 0.246011905 | NA          | NA      |
| ENSG00000143320 | CRABP2  | cellular retinoic acid binding protein 2             | 1382      | 369.6007506 | 3.079160363 | 1.022171497 | 3.012371576 | 0.002592151 | 0.220560515 | Not Sig |
| ENSG00000250444 | NA      | NA                                                   | NA        | 0.816325649 | 3.08248833  | 3.715871564 | 0.829546521 | 0.406795224 | NA          | NA      |
| ENSG00000214510 | SPINK13 | serine peptidase inhibitor, Kazal type 13 (putative) | 153218    | 28.28112851 | 3.085700004 | 1.641460712 | 1.879850051 | 0.060128517 | 0.999371363 | Not Sig |
| ENSG00000230813 | NA      | NA                                                   | NA        | 3.211199646 | 3.090123721 | 2.310265954 | 1.337561901 | 0.181039291 | NA          | NA      |
| ENSG00000100557 | CCDC198 | coiled-coil domain containing 198                    | 55195     | 64.06152514 | 3.09176712  | 1.665224925 | 1.856666371 | 0.063358635 | 0.999371363 | Not Sig |
| ENSG00000008196 | TFAP2B  | transcription factor AP-2 beta                       | 7021      | 6.081306465 | 3.096259526 | 1.840050644 | 1.682703428 | 0.092432518 | NA          | NA      |
| ENSG00000248705 | NA      | NA                                                   | NA        | 1.757863296 | 3.096934332 | 2.165287669 | 1.430264614 | 0.152641087 | NA          | NA      |
| ENSG00000115297 | TLX2    | T-cell leukemia homeobox 2                           | 3196      | 6.535312881 | 3.104277738 | 1.329349341 | 2.335185825 | 0.019533715 | NA          | NA      |
| ENSG00000135625 | EGR4    | early growth response 4                              | 1961      | 1.770738367 | 3.10735025  | 2.164168836 | 1.435816928 | 0.151054442 | NA          | NA      |
| ENSG00000137868 | STRA6   | stimulated by retinoic acid 6                        | 64220     | 146.2737978 | 3.114116572 | 0.948099351 | 3.284588865 | 0.001021313 | 0.120199932 | Not Sig |
| ENSG00000103546 | SLC6A2  | solute carrier family 6 member 2                     | 6530      | 3.04215614  | 3.116779274 | 2.301666334 | 1.354140358 | 0.175691603 | NA          | NA      |
| ENSG00000255690 | TRIL    | TLR4 interactor with leucine rich repeats            | 9865      | 3.393161987 | 3.11726667  | 1.663565906 | 1.873846211 | 0.060951625 | NA          | NA      |
| ENSG00000241680 | NA      | NA                                                   | NA        | 0.838350916 | 3.118064846 | 3.687937431 | 0.845476612 | 0.397844785 | NA          | NA      |
| ENSG00000254780 | NA      | NA                                                   | NA        | 0.838350916 | 3.118064846 | 3.687937431 | 0.845476612 | 0.397844785 | NA          | NA      |
| ENSG00000147003 | TMEM27  | transmembrane protein 27                             | 57393     | 64.17320112 | 3.124714752 | 0.876388957 | 3.565442863 | 0.000363242 | 0.058645003 | Not Sig |
| ENSG00000184144 | CNTN2   | contactin 2                                          | 6900      | 5.081390221 | 3.12482872  | 1.351595036 | 2.311956345 | 0.020780089 | NA          | NA      |
| ENSG00000233966 | NA      | NA                                                   | NA        | 0.844788452 | 3.125337871 | 3.09027679  | 1.011345612 | 0.311851042 | NA          | NA      |
| ENSG00000254326 | NA      | NA                                                   | NA        | 0.844788452 | 3.125337871 | 3.09027679  | 1.011345612 | 0.311851042 | NA          | NA      |
| ENSG00000258783 | NA      | NA                                                   | NA        | 0.844788452 | 3.125337871 | 3.09027679  | 1.011345612 | 0.311851042 | NA          | NA      |
| ENSG00000263987 | MIR5698 | microRNA 5698                                        | 100847024 | 0.844788452 | 3.125337871 | 3.09027679  | 1.011345612 | 0.311851042 | NA          | NA      |
| ENSG00000264911 | NA      | NA                                                   | NA        | 1.815507961 | 3.129386886 | 2.166406987 | 1.444505536 | 0.148596824 | NA          | NA      |
| ENSG00000215186 | GOLGA6B | golgin A6 family member B                            | 55889     | 1.860841898 | 3.148643034 | 2.18924772  | 1.438230587 | 0.150368639 | NA          | NA      |
| ENSG00000186766 | FOXI2   | forkhead box I2                                      | 399823    | 21.53393716 | 3.149591927 | 1.416480451 | 2.223533636 | 0.026179838 | 0.837114088 | Not Sig |
| ENSG00000252126 | NA      | NA                                                   | NA        | 1.840799334 | 3.165347594 | 2.141806945 | 1.477886511 | 0.139438157 | NA          | NA      |
| ENSG00000252170 | NA      | NA                                                   | NA        | 0.863642288 | 3.175462697 | 3.688809018 | 0.860836839 | 0.389327912 | NA          | NA      |
| ENSG00000249312 | NA      | NA                                                   | NA        | 3.688671486 | 3.181382264 | 2.000167778 | 1.590557702 | 0.11170915  | NA          | NA      |
| ENSG00000233384 | NA      | NA                                                   | NA        | 0.87968879  | 3.183755907 | 3.689860117 | 0.862839188 | 0.38822589  | NA          | NA      |
| ENSG00000237647 | NA      | NA                                                   | NA        | 0.87968879  | 3.183755907 | 3.689860117 | 0.862839188 | 0.38822589  | NA          | NA      |
| ENSG00000259871 | NA      | NA                                                   | NA        | 0.87968879  | 3.183755907 | 3.689860117 | 0.862839188 | 0.38822589  | NA          | NA      |
| ENSG00000206082 | NA      | NA                                                   | NA        | 0.870079824 | 3.185820775 | 3.621910913 | 0.879596669 | 0.379077844 | NA          | NA      |

|                 |           |                                   |           |             |             |             |             |             |             |          |
|-----------------|-----------|-----------------------------------|-----------|-------------|-------------|-------------|-------------|-------------|-------------|----------|
| ENSG00000263729 | NA        | NA                                | NA        | 0.870079824 | 3.185820775 | 3.621910913 | 0.879596669 | 0.379077844 | NA          | NA       |
| ENSG00000184908 | CLCNKB    | chloride voltage-gated channel Kb | 1188      | 42.07082374 | 3.193172789 | 0.99628083  | 3.205093073 | 0.001350188 | 0.138902032 | Not Sig  |
| ENSG00000140623 | 12-Sep    | septin 12                         | 124404    | 0.87651736  | 3.195882948 | 3.599981247 | 0.887749888 | 0.374675304 | NA          | NA       |
| ENSG00000255293 | NA        | NA                                | NA        | 3.379556958 | 3.198020281 | 1.654007281 | 1.933498309 | 0.053174841 | NA          | NA       |
| ENSG00000222044 | NA        | NA                                | NA        | 0.882954895 | 3.205762397 | 3.606924632 | 0.888779979 | 0.374121338 | NA          | NA       |
| ENSG00000201627 | NA        | NA                                | NA        | 1.968714344 | 3.2204343   | 2.582467745 | 1.24703757  | 0.212383722 | NA          | NA       |
| ENSG00000241335 | NA        | NA                                | NA        | 779.7750658 | 3.224561072 | 1.005984837 | 3.205377411 | 0.001348855 | 0.138902032 | Not Sig  |
| ENSG00000249852 | NA        | NA                                | NA        | 3.516705941 | 3.225327571 | 1.785014872 | 1.806891148 | 0.070779253 | NA          | NA       |
| ENSG00000187867 | PALM3     | paralemmin 3                      | 342979    | 178.7565801 | 3.227396738 | 0.853727421 | 3.780359699 | 0.000156602 | 0.031302989 | FDR<0.05 |
| ENSG00000244470 | NA        | NA                                | NA        | 0.898542627 | 3.228566343 | 3.649014643 | 0.884777579 | 0.376276604 | NA          | NA       |
| ENSG00000250644 | NA        | NA                                | NA        | 1.991293056 | 3.247298168 | 2.512186841 | 1.292618095 | 0.196143178 | NA          | NA       |
| ENSG00000188729 | OSTN      | osteocrin                         | 344901    | 0.911417698 | 3.249712102 | 2.951465575 | 1.101050315 | 0.270874759 | NA          | NA       |
| ENSG00000138347 | MYPN      | myopalladin                       | 84665     | 1.926022127 | 3.254193077 | 2.196989501 | 1.481205566 | 0.138551803 | NA          | NA       |
| ENSG00000198822 | GRM3      | glutamate metabotropic receptor 3 | 2913      | 0.917855234 | 3.259013418 | 2.946771741 | 1.105960591 | 0.268743577 | NA          | NA       |
| ENSG00000163046 | ANKRD30BL | ankyrin repeat domain 30B like    | 554226    | 1.964354186 | 3.267365949 | 2.567786015 | 1.272444795 | 0.203215127 | NA          | NA       |
| ENSG00000228146 | CASP16P   | caspase 16, pseudogene            | 197350    | 0.924292769 | 3.268136386 | 2.998611918 | 1.089883078 | 0.275764652 | NA          | NA       |
| ENSG00000233131 | NA        | NA                                | NA        | 0.924292769 | 3.268136386 | 2.998611918 | 1.089883078 | 0.275764652 | NA          | NA       |
| ENSG00000264175 | MIR3189   | microRNA 3189                     | 100422943 | 43.89051515 | 3.271668381 | 0.758778817 | 4.31175503  | 1.62E-05    | 0.004944809 | FDR<0.05 |
| ENSG00000235366 | NA        | NA                                | NA        | 1.986838223 | 3.274773499 | 2.510691641 | 1.304331223 | 0.192120674 | NA          | NA       |
| ENSG00000162892 | IL24      | interleukin 24                    | 11009     | 0.930730305 | 3.276665247 | 3.613968031 | 0.906666916 | 0.364582964 | NA          | NA       |
| ENSG00000226622 | NA        | NA                                | NA        | 0.930730305 | 3.276665247 | 3.613968031 | 0.906666916 | 0.364582964 | NA          | NA       |
| ENSG00000259045 | NA        | NA                                | NA        | 0.930730305 | 3.276665247 | 3.613968031 | 0.906666916 | 0.364582964 | NA          | NA       |
| ENSG00000211957 | NA        | NA                                | NA        | 0.939880501 | 3.289287269 | 3.544450834 | 0.928010409 | 0.35340217  | NA          | NA       |
| ENSG00000237463 | LOC400794 | uncharacterized LOC400794         | 400794    | 33.06737468 | 3.291970854 | 0.773196351 | 4.257613023 | 2.07E-05    | 0.006051118 | FDR<0.05 |
| ENSG00000132429 | POPDC3    | popeye domain containing 3        | 64208     | 15.31002019 | 3.292483483 | 1.282428887 | 2.56738094  | 0.010246997 | 0.497939162 | Not Sig  |
| ENSG00000227201 | NA        | NA                                | NA        | 42.65314351 | 3.292559727 | 1.610170845 | 2.044851164 | 0.040869534 | 0.999371363 | Not Sig  |
| ENSG00000226574 | NA        | NA                                | NA        | 2.011869305 | 3.30510654  | 2.517996156 | 1.312593957 | 0.189319807 | NA          | NA       |
| ENSG00000227120 | NA        | NA                                | NA        | 2.005985214 | 3.311117803 | 2.228044184 | 1.486109578 | 0.137250139 | NA          | NA       |
| ENSG00000131969 | ABHD12B   | abhydrolase domain containing 12B | 145447    | 3.857123472 | 3.315837699 | 1.609909843 | 2.059641857 | 0.039432792 | NA          | NA       |
| ENSG00000188869 | TMC3      | transmembrane channel like 3      | 342125    | 0.959193108 | 3.316299128 | 2.917090576 | 1.136851614 | 0.255600322 | NA          | NA       |
| ENSG00000215414 | NA        | NA                                | NA        | 0.959193108 | 3.316299128 | 2.917090576 | 1.136851614 | 0.255600322 | NA          | NA       |
| ENSG00000138083 | SIX3      | SIX homeobox 3                    | 6496      | 9.123179733 | 3.320147154 | 1.75543529  | 1.89135263  | 0.058577287 | 0.999371363 | Not Sig  |
| ENSG00000177306 | NA        | NA                                | NA        | 0.965630643 | 3.326308888 | 3.518440108 | 0.945393068 | 0.34445824  | NA          | NA       |
| ENSG00000270204 | NA        | NA                                | NA        | 0.965630643 | 3.326308888 | 3.518440108 | 0.945393068 | 0.34445824  | NA          | NA       |
| ENSG00000249715 | FER1L5    | fer-1 like family member 5        | 90342     | 64.44487459 | 3.339187778 | 1.019707111 | 3.274653811 | 0.001057915 | 0.123354883 | Not Sig  |

|                 |              |                                                              |           |             |             |             |             |             |             |          |
|-----------------|--------------|--------------------------------------------------------------|-----------|-------------|-------------|-------------|-------------|-------------|-------------|----------|
| ENSG00000230702 | NA           | NA                                                           | NA        | 0.981218375 | 3.347488115 | 3.488638054 | 0.959540102 | 0.337286727 | NA          | NA       |
| ENSG00000237303 | NA           | NA                                                           | NA        | 0.981218375 | 3.347488115 | 3.488638054 | 0.959540102 | 0.337286727 | NA          | NA       |
| ENSG00000263941 | NA           | NA                                                           | NA        | 0.981218375 | 3.347488115 | 3.488638054 | 0.959540102 | 0.337286727 | NA          | NA       |
| ENSG00000186723 | OR10H1       | olfactory receptor family 10 subfamily H member 1            | 26539     | 0.987655911 | 3.354217417 | 2.89831607  | 1.157298699 | 0.247150345 | NA          | NA       |
| ENSG00000265929 | MIR5195      | microRNA 5195                                                | 100847062 | 0.987655911 | 3.354217417 | 2.89831607  | 1.157298699 | 0.247150345 | NA          | NA       |
| ENSG00000251313 | NA           | NA                                                           | NA        | 2.059739389 | 3.357306755 | 2.47046039  | 1.3589802   | 0.174152863 | NA          | NA       |
| ENSG00000265901 | NA           | NA                                                           | NA        | 0.994093446 | 3.362919558 | 2.894251241 | 1.161930765 | 0.245263589 | NA          | NA       |
| ENSG00000239819 | NA           | NA                                                           | NA        | 85.4980973  | 3.363162496 | 2.947690074 | 1.140948475 | 0.253891365 | 0.999371363 | Not Sig  |
| ENSG00000109991 | P2RX3        | purinergic receptor P2X 3                                    | 5024      | 2.11411795  | 3.37250227  | 2.053236669 | 1.64252973  | 0.10048027  | NA          | NA       |
| ENSG00000232431 | LOC100289656 | Dexi homolog (mouse) pseudogene                              | 100289656 | 1.000530982 | 3.374279816 | 3.470400069 | 0.972302832 | 0.330899915 | NA          | NA       |
| ENSG00000239511 | NA           | NA                                                           | NA        | 1.000530982 | 3.374279816 | 3.470400069 | 0.972302832 | 0.330899915 | NA          | NA       |
| ENSG00000197251 | LINC00336    | long intergenic non-protein coding RNA 336                   | 401253    | 5.581974458 | 3.384394518 | 1.841506527 | 1.837840088 | 0.066085973 | NA          | NA       |
| ENSG00000118322 | ATP10B       | ATPase phospholipid transporting 10B (putative)              | 23120     | 446.075518  | 3.384716828 | 1.078389583 | 3.138677228 | 0.001697123 | 0.162078358 | Not Sig  |
| ENSG00000202215 | NA           | NA                                                           | NA        | 2.126273961 | 3.391296905 | 2.088232676 | 1.624003371 | 0.104375089 | NA          | NA       |
| ENSG00000234311 | NA           | NA                                                           | NA        | 3.798550368 | 3.40253122  | 1.97540732  | 1.722445385 | 0.084988868 | NA          | NA       |
| ENSG00000261330 | NA           | NA                                                           | NA        | 1.012947283 | 3.405012566 | 3.452183504 | 0.986335912 | 0.323968303 | NA          | NA       |
| ENSG00000254762 | NA           | NA                                                           | NA        | 2.129540066 | 3.406848746 | 2.058123452 | 1.655317976 | 0.097860015 | NA          | NA       |
| ENSG00000212544 | NA           | NA                                                           | NA        | 34.28826505 | 3.407066988 | 0.755581008 | 4.509201466 | 6.51E-06    | 0.002341294 | FDR<0.05 |
| ENSG00000143105 | KCNA10       | potassium voltage-gated channel subfamily A member 10        | 3744      | 1.028993785 | 3.408739087 | 2.930180502 | 1.163320514 | 0.244699486 | NA          | NA       |
| ENSG00000243455 | NA           | NA                                                           | NA        | 1.028993785 | 3.408739087 | 2.930180502 | 1.163320514 | 0.244699486 | NA          | NA       |
| ENSG00000234040 | NA           | NA                                                           | NA        | 1.019384818 | 3.413731213 | 3.423914848 | 0.997025733 | 0.318752019 | NA          | NA       |
| ENSG00000213937 | CLDN9        | claudin 9                                                    | 9080      | 104.5018443 | 3.414224645 | 0.771734015 | 4.424095062 | 9.68E-06    | 0.003278262 | FDR<0.05 |
| ENSG00000248498 | ASNSP1       | asparagine synthetase pseudogene 1                           | 389652    | 1.03543132  | 3.420871675 | 3.453212655 | 0.990634524 | 0.321864073 | NA          | NA       |
| ENSG00000112333 | NR2E1        | nuclear receptor subfamily 2 group E member 1                | 7101      | 3.977037225 | 3.427266299 | 2.146573176 | 1.596622159 | 0.110349956 | NA          | NA       |
| ENSG00000205847 | OR7E91P      | olfactory receptor family 7 subfamily E member 91 pseudogene | 79315     | 1.03225989  | 3.430717083 | 3.434818724 | 0.998805864 | 0.317888745 | NA          | NA       |
| ENSG00000227198 | NA           | NA                                                           | NA        | 1.03225989  | 3.430717083 | 3.434818724 | 0.998805864 | 0.317888745 | NA          | NA       |
| ENSG00000211750 | NA           | NA                                                           | NA        | 2.231694037 | 3.450311833 | 2.173108143 | 1.587731308 | 0.11234711  | NA          | NA       |
| ENSG00000215874 | NA           | NA                                                           | NA        | 1.054285157 | 3.460767845 | 2.826897758 | 1.224228162 | 0.220866168 | NA          | NA       |
| ENSG00000237708 | NA           | NA                                                           | NA        | 1.054285157 | 3.460767845 | 2.826897758 | 1.224228162 | 0.220866168 | NA          | NA       |
| ENSG00000205642 | VCX3B        | variable charge, X-linked 3B                                 | 425054    | 1.070331659 | 3.466442184 | 3.483831495 | 0.995008567 | 0.319732098 | NA          | NA       |
| ENSG00000204455 | NA           | NA                                                           | NA        | 2.221919455 | 3.473724038 | 2.474961952 | 1.403546441 | 0.160453954 | NA          | NA       |
| ENSG00000184368 | MAP7D2       | MAP7 domain containing 2                                     | 256714    | 115.6571368 | 3.475217714 | 0.902888268 | 3.849000853 | 0.000118601 | 0.026202409 | FDR<0.05 |
| ENSG00000100253 | MIOX         | myo-inositol oxygenase                                       | 55586     | 29.36966931 | 3.482910184 | 1.14208221  | 3.049614251 | 0.002291355 | 0.203204427 | Not Sig  |
| ENSG00000148965 | SAA4         | serum amyloid A4, constitutive                               | 6291      | 1.08274796  | 3.494575555 | 3.391738108 | 1.030319985 | 0.302859821 | NA          | NA       |
| ENSG00000234805 | NA           | NA                                                           | NA        | 2.291885747 | 3.497480691 | 2.02265143  | 1.729156412 | 0.083781105 | NA          | NA       |

|                 |              |                                                       |           |             |             |             |             |             |             |          |
|-----------------|--------------|-------------------------------------------------------|-----------|-------------|-------------|-------------|-------------|-------------|-------------|----------|
| ENSG00000268510 | NA           | NA                                                    | NA        | 2.259532454 | 3.499933395 | 2.046209562 | 1.71044719  | 0.087183211 | NA          | NA       |
| ENSG00000244122 | UGT1A7       | UDP glucuronosyltransferase family 1 member A7        | 54577     | 5.943781972 | 3.50051457  | 1.586426186 | 2.206541093 | 0.027346136 | NA          | NA       |
| ENSG00000213492 | NA           | NA                                                    | NA        | 1.095623031 | 3.510883912 | 2.743050279 | 1.279919635 | 0.200573401 | NA          | NA       |
| ENSG00000211802 | NA           | NA                                                    | NA        | 2.381728989 | 3.52670781  | 2.050214326 | 1.720165432 | 0.085402375 | NA          | NA       |
| ENSG00000232829 | NA           | NA                                                    | NA        | 1.114935638 | 3.534751472 | 3.366209343 | 1.05006882  | 0.293686473 | NA          | NA       |
| ENSG00000205695 | NA           | NA                                                    | NA        | 1.124085834 | 3.545309112 | 3.336694181 | 1.062521442 | 0.287999029 | NA          | NA       |
| ENSG00000216058 | MIR944       | microRNA 944                                          | 100126340 | 1.124085834 | 3.545309112 | 3.336694181 | 1.062521442 | 0.287999029 | NA          | NA       |
| ENSG00000041982 | TNC          | tenascin C                                            | 3371      | 10842.15305 | 3.546912892 | 0.97852043  | 3.624771424 | 0.000289217 | 0.049891937 | FDR<0.05 |
| ENSG00000204544 | MUC21        | mucin 21, cell surface associated                     | 394263    | 461.8184279 | 3.549907791 | 0.661224759 | 5.368685527 | 7.93E-08    | 5.82E-05    | FDR<0.05 |
| ENSG00000183783 | KCTD8        | potassium channel tetramerization domain containing 8 | 386617    | 2.354624503 | 3.566067568 | 2.134433874 | 1.670732277 | 0.09477457  | NA          | NA       |
| ENSG00000129159 | KCNC1        | potassium voltage-gated channel subfamily C member 1  | 3746      | 2.383806366 | 3.574239365 | 2.089036649 | 1.710951011 | 0.087090157 | NA          | NA       |
| ENSG00000197934 | CYYR1-AS1    | cysteine and tyrosine rich 1 antisense RNA 1          | 100996571 | 1.155814742 | 3.59518962  | 3.318182659 | 1.083481529 | 0.278594745 | NA          | NA       |
| ENSG00000131142 | CCL25        | C-C motif chemokine ligand 25                         | 6370      | 2.447628277 | 3.60034041  | 1.988091109 | 1.810953428 | 0.070148061 | NA          | NA       |
| ENSG00000234511 | C5orf58      | chromosome 5 open reading frame 58                    | 133874    | 1.178298779 | 3.606549418 | 2.762910166 | 1.305344438 | 0.191775589 | NA          | NA       |
| ENSG00000164778 | EN2          | engrailed homeobox 2                                  | 2020      | 33.27063308 | 3.625855944 | 1.387843389 | 2.612582927 | 0.008986089 | 0.472053287 | Not Sig  |
| ENSG00000227358 | NA           | NA                                                    | NA        | 1.184277544 | 3.627568429 | 3.366507351 | 1.077546564 | 0.28123616  | NA          | NA       |
| ENSG00000130513 | GDF15        | growth differentiation factor 15                      | 9518      | 2421.234925 | 3.629644837 | 0.662622258 | 5.47769833  | 4.31E-08    | 3.39E-05    | FDR<0.05 |
| ENSG00000207982 | MIR548B      | microRNA 548b                                         | 693128    | 4.516423189 | 3.647281296 | 1.758005678 | 2.074669804 | 0.038017148 | NA          | NA       |
| ENSG00000251758 | NA           | NA                                                    | NA        | 1.225615418 | 3.674181998 | 3.269462077 | 1.123787923 | 0.261103006 | NA          | NA       |
| ENSG00000252643 | NA           | NA                                                    | NA        | 2.584058201 | 3.685742328 | 1.94413179  | 1.895829464 | 0.057982598 | NA          | NA       |
| ENSG00000182870 | GALNT9       | polypeptide N-acetylgalactosaminyltransferase 9       | 50614     | 1.244928025 | 3.696104415 | 2.621492703 | 1.409923595 | 0.158562245 | NA          | NA       |
| ENSG00000237510 | NA           | NA                                                    | NA        | 9.394196887 | 3.703604953 | 1.47738669  | 2.506862271 | 0.012180816 | 0.551555006 | Not Sig  |
| ENSG00000132972 | RNF17        | ring finger protein 17                                | 56163     | 2.618499769 | 3.712548306 | 2.388071612 | 1.554621849 | 0.120036157 | NA          | NA       |
| ENSG00000175497 | DPP10        | dipeptidyl peptidase like 10                          | 57628     | 25.16918923 | 3.717890411 | 1.326601161 | 2.802568337 | 0.005069747 | 0.329089329 | Not Sig  |
| ENSG00000231575 | NA           | NA                                                    | NA        | 2.612355388 | 3.719914787 | 1.948953137 | 1.908673286 | 0.056304251 | NA          | NA       |
| ENSG00000162896 | PIGR         | polymeric immunoglobulin receptor                     | 5284      | 89167.09109 | 3.723804103 | 1.357797712 | 2.742532315 | 0.006096745 | 0.370900051 | Not Sig  |
| ENSG00000259422 | LOC101929439 | uncharacterized LOC101929439                          | 101929439 | 1.299140971 | 3.753704199 | 3.19616933  | 1.174438464 | 0.240219446 | NA          | NA       |
| ENSG00000230712 | NA           | NA                                                    | NA        | 4.719870187 | 3.762871433 | 1.700545648 | 2.212743561 | 0.02691533  | NA          | NA       |
| ENSG00000225165 | NA           | NA                                                    | NA        | 1.314728702 | 3.767526696 | 2.656786288 | 1.418076687 | 0.156168377 | NA          | NA       |
| ENSG00000178193 | NA           | NA                                                    | NA        | 1.327603773 | 3.780656127 | 2.65214278  | 1.425510028 | 0.154009824 | NA          | NA       |
| ENSG00000225330 | NA           | NA                                                    | NA        | 1.327145003 | 3.792021533 | 3.263909204 | 1.161803621 | 0.245315243 | NA          | NA       |
| ENSG00000232878 | DPYD-AS1     | DPYD antisense RNA 1                                  | 100873932 | 1.327145003 | 3.792021533 | 3.263909204 | 1.161803621 | 0.245315243 | NA          | NA       |
| ENSG00000232422 | NA           | NA                                                    | NA        | 2.761367228 | 3.794571277 | 2.368853546 | 1.601859804 | 0.109186615 | NA          | NA       |
| ENSG00000108244 | KRT23        | keratin 23                                            | 25984     | 75.07610076 | 3.804042209 | 1.212107947 | 3.138369168 | 0.001698908 | 0.162078358 | Not Sig  |
| ENSG00000149328 | GLB1L2       | galactosidase beta 1 like 2                           | 89944     | 617.3400797 | 3.805375295 | 0.733534374 | 5.187725935 | 2.13E-07    | 0.000121853 | FDR<0.05 |

|                 |              |                                                        |           |             |             |             |             |             |             |          |
|-----------------|--------------|--------------------------------------------------------|-----------|-------------|-------------|-------------|-------------|-------------|-------------|----------|
| ENSG00000166069 | TMC05A       | transmembrane and coiled-coil domains 5A               | 145942    | 1.362504112 | 3.815187066 | 2.665417975 | 1.4313654   | 0.152325519 | NA          | NA       |
| ENSG00000211978 | NA           | NA                                                     | NA        | 1.362504112 | 3.815187066 | 2.665417975 | 1.4313654   | 0.152325519 | NA          | NA       |
| ENSG00000207608 | MIR127       | microRNA 127                                           | 406914    | 2.851210469 | 3.819590738 | 2.047649401 | 1.865353872 | 0.062131819 | NA          | NA       |
| ENSG00000243420 | NA           | NA                                                     | NA        | 1.368941647 | 3.824958619 | 3.157340175 | 1.21144964  | 0.225723124 | NA          | NA       |
| ENSG00000233542 | NA           | NA                                                     | NA        | 1.381357948 | 3.847789463 | 2.562845215 | 1.501374114 | 0.133258825 | NA          | NA       |
| ENSG00000262003 | LOC101927727 | uncharacterized LOC101927727                           | 101927727 | 2.84387736  | 3.85332877  | 1.950968574 | 1.975085002 | 0.048258503 | NA          | NA       |
| ENSG00000266582 | MIR4527      | microRNA 4527                                          | 100616264 | 1.464033697 | 3.923920651 | 2.509980553 | 1.563327113 | 0.117975674 | NA          | NA       |
| ENSG00000273082 | NA           | NA                                                     | NA        | 1.45442473  | 3.925936857 | 3.062302573 | 1.282021212 | 0.199835205 | NA          | NA       |
| ENSG00000136457 | CHAD         | chondroadherin                                         | 1101      | 11.37686175 | 3.926254633 | 1.348772074 | 2.910984523 | 0.003602919 | 0.268774977 | Not Sig  |
| ENSG00000122194 | PLG          | plasminogen                                            | 5340      | 1.476908768 | 3.936007064 | 2.56873375  | 1.532275217 | 0.125454534 | NA          | NA       |
| ENSG00000207934 | MIR654       | microRNA 654                                           | 724024    | 1.467299801 | 3.937984634 | 3.056117012 | 1.288558199 | 0.197551723 | NA          | NA       |
| ENSG00000123572 | NRK          | Nik related kinase                                     | 203447    | 114.7961811 | 3.942662315 | 1.087363316 | 3.625892337 | 0.000287965 | 0.049891937 | FDR<0.05 |
| ENSG00000220515 | NA           | NA                                                     | NA        | 1.489325069 | 3.960166861 | 2.553480293 | 1.550889925 | 0.120928065 | NA          | NA       |
| ENSG00000259796 | NA           | NA                                                     | NA        | 16.08087044 | 3.980143035 | 1.393003699 | 2.857237951 | 0.004273453 | 0.298975548 | Not Sig  |
| ENSG00000230918 | NA           | NA                                                     | NA        | 8.444060723 | 3.992379054 | 1.273995967 | 3.133745442 | 0.001725905 | 0.163415962 | Not Sig  |
| ENSG00000071909 | MYO3B        | myosin IIIB                                            | 140469    | 141.9108159 | 4.007328067 | 1.045429187 | 3.833189388 | 0.000126492 | 0.026998643 | FDR<0.05 |
| ENSG00000228983 | NA           | NA                                                     | NA        | 3.171408922 | 4.010008821 | 1.865132814 | 2.149985669 | 0.031556348 | NA          | NA       |
| ENSG00000243507 | NA           | NA                                                     | NA        | 1.572000817 | 4.031151753 | 2.42427146  | 1.662830182 | 0.096346433 | NA          | NA       |
| ENSG00000189127 | ANKRD34B     | ankyrin repeat domain 34B                              | 340120    | 43.96820228 | 4.034906362 | 1.537660069 | 2.624056152 | 0.008688946 | 0.469613286 | Not Sig  |
| ENSG00000238920 | NA           | NA                                                     | NA        | 1.588047319 | 4.037420497 | 3.065718338 | 1.316957415 | 0.187852899 | NA          | NA       |
| ENSG00000231245 | NA           | NA                                                     | NA        | 1.591313424 | 4.047612491 | 2.526241915 | 1.602226797 | 0.109105467 | NA          | NA       |
| ENSG00000218357 | LINC01644    | long intergenic non-protein coding RNA 1644            | 101927722 | 49.58106067 | 4.059318704 | 0.91219909  | 4.450035906 | 8.59E-06    | 0.003003288 | FDR<0.05 |
| ENSG00000142319 | SLC6A3       | solute carrier family 6 member 3                       | 6531      | 53.94162788 | 4.076089825 | 0.852314878 | 4.782375543 | 1.73E-06    | 0.000727185 | FDR<0.05 |
| ENSG00000175604 | NA           | NA                                                     | NA        | 1.626213762 | 4.076220417 | 2.502641765 | 1.628767039 | 0.103362345 | NA          | NA       |
| ENSG00000123838 | C4BPA        | complement component 4 binding protein alpha           | 722       | 8301.036052 | 4.085973015 | 0.872559235 | 4.682745714 | 2.83E-06    | 0.00111392  | FDR<0.05 |
| ENSG00000230180 | NA           | NA                                                     | NA        | 1.654676565 | 4.098681867 | 2.434271136 | 1.683740897 | 0.092231754 | NA          | NA       |
| ENSG00000234892 | NA           | NA                                                     | NA        | 1.679967937 | 4.130920735 | 2.388632905 | 1.72940795  | 0.083736108 | NA          | NA       |
| ENSG00000252761 | NA           | NA                                                     | NA        | 1.712155615 | 4.155572592 | 2.994353224 | 1.387803068 | 0.16519702  | NA          | NA       |
| ENSG00000197587 | DMBX1        | diencephalon/mesencephalon homeobox 1                  | 127343    | 3.562740428 | 4.157358228 | 2.249356645 | 1.848243247 | 0.064567162 | NA          | NA       |
| ENSG00000251139 | NA           | NA                                                     | NA        | 3.604537073 | 4.171657773 | 2.329226315 | 1.791005772 | 0.073292369 | NA          | NA       |
| ENSG00000269621 | NA           | NA                                                     | NA        | 1.762643685 | 4.193842573 | 2.343555436 | 1.789521387 | 0.073530886 | NA          | NA       |
| ENSG00000148408 | CACNA1B      | calcium voltage-gated channel subunit alpha B          | 774       | 22.71793296 | 4.195611054 | 1.316090179 | 3.187935843 | 0.001432923 | 0.143788559 | Not Sig  |
| ENSG00000171136 | RLN3         | relaxin 3                                              | 117579    | 3.703448671 | 4.22131642  | 2.246678923 | 1.878913972 | 0.060256241 | NA          | NA       |
| ENSG00000163793 | DNAJC5G      | DnaJ heat shock protein family (Hsp40) member C5 gamma | 285126    | 1.800810129 | 4.233140224 | 2.425708456 | 1.745115005 | 0.080964852 | NA          | NA       |
| ENSG00000227375 | DLG1-AS1     | DLG1 antisense RNA 1                                   | 100507086 | 3.688665812 | 4.242820834 | 1.788112372 | 2.372793176 | 0.017654146 | NA          | NA       |

|                 |              |                                                   |           |             |             |             |             |             |             |          |
|-----------------|--------------|---------------------------------------------------|-----------|-------------|-------------|-------------|-------------|-------------|-------------|----------|
| ENSG00000181009 | OR52N5       | olfactory receptor family 52 subfamily N member 5 | 390075    | 3.870959383 | 4.282124321 | 2.262700298 | 1.892484093 | 0.058426511 | NA          | NA       |
| ENSG00000243766 | NA           | NA                                                | NA        | 1.879761002 | 4.289320508 | 2.869772688 | 1.494655143 | 0.135004467 | NA          | NA       |
| ENSG00000249114 | NA           | NA                                                | NA        | 1.886198537 | 4.293895515 | 2.410376297 | 1.781421233 | 0.074843662 | NA          | NA       |
| ENSG00000239748 | NA           | NA                                                | NA        | 1.889923412 | 4.297050618 | 2.431454641 | 1.767275665 | 0.077182073 | NA          | NA       |
| ENSG00000237416 | NA           | NA                                                | NA        | 2.01021216  | 4.378884481 | 2.390994419 | 1.831407237 | 0.067039782 | NA          | NA       |
| ENSG00000249439 | NA           | NA                                                | NA        | 4.166856712 | 4.3953641   | 2.208185162 | 1.990487109 | 0.046537303 | NA          | NA       |
| ENSG00000181001 | OR52N1       | olfactory receptor family 52 subfamily N member 1 | 79473     | 2.064425105 | 4.415026855 | 2.404615781 | 1.836063328 | 0.066348291 | NA          | NA       |
| ENSG00000137975 | CLCA2        | chloride channel accessory 2                      | 9635      | 126.7562691 | 4.420609071 | 1.130108142 | 3.911669076 | 9.17E-05    | 0.021375557 | FDR<0.05 |
| ENSG00000225833 | GS1-594A7.3  | uncharacterized LOC104798195                      | 104798195 | 2.124616815 | 4.460907055 | 2.235205665 | 1.995747919 | 0.045961368 | NA          | NA       |
| ENSG00000272514 | CFAP206      | cilia and flagella associated protein 206         | 154313    | 4.324947806 | 4.462233817 | 1.744326247 | 2.558141761 | 0.010523318 | NA          | NA       |
| ENSG00000073067 | CYP2W1       | cytochrome P450 family 2 subfamily W member 1     | 54905     | 8.416549629 | 4.567708378 | 1.659915577 | 2.7517715   | 0.005927386 | 0.364115006 | Not Sig  |
| ENSG00000259441 | NA           | NA                                                | NA        | 2.292775646 | 4.579186516 | 2.177967863 | 2.102504171 | 0.035509135 | NA          | NA       |
| ENSG00000215572 | NA           | NA                                                | NA        | 2.305650718 | 4.586739777 | 2.157134387 | 2.126311556 | 0.033477326 | NA          | NA       |
| ENSG00000233451 | NA           | NA                                                | NA        | 2.308363378 | 4.586905869 | 2.731551823 | 1.679230769 | 0.093107077 | NA          | NA       |
| ENSG00000183729 | NPBWR1       | neuropeptides B and W receptor 1                  | 2831      | 2.363129768 | 4.624139881 | 2.711651121 | 1.7052857   | 0.088141153 | NA          | NA       |
| ENSG00000230778 | ANKRD63      | ankyrin repeat domain 63                          | 100131244 | 2.363129768 | 4.624139881 | 2.711651121 | 1.7052857   | 0.088141153 | NA          | NA       |
| ENSG00000177414 | UBE2U        | ubiquitin conjugating enzyme E2 U (putative)      | 148581    | 18.43547609 | 4.624961914 | 1.331716182 | 3.472933631 | 0.000514803 | 0.072841682 | Not Sig  |
| ENSG00000175329 | ISX          | intestine specific homeobox                       | 91464     | 2.454861038 | 4.667376482 | 2.738331194 | 1.704460181 | 0.088295149 | NA          | NA       |
| ENSG00000258670 | NA           | NA                                                | NA        | 2.518872298 | 4.715799524 | 2.702329472 | 1.745086812 | 0.080969759 | NA          | NA       |
| ENSG00000225867 | NA           | NA                                                | NA        | 13.53865998 | 4.748037112 | 1.42520611  | 3.331474008 | 0.000863874 | 0.111007767 | Not Sig  |
| ENSG00000259370 | LOC105370854 | uncharacterized LOC105370854                      | 105370854 | 18.94913759 | 4.765928246 | 1.095551043 | 4.350256683 | 1.36E-05    | 0.004280936 | FDR<0.05 |
| ENSG00000082556 | OPRK1        | opioid receptor kappa 1                           | 4986      | 65.23151841 | 4.794958697 | 1.159427661 | 4.135625583 | 3.54E-05    | 0.009484645 | FDR<0.05 |
| ENSG00000139219 | COL2A1       | collagen type II alpha 1 chain                    | 1280      | 5.49952171  | 4.821071368 | 1.767429645 | 2.727730285 | 0.006377173 | NA          | NA       |
| ENSG00000182632 | CCNYL2       | cyclin Y-like 2 (pseudogene)                      | 414194    | 2.823271704 | 4.869247712 | 2.664570133 | 1.827404598 | 0.067638959 | NA          | NA       |
| ENSG00000263805 | NA           | NA                                                | NA        | 2.832975344 | 4.874447363 | 2.095821321 | 2.325793384 | 0.020029576 | NA          | NA       |
| ENSG00000166603 | MC4R         | melanocortin 4 receptor                           | 4160      | 2.845945089 | 4.892607306 | 2.229686603 | 2.194302688 | 0.028213656 | NA          | NA       |
| ENSG00000240194 | CYMP         | chymosin pseudogene                               | 643160    | 6.012158152 | 4.970492992 | 2.126978158 | 2.336880129 | 0.019445418 | NA          | NA       |
| ENSG00000241635 | UGT1A1       | UDP glucuronosyltransferase family 1 member A1    | 54658     | 6.146698281 | 4.994956471 | 1.730279684 | 2.886791376 | 0.003891922 | NA          | NA       |
| ENSG00000086570 | FAT2         | FAT atypical cadherin 2                           | 2196      | 226.7564043 | 5.089680069 | 0.71646267  | 7.103901271 | 1.21E-12    | 1.39E-09    | FDR<0.05 |
| ENSG00000237322 | NA           | NA                                                | NA        | 3.318962096 | 5.100829554 | 2.207166049 | 2.311031178 | 0.020831133 | NA          | NA       |
| ENSG00000216921 | LOC285095    | uncharacterized LOC285095                         | 285095    | 3.401827193 | 5.149001278 | 2.506763845 | 2.054043219 | 0.039971509 | NA          | NA       |
| ENSG00000250685 | LOC654780    | splicing factor proline/glutamine-rich            | 654780    | 3.550119973 | 5.212681883 | 2.0333083   | 2.563645603 | 0.010357925 | NA          | NA       |
| ENSG00000185038 | MROH2A       | maestro heat like repeat family member 2A         | 339766    | 37.7351059  | 5.227011298 | 1.004620948 | 5.20296865  | 1.96E-07    | 0.000117613 | FDR<0.05 |
| ENSG00000164265 | SCGB3A2      | secretoglobin family 3A member 2                  | 117156    | 19592.55713 | 5.230474412 | 1.214199103 | 4.307756776 | 1.65E-05    | 0.004944809 | FDR<0.05 |
| ENSG00000257703 | NA           | NA                                                | NA        | 3.732071415 | 5.280034816 | 1.961790303 | 2.691436902 | 0.007114496 | NA          | NA       |

|                 |           |                                                 |    |        |             |             |             |             |             |             |          |
|-----------------|-----------|-------------------------------------------------|----|--------|-------------|-------------|-------------|-------------|-------------|-------------|----------|
| ENSG00000197838 | CYP2A13   | cytochrome P450 family 2 subfamily A member 13  |    | 1553   | 4.1547897   | 5.436832839 | 2.451174549 | 2.218052093 | 0.026551281 | NA          | NA       |
| ENSG00000165799 | RNASE7    | ribonuclease A family member 7                  |    | 84659  | 4.267169927 | 5.475263134 | 2.470547355 | 2.216214606 | 0.026676808 | NA          | NA       |
| ENSG00000188095 | MESP2     | mesoderm posterior bHLH transcription factor 2  |    | 145873 | 25.46576753 | 5.542429947 | 1.208279494 | 4.58704296  | 4.50E-06    | 0.001665121 | FDR<0.05 |
| ENSG00000070729 | CNGB1     | cyclic nucleotide gated channel beta 1          |    | 1258   | 35.34526189 | 5.696115949 | 1.170946669 | 4.86453918  | 1.15E-06    | 0.00053508  | FDR<0.05 |
| ENSG00000170454 | KRT75     | keratin 75                                      |    | 9119   | 5.432593635 | 5.8222071   | 2.316087231 | 2.513811666 | 0.01194342  | NA          | NA       |
| ENSG00000198691 | ABCA4     | ATP binding cassette subfamily A member 4       |    | 24     | 698.2522545 | 5.84622395  | 0.730668465 | 8.001199212 | 1.23E-15    | 1.94E-12    | FDR<0.05 |
| ENSG00000197888 | UGT2B17   | UDP glucuronosyltransferase family 2 member B17 |    | 7367   | 5.864826212 | 5.930370754 | 2.250000462 | 2.635719793 | 0.008395903 | NA          | NA       |
| ENSG00000215474 | SKOR2     | SKI family transcriptional corepressor 2        |    | 652991 | 5.889753488 | 5.940874151 | 2.322358799 | 2.558120715 | 0.010523955 | NA          | NA       |
| ENSG00000036828 | CASR      | calcium sensing receptor                        |    | 846    | 125.1754889 | 6.107240499 | 1.311588009 | 4.656371099 | 3.22E-06    | 0.001228129 | FDR<0.05 |
| ENSG00000235026 | DPP10-AS1 | DPP10 antisense RNA 1                           |    | 389023 | 7.129256193 | 6.215961058 | 2.165057433 | 2.87103749  | 0.00409127  | 0.28944586  | Not Sig  |
| ENSG00000232843 | NA        | NA                                              | NA |        | 10.501743   | 6.771504735 | 3.910784289 | 1.73149533  | 0.083363457 | 0.999371363 | Not Sig  |
| ENSG00000220154 | NA        | NA                                              | NA |        | 82.72411462 | 7.354842402 | 1.508894464 | 4.874325262 | 1.09E-06    | 0.000528814 | FDR<0.05 |
| ENSG00000161055 | SCGB3A1   | secretoglobin family 3A member 1                |    | 92304  | 123030.2568 | 7.485702949 | 2.189001802 | 3.419687889 | 0.00062693  | 0.08398864  | Not Sig  |
| ENSG00000172782 | FADS6     | fatty acid desaturase 6                         |    | 283985 | 60.08808957 | 8.321178965 | 3.002426498 | 2.771484655 | 0.00558013  | 0.347874159 | Not Sig  |
| ENSG00000154975 | CA10      | carbonic anhydrase 10                           |    | 56934  | 164.6916787 | 8.418477377 | 2.519954385 | 3.340726097 | 0.000835596 | 0.108481053 | Not Sig  |
| ENSG00000201464 | NA        | NA                                              | NA |        | 44.99840255 | 8.870925321 | 1.696798975 | 5.228035526 | 1.71E-07    | 0.000107872 | FDR<0.05 |



## Supplementary 4

| circid                    | gene_region  | gene                                         | chr | start     | end       | E19D1 | E19D2 | E19D3 | E19N1 | E19N2 | E19N3 | length | baseMean    | log2FoldChange | lfcSE       | stat         | pvalue      | padj        |
|---------------------------|--------------|----------------------------------------------|-----|-----------|-----------|-------|-------|-------|-------|-------|-------|--------|-------------|----------------|-------------|--------------|-------------|-------------|
| chr1:194128410-194136845  | intergenic   | LINC01031 (dist=793327), NONE (dist=NONE)    | 1   | 194128410 | 194136845 | 0     | 0     | 0     | 0     | 3     | 21    | 8435   | 6.83567305  | -6.228811731   | 3.913737006 | -1.591525369 | NA          | NA          |
| chrY:2821949-2829687      | exonic       | ZFY                                          | Y   | 2821949   | 2829687   | 0     | 0     | 0     | 26    | 12    | 7     | 7738   | 6.373955337 | -6.136044827   | 1.619578029 | -3.78866885  | 0.000151457 | 0.998252924 |
| chrY:21749095-21749393    | ncRNA_exonic | TXLNGY                                       | Y   | 21749095  | 21749393  | 0     | 0     | 0     | 8     | 24    | 3     | 298    | 4.679805031 | -5.705525943   | 1.757787471 | -3.24585653  | NA          | NA          |
| chr17:48511955-48512326   | intronic     | ACSF2                                        | 17  | 48511955  | 48512326  | 0     | 0     | 0     | 4     | 0     | 12    | 371    | 4.123868846 | -5.495940108   | 3.918329944 | -1.402623104 | NA          | NA          |
| chrMT:9031-9189           | intergenic   | NONE (dist=NONE), NONE (dist=NONE)           | MT  | 9031      | 9189      | 0     | 0     | 0     | 0     | 10    | 5     | 158    | 2.751367262 | -4.915417436   | 3.75634175  | -1.308565025 | 0.190681735 | 0.998252924 |
| chr15:82218014-82222466   | intergenic   | TMC3-AS1 (dist=482597), MEX3B (dist=111653)  | 15  | 82218014  | 82222466  | 0     | 0     | 0     | 0     | 0     | 9     | 4452   | 2.773967479 | -4.915136666   | 3.924021564 | -1.252576365 | NA          | NA          |
| chr3:145820541-145839035  | exonic       | PLOD2                                        | 3   | 145820541 | 145839035 | 0     | 0     | 0     | 0     | 0     | 9     | 18494  | 2.773967479 | -4.915136666   | 3.924021564 | -1.252576365 | NA          | NA          |
| chr3:145820541-145842016  | exonic       | PLOD2                                        | 3   | 145820541 | 145842016 | 0     | 0     | 0     | 0     | 0     | 9     | 21475  | 2.773967479 | -4.915136666   | 3.924021564 | -1.252576365 | NA          | NA          |
| chr6:32610387-32713849    | exonic       | HLA-DQA1, HLA-DQA2, HLA-DQB1                 | 6   | 32610387  | 32713849  | 0     | 0     | 0     | 0     | 0     | 9     | 103462 | 2.773967479 | -4.915136666   | 3.924021564 | -1.252576365 | NA          | NA          |
| chr1:1417518-1454370      | exonic       | ATAD3A, ATAD3B                               | 1   | 1417518   | 1454370   | 0     | 0     | 0     | 11    | 0     | 5     | 36852  | 2.710518281 | -4.894341689   | 3.703226106 | -1.321642684 | 0.186287163 | 0.998252924 |
| chr20:52773707-52788209   | exonic       | CYP24A1                                      | 20  | 52773707  | 52788209  | 2     | 4     | 0     | 0     | 124   | 42    | 14502  | 28.90765895 | -4.865023633   | 2.323701219 | -2.09365283  | NA          | NA          |
| chr8:39982961-39984692    | intergenic   | IDO2 (dist=109051), C8orf4 (dist=26295)      | 8   | 39982961  | 39984692  | 0     | 0     | 0     | 0     | 21    | 0     | 1731   | 2.541575858 | -4.818435692   | 3.925208797 | -1.227561626 | NA          | NA          |
| chr5:142258938-142311690  | exonic       | ARHGAP26                                     | 5   | 142258938 | 142311690 | 0     | 0     | 0     | 6     | 14    | 0     | 52752  | 2.332252216 | -4.723365277   | 2.252650579 | -2.096803348 | 0.036010987 | 0.998252924 |
| chr11:82822155-82828239   | intergenic   | RAB30-AS1 (dist=37401), PCP11 (dist=39898)   | 11  | 82822155  | 82828239  | 0     | 0     | 0     | 5     | 14    | 0     | 6084   | 2.225940831 | -4.655832645   | 2.288949239 | -2.03404801  | 0.041946755 | 0.998252924 |
| chrX:93593982-93599840    | intergenic   | FAM133A (dist=626709), BRDTP1 (dist=1992245) | X   | 93593982  | 93599840  | 0     | 0     | 0     | 0     | 11    | 3     | 5858   | 2.255957466 | -4.632987702   | 3.711996791 | -1.24811199  | 0.211990048 | 0.998252924 |
| chr7:66458203-66459328    | exonic       | SBDS                                         | 7   | 66458203  | 66459328  | 0     | 0     | 0     | 2     | 9     | 3     | 1125   | 2.226525393 | -4.602907642   | 2.129169155 | -2.161832765 | NA          | NA          |
| chr8:141595218-141616013  | exonic       | AGO2                                         | 8   | 141595218 | 141616013 | 0     | 0     | 0     | 4     | 7     | 3     | 20795  | 2.19709332  | -4.583442006   | 2.101382921 | -2.181155067 | 0.029171949 | 0.998252924 |
| chr18:21650715-21650987   | intronic     | TTC39C                                       | 18  | 21650715  | 21650987  | 0     | 0     | 0     | 3     | 0     | 6     | 272    | 2.168245808 | -4.559698015   | 3.887994685 | -1.172763438 | 0.240890684 | 0.998252924 |
| chr14:84112888-84132553   | intergenic   | NONE (dist=NONE), LINC00911 (dist=1727670)   | 14  | 84112888  | 84132553  | 0     | 0     | 0     | 0     | 0     | 7     | 19665  | 2.157530262 | -4.546864931   | 3.928994066 | -1.157259302 | NA          | NA          |
| chr2:89278455-89442355    | intergenic   | MIR4436A (dist=166487), NONE (dist=NONE)     | 2   | 89278455  | 89442355  | 0     | 0     | 0     | 0     | 17    | 0     | 163900 | 2.057466171 | -4.515694043   | 3.929475066 | -1.149185061 | NA          | NA          |
| chr2:8383695-8427688      | ncRNA_exonic | LINC00299                                    | 2   | 8383695   | 8427688   | 0     | 0     | 0     | 18    | 0     | 0     | 43993  | 1.913604933 | -4.415151575   | 3.93109792  | -1.123134469 | NA          | NA          |
| chr22:42262834-42267039   | exonic       | SREBF2                                       | 22  | 42262834  | 42267039  | 0     | 0     | 0     | 3     | 0     | 5     | 4205   | 1.860027199 | -4.335135378   | 3.795347776 | -1.142223489 | 0.253361135 | 0.998252924 |
| chr14:106109960-106208132 | ncRNA_exonic | ELK2AP                                       | 14  | 106109960 | 106208132 | 0     | 0     | 0     | 0     | 0     | 6     | 98172  | 1.849311653 | -4.320210067   | 3.932735597 | -1.098525431 | NA          | NA          |
| chrMT:10783-10923         | intergenic   | NONE (dist=NONE), NONE (dist=NONE)           | MT  | 10783     | 10923     | 0     | 0     | 0     | 0     | 0     | 6     | 140    | 1.849311653 | -4.320210067   | 3.932735597 | -1.098525431 | NA          | NA          |
| chr10:98303832-98336586   | exonic       | TM9SF3                                       | 10  | 98303832  | 98336586  | 0     | 1     | 0     | 0     | 7     | 9     | 32754  | 3.795435231 | -4.304422099   | 2.003942525 | -2.147976823 | 0.031715597 | 0.998252924 |
| chr6:62362160-62442669    | exonic       | KHDRBS2                                      | 6   | 62362160  | 62442669  | 0     | 0     | 0     | 16    | 0     | 0     | 80509  | 1.700982162 | -4.266757018   | 2.772998329 | -1.538679981 | NA          | NA          |
| chr3:28174292-28182255    | intergenic   | LINC009662 (dist=288665), CMC1 (dist=100869) | 3   | 28174292  | 28182255  | 0     | 0     | 0     | 0     | 14    | 0     | 7963   | 1.694383905 | -4.253231686   | 2.782744933 | -1.528430305 | NA          | NA          |
| chr2:61406116-61413632    | exonic       | AHSA2                                        | 2   | 61406116  | 61413632  | 0     | 0     | 0     | 2     | 0     | 5     | 7516   | 1.753715814 | -4.247643063   | 3.897894504 | -1.089727559 | 0.275833173 | 0.998252924 |
| chr12:110566754-110584853 | exonic       | IFT81                                        | 12  | 110566754 | 110584853 | 2     | 0     | 0     | 1     | 4     | 0     | 18099  | 1.727699669 | -4.217565513   | 2.27297226  | -1.85552881  | 0.063520749 | 0.998252924 |
| chr4:54249939-54310270    | exonic       | FIPIL1                                       | 4   | 54249939  | 54310270  | 0     | 0     | 0     | 5     | 2     | 3     | 60331  | 1.698267596 | -4.193439687   | 2.295365796 | -1.826915646 | 0.067712453 | 0.998252924 |
| chr8:141856358-141874498  | exonic       | PTK2                                         | 8   | 141856358 | 141874498 | 0     | 0     | 0     | 0     | 4     | 4     | 18140  | 1.716984122 | -4.190417437   | 2.527389464 | -1.658002258 | 0.097317011 | 0.998252924 |
| chr22:39358103-39387631   | exonic       | APOBEC3A, APOBEC3A_B, APOBEC3B               | 22  | 39358103  | 39387631  | 0     | 0     | 0     | 15    | 0     | 0     | 29528  | 1.594670777 | -4.174262065   | 2.827463791 | -1.476327328 | NA          | NA          |
| chrMT:8927-9189           | intergenic   | NONE (dist=NONE), NONE (dist=NONE)           | MT  | 8927      | 9189      | 0     | 0     | 0     | 0     | 6     | 3     | 262    | 1.650820357 | -4.153962204   | 2.547304629 | -1.630728479 | 0.102947625 | 0.998252924 |
| chr11:65267160-65267534   | ncRNA_exonic | MALAT1                                       | 11  | 65267160  | 65267534  | 0     | 0     | 0     | 0     | 13    | 0     | 374    | 1.573356483 | -4.146849335   | 2.845570971 | -1.457299564 | NA          | NA          |

|                           |              |                                                 |    |           |           |   |   |   |    |   |   |        |             |              |             |              |             |             |
|---------------------------|--------------|-------------------------------------------------|----|-----------|-----------|---|---|---|----|---|---|--------|-------------|--------------|-------------|--------------|-------------|-------------|
| chr14:102449355-102449946 | exonic       | DYNC1H1                                         | 14 | 102449355 | 102449946 | 0 | 0 | 0 | 1  | 0 | 5 | 591    | 1.647404429 | -4.105886437 | 2.627585925 | -1.562607867 | NA          | NA          |
| chr10:24816864-24825822   | exonic       | KIAA1217                                        | 10 | 24816864  | 24825822  | 0 | 0 | 0 | 13 | 1 | 0 | 8958   | 1.503075429 | -4.096614204 | 2.644110643 | -1.549335394 | NA          | NA          |
| chr19:39948314-39950600   | exonic       | SUPT5H                                          | 19 | 39948314  | 39950600  | 0 | 0 | 0 | 0  | 3 | 4 | 2286   | 1.595956701 | -4.077099036 | 2.593165573 | -1.572247865 | 0.115893079 | 0.998252924 |
| chr6:12120122-12126103    | exonic       | HIVEP1                                          | 6  | 12120122  | 12126103  | 0 | 0 | 0 | 0  | 3 | 4 | 5981   | 1.595956701 | -4.077099036 | 2.593165573 | -1.572247865 | 0.115893079 | 0.998252924 |
| chr17:28811231-28819771   | exonic       | GOSR1                                           | 17 | 28811231  | 28819771  | 0 | 0 | 0 | 0  | 5 | 3 | 8540   | 1.529792935 | -4.037693181 | 2.610058457 | -1.546974234 | 0.121869459 | 0.998252924 |
| chr10:12442015-12445368   | intronic     | CAMK1D                                          | 10 | 12442015  | 12445368  | 0 | 0 | 0 | 3  | 0 | 4 | 3353   | 1.551808591 | -4.035477459 | 2.612324866 | -1.544783925 | 0.122398537 | 0.998252924 |
| chr17:62465140-62465559   | downstream   | MILR1 (dist=380)                                | 17 | 62465140  | 62465559  | 0 | 0 | 0 | 3  | 0 | 4 | 419    | 1.551808591 | -4.035477459 | 2.612324866 | -1.544783925 | 0.122398537 | 0.998252924 |
| chr5:137027973-137045545  | exonic       | KLHL3                                           | 5  | 137027973 | 137045545 | 0 | 0 | 0 | 3  | 0 | 4 | 17572  | 1.551808591 | -4.035477459 | 2.612324866 | -1.544783925 | 0.122398537 | 0.998252924 |
| chr6:129815213-129879311  | exonic       | LAMA2                                           | 6  | 129815213 | 129879311 | 0 | 0 | 0 | 3  | 0 | 4 | 64098  | 1.551808591 | -4.035477459 | 2.612324866 | -1.544783925 | 0.122398537 | 0.998252924 |
| chr8:25265499-25266456    | exonic       | DOCK5                                           | 8  | 25265499  | 25266456  | 0 | 0 | 0 | 6  | 2 | 2 | 957    | 1.496360372 | -4.03360034  | 2.384463598 | -1.691617496 | 0.090718928 | 0.998252924 |
| chr1:25666965-25669564    | exonic       | TMEM50A                                         | 1  | 25666965  | 25669564  | 0 | 0 | 0 | 0  | 0 | 5 | 2599   | 1.541093044 | -4.014715562 | 2.907276157 | -1.380919922 | NA          | NA          |
| chr11:129635441-129637334 | intergenic   | LINC01395 (dist=148277), TMEM45B (dist=48407)   | 11 | 129635441 | 129637334 | 0 | 0 | 0 | 0  | 0 | 5 | 1893   | 1.541093044 | -4.014715562 | 2.907276157 | -1.380919922 | NA          | NA          |
| chr12:28544236-28605587   | exonic       | CCDC91                                          | 12 | 28544236  | 28605587  | 0 | 0 | 0 | 0  | 0 | 5 | 61351  | 1.541093044 | -4.014715562 | 2.907276157 | -1.380919922 | NA          | NA          |
| chr12:8378905-8388595     | ncRNA_exonic | FAM86FP, LOC101927905                           | 12 | 8378905   | 8388595   | 0 | 0 | 0 | 0  | 0 | 5 | 9690   | 1.541093044 | -4.014715562 | 2.907276157 | -1.380919922 | NA          | NA          |
| chr15:59036112-59036948   | intronic     | ADAM10                                          | 15 | 59036112  | 59036948  | 0 | 0 | 0 | 0  | 0 | 5 | 836    | 1.541093044 | -4.014715562 | 2.907276157 | -1.380919922 | NA          | NA          |
| chr16:4978313-4978818     | intronic     | PPL                                             | 16 | 4978313   | 4978818   | 0 | 0 | 0 | 0  | 0 | 5 | 505    | 1.541093044 | -4.014715562 | 2.907276157 | -1.380919922 | NA          | NA          |
| chr2:156666440-156770739  | intergenic   | KCNJ3 (dist=951576), LOC101929378 (dist=106308) | 2  | 156666440 | 156770739 | 0 | 0 | 0 | 0  | 0 | 5 | 104299 | 1.541093044 | -4.014715562 | 2.907276157 | -1.380919922 | NA          | NA          |
| chr22:40912347-40913036   | intronic     | MKL1                                            | 22 | 40912347  | 40913036  | 0 | 0 | 0 | 0  | 0 | 5 | 689    | 1.541093044 | -4.014715562 | 2.907276157 | -1.380919922 | NA          | NA          |
| chr3:18082941-18105554    | exonic       | LOC339862                                       | 3  | 18082941  | 18105554  | 0 | 0 | 0 | 0  | 0 | 5 | 22613  | 1.541093044 | -4.014715562 | 2.907276157 | -1.380919922 | NA          | NA          |
| chr3:56764694-56765327    | intronic     | ARHGEF3                                         | 3  | 56764694  | 56765327  | 0 | 0 | 0 | 0  | 0 | 5 | 633    | 1.541093044 | -4.014715562 | 2.907276157 | -1.380919922 | NA          | NA          |
| chr8:112015642-112039662  | ncRNA_exonic | LINC01608                                       | 8  | 112015642 | 112039662 | 0 | 0 | 0 | 0  | 0 | 5 | 24020  | 1.541093044 | -4.014715562 | 2.907276157 | -1.380919922 | NA          | NA          |
| chr7:40027197-40027857    | exonic       | CDK13                                           | 7  | 40027197  | 40027857  | 0 | 0 | 0 | 2  | 3 | 3 | 660    | 1.500360862 | -3.999845917 | 2.399221177 | -1.667143469 | 0.09548588  | 0.998252924 |
| chr13:25073438-25077915   | exonic       | PARP4                                           | 13 | 25073438  | 25077915  | 0 | 0 | 0 | 13 | 0 | 0 | 4477   | 1.382048007 | -3.969050219 | 2.956980943 | -1.342264389 | NA          | NA          |
| chr4:9642695-9643074      | intergenic   | MIR54812 (dist=84758), DRD5 (dist=140184)       | 4  | 9642695   | 9643074   | 0 | 0 | 0 | 6  | 6 | 0 | 379    | 1.364032842 | -3.955800292 | 2.645090655 | -1.495525412 | 0.134777373 | 0.998252924 |
| chr11:120276826-120278532 | exonic       | ARHGEF12                                        | 11 | 120276826 | 120278532 | 0 | 0 | 0 | 0  | 2 | 4 | 1706   | 1.474929279 | -3.954281468 | 2.673259498 | -1.479198511 | 0.139087268 | 0.998252924 |
| chr7:74119495-74131270    | exonic       | GTF2I                                           | 7  | 74119495  | 74131270  | 2 | 0 | 0 | 5  | 6 | 5 | 11775  | 1.474929279 | -3.954281468 | 2.673259498 | -1.479198511 | 0.139087268 | 0.998252924 |
| chr2:9083315-9098771      | exonic       | MBOAT2                                          | 2  | 9083315   | 9098771   | 0 | 0 | 0 | 4  | 2 | 3 | 15456  | 1.349316805 | -3.941095702 | 2.655464389 | -1.484145567 | 0.137770307 | 0.998252924 |
| chr20:32138447-32144544   | intronic     | CBFA2T2                                         | 20 | 32138447  | 32144544  | 0 | 0 | 0 | 0  | 4 | 3 | 6097   | 1.408765514 | -3.911097319 | 2.683015968 | -1.457724205 | 0.144916577 | 0.998252924 |
| chr19:23844915-23845960   | exonic       | ZNF675                                          | 19 | 23844915  | 23845960  | 0 | 0 | 0 | 2  | 9 | 0 | 1045   | 1.301869566 | -3.884186336 | 2.727197456 | -1.424240965 | 0.15437673  | 0.998252924 |
| chr8:66534497-66539668    | exonic       | ARMC1                                           | 8  | 66534497  | 66539668  | 0 | 0 | 0 | 3  | 8 | 0 | 5171   | 1.28715353  | -3.869430142 | 2.716879996 | -1.424218275 | 0.154383296 | 0.998252924 |
| chr7:42063066-42088295    | exonic       | GLI3                                            | 7  | 42063066  | 42088295  | 0 | 0 | 0 | 12 | 0 | 0 | 25229  | 1.275736622 | -3.854241004 | 3.034913874 | -1.269967177 | NA          | NA          |
| chrY:15021270-15024974    | exonic       | DDX3Y                                           | Y  | 15021270  | 15024974  | 0 | 0 | 0 | 4  | 7 | 0 | 3704   | 1.272437493 | -3.854221971 | 2.716222537 | -1.418963991 | 0.155909514 | 0.998252924 |
| chr3:107429298-107451870  | exonic       | BBX                                             | 3  | 107429298 | 107451870 | 0 | 0 | 0 | 9  | 4 | 1 | 22572  | 1.294453148 | -3.853884798 | 2.517561544 | -1.530800663 | 0.125818674 | 0.998252924 |
| chr12:95887831-95889874   | exonic       | METAP2                                          | 12 | 95887831  | 95889874  | 0 | 0 | 0 | 1  | 5 | 2 | 2043   | 1.327885712 | -3.84822455  | 2.518790041 | -1.527806799 | 0.126560514 | 0.998252924 |
| chr2:113057425-113082774  | exonic       | ZC3H6                                           | 2  | 113057425 | 113082774 | 1 | 0 | 0 | 5  | 9 | 3 | 25349  | 2.674446491 | -3.842444471 | 1.923769659 | -1.997351633 | 0.045786998 | 0.998252924 |

|                           |          |                |    |           |           |   |   |   |    |    |   |        |             |              |             |              |             |             |
|---------------------------|----------|----------------|----|-----------|-----------|---|---|---|----|----|---|--------|-------------|--------------|-------------|--------------|-------------|-------------|
| chr7:111617186-111644186  | exonic   | DOCK4          | 7  | 111617186 | 111644186 | 0 | 0 | 0 | 8  | 1  | 1 | 27000  | 1.279737112 | -3.837568149 | 2.56480297  | -1.496242867 | 0.134590377 | 0.998252924 |
| chr2:203974872-203992660  | exonic   | NBEAL1         | 2  | 203974872 | 203992660 | 0 | 0 | 0 | 0  | 1  | 4 | 17788  | 1.353901857 | -3.821032778 | 2.780865722 | -1.37404433  | NA          | NA          |
| chr12:94562928-94621011   | exonic   | PLXNC1         | 12 | 94562928  | 94621011  | 0 | 0 | 0 | 1  | 0  | 4 | 58083  | 1.33918582  | -3.804533731 | 2.789280179 | -1.36398407  | NA          | NA          |
| chr1:114367763-114377061  | exonic   | PTPN22         | 1  | 114367763 | 114377061 | 0 | 0 | 0 | 5  | 1  | 2 | 9298   | 1.269021565 | -3.783878139 | 2.549337968 | -1.484259124 | 0.13774019  | 0.998252924 |
| chr1:16811318-16957604    | exonic   | FAM231B, NBPFL | 1  | 16811318  | 16957604  | 0 | 0 | 0 | 0  | 3  | 3 | 146286 | 1.287738092 | -3.772204244 | 2.769477334 | -1.362063591 | 0.173177817 | 0.998252924 |
| chr10:96201653-96203180   | exonic   | TBC1D12        | 10 | 96201653  | 96203180  | 0 | 0 | 0 | 0  | 3  | 3 | 1527   | 1.287738092 | -3.772204244 | 2.769477334 | -1.362063591 | 0.173177817 | 0.998252924 |
| chr12:117476835-117479799 | exonic   | TESC           | 12 | 117476835 | 117479799 | 0 | 0 | 0 | 0  | 3  | 3 | 2964   | 1.287738092 | -3.772204244 | 2.769477334 | -1.362063591 | 0.173177817 | 0.998252924 |
| chr13:21987791-21999817   | exonic   | ZDHHC20        | 13 | 21987791  | 21999817  | 0 | 0 | 0 | 0  | 3  | 3 | 12026  | 1.287738092 | -3.772204244 | 2.769477334 | -1.362063591 | 0.173177817 | 0.998252924 |
| chr14:92102768-92195823   | exonic   | CATSPERB       | 14 | 92102768  | 92195823  | 0 | 0 | 0 | 0  | 10 | 0 | 93055  | 1.210274218 | -3.77007694  | 3.094568207 | -1.218288526 | NA          | NA          |
| chr14:92105439-92195823   | exonic   | CATSPERB       | 14 | 92105439  | 92195823  | 0 | 0 | 0 | 0  | 10 | 0 | 90384  | 1.210274218 | -3.77007694  | 3.094568207 | -1.218288526 | NA          | NA          |
| chr6:170697374-170704667  | exonic   | FAM120B        | 6  | 170697374 | 170704667 | 0 | 0 | 0 | 4  | 4  | 1 | 7293   | 1.217573837 | -3.760497756 | 2.549407917 | -1.475047493 | 0.140199775 | 0.998252924 |
| chr12:131484927-131498885 | exonic   | ADGRD1         | 12 | 131484927 | 131498885 | 0 | 0 | 0 | 10 | 1  | 0 | 13958  | 1.184141273 | -3.754713387 | 2.845805926 | -1.319384907 | NA          | NA          |
| chr19:55107654-55144211   | exonic   | LILRA1, LILRB1 | 19 | 55107654  | 55144211  | 0 | 0 | 0 | 11 | 0  | 0 | 36557  | 1.169425237 | -3.729399177 | 3.124305778 | -1.193672912 | NA          | NA          |
| chr20:19978311-19978717   | intronic | RIN2           | 20 | 19978311  | 19978717  | 0 | 0 | 0 | 11 | 0  | 0 | 406    | 1.169425237 | -3.729399177 | 3.124305778 | -1.193672912 | NA          | NA          |
| chr3:130305349-130353469  | exonic   | COL6A6         | 3  | 130305349 | 130353469 | 0 | 0 | 0 | 11 | 0  | 0 | 48120  | 1.169425237 | -3.729399177 | 3.124305778 | -1.193672912 | NA          | NA          |
| chr19:39161471-39162975   | intronic | ACTN4          | 19 | 39161471  | 39162975  | 0 | 0 | 0 | 3  | 7  | 0 | 1504   | 1.166126108 | -3.727918922 | 2.80799314  | -1.327609697 | 0.184307079 | 0.998252924 |
| chr7:91924202-91948826    | exonic   | ANKIB1         | 7  | 91924202  | 91948826  | 0 | 0 | 0 | 2  | 1  | 3 | 24624  | 1.258306018 | -3.726842962 | 2.584971775 | -1.441734489 | 0.14937729  | 0.998252924 |
| chr1:179100445-179102509  | exonic   | ABL2           | 1  | 179100445 | 179102509 | 0 | 0 | 0 | 6  | 2  | 1 | 2064   | 1.188141763 | -3.726680153 | 2.586802316 | -1.440651313 | 0.149683216 | 0.998252924 |
| chr2:128093446-128100770  | exonic   | MAP3K2         | 2  | 128093446 | 128100770 | 0 | 0 | 0 | 0  | 5  | 2 | 7324   | 1.221574327 | -3.725314505 | 2.808854548 | -1.326275334 | NA          | NA          |
| chr8:48612964-48614577    | exonic   | SPIDR          | 8  | 48612964  | 48614577  | 0 | 0 | 0 | 1  | 4  | 2 | 1613   | 1.20685829  | -3.702336636 | 2.597816566 | -1.425172464 | 0.154107354 | 0.998252924 |
| chr2:73659325-73682422    | exonic   | ALMS1          | 2  | 73659325  | 73682422  | 0 | 0 | 0 | 5  | 5  | 0 | 23097  | 1.136694035 | -3.693786053 | 2.819049561 | -1.310294826 | 0.190096117 | 0.998252924 |
| chr1:150679028-150689758  | exonic   | HORMAD1        | 1  | 150679028 | 150689758 | 0 | 0 | 0 | 0  | 0  | 4 | 10730  | 1.232874435 | -3.688396026 | 3.117981479 | -1.182943533 | NA          | NA          |
| chr1:225226395-225284941  | exonic   | DNAH14         | 1  | 225226395 | 225284941 | 0 | 0 | 0 | 0  | 0  | 4 | 58546  | 1.232874435 | -3.688396026 | 3.117981479 | -1.182943533 | NA          | NA          |
| chr10:34748393-34749501   | intronic | PARD3          | 10 | 34748393  | 34749501  | 0 | 0 | 0 | 0  | 0  | 4 | 1108   | 1.232874435 | -3.688396026 | 3.117981479 | -1.182943533 | NA          | NA          |
| chr10:74373314-74373671   | intronic | MICU1          | 10 | 74373314  | 74373671  | 0 | 0 | 0 | 0  | 0  | 4 | 357    | 1.232874435 | -3.688396026 | 3.117981479 | -1.182943533 | NA          | NA          |
| chr11:15198656-15212360   | exonic   | INSC           | 11 | 15198656  | 15212360  | 0 | 0 | 0 | 0  | 0  | 4 | 13704  | 1.232874435 | -3.688396026 | 3.117981479 | -1.182943533 | NA          | NA          |
| chr12:47620452-47622361   | intronic | PCED1B         | 12 | 47620452  | 47622361  | 0 | 0 | 0 | 0  | 0  | 4 | 1909   | 1.232874435 | -3.688396026 | 3.117981479 | -1.182943533 | NA          | NA          |
| chr12:595651-596602       | intronic | B4GALNT3       | 12 | 595651    | 596602    | 0 | 0 | 0 | 0  | 0  | 4 | 951    | 1.232874435 | -3.688396026 | 3.117981479 | -1.182943533 | NA          | NA          |
| chr14:91970869-91972399   | intronic | PPP4R3A        | 14 | 91970869  | 91972399  | 0 | 0 | 0 | 0  | 0  | 4 | 1530   | 1.232874435 | -3.688396026 | 3.117981479 | -1.182943533 | NA          | NA          |
| chr15:90970093-90972180   | intronic | IQGAP1         | 15 | 90970093  | 90972180  | 0 | 0 | 0 | 0  | 0  | 4 | 2087   | 1.232874435 | -3.688396026 | 3.117981479 | -1.182943533 | NA          | NA          |
| chr19:50764813-50770265   | exonic   | MYH14          | 19 | 50764813  | 50770265  | 0 | 0 | 0 | 0  | 0  | 4 | 5452   | 1.232874435 | -3.688396026 | 3.117981479 | -1.182943533 | NA          | NA          |
| chr19:9007487-9018561     | exonic   | MUC16          | 19 | 9007487   | 9018561   | 0 | 0 | 0 | 0  | 0  | 4 | 11074  | 1.232874435 | -3.688396026 | 3.117981479 | -1.182943533 | NA          | NA          |
| chr20:5538591-5585086     | exonic   | GPCPD1         | 20 | 5538591   | 5585086   | 0 | 0 | 0 | 0  | 0  | 4 | 46495  | 1.232874435 | -3.688396026 | 3.117981479 | -1.182943533 | NA          | NA          |
| chr22:28910745-28946139   | intronic | TTC28          | 22 | 28910745  | 28946139  | 0 | 0 | 0 | 0  | 0  | 4 | 35394  | 1.232874435 | -3.688396026 | 3.117981479 | -1.182943533 | NA          | NA          |
| chr4:57878561-57879027    | intronic | POLR2B         | 4  | 57878561  | 57879027  | 0 | 0 | 0 | 0  | 0  | 4 | 466    | 1.232874435 | -3.688396026 | 3.117981479 | -1.182943533 | NA          | NA          |

|                           |                |                                                   |    |           |           |   |   |   |   |    |     |      |             |              |              |              |              |             |             |
|---------------------------|----------------|---------------------------------------------------|----|-----------|-----------|---|---|---|---|----|-----|------|-------------|--------------|--------------|--------------|--------------|-------------|-------------|
| chr5:104578994-104582067  | intergenic     | RAB9P1 (dist=143195), LOC102467213 (dist=1568831) | 5  | 104578994 | 104582067 | 0 | 0 | 0 | 0 | 0  | 0   | 4    | 3073        | 1.232874435  | -3.688396026 | 3.117981479  | -1.182943533 | NA          | NA          |
| chr6:134012478-134024761  | ncRNA_intronic | TARID                                             | 6  | 134012478 | 134024761 | 0 | 0 | 0 | 0 | 0  | 0   | 4    | 12283       | 1.232874435  | -3.688396026 | 3.117981479  | -1.182943533 | NA          | NA          |
| chr7:77237308-77238305    | intronic       | PTPN12                                            | 7  | 77237308  | 77238305  | 0 | 0 | 0 | 0 | 0  | 0   | 4    | 997         | 1.232874435  | -3.688396026 | 3.117981479  | -1.182943533 | NA          | NA          |
| chr8:87497100-87519341    | exonic         | RMDN1                                             | 8  | 87497100  | 87519341  | 0 | 0 | 0 | 0 | 0  | 0   | 4    | 22241       | 1.232874435  | -3.688396026 | 3.117981479  | -1.182943533 | NA          | NA          |
| chrMT:13678-13845         | intergenic     | NONE (dist=NONE), NONE (dist=NONE)                | MT | 13678     | 13845     | 0 | 0 | 0 | 0 | 0  | 0   | 4    | 167         | 1.232874435  | -3.688396026 | 3.117981479  | -1.182943533 | NA          | NA          |
| chrMT:13846-13989         | intergenic     | NONE (dist=NONE), NONE (dist=NONE)                | MT | 13846     | 13989     | 0 | 0 | 0 | 0 | 0  | 0   | 4    | 143         | 1.232874435  | -3.688396026 | 3.117981479  | -1.182943533 | NA          | NA          |
| chrX:93593982-93601012    | intergenic     | FAM133A (dist=626709), BRDTP1 (dist=1991073)      | X  | 93593982  | 93601012  | 0 | 0 | 0 | 0 | 0  | 0   | 4    | 7030        | 1.232874435  | -3.688396026 | 3.117981479  | -1.182943533 | NA          | NA          |
| chr17:869279-869697       | intronic       | NXN                                               | 17 | 869279    | 869697    | 0 | 0 | 0 | 2 | 3  | 2   | 2    | 418         | 1.192142253  | -3.683943214 | 2.577679453  | -1.429170415 | 0.152955259 | 0.998252924 |
| chr12:28408514-28412375   | exonic         | CCDC91                                            | 12 | 28408514  | 28412375  | 0 | 0 | 0 | 8 | 2  | 0   | 0    | 3861        | 1.092545925  | -3.639416483 | 2.883302919  | -1.262238684 | 0.206862913 | 0.998252924 |
| chr9:13216772-13250371    | exonic         | MPDZ                                              | 9  | 13216772  | 13250371  | 0 | 0 | 0 | 8 | 2  | 0   | 0    | 33599       | 1.092545925  | -3.639416483 | 2.883302919  | -1.262238684 | 0.206862913 | 0.998252924 |
| chrX:106331665-106332069  | exonic         | RBM41                                             | X  | 106331665 | 106332069 | 0 | 0 | 1 | 4 | 5  | 4   | 4    | 404         | 2.46052611   | -3.639008747 | 1.978681707  | -1.839107692 | 0.065899348 | 0.998252924 |
| chr2:36615115-36623930    | exonic         | CRIM1                                             | 2  | 36615115  | 36623930  | 0 | 0 | 0 | 5 | 0  | 2   | 2    | 8815        | 1.147994143  | -3.636365268 | 2.861769031  | -1.270670424 | NA          | NA          |
| chr11:111706887-111724459 | exonic         | ALG9                                              | 11 | 111706887 | 111724459 | 0 | 0 | 0 | 3 | 4  | 1   | 1    | 17572       | 1.111262451  | -3.624006506 | 2.634778248  | -1.37545029  | 0.168991887 | 0.998252924 |
| chr14:92185761-92195823   | exonic         | CATSPERB                                          | 14 | 92185761  | 92195823  | 0 | 0 | 0 | 0 | 9  | 0   | 0    | 10062       | 1.089246796  | -3.618708165 | 3.207010447  | -1.128374299 | NA          | NA          |
| chr14:96986391-96991728   | exonic         | PAPOLA                                            | 14 | 96986391  | 96991728  | 0 | 0 | 0 | 0 | 9  | 0   | 0    | 5337        | 1.089246796  | -3.618708165 | 3.207010447  | -1.128374299 | NA          | NA          |
| chr20:5580075-5580288     | intronic       | GPCPD1                                            | 20 | 5580075   | 5580288   | 0 | 0 | 0 | 0 | 2  | 3   | 2    | 213         | 1.16671067   | -3.618504898 | 2.875312991  | -1.258473394 | 0.208220603 | 0.998252924 |
| chr9:88957989-88961395    | exonic         | ZCCHC6                                            | 9  | 88957989  | 88961395  | 0 | 0 | 0 | 5 | 2  | 1   | 1    | 3406        | 1.081830378  | -3.586957145 | 2.667888266  | -1.344493017 | 0.178789013 | 0.998252924 |
| chr19:9007486-9012898     | exonic         | MUC16                                             | 19 | 9007486   | 9012898   | 8 | 0 | 9 | 2 | 10 | 105 | 5412 | 36.59316768 | -3.586559713 | 2.102778275  | -1.705629051 | NA           | NA          |             |
| chr20:5545662-5554615     | exonic         | GPCPD1                                            | 20 | 5545662   | 5554615   | 0 | 0 | 0 | 2 | 0  | 3   | 3    | 8953        | 1.137278597  | -3.580538635 | 2.897390373  | -1.235780538 | 0.216540151 | 0.998252924 |
| chr4:2656784-2702271      | exonic         | FAM193A                                           | 4  | 2656784   | 2702271   | 0 | 0 | 0 | 2 | 0  | 3   | 3    | 45487       | 1.137278597  | -3.580538635 | 2.897390373  | -1.235780538 | 0.216540151 | 0.998252924 |
| chr5:176671195-176675325  | exonic         | NSD1                                              | 5  | 176671195 | 176675325 | 0 | 0 | 0 | 2 | 0  | 3   | 3    | 4130        | 1.137278597  | -3.580538635 | 2.897390373  | -1.235780538 | 0.216540151 | 0.998252924 |
| chr15:45059429-45059793   | exonic         | TRIM69                                            | 15 | 45059429  | 45059793  | 0 | 0 | 0 | 3 | 6  | 0   | 0    | 364         | 1.045098686  | -3.570916256 | 2.915195086  | -1.224932175 | 0.220600776 | 0.998252924 |
| chr11:32118689-32120074   | exonic         | RCN1                                              | 11 | 32118689  | 32120074  | 0 | 0 | 0 | 6 | 1  | 1   | 1    | 1385        | 1.067114341  | -3.567796522 | 2.713925033  | -1.314626041 | 0.188635614 | 0.998252924 |
| chr16:19434178-19435168   | intronic       | TMC5                                              | 16 | 19434178  | 19435168  | 0 | 0 | 0 | 0 | 4  | 2   | 2    | 990         | 1.100546905  | -3.566508131 | 2.911482153  | -1.224980249 | 0.220582662 | 0.998252924 |
| chr2:190656515-190670480  | exonic         | PMS1                                              | 2  | 190656515 | 190670480 | 0 | 0 | 0 | 4 | 5  | 0   | 0    | 13965       | 1.03038265   | -3.551991701 | 2.921929859  | -1.21563209  | 0.224125104 | 0.998252924 |
| chr9:86276692-86284242    | exonic         | UBQLN1                                            | 9  | 86276692  | 86284242  | 0 | 0 | 0 | 4 | 5  | 0   | 0    | 7550        | 1.03038265   | -3.551991701 | 2.921929859  | -1.21563209  | 0.224125104 | 0.998252924 |
| chr7:77200394-77221573    | exonic         | PTPN12                                            | 7  | 77200394  | 77221573  | 1 | 0 | 0 | 3 | 0  | 6   | 6    | 21179       | 2.297232751  | -3.543127335 | 2.249431842  | -1.575121001 | 0.115228517 | 0.998252924 |
| chr16:75674081-75675621   | exonic         | KARS                                              | 16 | 75674081  | 75675621  | 0 | 0 | 0 | 1 | 3  | 2   | 2    | 1540        | 1.085830868  | -3.53978627  | 2.693378255  | -1.31425516  | 0.188760351 | 0.998252924 |
| chr12:113354313-113355505 | exonic         | OAS1                                              | 12 | 113354313 | 113355505 | 0 | 0 | 0 | 5 | 4  | 0   | 0    | 1192        | 1.015666613  | -3.532596357 | 2.935818083  | -1.20327495  | 0.228869939 | 0.998252924 |
| chr13:21955572-21965993   | exonic         | ZDHHC20                                           | 13 | 21955572  | 21965993  | 0 | 0 | 0 | 5 | 4  | 0   | 0    | 10421       | 1.015666613  | -3.532596357 | 2.935818083  | -1.20327495  | 0.228869939 | 0.998252924 |
| chr19:9768684-9770143     | exonic         | ZNF562                                            | 19 | 9768684   | 9770143   | 0 | 0 | 0 | 5 | 4  | 0   | 0    | 1459        | 1.015666613  | -3.532596357 | 2.935818083  | -1.20327495  | 0.228869939 | 0.998252924 |
| chr3:197557640-197593090  | exonic         | LRCH3                                             | 3  | 197557640 | 197593090 | 0 | 0 | 0 | 2 | 2  | 2   | 2    | 35450       | 1.071114831  | -3.51936777  | 2.683377309  | -1.311544134 | 0.189673993 | 0.998252924 |
| chr8:42924697-42927450    | exonic         | FNTA                                              | 8  | 42924697  | 42927450  | 0 | 0 | 0 | 2 | 2  | 2   | 2    | 2753        | 1.071114831  | -3.51936777  | 2.683377309  | -1.311544134 | 0.189673993 | 0.998252924 |
| chr12:46339031-46357971   | exonic         | SCAF11                                            | 12 | 46339031  | 46357971  | 0 | 0 | 0 | 0 | 6  | 1   | 1    | 18940       | 1.03438314   | -3.512982939 | 2.991699626  | -1.174243199 | 0.240297627 | 0.998252924 |
| chr16:11873021-11876244   | exonic         | ZC3H7A                                            | 16 | 11873021  | 11876244  | 0 | 0 | 0 | 0 | 6  | 1   | 1    | 3223        | 1.03438314   | -3.512982939 | 2.991699626  | -1.174243199 | 0.240297627 | 0.998252924 |

|                          |              |                                                                   |    |           |           |   |    |   |   |     |    |        |             |              |             |              |             |             |
|--------------------------|--------------|-------------------------------------------------------------------|----|-----------|-----------|---|----|---|---|-----|----|--------|-------------|--------------|-------------|--------------|-------------|-------------|
| chr4:17963525-17974508   | exonic       | LCORL                                                             | 4  | 17963525  | 17974508  | 0 | 0  | 0 | 6 | 3   | 0  | 10983  | 1.000950576 | -3.512723107 | 2.956390037 | -1.188179862 | 0.234762556 | 0.998252924 |
| chr2:20478343-20518406   | exonic       | PUM2                                                              | 2  | 20478343  | 20518406  | 0 | 0  | 1 | 2 | 3   | 5  | 40063  | 2.314067105 | -3.509311299 | 2.064102086 | -1.700163632 | NA          | NA          |
| chrY:7209155-7239930     | ncRNA_exonic | PRKY                                                              | Y  | 7209155   | 7239930   | 0 | 0  | 0 | 7 | 2   | 0  | 30775  | 0.98623454  | -3.492238742 | 2.987050383 | -1.16912616  | 0.242352806 | 0.998252924 |
| chr5:179258570-179258878 | intronic     | SQSTM1                                                            | 5  | 179258570 | 179258878 | 0 | 0  | 0 | 4 | 0   | 2  | 308    | 1.041682758 | -3.487295096 | 2.961651946 | -1.177483093 | 0.239002742 | 0.998252924 |
| chr6:34614377-34622556   | exonic       | C6orf106                                                          | 6  | 34614377  | 34622556  | 0 | 0  | 0 | 4 | 0   | 2  | 8179   | 1.041682758 | -3.487295096 | 2.961651946 | -1.177483093 | 0.239002742 | 0.998252924 |
| chr3:126340584-126366139 | exonic       | TXNRD3                                                            | 3  | 126340584 | 126366139 | 0 | 0  | 0 | 3 | 3   | 1  | 25555  | 0.99023503  | -3.452708675 | 2.743941932 | -1.258302384 | 0.208282419 | 0.998252924 |
| chr14:27664507-27676324  | intergenic   | <small>W18430785(dist+280558), LINC00945(dist+405470)</small>     | 14 | 27664507  | 27676324  | 0 | 0  | 0 | 0 | 8   | 0  | 11817  | 0.968219374 | -3.449458593 | 3.341771705 | -1.03222449  | NA          | NA          |
| chr1:93687165-93730458   | exonic       | CCDC18                                                            | 1  | 93687165  | 93730458  | 0 | 0  | 0 | 0 | 1   | 3  | 43293  | 1.045683248 | -3.447083156 | 3.015667634 | -1.143058047 | NA          | NA          |
| chr10:11990367-11994248  | exonic       | UPF2                                                              | 10 | 11990367  | 11994248  | 0 | 0  | 0 | 0 | 1   | 3  | 3881   | 1.045683248 | -3.447083156 | 3.015667634 | -1.143058047 | NA          | NA          |
| chr5:74842834-74879242   | exonic       | POLK                                                              | 5  | 74842834  | 74879242  | 0 | 0  | 0 | 0 | 1   | 3  | 36408  | 1.045683248 | -3.447083156 | 3.015667634 | -1.143058047 | NA          | NA          |
| chr8:70488204-70517167   | exonic       | SULF1                                                             | 8  | 70488204  | 70517167  | 0 | 0  | 0 | 0 | 1   | 3  | 28963  | 1.045683248 | -3.447083156 | 3.015667634 | -1.143058047 | NA          | NA          |
| chr10:21246660-21250708  | exonic       | NEBL                                                              | 10 | 21246660  | 21250708  | 0 | 0  | 0 | 9 | 0   | 0  | 4048   | 0.956802466 | -3.441370433 | 3.35005059  | -1.027259243 | NA          | NA          |
| chr5:36953719-36986403   | exonic       | NIPBL                                                             | 5  | 36953719  | 36986403  | 0 | 1  | 0 | 4 | 5   | 3  | 32684  | 2.129314275 | -3.440707719 | 2.048016942 | -1.680019168 | 0.092953586 | 0.998252924 |
| chr1:155874101-155874595 | exonic       | RIT1                                                              | 1  | 155874101 | 155874595 | 0 | 0  | 0 | 4 | 2   | 1  | 494    | 0.975518993 | -3.431995494 | 2.764379222 | -1.241506761 | 0.214418602 | 0.998252924 |
| chr11:17126715-17136012  | exonic       | PIK3C2A                                                           | 11 | 17126715  | 17136012  | 0 | 0  | 0 | 2 | 0   | 0  | 9297   | 1.030967212 | -3.425766632 | 3.028819275 | -1.131056799 | NA          | NA          |
| chr11:34110941-34113603  | exonic       | CAPRIN1                                                           | 11 | 34110941  | 34113603  | 0 | 0  | 0 | 1 | 0   | 3  | 2662   | 1.030967212 | -3.425766632 | 3.028819275 | -1.131056799 | NA          | NA          |
| chr13:21619823-21620369  | exonic       | LATS2                                                             | 13 | 21619823  | 21620369  | 0 | 0  | 0 | 1 | 0   | 3  | 546    | 1.030967212 | -3.425766632 | 3.028819275 | -1.131056799 | NA          | NA          |
| chr15:52425574-52433469  | exonic       | GNB5                                                              | 15 | 52425574  | 52433469  | 0 | 0  | 0 | 1 | 0   | 3  | 7895   | 1.030967212 | -3.425766632 | 3.028819275 | -1.131056799 | NA          | NA          |
| chr7:26235466-26237352   | exonic       | HNRNPA2B1                                                         | 7  | 26235466  | 26237352  | 0 | 0  | 0 | 1 | 0   | 3  | 1886   | 1.030967212 | -3.425766632 | 3.028819275 | -1.131056799 | NA          | NA          |
| chr2:90121838-90198770   | intergenic   | <small>W184396A(dist+1009670), LOC553342(dist+1625689)</small>    | 2  | 90121838  | 90198770  | 0 | 24 | 0 | 0 | 342 | 11 | 76932  | 48.96440213 | -3.421523271 | 3.737196649 | -0.91553204  | NA          | NA          |
| chr13:95813442-95840796  | exonic       | ABCC4                                                             | 13 | 95813442  | 95840796  | 0 | 0  | 0 | 2 | 6   | 0  | 27354  | 0.938787301 | -3.415446543 | 3.044267505 | -1.121927208 | 0.261893391 | 0.998252924 |
| chr4:39843567-39851272   | exonic       | PDS5A                                                             | 4  | 39843567  | 39851272  | 0 | 0  | 0 | 2 | 6   | 0  | 7705   | 0.938787301 | -3.415446543 | 3.044267505 | -1.121927208 | 0.261893391 | 0.998252924 |
| chr7:77236551-77261742   | exonic       | PTPN12                                                            | 7  | 77236551  | 77261742  | 2 | 0  | 0 | 1 | 6   | 0  | 25191  | 0.938787301 | -3.415446543 | 3.044267505 | -1.121927208 | 0.261893391 | 0.998252924 |
| chr5:39002636-39021238   | exonic       | RICTOR                                                            | 5  | 39002636  | 39021238  | 1 | 0  | 0 | 3 | 1   | 5  | 18602  | 2.110041564 | -3.408716835 | 2.145181329 | -1.589011049 | NA          | NA          |
| chr8:143412261-143413192 | exonic       | TSNARE1                                                           | 8  | 143412261 | 143413192 | 0 | 0  | 0 | 3 | 5   | 0  | 931    | 0.924071264 | -3.394552167 | 3.045612388 | -1.114571303 | 0.265034174 | 0.998252924 |
| chr9:126519981-126641300 | exonic       | DENND1A                                                           | 9  | 126519981 | 126641300 | 0 | 0  | 0 | 3 | 5   | 0  | 121319 | 0.924071264 | -3.394552167 | 3.045612388 | -1.114571303 | 0.265034174 | 0.998252924 |
| chr9:37126308-37327831   | exonic       | ZCCHC7                                                            | 9  | 37126308  | 37327831  | 0 | 0  | 0 | 3 | 5   | 0  | 201523 | 0.924071264 | -3.394552167 | 3.045612388 | -1.114571303 | 0.265034174 | 0.998252924 |
| chr2:63423257-63428426   | intronic     | WDPCP                                                             | 2  | 63423257  | 63428426  | 0 | 0  | 2 | 0 | 3   | 12 | 5169   | 4.456243622 | -3.393346621 | 2.952489562 | -1.14931706  | NA          | NA          |
| chr19:46024579-46026076  | exonic       | VASP                                                              | 19 | 46024579  | 46026076  | 0 | 0  | 0 | 6 | 0   | 1  | 1497   | 0.94608692  | -3.3884163   | 3.077915039 | -1.100880387 | 0.270948719 | 0.998252924 |
| chr15:65756098-65772737  | exonic       | DPP8                                                              | 15 | 65756098  | 65772737  | 0 | 0  | 0 | 0 | 3   | 2  | 16639  | 0.979519483 | -3.38775541  | 3.036106671 | -1.115822261 | 0.264498223 | 0.998252924 |
| chr15:65759015-65772737  | exonic       | DPP8                                                              | 15 | 65759015  | 65772737  | 0 | 0  | 0 | 0 | 3   | 2  | 13722  | 0.979519483 | -3.38775541  | 3.036106671 | -1.115822261 | 0.264498223 | 0.998252924 |
| chr4:152336876-152403800 | UTR5         | <small>FAM160A1(5'UTR_001109977:c.-111559_-1113274611aa0)</small> | 4  | 152336876 | 152403800 | 0 | 0  | 0 | 0 | 3   | 2  | 66924  | 0.979519483 | -3.38775541  | 3.036106671 | -1.115822261 | 0.264498223 | 0.998252924 |
| chr4:56269402-56284152   | exonic       | TMEM165                                                           | 4  | 56269402  | 56284152  | 0 | 0  | 0 | 0 | 3   | 2  | 14750  | 0.979519483 | -3.38775541  | 3.036106671 | -1.115822261 | 0.264498223 | 0.998252924 |
| chrX:21869626-21871621   | exonic       | MBTPS2                                                            | X  | 21869626  | 21871621  | 0 | 0  | 0 | 0 | 3   | 2  | 1995   | 0.979519483 | -3.38775541  | 3.036106671 | -1.115822261 | 0.264498223 | 0.998252924 |
| chr1:235505023-235506198 | exonic       | GGPS1                                                             | 1  | 235505023 | 235506198 | 0 | 0  | 0 | 4 | 4   | 0  | 1175   | 0.909355228 | -3.37302311  | 3.058377227 | -1.102880011 | 0.270079276 | 0.998252924 |

|                           |          |                  |    |           |           |   |   |   |   |   |   |        |             |              |             |              |             |             |
|---------------------------|----------|------------------|----|-----------|-----------|---|---|---|---|---|---|--------|-------------|--------------|-------------|--------------|-------------|-------------|
| chr12:102107867-102110590 | exonic   | CHPT1            | 12 | 102107867 | 102110590 | 0 | 0 | 0 | 4 | 4 | 0 | 2723   | 0.909355228 | -3.37302311  | 3.058377227 | -1.102880011 | 0.270079276 | 0.998252924 |
| chr9:26861063-26887511    | exonic   | CAAP1            | 9  | 26861063  | 26887511  | 0 | 0 | 0 | 2 | 0 | 2 | 26448  | 0.964803446 | -3.356378124 | 2.812837622 | -1.193235648 | 0.232777097 | 0.998252924 |
| chr10:70152894-70154208   | exonic   | RUFY2            | 10 | 70152894  | 70154208  | 1 | 0 | 0 | 3 | 5 | 3 | 1314   | 1.977714034 | -3.354504749 | 2.098754456 | -1.59833121  | 0.109969285 | 0.998252924 |
| chr11:116627861-116629123 | exonic   | BUD13            | 11 | 116627861 | 116629123 | 0 | 0 | 0 | 5 | 3 | 0 | 1262   | 0.894639191 | -3.35092432  | 3.079347124 | -1.088193109 | 0.276509866 | 0.998252924 |
| chr16:56660792-56673241   | exonic   | MT1A, MT1E, MT1M | 16 | 56660792  | 56673241  | 0 | 0 | 0 | 5 | 3 | 0 | 12449  | 0.894639191 | -3.35092432  | 3.079347124 | -1.088193109 | 0.276509866 | 0.998252924 |
| chr17:79571573-79575848   | exonic   | NPLOC4           | 17 | 79571573  | 79575848  | 0 | 0 | 0 | 5 | 3 | 0 | 4275   | 0.894639191 | -3.35092432  | 3.079347124 | -1.088193109 | 0.276509866 | 0.998252924 |
| chr2:43926785-43933555    | exonic   | PLEKHH2          | 2  | 43926785  | 43933555  | 0 | 0 | 0 | 5 | 3 | 0 | 6770   | 0.894639191 | -3.35092432  | 3.079347124 | -1.088193109 | 0.276509866 | 0.998252924 |
| chr2:40366540-40404995    | exonic   | SLC8A1           | 2  | 40366540  | 40404995  | 0 | 0 | 0 | 2 | 1 | 2 | 38455  | 0.95008741  | -3.334025305 | 2.825810664 | -1.179847379 | 0.238060922 | 0.998252924 |
| chr5:50055476-50093067    | exonic   | PARP8            | 5  | 50055476  | 50093067  | 0 | 0 | 0 | 2 | 1 | 2 | 37591  | 0.95008741  | -3.334025305 | 2.825810664 | -1.179847379 | 0.238060922 | 0.998252924 |
| chr17:76075475-76079247   | exonic   | TNRC6C           | 17 | 76075475  | 76079247  | 0 | 0 | 0 | 6 | 2 | 0 | 3772   | 0.879923154 | -3.328148936 | 3.111158672 | -1.069745804 | 0.284733743 | 0.998252924 |
| chr2:188223789-188252483  | exonic   | CALCRL           | 2  | 188223789 | 188252483 | 0 | 0 | 0 | 6 | 2 | 0 | 28694  | 0.879923154 | -3.328148936 | 3.111158672 | -1.069745804 | 0.284733743 | 0.998252924 |
| chr13:33306237-33309467   | exonic   | PDS5B            | 13 | 33306237  | 33309467  | 0 | 0 | 0 | 0 | 5 | 1 | 3230   | 0.913355718 | -3.328115842 | 3.122688126 | -1.065785537 | 0.2865206   | 0.998252924 |
| chr4:151727422-151738409  | exonic   | LRBA             | 4  | 151727422 | 151738409 | 0 | 0 | 0 | 0 | 5 | 1 | 10987  | 0.913355718 | -3.328115842 | 3.122688126 | -1.065785537 | 0.2865206   | 0.998252924 |
| chr6:42023268-42025251    | exonic   | TAF8             | 6  | 42023268  | 42025251  | 0 | 0 | 0 | 0 | 5 | 1 | 1983   | 0.913355718 | -3.328115842 | 3.122688126 | -1.065785537 | 0.2865206   | 0.998252924 |
| chr9:37126308-37304310    | exonic   | ZCCHC7           | 9  | 37126308  | 37304310  | 0 | 0 | 0 | 0 | 5 | 1 | 178002 | 0.913355718 | -3.328115842 | 3.122688126 | -1.065785537 | 0.2865206   | 0.998252924 |
| chr10:4872867-4975522     | exonic   | AKRIE2           | 10 | 4872867   | 4975522   | 0 | 0 | 0 | 3 | 0 | 2 | 102655 | 0.935371373 | -3.320729191 | 3.081201045 | -1.077738564 | 0.281150443 | 0.998252924 |
| chr11:110118427-110124834 | exonic   | RDX              | 11 | 110118427 | 110124834 | 0 | 0 | 0 | 3 | 0 | 2 | 6407   | 0.935371373 | -3.320729191 | 3.081201045 | -1.077738564 | 0.281150443 | 0.998252924 |
| chr17:19554859-19575269   | exonic   | ALDH3A2          | 17 | 19554859  | 19575269  | 0 | 0 | 0 | 3 | 0 | 2 | 20410  | 0.935371373 | -3.320729191 | 3.081201045 | -1.077738564 | 0.281150443 | 0.998252924 |
| chr17:61841375-61842207   | exonic   | CCDC47           | 17 | 61841375  | 61842207  | 0 | 0 | 0 | 3 | 0 | 2 | 832    | 0.935371373 | -3.320729191 | 3.081201045 | -1.077738564 | 0.281150443 | 0.998252924 |
| chr4:129857809-129886473  | exonic   | SCLT1            | 4  | 129857809 | 129886473 | 0 | 0 | 0 | 2 | 0 | 0 | 28664  | 0.935371373 | -3.320729191 | 3.081201045 | -1.077738564 | 0.281150443 | 0.998252924 |
| chr8:30332294-30336893    | exonic   | RBPMS            | 8  | 30332294  | 30336893  | 0 | 0 | 0 | 3 | 0 | 2 | 4599   | 0.935371373 | -3.320729191 | 3.081201045 | -1.077738564 | 0.281150443 | 0.998252924 |
| chr7:91700218-91715000    | exonic   | AKAP9            | 7  | 91700218  | 91715000  | 0 | 0 | 0 | 1 | 4 | 1 | 14782  | 0.898639681 | -3.304467115 | 2.879643723 | -1.147526372 | 0.25116414  | 0.998252924 |
| chr12:82780581-82832570   | exonic   | METTL25          | 12 | 82780581  | 82832570  | 0 | 0 | 0 | 7 | 1 | 0 | 51989  | 0.865207118 | -3.304326148 | 3.164417086 | -1.044213218 | NA          | NA          |
| chr2:241492330-241494472  | exonic   | ANKMY1           | 2  | 241492330 | 241494472 | 0 | 0 | 0 | 7 | 1 | 0 | 2142   | 0.865207118 | -3.304326148 | 3.164417086 | -1.044213218 | NA          | NA          |
| chr5:159437506-159476669  | exonic   | TTC1             | 5  | 159437506 | 159476669 | 0 | 0 | 0 | 7 | 1 | 0 | 39163  | 0.865207118 | -3.304326148 | 3.164417086 | -1.044213218 | NA          | NA          |
| chr6:144808683-144838084  | exonic   | UTRN             | 6  | 144808683 | 144838084 | 0 | 0 | 0 | 3 | 1 | 0 | 29401  | 0.865207118 | -3.304326148 | 3.164417086 | -1.044213218 | NA          | NA          |
| chr5:77423853-77461496    | exonic   | AP3B1            | 5  | 77423853  | 77461496  | 0 | 0 | 0 | 2 | 3 | 1 | 37643  | 0.883923644 | -3.281398768 | 2.866529349 | -1.144728823 | 0.252321508 | 0.998252924 |
| chr9:86279944-86293514    | exonic   | UBQLN1           | 9  | 86279944  | 86293514  | 0 | 0 | 0 | 2 | 3 | 1 | 13570  | 0.883923644 | -3.281398768 | 2.866529349 | -1.144728823 | 0.252321508 | 0.998252924 |
| chr10:30315031-30318795   | exonic   | KIAA1462         | 10 | 30315031  | 30318795  | 0 | 0 | 0 | 8 | 0 | 0 | 3764   | 0.850491081 | -3.272265865 | 3.495369091 | -0.936171769 | NA          | NA          |
| chr7:92086866-92121600    | exonic   | PEX1             | 7  | 92086866  | 92121600  | 0 | 0 | 0 | 8 | 0 | 0 | 34734  | 0.850491081 | -3.272265865 | 3.495369091 | -0.936171769 | NA          | NA          |
| chrX:8553307-8556019      | exonic   | ANOS1            | X  | 8553307   | 8556019   | 0 | 0 | 0 | 8 | 0 | 0 | 2712   | 0.850491081 | -3.272265865 | 3.495369091 | -0.936171769 | NA          | NA          |
| chr1:193044949-193046180  | exonic   | TROVE2           | 1  | 193044949 | 193046180 | 0 | 0 | 0 | 0 | 0 | 3 | 1231   | 0.924655826 | -3.268273915 | 3.438219945 | -0.950571507 | NA          | NA          |
| chr1:93683294-93730458    | exonic   | CCDC18           | 1  | 93683294  | 93730458  | 0 | 0 | 0 | 0 | 0 | 3 | 47164  | 0.924655826 | -3.268273915 | 3.438219945 | -0.950571507 | NA          | NA          |
| chr10:121335203-121340050 | exonic   | TIAL1            | 10 | 121335203 | 121340050 | 0 | 0 | 0 | 0 | 0 | 3 | 4847   | 0.924655826 | -3.268273915 | 3.438219945 | -0.950571507 | NA          | NA          |
| chr10:65208211-65208617   | intronic | JMJD1C           | 10 | 65208211  | 65208617  | 0 | 0 | 0 | 0 | 0 | 3 | 406    | 0.924655826 | -3.268273915 | 3.438219945 | -0.950571507 | NA          | NA          |

|                           |                |                                                              |    |           |           |   |   |   |   |   |   |       |             |              |             |              |    |    |
|---------------------------|----------------|--------------------------------------------------------------|----|-----------|-----------|---|---|---|---|---|---|-------|-------------|--------------|-------------|--------------|----|----|
| chr11:10011044-10052717   | exonic         | SBF2                                                         | 11 | 10011044  | 10052717  | 0 | 0 | 0 | 0 | 0 | 3 | 41673 | 0.924655826 | -3.268273915 | 3.438219945 | -0.950571507 | NA | NA |
| chr11:47817629-47818900   | intronic       | NUP160                                                       | 11 | 47817629  | 47818900  | 0 | 0 | 0 | 0 | 0 | 3 | 1271  | 0.924655826 | -3.268273915 | 3.438219945 | -0.950571507 | NA | NA |
| chr11:9424836-9438695     | exonic         | IPO7                                                         | 11 | 9424836   | 9438695   | 0 | 0 | 0 | 0 | 0 | 3 | 13859 | 0.924655826 | -3.268273915 | 3.438219945 | -0.950571507 | NA | NA |
| chr12:89744364-89744802   | exonic         | DUSP6                                                        | 12 | 89744364  | 89744802  | 0 | 0 | 0 | 0 | 0 | 3 | 438   | 0.924655826 | -3.268273915 | 3.438219945 | -0.950571507 | NA | NA |
| chr15:101929668-101970268 | exonic         | PCSK6                                                        | 15 | 101929668 | 101970268 | 0 | 0 | 0 | 0 | 0 | 3 | 40600 | 0.924655826 | -3.268273915 | 3.438219945 | -0.950571507 | NA | NA |
| chr15:50875285-50881853   | exonic         | TRPM7                                                        | 15 | 50875285  | 50881853  | 0 | 0 | 0 | 0 | 0 | 3 | 6568  | 0.924655826 | -3.268273915 | 3.438219945 | -0.950571507 | NA | NA |
| chr15:72810407-72837305   | exonic         | ARIH1                                                        | 15 | 72810407  | 72837305  | 0 | 0 | 0 | 0 | 0 | 3 | 26898 | 0.924655826 | -3.268273915 | 3.438219945 | -0.950571507 | NA | NA |
| chr15:99305893-99308596   | intronic       | IGF1R                                                        | 15 | 99305893  | 99308596  | 0 | 0 | 0 | 0 | 0 | 3 | 2703  | 0.924655826 | -3.268273915 | 3.438219945 | -0.950571507 | NA | NA |
| chr16:24953307-24981901   | exonic         | ARHGAP17                                                     | 16 | 24953307  | 24981901  | 0 | 0 | 0 | 0 | 0 | 3 | 28594 | 0.924655826 | -3.268273915 | 3.438219945 | -0.950571507 | NA | NA |
| chr16:56496445-56501205   | exonic         | OGFOD1                                                       | 16 | 56496445  | 56501205  | 0 | 0 | 0 | 0 | 0 | 3 | 4760  | 0.924655826 | -3.268273915 | 3.438219945 | -0.950571507 | NA | NA |
| chr16:57208173-57209008   | intronic       | FAM192A                                                      | 16 | 57208173  | 57209008  | 0 | 0 | 0 | 0 | 0 | 3 | 835   | 0.924655826 | -3.268273915 | 3.438219945 | -0.950571507 | NA | NA |
| chr16:67773163-67789326   | exonic         | RANBP10                                                      | 16 | 67773163  | 67789326  | 0 | 0 | 0 | 0 | 0 | 3 | 16163 | 0.924655826 | -3.268273915 | 3.438219945 | -0.950571507 | NA | NA |
| chr16:84492725-84495735   | exonic         | ATP2C2                                                       | 16 | 84492725  | 84495735  | 0 | 0 | 0 | 0 | 0 | 3 | 3010  | 0.924655826 | -3.268273915 | 3.438219945 | -0.950571507 | NA | NA |
| chr19:2189730-2191239     | exonic         | DOT1L                                                        | 19 | 2189730   | 2191239   | 0 | 0 | 0 | 0 | 0 | 3 | 1509  | 0.924655826 | -3.268273915 | 3.438219945 | -0.950571507 | NA | NA |
| chr19:53077329-53079274   | exonic         | ZNF701                                                       | 19 | 53077329  | 53079274  | 0 | 0 | 0 | 0 | 0 | 3 | 1945  | 0.924655826 | -3.268273915 | 3.438219945 | -0.950571507 | NA | NA |
| chr19:9004868-9006766     | exonic         | MUC16                                                        | 19 | 9004868   | 9006766   | 0 | 0 | 0 | 0 | 0 | 3 | 1898  | 0.924655826 | -3.268273915 | 3.438219945 | -0.950571507 | NA | NA |
| chr2:20467067-20468141    | intronic       | PUM2                                                         | 2  | 20467067  | 20468141  | 0 | 0 | 0 | 0 | 0 | 3 | 1074  | 0.924655826 | -3.268273915 | 3.438219945 | -0.950571507 | NA | NA |
| chr2:223338551-223339883  | exonic         | SGPP2                                                        | 2  | 223338551 | 223339883 | 0 | 0 | 0 | 0 | 0 | 3 | 1332  | 0.924655826 | -3.268273915 | 3.438219945 | -0.950571507 | NA | NA |
| chr2:234276106-234276924  | intronic       | DGKD                                                         | 2  | 234276106 | 234276924 | 0 | 0 | 0 | 0 | 0 | 3 | 818   | 0.924655826 | -3.268273915 | 3.438219945 | -0.950571507 | NA | NA |
| chr2:24777258-24778924    | intergenic     | <small>ITSN2 (dist=193861), NCOA1 (dist=28422)</small>       | 2  | 24777258  | 24778924  | 0 | 0 | 0 | 0 | 0 | 3 | 1666  | 0.924655826 | -3.268273915 | 3.438219945 | -0.950571507 | NA | NA |
| chr2:32716491-32728303    | exonic         | BIRC6                                                        | 2  | 32716491  | 32728303  | 0 | 0 | 0 | 0 | 0 | 3 | 11812 | 0.924655826 | -3.268273915 | 3.438219945 | -0.950571507 | NA | NA |
| chr2:38566340-38566914    | intronic       | ATL2                                                         | 2  | 38566340  | 38566914  | 0 | 0 | 0 | 0 | 0 | 3 | 574   | 0.924655826 | -3.268273915 | 3.438219945 | -0.950571507 | NA | NA |
| chr2:78166957-78178659    | ncRNA_intronic | LOC101927967                                                 | 2  | 78166957  | 78178659  | 0 | 0 | 0 | 0 | 0 | 3 | 11702 | 0.924655826 | -3.268273915 | 3.438219945 | -0.950571507 | NA | NA |
| chr20:33490643-33491594   | intronic       | ACSS2                                                        | 20 | 33490643  | 33491594  | 0 | 0 | 0 | 0 | 0 | 3 | 951   | 0.924655826 | -3.268273915 | 3.438219945 | -0.950571507 | NA | NA |
| chr22:29092888-29121355   | exonic         | CHEK2                                                        | 22 | 29092888  | 29121355  | 0 | 0 | 0 | 0 | 0 | 3 | 28467 | 0.924655826 | -3.268273915 | 3.438219945 | -0.950571507 | NA | NA |
| chr22:42046726-42053036   | exonic         | XRCC6                                                        | 22 | 42046726  | 42053036  | 0 | 0 | 0 | 0 | 0 | 3 | 6310  | 0.924655826 | -3.268273915 | 3.438219945 | -0.950571507 | NA | NA |
| chr22:42252213-42257422   | intronic       | SREBF2                                                       | 22 | 42252213  | 42257422  | 0 | 0 | 0 | 0 | 0 | 3 | 5209  | 0.924655826 | -3.268273915 | 3.438219945 | -0.950571507 | NA | NA |
| chr22:43230247-43243638   | exonic         | ARFGAP3                                                      | 22 | 43230247  | 43243638  | 0 | 0 | 0 | 0 | 0 | 3 | 13391 | 0.924655826 | -3.268273915 | 3.438219945 | -0.950571507 | NA | NA |
| chr3:28051961-28070094    | intergenic     | <small>LOC10096624 (dist=176324), CMC1 (dist=213030)</small> | 3  | 28051961  | 28070094  | 0 | 0 | 0 | 0 | 0 | 3 | 18133 | 0.924655826 | -3.268273915 | 3.438219945 | -0.950571507 | NA | NA |
| chr3:48736137-48736650    | intronic       | IP6K2                                                        | 3  | 48736137  | 48736650  | 0 | 0 | 0 | 0 | 0 | 3 | 513   | 0.924655826 | -3.268273915 | 3.438219945 | -0.950571507 | NA | NA |
| chr3:49317917-49320250    | exonic         | USP4                                                         | 3  | 49317917  | 49320250  | 0 | 0 | 0 | 0 | 0 | 3 | 2333  | 0.924655826 | -3.268273915 | 3.438219945 | -0.950571507 | NA | NA |
| chr3:65607647-65704289    | exonic         | MAGI1                                                        | 3  | 65607647  | 65704289  | 0 | 0 | 0 | 0 | 0 | 3 | 96642 | 0.924655826 | -3.268273915 | 3.438219945 | -0.950571507 | NA | NA |
| chr4:68284569-68286776    | ncRNA_exonic   | LOC101927237                                                 | 4  | 68284569  | 68286776  | 0 | 0 | 0 | 0 | 0 | 3 | 2207  | 0.924655826 | -3.268273915 | 3.438219945 | -0.950571507 | NA | NA |
| chr5:138240037-138261096  | exonic         | CTNNA1                                                       | 5  | 138240037 | 138261096 | 0 | 0 | 0 | 0 | 0 | 3 | 21059 | 0.924655826 | -3.268273915 | 3.438219945 | -0.950571507 | NA | NA |
| chr5:145602965-145616995  | exonic         | RBM27                                                        | 5  | 145602965 | 145616995 | 0 | 0 | 0 | 0 | 0 | 3 | 14030 | 0.924655826 | -3.268273915 | 3.438219945 | -0.950571507 | NA | NA |

|                           |            |                                                                  |    |           |           |   |   |   |   |    |   |        |             |              |             |              |             |             |
|---------------------------|------------|------------------------------------------------------------------|----|-----------|-----------|---|---|---|---|----|---|--------|-------------|--------------|-------------|--------------|-------------|-------------|
| chr5:171396254-171396787  | intronic   | FBXW11                                                           | 5  | 171396254 | 171396787 | 0 | 0 | 0 | 0 | 0  | 3 | 533    | 0.924655826 | -3.268273915 | 3.438219945 | -0.950571507 | NA          | NA          |
| chr6:111120264-111120914  | intronic   | CDK19                                                            | 6  | 111120264 | 111120914 | 0 | 0 | 0 | 0 | 0  | 3 | 650    | 0.924655826 | -3.268273915 | 3.438219945 | -0.950571507 | NA          | NA          |
| chr6:138949372-138951632  | intergenic | <small>NLSL1 (dist=55704), FLJ46906 (dist=61173)</small>         | 6  | 138949372 | 138951632 | 0 | 0 | 0 | 0 | 0  | 3 | 2260   | 0.924655826 | -3.268273915 | 3.438219945 | -0.950571507 | NA          | NA          |
| chr6:143222801-143228195  | intronic   | HIVEP2                                                           | 6  | 143222801 | 143228195 | 0 | 0 | 0 | 0 | 0  | 3 | 5394   | 0.924655826 | -3.268273915 | 3.438219945 | -0.950571507 | NA          | NA          |
| chr6:143654582-143655196  | exonic     | AIG1                                                             | 6  | 143654582 | 143655196 | 0 | 0 | 0 | 0 | 0  | 3 | 614    | 0.924655826 | -3.268273915 | 3.438219945 | -0.950571507 | NA          | NA          |
| chr6:157300939-157301356  | intronic   | ARID1B                                                           | 6  | 157300939 | 157301356 | 0 | 0 | 0 | 0 | 0  | 3 | 417    | 0.924655826 | -3.268273915 | 3.438219945 | -0.950571507 | NA          | NA          |
| chr6:7393331-7405254      | exonic     | RIOK1                                                            | 6  | 7393331   | 7405254   | 0 | 0 | 0 | 0 | 0  | 3 | 11923  | 0.924655826 | -3.268273915 | 3.438219945 | -0.950571507 | NA          | NA          |
| chr7:102279570-102280861  | exonic     | UPK3BL                                                           | 7  | 102279570 | 102280861 | 0 | 0 | 0 | 0 | 0  | 3 | 1291   | 0.924655826 | -3.268273915 | 3.438219945 | -0.950571507 | NA          | NA          |
| chr7:42187824-42262894    | exonic     | GLI3                                                             | 7  | 42187824  | 42262894  | 0 | 0 | 0 | 0 | 0  | 3 | 75070  | 0.924655826 | -3.268273915 | 3.438219945 | -0.950571507 | NA          | NA          |
| chr7:65946528-65955094    | intergenic | <small>LINC00174 (dist=81133), G51-124K5.11 (dist=40198)</small> | 7  | 65946528  | 65955094  | 0 | 0 | 0 | 0 | 0  | 3 | 8566   | 0.924655826 | -3.268273915 | 3.438219945 | -0.950571507 | NA          | NA          |
| chr7:75660383-75667870    | intronic   | STYXL1                                                           | 7  | 75660383  | 75667870  | 0 | 0 | 0 | 0 | 0  | 3 | 7487   | 0.924655826 | -3.268273915 | 3.438219945 | -0.950571507 | NA          | NA          |
| chr7:91972337-91981956    | exonic     | ANKIB1                                                           | 7  | 91972337  | 91981956  | 0 | 0 | 0 | 0 | 0  | 3 | 9619   | 0.924655826 | -3.268273915 | 3.438219945 | -0.950571507 | NA          | NA          |
| chr8:133253740-133254016  | intronic   | KCNQ3                                                            | 8  | 133253740 | 133254016 | 0 | 0 | 0 | 0 | 0  | 3 | 276    | 0.924655826 | -3.268273915 | 3.438219945 | -0.950571507 | NA          | NA          |
| chr8:144994560-144994952  | exonic     | PLEC                                                             | 8  | 144994560 | 144994952 | 0 | 0 | 0 | 0 | 0  | 3 | 392    | 0.924655826 | -3.268273915 | 3.438219945 | -0.950571507 | NA          | NA          |
| chr9:33941646-33963789    | exonic     | UBAP2                                                            | 9  | 33941646  | 33963789  | 0 | 0 | 0 | 0 | 0  | 3 | 22143  | 0.924655826 | -3.268273915 | 3.438219945 | -0.950571507 | NA          | NA          |
| chr9:37522821-37532055    | exonic     | FBXO10                                                           | 9  | 37522821  | 37532055  | 0 | 0 | 0 | 0 | 0  | 3 | 9234   | 0.924655826 | -3.268273915 | 3.438219945 | -0.950571507 | NA          | NA          |
| chrMT:12375-12704         | intergenic | <small>NONE (dist=NONE), NONE (dist=NONE)</small>                | MT | 12375     | 12704     | 0 | 0 | 0 | 0 | 0  | 3 | 329    | 0.924655826 | -3.268273915 | 3.438219945 | -0.950571507 | NA          | NA          |
| chrX:102825496-102859612  | exonic     | TCEAL4                                                           | X  | 102825496 | 102859612 | 0 | 0 | 0 | 0 | 0  | 3 | 34116  | 0.924655826 | -3.268273915 | 3.438219945 | -0.950571507 | NA          | NA          |
| chrX:15444028-15477863    | exonic     | PIR                                                              | X  | 15444028  | 15477863  | 0 | 0 | 0 | 0 | 0  | 3 | 33835  | 0.924655826 | -3.268273915 | 3.438219945 | -0.950571507 | NA          | NA          |
| chrX:2637702-2656297      | exonic     | CD99                                                             | X  | 2637702   | 2656297   | 0 | 0 | 0 | 0 | 0  | 3 | 18595  | 0.924655826 | -3.268273915 | 3.438219945 | -0.950571507 | NA          | NA          |
| chr19:42213599-42259610   | exonic     | CEACAM5, CEACAM6                                                 | 19 | 42213599  | 42259610  | 0 | 0 | 0 | 0 | 7  | 0 | 46011  | 0.847191953 | -3.257544046 | 3.506023663 | -0.929127798 | NA          | NA          |
| chr19:9677012-9678851     | exonic     | ZNF121                                                           | 19 | 9677012   | 9678851   | 0 | 0 | 0 | 0 | 7  | 0 | 1839   | 0.847191953 | -3.257544046 | 3.506023663 | -0.929127798 | NA          | NA          |
| chr22:22735410-22786381   | intergenic | <small>BMS1P20 (dist=58086), ZNF280B (dist=52390)</small>        | 22 | 22735410  | 22786381  | 0 | 0 | 0 | 0 | 7  | 0 | 50971  | 0.847191953 | -3.257544046 | 3.506023663 | -0.929127798 | NA          | NA          |
| chr8:17510694-17613470    | exonic     | MTUS1                                                            | 8  | 17510694  | 17613470  | 0 | 0 | 0 | 0 | 7  | 0 | 102776 | 0.847191953 | -3.257544046 | 3.506023663 | -0.929127798 | NA          | NA          |
| chrMT:3322-3603           | intergenic | <small>NONE (dist=NONE), NONE (dist=NONE)</small>                | MT | 3322      | 3603      | 0 | 0 | 0 | 0 | 7  | 0 | 281    | 0.847191953 | -3.257544046 | 3.506023663 | -0.929127798 | NA          | NA          |
| chr12:110566754-110581350 | exonic     | IFT81                                                            | 12 | 110566754 | 110581350 | 1 | 0 | 0 | 3 | 4  | 3 | 14596  | 1.856686612 | -3.249785357 | 2.138741681 | -1.519484744 | 0.128640525 | 0.998252924 |
| chr2:203817281-203820481  | exonic     | CARF                                                             | 2  | 203817281 | 203820481 | 1 | 0 | 0 | 6 | 8  | 0 | 3200   | 1.735074628 | -3.235810129 | 2.327872804 | -1.390028752 | 0.164520147 | 0.998252924 |
| chr4:2659529-2692697      | exonic     | FAM193A                                                          | 4  | 2659529   | 2692697   | 0 | 0 | 0 | 4 | 1  | 1 | 33168  | 0.854491571 | -3.234413824 | 2.9250913   | -1.105747989 | 0.268835612 | 0.998252924 |
| chr12:56742312-56743420   | exonic     | STAT2                                                            | 12 | 56742312  | 56743420  | 1 | 0 | 0 | 9 | 3  | 1 | 1108   | 1.757090283 | -3.234109081 | 2.188021456 | -1.478097517 | 0.139381679 | 0.998252924 |
| chr22:45197956-45221473   | exonic     | ARHGAP8, PRR5-ARHGAP8                                            | 22 | 45197956  | 45221473  | 0 | 1 | 0 | 2 | 0  | 5 | 23517  | 1.927991613 | -3.226188086 | 2.362087637 | -1.365820656 | NA          | NA          |
| chr10:34661425-34673182   | exonic     | PARD3                                                            | 10 | 34661425  | 34673182  | 1 | 0 | 0 | 5 | 2  | 3 | 11757  | 1.827254538 | -3.225792125 | 2.158150658 | -1.494702009 | 0.13499223  | 0.998252924 |
| chr2:201721404-201721708  | exonic     | CLK1                                                             | 2  | 201721404 | 201721708 | 1 | 0 | 0 | 1 | 10 | 1 | 304    | 1.753791155 | -3.221585092 | 2.254816335 | -1.428757208 | 0.153074029 | 0.998252924 |
| chr20:3893505-3894085     | intronic   | PANK2                                                            | 20 | 3893505   | 3894085   | 0 | 0 | 0 | 2 | 5  | 0 | 580    | 0.817759879 | -3.217543151 | 3.199553553 | -1.005622534 | 0.31459718  | 0.998252924 |
| chr6:47575662-47580272    | exonic     | CD2AP                                                            | 6  | 47575662  | 47580272  | 0 | 0 | 0 | 2 | 5  | 0 | 4610   | 0.817759879 | -3.217543151 | 3.199553553 | -1.005622534 | 0.31459718  | 0.998252924 |
| chr9:111868787-111870850  | exonic     | TMEM245                                                          | 9  | 111868787 | 111870850 | 0 | 0 | 0 | 2 | 5  | 0 | 2063   | 0.817759879 | -3.217543151 | 3.199553553 | -1.005622534 | 0.31459718  | 0.998252924 |



|                           |                |                     |       |           |           |          |   |   |    |   |    |       |             |              |             |              |              |             |             |
|---------------------------|----------------|---------------------|-------|-----------|-----------|----------|---|---|----|---|----|-------|-------------|--------------|-------------|--------------|--------------|-------------|-------------|
| chrY:22669238-22683186    | ncRNA_exonic   | TTY10               | Y     | 22669238  | 22683186  | 0        | 0 | 0 | 2  | 5 | 0  | 13948 | 0.817759879 | -3.217543151 | 3.199553553 | -1.005622534 | 0.31459718   | 0.998252924 |             |
| chrX:2129531-2139270      | exonic         | DHRSX               | X     | 2129531   | 2139270   | 2        | 0 | 0 | 3  | 3 | 7  | 9739  | 3.097520568 | -3.216191357 | 1.882564001 | -1.708410102 | NA           | NA          |             |
| chr15:50940883-50955243   | exonic         | TRPM7               | 15    | 50940883  | 50955243  | 0        | 0 | 0 | 5  | 0 | 1  | 14360 | 0.839775535 | -3.210411418 | 3.211052057 | -0.999800489 | 0.317407069  | 0.998252924 |             |
| chr11:65198240-65205128   | ncRNA_exonic   | NEAT1               | 11    | 65198240  | 65205128  | 5        | 0 | 2 | 13 | 6 | 26 | 6888  | 11.16136913 | -3.197286784 | 1.211124091 | -2.639933272 | NA           | NA          |             |
| chr15:44048846-44055404   | exonic         | PDIA3               | 15    | 44048846  | 44055404  | 0        | 0 | 0 | 3  | 4 | 0  | 6558  | 0.803043843 | -3.19339639  | 3.207939002 | -0.995466681 | 0.319509342  | 0.998252924 |             |
| chr15:77020935-77057413   | exonic         | SCAPER              | 15    | 77020935  | 77057413  | 0        | 0 | 0 | 3  | 4 | 0  | 36478 | 0.803043843 | -3.19339639  | 3.207939002 | -0.995466681 | 0.319509342  | 0.998252924 |             |
| chr7:35919433-35925489    | exonic         |                     | 7-Sep | 7         | 35919433  | 35925489 | 0 | 0 | 0  | 3 | 4  | 0     | 6056        | 0.803043843  | -3.19339639 | 3.207939002  | -0.995466681 | 0.319509342 | 0.998252924 |
| chr1:110203787-110233186  | exonic         | GSTM1, GSTM2, GSTM4 | 1     | 110203787 | 110233186 | 0        | 0 | 0 | 0  | 2 | 2  | 29399 | 0.858492061 | -3.183365074 | 3.192071896 | -0.99727236  | 0.318632326  | 0.998252924 |             |
| chr1:50956260-51001129    | exonic         | FAF1                | 1     | 50956260  | 51001129  | 0        | 0 | 0 | 0  | 2 | 2  | 44869 | 0.858492061 | -3.183365074 | 3.192071896 | -0.99727236  | 0.318632326  | 0.998252924 |             |
| chr10:96253121-96260084   | exonic         | TBC1D12             | 10    | 96253121  | 96260084  | 0        | 0 | 0 | 0  | 2 | 2  | 6963  | 0.858492061 | -3.183365074 | 3.192071896 | -0.99727236  | 0.318632326  | 0.998252924 |             |
| chr17:31065270-31076024   | exonic         | MYO1D               | 17    | 31065270  | 31076024  | 0        | 0 | 0 | 0  | 2 | 2  | 10754 | 0.858492061 | -3.183365074 | 3.192071896 | -0.99727236  | 0.318632326  | 0.998252924 |             |
| chr17:35800605-35825645   | exonic         | TADA2A              | 17    | 35800605  | 35825645  | 0        | 0 | 0 | 0  | 2 | 2  | 25040 | 0.858492061 | -3.183365074 | 3.192071896 | -0.99727236  | 0.318632326  | 0.998252924 |             |
| chr17:35800605-35827629   | exonic         | TADA2A              | 17    | 35800605  | 35827629  | 0        | 0 | 0 | 0  | 2 | 2  | 27024 | 0.858492061 | -3.183365074 | 3.192071896 | -0.99727236  | 0.318632326  | 0.998252924 |             |
| chr18:18586311-18588155   | exonic         | ROCK1               | 18    | 18586311  | 18588155  | 0        | 0 | 0 | 0  | 2 | 2  | 1844  | 0.858492061 | -3.183365074 | 3.192071896 | -0.99727236  | 0.318632326  | 0.998252924 |             |
| chr2:170691742-170692074  | intronic       | UBR3                | 2     | 170691742 | 170692074 | 0        | 0 | 0 | 0  | 2 | 2  | 332   | 0.858492061 | -3.183365074 | 3.192071896 | -0.99727236  | 0.318632326  | 0.998252924 |             |
| chr20:62654109-62657411   | exonic         | PRPF6               | 20    | 62654109  | 62657411  | 0        | 0 | 0 | 0  | 2 | 2  | 3302  | 0.858492061 | -3.183365074 | 3.192071896 | -0.99727236  | 0.318632326  | 0.998252924 |             |
| chr3:15258931-15262488    | exonic         | CAPN7               | 3     | 15258931  | 15262488  | 0        | 0 | 0 | 0  | 2 | 2  | 3557  | 0.858492061 | -3.183365074 | 3.192071896 | -0.99727236  | 0.318632326  | 0.998252924 |             |
| chr3:197592294-197598333  | exonic         | LRCH3               | 3     | 197592294 | 197598333 | 0        | 0 | 0 | 0  | 2 | 2  | 6039  | 0.858492061 | -3.183365074 | 3.192071896 | -0.99727236  | 0.318632326  | 0.998252924 |             |
| chr5:126859151-126860612  | exonic         | PRRC1               | 5     | 126859151 | 126860612 | 0        | 0 | 0 | 0  | 2 | 2  | 1461  | 0.858492061 | -3.183365074 | 3.192071896 | -0.99727236  | 0.318632326  | 0.998252924 |             |
| chrX:9656056-9683043      | exonic         | TBL1X               | X     | 9656056   | 9683043   | 0        | 0 | 0 | 0  | 2 | 2  | 26987 | 0.858492061 | -3.183365074 | 3.192071896 | -0.99727236  | 0.318632326  | 0.998252924 |             |
| chr7:74119495-74133260    | exonic         | GTF2I               | 7     | 74119495  | 74133260  | 1        | 0 | 0 | 2  | 2 | 4  | 13765 | 1.816538992 | -3.179233858 | 2.2006319   | -1.444691344 | 0.148544602  | 0.998252924 |             |
| chr12:111920591-111924628 | exonic         | ATXN2               | 12    | 111920591 | 111924628 | 0        | 0 | 0 | 4  | 3 | 0  | 4037  | 0.788327806 | -3.168498059 | 3.228771675 | -0.981332339 | 0.32642888   | 0.998252924 |             |
| chr14:35519990-35522657   | exonic         | FAM177A1            | 14    | 35519990  | 35522657  | 0        | 0 | 0 | 4  | 3 | 0  | 2667  | 0.788327806 | -3.168498059 | 3.228771675 | -0.981332339 | 0.32642888   | 0.998252924 |             |
| chr2:120634898-120643458  | exonic         | PTPN4               | 2     | 120634898 | 120643458 | 0        | 0 | 0 | 4  | 3 | 0  | 8560  | 0.788327806 | -3.168498059 | 3.228771675 | -0.981332339 | 0.32642888   | 0.998252924 |             |
| chr20:33302394-33303169   | exonic         | NCOA6               | 20    | 33302394  | 33303169  | 0        | 0 | 0 | 4  | 3 | 0  | 775   | 0.788327806 | -3.168498059 | 3.228771675 | -0.981332339 | 0.32642888   | 0.998252924 |             |
| chr3:50098388-50099541    | exonic         | RBM6                | 3     | 50098388  | 50099541  | 0        | 0 | 0 | 4  | 3 | 0  | 1153  | 0.788327806 | -3.168498059 | 3.228771675 | -0.981332339 | 0.32642888   | 0.998252924 |             |
| chr5:154330381-154346797  | exonic         | MRPL22              | 5     | 154330381 | 154346797 | 0        | 0 | 0 | 4  | 3 | 0  | 16416 | 0.788327806 | -3.168498059 | 3.228771675 | -0.981332339 | 0.32642888   | 0.998252924 |             |
| chr6:22056775-22063469    | ncRNA_exonic   | CASC15              | 6     | 22056775  | 22063469  | 0        | 0 | 0 | 4  | 3 | 0  | 6694  | 0.788327806 | -3.168498059 | 3.228771675 | -0.981332339 | 0.32642888   | 0.998252924 |             |
| chr1:150413398-150418877  | exonic         | RPRD2               | 1     | 150413398 | 150418877 | 0        | 0 | 1 | 1  | 5 | 3  | 5479  | 1.833373346 | -3.164178495 | 2.19814985  | -1.439473517 | 0.150016408  | 0.998252924 |             |
| chr18:8076452-8143777     | exonic         | PTPRM               | 18    | 8076452   | 8143777   | 2        | 0 | 0 | 0  | 0 | 8  | 67325 | 2.723722756 | -3.151649072 | 3.905933223 | -0.806887597 | NA           | NA          |             |
| chr13:21961646-21999817   | exonic         | ZDHHC20             | 13    | 21961646  | 21999817  | 0        | 0 | 0 | 1  | 1 | 2  | 38171 | 0.843776025 | -3.146557362 | 2.974560143 | -1.057822741 | 0.290136263  | 0.998252924 |             |
| chr12:46230371-46254732   | exonic         | ARID2               | 12    | 46230371  | 46254732  | 0        | 0 | 0 | 5  | 2 | 0  | 24361 | 0.773611769 | -3.142781832 | 3.261994729 | -0.963453988 | 0.335319744  | 0.998252924 |             |
| chr18:39595439-39609405   | exonic         | PIK3C3              | 18    | 39595439  | 39609405  | 0        | 0 | 0 | 5  | 2 | 0  | 13966 | 0.773611769 | -3.142781832 | 3.261994729 | -0.963453988 | 0.335319744  | 0.998252924 |             |
| chr3:125567073-125567290  | ncRNA_intronic | LOC101927056        | 3     | 125567073 | 125567290 | 0        | 0 | 0 | 5  | 2 | 0  | 217   | 0.773611769 | -3.142781832 | 3.261994729 | -0.963453988 | 0.335319744  | 0.998252924 |             |
| chrY:2829114-2829687      | exonic         | ZFY                 | Y     | 2829114   | 2829687   | 0        | 0 | 0 | 5  | 2 | 0  | 573   | 0.773611769 | -3.142781832 | 3.261994729 | -0.963453988 | 0.335319744  | 0.998252924 |             |

|                           |              |                  |    |           |           |   |   |   |   |   |   |       |             |              |             |              |             |             |
|---------------------------|--------------|------------------|----|-----------|-----------|---|---|---|---|---|---|-------|-------------|--------------|-------------|--------------|-------------|-------------|
| chr10:104938554-104938793 | intronic     | NT5C2            | 10 | 104938554 | 104938793 | 0 | 0 | 0 | 2 | 0 | 2 | 239   | 0.829059988 | -3.132135204 | 3.229640614 | -0.969809208 | 0.332141602 | 0.998252924 |
| chr14:92469762-92474196   | exonic       | TRIP11           | 14 | 92469762  | 92474196  | 0 | 0 | 0 | 2 | 0 | 2 | 4434  | 0.829059988 | -3.132135204 | 3.229640614 | -0.969809208 | 0.332141602 | 0.998252924 |
| chr19:8619360-8619627     | exonic       | MYO1F            | 19 | 8619360   | 8619627   | 0 | 0 | 0 | 2 | 0 | 2 | 267   | 0.829059988 | -3.132135204 | 3.229640614 | -0.969809208 | 0.332141602 | 0.998252924 |
| chr2:183998294-184024380  | exonic       | NUP35            | 2  | 183998294 | 184024380 | 0 | 0 | 0 | 2 | 0 | 2 | 26086 | 0.829059988 | -3.132135204 | 3.229640614 | -0.969809208 | 0.332141602 | 0.998252924 |
| chr20:34307522-34307814   | intronic     | RBM39            | 20 | 34307522  | 34307814  | 0 | 0 | 0 | 2 | 0 | 2 | 292   | 0.829059988 | -3.132135204 | 3.229640614 | -0.969809208 | 0.332141602 | 0.998252924 |
| chr20:49518554-49535318   | exonic       | ADNP             | 20 | 49518554  | 49535318  | 0 | 0 | 0 | 2 | 0 | 2 | 16764 | 0.829059988 | -3.132135204 | 3.229640614 | -0.969809208 | 0.332141602 | 0.998252924 |
| chr3:136170874-136221621  | exonic       | STAG1            | 3  | 136170874 | 136221621 | 0 | 0 | 0 | 2 | 0 | 2 | 50747 | 0.829059988 | -3.132135204 | 3.229640614 | -0.969809208 | 0.332141602 | 0.998252924 |
| chr3:197559067-197593090  | exonic       | LRCH3            | 3  | 197559067 | 197593090 | 0 | 0 | 0 | 2 | 0 | 2 | 34023 | 0.829059988 | -3.132135204 | 3.229640614 | -0.969809208 | 0.332141602 | 0.998252924 |
| chr3:197562544-197592342  | exonic       | LRCH3            | 3  | 197562544 | 197592342 | 0 | 0 | 0 | 2 | 0 | 2 | 29798 | 0.829059988 | -3.132135204 | 3.229640614 | -0.969809208 | 0.332141602 | 0.998252924 |
| chr5:40764615-40771965    | exonic       | PRKAA1           | 5  | 40764615  | 40771965  | 0 | 0 | 0 | 2 | 0 | 2 | 7350  | 0.829059988 | -3.132135204 | 3.229640614 | -0.969809208 | 0.332141602 | 0.998252924 |
| chr6:168271065-168290006  | exonic       | MLLT4            | 6  | 168271065 | 168290006 | 0 | 0 | 0 | 2 | 0 | 2 | 18941 | 0.829059988 | -3.132135204 | 3.229640614 | -0.969809208 | 0.332141602 | 0.998252924 |
| chr7:72604105-72605594    | ncRNA_exonic | GTF2IP1, GTF2IP4 | 7  | 72604105  | 72605594  | 0 | 0 | 0 | 2 | 0 | 2 | 1489  | 0.829059988 | -3.132135204 | 3.229640614 | -0.969809208 | 0.332141602 | 0.998252924 |
| chr7:98628217-98630662    | exonic       | SMURF1           | 7  | 98628217  | 98630662  | 0 | 0 | 0 | 2 | 0 | 2 | 2445  | 0.829059988 | -3.132135204 | 3.229640614 | -0.969809208 | 0.332141602 | 0.998252924 |
| chr8:146105750-146108221  | exonic       | ZNF250           | 8  | 146105750 | 146108221 | 0 | 0 | 0 | 2 | 0 | 2 | 2471  | 0.829059988 | -3.132135204 | 3.229640614 | -0.969809208 | 0.332141602 | 0.998252924 |
| chr12:110566754-110600870 | exonic       | IFT81            | 12 | 110566754 | 110600870 | 0 | 0 | 1 | 4 | 2 | 3 | 34116 | 1.789225236 | -3.122738427 | 2.176404327 | -1.434815392 | 0.151339711 | 0.998252924 |
| chr5:6737622-6746540      | exonic       | PAPD7            | 5  | 6737622   | 6746540   | 0 | 0 | 1 | 4 | 2 | 3 | 8918  | 1.789225236 | -3.122738427 | 2.176404327 | -1.434815392 | 0.151339711 | 0.998252924 |
| chr19:8601135-8604912     | exonic       | MYO1F            | 19 | 8601135   | 8604912   | 0 | 0 | 0 | 6 | 1 | 0 | 3777  | 0.758895733 | -3.115984907 | 3.316238844 | -0.939614139 | 0.347415521 | 0.998252924 |
| chr5:140960310-140963182  | exonic       | DIAPH1           | 5  | 140960310 | 140963182 | 0 | 0 | 0 | 6 | 1 | 0 | 2872  | 0.758895733 | -3.115984907 | 3.316238844 | -0.939614139 | 0.347415521 | 0.998252924 |
| chr1:52959282-52962855    | exonic       | ZCCHC11          | 1  | 52959282  | 52962855  | 0 | 0 | 0 | 0 | 4 | 1 | 3573  | 0.792328296 | -3.115690797 | 3.285821795 | -0.948222695 | 0.343016096 | 0.998252924 |
| chr14:38218143-38266152   | exonic       | TTC6             | 14 | 38218143  | 38266152  | 0 | 0 | 0 | 0 | 4 | 1 | 48009 | 0.792328296 | -3.115690797 | 3.285821795 | -0.948222695 | 0.343016096 | 0.998252924 |
| chr16:11940357-11940700   | exonic       | RSL1D1           | 16 | 11940357  | 11940700  | 0 | 0 | 0 | 0 | 4 | 1 | 343   | 0.792328296 | -3.115690797 | 3.285821795 | -0.948222695 | 0.343016096 | 0.998252924 |
| chr16:19477403-19481147   | exonic       | TMC5             | 16 | 19477403  | 19481147  | 0 | 0 | 0 | 0 | 4 | 1 | 3744  | 0.792328296 | -3.115690797 | 3.285821795 | -0.948222695 | 0.343016096 | 0.998252924 |
| chr16:53289511-53297009   | exonic       | CHD9             | 16 | 53289511  | 53297009  | 0 | 0 | 0 | 0 | 4 | 1 | 7498  | 0.792328296 | -3.115690797 | 3.285821795 | -0.948222695 | 0.343016096 | 0.998252924 |
| chr2:196544755-196548630  | exonic       | SLC39A10         | 2  | 196544755 | 196548630 | 0 | 0 | 0 | 0 | 4 | 1 | 3875  | 0.792328296 | -3.115690797 | 3.285821795 | -0.948222695 | 0.343016096 | 0.998252924 |
| chr20:50342357-50346517   | exonic       | ATP9A            | 20 | 50342357  | 50346517  | 0 | 0 | 0 | 0 | 4 | 1 | 4160  | 0.792328296 | -3.115690797 | 3.285821795 | -0.948222695 | 0.343016096 | 0.998252924 |
| chr6:42630995-42633983    | exonic       | UBR2             | 6  | 42630995  | 42633983  | 1 | 0 | 0 | 5 | 1 | 3 | 2988  | 1.706227117 | -3.112391595 | 2.234343537 | -1.392978091 | 0.163626416 | 0.998252924 |
| chr17:49059884-49063139   | exonic       | SPAG9            | 17 | 49059884  | 49063139  | 0 | 1 | 0 | 0 | 3 | 4 | 3255  | 1.7702325   | -3.10172918  | 2.394714339 | -1.295239741 | 0.195237539 | 0.998252924 |
| chr19:34790583-34791873   | exonic       | KIAA0355         | 19 | 34790583  | 34791873  | 0 | 0 | 0 | 1 | 3 | 1 | 1290  | 0.777612259 | -3.086889333 | 3.0299767   | -1.018783191 | 0.308305907 | 0.998252924 |
| chr6:109931567-109940439  | exonic       | AK9              | 6  | 109931567 | 109940439 | 0 | 0 | 0 | 1 | 3 | 1 | 8872  | 0.777612259 | -3.086889333 | 3.0299767   | -1.018783191 | 0.308305907 | 0.998252924 |
| chr10:124350181-124377856 | exonic       | DMBT1            | 10 | 124350181 | 124377856 | 0 | 0 | 0 | 7 | 0 | 0 | 27675 | 0.744179696 | -3.080455874 | 3.674073858 | -0.838430579 | NA          | NA          |
| chr10:21169723-21188379   | exonic       | NEBL             | 10 | 21169723  | 21188379  | 0 | 0 | 0 | 7 | 0 | 0 | 18656 | 0.744179696 | -3.080455874 | 3.674073858 | -0.838430579 | NA          | NA          |
| chr12:109660311-109661709 | exonic       | ACACB            | 12 | 109660311 | 109661709 | 0 | 0 | 0 | 7 | 0 | 0 | 1398  | 0.744179696 | -3.080455874 | 3.674073858 | -0.838430579 | NA          | NA          |
| chr12:82780581-82828503   | exonic       | METTL25          | 12 | 82780581  | 82828503  | 0 | 0 | 0 | 7 | 0 | 0 | 47922 | 0.744179696 | -3.080455874 | 3.674073858 | -0.838430579 | NA          | NA          |
| chr17:78593427-78617610   | exonic       | RPTOR            | 17 | 78593427  | 78617610  | 0 | 0 | 0 | 7 | 0 | 0 | 24183 | 0.744179696 | -3.080455874 | 3.674073858 | -0.838430579 | NA          | NA          |
| chr19:11356239-11356554   | exonic       | DOCK6            | 19 | 11356239  | 11356554  | 0 | 0 | 0 | 7 | 0 | 0 | 315   | 0.744179696 | -3.080455874 | 3.674073858 | -0.838430579 | NA          | NA          |

|                           |              |                                                                |    |           |           |   |   |   |    |   |   |        |             |              |             |              |             |             |
|---------------------------|--------------|----------------------------------------------------------------|----|-----------|-----------|---|---|---|----|---|---|--------|-------------|--------------|-------------|--------------|-------------|-------------|
| chr19:50358226-50361371   | exonic       | PTOV1                                                          | 19 | 50358226  | 50361371  | 0 | 0 | 0 | 7  | 0 | 0 | 3145   | 0.744179696 | -3.080455874 | 3.674073858 | -0.838430579 | NA          | NA          |
| chr2:224862831-224866639  | exonic       | SERPINE2                                                       | 2  | 224862831 | 224866639 | 0 | 0 | 0 | 7  | 0 | 0 | 3808   | 0.744179696 | -3.080455874 | 3.674073858 | -0.838430579 | NA          | NA          |
| chr3:49461112-49461392    | UTR3         | <small>NC1 (NM_032316:c.*1154_*874delins0)</small>             | 3  | 49461112  | 49461392  | 0 | 0 | 0 | 7  | 0 | 0 | 280    | 0.744179696 | -3.080455874 | 3.674073858 | -0.838430579 | NA          | NA          |
| chr4:103585841-103635718  | exonic       | MANBA                                                          | 4  | 103585841 | 103635718 | 0 | 0 | 0 | 7  | 0 | 0 | 49877  | 0.744179696 | -3.080455874 | 3.674073858 | -0.838430579 | NA          | NA          |
| chr4:106848492-106880283  | exonic       | NPNT                                                           | 4  | 106848492 | 106880283 | 0 | 0 | 0 | 7  | 0 | 0 | 31791  | 0.744179696 | -3.080455874 | 3.674073858 | -0.838430579 | NA          | NA          |
| chr6:129932677-129939997  | exonic       | ARHGAP18                                                       | 6  | 129932677 | 129939997 | 0 | 0 | 0 | 7  | 0 | 0 | 7320   | 0.744179696 | -3.080455874 | 3.674073858 | -0.838430579 | NA          | NA          |
| chr6:144669978-144670239  | intronic     | UTRN                                                           | 6  | 144669978 | 144670239 | 0 | 0 | 0 | 7  | 0 | 0 | 261    | 0.744179696 | -3.080455874 | 3.674073858 | -0.838430579 | NA          | NA          |
| chr6:144808683-144832259  | exonic       | UTRN                                                           | 6  | 144808683 | 144832259 | 0 | 0 | 0 | 4  | 0 | 0 | 23576  | 0.744179696 | -3.080455874 | 3.674073858 | -0.838430579 | NA          | NA          |
| chr7:42063066-42066011    | exonic       | GLI3                                                           | 7  | 42063066  | 42066011  | 0 | 0 | 0 | 7  | 0 | 0 | 2945   | 0.744179696 | -3.080455874 | 3.674073858 | -0.838430579 | NA          | NA          |
| chr8:1824736-1833873      | exonic       | ARHGEF10                                                       | 8  | 1824736   | 1833873   | 0 | 0 | 0 | 7  | 0 | 0 | 9137   | 0.744179696 | -3.080455874 | 3.674073858 | -0.838430579 | NA          | NA          |
| chrX:64295354-64295792    | intergenic   | <small>ZC4H2 (dist=40730), ZC3H12B (dist=412823)</small>       | X  | 64295354  | 64295792  | 0 | 0 | 0 | 7  | 0 | 0 | 438    | 0.744179696 | -3.080455874 | 3.674073858 | -0.838430579 | NA          | NA          |
| chr3:65415194-65428524    | exonic       | MAGI1                                                          | 3  | 65415194  | 65428524  | 2 | 0 | 0 | 11 | 3 | 3 | 13330  | 2.715137214 | -3.074966224 | 1.887800859 | -1.628861545 | 0.103342332 | 0.998252924 |
| chr1:15862969-15863309    | exonic       | DNAJC16                                                        | 1  | 15862969  | 15863309  | 0 | 0 | 0 | 2  | 2 | 1 | 340    | 0.762896223 | -3.059952521 | 3.028975256 | -1.010226979 | 0.312386556 | 0.998252924 |
| chr7:140439611-140508795  | exonic       | BRAF                                                           | 7  | 140439611 | 140508795 | 3 | 0 | 0 | 2  | 2 | 1 | 69184  | 0.762896223 | -3.059952521 | 3.028975256 | -1.010226979 | 0.312386556 | 0.998252924 |
| chr1:113098489-113159517  | exonic       | ST7L                                                           | 1  | 113098489 | 113159517 | 0 | 0 | 0 | 0  | 6 | 0 | 61028  | 0.726164531 | -3.035892057 | 3.713916936 | -0.817436714 | NA          | NA          |
| chr1:153737419-153740303  | exonic       | INTS3                                                          | 1  | 153737419 | 153740303 | 0 | 0 | 0 | 0  | 6 | 0 | 2884   | 0.726164531 | -3.035892057 | 3.713916936 | -0.817436714 | NA          | NA          |
| chr12:123678932-123682881 | exonic       | MPHOSPH9                                                       | 12 | 123678932 | 123682881 | 0 | 0 | 0 | 0  | 6 | 0 | 3949   | 0.726164531 | -3.035892057 | 3.713916936 | -0.817436714 | NA          | NA          |
| chr12:18434937-18478032   | exonic       | PIK3C2G                                                        | 12 | 18434937  | 18478032  | 0 | 0 | 0 | 0  | 6 | 0 | 43095  | 0.726164531 | -3.035892057 | 3.713916936 | -0.817436714 | NA          | NA          |
| chr12:65042317-65043332   | intronic     | RASSF3                                                         | 12 | 65042317  | 65043332  | 0 | 0 | 0 | 0  | 6 | 0 | 1015   | 0.726164531 | -3.035892057 | 3.713916936 | -0.817436714 | NA          | NA          |
| chr14:106110833-106237056 | ncRNA_exonic | ELK2AP                                                         | 14 | 106110833 | 106237056 | 0 | 0 | 0 | 0  | 6 | 0 | 126223 | 0.726164531 | -3.035892057 | 3.713916936 | -0.817436714 | NA          | NA          |
| chr14:27546444-27574979   | intergenic   | <small>W1843076 (dist=162495), LINC00945 (dist=506815)</small> | 14 | 27546444  | 27574979  | 0 | 0 | 0 | 0  | 6 | 0 | 28535  | 0.726164531 | -3.035892057 | 3.713916936 | -0.817436714 | NA          | NA          |
| chr17:19823348-19861884   | exonic       | AKAP10                                                         | 17 | 19823348  | 19861884  | 0 | 0 | 0 | 0  | 6 | 0 | 38536  | 0.726164531 | -3.035892057 | 3.713916936 | -0.817436714 | NA          | NA          |
| chr17:19823348-19866335   | exonic       | AKAP10                                                         | 17 | 19823348  | 19866335  | 0 | 0 | 0 | 0  | 6 | 0 | 42987  | 0.726164531 | -3.035892057 | 3.713916936 | -0.817436714 | NA          | NA          |
| chr17:45214517-45221348   | exonic       | CDC27                                                          | 17 | 45214517  | 45221348  | 0 | 0 | 0 | 0  | 6 | 0 | 6831   | 0.726164531 | -3.035892057 | 3.713916936 | -0.817436714 | NA          | NA          |
| chr22:22712304-22786381   | intergenic   | <small>BMS1P20 (dist=34980), ZNF290B (dist=52390)</small>      | 22 | 22712304  | 22786381  | 0 | 0 | 0 | 0  | 6 | 0 | 74077  | 0.726164531 | -3.035892057 | 3.713916936 | -0.817436714 | NA          | NA          |
| chr4:144449020-144451679  | exonic       | SMARCA5                                                        | 4  | 144449020 | 144451679 | 0 | 0 | 0 | 0  | 6 | 0 | 2659   | 0.726164531 | -3.035892057 | 3.713916936 | -0.817436714 | NA          | NA          |
| chr5:58882155-58882850    | exonic       | PDE4D                                                          | 5  | 58882155  | 58882850  | 0 | 0 | 0 | 0  | 6 | 0 | 695    | 0.726164531 | -3.035892057 | 3.713916936 | -0.817436714 | NA          | NA          |
| chr12:56182858-56197512   | exonic       | SARNP                                                          | 12 | 56182858  | 56197512  | 0 | 0 | 0 | 3  | 1 | 1 | 14654  | 0.748180186 | -3.032884577 | 3.068168746 | -0.988499926 | 0.322907871 | 0.998252924 |
| chr12:95528514-95535315   | exonic       | FGD6                                                           | 12 | 95528514  | 95535315  | 0 | 0 | 0 | 3  | 1 | 1 | 6801   | 0.748180186 | -3.032884577 | 3.068168746 | -0.988499926 | 0.322907871 | 0.998252924 |
| chr5:179976930-179980471  | exonic       | CNOT6                                                          | 5  | 179976930 | 179980471 | 0 | 0 | 1 | 2  | 3 | 3 | 3541   | 1.697629888 | -3.027171487 | 2.218045036 | -1.364792616 | 0.17231824  | 0.998252924 |
| chr4:62800557-62813994    | exonic       | ADGRL3                                                         | 4  | 62800557  | 62813994  | 0 | 1 | 0 | 13 | 0 | 0 | 13437  | 1.556323806 | -3.016594258 | 2.680604877 | -1.125340883 | NA          | NA          |
| chr2:204240779-204267457  | exonic       | ABI2                                                           | 2  | 204240779 | 204267457 | 0 | 0 | 0 | 1  | 5 | 0 | 26678  | 0.711448494 | -3.015326251 | 3.401541687 | -0.886458709 | NA          | NA          |
| chr2:98430433-98435184    | exonic       | TMEM131                                                        | 2  | 98430433  | 98435184  | 0 | 0 | 0 | 1  | 5 | 0 | 4751   | 0.711448494 | -3.015326251 | 3.401541687 | -0.886458709 | NA          | NA          |
| chr4:113483526-113506881  | exonic       | ZGRF1                                                          | 4  | 113483526 | 113506881 | 0 | 0 | 0 | 1  | 5 | 0 | 23355  | 0.711448494 | -3.015326251 | 3.401541687 | -0.886458709 | NA          | NA          |
| chr1:39788279-39815299    | exonic       | MACF1                                                          | 1  | 39788279  | 39815299  | 0 | 0 | 0 | 4  | 0 | 1 | 27020  | 0.733464149 | -3.006928901 | 3.374309363 | -0.89112425  | 0.372862516 | 0.998252924 |

|                           |            |                                                          |    |           |           |   |   |   |   |    |   |       |             |              |             |              |             |             |
|---------------------------|------------|----------------------------------------------------------|----|-----------|-----------|---|---|---|---|----|---|-------|-------------|--------------|-------------|--------------|-------------|-------------|
| chr17:48814320-48817706   | exonic     | LUC7L3                                                   | 17 | 48814320  | 48817706  | 0 | 0 | 0 | 4 | 0  | 1 | 3386  | 0.733464149 | -3.006928901 | 3.374309363 | -0.89112425  | 0.372862516 | 0.998252924 |
| chr2:37105033-37121176    | exonic     | STRN                                                     | 2  | 37105033  | 37121176  | 0 | 0 | 0 | 4 | 0  | 1 | 16143 | 0.733464149 | -3.006928901 | 3.374309363 | -0.89112425  | 0.372862516 | 0.998252924 |
| chr15:93496586-93499879   | exonic     | CHD2                                                     | 15 | 93496586  | 93499879  | 0 | 1 | 0 | 2 | 5  | 2 | 3293  | 1.608472896 | -2.999742066 | 2.239704238 | -1.339347408 | 0.180457602 | 0.998252924 |
| chr1:197552281-197576304  | exonic     | DENND1B                                                  | 1  | 197552281 | 197576304 | 0 | 0 | 0 | 2 | 4  | 0 | 24023 | 0.696732457 | -2.987909508 | 3.396335491 | -0.879745101 | 0.378997411 | 0.998252924 |
| chr1:197552281-197586889  | exonic     | DENND1B                                                  | 1  | 197552281 | 197586889 | 0 | 0 | 0 | 2 | 4  | 0 | 34608 | 0.696732457 | -2.987909508 | 3.396335491 | -0.879745101 | 0.378997411 | 0.998252924 |
| chr12:57789532-57791981   | intergenic | <small>R3HDM2 (dist=85286), INHBC (dist=36487)</small>   | 12 | 57789532  | 57791981  | 0 | 0 | 0 | 2 | 4  | 0 | 2449  | 0.696732457 | -2.987909508 | 3.396335491 | -0.879745101 | 0.378997411 | 0.998252924 |
| chr12:70773977-70775374   | intronic   | KCNMB4                                                   | 12 | 70773977  | 70775374  | 0 | 0 | 0 | 2 | 4  | 0 | 1397  | 0.696732457 | -2.987909508 | 3.396335491 | -0.879745101 | 0.378997411 | 0.998252924 |
| chr12:80214553-80215970   | exonic     | PPP1R12A                                                 | 12 | 80214553  | 80215970  | 0 | 0 | 0 | 2 | 4  | 0 | 1417  | 0.696732457 | -2.987909508 | 3.396335491 | -0.879745101 | 0.378997411 | 0.998252924 |
| chr14:92559595-92563182   | exonic     | ATXN3                                                    | 14 | 92559595  | 92563182  | 0 | 0 | 0 | 2 | 4  | 0 | 3587  | 0.696732457 | -2.987909508 | 3.396335491 | -0.879745101 | 0.378997411 | 0.998252924 |
| chr15:50935536-50955243   | exonic     | TRPM7                                                    | 15 | 50935536  | 50955243  | 0 | 0 | 0 | 2 | 4  | 0 | 19707 | 0.696732457 | -2.987909508 | 3.396335491 | -0.879745101 | 0.378997411 | 0.998252924 |
| chr2:242346951-242375953  | exonic     | FARP2                                                    | 2  | 242346951 | 242375953 | 0 | 0 | 0 | 1 | 3  | 0 | 29002 | 0.696732457 | -2.987909508 | 3.396335491 | -0.879745101 | 0.378997411 | 0.998252924 |
| chr2:85887981-85889232    | exonic     | SFTPB                                                    | 2  | 85887981  | 85889232  | 0 | 0 | 0 | 2 | 4  | 0 | 1251  | 0.696732457 | -2.987909508 | 3.396335491 | -0.879745101 | 0.378997411 | 0.998252924 |
| chr5:74130250-74137504    | exonic     | FAM169A                                                  | 5  | 74130250  | 74137504  | 0 | 0 | 0 | 2 | 4  | 0 | 7254  | 0.696732457 | -2.987909508 | 3.396335491 | -0.879745101 | 0.378997411 | 0.998252924 |
| chr6:129799837-129802584  | exonic     | LAMA2                                                    | 6  | 129799837 | 129802584 | 0 | 0 | 0 | 2 | 4  | 0 | 2747  | 0.696732457 | -2.987909508 | 3.396335491 | -0.879745101 | 0.378997411 | 0.998252924 |
| chr10:74828603-74834673   | exonic     | P4HA1                                                    | 10 | 74828603  | 74834673  | 0 | 0 | 1 | 0 | 2  | 4 | 6070  | 1.672198304 | -2.975172636 | 2.448150351 | -1.21527366  | 0.224261735 | 0.998252924 |
| chr3:47770514-47814426    | exonic     | SMARCC1                                                  | 3  | 47770514  | 47814426  | 0 | 0 | 1 | 0 | 2  | 4 | 43912 | 1.672198304 | -2.975172636 | 2.448150351 | -1.21527366  | 0.224261735 | 0.998252924 |
| chr1:161748033-161753886  | exonic     | ATF6                                                     | 1  | 161748033 | 161753886 | 0 | 0 | 0 | 3 | 3  | 0 | 5853  | 0.682016421 | -2.959366207 | 3.415504034 | -0.866450801 | 0.386242995 | 0.998252924 |
| chr10:88809158-88811627   | exonic     | GLUD1                                                    | 10 | 88809158  | 88811627  | 0 | 0 | 0 | 3 | 3  | 0 | 2469  | 0.682016421 | -2.959366207 | 3.415504034 | -0.866450801 | 0.386242995 | 0.998252924 |
| chr11:120339996-120348235 | exonic     | ARHGEF12                                                 | 11 | 120339996 | 120348235 | 0 | 0 | 0 | 3 | 3  | 0 | 8239  | 0.682016421 | -2.959366207 | 3.415504034 | -0.866450801 | 0.386242995 | 0.998252924 |
| chr12:29812813-29813818   | intronic   | TMTC1                                                    | 12 | 29812813  | 29813818  | 0 | 0 | 0 | 3 | 3  | 0 | 1005  | 0.682016421 | -2.959366207 | 3.415504034 | -0.866450801 | 0.386242995 | 0.998252924 |
| chr13:95829960-95840796   | exonic     | ABCC4                                                    | 13 | 95829960  | 95840796  | 0 | 0 | 0 | 3 | 3  | 0 | 10836 | 0.682016421 | -2.959366207 | 3.415504034 | -0.866450801 | 0.386242995 | 0.998252924 |
| chr17:29854859-29855796   | exonic     | RAB11FIP4                                                | 17 | 29854859  | 29855796  | 0 | 0 | 0 | 3 | 3  | 0 | 937   | 0.682016421 | -2.959366207 | 3.415504034 | -0.866450801 | 0.386242995 | 0.998252924 |
| chr18:42281140-42292759   | exonic     | SETBP1                                                   | 18 | 42281140  | 42292759  | 0 | 0 | 0 | 3 | 3  | 0 | 11619 | 0.682016421 | -2.959366207 | 3.415504034 | -0.866450801 | 0.386242995 | 0.998252924 |
| chr3:49016914-49017929    | exonic     | ARIH2                                                    | 3  | 49016914  | 49017929  | 0 | 0 | 0 | 3 | 3  | 0 | 1015  | 0.682016421 | -2.959366207 | 3.415504034 | -0.866450801 | 0.386242995 | 0.998252924 |
| chr4:89340454-89341580    | intronic   | HERC6                                                    | 4  | 89340454  | 89341580  | 0 | 0 | 0 | 3 | 3  | 0 | 1126  | 0.682016421 | -2.959366207 | 3.415504034 | -0.866450801 | 0.386242995 | 0.998252924 |
| chr5:109049220-109091157  | exonic     | MAN2A1                                                   | 5  | 109049220 | 109091157 | 0 | 0 | 0 | 3 | 3  | 0 | 41937 | 0.682016421 | -2.959366207 | 3.415504034 | -0.866450801 | 0.386242995 | 0.998252924 |
| chr5:55259179-55264224    | exonic     | IL6ST                                                    | 5  | 55259179  | 55264224  | 0 | 0 | 0 | 3 | 3  | 0 | 5045  | 0.682016421 | -2.959366207 | 3.415504034 | -0.866450801 | 0.386242995 | 0.998252924 |
| chr5:74011334-74012498    | exonic     | HEXB                                                     | 5  | 74011334  | 74012498  | 0 | 0 | 0 | 3 | 3  | 0 | 1164  | 0.682016421 | -2.959366207 | 3.415504034 | -0.866450801 | 0.386242995 | 0.998252924 |
| chr6:15615497-15638035    | exonic     | DTNBP1                                                   | 6  | 15615497  | 15638035  | 0 | 0 | 0 | 3 | 3  | 0 | 22538 | 0.682016421 | -2.959366207 | 3.415504034 | -0.866450801 | 0.386242995 | 0.998252924 |
| chrX:16685636-16709743    | exonic     | CTPS2                                                    | X  | 16685636  | 16709743  | 0 | 0 | 0 | 3 | 3  | 0 | 24107 | 0.682016421 | -2.959366207 | 3.415504034 | -0.866450801 | 0.386242995 | 0.998252924 |
| chrX:64295354-64333693    | intergenic | <small>ZC4H2 (dist=40730), ZC3H12B (dist=374922)</small> | X  | 64295354  | 64333693  | 0 | 0 | 0 | 3 | 3  | 0 | 38339 | 0.682016421 | -2.959366207 | 3.415504034 | -0.866450801 | 0.386242995 | 0.998252924 |
| chr5:131034609-131044965  | exonic     | FNIP1                                                    | 5  | 131034609 | 131044965 | 0 | 1 | 0 | 3 | 6  | 1 | 10356 | 1.527593094 | -2.956456204 | 2.275145595 | -1.299458026 | 0.193786789 | 0.998252924 |
| chr5:142264862-142311690  | exonic     | ARHGAP26                                                 | 5  | 142264862 | 142311690 | 1 | 1 | 0 | 6 | 14 | 0 | 46828 | 2.635514958 | -2.948214728 | 1.945646461 | -1.515287996 | 0.129699487 | 0.998252924 |
| chr1:113140592-113159517  | exonic     | ST7L                                                     | 1  | 113140592 | 113159517 | 0 | 0 | 0 | 0 | 1  | 2 | 18925 | 0.737464639 | -2.945188727 | 3.401462216 | -0.865859604 | 0.386567158 | 0.998252924 |
| chr1:185153374-185200840  | exonic     | SWT1                                                     | 1  | 185153374 | 185200840 | 0 | 0 | 0 | 0 | 1  | 2 | 47466 | 0.737464639 | -2.945188727 | 3.401462216 | -0.865859604 | 0.386567158 | 0.998252924 |

|                           |              |                  |    |           |           |   |   |   |   |   |   |       |             |              |             |              |             |             |
|---------------------------|--------------|------------------|----|-----------|-----------|---|---|---|---|---|---|-------|-------------|--------------|-------------|--------------|-------------|-------------|
| chr11:8732391-8734282     | exonic       | ST5              | 11 | 8732391   | 8734282   | 0 | 0 | 0 | 0 | 1 | 2 | 1891  | 0.737464639 | -2.945188727 | 3.401462216 | -0.865859604 | 0.386567158 | 0.998252924 |
| chr12:31648743-31652605   | exonic       | DENND5B          | 12 | 31648743  | 31652605  | 0 | 0 | 0 | 0 | 1 | 2 | 3862  | 0.737464639 | -2.945188727 | 3.401462216 | -0.865859604 | 0.386567158 | 0.998252924 |
| chr13:42352120-42385476   | exonic       | VWA8             | 13 | 42352120  | 42385476  | 0 | 0 | 0 | 0 | 1 | 2 | 33356 | 0.737464639 | -2.945188727 | 3.401462216 | -0.865859604 | 0.386567158 | 0.998252924 |
| chr17:33951415-33954745   | exonic       | AP2B1            | 17 | 33951415  | 33954745  | 0 | 0 | 0 | 0 | 1 | 2 | 3330  | 0.737464639 | -2.945188727 | 3.401462216 | -0.865859604 | 0.386567158 | 0.998252924 |
| chr17:66440633-66449133   | exonic       | WIPI1            | 17 | 66440633  | 66449133  | 0 | 0 | 0 | 0 | 1 | 2 | 8500  | 0.737464639 | -2.945188727 | 3.401462216 | -0.865859604 | 0.386567158 | 0.998252924 |
| chr18:12814201-12836890   | exonic       | PTPN2            | 18 | 12814201  | 12836890  | 0 | 0 | 0 | 0 | 1 | 2 | 22689 | 0.737464639 | -2.945188727 | 3.401462216 | -0.865859604 | 0.386567158 | 0.998252924 |
| chr21:27113883-27130515   | exonic       | GABPA            | 21 | 27113883  | 27130515  | 0 | 0 | 0 | 0 | 1 | 2 | 16632 | 0.737464639 | -2.945188727 | 3.401462216 | -0.865859604 | 0.386567158 | 0.998252924 |
| chr3:128852916-128853797  | exonic       | ISY1, ISY1-RAB43 | 3  | 128852916 | 128853797 | 0 | 0 | 0 | 0 | 1 | 2 | 881   | 0.737464639 | -2.945188727 | 3.401462216 | -0.865859604 | 0.386567158 | 0.998252924 |
| chr4:48371865-48380077    | exonic       | SLAIN2           | 4  | 48371865  | 48380077  | 0 | 0 | 0 | 0 | 1 | 2 | 8212  | 0.737464639 | -2.945188727 | 3.401462216 | -0.865859604 | 0.386567158 | 0.998252924 |
| chr5:170305100-170308900  | exonic       | RANBP17          | 5  | 170305100 | 170308900 | 0 | 0 | 0 | 0 | 1 | 2 | 3800  | 0.737464639 | -2.945188727 | 3.401462216 | -0.865859604 | 0.386567158 | 0.998252924 |
| chr7:156956503-156963144  | exonic       | UBE3C            | 7  | 156956503 | 156963144 | 0 | 0 | 0 | 0 | 1 | 2 | 6641  | 0.737464639 | -2.945188727 | 3.401462216 | -0.865859604 | 0.386567158 | 0.998252924 |
| chr8:62531536-62563683    | exonic       | ASPH             | 8  | 62531536  | 62563683  | 0 | 0 | 0 | 0 | 1 | 2 | 32147 | 0.737464639 | -2.945188727 | 3.401462216 | -0.865859604 | 0.386567158 | 0.998252924 |
| chr11:110134684-110135599 | exonic       | RDX              | 11 | 110134684 | 110135599 | 0 | 0 | 1 | 4 | 5 | 1 | 915   | 1.535870284 | -2.942023049 | 2.263627542 | -1.299693962 | 0.193705881 | 0.998252924 |
| chr15:62221699-62223458   | exonic       | VPS13C           | 15 | 62221699  | 62223458  | 0 | 0 | 0 | 4 | 2 | 0 | 1759  | 0.667300384 | -2.929833781 | 3.449796177 | -0.849277357 | 0.395726977 | 0.998252924 |
| chr15:93467550-93499879   | exonic       | CHD2             | 15 | 93467550  | 93499879  | 0 | 0 | 0 | 4 | 2 | 0 | 32329 | 0.667300384 | -2.929833781 | 3.449796177 | -0.849277357 | 0.395726977 | 0.998252924 |
| chr18:6237962-6264037     | exonic       | L3MBTL4          | 18 | 6237962   | 6264037   | 0 | 0 | 0 | 4 | 2 | 0 | 26075 | 0.667300384 | -2.929833781 | 3.449796177 | -0.849277357 | 0.395726977 | 0.998252924 |
| chr21:38792601-38794168   | exonic       | DYRK1A           | 21 | 38792601  | 38794168  | 0 | 0 | 0 | 4 | 2 | 0 | 1567  | 0.667300384 | -2.929833781 | 3.449796177 | -0.849277357 | 0.395726977 | 0.998252924 |
| chr22:46088875-46098727   | exonic       | ATXN10           | 22 | 46088875  | 46098727  | 0 | 0 | 0 | 4 | 2 | 0 | 9852  | 0.667300384 | -2.929833781 | 3.449796177 | -0.849277357 | 0.395726977 | 0.998252924 |
| chr4:140616350-140625350  | exonic       | MGST2            | 4  | 140616350 | 140625350 | 0 | 0 | 0 | 4 | 2 | 0 | 9000  | 0.667300384 | -2.929833781 | 3.449796177 | -0.849277357 | 0.395726977 | 0.998252924 |
| chr5:41794104-41807540    | exonic       | OXCT1            | 5  | 41794104  | 41807540  | 0 | 0 | 0 | 4 | 2 | 0 | 13436 | 0.667300384 | -2.929833781 | 3.449796177 | -0.849277357 | 0.395726977 | 0.998252924 |
| chr6:144093394-144095352  | exonic       | PHACTR2          | 6  | 144093394 | 144095352 | 0 | 0 | 0 | 4 | 2 | 0 | 1958  | 0.667300384 | -2.929833781 | 3.449796177 | -0.849277357 | 0.395726977 | 0.998252924 |
| chr6:36862279-36870210    | exonic       | C6orf89          | 6  | 36862279  | 36870210  | 0 | 0 | 0 | 4 | 2 | 0 | 7931  | 0.667300384 | -2.929833781 | 3.449796177 | -0.849277357 | 0.395726977 | 0.998252924 |
| chr7:102038066-102047945  | exonic       | PRKRIP1          | 7  | 102038066 | 102047945 | 0 | 0 | 0 | 0 | 2 | 0 | 9879  | 0.667300384 | -2.929833781 | 3.449796177 | -0.849277357 | 0.395726977 | 0.998252924 |
| chr7:156758963-156759786  | exonic       | NOM1             | 7  | 156758963 | 156759786 | 2 | 0 | 0 | 2 | 2 | 6 | 823   | 2.561963152 | -2.915196811 | 2.000670868 | -1.457109641 | NA          | NA          |
| chr14:55457930-55468903   | exonic       | WDHD1            | 14 | 55457930  | 55468903  | 0 | 0 | 0 | 1 | 0 | 2 | 10973 | 0.722748603 | -2.915105651 | 3.425245078 | -0.851064839 | 0.394733336 | 0.998252924 |
| chr16:68308593-68309152   | exonic       | SLC7A6           | 16 | 68308593  | 68309152  | 0 | 0 | 0 | 1 | 0 | 2 | 559   | 0.722748603 | -2.915105651 | 3.425245078 | -0.851064839 | 0.394733336 | 0.998252924 |
| chr19:48185232-48198731   | exonic       | GLTSCR1          | 19 | 48185232  | 48198731  | 0 | 0 | 0 | 1 | 0 | 2 | 13499 | 0.722748603 | -2.915105651 | 3.425245078 | -0.851064839 | 0.394733336 | 0.998252924 |
| chr3:9429770-9432181      | ncRNA_exonic | THUMPD3-AS1      | 3  | 9429770   | 9432181   | 0 | 0 | 0 | 1 | 0 | 2 | 2411  | 0.722748603 | -2.915105651 | 3.425245078 | -0.851064839 | 0.394733336 | 0.998252924 |
| chr4:140258001-140262223  | exonic       | NAA15            | 4  | 140258001 | 140262223 | 0 | 0 | 0 | 1 | 0 | 2 | 4222  | 0.722748603 | -2.915105651 | 3.425245078 | -0.851064839 | 0.394733336 | 0.998252924 |
| chr4:47886362-47892720    | exonic       | NFXL1            | 4  | 47886362  | 47892720  | 0 | 0 | 0 | 1 | 0 | 2 | 6358  | 0.722748603 | -2.915105651 | 3.425245078 | -0.851064839 | 0.394733336 | 0.998252924 |
| chr7:106921744-106924177  | exonic       | COG5             | 7  | 106921744 | 106924177 | 0 | 0 | 0 | 1 | 0 | 2 | 2433  | 0.722748603 | -2.915105651 | 3.425245078 | -0.851064839 | 0.394733336 | 0.998252924 |
| chr7:97766626-97784188    | exonic       | LMTK2            | 7  | 97766626  | 97784188  | 0 | 0 | 0 | 1 | 0 | 2 | 17562 | 0.722748603 | -2.915105651 | 3.425245078 | -0.851064839 | 0.394733336 | 0.998252924 |
| chr8:141582910-141595410  | exonic       | AGO2             | 8  | 141582910 | 141595410 | 0 | 0 | 0 | 1 | 0 | 2 | 12500 | 0.722748603 | -2.915105651 | 3.425245078 | -0.851064839 | 0.394733336 | 0.998252924 |
| chr8:98673299-98703416    | exonic       | MTDH             | 8  | 98673299  | 98703416  | 0 | 0 | 0 | 1 | 0 | 2 | 30117 | 0.722748603 | -2.915105651 | 3.425245078 | -0.851064839 | 0.394733336 | 0.998252924 |
| chr9:86395296-86421475    | exonic       | GKAP1            | 9  | 86395296  | 86421475  | 0 | 0 | 0 | 1 | 0 | 2 | 26179 | 0.722748603 | -2.915105651 | 3.425245078 | -0.851064839 | 0.394733336 | 0.998252924 |

|                           |            |                                                                  |    |           |           |   |   |   |   |   |   |       |             |              |             |              |             |             |
|---------------------------|------------|------------------------------------------------------------------|----|-----------|-----------|---|---|---|---|---|---|-------|-------------|--------------|-------------|--------------|-------------|-------------|
| chr10:104809463-104816721 | exonic     | CNNM2                                                            | 10 | 104809463 | 104816721 | 0 | 0 | 0 | 5 | 1 | 0 | 7258  | 0.652584348 | -2.898981244 | 3.508505686 | -0.826272352 | 0.408649614 | 0.998252924 |
| chr11:32610139-32611187   | exonic     | EIF3M                                                            | 11 | 32610139  | 32611187  | 0 | 0 | 0 | 5 | 1 | 0 | 1048  | 0.652584348 | -2.898981244 | 3.508505686 | -0.826272352 | 0.408649614 | 0.998252924 |
| chr16:19627435-19639127   | exonic     | C16orf62                                                         | 16 | 19627435  | 19639127  | 0 | 0 | 0 | 5 | 1 | 0 | 11692 | 0.652584348 | -2.898981244 | 3.508505686 | -0.826272352 | 0.408649614 | 0.998252924 |
| chr4:129857809-129920949  | exonic     | SCLT1                                                            | 4  | 129857809 | 129920949 | 6 | 4 | 0 | 3 | 1 | 0 | 63140 | 0.652584348 | -2.898981244 | 3.508505686 | -0.826272352 | 0.408649614 | 0.998252924 |
| chr6:42992722-42993879    | exonic     | RRP36                                                            | 6  | 42992722  | 42993879  | 0 | 0 | 0 | 5 | 1 | 0 | 1157  | 0.652584348 | -2.898981244 | 3.508505686 | -0.826272352 | 0.408649614 | 0.998252924 |
| chr9:82319697-82324614    | exonic     | TLE4                                                             | 9  | 82319697  | 82324614  | 0 | 0 | 0 | 5 | 1 | 0 | 4917  | 0.652584348 | -2.898981244 | 3.508505686 | -0.826272352 | 0.408649614 | 0.998252924 |
| chr4:106848492-106863859  | exonic     | NPNT                                                             | 4  | 106848492 | 106863859 | 1 | 0 | 0 | 7 | 2 | 1 | 15367 | 1.423440091 | -2.895666539 | 2.332816849 | -1.241274702 | 0.214504287 | 0.998252924 |
| chr2:136360069-136362586  | exonic     | R3HDM1                                                           | 2  | 136360069 | 136362586 | 0 | 1 | 0 | 2 | 2 | 3 | 2517  | 1.553609239 | -2.894570734 | 2.287082692 | -1.265616999 | 0.205650237 | 0.998252924 |
| chr4:103610731-103612114  | exonic     | MANBA                                                            | 4  | 103610731 | 103612114 | 2 | 0 | 0 | 2 | 4 | 5 | 1383  | 2.495799387 | -2.887044312 | 1.974393768 | -1.462243428 | 0.143674515 | 0.998252924 |
| chr1:193038163-193046180  | exonic     | TROVE2                                                           | 1  | 193038163 | 193046180 | 0 | 1 | 0 | 3 | 1 | 3 | 8017  | 1.538893203 | -2.880275718 | 2.311141757 | -1.246256621 | 0.212670198 | 0.998252924 |
| chr1:25666964-25678184    | exonic     | TMEM50A                                                          | 1  | 25666964  | 25678184  | 0 | 0 | 0 | 0 | 3 | 1 | 11220 | 0.671300874 | -2.866001828 | 3.495244718 | -0.819971721 | 0.412232228 | 0.998252924 |
| chr10:116590610-116608496 | exonic     | FAM160B1                                                         | 10 | 116590610 | 116608496 | 0 | 0 | 0 | 0 | 3 | 1 | 17886 | 0.671300874 | -2.866001828 | 3.495244718 | -0.819971721 | 0.412232228 | 0.998252924 |
| chr12:31595708-31648853   | exonic     | DENND5B                                                          | 12 | 31595708  | 31648853  | 0 | 0 | 0 | 0 | 3 | 1 | 53145 | 0.671300874 | -2.866001828 | 3.495244718 | -0.819971721 | 0.412232228 | 0.998252924 |
| chr12:31600471-31652605   | exonic     | DENND5B                                                          | 12 | 31600471  | 31652605  | 0 | 0 | 0 | 0 | 3 | 1 | 52134 | 0.671300874 | -2.866001828 | 3.495244718 | -0.819971721 | 0.412232228 | 0.998252924 |
| chr14:92126180-92185822   | exonic     | CATSPERB                                                         | 14 | 92126180  | 92185822  | 0 | 0 | 0 | 0 | 3 | 1 | 59642 | 0.671300874 | -2.866001828 | 3.495244718 | -0.819971721 | 0.412232228 | 0.998252924 |
| chr15:43668295-43669265   | exonic     | TUBGCP4                                                          | 15 | 43668295  | 43669265  | 0 | 0 | 0 | 0 | 3 | 1 | 970   | 0.671300874 | -2.866001828 | 3.495244718 | -0.819971721 | 0.412232228 | 0.998252924 |
| chr18:19116002-19148055   | exonic     | ESCO1                                                            | 18 | 19116002  | 19148055  | 0 | 0 | 0 | 0 | 3 | 1 | 32053 | 0.671300874 | -2.866001828 | 3.495244718 | -0.819971721 | 0.412232228 | 0.998252924 |
| chr19:38198814-38202593   | exonic     | ZNF607                                                           | 19 | 38198814  | 38202593  | 0 | 0 | 0 | 0 | 3 | 1 | 3779  | 0.671300874 | -2.866001828 | 3.495244718 | -0.819971721 | 0.412232228 | 0.998252924 |
| chr8:100108539-100115348  | exonic     | VPS13B                                                           | 8  | 100108539 | 100115348 | 0 | 0 | 0 | 0 | 3 | 1 | 6809  | 0.671300874 | -2.866001828 | 3.495244718 | -0.819971721 | 0.412232228 | 0.998252924 |
| chr1:77509889-77534528    | exonic     | ST6GALNAC5                                                       | 1  | 77509889  | 77534528  | 0 | 0 | 0 | 6 | 0 | 0 | 24639 | 0.637868311 | -2.858979784 | 3.898127303 | -0.733423914 | NA          | NA          |
| chr10:17401512-17432619   | exonic     | ST8SIA6                                                          | 10 | 17401512  | 17432619  | 0 | 0 | 0 | 6 | 0 | 0 | 31107 | 0.637868311 | -2.858979784 | 3.898127303 | -0.733423914 | NA          | NA          |
| chr10:30397716-30399760   | intergenic | <small>K1A1A142 (dist=49226), LOC101929279 (dist=101021)</small> | 10 | 30397716  | 30399760  | 0 | 0 | 0 | 6 | 0 | 0 | 2044  | 0.637868311 | -2.858979784 | 3.898127303 | -0.733423914 | NA          | NA          |
| chr11:31474265-31484852   | exonic     | IMMP1L                                                           | 11 | 31474265  | 31484852  | 0 | 0 | 0 | 6 | 0 | 0 | 10587 | 0.637868311 | -2.858979784 | 3.898127303 | -0.733423914 | NA          | NA          |
| chr15:41767722-41769713   | exonic     | RTF1                                                             | 15 | 41767722  | 41769713  | 0 | 0 | 0 | 6 | 0 | 0 | 1991  | 0.637868311 | -2.858979784 | 3.898127303 | -0.733423914 | NA          | NA          |
| chr16:1675973-1687908     | exonic     | CRAMP1                                                           | 16 | 1675973   | 1687908   | 0 | 0 | 0 | 6 | 0 | 0 | 11935 | 0.637868311 | -2.858979784 | 3.898127303 | -0.733423914 | NA          | NA          |
| chr16:53922744-53968021   | exonic     | FTO                                                              | 16 | 53922744  | 53968021  | 0 | 0 | 0 | 6 | 0 | 0 | 45277 | 0.637868311 | -2.858979784 | 3.898127303 | -0.733423914 | NA          | NA          |
| chr18:74561482-74567157   | exonic     | ZNF236                                                           | 18 | 74561482  | 74567157  | 0 | 0 | 0 | 6 | 0 | 0 | 5675  | 0.637868311 | -2.858979784 | 3.898127303 | -0.733423914 | NA          | NA          |
| chr2:109945680-109964405  | exonic     | SH3RF3                                                           | 2  | 109945680 | 109964405 | 0 | 0 | 0 | 6 | 0 | 0 | 18725 | 0.637868311 | -2.858979784 | 3.898127303 | -0.733423914 | NA          | NA          |
| chr2:170505691-170531550  | exonic     | CCDC173                                                          | 2  | 170505691 | 170531550 | 0 | 2 | 0 | 6 | 0 | 0 | 25859 | 0.637868311 | -2.858979784 | 3.898127303 | -0.733423914 | NA          | NA          |
| chr2:46228542-46237656    | exonic     | PRKCE                                                            | 2  | 46228542  | 46237656  | 0 | 0 | 0 | 6 | 0 | 0 | 9114  | 0.637868311 | -2.858979784 | 3.898127303 | -0.733423914 | NA          | NA          |
| chr20:47768118-47790806   | exonic     | STAU1                                                            | 20 | 47768118  | 47790806  | 0 | 0 | 0 | 6 | 0 | 0 | 22688 | 0.637868311 | -2.858979784 | 3.898127303 | -0.733423914 | NA          | NA          |
| chr4:160159961-160162520  | intergenic | <small>MIR3688-1 (dist=109915), RAPGEF2 (dist=26478)</small>     | 4  | 160159961 | 160162520 | 0 | 0 | 0 | 6 | 0 | 0 | 2559  | 0.637868311 | -2.858979784 | 3.898127303 | -0.733423914 | NA          | NA          |
| chr4:71808540-71835741    | exonic     | MOB1B                                                            | 4  | 71808540  | 71835741  | 0 | 0 | 0 | 6 | 0 | 0 | 27201 | 0.637868311 | -2.858979784 | 3.898127303 | -0.733423914 | NA          | NA          |
| chr7:150167917-150168361  | exonic     | GIMAP8                                                           | 7  | 150167917 | 150168361 | 0 | 0 | 0 | 6 | 0 | 0 | 444   | 0.637868311 | -2.858979784 | 3.898127303 | -0.733423914 | NA          | NA          |
| chr7:92146589-92148392    | exonic     | PEX1                                                             | 7  | 92146589  | 92148392  | 0 | 0 | 0 | 6 | 0 | 0 | 1803  | 0.637868311 | -2.858979784 | 3.898127303 | -0.733423914 | NA          | NA          |

|                           |            |                                                                   |    |           |           |   |   |   |   |    |   |        |             |              |             |              |             |             |
|---------------------------|------------|-------------------------------------------------------------------|----|-----------|-----------|---|---|---|---|----|---|--------|-------------|--------------|-------------|--------------|-------------|-------------|
| chr8:37692691-37695457    | exonic     | ADGRA2                                                            | 8  | 37692691  | 37695457  | 0 | 0 | 0 | 6 | 0  | 0 | 2766   | 0.637868311 | -2.858979784 | 3.898127303 | -0.733423914 | NA          | NA          |
| chr8:38587295-38596503    | intronic   | TACC1                                                             | 8  | 38587295  | 38596503  | 0 | 0 | 0 | 6 | 0  | 0 | 9208   | 0.637868311 | -2.858979784 | 3.898127303 | -0.733423914 | NA          | NA          |
| chr8:80830213-80831383    | exonic     | MRPS28                                                            | 8  | 80830213  | 80831383  | 0 | 0 | 0 | 6 | 0  | 0 | 1170   | 0.637868311 | -2.858979784 | 3.898127303 | -0.733423914 | NA          | NA          |
| chr9:127566372-127566621  | exonic     | OLFML2A                                                           | 9  | 127566372 | 127566621 | 0 | 0 | 0 | 6 | 0  | 0 | 249    | 0.637868311 | -2.858979784 | 3.898127303 | -0.733423914 | NA          | NA          |
| chr9:36160269-36160785    | intronic   | GLIPR2                                                            | 9  | 36160269  | 36160785  | 0 | 0 | 0 | 6 | 0  | 0 | 516    | 0.637868311 | -2.858979784 | 3.898127303 | -0.733423914 | NA          | NA          |
| chrX:154774757-154777885  | exonic     | TMLHE                                                             | X  | 154774757 | 154777885 | 0 | 0 | 0 | 6 | 0  | 0 | 3128   | 0.637868311 | -2.858979784 | 3.898127303 | -0.733423914 | NA          | NA          |
| chrX:67266836-67293141    | exonic     | OPHN1                                                             | X  | 67266836  | 67293141  | 0 | 0 | 0 | 6 | 0  | 0 | 26305  | 0.637868311 | -2.858979784 | 3.898127303 | -0.733423914 | NA          | NA          |
| chr11:67953247-67957619   | exonic     | KMT5B                                                             | 11 | 67953247  | 67957619  | 1 | 0 | 0 | 3 | 3  | 2 | 4372   | 1.427440581 | -2.848631649 | 2.308958757 | -1.233729983 | 0.217303537 | 0.998252924 |
| chr18:47455881-47463767   | exonic     | MYO5B                                                             | 18 | 47455881  | 47463767  | 0 | 1 | 0 | 0 | 1  | 4 | 7886   | 1.528177656 | -2.839480457 | 2.544415256 | -1.11596582  | NA          | NA          |
| chr5:142416760-142526946  | exonic     | ARHGAP26                                                          | 5  | 142416760 | 142526946 | 2 | 0 | 0 | 0 | 16 | 0 | 110186 | 2.194412634 | -2.83784979  | 3.910631937 | -0.725675501 | NA          | NA          |
| chr1:171504566-171530242  | exonic     | PRRC2C                                                            | 1  | 171504566 | 171530242 | 0 | 0 | 0 | 1 | 2  | 1 | 25676  | 0.656584838 | -2.830024499 | 3.22747839  | -0.876853121 | 0.380566422 | 0.998252924 |
| chr2:215617170-215646233  | exonic     | BARD1                                                             | 2  | 215617170 | 215646233 | 0 | 0 | 0 | 1 | 2  | 1 | 29063  | 0.656584838 | -2.830024499 | 3.22747839  | -0.876853121 | 0.380566422 | 0.998252924 |
| chr2:61722589-61727029    | exonic     | XPO1                                                              | 2  | 61722589  | 61727029  | 0 | 0 | 0 | 1 | 2  | 1 | 4440   | 0.656584838 | -2.830024499 | 3.22747839  | -0.876853121 | 0.380566422 | 0.998252924 |
| chr7:6085701-6089676      | exonic     | EIF2AK1                                                           | 7  | 6085701   | 6089676   | 0 | 0 | 0 | 1 | 2  | 1 | 3975   | 0.656584838 | -2.830024499 | 3.22747839  | -0.876853121 | 0.380566422 | 0.998252924 |
| chr2:38536520-38546161    | exonic     | ATL2                                                              | 2  | 38536520  | 38546161  | 1 | 0 | 0 | 3 | 5  | 1 | 9641   | 1.361276816 | -2.817562448 | 2.350965874 | -1.19847016  | 0.230734033 | 0.998252924 |
| chr2:231305190-231314970  | exonic     | SPI00                                                             | 2  | 231305190 | 231314970 | 1 | 0 | 0 | 5 | 1  | 2 | 9780   | 1.398008508 | -2.817471621 | 2.360572788 | -1.193554224 | 0.232652389 | 0.998252924 |
| chr12:124882664-124907101 | exonic     | NCOR2                                                             | 12 | 124882664 | 124907101 | 0 | 1 | 0 | 6 | 0  | 2 | 24437  | 1.428581328 | -2.804778239 | 2.520811176 | -1.112649081 | NA          | NA          |
| chr10:61592282-61612460   | exonic     | CCDC6                                                             | 10 | 61592282  | 61612460  | 0 | 0 | 0 | 2 | 1  | 1 | 20178  | 0.641868801 | -2.797992782 | 3.25235218  | -0.860298217 | 0.389624675 | 0.998252924 |
| chr11:94178975-94180604   | exonic     | MRE11A                                                            | 11 | 94178975  | 94180604  | 0 | 0 | 0 | 2 | 1  | 1 | 1629   | 0.641868801 | -2.797992782 | 3.25235218  | -0.860298217 | 0.389624675 | 0.998252924 |
| chr15:52188615-52194233   | exonic     | TMOD3                                                             | 15 | 52188615  | 52194233  | 0 | 0 | 0 | 2 | 1  | 1 | 5618   | 0.641868801 | -2.797992782 | 3.25235218  | -0.860298217 | 0.389624675 | 0.998252924 |
| chr3:12353878-12447580    | exonic     | PPARG                                                             | 3  | 12353878  | 12447580  | 0 | 0 | 0 | 2 | 1  | 1 | 93702  | 0.641868801 | -2.797992782 | 3.25235218  | -0.860298217 | 0.389624675 | 0.998252924 |
| chr9:33060462-33068932    | exonic     | SMU1                                                              | 9  | 33060462  | 33068932  | 0 | 0 | 0 | 2 | 1  | 1 | 8470   | 0.641868801 | -2.797992782 | 3.25235218  | -0.860298217 | 0.389624675 | 0.998252924 |
| chr3:128984391-128985942  | exonic     | COPG1                                                             | 3  | 128984391 | 128985942 | 0 | 1 | 0 | 2 | 8  | 0 | 1551   | 1.355117944 | -2.792599058 | 2.542679064 | -1.098290027 | 0.272077865 | 0.998252924 |
| chr1:235944164-235945387  | exonic     | LYST                                                              | 1  | 235944164 | 235945387 | 0 | 0 | 0 | 0 | 5  | 0 | 1223   | 0.605137109 | -2.773769048 | 3.981174939 | -0.696721217 | NA          | NA          |
| chr10:94243011-94268647   | exonic     | IDE                                                               | 10 | 94243011  | 94268647  | 0 | 0 | 0 | 0 | 5  | 0 | 25636  | 0.605137109 | -2.773769048 | 3.981174939 | -0.696721217 | NA          | NA          |
| chr11:18022044-18031686   | exonic     | SERGEF                                                            | 11 | 18022044  | 18031686  | 0 | 0 | 0 | 0 | 5  | 0 | 9642   | 0.605137109 | -2.773769048 | 3.981174939 | -0.696721217 | NA          | NA          |
| chr12:116817021-116837438 | intergenic | MED13L (dist=102030), MIR4472-2 (dist=28619)                      | 12 | 116817021 | 116837438 | 0 | 0 | 0 | 0 | 5  | 0 | 20417  | 0.605137109 | -2.773769048 | 3.981174939 | -0.696721217 | NA          | NA          |
| chr13:49712882-49720071   | exonic     | FNDCA3A                                                           | 13 | 49712882  | 49720071  | 0 | 0 | 0 | 0 | 5  | 0 | 7189   | 0.605137109 | -2.773769048 | 3.981174939 | -0.696721217 | NA          | NA          |
| chr14:107099543-107218980 | intergenic | MIR7641-2 (dist=6778), MIR5195 (dist=40120)                       | 14 | 107099543 | 107218980 | 0 | 0 | 0 | 0 | 5  | 0 | 119437 | 0.605137109 | -2.773769048 | 3.981174939 | -0.696721217 | NA          | NA          |
| chr14:92159469-92195823   | exonic     | CATSPERB                                                          | 14 | 92159469  | 92195823  | 0 | 0 | 0 | 0 | 5  | 0 | 36354  | 0.605137109 | -2.773769048 | 3.981174939 | -0.696721217 | NA          | NA          |
| chr15:50763829-50769190   | exonic     | USP8                                                              | 15 | 50763829  | 50769190  | 0 | 0 | 0 | 0 | 5  | 0 | 5361   | 0.605137109 | -2.773769048 | 3.981174939 | -0.696721217 | NA          | NA          |
| chr15:50763829-50769696   | exonic     | USP8                                                              | 15 | 50763829  | 50769696  | 0 | 0 | 0 | 0 | 5  | 0 | 5867   | 0.605137109 | -2.773769048 | 3.981174939 | -0.696721217 | NA          | NA          |
| chr15:63824845-63866602   | exonic     | USP3                                                              | 15 | 63824845  | 63866602  | 0 | 0 | 0 | 4 | 6  | 0 | 41757  | 0.605137109 | -2.773769048 | 3.981174939 | -0.696721217 | NA          | NA          |
| chr17:37412547-37413319   | UTR3       | MIR1207 (dist=1140), MIR1207-1 (dist=1140), MIR1207-2 (dist=1140) | 17 | 37412547  | 37413319  | 0 | 0 | 0 | 0 | 5  | 0 | 772    | 0.605137109 | -2.773769048 | 3.981174939 | -0.696721217 | NA          | NA          |
| chr17:41356233-41356547   | intronic   | NBR1                                                              | 17 | 41356233  | 41356547  | 0 | 0 | 0 | 0 | 5  | 0 | 314    | 0.605137109 | -2.773769048 | 3.981174939 | -0.696721217 | NA          | NA          |

|                           |              |                                       |    |           |           |   |   |   |   |   |   |        |             |              |             |              |             |             |
|---------------------------|--------------|---------------------------------------|----|-----------|-----------|---|---|---|---|---|---|--------|-------------|--------------|-------------|--------------|-------------|-------------|
| chr19:52887102-52888995   | exonic       | ZNF880                                | 19 | 52887102  | 52888995  | 0 | 0 | 0 | 0 | 5 | 0 | 1893   | 0.605137109 | -2.773769048 | 3.981174939 | -0.696721217 | NA          | NA          |
| chr2:204244930-204267457  | exonic       | ABI2                                  | 2  | 204244930 | 204267457 | 0 | 0 | 0 | 0 | 5 | 0 | 22527  | 0.605137109 | -2.773769048 | 3.981174939 | -0.696721217 | NA          | NA          |
| chr2:206986484-206987081  | downstream   | NDUFS1 (dist=722)                     | 2  | 206986484 | 206987081 | 0 | 0 | 0 | 0 | 5 | 0 | 597    | 0.605137109 | -2.773769048 | 3.981174939 | -0.696721217 | NA          | NA          |
| chr22:26057542-26070495   | exonic       | ADRBK2                                | 22 | 26057542  | 26070495  | 0 | 0 | 0 | 0 | 5 | 0 | 12953  | 0.605137109 | -2.773769048 | 3.981174939 | -0.696721217 | NA          | NA          |
| chr4:173852651-173883060  | exonic       | GALNTL6                               | 4  | 173852651 | 173883060 | 0 | 0 | 0 | 0 | 5 | 0 | 30409  | 0.605137109 | -2.773769048 | 3.981174939 | -0.696721217 | NA          | NA          |
| chr4:17816476-17816981    | exonic       | NCAPG                                 | 4  | 17816476  | 17816981  | 0 | 0 | 0 | 0 | 5 | 0 | 505    | 0.605137109 | -2.773769048 | 3.981174939 | -0.696721217 | NA          | NA          |
| chr5:142434003-142500712  | exonic       | ARHGAP26                              | 5  | 142434003 | 142500712 | 0 | 0 | 0 | 0 | 5 | 0 | 66709  | 0.605137109 | -2.773769048 | 3.981174939 | -0.696721217 | NA          | NA          |
| chr5:70238184-70238697    | exonic       | SMN1, SMN2                            | 5  | 70238184  | 70238697  | 0 | 0 | 0 | 0 | 5 | 0 | 513    | 0.605137109 | -2.773769048 | 3.981174939 | -0.696721217 | NA          | NA          |
| chr6:32610729-32714191    | exonic       | HLA-DQA2, HLA-DQB1                    | 6  | 32610729  | 32714191  | 0 | 0 | 0 | 0 | 5 | 0 | 103462 | 0.605137109 | -2.773769048 | 3.981174939 | -0.696721217 | NA          | NA          |
| chr7:100189289-100190640  | exonic       | FBXO24                                | 7  | 100189289 | 100190640 | 0 | 0 | 0 | 0 | 5 | 0 | 1351   | 0.605137109 | -2.773769048 | 3.981174939 | -0.696721217 | NA          | NA          |
| chr7:105099614-105135700  | exonic       | PUS7                                  | 7  | 105099614 | 105135700 | 0 | 0 | 0 | 0 | 5 | 0 | 36086  | 0.605137109 | -2.773769048 | 3.981174939 | -0.696721217 | NA          | NA          |
| chr9:100780571-100788733  | intergenic   | ANP32B (dist=2347), NANS (dist=30226) | 9  | 100780571 | 100788733 | 0 | 0 | 0 | 0 | 5 | 0 | 8162   | 0.605137109 | -2.773769048 | 3.981174939 | -0.696721217 | NA          | NA          |
| chrMT:9043-9189           | intergenic   | NONE (dist=NONE), NONE (dist=NONE)    | MT | 9043      | 9189      | 0 | 0 | 0 | 0 | 5 | 0 | 146    | 0.605137109 | -2.773769048 | 3.981174939 | -0.696721217 | NA          | NA          |
| chr10:128776211-128860040 | exonic       | DOCK1                                 | 10 | 128776211 | 128860040 | 0 | 0 | 0 | 3 | 0 | 1 | 83829  | 0.627152764 | -2.769418841 | 3.581373499 | -0.773284004 | 0.43935432  | 0.998252924 |
| chr13:99127074-99127612   | exonic       | STK24                                 | 13 | 99127074  | 99127612  | 0 | 0 | 0 | 3 | 0 | 1 | 538    | 0.627152764 | -2.769418841 | 3.581373499 | -0.773284004 | 0.43935432  | 0.998252924 |
| chr14:96807858-96813678   | exonic       | ATG2B                                 | 14 | 96807858  | 96813678  | 0 | 0 | 0 | 3 | 0 | 1 | 5820   | 0.627152764 | -2.769418841 | 3.581373499 | -0.773284004 | 0.43935432  | 0.998252924 |
| chr4:120180974-120190992  | exonic       | USP53                                 | 4  | 120180974 | 120190992 | 0 | 0 | 0 | 3 | 0 | 1 | 10018  | 0.627152764 | -2.769418841 | 3.581373499 | -0.773284004 | 0.43935432  | 0.998252924 |
| chr4:129042980-129083472  | exonic       | LARP1B                                | 4  | 129042980 | 129083472 | 0 | 0 | 0 | 3 | 0 | 1 | 40492  | 0.627152764 | -2.769418841 | 3.581373499 | -0.773284004 | 0.43935432  | 0.998252924 |
| chr6:84870530-84872989    | exonic       | CEP162                                | 6  | 84870530  | 84872989  | 0 | 0 | 0 | 3 | 0 | 1 | 2459   | 0.627152764 | -2.769418841 | 3.581373499 | -0.773284004 | 0.43935432  | 0.998252924 |
| chr9:97686267-97690813    | exonic       | C9orf3                                | 9  | 97686267  | 97690813  | 0 | 0 | 0 | 3 | 0 | 1 | 4546   | 0.627152764 | -2.769418841 | 3.581373499 | -0.773284004 | 0.43935432  | 0.998252924 |
| chrY:15024874-15026561    | exonic       | DDX3Y                                 | Y  | 15024874  | 15026561  | 0 | 0 | 0 | 3 | 0 | 1 | 1687   | 0.627152764 | -2.769418841 | 3.581373499 | -0.773284004 | 0.43935432  | 0.998252924 |
| chr2:69565029-69565697    | exonic       | GFPT1                                 | 2  | 69565029  | 69565697  | 1 | 0 | 0 | 6 | 2 | 1 | 668    | 1.317128706 | -2.767935164 | 2.384701007 | -1.160705328 | 0.245761755 | 0.998252924 |
| chr8:42914234-42919358    | exonic       | FNTA                                  | 8  | 42914234  | 42919358  | 3 | 0 | 0 | 4 | 6 | 6 | 5124   | 3.387682552 | -2.75953104  | 1.713072243 | -1.610866706 | NA          | NA          |
| chr7:32672154-32678977    | ncRNA_exonic | DPY19L1P1                             | 7  | 32672154  | 32678977  | 0 | 0 | 1 | 0 | 5 | 2 | 6823   | 1.418843352 | -2.756144776 | 2.534168126 | -1.087593498 | NA          | NA          |
| chr15:44060686-44062778   | exonic       | PDIA3                                 | 15 | 44060686  | 44062778  | 0 | 0 | 0 | 1 | 4 | 0 | 2092   | 0.590421072 | -2.747741884 | 3.649065269 | -0.752998831 | 0.451450616 | 0.998252924 |
| chr15:72810407-72864506   | exonic       | ARIH1                                 | 15 | 72810407  | 72864506  | 0 | 0 | 0 | 1 | 3 | 0 | 54099  | 0.590421072 | -2.747741884 | 3.649065269 | -0.752998831 | 0.451450616 | 0.998252924 |
| chr17:30267304-30300250   | exonic       | SUZ12                                 | 17 | 30267304  | 30300250  | 0 | 0 | 0 | 1 | 4 | 0 | 32946  | 0.590421072 | -2.747741884 | 3.649065269 | -0.752998831 | 0.451450616 | 0.998252924 |
| chr2:201718625-201719809  | exonic       | CLK1                                  | 2  | 201718625 | 201719809 | 0 | 0 | 0 | 1 | 4 | 0 | 1184   | 0.590421072 | -2.747741884 | 3.649065269 | -0.752998831 | 0.451450616 | 0.998252924 |
| chr22:26068262-26091181   | exonic       | ADRBK2                                | 22 | 26068262  | 26091181  | 0 | 0 | 0 | 1 | 4 | 0 | 22919  | 0.590421072 | -2.747741884 | 3.649065269 | -0.752998831 | 0.451450616 | 0.998252924 |
| chr3:172080422-172098883  | exonic       | FNDC3B                                | 3  | 172080422 | 172098883 | 0 | 0 | 0 | 1 | 4 | 0 | 18461  | 0.590421072 | -2.747741884 | 3.649065269 | -0.752998831 | 0.451450616 | 0.998252924 |
| chr3:196118683-196134264  | exonic       | UBXN7                                 | 3  | 196118683 | 196134264 | 0 | 0 | 0 | 1 | 4 | 0 | 15581  | 0.590421072 | -2.747741884 | 3.649065269 | -0.752998831 | 0.451450616 | 0.998252924 |
| chr6:149893420-149901859  | exonic       | GINM1                                 | 6  | 149893420 | 149901859 | 0 | 0 | 0 | 1 | 4 | 0 | 8439   | 0.590421072 | -2.747741884 | 3.649065269 | -0.752998831 | 0.451450616 | 0.998252924 |
| chr14:76633005-76644385   | exonic       | GPATCH2L                              | 14 | 76633005  | 76644385  | 0 | 1 | 0 | 6 | 4 | 0 | 11380  | 1.296253797 | -2.726468389 | 2.545128196 | -1.071249925 | 0.284057069 | 0.998252924 |
| chr1:109883345-109888503  | exonic       | SORT1                                 | 1  | 109883345 | 109888503 | 0 | 0 | 0 | 2 | 0 | 0 | 5158   | 0.575705036 | -2.714371859 | 3.657685474 | -0.742100948 | 0.458026175 | 0.998252924 |
| chr1:1647590-1647917      | exonic       | CDK11A, CDK11B                        | 1  | 1647590   | 1647917   | 0 | 0 | 0 | 2 | 3 | 0 | 327    | 0.575705036 | -2.714371859 | 3.657685474 | -0.742100948 | 0.458026175 | 0.998252924 |



|                           |            |                                        |    |           |           |   |   |   |    |   |   |       |             |              |             |              |             |             |
|---------------------------|------------|----------------------------------------|----|-----------|-----------|---|---|---|----|---|---|-------|-------------|--------------|-------------|--------------|-------------|-------------|
| chr1:40270550-40273870    | intergenic | BMP8B(dist=16017), TRIT1(dist=32836)   | 1  | 40270550  | 40273870  | 0 | 0 | 0 | 2  | 3 | 0 | 3320  | 0.575705036 | -2.714371859 | 3.657685474 | -0.742100948 | 0.458026175 | 0.998252924 |
| chr11:72598514-72613683   | exonic     | FCHSD2                                 | 11 | 72598514  | 72613683  | 0 | 0 | 0 | 2  | 3 | 0 | 15169 | 0.575705036 | -2.714371859 | 3.657685474 | -0.742100948 | 0.458026175 | 0.998252924 |
| chr13:28748408-28771483   | exonic     | PAN3                                   | 13 | 28748408  | 28771483  | 0 | 0 | 0 | 2  | 3 | 0 | 23075 | 0.575705036 | -2.714371859 | 3.657685474 | -0.742100948 | 0.458026175 | 0.998252924 |
| chr15:25650608-25667108   | exonic     | UBE3A                                  | 15 | 25650608  | 25667108  | 0 | 0 | 0 | 2  | 3 | 0 | 16500 | 0.575705036 | -2.714371859 | 3.657685474 | -0.742100948 | 0.458026175 | 0.998252924 |
| chr15:68467974-68468992   | exonic     | PIAS1                                  | 15 | 68467974  | 68468992  | 0 | 0 | 0 | 2  | 3 | 0 | 1018  | 0.575705036 | -2.714371859 | 3.657685474 | -0.742100948 | 0.458026175 | 0.998252924 |
| chr17:61841375-61843554   | exonic     | CCDC47                                 | 17 | 61841375  | 61843554  | 0 | 0 | 0 | 2  | 3 | 0 | 2179  | 0.575705036 | -2.714371859 | 3.657685474 | -0.742100948 | 0.458026175 | 0.998252924 |
| chr17:79254408-79258695   | exonic     | SLC38A10                               | 17 | 79254408  | 79258695  | 0 | 0 | 0 | 2  | 3 | 0 | 4287  | 0.575705036 | -2.714371859 | 3.657685474 | -0.742100948 | 0.458026175 | 0.998252924 |
| chr17:80828099-80861354   | exonic     | TBCD                                   | 17 | 80828099  | 80861354  | 0 | 0 | 0 | 2  | 3 | 0 | 33255 | 0.575705036 | -2.714371859 | 3.657685474 | -0.742100948 | 0.458026175 | 0.998252924 |
| chr19:30476129-30503438   | exonic     | URI1                                   | 19 | 30476129  | 30503438  | 0 | 0 | 0 | 2  | 3 | 0 | 27309 | 0.575705036 | -2.714371859 | 3.657685474 | -0.742100948 | 0.458026175 | 0.998252924 |
| chr19:34941169-34957919   | exonic     | UBA2                                   | 19 | 34941169  | 34957919  | 0 | 0 | 0 | 2  | 3 | 0 | 16750 | 0.575705036 | -2.714371859 | 3.657685474 | -0.742100948 | 0.458026175 | 0.998252924 |
| chr19:52364156-52384130   | exonic     | ZNF577                                 | 19 | 52364156  | 52384130  | 0 | 2 | 0 | 2  | 3 | 0 | 19974 | 0.575705036 | -2.714371859 | 3.657685474 | -0.742100948 | 0.458026175 | 0.998252924 |
| chr2:100055062-100081447  | exonic     | REV1                                   | 2  | 100055062 | 100081447 | 0 | 0 | 0 | 2  | 3 | 0 | 26385 | 0.575705036 | -2.714371859 | 3.657685474 | -0.742100948 | 0.458026175 | 0.998252924 |
| chr2:128944256-128945188  | exonic     | UGGT1                                  | 2  | 128944256 | 128945188 | 0 | 0 | 0 | 2  | 3 | 0 | 932   | 0.575705036 | -2.714371859 | 3.657685474 | -0.742100948 | 0.458026175 | 0.998252924 |
| chr2:68717321-68794519    | exonic     | APLF                                   | 2  | 68717321  | 68794519  | 0 | 0 | 0 | 2  | 3 | 0 | 77198 | 0.575705036 | -2.714371859 | 3.657685474 | -0.742100948 | 0.458026175 | 0.998252924 |
| chr3:126174766-126177189  | intronic   | ZXDC                                   | 3  | 126174766 | 126177189 | 0 | 0 | 0 | 2  | 3 | 0 | 2423  | 0.575705036 | -2.714371859 | 3.657685474 | -0.742100948 | 0.458026175 | 0.998252924 |
| chr3:152882555-152965320  | UTR3       | RAP2B(NM_002886:c. #1521_#7379delins0) | 3  | 152882555 | 152965320 | 0 | 0 | 0 | 2  | 3 | 0 | 82765 | 0.575705036 | -2.714371859 | 3.657685474 | -0.742100948 | 0.458026175 | 0.998252924 |
| chr4:36212011-36216102    | exonic     | ARAP2                                  | 4  | 36212011  | 36216102  | 0 | 0 | 0 | 2  | 3 | 0 | 4091  | 0.575705036 | -2.714371859 | 3.657685474 | -0.742100948 | 0.458026175 | 0.998252924 |
| chr4:39739039-39776553    | exonic     | UBE2K                                  | 4  | 39739039  | 39776553  | 3 | 0 | 0 | 2  | 3 | 0 | 37514 | 0.575705036 | -2.714371859 | 3.657685474 | -0.742100948 | 0.458026175 | 0.998252924 |
| chr6:74149931-74150168    | exonic     | MB21D1                                 | 6  | 74149931  | 74150168  | 0 | 0 | 0 | 2  | 3 | 0 | 237   | 0.575705036 | -2.714371859 | 3.657685474 | -0.742100948 | 0.458026175 | 0.998252924 |
| chr7:66262360-66270383    | exonic     | RABGEF1                                | 7  | 66262360  | 66270383  | 0 | 0 | 0 | 2  | 3 | 0 | 8023  | 0.575705036 | -2.714371859 | 3.657685474 | -0.742100948 | 0.458026175 | 0.998252924 |
| chr8:142195237-142200516  | exonic     | DENND3                                 | 8  | 142195237 | 142200516 | 0 | 0 | 0 | 2  | 3 | 0 | 5279  | 0.575705036 | -2.714371859 | 3.657685474 | -0.742100948 | 0.458026175 | 0.998252924 |
| chr8:42857249-42868543    | exonic     | HOOK3                                  | 8  | 42857249  | 42868543  | 0 | 0 | 0 | 2  | 3 | 0 | 11294 | 0.575705036 | -2.714371859 | 3.657685474 | -0.742100948 | 0.458026175 | 0.998252924 |
| chr9:86279944-86292876    | exonic     | UBQLN1                                 | 9  | 86279944  | 86292876  | 0 | 0 | 0 | 2  | 3 | 0 | 12932 | 0.575705036 | -2.714371859 | 3.657685474 | -0.742100948 | 0.458026175 | 0.998252924 |
| chr8:30332294-30361953    | exonic     | RBPMS                                  | 8  | 30332294  | 30361953  | 0 | 2 | 0 | 10 | 9 | 0 | 29659 | 2.500912246 | -2.708467174 | 2.047384031 | -1.322891619 | 0.185871423 | 0.998252924 |
| chr2:203976701-203991649  | exonic     | NBEAL1                                 | 2  | 203976701 | 203991649 | 1 | 0 | 0 | 0  | 0 | 4 | 14948 | 1.361861378 | -2.706975699 | 2.837591019 | -0.953969646 | NA          | NA          |
| chr6:149691044-149700654  | exonic     | TAB2                                   | 6  | 149691044 | 149700654 | 0 | 1 | 0 | 0  | 0 | 4 | 9610  | 1.407150234 | -2.704555924 | 2.809250673 | -0.962732144 | NA          | NA          |
| chr2:203974872-203991649  | exonic     | NBEAL1                                 | 2  | 203974872 | 203991649 | 0 | 0 | 1 | 0  | 0 | 4 | 16777 | 1.430143461 | -2.703394289 | 2.796033874 | -0.966867503 | NA          | NA          |
| chr10:89527429-89536184   | exonic     | ATAD1                                  | 10 | 89527429  | 89536184  | 0 | 1 | 0 | 2  | 5 | 1 | 8755  | 1.300254287 | -2.681983935 | 2.398782503 | -1.118060488 | 0.26354116  | 0.998252924 |
| chr14:102661274-102664184 | exonic     | WDR20                                  | 14 | 102661274 | 102664184 | 0 | 1 | 0 | 2  | 5 | 1 | 2910  | 1.300254287 | -2.681983935 | 2.398782503 | -1.118060488 | 0.26354116  | 0.998252924 |
| chr15:50923613-50955243   | exonic     | TRPM7                                  | 15 | 50923613  | 50955243  | 1 | 0 | 0 | 2  | 5 | 1 | 31630 | 1.254965431 | -2.681779752 | 2.423515759 | -1.10656584  | 0.268481683 | 0.998252924 |
| chr7:77236551-77265166    | exonic     | PTPN12                                 | 7  | 77236551  | 77265166  | 2 | 0 | 0 | 1  | 3 | 1 | 28615 | 1.254965431 | -2.681779752 | 2.423515759 | -1.10656584  | 0.268481683 | 0.998252924 |
| chr1:171162473-171165950  | exonic     | FMO2                                   | 1  | 171162473 | 171165950 | 0 | 0 | 0 | 3  | 2 | 0 | 3477  | 0.560988999 | -2.679556815 | 3.693500882 | -0.725478862 | 0.468158308 | 0.998252924 |
| chr1:26594973-26596105    | exonic     | CEP85                                  | 1  | 26594973  | 26596105  | 0 | 0 | 0 | 3  | 2 | 0 | 1132  | 0.560988999 | -2.679556815 | 3.693500882 | -0.725478862 | 0.468158308 | 0.998252924 |
| chr1:35862152-35865177    | exonic     | ZMYM4                                  | 1  | 35862152  | 35865177  | 0 | 0 | 0 | 3  | 2 | 0 | 3025  | 0.560988999 | -2.679556815 | 3.693500882 | -0.725478862 | 0.468158308 | 0.998252924 |
| chr1:62907158-62908990    | exonic     | USP1                                   | 1  | 62907158  | 62908990  | 0 | 0 | 0 | 3  | 2 | 0 | 1832  | 0.560988999 | -2.679556815 | 3.693500882 | -0.725478862 | 0.468158308 | 0.998252924 |

|                           |              |                                               |    |           |           |   |   |   |   |   |   |        |             |              |             |              |             |             |
|---------------------------|--------------|-----------------------------------------------|----|-----------|-----------|---|---|---|---|---|---|--------|-------------|--------------|-------------|--------------|-------------|-------------|
| chr11:119103157-119103405 | exonic       | CBL                                           | 11 | 119103157 | 119103405 | 0 | 0 | 0 | 3 | 2 | 0 | 248    | 0.560988999 | -2.679556815 | 3.693500882 | -0.725478862 | 0.468158308 | 0.998252924 |
| chr12:9231839-9244025     | exonic       | A2M                                           | 12 | 9231839   | 9244025   | 0 | 0 | 0 | 3 | 2 | 0 | 12186  | 0.560988999 | -2.679556815 | 3.693500882 | -0.725478862 | 0.468158308 | 0.998252924 |
| chr12:94603365-94613939   | exonic       | PLXNC1                                        | 12 | 94603365  | 94613939  | 0 | 0 | 0 | 3 | 2 | 0 | 10574  | 0.560988999 | -2.679556815 | 3.693500882 | -0.725478862 | 0.468158308 | 0.998252924 |
| chr14:67768105-67770316   | exonic       | MPP5                                          | 14 | 67768105  | 67770316  | 0 | 0 | 0 | 3 | 2 | 0 | 2211   | 0.560988999 | -2.679556815 | 3.693500882 | -0.725478862 | 0.468158308 | 0.998252924 |
| chr16:16108347-16110478   | exonic       | ABCC1                                         | 16 | 16108347  | 16110478  | 0 | 0 | 0 | 3 | 2 | 0 | 2131   | 0.560988999 | -2.679556815 | 3.693500882 | -0.725478862 | 0.468158308 | 0.998252924 |
| chr16:19488761-19492787   | exonic       | TMC5                                          | 16 | 19488761  | 19492787  | 0 | 0 | 0 | 3 | 2 | 0 | 4026   | 0.560988999 | -2.679556815 | 3.693500882 | -0.725478862 | 0.468158308 | 0.998252924 |
| chr17:29311634-29315124   | exonic       | RNF135                                        | 17 | 29311634  | 29315124  | 0 | 0 | 0 | 3 | 2 | 0 | 3490   | 0.560988999 | -2.679556815 | 3.693500882 | -0.725478862 | 0.468158308 | 0.998252924 |
| chr17:41456120-41456630   | ncRNA_exonic | LINC00910                                     | 17 | 41456120  | 41456630  | 0 | 0 | 0 | 3 | 2 | 0 | 510    | 0.560988999 | -2.679556815 | 3.693500882 | -0.725478862 | 0.468158308 | 0.998252924 |
| chr19:38220805-38221238   | intergenic   | ZNF607 (dist=10114), ZNF573 (dist=7965)       | 19 | 38220805  | 38221238  | 0 | 0 | 0 | 3 | 2 | 0 | 433    | 0.560988999 | -2.679556815 | 3.693500882 | -0.725478862 | 0.468158308 | 0.998252924 |
| chr19:58436990-58439415   | exonic       | ZNF418                                        | 19 | 58436990  | 58439415  | 0 | 0 | 0 | 3 | 2 | 0 | 2425   | 0.560988999 | -2.679556815 | 3.693500882 | -0.725478862 | 0.468158308 | 0.998252924 |
| chr2:122215262-122227536  | exonic       | CLASP1                                        | 2  | 122215262 | 122227536 | 0 | 0 | 0 | 3 | 2 | 0 | 12274  | 0.560988999 | -2.679556815 | 3.693500882 | -0.725478862 | 0.468158308 | 0.998252924 |
| chr2:210880697-210885788  | exonic       | RPE                                           | 2  | 210880697 | 210885788 | 0 | 0 | 0 | 3 | 2 | 0 | 5091   | 0.560988999 | -2.679556815 | 3.693500882 | -0.725478862 | 0.468158308 | 0.998252924 |
| chr2:228384663-228389631  | exonic       | AGFG1                                         | 2  | 228384663 | 228389631 | 0 | 0 | 0 | 3 | 2 | 0 | 4968   | 0.560988999 | -2.679556815 | 3.693500882 | -0.725478862 | 0.468158308 | 0.998252924 |
| chr2:63660879-63798760    | exonic       | WDPCP                                         | 2  | 63660879  | 63798760  | 0 | 0 | 0 | 3 | 2 | 0 | 137881 | 0.560988999 | -2.679556815 | 3.693500882 | -0.725478862 | 0.468158308 | 0.998252924 |
| chr20:35421651-35467844   | exonic       | SOGA1                                         | 20 | 35421651  | 35467844  | 0 | 0 | 0 | 3 | 2 | 0 | 46193  | 0.560988999 | -2.679556815 | 3.693500882 | -0.725478862 | 0.468158308 | 0.998252924 |
| chr4:153332455-153403825  | exonic       | FBXW7                                         | 4  | 153332455 | 153403825 | 0 | 0 | 0 | 3 | 2 | 0 | 71370  | 0.560988999 | -2.679556815 | 3.693500882 | -0.725478862 | 0.468158308 | 0.998252924 |
| chr4:160159961-160164943  | intergenic   | MIR3888-1 (dist=109915), RAPGEF2 (dist=24055) | 4  | 160159961 | 160164943 | 0 | 0 | 0 | 3 | 2 | 0 | 4982   | 0.560988999 | -2.679556815 | 3.693500882 | -0.725478862 | 0.468158308 | 0.998252924 |
| chr5:138994171-138994551  | exonic       | UBE2D2                                        | 5  | 138994171 | 138994551 | 0 | 0 | 0 | 3 | 2 | 0 | 380    | 0.560988999 | -2.679556815 | 3.693500882 | -0.725478862 | 0.468158308 | 0.998252924 |
| chr5:70888752-70900295    | exonic       | MCCC2                                         | 5  | 70888752  | 70900295  | 0 | 0 | 0 | 3 | 2 | 0 | 11543  | 0.560988999 | -2.679556815 | 3.693500882 | -0.725478862 | 0.468158308 | 0.998252924 |
| chr6:25255416-25260804    | ncRNA_exonic | LOC101928663                                  | 6  | 25255416  | 25260804  | 0 | 0 | 0 | 3 | 2 | 0 | 5388   | 0.560988999 | -2.679556815 | 3.693500882 | -0.725478862 | 0.468158308 | 0.998252924 |
| chr6:26385242-26388522    | exonic       | BTN2A2                                        | 6  | 26385242  | 26388522  | 0 | 0 | 0 | 3 | 2 | 0 | 3280   | 0.560988999 | -2.679556815 | 3.693500882 | -0.725478862 | 0.468158308 | 0.998252924 |
| chr6:42941740-42942776    | exonic       | PEX6                                          | 6  | 42941740  | 42942776  | 0 | 0 | 0 | 3 | 2 | 0 | 1036   | 0.560988999 | -2.679556815 | 3.693500882 | -0.725478862 | 0.468158308 | 0.998252924 |
| chr6:82922423-82924546    | exonic       | IBTK                                          | 6  | 82922423  | 82924546  | 0 | 0 | 0 | 3 | 2 | 0 | 2123   | 0.560988999 | -2.679556815 | 3.693500882 | -0.725478862 | 0.468158308 | 0.998252924 |
| chr7:123334768-123349277  | exonic       | WASL                                          | 7  | 123334768 | 123349277 | 0 | 0 | 0 | 3 | 2 | 0 | 14509  | 0.560988999 | -2.679556815 | 3.693500882 | -0.725478862 | 0.468158308 | 0.998252924 |
| chr7:5680784-5681007      | exonic       | RNF216                                        | 7  | 5680784   | 5681007   | 0 | 0 | 0 | 3 | 2 | 0 | 223    | 0.560988999 | -2.679556815 | 3.693500882 | -0.725478862 | 0.468158308 | 0.998252924 |
| chr9:34241182-34242106    | exonic       | UBAP1                                         | 9  | 34241182  | 34242106  | 0 | 0 | 0 | 3 | 2 | 0 | 924    | 0.560988999 | -2.679556815 | 3.693500882 | -0.725478862 | 0.468158308 | 0.998252924 |
| chrY:14832521-14870572    | exonic       | USP9Y                                         | Y  | 14832521  | 14870572  | 0 | 0 | 0 | 3 | 2 | 0 | 38051  | 0.560988999 | -2.679556815 | 3.693500882 | -0.725478862 | 0.468158308 | 0.998252924 |
| chr1:101376618-101387397  | exonic       | SLC30A7                                       | 1  | 101376618 | 101387397 | 0 | 0 | 0 | 0 | 0 | 2 | 10779  | 0.616437218 | -2.676722948 | 3.986198973 | -0.671497576 | 0.501903603 | 0.998252924 |
| chr1:10405902-10408791    | exonic       | KIF1B                                         | 1  | 10405902  | 10408791  | 0 | 0 | 0 | 0 | 0 | 2 | 2889   | 0.616437218 | -2.676722948 | 3.986198973 | -0.671497576 | 0.501903603 | 0.998252924 |
| chr1:113134146-113159466  | exonic       | ST7L                                          | 1  | 113134146 | 113159466 | 0 | 0 | 0 | 0 | 0 | 2 | 25320  | 0.616437218 | -2.676722948 | 3.986198973 | -0.671497576 | 0.501903603 | 0.998252924 |
| chr1:114160850-114161241  | intronic     | MAGI3                                         | 1  | 114160850 | 114161241 | 0 | 0 | 0 | 0 | 0 | 2 | 391    | 0.616437218 | -2.676722948 | 3.986198973 | -0.671497576 | 0.501903603 | 0.998252924 |
| chr1:150923840-150935195  | exonic       | SETDB1                                        | 1  | 150923840 | 150935195 | 0 | 0 | 0 | 0 | 0 | 2 | 11355  | 0.616437218 | -2.676722948 | 3.986198973 | -0.671497576 | 0.501903603 | 0.998252924 |
| chr1:161164457-161164741  | intronic     | ADAMTS4                                       | 1  | 161164457 | 161164741 | 0 | 0 | 0 | 0 | 0 | 2 | 284    | 0.616437218 | -2.676722948 | 3.986198973 | -0.671497576 | 0.501903603 | 0.998252924 |
| chr1:172547437-172554226  | exonic       | SUCO                                          | 1  | 172547437 | 172554226 | 0 | 0 | 0 | 0 | 0 | 2 | 6789   | 0.616437218 | -2.676722948 | 3.986198973 | -0.671497576 | 0.501903603 | 0.998252924 |
| chr1:174874924-174882157  | intronic     | RABGAP1L                                      | 1  | 174874924 | 174882157 | 0 | 0 | 0 | 0 | 0 | 2 | 7233   | 0.616437218 | -2.676722948 | 3.986198973 | -0.671497576 | 0.501903603 | 0.998252924 |

|                          |                |                                     |   |           |           |   |   |   |   |   |   |       |             |              |             |              |             |             |
|--------------------------|----------------|-------------------------------------|---|-----------|-----------|---|---|---|---|---|---|-------|-------------|--------------|-------------|--------------|-------------|-------------|
| chr1:178846632-178852668 | exonic         | RALGPS2                             | 1 | 178846632 | 178852668 | 0 | 0 | 0 | 0 | 0 | 2 | 6036  | 0.616437218 | -2.676722948 | 3.986198973 | -0.671497576 | 0.501903603 | 0.998252924 |
| chr1:179092576-179092859 | intronic       | ABL2                                | 1 | 179092576 | 179092859 | 0 | 0 | 0 | 0 | 0 | 2 | 283   | 0.616437218 | -2.676722948 | 3.986198973 | -0.671497576 | 0.501903603 | 0.998252924 |
| chr1:184680856-184681732 | exonic         | EDEM3                               | 1 | 184680856 | 184681732 | 0 | 0 | 0 | 0 | 0 | 2 | 876   | 0.616437218 | -2.676722948 | 3.986198973 | -0.671497576 | 0.501903603 | 0.998252924 |
| chr1:184681566-184702124 | exonic         | EDEM3                               | 1 | 184681566 | 184702124 | 0 | 0 | 0 | 0 | 0 | 2 | 20558 | 0.616437218 | -2.676722948 | 3.986198973 | -0.671497576 | 0.501903603 | 0.998252924 |
| chr1:192558156-192596551 | intergenic     | RGS1 (dist=8997), RGS13 (dist=8717) | 1 | 192558156 | 192596551 | 0 | 0 | 0 | 0 | 0 | 2 | 38395 | 0.616437218 | -2.676722948 | 3.986198973 | -0.671497576 | 0.501903603 | 0.998252924 |
| chr1:197093240-197094321 | exonic         | ASPM                                | 1 | 197093240 | 197094321 | 0 | 0 | 0 | 0 | 0 | 2 | 1081  | 0.616437218 | -2.676722948 | 3.986198973 | -0.671497576 | 0.501903603 | 0.998252924 |
| chr1:212506838-212522584 | exonic         | PPP2R5A                             | 1 | 212506838 | 212522584 | 0 | 0 | 0 | 0 | 0 | 2 | 15746 | 0.616437218 | -2.676722948 | 3.986198973 | -0.671497576 | 0.501903603 | 0.998252924 |
| chr1:214795421-214805945 | exonic         | CENPF                               | 1 | 214795421 | 214805945 | 0 | 0 | 0 | 0 | 0 | 2 | 10524 | 0.616437218 | -2.676722948 | 3.986198973 | -0.671497576 | 0.501903603 | 0.998252924 |
| chr1:21599191-21605825   | exonic         | ECE1                                | 1 | 21599191  | 21605825  | 0 | 0 | 0 | 0 | 0 | 2 | 6634  | 0.616437218 | -2.676722948 | 3.986198973 | -0.671497576 | 0.501903603 | 0.998252924 |
| chr1:223132950-223150466 | intronic       | DISP1                               | 1 | 223132950 | 223150466 | 0 | 0 | 0 | 0 | 0 | 2 | 17516 | 0.616437218 | -2.676722948 | 3.986198973 | -0.671497576 | 0.501903603 | 0.998252924 |
| chr1:224553581-224564879 | exonic         | CNIH4                               | 1 | 224553581 | 224564879 | 0 | 0 | 0 | 0 | 0 | 2 | 11298 | 0.616437218 | -2.676722948 | 3.986198973 | -0.671497576 | 0.501903603 | 0.998252924 |
| chr1:225190484-225211567 | exonic         | DNAH14                              | 1 | 225190484 | 225211567 | 0 | 0 | 0 | 0 | 0 | 2 | 21083 | 0.616437218 | -2.676722948 | 3.986198973 | -0.671497576 | 0.501903603 | 0.998252924 |
| chr1:235377083-235397807 | exonic         | ARID4B                              | 1 | 235377083 | 235397807 | 0 | 0 | 0 | 0 | 0 | 2 | 20724 | 0.616437218 | -2.676722948 | 3.986198973 | -0.671497576 | 0.501903603 | 0.998252924 |
| chr1:235431142-235431953 | intronic       | ARID4B                              | 1 | 235431142 | 235431953 | 0 | 0 | 0 | 0 | 0 | 2 | 811   | 0.616437218 | -2.676722948 | 3.986198973 | -0.671497576 | 0.501903603 | 0.998252924 |
| chr1:235775424-235775806 | ncRNA_intronic | MIR5096                             | 1 | 235775424 | 235775806 | 0 | 0 | 0 | 0 | 0 | 2 | 382   | 0.616437218 | -2.676722948 | 3.986198973 | -0.671497576 | 0.501903603 | 0.998252924 |
| chr1:235937141-235940608 | exonic         | LYST                                | 1 | 235937141 | 235940608 | 0 | 0 | 0 | 0 | 0 | 2 | 3467  | 0.616437218 | -2.676722948 | 3.986198973 | -0.671497576 | 0.501903603 | 0.998252924 |
| chr1:243327585-243349724 | exonic         | CEP170                              | 1 | 243327585 | 243349724 | 0 | 0 | 0 | 0 | 0 | 2 | 22139 | 0.616437218 | -2.676722948 | 3.986198973 | -0.671497576 | 0.501903603 | 0.998252924 |
| chr1:243776972-243828185 | exonic         | AKT3                                | 1 | 243776972 | 243828185 | 0 | 0 | 0 | 0 | 0 | 2 | 51213 | 0.616437218 | -2.676722948 | 3.986198973 | -0.671497576 | 0.501903603 | 0.998252924 |
| chr1:245765878-245775278 | exonic         | KIF26B                              | 1 | 245765878 | 245775278 | 0 | 0 | 0 | 0 | 0 | 2 | 9400  | 0.616437218 | -2.676722948 | 3.986198973 | -0.671497576 | 0.501903603 | 0.998252924 |
| chr1:25773252-25783322   | exonic         | TMEM57                              | 1 | 25773252  | 25783322  | 0 | 0 | 0 | 0 | 0 | 2 | 10070 | 0.616437218 | -2.676722948 | 3.986198973 | -0.671497576 | 0.501903603 | 0.998252924 |
| chr1:28601335-28605752   | exonic         | SESN2                               | 1 | 28601335  | 28605752  | 0 | 0 | 0 | 0 | 0 | 2 | 4417  | 0.616437218 | -2.676722948 | 3.986198973 | -0.671497576 | 0.501903603 | 0.998252924 |
| chr1:28697374-28697900   | intronic       | PHACTR4                             | 1 | 28697374  | 28697900  | 0 | 0 | 0 | 0 | 0 | 2 | 526   | 0.616437218 | -2.676722948 | 3.986198973 | -0.671497576 | 0.501903603 | 0.998252924 |
| chr1:31413997-31414970   | exonic         | PUM1                                | 1 | 31413997  | 31414970  | 0 | 0 | 0 | 0 | 0 | 2 | 973   | 0.616437218 | -2.676722948 | 3.986198973 | -0.671497576 | 0.501903603 | 0.998252924 |
| chr1:32385967-32386248   | intronic       | PTP4A2                              | 1 | 32385967  | 32386248  | 0 | 0 | 0 | 0 | 0 | 2 | 281   | 0.616437218 | -2.676722948 | 3.986198973 | -0.671497576 | 0.501903603 | 0.998252924 |
| chr1:33286826-33287137   | intronic       | S100BPB                             | 1 | 33286826  | 33287137  | 0 | 0 | 0 | 0 | 0 | 2 | 311   | 0.616437218 | -2.676722948 | 3.986198973 | -0.671497576 | 0.501903603 | 0.998252924 |
| chr1:44707587-44713710   | exonic         | ERI3                                | 1 | 44707587  | 44713710  | 0 | 0 | 0 | 0 | 0 | 2 | 6123  | 0.616437218 | -2.676722948 | 3.986198973 | -0.671497576 | 0.501903603 | 0.998252924 |
| chr1:51157145-51157694   | intronic       | FAF1                                | 1 | 51157145  | 51157694  | 0 | 0 | 0 | 0 | 0 | 2 | 549   | 0.616437218 | -2.676722948 | 3.986198973 | -0.671497576 | 0.501903603 | 0.998252924 |
| chr1:59361517-59362762   | ncRNA_exonic   | LINC01135                           | 1 | 59361517  | 59362762  | 0 | 0 | 0 | 0 | 0 | 2 | 1245  | 0.616437218 | -2.676722948 | 3.986198973 | -0.671497576 | 0.501903603 | 0.998252924 |
| chr1:62525197-62526948   | intronic       | INADL                               | 1 | 62525197  | 62526948  | 0 | 0 | 0 | 0 | 0 | 2 | 1751  | 0.616437218 | -2.676722948 | 3.986198973 | -0.671497576 | 0.501903603 | 0.998252924 |
| chr1:62599162-62600112   | intronic       | INADL                               | 1 | 62599162  | 62600112  | 0 | 0 | 0 | 0 | 0 | 2 | 950   | 0.616437218 | -2.676722948 | 3.986198973 | -0.671497576 | 0.501903603 | 0.998252924 |
| chr1:64060540-64087790   | intronic       | PGM1                                | 1 | 64060540  | 64087790  | 0 | 0 | 0 | 0 | 0 | 2 | 27250 | 0.616437218 | -2.676722948 | 3.986198973 | -0.671497576 | 0.501903603 | 0.998252924 |
| chr1:78105133-78107340   | exonic         | ZZZ3                                | 1 | 78105133  | 78107340  | 0 | 0 | 0 | 0 | 0 | 2 | 2207  | 0.616437218 | -2.676722948 | 3.986198973 | -0.671497576 | 0.501903603 | 0.998252924 |
| chr1:8803262-8803552     | intronic       | RERE                                | 1 | 8803262   | 8803552   | 0 | 0 | 0 | 0 | 0 | 2 | 290   | 0.616437218 | -2.676722948 | 3.986198973 | -0.671497576 | 0.501903603 | 0.998252924 |
| chr1:91382197-91406866   | exonic         | ZNF644                              | 1 | 91382197  | 91406866  | 0 | 0 | 0 | 0 | 0 | 2 | 24669 | 0.616437218 | -2.676722948 | 3.986198973 | -0.671497576 | 0.501903603 | 0.998252924 |
| chr1:92446445-92459811   | exonic         | BRDT                                | 1 | 92446445  | 92459811  | 0 | 0 | 0 | 0 | 0 | 2 | 13366 | 0.616437218 | -2.676722948 | 3.986198973 | -0.671497576 | 0.501903603 | 0.998252924 |

|                           |              |                                                                  |    |           |           |   |   |   |   |   |   |        |             |              |             |              |             |             |
|---------------------------|--------------|------------------------------------------------------------------|----|-----------|-----------|---|---|---|---|---|---|--------|-------------|--------------|-------------|--------------|-------------|-------------|
| chr1:94953097-94956803    | exonic       | ABCD3                                                            | 1  | 94953097  | 94956803  | 0 | 0 | 0 | 0 | 0 | 2 | 3706   | 0.616437218 | -2.676722948 | 3.986198973 | -0.671497576 | 0.501903603 | 0.998252924 |
| chr10:101571292-101590608 | exonic       | ABCC2                                                            | 10 | 101571292 | 101590608 | 0 | 0 | 0 | 0 | 0 | 2 | 19316  | 0.616437218 | -2.676722948 | 3.986198973 | -0.671497576 | 0.501903603 | 0.998252924 |
| chr10:103734968-103773781 | exonic       | C10orf76                                                         | 10 | 103734968 | 103773781 | 0 | 0 | 0 | 0 | 0 | 2 | 38813  | 0.616437218 | -2.676722948 | 3.986198973 | -0.671497576 | 0.501903603 | 0.998252924 |
| chr10:105133114-105139776 | exonic       | TAF5                                                             | 10 | 105133114 | 105139776 | 0 | 0 | 0 | 0 | 0 | 2 | 6662   | 0.616437218 | -2.676722948 | 3.986198973 | -0.671497576 | 0.501903603 | 0.998252924 |
| chr10:112047753-112048551 | downstream   | MXI1 (dist=630)                                                  | 10 | 112047753 | 112048551 | 0 | 0 | 0 | 0 | 0 | 2 | 798    | 0.616437218 | -2.676722948 | 3.986198973 | -0.671497576 | 0.501903603 | 0.998252924 |
| chr10:5144842-5146720     | exonic       | AKRIC3                                                           | 10 | 5144842   | 5146720   | 0 | 0 | 0 | 0 | 0 | 2 | 1878   | 0.616437218 | -2.676722948 | 3.986198973 | -0.671497576 | 0.501903603 | 0.998252924 |
| chr10:76735156-76748870   | exonic       | KAT6B                                                            | 10 | 76735156  | 76748870  | 0 | 0 | 0 | 0 | 0 | 2 | 13714  | 0.616437218 | -2.676722948 | 3.986198973 | -0.671497576 | 0.501903603 | 0.998252924 |
| chr10:77406083-77406348   | intronic     | C10orf11                                                         | 10 | 77406083  | 77406348  | 0 | 0 | 0 | 0 | 0 | 2 | 265    | 0.616437218 | -2.676722948 | 3.986198973 | -0.671497576 | 0.501903603 | 0.998252924 |
| chr10:91498714-91522592   | exonic       | KIF20B                                                           | 10 | 91498714  | 91522592  | 0 | 0 | 0 | 0 | 0 | 2 | 23878  | 0.616437218 | -2.676722948 | 3.986198973 | -0.671497576 | 0.501903603 | 0.998252924 |
| chr10:93711159-93726514   | exonic       | BTAF1                                                            | 10 | 93711159  | 93726514  | 0 | 0 | 0 | 0 | 0 | 2 | 15355  | 0.616437218 | -2.676722948 | 3.986198973 | -0.671497576 | 0.501903603 | 0.998252924 |
| chr10:96540256-96702098   | exonic       | CYP2C19, CYP2C9                                                  | 10 | 96540256  | 96702098  | 0 | 0 | 0 | 0 | 0 | 2 | 161842 | 0.616437218 | -2.676722948 | 3.986198973 | -0.671497576 | 0.501903603 | 0.998252924 |
| chr10:99915849-99923154   | exonic       | R3HCC1L                                                          | 10 | 99915849  | 99923154  | 0 | 0 | 0 | 0 | 0 | 2 | 7305   | 0.616437218 | -2.676722948 | 3.986198973 | -0.671497576 | 0.501903603 | 0.998252924 |
| chr11:102222254-102223236 | intronic     | BIRC2                                                            | 11 | 102222254 | 102223236 | 0 | 0 | 0 | 0 | 0 | 2 | 982    | 0.616437218 | -2.676722948 | 3.986198973 | -0.671497576 | 0.501903603 | 0.998252924 |
| chr11:108544193-108550287 | exonic       | DDX10                                                            | 11 | 108544193 | 108550287 | 0 | 0 | 0 | 0 | 0 | 2 | 6094   | 0.616437218 | -2.676722948 | 3.986198973 | -0.671497576 | 0.501903603 | 0.998252924 |
| chr11:116894689-116895355 | intronic     | SIK3                                                             | 11 | 116894689 | 116895355 | 0 | 0 | 0 | 0 | 0 | 2 | 666    | 0.616437218 | -2.676722948 | 3.986198973 | -0.671497576 | 0.501903603 | 0.998252924 |
| chr11:38891627-38906764   | intergenic   | <small>LINC01893 (dist=214828), LBRIC (dist=1228867)</small>     | 11 | 38891627  | 38906764  | 0 | 0 | 0 | 0 | 0 | 2 | 15137  | 0.616437218 | -2.676722948 | 3.986198973 | -0.671497576 | 0.501903603 | 0.998252924 |
| chr11:59313346-59316679   | intergenic   | <small>OR4D9 (dist=30016), OSBP (dist=25192)</small>             | 11 | 59313346  | 59316679  | 0 | 0 | 0 | 0 | 0 | 2 | 3333   | 0.616437218 | -2.676722948 | 3.986198973 | -0.671497576 | 0.501903603 | 0.998252924 |
| chr11:65202524-65211534   | ncRNA_exonic | NEAT1                                                            | 11 | 65202524  | 65211534  | 0 | 0 | 0 | 0 | 0 | 2 | 9010   | 0.616437218 | -2.676722948 | 3.986198973 | -0.671497576 | 0.501903603 | 0.998252924 |
| chr11:85685750-85726006   | exonic       | PICALM                                                           | 11 | 85685750  | 85726006  | 0 | 0 | 0 | 0 | 0 | 2 | 40256  | 0.616437218 | -2.676722948 | 3.986198973 | -0.671497576 | 0.501903603 | 0.998252924 |
| chr11:85707868-85712201   | exonic       | PICALM                                                           | 11 | 85707868  | 85712201  | 0 | 0 | 0 | 0 | 0 | 2 | 4333   | 0.616437218 | -2.676722948 | 3.986198973 | -0.671497576 | 0.501903603 | 0.998252924 |
| chr12:100491142-100497729 | exonic       | UHRF1BP1L                                                        | 12 | 100491142 | 100497729 | 0 | 0 | 0 | 0 | 0 | 2 | 6587   | 0.616437218 | -2.676722948 | 3.986198973 | -0.671497576 | 0.501903603 | 0.998252924 |
| chr12:100985513-101012365 | exonic       | GAS2L3                                                           | 12 | 100985513 | 101012365 | 0 | 0 | 0 | 0 | 0 | 2 | 26852  | 0.616437218 | -2.676722948 | 3.986198973 | -0.671497576 | 0.501903603 | 0.998252924 |
| chr12:118619175-118639268 | exonic       | TAOK3                                                            | 12 | 118619175 | 118639268 | 0 | 0 | 0 | 0 | 0 | 2 | 20093  | 0.616437218 | -2.676722948 | 3.986198973 | -0.671497576 | 0.501903603 | 0.998252924 |
| chr12:120992520-121001746 | exonic       | RNF10                                                            | 12 | 120992520 | 121001746 | 0 | 0 | 0 | 0 | 0 | 2 | 9226   | 0.616437218 | -2.676722948 | 3.986198973 | -0.671497576 | 0.501903603 | 0.998252924 |
| chr12:122801295-122826244 | exonic       | CLIP1                                                            | 12 | 122801295 | 122826244 | 0 | 0 | 0 | 0 | 0 | 2 | 24949  | 0.616437218 | -2.676722948 | 3.986198973 | -0.671497576 | 0.501903603 | 0.998252924 |
| chr12:123796133-123797065 | intronic     | SBNO1                                                            | 12 | 123796133 | 123797065 | 0 | 0 | 0 | 0 | 0 | 2 | 932    | 0.616437218 | -2.676722948 | 3.986198973 | -0.671497576 | 0.501903603 | 0.998252924 |
| chr12:124922475-124941708 | exonic       | NCOR2                                                            | 12 | 124922475 | 124941708 | 0 | 0 | 0 | 0 | 0 | 2 | 19233  | 0.616437218 | -2.676722948 | 3.986198973 | -0.671497576 | 0.501903603 | 0.998252924 |
| chr12:2558141-2721179     | exonic       | CACNA1C                                                          | 12 | 2558141   | 2721179   | 0 | 0 | 0 | 0 | 0 | 2 | 163038 | 0.616437218 | -2.676722948 | 3.986198973 | -0.671497576 | 0.501903603 | 0.998252924 |
| chr12:27521194-27533337   | exonic       | ARNTL2                                                           | 12 | 27521194  | 27533337  | 0 | 0 | 0 | 0 | 0 | 2 | 12143  | 0.616437218 | -2.676722948 | 3.986198973 | -0.671497576 | 0.501903603 | 0.998252924 |
| chr12:32884289-32890095   | exonic       | DNM1L                                                            | 12 | 32884289  | 32890095  | 0 | 0 | 0 | 0 | 0 | 2 | 5806   | 0.616437218 | -2.676722948 | 3.986198973 | -0.671497576 | 0.501903603 | 0.998252924 |
| chr12:34540522-34542105   | intergenic   | <small>ALG10 (dist=359286), NONE (dist=NONE)</small>             | 12 | 34540522  | 34542105  | 0 | 0 | 0 | 0 | 0 | 2 | 1583   | 0.616437218 | -2.676722948 | 3.986198973 | -0.671497576 | 0.501903603 | 0.998252924 |
| chr12:57490851-57492853   | exonic       | STAT6                                                            | 12 | 57490851  | 57492853  | 0 | 0 | 0 | 0 | 0 | 2 | 2002   | 0.616437218 | -2.676722948 | 3.986198973 | -0.671497576 | 0.501903603 | 0.998252924 |
| chr12:72050665-72054207   | exonic       | ZFC3H1                                                           | 12 | 72050665  | 72054207  | 0 | 0 | 0 | 0 | 0 | 2 | 3542   | 0.616437218 | -2.676722948 | 3.986198973 | -0.671497576 | 0.501903603 | 0.998252924 |
| chr12:72052410-72054207   | intronic     | ZFC3H1                                                           | 12 | 72052410  | 72054207  | 0 | 0 | 0 | 0 | 0 | 2 | 1797   | 0.616437218 | -2.676722948 | 3.986198973 | -0.671497576 | 0.501903603 | 0.998252924 |
| chr12:74718341-74718801   | intergenic   | <small>LINC00507377 (dist=91930), ATXN1L3B (dist=212750)</small> | 12 | 74718341  | 74718801  | 0 | 0 | 0 | 0 | 0 | 2 | 460    | 0.616437218 | -2.676722948 | 3.986198973 | -0.671497576 | 0.501903603 | 0.998252924 |

|                           |                |                                           |    |           |           |   |   |   |   |   |   |       |             |              |             |              |             |             |
|---------------------------|----------------|-------------------------------------------|----|-----------|-----------|---|---|---|---|---|---|-------|-------------|--------------|-------------|--------------|-------------|-------------|
| chr12:8846737-8847085     | intergenic     | NONE(dist=NONE), RIMKLB(dist=3411)        | 12 | 8846737   | 8847085   | 0 | 0 | 0 | 0 | 0 | 2 | 348   | 0.616437218 | -2.676722948 | 3.986198973 | -0.671497576 | 0.501903603 | 0.998252924 |
| chr12:94124772-94125636   | ncRNA_intronic | LOC101928731                              | 12 | 94124772  | 94125636  | 0 | 0 | 0 | 0 | 0 | 2 | 864   | 0.616437218 | -2.676722948 | 3.986198973 | -0.671497576 | 0.501903603 | 0.998252924 |
| chr12:95491329-95492755   | intronic       | FGD6                                      | 12 | 95491329  | 95492755  | 0 | 0 | 0 | 0 | 0 | 2 | 1426  | 0.616437218 | -2.676722948 | 3.986198973 | -0.671497576 | 0.501903603 | 0.998252924 |
| chr13:21006240-21063635   | exonic         | CRYL1                                     | 13 | 21006240  | 21063635  | 0 | 0 | 0 | 0 | 0 | 2 | 57395 | 0.616437218 | -2.676722948 | 3.986198973 | -0.671497576 | 0.501903603 | 0.998252924 |
| chr13:21955572-21999817   | exonic         | ZDHHC20                                   | 13 | 21955572  | 21999817  | 0 | 0 | 0 | 0 | 0 | 2 | 44245 | 0.616437218 | -2.676722948 | 3.986198973 | -0.671497576 | 0.501903603 | 0.998252924 |
| chr13:41157641-41157787   | intronic       | FOXO1                                     | 13 | 41157641  | 41157787  | 0 | 0 | 0 | 0 | 0 | 2 | 146   | 0.616437218 | -2.676722948 | 3.986198973 | -0.671497576 | 0.501903603 | 0.998252924 |
| chr13:41210314-41210746   | intronic       | FOXO1                                     | 13 | 41210314  | 41210746  | 0 | 0 | 0 | 0 | 0 | 2 | 432   | 0.616437218 | -2.676722948 | 3.986198973 | -0.671497576 | 0.501903603 | 0.998252924 |
| chr13:42352120-42393522   | exonic         | VWA8                                      | 13 | 42352120  | 42393522  | 0 | 0 | 0 | 0 | 0 | 2 | 41402 | 0.616437218 | -2.676722948 | 3.986198973 | -0.671497576 | 0.501903603 | 0.998252924 |
| chr13:43608072-43608546   | intronic       | DNAJC15                                   | 13 | 43608072  | 43608546  | 0 | 0 | 0 | 0 | 0 | 2 | 474   | 0.616437218 | -2.676722948 | 3.986198973 | -0.671497576 | 0.501903603 | 0.998252924 |
| chr13:49710539-49710737   | exonic         | FNDC3A                                    | 13 | 49710539  | 49710737  | 0 | 0 | 0 | 0 | 0 | 2 | 198   | 0.616437218 | -2.676722948 | 3.986198973 | -0.671497576 | 0.501903603 | 0.998252924 |
| chr14:103928281-103930730 | exonic         | MARK3                                     | 14 | 103928281 | 103930730 | 0 | 0 | 0 | 0 | 0 | 2 | 2449  | 0.616437218 | -2.676722948 | 3.986198973 | -0.671497576 | 0.501903603 | 0.998252924 |
| chr14:31596990-31638674   | exonic         | HECTD1                                    | 14 | 31596990  | 31638674  | 0 | 0 | 0 | 0 | 0 | 2 | 41684 | 0.616437218 | -2.676722948 | 3.986198973 | -0.671497576 | 0.501903603 | 0.998252924 |
| chr14:39649979-39650125   | exonic         | PNN                                       | 14 | 39649979  | 39650125  | 0 | 0 | 0 | 0 | 0 | 2 | 146   | 0.616437218 | -2.676722948 | 3.986198973 | -0.671497576 | 0.501903603 | 0.998252924 |
| chr14:50116982-50122561   | exonic         | POLE2                                     | 14 | 50116982  | 50122561  | 0 | 0 | 0 | 0 | 0 | 2 | 5579  | 0.616437218 | -2.676722948 | 3.986198973 | -0.671497576 | 0.501903603 | 0.998252924 |
| chr14:53118957-53133213   | exonic         | ERO1A                                     | 14 | 53118957  | 53133213  | 0 | 0 | 0 | 0 | 0 | 2 | 14256 | 0.616437218 | -2.676722948 | 3.986198973 | -0.671497576 | 0.501903603 | 0.998252924 |
| chr14:74522286-74523961   | exonic         | BBOF1                                     | 14 | 74522286  | 74523961  | 0 | 0 | 0 | 0 | 0 | 2 | 1675  | 0.616437218 | -2.676722948 | 3.986198973 | -0.671497576 | 0.501903603 | 0.998252924 |
| chr14:76633005-76643033   | exonic         | GPATCH2L                                  | 14 | 76633005  | 76643033  | 0 | 0 | 0 | 0 | 0 | 2 | 10028 | 0.616437218 | -2.676722948 | 3.986198973 | -0.671497576 | 0.501903603 | 0.998252924 |
| chr15:20659092-20662753   | ncRNA_exonic   | HERC2P3                                   | 15 | 20659092  | 20662753  | 0 | 0 | 0 | 0 | 0 | 2 | 3661  | 0.616437218 | -2.676722948 | 3.986198973 | -0.671497576 | 0.501903603 | 0.998252924 |
| chr15:43426454-43427847   | exonic         | TMEM62                                    | 15 | 43426454  | 43427847  | 0 | 0 | 0 | 0 | 0 | 2 | 1393  | 0.616437218 | -2.676722948 | 3.986198973 | -0.671497576 | 0.501903603 | 0.998252924 |
| chr15:50288873-50331026   | exonic         | ATP8B4                                    | 15 | 50288873  | 50331026  | 0 | 0 | 0 | 0 | 0 | 2 | 42153 | 0.616437218 | -2.676722948 | 3.986198973 | -0.671497576 | 0.501903603 | 0.998252924 |
| chr15:50973430-50975159   | intronic       | TRPM7                                     | 15 | 50973430  | 50975159  | 0 | 0 | 0 | 0 | 0 | 2 | 1729  | 0.616437218 | -2.676722948 | 3.986198973 | -0.671497576 | 0.501903603 | 0.998252924 |
| chr15:53957768-54015105   | exonic         | WDR72                                     | 15 | 53957768  | 54015105  | 0 | 0 | 0 | 0 | 0 | 2 | 57337 | 0.616437218 | -2.676722948 | 3.986198973 | -0.671497576 | 0.501903603 | 0.998252924 |
| chr15:68612522-68620600   | exonic         | ITGA11                                    | 15 | 68612522  | 68620600  | 0 | 0 | 0 | 0 | 0 | 2 | 8078  | 0.616437218 | -2.676722948 | 3.986198973 | -0.671497576 | 0.501903603 | 0.998252924 |
| chr15:76957994-76975402   | exonic         | SCAPER                                    | 15 | 76957994  | 76975402  | 0 | 0 | 0 | 0 | 0 | 2 | 17408 | 0.616437218 | -2.676722948 | 3.986198973 | -0.671497576 | 0.501903603 | 0.998252924 |
| chr15:85085375-85098301   | ncRNA_exonic   | UBE2Q2P1                                  | 15 | 85085375  | 85098301  | 0 | 0 | 0 | 0 | 0 | 2 | 12926 | 0.616437218 | -2.676722948 | 3.986198973 | -0.671497576 | 0.501903603 | 0.998252924 |
| chr15:86311247-86313051   | exonic         | KLHL25                                    | 15 | 86311247  | 86313051  | 0 | 0 | 0 | 0 | 0 | 2 | 1804  | 0.616437218 | -2.676722948 | 3.986198973 | -0.671497576 | 0.501903603 | 0.998252924 |
| chr15:90982563-91010824   | exonic         | IQGAP1                                    | 15 | 90982563  | 91010824  | 0 | 0 | 0 | 0 | 0 | 2 | 28261 | 0.616437218 | -2.676722948 | 3.986198973 | -0.671497576 | 0.501903603 | 0.998252924 |
| chr16:14700340-14711507   | exonic         | PARN                                      | 16 | 14700340  | 14711507  | 0 | 0 | 0 | 0 | 0 | 2 | 11167 | 0.616437218 | -2.676722948 | 3.986198973 | -0.671497576 | 0.501903603 | 0.998252924 |
| chr16:7898762-7901929     | intergenic     | RBF0X1(dist=135422), NONE(dist=NONE)      | 16 | 7898762   | 7901929   | 0 | 0 | 0 | 0 | 0 | 2 | 3167  | 0.616437218 | -2.676722948 | 3.986198973 | -0.671497576 | 0.501903603 | 0.998252924 |
| chr16:89453882-89454778   | intronic       | ANKRD11                                   | 16 | 89453882  | 89454778  | 0 | 0 | 0 | 0 | 0 | 2 | 896   | 0.616437218 | -2.676722948 | 3.986198973 | -0.671497576 | 0.501903603 | 0.998252924 |
| chr16:8999043-9011013     | exonic         | USP7                                      | 16 | 8999043   | 9011013   | 0 | 0 | 0 | 0 | 0 | 2 | 11970 | 0.616437218 | -2.676722948 | 3.986198973 | -0.671497576 | 0.501903603 | 0.998252924 |
| chr17:15960827-16005119   | exonic         | NCOR1                                     | 17 | 15960827  | 16005119  | 0 | 0 | 0 | 0 | 0 | 2 | 44292 | 0.616437218 | -2.676722948 | 3.986198973 | -0.671497576 | 0.501903603 | 0.998252924 |
| chr17:21198162-21199916   | UTR5           | MAP2K3(OM_001318332:c.-2365_-2241delins0) | 17 | 21198162  | 21199916  | 0 | 0 | 0 | 0 | 0 | 2 | 1754  | 0.616437218 | -2.676722948 | 3.986198973 | -0.671497576 | 0.501903603 | 0.998252924 |
| chr17:27731716-27732092   | intronic       | TAOK1                                     | 17 | 27731716  | 27732092  | 0 | 0 | 0 | 0 | 0 | 2 | 376   | 0.616437218 | -2.676722948 | 3.986198973 | -0.671497576 | 0.501903603 | 0.998252924 |
| chr17:29070319-29096983   | ncRNA_exonic   | SUZ12P1                                   | 17 | 29070319  | 29096983  | 0 | 0 | 0 | 0 | 0 | 2 | 26664 | 0.616437218 | -2.676722948 | 3.986198973 | -0.671497576 | 0.501903603 | 0.998252924 |

|                          |          |                  |    |           |           |   |   |   |   |   |   |       |             |              |             |              |             |             |
|--------------------------|----------|------------------|----|-----------|-----------|---|---|---|---|---|---|-------|-------------|--------------|-------------|--------------|-------------|-------------|
| chr17:29161165-29171057  | exonic   | ATAD5            | 17 | 29161165  | 29171057  | 0 | 0 | 0 | 0 | 0 | 2 | 9892  | 0.616437218 | -2.676722948 | 3.986198973 | -0.671497576 | 0.501903603 | 0.998252924 |
| chr17:29541468-29546136  | exonic   | NF1              | 17 | 29541468  | 29546136  | 0 | 0 | 0 | 0 | 0 | 2 | 4668  | 0.616437218 | -2.676722948 | 3.986198973 | -0.671497576 | 0.501903603 | 0.998252924 |
| chr17:29587386-29592357  | exonic   | NF1              | 17 | 29587386  | 29592357  | 0 | 0 | 0 | 0 | 0 | 2 | 4971  | 0.616437218 | -2.676722948 | 3.986198973 | -0.671497576 | 0.501903603 | 0.998252924 |
| chr17:30284044-30288314  | intronic | SUZ12            | 17 | 30284044  | 30288314  | 0 | 0 | 0 | 0 | 0 | 2 | 4270  | 0.616437218 | -2.676722948 | 3.986198973 | -0.671497576 | 0.501903603 | 0.998252924 |
| chr17:34843543-34845573  | intronic | ZNHIT3           | 17 | 34843543  | 34845573  | 0 | 0 | 0 | 0 | 0 | 2 | 2030  | 0.616437218 | -2.676722948 | 3.986198973 | -0.671497576 | 0.501903603 | 0.998252924 |
| chr17:38551700-38552717  | exonic   | TOP2A            | 17 | 38551700  | 38552717  | 0 | 0 | 0 | 0 | 0 | 2 | 1017  | 0.616437218 | -2.676722948 | 3.986198973 | -0.671497576 | 0.501903603 | 0.998252924 |
| chr17:42115946-42116529  | intronic | LSM12            | 17 | 42115946  | 42116529  | 0 | 0 | 0 | 0 | 0 | 2 | 583   | 0.616437218 | -2.676722948 | 3.986198973 | -0.671497576 | 0.501903603 | 0.998252924 |
| chr17:44714741-44720625  | exonic   | NSF              | 17 | 44714741  | 44720625  | 0 | 0 | 0 | 0 | 0 | 2 | 5884  | 0.616437218 | -2.676722948 | 3.986198973 | -0.671497576 | 0.501903603 | 0.998252924 |
| chr17:4769670-4771366    | intronic | MINK1            | 17 | 4769670   | 4771366   | 0 | 0 | 0 | 0 | 0 | 2 | 1696  | 0.616437218 | -2.676722948 | 3.986198973 | -0.671497576 | 0.501903603 | 0.998252924 |
| chr17:48808209-48808624  | intronic | LUC7L3           | 17 | 48808209  | 48808624  | 0 | 0 | 0 | 0 | 0 | 2 | 415   | 0.616437218 | -2.676722948 | 3.986198973 | -0.671497576 | 0.501903603 | 0.998252924 |
| chr17:59172113-59172922  | intronic | BCAS3            | 17 | 59172113  | 59172922  | 0 | 0 | 0 | 0 | 0 | 2 | 809   | 0.616437218 | -2.676722948 | 3.986198973 | -0.671497576 | 0.501903603 | 0.998252924 |
| chr17:65528918-65574373  | exonic   | PITPNC1          | 17 | 65528918  | 65574373  | 0 | 0 | 0 | 0 | 0 | 2 | 45455 | 0.616437218 | -2.676722948 | 3.986198973 | -0.671497576 | 0.501903603 | 0.998252924 |
| chr17:71018657-71019738  | intronic | SLC39A11         | 17 | 71018657  | 71019738  | 0 | 0 | 0 | 0 | 0 | 2 | 1081  | 0.616437218 | -2.676722948 | 3.986198973 | -0.671497576 | 0.501903603 | 0.998252924 |
| chr17:7416895-7417075    | exonic   | POLR2A           | 17 | 7416895   | 7417075   | 0 | 0 | 0 | 0 | 0 | 2 | 180   | 0.616437218 | -2.676722948 | 3.986198973 | -0.671497576 | 0.501903603 | 0.998252924 |
| chr18:2732262-2752550    | exonic   | SMCHD1           | 18 | 2732262   | 2752550   | 0 | 0 | 0 | 0 | 0 | 2 | 20288 | 0.616437218 | -2.676722948 | 3.986198973 | -0.671497576 | 0.501903603 | 0.998252924 |
| chr18:2732262-2772370    | exonic   | SMCHD1           | 18 | 2732262   | 2772370   | 0 | 0 | 0 | 0 | 0 | 2 | 40108 | 0.616437218 | -2.676722948 | 3.986198973 | -0.671497576 | 0.501903603 | 0.998252924 |
| chr18:67794737-67795782  | exonic   | RTTN             | 18 | 67794737  | 67795782  | 0 | 0 | 0 | 0 | 0 | 2 | 1045  | 0.616437218 | -2.676722948 | 3.986198973 | -0.671497576 | 0.501903603 | 0.998252924 |
| chr18:7754371-7774269    | exonic   | PTPRM            | 18 | 7754371   | 7774269   | 0 | 0 | 0 | 0 | 0 | 2 | 19898 | 0.616437218 | -2.676722948 | 3.986198973 | -0.671497576 | 0.501903603 | 0.998252924 |
| chr18:7754371-7839399    | exonic   | PTPRM            | 18 | 7754371   | 7839399   | 0 | 0 | 0 | 0 | 0 | 2 | 85028 | 0.616437218 | -2.676722948 | 3.986198973 | -0.671497576 | 0.501903603 | 0.998252924 |
| chr19:11623870-11630008  | exonic   | ECSIT            | 19 | 11623870  | 11630008  | 0 | 0 | 0 | 0 | 0 | 2 | 6138  | 0.616437218 | -2.676722948 | 3.986198973 | -0.671497576 | 0.501903603 | 0.998252924 |
| chr19:36530224-36531038  | exonic   | THAP8            | 19 | 36530224  | 36531038  | 0 | 0 | 0 | 0 | 0 | 2 | 814   | 0.616437218 | -2.676722948 | 3.986198973 | -0.671497576 | 0.501903603 | 0.998252924 |
| chr19:3715365-3726319    | exonic   | TJP3             | 19 | 3715365   | 3726319   | 0 | 0 | 0 | 0 | 0 | 2 | 10954 | 0.616437218 | -2.676722948 | 3.986198973 | -0.671497576 | 0.501903603 | 0.998252924 |
| chr19:45284161-45284620  | exonic   | CBLC             | 19 | 45284161  | 45284620  | 0 | 0 | 0 | 0 | 0 | 2 | 459   | 0.616437218 | -2.676722948 | 3.986198973 | -0.671497576 | 0.501903603 | 0.998252924 |
| chr2:109111746-109116210 | exonic   | GCC2             | 2  | 109111746 | 109116210 | 0 | 0 | 0 | 0 | 0 | 2 | 4464  | 0.616437218 | -2.676722948 | 3.986198973 | -0.671497576 | 0.501903603 | 0.998252924 |
| chr2:11341082-11354589   | exonic   | ROCK2            | 2  | 11341082  | 11354589  | 0 | 0 | 0 | 0 | 0 | 2 | 13507 | 0.616437218 | -2.676722948 | 3.986198973 | -0.671497576 | 0.501903603 | 0.998252924 |
| chr2:114489160-114508145 | exonic   | SLC35F5          | 2  | 114489160 | 114508145 | 0 | 0 | 0 | 0 | 0 | 2 | 18985 | 0.616437218 | -2.676722948 | 3.986198973 | -0.671497576 | 0.501903603 | 0.998252924 |
| chr2:160721349-160735880 | exonic   | LY75, LY75-CD302 | 2  | 160721349 | 160735880 | 0 | 0 | 0 | 0 | 0 | 2 | 14531 | 0.616437218 | -2.676722948 | 3.986198973 | -0.671497576 | 0.501903603 | 0.998252924 |
| chr2:181905905-181906220 | intronic | UBE2E3           | 2  | 181905905 | 181906220 | 0 | 0 | 0 | 0 | 0 | 2 | 315   | 0.616437218 | -2.676722948 | 3.986198973 | -0.671497576 | 0.501903603 | 0.998252924 |
| chr2:189850390-189870985 | exonic   | COL3A1           | 2  | 189850390 | 189870985 | 0 | 0 | 0 | 0 | 0 | 2 | 20595 | 0.616437218 | -2.676722948 | 3.986198973 | -0.671497576 | 0.501903603 | 0.998252924 |
| chr2:189870075-189870985 | exonic   | COL3A1           | 2  | 189870075 | 189870985 | 0 | 0 | 0 | 0 | 0 | 2 | 910   | 0.616437218 | -2.676722948 | 3.986198973 | -0.671497576 | 0.501903603 | 0.998252924 |
| chr2:201434385-201440184 | exonic   | SGOL2            | 2  | 201434385 | 201440184 | 0 | 0 | 0 | 0 | 0 | 2 | 5799  | 0.616437218 | -2.676722948 | 3.986198973 | -0.671497576 | 0.501903603 | 0.998252924 |
| chr2:202430451-202446940 | exonic   | ALS2CR11         | 2  | 202430451 | 202446940 | 0 | 0 | 0 | 0 | 0 | 2 | 16489 | 0.616437218 | -2.676722948 | 3.986198973 | -0.671497576 | 0.501903603 | 0.998252924 |
| chr2:203880878-203914698 | exonic   | NBEAL1           | 2  | 203880878 | 203914698 | 0 | 0 | 0 | 0 | 0 | 2 | 33820 | 0.616437218 | -2.676722948 | 3.986198973 | -0.671497576 | 0.501903603 | 0.998252924 |
| chr2:211421443-211481265 | exonic   | CPS1             | 2  | 211421443 | 211481265 | 0 | 0 | 0 | 0 | 0 | 2 | 59822 | 0.616437218 | -2.676722948 | 3.986198973 | -0.671497576 | 0.501903603 | 0.998252924 |
| chr2:216977738-216997110 | exonic   | XRCC5            | 2  | 216977738 | 216997110 | 0 | 0 | 0 | 0 | 0 | 2 | 19372 | 0.616437218 | -2.676722948 | 3.986198973 | -0.671497576 | 0.501903603 | 0.998252924 |

|                          |                |                                                |    |           |           |   |   |   |   |   |   |       |             |              |             |              |             |             |
|--------------------------|----------------|------------------------------------------------|----|-----------|-----------|---|---|---|---|---|---|-------|-------------|--------------|-------------|--------------|-------------|-------------|
| chr2:216985690-216988292 | exonic         | XRCC5                                          | 2  | 216985690 | 216988292 | 0 | 0 | 0 | 0 | 0 | 2 | 2602  | 0.616437218 | -2.676722948 | 3.986198973 | -0.671497576 | 0.501903603 | 0.998252924 |
| chr2:218745620-218749887 | exonic         | TNS1                                           | 2  | 218745620 | 218749887 | 0 | 0 | 0 | 0 | 0 | 2 | 4267  | 0.616437218 | -2.676722948 | 3.986198973 | -0.671497576 | 0.501903603 | 0.998252924 |
| chr2:47570242-47570979   | ncRNA_intronic | LOC101927043                                   | 2  | 47570242  | 47570979  | 0 | 0 | 0 | 0 | 0 | 2 | 737   | 0.616437218 | -2.676722948 | 3.986198973 | -0.671497576 | 0.501903603 | 0.998252924 |
| chr2:61730648-61731152   | intronic       | XPO1                                           | 2  | 61730648  | 61731152  | 0 | 0 | 0 | 0 | 0 | 2 | 504   | 0.616437218 | -2.676722948 | 3.986198973 | -0.671497576 | 0.501903603 | 0.998252924 |
| chr2:62289652-62314590   | intronic       | COMMD1                                         | 2  | 62289652  | 62314590  | 0 | 0 | 0 | 0 | 0 | 2 | 24938 | 0.616437218 | -2.676722948 | 3.986198973 | -0.671497576 | 0.501903603 | 0.998252924 |
| chr2:65658820-65659580   | exonic         | SPRED2                                         | 2  | 65658820  | 65659580  | 0 | 0 | 0 | 0 | 0 | 2 | 760   | 0.616437218 | -2.676722948 | 3.986198973 | -0.671497576 | 0.501903603 | 0.998252924 |
| chr2:73020830-73021139   | intronic       | EXOC6B                                         | 2  | 73020830  | 73021139  | 0 | 0 | 0 | 0 | 0 | 2 | 309   | 0.616437218 | -2.676722948 | 3.986198973 | -0.671497576 | 0.501903603 | 0.998252924 |
| chr2:96499578-96500875   | intergenic     | LINC00342 (dist=6849), ANKRD36C (dist=14421)   | 2  | 96499578  | 96500875  | 0 | 0 | 0 | 0 | 0 | 2 | 1297  | 0.616437218 | -2.676722948 | 3.986198973 | -0.671497576 | 0.501903603 | 0.998252924 |
| chr20:21195172-21213468  | exonic         | KIZ                                            | 20 | 21195172  | 21213468  | 0 | 0 | 0 | 0 | 0 | 2 | 18296 | 0.616437218 | -2.676722948 | 3.986198973 | -0.671497576 | 0.501903603 | 0.998252924 |
| chr20:34775597-34778719  | exonic         | EPB41L1                                        | 20 | 34775597  | 34778719  | 0 | 0 | 0 | 0 | 0 | 2 | 3122  | 0.616437218 | -2.676722948 | 3.986198973 | -0.671497576 | 0.501903603 | 0.998252924 |
| chr20:39690033-39729993  | exonic         | TOP1                                           | 20 | 39690033  | 39729993  | 0 | 0 | 0 | 0 | 0 | 2 | 39960 | 0.616437218 | -2.676722948 | 3.986198973 | -0.671497576 | 0.501903603 | 0.998252924 |
| chr20:44468063-44473822  | exonic         | ACOT8, SNX21                                   | 20 | 44468063  | 44473822  | 0 | 0 | 0 | 0 | 0 | 2 | 5759  | 0.616437218 | -2.676722948 | 3.986198973 | -0.671497576 | 0.501903603 | 0.998252924 |
| chr20:47881252-47888287  | exonic         | ZNFX1                                          | 20 | 47881252  | 47888287  | 0 | 0 | 0 | 0 | 0 | 2 | 7035  | 0.616437218 | -2.676722948 | 3.986198973 | -0.671497576 | 0.501903603 | 0.998252924 |
| chr21:34955793-34958487  | exonic         | DONSON                                         | 21 | 34955793  | 34958487  | 0 | 0 | 0 | 0 | 0 | 2 | 2694  | 0.616437218 | -2.676722948 | 3.986198973 | -0.671497576 | 0.501903603 | 0.998252924 |
| chr21:37745857-37746443  | intronic       | MORC3                                          | 21 | 37745857  | 37746443  | 0 | 0 | 0 | 0 | 0 | 2 | 586   | 0.616437218 | -2.676722948 | 3.986198973 | -0.671497576 | 0.501903603 | 0.998252924 |
| chr22:24491893-24509715  | exonic         | CABIN1                                         | 22 | 24491893  | 24509715  | 0 | 0 | 0 | 0 | 0 | 2 | 17822 | 0.616437218 | -2.676722948 | 3.986198973 | -0.671497576 | 0.501903603 | 0.998252924 |
| chr22:28911615-28915308  | intronic       | TTC28                                          | 22 | 28911615  | 28915308  | 0 | 0 | 0 | 0 | 0 | 2 | 3693  | 0.616437218 | -2.676722948 | 3.986198973 | -0.671497576 | 0.501903603 | 0.998252924 |
| chr22:30144407-30150852  | exonic         | ZMAT5                                          | 22 | 30144407  | 30150852  | 0 | 0 | 0 | 0 | 0 | 2 | 6445  | 0.616437218 | -2.676722948 | 3.986198973 | -0.671497576 | 0.501903603 | 0.998252924 |
| chr22:32044087-32046764  | intergenic     | PISD (dist=17277), PRR14L (dist=30570)         | 22 | 32044087  | 32046764  | 0 | 0 | 0 | 0 | 0 | 2 | 2677  | 0.616437218 | -2.676722948 | 3.986198973 | -0.671497576 | 0.501903603 | 0.998252924 |
| chr22:40917726-40936590  | ncRNA_exonic   | LOC101927257                                   | 22 | 40917726  | 40936590  | 0 | 0 | 0 | 0 | 0 | 2 | 18864 | 0.616437218 | -2.676722948 | 3.986198973 | -0.671497576 | 0.501903603 | 0.998252924 |
| chr22:41521867-41542820  | exonic         | EP300                                          | 22 | 41521867  | 41542820  | 0 | 0 | 0 | 0 | 0 | 2 | 20953 | 0.616437218 | -2.676722948 | 3.986198973 | -0.671497576 | 0.501903603 | 0.998252924 |
| chr3:101520078-101520833 | exonic         | NXPE3                                          | 3  | 101520078 | 101520833 | 0 | 0 | 0 | 0 | 0 | 2 | 755   | 0.616437218 | -2.676722948 | 3.986198973 | -0.671497576 | 0.501903603 | 0.998252924 |
| chr3:10311814-10312699   | exonic         | TATDN2                                         | 3  | 10311814  | 10312699  | 0 | 0 | 0 | 0 | 0 | 2 | 885   | 0.616437218 | -2.676722948 | 3.986198973 | -0.671497576 | 0.501903603 | 0.998252924 |
| chr3:111651115-111681159 | exonic         | PHLDB2                                         | 3  | 111651115 | 111681159 | 0 | 0 | 0 | 0 | 0 | 2 | 30044 | 0.616437218 | -2.676722948 | 3.986198973 | -0.671497576 | 0.501903603 | 0.998252924 |
| chr3:119806302-119806849 | intronic       | GSK3B                                          | 3  | 119806302 | 119806849 | 0 | 0 | 0 | 0 | 0 | 2 | 547   | 0.616437218 | -2.676722948 | 3.986198973 | -0.671497576 | 0.501903603 | 0.998252924 |
| chr3:130881252-130907418 | exonic         | NEK11                                          | 3  | 130881252 | 130907418 | 0 | 0 | 0 | 0 | 0 | 2 | 26166 | 0.616437218 | -2.676722948 | 3.986198973 | -0.671497576 | 0.501903603 | 0.998252924 |
| chr3:141115100-141122873 | UTR5           | ZBTB38 (NM_001080412:c.-46130..-45781delins40) | 3  | 141115100 | 141122873 | 0 | 0 | 0 | 0 | 0 | 2 | 7773  | 0.616437218 | -2.676722948 | 3.986198973 | -0.671497576 | 0.501903603 | 0.998252924 |
| chr3:172479399-172502593 | exonic         | ECT2                                           | 3  | 172479399 | 172502593 | 0 | 0 | 0 | 0 | 0 | 2 | 23194 | 0.616437218 | -2.676722948 | 3.986198973 | -0.671497576 | 0.501903603 | 0.998252924 |
| chr3:172504282-172525714 | exonic         | ECT2                                           | 3  | 172504282 | 172525714 | 0 | 0 | 0 | 0 | 0 | 2 | 21432 | 0.616437218 | -2.676722948 | 3.986198973 | -0.671497576 | 0.501903603 | 0.998252924 |
| chr3:17413566-17448018   | exonic         | TBC1D5                                         | 3  | 17413566  | 17448018  | 0 | 0 | 0 | 0 | 0 | 2 | 34452 | 0.616437218 | -2.676722948 | 3.986198973 | -0.671497576 | 0.501903603 | 0.998252924 |
| chr3:176906258-176908213 | intronic       | TBL1XR1                                        | 3  | 176906258 | 176908213 | 0 | 0 | 0 | 0 | 0 | 2 | 1955  | 0.616437218 | -2.676722948 | 3.986198973 | -0.671497576 | 0.501903603 | 0.998252924 |
| chr3:183469860-183504089 | exonic         | YEATS2                                         | 3  | 183469860 | 183504089 | 0 | 0 | 0 | 0 | 0 | 2 | 34229 | 0.616437218 | -2.676722948 | 3.986198973 | -0.671497576 | 0.501903603 | 0.998252924 |
| chr3:194154500-194158302 | exonic         | ATP13A3                                        | 3  | 194154500 | 194158302 | 0 | 0 | 0 | 0 | 0 | 2 | 3802  | 0.616437218 | -2.676722948 | 3.986198973 | -0.671497576 | 0.501903603 | 0.998252924 |
| chr3:197490337-197495458 | exonic         | FYTTD1                                         | 3  | 197490337 | 197495458 | 0 | 0 | 0 | 0 | 0 | 2 | 5121  | 0.616437218 | -2.676722948 | 3.986198973 | -0.671497576 | 0.501903603 | 0.998252924 |
| chr3:33340096-33340628   | intronic       | FBXL2                                          | 3  | 33340096  | 33340628  | 0 | 0 | 0 | 0 | 0 | 2 | 532   | 0.616437218 | -2.676722948 | 3.986198973 | -0.671497576 | 0.501903603 | 0.998252924 |

|                          |            |                                                          |   |           |           |   |   |   |   |   |   |       |             |              |             |              |             |             |
|--------------------------|------------|----------------------------------------------------------|---|-----------|-----------|---|---|---|---|---|---|-------|-------------|--------------|-------------|--------------|-------------|-------------|
| chr3:33576724-33592887   | exonic     | CLASP2                                                   | 3 | 33576724  | 33592887  | 0 | 0 | 0 | 0 | 0 | 2 | 16163 | 0.616437218 | -2.676722948 | 3.986198973 | -0.671497576 | 0.501903603 | 0.998252924 |
| chr3:37424717-37427861   | UTR5       | <small>C3orf35(NM_178344:c.-30998_-30897delins0)</small> | 3 | 37424717  | 37427861  | 0 | 0 | 0 | 0 | 0 | 2 | 3144  | 0.616437218 | -2.676722948 | 3.986198973 | -0.671497576 | 0.501903603 | 0.998252924 |
| chr3:44970797-44975476   | exonic     | ZDHHC3                                                   | 3 | 44970797  | 44975476  | 0 | 0 | 0 | 0 | 0 | 2 | 4679  | 0.616437218 | -2.676722948 | 3.986198973 | -0.671497576 | 0.501903603 | 0.998252924 |
| chr3:47747898-47762225   | exonic     | SMARCC1                                                  | 3 | 47747898  | 47762225  | 0 | 0 | 0 | 0 | 0 | 2 | 14327 | 0.616437218 | -2.676722948 | 3.986198973 | -0.671497576 | 0.501903603 | 0.998252924 |
| chr3:47870169-47881581   | exonic     | DHX30                                                    | 3 | 47870169  | 47881581  | 0 | 0 | 0 | 0 | 0 | 2 | 11412 | 0.616437218 | -2.676722948 | 3.986198973 | -0.671497576 | 0.501903603 | 0.998252924 |
| chr3:49355765-49357134   | intronic   | USP4                                                     | 3 | 49355765  | 49357134  | 0 | 0 | 0 | 0 | 0 | 2 | 1369  | 0.616437218 | -2.676722948 | 3.986198973 | -0.671497576 | 0.501903603 | 0.998252924 |
| chr3:56593622-56594769   | exonic     | CCDC66                                                   | 3 | 56593622  | 56594769  | 0 | 0 | 0 | 0 | 0 | 2 | 1147  | 0.616437218 | -2.676722948 | 3.986198973 | -0.671497576 | 0.501903603 | 0.998252924 |
| chr3:57875767-57908750   | exonic     | SLMAP                                                    | 3 | 57875767  | 57908750  | 0 | 0 | 0 | 0 | 0 | 2 | 32983 | 0.616437218 | -2.676722948 | 3.986198973 | -0.671497576 | 0.501903603 | 0.998252924 |
| chr3:58106967-58124256   | exonic     | FLNB                                                     | 3 | 58106967  | 58124256  | 0 | 0 | 0 | 0 | 0 | 2 | 17289 | 0.616437218 | -2.676722948 | 3.986198973 | -0.671497576 | 0.501903603 | 0.998252924 |
| chr3:71336854-71337141   | intronic   | FOXP1                                                    | 3 | 71336854  | 71337141  | 0 | 0 | 0 | 0 | 0 | 2 | 287   | 0.616437218 | -2.676722948 | 3.986198973 | -0.671497576 | 0.501903603 | 0.998252924 |
| chr3:9460417-9460566     | intronic   | SETD5                                                    | 3 | 9460417   | 9460566   | 0 | 0 | 0 | 0 | 0 | 2 | 149   | 0.616437218 | -2.676722948 | 3.986198973 | -0.671497576 | 0.501903603 | 0.998252924 |
| chr4:103644028-103651893 | exonic     | MANBA                                                    | 4 | 103644028 | 103651893 | 0 | 0 | 0 | 0 | 0 | 2 | 7865  | 0.616437218 | -2.676722948 | 3.986198973 | -0.671497576 | 0.501903603 | 0.998252924 |
| chr4:128935374-128936005 | intronic   | ABHD18                                                   | 4 | 128935374 | 128936005 | 0 | 0 | 0 | 0 | 0 | 2 | 631   | 0.616437218 | -2.676722948 | 3.986198973 | -0.671497576 | 0.501903603 | 0.998252924 |
| chr4:13600569-13615285   | exonic     | BOD1L1                                                   | 4 | 13600569  | 13615285  | 0 | 0 | 0 | 0 | 0 | 2 | 14716 | 0.616437218 | -2.676722948 | 3.986198973 | -0.671497576 | 0.501903603 | 0.998252924 |
| chr4:140297518-140307384 | exonic     | NAA15                                                    | 4 | 140297518 | 140307384 | 0 | 0 | 0 | 0 | 0 | 2 | 9866  | 0.616437218 | -2.676722948 | 3.986198973 | -0.671497576 | 0.501903603 | 0.998252924 |
| chr4:145959897-145961411 | intronic   | ANAPC10                                                  | 4 | 145959897 | 145961411 | 0 | 0 | 0 | 0 | 0 | 2 | 1514  | 0.616437218 | -2.676722948 | 3.986198973 | -0.671497576 | 0.501903603 | 0.998252924 |
| chr4:160107794-160131735 | intergenic | <small>MIR3688-1(dist=57748),RAPGEF2(dist=57263)</small> | 4 | 160107794 | 160131735 | 0 | 0 | 0 | 0 | 0 | 2 | 23941 | 0.616437218 | -2.676722948 | 3.986198973 | -0.671497576 | 0.501903603 | 0.998252924 |
| chr4:185701486-185735131 | exonic     | ACSL1                                                    | 4 | 185701486 | 185735131 | 0 | 0 | 0 | 0 | 0 | 2 | 33645 | 0.616437218 | -2.676722948 | 3.986198973 | -0.671497576 | 0.501903603 | 0.998252924 |
| chr4:36295147-36318108   | exonic     | DTHD1                                                    | 4 | 36295147  | 36318108  | 0 | 0 | 0 | 0 | 0 | 2 | 22961 | 0.616437218 | -2.676722948 | 3.986198973 | -0.671497576 | 0.501903603 | 0.998252924 |
| chr4:39747371-39757359   | exonic     | UBE2K                                                    | 4 | 39747371  | 39757359  | 0 | 0 | 0 | 0 | 0 | 2 | 9988  | 0.616437218 | -2.676722948 | 3.986198973 | -0.671497576 | 0.501903603 | 0.998252924 |
| chr4:39841171-39842841   | intronic   | PDS5A                                                    | 4 | 39841171  | 39842841  | 0 | 0 | 0 | 0 | 0 | 2 | 1670  | 0.616437218 | -2.676722948 | 3.986198973 | -0.671497576 | 0.501903603 | 0.998252924 |
| chr4:40551414-40584283   | intronic   | RBM47                                                    | 4 | 40551414  | 40584283  | 0 | 0 | 0 | 0 | 0 | 2 | 32869 | 0.616437218 | -2.676722948 | 3.986198973 | -0.671497576 | 0.501903603 | 0.998252924 |
| chr4:40567882-40568913   | intronic   | RBM47                                                    | 4 | 40567882  | 40568913  | 0 | 0 | 0 | 0 | 0 | 2 | 1031  | 0.616437218 | -2.676722948 | 3.986198973 | -0.671497576 | 0.501903603 | 0.998252924 |
| chr4:48371865-48381865   | exonic     | SLAIN2                                                   | 4 | 48371865  | 48381865  | 0 | 0 | 0 | 0 | 0 | 2 | 10000 | 0.616437218 | -2.676722948 | 3.986198973 | -0.671497576 | 0.501903603 | 0.998252924 |
| chr4:85800559-85853516   | UTR5       | <small>WDFY3(NM_014991:c.-71579_-71772delins0)</small>   | 4 | 85800559  | 85853516  | 0 | 0 | 0 | 0 | 0 | 2 | 52957 | 0.616437218 | -2.676722948 | 3.986198973 | -0.671497576 | 0.501903603 | 0.998252924 |
| chr5:112090569-112103087 | exonic     | APC                                                      | 5 | 112090569 | 112103087 | 0 | 0 | 0 | 0 | 0 | 2 | 12518 | 0.616437218 | -2.676722948 | 3.986198973 | -0.671497576 | 0.501903603 | 0.998252924 |
| chr5:132400671-132409818 | exonic     | HSPA4                                                    | 5 | 132400671 | 132409818 | 0 | 0 | 0 | 0 | 0 | 2 | 9147  | 0.616437218 | -2.676722948 | 3.986198973 | -0.671497576 | 0.501903603 | 0.998252924 |
| chr5:132940373-132941893 | intronic   | FSTL4                                                    | 5 | 132940373 | 132941893 | 0 | 0 | 0 | 0 | 0 | 2 | 1520  | 0.616437218 | -2.676722948 | 3.986198973 | -0.671497576 | 0.501903603 | 0.998252924 |
| chr5:137740239-137740814 | intronic   | KDM3B                                                    | 5 | 137740239 | 137740814 | 0 | 0 | 0 | 0 | 0 | 2 | 575   | 0.616437218 | -2.676722948 | 3.986198973 | -0.671497576 | 0.501903603 | 0.998252924 |
| chr5:138113455-138113777 | intronic   | CTNNA1                                                   | 5 | 138113455 | 138113777 | 0 | 0 | 0 | 0 | 0 | 2 | 322   | 0.616437218 | -2.676722948 | 3.986198973 | -0.671497576 | 0.501903603 | 0.998252924 |
| chr5:147468917-147473305 | exonic     | SPINK5                                                   | 5 | 147468917 | 147473305 | 0 | 0 | 0 | 0 | 0 | 2 | 4388  | 0.616437218 | -2.676722948 | 3.986198973 | -0.671497576 | 0.501903603 | 0.998252924 |
| chr5:176682242-176682639 | intronic   | NSD1                                                     | 5 | 176682242 | 176682639 | 0 | 0 | 0 | 0 | 0 | 2 | 397   | 0.616437218 | -2.676722948 | 3.986198973 | -0.671497576 | 0.501903603 | 0.998252924 |
| chr5:35646768-35670329   | exonic     | SPEF2                                                    | 5 | 35646768  | 35670329  | 0 | 0 | 0 | 0 | 0 | 2 | 23561 | 0.616437218 | -2.676722948 | 3.986198973 | -0.671497576 | 0.501903603 | 0.998252924 |
| chr5:37301538-37305312   | exonic     | NUP155                                                   | 5 | 37301538  | 37305312  | 0 | 0 | 0 | 0 | 0 | 2 | 3774  | 0.616437218 | -2.676722948 | 3.986198973 | -0.671497576 | 0.501903603 | 0.998252924 |
| chr5:37333564-37341344   | exonic     | NUP155                                                   | 5 | 37333564  | 37341344  | 0 | 0 | 0 | 0 | 0 | 2 | 7780  | 0.616437218 | -2.676722948 | 3.986198973 | -0.671497576 | 0.501903603 | 0.998252924 |



|                          |          |                        |   |           |           |   |   |   |   |   |   |        |             |              |             |              |             |             |
|--------------------------|----------|------------------------|---|-----------|-----------|---|---|---|---|---|---|--------|-------------|--------------|-------------|--------------|-------------|-------------|
| chr5:56509900-56546968   | exonic   | GPBP1                  | 5 | 56509900  | 56546968  | 0 | 0 | 0 | 0 | 0 | 2 | 37068  | 0.616437218 | -2.676722948 | 3.986198973 | -0.671497576 | 0.501903603 | 0.998252924 |
| chr5:66439329-66439469   | intronic | MAST4                  | 5 | 66439329  | 66439469  | 0 | 0 | 0 | 0 | 0 | 2 | 140    | 0.616437218 | -2.676722948 | 3.986198973 | -0.671497576 | 0.501903603 | 0.998252924 |
| chr5:70888752-70892191   | exonic   | MCCC2                  | 5 | 70888752  | 70892191  | 0 | 0 | 0 | 0 | 0 | 2 | 3439   | 0.616437218 | -2.676722948 | 3.986198973 | -0.671497576 | 0.501903603 | 0.998252924 |
| chr5:73136304-73154044   | exonic   | ARHGEF28               | 5 | 73136304  | 73154044  | 0 | 0 | 0 | 0 | 0 | 2 | 17740  | 0.616437218 | -2.676722948 | 3.986198973 | -0.671497576 | 0.501903603 | 0.998252924 |
| chr6:112015577-112041265 | exonic   | FYN                    | 6 | 112015577 | 112041265 | 0 | 0 | 0 | 0 | 0 | 2 | 25688  | 0.616437218 | -2.676722948 | 3.986198973 | -0.671497576 | 0.501903603 | 0.998252924 |
| chr6:125330320-125379252 | exonic   | RNF217                 | 6 | 125330320 | 125379252 | 0 | 0 | 0 | 0 | 0 | 2 | 48932  | 0.616437218 | -2.676722948 | 3.986198973 | -0.671497576 | 0.501903603 | 0.998252924 |
| chr6:128643183-128718833 | exonic   | PTPRK                  | 6 | 128643183 | 128718833 | 0 | 0 | 0 | 0 | 0 | 2 | 75650  | 0.616437218 | -2.676722948 | 3.986198973 | -0.671497576 | 0.501903603 | 0.998252924 |
| chr6:130475969-130497153 | exonic   | SAMD3                  | 6 | 130475969 | 130497153 | 0 | 0 | 0 | 0 | 0 | 2 | 21184  | 0.616437218 | -2.676722948 | 3.986198973 | -0.671497576 | 0.501903603 | 0.998252924 |
| chr6:13657340-13697128   | exonic   | RANBP9                 | 6 | 13657340  | 13697128  | 0 | 0 | 0 | 0 | 0 | 2 | 39788  | 0.616437218 | -2.676722948 | 3.986198973 | -0.671497576 | 0.501903603 | 0.998252924 |
| chr6:151125745-151139352 | exonic   | PLEKHG1                | 6 | 151125745 | 151139352 | 0 | 0 | 0 | 0 | 0 | 2 | 13607  | 0.616437218 | -2.676722948 | 3.986198973 | -0.671497576 | 0.501903603 | 0.998252924 |
| chr6:152629623-152643021 | exonic   | SYNE1                  | 6 | 152629623 | 152643021 | 0 | 0 | 0 | 0 | 0 | 2 | 13398  | 0.616437218 | -2.676722948 | 3.986198973 | -0.671497576 | 0.501903603 | 0.998252924 |
| chr6:168273057-168273219 | exonic   | MLLT4                  | 6 | 168273057 | 168273219 | 0 | 0 | 0 | 0 | 0 | 2 | 162    | 0.616437218 | -2.676722948 | 3.986198973 | -0.671497576 | 0.501903603 | 0.998252924 |
| chr6:17665469-17676001   | exonic   | NUP153                 | 6 | 17665469  | 17676001  | 0 | 0 | 0 | 0 | 0 | 2 | 10532  | 0.616437218 | -2.676722948 | 3.986198973 | -0.671497576 | 0.501903603 | 0.998252924 |
| chr6:18166497-18171710   | exonic   | KDM1B                  | 6 | 18166497  | 18171710  | 0 | 0 | 0 | 0 | 0 | 2 | 5213   | 0.616437218 | -2.676722948 | 3.986198973 | -0.671497576 | 0.501903603 | 0.998252924 |
| chr6:20546576-20649608   | exonic   | CDKAL1                 | 6 | 20546576  | 20649608  | 0 | 0 | 0 | 0 | 0 | 2 | 103032 | 0.616437218 | -2.676722948 | 3.986198973 | -0.671497576 | 0.501903603 | 0.998252924 |
| chr6:25495338-25520565   | exonic   | LRRC16A                | 6 | 25495338  | 25520565  | 0 | 0 | 0 | 0 | 0 | 2 | 25227  | 0.616437218 | -2.676722948 | 3.986198973 | -0.671497576 | 0.501903603 | 0.998252924 |
| chr6:35825037-35838736   | exonic   | SRPK1                  | 6 | 35825037  | 35838736  | 0 | 0 | 0 | 0 | 0 | 2 | 13699  | 0.616437218 | -2.676722948 | 3.986198973 | -0.671497576 | 0.501903603 | 0.998252924 |
| chr6:35835511-35835859   | intronic | SRPK1                  | 6 | 35835511  | 35835859  | 0 | 0 | 0 | 0 | 0 | 2 | 348    | 0.616437218 | -2.676722948 | 3.986198973 | -0.671497576 | 0.501903603 | 0.998252924 |
| chr6:42577842-42636523   | exonic   | UBR2                   | 6 | 42577842  | 42636523  | 0 | 0 | 0 | 0 | 0 | 2 | 58681  | 0.616437218 | -2.676722948 | 3.986198973 | -0.671497576 | 0.501903603 | 0.998252924 |
| chr6:43585629-43585958   | UTR3     | -----                  | 6 | 43585629  | 43585958  | 0 | 0 | 0 | 0 | 0 | 2 | 329    | 0.616437218 | -2.676722948 | 3.986198973 | -0.671497576 | 0.501903603 | 0.998252924 |
| chr6:47522381-47563762   | exonic   | CD2AP                  | 6 | 47522381  | 47563762  | 0 | 0 | 0 | 0 | 0 | 2 | 41381  | 0.616437218 | -2.676722948 | 3.986198973 | -0.671497576 | 0.501903603 | 0.998252924 |
| chr6:53370189-53374048   | exonic   | GCLC                   | 6 | 53370189  | 53374048  | 0 | 0 | 0 | 0 | 0 | 2 | 3859   | 0.616437218 | -2.676722948 | 3.986198973 | -0.671497576 | 0.501903603 | 0.998252924 |
| chr6:62866868-62867029   | intronic | KHDRBS2                | 6 | 62866868  | 62867029  | 0 | 0 | 0 | 0 | 0 | 2 | 161    | 0.616437218 | -2.676722948 | 3.986198973 | -0.671497576 | 0.501903603 | 0.998252924 |
| chr6:63986808-63989332   | UTR3     | -----                  | 6 | 63986808  | 63989332  | 0 | 0 | 0 | 0 | 0 | 2 | 2524   | 0.616437218 | -2.676722948 | 3.986198973 | -0.671497576 | 0.501903603 | 0.998252924 |
| chr6:689138-693018       | splicing | EXOC2                  | 6 | 689138    | 693018    | 0 | 0 | 0 | 0 | 0 | 2 | 3880   | 0.616437218 | -2.676722948 | 3.986198973 | -0.671497576 | 0.501903603 | 0.998252924 |
| chr6:90418214-90435115   | exonic   | MDN1                   | 6 | 90418214  | 90435115  | 0 | 0 | 0 | 0 | 0 | 2 | 16901  | 0.616437218 | -2.676722948 | 3.986198973 | -0.671497576 | 0.501903603 | 0.998252924 |
| chr7:121738504-121773795 | exonic   | AASS                   | 7 | 121738504 | 121773795 | 0 | 0 | 0 | 0 | 0 | 2 | 35291  | 0.616437218 | -2.676722948 | 3.986198973 | -0.671497576 | 0.501903603 | 0.998252924 |
| chr7:138209985-138223548 | exonic   | TRIM24                 | 7 | 138209985 | 138223548 | 0 | 0 | 0 | 0 | 0 | 2 | 13563  | 0.616437218 | -2.676722948 | 3.986198973 | -0.671497576 | 0.501903603 | 0.998252924 |
| chr7:139085163-139086293 | intronic | C7orf55-LUC7L2, LUC7L2 | 7 | 139085163 | 139086293 | 0 | 0 | 0 | 0 | 0 | 2 | 1130   | 0.616437218 | -2.676722948 | 3.986198973 | -0.671497576 | 0.501903603 | 0.998252924 |
| chr7:149189950-149260694 | exonic   | ZNF746                 | 7 | 149189950 | 149260694 | 0 | 0 | 0 | 0 | 0 | 2 | 70744  | 0.616437218 | -2.676722948 | 3.986198973 | -0.671497576 | 0.501903603 | 0.998252924 |
| chr7:21912891-21932285   | exonic   | DNAH11                 | 7 | 21912891  | 21932285  | 0 | 0 | 0 | 0 | 0 | 2 | 19394  | 0.616437218 | -2.676722948 | 3.986198973 | -0.671497576 | 0.501903603 | 0.998252924 |
| chr7:23401152-23458443   | exonic   | IGF2BP3                | 7 | 23401152  | 23458443  | 0 | 0 | 0 | 0 | 0 | 2 | 57291  | 0.616437218 | -2.676722948 | 3.986198973 | -0.671497576 | 0.501903603 | 0.998252924 |
| chr7:23496635-23505719   | intronic | IGF2BP3                | 7 | 23496635  | 23505719  | 0 | 0 | 0 | 0 | 0 | 2 | 9084   | 0.616437218 | -2.676722948 | 3.986198973 | -0.671497576 | 0.501903603 | 0.998252924 |
| chr7:35925437-35937993   | exonic   |                        | 7 | 35925437  | 35937993  | 0 | 0 | 0 | 0 | 0 | 2 | 12556  | 0.616437218 | -2.676722948 | 3.986198973 | -0.671497576 | 0.501903603 | 0.998252924 |
| chr7:38810797-38829467   | exonic   | VPS41                  | 7 | 38810797  | 38829467  | 0 | 0 | 0 | 0 | 0 | 2 | 18670  | 0.616437218 | -2.676722948 | 3.986198973 | -0.671497576 | 0.501903603 | 0.998252924 |

7-Sep

|                          |              |                                          |   |           |           |   |   |   |   |   |   |        |             |              |             |              |             |             |
|--------------------------|--------------|------------------------------------------|---|-----------|-----------|---|---|---|---|---|---|--------|-------------|--------------|-------------|--------------|-------------|-------------|
| chr7:40037092-40127930   | exonic       | CDK13                                    | 7 | 40037092  | 40127930  | 0 | 0 | 0 | 0 | 0 | 2 | 90838  | 0.616437218 | -2.676722948 | 3.986198973 | -0.671497576 | 0.501903603 | 0.998252924 |
| chr7:45063085-45063445   | intronic     | CCM2                                     | 7 | 45063085  | 45063445  | 0 | 0 | 0 | 0 | 0 | 2 | 360    | 0.616437218 | -2.676722948 | 3.986198973 | -0.671497576 | 0.501903603 | 0.998252924 |
| chr7:4794867-4796818     | exonic       | FOKK1                                    | 7 | 4794867   | 4796818   | 0 | 0 | 0 | 0 | 0 | 2 | 1951   | 0.616437218 | -2.676722948 | 3.986198973 | -0.671497576 | 0.501903603 | 0.998252924 |
| chr7:50742132-50771605   | exonic       | GRB10                                    | 7 | 50742132  | 50771605  | 0 | 0 | 0 | 0 | 0 | 2 | 29473  | 0.616437218 | -2.676722948 | 3.986198973 | -0.671497576 | 0.501903603 | 0.998252924 |
| chr7:65595731-65599361   | exonic       | CRCP                                     | 7 | 65595731  | 65599361  | 0 | 0 | 0 | 0 | 0 | 2 | 3630   | 0.616437218 | -2.676722948 | 3.986198973 | -0.671497576 | 0.501903603 | 0.998252924 |
| chr7:76903010-76909970   | exonic       | CCDC146                                  | 7 | 76903010  | 76909970  | 0 | 0 | 0 | 0 | 0 | 2 | 6960   | 0.616437218 | -2.676722948 | 3.986198973 | -0.671497576 | 0.501903603 | 0.998252924 |
| chr7:77247796-77256992   | exonic       | PTPN12                                   | 7 | 77247796  | 77256992  | 0 | 0 | 0 | 0 | 0 | 2 | 9196   | 0.616437218 | -2.676722948 | 3.986198973 | -0.671497576 | 0.501903603 | 0.998252924 |
| chr7:77973094-77998530   | exonic       | MAGI2                                    | 7 | 77973094  | 77998530  | 0 | 0 | 0 | 0 | 0 | 2 | 25436  | 0.616437218 | -2.676722948 | 3.986198973 | -0.671497576 | 0.501903603 | 0.998252924 |
| chr7:90001469-90022772   | exonic       | GTPBP10                                  | 7 | 90001469  | 90022772  | 0 | 0 | 0 | 0 | 0 | 2 | 21303  | 0.616437218 | -2.676722948 | 3.986198973 | -0.671497576 | 0.501903603 | 0.998252924 |
| chr7:97994104-97995017   | intronic     | BAIAP2L1                                 | 7 | 97994104  | 97995017  | 0 | 0 | 0 | 0 | 0 | 2 | 913    | 0.616437218 | -2.676722948 | 3.986198973 | -0.671497576 | 0.501903603 | 0.998252924 |
| chr7:98792692-98792961   | exonic       | KPNA7                                    | 7 | 98792692  | 98792961  | 0 | 0 | 0 | 0 | 0 | 2 | 269    | 0.616437218 | -2.676722948 | 3.986198973 | -0.671497576 | 0.501903603 | 0.998252924 |
| chr7:99923313-99926642   | ncRNA_exonic | PMS2P1                                   | 7 | 99923313  | 99926642  | 0 | 0 | 0 | 0 | 0 | 2 | 3329   | 0.616437218 | -2.676722948 | 3.986198973 | -0.671497576 | 0.501903603 | 0.998252924 |
| chr8:103323526-103335723 | exonic       | UBR5                                     | 8 | 103323526 | 103335723 | 0 | 0 | 0 | 0 | 0 | 2 | 12197  | 0.616437218 | -2.676722948 | 3.986198973 | -0.671497576 | 0.501903603 | 0.998252924 |
| chr8:130874474-130916831 | exonic       | FAM49B                                   | 8 | 130874474 | 130916831 | 0 | 0 | 0 | 0 | 0 | 2 | 42357  | 0.616437218 | -2.676722948 | 3.986198973 | -0.671497576 | 0.501903603 | 0.998252924 |
| chr8:141262875-141381279 | exonic       | TRAPPC9                                  | 8 | 141262875 | 141381279 | 0 | 0 | 0 | 0 | 0 | 2 | 118404 | 0.616437218 | -2.676722948 | 3.986198973 | -0.671497576 | 0.501903603 | 0.998252924 |
| chr8:38103468-38103746   | exonic       | DDHD2                                    | 8 | 38103468  | 38103746  | 0 | 0 | 0 | 0 | 0 | 2 | 278    | 0.616437218 | -2.676722948 | 3.986198973 | -0.671497576 | 0.501903603 | 0.998252924 |
| chr8:42798455-42829337   | exonic       | HOOK3                                    | 8 | 42798455  | 42829337  | 0 | 0 | 0 | 0 | 0 | 2 | 30882  | 0.616437218 | -2.676722948 | 3.986198973 | -0.671497576 | 0.501903603 | 0.998252924 |
| chr8:71495398-71496028   | exonic       | TRAM1                                    | 8 | 71495398  | 71496028  | 0 | 0 | 0 | 0 | 0 | 2 | 630    | 0.616437218 | -2.676722948 | 3.986198973 | -0.671497576 | 0.501903603 | 0.998252924 |
| chr8:98711981-98735263   | exonic       | MTDH                                     | 8 | 98711981  | 98735263  | 0 | 0 | 0 | 0 | 0 | 2 | 23282  | 0.616437218 | -2.676722948 | 3.986198973 | -0.671497576 | 0.501903603 | 0.998252924 |
| chr9:111732681-111746716 | exonic       | CTNNAL1                                  | 9 | 111732681 | 111746716 | 0 | 0 | 0 | 0 | 0 | 2 | 14035  | 0.616437218 | -2.676722948 | 3.986198973 | -0.671497576 | 0.501903603 | 0.998252924 |
| chr9:112360590-112360869 | intergenic   | MIR3927 (dist=86765), PALM2 (dist=42199) | 9 | 112360590 | 112360869 | 0 | 0 | 0 | 0 | 0 | 2 | 279    | 0.616437218 | -2.676722948 | 3.986198973 | -0.671497576 | 0.501903603 | 0.998252924 |
| chr9:115420422-115420952 | intronic     | KIAA1958                                 | 9 | 115420422 | 115420952 | 0 | 0 | 0 | 0 | 0 | 2 | 530    | 0.616437218 | -2.676722948 | 3.986198973 | -0.671497576 | 0.501903603 | 0.998252924 |
| chr9:123239627-123301442 | exonic       | CDK5RAP2                                 | 9 | 123239627 | 123301442 | 0 | 0 | 0 | 0 | 0 | 2 | 61815  | 0.616437218 | -2.676722948 | 3.986198973 | -0.671497576 | 0.501903603 | 0.998252924 |
| chr9:123632876-123636256 | splicing     | PHF19                                    | 9 | 123632876 | 123636256 | 0 | 0 | 0 | 0 | 0 | 2 | 3380   | 0.616437218 | -2.676722948 | 3.986198973 | -0.671497576 | 0.501903603 | 0.998252924 |
| chr9:132400965-132401480 | splicing     | ASB6                                     | 9 | 132400965 | 132401480 | 0 | 0 | 0 | 0 | 0 | 2 | 515    | 0.616437218 | -2.676722948 | 3.986198973 | -0.671497576 | 0.501903603 | 0.998252924 |
| chr9:132821675-132822436 | intronic     | GPR107                                   | 9 | 132821675 | 132822436 | 0 | 0 | 0 | 0 | 0 | 2 | 761    | 0.616437218 | -2.676722948 | 3.986198973 | -0.671497576 | 0.501903603 | 0.998252924 |
| chr9:134601005-134602265 | intronic     | RAPGEF1                                  | 9 | 134601005 | 134602265 | 0 | 0 | 0 | 0 | 0 | 2 | 1260   | 0.616437218 | -2.676722948 | 3.986198973 | -0.671497576 | 0.501903603 | 0.998252924 |
| chr9:135172273-135176190 | exonic       | SETX                                     | 9 | 135172273 | 135176190 | 0 | 0 | 0 | 0 | 0 | 2 | 3917   | 0.616437218 | -2.676722948 | 3.986198973 | -0.671497576 | 0.501903603 | 0.998252924 |
| chr9:135206438-135206835 | exonic       | SETX                                     | 9 | 135206438 | 135206835 | 0 | 0 | 0 | 0 | 0 | 2 | 397    | 0.616437218 | -2.676722948 | 3.986198973 | -0.671497576 | 0.501903603 | 0.998252924 |
| chr9:19063005-19096767   | exonic       | HAUS6                                    | 9 | 19063005  | 19096767  | 0 | 0 | 0 | 0 | 0 | 2 | 33762  | 0.616437218 | -2.676722948 | 3.986198973 | -0.671497576 | 0.501903603 | 0.998252924 |
| chr9:22046749-22097363   | ncRNA_exonic | CDKN2B-AS1                               | 9 | 22046749  | 22097363  | 0 | 0 | 0 | 0 | 0 | 2 | 50614  | 0.616437218 | -2.676722948 | 3.986198973 | -0.671497576 | 0.501903603 | 0.998252924 |
| chr9:33863440-33863866   | intronic     | UBE2R2                                   | 9 | 33863440  | 33863866  | 0 | 0 | 0 | 0 | 0 | 2 | 426    | 0.616437218 | -2.676722948 | 3.986198973 | -0.671497576 | 0.501903603 | 0.998252924 |
| chr9:33906808-33908058   | intronic     | UBE2R2                                   | 9 | 33906808  | 33908058  | 0 | 0 | 0 | 0 | 0 | 2 | 1250   | 0.616437218 | -2.676722948 | 3.986198973 | -0.671497576 | 0.501903603 | 0.998252924 |
| chr9:88648196-88661487   | exonic       | GOLM1                                    | 9 | 88648196  | 88661487  | 0 | 0 | 0 | 0 | 0 | 2 | 13291  | 0.616437218 | -2.676722948 | 3.986198973 | -0.671497576 | 0.501903603 | 0.998252924 |
| chr9:96233422-96294611   | exonic       | FAM120A                                  | 9 | 96233422  | 96294611  | 0 | 0 | 0 | 0 | 0 | 2 | 61189  | 0.616437218 | -2.676722948 | 3.986198973 | -0.671497576 | 0.501903603 | 0.998252924 |

|                          |              |                                  |    |          |           |           |   |   |   |   |    |        |             |              |              |              |              |             |             |
|--------------------------|--------------|----------------------------------|----|----------|-----------|-----------|---|---|---|---|----|--------|-------------|--------------|--------------|--------------|--------------|-------------|-------------|
| chrMT:9031-9185          | intergenic   | NONE(dist=NONE), NONE(dist=NONE) | MT | 9031     | 9185      | 0         | 0 | 0 | 0 | 0 | 2  | 154    | 0.616437218 | -2.676722948 | 3.986198973  | -0.671497576 | 0.501903603  | 0.998252924 |             |
| chrX:19865036-19865177   | intronic     | SH3KBP1                          | X  | 19865036 | 19865177  | 0         | 0 | 0 | 0 | 0 | 2  | 141    | 0.616437218 | -2.676722948 | 3.986198973  | -0.671497576 | 0.501903603  | 0.998252924 |             |
| chrX:31645790-31747865   | exonic       | DMD                              | X  | 31645790 | 31747865  | 0         | 0 | 0 | 0 | 0 | 2  | 102075 | 0.616437218 | -2.676722948 | 3.986198973  | -0.671497576 | 0.501903603  | 0.998252924 |             |
| chrX:38146268-38146481   | exonic       | RPGR                             | X  | 38146268 | 38146481  | 0         | 0 | 0 | 0 | 0 | 2  | 213    | 0.616437218 | -2.676722948 | 3.986198973  | -0.671497576 | 0.501903603  | 0.998252924 |             |
| chrX:67731690-67742759   | exonic       | YIPF6                            | X  | 67731690 | 67742759  | 0         | 0 | 0 | 0 | 0 | 2  | 11069  | 0.616437218 | -2.676722948 | 3.986198973  | -0.671497576 | 0.501903603  | 0.998252924 |             |
| chrX:83411082-83419395   | exonic       | RPS6KA6                          | X  | 83411082 | 83419395  | 0         | 0 | 0 | 0 | 0 | 2  | 8313   | 0.616437218 | -2.676722948 | 3.986198973  | -0.671497576 | 0.501903603  | 0.998252924 |             |
| chrX:9469820-9487173     | UTR5         |                                  | X  | 9469820  | 9487173   | 0         | 0 | 0 | 0 | 0 | 2  | 17353  | 0.616437218 | -2.676722948 | 3.986198973  | -0.671497576 | 0.501903603  | 0.998252924 |             |
| chr2:20478343-20527139   | exonic       | PUM2                             |    | 2        | 20478343  | 20527139  | 1 | 1 | 0 | 2 | 3  | 5      | 48796       | 2.420060822  | -2.672446467 | 1.903866232  | -1.403694452 | NA          | NA          |
| chr10:96018556-96018907  | exonic       | PLCE1                            |    | 10       | 96018556  | 96018907  | 0 | 1 | 0 | 9 | 1  | 0      | 351         | 1.252105687  | -2.670477169 | 2.635257199  | -1.013364908 | NA          | NA          |
| chr17:169210-171206      | exonic       | RPH3AL                           |    | 17       | 169210    | 171206    | 0 | 1 | 2 | 2 | 0  | 11     | 1996        | 4.171841317  | -2.658638924 | 1.804596936  | -1.473259136 | NA          | NA          |
| chr17:131558-171206      | exonic       | RPH3AL                           |    | 17       | 131558    | 171206    | 3 | 0 | 0 | 2 | 15 | 2      | 39648       | 3.031432143  | -2.650724757 | 1.813486722  | -1.461673099 | 0.143830812 | 0.998252924 |
| chr17:131558-177370      | exonic       | RPH3AL                           |    | 17       | 131558    | 177370    | 3 | 0 | 0 | 2 | 15 | 2      | 45812       | 3.031432143  | -2.650724757 | 1.813486722  | -1.461673099 | 0.143830812 | 0.998252924 |
| chr17:131558-183725      | exonic       | LOC100506388, RPH3AL             |    | 17       | 131558    | 183725    | 3 | 0 | 0 | 2 | 15 | 2      | 52167       | 3.031432143  | -2.650724757 | 1.813486722  | -1.461673099 | 0.143830812 | 0.998252924 |
| chr1:113655100-113662145 | exonic       | LRI G2                           |    | 1        | 113655100 | 113662145 | 0 | 0 | 0 | 4 | 1  | 0      | 7045        | 0.546272962  | -2.643177566 | 3.756145682  | -0.703694103 | 0.481623294 | 0.998252924 |
| chr1:29362337-29379824   | exonic       | EPB41                            |    | 1        | 29362337  | 29379824  | 0 | 0 | 0 | 4 | 1  | 0      | 17487       | 0.546272962  | -2.643177566 | 3.756145682  | -0.703694103 | 0.481623294 | 0.998252924 |
| chr16:23403700-23424885  | exonic       | COG7                             |    | 16       | 23403700  | 23424885  | 0 | 0 | 0 | 4 | 1  | 0      | 21185       | 0.546272962  | -2.643177566 | 3.756145682  | -0.703694103 | 0.481623294 | 0.998252924 |
| chr16:86523869-86524610  | ncRNA_exonic | FENDRR                           |    | 16       | 86523869  | 86524610  | 0 | 0 | 0 | 4 | 1  | 0      | 741         | 0.546272962  | -2.643177566 | 3.756145682  | -0.703694103 | 0.481623294 | 0.998252924 |
| chr17:3955264-3968123    | exonic       | ZZEF1                            |    | 17       | 3955264   | 3968123   | 0 | 0 | 0 | 4 | 1  | 0      | 12859       | 0.546272962  | -2.643177566 | 3.756145682  | -0.703694103 | 0.481623294 | 0.998252924 |
| chr18:55278868-55283207  | exonic       | NARS                             |    | 18       | 55278868  | 55283207  | 0 | 0 | 0 | 4 | 1  | 0      | 4339        | 0.546272962  | -2.643177566 | 3.756145682  | -0.703694103 | 0.481623294 | 0.998252924 |
| chr2:101643844-101650220 | exonic       | TBC1D8                           |    | 2        | 101643844 | 101650220 | 0 | 0 | 0 | 4 | 1  | 0      | 6376        | 0.546272962  | -2.643177566 | 3.756145682  | -0.703694103 | 0.481623294 | 0.998252924 |
| chr2:33748945-33759467   | exonic       | RASGRP3                          |    | 2        | 33748945  | 33759467  | 0 | 0 | 0 | 4 | 1  | 0      | 10522       | 0.546272962  | -2.643177566 | 3.756145682  | -0.703694103 | 0.481623294 | 0.998252924 |
| chr3:37105232-37125297   | exonic       | LRRFIP2                          |    | 3        | 37105232  | 37125297  | 0 | 0 | 0 | 4 | 1  | 0      | 20065       | 0.546272962  | -2.643177566 | 3.756145682  | -0.703694103 | 0.481623294 | 0.998252924 |
| chr3:71743025-71759635   | exonic       | EIF4E3                           |    | 3        | 71743025  | 71759635  | 0 | 0 | 0 | 4 | 1  | 0      | 16610       | 0.546272962  | -2.643177566 | 3.756145682  | -0.703694103 | 0.481623294 | 0.998252924 |
| chr4:174169130-174169591 | exonic       | GALNT7                           |    | 4        | 174169130 | 174169591 | 0 | 0 | 0 | 4 | 1  | 0      | 461         | 0.546272962  | -2.643177566 | 3.756145682  | -0.703694103 | 0.481623294 | 0.998252924 |
| chr5:176402396-176409624 | exonic       | UIMC1                            |    | 5        | 176402396 | 176409624 | 0 | 0 | 0 | 4 | 1  | 0      | 7228        | 0.546272962  | -2.643177566 | 3.756145682  | -0.703694103 | 0.481623294 | 0.998252924 |
| chr5:179250857-179252226 | exonic       | SQSTM1                           |    | 5        | 179250857 | 179252226 | 0 | 0 | 0 | 4 | 1  | 0      | 1369        | 0.546272962  | -2.643177566 | 3.756145682  | -0.703694103 | 0.481623294 | 0.998252924 |
| chr7:102039994-102047945 | exonic       | PRKRIP1                          |    | 7        | 102039994 | 102047945 | 0 | 0 | 0 | 1 | 2  | 0      | 7951        | 0.546272962  | -2.643177566 | 3.756145682  | -0.703694103 | 0.481623294 | 0.998252924 |
| chr7:98988515-98988876   | exonic       | ARPC1B                           |    | 7        | 98988515  | 98988876  | 0 | 0 | 0 | 4 | 1  | 0      | 361         | 0.546272962  | -2.643177566 | 3.756145682  | -0.703694103 | 0.481623294 | 0.998252924 |
| chr9:33944362-33948585   | exonic       | UBAP2                            |    | 9        | 33944362  | 33948585  | 0 | 0 | 0 | 4 | 1  | 0      | 4223        | 0.546272962  | -2.643177566 | 3.756145682  | -0.703694103 | 0.481623294 | 0.998252924 |
| chr3:47098310-47108608   | exonic       | SETD2                            |    | 3        | 47098310  | 47108608  | 2 | 0 | 0 | 2 | 8  | 2      | 10298       | 2.055253248  | -2.639605761 | 2.062272597  | -1.279949976 | 0.20056273  | 0.998252924 |
| chr9:35228011-35243361   | exonic       | UNC13B                           |    | 9        | 35228011  | 35243361  | 2 | 0 | 0 | 8 | 7  | 0      | 15350       | 1.955656919  | -2.628217623 | 2.214892933  | -1.18661159  | 0.235380862 | 0.998252924 |
| chr7:77200394-77230123   | exonic       | PTPN12                           |    | 7        | 77200394  | 77230123  | 0 | 0 | 2 | 0 | 9  | 4      | 29729       | 2.716659282  | -2.626939508 | 2.064979492  | -1.272138303 | NA          | NA          |
| chr13:20632714-20641530  | exonic       | ZMYM2                            |    | 13       | 20632714  | 20641530  | 1 | 0 | 0 | 2 | 0  | 3      | 8816        | 1.266265539  | -2.601866958 | 2.642966003  | -0.984449651 | 0.324894476 | 0.998252924 |
| chr1:10450527-10452266   | intergenic   | KIF1B(dist=8866), PGD(dist=6783) |    | 1        | 10450527  | 10452266  | 0 | 0 | 0 | 5 | 0  | 0      | 1739        | 0.531556926  | -2.601466817 | 3.990320854  | -0.65194427  | NA          | NA          |
| chr1:110207633-110233186 | exonic       | GSTM1, GSTM2, GSTM4              |    | 1        | 110207633 | 110233186 | 0 | 0 | 0 | 5 | 0  | 0      | 25553       | 0.531556926  | -2.601466817 | 3.990320854  | -0.65194427  | NA          | NA          |

|                           |            |                                         |    |           |           |   |   |   |   |   |   |        |             |              |             |             |    |    |
|---------------------------|------------|-----------------------------------------|----|-----------|-----------|---|---|---|---|---|---|--------|-------------|--------------|-------------|-------------|----|----|
| chr1:168200752-168212307  | exonic     | SFT2D2                                  | 1  | 168200752 | 168212307 | 0 | 0 | 0 | 5 | 0 | 0 | 11555  | 0.531556926 | -2.601466817 | 3.990320854 | -0.65194427 | NA | NA |
| chr1:44467984-44468657    | exonic     | SLC6A9                                  | 1  | 44467984  | 44468657  | 0 | 0 | 0 | 5 | 0 | 0 | 673    | 0.531556926 | -2.601466817 | 3.990320854 | -0.65194427 | NA | NA |
| chr1:47512139-47534435    | exonic     | CYP4X1, CYP4Z1                          | 1  | 47512139  | 47534435  | 0 | 0 | 0 | 5 | 0 | 0 | 22296  | 0.531556926 | -2.601466817 | 3.990320854 | -0.65194427 | NA | NA |
| chr1:48850980-48869554    | exonic     | SPATA6                                  | 1  | 48850980  | 48869554  | 0 | 0 | 0 | 5 | 0 | 0 | 18574  | 0.531556926 | -2.601466817 | 3.990320854 | -0.65194427 | NA | NA |
| chr1:52698842-52705267    | exonic     | ZFYVE9                                  | 1  | 52698842  | 52705267  | 0 | 0 | 0 | 5 | 0 | 0 | 6425   | 0.531556926 | -2.601466817 | 3.990320854 | -0.65194427 | NA | NA |
| chr1:59787207-59978111    | exonic     | FGGY                                    | 1  | 59787207  | 59978111  | 0 | 0 | 0 | 5 | 0 | 0 | 190904 | 0.531556926 | -2.601466817 | 3.990320854 | -0.65194427 | NA | NA |
| chr1:79132257-79138776    | intergenic | IF144 (dist=2494), ADGRL4 (dist=216673) | 1  | 79132257  | 79138776  | 0 | 0 | 0 | 5 | 0 | 0 | 6519   | 0.531556926 | -2.601466817 | 3.990320854 | -0.65194427 | NA | NA |
| chr1:91382197-91383711    | exonic     | ZNF644                                  | 1  | 91382197  | 91383711  | 0 | 0 | 0 | 5 | 0 | 0 | 1514   | 0.531556926 | -2.601466817 | 3.990320854 | -0.65194427 | NA | NA |
| chr10:120972931-120973581 | intronic   | GRK5                                    | 10 | 120972931 | 120973581 | 0 | 0 | 0 | 5 | 0 | 0 | 650    | 0.531556926 | -2.601466817 | 3.990320854 | -0.65194427 | NA | NA |
| chr10:133747962-133758963 | exonic     | PPP2R2D                                 | 10 | 133747962 | 133758963 | 0 | 0 | 0 | 5 | 0 | 0 | 11001  | 0.531556926 | -2.601466817 | 3.990320854 | -0.65194427 | NA | NA |
| chr10:24508555-24535366   | exonic     | KIAA1217                                | 10 | 24508555  | 24535366  | 0 | 0 | 0 | 5 | 0 | 0 | 26811  | 0.531556926 | -2.601466817 | 3.990320854 | -0.65194427 | NA | NA |
| chr10:53399102-53411438   | intronic   | PRKG1                                   | 10 | 53399102  | 53411438  | 0 | 0 | 0 | 5 | 0 | 0 | 12336  | 0.531556926 | -2.601466817 | 3.990320854 | -0.65194427 | NA | NA |
| chr10:94700483-94708136   | exonic     | EXOC6                                   | 10 | 94700483  | 94708136  | 0 | 0 | 0 | 5 | 0 | 0 | 7653   | 0.531556926 | -2.601466817 | 3.990320854 | -0.65194427 | NA | NA |
| chr11:108198371-108202764 | exonic     | ATM                                     | 11 | 108198371 | 108202764 | 0 | 0 | 0 | 5 | 0 | 0 | 4393   | 0.531556926 | -2.601466817 | 3.990320854 | -0.65194427 | NA | NA |
| chr11:22225349-22242756   | exonic     | ANO5                                    | 11 | 22225349  | 22242756  | 0 | 0 | 0 | 5 | 0 | 0 | 17407  | 0.531556926 | -2.601466817 | 3.990320854 | -0.65194427 | NA | NA |
| chr11:72423240-72424288   | exonic     | ARAP1                                   | 11 | 72423240  | 72424288  | 0 | 0 | 0 | 5 | 0 | 0 | 1048   | 0.531556926 | -2.601466817 | 3.990320854 | -0.65194427 | NA | NA |
| chr12:56094682-56094938   | exonic     | ITGA7                                   | 12 | 56094682  | 56094938  | 0 | 0 | 0 | 5 | 0 | 0 | 256    | 0.531556926 | -2.601466817 | 3.990320854 | -0.65194427 | NA | NA |
| chr13:101039023-101101559 | exonic     | PCCA                                    | 13 | 101039023 | 101101559 | 0 | 0 | 0 | 5 | 0 | 0 | 62536  | 0.531556926 | -2.601466817 | 3.990320854 | -0.65194427 | NA | NA |
| chr13:114806476-114823957 | exonic     | RASA3                                   | 13 | 114806476 | 114823957 | 0 | 0 | 0 | 5 | 0 | 0 | 17481  | 0.531556926 | -2.601466817 | 3.990320854 | -0.65194427 | NA | NA |
| chr13:48651289-48664554   | exonic     | MED4                                    | 13 | 48651289  | 48664554  | 0 | 0 | 0 | 5 | 0 | 0 | 13265  | 0.531556926 | -2.601466817 | 3.990320854 | -0.65194427 | NA | NA |
| chr14:71517793-71520129   | exonic     | PCNX                                    | 14 | 71517793  | 71520129  | 0 | 0 | 0 | 5 | 0 | 0 | 2336   | 0.531556926 | -2.601466817 | 3.990320854 | -0.65194427 | NA | NA |
| chr14:97312431-97327072   | exonic     | VRK1                                    | 14 | 97312431  | 97327072  | 0 | 0 | 0 | 5 | 0 | 0 | 14641  | 0.531556926 | -2.601466817 | 3.990320854 | -0.65194427 | NA | NA |
| chr15:101104897-101105470 | intergenic | PRKXP1 (dist=5409), LINS1 (dist=3958)   | 15 | 101104897 | 101105470 | 0 | 0 | 0 | 5 | 0 | 0 | 573    | 0.531556926 | -2.601466817 | 3.990320854 | -0.65194427 | NA | NA |
| chr15:61293091-61327125   | intronic   | RORA                                    | 15 | 61293091  | 61327125  | 0 | 0 | 0 | 5 | 0 | 0 | 34034  | 0.531556926 | -2.601466817 | 3.990320854 | -0.65194427 | NA | NA |
| chr17:28534749-28536260   | exonic     | SLC6A4                                  | 17 | 28534749  | 28536260  | 0 | 0 | 0 | 5 | 0 | 0 | 1511   | 0.531556926 | -2.601466817 | 3.990320854 | -0.65194427 | NA | NA |
| chr17:8409635-8413267     | exonic     | MYH10                                   | 17 | 8409635   | 8413267   | 0 | 0 | 0 | 5 | 0 | 0 | 3632   | 0.531556926 | -2.601466817 | 3.990320854 | -0.65194427 | NA | NA |
| chr18:10530767-10550251   | exonic     | NAPG                                    | 18 | 10530767  | 10550251  | 0 | 0 | 0 | 5 | 0 | 0 | 19484  | 0.531556926 | -2.601466817 | 3.990320854 | -0.65194427 | NA | NA |
| chr19:55420603-55421425   | exonic     | NCR1                                    | 19 | 55420603  | 55421425  | 0 | 0 | 0 | 5 | 0 | 0 | 822    | 0.531556926 | -2.601466817 | 3.990320854 | -0.65194427 | NA | NA |
| chr2:153220312-153222054  | intronic   | FMNL2                                   | 2  | 153220312 | 153222054 | 0 | 0 | 0 | 5 | 0 | 0 | 1742   | 0.531556926 | -2.601466817 | 3.990320854 | -0.65194427 | NA | NA |
| chr2:202430451-202440049  | exonic     | ALS2CR11                                | 2  | 202430451 | 202440049 | 0 | 0 | 0 | 5 | 0 | 0 | 9598   | 0.531556926 | -2.601466817 | 3.990320854 | -0.65194427 | NA | NA |
| chr2:32339706-32353548    | exonic     | SPAST                                   | 2  | 32339706  | 32353548  | 0 | 0 | 0 | 5 | 0 | 0 | 13842  | 0.531556926 | -2.601466817 | 3.990320854 | -0.65194427 | NA | NA |
| chr2:36623756-36623930    | exonic     | CRIM1                                   | 2  | 36623756  | 36623930  | 0 | 0 | 0 | 5 | 0 | 0 | 174    | 0.531556926 | -2.601466817 | 3.990320854 | -0.65194427 | NA | NA |
| chr2:36668400-36706837    | exonic     | CRIM1                                   | 2  | 36668400  | 36706837  | 0 | 0 | 0 | 5 | 0 | 0 | 38437  | 0.531556926 | -2.601466817 | 3.990320854 | -0.65194427 | NA | NA |
| chr2:46574011-46588229    | exonic     | EPAS1                                   | 2  | 46574011  | 46588229  | 0 | 0 | 0 | 5 | 0 | 0 | 14218  | 0.531556926 | -2.601466817 | 3.990320854 | -0.65194427 | NA | NA |
| chr21:17150222-17177577   | exonic     | USP25                                   | 21 | 17150222  | 17177577  | 0 | 0 | 0 | 5 | 0 | 0 | 27355  | 0.531556926 | -2.601466817 | 3.990320854 | -0.65194427 | NA | NA |

|                           |                |                                             |    |           |           |   |   |   |   |   |   |        |             |              |             |              |             |             |
|---------------------------|----------------|---------------------------------------------|----|-----------|-----------|---|---|---|---|---|---|--------|-------------|--------------|-------------|--------------|-------------|-------------|
| chr21:17150222-17191165   | exonic         | USP25                                       | 21 | 17150222  | 17191165  | 0 | 0 | 0 | 5 | 0 | 0 | 40943  | 0.531556926 | -2.601466817 | 3.990320854 | -0.65194427  | NA          | NA          |
| chr21:17150222-17199522   | exonic         | USP25                                       | 21 | 17150222  | 17199522  | 0 | 0 | 0 | 1 | 2 | 0 | 49300  | 0.531556926 | -2.601466817 | 3.990320854 | -0.65194427  | NA          | NA          |
| chr22:43286952-43287188   | exonic         | PACSN2                                      | 22 | 43286952  | 43287188  | 0 | 0 | 0 | 5 | 0 | 0 | 236    | 0.531556926 | -2.601466817 | 3.990320854 | -0.65194427  | NA          | NA          |
| chr22:51123012-51154181   | exonic         | SHANK3                                      | 22 | 51123012  | 51154181  | 0 | 0 | 0 | 5 | 0 | 0 | 31169  | 0.531556926 | -2.601466817 | 3.990320854 | -0.65194427  | NA          | NA          |
| chr22:51123012-51160865   | exonic         | SHANK3                                      | 22 | 51123012  | 51160865  | 0 | 0 | 0 | 5 | 0 | 0 | 37853  | 0.531556926 | -2.601466817 | 3.990320854 | -0.65194427  | NA          | NA          |
| chr3:132337477-132350323  | exonic         | ACAD11                                      | 3  | 132337477 | 132350323 | 0 | 0 | 0 | 5 | 0 | 0 | 12846  | 0.531556926 | -2.601466817 | 3.990320854 | -0.65194427  | NA          | NA          |
| chr3:4487181-4494733      | exonic         | SUMF1                                       | 3  | 4487181   | 4494733   | 0 | 0 | 0 | 5 | 0 | 0 | 7552   | 0.531556926 | -2.601466817 | 3.990320854 | -0.65194427  | NA          | NA          |
| chr3:69037445-69053633    | exonic         | EOGT                                        | 3  | 69037445  | 69053633  | 0 | 0 | 0 | 5 | 0 | 0 | 16188  | 0.531556926 | -2.601466817 | 3.990320854 | -0.65194427  | NA          | NA          |
| chr3:77147164-77600140    | exonic         | ROBO2                                       | 3  | 77147164  | 77600140  | 0 | 0 | 0 | 5 | 0 | 0 | 452976 | 0.531556926 | -2.601466817 | 3.990320854 | -0.65194427  | NA          | NA          |
| chr4:120446703-120517767  | exonic         | PDE5A                                       | 4  | 120446703 | 120517767 | 0 | 0 | 0 | 5 | 0 | 0 | 71064  | 0.531556926 | -2.601466817 | 3.990320854 | -0.65194427  | NA          | NA          |
| chr4:120460114-120528452  | exonic         | PDE5A                                       | 4  | 120460114 | 120528452 | 0 | 0 | 0 | 5 | 0 | 0 | 68338  | 0.531556926 | -2.601466817 | 3.990320854 | -0.65194427  | NA          | NA          |
| chr4:3105550-3109150      | exonic         | HTT                                         | 4  | 3105550   | 3109150   | 0 | 0 | 0 | 5 | 0 | 0 | 3600   | 0.531556926 | -2.601466817 | 3.990320854 | -0.65194427  | NA          | NA          |
| chr6:129843622-129879311  | intergenic     | LAMA2 (dist=5912), ARHGAP18 (dist=18929)    | 6  | 129843622 | 129879311 | 0 | 0 | 0 | 5 | 0 | 0 | 35689  | 0.531556926 | -2.601466817 | 3.990320854 | -0.65194427  | NA          | NA          |
| chr6:139232412-139251235  | exonic         | REPS1                                       | 6  | 139232412 | 139251235 | 0 | 0 | 0 | 5 | 0 | 0 | 18823  | 0.531556926 | -2.601466817 | 3.990320854 | -0.65194427  | NA          | NA          |
| chr6:148677822-148678959  | intronic       | SASH1                                       | 6  | 148677822 | 148678959 | 0 | 0 | 0 | 5 | 0 | 0 | 1137   | 0.531556926 | -2.601466817 | 3.990320854 | -0.65194427  | NA          | NA          |
| chr6:90959408-90981660    | UTR5           | BACH2 (NM_021813:c.-262927_-263097delins0)  | 6  | 90959408  | 90981660  | 0 | 0 | 0 | 5 | 0 | 0 | 22252  | 0.531556926 | -2.601466817 | 3.990320854 | -0.65194427  | NA          | NA          |
| chr7:151181823-151195266  | exonic         | RHEB                                        | 7  | 151181823 | 151195266 | 0 | 0 | 0 | 5 | 0 | 0 | 13443  | 0.531556926 | -2.601466817 | 3.990320854 | -0.65194427  | NA          | NA          |
| chr7:30496336-30496658    | exonic         | NOD1                                        | 7  | 30496336  | 30496658  | 0 | 0 | 0 | 5 | 0 | 0 | 322    | 0.531556926 | -2.601466817 | 3.990320854 | -0.65194427  | NA          | NA          |
| chr7:31815277-31855768    | exonic         | PDE1C                                       | 7  | 31815277  | 31855768  | 0 | 0 | 0 | 5 | 0 | 0 | 40491  | 0.531556926 | -2.601466817 | 3.990320854 | -0.65194427  | NA          | NA          |
| chr7:69925568-69927001    | intronic       | AUTS2                                       | 7  | 69925568  | 69927001  | 0 | 0 | 0 | 5 | 0 | 0 | 1433   | 0.531556926 | -2.601466817 | 3.990320854 | -0.65194427  | NA          | NA          |
| chr8:12522787-12523485    | ncRNA_exonic   | LOC729732                                   | 8  | 12522787  | 12523485  | 0 | 0 | 0 | 5 | 0 | 0 | 698    | 0.531556926 | -2.601466817 | 3.990320854 | -0.65194427  | NA          | NA          |
| chr9:136671202-136677338  | exonic         | VAV2                                        | 9  | 136671202 | 136677338 | 0 | 0 | 0 | 5 | 0 | 0 | 6136   | 0.531556926 | -2.601466817 | 3.990320854 | -0.65194427  | NA          | NA          |
| chr9:87356806-87367000    | exonic         | NTRK2                                       | 9  | 87356806  | 87367000  | 0 | 0 | 0 | 5 | 0 | 0 | 10194  | 0.531556926 | -2.601466817 | 3.990320854 | -0.65194427  | NA          | NA          |
| chrX:128166327-128256170  | intergenic     | ACTR11 (dist=979945), SMARCA1 (dist=324308) | X  | 128166327 | 128256170 | 0 | 0 | 0 | 5 | 0 | 0 | 89843  | 0.531556926 | -2.601466817 | 3.990320854 | -0.65194427  | NA          | NA          |
| chrY:14813939-14821476    | exonic         | USP9Y                                       | Y  | 14813939  | 14821476  | 0 | 0 | 0 | 5 | 0 | 0 | 7537   | 0.531556926 | -2.601466817 | 3.990320854 | -0.65194427  | NA          | NA          |
| chrY:21203256-21207177    | ncRNA_intronic | TTY14                                       | Y  | 21203256  | 21207177  | 0 | 0 | 0 | 5 | 0 | 0 | 3921   | 0.531556926 | -2.601466817 | 3.990320854 | -0.65194427  | NA          | NA          |
| chr12:48477373-48491907   | exonic         | SENP1                                       | 12 | 48477373  | 48491907  | 1 | 0 | 0 | 0 | 4 | 2 | 14534  | 1.229533848 | -2.596028583 | 2.647736391 | -0.980470938 | NA          | NA          |
| chr11:94532555-94533477   | exonic         | AMOTL1                                      | 11 | 94532555  | 94533477  | 1 | 0 | 0 | 7 | 0 | 1 | 922    | 1.181385248 | -2.587233167 | 2.691897628 | -0.96118707  | 0.336492485 | 0.998252924 |
| chr9:115013208-115015068  | exonic         | PTBP3                                       | 9  | 115013208 | 115015068 | 0 | 0 | 2 | 1 | 3 | 6 | 1860   | 2.713243354 | -2.586018375 | 1.963834103 | -1.316821198 | NA          | NA          |
| chr10:104899162-104934739 | exonic         | NT5C2                                       | 10 | 104899162 | 104934739 | 0 | 0 | 0 | 0 | 2 | 1 | 35577  | 0.550273452 | -2.563120227 | 3.777369045 | -0.678546416 | 0.497425305 | 0.998252924 |
| chr10:32120666-32150586   | exonic         | ARHGAP12                                    | 10 | 32120666  | 32150586  | 0 | 0 | 0 | 0 | 2 | 1 | 29920  | 0.550273452 | -2.563120227 | 3.777369045 | -0.678546416 | 0.497425305 | 0.998252924 |
| chr10:69647174-69648881   | exonic         | SIRT1                                       | 10 | 69647174  | 69648881  | 0 | 0 | 0 | 0 | 2 | 1 | 1707   | 0.550273452 | -2.563120227 | 3.777369045 | -0.678546416 | 0.497425305 | 0.998252924 |
| chr14:32586348-32621734   | exonic         | ARHGAP5                                     | 14 | 32586348  | 32621734  | 0 | 0 | 0 | 0 | 2 | 1 | 35386  | 0.550273452 | -2.563120227 | 3.777369045 | -0.678546416 | 0.497425305 | 0.998252924 |
| chr14:53558502-53570574   | exonic         | DDHD1                                       | 14 | 53558502  | 53570574  | 0 | 0 | 0 | 0 | 2 | 1 | 12072  | 0.550273452 | -2.563120227 | 3.777369045 | -0.678546416 | 0.497425305 | 0.998252924 |
| chr17:34869271-34871833   | exonic         | MYO19                                       | 17 | 34869271  | 34871833  | 0 | 0 | 0 | 0 | 2 | 1 | 2562   | 0.550273452 | -2.563120227 | 3.777369045 | -0.678546416 | 0.497425305 | 0.998252924 |

|                           |        |          |    |           |           |   |   |   |   |    |    |       |             |              |             |              |             |             |
|---------------------------|--------|----------|----|-----------|-----------|---|---|---|---|----|----|-------|-------------|--------------|-------------|--------------|-------------|-------------|
| chr2:172305190-172314585  | exonic | DCAF17   | 2  | 172305190 | 172314585 | 0 | 0 | 0 | 0 | 2  | 1  | 9395  | 0.550273452 | -2.563120227 | 3.777369045 | -0.678546416 | 0.497425305 | 0.998252924 |
| chr2:173423435-173435552  | exonic | PDK1     | 2  | 173423435 | 173435552 | 0 | 0 | 0 | 0 | 2  | 1  | 12117 | 0.550273452 | -2.563120227 | 3.777369045 | -0.678546416 | 0.497425305 | 0.998252924 |
| chr2:231624673-231658046  | exonic | CAB39    | 2  | 231624673 | 231658046 | 0 | 0 | 0 | 0 | 2  | 1  | 33373 | 0.550273452 | -2.563120227 | 3.777369045 | -0.678546416 | 0.497425305 | 0.998252924 |
| chr2:65318116-65331940    | exonic | RAB1A    | 2  | 65318116  | 65331940  | 0 | 0 | 0 | 0 | 2  | 1  | 13824 | 0.550273452 | -2.563120227 | 3.777369045 | -0.678546416 | 0.497425305 | 0.998252924 |
| chr20:33045194-33059320   | exonic | ITCH     | 20 | 33045194  | 33059320  | 0 | 0 | 0 | 0 | 2  | 1  | 14126 | 0.550273452 | -2.563120227 | 3.777369045 | -0.678546416 | 0.497425305 | 0.998252924 |
| chr4:120188474-120194863  | exonic | USP53    | 4  | 120188474 | 120194863 | 0 | 0 | 0 | 0 | 2  | 1  | 6389  | 0.550273452 | -2.563120227 | 3.777369045 | -0.678546416 | 0.497425305 | 0.998252924 |
| chr5:43139266-43162033    | exonic | ZNF131   | 5  | 43139266  | 43162033  | 0 | 0 | 0 | 0 | 2  | 1  | 22767 | 0.550273452 | -2.563120227 | 3.777369045 | -0.678546416 | 0.497425305 | 0.998252924 |
| chr6:72960032-72961071    | exonic | RIMS1    | 6  | 72960032  | 72961071  | 0 | 0 | 0 | 0 | 2  | 1  | 1039  | 0.550273452 | -2.563120227 | 3.777369045 | -0.678546416 | 0.497425305 | 0.998252924 |
| chr6:90556280-90566918    | exonic | CASP8AP2 | 6  | 90556280  | 90566918  | 0 | 0 | 0 | 0 | 2  | 1  | 10638 | 0.550273452 | -2.563120227 | 3.777369045 | -0.678546416 | 0.497425305 | 0.998252924 |
| chr7:105105759-105111295  | exonic | PUS7     | 7  | 105105759 | 105111295 | 0 | 0 | 0 | 0 | 2  | 1  | 5536  | 0.550273452 | -2.563120227 | 3.777369045 | -0.678546416 | 0.497425305 | 0.998252924 |
| chr7:73634073-73635064    | exonic | LAT2     | 7  | 73634073  | 73635064  | 0 | 0 | 0 | 0 | 2  | 1  | 991   | 0.550273452 | -2.563120227 | 3.777369045 | -0.678546416 | 0.497425305 | 0.998252924 |
| chr7:92881965-92953044    | exonic | VPS50    | 7  | 92881965  | 92953044  | 0 | 0 | 0 | 0 | 2  | 1  | 71079 | 0.550273452 | -2.563120227 | 3.777369045 | -0.678546416 | 0.497425305 | 0.998252924 |
| chr9:88655653-88667506    | exonic | GOLM1    | 9  | 88655653  | 88667506  | 0 | 0 | 0 | 0 | 2  | 1  | 11853 | 0.550273452 | -2.563120227 | 3.777369045 | -0.678546416 | 0.497425305 | 0.998252924 |
| chr8:68950393-68973014    | exonic | PREX2    | 8  | 68950393  | 68973014  | 1 | 0 | 0 | 6 | 3  | 0  | 22621 | 1.129937519 | -2.562637463 | 2.665846091 | -0.961284851 | 0.336408963 | 0.998252924 |
| chr20:3925823-3955047     | exonic | RNF24    | 20 | 3925823   | 3955047   | 0 | 0 | 3 | 0 | 3  | 10 | 29224 | 4.03707543  | -2.552157175 | 2.991477388 | -0.853142727 | NA          | NA          |
| chr5:142434003-142526946  | exonic | ARHGAP26 | 5  | 142434003 | 142526946 | 2 | 0 | 0 | 0 | 16 | 1  | 92943 | 1.897494134 | -2.549928969 | 2.338573855 | -1.09037778  | 0.275546766 | 0.998252924 |
| chr20:18523662-18535034   | exonic | SEC23B   | 20 | 18523662  | 18535034  | 1 | 0 | 0 | 7 | 2  | 0  | 11372 | 1.115221482 | -2.542385837 | 2.692763345 | -0.944154949 | 0.345090473 | 0.998252924 |
| chr1:168032858-168037701  | exonic | DCAF6    | 1  | 168032858 | 168037701 | 0 | 0 | 0 | 1 | 1  | 1  | 4843  | 0.535557416 | -2.516649978 | 3.503992741 | -0.718223514 | 0.472619482 | 0.998252924 |
| chr10:70719561-70721913   | exonic | DDX21    | 10 | 70719561  | 70721913  | 0 | 0 | 0 | 1 | 1  | 1  | 2352  | 0.535557416 | -2.516649978 | 3.503992741 | -0.718223514 | 0.472619482 | 0.998252924 |
| chr16:56419830-56448256   | exonic | AMFR     | 16 | 56419830  | 56448256  | 0 | 0 | 0 | 1 | 1  | 1  | 28426 | 0.535557416 | -2.516649978 | 3.503992741 | -0.718223514 | 0.472619482 | 0.998252924 |
| chr2:100035289-100052403  | exonic | REV1     | 2  | 100035289 | 100052403 | 0 | 0 | 0 | 1 | 1  | 1  | 17114 | 0.535557416 | -2.516649978 | 3.503992741 | -0.718223514 | 0.472619482 | 0.998252924 |
| chr2:242178063-242189395  | exonic | HDLBP    | 2  | 242178063 | 242189395 | 0 | 0 | 0 | 1 | 1  | 1  | 11332 | 0.535557416 | -2.516649978 | 3.503992741 | -0.718223514 | 0.472619482 | 0.998252924 |
| chr2:61447444-61450431    | exonic | USP34    | 2  | 61447444  | 61450431  | 0 | 0 | 0 | 1 | 1  | 1  | 2987  | 0.535557416 | -2.516649978 | 3.503992741 | -0.718223514 | 0.472619482 | 0.998252924 |
| chr4:6925099-6925838      | exonic | TBC1D14  | 4  | 6925099   | 6925838   | 0 | 0 | 0 | 1 | 1  | 1  | 739   | 0.535557416 | -2.516649978 | 3.503992741 | -0.718223514 | 0.472619482 | 0.998252924 |
| chr18:196636-199316       | exonic | USP14    | 18 | 196636    | 199316    | 0 | 0 | 1 | 4 | 0  | 2  | 2680  | 1.238951784 | -2.514909203 | 2.636787064 | -0.95377789  | 0.340196083 | 0.998252924 |
| chr17:18768781-18769265   | exonic | PRPSAP2  | 17 | 18768781  | 18769265  | 0 | 1 | 0 | 2 | 4  | 1  | 484   | 1.179226865 | -2.511896982 | 2.470237659 | -1.0168645   | 0.309217893 | 0.998252924 |
| chr13:20567202-20568059   | exonic | ZMYM2    | 13 | 20567202  | 20568059  | 0 | 0 | 1 | 0 | 8  | 0  | 857   | 1.1654884   | -2.497876581 | 2.928722985 | -0.852889329 | NA          | NA          |
| chr5:58476420-58511794    | exonic | PDE4D    | 5  | 58476420  | 58511794  | 0 | 0 | 1 | 0 | 8  | 0  | 35374 | 1.1654884   | -2.497876581 | 2.928722985 | -0.852889329 | NA          | NA          |
| chr10:32308785-32310215   | exonic | KIF5B    | 10 | 32308785  | 32310215  | 0 | 1 | 0 | 3 | 3  | 1  | 1430  | 1.164510829 | -2.491831003 | 2.470032878 | -1.008825034 | 0.313058553 | 0.998252924 |
| chr10:72619127-72629654   | exonic | SGPL1    | 10 | 72619127  | 72629654  | 0 | 0 | 0 | 2 | 0  | 1  | 10527 | 0.520841379 | -2.484135211 | 3.855538143 | -0.644303109 | 0.5193789   | 0.998252924 |
| chr11:116629789-116636162 | exonic | BUD13    | 11 | 116629789 | 116636162 | 0 | 0 | 0 | 2 | 0  | 1  | 6373  | 0.520841379 | -2.484135211 | 3.855538143 | -0.644303109 | 0.5193789   | 0.998252924 |
| chr14:31139461-31177271   | exonic | SCFD1    | 14 | 31139461  | 31177271  | 0 | 0 | 0 | 2 | 0  | 1  | 37810 | 0.520841379 | -2.484135211 | 3.855538143 | -0.644303109 | 0.5193789   | 0.998252924 |
| chr16:19194849-19195469   | exonic | SYT17    | 16 | 19194849  | 19195469  | 0 | 0 | 0 | 2 | 0  | 1  | 620   | 0.520841379 | -2.484135211 | 3.855538143 | -0.644303109 | 0.5193789   | 0.998252924 |
| chr17:38209550-38209888   | exonic | MED24    | 17 | 38209550  | 38209888  | 0 | 0 | 0 | 2 | 0  | 1  | 338   | 0.520841379 | -2.484135211 | 3.855538143 | -0.644303109 | 0.5193789   | 0.998252924 |
| chr2:219103386-219104207  | exonic | ARPC2    | 2  | 219103386 | 219104207 | 0 | 0 | 0 | 2 | 0  | 1  | 821   | 0.520841379 | -2.484135211 | 3.855538143 | -0.644303109 | 0.5193789   | 0.998252924 |

|                           |            |                                                                |    |           |           |    |   |   |    |   |    |        |             |              |             |              |             |             |
|---------------------------|------------|----------------------------------------------------------------|----|-----------|-----------|----|---|---|----|---|----|--------|-------------|--------------|-------------|--------------|-------------|-------------|
| chr2:39505547-39515421    | exonic     | MAP4K3                                                         | 2  | 39505547  | 39515421  | 0  | 0 | 0 | 2  | 0 | 1  | 9874   | 0.520841379 | -2.484135211 | 3.855538143 | -0.644303109 | 0.5193789   | 0.998252924 |
| chr20:57470666-57480535   | exonic     | GNAS                                                           | 20 | 57470666  | 57480535  | 0  | 0 | 0 | 2  | 0 | 1  | 9869   | 0.520841379 | -2.484135211 | 3.855538143 | -0.644303109 | 0.5193789   | 0.998252924 |
| chr21:33073307-33078670   | exonic     | SCAF4                                                          | 21 | 33073307  | 33078670  | 0  | 0 | 0 | 2  | 0 | 1  | 5363   | 0.520841379 | -2.484135211 | 3.855538143 | -0.644303109 | 0.5193789   | 0.998252924 |
| chr22:50181037-50187942   | exonic     | BRD1                                                           | 22 | 50181037  | 50187942  | 0  | 0 | 0 | 2  | 0 | 1  | 6905   | 0.520841379 | -2.484135211 | 3.855538143 | -0.644303109 | 0.5193789   | 0.998252924 |
| chr3:119562101-119582452  | exonic     | GSK3B                                                          | 3  | 119562101 | 119582452 | 0  | 0 | 0 | 2  | 0 | 1  | 20351  | 0.520841379 | -2.484135211 | 3.855538143 | -0.644303109 | 0.5193789   | 0.998252924 |
| chr4:95494501-95561601    | exonic     | PDLIM5                                                         | 4  | 95494501  | 95561601  | 0  | 0 | 0 | 2  | 0 | 1  | 67100  | 0.520841379 | -2.484135211 | 3.855538143 | -0.644303109 | 0.5193789   | 0.998252924 |
| chr6:47220991-47254331    | exonic     | TNFRSF21                                                       | 6  | 47220991  | 47254331  | 0  | 0 | 0 | 2  | 0 | 1  | 33340  | 0.520841379 | -2.484135211 | 3.855538143 | -0.644303109 | 0.5193789   | 0.998252924 |
| chr8:99560196-99608397    | exonic     | STK3                                                           | 8  | 99560196  | 99608397  | 0  | 0 | 0 | 2  | 0 | 1  | 48201  | 0.520841379 | -2.484135211 | 3.855538143 | -0.644303109 | 0.5193789   | 0.998252924 |
| chr11:9451220-9452550     | exonic     | IPO7                                                           | 11 | 9451220   | 9452550   | 2  | 0 | 1 | 4  | 6 | 5  | 1330   | 3.147746026 | -2.477880116 | 1.642767645 | -1.508357024 | 0.131463176 | 0.998252924 |
| chr17:37866065-37872192   | exonic     | ERBB2                                                          | 17 | 37866065  | 37872192  | 0  | 1 | 1 | 18 | 0 | 0  | 6127   | 2.285149757 | -2.474196609 | 2.239777429 | -1.104661819 | NA          | NA          |
| chr4:54292038-54294350    | exonic     | FIP1L1                                                         | 4  | 54292038  | 54294350  | 0  | 1 | 0 | 2  | 6 | 0  | 2312   | 1.1130631   | -2.465925923 | 2.698386659 | -0.913851955 | 0.360794642 | 0.998252924 |
| chr2:215645283-215661841  | exonic     | BARD1                                                          | 2  | 215645283 | 215661841 | 1  | 0 | 0 | 0  | 1 | 3  | 16558  | 1.174670191 | -2.464277809 | 2.739000097 | -0.899699789 | NA          | NA          |
| chr21:38480691-38507814   | exonic     | TTC3                                                           | 21 | 38480691  | 38507814  | 1  | 0 | 0 | 0  | 1 | 3  | 27123  | 1.174670191 | -2.464277809 | 2.739000097 | -0.899699789 | NA          | NA          |
| chr6:147527106-147560406  | exonic     | STXBP5                                                         | 6  | 147527106 | 147560406 | 1  | 0 | 0 | 0  | 1 | 3  | 33300  | 1.174670191 | -2.464277809 | 2.739000097 | -0.899699789 | NA          | NA          |
| chr2:168931491-168986268  | exonic     | STK39                                                          | 2  | 168931491 | 168986268 | 15 | 5 | 4 | 7  | 4 | 13 | 54777  | 1.79906693  | -2.460152255 | 3.917791069 | -0.627943709 | NA          | NA          |
| chr1:189714643-189760893  | intergenic | <small>NONE (dist=NONE), BRINP3 (dist=305904)</small>          | 1  | 189714643 | 189760893 | 0  | 0 | 0 | 0  | 4 | 0  | 46250  | 0.484109687 | -2.459087807 | 3.998695447 | -0.614972518 | NA          | NA          |
| chr1:24077334-24079008    | exonic     | TCEB3                                                          | 1  | 24077334  | 24079008  | 0  | 0 | 0 | 0  | 4 | 0  | 1674   | 0.484109687 | -2.459087807 | 3.998695447 | -0.614972518 | NA          | NA          |
| chr1:40878687-40882768    | exonic     | SMAP2                                                          | 1  | 40878687  | 40882768  | 0  | 0 | 0 | 0  | 4 | 0  | 4081   | 0.484109687 | -2.459087807 | 3.998695447 | -0.614972518 | NA          | NA          |
| chr1:44059565-44060986    | intronic   | PTPRF                                                          | 1  | 44059565  | 44060986  | 0  | 0 | 0 | 0  | 4 | 0  | 1421   | 0.484109687 | -2.459087807 | 3.998695447 | -0.614972518 | NA          | NA          |
| chr10:103699619-103717489 | exonic     | C10orf76                                                       | 10 | 103699619 | 103717489 | 0  | 0 | 0 | 0  | 4 | 0  | 17870  | 0.484109687 | -2.459087807 | 3.998695447 | -0.614972518 | NA          | NA          |
| chr10:116879948-116931050 | exonic     | ATRNL1                                                         | 10 | 116879948 | 116931050 | 0  | 0 | 0 | 0  | 4 | 0  | 51102  | 0.484109687 | -2.459087807 | 3.998695447 | -0.614972518 | NA          | NA          |
| chr10:96985305-97007123   | exonic     | ACSM6, PDLIM1                                                  | 10 | 96985305  | 97007123  | 0  | 0 | 0 | 0  | 4 | 0  | 21818  | 0.484109687 | -2.459087807 | 3.998695447 | -0.614972518 | NA          | NA          |
| chr10:97915083-97920158   | exonic     | ZNF518A                                                        | 10 | 97915083  | 97920158  | 0  | 0 | 0 | 0  | 4 | 0  | 5075   | 0.484109687 | -2.459087807 | 3.998695447 | -0.614972518 | NA          | NA          |
| chr11:87562451-87612330   | intergenic | <small>TNEM135 (dist=522575), RAB38 (dist=234085)</small>      | 11 | 87562451  | 87612330  | 0  | 0 | 0 | 0  | 4 | 0  | 49879  | 0.484109687 | -2.459087807 | 3.998695447 | -0.614972518 | NA          | NA          |
| chr12:100491142-100492319 | exonic     | UHRF1BP1L                                                      | 12 | 100491142 | 100492319 | 0  | 0 | 0 | 0  | 4 | 0  | 1177   | 0.484109687 | -2.459087807 | 3.998695447 | -0.614972518 | NA          | NA          |
| chr12:105238249-105322472 | exonic     | SLC41A2                                                        | 12 | 105238249 | 105322472 | 0  | 0 | 0 | 0  | 4 | 0  | 84223  | 0.484109687 | -2.459087807 | 3.998695447 | -0.614972518 | NA          | NA          |
| chr12:29492784-29494151   | exonic     | ERGIC2                                                         | 12 | 29492784  | 29494151  | 0  | 0 | 0 | 0  | 4 | 0  | 1367   | 0.484109687 | -2.459087807 | 3.998695447 | -0.614972518 | NA          | NA          |
| chr12:46655079-46655634   | intronic   | SLC38A1                                                        | 12 | 46655079  | 46655634  | 0  | 0 | 0 | 0  | 4 | 0  | 555    | 0.484109687 | -2.459087807 | 3.998695447 | -0.614972518 | NA          | NA          |
| chr12:5269473-5281055     | intergenic | <small>KCNK5 (dist=113519), LOC101929584 (dist=82107)</small>  | 12 | 5269473   | 5281055   | 0  | 0 | 0 | 0  | 4 | 0  | 11582  | 0.484109687 | -2.459087807 | 3.998695447 | -0.614972518 | NA          | NA          |
| chr12:56493361-56494138   | exonic     | ERBB3                                                          | 12 | 56493361  | 56494138  | 0  | 0 | 0 | 0  | 4 | 0  | 777    | 0.484109687 | -2.459087807 | 3.998695447 | -0.614972518 | NA          | NA          |
| chr12:90049456-90049884   | exonic     | ATP2B1                                                         | 12 | 90049456  | 90049884  | 0  | 0 | 0 | 0  | 4 | 0  | 428    | 0.484109687 | -2.459087807 | 3.998695447 | -0.614972518 | NA          | NA          |
| chr13:42744987-42746904   | intronic   | DGKH                                                           | 13 | 42744987  | 42746904  | 0  | 0 | 0 | 0  | 4 | 0  | 1917   | 0.484109687 | -2.459087807 | 3.998695447 | -0.614972518 | NA          | NA          |
| chr13:76195899-76335174   | exonic     | LMO7                                                           | 13 | 76195899  | 76335174  | 0  | 0 | 0 | 0  | 4 | 0  | 139275 | 0.484109687 | -2.459087807 | 3.998695447 | -0.614972518 | NA          | NA          |
| chr14:103865288-103894777 | exonic     | MARK3                                                          | 14 | 103865288 | 103894777 | 0  | 0 | 0 | 0  | 4 | 0  | 29489  | 0.484109687 | -2.459087807 | 3.998695447 | -0.614972518 | NA          | NA          |
| chr14:27675043-27676324   | intergenic | <small>NR4A3070 (dist=291094), LINC00645 (dist=405470)</small> | 14 | 27675043  | 27676324  | 0  | 0 | 0 | 0  | 4 | 0  | 1281   | 0.484109687 | -2.459087807 | 3.998695447 | -0.614972518 | NA          | NA          |

|                          |          |                                                      |    |           |           |   |   |   |   |   |   |       |             |              |             |              |    |    |
|--------------------------|----------|------------------------------------------------------|----|-----------|-----------|---|---|---|---|---|---|-------|-------------|--------------|-------------|--------------|----|----|
| chr14:31185130-31204064  | exonic   | SCFD1                                                | 14 | 31185130  | 31204064  | 0 | 0 | 0 | 0 | 4 | 0 | 18934 | 0.484109687 | -2.459087807 | 3.998695447 | -0.614972518 | NA | NA |
| chr14:64449347-64450604  | exonic   | SYNE2                                                | 14 | 64449347  | 64450604  | 0 | 0 | 0 | 0 | 4 | 0 | 1257  | 0.484109687 | -2.459087807 | 3.998695447 | -0.614972518 | NA | NA |
| chr14:71492833-71502874  | exonic   | PCNX                                                 | 14 | 71492833  | 71502874  | 0 | 0 | 0 | 0 | 4 | 0 | 10041 | 0.484109687 | -2.459087807 | 3.998695447 | -0.614972518 | NA | NA |
| chr14:78063528-78063723  | exonic   | SPTLC2                                               | 14 | 78063528  | 78063723  | 0 | 0 | 0 | 0 | 4 | 0 | 195   | 0.484109687 | -2.459087807 | 3.998695447 | -0.614972518 | NA | NA |
| chr14:92126180-92195823  | exonic   | CATSPERB                                             | 14 | 92126180  | 92195823  | 0 | 0 | 0 | 0 | 3 | 0 | 69643 | 0.484109687 | -2.459087807 | 3.998695447 | -0.614972518 | NA | NA |
| chr14:92136157-92185822  | exonic   | CATSPERB                                             | 14 | 92136157  | 92185822  | 0 | 0 | 0 | 0 | 4 | 0 | 49665 | 0.484109687 | -2.459087807 | 3.998695447 | -0.614972518 | NA | NA |
| chr14:92136157-92195823  | exonic   | CATSPERB                                             | 14 | 92136157  | 92195823  | 0 | 0 | 0 | 0 | 3 | 0 | 59666 | 0.484109687 | -2.459087807 | 3.998695447 | -0.614972518 | NA | NA |
| chr15:34376410-34380334  | exonic   | EMC7                                                 | 15 | 34376410  | 34380334  | 0 | 0 | 0 | 0 | 4 | 0 | 3924  | 0.484109687 | -2.459087807 | 3.998695447 | -0.614972518 | NA | NA |
| chr15:44843074-44843720  | exonic   | EIF3J                                                | 15 | 44843074  | 44843720  | 0 | 0 | 0 | 0 | 4 | 0 | 646   | 0.484109687 | -2.459087807 | 3.998695447 | -0.614972518 | NA | NA |
| chr16:16235030-16236799  | exonic   | ABCC1                                                | 16 | 16235030  | 16236799  | 0 | 0 | 0 | 0 | 4 | 0 | 1769  | 0.484109687 | -2.459087807 | 3.998695447 | -0.614972518 | NA | NA |
| chr16:18844261-18856973  | exonic   | SMG1                                                 | 16 | 18844261  | 18856973  | 0 | 0 | 0 | 2 | 4 | 0 | 12712 | 0.484109687 | -2.459087807 | 3.998695447 | -0.614972518 | NA | NA |
| chr16:27445667-27449008  | exonic   | IL21R                                                | 16 | 27445667  | 27449008  | 0 | 0 | 0 | 0 | 4 | 0 | 3341  | 0.484109687 | -2.459087807 | 3.998695447 | -0.614972518 | NA | NA |
| chr16:71690473-71713438  | exonic   | PHLPP2                                               | 16 | 71690473  | 71713438  | 0 | 0 | 0 | 0 | 4 | 0 | 22965 | 0.484109687 | -2.459087807 | 3.998695447 | -0.614972518 | NA | NA |
| chr16:71692135-71713438  | exonic   | PHLPP2                                               | 16 | 71692135  | 71713438  | 0 | 0 | 0 | 0 | 4 | 0 | 21303 | 0.484109687 | -2.459087807 | 3.998695447 | -0.614972518 | NA | NA |
| chr17:25630392-25631937  | exonic   | WSB1                                                 | 17 | 25630392  | 25631937  | 0 | 0 | 0 | 0 | 4 | 0 | 1545  | 0.484109687 | -2.459087807 | 3.998695447 | -0.614972518 | NA | NA |
| chr17:37037264-37044625  | intronic | LASP1                                                | 17 | 37037264  | 37044625  | 0 | 0 | 0 | 0 | 4 | 0 | 7361  | 0.484109687 | -2.459087807 | 3.998695447 | -0.614972518 | NA | NA |
| chr18:48573290-48575694  | exonic   | SMAD4                                                | 18 | 48573290  | 48575694  | 0 | 0 | 0 | 0 | 4 | 0 | 2404  | 0.484109687 | -2.459087807 | 3.998695447 | -0.614972518 | NA | NA |
| chr19:23522033-23545527  | exonic   | ZNF91                                                | 19 | 23522033  | 23545527  | 0 | 0 | 0 | 0 | 4 | 0 | 23494 | 0.484109687 | -2.459087807 | 3.998695447 | -0.614972518 | NA | NA |
| chr19:24288742-24290845  | exonic   | ZNF254                                               | 19 | 24288742  | 24290845  | 0 | 0 | 0 | 0 | 4 | 0 | 2103  | 0.484109687 | -2.459087807 | 3.998695447 | -0.614972518 | NA | NA |
| chr19:37203287-37203769  | exonic   | ZNF567                                               | 19 | 37203287  | 37203769  | 0 | 0 | 0 | 0 | 4 | 0 | 482   | 0.484109687 | -2.459087807 | 3.998695447 | -0.614972518 | NA | NA |
| chr19:40391998-40406060  | exonic   | FCGBP                                                | 19 | 40391998  | 40406060  | 0 | 0 | 0 | 0 | 4 | 0 | 14062 | 0.484109687 | -2.459087807 | 3.998695447 | -0.614972518 | NA | NA |
| chr2:112817554-112873780 | exonic   | TMEM87B                                              | 2  | 112817554 | 112873780 | 0 | 0 | 0 | 0 | 4 | 0 | 56226 | 0.484109687 | -2.459087807 | 3.998695447 | -0.614972518 | NA | NA |
| chr2:44401901-44407536   | intronic | PPM1B                                                | 2  | 44401901  | 44407536  | 0 | 0 | 0 | 0 | 4 | 0 | 5635  | 0.484109687 | -2.459087807 | 3.998695447 | -0.614972518 | NA | NA |
| chr2:51149007-51153093   | exonic   | NRXN1                                                | 2  | 51149007  | 51153093  | 0 | 0 | 0 | 0 | 4 | 0 | 4086  | 0.484109687 | -2.459087807 | 3.998695447 | -0.614972518 | NA | NA |
| chr2:61406116-61408540   | UTR5     | <small>AHSX2(NM_152392:c.-5745_-5469delins0)</small> | 2  | 61406116  | 61408540  | 0 | 0 | 0 | 0 | 4 | 0 | 2424  | 0.484109687 | -2.459087807 | 3.998695447 | -0.614972518 | NA | NA |
| chr2:65339140-65339391   | intronic | RAB1A                                                | 2  | 65339140  | 65339391  | 0 | 0 | 0 | 0 | 4 | 0 | 251   | 0.484109687 | -2.459087807 | 3.998695447 | -0.614972518 | NA | NA |
| chr20:43139929-43142681  | exonic   | SERINC3                                              | 20 | 43139929  | 43142681  | 0 | 0 | 0 | 0 | 4 | 0 | 2752  | 0.484109687 | -2.459087807 | 3.998695447 | -0.614972518 | NA | NA |
| chr20:43600718-43623898  | exonic   | STK4                                                 | 20 | 43600718  | 43623898  | 0 | 0 | 0 | 0 | 4 | 0 | 23180 | 0.484109687 | -2.459087807 | 3.998695447 | -0.614972518 | NA | NA |
| chr20:43600718-43625947  | exonic   | STK4                                                 | 20 | 43600718  | 43625947  | 0 | 0 | 0 | 0 | 4 | 0 | 25229 | 0.484109687 | -2.459087807 | 3.998695447 | -0.614972518 | NA | NA |
| chr22:38019333-38019640  | exonic   | GGA1                                                 | 22 | 38019333  | 38019640  | 0 | 0 | 0 | 0 | 4 | 0 | 307   | 0.484109687 | -2.459087807 | 3.998695447 | -0.614972518 | NA | NA |
| chr22:43227554-43231499  | exonic   | ARFGAP3                                              | 22 | 43227554  | 43231499  | 0 | 0 | 0 | 0 | 4 | 0 | 3945  | 0.484109687 | -2.459087807 | 3.998695447 | -0.614972518 | NA | NA |
| chr3:124456415-124463050 | exonic   | UMPS                                                 | 3  | 124456415 | 124463050 | 0 | 0 | 0 | 0 | 4 | 0 | 6635  | 0.484109687 | -2.459087807 | 3.998695447 | -0.614972518 | NA | NA |
| chr3:158399784-158409437 | exonic   | GFM1                                                 | 3  | 158399784 | 158409437 | 0 | 0 | 0 | 0 | 4 | 0 | 9653  | 0.484109687 | -2.459087807 | 3.998695447 | -0.614972518 | NA | NA |
| chr3:32745359-32750312   | exonic   | CNOT10                                               | 3  | 32745359  | 32750312  | 0 | 0 | 0 | 0 | 4 | 0 | 4953  | 0.484109687 | -2.459087807 | 3.998695447 | -0.614972518 | NA | NA |
| chr3:33725850-33731424   | exonic   | CLASP2                                               | 3  | 33725850  | 33731424  | 0 | 0 | 0 | 0 | 4 | 0 | 5574  | 0.484109687 | -2.459087807 | 3.998695447 | -0.614972518 | NA | NA |



|                           |            |                                                              |    |           |           |   |   |   |   |   |   |       |             |              |             |              |             |             |
|---------------------------|------------|--------------------------------------------------------------|----|-----------|-----------|---|---|---|---|---|---|-------|-------------|--------------|-------------|--------------|-------------|-------------|
| chr3:47752173-47770584    | exonic     | SMARCC1                                                      | 3  | 47752173  | 47770584  | 0 | 0 | 0 | 0 | 4 | 0 | 18411 | 0.484109687 | -2.459087807 | 3.998695447 | -0.614972518 | NA          | NA          |
| chr4:120166491-120194863  | exonic     | USP53                                                        | 4  | 120166491 | 120194863 | 0 | 0 | 0 | 0 | 4 | 0 | 28372 | 0.484109687 | -2.459087807 | 3.998695447 | -0.614972518 | NA          | NA          |
| chr4:148575002-148575717  | exonic     | PRMT9                                                        | 4  | 148575002 | 148575717 | 0 | 0 | 0 | 0 | 4 | 0 | 715   | 0.484109687 | -2.459087807 | 3.998695447 | -0.614972518 | NA          | NA          |
| chr4:173852651-173888267  | exonic     | GALNTL6                                                      | 4  | 173852651 | 173888267 | 0 | 0 | 0 | 0 | 4 | 0 | 35616 | 0.484109687 | -2.459087807 | 3.998695447 | -0.614972518 | NA          | NA          |
| chr4:3317796-3319778      | exonic     | RGS12                                                        | 4  | 3317796   | 3319778   | 0 | 0 | 0 | 0 | 4 | 0 | 1982  | 0.484109687 | -2.459087807 | 3.998695447 | -0.614972518 | NA          | NA          |
| chr5:142966228-142967057  | intergenic | <small>NR3C1 (dist=151151), MIR5197 (dist=92368)</small>     | 5  | 142966228 | 142967057 | 0 | 0 | 0 | 0 | 4 | 0 | 829   | 0.484109687 | -2.459087807 | 3.998695447 | -0.614972518 | NA          | NA          |
| chr5:68400457-68410323    | exonic     | SLC30A5                                                      | 5  | 68400457  | 68410323  | 0 | 0 | 0 | 0 | 4 | 0 | 9866  | 0.484109687 | -2.459087807 | 3.998695447 | -0.614972518 | NA          | NA          |
| chr6:149893420-149903739  | exonic     | GINM1                                                        | 6  | 149893420 | 149903739 | 0 | 0 | 0 | 0 | 4 | 0 | 10319 | 0.484109687 | -2.459087807 | 3.998695447 | -0.614972518 | NA          | NA          |
| chr6:42992722-42995215    | exonic     | RRP36                                                        | 6  | 42992722  | 42995215  | 0 | 0 | 0 | 0 | 4 | 0 | 2493  | 0.484109687 | -2.459087807 | 3.998695447 | -0.614972518 | NA          | NA          |
| chr6:46593154-46610035    | exonic     | CYP39A1                                                      | 6  | 46593154  | 46610035  | 0 | 0 | 0 | 0 | 4 | 0 | 16881 | 0.484109687 | -2.459087807 | 3.998695447 | -0.614972518 | NA          | NA          |
| chr6:56915572-56920595    | exonic     | KIAA1586                                                     | 6  | 56915572  | 56920595  | 0 | 0 | 0 | 0 | 4 | 0 | 5023  | 0.484109687 | -2.459087807 | 3.998695447 | -0.614972518 | NA          | NA          |
| chr6:82900789-82914675    | exonic     | IBTK                                                         | 6  | 82900789  | 82914675  | 0 | 0 | 0 | 0 | 4 | 0 | 13886 | 0.484109687 | -2.459087807 | 3.998695447 | -0.614972518 | NA          | NA          |
| chr7:104645765-104649656  | intergenic | <small>LINC01004 (dist=14153), KMT2E-AS1 (dist=1333)</small> | 7  | 104645765 | 104649656 | 0 | 0 | 0 | 0 | 4 | 0 | 3891  | 0.484109687 | -2.459087807 | 3.998695447 | -0.614972518 | NA          | NA          |
| chr7:47451325-47481653    | exonic     | TNS3                                                         | 7  | 47451325  | 47481653  | 0 | 0 | 0 | 0 | 4 | 0 | 30328 | 0.484109687 | -2.459087807 | 3.998695447 | -0.614972518 | NA          | NA          |
| chr8:17581180-17613470    | exonic     | MTUS1                                                        | 8  | 17581180  | 17613470  | 0 | 0 | 0 | 0 | 4 | 0 | 32290 | 0.484109687 | -2.459087807 | 3.998695447 | -0.614972518 | NA          | NA          |
| chr8:59851860-59872567    | exonic     | TOX                                                          | 8  | 59851860  | 59872567  | 0 | 0 | 0 | 0 | 4 | 0 | 20707 | 0.484109687 | -2.459087807 | 3.998695447 | -0.614972518 | NA          | NA          |
| chr8:93929157-93941802    | exonic     | TRIQQ                                                        | 8  | 93929157  | 93941802  | 0 | 0 | 0 | 0 | 4 | 0 | 12645 | 0.484109687 | -2.459087807 | 3.998695447 | -0.614972518 | NA          | NA          |
| chr9:100837852-100840629  | exonic     | NANS                                                         | 9  | 100837852 | 100840629 | 0 | 0 | 0 | 0 | 4 | 0 | 2777  | 0.484109687 | -2.459087807 | 3.998695447 | -0.614972518 | NA          | NA          |
| chr9:13247634-13276770    | exonic     | MPDZ                                                         | 9  | 13247634  | 13276770  | 0 | 0 | 0 | 0 | 4 | 0 | 29136 | 0.484109687 | -2.459087807 | 3.998695447 | -0.614972518 | NA          | NA          |
| chr9:19423859-19435082    | exonic     | ACER2                                                        | 9  | 19423859  | 19435082  | 0 | 0 | 0 | 0 | 4 | 0 | 11223 | 0.484109687 | -2.459087807 | 3.998695447 | -0.614972518 | NA          | NA          |
| chr9:86200468-86201283    | intergenic | <small>FRMD3 (dist=47120), IDNK (dist=36681)</small>         | 9  | 86200468  | 86201283  | 0 | 0 | 0 | 0 | 4 | 0 | 815   | 0.484109687 | -2.459087807 | 3.998695447 | -0.614972518 | NA          | NA          |
| chr4:103446668-103459113  | exonic     | NFKB1                                                        | 4  | 103446668 | 103459113 | 2 | 0 | 0 | 5 | 8 | 0 | 12445 | 1.757750186 | -2.454231493 | 2.292924735 | -1.070349783 | 0.284461894 | 0.998252924 |
| chr17:57814813-57851246   | exonic     | VMP1                                                         | 17 | 57814813  | 57851246  | 0 | 0 | 1 | 3 | 5 | 0 | 36433 | 1.12134029  | -2.44661448  | 2.676160792 | -0.914225515 | 0.36059836  | 0.998252924 |
| chr3:122942405-122978436  | exonic     | SEC22A                                                       | 3  | 122942405 | 122978436 | 0 | 1 | 0 | 3 | 5 | 0 | 36031 | 1.098347064 | -2.44582368  | 2.693542462 | -0.908032346 | 0.363861133 | 0.998252924 |
| chr18:19236821-19239304   | exonic     | ABHD3                                                        | 18 | 19236821  | 19239304  | 1 | 0 | 0 | 3 | 5 | 0 | 2483  | 1.053058207 | -2.444179261 | 2.730867749 | -0.895019271 | 0.370776787 | 0.998252924 |
| chr15:77544708-77578846   | UTR5       | <small>PEAK1 (NM_024776:c.-104216_-104578delins0)</small>    | 15 | 77544708  | 77578846  | 5 | 0 | 0 | 6 | 4 | 0 | 34138 | 1.743034149 | -2.441447073 | 2.293858126 | -1.064340922 | 0.287174286 | 0.998252924 |
| chr11:17126715-17134213   | exonic     | PIK3C2A                                                      | 11 | 17126715  | 17134213  | 0 | 0 | 1 | 2 | 0 | 3 | 7498  | 1.228236237 | -2.438166943 | 2.70181309  | -0.902418806 | NA          | NA          |
| chr22:41521867-41569788   | exonic     | EP300                                                        | 22 | 41521867  | 41569788  | 0 | 0 | 1 | 1 | 0 | 3 | 47921 | 1.228236237 | -2.438166943 | 2.70181309  | -0.902418806 | NA          | NA          |
| chr10:103552595-103567658 | exonic     | MGEA5                                                        | 10 | 103552595 | 103567658 | 1 | 0 | 1 | 5 | 5 | 2 | 15063 | 2.079387221 | -2.431667318 | 1.91093011  | -1.27250458  | 0.203193898 | 0.998252924 |
| chr17:61271351-61278318   | exonic     | TANC2                                                        | 17 | 61271351  | 61278318  | 0 | 2 | 0 | 1 | 0 | 6 | 6967  | 2.304174636 | -2.424574111 | 2.251624038 | -1.076811257 | NA          | NA          |
| chr1:171492359-171556890  | exonic     | PRRC2C                                                       | 1  | 171492359 | 171556890 | 0 | 0 | 0 | 1 | 3 | 0 | 64531 | 0.469393651 | -2.418542578 | 3.993187854 | -0.605667118 | 0.544735823 | 0.998252924 |
| chr1:186862142-186880521  | exonic     | PLA2G4A                                                      | 1  | 186862142 | 186880521 | 0 | 0 | 0 | 1 | 3 | 0 | 18379 | 0.469393651 | -2.418542578 | 3.993187854 | -0.605667118 | 0.544735823 | 0.998252924 |
| chr10:7262372-7269899     | exonic     | SFMBT2                                                       | 10 | 7262372   | 7269899   | 0 | 0 | 0 | 1 | 3 | 0 | 7527  | 0.469393651 | -2.418542578 | 3.993187854 | -0.605667118 | 0.544735823 | 0.998252924 |
| chr14:45473263-45475470   | exonic     | FAM179B                                                      | 14 | 45473263  | 45475470  | 0 | 0 | 0 | 1 | 3 | 0 | 2207  | 0.469393651 | -2.418542578 | 3.993187854 | -0.605667118 | 0.544735823 | 0.998252924 |
| chr14:50611887-50625364   | exonic     | SOS2                                                         | 14 | 50611887  | 50625364  | 0 | 0 | 0 | 1 | 3 | 0 | 13477 | 0.469393651 | -2.418542578 | 3.993187854 | -0.605667118 | 0.544735823 | 0.998252924 |

|                           |          |                |    |           |           |   |   |   |   |   |   |       |             |              |             |              |             |             |
|---------------------------|----------|----------------|----|-----------|-----------|---|---|---|---|---|---|-------|-------------|--------------|-------------|--------------|-------------|-------------|
| chr15:50862300-50867986   | exonic   | TRPM7          | 15 | 50862300  | 50867986  | 0 | 0 | 0 | 1 | 3 | 0 | 5686  | 0.469393651 | -2.418542578 | 3.993187854 | -0.605667118 | 0.544735823 | 0.998252924 |
| chr15:76168527-76175765   | exonic   | UBE2Q2         | 15 | 76168527  | 76175765  | 0 | 0 | 0 | 1 | 3 | 0 | 7238  | 0.469393651 | -2.418542578 | 3.993187854 | -0.605667118 | 0.544735823 | 0.998252924 |
| chr17:27248705-27251320   | exonic   | PHF12          | 17 | 27248705  | 27251320  | 0 | 0 | 0 | 1 | 3 | 0 | 2615  | 0.469393651 | -2.418542578 | 3.993187854 | -0.605667118 | 0.544735823 | 0.998252924 |
| chr18:19345732-19378189   | exonic   | MIB1           | 18 | 19345732  | 19378189  | 3 | 2 | 0 | 5 | 1 | 0 | 32457 | 0.469393651 | -2.418542578 | 3.993187854 | -0.605667118 | 0.544735823 | 0.998252924 |
| chr18:1966636-203190      | exonic   | USP14          | 18 | 1966636   | 203190    | 0 | 0 | 0 | 1 | 3 | 0 | 6554  | 0.469393651 | -2.418542578 | 3.993187854 | -0.605667118 | 0.544735823 | 0.998252924 |
| chr18:2732262-2740819     | exonic   | SMCHD1         | 18 | 2732262   | 2740819   | 0 | 0 | 0 | 1 | 3 | 0 | 8557  | 0.469393651 | -2.418542578 | 3.993187854 | -0.605667118 | 0.544735823 | 0.998252924 |
| chr18:76953182-76974038   | exonic   | ATP9B          | 18 | 76953182  | 76974038  | 0 | 0 | 0 | 1 | 3 | 0 | 20856 | 0.469393651 | -2.418542578 | 3.993187854 | -0.605667118 | 0.544735823 | 0.998252924 |
| chr19:52364156-52383654   | exonic   | ZNF577         | 19 | 52364156  | 52383654  | 0 | 0 | 0 | 1 | 3 | 0 | 19498 | 0.469393651 | -2.418542578 | 3.993187854 | -0.605667118 | 0.544735823 | 0.998252924 |
| chr2:170393736-170401345  | exonic   | FASTKD1        | 2  | 170393736 | 170401345 | 0 | 0 | 0 | 1 | 3 | 0 | 7609  | 0.469393651 | -2.418542578 | 3.993187854 | -0.605667118 | 0.544735823 | 0.998252924 |
| chr2:201790558-201800615  | exonic   | ORC2           | 2  | 201790558 | 201800615 | 0 | 0 | 0 | 1 | 3 | 0 | 10057 | 0.469393651 | -2.418542578 | 3.993187854 | -0.605667118 | 0.544735823 | 0.998252924 |
| chr2:85625142-85626408    | exonic   | CAPG           | 2  | 85625142  | 85626408  | 0 | 0 | 0 | 1 | 3 | 0 | 1266  | 0.469393651 | -2.418542578 | 3.993187854 | -0.605667118 | 0.544735823 | 0.998252924 |
| chr3:136191254-136196254  | exonic   | STAG1          | 3  | 136191254 | 136196254 | 0 | 0 | 0 | 1 | 3 | 0 | 5000  | 0.469393651 | -2.418542578 | 3.993187854 | -0.605667118 | 0.544735823 | 0.998252924 |
| chr3:196846280-196869639  | exonic   | DLG1           | 3  | 196846280 | 196869639 | 0 | 0 | 0 | 1 | 3 | 0 | 23359 | 0.469393651 | -2.418542578 | 3.993187854 | -0.605667118 | 0.544735823 | 0.998252924 |
| chr5:112336780-112337371  | exonic   | DCP2           | 5  | 112336780 | 112337371 | 0 | 0 | 0 | 1 | 3 | 0 | 591   | 0.469393651 | -2.418542578 | 3.993187854 | -0.605667118 | 0.544735823 | 0.998252924 |
| chr5:131006155-131014868  | exonic   | FNIP1          | 5  | 131006155 | 131014868 | 0 | 0 | 0 | 1 | 3 | 0 | 8713  | 0.469393651 | -2.418542578 | 3.993187854 | -0.605667118 | 0.544735823 | 0.998252924 |
| chr6:17646297-17649531    | exonic   | NUP153         | 6  | 17646297  | 17649531  | 0 | 0 | 0 | 1 | 3 | 0 | 3234  | 0.469393651 | -2.418542578 | 3.993187854 | -0.605667118 | 0.544735823 | 0.998252924 |
| chr7:65444385-65445396    | exonic   | GUSB           | 7  | 65444385  | 65445396  | 0 | 0 | 0 | 1 | 3 | 0 | 1011  | 0.469393651 | -2.418542578 | 3.993187854 | -0.605667118 | 0.544735823 | 0.998252924 |
| chr8:131191509-131200429  | exonic   | ASAP1          | 8  | 131191509 | 131200429 | 0 | 0 | 0 | 1 | 3 | 0 | 8920  | 0.469393651 | -2.418542578 | 3.993187854 | -0.605667118 | 0.544735823 | 0.998252924 |
| chr9:27009017-27048272    | exonic   | IFT74          | 9  | 27009017  | 27048272  | 0 | 0 | 0 | 1 | 3 | 0 | 39255 | 0.469393651 | -2.418542578 | 3.993187854 | -0.605667118 | 0.544735823 | 0.998252924 |
| chrY:15435434-15438230    | exonic   | UTY            | Y  | 15435434  | 15438230  | 0 | 0 | 0 | 1 | 3 | 0 | 2796  | 0.469393651 | -2.418542578 | 3.993187854 | -0.605667118 | 0.544735823 | 0.998252924 |
| chr8:98817580-98837381    | exonic   | LAPTM4B        | 8  | 98817580  | 98837381  | 0 | 1 | 0 | 0 | 3 | 2 | 19801 | 1.153795282 | -2.411995729 | 2.705899    | -0.891384242 | 0.372723069 | 0.998252924 |
| chr15:59494524-59506919   | exonic   | LDHAL6B, MYO1E | 15 | 59494524  | 59506919  | 0 | 0 | 1 | 0 | 3 | 2 | 12395 | 1.176788509 | -2.411160012 | 2.690007658 | -0.89633946  | 0.37007149  | 0.998252924 |
| chr6:135639656-135716034  | exonic   | AHI1           | 6  | 135639656 | 135716034 | 0 | 0 | 1 | 0 | 3 | 2 | 76378 | 1.176788509 | -2.411160012 | 2.690007658 | -0.89633946  | 0.37007149  | 0.998252924 |
| chr5:132262812-132270633  | exonic   | AFF4           | 5  | 132262812 | 132270633 | 0 | 1 | 1 | 4 | 9 | 1 | 7821  | 2.19425577  | -2.40596908  | 1.906736146 | -1.261825914 | 0.207011435 | 0.998252924 |
| chr2:114486977-114493435  | exonic   | SLC35F5        | 2  | 114486977 | 114493435 | 1 | 0 | 0 | 1 | 2 | 2 | 6458  | 1.093790389 | -2.381026036 | 2.562274104 | -0.929262811 | 0.352752903 | 0.998252924 |
| chr1:166831439-166833158  | exonic   | TADA1          | 1  | 166831439 | 166833158 | 1 | 0 | 0 | 6 | 2 | 0 | 1719  | 1.008910097 | -2.379290873 | 2.780048114 | -0.855845214 | 0.392083402 | 0.998252924 |
| chr11:68369330-68370960   | exonic   | PPP6R3         | 11 | 68369330  | 68370960  | 1 | 0 | 0 | 6 | 2 | 0 | 1630  | 1.008910097 | -2.379290873 | 2.780048114 | -0.855845214 | 0.392083402 | 0.998252924 |
| chr11:7614362-7631653     | exonic   | PPFIBP2        | 11 | 7614362   | 7631653   | 1 | 0 | 0 | 6 | 2 | 0 | 17291 | 1.008910097 | -2.379290873 | 2.780048114 | -0.855845214 | 0.392083402 | 0.998252924 |
| chr1:109336203-109342927  | exonic   | STXBP3         | 1  | 109336203 | 109342927 | 0 | 1 | 0 | 1 | 2 | 2 | 6724  | 1.139079245 | -2.379038381 | 2.531997554 | -0.939589526 | 0.347428151 | 0.998252924 |
| chr12:112087742-112098479 | exonic   | BRAP           | 12 | 112087742 | 112098479 | 0 | 1 | 0 | 1 | 2 | 2 | 10737 | 1.139079245 | -2.379038381 | 2.531997554 | -0.939589526 | 0.347428151 | 0.998252924 |
| chr1:109167266-109172279  | exonic   | FAM102B        | 1  | 109167266 | 109172279 | 0 | 0 | 0 | 2 | 2 | 0 | 5013  | 0.454677614 | -2.376612476 | 4.003913481 | -0.593572385 | 0.552798155 | 0.998252924 |
| chr1:112184775-112185492  | intronic | RAP1A          | 1  | 112184775 | 112185492 | 0 | 0 | 0 | 2 | 2 | 0 | 717   | 0.454677614 | -2.376612476 | 4.003913481 | -0.593572385 | 0.552798155 | 0.998252924 |
| chr1:179955303-179961356  | exonic   | CEP350         | 1  | 179955303 | 179961356 | 0 | 0 | 0 | 2 | 2 | 0 | 6053  | 0.454677614 | -2.376612476 | 4.003913481 | -0.593572385 | 0.552798155 | 0.998252924 |
| chr1:204082042-204092932  | exonic   | SOX13          | 1  | 204082042 | 204092932 | 0 | 0 | 0 | 2 | 2 | 0 | 10890 | 0.454677614 | -2.376612476 | 4.003913481 | -0.593572385 | 0.552798155 | 0.998252924 |
| chr1:205585606-205597002  | exonic   | ELK4           | 1  | 205585606 | 205597002 | 0 | 0 | 0 | 2 | 2 | 0 | 11396 | 0.454677614 | -2.376612476 | 4.003913481 | -0.593572385 | 0.552798155 | 0.998252924 |

|                           |            |                                                                                   |    |           |           |   |   |   |   |   |   |       |             |              |             |              |             |             |
|---------------------------|------------|-----------------------------------------------------------------------------------|----|-----------|-----------|---|---|---|---|---|---|-------|-------------|--------------|-------------|--------------|-------------|-------------|
| chr1:237532833-237620035  | exonic     | RYR2                                                                              | 1  | 237532833 | 237620035 | 0 | 0 | 0 | 2 | 2 | 0 | 87202 | 0.454677614 | -2.376612476 | 4.003913481 | -0.593572385 | 0.552798155 | 0.998252924 |
| chr1:51079692-51087181    | intronic   | FAF1                                                                              | 1  | 51079692  | 51087181  | 0 | 0 | 0 | 2 | 2 | 0 | 7489  | 0.454677614 | -2.376612476 | 4.003913481 | -0.593572385 | 0.552798155 | 0.998252924 |
| chr10:69647174-69651312   | exonic     | SIRT1                                                                             | 10 | 69647174  | 69651312  | 0 | 0 | 0 | 2 | 2 | 0 | 4138  | 0.454677614 | -2.376612476 | 4.003913481 | -0.593572385 | 0.552798155 | 0.998252924 |
| chr10:73956568-73973089   | exonic     | ASCC1                                                                             | 10 | 73956568  | 73973089  | 0 | 0 | 0 | 2 | 2 | 0 | 16521 | 0.454677614 | -2.376612476 | 4.003913481 | -0.593572385 | 0.552798155 | 0.998252924 |
| chr11:33117851-33127610   | exonic     | CSTF3                                                                             | 11 | 33117851  | 33127610  | 0 | 0 | 0 | 2 | 2 | 0 | 9759  | 0.454677614 | -2.376612476 | 4.003913481 | -0.593572385 | 0.552798155 | 0.998252924 |
| chr12:121731003-121731845 | intronic   | CAMKK2                                                                            | 12 | 121731003 | 121731845 | 0 | 0 | 0 | 2 | 2 | 0 | 842   | 0.454677614 | -2.376612476 | 4.003913481 | -0.593572385 | 0.552798155 | 0.998252924 |
| chr12:124904502-124934413 | exonic     | NCOR2                                                                             | 12 | 124904502 | 124934413 | 0 | 0 | 0 | 2 | 2 | 0 | 29911 | 0.454677614 | -2.376612476 | 4.003913481 | -0.593572385 | 0.552798155 | 0.998252924 |
| chr12:541031-547720       | exonic     | CCDC77                                                                            | 12 | 541031    | 547720    | 0 | 0 | 0 | 2 | 2 | 0 | 6689  | 0.454677614 | -2.376612476 | 4.003913481 | -0.593572385 | 0.552798155 | 0.998252924 |
| chr12:69644909-69663448   | exonic     | CPSF6                                                                             | 12 | 69644909  | 69663448  | 0 | 0 | 0 | 2 | 2 | 0 | 18539 | 0.454677614 | -2.376612476 | 4.003913481 | -0.593572385 | 0.552798155 | 0.998252924 |
| chr12:72020039-72022817   | exonic     | ZFC3H1                                                                            | 12 | 72020039  | 72022817  | 0 | 0 | 0 | 2 | 2 | 0 | 2778  | 0.454677614 | -2.376612476 | 4.003913481 | -0.593572385 | 0.552798155 | 0.998252924 |
| chr14:75276082-75277123   | exonic     | YLPM1                                                                             | 14 | 75276082  | 75277123  | 0 | 0 | 0 | 2 | 2 | 0 | 1041  | 0.454677614 | -2.376612476 | 4.003913481 | -0.593572385 | 0.552798155 | 0.998252924 |
| chr16:14687157-14700383   | exonic     | PARN                                                                              | 16 | 14687157  | 14700383  | 0 | 0 | 0 | 2 | 2 | 0 | 13226 | 0.454677614 | -2.376612476 | 4.003913481 | -0.593572385 | 0.552798155 | 0.998252924 |
| chr16:84132657-84135712   | exonic     | MBTPS1                                                                            | 16 | 84132657  | 84135712  | 0 | 0 | 0 | 2 | 2 | 0 | 3055  | 0.454677614 | -2.376612476 | 4.003913481 | -0.593572385 | 0.552798155 | 0.998252924 |
| chr17:18768781-18775962   | exonic     | PRPSAP2                                                                           | 17 | 18768781  | 18775962  | 0 | 0 | 0 | 2 | 2 | 0 | 7181  | 0.454677614 | -2.376612476 | 4.003913481 | -0.593572385 | 0.552798155 | 0.998252924 |
| chr17:36517593-36522300   | exonic     | SOCS7                                                                             | 17 | 36517593  | 36522300  | 0 | 0 | 0 | 2 | 2 | 0 | 4707  | 0.454677614 | -2.376612476 | 4.003913481 | -0.593572385 | 0.552798155 | 0.998252924 |
| chr17:45447802-45456619   | exonic     | EFCAB13                                                                           | 17 | 45447802  | 45456619  | 0 | 0 | 0 | 2 | 2 | 0 | 8817  | 0.454677614 | -2.376612476 | 4.003913481 | -0.593572385 | 0.552798155 | 0.998252924 |
| chr18:29412046-29419420   | exonic     | TRAPPC8                                                                           | 18 | 29412046  | 29419420  | 0 | 0 | 0 | 2 | 2 | 0 | 7374  | 0.454677614 | -2.376612476 | 4.003913481 | -0.593572385 | 0.552798155 | 0.998252924 |
| chr18:54398613-54426184   | exonic     | WDR7                                                                              | 18 | 54398613  | 54426184  | 0 | 0 | 0 | 2 | 2 | 0 | 27571 | 0.454677614 | -2.376612476 | 4.003913481 | -0.593572385 | 0.552798155 | 0.998252924 |
| chr19:34941169-34955036   | exonic     | UBA2                                                                              | 19 | 34941169  | 34955036  | 0 | 0 | 0 | 2 | 3 | 0 | 13867 | 0.454677614 | -2.376612476 | 4.003913481 | -0.593572385 | 0.552798155 | 0.998252924 |
| chr19:52380534-52384130   | exonic     | ZNF577                                                                            | 19 | 52380534  | 52384130  | 0 | 0 | 0 | 2 | 2 | 0 | 3596  | 0.454677614 | -2.376612476 | 4.003913481 | -0.593572385 | 0.552798155 | 0.998252924 |
| chr19:58372744-58374628   | UTR3       | <small>28939708, 832828, *1228, *1228+3aa, 98, 8022887, *1228, *1228+11aa</small> | 19 | 58372744  | 58374628  | 0 | 0 | 0 | 2 | 2 | 0 | 1884  | 0.454677614 | -2.376612476 | 4.003913481 | -0.593572385 | 0.552798155 | 0.998252924 |
| chr19:8601135-8601939     | exonic     | MYO1F                                                                             | 19 | 8601135   | 8601939   | 0 | 0 | 0 | 2 | 2 | 0 | 804   | 0.454677614 | -2.376612476 | 4.003913481 | -0.593572385 | 0.552798155 | 0.998252924 |
| chr2:198281464-198285266  | exonic     | SF3B1                                                                             | 2  | 198281464 | 198285266 | 0 | 0 | 0 | 2 | 2 | 0 | 3802  | 0.454677614 | -2.376612476 | 4.003913481 | -0.593572385 | 0.552798155 | 0.998252924 |
| chr2:242346951-242373736  | exonic     | FARP2                                                                             | 2  | 242346951 | 242373736 | 0 | 0 | 0 | 2 | 2 | 0 | 26785 | 0.454677614 | -2.376612476 | 4.003913481 | -0.593572385 | 0.552798155 | 0.998252924 |
| chr2:26022254-26029206    | exonic     | ASXL2                                                                             | 2  | 26022254  | 26029206  | 0 | 0 | 0 | 2 | 2 | 0 | 6952  | 0.454677614 | -2.376612476 | 4.003913481 | -0.593572385 | 0.552798155 | 0.998252924 |
| chr2:26587169-26606215    | exonic     | EPT1                                                                              | 2  | 26587169  | 26606215  | 0 | 0 | 0 | 2 | 2 | 0 | 19046 | 0.454677614 | -2.376612476 | 4.003913481 | -0.593572385 | 0.552798155 | 0.998252924 |
| chr2:29354123-29358532    | exonic     | CLIP4                                                                             | 2  | 29354123  | 29358532  | 0 | 0 | 0 | 2 | 2 | 0 | 4409  | 0.454677614 | -2.376612476 | 4.003913481 | -0.593572385 | 0.552798155 | 0.998252924 |
| chr21:34931535-34932081   | exonic     | SON                                                                               | 21 | 34931535  | 34932081  | 0 | 0 | 0 | 2 | 2 | 0 | 546   | 0.454677614 | -2.376612476 | 4.003913481 | -0.593572385 | 0.552798155 | 0.998252924 |
| chr22:32154531-32164849   | exonic     | DEPDC5                                                                            | 22 | 32154531  | 32164849  | 0 | 0 | 0 | 2 | 2 | 0 | 10318 | 0.454677614 | -2.376612476 | 4.003913481 | -0.593572385 | 0.552798155 | 0.998252924 |
| chr3:179408028-179424864  | exonic     | USP13                                                                             | 3  | 179408028 | 179424864 | 0 | 0 | 0 | 2 | 2 | 0 | 16836 | 0.454677614 | -2.376612476 | 4.003913481 | -0.593572385 | 0.552798155 | 0.998252924 |
| chr3:41990724-41991034    | intronic   | ULK4                                                                              | 3  | 41990724  | 41991034  | 0 | 0 | 0 | 2 | 2 | 0 | 310   | 0.454677614 | -2.376612476 | 4.003913481 | -0.593572385 | 0.552798155 | 0.998252924 |
| chr3:56599666-56601081    | exonic     | CCDC66                                                                            | 3  | 56599666  | 56601081  | 0 | 0 | 0 | 2 | 2 | 0 | 1415  | 0.454677614 | -2.376612476 | 4.003913481 | -0.593572385 | 0.552798155 | 0.998252924 |
| chr3:89390065-89391240    | exonic     | EPHA3                                                                             | 3  | 89390065  | 89391240  | 0 | 0 | 0 | 2 | 2 | 0 | 1175  | 0.454677614 | -2.376612476 | 4.003913481 | -0.593572385 | 0.552798155 | 0.998252924 |
| chr4:128958326-128958615  | intergenic | <small>ABHD18 (dist=5871), LARP1B (dist=23806)</small>                            | 4  | 128958326 | 128958615 | 0 | 0 | 0 | 2 | 2 | 0 | 289   | 0.454677614 | -2.376612476 | 4.003913481 | -0.593572385 | 0.552798155 | 0.998252924 |
| chr4:39871013-39891984    | exonic     | PDS5A                                                                             | 4  | 39871013  | 39891984  | 0 | 0 | 0 | 2 | 2 | 0 | 20971 | 0.454677614 | -2.376612476 | 4.003913481 | -0.593572385 | 0.552798155 | 0.998252924 |

|                           |              |                                                                               |    |           |           |   |   |   |   |    |    |        |             |              |             |              |             |             |
|---------------------------|--------------|-------------------------------------------------------------------------------|----|-----------|-----------|---|---|---|---|----|----|--------|-------------|--------------|-------------|--------------|-------------|-------------|
| chr5:133715245-133715701  | intronic     | UBE2B                                                                         | 5  | 133715245 | 133715701 | 0 | 0 | 0 | 2 | 2  | 0  | 456    | 0.454677614 | -2.376612476 | 4.003913481 | -0.593572385 | 0.552798155 | 0.998252924 |
| chr5:78964714-78977884    | exonic       | PAPD4                                                                         | 5  | 78964714  | 78977884  | 0 | 0 | 0 | 2 | 2  | 0  | 13170  | 0.454677614 | -2.376612476 | 4.003913481 | -0.593572385 | 0.552798155 | 0.998252924 |
| chr5:88201026-88261732    | ncRNA_exonic | MEF2C-AS1                                                                     | 5  | 88201026  | 88261732  | 0 | 0 | 0 | 2 | 2  | 0  | 60706  | 0.454677614 | -2.376612476 | 4.003913481 | -0.593572385 | 0.552798155 | 0.998252924 |
| chr6:106727535-106756366  | exonic       | ATG5                                                                          | 6  | 106727535 | 106756366 | 0 | 0 | 0 | 2 | 2  | 0  | 28831  | 0.454677614 | -2.376612476 | 4.003913481 | -0.593572385 | 0.552798155 | 0.998252924 |
| chr7:91708392-91709466    | exonic       | AKAP9                                                                         | 7  | 91708392  | 91709466  | 0 | 0 | 0 | 2 | 2  | 0  | 1074   | 0.454677614 | -2.376612476 | 4.003913481 | -0.593572385 | 0.552798155 | 0.998252924 |
| chr8:28827559-28876430    | exonic       | HMBOX1                                                                        | 8  | 28827559  | 28876430  | 0 | 0 | 0 | 2 | 2  | 0  | 48871  | 0.454677614 | -2.376612476 | 4.003913481 | -0.593572385 | 0.552798155 | 0.998252924 |
| chr8:67484716-67485741    | exonic       | MYBL1                                                                         | 8  | 67484716  | 67485741  | 0 | 0 | 0 | 2 | 2  | 0  | 1025   | 0.454677614 | -2.376612476 | 4.003913481 | -0.593572385 | 0.552798155 | 0.998252924 |
| chr9:111843118-111870850  | exonic       | TMEM245                                                                       | 9  | 111843118 | 111870850 | 0 | 0 | 0 | 2 | 2  | 0  | 27732  | 0.454677614 | -2.376612476 | 4.003913481 | -0.593572385 | 0.552798155 | 0.998252924 |
| chr9:19286766-19305525    | exonic       | DENND4C                                                                       | 9  | 19286766  | 19305525  | 1 | 1 | 1 | 4 | 10 | 3  | 18759  | 3.060707352 | -2.365289974 | 1.582508502 | -1.494645982 | 0.135006859 | 0.998252924 |
| chr19:58374733-58375127   | UTR3         | <small>20190708_020201_c1222_40504612461.58_0022007_c1222_40504612461</small> | 19 | 58374733  | 58375127  | 3 | 4 | 0 | 0 | 10 | 15 | 394    | 6.917617375 | -2.360094261 | 1.482459873 | -1.592012239 | 0.111381955 | 0.998252924 |
| chr18:66678171-66721370   | exonic       | CCDC102B                                                                      | 18 | 66678171  | 66721370  | 3 | 0 | 0 | 9 | 0  | 4  | 43199  | 2.57663773  | -2.357251853 | 2.047190976 | -1.151456743 | NA          | NA          |
| chr15:42957450-42961535   | exonic       | STARD9                                                                        | 15 | 42957450  | 42961535  | 1 | 0 | 0 | 7 | 1  | 0  | 4085   | 0.994194061 | -2.355536832 | 2.828597021 | -0.832758012 | NA          | NA          |
| chr2:167328826-167334220  | exonic       | SCN7A                                                                         | 2  | 167328826 | 167334220 | 1 | 0 | 0 | 7 | 1  | 0  | 5394   | 0.994194061 | -2.355536832 | 2.828597021 | -0.832758012 | NA          | NA          |
| chr13:76391296-76398009   | exonic       | LMO7                                                                          | 13 | 76391296  | 76398009  | 0 | 1 | 0 | 3 | 0  | 2  | 6713   | 1.109647172 | -2.344556195 | 2.735076691 | -0.857217716 | 0.391324573 | 0.998252924 |
| chr9:125616230-125622410  | exonic       | RC3H2                                                                         | 9  | 125616230 | 125622410 | 0 | 1 | 0 | 3 | 0  | 2  | 6180   | 1.109647172 | -2.344556195 | 2.735076691 | -0.857217716 | 0.391324573 | 0.998252924 |
| chr4:129857809-129880932  | exonic       | SCLT1                                                                         | 4  | 129857809 | 129880932 | 0 | 0 | 1 | 3 | 0  | 2  | 23123  | 1.132640399 | -2.343680218 | 2.718152732 | -0.862232718 | 0.388559469 | 0.998252924 |
| chr14:103865288-103871604 | exonic       | MARK3                                                                         | 14 | 103865288 | 103871604 | 2 | 0 | 0 | 5 | 7  | 0  | 6316   | 1.636722764 | -2.337659165 | 2.341327226 | -0.998433341 | 0.318069273 | 0.998252924 |
| chr1:114362198-114377061  | exonic       | PTPN22                                                                        | 1  | 114362198 | 114377061 | 0 | 0 | 0 | 3 | 1  | 0  | 14863  | 0.439961577 | -2.337071456 | 4.00605617  | -0.583384595 | 0.559634426 | 0.998252924 |
| chr1:205238077-205239012  | exonic       | TMCC2                                                                         | 1  | 205238077 | 205239012 | 0 | 0 | 0 | 3 | 1  | 0  | 935    | 0.439961577 | -2.337071456 | 4.00605617  | -0.583384595 | 0.559634426 | 0.998252924 |
| chr1:31478699-31479949    | exonic       | PUM1                                                                          | 1  | 31478699  | 31479949  | 0 | 0 | 0 | 3 | 1  | 0  | 1250   | 0.439961577 | -2.337071456 | 4.00605617  | -0.583384595 | 0.559634426 | 0.998252924 |
| chr1:67098752-67109402    | exonic       | SGIP1                                                                         | 1  | 67098752  | 67109402  | 0 | 0 | 0 | 3 | 1  | 0  | 10650  | 0.439961577 | -2.337071456 | 4.00605617  | -0.583384595 | 0.559634426 | 0.998252924 |
| chr1:84369761-84412965    | exonic       | TTL7                                                                          | 1  | 84369761  | 84412965  | 0 | 0 | 0 | 3 | 1  | 0  | 43204  | 0.439961577 | -2.337071456 | 4.00605617  | -0.583384595 | 0.559634426 | 0.998252924 |
| chr1:8601272-8716500      | exonic       | RERE                                                                          | 1  | 8601272   | 8716500   | 0 | 0 | 0 | 3 | 1  | 0  | 115228 | 0.439961577 | -2.337071456 | 4.00605617  | -0.583384595 | 0.559634426 | 0.998252924 |
| chr10:128768965-128851079 | exonic       | DOCK1                                                                         | 10 | 128768965 | 128851079 | 0 | 0 | 0 | 3 | 1  | 0  | 82114  | 0.439961577 | -2.337071456 | 4.00605617  | -0.583384595 | 0.559634426 | 0.998252924 |
| chr10:34648074-34649187   | exonic       | PARD3                                                                         | 10 | 34648074  | 34649187  | 0 | 0 | 0 | 3 | 1  | 0  | 1113   | 0.439961577 | -2.337071456 | 4.00605617  | -0.583384595 | 0.559634426 | 0.998252924 |
| chr10:70514470-70517134   | exonic       | CCAR1                                                                         | 10 | 70514470  | 70517134  | 0 | 0 | 0 | 3 | 1  | 0  | 2664   | 0.439961577 | -2.337071456 | 4.00605617  | -0.583384595 | 0.559634426 | 0.998252924 |
| chr10:7409610-7412337     | exonic       | SFMBT2                                                                        | 10 | 7409610   | 7412337   | 0 | 0 | 0 | 3 | 1  | 0  | 2727   | 0.439961577 | -2.337071456 | 4.00605617  | -0.583384595 | 0.559634426 | 0.998252924 |
| chr11:118625413-118629611 | exonic       | DDX6                                                                          | 11 | 118625413 | 118629611 | 0 | 0 | 0 | 3 | 1  | 0  | 4198   | 0.439961577 | -2.337071456 | 4.00605617  | -0.583384595 | 0.559634426 | 0.998252924 |
| chr12:102173929-102182367 | exonic       | GNPTAB                                                                        | 12 | 102173929 | 102182367 | 0 | 0 | 0 | 3 | 1  | 0  | 8438   | 0.439961577 | -2.337071456 | 4.00605617  | -0.583384595 | 0.559634426 | 0.998252924 |
| chr12:122973932-122977336 | exonic       | ZCCHC8                                                                        | 12 | 122973932 | 122977336 | 0 | 0 | 0 | 3 | 1  | 0  | 3404   | 0.439961577 | -2.337071456 | 4.00605617  | -0.583384595 | 0.559634426 | 0.998252924 |
| chr12:20769163-20787990   | exonic       | PDE3A                                                                         | 12 | 20769163  | 20787990  | 0 | 0 | 0 | 3 | 1  | 0  | 18827  | 0.439961577 | -2.337071456 | 4.00605617  | -0.583384595 | 0.559634426 | 0.998252924 |
| chr12:26864105-26878698   | exonic       | ITPR2                                                                         | 12 | 26864105  | 26878698  | 0 | 0 | 0 | 3 | 1  | 0  | 14593  | 0.439961577 | -2.337071456 | 4.00605617  | -0.583384595 | 0.559634426 | 0.998252924 |
| chr12:40704232-40717108   | exonic       | LRRK2                                                                         | 12 | 40704232  | 40717108  | 0 | 0 | 0 | 3 | 1  | 0  | 12876  | 0.439961577 | -2.337071456 | 4.00605617  | -0.583384595 | 0.559634426 | 0.998252924 |
| chr12:56182858-56194684   | exonic       | SARNP                                                                         | 12 | 56182858  | 56194684  | 0 | 0 | 0 | 3 | 1  | 0  | 11826  | 0.439961577 | -2.337071456 | 4.00605617  | -0.583384595 | 0.559634426 | 0.998252924 |
| chr14:50611887-50612314   | exonic       | SOS2                                                                          | 14 | 50611887  | 50612314  | 0 | 0 | 0 | 3 | 1  | 0  | 427    | 0.439961577 | -2.337071456 | 4.00605617  | -0.583384595 | 0.559634426 | 0.998252924 |

|                           |              |              |    |           |           |    |   |   |    |    |   |        |             |              |             |              |             |             |
|---------------------------|--------------|--------------|----|-----------|-----------|----|---|---|----|----|---|--------|-------------|--------------|-------------|--------------|-------------|-------------|
| chr14:56746393-56757174   | exonic       | PELI2        | 14 | 56746393  | 56757174  | 0  | 0 | 0 | 3  | 1  | 0 | 10781  | 0.439961577 | -2.337071456 | 4.00605617  | -0.583384595 | 0.559634426 | 0.998252924 |
| chr15:43122135-43170882   | exonic       | TTBK2        | 15 | 43122135  | 43170882  | 0  | 0 | 0 | 3  | 1  | 0 | 48747  | 0.439961577 | -2.337071456 | 4.00605617  | -0.583384595 | 0.559634426 | 0.998252924 |
| chr15:43348541-43351390   | exonic       | UBR1         | 15 | 43348541  | 43351390  | 0  | 0 | 0 | 3  | 1  | 0 | 2849   | 0.439961577 | -2.337071456 | 4.00605617  | -0.583384595 | 0.559634426 | 0.998252924 |
| chr15:68434627-68457142   | exonic       | PIAS1        | 15 | 68434627  | 68457142  | 0  | 0 | 0 | 3  | 1  | 0 | 22515  | 0.439961577 | -2.337071456 | 4.00605617  | -0.583384595 | 0.559634426 | 0.998252924 |
| chr17:28593902-28613920   | exonic       | BLMH         | 17 | 28593902  | 28613920  | 0  | 0 | 0 | 3  | 1  | 0 | 20018  | 0.439961577 | -2.337071456 | 4.00605617  | -0.583384595 | 0.559634426 | 0.998252924 |
| chr19:56918394-56925809   | exonic       | ZNF583       | 19 | 56918394  | 56925809  | 0  | 0 | 0 | 3  | 1  | 0 | 7415   | 0.439961577 | -2.337071456 | 4.00605617  | -0.583384595 | 0.559634426 | 0.998252924 |
| chr2:109111746-109113565  | exonic       | GCC2         | 2  | 109111746 | 109113565 | 0  | 0 | 0 | 3  | 1  | 0 | 1819   | 0.439961577 | -2.337071456 | 4.00605617  | -0.583384595 | 0.559634426 | 0.998252924 |
| chr2:135887564-135911446  | exonic       | RAB3GAP1     | 2  | 135887564 | 135911446 | 0  | 0 | 0 | 3  | 1  | 0 | 23882  | 0.439961577 | -2.337071456 | 4.00605617  | -0.583384595 | 0.559634426 | 0.998252924 |
| chr3:132202218-132203516  | exonic       | DNAJC13      | 3  | 132202218 | 132203516 | 0  | 0 | 0 | 3  | 1  | 0 | 1298   | 0.439961577 | -2.337071456 | 4.00605617  | -0.583384595 | 0.559634426 | 0.998252924 |
| chr3:196626536-196630481  | exonic       | SENP5        | 3  | 196626536 | 196630481 | 0  | 0 | 0 | 3  | 1  | 0 | 3945   | 0.439961577 | -2.337071456 | 4.00605617  | -0.583384595 | 0.559634426 | 0.998252924 |
| chr3:44986659-45000952    | exonic       | ZDHC3        | 3  | 44986659  | 45000952  | 0  | 0 | 0 | 3  | 1  | 0 | 14293  | 0.439961577 | -2.337071456 | 4.00605617  | -0.583384595 | 0.559634426 | 0.998252924 |
| chr3:58111307-58112489    | exonic       | FLNB         | 3  | 58111307  | 58112489  | 0  | 0 | 0 | 3  | 1  | 0 | 1182   | 0.439961577 | -2.337071456 | 4.00605617  | -0.583384595 | 0.559634426 | 0.998252924 |
| chr3:67546221-67579610    | exonic       | SUCLG2       | 3  | 67546221  | 67579610  | 0  | 0 | 0 | 3  | 1  | 0 | 33389  | 0.439961577 | -2.337071456 | 4.00605617  | -0.583384595 | 0.559634426 | 0.998252924 |
| chr4:170398274-170430003  | exonic       | NEK1         | 4  | 170398274 | 170430003 | 0  | 0 | 0 | 3  | 1  | 0 | 31729  | 0.439961577 | -2.337071456 | 4.00605617  | -0.583384595 | 0.559634426 | 0.998252924 |
| chr5:133871547-133887899  | exonic       | JADE2        | 5  | 133871547 | 133887899 | 0  | 0 | 0 | 3  | 1  | 0 | 16352  | 0.439961577 | -2.337071456 | 4.00605617  | -0.583384595 | 0.559634426 | 0.998252924 |
| chr5:141511372-141524241  | exonic       | NDFIP1       | 5  | 141511372 | 141524241 | 0  | 0 | 0 | 3  | 1  | 0 | 12869  | 0.439961577 | -2.337071456 | 4.00605617  | -0.583384595 | 0.559634426 | 0.998252924 |
| chr5:73128162-73154044    | exonic       | ARHGEF28     | 5  | 73128162  | 73154044  | 0  | 0 | 0 | 3  | 1  | 0 | 25882  | 0.439961577 | -2.337071456 | 4.00605617  | -0.583384595 | 0.559634426 | 0.998252924 |
| chr5:87577858-87588460    | ncRNA_exonic | TMEM161B-AS1 | 5  | 87577858  | 87588460  | 0  | 0 | 0 | 3  | 1  | 0 | 10602  | 0.439961577 | -2.337071456 | 4.00605617  | -0.583384595 | 0.559634426 | 0.998252924 |
| chr6:36181656-36182163    | exonic       | BRPF3        | 6  | 36181656  | 36182163  | 0  | 0 | 0 | 3  | 1  | 0 | 507    | 0.439961577 | -2.337071456 | 4.00605617  | -0.583384595 | 0.559634426 | 0.998252924 |
| chr7:80439926-80458061    | exonic       | SEMA3C       | 7  | 80439926  | 80458061  | 0  | 0 | 0 | 3  | 1  | 0 | 18135  | 0.439961577 | -2.337071456 | 4.00605617  | -0.583384595 | 0.559634426 | 0.998252924 |
| chr8:92982885-92988201    | exonic       | RUNX1T1      | 8  | 92982885  | 92988201  | 0  | 0 | 0 | 3  | 1  | 0 | 5316   | 0.439961577 | -2.337071456 | 4.00605617  | -0.583384595 | 0.559634426 | 0.998252924 |
| chr9:111812562-111835718  | exonic       | TMEM245      | 9  | 111812562 | 111835718 | 0  | 0 | 0 | 3  | 1  | 0 | 23156  | 0.439961577 | -2.337071456 | 4.00605617  | -0.583384595 | 0.559634426 | 0.998252924 |
| chr9:131362358-131367756  | exonic       | SPTAN1       | 9  | 131362358 | 131367756 | 0  | 0 | 0 | 3  | 1  | 0 | 5398   | 0.439961577 | -2.337071456 | 4.00605617  | -0.583384595 | 0.559634426 | 0.998252924 |
| chr9:2096656-2123937      | exonic       | SMARCA2      | 9  | 2096656   | 2123937   | 0  | 0 | 0 | 3  | 1  | 0 | 27281  | 0.439961577 | -2.337071456 | 4.00605617  | -0.583384595 | 0.559634426 | 0.998252924 |
| chr1:2880065-28807116     | exonic       | PHACTR4      | 1  | 2880065   | 28807116  | 1  | 2 | 0 | 9  | 0  | 5 | 7051   | 2.975434051 | -2.330644963 | 1.84977454  | -1.25996164  | 0.2076832   | 0.998252924 |
| chr4:39739039-39779430    | exonic       | UBE2K        | 4  | 39739039  | 39779430  | 3  | 0 | 0 | 0  | 3  | 1 | 40391  | 1.012910587 | -2.31857833  | 2.591607641 | -0.89464867  | 0.370974926 | 0.998252924 |
| chr18:19345732-19379935   | exonic       | MIB1         | 18 | 19345732  | 19379935  | 3  | 2 | 0 | 5  | 1  | 1 | 34203  | 1.058199444 | -2.318420595 | 2.557381028 | -0.906560489 | 0.364639264 | 0.998252924 |
| chr12:97886239-97954825   | ncRNA_exonic | RMST         | 12 | 97886239  | 97954825  | 11 | 3 | 0 | 30 | 54 | 0 | 68586  | 11.6665061  | -2.315306447 | 2.009401838 | -1.152236652 | 0.24922384  | 0.998252924 |
| chr15:59179173-59179739   | exonic       | SLTM         | 15 | 59179173  | 59179739  | 2  | 0 | 0 | 7  | 5  | 0 | 566    | 1.607290691 | -2.309917806 | 2.351956574 | -0.982126044 | 0.326037756 | 0.998252924 |
| chr12:121220457-121229360 | exonic       | SPPL3        | 12 | 121220457 | 121229360 | 0  | 0 | 1 | 0  | 7  | 0 | 8903   | 1.044460978 | -2.307131243 | 3.033316593 | -0.760596915 | NA          | NA          |
| chr15:51017417-51023236   | exonic       | SPPL2A       | 15 | 51017417  | 51023236  | 0  | 0 | 1 | 0  | 7  | 0 | 5819   | 1.044460978 | -2.307131243 | 3.033316593 | -0.760596915 | NA          | NA          |
| chr8:17513371-17613470    | exonic       | MTUS1        | 8  | 17513371  | 17613470  | 0  | 1 | 0 | 0  | 7  | 0 | 100099 | 1.021467752 | -2.306475489 | 3.055485714 | -0.754863778 | NA          | NA          |
| chr14:92174484-92195823   | exonic       | CATSPERB     | 14 | 92174484  | 92195823  | 1  | 0 | 0 | 0  | 7  | 0 | 21339  | 0.976178895 | -2.305120007 | 3.102922588 | -0.742886728 | NA          | NA          |
| chr1:10032076-10041228    | exonic       | NMNAT1       | 1  | 10032076  | 10041228  | 0  | 0 | 0 | 4  | 0  | 0 | 9152   | 0.425245541 | -2.30189363  | 4.007193468 | -0.574440353 | NA          | NA          |
| chr1:10380101-10436734    | exonic       | KIF1B        | 1  | 10380101  | 10436734  | 0  | 0 | 0 | 4  | 0  | 0 | 56633  | 0.425245541 | -2.30189363  | 4.007193468 | -0.574440353 | NA          | NA          |

|                           |            |                                        |    |           |           |   |   |   |   |   |   |        |             |             |             |              |    |    |
|---------------------------|------------|----------------------------------------|----|-----------|-----------|---|---|---|---|---|---|--------|-------------|-------------|-------------|--------------|----|----|
| chr1:10407818-10408791    | exonic     | KIF1B                                  | 1  | 10407818  | 10408791  | 0 | 0 | 0 | 4 | 0 | 0 | 973    | 0.425245541 | -2.30189363 | 4.007193468 | -0.574440353 | NA | NA |
| chr1:116928684-116939986  | exonic     | ATP1A1                                 | 1  | 116928684 | 116939986 | 0 | 0 | 0 | 4 | 0 | 0 | 11302  | 0.425245541 | -2.30189363 | 4.007193468 | -0.574440353 | NA | NA |
| chr1:1496712-1500296      | exonic     | SSU72                                  | 1  | 1496712   | 1500296   | 0 | 0 | 0 | 4 | 0 | 0 | 3584   | 0.425245541 | -2.30189363 | 4.007193468 | -0.574440353 | NA | NA |
| chr1:150997086-151001420  | exonic     | PRUNE                                  | 1  | 150997086 | 151001420 | 0 | 0 | 0 | 4 | 0 | 0 | 4334   | 0.425245541 | -2.30189363 | 4.007193468 | -0.574440353 | NA | NA |
| chr1:15361244-15370655    | exonic     | KAZN                                   | 1  | 15361244  | 15370655  | 0 | 0 | 0 | 4 | 0 | 0 | 9411   | 0.425245541 | -2.30189363 | 4.007193468 | -0.574440353 | NA | NA |
| chr1:155631098-155747611  | exonic     | DAP3, GON4L, YY1AP1                    | 1  | 155631098 | 155747611 | 0 | 0 | 0 | 4 | 0 | 0 | 116513 | 0.425245541 | -2.30189363 | 4.007193468 | -0.574440353 | NA | NA |
| chr1:2066701-2106752      | exonic     | PRKCZ                                  | 1  | 2066701   | 2106752   | 0 | 0 | 0 | 4 | 0 | 0 | 40051  | 0.425245541 | -2.30189363 | 4.007193468 | -0.574440353 | NA | NA |
| chr1:207989274-207990759  | upstream   | LOC148696(dist=965)                    | 1  | 207989274 | 207990759 | 0 | 0 | 0 | 4 | 0 | 0 | 1485   | 0.425245541 | -2.30189363 | 4.007193468 | -0.574440353 | NA | NA |
| chr1:215531891-215542370  | intergenic | KCNK2(dist=121455), KCTD3(dist=198365) | 1  | 215531891 | 215542370 | 0 | 0 | 0 | 4 | 0 | 0 | 10479  | 0.425245541 | -2.30189363 | 4.007193468 | -0.574440353 | NA | NA |
| chr1:21573713-21585332    | exonic     | ECE1                                   | 1  | 21573713  | 21585332  | 0 | 0 | 0 | 4 | 0 | 0 | 11619  | 0.425245541 | -2.30189363 | 4.007193468 | -0.574440353 | NA | NA |
| chr1:28075578-28081841    | exonic     | FAM76A                                 | 1  | 28075578  | 28081841  | 0 | 0 | 0 | 4 | 0 | 0 | 6263   | 0.425245541 | -2.30189363 | 4.007193468 | -0.574440353 | NA | NA |
| chr1:39476999-39478107    | intergenic | AKR1N1(dist=5262), NDUFS5(dist=13860)  | 1  | 39476999  | 39478107  | 0 | 0 | 0 | 4 | 0 | 0 | 1108   | 0.425245541 | -2.30189363 | 4.007193468 | -0.574440353 | NA | NA |
| chr1:39752957-39753234    | exonic     | MACF1                                  | 1  | 39752957  | 39753234  | 0 | 0 | 0 | 4 | 0 | 0 | 277    | 0.425245541 | -2.30189363 | 4.007193468 | -0.574440353 | NA | NA |
| chr1:62905469-62907970    | exonic     | USP1                                   | 1  | 62905469  | 62907970  | 0 | 0 | 0 | 4 | 0 | 0 | 2501   | 0.425245541 | -2.30189363 | 4.007193468 | -0.574440353 | NA | NA |
| chr1:76194085-76216231    | exonic     | ACADM                                  | 1  | 76194085  | 76216231  | 0 | 0 | 0 | 4 | 0 | 0 | 22146  | 0.425245541 | -2.30189363 | 4.007193468 | -0.574440353 | NA | NA |
| chr1:94643167-94649844    | exonic     | ARHGAP29                               | 1  | 94643167  | 94649844  | 0 | 0 | 0 | 4 | 0 | 0 | 6677   | 0.425245541 | -2.30189363 | 4.007193468 | -0.574440353 | NA | NA |
| chr10:123718838-123721032 | exonic     | NSMCE4A                                | 10 | 123718838 | 123721032 | 0 | 0 | 0 | 4 | 0 | 0 | 2194   | 0.425245541 | -2.30189363 | 4.007193468 | -0.574440353 | NA | NA |
| chr10:126381962-126391723 | exonic     | FAM53B                                 | 10 | 126381962 | 126391723 | 0 | 0 | 0 | 4 | 0 | 0 | 9761   | 0.425245541 | -2.30189363 | 4.007193468 | -0.574440353 | NA | NA |
| chr10:133747962-133761295 | exonic     | PPP2R2D                                | 10 | 133747962 | 133761295 | 0 | 0 | 0 | 4 | 0 | 0 | 13333  | 0.425245541 | -2.30189363 | 4.007193468 | -0.574440353 | NA | NA |
| chr10:15600072-15634303   | exonic     | ITGA8                                  | 10 | 15600072  | 15634303  | 0 | 0 | 0 | 4 | 0 | 0 | 34231  | 0.425245541 | -2.30189363 | 4.007193468 | -0.574440353 | NA | NA |
| chr10:15628582-15639298   | exonic     | ITGA8                                  | 10 | 15628582  | 15639298  | 0 | 0 | 0 | 4 | 0 | 0 | 10716  | 0.425245541 | -2.30189363 | 4.007193468 | -0.574440353 | NA | NA |
| chr10:24508555-24511384   | exonic     | KIAA1217                               | 10 | 24508555  | 24511384  | 0 | 0 | 0 | 4 | 0 | 0 | 2829   | 0.425245541 | -2.30189363 | 4.007193468 | -0.574440353 | NA | NA |
| chr10:27962889-27964483   | exonic     | MKX                                    | 10 | 27962889  | 27964483  | 0 | 0 | 0 | 4 | 0 | 0 | 1594   | 0.425245541 | -2.30189363 | 4.007193468 | -0.574440353 | NA | NA |
| chr10:31197861-31273355   | UTR5       |                                        | 10 | 31197861  | 31273355  | 0 | 0 | 0 | 4 | 0 | 0 | 75494  | 0.425245541 | -2.30189363 | 4.007193468 | -0.574440353 | NA | NA |
| chr10:31644073-31676195   | intronic   | ZEB1                                   | 10 | 31644073  | 31676195  | 0 | 0 | 0 | 4 | 0 | 0 | 32122  | 0.425245541 | -2.30189363 | 4.007193468 | -0.574440353 | NA | NA |
| chr10:70282495-70282956   | intronic   | SLC25A16                               | 10 | 70282495  | 70282956  | 0 | 0 | 0 | 4 | 0 | 0 | 461    | 0.425245541 | -2.30189363 | 4.007193468 | -0.574440353 | NA | NA |
| chr10:75331179-75336379   | exonic     | USP54                                  | 10 | 75331179  | 75336379  | 0 | 0 | 0 | 4 | 0 | 0 | 5200   | 0.425245541 | -2.30189363 | 4.007193468 | -0.574440353 | NA | NA |
| chr11:112070422-112088612 | exonic     | BCO2                                   | 11 | 112070422 | 112088612 | 0 | 0 | 0 | 4 | 0 | 0 | 18190  | 0.425245541 | -2.30189363 | 4.007193468 | -0.574440353 | NA | NA |
| chr11:120328430-120343836 | exonic     | ARHGEF12                               | 11 | 120328430 | 120343836 | 0 | 0 | 0 | 4 | 0 | 0 | 15406  | 0.425245541 | -2.30189363 | 4.007193468 | -0.574440353 | NA | NA |
| chr11:125330393-125333466 | exonic     | FEZ1                                   | 11 | 125330393 | 125333466 | 0 | 0 | 0 | 4 | 0 | 0 | 3073   | 0.425245541 | -2.30189363 | 4.007193468 | -0.574440353 | NA | NA |
| chr11:17899754-18029623   | exonic     | SERGEF                                 | 11 | 17899754  | 18029623  | 0 | 0 | 0 | 4 | 0 | 0 | 129869 | 0.425245541 | -2.30189363 | 4.007193468 | -0.574440353 | NA | NA |
| chr12:111951160-111957880 | exonic     | ATXN2                                  | 12 | 111951160 | 111957880 | 0 | 0 | 0 | 4 | 0 | 0 | 6720   | 0.425245541 | -2.30189363 | 4.007193468 | -0.574440353 | NA | NA |
| chr12:6991360-6993083     | upstream   | DSTNP2, RPL13P5(dist=62)               | 12 | 6991360   | 6993083   | 0 | 0 | 0 | 4 | 0 | 0 | 1723   | 0.425245541 | -2.30189363 | 4.007193468 | -0.574440353 | NA | NA |
| chr12:94603365-94618091   | exonic     | PLXNC1                                 | 12 | 94603365  | 94618091  | 0 | 0 | 0 | 4 | 0 | 0 | 14726  | 0.425245541 | -2.30189363 | 4.007193468 | -0.574440353 | NA | NA |
| chr13:103459495-103474509 | exonic     | BIVM, BIVM-ERCC5                       | 13 | 103459495 | 103474509 | 0 | 0 | 0 | 4 | 0 | 0 | 15014  | 0.425245541 | -2.30189363 | 4.007193468 | -0.574440353 | NA | NA |

|                           |              |                                                           |    |           |           |   |   |   |   |   |   |        |             |             |             |              |    |    |
|---------------------------|--------------|-----------------------------------------------------------|----|-----------|-----------|---|---|---|---|---|---|--------|-------------|-------------|-------------|--------------|----|----|
| chr13:28840851-28845003   | exonic       | PAN3                                                      | 13 | 28840851  | 28845003  | 0 | 0 | 0 | 4 | 0 | 0 | 4152   | 0.425245541 | -2.30189363 | 4.007193468 | -0.574440353 | NA | NA |
| chr13:33052024-33101669   | exonic       | N4BP2L2                                                   | 13 | 33052024  | 33101669  | 0 | 0 | 0 | 4 | 0 | 0 | 49645  | 0.425245541 | -2.30189363 | 4.007193468 | -0.574440353 | NA | NA |
| chr13:98798024-98798577   | intronic     | FARP1                                                     | 13 | 98798024  | 98798577  | 0 | 0 | 0 | 4 | 0 | 0 | 553    | 0.425245541 | -2.30189363 | 4.007193468 | -0.574440353 | NA | NA |
| chr14:102659800-102664184 | exonic       | WDR20                                                     | 14 | 102659800 | 102664184 | 0 | 0 | 0 | 4 | 0 | 0 | 4384   | 0.425245541 | -2.30189363 | 4.007193468 | -0.574440353 | NA | NA |
| chr14:25443871-25446449   | exonic       | STXBP6                                                    | 14 | 25443871  | 25446449  | 0 | 0 | 0 | 4 | 0 | 0 | 2578   | 0.425245541 | -2.30189363 | 4.007193468 | -0.574440353 | NA | NA |
| chr14:39646615-39647120   | exonic       | PNN                                                       | 14 | 39646615  | 39647120  | 0 | 0 | 0 | 4 | 0 | 0 | 505    | 0.425245541 | -2.30189363 | 4.007193468 | -0.574440353 | NA | NA |
| chr14:40111917-40125012   | intergenic   | <small>FR3033 (611+210213), LOC64819 (611+129890)</small> | 14 | 40111917  | 40125012  | 0 | 0 | 0 | 4 | 0 | 0 | 13095  | 0.425245541 | -2.30189363 | 4.007193468 | -0.574440353 | NA | NA |
| chr14:50190591-50192487   | exonic       | KLHDC1                                                    | 14 | 50190591  | 50192487  | 0 | 0 | 0 | 4 | 0 | 0 | 1896   | 0.425245541 | -2.30189363 | 4.007193468 | -0.574440353 | NA | NA |
| chr14:75264282-75269379   | exonic       | YLP1                                                      | 14 | 75264282  | 75269379  | 0 | 0 | 0 | 4 | 0 | 0 | 5097   | 0.425245541 | -2.30189363 | 4.007193468 | -0.574440353 | NA | NA |
| chr15:59323002-59368414   | exonic       | RNF111                                                    | 15 | 59323002  | 59368414  | 0 | 0 | 0 | 4 | 0 | 0 | 45412  | 0.425245541 | -2.30189363 | 4.007193468 | -0.574440353 | NA | NA |
| chr15:64227601-64228596   | ncRNA_exonic | LOC101928988                                              | 15 | 64227601  | 64228596  | 0 | 0 | 0 | 4 | 0 | 0 | 995    | 0.425245541 | -2.30189363 | 4.007193468 | -0.574440353 | NA | NA |
| chr15:66599162-66601182   | exonic       | DIS3L                                                     | 15 | 66599162  | 66601182  | 0 | 0 | 0 | 4 | 0 | 0 | 2020   | 0.425245541 | -2.30189363 | 4.007193468 | -0.574440353 | NA | NA |
| chr15:77656416-77657567   | intronic     | PEAK1                                                     | 15 | 77656416  | 77657567  | 0 | 0 | 0 | 4 | 0 | 0 | 1151   | 0.425245541 | -2.30189363 | 4.007193468 | -0.574440353 | NA | NA |
| chr16:16103632-16110478   | exonic       | ABCC1                                                     | 16 | 16103632  | 16110478  | 0 | 0 | 0 | 4 | 0 | 0 | 6846   | 0.425245541 | -2.30189363 | 4.007193468 | -0.574440353 | NA | NA |
| chr16:23403700-23428442   | exonic       | COG7                                                      | 16 | 23403700  | 23428442  | 0 | 0 | 0 | 4 | 0 | 0 | 24742  | 0.425245541 | -2.30189363 | 4.007193468 | -0.574440353 | NA | NA |
| chr16:31372384-31374695   | exonic       | ITGAX                                                     | 16 | 31372384  | 31374695  | 0 | 0 | 0 | 4 | 0 | 0 | 2311   | 0.425245541 | -2.30189363 | 4.007193468 | -0.574440353 | NA | NA |
| chr16:49764682-49765372   | exonic       | ZNF423                                                    | 16 | 49764682  | 49765372  | 0 | 0 | 0 | 4 | 0 | 0 | 690    | 0.425245541 | -2.30189363 | 4.007193468 | -0.574440353 | NA | NA |
| chr16:68127259-68160513   | exonic       | NFATC3                                                    | 16 | 68127259  | 68160513  | 0 | 0 | 0 | 4 | 0 | 0 | 33254  | 0.425245541 | -2.30189363 | 4.007193468 | -0.574440353 | NA | NA |
| chr16:73006050-73029948   | intronic     | ZFHX3                                                     | 16 | 73006050  | 73029948  | 0 | 0 | 0 | 4 | 0 | 0 | 23898  | 0.425245541 | -2.30189363 | 4.007193468 | -0.574440353 | NA | NA |
| chr17:19213197-19232960   | exonic       | EPN2                                                      | 17 | 19213197  | 19232960  | 0 | 0 | 0 | 4 | 0 | 0 | 19763  | 0.425245541 | -2.30189363 | 4.007193468 | -0.574440353 | NA | NA |
| chr17:65870932-65871860   | exonic       | BPTF                                                      | 17 | 65870932  | 65871860  | 0 | 0 | 0 | 4 | 0 | 0 | 928    | 0.425245541 | -2.30189363 | 4.007193468 | -0.574440353 | NA | NA |
| chr17:66518897-66521099   | exonic       | PRKAR1A                                                   | 17 | 66518897  | 66521099  | 0 | 0 | 0 | 4 | 0 | 0 | 2202   | 0.425245541 | -2.30189363 | 4.007193468 | -0.574440353 | NA | NA |
| chr17:74283272-74283978   | exonic       | QRICH2                                                    | 17 | 74283272  | 74283978  | 0 | 0 | 0 | 4 | 0 | 0 | 706    | 0.425245541 | -2.30189363 | 4.007193468 | -0.574440353 | NA | NA |
| chr17:9395145-9408479     | exonic       | STX8                                                      | 17 | 9395145   | 9408479   | 0 | 0 | 0 | 4 | 0 | 0 | 13334  | 0.425245541 | -2.30189363 | 4.007193468 | -0.574440353 | NA | NA |
| chr18:77455224-77464917   | exonic       | CTDP1                                                     | 18 | 77455224  | 77464917  | 0 | 0 | 0 | 4 | 0 | 0 | 9693   | 0.425245541 | -2.30189363 | 4.007193468 | -0.574440353 | NA | NA |
| chr19:17273797-17278874   | exonic       | MYO9B                                                     | 19 | 17273797  | 17278874  | 0 | 0 | 0 | 4 | 0 | 0 | 5077   | 0.425245541 | -2.30189363 | 4.007193468 | -0.574440353 | NA | NA |
| chr19:22167230-22171711   | exonic       | ZNF208                                                    | 19 | 22167230  | 22171711  | 0 | 0 | 0 | 4 | 0 | 0 | 4481   | 0.425245541 | -2.30189363 | 4.007193468 | -0.574440353 | NA | NA |
| chr19:23527784-23545527   | exonic       | ZNF91                                                     | 19 | 23527784  | 23545527  | 0 | 0 | 0 | 4 | 0 | 0 | 17743  | 0.425245541 | -2.30189363 | 4.007193468 | -0.574440353 | NA | NA |
| chr19:45901263-45901597   | exonic       | PPP1R13L                                                  | 19 | 45901263  | 45901597  | 0 | 0 | 0 | 4 | 0 | 0 | 334    | 0.425245541 | -2.30189363 | 4.007193468 | -0.574440353 | NA | NA |
| chr19:46823699-46838243   | exonic       | HIF3A                                                     | 19 | 46823699  | 46838243  | 0 | 0 | 0 | 4 | 0 | 0 | 14544  | 0.425245541 | -2.30189363 | 4.007193468 | -0.574440353 | NA | NA |
| chr19:50500761-50501271   | exonic       | VRK3                                                      | 19 | 50500761  | 50501271  | 0 | 0 | 0 | 4 | 0 | 0 | 510    | 0.425245541 | -2.30189363 | 4.007193468 | -0.574440353 | NA | NA |
| chr19:57088081-57089646   | exonic       | ZNF470                                                    | 19 | 57088081  | 57089646  | 0 | 0 | 0 | 4 | 0 | 0 | 1565   | 0.425245541 | -2.30189363 | 4.007193468 | -0.574440353 | NA | NA |
| chr2:144899449-145077435  | exonic       | GTDC1                                                     | 2  | 144899449 | 145077435 | 0 | 0 | 0 | 4 | 0 | 0 | 177986 | 0.425245541 | -2.30189363 | 4.007193468 | -0.574440353 | NA | NA |
| chr2:170802797-170917953  | exonic       | UBR3                                                      | 2  | 170802797 | 170917953 | 0 | 0 | 0 | 4 | 0 | 0 | 115156 | 0.425245541 | -2.30189363 | 4.007193468 | -0.574440353 | NA | NA |
| chr2:232070910-232160966  | exonic       | ARMC9                                                     | 2  | 232070910 | 232160966 | 0 | 0 | 0 | 4 | 0 | 0 | 90056  | 0.425245541 | -2.30189363 | 4.007193468 | -0.574440353 | NA | NA |

|                          |            |                                                           |    |           |           |   |   |   |   |   |   |       |             |             |             |              |    |    |
|--------------------------|------------|-----------------------------------------------------------|----|-----------|-----------|---|---|---|---|---|---|-------|-------------|-------------|-------------|--------------|----|----|
| chr2:238617187-238629465 | exonic     | LRRFIP1                                                   | 2  | 238617187 | 238629465 | 0 | 0 | 0 | 4 | 0 | 0 | 12278 | 0.425245541 | -2.30189363 | 4.007193468 | -0.574440353 | NA | NA |
| chr2:242079935-242080168 | exonic     | PASK                                                      | 2  | 242079935 | 242080168 | 0 | 0 | 0 | 4 | 0 | 0 | 233   | 0.425245541 | -2.30189363 | 4.007193468 | -0.574440353 | NA | NA |
| chr2:24962300-24975025   | exonic     | NCOA1                                                     | 2  | 24962300  | 24975025  | 0 | 0 | 0 | 4 | 0 | 0 | 12725 | 0.425245541 | -2.30189363 | 4.007193468 | -0.574440353 | NA | NA |
| chr2:61406116-61451977   | exonic     | AHSA2, USP34                                              | 2  | 61406116  | 61451977  | 0 | 0 | 0 | 4 | 0 | 0 | 45861 | 0.425245541 | -2.30189363 | 4.007193468 | -0.574440353 | NA | NA |
| chr2:61601102-61601934   | intronic   | USP34                                                     | 2  | 61601102  | 61601934  | 0 | 0 | 0 | 4 | 0 | 0 | 832   | 0.425245541 | -2.30189363 | 4.007193468 | -0.574440353 | NA | NA |
| chr2:7160603-7170346     | exonic     | RNF144A                                                   | 2  | 7160603   | 7170346   | 0 | 0 | 0 | 4 | 0 | 0 | 9743  | 0.425245541 | -2.30189363 | 4.007193468 | -0.574440353 | NA | NA |
| chr2:9458652-9468040     | exonic     | ASAP2                                                     | 2  | 9458652   | 9468040   | 0 | 0 | 0 | 4 | 0 | 0 | 9388  | 0.425245541 | -2.30189363 | 4.007193468 | -0.574440353 | NA | NA |
| chr2:96579856-96581919   | exonic     | ANKRD36C                                                  | 2  | 96579856  | 96581919  | 0 | 0 | 0 | 4 | 0 | 0 | 2063  | 0.425245541 | -2.30189363 | 4.007193468 | -0.574440353 | NA | NA |
| chr2:97852935-97877478   | exonic     | ANKRD36                                                   | 2  | 97852935  | 97877478  | 0 | 0 | 0 | 4 | 0 | 0 | 24543 | 0.425245541 | -2.30189363 | 4.007193468 | -0.574440353 | NA | NA |
| chr20:1433137-1435777    | exonic     | NSFL1C                                                    | 20 | 1433137   | 1435777   | 0 | 0 | 0 | 4 | 0 | 0 | 2640  | 0.425245541 | -2.30189363 | 4.007193468 | -0.574440353 | NA | NA |
| chr20:58322812-58330419  | exonic     | PHACTR3                                                   | 20 | 58322812  | 58330419  | 0 | 0 | 0 | 4 | 0 | 0 | 7607  | 0.425245541 | -2.30189363 | 4.007193468 | -0.574440353 | NA | NA |
| chr21:34906884-34911662  | exonic     | GART                                                      | 21 | 34906884  | 34911662  | 0 | 0 | 0 | 4 | 0 | 0 | 4778  | 0.425245541 | -2.30189363 | 4.007193468 | -0.574440353 | NA | NA |
| chr21:35475134-35497780  | exonic     | MRPS6                                                     | 21 | 35475134  | 35497780  | 0 | 0 | 0 | 4 | 0 | 0 | 22646 | 0.425245541 | -2.30189363 | 4.007193468 | -0.574440353 | NA | NA |
| chr21:46591524-46605006  | exonic     | ADARB1                                                    | 21 | 46591524  | 46605006  | 0 | 0 | 0 | 4 | 0 | 0 | 13482 | 0.425245541 | -2.30189363 | 4.007193468 | -0.574440353 | NA | NA |
| chr22:25905150-25906875  | intergenic | <small>CRYBB2P1 (dist=47505), ADRBK2 (dist=53986)</small> | 22 | 25905150  | 25906875  | 0 | 0 | 0 | 4 | 0 | 0 | 1725  | 0.425245541 | -2.30189363 | 4.007193468 | -0.574440353 | NA | NA |
| chr22:28490067-28504391  | exonic     | TTC28                                                     | 22 | 28490067  | 28504391  | 0 | 0 | 0 | 4 | 0 | 0 | 14324 | 0.425245541 | -2.30189363 | 4.007193468 | -0.574440353 | NA | NA |
| chr22:40752114-40753870  | intronic   | ADSL                                                      | 22 | 40752114  | 40753870  | 0 | 0 | 0 | 4 | 0 | 0 | 1756  | 0.425245541 | -2.30189363 | 4.007193468 | -0.574440353 | NA | NA |
| chr3:113077592-113085156 | exonic     | CFAP44                                                    | 3  | 113077592 | 113085156 | 0 | 0 | 0 | 4 | 0 | 0 | 7564  | 0.425245541 | -2.30189363 | 4.007193468 | -0.574440353 | NA | NA |
| chr3:123366071-123368041 | exonic     | MYLK                                                      | 3  | 123366071 | 123368041 | 0 | 0 | 0 | 4 | 0 | 0 | 1970  | 0.425245541 | -2.30189363 | 4.007193468 | -0.574440353 | NA | NA |
| chr3:130340665-130353469 | exonic     | COL6A6                                                    | 3  | 130340665 | 130353469 | 0 | 0 | 0 | 4 | 0 | 0 | 12804 | 0.425245541 | -2.30189363 | 4.007193468 | -0.574440353 | NA | NA |
| chr3:14860463-14863103   | exonic     | FGD5                                                      | 3  | 14860463  | 14863103  | 0 | 0 | 0 | 4 | 0 | 0 | 2640  | 0.425245541 | -2.30189363 | 4.007193468 | -0.574440353 | NA | NA |
| chr3:155267575-155314167 | exonic     | PLCH1                                                     | 3  | 155267575 | 155314167 | 0 | 0 | 0 | 4 | 0 | 0 | 46592 | 0.425245541 | -2.30189363 | 4.007193468 | -0.574440353 | NA | NA |
| chr3:56771212-56779490   | exonic     | ARHGEF3                                                   | 3  | 56771212  | 56779490  | 0 | 0 | 0 | 4 | 0 | 0 | 8278  | 0.425245541 | -2.30189363 | 4.007193468 | -0.574440353 | NA | NA |
| chr3:66286967-66313803   | exonic     | SLC25A26                                                  | 3  | 66286967  | 66313803  | 0 | 0 | 0 | 4 | 0 | 0 | 26836 | 0.425245541 | -2.30189363 | 4.007193468 | -0.574440353 | NA | NA |
| chr4:100200583-100229021 | exonic     | ADH1A, ADH1B                                              | 4  | 100200583 | 100229021 | 0 | 0 | 0 | 4 | 0 | 0 | 28438 | 0.425245541 | -2.30189363 | 4.007193468 | -0.574440353 | NA | NA |
| chr4:106377405-106377902 | exonic     | PPA2                                                      | 4  | 106377405 | 106377902 | 0 | 0 | 0 | 4 | 0 | 0 | 497   | 0.425245541 | -2.30189363 | 4.007193468 | -0.574440353 | NA | NA |
| chr4:144354643-144361535 | exonic     | GAB1                                                      | 4  | 144354643 | 144361535 | 0 | 0 | 0 | 4 | 0 | 0 | 6892  | 0.425245541 | -2.30189363 | 4.007193468 | -0.574440353 | NA | NA |
| chr4:724418-738476       | exonic     | PCGF3                                                     | 4  | 724418    | 738476    | 0 | 0 | 0 | 4 | 0 | 0 | 14058 | 0.425245541 | -2.30189363 | 4.007193468 | -0.574440353 | NA | NA |
| chr4:88362980-88372887   | exonic     | NUDT9                                                     | 4  | 88362980  | 88372887  | 0 | 0 | 0 | 4 | 0 | 0 | 9907  | 0.425245541 | -2.30189363 | 4.007193468 | -0.574440353 | NA | NA |
| chr5:122435348-122506802 | exonic     | PRDM6                                                     | 5  | 122435348 | 122506802 | 0 | 0 | 0 | 4 | 0 | 0 | 71454 | 0.425245541 | -2.30189363 | 4.007193468 | -0.574440353 | NA | NA |
| chr5:142393645-142437312 | exonic     | ARHGAP26                                                  | 5  | 142393645 | 142437312 | 0 | 0 | 0 | 4 | 0 | 0 | 43667 | 0.425245541 | -2.30189363 | 4.007193468 | -0.574440353 | NA | NA |
| chr5:145176004-145202697 | exonic     | PRELID2                                                   | 5  | 145176004 | 145202697 | 0 | 0 | 0 | 4 | 0 | 0 | 26693 | 0.425245541 | -2.30189363 | 4.007193468 | -0.574440353 | NA | NA |
| chr5:148340480-148349847 | intergenic | <small>ADRB2 (dist=132283), SH3TC2 (dist=1886)</small>    | 5  | 148340480 | 148349847 | 0 | 0 | 0 | 4 | 0 | 0 | 9367  | 0.425245541 | -2.30189363 | 4.007193468 | -0.574440353 | NA | NA |
| chr5:153429117-153433649 | exonic     | MFAP3                                                     | 5  | 153429117 | 153433649 | 0 | 0 | 0 | 4 | 0 | 0 | 4532  | 0.425245541 | -2.30189363 | 4.007193468 | -0.574440353 | NA | NA |
| chr5:31448653-31472339   | exonic     | DROSHA                                                    | 5  | 31448653  | 31472339  | 0 | 0 | 0 | 4 | 0 | 0 | 23686 | 0.425245541 | -2.30189363 | 4.007193468 | -0.574440353 | NA | NA |



|                          |              |                                              |   |           |           |   |   |   |   |   |   |       |             |              |             |              |             |             |
|--------------------------|--------------|----------------------------------------------|---|-----------|-----------|---|---|---|---|---|---|-------|-------------|--------------|-------------|--------------|-------------|-------------|
| chr5:71752230-71757337   | exonic       | ZNF366                                       | 5 | 71752230  | 71757337  | 0 | 0 | 0 | 4 | 0 | 0 | 5107  | 0.425245541 | -2.30189363  | 4.007193468 | -0.574440353 | NA          | NA          |
| chr5:96437463-96438798   | intronic     | LIX1                                         | 5 | 96437463  | 96438798  | 0 | 0 | 0 | 4 | 0 | 0 | 1335  | 0.425245541 | -2.30189363  | 4.007193468 | -0.574440353 | NA          | NA          |
| chr6:10894099-10898348   | exonic       | SYCP2L                                       | 6 | 10894099  | 10898348  | 0 | 0 | 0 | 4 | 0 | 0 | 4249  | 0.425245541 | -2.30189363  | 4.007193468 | -0.574440353 | NA          | NA          |
| chr6:129959538-129963163 | exonic       | ARHGAP18                                     | 6 | 129959538 | 129963163 | 0 | 0 | 0 | 4 | 0 | 0 | 3625  | 0.425245541 | -2.30189363  | 4.007193468 | -0.574440353 | NA          | NA          |
| chr6:144852187-144864006 | exonic       | UTRN                                         | 6 | 144852187 | 144864006 | 0 | 0 | 0 | 4 | 0 | 0 | 11819 | 0.425245541 | -2.30189363  | 4.007193468 | -0.574440353 | NA          | NA          |
| chr6:160461591-160471684 | exonic       | IGF2R                                        | 6 | 160461591 | 160471684 | 0 | 0 | 0 | 4 | 0 | 0 | 10093 | 0.425245541 | -2.30189363  | 4.007193468 | -0.574440353 | NA          | NA          |
| chr6:55966270-56021747   | exonic       | COL21A1                                      | 6 | 55966270  | 56021747  | 0 | 0 | 0 | 4 | 0 | 0 | 55477 | 0.425245541 | -2.30189363  | 4.007193468 | -0.574440353 | NA          | NA          |
| chr6:56513367-56535605   | exonic       | DST                                          | 6 | 56513367  | 56535605  | 0 | 0 | 0 | 4 | 0 | 0 | 22238 | 0.425245541 | -2.30189363  | 4.007193468 | -0.574440353 | NA          | NA          |
| chr6:62362160-62390965   | exonic       | KHDRBS2                                      | 6 | 62362160  | 62390965  | 0 | 0 | 0 | 4 | 0 | 0 | 28805 | 0.425245541 | -2.30189363  | 4.007193468 | -0.574440353 | NA          | NA          |
| chr6:62362160-62407158   | exonic       | KHDRBS2                                      | 6 | 62362160  | 62407158  | 0 | 0 | 0 | 4 | 0 | 0 | 44998 | 0.425245541 | -2.30189363  | 4.007193468 | -0.574440353 | NA          | NA          |
| chr6:83667030-83748204   | exonic       | UBE3D                                        | 6 | 83667030  | 83748204  | 0 | 0 | 0 | 4 | 0 | 0 | 81174 | 0.425245541 | -2.30189363  | 4.007193468 | -0.574440353 | NA          | NA          |
| chr6:97715747-97720938   | exonic       | MMS22L                                       | 6 | 97715747  | 97720938  | 0 | 0 | 0 | 4 | 0 | 0 | 5191  | 0.425245541 | -2.30189363  | 4.007193468 | -0.574440353 | NA          | NA          |
| chr7:104638448-104645543 | intergenic   | LINC01004 (dist=6836), KMT2E-AS1 (dist=5446) | 7 | 104638448 | 104645543 | 0 | 0 | 0 | 4 | 0 | 0 | 7095  | 0.425245541 | -2.30189363  | 4.007193468 | -0.574440353 | NA          | NA          |
| chr7:128214774-128232071 | intergenic   | METTL2B (dist=71796), LINC01000 (dist=49224) | 7 | 128214774 | 128232071 | 0 | 0 | 0 | 4 | 0 | 0 | 17297 | 0.425245541 | -2.30189363  | 4.007193468 | -0.574440353 | NA          | NA          |
| chr7:135705449-135715781 | intergenic   | MIPN (dist=43245), CHR22 (dist=837618)       | 7 | 135705449 | 135715781 | 0 | 0 | 0 | 4 | 0 | 0 | 10332 | 0.425245541 | -2.30189363  | 4.007193468 | -0.574440353 | NA          | NA          |
| chr7:143257371-143318113 | exonic       | CTAGE15                                      | 7 | 143257371 | 143318113 | 0 | 0 | 0 | 4 | 0 | 0 | 60742 | 0.425245541 | -2.30189363  | 4.007193468 | -0.574440353 | NA          | NA          |
| chr7:158672374-158698782 | exonic       | WDR60                                        | 7 | 158672374 | 158698782 | 0 | 0 | 0 | 4 | 0 | 0 | 26408 | 0.425245541 | -2.30189363  | 4.007193468 | -0.574440353 | NA          | NA          |
| chr7:2477439-2478965     | ncRNA_exonic | LOC101927181                                 | 7 | 2477439   | 2478965   | 0 | 0 | 0 | 4 | 0 | 0 | 1526  | 0.425245541 | -2.30189363  | 4.007193468 | -0.574440353 | NA          | NA          |
| chr7:50358644-50450405   | exonic       | IKZF1                                        | 7 | 50358644  | 50450405  | 0 | 0 | 0 | 4 | 0 | 0 | 91761 | 0.425245541 | -2.30189363  | 4.007193468 | -0.574440353 | NA          | NA          |
| chr7:56150971-56151408   | exonic       | PHKG1                                        | 7 | 56150971  | 56151408  | 0 | 0 | 0 | 4 | 0 | 0 | 437   | 0.425245541 | -2.30189363  | 4.007193468 | -0.574440353 | NA          | NA          |
| chr7:889560-906793       | exonic       | SUN1                                         | 7 | 889560    | 906793    | 0 | 0 | 0 | 4 | 0 | 0 | 17233 | 0.425245541 | -2.30189363  | 4.007193468 | -0.574440353 | NA          | NA          |
| chr8:29959414-29964359   | exonic       | LEPROTL1                                     | 8 | 29959414  | 29964359  | 0 | 0 | 0 | 4 | 0 | 0 | 4945  | 0.425245541 | -2.30189363  | 4.007193468 | -0.574440353 | NA          | NA          |
| chr8:38947565-38948865   | exonic       | ADAM9                                        | 8 | 38947565  | 38948865  | 0 | 0 | 0 | 4 | 0 | 0 | 1300  | 0.425245541 | -2.30189363  | 4.007193468 | -0.574440353 | NA          | NA          |
| chr8:42256229-42260979   | exonic       | VDAC3                                        | 8 | 42256229  | 42260979  | 0 | 0 | 0 | 4 | 0 | 0 | 4750  | 0.425245541 | -2.30189363  | 4.007193468 | -0.574440353 | NA          | NA          |
| chr8:42876153-42876541   | UTR3         | HOOK3 (NM_032410:c. *2512_ *2900delins0)     | 8 | 42876153  | 42876541  | 0 | 0 | 0 | 4 | 0 | 0 | 388   | 0.425245541 | -2.30189363  | 4.007193468 | -0.574440353 | NA          | NA          |
| chr8:71495398-71510490   | exonic       | TRAM1                                        | 8 | 71495398  | 71510490  | 0 | 0 | 0 | 4 | 0 | 0 | 15092 | 0.425245541 | -2.30189363  | 4.007193468 | -0.574440353 | NA          | NA          |
| chr9:131221845-131223346 | exonic       | ODF2                                         | 9 | 131221845 | 131223346 | 0 | 0 | 0 | 4 | 0 | 0 | 1501  | 0.425245541 | -2.30189363  | 4.007193468 | -0.574440353 | NA          | NA          |
| chr9:134274095-134277637 | intergenic   | PLPP7 (dist=89446), PRRC2B (dist=27840)      | 9 | 134274095 | 134277637 | 0 | 0 | 0 | 4 | 0 | 0 | 3542  | 0.425245541 | -2.30189363  | 4.007193468 | -0.574440353 | NA          | NA          |
| chr9:22820736-22821597   | ncRNA_exonic | LINC01239                                    | 9 | 22820736  | 22821597  | 0 | 0 | 0 | 4 | 0 | 0 | 861   | 0.425245541 | -2.30189363  | 4.007193468 | -0.574440353 | NA          | NA          |
| chr9:33948371-33996331   | exonic       | UBAP2                                        | 9 | 33948371  | 33996331  | 3 | 3 | 0 | 8 | 5 | 3 | 47960 | 0.425245541 | -2.30189363  | 4.007193468 | -0.574440353 | NA          | NA          |
| chr9:72333253-72365866   | exonic       | PTARI                                        | 9 | 72333253  | 72365866  | 0 | 0 | 0 | 4 | 0 | 0 | 32613 | 0.425245541 | -2.30189363  | 4.007193468 | -0.574440353 | NA          | NA          |
| chrX:15473970-15477863   | exonic       | PIR                                          | X | 15473970  | 15477863  | 0 | 0 | 0 | 4 | 0 | 0 | 3893  | 0.425245541 | -2.30189363  | 4.007193468 | -0.574440353 | NA          | NA          |
| chrX:8536272-8538745     | exonic       | ANOS1                                        | X | 8536272   | 8538745   | 0 | 0 | 0 | 4 | 0 | 0 | 2473  | 0.425245541 | -2.30189363  | 4.007193468 | -0.574440353 | NA          | NA          |
| chr8:28570973-28575724   | exonic       | EXTL3                                        | 8 | 28570973  | 28575724  | 0 | 1 | 0 | 3 | 2 | 1 | 4751  | 1.043483407 | -2.295437451 | 2.566860392 | -0.894258784 | 0.371183447 | 0.998252924 |
| chr7:104678572-104681470 | exonic       | KMT2E                                        | 7 | 104678572 | 104681470 | 1 | 1 | 1 | 7 | 2 | 5 | 2898  | 3.027859351 | -2.2953285   | 1.620226719 | -1.416671181 | 0.156579086 | 0.998252924 |

|                           |        |           |    |           |           |   |   |   |    |    |   |        |             |              |             |              |             |             |
|---------------------------|--------|-----------|----|-----------|-----------|---|---|---|----|----|---|--------|-------------|--------------|-------------|--------------|-------------|-------------|
| chr3:132400757-132411662  | exonic | NPHP3     | 3  | 132400757 | 132411662 | 0 | 1 | 0 | 1  | 6  | 0 | 10905  | 1.006751715 | -2.291581982 | 2.821973463 | -0.812049444 | NA          | NA          |
| chr2:190584297-190585513  | exonic | ANKAR     | 2  | 190584297 | 190585513 | 2 | 0 | 0 | 0  | 11 | 0 | 1216   | 1.589275525 | -2.288652365 | 2.646473889 | -0.864793102 | NA          | NA          |
| chr3:67546221-67559327    | exonic | SUCLG2    | 3  | 67546221  | 67559327  | 4 | 1 | 2 | 17 | 12 | 7 | 13106  | 6.501914492 | -2.286189281 | 1.144077028 | -1.998282655 | 0.045686025 | 0.998252924 |
| chr19:11223953-11224438   | exonic | LDLR      | 19 | 11223953  | 11224438  | 1 | 0 | 0 | 0  | 0  | 3 | 485    | 1.053642769 | -2.281457385 | 3.068990874 | -0.743390084 | NA          | NA          |
| chr22:29095825-29121355   | exonic | CHEK2     | 22 | 29095825  | 29121355  | 1 | 0 | 0 | 0  | 0  | 3 | 25530  | 1.053642769 | -2.281457385 | 3.068990874 | -0.743390084 | NA          | NA          |
| chr5:172359438-172362313  | exonic | ERGIC1    | 5  | 172359438 | 172362313 | 1 | 0 | 0 | 0  | 0  | 3 | 2875   | 1.053642769 | -2.281457385 | 3.068990874 | -0.743390084 | NA          | NA          |
| chr6:20781375-21065459    | exonic | CDKAL1    | 6  | 20781375  | 21065459  | 1 | 0 | 0 | 0  | 0  | 3 | 284084 | 1.053642769 | -2.281457385 | 3.068990874 | -0.743390084 | NA          | NA          |
| chr7:26235466-26237486    | exonic | HNRNPA2B1 | 7  | 26235466  | 26237486  | 1 | 0 | 0 | 0  | 0  | 3 | 2020   | 1.053642769 | -2.281457385 | 3.068990874 | -0.743390084 | NA          | NA          |
| chr9:33944362-33963789    | exonic | UBAP2     | 9  | 33944362  | 33963789  | 1 | 0 | 0 | 0  | 0  | 3 | 19427  | 1.053642769 | -2.281457385 | 3.068990874 | -0.743390084 | NA          | NA          |
| chr21:38480691-38512973   | exonic | TTC3      | 21 | 38480691  | 38512973  | 0 | 1 | 0 | 0  | 0  | 3 | 32282  | 1.098931625 | -2.277870602 | 3.027098768 | -0.75249299  | NA          | NA          |
| chr4:128564675-128609022  | exonic | INTU      | 4  | 128564675 | 128609022 | 0 | 1 | 0 | 0  | 0  | 3 | 44347  | 1.098931625 | -2.277870602 | 3.027098768 | -0.75249299  | NA          | NA          |
| chr10:103558598-103573363 | exonic | MGEA5     | 10 | 103558598 | 103573363 | 0 | 0 | 1 | 0  | 0  | 3 | 14765  | 1.121924852 | -2.276127584 | 3.007506654 | -0.756815477 | NA          | NA          |
| chr3:172499952-172504364  | exonic | ECT2      | 3  | 172499952 | 172504364 | 0 | 0 | 1 | 0  | 0  | 3 | 4412   | 1.121924852 | -2.276127584 | 3.007506654 | -0.756815477 | NA          | NA          |
| chr5:65342180-65350779    | exonic | ERBB2IP   | 5  | 65342180  | 65350779  | 0 | 0 | 1 | 0  | 0  | 3 | 8599   | 1.121924852 | -2.276127584 | 3.007506654 | -0.756815477 | NA          | NA          |
| chr5:74842834-74882883    | exonic | POLK      | 5  | 74842834  | 74882883  | 0 | 0 | 1 | 0  | 0  | 3 | 40049  | 1.121924852 | -2.276127584 | 3.007506654 | -0.756815477 | NA          | NA          |
| chr2:136505836-136533921  | exonic | UBXN4     | 2  | 136505836 | 136533921 | 0 | 0 | 2 | 1  | 2  | 5 | 28085  | 2.283997324 | -2.272515078 | 2.059459481 | -1.103452192 | NA          | NA          |
| chr7:77236551-77256992    | exonic | PTPN12    | 7  | 77236551  | 77256992  | 0 | 0 | 1 | 2  | 5  | 0 | 20441  | 1.015028905 | -2.270459014 | 2.779180183 | -0.816952793 | 0.413955406 | 0.998252924 |
| chr15:50929618-50955243   | exonic | TRPM7     | 15 | 50929618  | 50955243  | 1 | 0 | 0 | 2  | 5  | 0 | 25625  | 0.946746822 | -2.267782651 | 2.843185087 | -0.797620479 | 0.425090763 | 0.998252924 |
| chr4:113483526-113511030  | exonic | ZGRF1     | 4  | 113483526 | 113511030 | 1 | 0 | 0 | 2  | 5  | 0 | 27504  | 0.946746822 | -2.267782651 | 2.843185087 | -0.797620479 | 0.425090763 | 0.998252924 |
| chr20:34300940-34313077   | exonic | RBM39     | 20 | 34300940  | 34313077  | 0 | 0 | 2 | 3  | 9  | 1 | 12137  | 2.110937611 | -2.251409047 | 2.030296454 | -1.108906555 | NA          | NA          |
| chr12:110565164-110584853 | exonic | IFT81     | 12 | 110565164 | 110584853 | 0 | 1 | 1 | 3  | 4  | 3 | 19689  | 2.099244494 | -2.250433656 | 1.916411883 | -1.174295399 | 0.240276726 | 0.998252924 |
| chr6:83728691-83754378    | exonic | UBE3D     | 6  | 83728691  | 83754378  | 1 | 0 | 0 | 5  | 0  | 1 | 25687  | 0.968762477 | -2.248485107 | 2.865428834 | -0.784694102 | 0.432632942 | 0.998252924 |
| chr19:46832463-46834530   | exonic | HIF3A     | 19 | 46832463  | 46834530  | 2 | 0 | 0 | 12 | 0  | 0 | 2067   | 1.533710507 | -2.23976275  | 2.667412689 | -0.839676125 | NA          | NA          |
| chr12:101790176-101799759 | exonic | ARL1      | 12 | 101790176 | 101799759 | 2 | 0 | 0 | 5  | 4  | 1 | 9583   | 1.581859107 | -2.235983972 | 2.210757045 | -1.01141099  | 0.311819763 | 0.998252924 |
| chr11:124517260-124518071 | exonic | SIAE      | 11 | 124517260 | 124518071 | 2 | 0 | 0 | 4  | 7  | 0 | 811    | 1.530411379 | -2.225435629 | 2.396083206 | -0.928780613 | 0.353002794 | 0.998252924 |
| chr5:68553869-68558131    | exonic | CDK7      | 5  | 68553869  | 68558131  | 1 | 1 | 0 | 2  | 1  | 4 | 4262   | 1.869787369 | -2.224198242 | 2.071455466 | -1.073736935 | NA          | NA          |
| chr20:45874751-45878183   | exonic | ZMYND8    | 20 | 45874751  | 45878183  | 0 | 0 | 1 | 4  | 3  | 0 | 3432   | 0.985596831 | -2.223306699 | 2.791696078 | -0.796399979 | 0.42579959  | 0.998252924 |
| chr16:249060-258187       | exonic | LUC7L     | 16 | 249060    | 258187    | 0 | 1 | 0 | 4  | 3  | 0 | 9127   | 0.962603605 | -2.22230553  | 2.813083535 | -0.789989171 | 0.429534092 | 0.998252924 |
| chr2:61575004-61577828    | exonic | USP34     | 2  | 61575004  | 61577828  | 1 | 0 | 0 | 4  | 3  | 0 | 2824   | 0.917314749 | -2.220231851 | 2.859043544 | -0.776564546 | 0.437415726 | 0.998252924 |
| chr2:99802639-99812219    | exonic | MRPL30    | 2  | 99802639  | 99812219  | 2 | 0 | 0 | 5  | 6  | 0 | 9580   | 1.515695342 | -2.210422513 | 2.396957953 | -0.922178259 | 0.356435601 | 0.998252924 |
| chr21:34787194-34805178   | exonic | IFNGR2    | 21 | 34787194  | 34805178  | 1 | 0 | 0 | 0  | 2  | 2 | 17984  | 0.987479004 | -2.204146991 | 2.855902904 | -0.771786389 | 0.440240954 | 0.998252924 |
| chr17:11984672-11999011   | exonic | MAP2K4    | 17 | 11984672  | 11999011  | 0 | 1 | 0 | 0  | 2  | 2 | 14339  | 1.03276786  | -2.201516034 | 2.815332789 | -0.781973642 | 0.434230064 | 0.998252924 |
| chr12:56824664-56826308   | exonic | TIMELESS  | 12 | 56824664  | 56826308  | 0 | 0 | 1 | 0  | 2  | 2 | 1644   | 1.055761087 | -2.200242102 | 2.796430717 | -0.786803724 | 0.431396773 | 0.998252924 |
| chr2:61295983-61297635    | exonic | KIAA1841  | 2  | 61295983  | 61297635  | 0 | 0 | 1 | 0  | 2  | 2 | 1652   | 1.055761087 | -2.200242102 | 2.796430717 | -0.786803724 | 0.431396773 | 0.998252924 |
| chr4:6995910-7002978      | exonic | TBC1D14   | 4  | 6995910   | 7002978   | 0 | 2 | 0 | 2  | 4  | 3 | 7068   | 1.969939882 | -2.19996079  | 2.068531066 | -1.063537708 | 0.287538174 | 0.998252924 |

|                           |              |                          |    |           |           |   |   |   |    |    |   |       |             |              |             |              |             |             |
|---------------------------|--------------|--------------------------|----|-----------|-----------|---|---|---|----|----|---|-------|-------------|--------------|-------------|--------------|-------------|-------------|
| chr17:34864900-34867294   | exonic       | MYO19                    | 17 | 34864900  | 34867294  | 0 | 1 | 0 | 5  | 2  | 0 | 2394  | 0.947887568 | -2.197248549 | 2.838023365 | -0.774217921 | 0.438801932 | 0.998252924 |
| chr17:36517593-36523933   | exonic       | SOCS7                    | 17 | 36517593  | 36523933  | 1 | 0 | 0 | 5  | 2  | 0 | 6340  | 0.902598712 | -2.195078801 | 2.88499623  | -0.760860197 | 0.446740574 | 0.998252924 |
| chr4:1902352-1920350      | exonic       | WHSC1                    | 4  | 1902352   | 1920350   | 1 | 1 | 0 | 2  | 3  | 3 | 17998 | 1.803623604 | -2.194719041 | 2.033478789 | -1.079292812 | 0.280457216 | 0.998252924 |
| chr1:155691307-155695810  | exonic       | DAP3                     | 1  | 155691307 | 155695810 | 0 | 1 | 1 | 5  | 6  | 1 | 4503  | 1.93748489  | -2.181890936 | 1.959658656 | -1.113403566 | 0.265535144 | 0.998252924 |
| chr9:127660827-127662826  | exonic       | GOLGA1                   | 9  | 127660827 | 127662826 | 0 | 0 | 1 | 6  | 1  | 0 | 1999  | 0.956164758 | -2.171739136 | 2.863815788 | -0.758337581 | NA          | NA          |
| chr1:1735857-1747301      | exonic       | GNB1                     | 1  | 1735857   | 1747301   | 4 | 0 | 3 | 18 | 15 | 4 | 11444 | 6.069645542 | -2.171604637 | 1.227817696 | -1.768670255 | 0.076948919 | 0.998252924 |
| chr1:1735857-1749314      | exonic       | GNB1                     | 1  | 1735857   | 1749314   | 4 | 0 | 3 | 18 | 15 | 4 | 13457 | 6.069645542 | -2.171604637 | 1.227817696 | -1.768670255 | 0.076948919 | 0.998252924 |
| chr2:53941520-53943880    | exonic       | ASB3, GPR75-ASB3         | 2  | 53941520  | 53943880  | 0 | 1 | 0 | 6  | 1  | 0 | 2360  | 0.933171532 | -2.170671743 | 2.88611813  | -0.752107726 | NA          | NA          |
| chr10:105199502-105200607 | exonic       | PDCD11                   | 10 | 105199502 | 105200607 | 0 | 0 | 2 | 14 | 1  | 0 | 1105  | 2.003924865 | -2.168838156 | 2.26844037  | -0.956092205 | NA          | NA          |
| chr2:100623093-100628033  | exonic       | AFF3                     | 2  | 100623093 | 100628033 | 1 | 0 | 0 | 6  | 1  | 0 | 4940  | 0.887882675 | -2.168462167 | 2.934042606 | -0.739069761 | NA          | NA          |
| chr2:188223789-188250358  | exonic       | CALCRL                   | 2  | 188223789 | 188250358 | 1 | 0 | 0 | 6  | 1  | 0 | 26569 | 0.887882675 | -2.168462167 | 2.934042606 | -0.739069761 | NA          | NA          |
| chr20:47707278-47711500   | exonic       | CSE1L                    | 20 | 47707278  | 47711500  | 1 | 0 | 0 | 6  | 1  | 0 | 4222  | 0.887882675 | -2.168462167 | 2.934042606 | -0.739069761 | NA          | NA          |
| chr7:27824781-27825108    | exonic       | TAX1BP1                  | 7  | 27824781  | 27825108  | 1 | 0 | 0 | 1  | 1  | 2 | 327   | 0.972762967 | -2.165496715 | 2.686025871 | -0.806208436 | 0.420122676 | 0.998252924 |
| chr16:27222467-27226329   | exonic       | KDM8                     | 16 | 27222467  | 27226329  | 2 | 0 | 0 | 8  | 3  | 0 | 3862  | 1.471547232 | -2.164773302 | 2.431192418 | -0.890416277 | 0.373242405 | 0.998252924 |
| chr2:120885263-120903865  | exonic       | EPB41L5                  | 2  | 120885263 | 120903865 | 2 | 0 | 0 | 8  | 3  | 0 | 18602 | 1.471547232 | -2.164773302 | 2.431192418 | -0.890416277 | 0.373242405 | 0.998252924 |
| chr10:47232155-47234518   | ncRNA_exonic | BMS1P6                   | 10 | 47232155  | 47234518  | 0 | 0 | 1 | 1  | 1  | 2 | 2363  | 1.04104505  | -2.161098055 | 2.633243341 | -0.820698194 | 0.4118182   | 0.998252924 |
| chr7:90001468-90007525    | exonic       | GTPBP10                  | 7  | 90001468  | 90007525  | 0 | 0 | 1 | 1  | 1  | 2 | 6057  | 1.04104505  | -2.161098055 | 2.633243341 | -0.820698194 | 0.4118182   | 0.998252924 |
| chr11:85723323-85742653   | exonic       | PICALM                   | 11 | 85723323  | 85742653  | 1 | 0 | 0 | 0  | 4  | 1 | 19330 | 0.921315239 | -2.15034103  | 2.920117813 | -0.73638845  | 0.461494332 | 0.998252924 |
| chr13:96485180-96489456   | exonic       | UGGT2                    | 13 | 96485180  | 96489456  | 3 | 0 | 2 | 4  | 4  | 9 | 4276  | 4.464821586 | -2.148768914 | 1.471447614 | -1.460309489 | NA          | NA          |
| chr14:31602443-31641328   | exonic       | HECTD1                   | 14 | 31602443  | 31641328  | 0 | 0 | 1 | 5  | 3  | 0 | 38885 | 1.026329013 | -2.148278083 | 2.818913535 | -0.762094352 | 0.446003694 | 0.998252924 |
| chr19:34699833-34712643   | exonic       | LSM14A                   | 19 | 34699833  | 34712643  | 0 | 0 | 1 | 2  | 0  | 2 | 12810 | 1.026329013 | -2.148278083 | 2.818913535 | -0.762094352 | 0.446003694 | 0.998252924 |
| chr7:32660015-32718742    | ncRNA_exonic | DPY19L1P1                | 7  | 32660015  | 32718742  | 0 | 0 | 1 | 2  | 0  | 2 | 58727 | 1.026329013 | -2.148278083 | 2.818913535 | -0.762094352 | 0.446003694 | 0.998252924 |
| chr9:97101118-97200810    | exonic       | MFS14B                   | 9  | 97101118  | 97200810  | 0 | 0 | 2 | 0  | 4  | 4 | 99692 | 2.111522173 | -2.145229257 | 2.221662708 | -0.965596285 | 0.334246235 | 0.998252924 |
| chr7:104702610-104722244  | exonic       | KMT2E                    | 7  | 104702610 | 104722244 | 1 | 1 | 0 | 4  | 3  | 2 | 19634 | 1.708027765 | -2.143472307 | 2.036613367 | -1.052468938 | 0.292584455 | 0.998252924 |
| chr4:103578838-103635718  | exonic       | MANBA                    | 4  | 103578838 | 103635718 | 0 | 1 | 0 | 7  | 0  | 0 | 56880 | 0.918455495 | -2.134112552 | 3.159685105 | -0.675419379 | NA          | NA          |
| chr3:129182402-129188260  | exonic       | IFT122                   | 3  | 129182402 | 129188260 | 1 | 0 | 0 | 7  | 0  | 0 | 5858  | 0.873166639 | -2.132052564 | 3.215863133 | -0.662979883 | NA          | NA          |
| chr4:103585841-103647840  | exonic       | MANBA                    | 4  | 103585841 | 103647840 | 1 | 0 | 0 | 7  | 0  | 0 | 61999 | 0.873166639 | -2.132052564 | 3.215863133 | -0.662979883 | NA          | NA          |
| chr5:43161350-43162033    | exonic       | ZNF131                   | 5  | 43161350  | 43162033  | 1 | 0 | 1 | 3  | 2  | 3 | 683   | 1.811900794 | -2.1277354   | 2.025736711 | -1.050351405 | 0.293556579 | 0.998252924 |
| chr12:31604873-31648853   | exonic       | DENND5B                  | 12 | 31604873  | 31648853  | 0 | 1 | 0 | 1  | 3  | 1 | 43980 | 0.951888058 | -2.120755434 | 2.67585068  | -0.792553729 | 0.428037876 | 0.998252924 |
| chr1:14095613-14099683    | exonic       | PRDM2                    | 1  | 14095613  | 14099683  | 0 | 0 | 0 | 0  | 3  | 0 | 4070  | 0.363082265 | -2.115500483 | 4.013675407 | -0.527073136 | NA          | NA          |
| chr1:1584361-1647917      | exonic       | CDK11A, CDK11B, SLC35E2B | 1  | 1584361   | 1647917   | 0 | 0 | 0 | 0  | 3  | 0 | 63556 | 0.363082265 | -2.115500483 | 4.013675407 | -0.527073136 | NA          | NA          |
| chr1:180047598-180049796  | exonic       | CEP350                   | 1  | 180047598 | 180049796 | 0 | 0 | 0 | 0  | 3  | 0 | 2198  | 0.363082265 | -2.115500483 | 4.013675407 | -0.527073136 | NA          | NA          |
| chr1:204488543-204504762  | exonic       | MDM4                     | 1  | 204488543 | 204504762 | 0 | 0 | 0 | 0  | 3  | 0 | 16219 | 0.363082265 | -2.115500483 | 4.013675407 | -0.527073136 | NA          | NA          |
| chr1:232649603-232669329  | exonic       | SIPA1L2                  | 1  | 232649603 | 232669329 | 0 | 0 | 0 | 0  | 3  | 0 | 19726 | 0.363082265 | -2.115500483 | 4.013675407 | -0.527073136 | NA          | NA          |
| chr1:33097427-33099711    | exonic       | ZBTB80S                  | 1  | 33097427  | 33099711  | 0 | 0 | 0 | 0  | 3  | 0 | 2284  | 0.363082265 | -2.115500483 | 4.013675407 | -0.527073136 | NA          | NA          |

|                           |              |                                                                                   |    |           |           |   |   |   |   |   |   |       |             |              |             |              |    |    |
|---------------------------|--------------|-----------------------------------------------------------------------------------|----|-----------|-----------|---|---|---|---|---|---|-------|-------------|--------------|-------------|--------------|----|----|
| chr1:40869356-40875507    | exonic       | SMAP2                                                                             | 1  | 40869356  | 40875507  | 0 | 0 | 0 | 0 | 3 | 0 | 6151  | 0.363082265 | -2.115500483 | 4.013675407 | -0.527073136 | NA | NA |
| chr1:41651793-41660071    | exonic       | SCMH1                                                                             | 1  | 41651793  | 41660071  | 0 | 0 | 0 | 0 | 3 | 0 | 8278  | 0.363082265 | -2.115500483 | 4.013675407 | -0.527073136 | NA | NA |
| chr1:42094420-42111914    | UTR5         | <small>0019708.00127771..._41310_4092641144L.M.204903..._41320_430261144L</small> | 1  | 42094420  | 42111914  | 0 | 0 | 0 | 0 | 3 | 0 | 17494 | 0.363082265 | -2.115500483 | 4.013675407 | -0.527073136 | NA | NA |
| chr1:52283737-52299842    | exonic       | NRDC                                                                              | 1  | 52283737  | 52299842  | 0 | 0 | 0 | 0 | 3 | 0 | 16105 | 0.363082265 | -2.115500483 | 4.013675407 | -0.527073136 | NA | NA |
| chr1:59150825-59155921    | exonic       | MYSM1                                                                             | 1  | 59150825  | 59155921  | 0 | 0 | 0 | 0 | 3 | 0 | 5096  | 0.363082265 | -2.115500483 | 4.013675407 | -0.527073136 | NA | NA |
| chr1:79383318-79387471    | exonic       | ADGRL4                                                                            | 1  | 79383318  | 79387471  | 0 | 0 | 0 | 0 | 3 | 0 | 4153  | 0.363082265 | -2.115500483 | 4.013675407 | -0.527073136 | NA | NA |
| chr10:112711366-112724819 | exonic       | SHOC2                                                                             | 10 | 112711366 | 112724819 | 0 | 0 | 0 | 0 | 3 | 0 | 13453 | 0.363082265 | -2.115500483 | 4.013675407 | -0.527073136 | NA | NA |
| chr10:123670421-123673408 | exonic       | ATE1                                                                              | 10 | 123670421 | 123673408 | 0 | 0 | 0 | 0 | 3 | 0 | 2987  | 0.363082265 | -2.115500483 | 4.013675407 | -0.527073136 | NA | NA |
| chr10:13152273-13164487   | exonic       | OPTN                                                                              | 10 | 13152273  | 13164487  | 0 | 0 | 0 | 0 | 3 | 0 | 12214 | 0.363082265 | -2.115500483 | 4.013675407 | -0.527073136 | NA | NA |
| chr10:13233298-13234568   | exonic       | MCM10                                                                             | 10 | 13233298  | 13234568  | 0 | 0 | 0 | 0 | 3 | 0 | 1270  | 0.363082265 | -2.115500483 | 4.013675407 | -0.527073136 | NA | NA |
| chr10:70530962-70548085   | exonic       | CCAR1                                                                             | 10 | 70530962  | 70548085  | 0 | 0 | 0 | 0 | 3 | 0 | 17123 | 0.363082265 | -2.115500483 | 4.013675407 | -0.527073136 | NA | NA |
| chr10:74255336-74256927   | intronic     | MICU1                                                                             | 10 | 74255336  | 74256927  | 0 | 0 | 0 | 0 | 3 | 0 | 1591  | 0.363082265 | -2.115500483 | 4.013675407 | -0.527073136 | NA | NA |
| chr10:74468041-74501603   | ncRNA_exonic | MIR4676                                                                           | 10 | 74468041  | 74501603  | 0 | 0 | 0 | 0 | 3 | 0 | 33562 | 0.363082265 | -2.115500483 | 4.013675407 | -0.527073136 | NA | NA |
| chr10:7820800-7822270     | exonic       | KIN                                                                               | 10 | 7820800   | 7822270   | 0 | 0 | 0 | 0 | 3 | 0 | 1470  | 0.363082265 | -2.115500483 | 4.013675407 | -0.527073136 | NA | NA |
| chr10:98618049-98667504   | UTR5         | -----                                                                             | 10 | 98618049  | 98667504  | 0 | 0 | 0 | 0 | 3 | 0 | 49455 | 0.363082265 | -2.115500483 | 4.013675407 | -0.527073136 | NA | NA |
| chr11:108200940-108202764 | exonic       | ATM                                                                               | 11 | 108200940 | 108202764 | 0 | 0 | 0 | 0 | 3 | 0 | 1824  | 0.363082265 | -2.115500483 | 4.013675407 | -0.527073136 | NA | NA |
| chr11:110306558-110307862 | exonic       | FDX1                                                                              | 11 | 110306558 | 110307862 | 0 | 0 | 0 | 0 | 3 | 0 | 1304  | 0.363082265 | -2.115500483 | 4.013675407 | -0.527073136 | NA | NA |
| chr11:116655570-116658359 | exonic       | ZPR1                                                                              | 11 | 116655570 | 116658359 | 0 | 0 | 0 | 0 | 3 | 0 | 2789  | 0.363082265 | -2.115500483 | 4.013675407 | -0.527073136 | NA | NA |
| chr11:1261605-1262080     | exonic       | MUC5B                                                                             | 11 | 1261605   | 1262080   | 0 | 0 | 0 | 0 | 3 | 0 | 475   | 0.363082265 | -2.115500483 | 4.013675407 | -0.527073136 | NA | NA |
| chr11:14512110-14520531   | exonic       | COPB1                                                                             | 11 | 14512110  | 14520531  | 0 | 0 | 0 | 0 | 3 | 0 | 8421  | 0.363082265 | -2.115500483 | 4.013675407 | -0.527073136 | NA | NA |
| chr11:17139037-17167489   | exonic       | PIK3C2A                                                                           | 11 | 17139037  | 17167489  | 0 | 0 | 0 | 0 | 3 | 0 | 28452 | 0.363082265 | -2.115500483 | 4.013675407 | -0.527073136 | NA | NA |
| chr11:17190224-17191353   | exonic       | PIK3C2A                                                                           | 11 | 17190224  | 17191353  | 0 | 0 | 0 | 0 | 3 | 0 | 1129  | 0.363082265 | -2.115500483 | 4.013675407 | -0.527073136 | NA | NA |
| chr11:47752925-47772842   | exonic       | FNBP4                                                                             | 11 | 47752925  | 47772842  | 0 | 0 | 0 | 0 | 3 | 0 | 19917 | 0.363082265 | -2.115500483 | 4.013675407 | -0.527073136 | NA | NA |
| chr11:65267535-65267739   | ncRNA_exonic | MALAT1                                                                            | 11 | 65267535  | 65267739  | 0 | 0 | 0 | 0 | 3 | 0 | 204   | 0.363082265 | -2.115500483 | 4.013675407 | -0.527073136 | NA | NA |
| chr11:82872368-82881037   | exonic       | PCF11                                                                             | 11 | 82872368  | 82881037  | 0 | 0 | 0 | 0 | 3 | 0 | 8669  | 0.363082265 | -2.115500483 | 4.013675407 | -0.527073136 | NA | NA |
| chr11:9260657-9268546     | intronic     | DENND5A                                                                           | 11 | 9260657   | 9268546   | 0 | 0 | 0 | 0 | 3 | 0 | 7889  | 0.363082265 | -2.115500483 | 4.013675407 | -0.527073136 | NA | NA |
| chr11:92887274-92903387   | exonic       | SLC36A4                                                                           | 11 | 92887274  | 92903387  | 0 | 0 | 0 | 0 | 3 | 0 | 16113 | 0.363082265 | -2.115500483 | 4.013675407 | -0.527073136 | NA | NA |
| chr11:9308001-9316934     | exonic       | TMEM41B                                                                           | 11 | 9308001   | 9316934   | 0 | 0 | 0 | 0 | 3 | 0 | 8933  | 0.363082265 | -2.115500483 | 4.013675407 | -0.527073136 | NA | NA |
| chr11:9309248-9316934     | exonic       | TMEM41B                                                                           | 11 | 9309248   | 9316934   | 0 | 0 | 0 | 0 | 3 | 0 | 7686  | 0.363082265 | -2.115500483 | 4.013675407 | -0.527073136 | NA | NA |
| chr11:9829546-9830549     | exonic       | SBF2                                                                              | 11 | 9829546   | 9830549   | 0 | 0 | 0 | 0 | 3 | 0 | 1003  | 0.363082265 | -2.115500483 | 4.013675407 | -0.527073136 | NA | NA |
| chr12:103657104-103664086 | intergenic   | NONE (dist=NONE),NONE (dist=NONE)                                                 | 12 | 103657104 | 103664086 | 0 | 0 | 0 | 0 | 3 | 0 | 6982  | 0.363082265 | -2.115500483 | 4.013675407 | -0.527073136 | NA | NA |
| chr12:110426767-110429565 | exonic       | GIT2                                                                              | 12 | 110426767 | 110429565 | 0 | 0 | 0 | 0 | 3 | 0 | 2798  | 0.363082265 | -2.115500483 | 4.013675407 | -0.527073136 | NA | NA |
| chr12:116534474-116557584 | exonic       | MED13L                                                                            | 12 | 116534474 | 116557584 | 0 | 0 | 0 | 0 | 3 | 0 | 23110 | 0.363082265 | -2.115500483 | 4.013675407 | -0.527073136 | NA | NA |
| chr12:117485507-117487474 | exonic       | TESC                                                                              | 12 | 117485507 | 117487474 | 0 | 0 | 0 | 0 | 3 | 0 | 1967  | 0.363082265 | -2.115500483 | 4.013675407 | -0.527073136 | NA | NA |
| chr12:124123810-124137282 | exonic       | GTF2H3                                                                            | 12 | 124123810 | 124137282 | 0 | 0 | 0 | 0 | 3 | 0 | 13472 | 0.363082265 | -2.115500483 | 4.013675407 | -0.527073136 | NA | NA |

|                           |              |                                                          |    |           |           |   |   |   |   |   |   |        |             |              |             |              |    |    |
|---------------------------|--------------|----------------------------------------------------------|----|-----------|-----------|---|---|---|---|---|---|--------|-------------|--------------|-------------|--------------|----|----|
| chr12:124221605-124233332 | exonic       | ATP6VOA2                                                 | 12 | 124221605 | 124233332 | 0 | 0 | 0 | 0 | 3 | 0 | 11727  | 0.363082265 | -2.115500483 | 4.013675407 | -0.527073136 | NA | NA |
| chr12:20076132-20127661   | intergenic   | <small>ABP2(d1st+40959),LOC100506393(d1st+9958)</small>  | 12 | 20076132  | 20127661  | 0 | 0 | 0 | 0 | 3 | 0 | 51529  | 0.363082265 | -2.115500483 | 4.013675407 | -0.527073136 | NA | NA |
| chr12:26628228-26784992   | exonic       | ITPR2                                                    | 12 | 26628228  | 26784992  | 0 | 0 | 0 | 0 | 3 | 0 | 156764 | 0.363082265 | -2.115500483 | 4.013675407 | -0.527073136 | NA | NA |
| chr12:27807655-27820253   | exonic       | PPFIBP1                                                  | 12 | 27807655  | 27820253  | 0 | 0 | 0 | 0 | 3 | 0 | 12598  | 0.363082265 | -2.115500483 | 4.013675407 | -0.527073136 | NA | NA |
| chr12:2790820-2791778     | exonic       | CACNA1C                                                  | 12 | 2790820   | 2791778   | 0 | 0 | 0 | 0 | 3 | 0 | 958    | 0.363082265 | -2.115500483 | 4.013675407 | -0.527073136 | NA | NA |
| chr12:472128-475270       | exonic       | KDM5A                                                    | 12 | 472128    | 475270    | 0 | 0 | 0 | 0 | 3 | 0 | 3142   | 0.363082265 | -2.115500483 | 4.013675407 | -0.527073136 | NA | NA |
| chr12:50824277-50834332   | exonic       | LARP4                                                    | 12 | 50824277  | 50834332  | 0 | 0 | 0 | 0 | 3 | 0 | 10055  | 0.363082265 | -2.115500483 | 4.013675407 | -0.527073136 | NA | NA |
| chr12:56493431-56494029   | exonic       | ERBB3                                                    | 12 | 56493431  | 56494029  | 0 | 0 | 0 | 0 | 3 | 0 | 598    | 0.363082265 | -2.115500483 | 4.013675407 | -0.527073136 | NA | NA |
| chr12:71548013-71549621   | intronic     | TSPAN8                                                   | 12 | 71548013  | 71549621  | 0 | 0 | 0 | 0 | 3 | 0 | 1608   | 0.363082265 | -2.115500483 | 4.013675407 | -0.527073136 | NA | NA |
| chr12:8192414-8192761     | exonic       | FOXJ2                                                    | 12 | 8192414   | 8192761   | 0 | 0 | 0 | 0 | 3 | 0 | 347    | 0.363082265 | -2.115500483 | 4.013675407 | -0.527073136 | NA | NA |
| chr12:93206755-93246801   | exonic       | EEA1                                                     | 12 | 93206755  | 93246801  | 0 | 0 | 0 | 0 | 3 | 0 | 40046  | 0.363082265 | -2.115500483 | 4.013675407 | -0.527073136 | NA | NA |
| chr12:938228-939110       | intronic     | WNK1                                                     | 12 | 938228    | 939110    | 0 | 0 | 0 | 0 | 3 | 0 | 882    | 0.363082265 | -2.115500483 | 4.013675407 | -0.527073136 | NA | NA |
| chr13:31211880-31221194   | exonic       | USPL1                                                    | 13 | 31211880  | 31221194  | 0 | 0 | 0 | 0 | 3 | 0 | 9314   | 0.363082265 | -2.115500483 | 4.013675407 | -0.527073136 | NA | NA |
| chr13:42481721-42524149   | exonic       | VWA8                                                     | 13 | 42481721  | 42524149  | 0 | 0 | 0 | 0 | 3 | 0 | 42428  | 0.363082265 | -2.115500483 | 4.013675407 | -0.527073136 | NA | NA |
| chr13:50080770-50087302   | exonic       | PHF11                                                    | 13 | 50080770  | 50087302  | 0 | 0 | 0 | 0 | 3 | 0 | 6532   | 0.363082265 | -2.115500483 | 4.013675407 | -0.527073136 | NA | NA |
| chr13:77847606-77870809   | exonic       | MYCBP2                                                   | 13 | 77847606  | 77870809  | 0 | 0 | 0 | 0 | 3 | 0 | 23203  | 0.363082265 | -2.115500483 | 4.013675407 | -0.527073136 | NA | NA |
| chr13:96638586-96648389   | exonic       | UGGT2                                                    | 13 | 96638586  | 96648389  | 0 | 0 | 0 | 0 | 3 | 0 | 9803   | 0.363082265 | -2.115500483 | 4.013675407 | -0.527073136 | NA | NA |
| chr14:106094708-106111126 | ncRNA_exonic | MIR8071-1, MIR8071-2                                     | 14 | 106094708 | 106111126 | 0 | 0 | 0 | 0 | 3 | 0 | 16418  | 0.363082265 | -2.115500483 | 4.013675407 | -0.527073136 | NA | NA |
| chr14:106135888-106237056 | ncRNA_exonic | ELK2AP                                                   | 14 | 106135888 | 106237056 | 0 | 0 | 0 | 0 | 3 | 0 | 101168 | 0.363082265 | -2.115500483 | 4.013675407 | -0.527073136 | NA | NA |
| chr14:31103152-31112611   | exonic       | SCFD1                                                    | 14 | 31103152  | 31112611  | 0 | 0 | 0 | 0 | 3 | 0 | 9459   | 0.363082265 | -2.115500483 | 4.013675407 | -0.527073136 | NA | NA |
| chr14:32615468-32621734   | exonic       | ARHGAP5                                                  | 14 | 32615468  | 32621734  | 0 | 0 | 0 | 0 | 3 | 0 | 6266   | 0.363082265 | -2.115500483 | 4.013675407 | -0.527073136 | NA | NA |
| chr14:34993902-35002745   | exonic       | EAPP                                                     | 14 | 34993902  | 35002745  | 0 | 0 | 0 | 0 | 3 | 0 | 8843   | 0.363082265 | -2.115500483 | 4.013675407 | -0.527073136 | NA | NA |
| chr14:50912796-50930851   | exonic       | MAP4K5                                                   | 14 | 50912796  | 50930851  | 0 | 0 | 0 | 0 | 3 | 0 | 18055  | 0.363082265 | -2.115500483 | 4.013675407 | -0.527073136 | NA | NA |
| chr14:64514717-64516594   | exonic       | SYNE2                                                    | 14 | 64514717  | 64516594  | 0 | 0 | 0 | 0 | 3 | 0 | 1877   | 0.363082265 | -2.115500483 | 4.013675407 | -0.527073136 | NA | NA |
| chr14:92126180-92174580   | exonic       | CATSPERB                                                 | 14 | 92126180  | 92174580  | 0 | 0 | 0 | 0 | 3 | 0 | 48400  | 0.363082265 | -2.115500483 | 4.013675407 | -0.527073136 | NA | NA |
| chr15:41373217-41379880   | exonic       | INO80                                                    | 15 | 41373217  | 41379880  | 0 | 0 | 0 | 0 | 3 | 0 | 6663   | 0.363082265 | -2.115500483 | 4.013675407 | -0.527073136 | NA | NA |
| chr15:44615162-44630515   | exonic       | CASC4                                                    | 15 | 44615162  | 44630515  | 0 | 0 | 0 | 0 | 3 | 0 | 15353  | 0.363082265 | -2.115500483 | 4.013675407 | -0.527073136 | NA | NA |
| chr15:50592985-50593565   | exonic       | GABPB1                                                   | 15 | 50592985  | 50593565  | 0 | 0 | 0 | 0 | 3 | 0 | 580    | 0.363082265 | -2.115500483 | 4.013675407 | -0.527073136 | NA | NA |
| chr15:62283198-62315719   | exonic       | VPS13C                                                   | 15 | 62283198  | 62315719  | 0 | 0 | 0 | 0 | 3 | 0 | 32521  | 0.363082265 | -2.115500483 | 4.013675407 | -0.527073136 | NA | NA |
| chr15:62292762-62315719   | exonic       | VPS13C                                                   | 15 | 62292762  | 62315719  | 0 | 0 | 0 | 0 | 3 | 0 | 22957  | 0.363082265 | -2.115500483 | 4.013675407 | -0.527073136 | NA | NA |
| chr15:72853823-72862648   | exonic       | ARH1                                                     | 15 | 72853823  | 72862648  | 0 | 0 | 0 | 0 | 3 | 0 | 8825   | 0.363082265 | -2.115500483 | 4.013675407 | -0.527073136 | NA | NA |
| chr15:75215988-75219228   | exonic       | COX5A                                                    | 15 | 75215988  | 75219228  | 0 | 0 | 0 | 0 | 3 | 0 | 3240   | 0.363082265 | -2.115500483 | 4.013675407 | -0.527073136 | NA | NA |
| chr15:77576225-77578846   | UTR5         | <small>PEAK1(NM_024776:c.-104376_-104578delins0)</small> | 15 | 77576225  | 77578846  | 0 | 0 | 0 | 0 | 3 | 0 | 2621   | 0.363082265 | -2.115500483 | 4.013675407 | -0.527073136 | NA | NA |
| chr16:10508431-10534319   | exonic       | ATF7IP2                                                  | 16 | 10508431  | 10534319  | 0 | 0 | 0 | 0 | 3 | 0 | 25888  | 0.363082265 | -2.115500483 | 4.013675407 | -0.527073136 | NA | NA |
| chr16:1675017-1697461     | exonic       | CRAMP1                                                   | 16 | 1675017   | 1697461   | 0 | 0 | 0 | 0 | 3 | 0 | 22444  | 0.363082265 | -2.115500483 | 4.013675407 | -0.527073136 | NA | NA |

|                         |              |                                                                                           |    |          |          |   |   |   |   |   |   |        |             |              |             |              |    |    |
|-------------------------|--------------|-------------------------------------------------------------------------------------------|----|----------|----------|---|---|---|---|---|---|--------|-------------|--------------|-------------|--------------|----|----|
| chr16:18840607-18856973 | exonic       | SMG1                                                                                      | 16 | 18840607 | 18856973 | 0 | 0 | 0 | 0 | 3 | 0 | 16366  | 0.363082265 | -2.115500483 | 4.013675407 | -0.527073136 | NA | NA |
| chr16:46705616-46708572 | exonic       | VPS35                                                                                     | 16 | 46705616 | 46708572 | 0 | 0 | 0 | 0 | 3 | 0 | 2956   | 0.363082265 | -2.115500483 | 4.013675407 | -0.527073136 | NA | NA |
| chr16:66632081-66632743 | intergenic   | <small>CMTM2 (dist=9904), CMTM3 (dist=5485)</small>                                       | 16 | 66632081 | 66632743 | 0 | 0 | 0 | 0 | 3 | 0 | 662    | 0.363082265 | -2.115500483 | 4.013675407 | -0.527073136 | NA | NA |
| chr16:78420756-78466649 | exonic       | WVOX                                                                                      | 16 | 78420756 | 78466649 | 0 | 0 | 0 | 0 | 3 | 0 | 45893  | 0.363082265 | -2.115500483 | 4.013675407 | -0.527073136 | NA | NA |
| chr16:81346333-81346725 | intergenic   | <small>BCO1 (dist=21586), GAN (dist=1846)</small>                                         | 16 | 81346333 | 81346725 | 0 | 0 | 0 | 0 | 3 | 0 | 392    | 0.363082265 | -2.115500483 | 4.013675407 | -0.527073136 | NA | NA |
| chr16:81891867-81904540 | exonic       | PLCG2                                                                                     | 16 | 81891867 | 81904540 | 0 | 0 | 0 | 0 | 3 | 0 | 12673  | 0.363082265 | -2.115500483 | 4.013675407 | -0.527073136 | NA | NA |
| chr17:11958205-12032604 | exonic       | MAP2K4                                                                                    | 17 | 11958205 | 12032604 | 0 | 0 | 0 | 0 | 3 | 0 | 74399  | 0.363082265 | -2.115500483 | 4.013675407 | -0.527073136 | NA | NA |
| chr17:16042321-16049862 | exonic       | NCOR1                                                                                     | 17 | 16042321 | 16049862 | 0 | 0 | 0 | 0 | 3 | 0 | 7541   | 0.363082265 | -2.115500483 | 4.013675407 | -0.527073136 | NA | NA |
| chr17:169211-183725     | exonic       | LOC100506388, RPH3AL                                                                      | 17 | 169211   | 183725   | 0 | 0 | 0 | 0 | 3 | 0 | 14514  | 0.363082265 | -2.115500483 | 4.013675407 | -0.527073136 | NA | NA |
| chr17:2569309-2576051   | exonic       | PFAFH1B1                                                                                  | 17 | 2569309  | 2576051  | 0 | 0 | 0 | 0 | 3 | 0 | 6742   | 0.363082265 | -2.115500483 | 4.013675407 | -0.527073136 | NA | NA |
| chr17:29372428-29399067 | intergenic   | <small>RNF135 (dist=15499), MIB4733 (dist=22301)</small>                                  | 17 | 29372428 | 29399067 | 0 | 0 | 0 | 0 | 3 | 0 | 26639  | 0.363082265 | -2.115500483 | 4.013675407 | -0.527073136 | NA | NA |
| chr17:54926056-54936026 | exonic       | DGKE                                                                                      | 17 | 54926056 | 54936026 | 0 | 0 | 0 | 0 | 3 | 0 | 9970   | 0.363082265 | -2.115500483 | 4.013675407 | -0.527073136 | NA | NA |
| chr17:60087910-60112969 | exonic       | MED13                                                                                     | 17 | 60087910 | 60112969 | 0 | 0 | 0 | 0 | 3 | 0 | 25059  | 0.363082265 | -2.115500483 | 4.013675407 | -0.527073136 | NA | NA |
| chr17:61869771-61887019 | exonic       | DDX42                                                                                     | 17 | 61869771 | 61887019 | 0 | 0 | 0 | 0 | 3 | 0 | 17248  | 0.363082265 | -2.115500483 | 4.013675407 | -0.527073136 | NA | NA |
| chr17:67255846-67257889 | exonic       | ABCA5                                                                                     | 17 | 67255846 | 67257889 | 0 | 0 | 0 | 0 | 3 | 0 | 2043   | 0.363082265 | -2.115500483 | 4.013675407 | -0.527073136 | NA | NA |
| chr18:12999419-13008630 | exonic       | CEP192                                                                                    | 18 | 12999419 | 13008630 | 0 | 0 | 0 | 0 | 3 | 0 | 9211   | 0.363082265 | -2.115500483 | 4.013675407 | -0.527073136 | NA | NA |
| chr18:19345732-19429349 | exonic       | MIB1                                                                                      | 18 | 19345732 | 19429349 | 0 | 0 | 0 | 0 | 3 | 0 | 83617  | 0.363082265 | -2.115500483 | 4.013675407 | -0.527073136 | NA | NA |
| chr18:196636-204692     | exonic       | USP14                                                                                     | 18 | 196636   | 204692   | 0 | 0 | 0 | 0 | 3 | 0 | 8056   | 0.363082265 | -2.115500483 | 4.013675407 | -0.527073136 | NA | NA |
| chr18:33740894-33750159 | exonic       | ELP2                                                                                      | 18 | 33740894 | 33750159 | 0 | 0 | 0 | 0 | 3 | 0 | 9265   | 0.363082265 | -2.115500483 | 4.013675407 | -0.527073136 | NA | NA |
| chr18:61067281-61067936 | exonic       | VPS4B                                                                                     | 18 | 61067281 | 61067936 | 0 | 0 | 0 | 0 | 3 | 0 | 655    | 0.363082265 | -2.115500483 | 4.013675407 | -0.527073136 | NA | NA |
| chr18:72342923-72493458 | exonic       | ZNF407                                                                                    | 18 | 72342923 | 72493458 | 0 | 0 | 0 | 0 | 3 | 0 | 150535 | 0.363082265 | -2.115500483 | 4.013675407 | -0.527073136 | NA | NA |
| chr19:11979090-12015702 | exonic       | ZNF439, ZNF69                                                                             | 19 | 11979090 | 12015702 | 0 | 0 | 0 | 0 | 3 | 0 | 36612  | 0.363082265 | -2.115500483 | 4.013675407 | -0.527073136 | NA | NA |
| chr19:12355396-12361183 | intergenic   | <small>LOC100289333 (dist=37005), ZNF44 (dist=21442)</small>                              | 19 | 12355396 | 12361183 | 0 | 0 | 0 | 0 | 3 | 0 | 5787   | 0.363082265 | -2.115500483 | 4.013675407 | -0.527073136 | NA | NA |
| chr19:20146794-20147195 | intronic     | ZNF682                                                                                    | 19 | 20146794 | 20147195 | 0 | 0 | 0 | 0 | 3 | 0 | 401    | 0.363082265 | -2.115500483 | 4.013675407 | -0.527073136 | NA | NA |
| chr19:21558040-21588658 | exonic       | ZNF493                                                                                    | 19 | 21558040 | 21588658 | 0 | 0 | 0 | 0 | 3 | 0 | 30618  | 0.363082265 | -2.115500483 | 4.013675407 | -0.527073136 | NA | NA |
| chr19:2855485-2860573   | UTR3         | <small>ZNF509 (dist=10777), -4130, -4032a11a1c1b1, -132761, -4131, -4032a11a1c1b1</small> | 19 | 2855485  | 2860573  | 0 | 0 | 0 | 0 | 3 | 0 | 5088   | 0.363082265 | -2.115500483 | 4.013675407 | -0.527073136 | NA | NA |
| chr19:33608730-33610023 | exonic       | GPATCH1                                                                                   | 19 | 33608730 | 33610023 | 0 | 0 | 0 | 0 | 3 | 0 | 1293   | 0.363082265 | -2.115500483 | 4.013675407 | -0.527073136 | NA | NA |
| chr19:34926239-34937565 | exonic       | UBA2                                                                                      | 19 | 34926239 | 34937565 | 0 | 0 | 0 | 0 | 3 | 0 | 11326  | 0.363082265 | -2.115500483 | 4.013675407 | -0.527073136 | NA | NA |
| chr19:42621402-42664544 | exonic       | POU2F2                                                                                    | 19 | 42621402 | 42664544 | 0 | 0 | 0 | 0 | 3 | 0 | 43142  | 0.363082265 | -2.115500483 | 4.013675407 | -0.527073136 | NA | NA |
| chr19:52364156-52380630 | exonic       | ZNF577                                                                                    | 19 | 52364156 | 52380630 | 0 | 0 | 0 | 0 | 3 | 0 | 16474  | 0.363082265 | -2.115500483 | 4.013675407 | -0.527073136 | NA | NA |
| chr19:53714234-53716922 | ncRNA_exonic | ZNF818P                                                                                   | 19 | 53714234 | 53716922 | 0 | 0 | 0 | 0 | 3 | 0 | 2688   | 0.363082265 | -2.115500483 | 4.013675407 | -0.527073136 | NA | NA |
| chr19:53910951-53913678 | exonic       | ZNF765                                                                                    | 19 | 53910951 | 53913678 | 0 | 0 | 0 | 0 | 3 | 0 | 2727   | 0.363082265 | -2.115500483 | 4.013675407 | -0.527073136 | NA | NA |
| chr19:53945049-53949590 | ncRNA_exonic | TPM3P9                                                                                    | 19 | 53945049 | 53949590 | 0 | 0 | 0 | 0 | 3 | 0 | 4541   | 0.363082265 | -2.115500483 | 4.013675407 | -0.527073136 | NA | NA |
| chr19:6702138-6702590   | exonic       | C3                                                                                        | 19 | 6702138  | 6702590  | 0 | 0 | 0 | 0 | 3 | 0 | 452    | 0.363082265 | -2.115500483 | 4.013675407 | -0.527073136 | NA | NA |
| chr19:6742977-6743847   | exonic       | TRIP10                                                                                    | 19 | 6742977  | 6743847  | 0 | 0 | 0 | 0 | 3 | 0 | 870    | 0.363082265 | -2.115500483 | 4.013675407 | -0.527073136 | NA | NA |

|                          |            |                                                  |    |           |           |   |   |   |   |   |   |        |             |              |             |              |    |    |
|--------------------------|------------|--------------------------------------------------|----|-----------|-----------|---|---|---|---|---|---|--------|-------------|--------------|-------------|--------------|----|----|
| chr19:8530207-8539128    | exonic     | HNRNPM                                           | 19 | 8530207   | 8539128   | 0 | 0 | 0 | 0 | 3 | 0 | 8921   | 0.363082265 | -2.115500483 | 4.013675407 | -0.527073136 | NA | NA |
| chr2:100050793-100081447 | exonic     | REV1                                             | 2  | 100050793 | 100081447 | 0 | 0 | 0 | 0 | 3 | 0 | 30654  | 0.363082265 | -2.115500483 | 4.013675407 | -0.527073136 | NA | NA |
| chr2:112588863-112636548 | exonic     | ANAPC1                                           | 2  | 112588863 | 112636548 | 0 | 0 | 0 | 0 | 3 | 0 | 47685  | 0.363082265 | -2.115500483 | 4.013675407 | -0.527073136 | NA | NA |
| chr2:170728745-170732459 | exonic     | UBR3                                             | 2  | 170728745 | 170732459 | 0 | 0 | 0 | 0 | 3 | 0 | 3714   | 0.363082265 | -2.115500483 | 4.013675407 | -0.527073136 | NA | NA |
| chr2:190670377-190682906 | exonic     | PMS1                                             | 2  | 190670377 | 190682906 | 0 | 0 | 0 | 0 | 3 | 0 | 12529  | 0.363082265 | -2.115500483 | 4.013675407 | -0.527073136 | NA | NA |
| chr2:196889152-196892771 | exonic     | DNAH7                                            | 2  | 196889152 | 196892771 | 0 | 0 | 0 | 0 | 3 | 0 | 3619   | 0.363082265 | -2.115500483 | 4.013675407 | -0.527073136 | NA | NA |
| chr2:228172432-228174034 | exonic     | COL4A3                                           | 2  | 228172432 | 228174034 | 0 | 0 | 0 | 0 | 3 | 0 | 1602   | 0.363082265 | -2.115500483 | 4.013675407 | -0.527073136 | NA | NA |
| chr2:24046127-24056948   | exonic     | ATAD2B                                           | 2  | 24046127  | 24056948  | 0 | 0 | 0 | 0 | 3 | 0 | 10821  | 0.363082265 | -2.115500483 | 4.013675407 | -0.527073136 | NA | NA |
| chr2:24787164-24816590   | UTR5       | -----                                            | 2  | 24787164  | 24816590  | 0 | 0 | 0 | 0 | 3 | 0 | 29426  | 0.363082265 | -2.115500483 | 4.013675407 | -0.527073136 | NA | NA |
| chr2:27900161-27900791   | exonic     | SLC4A1AP                                         | 2  | 27900161  | 27900791  | 0 | 0 | 0 | 0 | 3 | 0 | 630    | 0.363082265 | -2.115500483 | 4.013675407 | -0.527073136 | NA | NA |
| chr2:61719169-61724142   | exonic     | XPO1                                             | 2  | 61719169  | 61724142  | 0 | 0 | 0 | 0 | 3 | 0 | 4973   | 0.363082265 | -2.115500483 | 4.013675407 | -0.527073136 | NA | NA |
| chr2:62099216-62107529   | exonic     | CCT4                                             | 2  | 62099216  | 62107529  | 0 | 0 | 0 | 0 | 3 | 0 | 8313   | 0.363082265 | -2.115500483 | 4.013675407 | -0.527073136 | NA | NA |
| chr2:86768240-86769435   | exonic     | CHMP3, RNF103-CHMP3                              | 2  | 86768240  | 86769435  | 0 | 0 | 0 | 0 | 3 | 0 | 1195   | 0.363082265 | -2.115500483 | 4.013675407 | -0.527073136 | NA | NA |
| chr2:89385138-89442355   | intergenic | MIR4436A (dist=273170), NONE (dist=NONE)         | 2  | 89385138  | 89442355  | 0 | 0 | 0 | 0 | 3 | 0 | 57217  | 0.363082265 | -2.115500483 | 4.013675407 | -0.527073136 | NA | NA |
| chr2:9727543-9731644     | exonic     | YWHAQ                                            | 2  | 9727543   | 9731644   | 0 | 0 | 0 | 0 | 3 | 0 | 4101   | 0.363082265 | -2.115500483 | 4.013675407 | -0.527073136 | NA | NA |
| chr20:16359449-16362392  | exonic     | KIF16B                                           | 20 | 16359449  | 16362392  | 0 | 0 | 0 | 0 | 3 | 0 | 2943   | 0.363082265 | -2.115500483 | 4.013675407 | -0.527073136 | NA | NA |
| chr20:21195173-21196286  | exonic     | KIZ                                              | 20 | 21195173  | 21196286  | 0 | 0 | 0 | 0 | 3 | 0 | 1113   | 0.363082265 | -2.115500483 | 4.013675407 | -0.527073136 | NA | NA |
| chr20:3277507-3278822    | exonic     | C20orf194                                        | 20 | 3277507   | 3278822   | 0 | 0 | 0 | 0 | 3 | 0 | 1315   | 0.363082265 | -2.115500483 | 4.013675407 | -0.527073136 | NA | NA |
| chr20:33902490-33962059  | exonic     | UQCC1                                            | 20 | 33902490  | 33962059  | 0 | 0 | 0 | 0 | 3 | 0 | 59569  | 0.363082265 | -2.115500483 | 4.013675407 | -0.527073136 | NA | NA |
| chr20:34312492-34313077  | exonic     | RBM39                                            | 20 | 34312492  | 34313077  | 0 | 0 | 0 | 0 | 3 | 0 | 585    | 0.363082265 | -2.115500483 | 4.013675407 | -0.527073136 | NA | NA |
| chr20:34446223-34451322  | exonic     | PHF20                                            | 20 | 34446223  | 34451322  | 0 | 0 | 0 | 0 | 3 | 0 | 5099   | 0.363082265 | -2.115500483 | 4.013675407 | -0.527073136 | NA | NA |
| chr20:52644930-52645511  | exonic     | BCAS1                                            | 20 | 52644930  | 52645511  | 0 | 0 | 0 | 0 | 3 | 0 | 581    | 0.363082265 | -2.115500483 | 4.013675407 | -0.527073136 | NA | NA |
| chr21:16363522-16415895  | UTR5       | NR1P1 (NM_003489:c.-75180..-75382delins0)        | 21 | 16363522  | 16415895  | 0 | 0 | 0 | 0 | 3 | 0 | 52373  | 0.363082265 | -2.115500483 | 4.013675407 | -0.527073136 | NA | NA |
| chr21:37741285-37744829  | exonic     | MORC3                                            | 21 | 37741285  | 37744829  | 0 | 0 | 0 | 0 | 3 | 0 | 3544   | 0.363082265 | -2.115500483 | 4.013675407 | -0.527073136 | NA | NA |
| chr21:38792601-38801210  | exonic     | DYRK1A                                           | 21 | 38792601  | 38801210  | 0 | 0 | 0 | 0 | 3 | 0 | 8609   | 0.363082265 | -2.115500483 | 4.013675407 | -0.527073136 | NA | NA |
| chr21:40585406-40597123  | exonic     | BRWD1                                            | 21 | 40585406  | 40597123  | 0 | 0 | 0 | 0 | 3 | 0 | 11717  | 0.363082265 | -2.115500483 | 4.013675407 | -0.527073136 | NA | NA |
| chr21:47152589-47175366  | intergenic | SLC19A1 (dist=190204), LOC100129027 (dist=72389) | 21 | 47152589  | 47175366  | 0 | 0 | 0 | 0 | 3 | 0 | 22777  | 0.363082265 | -2.115500483 | 4.013675407 | -0.527073136 | NA | NA |
| chr22:23101393-23135067  | intergenic | GGTLC2 (dist=111025), MIR650 (dist=30203)        | 22 | 23101393  | 23135067  | 0 | 0 | 0 | 0 | 3 | 0 | 33674  | 0.363082265 | -2.115500483 | 4.013675407 | -0.527073136 | NA | NA |
| chr22:25990266-26000420  | exonic     | ADRBK2                                           | 22 | 25990266  | 26000420  | 0 | 0 | 0 | 0 | 3 | 0 | 10154  | 0.363082265 | -2.115500483 | 4.013675407 | -0.527073136 | NA | NA |
| chr22:44169650-44171432  | intronic   | EFCAB6                                           | 22 | 44169650  | 44171432  | 0 | 0 | 0 | 0 | 3 | 0 | 1782   | 0.363082265 | -2.115500483 | 4.013675407 | -0.527073136 | NA | NA |
| chr3:11874477-11880788   | exonic     | TAMM41                                           | 3  | 11874477  | 11880788  | 0 | 0 | 0 | 0 | 3 | 0 | 6311   | 0.363082265 | -2.115500483 | 4.013675407 | -0.527073136 | NA | NA |
| chr3:129684544-129690951 | intergenic | TMC1-AS1 (dist=56789), TRH (dist=2285)           | 3  | 129684544 | 129690951 | 0 | 0 | 0 | 0 | 3 | 0 | 6407   | 0.363082265 | -2.115500483 | 4.013675407 | -0.527073136 | NA | NA |
| chr3:136117590-136221621 | exonic     | STAG1                                            | 3  | 136117590 | 136221621 | 0 | 0 | 0 | 0 | 3 | 0 | 104031 | 0.363082265 | -2.115500483 | 4.013675407 | -0.527073136 | NA | NA |
| chr3:169701041-169702140 | exonic     | SEC62                                            | 3  | 169701041 | 169702140 | 0 | 0 | 0 | 0 | 3 | 0 | 1099   | 0.363082265 | -2.115500483 | 4.013675407 | -0.527073136 | NA | NA |
| chr3:171431682-171452760 | exonic     | PLD1                                             | 3  | 171431682 | 171452760 | 0 | 0 | 0 | 0 | 3 | 0 | 21078  | 0.363082265 | -2.115500483 | 4.013675407 | -0.527073136 | NA | NA |

|                          |              |                                                          |   |           |           |   |   |   |   |   |   |        |             |              |             |              |    |    |
|--------------------------|--------------|----------------------------------------------------------|---|-----------|-----------|---|---|---|---|---|---|--------|-------------|--------------|-------------|--------------|----|----|
| chr3:179045348-179047516 | exonic       | ZNF639                                                   | 3 | 179045348 | 179047516 | 0 | 0 | 0 | 0 | 3 | 0 | 2168   | 0.363082265 | -2.115500483 | 4.013675407 | -0.527073136 | NA | NA |
| chr3:182665025-182681837 | exonic       | DCUN1D1                                                  | 3 | 182665025 | 182681837 | 0 | 0 | 0 | 0 | 3 | 0 | 16812  | 0.363082265 | -2.115500483 | 4.013675407 | -0.527073136 | NA | NA |
| chr3:183558357-183585848 | exonic       | PARL                                                     | 3 | 183558357 | 183585848 | 0 | 0 | 0 | 0 | 3 | 0 | 27491  | 0.363082265 | -2.115500483 | 4.013675407 | -0.527073136 | NA | NA |
| chr3:188202379-188478070 | exonic       | LPP                                                      | 3 | 188202379 | 188478070 | 0 | 0 | 0 | 0 | 3 | 0 | 275691 | 0.363082265 | -2.115500483 | 4.013675407 | -0.527073136 | NA | NA |
| chr3:196863412-196876667 | exonic       | DLG1                                                     | 3 | 196863412 | 196876667 | 0 | 0 | 0 | 0 | 3 | 0 | 13255  | 0.363082265 | -2.115500483 | 4.013675407 | -0.527073136 | NA | NA |
| chr3:27420739-27433299   | exonic       | SLC4A7                                                   | 3 | 27420739  | 27433299  | 0 | 0 | 0 | 0 | 3 | 0 | 12560  | 0.363082265 | -2.115500483 | 4.013675407 | -0.527073136 | NA | NA |
| chr3:47716964-47719801   | exonic       | SMARCC1                                                  | 3 | 47716964  | 47719801  | 0 | 0 | 0 | 0 | 3 | 0 | 2837   | 0.363082265 | -2.115500483 | 4.013675407 | -0.527073136 | NA | NA |
| chr3:50095160-50095995   | exonic       | RBM6                                                     | 3 | 50095160  | 50095995  | 0 | 0 | 0 | 0 | 3 | 0 | 835    | 0.363082265 | -2.115500483 | 4.013675407 | -0.527073136 | NA | NA |
| chr3:51575605-51586079   | UTR5         | <small>RAD54L2(NM_015106:c.-48832_-48771delins0)</small> | 3 | 51575605  | 51586079  | 0 | 0 | 0 | 0 | 3 | 0 | 10474  | 0.363082265 | -2.115500483 | 4.013675407 | -0.527073136 | NA | NA |
| chr3:57627379-57632165   | exonic       | DENND6A                                                  | 3 | 57627379  | 57632165  | 0 | 0 | 0 | 0 | 3 | 0 | 4786   | 0.363082265 | -2.115500483 | 4.013675407 | -0.527073136 | NA | NA |
| chr3:64795470-64859021   | ncRNA_exonic | ADAMTS9-AS2, MIR548A2                                    | 3 | 64795470  | 64859021  | 0 | 0 | 0 | 0 | 3 | 0 | 63551  | 0.363082265 | -2.115500483 | 4.013675407 | -0.527073136 | NA | NA |
| chr4:173842869-173846132 | intronic     | GALNTL6                                                  | 4 | 173842869 | 173846132 | 0 | 0 | 0 | 0 | 3 | 0 | 3263   | 0.363082265 | -2.115500483 | 4.013675407 | -0.527073136 | NA | NA |
| chr4:25777898-25792196   | exonic       | SEL1L3                                                   | 4 | 25777898  | 25792196  | 0 | 0 | 0 | 0 | 3 | 0 | 14298  | 0.363082265 | -2.115500483 | 4.013675407 | -0.527073136 | NA | NA |
| chr4:44709768-44724259   | exonic       | GNPDA2                                                   | 4 | 44709768  | 44724259  | 0 | 0 | 0 | 0 | 3 | 0 | 14491  | 0.363082265 | -2.115500483 | 4.013675407 | -0.527073136 | NA | NA |
| chr4:72352664-72363409   | exonic       | SLC4A4                                                   | 4 | 72352664  | 72363409  | 0 | 0 | 0 | 0 | 3 | 0 | 10745  | 0.363082265 | -2.115500483 | 4.013675407 | -0.527073136 | NA | NA |
| chr4:78678015-78697546   | exonic       | CNOT6L                                                   | 4 | 78678015  | 78697546  | 0 | 0 | 0 | 0 | 3 | 0 | 19531  | 0.363082265 | -2.115500483 | 4.013675407 | -0.527073136 | NA | NA |
| chr4:85800559-85833472   | UTR5         | <small>WDFY3(NM_014991:c.36419_36320delins0)</small>     | 4 | 85800559  | 85833472  | 0 | 0 | 0 | 0 | 3 | 0 | 32913  | 0.363082265 | -2.115500483 | 4.013675407 | -0.527073136 | NA | NA |
| chr5:130590788-130591885 | intergenic   | <small>LYRM7(dist=49669), CDC42SE2(dist=7817)</small>    | 5 | 130590788 | 130591885 | 0 | 0 | 0 | 0 | 3 | 0 | 1097   | 0.363082265 | -2.115500483 | 4.013675407 | -0.527073136 | NA | NA |
| chr5:141843535-141847396 | ncRNA_exonic | LOC101926941                                             | 5 | 141843535 | 141847396 | 0 | 0 | 0 | 0 | 3 | 0 | 3861   | 0.363082265 | -2.115500483 | 4.013675407 | -0.527073136 | NA | NA |
| chr5:14363840-14381361   | exonic       | TRIO                                                     | 5 | 14363840  | 14381361  | 0 | 0 | 0 | 0 | 3 | 0 | 17521  | 0.363082265 | -2.115500483 | 4.013675407 | -0.527073136 | NA | NA |
| chr5:145863102-145886770 | exonic       | TCERG1                                                   | 5 | 145863102 | 145886770 | 0 | 0 | 0 | 0 | 3 | 0 | 23668  | 0.363082265 | -2.115500483 | 4.013675407 | -0.527073136 | NA | NA |
| chr5:157230658-157244555 | exonic       | CLINT1                                                   | 5 | 157230658 | 157244555 | 0 | 0 | 0 | 0 | 3 | 0 | 13897  | 0.363082265 | -2.115500483 | 4.013675407 | -0.527073136 | NA | NA |
| chr5:169108747-169116337 | exonic       | DOCK2                                                    | 5 | 169108747 | 169116337 | 0 | 0 | 0 | 0 | 3 | 0 | 7590   | 0.363082265 | -2.115500483 | 4.013675407 | -0.527073136 | NA | NA |
| chr5:751248-840765       | exonic       | ZDHC11                                                   | 5 | 751248    | 840765    | 0 | 0 | 0 | 0 | 3 | 0 | 89517  | 0.363082265 | -2.115500483 | 4.013675407 | -0.527073136 | NA | NA |
| chr5:75993811-75998415   | exonic       | IQGAP2                                                   | 5 | 75993811  | 75998415  | 0 | 0 | 0 | 0 | 3 | 0 | 4604   | 0.363082265 | -2.115500483 | 4.013675407 | -0.527073136 | NA | NA |
| chr5:76330242-76332545   | exonic       | AGGF1                                                    | 5 | 76330242  | 76332545  | 0 | 0 | 0 | 0 | 3 | 0 | 2303   | 0.363082265 | -2.115500483 | 4.013675407 | -0.527073136 | NA | NA |
| chr5:79745409-79770649   | exonic       | ZFYVE16                                                  | 5 | 79745409  | 79770649  | 0 | 0 | 0 | 0 | 3 | 0 | 25240  | 0.363082265 | -2.115500483 | 4.013675407 | -0.527073136 | NA | NA |
| chr6:118953616-118985684 | exonic       | CEP85L                                                   | 6 | 118953616 | 118985684 | 0 | 0 | 0 | 0 | 3 | 0 | 32068  | 0.363082265 | -2.115500483 | 4.013675407 | -0.527073136 | NA | NA |
| chr6:150016209-150023402 | exonic       | LATS1                                                    | 6 | 150016209 | 150023402 | 0 | 0 | 0 | 0 | 3 | 0 | 7193   | 0.363082265 | -2.115500483 | 4.013675407 | -0.527073136 | NA | NA |
| chr6:154520801-154544377 | exonic       | IPCEF1                                                   | 6 | 154520801 | 154544377 | 0 | 0 | 0 | 0 | 3 | 0 | 23576  | 0.363082265 | -2.115500483 | 4.013675407 | -0.527073136 | NA | NA |
| chr6:170697374-170700209 | exonic       | FAM120B                                                  | 6 | 170697374 | 170700209 | 0 | 0 | 0 | 0 | 3 | 0 | 2835   | 0.363082265 | -2.115500483 | 4.013675407 | -0.527073136 | NA | NA |
| chr6:31777876-31779762   | exonic       | HSPA1L                                                   | 6 | 31777876  | 31779762  | 0 | 0 | 0 | 0 | 3 | 0 | 1886   | 0.363082265 | -2.115500483 | 4.013675407 | -0.527073136 | NA | NA |
| chr6:31832429-31837414   | exonic       | SLC44A4                                                  | 6 | 31832429  | 31837414  | 0 | 0 | 0 | 0 | 3 | 0 | 4985   | 0.363082265 | -2.115500483 | 4.013675407 | -0.527073136 | NA | NA |
| chr6:31975046-32007612   | exonic       | <small>C4B, C4B_2, CYP21A2, STK19, TNXB</small>          | 6 | 31975046  | 32007612  | 0 | 0 | 0 | 0 | 3 | 0 | 32566  | 0.363082265 | -2.115500483 | 4.013675407 | -0.527073136 | NA | NA |
| chr6:56917484-56920595   | exonic       | KIAA1586                                                 | 6 | 56917484  | 56920595  | 0 | 0 | 0 | 0 | 3 | 0 | 3111   | 0.363082265 | -2.115500483 | 4.013675407 | -0.527073136 | NA | NA |



|                          |              |                                                 |   |           |           |   |   |   |   |   |   |        |             |              |             |              |    |    |
|--------------------------|--------------|-------------------------------------------------|---|-----------|-----------|---|---|---|---|---|---|--------|-------------|--------------|-------------|--------------|----|----|
| chr6:76344422-76380436   | exonic       | SENP6                                           | 6 | 76344422  | 76380436  | 0 | 0 | 0 | 0 | 3 | 0 | 36014  | 0.363082265 | -2.115500483 | 4.013675407 | -0.527073136 | NA | NA |
| chr6:89554075-89563483   | exonic       | RNGTT                                           | 6 | 89554075  | 89563483  | 0 | 0 | 0 | 0 | 3 | 0 | 9408   | 0.363082265 | -2.115500483 | 4.013675407 | -0.527073136 | NA | NA |
| chr7:100066773-100068024 | intronic     | TSC22D4                                         | 7 | 100066773 | 100068024 | 0 | 0 | 0 | 0 | 3 | 0 | 1251   | 0.363082265 | -2.115500483 | 4.013675407 | -0.527073136 | NA | NA |
| chr7:102976537-102976900 | intronic     | DNAJC2                                          | 7 | 102976537 | 102976900 | 0 | 0 | 0 | 0 | 3 | 0 | 363    | 0.363082265 | -2.115500483 | 4.013675407 | -0.527073136 | NA | NA |
| chr7:114582329-114619836 | exonic       | MDFIC                                           | 7 | 114582329 | 114619836 | 0 | 0 | 0 | 0 | 3 | 0 | 37507  | 0.363082265 | -2.115500483 | 4.013675407 | -0.527073136 | NA | NA |
| chr7:117175301-117305618 | exonic       | CFTR                                            | 7 | 117175301 | 117305618 | 0 | 0 | 0 | 0 | 7 | 0 | 130317 | 0.363082265 | -2.115500483 | 4.013675407 | -0.527073136 | NA | NA |
| chr7:123119848-123136960 | exonic       | IQUB                                            | 7 | 123119848 | 123136960 | 0 | 0 | 0 | 0 | 3 | 0 | 17112  | 0.363082265 | -2.115500483 | 4.013675407 | -0.527073136 | NA | NA |
| chr7:139810894-139820329 | exonic       | KDM7A                                           | 7 | 139810894 | 139820329 | 0 | 0 | 0 | 0 | 3 | 0 | 9435   | 0.363082265 | -2.115500483 | 4.013675407 | -0.527073136 | NA | NA |
| chr7:37988442-37989994   | exonic       | EPDR1                                           | 7 | 37988442  | 37989994  | 0 | 0 | 0 | 0 | 3 | 0 | 1552   | 0.363082265 | -2.115500483 | 4.013675407 | -0.527073136 | NA | NA |
| chr7:45834674-45838202   | intergenic   | SEPT72 (dist=26657), IGFBP1 (dist=89757)        | 7 | 45834674  | 45838202  | 0 | 0 | 0 | 0 | 3 | 0 | 3528   | 0.363082265 | -2.115500483 | 4.013675407 | -0.527073136 | NA | NA |
| chr7:47336679-47344601   | exonic       | TNS3                                            | 7 | 47336679  | 47344601  | 0 | 0 | 0 | 0 | 3 | 0 | 7922   | 0.363082265 | -2.115500483 | 4.013675407 | -0.527073136 | NA | NA |
| chr7:56125686-56126395   | exonic       | CCT6A                                           | 7 | 56125686  | 56126395  | 0 | 0 | 0 | 0 | 3 | 0 | 709    | 0.363082265 | -2.115500483 | 4.013675407 | -0.527073136 | NA | NA |
| chr7:74528190-74536811   | exonic       | GTF2IRD2, GTF2IRD2B                             | 7 | 74528190  | 74536811  | 0 | 0 | 0 | 0 | 3 | 0 | 8621   | 0.363082265 | -2.115500483 | 4.013675407 | -0.527073136 | NA | NA |
| chr7:76922269-76924255   | exonic       | CCDC146                                         | 7 | 76922269  | 76924255  | 0 | 0 | 0 | 0 | 3 | 0 | 1986   | 0.363082265 | -2.115500483 | 4.013675407 | -0.527073136 | NA | NA |
| chr7:77006165-77033932   | exonic       | GSAP                                            | 7 | 77006165  | 77033932  | 0 | 0 | 0 | 0 | 3 | 0 | 27767  | 0.363082265 | -2.115500483 | 4.013675407 | -0.527073136 | NA | NA |
| chr7:77407655-77408131   | exonic       | RSBN1L                                          | 7 | 77407655  | 77408131  | 0 | 0 | 0 | 0 | 3 | 0 | 476    | 0.363082265 | -2.115500483 | 4.013675407 | -0.527073136 | NA | NA |
| chr7:7844212-7858575     | intronic     | UMAD1                                           | 7 | 7844212   | 7858575   | 0 | 0 | 0 | 0 | 3 | 0 | 14363  | 0.363082265 | -2.115500483 | 4.013675407 | -0.527073136 | NA | NA |
| chr7:91706169-91712969   | exonic       | AKAP9                                           | 7 | 91706169  | 91712969  | 0 | 0 | 0 | 0 | 3 | 0 | 6800   | 0.363082265 | -2.115500483 | 4.013675407 | -0.527073136 | NA | NA |
| chr7:97939756-97949610   | exonic       | BAIAP2L1                                        | 7 | 97939756  | 97949610  | 0 | 0 | 0 | 0 | 3 | 0 | 9854   | 0.363082265 | -2.115500483 | 4.013675407 | -0.527073136 | NA | NA |
| chr7:97941408-97949610   | exonic       | BAIAP2L1                                        | 7 | 97941408  | 97949610  | 0 | 0 | 0 | 0 | 3 | 0 | 8202   | 0.363082265 | -2.115500483 | 4.013675407 | -0.527073136 | NA | NA |
| chr8:109462051-109462721 | exonic       | EMC2                                            | 8 | 109462051 | 109462721 | 0 | 0 | 0 | 0 | 3 | 0 | 670    | 0.363082265 | -2.115500483 | 4.013675407 | -0.527073136 | NA | NA |
| chr8:124371460-124373886 | exonic       | ATAD2                                           | 8 | 124371460 | 124373886 | 0 | 0 | 0 | 0 | 3 | 0 | 2426   | 0.363082265 | -2.115500483 | 4.013675407 | -0.527073136 | NA | NA |
| chr8:130110536-130142350 | intergenic   | LINC00824 (dist=533611), LINC00977 (dist=86363) | 8 | 130110536 | 130142350 | 0 | 0 | 0 | 0 | 3 | 0 | 31814  | 0.363082265 | -2.115500483 | 4.013675407 | -0.527073136 | NA | NA |
| chr8:130365050-130411930 | ncRNA_exonic | CCDC26                                          | 8 | 130365050 | 130411930 | 0 | 0 | 0 | 0 | 3 | 0 | 46880  | 0.363082265 | -2.115500483 | 4.013675407 | -0.527073136 | NA | NA |
| chr8:130861488-130866589 | exonic       | FAM49B                                          | 8 | 130861488 | 130866589 | 0 | 0 | 0 | 0 | 3 | 0 | 5101   | 0.363082265 | -2.115500483 | 4.013675407 | -0.527073136 | NA | NA |
| chr8:131191509-131199531 | exonic       | ASAP1                                           | 8 | 131191509 | 131199531 | 0 | 0 | 0 | 0 | 3 | 0 | 8022   | 0.363082265 | -2.115500483 | 4.013675407 | -0.527073136 | NA | NA |
| chr8:133595940-133627343 | exonic       | LRRC6                                           | 8 | 133595940 | 133627343 | 0 | 0 | 0 | 0 | 3 | 0 | 31403  | 0.363082265 | -2.115500483 | 4.013675407 | -0.527073136 | NA | NA |
| chr8:17446976-17447274   | exonic       | PDGFRL                                          | 8 | 17446976  | 17447274  | 0 | 0 | 0 | 0 | 3 | 0 | 298    | 0.363082265 | -2.115500483 | 4.013675407 | -0.527073136 | NA | NA |
| chr8:17814112-17869336   | exonic       | PCM1                                            | 8 | 17814112  | 17869336  | 0 | 0 | 0 | 0 | 3 | 0 | 55224  | 0.363082265 | -2.115500483 | 4.013675407 | -0.527073136 | NA | NA |
| chr8:25156459-25168048   | exonic       | DOCK5                                           | 8 | 25156459  | 25168048  | 0 | 0 | 0 | 0 | 3 | 0 | 11589  | 0.363082265 | -2.115500483 | 4.013675407 | -0.527073136 | NA | NA |
| chr8:25158091-25168048   | exonic       | DOCK5                                           | 8 | 25158091  | 25168048  | 0 | 0 | 0 | 0 | 3 | 0 | 9957   | 0.363082265 | -2.115500483 | 4.013675407 | -0.527073136 | NA | NA |
| chr8:26211984-26223922   | exonic       | PPP2R2A                                         | 8 | 26211984  | 26223922  | 0 | 0 | 0 | 0 | 3 | 0 | 11938  | 0.363082265 | -2.115500483 | 4.013675407 | -0.527073136 | NA | NA |
| chr8:30265953-30270689   | intronic     | RBPMS                                           | 8 | 30265953  | 30270689  | 0 | 0 | 0 | 0 | 3 | 0 | 4736   | 0.363082265 | -2.115500483 | 4.013675407 | -0.527073136 | NA | NA |
| chr8:363072-408551       | exonic       | FBXO25                                          | 8 | 363072    | 408551    | 0 | 0 | 0 | 0 | 3 | 0 | 45479  | 0.363082265 | -2.115500483 | 4.013675407 | -0.527073136 | NA | NA |
| chr8:61135207-61144938   | exonic       | CA8                                             | 8 | 61135207  | 61144938  | 0 | 0 | 0 | 0 | 3 | 0 | 9731   | 0.363082265 | -2.115500483 | 4.013675407 | -0.527073136 | NA | NA |

|                           |              |                                        |    |           |           |   |   |   |    |   |   |       |             |              |             |              |             |             |
|---------------------------|--------------|----------------------------------------|----|-----------|-----------|---|---|---|----|---|---|-------|-------------|--------------|-------------|--------------|-------------|-------------|
| chr8:71036118-71075089    | exonic       | NCOA2                                  | 8  | 71036118  | 71075089  | 0 | 0 | 0 | 0  | 3 | 0 | 38971 | 0.363082265 | -2.115500483 | 4.013675407 | -0.527073136 | NA          | NA          |
| chr8:90949253-90958523    | exonic       | NBN                                    | 8  | 90949253  | 90958523  | 0 | 0 | 0 | 0  | 3 | 0 | 9270  | 0.363082265 | -2.115500483 | 4.013675407 | -0.527073136 | NA          | NA          |
| chr9:108125101-108137016  | exonic       | SLC44A1                                | 9  | 108125101 | 108137016 | 0 | 0 | 0 | 0  | 3 | 0 | 11915 | 0.363082265 | -2.115500483 | 4.013675407 | -0.527073136 | NA          | NA          |
| chr9:134274139-134275940  | intergenic   | PLPP7 (dist=89490), PRC2B (dist=29537) | 9  | 134274139 | 134275940 | 0 | 0 | 0 | 0  | 3 | 0 | 1801  | 0.363082265 | -2.115500483 | 4.013675407 | -0.527073136 | NA          | NA          |
| chr9:14609848-14674383    | exonic       | ZDHHC21                                | 9  | 14609848  | 14674383  | 0 | 0 | 0 | 0  | 3 | 0 | 64535 | 0.363082265 | -2.115500483 | 4.013675407 | -0.527073136 | NA          | NA          |
| chr9:37126309-37190648    | exonic       | ZCCHC7                                 | 9  | 37126309  | 37190648  | 0 | 0 | 0 | 0  | 3 | 0 | 64339 | 0.363082265 | -2.115500483 | 4.013675407 | -0.527073136 | NA          | NA          |
| chr9:77692075-77695857    | exonic       | NMRK1                                  | 9  | 77692075  | 77695857  | 0 | 0 | 0 | 0  | 3 | 0 | 3782  | 0.363082265 | -2.115500483 | 4.013675407 | -0.527073136 | NA          | NA          |
| chr9:88655653-88661487    | exonic       | GOLM1                                  | 9  | 88655653  | 88661487  | 0 | 0 | 0 | 0  | 3 | 0 | 5834  | 0.363082265 | -2.115500483 | 4.013675407 | -0.527073136 | NA          | NA          |
| chr9:95618092-95618600    | exonic       | ZNF484                                 | 9  | 95618092  | 95618600  | 0 | 0 | 0 | 0  | 3 | 0 | 508   | 0.363082265 | -2.115500483 | 4.013675407 | -0.527073136 | NA          | NA          |
| chrX:53667543-53672415    | exonic       | HUWE1                                  | X  | 53667543  | 53672415  | 0 | 0 | 0 | 0  | 3 | 0 | 4872  | 0.363082265 | -2.115500483 | 4.013675407 | -0.527073136 | NA          | NA          |
| chrY:21738591-21749393    | ncRNA_exonic | TXLNGY                                 | Y  | 21738591  | 21749393  | 0 | 0 | 0 | 0  | 3 | 0 | 10802 | 0.363082265 | -2.115500483 | 4.013675407 | -0.527073136 | NA          | NA          |
| chrY:21749096-21752658    | ncRNA_exonic | TXLNGY                                 | Y  | 21749096  | 21752658  | 0 | 0 | 0 | 0  | 3 | 0 | 3562  | 0.363082265 | -2.115500483 | 4.013675407 | -0.527073136 | NA          | NA          |
| chr9:80409378-80412564    | exonic       | GNAQ                                   | 9  | 80409378  | 80412564  | 3 | 0 | 0 | 7  | 6 | 1 | 3186  | 2.165523664 | -2.109595326 | 1.947503168 | -1.083230755 | NA          | NA          |
| chr2:110673528-110674233  | ncRNA_exonic | LIMS3-LOC440895                        | 2  | 110673528 | 110674233 | 1 | 1 | 0 | 5  | 4 | 1 | 705   | 1.627147964 | -2.107936472 | 2.071427194 | -1.01762518  | 0.308856116 | 0.998252924 |
| chr16:30490411-30490782   | exonic       | ITGAL                                  | 16 | 30490411  | 30490782  | 1 | 1 | 0 | 12 | 0 | 0 | 371   | 1.578999364 | -2.099907254 | 2.471817901 | -0.849539625 | NA          | NA          |
| chr3:77147164-77147491    | exonic       | ROBO2                                  | 3  | 77147164  | 77147491  | 4 | 0 | 0 | 21 | 0 | 0 | 327   | 2.748486859 | -2.09834914  | 3.83372083  | -0.547340099 | NA          | NA          |
| chr1:15855582-15873366    | exonic       | DNAJC16                                | 1  | 15855582  | 15873366  | 0 | 0 | 0 | 0  | 1 | 1 | 17784 | 0.429246031 | -2.094735489 | 4.014447396 | -0.521799212 | 0.601810138 | 0.998252924 |
| chr1:16237595-16242774    | exonic       | SPEN                                   | 1  | 16237595  | 16242774  | 0 | 0 | 0 | 0  | 1 | 1 | 5179  | 0.429246031 | -2.094735489 | 4.014447396 | -0.521799212 | 0.601810138 | 0.998252924 |
| chr1:193099303-193121574  | exonic       | CDC73                                  | 1  | 193099303 | 193121574 | 0 | 0 | 0 | 0  | 1 | 1 | 22271 | 0.429246031 | -2.094735489 | 4.014447396 | -0.521799212 | 0.601810138 | 0.998252924 |
| chr1:196682864-196697652  | exonic       | CFH                                    | 1  | 196682864 | 196697652 | 0 | 0 | 0 | 0  | 1 | 1 | 14788 | 0.429246031 | -2.094735489 | 4.014447396 | -0.521799212 | 0.601810138 | 0.998252924 |
| chr1:200617566-200618354  | exonic       | DDX59                                  | 1  | 200617566 | 200618354 | 0 | 0 | 0 | 0  | 1 | 1 | 788   | 0.429246031 | -2.094735489 | 4.014447396 | -0.521799212 | 0.601810138 | 0.998252924 |
| chr1:200729966-200730226  | exonic       | CAMSAP2                                | 1  | 200729966 | 200730226 | 0 | 0 | 0 | 0  | 1 | 1 | 260   | 0.429246031 | -2.094735489 | 4.014447396 | -0.521799212 | 0.601810138 | 0.998252924 |
| chr1:32560384-32566163    | exonic       | TMEM39B                                | 1  | 32560384  | 32566163  | 0 | 0 | 0 | 0  | 1 | 1 | 5779  | 0.429246031 | -2.094735489 | 4.014447396 | -0.521799212 | 0.601810138 | 0.998252924 |
| chr10:46751425-46754867   | ncRNA_exonic | BMS1P5                                 | 10 | 46751425  | 46754867  | 0 | 0 | 0 | 0  | 1 | 1 | 3442  | 0.429246031 | -2.094735489 | 4.014447396 | -0.521799212 | 0.601810138 | 0.998252924 |
| chr11:20429456-20486092   | exonic       | PRMT3                                  | 11 | 20429456  | 20486092  | 0 | 0 | 0 | 0  | 1 | 1 | 56636 | 0.429246031 | -2.094735489 | 4.014447396 | -0.521799212 | 0.601810138 | 0.998252924 |
| chr11:72695132-72726930   | exonic       | FCHSD2                                 | 11 | 72695132  | 72726930  | 0 | 0 | 0 | 0  | 1 | 1 | 31798 | 0.429246031 | -2.094735489 | 4.014447396 | -0.521799212 | 0.601810138 | 0.998252924 |
| chr11:74559159-74563127   | exonic       | XRR1A1                                 | 11 | 74559159  | 74563127  | 0 | 0 | 0 | 0  | 1 | 1 | 3968  | 0.429246031 | -2.094735489 | 4.014447396 | -0.521799212 | 0.601810138 | 0.998252924 |
| chr12:110832905-110834257 | exonic       | ANAPC7                                 | 12 | 110832905 | 110834257 | 0 | 0 | 0 | 0  | 1 | 1 | 1352  | 0.429246031 | -2.094735489 | 4.014447396 | -0.521799212 | 0.601810138 | 0.998252924 |
| chr12:28544236-28637098   | exonic       | CCDC91                                 | 12 | 28544236  | 28637098  | 0 | 0 | 0 | 0  | 1 | 1 | 92862 | 0.429246031 | -2.094735489 | 4.014447396 | -0.521799212 | 0.601810138 | 0.998252924 |
| chr12:40422102-40442012   | exonic       | SLC2A13                                | 12 | 40422102  | 40442012  | 0 | 0 | 0 | 0  | 1 | 1 | 19910 | 0.429246031 | -2.094735489 | 4.014447396 | -0.521799212 | 0.601810138 | 0.998252924 |
| chr14:50647289-50667802   | exonic       | SOS2                                   | 14 | 50647289  | 50667802  | 0 | 0 | 0 | 0  | 1 | 1 | 20513 | 0.429246031 | -2.094735489 | 4.014447396 | -0.521799212 | 0.601810138 | 0.998252924 |
| chr16:23632682-23649450   | exonic       | PALB2                                  | 16 | 23632682  | 23649450  | 0 | 0 | 0 | 0  | 1 | 1 | 16768 | 0.429246031 | -2.094735489 | 4.014447396 | -0.521799212 | 0.601810138 | 0.998252924 |
| chr17:28808160-28819771   | exonic       | GOSR1                                  | 17 | 28808160  | 28819771  | 0 | 0 | 0 | 0  | 1 | 1 | 11611 | 0.429246031 | -2.094735489 | 4.014447396 | -0.521799212 | 0.601810138 | 0.998252924 |
| chr17:41598736-41599594   | exonic       | DHX8                                   | 17 | 41598736  | 41599594  | 0 | 0 | 0 | 0  | 1 | 1 | 858   | 0.429246031 | -2.094735489 | 4.014447396 | -0.521799212 | 0.601810138 | 0.998252924 |
| chr2:24103508-24111269    | exonic       | ATAD2B                                 | 2  | 24103508  | 24111269  | 0 | 0 | 0 | 0  | 1 | 1 | 7761  | 0.429246031 | -2.094735489 | 4.014447396 | -0.521799212 | 0.601810138 | 0.998252924 |

|                           |              |              |    |           |           |   |   |   |   |   |   |        |             |              |             |              |             |             |
|---------------------------|--------------|--------------|----|-----------|-----------|---|---|---|---|---|---|--------|-------------|--------------|-------------|--------------|-------------|-------------|
| chr2:61712902-61717911    | exonic       | XPO1         | 2  | 61712902  | 61717911  | 0 | 0 | 0 | 0 | 1 | 1 | 5009   | 0.429246031 | -2.094735489 | 4.014447396 | -0.521799212 | 0.601810138 | 0.998252924 |
| chr2:61725807-61727029    | exonic       | XPO1         | 2  | 61725807  | 61727029  | 0 | 0 | 0 | 0 | 1 | 1 | 1222   | 0.429246031 | -2.094735489 | 4.014447396 | -0.521799212 | 0.601810138 | 0.998252924 |
| chr2:74386217-74399879    | exonic       | MOB1A        | 2  | 74386217  | 74399879  | 0 | 0 | 0 | 0 | 1 | 1 | 13662  | 0.429246031 | -2.094735489 | 4.014447396 | -0.521799212 | 0.601810138 | 0.998252924 |
| chr3:136141251-136141886  | exonic       | STAG1        | 3  | 136141251 | 136141886 | 0 | 0 | 0 | 0 | 1 | 1 | 635    | 0.429246031 | -2.094735489 | 4.014447396 | -0.521799212 | 0.601810138 | 0.998252924 |
| chr3:155551256-155560408  | exonic       | SLC33A1      | 3  | 155551256 | 155560408 | 0 | 0 | 0 | 0 | 1 | 1 | 9152   | 0.429246031 | -2.094735489 | 4.014447396 | -0.521799212 | 0.601810138 | 0.998252924 |
| chr3:160131260-160141628  | exonic       | SMC4         | 3  | 160131260 | 160141628 | 0 | 0 | 0 | 0 | 1 | 1 | 10368  | 0.429246031 | -2.094735489 | 4.014447396 | -0.521799212 | 0.601810138 | 0.998252924 |
| chr4:120192450-120212416  | exonic       | USP53        | 4  | 120192450 | 120212416 | 0 | 0 | 0 | 0 | 1 | 1 | 19966  | 0.429246031 | -2.094735489 | 4.014447396 | -0.521799212 | 0.601810138 | 0.998252924 |
| chr4:146083791-146092872  | exonic       | OTUD4        | 4  | 146083791 | 146092872 | 0 | 0 | 0 | 0 | 1 | 1 | 9081   | 0.429246031 | -2.094735489 | 4.014447396 | -0.521799212 | 0.601810138 | 0.998252924 |
| chr4:56342129-56348995    | exonic       | CLOCK        | 4  | 56342129  | 56348995  | 0 | 0 | 0 | 0 | 1 | 1 | 6866   | 0.429246031 | -2.094735489 | 4.014447396 | -0.521799212 | 0.601810138 | 0.998252924 |
| chr5:158608967-158630664  | exonic       | RNF145       | 5  | 158608967 | 158630664 | 0 | 0 | 0 | 0 | 1 | 1 | 21697  | 0.429246031 | -2.094735489 | 4.014447396 | -0.521799212 | 0.601810138 | 0.998252924 |
| chr5:170817054-170819982  | exonic       | NPM1         | 5  | 170817054 | 170819982 | 0 | 0 | 0 | 0 | 1 | 1 | 2928   | 0.429246031 | -2.094735489 | 4.014447396 | -0.521799212 | 0.601810138 | 0.998252924 |
| chr5:65073253-65081737    | exonic       | NLN          | 5  | 65073253  | 65081737  | 0 | 0 | 0 | 0 | 1 | 1 | 8484   | 0.429246031 | -2.094735489 | 4.014447396 | -0.521799212 | 0.601810138 | 0.998252924 |
| chr5:77452081-77461496    | exonic       | AP3B1        | 5  | 77452081  | 77461496  | 0 | 0 | 0 | 0 | 1 | 1 | 9415   | 0.429246031 | -2.094735489 | 4.014447396 | -0.521799212 | 0.601810138 | 0.998252924 |
| chr5:79441912-79462301    | exonic       | SERINC5      | 5  | 79441912  | 79462301  | 0 | 0 | 0 | 0 | 1 | 1 | 20389  | 0.429246031 | -2.094735489 | 4.014447396 | -0.521799212 | 0.601810138 | 0.998252924 |
| chr6:135639656-135749897  | exonic       | AHI1         | 6  | 135639656 | 135749897 | 0 | 0 | 0 | 0 | 1 | 1 | 110241 | 0.429246031 | -2.094735489 | 4.014447396 | -0.521799212 | 0.601810138 | 0.998252924 |
| chr6:147560305-147599340  | exonic       | STXBP5       | 6  | 147560305 | 147599340 | 0 | 0 | 0 | 0 | 1 | 1 | 39035  | 0.429246031 | -2.094735489 | 4.014447396 | -0.521799212 | 0.601810138 | 0.998252924 |
| chr6:150147399-150157433  | exonic       | LRP11        | 6  | 150147399 | 150157433 | 0 | 0 | 0 | 0 | 1 | 1 | 10034  | 0.429246031 | -2.094735489 | 4.014447396 | -0.521799212 | 0.601810138 | 0.998252924 |
| chr6:7226699-7232140      | exonic       | RREB1        | 6  | 7226699   | 7232140   | 0 | 0 | 0 | 0 | 1 | 1 | 5441   | 0.429246031 | -2.094735489 | 4.014447396 | -0.521799212 | 0.601810138 | 0.998252924 |
| chr7:5363844-5372680      | exonic       | TNRC18       | 7  | 5363844   | 5372680   | 0 | 0 | 0 | 0 | 1 | 1 | 8836   | 0.429246031 | -2.094735489 | 4.014447396 | -0.521799212 | 0.601810138 | 0.998252924 |
| chrX:80064511-80064803    | exonic       | BRWD3        | X  | 80064511  | 80064803  | 0 | 0 | 0 | 0 | 1 | 1 | 292    | 0.429246031 | -2.094735489 | 4.014447396 | -0.521799212 | 0.601810138 | 0.998252924 |
| chr8:117668094-117671219  | exonic       | EIF3H        | 8  | 117668094 | 117671219 | 1 | 0 | 0 | 2 | 2 | 1 | 3125   | 0.891883165 | -2.094610083 | 2.708965957 | -0.773213882 | 0.439395812 | 0.998252924 |
| chr9:99098998-99114391    | exonic       | SLC35D2      | 9  | 99098998  | 99114391  | 1 | 0 | 0 | 2 | 2 | 1 | 15393  | 0.891883165 | -2.094610083 | 2.708965957 | -0.773213882 | 0.439395812 | 0.998252924 |
| chr2:113158693-113159425  | exonic       | RGPD5, RGPD8 | 2  | 113158693 | 113159425 | 0 | 0 | 1 | 2 | 2 | 1 | 732    | 0.960165248 | -2.09376955  | 2.648397055 | -0.790579927 | 0.429189164 | 0.998252924 |
| chr7:5023301-5028808      | ncRNA_exonic | RNF216P1     | 7  | 5023301   | 5028808   | 0 | 0 | 1 | 2 | 2 | 1 | 5507   | 0.960165248 | -2.09376955  | 2.648397055 | -0.790579927 | 0.429189164 | 0.998252924 |
| chr1:220355598-220356273  | exonic       | RAB3GAP2     | 1  | 220355598 | 220356273 | 0 | 1 | 0 | 0 | 6 | 0 | 675    | 0.90044033  | -2.086241629 | 3.187064249 | -0.654596665 | NA          | NA          |
| chr2:70451685-70457986    | exonic       | TIA1         | 2  | 70451685  | 70457986  | 0 | 1 | 0 | 0 | 6 | 0 | 6301   | 0.90044033  | -2.086241629 | 3.187064249 | -0.654596665 | NA          | NA          |
| chr13:100959445-101020828 | exonic       | PCCA         | 13 | 100959445 | 101020828 | 5 | 0 | 0 | 2 | 5 | 0 | 61383  | 0.855151474 | -2.084617374 | 3.244949796 | -0.642418991 | NA          | NA          |
| chr1:111690263-111717585  | exonic       | CEPT1        | 1  | 111690263 | 111717585 | 0 | 0 | 0 | 1 | 2 | 0 | 27322  | 0.348366229 | -2.073305549 | 4.015255082 | -0.51635712  | 0.605605009 | 0.998252924 |
| chr1:171504566-171535560  | exonic       | PRRC2C       | 1  | 171504566 | 171535560 | 0 | 0 | 0 | 1 | 2 | 0 | 30994  | 0.348366229 | -2.073305549 | 4.015255082 | -0.51635712  | 0.605605009 | 0.998252924 |
| chr1:46105881-46120991    | exonic       | GPBP1L1      | 1  | 46105881  | 46120991  | 0 | 0 | 0 | 1 | 2 | 0 | 15110  | 0.348366229 | -2.073305549 | 4.015255082 | -0.51635712  | 0.605605009 | 0.998252924 |
| chr10:51582182-51585599   | exonic       | NCOA4        | 10 | 51582182  | 51585599  | 0 | 0 | 0 | 1 | 2 | 0 | 3417   | 0.348366229 | -2.073305549 | 4.015255082 | -0.51635712  | 0.605605009 | 0.998252924 |
| chr11:85725912-85742653   | exonic       | PICALM       | 11 | 85725912  | 85742653  | 0 | 0 | 0 | 1 | 2 | 0 | 16741  | 0.348366229 | -2.073305549 | 4.015255082 | -0.51635712  | 0.605605009 | 0.998252924 |
| chr12:109509416-109511337 | exonic       | USP30        | 12 | 109509416 | 109511337 | 0 | 0 | 0 | 1 | 2 | 0 | 1921   | 0.348366229 | -2.073305549 | 4.015255082 | -0.51635712  | 0.605605009 | 0.998252924 |
| chr12:109687788-109696913 | exonic       | ACACB        | 12 | 109687788 | 109696913 | 0 | 0 | 0 | 1 | 2 | 0 | 9125   | 0.348366229 | -2.073305549 | 4.015255082 | -0.51635712  | 0.605605009 | 0.998252924 |
| chr12:112110464-112117144 | exonic       | BRAP         | 12 | 112110464 | 112117144 | 0 | 0 | 0 | 1 | 2 | 0 | 6680   | 0.348366229 | -2.073305549 | 4.015255082 | -0.51635712  | 0.605605009 | 0.998252924 |

|                           |        |                       |    |           |           |   |   |   |   |   |   |       |             |              |             |             |             |             |
|---------------------------|--------|-----------------------|----|-----------|-----------|---|---|---|---|---|---|-------|-------------|--------------|-------------|-------------|-------------|-------------|
| chr12:2931959-2933418     | exonic | ITFG2                 | 12 | 2931959   | 2933418   | 0 | 0 | 0 | 1 | 2 | 0 | 1459  | 0.348366229 | -2.073305549 | 4.015255082 | -0.51635712 | 0.605605009 | 0.998252924 |
| chr12:53410256-53421972   | exonic | EIF4B                 | 12 | 53410256  | 53421972  | 0 | 0 | 0 | 1 | 2 | 0 | 11716 | 0.348366229 | -2.073305549 | 4.015255082 | -0.51635712 | 0.605605009 | 0.998252924 |
| chr13:41890981-41905505   | exonic | NAA16                 | 13 | 41890981  | 41905505  | 0 | 0 | 0 | 1 | 2 | 0 | 14524 | 0.348366229 | -2.073305549 | 4.015255082 | -0.51635712 | 0.605605009 | 0.998252924 |
| chr13:41890981-41910892   | exonic | NAA16                 | 13 | 41890981  | 41910892  | 0 | 0 | 0 | 1 | 2 | 0 | 19911 | 0.348366229 | -2.073305549 | 4.015255082 | -0.51635712 | 0.605605009 | 0.998252924 |
| chr13:42860121-42882745   | exonic | AKAP11                | 13 | 42860121  | 42882745  | 0 | 0 | 0 | 1 | 2 | 0 | 22624 | 0.348366229 | -2.073305549 | 4.015255082 | -0.51635712 | 0.605605009 | 0.998252924 |
| chr13:53196123-53201713   | UTR5   |                       | 13 | 53196123  | 53201713  | 0 | 0 | 0 | 1 | 2 | 0 | 5590  | 0.348366229 | -2.073305549 | 4.015255082 | -0.51635712 | 0.605605009 | 0.998252924 |
| chr13:53232533-53239868   | exonic | SUGT1                 | 13 | 53232533  | 53239868  | 0 | 0 | 0 | 1 | 2 | 0 | 7335  | 0.348366229 | -2.073305549 | 4.015255082 | -0.51635712 | 0.605605009 | 0.998252924 |
| chr14:61275042-61346553   | exonic | MNAT1                 | 14 | 61275042  | 61346553  | 0 | 4 | 0 | 5 | 2 | 0 | 71511 | 0.348366229 | -2.073305549 | 4.015255082 | -0.51635712 | 0.605605009 | 0.998252924 |
| chr15:101550654-101551042 | exonic | LRRK1                 | 15 | 101550654 | 101551042 | 0 | 0 | 0 | 1 | 2 | 0 | 388   | 0.348366229 | -2.073305549 | 4.015255082 | -0.51635712 | 0.605605009 | 0.998252924 |
| chr15:35192822-35196706   | exonic | AQR                   | 15 | 35192822  | 35196706  | 0 | 0 | 0 | 1 | 2 | 0 | 3884  | 0.348366229 | -2.073305549 | 4.015255082 | -0.51635712 | 0.605605009 | 0.998252924 |
| chr15:59487659-59506919   | exonic | LDHAL6B, MYO1E        | 15 | 59487659  | 59506919  | 0 | 0 | 0 | 1 | 2 | 0 | 19260 | 0.348366229 | -2.073305549 | 4.015255082 | -0.51635712 | 0.605605009 | 0.998252924 |
| chr15:59487659-59510286   | exonic | LDHAL6B, MYO1E        | 15 | 59487659  | 59510286  | 0 | 0 | 0 | 1 | 2 | 0 | 22627 | 0.348366229 | -2.073305549 | 4.015255082 | -0.51635712 | 0.605605009 | 0.998252924 |
| chr15:63829223-63848947   | exonic | USP3                  | 15 | 63829223  | 63848947  | 0 | 0 | 0 | 1 | 2 | 0 | 19724 | 0.348366229 | -2.073305549 | 4.015255082 | -0.51635712 | 0.605605009 | 0.998252924 |
| chr15:65799580-65804902   | exonic | DPP8                  | 15 | 65799580  | 65804902  | 0 | 0 | 0 | 1 | 2 | 0 | 5322  | 0.348366229 | -2.073305549 | 4.015255082 | -0.51635712 | 0.605605009 | 0.998252924 |
| chr15:66824584-66839043   | exonic | ZWILCH                | 15 | 66824584  | 66839043  | 0 | 0 | 0 | 1 | 2 | 0 | 14459 | 0.348366229 | -2.073305549 | 4.015255082 | -0.51635712 | 0.605605009 | 0.998252924 |
| chr15:90420537-90432372   | exonic | AP3S2, C15orf38-AP3S2 | 15 | 90420537  | 90432372  | 0 | 0 | 0 | 1 | 2 | 0 | 11835 | 0.348366229 | -2.073305549 | 4.015255082 | -0.51635712 | 0.605605009 | 0.998252924 |
| chr16:19474601-19485598   | exonic | TMC5                  | 16 | 19474601  | 19485598  | 0 | 0 | 0 | 1 | 2 | 0 | 10997 | 0.348366229 | -2.073305549 | 4.015255082 | -0.51635712 | 0.605605009 | 0.998252924 |
| chr16:19627435-19653798   | exonic | C16orf62              | 16 | 19627435  | 19653798  | 0 | 0 | 0 | 1 | 2 | 0 | 26363 | 0.348366229 | -2.073305549 | 4.015255082 | -0.51635712 | 0.605605009 | 0.998252924 |
| chr16:21979948-21987564   | exonic | UQCRC2                | 16 | 21979948  | 21987564  | 0 | 0 | 0 | 1 | 2 | 0 | 7616  | 0.348366229 | -2.073305549 | 4.015255082 | -0.51635712 | 0.605605009 | 0.998252924 |
| chr17:29527439-29592357   | exonic | NF1                   | 17 | 29527439  | 29592357  | 0 | 0 | 0 | 1 | 2 | 0 | 64918 | 0.348366229 | -2.073305549 | 4.015255082 | -0.51635712 | 0.605605009 | 0.998252924 |
| chr17:76696412-76698686   | exonic | CYTH1                 | 17 | 76696412  | 76698686  | 0 | 0 | 0 | 1 | 2 | 0 | 2274  | 0.348366229 | -2.073305549 | 4.015255082 | -0.51635712 | 0.605605009 | 0.998252924 |
| chr17:8347577-8363478     | exonic | NDEL1                 | 17 | 8347577   | 8363478   | 0 | 0 | 0 | 1 | 2 | 0 | 15901 | 0.348366229 | -2.073305549 | 4.015255082 | -0.51635712 | 0.605605009 | 0.998252924 |
| chr19:16790794-16791392   | exonic | TMEM38A               | 19 | 16790794  | 16791392  | 0 | 0 | 0 | 1 | 2 | 0 | 598   | 0.348366229 | -2.073305549 | 4.015255082 | -0.51635712 | 0.605605009 | 0.998252924 |
| chr2:170871790-170917953  | exonic | UBR3                  | 2  | 170871790 | 170917953 | 0 | 0 | 0 | 1 | 2 | 0 | 46163 | 0.348366229 | -2.073305549 | 4.015255082 | -0.51635712 | 0.605605009 | 0.998252924 |
| chr2:204312681-204326648  | exonic | RAPH1                 | 2  | 204312681 | 204326648 | 0 | 0 | 0 | 1 | 2 | 0 | 13967 | 0.348366229 | -2.073305549 | 4.015255082 | -0.51635712 | 0.605605009 | 0.998252924 |
| chr2:43712372-43735919    | exonic | THADA                 | 2  | 43712372  | 43735919  | 0 | 0 | 0 | 1 | 2 | 0 | 23547 | 0.348366229 | -2.073305549 | 4.015255082 | -0.51635712 | 0.605605009 | 0.998252924 |
| chr2:61512009-61520685    | exonic | USP34                 | 2  | 61512009  | 61520685  | 0 | 0 | 0 | 1 | 2 | 0 | 8676  | 0.348366229 | -2.073305549 | 4.015255082 | -0.51635712 | 0.605605009 | 0.998252924 |
| chr2:61512009-61522425    | exonic | USP34                 | 2  | 61512009  | 61522425  | 0 | 0 | 0 | 1 | 2 | 0 | 10416 | 0.348366229 | -2.073305549 | 4.015255082 | -0.51635712 | 0.605605009 | 0.998252924 |
| chr2:61512009-61524060    | exonic | USP34                 | 2  | 61512009  | 61524060  | 0 | 0 | 0 | 1 | 2 | 0 | 12051 | 0.348366229 | -2.073305549 | 4.015255082 | -0.51635712 | 0.605605009 | 0.998252924 |
| chr21:40641824-40642359   | exonic | BRWD1                 | 21 | 40641824  | 40642359  | 0 | 0 | 0 | 1 | 2 | 0 | 535   | 0.348366229 | -2.073305549 | 4.015255082 | -0.51635712 | 0.605605009 | 0.998252924 |
| chr3:11372813-11383753    | exonic | ATG7                  | 3  | 11372813  | 11383753  | 0 | 0 | 0 | 1 | 2 | 0 | 10940 | 0.348366229 | -2.073305549 | 4.015255082 | -0.51635712 | 0.605605009 | 0.998252924 |
| chr3:149563797-149613347  | exonic | RNF13                 | 3  | 149563797 | 149613347 | 0 | 0 | 0 | 1 | 2 | 0 | 49550 | 0.348366229 | -2.073305549 | 4.015255082 | -0.51635712 | 0.605605009 | 0.998252924 |
| chr3:27453132-27465643    | exonic | SLC4A7                | 3  | 27453132  | 27465643  | 0 | 0 | 0 | 1 | 2 | 0 | 12511 | 0.348366229 | -2.073305549 | 4.015255082 | -0.51635712 | 0.605605009 | 0.998252924 |
| chr4:110384056-110416012  | exonic | SEC24B                | 4  | 110384056 | 110416012 | 0 | 0 | 0 | 1 | 2 | 0 | 31956 | 0.348366229 | -2.073305549 | 4.015255082 | -0.51635712 | 0.605605009 | 0.998252924 |
| chr4:148778703-148876525  | exonic | ARHGAP10              | 4  | 148778703 | 148876525 | 0 | 0 | 0 | 1 | 2 | 0 | 97822 | 0.348366229 | -2.073305549 | 4.015255082 | -0.51635712 | 0.605605009 | 0.998252924 |

|                          |              |           |    |           |           |   |   |   |   |   |   |       |             |              |             |              |             |             |
|--------------------------|--------------|-----------|----|-----------|-----------|---|---|---|---|---|---|-------|-------------|--------------|-------------|--------------|-------------|-------------|
| chr4:186185591-186188309 | exonic       | SNX25     | 4  | 186185591 | 186188309 | 0 | 0 | 0 | 1 | 2 | 0 | 2718  | 0.348366229 | -2.073305549 | 4.015255082 | -0.51635712  | 0.605605009 | 0.998252924 |
| chr4:48592675-48611084   | exonic       | FRYL      | 4  | 48592675  | 48611084  | 0 | 0 | 0 | 1 | 2 | 0 | 18409 | 0.348366229 | -2.073305549 | 4.015255082 | -0.51635712  | 0.605605009 | 0.998252924 |
| chr4:56759717-56766050   | exonic       | EXOC1     | 4  | 56759717  | 56766050  | 0 | 0 | 0 | 1 | 2 | 0 | 6333  | 0.348366229 | -2.073305549 | 4.015255082 | -0.51635712  | 0.605605009 | 0.998252924 |
| chr4:7870348-7873807     | exonic       | AFAP1     | 4  | 7870348   | 7873807   | 0 | 0 | 0 | 1 | 2 | 0 | 3459  | 0.348366229 | -2.073305549 | 4.015255082 | -0.51635712  | 0.605605009 | 0.998252924 |
| chr5:112321531-112346504 | exonic       | DCP2      | 5  | 112321531 | 112346504 | 0 | 0 | 0 | 1 | 2 | 0 | 24973 | 0.348366229 | -2.073305549 | 4.015255082 | -0.51635712  | 0.605605009 | 0.998252924 |
| chr5:141004774-141009692 | exonic       | HDAC3     | 5  | 141004774 | 141009692 | 0 | 0 | 0 | 1 | 2 | 0 | 4918  | 0.348366229 | -2.073305549 | 4.015255082 | -0.51635712  | 0.605605009 | 0.998252924 |
| chr5:14673750-14681716   | exonic       | OTULIN    | 5  | 14673750  | 14681716  | 0 | 0 | 0 | 1 | 2 | 0 | 7966  | 0.348366229 | -2.073305549 | 4.015255082 | -0.51635712  | 0.605605009 | 0.998252924 |
| chr5:179007947-179020646 | exonic       | RUFY1     | 5  | 179007947 | 179020646 | 0 | 0 | 0 | 1 | 2 | 0 | 12699 | 0.348366229 | -2.073305549 | 4.015255082 | -0.51635712  | 0.605605009 | 0.998252924 |
| chr5:33561131-33624456   | exonic       | ADAMTS12  | 5  | 33561131  | 33624456  | 0 | 0 | 0 | 1 | 2 | 0 | 63325 | 0.348366229 | -2.073305549 | 4.015255082 | -0.51635712  | 0.605605009 | 0.998252924 |
| chr6:144768346-144806655 | exonic       | UTRN      | 6  | 144768346 | 144806655 | 0 | 0 | 0 | 1 | 2 | 0 | 38309 | 0.348366229 | -2.073305549 | 4.015255082 | -0.51635712  | 0.605605009 | 0.998252924 |
| chr6:17624791-17649531   | exonic       | NUP153    | 6  | 17624791  | 17649531  | 0 | 0 | 0 | 1 | 2 | 0 | 24740 | 0.348366229 | -2.073305549 | 4.015255082 | -0.51635712  | 0.605605009 | 0.998252924 |
| chr7:103777227-103808973 | exonic       | ORC5      | 7  | 103777227 | 103808973 | 0 | 0 | 0 | 1 | 2 | 0 | 31746 | 0.348366229 | -2.073305549 | 4.015255082 | -0.51635712  | 0.605605009 | 0.998252924 |
| chr7:65220766-65221561   | ncRNA_exonic | CCT6P1    | 7  | 65220766  | 65221561  | 0 | 0 | 0 | 1 | 2 | 0 | 795   | 0.348366229 | -2.073305549 | 4.015255082 | -0.51635712  | 0.605605009 | 0.998252924 |
| chr8:120805605-120814265 | exonic       | TAF2      | 8  | 120805605 | 120814265 | 0 | 0 | 0 | 1 | 2 | 0 | 8660  | 0.348366229 | -2.073305549 | 4.015255082 | -0.51635712  | 0.605605009 | 0.998252924 |
| chr8:48748898-48749980   | exonic       | PRKDC     | 8  | 48748898  | 48749980  | 0 | 0 | 0 | 1 | 2 | 0 | 1082  | 0.348366229 | -2.073305549 | 4.015255082 | -0.51635712  | 0.605605009 | 0.998252924 |
| chr9:19070216-19096767   | exonic       | HAUS6     | 9  | 19070216  | 19096767  | 0 | 0 | 0 | 1 | 2 | 0 | 26551 | 0.348366229 | -2.073305549 | 4.015255082 | -0.51635712  | 0.605605009 | 0.998252924 |
| chr9:88648196-88651422   | exonic       | GOLM1     | 9  | 88648196  | 88651422  | 0 | 0 | 0 | 1 | 2 | 0 | 3226  | 0.348366229 | -2.073305549 | 4.015255082 | -0.51635712  | 0.605605009 | 0.998252924 |
| chrX:117700536-117733191 | exonic       | DOCK11    | X  | 117700536 | 117733191 | 0 | 0 | 0 | 1 | 2 | 0 | 32655 | 0.348366229 | -2.073305549 | 4.015255082 | -0.51635712  | 0.605605009 | 0.998252924 |
| chrX:37663129-37665786   | exonic       | CYBB      | X  | 37663129  | 37665786  | 0 | 0 | 0 | 1 | 2 | 0 | 2657  | 0.348366229 | -2.073305549 | 4.015255082 | -0.51635712  | 0.605605009 | 0.998252924 |
| chr20:54956488-54959380  | exonic       | AURKA     | 20 | 54956488  | 54959380  | 1 | 0 | 0 | 3 | 1 | 1 | 2892  | 0.877167129 | -2.067918929 | 2.74148273  | -0.754306751 | 0.45066505  | 0.998252924 |
| chr4:107114765-107133992 | exonic       | TBCK      | 4  | 107114765 | 107133992 | 3 | 0 | 2 | 6 | 3 | 8 | 19227 | 4.248198326 | -2.066748786 | 1.476477737 | -1.399783237 | NA          | NA          |
| chr9:127064214-127076264 | exonic       | NEK6      | 9  | 127064214 | 127076264 | 0 | 2 | 2 | 7 | 6 | 5 | 12050 | 3.75452692  | -2.050047221 | 1.49433033  | -1.371883565 | 0.170099687 | 0.998252924 |
| chr2:242346951-242371189 | exonic       | FARP2     | 2  | 242346951 | 242371189 | 0 | 0 | 1 | 2 | 4 | 0 | 24238 | 0.894001483 | -2.043037617 | 2.899808031 | -0.704542368 | 0.481095075 | 0.998252924 |
| chr3:47908735-47919013   | exonic       | MAP4      | 3  | 47908735  | 47919013  | 0 | 1 | 0 | 4 | 0 | 1 | 10278 | 0.907739948 | -2.042095572 | 2.929076316 | -0.697180733 | 0.485689695 | 0.998252924 |
| chr1:197552281-197581106 | exonic       | DENND1B   | 1  | 197552281 | 197581106 | 0 | 1 | 0 | 2 | 4 | 0 | 28825 | 0.871008257 | -2.041980662 | 2.924715497 | -0.698180956 | 0.485064035 | 0.998252924 |
| chr16:48587449-48596355  | exonic       | N4BP1     | 16 | 48587449  | 48596355  | 0 | 1 | 0 | 2 | 4 | 0 | 8906  | 0.871008257 | -2.041980662 | 2.924715497 | -0.698180956 | 0.485064035 | 0.998252924 |
| chr16:4679087-4679793    | intronic     | MGRN1     | 16 | 4679087   | 4679793   | 2 | 0 | 0 | 0 | 0 | 4 | 706   | 1.490848321 | -2.04020062  | 2.740213494 | -0.744540754 | NA          | NA          |
| chr8:61653817-61693989   | exonic       | CHD7      | 8  | 61653817  | 61693989  | 2 | 0 | 0 | 0 | 0 | 4 | 40172 | 1.490848321 | -2.04020062  | 2.740213494 | -0.744540754 | NA          | NA          |
| chr9:97187142-97187457   | intronic     | MFS14B    | 9  | 97187142  | 97187457  | 2 | 0 | 0 | 0 | 0 | 4 | 315   | 1.490848321 | -2.04020062  | 2.740213494 | -0.744540754 | NA          | NA          |
| chr2:242343242-242373736 | exonic       | FARP2     | 2  | 242343242 | 242373736 | 1 | 0 | 0 | 0 | 2 | 0 | 30494 | 0.8257194   | -2.039794286 | 2.978329949 | -0.684878546 | 0.493420565 | 0.998252924 |
| chr5:56526672-56527148   | exonic       | GPBP1     | 5  | 56526672  | 56527148  | 1 | 0 | 0 | 2 | 4 | 0 | 476   | 0.8257194   | -2.039794286 | 2.978329949 | -0.684878546 | 0.493420565 | 0.998252924 |
| chr1:149627308-149640911 | ncRNA_exonic | LINCO0869 | 1  | 149627308 | 149640911 | 0 | 0 | 0 | 2 | 1 | 0 | 13603 | 0.333650192 | -2.029772377 | 4.016930749 | -0.505304299 | 0.613345124 | 0.998252924 |
| chr1:155348071-155365344 | exonic       | ASH1L     | 1  | 155348071 | 155365344 | 0 | 0 | 0 | 2 | 1 | 0 | 17273 | 0.333650192 | -2.029772377 | 4.016930749 | -0.505304299 | 0.613345124 | 0.998252924 |
| chr1:155686796-155695810 | exonic       | DAP3      | 1  | 155686796 | 155695810 | 0 | 0 | 0 | 2 | 1 | 0 | 9014  | 0.333650192 | -2.029772377 | 4.016930749 | -0.505304299 | 0.613345124 | 0.998252924 |
| chr1:202394693-202400747 | exonic       | PPP1R12B  | 1  | 202394693 | 202400747 | 0 | 0 | 0 | 2 | 1 | 0 | 6054  | 0.333650192 | -2.029772377 | 4.016930749 | -0.505304299 | 0.613345124 | 0.998252924 |

|                           |        |            |    |           |           |   |   |   |   |   |   |        |             |              |             |              |             |             |
|---------------------------|--------|------------|----|-----------|-----------|---|---|---|---|---|---|--------|-------------|--------------|-------------|--------------|-------------|-------------|
| chr1:215768697-215785263  | exonic | KCTD3      | 1  | 215768697 | 215785263 | 0 | 0 | 0 | 2 | 1 | 0 | 16566  | 0.333650192 | -2.029772377 | 4.016930749 | -0.505304299 | 0.613345124 | 0.998252924 |
| chr1:223946971-223959941  | exonic | CAPN2      | 1  | 223946971 | 223959941 | 0 | 0 | 0 | 2 | 1 | 0 | 12970  | 0.333650192 | -2.029772377 | 4.016930749 | -0.505304299 | 0.613345124 | 0.998252924 |
| chr1:234553829-234608557  | exonic | TARBP1     | 1  | 234553829 | 234608557 | 0 | 0 | 0 | 2 | 1 | 0 | 54728  | 0.333650192 | -2.029772377 | 4.016930749 | -0.505304299 | 0.613345124 | 0.998252924 |
| chr1:243471290-243589860  | exonic | SDCCAG8    | 1  | 243471290 | 243589860 | 2 | 2 | 0 | 2 | 1 | 0 | 118570 | 0.333650192 | -2.029772377 | 4.016930749 | -0.505304299 | 0.613345124 | 0.998252924 |
| chr1:246784730-246797889  | exonic | CNST       | 1  | 246784730 | 246797889 | 0 | 0 | 0 | 2 | 1 | 0 | 13159  | 0.333650192 | -2.029772377 | 4.016930749 | -0.505304299 | 0.613345124 | 0.998252924 |
| chr1:24976461-24978103    | exonic | SRRM1      | 1  | 24976461  | 24978103  | 0 | 0 | 0 | 2 | 1 | 0 | 1642   | 0.333650192 | -2.029772377 | 4.016930749 | -0.505304299 | 0.613345124 | 0.998252924 |
| chr1:39916723-39929358    | exonic | MACF1      | 1  | 39916723  | 39929358  | 0 | 0 | 0 | 2 | 1 | 0 | 12635  | 0.333650192 | -2.029772377 | 4.016930749 | -0.505304299 | 0.613345124 | 0.998252924 |
| chr1:91808986-91818709    | exonic | HFM1       | 1  | 91808986  | 91818709  | 0 | 0 | 0 | 2 | 1 | 0 | 9723   | 0.333650192 | -2.029772377 | 4.016930749 | -0.505304299 | 0.613345124 | 0.998252924 |
| chr10:111860382-111872673 | exonic | ADD3       | 10 | 111860382 | 111872673 | 0 | 0 | 0 | 2 | 1 | 0 | 12291  | 0.333650192 | -2.029772377 | 4.016930749 | -0.505304299 | 0.613345124 | 0.998252924 |
| chr10:11291115-11299835   | exonic | CELF2      | 10 | 11291115  | 11299835  | 0 | 0 | 0 | 2 | 1 | 0 | 8720   | 0.333650192 | -2.029772377 | 4.016930749 | -0.505304299 | 0.613345124 | 0.998252924 |
| chr10:34648074-34673182   | exonic | PARD3      | 10 | 34648074  | 34673182  | 0 | 0 | 0 | 2 | 1 | 0 | 25108  | 0.333650192 | -2.029772377 | 4.016930749 | -0.505304299 | 0.613345124 | 0.998252924 |
| chr10:43650344-43662546   | exonic | CSGALNACT2 | 10 | 43650344  | 43662546  | 0 | 0 | 0 | 2 | 1 | 0 | 12202  | 0.333650192 | -2.029772377 | 4.016930749 | -0.505304299 | 0.613345124 | 0.998252924 |
| chr10:97959830-97967655   | exonic | BLNK       | 10 | 97959830  | 97967655  | 0 | 0 | 0 | 2 | 1 | 0 | 7825   | 0.333650192 | -2.029772377 | 4.016930749 | -0.505304299 | 0.613345124 | 0.998252924 |
| chr11:17131978-17136012   | exonic | PIK3C2A    | 11 | 17131978  | 17136012  | 0 | 0 | 0 | 2 | 1 | 0 | 4034   | 0.333650192 | -2.029772377 | 4.016930749 | -0.505304299 | 0.613345124 | 0.998252924 |
| chr11:3800102-3803375     | exonic | NUP98      | 11 | 3800102   | 3803375   | 0 | 0 | 0 | 2 | 1 | 0 | 3273   | 0.333650192 | -2.029772377 | 4.016930749 | -0.505304299 | 0.613345124 | 0.998252924 |
| chr11:57460082-57464345   | exonic | ZDHC5      | 11 | 57460082  | 57464345  | 0 | 0 | 0 | 2 | 1 | 0 | 4263   | 0.333650192 | -2.029772377 | 4.016930749 | -0.505304299 | 0.613345124 | 0.998252924 |
| chr11:73843888-73844602   | exonic | C2CD3      | 11 | 73843888  | 73844602  | 0 | 0 | 0 | 2 | 1 | 0 | 714    | 0.333650192 | -2.029772377 | 4.016930749 | -0.505304299 | 0.613345124 | 0.998252924 |
| chr14:31626045-31643012   | exonic | HECTD1     | 14 | 31626045  | 31643012  | 0 | 0 | 0 | 2 | 1 | 0 | 16967  | 0.333650192 | -2.029772377 | 4.016930749 | -0.505304299 | 0.613345124 | 0.998252924 |
| chr14:35565763-35568590   | exonic | PPP2R3C    | 14 | 35565763  | 35568590  | 0 | 0 | 0 | 2 | 1 | 0 | 2827   | 0.333650192 | -2.029772377 | 4.016930749 | -0.505304299 | 0.613345124 | 0.998252924 |
| chr14:45715945-45716580   | exonic | MIS18BP1   | 14 | 45715945  | 45716580  | 0 | 0 | 0 | 2 | 1 | 0 | 635    | 0.333650192 | -2.029772377 | 4.016930749 | -0.505304299 | 0.613345124 | 0.998252924 |
| chr14:89212528-89221015   | exonic | EML5       | 14 | 89212528  | 89221015  | 0 | 0 | 0 | 2 | 1 | 0 | 8487   | 0.333650192 | -2.029772377 | 4.016930749 | -0.505304299 | 0.613345124 | 0.998252924 |
| chr15:28478291-28479430   | exonic | HERC2      | 15 | 28478291  | 28479430  | 0 | 0 | 0 | 2 | 1 | 0 | 1139   | 0.333650192 | -2.029772377 | 4.016930749 | -0.505304299 | 0.613345124 | 0.998252924 |
| chr15:64404771-64411053   | exonic | SNX1       | 15 | 64404771  | 64411053  | 0 | 0 | 0 | 2 | 1 | 0 | 6282   | 0.333650192 | -2.029772377 | 4.016930749 | -0.505304299 | 0.613345124 | 0.998252924 |
| chr15:93467550-93492306   | exonic | CHD2       | 15 | 93467550  | 93492306  | 0 | 0 | 0 | 2 | 1 | 0 | 24756  | 0.333650192 | -2.029772377 | 4.016930749 | -0.505304299 | 0.613345124 | 0.998252924 |
| chr16:66971939-66973261   | exonic | CES2       | 16 | 66971939  | 66973261  | 0 | 0 | 0 | 2 | 1 | 0 | 1322   | 0.333650192 | -2.029772377 | 4.016930749 | -0.505304299 | 0.613345124 | 0.998252924 |
| chr17:12812213-12832363   | exonic | ARHGAP44   | 17 | 12812213  | 12832363  | 0 | 0 | 0 | 2 | 1 | 0 | 20150  | 0.333650192 | -2.029772377 | 4.016930749 | -0.505304299 | 0.613345124 | 0.998252924 |
| chr17:43314647-43316432   | exonic | FMNL1      | 17 | 43314647  | 43316432  | 0 | 0 | 0 | 2 | 1 | 0 | 1785   | 0.333650192 | -2.029772377 | 4.016930749 | -0.505304299 | 0.613345124 | 0.998252924 |
| chr17:65906992-65940488   | exonic | BPTF       | 17 | 65906992  | 65940488  | 0 | 0 | 0 | 2 | 1 | 0 | 33496  | 0.333650192 | -2.029772377 | 4.016930749 | -0.505304299 | 0.613345124 | 0.998252924 |
| chr17:73933646-73934313   | exonic | FBF1       | 17 | 73933646  | 73934313  | 0 | 0 | 0 | 2 | 1 | 0 | 667    | 0.333650192 | -2.029772377 | 4.016930749 | -0.505304299 | 0.613345124 | 0.998252924 |
| chr18:20814571-20817209   | exonic | CABLES1    | 18 | 20814571  | 20817209  | 0 | 0 | 0 | 2 | 1 | 0 | 2638   | 0.333650192 | -2.029772377 | 4.016930749 | -0.505304299 | 0.613345124 | 0.998252924 |
| chr19:33406242-33417179   | exonic | CEP89      | 19 | 33406242  | 33417179  | 3 | 0 | 0 | 2 | 2 | 0 | 10937  | 0.333650192 | -2.029772377 | 4.016930749 | -0.505304299 | 0.613345124 | 0.998252924 |
| chr19:35420787-35424627   | exonic | ZNF30      | 19 | 35420787  | 35424627  | 0 | 0 | 0 | 2 | 1 | 0 | 3840   | 0.333650192 | -2.029772377 | 4.016930749 | -0.505304299 | 0.613345124 | 0.998252924 |
| chr19:46878860-46879831   | exonic | PPP5C      | 19 | 46878860  | 46879831  | 0 | 0 | 0 | 2 | 1 | 0 | 971    | 0.333650192 | -2.029772377 | 4.016930749 | -0.505304299 | 0.613345124 | 0.998252924 |
| chr2:120677644-120725548  | exonic | PTPN4      | 2  | 120677644 | 120725548 | 0 | 0 | 0 | 2 | 1 | 0 | 47904  | 0.333650192 | -2.029772377 | 4.016930749 | -0.505304299 | 0.613345124 | 0.998252924 |
| chr2:120684173-120702816  | exonic | PTPN4      | 2  | 120684173 | 120702816 | 0 | 0 | 0 | 2 | 1 | 0 | 18643  | 0.333650192 | -2.029772377 | 4.016930749 | -0.505304299 | 0.613345124 | 0.998252924 |

|                          |        |         |    |           |           |   |   |   |   |   |   |        |             |              |             |              |             |             |
|--------------------------|--------|---------|----|-----------|-----------|---|---|---|---|---|---|--------|-------------|--------------|-------------|--------------|-------------|-------------|
| chr2:15601324-15674765   | exonic | NBAS    | 2  | 15601324  | 15674765  | 0 | 0 | 0 | 2 | 1 | 0 | 73441  | 0.333650192 | -2.029772377 | 4.016930749 | -0.505304299 | 0.613345124 | 0.998252924 |
| chr2:201994451-202000830 | exonic | CFLAR   | 2  | 201994451 | 202000830 | 0 | 0 | 0 | 2 | 1 | 0 | 6379   | 0.333650192 | -2.029772377 | 4.016930749 | -0.505304299 | 0.613345124 | 0.998252924 |
| chr2:240158288-240274613 | exonic | HDAC4   | 2  | 240158288 | 240274613 | 0 | 0 | 0 | 2 | 1 | 0 | 116325 | 0.333650192 | -2.029772377 | 4.016930749 | -0.505304299 | 0.613345124 | 0.998252924 |
| chr2:39535083-39553418   | exonic | MAP4K3  | 2  | 39535083  | 39553418  | 0 | 0 | 0 | 2 | 1 | 0 | 18335  | 0.333650192 | -2.029772377 | 4.016930749 | -0.505304299 | 0.613345124 | 0.998252924 |
| chr2:46587776-46588229   | exonic | EPAS1   | 2  | 46587776  | 46588229  | 0 | 0 | 0 | 2 | 1 | 0 | 453    | 0.333650192 | -2.029772377 | 4.016930749 | -0.505304299 | 0.613345124 | 0.998252924 |
| chr2:64189191-64209021   | exonic | VPS54   | 2  | 64189191  | 64209021  | 0 | 0 | 0 | 2 | 1 | 0 | 19830  | 0.333650192 | -2.029772377 | 4.016930749 | -0.505304299 | 0.613345124 | 0.998252924 |
| chr20:17928129-17937681  | exonic | SNX5    | 20 | 17928129  | 17937681  | 0 | 0 | 0 | 2 | 1 | 0 | 9552   | 0.333650192 | -2.029772377 | 4.016930749 | -0.505304299 | 0.613345124 | 0.998252924 |
| chr20:32619327-32660136  | exonic | RALY    | 20 | 32619327  | 32660136  | 0 | 0 | 0 | 2 | 1 | 0 | 40809  | 0.333650192 | -2.029772377 | 4.016930749 | -0.505304299 | 0.613345124 | 0.998252924 |
| chr20:3893104-3899443    | exonic | PANK2   | 20 | 3893104   | 3899443   | 0 | 0 | 0 | 2 | 1 | 0 | 6339   | 0.333650192 | -2.029772377 | 4.016930749 | -0.505304299 | 0.613345124 | 0.998252924 |
| chr21:34066537-34067592  | exonic | SYNJ1   | 21 | 34066537  | 34067592  | 0 | 0 | 0 | 2 | 1 | 0 | 1055   | 0.333650192 | -2.029772377 | 4.016930749 | -0.505304299 | 0.613345124 | 0.998252924 |
| chr21:40596333-40610499  | exonic | BRWD1   | 21 | 40596333  | 40610499  | 0 | 0 | 0 | 2 | 1 | 0 | 14166  | 0.333650192 | -2.029772377 | 4.016930749 | -0.505304299 | 0.613345124 | 0.998252924 |
| chr22:36914809-36915584  | exonic | EIF3D   | 22 | 36914809  | 36915584  | 0 | 0 | 0 | 2 | 1 | 0 | 775    | 0.333650192 | -2.029772377 | 4.016930749 | -0.505304299 | 0.613345124 | 0.998252924 |
| chr3:108366789-108391503 | exonic | DZIP3   | 3  | 108366789 | 108391503 | 0 | 0 | 0 | 2 | 1 | 0 | 24714  | 0.333650192 | -2.029772377 | 4.016930749 | -0.505304299 | 0.613345124 | 0.998252924 |
| chr3:123356917-123359351 | exonic | MYLK    | 3  | 123356917 | 123359351 | 0 | 0 | 0 | 2 | 1 | 0 | 2434   | 0.333650192 | -2.029772377 | 4.016930749 | -0.505304299 | 0.613345124 | 0.998252924 |
| chr3:195605123-195615477 | exonic | TNK2    | 3  | 195605123 | 195615477 | 0 | 0 | 0 | 2 | 1 | 0 | 10354  | 0.333650192 | -2.029772377 | 4.016930749 | -0.505304299 | 0.613345124 | 0.998252924 |
| chr3:47719687-47727660   | exonic | SMARCC1 | 3  | 47719687  | 47727660  | 0 | 0 | 0 | 2 | 1 | 0 | 7973   | 0.333650192 | -2.029772377 | 4.016930749 | -0.505304299 | 0.613345124 | 0.998252924 |
| chr4:170501992-170523829 | exonic | NEK1    | 4  | 170501992 | 170523829 | 0 | 0 | 0 | 2 | 1 | 0 | 21837  | 0.333650192 | -2.029772377 | 4.016930749 | -0.505304299 | 0.613345124 | 0.998252924 |
| chr4:25766947-25792196   | exonic | SELIL3  | 4  | 25766947  | 25792196  | 0 | 0 | 0 | 2 | 1 | 0 | 25249  | 0.333650192 | -2.029772377 | 4.016930749 | -0.505304299 | 0.613345124 | 0.998252924 |
| chr4:74000833-74043250   | exonic | ANKRD17 | 4  | 74000833  | 74043250  | 0 | 0 | 0 | 2 | 1 | 0 | 42417  | 0.333650192 | -2.029772377 | 4.016930749 | -0.505304299 | 0.613345124 | 0.998252924 |
| chr5:146070690-146080705 | exonic | PPP2R2B | 5  | 146070690 | 146080705 | 0 | 0 | 0 | 2 | 1 | 0 | 10015  | 0.333650192 | -2.029772377 | 4.016930749 | -0.505304299 | 0.613345124 | 0.998252924 |
| chr5:154251289-154252211 | exonic | CNOT8   | 5  | 154251289 | 154252211 | 0 | 0 | 0 | 2 | 1 | 0 | 922    | 0.333650192 | -2.029772377 | 4.016930749 | -0.505304299 | 0.613345124 | 0.998252924 |
| chr5:167927595-167929110 | exonic | RARS    | 5  | 167927595 | 167929110 | 0 | 0 | 0 | 2 | 1 | 0 | 1515   | 0.333650192 | -2.029772377 | 4.016930749 | -0.505304299 | 0.613345124 | 0.998252924 |
| chr5:169108747-169111354 | exonic | DOCK2   | 5  | 169108747 | 169111354 | 0 | 0 | 0 | 2 | 1 | 0 | 2607   | 0.333650192 | -2.029772377 | 4.016930749 | -0.505304299 | 0.613345124 | 0.998252924 |
| chr5:170626673-170648844 | exonic | RANBP17 | 5  | 170626673 | 170648844 | 0 | 0 | 0 | 2 | 1 | 0 | 22171  | 0.333650192 | -2.029772377 | 4.016930749 | -0.505304299 | 0.613345124 | 0.998252924 |
| chr5:54763696-54786942   | exonic | PLPP1   | 5  | 54763696  | 54786942  | 0 | 0 | 0 | 2 | 1 | 0 | 23246  | 0.333650192 | -2.029772377 | 4.016930749 | -0.505304299 | 0.613345124 | 0.998252924 |
| chr5:56152426-56184184   | exonic | MAP3K1  | 5  | 56152426  | 56184184  | 0 | 0 | 0 | 2 | 1 | 0 | 31758  | 0.333650192 | -2.029772377 | 4.016930749 | -0.505304299 | 0.613345124 | 0.998252924 |
| chr5:90261231-90281339   | exonic | ADGRV1  | 5  | 90261231  | 90281339  | 0 | 0 | 0 | 2 | 1 | 0 | 20108  | 0.333650192 | -2.029772377 | 4.016930749 | -0.505304299 | 0.613345124 | 0.998252924 |
| chr5:96058342-96066564   | exonic | CAST    | 5  | 96058342  | 96066564  | 0 | 0 | 0 | 2 | 1 | 0 | 8222   | 0.333650192 | -2.029772377 | 4.016930749 | -0.505304299 | 0.613345124 | 0.998252924 |
| chr6:4935748-4937971     | exonic | CDYL    | 6  | 4935748   | 4937971   | 0 | 0 | 0 | 2 | 1 | 0 | 2223   | 0.333650192 | -2.029772377 | 4.016930749 | -0.505304299 | 0.613345124 | 0.998252924 |
| chr7:139801750-139810984 | exonic | KDM7A   | 7  | 139801750 | 139810984 | 0 | 0 | 0 | 2 | 1 | 0 | 9234   | 0.333650192 | -2.029772377 | 4.016930749 | -0.505304299 | 0.613345124 | 0.998252924 |
| chr7:140285388-140287580 | exonic | DENND2A | 7  | 140285388 | 140287580 | 0 | 0 | 0 | 2 | 1 | 0 | 2192   | 0.333650192 | -2.029772377 | 4.016930749 | -0.505304299 | 0.613345124 | 0.998252924 |
| chr7:151900018-151904513 | exonic | KMT2C   | 7  | 151900018 | 151904513 | 0 | 0 | 0 | 2 | 1 | 0 | 4495   | 0.333650192 | -2.029772377 | 4.016930749 | -0.505304299 | 0.613345124 | 0.998252924 |
| chr7:23004033-23030758   | exonic | FAM126A | 7  | 23004033  | 23030758  | 0 | 0 | 0 | 2 | 1 | 0 | 26725  | 0.333650192 | -2.029772377 | 4.016930749 | -0.505304299 | 0.613345124 | 0.998252924 |
| chr8:100443764-100533238 | exonic | VPS13B  | 8  | 100443764 | 100533238 | 0 | 0 | 0 | 2 | 1 | 0 | 89474  | 0.333650192 | -2.029772377 | 4.016930749 | -0.505304299 | 0.613345124 | 0.998252924 |
| chr8:103299660-103300494 | exonic | UBR5    | 8  | 103299660 | 103300494 | 0 | 0 | 0 | 2 | 1 | 0 | 834    | 0.333650192 | -2.029772377 | 4.016930749 | -0.505304299 | 0.613345124 | 0.998252924 |

|                           |        |         |    |           |           |    |    |    |    |     |    |        |             |              |             |              |             |             |
|---------------------------|--------|---------|----|-----------|-----------|----|----|----|----|-----|----|--------|-------------|--------------|-------------|--------------|-------------|-------------|
| chr8:125527986-125534441  | exonic | TATDN1  | 8  | 125527986 | 125534441 | 0  | 0  | 0  | 2  | 1   | 0  | 6455   | 0.333650192 | -2.029772377 | 4.016930749 | -0.505304299 | 0.613345124 | 0.998252924 |
| chr8:141710989-141900868  | exonic | PTK2    | 8  | 141710989 | 141900868 | 0  | 0  | 0  | 2  | 1   | 0  | 189879 | 0.333650192 | -2.029772377 | 4.016930749 | -0.505304299 | 0.613345124 | 0.998252924 |
| chr8:25189766-25193889    | exonic | DOCK5   | 8  | 25189766  | 25193889  | 0  | 0  | 0  | 2  | 1   | 0  | 4123   | 0.333650192 | -2.029772377 | 4.016930749 | -0.505304299 | 0.613345124 | 0.998252924 |
| chr8:28837587-28876430    | exonic | HMBOX1  | 8  | 28837587  | 28876430  | 0  | 0  | 0  | 2  | 1   | 0  | 38843  | 0.333650192 | -2.029772377 | 4.016930749 | -0.505304299 | 0.613345124 | 0.998252924 |
| chr8:42716887-42720632    | exonic | RNF170  | 8  | 42716887  | 42720632  | 0  | 0  | 0  | 2  | 1   | 0  | 3745   | 0.333650192 | -2.029772377 | 4.016930749 | -0.505304299 | 0.613345124 | 0.998252924 |
| chr9:110068659-110074018  | exonic | RAD23B  | 9  | 110068659 | 110074018 | 0  | 0  | 0  | 2  | 1   | 0  | 5359   | 0.333650192 | -2.029772377 | 4.016930749 | -0.505304299 | 0.613345124 | 0.998252924 |
| chr9:132841908-132854660  | exonic | GPR107  | 9  | 132841908 | 132854660 | 0  | 0  | 0  | 2  | 1   | 0  | 12752  | 0.333650192 | -2.029772377 | 4.016930749 | -0.505304299 | 0.613345124 | 0.998252924 |
| chr9:135218076-135224822  | exonic | SETX    | 9  | 135218076 | 135224822 | 0  | 0  | 0  | 2  | 1   | 0  | 6746   | 0.333650192 | -2.029772377 | 4.016930749 | -0.505304299 | 0.613345124 | 0.998252924 |
| chr9:19288593-19316837    | exonic | DENND4C | 9  | 19288593  | 19316837  | 0  | 0  | 0  | 2  | 1   | 0  | 28244  | 0.333650192 | -2.029772377 | 4.016930749 | -0.505304299 | 0.613345124 | 0.998252924 |
| chr9:78547294-78641953    | exonic | PCSK5   | 9  | 78547294  | 78641953  | 0  | 0  | 0  | 2  | 1   | 0  | 94659  | 0.333650192 | -2.029772377 | 4.016930749 | -0.505304299 | 0.613345124 | 0.998252924 |
| chr9:97730039-97767898    | exonic | C9orf3  | 9  | 97730039  | 97767898  | 0  | 0  | 0  | 2  | 1   | 0  | 37859  | 0.333650192 | -2.029772377 | 4.016930749 | -0.505304299 | 0.613345124 | 0.998252924 |
| chrX:114868311-114877820  | exonic | PLS3    | X  | 114868311 | 114877820 | 0  | 0  | 0  | 2  | 1   | 0  | 9509   | 0.333650192 | -2.029772377 | 4.016930749 | -0.505304299 | 0.613345124 | 0.998252924 |
| chrX:76872080-76920267    | exonic | ATRX    | X  | 76872080  | 76920267  | 0  | 0  | 0  | 2  | 1   | 0  | 48187  | 0.333650192 | -2.029772377 | 4.016930749 | -0.505304299 | 0.613345124 | 0.998252924 |
| chr19:23541232-23545527   | exonic | ZNF91   | 19 | 23541232  | 23545527  | 18 | 14 | 23 | 50 | 218 | 18 | 4295   | 46.54629591 | -2.018882221 | 0.761422019 | -2.651462881 | NA          | NA          |
| chr16:68208276-68225678   | exonic | NFATC3  | 16 | 68208276  | 68225678  | 0  | 0  | 1  | 3  | 3   | 0  | 17402  | 0.879285446 | -2.015701615 | 2.907188204 | -0.69335092  | 0.488089355 | 0.998252924 |
| chr9:14120438-14179779    | exonic | NFIB    | 9  | 14120438  | 14179779  | 0  | 0  | 1  | 3  | 3   | 0  | 59341  | 0.879285446 | -2.015701615 | 2.907188204 | -0.69335092  | 0.488089355 | 0.998252924 |
| chr2:203921149-203922176  | exonic | NBEAL1  | 2  | 203921149 | 203922176 | 0  | 1  | 0  | 3  | 3   | 0  | 1027   | 0.85629222  | -2.014557585 | 2.932814686 | -0.686902447 | 0.492144205 | 0.998252924 |
| chr6:144811206-144814592  | exonic | UTRN    | 6  | 144811206 | 144814592 | 0  | 1  | 0  | 3  | 3   | 0  | 3386   | 0.85629222  | -2.014557585 | 2.932814686 | -0.686902447 | 0.492144205 | 0.998252924 |
| chr11:89133184-89135710   | exonic | NOX4    | 11 | 89133184  | 89135710  | 0  | 3  | 0  | 2  | 8   | 3  | 2526   | 2.628325368 | -2.014294033 | 1.852014464 | -1.087623273 | NA          | NA          |
| chr1:211956570-211966532  | exonic | LPGAT1  | 1  | 211956570 | 211966532 | 0  | 0  | 0  | 1  | 0   | 1  | 9962   | 0.414529994 | -2.01328324  | 4.017577865 | -0.50118661  | 0.616287614 | 0.998252924 |
| chr10:105750432-105752891 | exonic | SLK     | 10 | 105750432 | 105752891 | 0  | 0  | 0  | 1  | 0   | 1  | 2459   | 0.414529994 | -2.01328324  | 4.017577865 | -0.50118661  | 0.616287614 | 0.998252924 |
| chr10:46121398-46122553   | exonic | ZFAND4  | 10 | 46121398  | 46122553  | 0  | 0  | 0  | 1  | 0   | 1  | 1155   | 0.414529994 | -2.01328324  | 4.017577865 | -0.50118661  | 0.616287614 | 0.998252924 |
| chr10:70506917-70507323   | exonic | CCAR1   | 10 | 70506917  | 70507323  | 0  | 0  | 0  | 1  | 0   | 1  | 406    | 0.414529994 | -2.01328324  | 4.017577865 | -0.50118661  | 0.616287614 | 0.998252924 |
| chr10:99220451-99222439   | exonic | MMS19   | 10 | 99220451  | 99222439  | 0  | 0  | 0  | 1  | 0   | 1  | 1988   | 0.414529994 | -2.01328324  | 4.017577865 | -0.50118661  | 0.616287614 | 0.998252924 |
| chr11:11348632-11362551   | exonic | GALNT18 | 11 | 11348632  | 11362551  | 0  | 0  | 0  | 1  | 0   | 1  | 13919  | 0.414529994 | -2.01328324  | 4.017577865 | -0.50118661  | 0.616287614 | 0.998252924 |
| chr11:64627395-64627808   | exonic | EHD1    | 11 | 64627395  | 64627808  | 0  | 0  | 0  | 1  | 0   | 1  | 413    | 0.414529994 | -2.01328324  | 4.017577865 | -0.50118661  | 0.616287614 | 0.998252924 |
| chr11:72598514-72600990   | exonic | FCHSD2  | 11 | 72598514  | 72600990  | 0  | 0  | 0  | 1  | 0   | 1  | 2476   | 0.414529994 | -2.01328324  | 4.017577865 | -0.50118661  | 0.616287614 | 0.998252924 |
| chr12:104373608-104374740 | exonic | TDG     | 12 | 104373608 | 104374740 | 0  | 0  | 0  | 1  | 0   | 1  | 1132   | 0.414529994 | -2.01328324  | 4.017577865 | -0.50118661  | 0.616287614 | 0.998252924 |
| chr12:19436213-19436679   | exonic | PLEKHA5 | 12 | 19436213  | 19436679  | 0  | 0  | 0  | 1  | 0   | 1  | 466    | 0.414529994 | -2.01328324  | 4.017577865 | -0.50118661  | 0.616287614 | 0.998252924 |
| chr14:57713428-57714430   | exonic | EXOC5   | 14 | 57713428  | 57714430  | 0  | 0  | 0  | 1  | 0   | 1  | 1002   | 0.414529994 | -2.01328324  | 4.017577865 | -0.50118661  | 0.616287614 | 0.998252924 |
| chr15:93470473-93482948   | exonic | CHD2    | 15 | 93470473  | 93482948  | 0  | 0  | 0  | 1  | 0   | 1  | 12475  | 0.414529994 | -2.01328324  | 4.017577865 | -0.50118661  | 0.616287614 | 0.998252924 |
| chr16:11870175-11873219   | exonic | ZC3H7A  | 16 | 11870175  | 11873219  | 0  | 0  | 0  | 1  | 0   | 1  | 3044   | 0.414529994 | -2.01328324  | 4.017577865 | -0.50118661  | 0.616287614 | 0.998252924 |
| chr17:34105891-34106327   | exonic | MMP28   | 17 | 34105891  | 34106327  | 0  | 0  | 0  | 1  | 0   | 1  | 436    | 0.414529994 | -2.01328324  | 4.017577865 | -0.50118661  | 0.616287614 | 0.998252924 |
| chr17:76388556-76400170   | exonic | PGS1    | 17 | 76388556  | 76400170  | 0  | 0  | 0  | 1  | 0   | 1  | 11614  | 0.414529994 | -2.01328324  | 4.017577865 | -0.50118661  | 0.616287614 | 0.998252924 |
| chr2:120677644-120684242  | exonic | PTPN4   | 2  | 120677644 | 120684242 | 0  | 0  | 0  | 1  | 0   | 1  | 6598   | 0.414529994 | -2.01328324  | 4.017577865 | -0.50118661  | 0.616287614 | 0.998252924 |



|                          |            |                                            |    |           |           |   |   |   |    |    |   |        |             |              |             |              |             |             |
|--------------------------|------------|--------------------------------------------|----|-----------|-----------|---|---|---|----|----|---|--------|-------------|--------------|-------------|--------------|-------------|-------------|
| chr2:32754717-32800433   | exonic     | BIRC6                                      | 2  | 32754717  | 32800433  | 0 | 0 | 0 | 1  | 0  | 1 | 45716  | 0.414529994 | -2.01328324  | 4.017577865 | -0.501118661 | 0.616287614 | 0.998252924 |
| chr2:73659325-73747143   | exonic     | ALMS1                                      | 2  | 73659325  | 73747143  | 0 | 0 | 0 | 1  | 0  | 1 | 87818  | 0.414529994 | -2.01328324  | 4.017577865 | -0.501118661 | 0.616287614 | 0.998252924 |
| chr3:195063199-195066046 | exonic     | ACAP2                                      | 3  | 195063199 | 195066046 | 0 | 0 | 0 | 1  | 0  | 1 | 2847   | 0.414529994 | -2.01328324  | 4.017577865 | -0.501118661 | 0.616287614 | 0.998252924 |
| chr3:32750161-32769362   | exonic     | CNOT10                                     | 3  | 32750161  | 32769362  | 0 | 0 | 0 | 1  | 0  | 1 | 19201  | 0.414529994 | -2.01328324  | 4.017577865 | -0.501118661 | 0.616287614 | 0.998252924 |
| chr4:106569839-106569947 | exonic     | ARHGEF38                                   | 4  | 106569839 | 106569947 | 0 | 0 | 0 | 1  | 0  | 1 | 108    | 0.414529994 | -2.01328324  | 4.017577865 | -0.501118661 | 0.616287614 | 0.998252924 |
| chr4:75040222-75147267   | exonic     | MTHFD2L                                    | 4  | 75040222  | 75147267  | 0 | 0 | 0 | 1  | 0  | 1 | 107045 | 0.414529994 | -2.01328324  | 4.017577865 | -0.501118661 | 0.616287614 | 0.998252924 |
| chr5:109178028-109183491 | exonic     | MAN2A1                                     | 5  | 109178028 | 109183491 | 0 | 0 | 0 | 1  | 0  | 1 | 5463   | 0.414529994 | -2.01328324  | 4.017577865 | -0.501118661 | 0.616287614 | 0.998252924 |
| chr5:133996808-134002686 | exonic     | SEC24A                                     | 5  | 133996808 | 134002686 | 0 | 0 | 0 | 1  | 0  | 1 | 5878   | 0.414529994 | -2.01328324  | 4.017577865 | -0.501118661 | 0.616287614 | 0.998252924 |
| chr5:36984777-36995906   | exonic     | NIPBL                                      | 5  | 36984777  | 36995906  | 0 | 0 | 0 | 1  | 0  | 1 | 11129  | 0.414529994 | -2.01328324  | 4.017577865 | -0.501118661 | 0.616287614 | 0.998252924 |
| chr6:99862447-99864304   | exonic     | PNISR                                      | 6  | 99862447  | 99864304  | 0 | 0 | 0 | 1  | 0  | 1 | 1857   | 0.414529994 | -2.01328324  | 4.017577865 | -0.501118661 | 0.616287614 | 0.998252924 |
| chr7:66240213-66270383   | exonic     | RABGEF1                                    | 7  | 66240213  | 66270383  | 0 | 0 | 0 | 1  | 0  | 1 | 30170  | 0.414529994 | -2.01328324  | 4.017577865 | -0.501118661 | 0.616287614 | 0.998252924 |
| chr8:124146353-124157095 | exonic     | TBC1D31                                    | 8  | 124146353 | 124157095 | 0 | 0 | 0 | 1  | 0  | 1 | 10742  | 0.414529994 | -2.01328324  | 4.017577865 | -0.501118661 | 0.616287614 | 0.998252924 |
| chr8:131149196-131193126 | exonic     | ASAP1                                      | 8  | 131149196 | 131193126 | 0 | 0 | 0 | 1  | 0  | 1 | 43930  | 0.414529994 | -2.01328324  | 4.017577865 | -0.501118661 | 0.616287614 | 0.998252924 |
| chr9:127733648-127734123 | exonic     | SCAI                                       | 9  | 127733648 | 127734123 | 0 | 0 | 0 | 1  | 0  | 1 | 475    | 0.414529994 | -2.01328324  | 4.017577865 | -0.501118661 | 0.616287614 | 0.998252924 |
| chr13:46090277-46093229  | exonic     | COG3                                       | 13 | 46090277  | 46093229  | 1 | 0 | 0 | 3  | 3  | 0 | 2952   | 0.811003364 | -2.012223242 | 2.98800217  | -0.673434331 | 0.500671014 | 0.998252924 |
| chr4:185580493-185599548 | exonic     | PRIMPOL                                    | 4  | 185580493 | 185599548 | 1 | 0 | 0 | 3  | 3  | 0 | 19055  | 0.811003364 | -2.012223242 | 2.98800217  | -0.673434331 | 0.500671014 | 0.998252924 |
| chr16:4311779-4312702    | exonic     | TFAP4                                      | 16 | 4311779   | 4312702   | 0 | 2 | 1 | 5  | 10 | 1 | 923    | 2.595870376 | -1.998397866 | 1.746114301 | -1.144482847 | 0.252423448 | 0.998252924 |
| chr8:37727937-37735069   | exonic     | RAB11FIP1                                  | 8  | 37727937  | 37735069  | 0 | 1 | 3 | 14 | 6  | 2 | 7132   | 3.597044016 | -1.9888593   | 1.541015356 | -1.290616147 | 0.196836814 | 0.998252924 |
| chr1:171492359-171496983 | exonic     | PRRC2C                                     | 1  | 171492359 | 171496983 | 0 | 0 | 1 | 4  | 2  | 0 | 4624   | 0.86456941  | -1.987193369 | 2.930148138 | -0.678188704 | 0.497652054 | 0.998252924 |
| chr1:112175451-112193518 | intronic   | RAP1A                                      | 1  | 112175451 | 112193518 | 0 | 0 | 0 | 3  | 0  | 0 | 18067  | 0.318934155 | -1.984826747 | 4.018710979 | -0.493896366 | NA          | NA          |
| chr1:114440461-114444507 | exonic     | AP4B1                                      | 1  | 114440461 | 114444507 | 0 | 0 | 0 | 3  | 0  | 0 | 4046   | 0.318934155 | -1.984826747 | 4.018710979 | -0.493896366 | NA          | NA          |
| chr1:12253619-12253813   | intronic   | TNFRSF1B                                   | 1  | 12253619  | 12253813  | 0 | 0 | 0 | 3  | 0  | 0 | 194    | 0.318934155 | -1.984826747 | 4.018710979 | -0.493896366 | NA          | NA          |
| chr1:145290429-145305996 | exonic     | NBPF10                                     | 1  | 145290429 | 145305996 | 0 | 0 | 0 | 3  | 0  | 0 | 15567  | 0.318934155 | -1.984826747 | 4.018710979 | -0.493896366 | NA          | NA          |
| chr1:145592633-145594188 | exonic     | POLR3C                                     | 1  | 145592633 | 145594188 | 0 | 0 | 0 | 3  | 0  | 0 | 1555   | 0.318934155 | -1.984826747 | 4.018710979 | -0.493896366 | NA          | NA          |
| chr1:150931653-150933667 | exonic     | SETDB1                                     | 1  | 150931653 | 150933667 | 0 | 0 | 0 | 3  | 0  | 0 | 2014   | 0.318934155 | -1.984826747 | 4.018710979 | -0.493896366 | NA          | NA          |
| chr1:151495909-151498266 | exonic     | CGN                                        | 1  | 151495909 | 151498266 | 0 | 0 | 0 | 3  | 0  | 0 | 2357   | 0.318934155 | -1.984826747 | 4.018710979 | -0.493896366 | NA          | NA          |
| chr1:155307380-155309159 | exonic     | ASH1L                                      | 1  | 155307380 | 155309159 | 0 | 0 | 0 | 3  | 0  | 0 | 1779   | 0.318934155 | -1.984826747 | 4.018710979 | -0.493896366 | NA          | NA          |
| chr1:155783424-155784240 | exonic     | GON4L                                      | 1  | 155783424 | 155784240 | 0 | 0 | 0 | 3  | 0  | 0 | 816    | 0.318934155 | -1.984826747 | 4.018710979 | -0.493896366 | NA          | NA          |
| chr1:1599766-1671143     | exonic     | CDK11A, CDK11B, SLC35E2, SLC35E2B          | 1  | 1599766   | 1671143   | 0 | 0 | 0 | 3  | 0  | 0 | 71377  | 0.318934155 | -1.984826747 | 4.018710979 | -0.493896366 | NA          | NA          |
| chr1:160805984-160808839 | exonic     | CD244                                      | 1  | 160805984 | 160808839 | 0 | 0 | 0 | 3  | 0  | 0 | 2855   | 0.318934155 | -1.984826747 | 4.018710979 | -0.493896366 | NA          | NA          |
| chr1:164761730-164790863 | exonic     | PBX1                                       | 1  | 164761730 | 164790863 | 0 | 0 | 0 | 3  | 0  | 0 | 29133  | 0.318934155 | -1.984826747 | 4.018710979 | -0.493896366 | NA          | NA          |
| chr1:1666129-1671143     | exonic     | SLC35E2                                    | 1  | 1666129   | 1671143   | 0 | 0 | 0 | 3  | 0  | 0 | 5014   | 0.318934155 | -1.984826747 | 4.018710979 | -0.493896366 | NA          | NA          |
| chr1:172785931-172791104 | intergenic | PASLG (dist=149919), TNFSF18 (dist=219256) | 1  | 172785931 | 172791104 | 0 | 0 | 0 | 3  | 0  | 0 | 5173   | 0.318934155 | -1.984826747 | 4.018710979 | -0.493896366 | NA          | NA          |
| chr1:174241551-174340210 | exonic     | RABGAP1L                                   | 1  | 174241551 | 174340210 | 0 | 0 | 0 | 3  | 0  | 0 | 98659  | 0.318934155 | -1.984826747 | 4.018710979 | -0.493896366 | NA          | NA          |
| chr1:183481972-183486955 | exonic     | SMG7                                       | 1  | 183481972 | 183486955 | 0 | 0 | 0 | 3  | 0  | 0 | 4983   | 0.318934155 | -1.984826747 | 4.018710979 | -0.493896366 | NA          | NA          |

|                           |              |                                         |    |           |           |   |   |   |   |   |   |        |             |              |             |              |    |    |
|---------------------------|--------------|-----------------------------------------|----|-----------|-----------|---|---|---|---|---|---|--------|-------------|--------------|-------------|--------------|----|----|
| chr1:193172924-193205486  | exonic       | CDC73                                   | 1  | 193172924 | 193205486 | 0 | 0 | 0 | 3 | 0 | 0 | 32562  | 0.318934155 | -1.984826747 | 4.018710979 | -0.493896366 | NA | NA |
| chr1:19800140-19800733    | intronic     | CAPZB                                   | 1  | 19800140  | 19800733  | 0 | 0 | 0 | 3 | 0 | 0 | 593    | 0.318934155 | -1.984826747 | 4.018710979 | -0.493896366 | NA | NA |
| chr1:213251037-213303232  | exonic       | RPS6KC1                                 | 1  | 213251037 | 213303232 | 0 | 0 | 0 | 3 | 0 | 0 | 52195  | 0.318934155 | -1.984826747 | 4.018710979 | -0.493896366 | NA | NA |
| chr1:22074631-22079612    | exonic       | USP48                                   | 1  | 22074631  | 22079612  | 0 | 0 | 0 | 3 | 0 | 0 | 4981   | 0.318934155 | -1.984826747 | 4.018710979 | -0.493896366 | NA | NA |
| chr1:223865640-223881240  | intergenic   | CAPN8 (dist=12204), CAPN2 (dist=8055)   | 1  | 223865640 | 223881240 | 0 | 0 | 0 | 3 | 0 | 0 | 15600  | 0.318934155 | -1.984826747 | 4.018710979 | -0.493896366 | NA | NA |
| chr1:227073238-227076750  | exonic       | PSEN2                                   | 1  | 227073238 | 227076750 | 0 | 0 | 0 | 3 | 0 | 0 | 3512   | 0.318934155 | -1.984826747 | 4.018710979 | -0.493896366 | NA | NA |
| chr1:229306988-229308892  | intergenic   | RHO (dist=424572), MIR4454 (dist=1538)  | 1  | 229306988 | 229308892 | 0 | 0 | 0 | 3 | 0 | 0 | 1904   | 0.318934155 | -1.984826747 | 4.018710979 | -0.493896366 | NA | NA |
| chr1:235850248-235860572  | exonic       | LYST                                    | 1  | 235850248 | 235860572 | 0 | 0 | 0 | 3 | 0 | 0 | 10324  | 0.318934155 | -1.984826747 | 4.018710979 | -0.493896366 | NA | NA |
| chr1:243828073-244006584  | exonic       | AKT3                                    | 1  | 243828073 | 244006584 | 0 | 0 | 0 | 3 | 0 | 0 | 178511 | 0.318934155 | -1.984826747 | 4.018710979 | -0.493896366 | NA | NA |
| chr1:24987209-24989715    | exonic       | SRRM1                                   | 1  | 24987209  | 24989715  | 0 | 0 | 0 | 3 | 0 | 0 | 2506   | 0.318934155 | -1.984826747 | 4.018710979 | -0.493896366 | NA | NA |
| chr1:28200657-28201174    | intronic     | THEMIS2                                 | 1  | 28200657  | 28201174  | 0 | 0 | 0 | 3 | 0 | 0 | 517    | 0.318934155 | -1.984826747 | 4.018710979 | -0.493896366 | NA | NA |
| chr1:31819486-31821821    | exonic       | ZCCHC17                                 | 1  | 31819486  | 31821821  | 0 | 0 | 0 | 3 | 0 | 0 | 2335   | 0.318934155 | -1.984826747 | 4.018710979 | -0.493896366 | NA | NA |
| chr1:32697345-32697785    | ncRNA_exonic | MTMR9LP                                 | 1  | 32697345  | 32697785  | 0 | 0 | 0 | 3 | 0 | 0 | 440    | 0.318934155 | -1.984826747 | 4.018710979 | -0.493896366 | NA | NA |
| chr1:33300649-33309609    | intronic     | S100BPB                                 | 1  | 33300649  | 33309609  | 0 | 0 | 0 | 3 | 0 | 0 | 8960   | 0.318934155 | -1.984826747 | 4.018710979 | -0.493896366 | NA | NA |
| chr1:39752957-39768750    | exonic       | MACF1                                   | 1  | 39752957  | 39768750  | 0 | 0 | 0 | 3 | 0 | 0 | 15793  | 0.318934155 | -1.984826747 | 4.018710979 | -0.493896366 | NA | NA |
| chr1:39816456-39838268    | exonic       | MACF1                                   | 1  | 39816456  | 39838268  | 0 | 0 | 0 | 2 | 0 | 0 | 21812  | 0.318934155 | -1.984826747 | 4.018710979 | -0.493896366 | NA | NA |
| chr1:44568738-44571186    | intergenic   | SLC6A9 (dist=71574), KLF17 (dist=13336) | 1  | 44568738  | 44571186  | 0 | 0 | 0 | 3 | 0 | 0 | 2448   | 0.318934155 | -1.984826747 | 4.018710979 | -0.493896366 | NA | NA |
| chr1:46105881-46124814    | exonic       | GPBP1L1                                 | 1  | 46105881  | 46124814  | 0 | 0 | 0 | 3 | 0 | 0 | 18933  | 0.318934155 | -1.984826747 | 4.018710979 | -0.493896366 | NA | NA |
| chr1:46527600-46546422    | exonic       | PIK3R3                                  | 1  | 46527600  | 46546422  | 0 | 0 | 0 | 3 | 0 | 0 | 18822  | 0.318934155 | -1.984826747 | 4.018710979 | -0.493896366 | NA | NA |
| chr1:76215103-76216231    | exonic       | ACADM                                   | 1  | 76215103  | 76216231  | 0 | 0 | 0 | 3 | 0 | 0 | 1128   | 0.318934155 | -1.984826747 | 4.018710979 | -0.493896366 | NA | NA |
| chr1:77533769-77534528    | intergenic   | ST6GALM5 (dist=4032), PTGK (dist=20139) | 1  | 77533769  | 77534528  | 0 | 0 | 0 | 3 | 0 | 0 | 759    | 0.318934155 | -1.984826747 | 4.018710979 | -0.493896366 | NA | NA |
| chr1:92554255-92595333    | exonic       | BTBD8                                   | 1  | 92554255  | 92595333  | 0 | 0 | 0 | 3 | 0 | 0 | 41078  | 0.318934155 | -1.984826747 | 4.018710979 | -0.493896366 | NA | NA |
| chr10:103784912-103789502 | exonic       | C10orf76                                | 10 | 103784912 | 103789502 | 0 | 0 | 0 | 3 | 0 | 0 | 4590   | 0.318934155 | -1.984826747 | 4.018710979 | -0.493896366 | NA | NA |
| chr10:123652117-123652727 | intronic     | ATE1                                    | 10 | 123652117 | 123652727 | 0 | 0 | 0 | 3 | 0 | 0 | 610    | 0.318934155 | -1.984826747 | 4.018710979 | -0.493896366 | NA | NA |
| chr10:125525594-125526668 | exonic       | CPXM2                                   | 10 | 125525594 | 125526668 | 0 | 0 | 0 | 3 | 0 | 0 | 1074   | 0.318934155 | -1.984826747 | 4.018710979 | -0.493896366 | NA | NA |
| chr10:126727566-126763412 | exonic       | CTBP2                                   | 10 | 126727566 | 126763412 | 0 | 0 | 0 | 3 | 0 | 0 | 35846  | 0.318934155 | -1.984826747 | 4.018710979 | -0.493896366 | NA | NA |
| chr10:126727566-126776888 | exonic       | CTBP2                                   | 10 | 126727566 | 126776888 | 0 | 0 | 0 | 3 | 0 | 0 | 49322  | 0.318934155 | -1.984826747 | 4.018710979 | -0.493896366 | NA | NA |
| chr10:135209216-135216277 | exonic       | MTG1                                    | 10 | 135209216 | 135216277 | 0 | 0 | 0 | 3 | 0 | 0 | 7061   | 0.318934155 | -1.984826747 | 4.018710979 | -0.493896366 | NA | NA |
| chr10:13708096-13712528   | exonic       | FRMD4A                                  | 10 | 13708096  | 13712528  | 0 | 0 | 0 | 3 | 0 | 0 | 4432   | 0.318934155 | -1.984826747 | 4.018710979 | -0.493896366 | NA | NA |
| chr10:20436712-20466338   | exonic       | PLXDC2                                  | 10 | 20436712  | 20466338  | 0 | 0 | 0 | 3 | 0 | 0 | 29626  | 0.318934155 | -1.984826747 | 4.018710979 | -0.493896366 | NA | NA |
| chr10:20558855-20559574   | intronic     | PLXDC2                                  | 10 | 20558855  | 20559574  | 0 | 0 | 0 | 3 | 0 | 0 | 719    | 0.318934155 | -1.984826747 | 4.018710979 | -0.493896366 | NA | NA |
| chr10:26800675-26802589   | exonic       | APBB1IP                                 | 10 | 26800675  | 26802589  | 0 | 0 | 0 | 3 | 0 | 0 | 1914   | 0.318934155 | -1.984826747 | 4.018710979 | -0.493896366 | NA | NA |
| chr10:30726104-30728203   | exonic       | MAP3K8                                  | 10 | 30726104  | 30728203  | 0 | 0 | 0 | 3 | 0 | 0 | 2099   | 0.318934155 | -1.984826747 | 4.018710979 | -0.493896366 | NA | NA |
| chr10:32751611-32873232   | exonic       | CCDC7                                   | 10 | 32751611  | 32873232  | 0 | 0 | 0 | 3 | 0 | 0 | 121621 | 0.318934155 | -1.984826747 | 4.018710979 | -0.493896366 | NA | NA |
| chr10:34558584-34630744   | exonic       | PARD3                                   | 10 | 34558584  | 34630744  | 0 | 0 | 0 | 3 | 0 | 0 | 72160  | 0.318934155 | -1.984826747 | 4.018710979 | -0.493896366 | NA | NA |

|                           |            |                                                              |    |           |           |   |   |   |   |   |   |        |             |              |             |              |    |    |
|---------------------------|------------|--------------------------------------------------------------|----|-----------|-----------|---|---|---|---|---|---|--------|-------------|--------------|-------------|--------------|----|----|
| chr10:49533940-49618211   | exonic     | MAPK8                                                        | 10 | 49533940  | 49618211  | 0 | 0 | 0 | 3 | 0 | 0 | 84271  | 0.318934155 | -1.984826747 | 4.018710979 | -0.493896366 | NA | NA |
| chr10:64936056-64957323   | exonic     | JMJD1C                                                       | 10 | 64936056  | 64957323  | 0 | 0 | 0 | 3 | 0 | 0 | 21267  | 0.318934155 | -1.984826747 | 4.018710979 | -0.493896366 | NA | NA |
| chr10:70152894-70161494   | exonic     | RUFY2                                                        | 10 | 70152894  | 70161494  | 0 | 0 | 0 | 3 | 0 | 0 | 8600   | 0.318934155 | -1.984826747 | 4.018710979 | -0.493896366 | NA | NA |
| chr10:74914013-74923708   | exonic     | ECD                                                          | 10 | 74914013  | 74923708  | 0 | 0 | 0 | 3 | 0 | 0 | 9695   | 0.318934155 | -1.984826747 | 4.018710979 | -0.493896366 | NA | NA |
| chr10:7657944-7697638     | exonic     | ITIH5                                                        | 10 | 7657944   | 7697638   | 0 | 0 | 0 | 3 | 0 | 0 | 39694  | 0.318934155 | -1.984826747 | 4.018710979 | -0.493896366 | NA | NA |
| chr10:89268092-89280926   | exonic     | MINPP1                                                       | 10 | 89268092  | 89280926  | 0 | 0 | 0 | 3 | 0 | 0 | 12834  | 0.318934155 | -1.984826747 | 4.018710979 | -0.493896366 | NA | NA |
| chr10:93579027-93602148   | exonic     | TNKS2                                                        | 10 | 93579027  | 93602148  | 0 | 0 | 0 | 3 | 0 | 0 | 23121  | 0.318934155 | -1.984826747 | 4.018710979 | -0.493896366 | NA | NA |
| chr11:103173821-103306760 | exonic     | DYNC2H1                                                      | 11 | 103173821 | 103306760 | 0 | 0 | 0 | 3 | 0 | 0 | 132939 | 0.318934155 | -1.984826747 | 4.018710979 | -0.493896366 | NA | NA |
| chr11:108106396-108115753 | exonic     | ATM                                                          | 11 | 108106396 | 108115753 | 0 | 0 | 0 | 1 | 2 | 0 | 9357   | 0.318934155 | -1.984826747 | 4.018710979 | -0.493896366 | NA | NA |
| chr11:118347520-118353210 | exonic     | KMT2A                                                        | 11 | 118347520 | 118353210 | 0 | 0 | 0 | 3 | 0 | 0 | 5690   | 0.318934155 | -1.984826747 | 4.018710979 | -0.493896366 | NA | NA |
| chr11:120276826-120295124 | exonic     | ARHGEF12                                                     | 11 | 120276826 | 120295124 | 0 | 0 | 0 | 3 | 0 | 0 | 18298  | 0.318934155 | -1.984826747 | 4.018710979 | -0.493896366 | NA | NA |
| chr11:123464789-123466745 | exonic     | GRAMD1B                                                      | 11 | 123464789 | 123466745 | 0 | 0 | 0 | 3 | 0 | 0 | 1956   | 0.318934155 | -1.984826747 | 4.018710979 | -0.493896366 | NA | NA |
| chr11:15366380-15366839   | intergenic | <small>INSC (dist=97624), LOC102724957 (dist=298592)</small> | 11 | 15366380  | 15366839  | 0 | 0 | 0 | 3 | 0 | 0 | 459    | 0.318934155 | -1.984826747 | 4.018710979 | -0.493896366 | NA | NA |
| chr11:16205431-16208501   | exonic     | SOX6                                                         | 11 | 16205431  | 16208501  | 0 | 0 | 0 | 3 | 0 | 0 | 3070   | 0.318934155 | -1.984826747 | 4.018710979 | -0.493896366 | NA | NA |
| chr11:28420335-28445911   | intergenic | <small>METTL15 (dist=65281), MIR8068 (dist=53117)</small>    | 11 | 28420335  | 28445911  | 0 | 0 | 0 | 3 | 0 | 0 | 25576  | 0.318934155 | -1.984826747 | 4.018710979 | -0.493896366 | NA | NA |
| chr11:33360302-33363232   | exonic     | HIPK3                                                        | 11 | 33360302  | 33363232  | 0 | 0 | 0 | 3 | 0 | 0 | 2930   | 0.318934155 | -1.984826747 | 4.018710979 | -0.493896366 | NA | NA |
| chr11:46776437-46782334   | exonic     | CKAP5                                                        | 11 | 46776437  | 46782334  | 0 | 0 | 0 | 3 | 0 | 0 | 5897   | 0.318934155 | -1.984826747 | 4.018710979 | -0.493896366 | NA | NA |
| chr11:63419407-63420047   | exonic     | ATL3                                                         | 11 | 63419407  | 63420047  | 0 | 0 | 0 | 3 | 0 | 0 | 640    | 0.318934155 | -1.984826747 | 4.018710979 | -0.493896366 | NA | NA |
| chr11:6344815-6363621     | intergenic | <small>PRKCBP (dist=3075), SMPD1 (dist=48023)</small>        | 11 | 6344815   | 6363621   | 0 | 0 | 0 | 3 | 0 | 0 | 18806  | 0.318934155 | -1.984826747 | 4.018710979 | -0.493896366 | NA | NA |
| chr11:63960549-63965446   | exonic     | STIP1                                                        | 11 | 63960549  | 63965446  | 0 | 0 | 0 | 3 | 0 | 0 | 4897   | 0.318934155 | -1.984826747 | 4.018710979 | -0.493896366 | NA | NA |
| chr11:68548108-68575106   | exonic     | CPT1A                                                        | 11 | 68548108  | 68575106  | 0 | 0 | 0 | 3 | 0 | 0 | 26998  | 0.318934155 | -1.984826747 | 4.018710979 | -0.493896366 | NA | NA |
| chr11:68574934-68580044   | exonic     | CPT1A                                                        | 11 | 68574934  | 68580044  | 0 | 0 | 0 | 3 | 0 | 0 | 5110   | 0.318934155 | -1.984826747 | 4.018710979 | -0.493896366 | NA | NA |
| chr11:70183470-70185412   | exonic     | PPFIA1                                                       | 11 | 70183470  | 70185412  | 0 | 0 | 0 | 3 | 0 | 0 | 1942   | 0.318934155 | -1.984826747 | 4.018710979 | -0.493896366 | NA | NA |
| chr11:72548576-72552004   | exonic     | FCHSD2                                                       | 11 | 72548576  | 72552004  | 0 | 0 | 0 | 3 | 0 | 0 | 3428   | 0.318934155 | -1.984826747 | 4.018710979 | -0.493896366 | NA | NA |
| chr11:77649696-77672184   | exonic     | INTS4                                                        | 11 | 77649696  | 77672184  | 0 | 0 | 0 | 3 | 0 | 0 | 22488  | 0.318934155 | -1.984826747 | 4.018710979 | -0.493896366 | NA | NA |
| chr11:77666987-77692622   | exonic     | INTS4                                                        | 11 | 77666987  | 77692622  | 0 | 0 | 0 | 3 | 0 | 0 | 25635  | 0.318934155 | -1.984826747 | 4.018710979 | -0.493896366 | NA | NA |
| chr11:85692788-85707972   | exonic     | PICALM                                                       | 11 | 85692788  | 85707972  | 0 | 0 | 0 | 3 | 0 | 0 | 15184  | 0.318934155 | -1.984826747 | 4.018710979 | -0.493896366 | NA | NA |
| chr11:93521166-93527201   | exonic     | MED17                                                        | 11 | 93521166  | 93527201  | 0 | 0 | 0 | 3 | 0 | 0 | 6035   | 0.318934155 | -1.984826747 | 4.018710979 | -0.493896366 | NA | NA |
| chr11:94583278-94592880   | exonic     | AMOTL1                                                       | 11 | 94583278  | 94592880  | 0 | 0 | 0 | 3 | 0 | 0 | 9602   | 0.318934155 | -1.984826747 | 4.018710979 | -0.493896366 | NA | NA |
| chr11:9735012-9770730     | exonic     | SWAP70                                                       | 11 | 9735012   | 9770730   | 0 | 0 | 0 | 3 | 0 | 0 | 35718  | 0.318934155 | -1.984826747 | 4.018710979 | -0.493896366 | NA | NA |
| chr11:9878004-10011142    | exonic     | SBF2                                                         | 11 | 9878004   | 10011142  | 0 | 0 | 0 | 3 | 0 | 0 | 133138 | 0.318934155 | -1.984826747 | 4.018710979 | -0.493896366 | NA | NA |
| chr12:106824050-106831557 | exonic     | POLR3B                                                       | 12 | 106824050 | 106831557 | 0 | 0 | 0 | 3 | 0 | 0 | 7507   | 0.318934155 | -1.984826747 | 4.018710979 | -0.493896366 | NA | NA |
| chr12:109210814-109212334 | exonic     | SSH1                                                         | 12 | 109210814 | 109212334 | 0 | 0 | 0 | 3 | 0 | 0 | 1520   | 0.318934155 | -1.984826747 | 4.018710979 | -0.493896366 | NA | NA |
| chr12:112707507-112711599 | exonic     | HECTD4                                                       | 12 | 112707507 | 112711599 | 0 | 0 | 0 | 3 | 0 | 0 | 4092   | 0.318934155 | -1.984826747 | 4.018710979 | -0.493896366 | NA | NA |
| chr12:117365827-117423207 | exonic     | FBXW8                                                        | 12 | 117365827 | 117423207 | 0 | 0 | 0 | 3 | 0 | 0 | 57380  | 0.318934155 | -1.984826747 | 4.018710979 | -0.493896366 | NA | NA |

|                           |              |                   |    |           |           |   |   |   |   |   |   |       |             |              |             |              |    |    |
|---------------------------|--------------|-------------------|----|-----------|-----------|---|---|---|---|---|---|-------|-------------|--------------|-------------|--------------|----|----|
| chr12:121154430-121154845 | exonic       | UNC119B           | 12 | 121154430 | 121154845 | 0 | 0 | 0 | 3 | 0 | 0 | 415   | 0.318934155 | -1.984826747 | 4.018710979 | -0.493896366 | NA | NA |
| chr12:123362349-123364052 | intronic     | VPS37B            | 12 | 123362349 | 123364052 | 0 | 0 | 0 | 3 | 0 | 0 | 1703  | 0.318934155 | -1.984826747 | 4.018710979 | -0.493896366 | NA | NA |
| chr12:124882665-124887104 | exonic       | NCOR2             | 12 | 124882665 | 124887104 | 0 | 0 | 0 | 3 | 0 | 0 | 4439  | 0.318934155 | -1.984826747 | 4.018710979 | -0.493896366 | NA | NA |
| chr12:125292306-125294835 | exonic       | SCARB1            | 12 | 125292306 | 125294835 | 0 | 0 | 0 | 3 | 0 | 0 | 2529  | 0.318934155 | -1.984826747 | 4.018710979 | -0.493896366 | NA | NA |
| chr12:131471639-131498885 | exonic       | ADGRD1            | 12 | 131471639 | 131498885 | 0 | 0 | 0 | 3 | 0 | 0 | 27246 | 0.318934155 | -1.984826747 | 4.018710979 | -0.493896366 | NA | NA |
| chr12:26564252-26596583   | exonic       | ITPR2             | 12 | 26564252  | 26596583  | 0 | 0 | 0 | 3 | 0 | 0 | 32331 | 0.318934155 | -1.984826747 | 4.018710979 | -0.493896366 | NA | NA |
| chr12:27807654-27809663   | exonic       | PPFIBP1           | 12 | 27807654  | 27809663  | 0 | 0 | 0 | 3 | 0 | 0 | 2009  | 0.318934155 | -1.984826747 | 4.018710979 | -0.493896366 | NA | NA |
| chr12:31604873-31605410   | exonic       | DENND5B           | 12 | 31604873  | 31605410  | 0 | 0 | 0 | 3 | 0 | 0 | 537   | 0.318934155 | -1.984826747 | 4.018710979 | -0.493896366 | NA | NA |
| chr12:42604157-42606286   | exonic       | YAF2              | 12 | 42604157  | 42606286  | 0 | 0 | 0 | 3 | 0 | 0 | 2129  | 0.318934155 | -1.984826747 | 4.018710979 | -0.493896366 | NA | NA |
| chr12:464323-472263       | exonic       | KDM5A             | 12 | 464323    | 472263    | 0 | 0 | 0 | 3 | 0 | 0 | 7940  | 0.318934155 | -1.984826747 | 4.018710979 | -0.493896366 | NA | NA |
| chr12:48490125-48495299   | exonic       | SENPI1            | 12 | 48490125  | 48495299  | 0 | 0 | 0 | 3 | 0 | 0 | 5174  | 0.318934155 | -1.984826747 | 4.018710979 | -0.493896366 | NA | NA |
| chr12:51695803-51707687   | exonic       | BIN2              | 12 | 51695803  | 51707687  | 0 | 0 | 0 | 3 | 0 | 0 | 11884 | 0.318934155 | -1.984826747 | 4.018710979 | -0.493896366 | NA | NA |
| chr12:5936934-5963307     | exonic       | ANO2              | 12 | 5936934   | 5963307   | 0 | 0 | 0 | 3 | 0 | 0 | 26373 | 0.318934155 | -1.984826747 | 4.018710979 | -0.493896366 | NA | NA |
| chr12:6090952-6094831     | exonic       | VWF               | 12 | 6090952   | 6094831   | 0 | 0 | 0 | 3 | 0 | 0 | 3879  | 0.318934155 | -1.984826747 | 4.018710979 | -0.493896366 | NA | NA |
| chr12:6120783-6122811     | exonic       | VWF               | 12 | 6120783   | 6122811   | 0 | 0 | 0 | 3 | 0 | 0 | 2028  | 0.318934155 | -1.984826747 | 4.018710979 | -0.493896366 | NA | NA |
| chr12:62877949-62895478   | exonic       | MON2              | 12 | 62877949  | 62895478  | 0 | 0 | 0 | 3 | 0 | 0 | 17529 | 0.318934155 | -1.984826747 | 4.018710979 | -0.493896366 | NA | NA |
| chr12:70953122-70975082   | exonic       | PTPRB             | 12 | 70953122  | 70975082  | 0 | 0 | 0 | 3 | 0 | 0 | 21960 | 0.318934155 | -1.984826747 | 4.018710979 | -0.493896366 | NA | NA |
| chr12:93824926-93826818   | intronic     | UBE2N             | 12 | 93824926  | 93826818  | 0 | 0 | 0 | 3 | 0 | 0 | 1892  | 0.318934155 | -1.984826747 | 4.018710979 | -0.493896366 | NA | NA |
| chr12:96704829-96728643   | exonic       | CDK17             | 12 | 96704829  | 96728643  | 0 | 0 | 0 | 3 | 0 | 0 | 23814 | 0.318934155 | -1.984826747 | 4.018710979 | -0.493896366 | NA | NA |
| chr13:103514379-103515453 | exonic       | BIVM-ERCC5, ERCC5 | 13 | 103514379 | 103515453 | 0 | 0 | 0 | 3 | 0 | 0 | 1074  | 0.318934155 | -1.984826747 | 4.018710979 | -0.493896366 | NA | NA |
| chr13:114806476-114823993 | exonic       | RASA3             | 13 | 114806476 | 114823993 | 0 | 0 | 0 | 3 | 0 | 0 | 17517 | 0.318934155 | -1.984826747 | 4.018710979 | -0.493896366 | NA | NA |
| chr13:26792647-26795467   | exonic       | RNF6              | 13 | 26792647  | 26795467  | 0 | 0 | 0 | 3 | 0 | 0 | 2820  | 0.318934155 | -1.984826747 | 4.018710979 | -0.493896366 | NA | NA |
| chr13:51957464-51963580   | exonic       | INTS6             | 13 | 51957464  | 51963580  | 0 | 0 | 0 | 3 | 0 | 0 | 6116  | 0.318934155 | -1.984826747 | 4.018710979 | -0.493896366 | NA | NA |
| chr13:53232533-53254290   | exonic       | SUGT1             | 13 | 53232533  | 53254290  | 0 | 0 | 0 | 3 | 0 | 0 | 21757 | 0.318934155 | -1.984826747 | 4.018710979 | -0.493896366 | NA | NA |
| chr13:78133939-78171724   | exonic       | SCEL              | 13 | 78133939  | 78171724  | 0 | 0 | 0 | 3 | 0 | 0 | 37785 | 0.318934155 | -1.984826747 | 4.018710979 | -0.493896366 | NA | NA |
| chr14:103336521-103342862 | exonic       | TRAF3             | 14 | 103336521 | 103342862 | 0 | 0 | 0 | 3 | 0 | 0 | 6341  | 0.318934155 | -1.984826747 | 4.018710979 | -0.493896366 | NA | NA |
| chr14:31626045-31638674   | exonic       | HECTD1            | 14 | 31626045  | 31638674  | 0 | 0 | 0 | 2 | 0 | 0 | 12629 | 0.318934155 | -1.984826747 | 4.018710979 | -0.493896366 | NA | NA |
| chr14:31626045-31641328   | exonic       | HECTD1            | 14 | 31626045  | 31641328  | 0 | 0 | 0 | 2 | 0 | 0 | 15283 | 0.318934155 | -1.984826747 | 4.018710979 | -0.493896366 | NA | NA |
| chr14:33004759-33069998   | exonic       | AKAP6             | 14 | 33004759  | 33069998  | 0 | 0 | 0 | 3 | 0 | 0 | 65239 | 0.318934155 | -1.984826747 | 4.018710979 | -0.493896366 | NA | NA |
| chr14:36103779-36194359   | exonic       | RALGAPA1          | 14 | 36103779  | 36194359  | 0 | 0 | 0 | 3 | 0 | 0 | 90580 | 0.318934155 | -1.984826747 | 4.018710979 | -0.493896366 | NA | NA |
| chr14:56119567-56126421   | exonic       | KTN1              | 14 | 56119567  | 56126421  | 0 | 2 | 0 | 1 | 0 | 0 | 6854  | 0.318934155 | -1.984826747 | 4.018710979 | -0.493896366 | NA | NA |
| chr14:57051719-57103316   | exonic       | TMEM260           | 14 | 57051719  | 57103316  | 0 | 0 | 0 | 3 | 0 | 0 | 51597 | 0.318934155 | -1.984826747 | 4.018710979 | -0.493896366 | NA | NA |
| chr14:58753358-58758425   | ncRNA_exonic | PSMA3-AS1         | 14 | 58753358  | 58758425  | 0 | 0 | 0 | 3 | 0 | 0 | 5067  | 0.318934155 | -1.984826747 | 4.018710979 | -0.493896366 | NA | NA |
| chr14:64532149-64532368   | exonic       | SYNE2             | 14 | 64532149  | 64532368  | 0 | 0 | 0 | 3 | 0 | 0 | 219   | 0.318934155 | -1.984826747 | 4.018710979 | -0.493896366 | NA | NA |
| chr14:69542061-69558604   | exonic       | DCAF5             | 14 | 69542061  | 69558604  | 0 | 0 | 0 | 3 | 0 | 0 | 16543 | 0.318934155 | -1.984826747 | 4.018710979 | -0.493896366 | NA | NA |

|                           |              |                                          |    |           |           |   |   |   |   |   |   |       |             |              |             |              |    |    |
|---------------------------|--------------|------------------------------------------|----|-----------|-----------|---|---|---|---|---|---|-------|-------------|--------------|-------------|--------------|----|----|
| chr14:73538334-73544244   | exonic       | RBM25                                    | 14 | 73538334  | 73544244  | 0 | 0 | 0 | 3 | 0 | 0 | 5910  | 0.318934155 | -1.984826747 | 4.018710979 | -0.493896366 | NA | NA |
| chr14:73544076-73554869   | exonic       | RBM25                                    | 14 | 73544076  | 73554869  | 0 | 0 | 0 | 3 | 0 | 0 | 10793 | 0.318934155 | -1.984826747 | 4.018710979 | -0.493896366 | NA | NA |
| chr14:73763798-73764706   | exonic       | NUMB                                     | 14 | 73763798  | 73764706  | 0 | 0 | 0 | 3 | 0 | 0 | 908   | 0.318934155 | -1.984826747 | 4.018710979 | -0.493896366 | NA | NA |
| chr14:74968144-74976916   | exonic       | LTBP2                                    | 14 | 74968144  | 74976916  | 0 | 0 | 0 | 3 | 0 | 0 | 8772  | 0.318934155 | -1.984826747 | 4.018710979 | -0.493896366 | NA | NA |
| chr14:75183967-75185271   | intronic     | FCF1                                     | 14 | 75183967  | 75185271  | 0 | 0 | 0 | 3 | 0 | 0 | 1304  | 0.318934155 | -1.984826747 | 4.018710979 | -0.493896366 | NA | NA |
| chr14:86445314-86537311   | ncRNA_exonic | LOC101928767                             | 14 | 86445314  | 86537311  | 0 | 0 | 0 | 3 | 0 | 0 | 91997 | 0.318934155 | -1.984826747 | 4.018710979 | -0.493896366 | NA | NA |
| chr15:100211527-100215663 | exonic       | MEF2A                                    | 15 | 100211527 | 100215663 | 0 | 0 | 0 | 3 | 0 | 0 | 4136  | 0.318934155 | -1.984826747 | 4.018710979 | -0.493896366 | NA | NA |
| chr15:100739523-100775958 | exonic       | ADAMTS17                                 | 15 | 100739523 | 100775958 | 0 | 0 | 0 | 3 | 0 | 0 | 36435 | 0.318934155 | -1.984826747 | 4.018710979 | -0.493896366 | NA | NA |
| chr15:25264174-25265908   | intergenic   | PWARS(dist=30795), SNORD109A(dist=21213) | 15 | 25264174  | 25265908  | 0 | 0 | 0 | 3 | 0 | 0 | 1734  | 0.318934155 | -1.984826747 | 4.018710979 | -0.493896366 | NA | NA |
| chr15:25953122-25981288   | exonic       | ATP10A                                   | 15 | 25953122  | 25981288  | 0 | 0 | 0 | 3 | 0 | 0 | 28166 | 0.318934155 | -1.984826747 | 4.018710979 | -0.493896366 | NA | NA |
| chr15:28482108-28508315   | exonic       | HERC2                                    | 15 | 28482108  | 28508315  | 0 | 0 | 0 | 3 | 0 | 0 | 26207 | 0.318934155 | -1.984826747 | 4.018710979 | -0.493896366 | NA | NA |
| chr15:32815230-32825569   | ncRNA_exonic | WHAMMP1                                  | 15 | 32815230  | 32825569  | 0 | 0 | 0 | 3 | 0 | 0 | 10339 | 0.318934155 | -1.984826747 | 4.018710979 | -0.493896366 | NA | NA |
| chr15:41361767-41372102   | exonic       | INO80                                    | 15 | 41361767  | 41372102  | 0 | 0 | 0 | 3 | 0 | 0 | 10335 | 0.318934155 | -1.984826747 | 4.018710979 | -0.493896366 | NA | NA |
| chr15:43067332-43132631   | exonic       | TTBK2                                    | 15 | 43067332  | 43132631  | 0 | 0 | 0 | 3 | 0 | 0 | 65299 | 0.318934155 | -1.984826747 | 4.018710979 | -0.493896366 | NA | NA |
| chr15:43122135-43164956   | exonic       | TTBK2                                    | 15 | 43122135  | 43164956  | 0 | 0 | 0 | 3 | 0 | 0 | 42821 | 0.318934155 | -1.984826747 | 4.018710979 | -0.493896366 | NA | NA |
| chr15:50885813-50897341   | exonic       | TRPM7                                    | 15 | 50885813  | 50897341  | 0 | 0 | 0 | 3 | 0 | 0 | 11528 | 0.318934155 | -1.984826747 | 4.018710979 | -0.493896366 | NA | NA |
| chr15:50929618-50941082   | exonic       | TRPM7                                    | 15 | 50929618  | 50941082  | 0 | 0 | 0 | 3 | 0 | 0 | 11464 | 0.318934155 | -1.984826747 | 4.018710979 | -0.493896366 | NA | NA |
| chr15:59189313-59209198   | exonic       | SLTM                                     | 15 | 59189313  | 59209198  | 0 | 0 | 0 | 3 | 0 | 0 | 19885 | 0.318934155 | -1.984826747 | 4.018710979 | -0.493896366 | NA | NA |
| chr15:59296201-59323901   | exonic       | RNF111                                   | 15 | 59296201  | 59323901  | 0 | 0 | 0 | 3 | 0 | 0 | 27700 | 0.318934155 | -1.984826747 | 4.018710979 | -0.493896366 | NA | NA |
| chr15:63845913-63852169   | exonic       | USP3                                     | 15 | 63845913  | 63852169  | 0 | 0 | 0 | 3 | 0 | 0 | 6256  | 0.318934155 | -1.984826747 | 4.018710979 | -0.493896366 | NA | NA |
| chr15:63988322-64047524   | exonic       | HERC1                                    | 15 | 63988322  | 64047524  | 0 | 0 | 0 | 3 | 0 | 0 | 59202 | 0.318934155 | -1.984826747 | 4.018710979 | -0.493896366 | NA | NA |
| chr15:64004973-64008672   | exonic       | HERC1                                    | 15 | 64004973  | 64008672  | 0 | 0 | 0 | 3 | 0 | 0 | 3699  | 0.318934155 | -1.984826747 | 4.018710979 | -0.493896366 | NA | NA |
| chr15:64496639-64497148   | exonic       | CSNK1G1                                  | 15 | 64496639  | 64497148  | 0 | 0 | 0 | 3 | 0 | 0 | 509   | 0.318934155 | -1.984826747 | 4.018710979 | -0.493896366 | NA | NA |
| chr15:72252241-72338975   | exonic       | MYO9A                                    | 15 | 72252241  | 72338975  | 0 | 0 | 0 | 3 | 0 | 0 | 86734 | 0.318934155 | -1.984826747 | 4.018710979 | -0.493896366 | NA | NA |
| chr15:78322348-78337410   | exonic       | TBC1D2B                                  | 15 | 78322348  | 78337410  | 0 | 0 | 0 | 3 | 0 | 0 | 15062 | 0.318934155 | -1.984826747 | 4.018710979 | -0.493896366 | NA | NA |
| chr15:90969341-90977027   | exonic       | IQGAP1                                   | 15 | 90969341  | 90977027  | 0 | 0 | 0 | 3 | 0 | 0 | 7686  | 0.318934155 | -1.984826747 | 4.018710979 | -0.493896366 | NA | NA |
| chr15:90969341-91010824   | exonic       | IQGAP1                                   | 15 | 90969341  | 91010824  | 0 | 0 | 0 | 3 | 0 | 0 | 41483 | 0.318934155 | -1.984826747 | 4.018710979 | -0.493896366 | NA | NA |
| chr15:94899365-94913409   | exonic       | MCTP2                                    | 15 | 94899365  | 94913409  | 0 | 0 | 0 | 3 | 0 | 0 | 14044 | 0.318934155 | -1.984826747 | 4.018710979 | -0.493896366 | NA | NA |
| chr15:99434553-99442850   | exonic       | IGF1R                                    | 15 | 99434553  | 99442850  | 0 | 0 | 0 | 3 | 0 | 0 | 8297  | 0.318934155 | -1.984826747 | 4.018710979 | -0.493896366 | NA | NA |
| chr16:1451568-1453345     | exonic       | UNKL                                     | 16 | 1451568   | 1453345   | 0 | 0 | 0 | 3 | 0 | 0 | 1777  | 0.318934155 | -1.984826747 | 4.018710979 | -0.493896366 | NA | NA |
| chr16:15162025-15173953   | exonic       | RRN3                                     | 16 | 15162025  | 15173953  | 0 | 0 | 0 | 3 | 0 | 0 | 11928 | 0.318934155 | -1.984826747 | 4.018710979 | -0.493896366 | NA | NA |
| chr16:16165498-16173335   | exonic       | ABCC1                                    | 16 | 16165498  | 16173335  | 0 | 0 | 0 | 3 | 0 | 0 | 7837  | 0.318934155 | -1.984826747 | 4.018710979 | -0.493896366 | NA | NA |
| chr16:19191712-19195469   | exonic       | SYT17                                    | 16 | 19191712  | 19195469  | 0 | 0 | 0 | 3 | 0 | 0 | 3757  | 0.318934155 | -1.984826747 | 4.018710979 | -0.493896366 | NA | NA |
| chr16:19653717-19663412   | exonic       | C16orf62                                 | 16 | 19653717  | 19663412  | 0 | 0 | 0 | 3 | 0 | 0 | 9695  | 0.318934155 | -1.984826747 | 4.018710979 | -0.493896366 | NA | NA |
| chr16:2106197-2108874     | exonic       | TSC2                                     | 16 | 2106197   | 2108874   | 0 | 0 | 0 | 3 | 0 | 0 | 2677  | 0.318934155 | -1.984826747 | 4.018710979 | -0.493896366 | NA | NA |

|                         |            |                                         |    |          |          |   |   |   |   |   |   |       |             |              |             |              |    |    |
|-------------------------|------------|-----------------------------------------|----|----------|----------|---|---|---|---|---|---|-------|-------------|--------------|-------------|--------------|----|----|
| chr16:49443260-49448800 | intergenic | Cl6orf78(dist=9918), ZNF423(dist=75715) | 16 | 49443260 | 49448800 | 0 | 0 | 0 | 3 | 0 | 0 | 5540  | 0.318934155 | -1.984826747 | 4.018710979 | -0.493896366 | NA | NA |
| chr16:49764682-49856649 | exonic     | ZNF423                                  | 16 | 49764682 | 49856649 | 0 | 0 | 0 | 3 | 0 | 0 | 91967 | 0.318934155 | -1.984826747 | 4.018710979 | -0.493896366 | NA | NA |
| chr16:66551039-66551780 | exonic     | TK2                                     | 16 | 66551039 | 66551780 | 0 | 0 | 0 | 3 | 0 | 0 | 741   | 0.318934155 | -1.984826747 | 4.018710979 | -0.493896366 | NA | NA |
| chr16:69317951-69318147 | exonic     | SNTB2                                   | 16 | 69317951 | 69318147 | 0 | 0 | 0 | 3 | 0 | 0 | 196   | 0.318934155 | -1.984826747 | 4.018710979 | -0.493896366 | NA | NA |
| chr16:74982416-74990508 | exonic     | WDR59                                   | 16 | 74982416 | 74990508 | 0 | 0 | 0 | 3 | 0 | 0 | 8092  | 0.318934155 | -1.984826747 | 4.018710979 | -0.493896366 | NA | NA |
| chr16:75425278-75448593 | exonic     | CFDP1                                   | 16 | 75425278 | 75448593 | 0 | 0 | 0 | 3 | 0 | 0 | 23315 | 0.318934155 | -1.984826747 | 4.018710979 | -0.493896366 | NA | NA |
| chr16:87412830-87415564 | intronic   | FBXO31                                  | 16 | 87412830 | 87415564 | 0 | 0 | 0 | 3 | 0 | 0 | 2734  | 0.318934155 | -1.984826747 | 4.018710979 | -0.493896366 | NA | NA |
| chr16:88014641-88017865 | exonic     | BANP                                    | 16 | 88014641 | 88017865 | 0 | 0 | 0 | 3 | 0 | 0 | 3224  | 0.318934155 | -1.984826747 | 4.018710979 | -0.493896366 | NA | NA |
| chr16:88664585-88666356 | exonic     | ZC3H18                                  | 16 | 88664585 | 88666356 | 0 | 0 | 0 | 3 | 0 | 0 | 1771  | 0.318934155 | -1.984826747 | 4.018710979 | -0.493896366 | NA | NA |
| chr16:88677675-88677944 | exonic     | ZC3H18                                  | 16 | 88677675 | 88677944 | 0 | 0 | 0 | 3 | 0 | 0 | 269   | 0.318934155 | -1.984826747 | 4.018710979 | -0.493896366 | NA | NA |
| chr17:18768781-18785996 | exonic     | PRPSAP2                                 | 17 | 18768781 | 18785996 | 0 | 0 | 0 | 3 | 0 | 0 | 17215 | 0.318934155 | -1.984826747 | 4.018710979 | -0.493896366 | NA | NA |
| chr17:19741813-19746535 | exonic     | ULK2                                    | 17 | 19741813 | 19746535 | 0 | 0 | 0 | 3 | 0 | 0 | 4722  | 0.318934155 | -1.984826747 | 4.018710979 | -0.493896366 | NA | NA |
| chr17:28011581-28085411 | exonic     | SSH2                                    | 17 | 28011581 | 28085411 | 0 | 0 | 0 | 3 | 0 | 0 | 73830 | 0.318934155 | -1.984826747 | 4.018710979 | -0.493896366 | NA | NA |
| chr17:2894590-2923889   | exonic     | RAP1GAP2                                | 17 | 2894590  | 2923889  | 0 | 0 | 0 | 3 | 0 | 0 | 29299 | 0.318934155 | -1.984826747 | 4.018710979 | -0.493896366 | NA | NA |
| chr17:30870167-30870920 | intronic   | MYO1D                                   | 17 | 30870167 | 30870920 | 0 | 0 | 0 | 3 | 0 | 0 | 753   | 0.318934155 | -1.984826747 | 4.018710979 | -0.493896366 | NA | NA |
| chr17:31065270-31099860 | exonic     | MYO1D                                   | 17 | 31065270 | 31099860 | 0 | 0 | 0 | 3 | 0 | 0 | 34590 | 0.318934155 | -1.984826747 | 4.018710979 | -0.493896366 | NA | NA |
| chr17:34158990-34208784 | exonic     | CCL5, HEATR9, TAF15                     | 17 | 34158990 | 34208784 | 0 | 0 | 0 | 3 | 0 | 0 | 49794 | 0.318934155 | -1.984826747 | 4.018710979 | -0.493896366 | NA | NA |
| chr17:40986532-40991029 | exonic     | PSME3                                   | 17 | 40986532 | 40991029 | 0 | 0 | 0 | 3 | 0 | 0 | 4497  | 0.318934155 | -1.984826747 | 4.018710979 | -0.493896366 | NA | NA |
| chr17:4139066-4145743   | exonic     | ANKFY1                                  | 17 | 4139066  | 4145743  | 0 | 0 | 0 | 3 | 0 | 0 | 6677  | 0.318934155 | -1.984826747 | 4.018710979 | -0.493896366 | NA | NA |
| chr17:45668082-45669911 | exonic     | NPEPPS                                  | 17 | 45668082 | 45669911 | 0 | 0 | 0 | 3 | 0 | 0 | 1829  | 0.318934155 | -1.984826747 | 4.018710979 | -0.493896366 | NA | NA |
| chr17:45740454-45752148 | exonic     | KPNB1                                   | 17 | 45740454 | 45752148 | 0 | 0 | 0 | 3 | 0 | 0 | 11694 | 0.318934155 | -1.984826747 | 4.018710979 | -0.493896366 | NA | NA |
| chr17:46187329-46195399 | exonic     | SNX11                                   | 17 | 46187329 | 46195399 | 0 | 0 | 0 | 3 | 0 | 0 | 8070  | 0.318934155 | -1.984826747 | 4.018710979 | -0.493896366 | NA | NA |
| chr17:46925425-46937811 | exonic     | CALCOCO2                                | 17 | 46925425 | 46937811 | 0 | 0 | 0 | 3 | 0 | 0 | 12386 | 0.318934155 | -1.984826747 | 4.018710979 | -0.493896366 | NA | NA |
| chr17:49271068-49272216 | intronic   | MBTD1                                   | 17 | 49271068 | 49272216 | 0 | 0 | 0 | 3 | 0 | 0 | 1148  | 0.318934155 | -1.984826747 | 4.018710979 | -0.493896366 | NA | NA |
| chr17:55607037-55693445 | exonic     | MSI2                                    | 17 | 55607037 | 55693445 | 0 | 0 | 0 | 3 | 0 | 0 | 86408 | 0.318934155 | -1.984826747 | 4.018710979 | -0.493896366 | NA | NA |
| chr17:57141716-57161450 | exonic     | TRIM37                                  | 17 | 57141716 | 57161450 | 0 | 0 | 0 | 3 | 0 | 0 | 19734 | 0.318934155 | -1.984826747 | 4.018710979 | -0.493896366 | NA | NA |
| chr17:57890222-57891394 | intronic   | VMP1                                    | 17 | 57890222 | 57891394 | 0 | 0 | 0 | 3 | 0 | 0 | 1172  | 0.318934155 | -1.984826747 | 4.018710979 | -0.493896366 | NA | NA |
| chr17:60032297-60033842 | exonic     | MED13                                   | 17 | 60032297 | 60033842 | 0 | 0 | 0 | 3 | 0 | 0 | 1545  | 0.318934155 | -1.984826747 | 4.018710979 | -0.493896366 | NA | NA |
| chr17:6493098-6515468   | exonic     | KIAA0753                                | 17 | 6493098  | 6515468  | 0 | 0 | 0 | 3 | 0 | 0 | 22370 | 0.318934155 | -1.984826747 | 4.018710979 | -0.493896366 | NA | NA |
| chr17:65468671-65469086 | intronic   | PITPNC1                                 | 17 | 65468671 | 65469086 | 0 | 0 | 0 | 3 | 0 | 0 | 415   | 0.318934155 | -1.984826747 | 4.018710979 | -0.493896366 | NA | NA |
| chr17:65955657-65962772 | exonic     | BPTF                                    | 17 | 65955657 | 65962772 | 0 | 0 | 0 | 3 | 0 | 0 | 7115  | 0.318934155 | -1.984826747 | 4.018710979 | -0.493896366 | NA | NA |
| chr17:7093888-7094628   | exonic     | DLG4                                    | 17 | 7093888  | 7094628  | 0 | 0 | 0 | 3 | 0 | 0 | 740   | 0.318934155 | -1.984826747 | 4.018710979 | -0.493896366 | NA | NA |
| chr17:74287095-74290102 | exonic     | QRICH2                                  | 17 | 74287095 | 74290102 | 0 | 0 | 0 | 3 | 0 | 0 | 3007  | 0.318934155 | -1.984826747 | 4.018710979 | -0.493896366 | NA | NA |
| chr17:76069117-76083174 | exonic     | TNRC6C                                  | 17 | 76069117 | 76083174 | 0 | 0 | 0 | 3 | 0 | 0 | 14057 | 0.318934155 | -1.984826747 | 4.018710979 | -0.493896366 | NA | NA |
| chr17:80962990-81006661 | exonic     | B3GNTL1                                 | 17 | 80962990 | 81006661 | 0 | 0 | 0 | 3 | 0 | 0 | 43671 | 0.318934155 | -1.984826747 | 4.018710979 | -0.493896366 | NA | NA |

|                         |                |                                                                |    |          |          |   |   |   |   |   |   |        |             |              |             |              |    |    |
|-------------------------|----------------|----------------------------------------------------------------|----|----------|----------|---|---|---|---|---|---|--------|-------------|--------------|-------------|--------------|----|----|
| chr18:10672686-10680368 | exonic         | PIEZO2                                                         | 18 | 10672686 | 10680368 | 0 | 0 | 0 | 3 | 0 | 0 | 7682   | 0.318934155 | -1.984826747 | 4.018710979 | -0.493896366 | NA | NA |
| chr18:21757976-21759799 | exonic         | OSBPL1A                                                        | 18 | 21757976 | 21759799 | 0 | 0 | 0 | 3 | 0 | 0 | 1823   | 0.318934155 | -1.984826747 | 4.018710979 | -0.493896366 | NA | NA |
| chr18:45368163-45423180 | exonic         | SMAD2                                                          | 18 | 45368163 | 45423180 | 0 | 0 | 0 | 3 | 0 | 0 | 55017  | 0.318934155 | -1.984826747 | 4.018710979 | -0.493896366 | NA | NA |
| chr18:6171826-6244587   | exonic         | L3MBTL4                                                        | 18 | 6171826  | 6244587  | 0 | 0 | 0 | 3 | 0 | 0 | 72761  | 0.318934155 | -1.984826747 | 4.018710979 | -0.493896366 | NA | NA |
| chr18:66490603-66542022 | exonic         | CCDC102B                                                       | 18 | 66490603 | 66542022 | 0 | 0 | 0 | 3 | 0 | 0 | 51419  | 0.318934155 | -1.984826747 | 4.018710979 | -0.493896366 | NA | NA |
| chr18:66541906-66564919 | exonic         | CCDC102B                                                       | 18 | 66541906 | 66564919 | 0 | 0 | 0 | 3 | 0 | 0 | 23013  | 0.318934155 | -1.984826747 | 4.018710979 | -0.493896366 | NA | NA |
| chr18:6824761-6859896   | exonic         | ARHGAP28                                                       | 18 | 6824761  | 6859896  | 0 | 0 | 0 | 3 | 0 | 0 | 35135  | 0.318934155 | -1.984826747 | 4.018710979 | -0.493896366 | NA | NA |
| chr18:6824761-6873774   | exonic         | ARHGAP28                                                       | 18 | 6824761  | 6873774  | 0 | 0 | 0 | 3 | 0 | 0 | 49013  | 0.318934155 | -1.984826747 | 4.018710979 | -0.493896366 | NA | NA |
| chr18:76886266-77013541 | exonic         | ATP9B                                                          | 18 | 76886266 | 77013541 | 0 | 0 | 0 | 3 | 0 | 0 | 127275 | 0.318934155 | -1.984826747 | 4.018710979 | -0.493896366 | NA | NA |
| chr18:76886266-77037196 | exonic         | ATP9B                                                          | 18 | 76886266 | 77037196 | 0 | 0 | 0 | 3 | 0 | 0 | 150930 | 0.318934155 | -1.984826747 | 4.018710979 | -0.493896366 | NA | NA |
| chr18:9775274-9815219   | exonic         | RAB31                                                          | 18 | 9775274  | 9815219  | 0 | 0 | 0 | 3 | 0 | 0 | 39945  | 0.318934155 | -1.984826747 | 4.018710979 | -0.493896366 | NA | NA |
| chr19:10103503-10104482 | exonic         | COL5A3                                                         | 19 | 10103503 | 10104482 | 0 | 0 | 0 | 3 | 0 | 0 | 979    | 0.318934155 | -1.984826747 | 4.018710979 | -0.493896366 | NA | NA |
| chr19:11101825-11107220 | exonic         | SMARCA4                                                        | 19 | 11101825 | 11107220 | 0 | 0 | 0 | 3 | 0 | 0 | 5395   | 0.318934155 | -1.984826747 | 4.018710979 | -0.493896366 | NA | NA |
| chr19:11151973-11170863 | exonic         | SMARCA4                                                        | 19 | 11151973 | 11170863 | 0 | 0 | 0 | 3 | 0 | 0 | 18890  | 0.318934155 | -1.984826747 | 4.018710979 | -0.493896366 | NA | NA |
| chr19:11209245-11210349 | intronic       | LDLR                                                           | 19 | 11209245 | 11210349 | 0 | 0 | 0 | 3 | 0 | 0 | 1104   | 0.318934155 | -1.984826747 | 4.018710979 | -0.493896366 | NA | NA |
| chr19:14104337-14109129 | exonic         | RFX1                                                           | 19 | 14104337 | 14109129 | 0 | 0 | 0 | 3 | 0 | 0 | 4792   | 0.318934155 | -1.984826747 | 4.018710979 | -0.493896366 | NA | NA |
| chr19:15475545-15476615 | intronic       | AKAP8                                                          | 19 | 15475545 | 15476615 | 0 | 0 | 0 | 3 | 0 | 0 | 1070   | 0.318934155 | -1.984826747 | 4.018710979 | -0.493896366 | NA | NA |
| chr19:16198836-16199930 | exonic         | TPM4                                                           | 19 | 16198836 | 16199930 | 0 | 0 | 0 | 3 | 0 | 0 | 1094   | 0.318934155 | -1.984826747 | 4.018710979 | -0.493896366 | NA | NA |
| chr19:38582612-38583594 | intronic       | SIPA1L3                                                        | 19 | 38582612 | 38583594 | 0 | 0 | 0 | 3 | 0 | 0 | 982    | 0.318934155 | -1.984826747 | 4.018710979 | -0.493896366 | NA | NA |
| chr19:41754418-41754725 | exonic         | AXL                                                            | 19 | 41754418 | 41754725 | 0 | 0 | 0 | 3 | 0 | 0 | 307    | 0.318934155 | -1.984826747 | 4.018710979 | -0.493896366 | NA | NA |
| chr19:42740757-42744294 | exonic         | GSK3A                                                          | 19 | 42740757 | 42744294 | 0 | 0 | 0 | 3 | 0 | 0 | 3537   | 0.318934155 | -1.984826747 | 4.018710979 | -0.493896366 | NA | NA |
| chr19:4405908-4409756   | exonic         | CHAF1A                                                         | 19 | 4405908  | 4409756  | 0 | 0 | 0 | 3 | 0 | 0 | 3848   | 0.318934155 | -1.984826747 | 4.018710979 | -0.493896366 | NA | NA |
| chr19:44495700-44648800 | exonic         | ZNF155, ZNF222, ZNF223, ZNF224, ZNF225, ZNF230, ZNF234, ZNF284 | 19 | 44495700 | 44648800 | 0 | 0 | 0 | 3 | 0 | 0 | 153100 | 0.318934155 | -1.984826747 | 4.018710979 | -0.493896366 | NA | NA |
| chr19:45690589-45690998 | intergenic     | BLOC1S3 (dist=5530), EXOC3L2 (dist=24881)                      | 19 | 45690589 | 45690998 | 0 | 0 | 0 | 3 | 0 | 0 | 409    | 0.318934155 | -1.984826747 | 4.018710979 | -0.493896366 | NA | NA |
| chr19:48737660-48745901 | exonic         | CARD8                                                          | 19 | 48737660 | 48745901 | 0 | 0 | 0 | 3 | 0 | 0 | 8241   | 0.318934155 | -1.984826747 | 4.018710979 | -0.493896366 | NA | NA |
| chr19:48741639-48744320 | exonic         | CARD8                                                          | 19 | 48741639 | 48744320 | 0 | 0 | 0 | 3 | 0 | 0 | 2681   | 0.318934155 | -1.984826747 | 4.018710979 | -0.493896366 | NA | NA |
| chr19:49230041-49230687 | exonic         | RASIP1                                                         | 19 | 49230041 | 49230687 | 0 | 0 | 0 | 3 | 0 | 0 | 646    | 0.318934155 | -1.984826747 | 4.018710979 | -0.493896366 | NA | NA |
| chr19:49834874-49835577 | intergenic     | SLCGA16 (dist=6400), CD37 (dist=3100)                          | 19 | 49834874 | 49835577 | 0 | 0 | 0 | 3 | 0 | 0 | 703    | 0.318934155 | -1.984826747 | 4.018710979 | -0.493896366 | NA | NA |
| chr19:51303935-51305007 | intronic       | C19orf48                                                       | 19 | 51303935 | 51305007 | 0 | 0 | 0 | 3 | 0 | 0 | 1072   | 0.318934155 | -1.984826747 | 4.018710979 | -0.493896366 | NA | NA |
| chr19:52873040-52896041 | exonic         | ZNF880                                                         | 19 | 52873040 | 52896041 | 0 | 0 | 0 | 3 | 0 | 0 | 23001  | 0.318934155 | -1.984826747 | 4.018710979 | -0.493896366 | NA | NA |
| chr19:53158814-53164096 | UTR5           | -----                                                          | 19 | 53158814 | 53164096 | 0 | 0 | 0 | 3 | 0 | 0 | 5282   | 0.318934155 | -1.984826747 | 4.018710979 | -0.493896366 | NA | NA |
| chr19:53438681-53439239 | ncRNA_intronic | ZNF321P                                                        | 19 | 53438681 | 53439239 | 0 | 0 | 0 | 3 | 0 | 0 | 558    | 0.318934155 | -1.984826747 | 4.018710979 | -0.493896366 | NA | NA |
| chr19:54378075-54379033 | UTR3           | -----                                                          | 19 | 54378075 | 54379033 | 0 | 0 | 0 | 3 | 0 | 0 | 958    | 0.318934155 | -1.984826747 | 4.018710979 | -0.493896366 | NA | NA |
| chr19:58290119-58291514 | exonic         | ZNF586                                                         | 19 | 58290119 | 58291514 | 0 | 0 | 0 | 3 | 0 | 0 | 1395   | 0.318934155 | -1.984826747 | 4.018710979 | -0.493896366 | NA | NA |
| chr19:58499574-58511264 | exonic         | ZNF606                                                         | 19 | 58499574 | 58511264 | 0 | 0 | 0 | 3 | 0 | 0 | 11690  | 0.318934155 | -1.984826747 | 4.018710979 | -0.493896366 | NA | NA |

|                          |                |                                                             |       |           |           |   |   |   |   |   |   |        |             |              |             |              |    |    |
|--------------------------|----------------|-------------------------------------------------------------|-------|-----------|-----------|---|---|---|---|---|---|--------|-------------|--------------|-------------|--------------|----|----|
| chr19:5941631-5957984    | exonic         | RANBP3                                                      | 19    | 5941631   | 5957984   | 0 | 0 | 0 | 3 | 0 | 0 | 16353  | 0.318934155 | -1.984826747 | 4.018710979 | -0.493896366 | NA | NA |
| chr2:102472438-102476326 | exonic         | MAP4K4                                                      | 2     | 102472438 | 102476326 | 0 | 0 | 0 | 3 | 0 | 0 | 3888   | 0.318934155 | -1.984826747 | 4.018710979 | -0.493896366 | NA | NA |
| chr2:10823142-10824211   | intronic       | NOL10                                                       | 2     | 10823142  | 10824211  | 0 | 0 | 0 | 3 | 0 | 0 | 1069   | 0.318934155 | -1.984826747 | 4.018710979 | -0.493896366 | NA | NA |
| chr2:113145600-113163961 | exonic         | RGPD5, RGPD8                                                | 2     | 113145600 | 113163961 | 0 | 0 | 0 | 3 | 0 | 0 | 18361  | 0.318934155 | -1.984826747 | 4.018710979 | -0.493896366 | NA | NA |
| chr2:114476730-114493435 | exonic         | SLC35F5                                                     | 2     | 114476730 | 114493435 | 0 | 0 | 0 | 3 | 0 | 0 | 16705  | 0.318934155 | -1.984826747 | 4.018710979 | -0.493896366 | NA | NA |
| chr2:133531388-133547778 | exonic         | NCKAP5                                                      | 2     | 133531388 | 133547778 | 0 | 0 | 0 | 3 | 0 | 0 | 16390  | 0.318934155 | -1.984826747 | 4.018710979 | -0.493896366 | NA | NA |
| chr2:153405534-153417549 | exonic         | FMNL2                                                       | 2     | 153405534 | 153417549 | 0 | 0 | 0 | 3 | 0 | 0 | 12015  | 0.318934155 | -1.984826747 | 4.018710979 | -0.493896366 | NA | NA |
| chr2:15432661-15436349   | exonic         | NBAS                                                        | 2     | 15432661  | 15436349  | 0 | 0 | 0 | 3 | 0 | 0 | 3688   | 0.318934155 | -1.984826747 | 4.018710979 | -0.493896366 | NA | NA |
| chr2:160229555-160245996 | exonic         | BAZ2B                                                       | 2     | 160229555 | 160245996 | 0 | 0 | 0 | 3 | 0 | 0 | 16441  | 0.318934155 | -1.984826747 | 4.018710979 | -0.493896366 | NA | NA |
| chr2:165689457-165690087 | intronic       | COBLL1                                                      | 2     | 165689457 | 165690087 | 0 | 0 | 0 | 3 | 0 | 0 | 630    | 0.318934155 | -1.984826747 | 4.018710979 | -0.493896366 | NA | NA |
| chr2:173825488-173832172 | exonic         | RAPGEF4                                                     | 2     | 173825488 | 173832172 | 0 | 0 | 0 | 3 | 0 | 0 | 6684   | 0.318934155 | -1.984826747 | 4.018710979 | -0.493896366 | NA | NA |
| chr2:175711607-175742856 | exonic         | CHN1                                                        | 2     | 175711607 | 175742856 | 0 | 0 | 0 | 3 | 0 | 0 | 31249  | 0.318934155 | -1.984826747 | 4.018710979 | -0.493896366 | NA | NA |
| chr2:184043535-184047408 | intergenic     | <small>NIP35 (dist=17123), MIR548AE1 (dist=1196294)</small> | 2     | 184043535 | 184047408 | 0 | 0 | 0 | 3 | 0 | 0 | 3873   | 0.318934155 | -1.984826747 | 4.018710979 | -0.493896366 | NA | NA |
| chr2:188243667-188250358 | exonic         | CALCRL                                                      | 2     | 188243667 | 188250358 | 0 | 0 | 0 | 3 | 0 | 0 | 6691   | 0.318934155 | -1.984826747 | 4.018710979 | -0.493896366 | NA | NA |
| chr2:191927487-191931241 | exonic         | STAT4                                                       | 2     | 191927487 | 191931241 | 0 | 0 | 0 | 3 | 0 | 0 | 3754   | 0.318934155 | -1.984826747 | 4.018710979 | -0.493896366 | NA | NA |
| chr2:197105172-197172809 | exonic         | HECW2                                                       | 2     | 197105172 | 197172809 | 0 | 0 | 0 | 3 | 0 | 0 | 67637  | 0.318934155 | -1.984826747 | 4.018710979 | -0.493896366 | NA | NA |
| chr2:202272125-202285429 | exonic         | TRAK2                                                       | 2     | 202272125 | 202285429 | 0 | 0 | 0 | 3 | 0 | 0 | 13304  | 0.318934155 | -1.984826747 | 4.018710979 | -0.493896366 | NA | NA |
| chr2:203817281-203818857 | exonic         | CARF                                                        | 2     | 203817281 | 203818857 | 0 | 0 | 0 | 3 | 0 | 0 | 1576   | 0.318934155 | -1.984826747 | 4.018710979 | -0.493896366 | NA | NA |
| chr2:231314275-231371160 | exonic         | SP100                                                       | 2     | 231314275 | 231371160 | 0 | 0 | 0 | 3 | 0 | 0 | 56885  | 0.318934155 | -1.984826747 | 4.018710979 | -0.493896366 | NA | NA |
| chr2:238434243-238436159 | exonic         | MLPH                                                        | 2     | 238434243 | 238436159 | 0 | 0 | 0 | 3 | 0 | 0 | 1916   | 0.318934155 | -1.984826747 | 4.018710979 | -0.493896366 | NA | NA |
| chr2:242263630-242275513 | exonic         |                                                             | 2-Sep | 242263630 | 242275513 | 0 | 0 | 2 | 2 | 0 | 0 | 11883  | 0.318934155 | -1.984826747 | 4.018710979 | -0.493896366 | NA | NA |
| chr2:242343242-242357524 | exonic         | FARP2                                                       | 2     | 242343242 | 242357524 | 0 | 0 | 0 | 3 | 0 | 0 | 14282  | 0.318934155 | -1.984826747 | 4.018710979 | -0.493896366 | NA | NA |
| chr2:24777258-24807429   | UTR5           | -----                                                       | 2     | 24777258  | 24807429  | 0 | 0 | 0 | 3 | 0 | 0 | 30171  | 0.318934155 | -1.984826747 | 4.018710979 | -0.493896366 | NA | NA |
| chr2:29356520-29366811   | exonic         | CLIP4                                                       | 2     | 29356520  | 29366811  | 0 | 0 | 0 | 3 | 0 | 0 | 10291  | 0.318934155 | -1.984826747 | 4.018710979 | -0.493896366 | NA | NA |
| chr2:30748452-30791042   | exonic         | LCLAT1                                                      | 2     | 30748452  | 30791042  | 0 | 0 | 0 | 3 | 0 | 0 | 42590  | 0.318934155 | -1.984826747 | 4.018710979 | -0.493896366 | NA | NA |
| chr2:33477743-33590570   | exonic         | LTBP1                                                       | 2     | 33477743  | 33590570  | 0 | 0 | 0 | 3 | 0 | 0 | 112827 | 0.318934155 | -1.984826747 | 4.018710979 | -0.493896366 | NA | NA |
| chr2:36596251-36623930   | exonic         | CRIM1                                                       | 2     | 36596251  | 36623930  | 0 | 0 | 0 | 3 | 0 | 0 | 27679  | 0.318934155 | -1.984826747 | 4.018710979 | -0.493896366 | NA | NA |
| chr2:37329066-37331275   | intergenic     | <small>SPATCH11 (dist=2679), EIF2AK2 (dist=1009)</small>    | 2     | 37329066  | 37331275  | 0 | 0 | 0 | 3 | 0 | 0 | 2209   | 0.318934155 | -1.984826747 | 4.018710979 | -0.493896366 | NA | NA |
| chr2:38545676-38546161   | exonic         | ATL2                                                        | 2     | 38545676  | 38546161  | 0 | 0 | 0 | 3 | 0 | 0 | 485    | 0.318934155 | -1.984826747 | 4.018710979 | -0.493896366 | NA | NA |
| chr2:46067519-46070202   | exonic         | PRKCE                                                       | 2     | 46067519  | 46070202  | 0 | 0 | 0 | 3 | 0 | 0 | 2683   | 0.318934155 | -1.984826747 | 4.018710979 | -0.493896366 | NA | NA |
| chr2:65696648-65717333   | intergenic     | <small>SPRED2 (dist=36992), MIR4778 (dist=868048)</small>   | 2     | 65696648  | 65717333  | 0 | 0 | 0 | 3 | 0 | 0 | 20685  | 0.318934155 | -1.984826747 | 4.018710979 | -0.493896366 | NA | NA |
| chr2:8342077-8385270     | ncRNA_intronic | LINCO0299                                                   | 2     | 8342077   | 8385270   | 0 | 0 | 0 | 3 | 0 | 0 | 43193  | 0.318934155 | -1.984826747 | 4.018710979 | -0.493896366 | NA | NA |
| chr2:9650107-9661445     | exonic         | ADAM17                                                      | 2     | 9650107   | 9661445   | 0 | 0 | 0 | 3 | 0 | 0 | 11338  | 0.318934155 | -1.984826747 | 4.018710979 | -0.493896366 | NA | NA |
| chr2:9650107-9663467     | exonic         | ADAM17                                                      | 2     | 9650107   | 9663467   | 0 | 0 | 0 | 3 | 0 | 0 | 13360  | 0.318934155 | -1.984826747 | 4.018710979 | -0.493896366 | NA | NA |
| chr20:13550153-13568017  | exonic         | TASPI                                                       | 20    | 13550153  | 13568017  | 0 | 0 | 0 | 3 | 0 | 0 | 17864  | 0.318934155 | -1.984826747 | 4.018710979 | -0.493896366 | NA | NA |



|                          |              |          |    |           |           |   |   |   |   |   |   |       |             |              |             |              |    |    |  |
|--------------------------|--------------|----------|----|-----------|-----------|---|---|---|---|---|---|-------|-------------|--------------|-------------|--------------|----|----|--|
| chr20:1558983-1559340    | exonic       | SIRPB1   | 20 | 1558983   | 1559340   | 0 | 0 | 0 | 3 | 0 | 0 | 357   | 0.318934155 | -1.984826747 | 4.018710979 | -0.493896366 | NA | NA |  |
| chr20:3893105-3894259    | exonic       | PANK2    | 20 | 3893105   | 3894259   | 0 | 0 | 0 | 3 | 0 | 0 | 1154  | 0.318934155 | -1.984826747 | 4.018710979 | -0.493896366 | NA | NA |  |
| chr20:39741421-39744079  | exonic       | TOP1     | 20 | 39741421  | 39744079  | 0 | 0 | 0 | 3 | 0 | 0 | 2658  | 0.318934155 | -1.984826747 | 4.018710979 | -0.493896366 | NA | NA |  |
| chr20:45905057-45905539  | exonic       | ZMYND8   | 20 | 45905057  | 45905539  | 0 | 0 | 0 | 3 | 0 | 0 | 482   | 0.318934155 | -1.984826747 | 4.018710979 | -0.493896366 | NA | NA |  |
| chr20:58318161-58330419  | exonic       | PHACTR3  | 20 | 58318161  | 58330419  | 0 | 0 | 0 | 3 | 0 | 0 | 12258 | 0.318934155 | -1.984826747 | 4.018710979 | -0.493896366 | NA | NA |  |
| chr20:58342240-58349545  | exonic       | PHACTR3  | 20 | 58342240  | 58349545  | 0 | 0 | 0 | 3 | 0 | 0 | 7305  | 0.318934155 | -1.984826747 | 4.018710979 | -0.493896366 | NA | NA |  |
| chr20:62528655-62542120  | intronic     | DNAJC5   | 20 | 62528655  | 62542120  | 0 | 0 | 0 | 3 | 0 | 0 | 13465 | 0.318934155 | -1.984826747 | 4.018710979 | -0.493896366 | NA | NA |  |
| chr21:22652897-22664561  | exonic       | NCAM2    | 21 | 22652897  | 22664561  | 0 | 0 | 0 | 3 | 0 | 0 | 11664 | 0.318934155 | -1.984826747 | 4.018710979 | -0.493896366 | NA | NA |  |
| chr21:34937074-34947436  | exonic       | SON      | 21 | 34937074  | 34947436  | 0 | 0 | 0 | 3 | 0 | 0 | 10362 | 0.318934155 | -1.984826747 | 4.018710979 | -0.493896366 | NA | NA |  |
| chr22:18383607-18389652  | exonic       | MICAL3   | 22 | 18383607  | 18389652  | 0 | 0 | 0 | 3 | 0 | 0 | 6045  | 0.318934155 | -1.984826747 | 4.018710979 | -0.493896366 | NA | NA |  |
| chr22:27113216-27114194  | ncRNA_exonic | MIATNB   | 22 | 27113216  | 27114194  | 0 | 0 | 0 | 3 | 0 | 0 | 978   | 0.318934155 | -1.984826747 | 4.018710979 | -0.493896366 | NA | NA |  |
| chr22:29915996-29921935  | exonic       | THOC5    | 22 | 29915996  | 29921935  | 0 | 0 | 0 | 3 | 0 | 0 | 5939  | 0.318934155 | -1.984826747 | 4.018710979 | -0.493896366 | NA | NA |  |
| chr22:38889714-38894578  | exonic       | DDX17    | 22 | 38889714  | 38894578  | 0 | 0 | 0 | 3 | 0 | 0 | 4864  | 0.318934155 | -1.984826747 | 4.018710979 | -0.493896366 | NA | NA |  |
| chr22:41855945-41856491  | exonic       | PHF5A    | 22 | 41855945  | 41856491  | 0 | 0 | 0 | 3 | 0 | 0 | 546   | 0.318934155 | -1.984826747 | 4.018710979 | -0.493896366 | NA | NA |  |
| chr22:50251872-50253301  | intronic     | ZBED4    | 22 | 50251872  | 50253301  | 0 | 0 | 0 | 3 | 0 | 0 | 1429  | 0.318934155 | -1.984826747 | 4.018710979 | -0.493896366 | NA | NA |  |
| chr3:100053473-100067725 | exonic       | NIT2     | 3  | 100053473 | 100067725 | 0 | 0 | 0 | 3 | 0 | 0 | 14252 | 0.318934155 | -1.984826747 | 4.018710979 | -0.493896366 | NA | NA |  |
| chr3:111342601-111368705 | exonic       | CD96     | 3  | 111342601 | 111368705 | 0 | 0 | 0 | 3 | 0 | 0 | 26104 | 0.318934155 | -1.984826747 | 4.018710979 | -0.493896366 | NA | NA |  |
| chr3:114412374-114462626 | ncRNA_exonic | MIR4796  | 3  | 114412374 | 114462626 | 0 | 0 | 0 | 3 | 0 | 0 | 50252 | 0.318934155 | -1.984826747 | 4.018710979 | -0.493896366 | NA | NA |  |
| chr3:117314324-117355674 | intergenic   |          | 3  | 117314324 | 117355674 | 0 | 0 | 0 | 3 | 0 | 0 | 41350 | 0.318934155 | -1.984826747 | 4.018710979 | -0.493896366 | NA | NA |  |
|                          |              |          |    |           |           |   |   |   |   |   |   |       |             |              |             |              |    |    |  |
| chr3:123411581-123420356 | exonic       | MYLK     | 3  | 123411581 | 123420356 | 0 | 0 | 0 | 3 | 0 | 0 | 8775  | 0.318934155 | -1.984826747 | 4.018710979 | -0.493896366 | NA | NA |  |
| chr3:126189233-126193038 | exonic       | ZXDC     | 3  | 126189233 | 126193038 | 0 | 0 | 0 | 3 | 0 | 0 | 3805  | 0.318934155 | -1.984826747 | 4.018710979 | -0.493896366 | NA | NA |  |
| chr3:129599152-129603814 | UTR5         |          | 3  | 129599152 | 129603814 | 0 | 0 | 0 | 3 | 0 | 0 | 4662  | 0.318934155 | -1.984826747 | 4.018710979 | -0.493896366 | NA | NA |  |
|                          |              |          |    |           |           |   |   |   |   |   |   |       |             |              |             |              |    |    |  |
| chr3:1320097-1339675     | exonic       | CNTN6    | 3  | 1320097   | 1339675   | 0 | 0 | 0 | 3 | 0 | 0 | 19578 | 0.318934155 | -1.984826747 | 4.018710979 | -0.493896366 | NA | NA |  |
| chr3:1337284-1339675     | exonic       | CNTN6    | 3  | 1337284   | 1339675   | 0 | 0 | 0 | 3 | 0 | 0 | 2391  | 0.318934155 | -1.984826747 | 4.018710979 | -0.493896366 | NA | NA |  |
| chr3:138261533-138291774 | exonic       | CEP70    | 3  | 138261533 | 138291774 | 0 | 0 | 0 | 3 | 0 | 0 | 30241 | 0.318934155 | -1.984826747 | 4.018710979 | -0.493896366 | NA | NA |  |
| chr3:138261533-138291826 | exonic       | CEP70    | 3  | 138261533 | 138291826 | 0 | 0 | 0 | 3 | 0 | 0 | 30293 | 0.318934155 | -1.984826747 | 4.018710979 | -0.493896366 | NA | NA |  |
| chr3:148711928-148714691 | exonic       | GYG1     | 3  | 148711928 | 148714691 | 0 | 0 | 0 | 3 | 0 | 0 | 2763  | 0.318934155 | -1.984826747 | 4.018710979 | -0.493896366 | NA | NA |  |
| chr3:153912433-153943799 | exonic       | ARHGEF26 | 3  | 153912433 | 153943799 | 0 | 0 | 0 | 3 | 0 | 0 | 31366 | 0.318934155 | -1.984826747 | 4.018710979 | -0.493896366 | NA | NA |  |
| chr3:167319915-167345080 | exonic       | WDR49    | 3  | 167319915 | 167345080 | 0 | 0 | 0 | 3 | 0 | 0 | 25165 | 0.318934155 | -1.984826747 | 4.018710979 | -0.493896366 | NA | NA |  |
| chr3:183361267-183382827 | exonic       | KLHL24   | 3  | 183361267 | 183382827 | 0 | 0 | 0 | 3 | 0 | 0 | 21560 | 0.318934155 | -1.984826747 | 4.018710979 | -0.493896366 | NA | NA |  |
| chr3:183368083-183382827 | exonic       | KLHL24   | 3  | 183368083 | 183382827 | 0 | 0 | 0 | 3 | 0 | 0 | 14744 | 0.318934155 | -1.984826747 | 4.018710979 | -0.493896366 | NA | NA |  |
| chr3:183474315-183480067 | exonic       | YEATS2   | 3  | 183474315 | 183480067 | 0 | 0 | 0 | 3 | 0 | 0 | 5752  | 0.318934155 | -1.984826747 | 4.018710979 | -0.493896366 | NA | NA |  |
| chr3:188476420-188478070 | exonic       | LPP      | 3  | 188476420 | 188478070 | 0 | 0 | 0 | 3 | 0 | 0 | 1650  | 0.318934155 | -1.984826747 | 4.018710979 | -0.493896366 | NA | NA |  |
| chr3:188880970-188882046 | intergenic   |          | 3  | 188880970 | 188882046 | 0 | 0 | 0 | 3 | 0 | 0 | 1076  | 0.318934155 | -1.984826747 | 4.018710979 | -0.493896366 | NA | NA |  |
|                          |              |          |    |           |           |   |   |   |   |   |   |       |             |              |             |              |    |    |  |
| chr3:195404598-195410736 | ncRNA_exonic | SDHAP2   | 3  | 195404598 | 195410736 | 0 | 0 | 0 | 3 | 0 | 0 | 6138  | 0.318934155 | -1.984826747 | 4.018710979 | -0.493896366 | NA | NA |  |

|                          |                |                                            |   |           |           |   |   |   |   |   |   |       |             |              |             |              |    |    |
|--------------------------|----------------|--------------------------------------------|---|-----------|-----------|---|---|---|---|---|---|-------|-------------|--------------|-------------|--------------|----|----|
| chr3:195800800-195802231 | exonic         | TFRC                                       | 3 | 195800800 | 195802231 | 0 | 0 | 0 | 3 | 0 | 0 | 1431  | 0.318934155 | -1.984826747 | 4.018710979 | -0.493896366 | NA | NA |
| chr3:196098767-196129890 | exonic         | UBXN7                                      | 3 | 196098767 | 196129890 | 0 | 0 | 0 | 3 | 0 | 0 | 31123 | 0.318934155 | -1.984826747 | 4.018710979 | -0.493896366 | NA | NA |
| chr3:196541321-196545027 | exonic         | PAK2                                       | 3 | 196541321 | 196545027 | 0 | 0 | 0 | 3 | 0 | 0 | 3706  | 0.318934155 | -1.984826747 | 4.018710979 | -0.493896366 | NA | NA |
| chr3:196857397-196876667 | exonic         | DLG1                                       | 3 | 196857397 | 196876667 | 0 | 0 | 0 | 3 | 0 | 0 | 19270 | 0.318934155 | -1.984826747 | 4.018710979 | -0.493896366 | NA | NA |
| chr3:197557640-197559188 | exonic         | LRCH3                                      | 3 | 197557640 | 197559188 | 0 | 0 | 0 | 3 | 0 | 0 | 1548  | 0.318934155 | -1.984826747 | 4.018710979 | -0.493896366 | NA | NA |
| chr3:23942298-23952412   | exonic         | NKIRAS1                                    | 3 | 23942298  | 23952412  | 0 | 0 | 0 | 3 | 0 | 0 | 10114 | 0.318934155 | -1.984826747 | 4.018710979 | -0.493896366 | NA | NA |
| chr3:37100280-37190529   | exonic         | LRRFIP2                                    | 3 | 37100280  | 37190529  | 0 | 0 | 0 | 3 | 0 | 0 | 90249 | 0.318934155 | -1.984826747 | 4.018710979 | -0.493896366 | NA | NA |
| chr3:41973335-41979689   | exonic         | ULK4                                       | 3 | 41973335  | 41979689  | 0 | 0 | 0 | 3 | 0 | 0 | 6354  | 0.318934155 | -1.984826747 | 4.018710979 | -0.493896366 | NA | NA |
| chr3:47956307-47960331   | exonic         | MAP4                                       | 3 | 47956307  | 47960331  | 0 | 0 | 0 | 3 | 0 | 0 | 4024  | 0.318934155 | -1.984826747 | 4.018710979 | -0.493896366 | NA | NA |
| chr3:50091767-50095995   | exonic         | RBM6                                       | 3 | 50091767  | 50095995  | 0 | 0 | 0 | 3 | 0 | 0 | 4228  | 0.318934155 | -1.984826747 | 4.018710979 | -0.493896366 | NA | NA |
| chr3:51466712-51467664   | exonic         | VPRBP                                      | 3 | 51466712  | 51467664  | 0 | 0 | 0 | 3 | 0 | 0 | 952   | 0.318934155 | -1.984826747 | 4.018710979 | -0.493896366 | NA | NA |
| chr3:57561274-57569734   | exonic         | ARF4                                       | 3 | 57561274  | 57569734  | 0 | 0 | 0 | 3 | 0 | 0 | 8460  | 0.318934155 | -1.984826747 | 4.018710979 | -0.493896366 | NA | NA |
| chr3:58256658-58271180   | exonic         | ABHD6                                      | 3 | 58256658  | 58271180  | 0 | 0 | 0 | 3 | 0 | 0 | 14522 | 0.318934155 | -1.984826747 | 4.018710979 | -0.493896366 | NA | NA |
| chr3:61608137-61609229   | intronic       | PTPRG                                      | 3 | 61608137  | 61609229  | 0 | 0 | 0 | 3 | 0 | 0 | 1092  | 0.318934155 | -1.984826747 | 4.018710979 | -0.493896366 | NA | NA |
| chr3:73004248-73016870   | exonic         | GXYLT2                                     | 3 | 73004248  | 73016870  | 0 | 0 | 0 | 3 | 0 | 0 | 12622 | 0.318934155 | -1.984826747 | 4.018710979 | -0.493896366 | NA | NA |
| chr3:78710179-78742506   | exonic         | ROBO1                                      | 3 | 78710179  | 78742506  | 0 | 0 | 0 | 3 | 0 | 0 | 32327 | 0.318934155 | -1.984826747 | 4.018710979 | -0.493896366 | NA | NA |
| chr3:8524341-8524549     | ncRNA_intronic | LMCD1-AS1                                  | 3 | 8524341   | 8524549   | 0 | 0 | 0 | 3 | 0 | 0 | 208   | 0.318934155 | -1.984826747 | 4.018710979 | -0.493896366 | NA | NA |
| chr4:107133906-107176204 | exonic         | TBCK                                       | 4 | 107133906 | 107176204 | 0 | 0 | 0 | 3 | 0 | 0 | 42298 | 0.318934155 | -1.984826747 | 4.018710979 | -0.493896366 | NA | NA |
| chr4:143066992-143114348 | exonic         | INPP4B                                     | 4 | 143066992 | 143114348 | 0 | 0 | 0 | 3 | 0 | 0 | 47356 | 0.318934155 | -1.984826747 | 4.018710979 | -0.493896366 | NA | NA |
| chr4:148958909-148971100 | exonic         | ARHGAP10                                   | 4 | 148958909 | 148971100 | 0 | 0 | 0 | 3 | 0 | 0 | 12191 | 0.318934155 | -1.984826747 | 4.018710979 | -0.493896366 | NA | NA |
| chr4:183812556-183836728 | exonic         | DCTD                                       | 4 | 183812556 | 183836728 | 0 | 0 | 0 | 3 | 0 | 0 | 24172 | 0.318934155 | -1.984826747 | 4.018710979 | -0.493896366 | NA | NA |
| chr4:184930311-184932576 | exonic         | STOX2                                      | 4 | 184930311 | 184932576 | 0 | 0 | 0 | 3 | 0 | 0 | 2265  | 0.318934155 | -1.984826747 | 4.018710979 | -0.493896366 | NA | NA |
| chr4:2659529-2674099     | exonic         | FAM193A                                    | 4 | 2659529   | 2674099   | 0 | 0 | 0 | 3 | 0 | 0 | 14570 | 0.318934155 | -1.984826747 | 4.018710979 | -0.493896366 | NA | NA |
| chr4:2803913-2817982     | exonic         | SH3BP2                                     | 4 | 2803913   | 2817982   | 0 | 0 | 0 | 3 | 0 | 0 | 14069 | 0.318934155 | -1.984826747 | 4.018710979 | -0.493896366 | NA | NA |
| chr4:39875909-39902127   | exonic         | PDS5A                                      | 4 | 39875909  | 39902127  | 0 | 0 | 0 | 3 | 0 | 0 | 26218 | 0.318934155 | -1.984826747 | 4.018710979 | -0.493896366 | NA | NA |
| chr4:39918667-39929784   | exonic         | PDS5A                                      | 4 | 39918667  | 39929784  | 0 | 0 | 0 | 3 | 0 | 0 | 11117 | 0.318934155 | -1.984826747 | 4.018710979 | -0.493896366 | NA | NA |
| chr4:40484516-40509610   | ncRNA_exonic   | MIR4802                                    | 4 | 40484516  | 40509610  | 0 | 0 | 0 | 3 | 0 | 0 | 25094 | 0.318934155 | -1.984826747 | 4.018710979 | -0.493896366 | NA | NA |
| chr4:54249940-54262228   | exonic         | FIP1L1                                     | 4 | 54249940  | 54262228  | 0 | 0 | 0 | 3 | 0 | 0 | 12288 | 0.318934155 | -1.984826747 | 4.018710979 | -0.493896366 | NA | NA |
| chr4:6599924-6602483     | exonic         | MAN2B2                                     | 4 | 6599924   | 6602483   | 0 | 0 | 0 | 3 | 0 | 0 | 2559  | 0.318934155 | -1.984826747 | 4.018710979 | -0.493896366 | NA | NA |
| chr4:74904007-74964401   | exonic         | CXCL2, CXCL3                               | 4 | 74904007  | 74964401  | 0 | 0 | 0 | 3 | 0 | 0 | 60394 | 0.318934155 | -1.984826747 | 4.018710979 | -0.493896366 | NA | NA |
| chr4:83266654-83266789   | intergenic     | RASGEF1B (dist=873572), HNRNPD (dist=7678) | 4 | 83266654  | 83266789  | 0 | 0 | 0 | 3 | 0 | 0 | 135   | 0.318934155 | -1.984826747 | 4.018710979 | -0.493896366 | NA | NA |
| chr4:99495608-99496056   | intronic       | TSPAN5                                     | 4 | 99495608  | 99496056  | 0 | 0 | 0 | 3 | 0 | 0 | 448   | 0.318934155 | -1.984826747 | 4.018710979 | -0.493896366 | NA | NA |
| chr5:115188676-115205825 | exonic         | AP3S1                                      | 5 | 115188676 | 115205825 | 0 | 0 | 0 | 3 | 0 | 0 | 17149 | 0.318934155 | -1.984826747 | 4.018710979 | -0.493896366 | NA | NA |
| chr5:115627214-115639380 | exonic         | COMMD10                                    | 5 | 115627214 | 115639380 | 0 | 0 | 0 | 3 | 0 | 0 | 12166 | 0.318934155 | -1.984826747 | 4.018710979 | -0.493896366 | NA | NA |
| chr5:132224770-132228810 | exonic         | AFF4                                       | 5 | 132224770 | 132228810 | 0 | 0 | 0 | 3 | 0 | 0 | 4040  | 0.318934155 | -1.984826747 | 4.018710979 | -0.493896366 | NA | NA |

|                          |              |                                          |   |           |           |   |   |   |   |   |   |       |             |              |             |              |    |    |
|--------------------------|--------------|------------------------------------------|---|-----------|-----------|---|---|---|---|---|---|-------|-------------|--------------|-------------|--------------|----|----|
| chr5:133502189-133503323 | exonic       | SKP1                                     | 5 | 133502189 | 133503323 | 0 | 0 | 0 | 3 | 0 | 0 | 1134  | 0.318934155 | -1.984826747 | 4.018710979 | -0.493896366 | NA | NA |
| chr5:134135336-134135732 | intronic     | DDX46                                    | 5 | 134135336 | 134135732 | 0 | 0 | 0 | 3 | 0 | 0 | 396   | 0.318934155 | -1.984826747 | 4.018710979 | -0.493896366 | NA | NA |
| chr5:137758237-137758723 | intronic     | KDM3B                                    | 5 | 137758237 | 137758723 | 0 | 0 | 0 | 3 | 0 | 0 | 486   | 0.318934155 | -1.984826747 | 4.018710979 | -0.493896366 | NA | NA |
| chr5:141041251-141041822 | exonic       | ARAP3                                    | 5 | 141041251 | 141041822 | 0 | 0 | 0 | 3 | 0 | 0 | 571   | 0.318934155 | -1.984826747 | 4.018710979 | -0.493896366 | NA | NA |
| chr5:141105176-141106430 | intergenic   | ARAP3 (dist=43376), PCDH11 (dist=126246) | 5 | 141105176 | 141106430 | 0 | 0 | 0 | 3 | 0 | 0 | 1254  | 0.318934155 | -1.984826747 | 4.018710979 | -0.493896366 | NA | NA |
| chr5:14362114-14363221   | intronic     | TRIO                                     | 5 | 14362114  | 14363221  | 0 | 0 | 0 | 3 | 0 | 0 | 1107  | 0.318934155 | -1.984826747 | 4.018710979 | -0.493896366 | NA | NA |
| chr5:14678790-14693203   | exonic       | OTULIN                                   | 5 | 14678790  | 14693203  | 0 | 0 | 0 | 3 | 0 | 0 | 14413 | 0.318934155 | -1.984826747 | 4.018710979 | -0.493896366 | NA | NA |
| chr5:149440424-149441412 | exonic       | CSF1R                                    | 5 | 149440424 | 149441412 | 0 | 0 | 0 | 3 | 0 | 0 | 988   | 0.318934155 | -1.984826747 | 4.018710979 | -0.493896366 | NA | NA |
| chr5:176954916-176958522 | intronic     | FAM193B                                  | 5 | 176954916 | 176958522 | 0 | 0 | 0 | 3 | 0 | 0 | 3606  | 0.318934155 | -1.984826747 | 4.018710979 | -0.493896366 | NA | NA |
| chr5:33637681-33662145   | exonic       | ADAMTS12                                 | 5 | 33637681  | 33662145  | 0 | 0 | 0 | 3 | 0 | 0 | 24464 | 0.318934155 | -1.984826747 | 4.018710979 | -0.493896366 | NA | NA |
| chr5:34124523-34169258   | ncRNA_exonic | CIQTNF3-AMACR                            | 5 | 34124523  | 34169258  | 0 | 0 | 0 | 3 | 0 | 0 | 44735 | 0.318934155 | -1.984826747 | 4.018710979 | -0.493896366 | NA | NA |
| chr5:78919074-78941015   | exonic       | PAPD4                                    | 5 | 78919074  | 78941015  | 0 | 0 | 0 | 3 | 0 | 0 | 21941 | 0.318934155 | -1.984826747 | 4.018710979 | -0.493896366 | NA | NA |
| chr5:86563718-86563977   | upstream     | RASA1 (dist=93)                          | 5 | 86563718  | 86563977  | 0 | 0 | 0 | 3 | 0 | 0 | 259   | 0.318934155 | -1.984826747 | 4.018710979 | -0.493896366 | NA | NA |
| chr5:86627164-86649052   | exonic       | RASA1                                    | 5 | 86627164  | 86649052  | 0 | 0 | 0 | 3 | 0 | 0 | 21888 | 0.318934155 | -1.984826747 | 4.018710979 | -0.493896366 | NA | NA |
| chr5:94244955-94253678   | exonic       | MCTP1                                    | 5 | 94244955  | 94253678  | 0 | 0 | 0 | 3 | 0 | 0 | 8723  | 0.318934155 | -1.984826747 | 4.018710979 | -0.493896366 | NA | NA |
| chr6:101163337-101173579 | exonic       | ASCC3                                    | 6 | 101163337 | 101173579 | 0 | 0 | 0 | 3 | 0 | 0 | 10242 | 0.318934155 | -1.984826747 | 4.018710979 | -0.493896366 | NA | NA |
| chr6:10728873-10731082   | exonic       | TMEM14C                                  | 6 | 10728873  | 10731082  | 0 | 0 | 0 | 3 | 0 | 0 | 2209  | 0.318934155 | -1.984826747 | 4.018710979 | -0.493896366 | NA | NA |
| chr6:109894644-109931716 | exonic       | AK9                                      | 6 | 109894644 | 109931716 | 0 | 0 | 0 | 3 | 0 | 0 | 37072 | 0.318934155 | -1.984826747 | 4.018710979 | -0.493896366 | NA | NA |
| chr6:110531909-110534363 | exonic       | CDC40                                    | 6 | 110531909 | 110534363 | 0 | 0 | 0 | 3 | 0 | 0 | 2454  | 0.318934155 | -1.984826747 | 4.018710979 | -0.493896366 | NA | NA |
| chr6:111891288-111897673 | exonic       | TRAF3IP2                                 | 6 | 111891288 | 111897673 | 0 | 0 | 0 | 3 | 0 | 0 | 6385  | 0.318934155 | -1.984826747 | 4.018710979 | -0.493896366 | NA | NA |
| chr6:130496985-130505768 | exonic       | SAMD3                                    | 6 | 130496985 | 130505768 | 0 | 0 | 0 | 3 | 0 | 0 | 8783  | 0.318934155 | -1.984826747 | 4.018710979 | -0.493896366 | NA | NA |
| chr6:136904692-136980516 | exonic       | MAP3K5                                   | 6 | 136904692 | 136980516 | 0 | 0 | 0 | 3 | 0 | 0 | 75824 | 0.318934155 | -1.984826747 | 4.018710979 | -0.493896366 | NA | NA |
| chr6:136958462-136990533 | exonic       | MAP3K5                                   | 6 | 136958462 | 136990533 | 0 | 0 | 0 | 3 | 0 | 0 | 32071 | 0.318934155 | -1.984826747 | 4.018710979 | -0.493896366 | NA | NA |
| chr6:144093394-144104417 | exonic       | PHACTR2                                  | 6 | 144093394 | 144104417 | 0 | 0 | 0 | 3 | 0 | 0 | 11023 | 0.318934155 | -1.984826747 | 4.018710979 | -0.493896366 | NA | NA |
| chr6:144858717-144878447 | exonic       | UTRN                                     | 6 | 144858717 | 144878447 | 0 | 0 | 0 | 3 | 0 | 0 | 19730 | 0.318934155 | -1.984826747 | 4.018710979 | -0.493896366 | NA | NA |
| chr6:151108072-151111251 | intronic     | PLEKHG1                                  | 6 | 151108072 | 151111251 | 0 | 0 | 0 | 3 | 0 | 0 | 3179  | 0.318934155 | -1.984826747 | 4.018710979 | -0.493896366 | NA | NA |
| chr6:155131148-155148374 | exonic       | SCAF8                                    | 6 | 155131148 | 155148374 | 0 | 0 | 0 | 3 | 0 | 0 | 17226 | 0.318934155 | -1.984826747 | 4.018710979 | -0.493896366 | NA | NA |
| chr6:163983101-163984354 | exonic       | QKI                                      | 6 | 163983101 | 163984354 | 0 | 0 | 0 | 3 | 0 | 0 | 1253  | 0.318934155 | -1.984826747 | 4.018710979 | -0.493896366 | NA | NA |
| chr6:166843941-166864721 | exonic       | RPS6KA2                                  | 6 | 166843941 | 166864721 | 0 | 0 | 0 | 3 | 0 | 0 | 20780 | 0.318934155 | -1.984826747 | 4.018710979 | -0.493896366 | NA | NA |
| chr6:18161557-18166609   | exonic       | KDM1B                                    | 6 | 18161557  | 18166609  | 0 | 0 | 0 | 3 | 0 | 0 | 5052  | 0.318934155 | -1.984826747 | 4.018710979 | -0.493896366 | NA | NA |
| chr6:26426469-26429013   | ncRNA_exonic | BTN2A3P                                  | 6 | 26426469  | 26429013  | 0 | 0 | 0 | 3 | 0 | 0 | 2544  | 0.318934155 | -1.984826747 | 4.018710979 | -0.493896366 | NA | NA |
| chr6:2779496-2784637     | exonic       | WRNIP1                                   | 6 | 2779496   | 2784637   | 0 | 0 | 0 | 3 | 0 | 0 | 5141  | 0.318934155 | -1.984826747 | 4.018710979 | -0.493896366 | NA | NA |
| chr6:39507779-39581094   | exonic       | KIF6                                     | 6 | 39507779  | 39581094  | 0 | 0 | 0 | 3 | 0 | 0 | 73315 | 0.318934155 | -1.984826747 | 4.018710979 | -0.493896366 | NA | NA |
| chr6:43495372-43496666   | exonic       | XPO5                                     | 6 | 43495372  | 43496666  | 0 | 0 | 0 | 3 | 0 | 0 | 1294  | 0.318934155 | -1.984826747 | 4.018710979 | -0.493896366 | NA | NA |
| chr6:43585580-43586002   | UTR3         |                                          | 6 | 43585580  | 43586002  | 0 | 0 | 0 | 3 | 0 | 0 | 422   | 0.318934155 | -1.984826747 | 4.018710979 | -0.493896366 | NA | NA |



|                          |            |                                              |   |           |           |   |   |   |   |   |   |       |             |              |             |              |    |    |
|--------------------------|------------|----------------------------------------------|---|-----------|-----------|---|---|---|---|---|---|-------|-------------|--------------|-------------|--------------|----|----|
| chr8:38105231-38119117   | exonic     | DDHD2                                        | 8 | 38105231  | 38119117  | 0 | 0 | 0 | 3 | 0 | 0 | 13886 | 0.318934155 | -1.984826747 | 4.018710979 | -0.493896366 | NA | NA |
| chr8:42202471-42210086   | exonic     | POLB                                         | 8 | 42202471  | 42210086  | 0 | 0 | 0 | 3 | 0 | 0 | 7615  | 0.318934155 | -1.984826747 | 4.018710979 | -0.493896366 | NA | NA |
| chr8:56695306-56708711   | exonic     | TGS1                                         | 8 | 56695306  | 56708711  | 0 | 0 | 0 | 3 | 0 | 0 | 13405 | 0.318934155 | -1.984826747 | 4.018710979 | -0.493896366 | NA | NA |
| chr8:56854413-56860282   | exonic     | LYN                                          | 8 | 56854413  | 56860282  | 0 | 0 | 0 | 3 | 0 | 0 | 5869  | 0.318934155 | -1.984826747 | 4.018710979 | -0.493896366 | NA | NA |
| chr8:92998351-93029591   | exonic     | RUNX1T1                                      | 8 | 92998351  | 93029591  | 0 | 0 | 0 | 3 | 0 | 0 | 31240 | 0.318934155 | -1.984826747 | 4.018710979 | -0.493896366 | NA | NA |
| chr8:94776069-94797606   | exonic     | TMEM67                                       | 8 | 94776069  | 94797606  | 0 | 0 | 0 | 3 | 0 | 0 | 21537 | 0.318934155 | -1.984826747 | 4.018710979 | -0.493896366 | NA | NA |
| chr8:98703179-98731417   | exonic     | MTDH                                         | 8 | 98703179  | 98731417  | 0 | 0 | 0 | 3 | 0 | 0 | 28238 | 0.318934155 | -1.984826747 | 4.018710979 | -0.493896366 | NA | NA |
| chr9:101891137-101911583 | exonic     | TGFBR1                                       | 9 | 101891137 | 101911583 | 0 | 0 | 0 | 3 | 0 | 0 | 20446 | 0.318934155 | -1.984826747 | 4.018710979 | -0.493896366 | NA | NA |
| chr9:113148177-113166832 | exonic     | SVEP1                                        | 9 | 113148177 | 113166832 | 0 | 0 | 0 | 3 | 0 | 0 | 18655 | 0.318934155 | -1.984826747 | 4.018710979 | -0.493896366 | NA | NA |
| chr9:113191422-113198784 | exonic     | SVEP1                                        | 9 | 113191422 | 113198784 | 0 | 0 | 0 | 3 | 0 | 0 | 7362  | 0.318934155 | -1.984826747 | 4.018710979 | -0.493896366 | NA | NA |
| chr9:114825216-114841004 | exonic     | SUSD1                                        | 9 | 114825216 | 114841004 | 0 | 0 | 0 | 3 | 0 | 0 | 15788 | 0.318934155 | -1.984826747 | 4.018710979 | -0.493896366 | NA | NA |
| chr9:126214555-126217058 | exonic     | DENND1A                                      | 9 | 126214555 | 126217058 | 0 | 0 | 0 | 3 | 0 | 0 | 2503  | 0.318934155 | -1.984826747 | 4.018710979 | -0.493896366 | NA | NA |
| chr9:127915811-127916264 | exonic     | PPP6C                                        | 9 | 127915811 | 127916264 | 0 | 0 | 0 | 3 | 0 | 0 | 453   | 0.318934155 | -1.984826747 | 4.018710979 | -0.493896366 | NA | NA |
| chr9:132658116-132671278 | exonic     | FNBP1                                        | 9 | 132658116 | 132671278 | 0 | 0 | 0 | 3 | 0 | 0 | 13162 | 0.318934155 | -1.984826747 | 4.018710979 | -0.493896366 | NA | NA |
| chr9:134525515-134526336 | exonic     | RAPGEF1                                      | 9 | 134525515 | 134526336 | 0 | 0 | 0 | 3 | 0 | 0 | 821   | 0.318934155 | -1.984826747 | 4.018710979 | -0.493896366 | NA | NA |
| chr9:135172273-135187243 | exonic     | SETX                                         | 9 | 135172273 | 135187243 | 0 | 0 | 0 | 3 | 0 | 0 | 14970 | 0.318934155 | -1.984826747 | 4.018710979 | -0.493896366 | NA | NA |
| chr9:135212376-135215109 | intronic   | SETX                                         | 9 | 135212376 | 135215109 | 0 | 0 | 0 | 3 | 0 | 0 | 2733  | 0.318934155 | -1.984826747 | 4.018710979 | -0.493896366 | NA | NA |
| chr9:135802587-135804339 | exonic     | TSC1                                         | 9 | 135802587 | 135804339 | 0 | 0 | 0 | 3 | 0 | 0 | 1752  | 0.318934155 | -1.984826747 | 4.018710979 | -0.493896366 | NA | NA |
| chr9:137619111-137630654 | exonic     | COL5A1                                       | 9 | 137619111 | 137630654 | 0 | 0 | 0 | 3 | 0 | 0 | 11543 | 0.318934155 | -1.984826747 | 4.018710979 | -0.493896366 | NA | NA |
| chr9:19276155-19300329   | exonic     | DENND4C                                      | 9 | 19276155  | 19300329  | 0 | 0 | 0 | 3 | 0 | 0 | 24174 | 0.318934155 | -1.984826747 | 4.018710979 | -0.493896366 | NA | NA |
| chr9:19288593-19328160   | exonic     | DENND4C                                      | 9 | 19288593  | 19328160  | 0 | 0 | 0 | 3 | 0 | 0 | 39567 | 0.318934155 | -1.984826747 | 4.018710979 | -0.493896366 | NA | NA |
| chr9:35295692-35366990   | exonic     | UNC13B                                       | 9 | 35295692  | 35366990  | 0 | 0 | 0 | 3 | 0 | 0 | 71298 | 0.318934155 | -1.984826747 | 4.018710979 | -0.493896366 | NA | NA |
| chr9:36474233-36476630   | intergenic | RNF38 (dist=73038), MELK (dist=96229)        | 9 | 36474233  | 36476630  | 0 | 0 | 0 | 3 | 0 | 0 | 2397  | 0.318934155 | -1.984826747 | 4.018710979 | -0.493896366 | NA | NA |
| chr9:4833154-4860901     | exonic     | RCL1                                         | 9 | 4833154   | 4860901   | 0 | 0 | 0 | 3 | 0 | 0 | 27747 | 0.318934155 | -1.984826747 | 4.018710979 | -0.493896366 | NA | NA |
| chr9:7011697-7049200     | exonic     | KDM4C                                        | 9 | 7011697   | 7049200   | 0 | 0 | 0 | 3 | 0 | 0 | 37503 | 0.318934155 | -1.984826747 | 4.018710979 | -0.493896366 | NA | NA |
| chr9:78916668-78929963   | exonic     | PCSK5                                        | 9 | 78916668  | 78929963  | 0 | 0 | 0 | 3 | 0 | 0 | 13295 | 0.318934155 | -1.984826747 | 4.018710979 | -0.493896366 | NA | NA |
| chr9:86465621-86465862   | intronic   | KIF27                                        | 9 | 86465621  | 86465862  | 0 | 0 | 0 | 3 | 0 | 0 | 241   | 0.318934155 | -1.984826747 | 4.018710979 | -0.493896366 | NA | NA |
| chr9:87317073-87342874   | exonic     | NTRK2                                        | 9 | 87317073  | 87342874  | 0 | 0 | 0 | 3 | 0 | 0 | 25801 | 0.318934155 | -1.984826747 | 4.018710979 | -0.493896366 | NA | NA |
| chr9:88952333-88961395   | exonic     | ZCCHC6                                       | 9 | 88952333  | 88961395  | 0 | 0 | 0 | 3 | 0 | 0 | 9062  | 0.318934155 | -1.984826747 | 4.018710979 | -0.493896366 | NA | NA |
| chr9:95765206-95768462   | exonic     | FGD3                                         | 9 | 95765206  | 95768462  | 0 | 0 | 0 | 3 | 0 | 0 | 3256  | 0.318934155 | -1.984826747 | 4.018710979 | -0.493896366 | NA | NA |
| chr9:96392251-96398807   | exonic     | PHF2                                         | 9 | 96392251  | 96398807  | 0 | 0 | 0 | 3 | 0 | 0 | 6556  | 0.318934155 | -1.984826747 | 4.018710979 | -0.493896366 | NA | NA |
| chr9:96857599-96870238   | exonic     | PTPDC1                                       | 9 | 96857599  | 96870238  | 0 | 0 | 0 | 3 | 0 | 0 | 12639 | 0.318934155 | -1.984826747 | 4.018710979 | -0.493896366 | NA | NA |
| chrX:102152502-102160665 | intergenic | LINC00630 (dist=12164), RAB40AL (dist=31535) | X | 102152502 | 102160665 | 0 | 0 | 0 | 3 | 0 | 0 | 8163  | 0.318934155 | -1.984826747 | 4.018710979 | -0.493896366 | NA | NA |
| chrX:11196219-11207104   | exonic     | ARHGAP6                                      | X | 11196219  | 11207104  | 0 | 0 | 0 | 3 | 0 | 0 | 10885 | 0.318934155 | -1.984826747 | 4.018710979 | -0.493896366 | NA | NA |
| chrX:128250587-128256170 | intergenic | ACTRT1 (dist=1064205), SMARCA1 (dist=324308) | X | 128250587 | 128256170 | 0 | 0 | 0 | 3 | 0 | 0 | 5583  | 0.318934155 | -1.984826747 | 4.018710979 | -0.493896366 | NA | NA |

|                          |                |           |    |           |           |   |   |   |   |    |   |        |             |              |             |              |             |             |
|--------------------------|----------------|-----------|----|-----------|-----------|---|---|---|---|----|---|--------|-------------|--------------|-------------|--------------|-------------|-------------|
| chrX:135312543-135326954 | exonic         | MAP7D3    | X  | 135312543 | 135326954 | 0 | 0 | 0 | 3 | 0  | 0 | 14411  | 0.318934155 | -1.984826747 | 4.018710979 | -0.493896366 | NA          | NA          |
| chrX:1407412-1407781     | exonic         | CSF2RA    | X  | 1407412   | 1407781   | 0 | 0 | 0 | 3 | 0  | 0 | 369    | 0.318934155 | -1.984826747 | 4.018710979 | -0.493896366 | NA          | NA          |
| chrX:148601354-148606303 | intergenic     |           | X  | 148601354 | 148606303 | 0 | 0 | 0 | 3 | 0  | 0 | 4949   | 0.318934155 | -1.984826747 | 4.018710979 | -0.493896366 | NA          | NA          |
| chrX:149895686-149905920 | exonic         | MTMR1     | X  | 149895686 | 149905920 | 0 | 0 | 0 | 3 | 0  | 0 | 10234  | 0.318934155 | -1.984826747 | 4.018710979 | -0.493896366 | NA          | NA          |
| chrX:19948352-19950759   | intronic       | CXorf23   | X  | 19948352  | 19950759  | 0 | 0 | 0 | 3 | 0  | 0 | 2407   | 0.318934155 | -1.984826747 | 4.018710979 | -0.493896366 | NA          | NA          |
| chrX:32305645-32366645   | exonic         | DMD       | X  | 32305645  | 32366645  | 0 | 0 | 0 | 3 | 0  | 0 | 61000  | 0.318934155 | -1.984826747 | 4.018710979 | -0.493896366 | NA          | NA          |
| chrX:3735586-3736541     | ncRNA_exonic   | LOC389906 | X  | 3735586   | 3736541   | 0 | 0 | 0 | 3 | 0  | 0 | 955    | 0.318934155 | -1.984826747 | 4.018710979 | -0.493896366 | NA          | NA          |
| chrX:37892786-37893261   | exonic         | SYTL5     | X  | 37892786  | 37893261  | 0 | 0 | 0 | 3 | 0  | 0 | 475    | 0.318934155 | -1.984826747 | 4.018710979 | -0.493896366 | NA          | NA          |
| chrX:67283695-67293141   | exonic         | OPHN1     | X  | 67283695  | 67293141  | 0 | 0 | 0 | 3 | 0  | 0 | 9446   | 0.318934155 | -1.984826747 | 4.018710979 | -0.493896366 | NA          | NA          |
| chrY:14798442-14813984   | ncRNA_exonic   | TTY15     | Y  | 14798442  | 14813984  | 0 | 0 | 0 | 3 | 0  | 0 | 15542  | 0.318934155 | -1.984826747 | 4.018710979 | -0.493896366 | NA          | NA          |
| chrY:21203256-21210798   | ncRNA_intronic | TTY14     | Y  | 21203256  | 21210798  | 0 | 0 | 0 | 3 | 0  | 0 | 7542   | 0.318934155 | -1.984826747 | 4.018710979 | -0.493896366 | NA          | NA          |
| chr17:76082583-76083174  | exonic         | TNRC6C    | 17 | 76082583  | 76083174  | 1 | 0 | 0 | 4 | 2  | 0 | 591    | 0.796287327 | -1.983462573 | 3.013079272 | -0.658284231 | 0.510355509 | 0.998252924 |
| chr5:107521817-107684231 | exonic         | FBXL17    | 5  | 107521817 | 107684231 | 1 | 0 | 0 | 4 | 2  | 0 | 162414 | 0.796287327 | -1.983462573 | 3.013079272 | -0.658284231 | 0.510355509 | 0.998252924 |
| chr17:57842331-57851246  | exonic         | VMP1      | 17 | 57842331  | 57851246  | 0 | 2 | 0 | 5 | 4  | 1 | 8915   | 1.67243682  | -1.976561342 | 2.158567857 | -0.915681819 | 0.359833804 | 0.998252924 |
| chr1:78183551-78191447   | exonic         | USP33     | 1  | 78183551  | 78191447  | 2 | 0 | 2 | 7 | 5  | 4 | 7896   | 3.234703177 | -1.962569393 | 1.55478504  | -1.262276998 | 0.20684913  | 0.998252924 |
| chr16:67662272-67663436  | exonic         | CTCF      | 16 | 67662272  | 67663436  | 2 | 2 | 0 | 4 | 9  | 3 | 1164   | 3.045673647 | -1.958187788 | 1.591588683 | -1.23033533  | 0.218571559 | 0.998252924 |
| chr1:39381233-39385009   | exonic         | RHBDL2    | 1  | 39381233  | 39385009  | 1 | 0 | 0 | 0 | 1  | 2 | 3776   | 0.866451582 | -1.957964283 | 3.011012932 | -0.650267643 | 0.515519354 | 0.998252924 |
| chr10:71964628-71969441  | exonic         | PPA1      | 10 | 71964628  | 71969441  | 1 | 0 | 0 | 0 | 1  | 2 | 4813   | 0.866451582 | -1.957964283 | 3.011012932 | -0.650267643 | 0.515519354 | 0.998252924 |
| chr2:232879544-232894790 | exonic         | DIS3L2    | 2  | 232879544 | 232894790 | 0 | 0 | 1 | 5 | 1  | 0 | 15246  | 0.849853373 | -1.956966942 | 2.977805005 | -0.657184382 | 0.511062367 | 0.998252924 |
| chr5:43675612-43677908   | exonic         | NNT       | 5  | 43675612  | 43677908  | 0 | 0 | 1 | 5 | 1  | 0 | 2296   | 0.849853373 | -1.956966942 | 2.977805005 | -0.657184382 | 0.511062367 | 0.998252924 |
| chr6:158922709-158925210 | exonic         | TULP4     | 6  | 158922709 | 158925210 | 0 | 0 | 1 | 5 | 1  | 0 | 2501   | 0.849853373 | -1.956966942 | 2.977805005 | -0.657184382 | 0.511062367 | 0.998252924 |
| chr11:68318588-68331900  | exonic         | PPP6R3    | 11 | 68318588  | 68331900  | 3 | 0 | 1 | 9 | 4  | 3 | 13312  | 2.949797834 | -1.956351262 | 1.618482101 | -1.208756811 | 0.226756289 | 0.998252924 |
| chr17:16040624-16068475  | exonic         | NCOR1     | 17 | 16040624  | 16068475  | 0 | 1 | 0 | 0 | 1  | 2 | 27851  | 0.911740438 | -1.953871327 | 2.961891024 | -0.659670228 | 0.509465476 | 0.998252924 |
| chr20:54956488-54961589  | exonic         | AURKA     | 20 | 54956488  | 54961589  | 0 | 1 | 0 | 0 | 1  | 2 | 5101   | 0.911740438 | -1.953871327 | 2.961891024 | -0.659670228 | 0.509465476 | 0.998252924 |
| chr7:24659670-24690331   | exonic         | MPP6      | 7  | 24659670  | 24690331  | 0 | 1 | 0 | 0 | 1  | 2 | 30661  | 0.911740438 | -1.953871327 | 2.961891024 | -0.659670228 | 0.509465476 | 0.998252924 |
| chr1:237729866-237732619 | exonic         | RYR2      | 1  | 237729866 | 237732619 | 1 | 0 | 0 | 5 | 1  | 0 | 2753   | 0.78157129  | -1.953104724 | 3.062708318 | -0.637705103 | 0.523665663 | 0.998252924 |
| chr19:11324950-11328067  | exonic         | DOCK6     | 19 | 11324950  | 11328067  | 1 | 0 | 0 | 5 | 1  | 0 | 3117   | 0.78157129  | -1.953104724 | 3.062708318 | -0.637705103 | 0.523665663 | 0.998252924 |
| chr2:242396161-242415402 | exonic         | FARP2     | 2  | 242396161 | 242415402 | 1 | 0 | 0 | 5 | 1  | 0 | 19241  | 0.78157129  | -1.953104724 | 3.062708318 | -0.637705103 | 0.523665663 | 0.998252924 |
| chr4:129867161-129925031 | exonic         | SCLT1     | 4  | 129867161 | 129925031 | 1 | 0 | 0 | 5 | 1  | 0 | 57870  | 0.78157129  | -1.953104724 | 3.062708318 | -0.637705103 | 0.523665663 | 0.998252924 |
| chr17:62130139-62130731  | exonic         | ERN1      | 17 | 62130139  | 62130731  | 0 | 0 | 1 | 0 | 1  | 2 | 592    | 0.934733665 | -1.951880604 | 2.939034753 | -0.664123009 | 0.506611585 | 0.998252924 |
| chr7:32672154-32718742   | ncRNA_exonic   | DPY19L1P1 | 7  | 32672154  | 32718742  | 3 | 0 | 0 | 0 | 6  | 3 | 46588  | 2.037781186 | -1.95165171  | 2.198721635 | -0.887630193 | NA          | NA          |
| chr7:158672374-158684024 | exonic         | WDR60     | 7  | 158672374 | 158684024 | 1 | 2 | 0 | 3 | 1  | 5 | 11650  | 2.458593162 | -1.946025432 | 1.845388857 | -1.054534075 | NA          | NA          |
| chr8:37971709-37976881   | exonic         | ASH2L     | 8  | 37971709  | 37976881  | 3 | 0 | 1 | 7 | 10 | 1 | 5172   | 2.846902377 | -1.942654083 | 1.660740305 | -1.169751873 | 0.242100836 | 0.998252924 |
| chr14:31596990-31641328  | exonic         | HECTD1    | 14 | 31596990  | 31641328  | 1 | 0 | 1 | 5 | 3  | 0 | 44338  | 1.595277533 | -1.935718624 | 2.117260847 | -0.91425609  | 0.360582297 | 0.998252924 |
| chr1:237756775-237778143 | exonic         | RYR2      | 1  | 237756775 | 237778143 | 1 | 0 | 0 | 1 | 0  | 2 | 21368  | 0.851735546 | -1.927265616 | 3.026657582 | -0.636763679 | 0.524278788 | 0.998252924 |

|                           |              |                                             |    |           |           |    |   |   |    |    |    |       |             |              |             |              |             |             |
|---------------------------|--------------|---------------------------------------------|----|-----------|-----------|----|---|---|----|----|----|-------|-------------|--------------|-------------|--------------|-------------|-------------|
| chr19:2076809-2078678     | exonic       | MOB3A                                       | 19 | 2076809   | 2078678   | 1  | 0 | 0 | 1  | 0  | 2  | 1869  | 0.851735546 | -1.927265616 | 3.026657582 | -0.636763679 | 0.524278788 | 0.998252924 |
| chr11:62303416-62304039   | exonic       | AHNAK                                       | 11 | 62303416  | 62304039  | 2  | 0 | 2 | 20 | 2  | 0  | 623   | 3.020794483 | -1.924214022 | 1.803276858 | -1.067065223 | NA          | NA          |
| chr2:242651392-242662686  | exonic       | ING5                                        | 2  | 242651392 | 242662686 | 2  | 0 | 0 | 0  | 4  | 2  | 11294 | 1.35852079  | -1.922505223 | 2.545093382 | -0.755377086 | NA          | NA          |
| chr15:50757243-50763992   | exonic       | USP8                                        | 15 | 50757243  | 50763992  | 1  | 1 | 0 | 6  | 4  | 0  | 6749  | 1.42524074  | -1.921191806 | 2.291929911 | -0.838241954 | 0.401894829 | 0.998252924 |
| chr19:56889974-56890739   | ncRNA_exonic | ZNF542P                                     | 19 | 56889974  | 56890739  | 3  | 0 | 0 | 0  | 0  | 5  | 765   | 1.928053872 | -1.920993403 | 3.871987793 | -0.496125893 | NA          | NA          |
| chr6:151277130-151293194  | exonic       | MTHFD1L                                     | 6  | 151277130 | 151293194 | 0  | 0 | 1 | 1  | 0  | 2  | 16064 | 0.920017628 | -1.920988798 | 2.95280079  | -0.650564984 | 0.51532734  | 0.998252924 |
| chr12:54113522-54115967   | exonic       | CALCOCO1                                    | 12 | 54113522  | 54115967  | 0  | 0 | 1 | 6  | 0  | 0  | 2445  | 0.835137336 | -1.915842062 | 3.265252305 | -0.586736302 | NA          | NA          |
| chr9:87317073-87325706    | exonic       | NTRK2                                       | 9  | 87317073  | 87325706  | 0  | 0 | 1 | 6  | 0  | 0  | 8633  | 0.835137336 | -1.915842062 | 3.265252305 | -0.586736302 | NA          | NA          |
| chr10:15617487-15639298   | exonic       | ITGA8                                       | 10 | 15617487  | 15639298  | 0  | 1 | 0 | 6  | 0  | 0  | 21811 | 0.81214411  | -1.914646719 | 3.29697271  | -0.580728713 | NA          | NA          |
| chr16:50321822-50322261   | exonic       | ADCY7                                       | 16 | 50321822  | 50322261  | 0  | 1 | 0 | 6  | 0  | 0  | 439   | 0.81214411  | -1.914646719 | 3.29697271  | -0.580728713 | NA          | NA          |
| chr21:46595644-46624651   | exonic       | ADARB1                                      | 21 | 46595644  | 46624651  | 0  | 1 | 0 | 6  | 0  | 0  | 29007 | 0.81214411  | -1.914646719 | 3.29697271  | -0.580728713 | NA          | NA          |
| chr9:100109595-100112837  | exonic       | CCDC180                                     | 9  | 100109595 | 100112837 | 0  | 1 | 0 | 6  | 0  | 0  | 3242  | 0.81214411  | -1.914646719 | 3.29697271  | -0.580728713 | NA          | NA          |
| chr10:71912019-71920825   | exonic       | SARIA                                       | 10 | 71912019  | 71920825  | 2  | 0 | 0 | 5  | 4  | 0  | 8806  | 1.273640498 | -1.914592531 | 2.536995254 | -0.754669339 | 0.450447408 | 0.998252924 |
| chr8:125332326-125343033  | exonic       | TMEM65                                      | 8  | 125332326 | 125343033 | 2  | 0 | 0 | 5  | 4  | 0  | 10707 | 1.273640498 | -1.914592531 | 2.536995254 | -0.754669339 | 0.450447408 | 0.998252924 |
| chr7:158704240-158711560  | exonic       | WDR60                                       | 7  | 158704240 | 158711560 | 1  | 1 | 0 | 2  | 1  | 3  | 7320  | 1.56156876  | -1.914055853 | 2.162306139 | -0.885191888 | 0.376053147 | 0.998252924 |
| chr1:39816456-39824936    | exonic       | MACF1                                       | 1  | 39816456  | 39824936  | 1  | 0 | 0 | 6  | 0  | 0  | 8480  | 0.766855254 | -1.912217935 | 3.365179198 | -0.568236585 | NA          | NA          |
| chr6:145148746-145157074  | exonic       | UTRN                                        | 6  | 145148746 | 145157074 | 1  | 0 | 0 | 6  | 0  | 0  | 8328  | 0.766855254 | -1.912217935 | 3.365179198 | -0.568236585 | NA          | NA          |
| chr5:21491429-21497305    | ncRNA_exonic | GUSBP1                                      | 5  | 21491429  | 21497305  | 21 | 2 | 3 | 64 | 50 | 3  | 5876  | 17.42904004 | -1.905757003 | 0.973396424 | -1.957842618 | NA          | NA          |
| chr1:93070863-93101893    | exonic       | EVI5                                        | 1  | 93070863  | 93101893  | 0  | 3 | 0 | 4  | 5  | 3  | 31030 | 2.477865873 | -1.90133802  | 1.853133037 | -1.026012695 | NA          | NA          |
| chr1:227381486-227400920  | exonic       | CDC42BPA                                    | 1  | 227381486 | 227400920 | 1  | 0 | 0 | 0  | 3  | 1  | 19434 | 0.800287817 | -1.896817077 | 3.064118826 | -0.619041618 | 0.535888942 | 0.998252924 |
| chr18:19345732-19399607   | exonic       | MIB1                                        | 18 | 19345732  | 19399607  | 1  | 0 | 0 | 0  | 3  | 1  | 53875 | 0.800287817 | -1.896817077 | 3.064118826 | -0.619041618 | 0.535888942 | 0.998252924 |
| chr5:134002512-134007576  | exonic       | SEC24A                                      | 5  | 134002512 | 134007576 | 1  | 0 | 0 | 0  | 3  | 1  | 5064  | 0.800287817 | -1.896817077 | 3.064118826 | -0.619041618 | 0.535888942 | 0.998252924 |
| chr8:103845283-103846975  | exonic       | AZIN1                                       | 8  | 103845283 | 103846975 | 1  | 0 | 0 | 0  | 3  | 1  | 1692  | 0.800287817 | -1.896817077 | 3.064118826 | -0.619041618 | 0.535888942 | 0.998252924 |
| chr1:155447676-155491409  | exonic       | ASH1L                                       | 1  | 155447676 | 155491409 | 0  | 1 | 0 | 0  | 3  | 1  | 43733 | 0.845576673 | -1.895591852 | 3.00844471  | -0.630090308 | 0.528635501 | 0.998252924 |
| chr2:43934539-43965659    | exonic       | PLEKHH2                                     | 2  | 43934539  | 43965659  | 0  | 0 | 2 | 10 | 2  | 0  | 31120 | 1.699706746 | -1.868875462 | 2.329825616 | -0.802152508 | 0.422464744 | 0.998252924 |
| chr2:43939363-43965659    | exonic       | PLEKHH2                                     | 2  | 43939363  | 43965659  | 0  | 0 | 2 | 10 | 2  | 0  | 26296 | 1.699706746 | -1.868875462 | 2.329825616 | -0.802152508 | 0.422464744 | 0.998252924 |
| chr14:76633005-76647192   | exonic       | GPATCH2L                                    | 14 | 76633005  | 76647192  | 1  | 0 | 1 | 6  | 4  | 0  | 14187 | 1.448233966 | -1.860626814 | 2.27787818  | -0.816824547 | 0.414028702 | 0.998252924 |
| chr10:27311486-27322306   | exonic       | ANKRD26                                     | 10 | 27311486  | 27322306  | 0  | 1 | 0 | 1  | 2  | 1  | 10820 | 0.830860637 | -1.858834954 | 2.804015263 | -0.662918986 | 0.507382442 | 0.998252924 |
| chr12:51173922-51203372   | exonic       | ATF1                                        | 12 | 51173922  | 51203372  | 0  | 0 | 1 | 1  | 2  | 1  | 29450 | 0.853853863 | -1.858181434 | 2.780952574 | -0.668181634 | 0.504017658 | 0.998252924 |
| chr7:91924202-91936970    | exonic       | ANKIB1                                      | 7  | 91924202  | 91936970  | 4  | 0 | 0 | 11 | 4  | 1  | 12768 | 2.477701304 | -1.857141839 | 1.859355847 | -0.998809261 | NA          | NA          |
| chr14:102486229-102489217 | exonic       | DYNC1H1                                     | 14 | 102486229 | 102489217 | 1  | 0 | 1 | 8  | 0  | 1  | 2988  | 1.484965658 | -1.856527854 | 2.334830369 | -0.795144641 | 0.42652937  | 0.998252924 |
| chr5:76745584-76759051    | exonic       | WDR41                                       | 5  | 76745584  | 76759051  | 4  | 0 | 0 | 10 | 7  | 0  | 13467 | 2.426253575 | -1.848833724 | 1.998135081 | -0.925279648 | NA          | NA          |
| chr3:47676679-47677626    | exonic       | SMARCC1                                     | 3  | 47676679  | 47677626  | 1  | 1 | 0 | 3  | 4  | 1  | 947   | 1.414525193 | -1.846211914 | 2.166630478 | -0.852112039 | 0.394151911 | 0.998252924 |
| chr2:168920009-168986116  | exonic       | STK39                                       | 2  | 168920009 | 168986116 | 15 | 5 | 4 | 7  | 4  | 13 | 66107 | 2.238390799 | -1.843247103 | 2.046731741 | -0.9005807   | NA          | NA          |
| chr8:135824853-135825412  | intergenic   | MIR300 (dist=7665), NCRNA00250 (dist=24900) | 8  | 135824853 | 135825412 | 6  | 3 | 4 | 32 | 20 | 5  | 559   | 9.449430961 | -1.841080717 | 0.96361945  | -1.910588995 | 0.05605742  | 0.998252924 |

|                          |              |          |    |           |           |    |   |   |    |    |   |        |             |              |             |              |             |             |
|--------------------------|--------------|----------|----|-----------|-----------|----|---|---|----|----|---|--------|-------------|--------------|-------------|--------------|-------------|-------------|
| chr3:52446826-52448603   | exonic       | PHF7     | 3  | 52446826  | 52448603  | 2  | 0 | 0 | 9  | 0  | 0 | 1777   | 1.214776352 | -1.83810664  | 2.86437147  | -0.641713779 | NA          | NA          |
| chr7:141336759-141349133 | exonic       | AGK      | 7  | 141336759 | 141349133 | 1  | 0 | 1 | 2  | 3  | 2 | 12374  | 1.518398222 | -1.830312973 | 2.125393276 | -0.861164375 | 0.389147518 | 0.998252924 |
| chr11:70176278-70181800  | exonic       | PPFIA1   | 11 | 70176278  | 70181800  | 1  | 0 | 0 | 2  | 1  | 1 | 5522   | 0.770855744 | -1.828399893 | 2.869818987 | -0.637113317 | 0.524051035 | 0.998252924 |
| chr16:2312278-2313288    | exonic       | RNPS1    | 16 | 2312278   | 2313288   | 1  | 0 | 0 | 2  | 1  | 1 | 1010   | 0.770855744 | -1.828399893 | 2.869818987 | -0.637113317 | 0.524051035 | 0.998252924 |
| chr8:141799572-141829119 | exonic       | PTK2     | 8  | 141799572 | 141829119 | 1  | 0 | 0 | 2  | 1  | 1 | 29547  | 0.770855744 | -1.828399893 | 2.869818987 | -0.637113317 | 0.524051035 | 0.998252924 |
| chr8:98680423-98680877   | intronic     | MTDH     | 8  | 98680423  | 98680877  | 4  | 0 | 0 | 2  | 0  | 6 | 454    | 2.577882194 | -1.827122898 | 2.085476815 | -0.876117579 | NA          | NA          |
| chr2:204058517-204064170 | exonic       | NBEAL1   | 2  | 204058517 | 204064170 | 0  | 0 | 1 | 0  | 5  | 0 | 5653   | 0.802406135 | -1.826894659 | 3.317488478 | -0.55068606  | NA          | NA          |
| chr2:42488260-42491871   | exonic       | EML4     | 2  | 42488260  | 42491871  | 0  | 0 | 1 | 0  | 5  | 0 | 3611   | 0.802406135 | -1.826894659 | 3.317488478 | -0.55068606  | NA          | NA          |
| chr3:185155234-185169183 | exonic       | MAP3K13  | 3  | 185155234 | 185169183 | 0  | 0 | 1 | 0  | 5  | 0 | 13949  | 0.802406135 | -1.826894659 | 3.317488478 | -0.55068606  | NA          | NA          |
| chr4:113483526-113505330 | exonic       | ZGRF1    | 4  | 113483526 | 113505330 | 0  | 0 | 1 | 0  | 5  | 0 | 21804  | 0.802406135 | -1.826894659 | 3.317488478 | -0.55068606  | NA          | NA          |
| chr2:152988627-153006743 | exonic       | STAM2    | 2  | 152988627 | 153006743 | 0  | 1 | 0 | 0  | 5  | 0 | 18116  | 0.779412908 | -1.825926657 | 3.351242056 | -0.544850723 | NA          | NA          |
| chr5:142434003-142513670 | exonic       | ARHGAP26 | 5  | 142434003 | 142513670 | 0  | 1 | 0 | 0  | 11 | 0 | 79667  | 0.779412908 | -1.825926657 | 3.351242056 | -0.544850723 | NA          | NA          |
| chr6:20546576-20548936   | exonic       | CDKAL1   | 6  | 20546576  | 20548936  | 0  | 1 | 0 | 0  | 5  | 0 | 2360   | 0.779412908 | -1.825926657 | 3.351242056 | -0.544850723 | NA          | NA          |
| chr12:50821544-50824353  | exonic       | LARP4    | 12 | 50821544  | 50824353  | 1  | 0 | 0 | 0  | 5  | 0 | 2809   | 0.734124052 | -1.823936606 | 3.423842935 | -0.532716202 | NA          | NA          |
| chr12:65258447-65260683  | exonic       | TBC1D30  | 12 | 65258447  | 65260683  | 1  | 0 | 0 | 0  | 5  | 0 | 2236   | 0.734124052 | -1.823936606 | 3.423842935 | -0.532716202 | NA          | NA          |
| chr7:17885217-17890587   | exonic       | SNX13    | 7  | 17885217  | 17890587  | 1  | 0 | 0 | 0  | 5  | 0 | 5370   | 0.734124052 | -1.823936606 | 3.423842935 | -0.532716202 | NA          | NA          |
| chr7:44089823-44092540   | exonic       | DBNL     | 7  | 44089823  | 44092540  | 1  | 0 | 0 | 0  | 5  | 0 | 2717   | 0.734124052 | -1.823936606 | 3.423842935 | -0.532716202 | NA          | NA          |
| chr7:8095062-8110761     | exonic       | GLCCI1   | 7  | 8095062   | 8110761   | 1  | 0 | 0 | 0  | 3  | 0 | 15699  | 0.734124052 | -1.823936606 | 3.423842935 | -0.532716202 | NA          | NA          |
| chr9:37126308-37305711   | exonic       | ZCCHC7   | 9  | 37126308  | 37305711  | 1  | 0 | 0 | 0  | 5  | 0 | 179403 | 0.734124052 | -1.823936606 | 3.423842935 | -0.532716202 | NA          | NA          |
| chr14:91947919-91952074  | exonic       | PPP4R3A  | 14 | 91947919  | 91952074  | 5  | 1 | 1 | 24 | 8  | 0 | 4155   | 4.536172156 | -1.806118995 | 1.460886401 | -1.236317207 | 0.216340678 | 0.998252924 |
| chr5:72285253-72286691   | exonic       | FCHO2    | 5  | 72285253  | 72286691  | 2  | 1 | 2 | 1  | 13 | 4 | 1438   | 3.739330039 | -1.805965055 | 1.491351356 | -1.210958805 | 0.225911193 | 0.998252924 |
| chr8:17570722-17581342   | exonic       | MTUS1    | 8  | 17570722  | 17581342  | 10 | 7 | 0 | 6  | 48 | 8 | 10620  | 11.42273345 | -1.804576183 | 1.116346318 | -1.616502115 | 0.105985797 | 0.998252924 |
| chr8:141357856-141370292 | exonic       | TRAPPC9  | 8  | 141357856 | 141370292 | 3  | 0 | 0 | 0  | 7  | 2 | 12436  | 1.850589999 | -1.80450395  | 2.267273675 | -0.795891546 | 0.426095076 | 0.998252924 |
| chr1:78167053-78178966   | exonic       | USP33    | 1  | 78167053  | 78178966  | 0  | 0 | 1 | 1  | 4  | 0 | 11913  | 0.787690098 | -1.80397559  | 3.061170685 | -0.589309051 | NA          | NA          |
| chr6:90082155-90097309   | exonic       | RRAGD    | 6  | 90082155  | 90097309  | 0  | 0 | 1 | 1  | 4  | 0 | 15154  | 0.787690098 | -1.80397559  | 3.061170685 | -0.589309051 | NA          | NA          |
| chr9:125932180-125936121 | exonic       | STRBP    | 9  | 125932180 | 125936121 | 0  | 1 | 0 | 1  | 4  | 0 | 3941   | 0.764696871 | -1.802797746 | 3.091489739 | -0.583148546 | NA          | NA          |
| chr9:95018961-95048121   | exonic       | IARS     | 9  | 95018961  | 95048121  | 0  | 1 | 0 | 1  | 4  | 0 | 29160  | 0.764696871 | -1.802797746 | 3.091489739 | -0.583148546 | NA          | NA          |
| chr8:48815128-48842572   | exonic       | PRKDC    | 8  | 48815128  | 48842572  | 1  | 0 | 0 | 3  | 0  | 1 | 27444  | 0.756139707 | -1.80077242  | 3.119638088 | -0.577237605 | 0.563778957 | 0.998252924 |
| chr8:92982885-93017525   | exonic       | RUNX1T1  | 8  | 92982885  | 93017525  | 1  | 0 | 0 | 3  | 0  | 1 | 34640  | 0.756139707 | -1.80077242  | 3.119638088 | -0.577237605 | 0.563778957 | 0.998252924 |
| chr12:62936876-62946954  | exonic       | MON2     | 12 | 62936876  | 62946954  | 1  | 0 | 0 | 1  | 4  | 0 | 10078  | 0.719408015 | -1.800359696 | 3.157080951 | -0.570260859 | 0.568500784 | 0.998252924 |
| chr5:134696186-134705832 | exonic       | H2AFY    | 5  | 134696186 | 134705832 | 1  | 0 | 0 | 1  | 4  | 0 | 9646   | 0.719408015 | -1.800359696 | 3.157080951 | -0.570260859 | 0.568500784 | 0.998252924 |
| chr5:61745753-61747760   | exonic       | IPO11    | 5  | 61745753  | 61747760  | 1  | 0 | 0 | 1  | 4  | 0 | 2007   | 0.719408015 | -1.800359696 | 3.157080951 | -0.570260859 | 0.568500784 | 0.998252924 |
| chr7:149247958-149255930 | ncRNA_exonic | ZNF767P  | 7  | 149247958 | 149255930 | 1  | 0 | 0 | 1  | 4  | 0 | 7972   | 0.719408015 | -1.800359696 | 3.157080951 | -0.570260859 | 0.568500784 | 0.998252924 |
| chr15:72855734-72864506  | exonic       | ARIH1    | 15 | 72855734  | 72864506  | 0  | 1 | 0 | 3  | 0  | 1 | 8772   | 0.801428563 | -1.79962398  | 3.058996175 | -0.588305404 | 0.556327319 | 0.998252924 |
| chr9:123199572-123210404 | exonic       | CDK5RAP2 | 9  | 123199572 | 123210404 | 0  | 1 | 0 | 3  | 0  | 1 | 10832  | 0.801428563 | -1.79962398  | 3.058996175 | -0.588305404 | 0.556327319 | 0.998252924 |



|                           |              |                        |    |           |           |   |   |   |    |    |   |       |             |              |             |              |             |             |
|---------------------------|--------------|------------------------|----|-----------|-----------|---|---|---|----|----|---|-------|-------------|--------------|-------------|--------------|-------------|-------------|
| chr7:151877795-151896544  | exonic       | KMT2C                  | 7  | 151877795 | 151896544 | 0 | 0 | 1 | 3  | 0  | 1 | 18749 | 0.82442179  | -1.799067118 | 3.030880927 | -0.59357895  | 0.552793764 | 0.998252924 |
| chr20:34430494-34446303   | exonic       | PHF20                  | 20 | 34430494  | 34446303  | 1 | 1 | 0 | 4  | 5  | 0 | 15809 | 1.333645391 | -1.798557059 | 2.341002668 | -0.768284925 | 0.442317929 | 0.998252924 |
| chr10:70497601-70502326   | exonic       | CCAR1                  | 10 | 70497601  | 70502326  | 1 | 3 | 0 | 1  | 6  | 5 | 4725  | 3.0253833   | -1.797841869 | 1.700470397 | -1.057261492 | 0.290392263 | 0.998252924 |
| chr12:124846671-124848345 | exonic       | NCOR2                  | 12 | 124846671 | 124848345 | 2 | 2 | 0 | 4  | 0  | 6 | 1674  | 2.881082677 | -1.793546642 | 1.842685807 | -0.973332858 | 0.330387897 | 0.998252924 |
| chr2:24090704-24111269    | exonic       | ATAD2B                 | 2  | 24090704  | 24111269  | 2 | 0 | 0 | 0  | 1  | 3 | 20565 | 1.303657134 | -1.790803158 | 2.632769087 | -0.680197579 | NA          | NA          |
| chr3:196778447-196793625  | exonic       | DLG1                   | 3  | 196778447 | 196793625 | 2 | 0 | 0 | 0  | 1  | 3 | 15178 | 1.303657134 | -1.790803158 | 2.632769087 | -0.680197579 | NA          | NA          |
| chr7:5941287-5949747      | exonic       | CCZ1                   | 7  | 5941287   | 5949747   | 0 | 0 | 2 | 7  | 4  | 0 | 8460  | 1.622827434 | -1.781449786 | 2.332419832 | -0.763777499 | 0.444999848 | 0.998252924 |
| chr7:5941287-5951553      | exonic       | CCZ1                   | 7  | 5941287   | 5951553   | 0 | 0 | 2 | 7  | 4  | 0 | 10266 | 1.622827434 | -1.781449786 | 2.332419832 | -0.763777499 | 0.444999848 | 0.998252924 |
| chr7:5942291-5949747      | exonic       | CCZ1                   | 7  | 5942291   | 5949747   | 0 | 0 | 2 | 7  | 4  | 0 | 7456  | 1.622827434 | -1.781449786 | 2.332419832 | -0.763777499 | 0.444999848 | 0.998252924 |
| chr10:116730126-116734144 | exonic       | TRUB1                  | 10 | 116730126 | 116734144 | 0 | 1 | 1 | 3  | 7  | 0 | 4018  | 1.537670933 | -1.774757271 | 2.244755826 | -0.790623751 | 0.429163583 | 0.998252924 |
| chr1:16812920-16813156    | ncRNA_exonic | CROCCP3                | 1  | 16812920  | 16813156  | 0 | 0 | 1 | 2  | 3  | 0 | 236   | 0.772974061 | -1.772542843 | 3.05222553  | -0.580737834 | 0.561417159 | 0.998252924 |
| chr14:35269429-35272194   | exonic       | BAZ1A                  | 14 | 35269429  | 35272194  | 0 | 0 | 1 | 2  | 3  | 0 | 2765  | 0.772974061 | -1.772542843 | 3.05222553  | -0.580737834 | 0.561417159 | 0.998252924 |
| chr5:68715197-68716358    | exonic       | MARVELD2               | 5  | 68715197  | 68716358  | 0 | 0 | 1 | 2  | 3  | 0 | 1161  | 0.772974061 | -1.772542843 | 3.05222553  | -0.580737834 | 0.561417159 | 0.998252924 |
| chr1:214169811-214185058  | exonic       | PROX1                  | 1  | 214169811 | 214185058 | 0 | 1 | 0 | 2  | 3  | 0 | 15247 | 0.749980835 | -1.77122477  | 3.08358664  | -0.574404087 | 0.565694388 | 0.998252924 |
| chr11:12341242-12348813   | exonic       | MICALCL                | 11 | 12341242  | 12348813  | 0 | 1 | 0 | 2  | 3  | 0 | 7571  | 0.749980835 | -1.77122477  | 3.08358664  | -0.574404087 | 0.565694388 | 0.998252924 |
| chr3:132322072-132350323  | exonic       | ACAD11                 | 3  | 132322072 | 132350323 | 0 | 1 | 0 | 2  | 3  | 0 | 28251 | 0.749980835 | -1.77122477  | 3.08358664  | -0.574404087 | 0.565694388 | 0.998252924 |
| chr7:139083344-139102475  | exonic       | C7orf55-LUC7L2, LUC7L2 | 7  | 139083344 | 139102475 | 0 | 1 | 0 | 2  | 3  | 0 | 19131 | 0.749980835 | -1.77122477  | 3.08358664  | -0.574404087 | 0.565694388 | 0.998252924 |
| chr7:66260497-66270383    | exonic       | RABGEF1                | 7  | 66260497  | 66270383  | 0 | 1 | 0 | 2  | 3  | 0 | 9886  | 0.749980835 | -1.77122477  | 3.08358664  | -0.574404087 | 0.565694388 | 0.998252924 |
| chrX:2184780-2209644      | exonic       | DHRXS                  | X  | 2184780   | 2209644   | 0 | 1 | 0 | 2  | 3  | 0 | 24864 | 0.749980835 | -1.77122477  | 3.08358664  | -0.574404087 | 0.565694388 | 0.998252924 |
| chr1:222889025-222897506  | exonic       | BROX                   | 1  | 222889025 | 222897506 | 1 | 0 | 0 | 2  | 3  | 0 | 8481  | 0.704691978 | -1.768532603 | 3.15141339  | -0.56118712  | 0.574669983 | 0.998252924 |
| chr12:27802942-27809663   | exonic       | PPFIBP1                | 12 | 27802942  | 27809663  | 1 | 0 | 0 | 2  | 3  | 0 | 6721  | 0.704691978 | -1.768532603 | 3.15141339  | -0.56118712  | 0.574669983 | 0.998252924 |
| chr16:30505532-30506171   | exonic       | ITGAL                  | 16 | 30505532  | 30506171  | 1 | 0 | 0 | 2  | 3  | 0 | 639   | 0.704691978 | -1.768532603 | 3.15141339  | -0.56118712  | 0.574669983 | 0.998252924 |
| chr6:117010482-117019961  | exonic       | KPNA5                  | 6  | 117010482 | 117019961 | 1 | 0 | 0 | 2  | 3  | 0 | 9479  | 0.704691978 | -1.768532603 | 3.15141339  | -0.56118712  | 0.574669983 | 0.998252924 |
| chr9:35236465-35243361    | exonic       | UNC13B                 | 9  | 35236465  | 35243361  | 1 | 0 | 0 | 2  | 3  | 0 | 6896  | 0.704691978 | -1.768532603 | 3.15141339  | -0.56118712  | 0.574669983 | 0.998252924 |
| chr21:38480691-38505066   | exonic       | TTC3                   | 21 | 38480691  | 38505066  | 1 | 1 | 0 | 1  | 1  | 3 | 24375 | 1.455257375 | -1.76850839  | 2.23741252  | -0.790425714 | 0.42927919  | 0.998252924 |
| chr12:14576842-14578407   | exonic       | ATF7IP                 | 12 | 14576842  | 14578407  | 0 | 3 | 0 | 5  | 5  | 2 | 1565  | 2.27595865  | -1.767276907 | 1.898349596 | -0.930954399 | NA          | NA          |
| chr5:122868263-122893258  | exonic       | CSNK1G3                | 5  | 122868263 | 122893258 | 0 | 0 | 2 | 8  | 3  | 0 | 24995 | 1.608111398 | -1.764154423 | 2.348531959 | -0.751173267 | 0.452548387 | 0.998252924 |
| chr2:101898320-101911643  | exonic       | RNF149                 | 2  | 101898320 | 101911643 | 3 | 0 | 0 | 7  | 5  | 0 | 13323 | 1.736277633 | -1.763612375 | 2.244840956 | -0.785629098 | NA          | NA          |
| chr19:45781180-45781873   | exonic       | MARK4                  | 19 | 45781180  | 45781873  | 2 | 0 | 0 | 4  | 4  | 0 | 693   | 1.167329113 | -1.75987113  | 2.613829493 | -0.673292246 | 0.500761385 | 0.998252924 |
| chr19:12628559-12639510   | exonic       | ZNF564                 | 19 | 12628559  | 12639510  | 0 | 2 | 0 | 7  | 3  | 0 | 10951 | 1.45581356  | -1.754399213 | 2.425171569 | -0.723412412 | 0.469426548 | 0.998252924 |
| chr6:111583459-111585149  | exonic       | KIAA1919               | 6  | 111583459 | 111585149 | 0 | 0 | 2 | 3  | 5  | 1 | 1690  | 1.626827924 | -1.752120364 | 2.183024046 | -0.802611573 | 0.422199277 | 0.998252924 |
| chr7:151960100-152012423  | exonic       | KMT2C                  | 7  | 151960100 | 152012423 | 0 | 0 | 2 | 3  | 5  | 1 | 52323 | 1.626827924 | -1.752120364 | 2.183024046 | -0.802611573 | 0.422199277 | 0.998252924 |
| chr2:203419974-203421254  | exonic       | BMP2                   | 2  | 203419974 | 203421254 | 0 | 0 | 4 | 11 | 8  | 1 | 1280  | 3.234939322 | -1.743494465 | 1.717774722 | -1.01497271  | NA          | NA          |
| chr17:47388673-47389404   | exonic       | ZNF652                 | 17 | 47388673  | 47389404  | 6 | 0 | 0 | 9  | 14 | 0 | 731   | 3.425108028 | -1.74214532  | 1.797537447 | -0.969184438 | 0.332453174 | 0.998252924 |
| chr10:35321362-35328010   | exonic       | CUL2                   | 10 | 35321362  | 35328010  | 0 | 0 | 1 | 3  | 2  | 0 | 6648  | 0.758258025 | -1.739292546 | 3.071391949 | -0.566288046 | 0.571197985 | 0.998252924 |

|                          |              |               |    |           |           |   |   |   |    |   |   |       |             |              |             |              |             |             |
|--------------------------|--------------|---------------|----|-----------|-----------|---|---|---|----|---|---|-------|-------------|--------------|-------------|--------------|-------------|-------------|
| chr19:14854231-14854596  | exonic       | ADGRE2        | 19 | 14854231  | 14854596  | 0 | 0 | 1 | 3  | 2 | 0 | 365   | 0.758258025 | -1.739292546 | 3.071391949 | -0.566288046 | 0.571197985 | 0.998252924 |
| chr2:160005652-160007067 | exonic       | TANC1         | 2  | 160005652 | 160007067 | 0 | 0 | 1 | 3  | 2 | 0 | 1415  | 0.758258025 | -1.739292546 | 3.071391949 | -0.566288046 | 0.571197985 | 0.998252924 |
| chr2:169684667-169690835 | exonic       | NOSTRIN       | 2  | 169684667 | 169690835 | 0 | 0 | 1 | 3  | 2 | 0 | 6168  | 0.758258025 | -1.739292546 | 3.071391949 | -0.566288046 | 0.571197985 | 0.998252924 |
| chr2:201881713-201888762 | exonic       | FAM126B       | 2  | 201881713 | 201888762 | 0 | 0 | 1 | 3  | 2 | 0 | 7049  | 0.758258025 | -1.739292546 | 3.071391949 | -0.566288046 | 0.571197985 | 0.998252924 |
| chr11:62491058-62491898  | exonic       | HNRNPUL2      | 11 | 62491058  | 62491898  | 0 | 1 | 0 | 3  | 2 | 0 | 840   | 0.735264798 | -1.737858431 | 3.103734393 | -0.559924984 | 0.575530606 | 0.998252924 |
| chr12:22637630-22659753  | exonic       | C2CD5         | 12 | 22637630  | 22659753  | 0 | 1 | 0 | 3  | 2 | 0 | 22123 | 0.735264798 | -1.737858431 | 3.103734393 | -0.559924984 | 0.575530606 | 0.998252924 |
| chr2:234358627-234360706 | exonic       | DGKD          | 2  | 234358627 | 234360706 | 0 | 1 | 0 | 3  | 2 | 0 | 2079  | 0.735264798 | -1.737858431 | 3.103734393 | -0.559924984 | 0.575530606 | 0.998252924 |
| chr3:18456602-18462483   | exonic       | SATB1         | 3  | 18456602  | 18462483  | 0 | 1 | 0 | 3  | 2 | 0 | 5881  | 0.735264798 | -1.737858431 | 3.103734393 | -0.559924984 | 0.575530606 | 0.998252924 |
| chr1:114214355-114216087 | exonic       | MAGI3         | 1  | 114214355 | 114216087 | 1 | 0 | 0 | 3  | 2 | 0 | 1732  | 0.689975942 | -1.734932443 | 3.173741193 | -0.546652149 | 0.584617735 | 0.998252924 |
| chr1:51871576-51874004   | exonic       | EPS15         | 1  | 51871576  | 51874004  | 1 | 0 | 0 | 3  | 2 | 0 | 2428  | 0.689975942 | -1.734932443 | 3.173741193 | -0.546652149 | 0.584617735 | 0.998252924 |
| chr10:69726439-69752439  | exonic       | HERC4         | 10 | 69726439  | 69752439  | 1 | 0 | 0 | 3  | 2 | 0 | 26000 | 0.689975942 | -1.734932443 | 3.173741193 | -0.546652149 | 0.584617735 | 0.998252924 |
| chr17:33689757-33690845  | exonic       | SLFN11        | 17 | 33689757  | 33690845  | 1 | 0 | 0 | 3  | 2 | 0 | 1088  | 0.689975942 | -1.734932443 | 3.173741193 | -0.546652149 | 0.584617735 | 0.998252924 |
| chr2:136527338-136530117 | exonic       | UBXN4         | 2  | 136527338 | 136530117 | 1 | 0 | 0 | 3  | 2 | 0 | 2779  | 0.689975942 | -1.734932443 | 3.173741193 | -0.546652149 | 0.584617735 | 0.998252924 |
| chr2:206165253-206166425 | exonic       | PARD3B        | 2  | 206165253 | 206166425 | 1 | 0 | 0 | 3  | 2 | 0 | 1172  | 0.689975942 | -1.734932443 | 3.173741193 | -0.546652149 | 0.584617735 | 0.998252924 |
| chr2:227704124-227779067 | exonic       | RHBDD1        | 2  | 227704124 | 227779067 | 1 | 0 | 0 | 3  | 2 | 0 | 74943 | 0.689975942 | -1.734932443 | 3.173741193 | -0.546652149 | 0.584617735 | 0.998252924 |
| chr2:69297778-69304620   | exonic       | ANTXR1        | 2  | 69297778  | 69304620  | 1 | 0 | 0 | 3  | 2 | 0 | 6842  | 0.689975942 | -1.734932443 | 3.173741193 | -0.546652149 | 0.584617735 | 0.998252924 |
| chr3:101450683-101451498 | exonic       | CEP97         | 3  | 101450683 | 101451498 | 1 | 0 | 0 | 3  | 2 | 0 | 815   | 0.689975942 | -1.734932443 | 3.173741193 | -0.546652149 | 0.584617735 | 0.998252924 |
| chr7:26724354-26766625   | exonic       | SKAP2         | 7  | 26724354  | 26766625  | 1 | 0 | 0 | 3  | 2 | 0 | 42271 | 0.689975942 | -1.734932443 | 3.173741193 | -0.546652149 | 0.584617735 | 0.998252924 |
| chr19:14513408-14515374  | exonic       | ADGRE5        | 19 | 14513408  | 14515374  | 2 | 1 | 0 | 11 | 2 | 0 | 1966  | 1.843729765 | -1.723283588 | 2.089982717 | -0.824544421 | 0.409630287 | 0.998252924 |
| chr1:111690263-111703918 | exonic       | CEPT1         | 1  | 111690263 | 111703918 | 3 | 0 | 1 | 11 | 6 | 0 | 13655 | 2.479819621 | -1.720118924 | 1.848815888 | -0.930389519 | 0.352169443 | 0.998252924 |
| chr1:39910333-39914435   | exonic       | MACF1         | 1  | 39910333  | 39914435  | 2 | 0 | 0 | 6  | 2 | 0 | 4102  | 1.13789704  | -1.718080031 | 2.652464611 | -0.647729671 | 0.51715981  | 0.998252924 |
| chr2:43953410-43968182   | exonic       | PLEKHH2       | 2  | 43953410  | 43968182  | 2 | 0 | 0 | 0  | 2 | 0 | 14772 | 1.13789704  | -1.718080031 | 2.652464611 | -0.647729671 | 0.51715981  | 0.998252924 |
| chr3:132294615-132324049 | exonic       | ACAD11, ACKR4 | 3  | 132294615 | 132324049 | 2 | 0 | 0 | 6  | 2 | 0 | 29434 | 1.13789704  | -1.718080031 | 2.652464611 | -0.647729671 | 0.51715981  | 0.998252924 |
| chr3:171969050-171979873 | exonic       | FNDC3B        | 3  | 171969050 | 171979873 | 3 | 0 | 0 | 2  | 0 | 4 | 10823 | 1.832458034 | -1.715968377 | 2.304037367 | -0.744765862 | NA          | NA          |
| chr17:169210-177370      | exonic       | RPH3AL        | 17 | 169210    | 177370    | 0 | 3 | 0 | 1  | 8 | 2 | 8160  | 2.213795374 | -1.706736223 | 1.991674333 | -0.856935391 | 0.391480592 | 0.998252924 |
| chr4:152095821-152108615 | exonic       | SH3D19        | 4  | 152095821 | 152108615 | 3 | 0 | 2 | 18 | 0 | 2 | 12794 | 3.31154103  | -1.704956792 | 1.752542209 | -0.972847777 | 0.330628963 | 0.998252924 |
| chr7:5363844-5364879     | exonic       | TNRC18        | 7  | 5363844   | 5364879   | 0 | 0 | 1 | 4  | 1 | 0 | 1035  | 0.743541988 | -1.704024296 | 3.11857867  | -0.546410553 | 0.584783757 | 0.998252924 |
| chr8:90736856-90737869   | ncRNA_exonic | LOC101929709  | 8  | 90736856  | 90737869  | 0 | 0 | 1 | 4  | 1 | 0 | 1013  | 0.743541988 | -1.704024296 | 3.11857867  | -0.546410553 | 0.584783757 | 0.998252924 |
| chrX:76918870-76931793   | exonic       | ATRX          | X  | 76918870  | 76931793  | 0 | 0 | 1 | 4  | 1 | 0 | 12923 | 0.743541988 | -1.704024296 | 3.11857867  | -0.546410553 | 0.584783757 | 0.998252924 |
| chr3:149619858-149639014 | exonic       | RNF13         | 3  | 149619858 | 149639014 | 1 | 0 | 1 | 2  | 0 | 3 | 19156 | 1.463534565 | -1.703483766 | 2.351665677 | -0.724373274 | 0.468836603 | 0.998252924 |
| chr2:128520635-128528578 | exonic       | WDR33         | 2  | 128520635 | 128528578 | 0 | 1 | 0 | 4  | 1 | 0 | 7943  | 0.720548761 | -1.702508785 | 3.151827492 | -0.540165599 | 0.589082834 | 0.998252924 |
| chr3:50137414-50142575   | exonic       | RBM5          | 3  | 50137414  | 50142575  | 0 | 1 | 0 | 4  | 1 | 0 | 5161  | 0.720548761 | -1.702508785 | 3.151827492 | -0.540165599 | 0.589082834 | 0.998252924 |
| chr9:110062421-110068928 | exonic       | RAD23B        | 9  | 110062421 | 110068928 | 0 | 1 | 0 | 4  | 1 | 0 | 6507  | 0.720548761 | -1.702508785 | 3.151827492 | -0.540165599 | 0.589082834 | 0.998252924 |
| chr7:810107-814799       | exonic       | DNAAF5        | 7  | 810107    | 814799    | 0 | 3 | 0 | 0  | 2 | 5 | 4692  | 2.305975285 | -1.70215786  | 2.163793946 | -0.786654322 | NA          | NA          |
| chr15:65471271-65472542  | exonic       | CLPX          | 15 | 65471271  | 65472542  | 3 | 2 | 0 | 9  | 5 | 3 | 1271  | 3.222107828 | -1.70210142  | 1.525436881 | -1.115812422 | 0.264502436 | 0.998252924 |

|                           |              |                         |    |           |           |    |   |    |    |    |    |       |             |              |             |              |             |             |
|---------------------------|--------------|-------------------------|----|-----------|-----------|----|---|----|----|----|----|-------|-------------|--------------|-------------|--------------|-------------|-------------|
| chr2:136505836-136530117  | exonic       | UBXN4                   | 2  | 136505836 | 136530117 | 1  | 0 | 2  | 0  | 2  | 5  | 24281 | 2.306672881 | -1.700336675 | 2.028921746 | -0.838049412 | NA          | NA          |
| chr11:69999162-70007468   | exonic       | ANO1                    | 11 | 69999162  | 70007468  | 1  | 0 | 0  | 4  | 1  | 0  | 8306  | 0.675259905 | -1.699411954 | 3.223846785 | -0.52713794  | 0.598097801 | 0.998252924 |
| chr5:139889221-139889766  | exonic       | ANKHD1, ANKHD1-EIF4EBP3 | 5  | 139889221 | 139889766 | 1  | 0 | 0  | 4  | 1  | 0  | 545   | 0.675259905 | -1.699411954 | 3.223846785 | -0.52713794  | 0.598097801 | 0.998252924 |
| chr6:17764385-17765177    | exonic       | KIF13A                  | 6  | 17764385  | 17765177  | 1  | 0 | 0  | 4  | 1  | 0  | 792   | 0.675259905 | -1.699411954 | 3.223846785 | -0.52713794  | 0.598097801 | 0.998252924 |
| chr8:42259305-42260979    | exonic       | VDAC3                   | 8  | 42259305  | 42260979  | 1  | 0 | 0  | 4  | 1  | 0  | 1674  | 0.675259905 | -1.699411954 | 3.223846785 | -0.52713794  | 0.598097801 | 0.998252924 |
| chr8:93017343-93088365    | exonic       | RUNX1T1                 | 8  | 93017343  | 93088365  | 1  | 0 | 0  | 4  | 1  | 0  | 71022 | 0.675259905 | -1.699411954 | 3.223846785 | -0.52713794  | 0.598097801 | 0.998252924 |
| chr5:176468126-176477937  | exonic       | ZNF346                  | 5  | 176468126 | 176477937 | 1  | 0 | 1  | 6  | 3  | 0  | 9811  | 1.327206545 | -1.699261408 | 2.346018612 | -0.724317104 | 0.468871079 | 0.998252924 |
| chr1:94685813-94697199    | exonic       | ARHGAP29                | 1  | 94685813  | 94697199  | 2  | 0 | 0  | 7  | 1  | 0  | 11386 | 1.123181003 | -1.696563282 | 2.699805714 | -0.628401989 | NA          | NA          |
| chr6:17671288-17672025    | intronic     | NUP153                  | 6  | 17671288  | 17672025  | 0  | 4 | 0  | 0  | 4  | 6  | 737   | 3.030524536 | -1.692337753 | 1.972910619 | -0.857787341 | 0.391009901 | 0.998252924 |
| chr3:145838898-145842016  | exonic       | PLOD2                   | 3  | 145838898 | 145842016 | 3  | 3 | 13 | 6  | 17 | 28 | 3118  | 14.79974109 | -1.690440922 | 1.062952586 | -1.5903258   | 0.111761386 | 0.998252924 |
| chr1:1430865-1464711      | exonic       | ATAD3A, ATAD3B          | 1  | 1430865   | 1464711   | 0  | 0 | 2  | 11 | 0  | 0  | 33846 | 1.563963288 | -1.686799282 | 2.633616529 | -0.640487809 | NA          | NA          |
| chr4:38682579-38683774    | intronic     | KLF3                    | 4  | 38682579  | 38683774  | 4  | 0 | 0  | 3  | 0  | 5  | 1195  | 2.375974971 | -1.685106183 | 2.105304039 | -0.800409894 | 0.42347335  | 0.998252924 |
| chr1:219366424-219392054  | exonic       | LYPLAL1                 | 1  | 219366424 | 219392054 | 4  | 0 | 0  | 8  | 7  | 0  | 25630 | 2.213630805 | -1.684241056 | 2.055527771 | -0.819371589 | NA          | NA          |
| chr17:8141348-8141947     | exonic       | CTC1                    | 17 | 8141348   | 8141947   | 2  | 1 | 0  | 5  | 7  | 0  | 599   | 1.810998563 | -1.684158898 | 2.063347121 | -0.816226645 | 0.41437052  | 0.998252924 |
| chr11:10540580-10555752   | exonic       | RNF141                  | 11 | 10540580  | 10555752  | 1  | 0 | 0  | 0  | 0  | 2  | 15172 | 0.74542416  | -1.680481664 | 3.449052573 | -0.487229936 | 0.626095393 | 0.998252924 |
| chr11:8462224-8486369     | exonic       | STK33                   | 11 | 8462224   | 8486369   | 13 | 2 | 4  | 0  | 2  | 2  | 24145 | 0.74542416  | -1.680481664 | 3.449052573 | -0.487229936 | 0.626095393 | 0.998252924 |
| chr12:124856567-124857156 | exonic       | NCOR2                   | 12 | 124856567 | 124857156 | 1  | 0 | 0  | 0  | 0  | 2  | 589   | 0.74542416  | -1.680481664 | 3.449052573 | -0.487229936 | 0.626095393 | 0.998252924 |
| chr14:31592119-31641328   | exonic       | HECTD1                  | 14 | 31592119  | 31641328  | 1  | 0 | 0  | 0  | 0  | 2  | 49209 | 0.74542416  | -1.680481664 | 3.449052573 | -0.487229936 | 0.626095393 | 0.998252924 |
| chr2:220429963-220433046  | exonic       | OBSL1                   | 2  | 220429963 | 220433046 | 1  | 0 | 0  | 0  | 0  | 2  | 3083  | 0.74542416  | -1.680481664 | 3.449052573 | -0.487229936 | 0.626095393 | 0.998252924 |
| chr2:38956697-38959051    | exonic       | GALM                    | 2  | 38956697  | 38959051  | 1  | 0 | 0  | 0  | 0  | 2  | 2354  | 0.74542416  | -1.680481664 | 3.449052573 | -0.487229936 | 0.626095393 | 0.998252924 |
| chr22:36681402-36681703   | splicing     | MYH9                    | 22 | 36681402  | 36681703  | 1  | 0 | 0  | 0  | 0  | 2  | 301   | 0.74542416  | -1.680481664 | 3.449052573 | -0.487229936 | 0.626095393 | 0.998252924 |
| chr5:126859151-126862470  | exonic       | PRRC1                   | 5  | 126859151 | 126862470 | 1  | 0 | 0  | 0  | 0  | 2  | 3319  | 0.74542416  | -1.680481664 | 3.449052573 | -0.487229936 | 0.626095393 | 0.998252924 |
| chr3:16343132-16344255    | exonic       | OXNAD1                  | 3  | 16343132  | 16344255  | 1  | 0 | 1  | 1  | 3  | 2  | 1123  | 1.412086836 | -1.680053148 | 2.203661226 | -0.762391754 | 0.445826226 | 0.998252924 |
| chr6:592468-619543        | exonic       | EXOC2                   | 6  | 592468    | 619543    | 2  | 0 | 0  | 3  | 0  | 2  | 27075 | 1.193345259 | -1.676077186 | 2.652258854 | -0.63194329  | 0.527423935 | 0.998252924 |
| chr10:4872866-4884696     | exonic       | AKR1E2                  | 10 | 4872866   | 4884696   | 0  | 1 | 0  | 0  | 0  | 2  | 11830 | 0.790713017 | -1.674464528 | 3.378746561 | -0.49558749  | 0.620185481 | 0.998252924 |
| chr11:85692171-85722179   | exonic       | PICALM                  | 11 | 85692171  | 85722179  | 0  | 1 | 0  | 0  | 0  | 2  | 30008 | 0.790713017 | -1.674464528 | 3.378746561 | -0.49558749  | 0.620185481 | 0.998252924 |
| chr17:42161922-42165064   | exonic       | HDAC5                   | 17 | 42161922  | 42165064  | 0  | 1 | 0  | 0  | 0  | 2  | 3142  | 0.790713017 | -1.674464528 | 3.378746561 | -0.49558749  | 0.620185481 | 0.998252924 |
| chr6:86252899-86284096    | exonic       | SNX14                   | 6  | 86252899  | 86284096  | 0  | 1 | 0  | 0  | 0  | 2  | 31197 | 0.790713017 | -1.674464528 | 3.378746561 | -0.49558749  | 0.620185481 | 0.998252924 |
| chr7:102960055-102963241  | exonic       | DNAJC2                  | 7  | 102960055 | 102963241 | 0  | 1 | 0  | 0  | 0  | 2  | 3186  | 0.790713017 | -1.674464528 | 3.378746561 | -0.49558749  | 0.620185481 | 0.998252924 |
| chr7:140439611-140494267  | exonic       | BRAF                    | 7  | 140439611 | 140494267 | 0  | 1 | 0  | 0  | 0  | 2  | 54656 | 0.790713017 | -1.674464528 | 3.378746561 | -0.49558749  | 0.620185481 | 0.998252924 |
| chr4:77917577-77952123    | exonic       |                         | 4  | 77917577  | 77952123  | 2  | 0 | 0  | 8  | 0  | 0  | 34546 | 1.108464967 | -1.673614732 | 2.950403281 | -0.567249482 | NA          | NA          |
| chr7:2477439-2483381      | ncRNA_exonic | LOC101927181            | 7  | 2477439   | 2483381   | 2  | 0 | 0  | 8  | 0  | 0  | 5942  | 1.108464967 | -1.673614732 | 2.950403281 | -0.567249482 | NA          | NA          |
| chr1:100681538-100684303  | exonic       | DBT                     | 1  | 100681538 | 100684303 | 0  | 0 | 0  | 0  | 2  | 0  | 2765  | 0.242054844 | -1.673220759 | 4.032572473 | -0.414926395 | 0.678195787 | 0.998252924 |
| chr1:110532090-110541520  | intronic     | AHCYL1                  | 1  | 110532090 | 110541520 | 0  | 0 | 0  | 0  | 2  | 0  | 9430  | 0.242054844 | -1.673220759 | 4.032572473 | -0.414926395 | 0.678195787 | 0.998252924 |
| chr1:113084572-113159517  | exonic       | ST7L                    | 1  | 113084572 | 113159517 | 0  | 0 | 0  | 0  | 2  | 0  | 74945 | 0.242054844 | -1.673220759 | 4.032572473 | -0.414926395 | 0.678195787 | 0.998252924 |

|                          |            |                                                              |   |           |           |   |   |   |   |   |   |        |             |              |             |              |             |             |
|--------------------------|------------|--------------------------------------------------------------|---|-----------|-----------|---|---|---|---|---|---|--------|-------------|--------------|-------------|--------------|-------------|-------------|
| chr1:114347834-114348892 | intronic   | RSBN1                                                        | 1 | 114347834 | 114348892 | 0 | 0 | 0 | 0 | 2 | 0 | 1058   | 0.242054844 | -1.673220759 | 4.032572473 | -0.414926395 | 0.678195787 | 0.998252924 |
| chr1:150418701-150437203 | exonic     | RPRD2                                                        | 1 | 150418701 | 150437203 | 0 | 0 | 0 | 0 | 2 | 0 | 18502  | 0.242054844 | -1.673220759 | 4.032572473 | -0.414926395 | 0.678195787 | 0.998252924 |
| chr1:150795669-150804875 | exonic     | ARNT                                                         | 1 | 150795669 | 150804875 | 0 | 0 | 0 | 0 | 2 | 0 | 9206   | 0.242054844 | -1.673220759 | 4.032572473 | -0.414926395 | 0.678195787 | 0.998252924 |
| chr1:153982447-153984846 | exonic     | NUP210L                                                      | 1 | 153982447 | 153984846 | 0 | 0 | 0 | 0 | 2 | 0 | 2399   | 0.242054844 | -1.673220759 | 4.032572473 | -0.414926395 | 0.678195787 | 0.998252924 |
| chr1:154233367-154239044 | exonic     | UBAP2L                                                       | 1 | 154233367 | 154239044 | 0 | 0 | 0 | 0 | 2 | 0 | 5677   | 0.242054844 | -1.673220759 | 4.032572473 | -0.414926395 | 0.678195787 | 0.998252924 |
| chr1:155365249-155385714 | exonic     | ASH1L                                                        | 1 | 155365249 | 155385714 | 0 | 0 | 0 | 0 | 2 | 0 | 20465  | 0.242054844 | -1.673220759 | 4.032572473 | -0.414926395 | 0.678195787 | 0.998252924 |
| chr1:155447676-155452240 | exonic     | ASH1L                                                        | 1 | 155447676 | 155452240 | 0 | 0 | 0 | 0 | 2 | 0 | 4564   | 0.242054844 | -1.673220759 | 4.032572473 | -0.414926395 | 0.678195787 | 0.998252924 |
| chr1:158984450-158990319 | exonic     | IFI16                                                        | 1 | 158984450 | 158990319 | 0 | 0 | 0 | 0 | 2 | 0 | 5869   | 0.242054844 | -1.673220759 | 4.032572473 | -0.414926395 | 0.678195787 | 0.998252924 |
| chr1:15956819-15970145   | exonic     | DDI2                                                         | 1 | 15956819  | 15970145  | 0 | 0 | 0 | 0 | 2 | 0 | 13326  | 0.242054844 | -1.673220759 | 4.032572473 | -0.414926395 | 0.678195787 | 0.998252924 |
| chr1:161561423-161643019 | exonic     | FCGR2B, FCGR2C, FCGR3B                                       | 1 | 161561423 | 161643019 | 0 | 0 | 0 | 0 | 2 | 0 | 81596  | 0.242054844 | -1.673220759 | 4.032572473 | -0.414926395 | 0.678195787 | 0.998252924 |
| chr1:169080608-169100707 | exonic     | ATP1B1                                                       | 1 | 169080608 | 169100707 | 0 | 0 | 0 | 0 | 2 | 0 | 20099  | 0.242054844 | -1.673220759 | 4.032572473 | -0.414926395 | 0.678195787 | 0.998252924 |
| chr1:171504566-171535982 | exonic     | PRRC2C                                                       | 1 | 171504566 | 171535982 | 0 | 0 | 0 | 0 | 2 | 0 | 31416  | 0.242054844 | -1.673220759 | 4.032572473 | -0.414926395 | 0.678195787 | 0.998252924 |
| chr1:171528938-171530295 | exonic     | PRRC2C                                                       | 1 | 171528938 | 171530295 | 0 | 0 | 0 | 0 | 2 | 0 | 1357   | 0.242054844 | -1.673220759 | 4.032572473 | -0.414926395 | 0.678195787 | 0.998252924 |
| chr1:178846633-178855255 | exonic     | RALGPS2                                                      | 1 | 178846633 | 178855255 | 0 | 0 | 0 | 0 | 2 | 0 | 8622   | 0.242054844 | -1.673220759 | 4.032572473 | -0.414926395 | 0.678195787 | 0.998252924 |
| chr1:179084012-179091002 | exonic     | ABL2                                                         | 1 | 179084012 | 179091002 | 0 | 0 | 0 | 0 | 2 | 0 | 6990   | 0.242054844 | -1.673220759 | 4.032572473 | -0.414926395 | 0.678195787 | 0.998252924 |
| chr1:179869261-179883189 | exonic     | TOR1AIP1                                                     | 1 | 179869261 | 179883189 | 0 | 0 | 0 | 0 | 2 | 0 | 13928  | 0.242054844 | -1.673220759 | 4.032572473 | -0.414926395 | 0.678195787 | 0.998252924 |
| chr1:180065319-180067973 | exonic     | CEP350                                                       | 1 | 180065319 | 180067973 | 0 | 0 | 0 | 0 | 2 | 0 | 2654   | 0.242054844 | -1.673220759 | 4.032572473 | -0.414926395 | 0.678195787 | 0.998252924 |
| chr1:185946918-186047352 | exonic     | HMCN1                                                        | 1 | 185946918 | 186047352 | 0 | 0 | 0 | 0 | 2 | 0 | 100434 | 0.242054844 | -1.673220759 | 4.032572473 | -0.414926395 | 0.678195787 | 0.998252924 |
| chr1:186862142-186863343 | exonic     | PLA2G4A                                                      | 1 | 186862142 | 186863343 | 0 | 0 | 0 | 0 | 2 | 0 | 1201   | 0.242054844 | -1.673220759 | 4.032572473 | -0.414926395 | 0.678195787 | 0.998252924 |
| chr1:193107214-193111196 | exonic     | CDC73                                                        | 1 | 193107214 | 193111196 | 0 | 0 | 0 | 0 | 2 | 0 | 3982   | 0.242054844 | -1.673220759 | 4.032572473 | -0.414926395 | 0.678195787 | 0.998252924 |
| chr1:202119438-202121827 | exonic     | PTPN7                                                        | 1 | 202119438 | 202121827 | 0 | 0 | 0 | 0 | 2 | 0 | 2389   | 0.242054844 | -1.673220759 | 4.032572473 | -0.414926395 | 0.678195787 | 0.998252924 |
| chr1:202528005-202538325 | exonic     | PPP1R12B                                                     | 1 | 202528005 | 202538325 | 0 | 0 | 0 | 0 | 2 | 0 | 10320  | 0.242054844 | -1.673220759 | 4.032572473 | -0.414926395 | 0.678195787 | 0.998252924 |
| chr1:205064000-205085011 | exonic     | RBBP5                                                        | 1 | 205064000 | 205085011 | 0 | 0 | 0 | 0 | 2 | 0 | 21011  | 0.242054844 | -1.673220759 | 4.032572473 | -0.414926395 | 0.678195787 | 0.998252924 |
| chr1:212118125-212141323 | exonic     | INTS7                                                        | 1 | 212118125 | 212141323 | 0 | 0 | 0 | 0 | 2 | 0 | 23198  | 0.242054844 | -1.673220759 | 4.032572473 | -0.414926395 | 0.678195787 | 0.998252924 |
| chr1:212515529-212520748 | exonic     | PPP2R5A                                                      | 1 | 212515529 | 212520748 | 0 | 0 | 0 | 0 | 2 | 0 | 5219   | 0.242054844 | -1.673220759 | 4.032572473 | -0.414926395 | 0.678195787 | 0.998252924 |
| chr1:21566587-21568025   | intronic   | ECE1                                                         | 1 | 21566587  | 21568025  | 0 | 0 | 0 | 0 | 2 | 0 | 1438   | 0.242054844 | -1.673220759 | 4.032572473 | -0.414926395 | 0.678195787 | 0.998252924 |
| chr1:21943798-21946543   | exonic     | RAP1GAP                                                      | 1 | 21943798  | 21946543  | 0 | 0 | 0 | 0 | 2 | 0 | 2745   | 0.242054844 | -1.673220759 | 4.032572473 | -0.414926395 | 0.678195787 | 0.998252924 |
| chr1:229596357-229634053 | exonic     | NUP133                                                       | 1 | 229596357 | 229634053 | 0 | 0 | 0 | 0 | 2 | 0 | 37696  | 0.242054844 | -1.673220759 | 4.032572473 | -0.414926395 | 0.678195787 | 0.998252924 |
| chr1:232695370-232711361 | intergenic | <small>SIPAL2(d1st-44016), LOC101927083(d1st-151628)</small> | 1 | 232695370 | 232711361 | 0 | 0 | 0 | 0 | 2 | 0 | 15991  | 0.242054844 | -1.673220759 | 4.032572473 | -0.414926395 | 0.678195787 | 0.998252924 |
| chr1:235437470-235446335 | intronic   | ARID4B                                                       | 1 | 235437470 | 235446335 | 0 | 0 | 0 | 0 | 2 | 0 | 8865   | 0.242054844 | -1.673220759 | 4.032572473 | -0.414926395 | 0.678195787 | 0.998252924 |
| chr1:24075510-24080950   | exonic     | TCEB3                                                        | 1 | 24075510  | 24080950  | 0 | 0 | 0 | 0 | 2 | 0 | 5440   | 0.242054844 | -1.673220759 | 4.032572473 | -0.414926395 | 0.678195787 | 0.998252924 |
| chr1:246490503-246518396 | exonic     | SMYD3                                                        | 1 | 246490503 | 246518396 | 0 | 0 | 0 | 0 | 2 | 0 | 27893  | 0.242054844 | -1.673220759 | 4.032572473 | -0.414926395 | 0.678195787 | 0.998252924 |
| chr1:247319708-247323169 | exonic     | ZNF124                                                       | 1 | 247319708 | 247323169 | 0 | 0 | 0 | 0 | 2 | 0 | 3461   | 0.242054844 | -1.673220759 | 4.032572473 | -0.414926395 | 0.678195787 | 0.998252924 |
| chr1:29542517-29547433   | exonic     | MECR                                                         | 1 | 29542517  | 29547433  | 0 | 0 | 0 | 0 | 2 | 0 | 4916   | 0.242054844 | -1.673220759 | 4.032572473 | -0.414926395 | 0.678195787 | 0.998252924 |
| chr1:31412066-31412424   | intronic   | PUM1                                                         | 1 | 31412066  | 31412424  | 0 | 0 | 0 | 0 | 2 | 0 | 358    | 0.242054844 | -1.673220759 | 4.032572473 | -0.414926395 | 0.678195787 | 0.998252924 |

|                           |              |           |    |           |           |   |   |   |   |   |   |        |             |              |             |              |             |             |
|---------------------------|--------------|-----------|----|-----------|-----------|---|---|---|---|---|---|--------|-------------|--------------|-------------|--------------|-------------|-------------|
| chr1:32502510-32505174    | exonic       | KHDRBS1   | 1  | 32502510  | 32505174  | 0 | 0 | 0 | 0 | 2 | 0 | 2664   | 0.242054844 | -1.673220759 | 4.032572473 | -0.414926395 | 0.678195787 | 0.998252924 |
| chr1:33149610-33149983    | exonic       | SYNC      | 1  | 33149610  | 33149983  | 0 | 0 | 0 | 0 | 2 | 0 | 373    | 0.242054844 | -1.673220759 | 4.032572473 | -0.414926395 | 0.678195787 | 0.998252924 |
| chr1:35559514-35576048    | exonic       | ZMYM1     | 1  | 35559514  | 35576048  | 0 | 0 | 0 | 0 | 2 | 0 | 16534  | 0.242054844 | -1.673220759 | 4.032572473 | -0.414926395 | 0.678195787 | 0.998252924 |
| chr1:35824525-35855699    | exonic       | ZMYM4     | 1  | 35824525  | 35855699  | 0 | 0 | 0 | 0 | 2 | 0 | 31174  | 0.242054844 | -1.673220759 | 4.032572473 | -0.414926395 | 0.678195787 | 0.998252924 |
| chr1:35932208-35944813    | exonic       | KIAA0319L | 1  | 35932208  | 35944813  | 0 | 0 | 0 | 0 | 2 | 0 | 12605  | 0.242054844 | -1.673220759 | 4.032572473 | -0.414926395 | 0.678195787 | 0.998252924 |
| chr1:41163943-41168109    | intronic     | NFYC      | 1  | 41163943  | 41168109  | 0 | 0 | 0 | 0 | 2 | 0 | 4166   | 0.242054844 | -1.673220759 | 4.032572473 | -0.414926395 | 0.678195787 | 0.998252924 |
| chr1:42654973-42664901    | exonic       | FOXJ3     | 1  | 42654973  | 42664901  | 0 | 0 | 0 | 0 | 2 | 0 | 9928   | 0.242054844 | -1.673220759 | 4.032572473 | -0.414926395 | 0.678195787 | 0.998252924 |
| chr1:46650631-46650980    | exonic       | TSPAN1    | 1  | 46650631  | 46650980  | 0 | 0 | 0 | 0 | 2 | 0 | 349    | 0.242054844 | -1.673220759 | 4.032572473 | -0.414926395 | 0.678195787 | 0.998252924 |
| chr1:53362028-53363156    | exonic       | ECHDC2    | 1  | 53362028  | 53363156  | 0 | 0 | 0 | 0 | 2 | 0 | 1128   | 0.242054844 | -1.673220759 | 4.032572473 | -0.414926395 | 0.678195787 | 0.998252924 |
| chr1:54389576-54405770    | exonic       | HSPB11    | 1  | 54389576  | 54405770  | 0 | 0 | 0 | 0 | 2 | 0 | 16194  | 0.242054844 | -1.673220759 | 4.032572473 | -0.414926395 | 0.678195787 | 0.998252924 |
| chr1:63269389-63286880    | exonic       | ATG4C     | 1  | 63269389  | 63286880  | 0 | 0 | 0 | 0 | 2 | 0 | 17491  | 0.242054844 | -1.673220759 | 4.032572473 | -0.414926395 | 0.678195787 | 0.998252924 |
| chr1:65455118-65460771    | ncRNA_exonic | LINC01359 | 1  | 65455118  | 65460771  | 0 | 0 | 0 | 0 | 2 | 0 | 5653   | 0.242054844 | -1.673220759 | 4.032572473 | -0.414926395 | 0.678195787 | 0.998252924 |
| chr1:6880241-6948959      | exonic       | CAMTA1    | 1  | 6880241   | 6948959   | 0 | 0 | 0 | 0 | 2 | 0 | 68718  | 0.242054844 | -1.673220759 | 4.032572473 | -0.414926395 | 0.678195787 | 0.998252924 |
| chr1:78201741-78205102    | exonic       | USP33     | 1  | 78201741  | 78205102  | 0 | 0 | 0 | 0 | 2 | 0 | 3361   | 0.242054844 | -1.673220759 | 4.032572473 | -0.414926395 | 0.678195787 | 0.998252924 |
| chr1:78433373-78433848    | splicing     | FUBP1     | 1  | 78433373  | 78433848  | 0 | 0 | 0 | 0 | 2 | 0 | 475    | 0.242054844 | -1.673220759 | 4.032572473 | -0.414926395 | 0.678195787 | 0.998252924 |
| chr1:84644859-84663507    | exonic       | PRKACB    | 1  | 84644859  | 84663507  | 0 | 0 | 0 | 0 | 2 | 0 | 18648  | 0.242054844 | -1.673220759 | 4.032572473 | -0.414926395 | 0.678195787 | 0.998252924 |
| chr1:8555123-8568734      | exonic       | RERE      | 1  | 8555123   | 8568734   | 0 | 0 | 0 | 0 | 2 | 0 | 13611  | 0.242054844 | -1.673220759 | 4.032572473 | -0.414926395 | 0.678195787 | 0.998252924 |
| chr1:86590528-86611866    | exonic       | COL24A1   | 1  | 86590528  | 86611866  | 0 | 0 | 0 | 0 | 2 | 0 | 21338  | 0.242054844 | -1.673220759 | 4.032572473 | -0.414926395 | 0.678195787 | 0.998252924 |
| chr1:92798948-92829327    | exonic       | RPAP2     | 1  | 92798948  | 92829327  | 0 | 0 | 0 | 0 | 2 | 0 | 30379  | 0.242054844 | -1.673220759 | 4.032572473 | -0.414926395 | 0.678195787 | 0.998252924 |
| chr1:93648916-93676483    | exonic       | CCDC18    | 1  | 93648916  | 93676483  | 0 | 0 | 0 | 0 | 2 | 0 | 27567  | 0.242054844 | -1.673220759 | 4.032572473 | -0.414926395 | 0.678195787 | 0.998252924 |
| chr1:93677657-93692006    | exonic       | CCDC18    | 1  | 93677657  | 93692006  | 0 | 0 | 0 | 0 | 2 | 0 | 14349  | 0.242054844 | -1.673220759 | 4.032572473 | -0.414926395 | 0.678195787 | 0.998252924 |
| chr10:103750307-103761829 | exonic       | C10orf76  | 10 | 103750307 | 103761829 | 0 | 0 | 0 | 0 | 2 | 0 | 11522  | 0.242054844 | -1.673220759 | 4.032572473 | -0.414926395 | 0.678195787 | 0.998252924 |
| chr10:104117795-104119192 | exonic       | GBF1      | 10 | 104117795 | 104119192 | 0 | 0 | 0 | 0 | 2 | 0 | 1397   | 0.242054844 | -1.673220759 | 4.032572473 | -0.414926395 | 0.678195787 | 0.998252924 |
| chr10:104899162-104941085 | exonic       | NT5C2     | 10 | 104899162 | 104941085 | 0 | 0 | 0 | 0 | 2 | 0 | 41923  | 0.242054844 | -1.673220759 | 4.032572473 | -0.414926395 | 0.678195787 | 0.998252924 |
| chr10:105073942-105107207 | exonic       | PCGF6     | 10 | 105073942 | 105107207 | 0 | 0 | 0 | 0 | 2 | 0 | 33265  | 0.242054844 | -1.673220759 | 4.032572473 | -0.414926395 | 0.678195787 | 0.998252924 |
| chr10:112640990-112642855 | exonic       | PDCD4     | 10 | 112640990 | 112642855 | 0 | 0 | 0 | 0 | 2 | 0 | 1865   | 0.242054844 | -1.673220759 | 4.032572473 | -0.414926395 | 0.678195787 | 0.998252924 |
| chr10:116879948-117185812 | exonic       | ATRNL1    | 10 | 116879948 | 117185812 | 0 | 0 | 0 | 0 | 2 | 0 | 305864 | 0.242054844 | -1.673220759 | 4.032572473 | -0.414926395 | 0.678195787 | 0.998252924 |
| chr10:120813528-120814657 | intronic     | EIF3A     | 10 | 120813528 | 120814657 | 0 | 0 | 0 | 0 | 2 | 0 | 1129   | 0.242054844 | -1.673220759 | 4.032572473 | -0.414926395 | 0.678195787 | 0.998252924 |
| chr10:124350181-124352111 | exonic       | DMBT1     | 10 | 124350181 | 124352111 | 0 | 0 | 0 | 0 | 2 | 0 | 1930   | 0.242054844 | -1.673220759 | 4.032572473 | -0.414926395 | 0.678195787 | 0.998252924 |
| chr10:127483448-127505094 | exonic       | UROS      | 10 | 127483448 | 127505094 | 0 | 0 | 0 | 0 | 2 | 0 | 21646  | 0.242054844 | -1.673220759 | 4.032572473 | -0.414926395 | 0.678195787 | 0.998252924 |
| chr10:128768965-128807068 | exonic       | DOCK1     | 10 | 128768965 | 128807068 | 0 | 0 | 0 | 0 | 2 | 0 | 38103  | 0.242054844 | -1.673220759 | 4.032572473 | -0.414926395 | 0.678195787 | 0.998252924 |
| chr10:128806995-128830584 | exonic       | DOCK1     | 10 | 128806995 | 128830584 | 0 | 0 | 0 | 0 | 2 | 0 | 23589  | 0.242054844 | -1.673220759 | 4.032572473 | -0.414926395 | 0.678195787 | 0.998252924 |
| chr10:15824153-15879317   | exonic       | FAM188A   | 10 | 15824153  | 15879317  | 0 | 0 | 0 | 0 | 2 | 0 | 55164  | 0.242054844 | -1.673220759 | 4.032572473 | -0.414926395 | 0.678195787 | 0.998252924 |
| chr10:21875222-21971186   | exonic       | MLLT10    | 10 | 21875222  | 21971186  | 0 | 0 | 0 | 0 | 2 | 0 | 95964  | 0.242054844 | -1.673220759 | 4.032572473 | -0.414926395 | 0.678195787 | 0.998252924 |
| chr10:22219009-22221198   | intronic     | DNAJC1    | 10 | 22219009  | 22221198  | 0 | 0 | 0 | 0 | 2 | 0 | 2189   | 0.242054844 | -1.673220759 | 4.032572473 | -0.414926395 | 0.678195787 | 0.998252924 |

|                         |              |            |    |          |          |   |   |   |   |   |   |        |             |              |             |              |             |             |
|-------------------------|--------------|------------|----|----------|----------|---|---|---|---|---|---|--------|-------------|--------------|-------------|--------------|-------------|-------------|
| chr10:225934-255988     | exonic       | ZMYND11    | 10 | 225934   | 255988   | 0 | 0 | 0 | 0 | 2 | 0 | 30054  | 0.242054844 | -1.673220759 | 4.032572473 | -0.414926395 | 0.678195787 | 0.998252924 |
| chr10:22941142-22942738 | intronic     | PIP4K2A    | 10 | 22941142 | 22942738 | 0 | 0 | 0 | 0 | 2 | 0 | 1596   | 0.242054844 | -1.673220759 | 4.032572473 | -0.414926395 | 0.678195787 | 0.998252924 |
| chr10:26777440-26778677 | intronic     | APBB1IP    | 10 | 26777440 | 26778677 | 0 | 0 | 0 | 0 | 2 | 0 | 1237   | 0.242054844 | -1.673220759 | 4.032572473 | -0.414926395 | 0.678195787 | 0.998252924 |
| chr10:27317780-27326983 | exonic       | ANKRD26    | 10 | 27317780 | 27326983 | 0 | 0 | 0 | 0 | 2 | 0 | 9203   | 0.242054844 | -1.673220759 | 4.032572473 | -0.414926395 | 0.678195787 | 0.998252924 |
| chr10:27458872-27462188 | exonic       | MASTL      | 10 | 27458872 | 27462188 | 0 | 0 | 0 | 0 | 2 | 0 | 3316   | 0.242054844 | -1.673220759 | 4.032572473 | -0.414926395 | 0.678195787 | 0.998252924 |
| chr10:28412960-28420620 | exonic       | MPP7       | 10 | 28412960 | 28420620 | 0 | 0 | 0 | 0 | 2 | 0 | 7660   | 0.242054844 | -1.673220759 | 4.032572473 | -0.414926395 | 0.678195787 | 0.998252924 |
| chr10:31165927-31273355 | exonic       | ZNF438     | 10 | 31165927 | 31273355 | 0 | 0 | 0 | 0 | 2 | 0 | 107428 | 0.242054844 | -1.673220759 | 4.032572473 | -0.414926395 | 0.678195787 | 0.998252924 |
| chr10:31644076-31676727 | intronic     | ZEB1       | 10 | 31644076 | 31676727 | 0 | 0 | 0 | 0 | 2 | 0 | 32651  | 0.242054844 | -1.673220759 | 4.032572473 | -0.414926395 | 0.678195787 | 0.998252924 |
| chr10:32759991-32833229 | exonic       | CCDC7      | 10 | 32759991 | 32833229 | 0 | 0 | 0 | 0 | 2 | 0 | 73238  | 0.242054844 | -1.673220759 | 4.032572473 | -0.414926395 | 0.678195787 | 0.998252924 |
| chr10:43111648-43112225 | intronic     | ZNF33B     | 10 | 43111648 | 43112225 | 0 | 0 | 0 | 0 | 2 | 0 | 577    | 0.242054844 | -1.673220759 | 4.032572473 | -0.414926395 | 0.678195787 | 0.998252924 |
| chr10:43650344-43659492 | exonic       | CSGALNACT2 | 10 | 43650344 | 43659492 | 0 | 0 | 0 | 0 | 2 | 0 | 9148   | 0.242054844 | -1.673220759 | 4.032572473 | -0.414926395 | 0.678195787 | 0.998252924 |
| chr10:486810-532470     | exonic       | DIP2C      | 10 | 486810   | 532470   | 0 | 0 | 0 | 0 | 2 | 0 | 45660  | 0.242054844 | -1.673220759 | 4.032572473 | -0.414926395 | 0.678195787 | 0.998252924 |
| chr10:51065351-51077601 | exonic       | PARG       | 10 | 51065351 | 51077601 | 0 | 0 | 0 | 0 | 2 | 0 | 12250  | 0.242054844 | -1.673220759 | 4.032572473 | -0.414926395 | 0.678195787 | 0.998252924 |
| chr10:51262048-51299327 | ncRNA_exonic | PARGP1     | 10 | 51262048 | 51299327 | 0 | 0 | 0 | 0 | 2 | 0 | 37279  | 0.242054844 | -1.673220759 | 4.032572473 | -0.414926395 | 0.678195787 | 0.998252924 |
| chr10:518378-532470     | exonic       | DIP2C      | 10 | 518378   | 532470   | 0 | 0 | 0 | 0 | 2 | 0 | 14092  | 0.242054844 | -1.673220759 | 4.032572473 | -0.414926395 | 0.678195787 | 0.998252924 |
| chr10:5922260-5925130   | exonic       | ANKRD16    | 10 | 5922260  | 5925130  | 0 | 0 | 0 | 0 | 2 | 0 | 2870   | 0.242054844 | -1.673220759 | 4.032572473 | -0.414926395 | 0.678195787 | 0.998252924 |
| chr10:60147949-60150620 | exonic       | TFAM       | 10 | 60147949 | 60150620 | 0 | 0 | 0 | 0 | 2 | 0 | 2671   | 0.242054844 | -1.673220759 | 4.032572473 | -0.414926395 | 0.678195787 | 0.998252924 |
| chr10:61011334-61014203 | exonic       | FAM13C     | 10 | 61011334 | 61014203 | 0 | 0 | 0 | 0 | 2 | 0 | 2869   | 0.242054844 | -1.673220759 | 4.032572473 | -0.414926395 | 0.678195787 | 0.998252924 |
| chr10:64944367-64954135 | exonic       | JMJD1C     | 10 | 64944367 | 64954135 | 0 | 0 | 0 | 0 | 2 | 0 | 9768   | 0.242054844 | -1.673220759 | 4.032572473 | -0.414926395 | 0.678195787 | 0.998252924 |
| chr10:65140078-65214849 | exonic       | JMJD1C     | 10 | 65140078 | 65214849 | 0 | 0 | 0 | 0 | 2 | 0 | 74771  | 0.242054844 | -1.673220759 | 4.032572473 | -0.414926395 | 0.678195787 | 0.998252924 |
| chr10:69692353-69726559 | exonic       | HERC4      | 10 | 69692353 | 69726559 | 0 | 0 | 0 | 0 | 2 | 0 | 34206  | 0.242054844 | -1.673220759 | 4.032572473 | -0.414926395 | 0.678195787 | 0.998252924 |
| chr10:70136609-70152960 | exonic       | RUFY2      | 10 | 70136609 | 70152960 | 0 | 0 | 0 | 0 | 2 | 0 | 16351  | 0.242054844 | -1.673220759 | 4.032572473 | -0.414926395 | 0.678195787 | 0.998252924 |
| chr10:70243177-70248386 | exonic       | SLC25A16   | 10 | 70243177 | 70248386 | 0 | 0 | 0 | 0 | 2 | 0 | 5209   | 0.242054844 | -1.673220759 | 4.032572473 | -0.414926395 | 0.678195787 | 0.998252924 |
| chr10:70666466-70670138 | exonic       | DDX50      | 10 | 70666466 | 70670138 | 0 | 0 | 0 | 0 | 2 | 0 | 3672   | 0.242054844 | -1.673220759 | 4.032572473 | -0.414926395 | 0.678195787 | 0.998252924 |
| chr10:70765487-70770771 | exonic       | KIAA1279   | 10 | 70765487 | 70770771 | 0 | 0 | 0 | 0 | 2 | 0 | 5284   | 0.242054844 | -1.673220759 | 4.032572473 | -0.414926395 | 0.678195787 | 0.998252924 |
| chr10:74267912-74326552 | exonic       | MICU1      | 10 | 74267912 | 74326552 | 0 | 0 | 0 | 0 | 2 | 0 | 58640  | 0.242054844 | -1.673220759 | 4.032572473 | -0.414926395 | 0.678195787 | 0.998252924 |
| chr10:7611630-7622027   | exonic       | ITIH5      | 10 | 7611630  | 7622027  | 0 | 0 | 0 | 0 | 2 | 0 | 10397  | 0.242054844 | -1.673220759 | 4.032572473 | -0.414926395 | 0.678195787 | 0.998252924 |
| chr10:76910272-76910864 | exonic       | SAMD8      | 10 | 76910272 | 76910864 | 0 | 0 | 0 | 0 | 2 | 0 | 592    | 0.242054844 | -1.673220759 | 4.032572473 | -0.414926395 | 0.678195787 | 0.998252924 |
| chr10:7801852-7808066   | exonic       | KIN        | 10 | 7801852  | 7808066  | 0 | 0 | 0 | 0 | 2 | 0 | 6214   | 0.242054844 | -1.673220759 | 4.032572473 | -0.414926395 | 0.678195787 | 0.998252924 |
| chr10:88230748-88260500 | exonic       | WAPL       | 10 | 88230748 | 88260500 | 0 | 0 | 0 | 0 | 2 | 0 | 29752  | 0.242054844 | -1.673220759 | 4.032572473 | -0.414926395 | 0.678195787 | 0.998252924 |
| chr10:89653782-89655534 | exonic       | PTEN       | 10 | 89653782 | 89655534 | 0 | 0 | 0 | 0 | 2 | 0 | 1752   | 0.242054844 | -1.673220759 | 4.032572473 | -0.414926395 | 0.678195787 | 0.998252924 |
| chr10:930387-936769     | exonic       | LARP4B     | 10 | 930387   | 936769   | 0 | 0 | 0 | 0 | 2 | 0 | 6382   | 0.242054844 | -1.673220759 | 4.032572473 | -0.414926395 | 0.678195787 | 0.998252924 |
| chr10:93841076-93952393 | exonic       | CPEB3      | 10 | 93841076 | 93952393 | 0 | 0 | 0 | 0 | 2 | 0 | 111317 | 0.242054844 | -1.673220759 | 4.032572473 | -0.414926395 | 0.678195787 | 0.998252924 |
| chr10:96109869-96112160 | exonic       | NOC3L      | 10 | 96109869 | 96112160 | 0 | 0 | 0 | 0 | 2 | 0 | 2291   | 0.242054844 | -1.673220759 | 4.032572473 | -0.414926395 | 0.678195787 | 0.998252924 |
| chr10:96116292-96117972 | exonic       | NOC3L      | 10 | 96116292 | 96117972 | 0 | 0 | 0 | 0 | 2 | 0 | 1680   | 0.242054844 | -1.673220759 | 4.032572473 | -0.414926395 | 0.678195787 | 0.998252924 |

|                           |            |                                                      |    |           |           |   |   |   |   |   |   |       |             |              |             |              |             |             |
|---------------------------|------------|------------------------------------------------------|----|-----------|-----------|---|---|---|---|---|---|-------|-------------|--------------|-------------|--------------|-------------|-------------|
| chr10:98311001-98325183   | exonic     | TM9SF3                                               | 10 | 98311001  | 98325183  | 0 | 0 | 0 | 0 | 2 | 0 | 14182 | 0.242054844 | -1.673220759 | 4.032572473 | -0.414926395 | 0.678195787 | 0.998252924 |
| chr11:102076623-102094483 | exonic     | YAP1                                                 | 11 | 102076623 | 102094483 | 0 | 0 | 0 | 0 | 2 | 0 | 17860 | 0.242054844 | -1.673220759 | 4.032572473 | -0.414926395 | 0.678195787 | 0.998252924 |
| chr11:108042925-108047817 | exonic     | NPAT                                                 | 11 | 108042925 | 108047817 | 0 | 0 | 0 | 0 | 2 | 0 | 4892  | 0.242054844 | -1.673220759 | 4.032572473 | -0.414926395 | 0.678195787 | 0.998252924 |
| chr11:108106396-108119829 | exonic     | ATM                                                  | 11 | 108106396 | 108119829 | 0 | 0 | 0 | 0 | 2 | 0 | 13433 | 0.242054844 | -1.673220759 | 4.032572473 | -0.414926395 | 0.678195787 | 0.998252924 |
| chr11:108186549-108202764 | exonic     | ATM                                                  | 11 | 108186549 | 108202764 | 0 | 0 | 0 | 0 | 2 | 0 | 16215 | 0.242054844 | -1.673220759 | 4.032572473 | -0.414926395 | 0.678195787 | 0.998252924 |
| chr11:108188099-108199965 | exonic     | ATM                                                  | 11 | 108188099 | 108199965 | 0 | 0 | 0 | 0 | 2 | 0 | 11866 | 0.242054844 | -1.673220759 | 4.032572473 | -0.414926395 | 0.678195787 | 0.998252924 |
| chr11:118461055-118463571 | exonic     | ARCNI                                                | 11 | 118461055 | 118463571 | 0 | 0 | 0 | 0 | 2 | 0 | 2516  | 0.242054844 | -1.673220759 | 4.032572473 | -0.414926395 | 0.678195787 | 0.998252924 |
| chr11:120276827-120280159 | exonic     | ARHGEF12                                             | 11 | 120276827 | 120280159 | 0 | 0 | 0 | 0 | 2 | 0 | 3332  | 0.242054844 | -1.673220759 | 4.032572473 | -0.414926395 | 0.678195787 | 0.998252924 |
| chr11:122953792-122955421 | exonic     | CLMP                                                 | 11 | 122953792 | 122955421 | 0 | 0 | 0 | 0 | 2 | 0 | 1629  | 0.242054844 | -1.673220759 | 4.032572473 | -0.414926395 | 0.678195787 | 0.998252924 |
| chr11:128993341-128997200 | exonic     | ARHGAP32                                             | 11 | 128993341 | 128997200 | 0 | 0 | 0 | 0 | 2 | 0 | 3859  | 0.242054844 | -1.673220759 | 4.032572473 | -0.414926395 | 0.678195787 | 0.998252924 |
| chr11:129991647-129992245 | exonic     | APLP2                                                | 11 | 129991647 | 129992245 | 0 | 0 | 0 | 0 | 2 | 0 | 598   | 0.242054844 | -1.673220759 | 4.032572473 | -0.414926395 | 0.678195787 | 0.998252924 |
| chr11:14880588-14882912   | exonic     | PDE3B                                                | 11 | 14880588  | 14882912  | 0 | 0 | 0 | 0 | 2 | 0 | 2324  | 0.242054844 | -1.673220759 | 4.032572473 | -0.414926395 | 0.678195787 | 0.998252924 |
| chr11:16068059-16119234   | exonic     | SOX6                                                 | 11 | 16068059  | 16119234  | 0 | 0 | 0 | 0 | 2 | 0 | 51175 | 0.242054844 | -1.673220759 | 4.032572473 | -0.414926395 | 0.678195787 | 0.998252924 |
| chr11:18305341-18307006   | exonic     | HPS5                                                 | 11 | 18305341  | 18307006  | 0 | 0 | 0 | 0 | 2 | 0 | 1665  | 0.242054844 | -1.673220759 | 4.032572473 | -0.414926395 | 0.678195787 | 0.998252924 |
| chr11:18357924-18358722   | intronic   | GTF2H1                                               | 11 | 18357924  | 18358722  | 0 | 0 | 0 | 0 | 2 | 0 | 798   | 0.242054844 | -1.673220759 | 4.032572473 | -0.414926395 | 0.678195787 | 0.998252924 |
| chr11:32953288-32956981   | exonic     | QSER1                                                | 11 | 32953288  | 32956981  | 0 | 0 | 0 | 0 | 2 | 0 | 3693  | 0.242054844 | -1.673220759 | 4.032572473 | -0.414926395 | 0.678195787 | 0.998252924 |
| chr11:34101174-34107960   | exonic     | CAPRIN1                                              | 11 | 34101174  | 34107960  | 0 | 0 | 0 | 0 | 2 | 0 | 6786  | 0.242054844 | -1.673220759 | 4.032572473 | -0.414926395 | 0.678195787 | 0.998252924 |
| chr11:46945127-46946351   | intergenic | <small>LRP4(dist=4954), C11orf49(dist=11889)</small> | 11 | 46945127  | 46946351  | 0 | 0 | 0 | 0 | 2 | 0 | 1224  | 0.242054844 | -1.673220759 | 4.032572473 | -0.414926395 | 0.678195787 | 0.998252924 |
| chr11:47647225-47653263   | exonic     | MTCH2                                                | 11 | 47647225  | 47653263  | 0 | 0 | 0 | 0 | 2 | 0 | 6038  | 0.242054844 | -1.673220759 | 4.032572473 | -0.414926395 | 0.678195787 | 0.998252924 |
| chr11:65830479-65835804   | exonic     | SF3B2                                                | 11 | 65830479  | 65835804  | 0 | 0 | 0 | 0 | 2 | 0 | 5325  | 0.242054844 | -1.673220759 | 4.032572473 | -0.414926395 | 0.678195787 | 0.998252924 |
| chr11:68115314-68115711   | exonic     | LRP5                                                 | 11 | 68115314  | 68115711  | 0 | 0 | 0 | 0 | 2 | 0 | 397   | 0.242054844 | -1.673220759 | 4.032572473 | -0.414926395 | 0.678195787 | 0.998252924 |
| chr11:68157348-68179088   | exonic     | LRP5                                                 | 11 | 68157348  | 68179088  | 0 | 0 | 0 | 0 | 2 | 0 | 21740 | 0.242054844 | -1.673220759 | 4.032572473 | -0.414926395 | 0.678195787 | 0.998252924 |
| chr11:68578259-68578705   | intronic   | CPT1A                                                | 11 | 68578259  | 68578705  | 0 | 0 | 0 | 0 | 2 | 0 | 446   | 0.242054844 | -1.673220759 | 4.032572473 | -0.414926395 | 0.678195787 | 0.998252924 |
| chr11:77433100-77436744   | exonic     | RSF1                                                 | 11 | 77433100  | 77436744  | 0 | 0 | 0 | 0 | 2 | 0 | 3644  | 0.242054844 | -1.673220759 | 4.032572473 | -0.414926395 | 0.678195787 | 0.998252924 |
| chr11:77936153-77938097   | exonic     | GAB2                                                 | 11 | 77936153  | 77938097  | 0 | 0 | 0 | 0 | 2 | 0 | 1944  | 0.242054844 | -1.673220759 | 4.032572473 | -0.414926395 | 0.678195787 | 0.998252924 |
| chr11:85685750-85692271   | exonic     | PICALM                                               | 11 | 85685750  | 85692271  | 0 | 0 | 0 | 0 | 2 | 0 | 6521  | 0.242054844 | -1.673220759 | 4.032572473 | -0.414926395 | 0.678195787 | 0.998252924 |
| chr11:85722072-85726006   | exonic     | PICALM                                               | 11 | 85722072  | 85726006  | 0 | 0 | 0 | 0 | 2 | 0 | 3934  | 0.242054844 | -1.673220759 | 4.032572473 | -0.414926395 | 0.678195787 | 0.998252924 |
| chr11:85975213-85979603   | exonic     | EED                                                  | 11 | 85975213  | 85979603  | 0 | 0 | 0 | 0 | 2 | 0 | 4390  | 0.242054844 | -1.673220759 | 4.032572473 | -0.414926395 | 0.678195787 | 0.998252924 |
| chr11:9459300-9463744     | exonic     | IPO7                                                 | 11 | 9459300   | 9463744   | 0 | 0 | 0 | 0 | 2 | 0 | 4444  | 0.242054844 | -1.673220759 | 4.032572473 | -0.414926395 | 0.678195787 | 0.998252924 |
| chr12:100681186-100682360 | intronic   | SCYL2                                                | 12 | 100681186 | 100682360 | 0 | 0 | 0 | 0 | 2 | 0 | 1174  | 0.242054844 | -1.673220759 | 4.032572473 | -0.414926395 | 0.678195787 | 0.998252924 |
| chr12:102179789-102183835 | exonic     | GNPTAB                                               | 12 | 102179789 | 102183835 | 0 | 0 | 0 | 0 | 2 | 0 | 4046  | 0.242054844 | -1.673220759 | 4.032572473 | -0.414926395 | 0.678195787 | 0.998252924 |
| chr12:104682708-104721449 | exonic     | EID3, TXNRD1                                         | 12 | 104682708 | 104721449 | 0 | 0 | 0 | 0 | 2 | 0 | 38741 | 0.242054844 | -1.673220759 | 4.032572473 | -0.414926395 | 0.678195787 | 0.998252924 |
| chr12:105514376-105514866 | splicing   | KIAA1033                                             | 12 | 105514376 | 105514866 | 0 | 0 | 0 | 0 | 2 | 0 | 490   | 0.242054844 | -1.673220759 | 4.032572473 | -0.414926395 | 0.678195787 | 0.998252924 |
| chr12:105600838-105605095 | exonic     | APPL2                                                | 12 | 105600838 | 105605095 | 0 | 0 | 0 | 0 | 2 | 0 | 4257  | 0.242054844 | -1.673220759 | 4.032572473 | -0.414926395 | 0.678195787 | 0.998252924 |
| chr12:110641668-110643485 | exonic     | IFT81                                                | 12 | 110641668 | 110643485 | 0 | 0 | 0 | 0 | 2 | 0 | 1817  | 0.242054844 | -1.673220759 | 4.032572473 | -0.414926395 | 0.678195787 | 0.998252924 |

|                           |                |              |    |           |           |   |   |   |   |   |   |       |             |              |             |              |             |             |
|---------------------------|----------------|--------------|----|-----------|-----------|---|---|---|---|---|---|-------|-------------|--------------|-------------|--------------|-------------|-------------|
| chr12:110764194-110780253 | exonic         | ATP2A2       | 12 | 110764194 | 110780253 | 0 | 0 | 0 | 0 | 2 | 0 | 16059 | 0.242054844 | -1.673220759 | 4.032572473 | -0.414926395 | 0.678195787 | 0.998252924 |
| chr12:111057640-111070364 | exonic         | TCTN1        | 12 | 111057640 | 111070364 | 0 | 0 | 0 | 0 | 2 | 0 | 12724 | 0.242054844 | -1.673220759 | 4.032572473 | -0.414926395 | 0.678195787 | 0.998252924 |
| chr12:111962996-111993723 | exonic         | ATXN2        | 12 | 111962996 | 111993723 | 0 | 0 | 0 | 0 | 2 | 0 | 30727 | 0.242054844 | -1.673220759 | 4.032572473 | -0.414926395 | 0.678195787 | 0.998252924 |
| chr12:112096539-112098479 | exonic         | BRAP         | 12 | 112096539 | 112098479 | 0 | 0 | 0 | 0 | 2 | 0 | 1940  | 0.242054844 | -1.673220759 | 4.032572473 | -0.414926395 | 0.678195787 | 0.998252924 |
| chr12:112374495-112381173 | exonic         | TMEM116      | 12 | 112374495 | 112381173 | 0 | 0 | 0 | 0 | 2 | 0 | 6678  | 0.242054844 | -1.673220759 | 4.032572473 | -0.414926395 | 0.678195787 | 0.998252924 |
| chr12:11273609-11276786   | ncRNA_intronic | PRH1-PRR4    | 12 | 11273609  | 11276786  | 0 | 0 | 0 | 0 | 2 | 0 | 3177  | 0.242054844 | -1.673220759 | 4.032572473 | -0.414926395 | 0.678195787 | 0.998252924 |
| chr12:117365828-117387511 | exonic         | FBXW8        | 12 | 117365828 | 117387511 | 0 | 0 | 0 | 0 | 2 | 0 | 21683 | 0.242054844 | -1.673220759 | 4.032572473 | -0.414926395 | 0.678195787 | 0.998252924 |
| chr12:118456876-118465835 | exonic         | RFC5         | 12 | 118456876 | 118465835 | 0 | 0 | 0 | 0 | 2 | 0 | 8959  | 0.242054844 | -1.673220759 | 4.032572473 | -0.414926395 | 0.678195787 | 0.998252924 |
| chr12:1219357-1225199     | exonic         | ERC1         | 12 | 1219357   | 1225199   | 0 | 0 | 0 | 0 | 2 | 0 | 5842  | 0.242054844 | -1.673220759 | 4.032572473 | -0.414926395 | 0.678195787 | 0.998252924 |
| chr12:123811972-123815056 | exonic         | SBN01        | 12 | 123811972 | 123815056 | 0 | 0 | 0 | 0 | 2 | 0 | 3084  | 0.242054844 | -1.673220759 | 4.032572473 | -0.414926395 | 0.678195787 | 0.998252924 |
| chr12:12491353-12496348   | exonic         | MANSC1       | 12 | 12491353  | 12496348  | 0 | 0 | 0 | 0 | 2 | 0 | 4995  | 0.242054844 | -1.673220759 | 4.032572473 | -0.414926395 | 0.678195787 | 0.998252924 |
| chr12:1299024-1299218     | exonic         | ERC1         | 12 | 1299024   | 1299218   | 0 | 0 | 0 | 0 | 2 | 0 | 194   | 0.242054844 | -1.673220759 | 4.032572473 | -0.414926395 | 0.678195787 | 0.998252924 |
| chr12:132237667-132250853 | exonic         | SFSWAP       | 12 | 132237667 | 132250853 | 0 | 0 | 0 | 0 | 2 | 0 | 13186 | 0.242054844 | -1.673220759 | 4.032572473 | -0.414926395 | 0.678195787 | 0.998252924 |
| chr12:15818689-15834236   | exonic         | EPS8         | 12 | 15818689  | 15834236  | 0 | 0 | 0 | 0 | 2 | 0 | 15547 | 0.242054844 | -1.673220759 | 4.032572473 | -0.414926395 | 0.678195787 | 0.998252924 |
| chr12:18433957-18446949   | exonic         | PIK3C2G      | 12 | 18433957  | 18446949  | 0 | 0 | 0 | 0 | 2 | 0 | 12992 | 0.242054844 | -1.673220759 | 4.032572473 | -0.414926395 | 0.678195787 | 0.998252924 |
| chr12:18434937-18466998   | exonic         | PIK3C2G      | 12 | 18434937  | 18466998  | 0 | 0 | 0 | 0 | 2 | 0 | 32061 | 0.242054844 | -1.673220759 | 4.032572473 | -0.414926395 | 0.678195787 | 0.998252924 |
| chr12:19432505-19433739   | intronic       | PLEKHA5      | 12 | 19432505  | 19433739  | 0 | 0 | 0 | 0 | 2 | 0 | 1234  | 0.242054844 | -1.673220759 | 4.032572473 | -0.414926395 | 0.678195787 | 0.998252924 |
| chr12:20615333-20618439   | intronic       | PDE3A        | 12 | 20615333  | 20618439  | 0 | 0 | 0 | 0 | 2 | 0 | 3106  | 0.242054844 | -1.673220759 | 4.032572473 | -0.414926395 | 0.678195787 | 0.998252924 |
| chr12:20790033-20807139   | exonic         | PDE3A        | 12 | 20790033  | 20807139  | 0 | 0 | 0 | 0 | 2 | 0 | 17106 | 0.242054844 | -1.673220759 | 4.032572473 | -0.414926395 | 0.678195787 | 0.998252924 |
| chr12:2297669-2299478     | intronic       | CACNA1C      | 12 | 2297669   | 2299478   | 0 | 0 | 0 | 0 | 2 | 0 | 1809  | 0.242054844 | -1.673220759 | 4.032572473 | -0.414926395 | 0.678195787 | 0.998252924 |
| chr12:24366276-24430246   | ncRNA_exonic   | LOC101928471 | 12 | 24366276  | 24430246  | 0 | 0 | 0 | 0 | 2 | 0 | 63970 | 0.242054844 | -1.673220759 | 4.032572473 | -0.414926395 | 0.678195787 | 0.998252924 |
| chr12:24982756-24989530   | exonic         | BCAT1        | 12 | 24982756  | 24989530  | 0 | 0 | 0 | 0 | 2 | 0 | 6774  | 0.242054844 | -1.673220759 | 4.032572473 | -0.414926395 | 0.678195787 | 0.998252924 |
| chr12:26922282-26943160   | exonic         | ITPR2        | 12 | 26922282  | 26943160  | 0 | 0 | 0 | 0 | 2 | 0 | 20878 | 0.242054844 | -1.673220759 | 4.032572473 | -0.414926395 | 0.678195787 | 0.998252924 |
| chr12:30822116-30834751   | exonic         | IPO8         | 12 | 30822116  | 30834751  | 0 | 0 | 0 | 0 | 2 | 0 | 12635 | 0.242054844 | -1.673220759 | 4.032572473 | -0.414926395 | 0.678195787 | 0.998252924 |
| chr12:32882535-32883184   | intronic       | DNM1L        | 12 | 32882535  | 32883184  | 0 | 0 | 0 | 0 | 2 | 0 | 649   | 0.242054844 | -1.673220759 | 4.032572473 | -0.414926395 | 0.678195787 | 0.998252924 |
| chr12:3931038-3939184     | exonic         | PARP11       | 12 | 3931038   | 3939184   | 0 | 0 | 0 | 0 | 2 | 0 | 8146  | 0.242054844 | -1.673220759 | 4.032572473 | -0.414926395 | 0.678195787 | 0.998252924 |
| chr12:46285562-46287504   | exonic         | ARID2        | 12 | 46285562  | 46287504  | 0 | 0 | 0 | 0 | 2 | 0 | 1942  | 0.242054844 | -1.673220759 | 4.032572473 | -0.414926395 | 0.678195787 | 0.998252924 |
| chr12:46591502-46592526   | exonic         | SLC38A1      | 12 | 46591502  | 46592526  | 0 | 0 | 0 | 0 | 2 | 0 | 1024  | 0.242054844 | -1.673220759 | 4.032572473 | -0.414926395 | 0.678195787 | 0.998252924 |
| chr12:49237722-49239565   | exonic         | DDX23        | 12 | 49237722  | 49239565  | 0 | 0 | 0 | 0 | 2 | 0 | 1843  | 0.242054844 | -1.673220759 | 4.032572473 | -0.414926395 | 0.678195787 | 0.998252924 |
| chr12:50810129-50848200   | exonic         | LARP4        | 12 | 50810129  | 50848200  | 0 | 0 | 0 | 0 | 2 | 0 | 38071 | 0.242054844 | -1.673220759 | 4.032572473 | -0.414926395 | 0.678195787 | 0.998252924 |
| chr12:50829270-50855130   | exonic         | LARP4        | 12 | 50829270  | 50855130  | 0 | 0 | 0 | 0 | 2 | 0 | 25860 | 0.242054844 | -1.673220759 | 4.032572473 | -0.414926395 | 0.678195787 | 0.998252924 |
| chr12:51502903-51511530   | exonic         | TFCP2        | 12 | 51502903  | 51511530  | 0 | 0 | 0 | 0 | 2 | 0 | 8627  | 0.242054844 | -1.673220759 | 4.032572473 | -0.414926395 | 0.678195787 | 0.998252924 |
| chr12:51634126-51634900   | exonic         | DAZAP2       | 12 | 51634126  | 51634900  | 0 | 0 | 0 | 0 | 2 | 0 | 774   | 0.242054844 | -1.673220759 | 4.032572473 | -0.414926395 | 0.678195787 | 0.998252924 |
| chr12:537934-547720       | exonic         | CCDC77       | 12 | 537934    | 547720    | 0 | 0 | 0 | 0 | 2 | 0 | 9786  | 0.242054844 | -1.673220759 | 4.032572473 | -0.414926395 | 0.678195787 | 0.998252924 |
| chr12:53848509-53853187   | exonic         | PCBP2        | 12 | 53848509  | 53853187  | 0 | 0 | 0 | 0 | 2 | 0 | 4678  | 0.242054844 | -1.673220759 | 4.032572473 | -0.414926395 | 0.678195787 | 0.998252924 |



|                           |              |                                                          |    |           |           |   |   |   |   |   |   |        |             |              |             |              |             |             |
|---------------------------|--------------|----------------------------------------------------------|----|-----------|-----------|---|---|---|---|---|---|--------|-------------|--------------|-------------|--------------|-------------|-------------|
| chr12:54639898-54646011   | exonic       | CBX5                                                     | 12 | 54639898  | 54646011  | 0 | 0 | 0 | 0 | 2 | 0 | 6113   | 0.242054844 | -1.673220759 | 4.032572473 | -0.414926395 | 0.678195787 | 0.998252924 |
| chr12:57059988-57066849   | exonic       | PTGES3                                                   | 12 | 57059988  | 57066849  | 0 | 0 | 0 | 0 | 2 | 0 | 6861   | 0.242054844 | -1.673220759 | 4.032572473 | -0.414926395 | 0.678195787 | 0.998252924 |
| chr12:57463016-57466695   | exonic       | NEMP1                                                    | 12 | 57463016  | 57466695  | 0 | 0 | 0 | 0 | 2 | 0 | 3679   | 0.242054844 | -1.673220759 | 4.032572473 | -0.414926395 | 0.678195787 | 0.998252924 |
| chr12:57568893-5941769    | exonic       | ANO2                                                     | 12 | 57568893  | 5941769   | 0 | 0 | 0 | 0 | 2 | 0 | 184876 | 0.242054844 | -1.673220759 | 4.032572473 | -0.414926395 | 0.678195787 | 0.998252924 |
| chr12:58339410-58347472   | exonic       | XRCC6BP1                                                 | 12 | 58339410  | 58347472  | 0 | 0 | 0 | 0 | 2 | 0 | 8062   | 0.242054844 | -1.673220759 | 4.032572473 | -0.414926395 | 0.678195787 | 0.998252924 |
| chr12:68696400-68697693   | exonic       | MDM1                                                     | 12 | 68696400  | 68697693  | 0 | 0 | 0 | 0 | 2 | 0 | 1293   | 0.242054844 | -1.673220759 | 4.032572473 | -0.414926395 | 0.678195787 | 0.998252924 |
| chr12:69047892-69050997   | exonic       | RAP1B                                                    | 12 | 69047892  | 69050997  | 0 | 0 | 0 | 0 | 2 | 0 | 3105   | 0.242054844 | -1.673220759 | 4.032572473 | -0.414926395 | 0.678195787 | 0.998252924 |
| chr12:72036215-72041593   | exonic       | ZFC3H1                                                   | 12 | 72036215  | 72041593  | 0 | 0 | 0 | 0 | 2 | 0 | 5378   | 0.242054844 | -1.673220759 | 4.032572473 | -0.414926395 | 0.678195787 | 0.998252924 |
| chr12:91550851-91552286   | exonic       | DCN                                                      | 12 | 91550851  | 91552286  | 0 | 0 | 0 | 0 | 2 | 0 | 1435   | 0.242054844 | -1.673220759 | 4.032572473 | -0.414926395 | 0.678195787 | 0.998252924 |
| chr12:9251977-9333728     | exonic       | A2M, PZP                                                 | 12 | 9251977   | 9333728   | 0 | 0 | 0 | 0 | 2 | 0 | 81751  | 0.242054844 | -1.673220759 | 4.032572473 | -0.414926395 | 0.678195787 | 0.998252924 |
| chr12:94072544-94072848   | exonic       | CRADD                                                    | 12 | 94072544  | 94072848  | 0 | 0 | 0 | 0 | 2 | 0 | 304    | 0.242054844 | -1.673220759 | 4.032572473 | -0.414926395 | 0.678195787 | 0.998252924 |
| chr12:94725475-94797038   | exonic       | CEP83                                                    | 12 | 94725475  | 94797038  | 0 | 0 | 0 | 0 | 2 | 0 | 71563  | 0.242054844 | -1.673220759 | 4.032572473 | -0.414926395 | 0.678195787 | 0.998252924 |
| chr12:992108-992997       | exonic       | WNK1                                                     | 12 | 992108    | 992997    | 0 | 0 | 0 | 0 | 2 | 0 | 889    | 0.242054844 | -1.673220759 | 4.032572473 | -0.414926395 | 0.678195787 | 0.998252924 |
| chr13:100191699-100204580 | exonic       | TM9SF2                                                   | 13 | 100191699 | 100204580 | 0 | 0 | 0 | 0 | 2 | 0 | 12881  | 0.242054844 | -1.673220759 | 4.032572473 | -0.414926395 | 0.678195787 | 0.998252924 |
| chr13:100206557-100207901 | exonic       | TM9SF2                                                   | 13 | 100206557 | 100207901 | 0 | 0 | 0 | 0 | 2 | 0 | 1344   | 0.242054844 | -1.673220759 | 4.032572473 | -0.414926395 | 0.678195787 | 0.998252924 |
| chr13:108895880-108903664 | intergenic   | <small>ABHD13 (dist=9277), TNFSF13B (dist=18313)</small> | 13 | 108895880 | 108903664 | 0 | 0 | 0 | 0 | 2 | 0 | 7784   | 0.242054844 | -1.673220759 | 4.032572473 | -0.414926395 | 0.678195787 | 0.998252924 |
| chr13:110427697-110428301 | intronic     | IRS2                                                     | 13 | 110427697 | 110428301 | 0 | 0 | 0 | 0 | 2 | 0 | 604    | 0.242054844 | -1.673220759 | 4.032572473 | -0.414926395 | 0.678195787 | 0.998252924 |
| chr13:21735929-21746820   | exonic       | SKA3                                                     | 13 | 21735929  | 21746820  | 0 | 0 | 0 | 0 | 2 | 0 | 10891  | 0.242054844 | -1.673220759 | 4.032572473 | -0.414926395 | 0.678195787 | 0.998252924 |
| chr13:21976935-21987911   | exonic       | ZDHHC20                                                  | 13 | 21976935  | 21987911  | 0 | 0 | 0 | 0 | 2 | 0 | 10976  | 0.242054844 | -1.673220759 | 4.032572473 | -0.414926395 | 0.678195787 | 0.998252924 |
| chr13:31204971-31205611   | exonic       | USPL1                                                    | 13 | 31204971  | 31205611  | 0 | 0 | 0 | 0 | 2 | 0 | 640    | 0.242054844 | -1.673220759 | 4.032572473 | -0.414926395 | 0.678195787 | 0.998252924 |
| chr13:35615069-35619538   | exonic       | NBEA                                                     | 13 | 35615069  | 35619538  | 0 | 0 | 0 | 0 | 2 | 0 | 4469   | 0.242054844 | -1.673220759 | 4.032572473 | -0.414926395 | 0.678195787 | 0.998252924 |
| chr13:38721047-38765048   | intergenic   | <small>LINC00571 (dist=3678), UFM1 (dist=15886)</small>  | 13 | 38721047  | 38765048  | 0 | 0 | 0 | 0 | 2 | 0 | 44001  | 0.242054844 | -1.673220759 | 4.032572473 | -0.414926395 | 0.678195787 | 0.998252924 |
| chr13:41626330-41627276   | intergenic   | <small>ELF1 (dist=32822), WBP4 (dist=8421)</small>       | 13 | 41626330  | 41627276  | 0 | 0 | 0 | 0 | 2 | 0 | 946    | 0.242054844 | -1.673220759 | 4.032572473 | -0.414926395 | 0.678195787 | 0.998252924 |
| chr13:41642697-41645709   | exonic       | WBP4                                                     | 13 | 41642697  | 41645709  | 0 | 0 | 0 | 0 | 2 | 0 | 3012   | 0.242054844 | -1.673220759 | 4.032572473 | -0.414926395 | 0.678195787 | 0.998252924 |
| chr13:41892941-41910892   | exonic       | NAA16                                                    | 13 | 41892941  | 41910892  | 0 | 0 | 0 | 0 | 2 | 0 | 17951  | 0.242054844 | -1.673220759 | 4.032572473 | -0.414926395 | 0.678195787 | 0.998252924 |
| chr13:42729427-42729935   | exonic       | DGKH                                                     | 13 | 42729427  | 42729935  | 0 | 0 | 0 | 0 | 2 | 0 | 508    | 0.242054844 | -1.673220759 | 4.032572473 | -0.414926395 | 0.678195787 | 0.998252924 |
| chr13:46090278-46108951   | exonic       | COG3                                                     | 13 | 46090278  | 46108951  | 0 | 0 | 0 | 0 | 2 | 0 | 18673  | 0.242054844 | -1.673220759 | 4.032572473 | -0.414926395 | 0.678195787 | 0.998252924 |
| chr13:53237247-53238165   | exonic       | SUGT1                                                    | 13 | 53237247  | 53238165  | 0 | 0 | 0 | 0 | 2 | 0 | 918    | 0.242054844 | -1.673220759 | 4.032572473 | -0.414926395 | 0.678195787 | 0.998252924 |
| chr13:60582677-60590279   | exonic       | DIAPH3                                                   | 13 | 60582677  | 60590279  | 0 | 0 | 0 | 0 | 2 | 0 | 7602   | 0.242054844 | -1.673220759 | 4.032572473 | -0.414926395 | 0.678195787 | 0.998252924 |
| chr13:61102500-61109367   | exonic       | TDRD3                                                    | 13 | 61102500  | 61109367  | 0 | 0 | 0 | 0 | 2 | 0 | 6867   | 0.242054844 | -1.673220759 | 4.032572473 | -0.414926395 | 0.678195787 | 0.998252924 |
| chr13:79915257-79953042   | exonic       | RBM26                                                    | 13 | 79915257  | 79953042  | 0 | 0 | 0 | 0 | 2 | 0 | 37785  | 0.242054844 | -1.673220759 | 4.032572473 | -0.414926395 | 0.678195787 | 0.998252924 |
| chr13:95695935-95735544   | exonic       | ABCC4                                                    | 13 | 95695935  | 95735544  | 0 | 0 | 0 | 0 | 2 | 0 | 39609  | 0.242054844 | -1.673220759 | 4.032572473 | -0.414926395 | 0.678195787 | 0.998252924 |
| chr13:96505797-96601708   | exonic       | UGGT2                                                    | 13 | 96505797  | 96601708  | 0 | 0 | 0 | 0 | 2 | 0 | 95911  | 0.242054844 | -1.673220759 | 4.032572473 | -0.414926395 | 0.678195787 | 0.998252924 |
| chr14:102812371-102813704 | downstream   | CINP (dist=915)                                          | 14 | 102812371 | 102813704 | 0 | 0 | 0 | 0 | 2 | 0 | 1333   | 0.242054844 | -1.673220759 | 4.032572473 | -0.414926395 | 0.678195787 | 0.998252924 |
| chr14:106110833-106208722 | ncRNA_exonic | ELK2AP                                                   | 14 | 106110833 | 106208722 | 0 | 0 | 0 | 0 | 2 | 0 | 97889  | 0.242054844 | -1.673220759 | 4.032572473 | -0.414926395 | 0.678195787 | 0.998252924 |

|                           |              |                                            |    |           |           |   |   |   |   |   |   |        |             |              |             |              |             |             |
|---------------------------|--------------|--------------------------------------------|----|-----------|-----------|---|---|---|---|---|---|--------|-------------|--------------|-------------|--------------|-------------|-------------|
| chr14:106174187-106174462 | intergenic   | ELK2AP (dist=35043), MIR4507 (dist=149831) | 14 | 106174187 | 106174462 | 0 | 0 | 0 | 0 | 2 | 0 | 275    | 0.242054844 | -1.673220759 | 4.032572473 | -0.414926395 | 0.678195787 | 0.998252924 |
| chr14:106994222-107131334 | ncRNA_exonic | MIR7641-2                                  | 14 | 106994222 | 107131334 | 0 | 0 | 0 | 0 | 2 | 0 | 137112 | 0.242054844 | -1.673220759 | 4.032572473 | -0.414926395 | 0.678195787 | 0.998252924 |
| chr14:31163978-31191765   | exonic       | SCFD1                                      | 14 | 31163978  | 31191765  | 0 | 0 | 0 | 0 | 2 | 0 | 27787  | 0.242054844 | -1.673220759 | 4.032572473 | -0.414926395 | 0.678195787 | 0.998252924 |
| chr14:32586345-32621734   | exonic       | ARHGAP5                                    | 14 | 32586345  | 32621734  | 0 | 0 | 0 | 0 | 2 | 0 | 35389  | 0.242054844 | -1.673220759 | 4.032572473 | -0.414926395 | 0.678195787 | 0.998252924 |
| chr14:35269429-35331528   | exonic       | BAZ1A                                      | 14 | 35269429  | 35331528  | 0 | 0 | 0 | 0 | 2 | 0 | 62099  | 0.242054844 | -1.673220759 | 4.032572473 | -0.414926395 | 0.678195787 | 0.998252924 |
| chr14:36121010-36128402   | exonic       | RALGAPA1                                   | 14 | 36121010  | 36128402  | 0 | 0 | 0 | 0 | 2 | 0 | 7392   | 0.242054844 | -1.673220759 | 4.032572473 | -0.414926395 | 0.678195787 | 0.998252924 |
| chr14:36143385-36143915   | exonic       | RALGAPA1                                   | 14 | 36143385  | 36143915  | 0 | 0 | 0 | 0 | 2 | 0 | 530    | 0.242054844 | -1.673220759 | 4.032572473 | -0.414926395 | 0.678195787 | 0.998252924 |
| chr14:38277938-38343768   | exonic       | TTC6                                       | 14 | 38277938  | 38343768  | 0 | 0 | 0 | 0 | 2 | 0 | 65830  | 0.242054844 | -1.673220759 | 4.032572473 | -0.414926395 | 0.678195787 | 0.998252924 |
| chr14:39534116-39555110   | exonic       | SEC23A                                     | 14 | 39534116  | 39555110  | 0 | 0 | 0 | 0 | 2 | 0 | 20994  | 0.242054844 | -1.673220759 | 4.032572473 | -0.414926395 | 0.678195787 | 0.998252924 |
| chr14:45478115-45514073   | exonic       | FAM179B                                    | 14 | 45478115  | 45514073  | 0 | 0 | 0 | 0 | 2 | 0 | 35958  | 0.242054844 | -1.673220759 | 4.032572473 | -0.414926395 | 0.678195787 | 0.998252924 |
| chr14:45686221-45687657   | exonic       | MIS18BP1                                   | 14 | 45686221  | 45687657  | 0 | 0 | 0 | 0 | 2 | 0 | 1436   | 0.242054844 | -1.673220759 | 4.032572473 | -0.414926395 | 0.678195787 | 0.998252924 |
| chr14:53525194-53558650   | exonic       | DDHD1                                      | 14 | 53525194  | 53558650  | 0 | 0 | 0 | 0 | 2 | 0 | 33456  | 0.242054844 | -1.673220759 | 4.032572473 | -0.414926395 | 0.678195787 | 0.998252924 |
| chr14:56068474-56079289   | exonic       | KTN1                                       | 14 | 56068474  | 56079289  | 0 | 0 | 0 | 0 | 2 | 0 | 10815  | 0.242054844 | -1.673220759 | 4.032572473 | -0.414926395 | 0.678195787 | 0.998252924 |
| chr14:56083234-56096815   | exonic       | KTN1                                       | 14 | 56083234  | 56096815  | 0 | 0 | 0 | 0 | 2 | 0 | 13581  | 0.242054844 | -1.673220759 | 4.032572473 | -0.414926395 | 0.678195787 | 0.998252924 |
| chr14:62242812-62245628   | exonic       | SNAPC1                                     | 14 | 62242812  | 62245628  | 0 | 0 | 0 | 0 | 2 | 0 | 2816   | 0.242054844 | -1.673220759 | 4.032572473 | -0.414926395 | 0.678195787 | 0.998252924 |
| chr14:63848773-63860646   | exonic       | PPP2R5E                                    | 14 | 63848773  | 63860646  | 0 | 0 | 0 | 0 | 2 | 0 | 11873  | 0.242054844 | -1.673220759 | 4.032572473 | -0.414926395 | 0.678195787 | 0.998252924 |
| chr14:67786947-67790529   | exonic       | MPP5                                       | 14 | 67786947  | 67790529  | 0 | 0 | 0 | 0 | 2 | 0 | 3582   | 0.242054844 | -1.673220759 | 4.032572473 | -0.414926395 | 0.678195787 | 0.998252924 |
| chr14:68613075-68616756   | intronic     | RAD51B                                     | 14 | 68613075  | 68616756  | 0 | 0 | 0 | 0 | 2 | 0 | 3681   | 0.242054844 | -1.673220759 | 4.032572473 | -0.414926395 | 0.678195787 | 0.998252924 |
| chr14:75269258-75277123   | exonic       | YLPM1                                      | 14 | 75269258  | 75277123  | 0 | 0 | 0 | 0 | 2 | 0 | 7865   | 0.242054844 | -1.673220759 | 4.032572473 | -0.414926395 | 0.678195787 | 0.998252924 |
| chr14:81345090-81424629   | exonic       | CEP128, TSHR                               | 14 | 81345090  | 81424629  | 0 | 0 | 0 | 0 | 2 | 0 | 79539  | 0.242054844 | -1.673220759 | 4.032572473 | -0.414926395 | 0.678195787 | 0.998252924 |
| chr14:81362062-81408724   | exonic       | CEP128                                     | 14 | 81362062  | 81408724  | 0 | 0 | 0 | 0 | 2 | 0 | 46662  | 0.242054844 | -1.673220759 | 4.032572473 | -0.414926395 | 0.678195787 | 0.998252924 |
| chr14:89922461-89930238   | intronic     | FOXN3                                      | 14 | 89922461  | 89930238  | 0 | 0 | 0 | 0 | 2 | 0 | 7777   | 0.242054844 | -1.673220759 | 4.032572473 | -0.414926395 | 0.678195787 | 0.998252924 |
| chr14:92102768-92139360   | exonic       | CATSPERB                                   | 14 | 92102768  | 92139360  | 0 | 0 | 0 | 0 | 2 | 0 | 36592  | 0.242054844 | -1.673220759 | 4.032572473 | -0.414926395 | 0.678195787 | 0.998252924 |
| chr14:92454628-92478139   | exonic       | TRIP11                                     | 14 | 92454628  | 92478139  | 0 | 0 | 0 | 0 | 2 | 0 | 23511  | 0.242054844 | -1.673220759 | 4.032572473 | -0.414926395 | 0.678195787 | 0.998252924 |
| chr15:35174702-35189906   | exonic       | AQR                                        | 15 | 35174702  | 35189906  | 0 | 0 | 0 | 0 | 2 | 0 | 15204  | 0.242054844 | -1.673220759 | 4.032572473 | -0.414926395 | 0.678195787 | 0.998252924 |
| chr15:40231705-40247969   | exonic       | EIF2AK4                                    | 15 | 40231705  | 40247969  | 0 | 0 | 0 | 0 | 2 | 0 | 16264  | 0.242054844 | -1.673220759 | 4.032572473 | -0.414926395 | 0.678195787 | 0.998252924 |
| chr15:40690927-40694489   | intergenic   | KNSTRN (dist=4438), IVD (dist=3197)        | 15 | 40690927  | 40694489  | 0 | 0 | 0 | 0 | 2 | 0 | 3562   | 0.242054844 | -1.673220759 | 4.032572473 | -0.414926395 | 0.678195787 | 0.998252924 |
| chr15:41361767-41379880   | exonic       | INO80                                      | 15 | 41361767  | 41379880  | 0 | 0 | 0 | 0 | 2 | 0 | 18113  | 0.242054844 | -1.673220759 | 4.032572473 | -0.414926395 | 0.678195787 | 0.998252924 |
| chr15:41361767-41384380   | exonic       | INO80                                      | 15 | 41361767  | 41384380  | 0 | 0 | 0 | 0 | 2 | 0 | 22613  | 0.242054844 | -1.673220759 | 4.032572473 | -0.414926395 | 0.678195787 | 0.998252924 |
| chr15:42850395-42856055   | exonic       | HAUS2                                      | 15 | 42850395  | 42856055  | 0 | 0 | 0 | 0 | 2 | 0 | 5660   | 0.242054844 | -1.673220759 | 4.032572473 | -0.414926395 | 0.678195787 | 0.998252924 |
| chr15:43294752-43299482   | exonic       | UBR1                                       | 15 | 43294752  | 43299482  | 0 | 0 | 0 | 0 | 2 | 0 | 4730   | 0.242054844 | -1.673220759 | 4.032572473 | -0.414926395 | 0.678195787 | 0.998252924 |
| chr15:43440952-43452992   | exonic       | TMEM62                                     | 15 | 43440952  | 43452992  | 0 | 0 | 0 | 0 | 2 | 0 | 12040  | 0.242054844 | -1.673220759 | 4.032572473 | -0.414926395 | 0.678195787 | 0.998252924 |
| chr15:43941307-44038824   | exonic       | CKMT1A, PDIA3                              | 15 | 43941307  | 44038824  | 0 | 0 | 0 | 0 | 2 | 0 | 97517  | 0.242054844 | -1.673220759 | 4.032572473 | -0.414926395 | 0.678195787 | 0.998252924 |
| chr15:50596162-50601995   | exonic       | GABPB1                                     | 15 | 50596162  | 50601995  | 0 | 0 | 0 | 0 | 2 | 0 | 5833   | 0.242054844 | -1.673220759 | 4.032572473 | -0.414926395 | 0.678195787 | 0.998252924 |
| chr15:55640530-55640923   | intronic     | PIGB                                       | 15 | 55640530  | 55640923  | 0 | 0 | 0 | 0 | 2 | 0 | 393    | 0.242054844 | -1.673220759 | 4.032572473 | -0.414926395 | 0.678195787 | 0.998252924 |

|                         |              |                                             |    |          |          |   |   |   |   |   |   |       |             |              |             |              |             |             |
|-------------------------|--------------|---------------------------------------------|----|----------|----------|---|---|---|---|---|---|-------|-------------|--------------|-------------|--------------|-------------|-------------|
| chr15:56676149-56704634 | exonic       | TEX9                                        | 15 | 56676149 | 56704634 | 0 | 0 | 0 | 0 | 2 | 0 | 28485 | 0.242054844 | -1.673220759 | 4.032572473 | -0.414926395 | 0.678195787 | 0.998252924 |
| chr15:56683441-56687032 | exonic       | TEX9                                        | 15 | 56683441 | 56687032 | 0 | 0 | 0 | 0 | 2 | 0 | 3591  | 0.242054844 | -1.673220759 | 4.032572473 | -0.414926395 | 0.678195787 | 0.998252924 |
| chr15:56923636-56927448 | exonic       | ZNF280D                                     | 15 | 56923636 | 56927448 | 0 | 0 | 0 | 0 | 2 | 0 | 3812  | 0.242054844 | -1.673220759 | 4.032572473 | -0.414926395 | 0.678195787 | 0.998252924 |
| chr15:59657449-59660614 | intronic     | MYO1E                                       | 15 | 59657449 | 59660614 | 0 | 0 | 0 | 0 | 2 | 0 | 3165  | 0.242054844 | -1.673220759 | 4.032572473 | -0.414926395 | 0.678195787 | 0.998252924 |
| chr15:60653139-60674640 | exonic       | ANXA2                                       | 15 | 60653139 | 60674640 | 0 | 0 | 0 | 0 | 2 | 0 | 21501 | 0.242054844 | -1.673220759 | 4.032572473 | -0.414926395 | 0.678195787 | 0.998252924 |
| chr15:63941923-63944740 | exonic       | HERC1                                       | 15 | 63941923 | 63944740 | 0 | 0 | 0 | 0 | 2 | 0 | 2817  | 0.242054844 | -1.673220759 | 4.032572473 | -0.414926395 | 0.678195787 | 0.998252924 |
| chr15:64025122-64027048 | exonic       | HERC1                                       | 15 | 64025122 | 64027048 | 0 | 0 | 0 | 0 | 2 | 0 | 1926  | 0.242054844 | -1.673220759 | 4.032572473 | -0.414926395 | 0.678195787 | 0.998252924 |
| chr15:67664449-67681344 | exonic       | IQCH                                        | 15 | 67664449 | 67681344 | 0 | 0 | 0 | 0 | 2 | 0 | 16895 | 0.242054844 | -1.673220759 | 4.032572473 | -0.414926395 | 0.678195787 | 0.998252924 |
| chr15:70044717-70048545 | intergenic   | PCAT29 (dist=56626), LINC00593 (dist=79028) | 15 | 70044717 | 70048545 | 0 | 0 | 0 | 0 | 2 | 0 | 3828  | 0.242054844 | -1.673220759 | 4.032572473 | -0.414926395 | 0.678195787 | 0.998252924 |
| chr15:70949269-70957153 | exonic       | UACA                                        | 15 | 70949269 | 70957153 | 0 | 0 | 0 | 0 | 2 | 0 | 7884  | 0.242054844 | -1.673220759 | 4.032572473 | -0.414926395 | 0.678195787 | 0.998252924 |
| chr15:72773137-72773804 | intronic     | ARIH1                                       | 15 | 72773137 | 72773804 | 0 | 0 | 0 | 0 | 2 | 0 | 667   | 0.242054844 | -1.673220759 | 4.032572473 | -0.414926395 | 0.678195787 | 0.998252924 |
| chr15:72837160-72848248 | exonic       | ARIH1                                       | 15 | 72837160 | 72848248 | 0 | 0 | 0 | 0 | 2 | 0 | 11088 | 0.242054844 | -1.673220759 | 4.032572473 | -0.414926395 | 0.678195787 | 0.998252924 |
| chr15:73052748-73072663 | exonic       | ADPGK                                       | 15 | 73052748 | 73072663 | 0 | 0 | 0 | 0 | 2 | 0 | 19915 | 0.242054844 | -1.673220759 | 4.032572473 | -0.414926395 | 0.678195787 | 0.998252924 |
| chr15:74781930-74783923 | intergenic   | UBL7-AS1 (dist=8297), ARID3B (dist=49595)   | 15 | 74781930 | 74783923 | 0 | 0 | 0 | 0 | 2 | 0 | 1993  | 0.242054844 | -1.673220759 | 4.032572473 | -0.414926395 | 0.678195787 | 0.998252924 |
| chr15:75693070-75705386 | exonic       | SIN3A                                       | 15 | 75693070 | 75705386 | 0 | 0 | 0 | 0 | 2 | 0 | 12316 | 0.242054844 | -1.673220759 | 4.032572473 | -0.414926395 | 0.678195787 | 0.998252924 |
| chr15:78762873-78764266 | exonic       | IREB2                                       | 15 | 78762873 | 78764266 | 0 | 0 | 0 | 0 | 2 | 0 | 1393  | 0.242054844 | -1.673220759 | 4.032572473 | -0.414926395 | 0.678195787 | 0.998252924 |
| chr15:81271107-81274523 | exonic       | MESDC2                                      | 15 | 81271107 | 81274523 | 0 | 0 | 0 | 0 | 2 | 0 | 3416  | 0.242054844 | -1.673220759 | 4.032572473 | -0.414926395 | 0.678195787 | 0.998252924 |
| chr15:85180578-85184493 | ncRNA_exonic | SCAND2P                                     | 15 | 85180578 | 85184493 | 0 | 0 | 0 | 0 | 2 | 0 | 3915  | 0.242054844 | -1.673220759 | 4.032572473 | -0.414926395 | 0.678195787 | 0.998252924 |
| chr15:86221112-86221832 | intronic     | AKAP13                                      | 15 | 86221112 | 86221832 | 0 | 0 | 0 | 0 | 2 | 0 | 720   | 0.242054844 | -1.673220759 | 4.032572473 | -0.414926395 | 0.678195787 | 0.998252924 |
| chr15:90991804-91010824 | exonic       | IQGAP1                                      | 15 | 90991804 | 91010824 | 0 | 0 | 0 | 0 | 2 | 0 | 19020 | 0.242054844 | -1.673220759 | 4.032572473 | -0.414926395 | 0.678195787 | 0.998252924 |
| chr15:94841429-94858866 | exonic       | MCTP2                                       | 15 | 94841429 | 94858866 | 0 | 0 | 0 | 0 | 2 | 0 | 17437 | 0.242054844 | -1.673220759 | 4.032572473 | -0.414926395 | 0.678195787 | 0.998252924 |
| chr15:94910833-94928754 | exonic       | MCTP2                                       | 15 | 94910833 | 94928754 | 0 | 0 | 0 | 0 | 2 | 0 | 17921 | 0.242054844 | -1.673220759 | 4.032572473 | -0.414926395 | 0.678195787 | 0.998252924 |
| chr15:99696352-99702072 | exonic       | TTC23                                       | 15 | 99696352 | 99702072 | 0 | 0 | 0 | 0 | 2 | 0 | 5720  | 0.242054844 | -1.673220759 | 4.032572473 | -0.414926395 | 0.678195787 | 0.998252924 |
| chr15:99827461-99874334 | exonic       | LRRC28                                      | 15 | 99827461 | 99874334 | 0 | 0 | 0 | 0 | 2 | 0 | 46873 | 0.242054844 | -1.673220759 | 4.032572473 | -0.414926395 | 0.678195787 | 0.998252924 |
| chr16:10524467-10527506 | exonic       | ATF7IP2                                     | 16 | 10524467 | 10527506 | 0 | 0 | 0 | 0 | 2 | 0 | 3039  | 0.242054844 | -1.673220759 | 4.032572473 | -0.414926395 | 0.678195787 | 0.998252924 |
| chr16:14700340-14721193 | exonic       | PARN                                        | 16 | 14700340 | 14721193 | 0 | 0 | 0 | 0 | 2 | 0 | 20853 | 0.242054844 | -1.673220759 | 4.032572473 | -0.414926395 | 0.678195787 | 0.998252924 |
| chr16:15724188-15725355 | exonic       | KIAA0430                                    | 16 | 15724188 | 15725355 | 0 | 0 | 0 | 0 | 2 | 0 | 1167  | 0.242054844 | -1.673220759 | 4.032572473 | -0.414926395 | 0.678195787 | 0.998252924 |
| chr16:15835319-15835748 | exonic       | MYH11                                       | 16 | 15835319 | 15835748 | 0 | 0 | 0 | 0 | 2 | 0 | 429   | 0.242054844 | -1.673220759 | 4.032572473 | -0.414926395 | 0.678195787 | 0.998252924 |
| chr16:16101672-16150152 | exonic       | ABCC1                                       | 16 | 16101672 | 16150152 | 0 | 0 | 0 | 0 | 2 | 0 | 48480 | 0.242054844 | -1.673220759 | 4.032572473 | -0.414926395 | 0.678195787 | 0.998252924 |
| chr16:21809070-21817550 | ncRNA_exonic | RRN3P1                                      | 16 | 21809070 | 21817550 | 0 | 0 | 0 | 0 | 2 | 0 | 8480  | 0.242054844 | -1.673220759 | 4.032572473 | -0.414926395 | 0.678195787 | 0.998252924 |
| chr16:23436069-23457282 | exonic       | COG7                                        | 16 | 23436069 | 23457282 | 0 | 0 | 0 | 0 | 2 | 0 | 21213 | 0.242054844 | -1.673220759 | 4.032572473 | -0.414926395 | 0.678195787 | 0.998252924 |
| chr16:24574743-24578826 | exonic       | RBBP6                                       | 16 | 24574743 | 24578826 | 0 | 0 | 0 | 0 | 2 | 0 | 4083  | 0.242054844 | -1.673220759 | 4.032572473 | -0.414926395 | 0.678195787 | 0.998252924 |
| chr16:2607703-2627501   | exonic       | PDPK1                                       | 16 | 2607703  | 2627501  | 0 | 0 | 0 | 0 | 2 | 0 | 19798 | 0.242054844 | -1.673220759 | 4.032572473 | -0.414926395 | 0.678195787 | 0.998252924 |
| chr16:27244321-27246620 | exonic       | NSMCE1                                      | 16 | 27244321 | 27246620 | 0 | 0 | 0 | 0 | 2 | 0 | 2299  | 0.242054844 | -1.673220759 | 4.032572473 | -0.414926395 | 0.678195787 | 0.998252924 |
| chr16:30727386-30727800 | exonic       | SRCAP                                       | 16 | 30727386 | 30727800 | 0 | 0 | 0 | 0 | 2 | 0 | 414   | 0.242054844 | -1.673220759 | 4.032572473 | -0.414926395 | 0.678195787 | 0.998252924 |

|                         |              |                                         |    |          |          |   |   |   |   |   |   |       |             |              |             |              |             |             |
|-------------------------|--------------|-----------------------------------------|----|----------|----------|---|---|---|---|---|---|-------|-------------|--------------|-------------|--------------|-------------|-------------|
| chr16:47345150-47347734 | exonic       | ITFG1                                   | 16 | 47345150 | 47347734 | 0 | 0 | 0 | 0 | 2 | 0 | 2584  | 0.242054844 | -1.673220759 | 4.032572473 | -0.414926395 | 0.678195787 | 0.998252924 |
| chr16:48292528-48296783 | exonic       | LONP2                                   | 16 | 48292528 | 48296783 | 0 | 0 | 0 | 0 | 2 | 0 | 4255  | 0.242054844 | -1.673220759 | 4.032572473 | -0.414926395 | 0.678195787 | 0.998252924 |
| chr16:53265330-53283978 | exonic       | CHD9                                    | 16 | 53265330 | 53283978 | 0 | 0 | 0 | 0 | 2 | 0 | 18648 | 0.242054844 | -1.673220759 | 4.032572473 | -0.414926395 | 0.678195787 | 0.998252924 |
| chr16:53289511-53340309 | exonic       | CHD9                                    | 16 | 53289511 | 53340309 | 0 | 0 | 0 | 0 | 2 | 0 | 50798 | 0.242054844 | -1.673220759 | 4.032572473 | -0.414926395 | 0.678195787 | 0.998252924 |
| chr16:56488168-56491686 | intronic     | OGFOD1                                  | 16 | 56488168 | 56491686 | 0 | 0 | 0 | 0 | 2 | 0 | 3518  | 0.242054844 | -1.673220759 | 4.032572473 | -0.414926395 | 0.678195787 | 0.998252924 |
| chr16:56692985-56704483 | exonic       | MT1F, MT1G, MT1H                        | 16 | 56692985 | 56704483 | 0 | 0 | 0 | 0 | 2 | 0 | 11498 | 0.242054844 | -1.673220759 | 4.032572473 | -0.414926395 | 0.678195787 | 0.998252924 |
| chr16:68842326-68842751 | exonic       | CDH1                                    | 16 | 68842326 | 68842751 | 0 | 0 | 0 | 0 | 2 | 0 | 425   | 0.242054844 | -1.673220759 | 4.032572473 | -0.414926395 | 0.678195787 | 0.998252924 |
| chr16:68893787-68914533 | exonic       | TANGO6                                  | 16 | 68893787 | 68914533 | 0 | 0 | 0 | 0 | 2 | 0 | 20746 | 0.242054844 | -1.673220759 | 4.032572473 | -0.414926395 | 0.678195787 | 0.998252924 |
| chr16:71218767-71220821 | exonic       | HYDIN                                   | 16 | 71218767 | 71220821 | 0 | 0 | 0 | 0 | 2 | 0 | 2054  | 0.242054844 | -1.673220759 | 4.032572473 | -0.414926395 | 0.678195787 | 0.998252924 |
| chr16:75669577-75670445 | exonic       | KARS                                    | 16 | 75669577 | 75670445 | 0 | 0 | 0 | 0 | 2 | 0 | 868   | 0.242054844 | -1.673220759 | 4.032572473 | -0.414926395 | 0.678195787 | 0.998252924 |
| chr16:792250-792543     | intergenic   | NARFL (dist=1212), MSLN (dist=18222)    | 16 | 792250   | 792543   | 0 | 0 | 0 | 0 | 2 | 0 | 293   | 0.242054844 | -1.673220759 | 4.032572473 | -0.414926395 | 0.678195787 | 0.998252924 |
| chr16:821917-823001     | intergenic   | MIR662 (dist=1640), RPUSD1 (dist=11973) | 16 | 821917   | 823001   | 0 | 0 | 0 | 0 | 2 | 0 | 1084  | 0.242054844 | -1.673220759 | 4.032572473 | -0.414926395 | 0.678195787 | 0.998252924 |
| chr16:84117857-84118911 | exonic       | MBTPS1                                  | 16 | 84117857 | 84118911 | 0 | 0 | 0 | 0 | 2 | 0 | 1054  | 0.242054844 | -1.673220759 | 4.032572473 | -0.414926395 | 0.678195787 | 0.998252924 |
| chr16:85012794-85015600 | exonic       | ZDHHC7                                  | 16 | 85012794 | 85015600 | 0 | 0 | 0 | 0 | 2 | 0 | 2806  | 0.242054844 | -1.673220759 | 4.032572473 | -0.414926395 | 0.678195787 | 0.998252924 |
| chr16:89799890-89804313 | exonic       | ZNF276                                  | 16 | 89799890 | 89804313 | 0 | 0 | 0 | 0 | 2 | 0 | 4423  | 0.242054844 | -1.673220759 | 4.032572473 | -0.414926395 | 0.678195787 | 0.998252924 |
| chr16:90094043-90099332 | exonic       | GAS8                                    | 16 | 90094043 | 90099332 | 0 | 0 | 0 | 0 | 2 | 0 | 5289  | 0.242054844 | -1.673220759 | 4.032572473 | -0.414926395 | 0.678195787 | 0.998252924 |
| chr17:12812213-12823148 | exonic       | ARHGAP44                                | 17 | 12812213 | 12823148 | 0 | 0 | 0 | 0 | 2 | 0 | 10935 | 0.242054844 | -1.673220759 | 4.032572473 | -0.414926395 | 0.678195787 | 0.998252924 |
| chr17:15938078-15971435 | exonic       | NCOR1                                   | 17 | 15938078 | 15971435 | 0 | 0 | 0 | 0 | 2 | 0 | 33357 | 0.242054844 | -1.673220759 | 4.032572473 | -0.414926395 | 0.678195787 | 0.998252924 |
| chr17:15953831-15954965 | intronic     | NCOR1                                   | 17 | 15953831 | 15954965 | 0 | 0 | 0 | 0 | 2 | 0 | 1134  | 0.242054844 | -1.673220759 | 4.032572473 | -0.414926395 | 0.678195787 | 0.998252924 |
| chr17:16040624-16056709 | exonic       | NCOR1                                   | 17 | 16040624 | 16056709 | 0 | 0 | 0 | 0 | 2 | 0 | 16085 | 0.242054844 | -1.673220759 | 4.032572473 | -0.414926395 | 0.678195787 | 0.998252924 |
| chr17:17158172-17168295 | exonic       | COPS3                                   | 17 | 17158172 | 17168295 | 0 | 0 | 0 | 0 | 2 | 0 | 10123 | 0.242054844 | -1.673220759 | 4.032572473 | -0.414926395 | 0.678195787 | 0.998252924 |
| chr17:18700891-18707579 | exonic       | TVP23B                                  | 17 | 18700891 | 18707579 | 0 | 0 | 0 | 0 | 2 | 0 | 6688  | 0.242054844 | -1.673220759 | 4.032572473 | -0.414926395 | 0.678195787 | 0.998252924 |
| chr17:19827145-19830389 | exonic       | AKAP10                                  | 17 | 19827145 | 19830389 | 0 | 0 | 0 | 0 | 2 | 0 | 3244  | 0.242054844 | -1.673220759 | 4.032572473 | -0.414926395 | 0.678195787 | 0.998252924 |
| chr17:20209336-20217536 | exonic       | SPECC1                                  | 17 | 20209336 | 20217536 | 0 | 0 | 0 | 0 | 2 | 0 | 8200  | 0.242054844 | -1.673220759 | 4.032572473 | -0.414926395 | 0.678195787 | 0.998252924 |
| chr17:28003837-28030080 | exonic       | SSH2                                    | 17 | 28003837 | 28030080 | 0 | 0 | 0 | 0 | 2 | 0 | 26243 | 0.242054844 | -1.673220759 | 4.032572473 | -0.414926395 | 0.678195787 | 0.998252924 |
| chr17:28111326-28117856 | intronic     | SSH2                                    | 17 | 28111326 | 28117856 | 0 | 0 | 0 | 0 | 2 | 0 | 6530  | 0.242054844 | -1.673220759 | 4.032572473 | -0.414926395 | 0.678195787 | 0.998252924 |
| chr17:29061915-29086557 | ncRNA_exonic | SUZ12P1                                 | 17 | 29061915 | 29086557 | 0 | 0 | 0 | 0 | 2 | 0 | 24642 | 0.242054844 | -1.673220759 | 4.032572473 | -0.414926395 | 0.678195787 | 0.998252924 |
| chr17:30302500-30315516 | exonic       | SUZ12                                   | 17 | 30302500 | 30315516 | 0 | 0 | 0 | 0 | 2 | 0 | 13016 | 0.242054844 | -1.673220759 | 4.032572473 | -0.414926395 | 0.678195787 | 0.998252924 |
| chr17:30320883-30321740 | exonic       | SUZ12                                   | 17 | 30320883 | 30321740 | 0 | 0 | 0 | 0 | 2 | 0 | 857   | 0.242054844 | -1.673220759 | 4.032572473 | -0.414926395 | 0.678195787 | 0.998252924 |
| chr17:34160910-34165557 | exonic       | TAF15                                   | 17 | 34160910 | 34165557 | 0 | 0 | 0 | 0 | 2 | 0 | 4647  | 0.242054844 | -1.673220759 | 4.032572473 | -0.414926395 | 0.678195787 | 0.998252924 |
| chr17:3745810-3746445   | exonic       | NCBP3                                   | 17 | 3745810  | 3746445  | 0 | 0 | 0 | 0 | 2 | 0 | 635   | 0.242054844 | -1.673220759 | 4.032572473 | -0.414926395 | 0.678195787 | 0.998252924 |
| chr17:37944510-37949186 | exonic       | IKZF3                                   | 17 | 37944510 | 37949186 | 0 | 0 | 0 | 0 | 2 | 0 | 4676  | 0.242054844 | -1.673220759 | 4.032572473 | -0.414926395 | 0.678195787 | 0.998252924 |
| chr17:38788446-38793824 | exonic       | SMARCE1                                 | 17 | 38788446 | 38793824 | 0 | 0 | 0 | 0 | 2 | 0 | 5378  | 0.242054844 | -1.673220759 | 4.032572473 | -0.414926395 | 0.678195787 | 0.998252924 |
| chr17:41247862-41276132 | exonic       | BRCA1                                   | 17 | 41247862 | 41276132 | 0 | 0 | 0 | 0 | 2 | 0 | 28270 | 0.242054844 | -1.673220759 | 4.032572473 | -0.414926395 | 0.678195787 | 0.998252924 |
| chr17:44159807-44197415 | exonic       | KANSL1                                  | 17 | 44159807 | 44197415 | 0 | 0 | 0 | 0 | 2 | 0 | 37608 | 0.242054844 | -1.673220759 | 4.032572473 | -0.414926395 | 0.678195787 | 0.998252924 |

|                         |              |                                           |    |          |          |   |   |   |   |   |   |       |             |              |             |              |             |             |
|-------------------------|--------------|-------------------------------------------|----|----------|----------|---|---|---|---|---|---|-------|-------------|--------------|-------------|--------------|-------------|-------------|
| chr17:455111-531471     | exonic       | VPS53                                     | 17 | 455111   | 531471   | 0 | 0 | 0 | 0 | 2 | 0 | 76360 | 0.242054844 | -1.673220759 | 4.032572473 | -0.414926395 | 0.678195787 | 0.998252924 |
| chr17:46919059-46926739 | exonic       | CALCOCO2                                  | 17 | 46919059 | 46926739 | 0 | 0 | 0 | 0 | 2 | 0 | 7680  | 0.242054844 | -1.673220759 | 4.032572473 | -0.414926395 | 0.678195787 | 0.998252924 |
| chr17:47809642-47810082 | exonic       | FAM117A                                   | 17 | 47809642 | 47810082 | 0 | 0 | 0 | 0 | 2 | 0 | 440   | 0.242054844 | -1.673220759 | 4.032572473 | -0.414926395 | 0.678195787 | 0.998252924 |
| chr17:48818463-48819092 | exonic       | LUC7L3                                    | 17 | 48818463 | 48819092 | 0 | 0 | 0 | 0 | 2 | 0 | 629   | 0.242054844 | -1.673220759 | 4.032572473 | -0.414926395 | 0.678195787 | 0.998252924 |
| chr17:49294694-49297824 | exonic       | MBTD1                                     | 17 | 49294694 | 49297824 | 0 | 0 | 0 | 0 | 2 | 0 | 3130  | 0.242054844 | -1.673220759 | 4.032572473 | -0.414926395 | 0.678195787 | 0.998252924 |
| chr17:5253745-5266311   | exonic       | RABEP1                                    | 17 | 5253745  | 5266311  | 0 | 0 | 0 | 0 | 2 | 0 | 12566 | 0.242054844 | -1.673220759 | 4.032572473 | -0.414926395 | 0.678195787 | 0.998252924 |
| chr17:5314022-5320002   | exonic       | NUP88                                     | 17 | 5314022  | 5320002  | 0 | 0 | 0 | 0 | 2 | 0 | 5980  | 0.242054844 | -1.673220759 | 4.032572473 | -0.414926395 | 0.678195787 | 0.998252924 |
| chr17:57958254-57968402 | exonic       | TUBD1                                     | 17 | 57958254 | 57968402 | 0 | 0 | 0 | 0 | 2 | 0 | 10148 | 0.242054844 | -1.673220759 | 4.032572473 | -0.414926395 | 0.678195787 | 0.998252924 |
| chr17:58538023-58539422 | exonic       | APPBP2                                    | 17 | 58538023 | 58539422 | 0 | 0 | 0 | 0 | 2 | 0 | 1399  | 0.242054844 | -1.673220759 | 4.032572473 | -0.414926395 | 0.678195787 | 0.998252924 |
| chr17:59821792-59857762 | exonic       | BRIP1                                     | 17 | 59821792 | 59857762 | 0 | 0 | 0 | 0 | 2 | 0 | 35970 | 0.242054844 | -1.673220759 | 4.032572473 | -0.414926395 | 0.678195787 | 0.998252924 |
| chr17:59967146-59969050 | exonic       | INTS2                                     | 17 | 59967146 | 59969050 | 0 | 0 | 0 | 0 | 2 | 0 | 1904  | 0.242054844 | -1.673220759 | 4.032572473 | -0.414926395 | 0.678195787 | 0.998252924 |
| chr17:64092368-64179425 | exonic       | CEP112                                    | 17 | 64092368 | 64179425 | 0 | 0 | 0 | 0 | 2 | 0 | 87057 | 0.242054844 | -1.673220759 | 4.032572473 | -0.414926395 | 0.678195787 | 0.998252924 |
| chr17:6531436-6538491   | exonic       | KIAA0753                                  | 17 | 6531436  | 6538491  | 0 | 0 | 0 | 0 | 2 | 0 | 7055  | 0.242054844 | -1.673220759 | 4.032572473 | -0.414926395 | 0.678195787 | 0.998252924 |
| chr17:65882243-65900956 | exonic       | BPTF                                      | 17 | 65882243 | 65900956 | 0 | 0 | 0 | 0 | 2 | 0 | 18713 | 0.242054844 | -1.673220759 | 4.032572473 | -0.414926395 | 0.678195787 | 0.998252924 |
| chr17:65941524-65955991 | exonic       | BPTF                                      | 17 | 65941524 | 65955991 | 0 | 0 | 0 | 0 | 2 | 0 | 14467 | 0.242054844 | -1.673220759 | 4.032572473 | -0.414926395 | 0.678195787 | 0.998252924 |
| chr17:66229558-66232813 | intergenic   | LOC440461 (dist=33115), AM22 (dist=11332) | 17 | 66229558 | 66232813 | 0 | 0 | 0 | 0 | 2 | 0 | 3255  | 0.242054844 | -1.673220759 | 4.032572473 | -0.414926395 | 0.678195787 | 0.998252924 |
| chr17:67273781-67280213 | exonic       | ABCA5                                     | 17 | 67273781 | 67280213 | 0 | 0 | 0 | 0 | 2 | 0 | 6432  | 0.242054844 | -1.673220759 | 4.032572473 | -0.414926395 | 0.678195787 | 0.998252924 |
| chr17:73951646-73952028 | exonic       | ACOX1                                     | 17 | 73951646 | 73952028 | 0 | 0 | 0 | 0 | 2 | 0 | 382   | 0.242054844 | -1.673220759 | 4.032572473 | -0.414926395 | 0.678195787 | 0.998252924 |
| chr17:73951646-73953647 | exonic       | ACOX1                                     | 17 | 73951646 | 73953647 | 0 | 0 | 0 | 0 | 2 | 0 | 2001  | 0.242054844 | -1.673220759 | 4.032572473 | -0.414926395 | 0.678195787 | 0.998252924 |
| chr17:78290987-78310178 | exonic       | RNF213                                    | 17 | 78290987 | 78310178 | 0 | 0 | 0 | 0 | 2 | 0 | 19191 | 0.242054844 | -1.673220759 | 4.032572473 | -0.414926395 | 0.678195787 | 0.998252924 |
| chr17:80721840-80726442 | exonic       | TBCD                                      | 17 | 80721840 | 80726442 | 0 | 0 | 0 | 0 | 2 | 0 | 4602  | 0.242054844 | -1.673220759 | 4.032572473 | -0.414926395 | 0.678195787 | 0.998252924 |
| chr17:80847543-80851508 | exonic       | TBCD                                      | 17 | 80847543 | 80851508 | 0 | 0 | 0 | 0 | 2 | 0 | 3965  | 0.242054844 | -1.673220759 | 4.032572473 | -0.414926395 | 0.678195787 | 0.998252924 |
| chr17:8273105-8275399   | exonic       | KRBA2                                     | 17 | 8273105  | 8275399  | 0 | 0 | 0 | 0 | 2 | 0 | 2294  | 0.242054844 | -1.673220759 | 4.032572473 | -0.414926395 | 0.678195787 | 0.998252924 |
| chr18:116841-118504     | ncRNA_exonic | ROCK1P1                                   | 18 | 116841   | 118504   | 0 | 0 | 0 | 0 | 2 | 0 | 1663  | 0.242054844 | -1.673220759 | 4.032572473 | -0.414926395 | 0.678195787 | 0.998252924 |
| chr18:13569792-13571730 | intronic     | LDLRAD4                                   | 18 | 13569792 | 13571730 | 0 | 0 | 0 | 0 | 2 | 0 | 1938  | 0.242054844 | -1.673220759 | 4.032572473 | -0.414926395 | 0.678195787 | 0.998252924 |
| chr18:13631834-13636589 | intronic     | LDLRAD4                                   | 18 | 13631834 | 13636589 | 0 | 0 | 0 | 0 | 2 | 0 | 4755  | 0.242054844 | -1.673220759 | 4.032572473 | -0.414926395 | 0.678195787 | 0.998252924 |
| chr18:18619432-18625428 | exonic       | ROCK1                                     | 18 | 18619432 | 18625428 | 0 | 0 | 0 | 0 | 2 | 0 | 5996  | 0.242054844 | -1.673220759 | 4.032572473 | -0.414926395 | 0.678195787 | 0.998252924 |
| chr18:19418325-19424214 | exonic       | MIB1                                      | 18 | 19418325 | 19424214 | 0 | 0 | 0 | 0 | 2 | 0 | 5889  | 0.242054844 | -1.673220759 | 4.032572473 | -0.414926395 | 0.678195787 | 0.998252924 |
| chr18:216486-224179     | exonic       | THOC1                                     | 18 | 216486   | 224179   | 0 | 0 | 0 | 0 | 2 | 0 | 7693  | 0.242054844 | -1.673220759 | 4.032572473 | -0.414926395 | 0.678195787 | 0.998252924 |
| chr18:2762102-2770106   | exonic       | SMCHD1                                    | 18 | 2762102  | 2770106  | 0 | 0 | 0 | 0 | 2 | 0 | 8004  | 0.242054844 | -1.673220759 | 4.032572473 | -0.414926395 | 0.678195787 | 0.998252924 |
| chr18:29884193-29885592 | intronic     | GAREM1                                    | 18 | 29884193 | 29885592 | 0 | 0 | 0 | 0 | 2 | 0 | 1399  | 0.242054844 | -1.673220759 | 4.032572473 | -0.414926395 | 0.678195787 | 0.998252924 |
| chr18:39550290-39570518 | exonic       | PIK3C3                                    | 18 | 39550290 | 39570518 | 0 | 0 | 0 | 0 | 2 | 0 | 20228 | 0.242054844 | -1.673220759 | 4.032572473 | -0.414926395 | 0.678195787 | 0.998252924 |
| chr18:39593405-39595530 | exonic       | PIK3C3                                    | 18 | 39593405 | 39595530 | 0 | 0 | 0 | 0 | 2 | 0 | 2125  | 0.242054844 | -1.673220759 | 4.032572473 | -0.414926395 | 0.678195787 | 0.998252924 |
| chr18:56615299-56621031 | exonic       | ZNF532                                    | 18 | 56615299 | 56621031 | 0 | 0 | 0 | 0 | 2 | 0 | 5732  | 0.242054844 | -1.673220759 | 4.032572473 | -0.414926395 | 0.678195787 | 0.998252924 |
| chr18:59888270-59933982 | exonic       | KIAA1468                                  | 18 | 59888270 | 59933982 | 0 | 0 | 0 | 0 | 2 | 0 | 45712 | 0.242054844 | -1.673220759 | 4.032572473 | -0.414926395 | 0.678195787 | 0.998252924 |

|                          |            |                                          |    |           |           |   |   |   |   |   |   |       |             |              |             |              |             |             |
|--------------------------|------------|------------------------------------------|----|-----------|-----------|---|---|---|---|---|---|-------|-------------|--------------|-------------|--------------|-------------|-------------|
| chr18:67753848-67795782  | exonic     | RTTN                                     | 18 | 67753848  | 67795782  | 0 | 0 | 0 | 0 | 2 | 0 | 41934 | 0.242054844 | -1.673220759 | 4.032572473 | -0.414926395 | 0.678195787 | 0.998252924 |
| chr18:76886266-76953263  | exonic     | ATP9B                                    | 18 | 76886266  | 76953263  | 2 | 0 | 0 | 2 | 2 | 0 | 66997 | 0.242054844 | -1.673220759 | 4.032572473 | -0.414926395 | 0.678195787 | 0.998252924 |
| chr18:77733522-77737701  | exonic     | TXNL4A                                   | 18 | 77733522  | 77737701  | 0 | 0 | 0 | 0 | 2 | 0 | 4179  | 0.242054844 | -1.673220759 | 4.032572473 | -0.414926395 | 0.678195787 | 0.998252924 |
| chr19:11513325-11516102  | exonic     | RGL3                                     | 19 | 11513325  | 11516102  | 0 | 0 | 0 | 0 | 2 | 0 | 2777  | 0.242054844 | -1.673220759 | 4.032572473 | -0.414926395 | 0.678195787 | 0.998252924 |
| chr19:11546360-11546510  | splicing   | CCDC151                                  | 19 | 11546360  | 11546510  | 0 | 0 | 0 | 0 | 2 | 0 | 150   | 0.242054844 | -1.673220759 | 4.032572473 | -0.414926395 | 0.678195787 | 0.998252924 |
| chr19:11833769-11834157  | exonic     | ZNF823                                   | 19 | 11833769  | 11834157  | 0 | 0 | 0 | 0 | 2 | 0 | 388   | 0.242054844 | -1.673220759 | 4.032572473 | -0.414926395 | 0.678195787 | 0.998252924 |
| chr19:12458128-12463928  | exonic     | ZNF442                                   | 19 | 12458128  | 12463928  | 0 | 0 | 0 | 0 | 2 | 0 | 5800  | 0.242054844 | -1.673220759 | 4.032572473 | -0.414926395 | 0.678195787 | 0.998252924 |
| chr19:12821434-12822427  | exonic     | TNP02                                    | 19 | 12821434  | 12822427  | 0 | 0 | 0 | 0 | 2 | 0 | 993   | 0.242054844 | -1.673220759 | 4.032572473 | -0.414926395 | 0.678195787 | 0.998252924 |
| chr19:14104337-14110187  | exonic     | RFX1                                     | 19 | 14104337  | 14110187  | 0 | 0 | 0 | 0 | 2 | 0 | 5850  | 0.242054844 | -1.673220759 | 4.032572473 | -0.414926395 | 0.678195787 | 0.998252924 |
| chr19:16973162-16977367  | exonic     | SIN3B                                    | 19 | 16973162  | 16977367  | 0 | 0 | 0 | 0 | 2 | 0 | 4205  | 0.242054844 | -1.673220759 | 4.032572473 | -0.414926395 | 0.678195787 | 0.998252924 |
| chr19:17772465-17779383  | exonic     | UNC13A                                   | 19 | 17772465  | 17779383  | 0 | 0 | 0 | 0 | 2 | 0 | 6918  | 0.242054844 | -1.673220759 | 4.032572473 | -0.414926395 | 0.678195787 | 0.998252924 |
| chr19:18541650-18543024  | exonic     | SSBP4                                    | 19 | 18541650  | 18543024  | 0 | 0 | 0 | 0 | 2 | 0 | 1374  | 0.242054844 | -1.673220759 | 4.032572473 | -0.414926395 | 0.678195787 | 0.998252924 |
| chr19:18707431-18707859  | exonic     | CRLF1                                    | 19 | 18707431  | 18707859  | 0 | 0 | 0 | 0 | 2 | 0 | 428   | 0.242054844 | -1.673220759 | 4.032572473 | -0.414926395 | 0.678195787 | 0.998252924 |
| chr19:20215711-20217357  | exonic     | ZNF90                                    | 19 | 20215711  | 20217357  | 0 | 0 | 0 | 0 | 2 | 0 | 1646  | 0.242054844 | -1.673220759 | 4.032572473 | -0.414926395 | 0.678195787 | 0.998252924 |
| chr19:2112859-2114198    | exonic     | AP3D1                                    | 19 | 2112859   | 2114198   | 0 | 0 | 0 | 0 | 2 | 0 | 1339  | 0.242054844 | -1.673220759 | 4.032572473 | -0.414926395 | 0.678195787 | 0.998252924 |
| chr19:3058378-3059758    | intronic   | AES                                      | 19 | 3058378   | 3059758   | 0 | 0 | 0 | 0 | 2 | 0 | 1380  | 0.242054844 | -1.673220759 | 4.032572473 | -0.414926395 | 0.678195787 | 0.998252924 |
| chr19:33428536-33457372  | exonic     | CEP89                                    | 19 | 33428536  | 33457372  | 0 | 0 | 0 | 0 | 2 | 0 | 28836 | 0.242054844 | -1.673220759 | 4.032572473 | -0.414926395 | 0.678195787 | 0.998252924 |
| chr19:34712412-34712643  | exonic     | LSM14A                                   | 19 | 34712412  | 34712643  | 0 | 0 | 0 | 0 | 2 | 0 | 231   | 0.242054844 | -1.673220759 | 4.032572473 | -0.414926395 | 0.678195787 | 0.998252924 |
| chr19:35998359-35999142  | exonic     | DMKN                                     | 19 | 35998359  | 35999142  | 0 | 0 | 0 | 0 | 2 | 0 | 783   | 0.242054844 | -1.673220759 | 4.032572473 | -0.414926395 | 0.678195787 | 0.998252924 |
| chr19:36219265-36220197  | exonic     | KMT2B                                    | 19 | 36219265  | 36220197  | 0 | 0 | 0 | 0 | 2 | 0 | 932   | 0.242054844 | -1.673220759 | 4.032572473 | -0.414926395 | 0.678195787 | 0.998252924 |
| chr19:37492233-37492585  | intergenic | ZNF568 (dist=3399), ZNF420 (dist=76797)  | 19 | 37492233  | 37492585  | 0 | 0 | 0 | 0 | 2 | 0 | 352   | 0.242054844 | -1.673220759 | 4.032572473 | -0.414926395 | 0.678195787 | 0.998252924 |
| chr19:37597527-37615984  | intronic   | ZNF420                                   | 19 | 37597527  | 37615984  | 0 | 0 | 0 | 0 | 2 | 0 | 18457 | 0.242054844 | -1.673220759 | 4.032572473 | -0.414926395 | 0.678195787 | 0.998252924 |
| chr19:37814320-37818867  | intergenic | LOC284412 (dist=54408), HKR1 (dist=6713) | 19 | 37814320  | 37818867  | 0 | 0 | 0 | 0 | 2 | 0 | 4547  | 0.242054844 | -1.673220759 | 4.032572473 | -0.414926395 | 0.678195787 | 0.998252924 |
| chr19:38185790-38186872  | downstream | ZNF607 (dist=392)                        | 19 | 38185790  | 38186872  | 0 | 0 | 0 | 0 | 2 | 0 | 1082  | 0.242054844 | -1.673220759 | 4.032572473 | -0.414926395 | 0.678195787 | 0.998252924 |
| chr19:39660397-39663445  | exonic     | PAK4                                     | 19 | 39660397  | 39663445  | 0 | 0 | 0 | 0 | 2 | 0 | 3048  | 0.242054844 | -1.673220759 | 4.032572473 | -0.414926395 | 0.678195787 | 0.998252924 |
| chr19:4865424-4865845    | intronic   | PLIN3                                    | 19 | 4865424   | 4865845   | 0 | 0 | 0 | 0 | 2 | 0 | 421   | 0.242054844 | -1.673220759 | 4.032572473 | -0.414926395 | 0.678195787 | 0.998252924 |
| chr19:48718596-48725112  | exonic     | CARD8                                    | 19 | 48718596  | 48725112  | 0 | 0 | 0 | 0 | 2 | 0 | 6516  | 0.242054844 | -1.673220759 | 4.032572473 | -0.414926395 | 0.678195787 | 0.998252924 |
| chr19:52909160-52909896  | exonic     | ZNF528                                   | 19 | 52909160  | 52909896  | 0 | 0 | 0 | 0 | 2 | 0 | 736   | 0.242054844 | -1.673220759 | 4.032572473 | -0.414926395 | 0.678195787 | 0.998252924 |
| chr19:53577393-53578436  | exonic     | ZNF160                                   | 19 | 53577393  | 53578436  | 0 | 0 | 0 | 0 | 2 | 0 | 1043  | 0.242054844 | -1.673220759 | 4.032572473 | -0.414926395 | 0.678195787 | 0.998252924 |
| chr19:5700799-5706003    | exonic     | LONP1                                    | 19 | 5700799   | 5706003   | 0 | 0 | 0 | 0 | 2 | 0 | 5204  | 0.242054844 | -1.673220759 | 4.032572473 | -0.414926395 | 0.678195787 | 0.998252924 |
| chr19:58264659-58268366  | exonic     | ZNF776                                   | 19 | 58264659  | 58268366  | 0 | 0 | 0 | 0 | 2 | 0 | 3707  | 0.242054844 | -1.673220759 | 4.032572473 | -0.414926395 | 0.678195787 | 0.998252924 |
| chr19:9922828-9928696    | UTR5       |                                          | 19 | 9922828   | 9928696   | 0 | 0 | 0 | 0 | 2 | 0 | 5868  | 0.242054844 | -1.673220759 | 4.032572473 | -0.414926395 | 0.678195787 | 0.998252924 |
| chr2:105992018-105999452 | intronic   | FHL2                                     | 2  | 105992018 | 105999452 | 0 | 0 | 0 | 0 | 2 | 0 | 7434  | 0.242054844 | -1.673220759 | 4.032572473 | -0.414926395 | 0.678195787 | 0.998252924 |
| chr2:107049390-107051658 | exonic     | RGPD3                                    | 2  | 107049390 | 107051658 | 0 | 0 | 0 | 0 | 2 | 0 | 2268  | 0.242054844 | -1.673220759 | 4.032572473 | -0.414926395 | 0.678195787 | 0.998252924 |
| chr2:109405307-109411177 | exonic     | CCDC138                                  | 2  | 109405307 | 109411177 | 0 | 0 | 0 | 0 | 2 | 0 | 5870  | 0.242054844 | -1.673220759 | 4.032572473 | -0.414926395 | 0.678195787 | 0.998252924 |

|                          |              |                                            |   |           |           |   |   |   |   |   |   |        |             |              |             |              |             |             |
|--------------------------|--------------|--------------------------------------------|---|-----------|-----------|---|---|---|---|---|---|--------|-------------|--------------|-------------|--------------|-------------|-------------|
| chr2:111991205-111997573 | intergenic   | BCL2L11(dist=65183), MIR4435-1(dist=81016) | 2 | 111991205 | 111997573 | 0 | 0 | 0 | 0 | 2 | 0 | 6368   | 0.242054844 | -1.673220759 | 4.032572473 | -0.414926395 | 0.678195787 | 0.998252924 |
| chr2:11332273-11335151   | exonic       | ROCK2                                      | 2 | 11332273  | 11335151  | 0 | 0 | 0 | 0 | 2 | 0 | 2878   | 0.242054844 | -1.673220759 | 4.032572473 | -0.414926395 | 0.678195787 | 0.998252924 |
| chr2:114588429-114589162 | ncRNA_exonic | LOC101060091                               | 2 | 114588429 | 114589162 | 0 | 0 | 0 | 0 | 2 | 0 | 733    | 0.242054844 | -1.673220759 | 4.032572473 | -0.414926395 | 0.678195787 | 0.998252924 |
| chr2:118693070-118698873 | exonic       | CCDC93                                     | 2 | 118693070 | 118698873 | 0 | 0 | 0 | 0 | 2 | 0 | 5803   | 0.242054844 | -1.673220759 | 4.032572473 | -0.414926395 | 0.678195787 | 0.998252924 |
| chr2:121043449-121047333 | exonic       | RALB                                       | 2 | 121043449 | 121047333 | 0 | 0 | 0 | 0 | 2 | 0 | 3884   | 0.242054844 | -1.673220759 | 4.032572473 | -0.414926395 | 0.678195787 | 0.998252924 |
| chr2:128087497-128100770 | exonic       | MAP3K2                                     | 2 | 128087497 | 128100770 | 0 | 0 | 0 | 0 | 2 | 0 | 13273  | 0.242054844 | -1.673220759 | 4.032572473 | -0.414926395 | 0.678195787 | 0.998252924 |
| chr2:135878388-135884226 | exonic       | RAB3GAP1                                   | 2 | 135878388 | 135884226 | 0 | 0 | 0 | 0 | 2 | 0 | 5838   | 0.242054844 | -1.673220759 | 4.032572473 | -0.414926395 | 0.678195787 | 0.998252924 |
| chr2:135883750-135884226 | exonic       | RAB3GAP1                                   | 2 | 135883750 | 135884226 | 0 | 0 | 0 | 0 | 2 | 0 | 476    | 0.242054844 | -1.673220759 | 4.032572473 | -0.414926395 | 0.678195787 | 0.998252924 |
| chr2:136071058-136103205 | exonic       | ZRANB3                                     | 2 | 136071058 | 136103205 | 0 | 0 | 0 | 0 | 2 | 0 | 32147  | 0.242054844 | -1.673220759 | 4.032572473 | -0.414926395 | 0.678195787 | 0.998252924 |
| chr2:136379063-136403097 | exonic       | R3HDM1                                     | 2 | 136379063 | 136403097 | 0 | 0 | 0 | 0 | 2 | 0 | 24034  | 0.242054844 | -1.673220759 | 4.032572473 | -0.414926395 | 0.678195787 | 0.998252924 |
| chr2:144193169-144194611 | exonic       | ARHGAP15                                   | 2 | 144193169 | 144194611 | 0 | 0 | 0 | 0 | 2 | 0 | 1442   | 0.242054844 | -1.673220759 | 4.032572473 | -0.414926395 | 0.678195787 | 0.998252924 |
| chr2:148936268-149099905 | UTR5         | MB05(NM_018328:c.-280059..-279692delins0)  | 2 | 148936268 | 149099905 | 0 | 0 | 0 | 0 | 2 | 0 | 163637 | 0.242054844 | -1.673220759 | 4.032572473 | -0.414926395 | 0.678195787 | 0.998252924 |
| chr2:148936269-148990964 | UTR5         | MB05(NM_018328:c.-280059..-279815delins0)  | 2 | 148936269 | 148990964 | 0 | 0 | 0 | 0 | 2 | 0 | 54695  | 0.242054844 | -1.673220759 | 4.032572473 | -0.414926395 | 0.678195787 | 0.998252924 |
| chr2:152299772-152308219 | exonic       | RIF1                                       | 2 | 152299772 | 152308219 | 0 | 0 | 0 | 0 | 2 | 0 | 8447   | 0.242054844 | -1.673220759 | 4.032572473 | -0.414926395 | 0.678195787 | 0.998252924 |
| chr2:152988627-152992117 | exonic       | STAM2                                      | 2 | 152988627 | 152992117 | 0 | 0 | 0 | 0 | 2 | 0 | 3490   | 0.242054844 | -1.673220759 | 4.032572473 | -0.414926395 | 0.678195787 | 0.998252924 |
| chr2:153003675-153004814 | exonic       | STAM2                                      | 2 | 153003675 | 153004814 | 0 | 0 | 0 | 0 | 2 | 0 | 1139   | 0.242054844 | -1.673220759 | 4.032572473 | -0.414926395 | 0.678195787 | 0.998252924 |
| chr2:15467873-15470889   | exonic       | NBAS                                       | 2 | 15467873  | 15470889  | 0 | 0 | 0 | 0 | 2 | 0 | 3016   | 0.242054844 | -1.673220759 | 4.032572473 | -0.414926395 | 0.678195787 | 0.998252924 |
| chr2:15467873-15567918   | exonic       | NBAS                                       | 2 | 15467873  | 15567918  | 0 | 0 | 0 | 0 | 2 | 0 | 100045 | 0.242054844 | -1.673220759 | 4.032572473 | -0.414926395 | 0.678195787 | 0.998252924 |
| chr2:157352555-157370008 | exonic       | GPD2                                       | 2 | 157352555 | 157370008 | 0 | 0 | 0 | 0 | 2 | 0 | 17453  | 0.242054844 | -1.673220759 | 4.032572473 | -0.414926395 | 0.678195787 | 0.998252924 |
| chr2:165378489-165383645 | exonic       | GRB14                                      | 2 | 165378489 | 165383645 | 0 | 0 | 0 | 0 | 2 | 0 | 5156   | 0.242054844 | -1.673220759 | 4.032572473 | -0.414926395 | 0.678195787 | 0.998252924 |
| chr2:166451552-166514530 | exonic       | CSRNP3                                     | 2 | 166451552 | 166514530 | 0 | 0 | 0 | 0 | 2 | 0 | 62978  | 0.242054844 | -1.673220759 | 4.032572473 | -0.414926395 | 0.678195787 | 0.998252924 |
| chr2:171910270-171917666 | exonic       | TLK1                                       | 2 | 171910270 | 171917666 | 0 | 0 | 0 | 0 | 2 | 0 | 7396   | 0.242054844 | -1.673220759 | 4.032572473 | -0.414926395 | 0.678195787 | 0.998252924 |
| chr2:173429230-173457776 | exonic       | PDK1                                       | 2 | 173429230 | 173457776 | 0 | 5 | 6 | 3 | 5 | 0 | 28546  | 0.242054844 | -1.673220759 | 4.032572473 | -0.414926395 | 0.678195787 | 0.998252924 |
| chr2:173433468-173457776 | exonic       | PDK1                                       | 2 | 173433468 | 173457776 | 0 | 0 | 0 | 0 | 2 | 0 | 24308  | 0.242054844 | -1.673220759 | 4.032572473 | -0.414926395 | 0.678195787 | 0.998252924 |
| chr2:174819997-174820200 | exonic       | SP3                                        | 2 | 174819997 | 174820200 | 0 | 0 | 0 | 0 | 2 | 0 | 203    | 0.242054844 | -1.673220759 | 4.032572473 | -0.414926395 | 0.678195787 | 0.998252924 |
| chr2:175432805-175436403 | splicing     | WIPF1                                      | 2 | 175432805 | 175436403 | 0 | 0 | 0 | 0 | 2 | 0 | 3598   | 0.242054844 | -1.673220759 | 4.032572473 | -0.414926395 | 0.678195787 | 0.998252924 |
| chr2:175945387-175962321 | exonic       | ATF2                                       | 2 | 175945387 | 175962321 | 0 | 0 | 0 | 0 | 2 | 0 | 16934  | 0.242054844 | -1.673220759 | 4.032572473 | -0.414926395 | 0.678195787 | 0.998252924 |
| chr2:17876418-17877693   | exonic       | SMC6                                       | 2 | 17876418  | 17877693  | 0 | 0 | 0 | 0 | 2 | 0 | 1275   | 0.242054844 | -1.673220759 | 4.032572473 | -0.414926395 | 0.678195787 | 0.998252924 |
| chr2:186815371-186951097 | ncRNA_exonic | LINC01473                                  | 2 | 186815371 | 186951097 | 0 | 0 | 0 | 0 | 2 | 0 | 135726 | 0.242054844 | -1.673220759 | 4.032572473 | -0.414926395 | 0.678195787 | 0.998252924 |
| chr2:189248489-189348219 | exonic       | GULP1                                      | 2 | 189248489 | 189348219 | 0 | 0 | 0 | 0 | 2 | 0 | 99730  | 0.242054844 | -1.673220759 | 4.032572473 | -0.414926395 | 0.678195787 | 0.998252924 |
| chr2:190593386-190620046 | exonic       | ANKAR, OSGEPL1                             | 2 | 190593386 | 190620046 | 0 | 0 | 0 | 0 | 2 | 0 | 26660  | 0.242054844 | -1.673220759 | 4.032572473 | -0.414926395 | 0.678195787 | 0.998252924 |
| chr2:191375086-191383909 | exonic       | NEMP2                                      | 2 | 191375086 | 191383909 | 0 | 0 | 0 | 0 | 2 | 0 | 8823   | 0.242054844 | -1.673220759 | 4.032572473 | -0.414926395 | 0.678195787 | 0.998252924 |
| chr2:198281464-198288698 | exonic       | SF3B1                                      | 2 | 198281464 | 198288698 | 0 | 0 | 0 | 0 | 2 | 0 | 7234   | 0.242054844 | -1.673220759 | 4.032572473 | -0.414926395 | 0.678195787 | 0.998252924 |
| chr2:198283675-198285151 | exonic       | SF3B1                                      | 2 | 198283675 | 198285151 | 0 | 0 | 0 | 0 | 2 | 0 | 1476   | 0.242054844 | -1.673220759 | 4.032572473 | -0.414926395 | 0.678195787 | 0.998252924 |
| chr2:198324655-198327455 | exonic       | COQ10B                                     | 2 | 198324655 | 198327455 | 0 | 0 | 0 | 0 | 2 | 0 | 2800   | 0.242054844 | -1.673220759 | 4.032572473 | -0.414926395 | 0.678195787 | 0.998252924 |

|                          |              |                                       |   |           |           |   |   |   |    |   |   |        |             |              |             |              |             |             |
|--------------------------|--------------|---------------------------------------|---|-----------|-----------|---|---|---|----|---|---|--------|-------------|--------------|-------------|--------------|-------------|-------------|
| chr2:201997751-202014558 | exonic       | CFLAR                                 | 2 | 201997751 | 202014558 | 2 | 3 | 0 | 14 | 3 | 0 | 16807  | 0.242054844 | -1.673220759 | 4.032572473 | -0.414926395 | 0.678195787 | 0.998252924 |
| chr2:203744710-203745052 | downstream   | WDR12(dist=271)                       | 2 | 203744710 | 203745052 | 0 | 0 | 0 | 0  | 2 | 0 | 342    | 0.242054844 | -1.673220759 | 4.032572473 | -0.414926395 | 0.678195787 | 0.998252924 |
| chr2:203834642-203842055 | exonic       | CARF                                  | 2 | 203834642 | 203842055 | 0 | 0 | 0 | 0  | 2 | 0 | 7413   | 0.242054844 | -1.673220759 | 4.032572473 | -0.414926395 | 0.678195787 | 0.998252924 |
| chr2:203921149-203933198 | exonic       | NBEAL1                                | 2 | 203921149 | 203933198 | 0 | 0 | 0 | 0  | 2 | 0 | 12049  | 0.242054844 | -1.673220759 | 4.032572473 | -0.414926395 | 0.678195787 | 0.998252924 |
| chr2:204030871-204032083 | exonic       | NBEAL1                                | 2 | 204030871 | 204032083 | 0 | 0 | 0 | 0  | 2 | 0 | 1212   | 0.242054844 | -1.673220759 | 4.032572473 | -0.414926395 | 0.678195787 | 0.998252924 |
| chr2:204309590-204326648 | exonic       | RAPH1                                 | 2 | 204309590 | 204326648 | 0 | 0 | 0 | 0  | 2 | 0 | 17058  | 0.242054844 | -1.673220759 | 4.032572473 | -0.414926395 | 0.678195787 | 0.998252924 |
| chr2:206959646-206960515 | intergenic   | IN0800(dist=8740), GC5HP3(dist=19782) | 2 | 206959646 | 206960515 | 0 | 0 | 0 | 0  | 2 | 0 | 869    | 0.242054844 | -1.673220759 | 4.032572473 | -0.414926395 | 0.678195787 | 0.998252924 |
| chr2:216177728-216179316 | intronic     | ATIC                                  | 2 | 216177728 | 216179316 | 0 | 0 | 0 | 0  | 2 | 0 | 1588   | 0.242054844 | -1.673220759 | 4.032572473 | -0.414926395 | 0.678195787 | 0.998252924 |
| chr2:219353026-219360673 | exonic       | USP37                                 | 2 | 219353026 | 219360673 | 0 | 0 | 0 | 0  | 2 | 0 | 7647   | 0.242054844 | -1.673220759 | 4.032572473 | -0.414926395 | 0.678195787 | 0.998252924 |
| chr2:223773450-223799405 | exonic       | ACSL3                                 | 2 | 223773450 | 223799405 | 0 | 0 | 0 | 0  | 2 | 0 | 25955  | 0.242054844 | -1.673220759 | 4.032572473 | -0.414926395 | 0.678195787 | 0.998252924 |
| chr2:230678585-230695555 | exonic       | TRIP12                                | 2 | 230678585 | 230695555 | 0 | 0 | 0 | 0  | 2 | 0 | 16970  | 0.242054844 | -1.673220759 | 4.032572473 | -0.414926395 | 0.678195787 | 0.998252924 |
| chr2:231120166-231152681 | exonic       | SP140                                 | 2 | 231120166 | 231152681 | 0 | 0 | 0 | 0  | 2 | 0 | 32515  | 0.242054844 | -1.673220759 | 4.032572473 | -0.414926395 | 0.678195787 | 0.998252924 |
| chr2:231134246-231152681 | exonic       | SP140                                 | 2 | 231134246 | 231152681 | 0 | 0 | 0 | 0  | 2 | 0 | 18435  | 0.242054844 | -1.673220759 | 4.032572473 | -0.414926395 | 0.678195787 | 0.998252924 |
| chr2:231327233-231327812 | exonic       | SP100                                 | 2 | 231327233 | 231327812 | 0 | 0 | 0 | 0  | 2 | 0 | 579    | 0.242054844 | -1.673220759 | 4.032572473 | -0.414926395 | 0.678195787 | 0.998252924 |
| chr2:233651860-233671367 | exonic       | GIGYF2                                | 2 | 233651860 | 233671367 | 0 | 0 | 0 | 0  | 2 | 0 | 19507  | 0.242054844 | -1.673220759 | 4.032572473 | -0.414926395 | 0.678195787 | 0.998252924 |
| chr2:234070369-234104141 | exonic       | INPP5D                                | 2 | 234070369 | 234104141 | 0 | 0 | 0 | 0  | 2 | 0 | 33772  | 0.242054844 | -1.673220759 | 4.032572473 | -0.414926395 | 0.678195787 | 0.998252924 |
| chr2:234457746-234460165 | exonic       | USP40                                 | 2 | 234457746 | 234460165 | 0 | 0 | 0 | 0  | 2 | 0 | 2419   | 0.242054844 | -1.673220759 | 4.032572473 | -0.414926395 | 0.678195787 | 0.998252924 |
| chr2:236626200-236653483 | exonic       | AGAP1                                 | 2 | 236626200 | 236653483 | 0 | 0 | 0 | 0  | 2 | 0 | 27283  | 0.242054844 | -1.673220759 | 4.032572473 | -0.414926395 | 0.678195787 | 0.998252924 |
| chr2:238448990-238455326 | exonic       | MLPH                                  | 2 | 238448990 | 238455326 | 0 | 0 | 0 | 0  | 2 | 0 | 6336   | 0.242054844 | -1.673220759 | 4.032572473 | -0.414926395 | 0.678195787 | 0.998252924 |
| chr2:239170370-239177615 | exonic       | PER2                                  | 2 | 239170370 | 239177615 | 0 | 0 | 0 | 0  | 2 | 0 | 7245   | 0.242054844 | -1.673220759 | 4.032572473 | -0.414926395 | 0.678195787 | 0.998252924 |
| chr2:240944626-240954277 | exonic       | NDUFA10                               | 2 | 240944626 | 240954277 | 0 | 0 | 0 | 0  | 2 | 0 | 9651   | 0.242054844 | -1.673220759 | 4.032572473 | -0.414926395 | 0.678195787 | 0.998252924 |
| chr2:27280170-27282272   | exonic       | AGBL5                                 | 2 | 27280170  | 27282272  | 0 | 0 | 0 | 0  | 2 | 0 | 2102   | 0.242054844 | -1.673220759 | 4.032572473 | -0.414926395 | 0.678195787 | 0.998252924 |
| chr2:29135455-29137074   | exonic       | WDR43                                 | 2 | 29135455  | 29137074  | 0 | 0 | 0 | 0  | 2 | 0 | 1619   | 0.242054844 | -1.673220759 | 4.032572473 | -0.414926395 | 0.678195787 | 0.998252924 |
| chr2:29356520-29390406   | exonic       | CLIP4                                 | 2 | 29356520  | 29390406  | 0 | 0 | 0 | 0  | 2 | 0 | 33886  | 0.242054844 | -1.673220759 | 4.032572473 | -0.414926395 | 0.678195787 | 0.998252924 |
| chr2:29375550-29380213   | exonic       | CLIP4                                 | 2 | 29375550  | 29380213  | 0 | 0 | 0 | 0  | 2 | 0 | 4663   | 0.242054844 | -1.673220759 | 4.032572473 | -0.414926395 | 0.678195787 | 0.998252924 |
| chr2:30682417-30791042   | exonic       | LCLAT1                                | 2 | 30682417  | 30791042  | 0 | 0 | 0 | 0  | 2 | 0 | 108625 | 0.242054844 | -1.673220759 | 4.032572473 | -0.414926395 | 0.678195787 | 0.998252924 |
| chr2:32631567-32641231   | exonic       | BIRC6                                 | 2 | 32631567  | 32641231  | 0 | 0 | 0 | 0  | 2 | 0 | 9664   | 0.242054844 | -1.673220759 | 4.032572473 | -0.414926395 | 0.678195787 | 0.998252924 |
| chr2:32670588-32693179   | exonic       | BIRC6                                 | 2 | 32670588  | 32693179  | 0 | 0 | 0 | 0  | 2 | 0 | 22591  | 0.242054844 | -1.673220759 | 4.032572473 | -0.414926395 | 0.678195787 | 0.998252924 |
| chr2:32718734-32724564   | exonic       | BIRC6                                 | 2 | 32718734  | 32724564  | 0 | 0 | 0 | 0  | 2 | 0 | 5830   | 0.242054844 | -1.673220759 | 4.032572473 | -0.414926395 | 0.678195787 | 0.998252924 |
| chr2:37426847-37428869   | ncRNA_exonic | CEBPZOS                               | 2 | 37426847  | 37428869  | 0 | 0 | 0 | 0  | 2 | 0 | 2022   | 0.242054844 | -1.673220759 | 4.032572473 | -0.414926395 | 0.678195787 | 0.998252924 |
| chr2:43805651-43818093   | exonic       | THADA                                 | 2 | 43805651  | 43818093  | 0 | 0 | 0 | 0  | 2 | 0 | 12442  | 0.242054844 | -1.673220759 | 4.032572473 | -0.414926395 | 0.678195787 | 0.998252924 |
| chr2:44421337-44436466   | exonic       | PPM1B                                 | 2 | 44421337  | 44436466  | 0 | 0 | 0 | 0  | 2 | 0 | 15129  | 0.242054844 | -1.673220759 | 4.032572473 | -0.414926395 | 0.678195787 | 0.998252924 |
| chr2:44451502-44452890   | intronic     | PPM1B                                 | 2 | 44451502  | 44452890  | 0 | 0 | 0 | 0  | 2 | 0 | 1388   | 0.242054844 | -1.673220759 | 4.032572473 | -0.414926395 | 0.678195787 | 0.998252924 |
| chr2:54125006-54127154   | exonic       | PSME4                                 | 2 | 54125006  | 54127154  | 0 | 0 | 0 | 0  | 2 | 0 | 2148   | 0.242054844 | -1.673220759 | 4.032572473 | -0.414926395 | 0.678195787 | 0.998252924 |
| chr2:55539569-55544485   | exonic       | CCDC88A                               | 2 | 55539569  | 55544485  | 0 | 0 | 0 | 0  | 2 | 0 | 4916   | 0.242054844 | -1.673220759 | 4.032572473 | -0.414926395 | 0.678195787 | 0.998252924 |



|                         |              |                                         |    |          |          |   |   |   |   |   |   |       |             |              |             |              |             |             |
|-------------------------|--------------|-----------------------------------------|----|----------|----------|---|---|---|---|---|---|-------|-------------|--------------|-------------|--------------|-------------|-------------|
| chr2:55804450-55816092  | exonic       | PPP4R3B                                 | 2  | 55804450 | 55816092 | 0 | 0 | 0 | 0 | 2 | 0 | 11642 | 0.242054844 | -1.673220759 | 4.032572473 | -0.414926395 | 0.678195787 | 0.998252924 |
| chr2:55986331-56000047  | intergenic   | PWPT1 (dist=65286), EFEMP1 (dist=93050) | 2  | 55986331 | 56000047 | 0 | 0 | 0 | 0 | 2 | 0 | 13716 | 0.242054844 | -1.673220759 | 4.032572473 | -0.414926395 | 0.678195787 | 0.998252924 |
| chr2:61118818-61149134  | exonic       | REL                                     | 2  | 61118818 | 61149134 | 0 | 0 | 0 | 0 | 2 | 0 | 30316 | 0.242054844 | -1.673220759 | 4.032572473 | -0.414926395 | 0.678195787 | 0.998252924 |
| chr2:61431631-61441829  | exonic       | USP34                                   | 2  | 61431631 | 61441829 | 0 | 0 | 0 | 0 | 2 | 0 | 10198 | 0.242054844 | -1.673220759 | 4.032572473 | -0.414926395 | 0.678195787 | 0.998252924 |
| chr2:61450194-61454353  | exonic       | USP34                                   | 2  | 61450194 | 61454353 | 0 | 0 | 0 | 0 | 2 | 0 | 4159  | 0.242054844 | -1.673220759 | 4.032572473 | -0.414926395 | 0.678195787 | 0.998252924 |
| chr2:64796225-64800202  | exonic       | AFTPH                                   | 2  | 64796225 | 64800202 | 0 | 0 | 0 | 0 | 2 | 0 | 3977  | 0.242054844 | -1.673220759 | 4.032572473 | -0.414926395 | 0.678195787 | 0.998252924 |
| chr2:69569283-69590802  | exonic       | GFPT1                                   | 2  | 69569283 | 69590802 | 0 | 0 | 0 | 0 | 2 | 0 | 21519 | 0.242054844 | -1.673220759 | 4.032572473 | -0.414926395 | 0.678195787 | 0.998252924 |
| chr2:71626688-71633392  | exonic       | ZNF638                                  | 2  | 71626688 | 71633392 | 0 | 0 | 0 | 0 | 2 | 0 | 6704  | 0.242054844 | -1.673220759 | 4.032572473 | -0.414926395 | 0.678195787 | 0.998252924 |
| chr2:72719446-72742255  | exonic       | EXOC6B                                  | 2  | 72719446 | 72742255 | 0 | 0 | 0 | 0 | 2 | 0 | 22809 | 0.242054844 | -1.673220759 | 4.032572473 | -0.414926395 | 0.678195787 | 0.998252924 |
| chr2:8452856-8466554    | ncRNA_exonic | LINC00299                               | 2  | 8452856  | 8466554  | 0 | 0 | 0 | 0 | 2 | 0 | 13698 | 0.242054844 | -1.673220759 | 4.032572473 | -0.414926395 | 0.678195787 | 0.998252924 |
| chr2:85892411-85892917  | exonic       | SFTPB                                   | 2  | 85892411 | 85892917 | 0 | 0 | 0 | 0 | 2 | 0 | 506   | 0.242054844 | -1.673220759 | 4.032572473 | -0.414926395 | 0.678195787 | 0.998252924 |
| chr2:86386659-86389202  | exonic       | IMMT                                    | 2  | 86386659 | 86389202 | 0 | 0 | 0 | 0 | 2 | 0 | 2543  | 0.242054844 | -1.673220759 | 4.032572473 | -0.414926395 | 0.678195787 | 0.998252924 |
| chr2:88094635-88095367  | exonic       | RGPD1, RGPLD2                           | 2  | 88094635 | 88095367 | 0 | 0 | 0 | 0 | 2 | 0 | 732   | 0.242054844 | -1.673220759 | 4.032572473 | -0.414926395 | 0.678195787 | 0.998252924 |
| chr2:97259036-97261368  | exonic       | KANSL3                                  | 2  | 97259036 | 97261368 | 0 | 0 | 0 | 0 | 2 | 0 | 2332  | 0.242054844 | -1.673220759 | 4.032572473 | -0.414926395 | 0.678195787 | 0.998252924 |
| chr2:97808376-97833504  | exonic       | ANKRD36                                 | 2  | 97808376 | 97833504 | 0 | 0 | 0 | 0 | 2 | 0 | 25128 | 0.242054844 | -1.673220759 | 4.032572473 | -0.414926395 | 0.678195787 | 0.998252924 |
| chr2:97860582-97871705  | exonic       | ANKRD36                                 | 2  | 97860582 | 97871705 | 0 | 0 | 0 | 0 | 2 | 0 | 11123 | 0.242054844 | -1.673220759 | 4.032572473 | -0.414926395 | 0.678195787 | 0.998252924 |
| chr2:98124026-98132408  | exonic       | ANKRD36B                                | 2  | 98124026 | 98132408 | 0 | 0 | 0 | 0 | 2 | 0 | 8382  | 0.242054844 | -1.673220759 | 4.032572473 | -0.414926395 | 0.678195787 | 0.998252924 |
| chr2:99342701-99343030  | exonic       | MGAT4A                                  | 2  | 99342701 | 99343030 | 0 | 0 | 0 | 0 | 2 | 0 | 329   | 0.242054844 | -1.673220759 | 4.032572473 | -0.414926395 | 0.678195787 | 0.998252924 |
| chr2:99720429-99743639  | exonic       | TSGA10                                  | 2  | 99720429 | 99743639 | 0 | 0 | 0 | 0 | 2 | 0 | 23210 | 0.242054844 | -1.673220759 | 4.032572473 | -0.414926395 | 0.678195787 | 0.998252924 |
| chr20:31954664-31984890 | exonic       | CDK5RAP1                                | 20 | 31954664 | 31984890 | 0 | 0 | 0 | 0 | 2 | 0 | 30226 | 0.242054844 | -1.673220759 | 4.032572473 | -0.414926395 | 0.678195787 | 0.998252924 |
| chr20:33068403-33069011 | exonic       | ITCH                                    | 20 | 33068403 | 33069011 | 0 | 0 | 0 | 0 | 2 | 0 | 608   | 0.242054844 | -1.673220759 | 4.032572473 | -0.414926395 | 0.678195787 | 0.998252924 |
| chr20:33632307-33657215 | exonic       | TRPC4AP                                 | 20 | 33632307 | 33657215 | 0 | 0 | 0 | 0 | 2 | 0 | 24908 | 0.242054844 | -1.673220759 | 4.032572473 | -0.414926395 | 0.678195787 | 0.998252924 |
| chr20:37117045-37121775 | exonic       | RALGAPB                                 | 20 | 37117045 | 37121775 | 0 | 0 | 0 | 0 | 2 | 0 | 4730  | 0.242054844 | -1.673220759 | 4.032572473 | -0.414926395 | 0.678195787 | 0.998252924 |
| chr20:4839934-4848521   | exonic       | SLC23A2                                 | 20 | 4839934  | 4848521  | 0 | 0 | 0 | 0 | 2 | 0 | 8587  | 0.242054844 | -1.673220759 | 4.032572473 | -0.414926395 | 0.678195787 | 0.998252924 |
| chr20:49493023-49494124 | exonic       | BCAS4                                   | 20 | 49493023 | 49494124 | 0 | 0 | 0 | 0 | 2 | 0 | 1101  | 0.242054844 | -1.673220759 | 4.032572473 | -0.414926395 | 0.678195787 | 0.998252924 |
| chr20:50234028-50245611 | exonic       | ATP9A                                   | 20 | 50234028 | 50245611 | 0 | 0 | 0 | 0 | 2 | 0 | 11583 | 0.242054844 | -1.673220759 | 4.032572473 | -0.414926395 | 0.678195787 | 0.998252924 |
| chr20:50305602-50346517 | exonic       | ATP9A                                   | 20 | 50305602 | 50346517 | 0 | 0 | 0 | 0 | 2 | 0 | 40915 | 0.242054844 | -1.673220759 | 4.032572473 | -0.414926395 | 0.678195787 | 0.998252924 |
| chr20:5157294-5159602   | exonic       | CDS2                                    | 20 | 5157294  | 5159602  | 0 | 0 | 0 | 0 | 2 | 0 | 2308  | 0.242054844 | -1.673220759 | 4.032572473 | -0.414926395 | 0.678195787 | 0.998252924 |
| chr20:60701495-60702621 | exonic       | LSM14B                                  | 20 | 60701495 | 60702621 | 0 | 0 | 0 | 0 | 2 | 0 | 1126  | 0.242054844 | -1.673220759 | 4.032572473 | -0.414926395 | 0.678195787 | 0.998252924 |
| chr20:60848364-60859225 | exonic       | OSBPL2                                  | 20 | 60848364 | 60859225 | 0 | 0 | 0 | 0 | 2 | 0 | 10861 | 0.242054844 | -1.673220759 | 4.032572473 | -0.414926395 | 0.678195787 | 0.998252924 |
| chr20:62541804-62542120 | intronic     | DNAJC5                                  | 20 | 62541804 | 62542120 | 0 | 0 | 0 | 0 | 2 | 0 | 316   | 0.242054844 | -1.673220759 | 4.032572473 | -0.414926395 | 0.678195787 | 0.998252924 |
| chr21:27337216-27358772 | exonic       | APP                                     | 21 | 27337216 | 27358772 | 0 | 0 | 0 | 0 | 2 | 0 | 21556 | 0.242054844 | -1.673220759 | 4.032572473 | -0.414926395 | 0.678195787 | 0.998252924 |
| chr21:37595528-37597965 | exonic       | DOPEY2                                  | 21 | 37595528 | 37597965 | 0 | 0 | 0 | 0 | 2 | 0 | 2437  | 0.242054844 | -1.673220759 | 4.032572473 | -0.414926395 | 0.678195787 | 0.998252924 |
| chr21:37619814-37623582 | exonic       | DOPEY2                                  | 21 | 37619814 | 37623582 | 0 | 0 | 0 | 0 | 2 | 0 | 3768  | 0.242054844 | -1.673220759 | 4.032572473 | -0.414926395 | 0.678195787 | 0.998252924 |
| chr21:38844985-38868560 | exonic       | DYRK1A                                  | 21 | 38844985 | 38868560 | 0 | 0 | 0 | 0 | 2 | 0 | 23575 | 0.242054844 | -1.673220759 | 4.032572473 | -0.414926395 | 0.678195787 | 0.998252924 |

|                          |            |                                                                  |    |           |           |   |   |   |   |   |   |        |             |              |             |              |             |             |
|--------------------------|------------|------------------------------------------------------------------|----|-----------|-----------|---|---|---|---|---|---|--------|-------------|--------------|-------------|--------------|-------------|-------------|
| chr21:40582075-40582711  | splicing   | BRWD1                                                            | 21 | 40582075  | 40582711  | 0 | 0 | 0 | 0 | 2 | 0 | 636    | 0.242054844 | -1.673220759 | 4.032572473 | -0.414926395 | 0.678195787 | 0.998252924 |
| chr21:40596334-40601362  | exonic     | BRWD1                                                            | 21 | 40596334  | 40601362  | 0 | 0 | 0 | 0 | 2 | 0 | 5028   | 0.242054844 | -1.673220759 | 4.032572473 | -0.414926395 | 0.678195787 | 0.998252924 |
| chr21:47155306-47175366  | intergenic | <small>SLC19A1 (4141+192921)...LOC100129027 (4141+72389)</small> | 21 | 47155306  | 47175366  | 0 | 0 | 0 | 0 | 2 | 0 | 20060  | 0.242054844 | -1.673220759 | 4.032572473 | -0.414926395 | 0.678195787 | 0.998252924 |
| chr22:20047524-20047801  | intronic   | TANGO2                                                           | 22 | 20047524  | 20047801  | 0 | 0 | 0 | 0 | 2 | 0 | 277    | 0.242054844 | -1.673220759 | 4.032572473 | -0.414926395 | 0.678195787 | 0.998252924 |
| chr22:22142545-22162135  | exonic     | MAPK1                                                            | 22 | 22142545  | 22162135  | 0 | 0 | 0 | 0 | 2 | 0 | 19590  | 0.242054844 | -1.673220759 | 4.032572473 | -0.414926395 | 0.678195787 | 0.998252924 |
| chr22:29025539-29025818  | exonic     | TTC28                                                            | 22 | 29025539  | 29025818  | 0 | 0 | 0 | 0 | 2 | 0 | 279    | 0.242054844 | -1.673220759 | 4.032572473 | -0.414926395 | 0.678195787 | 0.998252924 |
| chr22:30353024-30387659  | exonic     | MTMR3                                                            | 22 | 30353024  | 30387659  | 0 | 0 | 0 | 0 | 2 | 0 | 34635  | 0.242054844 | -1.673220759 | 4.032572473 | -0.414926395 | 0.678195787 | 0.998252924 |
| chr22:32108068-32113277  | exonic     | PRR14L                                                           | 22 | 32108068  | 32113277  | 0 | 0 | 0 | 0 | 2 | 0 | 5209   | 0.242054844 | -1.673220759 | 4.032572473 | -0.414926395 | 0.678195787 | 0.998252924 |
| chr22:36661197-36661902  | exonic     | APOL1                                                            | 22 | 36661197  | 36661902  | 0 | 0 | 0 | 0 | 2 | 0 | 705    | 0.242054844 | -1.673220759 | 4.032572473 | -0.414926395 | 0.678195787 | 0.998252924 |
| chr22:41513190-41527637  | exonic     | EP300                                                            | 22 | 41513190  | 41527637  | 0 | 0 | 0 | 0 | 2 | 0 | 14447  | 0.242054844 | -1.673220759 | 4.032572473 | -0.414926395 | 0.678195787 | 0.998252924 |
| chr22:42565852-42611347  | exonic     | TCF20                                                            | 22 | 42565852  | 42611347  | 0 | 0 | 0 | 0 | 2 | 0 | 45495  | 0.242054844 | -1.673220759 | 4.032572473 | -0.414926395 | 0.678195787 | 0.998252924 |
| chr22:43195044-43213863  | exonic     | ARFGAP3                                                          | 22 | 43195044  | 43213863  | 0 | 0 | 0 | 0 | 2 | 0 | 18819  | 0.242054844 | -1.673220759 | 4.032572473 | -0.414926395 | 0.678195787 | 0.998252924 |
| chr22:44127578-44151712  | exonic     | EFCAB6                                                           | 22 | 44127578  | 44151712  | 0 | 0 | 0 | 0 | 2 | 0 | 24134  | 0.242054844 | -1.673220759 | 4.032572473 | -0.414926395 | 0.678195787 | 0.998252924 |
| chr3:105238910-105252534 | exonic     | ALCAM                                                            | 3  | 105238910 | 105252534 | 0 | 0 | 0 | 0 | 2 | 0 | 13624  | 0.242054844 | -1.673220759 | 4.032572473 | -0.414926395 | 0.678195787 | 0.998252924 |
| chr3:112256581-112269109 | exonic     | ATG3                                                             | 3  | 112256581 | 112269109 | 0 | 0 | 0 | 0 | 2 | 0 | 12528  | 0.242054844 | -1.673220759 | 4.032572473 | -0.414926395 | 0.678195787 | 0.998252924 |
| chr3:113077591-113135474 | exonic     | CFAP44                                                           | 3  | 113077591 | 113135474 | 0 | 0 | 0 | 0 | 2 | 0 | 57883  | 0.242054844 | -1.673220759 | 4.032572473 | -0.414926395 | 0.678195787 | 0.998252924 |
| chr3:11399892-11518742   | exonic     | ATG7                                                             | 3  | 11399892  | 11518742  | 0 | 0 | 0 | 0 | 2 | 0 | 118850 | 0.242054844 | -1.673220759 | 4.032572473 | -0.414926395 | 0.678195787 | 0.998252924 |
| chr3:121508920-121526290 | exonic     | IQCB1                                                            | 3  | 121508920 | 121526290 | 0 | 0 | 0 | 0 | 2 | 0 | 17370  | 0.242054844 | -1.673220759 | 4.032572473 | -0.414926395 | 0.678195787 | 0.998252924 |
| chr3:121544897-121547819 | exonic     | IQCB1                                                            | 3  | 121544897 | 121547819 | 0 | 0 | 0 | 0 | 2 | 0 | 2922   | 0.242054844 | -1.673220759 | 4.032572473 | -0.414926395 | 0.678195787 | 0.998252924 |
| chr3:128620118-128623348 | exonic     | ACAD9                                                            | 3  | 128620118 | 128623348 | 0 | 0 | 0 | 0 | 2 | 0 | 3230   | 0.242054844 | -1.673220759 | 4.032572473 | -0.414926395 | 0.678195787 | 0.998252924 |
| chr3:130435239-130454846 | exonic     | PIK3R4                                                           | 3  | 130435239 | 130454846 | 0 | 0 | 0 | 0 | 2 | 0 | 19607  | 0.242054844 | -1.673220759 | 4.032572473 | -0.414926395 | 0.678195787 | 0.998252924 |
| chr3:135801106-135809509 | exonic     | PPP2R3A                                                          | 3  | 135801106 | 135809509 | 0 | 0 | 0 | 0 | 2 | 0 | 8403   | 0.242054844 | -1.673220759 | 4.032572473 | -0.414926395 | 0.678195787 | 0.998252924 |
| chr3:138213078-138251412 | exonic     | CEP70                                                            | 3  | 138213078 | 138251412 | 0 | 0 | 0 | 0 | 2 | 0 | 38334  | 0.242054844 | -1.673220759 | 4.032572473 | -0.414926395 | 0.678195787 | 0.998252924 |
| chr3:138426133-138431049 | splicing   | PIK3CB                                                           | 3  | 138426133 | 138431049 | 0 | 0 | 0 | 0 | 2 | 0 | 4916   | 0.242054844 | -1.673220759 | 4.032572473 | -0.414926395 | 0.678195787 | 0.998252924 |
| chr3:141622461-141640905 | exonic     | ATP1B3                                                           | 3  | 141622461 | 141640905 | 0 | 0 | 0 | 0 | 2 | 0 | 18444  | 0.242054844 | -1.673220759 | 4.032572473 | -0.414926395 | 0.678195787 | 0.998252924 |
| chr3:142089326-142133133 | exonic     | XRN1                                                             | 3  | 142089326 | 142133133 | 0 | 0 | 0 | 0 | 2 | 0 | 43807  | 0.242054844 | -1.673220759 | 4.032572473 | -0.414926395 | 0.678195787 | 0.998252924 |
| chr3:142231102-142279296 | exonic     | ATR                                                              | 3  | 142231102 | 142279296 | 0 | 0 | 0 | 0 | 2 | 0 | 48194  | 0.242054844 | -1.673220759 | 4.032572473 | -0.414926395 | 0.678195787 | 0.998252924 |
| chr3:142751625-142754946 | exonic     | U2SURP                                                           | 3  | 142751625 | 142754946 | 0 | 0 | 0 | 0 | 2 | 0 | 3321   | 0.242054844 | -1.673220759 | 4.032572473 | -0.414926395 | 0.678195787 | 0.998252924 |
| chr3:148792001-148793834 | exonic     | HLTF                                                             | 3  | 148792001 | 148793834 | 0 | 0 | 0 | 0 | 2 | 0 | 1833   | 0.242054844 | -1.673220759 | 4.032572473 | -0.414926395 | 0.678195787 | 0.998252924 |
| chr3:155301260-155314167 | exonic     | PLCH1                                                            | 3  | 155301260 | 155314167 | 0 | 0 | 0 | 0 | 2 | 0 | 12907  | 0.242054844 | -1.673220759 | 4.032572473 | -0.414926395 | 0.678195787 | 0.998252924 |
| chr3:155615715-155654299 | exonic     | GMPS                                                             | 3  | 155615715 | 155654299 | 0 | 0 | 0 | 0 | 2 | 0 | 38584  | 0.242054844 | -1.673220759 | 4.032572473 | -0.414926395 | 0.678195787 | 0.998252924 |
| chr3:156395445-156396403 | exonic     | TIPARP                                                           | 3  | 156395445 | 156396403 | 0 | 0 | 0 | 0 | 2 | 0 | 958    | 0.242054844 | -1.673220759 | 4.032572473 | -0.414926395 | 0.678195787 | 0.998252924 |
| chr3:160099291-160112098 | exonic     | IFT80                                                            | 3  | 160099291 | 160112098 | 0 | 0 | 0 | 0 | 2 | 0 | 12807  | 0.242054844 | -1.673220759 | 4.032572473 | -0.414926395 | 0.678195787 | 0.998252924 |
| chr3:16633556-16640105   | exonic     | DAZL                                                             | 3  | 16633556  | 16640105  | 0 | 0 | 0 | 0 | 2 | 0 | 6549   | 0.242054844 | -1.673220759 | 4.032572473 | -0.414926395 | 0.678195787 | 0.998252924 |
| chr3:183465459-183504089 | exonic     | YEATS2                                                           | 3  | 183465459 | 183504089 | 0 | 0 | 0 | 0 | 2 | 0 | 38630  | 0.242054844 | -1.673220759 | 4.032572473 | -0.414926395 | 0.678195787 | 0.998252924 |

|                          |                               |                                                       |   |           |           |   |   |   |   |   |   |       |             |              |             |              |             |             |
|--------------------------|-------------------------------|-------------------------------------------------------|---|-----------|-----------|---|---|---|---|---|---|-------|-------------|--------------|-------------|--------------|-------------|-------------|
| chr3:183493702-183495488 | exonic                        | YEATS2                                                | 3 | 183493702 | 183495488 | 0 | 0 | 0 | 0 | 2 | 0 | 1786  | 0.242054844 | -1.673220759 | 4.032572473 | -0.414926395 | 0.678195787 | 0.998252924 |
| chr3:183493702-183508768 | exonic                        | YEATS2                                                | 3 | 183493702 | 183508768 | 0 | 0 | 0 | 0 | 2 | 0 | 15066 | 0.242054844 | -1.673220759 | 4.032572473 | -0.414926395 | 0.678195787 | 0.998252924 |
| chr3:194159584-194168738 | exonic                        | ATP13A3                                               | 3 | 194159584 | 194168738 | 0 | 0 | 0 | 0 | 2 | 0 | 9154  | 0.242054844 | -1.673220759 | 4.032572473 | -0.414926395 | 0.678195787 | 0.998252924 |
| chr3:195451551-195456610 | exonic                        | MUC20                                                 | 3 | 195451551 | 195456610 | 0 | 0 | 0 | 0 | 2 | 0 | 5059  | 0.242054844 | -1.673220759 | 4.032572473 | -0.414926395 | 0.678195787 | 0.998252924 |
| chr3:286295-370037       | exonic                        | CHL1                                                  | 3 | 286295    | 370037    | 0 | 0 | 0 | 0 | 2 | 0 | 83742 | 0.242054844 | -1.673220759 | 4.032572473 | -0.414926395 | 0.678195787 | 0.998252924 |
| chr3:29910348-29977687   | exonic                        | RBMS3                                                 | 3 | 29910348  | 29977687  | 0 | 0 | 0 | 0 | 2 | 0 | 67339 | 0.242054844 | -1.673220759 | 4.032572473 | -0.414926395 | 0.678195787 | 0.998252924 |
| chr3:32574477-32578596   | exonic                        | DYNC1LI1                                              | 3 | 32574477  | 32578596  | 0 | 0 | 0 | 0 | 2 | 0 | 4119  | 0.242054844 | -1.673220759 | 4.032572473 | -0.414926395 | 0.678195787 | 0.998252924 |
| chr3:3819409-3824385     | intergenic                    | <small>CRBN (dist=598008), LRRN1 (dist=16736)</small> | 3 | 3819409   | 3824385   | 0 | 0 | 0 | 0 | 2 | 0 | 4976  | 0.242054844 | -1.673220759 | 4.032572473 | -0.414926395 | 0.678195787 | 0.998252924 |
| chr3:42662920-42674315   | exonic                        | NKTR                                                  | 3 | 42662920  | 42674315  | 0 | 0 | 0 | 0 | 2 | 0 | 11395 | 0.242054844 | -1.673220759 | 4.032572473 | -0.414926395 | 0.678195787 | 0.998252924 |
| chr3:44835708-44835918   | exonic                        | KIF15                                                 | 3 | 44835708  | 44835918  | 0 | 0 | 0 | 0 | 2 | 0 | 210   | 0.242054844 | -1.673220759 | 4.032572473 | -0.414926395 | 0.678195787 | 0.998252924 |
| chr3:45030631-45049067   | exonic                        | EXOSC7                                                | 3 | 45030631  | 45049067  | 0 | 0 | 0 | 0 | 2 | 0 | 18436 | 0.242054844 | -1.673220759 | 4.032572473 | -0.414926395 | 0.678195787 | 0.998252924 |
| chr3:47220918-47221173   | <small>ncRNA_intronic</small> | KIF9-AS1                                              | 3 | 47220918  | 47221173  | 0 | 0 | 0 | 0 | 2 | 0 | 255   | 0.242054844 | -1.673220759 | 4.032572473 | -0.414926395 | 0.678195787 | 0.998252924 |
| chr3:47468646-47470160   | exonic                        | SCAP                                                  | 3 | 47468646  | 47470160  | 0 | 0 | 0 | 0 | 2 | 0 | 1514  | 0.242054844 | -1.673220759 | 4.032572473 | -0.414926395 | 0.678195787 | 0.998252924 |
| chr3:47787397-47814426   | exonic                        | SMARCC1                                               | 3 | 47787397  | 47814426  | 0 | 0 | 0 | 0 | 2 | 0 | 27029 | 0.242054844 | -1.673220759 | 4.032572473 | -0.414926395 | 0.678195787 | 0.998252924 |
| chr3:52668617-52678805   | exonic                        | PBRM1                                                 | 3 | 52668617  | 52678805  | 0 | 0 | 0 | 0 | 2 | 0 | 10188 | 0.242054844 | -1.673220759 | 4.032572473 | -0.414926395 | 0.678195787 | 0.998252924 |
| chr3:56694758-56696518   | exonic                        | FAM208A                                               | 3 | 56694758  | 56696518  | 0 | 0 | 0 | 0 | 2 | 0 | 1760  | 0.242054844 | -1.673220759 | 4.032572473 | -0.414926395 | 0.678195787 | 0.998252924 |
| chr3:57283387-57291456   | exonic                        | APPL1                                                 | 3 | 57283387  | 57291456  | 0 | 0 | 0 | 0 | 2 | 0 | 8069  | 0.242054844 | -1.673220759 | 4.032572473 | -0.414926395 | 0.678195787 | 0.998252924 |
| chr3:60164169-60166168   | intronic                      | FHIT                                                  | 3 | 60164169  | 60166168  | 0 | 0 | 0 | 0 | 2 | 0 | 1999  | 0.242054844 | -1.673220759 | 4.032572473 | -0.414926395 | 0.678195787 | 0.998252924 |
| chr3:69986972-70008571   | exonic                        | MITF                                                  | 3 | 69986972  | 70008571  | 0 | 0 | 0 | 0 | 2 | 0 | 21599 | 0.242054844 | -1.673220759 | 4.032572473 | -0.414926395 | 0.678195787 | 0.998252924 |
| chr3:9476507-9487424     | exonic                        | SETD5                                                 | 3 | 9476507   | 9487424   | 0 | 0 | 0 | 0 | 2 | 0 | 10917 | 0.242054844 | -1.673220759 | 4.032572473 | -0.414926395 | 0.678195787 | 0.998252924 |
| chr3:97614802-97634580   | exonic                        | CRYBG3                                                | 3 | 97614802  | 97634580  | 0 | 0 | 0 | 0 | 2 | 0 | 19778 | 0.242054844 | -1.673220759 | 4.032572473 | -0.414926395 | 0.678195787 | 0.998252924 |
| chr4:103585842-103600866 | exonic                        | MANBA                                                 | 4 | 103585842 | 103600866 | 0 | 0 | 0 | 0 | 2 | 0 | 15024 | 0.242054844 | -1.673220759 | 4.032572473 | -0.414926395 | 0.678195787 | 0.998252924 |
| chr4:103987483-103988749 | exonic                        | SLC9B2                                                | 4 | 103987483 | 103988749 | 0 | 0 | 0 | 0 | 2 | 0 | 1266  | 0.242054844 | -1.673220759 | 4.032572473 | -0.414926395 | 0.678195787 | 0.998252924 |
| chr4:106345352-106370560 | exonic                        | PPA2                                                  | 4 | 106345352 | 106370560 | 0 | 0 | 0 | 0 | 2 | 0 | 25208 | 0.242054844 | -1.673220759 | 4.032572473 | -0.414926395 | 0.678195787 | 0.998252924 |
| chr4:110153302-110177930 | intronic                      | COL25A1                                               | 4 | 110153302 | 110177930 | 0 | 0 | 0 | 0 | 2 | 0 | 24628 | 0.242054844 | -1.673220759 | 4.032572473 | -0.414926395 | 0.678195787 | 0.998252924 |
| chr4:110442272-110454841 | exonic                        | SEC24B                                                | 4 | 110442272 | 110454841 | 0 | 0 | 0 | 0 | 2 | 0 | 12569 | 0.242054844 | -1.673220759 | 4.032572473 | -0.414926395 | 0.678195787 | 0.998252924 |
| chr4:114530308-114600652 | exonic                        | CAMK2D                                                | 4 | 114530308 | 114600652 | 0 | 0 | 0 | 0 | 2 | 0 | 70344 | 0.242054844 | -1.673220759 | 4.032572473 | -0.414926395 | 0.678195787 | 0.998252924 |
| chr4:120189422-120193189 | exonic                        | USP53                                                 | 4 | 120189422 | 120193189 | 0 | 0 | 0 | 0 | 2 | 0 | 3767  | 0.242054844 | -1.673220759 | 4.032572473 | -0.414926395 | 0.678195787 | 0.998252924 |
| chr4:120440199-120528452 | exonic                        | PDE5A                                                 | 4 | 120440199 | 120528452 | 0 | 0 | 0 | 0 | 2 | 0 | 88253 | 0.242054844 | -1.673220759 | 4.032572473 | -0.414926395 | 0.678195787 | 0.998252924 |
| chr4:123193314-123202929 | exonic                        | KIAA1109                                              | 4 | 123193314 | 123202929 | 0 | 0 | 0 | 0 | 2 | 0 | 9615  | 0.242054844 | -1.673220759 | 4.032572473 | -0.414926395 | 0.678195787 | 0.998252924 |
| chr4:139980763-139981477 | splicing                      | ELF2                                                  | 4 | 139980763 | 139981477 | 0 | 0 | 0 | 0 | 2 | 0 | 714   | 0.242054844 | -1.673220759 | 4.032572473 | -0.414926395 | 0.678195787 | 0.998252924 |
| chr4:141590070-141600997 | exonic                        | TBC1D9                                                | 4 | 141590070 | 141600997 | 0 | 0 | 0 | 0 | 2 | 0 | 10927 | 0.242054844 | -1.673220759 | 4.032572473 | -0.414926395 | 0.678195787 | 0.998252924 |
| chr4:146080655-146092872 | exonic                        | OTUD4                                                 | 4 | 146080655 | 146092872 | 0 | 0 | 0 | 0 | 2 | 0 | 12217 | 0.242054844 | -1.673220759 | 4.032572473 | -0.414926395 | 0.678195787 | 0.998252924 |
| chr4:148867767-148944564 | exonic                        | ARHGAP10                                              | 4 | 148867767 | 148944564 | 0 | 0 | 0 | 2 | 1 | 0 | 76797 | 0.242054844 | -1.673220759 | 4.032572473 | -0.414926395 | 0.678195787 | 0.998252924 |
| chr4:152020866-152021634 | exonic                        | RPS3A                                                 | 4 | 152020866 | 152021634 | 0 | 0 | 0 | 0 | 2 | 0 | 768   | 0.242054844 | -1.673220759 | 4.032572473 | -0.414926395 | 0.678195787 | 0.998252924 |

|                          |            |                                            |   |           |           |   |   |   |   |   |   |        |             |              |             |              |             |             |
|--------------------------|------------|--------------------------------------------|---|-----------|-----------|---|---|---|---|---|---|--------|-------------|--------------|-------------|--------------|-------------|-------------|
| chr4:153303341-153333681 | exonic     | FBXW7                                      | 4 | 153303341 | 153333681 | 0 | 0 | 0 | 0 | 2 | 0 | 30340  | 0.242054844 | -1.673220759 | 4.032572473 | -0.414926395 | 0.678195787 | 0.998252924 |
| chr4:173852651-173883891 | exonic     | GALNTL6                                    | 4 | 173852651 | 173883891 | 0 | 0 | 0 | 0 | 2 | 0 | 31240  | 0.242054844 | -1.673220759 | 4.032572473 | -0.414926395 | 0.678195787 | 0.998252924 |
| chr4:1952799-1955251     | exonic     | WHSC1                                      | 4 | 1952799   | 1955251   | 0 | 0 | 0 | 0 | 2 | 0 | 2452   | 0.242054844 | -1.673220759 | 4.032572473 | -0.414926395 | 0.678195787 | 0.998252924 |
| chr4:25253942-25265471   | exonic     | PI4K2B                                     | 4 | 25253942  | 25265471  | 0 | 0 | 0 | 0 | 2 | 0 | 11529  | 0.242054844 | -1.673220759 | 4.032572473 | -0.414926395 | 0.678195787 | 0.998252924 |
| chr4:25517761-25520475   | intergenic | ANAPC4 (dist=97641), SLC34A2 (dist=136960) | 4 | 25517761  | 25520475  | 0 | 0 | 0 | 0 | 2 | 0 | 2714   | 0.242054844 | -1.673220759 | 4.032572473 | -0.414926395 | 0.678195787 | 0.998252924 |
| chr4:25669501-25673343   | exonic     | SLC34A2                                    | 4 | 25669501  | 25673343  | 0 | 0 | 0 | 0 | 2 | 0 | 3842   | 0.242054844 | -1.673220759 | 4.032572473 | -0.414926395 | 0.678195787 | 0.998252924 |
| chr4:25777898-25823750   | exonic     | SEL1L3                                     | 4 | 25777898  | 25823750  | 0 | 0 | 0 | 0 | 2 | 0 | 45852  | 0.242054844 | -1.673220759 | 4.032572473 | -0.414926395 | 0.678195787 | 0.998252924 |
| chr4:26719554-26755512   | exonic     | TBC1D19                                    | 4 | 26719554  | 26755512  | 0 | 0 | 0 | 0 | 2 | 0 | 35958  | 0.242054844 | -1.673220759 | 4.032572473 | -0.414926395 | 0.678195787 | 0.998252924 |
| chr4:39322003-39325037   | exonic     | RFC1                                       | 4 | 39322003  | 39325037  | 0 | 0 | 0 | 0 | 2 | 0 | 3034   | 0.242054844 | -1.673220759 | 4.032572473 | -0.414926395 | 0.678195787 | 0.998252924 |
| chr4:39843567-39846421   | exonic     | PDS5A                                      | 4 | 39843567  | 39846421  | 0 | 0 | 0 | 0 | 2 | 0 | 2854   | 0.242054844 | -1.673220759 | 4.032572473 | -0.414926395 | 0.678195787 | 0.998252924 |
| chr4:39915230-39924368   | exonic     | PDS5A                                      | 4 | 39915230  | 39924368  | 0 | 0 | 0 | 0 | 2 | 0 | 9138   | 0.242054844 | -1.673220759 | 4.032572473 | -0.414926395 | 0.678195787 | 0.998252924 |
| chr4:40776282-40778276   | exonic     | NSUN7                                      | 4 | 40776282  | 40778276  | 0 | 0 | 0 | 0 | 2 | 0 | 1994   | 0.242054844 | -1.673220759 | 4.032572473 | -0.414926395 | 0.678195787 | 0.998252924 |
| chr4:41033165-41036451   | exonic     | APBB2                                      | 4 | 41033165  | 41036451  | 0 | 0 | 0 | 0 | 2 | 0 | 3286   | 0.242054844 | -1.673220759 | 4.032572473 | -0.414926395 | 0.678195787 | 0.998252924 |
| chr4:48091766-48106972   | exonic     | TXK                                        | 4 | 48091766  | 48106972  | 0 | 0 | 0 | 0 | 2 | 0 | 15206  | 0.242054844 | -1.673220759 | 4.032572473 | -0.414926395 | 0.678195787 | 0.998252924 |
| chr4:48379912-48385801   | exonic     | SLAIN2                                     | 4 | 48379912  | 48385801  | 0 | 0 | 0 | 0 | 2 | 0 | 5889   | 0.242054844 | -1.673220759 | 4.032572473 | -0.414926395 | 0.678195787 | 0.998252924 |
| chr4:52714370-52765544   | exonic     | DCUN1D4                                    | 4 | 52714370  | 52765544  | 0 | 0 | 0 | 0 | 2 | 0 | 51174  | 0.242054844 | -1.673220759 | 4.032572473 | -0.414926395 | 0.678195787 | 0.998252924 |
| chr4:56314945-56319991   | exonic     | CLOCK                                      | 4 | 56314945  | 56319991  | 0 | 0 | 0 | 0 | 2 | 0 | 5046   | 0.242054844 | -1.673220759 | 4.032572473 | -0.414926395 | 0.678195787 | 0.998252924 |
| chr4:72136705-72263370   | exonic     | SLC4A4                                     | 4 | 72136705  | 72263370  | 0 | 0 | 0 | 0 | 2 | 0 | 126665 | 0.242054844 | -1.673220759 | 4.032572473 | -0.414926395 | 0.678195787 | 0.998252924 |
| chr4:75040222-75067087   | exonic     | MTHFD2L                                    | 4 | 75040222  | 75067087  | 0 | 0 | 0 | 0 | 2 | 0 | 26865  | 0.242054844 | -1.673220759 | 4.032572473 | -0.414926395 | 0.678195787 | 0.998252924 |
| chr4:76902525-76903190   | exonic     | SDAD1                                      | 4 | 76902525  | 76903190  | 0 | 0 | 0 | 0 | 2 | 0 | 665    | 0.242054844 | -1.673220759 | 4.032572473 | -0.414926395 | 0.678195787 | 0.998252924 |
| chr4:83275202-83280792   | exonic     | HNRNPD                                     | 4 | 83275202  | 83280792  | 0 | 0 | 0 | 0 | 2 | 0 | 5590   | 0.242054844 | -1.673220759 | 4.032572473 | -0.414926395 | 0.678195787 | 0.998252924 |
| chr4:83763292-83778917   | exonic     | SEC31A                                     | 4 | 83763292  | 83778917  | 0 | 0 | 0 | 0 | 2 | 0 | 15625  | 0.242054844 | -1.673220759 | 4.032572473 | -0.414926395 | 0.678195787 | 0.998252924 |
| chr4:83867410-83891622   | exonic     | LIN54                                      | 4 | 83867410  | 83891622  | 0 | 0 | 0 | 0 | 2 | 0 | 24212  | 0.242054844 | -1.673220759 | 4.032572473 | -0.414926395 | 0.678195787 | 0.998252924 |
| chr4:84337883-84370114   | exonic     | HELQ                                       | 4 | 84337883  | 84370114  | 0 | 0 | 0 | 0 | 2 | 0 | 32231  | 0.242054844 | -1.673220759 | 4.032572473 | -0.414926395 | 0.678195787 | 0.998252924 |
| chr4:85686962-85724620   | exonic     | WDFY3                                      | 4 | 85686962  | 85724620  | 0 | 0 | 0 | 0 | 2 | 0 | 37658  | 0.242054844 | -1.673220759 | 4.032572473 | -0.414926395 | 0.678195787 | 0.998252924 |
| chr4:85811547-85817150   | intronic   | WDFY3                                      | 4 | 85811547  | 85817150  | 0 | 0 | 0 | 0 | 2 | 0 | 5603   | 0.242054844 | -1.673220759 | 4.032572473 | -0.414926395 | 0.678195787 | 0.998252924 |
| chr4:85818064-85833472   | UTR5       | WDFY3 (NM_014991:c.36419_36320delins0)     | 4 | 85818064  | 85833472  | 0 | 0 | 0 | 0 | 2 | 0 | 15408  | 0.242054844 | -1.673220759 | 4.032572473 | -0.414926395 | 0.678195787 | 0.998252924 |
| chr4:870317-871597       | exonic     | GAK                                        | 4 | 870317    | 871597    | 0 | 0 | 0 | 0 | 2 | 0 | 1280   | 0.242054844 | -1.673220759 | 4.032572473 | -0.414926395 | 0.678195787 | 0.998252924 |
| chr4:89708903-89726203   | exonic     | FAM13A                                     | 4 | 89708903  | 89726203  | 0 | 0 | 0 | 0 | 2 | 0 | 17300  | 0.242054844 | -1.673220759 | 4.032572473 | -0.414926395 | 0.678195787 | 0.998252924 |
| chr4:95509622-95511020   | intronic   | PDLIM5                                     | 4 | 95509622  | 95511020  | 0 | 0 | 0 | 0 | 2 | 0 | 1398   | 0.242054844 | -1.673220759 | 4.032572473 | -0.414926395 | 0.678195787 | 0.998252924 |
| chr4:9982215-9998565     | exonic     | SLC2A9                                     | 4 | 9982215   | 9998565   | 0 | 0 | 0 | 0 | 2 | 0 | 16350  | 0.242054844 | -1.673220759 | 4.032572473 | -0.414926395 | 0.678195787 | 0.998252924 |
| chr5:1057586-1094363     | exonic     | SLC12A7                                    | 5 | 1057586   | 1094363   | 0 | 0 | 0 | 0 | 2 | 0 | 36777  | 0.242054844 | -1.673220759 | 4.032572473 | -0.414926395 | 0.678195787 | 0.998252924 |
| chr5:112336780-112339774 | exonic     | DCP2                                       | 5 | 112336780 | 112339774 | 0 | 0 | 0 | 0 | 2 | 0 | 2994   | 0.242054844 | -1.673220759 | 4.032572473 | -0.414926395 | 0.678195787 | 0.998252924 |
| chr5:118433673-118456834 | exonic     | DMXL1                                      | 5 | 118433673 | 118456834 | 0 | 0 | 0 | 0 | 2 | 0 | 23161  | 0.242054844 | -1.673220759 | 4.032572473 | -0.414926395 | 0.678195787 | 0.998252924 |
| chr5:118440874-118454699 | exonic     | DMXL1                                      | 5 | 118440874 | 118454699 | 0 | 0 | 0 | 0 | 2 | 0 | 13825  | 0.242054844 | -1.673220759 | 4.032572473 | -0.414926395 | 0.678195787 | 0.998252924 |

|                          |          |          |   |           |           |   |   |   |   |   |   |       |             |              |             |              |             |             |
|--------------------------|----------|----------|---|-----------|-----------|---|---|---|---|---|---|-------|-------------|--------------|-------------|--------------|-------------|-------------|
| chr5:122881110-122881535 | exonic   | CSNK1G3  | 5 | 122881110 | 122881535 | 0 | 0 | 0 | 0 | 2 | 0 | 425   | 0.242054844 | -1.673220759 | 4.032572473 | -0.414926395 | 0.678195787 | 0.998252924 |
| chr5:123974825-123980354 | exonic   | ZNF608   | 5 | 123974825 | 123980354 | 0 | 0 | 0 | 0 | 2 | 0 | 5529  | 0.242054844 | -1.673220759 | 4.032572473 | -0.414926395 | 0.678195787 | 0.998252924 |
| chr5:131924378-131939738 | exonic   | RAD50    | 5 | 131924378 | 131939738 | 0 | 0 | 0 | 0 | 2 | 0 | 15360 | 0.242054844 | -1.673220759 | 4.032572473 | -0.414926395 | 0.678195787 | 0.998252924 |
| chr5:132262812-132272885 | exonic   | AFF4     | 5 | 132262812 | 132272885 | 0 | 0 | 0 | 0 | 2 | 0 | 10073 | 0.242054844 | -1.673220759 | 4.032572473 | -0.414926395 | 0.678195787 | 0.998252924 |
| chr5:134010304-134015418 | exonic   | SEC24A   | 5 | 134010304 | 134015418 | 0 | 0 | 0 | 0 | 2 | 0 | 5114  | 0.242054844 | -1.673220759 | 4.032572473 | -0.414926395 | 0.678195787 | 0.998252924 |
| chr5:134109385-134117776 | exonic   | DDX46    | 5 | 134109385 | 134117776 | 0 | 0 | 0 | 0 | 2 | 0 | 8391  | 0.242054844 | -1.673220759 | 4.032572473 | -0.414926395 | 0.678195787 | 0.998252924 |
| chr5:137853249-137854556 | exonic   | ETF1     | 5 | 137853249 | 137854556 | 0 | 0 | 0 | 0 | 2 | 0 | 1307  | 0.242054844 | -1.673220759 | 4.032572473 | -0.414926395 | 0.678195787 | 0.998252924 |
| chr5:138654596-138655190 | exonic   | MATR3    | 5 | 138654596 | 138655190 | 0 | 0 | 0 | 0 | 2 | 0 | 594   | 0.242054844 | -1.673220759 | 4.032572473 | -0.414926395 | 0.678195787 | 0.998252924 |
| chr5:139568649-139574237 | exonic   | CYSTM1   | 5 | 139568649 | 139574237 | 0 | 0 | 0 | 0 | 2 | 0 | 5588  | 0.242054844 | -1.673220759 | 4.032572473 | -0.414926395 | 0.678195787 | 0.998252924 |
| chr5:140305481-140308910 | exonic   | PCDHAC1  | 5 | 140305481 | 140308910 | 0 | 0 | 0 | 0 | 2 | 0 | 3429  | 0.242054844 | -1.673220759 | 4.032572473 | -0.414926395 | 0.678195787 | 0.998252924 |
| chr5:141511372-141517423 | exonic   | NDFIP1   | 5 | 141511372 | 141517423 | 0 | 0 | 0 | 0 | 2 | 0 | 6051  | 0.242054844 | -1.673220759 | 4.032572473 | -0.414926395 | 0.678195787 | 0.998252924 |
| chr5:142281499-142311690 | exonic   | ARHGAP26 | 5 | 142281499 | 142311690 | 0 | 0 | 0 | 0 | 2 | 0 | 30191 | 0.242054844 | -1.673220759 | 4.032572473 | -0.414926395 | 0.678195787 | 0.998252924 |
| chr5:142283104-142311690 | exonic   | ARHGAP26 | 5 | 142283104 | 142311690 | 0 | 0 | 0 | 0 | 2 | 0 | 28586 | 0.242054844 | -1.673220759 | 4.032572473 | -0.414926395 | 0.678195787 | 0.998252924 |
| chr5:142287268-142311690 | exonic   | ARHGAP26 | 5 | 142287268 | 142311690 | 0 | 0 | 0 | 0 | 2 | 0 | 24422 | 0.242054844 | -1.673220759 | 4.032572473 | -0.414926395 | 0.678195787 | 0.998252924 |
| chr5:145647211-145649147 | exonic   | RBM27    | 5 | 145647211 | 145649147 | 0 | 0 | 0 | 0 | 2 | 0 | 1936  | 0.242054844 | -1.673220759 | 4.032572473 | -0.414926395 | 0.678195787 | 0.998252924 |
| chr5:156668656-156671488 | exonic   | ITK      | 5 | 156668656 | 156671488 | 0 | 0 | 0 | 0 | 2 | 0 | 2832  | 0.242054844 | -1.673220759 | 4.032572473 | -0.414926395 | 0.678195787 | 0.998252924 |
| chr5:156932725-156934124 | exonic   | ADAM19   | 5 | 156932725 | 156934124 | 0 | 0 | 0 | 0 | 2 | 0 | 1399  | 0.242054844 | -1.673220759 | 4.032572473 | -0.414926395 | 0.678195787 | 0.998252924 |
| chr5:157218710-157221980 | exonic   | CLINT1   | 5 | 157218710 | 157221980 | 0 | 0 | 0 | 0 | 2 | 0 | 3270  | 0.242054844 | -1.673220759 | 4.032572473 | -0.414926395 | 0.678195787 | 0.998252924 |
| chr5:170648761-170669824 | exonic   | RANBP17  | 5 | 170648761 | 170669824 | 0 | 0 | 0 | 0 | 2 | 0 | 21063 | 0.242054844 | -1.673220759 | 4.032572473 | -0.414926395 | 0.678195787 | 0.998252924 |
| chr5:172513503-172518404 | exonic   | CREBRF   | 5 | 172513503 | 172518404 | 0 | 0 | 0 | 0 | 2 | 0 | 4901  | 0.242054844 | -1.673220759 | 4.032572473 | -0.414926395 | 0.678195787 | 0.998252924 |
| chr5:180668491-180669345 | exonic   | GNB2L1   | 5 | 180668491 | 180669345 | 0 | 0 | 0 | 0 | 2 | 0 | 854   | 0.242054844 | -1.673220759 | 4.032572473 | -0.414926395 | 0.678195787 | 0.998252924 |
| chr5:32364053-32400308   | exonic   | ZFR      | 5 | 32364053  | 32400308  | 0 | 0 | 0 | 0 | 2 | 0 | 36255 | 0.242054844 | -1.673220759 | 4.032572473 | -0.414926395 | 0.678195787 | 0.998252924 |
| chr5:32379220-32388780   | exonic   | ZFR      | 5 | 32379220  | 32388780  | 0 | 0 | 0 | 0 | 2 | 0 | 9560  | 0.242054844 | -1.673220759 | 4.032572473 | -0.414926395 | 0.678195787 | 0.998252924 |
| chr5:37243114-37244709   | exonic   | C5orf42  | 5 | 37243114  | 37244709  | 0 | 0 | 0 | 0 | 2 | 0 | 1595  | 0.242054844 | -1.673220759 | 4.032572473 | -0.414926395 | 0.678195787 | 0.998252924 |
| chr5:54941616-54952602   | exonic   | SLC38A9  | 5 | 54941616  | 54952602  | 0 | 0 | 0 | 0 | 2 | 0 | 10986 | 0.242054844 | -1.673220759 | 4.032572473 | -0.414926395 | 0.678195787 | 0.998252924 |
| chr5:56509900-56527148   | exonic   | GPBP1    | 5 | 56509900  | 56527148  | 0 | 0 | 0 | 0 | 2 | 0 | 17248 | 0.242054844 | -1.673220759 | 4.032572473 | -0.414926395 | 0.678195787 | 0.998252924 |
| chr5:58334685-58334798   | exonic   | PDE4D    | 5 | 58334685  | 58334798  | 0 | 0 | 0 | 0 | 2 | 0 | 113   | 0.242054844 | -1.673220759 | 4.032572473 | -0.414926395 | 0.678195787 | 0.998252924 |
| chr5:64760539-64760743   | intronic | ADAMTS6  | 5 | 64760539  | 64760743  | 0 | 0 | 0 | 0 | 2 | 0 | 204   | 0.242054844 | -1.673220759 | 4.032572473 | -0.414926395 | 0.678195787 | 0.998252924 |
| chr5:6606932-6620411     | exonic   | NSUN2    | 5 | 6606932   | 6620411   | 0 | 0 | 0 | 0 | 2 | 0 | 13479 | 0.242054844 | -1.673220759 | 4.032572473 | -0.414926395 | 0.678195787 | 0.998252924 |
| chr5:68602643-68607031   | exonic   | CCDC125  | 5 | 68602643  | 68607031  | 0 | 0 | 0 | 0 | 2 | 0 | 4388  | 0.242054844 | -1.673220759 | 4.032572473 | -0.414926395 | 0.678195787 | 0.998252924 |
| chr5:68666861-68677884   | exonic   | RAD17    | 5 | 68666861  | 68677884  | 0 | 0 | 0 | 0 | 2 | 0 | 11023 | 0.242054844 | -1.673220759 | 4.032572473 | -0.414926395 | 0.678195787 | 0.998252924 |
| chr5:72370568-72374139   | exonic   | FCHO2    | 5 | 72370568  | 72374139  | 0 | 0 | 0 | 0 | 2 | 0 | 3571  | 0.242054844 | -1.673220759 | 4.032572473 | -0.414926395 | 0.678195787 | 0.998252924 |
| chr5:73069679-73076570   | exonic   | ARHGEF28 | 5 | 73069679  | 73076570  | 0 | 0 | 0 | 0 | 2 | 0 | 6891  | 0.242054844 | -1.673220759 | 4.032572473 | -0.414926395 | 0.678195787 | 0.998252924 |
| chr5:74675162-74677026   | exonic   | COL4A3BP | 5 | 74675162  | 74677026  | 0 | 0 | 0 | 0 | 2 | 0 | 1864  | 0.242054844 | -1.673220759 | 4.032572473 | -0.414926395 | 0.678195787 | 0.998252924 |
| chr5:74842834-74848416   | exonic   | POLK     | 5 | 74842834  | 74848416  | 0 | 0 | 0 | 0 | 2 | 0 | 5582  | 0.242054844 | -1.673220759 | 4.032572473 | -0.414926395 | 0.678195787 | 0.998252924 |

|                          |          |         |   |           |           |   |   |   |   |   |   |        |             |              |             |              |             |             |
|--------------------------|----------|---------|---|-----------|-----------|---|---|---|---|---|---|--------|-------------|--------------|-------------|--------------|-------------|-------------|
| chr5:76342171-76357627   | exonic   | AGGF1   | 5 | 76342171  | 76357627  | 0 | 0 | 0 | 0 | 2 | 0 | 15456  | 0.242054844 | -1.673220759 | 4.032572473 | -0.414926395 | 0.678195787 | 0.998252924 |
| chr5:76344760-76351421   | exonic   | AGGF1   | 5 | 76344760  | 76351421  | 0 | 0 | 0 | 0 | 2 | 0 | 6661   | 0.242054844 | -1.673220759 | 4.032572473 | -0.414926395 | 0.678195787 | 0.998252924 |
| chr5:79470776-79473886   | exonic   | SERINC5 | 5 | 79470776  | 79473886  | 0 | 0 | 0 | 0 | 2 | 0 | 3110   | 0.242054844 | -1.673220759 | 4.032572473 | -0.414926395 | 0.678195787 | 0.998252924 |
| chr5:80063751-80109560   | exonic   | MSH3    | 5 | 80063751  | 80109560  | 0 | 0 | 0 | 0 | 2 | 0 | 45809  | 0.242054844 | -1.673220759 | 4.032572473 | -0.414926395 | 0.678195787 | 0.998252924 |
| chr5:80932376-80948145   | exonic   | SSBP2   | 5 | 80932376  | 80948145  | 0 | 0 | 0 | 0 | 2 | 0 | 15769  | 0.242054844 | -1.673220759 | 4.032572473 | -0.414926395 | 0.678195787 | 0.998252924 |
| chr5:95072592-95091465   | exonic   | RHOBTB3 | 5 | 95072592  | 95091465  | 0 | 0 | 0 | 0 | 2 | 0 | 18873  | 0.242054844 | -1.673220759 | 4.032572473 | -0.414926395 | 0.678195787 | 0.998252924 |
| chr5:95080686-95080869   | intronic | RHOBTB3 | 5 | 95080686  | 95080869  | 0 | 0 | 0 | 0 | 2 | 0 | 183    | 0.242054844 | -1.673220759 | 4.032572473 | -0.414926395 | 0.678195787 | 0.998252924 |
| chr5:98217678-98230390   | exonic   | CHD1    | 5 | 98217678  | 98230390  | 0 | 0 | 0 | 0 | 2 | 0 | 12712  | 0.242054844 | -1.673220759 | 4.032572473 | -0.414926395 | 0.678195787 | 0.998252924 |
| chr6:100988038-100988263 | exonic   | ASCC3   | 6 | 100988038 | 100988263 | 0 | 0 | 0 | 0 | 2 | 0 | 225    | 0.242054844 | -1.673220759 | 4.032572473 | -0.414926395 | 0.678195787 | 0.998252924 |
| chr6:10758132-10759246   | exonic   | TMEM14B | 6 | 10758132  | 10759246  | 0 | 0 | 0 | 0 | 2 | 0 | 1114   | 0.242054844 | -1.673220759 | 4.032572473 | -0.414926395 | 0.678195787 | 0.998252924 |
| chr6:108218852-108246136 | exonic   | SEC63   | 6 | 108218852 | 108246136 | 0 | 0 | 0 | 0 | 2 | 0 | 27284  | 0.242054844 | -1.673220759 | 4.032572473 | -0.414926395 | 0.678195787 | 0.998252924 |
| chr6:110036280-110037771 | exonic   | FIG4    | 6 | 110036280 | 110037771 | 0 | 0 | 0 | 0 | 2 | 0 | 1491   | 0.242054844 | -1.673220759 | 4.032572473 | -0.414926395 | 0.678195787 | 0.998252924 |
| chr6:110522760-110533475 | exonic   | CDC40   | 6 | 110522760 | 110533475 | 0 | 0 | 0 | 0 | 2 | 0 | 10715  | 0.242054844 | -1.673220759 | 4.032572473 | -0.414926395 | 0.678195787 | 0.998252924 |
| chr6:111038258-111039014 | intronic | CDK19   | 6 | 111038258 | 111039014 | 0 | 0 | 0 | 0 | 2 | 0 | 756    | 0.242054844 | -1.673220759 | 4.032572473 | -0.414926395 | 0.678195787 | 0.998252924 |
| chr6:111632271-111643881 | exonic   | REV3L   | 6 | 111632271 | 111643881 | 0 | 0 | 0 | 0 | 2 | 0 | 11610  | 0.242054844 | -1.673220759 | 4.032572473 | -0.414926395 | 0.678195787 | 0.998252924 |
| chr6:11305299-11334794   | exonic   | NEDD9   | 6 | 11305299  | 11334794  | 0 | 0 | 0 | 0 | 2 | 0 | 29495  | 0.242054844 | -1.673220759 | 4.032572473 | -0.414926395 | 0.678195787 | 0.998252924 |
| chr6:126332399-126360071 | exonic   | TRMT11  | 6 | 126332399 | 126360071 | 0 | 0 | 0 | 0 | 2 | 0 | 27672  | 0.242054844 | -1.673220759 | 4.032572473 | -0.414926395 | 0.678195787 | 0.998252924 |
| chr6:130374003-130442103 | exonic   | L3MBTL3 | 6 | 130374003 | 130442103 | 0 | 0 | 0 | 0 | 2 | 0 | 68100  | 0.242054844 | -1.673220759 | 4.032572473 | -0.414926395 | 0.678195787 | 0.998252924 |
| chr6:132791799-132792601 | splicing | STX7    | 6 | 132791799 | 132792601 | 0 | 0 | 0 | 0 | 2 | 0 | 802    | 0.242054844 | -1.673220759 | 4.032572473 | -0.414926395 | 0.678195787 | 0.998252924 |
| chr6:133806999-133827408 | exonic   | EYA4    | 6 | 133806999 | 133827408 | 0 | 0 | 0 | 0 | 2 | 0 | 20409  | 0.242054844 | -1.673220759 | 4.032572473 | -0.414926395 | 0.678195787 | 0.998252924 |
| chr6:135715913-135778851 | exonic   | AHI1    | 6 | 135715913 | 135778851 | 0 | 0 | 0 | 0 | 2 | 0 | 62938  | 0.242054844 | -1.673220759 | 4.032572473 | -0.414926395 | 0.678195787 | 0.998252924 |
| chr6:138192349-138192659 | exonic   | TNFAIP3 | 6 | 138192349 | 138192659 | 0 | 0 | 0 | 0 | 2 | 0 | 310    | 0.242054844 | -1.673220759 | 4.032572473 | -0.414926395 | 0.678195787 | 0.998252924 |
| chr6:144070121-144098520 | exonic   | PHACTR2 | 6 | 144070121 | 144098520 | 0 | 0 | 0 | 0 | 2 | 0 | 28399  | 0.242054844 | -1.673220759 | 4.032572473 | -0.414926395 | 0.678195787 | 0.998252924 |
| chr6:144768346-145124283 | exonic   | UTRN    | 6 | 144768346 | 145124283 | 0 | 0 | 0 | 0 | 2 | 0 | 355937 | 0.242054844 | -1.673220759 | 4.032572473 | -0.414926395 | 0.678195787 | 0.998252924 |
| chr6:144768737-144809970 | exonic   | UTRN    | 6 | 144768737 | 144809970 | 0 | 0 | 0 | 0 | 2 | 0 | 41233  | 0.242054844 | -1.673220759 | 4.032572473 | -0.414926395 | 0.678195787 | 0.998252924 |
| chr6:144772505-144784002 | exonic   | UTRN    | 6 | 144772505 | 144784002 | 0 | 0 | 0 | 0 | 2 | 0 | 11497  | 0.242054844 | -1.673220759 | 4.032572473 | -0.414926395 | 0.678195787 | 0.998252924 |
| chr6:144852187-144898424 | exonic   | UTRN    | 6 | 144852187 | 144898424 | 0 | 0 | 0 | 0 | 2 | 0 | 46237  | 0.242054844 | -1.673220759 | 4.032572473 | -0.414926395 | 0.678195787 | 0.998252924 |
| chr6:145142017-145157677 | exonic   | UTRN    | 6 | 145142017 | 145157677 | 0 | 0 | 0 | 0 | 2 | 0 | 15660  | 0.242054844 | -1.673220759 | 4.032572473 | -0.414926395 | 0.678195787 | 0.998252924 |
| chr6:152163732-152201906 | exonic   | ESR1    | 6 | 152163732 | 152201906 | 0 | 0 | 0 | 0 | 2 | 0 | 38174  | 0.242054844 | -1.673220759 | 4.032572473 | -0.414926395 | 0.678195787 | 0.998252924 |
| chr6:158349630-158357072 | exonic   | SNX9    | 6 | 158349630 | 158357072 | 0 | 0 | 0 | 0 | 2 | 0 | 7442   | 0.242054844 | -1.673220759 | 4.032572473 | -0.414926395 | 0.678195787 | 0.998252924 |
| chr6:158504460-158505206 | exonic   | SYNJ2   | 6 | 158504460 | 158505206 | 0 | 0 | 0 | 0 | 2 | 0 | 746    | 0.242054844 | -1.673220759 | 4.032572473 | -0.414926395 | 0.678195787 | 0.998252924 |
| chr6:158683677-158735300 | exonic   | TULP4   | 6 | 158683677 | 158735300 | 0 | 0 | 0 | 0 | 2 | 0 | 51623  | 0.242054844 | -1.673220759 | 4.032572473 | -0.414926395 | 0.678195787 | 0.998252924 |
| chr6:159082300-159104021 | exonic   | SYTL3   | 6 | 159082300 | 159104021 | 0 | 0 | 0 | 0 | 2 | 0 | 21721  | 0.242054844 | -1.673220759 | 4.032572473 | -0.414926395 | 0.678195787 | 0.998252924 |
| chr6:159401805-159404839 | exonic   | RSPH3   | 6 | 159401805 | 159404839 | 0 | 0 | 0 | 0 | 2 | 0 | 3034   | 0.242054844 | -1.673220759 | 4.032572473 | -0.414926395 | 0.678195787 | 0.998252924 |
| chr6:160200658-160207029 | exonic   | TCP1    | 6 | 160200658 | 160207029 | 0 | 0 | 0 | 0 | 2 | 0 | 6371   | 0.242054844 | -1.673220759 | 4.032572473 | -0.414926395 | 0.678195787 | 0.998252924 |

|                          |                |                                         |   |           |           |   |   |   |   |   |   |       |             |              |             |              |             |             |
|--------------------------|----------------|-----------------------------------------|---|-----------|-----------|---|---|---|---|---|---|-------|-------------|--------------|-------------|--------------|-------------|-------------|
| chr6:17602820-17606244   | exonic         | FAM8A1                                  | 6 | 17602820  | 17606244  | 0 | 0 | 0 | 0 | 2 | 0 | 3424  | 0.242054844 | -1.673220759 | 4.032572473 | -0.414926395 | 0.678195787 | 0.998252924 |
| chr6:17817250-17834302   | exonic         | KIF13A                                  | 6 | 17817250  | 17834302  | 0 | 0 | 0 | 0 | 2 | 0 | 17052 | 0.242054844 | -1.673220759 | 4.032572473 | -0.414926395 | 0.678195787 | 0.998252924 |
| chr6:17834191-17837814   | exonic         | KIF13A                                  | 6 | 17834191  | 17837814  | 0 | 0 | 0 | 0 | 2 | 0 | 3623  | 0.242054844 | -1.673220759 | 4.032572473 | -0.414926395 | 0.678195787 | 0.998252924 |
| chr6:18160113-18171710   | exonic         | KDM1B                                   | 6 | 18160113  | 18171710  | 0 | 0 | 0 | 0 | 2 | 0 | 11597 | 0.242054844 | -1.673220759 | 4.032572473 | -0.414926395 | 0.678195787 | 0.998252924 |
| chr6:18249881-18258293   | exonic         | DEK                                     | 6 | 18249881  | 18258293  | 0 | 0 | 0 | 0 | 2 | 0 | 8412  | 0.242054844 | -1.673220759 | 4.032572473 | -0.414926395 | 0.678195787 | 0.998252924 |
| chr6:2294679-2295009     | ncRNA_intronic | GMDS-AS1                                | 6 | 2294679   | 2295009   | 0 | 0 | 0 | 0 | 2 | 0 | 330   | 0.242054844 | -1.673220759 | 4.032572473 | -0.414926395 | 0.678195787 | 0.998252924 |
| chr6:25097288-25110331   | ncRNA_exonic   | CMAHP                                   | 6 | 25097288  | 25110331  | 0 | 0 | 0 | 0 | 2 | 0 | 13043 | 0.242054844 | -1.673220759 | 4.032572473 | -0.414926395 | 0.678195787 | 0.998252924 |
| chr6:27793084-27797096   | downstream     | HIST1H4J (dist=826)                     | 6 | 27793084  | 27797096  | 0 | 0 | 0 | 0 | 2 | 0 | 4012  | 0.242054844 | -1.673220759 | 4.032572473 | -0.414926395 | 0.678195787 | 0.998252924 |
| chr6:30459430-30460158   | exonic         | HLA-E                                   | 6 | 30459430  | 30460158  | 0 | 0 | 0 | 0 | 2 | 0 | 728   | 0.242054844 | -1.673220759 | 4.032572473 | -0.414926395 | 0.678195787 | 0.998252924 |
| chr6:33232623-33235084   | exonic         | VPS52                                   | 6 | 33232623  | 33235084  | 0 | 0 | 0 | 0 | 2 | 0 | 2461  | 0.242054844 | -1.673220759 | 4.032572473 | -0.414926395 | 0.678195787 | 0.998252924 |
| chr6:35277446-35280315   | exonic         | DEF6                                    | 6 | 35277446  | 35280315  | 0 | 0 | 0 | 0 | 2 | 0 | 2869  | 0.242054844 | -1.673220759 | 4.032572473 | -0.414926395 | 0.678195787 | 0.998252924 |
| chr6:47494364-47522502   | exonic         | CD2AP                                   | 6 | 47494364  | 47522502  | 0 | 0 | 0 | 0 | 2 | 0 | 28138 | 0.242054844 | -1.673220759 | 4.032572473 | -0.414926395 | 0.678195787 | 0.998252924 |
| chr6:50712819-50719037   | exonic         | TFAP2D                                  | 6 | 50712819  | 50719037  | 0 | 0 | 0 | 0 | 2 | 0 | 6218  | 0.242054844 | -1.673220759 | 4.032572473 | -0.414926395 | 0.678195787 | 0.998252924 |
| chr6:54191599-54219434   | exonic         | TINAG                                   | 6 | 54191599  | 54219434  | 0 | 0 | 0 | 0 | 2 | 0 | 27835 | 0.242054844 | -1.673220759 | 4.032572473 | -0.414926395 | 0.678195787 | 0.998252924 |
| chr6:57017018-57025950   | exonic         | ZNF451                                  | 6 | 57017018  | 57025950  | 0 | 0 | 0 | 0 | 2 | 0 | 8932  | 0.242054844 | -1.673220759 | 4.032572473 | -0.414926395 | 0.678195787 | 0.998252924 |
| chr6:592468-610178       | exonic         | EXOC2                                   | 6 | 592468    | 610178    | 0 | 0 | 0 | 0 | 2 | 0 | 17710 | 0.242054844 | -1.673220759 | 4.032572473 | -0.414926395 | 0.678195787 | 0.998252924 |
| chr6:63986808-64031204   | exonic         | LGSN                                    | 6 | 63986808  | 64031204  | 0 | 0 | 0 | 0 | 2 | 0 | 44396 | 0.242054844 | -1.673220759 | 4.032572473 | -0.414926395 | 0.678195787 | 0.998252924 |
| chr6:64110500-64114506   | intergenic     | LGSN (dist=80618), PTP4A1 (dist=167411) | 6 | 64110500  | 64114506  | 0 | 0 | 0 | 0 | 2 | 0 | 4006  | 0.242054844 | -1.673220759 | 4.032572473 | -0.414926395 | 0.678195787 | 0.998252924 |
| chr6:64389900-64395812   | exonic         | PHF3                                    | 6 | 64389900  | 64395812  | 0 | 0 | 0 | 0 | 2 | 0 | 5912  | 0.242054844 | -1.673220759 | 4.032572473 | -0.414926395 | 0.678195787 | 0.998252924 |
| chr6:71442080-71508440   | exonic         | SMAP1                                   | 6 | 71442080  | 71508440  | 0 | 0 | 0 | 0 | 2 | 0 | 66360 | 0.242054844 | -1.673220759 | 4.032572473 | -0.414926395 | 0.678195787 | 0.998252924 |
| chr6:76344423-76350420   | exonic         | SENP6                                   | 6 | 76344423  | 76350420  | 0 | 0 | 0 | 0 | 2 | 0 | 5997  | 0.242054844 | -1.673220759 | 4.032572473 | -0.414926395 | 0.678195787 | 0.998252924 |
| chr6:76568618-76572440   | exonic         | MYO6                                    | 6 | 76568618  | 76572440  | 0 | 0 | 0 | 0 | 2 | 0 | 3822  | 0.242054844 | -1.673220759 | 4.032572473 | -0.414926395 | 0.678195787 | 0.998252924 |
| chr6:7784939-7785139     | intronic       | BMP6                                    | 6 | 7784939   | 7785139   | 0 | 0 | 0 | 0 | 2 | 0 | 200   | 0.242054844 | -1.673220759 | 4.032572473 | -0.414926395 | 0.678195787 | 0.998252924 |
| chr6:90556280-90565263   | exonic         | CASP8AP2                                | 6 | 90556280  | 90565263  | 0 | 0 | 0 | 0 | 2 | 0 | 8983  | 0.242054844 | -1.673220759 | 4.032572473 | -0.414926395 | 0.678195787 | 0.998252924 |
| chr6:99912479-99916494   | exonic         | USP45                                   | 6 | 99912479  | 99916494  | 0 | 0 | 0 | 0 | 2 | 0 | 4015  | 0.242054844 | -1.673220759 | 4.032572473 | -0.414926395 | 0.678195787 | 0.998252924 |
| chr6:99912479-99958106   | exonic         | USP45                                   | 6 | 99912479  | 99958106  | 0 | 0 | 0 | 0 | 2 | 0 | 45627 | 0.242054844 | -1.673220759 | 4.032572473 | -0.414926395 | 0.678195787 | 0.998252924 |
| chr6:99936075-99958106   | exonic         | USP45                                   | 6 | 99936075  | 99958106  | 0 | 0 | 0 | 0 | 2 | 0 | 22031 | 0.242054844 | -1.673220759 | 4.032572473 | -0.414926395 | 0.678195787 | 0.998252924 |
| chr7:105182854-105192154 | exonic         | RINT1                                   | 7 | 105182854 | 105192154 | 0 | 0 | 0 | 0 | 2 | 0 | 9300  | 0.242054844 | -1.673220759 | 4.032572473 | -0.414926395 | 0.678195787 | 0.998252924 |
| chr7:115750762-115761522 | intergenic     | TFEC (dist=79895), TES (dist=89025)     | 7 | 115750762 | 115761522 | 0 | 0 | 0 | 0 | 2 | 0 | 10760 | 0.242054844 | -1.673220759 | 4.032572473 | -0.414926395 | 0.678195787 | 0.998252924 |
| chr7:117175301-117199709 | exonic         | CFTR                                    | 7 | 117175301 | 117199709 | 0 | 0 | 0 | 0 | 2 | 0 | 24408 | 0.242054844 | -1.673220759 | 4.032572473 | -0.414926395 | 0.678195787 | 0.998252924 |
| chr7:120606679-120610934 | exonic         | ING3                                    | 7 | 120606679 | 120610934 | 0 | 0 | 0 | 0 | 2 | 0 | 4255  | 0.242054844 | -1.673220759 | 4.032572473 | -0.414926395 | 0.678195787 | 0.998252924 |
| chr7:122047594-122114571 | exonic         | CADPS2                                  | 7 | 122047594 | 122114571 | 0 | 0 | 0 | 0 | 2 | 0 | 66977 | 0.242054844 | -1.673220759 | 4.032572473 | -0.414926395 | 0.678195787 | 0.998252924 |
| chr7:129541666-129542145 | intronic       | UBE2H                                   | 7 | 129541666 | 129542145 | 0 | 0 | 0 | 0 | 2 | 0 | 479   | 0.242054844 | -1.673220759 | 4.032572473 | -0.414926395 | 0.678195787 | 0.998252924 |
| chr7:131113791-131151174 | exonic         | MKLN1                                   | 7 | 131113791 | 131151174 | 0 | 0 | 0 | 0 | 2 | 0 | 37383 | 0.242054844 | -1.673220759 | 4.032572473 | -0.414926395 | 0.678195787 | 0.998252924 |
| chr7:148451092-148464841 | exonic         | CUL1                                    | 7 | 148451092 | 148464841 | 0 | 0 | 0 | 0 | 2 | 0 | 13749 | 0.242054844 | -1.673220759 | 4.032572473 | -0.414926395 | 0.678195787 | 0.998252924 |

|                          |            |                                                                |   |           |           |   |   |   |   |   |   |        |             |              |             |              |             |             |
|--------------------------|------------|----------------------------------------------------------------|---|-----------|-----------|---|---|---|---|---|---|--------|-------------|--------------|-------------|--------------|-------------|-------------|
| chr7:151891093-151896544 | exonic     | KMT2C                                                          | 7 | 151891093 | 151896544 | 0 | 0 | 0 | 0 | 2 | 0 | 5451   | 0.242054844 | -1.673220759 | 4.032572473 | -0.414926395 | 0.678195787 | 0.998252924 |
| chr7:151946960-151970952 | exonic     | KMT2C                                                          | 7 | 151946960 | 151970952 | 0 | 0 | 0 | 0 | 2 | 0 | 23992  | 0.242054844 | -1.673220759 | 4.032572473 | -0.414926395 | 0.678195787 | 0.998252924 |
| chr7:157009560-157024021 | exonic     | UBE3C                                                          | 7 | 157009560 | 157024021 | 0 | 0 | 0 | 0 | 2 | 0 | 14461  | 0.242054844 | -1.673220759 | 4.032572473 | -0.414926395 | 0.678195787 | 0.998252924 |
| chr7:158663832-158672680 | exonic     | WDR60                                                          | 7 | 158663832 | 158672680 | 0 | 0 | 0 | 0 | 2 | 0 | 8848   | 0.242054844 | -1.673220759 | 4.032572473 | -0.414926395 | 0.678195787 | 0.998252924 |
| chr7:23545756-23552701   | exonic     | TRA2A                                                          | 7 | 23545756  | 23552701  | 0 | 0 | 0 | 0 | 2 | 0 | 6945   | 0.242054844 | -1.673220759 | 4.032572473 | -0.414926395 | 0.678195787 | 0.998252924 |
| chr7:33055281-33066527   | exonic     | NT5C3A                                                         | 7 | 33055281  | 33066527  | 0 | 0 | 0 | 0 | 2 | 0 | 11246  | 0.242054844 | -1.673220759 | 4.032572473 | -0.414926395 | 0.678195787 | 0.998252924 |
| chr7:40117603-40118450   | exonic     | CDK13                                                          | 7 | 40117603  | 40118450  | 0 | 0 | 0 | 0 | 2 | 0 | 847    | 0.242054844 | -1.673220759 | 4.032572473 | -0.414926395 | 0.678195787 | 0.998252924 |
| chr7:56049903-56052571   | exonic     | GBAS                                                           | 7 | 56049903  | 56052571  | 0 | 0 | 0 | 0 | 2 | 0 | 2668   | 0.242054844 | -1.673220759 | 4.032572473 | -0.414926395 | 0.678195787 | 0.998252924 |
| chr7:6465618-6472590     | exonic     | DAGLB                                                          | 7 | 6465618   | 6472590   | 0 | 0 | 0 | 0 | 2 | 0 | 6972   | 0.242054844 | -1.673220759 | 4.032572473 | -0.414926395 | 0.678195787 | 0.998252924 |
| chr7:65941246-65950140   | intergenic | <small>LINC00174(dist=75851), GSI-124K5.11(dist=45152)</small> | 7 | 65941246  | 65950140  | 0 | 0 | 0 | 0 | 2 | 0 | 8894   | 0.242054844 | -1.673220759 | 4.032572473 | -0.414926395 | 0.678195787 | 0.998252924 |
| chr7:66199611-66200742   | intronic   | RABGEF1                                                        | 7 | 66199611  | 66200742  | 0 | 0 | 0 | 0 | 2 | 0 | 1131   | 0.242054844 | -1.673220759 | 4.032572473 | -0.414926395 | 0.678195787 | 0.998252924 |
| chr7:72178578-72209578   | exonic     | TYW1B                                                          | 7 | 72178578  | 72209578  | 0 | 0 | 0 | 0 | 2 | 0 | 31000  | 0.242054844 | -1.673220759 | 4.032572473 | -0.414926395 | 0.678195787 | 0.998252924 |
| chr7:76883822-76891624   | exonic     | CCDC146                                                        | 7 | 76883822  | 76891624  | 0 | 0 | 0 | 0 | 2 | 0 | 7802   | 0.242054844 | -1.673220759 | 4.032572473 | -0.414926395 | 0.678195787 | 0.998252924 |
| chr7:79828540-79840414   | exonic     | GNAI1                                                          | 7 | 79828540  | 79840414  | 0 | 0 | 0 | 0 | 2 | 0 | 11874  | 0.242054844 | -1.673220759 | 4.032572473 | -0.414926395 | 0.678195787 | 0.998252924 |
| chr7:8062112-8099878     | exonic     | GLCCI1                                                         | 7 | 8062112   | 8099878   | 0 | 0 | 0 | 0 | 2 | 0 | 37766  | 0.242054844 | -1.673220759 | 4.032572473 | -0.414926395 | 0.678195787 | 0.998252924 |
| chr7:888055-905704       | exonic     | SUN1                                                           | 7 | 888055    | 905704    | 0 | 0 | 0 | 0 | 2 | 0 | 17649  | 0.242054844 | -1.673220759 | 4.032572473 | -0.414926395 | 0.678195787 | 0.998252924 |
| chr7:90237844-90419967   | exonic     | CDK14                                                          | 7 | 90237844  | 90419967  | 0 | 0 | 0 | 0 | 2 | 0 | 182123 | 0.242054844 | -1.673220759 | 4.032572473 | -0.414926395 | 0.678195787 | 0.998252924 |
| chr7:91622198-91632549   | exonic     | AKAP9                                                          | 7 | 91622198  | 91632549  | 0 | 0 | 0 | 0 | 2 | 0 | 10351  | 0.242054844 | -1.673220759 | 4.032572473 | -0.414926395 | 0.678195787 | 0.998252924 |
| chr7:91842508-91871451   | exonic     | KRIT1                                                          | 7 | 91842508  | 91871451  | 0 | 0 | 0 | 0 | 2 | 0 | 28943  | 0.242054844 | -1.673220759 | 4.032572473 | -0.414926395 | 0.678195787 | 0.998252924 |
| chr7:99082816-99092254   | exonic     | ZNF394, ZNF789                                                 | 7 | 99082816  | 99092254  | 0 | 0 | 0 | 0 | 2 | 0 | 9438   | 0.242054844 | -1.673220759 | 4.032572473 | -0.414926395 | 0.678195787 | 0.998252924 |
| chr8:100587886-100597745 | exonic     | VPS13B                                                         | 8 | 100587886 | 100597745 | 0 | 0 | 0 | 0 | 2 | 0 | 9859   | 0.242054844 | -1.673220759 | 4.032572473 | -0.414926395 | 0.678195787 | 0.998252924 |
| chr8:103311200-103311679 | splicing   | UBR5                                                           | 8 | 103311200 | 103311679 | 0 | 0 | 0 | 0 | 2 | 0 | 479    | 0.242054844 | -1.673220759 | 4.032572473 | -0.414926395 | 0.678195787 | 0.998252924 |
| chr8:10677702-10692285   | exonic     | PINX1                                                          | 8 | 10677702  | 10692285  | 0 | 0 | 0 | 0 | 2 | 0 | 14583  | 0.242054844 | -1.673220759 | 4.032572473 | -0.414926395 | 0.678195787 | 0.998252924 |
| chr8:124368628-124373886 | exonic     | ATAD2                                                          | 8 | 124368628 | 124373886 | 0 | 0 | 0 | 0 | 2 | 0 | 5258   | 0.242054844 | -1.673220759 | 4.032572473 | -0.414926395 | 0.678195787 | 0.998252924 |
| chr8:133622412-133627343 | exonic     | LRRC6                                                          | 8 | 133622412 | 133627343 | 0 | 0 | 0 | 0 | 2 | 0 | 4931   | 0.242054844 | -1.673220759 | 4.032572473 | -0.414926395 | 0.678195787 | 0.998252924 |
| chr8:135820747-135825412 | intergenic | <small>MIR300(dist=3559), NCRNA00250(dist=24900)</small>       | 8 | 135820747 | 135825412 | 0 | 0 | 0 | 0 | 2 | 0 | 4665   | 0.242054844 | -1.673220759 | 4.032572473 | -0.414926395 | 0.678195787 | 0.998252924 |
| chr8:141285756-141301177 | exonic     | TRAPPC9                                                        | 8 | 141285756 | 141301177 | 0 | 0 | 0 | 0 | 2 | 0 | 15421  | 0.242054844 | -1.673220759 | 4.032572473 | -0.414926395 | 0.678195787 | 0.998252924 |
| chr8:141310567-141370292 | exonic     | TRAPPC9                                                        | 8 | 141310567 | 141370292 | 0 | 0 | 0 | 0 | 2 | 0 | 59725  | 0.242054844 | -1.673220759 | 4.032572473 | -0.414926395 | 0.678195787 | 0.998252924 |
| chr8:141810558-141840625 | exonic     | PTK2                                                           | 8 | 141810558 | 141840625 | 0 | 0 | 0 | 0 | 2 | 0 | 30067  | 0.242054844 | -1.673220759 | 4.032572473 | -0.414926395 | 0.678195787 | 0.998252924 |
| chr8:16479750-16523269   | intergenic | <small>MSR1(dist=429450), FGF20(dist=327065)</small>           | 8 | 16479750  | 16523269  | 0 | 0 | 0 | 0 | 2 | 0 | 43519  | 0.242054844 | -1.673220759 | 4.032572473 | -0.414926395 | 0.678195787 | 0.998252924 |
| chr8:17510694-17532761   | exonic     | MTUS1                                                          | 8 | 17510694  | 17532761  | 0 | 0 | 0 | 0 | 2 | 0 | 22067  | 0.242054844 | -1.673220759 | 4.032572473 | -0.414926395 | 0.678195787 | 0.998252924 |
| chr8:17556973-17557759   | intronic   | MTUS1                                                          | 8 | 17556973  | 17557759  | 0 | 0 | 0 | 0 | 2 | 0 | 786    | 0.242054844 | -1.673220759 | 4.032572473 | -0.414926395 | 0.678195787 | 0.998252924 |
| chr8:17824679-17827060   | exonic     | PCM1                                                           | 8 | 17824679  | 17827060  | 0 | 0 | 0 | 0 | 2 | 0 | 2381   | 0.242054844 | -1.673220759 | 4.032572473 | -0.414926395 | 0.678195787 | 0.998252924 |
| chr8:21832181-21837714   | exonic     | XPO7                                                           | 8 | 21832181  | 21837714  | 0 | 0 | 0 | 0 | 2 | 0 | 5533   | 0.242054844 | -1.673220759 | 4.032572473 | -0.414926395 | 0.678195787 | 0.998252924 |
| chr8:30643727-30657271   | exonic     | PPP2CB                                                         | 8 | 30643727  | 30657271  | 0 | 0 | 0 | 0 | 2 | 0 | 13544  | 0.242054844 | -1.673220759 | 4.032572473 | -0.414926395 | 0.678195787 | 0.998252924 |



|                          |            |                                      |   |           |           |   |   |   |   |   |   |        |             |              |             |              |             |             |
|--------------------------|------------|--------------------------------------|---|-----------|-----------|---|---|---|---|---|---|--------|-------------|--------------|-------------|--------------|-------------|-------------|
| chr8:30998945-31007971   | exonic     | WRN                                  | 8 | 30998945  | 31007971  | 0 | 0 | 0 | 0 | 2 | 0 | 9026   | 0.242054844 | -1.673220759 | 4.032572473 | -0.414926395 | 0.678195787 | 0.998252924 |
| chr8:37991827-37992073   | intronic   | ASH2L                                | 8 | 37991827  | 37992073  | 0 | 0 | 0 | 0 | 2 | 0 | 246    | 0.242054844 | -1.673220759 | 4.032572473 | -0.414926395 | 0.678195787 | 0.998252924 |
| chr8:42725146-42743014   | exonic     | RNF170                               | 8 | 42725146  | 42743014  | 0 | 0 | 0 | 0 | 2 | 0 | 17868  | 0.242054844 | -1.673220759 | 4.032572473 | -0.414926395 | 0.678195787 | 0.998252924 |
| chr8:42761315-42823357   | exonic     | HOOK3                                | 8 | 42761315  | 42823357  | 0 | 0 | 0 | 0 | 2 | 0 | 62042  | 0.242054844 | -1.673220759 | 4.032572473 | -0.414926395 | 0.678195787 | 0.998252924 |
| chr8:42919244-42940539   | exonic     | FNTA                                 | 8 | 42919244  | 42940539  | 0 | 0 | 0 | 0 | 2 | 0 | 21295  | 0.242054844 | -1.673220759 | 4.032572473 | -0.414926395 | 0.678195787 | 0.998252924 |
| chr8:48790284-48805947   | exonic     | PRKDC                                | 8 | 48790284  | 48805947  | 0 | 0 | 0 | 0 | 2 | 0 | 15663  | 0.242054844 | -1.673220759 | 4.032572473 | -0.414926395 | 0.678195787 | 0.998252924 |
| chr8:53028834-53055605   | exonic     | ST18                                 | 8 | 53028834  | 53055605  | 0 | 0 | 0 | 0 | 2 | 0 | 26771  | 0.242054844 | -1.673220759 | 4.032572473 | -0.414926395 | 0.678195787 | 0.998252924 |
| chr8:54975887-54978373   | exonic     | LYPLA1                               | 8 | 54975887  | 54978373  | 0 | 0 | 0 | 0 | 2 | 0 | 2486   | 0.242054844 | -1.673220759 | 4.032572473 | -0.414926395 | 0.678195787 | 0.998252924 |
| chr8:585668-590834       | intronic   | ERICH1                               | 8 | 585668    | 590834    | 0 | 0 | 0 | 0 | 2 | 0 | 5166   | 0.242054844 | -1.673220759 | 4.032572473 | -0.414926395 | 0.678195787 | 0.998252924 |
| chr8:59535778-59555632   | exonic     | NSMAF                                | 8 | 59535778  | 59555632  | 0 | 0 | 0 | 0 | 2 | 0 | 19854  | 0.242054844 | -1.673220759 | 4.032572473 | -0.414926395 | 0.678195787 | 0.998252924 |
| chr8:68089914-68092161   | exonic     | CSPP1                                | 8 | 68089914  | 68092161  | 0 | 0 | 0 | 0 | 2 | 0 | 2247   | 0.242054844 | -1.673220759 | 4.032572473 | -0.414926395 | 0.678195787 | 0.998252924 |
| chr8:71506740-71510490   | exonic     | TRAM1                                | 8 | 71506740  | 71510490  | 0 | 0 | 0 | 0 | 2 | 0 | 3750   | 0.242054844 | -1.673220759 | 4.032572473 | -0.414926395 | 0.678195787 | 0.998252924 |
| chr8:74507400-74529686   | exonic     | STAU2                                | 8 | 74507400  | 74529686  | 0 | 0 | 0 | 0 | 2 | 0 | 22286  | 0.242054844 | -1.673220759 | 4.032572473 | -0.414926395 | 0.678195787 | 0.998252924 |
| chr8:75227095-75227855   | exonic     | JPH1                                 | 8 | 75227095  | 75227855  | 0 | 0 | 0 | 0 | 2 | 0 | 760    | 0.242054844 | -1.673220759 | 4.032572473 | -0.414926395 | 0.678195787 | 0.998252924 |
| chr8:8738448-8739130     | intronic   | MFHAS1                               | 8 | 8738448   | 8739130   | 0 | 0 | 0 | 0 | 2 | 0 | 682    | 0.242054844 | -1.673220759 | 4.032572473 | -0.414926395 | 0.678195787 | 0.998252924 |
| chr8:87392954-87410867   | exonic     | WWP1                                 | 8 | 87392954  | 87410867  | 0 | 0 | 0 | 0 | 2 | 0 | 17913  | 0.242054844 | -1.673220759 | 4.032572473 | -0.414926395 | 0.678195787 | 0.998252924 |
| chr8:87414248-87414432   | exonic     | WWP1                                 | 8 | 87414248  | 87414432  | 0 | 0 | 0 | 0 | 2 | 0 | 184    | 0.242054844 | -1.673220759 | 4.032572473 | -0.414926395 | 0.678195787 | 0.998252924 |
| chr8:92998351-93017525   | exonic     | RUNX1T1                              | 8 | 92998351  | 93017525  | 0 | 0 | 0 | 0 | 2 | 0 | 19174  | 0.242054844 | -1.673220759 | 4.032572473 | -0.414926395 | 0.678195787 | 0.998252924 |
| chr8:94798450-94803547   | exonic     | TMEM67                               | 8 | 94798450  | 94803547  | 0 | 0 | 0 | 0 | 2 | 0 | 5097   | 0.242054844 | -1.673220759 | 4.032572473 | -0.414926395 | 0.678195787 | 0.998252924 |
| chr8:95547066-95550574   | exonic     | KIAA1429                             | 8 | 95547066  | 95550574  | 0 | 0 | 0 | 0 | 2 | 0 | 3508   | 0.242054844 | -1.673220759 | 4.032572473 | -0.414926395 | 0.678195787 | 0.998252924 |
| chr8:95844219-95853819   | exonic     | INTS8                                | 8 | 95844219  | 95853819  | 0 | 0 | 0 | 0 | 2 | 0 | 9600   | 0.242054844 | -1.673220759 | 4.032572473 | -0.414926395 | 0.678195787 | 0.998252924 |
| chr9:111835635-111855871 | exonic     | TMEM245                              | 9 | 111835635 | 111855871 | 0 | 0 | 0 | 0 | 2 | 0 | 20236  | 0.242054844 | -1.673220759 | 4.032572473 | -0.414926395 | 0.678195787 | 0.998252924 |
| chr9:114173259-114178632 | exonic     | KIAA0368                             | 9 | 114173259 | 114178632 | 0 | 0 | 0 | 0 | 2 | 0 | 5373   | 0.242054844 | -1.673220759 | 4.032572473 | -0.414926395 | 0.678195787 | 0.998252924 |
| chr9:114911523-114919893 | exonic     | SUSD1                                | 9 | 114911523 | 114919893 | 0 | 0 | 0 | 0 | 2 | 0 | 8370   | 0.242054844 | -1.673220759 | 4.032572473 | -0.414926395 | 0.678195787 | 0.998252924 |
| chr9:116091843-116092511 | intronic   | WDR31                                | 9 | 116091843 | 116092511 | 0 | 0 | 0 | 0 | 2 | 0 | 668    | 0.242054844 | -1.673220759 | 4.032572473 | -0.414926395 | 0.678195787 | 0.998252924 |
| chr9:123230137-123253755 | exonic     | CDK5RAP2                             | 9 | 123230137 | 123253755 | 0 | 0 | 0 | 0 | 2 | 0 | 23618  | 0.242054844 | -1.673220759 | 4.032572473 | -0.414926395 | 0.678195787 | 0.998252924 |
| chr9:125909134-125946577 | exonic     | STRBP                                | 9 | 125909134 | 125946577 | 0 | 0 | 0 | 0 | 2 | 0 | 37443  | 0.242054844 | -1.673220759 | 4.032572473 | -0.414926395 | 0.678195787 | 0.998252924 |
| chr9:125930468-125936121 | exonic     | STRBP                                | 9 | 125930468 | 125936121 | 0 | 0 | 0 | 0 | 2 | 0 | 5653   | 0.242054844 | -1.673220759 | 4.032572473 | -0.414926395 | 0.678195787 | 0.998252924 |
| chr9:126202638-126641300 | exonic     | DENND1A                              | 9 | 126202638 | 126641300 | 0 | 0 | 0 | 0 | 2 | 0 | 438662 | 0.242054844 | -1.673220759 | 4.032572473 | -0.414926395 | 0.678195787 | 0.998252924 |
| chr9:126214554-126220176 | exonic     | DENND1A                              | 9 | 126214554 | 126220176 | 0 | 0 | 0 | 0 | 2 | 0 | 5622   | 0.242054844 | -1.673220759 | 4.032572473 | -0.414926395 | 0.678195787 | 0.998252924 |
| chr9:132792167-132794576 | intronic   | FNBP1                                | 9 | 132792167 | 132794576 | 0 | 0 | 0 | 0 | 2 | 0 | 2409   | 0.242054844 | -1.673220759 | 4.032572473 | -0.414926395 | 0.678195787 | 0.998252924 |
| chr9:133585160-133585795 | intergenic | EXOSC2 (dist=4879), ABL1 (dist=3473) | 9 | 133585160 | 133585795 | 0 | 0 | 0 | 0 | 2 | 0 | 635    | 0.242054844 | -1.673220759 | 4.032572473 | -0.414926395 | 0.678195787 | 0.998252924 |
| chr9:134330462-134334743 | exonic     | PRRC2B                               | 9 | 134330462 | 134334743 | 0 | 0 | 0 | 0 | 2 | 0 | 4281   | 0.242054844 | -1.673220759 | 4.032572473 | -0.414926395 | 0.678195787 | 0.998252924 |
| chr9:139809859-139810550 | intronic   | TRAF2                                | 9 | 139809859 | 139810550 | 0 | 0 | 0 | 0 | 2 | 0 | 691    | 0.242054844 | -1.673220759 | 4.032572473 | -0.414926395 | 0.678195787 | 0.998252924 |
| chr9:14239477-14239896   | intronic   | NFIB                                 | 9 | 14239477  | 14239896  | 0 | 0 | 0 | 0 | 2 | 0 | 419    | 0.242054844 | -1.673220759 | 4.032572473 | -0.414926395 | 0.678195787 | 0.998252924 |

|                          |            |                                          |    |           |           |   |   |   |   |    |   |        |             |              |             |              |             |             |
|--------------------------|------------|------------------------------------------|----|-----------|-----------|---|---|---|---|----|---|--------|-------------|--------------|-------------|--------------|-------------|-------------|
| chr9:15199858-15214247   | exonic     | TTC39B                                   | 9  | 15199858  | 15214247  | 0 | 0 | 0 | 0 | 2  | 0 | 14389  | 0.242054844 | -1.673220759 | 4.032572473 | -0.414926395 | 0.678195787 | 0.998252924 |
| chr9:17309056-17342442   | exonic     | CNTLN                                    | 9  | 17309056  | 17342442  | 0 | 0 | 0 | 0 | 2  | 0 | 33386  | 0.242054844 | -1.673220759 | 4.032572473 | -0.414926395 | 0.678195787 | 0.998252924 |
| chr9:19093168-19096767   | exonic     | HAUS6                                    | 9  | 19093168  | 19096767  | 0 | 0 | 0 | 0 | 2  | 0 | 3599   | 0.242054844 | -1.673220759 | 4.032572473 | -0.414926395 | 0.678195787 | 0.998252924 |
| chr9:19118454-19119647   | splicing   | PLIN2                                    | 9  | 19118454  | 19119647  | 0 | 0 | 0 | 0 | 2  | 0 | 1193   | 0.242054844 | -1.673220759 | 4.032572473 | -0.414926395 | 0.678195787 | 0.998252924 |
| chr9:19276155-19316837   | exonic     | DENND4C                                  | 9  | 19276155  | 19316837  | 0 | 0 | 0 | 0 | 2  | 0 | 40682  | 0.242054844 | -1.673220759 | 4.032572473 | -0.414926395 | 0.678195787 | 0.998252924 |
| chr9:19298053-19300329   | exonic     | DENND4C                                  | 9  | 19298053  | 19300329  | 0 | 0 | 0 | 0 | 2  | 0 | 2276   | 0.242054844 | -1.673220759 | 4.032572473 | -0.414926395 | 0.678195787 | 0.998252924 |
| chr9:26861063-26884883   | exonic     | CAAP1                                    | 9  | 26861063  | 26884883  | 0 | 0 | 0 | 0 | 2  | 0 | 23820  | 0.242054844 | -1.673220759 | 4.032572473 | -0.414926395 | 0.678195787 | 0.998252924 |
| chr9:27101914-27103074   | intergenic | IFT74 (dist=38983), TEK (dist=6065)      | 9  | 27101914  | 27103074  | 0 | 0 | 0 | 0 | 2  | 0 | 1160   | 0.242054844 | -1.673220759 | 4.032572473 | -0.414926395 | 0.678195787 | 0.998252924 |
| chr9:2828674-2838517     | exonic     | PUM3                                     | 9  | 2828674   | 2838517   | 0 | 0 | 0 | 0 | 2  | 0 | 9843   | 0.242054844 | -1.673220759 | 4.032572473 | -0.414926395 | 0.678195787 | 0.998252924 |
| chr9:37126309-37247127   | exonic     | ZCCHC7                                   | 9  | 37126309  | 37247127  | 0 | 0 | 0 | 0 | 2  | 0 | 120818 | 0.242054844 | -1.673220759 | 4.032572473 | -0.414926395 | 0.678195787 | 0.998252924 |
| chr9:4541033-4618898     | exonic     | SLC1A1, SPATA6L                          | 9  | 4541033   | 4618898   | 0 | 0 | 0 | 0 | 2  | 0 | 77865  | 0.242054844 | -1.673220759 | 4.032572473 | -0.414926395 | 0.678195787 | 0.998252924 |
| chr9:77748317-77749258   | exonic     | OSTF1                                    | 9  | 77748317  | 77749258  | 0 | 0 | 0 | 0 | 2  | 0 | 941    | 0.242054844 | -1.673220759 | 4.032572473 | -0.414926395 | 0.678195787 | 0.998252924 |
| chr9:79115832-79142811   | exonic     | GCNT1                                    | 9  | 79115832  | 79142811  | 0 | 0 | 0 | 0 | 2  | 0 | 26979  | 0.242054844 | -1.673220759 | 4.032572473 | -0.414926395 | 0.678195787 | 0.998252924 |
| chr9:79814860-79843180   | exonic     | VPS13A                                   | 9  | 79814860  | 79843180  | 0 | 0 | 0 | 0 | 2  | 0 | 28320  | 0.242054844 | -1.673220759 | 4.032572473 | -0.414926395 | 0.678195787 | 0.998252924 |
| chr9:86284099-86301070   | exonic     | UBQLN1                                   | 9  | 86284099  | 86301070  | 0 | 0 | 0 | 0 | 2  | 0 | 16971  | 0.242054844 | -1.673220759 | 4.032572473 | -0.414926395 | 0.678195787 | 0.998252924 |
| chr9:86586796-86588314   | exonic     | HNRNPK                                   | 9  | 86586796  | 86588314  | 0 | 0 | 0 | 0 | 2  | 0 | 1518   | 0.242054844 | -1.673220759 | 4.032572473 | -0.414926395 | 0.678195787 | 0.998252924 |
| chr9:88292350-88307728   | exonic     | AGTPBP1                                  | 9  | 88292350  | 88307728  | 0 | 0 | 0 | 0 | 2  | 0 | 15378  | 0.242054844 | -1.673220759 | 4.032572473 | -0.414926395 | 0.678195787 | 0.998252924 |
| chr9:98732857-98766983   | exonic     | ERCC6L2                                  | 9  | 98732857  | 98766983  | 0 | 0 | 0 | 0 | 2  | 0 | 34126  | 0.242054844 | -1.673220759 | 4.032572473 | -0.414926395 | 0.678195787 | 0.998252924 |
| chr9:99126745-99130587   | exonic     | SLC35D2                                  | 9  | 99126745  | 99130587  | 0 | 0 | 0 | 0 | 2  | 0 | 3842   | 0.242054844 | -1.673220759 | 4.032572473 | -0.414926395 | 0.678195787 | 0.998252924 |
| chrMT:10746-10954        | intergenic | NONE (dist=NONE), NONE (dist=NONE)       | MT | 10746     | 10954     | 0 | 0 | 0 | 0 | 2  | 0 | 208    | 0.242054844 | -1.673220759 | 4.032572473 | -0.414926395 | 0.678195787 | 0.998252924 |
| chrX:106093254-106114043 | exonic     | TBC1D8B                                  | X  | 106093254 | 106114043 | 0 | 0 | 0 | 0 | 2  | 0 | 20789  | 0.242054844 | -1.673220759 | 4.032572473 | -0.414926395 | 0.678195787 | 0.998252924 |
| chrX:109263580-109352374 | exonic     | TMEM164                                  | X  | 109263580 | 109352374 | 0 | 0 | 0 | 0 | 2  | 0 | 88794  | 0.242054844 | -1.673220759 | 4.032572473 | -0.414926395 | 0.678195787 | 0.998252924 |
| chrX:109263580-109388104 | exonic     | TMEM164                                  | X  | 109263580 | 109388104 | 0 | 0 | 0 | 0 | 2  | 0 | 124524 | 0.242054844 | -1.673220759 | 4.032572473 | -0.414926395 | 0.678195787 | 0.998252924 |
| chrX:122820397-122831601 | exonic     | THOC2                                    | X  | 122820397 | 122831601 | 0 | 0 | 0 | 0 | 2  | 0 | 11204  | 0.242054844 | -1.673220759 | 4.032572473 | -0.414926395 | 0.678195787 | 0.998252924 |
| chrX:123587186-123695667 | exonic     | TENM1                                    | X  | 123587186 | 123695667 | 0 | 0 | 0 | 0 | 2  | 0 | 108481 | 0.242054844 | -1.673220759 | 4.032572473 | -0.414926395 | 0.678195787 | 0.998252924 |
| chrX:130466181-130503026 | intergenic | IGSF1 (dist=42778), OR13H1 (dist=175022) | X  | 130466181 | 130503026 | 0 | 0 | 0 | 0 | 2  | 0 | 36845  | 0.242054844 | -1.673220759 | 4.032572473 | -0.414926395 | 0.678195787 | 0.998252924 |
| chrX:154344332-154348443 | exonic     | BRCC3                                    | X  | 154344332 | 154348443 | 0 | 0 | 0 | 0 | 2  | 0 | 4111   | 0.242054844 | -1.673220759 | 4.032572473 | -0.414926395 | 0.678195787 | 0.998252924 |
| chrX:2871183-2876476     | exonic     | ARSE                                     | X  | 2871183   | 2876476   | 0 | 0 | 0 | 0 | 2  | 0 | 5293   | 0.242054844 | -1.673220759 | 4.032572473 | -0.414926395 | 0.678195787 | 0.998252924 |
| chrX:70587904-70607311   | exonic     | TAF1                                     | X  | 70587904  | 70607311  | 0 | 0 | 0 | 0 | 2  | 0 | 19407  | 0.242054844 | -1.673220759 | 4.032572473 | -0.414926395 | 0.678195787 | 0.998252924 |
| chrX:70782697-70784603   | exonic     | OGT                                      | X  | 70782697  | 70784603  | 0 | 0 | 0 | 0 | 2  | 0 | 1906   | 0.242054844 | -1.673220759 | 4.032572473 | -0.414926395 | 0.678195787 | 0.998252924 |
| chrX:96136577-96369964   | exonic     | DIAPH2, RPA4                             | X  | 96136577  | 96369964  | 0 | 0 | 0 | 0 | 2  | 0 | 233387 | 0.242054844 | -1.673220759 | 4.032572473 | -0.414926395 | 0.678195787 | 0.998252924 |
| chrY:14821320-14834120   | exonic     | USP9Y                                    | Y  | 14821320  | 14834120  | 0 | 0 | 0 | 0 | 2  | 0 | 12800  | 0.242054844 | -1.673220759 | 4.032572473 | -0.414926395 | 0.678195787 | 0.998252924 |
| chr4:39077584-39088347   | exonic     | KLHL5                                    | 4  | 39077584  | 39088347  | 1 | 1 | 2 | 2 | 11 | 2 | 10763  | 2.858162421 | -1.673094118 | 1.602381441 | -1.044129741 | 0.296425368 | 0.998252924 |
| chr1:155316173-155317695 | exonic     | ASH1L                                    | 1  | 155316173 | 155317695 | 0 | 0 | 1 | 0 | 0  | 2 | 1522   | 0.813706243 | -1.67146697  | 3.34608555  | -0.49952906  | 0.61740672  | 0.998252924 |
| chr1:60366636-60381772   | exonic     | CYP2J2                                   | 1  | 60366636  | 60381772  | 0 | 0 | 1 | 0 | 0  | 2 | 15136  | 0.813706243 | -1.67146697  | 3.34608555  | -0.49952906  | 0.61740672  | 0.998252924 |

|                          |            |                                                             |    |           |           |    |   |   |    |    |    |       |             |              |             |              |             |             |
|--------------------------|------------|-------------------------------------------------------------|----|-----------|-----------|----|---|---|----|----|----|-------|-------------|--------------|-------------|--------------|-------------|-------------|
| chr10:98303832-98319493  | exonic     | TM9SF3                                                      | 10 | 98303832  | 98319493  | 0  | 0 | 1 | 0  | 0  | 2  | 15661 | 0.813706243 | -1.67146697  | 3.34608555  | -0.49952906  | 0.61740672  | 0.998252924 |
| chr13:96375495-96377506  | exonic     | DNAJC3                                                      | 13 | 96375495  | 96377506  | 0  | 0 | 1 | 0  | 0  | 2  | 2011  | 0.813706243 | -1.67146697  | 3.34608555  | -0.49952906  | 0.61740672  | 0.998252924 |
| chr14:31613316-31641328  | exonic     | HECTD1                                                      | 14 | 31613316  | 31641328  | 0  | 0 | 1 | 0  | 0  | 2  | 28012 | 0.813706243 | -1.67146697  | 3.34608555  | -0.49952906  | 0.61740672  | 0.998252924 |
| chr14:51710573-51713938  | exonic     | TMX1                                                        | 14 | 51710573  | 51713938  | 0  | 0 | 1 | 0  | 0  | 2  | 3365  | 0.813706243 | -1.67146697  | 3.34608555  | -0.49952906  | 0.61740672  | 0.998252924 |
| chr18:18619432-18629841  | exonic     | ROCK1                                                       | 18 | 18619432  | 18629841  | 0  | 0 | 1 | 0  | 0  | 2  | 10409 | 0.813706243 | -1.67146697  | 3.34608555  | -0.49952906  | 0.61740672  | 0.998252924 |
| chr19:19260034-19261573  | exonic     | MEF2B, MEF2BNB-MEF2B                                        | 19 | 19260034  | 19261573  | 0  | 0 | 1 | 0  | 0  | 2  | 1539  | 0.813706243 | -1.67146697  | 3.34608555  | -0.49952906  | 0.61740672  | 0.998252924 |
| chr2:153514402-153515870 | exonic     | PRPF40A                                                     | 2  | 153514402 | 153515870 | 0  | 0 | 1 | 0  | 0  | 2  | 1468  | 0.813706243 | -1.67146697  | 3.34608555  | -0.49952906  | 0.61740672  | 0.998252924 |
| chr2:170413696-170419860 | exonic     | FASTKD1                                                     | 2  | 170413696 | 170419860 | 0  | 0 | 1 | 0  | 0  | 2  | 6164  | 0.813706243 | -1.67146697  | 3.34608555  | -0.49952906  | 0.61740672  | 0.998252924 |
| chr2:238896604-238903451 | exonic     | UBE2F                                                       | 2  | 238896604 | 238903451 | 0  | 0 | 1 | 0  | 0  | 2  | 6847  | 0.813706243 | -1.67146697  | 3.34608555  | -0.49952906  | 0.61740672  | 0.998252924 |
| chr2:64199299-64211153   | exonic     | VPS54                                                       | 2  | 64199299  | 64211153  | 0  | 0 | 1 | 0  | 0  | 2  | 11854 | 0.813706243 | -1.67146697  | 3.34608555  | -0.49952906  | 0.61740672  | 0.998252924 |
| chr6:35825037-35840505   | exonic     | SRPK1                                                       | 6  | 35825037  | 35840505  | 0  | 0 | 1 | 0  | 0  | 2  | 15468 | 0.813706243 | -1.67146697  | 3.34608555  | -0.49952906  | 0.61740672  | 0.998252924 |
| chr7:77200394-77227218   | exonic     | PTPN12                                                      | 7  | 77200394  | 77227218  | 6  | 0 | 2 | 0  | 10 | 5  | 26824 | 0.813706243 | -1.67146697  | 3.34608555  | -0.49952906  | 0.61740672  | 0.998252924 |
| chr8:26217684-26223922   | exonic     | PPP2R2A                                                     | 8  | 26217684  | 26223922  | 0  | 0 | 1 | 0  | 0  | 2  | 6238  | 0.813706243 | -1.67146697  | 3.34608555  | -0.49952906  | 0.61740672  | 0.998252924 |
| chrX:76937011-76940498   | exonic     | ATRX                                                        | X  | 76937011  | 76940498  | 2  | 0 | 0 | 1  | 4  | 1  | 3487  | 1.156613567 | -1.666631879 | 2.494314104 | -0.668172415 | 0.504023541 | 0.998252924 |
| chrX:93780210-93784482   | intergenic | <small>FAM133A (dist=812937), BRDTP1 (dist=1807603)</small> | X  | 93780210  | 93784482  | 12 | 0 | 4 | 17 | 18 | 12 | 4272  | 10.02132986 | -1.664996059 | 1.070732779 | -1.555006152 | 0.119944604 | 0.998252924 |
| chr7:16415716-16445962   | exonic     | ISPD                                                        | 7  | 16415716  | 16445962  | 0  | 1 | 1 | 0  | 0  | 4  | 30246 | 1.60441926  | -1.657830192 | 2.500716017 | -0.662942206 | NA          | NA          |
| chr1:87188222-87190088   | exonic     | SH3GLB1                                                     | 1  | 87188222  | 87190088  | 0  | 0 | 1 | 5  | 0  | 0  | 1866  | 0.728825951 | -1.656822567 | 3.427402155 | -0.483404775 | NA          | NA          |
| chr3:32586367-32587457   | exonic     | DYNC1LI1                                                    | 3  | 32586367  | 32587457  | 0  | 0 | 1 | 5  | 0  | 0  | 1090  | 0.728825951 | -1.656822567 | 3.427402155 | -0.483404775 | NA          | NA          |
| chr4:120473704-120528452 | exonic     | PDE5A                                                       | 4  | 120473704 | 120528452 | 0  | 0 | 1 | 5  | 0  | 0  | 54748 | 0.728825951 | -1.656822567 | 3.427402155 | -0.483404775 | NA          | NA          |
| chr4:129873923-129920949 | exonic     | SCLT1                                                       | 4  | 129873923 | 129920949 | 0  | 0 | 1 | 5  | 0  | 0  | 47026 | 0.728825951 | -1.656822567 | 3.427402155 | -0.483404775 | NA          | NA          |
| chr8:16935291-16948093   | exonic     | MICU3                                                       | 8  | 16935291  | 16948093  | 0  | 0 | 1 | 5  | 0  | 0  | 12802 | 0.728825951 | -1.656822567 | 3.427402155 | -0.483404775 | NA          | NA          |
| chr3:174241203-174271547 | intergenic | <small>NLGN1 (dist=240064), NAALADL2 (dist=305564)</small>  | 3  | 174241203 | 174271547 | 2  | 0 | 0 | 0  | 7  | 0  | 30344 | 1.105165838 | -1.655441812 | 2.959497332 | -0.559365874 | NA          | NA          |
| chr8:17125766-17143936   | exonic     | VPS37A                                                      | 8  | 17125766  | 17143936  | 2  | 0 | 0 | 0  | 7  | 0  | 18170 | 1.105165838 | -1.655441812 | 2.959497332 | -0.559365874 | NA          | NA          |
| chr14:36121010-36194359  | exonic     | RALGAPA1                                                    | 14 | 36121010  | 36194359  | 0  | 1 | 0 | 3  | 0  | 0  | 73349 | 0.705832725 | -1.655326116 | 3.467605765 | -0.477368602 | NA          | NA          |
| chr14:50266192-50272851  | exonic     | NEMF                                                        | 14 | 50266192  | 50272851  | 0  | 1 | 0 | 5  | 0  | 0  | 6659  | 0.705832725 | -1.655326116 | 3.467605765 | -0.477368602 | NA          | NA          |
| chr17:526772-530556      | exonic     | VPS53                                                       | 17 | 526772    | 530556    | 0  | 1 | 0 | 5  | 0  | 0  | 3784  | 0.705832725 | -1.655326116 | 3.467605765 | -0.477368602 | NA          | NA          |
| chr18:8244055-8253412    | exonic     | PTPRM                                                       | 18 | 8244055   | 8253412   | 0  | 1 | 0 | 5  | 0  | 0  | 9357  | 0.705832725 | -1.655326116 | 3.467605765 | -0.477368602 | NA          | NA          |
| chr21:44514580-44515853  | exonic     | U2AF1                                                       | 21 | 44514580  | 44515853  | 0  | 1 | 0 | 5  | 0  | 0  | 1273  | 0.705832725 | -1.655326116 | 3.467605765 | -0.477368602 | NA          | NA          |
| chr3:13542212-13544480   | exonic     | HDAC11                                                      | 3  | 13542212  | 13544480  | 0  | 1 | 0 | 5  | 0  | 0  | 2268  | 0.705832725 | -1.655326116 | 3.467605765 | -0.477368602 | NA          | NA          |
| chr2:200245086-200298237 | exonic     | SATB2                                                       | 2  | 200245086 | 200298237 | 4  | 0 | 0 | 2  | 12 | 0  | 53151 | 2.180899603 | -1.653622273 | 2.123866345 | -0.778590553 | NA          | NA          |
| chr1:39913103-39914435   | exonic     | MACF1                                                       | 1  | 39913103  | 39914435  | 1  | 0 | 0 | 5  | 0  | 0  | 1332  | 0.660543869 | -1.652344363 | 3.551958019 | -0.465192537 | NA          | NA          |
| chr10:7679190-7697638    | exonic     | ITIH5                                                       | 10 | 7679190   | 7697638   | 1  | 0 | 0 | 5  | 0  | 0  | 18448 | 0.660543869 | -1.652344363 | 3.551958019 | -0.465192537 | NA          | NA          |
| chr8:17820609-17824679   | exonic     | PCM1                                                        | 8  | 17820609  | 17824679  | 1  | 0 | 0 | 5  | 0  | 0  | 4070  | 0.660543869 | -1.652344363 | 3.551958019 | -0.465192537 | NA          | NA          |
| chr9:5944870-5969436     | exonic     | KIAA2026                                                    | 9  | 5944870   | 5969436   | 1  | 0 | 0 | 5  | 0  | 0  | 24566 | 0.660543869 | -1.652344363 | 3.551958019 | -0.465192537 | NA          | NA          |
| chrX:55755726-55758019   | exonic     | RRAGB                                                       | X  | 55755726  | 55758019  | 1  | 0 | 0 | 5  | 0  | 0  | 2293  | 0.660543869 | -1.652344363 | 3.551958019 | -0.465192537 | NA          | NA          |

|                           |              |                                               |    |           |           |   |   |   |    |    |   |       |             |              |             |              |             |             |
|---------------------------|--------------|-----------------------------------------------|----|-----------|-----------|---|---|---|----|----|---|-------|-------------|--------------|-------------|--------------|-------------|-------------|
| chr18:42281139-42281797   | exonic       | SETBP1                                        | 18 | 42281139  | 42281797  | 0 | 0 | 4 | 14 | 4  | 1 | 658   | 3.06976379  | -1.639805959 | 1.767730264 | -0.927633583 | NA          | NA          |
| chr6:151669845-151674887  | exonic       | AKAP12                                        | 6  | 151669845 | 151674887 | 3 | 0 | 1 | 7  | 2  | 3 | 5042  | 2.49512022  | -1.632456297 | 1.731650245 | -0.9427171   | 0.345825624 | 0.998252924 |
| chr19:58772217-58775042   | exonic       | ZNF544                                        | 19 | 58772217  | 58775042  | 0 | 3 | 0 | 2  | 11 | 0 | 2825  | 2.066751807 | -1.630372209 | 2.174579432 | -0.749741392 | NA          | NA          |
| chr1:89206670-89251896    | exonic       | PKN2                                          | 1  | 89206670  | 89251896  | 1 | 0 | 1 | 9  | 0  | 0 | 45226 | 1.283058435 | -1.625811734 | 2.61809885  | -0.620989438 | NA          | NA          |
| chr1:51860052-51887530    | exonic       | EPS15                                         | 1  | 51860052  | 51887530  | 2 | 0 | 0 | 3  | 2  | 1 | 27478 | 1.127181493 | -1.620144572 | 2.482956883 | -0.652506124 | 0.514074723 | 0.998252924 |
| chr6:139228631-139237113  | exonic       | REPS1                                         | 6  | 139228631 | 139237113 | 2 | 0 | 0 | 0  | 0  | 1 | 8482  | 1.127181493 | -1.620144572 | 2.482956883 | -0.652506124 | 0.514074723 | 0.998252924 |
| chr1:1572443-1635585      | exonic       | CDK11A, CDK11B, SLC35E2B                      | 1  | 1572443   | 1635585   | 2 | 0 | 0 | 0  | 0  | 3 | 63142 | 1.182629712 | -1.618713512 | 2.939287699 | -0.550716254 | NA          | NA          |
| chr12:1399017-1481143     | exonic       | ERC1                                          | 12 | 1399017   | 1481143   | 2 | 0 | 0 | 0  | 0  | 3 | 82126 | 1.182629712 | -1.618713512 | 2.939287699 | -0.550716254 | NA          | NA          |
| chr17:61368700-61370014   | intronic     | TANC2                                         | 17 | 61368700  | 61370014  | 2 | 0 | 0 | 0  | 0  | 3 | 1314  | 1.182629712 | -1.618713512 | 2.939287699 | -0.550716254 | NA          | NA          |
| chr17:64059080-64066119   | exonic       | CEP112                                        | 17 | 64059080  | 64066119  | 2 | 0 | 0 | 0  | 0  | 3 | 7039  | 1.182629712 | -1.618713512 | 2.939287699 | -0.550716254 | NA          | NA          |
| chr2:24090704-24108699    | exonic       | ATAD2B                                        | 2  | 24090704  | 24108699  | 2 | 0 | 0 | 0  | 0  | 3 | 17995 | 1.182629712 | -1.618713512 | 2.939287699 | -0.550716254 | NA          | NA          |
| chr7:32852369-32860353    | intergenic   | LINC00997 (dist=49833), DPY19L1P2 (dist=5561) | 7  | 32852369  | 32860353  | 2 | 0 | 0 | 0  | 0  | 3 | 7984  | 1.182629712 | -1.618713512 | 2.939287699 | -0.550716254 | NA          | NA          |
| chr19:21216261-21216990   | exonic       | ZNF430                                        | 19 | 21216261  | 21216990  | 4 | 0 | 0 | 15 | 0  | 0 | 729   | 2.110618548 | -1.617987314 | 3.842087011 | -0.421121986 | NA          | NA          |
| chr8:99538969-99608397    | exonic       | STK3                                          | 8  | 99538969  | 99608397  | 1 | 1 | 0 | 6  | 0  | 1 | 69428 | 1.249349662 | -1.617024914 | 2.455736941 | -0.658468294 | 0.510237264 | 0.998252924 |
| chr1:213037066-213058738  | exonic       | FLVCR1                                        | 1  | 213037066 | 213058738 | 0 | 0 | 0 | 1  | 1  | 0 | 21672 | 0.227338807 | -1.613310929 | 4.035567574 | -0.399772993 | 0.689323724 | 0.998252924 |
| chr1:231902885-231906816  | exonic       | DISC1                                         | 1  | 231902885 | 231906816 | 0 | 0 | 0 | 1  | 1  | 0 | 3931  | 0.227338807 | -1.613310929 | 4.035567574 | -0.399772993 | 0.689323724 | 0.998252924 |
| chr1:245020899-245022676  | exonic       | HNRNPU                                        | 1  | 245020899 | 245022676 | 0 | 0 | 0 | 1  | 1  | 0 | 1777  | 0.227338807 | -1.613310929 | 4.035567574 | -0.399772993 | 0.689323724 | 0.998252924 |
| chr1:24857707-24859744    | exonic       | RCAN3                                         | 1  | 24857707  | 24859744  | 0 | 0 | 0 | 1  | 1  | 0 | 2037  | 0.227338807 | -1.613310929 | 4.035567574 | -0.399772993 | 0.689323724 | 0.998252924 |
| chr1:46079767-46082065    | exonic       | NASP                                          | 1  | 46079767  | 46082065  | 0 | 0 | 0 | 1  | 1  | 0 | 2298  | 0.227338807 | -1.613310929 | 4.035567574 | -0.399772993 | 0.689323724 | 0.998252924 |
| chr1:63294710-63307218    | exonic       | ATG4C                                         | 1  | 63294710  | 63307218  | 0 | 0 | 0 | 1  | 1  | 0 | 12508 | 0.227338807 | -1.613310929 | 4.035567574 | -0.399772993 | 0.689323724 | 0.998252924 |
| chr1:70736538-70771973    | exonic       | ANKRD13C                                      | 1  | 70736538  | 70771973  | 0 | 0 | 0 | 1  | 1  | 0 | 35435 | 0.227338807 | -1.613310929 | 4.035567574 | -0.399772993 | 0.689323724 | 0.998252924 |
| chr1:8616533-8674745      | exonic       | RERE                                          | 1  | 8616533   | 8674745   | 0 | 0 | 0 | 1  | 1  | 0 | 58212 | 0.227338807 | -1.613310929 | 4.035567574 | -0.399772993 | 0.689323724 | 0.998252924 |
| chr1:93672663-93672955    | exonic       | CCDC18                                        | 1  | 93672663  | 93672955  | 0 | 0 | 0 | 1  | 1  | 0 | 292   | 0.227338807 | -1.613310929 | 4.035567574 | -0.399772993 | 0.689323724 | 0.998252924 |
| chr10:104120778-104123555 | exonic       | GBF1                                          | 10 | 104120778 | 104123555 | 0 | 0 | 0 | 1  | 1  | 0 | 2777  | 0.227338807 | -1.613310929 | 4.035567574 | -0.399772993 | 0.689323724 | 0.998252924 |
| chr10:120467003-120489922 | exonic       | CACUL1                                        | 10 | 120467003 | 120489922 | 0 | 0 | 0 | 1  | 1  | 0 | 22919 | 0.227338807 | -1.613310929 | 4.035567574 | -0.399772993 | 0.689323724 | 0.998252924 |
| chr10:127500782-127505094 | exonic       | UROS                                          | 10 | 127500782 | 127505094 | 0 | 0 | 0 | 1  | 1  | 0 | 4312  | 0.227338807 | -1.613310929 | 4.035567574 | -0.399772993 | 0.689323724 | 0.998252924 |
| chr10:24813251-24817048   | exonic       | KIAA1217                                      | 10 | 24813251  | 24817048  | 0 | 0 | 0 | 1  | 1  | 0 | 3797  | 0.227338807 | -1.613310929 | 4.035567574 | -0.399772993 | 0.689323724 | 0.998252924 |
| chr10:26789747-26802589   | exonic       | APBB1IP                                       | 10 | 26789747  | 26802589  | 0 | 0 | 0 | 1  | 1  | 0 | 12842 | 0.227338807 | -1.613310929 | 4.035567574 | -0.399772993 | 0.689323724 | 0.998252924 |
| chr10:26849033-26851358   | exonic       | APBB1IP                                       | 10 | 26849033  | 26851358  | 0 | 0 | 0 | 1  | 1  | 0 | 2325  | 0.227338807 | -1.613310929 | 4.035567574 | -0.399772993 | 0.689323724 | 0.998252924 |
| chr10:47232155-47235609   | ncRNA_exonic | BMS1P6                                        | 10 | 47232155  | 47235609  | 0 | 0 | 0 | 1  | 1  | 0 | 3454  | 0.227338807 | -1.613310929 | 4.035567574 | -0.399772993 | 0.689323724 | 0.998252924 |
| chr10:48194832-48197195   | ncRNA_exonic | BMS1P6                                        | 10 | 48194832  | 48197195  | 0 | 0 | 0 | 1  | 1  | 0 | 2363  | 0.227338807 | -1.613310929 | 4.035567574 | -0.399772993 | 0.689323724 | 0.998252924 |
| chr11:14852243-14882912   | exonic       | PDE3B                                         | 11 | 14852243  | 14882912  | 0 | 0 | 0 | 1  | 1  | 0 | 30669 | 0.227338807 | -1.613310929 | 4.035567574 | -0.399772993 | 0.689323724 | 0.998252924 |
| chr11:16068059-16077447   | exonic       | SOX6                                          | 11 | 16068059  | 16077447  | 0 | 0 | 0 | 1  | 1  | 0 | 9388  | 0.227338807 | -1.613310929 | 4.035567574 | -0.399772993 | 0.689323724 | 0.998252924 |
| chr11:18316566-18319264   | exonic       | HPS5                                          | 11 | 18316566  | 18319264  | 0 | 0 | 0 | 1  | 1  | 0 | 2698  | 0.227338807 | -1.613310929 | 4.035567574 | -0.399772993 | 0.689323724 | 0.998252924 |
| chr11:66947549-66999431   | exonic       | KDM2A                                         | 11 | 66947549  | 66999431  | 0 | 0 | 0 | 1  | 1  | 0 | 51882 | 0.227338807 | -1.613310929 | 4.035567574 | -0.399772993 | 0.689323724 | 0.998252924 |

|                           |        |          |    |           |           |   |   |   |   |   |   |        |             |              |             |              |             |             |
|---------------------------|--------|----------|----|-----------|-----------|---|---|---|---|---|---|--------|-------------|--------------|-------------|--------------|-------------|-------------|
| chr11:77815025-77820627   | exonic | ALG8     | 11 | 77815025  | 77820627  | 0 | 0 | 0 | 1 | 1 | 0 | 5602   | 0.227338807 | -1.613310929 | 4.035567574 | -0.399772993 | 0.689323724 | 0.998252924 |
| chr12:1003727-1006847     | exonic | WNK1     | 12 | 1003727   | 1006847   | 0 | 0 | 0 | 1 | 1 | 0 | 3120   | 0.227338807 | -1.613310929 | 4.035567574 | -0.399772993 | 0.689323724 | 0.998252924 |
| chr12:105504902-105521067 | exonic | KIAA1033 | 12 | 105504902 | 105521067 | 0 | 0 | 0 | 1 | 1 | 0 | 16165  | 0.227338807 | -1.613310929 | 4.035567574 | -0.399772993 | 0.689323724 | 0.998252924 |
| chr12:132237667-132241189 | exonic | SFSWAP   | 12 | 132237667 | 132241189 | 0 | 0 | 0 | 1 | 1 | 0 | 3522   | 0.227338807 | -1.613310929 | 4.035567574 | -0.399772993 | 0.689323724 | 0.998252924 |
| chr12:94562928-94603480   | exonic | PLXNC1   | 12 | 94562928  | 94603480  | 0 | 0 | 0 | 1 | 1 | 0 | 40552  | 0.227338807 | -1.613310929 | 4.035567574 | -0.399772993 | 0.689323724 | 0.998252924 |
| chr13:42245081-42277547   | exonic | VWA8     | 13 | 42245081  | 42277547  | 0 | 0 | 0 | 1 | 1 | 0 | 32466  | 0.227338807 | -1.613310929 | 4.035567574 | -0.399772993 | 0.689323724 | 0.998252924 |
| chr13:73395986-73428293   | exonic | PIBF1    | 13 | 73395986  | 73428293  | 0 | 0 | 0 | 1 | 1 | 0 | 32307  | 0.227338807 | -1.613310929 | 4.035567574 | -0.399772993 | 0.689323724 | 0.998252924 |
| chr13:77825285-77838137   | exonic | MYCBP2   | 13 | 77825285  | 77838137  | 0 | 0 | 0 | 1 | 1 | 0 | 12852  | 0.227338807 | -1.613310929 | 4.035567574 | -0.399772993 | 0.689323724 | 0.998252924 |
| chr14:24679553-24681035   | exonic | CHMP4A   | 14 | 24679553  | 24681035  | 0 | 0 | 0 | 1 | 1 | 0 | 1482   | 0.227338807 | -1.613310929 | 4.035567574 | -0.399772993 | 0.689323724 | 0.998252924 |
| chr14:37716307-37838829   | exonic | MIPOL1   | 14 | 37716307  | 37838829  | 0 | 0 | 0 | 1 | 1 | 0 | 122522 | 0.227338807 | -1.613310929 | 4.035567574 | -0.399772993 | 0.689323724 | 0.998252924 |
| chr14:39782543-39796226   | exonic | CTAGE5   | 14 | 39782543  | 39796226  | 0 | 0 | 0 | 1 | 1 | 0 | 13683  | 0.227338807 | -1.613310929 | 4.035567574 | -0.399772993 | 0.689323724 | 0.998252924 |
| chr14:50301080-50307584   | exonic | NEMF     | 14 | 50301080  | 50307584  | 0 | 0 | 0 | 1 | 1 | 0 | 6504   | 0.227338807 | -1.613310929 | 4.035567574 | -0.399772993 | 0.689323724 | 0.998252924 |
| chr14:57740961-57741607   | exonic | AP5M1    | 14 | 57740961  | 57741607  | 0 | 0 | 0 | 1 | 1 | 0 | 646    | 0.227338807 | -1.613310929 | 4.035567574 | -0.399772993 | 0.689323724 | 0.998252924 |
| chr15:40863802-40864099   | exonic | RPUSD2   | 15 | 40863802  | 40864099  | 0 | 0 | 0 | 1 | 1 | 0 | 297    | 0.227338807 | -1.613310929 | 4.035567574 | -0.399772993 | 0.689323724 | 0.998252924 |
| chr15:41535864-41555081   | exonic | CHP1     | 15 | 41535864  | 41555081  | 0 | 0 | 0 | 1 | 1 | 0 | 19217  | 0.227338807 | -1.613310929 | 4.035567574 | -0.399772993 | 0.689323724 | 0.998252924 |
| chr15:50866470-50867986   | exonic | TRPM7    | 15 | 50866470  | 50867986  | 0 | 0 | 0 | 1 | 1 | 0 | 1516   | 0.227338807 | -1.613310929 | 4.035567574 | -0.399772993 | 0.689323724 | 0.998252924 |
| chr15:59323002-59350749   | exonic | RNF111   | 15 | 59323002  | 59350749  | 0 | 0 | 0 | 1 | 1 | 0 | 27747  | 0.227338807 | -1.613310929 | 4.035567574 | -0.399772993 | 0.689323724 | 0.998252924 |
| chr15:60745801-60758912   | exonic | ICE2     | 15 | 60745801  | 60758912  | 0 | 0 | 0 | 1 | 1 | 0 | 13111  | 0.227338807 | -1.613310929 | 4.035567574 | -0.399772993 | 0.689323724 | 0.998252924 |
| chr15:68434283-68446033   | exonic | PIAS1    | 15 | 68434283  | 68446033  | 0 | 0 | 0 | 1 | 1 | 0 | 11750  | 0.227338807 | -1.613310929 | 4.035567574 | -0.399772993 | 0.689323724 | 0.998252924 |
| chr15:78305164-78310299   | exonic | TBC1D2B  | 15 | 78305164  | 78310299  | 0 | 0 | 0 | 1 | 1 | 0 | 5135   | 0.227338807 | -1.613310929 | 4.035567574 | -0.399772993 | 0.689323724 | 0.998252924 |
| chr15:85641178-85658718   | exonic | PDE8A    | 15 | 85641178  | 85658718  | 0 | 0 | 0 | 1 | 1 | 0 | 17540  | 0.227338807 | -1.613310929 | 4.035567574 | -0.399772993 | 0.689323724 | 0.998252924 |
| chr16:23494243-23505699   | exonic | GGA2     | 16 | 23494243  | 23505699  | 0 | 0 | 0 | 1 | 1 | 0 | 11456  | 0.227338807 | -1.613310929 | 4.035567574 | -0.399772993 | 0.689323724 | 0.998252924 |
| chr16:4701963-4707364     | exonic | MGRN1    | 16 | 4701963   | 4707364   | 0 | 0 | 0 | 1 | 1 | 0 | 5401   | 0.227338807 | -1.613310929 | 4.035567574 | -0.399772993 | 0.689323724 | 0.998252924 |
| chr16:68191771-68225678   | exonic | NFATC3   | 16 | 68191771  | 68225678  | 0 | 0 | 0 | 1 | 1 | 0 | 33907  | 0.227338807 | -1.613310929 | 4.035567574 | -0.399772993 | 0.689323724 | 0.998252924 |
| chr17:15974722-15976883   | exonic | NCOR1    | 17 | 15974722  | 15976883  | 0 | 0 | 0 | 1 | 1 | 0 | 2161   | 0.227338807 | -1.613310929 | 4.035567574 | -0.399772993 | 0.689323724 | 0.998252924 |
| chr17:20149238-20163607   | exonic | SPECC1   | 17 | 20149238  | 20163607  | 0 | 0 | 0 | 1 | 1 | 0 | 14369  | 0.227338807 | -1.613310929 | 4.035567574 | -0.399772993 | 0.689323724 | 0.998252924 |
| chr17:27809214-27818883   | exonic | TAOK1    | 17 | 27809214  | 27818883  | 0 | 0 | 0 | 1 | 1 | 0 | 9669   | 0.227338807 | -1.613310929 | 4.035567574 | -0.399772993 | 0.689323724 | 0.998252924 |
| chr17:35931889-35945538   | exonic | SYNRG    | 17 | 35931889  | 35945538  | 0 | 0 | 0 | 1 | 1 | 0 | 13649  | 0.227338807 | -1.613310929 | 4.035567574 | -0.399772993 | 0.689323724 | 0.998252924 |
| chr17:4109615-4139185     | exonic | ANKFY1   | 17 | 4109615   | 4139185   | 0 | 0 | 0 | 1 | 1 | 0 | 29570  | 0.227338807 | -1.613310929 | 4.035567574 | -0.399772993 | 0.689323724 | 0.998252924 |
| chr17:49071124-49072894   | exonic | SPAG9    | 17 | 49071124  | 49072894  | 0 | 0 | 0 | 1 | 1 | 0 | 1770   | 0.227338807 | -1.613310929 | 4.035567574 | -0.399772993 | 0.689323724 | 0.998252924 |
| chr17:61833599-61843554   | exonic | CCDC47   | 17 | 61833599  | 61843554  | 0 | 0 | 0 | 1 | 1 | 0 | 9955   | 0.227338807 | -1.613310929 | 4.035567574 | -0.399772993 | 0.689323724 | 0.998252924 |
| chr17:6510192-6515468     | exonic | KIAA0753 | 17 | 6510192   | 6515468   | 0 | 0 | 0 | 1 | 1 | 0 | 5276   | 0.227338807 | -1.613310929 | 4.035567574 | -0.399772993 | 0.689323724 | 0.998252924 |
| chr17:65156376-65175042   | exonic | HELZ     | 17 | 65156376  | 65175042  | 0 | 0 | 0 | 1 | 1 | 0 | 18666  | 0.227338807 | -1.613310929 | 4.035567574 | -0.399772993 | 0.689323724 | 0.998252924 |
| chr17:78313000-78314156   | exonic | RNF213   | 17 | 78313000  | 78314156  | 0 | 0 | 0 | 1 | 1 | 0 | 1156   | 0.227338807 | -1.613310929 | 4.035567574 | -0.399772993 | 0.689323724 | 0.998252924 |
| chr18:12356692-12358942   | exonic | AFG3L2   | 18 | 12356692  | 12358942  | 0 | 0 | 0 | 1 | 1 | 0 | 2250   | 0.227338807 | -1.613310929 | 4.035567574 | -0.399772993 | 0.689323724 | 0.998252924 |

|                          |              |               |    |           |           |   |   |   |   |   |   |       |             |              |             |              |             |             |
|--------------------------|--------------|---------------|----|-----------|-----------|---|---|---|---|---|---|-------|-------------|--------------|-------------|--------------|-------------|-------------|
| chr18:33722243-33744630  | exonic       | ELP2          | 18 | 33722243  | 33744630  | 0 | 0 | 0 | 1 | 1 | 0 | 22387 | 0.227338807 | -1.613310929 | 4.035567574 | -0.399772993 | 0.689323724 | 0.998252924 |
| chr18:59888269-59899660  | exonic       | KIAA1468      | 18 | 59888269  | 59899660  | 0 | 0 | 0 | 1 | 1 | 0 | 11391 | 0.227338807 | -1.613310929 | 4.035567574 | -0.399772993 | 0.689323724 | 0.998252924 |
| chr18:6213147-6244587    | exonic       | L3MBTL4       | 18 | 6213147   | 6244587   | 0 | 0 | 0 | 1 | 1 | 0 | 31440 | 0.227338807 | -1.613310929 | 4.035567574 | -0.399772993 | 0.689323724 | 0.998252924 |
| chr19:41231244-41235320  | exonic       | ITPKC         | 19 | 41231244  | 41235320  | 0 | 0 | 0 | 1 | 1 | 0 | 4076  | 0.227338807 | -1.613310929 | 4.035567574 | -0.399772993 | 0.689323724 | 0.998252924 |
| chr2:107051092-107051658 | exonic       | RGPD3         | 2  | 107051092 | 107051658 | 0 | 0 | 0 | 1 | 1 | 0 | 566   | 0.227338807 | -1.613310929 | 4.035567574 | -0.399772993 | 0.689323724 | 0.998252924 |
| chr2:109369453-109370019 | exonic       | RANBP2        | 2  | 109369453 | 109370019 | 0 | 0 | 0 | 1 | 1 | 0 | 566   | 0.227338807 | -1.613310929 | 4.035567574 | -0.399772993 | 0.689323724 | 0.998252924 |
| chr2:11375827-11376088   | exonic       | ROCK2         | 2  | 11375827  | 11376088  | 0 | 0 | 0 | 1 | 1 | 0 | 261   | 0.227338807 | -1.613310929 | 4.035567574 | -0.399772993 | 0.689323724 | 0.998252924 |
| chr2:131829427-131840230 | exonic       | FAM168B       | 2  | 131829427 | 131840230 | 0 | 0 | 0 | 1 | 1 | 0 | 10803 | 0.227338807 | -1.613310929 | 4.035567574 | -0.399772993 | 0.689323724 | 0.998252924 |
| chr2:135878388-135893502 | exonic       | RAB3GAP1      | 2  | 135878388 | 135893502 | 0 | 0 | 0 | 1 | 1 | 0 | 15114 | 0.227338807 | -1.613310929 | 4.035567574 | -0.399772993 | 0.689323724 | 0.998252924 |
| chr2:158617391-158630699 | exonic       | ACVR1         | 2  | 158617391 | 158630699 | 0 | 0 | 0 | 1 | 1 | 0 | 13308 | 0.227338807 | -1.613310929 | 4.035567574 | -0.399772993 | 0.689323724 | 0.998252924 |
| chr2:168994597-169023917 | exonic       | STK39         | 2  | 168994597 | 169023917 | 0 | 0 | 0 | 1 | 1 | 0 | 29320 | 0.227338807 | -1.613310929 | 4.035567574 | -0.399772993 | 0.689323724 | 0.998252924 |
| chr2:175337692-175346715 | exonic       | GPR155        | 2  | 175337692 | 175346715 | 0 | 0 | 0 | 1 | 1 | 0 | 9023  | 0.227338807 | -1.613310929 | 4.035567574 | -0.399772993 | 0.689323724 | 0.998252924 |
| chr2:180309602-180311497 | exonic       | ZNF385B       | 2  | 180309602 | 180311497 | 0 | 0 | 0 | 1 | 1 | 0 | 1895  | 0.227338807 | -1.613310929 | 4.035567574 | -0.399772993 | 0.689323724 | 0.998252924 |
| chr2:196912075-196915973 | exonic       | DNAH7         | 2  | 196912075 | 196915973 | 0 | 0 | 0 | 1 | 1 | 0 | 3898  | 0.227338807 | -1.613310929 | 4.035567574 | -0.399772993 | 0.689323724 | 0.998252924 |
| chr2:213886716-213921823 | exonic       | IKZF2         | 2  | 213886716 | 213921823 | 0 | 0 | 0 | 1 | 1 | 0 | 35107 | 0.227338807 | -1.613310929 | 4.035567574 | -0.399772993 | 0.689323724 | 0.998252924 |
| chr2:234070369-234073070 | exonic       | INPP5D        | 2  | 234070369 | 234073070 | 0 | 0 | 0 | 1 | 1 | 0 | 2701  | 0.227338807 | -1.613310929 | 4.035567574 | -0.399772993 | 0.689323724 | 0.998252924 |
| chr2:32323864-32352091   | exonic       | SPAST         | 2  | 32323864  | 32352091  | 0 | 0 | 0 | 1 | 1 | 0 | 28227 | 0.227338807 | -1.613310929 | 4.035567574 | -0.399772993 | 0.689323724 | 0.998252924 |
| chr2:36691676-36706837   | exonic       | CRIM1         | 2  | 36691676  | 36706837  | 0 | 0 | 0 | 1 | 1 | 0 | 15161 | 0.227338807 | -1.613310929 | 4.035567574 | -0.399772993 | 0.689323724 | 0.998252924 |
| chr2:37246951-37247979   | exonic       | HEATR5B       | 2  | 37246951  | 37247979  | 0 | 0 | 0 | 1 | 1 | 0 | 1028  | 0.227338807 | -1.613310929 | 4.035567574 | -0.399772993 | 0.689323724 | 0.998252924 |
| chr2:48701821-48718309   | exonic       | PPP1R21       | 2  | 48701821  | 48718309  | 0 | 0 | 0 | 1 | 1 | 0 | 16488 | 0.227338807 | -1.613310929 | 4.035567574 | -0.399772993 | 0.689323724 | 0.998252924 |
| chr20:5560653-5574057    | exonic       | GPCPD1        | 20 | 5560653   | 5574057   | 0 | 0 | 0 | 1 | 1 | 0 | 13404 | 0.227338807 | -1.613310929 | 4.035567574 | -0.399772993 | 0.689323724 | 0.998252924 |
| chr21:45457672-45475774  | exonic       | TRAPPC10      | 21 | 45457672  | 45475774  | 0 | 0 | 0 | 1 | 1 | 0 | 18102 | 0.227338807 | -1.613310929 | 4.035567574 | -0.399772993 | 0.689323724 | 0.998252924 |
| chr22:18165979-18185152  | exonic       | BCL2L13       | 22 | 18165979  | 18185152  | 0 | 0 | 0 | 1 | 1 | 0 | 19173 | 0.227338807 | -1.613310929 | 4.035567574 | -0.399772993 | 0.689323724 | 0.998252924 |
| chr22:24056373-24057381  | ncRNA_exonic | GUSBP11       | 22 | 24056373  | 24057381  | 0 | 0 | 0 | 1 | 1 | 0 | 1008  | 0.227338807 | -1.613310929 | 4.035567574 | -0.399772993 | 0.689323724 | 0.998252924 |
| chr22:29533329-29538088  | exonic       | KREMEN1       | 22 | 29533329  | 29538088  | 0 | 0 | 0 | 1 | 1 | 0 | 4759  | 0.227338807 | -1.613310929 | 4.035567574 | -0.399772993 | 0.689323724 | 0.998252924 |
| chr22:46739158-46742441  | exonic       | TRMU          | 22 | 46739158  | 46742441  | 0 | 0 | 0 | 1 | 1 | 0 | 3283  | 0.227338807 | -1.613310929 | 4.035567574 | -0.399772993 | 0.689323724 | 0.998252924 |
| chr3:132153381-132166783 | exonic       | DNAJC13       | 3  | 132153381 | 132166783 | 0 | 0 | 0 | 1 | 1 | 0 | 13402 | 0.227338807 | -1.613310929 | 4.035567574 | -0.399772993 | 0.689323724 | 0.998252924 |
| chr3:152132729-152165562 | exonic       | MBNL1         | 3  | 152132729 | 152165562 | 0 | 0 | 0 | 1 | 1 | 0 | 32833 | 0.227338807 | -1.613310929 | 4.035567574 | -0.399772993 | 0.689323724 | 0.998252924 |
| chr3:155611306-155624052 | exonic       | GMPS          | 3  | 155611306 | 155624052 | 0 | 0 | 0 | 1 | 1 | 0 | 12746 | 0.227338807 | -1.613310929 | 4.035567574 | -0.399772993 | 0.689323724 | 0.998252924 |
| chr3:20017092-20019895   | exonic       | RAB5A         | 3  | 20017092  | 20019895  | 0 | 0 | 0 | 1 | 1 | 0 | 2803  | 0.227338807 | -1.613310929 | 4.035567574 | -0.399772993 | 0.689323724 | 0.998252924 |
| chr3:27478878-27490288   | exonic       | SLC4A7        | 3  | 27478878  | 27490288  | 0 | 0 | 0 | 1 | 1 | 0 | 11410 | 0.227338807 | -1.613310929 | 4.035567574 | -0.399772993 | 0.689323724 | 0.998252924 |
| chr3:33648082-33673863   | exonic       | CLASP2        | 3  | 33648082  | 33673863  | 0 | 0 | 0 | 1 | 1 | 0 | 25781 | 0.227338807 | -1.613310929 | 4.035567574 | -0.399772993 | 0.689323724 | 0.998252924 |
| chr3:50102463-50106197   | exonic       | RBM6          | 3  | 50102463  | 50106197  | 0 | 0 | 0 | 1 | 1 | 0 | 3734  | 0.227338807 | -1.613310929 | 4.035567574 | -0.399772993 | 0.689323724 | 0.998252924 |
| chr3:89456418-89499520   | exonic       | EPHA3         | 3  | 89456418  | 89499520  | 0 | 0 | 0 | 1 | 1 | 0 | 43102 | 0.227338807 | -1.613310929 | 4.035567574 | -0.399772993 | 0.689323724 | 0.998252924 |
| chr3:93714717-93762084   | exonic       | ARL13B, STX19 | 3  | 93714717  | 93762084  | 0 | 0 | 0 | 1 | 1 | 0 | 47367 | 0.227338807 | -1.613310929 | 4.035567574 | -0.399772993 | 0.689323724 | 0.998252924 |

|                          |        |          |   |           |           |   |   |   |   |   |   |       |             |              |             |              |             |             |
|--------------------------|--------|----------|---|-----------|-----------|---|---|---|---|---|---|-------|-------------|--------------|-------------|--------------|-------------|-------------|
| chr4:152069073-152070713 | exonic | SH3D19   | 4 | 152069073 | 152070713 | 0 | 0 | 0 | 1 | 1 | 0 | 1640  | 0.227338807 | -1.613310929 | 4.035567574 | -0.399772993 | 0.689323724 | 0.998252924 |
| chr4:153791904-153809459 | exonic | ARFIP1   | 4 | 153791904 | 153809459 | 0 | 0 | 0 | 1 | 1 | 0 | 17555 | 0.227338807 | -1.613310929 | 4.035567574 | -0.399772993 | 0.689323724 | 0.998252924 |
| chr4:166149958-166160051 | exonic | KLHL2    | 4 | 166149958 | 166160051 | 0 | 0 | 0 | 1 | 1 | 0 | 10093 | 0.227338807 | -1.613310929 | 4.035567574 | -0.399772993 | 0.689323724 | 0.998252924 |
| chr4:42445581-42509171   | exonic | ATP8A1   | 4 | 42445581  | 42509171  | 0 | 0 | 0 | 1 | 1 | 0 | 63590 | 0.227338807 | -1.613310929 | 4.035567574 | -0.399772993 | 0.689323724 | 0.998252924 |
| chr4:54373483-54374394   | exonic | LNX1     | 4 | 54373483  | 54374394  | 0 | 0 | 0 | 1 | 1 | 0 | 911   | 0.227338807 | -1.613310929 | 4.035567574 | -0.399772993 | 0.689323724 | 0.998252924 |
| chr4:7008358-7016284     | exonic | TBC1D14  | 4 | 7008358   | 7016284   | 0 | 0 | 0 | 1 | 1 | 0 | 7926  | 0.227338807 | -1.613310929 | 4.035567574 | -0.399772993 | 0.689323724 | 0.998252924 |
| chr4:71628235-71634378   | exonic | RUFY3    | 4 | 71628235  | 71634378  | 0 | 0 | 0 | 1 | 1 | 0 | 6143  | 0.227338807 | -1.613310929 | 4.035567574 | -0.399772993 | 0.689323724 | 0.998252924 |
| chr5:111540071-111545679 | exonic | EPB41L4A | 5 | 111540071 | 111545679 | 0 | 0 | 0 | 1 | 1 | 0 | 5608  | 0.227338807 | -1.613310929 | 4.035567574 | -0.399772993 | 0.689323724 | 0.998252924 |
| chr5:130766551-130778230 | exonic | RAPGEF6  | 5 | 130766551 | 130778230 | 0 | 0 | 0 | 1 | 1 | 0 | 11679 | 0.227338807 | -1.613310929 | 4.035567574 | -0.399772993 | 0.689323724 | 0.998252924 |
| chr5:131915008-131925529 | exonic | RAD50    | 5 | 131915008 | 131925529 | 0 | 0 | 0 | 1 | 1 | 0 | 10521 | 0.227338807 | -1.613310929 | 4.035567574 | -0.399772993 | 0.689323724 | 0.998252924 |
| chr5:147928230-147929825 | exonic | HTR4     | 5 | 147928230 | 147929825 | 0 | 0 | 0 | 1 | 1 | 0 | 1595  | 0.227338807 | -1.613310929 | 4.035567574 | -0.399772993 | 0.689323724 | 0.998252924 |
| chr5:179743340-179744058 | exonic | GFPT2    | 5 | 179743340 | 179744058 | 0 | 0 | 0 | 1 | 1 | 0 | 718   | 0.227338807 | -1.613310929 | 4.035567574 | -0.399772993 | 0.689323724 | 0.998252924 |
| chr5:38971978-38982138   | exonic | RICTOR   | 5 | 38971978  | 38982138  | 0 | 0 | 0 | 1 | 1 | 0 | 10160 | 0.227338807 | -1.613310929 | 4.035567574 | -0.399772993 | 0.689323724 | 0.998252924 |
| chr6:101163337-101253756 | exonic | ASCC3    | 6 | 101163337 | 101253756 | 0 | 0 | 0 | 1 | 1 | 0 | 90419 | 0.227338807 | -1.613310929 | 4.035567574 | -0.399772993 | 0.689323724 | 0.998252924 |
| chr6:130374003-130378642 | exonic | L3MBTL3  | 6 | 130374003 | 130378642 | 0 | 0 | 0 | 1 | 1 | 0 | 4639  | 0.227338807 | -1.613310929 | 4.035567574 | -0.399772993 | 0.689323724 | 0.998252924 |
| chr6:136958462-137019820 | exonic | MAP3K5   | 6 | 136958462 | 137019820 | 0 | 0 | 0 | 1 | 1 | 0 | 61358 | 0.227338807 | -1.613310929 | 4.035567574 | -0.399772993 | 0.689323724 | 0.998252924 |
| chr6:144835044-144844324 | exonic | UTRN     | 6 | 144835044 | 144844324 | 0 | 0 | 0 | 1 | 1 | 0 | 9280  | 0.227338807 | -1.613310929 | 4.035567574 | -0.399772993 | 0.689323724 | 0.998252924 |
| chr6:151198769-151206870 | exonic | MTHFD1L  | 6 | 151198769 | 151206870 | 0 | 0 | 0 | 1 | 1 | 0 | 8101  | 0.227338807 | -1.613310929 | 4.035567574 | -0.399772993 | 0.689323724 | 0.998252924 |
| chr6:17834191-17855848   | exonic | KIF13A   | 6 | 17834191  | 17855848  | 0 | 0 | 0 | 1 | 1 | 0 | 21657 | 0.227338807 | -1.613310929 | 4.035567574 | -0.399772993 | 0.689323724 | 0.998252924 |
| chr6:7884591-7889081     | exonic | TXNDC5   | 6 | 7884591   | 7889081   | 0 | 0 | 0 | 1 | 1 | 0 | 4490  | 0.227338807 | -1.613310929 | 4.035567574 | -0.399772993 | 0.689323724 | 0.998252924 |
| chr6:90564535-90566918   | exonic | CASP8AP2 | 6 | 90564535  | 90566918  | 0 | 0 | 0 | 1 | 1 | 0 | 2383  | 0.227338807 | -1.613310929 | 4.035567574 | -0.399772993 | 0.689323724 | 0.998252924 |
| chr7:129825031-129832663 | exonic | TMEM209  | 7 | 129825031 | 129832663 | 0 | 0 | 0 | 1 | 1 | 0 | 7632  | 0.227338807 | -1.613310929 | 4.035567574 | -0.399772993 | 0.689323724 | 0.998252924 |
| chr7:143573081-143573715 | exonic | TCAF1    | 7 | 143573081 | 143573715 | 0 | 0 | 0 | 1 | 1 | 0 | 634   | 0.227338807 | -1.613310929 | 4.035567574 | -0.399772993 | 0.689323724 | 0.998252924 |
| chr7:152480271-152498816 | exonic | ACTR3B   | 7 | 152480271 | 152498816 | 0 | 0 | 0 | 1 | 1 | 0 | 18545 | 0.227338807 | -1.613310929 | 4.035567574 | -0.399772993 | 0.689323724 | 0.998252924 |
| chr7:155465560-155493638 | exonic | RBM33    | 7 | 155465560 | 155493638 | 0 | 0 | 0 | 1 | 1 | 0 | 28078 | 0.227338807 | -1.613310929 | 4.035567574 | -0.399772993 | 0.689323724 | 0.998252924 |
| chr7:157009560-157018233 | exonic | UBE3C    | 7 | 157009560 | 157018233 | 0 | 0 | 0 | 1 | 1 | 0 | 8673  | 0.227338807 | -1.613310929 | 4.035567574 | -0.399772993 | 0.689323724 | 0.998252924 |
| chr7:21516696-21521741   | exonic | SP4      | 7 | 21516696  | 21521741  | 0 | 0 | 0 | 1 | 1 | 0 | 5045  | 0.227338807 | -1.613310929 | 4.035567574 | -0.399772993 | 0.689323724 | 0.998252924 |
| chr7:66489886-66520874   | exonic | TYW1     | 7 | 66489886  | 66520874  | 0 | 0 | 0 | 1 | 1 | 0 | 30988 | 0.227338807 | -1.613310929 | 4.035567574 | -0.399772993 | 0.689323724 | 0.998252924 |
| chr7:76109737-76121570   | exonic | DTX2     | 7 | 76109737  | 76121570  | 0 | 0 | 0 | 1 | 1 | 0 | 11833 | 0.227338807 | -1.613310929 | 4.035567574 | -0.399772993 | 0.689323724 | 0.998252924 |
| chr8:120795620-120803699 | exonic | TAF2     | 8 | 120795620 | 120803699 | 0 | 0 | 0 | 1 | 1 | 0 | 8079  | 0.227338807 | -1.613310929 | 4.035567574 | -0.399772993 | 0.689323724 | 0.998252924 |
| chr8:42166418-42175289   | exonic | IKBKB    | 8 | 42166418  | 42175289  | 0 | 0 | 0 | 1 | 1 | 0 | 8871  | 0.227338807 | -1.613310929 | 4.035567574 | -0.399772993 | 0.689323724 | 0.998252924 |
| chr8:42821615-42823357   | exonic | HOOK3    | 8 | 42821615  | 42823357  | 0 | 0 | 0 | 1 | 1 | 0 | 1742  | 0.227338807 | -1.613310929 | 4.035567574 | -0.399772993 | 0.689323724 | 0.998252924 |
| chr8:48839753-48842572   | exonic | PRKDC    | 8 | 48839753  | 48842572  | 0 | 0 | 0 | 1 | 1 | 0 | 2819  | 0.227338807 | -1.613310929 | 4.035567574 | -0.399772993 | 0.689323724 | 0.998252924 |
| chr9:102722198-102722437 | exonic | STX17    | 9 | 102722198 | 102722437 | 0 | 0 | 0 | 1 | 1 | 0 | 239   | 0.227338807 | -1.613310929 | 4.035567574 | -0.399772993 | 0.689323724 | 0.998252924 |
| chr9:125639749-125659855 | exonic | RC3H2    | 9 | 125639749 | 125659855 | 0 | 0 | 0 | 1 | 1 | 0 | 20106 | 0.227338807 | -1.613310929 | 4.035567574 | -0.399772993 | 0.689323724 | 0.998252924 |

|                           |              |                                                       |    |           |           |   |   |   |    |   |   |        |             |              |             |              |             |             |
|---------------------------|--------------|-------------------------------------------------------|----|-----------|-----------|---|---|---|----|---|---|--------|-------------|--------------|-------------|--------------|-------------|-------------|
| chr9:126392654-126554909  | exonic       | DENND1A                                               | 9  | 126392654 | 126554909 | 0 | 0 | 0 | 1  | 1 | 0 | 162255 | 0.227338807 | -1.613310929 | 4.035567574 | -0.399772993 | 0.689323724 | 0.998252924 |
| chr9:132662243-132671278  | exonic       | FNBP1                                                 | 9  | 132662243 | 132671278 | 0 | 0 | 0 | 1  | 1 | 0 | 9035   | 0.227338807 | -1.613310929 | 4.035567574 | -0.399772993 | 0.689323724 | 0.998252924 |
| chr9:97535283-97563284    | exonic       | C9orf3                                                | 9  | 97535283  | 97563284  | 0 | 0 | 0 | 1  | 1 | 0 | 28001  | 0.227338807 | -1.613310929 | 4.035567574 | -0.399772993 | 0.689323724 | 0.998252924 |
| chrX:110385323-110406955  | exonic       | PAK3                                                  | X  | 110385323 | 110406955 | 0 | 0 | 0 | 1  | 1 | 0 | 21632  | 0.227338807 | -1.613310929 | 4.035567574 | -0.399772993 | 0.689323724 | 0.998252924 |
| chrX:20181081-20185865    | exonic       | RPS6KA3                                               | X  | 20181081  | 20185865  | 0 | 0 | 0 | 1  | 1 | 0 | 4784   | 0.227338807 | -1.613310929 | 4.035567574 | -0.399772993 | 0.689323724 | 0.998252924 |
| chrX:30877603-30889918    | exonic       | TAB3                                                  | X  | 30877603  | 30889918  | 0 | 0 | 0 | 1  | 1 | 0 | 12315  | 0.227338807 | -1.613310929 | 4.035567574 | -0.399772993 | 0.689323724 | 0.998252924 |
| chrY:21901413-21903743    | exonic       | KDM5D                                                 | Y  | 21901413  | 21903743  | 0 | 0 | 0 | 1  | 1 | 0 | 2330   | 0.227338807 | -1.613310929 | 4.035567574 | -0.399772993 | 0.689323724 | 0.998252924 |
| chr2:136505836-136528305  | exonic       | UBXN4                                                 | 2  | 136505836 | 136528305 | 0 | 1 | 2 | 0  | 2 | 5 | 22469  | 2.351961738 | -1.605492095 | 2.018368602 | -0.795440482 | NA          | NA          |
| chr13:45084451-45084838   | intronic     | TSC22D1                                               | 13 | 45084451  | 45084838  | 0 | 0 | 2 | 0  | 0 | 4 | 387    | 1.627412486 | -1.602887714 | 2.653278517 | -0.604115891 | NA          | NA          |
| chr4:39734979-39747430    | exonic       | UBE2K                                                 | 4  | 39734979  | 39747430  | 0 | 0 | 2 | 0  | 0 | 4 | 12451  | 1.627412486 | -1.602887714 | 2.653278517 | -0.604115891 | NA          | NA          |
| chr11:65268334-65268664   | ncRNA_exonic | MALAT1                                                | 11 | 65268334  | 65268664  | 0 | 0 | 4 | 0  | 2 | 7 | 330    | 3.188661207 | -1.597736337 | 3.030222091 | -0.527267075 | NA          | NA          |
| chr8:95549330-95550574    | exonic       | KIAA1429                                              | 8  | 95549330  | 95550574  | 0 | 2 | 1 | 0  | 6 | 3 | 1244   | 2.196640981 | -1.590986319 | 2.009985237 | -0.791541296 | NA          | NA          |
| chr2:15691616-15698758    | exonic       | NBAS                                                  | 2  | 15691616  | 15698758  | 0 | 2 | 0 | 2  | 2 | 2 | 7142   | 1.41966643  | -1.589004954 | 2.299015508 | -0.691167566 | 0.489460244 | 0.998252924 |
| chr11:14793482-14840755   | exonic       | PDE3B                                                 | 11 | 14793482  | 14840755  | 1 | 0 | 0 | 0  | 2 | 1 | 47273  | 0.679260395 | -1.586827415 | 3.252245979 | -0.487917404 | 0.625608347 | 0.998252924 |
| chr2:230840956-230861639  | exonic       | FBXO36                                                | 2  | 230840956 | 230861639 | 1 | 0 | 0 | 0  | 2 | 1 | 20683  | 0.679260395 | -1.586827415 | 3.252245979 | -0.487917404 | 0.625608347 | 0.998252924 |
| chr4:143324090-143383879  | exonic       | INPP4B                                                | 4  | 143324090 | 143383879 | 1 | 0 | 0 | 0  | 2 | 1 | 59789  | 0.679260395 | -1.586827415 | 3.252245979 | -0.487917404 | 0.625608347 | 0.998252924 |
| chr7:158662545-158672680  | exonic       | WDR60                                                 | 7  | 158662545 | 158672680 | 1 | 0 | 0 | 0  | 2 | 1 | 10135  | 0.679260395 | -1.586827415 | 3.252245979 | -0.487917404 | 0.625608347 | 0.998252924 |
| chr18:9931806-99505665    | exonic       | VAPA                                                  | 18 | 9931806   | 99505665  | 2 | 0 | 0 | 3  | 4 | 0 | 18759  | 1.061017728 | -1.585606279 | 2.705332874 | -0.586103948 | 0.557805663 | 0.998252924 |
| chr6:69723929-69785930    | exonic       | ADGRB3                                                | 6  | 69723929  | 69785930  | 2 | 0 | 0 | 3  | 4 | 0 | 62001  | 1.061017728 | -1.585606279 | 2.705332874 | -0.586103948 | 0.557805663 | 0.998252924 |
| chr9:79954431-79981788    | exonic       | VPS13A                                                | 9  | 79954431  | 79981788  | 2 | 0 | 0 | 3  | 4 | 0 | 27357  | 1.061017728 | -1.585606279 | 2.705332874 | -0.586103948 | 0.557805663 | 0.998252924 |
| chr1:42730785-42744343    | exonic       | FOXJ3                                                 | 1  | 42730785  | 42744343  | 0 | 4 | 0 | 5  | 3 | 4 | 13558  | 2.824616823 | -1.584814562 | 1.780931788 | -0.889879429 | NA          | NA          |
| chr2:39278284-39294894    | exonic       | SOS1                                                  | 2  | 39278284  | 39294894  | 0 | 1 | 0 | 0  | 2 | 1 | 16610  | 0.724549251 | -1.584243521 | 3.181430294 | -0.497965812 | 0.618508139 | 0.998252924 |
| chr1:150997086-150999803  | exonic       | PRUNE                                                 | 1  | 150997086 | 150999803 | 0 | 0 | 1 | 0  | 2 | 1 | 2717   | 0.747542478 | -1.58298475  | 3.148729582 | -0.502737599 | 0.615148771 | 0.998252924 |
| chr11:107673726-107686691 | exonic       | SLC35F2                                               | 11 | 107673726 | 107686691 | 0 | 0 | 1 | 0  | 2 | 1 | 12965  | 0.747542478 | -1.58298475  | 3.148729582 | -0.502737599 | 0.615148771 | 0.998252924 |
| chr12:66597490-66605377   | exonic       | IRAK3                                                 | 12 | 66597490  | 66605377  | 0 | 0 | 1 | 0  | 2 | 1 | 7887   | 0.747542478 | -1.58298475  | 3.148729582 | -0.502737599 | 0.615148771 | 0.998252924 |
| chr3:167413383-167443261  | exonic       | PDCD10                                                | 3  | 167413383 | 167443261 | 0 | 0 | 1 | 0  | 2 | 1 | 29878  | 0.747542478 | -1.58298475  | 3.148729582 | -0.502737599 | 0.615148771 | 0.998252924 |
| chr3:27424643-27465643    | exonic       | SLC4A7                                                | 3  | 27424643  | 27465643  | 0 | 0 | 1 | 0  | 2 | 1 | 41000  | 0.747542478 | -1.58298475  | 3.148729582 | -0.502737599 | 0.615148771 | 0.998252924 |
| chr6:149944238-149959696  | exonic       | KATNA1                                                | 6  | 149944238 | 149959696 | 0 | 0 | 1 | 0  | 2 | 1 | 15458  | 0.747542478 | -1.58298475  | 3.148729582 | -0.502737599 | 0.615148771 | 0.998252924 |
| chr8:124089350-124132428  | exonic       | TBC1D31                                               | 8  | 124089350 | 124132428 | 0 | 0 | 1 | 0  | 2 | 1 | 43078  | 0.747542478 | -1.58298475  | 3.148729582 | -0.502737599 | 0.615148771 | 0.998252924 |
| chr10:112645010-112650428 | exonic       | PDCD4                                                 | 10 | 112645010 | 112650428 | 1 | 0 | 1 | 3  | 5 | 0 | 5418   | 1.250327233 | -1.580347527 | 2.392815398 | -0.660455265 | 0.508961717 | 0.998252924 |
| chr1:115005725-115007010  | exonic       | TRIM33                                                | 1  | 115005725 | 115007010 | 5 | 2 | 0 | 7  | 5 | 6 | 1285   | 4.19211477  | -1.57936943  | 1.409424249 | -1.120577733 | 0.262467647 | 0.998252924 |
| chr2:228550817-228551161  | UTR3         | <small>SLC19A3(NM_025243:c.*1296_*952delins0)</small> | 2  | 228550817 | 228551161 | 3 | 0 | 0 | 11 | 0 | 0 | 344    | 1.556386065 | -1.574598312 | 2.609562891 | -0.603395426 | NA          | NA          |
| chr4:140058784-140060651  | exonic       | ELF2                                                  | 4  | 140058784 | 140060651 | 0 | 0 | 2 | 0  | 9 | 0 | 1867   | 1.483784847 | -1.57171582  | 2.682163131 | -0.585988153 | NA          | NA          |
| chr7:151927007-151935911  | exonic       | KMT2C                                                 | 7  | 151927007 | 151935911 | 0 | 2 | 0 | 3  | 1 | 2 | 8904   | 1.404950393 | -1.569543111 | 2.324871377 | -0.675109654 | 0.499606101 | 0.998252924 |
| chr9:110062421-110087285  | exonic       | RAD23B                                                | 9  | 110062421 | 110087285 | 3 | 1 | 0 | 0  | 0 | 6 | 24864  | 2.41054828  | -1.568388712 | 2.174197511 | -0.721364413 | NA          | NA          |



|                          |          |                                                                                           |    |           |           |   |   |   |    |   |   |       |             |              |             |              |             |             |
|--------------------------|----------|-------------------------------------------------------------------------------------------|----|-----------|-----------|---|---|---|----|---|---|-------|-------------|--------------|-------------|--------------|-------------|-------------|
| chr6:168271062-168290006 | exonic   | MLLT4                                                                                     | 6  | 168271062 | 168290006 | 3 | 1 | 4 | 18 | 2 | 6 | 18944 | 5.355284158 | -1.566374757 | 1.285500226 | -1.218494346 | NA          | NA          |
| chr13:52992126-53001354  | exonic   | VPS36                                                                                     | 13 | 52992126  | 53001354  | 3 | 1 | 0 | 4  | 8 | 1 | 9228  | 2.262920151 | -1.563510506 | 1.78483336  | -0.875998029 | 0.381031105 | 0.998252924 |
| chr20:32619328-32621124  | UTR5     | <small>3843706.504252...-48252...-494716112665.98.802367...-48252...-494716112665</small> | 20 | 32619328  | 32621124  | 2 | 0 | 0 | 4  | 3 | 0 | 1796  | 1.046301692 | -1.562169339 | 2.716665659 | -0.575031872 | 0.565269742 | 0.998252924 |
| chr6:99979239-99979666   | exonic   | TSTD3                                                                                     | 6  | 99979239  | 99979666  | 2 | 0 | 0 | 4  | 3 | 0 | 427   | 1.046301692 | -1.562169339 | 2.716665659 | -0.575031872 | 0.565269742 | 0.998252924 |
| chr2:171872511-171872761 | intronic | TLK1                                                                                      | 2  | 171872511 | 171872761 | 0 | 2 | 0 | 4  | 0 | 2 | 250   | 1.390234356 | -1.553875372 | 2.509701082 | -0.619147588 | 0.535819136 | 0.998252924 |
| chr10:22002700-22016857  | exonic   | MLLT10                                                                                    | 10 | 22002700  | 22016857  | 0 | 3 | 0 | 0  | 3 | 4 | 14157 | 2.118784098 | -1.551201469 | 2.19171232  | -0.707757791 | 0.479095682 | 0.998252924 |
| chr9:33986757-33998862   | exonic   | UBAP2                                                                                     | 9  | 33986757  | 33998862  | 2 | 1 | 0 | 7  | 2 | 1 | 12105 | 1.726702833 | -1.551159352 | 1.984836367 | -0.781504902 | 0.434505595 | 0.998252924 |
| chr1:100602437-100606070 | exonic   | TRMT13                                                                                    | 1  | 100602437 | 100606070 | 0 | 0 | 0 | 2  | 0 | 0 | 3633  | 0.21262277  | -1.55080501  | 4.038815656 | -0.38397519  | 0.700996836 | 0.998252924 |
| chr1:100889777-100921048 | exonic   | CDC14A                                                                                    | 1  | 100889777 | 100921048 | 0 | 0 | 0 | 2  | 0 | 0 | 31271 | 0.21262277  | -1.55080501  | 4.038815656 | -0.38397519  | 0.700996836 | 0.998252924 |
| chr1:109553537-109554340 | exonic   | WDR47                                                                                     | 1  | 109553537 | 109554340 | 0 | 0 | 0 | 2  | 0 | 0 | 803   | 0.21262277  | -1.55080501  | 4.038815656 | -0.38397519  | 0.700996836 | 0.998252924 |
| chr1:113140592-113153625 | exonic   | ST7L                                                                                      | 1  | 113140592 | 113153625 | 0 | 0 | 0 | 2  | 0 | 0 | 13033 | 0.21262277  | -1.55080501  | 4.038815656 | -0.38397519  | 0.700996836 | 0.998252924 |
| chr1:113194651-113203003 | exonic   | CAPZA1                                                                                    | 1  | 113194651 | 113203003 | 0 | 0 | 0 | 2  | 0 | 0 | 8352  | 0.21262277  | -1.55080501  | 4.038815656 | -0.38397519  | 0.700996836 | 0.998252924 |
| chr1:114128008-114165616 | exonic   | MAGI3                                                                                     | 1  | 114128008 | 114165616 | 0 | 0 | 0 | 2  | 0 | 0 | 37608 | 0.21262277  | -1.55080501  | 4.038815656 | -0.38397519  | 0.700996836 | 0.998252924 |
| chr1:114248511-114249344 | exonic   | PHTF1                                                                                     | 1  | 114248511 | 114249344 | 0 | 0 | 0 | 2  | 0 | 0 | 833   | 0.21262277  | -1.55080501  | 4.038815656 | -0.38397519  | 0.700996836 | 0.998252924 |
| chr1:115042712-115043070 | intronic | TRIM33                                                                                    | 1  | 115042712 | 115043070 | 0 | 0 | 0 | 2  | 0 | 0 | 358   | 0.21262277  | -1.55080501  | 4.038815656 | -0.38397519  | 0.700996836 | 0.998252924 |
| chr1:115252189-115256599 | exonic   | NRAS                                                                                      | 1  | 115252189 | 115256599 | 0 | 0 | 0 | 2  | 0 | 0 | 4410  | 0.21262277  | -1.55080501  | 4.038815656 | -0.38397519  | 0.700996836 | 0.998252924 |
| chr1:116202261-116228148 | exonic   | VANGL1                                                                                    | 1  | 116202261 | 116228148 | 0 | 0 | 0 | 2  | 0 | 0 | 25887 | 0.21262277  | -1.55080501  | 4.038815656 | -0.38397519  | 0.700996836 | 0.998252924 |
| chr1:117984852-118009049 | exonic   | MAN1A2                                                                                    | 1  | 117984852 | 118009049 | 0 | 0 | 0 | 2  | 0 | 0 | 24197 | 0.21262277  | -1.55080501  | 4.038815656 | -0.38397519  | 0.700996836 | 0.998252924 |
| chr1:12009829-12010577   | exonic   | PLOD1                                                                                     | 1  | 12009829  | 12010577  | 0 | 0 | 0 | 2  | 0 | 0 | 748   | 0.21262277  | -1.55080501  | 4.038815656 | -0.38397519  | 0.700996836 | 0.998252924 |
| chr1:12629169-12632305   | intronic | DHRS3                                                                                     | 1  | 12629169  | 12632305  | 0 | 0 | 0 | 2  | 0 | 0 | 3136  | 0.21262277  | -1.55080501  | 4.038815656 | -0.38397519  | 0.700996836 | 0.998252924 |
| chr1:145594038-145601852 | exonic   | POLR3C                                                                                    | 1  | 145594038 | 145601852 | 0 | 0 | 0 | 2  | 0 | 0 | 7814  | 0.21262277  | -1.55080501  | 4.038815656 | -0.38397519  | 0.700996836 | 0.998252924 |
| chr1:146757974-146759412 | exonic   | CHD1L                                                                                     | 1  | 146757974 | 146759412 | 0 | 0 | 0 | 2  | 0 | 0 | 1438  | 0.21262277  | -1.55080501  | 4.038815656 | -0.38397519  | 0.700996836 | 0.998252924 |
| chr1:150599032-150599942 | exonic   | ENSA                                                                                      | 1  | 150599032 | 150599942 | 0 | 0 | 0 | 2  | 0 | 0 | 910   | 0.21262277  | -1.55080501  | 4.038815656 | -0.38397519  | 0.700996836 | 0.998252924 |
| chr1:150938638-150941567 | exonic   | CERS2                                                                                     | 1  | 150938638 | 150941567 | 0 | 0 | 0 | 2  | 0 | 0 | 2929  | 0.21262277  | -1.55080501  | 4.038815656 | -0.38397519  | 0.700996836 | 0.998252924 |
| chr1:151114979-151116910 | exonic   | SEMA6C                                                                                    | 1  | 151114979 | 151116910 | 0 | 0 | 0 | 2  | 0 | 0 | 1931  | 0.21262277  | -1.55080501  | 4.038815656 | -0.38397519  | 0.700996836 | 0.998252924 |
| chr1:151199795-151205179 | exonic   | PIP5K1A                                                                                   | 1  | 151199795 | 151205179 | 0 | 0 | 0 | 2  | 0 | 0 | 5384  | 0.21262277  | -1.55080501  | 4.038815656 | -0.38397519  | 0.700996836 | 0.998252924 |
| chr1:151340674-151342245 | exonic   | SELENBP1                                                                                  | 1  | 151340674 | 151342245 | 0 | 0 | 0 | 2  | 0 | 0 | 1571  | 0.21262277  | -1.55080501  | 4.038815656 | -0.38397519  | 0.700996836 | 0.998252924 |
| chr1:151860749-151861849 | exonic   | THEM4                                                                                     | 1  | 151860749 | 151861849 | 0 | 0 | 0 | 2  | 0 | 0 | 1100  | 0.21262277  | -1.55080501  | 4.038815656 | -0.38397519  | 0.700996836 | 0.998252924 |
| chr1:153789847-153790647 | exonic   | GATAD2B                                                                                   | 1  | 153789847 | 153790647 | 0 | 0 | 0 | 2  | 0 | 0 | 800   | 0.21262277  | -1.55080501  | 4.038815656 | -0.38397519  | 0.700996836 | 0.998252924 |
| chr1:154207066-154215778 | exonic   | UBAP2L                                                                                    | 1  | 154207066 | 154215778 | 0 | 0 | 0 | 2  | 0 | 0 | 8712  | 0.21262277  | -1.55080501  | 4.038815656 | -0.38397519  | 0.700996836 | 0.998252924 |
| chr1:155737216-155743001 | exonic   | GON4L                                                                                     | 1  | 155737216 | 155743001 | 0 | 0 | 0 | 2  | 0 | 0 | 5785  | 0.21262277  | -1.55080501  | 4.038815656 | -0.38397519  | 0.700996836 | 0.998252924 |
| chr1:155740857-155747611 | exonic   | GON4L                                                                                     | 1  | 155740857 | 155747611 | 0 | 0 | 0 | 2  | 0 | 0 | 6754  | 0.21262277  | -1.55080501  | 4.038815656 | -0.38397519  | 0.700996836 | 0.998252924 |
| chr1:15844604-15844890   | exonic   | CASP9                                                                                     | 1  | 15844604  | 15844890  | 0 | 0 | 0 | 2  | 0 | 0 | 286   | 0.21262277  | -1.55080501  | 4.038815656 | -0.38397519  | 0.700996836 | 0.998252924 |
| chr1:162762448-162775282 | exonic   | HSD17B7                                                                                   | 1  | 162762448 | 162775282 | 0 | 0 | 0 | 2  | 0 | 0 | 12834 | 0.21262277  | -1.55080501  | 4.038815656 | -0.38397519  | 0.700996836 | 0.998252924 |
| chr1:16621277-16641930   | exonic   | FBXO42                                                                                    | 1  | 16621277  | 16641930  | 0 | 0 | 0 | 2  | 0 | 0 | 20653 | 0.21262277  | -1.55080501  | 4.038815656 | -0.38397519  | 0.700996836 | 0.998252924 |

|                          |          |                                                                                                        |   |           |           |   |   |   |   |   |   |       |            |             |             |             |             |             |
|--------------------------|----------|--------------------------------------------------------------------------------------------------------|---|-----------|-----------|---|---|---|---|---|---|-------|------------|-------------|-------------|-------------|-------------|-------------|
| chr1:16658467-16659145   | intronic | FBX042                                                                                                 | 1 | 16658467  | 16659145  | 0 | 0 | 0 | 2 | 0 | 0 | 678   | 0.21262277 | -1.55080501 | 4.038815656 | -0.38397519 | 0.700996836 | 0.998252924 |
| chr1:167301707-167307495 | exonic   | POU2F1                                                                                                 | 1 | 167301707 | 167307495 | 0 | 0 | 0 | 2 | 0 | 0 | 5788  | 0.21262277 | -1.55080501 | 4.038815656 | -0.38397519 | 0.700996836 | 0.998252924 |
| chr1:168012262-168014465 | exonic   | DCAF6                                                                                                  | 1 | 168012262 | 168014465 | 0 | 0 | 0 | 2 | 0 | 0 | 2203  | 0.21262277 | -1.55080501 | 4.038815656 | -0.38397519 | 0.700996836 | 0.998252924 |
| chr1:1770629-1779968     | UTR5     | <small>UC001LW00010001...UC001LW00010001...UC001LW00010001...UC001LW00010001...UC001LW00010001</small> | 1 | 1770629   | 1779968   | 0 | 0 | 0 | 2 | 0 | 0 | 9339  | 0.21262277 | -1.55080501 | 4.038815656 | -0.38397519 | 0.700996836 | 0.998252924 |
| chr1:177936818-177991803 | exonic   | SEC16B                                                                                                 | 1 | 177936818 | 177991803 | 0 | 0 | 0 | 2 | 0 | 0 | 54985 | 0.21262277 | -1.55080501 | 4.038815656 | -0.38397519 | 0.700996836 | 0.998252924 |
| chr1:180945254-180962561 | exonic   | STX6                                                                                                   | 1 | 180945254 | 180962561 | 0 | 0 | 0 | 2 | 0 | 0 | 17307 | 0.21262277 | -1.55080501 | 4.038815656 | -0.38397519 | 0.700996836 | 0.998252924 |
| chr1:183085711-183087281 | exonic   | LAMC1                                                                                                  | 1 | 183085711 | 183087281 | 0 | 0 | 0 | 2 | 0 | 0 | 1570  | 0.21262277 | -1.55080501 | 4.038815656 | -0.38397519 | 0.700996836 | 0.998252924 |
| chr1:183614908-183711424 | exonic   | APOBEC4, RGL1                                                                                          | 1 | 183614908 | 183711424 | 0 | 0 | 0 | 2 | 0 | 0 | 96516 | 0.21262277 | -1.55080501 | 4.038815656 | -0.38397519 | 0.700996836 | 0.998252924 |
| chr1:185151077-185159774 | exonic   | SWT1                                                                                                   | 1 | 185151077 | 185159774 | 0 | 0 | 0 | 2 | 0 | 0 | 8697  | 0.21262277 | -1.55080501 | 4.038815656 | -0.38397519 | 0.700996836 | 0.998252924 |
| chr1:186022083-186031732 | exonic   | HMCN1                                                                                                  | 1 | 186022083 | 186031732 | 0 | 0 | 0 | 2 | 0 | 0 | 9649  | 0.21262277 | -1.55080501 | 4.038815656 | -0.38397519 | 0.700996836 | 0.998252924 |
| chr1:186022956-186031732 | exonic   | HMCN1                                                                                                  | 1 | 186022956 | 186031732 | 0 | 0 | 0 | 2 | 0 | 0 | 8776  | 0.21262277 | -1.55080501 | 4.038815656 | -0.38397519 | 0.700996836 | 0.998252924 |
| chr1:186287578-186287960 | exonic   | TPR                                                                                                    | 1 | 186287578 | 186287960 | 0 | 0 | 0 | 2 | 0 | 0 | 382   | 0.21262277 | -1.55080501 | 4.038815656 | -0.38397519 | 0.700996836 | 0.998252924 |
| chr1:186331968-186340175 | exonic   | TPR                                                                                                    | 1 | 186331968 | 186340175 | 0 | 0 | 0 | 2 | 0 | 0 | 8207  | 0.21262277 | -1.55080501 | 4.038815656 | -0.38397519 | 0.700996836 | 0.998252924 |
| chr1:190203501-190250880 | exonic   | BRINP3                                                                                                 | 1 | 190203501 | 190250880 | 0 | 0 | 0 | 2 | 0 | 0 | 47379 | 0.21262277 | -1.55080501 | 4.038815656 | -0.38397519 | 0.700996836 | 0.998252924 |
| chr1:201786216-201786413 | exonic   | NAV1                                                                                                   | 1 | 201786216 | 201786413 | 0 | 0 | 0 | 2 | 0 | 0 | 197   | 0.21262277 | -1.55080501 | 4.038815656 | -0.38397519 | 0.700996836 | 0.998252924 |
| chr1:201823722-201828122 | exonic   | IPO9                                                                                                   | 1 | 201823722 | 201828122 | 0 | 0 | 0 | 2 | 0 | 0 | 4400  | 0.21262277 | -1.55080501 | 4.038815656 | -0.38397519 | 0.700996836 | 0.998252924 |
| chr1:201965274-201966682 | exonic   | RNPEP                                                                                                  | 1 | 201965274 | 201966682 | 0 | 0 | 0 | 2 | 0 | 0 | 1408  | 0.21262277 | -1.55080501 | 4.038815656 | -0.38397519 | 0.700996836 | 0.998252924 |
| chr1:2029786-2082417     | exonic   | PRKCZ                                                                                                  | 1 | 2029786   | 2082417   | 0 | 0 | 0 | 2 | 0 | 0 | 52631 | 0.21262277 | -1.55080501 | 4.038815656 | -0.38397519 | 0.700996836 | 0.998252924 |
| chr1:203786053-203800899 | exonic   | ZC3H11A                                                                                                | 1 | 203786053 | 203800899 | 0 | 0 | 0 | 2 | 0 | 0 | 14846 | 0.21262277 | -1.55080501 | 4.038815656 | -0.38397519 | 0.700996836 | 0.998252924 |
| chr1:204082042-204091113 | exonic   | SOX13                                                                                                  | 1 | 204082042 | 204091113 | 0 | 0 | 0 | 2 | 0 | 0 | 9071  | 0.21262277 | -1.55080501 | 4.038815656 | -0.38397519 | 0.700996836 | 0.998252924 |
| chr1:207532891-207536124 | exonic   | CD55                                                                                                   | 1 | 207532891 | 207536124 | 0 | 0 | 0 | 2 | 0 | 0 | 3233  | 0.21262277 | -1.55080501 | 4.038815656 | -0.38397519 | 0.700996836 | 0.998252924 |
| chr1:208266130-208270228 | exonic   | PLXNA2                                                                                                 | 1 | 208266130 | 208270228 | 0 | 0 | 0 | 2 | 0 | 0 | 4098  | 0.21262277 | -1.55080501 | 4.038815656 | -0.38397519 | 0.700996836 | 0.998252924 |
| chr1:21072035-21100103   | exonic   | HP1BP3                                                                                                 | 1 | 21072035  | 21100103  | 0 | 0 | 0 | 2 | 0 | 0 | 28068 | 0.21262277 | -1.55080501 | 4.038815656 | -0.38397519 | 0.700996836 | 0.998252924 |
| chr1:21074036-21103243   | exonic   | HP1BP3                                                                                                 | 1 | 21074036  | 21103243  | 0 | 0 | 0 | 2 | 0 | 0 | 29207 | 0.21262277 | -1.55080501 | 4.038815656 | -0.38397519 | 0.700996836 | 0.998252924 |
| chr1:212216334-212220759 | exonic   | DTL                                                                                                    | 1 | 212216334 | 212220759 | 0 | 0 | 0 | 2 | 0 | 0 | 4425  | 0.21262277 | -1.55080501 | 4.038815656 | -0.38397519 | 0.700996836 | 0.998252924 |
| chr1:212977662-212981190 | exonic   | TATDN3                                                                                                 | 1 | 212977662 | 212981190 | 0 | 0 | 0 | 2 | 0 | 0 | 3528  | 0.21262277 | -1.55080501 | 4.038815656 | -0.38397519 | 0.700996836 | 0.998252924 |
| chr1:213244347-213277911 | exonic   | RPS6KC1                                                                                                | 1 | 213244347 | 213277911 | 0 | 0 | 0 | 2 | 0 | 0 | 33564 | 0.21262277 | -1.55080501 | 4.038815656 | -0.38397519 | 0.700996836 | 0.998252924 |
| chr1:224585798-224599267 | exonic   | WDR26                                                                                                  | 1 | 224585798 | 224599267 | 0 | 0 | 0 | 2 | 0 | 0 | 13469 | 0.21262277 | -1.55080501 | 4.038815656 | -0.38397519 | 0.700996836 | 0.998252924 |
| chr1:230384930-230391090 | exonic   | GALNT2                                                                                                 | 1 | 230384930 | 230391090 | 0 | 0 | 0 | 2 | 0 | 0 | 6160  | 0.21262277 | -1.55080501 | 4.038815656 | -0.38397519 | 0.700996836 | 0.998252924 |
| chr1:235963619-235964397 | exonic   | LYST                                                                                                   | 1 | 235963619 | 235964397 | 0 | 0 | 0 | 2 | 0 | 0 | 778   | 0.21262277 | -1.55080501 | 4.038815656 | -0.38397519 | 0.700996836 | 0.998252924 |
| chr1:236187369-236201553 | exonic   | NID1                                                                                                   | 1 | 236187369 | 236201553 | 0 | 0 | 0 | 2 | 0 | 0 | 14184 | 0.21262277 | -1.55080501 | 4.038815656 | -0.38397519 | 0.700996836 | 0.998252924 |
| chr1:236969443-236998987 | exonic   | MTR                                                                                                    | 1 | 236969443 | 236998987 | 0 | 0 | 0 | 2 | 0 | 0 | 29544 | 0.21262277 | -1.55080501 | 4.038815656 | -0.38397519 | 0.700996836 | 0.998252924 |
| chr1:23885618-23885855   | exonic   | ID3                                                                                                    | 1 | 23885618  | 23885855  | 0 | 0 | 0 | 2 | 0 | 0 | 237   | 0.21262277 | -1.55080501 | 4.038815656 | -0.38397519 | 0.700996836 | 0.998252924 |
| chr1:243493841-243589860 | exonic   | SDCCAG8                                                                                                | 1 | 243493841 | 243589860 | 0 | 0 | 0 | 2 | 0 | 0 | 96019 | 0.21262277 | -1.55080501 | 4.038815656 | -0.38397519 | 0.700996836 | 0.998252924 |
| chr1:244574588-244581054 | exonic   | ADSS                                                                                                   | 1 | 244574588 | 244581054 | 0 | 0 | 0 | 2 | 0 | 0 | 6466  | 0.21262277 | -1.55080501 | 4.038815656 | -0.38397519 | 0.700996836 | 0.998252924 |

|                          |            |                                          |   |           |           |   |   |   |   |   |   |        |            |             |             |             |             |             |
|--------------------------|------------|------------------------------------------|---|-----------|-----------|---|---|---|---|---|---|--------|------------|-------------|-------------|-------------|-------------|-------------|
| chr1:24781459-24782763   | exonic     | NIPAL3                                   | 1 | 24781459  | 24782763  | 0 | 0 | 0 | 2 | 0 | 0 | 1304   | 0.21262277 | -1.55080501 | 4.038815656 | -0.38397519 | 0.700996836 | 0.998252924 |
| chr1:249111975-249116971 | intronic   | SH3BP5L                                  | 1 | 249111975 | 249116971 | 0 | 0 | 0 | 2 | 0 | 0 | 4996   | 0.21262277 | -1.55080501 | 4.038815656 | -0.38397519 | 0.700996836 | 0.998252924 |
| chr1:26299048-26301141   | exonic     | PFAFAH2                                  | 1 | 26299048  | 26301141  | 0 | 0 | 0 | 2 | 0 | 0 | 2093   | 0.21262277 | -1.55080501 | 4.038815656 | -0.38397519 | 0.700996836 | 0.998252924 |
| chr1:28059642-28060140   | intronic   | FAM76A                                   | 1 | 28059642  | 28060140  | 0 | 0 | 0 | 2 | 0 | 0 | 498    | 0.21262277 | -1.55080501 | 4.038815656 | -0.38397519 | 0.700996836 | 0.998252924 |
| chr1:28323830-28330930   | exonic     | EYA3                                     | 1 | 28323830  | 28330930  | 0 | 0 | 0 | 2 | 0 | 0 | 7100   | 0.21262277 | -1.55080501 | 4.038815656 | -0.38397519 | 0.700996836 | 0.998252924 |
| chr1:29313959-29344954   | exonic     | EPB41                                    | 1 | 29313959  | 29344954  | 0 | 0 | 0 | 2 | 0 | 0 | 30995  | 0.21262277 | -1.55080501 | 4.038815656 | -0.38397519 | 0.700996836 | 0.998252924 |
| chr1:29319841-29323831   | exonic     | EPB41                                    | 1 | 29319841  | 29323831  | 0 | 0 | 0 | 2 | 0 | 0 | 3990   | 0.21262277 | -1.55080501 | 4.038815656 | -0.38397519 | 0.700996836 | 0.998252924 |
| chr1:33276191-33276658   | exonic     | YARS                                     | 1 | 33276191  | 33276658  | 0 | 0 | 0 | 2 | 0 | 0 | 467    | 0.21262277 | -1.55080501 | 4.038815656 | -0.38397519 | 0.700996836 | 0.998252924 |
| chr1:33747187-33760906   | exonic     | ZNF362                                   | 1 | 33747187  | 33760906  | 0 | 0 | 0 | 2 | 0 | 0 | 13719  | 0.21262277 | -1.55080501 | 4.038815656 | -0.38397519 | 0.700996836 | 0.998252924 |
| chr1:35870623-35871069   | exonic     | ZMYM4                                    | 1 | 35870623  | 35871069  | 0 | 0 | 0 | 2 | 0 | 0 | 446    | 0.21262277 | -1.55080501 | 4.038815656 | -0.38397519 | 0.700996836 | 0.998252924 |
| chr1:36282482-36292436   | exonic     | AGO4                                     | 1 | 36282482  | 36292436  | 0 | 0 | 0 | 2 | 0 | 0 | 9954   | 0.21262277 | -1.55080501 | 4.038815656 | -0.38397519 | 0.700996836 | 0.998252924 |
| chr1:36475075-36499934   | exonic     | AGO3                                     | 1 | 36475075  | 36499934  | 0 | 0 | 0 | 2 | 0 | 0 | 24859  | 0.21262277 | -1.55080501 | 4.038815656 | -0.38397519 | 0.700996836 | 0.998252924 |
| chr1:36505390-36509149   | exonic     | AGO3                                     | 1 | 36505390  | 36509149  | 0 | 0 | 0 | 2 | 0 | 0 | 3759   | 0.21262277 | -1.55080501 | 4.038815656 | -0.38397519 | 0.700996836 | 0.998252924 |
| chr1:36814300-36826941   | exonic     | STK40                                    | 1 | 36814300  | 36826941  | 0 | 0 | 0 | 2 | 0 | 0 | 12641  | 0.21262277 | -1.55080501 | 4.038815656 | -0.38397519 | 0.700996836 | 0.998252924 |
| chr1:39815149-39838268   | exonic     | MACF1                                    | 1 | 39815149  | 39838268  | 0 | 0 | 0 | 3 | 0 | 0 | 23119  | 0.21262277 | -1.55080501 | 4.038815656 | -0.38397519 | 0.700996836 | 0.998252924 |
| chr1:39916723-39926466   | exonic     | MACF1                                    | 1 | 39916723  | 39926466  | 0 | 0 | 0 | 2 | 0 | 0 | 9743   | 0.21262277 | -1.55080501 | 4.038815656 | -0.38397519 | 0.700996836 | 0.998252924 |
| chr1:44567232-44571186   | intergenic | SLC6A9 (dist=70068) , KLF17 (dist=13336) | 1 | 44567232  | 44571186  | 0 | 0 | 0 | 2 | 0 | 0 | 3954   | 0.21262277 | -1.55080501 | 4.038815656 | -0.38397519 | 0.700996836 | 0.998252924 |
| chr1:44778840-44804994   | exonic     | ERT3                                     | 1 | 44778840  | 44804994  | 0 | 0 | 0 | 2 | 0 | 0 | 26154  | 0.21262277 | -1.55080501 | 4.038815656 | -0.38397519 | 0.700996836 | 0.998252924 |
| chr1:45923235-45923543   | exonic     | TESK2                                    | 1 | 45923235  | 45923543  | 0 | 0 | 0 | 2 | 0 | 0 | 308    | 0.21262277 | -1.55080501 | 4.038815656 | -0.38397519 | 0.700996836 | 0.998252924 |
| chr1:4771959-4772759     | exonic     | AJAP1                                    | 1 | 4771959   | 4772759   | 0 | 0 | 0 | 2 | 0 | 0 | 800    | 0.21262277 | -1.55080501 | 4.038815656 | -0.38397519 | 0.700996836 | 0.998252924 |
| chr1:53540277-53547860   | exonic     | PODN                                     | 1 | 53540277  | 53547860  | 0 | 0 | 0 | 2 | 0 | 0 | 7583   | 0.21262277 | -1.55080501 | 4.038815656 | -0.38397519 | 0.700996836 | 0.998252924 |
| chr1:54348616-54348949   | exonic     | YIPF1                                    | 1 | 54348616  | 54348949  | 0 | 0 | 0 | 2 | 0 | 0 | 333    | 0.21262277 | -1.55080501 | 4.038815656 | -0.38397519 | 0.700996836 | 0.998252924 |
| chr1:54675618-54682017   | exonic     | MRPL37                                   | 1 | 54675618  | 54682017  | 0 | 0 | 0 | 2 | 0 | 0 | 6399   | 0.21262277 | -1.55080501 | 4.038815656 | -0.38397519 | 0.700996836 | 0.998252924 |
| chr1:55117621-55138859   | exonic     | MROH7                                    | 1 | 55117621  | 55138859  | 0 | 0 | 0 | 2 | 0 | 0 | 21238  | 0.21262277 | -1.55080501 | 4.038815656 | -0.38397519 | 0.700996836 | 0.998252924 |
| chr1:63877596-63894797   | exonic     | ALG6                                     | 1 | 63877596  | 63894797  | 0 | 0 | 0 | 2 | 0 | 0 | 17201  | 0.21262277 | -1.55080501 | 4.038815656 | -0.38397519 | 0.700996836 | 0.998252924 |
| chr1:64095096-64240179   | exonic     | PGM1, ROR1                               | 1 | 64095096  | 64240179  | 0 | 0 | 0 | 2 | 0 | 0 | 145083 | 0.21262277 | -1.55080501 | 4.038815656 | -0.38397519 | 0.700996836 | 0.998252924 |
| chr1:65129378-65130362   | exonic     | CACHD1                                   | 1 | 65129378  | 65130362  | 0 | 0 | 0 | 2 | 0 | 0 | 984    | 0.21262277 | -1.55080501 | 4.038815656 | -0.38397519 | 0.700996836 | 0.998252924 |
| chr1:66713142-66731770   | exonic     | PDE4B                                    | 1 | 66713142  | 66731770  | 0 | 0 | 0 | 2 | 0 | 0 | 18628  | 0.21262277 | -1.55080501 | 4.038815656 | -0.38397519 | 0.700996836 | 0.998252924 |
| chr1:78248922-78329713   | exonic     | FAM73A                                   | 1 | 78248922  | 78329713  | 0 | 0 | 0 | 2 | 0 | 0 | 80791  | 0.21262277 | -1.55080501 | 4.038815656 | -0.38397519 | 0.700996836 | 0.998252924 |
| chr1:78324622-78332076   | exonic     | FAM73A                                   | 1 | 78324622  | 78332076  | 0 | 0 | 0 | 2 | 0 | 0 | 7454   | 0.21262277 | -1.55080501 | 4.038815656 | -0.38397519 | 0.700996836 | 0.998252924 |
| chr1:82372701-82409453   | exonic     | ADGRL2                                   | 1 | 82372701  | 82409453  | 0 | 0 | 0 | 2 | 0 | 0 | 36752  | 0.21262277 | -1.55080501 | 4.038815656 | -0.38397519 | 0.700996836 | 0.998252924 |
| chr1:85655739-85656435   | exonic     | SYDE2                                    | 1 | 85655739  | 85656435  | 0 | 0 | 0 | 2 | 0 | 0 | 696    | 0.21262277 | -1.55080501 | 4.038815656 | -0.38397519 | 0.700996836 | 0.998252924 |
| chr1:89272995-89287686   | exonic     | PKN2                                     | 1 | 89272995  | 89287686  | 0 | 0 | 0 | 2 | 0 | 0 | 14691  | 0.21262277 | -1.55080501 | 4.038815656 | -0.38397519 | 0.700996836 | 0.998252924 |
| chr1:91808986-91818856   | exonic     | HFM1                                     | 1 | 91808986  | 91818856  | 0 | 0 | 0 | 2 | 0 | 0 | 9870   | 0.21262277 | -1.55080501 | 4.038815656 | -0.38397519 | 0.700996836 | 0.998252924 |
| chr1:92193215-92224307   | exonic     | TGFBR3                                   | 1 | 92193215  | 92224307  | 0 | 0 | 0 | 2 | 0 | 0 | 31092  | 0.21262277 | -1.55080501 | 4.038815656 | -0.38397519 | 0.700996836 | 0.998252924 |

|                           |              |         |    |           |           |   |   |   |   |   |   |        |            |             |             |             |             |             |
|---------------------------|--------------|---------|----|-----------|-----------|---|---|---|---|---|---|--------|------------|-------------|-------------|-------------|-------------|-------------|
| chr1:93594834-93599752    | exonic       | MTF2    | 1  | 93594834  | 93599752  | 0 | 0 | 0 | 2 | 0 | 0 | 4918   | 0.21262277 | -1.55080501 | 4.038815656 | -0.38397519 | 0.700996836 | 0.998252924 |
| chr1:94930330-94965170    | exonic       | ABCD3   | 1  | 94930330  | 94965170  | 0 | 0 | 0 | 2 | 0 | 0 | 34840  | 0.21262277 | -1.55080501 | 4.038815656 | -0.38397519 | 0.700996836 | 0.998252924 |
| chr1:95367224-95369080    | exonic       | CNN3    | 1  | 95367224  | 95369080  | 0 | 0 | 0 | 2 | 0 | 0 | 1856   | 0.21262277 | -1.55080501 | 4.038815656 | -0.38397519 | 0.700996836 | 0.998252924 |
| chr1:98015115-98060722    | exonic       | DPYD    | 1  | 98015115  | 98060722  | 0 | 0 | 0 | 2 | 0 | 0 | 45607  | 0.21262277 | -1.55080501 | 4.038815656 | -0.38397519 | 0.700996836 | 0.998252924 |
| chr10:100189329-100191048 | exonic       | HPS1    | 10 | 100189329 | 100191048 | 0 | 0 | 0 | 2 | 0 | 0 | 1719   | 0.21262277 | -1.55080501 | 4.038815656 | -0.38397519 | 0.700996836 | 0.998252924 |
| chr10:102683731-102690835 | exonic       | SLF2    | 10 | 102683731 | 102690835 | 0 | 0 | 0 | 2 | 0 | 0 | 7104   | 0.21262277 | -1.55080501 | 4.038815656 | -0.38397519 | 0.700996836 | 0.998252924 |
| chr10:103557736-103567658 | exonic       | MGEA5   | 10 | 103557736 | 103567658 | 3 | 0 | 0 | 2 | 0 | 0 | 9922   | 0.21262277 | -1.55080501 | 4.038815656 | -0.38397519 | 0.700996836 | 0.998252924 |
| chr10:103563491-103563776 | exonic       | MGEA5   | 10 | 103563491 | 103563776 | 0 | 0 | 0 | 2 | 0 | 0 | 285    | 0.21262277 | -1.55080501 | 4.038815656 | -0.38397519 | 0.700996836 | 0.998252924 |
| chr10:103904006-103904847 | exonic       | PPRC1   | 10 | 103904006 | 103904847 | 0 | 0 | 0 | 2 | 0 | 0 | 841    | 0.21262277 | -1.55080501 | 4.038815656 | -0.38397519 | 0.700996836 | 0.998252924 |
| chr10:1130342-1151207     | exonic       | WDR37   | 10 | 1130342   | 1151207   | 0 | 0 | 0 | 2 | 0 | 0 | 20865  | 0.21262277 | -1.55080501 | 4.038815656 | -0.38397519 | 0.700996836 | 0.998252924 |
| chr10:11363169-11371060   | exonic       | CELF2   | 10 | 11363169  | 11371060  | 0 | 0 | 0 | 2 | 0 | 0 | 7891   | 0.21262277 | -1.55080501 | 4.038815656 | -0.38397519 | 0.700996836 | 0.998252924 |
| chr10:119049696-119100613 | exonic       | PDZD8   | 10 | 119049696 | 119100613 | 0 | 0 | 0 | 2 | 0 | 0 | 50917  | 0.21262277 | -1.55080501 | 4.038815656 | -0.38397519 | 0.700996836 | 0.998252924 |
| chr10:11994064-12056183   | exonic       | UPF2    | 10 | 11994064  | 12056183  | 0 | 0 | 0 | 2 | 0 | 0 | 62119  | 0.21262277 | -1.55080501 | 4.038815656 | -0.38397519 | 0.700996836 | 0.998252924 |
| chr10:11997230-12006124   | exonic       | UPF2    | 10 | 11997230  | 12006124  | 0 | 0 | 0 | 2 | 0 | 0 | 8894   | 0.21262277 | -1.55080501 | 4.038815656 | -0.38397519 | 0.700996836 | 0.998252924 |
| chr10:12291580-12292426   | exonic       | CDC123  | 10 | 12291580  | 12292426  | 0 | 0 | 0 | 2 | 0 | 0 | 846    | 0.21262277 | -1.55080501 | 4.038815656 | -0.38397519 | 0.700996836 | 0.998252924 |
| chr10:123658215-123673408 | exonic       | ATE1    | 10 | 123658215 | 123673408 | 0 | 0 | 0 | 2 | 0 | 0 | 15193  | 0.21262277 | -1.55080501 | 4.038815656 | -0.38397519 | 0.700996836 | 0.998252924 |
| chr10:12571821-12595355   | exonic       | CAMK1D  | 10 | 12571821  | 12595355  | 0 | 0 | 0 | 2 | 0 | 0 | 23534  | 0.21262277 | -1.55080501 | 4.038815656 | -0.38397519 | 0.700996836 | 0.998252924 |
| chr10:13150961-13151288   | exonic       | OPTN    | 10 | 13150961  | 13151288  | 0 | 0 | 0 | 2 | 0 | 0 | 327    | 0.21262277 | -1.55080501 | 4.038815656 | -0.38397519 | 0.700996836 | 0.998252924 |
| chr10:131964770-131967754 | exonic       | GLRX3   | 10 | 131964770 | 131967754 | 0 | 0 | 0 | 2 | 0 | 0 | 2984   | 0.21262277 | -1.55080501 | 4.038815656 | -0.38397519 | 0.700996836 | 0.998252924 |
| chr10:13779843-13789819   | exonic       | FRMD4A  | 10 | 13779843  | 13789819  | 0 | 0 | 0 | 2 | 0 | 0 | 9976   | 0.21262277 | -1.55080501 | 4.038815656 | -0.38397519 | 0.700996836 | 0.998252924 |
| chr10:15686028-15689050   | exonic       | ITGA8   | 10 | 15686028  | 15689050  | 0 | 0 | 0 | 2 | 0 | 0 | 3022   | 0.21262277 | -1.55080501 | 4.038815656 | -0.38397519 | 0.700996836 | 0.998252924 |
| chr10:20290703-20466338   | exonic       | PLXDC2  | 10 | 20290703  | 20466338  | 0 | 0 | 0 | 2 | 0 | 0 | 175635 | 0.21262277 | -1.55080501 | 4.038815656 | -0.38397519 | 0.700996836 | 0.998252924 |
| chr10:21906040-21959633   | exonic       | MLLT10  | 10 | 21906040  | 21959633  | 0 | 0 | 0 | 2 | 0 | 0 | 53593  | 0.21262277 | -1.55080501 | 4.038815656 | -0.38397519 | 0.700996836 | 0.998252924 |
| chr10:27317780-27332496   | exonic       | ANKRD26 | 10 | 27317780  | 27332496  | 0 | 0 | 0 | 2 | 0 | 0 | 14716  | 0.21262277 | -1.55080501 | 4.038815656 | -0.38397519 | 0.700996836 | 0.998252924 |
| chr10:33093942-33113532   | exonic       | CCDC7   | 10 | 33093942  | 33113532  | 0 | 0 | 0 | 2 | 0 | 0 | 19590  | 0.21262277 | -1.55080501 | 4.038815656 | -0.38397519 | 0.700996836 | 0.998252924 |
| chr10:33208812-33224486   | exonic       | ITGB1   | 10 | 33208812  | 33224486  | 0 | 0 | 0 | 2 | 0 | 0 | 15674  | 0.21262277 | -1.55080501 | 4.038815656 | -0.38397519 | 0.700996836 | 0.998252924 |
| chr10:33214798-33224486   | exonic       | ITGB1   | 10 | 33214798  | 33224486  | 0 | 0 | 0 | 2 | 0 | 0 | 9688   | 0.21262277 | -1.55080501 | 4.038815656 | -0.38397519 | 0.700996836 | 0.998252924 |
| chr10:38138922-38142415   | intronic     | ZNF248  | 10 | 38138922  | 38142415  | 0 | 0 | 0 | 2 | 0 | 0 | 3493   | 0.21262277 | -1.55080501 | 4.038815656 | -0.38397519 | 0.700996836 | 0.998252924 |
| chr10:46028558-46086022   | exonic       |         | 10 | 46028558  | 46086022  | 0 | 0 | 0 | 2 | 0 | 0 | 57464  | 0.21262277 | -1.55080501 | 4.038815656 | -0.38397519 | 0.700996836 | 0.998252924 |
| chr10:46158989-46159290   | exonic       | ZFAND4  | 10 | 46158989  | 46159290  | 0 | 0 | 0 | 2 | 0 | 0 | 301    | 0.21262277 | -1.55080501 | 4.038815656 | -0.38397519 | 0.700996836 | 0.998252924 |
| chr10:4872867-4932115     | exonic       | AKR1E2  | 10 | 4872867   | 4932115   | 0 | 0 | 0 | 2 | 0 | 0 | 59248  | 0.21262277 | -1.55080501 | 4.038815656 | -0.38397519 | 0.700996836 | 0.998252924 |
| chr10:4915406-4951798     | ncRNA_exonic | AKRIC6P | 10 | 4915406   | 4951798   | 0 | 0 | 0 | 2 | 0 | 0 | 36392  | 0.21262277 | -1.55080501 | 4.038815656 | -0.38397519 | 0.700996836 | 0.998252924 |
| chr10:53564344-53822391   | exonic       | PRKG1   | 10 | 53564344  | 53822391  | 0 | 0 | 0 | 2 | 0 | 0 | 258047 | 0.21262277 | -1.55080501 | 4.038815656 | -0.38397519 | 0.700996836 | 0.998252924 |
| chr10:6001716-6002530     | exonic       | IL15RA  | 10 | 6001716   | 6002530   | 0 | 0 | 0 | 2 | 0 | 0 | 814    | 0.21262277 | -1.55080501 | 4.038815656 | -0.38397519 | 0.700996836 | 0.998252924 |
| chr10:6008858-6009277     | intronic     | IL15RA  | 10 | 6008858   | 6009277   | 0 | 0 | 0 | 2 | 0 | 0 | 419    | 0.21262277 | -1.55080501 | 4.038815656 | -0.38397519 | 0.700996836 | 0.998252924 |

8-Mar

|                           |          |               |    |           |           |   |   |   |   |   |   |        |            |             |             |             |             |             |
|---------------------------|----------|---------------|----|-----------|-----------|---|---|---|---|---|---|--------|------------|-------------|-------------|-------------|-------------|-------------|
| chr10:63958042-63959620   | exonic   | RTKN2         | 10 | 63958042  | 63959620  | 0 | 0 | 0 | 2 | 0 | 0 | 1578   | 0.21262277 | -1.55080501 | 4.038815656 | -0.38397519 | 0.700996836 | 0.998252924 |
| chr10:63958042-63978060   | exonic   | RTKN2         | 10 | 63958042  | 63978060  | 0 | 0 | 0 | 2 | 0 | 0 | 20018  | 0.21262277 | -1.55080501 | 4.038815656 | -0.38397519 | 0.700996836 | 0.998252924 |
| chr10:63958042-63983091   | exonic   | RTKN2         | 10 | 63958042  | 63983091  | 0 | 0 | 0 | 2 | 0 | 0 | 25049  | 0.21262277 | -1.55080501 | 4.038815656 | -0.38397519 | 0.700996836 | 0.998252924 |
| chr10:69692353-69785433   | exonic   | HERC4         | 10 | 69692353  | 69785433  | 0 | 0 | 0 | 2 | 0 | 0 | 93080  | 0.21262277 | -1.55080501 | 4.038815656 | -0.38397519 | 0.700996836 | 0.998252924 |
| chr10:69695909-69785433   | exonic   | HERC4         | 10 | 69695909  | 69785433  | 0 | 0 | 0 | 2 | 0 | 0 | 89524  | 0.21262277 | -1.55080501 | 4.038815656 | -0.38397519 | 0.700996836 | 0.998252924 |
| chr10:69714351-69797926   | exonic   | HERC4         | 10 | 69714351  | 69797926  | 3 | 0 | 0 | 1 | 0 | 0 | 83575  | 0.21262277 | -1.55080501 | 4.038815656 | -0.38397519 | 0.700996836 | 0.998252924 |
| chr10:69748419-69804320   | exonic   | HERC4         | 10 | 69748419  | 69804320  | 0 | 0 | 0 | 2 | 0 | 0 | 55901  | 0.21262277 | -1.55080501 | 4.038815656 | -0.38397519 | 0.700996836 | 0.998252924 |
| chr10:70411602-70442730   | exonic   | TET1          | 10 | 70411602  | 70442730  | 0 | 0 | 0 | 2 | 0 | 0 | 31128  | 0.21262277 | -1.55080501 | 4.038815656 | -0.38397519 | 0.700996836 | 0.998252924 |
| chr10:72617370-72629654   | exonic   | SGPL1         | 10 | 72617370  | 72629654  | 0 | 0 | 0 | 2 | 0 | 0 | 12284  | 0.21262277 | -1.55080501 | 4.038815656 | -0.38397519 | 0.700996836 | 0.998252924 |
| chr10:7285519-7423911     | exonic   | SFMBT2        | 10 | 7285519   | 7423911   | 0 | 0 | 0 | 2 | 0 | 0 | 138392 | 0.21262277 | -1.55080501 | 4.038815656 | -0.38397519 | 0.700996836 | 0.998252924 |
| chr10:75069915-75072401   | exonic   | CFAP70        | 10 | 75069915  | 75072401  | 0 | 0 | 0 | 2 | 0 | 0 | 2486   | 0.21262277 | -1.55080501 | 4.038815656 | -0.38397519 | 0.700996836 | 0.998252924 |
| chr10:75214169-75234788   | exonic   | PPP3CB        | 10 | 75214169  | 75234788  | 3 | 2 | 0 | 2 | 0 | 0 | 20619  | 0.21262277 | -1.55080501 | 4.038815656 | -0.38397519 | 0.700996836 | 0.998252924 |
| chr10:75331179-75336119   | exonic   | USP54         | 10 | 75331179  | 75336119  | 0 | 0 | 0 | 2 | 0 | 0 | 4940   | 0.21262277 | -1.55080501 | 4.038815656 | -0.38397519 | 0.700996836 | 0.998252924 |
| chr10:75579290-75583842   | exonic   | CAMK2G        | 10 | 75579290  | 75583842  | 0 | 0 | 0 | 2 | 0 | 0 | 4552   | 0.21262277 | -1.55080501 | 4.038815656 | -0.38397519 | 0.700996836 | 0.998252924 |
| chr10:7801852-7817762     | exonic   | KIN           | 10 | 7801852   | 7817762   | 0 | 0 | 0 | 2 | 0 | 0 | 15910  | 0.21262277 | -1.55080501 | 4.038815656 | -0.38397519 | 0.700996836 | 0.998252924 |
| chr10:81459935-81588207   | exonic   | NUTM2B        | 10 | 81459935  | 81588207  | 0 | 0 | 0 | 2 | 0 | 0 | 128272 | 0.21262277 | -1.55080501 | 4.038815656 | -0.38397519 | 0.700996836 | 0.998252924 |
| chr10:875324-890995       | exonic   | LARP4B        | 10 | 875324    | 890995    | 0 | 0 | 0 | 2 | 0 | 0 | 15671  | 0.21262277 | -1.55080501 | 4.038815656 | -0.38397519 | 0.700996836 | 0.998252924 |
| chr10:88817447-88822592   | exonic   | GLUD1         | 10 | 88817447  | 88822592  | 0 | 0 | 0 | 2 | 0 | 0 | 5145   | 0.21262277 | -1.55080501 | 4.038815656 | -0.38397519 | 0.700996836 | 0.998252924 |
| chr10:91478467-91486278   | exonic   | KIF20B        | 10 | 91478467  | 91486278  | 0 | 0 | 0 | 2 | 0 | 0 | 7811   | 0.21262277 | -1.55080501 | 4.038815656 | -0.38397519 | 0.700996836 | 0.998252924 |
| chr10:96022251-96044722   | exonic   | PLCE1         | 10 | 96022251  | 96044722  | 0 | 0 | 0 | 2 | 0 | 0 | 22471  | 0.21262277 | -1.55080501 | 4.038815656 | -0.38397519 | 0.700996836 | 0.998252924 |
| chr10:96256811-96267104   | exonic   | TBC1D12       | 10 | 96256811  | 96267104  | 0 | 0 | 0 | 2 | 0 | 0 | 10293  | 0.21262277 | -1.55080501 | 4.038815656 | -0.38397519 | 0.700996836 | 0.998252924 |
| chr10:96256811-96269936   | exonic   | TBC1D12       | 10 | 96256811  | 96269936  | 0 | 0 | 0 | 2 | 0 | 0 | 13125  | 0.21262277 | -1.55080501 | 4.038815656 | -0.38397519 | 0.700996836 | 0.998252924 |
| chr10:96985305-96998442   | exonic   | ACSM6, PDLIM1 | 10 | 96985305  | 96998442  | 0 | 0 | 0 | 2 | 0 | 0 | 13137  | 0.21262277 | -1.55080501 | 4.038815656 | -0.38397519 | 0.700996836 | 0.998252924 |
| chr10:96998324-97007123   | exonic   | PDLIM1        | 10 | 96998324  | 97007123  | 0 | 0 | 0 | 2 | 0 | 0 | 8799   | 0.21262277 | -1.55080501 | 4.038815656 | -0.38397519 | 0.700996836 | 0.998252924 |
| chr10:98644160-98667504   | UTR5     | -----         | 10 | 98644160  | 98667504  | 0 | 0 | 0 | 2 | 0 | 0 | 23344  | 0.21262277 | -1.55080501 | 4.038815656 | -0.38397519 | 0.700996836 | 0.998252924 |
| chr11:10794673-10797180   | exonic   | CTR9          | 11 | 10794673  | 10797180  | 0 | 0 | 0 | 2 | 0 | 0 | 2507   | 0.21262277 | -1.55080501 | 4.038815656 | -0.38397519 | 0.700996836 | 0.998252924 |
| chr11:108016929-108019585 | exonic   | ACAT1         | 11 | 108016929 | 108019585 | 0 | 0 | 0 | 2 | 0 | 0 | 2656   | 0.21262277 | -1.55080501 | 4.038815656 | -0.38397519 | 0.700996836 | 0.998252924 |
| chr11:110109299-110109847 | intronic | RDX           | 11 | 110109299 | 110109847 | 0 | 0 | 0 | 2 | 0 | 0 | 548    | 0.21262277 | -1.55080501 | 4.038815656 | -0.38397519 | 0.700996836 | 0.998252924 |
| chr11:113607341-113619142 | exonic   | ZW10          | 11 | 113607341 | 113619142 | 0 | 0 | 0 | 2 | 0 | 0 | 11801  | 0.21262277 | -1.55080501 | 4.038815656 | -0.38397519 | 0.700996836 | 0.998252924 |
| chr11:117973815-117975535 | exonic   | TMPRSS4       | 11 | 117973815 | 117975535 | 0 | 0 | 0 | 2 | 0 | 0 | 1720   | 0.21262277 | -1.55080501 | 4.038815656 | -0.38397519 | 0.700996836 | 0.998252924 |
| chr11:118453076-118453519 | intronic | ARCN1         | 11 | 118453076 | 118453519 | 0 | 0 | 0 | 2 | 0 | 0 | 443    | 0.21262277 | -1.55080501 | 4.038815656 | -0.38397519 | 0.700996836 | 0.998252924 |
| chr11:118994278-118997835 | exonic   | HINFP         | 11 | 118994278 | 118997835 | 0 | 0 | 0 | 2 | 0 | 0 | 3557   | 0.21262277 | -1.55080501 | 4.038815656 | -0.38397519 | 0.700996836 | 0.998252924 |
| chr11:120310837-120312911 | exonic   | ARHGEF12      | 11 | 120310837 | 120312911 | 0 | 0 | 0 | 2 | 0 | 0 | 2074   | 0.21262277 | -1.55080501 | 4.038815656 | -0.38397519 | 0.700996836 | 0.998252924 |
| chr11:125201714-125237881 | exonic   | PKNOX2        | 11 | 125201714 | 125237881 | 0 | 0 | 0 | 2 | 0 | 0 | 36167  | 0.21262277 | -1.55080501 | 4.038815656 | -0.38397519 | 0.700996836 | 0.998252924 |
| chr11:17126715-17141521   | exonic   | PIK3C2A       | 11 | 17126715  | 17141521  | 0 | 0 | 0 | 2 | 0 | 0 | 14806  | 0.21262277 | -1.55080501 | 4.038815656 | -0.38397519 | 0.700996836 | 0.998252924 |

|                         |            |                                                            |    |          |          |   |   |   |   |   |   |       |            |             |             |             |             |             |
|-------------------------|------------|------------------------------------------------------------|----|----------|----------|---|---|---|---|---|---|-------|------------|-------------|-------------|-------------|-------------|-------------|
| chr11:18305341-18309560 | exonic     | HPS5                                                       | 11 | 18305341 | 18309560 | 0 | 0 | 0 | 2 | 0 | 0 | 4219  | 0.21262277 | -1.55080501 | 4.038815656 | -0.38397519 | 0.700996836 | 0.998252924 |
| chr11:20083852-20099650 | exonic     | NAV2                                                       | 11 | 20083852 | 20099650 | 0 | 0 | 0 | 2 | 0 | 0 | 15798 | 0.21262277 | -1.55080501 | 4.038815656 | -0.38397519 | 0.700996836 | 0.998252924 |
| chr11:20083852-20104725 | exonic     | NAV2                                                       | 11 | 20083852 | 20104725 | 0 | 0 | 0 | 5 | 0 | 0 | 20873 | 0.21262277 | -1.55080501 | 4.038815656 | -0.38397519 | 0.700996836 | 0.998252924 |
| chr11:28311752-28318478 | exonic     | METTL15                                                    | 11 | 28311752 | 28318478 | 0 | 0 | 0 | 2 | 0 | 0 | 6726  | 0.21262277 | -1.55080501 | 4.038815656 | -0.38397519 | 0.700996836 | 0.998252924 |
| chr11:33307958-33369299 | exonic     | HIPK3                                                      | 11 | 33307958 | 33369299 | 0 | 0 | 0 | 2 | 0 | 0 | 61341 | 0.21262277 | -1.55080501 | 4.038815656 | -0.38397519 | 0.700996836 | 0.998252924 |
| chr11:43421437-43429127 | exonic     | TTC17                                                      | 11 | 43421437 | 43429127 | 0 | 0 | 0 | 2 | 0 | 0 | 7690  | 0.21262277 | -1.55080501 | 4.038815656 | -0.38397519 | 0.700996836 | 0.998252924 |
| chr11:46380601-46381248 | intronic   | DGKZ                                                       | 11 | 46380601 | 46381248 | 0 | 0 | 0 | 2 | 0 | 0 | 647   | 0.21262277 | -1.55080501 | 4.038815656 | -0.38397519 | 0.700996836 | 0.998252924 |
| chr11:47444124-47444524 | exonic     | PSMC3                                                      | 11 | 47444124 | 47444524 | 0 | 0 | 0 | 2 | 0 | 0 | 400   | 0.21262277 | -1.55080501 | 4.038815656 | -0.38397519 | 0.700996836 | 0.998252924 |
| chr11:48084788-48086661 | intronic   | PTPRJ                                                      | 11 | 48084788 | 48086661 | 0 | 0 | 0 | 2 | 0 | 0 | 1873  | 0.21262277 | -1.55080501 | 4.038815656 | -0.38397519 | 0.700996836 | 0.998252924 |
| chr11:57460082-57463515 | exonic     | ZDHC5                                                      | 11 | 57460082 | 57463515 | 0 | 0 | 0 | 2 | 0 | 0 | 3433  | 0.21262277 | -1.55080501 | 4.038815656 | -0.38397519 | 0.700996836 | 0.998252924 |
| chr11:60687157-60688460 | exonic     | TMEM109                                                    | 11 | 60687157 | 60688460 | 0 | 0 | 0 | 2 | 0 | 0 | 1303  | 0.21262277 | -1.55080501 | 4.038815656 | -0.38397519 | 0.700996836 | 0.998252924 |
| chr11:61912453-61914374 | exonic     | INCENP                                                     | 11 | 61912453 | 61914374 | 0 | 0 | 0 | 2 | 0 | 0 | 1921  | 0.21262277 | -1.55080501 | 4.038815656 | -0.38397519 | 0.700996836 | 0.998252924 |
| chr11:62502854-62505962 | exonic     | TTC9C                                                      | 11 | 62502854 | 62505962 | 0 | 0 | 0 | 2 | 0 | 0 | 3108  | 0.21262277 | -1.55080501 | 4.038815656 | -0.38397519 | 0.700996836 | 0.998252924 |
| chr11:63719878-63720311 | exonic     | NAA40                                                      | 11 | 63719878 | 63720311 | 0 | 0 | 0 | 2 | 0 | 0 | 433   | 0.21262277 | -1.55080501 | 4.038815656 | -0.38397519 | 0.700996836 | 0.998252924 |
| chr11:63961660-63965446 | exonic     | STIP1                                                      | 11 | 63961660 | 63965446 | 0 | 0 | 0 | 2 | 0 | 0 | 3786  | 0.21262277 | -1.55080501 | 4.038815656 | -0.38397519 | 0.700996836 | 0.998252924 |
| chr11:64570155-64570356 | splicing   | MAP4K2                                                     | 11 | 64570155 | 64570356 | 0 | 0 | 0 | 2 | 0 | 0 | 201   | 0.21262277 | -1.55080501 | 4.038815656 | -0.38397519 | 0.700996836 | 0.998252924 |
| chr11:65417227-65417522 | exonic     | SIPA1                                                      | 11 | 65417227 | 65417522 | 0 | 0 | 0 | 2 | 0 | 0 | 295   | 0.21262277 | -1.55080501 | 4.038815656 | -0.38397519 | 0.700996836 | 0.998252924 |
| chr11:66416059-66421068 | intronic   | RBM4                                                       | 11 | 66416059 | 66421068 | 0 | 0 | 0 | 2 | 0 | 0 | 5009  | 0.21262277 | -1.55080501 | 4.038815656 | -0.38397519 | 0.700996836 | 0.998252924 |
| chr11:66571465-66590145 | exonic     | C11orf80                                                   | 11 | 66571465 | 66590145 | 0 | 0 | 0 | 2 | 0 | 0 | 18680 | 0.21262277 | -1.55080501 | 4.038815656 | -0.38397519 | 0.700996836 | 0.998252924 |
| chr11:668035-668935     | intronic   | DEAF1                                                      | 11 | 668035   | 668935   | 0 | 0 | 0 | 2 | 0 | 0 | 900   | 0.21262277 | -1.55080501 | 4.038815656 | -0.38397519 | 0.700996836 | 0.998252924 |
| chr11:66982810-66999431 | exonic     | KDM2A                                                      | 11 | 66982810 | 66999431 | 0 | 0 | 0 | 2 | 0 | 0 | 16621 | 0.21262277 | -1.55080501 | 4.038815656 | -0.38397519 | 0.700996836 | 0.998252924 |
| chr11:67809219-67811374 | exonic     | TCIRG1                                                     | 11 | 67809219 | 67811374 | 0 | 0 | 0 | 2 | 0 | 0 | 2155  | 0.21262277 | -1.55080501 | 4.038815656 | -0.38397519 | 0.700996836 | 0.998252924 |
| chr11:68334481-68377491 | exonic     | PPP6R3                                                     | 11 | 68334481 | 68377491 | 0 | 0 | 0 | 2 | 0 | 0 | 43010 | 0.21262277 | -1.55080501 | 4.038815656 | -0.38397519 | 0.700996836 | 0.998252924 |
| chr11:68355394-68370960 | exonic     | PPP6R3                                                     | 11 | 68355394 | 68370960 | 0 | 0 | 0 | 2 | 0 | 0 | 15566 | 0.21262277 | -1.55080501 | 4.038815656 | -0.38397519 | 0.700996836 | 0.998252924 |
| chr11:68527692-68529155 | exonic     | CPT1A                                                      | 11 | 68527692 | 68529155 | 0 | 0 | 0 | 2 | 0 | 0 | 1463  | 0.21262277 | -1.55080501 | 4.038815656 | -0.38397519 | 0.700996836 | 0.998252924 |
| chr11:70003052-70017145 | exonic     | ANO1                                                       | 11 | 70003052 | 70017145 | 0 | 0 | 0 | 2 | 0 | 0 | 14093 | 0.21262277 | -1.55080501 | 4.038815656 | -0.38397519 | 0.700996836 | 0.998252924 |
| chr11:72535104-72540029 | exonic     | ATG16L2                                                    | 11 | 72535104 | 72540029 | 0 | 0 | 0 | 2 | 0 | 0 | 4925  | 0.21262277 | -1.55080501 | 4.038815656 | -0.38397519 | 0.700996836 | 0.998252924 |
| chr11:76169226-76175124 | exonic     | EMSY                                                       | 11 | 76169226 | 76175124 | 0 | 0 | 0 | 2 | 0 | 0 | 5898  | 0.21262277 | -1.55080501 | 4.038815656 | -0.38397519 | 0.700996836 | 0.998252924 |
| chr11:77812139-77823816 | exonic     | ALG8                                                       | 11 | 77812139 | 77823816 | 0 | 0 | 0 | 2 | 0 | 0 | 11677 | 0.21262277 | -1.55080501 | 4.038815656 | -0.38397519 | 0.700996836 | 0.998252924 |
| chr11:78516336-78525440 | exonic     | TENM4                                                      | 11 | 78516336 | 78525440 | 0 | 0 | 0 | 2 | 0 | 0 | 9104  | 0.21262277 | -1.55080501 | 4.038815656 | -0.38397519 | 0.700996836 | 0.998252924 |
| chr11:8724118-8728772   | exonic     | ST5                                                        | 11 | 8724118  | 8728772  | 0 | 0 | 0 | 2 | 0 | 0 | 4654  | 0.21262277 | -1.55080501 | 4.038815656 | -0.38397519 | 0.700996836 | 0.998252924 |
| chr11:91963542-91968159 | intergenic | <small>DISC1FP1 (dist=1315322), FAT3 (dist=117103)</small> | 11 | 91963542 | 91968159 | 0 | 0 | 0 | 2 | 0 | 0 | 4617  | 0.21262277 | -1.55080501 | 4.038815656 | -0.38397519 | 0.700996836 | 0.998252924 |
| chr11:9215040-9229179   | exonic     | DENND5A                                                    | 11 | 9215040  | 9229179  | 0 | 0 | 0 | 2 | 0 | 0 | 14139 | 0.21262277 | -1.55080501 | 4.038815656 | -0.38397519 | 0.700996836 | 0.998252924 |
| chr11:92981557-92985425 | intergenic | <small>SLC38A4 (dist=50416), CCDC67 (dist=78458)</small>   | 11 | 92981557 | 92985425 | 0 | 0 | 0 | 2 | 0 | 0 | 3868  | 0.21262277 | -1.55080501 | 4.038815656 | -0.38397519 | 0.700996836 | 0.998252924 |
| chr11:9444553-9446809   | exonic     | IPO7                                                       | 11 | 9444553  | 9446809  | 0 | 0 | 0 | 2 | 0 | 0 | 2256  | 0.21262277 | -1.55080501 | 4.038815656 | -0.38397519 | 0.700996836 | 0.998252924 |

|                           |              |                                      |    |           |           |   |   |   |   |   |   |       |            |             |             |             |             |             |
|---------------------------|--------------|--------------------------------------|----|-----------|-----------|---|---|---|---|---|---|-------|------------|-------------|-------------|-------------|-------------|-------------|
| chr11:9746204-9754257     | exonic       | SWAP70                               | 11 | 9746204   | 9754257   | 0 | 0 | 0 | 2 | 0 | 0 | 8053  | 0.21262277 | -1.55080501 | 4.038815656 | -0.38397519 | 0.700996836 | 0.998252924 |
| chr11:9759759-9761894     | exonic       | SWAP70                               | 11 | 9759759   | 9761894   | 0 | 0 | 0 | 2 | 0 | 0 | 2135  | 0.21262277 | -1.55080501 | 4.038815656 | -0.38397519 | 0.700996836 | 0.998252924 |
| chr11:9834078-9853967     | exonic       | SBF2                                 | 11 | 9834078   | 9853967   | 0 | 0 | 0 | 2 | 0 | 0 | 19889 | 0.21262277 | -1.55080501 | 4.038815656 | -0.38397519 | 0.700996836 | 0.998252924 |
| chr12:100570821-100590757 | ncRNA_exonic | MIR1827                              | 12 | 100570821 | 100590757 | 0 | 0 | 0 | 2 | 0 | 0 | 19936 | 0.21262277 | -1.55080501 | 4.038815656 | -0.38397519 | 0.700996836 | 0.998252924 |
| chr12:100704821-100708392 | exonic       | SCYL2                                | 12 | 100704821 | 100708392 | 0 | 0 | 0 | 2 | 0 | 0 | 3571  | 0.21262277 | -1.55080501 | 4.038815656 | -0.38397519 | 0.700996836 | 0.998252924 |
| chr12:109052513-109055934 | exonic       | CORO1C                               | 12 | 109052513 | 109055934 | 0 | 0 | 0 | 2 | 0 | 0 | 3421  | 0.21262277 | -1.55080501 | 4.038815656 | -0.38397519 | 0.700996836 | 0.998252924 |
| chr12:109660311-109660717 | exonic       | ACACB                                | 12 | 109660311 | 109660717 | 0 | 0 | 0 | 2 | 0 | 0 | 406   | 0.21262277 | -1.55080501 | 4.038815656 | -0.38397519 | 0.700996836 | 0.998252924 |
| chr12:109660311-109684253 | exonic       | ACACB                                | 12 | 109660311 | 109684253 | 0 | 0 | 0 | 2 | 0 | 0 | 23942 | 0.21262277 | -1.55080501 | 4.038815656 | -0.38397519 | 0.700996836 | 0.998252924 |
| chr12:110344376-110349040 | exonic       | TCHP                                 | 12 | 110344376 | 110349040 | 0 | 0 | 0 | 2 | 0 | 0 | 4664  | 0.21262277 | -1.55080501 | 4.038815656 | -0.38397519 | 0.700996836 | 0.998252924 |
| chr12:110566754-110647021 | exonic       | IFT81                                | 12 | 110566754 | 110647021 | 0 | 0 | 0 | 2 | 0 | 0 | 80267 | 0.21262277 | -1.55080501 | 4.038815656 | -0.38397519 | 0.700996836 | 0.998252924 |
| chr12:110910883-110924522 | exonic       | FAM216A                              | 12 | 110910883 | 110924522 | 0 | 0 | 0 | 2 | 0 | 0 | 13639 | 0.21262277 | -1.55080501 | 4.038815656 | -0.38397519 | 0.700996836 | 0.998252924 |
| chr12:11199619-11273779   | exonic       | PRH1, PRH1-TAS2R14, TAS2R43, TAS2R46 | 12 | 11199619  | 11273779  | 0 | 0 | 0 | 2 | 0 | 0 | 74160 | 0.21262277 | -1.55080501 | 4.038815656 | -0.38397519 | 0.700996836 | 0.998252924 |
| chr12:112229865-112230586 | exonic       | ALDH2                                | 12 | 112229865 | 112230586 | 0 | 0 | 0 | 2 | 0 | 0 | 721   | 0.21262277 | -1.55080501 | 4.038815656 | -0.38397519 | 0.700996836 | 0.998252924 |
| chr12:112568314-112572870 | exonic       | TRAFD1                               | 12 | 112568314 | 112572870 | 0 | 0 | 0 | 2 | 0 | 0 | 4556  | 0.21262277 | -1.55080501 | 4.038815656 | -0.38397519 | 0.700996836 | 0.998252924 |
| chr12:112667501-112669519 | exonic       | HECTD4                               | 12 | 112667501 | 112669519 | 0 | 0 | 0 | 2 | 0 | 0 | 2018  | 0.21262277 | -1.55080501 | 4.038815656 | -0.38397519 | 0.700996836 | 0.998252924 |
| chr12:114832545-114841741 | exonic       | TBX5                                 | 12 | 114832545 | 114841741 | 0 | 0 | 0 | 2 | 0 | 0 | 9196  | 0.21262277 | -1.55080501 | 4.038815656 | -0.38397519 | 0.700996836 | 0.998252924 |
| chr12:117170435-117171097 | intronic     | C12orf49                             | 12 | 117170435 | 117171097 | 0 | 0 | 0 | 2 | 0 | 0 | 662   | 0.21262277 | -1.55080501 | 4.038815656 | -0.38397519 | 0.700996836 | 0.998252924 |
| chr12:118480645-118481182 | exonic       | WSB2                                 | 12 | 118480645 | 118481182 | 0 | 0 | 0 | 2 | 0 | 0 | 537   | 0.21262277 | -1.55080501 | 4.038815656 | -0.38397519 | 0.700996836 | 0.998252924 |
| chr12:118671478-118682770 | exonic       | TAOK3                                | 12 | 118671478 | 118682770 | 0 | 0 | 0 | 2 | 0 | 0 | 11292 | 0.21262277 | -1.55080501 | 4.038815656 | -0.38397519 | 0.700996836 | 0.998252924 |
| chr12:1192329-1250953     | exonic       | ERC1                                 | 12 | 1192329   | 1250953   | 0 | 0 | 0 | 2 | 0 | 0 | 58624 | 0.21262277 | -1.55080501 | 4.038815656 | -0.38397519 | 0.700996836 | 0.998252924 |
| chr12:121592587-121593950 | exonic       | P2RX7                                | 12 | 121592587 | 121593950 | 0 | 0 | 0 | 2 | 0 | 0 | 1363  | 0.21262277 | -1.55080501 | 4.038815656 | -0.38397519 | 0.700996836 | 0.998252924 |
| chr12:121858045-121861320 | exonic       | RNF34                                | 12 | 121858045 | 121861320 | 0 | 0 | 0 | 2 | 0 | 0 | 3275  | 0.21262277 | -1.55080501 | 4.038815656 | -0.38397519 | 0.700996836 | 0.998252924 |
| chr12:1225031-1299218     | exonic       | ERC1                                 | 12 | 1225031   | 1299218   | 0 | 0 | 0 | 2 | 0 | 0 | 74187 | 0.21262277 | -1.55080501 | 4.038815656 | -0.38397519 | 0.700996836 | 0.998252924 |
| chr12:123078822-123109235 | exonic       | KNTC1                                | 12 | 123078822 | 123109235 | 0 | 0 | 0 | 2 | 0 | 0 | 30413 | 0.21262277 | -1.55080501 | 4.038815656 | -0.38397519 | 0.700996836 | 0.998252924 |
| chr12:123552918-123571909 | ncRNA_exonic | LOC100507091                         | 12 | 123552918 | 123571909 | 0 | 0 | 0 | 2 | 0 | 0 | 18991 | 0.21262277 | -1.55080501 | 4.038815656 | -0.38397519 | 0.700996836 | 0.998252924 |
| chr12:132522226-132539753 | exonic       | EP400                                | 12 | 132522226 | 132539753 | 0 | 0 | 0 | 2 | 0 | 0 | 17527 | 0.21262277 | -1.55080501 | 4.038815656 | -0.38397519 | 0.700996836 | 0.998252924 |
| chr12:133696874-133698610 | exonic       | ZNF891                               | 12 | 133696874 | 133698610 | 0 | 0 | 0 | 2 | 0 | 0 | 1736  | 0.21262277 | -1.55080501 | 4.038815656 | -0.38397519 | 0.700996836 | 0.998252924 |
| chr12:15699502-15718562   | exonic       | PTPRO                                | 12 | 15699502  | 15718562  | 0 | 0 | 0 | 2 | 0 | 0 | 19060 | 0.21262277 | -1.55080501 | 4.038815656 | -0.38397519 | 0.700996836 | 0.998252924 |
| chr12:22622642-22646271   | exonic       | C2CD5                                | 12 | 22622642  | 22646271  | 0 | 0 | 0 | 2 | 0 | 0 | 23629 | 0.21262277 | -1.55080501 | 4.038815656 | -0.38397519 | 0.700996836 | 0.998252924 |
| chr12:25214526-25222365   | exonic       | LRMP                                 | 12 | 25214526  | 25222365  | 0 | 0 | 0 | 2 | 0 | 0 | 7839  | 0.21262277 | -1.55080501 | 4.038815656 | -0.38397519 | 0.700996836 | 0.998252924 |
| chr12:25299934-25314131   | exonic       | CASC1                                | 12 | 25299934  | 25314131  | 0 | 0 | 0 | 2 | 0 | 0 | 14197 | 0.21262277 | -1.55080501 | 4.038815656 | -0.38397519 | 0.700996836 | 0.998252924 |
| chr12:28458582-28481124   | exonic       | CCDC91                               | 12 | 28458582  | 28481124  | 0 | 0 | 0 | 2 | 0 | 0 | 22542 | 0.21262277 | -1.55080501 | 4.038815656 | -0.38397519 | 0.700996836 | 0.998252924 |
| chr12:28603093-28637098   | exonic       | CCDC91                               | 12 | 28603093  | 28637098  | 0 | 0 | 0 | 2 | 0 | 0 | 34005 | 0.21262277 | -1.55080501 | 4.038815656 | -0.38397519 | 0.700996836 | 0.998252924 |
| chr12:29812813-29814312   | intronic     | TMTC1                                | 12 | 29812813  | 29814312  | 0 | 0 | 0 | 2 | 0 | 0 | 1499  | 0.21262277 | -1.55080501 | 4.038815656 | -0.38397519 | 0.700996836 | 0.998252924 |
| chr12:29904598-29911710   | exonic       | TMTC1                                | 12 | 29904598  | 29911710  | 0 | 0 | 0 | 2 | 0 | 0 | 7112  | 0.21262277 | -1.55080501 | 4.038815656 | -0.38397519 | 0.700996836 | 0.998252924 |

|                           |            |                                          |    |           |           |   |   |   |   |   |   |        |            |             |             |             |             |             |
|---------------------------|------------|------------------------------------------|----|-----------|-----------|---|---|---|---|---|---|--------|------------|-------------|-------------|-------------|-------------|-------------|
| chr12:29908641-29911710   | exonic     | TMTC1                                    | 12 | 29908641  | 29911710  | 0 | 0 | 0 | 2 | 0 | 0 | 3069   | 0.21262277 | -1.55080501 | 4.038815656 | -0.38397519 | 0.700996836 | 0.998252924 |
| chr12:45725078-45751207   | exonic     | ANO6                                     | 12 | 45725078  | 45751207  | 0 | 0 | 0 | 2 | 0 | 0 | 26129  | 0.21262277 | -1.55080501 | 4.038815656 | -0.38397519 | 0.700996836 | 0.998252924 |
| chr12:49835513-49884514   | exonic     | SPATS2                                   | 12 | 49835513  | 49884514  | 0 | 0 | 0 | 2 | 0 | 0 | 49001  | 0.21262277 | -1.55080501 | 4.038815656 | -0.38397519 | 0.700996836 | 0.998252924 |
| chr12:50176480-50177203   | intergenic | TMB1M6 (dist=17763), NCKAP5L (dist=7726) | 12 | 50176480  | 50177203  | 0 | 0 | 0 | 2 | 0 | 0 | 723    | 0.21262277 | -1.55080501 | 4.038815656 | -0.38397519 | 0.700996836 | 0.998252924 |
| chr12:50547660-50556496   | intronic   | CERS5                                    | 12 | 50547660  | 50556496  | 0 | 0 | 0 | 2 | 0 | 0 | 8836   | 0.21262277 | -1.55080501 | 4.038815656 | -0.38397519 | 0.700996836 | 0.998252924 |
| chr12:50617744-50618808   | intronic   | LIMA1                                    | 12 | 50617744  | 50618808  | 0 | 0 | 0 | 2 | 0 | 0 | 1064   | 0.21262277 | -1.55080501 | 4.038815656 | -0.38397519 | 0.700996836 | 0.998252924 |
| chr12:53708082-53709566   | exonic     | AAAS                                     | 12 | 53708082  | 53709566  | 0 | 0 | 0 | 2 | 0 | 0 | 1484   | 0.21262277 | -1.55080501 | 4.038815656 | -0.38397519 | 0.700996836 | 0.998252924 |
| chr12:53849668-53853187   | exonic     | PCBP2                                    | 12 | 53849668  | 53853187  | 0 | 0 | 0 | 2 | 0 | 0 | 3519   | 0.21262277 | -1.55080501 | 4.038815656 | -0.38397519 | 0.700996836 | 0.998252924 |
| chr12:53928285-53931336   | exonic     | ATF7                                     | 12 | 53928285  | 53931336  | 0 | 0 | 0 | 2 | 0 | 0 | 3051   | 0.21262277 | -1.55080501 | 4.038815656 | -0.38397519 | 0.700996836 | 0.998252924 |
| chr12:54106883-54107684   | exonic     | CALCOCO1                                 | 12 | 54106883  | 54107684  | 0 | 0 | 0 | 2 | 0 | 0 | 801    | 0.21262277 | -1.55080501 | 4.038815656 | -0.38397519 | 0.700996836 | 0.998252924 |
| chr12:56151166-56154424   | exonic     | SARNP                                    | 12 | 56151166  | 56154424  | 0 | 0 | 0 | 2 | 0 | 0 | 3258   | 0.21262277 | -1.55080501 | 4.038815656 | -0.38397519 | 0.700996836 | 0.998252924 |
| chr12:56962758-56965639   | exonic     | RBMS2                                    | 12 | 56962758  | 56965639  | 0 | 0 | 0 | 2 | 0 | 0 | 2881   | 0.21262277 | -1.55080501 | 4.038815656 | -0.38397519 | 0.700996836 | 0.998252924 |
| chr12:58340777-58347472   | exonic     | XRCC6BP1                                 | 12 | 58340777  | 58347472  | 0 | 0 | 0 | 1 | 2 | 0 | 6695   | 0.21262277 | -1.55080501 | 4.038815656 | -0.38397519 | 0.700996836 | 0.998252924 |
| chr12:64410729-64437355   | exonic     | SRGAP1                                   | 12 | 64410729  | 64437355  | 0 | 0 | 0 | 2 | 0 | 0 | 26626  | 0.21262277 | -1.55080501 | 4.038815656 | -0.38397519 | 0.700996836 | 0.998252924 |
| chr12:64456696-64509673   | exonic     | SRGAP1                                   | 12 | 64456696  | 64509673  | 0 | 0 | 0 | 2 | 0 | 0 | 52977  | 0.21262277 | -1.55080501 | 4.038815656 | -0.38397519 | 0.700996836 | 0.998252924 |
| chr12:66603236-66622150   | exonic     | IRAK3                                    | 12 | 66603236  | 66622150  | 0 | 0 | 0 | 2 | 0 | 0 | 18914  | 0.21262277 | -1.55080501 | 4.038815656 | -0.38397519 | 0.700996836 | 0.998252924 |
| chr12:6879090-6879384     | exonic     | PTMS                                     | 12 | 6879090   | 6879384   | 0 | 0 | 0 | 2 | 0 | 0 | 294    | 0.21262277 | -1.55080501 | 4.038815656 | -0.38397519 | 0.700996836 | 0.998252924 |
| chr12:7063967-7065731     | exonic     | PTPN6                                    | 12 | 7063967   | 7065731   | 0 | 0 | 0 | 2 | 0 | 0 | 1764   | 0.21262277 | -1.55080501 | 4.038815656 | -0.38397519 | 0.700996836 | 0.998252924 |
| chr12:72012112-72014095   | exonic     | ZFC3H1                                   | 12 | 72012112  | 72014095  | 0 | 0 | 0 | 2 | 0 | 0 | 1983   | 0.21262277 | -1.55080501 | 4.038815656 | -0.38397519 | 0.700996836 | 0.998252924 |
| chr12:75698536-75720307   | exonic     | CAPS2                                    | 12 | 75698536  | 75720307  | 0 | 0 | 0 | 2 | 0 | 0 | 21771  | 0.21262277 | -1.55080501 | 4.038815656 | -0.38397519 | 0.700996836 | 0.998252924 |
| chr12:77214838-77216311   | exonic     | ZDHC17                                   | 12 | 77214838  | 77216311  | 0 | 0 | 0 | 2 | 0 | 0 | 1473   | 0.21262277 | -1.55080501 | 4.038815656 | -0.38397519 | 0.700996836 | 0.998252924 |
| chr12:80165177-80178527   | exonic     | PPP1R12A                                 | 12 | 80165177  | 80178527  | 0 | 0 | 0 | 2 | 0 | 0 | 13350  | 0.21262277 | -1.55080501 | 4.038815656 | -0.38397519 | 0.700996836 | 0.998252924 |
| chr12:9246060-9254270     | exonic     | A2M                                      | 12 | 9246060   | 9254270   | 0 | 0 | 0 | 2 | 0 | 0 | 8210   | 0.21262277 | -1.55080501 | 4.038815656 | -0.38397519 | 0.700996836 | 0.998252924 |
| chr12:9247569-9248296     | exonic     | A2M                                      | 12 | 9247569   | 9248296   | 0 | 0 | 0 | 2 | 0 | 0 | 727    | 0.21262277 | -1.55080501 | 4.038815656 | -0.38397519 | 0.700996836 | 0.998252924 |
| chr12:9256834-9266139     | exonic     | A2M                                      | 12 | 9256834   | 9266139   | 0 | 0 | 0 | 2 | 0 | 0 | 9305   | 0.21262277 | -1.55080501 | 4.038815656 | -0.38397519 | 0.700996836 | 0.998252924 |
| chr12:93192667-93196510   | exonic     | EEA1                                     | 12 | 93192667  | 93196510  | 0 | 0 | 0 | 2 | 0 | 0 | 3843   | 0.21262277 | -1.55080501 | 4.038815656 | -0.38397519 | 0.700996836 | 0.998252924 |
| chr12:95660132-95681633   | exonic     | VEZT                                     | 12 | 95660132  | 95681633  | 0 | 0 | 0 | 2 | 0 | 0 | 21501  | 0.21262277 | -1.55080501 | 4.038815656 | -0.38397519 | 0.700996836 | 0.998252924 |
| chr12:96897663-96929378   | exonic     | CFAP54                                   | 12 | 96897663  | 96929378  | 0 | 0 | 0 | 2 | 0 | 0 | 31715  | 0.21262277 | -1.55080501 | 4.038815656 | -0.38397519 | 0.700996836 | 0.998252924 |
| chr12:9856725-9862364     | intergenic | CLEC2D (dist=4574), CLECL1 (dist=6092)   | 12 | 9856725   | 9862364   | 0 | 0 | 0 | 2 | 0 | 0 | 5639   | 0.21262277 | -1.55080501 | 4.038815656 | -0.38397519 | 0.700996836 | 0.998252924 |
| chr13:100953713-101101559 | exonic     | PCCA                                     | 13 | 100953713 | 101101559 | 0 | 0 | 0 | 2 | 0 | 0 | 147846 | 0.21262277 | -1.55080501 | 4.038815656 | -0.38397519 | 0.700996836 | 0.998252924 |
| chr13:103459495-103484047 | exonic     | BIVM, BIVM-ERCC5                         | 13 | 103459495 | 103484047 | 0 | 0 | 0 | 2 | 0 | 0 | 24552  | 0.21262277 | -1.55080501 | 4.038815656 | -0.38397519 | 0.700996836 | 0.998252924 |
| chr13:110808182-110811199 | intronic   | COL4A1                                   | 13 | 110808182 | 110811199 | 0 | 0 | 0 | 2 | 0 | 0 | 3017   | 0.21262277 | -1.55080501 | 4.038815656 | -0.38397519 | 0.700996836 | 0.998252924 |
| chr13:110844651-110845176 | splicing   | COL4A1                                   | 13 | 110844651 | 110845176 | 0 | 0 | 0 | 2 | 0 | 0 | 525    | 0.21262277 | -1.55080501 | 4.038815656 | -0.38397519 | 0.700996836 | 0.998252924 |
| chr13:113897281-113898828 | exonic     | CUL4A                                    | 13 | 113897281 | 113898828 | 0 | 0 | 0 | 2 | 0 | 0 | 1547   | 0.21262277 | -1.55080501 | 4.038815656 | -0.38397519 | 0.700996836 | 0.998252924 |
| chr13:20235837-20242671   | exonic     | MPHOSPH8                                 | 13 | 20235837  | 20242671  | 0 | 0 | 0 | 2 | 0 | 0 | 6834   | 0.21262277 | -1.55080501 | 4.038815656 | -0.38397519 | 0.700996836 | 0.998252924 |



|                           |            |                                       |    |           |           |   |   |   |   |   |   |       |            |             |             |             |             |             |
|---------------------------|------------|---------------------------------------|----|-----------|-----------|---|---|---|---|---|---|-------|------------|-------------|-------------|-------------|-------------|-------------|
| chr13:24863136-24865022   | exonic     | SPATA13                               | 13 | 24863136  | 24865022  | 0 | 0 | 0 | 2 | 0 | 0 | 1886  | 0.21262277 | -1.55080501 | 4.038815656 | -0.38397519 | 0.700996836 | 0.998252924 |
| chr13:33739473-33741759   | exonic     | STARD13                               | 13 | 33739473  | 33741759  | 0 | 0 | 0 | 2 | 0 | 0 | 2286  | 0.21262277 | -1.55080501 | 4.038815656 | -0.38397519 | 0.700996836 | 0.998252924 |
| chr13:42481722-42486304   | exonic     | VWA8                                  | 13 | 42481722  | 42486304  | 0 | 0 | 0 | 2 | 0 | 0 | 4582  | 0.21262277 | -1.55080501 | 4.038815656 | -0.38397519 | 0.700996836 | 0.998252924 |
| chr13:42733402-42734272   | exonic     | DGKH                                  | 13 | 42733402  | 42734272  | 0 | 0 | 0 | 2 | 0 | 0 | 870   | 0.21262277 | -1.55080501 | 4.038815656 | -0.38397519 | 0.700996836 | 0.998252924 |
| chr13:46594583-46619651   | exonic     | ZC3H13                                | 13 | 46594583  | 46619651  | 0 | 0 | 0 | 2 | 0 | 0 | 25068 | 0.21262277 | -1.55080501 | 4.038815656 | -0.38397519 | 0.700996836 | 0.998252924 |
| chr13:47275255-47303119   | exonic     | LRCH1                                 | 13 | 47275255  | 47303119  | 0 | 0 | 0 | 2 | 0 | 0 | 27864 | 0.21262277 | -1.55080501 | 4.038815656 | -0.38397519 | 0.700996836 | 0.998252924 |
| chr13:47297356-47303119   | exonic     | LRCH1                                 | 13 | 47297356  | 47303119  | 0 | 0 | 0 | 2 | 0 | 0 | 5763  | 0.21262277 | -1.55080501 | 4.038815656 | -0.38397519 | 0.700996836 | 0.998252924 |
| chr13:48651355-48651689   | exonic     | MED4                                  | 13 | 48651355  | 48651689  | 0 | 0 | 0 | 2 | 0 | 0 | 334   | 0.21262277 | -1.55080501 | 4.038815656 | -0.38397519 | 0.700996836 | 0.998252924 |
| chr13:49913812-49957077   | exonic     | CAB39L                                | 13 | 49913812  | 49957077  | 0 | 0 | 0 | 2 | 0 | 0 | 43265 | 0.21262277 | -1.55080501 | 4.038815656 | -0.38397519 | 0.700996836 | 0.998252924 |
| chr13:52992126-52997774   | exonic     | VPS36                                 | 13 | 52992126  | 52997774  | 0 | 0 | 0 | 2 | 0 | 0 | 5648  | 0.21262277 | -1.55080501 | 4.038815656 | -0.38397519 | 0.700996836 | 0.998252924 |
| chr13:74518117-74569190   | exonic     | KLF12                                 | 13 | 74518117  | 74569190  | 0 | 0 | 0 | 2 | 0 | 0 | 51073 | 0.21262277 | -1.55080501 | 4.038815656 | -0.38397519 | 0.700996836 | 0.998252924 |
| chr13:75900332-75923438   | exonic     | TBC1D4                                | 13 | 75900332  | 75923438  | 0 | 0 | 0 | 2 | 0 | 0 | 23106 | 0.21262277 | -1.55080501 | 4.038815656 | -0.38397519 | 0.700996836 | 0.998252924 |
| chr13:75911056-75933994   | exonic     | TBC1D4                                | 13 | 75911056  | 75933994  | 0 | 0 | 0 | 2 | 0 | 0 | 22938 | 0.21262277 | -1.55080501 | 4.038815656 | -0.38397519 | 0.700996836 | 0.998252924 |
| chr13:77636730-77673148   | exonic     | MYCBP2                                | 13 | 77636730  | 77673148  | 0 | 0 | 0 | 2 | 0 | 0 | 36418 | 0.21262277 | -1.55080501 | 4.038815656 | -0.38397519 | 0.700996836 | 0.998252924 |
| chr13:77779390-77838137   | exonic     | MYCBP2                                | 13 | 77779390  | 77838137  | 0 | 0 | 0 | 2 | 0 | 0 | 58747 | 0.21262277 | -1.55080501 | 4.038815656 | -0.38397519 | 0.700996836 | 0.998252924 |
| chr13:79896483-79916966   | exonic     | RBM26                                 | 13 | 79896483  | 79916966  | 0 | 0 | 0 | 2 | 0 | 0 | 20483 | 0.21262277 | -1.55080501 | 4.038815656 | -0.38397519 | 0.700996836 | 0.998252924 |
| chr13:95725457-95727805   | exonic     | ABCC4                                 | 13 | 95725457  | 95727805  | 0 | 0 | 0 | 2 | 0 | 0 | 2348  | 0.21262277 | -1.55080501 | 4.038815656 | -0.38397519 | 0.700996836 | 0.998252924 |
| chr13:95858785-95863035   | exonic     | ABCC4                                 | 13 | 95858785  | 95863035  | 0 | 0 | 0 | 2 | 0 | 0 | 4250  | 0.21262277 | -1.55080501 | 4.038815656 | -0.38397519 | 0.700996836 | 0.998252924 |
| chr13:96236989-96261767   | exonic     | DZIP1                                 | 13 | 96236989  | 96261767  | 0 | 0 | 0 | 2 | 0 | 0 | 24778 | 0.21262277 | -1.55080501 | 4.038815656 | -0.38397519 | 0.700996836 | 0.998252924 |
| chr13:96238259-96261767   | exonic     | DZIP1                                 | 13 | 96238259  | 96261767  | 0 | 0 | 0 | 2 | 0 | 0 | 23508 | 0.21262277 | -1.55080501 | 4.038815656 | -0.38397519 | 0.700996836 | 0.998252924 |
| chr13:99127074-99134575   | exonic     | STK24                                 | 13 | 99127074  | 99134575  | 0 | 0 | 0 | 2 | 0 | 0 | 7501  | 0.21262277 | -1.55080501 | 4.038815656 | -0.38397519 | 0.700996836 | 0.998252924 |
| chr14:100373974-100377913 | exonic     | EML1                                  | 14 | 100373974 | 100377913 | 0 | 0 | 0 | 2 | 0 | 0 | 3939  | 0.21262277 | -1.55080501 | 4.038815656 | -0.38397519 | 0.700996836 | 0.998252924 |
| chr14:102503648-102504441 | intronic   | DYNC1H1                               | 14 | 102503648 | 102504441 | 0 | 0 | 0 | 2 | 0 | 0 | 793   | 0.21262277 | -1.55080501 | 4.038815656 | -0.38397519 | 0.700996836 | 0.998252924 |
| chr14:102747584-102748026 | intronic   | MOK                                   | 14 | 102747584 | 102748026 | 0 | 0 | 0 | 2 | 0 | 0 | 442   | 0.21262277 | -1.55080501 | 4.038815656 | -0.38397519 | 0.700996836 | 0.998252924 |
| chr14:102791856-102793224 | exonic     | ZNF839                                | 14 | 102791856 | 102793224 | 0 | 0 | 0 | 2 | 0 | 0 | 1368  | 0.21262277 | -1.55080501 | 4.038815656 | -0.38397519 | 0.700996836 | 0.998252924 |
| chr14:104168411-104170593 | exonic     | XRCC3                                 | 14 | 104168411 | 104170593 | 0 | 0 | 0 | 2 | 0 | 0 | 2182  | 0.21262277 | -1.55080501 | 4.038815656 | -0.38397519 | 0.700996836 | 0.998252924 |
| chr14:20857797-20859255   | exonic     | TEP1                                  | 14 | 20857797  | 20859255  | 0 | 0 | 0 | 2 | 0 | 0 | 1458  | 0.21262277 | -1.55080501 | 4.038815656 | -0.38397519 | 0.700996836 | 0.998252924 |
| chr14:21532604-21534680   | intronic   | NDRG2                                 | 14 | 21532604  | 21534680  | 0 | 0 | 0 | 2 | 0 | 0 | 2076  | 0.21262277 | -1.55080501 | 4.038815656 | -0.38397519 | 0.700996836 | 0.998252924 |
| chr14:24640065-24640544   | upstream   | REC8 (dist=690)                       | 14 | 24640065  | 24640544  | 0 | 0 | 0 | 2 | 0 | 0 | 479   | 0.21262277 | -1.55080501 | 4.038815656 | -0.38397519 | 0.700996836 | 0.998252924 |
| chr14:24666201-24669848   | intergenic | TM9SF1 (dist=1259), TSSK4 (dist=5009) | 14 | 24666201  | 24669848  | 0 | 0 | 0 | 2 | 0 | 0 | 3647  | 0.21262277 | -1.55080501 | 4.038815656 | -0.38397519 | 0.700996836 | 0.998252924 |
| chr14:25076818-25101324   | exonic     | GZMB, GZMH                            | 14 | 25076818  | 25101324  | 0 | 0 | 0 | 2 | 0 | 0 | 24506 | 0.21262277 | -1.55080501 | 4.038815656 | -0.38397519 | 0.700996836 | 0.998252924 |
| chr14:32902665-32903023   | exonic     | AKAP6                                 | 14 | 32902665  | 32903023  | 0 | 0 | 0 | 2 | 0 | 0 | 358   | 0.21262277 | -1.55080501 | 4.038815656 | -0.38397519 | 0.700996836 | 0.998252924 |
| chr14:33046325-33069998   | exonic     | AKAP6                                 | 14 | 33046325  | 33069998  | 0 | 0 | 0 | 2 | 0 | 0 | 23673 | 0.21262277 | -1.55080501 | 4.038815656 | -0.38397519 | 0.700996836 | 0.998252924 |
| chr14:35036891-35037219   | exonic     | SNX6                                  | 14 | 35036891  | 35037219  | 0 | 0 | 0 | 2 | 0 | 0 | 328   | 0.21262277 | -1.55080501 | 4.038815656 | -0.38397519 | 0.700996836 | 0.998252924 |
| chr14:35476489-35478037   | exonic     | SRP54                                 | 14 | 35476489  | 35478037  | 0 | 0 | 0 | 2 | 0 | 0 | 1548  | 0.21262277 | -1.55080501 | 4.038815656 | -0.38397519 | 0.700996836 | 0.998252924 |

|                           |                |              |    |           |           |   |   |   |   |   |   |        |            |             |             |             |             |             |
|---------------------------|----------------|--------------|----|-----------|-----------|---|---|---|---|---|---|--------|------------|-------------|-------------|-------------|-------------|-------------|
| chr14:36989101-36989257   | splicing       | NKX2-1       | 14 | 36989101  | 36989257  | 0 | 0 | 0 | 2 | 0 | 0 | 156    | 0.21262277 | -1.55080501 | 4.038815656 | -0.38397519 | 0.700996836 | 0.998252924 |
| chr14:39218796-39232249   | ncRNA_exonic   | LINC00639    | 14 | 39218796  | 39232249  | 0 | 0 | 0 | 2 | 0 | 0 | 13453  | 0.21262277 | -1.55080501 | 4.038815656 | -0.38397519 | 0.700996836 | 0.998252924 |
| chr14:39543618-39561831   | exonic         | SEC23A       | 14 | 39543618  | 39561831  | 0 | 0 | 0 | 2 | 0 | 0 | 18213  | 0.21262277 | -1.55080501 | 4.038815656 | -0.38397519 | 0.700996836 | 0.998252924 |
| chr14:50175876-50196266   | exonic         | KLHDC1       | 14 | 50175876  | 50196266  | 0 | 0 | 0 | 2 | 0 | 0 | 20390  | 0.21262277 | -1.55080501 | 4.038815656 | -0.38397519 | 0.700996836 | 0.998252924 |
| chr14:50190591-50206900   | exonic         | KLHDC1       | 14 | 50190591  | 50206900  | 0 | 0 | 0 | 2 | 0 | 0 | 16309  | 0.21262277 | -1.55080501 | 4.038815656 | -0.38397519 | 0.700996836 | 0.998252924 |
| chr14:50649180-50655418   | exonic         | SOS2         | 14 | 50649180  | 50655418  | 0 | 0 | 0 | 2 | 0 | 0 | 6238   | 0.21262277 | -1.55080501 | 4.038815656 | -0.38397519 | 0.700996836 | 0.998252924 |
| chr14:50796551-50808940   | exonic         | CDKL1        | 14 | 50796551  | 50808940  | 0 | 0 | 0 | 2 | 0 | 0 | 12389  | 0.21262277 | -1.55080501 | 4.038815656 | -0.38397519 | 0.700996836 | 0.998252924 |
| chr14:50909450-50915550   | exonic         | MAP4K5       | 14 | 50909450  | 50915550  | 0 | 0 | 0 | 2 | 0 | 0 | 6100   | 0.21262277 | -1.55080501 | 4.038815656 | -0.38397519 | 0.700996836 | 0.998252924 |
| chr14:53223269-53226472   | exonic         | STYX         | 14 | 53223269  | 53226472  | 0 | 0 | 0 | 2 | 0 | 0 | 3203   | 0.21262277 | -1.55080501 | 4.038815656 | -0.38397519 | 0.700996836 | 0.998252924 |
| chr14:57676284-57696599   | exonic         | EXOC5        | 14 | 57676284  | 57696599  | 0 | 0 | 0 | 2 | 0 | 0 | 20315  | 0.21262277 | -1.55080501 | 4.038815656 | -0.38397519 | 0.700996836 | 0.998252924 |
| chr14:58924476-58953884   | exonic         | KIAA0586     | 14 | 58924476  | 58953884  | 0 | 0 | 0 | 2 | 0 | 0 | 29408  | 0.21262277 | -1.55080501 | 4.038815656 | -0.38397519 | 0.700996836 | 0.998252924 |
| chr14:61262935-61305317   | exonic         | MNAT1        | 14 | 61262935  | 61305317  | 0 | 0 | 0 | 2 | 0 | 0 | 42382  | 0.21262277 | -1.55080501 | 4.038815656 | -0.38397519 | 0.700996836 | 0.998252924 |
| chr14:61855006-61858006   | exonic         | PRKCH        | 14 | 61855006  | 61858006  | 0 | 0 | 0 | 2 | 0 | 0 | 3000   | 0.21262277 | -1.55080501 | 4.038815656 | -0.38397519 | 0.700996836 | 0.998252924 |
| chr14:68228919-68236447   | exonic         | ZFYVE26      | 14 | 68228919  | 68236447  | 0 | 0 | 0 | 2 | 0 | 0 | 7528   | 0.21262277 | -1.55080501 | 4.038815656 | -0.38397519 | 0.700996836 | 0.998252924 |
| chr14:72085473-72152348   | exonic         | SIPA1L1      | 14 | 72085473  | 72152348  | 0 | 0 | 0 | 2 | 0 | 0 | 66875  | 0.21262277 | -1.55080501 | 4.038815656 | -0.38397519 | 0.700996836 | 0.998252924 |
| chr14:73614502-73653628   | exonic         | PSEN1        | 14 | 73614502  | 73653628  | 0 | 0 | 0 | 2 | 0 | 0 | 39126  | 0.21262277 | -1.55080501 | 4.038815656 | -0.38397519 | 0.700996836 | 0.998252924 |
| chr14:74119872-74138300   | exonic         | DNAL1        | 14 | 74119872  | 74138300  | 0 | 0 | 0 | 2 | 0 | 0 | 18428  | 0.21262277 | -1.55080501 | 4.038815656 | -0.38397519 | 0.700996836 | 0.998252924 |
| chr14:76498298-76525716   | exonic         | IFT43        | 14 | 76498298  | 76525716  | 0 | 0 | 0 | 2 | 0 | 0 | 27418  | 0.21262277 | -1.55080501 | 4.038815656 | -0.38397519 | 0.700996836 | 0.998252924 |
| chr14:80971254-80997230   | exonic         | CEP128       | 14 | 80971254  | 80997230  | 0 | 0 | 0 | 2 | 0 | 0 | 25976  | 0.21262277 | -1.55080501 | 4.038815656 | -0.38397519 | 0.700996836 | 0.998252924 |
| chr14:81297487-81373837   | exonic         | CEP128       | 14 | 81297487  | 81373837  | 0 | 0 | 0 | 2 | 0 | 0 | 76350  | 0.21262277 | -1.55080501 | 4.038815656 | -0.38397519 | 0.700996836 | 0.998252924 |
| chr14:86494713-86508177   | ncRNA_intronic | LOC101928767 | 14 | 86494713  | 86508177  | 0 | 0 | 0 | 2 | 0 | 0 | 13464  | 0.21262277 | -1.55080501 | 4.038815656 | -0.38397519 | 0.700996836 | 0.998252924 |
| chr14:86497480-86537311   | ncRNA_exonic   | LOC101928767 | 14 | 86497480  | 86537311  | 0 | 0 | 0 | 2 | 0 | 0 | 39831  | 0.21262277 | -1.55080501 | 4.038815656 | -0.38397519 | 0.700996836 | 0.998252924 |
| chr14:88429727-88442832   | exonic         | GALC         | 14 | 88429727  | 88442832  | 0 | 0 | 0 | 2 | 0 | 0 | 13105  | 0.21262277 | -1.55080501 | 4.038815656 | -0.38397519 | 0.700996836 | 0.998252924 |
| chr14:88881549-88904247   | exonic         | SPATA7       | 14 | 88881549  | 88904247  | 0 | 0 | 0 | 2 | 0 | 0 | 22698  | 0.21262277 | -1.55080501 | 4.038815656 | -0.38397519 | 0.700996836 | 0.998252924 |
| chr14:89628045-89656793   | exonic         | FOXN3        | 14 | 89628045  | 89656793  | 0 | 0 | 0 | 2 | 0 | 0 | 28748  | 0.21262277 | -1.55080501 | 4.038815656 | -0.38397519 | 0.700996836 | 0.998252924 |
| chr14:91642277-91655514   | exonic         | C14orf159    | 14 | 91642277  | 91655514  | 0 | 0 | 0 | 2 | 0 | 0 | 13237  | 0.21262277 | -1.55080501 | 4.038815656 | -0.38397519 | 0.700996836 | 0.998252924 |
| chr14:92555073-92560175   | exonic         | ATXN3        | 14 | 92555073  | 92560175  | 0 | 0 | 0 | 2 | 0 | 0 | 5102   | 0.21262277 | -1.55080501 | 4.038815656 | -0.38397519 | 0.700996836 | 0.998252924 |
| chr14:92570717-92571073   | intronic       | ATXN3        | 14 | 92570717  | 92571073  | 0 | 0 | 0 | 2 | 0 | 0 | 356    | 0.21262277 | -1.55080501 | 4.038815656 | -0.38397519 | 0.700996836 | 0.998252924 |
| chr14:93276598-93282766   | exonic         | GOLGA5       | 14 | 93276598  | 93282766  | 0 | 0 | 0 | 2 | 0 | 0 | 6168   | 0.21262277 | -1.55080501 | 4.038815656 | -0.38397519 | 0.700996836 | 0.998252924 |
| chr15:100138634-100215663 | exonic         | MEF2A        | 15 | 100138634 | 100215663 | 0 | 0 | 0 | 2 | 0 | 0 | 77029  | 0.21262277 | -1.55080501 | 4.038815656 | -0.38397519 | 0.700996836 | 0.998252924 |
| chr15:100533252-100695525 | exonic         | ADAMTS17     | 15 | 100533252 | 100695525 | 0 | 0 | 0 | 2 | 0 | 0 | 162273 | 0.21262277 | -1.55080501 | 4.038815656 | -0.38397519 | 0.700996836 | 0.998252924 |
| chr15:100589061-100695525 | exonic         | ADAMTS17     | 15 | 100589061 | 100695525 | 0 | 0 | 0 | 2 | 0 | 0 | 106464 | 0.21262277 | -1.55080501 | 4.038815656 | -0.38397519 | 0.700996836 | 0.998252924 |
| chr15:100672211-100673520 | exonic         | ADAMTS17     | 15 | 100672211 | 100673520 | 0 | 0 | 0 | 2 | 0 | 0 | 1309   | 0.21262277 | -1.55080501 | 4.038815656 | -0.38397519 | 0.700996836 | 0.998252924 |
| chr15:100692816-100739628 | exonic         | ADAMTS17     | 15 | 100692816 | 100739628 | 0 | 0 | 0 | 2 | 0 | 0 | 46812  | 0.21262277 | -1.55080501 | 4.038815656 | -0.38397519 | 0.700996836 | 0.998252924 |
| chr15:22566769-22570820   | ncRNA_exonic   | REREP3       | 15 | 22566769  | 22570820  | 0 | 0 | 0 | 2 | 0 | 0 | 4051   | 0.21262277 | -1.55080501 | 4.038815656 | -0.38397519 | 0.700996836 | 0.998252924 |

|                         |              |           |    |          |          |   |   |   |   |   |   |       |            |             |             |             |             |             |
|-------------------------|--------------|-----------|----|----------|----------|---|---|---|---|---|---|-------|------------|-------------|-------------|-------------|-------------|-------------|
| chr15:30033534-30064369 | exonic       | TJP1      | 15 | 30033534 | 30064369 | 0 | 0 | 0 | 2 | 0 | 0 | 30835 | 0.21262277 | -1.55080501 | 4.038815656 | -0.38397519 | 0.700996836 | 0.998252924 |
| chr15:30053341-30054641 | exonic       | TJP1      | 15 | 30053341 | 30054641 | 0 | 0 | 0 | 2 | 0 | 0 | 1300  | 0.21262277 | -1.55080501 | 4.038815656 | -0.38397519 | 0.700996836 | 0.998252924 |
| chr15:35216881-35217820 | intronic     | AQR       | 15 | 35216881 | 35217820 | 0 | 0 | 0 | 2 | 0 | 0 | 939   | 0.21262277 | -1.55080501 | 4.038815656 | -0.38397519 | 0.700996836 | 0.998252924 |
| chr15:35233099-35240585 | exonic       | AQR       | 15 | 35233099 | 35240585 | 0 | 0 | 0 | 2 | 0 | 0 | 7486  | 0.21262277 | -1.55080501 | 4.038815656 | -0.38397519 | 0.700996836 | 0.998252924 |
| chr15:35665722-35747021 | exonic       | DPH6      | 15 | 35665722 | 35747021 | 0 | 0 | 0 | 2 | 0 | 0 | 81299 | 0.21262277 | -1.55080501 | 4.038815656 | -0.38397519 | 0.700996836 | 0.998252924 |
| chr15:42470415-42476898 | exonic       | VPS39     | 15 | 42470415 | 42476898 | 0 | 0 | 0 | 2 | 0 | 0 | 6483  | 0.21262277 | -1.55080501 | 4.038815656 | -0.38397519 | 0.700996836 | 0.998252924 |
| chr15:44060686-44061844 | exonic       | PDIA3     | 15 | 44060686 | 44061844 | 0 | 0 | 0 | 2 | 0 | 0 | 1158  | 0.21262277 | -1.55080501 | 4.038815656 | -0.38397519 | 0.700996836 | 0.998252924 |
| chr15:44629961-44630515 | exonic       | CASC4     | 15 | 44629961 | 44630515 | 0 | 0 | 0 | 2 | 0 | 0 | 554   | 0.21262277 | -1.55080501 | 4.038815656 | -0.38397519 | 0.700996836 | 0.998252924 |
| chr15:52315240-52315845 | intronic     | MAPK6     | 15 | 52315240 | 52315845 | 0 | 0 | 0 | 2 | 0 | 0 | 605   | 0.21262277 | -1.55080501 | 4.038815656 | -0.38397519 | 0.700996836 | 0.998252924 |
| chr15:55657385-55670574 | exonic       | CCPG1     | 15 | 55657385 | 55670574 | 0 | 0 | 0 | 2 | 0 | 0 | 13189 | 0.21262277 | -1.55080501 | 4.038815656 | -0.38397519 | 0.700996836 | 0.998252924 |
| chr15:55731669-55742565 | exonic       | DYX1C1    | 15 | 55731669 | 55742565 | 0 | 0 | 0 | 2 | 0 | 0 | 10896 | 0.21262277 | -1.55080501 | 4.038815656 | -0.38397519 | 0.700996836 | 0.998252924 |
| chr15:57730182-57746016 | exonic       | CGNL1     | 15 | 57730182 | 57746016 | 0 | 0 | 0 | 2 | 0 | 0 | 15834 | 0.21262277 | -1.55080501 | 4.038815656 | -0.38397519 | 0.700996836 | 0.998252924 |
| chr15:59934334-59944525 | exonic       | GTF2A2    | 15 | 59934334 | 59944525 | 0 | 0 | 0 | 2 | 0 | 0 | 10191 | 0.21262277 | -1.55080501 | 4.038815656 | -0.38397519 | 0.700996836 | 0.998252924 |
| chr15:62300853-62306191 | exonic       | VPS13C    | 15 | 62300853 | 62306191 | 0 | 0 | 0 | 2 | 0 | 0 | 5338  | 0.21262277 | -1.55080501 | 4.038815656 | -0.38397519 | 0.700996836 | 0.998252924 |
| chr15:63966541-63967292 | exonic       | HERC1     | 15 | 63966541 | 63967292 | 0 | 0 | 0 | 2 | 0 | 0 | 751   | 0.21262277 | -1.55080501 | 4.038815656 | -0.38397519 | 0.700996836 | 0.998252924 |
| chr15:64706284-64717830 | exonic       | TRIP4     | 15 | 64706284 | 64717830 | 0 | 0 | 0 | 2 | 0 | 0 | 11546 | 0.21262277 | -1.55080501 | 4.038815656 | -0.38397519 | 0.700996836 | 0.998252924 |
| chr15:65152093-65157427 | exonic       | PLEKH02   | 15 | 65152093 | 65157427 | 0 | 0 | 0 | 2 | 0 | 0 | 5334  | 0.21262277 | -1.55080501 | 4.038815656 | -0.38397519 | 0.700996836 | 0.998252924 |
| chr15:65295224-65298056 | exonic       | MTFMT     | 15 | 65295224 | 65298056 | 0 | 0 | 0 | 2 | 0 | 0 | 2832  | 0.21262277 | -1.55080501 | 4.038815656 | -0.38397519 | 0.700996836 | 0.998252924 |
| chr15:65411010-65412292 | exonic       | PDCD7     | 15 | 65411010 | 65412292 | 0 | 0 | 0 | 2 | 0 | 0 | 1282  | 0.21262277 | -1.55080501 | 4.038815656 | -0.38397519 | 0.700996836 | 0.998252924 |
| chr15:65936765-65943280 | exonic       | SLC24A1   | 15 | 65936765 | 65943280 | 0 | 0 | 0 | 2 | 0 | 0 | 6515  | 0.21262277 | -1.55080501 | 4.038815656 | -0.38397519 | 0.700996836 | 0.998252924 |
| chr15:66956700-66962878 | ncRNA_exonic | LINC01169 | 15 | 66956700 | 66962878 | 0 | 0 | 0 | 2 | 0 | 0 | 6178  | 0.21262277 | -1.55080501 | 4.038815656 | -0.38397519 | 0.700996836 | 0.998252924 |
| chr15:67893022-67956983 | exonic       | MAP2K5    | 15 | 67893022 | 67956983 | 0 | 0 | 0 | 2 | 0 | 0 | 63961 | 0.21262277 | -1.55080501 | 4.038815656 | -0.38397519 | 0.700996836 | 0.998252924 |
| chr15:68121516-68125595 | exonic       | SKOR1     | 15 | 68121516 | 68125595 | 0 | 0 | 0 | 2 | 0 | 0 | 4079  | 0.21262277 | -1.55080501 | 4.038815656 | -0.38397519 | 0.700996836 | 0.998252924 |
| chr15:70975097-70976785 | exonic       | UACA      | 15 | 70975097 | 70976785 | 0 | 0 | 0 | 2 | 0 | 0 | 1688  | 0.21262277 | -1.55080501 | 4.038815656 | -0.38397519 | 0.700996836 | 0.998252924 |
| chr15:72637786-72639051 | exonic       | HEXA      | 15 | 72637786 | 72639051 | 0 | 0 | 0 | 2 | 0 | 0 | 1265  | 0.21262277 | -1.55080501 | 4.038815656 | -0.38397519 | 0.700996836 | 0.998252924 |
| chr15:75693070-75694311 | exonic       | SIN3A     | 15 | 75693070 | 75694311 | 0 | 0 | 0 | 2 | 0 | 0 | 1241  | 0.21262277 | -1.55080501 | 4.038815656 | -0.38397519 | 0.700996836 | 0.998252924 |
| chr15:75909748-75913397 | exonic       | SNUPN     | 15 | 75909748 | 75913397 | 0 | 0 | 0 | 2 | 0 | 0 | 3649  | 0.21262277 | -1.55080501 | 4.038815656 | -0.38397519 | 0.700996836 | 0.998252924 |
| chr15:76577977-76588078 | exonic       | ETFA      | 15 | 76577977 | 76588078 | 0 | 0 | 0 | 2 | 0 | 0 | 10101 | 0.21262277 | -1.55080501 | 4.038815656 | -0.38397519 | 0.700996836 | 0.998252924 |
| chr15:77450844-77474382 | exonic       | PEAK1     | 15 | 77450844 | 77474382 | 0 | 0 | 0 | 2 | 0 | 0 | 23538 | 0.21262277 | -1.55080501 | 4.038815656 | -0.38397519 | 0.700996836 | 0.998252924 |
| chr15:78305164-78322512 | exonic       | TBC1D2B   | 15 | 78305164 | 78322512 | 0 | 0 | 0 | 2 | 0 | 0 | 17348 | 0.21262277 | -1.55080501 | 4.038815656 | -0.38397519 | 0.700996836 | 0.998252924 |
| chr15:79179610-79186572 | exonic       | MORF4L1   | 15 | 79179610 | 79186572 | 0 | 0 | 0 | 2 | 0 | 0 | 6962  | 0.21262277 | -1.55080501 | 4.038815656 | -0.38397519 | 0.700996836 | 0.998252924 |
| chr15:81419931-81436161 | exonic       | CFAP161   | 15 | 81419931 | 81436161 | 0 | 0 | 0 | 2 | 0 | 0 | 16230 | 0.21262277 | -1.55080501 | 4.038815656 | -0.38397519 | 0.700996836 | 0.998252924 |
| chr15:83481854-83495598 | exonic       | WHAMM     | 15 | 83481854 | 83495598 | 0 | 0 | 0 | 2 | 0 | 0 | 13744 | 0.21262277 | -1.55080501 | 4.038815656 | -0.38397519 | 0.700996836 | 0.998252924 |
| chr15:83793423-83796229 | exonic       | TM6SF1    | 15 | 83793423 | 83796229 | 0 | 0 | 0 | 2 | 0 | 0 | 2806  | 0.21262277 | -1.55080501 | 4.038815656 | -0.38397519 | 0.700996836 | 0.998252924 |
| chr15:84228004-84257523 | exonic       | SH3GL3    | 15 | 84228004 | 84257523 | 0 | 0 | 0 | 2 | 0 | 0 | 29519 | 0.21262277 | -1.55080501 | 4.038815656 | -0.38397519 | 0.700996836 | 0.998252924 |

|                         |              |                                               |    |          |          |   |   |   |   |   |   |       |            |             |             |             |             |             |
|-------------------------|--------------|-----------------------------------------------|----|----------|----------|---|---|---|---|---|---|-------|------------|-------------|-------------|-------------|-------------|-------------|
| chr15:84506840-84558999 | exonic       | ADAMTSL3                                      | 15 | 84506840 | 84558999 | 0 | 0 | 0 | 2 | 0 | 0 | 52159 | 0.21262277 | -1.55080501 | 4.038815656 | -0.38397519 | 0.700996836 | 0.998252924 |
| chr15:84592655-84611834 | exonic       | ADAMTSL3                                      | 15 | 84592655 | 84611834 | 0 | 0 | 0 | 2 | 0 | 0 | 19179 | 0.21262277 | -1.55080501 | 4.038815656 | -0.38397519 | 0.700996836 | 0.998252924 |
| chr15:86028941-86069632 | exonic       | AKAP13                                        | 15 | 86028941 | 86069632 | 0 | 0 | 0 | 2 | 0 | 0 | 40691 | 0.21262277 | -1.55080501 | 4.038815656 | -0.38397519 | 0.700996836 | 0.998252924 |
| chr15:86207793-86213061 | exonic       | AKAP13                                        | 15 | 86207793 | 86213061 | 0 | 0 | 0 | 2 | 0 | 0 | 5268  | 0.21262277 | -1.55080501 | 4.038815656 | -0.38397519 | 0.700996836 | 0.998252924 |
| chr15:86283452-86284726 | exonic       | AKAP13                                        | 15 | 86283452 | 86284726 | 0 | 0 | 0 | 2 | 0 | 0 | 1274  | 0.21262277 | -1.55080501 | 4.038815656 | -0.38397519 | 0.700996836 | 0.998252924 |
| chr15:93428744-93435302 | ncRNA_exonic | LINC01578                                     | 15 | 93428744 | 93435302 | 0 | 0 | 0 | 2 | 0 | 0 | 6558  | 0.21262277 | -1.55080501 | 4.038815656 | -0.38397519 | 0.700996836 | 0.998252924 |
| chr16:11609785-11610163 | intergenic   | LOC101927131 (dist=42755), LITAF (dist=31415) | 16 | 11609785 | 11610163 | 0 | 0 | 0 | 2 | 0 | 0 | 378   | 0.21262277 | -1.55080501 | 4.038815656 | -0.38397519 | 0.700996836 | 0.998252924 |
| chr16:11818062-11818711 | intronic     | TXNDC11                                       | 16 | 11818062 | 11818711 | 0 | 0 | 0 | 2 | 0 | 0 | 649   | 0.21262277 | -1.55080501 | 4.038815656 | -0.38397519 | 0.700996836 | 0.998252924 |
| chr16:14687157-14698083 | exonic       | PARN                                          | 16 | 14687157 | 14698083 | 0 | 0 | 0 | 2 | 0 | 0 | 10926 | 0.21262277 | -1.55080501 | 4.038815656 | -0.38397519 | 0.700996836 | 0.998252924 |
| chr16:15876241-15880589 | exonic       | MYH11                                         | 16 | 15876241 | 15880589 | 0 | 0 | 0 | 2 | 0 | 0 | 4348  | 0.21262277 | -1.55080501 | 4.038815656 | -0.38397519 | 0.700996836 | 0.998252924 |
| chr16:16112314-16113873 | intronic     | ABCC1                                         | 16 | 16112314 | 16113873 | 0 | 0 | 0 | 2 | 0 | 0 | 1559  | 0.21262277 | -1.55080501 | 4.038815656 | -0.38397519 | 0.700996836 | 0.998252924 |
| chr16:16126965-16130460 | exonic       | ABCC1                                         | 16 | 16126965 | 16130460 | 0 | 0 | 0 | 2 | 0 | 0 | 3495  | 0.21262277 | -1.55080501 | 4.038815656 | -0.38397519 | 0.700996836 | 0.998252924 |
| chr16:1642176-1642589   | exonic       | IFT140                                        | 16 | 1642176  | 1642589  | 0 | 0 | 0 | 2 | 0 | 0 | 413   | 0.21262277 | -1.55080501 | 4.038815656 | -0.38397519 | 0.700996836 | 0.998252924 |
| chr16:19744151-19746772 | exonic       | IQCK                                          | 16 | 19744151 | 19746772 | 0 | 0 | 0 | 2 | 0 | 0 | 2621  | 0.21262277 | -1.55080501 | 4.038815656 | -0.38397519 | 0.700996836 | 0.998252924 |
| chr16:20894758-20902425 | intronic     | DCUN1D3                                       | 16 | 20894758 | 20902425 | 0 | 0 | 0 | 2 | 0 | 0 | 7667  | 0.21262277 | -1.55080501 | 4.038815656 | -0.38397519 | 0.700996836 | 0.998252924 |
| chr16:21623965-21636436 | exonic       | METTL9                                        | 16 | 21623965 | 21636436 | 0 | 0 | 0 | 2 | 0 | 0 | 12471 | 0.21262277 | -1.55080501 | 4.038815656 | -0.38397519 | 0.700996836 | 0.998252924 |
| chr16:22277711-22278197 | exonic       | EEF2K                                         | 16 | 22277711 | 22278197 | 0 | 0 | 0 | 2 | 0 | 0 | 486   | 0.21262277 | -1.55080501 | 4.038815656 | -0.38397519 | 0.700996836 | 0.998252924 |
| chr16:23632683-23634451 | exonic       | PALB2                                         | 16 | 23632683 | 23634451 | 0 | 0 | 0 | 2 | 0 | 0 | 1768  | 0.21262277 | -1.55080501 | 4.038815656 | -0.38397519 | 0.700996836 | 0.998252924 |
| chr16:2378453-2379855   | UTR5         | ABCA3 (NM_001089-c.-2877_-3388delins0)        | 16 | 2378453  | 2379855  | 0 | 0 | 0 | 2 | 0 | 0 | 1402  | 0.21262277 | -1.55080501 | 4.038815656 | -0.38397519 | 0.700996836 | 0.998252924 |
| chr16:25151491-25162936 | exonic       | LCMT1                                         | 16 | 25151491 | 25162936 | 0 | 0 | 0 | 2 | 0 | 0 | 11445 | 0.21262277 | -1.55080501 | 4.038815656 | -0.38397519 | 0.700996836 | 0.998252924 |
| chr16:27222471-27226329 | exonic       | KDM8                                          | 16 | 27222471 | 27226329 | 0 | 0 | 0 | 2 | 0 | 0 | 3858  | 0.21262277 | -1.55080501 | 4.038815656 | -0.38397519 | 0.700996836 | 0.998252924 |
| chr16:27351506-27364017 | exonic       | IL4R                                          | 16 | 27351506 | 27364017 | 0 | 0 | 0 | 2 | 0 | 0 | 12511 | 0.21262277 | -1.55080501 | 4.038815656 | -0.38397519 | 0.700996836 | 0.998252924 |
| chr16:27357788-27367228 | exonic       | IL4R                                          | 16 | 27357788 | 27367228 | 0 | 0 | 0 | 2 | 0 | 0 | 9440  | 0.21262277 | -1.55080501 | 4.038815656 | -0.38397519 | 0.700996836 | 0.998252924 |
| chr16:27544611-27556844 | exonic       | GTF3C1                                        | 16 | 27544611 | 27556844 | 0 | 0 | 0 | 2 | 0 | 0 | 12233 | 0.21262277 | -1.55080501 | 4.038815656 | -0.38397519 | 0.700996836 | 0.998252924 |
| chr16:27760904-27763245 | exonic       | KIAA0556                                      | 16 | 27760904 | 27763245 | 0 | 0 | 0 | 2 | 0 | 0 | 2341  | 0.21262277 | -1.55080501 | 4.038815656 | -0.38397519 | 0.700996836 | 0.998252924 |
| chr16:28137009-28157524 | exonic       | XPO6                                          | 16 | 28137009 | 28157524 | 0 | 0 | 0 | 2 | 0 | 0 | 20515 | 0.21262277 | -1.55080501 | 4.038815656 | -0.38397519 | 0.700996836 | 0.998252924 |
| chr16:29124371-29127647 | ncRNA_exonic | RRN3P2                                        | 16 | 29124371 | 29127647 | 0 | 0 | 0 | 2 | 0 | 0 | 3276  | 0.21262277 | -1.55080501 | 4.038815656 | -0.38397519 | 0.700996836 | 0.998252924 |
| chr16:29468952-29469336 | exonic       | SLX1A, SLX1B                                  | 16 | 29468952 | 29469336 | 0 | 0 | 0 | 2 | 0 | 0 | 384   | 0.21262277 | -1.55080501 | 4.038815656 | -0.38397519 | 0.700996836 | 0.998252924 |
| chr16:29826240-29826435 | UTR3         | -----                                         | 16 | 29826240 | 29826435 | 0 | 0 | 0 | 2 | 0 | 0 | 195   | 0.21262277 | -1.55080501 | 4.038815656 | -0.38397519 | 0.700996836 | 0.998252924 |
| chr16:30507417-30515585 | exonic       | ITGAL                                         | 16 | 30507417 | 30515585 | 0 | 0 | 0 | 2 | 0 | 0 | 8168  | 0.21262277 | -1.55080501 | 4.038815656 | -0.38397519 | 0.700996836 | 0.998252924 |
| chr16:31131506-31139460 | exonic       | KAT8                                          | 16 | 31131506 | 31139460 | 0 | 0 | 0 | 2 | 0 | 0 | 7954  | 0.21262277 | -1.55080501 | 4.038815656 | -0.38397519 | 0.700996836 | 0.998252924 |
| chr16:3790399-3801807   | exonic       | CREBBP                                        | 16 | 3790399  | 3801807  | 0 | 0 | 0 | 2 | 0 | 0 | 11408 | 0.21262277 | -1.55080501 | 4.038815656 | -0.38397519 | 0.700996836 | 0.998252924 |
| chr16:3929553-3929832   | splicing     | CREBBP                                        | 16 | 3929553  | 3929832  | 0 | 0 | 0 | 2 | 0 | 0 | 279   | 0.21262277 | -1.55080501 | 4.038815656 | -0.38397519 | 0.700996836 | 0.998252924 |
| chr16:46705616-46710604 | exonic       | VPS35                                         | 16 | 46705616 | 46710604 | 0 | 0 | 0 | 2 | 0 | 0 | 4988  | 0.21262277 | -1.55080501 | 4.038815656 | -0.38397519 | 0.700996836 | 0.998252924 |
| chr16:4721392-4723658   | exonic       | MGRN1                                         | 16 | 4721392  | 4723658  | 0 | 0 | 0 | 2 | 0 | 0 | 2266  | 0.21262277 | -1.55080501 | 4.038815656 | -0.38397519 | 0.700996836 | 0.998252924 |

|                         |              |          |    |          |          |   |   |   |   |   |   |       |            |             |             |             |             |             |
|-------------------------|--------------|----------|----|----------|----------|---|---|---|---|---|---|-------|------------|-------------|-------------|-------------|-------------|-------------|
| chr16:47497810-47549512 | exonic       | PHKB     | 16 | 47497810 | 47549512 | 0 | 0 | 0 | 2 | 0 | 0 | 51702 | 0.21262277 | -1.55080501 | 4.038815656 | -0.38397519 | 0.700996836 | 0.998252924 |
| chr16:48580057-48596355 | exonic       | N4BP1    | 16 | 48580057 | 48596355 | 0 | 0 | 0 | 2 | 0 | 0 | 16298 | 0.21262277 | -1.55080501 | 4.038815656 | -0.38397519 | 0.700996836 | 0.998252924 |
| chr16:49557534-49559405 | exonic       | ZNF423   | 16 | 49557534 | 49559405 | 0 | 0 | 0 | 2 | 0 | 0 | 1871  | 0.21262277 | -1.55080501 | 4.038815656 | -0.38397519 | 0.700996836 | 0.998252924 |
| chr16:50112651-50112929 | exonic       | HEATR3   | 16 | 50112651 | 50112929 | 0 | 0 | 0 | 2 | 0 | 0 | 278   | 0.21262277 | -1.55080501 | 4.038815656 | -0.38397519 | 0.700996836 | 0.998252924 |
| chr16:56969146-56974157 | exonic       | HERPUD1  | 16 | 56969146 | 56974157 | 0 | 0 | 0 | 2 | 0 | 0 | 5011  | 0.21262277 | -1.55080501 | 4.038815656 | -0.38397519 | 0.700996836 | 0.998252924 |
| chr16:58614536-58615419 | exonic       | CNOT1    | 16 | 58614536 | 58615419 | 0 | 0 | 0 | 2 | 0 | 0 | 883   | 0.21262277 | -1.55080501 | 4.038815656 | -0.38397519 | 0.700996836 | 0.998252924 |
| chr16:58633139-58633415 | exonic       | CNOT1    | 16 | 58633139 | 58633415 | 0 | 0 | 0 | 2 | 0 | 0 | 276   | 0.21262277 | -1.55080501 | 4.038815656 | -0.38397519 | 0.700996836 | 0.998252924 |
| chr16:66761591-66766408 | exonic       | DYNC1LI2 | 16 | 66761591 | 66766408 | 0 | 0 | 0 | 2 | 0 | 0 | 4817  | 0.21262277 | -1.55080501 | 4.038815656 | -0.38397519 | 0.700996836 | 0.998252924 |
| chr16:66839679-66844675 | exonic       | NAE1     | 16 | 66839679 | 66844675 | 0 | 0 | 0 | 2 | 0 | 0 | 4996  | 0.21262277 | -1.55080501 | 4.038815656 | -0.38397519 | 0.700996836 | 0.998252924 |
| chr16:67717283-67719705 | exonic       | GFOD2    | 16 | 67717283 | 67719705 | 0 | 0 | 0 | 2 | 0 | 0 | 2422  | 0.21262277 | -1.55080501 | 4.038815656 | -0.38397519 | 0.700996836 | 0.998252924 |
| chr16:69304045-69318147 | exonic       | SNTB2    | 16 | 69304045 | 69318147 | 0 | 0 | 0 | 2 | 0 | 0 | 14102 | 0.21262277 | -1.55080501 | 4.038815656 | -0.38397519 | 0.700996836 | 0.998252924 |
| chr16:70500035-70505255 | exonic       | FUK      | 16 | 70500035 | 70505255 | 0 | 0 | 0 | 2 | 0 | 0 | 5220  | 0.21262277 | -1.55080501 | 4.038815656 | -0.38397519 | 0.700996836 | 0.998252924 |
| chr16:70594371-70597953 | exonic       | SF3B3    | 16 | 70594371 | 70597953 | 0 | 0 | 0 | 2 | 0 | 0 | 3582  | 0.21262277 | -1.55080501 | 4.038815656 | -0.38397519 | 0.700996836 | 0.998252924 |
| chr16:71149598-71220821 | exonic       | HYDIN    | 16 | 71149598 | 71220821 | 0 | 0 | 0 | 2 | 0 | 0 | 71223 | 0.21262277 | -1.55080501 | 4.038815656 | -0.38397519 | 0.700996836 | 0.998252924 |
| chr16:81888048-81892768 | exonic       | PLCG2    | 16 | 81888048 | 81892768 | 0 | 0 | 0 | 2 | 0 | 0 | 4720  | 0.21262277 | -1.55080501 | 4.038815656 | -0.38397519 | 0.700996836 | 0.998252924 |
| chr16:85078632-85079056 | intronic     | KIAA0513 | 16 | 85078632 | 85079056 | 0 | 0 | 0 | 2 | 0 | 0 | 424   | 0.21262277 | -1.55080501 | 4.038815656 | -0.38397519 | 0.700996836 | 0.998252924 |
| chr16:86519238-86524610 | ncRNA_exonic | FENRRR   | 16 | 86519238 | 86524610 | 0 | 0 | 0 | 2 | 0 | 0 | 5372  | 0.21262277 | -1.55080501 | 4.038815656 | -0.38397519 | 0.700996836 | 0.998252924 |
| chr16:87448881-87452507 | exonic       | ZCCHC14  | 16 | 87448881 | 87452507 | 0 | 0 | 0 | 2 | 0 | 0 | 3626  | 0.21262277 | -1.55080501 | 4.038815656 | -0.38397519 | 0.700996836 | 0.998252924 |
| chr16:87451065-87452507 | exonic       | ZCCHC14  | 16 | 87451065 | 87452507 | 0 | 0 | 0 | 2 | 0 | 0 | 1442  | 0.21262277 | -1.55080501 | 4.038815656 | -0.38397519 | 0.700996836 | 0.998252924 |
| chr16:88008654-88071617 | exonic       | BANP     | 16 | 88008654 | 88071617 | 0 | 0 | 0 | 2 | 0 | 0 | 62963 | 0.21262277 | -1.55080501 | 4.038815656 | -0.38397519 | 0.700996836 | 0.998252924 |
| chr16:89857810-89858955 | exonic       | FANCA    | 16 | 89857810 | 89858955 | 0 | 0 | 0 | 2 | 0 | 0 | 1145  | 0.21262277 | -1.55080501 | 4.038815656 | -0.38397519 | 0.700996836 | 0.998252924 |
| chr17:1270159-1275242   | intronic     | YWHAE    | 17 | 1270159  | 1275242  | 0 | 0 | 0 | 2 | 0 | 0 | 5083  | 0.21262277 | -1.55080501 | 4.038815656 | -0.38397519 | 0.700996836 | 0.998252924 |
| chr17:1383821-1384179   | exonic       | MYO1C    | 17 | 1383821  | 1384179  | 0 | 0 | 0 | 2 | 0 | 0 | 358   | 0.21262277 | -1.55080501 | 4.038815656 | -0.38397519 | 0.700996836 | 0.998252924 |
| chr17:1442162-1456443   | exonic       | PITPNA   | 17 | 1442162  | 1456443  | 0 | 0 | 0 | 2 | 0 | 0 | 14281 | 0.21262277 | -1.55080501 | 4.038815656 | -0.38397519 | 0.700996836 | 0.998252924 |
| chr17:16635113-16638957 | exonic       | CCDC144A | 17 | 16635113 | 16638957 | 0 | 0 | 0 | 2 | 0 | 0 | 3844  | 0.21262277 | -1.55080501 | 4.038815656 | -0.38397519 | 0.700996836 | 0.998252924 |
| chr17:18243168-18244694 | exonic       | SHMT1    | 17 | 18243168 | 18244694 | 0 | 0 | 0 | 2 | 0 | 0 | 1526  | 0.21262277 | -1.55080501 | 4.038815656 | -0.38397519 | 0.700996836 | 0.998252924 |
| chr17:18506916-18513605 | ncRNA_exonic | CCDC144B | 17 | 18506916 | 18513605 | 0 | 0 | 0 | 2 | 0 | 0 | 6689  | 0.21262277 | -1.55080501 | 4.038815656 | -0.38397519 | 0.700996836 | 0.998252924 |
| chr17:18692665-18702256 | exonic       | TVP23B   | 17 | 18692665 | 18702256 | 0 | 0 | 0 | 2 | 0 | 0 | 9591  | 0.21262277 | -1.55080501 | 4.038815656 | -0.38397519 | 0.700996836 | 0.998252924 |
| chr17:18768781-18793190 | exonic       | PRPSAP2  | 17 | 18768781 | 18793190 | 0 | 0 | 0 | 2 | 0 | 0 | 24409 | 0.21262277 | -1.55080501 | 4.038815656 | -0.38397519 | 0.700996836 | 0.998252924 |
| chr17:18770594-18793190 | exonic       | PRPSAP2  | 17 | 18770594 | 18793190 | 0 | 0 | 0 | 2 | 0 | 0 | 22596 | 0.21262277 | -1.55080501 | 4.038815656 | -0.38397519 | 0.700996836 | 0.998252924 |
| chr17:19921300-20013875 | exonic       | SPECC1   | 17 | 19921300 | 20013875 | 0 | 0 | 0 | 2 | 0 | 0 | 92575 | 0.21262277 | -1.55080501 | 4.038815656 | -0.38397519 | 0.700996836 | 0.998252924 |
| chr17:2067054-2076153   | exonic       | SMG6     | 17 | 2067054  | 2076153  | 0 | 0 | 0 | 2 | 0 | 0 | 9099  | 0.21262277 | -1.55080501 | 4.038815656 | -0.38397519 | 0.700996836 | 0.998252924 |
| chr17:20910208-20916248 | exonic       | USP22    | 17 | 20910208 | 20916248 | 0 | 0 | 0 | 2 | 0 | 0 | 6040  | 0.21262277 | -1.55080501 | 4.038815656 | -0.38397519 | 0.700996836 | 0.998252924 |
| chr17:28535965-28536471 | exonic       | SLC6A4   | 17 | 28535965 | 28536471 | 0 | 0 | 0 | 2 | 0 | 0 | 506   | 0.21262277 | -1.55080501 | 4.038815656 | -0.38397519 | 0.700996836 | 0.998252924 |
| chr17:29130918-29131126 | exonic       | CRLF3    | 17 | 29130918 | 29131126 | 0 | 0 | 0 | 2 | 0 | 0 | 208   | 0.21262277 | -1.55080501 | 4.038815656 | -0.38397519 | 0.700996836 | 0.998252924 |

|                         |        |                                  |    |          |          |   |   |   |   |   |   |       |            |             |             |             |             |             |
|-------------------------|--------|----------------------------------|----|----------|----------|---|---|---|---|---|---|-------|------------|-------------|-------------|-------------|-------------|-------------|
| chr17:29654667-29685650 | exonic | NF1                              | 17 | 29654667 | 29685650 | 0 | 0 | 0 | 2 | 0 | 0 | 30983 | 0.21262277 | -1.55080501 | 4.038815656 | -0.38397519 | 0.700996836 | 0.998252924 |
| chr17:30357674-30362658 | exonic | LRR37B                           | 17 | 30357674 | 30362658 | 0 | 0 | 0 | 2 | 0 | 0 | 4984  | 0.21262277 | -1.55080501 | 4.038815656 | -0.38397519 | 0.700996836 | 0.998252924 |
| chr17:31039005-31082680 | exonic | MYO1D                            | 17 | 31039005 | 31082680 | 0 | 0 | 0 | 2 | 0 | 0 | 43675 | 0.21262277 | -1.55080501 | 4.038815656 | -0.38397519 | 0.700996836 | 0.998252924 |
| chr17:3474817-3511859   | exonic | TRPV1                            | 17 | 3474817  | 3511859  | 0 | 0 | 0 | 2 | 0 | 0 | 37042 | 0.21262277 | -1.55080501 | 4.038815656 | -0.38397519 | 0.700996836 | 0.998252924 |
| chr17:35797839-35804870 | exonic | TADA2A                           | 17 | 35797839 | 35804870 | 0 | 0 | 0 | 2 | 0 | 0 | 7031  | 0.21262277 | -1.55080501 | 4.038815656 | -0.38397519 | 0.700996836 | 0.998252924 |
| chr17:3608375-3623696   | exonic | ITGAE                            | 17 | 3608375  | 3623696  | 0 | 0 | 0 | 2 | 0 | 0 | 15321 | 0.21262277 | -1.55080501 | 4.038815656 | -0.38397519 | 0.700996836 | 0.998252924 |
| chr17:3850684-3851149   | exonic | ATP2A3                           | 17 | 3850684  | 3851149  | 0 | 0 | 0 | 2 | 0 | 0 | 465   | 0.21262277 | -1.55080501 | 4.038815656 | -0.38397519 | 0.700996836 | 0.998252924 |
| chr17:4098272-4100872   | exonic | ANKFY1                           | 17 | 4098272  | 4100872  | 0 | 0 | 0 | 2 | 0 | 0 | 2600  | 0.21262277 | -1.55080501 | 4.038815656 | -0.38397519 | 0.700996836 | 0.998252924 |
| chr17:42188097-42195072 | exonic | HDAC5                            | 17 | 42188097 | 42195072 | 0 | 0 | 0 | 2 | 0 | 0 | 6975  | 0.21262277 | -1.55080501 | 4.038815656 | -0.38397519 | 0.700996836 | 0.998252924 |
| chr17:42288159-42288520 | exonic | UBTF                             | 17 | 42288159 | 42288520 | 0 | 0 | 0 | 2 | 0 | 0 | 361   | 0.21262277 | -1.55080501 | 4.038815656 | -0.38397519 | 0.700996836 | 0.998252924 |
| chr17:4539053-4540553   | exonic | ALOX15                           | 17 | 4539053  | 4540553  | 0 | 0 | 0 | 2 | 0 | 0 | 1500  | 0.21262277 | -1.55080501 | 4.038815656 | -0.38397519 | 0.700996836 | 0.998252924 |
| chr17:47684611-47700238 | exonic | SPOP                             | 17 | 47684611 | 47700238 | 0 | 0 | 0 | 2 | 0 | 0 | 15627 | 0.21262277 | -1.55080501 | 4.038815656 | -0.38397519 | 0.700996836 | 0.998252924 |
| chr17:47797121-47797798 | exonic | FAM117A                          | 17 | 47797121 | 47797798 | 0 | 0 | 0 | 2 | 0 | 0 | 677   | 0.21262277 | -1.55080501 | 4.038815656 | -0.38397519 | 0.700996836 | 0.998252924 |
| chr17:49097519-49133843 | exonic | SPAG9                            | 17 | 49097519 | 49133843 | 0 | 0 | 0 | 2 | 0 | 0 | 36324 | 0.21262277 | -1.55080501 | 4.038815656 | -0.38397519 | 0.700996836 | 0.998252924 |
| chr17:5211989-5235447   | exonic | RABEP1                           | 17 | 5211989  | 5235447  | 0 | 0 | 0 | 2 | 0 | 0 | 23458 | 0.21262277 | -1.55080501 | 4.038815656 | -0.38397519 | 0.700996836 | 0.998252924 |
| chr17:57105776-57141766 | exonic | TRIM37                           | 17 | 57105776 | 57141766 | 0 | 0 | 0 | 2 | 0 | 0 | 35990 | 0.21262277 | -1.55080501 | 4.038815656 | -0.38397519 | 0.700996836 | 0.998252924 |
| chr17:57153007-57161450 | exonic | TRIM37                           | 17 | 57153007 | 57161450 | 0 | 0 | 0 | 2 | 0 | 0 | 8443  | 0.21262277 | -1.55080501 | 4.038815656 | -0.38397519 | 0.700996836 | 0.998252924 |
| chr17:59480568-59481751 | exonic | TBX2                             | 17 | 59480568 | 59481751 | 0 | 0 | 0 | 2 | 0 | 0 | 1183  | 0.21262277 | -1.55080501 | 4.038815656 | -0.38397519 | 0.700996836 | 0.998252924 |
| chr17:61838273-61842207 | exonic | CCDC47                           | 17 | 61838273 | 61842207 | 0 | 0 | 0 | 2 | 0 | 0 | 3934  | 0.21262277 | -1.55080501 | 4.038815656 | -0.38397519 | 0.700996836 | 0.998252924 |
| chr17:65906992-65936772 | exonic | BPTF                             | 17 | 65906992 | 65936772 | 0 | 0 | 0 | 2 | 0 | 0 | 29780 | 0.21262277 | -1.55080501 | 4.038815656 | -0.38397519 | 0.700996836 | 0.998252924 |
| chr17:67040638-67058277 | exonic | ABCA9                            | 17 | 67040638 | 67058277 | 0 | 0 | 0 | 2 | 0 | 0 | 17639 | 0.21262277 | -1.55080501 | 4.038815656 | -0.38397519 | 0.700996836 | 0.998252924 |
| chr17:73038276-73038754 | exonic | ATP5H                            | 17 | 73038276 | 73038754 | 0 | 0 | 0 | 2 | 0 | 0 | 478   | 0.21262277 | -1.55080501 | 4.038815656 | -0.38397519 | 0.700996836 | 0.998252924 |
| chr17:73737795-73739408 | exonic | ITGB4                            | 17 | 73737795 | 73739408 | 0 | 0 | 0 | 2 | 0 | 0 | 1613  | 0.21262277 | -1.55080501 | 4.038815656 | -0.38397519 | 0.700996836 | 0.998252924 |
| chr17:76000251-76005778 | UTR5   | <small>76000251-76005778</small> | 17 | 76000251 | 76005778 | 0 | 0 | 0 | 2 | 0 | 0 | 5527  | 0.21262277 | -1.55080501 | 4.038815656 | -0.38397519 | 0.700996836 | 0.998252924 |
| chr17:76069117-76079247 | exonic | TNRC6C                           | 17 | 76069117 | 76079247 | 0 | 0 | 0 | 2 | 0 | 0 | 10130 | 0.21262277 | -1.55080501 | 4.038815656 | -0.38397519 | 0.700996836 | 0.998252924 |
| chr17:76697752-76705814 | exonic | CYTH1                            | 17 | 76697752 | 76705814 | 0 | 0 | 0 | 2 | 0 | 0 | 8062  | 0.21262277 | -1.55080501 | 4.038815656 | -0.38397519 | 0.700996836 | 0.998252924 |
| chr17:79563141-79575848 | exonic | NPLOC4                           | 17 | 79563141 | 79575848 | 0 | 0 | 0 | 2 | 0 | 0 | 12707 | 0.21262277 | -1.55080501 | 4.038815656 | -0.38397519 | 0.700996836 | 0.998252924 |
| chr18:12337339-12344246 | exonic | AFG3L2                           | 18 | 12337339 | 12344246 | 0 | 0 | 0 | 2 | 0 | 0 | 6907  | 0.21262277 | -1.55080501 | 4.038815656 | -0.38397519 | 0.700996836 | 0.998252924 |
| chr18:13029661-13059311 | exonic | CEP192                           | 18 | 13029661 | 13059311 | 0 | 0 | 0 | 2 | 0 | 0 | 29650 | 0.21262277 | -1.55080501 | 4.038815656 | -0.38397519 | 0.700996836 | 0.998252924 |
| chr18:13408992-13438383 | exonic | LDLRAD4                          | 18 | 13408992 | 13438383 | 0 | 0 | 0 | 2 | 0 | 0 | 29391 | 0.21262277 | -1.55080501 | 4.038815656 | -0.38397519 | 0.700996836 | 0.998252924 |
| chr18:13666478-13682104 | exonic | FAM210A                          | 18 | 13666478 | 13682104 | 0 | 0 | 0 | 2 | 0 | 0 | 15626 | 0.21262277 | -1.55080501 | 4.038815656 | -0.38397519 | 0.700996836 | 0.998252924 |
| chr18:21703797-21708947 | exonic | TTC39C                           | 18 | 21703797 | 21708947 | 0 | 0 | 0 | 2 | 0 | 0 | 5150  | 0.21262277 | -1.55080501 | 4.038815656 | -0.38397519 | 0.700996836 | 0.998252924 |
| chr18:21883601-21921622 | exonic | OSBPL1A                          | 18 | 21883601 | 21921622 | 0 | 0 | 0 | 2 | 0 | 0 | 38021 | 0.21262277 | -1.55080501 | 4.038815656 | -0.38397519 | 0.700996836 | 0.998252924 |
| chr18:21921510-21946930 | exonic | OSBPL1A                          | 18 | 21921510 | 21946930 | 0 | 0 | 0 | 2 | 0 | 0 | 25420 | 0.21262277 | -1.55080501 | 4.038815656 | -0.38397519 | 0.700996836 | 0.998252924 |
| chr18:2750040-2751391   | exonic | SMCHD1                           | 18 | 2750040  | 2751391  | 0 | 0 | 0 | 2 | 0 | 0 | 1351  | 0.21262277 | -1.55080501 | 4.038815656 | -0.38397519 | 0.700996836 | 0.998252924 |

|                         |            |                 |    |          |          |   |   |   |   |   |   |        |            |             |             |             |             |             |
|-------------------------|------------|-----------------|----|----------|----------|---|---|---|---|---|---|--------|------------|-------------|-------------|-------------|-------------|-------------|
| chr18:2775732-2784619   | exonic     | SMCHD1          | 18 | 2775732  | 2784619  | 0 | 0 | 0 | 2 | 0 | 0 | 8887   | 0.21262277 | -1.55080501 | 4.038815656 | -0.38397519 | 0.700996836 | 0.998252924 |
| chr18:29218606-29238052 | exonic     | B4GALT6         | 18 | 29218606 | 29238052 | 0 | 0 | 0 | 2 | 0 | 0 | 19446  | 0.21262277 | -1.55080501 | 4.038815656 | -0.38397519 | 0.700996836 | 0.998252924 |
| chr18:2923772-2925366   | exonic     | LPIN2           | 18 | 2923772  | 2925366  | 0 | 0 | 0 | 2 | 0 | 0 | 1594   | 0.21262277 | -1.55080501 | 4.038815656 | -0.38397519 | 0.700996836 | 0.998252924 |
| chr18:346294-357522     | exonic     | COLEC12         | 18 | 346294   | 357522   | 0 | 0 | 0 | 2 | 0 | 0 | 11228  | 0.21262277 | -1.55080501 | 4.038815656 | -0.38397519 | 0.700996836 | 0.998252924 |
| chr18:34646831-34664195 | exonic     | KIAA1328        | 18 | 34646831 | 34664195 | 0 | 0 | 0 | 2 | 0 | 0 | 17364  | 0.21262277 | -1.55080501 | 4.038815656 | -0.38397519 | 0.700996836 | 0.998252924 |
| chr18:43698146-43704859 | exonic     | HAUS1           | 18 | 43698146 | 43704859 | 0 | 0 | 0 | 2 | 0 | 0 | 6713   | 0.21262277 | -1.55080501 | 4.038815656 | -0.38397519 | 0.700996836 | 0.998252924 |
| chr18:43698146-43705757 | exonic     | HAUS1           | 18 | 43698146 | 43705757 | 0 | 0 | 0 | 2 | 0 | 0 | 7611   | 0.21262277 | -1.55080501 | 4.038815656 | -0.38397519 | 0.700996836 | 0.998252924 |
| chr18:43698147-43708803 | exonic     | HAUS1           | 18 | 43698147 | 43708803 | 0 | 0 | 0 | 2 | 0 | 0 | 10656  | 0.21262277 | -1.55080501 | 4.038815656 | -0.38397519 | 0.700996836 | 0.998252924 |
| chr18:44013153-44019158 | exonic     | RNF165          | 18 | 44013153 | 44019158 | 0 | 0 | 0 | 2 | 0 | 0 | 6005   | 0.21262277 | -1.55080501 | 4.038815656 | -0.38397519 | 0.700996836 | 0.998252924 |
| chr18:50831948-50942526 | exonic     | DCC             | 18 | 50831948 | 50942526 | 0 | 0 | 0 | 2 | 0 | 0 | 110578 | 0.21262277 | -1.55080501 | 4.038815656 | -0.38397519 | 0.700996836 | 0.998252924 |
| chr18:54367022-54483375 | exonic     | WDR7            | 18 | 54367022 | 54483375 | 0 | 0 | 0 | 2 | 0 | 0 | 116353 | 0.21262277 | -1.55080501 | 4.038815656 | -0.38397519 | 0.700996836 | 0.998252924 |
| chr18:56585502-56601846 | exonic     | ZNF532          | 18 | 56585502 | 56601846 | 0 | 0 | 0 | 2 | 0 | 0 | 16344  | 0.21262277 | -1.55080501 | 4.038815656 | -0.38397519 | 0.700996836 | 0.998252924 |
| chr18:56598878-56606853 | exonic     | ZNF532          | 18 | 56598878 | 56606853 | 0 | 0 | 0 | 2 | 0 | 0 | 7975   | 0.21262277 | -1.55080501 | 4.038815656 | -0.38397519 | 0.700996836 | 0.998252924 |
| chr18:56816744-56823039 | exonic     | SEC11C          | 18 | 56816744 | 56823039 | 0 | 0 | 0 | 2 | 0 | 0 | 6295   | 0.21262277 | -1.55080501 | 4.038815656 | -0.38397519 | 0.700996836 | 0.998252924 |
| chr18:59481840-59483831 | exonic     | RNF152          | 18 | 59481840 | 59483831 | 0 | 0 | 0 | 2 | 0 | 0 | 1991   | 0.21262277 | -1.55080501 | 4.038815656 | -0.38397519 | 0.700996836 | 0.998252924 |
| chr18:6093353-6138295   | exonic     | L3MBTL4         | 18 | 6093353  | 6138295  | 0 | 0 | 0 | 2 | 0 | 0 | 44942  | 0.21262277 | -1.55080501 | 4.038815656 | -0.38397519 | 0.700996836 | 0.998252924 |
| chr18:6281103-6312055   | exonic     | L3MBTL4         | 18 | 6281103  | 6312055  | 0 | 0 | 0 | 2 | 0 | 0 | 30952  | 0.21262277 | -1.55080501 | 4.038815656 | -0.38397519 | 0.700996836 | 0.998252924 |
| chr18:67788791-67795782 | exonic     | RTTN            | 18 | 67788791 | 67795782 | 0 | 0 | 0 | 2 | 0 | 0 | 6991   | 0.21262277 | -1.55080501 | 4.038815656 | -0.38397519 | 0.700996836 | 0.998252924 |
| chr18:6824761-6837413   | exonic     | ARHGAP28        | 18 | 6824761  | 6837413  | 0 | 0 | 0 | 2 | 0 | 0 | 12652  | 0.21262277 | -1.55080501 | 4.038815656 | -0.38397519 | 0.700996836 | 0.998252924 |
| chr18:6824761-6851125   | exonic     | ARHGAP28        | 18 | 6824761  | 6851125  | 0 | 0 | 0 | 2 | 0 | 0 | 26364  | 0.21262277 | -1.55080501 | 4.038815656 | -0.38397519 | 0.700996836 | 0.998252924 |
| chr18:76886267-76914555 | exonic     | ATP9B           | 18 | 76886267 | 76914555 | 0 | 0 | 0 | 2 | 0 | 0 | 28288  | 0.21262277 | -1.55080501 | 4.038815656 | -0.38397519 | 0.700996836 | 0.998252924 |
| chr18:77811284-77814330 | downstream | RBFA (dist=632) | 18 | 77811284 | 77814330 | 0 | 0 | 0 | 2 | 0 | 0 | 3046   | 0.21262277 | -1.55080501 | 4.038815656 | -0.38397519 | 0.700996836 | 0.998252924 |
| chr19:1031069-1032695   | exonic     | CNN2            | 19 | 1031069  | 1032695  | 0 | 0 | 0 | 2 | 0 | 0 | 1626   | 0.21262277 | -1.55080501 | 4.038815656 | -0.38397519 | 0.700996836 | 0.998252924 |
| chr19:1036128-1036561   | exonic     | CNN2            | 19 | 1036128  | 1036561  | 0 | 0 | 0 | 2 | 0 | 0 | 433    | 0.21262277 | -1.55080501 | 4.038815656 | -0.38397519 | 0.700996836 | 0.998252924 |
| chr19:11294975-11295598 | intronic   | KANK2           | 19 | 11294975 | 11295598 | 0 | 0 | 0 | 2 | 0 | 0 | 623    | 0.21262277 | -1.55080501 | 4.038815656 | -0.38397519 | 0.700996836 | 0.998252924 |
| chr19:12057996-12067457 | exonic     | ZNF700          | 19 | 12057996 | 12067457 | 0 | 0 | 0 | 2 | 0 | 0 | 9461   | 0.21262277 | -1.55080501 | 4.038815656 | -0.38397519 | 0.700996836 | 0.998252924 |
| chr19:12568245-12577664 | exonic     | ZNF709          | 19 | 12568245 | 12577664 | 0 | 0 | 0 | 2 | 0 | 0 | 9419   | 0.21262277 | -1.55080501 | 4.038815656 | -0.38397519 | 0.700996836 | 0.998252924 |
| chr19:14501735-14508951 | exonic     | ADGRE5          | 19 | 14501735 | 14508951 | 0 | 0 | 0 | 2 | 0 | 0 | 7216   | 0.21262277 | -1.55080501 | 4.038815656 | -0.38397519 | 0.700996836 | 0.998252924 |
| chr19:14501736-14502304 | exonic     | ADGRE5          | 19 | 14501736 | 14502304 | 0 | 0 | 0 | 2 | 0 | 0 | 568    | 0.21262277 | -1.55080501 | 4.038815656 | -0.38397519 | 0.700996836 | 0.998252924 |
| chr19:14826193-14828545 | exonic     | ZNF333          | 19 | 14826193 | 14828545 | 0 | 0 | 0 | 2 | 0 | 0 | 2352   | 0.21262277 | -1.55080501 | 4.038815656 | -0.38397519 | 0.700996836 | 0.998252924 |
| chr19:17308600-17311638 | exonic     | MYO9B           | 19 | 17308600 | 17311638 | 0 | 0 | 0 | 2 | 0 | 0 | 3038   | 0.21262277 | -1.55080501 | 4.038815656 | -0.38397519 | 0.700996836 | 0.998252924 |
| chr19:17362390-17366415 | exonic     | USHBP1          | 19 | 17362390 | 17366415 | 0 | 0 | 0 | 2 | 0 | 0 | 4025   | 0.21262277 | -1.55080501 | 4.038815656 | -0.38397519 | 0.700996836 | 0.998252924 |
| chr19:17601933-17605891 | intronic   | SLC27A1         | 19 | 17601933 | 17605891 | 0 | 0 | 0 | 2 | 0 | 0 | 3958   | 0.21262277 | -1.55080501 | 4.038815656 | -0.38397519 | 0.700996836 | 0.998252924 |
| chr19:18232494-18239761 | exonic     | MAST3           | 19 | 18232494 | 18239761 | 0 | 0 | 0 | 2 | 0 | 0 | 7267   | 0.21262277 | -1.55080501 | 4.038815656 | -0.38397519 | 0.700996836 | 0.998252924 |
| chr19:18856632-18860685 | exonic     | CRTC1           | 19 | 18856632 | 18860685 | 0 | 0 | 0 | 2 | 0 | 0 | 4053   | 0.21262277 | -1.55080501 | 4.038815656 | -0.38397519 | 0.700996836 | 0.998252924 |

|                         |            |                                             |    |          |          |   |   |   |   |   |   |       |            |             |             |             |             |             |
|-------------------------|------------|---------------------------------------------|----|----------|----------|---|---|---|---|---|---|-------|------------|-------------|-------------|-------------|-------------|-------------|
| chr19:19576149-19584927 | exonic     | GATAD2A                                     | 19 | 19576149 | 19584927 | 0 | 0 | 0 | 2 | 0 | 0 | 8778  | 0.21262277 | -1.55080501 | 4.038815656 | -0.38397519 | 0.700996836 | 0.998252924 |
| chr19:19822009-19825296 | exonic     | ZNF14                                       | 19 | 19822009 | 19825296 | 0 | 0 | 0 | 2 | 0 | 0 | 3287  | 0.21262277 | -1.55080501 | 4.038815656 | -0.38397519 | 0.700996836 | 0.998252924 |
| chr19:2180711-2191239   | exonic     | DOT1L                                       | 19 | 2180711  | 2191239  | 0 | 0 | 0 | 2 | 0 | 0 | 10528 | 0.21262277 | -1.55080501 | 4.038815656 | -0.38397519 | 0.700996836 | 0.998252924 |
| chr19:23316882-23321357 | exonic     | ZNF730                                      | 19 | 23316882 | 23321357 | 0 | 0 | 0 | 2 | 0 | 0 | 4475  | 0.21262277 | -1.55080501 | 4.038815656 | -0.38397519 | 0.700996836 | 0.998252924 |
| chr19:24288742-24310982 | exonic     | ZNF254                                      | 19 | 24288742 | 24310982 | 0 | 0 | 0 | 2 | 0 | 0 | 22240 | 0.21262277 | -1.55080501 | 4.038815656 | -0.38397519 | 0.700996836 | 0.998252924 |
| chr19:33579039-33592480 | exonic     | GPATCH1                                     | 19 | 33579039 | 33592480 | 0 | 0 | 0 | 2 | 0 | 0 | 13441 | 0.21262277 | -1.55080501 | 4.038815656 | -0.38397519 | 0.700996836 | 0.998252924 |
| chr19:34685382-34706566 | exonic     | LSM14A                                      | 19 | 34685382 | 34706566 | 0 | 0 | 0 | 2 | 0 | 0 | 21184 | 0.21262277 | -1.55080501 | 4.038815656 | -0.38397519 | 0.700996836 | 0.998252924 |
| chr19:37020611-37025308 | intergenic | ZNF260 (dist=1363), ZNF529 (dist=9209)      | 19 | 37020611 | 37025308 | 0 | 0 | 0 | 2 | 0 | 0 | 4697  | 0.21262277 | -1.55080501 | 4.038815656 | -0.38397519 | 0.700996836 | 0.998252924 |
| chr19:37579941-37587017 | exonic     | ZNF420                                      | 19 | 37579941 | 37587017 | 0 | 0 | 0 | 2 | 0 | 0 | 7076  | 0.21262277 | -1.55080501 | 4.038815656 | -0.38397519 | 0.700996836 | 0.998252924 |
| chr19:38282397-38282773 | intergenic | ZNF573 (dist=12167), LOC644554 (dist=25278) | 19 | 38282397 | 38282773 | 0 | 0 | 0 | 2 | 0 | 0 | 376   | 0.21262277 | -1.55080501 | 4.038815656 | -0.38397519 | 0.700996836 | 0.998252924 |
| chr19:39819639-39823766 | exonic     | GMFG                                        | 19 | 39819639 | 39823766 | 0 | 0 | 0 | 2 | 0 | 0 | 4127  | 0.21262277 | -1.55080501 | 4.038815656 | -0.38397519 | 0.700996836 | 0.998252924 |
| chr19:39883104-39884277 | exonic     | MED29                                       | 19 | 39883104 | 39884277 | 0 | 0 | 0 | 2 | 0 | 0 | 1173  | 0.21262277 | -1.55080501 | 4.038815656 | -0.38397519 | 0.700996836 | 0.998252924 |
| chr19:39936443-39949713 | exonic     | SUPT5H                                      | 19 | 39936443 | 39949713 | 0 | 0 | 0 | 2 | 0 | 0 | 13270 | 0.21262277 | -1.55080501 | 4.038815656 | -0.38397519 | 0.700996836 | 0.998252924 |
| chr19:4015561-4017180   | intronic   | PIAS4                                       | 19 | 4015561  | 4017180  | 0 | 0 | 0 | 2 | 0 | 0 | 1619  | 0.21262277 | -1.55080501 | 4.038815656 | -0.38397519 | 0.700996836 | 0.998252924 |
| chr19:4117416-4117627   | exonic     | MAP2K2                                      | 19 | 4117416  | 4117627  | 0 | 0 | 0 | 2 | 0 | 0 | 211   | 0.21262277 | -1.55080501 | 4.038815656 | -0.38397519 | 0.700996836 | 0.998252924 |
| chr19:4356450-4356732   | intronic   | MPND                                        | 19 | 4356450  | 4356732  | 0 | 0 | 0 | 2 | 0 | 0 | 282   | 0.21262277 | -1.55080501 | 4.038815656 | -0.38397519 | 0.700996836 | 0.998252924 |
| chr19:45559708-45563885 | exonic     | CLASRP                                      | 19 | 45559708 | 45563885 | 0 | 0 | 0 | 2 | 0 | 0 | 4177  | 0.21262277 | -1.55080501 | 4.038815656 | -0.38397519 | 0.700996836 | 0.998252924 |
| chr19:45922355-45924651 | exonic     | ERCC1                                       | 19 | 45922355 | 45924651 | 0 | 0 | 0 | 2 | 0 | 0 | 2296  | 0.21262277 | -1.55080501 | 4.038815656 | -0.38397519 | 0.700996836 | 0.998252924 |
| chr19:46823699-46825223 | exonic     | HIF3A                                       | 19 | 46823699 | 46825223 | 0 | 0 | 0 | 2 | 0 | 0 | 1524  | 0.21262277 | -1.55080501 | 4.038815656 | -0.38397519 | 0.700996836 | 0.998252924 |
| chr19:46823699-46832735 | exonic     | HIF3A                                       | 19 | 46823699 | 46832735 | 0 | 0 | 0 | 2 | 0 | 0 | 9036  | 0.21262277 | -1.55080501 | 4.038815656 | -0.38397519 | 0.700996836 | 0.998252924 |
| chr19:47856010-47858607 | exonic     | DHX34                                       | 19 | 47856010 | 47858607 | 0 | 0 | 0 | 2 | 0 | 0 | 2597  | 0.21262277 | -1.55080501 | 4.038815656 | -0.38397519 | 0.700996836 | 0.998252924 |
| chr19:49463125-49463560 | intronic   | BAX                                         | 19 | 49463125 | 49463560 | 0 | 0 | 0 | 2 | 0 | 0 | 435   | 0.21262277 | -1.55080501 | 4.038815656 | -0.38397519 | 0.700996836 | 0.998252924 |
| chr19:52908826-52909896 | exonic     | ZNF528                                      | 19 | 52908826 | 52909896 | 0 | 0 | 0 | 2 | 0 | 0 | 1070  | 0.21262277 | -1.55080501 | 4.038815656 | -0.38397519 | 0.700996836 | 0.998252924 |
| chr19:53073293-53095481 | exonic     | ZNF701                                      | 19 | 53073293 | 53095481 | 0 | 0 | 0 | 2 | 0 | 0 | 22188 | 0.21262277 | -1.55080501 | 4.038815656 | -0.38397519 | 0.700996836 | 0.998252924 |
| chr19:53077330-53087450 | exonic     | ZNF701                                      | 19 | 53077330 | 53087450 | 0 | 0 | 0 | 2 | 0 | 0 | 10120 | 0.21262277 | -1.55080501 | 4.038815656 | -0.38397519 | 0.700996836 | 0.998252924 |
| chr19:53122188-53138406 | UTR5       |                                             | 19 | 53122188 | 53138406 | 0 | 0 | 0 | 2 | 0 | 0 | 16218 | 0.21262277 | -1.55080501 | 4.038815656 | -0.38397519 | 0.700996836 | 0.998252924 |
| chr19:53651933-53657046 | exonic     | ZNF347                                      | 19 | 53651933 | 53657046 | 0 | 0 | 0 | 2 | 0 | 0 | 5113  | 0.21262277 | -1.55080501 | 4.038815656 | -0.38397519 | 0.700996836 | 0.998252924 |
| chr19:54755917-54778683 | exonic     | LILRB2, LILRB5                              | 19 | 54755917 | 54778683 | 0 | 0 | 0 | 2 | 0 | 0 | 22766 | 0.21262277 | -1.55080501 | 4.038815656 | -0.38397519 | 0.700996836 | 0.998252924 |
| chr19:55501389-55508855 | exonic     | NLRP2                                       | 19 | 55501389 | 55508855 | 0 | 0 | 0 | 2 | 0 | 0 | 7466  | 0.21262277 | -1.55080501 | 4.038815656 | -0.38397519 | 0.700996836 | 0.998252924 |
| chr19:5595371-5604947   | exonic     | SAFB2                                       | 19 | 5595371  | 5604947  | 0 | 0 | 0 | 2 | 0 | 0 | 9576  | 0.21262277 | -1.55080501 | 4.038815656 | -0.38397519 | 0.700996836 | 0.998252924 |
| chr19:5598803-5610106   | exonic     | SAFB2                                       | 19 | 5598803  | 5610106  | 0 | 0 | 0 | 2 | 0 | 0 | 11303 | 0.21262277 | -1.55080501 | 4.038815656 | -0.38397519 | 0.700996836 | 0.998252924 |
| chr19:5653126-5653431   | exonic     | SAFB                                        | 19 | 5653126  | 5653431  | 0 | 0 | 0 | 2 | 0 | 0 | 305   | 0.21262277 | -1.55080501 | 4.038815656 | -0.38397519 | 0.700996836 | 0.998252924 |
| chr19:6759604-6760998   | exonic     | SH2D3A                                      | 19 | 6759604  | 6760998  | 0 | 0 | 0 | 2 | 0 | 0 | 1394  | 0.21262277 | -1.55080501 | 4.038815656 | -0.38397519 | 0.700996836 | 0.998252924 |
| chr19:7267355-7267907   | exonic     | INSR                                        | 19 | 7267355  | 7267907  | 0 | 0 | 0 | 2 | 0 | 0 | 552   | 0.21262277 | -1.55080501 | 4.038815656 | -0.38397519 | 0.700996836 | 0.998252924 |
| chr19:8280271-8286524   | intronic   | CERS4                                       | 19 | 8280271  | 8286524  | 0 | 0 | 0 | 2 | 0 | 0 | 6253  | 0.21262277 | -1.55080501 | 4.038815656 | -0.38397519 | 0.700996836 | 0.998252924 |



|                          |            |                                           |    |           |           |   |   |   |   |   |   |        |            |             |             |             |             |             |
|--------------------------|------------|-------------------------------------------|----|-----------|-----------|---|---|---|---|---|---|--------|------------|-------------|-------------|-------------|-------------|-------------|
| chr19:8591336-8601939    | exonic     | MYO1F                                     | 19 | 8591336   | 8601939   | 0 | 0 | 0 | 2 | 0 | 0 | 10603  | 0.21262277 | -1.55080501 | 4.038815656 | -0.38397519 | 0.700996836 | 0.998252924 |
| chr19:8619361-8620680    | exonic     | MYO1F                                     | 19 | 8619361   | 8620680   | 0 | 0 | 0 | 2 | 0 | 0 | 1319   | 0.21262277 | -1.55080501 | 4.038815656 | -0.38397519 | 0.700996836 | 0.998252924 |
| chr19:9939267-9939550    | exonic     | UBL5                                      | 19 | 9939267   | 9939550   | 0 | 0 | 0 | 2 | 0 | 0 | 283    | 0.21262277 | -1.55080501 | 4.038815656 | -0.38397519 | 0.700996836 | 0.998252924 |
| chr2:101648729-101650220 | exonic     | TBC1D8                                    | 2  | 101648729 | 101650220 | 0 | 0 | 0 | 2 | 0 | 0 | 1491   | 0.21262277 | -1.55080501 | 4.038815656 | -0.38397519 | 0.700996836 | 0.998252924 |
| chr2:102459070-102460773 | exonic     | MAP4K4                                    | 2  | 102459070 | 102460773 | 0 | 0 | 0 | 2 | 0 | 0 | 1703   | 0.21262277 | -1.55080501 | 4.038815656 | -0.38397519 | 0.700996836 | 0.998252924 |
| chr2:109100604-109116210 | exonic     | GCC2                                      | 2  | 109100604 | 109116210 | 0 | 0 | 0 | 2 | 0 | 0 | 15606  | 0.21262277 | -1.55080501 | 4.038815656 | -0.38397519 | 0.700996836 | 0.998252924 |
| chr2:109106293-109109246 | exonic     | GCC2                                      | 2  | 109106293 | 109109246 | 0 | 0 | 0 | 2 | 0 | 0 | 2953   | 0.21262277 | -1.55080501 | 4.038815656 | -0.38397519 | 0.700996836 | 0.998252924 |
| chr2:112817554-112824644 | exonic     | TMEM87B                                   | 2  | 112817554 | 112824644 | 0 | 0 | 0 | 2 | 0 | 0 | 7090   | 0.21262277 | -1.55080501 | 4.038815656 | -0.38397519 | 0.700996836 | 0.998252924 |
| chr2:11357216-11389924   | exonic     | ROCK2                                     | 2  | 11357216  | 11389924  | 0 | 0 | 0 | 2 | 0 | 0 | 32708  | 0.21262277 | -1.55080501 | 4.038815656 | -0.38397519 | 0.700996836 | 0.998252924 |
| chr2:114489160-114493435 | exonic     | SLC35F5                                   | 2  | 114489160 | 114493435 | 0 | 0 | 0 | 2 | 0 | 0 | 4275   | 0.21262277 | -1.55080501 | 4.038815656 | -0.38397519 | 0.700996836 | 0.998252924 |
| chr2:114563573-114566052 | intergenic | SLC35F5(d14+49173),LOC101000091(d14+2270) | 2  | 114563573 | 114566052 | 0 | 0 | 0 | 2 | 0 | 0 | 2479   | 0.21262277 | -1.55080501 | 4.038815656 | -0.38397519 | 0.700996836 | 0.998252924 |
| chr2:114670748-114688973 | exonic     | ACTR3                                     | 2  | 114670748 | 114688973 | 0 | 0 | 0 | 2 | 0 | 0 | 18225  | 0.21262277 | -1.55080501 | 4.038815656 | -0.38397519 | 0.700996836 | 0.998252924 |
| chr2:122120747-122125407 | exonic     | CLASP1                                    | 2  | 122120747 | 122125407 | 0 | 0 | 0 | 2 | 0 | 0 | 4660   | 0.21262277 | -1.55080501 | 4.038815656 | -0.38397519 | 0.700996836 | 0.998252924 |
| chr2:122187648-122216551 | exonic     | CLASP1                                    | 2  | 122187648 | 122216551 | 0 | 0 | 0 | 2 | 0 | 0 | 28903  | 0.21262277 | -1.55080501 | 4.038815656 | -0.38397519 | 0.700996836 | 0.998252924 |
| chr2:128712559-128712918 | exonic     | SAP130                                    | 2  | 128712559 | 128712918 | 0 | 0 | 0 | 2 | 0 | 0 | 359    | 0.21262277 | -1.55080501 | 4.038815656 | -0.38397519 | 0.700996836 | 0.998252924 |
| chr2:128922303-128931513 | exonic     | UGGT1                                     | 2  | 128922303 | 128931513 | 0 | 0 | 0 | 2 | 0 | 0 | 9210   | 0.21262277 | -1.55080501 | 4.038815656 | -0.38397519 | 0.700996836 | 0.998252924 |
| chr2:133618065-133653137 | exonic     | NCKAP5                                    | 2  | 133618065 | 133653137 | 0 | 0 | 0 | 2 | 0 | 0 | 35072  | 0.21262277 | -1.55080501 | 4.038815656 | -0.38397519 | 0.700996836 | 0.998252924 |
| chr2:135625090-135626611 | exonic     | ACMSD                                     | 2  | 135625090 | 135626611 | 0 | 0 | 0 | 2 | 0 | 0 | 1521   | 0.21262277 | -1.55080501 | 4.038815656 | -0.38397519 | 0.700996836 | 0.998252924 |
| chr2:136527338-136537955 | exonic     | UBXN4                                     | 2  | 136527338 | 136537955 | 0 | 0 | 0 | 2 | 0 | 0 | 10617  | 0.21262277 | -1.55080501 | 4.038815656 | -0.38397519 | 0.700996836 | 0.998252924 |
| chr2:15514731-15618413   | exonic     | NBAS                                      | 2  | 15514731  | 15618413  | 0 | 0 | 0 | 2 | 0 | 0 | 103682 | 0.21262277 | -1.55080501 | 4.038815656 | -0.38397519 | 0.700996836 | 0.998252924 |
| chr2:158617391-158627026 | exonic     | ACVR1                                     | 2  | 158617391 | 158627026 | 0 | 0 | 0 | 2 | 0 | 0 | 9635   | 0.21262277 | -1.55080501 | 4.038815656 | -0.38397519 | 0.700996836 | 0.998252924 |
| chr2:159165944-159201830 | exonic     | CCDC148                                   | 2  | 159165944 | 159201830 | 0 | 0 | 0 | 2 | 0 | 0 | 35886  | 0.21262277 | -1.55080501 | 4.038815656 | -0.38397519 | 0.700996836 | 0.998252924 |
| chr2:159488264-159497271 | exonic     | PKP4                                      | 2  | 159488264 | 159497271 | 0 | 0 | 0 | 2 | 0 | 0 | 9007   | 0.21262277 | -1.55080501 | 4.038815656 | -0.38397519 | 0.700996836 | 0.998252924 |
| chr2:159857592-159867952 | UTR5       | TANC1                                     | 2  | 159857592 | 159867952 | 0 | 0 | 0 | 2 | 0 | 0 | 10360  | 0.21262277 | -1.55080501 | 4.038815656 | -0.38397519 | 0.700996836 | 0.998252924 |
| chr2:159992704-160076378 | exonic     | TANC1                                     | 2  | 159992704 | 160076378 | 0 | 0 | 0 | 2 | 0 | 0 | 83674  | 0.21262277 | -1.55080501 | 4.038815656 | -0.38397519 | 0.700996836 | 0.998252924 |
| chr2:160585520-160599764 | exonic     | SCN7A                                     | 2  | 160585520 | 160599764 | 0 | 0 | 0 | 2 | 0 | 0 | 14244  | 0.21262277 | -1.55080501 | 4.038815656 | -0.38397519 | 0.700996836 | 0.998252924 |
| chr2:167304121-167313586 | exonic     | SCN7A                                     | 2  | 167304121 | 167313586 | 0 | 0 | 0 | 2 | 0 | 0 | 9465   | 0.21262277 | -1.55080501 | 4.038815656 | -0.38397519 | 0.700996836 | 0.998252924 |
| chr2:169684667-169711970 | exonic     | NOSTRIN                                   | 2  | 169684667 | 169711970 | 0 | 0 | 0 | 2 | 0 | 0 | 27303  | 0.21262277 | -1.55080501 | 4.038815656 | -0.38397519 | 0.700996836 | 0.998252924 |
| chr2:170802798-170815036 | exonic     | UBR3                                      | 2  | 170802798 | 170815036 | 0 | 0 | 0 | 2 | 0 | 0 | 12238  | 0.21262277 | -1.55080501 | 4.038815656 | -0.38397519 | 0.700996836 | 0.998252924 |
| chr2:172180554-172196064 | exonic     | METTL8                                    | 2  | 172180554 | 172196064 | 0 | 0 | 0 | 2 | 0 | 0 | 15510  | 0.21262277 | -1.55080501 | 4.038815656 | -0.38397519 | 0.700996836 | 0.998252924 |
| chr2:172644081-172666196 | exonic     | SLC25A12                                  | 2  | 172644081 | 172666196 | 0 | 0 | 0 | 2 | 0 | 0 | 22115  | 0.21262277 | -1.55080501 | 4.038815656 | -0.38397519 | 0.700996836 | 0.998252924 |
| chr2:178097119-178098999 | exonic     | NFE2L2                                    | 2  | 178097119 | 178098999 | 0 | 0 | 0 | 2 | 0 | 0 | 1880   | 0.21262277 | -1.55080501 | 4.038815656 | -0.38397519 | 0.700996836 | 0.998252924 |
| chr2:179981395-179982340 | exonic     | SESTD1                                    | 2  | 179981395 | 179982340 | 0 | 0 | 0 | 2 | 0 | 0 | 945    | 0.21262277 | -1.55080501 | 4.038815656 | -0.38397519 | 0.700996836 | 0.998252924 |
| chr2:180835227-180846724 | exonic     | CWC22                                     | 2  | 180835227 | 180846724 | 0 | 0 | 0 | 2 | 0 | 0 | 11497  | 0.21262277 | -1.55080501 | 4.038815656 | -0.38397519 | 0.700996836 | 0.998252924 |
| chr2:183600975-183608439 | exonic     | DNAJC10                                   | 2  | 183600975 | 183608439 | 0 | 0 | 0 | 2 | 0 | 0 | 7464   | 0.21262277 | -1.55080501 | 4.038815656 | -0.38397519 | 0.700996836 | 0.998252924 |

7-Mar

|                          |                |                                      |   |           |           |   |   |   |   |   |   |       |            |             |             |             |             |             |
|--------------------------|----------------|--------------------------------------|---|-----------|-----------|---|---|---|---|---|---|-------|------------|-------------|-------------|-------------|-------------|-------------|
| chr2:186903057-186947948 | ncRNA_exonic   | LINC01473                            | 2 | 186903057 | 186947948 | 0 | 0 | 0 | 2 | 0 | 0 | 44891 | 0.21262277 | -1.55080501 | 4.038815656 | -0.38397519 | 0.700996836 | 0.998252924 |
| chr2:190428309-190436567 | exonic         | SLC40A1                              | 2 | 190428309 | 190436567 | 0 | 0 | 0 | 2 | 0 | 0 | 8258  | 0.21262277 | -1.55080501 | 4.038815656 | -0.38397519 | 0.700996836 | 0.998252924 |
| chr2:191382245-191383909 | exonic         | NEMP2                                | 2 | 191382245 | 191383909 | 0 | 0 | 0 | 2 | 0 | 0 | 1664  | 0.21262277 | -1.55080501 | 4.038815656 | -0.38397519 | 0.700996836 | 0.998252924 |
| chr2:191900889-191919260 | exonic         | STAT4                                | 2 | 191900889 | 191919260 | 0 | 0 | 0 | 2 | 0 | 0 | 18371 | 0.21262277 | -1.55080501 | 4.038815656 | -0.38397519 | 0.700996836 | 0.998252924 |
| chr2:197964540-198051830 | exonic         | ANKRD44                              | 2 | 197964540 | 198051830 | 0 | 0 | 0 | 2 | 0 | 0 | 87290 | 0.21262277 | -1.55080501 | 4.038815656 | -0.38397519 | 0.700996836 | 0.998252924 |
| chr2:198327262-198334895 | exonic         | COQ10B                               | 2 | 198327262 | 198334895 | 0 | 0 | 0 | 2 | 0 | 0 | 7633  | 0.21262277 | -1.55080501 | 4.038815656 | -0.38397519 | 0.700996836 | 0.998252924 |
| chr2:201798598-201806002 | exonic         | ORC2                                 | 2 | 201798598 | 201806002 | 0 | 0 | 0 | 2 | 0 | 0 | 7404  | 0.21262277 | -1.55080501 | 4.038815656 | -0.38397519 | 0.700996836 | 0.998252924 |
| chr2:202007553-202007951 | ncRNA_intronic | CFLAR-AS1                            | 2 | 202007553 | 202007951 | 0 | 0 | 0 | 2 | 0 | 0 | 398   | 0.21262277 | -1.55080501 | 4.038815656 | -0.38397519 | 0.700996836 | 0.998252924 |
| chr2:202603392-202626541 | exonic         | ALS2                                 | 2 | 202603392 | 202626541 | 0 | 0 | 0 | 2 | 0 | 0 | 23149 | 0.21262277 | -1.55080501 | 4.038815656 | -0.38397519 | 0.700996836 | 0.998252924 |
| chr2:202614434-202619394 | exonic         | ALS2                                 | 2 | 202614434 | 202619394 | 0 | 0 | 0 | 2 | 0 | 0 | 4960  | 0.21262277 | -1.55080501 | 4.038815656 | -0.38397519 | 0.700996836 | 0.998252924 |
| chr2:203567022-203567371 | intronic       | FAM117B                              | 2 | 203567022 | 203567371 | 0 | 0 | 0 | 2 | 0 | 0 | 349   | 0.21262277 | -1.55080501 | 4.038815656 | -0.38397519 | 0.700996836 | 0.998252924 |
| chr2:204267299-204291992 | exonic         | ABI2                                 | 2 | 204267299 | 204291992 | 0 | 0 | 0 | 2 | 0 | 0 | 24693 | 0.21262277 | -1.55080501 | 4.038815656 | -0.38397519 | 0.700996836 | 0.998252924 |
| chr2:204319152-204326648 | exonic         | RAPH1                                | 2 | 204319152 | 204326648 | 0 | 0 | 0 | 2 | 0 | 0 | 7496  | 0.21262277 | -1.55080501 | 4.038815656 | -0.38397519 | 0.700996836 | 0.998252924 |
| chr2:205912303-205990461 | exonic         | PARD3B                               | 2 | 205912303 | 205990461 | 0 | 0 | 0 | 2 | 0 | 0 | 78158 | 0.21262277 | -1.55080501 | 4.038815656 | -0.38397519 | 0.700996836 | 0.998252924 |
| chr2:206991262-207017234 | exonic         | NDUFS1                               | 2 | 206991262 | 207017234 | 0 | 0 | 0 | 2 | 0 | 0 | 25972 | 0.21262277 | -1.55080501 | 4.038815656 | -0.38397519 | 0.700996836 | 0.998252924 |
| chr2:206997668-207007555 | exonic         | NDUFS1                               | 2 | 206997668 | 207007555 | 0 | 0 | 0 | 2 | 0 | 0 | 9887  | 0.21262277 | -1.55080501 | 4.038815656 | -0.38397519 | 0.700996836 | 0.998252924 |
| chr2:207705831-207744164 | intergenic     | FASTKD2(dist=44920), CPO(dist=60114) | 2 | 207705831 | 207744164 | 0 | 0 | 0 | 2 | 0 | 0 | 38333 | 0.21262277 | -1.55080501 | 4.038815656 | -0.38397519 | 0.700996836 | 0.998252924 |
| chr2:207705831-207746615 | intergenic     | FASTKD2(dist=44920), CPO(dist=57663) | 2 | 207705831 | 207746615 | 0 | 0 | 0 | 2 | 0 | 0 | 40784 | 0.21262277 | -1.55080501 | 4.038815656 | -0.38397519 | 0.700996836 | 0.998252924 |
| chr2:209138307-209163503 | exonic         | PIKFYVE                              | 2 | 209138307 | 209163503 | 0 | 0 | 0 | 2 | 0 | 0 | 25196 | 0.21262277 | -1.55080501 | 4.038815656 | -0.38397519 | 0.700996836 | 0.998252924 |
| chr2:210905143-210962931 | exonic         | KANSL1L                              | 2 | 210905143 | 210962931 | 0 | 0 | 0 | 2 | 0 | 0 | 57788 | 0.21262277 | -1.55080501 | 4.038815656 | -0.38397519 | 0.700996836 | 0.998252924 |
| chr2:211057527-211070520 | exonic         | ACADL                                | 2 | 211057527 | 211070520 | 0 | 0 | 0 | 2 | 0 | 0 | 12993 | 0.21262277 | -1.55080501 | 4.038815656 | -0.38397519 | 0.700996836 | 0.998252924 |
| chr2:211068054-211085526 | exonic         | ACADL                                | 2 | 211068054 | 211085526 | 0 | 0 | 0 | 2 | 0 | 0 | 17472 | 0.21262277 | -1.55080501 | 4.038815656 | -0.38397519 | 0.700996836 | 0.998252924 |
| chr2:212483901-212495319 | exonic         | ERBB4                                | 2 | 212483901 | 212495319 | 0 | 0 | 0 | 2 | 0 | 0 | 11418 | 0.21262277 | -1.55080501 | 4.038815656 | -0.38397519 | 0.700996836 | 0.998252924 |
| chr2:216288868-216295575 | exonic         | FN1                                  | 2 | 216288868 | 216295575 | 0 | 0 | 0 | 2 | 0 | 0 | 6707  | 0.21262277 | -1.55080501 | 4.038815656 | -0.38397519 | 0.700996836 | 0.998252924 |
| chr2:219254184-219256442 | exonic         | SLC11A1                              | 2 | 219254184 | 219256442 | 0 | 0 | 0 | 2 | 0 | 0 | 2258  | 0.21262277 | -1.55080501 | 4.038815656 | -0.38397519 | 0.700996836 | 0.998252924 |
| chr2:230672967-230675761 | exonic         | TRIP12                               | 2 | 230672967 | 230675761 | 0 | 0 | 0 | 2 | 0 | 0 | 2794  | 0.21262277 | -1.55080501 | 4.038815656 | -0.38397519 | 0.700996836 | 0.998252924 |
| chr2:231033763-231035477 | exonic         | SP110                                | 2 | 231033763 | 231035477 | 0 | 0 | 0 | 2 | 0 | 0 | 1714  | 0.21262277 | -1.55080501 | 4.038815656 | -0.38397519 | 0.700996836 | 0.998252924 |
| chr2:232576624-232577226 | exonic         | PTMA                                 | 2 | 232576624 | 232577226 | 0 | 0 | 0 | 2 | 0 | 0 | 602   | 0.21262277 | -1.55080501 | 4.038815656 | -0.38397519 | 0.700996836 | 0.998252924 |
| chr2:232660815-232663674 | exonic         | COPS7B                               | 2 | 232660815 | 232663674 | 0 | 0 | 0 | 2 | 0 | 0 | 2859  | 0.21262277 | -1.55080501 | 4.038815656 | -0.38397519 | 0.700996836 | 0.998252924 |
| chr2:233651859-233697803 | exonic         | GIGYF2                               | 2 | 233651859 | 233697803 | 0 | 0 | 0 | 2 | 0 | 0 | 45944 | 0.21262277 | -1.55080501 | 4.038815656 | -0.38397519 | 0.700996836 | 0.998252924 |
| chr2:236929920-236945359 | exonic         | AGAP1                                | 2 | 236929920 | 236945359 | 0 | 0 | 0 | 2 | 0 | 0 | 15439 | 0.21262277 | -1.55080501 | 4.038815656 | -0.38397519 | 0.700996836 | 0.998252924 |
| chr2:238881733-238903451 | exonic         | UBE2F                                | 2 | 238881733 | 238903451 | 0 | 0 | 0 | 2 | 0 | 0 | 21718 | 0.21262277 | -1.55080501 | 4.038815656 | -0.38397519 | 0.700996836 | 0.998252924 |
| chr2:239233946-239258049 | exonic         | TRAF3IP1                             | 2 | 239233946 | 239258049 | 0 | 0 | 0 | 2 | 0 | 0 | 24103 | 0.21262277 | -1.55080501 | 4.038815656 | -0.38397519 | 0.700996836 | 0.998252924 |
| chr2:239237326-239257489 | exonic         | TRAF3IP1                             | 2 | 239237326 | 239257489 | 0 | 0 | 0 | 2 | 0 | 0 | 20163 | 0.21262277 | -1.55080501 | 4.038815656 | -0.38397519 | 0.700996836 | 0.998252924 |
| chr2:239237326-239261850 | exonic         | TRAF3IP1                             | 2 | 239237326 | 239261850 | 0 | 0 | 0 | 2 | 0 | 0 | 24524 | 0.21262277 | -1.55080501 | 4.038815656 | -0.38397519 | 0.700996836 | 0.998252924 |

|                         |                |            |    |          |          |   |   |   |   |   |   |       |            |             |             |             |             |             |
|-------------------------|----------------|------------|----|----------|----------|---|---|---|---|---|---|-------|------------|-------------|-------------|-------------|-------------|-------------|
| chr2:26022254-26068432  | exonic         | ASXL2      | 2  | 26022254 | 26068432 | 0 | 0 | 0 | 2 | 0 | 0 | 46178 | 0.21262277 | -1.55080501 | 4.038815656 | -0.38397519 | 0.700996836 | 0.998252924 |
| chr2:32740056-32744013  | exonic         | BIRC6      | 2  | 32740056 | 32744013 | 0 | 0 | 0 | 2 | 0 | 0 | 3957  | 0.21262277 | -1.55080501 | 4.038815656 | -0.38397519 | 0.700996836 | 0.998252924 |
| chr2:33567904-33590570  | exonic         | LTBP1      | 2  | 33567904 | 33590570 | 0 | 0 | 0 | 2 | 0 | 0 | 22666 | 0.21262277 | -1.55080501 | 4.038815656 | -0.38397519 | 0.700996836 | 0.998252924 |
| chr2:38567229-38570654  | exonic         | ATL2       | 2  | 38567229 | 38570654 | 0 | 0 | 0 | 2 | 0 | 0 | 3425  | 0.21262277 | -1.55080501 | 4.038815656 | -0.38397519 | 0.700996836 | 0.998252924 |
| chr2:39505548-39507497  | exonic         | MAP4K3     | 2  | 39505548 | 39507497 | 0 | 0 | 0 | 2 | 0 | 0 | 1949  | 0.21262277 | -1.55080501 | 4.038815656 | -0.38397519 | 0.700996836 | 0.998252924 |
| chr2:43798845-43804381  | exonic         | THADA      | 2  | 43798845 | 43804381 | 0 | 0 | 0 | 2 | 0 | 0 | 5536  | 0.21262277 | -1.55080501 | 4.038815656 | -0.38397519 | 0.700996836 | 0.998252924 |
| chr2:44003920-44023097  | exonic         | DYNC2LI1   | 2  | 44003920 | 44023097 | 0 | 0 | 0 | 2 | 0 | 0 | 19177 | 0.21262277 | -1.55080501 | 4.038815656 | -0.38397519 | 0.700996836 | 0.998252924 |
| chr2:44173251-44202356  | exonic         | LRPPRC     | 2  | 44173251 | 44202356 | 0 | 0 | 0 | 2 | 0 | 0 | 29105 | 0.21262277 | -1.55080501 | 4.038815656 | -0.38397519 | 0.700996836 | 0.998252924 |
| chr2:46067519-46087337  | exonic         | PRKCE      | 2  | 46067519 | 46087337 | 0 | 0 | 0 | 2 | 0 | 0 | 19818 | 0.21262277 | -1.55080501 | 4.038815656 | -0.38397519 | 0.700996836 | 0.998252924 |
| chr2:55566599-55576735  | exonic         | CCDC88A    | 2  | 55566599 | 55576735 | 0 | 0 | 0 | 2 | 0 | 0 | 10136 | 0.21262277 | -1.55080501 | 4.038815656 | -0.38397519 | 0.700996836 | 0.998252924 |
| chr2:61456682-61463524  | exonic         | USP34      | 2  | 61456682 | 61463524 | 0 | 0 | 0 | 2 | 0 | 0 | 6842  | 0.21262277 | -1.55080501 | 4.038815656 | -0.38397519 | 0.700996836 | 0.998252924 |
| chr2:64139478-64148469  | exonic         | VPS54      | 2  | 64139478 | 64148469 | 0 | 0 | 0 | 2 | 0 | 0 | 8991  | 0.21262277 | -1.55080501 | 4.038815656 | -0.38397519 | 0.700996836 | 0.998252924 |
| chr2:66691240-66739426  | exonic         | MEIS1      | 2  | 66691240 | 66739426 | 0 | 0 | 0 | 2 | 0 | 0 | 48186 | 0.21262277 | -1.55080501 | 4.038815656 | -0.38397519 | 0.700996836 | 0.998252924 |
| chr2:68461398-68473316  | intronic       | PPP3R1     | 2  | 68461398 | 68473316 | 0 | 0 | 0 | 2 | 0 | 0 | 11918 | 0.21262277 | -1.55080501 | 4.038815656 | -0.38397519 | 0.700996836 | 0.998252924 |
| chr2:69972138-69973238  | intronic       | ANXA4      | 2  | 69972138 | 69973238 | 0 | 0 | 0 | 2 | 0 | 0 | 1100  | 0.21262277 | -1.55080501 | 4.038815656 | -0.38397519 | 0.700996836 | 0.998252924 |
| chr2:70442502-70451761  | exonic         | TIA1       | 2  | 70442502 | 70451761 | 0 | 0 | 0 | 2 | 0 | 0 | 9259  | 0.21262277 | -1.55080501 | 4.038815656 | -0.38397519 | 0.700996836 | 0.998252924 |
| chr2:7154584-7170346    | exonic         | RNF144A    | 2  | 7154584  | 7170346  | 0 | 0 | 0 | 2 | 0 | 0 | 15762 | 0.21262277 | -1.55080501 | 4.038815656 | -0.38397519 | 0.700996836 | 0.998252924 |
| chr2:73195576-73228707  | exonic         | SFXN5      | 2  | 73195576 | 73228707 | 0 | 0 | 0 | 2 | 0 | 0 | 33131 | 0.21262277 | -1.55080501 | 4.038815656 | -0.38397519 | 0.700996836 | 0.998252924 |
| chr2:73315177-73316443  | exonic         | RAB11FIP5  | 2  | 73315177 | 73316443 | 0 | 0 | 0 | 2 | 0 | 0 | 1266  | 0.21262277 | -1.55080501 | 4.038815656 | -0.38397519 | 0.700996836 | 0.998252924 |
| chr2:75914952-75919226  | exonic         | GCFC2      | 2  | 75914952 | 75919226 | 0 | 0 | 0 | 2 | 0 | 0 | 4274  | 0.21262277 | -1.55080501 | 4.038815656 | -0.38397519 | 0.700996836 | 0.998252924 |
| chr2:86676929-86694006  | exonic         | KDM3A      | 2  | 86676929 | 86694006 | 0 | 0 | 0 | 2 | 0 | 0 | 17077 | 0.21262277 | -1.55080501 | 4.038815656 | -0.38397519 | 0.700996836 | 0.998252924 |
| chr2:9490936-9508648    | exonic         | ASAP2      | 2  | 9490936  | 9508648  | 0 | 0 | 0 | 2 | 0 | 0 | 17712 | 0.21262277 | -1.55080501 | 4.038815656 | -0.38397519 | 0.700996836 | 0.998252924 |
| chr2:9661331-9668083    | exonic         | ADAM17     | 2  | 9661331  | 9668083  | 0 | 0 | 0 | 2 | 0 | 0 | 6752  | 0.21262277 | -1.55080501 | 4.038815656 | -0.38397519 | 0.700996836 | 0.998252924 |
| chr2:99279508-99343030  | exonic         | MGAT4A     | 2  | 99279508 | 99343030 | 0 | 0 | 0 | 2 | 0 | 0 | 63522 | 0.21262277 | -1.55080501 | 4.038815656 | -0.38397519 | 0.700996836 | 0.998252924 |
| chr2:9989501-10045135   | exonic         | TAF1B      | 2  | 9989501  | 10045135 | 0 | 0 | 0 | 2 | 0 | 0 | 55634 | 0.21262277 | -1.55080501 | 4.038815656 | -0.38397519 | 0.700996836 | 0.998252924 |
| chr20:25016271-25017397 | intronic       | ACSS1      | 20 | 25016271 | 25017397 | 0 | 0 | 0 | 2 | 0 | 0 | 1126  | 0.21262277 | -1.55080501 | 4.038815656 | -0.38397519 | 0.700996836 | 0.998252924 |
| chr20:25394425-25398831 | exonic         | GINS1      | 20 | 25394425 | 25398831 | 0 | 0 | 0 | 2 | 0 | 0 | 4406  | 0.21262277 | -1.55080501 | 4.038815656 | -0.38397519 | 0.700996836 | 0.998252924 |
| chr20:25448025-25451461 | exonic         | NINL       | 20 | 25448025 | 25451461 | 0 | 0 | 0 | 2 | 0 | 0 | 3436  | 0.21262277 | -1.55080501 | 4.038815656 | -0.38397519 | 0.700996836 | 0.998252924 |
| chr20:25612794-25626284 | ncRNA_exonic   | ZNF337-AS1 | 20 | 25612794 | 25626284 | 0 | 0 | 0 | 2 | 0 | 0 | 13490 | 0.21262277 | -1.55080501 | 4.038815656 | -0.38397519 | 0.700996836 | 0.998252924 |
| chr20:25666202-25667102 | exonic         | ZNF337     | 20 | 25666202 | 25667102 | 0 | 0 | 0 | 2 | 0 | 0 | 900   | 0.21262277 | -1.55080501 | 4.038815656 | -0.38397519 | 0.700996836 | 0.998252924 |
| chr20:3295679-3324378   | exonic         | C2Oorf194  | 20 | 3295679  | 3324378  | 0 | 0 | 0 | 2 | 0 | 0 | 28699 | 0.21262277 | -1.55080501 | 4.038815656 | -0.38397519 | 0.700996836 | 0.998252924 |
| chr20:32981597-33000445 | exonic         | ITCH       | 20 | 32981597 | 33000445 | 0 | 0 | 0 | 2 | 0 | 0 | 18848 | 0.21262277 | -1.55080501 | 4.038815656 | -0.38397519 | 0.700996836 | 0.998252924 |
| chr20:34446223-34487570 | exonic         | PHF20      | 20 | 34446223 | 34487570 | 0 | 0 | 0 | 2 | 0 | 0 | 41347 | 0.21262277 | -1.55080501 | 4.038815656 | -0.38397519 | 0.700996836 | 0.998252924 |
| chr20:35174231-35175107 | ncRNA_intronic | DLGAP4-AS1 | 20 | 35174231 | 35175107 | 0 | 0 | 0 | 2 | 0 | 0 | 876   | 0.21262277 | -1.55080501 | 4.038815656 | -0.38397519 | 0.700996836 | 0.998252924 |
| chr20:36011021-36026257 | exonic         | SRC        | 20 | 36011021 | 36026257 | 0 | 0 | 0 | 2 | 0 | 0 | 15236 | 0.21262277 | -1.55080501 | 4.038815656 | -0.38397519 | 0.700996836 | 0.998252924 |

|                         |              |                                             |    |          |          |   |   |   |   |   |   |       |            |             |             |             |             |             |
|-------------------------|--------------|---------------------------------------------|----|----------|----------|---|---|---|---|---|---|-------|------------|-------------|-------------|-------------|-------------|-------------|
| chr20:37153420-37161502 | exonic       | RALGAPB                                     | 20 | 37153420 | 37161502 | 0 | 0 | 0 | 2 | 0 | 0 | 8082  | 0.21262277 | -1.55080501 | 4.038815656 | -0.38397519 | 0.700996836 | 0.998252924 |
| chr20:39197258-39207985 | intergenic   | LINC01370 (dist=560087), MAFB (dist=106503) | 20 | 39197258 | 39207985 | 0 | 0 | 0 | 2 | 0 | 0 | 10727 | 0.21262277 | -1.55080501 | 4.038815656 | -0.38397519 | 0.700996836 | 0.998252924 |
| chr20:41385101-41420106 | exonic       | PTPRT                                       | 20 | 41385101 | 41420106 | 0 | 0 | 0 | 2 | 0 | 0 | 35005 | 0.21262277 | -1.55080501 | 4.038815656 | -0.38397519 | 0.700996836 | 0.998252924 |
| chr20:42226442-42230899 | intronic     | IFT52                                       | 20 | 42226442 | 42230899 | 0 | 0 | 0 | 2 | 0 | 0 | 4457  | 0.21262277 | -1.55080501 | 4.038815656 | -0.38397519 | 0.700996836 | 0.998252924 |
| chr20:42679946-42683166 | exonic       | TOX2                                        | 20 | 42679946 | 42683166 | 0 | 0 | 0 | 2 | 0 | 0 | 3220  | 0.21262277 | -1.55080501 | 4.038815656 | -0.38397519 | 0.700996836 | 0.998252924 |
| chr20:43132455-43141635 | exonic       | SERINC3                                     | 20 | 43132455 | 43141635 | 0 | 0 | 0 | 2 | 0 | 0 | 9180  | 0.21262277 | -1.55080501 | 4.038815656 | -0.38397519 | 0.700996836 | 0.998252924 |
| chr20:43629032-43629994 | exonic       | STK4                                        | 20 | 43629032 | 43629994 | 0 | 0 | 0 | 2 | 0 | 0 | 962   | 0.21262277 | -1.55080501 | 4.038815656 | -0.38397519 | 0.700996836 | 0.998252924 |
| chr20:45865069-45867882 | exonic       | ZMYND8                                      | 20 | 45865069 | 45867882 | 0 | 0 | 0 | 2 | 0 | 0 | 2813  | 0.21262277 | -1.55080501 | 4.038815656 | -0.38397519 | 0.700996836 | 0.998252924 |
| chr20:47588862-47589821 | exonic       | ARFGEF2                                     | 20 | 47588862 | 47589821 | 0 | 0 | 0 | 2 | 0 | 0 | 959   | 0.21262277 | -1.55080501 | 4.038815656 | -0.38397519 | 0.700996836 | 0.998252924 |
| chr20:47591302-47592736 | exonic       | ARFGEF2                                     | 20 | 47591302 | 47592736 | 0 | 0 | 0 | 2 | 0 | 0 | 1434  | 0.21262277 | -1.55080501 | 4.038815656 | -0.38397519 | 0.700996836 | 0.998252924 |
| chr20:48156106-48160985 | exonic       | PTGIS                                       | 20 | 48156106 | 48160985 | 0 | 0 | 0 | 2 | 0 | 0 | 4879  | 0.21262277 | -1.55080501 | 4.038815656 | -0.38397519 | 0.700996836 | 0.998252924 |
| chr20:48491241-48500603 | exonic       | SLC9A8                                      | 20 | 48491241 | 48500603 | 0 | 0 | 0 | 2 | 0 | 0 | 9362  | 0.21262277 | -1.55080501 | 4.038815656 | -0.38397519 | 0.700996836 | 0.998252924 |
| chr20:48561918-48565892 | exonic       | RNF114                                      | 20 | 48561918 | 48565892 | 0 | 0 | 0 | 2 | 0 | 0 | 3974  | 0.21262277 | -1.55080501 | 4.038815656 | -0.38397519 | 0.700996836 | 0.998252924 |
| chr20:49555439-49560006 | exonic       | DPM1                                        | 20 | 49555439 | 49560006 | 0 | 0 | 0 | 2 | 0 | 0 | 4567  | 0.21262277 | -1.55080501 | 4.038815656 | -0.38397519 | 0.700996836 | 0.998252924 |
| chr20:55745697-55758975 | exonic       | BMP7                                        | 20 | 55745697 | 55758975 | 0 | 0 | 0 | 2 | 0 | 0 | 13278 | 0.21262277 | -1.55080501 | 4.038815656 | -0.38397519 | 0.700996836 | 0.998252924 |
| chr20:56993266-57016139 | exonic       | VAPB                                        | 20 | 56993266 | 57016139 | 0 | 0 | 0 | 2 | 0 | 0 | 22873 | 0.21262277 | -1.55080501 | 4.038815656 | -0.38397519 | 0.700996836 | 0.998252924 |
| chr20:60699672-60706562 | exonic       | LSM14B                                      | 20 | 60699672 | 60706562 | 0 | 0 | 0 | 2 | 0 | 0 | 6890  | 0.21262277 | -1.55080501 | 4.038815656 | -0.38397519 | 0.700996836 | 0.998252924 |
| chr20:62370003-62370265 | exonic       | LIME1                                       | 20 | 62370003 | 62370265 | 0 | 0 | 0 | 2 | 0 | 0 | 262   | 0.21262277 | -1.55080501 | 4.038815656 | -0.38397519 | 0.700996836 | 0.998252924 |
| chr20:62407031-62436817 | exonic       | ZBTB46                                      | 20 | 62407031 | 62436817 | 0 | 0 | 0 | 2 | 0 | 0 | 29786 | 0.21262277 | -1.55080501 | 4.038815656 | -0.38397519 | 0.700996836 | 0.998252924 |
| chr20:62421173-62422143 | exonic       | ZBTB46                                      | 20 | 62421173 | 62422143 | 0 | 0 | 0 | 2 | 0 | 0 | 970   | 0.21262277 | -1.55080501 | 4.038815656 | -0.38397519 | 0.700996836 | 0.998252924 |
| chr20:9370525-9385995   | exonic       | PLCB4                                       | 20 | 9370525  | 9385995  | 0 | 0 | 0 | 2 | 0 | 0 | 15470 | 0.21262277 | -1.55080501 | 4.038815656 | -0.38397519 | 0.700996836 | 0.998252924 |
| chr21:16340618-16415895 | UTR5         | NRIP1 (NM_003489;c.-74950..-75382delins0)   | 21 | 16340618 | 16415895 | 0 | 0 | 0 | 2 | 0 | 0 | 75277 | 0.21262277 | -1.55080501 | 4.038815656 | -0.38397519 | 0.700996836 | 0.998252924 |
| chr21:18970934-18981470 | exonic       | BTG3                                        | 21 | 18970934 | 18981470 | 0 | 0 | 0 | 2 | 0 | 0 | 10536 | 0.21262277 | -1.55080501 | 4.038815656 | -0.38397519 | 0.700996836 | 0.998252924 |
| chr21:27347382-27372497 | exonic       | APP                                         | 21 | 27347382 | 27372497 | 0 | 0 | 0 | 2 | 0 | 0 | 25115 | 0.21262277 | -1.55080501 | 4.038815656 | -0.38397519 | 0.700996836 | 0.998252924 |
| chr21:27423315-27425664 | exonic       | APP                                         | 21 | 27423315 | 27425664 | 0 | 0 | 0 | 2 | 0 | 0 | 2349  | 0.21262277 | -1.55080501 | 4.038815656 | -0.38397519 | 0.700996836 | 0.998252924 |
| chr21:34787194-34793992 | exonic       | IFNGR2                                      | 21 | 34787194 | 34793992 | 0 | 0 | 0 | 2 | 0 | 0 | 6798  | 0.21262277 | -1.55080501 | 4.038815656 | -0.38397519 | 0.700996836 | 0.998252924 |
| chr21:35279645-35281515 | exonic       | ATP50                                       | 21 | 35279645 | 35281515 | 0 | 0 | 0 | 2 | 0 | 0 | 1870  | 0.21262277 | -1.55080501 | 4.038815656 | -0.38397519 | 0.700996836 | 0.998252924 |
| chr21:40646299-40650739 | exonic       | BRWD1                                       | 21 | 40646299 | 40650739 | 0 | 0 | 0 | 2 | 0 | 0 | 4440  | 0.21262277 | -1.55080501 | 4.038815656 | -0.38397519 | 0.700996836 | 0.998252924 |
| chr21:40762623-40765206 | exonic       | WRB                                         | 21 | 40762623 | 40765206 | 0 | 0 | 0 | 2 | 0 | 0 | 2583  | 0.21262277 | -1.55080501 | 4.038815656 | -0.38397519 | 0.700996836 | 0.998252924 |
| chr21:46875659-46876090 | exonic       | COL18A1                                     | 21 | 46875659 | 46876090 | 0 | 0 | 0 | 2 | 0 | 0 | 431   | 0.21262277 | -1.55080501 | 4.038815656 | -0.38397519 | 0.700996836 | 0.998252924 |
| chr22:18324587-18379747 | exonic       | MICAL3                                      | 22 | 18324587 | 18379747 | 0 | 0 | 0 | 2 | 0 | 0 | 55160 | 0.21262277 | -1.55080501 | 4.038815656 | -0.38397519 | 0.700996836 | 0.998252924 |
| chr22:21947149-21965332 | exonic       | UBE2L3                                      | 22 | 21947149 | 21965332 | 0 | 0 | 0 | 2 | 0 | 0 | 18183 | 0.21262277 | -1.55080501 | 4.038815656 | -0.38397519 | 0.700996836 | 0.998252924 |
| chr22:24698162-24720395 | exonic       | SPECC1L                                     | 22 | 24698162 | 24720395 | 0 | 0 | 0 | 2 | 0 | 0 | 22233 | 0.21262277 | -1.55080501 | 4.038815656 | -0.38397519 | 0.700996836 | 0.998252924 |
| chr22:27113216-27134203 | ncRNA_exonic | MIATNB                                      | 22 | 27113216 | 27134203 | 0 | 0 | 0 | 2 | 0 | 0 | 20987 | 0.21262277 | -1.55080501 | 4.038815656 | -0.38397519 | 0.700996836 | 0.998252924 |
| chr22:28685935-28690666 | intronic     | TTC28                                       | 22 | 28685935 | 28690666 | 0 | 0 | 0 | 2 | 0 | 0 | 4731  | 0.21262277 | -1.55080501 | 4.038815656 | -0.38397519 | 0.700996836 | 0.998252924 |

|                          |            |                                      |    |           |           |   |   |   |   |   |   |       |            |             |             |             |             |             |
|--------------------------|------------|--------------------------------------|----|-----------|-----------|---|---|---|---|---|---|-------|------------|-------------|-------------|-------------|-------------|-------------|
| chr22:29140602-29141996  | exonic     | HSCB                                 | 22 | 29140602  | 29141996  | 0 | 0 | 0 | 2 | 0 | 0 | 1394  | 0.21262277 | -1.55080501 | 4.038815656 | -0.38397519 | 0.700996836 | 0.998252924 |
| chr22:30032740-30038274  | exonic     | NF2                                  | 22 | 30032740  | 30038274  | 0 | 0 | 0 | 2 | 0 | 0 | 5534  | 0.21262277 | -1.55080501 | 4.038815656 | -0.38397519 | 0.700996836 | 0.998252924 |
| chr22:38014454-38017703  | exonic     | GGA1                                 | 22 | 38014454  | 38017703  | 0 | 0 | 0 | 2 | 0 | 0 | 3249  | 0.21262277 | -1.55080501 | 4.038815656 | -0.38397519 | 0.700996836 | 0.998252924 |
| chr22:38171702-38175105  | UTR3       |                                      | 22 | 38171702  | 38175105  | 0 | 0 | 0 | 2 | 0 | 0 | 3403  | 0.21262277 | -1.55080501 | 4.038815656 | -0.38397519 | 0.700996836 | 0.998252924 |
| chr22:41832441-41832593  | exonic     | TOB2                                 | 22 | 41832441  | 41832593  | 0 | 0 | 0 | 2 | 0 | 0 | 152   | 0.21262277 | -1.55080501 | 4.038815656 | -0.38397519 | 0.700996836 | 0.998252924 |
| chr22:41900842-41901311  | intronic   | ACO2                                 | 22 | 41900842  | 41901311  | 0 | 0 | 0 | 2 | 0 | 0 | 469   | 0.21262277 | -1.55080501 | 4.038815656 | -0.38397519 | 0.700996836 | 0.998252924 |
| chr22:42415314-42416100  | exonic     | WBP2NL                               | 22 | 42415314  | 42416100  | 0 | 0 | 0 | 2 | 0 | 0 | 786   | 0.21262277 | -1.55080501 | 4.038815656 | -0.38397519 | 0.700996836 | 0.998252924 |
| chr22:45927144-45929778  | exonic     | FBLN1                                | 22 | 45927144  | 45929778  | 0 | 0 | 0 | 2 | 0 | 0 | 2634  | 0.21262277 | -1.55080501 | 4.038815656 | -0.38397519 | 0.700996836 | 0.998252924 |
| chr3:100002450-100018175 | exonic     | TBC1D23                              | 3  | 100002450 | 100018175 | 0 | 0 | 0 | 2 | 0 | 0 | 15725 | 0.21262277 | -1.55080501 | 4.038815656 | -0.38397519 | 0.700996836 | 0.998252924 |
| chr3:100098597-100099092 | intronic   | TOMM70A                              | 3  | 100098597 | 100099092 | 0 | 0 | 0 | 2 | 0 | 0 | 495   | 0.21262277 | -1.55080501 | 4.038815656 | -0.38397519 | 0.700996836 | 0.998252924 |
| chr3:100560842-100567719 | exonic     | ABI3BP                               | 3  | 100560842 | 100567719 | 0 | 0 | 0 | 2 | 0 | 0 | 6877  | 0.21262277 | -1.55080501 | 4.038815656 | -0.38397519 | 0.700996836 | 0.998252924 |
| chr3:100581154-100645325 | exonic     | ABI3BP                               | 3  | 100581154 | 100645325 | 0 | 0 | 0 | 2 | 0 | 0 | 64171 | 0.21262277 | -1.55080501 | 4.038815656 | -0.38397519 | 0.700996836 | 0.998252924 |
| chr3:101136436-101177896 | exonic     | SENP7                                | 3  | 101136436 | 101177896 | 0 | 0 | 0 | 2 | 0 | 0 | 41460 | 0.21262277 | -1.55080501 | 4.038815656 | -0.38397519 | 0.700996836 | 0.998252924 |
| chr3:107789939-107799191 | exonic     | CD47                                 | 3  | 107789939 | 107799191 | 0 | 0 | 0 | 2 | 0 | 0 | 9252  | 0.21262277 | -1.55080501 | 4.038815656 | -0.38397519 | 0.700996836 | 0.998252924 |
| chr3:113720441-113765579 | exonic     | CCDC191                              | 3  | 113720441 | 113765579 | 0 | 0 | 0 | 2 | 0 | 0 | 45138 | 0.21262277 | -1.55080501 | 4.038815656 | -0.38397519 | 0.700996836 | 0.998252924 |
| chr3:113784084-113798904 | exonic     | QTRTD1                               | 3  | 113784084 | 113798904 | 0 | 0 | 0 | 2 | 0 | 0 | 14820 | 0.21262277 | -1.55080501 | 4.038815656 | -0.38397519 | 0.700996836 | 0.998252924 |
| chr3:119222378-119222868 | exonic     | TIMMDC1                              | 3  | 119222378 | 119222868 | 0 | 0 | 0 | 2 | 0 | 0 | 490   | 0.21262277 | -1.55080501 | 4.038815656 | -0.38397519 | 0.700996836 | 0.998252924 |
| chr3:122284705-122284917 | exonic     | DTX3L                                | 3  | 122284705 | 122284917 | 0 | 0 | 0 | 2 | 0 | 0 | 212   | 0.21262277 | -1.55080501 | 4.038815656 | -0.38397519 | 0.700996836 | 0.998252924 |
| chr3:124412651-124415102 | exonic     | KALRN                                | 3  | 124412651 | 124415102 | 0 | 0 | 0 | 2 | 0 | 0 | 2451  | 0.21262277 | -1.55080501 | 4.038815656 | -0.38397519 | 0.700996836 | 0.998252924 |
| chr3:129546646-129579855 | exonic     | TMCC1                                | 3  | 129546646 | 129579855 | 0 | 0 | 0 | 2 | 0 | 0 | 33209 | 0.21262277 | -1.55080501 | 4.038815656 | -0.38397519 | 0.700996836 | 0.998252924 |
| chr3:1337284-1371619     | exonic     | CNTN6                                | 3  | 1337284   | 1371619   | 0 | 0 | 0 | 2 | 0 | 0 | 34335 | 0.21262277 | -1.55080501 | 4.038815656 | -0.38397519 | 0.700996836 | 0.998252924 |
| chr3:1337284-1418759     | exonic     | CNTN6                                | 3  | 1337284   | 1418759   | 0 | 0 | 0 | 2 | 0 | 0 | 81475 | 0.21262277 | -1.55080501 | 4.038815656 | -0.38397519 | 0.700996836 | 0.998252924 |
| chr3:136045645-136048826 | exonic     | PCCB                                 | 3  | 136045645 | 136048826 | 0 | 0 | 0 | 2 | 0 | 0 | 3181  | 0.21262277 | -1.55080501 | 4.038815656 | -0.38397519 | 0.700996836 | 0.998252924 |
| chr3:136112272-136112547 | intronic   | STAG1                                | 3  | 136112272 | 136112547 | 0 | 0 | 0 | 2 | 0 | 0 | 275   | 0.21262277 | -1.55080501 | 4.038815656 | -0.38397519 | 0.700996836 | 0.998252924 |
| chr3:138207255-138207491 | intergenic | ESYT3 (dist=9999), CEP70 (dist=5690) | 3  | 138207255 | 138207491 | 0 | 0 | 0 | 2 | 0 | 0 | 236   | 0.21262277 | -1.55080501 | 4.038815656 | -0.38397519 | 0.700996836 | 0.998252924 |
| chr3:14183093-14183453   | exonic     | TMEM43                               | 3  | 14183093  | 14183453  | 0 | 0 | 0 | 2 | 0 | 0 | 360   | 0.21262277 | -1.55080501 | 4.038815656 | -0.38397519 | 0.700996836 | 0.998252924 |
| chr3:142122515-142133133 | exonic     | XRN1                                 | 3  | 142122515 | 142133133 | 0 | 0 | 0 | 2 | 0 | 0 | 10618 | 0.21262277 | -1.55080501 | 4.038815656 | -0.38397519 | 0.700996836 | 0.998252924 |
| chr3:150931791-150937430 | exonic     | P2RY14                               | 3  | 150931791 | 150937430 | 0 | 0 | 0 | 2 | 0 | 0 | 5639  | 0.21262277 | -1.55080501 | 4.038815656 | -0.38397519 | 0.700996836 | 0.998252924 |
| chr3:154027441-154033952 | exonic     | DHX36                                | 3  | 154027441 | 154033952 | 0 | 0 | 0 | 2 | 0 | 0 | 6511  | 0.21262277 | -1.55080501 | 4.038815656 | -0.38397519 | 0.700996836 | 0.998252924 |
| chr3:154801946-154866442 | exonic     | MME                                  | 3  | 154801946 | 154866442 | 0 | 0 | 0 | 2 | 0 | 0 | 64496 | 0.21262277 | -1.55080501 | 4.038815656 | -0.38397519 | 0.700996836 | 0.998252924 |
| chr3:15604864-15616589   | exonic     | HACL1                                | 3  | 15604864  | 15616589  | 0 | 0 | 0 | 2 | 0 | 0 | 11725 | 0.21262277 | -1.55080501 | 4.038815656 | -0.38397519 | 0.700996836 | 0.998252924 |
| chr3:160129708-160132305 | exonic     | SMC4                                 | 3  | 160129708 | 160132305 | 0 | 0 | 0 | 2 | 0 | 0 | 2597  | 0.21262277 | -1.55080501 | 4.038815656 | -0.38397519 | 0.700996836 | 0.998252924 |
| chr3:167319914-167322256 | exonic     | WDR49                                | 3  | 167319914 | 167322256 | 0 | 0 | 0 | 2 | 0 | 0 | 2342  | 0.21262277 | -1.55080501 | 4.038815656 | -0.38397519 | 0.700996836 | 0.998252924 |
| chr3:170855980-170879125 | exonic     | TNIK                                 | 3  | 170855980 | 170879125 | 0 | 0 | 0 | 2 | 0 | 0 | 23145 | 0.21262277 | -1.55080501 | 4.038815656 | -0.38397519 | 0.700996836 | 0.998252924 |
| chr3:171426544-171443866 | exonic     | PLD1                                 | 3  | 171426544 | 171443866 | 0 | 0 | 0 | 2 | 0 | 0 | 17322 | 0.21262277 | -1.55080501 | 4.038815656 | -0.38397519 | 0.700996836 | 0.998252924 |

|                          |          |         |   |           |           |   |   |   |   |   |   |        |            |             |             |             |             |             |
|--------------------------|----------|---------|---|-----------|-----------|---|---|---|---|---|---|--------|------------|-------------|-------------|-------------|-------------|-------------|
| chr3:172491692-172501699 | exonic   | ECT2    | 3 | 172491692 | 172501699 | 0 | 0 | 0 | 2 | 0 | 0 | 10007  | 0.21262277 | -1.55080501 | 4.038815656 | -0.38397519 | 0.700996836 | 0.998252924 |
| chr3:179096129-179104417 | exonic   | MFN1    | 3 | 179096129 | 179104417 | 0 | 0 | 0 | 2 | 0 | 0 | 8288   | 0.21262277 | -1.55080501 | 4.038815656 | -0.38397519 | 0.700996836 | 0.998252924 |
| chr3:179340646-179340833 | intronic | NDUFB5  | 3 | 179340646 | 179340833 | 0 | 0 | 0 | 2 | 0 | 0 | 187    | 0.21262277 | -1.55080501 | 4.038815656 | -0.38397519 | 0.700996836 | 0.998252924 |
| chr3:179399665-179424864 | exonic   | USP13   | 3 | 179399665 | 179424864 | 0 | 0 | 0 | 2 | 0 | 0 | 25199  | 0.21262277 | -1.55080501 | 4.038815656 | -0.38397519 | 0.700996836 | 0.998252924 |
| chr3:182870162-182872179 | exonic   | LAMP3   | 3 | 182870162 | 182872179 | 0 | 0 | 0 | 2 | 0 | 0 | 2017   | 0.21262277 | -1.55080501 | 4.038815656 | -0.38397519 | 0.700996836 | 0.998252924 |
| chr3:183361268-183371877 | exonic   | KLHL24  | 3 | 183361268 | 183371877 | 0 | 0 | 0 | 2 | 0 | 0 | 10609  | 0.21262277 | -1.55080501 | 4.038815656 | -0.38397519 | 0.700996836 | 0.998252924 |
| chr3:183368084-183371877 | exonic   | KLHL24  | 3 | 183368084 | 183371877 | 0 | 0 | 0 | 2 | 0 | 0 | 3793   | 0.21262277 | -1.55080501 | 4.038815656 | -0.38397519 | 0.700996836 | 0.998252924 |
| chr3:183857867-183858518 | exonic   | EIF2B5  | 3 | 183857867 | 183858518 | 0 | 0 | 0 | 2 | 0 | 0 | 651    | 0.21262277 | -1.55080501 | 4.038815656 | -0.38397519 | 0.700996836 | 0.998252924 |
| chr3:183962388-183963600 | exonic   | ALG3    | 3 | 183962388 | 183963600 | 0 | 0 | 0 | 2 | 0 | 0 | 1212   | 0.21262277 | -1.55080501 | 4.038815656 | -0.38397519 | 0.700996836 | 0.998252924 |
| chr3:184566858-184675309 | exonic   | VPS8    | 3 | 184566858 | 184675309 | 0 | 0 | 0 | 2 | 0 | 0 | 108451 | 0.21262277 | -1.55080501 | 4.038815656 | -0.38397519 | 0.700996836 | 0.998252924 |
| chr3:189700834-189713231 | exonic   | P3H2    | 3 | 189700834 | 189713231 | 0 | 0 | 0 | 2 | 0 | 0 | 12397  | 0.21262277 | -1.55080501 | 4.038815656 | -0.38397519 | 0.700996836 | 0.998252924 |
| chr3:191074876-191087825 | exonic   | CCDC50  | 3 | 191074876 | 191087825 | 0 | 0 | 0 | 2 | 0 | 0 | 12949  | 0.21262277 | -1.55080501 | 4.038815656 | -0.38397519 | 0.700996836 | 0.998252924 |
| chr3:193174788-193185275 | exonic   | ATP13A4 | 3 | 193174788 | 193185275 | 0 | 0 | 0 | 2 | 0 | 0 | 10487  | 0.21262277 | -1.55080501 | 4.038815656 | -0.38397519 | 0.700996836 | 0.998252924 |
| chr3:20167396-20169041   | exonic   | KAT2B   | 3 | 20167396  | 20169041  | 0 | 0 | 0 | 2 | 0 | 0 | 1645   | 0.21262277 | -1.55080501 | 4.038815656 | -0.38397519 | 0.700996836 | 0.998252924 |
| chr3:25642590-25656779   | exonic   | TOP2B   | 3 | 25642590  | 25656779  | 0 | 0 | 0 | 2 | 0 | 0 | 14189  | 0.21262277 | -1.55080501 | 4.038815656 | -0.38397519 | 0.700996836 | 0.998252924 |
| chr3:3178944-3190917     | exonic   | TRNT1   | 3 | 3178944   | 3190917   | 0 | 0 | 0 | 2 | 0 | 0 | 11973  | 0.21262277 | -1.55080501 | 4.038815656 | -0.38397519 | 0.700996836 | 0.998252924 |
| chr3:32750161-32758729   | exonic   | CNOT10  | 3 | 32750161  | 32758729  | 0 | 0 | 0 | 2 | 0 | 0 | 8568   | 0.21262277 | -1.55080501 | 4.038815656 | -0.38397519 | 0.700996836 | 0.998252924 |
| chr3:33093250-33095041   | exonic   | GLB1    | 3 | 33093250  | 33095041  | 0 | 0 | 0 | 2 | 0 | 0 | 1791   | 0.21262277 | -1.55080501 | 4.038815656 | -0.38397519 | 0.700996836 | 0.998252924 |
| chr3:36484855-36570477   | exonic   | STAC    | 3 | 36484855  | 36570477  | 0 | 0 | 0 | 2 | 0 | 0 | 85622  | 0.21262277 | -1.55080501 | 4.038815656 | -0.38397519 | 0.700996836 | 0.998252924 |
| chr3:37146945-37190529   | exonic   | LRRFIP2 | 3 | 37146945  | 37190529  | 0 | 0 | 0 | 2 | 0 | 0 | 43584  | 0.21262277 | -1.55080501 | 4.038815656 | -0.38397519 | 0.700996836 | 0.998252924 |
| chr3:37323448-37343823   | exonic   | GOLGA4  | 3 | 37323448  | 37343823  | 0 | 0 | 0 | 2 | 0 | 0 | 20375  | 0.21262277 | -1.55080501 | 4.038815656 | -0.38397519 | 0.700996836 | 0.998252924 |
| chr3:39107301-39110350   | exonic   | WDR48   | 3 | 39107301  | 39110350  | 0 | 0 | 0 | 2 | 0 | 0 | 3049   | 0.21262277 | -1.55080501 | 4.038815656 | -0.38397519 | 0.700996836 | 0.998252924 |
| chr3:41265511-41280845   | exonic   | CTNNB1  | 3 | 41265511  | 41280845  | 0 | 0 | 0 | 2 | 0 | 0 | 15334  | 0.21262277 | -1.55080501 | 4.038815656 | -0.38397519 | 0.700996836 | 0.998252924 |
| chr3:41860914-41961310   | exonic   | ULK4    | 3 | 41860914  | 41961310  | 0 | 0 | 0 | 2 | 0 | 0 | 100396 | 0.21262277 | -1.55080501 | 4.038815656 | -0.38397519 | 0.700996836 | 0.998252924 |
| chr3:42597421-42605178   | exonic   | SEC22C  | 3 | 42597421  | 42605178  | 0 | 0 | 0 | 2 | 0 | 0 | 7757   | 0.21262277 | -1.55080501 | 4.038815656 | -0.38397519 | 0.700996836 | 0.998252924 |
| chr3:42672037-42674315   | exonic   | NKTR    | 3 | 42672037  | 42674315  | 0 | 0 | 0 | 2 | 0 | 0 | 2278   | 0.21262277 | -1.55080501 | 4.038815656 | -0.38397519 | 0.700996836 | 0.998252924 |
| chr3:47079155-47139571   | exonic   | SETD2   | 3 | 47079155  | 47139571  | 0 | 0 | 0 | 2 | 0 | 0 | 60416  | 0.21262277 | -1.55080501 | 4.038815656 | -0.38397519 | 0.700996836 | 0.998252924 |
| chr3:47084050-47139571   | exonic   | SETD2   | 3 | 47084050  | 47139571  | 0 | 0 | 0 | 2 | 0 | 0 | 55521  | 0.21262277 | -1.55080501 | 4.038815656 | -0.38397519 | 0.700996836 | 0.998252924 |
| chr3:47098310-47103836   | exonic   | SETD2   | 3 | 47098310  | 47103836  | 0 | 0 | 0 | 2 | 0 | 0 | 5526   | 0.21262277 | -1.55080501 | 4.038815656 | -0.38397519 | 0.700996836 | 0.998252924 |
| chr3:4718297-4810448     | exonic   | ITPR1   | 3 | 4718297   | 4810448   | 0 | 0 | 0 | 2 | 0 | 0 | 92151  | 0.21262277 | -1.55080501 | 4.038815656 | -0.38397519 | 0.700996836 | 0.998252924 |
| chr3:47465422-47470160   | exonic   | SCAP    | 3 | 47465422  | 47470160  | 0 | 0 | 0 | 2 | 0 | 0 | 4738   | 0.21262277 | -1.55080501 | 4.038815656 | -0.38397519 | 0.700996836 | 0.998252924 |
| chr3:47716965-47727660   | exonic   | SMARCC1 | 3 | 47716965  | 47727660  | 0 | 0 | 0 | 2 | 0 | 0 | 10695  | 0.21262277 | -1.55080501 | 4.038815656 | -0.38397519 | 0.700996836 | 0.998252924 |
| chr3:52777367-52800391   | exonic   | NEK4    | 3 | 52777367  | 52800391  | 0 | 0 | 0 | 2 | 0 | 0 | 23024  | 0.21262277 | -1.55080501 | 4.038815656 | -0.38397519 | 0.700996836 | 0.998252924 |
| chr3:53221355-53224017   | exonic   | PRKCD   | 3 | 53221355  | 53224017  | 0 | 0 | 0 | 2 | 0 | 0 | 2662   | 0.21262277 | -1.55080501 | 4.038815656 | -0.38397519 | 0.700996836 | 0.998252924 |
| chr3:53769400-53777144   | exonic   | CACNA1D | 3 | 53769400  | 53777144  | 0 | 0 | 0 | 2 | 0 | 0 | 7744   | 0.21262277 | -1.55080501 | 4.038815656 | -0.38397519 | 0.700996836 | 0.998252924 |

|                          |              |                                            |   |           |           |   |   |   |   |   |   |       |            |             |             |             |             |             |
|--------------------------|--------------|--------------------------------------------|---|-----------|-----------|---|---|---|---|---|---|-------|------------|-------------|-------------|-------------|-------------|-------------|
| chr3:56672733-56683085   | exonic       | FAM208A                                    | 3 | 56672733  | 56683085  | 0 | 0 | 0 | 2 | 0 | 0 | 10352 | 0.21262277 | -1.55080501 | 4.038815656 | -0.38397519 | 0.700996836 | 0.998252924 |
| chr3:57827025-57857425   | exonic       | SLMAP                                      | 3 | 57827025  | 57857425  | 0 | 0 | 0 | 2 | 0 | 0 | 30400 | 0.21262277 | -1.55080501 | 4.038815656 | -0.38397519 | 0.700996836 | 0.998252924 |
| chr3:57827026-57835543   | exonic       | SLMAP                                      | 3 | 57827026  | 57835543  | 0 | 0 | 0 | 2 | 0 | 0 | 8517  | 0.21262277 | -1.55080501 | 4.038815656 | -0.38397519 | 0.700996836 | 0.998252924 |
| chr3:58104599-58135954   | exonic       | FLNB                                       | 3 | 58104599  | 58135954  | 0 | 0 | 0 | 2 | 0 | 0 | 31355 | 0.21262277 | -1.55080501 | 4.038815656 | -0.38397519 | 0.700996836 | 0.998252924 |
| chr3:63812500-63825449   | exonic       | THOC7                                      | 3 | 63812500  | 63825449  | 0 | 0 | 0 | 2 | 0 | 0 | 12949 | 0.21262277 | -1.55080501 | 4.038815656 | -0.38397519 | 0.700996836 | 0.998252924 |
| chr3:63819739-63825449   | exonic       | THOC7                                      | 3 | 63819739  | 63825449  | 0 | 0 | 0 | 2 | 0 | 0 | 5710  | 0.21262277 | -1.55080501 | 4.038815656 | -0.38397519 | 0.700996836 | 0.998252924 |
| chr3:64644177-64644467   | exonic       | ADAMTS9                                    | 3 | 64644177  | 64644467  | 0 | 0 | 0 | 2 | 0 | 0 | 290   | 0.21262277 | -1.55080501 | 4.038815656 | -0.38397519 | 0.700996836 | 0.998252924 |
| chr3:65004116-65036497   | intergenic   | ADAMTS9-AS2(dist=6973), MAG11(dist=303409) | 3 | 65004116  | 65036497  | 0 | 0 | 0 | 2 | 0 | 0 | 32381 | 0.21262277 | -1.55080501 | 4.038815656 | -0.38397519 | 0.700996836 | 0.998252924 |
| chr3:72957517-72971486   | exonic       | GXYLT2                                     | 3 | 72957517  | 72971486  | 0 | 0 | 0 | 2 | 0 | 0 | 13969 | 0.21262277 | -1.55080501 | 4.038815656 | -0.38397519 | 0.700996836 | 0.998252924 |
| chr3:77526564-77542533   | exonic       | ROBO2                                      | 3 | 77526564  | 77542533  | 0 | 0 | 0 | 2 | 0 | 0 | 15969 | 0.21262277 | -1.55080501 | 4.038815656 | -0.38397519 | 0.700996836 | 0.998252924 |
| chr3:77656948-77671583   | exonic       | ROBO2                                      | 3 | 77656948  | 77671583  | 0 | 0 | 0 | 2 | 0 | 0 | 14635 | 0.21262277 | -1.55080501 | 4.038815656 | -0.38397519 | 0.700996836 | 0.998252924 |
| chr4:106291993-106377902 | exonic       | PPA2                                       | 4 | 106291993 | 106377902 | 0 | 0 | 0 | 2 | 0 | 0 | 85909 | 0.21262277 | -1.55080501 | 4.038815656 | -0.38397519 | 0.700996836 | 0.998252924 |
| chr4:106307723-106359193 | exonic       | PPA2                                       | 4 | 106307723 | 106359193 | 0 | 0 | 0 | 2 | 0 | 0 | 51470 | 0.21262277 | -1.55080501 | 4.038815656 | -0.38397519 | 0.700996836 | 0.998252924 |
| chr4:106832306-106832889 | intronic     | NPNT                                       | 4 | 106832306 | 106832889 | 0 | 0 | 0 | 2 | 0 | 0 | 583   | 0.21262277 | -1.55080501 | 4.038815656 | -0.38397519 | 0.700996836 | 0.998252924 |
| chr4:106858165-106863859 | exonic       | NPNT                                       | 4 | 106858165 | 106863859 | 0 | 0 | 0 | 2 | 0 | 0 | 5694  | 0.21262277 | -1.55080501 | 4.038815656 | -0.38397519 | 0.700996836 | 0.998252924 |
| chr4:110427483-110435012 | exonic       | SEC24B                                     | 4 | 110427483 | 110435012 | 0 | 0 | 0 | 2 | 0 | 0 | 7529  | 0.21262277 | -1.55080501 | 4.038815656 | -0.38397519 | 0.700996836 | 0.998252924 |
| chr4:114421618-114438813 | exonic       | CAMK2D                                     | 4 | 114421618 | 114438813 | 0 | 0 | 0 | 2 | 0 | 0 | 17195 | 0.21262277 | -1.55080501 | 4.038815656 | -0.38397519 | 0.700996836 | 0.998252924 |
| chr4:120138704-120170037 | exonic       | USP53                                      | 4 | 120138704 | 120170037 | 0 | 0 | 0 | 2 | 0 | 0 | 31333 | 0.21262277 | -1.55080501 | 4.038815656 | -0.38397519 | 0.700996836 | 0.998252924 |
| chr4:120188474-120190992 | exonic       | USP53                                      | 4 | 120188474 | 120190992 | 0 | 0 | 0 | 2 | 0 | 0 | 2518  | 0.21262277 | -1.55080501 | 4.038815656 | -0.38397519 | 0.700996836 | 0.998252924 |
| chr4:123113383-123164223 | exonic       | KIAA1109                                   | 4 | 123113383 | 123164223 | 0 | 0 | 0 | 2 | 0 | 0 | 50840 | 0.21262277 | -1.55080501 | 4.038815656 | -0.38397519 | 0.700996836 | 0.998252924 |
| chr4:13584276-13597568   | exonic       | BOD1L1                                     | 4 | 13584276  | 13597568  | 0 | 0 | 0 | 2 | 0 | 0 | 13292 | 0.21262277 | -1.55080501 | 4.038815656 | -0.38397519 | 0.700996836 | 0.998252924 |
| chr4:144336629-144354869 | exonic       | GAB1                                       | 4 | 144336629 | 144354869 | 0 | 0 | 0 | 2 | 0 | 0 | 18240 | 0.21262277 | -1.55080501 | 4.038815656 | -0.38397519 | 0.700996836 | 0.998252924 |
| chr4:146073692-146077148 | exonic       | OTUD4                                      | 4 | 146073692 | 146077148 | 0 | 0 | 0 | 2 | 0 | 0 | 3456  | 0.21262277 | -1.55080501 | 4.038815656 | -0.38397519 | 0.700996836 | 0.998252924 |
| chr4:148830882-148876525 | exonic       | ARHGAP10                                   | 4 | 148830882 | 148876525 | 0 | 0 | 0 | 2 | 0 | 0 | 45643 | 0.21262277 | -1.55080501 | 4.038815656 | -0.38397519 | 0.700996836 | 0.998252924 |
| chr4:148860975-148944564 | exonic       | ARHGAP10                                   | 4 | 148860975 | 148944564 | 0 | 0 | 0 | 1 | 2 | 0 | 83589 | 0.21262277 | -1.55080501 | 4.038815656 | -0.38397519 | 0.700996836 | 0.998252924 |
| chr4:148886174-148887990 | exonic       | ARHGAP10                                   | 4 | 148886174 | 148887990 | 0 | 0 | 0 | 2 | 0 | 0 | 1816  | 0.21262277 | -1.55080501 | 4.038815656 | -0.38397519 | 0.700996836 | 0.998252924 |
| chr4:152070651-152086848 | exonic       | SH3D19                                     | 4 | 152070651 | 152086848 | 0 | 0 | 0 | 2 | 0 | 0 | 16197 | 0.21262277 | -1.55080501 | 4.038815656 | -0.38397519 | 0.700996836 | 0.998252924 |
| chr4:152095822-152147238 | exonic       | SH3D19                                     | 4 | 152095822 | 152147238 | 0 | 0 | 0 | 2 | 0 | 0 | 51416 | 0.21262277 | -1.55080501 | 4.038815656 | -0.38397519 | 0.700996836 | 0.998252924 |
| chr4:153784757-153809459 | exonic       | ARFIP1                                     | 4 | 153784757 | 153809459 | 0 | 0 | 0 | 2 | 0 | 0 | 24702 | 0.21262277 | -1.55080501 | 4.038815656 | -0.38397519 | 0.700996836 | 0.998252924 |
| chr4:15632288-15646331   | exonic       | FBXL5                                      | 4 | 15632288  | 15646331  | 0 | 0 | 0 | 2 | 0 | 0 | 14043 | 0.21262277 | -1.55080501 | 4.038815656 | -0.38397519 | 0.700996836 | 0.998252924 |
| chr4:160225493-160235920 | exonic       | RAPGEF2                                    | 4 | 160225493 | 160235920 | 0 | 0 | 0 | 2 | 0 | 0 | 10427 | 0.21262277 | -1.55080501 | 4.038815656 | -0.38397519 | 0.700996836 | 0.998252924 |
| chr4:16257880-16290668   | ncRNA_exonic | TAPT1-AS1                                  | 4 | 16257880  | 16290668  | 0 | 0 | 0 | 2 | 0 | 0 | 32788 | 0.21262277 | -1.55080501 | 4.038815656 | -0.38397519 | 0.700996836 | 0.998252924 |
| chr4:166946467-166999182 | exonic       | TLL1                                       | 4 | 166946467 | 166999182 | 0 | 0 | 0 | 2 | 0 | 0 | 52715 | 0.21262277 | -1.55080501 | 4.038815656 | -0.38397519 | 0.700996836 | 0.998252924 |
| chr4:169343674-169353721 | exonic       | DDX60L                                     | 4 | 169343674 | 169353721 | 0 | 0 | 0 | 2 | 0 | 0 | 10047 | 0.21262277 | -1.55080501 | 4.038815656 | -0.38397519 | 0.700996836 | 0.998252924 |
| chr4:169362487-169393960 | exonic       | DDX60L                                     | 4 | 169362487 | 169393960 | 0 | 0 | 0 | 2 | 0 | 0 | 31473 | 0.21262277 | -1.55080501 | 4.038815656 | -0.38397519 | 0.700996836 | 0.998252924 |

|                          |            |                   |   |           |           |   |   |   |   |   |   |       |            |             |             |             |             |             |
|--------------------------|------------|-------------------|---|-----------|-----------|---|---|---|---|---|---|-------|------------|-------------|-------------|-------------|-------------|-------------|
| chr4:169815729-169837178 | exonic     | PALLD             | 4 | 169815729 | 169837178 | 4 | 0 | 0 | 8 | 0 | 0 | 21449 | 0.21262277 | -1.55080501 | 4.038815656 | -0.38397519 | 0.700996836 | 0.998252924 |
| chr4:170398274-170400685 | exonic     | NEK1              | 4 | 170398274 | 170400685 | 0 | 0 | 0 | 2 | 0 | 0 | 2411  | 0.21262277 | -1.55080501 | 4.038815656 | -0.38397519 | 0.700996836 | 0.998252924 |
| chr4:17629629-17633596   | downstream | FAM184B(dist=113) | 4 | 17629629  | 17633596  | 0 | 0 | 0 | 2 | 0 | 0 | 3967  | 0.21262277 | -1.55080501 | 4.038815656 | -0.38397519 | 0.700996836 | 0.998252924 |
| chr4:183812502-183836728 | exonic     | DCTD              | 4 | 183812502 | 183836728 | 0 | 0 | 0 | 2 | 0 | 0 | 24226 | 0.21262277 | -1.55080501 | 4.038815656 | -0.38397519 | 0.700996836 | 0.998252924 |
| chr4:184605127-184606556 | exonic     | TRAPPC11          | 4 | 184605127 | 184606556 | 0 | 0 | 0 | 2 | 0 | 0 | 1429  | 0.21262277 | -1.55080501 | 4.038815656 | -0.38397519 | 0.700996836 | 0.998252924 |
| chr4:186326933-186337021 | exonic     | UFSP2             | 4 | 186326933 | 186337021 | 0 | 0 | 0 | 2 | 0 | 0 | 10088 | 0.21262277 | -1.55080501 | 4.038815656 | -0.38397519 | 0.700996836 | 0.998252924 |
| chr4:187584452-187584767 | exonic     | FAT1              | 4 | 187584452 | 187584767 | 0 | 0 | 0 | 2 | 0 | 0 | 315   | 0.21262277 | -1.55080501 | 4.038815656 | -0.38397519 | 0.700996836 | 0.998252924 |
| chr4:20490441-20569238   | exonic     | SLIT2             | 4 | 20490441  | 20569238  | 0 | 0 | 0 | 2 | 0 | 0 | 78797 | 0.21262277 | -1.55080501 | 4.038815656 | -0.38397519 | 0.700996836 | 0.998252924 |
| chr4:20493383-20555591   | exonic     | SLIT2             | 4 | 20493383  | 20555591  | 0 | 0 | 0 | 2 | 0 | 0 | 62208 | 0.21262277 | -1.55080501 | 4.038815656 | -0.38397519 | 0.700996836 | 0.998252924 |
| chr4:20493384-20512760   | exonic     | SLIT2             | 4 | 20493384  | 20512760  | 0 | 0 | 0 | 2 | 0 | 0 | 19376 | 0.21262277 | -1.55080501 | 4.038815656 | -0.38397519 | 0.700996836 | 0.998252924 |
| chr4:20706089-20729020   | exonic     | PACRGL            | 4 | 20706089  | 20729020  | 0 | 0 | 0 | 2 | 0 | 0 | 22931 | 0.21262277 | -1.55080501 | 4.038815656 | -0.38397519 | 0.700996836 | 0.998252924 |
| chr4:2474675-2477160     | intronic   | RNF4              | 4 | 2474675   | 2477160   | 0 | 0 | 0 | 2 | 0 | 0 | 2485  | 0.21262277 | -1.55080501 | 4.038815656 | -0.38397519 | 0.700996836 | 0.998252924 |
| chr4:24833127-24839894   | exonic     | CCDC149           | 4 | 24833127  | 24839894  | 0 | 0 | 0 | 2 | 0 | 0 | 6767  | 0.21262277 | -1.55080501 | 4.038815656 | -0.38397519 | 0.700996836 | 0.998252924 |
| chr4:2492063-2502465     | exonic     | RNF4              | 4 | 2492063   | 2502465   | 0 | 0 | 0 | 2 | 0 | 0 | 10402 | 0.21262277 | -1.55080501 | 4.038815656 | -0.38397519 | 0.700996836 | 0.998252924 |
| chr4:25156619-25160729   | exonic     | SEPSECS           | 4 | 25156619  | 25160729  | 0 | 0 | 0 | 2 | 0 | 0 | 4110  | 0.21262277 | -1.55080501 | 4.038815656 | -0.38397519 | 0.700996836 | 0.998252924 |
| chr4:2906490-2910331     | exonic     | ADD1              | 4 | 2906490   | 2910331   | 0 | 0 | 0 | 2 | 0 | 0 | 3841  | 0.21262277 | -1.55080501 | 4.038815656 | -0.38397519 | 0.700996836 | 0.998252924 |
| chr4:3005957-3039238     | exonic     | GRK4              | 4 | 3005957   | 3039238   | 0 | 0 | 0 | 2 | 0 | 0 | 33281 | 0.21262277 | -1.55080501 | 4.038815656 | -0.38397519 | 0.700996836 | 0.998252924 |
| chr4:36179448-36195269   | exonic     | ARAP2             | 4 | 36179448  | 36195269  | 0 | 0 | 0 | 2 | 0 | 0 | 15821 | 0.21262277 | -1.55080501 | 4.038815656 | -0.38397519 | 0.700996836 | 0.998252924 |
| chr4:37633006-37651122   | exonic     | RELL1             | 4 | 37633006  | 37651122  | 0 | 0 | 0 | 2 | 0 | 0 | 18116 | 0.21262277 | -1.55080501 | 4.038815656 | -0.38397519 | 0.700996836 | 0.998252924 |
| chr4:39606691-39613730   | exonic     | SMIM14            | 4 | 39606691  | 39613730  | 0 | 0 | 0 | 2 | 0 | 0 | 7039  | 0.21262277 | -1.55080501 | 4.038815656 | -0.38397519 | 0.700996836 | 0.998252924 |
| chr4:40605910-40606381   | intronic   | RBM47             | 4 | 40605910  | 40606381  | 0 | 0 | 0 | 2 | 0 | 0 | 471   | 0.21262277 | -1.55080501 | 4.038815656 | -0.38397519 | 0.700996836 | 0.998252924 |
| chr4:40871019-40883432   | intronic   | APBB2             | 4 | 40871019  | 40883432  | 0 | 0 | 0 | 2 | 0 | 0 | 12413 | 0.21262277 | -1.55080501 | 4.038815656 | -0.38397519 | 0.700996836 | 0.998252924 |
| chr4:41652409-41665001   | exonic     | LIMCH1            | 4 | 41652409  | 41665001  | 0 | 0 | 0 | 2 | 0 | 0 | 12592 | 0.21262277 | -1.55080501 | 4.038815656 | -0.38397519 | 0.700996836 | 0.998252924 |
| chr4:48512075-48517292   | exonic     | FRYL              | 4 | 48512075  | 48517292  | 0 | 0 | 0 | 2 | 0 | 0 | 5217  | 0.21262277 | -1.55080501 | 4.038815656 | -0.38397519 | 0.700996836 | 0.998252924 |
| chr4:54011499-54011749   | exonic     | SCFD2             | 4 | 54011499  | 54011749  | 0 | 0 | 0 | 2 | 0 | 0 | 250   | 0.21262277 | -1.55080501 | 4.038815656 | -0.38397519 | 0.700996836 | 0.998252924 |
| chr4:54439790-54457682   | exonic     | LNX1              | 4 | 54439790  | 54457682  | 0 | 0 | 0 | 2 | 0 | 0 | 17892 | 0.21262277 | -1.55080501 | 4.038815656 | -0.38397519 | 0.700996836 | 0.998252924 |
| chr4:56756388-56763066   | exonic     | EXOC1             | 4 | 56756388  | 56763066  | 0 | 0 | 0 | 2 | 0 | 0 | 6678  | 0.21262277 | -1.55080501 | 4.038815656 | -0.38397519 | 0.700996836 | 0.998252924 |
| chr4:6083335-6087356     | exonic     | JAKMIP1           | 4 | 6083335   | 6087356   | 0 | 0 | 0 | 2 | 0 | 0 | 4021  | 0.21262277 | -1.55080501 | 4.038815656 | -0.38397519 | 0.700996836 | 0.998252924 |
| chr4:73998890-73999217   | intronic   | ANKRD17           | 4 | 73998890  | 73999217  | 0 | 0 | 0 | 2 | 0 | 0 | 327   | 0.21262277 | -1.55080501 | 4.038815656 | -0.38397519 | 0.700996836 | 0.998252924 |
| chr4:76841061-76861318   | exonic     | NAAA              | 4 | 76841061  | 76861318  | 0 | 0 | 0 | 2 | 0 | 0 | 20257 | 0.21262277 | -1.55080501 | 4.038815656 | -0.38397519 | 0.700996836 | 0.998252924 |
| chr4:79229219-79258971   | exonic     | FRAS1             | 4 | 79229219  | 79258971  | 0 | 0 | 0 | 2 | 0 | 0 | 29752 | 0.21262277 | -1.55080501 | 4.038815656 | -0.38397519 | 0.700996836 | 0.998252924 |
| chr4:80929674-80957186   | exonic     | ANTXR2            | 4 | 80929674  | 80957186  | 0 | 0 | 0 | 2 | 0 | 0 | 27512 | 0.21262277 | -1.55080501 | 4.038815656 | -0.38397519 | 0.700996836 | 0.998252924 |
| chr4:87073144-87080620   | exonic     | MAPK10            | 4 | 87073144  | 87080620  | 0 | 0 | 0 | 2 | 0 | 0 | 7476  | 0.21262277 | -1.55080501 | 4.038815656 | -0.38397519 | 0.700996836 | 0.998252924 |
| chr4:89827530-89859392   | exonic     | FAM13A            | 4 | 89827530  | 89859392  | 0 | 0 | 0 | 2 | 0 | 0 | 31862 | 0.21262277 | -1.55080501 | 4.038815656 | -0.38397519 | 0.700996836 | 0.998252924 |
| chr5:108233359-108295048 | exonic     | FER               | 5 | 108233359 | 108295048 | 0 | 0 | 0 | 2 | 0 | 0 | 61689 | 0.21262277 | -1.55080501 | 4.038815656 | -0.38397519 | 0.700996836 | 0.998252924 |



|                          |          |                         |   |           |           |   |   |   |   |   |   |       |            |             |             |             |             |             |
|--------------------------|----------|-------------------------|---|-----------|-----------|---|---|---|---|---|---|-------|------------|-------------|-------------|-------------|-------------|-------------|
| chr5:112102022-112137080 | exonic   | APC                     | 5 | 112102022 | 112137080 | 0 | 0 | 0 | 2 | 0 | 0 | 35058 | 0.21262277 | -1.55080501 | 4.038815656 | -0.38397519 | 0.700996836 | 0.998252924 |
| chr5:114557520-114588952 | exonic   | PGGT1B                  | 5 | 114557520 | 114588952 | 0 | 0 | 0 | 2 | 0 | 0 | 31432 | 0.21262277 | -1.55080501 | 4.038815656 | -0.38397519 | 0.700996836 | 0.998252924 |
| chr5:125894931-125906551 | exonic   | ALDH7A1                 | 5 | 125894931 | 125906551 | 0 | 0 | 0 | 2 | 0 | 0 | 11620 | 0.21262277 | -1.55080501 | 4.038815656 | -0.38397519 | 0.700996836 | 0.998252924 |
| chr5:130726686-130729184 | exonic   | CDC42SE2                | 5 | 130726686 | 130729184 | 0 | 0 | 0 | 2 | 0 | 0 | 2498  | 0.21262277 | -1.55080501 | 4.038815656 | -0.38397519 | 0.700996836 | 0.998252924 |
| chr5:130825238-130828478 | exonic   | RAPGEF6                 | 5 | 130825238 | 130828478 | 0 | 0 | 0 | 2 | 0 | 0 | 3240  | 0.21262277 | -1.55080501 | 4.038815656 | -0.38397519 | 0.700996836 | 0.998252924 |
| chr5:130831245-130857214 | exonic   | RAPGEF6                 | 5 | 130831245 | 130857214 | 0 | 0 | 0 | 2 | 0 | 0 | 25969 | 0.21262277 | -1.55080501 | 4.038815656 | -0.38397519 | 0.700996836 | 0.998252924 |
| chr5:131926915-131931502 | exonic   | RAD50                   | 5 | 131926915 | 131931502 | 0 | 0 | 0 | 2 | 0 | 0 | 4587  | 0.21262277 | -1.55080501 | 4.038815656 | -0.38397519 | 0.700996836 | 0.998252924 |
| chr5:131951694-131953986 | exonic   | RAD50                   | 5 | 131951694 | 131953986 | 0 | 0 | 0 | 2 | 0 | 0 | 2292  | 0.21262277 | -1.55080501 | 4.038815656 | -0.38397519 | 0.700996836 | 0.998252924 |
| chr5:135382023-135383109 | exonic   | TGFBI                   | 5 | 135382023 | 135383109 | 0 | 0 | 0 | 2 | 0 | 0 | 1086  | 0.21262277 | -1.55080501 | 4.038815656 | -0.38397519 | 0.700996836 | 0.998252924 |
| chr5:137281590-137290065 | exonic   | FAM13B                  | 5 | 137281590 | 137290065 | 0 | 0 | 0 | 2 | 0 | 0 | 8475  | 0.21262277 | -1.55080501 | 4.038815656 | -0.38397519 | 0.700996836 | 0.998252924 |
| chr5:138221900-138240130 | exonic   | CTNNA1                  | 5 | 138221900 | 138240130 | 0 | 0 | 0 | 2 | 0 | 0 | 18230 | 0.21262277 | -1.55080501 | 4.038815656 | -0.38397519 | 0.700996836 | 0.998252924 |
| chr5:13891084-13931353   | exonic   | DNAH5                   | 5 | 13891084  | 13931353  | 0 | 0 | 0 | 2 | 0 | 0 | 40269 | 0.21262277 | -1.55080501 | 4.038815656 | -0.38397519 | 0.700996836 | 0.998252924 |
| chr5:139818045-139838940 | exonic   | ANKHD1, ANKHD1-EIF4EBP3 | 5 | 139818045 | 139838940 | 0 | 0 | 0 | 2 | 0 | 0 | 20895 | 0.21262277 | -1.55080501 | 4.038815656 | -0.38397519 | 0.700996836 | 0.998252924 |
| chr5:139876104-139889766 | exonic   | ANKHD1, ANKHD1-EIF4EBP3 | 5 | 139876104 | 139889766 | 0 | 0 | 0 | 2 | 0 | 0 | 13662 | 0.21262277 | -1.55080501 | 4.038815656 | -0.38397519 | 0.700996836 | 0.998252924 |
| chr5:141515294-141520194 | exonic   | NDFIP1                  | 5 | 141515294 | 141520194 | 0 | 0 | 0 | 2 | 0 | 0 | 4900  | 0.21262277 | -1.55080501 | 4.038815656 | -0.38397519 | 0.700996836 | 0.998252924 |
| chr5:142168995-142172338 | intronic | ARHGAP26                | 5 | 142168995 | 142172338 | 0 | 0 | 0 | 2 | 0 | 0 | 3343  | 0.21262277 | -1.55080501 | 4.038815656 | -0.38397519 | 0.700996836 | 0.998252924 |
| chr5:14270933-14297372   | exonic   | TRIO                    | 5 | 14270933  | 14297372  | 0 | 0 | 0 | 2 | 0 | 0 | 26439 | 0.21262277 | -1.55080501 | 4.038815656 | -0.38397519 | 0.700996836 | 0.998252924 |
| chr5:14290824-14369632   | exonic   | TRIO                    | 5 | 14290824  | 14369632  | 0 | 0 | 0 | 2 | 0 | 0 | 78808 | 0.21262277 | -1.55080501 | 4.038815656 | -0.38397519 | 0.700996836 | 0.998252924 |
| chr5:14678790-14681716   | exonic   | OTULIN                  | 5 | 14678790  | 14681716  | 0 | 0 | 0 | 2 | 0 | 0 | 2926  | 0.21262277 | -1.55080501 | 4.038815656 | -0.38397519 | 0.700996836 | 0.998252924 |
| chr5:147785819-147796767 | exonic   | FBXO38                  | 5 | 147785819 | 147796767 | 0 | 0 | 0 | 2 | 0 | 0 | 10948 | 0.21262277 | -1.55080501 | 4.038815656 | -0.38397519 | 0.700996836 | 0.998252924 |
| chr5:150075067-150078833 | exonic   | RBM22                   | 5 | 150075067 | 150078833 | 0 | 0 | 0 | 2 | 0 | 0 | 3766  | 0.21262277 | -1.55080501 | 4.038815656 | -0.38397519 | 0.700996836 | 0.998252924 |
| chr5:153085256-153085627 | exonic   | GRIA1                   | 5 | 153085256 | 153085627 | 0 | 0 | 0 | 2 | 0 | 0 | 371   | 0.21262277 | -1.55080501 | 4.038815656 | -0.38397519 | 0.700996836 | 0.998252924 |
| chr5:156945831-156947039 | exonic   | ADAM19                  | 5 | 156945831 | 156947039 | 0 | 0 | 0 | 2 | 0 | 0 | 1208  | 0.21262277 | -1.55080501 | 4.038815656 | -0.38397519 | 0.700996836 | 0.998252924 |
| chr5:157268497-157268738 | intronic | CLINT1                  | 5 | 157268497 | 157268738 | 0 | 0 | 0 | 2 | 0 | 0 | 241   | 0.21262277 | -1.55080501 | 4.038815656 | -0.38397519 | 0.700996836 | 0.998252924 |
| chr5:159462146-159476669 | exonic   | TTC1                    | 5 | 159462146 | 159476669 | 0 | 0 | 0 | 2 | 0 | 0 | 14523 | 0.21262277 | -1.55080501 | 4.038815656 | -0.38397519 | 0.700996836 | 0.998252924 |
| chr5:160757889-160763776 | exonic   | GABRB2                  | 5 | 160757889 | 160763776 | 0 | 0 | 0 | 2 | 0 | 0 | 5887  | 0.21262277 | -1.55080501 | 4.038815656 | -0.38397519 | 0.700996836 | 0.998252924 |
| chr5:168110970-168112932 | exonic   | SLIT3                   | 5 | 168110970 | 168112932 | 0 | 0 | 0 | 2 | 0 | 0 | 1962  | 0.21262277 | -1.55080501 | 4.038815656 | -0.38397519 | 0.700996836 | 0.998252924 |
| chr5:171377814-171379566 | intronic | FBXW11                  | 5 | 171377814 | 171379566 | 0 | 0 | 0 | 2 | 0 | 0 | 1752  | 0.21262277 | -1.55080501 | 4.038815656 | -0.38397519 | 0.700996836 | 0.998252924 |
| chr5:171573591-171576685 | intronic | STK10                   | 5 | 171573591 | 171576685 | 0 | 0 | 0 | 2 | 0 | 0 | 3094  | 0.21262277 | -1.55080501 | 4.038815656 | -0.38397519 | 0.700996836 | 0.998252924 |
| chr5:179149804-179151784 | exonic   | CANX                    | 5 | 179149804 | 179151784 | 0 | 0 | 0 | 2 | 0 | 0 | 1980  | 0.21262277 | -1.55080501 | 4.038815656 | -0.38397519 | 0.700996836 | 0.998252924 |
| chr5:179250243-179255579 | exonic   | SQSTM1                  | 5 | 179250243 | 179255579 | 0 | 0 | 0 | 2 | 0 | 0 | 5336  | 0.21262277 | -1.55080501 | 4.038815656 | -0.38397519 | 0.700996836 | 0.998252924 |
| chr5:179956274-179980471 | exonic   | CNOT6                   | 5 | 179956274 | 179980471 | 0 | 0 | 0 | 2 | 0 | 0 | 24197 | 0.21262277 | -1.55080501 | 4.038815656 | -0.38397519 | 0.700996836 | 0.998252924 |
| chr5:31983260-31983762   | exonic   | PDZD2                   | 5 | 31983260  | 31983762  | 0 | 0 | 0 | 2 | 0 | 0 | 502   | 0.21262277 | -1.55080501 | 4.038815656 | -0.38397519 | 0.700996836 | 0.998252924 |
| chr5:35659120-35670329   | exonic   | SPEF2                   | 5 | 35659120  | 35670329  | 0 | 0 | 0 | 2 | 0 | 0 | 11209 | 0.21262277 | -1.55080501 | 4.038815656 | -0.38397519 | 0.700996836 | 0.998252924 |
| chr5:37121718-37158447   | exonic   | C5orf42                 | 5 | 37121718  | 37158447  | 3 | 0 | 0 | 1 | 0 | 0 | 36729 | 0.21262277 | -1.55080501 | 4.038815656 | -0.38397519 | 0.700996836 | 0.998252924 |

|                          |              |                                                                |   |           |           |   |   |   |   |   |   |       |            |             |             |             |             |             |
|--------------------------|--------------|----------------------------------------------------------------|---|-----------|-----------|---|---|---|---|---|---|-------|------------|-------------|-------------|-------------|-------------|-------------|
| chr5:37125345-37164429   | exonic       | C5orf42                                                        | 5 | 37125345  | 37164429  | 0 | 0 | 0 | 2 | 0 | 0 | 39084 | 0.21262277 | -1.55080501 | 4.038815656 | -0.38397519 | 0.700996836 | 0.998252924 |
| chr5:38496483-38523684   | exonic       | LIFR                                                           | 5 | 38496483  | 38523684  | 0 | 0 | 0 | 2 | 0 | 0 | 27201 | 0.21262277 | -1.55080501 | 4.038815656 | -0.38397519 | 0.700996836 | 0.998252924 |
| chr5:39373492-39381718   | exonic       | DAB2                                                           | 5 | 39373492  | 39381718  | 0 | 0 | 0 | 2 | 0 | 0 | 8226  | 0.21262277 | -1.55080501 | 4.038815656 | -0.38397519 | 0.700996836 | 0.998252924 |
| chr5:54623543-54654526   | exonic       | SKIV2L2                                                        | 5 | 54623543  | 54654526  | 0 | 0 | 0 | 2 | 0 | 0 | 30983 | 0.21262277 | -1.55080501 | 4.038815656 | -0.38397519 | 0.700996836 | 0.998252924 |
| chr5:56515801-56525837   | exonic       | GPBP1                                                          | 5 | 56515801  | 56525837  | 0 | 0 | 0 | 2 | 0 | 0 | 10036 | 0.21262277 | -1.55080501 | 4.038815656 | -0.38397519 | 0.700996836 | 0.998252924 |
| chr5:64963875-64964503   | UTR3         | <small>SGTB(OM_019072:c.*2198_*1570delins0)</small>            | 5 | 64963875  | 64964503  | 0 | 0 | 0 | 2 | 0 | 0 | 628   | 0.21262277 | -1.55080501 | 4.038815656 | -0.38397519 | 0.700996836 | 0.998252924 |
| chr5:65284462-65334310   | exonic       | ERBB2IP                                                        | 5 | 65284462  | 65334310  | 0 | 0 | 0 | 2 | 0 | 0 | 49848 | 0.21262277 | -1.55080501 | 4.038815656 | -0.38397519 | 0.700996836 | 0.998252924 |
| chr5:66032540-66084622   | exonic       | MAST4                                                          | 5 | 66032540  | 66084622  | 0 | 0 | 0 | 2 | 0 | 0 | 52082 | 0.21262277 | -1.55080501 | 4.038815656 | -0.38397519 | 0.700996836 | 0.998252924 |
| chr5:6604250-6605521     | exonic       | NSUN2                                                          | 5 | 6604250   | 6605521   | 0 | 0 | 0 | 2 | 0 | 0 | 1271  | 0.21262277 | -1.55080501 | 4.038815656 | -0.38397519 | 0.700996836 | 0.998252924 |
| chr5:68400457-68413223   | exonic       | SLC30A5                                                        | 5 | 68400457  | 68413223  | 0 | 0 | 0 | 2 | 0 | 0 | 12766 | 0.21262277 | -1.55080501 | 4.038815656 | -0.38397519 | 0.700996836 | 0.998252924 |
| chr5:68522164-68524214   | exonic       | MRPS36                                                         | 5 | 68522164  | 68524214  | 0 | 0 | 0 | 2 | 0 | 0 | 2050  | 0.21262277 | -1.55080501 | 4.038815656 | -0.38397519 | 0.700996836 | 0.998252924 |
| chr5:68581163-68599756   | exonic       | CCDC125                                                        | 5 | 68581163  | 68599756  | 0 | 0 | 0 | 2 | 0 | 0 | 18593 | 0.21262277 | -1.55080501 | 4.038815656 | -0.38397519 | 0.700996836 | 0.998252924 |
| chr5:69730741-69741349   | ncRNA_exonic | GTF2H2B                                                        | 5 | 69730741  | 69741349  | 0 | 0 | 0 | 2 | 0 | 0 | 10608 | 0.21262277 | -1.55080501 | 4.038815656 | -0.38397519 | 0.700996836 | 0.998252924 |
| chr5:70333333-70341334   | exonic       | GTF2H2                                                         | 5 | 70333333  | 70341334  | 0 | 0 | 0 | 2 | 0 | 0 | 8001  | 0.21262277 | -1.55080501 | 4.038815656 | -0.38397519 | 0.700996836 | 0.998252924 |
| chr5:70798425-70813279   | exonic       | BDP1                                                           | 5 | 70798425  | 70813279  | 0 | 0 | 0 | 2 | 0 | 0 | 14854 | 0.21262277 | -1.55080501 | 4.038815656 | -0.38397519 | 0.700996836 | 0.998252924 |
| chr5:72173054-72179059   | exonic       | TNPO1                                                          | 5 | 72173054  | 72179059  | 0 | 0 | 0 | 2 | 0 | 0 | 6005  | 0.21262277 | -1.55080501 | 4.038815656 | -0.38397519 | 0.700996836 | 0.998252924 |
| chr5:72311452-72337142   | exonic       | FCHO2                                                          | 5 | 72311452  | 72337142  | 0 | 0 | 0 | 2 | 0 | 0 | 25690 | 0.21262277 | -1.55080501 | 4.038815656 | -0.38397519 | 0.700996836 | 0.998252924 |
| chr5:73128163-73136585   | exonic       | ARHGEF28                                                       | 5 | 73128163  | 73136585  | 0 | 0 | 0 | 2 | 0 | 0 | 8422  | 0.21262277 | -1.55080501 | 4.038815656 | -0.38397519 | 0.700996836 | 0.998252924 |
| chr5:75709076-75711685   | intronic     | IQGAP2                                                         | 5 | 75709076  | 75711685  | 0 | 0 | 0 | 2 | 0 | 0 | 2609  | 0.21262277 | -1.55080501 | 4.038815656 | -0.38397519 | 0.700996836 | 0.998252924 |
| chr5:75880478-75886119   | exonic       | IQGAP2                                                         | 5 | 75880478  | 75886119  | 0 | 0 | 0 | 2 | 0 | 0 | 5641  | 0.21262277 | -1.55080501 | 4.038815656 | -0.38397519 | 0.700996836 | 0.998252924 |
| chr5:76754886-76760634   | exonic       | WDR41                                                          | 5 | 76754886  | 76760634  | 0 | 0 | 0 | 2 | 0 | 0 | 5748  | 0.21262277 | -1.55080501 | 4.038815656 | -0.38397519 | 0.700996836 | 0.998252924 |
| chr5:78952780-78964851   | exonic       | PAPD4                                                          | 5 | 78952780  | 78964851  | 0 | 0 | 0 | 2 | 0 | 0 | 12071 | 0.21262277 | -1.55080501 | 4.038815656 | -0.38397519 | 0.700996836 | 0.998252924 |
| chr5:79441912-79473886   | exonic       | SERINC5                                                        | 5 | 79441912  | 79473886  | 0 | 0 | 0 | 2 | 0 | 0 | 31974 | 0.21262277 | -1.55080501 | 4.038815656 | -0.38397519 | 0.700996836 | 0.998252924 |
| chr5:80846656-80946158   | exonic       | SSBP2                                                          | 5 | 80846656  | 80946158  | 0 | 0 | 0 | 2 | 0 | 0 | 99502 | 0.21262277 | -1.55080501 | 4.038815656 | -0.38397519 | 0.700996836 | 0.998252924 |
| chr5:80911291-80946158   | exonic       | SSBP2                                                          | 5 | 80911291  | 80946158  | 0 | 0 | 0 | 2 | 0 | 0 | 34867 | 0.21262277 | -1.55080501 | 4.038815656 | -0.38397519 | 0.700996836 | 0.998252924 |
| chr5:8783547-8783823     | intergenic   | <small>WDR44886(dist=320328), LOC101929284(dist=56021)</small> | 5 | 8783547   | 8783823   | 0 | 0 | 0 | 2 | 0 | 0 | 276   | 0.21262277 | -1.55080501 | 4.038815656 | -0.38397519 | 0.700996836 | 0.998252924 |
| chr5:88044886-88057145   | exonic       | MEF2C                                                          | 5 | 88044886  | 88057145  | 0 | 0 | 0 | 2 | 0 | 0 | 12259 | 0.21262277 | -1.55080501 | 4.038815656 | -0.38397519 | 0.700996836 | 0.998252924 |
| chr5:88238833-88261732   | ncRNA_exonic | MEF2C-AS1                                                      | 5 | 88238833  | 88261732  | 0 | 0 | 0 | 2 | 0 | 0 | 22899 | 0.21262277 | -1.55080501 | 4.038815656 | -0.38397519 | 0.700996836 | 0.998252924 |
| chr5:95103749-95119667   | exonic       | RHOBTB3                                                        | 5 | 95103749  | 95119667  | 0 | 0 | 0 | 2 | 0 | 0 | 15918 | 0.21262277 | -1.55080501 | 4.038815656 | -0.38397519 | 0.700996836 | 0.998252924 |
| chr5:96058342-96065429   | exonic       | CAST                                                           | 5 | 96058342  | 96065429  | 0 | 0 | 0 | 2 | 0 | 0 | 7087  | 0.21262277 | -1.55080501 | 4.038815656 | -0.38397519 | 0.700996836 | 0.998252924 |
| chr5:96349351-96363518   | exonic       | LNPEP                                                          | 5 | 96349351  | 96363518  | 0 | 0 | 0 | 2 | 0 | 0 | 14167 | 0.21262277 | -1.55080501 | 4.038815656 | -0.38397519 | 0.700996836 | 0.998252924 |
| chr6:104876571-104877407 | intergenic   | <small>NONE(dist=NONE), HACE1(dist=298561)</small>             | 6 | 104876571 | 104877407 | 0 | 0 | 0 | 2 | 0 | 0 | 836   | 0.21262277 | -1.55080501 | 4.038815656 | -0.38397519 | 0.700996836 | 0.998252924 |
| chr6:105272689-105291173 | exonic       | HACE1                                                          | 6 | 105272689 | 105291173 | 0 | 0 | 0 | 2 | 0 | 0 | 18484 | 0.21262277 | -1.55080501 | 4.038815656 | -0.38397519 | 0.700996836 | 0.998252924 |
| chr6:107031203-107050797 | exonic       | RTN4IP1                                                        | 6 | 107031203 | 107050797 | 0 | 0 | 0 | 2 | 0 | 0 | 19594 | 0.21262277 | -1.55080501 | 4.038815656 | -0.38397519 | 0.700996836 | 0.998252924 |
| chr6:10994835-10996719   | exonic       | ELOVL2                                                         | 6 | 10994835  | 10996719  | 0 | 0 | 0 | 2 | 0 | 0 | 1884  | 0.21262277 | -1.55080501 | 4.038815656 | -0.38397519 | 0.700996836 | 0.998252924 |

|                          |              |                                               |   |           |           |   |   |   |   |   |   |        |            |             |             |             |             |             |
|--------------------------|--------------|-----------------------------------------------|---|-----------|-----------|---|---|---|---|---|---|--------|------------|-------------|-------------|-------------|-------------|-------------|
| chr6:11192577-11193925   | exonic       | NEDD9                                         | 6 | 11192577  | 11193925  | 0 | 0 | 0 | 2 | 0 | 0 | 1348   | 0.21262277 | -1.55080501 | 4.038815656 | -0.38397519 | 0.700996836 | 0.998252924 |
| chr6:112471712-112486478 | exonic       | LAMA4                                         | 6 | 112471712 | 112486478 | 0 | 0 | 0 | 2 | 0 | 0 | 14766  | 0.21262277 | -1.55080501 | 4.038815656 | -0.38397519 | 0.700996836 | 0.998252924 |
| chr6:116917126-116951715 | exonic       | RSPH4A                                        | 6 | 116917126 | 116951715 | 0 | 0 | 0 | 2 | 0 | 0 | 34589  | 0.21262277 | -1.55080501 | 4.038815656 | -0.38397519 | 0.700996836 | 0.998252924 |
| chr6:119569424-119628157 | exonic       | MAN1A1                                        | 6 | 119569424 | 119628157 | 0 | 0 | 0 | 2 | 0 | 0 | 58733  | 0.21262277 | -1.55080501 | 4.038815656 | -0.38397519 | 0.700996836 | 0.998252924 |
| chr6:129815327-129879311 | exonic       | LAMA2                                         | 6 | 129815327 | 129879311 | 0 | 0 | 0 | 2 | 0 | 0 | 63984  | 0.21262277 | -1.55080501 | 4.038815656 | -0.38397519 | 0.700996836 | 0.998252924 |
| chr6:129937356-129955250 | exonic       | ARHGAP18                                      | 6 | 129937356 | 129955250 | 0 | 0 | 0 | 2 | 0 | 0 | 17894  | 0.21262277 | -1.55080501 | 4.038815656 | -0.38397519 | 0.700996836 | 0.998252924 |
| chr6:136980493-136990533 | exonic       | MAP3K5                                        | 6 | 136980493 | 136990533 | 0 | 0 | 0 | 2 | 0 | 0 | 10040  | 0.21262277 | -1.55080501 | 4.038815656 | -0.38397519 | 0.700996836 | 0.998252924 |
| chr6:139264649-139269050 | exonic       | REPS1                                         | 6 | 139264649 | 139269050 | 0 | 0 | 0 | 2 | 0 | 0 | 4401   | 0.21262277 | -1.55080501 | 4.038815656 | -0.38397519 | 0.700996836 | 0.998252924 |
| chr6:143780221-143784134 | exonic       | PEX3                                          | 6 | 143780221 | 143784134 | 0 | 0 | 0 | 2 | 0 | 0 | 3913   | 0.21262277 | -1.55080501 | 4.038815656 | -0.38397519 | 0.700996836 | 0.998252924 |
| chr6:145124172-145142073 | exonic       | UTRN                                          | 6 | 145124172 | 145142073 | 0 | 0 | 0 | 2 | 0 | 0 | 17901  | 0.21262277 | -1.55080501 | 4.038815656 | -0.38397519 | 0.700996836 | 0.998252924 |
| chr6:148761320-148808851 | exonic       | SASH1                                         | 6 | 148761320 | 148808851 | 0 | 0 | 0 | 2 | 0 | 0 | 47531  | 0.21262277 | -1.55080501 | 4.038815656 | -0.38397519 | 0.700996836 | 0.998252924 |
| chr6:148789681-148795358 | exonic       | SASH1                                         | 6 | 148789681 | 148795358 | 0 | 0 | 0 | 2 | 0 | 0 | 5677   | 0.21262277 | -1.55080501 | 4.038815656 | -0.38397519 | 0.700996836 | 0.998252924 |
| chr6:149262415-149285699 | exonic       | UST                                           | 6 | 149262415 | 149285699 | 0 | 0 | 0 | 2 | 0 | 0 | 23284  | 0.21262277 | -1.55080501 | 4.038815656 | -0.38397519 | 0.700996836 | 0.998252924 |
| chr6:154731476-154732276 | exonic       | CNKSР3                                        | 6 | 154731476 | 154732276 | 0 | 0 | 0 | 2 | 0 | 0 | 800    | 0.21262277 | -1.55080501 | 4.038815656 | -0.38397519 | 0.700996836 | 0.998252924 |
| chr6:155337375-155343576 | intergenic   | MIR1273C (dist=162805), TIAM2 (dist=67847)    | 6 | 155337375 | 155343576 | 0 | 0 | 0 | 2 | 0 | 0 | 6201   | 0.21262277 | -1.55080501 | 4.038815656 | -0.38397519 | 0.700996836 | 0.998252924 |
| chr6:158540060-158549302 | exonic       | SERAC1                                        | 6 | 158540060 | 158549302 | 0 | 0 | 0 | 2 | 0 | 0 | 9242   | 0.21262277 | -1.55080501 | 4.038815656 | -0.38397519 | 0.700996836 | 0.998252924 |
| chr6:159146534-159173062 | exonic       | SYTL3                                         | 6 | 159146534 | 159173062 | 0 | 0 | 0 | 2 | 0 | 0 | 26528  | 0.21262277 | -1.55080501 | 4.038815656 | -0.38397519 | 0.700996836 | 0.998252924 |
| chr6:168271065-168281197 | exonic       | MLLT4                                         | 6 | 168271065 | 168281197 | 0 | 0 | 0 | 2 | 0 | 0 | 10132  | 0.21262277 | -1.55080501 | 4.038815656 | -0.38397519 | 0.700996836 | 0.998252924 |
| chr6:17507399-17507957   | exonic       | CAP2                                          | 6 | 17507399  | 17507957  | 0 | 0 | 0 | 2 | 0 | 0 | 558    | 0.21262277 | -1.55080501 | 4.038815656 | -0.38397519 | 0.700996836 | 0.998252924 |
| chr6:17772138-17779915   | exonic       | KIF13A                                        | 6 | 17772138  | 17779915  | 0 | 0 | 0 | 2 | 0 | 0 | 7777   | 0.21262277 | -1.55080501 | 4.038815656 | -0.38397519 | 0.700996836 | 0.998252924 |
| chr6:17794479-17794935   | exonic       | KIF13A                                        | 6 | 17794479  | 17794935  | 0 | 0 | 0 | 2 | 0 | 0 | 456    | 0.21262277 | -1.55080501 | 4.038815656 | -0.38397519 | 0.700996836 | 0.998252924 |
| chr6:18160113-18163155   | exonic       | KDM1B                                         | 6 | 18160113  | 18163155  | 0 | 0 | 0 | 2 | 0 | 0 | 3042   | 0.21262277 | -1.55080501 | 4.038815656 | -0.38397519 | 0.700996836 | 0.998252924 |
| chr6:19302174-19326029   | intergenic   | LOC101928519 (dist=121463), ID4 (dist=511572) | 6 | 19302174  | 19326029  | 0 | 0 | 0 | 2 | 0 | 0 | 23855  | 0.21262277 | -1.55080501 | 4.038815656 | -0.38397519 | 0.700996836 | 0.998252924 |
| chr6:20781375-21000603   | exonic       | CDKAL1                                        | 6 | 20781375  | 21000603  | 0 | 0 | 0 | 2 | 0 | 0 | 219228 | 0.21262277 | -1.55080501 | 4.038815656 | -0.38397519 | 0.700996836 | 0.998252924 |
| chr6:20781376-20797973   | exonic       | CDKAL1                                        | 6 | 20781376  | 20797973  | 0 | 0 | 0 | 2 | 0 | 0 | 16597  | 0.21262277 | -1.55080501 | 4.038815656 | -0.38397519 | 0.700996836 | 0.998252924 |
| chr6:21000457-21201505   | exonic       | CDKAL1                                        | 6 | 21000457  | 21201505  | 0 | 0 | 0 | 2 | 0 | 0 | 201048 | 0.21262277 | -1.55080501 | 4.038815656 | -0.38397519 | 0.700996836 | 0.998252924 |
| chr6:24653210-24666839   | exonic       | TDP2                                          | 6 | 24653210  | 24666839  | 0 | 0 | 0 | 2 | 0 | 0 | 13629  | 0.21262277 | -1.55080501 | 4.038815656 | -0.38397519 | 0.700996836 | 0.998252924 |
| chr6:25509883-25557078   | exonic       | LRRС16A                                       | 6 | 25509883  | 25557078  | 0 | 0 | 0 | 2 | 0 | 0 | 47195  | 0.21262277 | -1.55080501 | 4.038815656 | -0.38397519 | 0.700996836 | 0.998252924 |
| chr6:25515902-25557078   | exonic       | LRRС16A                                       | 6 | 25515902  | 25557078  | 0 | 0 | 0 | 2 | 0 | 0 | 41176  | 0.21262277 | -1.55080501 | 4.038815656 | -0.38397519 | 0.700996836 | 0.998252924 |
| chr6:2954825-2959576     | exonic       | SERPINB6                                      | 6 | 2954825   | 2959576   | 0 | 0 | 0 | 2 | 0 | 0 | 4751   | 0.21262277 | -1.55080501 | 4.038815656 | -0.38397519 | 0.700996836 | 0.998252924 |
| chr6:30202134-30222241   | ncRNA_exonic | HCG17                                         | 6 | 30202134  | 30222241  | 0 | 0 | 0 | 2 | 0 | 0 | 20107  | 0.21262277 | -1.55080501 | 4.038815656 | -0.38397519 | 0.700996836 | 0.998252924 |
| chr6:33235458-33237334   | exonic       | VPS52                                         | 6 | 33235458  | 33237334  | 0 | 0 | 0 | 2 | 0 | 0 | 1876   | 0.21262277 | -1.55080501 | 4.038815656 | -0.38397519 | 0.700996836 | 0.998252924 |
| chr6:35547812-35588051   | exonic       | FKBP5                                         | 6 | 35547812  | 35588051  | 0 | 0 | 0 | 2 | 0 | 0 | 40239  | 0.21262277 | -1.55080501 | 4.038815656 | -0.38397519 | 0.700996836 | 0.998252924 |
| chr6:39545831-39607533   | exonic       | KIF6                                          | 6 | 39545831  | 39607533  | 0 | 0 | 0 | 2 | 0 | 0 | 61702  | 0.21262277 | -1.55080501 | 4.038815656 | -0.38397519 | 0.700996836 | 0.998252924 |
| chr6:43465618-43471444   | exonic       | TJAP1                                         | 6 | 43465618  | 43471444  | 0 | 0 | 0 | 2 | 0 | 0 | 5826   | 0.21262277 | -1.55080501 | 4.038815656 | -0.38397519 | 0.700996836 | 0.998252924 |

|                          |              |                                           |   |           |           |   |   |   |   |   |   |        |            |             |             |             |             |             |
|--------------------------|--------------|-------------------------------------------|---|-----------|-----------|---|---|---|---|---|---|--------|------------|-------------|-------------|-------------|-------------|-------------|
| chr6:44089599-44089929   | intronic     | MRPL14                                    | 6 | 44089599  | 44089929  | 0 | 0 | 0 | 2 | 0 | 0 | 330    | 0.21262277 | -1.55080501 | 4.038815656 | -0.38397519 | 0.700996836 | 0.998252924 |
| chr6:47522381-47549801   | exonic       | CD2AP                                     | 6 | 47522381  | 47549801  | 0 | 0 | 0 | 2 | 0 | 0 | 27420  | 0.21262277 | -1.55080501 | 4.038815656 | -0.38397519 | 0.700996836 | 0.998252924 |
| chr6:56462538-56476394   | exonic       | DST                                       | 6 | 56462538  | 56476394  | 0 | 0 | 0 | 2 | 0 | 0 | 13856  | 0.21262277 | -1.55080501 | 4.038815656 | -0.38397519 | 0.700996836 | 0.998252924 |
| chr6:64356431-64390062   | exonic       | PHF3                                      | 6 | 64356431  | 64390062  | 0 | 0 | 0 | 2 | 0 | 0 | 33631  | 0.21262277 | -1.55080501 | 4.038815656 | -0.38397519 | 0.700996836 | 0.998252924 |
| chr6:69640451-69785930   | exonic       | ADGRB3                                    | 6 | 69640451  | 69785930  | 0 | 0 | 0 | 2 | 0 | 0 | 145479 | 0.21262277 | -1.55080501 | 4.038815656 | -0.38397519 | 0.700996836 | 0.998252924 |
| chr6:76357446-76385770   | exonic       | SENP6                                     | 6 | 76357446  | 76385770  | 0 | 5 | 2 | 2 | 2 | 0 | 28324  | 0.21262277 | -1.55080501 | 4.038815656 | -0.38397519 | 0.700996836 | 0.998252924 |
| chr6:77860918-77921770   | intergenic   | IMP61 (dist=1078523), HTR1B (dist=248795) | 6 | 77860918  | 77921770  | 0 | 0 | 0 | 2 | 0 | 0 | 60852  | 0.21262277 | -1.55080501 | 4.038815656 | -0.38397519 | 0.700996836 | 0.998252924 |
| chr6:79697925-79708108   | exonic       | PHIP                                      | 6 | 79697925  | 79708108  | 0 | 0 | 0 | 2 | 0 | 0 | 10183  | 0.21262277 | -1.55080501 | 4.038815656 | -0.38397519 | 0.700996836 | 0.998252924 |
| chr6:84894904-84896341   | exonic       | CEP162                                    | 6 | 84894904  | 84896341  | 0 | 0 | 0 | 2 | 0 | 0 | 1437   | 0.21262277 | -1.55080501 | 4.038815656 | -0.38397519 | 0.700996836 | 0.998252924 |
| chr6:90362710-90366520   | exonic       | MDN1                                      | 6 | 90362710  | 90366520  | 0 | 0 | 0 | 2 | 0 | 0 | 3810   | 0.21262277 | -1.55080501 | 4.038815656 | -0.38397519 | 0.700996836 | 0.998252924 |
| chr6:90547559-90566918   | exonic       | CASP8AP2                                  | 6 | 90547559  | 90566918  | 0 | 0 | 0 | 2 | 0 | 0 | 19359  | 0.21262277 | -1.55080501 | 4.038815656 | -0.38397519 | 0.700996836 | 0.998252924 |
| chr6:99374352-99382755   | exonic       | FBXL4                                     | 6 | 99374352  | 99382755  | 0 | 0 | 0 | 2 | 0 | 0 | 8403   | 0.21262277 | -1.55080501 | 4.038815656 | -0.38397519 | 0.700996836 | 0.998252924 |
| chr6:99823815-99828217   | exonic       | COQ3                                      | 6 | 99823815  | 99828217  | 0 | 0 | 0 | 2 | 0 | 0 | 4402   | 0.21262277 | -1.55080501 | 4.038815656 | -0.38397519 | 0.700996836 | 0.998252924 |
| chr7:100414813-100416266 | exonic       | EPHB4                                     | 7 | 100414813 | 100416266 | 0 | 0 | 0 | 2 | 0 | 0 | 1453   | 0.21262277 | -1.55080501 | 4.038815656 | -0.38397519 | 0.700996836 | 0.998252924 |
| chr7:100454489-100456783 | exonic       | SLC12A9                                   | 7 | 100454489 | 100456783 | 0 | 0 | 0 | 2 | 0 | 0 | 2294   | 0.21262277 | -1.55080501 | 4.038815656 | -0.38397519 | 0.700996836 | 0.998252924 |
| chr7:102944288-102944937 | exonic       | PMPCB                                     | 7 | 102944288 | 102944937 | 0 | 0 | 0 | 2 | 0 | 0 | 649    | 0.21262277 | -1.55080501 | 4.038815656 | -0.38397519 | 0.700996836 | 0.998252924 |
| chr7:104741871-104742641 | exonic       | KMT2E                                     | 7 | 104741871 | 104742641 | 0 | 0 | 0 | 2 | 0 | 0 | 770    | 0.21262277 | -1.55080501 | 4.038815656 | -0.38397519 | 0.700996836 | 0.998252924 |
| chr7:106245625-106256217 | intergenic   | NAMPT (dist=319987), CCDC71L (dist=40994) | 7 | 106245625 | 106256217 | 0 | 0 | 0 | 2 | 0 | 0 | 10592  | 0.21262277 | -1.55080501 | 4.038815656 | -0.38397519 | 0.700996836 | 0.998252924 |
| chr7:107613436-107626808 | exonic       | LAMB1                                     | 7 | 107613436 | 107626808 | 0 | 0 | 0 | 2 | 0 | 0 | 13372  | 0.21262277 | -1.55080501 | 4.038815656 | -0.38397519 | 0.700996836 | 0.998252924 |
| chr7:111629069-111644186 | exonic       | DOCK4                                     | 7 | 111629069 | 111644186 | 0 | 0 | 0 | 2 | 0 | 0 | 15117  | 0.21262277 | -1.55080501 | 4.038815656 | -0.38397519 | 0.700996836 | 0.998252924 |
| chr7:112098915-112102433 | exonic       | IFRD1                                     | 7 | 112098915 | 112102433 | 0 | 0 | 0 | 2 | 0 | 0 | 3518   | 0.21262277 | -1.55080501 | 4.038815656 | -0.38397519 | 0.700996836 | 0.998252924 |
| chr7:112102055-112108170 | exonic       | IFRD1                                     | 7 | 112102055 | 112108170 | 0 | 0 | 0 | 2 | 0 | 0 | 6115   | 0.21262277 | -1.55080501 | 4.038815656 | -0.38397519 | 0.700996836 | 0.998252924 |
| chr7:120655718-120782195 | exonic       | CPED1                                     | 7 | 120655718 | 120782195 | 0 | 0 | 0 | 2 | 0 | 0 | 126477 | 0.21262277 | -1.55080501 | 4.038815656 | -0.38397519 | 0.700996836 | 0.998252924 |
| chr7:128282270-128289036 | ncRNA_exonic | LINC01000                                 | 7 | 128282270 | 128289036 | 0 | 0 | 0 | 2 | 0 | 0 | 6766   | 0.21262277 | -1.55080501 | 4.038815656 | -0.38397519 | 0.700996836 | 0.998252924 |
| chr7:131071878-131082135 | exonic       | MKLN1                                     | 7 | 131071878 | 131082135 | 2 | 5 | 0 | 4 | 3 | 3 | 10257  | 0.21262277 | -1.55080501 | 4.038815656 | -0.38397519 | 0.700996836 | 0.998252924 |
| chr7:131113791-131128461 | exonic       | MKLN1                                     | 7 | 131113791 | 131128461 | 2 | 0 | 0 | 5 | 2 | 0 | 14670  | 0.21262277 | -1.55080501 | 4.038815656 | -0.38397519 | 0.700996836 | 0.998252924 |
| chr7:138964063-138969320 | exonic       | UBN2                                      | 7 | 138964063 | 138969320 | 0 | 0 | 0 | 2 | 0 | 0 | 5257   | 0.21262277 | -1.55080501 | 4.038815656 | -0.38397519 | 0.700996836 | 0.998252924 |
| chr7:140058439-140069482 | exonic       | SLC37A3                                   | 7 | 140058439 | 140069482 | 0 | 0 | 0 | 2 | 0 | 0 | 11043  | 0.21262277 | -1.55080501 | 4.038815656 | -0.38397519 | 0.700996836 | 0.998252924 |
| chr7:140285388-140302342 | exonic       | DENND2A                                   | 7 | 140285388 | 140302342 | 0 | 0 | 0 | 2 | 0 | 0 | 16954  | 0.21262277 | -1.55080501 | 4.038815656 | -0.38397519 | 0.700996836 | 0.998252924 |
| chr7:140481375-140494267 | exonic       | BRAF                                      | 7 | 140481375 | 140494267 | 0 | 0 | 0 | 2 | 0 | 0 | 12892  | 0.21262277 | -1.55080501 | 4.038815656 | -0.38397519 | 0.700996836 | 0.998252924 |
| chr7:142638400-142640970 | exonic       | KEL                                       | 7 | 142638400 | 142640970 | 0 | 0 | 0 | 2 | 0 | 0 | 2570   | 0.21262277 | -1.55080501 | 4.038815656 | -0.38397519 | 0.700996836 | 0.998252924 |
| chr7:151478237-151478517 | exonic       | PRKAG2                                    | 7 | 151478237 | 151478517 | 0 | 0 | 0 | 2 | 0 | 0 | 280    | 0.21262277 | -1.55080501 | 4.038815656 | -0.38397519 | 0.700996836 | 0.998252924 |
| chr7:155530223-155559349 | exonic       | RBM33                                     | 7 | 155530223 | 155559349 | 0 | 0 | 0 | 2 | 0 | 0 | 29126  | 0.21262277 | -1.55080501 | 4.038815656 | -0.38397519 | 0.700996836 | 0.998252924 |
| chr7:156589083-156619438 | exonic       | LMBR1                                     | 7 | 156589083 | 156619438 | 0 | 0 | 0 | 2 | 0 | 0 | 30355  | 0.21262277 | -1.55080501 | 4.038815656 | -0.38397519 | 0.700996836 | 0.998252924 |
| chr7:157015947-157041274 | exonic       | UBE3C                                     | 7 | 157015947 | 157041274 | 0 | 0 | 0 | 2 | 0 | 0 | 25327  | 0.21262277 | -1.55080501 | 4.038815656 | -0.38397519 | 0.700996836 | 0.998252924 |

|                          |              |                                               |   |           |           |   |   |   |   |   |   |       |            |             |             |             |             |             |
|--------------------------|--------------|-----------------------------------------------|---|-----------|-----------|---|---|---|---|---|---|-------|------------|-------------|-------------|-------------|-------------|-------------|
| chr7:158566031-158586417 | exonic       | ESYT2                                         | 7 | 158566031 | 158586417 | 0 | 0 | 0 | 2 | 0 | 0 | 20386 | 0.21262277 | -1.55080501 | 4.038815656 | -0.38397519 | 0.700996836 | 0.998252924 |
| chr7:17175032-17189830   | intergenic   | AGR3 (dist=253419), AHR (dist=148446)         | 7 | 17175032  | 17189830  | 0 | 0 | 0 | 2 | 0 | 0 | 14798 | 0.21262277 | -1.55080501 | 4.038815656 | -0.38397519 | 0.700996836 | 0.998252924 |
| chr7:22190024-22259610   | exonic       | RAPGEF5                                       | 7 | 22190024  | 22259610  | 0 | 0 | 0 | 2 | 0 | 0 | 69586 | 0.21262277 | -1.55080501 | 4.038815656 | -0.38397519 | 0.700996836 | 0.998252924 |
| chr7:22980591-23030758   | exonic       | FAM126A                                       | 7 | 22980591  | 23030758  | 0 | 0 | 0 | 2 | 0 | 0 | 50167 | 0.21262277 | -1.55080501 | 4.038815656 | -0.38397519 | 0.700996836 | 0.998252924 |
| chr7:24901231-24911688   | exonic       | OSBPL3                                        | 7 | 24901231  | 24911688  | 0 | 0 | 0 | 2 | 0 | 0 | 10457 | 0.21262277 | -1.55080501 | 4.038815656 | -0.38397519 | 0.700996836 | 0.998252924 |
| chr7:26380498-26380800   | intronic     | SNX10                                         | 7 | 26380498  | 26380800  | 0 | 0 | 0 | 2 | 0 | 0 | 302   | 0.21262277 | -1.55080501 | 4.038815656 | -0.38397519 | 0.700996836 | 0.998252924 |
| chr7:26724354-26779583   | exonic       | SKAP2                                         | 7 | 26724354  | 26779583  | 0 | 0 | 0 | 2 | 0 | 0 | 55229 | 0.21262277 | -1.55080501 | 4.038815656 | -0.38397519 | 0.700996836 | 0.998252924 |
| chr7:30363257-30402072   | exonic       | ZNRF2                                         | 7 | 30363257  | 30402072  | 0 | 0 | 0 | 2 | 0 | 0 | 38815 | 0.21262277 | -1.55080501 | 4.038815656 | -0.38397519 | 0.700996836 | 0.998252924 |
| chr7:32584305-32609766   | exonic       | AVL9                                          | 7 | 32584305  | 32609766  | 0 | 0 | 0 | 2 | 0 | 0 | 25461 | 0.21262277 | -1.55080501 | 4.038815656 | -0.38397519 | 0.700996836 | 0.998252924 |
| chr7:33976900-34014396   | exonic       | BMPER                                         | 7 | 33976900  | 34014396  | 0 | 0 | 0 | 2 | 0 | 0 | 37496 | 0.21262277 | -1.55080501 | 4.038815656 | -0.38397519 | 0.700996836 | 0.998252924 |
| chr7:35820818-35833632   | ncRNA_exonic | SEPT7-AS1                                     | 7 | 35820818  | 35833632  | 0 | 0 | 0 | 2 | 0 | 0 | 12814 | 0.21262277 | -1.55080501 | 4.038815656 | -0.38397519 | 0.700996836 | 0.998252924 |
| chr7:37136223-37172839   | exonic       | ELMO1                                         | 7 | 37136223  | 37172839  | 0 | 0 | 0 | 2 | 0 | 0 | 36616 | 0.21262277 | -1.55080501 | 4.038815656 | -0.38397519 | 0.700996836 | 0.998252924 |
| chr7:38381857-38390051   | ncRNA_exonic | TRG-AS1                                       | 7 | 38381857  | 38390051  | 0 | 0 | 0 | 2 | 0 | 0 | 8194  | 0.21262277 | -1.55080501 | 4.038815656 | -0.38397519 | 0.700996836 | 0.998252924 |
| chr7:38829401-38836464   | exonic       | VPS41                                         | 7 | 38829401  | 38836464  | 0 | 0 | 0 | 2 | 0 | 0 | 7063  | 0.21262277 | -1.55080501 | 4.038815656 | -0.38397519 | 0.700996836 | 0.998252924 |
| chr7:45688268-45726272   | exonic       | ADCY1                                         | 7 | 45688268  | 45726272  | 0 | 0 | 0 | 2 | 0 | 0 | 38004 | 0.21262277 | -1.55080501 | 4.038815656 | -0.38397519 | 0.700996836 | 0.998252924 |
| chr7:48258950-48316162   | exonic       | ABCA13                                        | 7 | 48258950  | 48316162  | 0 | 0 | 0 | 2 | 0 | 0 | 57212 | 0.21262277 | -1.55080501 | 4.038815656 | -0.38397519 | 0.700996836 | 0.998252924 |
| chr7:4836687-4837308     | intergenic   | AP5Z1 (dist=2661), RAD1L (dist=1432)          | 7 | 4836687   | 4837308   | 0 | 0 | 0 | 2 | 0 | 0 | 621   | 0.21262277 | -1.55080501 | 4.038815656 | -0.38397519 | 0.700996836 | 0.998252924 |
| chr7:65219513-65221561   | ncRNA_exonic | CCT6P1, SNORA22                               | 7 | 65219513  | 65221561  | 0 | 0 | 0 | 2 | 0 | 0 | 2048  | 0.21262277 | -1.55080501 | 4.038815656 | -0.38397519 | 0.700996836 | 0.998252924 |
| chr7:65429309-65432894   | exonic       | GUSB                                          | 7 | 65429309  | 65432894  | 0 | 0 | 0 | 2 | 0 | 0 | 3585  | 0.21262277 | -1.55080501 | 4.038815656 | -0.38397519 | 0.700996836 | 0.998252924 |
| chr7:6851582-6859572     | exonic       | CCZ1B                                         | 7 | 6851582   | 6859572   | 0 | 0 | 0 | 2 | 0 | 0 | 7990  | 0.21262277 | -1.55080501 | 4.038815656 | -0.38397519 | 0.700996836 | 0.998252924 |
| chr7:70227855-70242160   | exonic       | AUTS2                                         | 7 | 70227855  | 70242160  | 0 | 0 | 0 | 2 | 0 | 0 | 14305 | 0.21262277 | -1.55080501 | 4.038815656 | -0.38397519 | 0.700996836 | 0.998252924 |
| chr7:73477482-73478025   | exonic       | ELN                                           | 7 | 73477482  | 73478025  | 0 | 0 | 0 | 2 | 0 | 0 | 543   | 0.21262277 | -1.55080501 | 4.038815656 | -0.38397519 | 0.700996836 | 0.998252924 |
| chr7:73520204-73520573   | exonic       | LIMK1                                         | 7 | 73520204  | 73520573  | 0 | 0 | 0 | 2 | 0 | 0 | 369   | 0.21262277 | -1.55080501 | 4.038815656 | -0.38397519 | 0.700996836 | 0.998252924 |
| chr7:74004179-74005346   | exonic       | GTF2IRD1                                      | 7 | 74004179  | 74005346  | 0 | 0 | 0 | 2 | 0 | 0 | 1167  | 0.21262277 | -1.55080501 | 4.038815656 | -0.38397519 | 0.700996836 | 0.998252924 |
| chr7:75095265-75104454   | UTR5         | POM21C(ORF_001099415:c.-33372..-33988deliso0) | 7 | 75095265  | 75104454  | 0 | 0 | 0 | 2 | 0 | 0 | 9189  | 0.21262277 | -1.55080501 | 4.038815656 | -0.38397519 | 0.700996836 | 0.998252924 |
| chr7:75197502-75210614   | exonic       | HIP1                                          | 7 | 75197502  | 75210614  | 0 | 0 | 0 | 2 | 0 | 0 | 13112 | 0.21262277 | -1.55080501 | 4.038815656 | -0.38397519 | 0.700996836 | 0.998252924 |
| chr7:75717457-75729274   | intergenic   | MIR2 (dist=20630), SRRM3 (dist=101937)        | 7 | 75717457  | 75729274  | 0 | 0 | 0 | 2 | 0 | 0 | 11817 | 0.21262277 | -1.55080501 | 4.038815656 | -0.38397519 | 0.700996836 | 0.998252924 |
| chr7:77214860-77236618   | exonic       | PTPN12                                        | 7 | 77214860  | 77236618  | 0 | 0 | 0 | 2 | 0 | 0 | 21758 | 0.21262277 | -1.55080501 | 4.038815656 | -0.38397519 | 0.700996836 | 0.998252924 |
| chr7:77394811-77402631   | exonic       | RSBN1L                                        | 7 | 77394811  | 77402631  | 0 | 0 | 0 | 2 | 0 | 0 | 7820  | 0.21262277 | -1.55080501 | 4.038815656 | -0.38397519 | 0.700996836 | 0.998252924 |
| chr7:80275404-80303463   | exonic       | CD36                                          | 7 | 80275404  | 80303463  | 0 | 0 | 0 | 2 | 0 | 0 | 28059 | 0.21262277 | -1.55080501 | 4.038815656 | -0.38397519 | 0.700996836 | 0.998252924 |
| chr7:80285875-80286010   | exonic       | CD36                                          | 7 | 80285875  | 80286010  | 0 | 0 | 0 | 2 | 0 | 0 | 135   | 0.21262277 | -1.55080501 | 4.038815656 | -0.38397519 | 0.700996836 | 0.998252924 |
| chr7:91746357-91747929   | exonic       | CYP51A1                                       | 7 | 91746357  | 91747929  | 0 | 0 | 0 | 2 | 0 | 0 | 1572  | 0.21262277 | -1.55080501 | 4.038815656 | -0.38397519 | 0.700996836 | 0.998252924 |
| chr7:91936672-91948826   | exonic       | ANKIB1                                        | 7 | 91936672  | 91948826  | 0 | 0 | 0 | 2 | 0 | 0 | 12154 | 0.21262277 | -1.55080501 | 4.038815656 | -0.38397519 | 0.700996836 | 0.998252924 |
| chr7:91957096-91991587   | exonic       | ANKIB1                                        | 7 | 91957096  | 91991587  | 0 | 0 | 0 | 2 | 0 | 0 | 34491 | 0.21262277 | -1.55080501 | 4.038815656 | -0.38397519 | 0.700996836 | 0.998252924 |
| chr7:92118606-92119225   | exonic       | PEX1                                          | 7 | 92118606  | 92119225  | 0 | 0 | 0 | 2 | 0 | 0 | 619   | 0.21262277 | -1.55080501 | 4.038815656 | -0.38397519 | 0.700996836 | 0.998252924 |

|                          |          |                                 |   |           |           |   |   |   |   |   |   |        |            |             |             |             |             |             |
|--------------------------|----------|---------------------------------|---|-----------|-----------|---|---|---|---|---|---|--------|------------|-------------|-------------|-------------|-------------|-------------|
| chr7:92932772-92963509   | exonic   | VPS50                           | 7 | 92932772  | 92963509  | 0 | 0 | 0 | 2 | 0 | 0 | 30737  | 0.21262277 | -1.55080501 | 4.038815656 | -0.38397519 | 0.700996836 | 0.998252924 |
| chr7:95799181-95822495   | exonic   | SLC25A13                        | 7 | 95799181  | 95822495  | 0 | 0 | 0 | 2 | 0 | 0 | 23314  | 0.21262277 | -1.55080501 | 4.038815656 | -0.38397519 | 0.700996836 | 0.998252924 |
| chr7:98013389-98016121   | intronic | BAIAP2L1                        | 7 | 98013389  | 98016121  | 0 | 0 | 0 | 2 | 0 | 0 | 2732   | 0.21262277 | -1.55080501 | 4.038815656 | -0.38397519 | 0.700996836 | 0.998252924 |
| chr7:98534778-98535443   | exonic   | TRRAP                           | 7 | 98534778  | 98535443  | 0 | 0 | 0 | 2 | 0 | 0 | 665    | 0.21262277 | -1.55080501 | 4.038815656 | -0.38397519 | 0.700996836 | 0.998252924 |
| chr7:99315149-99367479   | exonic   | CYP3A4, CYP3A7, CYP3A7-CYP3A51P | 7 | 99315149  | 99367479  | 0 | 0 | 0 | 2 | 0 | 0 | 52330  | 0.21262277 | -1.55080501 | 4.038815656 | -0.38397519 | 0.700996836 | 0.998252924 |
| chr8:100662066-100733275 | exonic   | VPS13B                          | 8 | 100662066 | 100733275 | 0 | 0 | 0 | 2 | 0 | 0 | 71209  | 0.21262277 | -1.55080501 | 4.038815656 | -0.38397519 | 0.700996836 | 0.998252924 |
| chr8:101051158-101092583 | exonic   | RGS22                           | 8 | 101051158 | 101092583 | 0 | 0 | 0 | 2 | 0 | 0 | 41425  | 0.21262277 | -1.55080501 | 4.038815656 | -0.38397519 | 0.700996836 | 0.998252924 |
| chr8:101271335-101287389 | exonic   | RNF19A                          | 8 | 101271335 | 101287389 | 0 | 0 | 0 | 2 | 0 | 0 | 16054  | 0.21262277 | -1.55080501 | 4.038815656 | -0.38397519 | 0.700996836 | 0.998252924 |
| chr8:101276261-101312879 | exonic   | RNF19A                          | 8 | 101276261 | 101312879 | 0 | 0 | 0 | 2 | 0 | 0 | 36618  | 0.21262277 | -1.55080501 | 4.038815656 | -0.38397519 | 0.700996836 | 0.998252924 |
| chr8:102731479-102731876 | exonic   | NCALD                           | 8 | 102731479 | 102731876 | 0 | 0 | 0 | 2 | 0 | 0 | 397    | 0.21262277 | -1.55080501 | 4.038815656 | -0.38397519 | 0.700996836 | 0.998252924 |
| chr8:103358463-103359320 | exonic   | UBR5                            | 8 | 103358463 | 103359320 | 0 | 0 | 0 | 2 | 0 | 0 | 857    | 0.21262277 | -1.55080501 | 4.038815656 | -0.38397519 | 0.700996836 | 0.998252924 |
| chr8:108296909-108359325 | exonic   | ANGPT1                          | 8 | 108296909 | 108359325 | 0 | 0 | 0 | 2 | 0 | 0 | 62416  | 0.21262277 | -1.55080501 | 4.038815656 | -0.38397519 | 0.700996836 | 0.998252924 |
| chr8:108348377-108359325 | exonic   | ANGPT1                          | 8 | 108348377 | 108359325 | 0 | 0 | 0 | 2 | 0 | 0 | 10948  | 0.21262277 | -1.55080501 | 4.038815656 | -0.38397519 | 0.700996836 | 0.998252924 |
| chr8:109080220-109081551 | intronic | RSPO2                           | 8 | 109080220 | 109081551 | 0 | 0 | 0 | 2 | 0 | 0 | 1331   | 0.21262277 | -1.55080501 | 4.038815656 | -0.38397519 | 0.700996836 | 0.998252924 |
| chr8:109226835-109254142 | exonic   | EIF3E                           | 8 | 109226835 | 109254142 | 0 | 0 | 0 | 2 | 0 | 0 | 27307  | 0.21262277 | -1.55080501 | 4.038815656 | -0.38397519 | 0.700996836 | 0.998252924 |
| chr8:110424493-110439385 | exonic   | PKHD1L1                         | 8 | 110424493 | 110439385 | 0 | 0 | 0 | 2 | 0 | 0 | 14892  | 0.21262277 | -1.55080501 | 4.038815656 | -0.38397519 | 0.700996836 | 0.998252924 |
| chr8:11666303-11696082   | exonic   | FDFT1                           | 8 | 11666303  | 11696082  | 0 | 0 | 0 | 2 | 0 | 0 | 29779  | 0.21262277 | -1.55080501 | 4.038815656 | -0.38397519 | 0.700996836 | 0.998252924 |
| chr8:121426229-121444363 | exonic   | MRPL13                          | 8 | 121426229 | 121444363 | 0 | 0 | 0 | 2 | 0 | 0 | 18134  | 0.21262277 | -1.55080501 | 4.038815656 | -0.38397519 | 0.700996836 | 0.998252924 |
| chr8:126085394-126094709 | exonic   | KIAA0196                        | 8 | 126085394 | 126094709 | 0 | 0 | 0 | 2 | 0 | 0 | 9315   | 0.21262277 | -1.55080501 | 4.038815656 | -0.38397519 | 0.700996836 | 0.998252924 |
| chr8:12943798-12946213   | exonic   | DLC1                            | 8 | 12943798  | 12946213  | 0 | 0 | 0 | 2 | 0 | 0 | 2415   | 0.21262277 | -1.55080501 | 4.038815656 | -0.38397519 | 0.700996836 | 0.998252924 |
| chr8:131130406-131181313 | exonic   | ASAP1                           | 8 | 131130406 | 131181313 | 0 | 0 | 0 | 2 | 0 | 0 | 50907  | 0.21262277 | -1.55080501 | 4.038815656 | -0.38397519 | 0.700996836 | 0.998252924 |
| chr8:133816063-133837616 | exonic   | PHF20L1                         | 8 | 133816063 | 133837616 | 0 | 0 | 0 | 2 | 0 | 0 | 21553  | 0.21262277 | -1.55080501 | 4.038815656 | -0.38397519 | 0.700996836 | 0.998252924 |
| chr8:140898123-140922544 | exonic   | TRAPPC9                         | 8 | 140898123 | 140922544 | 0 | 0 | 0 | 2 | 0 | 0 | 24421  | 0.21262277 | -1.55080501 | 4.038815656 | -0.38397519 | 0.700996836 | 0.998252924 |
| chr8:141678367-141684503 | exonic   | PTK2                            | 8 | 141678367 | 141684503 | 0 | 0 | 0 | 2 | 0 | 0 | 6136   | 0.21262277 | -1.55080501 | 4.038815656 | -0.38397519 | 0.700996836 | 0.998252924 |
| chr8:141696730-141727808 | exonic   | PTK2                            | 8 | 141696730 | 141727808 | 0 | 0 | 0 | 2 | 0 | 0 | 31078  | 0.21262277 | -1.55080501 | 4.038815656 | -0.38397519 | 0.700996836 | 0.998252924 |
| chr8:141727696-141900868 | exonic   | PTK2                            | 8 | 141727696 | 141900868 | 0 | 0 | 0 | 2 | 0 | 0 | 173172 | 0.21262277 | -1.55080501 | 4.038815656 | -0.38397519 | 0.700996836 | 0.998252924 |
| chr8:141756858-141774389 | exonic   | PTK2                            | 8 | 141756858 | 141774389 | 0 | 0 | 0 | 2 | 0 | 0 | 17531  | 0.21262277 | -1.55080501 | 4.038815656 | -0.38397519 | 0.700996836 | 0.998252924 |
| chr8:145161457-145161866 | exonic   | MAF1                            | 8 | 145161457 | 145161866 | 0 | 0 | 0 | 2 | 0 | 0 | 409    | 0.21262277 | -1.55080501 | 4.038815656 | -0.38397519 | 0.700996836 | 0.998252924 |
| chr8:17813162-17813606   | exonic   | PCM1                            | 8 | 17813162  | 17813606  | 0 | 0 | 0 | 2 | 0 | 0 | 444    | 0.21262277 | -1.55080501 | 4.038815656 | -0.38397519 | 0.700996836 | 0.998252924 |
| chr8:18413718-18490316   | exonic   | PSD3                            | 8 | 18413718  | 18490316  | 0 | 0 | 0 | 2 | 0 | 0 | 76598  | 0.21262277 | -1.55080501 | 4.038815656 | -0.38397519 | 0.700996836 | 0.998252924 |
| chr8:1876592-1882108     | exonic   | ARHGEF10                        | 8 | 1876592   | 1882108   | 0 | 0 | 0 | 2 | 0 | 0 | 5516   | 0.21262277 | -1.55080501 | 4.038815656 | -0.38397519 | 0.700996836 | 0.998252924 |
| chr8:19531727-19533113   | intronic | CSGALNACT1                      | 8 | 19531727  | 19533113  | 0 | 0 | 0 | 2 | 0 | 0 | 1386   | 0.21262277 | -1.55080501 | 4.038815656 | -0.38397519 | 0.700996836 | 0.998252924 |
| chr8:28821327-28876430   | exonic   | HMBOX1                          | 8 | 28821327  | 28876430  | 0 | 0 | 0 | 2 | 0 | 0 | 55103  | 0.21262277 | -1.55080501 | 4.038815656 | -0.38397519 | 0.700996836 | 0.998252924 |
| chr8:30938383-30946481   | exonic   | WRN                             | 8 | 30938383  | 30946481  | 0 | 0 | 0 | 2 | 0 | 0 | 8098   | 0.21262277 | -1.55080501 | 4.038815656 | -0.38397519 | 0.700996836 | 0.998252924 |
| chr8:37731047-37746425   | exonic   | RAB11FIP1                       | 8 | 37731047  | 37746425  | 0 | 0 | 0 | 2 | 0 | 0 | 15378  | 0.21262277 | -1.55080501 | 4.038815656 | -0.38397519 | 0.700996836 | 0.998252924 |

|                          |            |                                                  |   |           |           |   |   |   |   |   |   |        |            |             |             |             |             |             |
|--------------------------|------------|--------------------------------------------------|---|-----------|-----------|---|---|---|---|---|---|--------|------------|-------------|-------------|-------------|-------------|-------------|
| chr8:38595835-38596503   | intronic   | TACC1                                            | 8 | 38595835  | 38596503  | 0 | 0 | 0 | 2 | 0 | 0 | 668    | 0.21262277 | -1.55080501 | 4.038815656 | -0.38397519 | 0.700996836 | 0.998252924 |
| chr8:38808367-38814904   | exonic     | PLEKHA2                                          | 8 | 38808367  | 38814904  | 0 | 0 | 0 | 2 | 0 | 0 | 6537   | 0.21262277 | -1.55080501 | 4.038815656 | -0.38397519 | 0.700996836 | 0.998252924 |
| chr8:38911999-38913291   | exonic     | ADAM9                                            | 8 | 38911999  | 38913291  | 0 | 0 | 0 | 2 | 0 | 0 | 1292   | 0.21262277 | -1.55080501 | 4.038815656 | -0.38397519 | 0.700996836 | 0.998252924 |
| chr8:39044427-39114862   | exonic     | ADAM32                                           | 8 | 39044427  | 39114862  | 0 | 0 | 0 | 2 | 0 | 0 | 70435  | 0.21262277 | -1.55080501 | 4.038815656 | -0.38397519 | 0.700996836 | 0.998252924 |
| chr8:42805530-42852780   | exonic     | HOOK3                                            | 8 | 42805530  | 42852780  | 0 | 0 | 0 | 2 | 0 | 0 | 47250  | 0.21262277 | -1.55080501 | 4.038815656 | -0.38397519 | 0.700996836 | 0.998252924 |
| chr8:42812236-42841938   | exonic     | HOOK3                                            | 8 | 42812236  | 42841938  | 0 | 0 | 0 | 2 | 0 | 0 | 29702  | 0.21262277 | -1.55080501 | 4.038815656 | -0.38397519 | 0.700996836 | 0.998252924 |
| chr8:48697673-48710958   | exonic     | PRKDC                                            | 8 | 48697673  | 48710958  | 0 | 0 | 0 | 2 | 0 | 0 | 13285  | 0.21262277 | -1.55080501 | 4.038815656 | -0.38397519 | 0.700996836 | 0.998252924 |
| chr8:48798504-48805947   | exonic     | PRKDC                                            | 8 | 48798504  | 48805947  | 0 | 0 | 0 | 2 | 0 | 0 | 7443   | 0.21262277 | -1.55080501 | 4.038815656 | -0.38397519 | 0.700996836 | 0.998252924 |
| chr8:48955592-48962538   | exonic     | UBE2V2                                           | 8 | 48955592  | 48962538  | 0 | 0 | 0 | 2 | 0 | 0 | 6946   | 0.21262277 | -1.55080501 | 4.038815656 | -0.38397519 | 0.700996836 | 0.998252924 |
| chr8:48970936-48972063   | intronic   | UBE2V2                                           | 8 | 48970936  | 48972063  | 0 | 0 | 0 | 2 | 0 | 0 | 1127   | 0.21262277 | -1.55080501 | 4.038815656 | -0.38397519 | 0.700996836 | 0.998252924 |
| chr8:55696107-55769666   | intergenic | RP1 (dist=152713), XKR4 (dist=245351)            | 8 | 55696107  | 55769666  | 0 | 0 | 0 | 2 | 0 | 0 | 73559  | 0.21262277 | -1.55080501 | 4.038815656 | -0.38397519 | 0.700996836 | 0.998252924 |
| chr8:588541-588891       | intronic   | ERICH1                                           | 8 | 588541    | 588891    | 0 | 0 | 0 | 2 | 0 | 0 | 350    | 0.21262277 | -1.55080501 | 4.038815656 | -0.38397519 | 0.700996836 | 0.998252924 |
| chr8:62546242-62557191   | exonic     | ASPH                                             | 8 | 62546242  | 62557191  | 0 | 0 | 0 | 2 | 0 | 0 | 10949  | 0.21262277 | -1.55080501 | 4.038815656 | -0.38397519 | 0.700996836 | 0.998252924 |
| chr8:640898-642612       | exonic     | ERICH1                                           | 8 | 640898    | 642612    | 0 | 0 | 0 | 2 | 0 | 0 | 1714   | 0.21262277 | -1.55080501 | 4.038815656 | -0.38397519 | 0.700996836 | 0.998252924 |
| chr8:66647028-66657705   | exonic     | PDE7A                                            | 8 | 66647028  | 66657705  | 0 | 0 | 0 | 2 | 0 | 0 | 10677  | 0.21262277 | -1.55080501 | 4.038815656 | -0.38397519 | 0.700996836 | 0.998252924 |
| chr8:67484716-67505429   | exonic     | MYBL1                                            | 8 | 67484716  | 67505429  | 0 | 0 | 0 | 2 | 0 | 0 | 20713  | 0.21262277 | -1.55080501 | 4.038815656 | -0.38397519 | 0.700996836 | 0.998252924 |
| chr8:67988716-68007967   | exonic     | CSPP1                                            | 8 | 67988716  | 68007967  | 0 | 0 | 0 | 2 | 0 | 0 | 19251  | 0.21262277 | -1.55080501 | 4.038815656 | -0.38397519 | 0.700996836 | 0.998252924 |
| chr8:68030482-68062170   | exonic     | CSPP1                                            | 8 | 68030482  | 68062170  | 0 | 0 | 0 | 2 | 0 | 0 | 31688  | 0.21262277 | -1.55080501 | 4.038815656 | -0.38397519 | 0.700996836 | 0.998252924 |
| chr8:68044185-68102994   | exonic     | CSPP1                                            | 8 | 68044185  | 68102994  | 0 | 0 | 0 | 2 | 0 | 0 | 58809  | 0.21262277 | -1.55080501 | 4.038815656 | -0.38397519 | 0.700996836 | 0.998252924 |
| chr8:68999959-69009436   | exonic     | PREX2                                            | 8 | 68999959  | 69009436  | 0 | 0 | 0 | 2 | 0 | 0 | 9477   | 0.21262277 | -1.55080501 | 4.038815656 | -0.38397519 | 0.700996836 | 0.998252924 |
| chr8:81942231-81961099   | UTR5       | PAG1 (NM_018440:c.36862_36769delins0)            | 8 | 81942231  | 81961099  | 0 | 0 | 0 | 2 | 0 | 0 | 18868  | 0.21262277 | -1.55080501 | 4.038815656 | -0.38397519 | 0.700996836 | 0.998252924 |
| chr8:81996193-82018390   | intronic   | PAG1                                             | 8 | 81996193  | 82018390  | 0 | 0 | 0 | 2 | 0 | 0 | 22197  | 0.21262277 | -1.55080501 | 4.038815656 | -0.38397519 | 0.700996836 | 0.998252924 |
| chr8:90600120-90608741   | intergenic | MMP16 (dist=1200403), LOC101929709 (dist=120886) | 8 | 90600120  | 90608741  | 0 | 0 | 0 | 2 | 0 | 0 | 8621   | 0.21262277 | -1.55080501 | 4.038815656 | -0.38397519 | 0.700996836 | 0.998252924 |
| chr8:95839949-95854716   | exonic     | INTS8                                            | 8 | 95839949  | 95854716  | 0 | 0 | 0 | 2 | 0 | 0 | 14767  | 0.21262277 | -1.55080501 | 4.038815656 | -0.38397519 | 0.700996836 | 0.998252924 |
| chr8:97549528-97552488   | intronic   | SDC2                                             | 8 | 97549528  | 97552488  | 0 | 0 | 0 | 2 | 0 | 0 | 2960   | 0.21262277 | -1.55080501 | 4.038815656 | -0.38397519 | 0.700996836 | 0.998252924 |
| chr8:97810187-97819556   | intronic   | CPQ                                              | 8 | 97810187  | 97819556  | 0 | 0 | 0 | 2 | 0 | 0 | 9369   | 0.21262277 | -1.55080501 | 4.038815656 | -0.38397519 | 0.700996836 | 0.998252924 |
| chr8:97847200-97978274   | exonic     | CPQ                                              | 8 | 97847200  | 97978274  | 0 | 0 | 0 | 2 | 0 | 0 | 131074 | 0.21262277 | -1.55080501 | 4.038815656 | -0.38397519 | 0.700996836 | 0.998252924 |
| chr9:100092435-100133060 | exonic     | CCDC180                                          | 9 | 100092435 | 100133060 | 0 | 0 | 0 | 2 | 0 | 0 | 40625  | 0.21262277 | -1.55080501 | 4.038815656 | -0.38397519 | 0.700996836 | 0.998252924 |
| chr9:102722199-102738001 | exonic     | STX17                                            | 9 | 102722199 | 102738001 | 0 | 0 | 0 | 2 | 0 | 0 | 15802  | 0.21262277 | -1.55080501 | 4.038815656 | -0.38397519 | 0.700996836 | 0.998252924 |
| chr9:113205825-113213682 | exonic     | SVEP1                                            | 9 | 113205825 | 113213682 | 0 | 0 | 0 | 2 | 0 | 0 | 7857   | 0.21262277 | -1.55080501 | 4.038815656 | -0.38397519 | 0.700996836 | 0.998252924 |
| chr9:114337013-114359712 | exonic     | PTGRI, ZNF483                                    | 9 | 114337013 | 114359712 | 0 | 0 | 0 | 2 | 0 | 0 | 22699  | 0.21262277 | -1.55080501 | 4.038815656 | -0.38397519 | 0.700996836 | 0.998252924 |
| chr9:114842353-114905903 | exonic     | SUSD1                                            | 9 | 114842353 | 114905903 | 0 | 0 | 0 | 2 | 0 | 0 | 63550  | 0.21262277 | -1.55080501 | 4.038815656 | -0.38397519 | 0.700996836 | 0.998252924 |
| chr9:115950072-115952858 | exonic     | FKBP15                                           | 9 | 115950072 | 115952858 | 0 | 0 | 0 | 2 | 0 | 0 | 2786   | 0.21262277 | -1.55080501 | 4.038815656 | -0.38397519 | 0.700996836 | 0.998252924 |
| chr9:117396047-117401006 | exonic     | C9orf91                                          | 9 | 117396047 | 117401006 | 0 | 0 | 0 | 2 | 0 | 0 | 4959   | 0.21262277 | -1.55080501 | 4.038815656 | -0.38397519 | 0.700996836 | 0.998252924 |
| chr9:123929766-123932094 | exonic     | CNTRL                                            | 9 | 123929766 | 123932094 | 0 | 0 | 0 | 2 | 0 | 0 | 2328   | 0.21262277 | -1.55080501 | 4.038815656 | -0.38397519 | 0.700996836 | 0.998252924 |

|                          |            |                                             |   |           |           |   |   |   |   |   |   |       |            |             |             |             |             |             |
|--------------------------|------------|---------------------------------------------|---|-----------|-----------|---|---|---|---|---|---|-------|------------|-------------|-------------|-------------|-------------|-------------|
| chr9:125760875-125777915 | exonic     | RABGAP1                                     | 9 | 125760875 | 125777915 | 0 | 0 | 0 | 2 | 0 | 0 | 17040 | 0.21262277 | -1.55080501 | 4.038815656 | -0.38397519 | 0.700996836 | 0.998252924 |
| chr9:125884472-125946577 | exonic     | STRBP                                       | 9 | 125884472 | 125946577 | 0 | 0 | 0 | 2 | 0 | 0 | 62105 | 0.21262277 | -1.55080501 | 4.038815656 | -0.38397519 | 0.700996836 | 0.998252924 |
| chr9:127561563-127563942 | exonic     | OLFML2A                                     | 9 | 127561563 | 127563942 | 0 | 0 | 0 | 2 | 0 | 0 | 2379  | 0.21262277 | -1.55080501 | 4.038815656 | -0.38397519 | 0.700996836 | 0.998252924 |
| chr9:127651421-127652757 | exonic     | GOLGA1                                      | 9 | 127651421 | 127652757 | 0 | 0 | 0 | 2 | 0 | 0 | 1336  | 0.21262277 | -1.55080501 | 4.038815656 | -0.38397519 | 0.700996836 | 0.998252924 |
| chr9:130652915-130653322 | exonic     | ST6GALNAC6                                  | 9 | 130652915 | 130653322 | 0 | 0 | 0 | 2 | 0 | 0 | 407   | 0.21262277 | -1.55080501 | 4.038815656 | -0.38397519 | 0.700996836 | 0.998252924 |
| chr9:131107433-131107828 | exonic     | SLC27A4                                     | 9 | 131107433 | 131107828 | 0 | 0 | 0 | 2 | 0 | 0 | 395   | 0.21262277 | -1.55080501 | 4.038815656 | -0.38397519 | 0.700996836 | 0.998252924 |
| chr9:131185146-131186893 | exonic     | CERCAM                                      | 9 | 131185146 | 131186893 | 0 | 0 | 0 | 2 | 0 | 0 | 1747  | 0.21262277 | -1.55080501 | 4.038815656 | -0.38397519 | 0.700996836 | 0.998252924 |
| chr9:13168365-13188992   | exonic     | MPDZ                                        | 9 | 13168365  | 13188992  | 0 | 0 | 0 | 2 | 0 | 0 | 20627 | 0.21262277 | -1.55080501 | 4.038815656 | -0.38397519 | 0.700996836 | 0.998252924 |
| chr9:132569466-132571311 | exonic     | TOR1B                                       | 9 | 132569466 | 132571311 | 0 | 0 | 0 | 2 | 0 | 0 | 1845  | 0.21262277 | -1.55080501 | 4.038815656 | -0.38397519 | 0.700996836 | 0.998252924 |
| chr9:133274897-133276334 | exonic     | HMCN2                                       | 9 | 133274897 | 133276334 | 0 | 0 | 0 | 2 | 0 | 0 | 1437  | 0.21262277 | -1.55080501 | 4.038815656 | -0.38397519 | 0.700996836 | 0.998252924 |
| chr9:133506014-133507409 | exonic     | FUBP3                                       | 9 | 133506014 | 133507409 | 0 | 0 | 0 | 2 | 0 | 0 | 1395  | 0.21262277 | -1.55080501 | 4.038815656 | -0.38397519 | 0.700996836 | 0.998252924 |
| chr9:133814060-133814389 | splicing   | FIBCD1                                      | 9 | 133814060 | 133814389 | 0 | 0 | 0 | 2 | 0 | 0 | 329   | 0.21262277 | -1.55080501 | 4.038815656 | -0.38397519 | 0.700996836 | 0.998252924 |
| chr9:134019666-134022971 | exonic     | NUP214                                      | 9 | 134019666 | 134022971 | 0 | 0 | 0 | 2 | 0 | 0 | 3305  | 0.21262277 | -1.55080501 | 4.038815656 | -0.38397519 | 0.700996836 | 0.998252924 |
| chr9:134025710-134039531 | exonic     | NUP214                                      | 9 | 134025710 | 134039531 | 0 | 0 | 0 | 2 | 0 | 0 | 13821 | 0.21262277 | -1.55080501 | 4.038815656 | -0.38397519 | 0.700996836 | 0.998252924 |
| chr9:134501308-134504641 | exonic     | RAPGEF1                                     | 9 | 134501308 | 134504641 | 0 | 0 | 0 | 2 | 0 | 0 | 3333  | 0.21262277 | -1.55080501 | 4.038815656 | -0.38397519 | 0.700996836 | 0.998252924 |
| chr9:140605418-140611634 | exonic     | EHMT1                                       | 9 | 140605418 | 140611634 | 0 | 0 | 0 | 2 | 0 | 0 | 6216  | 0.21262277 | -1.55080501 | 4.038815656 | -0.38397519 | 0.700996836 | 0.998252924 |
| chr9:14087047-14087198   | UTR3       |                                             | 9 | 14087047  | 14087198  | 0 | 0 | 0 | 2 | 0 | 0 | 151   | 0.21262277 | -1.55080501 | 4.038815656 | -0.38397519 | 0.700996836 | 0.998252924 |
| chr9:15468818-15478550   | exonic     | PSIP1                                       | 9 | 15468818  | 15478550  | 0 | 0 | 0 | 2 | 0 | 0 | 9732  | 0.21262277 | -1.55080501 | 4.038815656 | -0.38397519 | 0.700996836 | 0.998252924 |
| chr9:17388160-17466889   | exonic     | CNTLN                                       | 9 | 17388160  | 17466889  | 0 | 0 | 0 | 2 | 0 | 0 | 78729 | 0.21262277 | -1.55080501 | 4.038815656 | -0.38397519 | 0.700996836 | 0.998252924 |
| chr9:19086732-19096767   | exonic     | HAUS6                                       | 9 | 19086732  | 19096767  | 0 | 0 | 0 | 2 | 0 | 0 | 10035 | 0.21262277 | -1.55080501 | 4.038815656 | -0.38397519 | 0.700996836 | 0.998252924 |
| chr9:2028986-2088613     | exonic     | SMARCA2                                     | 9 | 2028986   | 2088613   | 0 | 0 | 0 | 2 | 0 | 0 | 59627 | 0.21262277 | -1.55080501 | 4.038815656 | -0.38397519 | 0.700996836 | 0.998252924 |
| chr9:2170418-2186228     | exonic     | SMARCA2                                     | 9 | 2170418   | 2186228   | 0 | 0 | 0 | 2 | 0 | 0 | 15810 | 0.21262277 | -1.55080501 | 4.038815656 | -0.38397519 | 0.700996836 | 0.998252924 |
| chr9:2385610-2425540     | intergenic | SMARCA2(41st-191987), YLDR-AS1(41st-110115) | 9 | 2385610   | 2425540   | 0 | 0 | 0 | 2 | 0 | 0 | 39930 | 0.21262277 | -1.55080501 | 4.038815656 | -0.38397519 | 0.700996836 | 0.998252924 |
| chr9:26978126-27018685   | exonic     | IFT74, LRRC19                               | 9 | 26978126  | 27018685  | 0 | 0 | 0 | 2 | 0 | 0 | 40559 | 0.21262277 | -1.55080501 | 4.038815656 | -0.38397519 | 0.700996836 | 0.998252924 |
| chr9:27168492-27173360   | exonic     | TEK                                         | 9 | 27168492  | 27173360  | 0 | 0 | 0 | 2 | 0 | 0 | 4868  | 0.21262277 | -1.55080501 | 4.038815656 | -0.38397519 | 0.700996836 | 0.998252924 |
| chr9:27168492-27203117   | exonic     | TEK                                         | 9 | 27168492  | 27203117  | 0 | 0 | 0 | 2 | 0 | 0 | 34625 | 0.21262277 | -1.55080501 | 4.038815656 | -0.38397519 | 0.700996836 | 0.998252924 |
| chr9:27180237-27192621   | exonic     | TEK                                         | 9 | 27180237  | 27192621  | 0 | 0 | 0 | 2 | 0 | 0 | 12384 | 0.21262277 | -1.55080501 | 4.038815656 | -0.38397519 | 0.700996836 | 0.998252924 |
| chr9:2804257-2824815     | exonic     | PUM3                                        | 9 | 2804257   | 2824815   | 0 | 0 | 0 | 2 | 0 | 0 | 20558 | 0.21262277 | -1.55080501 | 4.038815656 | -0.38397519 | 0.700996836 | 0.998252924 |
| chr9:286460-304704       | exonic     | DOCK8                                       | 9 | 286460    | 304704    | 0 | 0 | 0 | 2 | 0 | 0 | 18244 | 0.21262277 | -1.55080501 | 4.038815656 | -0.38397519 | 0.700996836 | 0.998252924 |
| chr9:33971648-33996331   | exonic     | UBAP2                                       | 9 | 33971648  | 33996331  | 0 | 0 | 0 | 2 | 0 | 0 | 24683 | 0.21262277 | -1.55080501 | 4.038815656 | -0.38397519 | 0.700996836 | 0.998252924 |
| chr9:36369715-36376124   | exonic     | RNF38                                       | 9 | 36369715  | 36376124  | 0 | 0 | 0 | 2 | 0 | 0 | 6409  | 0.21262277 | -1.55080501 | 4.038815656 | -0.38397519 | 0.700996836 | 0.998252924 |
| chr9:4629091-4646528     | exonic     | SPATA6L                                     | 9 | 4629091   | 4646528   | 0 | 0 | 0 | 2 | 0 | 0 | 17437 | 0.21262277 | -1.55080501 | 4.038815656 | -0.38397519 | 0.700996836 | 0.998252924 |
| chr9:4728494-4729120     | intronic   | AK3                                         | 9 | 4728494   | 4729120   | 0 | 0 | 0 | 2 | 0 | 0 | 626   | 0.21262277 | -1.55080501 | 4.038815656 | -0.38397519 | 0.700996836 | 0.998252924 |
| chr9:5920544-5923309     | exonic     | KIAA2026                                    | 9 | 5920544   | 5923309   | 0 | 0 | 0 | 2 | 0 | 0 | 2765  | 0.21262277 | -1.55080501 | 4.038815656 | -0.38397519 | 0.700996836 | 0.998252924 |
| chr9:6250473-6251265     | exonic     | IL33                                        | 9 | 6250473   | 6251265   | 0 | 0 | 0 | 2 | 0 | 0 | 792   | 0.21262277 | -1.55080501 | 4.038815656 | -0.38397519 | 0.700996836 | 0.998252924 |



|                          |            |                                                          |   |   |           |           |   |   |   |   |   |   |        |            |             |             |             |             |             |
|--------------------------|------------|----------------------------------------------------------|---|---|-----------|-----------|---|---|---|---|---|---|--------|------------|-------------|-------------|-------------|-------------|-------------|
| chr9:74975025-74975703   | exonic     | ZFAND5                                                   |   | 9 | 74975025  | 74975703  | 0 | 0 | 0 | 2 | 0 | 0 | 678    | 0.21262277 | -1.55080501 | 4.038815656 | -0.38397519 | 0.700996836 | 0.998252924 |
| chr9:77710890-77714667   | intronic   | OSTF1                                                    |   | 9 | 77710890  | 77714667  | 0 | 0 | 0 | 2 | 0 | 0 | 3777   | 0.21262277 | -1.55080501 | 4.038815656 | -0.38397519 | 0.700996836 | 0.998252924 |
| chr9:78710805-78722267   | exonic     | PCSK5                                                    |   | 9 | 78710805  | 78722267  | 0 | 0 | 0 | 2 | 0 | 0 | 11462  | 0.21262277 | -1.55080501 | 4.038815656 | -0.38397519 | 0.700996836 | 0.998252924 |
| chr9:86354616-86421475   | exonic     | GKAP1                                                    |   | 9 | 86354616  | 86421475  | 0 | 0 | 0 | 2 | 0 | 0 | 66859  | 0.21262277 | -1.55080501 | 4.038815656 | -0.38397519 | 0.700996836 | 0.998252924 |
| chr9:86586796-86589504   | exonic     | HNRNPK                                                   |   | 9 | 86586796  | 86589504  | 0 | 0 | 0 | 2 | 0 | 0 | 2708   | 0.21262277 | -1.55080501 | 4.038815656 | -0.38397519 | 0.700996836 | 0.998252924 |
| chr9:88190229-88207619   | exonic     | AGTPBP1                                                  |   | 9 | 88190229  | 88207619  | 0 | 0 | 0 | 2 | 0 | 0 | 17390  | 0.21262277 | -1.55080501 | 4.038815656 | -0.38397519 | 0.700996836 | 0.998252924 |
| chr9:88190229-88211364   | exonic     | AGTPBP1                                                  |   | 9 | 88190229  | 88211364  | 0 | 0 | 0 | 2 | 0 | 0 | 21135  | 0.21262277 | -1.55080501 | 4.038815656 | -0.38397519 | 0.700996836 | 0.998252924 |
| chr9:90252858-90273042   | exonic     | DAPK1                                                    |   | 9 | 90252858  | 90273042  | 0 | 0 | 0 | 2 | 0 | 0 | 20184  | 0.21262277 | -1.55080501 | 4.038815656 | -0.38397519 | 0.700996836 | 0.998252924 |
| chr9:91723963-91727541   | exonic     | SHC3                                                     |   | 9 | 91723963  | 91727541  | 0 | 0 | 0 | 2 | 0 | 0 | 3578   | 0.21262277 | -1.55080501 | 4.038815656 | -0.38397519 | 0.700996836 | 0.998252924 |
| chr9:99932889-99941822   | intergenic | <small>GSZL192(d11+88662)_LOC100499484(d11+5888)</small> |   | 9 | 99932889  | 99941822  | 0 | 0 | 0 | 2 | 0 | 0 | 8933   | 0.21262277 | -1.55080501 | 4.038815656 | -0.38397519 | 0.700996836 | 0.998252924 |
| chrX:107372010-107393527 | exonic     | ATG4A                                                    | X |   | 107372010 | 107393527 | 0 | 0 | 0 | 2 | 0 | 0 | 21517  | 0.21262277 | -1.55080501 | 4.038815656 | -0.38397519 | 0.700996836 | 0.998252924 |
| chrX:117700536-117712610 | exonic     | DOCK11                                                   | X |   | 117700536 | 117712610 | 0 | 0 | 0 | 2 | 0 | 0 | 12074  | 0.21262277 | -1.55080501 | 4.038815656 | -0.38397519 | 0.700996836 | 0.998252924 |
| chrX:122744769-122748040 | exonic     | THOC2                                                    | X |   | 122744769 | 122748040 | 0 | 0 | 0 | 2 | 0 | 0 | 3271   | 0.21262277 | -1.55080501 | 4.038815656 | -0.38397519 | 0.700996836 | 0.998252924 |
| chrX:122819952-122820113 | intronic   | THOC2                                                    | X |   | 122819952 | 122820113 | 0 | 0 | 0 | 2 | 0 | 0 | 161    | 0.21262277 | -1.55080501 | 4.038815656 | -0.38397519 | 0.700996836 | 0.998252924 |
| chrX:129053150-129055563 | exonic     | UTP14A                                                   | X |   | 129053150 | 129055563 | 0 | 0 | 0 | 2 | 0 | 0 | 2413   | 0.21262277 | -1.55080501 | 4.038815656 | -0.38397519 | 0.700996836 | 0.998252924 |
| chrX:135304551-135326954 | exonic     | MAP7D3                                                   | X |   | 135304551 | 135326954 | 0 | 0 | 0 | 2 | 0 | 0 | 22403  | 0.21262277 | -1.55080501 | 4.038815656 | -0.38397519 | 0.700996836 | 0.998252924 |
| chrX:13767545-13773361   | exonic     | OFD1                                                     | X |   | 13767545  | 13773361  | 0 | 0 | 0 | 2 | 0 | 0 | 5816   | 0.21262277 | -1.55080501 | 4.038815656 | -0.38397519 | 0.700996836 | 0.998252924 |
| chrX:1483996-1486983     | exonic     | IL3RA                                                    | X |   | 1483996   | 1486983   | 0 | 0 | 0 | 2 | 0 | 0 | 2987   | 0.21262277 | -1.55080501 | 4.038815656 | -0.38397519 | 0.700996836 | 0.998252924 |
| chrX:1502135-1502736     | downstream | IL3RA (dist=553)                                         | X |   | 1502135   | 1502736   | 0 | 0 | 0 | 2 | 0 | 0 | 601    | 0.21262277 | -1.55080501 | 4.038815656 | -0.38397519 | 0.700996836 | 0.998252924 |
| chrX:15782700-15793431   | exonic     | CA5B                                                     | X |   | 15782700  | 15793431  | 0 | 0 | 0 | 2 | 0 | 0 | 10731  | 0.21262277 | -1.55080501 | 4.038815656 | -0.38397519 | 0.700996836 | 0.998252924 |
| chrX:16685636-16721064   | exonic     | CTPS2                                                    | X |   | 16685636  | 16721064  | 0 | 0 | 0 | 2 | 0 | 0 | 35428  | 0.21262277 | -1.55080501 | 4.038815656 | -0.38397519 | 0.700996836 | 0.998252924 |
| chrX:18323091-18352215   | exonic     | SCML2                                                    | X |   | 18323091  | 18352215  | 0 | 0 | 0 | 2 | 0 | 0 | 29124  | 0.21262277 | -1.55080501 | 4.038815656 | -0.38397519 | 0.700996836 | 0.998252924 |
| chrX:18525054-18528974   | exonic     | CDKL5                                                    | X |   | 18525054  | 18528974  | 0 | 0 | 0 | 2 | 0 | 0 | 3920   | 0.21262277 | -1.55080501 | 4.038815656 | -0.38397519 | 0.700996836 | 0.998252924 |
| chrX:19626056-19764559   | exonic     | SH3KBP1                                                  | X |   | 19626056  | 19764559  | 0 | 0 | 0 | 2 | 0 | 0 | 138503 | 0.21262277 | -1.55080501 | 4.038815656 | -0.38397519 | 0.700996836 | 0.998252924 |
| chrX:19760355-19761429   | intronic   | SH3KBP1                                                  | X |   | 19760355  | 19761429  | 0 | 0 | 0 | 2 | 0 | 0 | 1074   | 0.21262277 | -1.55080501 | 4.038815656 | -0.38397519 | 0.700996836 | 0.998252924 |
| chrX:200833-208321       | exonic     | PLCXD1                                                   | X |   | 200833    | 208321    | 0 | 0 | 0 | 2 | 0 | 0 | 7488   | 0.21262277 | -1.55080501 | 4.038815656 | -0.38397519 | 0.700996836 | 0.998252924 |
| chrX:20187519-20195202   | exonic     | RPS6KA3                                                  | X |   | 20187519  | 20195202  | 0 | 0 | 0 | 2 | 0 | 0 | 7683   | 0.21262277 | -1.55080501 | 4.038815656 | -0.38397519 | 0.700996836 | 0.998252924 |
| chrX:22237152-22245728   | exonic     | PHEX                                                     | X |   | 22237152  | 22245728  | 0 | 0 | 0 | 2 | 0 | 0 | 8576   | 0.21262277 | -1.55080501 | 4.038815656 | -0.38397519 | 0.700996836 | 0.998252924 |
| chrX:30870894-30889918   | exonic     | TAB3                                                     | X |   | 30870894  | 30889918  | 0 | 0 | 0 | 2 | 0 | 0 | 19024  | 0.21262277 | -1.55080501 | 4.038815656 | -0.38397519 | 0.700996836 | 0.998252924 |
| chrX:32456357-32466755   | exonic     | DMD                                                      | X |   | 32456357  | 32466755  | 0 | 0 | 0 | 2 | 0 | 0 | 10398  | 0.21262277 | -1.55080501 | 4.038815656 | -0.38397519 | 0.700996836 | 0.998252924 |
| chrX:46844284-46857679   | exonic     | JADE3                                                    | X |   | 46844284  | 46857679  | 0 | 0 | 0 | 2 | 0 | 0 | 13395  | 0.21262277 | -1.55080501 | 4.038815656 | -0.38397519 | 0.700996836 | 0.998252924 |
| chrX:53426510-53430825   | exonic     | SMC1A                                                    | X |   | 53426510  | 53430825  | 0 | 0 | 0 | 2 | 0 | 0 | 4315   | 0.21262277 | -1.55080501 | 4.038815656 | -0.38397519 | 0.700996836 | 0.998252924 |
| chrX:53430497-53432323   | exonic     | SMC1A                                                    | X |   | 53430497  | 53432323  | 0 | 0 | 0 | 2 | 0 | 0 | 1826   | 0.21262277 | -1.55080501 | 4.038815656 | -0.38397519 | 0.700996836 | 0.998252924 |
| chrX:67454328-67518938   | exonic     | OPHN1                                                    | X |   | 67454328  | 67518938  | 0 | 0 | 0 | 2 | 0 | 0 | 64610  | 0.21262277 | -1.55080501 | 4.038815656 | -0.38397519 | 0.700996836 | 0.998252924 |
| chrX:71708783-71715118   | exonic     | HDAC8                                                    | X |   | 71708783  | 71715118  | 0 | 0 | 0 | 2 | 0 | 0 | 6335   | 0.21262277 | -1.55080501 | 4.038815656 | -0.38397519 | 0.700996836 | 0.998252924 |

|                           |              |                                                             |    |           |           |   |   |   |    |    |   |        |             |              |             |              |             |             |
|---------------------------|--------------|-------------------------------------------------------------|----|-----------|-----------|---|---|---|----|----|---|--------|-------------|--------------|-------------|--------------|-------------|-------------|
| chrX:74318776-74334669    | exonic       | ABCB7                                                       | X  | 74318776  | 74334669  | 0 | 0 | 0 | 2  | 0  | 0 | 15893  | 0.21262277  | -1.55080501  | 4.038815656 | -0.38397519  | 0.700996836 | 0.998252924 |
| chrX:76872080-76912143    | exonic       | ATRX                                                        | X  | 76872080  | 76912143  | 0 | 0 | 0 | 2  | 0  | 0 | 40063  | 0.21262277  | -1.55080501  | 4.038815656 | -0.38397519  | 0.700996836 | 0.998252924 |
| chrX:77126305-77135110    | exonic       | MAGT1                                                       | X  | 77126305  | 77135110  | 0 | 0 | 0 | 2  | 0  | 0 | 8805   | 0.21262277  | -1.55080501  | 4.038815656 | -0.38397519  | 0.700996836 | 0.998252924 |
| chrX:8553307-8591711      | exonic       | ANOS1                                                       | X  | 8553307   | 8591711   | 0 | 0 | 0 | 2  | 0  | 0 | 38404  | 0.21262277  | -1.55080501  | 4.038815656 | -0.38397519  | 0.700996836 | 0.998252924 |
| chrX:9841691-9866330      | exonic       | SHROOM2                                                     | X  | 9841691   | 9866330   | 0 | 0 | 0 | 2  | 0  | 0 | 24639  | 0.21262277  | -1.55080501  | 4.038815656 | -0.38397519  | 0.700996836 | 0.998252924 |
| chrX:9862397-9866330      | exonic       | SHROOM2                                                     | X  | 9862397   | 9866330   | 0 | 0 | 0 | 2  | 0  | 0 | 3933   | 0.21262277  | -1.55080501  | 4.038815656 | -0.38397519  | 0.700996836 | 0.998252924 |
| chrY:14510475-14519108    | ncRNA_exonic | GYG2P1                                                      | Y  | 14510475  | 14519108  | 0 | 0 | 0 | 2  | 0  | 0 | 8633   | 0.21262277  | -1.55080501  | 4.038815656 | -0.38397519  | 0.700996836 | 0.998252924 |
| chrY:14821320-14924987    | exonic       | USP9Y                                                       | Y  | 14821320  | 14924987  | 0 | 0 | 0 | 2  | 0  | 0 | 103667 | 0.21262277  | -1.55080501  | 4.038815656 | -0.38397519  | 0.700996836 | 0.998252924 |
| chrY:14832522-14851563    | exonic       | USP9Y                                                       | Y  | 14832522  | 14851563  | 0 | 0 | 0 | 2  | 0  | 0 | 19041  | 0.21262277  | -1.55080501  | 4.038815656 | -0.38397519  | 0.700996836 | 0.998252924 |
| chrY:21094628-21095361    | ncRNA_exonic | TTY14                                                       | Y  | 21094628  | 21095361  | 0 | 0 | 0 | 2  | 0  | 0 | 733    | 0.21262277  | -1.55080501  | 4.038815656 | -0.38397519  | 0.700996836 | 0.998252924 |
| chrY:21094629-21100565    | ncRNA_exonic | TTY14                                                       | Y  | 21094629  | 21100565  | 0 | 0 | 0 | 2  | 0  | 0 | 5936   | 0.21262277  | -1.55080501  | 4.038815656 | -0.38397519  | 0.700996836 | 0.998252924 |
| chrY:4898939-4968748      | exonic       | PCDH11Y                                                     | Y  | 4898939   | 4968748   | 0 | 0 | 0 | 2  | 0  | 0 | 69809  | 0.21262277  | -1.55080501  | 4.038815656 | -0.38397519  | 0.700996836 | 0.998252924 |
| chr10:48941193-48943556   | ncRNA_exonic | BMS1P5                                                      | 10 | 48941193  | 48943556  | 0 | 1 | 1 | 1  | 3  | 2 | 2363   | 1.457375693 | -1.548376939 | 2.17761219  | -0.711043475 | 0.477057296 | 0.998252924 |
| chr18:19371334-19383975   | exonic       | MIB1                                                        | 18 | 19371334  | 19383975  | 2 | 1 | 0 | 6  | 5  | 0 | 12641  | 1.675255105 | -1.541291741 | 2.11127037  | -0.730030489 | 0.465371548 | 0.998252924 |
| chr7:75103969-75104454    | UTR5         | <small>P00121(CM_001099415:c.-33375..-33680del11aa)</small> | 7  | 75103969  | 75104454  | 1 | 0 | 0 | 1  | 1  | 1 | 485    | 0.664544359 | -1.538896177 | 3.04463512  | -0.50544519  | 0.613246186 | 0.998252924 |
| chr19:32862288-32862640   | intronic     | ZNF507                                                      | 19 | 32862288  | 32862640  | 2 | 0 | 0 | 5  | 2  | 0 | 352    | 1.031585655 | -1.538301451 | 2.740333603 | -0.561355541 | 0.574555186 | 0.998252924 |
| chr7:91122710-91125916    | intergenic   | <small>FZD1(dist=224578), MTERF1(dist=376275)</small>       | 7  | 91122710  | 91125916  | 2 | 0 | 0 | 5  | 2  | 0 | 3206   | 1.031585655 | -1.538301451 | 2.740333603 | -0.561355541 | 0.574555186 | 0.998252924 |
| chr7:91752433-91761186    | exonic       | CYP51A1                                                     | 7  | 91752433  | 91761186  | 0 | 1 | 0 | 1  | 1  | 1 | 8753   | 0.709833215 | -1.536036102 | 2.981119895 | -0.515254722 | 0.606375034 | 0.998252924 |
| chrX:53430497-53430825    | exonic       | SMC1A                                                       | X  | 53430497  | 53430825  | 6 | 2 | 0 | 20 | 0  | 4 | 328    | 4.481575393 | -1.535040479 | 1.586926834 | -0.967303877 | 0.333392146 | 0.998252924 |
| chr7:91621471-91632549    | exonic       | AKAP9                                                       | 7  | 91621471  | 91632549  | 2 | 0 | 0 | 0  | 2  | 2 | 11078  | 1.116465947 | -1.534959331 | 2.727016745 | -0.562871253 | 0.573522557 | 0.998252924 |
| chr17:49067810-49075978   | exonic       | SPAG9                                                       | 17 | 49067810  | 49075978  | 0 | 0 | 1 | 1  | 1  | 1 | 8168   | 0.732826441 | -1.534651401 | 2.951879755 | -0.519889538 | 0.603140568 | 0.998252924 |
| chr11:129979323-129980556 | exonic       | APLP2                                                       | 11 | 129979323 | 129980556 | 1 | 1 | 0 | 8  | 0  | 0 | 1233   | 1.153753823 | -1.529421637 | 2.706671494 | -0.565056247 | NA          | NA          |
| chr3:32798506-32798766    | intronic     | CNOT10                                                      | 3  | 32798506  | 32798766  | 0 | 3 | 0 | 0  | 0  | 5 | 260    | 2.063920441 | -1.529407486 | 3.845188748 | -0.397745751 | NA          | NA          |
| chr4:48371866-48396670    | exonic       | SLAIN2                                                      | 4  | 48371866  | 48396670  | 2 | 0 | 3 | 5  | 8  | 3 | 24804  | 3.274213089 | -1.525562414 | 1.530636616 | -0.996684908 | 0.318917478 | 0.998252924 |
| chr11:118656760-118657227 | exonic       | DDX6                                                        | 11 | 118656760 | 118657227 | 0 | 2 | 2 | 5  | 12 | 0 | 467    | 2.726975637 | -1.521393476 | 1.800264717 | -0.845094314 | 0.398058183 | 0.998252924 |
| chr9:140705912-140712590  | exonic       | EHMT1                                                       | 9  | 140705912 | 140712590 | 3 | 0 | 0 | 3  | 0  | 3 | 6678   | 1.63055081  | -1.517891259 | 2.363287941 | -0.642279441 | 0.52069176  | 0.998252924 |
| chr5:38510565-38530768    | exonic       | LIFR                                                        | 5  | 38510565  | 38530768  | 2 | 0 | 0 | 6  | 1  | 0 | 20203  | 1.016869618 | -1.513828976 | 2.78749478  | -0.543078677 | NA          | NA          |
| chr3:138340248-138341258  | exonic       | FAIM                                                        | 3  | 138340248 | 138341258 | 0 | 2 | 0 | 2  | 6  | 0 | 1010   | 1.287338899 | -1.51008502  | 2.543072354 | -0.593803404 | 0.552643612 | 0.998252924 |
| chr1:46774772-46775988    | exonic       | UQCRH                                                       | 1  | 46774772  | 46775988  | 0 | 0 | 1 | 0  | 4  | 0 | 1216   | 0.681378713 | -1.508839071 | 3.519717338 | -0.428681887 | NA          | NA          |
| chr1:78167053-78181553    | exonic       | USP33                                                       | 1  | 78167053  | 78181553  | 0 | 0 | 1 | 0  | 4  | 0 | 14500  | 0.681378713 | -1.508839071 | 3.519717338 | -0.428681887 | NA          | NA          |
| chr12:97303529-97313903   | exonic       | NEDD1                                                       | 12 | 97303529  | 97313903  | 0 | 0 | 1 | 0  | 4  | 0 | 10374  | 0.681378713 | -1.508839071 | 3.519717338 | -0.428681887 | NA          | NA          |
| chr13:111274562-111276626 | exonic       | CARKD                                                       | 13 | 111274562 | 111276626 | 0 | 0 | 1 | 0  | 4  | 0 | 2064   | 0.681378713 | -1.508839071 | 3.519717338 | -0.428681887 | NA          | NA          |
| chr15:43690235-43694048   | exonic       | TUBGCP4                                                     | 15 | 43690235  | 43694048  | 0 | 0 | 1 | 0  | 4  | 0 | 3813   | 0.681378713 | -1.508839071 | 3.519717338 | -0.428681887 | NA          | NA          |
| chr15:75699395-75705386   | exonic       | SIN3A                                                       | 15 | 75699395  | 75705386  | 0 | 0 | 1 | 0  | 4  | 0 | 5991   | 0.681378713 | -1.508839071 | 3.519717338 | -0.428681887 | NA          | NA          |
| chr20:35684548-35693876   | exonic       | RBL1                                                        | 20 | 35684548  | 35693876  | 0 | 0 | 1 | 0  | 4  | 0 | 9328   | 0.681378713 | -1.508839071 | 3.519717338 | -0.428681887 | NA          | NA          |

|                           |        |          |    |           |           |   |   |   |   |    |   |       |             |              |             |              |             |             |
|---------------------------|--------|----------|----|-----------|-----------|---|---|---|---|----|---|-------|-------------|--------------|-------------|--------------|-------------|-------------|
| chr3:169693395-169703653  | exonic | SEC62    | 3  | 169693395 | 169703653 | 3 | 0 | 1 | 0 | 0  | 0 | 10258 | 0.681378713 | -1.508839071 | 3.519717338 | -0.428681887 | NA          | NA          |
| chr5:75993811-75997038    | exonic | IQGAP2   | 5  | 75993811  | 75997038  | 0 | 0 | 1 | 0 | 4  | 0 | 3227  | 0.681378713 | -1.508839071 | 3.519717338 | -0.428681887 | NA          | NA          |
| chr9:99314077-99327765    | exonic | CDC14B   | 9  | 99314077  | 99327765  | 0 | 0 | 1 | 0 | 4  | 0 | 13688 | 0.681378713 | -1.508839071 | 3.519717338 | -0.428681887 | NA          | NA          |
| chr15:74963795-74967483   | exonic | EDC3     | 15 | 74963795  | 74967483  | 3 | 0 | 0 | 6 | 4  | 0 | 3688  | 1.508938826 | -1.508257339 | 2.35430662  | -0.640637598 | NA          | NA          |
| chr5:67522117-67522837    | exonic | PIK3R1   | 5  | 67522117  | 67522837  | 3 | 0 | 0 | 6 | 4  | 0 | 720   | 1.508938826 | -1.508257339 | 2.35430662  | -0.640637598 | NA          | NA          |
| chr1:176118141-176145143  | exonic | RFWD2    | 1  | 176118141 | 176145143 | 1 | 0 | 0 | 2 | 0  | 1 | 27002 | 0.649828322 | -1.507771875 | 3.300435804 | -0.456840237 | 0.647785882 | 0.998252924 |
| chr1:212502476-212519275  | exonic | PPP2R5A  | 1  | 212502476 | 212519275 | 1 | 0 | 0 | 2 | 0  | 1 | 16799 | 0.649828322 | -1.507771875 | 3.300435804 | -0.456840237 | 0.647785882 | 0.998252924 |
| chr16:19775169-19775434   | exonic | IQCK     | 16 | 19775169  | 19775434  | 1 | 0 | 0 | 2 | 0  | 1 | 265   | 0.649828322 | -1.507771875 | 3.300435804 | -0.456840237 | 0.647785882 | 0.998252924 |
| chr20:34309661-34320057   | exonic | RBM39    | 20 | 34309661  | 34320057  | 1 | 0 | 0 | 2 | 0  | 1 | 10396 | 0.649828322 | -1.507771875 | 3.300435804 | -0.456840237 | 0.647785882 | 0.998252924 |
| chr4:148827788-148867855  | exonic | ARHGAP10 | 4  | 148827788 | 148867855 | 1 | 0 | 0 | 2 | 0  | 1 | 40067 | 0.649828322 | -1.507771875 | 3.300435804 | -0.456840237 | 0.647785882 | 0.998252924 |
| chr9:20819794-20823114    | exonic | FOCAD    | 9  | 20819794  | 20823114  | 1 | 4 | 0 | 2 | 17 | 0 | 3320  | 3.09617908  | -1.507697342 | 1.805124054 | -0.835231982 | NA          | NA          |
| chr11:128993340-128994789 | exonic | ARHGAP32 | 11 | 128993340 | 128994789 | 0 | 1 | 0 | 0 | 4  | 0 | 1449  | 0.658385486 | -1.50760971  | 3.563302144 | -0.423093425 | NA          | NA          |
| chr11:77830227-77838482   | exonic | ALG8     | 11 | 77830227  | 77838482  | 0 | 1 | 0 | 0 | 4  | 0 | 8255  | 0.658385486 | -1.50760971  | 3.563302144 | -0.423093425 | NA          | NA          |
| chr14:73614502-73640415   | exonic | PSEN1    | 14 | 73614502  | 73640415  | 0 | 1 | 0 | 0 | 4  | 0 | 25913 | 0.658385486 | -1.50760971  | 3.563302144 | -0.423093425 | NA          | NA          |
| chr16:18846213-18858929   | exonic | SMG1     | 16 | 18846213  | 18858929  | 0 | 1 | 0 | 2 | 0  | 0 | 12716 | 0.658385486 | -1.50760971  | 3.563302144 | -0.423093425 | NA          | NA          |
| chr18:12999419-13073184   | exonic | CEP192   | 18 | 12999419  | 13073184  | 0 | 1 | 0 | 0 | 4  | 0 | 73765 | 0.658385486 | -1.50760971  | 3.563302144 | -0.423093425 | NA          | NA          |
| chr22:26063705-26091181   | exonic | ADRBK2   | 22 | 26063705  | 26091181  | 0 | 1 | 0 | 0 | 4  | 0 | 27476 | 0.658385486 | -1.50760971  | 3.563302144 | -0.423093425 | NA          | NA          |
| chr4:128998942-129003460  | exonic | LARP1B   | 4  | 128998942 | 129003460 | 0 | 1 | 0 | 0 | 4  | 0 | 4518  | 0.658385486 | -1.50760971  | 3.563302144 | -0.423093425 | NA          | NA          |
| chr1:146747016-146757164  | exonic | CHD1L    | 1  | 146747016 | 146757164 | 3 | 1 | 2 | 3 | 8  | 5 | 10148 | 3.784021252 | -1.507609239 | 1.399660523 | -1.077124928 | 0.281424458 | 0.998252924 |
| chr15:22835915-22842183   | exonic | TUBGCP5  | 15 | 22835915  | 22842183  | 0 | 1 | 0 | 2 | 0  | 1 | 6268  | 0.695117178 | -1.505149194 | 3.224789136 | -0.466743446 | 0.640683442 | 0.998252924 |
| chr3:61975298-61989171    | exonic | PTPRG    | 3  | 61975298  | 61989171  | 0 | 1 | 0 | 2 | 0  | 1 | 13873 | 0.695117178 | -1.505149194 | 3.224789136 | -0.466743446 | 0.640683442 | 0.998252924 |
| chr5:167986036-167991070  | exonic | PANK3    | 5  | 167986036 | 167991070 | 0 | 1 | 0 | 2 | 0  | 1 | 5034  | 0.695117178 | -1.505149194 | 3.224789136 | -0.466743446 | 0.640683442 | 0.998252924 |
| chr14:38222303-38266152   | exonic | TTC6     | 14 | 38222303  | 38266152  | 1 | 0 | 0 | 0 | 4  | 0 | 43849 | 0.61309663  | -1.505084027 | 3.657719023 | -0.411481587 | NA          | NA          |
| chr2:73761950-73800551    | exonic | ALMS1    | 2  | 73761950  | 73800551  | 1 | 0 | 0 | 0 | 4  | 0 | 38601 | 0.61309663  | -1.505084027 | 3.657719023 | -0.411481587 | NA          | NA          |
| chr3:52794810-52797640    | exonic | NEK4     | 3  | 52794810  | 52797640  | 1 | 0 | 0 | 0 | 4  | 0 | 2830  | 0.61309663  | -1.505084027 | 3.657719023 | -0.411481587 | NA          | NA          |
| chr4:143094784-143114348  | exonic | INPP4B   | 4  | 143094784 | 143114348 | 1 | 0 | 0 | 0 | 4  | 0 | 19564 | 0.61309663  | -1.505084027 | 3.657719023 | -0.411481587 | NA          | NA          |
| chr4:95494501-95539342    | exonic | PDLIM5   | 4  | 95494501  | 95539342  | 1 | 0 | 0 | 0 | 4  | 0 | 44841 | 0.61309663  | -1.505084027 | 3.657719023 | -0.411481587 | NA          | NA          |
| chr6:13579682-13601181    | exonic | SIRT5    | 6  | 13579682  | 13601181  | 1 | 0 | 0 | 0 | 4  | 0 | 21499 | 0.61309663  | -1.505084027 | 3.657719023 | -0.411481587 | NA          | NA          |
| chr15:91029261-91035943   | exonic | IQGAP1   | 15 | 91029261  | 91035943  | 0 | 0 | 2 | 5 | 4  | 0 | 6682  | 1.410204664 | -1.504018777 | 2.441106264 | -0.616121797 | 0.537814137 | 0.998252924 |
| chr10:46135263-46159290   | exonic | ZFAND4   | 10 | 46135263  | 46159290  | 0 | 0 | 1 | 2 | 0  | 1 | 24027 | 0.718110405 | -1.503873951 | 3.189927604 | -0.47144454  | 0.637323316 | 0.998252924 |
| chr14:68151731-68157138   | exonic | RDH11    | 14 | 68151731  | 68157138  | 0 | 0 | 1 | 2 | 0  | 1 | 5407  | 0.718110405 | -1.503873951 | 3.189927604 | -0.47144454  | 0.637323316 | 0.998252924 |
| chr3:15253610-15265068    | exonic | CAPN7    | 3  | 15253610  | 15265068  | 0 | 0 | 1 | 2 | 0  | 1 | 11458 | 0.718110405 | -1.503873951 | 3.189927604 | -0.47144454  | 0.637323316 | 0.998252924 |
| chr3:57832923-57857425    | exonic | SLMAP    | 3  | 57832923  | 57857425  | 0 | 0 | 1 | 2 | 0  | 1 | 24502 | 0.718110405 | -1.503873951 | 3.189927604 | -0.47144454  | 0.637323316 | 0.998252924 |
| chr6:168271062-168281197  | exonic | MLLT4    | 6  | 168271062 | 168281197 | 0 | 0 | 1 | 2 | 0  | 1 | 10135 | 0.718110405 | -1.503873951 | 3.189927604 | -0.47144454  | 0.637323316 | 0.998252924 |
| chr9:127074787-127089724  | exonic | NEK6     | 9  | 127074787 | 127089724 | 0 | 0 | 1 | 2 | 0  | 1 | 14937 | 0.718110405 | -1.503873951 | 3.189927604 | -0.47144454  | 0.637323316 | 0.998252924 |

|                          |          |               |    |           |           |   |   |   |    |    |   |       |             |              |             |              |             |             |
|--------------------------|----------|---------------|----|-----------|-----------|---|---|---|----|----|---|-------|-------------|--------------|-------------|--------------|-------------|-------------|
| chr15:83481854-83488240  | exonic   | WHAMM         | 15 | 83481854  | 83488240  | 2 | 0 | 1 | 1  | 3  | 3 | 6386  | 1.849292388 | -1.503774186 | 1.979045197 | -0.759848329 | 0.44734525  | 0.998252924 |
| chr9:115030328-115060196 | exonic   | PTBP3         | 9  | 115030328 | 115060196 | 1 | 3 | 1 | 0  | 10 | 4 | 29868 | 3.292232019 | -1.50355941  | 1.659641524 | -0.905954321 | NA          | NA          |
| chr18:8076452-8088849    | exonic   | PTPRM         | 18 | 8076452   | 8088849   | 5 | 2 | 2 | 20 | 5  | 4 | 12397 | 5.35226361  | -1.503050243 | 1.205083234 | -1.247258447 | 0.212302748 | 0.998252924 |
| chr8:56854413-56866543   | exonic   | LYN           | 8  | 56854413  | 56866543  | 3 | 0 | 0 | 7  | 3  | 0 | 12130 | 1.49422279  | -1.491627301 | 2.370043864 | -0.62936696  | 0.529108844 | 0.998252924 |
| chr4:83787960-83788469   | exonic   | SEC31A        | 4  | 83787960  | 83788469  | 1 | 1 | 0 | 1  | 6  | 0 | 509   | 1.135738658 | -1.491289177 | 2.51928214  | -0.591950045 | NA          | NA          |
| chr8:19221582-19231171   | exonic   | SH2D4A        | 8  | 19221582  | 19231171  | 0 | 2 | 0 | 3  | 5  | 0 | 9589  | 1.272622863 | -1.490407374 | 2.536169795 | -0.587660723 | 0.556760044 | 0.998252924 |
| chr20:31376659-31380576  | exonic   | DNMT3B        | 20 | 31376659  | 31380576  | 2 | 0 | 0 | 1  | 1  | 2 | 3917  | 1.10174991  | -1.487402172 | 2.565744537 | -0.579715615 | 0.562106411 | 0.998252924 |
| chr19:41089303-41089623  | exonic   | SHKBP1        | 19 | 41089303  | 41089623  | 2 | 0 | 0 | 7  | 0  | 0 | 320   | 1.002153582 | -1.487107673 | 3.0512435   | -0.48737758  | NA          | NA          |
| chr2:220431551-220433046 | exonic   | OBSL1         | 2  | 220431551 | 220433046 | 2 | 0 | 0 | 7  | 0  | 0 | 1495  | 1.002153582 | -1.487107673 | 3.0512435   | -0.48737758  | NA          | NA          |
| chr4:16587544-16597498   | exonic   | LDB2          | 4  | 16587544  | 16597498  | 2 | 0 | 0 | 7  | 0  | 0 | 9954  | 1.002153582 | -1.487107673 | 3.0512435   | -0.48737758  | NA          | NA          |
| chr5:31995681-32010588   | exonic   | PDZD2         | 5  | 31995681  | 32010588  | 2 | 0 | 0 | 7  | 0  | 0 | 14907 | 1.002153582 | -1.487107673 | 3.0512435   | -0.48737758  | NA          | NA          |
| chr8:38693679-38696064   | exonic   | TACC1         | 8  | 38693679  | 38696064  | 2 | 0 | 0 | 7  | 0  | 0 | 2385  | 1.002153582 | -1.487107673 | 3.0512435   | -0.48737758  | NA          | NA          |
| chr6:74190397-74191967   | exonic   | MTO1          | 6  | 74190397  | 74191967  | 0 | 0 | 2 | 6  | 3  | 0 | 1570  | 1.395488627 | -1.484006639 | 2.455279476 | -0.60441455  | 0.545568065 | 0.998252924 |
| chr22:50848988-50849806  | intronic | PPP6R2        | 22 | 50848988  | 50849806  | 2 | 0 | 0 | 2  | 0  | 2 | 818   | 1.087033873 | -1.483622597 | 2.747741779 | -0.539942512 | 0.589236679 | 0.998252924 |
| chr7:26245987-26248175   | exonic   | CBX3          | 7  | 26245987  | 26248175  | 2 | 0 | 0 | 2  | 0  | 2 | 2188  | 1.087033873 | -1.483622597 | 2.747741779 | -0.539942512 | 0.589236679 | 0.998252924 |
| chr8:61707544-61714152   | exonic   | CHD7          | 8  | 61707544  | 61714152  | 4 | 3 | 0 | 6  | 5  | 6 | 6608  | 4.131092241 | -1.479798721 | 1.410167897 | -1.049377684 | 0.294004325 | 0.998252924 |
| chr10:76602357-76603236  | exonic   | KAT6B         | 10 | 76602357  | 76603236  | 0 | 0 | 1 | 1  | 3  | 0 | 879   | 0.666662676 | -1.478775241 | 3.248154698 | -0.45526626  | 0.648917696 | 0.998252924 |
| chr4:152053482-152056284 | exonic   | SH3D19        | 4  | 152053482 | 152056284 | 7 | 0 | 0 | 21 | 0  | 1 | 2802  | 3.443666296 | -1.478404896 | 2.994925824 | -0.493636565 | NA          | NA          |
| chr21:47746290-47787054  | exonic   | PCNT          | 21 | 47746290  | 47787054  | 0 | 1 | 0 | 1  | 3  | 0 | 40764 | 0.64366945  | -1.477256774 | 3.287593036 | -0.449342956 | 0.653184275 | 0.998252924 |
| chr3:113060590-113085156 | exonic   | CFAP44        | 3  | 113060590 | 113085156 | 0 | 1 | 0 | 1  | 3  | 0 | 24566 | 0.64366945  | -1.477256774 | 3.287593036 | -0.449342956 | 0.653184275 | 0.998252924 |
| chr5:176468126-176471534 | exonic   | ZNF346        | 5  | 176468126 | 176471534 | 0 | 1 | 0 | 1  | 3  | 0 | 3408  | 0.64366945  | -1.477256774 | 3.287593036 | -0.449342956 | 0.653184275 | 0.998252924 |
| chr9:96277948-96278551   | exonic   | FAM120A       | 9  | 96277948  | 96278551  | 0 | 1 | 0 | 1  | 3  | 0 | 603   | 0.64366945  | -1.477256774 | 3.287593036 | -0.449342956 | 0.653184275 | 0.998252924 |
| chr1:213302869-213349835 | exonic   | RPS6KC1       | 1  | 213302869 | 213349835 | 1 | 0 | 0 | 1  | 3  | 0 | 46966 | 0.598380593 | -1.474115328 | 3.373524601 | -0.436965934 | 0.662136054 | 0.998252924 |
| chr2:63711737-63720074   | exonic   | WDPCP         | 2  | 63711737  | 63720074  | 1 | 0 | 0 | 1  | 3  | 0 | 8337  | 0.598380593 | -1.474115328 | 3.373524601 | -0.436965934 | 0.662136054 | 0.998252924 |
| chr4:38022211-38029500   | exonic   | TBC1D1        | 4  | 38022211  | 38029500  | 1 | 0 | 0 | 1  | 3  | 0 | 7289  | 0.598380593 | -1.474115328 | 3.373524601 | -0.436965934 | 0.662136054 | 0.998252924 |
| chr7:80418621-80435074   | exonic   | SEMA3C        | 7  | 80418621  | 80435074  | 1 | 0 | 0 | 1  | 3  | 0 | 16453 | 0.598380593 | -1.474115328 | 3.373524601 | -0.436965934 | 0.662136054 | 0.998252924 |
| chr9:125719289-125761045 | exonic   | RABGAP1       | 9  | 125719289 | 125761045 | 1 | 0 | 0 | 1  | 3  | 0 | 41756 | 0.598380593 | -1.474115328 | 3.373524601 | -0.436965934 | 0.662136054 | 0.998252924 |
| chr9:39165929-39178357   | exonic   | CNTNAP3       | 9  | 39165929  | 39178357  | 1 | 0 | 0 | 1  | 3  | 0 | 12428 | 0.598380593 | -1.474115328 | 3.373524601 | -0.436965934 | 0.662136054 | 0.998252924 |
| chr9:114332370-114348445 | exonic   | PTGR1, ZNF483 | 9  | 114332370 | 114348445 | 1 | 2 | 0 | 12 | 0  | 0 | 16075 | 1.753275163 | -1.470514424 | 2.334008694 | -0.630038109 | NA          | NA          |
| chr4:82377804-82380668   | exonic   | RASGEF1B      | 4  | 82377804  | 82380668  | 1 | 1 | 0 | 2  | 5  | 0 | 2864  | 1.121022621 | -1.469769345 | 2.493527899 | -0.589433688 | 0.555570384 | 0.998252924 |
| chr5:76745584-76760634   | exonic   | WDR41         | 5  | 76745584  | 76760634  | 4 | 1 | 0 | 10 | 7  | 0 | 15050 | 2.600529374 | -1.46944956  | 1.80470683  | -0.814231728 | 0.415512213 | 0.998252924 |
| chr12:45771835-45784281  | exonic   | ANO6          | 12 | 45771835  | 45784281  | 0 | 2 | 0 | 6  | 0  | 1 | 12446 | 1.294638518 | -1.468616455 | 2.582017642 | -0.568786375 | 0.569501122 | 0.998252924 |
| chr1:211526580-211527809 | exonic   | TRAF5         | 1  | 211526580 | 211527809 | 2 | 3 | 0 | 10 | 4  | 2 | 1229  | 2.944462039 | -1.465081972 | 1.587144712 | -0.923092873 | 0.355958808 | 0.998252924 |
| chr15:59204761-59205895  | exonic   | SLTM          | 15 | 59204761  | 59205895  | 5 | 0 | 3 | 7  | 10 | 5 | 1134  | 4.732288748 | -1.461341782 | 1.326985249 | -1.101249455 | 0.270788103 | 0.998252924 |
| chr15:93543741-93558139  | exonic   | CHD2          | 15 | 93543741  | 93558139  | 4 | 2 | 0 | 8  | 8  | 2 | 14398 | 3.299647042 | -1.459348191 | 1.503280133 | -0.970775944 | 0.331659864 | 0.998252924 |

|                           |          |                |    |           |           |   |   |   |    |   |   |        |             |              |             |              |             |             |
|---------------------------|----------|----------------|----|-----------|-----------|---|---|---|----|---|---|--------|-------------|--------------|-------------|--------------|-------------|-------------|
| chr14:24640043-24640588   | upstream | REC8(dist=646) | 14 | 24640043  | 24640588  | 2 | 3 | 0 | 6  | 3 | 4 | 545    | 3.014626294 | -1.448482179 | 1.586896012 | -0.912776999 | 0.361359838 | 0.998252924 |
| chr2:230723487-230725247  | exonic   | TRIP12         | 2  | 230723487 | 230725247 | 2 | 0 | 1 | 3  | 3 | 2 | 1760   | 1.75369655  | -1.447591574 | 1.953835581 | -0.740897335 | 0.458755692 | 0.998252924 |
| chr13:114806475-114839312 | exonic   | RASA3          | 13 | 114806475 | 114839312 | 2 | 1 | 0 | 3  | 7 | 0 | 32837  | 1.598375793 | -1.447398855 | 2.159878739 | -0.670129683 | 0.502775124 | 0.998252924 |
| chr1:160293220-160302347  | exonic   | COPA           | 1  | 160293220 | 160302347 | 5 | 0 | 1 | 12 | 6 | 1 | 9127   | 3.152323501 | -1.442812412 | 1.59219928  | -0.906175772 | 0.364842825 | 0.998252924 |
| chrX:153924191-153928334  | exonic   | GAB3           | X  | 153924191 | 153928334 | 3 | 0 | 0 | 10 | 0 | 0 | 4143   | 1.45007468  | -1.441915366 | 2.667350024 | -0.540579734 | NA          | NA          |
| chr17:19823348-19871774   | exonic   | AKAP10         | 17 | 19823348  | 19871774  | 2 | 0 | 0 | 0  | 6 | 0 | 48426  | 0.984138416 | -1.439322761 | 3.076234767 | -0.467884563 | NA          | NA          |
| chr5:137904613-137906830  | exonic   | HSPA9          | 5  | 137904613 | 137906830 | 2 | 0 | 0 | 0  | 6 | 0 | 2217   | 0.984138416 | -1.439322761 | 3.076234767 | -0.467884563 | NA          | NA          |
| chr9:35236465-35259047    | exonic   | UNC13B         | 9  | 35236465  | 35259047  | 2 | 0 | 0 | 0  | 6 | 0 | 22582  | 0.984138416 | -1.439322761 | 3.076234767 | -0.467884563 | NA          | NA          |
| chr1:151611363-151611595  | exonic   | SNX27          | 1  | 151611363 | 151611595 | 0 | 0 | 1 | 2  | 2 | 0 | 232    | 0.651946639 | -1.43892231  | 3.253580498 | -0.442258094 | 0.658302452 | 0.998252924 |
| chr1:93029198-93073284    | exonic   | EVI5           | 1  | 93029198  | 93073284  | 0 | 0 | 1 | 2  | 2 | 0 | 44086  | 0.651946639 | -1.43892231  | 3.253580498 | -0.442258094 | 0.658302452 | 0.998252924 |
| chr4:129857809-129891623  | exonic   | SCLT1          | 4  | 129857809 | 129891623 | 0 | 0 | 1 | 2  | 2 | 0 | 33814  | 0.651946639 | -1.43892231  | 3.253580498 | -0.442258094 | 0.658302452 | 0.998252924 |
| chr5:38489179-38530768    | exonic   | LIFR           | 5  | 38489179  | 38530768  | 0 | 0 | 1 | 3  | 2 | 0 | 41589  | 0.651946639 | -1.43892231  | 3.253580498 | -0.442258094 | 0.658302452 | 0.998252924 |
| chr2:88093149-88093712    | exonic   | RGPD1, RGPD2   | 2  | 88093149  | 88093712  | 1 | 0 | 1 | 0  | 7 | 0 | 563    | 1.173447921 | -1.437875356 | 2.695969139 | -0.533342662 | NA          | NA          |
| chr1:180366650-180382606  | exonic   | ACBD6          | 1  | 180366650 | 180382606 | 0 | 1 | 0 | 2  | 2 | 0 | 15956  | 0.628953413 | -1.437205492 | 3.294544112 | -0.436238048 | 0.662664025 | 0.998252924 |
| chr10:121663595-121668642 | exonic   | SEC23IP        | 10 | 121663595 | 121668642 | 0 | 1 | 0 | 2  | 2 | 0 | 5047   | 0.628953413 | -1.437205492 | 3.294544112 | -0.436238048 | 0.662664025 | 0.998252924 |
| chr11:9462001-9463744     | exonic   | IPO7           | 11 | 9462001   | 9463744   | 0 | 1 | 0 | 2  | 2 | 0 | 1743   | 0.628953413 | -1.437205492 | 3.294544112 | -0.436238048 | 0.662664025 | 0.998252924 |
| chr12:133428203-133438220 | exonic   | CHFR           | 12 | 133428203 | 133438220 | 0 | 1 | 0 | 2  | 2 | 0 | 10017  | 0.628953413 | -1.437205492 | 3.294544112 | -0.436238048 | 0.662664025 | 0.998252924 |
| chr15:93467550-93518180   | exonic   | CHD2           | 15 | 93467550  | 93518180  | 0 | 1 | 0 | 2  | 2 | 0 | 50630  | 0.628953413 | -1.437205492 | 3.294544112 | -0.436238048 | 0.662664025 | 0.998252924 |
| chr17:4856089-4857140     | exonic   | ENO3           | 17 | 4856089   | 4857140   | 0 | 1 | 0 | 2  | 2 | 0 | 1051   | 0.628953413 | -1.437205492 | 3.294544112 | -0.436238048 | 0.662664025 | 0.998252924 |
| chr2:128750760-128754065  | exonic   | SAPI30         | 2  | 128750760 | 128754065 | 0 | 1 | 0 | 2  | 2 | 0 | 3305   | 0.628953413 | -1.437205492 | 3.294544112 | -0.436238048 | 0.662664025 | 0.998252924 |
| chr6:107824860-107854814  | exonic   | SOBP           | 6  | 107824860 | 107854814 | 0 | 1 | 0 | 2  | 2 | 0 | 29954  | 0.628953413 | -1.437205492 | 3.294544112 | -0.436238048 | 0.662664025 | 0.998252924 |
| chr20:2967410-2969120     | exonic   | PTPRA          | 20 | 2967410   | 2969120   | 1 | 1 | 0 | 5  | 0 | 1 | 1710   | 1.143038276 | -1.436874047 | 2.522543814 | -0.569613118 | 0.568940129 | 0.998252924 |
| chr3:9792628-9793633      | exonic   | OGG1           | 3  | 9792628   | 9793633   | 3 | 1 | 0 | 13 | 1 | 0 | 1005   | 2.064312056 | -1.434645241 | 2.03872466  | -0.703697399 | NA          | NA          |
| chr1:204082042-204093985  | exonic   | SOX13          | 1  | 204082042 | 204093985 | 1 | 0 | 0 | 2  | 2 | 0 | 11943  | 0.583664557 | -1.433656266 | 3.38393179  | -0.423665829 | 0.671809539 | 0.998252924 |
| chr2:120684173-120692534  | exonic   | PTPN4          | 2  | 120684173 | 120692534 | 1 | 0 | 0 | 2  | 2 | 0 | 8361   | 0.583664557 | -1.433656266 | 3.38393179  | -0.423665829 | 0.671809539 | 0.998252924 |
| chr3:30686238-30691952    | exonic   | TGFBR2         | 3  | 30686238  | 30691952  | 1 | 0 | 0 | 2  | 2 | 0 | 5714   | 0.583664557 | -1.433656266 | 3.38393179  | -0.423665829 | 0.671809539 | 0.998252924 |
| chr5:86627164-86633908    | exonic   | RASA1          | 5  | 86627164  | 86633908  | 1 | 0 | 0 | 2  | 2 | 0 | 6744   | 0.583664557 | -1.433656266 | 3.38393179  | -0.423665829 | 0.671809539 | 0.998252924 |
| chr8:106431371-106573709  | exonic   | ZFPM2          | 8  | 106431371 | 106573709 | 1 | 0 | 0 | 2  | 2 | 0 | 142338 | 0.583664557 | -1.433656266 | 3.38393179  | -0.423665829 | 0.671809539 | 0.998252924 |
| chr8:124346117-124348772  | exonic   | ATAD2          | 8  | 124346117 | 124348772 | 1 | 0 | 0 | 2  | 2 | 0 | 2655   | 0.583664557 | -1.433656266 | 3.38393179  | -0.423665829 | 0.671809539 | 0.998252924 |
| chr1:204085634-204086835  | exonic   | SOX13          | 1  | 204085634 | 204086835 | 0 | 2 | 0 | 6  | 2 | 0 | 1201   | 1.228474753 | -1.425805241 | 2.576846663 | -0.553313964 | 0.580048441 | 0.998252924 |
| chr22:30374430-30394846   | exonic   | MTMR3          | 22 | 30374430  | 30394846  | 0 | 2 | 0 | 6  | 2 | 0 | 20416  | 1.228474753 | -1.425805241 | 2.576846663 | -0.553313964 | 0.580048441 | 0.998252924 |
| chr10:70246900-70253327   | exonic   | SLC25A16       | 10 | 70246900  | 70253327  | 1 | 1 | 0 | 4  | 3 | 0 | 6427   | 1.091590548 | -1.424137509 | 2.499326002 | -0.569808624 | 0.568807506 | 0.998252924 |
| chr11:93523739-93527201   | exonic   | MED17          | 11 | 93523739  | 93527201  | 2 | 0 | 0 | 2  | 2 | 1 | 3462   | 1.020870108 | -1.422655913 | 2.575672377 | -0.552343507 | 0.580713028 | 0.998252924 |
| chr16:66642211-66643906   | exonic   | CMTM3          | 16 | 66642211  | 66643906  | 2 | 0 | 0 | 2  | 2 | 1 | 1695   | 1.020870108 | -1.422655913 | 2.575672377 | -0.552343507 | 0.580713028 | 0.998252924 |
| chr4:76885287-76903190    | exonic   | SDAD1          | 4  | 76885287  | 76903190  | 1 | 0 | 2 | 0  | 2 | 4 | 17903  | 1.998454273 | -1.419750333 | 2.101104583 | -0.675716166 | 0.49922087  | 0.998252924 |

|                           |              |          |    |           |           |   |   |   |    |    |   |       |             |              |             |              |             |             |
|---------------------------|--------------|----------|----|-----------|-----------|---|---|---|----|----|---|-------|-------------|--------------|-------------|--------------|-------------|-------------|
| chr4:39739039-39757359    | exonic       | UBE2K    | 4  | 39739039  | 39757359  | 1 | 0 | 2 | 1  | 10 | 0 | 18320 | 1.840110597 | -1.418808596 | 2.13550628  | -0.664389803 | NA          | NA          |
| chr14:45478115-45501579   | exonic       | FAM179B  | 14 | 45478115  | 45501579  | 1 | 2 | 0 | 3  | 1  | 3 | 23464 | 1.842155945 | -1.418005932 | 1.977659677 | -0.717012107 | 0.473366626 | 0.998252924 |
| chr15:94983404-95001475   | exonic       | MCTP2    | 15 | 94983404  | 95001475  | 4 | 0 | 0 | 5  | 5  | 1 | 18071 | 1.960860415 | -1.415724668 | 1.98999237  | -0.711422159 | NA          | NA          |
| chr8:17611225-17613470    | exonic       | MTUS1    | 8  | 17611225  | 17613470  | 6 | 0 | 0 | 2  | 11 | 2 | 2245  | 2.934283284 | -1.404116729 | 1.770881032 | -0.792891619 | 0.42784097  | 0.998252924 |
| chr12:121220457-121222396 | exonic       | SPPL3    | 12 | 121220457 | 121222396 | 9 | 2 | 4 | 13 | 24 | 6 | 1939  | 8.434527968 | -1.402370579 | 1.009757013 | -1.388819846 | 0.164887539 | 0.998252924 |
| chr13:41482295-41488241   | ncRNA_exonic | SUGTIP3  | 13 | 41482295  | 41488241  | 0 | 0 | 2 | 0  | 8  | 0 | 5946  | 1.362757425 | -1.401163628 | 2.753503705 | -0.508865714 | NA          | NA          |
| chr12:66597490-66611015   | exonic       | IRAK3    | 12 | 66597490  | 66611015  | 2 | 0 | 3 | 15 | 2  | 1 | 13525 | 2.994725192 | -1.400902691 | 1.659260174 | -0.844293567 | NA          | NA          |
| chr7:131113791-131130662  | exonic       | MKLN1    | 7  | 131113791 | 131130662 | 1 | 1 | 0 | 5  | 2  | 0 | 16871 | 1.076874511 | -1.400122143 | 2.520976873 | -0.55538873  | 0.5786288   | 0.998252924 |
| chr7:17929985-17937069    | exonic       | SNX13    | 7  | 17929985  | 17937069  | 0 | 0 | 2 | 1  | 7  | 0 | 7084  | 1.348041389 | -1.399532969 | 2.541139955 | -0.550750054 | NA          | NA          |
| chr20:33077070-33080402   | exonic       | ITCH     | 20 | 33077070  | 33080402  | 2 | 0 | 0 | 3  | 1  | 1 | 3332  | 1.006154072 | -1.397650206 | 2.606080854 | -0.53630347  | 0.591748833 | 0.998252924 |
| chr6:74432973-74446231    | exonic       | CD109    | 6  | 74432973  | 74446231  | 0 | 0 | 2 | 4  | 2  | 1 | 13258 | 1.370057044 | -1.396647283 | 2.315465748 | -0.60318201  | 0.546387614 | 0.998252924 |
| chr11:89088129-89135710   | exonic       | NOX4     | 11 | 89088129  | 89135710  | 0 | 0 | 1 | 3  | 1  | 0 | 47581 | 0.637230603 | -1.396243976 | 3.299981642 | -0.423106589 | 0.672217495 | 0.998252924 |
| chr13:72131155-72147144   | exonic       | DACH1    | 13 | 72131155  | 72147144  | 0 | 0 | 1 | 3  | 1  | 0 | 15989 | 0.637230603 | -1.396243976 | 3.299981642 | -0.423106589 | 0.672217495 | 0.998252924 |
| chr4:170398274-170429482  | exonic       | NEK1     | 4  | 170398274 | 170429482 | 0 | 0 | 1 | 3  | 1  | 0 | 31208 | 0.637230603 | -1.396243976 | 3.299981642 | -0.423106589 | 0.672217495 | 0.998252924 |
| chr12:121002874-121004783 | exonic       | RNF10    | 12 | 121002874 | 121004783 | 0 | 1 | 0 | 3  | 1  | 0 | 1909  | 0.614237376 | -1.394376775 | 3.342363057 | -0.417182919 | 0.676544618 | 0.998252924 |
| chr2:242343242-242352836  | exonic       | FARP2    | 2  | 242343242 | 242352836 | 0 | 1 | 0 | 3  | 1  | 0 | 9594  | 0.614237376 | -1.394376775 | 3.342363057 | -0.417182919 | 0.676544618 | 0.998252924 |
| chr3:69336902-69362668    | exonic       | FRMD4B   | 3  | 69336902  | 69362668  | 0 | 1 | 0 | 3  | 1  | 0 | 25766 | 0.614237376 | -1.394376775 | 3.342363057 | -0.417182919 | 0.676544618 | 0.998252924 |
| chr5:14304569-14336836    | exonic       | TRIO     | 5  | 14304569  | 14336836  | 0 | 1 | 0 | 3  | 1  | 0 | 32267 | 0.614237376 | -1.394376775 | 3.342363057 | -0.417182919 | 0.676544618 | 0.998252924 |
| chr6:88265125-88279308    | exonic       | RARS2    | 6  | 88265125  | 88279308  | 0 | 1 | 0 | 3  | 1  | 0 | 14183 | 0.614237376 | -1.394376775 | 3.342363057 | -0.417182919 | 0.676544618 | 0.998252924 |
| chrX:117575330-117578457  | exonic       | WDR44    | X  | 117575330 | 117578457 | 0 | 1 | 0 | 3  | 1  | 0 | 3127  | 0.614237376 | -1.394376775 | 3.342363057 | -0.417182919 | 0.676544618 | 0.998252924 |
| chr10:32306070-32308887   | exonic       | KIF5B    | 10 | 32306070  | 32308887  | 1 | 0 | 0 | 3  | 1  | 0 | 2817  | 0.56894852  | -1.390516797 | 3.434970508 | -0.404811859 | 0.685615811 | 0.998252924 |
| chr11:108106396-108117854 | exonic       | ATM      | 11 | 108106396 | 108117854 | 1 | 0 | 0 | 3  | 1  | 0 | 11458 | 0.56894852  | -1.390516797 | 3.434970508 | -0.404811859 | 0.685615811 | 0.998252924 |
| chr11:68334481-68350597   | exonic       | PPP6R3   | 11 | 68334481  | 68350597  | 1 | 0 | 0 | 3  | 1  | 0 | 16116 | 0.56894852  | -1.390516797 | 3.434970508 | -0.404811859 | 0.685615811 | 0.998252924 |
| chr13:99061591-99076904   | exonic       | FARP1    | 13 | 99061591  | 99076904  | 1 | 0 | 0 | 3  | 1  | 0 | 15313 | 0.56894852  | -1.390516797 | 3.434970508 | -0.404811859 | 0.685615811 | 0.998252924 |
| chr15:43120125-43170882   | exonic       | TTBK2    | 15 | 43120125  | 43170882  | 1 | 0 | 0 | 3  | 1  | 0 | 50757 | 0.56894852  | -1.390516797 | 3.434970508 | -0.404811859 | 0.685615811 | 0.998252924 |
| chr16:14680174-14711507   | exonic       | PARN     | 16 | 14680174  | 14711507  | 1 | 0 | 0 | 3  | 1  | 0 | 31333 | 0.56894852  | -1.390516797 | 3.434970508 | -0.404811859 | 0.685615811 | 0.998252924 |
| chr17:58342772-58372162   | exonic       | USP32    | 17 | 58342772  | 58372162  | 1 | 0 | 0 | 3  | 1  | 0 | 29390 | 0.56894852  | -1.390516797 | 3.434970508 | -0.404811859 | 0.685615811 | 0.998252924 |
| chr21:32554737-32575328   | exonic       | TIAM1    | 21 | 32554737  | 32575328  | 1 | 0 | 0 | 3  | 1  | 0 | 20591 | 0.56894852  | -1.390516797 | 3.434970508 | -0.404811859 | 0.685615811 | 0.998252924 |
| chr7:12263851-12269445    | exonic       | TMEM106B | 7  | 12263851  | 12269445  | 1 | 0 | 0 | 3  | 1  | 0 | 5594  | 0.56894852  | -1.390516797 | 3.434970508 | -0.404811859 | 0.685615811 | 0.998252924 |
| chr9:135171258-135187243  | exonic       | SETX     | 9  | 135171258 | 135187243 | 1 | 0 | 0 | 3  | 1  | 0 | 15985 | 0.56894852  | -1.390516797 | 3.434970508 | -0.404811859 | 0.685615811 | 0.998252924 |
| chr7:104714065-104722244  | exonic       | KMT2E    | 7  | 104714065 | 104722244 | 3 | 0 | 1 | 4  | 0  | 4 | 8179  | 2.24234983  | -1.387215473 | 1.976982043 | -0.701683396 | 0.48287663  | 0.998252924 |
| chr11:101374754-101375529 | exonic       | TRPC6    | 11 | 101374754 | 101375529 | 2 | 0 | 0 | 2  | 4  | 0 | 775   | 0.954706343 | -1.386123901 | 2.817969671 | -0.491887445 | 0.622798915 | 0.998252924 |
| chr15:77020935-77057979   | exonic       | SCAPER   | 15 | 77020935  | 77057979  | 2 | 0 | 0 | 2  | 4  | 0 | 37044 | 0.954706343 | -1.386123901 | 2.817969671 | -0.491887445 | 0.622798915 | 0.998252924 |
| chr17:35936438-35945538   | exonic       | SYNRG    | 17 | 35936438  | 35945538  | 2 | 0 | 0 | 2  | 4  | 0 | 9100  | 0.954706343 | -1.386123901 | 2.817969671 | -0.491887445 | 0.622798915 | 0.998252924 |
| chr6:18256591-18258636    | exonic       | DEK      | 6  | 18256591  | 18258636  | 2 | 0 | 0 | 2  | 4  | 0 | 2045  | 0.954706343 | -1.386123901 | 2.817969671 | -0.491887445 | 0.622798915 | 0.998252924 |

|                           |            |                                           |    |           |           |   |   |   |    |    |   |        |             |              |             |              |             |             |
|---------------------------|------------|-------------------------------------------|----|-----------|-----------|---|---|---|----|----|---|--------|-------------|--------------|-------------|--------------|-------------|-------------|
| chr10:35805450-35819171   | exonic     | CCNY                                      | 10 | 35805450  | 35819171  | 0 | 0 | 2 | 2  | 6  | 0 | 13721  | 1.333325352 | -1.382586238 | 2.511976149 | -0.550397837 | 0.582046532 | 0.998252924 |
| chr7:128218007-128278951  | intergenic | METTL2B(dist=75029), LINC01000(dist=2344) | 7  | 128218007 | 128278951 | 0 | 2 | 0 | 3  | 0  | 2 | 60944  | 1.283922971 | -1.380173443 | 2.580898648 | -0.534764681 | 0.592812588 | 0.998252924 |
| chr21:34804483-34805178   | exonic     | IFNGR2                                    | 21 | 34804483  | 34805178  | 5 | 1 | 3 | 9  | 19 | 1 | 695    | 4.975559679 | -1.372947421 | 1.285378117 | -1.068127272 | 0.285463106 | 0.998252924 |
| chr17:80828099-80858607   | exonic     | TBCD                                      | 17 | 80828099  | 80858607  | 1 | 1 | 0 | 0  | 2  | 2 | 30508  | 1.161754803 | -1.370871981 | 2.519884253 | -0.544021806 | 0.586426468 | 0.998252924 |
| chr19:334399-336173       | exonic     | MIER2                                     | 19 | 334399    | 336173    | 3 | 0 | 0 | 5  | 4  | 0 | 1774   | 1.402627441 | -1.369566381 | 2.413620729 | -0.567432308 | NA          | NA          |
| chr11:68334481-68343511   | exonic     | PPP6R3                                    | 11 | 68334481  | 68343511  | 0 | 3 | 0 | 6  | 3  | 1 | 9030   | 1.831996582 | -1.369087095 | 2.064185691 | -0.66325772  | NA          | NA          |
| chr16:89582198-89582881   | intronic   | SPG7                                      | 16 | 89582198  | 89582881  | 0 | 0 | 3 | 0  | 0  | 5 | 683    | 2.132900121 | -1.365575106 | 3.835911579 | -0.355997545 | NA          | NA          |
| chr16:88694029-88695262   | exonic     | ZC3H18                                    | 16 | 88694029  | 88695262  | 2 | 1 | 0 | 8  | 2  | 0 | 1233   | 1.524795609 | -1.364799352 | 2.204466108 | -0.619106525 | 0.535846185 | 0.998252924 |
| chr7:76713204-76728268    | intergenic | PMS2P9(dist=30849), CCDC146(dist=23666)   | 7  | 76713204  | 76728268  | 0 | 2 | 0 | 8  | 0  | 0 | 15064  | 1.199042679 | -1.364775997 | 2.865247525 | -0.476320453 | NA          | NA          |
| chr16:22142525-22143050   | exonic     | VWA3A                                     | 16 | 22142525  | 22143050  | 4 | 3 | 0 | 25 | 0  | 0 | 525    | 3.696559797 | -1.364559112 | 2.909913366 | -0.468934618 | NA          | NA          |
| chr1:233313547-233344435  | exonic     | PCNXL2                                    | 1  | 233313547 | 233344435 | 0 | 0 | 2 | 0  | 1  | 3 | 30888  | 1.440221299 | -1.364450077 | 2.539129755 | -0.537369181 | NA          | NA          |
| chr8:141799572-141813749  | exonic     | PTK2                                      | 8  | 141799572 | 141813749 | 0 | 2 | 0 | 2  | 3  | 1 | 14177  | 1.232475243 | -1.361495769 | 2.404129992 | -0.566315371 | 0.571179413 | 0.998252924 |
| chr1:70742447-70781249    | exonic     | ANKRD13C                                  | 1  | 70742447  | 70781249  | 2 | 0 | 0 | 3  | 3  | 0 | 38802  | 0.939990306 | -1.359183507 | 2.823820193 | -0.481327923 | 0.630283455 | 0.998252924 |
| chr11:77383086-77404656   | exonic     | RSF1                                      | 11 | 77383086  | 77404656  | 2 | 0 | 0 | 3  | 3  | 0 | 21570  | 0.939990306 | -1.359183507 | 2.823820193 | -0.481327923 | 0.630283455 | 0.998252924 |
| chr14:33684387-33684793   | exonic     | NPAS3                                     | 14 | 33684387  | 33684793  | 2 | 0 | 0 | 3  | 3  | 0 | 406    | 0.939990306 | -1.359183507 | 2.823820193 | -0.481327923 | 0.630283455 | 0.998252924 |
| chr7:103828698-103844682  | exonic     | ORC5                                      | 7  | 103828698 | 103844682 | 1 | 0 | 1 | 4  | 3  | 0 | 15984  | 1.114583774 | -1.358760222 | 2.480410894 | -0.547796426 | 0.583831693 | 0.998252924 |
| chr20:40141484-40143591   | exonic     | CHD6                                      | 20 | 40141484  | 40143591  | 0 | 2 | 1 | 6  | 1  | 2 | 2107   | 1.921153574 | -1.355549032 | 1.939137267 | -0.699047486 | 0.484522355 | 0.998252924 |
| chr1:87181406-87208119    | exonic     | SH3GLB1                                   | 1  | 87181406  | 87208119  | 0 | 0 | 1 | 4  | 0  | 0 | 26713  | 0.622514566 | -1.349330509 | 3.635819396 | -0.371121434 | NA          | NA          |
| chr10:104122231-104123555 | exonic     | GBF1                                      | 10 | 104122231 | 104123555 | 0 | 0 | 1 | 4  | 0  | 0 | 1324   | 0.622514566 | -1.349330509 | 3.635819396 | -0.371121434 | NA          | NA          |
| chr17:20910208-20914622   | exonic     | USP22                                     | 17 | 20910208  | 20914622  | 0 | 0 | 1 | 4  | 0  | 0 | 4414   | 0.622514566 | -1.349330509 | 3.635819396 | -0.371121434 | NA          | NA          |
| chr19:17273159-17278874   | exonic     | MYO9B                                     | 19 | 17273159  | 17278874  | 0 | 0 | 1 | 4  | 0  | 0 | 5715   | 0.622514566 | -1.349330509 | 3.635819396 | -0.371121434 | NA          | NA          |
| chr19:325634-336173       | exonic     | MIER2                                     | 19 | 325634    | 336173    | 0 | 0 | 1 | 4  | 0  | 0 | 10539  | 0.622514566 | -1.349330509 | 3.635819396 | -0.371121434 | NA          | NA          |
| chr2:170802797-170912094  | exonic     | UBR3                                      | 2  | 170802797 | 170912094 | 0 | 0 | 1 | 4  | 0  | 0 | 109297 | 0.622514566 | -1.349330509 | 3.635819396 | -0.371121434 | NA          | NA          |
| chr3:50289531-50295146    | exonic     | GNAI2                                     | 3  | 50289531  | 50295146  | 0 | 0 | 1 | 4  | 0  | 0 | 5615   | 0.622514566 | -1.349330509 | 3.635819396 | -0.371121434 | NA          | NA          |
| chr3:71739160-71759635    | exonic     | EIF4E3                                    | 3  | 71739160  | 71759635  | 0 | 0 | 1 | 4  | 0  | 0 | 20475  | 0.622514566 | -1.349330509 | 3.635819396 | -0.371121434 | NA          | NA          |
| chr4:62800557-62863983    | exonic     | ADGRL3                                    | 4  | 62800557  | 62863983  | 0 | 0 | 1 | 4  | 0  | 0 | 63426  | 0.622514566 | -1.349330509 | 3.635819396 | -0.371121434 | NA          | NA          |
| chr7:63529268-63529987    | exonic     | ZNF727                                    | 7  | 63529268  | 63529987  | 0 | 0 | 1 | 4  | 0  | 0 | 719    | 0.622514566 | -1.349330509 | 3.635819396 | -0.371121434 | NA          | NA          |
| chr7:98564663-98565321    | exonic     | TRRAP                                     | 7  | 98564663  | 98565321  | 0 | 0 | 1 | 4  | 0  | 0 | 658    | 0.622514566 | -1.349330509 | 3.635819396 | -0.371121434 | NA          | NA          |
| chr8:124383909-124392917  | exonic     | ATAD2                                     | 8  | 124383909 | 124392917 | 0 | 0 | 1 | 4  | 0  | 0 | 9008   | 0.622514566 | -1.349330509 | 3.635819396 | -0.371121434 | NA          | NA          |
| chr5:142416760-142437312  | exonic     | ARHGAP26                                  | 5  | 142416760 | 142437312 | 3 | 4 | 6 | 21 | 22 | 2 | 20552  | 7.779257763 | -1.347953145 | 1.064783776 | -1.265940725 | 0.205534305 | 0.998252924 |
| chr1:243456392-243471479  | exonic     | SDCCAG8                                   | 1  | 243456392 | 243471479 | 0 | 1 | 0 | 4  | 0  | 0 | 15087  | 0.59952134  | -1.347905951 | 3.686307776 | -0.365652038 | NA          | NA          |
| chr10:15600072-15639298   | exonic     | ITGA8                                     | 10 | 15600072  | 15639298  | 0 | 1 | 0 | 4  | 0  | 0 | 39226  | 0.59952134  | -1.347905951 | 3.686307776 | -0.365652038 | NA          | NA          |
| chr13:28771321-28794515   | exonic     | PAN3                                      | 13 | 28771321  | 28794515  | 0 | 1 | 0 | 4  | 0  | 0 | 23194  | 0.59952134  | -1.347905951 | 3.686307776 | -0.365652038 | NA          | NA          |
| chr17:19215364-19232960   | exonic     | EPN2                                      | 17 | 19215364  | 19232960  | 0 | 1 | 0 | 4  | 0  | 0 | 17596  | 0.59952134  | -1.347905951 | 3.686307776 | -0.365652038 | NA          | NA          |
| chr17:40489452-40490830   | exonic     | STAT3                                     | 17 | 40489452  | 40490830  | 0 | 1 | 0 | 4  | 0  | 0 | 1378   | 0.59952134  | -1.347905951 | 3.686307776 | -0.365652038 | NA          | NA          |

|                           |        |          |    |           |           |   |   |   |    |    |   |       |             |              |             |              |             |             |
|---------------------------|--------|----------|----|-----------|-----------|---|---|---|----|----|---|-------|-------------|--------------|-------------|--------------|-------------|-------------|
| chr17:59988880-60002460   | exonic | INTS2    | 17 | 59988880  | 60002460  | 0 | 1 | 0 | 4  | 0  | 0 | 13580 | 0.59952134  | -1.347905951 | 3.686307776 | -0.365652038 | NA          | NA          |
| chr19:52579296-52592255   | exonic | ZNF841   | 19 | 52579296  | 52592255  | 0 | 1 | 0 | 4  | 0  | 0 | 12959 | 0.59952134  | -1.347905951 | 3.686307776 | -0.365652038 | NA          | NA          |
| chr22:38889714-38897285   | exonic | DDX17    | 22 | 38889714  | 38897285  | 7 | 4 | 4 | 13 | 4  | 0 | 7571  | 0.59952134  | -1.347905951 | 3.686307776 | -0.365652038 | NA          | NA          |
| chr4:170428187-170477246  | exonic | NEK1     | 4  | 170428187 | 170477246 | 0 | 1 | 0 | 4  | 0  | 0 | 49059 | 0.59952134  | -1.347905951 | 3.686307776 | -0.365652038 | NA          | NA          |
| chr6:89638703-89650899    | exonic | RNGTT    | 6  | 89638703  | 89650899  | 0 | 1 | 0 | 4  | 0  | 0 | 12196 | 0.59952134  | -1.347905951 | 3.686307776 | -0.365652038 | NA          | NA          |
| chr9:109734285-109746690  | exonic | ZNF462   | 9  | 109734285 | 109746690 | 0 | 1 | 0 | 4  | 0  | 0 | 12405 | 0.59952134  | -1.347905951 | 3.686307776 | -0.365652038 | NA          | NA          |
| chr9:128112573-128118136  | exonic | GAPVD1   | 9  | 128112573 | 128118136 | 0 | 1 | 0 | 4  | 0  | 0 | 5563  | 0.59952134  | -1.347905951 | 3.686307776 | -0.365652038 | NA          | NA          |
| chrX:117526594-117538407  | exonic | WDR44    | X  | 117526594 | 117538407 | 0 | 2 | 0 | 3  | 0  | 0 | 11813 | 0.59952134  | -1.347905951 | 3.686307776 | -0.365652038 | NA          | NA          |
| chr15:30053341-30092905   | exonic | TJP1     | 15 | 30053341  | 30092905  | 0 | 0 | 1 | 4  | 0  | 1 | 39564 | 1.613952601 | -1.347051714 | 2.216432246 | -0.607756775 | 0.543348802 | 0.998252924 |
| chr12:116668238-116675510 | exonic | MED13L   | 12 | 116668238 | 116675510 | 0 | 3 | 2 | 8  | 11 | 0 | 7272  | 3.099158169 | -1.347017457 | 1.704065269 | -0.790472925 | 0.429251628 | 0.998252924 |
| chr9:33953282-33989124    | exonic | UBAP2    | 9  | 33953282  | 33989124  | 3 | 3 | 0 | 8  | 5  | 3 | 35842 | 3.290072242 | -1.345959328 | 1.498591234 | -0.898149741 | 0.369105724 | 0.998252924 |
| chr9:33953282-33996331    | exonic | UBAP2    | 9  | 33953282  | 33996331  | 0 | 2 | 4 | 3  | 4  | 2 | 43049 | 3.290072242 | -1.345959328 | 1.498591234 | -0.898149741 | 0.369105724 | 0.998252924 |
| chr8:71550050-71556478    | exonic | LACTB2   | 8  | 71550050  | 71556478  | 4 | 0 | 0 | 0  | 2  | 4 | 6428  | 1.99087705  | -1.345290612 | 2.230400192 | -0.603161091 | NA          | NA          |
| chr1:110765585-110768800  | exonic | KCNC4    | 1  | 110765585 | 110768800 | 1 | 0 | 0 | 4  | 0  | 0 | 3215  | 0.554232483 | -1.344997125 | 3.796542304 | -0.354268968 | NA          | NA          |
| chr1:205588084-205589966  | exonic | ELK4     | 1  | 205588084 | 205589966 | 1 | 0 | 0 | 4  | 0  | 0 | 1882  | 0.554232483 | -1.344997125 | 3.796542304 | -0.354268968 | NA          | NA          |
| chr12:112676855-112677831 | exonic | HECTD4   | 12 | 112676855 | 112677831 | 1 | 0 | 0 | 4  | 0  | 0 | 976   | 0.554232483 | -1.344997125 | 3.796542304 | -0.354268968 | NA          | NA          |
| chr13:101881743-101944717 | exonic | NALCN    | 13 | 101881743 | 101944717 | 1 | 0 | 0 | 4  | 0  | 0 | 62974 | 0.554232483 | -1.344997125 | 3.796542304 | -0.354268968 | NA          | NA          |
| chr14:103434589-103436598 | exonic | CDC42BPB | 14 | 103434589 | 103436598 | 1 | 0 | 0 | 4  | 0  | 0 | 2009  | 0.554232483 | -1.344997125 | 3.796542304 | -0.354268968 | NA          | NA          |
| chr16:23091266-23093878   | exonic | USP31    | 16 | 23091266  | 23093878  | 1 | 0 | 0 | 4  | 0  | 0 | 2612  | 0.554232483 | -1.344997125 | 3.796542304 | -0.354268968 | NA          | NA          |
| chr16:28498776-28500707   | exonic | CLN3     | 16 | 28498776  | 28500707  | 1 | 0 | 0 | 4  | 0  | 0 | 1931  | 0.554232483 | -1.344997125 | 3.796542304 | -0.354268968 | NA          | NA          |
| chr16:70502751-70503226   | exonic | FUK      | 16 | 70502751  | 70503226  | 1 | 0 | 0 | 4  | 0  | 0 | 475   | 0.554232483 | -1.344997125 | 3.796542304 | -0.354268968 | NA          | NA          |
| chr17:37880978-37882106   | exonic | ERBB2    | 17 | 37880978  | 37882106  | 1 | 0 | 0 | 4  | 0  | 0 | 1128  | 0.554232483 | -1.344997125 | 3.796542304 | -0.354268968 | NA          | NA          |
| chr17:3955264-3970536     | exonic | ZZEF1    | 17 | 3955264   | 3970536   | 1 | 0 | 0 | 4  | 0  | 0 | 15272 | 0.554232483 | -1.344997125 | 3.796542304 | -0.354268968 | NA          | NA          |
| chr17:556530-565135       | exonic | VPS53    | 17 | 556530    | 565135    | 1 | 0 | 0 | 4  | 0  | 0 | 8605  | 0.554232483 | -1.344997125 | 3.796542304 | -0.354268968 | NA          | NA          |
| chr19:16790794-16793319   | exonic | TMEM38A  | 19 | 16790794  | 16793319  | 1 | 0 | 0 | 4  | 0  | 0 | 2525  | 0.554232483 | -1.344997125 | 3.796542304 | -0.354268968 | NA          | NA          |
| chr2:204231599-204281804  | exonic | ABI2     | 2  | 204231599 | 204281804 | 1 | 0 | 0 | 4  | 0  | 0 | 50205 | 0.554232483 | -1.344997125 | 3.796542304 | -0.354268968 | NA          | NA          |
| chr2:218745620-218765235  | exonic | TNS1     | 2  | 218745620 | 218765235 | 1 | 0 | 0 | 4  | 0  | 0 | 19615 | 0.554232483 | -1.344997125 | 3.796542304 | -0.354268968 | NA          | NA          |
| chr2:236839408-236877267  | exonic | AGAP1    | 2  | 236839408 | 236877267 | 1 | 0 | 0 | 4  | 0  | 0 | 37859 | 0.554232483 | -1.344997125 | 3.796542304 | -0.354268968 | NA          | NA          |
| chr2:32703702-32725176    | exonic | BIRC6    | 2  | 32703702  | 32725176  | 1 | 0 | 0 | 4  | 0  | 0 | 21474 | 0.554232483 | -1.344997125 | 3.796542304 | -0.354268968 | NA          | NA          |
| chr2:32703702-32728303    | exonic | BIRC6    | 2  | 32703702  | 32728303  | 3 | 0 | 0 | 0  | 0  | 0 | 24601 | 0.554232483 | -1.344997125 | 3.796542304 | -0.354268968 | NA          | NA          |
| chr4:79158663-79176529    | exonic | FRAS1    | 4  | 79158663  | 79176529  | 1 | 0 | 0 | 4  | 0  | 0 | 17866 | 0.554232483 | -1.344997125 | 3.796542304 | -0.354268968 | NA          | NA          |
| chr5:122435348-122516017  | exonic | PRDM6    | 5  | 122435348 | 122516017 | 1 | 0 | 0 | 4  | 0  | 0 | 80669 | 0.554232483 | -1.344997125 | 3.796542304 | -0.354268968 | NA          | NA          |
| chr5:32087236-32091281    | exonic | PDZD2    | 5  | 32087236  | 32091281  | 1 | 0 | 0 | 4  | 0  | 0 | 4045  | 0.554232483 | -1.344997125 | 3.796542304 | -0.354268968 | NA          | NA          |
| chr7:158677254-158698782  | exonic | WDR60    | 7  | 158677254 | 158698782 | 1 | 0 | 0 | 4  | 0  | 0 | 21528 | 0.554232483 | -1.344997125 | 3.796542304 | -0.354268968 | NA          | NA          |
| chr8:135521861-135533244  | exonic | ZFAT     | 8  | 135521861 | 135533244 | 1 | 0 | 0 | 4  | 0  | 0 | 11383 | 0.554232483 | -1.344997125 | 3.796542304 | -0.354268968 | NA          | NA          |



|                          |              |                                                                                             |    |           |           |   |   |   |    |    |   |       |             |              |             |              |             |             |
|--------------------------|--------------|---------------------------------------------------------------------------------------------|----|-----------|-----------|---|---|---|----|----|---|-------|-------------|--------------|-------------|--------------|-------------|-------------|
| chr7:73770739-73771807   | exonic       | CLIP2                                                                                       | 7  | 73770739  | 73771807  | 0 | 0 | 3 | 8  | 2  | 1 | 1068  | 1.99257161  | -1.343604885 | 2.032567639 | -0.661038215 | NA          | NA          |
| chr6:76331247-76357517   | exonic       | SENP6                                                                                       | 6  | 76331247  | 76357517  | 2 | 1 | 0 | 0  | 0  | 4 | 26270 | 1.66512412  | -1.343531393 | 2.42236171  | -0.554636984 | NA          | NA          |
| chr2:214174782-214228869 | exonic       | SPAG16                                                                                      | 2  | 214174782 | 214228869 | 5 | 4 | 1 | 7  | 2  | 3 | 54087 | 2.176186064 | -1.343437485 | 1.812250361 | -0.74130899  | 0.458506112 | 0.998252924 |
| chr17:71231614-71233134  | exonic       | C17orf80                                                                                    | 17 | 71231614  | 71233134  | 4 | 0 | 0 | 3  | 4  | 2 | 1520  | 1.935428831 | -1.342267181 | 1.994707134 | -0.672914413 | NA          | NA          |
| chr14:91804348-91810001  | exonic       | CCDC88C                                                                                     | 14 | 91804348  | 91810001  | 1 | 1 | 0 | 7  | 0  | 0 | 5653  | 1.047442438 | -1.341791807 | 2.789721046 | -0.480977053 | NA          | NA          |
| chr5:83356118-83362425   | exonic       | EDIL3                                                                                       | 5  | 83356118  | 83362425  | 1 | 1 | 0 | 7  | 0  | 0 | 6307  | 1.047442438 | -1.341791807 | 2.789721046 | -0.480977053 | NA          | NA          |
| chr7:131071878-131084192 | exonic       | MKLN1                                                                                       | 7  | 131071878 | 131084192 | 2 | 1 | 0 | 3  | 2  | 2 | 12314 | 1.609675901 | -1.338454391 | 2.019870973 | -0.66264351  | 0.507558897 | 0.998252924 |
| chr17:65887959-65890281  | exonic       | BPTF                                                                                        | 17 | 65887959  | 65890281  | 2 | 0 | 2 | 2  | 9  | 1 | 2322  | 2.262600112 | -1.337093109 | 1.803038423 | -0.741577712 | NA          | NA          |
| chr4:128015566-128027929 | intergenic   | MIR2054 (dist=1587104), INTU (dist=526158)                                                  | 4  | 128015566 | 128027929 | 3 | 0 | 0 | 7  | 2  | 0 | 12363 | 1.373195368 | -1.332617906 | 2.453008083 | -0.543258669 | 0.586951717 | 0.998252924 |
| chr8:29959413-29962002   | exonic       | LEPROTL1                                                                                    | 8  | 29959413  | 29962002  | 4 | 2 | 4 | 15 | 15 | 2 | 2589  | 5.680094793 | -1.332579731 | 1.159205991 | -1.149562495 | 0.250324113 | 0.998252924 |
| chr15:77759436-77764156  | exonic       | HMG20A                                                                                      | 15 | 77759436  | 77764156  | 2 | 0 | 0 | 4  | 2  | 0 | 4720  | 0.92527427  | -1.331676061 | 2.845499695 | -0.467993746 | 0.639789062 | 0.998252924 |
| chr3:189710130-189710918 | intronic     | P3H2                                                                                        | 3  | 189710130 | 189710918 | 2 | 0 | 0 | 4  | 2  | 0 | 788   | 0.92527427  | -1.331676061 | 2.845499695 | -0.467993746 | 0.639789062 | 0.998252924 |
| chr8:17532694-17542051   | exonic       | MTUS1                                                                                       | 8  | 17532694  | 17542051  | 2 | 0 | 0 | 4  | 2  | 0 | 9357  | 0.92527427  | -1.331676061 | 2.845499695 | -0.467993746 | 0.639789062 | 0.998252924 |
| chr8:68930080-68942893   | exonic       | PREX2                                                                                       | 8  | 68930080  | 68942893  | 2 | 0 | 0 | 4  | 2  | 0 | 12813 | 0.92527427  | -1.331676061 | 2.845499695 | -0.467993746 | 0.639789062 | 0.998252924 |
| chr8:128902834-128903244 | ncRNA_exonic | PVT1                                                                                        | 8  | 128902834 | 128903244 | 1 | 1 | 3 | 4  | 5  | 4 | 410   | 3.158326903 | -1.329255529 | 1.501531407 | -0.88526655  | 0.376012886 | 0.998252924 |
| chr1:204082042-204083733 | exonic       | SOX13                                                                                       | 1  | 204082042 | 204083733 | 8 | 3 | 0 | 33 | 3  | 0 | 1691  | 5.426080915 | -1.328220554 | 1.514046389 | -0.877265428 | NA          | NA          |
| chr12:47497896-47501947  | UTR5         | <small>UC001DK.00201420+...+13951...139996611465_NK_130271...+139951...139986611466</small> | 12 | 47497896  | 47501947  | 4 | 0 | 3 | 16 | 8  | 0 | 4051  | 3.776956384 | -1.323649927 | 1.580503213 | -0.837486388 | 0.402319225 | 0.998252924 |
| chr2:20507738-20527139   | exonic       | PUM2                                                                                        | 2  | 20507738  | 20527139  | 0 | 4 | 0 | 7  | 3  | 2 | 19401 | 2.420802375 | -1.32329517  | 1.860510638 | -0.711253751 | NA          | NA          |
| chr11:77394754-77404656  | exonic       | RSF1                                                                                        | 11 | 77394754  | 77404656  | 8 | 2 | 4 | 28 | 19 | 0 | 9902  | 7.445763041 | -1.322309693 | 1.197659556 | -1.104078105 | 0.269559258 | 0.998252924 |
| chr5:39201927-39203089   | exonic       | FYB                                                                                         | 5  | 39201927  | 39203089  | 0 | 0 | 2 | 5  | 3  | 0 | 1162  | 1.289177242 | -1.320831918 | 2.520568314 | -0.524021472 | 0.600263606 | 0.998252924 |
| chr9:103204187-103204638 | exonic       | MSANTD3, MSANTD3-TMEFF1                                                                     | 9  | 103204187 | 103204638 | 1 | 1 | 0 | 2  | 0  | 2 | 451   | 1.13232273  | -1.318687519 | 2.536714726 | -0.519840684 | 0.60317462  | 0.998252924 |
| chr4:24854693-24878319   | exonic       | CCDC149                                                                                     | 4  | 24854693  | 24878319  | 0 | 2 | 0 | 4  | 1  | 1 | 23626 | 1.203043169 | -1.314592922 | 2.447474152 | -0.53712229  | 0.591183145 | 0.998252924 |
| chr7:137586099-137600758 | exonic       | CREB3L2                                                                                     | 7  | 137586099 | 137600758 | 0 | 2 | 1 | 5  | 6  | 0 | 14659 | 1.80354208  | -1.313554442 | 2.066357284 | -0.635686022 | 0.524981089 | 0.998252924 |
| chr2:179400458-179407088 | exonic       | TTN                                                                                         | 2  | 179400458 | 179407088 | 5 | 3 | 0 | 20 | 6  | 0 | 6630  | 4.020154345 | -1.312598542 | 1.561205114 | -0.840759828 | 0.400482496 | 0.998252924 |
| chr15:83819966-83832827  | exonic       | HDGFRP3                                                                                     | 15 | 83819966  | 83832827  | 0 | 1 | 1 | 3  | 0  | 2 | 12861 | 1.306916198 | -1.31092474  | 2.407550459 | -0.544505613 | 0.586093587 | 0.998252924 |
| chr9:111819470-111835718 | exonic       | TMEM245                                                                                     | 9  | 111819470 | 111835718 | 0 | 1 | 1 | 3  | 0  | 2 | 16248 | 1.306916198 | -1.31092474  | 2.407550459 | -0.544505613 | 0.586093587 | 0.998252924 |
| chr2:175779785-175816930 | exonic       | CHN1                                                                                        | 2  | 175779785 | 175816930 | 0 | 1 | 1 | 8  | 0  | 0 | 37145 | 1.222035906 | -1.310237167 | 2.651183896 | -0.49420833  | NA          | NA          |
| chr7:5963017-5963593     | exonic       | CCZ1                                                                                        | 7  | 5963017   | 5963593   | 3 | 1 | 0 | 5  | 7  | 0 | 576   | 1.939985506 | -1.306985871 | 1.992228988 | -0.656041991 | 0.511797107 | 0.998252924 |
| chr1:1735857-1737977     | exonic       | GNB1                                                                                        | 1  | 1735857   | 1737977   | 2 | 0 | 0 | 5  | 1  | 0 | 2120  | 0.910558233 | -1.30336844  | 2.892220844 | -0.450646237 | NA          | NA          |
| chr10:86177526-86237420  | exonic       | CCSER2                                                                                      | 10 | 86177526  | 86237420  | 2 | 0 | 0 | 5  | 1  | 0 | 59894 | 0.910558233 | -1.30336844  | 2.892220844 | -0.450646237 | NA          | NA          |
| chr13:99061591-99064288  | exonic       | FARF1                                                                                       | 13 | 99061591  | 99064288  | 2 | 0 | 0 | 5  | 1  | 0 | 2697  | 0.910558233 | -1.30336844  | 2.892220844 | -0.450646237 | NA          | NA          |
| chr15:30058468-30065560  | exonic       | TJP1                                                                                        | 15 | 30058468  | 30065560  | 2 | 0 | 0 | 5  | 1  | 0 | 7092  | 0.910558233 | -1.30336844  | 2.892220844 | -0.450646237 | NA          | NA          |
| chr2:201994451-202014558 | exonic       | CFLAR                                                                                       | 2  | 201994451 | 202014558 | 0 | 3 | 0 | 8  | 3  | 0 | 20107 | 2.63224294  | -1.297050365 | 1.810491536 | -0.716407859 | 0.473739543 | 0.998252924 |
| chr9:114341075-114348445 | exonic       | PTGR1                                                                                       | 9  | 114341075 | 114348445 | 0 | 0 | 2 | 1  | 2  | 2 | 7370  | 1.359341497 | -1.295745606 | 2.361163729 | -0.548774145 | 0.583160456 | 0.998252924 |
| chr3:31617887-31621588   | exonic       | STT3B                                                                                       | 3  | 31617887  | 31621588  | 5 | 2 | 3 | 4  | 12 | 7 | 3701  | 5.620398252 | -1.294306527 | 1.19180613  | -1.086004254 | 0.27747711  | 0.998252924 |

|                          |                |                                     |    |           |           |    |   |   |     |    |    |        |             |              |             |              |             |             |
|--------------------------|----------------|-------------------------------------|----|-----------|-----------|----|---|---|-----|----|----|--------|-------------|--------------|-------------|--------------|-------------|-------------|
| chr15:93545406-93558139  | exonic         | CHD2                                | 15 | 93545406  | 93558139  | 4  | 2 | 0 | 8   | 8  | 1  | 12733  | 2.991428434 | -1.291567352 | 1.577727053 | -0.818625344 | 0.413000203 | 0.998252924 |
| chr10:4872867-4951798    | exonic         | AKR1E2                              | 10 | 4872867   | 4951798   | 6  | 0 | 0 | 7   | 3  | 3  | 78931  | 2.805839445 | -1.286878655 | 1.753101529 | -0.734058259 | NA          | NA          |
| chrX:147733519-147744289 | exonic         | AFF2                                | X  | 147733519 | 147744289 | 5  | 1 | 0 | 11  | 0  | 3  | 10770  | 2.913291576 | -1.282081469 | 1.804116476 | -0.710642293 | NA          | NA          |
| chr4:120517677-120528452 | exonic         | PDE5A                               | 4  | 120517677 | 120528452 | 1  | 1 | 0 | 4   | 2  | 0  | 10775  | 1.584800502 | -1.278503821 | 2.160194416 | -0.591846646 | 0.553953284 | 0.998252924 |
| chr17:96901-177370       | exonic         | RPH3AL                              | 17 | 96901     | 177370    | 1  | 1 | 0 | 0   | 4  | 4  | 80469  | 1.598960355 | -1.275643443 | 2.233308824 | -0.5711899   | 0.567870924 | 0.998252924 |
| chr9:88437794-88444521   | ncRNA_exonic   | LOC389765                           | 9  | 88437794  | 88444521  | 0  | 0 | 2 | 0   | 5  | 1  | 6727   | 1.307893769 | -1.273318419 | 2.578141907 | -0.493889966 | 0.621383891 | 0.998252924 |
| chr15:68434283-68466230  | exonic         | PIAS1                               | 15 | 68434283  | 68466230  | 0  | 0 | 2 | 2   | 1  | 2  | 31947  | 1.344625461 | -1.272786072 | 2.367466951 | -0.537615138 | 0.590842777 | 0.998252924 |
| chr15:68438153-68466230  | exonic         | PIAS1                               | 15 | 68438153  | 68466230  | 0  | 0 | 2 | 2   | 1  | 2  | 28077  | 1.344625461 | -1.272786072 | 2.367466951 | -0.537615138 | 0.590842777 | 0.998252924 |
| chr1:197552281-197742062 | exonic         | DENND1B                             | 1  | 197552281 | 197742062 | 2  | 0 | 0 | 6   | 0  | 0  | 189781 | 0.895842196 | -1.271794257 | 3.171440597 | -0.401014687 | NA          | NA          |
| chr1:197576202-197742062 | exonic         | DENND1B                             | 1  | 197576202 | 197742062 | 2  | 0 | 0 | 6   | 0  | 0  | 165860 | 0.895842196 | -1.271794257 | 3.171440597 | -0.401014687 | NA          | NA          |
| chr12:65702308-65762806  | exonic         | MSRB3                               | 12 | 65702308  | 65762806  | 2  | 0 | 0 | 6   | 0  | 0  | 60498  | 0.895842196 | -1.271794257 | 3.171440597 | -0.401014687 | NA          | NA          |
| chr14:53622961-53656654  | ncRNA_exonic   | LOC101927620                        | 14 | 53622961  | 53656654  | 2  | 0 | 0 | 6   | 0  | 0  | 33693  | 0.895842196 | -1.271794257 | 3.171440597 | -0.401014687 | NA          | NA          |
| chr2:43953410-43965659   | exonic         | PLEKHH2                             | 2  | 43953410  | 43965659  | 2  | 0 | 0 | 5   | 0  | 0  | 12249  | 0.895842196 | -1.271794257 | 3.171440597 | -0.401014687 | NA          | NA          |
| chr12:89860546-89866052  | exonic         | POC1B                               | 12 | 89860546  | 89866052  | 0  | 2 | 2 | 5   | 7  | 1  | 5506   | 2.430057136 | -1.268437655 | 1.728828351 | -0.733697857 | 0.463132905 | 0.998252924 |
| chr5:50055476-50059076   | exonic         | PARP8                               | 5  | 50055476  | 50059076  | 0  | 0 | 3 | 6   | 1  | 2  | 3600   | 1.967140027 | -1.268012848 | 2.054181618 | -0.617283709 | NA          | NA          |
| chr3:3194139-3215945     | exonic         | CRBN                                | 3  | 3194139   | 3215945   | 7  | 3 | 2 | 9   | 7  | 1  | 21806  | 1.118584264 | -1.267541628 | 2.5445372   | -0.498142306 | 0.618383744 | 0.998252924 |
| chr4:106367539-106377902 | exonic         | PPA2                                | 4  | 106367539 | 106377902 | 4  | 0 | 2 | 7   | 7  | 2  | 10363  | 3.118294688 | -1.267336661 | 1.535219132 | -0.825508642 | 0.409082878 | 0.998252924 |
| chr1:51926762-51930998   | exonic         | EPS15                               | 1  | 51926762  | 51930998  | 4  | 0 | 0 | 5   | 6  | 0  | 4236   | 1.773669228 | -1.266366493 | 2.212855624 | -0.572277052 | NA          | NA          |
| chr13:96636058-96651561  | exonic         | UGGT2                               | 13 | 96636058  | 96651561  | 4  | 0 | 4 | 0   | 9  | 7  | 15503  | 4.551800931 | -1.266363225 | 1.580147746 | -0.801420771 | 0.422888094 | 0.998252924 |
| chr11:13435076-13466728  | exonic         | BTBD10                              | 11 | 13435076  | 13466728  | 3  | 1 | 2 | 16  | 4  | 0  | 31652  | 3.140866528 | -1.260967514 | 1.595622122 | -0.790267004 | 0.429371852 | 0.998252924 |
| chr16:19775169-19800244  | exonic         | IQCK                                | 16 | 19775169  | 19800244  | 2  | 0 | 0 | 1   | 0  | 2  | 25075  | 0.980722488 | -1.259569065 | 2.874728129 | -0.438152412 | 0.661275802 | 0.998252924 |
| chr2:62100136-62110683   | exonic         | CCT4                                | 2  | 62100136  | 62110683  | 2  | 0 | 0 | 1   | 0  | 2  | 10547  | 0.980722488 | -1.259569065 | 2.874728129 | -0.438152412 | 0.661275802 | 0.998252924 |
| chr3:58131647-58135954   | exonic         | FLNB                                | 3  | 58131647  | 58135954  | 2  | 0 | 0 | 1   | 0  | 2  | 4307   | 0.980722488 | -1.259569065 | 2.874728129 | -0.438152412 | 0.661275802 | 0.998252924 |
| chr9:79996891-80022523   | exonic         | VPS13A                              | 9  | 79996891  | 80022523  | 5  | 0 | 1 | 2   | 6  | 4  | 25632  | 3.013865476 | -1.259362768 | 1.630332841 | -0.772457462 | 0.439843532 | 0.998252924 |
| chr6:131276244-131277639 | exonic         | EPB41L2                             | 6  | 131276244 | 131277639 | 25 | 4 | 6 | 110 | 4  | 0  | 1395   | 17.28375297 | -1.259201093 | 1.832847295 | -0.687019097 | NA          | NA          |
| chr3:142144063-142145683 | exonic         | XRN1                                | 3  | 142144063 | 142145683 | 3  | 0 | 0 | 2   | 6  | 0  | 1620   | 1.325748129 | -1.255890962 | 2.486226984 | -0.505139302 | 0.613460999 | 0.998252924 |
| chr2:39283842-39285945   | exonic         | SOS1                                | 2  | 39283842  | 39285945  | 1  | 0 | 2 | 3   | 7  | 0  | 2103   | 1.689651102 | -1.254287001 | 2.123982452 | -0.590535482 | 0.554831705 | 0.998252924 |
| chr9:33271149-33278223   | exonic         | CHMP5                               | 9  | 33271149  | 33278223  | 2  | 3 | 2 | 7   | 7  | 4  | 7074   | 3.999585418 | -1.252954535 | 1.30759827  | -0.958210609 | 0.337956569 | 0.998252924 |
| chr7:115750762-115752092 | intergenic     | TFEC (dist=79895), TES (dist=98455) | 7  | 115750762 | 115752092 | 0  | 0 | 5 | 0   | 14 | 2  | 1330   | 3.29716625  | -1.251685193 | 2.948427187 | -0.424526405 | 0.671181953 | 0.998252924 |
| chr6:42559888-42562042   | exonic         | UBR2                                | 6  | 42559888  | 42562042  | 6  | 3 | 6 | 15  | 11 | 10 | 2154   | 8.488521712 | -1.248287179 | 0.992770134 | -1.257377853 | 0.208616845 | 0.998252924 |
| chr11:85701292-85742653  | exonic         | PICALM                              | 11 | 85701292  | 85742653  | 18 | 5 | 6 | 12  | 11 | 6  | 41361  | 1.500341597 | -1.246933677 | 2.201129555 | -0.566497176 | 0.571055852 | 0.998252924 |
| chrX:119063978-119066179 | exonic         | NKAP                                | X  | 119063978 | 119066179 | 3  | 0 | 0 | 4   | 2  | 1  | 2201   | 1.362479821 | -1.244050926 | 2.285831946 | -0.544244264 | NA          | NA          |
| chr7:30612616-30614497   | ncRNA_intronic | LOC401320                           | 7  | 30612616  | 30614497  | 0  | 3 | 0 | 0   | 3  | 3  | 1881   | 1.810565489 | -1.24195293  | 2.291575956 | -0.541964549 | 0.587842928 | 0.998252924 |
| chr2:45773870-45780869   | exonic         | SRBD1                               | 2  | 45773870  | 45780869  | 0  | 1 | 1 | 3   | 4  | 0  | 6999   | 1.174588667 | -1.240778831 | 2.436718991 | -0.509200624 | 0.610611606 | 0.998252924 |
| chr4:39875908-39878773   | exonic         | PDS5A                               | 4  | 39875908  | 39878773  | 0  | 0 | 2 | 2   | 3  | 1  | 2865   | 1.278461696 | -1.23931552  | 2.374121191 | -0.522010218 | 0.601663216 | 0.998252924 |

|                          |          |                |    |           |           |   |   |   |    |    |    |       |             |              |             |              |             |             |
|--------------------------|----------|----------------|----|-----------|-----------|---|---|---|----|----|----|-------|-------------|--------------|-------------|--------------|-------------|-------------|
| chr18:18619432-18624147  | exonic   | ROCK1          | 18 | 18619432  | 18624147  | 1 | 0 | 1 | 1  | 3  | 1  | 4715  | 1.103868228 | -1.23921846  | 2.380261292 | -0.520622868 | 0.602629516 | 0.998252924 |
| chr3:183432931-183446639 | exonic   | YEATS2         | 3  | 183432931 | 183446639 | 1 | 0 | 1 | 1  | 3  | 1  | 13708 | 1.103868228 | -1.23921846  | 2.380261292 | -0.520622868 | 0.602629516 | 0.998252924 |
| chr1:84644859-84680000   | exonic   | PRKACB         | 1  | 84644859  | 84680000  | 2 | 0 | 0 | 0  | 3  | 1  | 35141 | 0.92927476  | -1.237547918 | 2.899400747 | -0.426828861 | 0.669503984 | 0.998252924 |
| chr10:99236439-99238146  | exonic   | MMS19          | 10 | 99236439  | 99238146  | 2 | 0 | 0 | 0  | 3  | 1  | 1707  | 0.92927476  | -1.237547918 | 2.899400747 | -0.426828861 | 0.669503984 | 0.998252924 |
| chr17:16040624-16049862  | exonic   | NCOR1          | 17 | 16040624  | 16049862  | 2 | 0 | 0 | 0  | 3  | 1  | 9238  | 0.92927476  | -1.237547918 | 2.899400747 | -0.426828861 | 0.669503984 | 0.998252924 |
| chr22:40669428-40681774  | exonic   | TNRC6B         | 22 | 40669428  | 40681774  | 2 | 0 | 0 | 0  | 3  | 1  | 12346 | 0.92927476  | -1.237547918 | 2.899400747 | -0.426828861 | 0.669503984 | 0.998252924 |
| chr8:126021212-126021585 | exonic   | SQLE           | 8  | 126021212 | 126021585 | 2 | 0 | 0 | 0  | 3  | 1  | 373   | 0.92927476  | -1.237547918 | 2.899400747 | -0.426828861 | 0.669503984 | 0.998252924 |
| chr9:33293678-33295425   | exonic   | NFX1           | 9  | 33293678  | 33295425  | 4 | 0 | 0 | 7  | 4  | 0  | 1747  | 1.744237154 | -1.236232989 | 2.227466761 | -0.554995033 | 0.578898058 | 0.998252924 |
| chr11:14793482-14810788  | exonic   | PDE3B          | 11 | 14793482  | 14810788  | 3 | 0 | 5 | 19 | 4  | 2  | 17306 | 4.493769178 | -1.236128072 | 1.411340339 | -0.875853994 | 0.381109413 | 0.998252924 |
| chr8:17808123-17810695   | exonic   | PCM1           | 8  | 17808123  | 17810695  | 0 | 2 | 0 | 0  | 2  | 2  | 2572  | 1.207043659 | -1.233810609 | 2.649658174 | -0.465648973 | 0.641466782 | 0.998252924 |
| chr2:55559701-55562300   | exonic   | CCDC88A        | 2  | 55559701  | 55562300  | 4 | 0 | 2 | 5  | 4  | 4  | 2599  | 3.15902687  | -1.231565814 | 1.546624146 | -0.796292892 | 0.425861816 | 0.998252924 |
| chr8:131370262-131374017 | exonic   | ASAP1          | 8  | 131370262 | 131374017 | 4 | 3 | 5 | 16 | 3  | 9  | 3755  | 6.863152203 | -1.225784282 | 1.135486265 | -1.079523654 | 0.280354355 | 0.998252924 |
| chr20:50273476-50307358  | exonic   | ATP9A          | 20 | 50273476  | 50307358  | 1 | 1 | 0 | 3  | 3  | 0  | 33882 | 0.985279163 | -1.219123304 | 2.589311789 | -0.470829087 | 0.637762792 | 0.998252924 |
| chr22:38687035-38687429  | UTR3     |                | 22 | 38687035  | 38687429  | 5 | 9 | 0 | 7  | 3  | 14 | 394   | 7.63573939  | -1.218575519 | 1.282132718 | -0.950428533 | NA          | NA          |
| chr19:23541232-23545541  | exonic   | ZNF91          | 19 | 23541232  | 23545541  | 0 | 0 | 3 | 0  | 6  | 2  | 4309  | 1.934408825 | -1.215753938 | 2.237930652 | -0.543249156 | NA          | NA          |
| chr6:137015277-137018525 | exonic   | MAP3K5         | 6  | 137015277 | 137018525 | 2 | 0 | 2 | 6  | 0  | 3  | 3248  | 2.215036074 | -1.215362682 | 1.952695113 | -0.622402685 | 0.533677115 | 0.998252924 |
| chr9:19356969-19358158   | exonic   | DENND4C        | 9  | 19356969  | 19358158  | 3 | 0 | 0 | 4  | 4  | 0  | 1189  | 1.296316056 | -1.215349859 | 2.482238812 | -0.489618425 | NA          | NA          |
| chr8:142170730-142173528 | exonic   | DENND3         | 8  | 142170730 | 142173528 | 0 | 2 | 0 | 6  | 1  | 0  | 2798  | 1.107447331 | -1.214613825 | 2.70093458  | -0.449701312 | NA          | NA          |
| chr5:170823221-170823744 | intronic | NPM1           | 5  | 170823221 | 170823744 | 2 | 5 | 0 | 0  | 5  | 7  | 523   | 3.892020252 | -1.210731649 | 1.67950063  | -0.72088788  | 0.4709785   | 0.998252924 |
| chr2:39564060-39564722   | exonic   | MAP4K3         | 2  | 39564060  | 39564722  | 0 | 0 | 3 | 0  | 11 | 0  | 662   | 1.923108716 | -1.207831991 | 3.839563643 | -0.314575328 | NA          | NA          |
| chr18:8113483-8143777    | exonic   | PTPRM          | 18 | 8113483   | 8143777   | 3 | 4 | 0 | 12 | 5  | 2  | 30294 | 3.581374973 | -1.205987737 | 1.466882698 | -0.822143269 | 0.410995362 | 0.998252924 |
| chr1:15964801-15970145   | exonic   | DDI2           | 1  | 15964801  | 15970145  | 3 | 1 | 0 | 5  | 4  | 1  | 5344  | 1.885121849 | -1.20096635  | 1.8810681   | -0.638449161 | 0.523181338 | 0.998252924 |
| chr8:42761315-42805598   | exonic   | HOOK3          | 8  | 42761315  | 42805598  | 1 | 0 | 0 | 2  | 0  | 0  | 44283 | 5.034410744 | -1.197614671 | 1.333331924 | -0.898211953 | 0.369072562 | 0.998252924 |
| chr10:71243446-71258152  | exonic   | TSPAN15        | 10 | 71243446  | 71258152  | 2 | 0 | 0 | 1  | 2  | 1  | 14706 | 0.914558723 | -1.191891998 | 2.701312038 | -0.441227071 | 0.659048617 | 0.998252924 |
| chr15:65959786-65962526  | exonic   | DENND4A        | 15 | 65959786  | 65962526  | 2 | 0 | 0 | 1  | 2  | 1  | 2740  | 0.914558723 | -1.191891998 | 2.701312038 | -0.441227071 | 0.659048617 | 0.998252924 |
| chr5:167915606-167919852 | exonic   | RARS           | 5  | 167915606 | 167919852 | 1 | 1 | 0 | 4  | 2  | 0  | 4246  | 0.970563126 | -1.191727591 | 2.608426574 | -0.456876035 | 0.64776015  | 0.998252924 |
| chr3:65415194-65416556   | exonic   | MAGI1          | 3  | 65415194  | 65416556  | 0 | 0 | 2 | 4  | 1  | 1  | 1362  | 1.249029622 | -1.190718996 | 2.416474659 | -0.492750459 | 0.62218892  | 0.998252924 |
| chr19:48180861-48181467  | intronic | GLTSCR1        | 19 | 48180861  | 48181467  | 0 | 3 | 0 | 3  | 0  | 3  | 606   | 1.766417379 | -1.189388126 | 2.30515269  | -0.515969346 | 0.605875819 | 0.998252924 |
| chr7:3658711-3681737     | exonic   | SDK1           | 7  | 3658711   | 3681737   | 0 | 5 | 0 | 2  | 14 | 0  | 23026 | 2.778385671 | -1.188914453 | 1.991267934 | -0.597064028 | NA          | NA          |
| chr15:59480316-59510286  | exonic   | LDHAL6B, MYO1E | 15 | 59480316  | 59510286  | 0 | 2 | 0 | 0  | 4  | 1  | 29970 | 1.140879894 | -1.186584991 | 2.697209022 | -0.439930677 | 0.659987317 | 0.998252924 |
| chr3:179096129-179109892 | exonic   | MFN1           | 3  | 179096129 | 179109892 | 0 | 3 | 0 | 6  | 4  | 0  | 13763 | 1.644805395 | -1.183716787 | 2.290475577 | -0.516799567 | NA          | NA          |
| chr4:73944358-73958017   | exonic   | ANKRD17        | 4  | 73944358  | 73958017  | 0 | 0 | 2 | 2  | 5  | 0  | 13659 | 1.21229793  | -1.183673049 | 2.590494177 | -0.456929438 | 0.647721764 | 0.998252924 |
| chr9:125719289-125782738 | exonic   | RABGAP1        | 9  | 125719289 | 125782738 | 2 | 0 | 0 | 0  | 5  | 0  | 63449 | 0.863110995 | -1.183624955 | 3.219406522 | -0.367653152 | NA          | NA          |
| chr10:93902785-93940776  | exonic   | CPEB3          | 10 | 93902785  | 93940776  | 0 | 2 | 0 | 2  | 0  | 2  | 37991 | 1.177611586 | -1.181264768 | 2.667994737 | -0.442753785 | 0.657943835 | 0.998252924 |
| chr2:73659325-73718625   | exonic   | ALMS1          | 2  | 73659325  | 73718625  | 0 | 2 | 0 | 2  | 2  | 2  | 59300 | 1.177611586 | -1.181264768 | 2.667994737 | -0.442753785 | 0.657943835 | 0.998252924 |

|                           |          |                   |    |           |           |   |   |   |    |    |   |        |             |              |             |              |             |             |
|---------------------------|----------|-------------------|----|-----------|-----------|---|---|---|----|----|---|--------|-------------|--------------|-------------|--------------|-------------|-------------|
| chr3:15073885-15076316    | exonic   | NR2C2             | 3  | 15073885  | 15076316  | 0 | 2 | 0 | 2  | 0  | 2 | 2431   | 1.177611586 | -1.181264768 | 2.667994737 | -0.442753785 | 0.657943835 | 0.998252924 |
| chr9:77611362-77632364    | exonic   | CARNMT1           | 9  | 77611362  | 77632364  | 5 | 1 | 1 | 3  | 3  | 6 | 21002  | 3.547807612 | -1.179630225 | 1.47753484  | -0.798377266 | NA          | NA          |
| chr20:1433137-1438919     | exonic   | NSFL1C            | 20 | 1433137   | 1438919   | 0 | 0 | 3 | 7  | 4  | 0 | 5782   | 1.82009646  | -1.178919279 | 2.219730394 | -0.53110922  | 0.595343095 | 0.998252924 |
| chr10:131964770-131969900 | exonic   | GLRX3             | 10 | 131964770 | 131969900 | 1 | 0 | 1 | 2  | 4  | 0 | 5130   | 1.022988426 | -1.178241026 | 2.565263697 | -0.459306007 | 0.646014435 | 0.998252924 |
| chr11:2991032-2993473     | exonic   | NAP1L4            | 11 | 2991032   | 2993473   | 0 | 0 | 3 | 0  | 8  | 1 | 2441   | 1.86824506  | -1.178066889 | 2.287345356 | -0.515036737 | 0.606527349 | 0.998252924 |
| chr4:148860976-148876525  | exonic   | ARHGAP10          | 4  | 148860976 | 148876525 | 0 | 2 | 0 | 7  | 0  | 0 | 15549  | 1.092731294 | -1.174609035 | 2.954751294 | -0.397532286 | NA          | NA          |
| chr9:2191266-2192802      | exonic   | SMARCA2           | 9  | 2191266   | 2192802   | 0 | 2 | 0 | 7  | 0  | 0 | 1536   | 1.092731294 | -1.174609035 | 2.954751294 | -0.397532286 | NA          | NA          |
| chr8:42812236-42819617    | exonic   | HOOK3             | 8  | 42812236  | 42819617  | 7 | 5 | 2 | 6  | 14 | 9 | 7381   | 7.275045341 | -1.173574797 | 1.079832428 | -1.08681196  | 0.277119921 | 0.998252924 |
| chr16:16218645-16219768   | exonic   | ABCC1             | 16 | 16218645  | 16219768  | 0 | 4 | 1 | 18 | 0  | 0 | 1123   | 2.807977154 | -1.17129322  | 2.033555369 | -0.57598295  | NA          | NA          |
| chr3:119219541-119232566  | exonic   | TIMMDC1           | 3  | 119219541 | 119232566 | 3 | 4 | 0 | 12 | 9  | 0 | 13025  | 3.449047443 | -1.170102372 | 1.612789259 | -0.725514735 | 0.468136309 | 0.998252924 |
| chr20:45905057-45916028   | exonic   | ZMYND8            | 20 | 45905057  | 45916028  | 3 | 2 | 0 | 5  | 9  | 0 | 10971  | 2.356316148 | -1.16914905  | 1.841123781 | -0.635019254 | 0.525415858 | 0.998252924 |
| chr11:309018-314356       | exonic   | IFITM1, IFITM2    | 11 | 309018    | 314356    | 3 | 3 | 0 | 6  | 0  | 5 | 5338   | 3.08874958  | -1.167649637 | 1.748590378 | -0.667766248 | 0.504282814 | 0.998252924 |
| chr3:136096501-136141886  | exonic   | STAG1             | 3  | 136096501 | 136141886 | 4 | 0 | 0 | 0  | 3  | 3 | 45385  | 1.803685863 | -1.16729625  | 2.275755101 | -0.512927006 | 0.608002382 | 0.998252924 |
| chr6:138794442-138817508  | exonic   | NHSL1             | 6  | 138794442 | 138817508 | 0 | 3 | 0 | 2  | 3  | 2 | 23066  | 1.714969651 | -1.165818399 | 2.118309501 | -0.550353194 | NA          | NA          |
| chr1:172520651-172539870  | exonic   | SUCO              | 1  | 172520651 | 172539870 | 0 | 1 | 3 | 0  | 2  | 5 | 19219  | 2.549230763 | -1.165643654 | 1.955435618 | -0.596104337 | NA          | NA          |
| chr3:188123899-188242575  | exonic   | LPP               | 3  | 188123899 | 188242575 | 1 | 2 | 1 | 1  | 0  | 5 | 118676 | 2.322211996 | -1.164882132 | 1.916825869 | -0.607714112 | NA          | NA          |
| chr11:72420914-72425366   | exonic   | ARAP1             | 11 | 72420914  | 72425366  | 0 | 0 | 2 | 0  | 0  | 3 | 4452   | 1.319193877 | -1.164568367 | 2.826253397 | -0.41205377  | NA          | NA          |
| chr12:118788588-118789788 | intronic | TAOK3             | 12 | 118788588 | 118789788 | 0 | 0 | 2 | 0  | 0  | 3 | 1200   | 1.319193877 | -1.164568367 | 2.826253397 | -0.41205377  | NA          | NA          |
| chr17:62526412-62526721   | intronic | CEP95             | 17 | 62526412  | 62526721  | 0 | 0 | 2 | 0  | 0  | 3 | 309    | 1.319193877 | -1.164568367 | 2.826253397 | -0.41205377  | NA          | NA          |
| chr6:57372287-57398317    | exonic   | PRIM2             | 6  | 57372287  | 57398317  | 0 | 0 | 2 | 0  | 0  | 3 | 26030  | 1.319193877 | -1.164568367 | 2.826253397 | -0.41205377  | NA          | NA          |
| chr8:99538969-99560389    | exonic   | STK3              | 8  | 99538969  | 99560389  | 0 | 0 | 2 | 0  | 0  | 3 | 21420  | 1.319193877 | -1.164568367 | 2.826253397 | -0.41205377  | NA          | NA          |
| chr17:46109521-46111310   | exonic   | COPZ2             | 17 | 46109521  | 46111310  | 1 | 1 | 0 | 5  | 1  | 0 | 1789   | 0.955847089 | -1.16275255  | 2.651817453 | -0.438473828 | NA          | NA          |
| chr6:17825998-17834302    | exonic   | KIF13A            | 6  | 17825998  | 17834302  | 1 | 1 | 0 | 5  | 1  | 0 | 8304   | 0.955847089 | -1.16275255  | 2.651817453 | -0.438473828 | NA          | NA          |
| chr11:111706887-111728460 | exonic   | ALG9              | 11 | 111706887 | 111728460 | 0 | 0 | 2 | 3  | 4  | 0 | 21573  | 1.197581894 | -1.161179349 | 2.58740395  | -0.448781625 | 0.653589195 | 0.998252924 |
| chr4:83891479-83900159    | exonic   | LIN54             | 4  | 83891479  | 83900159  | 0 | 0 | 2 | 3  | 4  | 0 | 8680   | 1.197581894 | -1.161179349 | 2.58740395  | -0.448781625 | 0.653589195 | 0.998252924 |
| chr12:46230371-46233279   | exonic   | ARID2             | 12 | 46230371  | 46233279  | 2 | 0 | 0 | 2  | 1  | 1 | 2908   | 0.899842686 | -1.16069619  | 2.713922309 | -0.427682173 | 0.668882531 | 0.998252924 |
| chr14:104135847-104139768 | exonic   | KLC1              | 14 | 104135847 | 104139768 | 0 | 1 | 1 | 0  | 2  | 2 | 3921   | 1.230036886 | -1.159327495 | 2.469317693 | -0.46949305  | 0.638717251 | 0.998252924 |
| chr2:201862167-201876195  | exonic   | FAM126B           | 2  | 201862167 | 201876195 | 0 | 1 | 1 | 0  | 2  | 2 | 14028  | 1.230036886 | -1.159327495 | 2.469317693 | -0.46949305  | 0.638717251 | 0.998252924 |
| chr9:115013208-115060196  | exonic   | PTBP3             | 9  | 115013208 | 115060196 | 5 | 0 | 0 | 0  | 3  | 4 | 46988  | 2.240891415 | -1.157322271 | 2.12886144  | -0.543634381 | 0.586693096 | 0.998252924 |
| chr11:108055958-108057296 | exonic   | NPAT              | 11 | 108055958 | 108057296 | 0 | 0 | 1 | 0  | 3  | 0 | 1338   | 0.560351291 | -1.156765037 | 3.785436813 | -0.305582973 | NA          | NA          |
| chr12:110376184-110377052 | exonic   | GIT2              | 12 | 110376184 | 110377052 | 0 | 0 | 1 | 0  | 3  | 0 | 868    | 0.560351291 | -1.156765037 | 3.785436813 | -0.305582973 | NA          | NA          |
| chr12:57140564-57144979   | exonic   | PRIM1             | 12 | 57140564  | 57144979  | 0 | 0 | 1 | 0  | 3  | 0 | 4415   | 0.560351291 | -1.156765037 | 3.785436813 | -0.305582973 | NA          | NA          |
| chr12:72163579-72167802   | exonic   | RAB21             | 12 | 72163579  | 72167802  | 0 | 0 | 1 | 0  | 3  | 0 | 4223   | 0.560351291 | -1.156765037 | 3.785436813 | -0.305582973 | NA          | NA          |
| chr13:103504467-103524748 | exonic   | BIVM-ERCC5, ERCC5 | 13 | 103504467 | 103524748 | 0 | 0 | 1 | 0  | 3  | 0 | 20281  | 0.560351291 | -1.156765037 | 3.785436813 | -0.305582973 | NA          | NA          |
| chr13:21974511-21995303   | exonic   | ZDHC20            | 13 | 21974511  | 21995303  | 0 | 0 | 1 | 0  | 2  | 0 | 20792  | 0.560351291 | -1.156765037 | 3.785436813 | -0.305582973 | NA          | NA          |

|                           |        |                                                                                                  |    |           |           |   |   |   |    |   |   |        |             |              |             |              |             |             |
|---------------------------|--------|--------------------------------------------------------------------------------------------------|----|-----------|-----------|---|---|---|----|---|---|--------|-------------|--------------|-------------|--------------|-------------|-------------|
| chr14:103355896-103369766 | exonic | TRAF3                                                                                            | 14 | 103355896 | 103369766 | 0 | 0 | 1 | 0  | 3 | 0 | 13870  | 0.560351291 | -1.156765037 | 3.785436813 | -0.305582973 | NA          | NA          |
| chr15:74948073-74948409   | exonic | EDC3                                                                                             | 15 | 74948073  | 74948409  | 0 | 0 | 1 | 0  | 3 | 0 | 336    | 0.560351291 | -1.156765037 | 3.785436813 | -0.305582973 | NA          | NA          |
| chr17:67251683-67252424   | exonic | ABCA5                                                                                            | 17 | 67251683  | 67252424  | 0 | 0 | 1 | 0  | 3 | 0 | 741    | 0.560351291 | -1.156765037 | 3.785436813 | -0.305582973 | NA          | NA          |
| chr19:5598803-5604947     | exonic | SAFB2                                                                                            | 19 | 5598803   | 5604947   | 0 | 0 | 1 | 0  | 3 | 0 | 6144   | 0.560351291 | -1.156765037 | 3.785436813 | -0.305582973 | NA          | NA          |
| chr20:34435271-34451322   | exonic | PHF20                                                                                            | 20 | 34435271  | 34451322  | 0 | 0 | 1 | 0  | 3 | 0 | 16051  | 0.560351291 | -1.156765037 | 3.785436813 | -0.305582973 | NA          | NA          |
| chr4:54265896-54319300    | exonic | FIP1L1                                                                                           | 4  | 54265896  | 54319300  | 0 | 0 | 1 | 0  | 3 | 0 | 53404  | 0.560351291 | -1.156765037 | 3.785436813 | -0.305582973 | NA          | NA          |
| chr4:76580249-76581054    | exonic | G3BP2                                                                                            | 4  | 76580249  | 76581054  | 0 | 0 | 1 | 0  | 3 | 0 | 805    | 0.560351291 | -1.156765037 | 3.785436813 | -0.305582973 | NA          | NA          |
| chr6:17669523-17675264    | exonic | NUP153                                                                                           | 6  | 17669523  | 17675264  | 0 | 0 | 1 | 0  | 3 | 0 | 5741   | 0.560351291 | -1.156765037 | 3.785436813 | -0.305582973 | NA          | NA          |
| chr7:101801839-101821937  | exonic | CUX1                                                                                             | 7  | 101801839 | 101821937 | 0 | 0 | 1 | 0  | 3 | 0 | 20098  | 0.560351291 | -1.156765037 | 3.785436813 | -0.305582973 | NA          | NA          |
| chr1:155429587-155452240  | exonic | ASH1L                                                                                            | 1  | 155429587 | 155452240 | 0 | 1 | 0 | 0  | 3 | 0 | 22653  | 0.537358064 | -1.155919951 | 3.844829357 | -0.300642719 | NA          | NA          |
| chr1:21220009-21437876    | exonic | EIF4G3                                                                                           | 1  | 21220009  | 21437876  | 0 | 1 | 0 | 0  | 3 | 0 | 217867 | 0.537358064 | -1.155919951 | 3.844829357 | -0.300642719 | NA          | NA          |
| chr12:102301963-102308010 | exonic | DRAM1                                                                                            | 12 | 102301963 | 102308010 | 0 | 1 | 0 | 0  | 3 | 0 | 6047   | 0.537358064 | -1.155919951 | 3.844829357 | -0.300642719 | NA          | NA          |
| chr14:45496501-45497532   | exonic | FAM179B                                                                                          | 14 | 45496501  | 45497532  | 0 | 1 | 0 | 0  | 3 | 0 | 1031   | 0.537358064 | -1.155919951 | 3.844829357 | -0.300642719 | NA          | NA          |
| chr16:16101672-16196574   | exonic | ABCC1                                                                                            | 16 | 16101672  | 16196574  | 0 | 1 | 0 | 0  | 3 | 0 | 94902  | 0.537358064 | -1.155919951 | 3.844829357 | -0.300642719 | NA          | NA          |
| chr17:54925282-54936026   | exonic | DGKE                                                                                             | 17 | 54925282  | 54936026  | 0 | 1 | 0 | 0  | 3 | 0 | 10744  | 0.537358064 | -1.155919951 | 3.844829357 | -0.300642719 | NA          | NA          |
| chr17:81042813-81043199   | exonic | METRNL                                                                                           | 17 | 81042813  | 81043199  | 0 | 1 | 0 | 0  | 3 | 0 | 386    | 0.537358064 | -1.155919951 | 3.844829357 | -0.300642719 | NA          | NA          |
| chr19:18258252-18258434   | exonic | MAST3                                                                                            | 19 | 18258252  | 18258434  | 0 | 1 | 0 | 0  | 3 | 0 | 182    | 0.537358064 | -1.155919951 | 3.844829357 | -0.300642719 | NA          | NA          |
| chr19:3656402-3661999     | exonic | PIP5K1C                                                                                          | 19 | 3656402   | 3661999   | 0 | 1 | 0 | 0  | 3 | 0 | 5597   | 0.537358064 | -1.155919951 | 3.844829357 | -0.300642719 | NA          | NA          |
| chr2:25851039-25861963    | exonic | DTNB                                                                                             | 2  | 25851039  | 25861963  | 0 | 1 | 0 | 0  | 3 | 0 | 10924  | 0.537358064 | -1.155919951 | 3.844829357 | -0.300642719 | NA          | NA          |
| chr2:62100136-62106146    | exonic | CCT4                                                                                             | 2  | 62100136  | 62106146  | 0 | 1 | 0 | 0  | 3 | 0 | 6010   | 0.537358064 | -1.155919951 | 3.844829357 | -0.300642719 | NA          | NA          |
| chr3:113063362-113085156  | exonic | CFAP44                                                                                           | 3  | 113063362 | 113085156 | 0 | 1 | 0 | 0  | 3 | 0 | 21794  | 0.537358064 | -1.155919951 | 3.844829357 | -0.300642719 | NA          | NA          |
| chr3:183435438-183446639  | exonic | YEATS2                                                                                           | 3  | 183435438 | 183446639 | 0 | 1 | 0 | 0  | 3 | 0 | 11201  | 0.537358064 | -1.155919951 | 3.844829357 | -0.300642719 | NA          | NA          |
| chr3:31617887-31641951    | exonic | STT3B                                                                                            | 3  | 31617887  | 31641951  | 0 | 1 | 0 | 0  | 3 | 0 | 24064  | 0.537358064 | -1.155919951 | 3.844829357 | -0.300642719 | NA          | NA          |
| chr6:107419754-107420500  | exonic | BEND3                                                                                            | 6  | 107419754 | 107420500 | 0 | 1 | 0 | 0  | 3 | 0 | 746    | 0.537358064 | -1.155919951 | 3.844829357 | -0.300642719 | NA          | NA          |
| chr6:16522857-16658132    | UTR5   | <small>UTR5 (NM_006322.4; ENST.00000411446.10; ENST.00000411446.10; ENST.00000411446.10)</small> | 6  | 16522857  | 16658132  | 0 | 1 | 0 | 0  | 3 | 0 | 135275 | 0.537358064 | -1.155919951 | 3.844829357 | -0.300642719 | NA          | NA          |
| chr7:151960100-151962294  | exonic | KMT2C                                                                                            | 7  | 151960100 | 151962294 | 0 | 1 | 0 | 0  | 3 | 0 | 2194   | 0.537358064 | -1.155919951 | 3.844829357 | -0.300642719 | NA          | NA          |
| chr8:17823507-17868875    | exonic | PCM1                                                                                             | 8  | 17823507  | 17868875  | 0 | 1 | 0 | 0  | 3 | 0 | 45368  | 0.537358064 | -1.155919951 | 3.844829357 | -0.300642719 | NA          | NA          |
| chr9:74309424-74313120    | exonic | TMEM2                                                                                            | 9  | 74309424  | 74313120  | 0 | 1 | 0 | 0  | 3 | 0 | 3696   | 0.537358064 | -1.155919951 | 3.844829357 | -0.300642719 | NA          | NA          |
| chr11:120345268-120348235 | exonic | ARHGEF12                                                                                         | 11 | 120345268 | 120348235 | 8 | 1 | 0 | 15 | 9 | 0 | 2967   | 3.890088915 | -1.154270827 | 1.606688677 | -0.718415984 | 0.472500834 | 0.998252924 |
| chr1:109883345-109888500  | exonic | SORT1                                                                                            | 1  | 109883345 | 109888500 | 1 | 0 | 0 | 0  | 3 | 0 | 5155   | 0.492069208 | -1.154189711 | 3.97562277  | -0.290316707 | NA          | NA          |
| chr1:11133990-11137005    | exonic | EXOSC10                                                                                          | 1  | 11133990  | 11137005  | 1 | 0 | 0 | 0  | 3 | 0 | 3015   | 0.492069208 | -1.154189711 | 3.97562277  | -0.290316707 | NA          | NA          |
| chr1:41578954-41582682    | exonic | SCMH1                                                                                            | 1  | 41578954  | 41582682  | 1 | 0 | 0 | 0  | 3 | 0 | 3728   | 0.492069208 | -1.154189711 | 3.97562277  | -0.290316707 | NA          | NA          |
| chr11:17143734-17167489   | exonic | PIK3C2A                                                                                          | 11 | 17143734  | 17167489  | 1 | 0 | 0 | 0  | 3 | 0 | 23755  | 0.492069208 | -1.154189711 | 3.97562277  | -0.290316707 | NA          | NA          |
| chr11:94219089-94224131   | exonic | MRE11A                                                                                           | 11 | 94219089  | 94224131  | 1 | 0 | 0 | 0  | 3 | 0 | 5042   | 0.492069208 | -1.154189711 | 3.97562277  | -0.290316707 | NA          | NA          |
| chr12:32133811-32140256   | exonic | KIAA1551                                                                                         | 12 | 32133811  | 32140256  | 1 | 0 | 0 | 0  | 3 | 0 | 6445   | 0.492069208 | -1.154189711 | 3.97562277  | -0.290316707 | NA          | NA          |

|                           |              |                                                       |    |           |           |    |    |    |    |    |    |       |             |              |             |              |             |             |
|---------------------------|--------------|-------------------------------------------------------|----|-----------|-----------|----|----|----|----|----|----|-------|-------------|--------------|-------------|--------------|-------------|-------------|
| chr15:101906400-101910728 | exonic       | PCSK6                                                 | 15 | 101906400 | 101910728 | 1  | 0  | 0  | 0  | 3  | 0  | 4328  | 0.492069208 | -1.154189711 | 3.97562277  | -0.290316707 | NA          | NA          |
| chr15:52638557-52646211   | exonic       | MYO5A                                                 | 15 | 52638557  | 52646211  | 1  | 0  | 0  | 0  | 3  | 0  | 7654  | 0.492069208 | -1.154189711 | 3.97562277  | -0.290316707 | NA          | NA          |
| chr17:30205268-30207773   | exonic       | UTP6                                                  | 17 | 30205268  | 30207773  | 1  | 0  | 0  | 0  | 3  | 0  | 2505  | 0.492069208 | -1.154189711 | 3.97562277  | -0.290316707 | NA          | NA          |
| chr18:13681603-13682104   | exonic       | FAM210A                                               | 18 | 13681603  | 13682104  | 1  | 0  | 0  | 0  | 3  | 0  | 501   | 0.492069208 | -1.154189711 | 3.97562277  | -0.290316707 | NA          | NA          |
| chr19:40376630-40408135   | exonic       | FCGBP                                                 | 19 | 40376630  | 40408135  | 1  | 0  | 0  | 0  | 3  | 0  | 31505 | 0.492069208 | -1.154189711 | 3.97562277  | -0.290316707 | NA          | NA          |
| chr2:175978721-175983097  | exonic       | ATF2                                                  | 2  | 175978721 | 175983097 | 1  | 0  | 0  | 0  | 3  | 0  | 4376  | 0.492069208 | -1.154189711 | 3.97562277  | -0.290316707 | NA          | NA          |
| chr2:32858942-32865477    | exonic       | TTC27                                                 | 2  | 32858942  | 32865477  | 1  | 0  | 0  | 0  | 3  | 0  | 6535  | 0.492069208 | -1.154189711 | 3.97562277  | -0.290316707 | NA          | NA          |
| chr2:46803225-46803795    | exonic       | RHOQ                                                  | 2  | 46803225  | 46803795  | 1  | 0  | 0  | 0  | 3  | 0  | 570   | 0.492069208 | -1.154189711 | 3.97562277  | -0.290316707 | NA          | NA          |
| chr2:64208779-64211153    | exonic       | VPS54                                                 | 2  | 64208779  | 64211153  | 1  | 0  | 0  | 0  | 3  | 0  | 2374  | 0.492069208 | -1.154189711 | 3.97562277  | -0.290316707 | NA          | NA          |
| chr22:31843411-31846346   | exonic       | EIF4ENIF1                                             | 22 | 31843411  | 31846346  | 1  | 0  | 0  | 0  | 3  | 0  | 2935  | 0.492069208 | -1.154189711 | 3.97562277  | -0.290316707 | NA          | NA          |
| chr4:184605127-184607901  | exonic       | TRAPPC11                                              | 4  | 184605127 | 184607901 | 1  | 0  | 0  | 0  | 3  | 0  | 2774  | 0.492069208 | -1.154189711 | 3.97562277  | -0.290316707 | NA          | NA          |
| chr5:38527256-38530768    | exonic       | LIFR                                                  | 5  | 38527256  | 38530768  | 1  | 0  | 0  | 0  | 3  | 0  | 3512  | 0.492069208 | -1.154189711 | 3.97562277  | -0.290316707 | NA          | NA          |
| chr5:40771820-40777688    | exonic       | PRKAA1                                                | 5  | 40771820  | 40777688  | 1  | 0  | 0  | 0  | 3  | 0  | 5868  | 0.492069208 | -1.154189711 | 3.97562277  | -0.290316707 | NA          | NA          |
| chr5:93386435-93410474    | exonic       | FAM172A                                               | 5  | 93386435  | 93410474  | 1  | 0  | 0  | 0  | 3  | 0  | 24039 | 0.492069208 | -1.154189711 | 3.97562277  | -0.290316707 | NA          | NA          |
| chr7:105103067-105108910  | exonic       | PUS7                                                  | 7  | 105103067 | 105108910 | 1  | 0  | 0  | 0  | 3  | 0  | 5843  | 0.492069208 | -1.154189711 | 3.97562277  | -0.290316707 | NA          | NA          |
| chr8:124035952-124042956  | exonic       | DERL1                                                 | 8  | 124035952 | 124042956 | 1  | 0  | 0  | 0  | 3  | 0  | 7004  | 0.492069208 | -1.154189711 | 3.97562277  | -0.290316707 | NA          | NA          |
| chr8:17814112-17868875    | exonic       | PCM1                                                  | 8  | 17814112  | 17868875  | 1  | 0  | 0  | 0  | 3  | 0  | 54763 | 0.492069208 | -1.154189711 | 3.97562277  | -0.290316707 | NA          | NA          |
| chr9:88437794-88445491    | ncRNA_exonic | LOC389765                                             | 9  | 88437794  | 88445491  | 1  | 0  | 0  | 0  | 3  | 0  | 7697  | 0.492069208 | -1.154189711 | 3.97562277  | -0.290316707 | NA          | NA          |
| chr13:101997616-102031004 | exonic       | NALCN                                                 | 13 | 101997616 | 102031004 | 2  | 0  | 0  | 1  | 4  | 0  | 33388 | 0.848394958 | -1.152818955 | 2.968735067 | -0.388319917 | NA          | NA          |
| chr14:76330009-76368567   | exonic       | TTLL5                                                 | 14 | 76330009  | 76368567  | 2  | 0  | 0  | 1  | 4  | 0  | 38558 | 0.848394958 | -1.152818955 | 2.968735067 | -0.388319917 | NA          | NA          |
| chr21:30698379-30702014   | exonic       | BACH1                                                 | 21 | 30698379  | 30702014  | 4  | 0  | 0  | 5  | 3  | 1  | 3635  | 1.718805571 | -1.151828047 | 2.086608241 | -0.552009727 | NA          | NA          |
| chr17:20107645-20109225   | exonic       | SPECC1                                                | 17 | 20107645  | 20109225  | 38 | 22 | 16 | 70 | 55 | 41 | 1580  | 38.62714393 | -1.146986658 | 0.632197864 | -1.814284299 | 0.069633967 | 0.998252924 |
| chr10:95140975-95148911   | exonic       | MYOF                                                  | 10 | 95140975  | 95148911  | 2  | 1  | 3  | 12 | 7  | 0  | 7936  | 3.146985336 | -1.144543986 | 1.571919245 | -0.72811882  | 0.466540854 | 0.998252924 |
| chr6:129823750-129879311  | exonic       | LAMA2                                                 | 6  | 129823750 | 129879311 | 0  | 0  | 3  | 9  | 2  | 0  | 55561 | 1.790664386 | -1.143808503 | 2.259827675 | -0.506148551 | 0.61275237  | 0.998252924 |
| chr20:36668836-36687922   | exonic       | RPRD1B                                                | 20 | 36668836  | 36687922  | 2  | 0  | 0  | 3  | 0  | 1  | 19086 | 0.88512665  | -1.143141384 | 2.943051229 | -0.388420484 | 0.697704888 | 0.998252924 |
| chr3:14485131-14489324    | exonic       | SLC6A6                                                | 3  | 14485131  | 14489324  | 2  | 0  | 0  | 3  | 0  | 1  | 4193  | 0.88512665  | -1.143141384 | 2.943051229 | -0.388420484 | 0.697704888 | 0.998252924 |
| chr6:22020567-22056919    | ncRNA_exonic | CASC15                                                | 6  | 22020567  | 22056919  | 2  | 0  | 0  | 3  | 0  | 1  | 36352 | 0.88512665  | -1.143141384 | 2.943051229 | -0.388420484 | 0.697704888 | 0.998252924 |
| chr15:85081762-85098301   | ncRNA_exonic | UBE2Q2P1                                              | 15 | 85081762  | 85098301  | 4  | 2  | 0  | 7  | 5  | 2  | 16539 | 2.830253392 | -1.142649752 | 1.583109051 | -0.721775769 | 0.47043235  | 0.998252924 |
| chr8:68044185-68049838    | exonic       | CSPP1                                                 | 8  | 68044185  | 68049838  | 6  | 0  | 2  | 6  | 9  | 3  | 5653  | 3.820230641 | -1.142482704 | 1.433258185 | -0.797122749 | 0.425379746 | 0.998252924 |
| chr2:61521404-61521663    | intronic     | USP34                                                 | 2  | 61521404  | 61521663  | 2  | 2  | 3  | 4  | 4  | 6  | 259   | 3.956999441 | -1.140400078 | 1.366931231 | -0.834277579 | 0.404124583 | 0.998252924 |
| chr4:151682934-151729550  | exonic       | LRBA                                                  | 4  | 151682934 | 151729550 | 2  | 2  | 1  | 4  | 4  | 3  | 46616 | 2.637805563 | -1.137720246 | 1.556530101 | -0.730933661 | 0.464819674 | 0.998252924 |
| chr17:45041063-45042405   | intergenic   | <small>GIS2 (dist=22330), MIR5089 (dist=7978)</small> | 17 | 45041063  | 45042405  | 0  | 0  | 2  | 4  | 3  | 0  | 1342  | 1.182865857 | -1.137061379 | 2.596754472 | -0.437877894 | 0.661474801 | 0.998252924 |
| chr2:32142994-32157204    | exonic       | MEMO1                                                 | 2  | 32142994  | 32157204  | 0  | 3  | 0  | 2  | 5  | 1  | 14210 | 1.648805885 | -1.136986909 | 2.154617653 | -0.52769776  | NA          | NA          |
| chr1:243776972-243859018  | exonic       | AKT3                                                  | 1  | 243776972 | 243859018 | 1  | 2  | 0  | 6  | 3  | 0  | 82046 | 1.478489117 | -1.135661659 | 2.207369813 | -0.514486359 | 0.606911995 | 0.998252924 |
| chr2:24181170-24207701    | exonic       | UBXN2A                                                | 2  | 24181170  | 24207701  | 2  | 3  | 4  | 1  | 6  | 9  | 26531 | 5.17632078  | -1.135106916 | 1.345026286 | -0.843929169 | 0.398708987 | 0.998252924 |

|                           |        |                                                                                     |    |           |           |    |   |   |    |    |    |        |             |              |             |              |             |             |
|---------------------------|--------|-------------------------------------------------------------------------------------|----|-----------|-----------|----|---|---|----|----|----|--------|-------------|--------------|-------------|--------------|-------------|-------------|
| chr14:103336521-103369766 | exonic | TRAF3                                                                               | 14 | 103336521 | 103369766 | 0  | 2 | 0 | 2  | 2  | 1  | 33245  | 1.111447821 | -1.134423258 | 2.49651213  | -0.454403263 | 0.649538604 | 0.998252924 |
| chr3:50004902-50012825    | exonic | RBM6                                                                                | 3  | 50004902  | 50012825  | 5  | 2 | 1 | 10 | 10 | 1  | 7923   | 3.772362016 | -1.133173725 | 1.374636563 | -0.824344234 | 0.409743991 | 0.998252924 |
| chr22:26853824-26854543   | exonic | HPS4                                                                                | 22 | 26853824  | 26854543  | 3  | 0 | 0 | 8  | 0  | 0  | 719    | 1.23745191  | -1.131364621 | 2.807162912 | -0.403027775 | NA          | NA          |
| chr19:45766370-45766625   | exonic | MARK4                                                                               | 19 | 45766370  | 45766625  | 12 | 0 | 2 | 18 | 10 | 4  | 255    | 6.29913495  | -1.131027403 | 1.244639168 | -0.908719114 | NA          | NA          |
| chr18:9204473-9221997     | exonic | ANKRD12                                                                             | 18 | 9204473   | 9221997   | 2  | 3 | 0 | 5  | 7  | 1  | 17524  | 2.46776877  | -1.128084676 | 1.693958195 | -0.665945995 | 0.50544562  | 0.998252924 |
| chr3:71064699-71102924    | exonic | FOXP1                                                                               | 3  | 71064699  | 71102924  | 4  | 2 | 2 | 25 | 0  | 0  | 38225  | 3.916822049 | -1.127152119 | 1.684253076 | -0.669229664 | NA          | NA          |
| chr12:111990083-111993723 | exonic | ATXN2                                                                               | 12 | 111990083 | 111993723 | 10 | 6 | 7 | 9  | 55 | 1  | 3640   | 11.63793668 | -1.126010226 | 1.061093499 | -1.061179082 | NA          | NA          |
| chrX:51638148-51640367    | exonic | MAGED1                                                                              | X  | 51638148  | 51640367  | 3  | 0 | 0 | 2  | 1  | 2  | 2219   | 1.337048238 | -1.12591441  | 2.339278915 | -0.481308322 | NA          | NA          |
| chr1:39775241-39784287    | exonic | MACF1                                                                               | 1  | 39775241  | 39784287  | 1  | 1 | 0 | 6  | 0  | 0  | 9046   | 0.941131053 | -1.125425665 | 2.888286995 | -0.389651606 | NA          | NA          |
| chr6:55360216-55406938    | exonic | HMGCLL1                                                                             | 6  | 55360216  | 55406938  | 1  | 1 | 0 | 6  | 0  | 0  | 46722  | 0.941131053 | -1.125425665 | 2.888286995 | -0.389651606 | NA          | NA          |
| chr12:122995655-122999774 | exonic | RSRC2                                                                               | 12 | 122995655 | 122999774 | 1  | 0 | 1 | 4  | 2  | 0  | 4119   | 0.993556352 | -1.124177254 | 2.58663897  | -0.434609262 | 0.663846071 | 0.998252924 |
| chr10:126370175-126370948 | exonic | FAM53B                                                                              | 10 | 126370175 | 126370948 | 4  | 4 | 3 | 23 | 4  | 3  | 773    | 5.658785416 | -1.124086628 | 1.183046331 | -0.950162812 | 0.342029531 | 0.998252924 |
| chr15:52876941-52885933   | exonic | FAM214A                                                                             | 15 | 52876941  | 52885933  | 2  | 1 | 0 | 3  | 5  | 0  | 8992   | 1.356320949 | -1.123139946 | 2.272273603 | -0.494280242 | 0.621108277 | 0.998252924 |
| chr1:70736538-70790640    | exonic | ANKRD13C                                                                            | 1  | 70736538  | 70790640  | 2  | 0 | 0 | 2  | 3  | 0  | 54102  | 0.833678921 | -1.121186342 | 2.957294914 | -0.379125645 | 0.704594563 | 0.998252924 |
| chr10:31661947-31791437   | exonic | ZEB1                                                                                | 10 | 31661947  | 31791437  | 2  | 0 | 0 | 2  | 3  | 0  | 129490 | 0.833678921 | -1.121186342 | 2.957294914 | -0.379125645 | 0.704594563 | 0.998252924 |
| chr2:219103386-219110269  | exonic | ARPC2                                                                               | 2  | 219103386 | 219110269 | 2  | 0 | 0 | 2  | 3  | 0  | 6883   | 0.833678921 | -1.121186342 | 2.957294914 | -0.379125645 | 0.704594563 | 0.998252924 |
| chr5:77385216-77477486    | exonic | AP3B1                                                                               | 5  | 77385216  | 77477486  | 2  | 0 | 0 | 2  | 3  | 0  | 92270  | 0.833678921 | -1.121186342 | 2.957294914 | -0.379125645 | 0.704594563 | 0.998252924 |
| chr10:13701322-13705509   | exonic | FRMD4A                                                                              | 10 | 13701322  | 13705509  | 0  | 4 | 0 | 5  | 3  | 2  | 4187   | 2.208179605 | -1.120096455 | 1.917773475 | -0.584060876 | NA          | NA          |
| chr15:25207260-25213229   | exonic | SNURF                                                                               | 15 | 25207260  | 25213229  | 0  | 0 | 1 | 1  | 2  | 0  | 5969   | 0.545635254 | -1.120031024 | 3.496775891 | -0.32030392  | 0.748737952 | 0.998252924 |
| chr17:17165279-17168295   | exonic | COPS3                                                                               | 17 | 17165279  | 17168295  | 0  | 0 | 1 | 1  | 2  | 0  | 3016   | 0.545635254 | -1.120031024 | 3.496775891 | -0.32030392  | 0.748737952 | 0.998252924 |
| chr19:45211132-45211459   | exonic | CEACAM16                                                                            | 19 | 45211132  | 45211459  | 0  | 0 | 1 | 1  | 2  | 0  | 327    | 0.545635254 | -1.120031024 | 3.496775891 | -0.32030392  | 0.748737952 | 0.998252924 |
| chr2:230701563-230725247  | exonic | TRIP12                                                                              | 2  | 230701563 | 230725247 | 0  | 0 | 1 | 1  | 2  | 0  | 23684  | 0.545635254 | -1.120031024 | 3.496775891 | -0.32030392  | 0.748737952 | 0.998252924 |
| chr20:62614399-62616378   | exonic | PRPF6                                                                               | 20 | 62614399  | 62616378  | 0  | 0 | 1 | 1  | 2  | 0  | 1979   | 0.545635254 | -1.120031024 | 3.496775891 | -0.32030392  | 0.748737952 | 0.998252924 |
| chr4:56883813-56885721    | exonic | CEP135                                                                              | 4  | 56883813  | 56885721  | 0  | 0 | 1 | 1  | 2  | 0  | 1908   | 0.545635254 | -1.120031024 | 3.496775891 | -0.32030392  | 0.748737952 | 0.998252924 |
| chr6:7187666-7211942      | exonic | RREB1                                                                               | 6  | 7187666   | 7211942   | 0  | 0 | 1 | 1  | 2  | 0  | 24276  | 0.545635254 | -1.120031024 | 3.496775891 | -0.32030392  | 0.748737952 | 0.998252924 |
| chr5:159437506-159478190  | exonic | TTC1                                                                                | 5  | 159437506 | 159478190 | 0  | 1 | 1 | 7  | 0  | 0  | 40684  | 1.115724521 | -1.119613214 | 2.727398636 | -0.410505894 | NA          | NA          |
| chr11:8832793-8860897     | UTR5   | <small>558-10131171...-6040..._00547411046..._00548..._00551..._00550a11047</small> | 11 | 8832793   | 8860897   | 0  | 1 | 0 | 1  | 2  | 0  | 28104  | 0.522642028 | -1.11896561  | 3.55078848  | -0.315131587 | 0.752661746 | 0.998252924 |
| chr18:74561481-74580819   | exonic | ZNF236                                                                              | 18 | 74561481  | 74580819  | 0  | 1 | 0 | 1  | 2  | 0  | 19338  | 0.522642028 | -1.11896561  | 3.55078848  | -0.315131587 | 0.752661746 | 0.998252924 |
| chr2:152980279-153006743  | exonic | STAM2                                                                               | 2  | 152980279 | 153006743 | 0  | 1 | 0 | 1  | 2  | 0  | 26464  | 0.522642028 | -1.11896561  | 3.55078848  | -0.315131587 | 0.752661746 | 0.998252924 |
| chr3:47087976-47108608    | exonic | SETD2                                                                               | 3  | 47087976  | 47108608  | 0  | 1 | 0 | 1  | 2  | 0  | 20632  | 0.522642028 | -1.11896561  | 3.55078848  | -0.315131587 | 0.752661746 | 0.998252924 |
| chr9:114337013-114348445  | exonic | PTGRI, ZNF483                                                                       | 9  | 114337013 | 114348445 | 0  | 1 | 0 | 1  | 2  | 0  | 11432  | 0.522642028 | -1.11896561  | 3.55078848  | -0.315131587 | 0.752661746 | 0.998252924 |
| chr3:142066075-142095436  | exonic | XRN1                                                                                | 3  | 142066075 | 142095436 | 0  | 1 | 3 | 1  | 3  | 4  | 29361  | 2.468350961 | -1.118481169 | 1.812847479 | -0.616974777 | 0.537251363 | 0.998252924 |
| chr9:113734352-113735838  | exonic | LPAR1                                                                               | 9  | 113734352 | 113735838 | 9  | 6 | 3 | 6  | 12 | 14 | 1486   | 9.203602252 | -1.11834863  | 1.032906556 | -1.082720043 | 0.278932705 | 0.998252924 |
| chr8:48320422-48353104    | exonic | SPIDR                                                                               | 8  | 48320422  | 48353104  | 5  | 0 | 0 | 6  | 2  | 2  | 32682  | 2.141295086 | -1.116992502 | 1.933518911 | -0.57769929  | NA          | NA          |
| chr10:15617487-15634303   | exonic | ITGA8                                                                               | 10 | 15617487  | 15634303  | 1  | 0 | 3 | 1  | 1  | 0  | 16816  | 0.477353172 | -1.11677582  | 3.670250922 | -0.304277785 | 0.760916268 | 0.998252924 |

|                          |              |                       |    |           |           |   |   |   |    |    |   |       |             |              |             |              |             |             |
|--------------------------|--------------|-----------------------|----|-----------|-----------|---|---|---|----|----|---|-------|-------------|--------------|-------------|--------------|-------------|-------------|
| chr19:8533657-8539128    | exonic       | HNRNPM                | 19 | 8533657   | 8539128   | 1 | 0 | 0 | 1  | 2  | 0 | 5471  | 0.477353172 | -1.11677582  | 3.670250922 | -0.304277785 | 0.760916268 | 0.998252924 |
| chr3:182602540-182605501 | exonic       | ATP11B                | 3  | 182602540 | 182605501 | 1 | 0 | 0 | 1  | 2  | 0 | 2961  | 0.477353172 | -1.11677582  | 3.670250922 | -0.304277785 | 0.760916268 | 0.998252924 |
| chr4:106345352-106374799 | exonic       | PPA2                  | 4  | 106345352 | 106374799 | 6 | 9 | 6 | 13 | 6  | 4 | 29447 | 0.477353172 | -1.11677582  | 3.670250922 | -0.304277785 | 0.760916268 | 0.998252924 |
| chr4:39839475-39847500   | exonic       | PDS5A                 | 4  | 39839475  | 39847500  | 2 | 0 | 0 | 1  | 1  | 0 | 8025  | 0.477353172 | -1.11677582  | 3.670250922 | -0.304277785 | 0.760916268 | 0.998252924 |
| chr6:18249881-18258636   | exonic       | DEK                   | 6  | 18249881  | 18258636  | 1 | 0 | 0 | 1  | 2  | 0 | 8755  | 0.477353172 | -1.11677582  | 3.670250922 | -0.304277785 | 0.760916268 | 0.998252924 |
| chr8:100515063-100523740 | exonic       | VPS13B                | 8  | 100515063 | 100523740 | 1 | 0 | 0 | 1  | 2  | 0 | 8677  | 0.477353172 | -1.11677582  | 3.670250922 | -0.304277785 | 0.760916268 | 0.998252924 |
| chr8:28866588-28876430   | exonic       | HMBX1                 | 8  | 28866588  | 28876430  | 1 | 0 | 0 | 1  | 2  | 0 | 9842  | 0.477353172 | -1.11677582  | 3.670250922 | -0.304277785 | 0.760916268 | 0.998252924 |
| chr9:114178551-114206774 | exonic       | KIAA0368              | 9  | 114178551 | 114206774 | 1 | 0 | 0 | 1  | 2  | 0 | 28223 | 0.477353172 | -1.11677582  | 3.670250922 | -0.304277785 | 0.760916268 | 0.998252924 |
| chr9:14672827-14680160   | exonic       | ZDHHC21               | 9  | 14672827  | 14680160  | 1 | 0 | 0 | 1  | 2  | 0 | 7333  | 0.477353172 | -1.11677582  | 3.670250922 | -0.304277785 | 0.760916268 | 0.998252924 |
| chrX:16711263-16721064   | exonic       | CTPS2                 | X  | 16711263  | 16721064  | 1 | 0 | 0 | 1  | 2  | 0 | 9801  | 0.477353172 | -1.11677582  | 3.670250922 | -0.304277785 | 0.760916268 | 0.998252924 |
| chr8:124243539-124251384 | exonic       | C8orf76, ZHX1-C8orf76 | 8  | 124243539 | 124251384 | 1 | 1 | 0 | 0  | 1  | 2 | 7845  | 1.040727381 | -1.116240454 | 2.637980247 | -0.423142082 | 0.672191601 | 0.998252924 |
| chr8:71587052-71593565   | exonic       | XKR9                  | 8  | 71587052  | 71593565  | 0 | 4 | 0 | 0  | 0  | 5 | 6513  | 2.23819624  | -1.112928616 | 3.823476881 | -0.291077637 | NA          | NA          |
| chr11:65266744-65266894  | ncRNA_exonic | MALAT1                | 11 | 65266744  | 65266894  | 3 | 0 | 0 | 0  | 7  | 0 | 150   | 1.234152781 | -1.112444187 | 2.816034617 | -0.395039244 | NA          | NA          |
| chr4:129035724-129043343 | exonic       | LARP1B                | 4  | 129035724 | 129043343 | 1 | 0 | 0 | 0  | 1  | 1 | 7619  | 0.558232973 | -1.107433891 | 3.510390627 | -0.315473122 | 0.752402455 | 0.998252924 |
| chr9:33948371-33963789   | exonic       | UBAP2                 | 9  | 33948371  | 33963789  | 1 | 0 | 0 | 0  | 1  | 1 | 15418 | 0.558232973 | -1.107433891 | 3.510390627 | -0.315473122 | 0.752402455 | 0.998252924 |
| chr1:14099572-14109326   | exonic       | PRDM2                 | 1  | 14099572  | 14109326  | 0 | 3 | 5 | 15 | 5  | 3 | 9754  | 4.633636237 | -1.106946006 | 1.377321477 | -0.803694725 | 0.421573301 | 0.998252924 |
| chr5:159462146-159478190 | exonic       | TTC1                  | 5  | 159462146 | 159478190 | 0 | 1 | 2 | 1  | 3  | 3 | 16044 | 1.200604812 | -1.106211657 | 2.484712512 | -0.445207102 | 0.656170095 | 0.998252924 |
| chr7:140476711-140494267 | exonic       | BRAF                  | 7  | 140476711 | 140494267 | 2 | 3 | 2 | 20 | 0  | 1 | 17556 | 3.609785646 | -1.104752017 | 1.606549256 | -0.687655242 | NA          | NA          |
| chr5:138145726-138163407 | exonic       | CTNNA1                | 5  | 138145726 | 138163407 | 2 | 2 | 1 | 6  | 4  | 2 | 17681 | 2.542209725 | -1.104486114 | 1.565654093 | -0.705447084 | 0.480532052 | 0.998252924 |
| chr15:85657103-85658718  | exonic       | PDE8A                 | 15 | 85657103  | 85658718  | 3 | 4 | 3 | 0  | 15 | 6 | 1615  | 5.340594081 | -1.104386113 | 1.379611944 | -0.800504894 | NA          | NA          |
| chr2:62227835-62228117   | exonic       | COMMD1                | 2  | 62227835  | 62228117  | 0 | 1 | 0 | 0  | 1  | 1 | 282   | 0.60352183  | -1.101458446 | 3.416280505 | -0.322414522 | 0.747138684 | 0.998252924 |
| chr2:86701898-86707485   | exonic       | KDM3A                 | 2  | 86701898  | 86707485  | 0 | 1 | 0 | 0  | 1  | 1 | 5587  | 0.60352183  | -1.101458446 | 3.416280505 | -0.322414522 | 0.747138684 | 0.998252924 |
| chr6:7899808-7904956     | exonic       | TXNDC5                | 6  | 7899808   | 7904956   | 0 | 1 | 0 | 0  | 1  | 1 | 5148  | 0.60352183  | -1.101458446 | 3.416280505 | -0.322414522 | 0.747138684 | 0.998252924 |
| chr1:245165422-245180628 | exonic       | EFCAB2                | 1  | 245165422 | 245180628 | 0 | 0 | 2 | 0  | 2  | 2 | 15206 | 1.253030112 | -1.101171813 | 2.615960973 | -0.420943517 | 0.673796327 | 0.998252924 |
| chr10:97141441-97170534  | exonic       | SORBS1                | 10 | 97141441  | 97170534  | 1 | 3 | 2 | 20 | 0  | 0 | 29093 | 3.172580094 | -1.101160332 | 1.810768886 | -0.608117547 | NA          | NA          |
| chr10:99196174-99198460  | exonic       | EXOSC1                | 10 | 99196174  | 99198460  | 6 | 0 | 0 | 10 | 5  | 0 | 2286  | 2.442172617 | -1.099384846 | 1.99031378  | -0.5523676   | 0.580696524 | 0.998252924 |
| chr5:34922321-34923339   | exonic       | BRIX1                 | 5  | 34922321  | 34923339  | 1 | 0 | 2 | 3  | 6  | 0 | 1018  | 1.56862368  | -1.098877737 | 2.171895213 | -0.505953386 | 0.612889374 | 0.998252924 |
| chr9:86590661-86591909   | splicing     | HNRNPK                | 9  | 86590661  | 86591909  | 0 | 0 | 1 | 0  | 1  | 1 | 1248  | 0.626515056 | -1.098570737 | 3.37326717  | -0.325669649 | 0.74467431  | 0.998252924 |
| chr15:93540186-93558139  | exonic       | CHD2                  | 15 | 93540186  | 93558139  | 4 | 2 | 0 | 8  | 8  | 0 | 17953 | 2.683209825 | -1.098494291 | 1.749377589 | -0.627934357 | 0.530046943 | 0.998252924 |
| chr19:6697354-6697805    | exonic       | C3                    | 19 | 6697354   | 6697805   | 4 | 0 | 0 | 0  | 7  | 1 | 451   | 1.671358333 | -1.097823404 | 2.343758708 | -0.468402912 | 0.639496486 | 0.998252924 |
| chr2:216238044-216256537 | exonic       | FN1                   | 2  | 216238044 | 216256537 | 5 | 5 | 0 | 9  | 0  | 8 | 18493 | 4.938865046 | -1.097497132 | 1.532746153 | -0.7160332   | 0.473970849 | 0.998252924 |
| chr1:22041881-22048257   | exonic       | USP48                 | 1  | 22041881  | 22048257  | 4 | 0 | 1 | 5  | 8  | 0 | 6376  | 2.212993097 | -1.096632513 | 1.903813084 | -0.576019002 | 0.564602338 | 0.998252924 |
| chr2:24181170-24205903   | exonic       | UBXN2A                | 2  | 24181170  | 24205903  | 2 | 3 | 4 | 0  | 6  | 9 | 24733 | 5.070009395 | -1.094920223 | 1.445416376 | -0.757511981 | 0.44874319  | 0.998252924 |
| chr10:35302626-35320547  | exonic       | CUL2                  | 10 | 35302626  | 35320547  | 2 | 1 | 0 | 0  | 1  | 3 | 17921 | 1.477932933 | -1.094495382 | 2.320252764 | -0.471713858 | NA          | NA          |
| chr9:34220905-34242106   | exonic       | UBAP1                 | 9  | 34220905  | 34242106  | 2 | 1 | 0 | 0  | 1  | 3 | 21201 | 1.477932933 | -1.094495382 | 2.320252764 | -0.471713858 | NA          | NA          |



|                           |              |           |    |           |           |   |   |   |   |   |   |       |             |              |             |              |             |             |
|---------------------------|--------------|-----------|----|-----------|-----------|---|---|---|---|---|---|-------|-------------|--------------|-------------|--------------|-------------|-------------|
| chr4:108866125-108868693  | exonic       | CYP2U1    | 4  | 108866125 | 108868693 | 1 | 0 | 1 | 5 | 1 | 0 | 2568  | 0.978840316 | -1.094266451 | 2.629590514 | -0.416135686 | NA          | NA          |
| chr14:67736417-67770316   | exonic       | MPP5      | 14 | 67736417  | 67770316  | 2 | 0 | 1 | 2 | 6 | 0 | 33899 | 1.394030212 | -1.093810253 | 2.269811068 | -0.481894845 | 0.629880648 | 0.998252924 |
| chr7:139746683-139757834  | exonic       | PARP12    | 7  | 139746683 | 139757834 | 3 | 0 | 0 | 2 | 3 | 1 | 11151 | 1.270884473 | -1.093731076 | 2.34602782  | -0.466205501 | NA          | NA          |
| chr1:39835701-39838268    | exonic       | MACF1     | 1  | 39835701  | 39838268  | 2 | 1 | 0 | 6 | 0 | 1 | 2567  | 1.378336604 | -1.093686991 | 2.32232132  | -0.470945593 | 0.637679588 | 0.998252924 |
| chr1:118003110-118045592  | exonic       | MAN1A2    | 1  | 118003110 | 118045592 | 2 | 0 | 0 | 3 | 2 | 0 | 42482 | 0.818962885 | -1.088760413 | 2.974431111 | -0.366039882 | 0.714335316 | 0.998252924 |
| chr12:112509698-112516545 | exonic       | NAA25     | 12 | 112509698 | 112516545 | 2 | 0 | 0 | 3 | 2 | 0 | 6847  | 0.818962885 | -1.088760413 | 2.974431111 | -0.366039882 | 0.714335316 | 0.998252924 |
| chr15:49429346-49431850   | exonic       | COPS2     | 15 | 49429346  | 49431850  | 2 | 0 | 0 | 3 | 2 | 0 | 2504  | 0.818962885 | -1.088760413 | 2.974431111 | -0.366039882 | 0.714335316 | 0.998252924 |
| chr16:583945-586142       | ncRNA_exonic | MIR5587   | 16 | 583945    | 586142    | 2 | 0 | 0 | 3 | 2 | 0 | 2197  | 0.818962885 | -1.088760413 | 2.974431111 | -0.366039882 | 0.714335316 | 0.998252924 |
| chr17:52990026-53024673   | exonic       | TOM1L1    | 17 | 52990026  | 53024673  | 2 | 0 | 0 | 3 | 2 | 0 | 34647 | 0.818962885 | -1.088760413 | 2.974431111 | -0.366039882 | 0.714335316 | 0.998252924 |
| chr18:42281140-42338921   | exonic       | SETBP1    | 18 | 42281140  | 42338921  | 2 | 0 | 0 | 3 | 2 | 0 | 57781 | 0.818962885 | -1.088760413 | 2.974431111 | -0.366039882 | 0.714335316 | 0.998252924 |
| chr21:40590077-40590586   | exonic       | BRWD1     | 21 | 40590077  | 40590586  | 2 | 0 | 0 | 3 | 2 | 0 | 509   | 0.818962885 | -1.088760413 | 2.974431111 | -0.366039882 | 0.714335316 | 0.998252924 |
| chrX:117718697-117724265  | exonic       | DOCK11    | X  | 117718697 | 117724265 | 2 | 0 | 0 | 3 | 2 | 0 | 5568  | 0.818962885 | -1.088760413 | 2.974431111 | -0.366039882 | 0.714335316 | 0.998252924 |
| chrX:76854879-76856033    | exonic       | ATRX      | X  | 76854879  | 76856033  | 2 | 0 | 0 | 3 | 2 | 0 | 1154  | 0.818962885 | -1.088760413 | 2.974431111 | -0.366039882 | 0.714335316 | 0.998252924 |
| chr11:12427413-12428312   | intronic     | PARVA     | 11 | 12427413  | 12428312  | 0 | 4 | 0 | 3 | 0 | 4 | 899   | 2.248911787 | -1.087602323 | 2.139166259 | -0.508423466 | 0.6111564   | 0.998252924 |
| chr13:21305979-21306260   | exonic       | N6AMT2    | 13 | 21305979  | 21306260  | 5 | 0 | 0 | 5 | 7 | 0 | 281   | 2.023683592 | -1.083843266 | 2.113749519 | -0.51275861  | 0.608120186 | 0.998252924 |
| chr16:11988810-11991892   | exonic       | GSPT1     | 16 | 11988810  | 11991892  | 1 | 0 | 2 | 4 | 5 | 0 | 3082  | 1.553907643 | -1.08150485  | 2.16943699  | -0.498518673 | 0.618118511 | 0.998252924 |
| chr10:12123470-12143180   | exonic       | DHTKD1    | 10 | 12123470  | 12143180  | 1 | 1 | 0 | 0 | 3 | 1 | 19710 | 0.974563616 | -1.078445993 | 2.663185805 | -0.404945832 | 0.685517328 | 0.998252924 |
| chr11:85685750-85742653   | exonic       | PICALM    | 11 | 85685750  | 85742653  | 0 | 4 | 0 | 1 | 4 | 3 | 56903 | 2.212180095 | -1.076672225 | 1.979727385 | -0.543848731 | 0.586545572 | 0.998252924 |
| chr1:39916723-39927709    | exonic       | MACF1     | 1  | 39916723  | 39927709  | 0 | 0 | 1 | 2 | 1 | 0 | 10986 | 0.530919218 | -1.076646273 | 3.529772563 | -0.305018596 | 0.760351989 | 0.998252924 |
| chr10:69692353-69773943   | exonic       | HERC4     | 10 | 69692353  | 69773943  | 0 | 0 | 1 | 2 | 1 | 0 | 81590 | 0.530919218 | -1.076646273 | 3.529772563 | -0.305018596 | 0.760351989 | 0.998252924 |
| chr15:66021409-66048810   | exonic       | DENND4A   | 15 | 66021409  | 66048810  | 0 | 0 | 1 | 2 | 1 | 0 | 27401 | 0.530919218 | -1.076646273 | 3.529772563 | -0.305018596 | 0.760351989 | 0.998252924 |
| chr15:86207793-86228104   | exonic       | AKAP13    | 15 | 86207793  | 86228104  | 0 | 0 | 1 | 2 | 1 | 0 | 20311 | 0.530919218 | -1.076646273 | 3.529772563 | -0.305018596 | 0.760351989 | 0.998252924 |
| chr18:9570154-9577189     | exonic       | PPP4R1    | 18 | 9570154   | 9577189   | 0 | 0 | 1 | 2 | 1 | 0 | 7035  | 0.530919218 | -1.076646273 | 3.529772563 | -0.305018596 | 0.760351989 | 0.998252924 |
| chr2:60995604-60997646    | exonic       | PAPOLG    | 2  | 60995604  | 60997646  | 0 | 0 | 1 | 2 | 1 | 0 | 2042  | 0.530919218 | -1.076646273 | 3.529772563 | -0.305018596 | 0.760351989 | 0.998252924 |
| chr3:12421202-12434251    | exonic       | PPARG     | 3  | 12421202  | 12434251  | 0 | 0 | 1 | 2 | 1 | 0 | 13049 | 0.530919218 | -1.076646273 | 3.529772563 | -0.305018596 | 0.760351989 | 0.998252924 |
| chr8:54682177-54684727    | exonic       | ATP6V1H   | 8  | 54682177  | 54684727  | 0 | 0 | 1 | 2 | 1 | 0 | 2550  | 0.530919218 | -1.076646273 | 3.529772563 | -0.305018596 | 0.760351989 | 0.998252924 |
| chrX:76888694-76912143    | exonic       | ATRX      | X  | 76888694  | 76912143  | 0 | 0 | 1 | 2 | 1 | 0 | 23449 | 0.530919218 | -1.076646273 | 3.529772563 | -0.305018596 | 0.760351989 | 0.998252924 |
| chr1:176104145-176133027  | exonic       | RFWD2     | 1  | 176104145 | 176133027 | 0 | 1 | 0 | 2 | 1 | 0 | 28882 | 0.507925991 | -1.075454867 | 3.586190777 | -0.299887801 | 0.76426274  | 0.998252924 |
| chr14:73749066-73763993   | exonic       | NUMB      | 14 | 73749066  | 73763993  | 0 | 1 | 0 | 2 | 1 | 0 | 14927 | 0.507925991 | -1.075454867 | 3.586190777 | -0.299887801 | 0.76426274  | 0.998252924 |
| chr15:43692241-43694048   | exonic       | TUBGCP4   | 15 | 43692241  | 43694048  | 0 | 1 | 0 | 2 | 1 | 0 | 1807  | 0.507925991 | -1.075454867 | 3.586190777 | -0.299887801 | 0.76426274  | 0.998252924 |
| chr15:67528316-67529158   | exonic       | AAGAB     | 15 | 67528316  | 67529158  | 0 | 1 | 0 | 2 | 1 | 0 | 842   | 0.507925991 | -1.075454867 | 3.586190777 | -0.299887801 | 0.76426274  | 0.998252924 |
| chr19:1147307-1154401     | exonic       | SBNO2     | 19 | 1147307   | 1154401   | 0 | 1 | 0 | 2 | 1 | 0 | 7094  | 0.507925991 | -1.075454867 | 3.586190777 | -0.299887801 | 0.76426274  | 0.998252924 |
| chr20:21306916-21349228   | exonic       | XRN2      | 20 | 21306916  | 21349228  | 0 | 1 | 0 | 2 | 1 | 0 | 42312 | 0.507925991 | -1.075454867 | 3.586190777 | -0.299887801 | 0.76426274  | 0.998252924 |
| chr6:109080620-109081606  | ncRNA_exonic | LINCO0222 | 6  | 109080620 | 109081606 | 0 | 1 | 0 | 2 | 1 | 0 | 986   | 0.507925991 | -1.075454867 | 3.586190777 | -0.299887801 | 0.76426274  | 0.998252924 |
| chr7:139741443-139746807  | exonic       | PARP12    | 7  | 139741443 | 139746807 | 0 | 1 | 0 | 2 | 1 | 0 | 5364  | 0.507925991 | -1.075454867 | 3.586190777 | -0.299887801 | 0.76426274  | 0.998252924 |

|                           |            |                                              |    |           |           |    |   |   |    |    |   |       |             |              |             |              |             |             |
|---------------------------|------------|----------------------------------------------|----|-----------|-----------|----|---|---|----|----|---|-------|-------------|--------------|-------------|--------------|-------------|-------------|
| chr7:148463652-148464841  | exonic     | CUL1                                         | 7  | 148463652 | 148464841 | 0  | 1 | 0 | 2  | 1  | 0 | 1189  | 0.507925991 | -1.075454867 | 3.586190777 | -0.299887801 | 0.76426274  | 0.998252924 |
| chr8:108334123-108359325  | exonic     | ANGPT1                                       | 8  | 108334123 | 108359325 | 0  | 1 | 0 | 2  | 1  | 0 | 25202 | 0.507925991 | -1.075454867 | 3.586190777 | -0.299887801 | 0.76426274  | 0.998252924 |
| chr8:17829837-17830196    | exonic     | PCMI                                         | 8  | 17829837  | 17830196  | 0  | 1 | 0 | 2  | 1  | 0 | 359   | 0.507925991 | -1.075454867 | 3.586190777 | -0.299887801 | 0.76426274  | 0.998252924 |
| chrX:106096750-106097526  | exonic     | TBC1D8B                                      | X  | 106096750 | 106097526 | 0  | 1 | 0 | 2  | 1  | 0 | 776   | 0.507925991 | -1.075454867 | 3.586190777 | -0.299887801 | 0.76426274  | 0.998252924 |
| chr1:39781184-39818903    | exonic     | MACF1                                        | 1  | 39781184  | 39818903  | 1  | 0 | 0 | 2  | 1  | 0 | 37719 | 0.462637135 | -1.073009706 | 3.71128486  | -0.289120816 | 0.772488925 | 0.998252924 |
| chr10:106118098-106139978 | exonic     | CFAP58                                       | 10 | 106118098 | 106139978 | 1  | 0 | 0 | 2  | 1  | 0 | 21880 | 0.462637135 | -1.073009706 | 3.71128486  | -0.289120816 | 0.772488925 | 0.998252924 |
| chr11:22242642-22261230   | exonic     | ANO5                                         | 11 | 22242642  | 22261230  | 1  | 0 | 0 | 2  | 1  | 0 | 18588 | 0.462637135 | -1.073009706 | 3.71128486  | -0.289120816 | 0.772488925 | 0.998252924 |
| chr11:66436085-66436762   | exonic     | RBM4B                                        | 11 | 66436085  | 66436762  | 1  | 0 | 0 | 2  | 1  | 0 | 677   | 0.462637135 | -1.073009706 | 3.71128486  | -0.289120816 | 0.772488925 | 0.998252924 |
| chr15:76576097-76588078   | exonic     | ETFA                                         | 15 | 76576097  | 76588078  | 1  | 0 | 0 | 2  | 1  | 0 | 11981 | 0.462637135 | -1.073009706 | 3.71128486  | -0.289120816 | 0.772488925 | 0.998252924 |
| chr17:78298829-78310178   | exonic     | RNF213                                       | 17 | 78298829  | 78310178  | 1  | 0 | 0 | 2  | 1  | 0 | 11349 | 0.462637135 | -1.073009706 | 3.71128486  | -0.289120816 | 0.772488925 | 0.998252924 |
| chr18:54591152-54606624   | exonic     | WDR7                                         | 18 | 54591152  | 54606624  | 1  | 0 | 0 | 2  | 1  | 0 | 15472 | 0.462637135 | -1.073009706 | 3.71128486  | -0.289120816 | 0.772488925 | 0.998252924 |
| chr18:6237962-6244587     | exonic     | L3MBTL4                                      | 18 | 6237962   | 6244587   | 1  | 0 | 0 | 2  | 1  | 0 | 6625  | 0.462637135 | -1.073009706 | 3.71128486  | -0.289120816 | 0.772488925 | 0.998252924 |
| chr2:203329531-203384924  | exonic     | BMPR2                                        | 2  | 203329531 | 203384924 | 1  | 0 | 0 | 2  | 1  | 0 | 55393 | 0.462637135 | -1.073009706 | 3.71128486  | -0.289120816 | 0.772488925 | 0.998252924 |
| chr2:88482217-88482592    | exonic     | THNSL2                                       | 2  | 88482217  | 88482592  | 1  | 0 | 0 | 2  | 1  | 0 | 375   | 0.462637135 | -1.073009706 | 3.71128486  | -0.289120816 | 0.772488925 | 0.998252924 |
| chr3:43591211-43607219    | exonic     | ANO10                                        | 3  | 43591211  | 43607219  | 1  | 0 | 0 | 2  | 1  | 0 | 16008 | 0.462637135 | -1.073009706 | 3.71128486  | -0.289120816 | 0.772488925 | 0.998252924 |
| chr6:149663820-149691235  | exonic     | TAB2                                         | 6  | 149663820 | 149691235 | 1  | 0 | 0 | 2  | 1  | 0 | 27415 | 0.462637135 | -1.073009706 | 3.71128486  | -0.289120816 | 0.772488925 | 0.998252924 |
| chr6:76357446-76380436    | exonic     | SENP6                                        | 6  | 76357446  | 76380436  | 1  | 0 | 0 | 2  | 1  | 0 | 22990 | 0.462637135 | -1.073009706 | 3.71128486  | -0.289120816 | 0.772488925 | 0.998252924 |
| chr7:138189034-138200104  | exonic     | TRIM24                                       | 7  | 138189034 | 138200104 | 1  | 0 | 0 | 2  | 1  | 0 | 11070 | 0.462637135 | -1.073009706 | 3.71128486  | -0.289120816 | 0.772488925 | 0.998252924 |
| chr9:129102786-129184227  | exonic     | MVB12B                                       | 9  | 129102786 | 129184227 | 1  | 0 | 0 | 2  | 1  | 0 | 81441 | 0.462637135 | -1.073009706 | 3.71128486  | -0.289120816 | 0.772488925 | 0.998252924 |
| chr9:14120438-14125765    | exonic     | NFIB                                         | 9  | 14120438  | 14125765  | 1  | 0 | 0 | 2  | 1  | 0 | 5327  | 0.462637135 | -1.073009706 | 3.71128486  | -0.289120816 | 0.772488925 | 0.998252924 |
| chr9:37302184-37305711    | exonic     | ZCCHC7                                       | 9  | 37302184  | 37305711  | 1  | 0 | 0 | 2  | 1  | 0 | 3527  | 0.462637135 | -1.073009706 | 3.71128486  | -0.289120816 | 0.772488925 | 0.998252924 |
| chr9:134381501-134381840  | exonic     | POMT1                                        | 9  | 134381501 | 134381840 | 0  | 0 | 3 | 0  | 10 | 0 | 339   | 1.802081295 | -1.071931298 | 3.843036932 | -0.27892818  | NA          | NA          |
| chr16:29845053-29845387   | exonic     | MVP                                          | 16 | 29845053  | 29845387  | 10 | 3 | 2 | 34 | 3  | 2 | 334   | 6.801341454 | -1.070189909 | 1.20899249  | -0.885191527 | NA          | NA          |
| chrX:2637701-2644414      | exonic     | CD99                                         | X  | 2637701   | 2644414   | 3  | 2 | 0 | 13 | 1  | 0 | 6713  | 2.238587855 | -1.069992076 | 1.953612088 | -0.547699352 | NA          | NA          |
| chr14:89628045-89629313   | exonic     | FOXN3                                        | 14 | 89628045  | 89629313  | 4  | 2 | 2 | 24 | 0  | 0 | 1268  | 3.810510664 | -1.069792522 | 1.692736166 | -0.631990114 | NA          | NA          |
| chr4:151719232-151738409  | exonic     | LRBA                                         | 4  | 151719232 | 151738409 | 4  | 6 | 0 | 7  | 9  | 5 | 19177 | 4.936122102 | -1.069773208 | 1.305252243 | -0.819591166 | 0.412449211 | 0.998252924 |
| chr18:1183831-1238468     | intergenic | ACLYP1 (dist=271658), LINC00470 (dist=29844) | 18 | 1183831   | 1238468   | 3  | 0 | 0 | 0  | 0  | 3 | 54637 | 1.311616655 | -1.066540509 | 2.805763368 | -0.380124896 | NA          | NA          |
| chr14:31139461-31144271   | exonic     | SCFD1                                        | 14 | 31139461  | 31144271  | 0  | 4 | 4 | 6  | 12 | 3 | 4810  | 4.501032497 | -1.065510848 | 1.376230159 | -0.774224311 | NA          | NA          |
| chr7:149930124-149934697  | intergenic | ATP6V0E2 (dist=352323), ACTR3C (dist=9604)   | 7  | 149930124 | 149934697 | 3  | 0 | 0 | 2  | 5  | 0 | 4573  | 1.204720708 | -1.064637796 | 2.566459314 | -0.414827459 | 0.678268217 | 0.998252924 |
| chr8:68211443-68214701    | exonic     | ARFGEF1                                      | 8  | 68211443  | 68214701  | 0  | 4 | 2 | 5  | 11 | 1 | 3258  | 3.262718422 | -1.064365651 | 1.573805312 | -0.676300711 | 0.498849742 | 0.998252924 |
| chr15:91030185-91035943   | exonic     | IQGAP1                                       | 15 | 91030185  | 91035943  | 1  | 0 | 2 | 5  | 4  | 0 | 5758  | 1.539191607 | -1.063244532 | 2.174581656 | -0.488942105 | 0.624882685 | 0.998252924 |
| chr12:6657590-6657991     | exonic     | IFFO1                                        | 12 | 6657590   | 6657991   | 4  | 0 | 0 | 9  | 1  | 0 | 401   | 1.593777659 | -1.059141196 | 2.360809125 | -0.448634828 | NA          | NA          |
| chr1:179316734-179319566  | exonic     | SOAT1                                        | 1  | 179316734 | 179319566 | 0  | 2 | 0 | 3  | 3  | 0 | 2832  | 1.030568019 | -1.058800648 | 2.728545322 | -0.388045835 | 0.697982114 | 0.998252924 |
| chr17:79244325-79244824   | exonic     | SLC38A10                                     | 17 | 79244325  | 79244824  | 0  | 2 | 0 | 3  | 3  | 0 | 499   | 1.030568019 | -1.058800648 | 2.728545322 | -0.388045835 | 0.697982114 | 0.998252924 |
| chr5:80021271-80040434    | exonic     | MSH3                                         | 5  | 80021271  | 80040434  | 0  | 1 | 1 | 1  | 5  | 0 | 19163 | 1.082993319 | -1.057944642 | 2.548248149 | -0.415165471 | NA          | NA          |

|                           |        |                                               |    |           |           |    |   |   |    |    |   |        |             |              |             |              |             |             |
|---------------------------|--------|-----------------------------------------------|----|-----------|-----------|----|---|---|----|----|---|--------|-------------|--------------|-------------|--------------|-------------|-------------|
| chr12:109696072-109696913 | exonic | ACACB                                         | 12 | 109696072 | 109696913 | 2  | 0 | 0 | 4  | 1  | 0 | 841    | 0.804246848 | -1.055257172 | 3.01999992  | -0.349422914 | 0.726771833 | 0.998252924 |
| chr20:2928627-2945848     | exonic | PTPRA                                         | 20 | 2928627   | 2945848   | 7  | 2 | 2 | 9  | 13 | 3 | 17221  | 5.100813025 | -1.05491412  | 1.192498382 | -0.8846252   | 0.37635881  | 0.998252924 |
| chr16:27357787-27364017   | exonic | IL4R                                          | 16 | 27357787  | 27364017  | 2  | 0 | 1 | 4  | 4  | 0 | 6230   | 1.364598139 | -1.054726781 | 2.262034802 | -0.466273455 | 0.641019777 | 0.998252924 |
| chr15:28505922-28508315   | exonic | HERC2                                         | 15 | 28505922  | 28508315  | 1  | 0 | 1 | 6  | 0  | 0 | 2393   | 0.964124279 | -1.052074942 | 2.863286643 | -0.367436123 | NA          | NA          |
| chr3:47139444-47144913    | exonic | SETD2                                         | 3  | 47139444  | 47144913  | 0  | 3 | 1 | 4  | 8  | 0 | 5469   | 2.113561338 | -1.048292379 | 1.957634545 | -0.535489314 | 0.592311545 | 0.998252924 |
| chr1:207753585-207868096  | exonic | CR1, CR1L                                     | 1  | 207753585 | 207868096 | 0  | 0 | 2 | 2  | 0  | 2 | 114511 | 1.223598039 | -1.048062196 | 2.633223029 | -0.398014974 | 0.690619148 | 0.998252924 |
| chr10:65369946-65379560   | exonic | REEP3                                         | 10 | 65369946  | 65379560  | 0  | 0 | 2 | 2  | 0  | 2 | 9614   | 1.223598039 | -1.048062196 | 2.633223029 | -0.398014974 | 0.690619148 | 0.998252924 |
| chr14:55847290-55848909   | exonic | ATG14                                         | 14 | 55847290  | 55848909  | 0  | 0 | 2 | 2  | 0  | 2 | 1619   | 1.223598039 | -1.048062196 | 2.633223029 | -0.398014974 | 0.690619148 | 0.998252924 |
| chr7:89915594-89934134    | exonic | CFAP69                                        | 7  | 89915594  | 89934134  | 0  | 0 | 2 | 2  | 0  | 2 | 18540  | 1.223598039 | -1.048062196 | 2.633223029 | -0.398014974 | 0.690619148 | 0.998252924 |
| chr19:11289020-11289396   | exonic | KANK2                                         | 19 | 11289020  | 11289396  | 15 | 3 | 0 | 42 | 0  | 2 | 376    | 7.539146933 | -1.045855795 | 2.308432584 | -0.453058843 | NA          | NA          |
| chr8:141710989-141716304  | exonic | PTK2                                          | 8  | 141710989 | 141716304 | 3  | 1 | 0 | 6  | 2  | 1 | 5315   | 1.749378391 | -1.045479888 | 1.947437519 | -0.536849002 | 0.591371921 | 0.998252924 |
| chr2:191765289-191775047  | exonic | GLS                                           | 2  | 191765289 | 191775047 | 3  | 0 | 0 | 3  | 4  | 0 | 9758   | 1.190004671 | -1.041676389 | 2.563260779 | -0.406387207 | 0.684458118 | 0.998252924 |
| chr2:197135916-197172809  | exonic | HECW2                                         | 2  | 197135916 | 197172809 | 3  | 1 | 3 | 12 | 8  | 0 | 36893  | 3.3969997   | -1.040658235 | 1.517453417 | -0.685792541 | 0.492843941 | 0.998252924 |
| chr7:65705311-65751696    | exonic | TPST1                                         | 7  | 65705311  | 65751696  | 4  | 3 | 1 | 3  | 9  | 4 | 46385  | 3.877099581 | -1.039729081 | 1.35702409  | -0.766183215 | NA          | NA          |
| chr8:42761315-42798588    | exonic | HOOK3                                         | 8  | 42761315  | 42798588  | 5  | 1 | 1 | 2  | 9  | 5 | 37273  | 5.208686543 | -1.038359323 | 1.237125692 | -0.839332114 | NA          | NA          |
| chr12:94562928-94613939   | exonic | PLXNC1                                        | 12 | 94562928  | 94613939  | 0  | 0 | 3 | 0  | 0  | 4 | 51011  | 1.824681512 | -1.034755076 | 3.84404339  | -0.269184026 | NA          | NA          |
| chr7:102962378-102963241  | exonic | DNAJC2                                        | 7  | 102962378 | 102963241 | 3  | 2 | 2 | 10 | 5  | 2 | 863    | 3.414738656 | -1.034724189 | 1.379357516 | -0.750149382 | 0.453164741 | 0.998252924 |
| chr4:128995614-129019485  | exonic | LARP1B                                        | 4  | 128995614 | 129019485 | 0  | 0 | 2 | 1  | 3  | 1 | 23871  | 1.17215031  | -1.034687093 | 2.474063523 | -0.418213632 | 0.675790929 | 0.998252924 |
| chr6:150059778-150063706  | exonic | NUP43                                         | 6  | 150059778 | 150063706 | 1  | 1 | 0 | 0  | 5  | 0 | 3928   | 0.908399851 | -1.033839937 | 2.928853769 | -0.352984484 | NA          | NA          |
| chr8:141856358-141889736  | exonic | PTK2                                          | 8  | 141856358 | 141889736 | 1  | 1 | 0 | 0  | 5  | 0 | 33378  | 0.908399851 | -1.033839937 | 2.928853769 | -0.352984484 | NA          | NA          |
| chr1:46124699-46126897    | exonic | GPBP1L1                                       | 1  | 46124699  | 46126897  | 4  | 0 | 0 | 3  | 4  | 1 | 2198   | 1.627210223 | -1.032994446 | 2.128899694 | -0.485224573 | NA          | NA          |
| chr17:76000251-76027923   | UTR5   | <small>UTR5 (chr17:76000251-76027923)</small> | 17 | 76000251  | 76027923  | 0  | 2 | 0 | 4  | 2  | 0 | 27672  | 1.015851982 | -1.030401121 | 2.748429881 | -0.37490537  | 0.707730845 | 0.998252924 |
| chr12:110778463-110780253 | exonic | ATP2A2                                        | 12 | 110778463 | 110780253 | 1  | 0 | 0 | 1  | 0  | 1 | 1790   | 0.543516937 | -1.029632489 | 3.541628303 | -0.290722911 | 0.771263248 | 0.998252924 |
| chr14:67431907-67490392   | exonic | GPHN                                          | 14 | 67431907  | 67490392  | 1  | 0 | 0 | 1  | 0  | 1 | 58485  | 0.543516937 | -1.029632489 | 3.541628303 | -0.290722911 | 0.771263248 | 0.998252924 |
| chr15:55724694-55742565   | exonic | DYX1C1                                        | 15 | 55724694  | 55742565  | 1  | 0 | 0 | 1  | 0  | 1 | 17871  | 0.543516937 | -1.029632489 | 3.541628303 | -0.290722911 | 0.771263248 | 0.998252924 |
| chr17:46993437-47000299   | exonic | UBE2Z                                         | 17 | 46993437  | 47000299  | 1  | 0 | 0 | 1  | 0  | 1 | 6862   | 0.543516937 | -1.029632489 | 3.541628303 | -0.290722911 | 0.771263248 | 0.998252924 |
| chr19:41122794-41125398   | exonic | LTBP4                                         | 19 | 41122794  | 41125398  | 1  | 0 | 0 | 1  | 0  | 1 | 2604   | 0.543516937 | -1.029632489 | 3.541628303 | -0.290722911 | 0.771263248 | 0.998252924 |
| chr3:129546645-129547351  | exonic | TMCC1                                         | 3  | 129546645 | 129547351 | 1  | 0 | 0 | 1  | 0  | 1 | 706    | 0.543516937 | -1.029632489 | 3.541628303 | -0.290722911 | 0.771263248 | 0.998252924 |
| chr5:175925914-175927147  | exonic | FAF2                                          | 5  | 175925914 | 175927147 | 1  | 0 | 0 | 1  | 0  | 1 | 1233   | 0.543516937 | -1.029632489 | 3.541628303 | -0.290722911 | 0.771263248 | 0.998252924 |
| chr13:114806476-114822949 | exonic | RASA3                                         | 13 | 114806476 | 114822949 | 0  | 0 | 3 | 11 | 0  | 0 | 16473  | 1.761232313 | -1.028146351 | 3.844225321 | -0.267452156 | NA          | NA          |
| chr1:173725061-173735428  | exonic | KLHL20                                        | 1  | 173725061 | 173735428 | 0  | 0 | 1 | 3  | 0  | 0 | 10367  | 0.516203181 | -1.025047287 | 3.899480463 | -0.262867656 | NA          | NA          |
| chr1:243858892-244006584  | exonic | AKT3                                          | 1  | 243858892 | 244006584 | 0  | 0 | 1 | 3  | 0  | 0 | 147692 | 0.516203181 | -1.025047287 | 3.899480463 | -0.262867656 | NA          | NA          |
| chr1:40872407-40875507    | exonic | SMAP2                                         | 1  | 40872407  | 40875507  | 0  | 0 | 1 | 3  | 0  | 0 | 3100   | 0.516203181 | -1.025047287 | 3.899480463 | -0.262867656 | NA          | NA          |
| chr10:24783428-24802363   | exonic | KIAA1217                                      | 10 | 24783428  | 24802363  | 0  | 0 | 1 | 3  | 0  | 0 | 18935  | 0.516203181 | -1.025047287 | 3.899480463 | -0.262867656 | NA          | NA          |
| chr11:103173821-103194718 | exonic | DYNC2H1                                       | 11 | 103173821 | 103194718 | 0  | 0 | 1 | 3  | 0  | 0 | 20897  | 0.516203181 | -1.025047287 | 3.899480463 | -0.262867656 | NA          | NA          |

|                          |              |                  |    |           |           |   |   |   |   |   |   |       |             |              |             |              |             |             |
|--------------------------|--------------|------------------|----|-----------|-----------|---|---|---|---|---|---|-------|-------------|--------------|-------------|--------------|-------------|-------------|
| chr11:22242642-22284589  | exonic       | ANO5             | 11 | 22242642  | 22284589  | 0 | 0 | 1 | 3 | 0 | 0 | 41947 | 0.516203181 | -1.025047287 | 3.899480463 | -0.262867656 | NA          | NA          |
| chr14:60193636-60194386  | exonic       | RTN1             | 14 | 60193636  | 60194386  | 0 | 0 | 1 | 3 | 0 | 0 | 750   | 0.516203181 | -1.025047287 | 3.899480463 | -0.262867656 | NA          | NA          |
| chr15:22862934-22864369  | exonic       | TUBGCP5          | 15 | 22862934  | 22864369  | 0 | 0 | 1 | 3 | 0 | 0 | 1435  | 0.516203181 | -1.025047287 | 3.899480463 | -0.262867656 | NA          | NA          |
| chr16:50709680-50711446  | exonic       | SNX20            | 16 | 50709680  | 50711446  | 0 | 0 | 1 | 3 | 0 | 0 | 1766  | 0.516203181 | -1.025047287 | 3.899480463 | -0.262867656 | NA          | NA          |
| chr16:74983615-74990508  | exonic       | WDR59            | 16 | 74983615  | 74990508  | 0 | 0 | 1 | 3 | 0 | 0 | 6893  | 0.516203181 | -1.025047287 | 3.899480463 | -0.262867656 | NA          | NA          |
| chr16:89958600-89967202  | exonic       | TCF25            | 16 | 89958600  | 89967202  | 0 | 0 | 1 | 3 | 0 | 0 | 8602  | 0.516203181 | -1.025047287 | 3.899480463 | -0.262867656 | NA          | NA          |
| chr18:46798547-46812986  | exonic       | DYM              | 18 | 46798547  | 46812986  | 0 | 0 | 1 | 3 | 0 | 0 | 14439 | 0.516203181 | -1.025047287 | 3.899480463 | -0.262867656 | NA          | NA          |
| chr19:11151982-11170863  | exonic       | SMARCA4          | 19 | 11151982  | 11170863  | 0 | 0 | 1 | 3 | 0 | 0 | 18881 | 0.516203181 | -1.025047287 | 3.899480463 | -0.262867656 | NA          | NA          |
| chr19:3425103-3452664    | exonic       | NFIC             | 19 | 3425103   | 3452664   | 0 | 0 | 1 | 3 | 0 | 0 | 27561 | 0.516203181 | -1.025047287 | 3.899480463 | -0.262867656 | NA          | NA          |
| chr2:44021595-44032385   | exonic       | DYNC2LI1         | 2  | 44021595  | 44032385  | 0 | 0 | 1 | 3 | 0 | 0 | 10790 | 0.516203181 | -1.025047287 | 3.899480463 | -0.262867656 | NA          | NA          |
| chr20:35315894-35317187  | exonic       | NDRG3            | 20 | 35315894  | 35317187  | 0 | 0 | 1 | 3 | 0 | 0 | 1293  | 0.516203181 | -1.025047287 | 3.899480463 | -0.262867656 | NA          | NA          |
| chr3:169840378-169867032 | exonic       | PHC3             | 3  | 169840378 | 169867032 | 0 | 0 | 1 | 3 | 0 | 0 | 26654 | 0.516203181 | -1.025047287 | 3.899480463 | -0.262867656 | NA          | NA          |
| chr4:882634-898567       | exonic       | GAK              | 4  | 882634    | 898567    | 0 | 0 | 1 | 3 | 0 | 0 | 15933 | 0.516203181 | -1.025047287 | 3.899480463 | -0.262867656 | NA          | NA          |
| chr5:171509329-171517366 | exonic       | STK10            | 5  | 171509329 | 171517366 | 0 | 0 | 1 | 3 | 0 | 0 | 8037  | 0.516203181 | -1.025047287 | 3.899480463 | -0.262867656 | NA          | NA          |
| chr6:155129203-155145512 | exonic       | SCAF8            | 6  | 155129203 | 155145512 | 0 | 0 | 1 | 3 | 0 | 0 | 16309 | 0.516203181 | -1.025047287 | 3.899480463 | -0.262867656 | NA          | NA          |
| chr6:69703659-69772928   | exonic       | ADGRB3           | 6  | 69703659  | 69772928  | 0 | 0 | 1 | 3 | 0 | 0 | 69269 | 0.516203181 | -1.025047287 | 3.899480463 | -0.262867656 | NA          | NA          |
| chr7:16298014-16348252   | exonic       | ISPD             | 7  | 16298014  | 16348252  | 0 | 0 | 1 | 3 | 0 | 0 | 50238 | 0.516203181 | -1.025047287 | 3.899480463 | -0.262867656 | NA          | NA          |
| chr7:74626246-74632979   | ncRNA_exonic | GTF2IP1, GTF2IP4 | 7  | 74626246  | 74632979  | 0 | 0 | 1 | 3 | 0 | 0 | 6733  | 0.516203181 | -1.025047287 | 3.899480463 | -0.262867656 | NA          | NA          |
| chr8:123963531-123966268 | exonic       | ZHX2             | 8  | 123963531 | 123966268 | 0 | 0 | 1 | 3 | 0 | 0 | 2737  | 0.516203181 | -1.025047287 | 3.899480463 | -0.262867656 | NA          | NA          |
| chr8:26248758-26265892   | exonic       | BNIP3L           | 8  | 26248758  | 26265892  | 0 | 0 | 1 | 3 | 0 | 0 | 17134 | 0.516203181 | -1.025047287 | 3.899480463 | -0.262867656 | NA          | NA          |
| chr8:98703179-98735263   | exonic       | MTDH             | 8  | 98703179  | 98735263  | 0 | 0 | 1 | 3 | 0 | 0 | 32084 | 0.516203181 | -1.025047287 | 3.899480463 | -0.262867656 | NA          | NA          |
| chr9:113163133-113166832 | exonic       | SVEP1            | 9  | 113163133 | 113166832 | 0 | 0 | 1 | 3 | 0 | 0 | 3699  | 0.516203181 | -1.025047287 | 3.899480463 | -0.262867656 | NA          | NA          |
| chrX:100290601-100297301 | exonic       | TRMT2B           | X  | 100290601 | 100297301 | 0 | 0 | 1 | 3 | 0 | 0 | 6700  | 0.516203181 | -1.025047287 | 3.899480463 | -0.262867656 | NA          | NA          |
| chrX:122771893-122779226 | exonic       | THOC2            | X  | 122771893 | 122779226 | 0 | 0 | 1 | 3 | 0 | 0 | 7333  | 0.516203181 | -1.025047287 | 3.899480463 | -0.262867656 | NA          | NA          |
| chrX:8553307-8565297     | exonic       | ANOS1            | X  | 8553307   | 8565297   | 0 | 0 | 1 | 3 | 0 | 0 | 11990 | 0.516203181 | -1.025047287 | 3.899480463 | -0.262867656 | NA          | NA          |
| chr1:21167348-21212864   | exonic       | EIF4G3           | 1  | 21167348  | 21212864  | 0 | 1 | 0 | 1 | 0 | 1 | 45516 | 0.588805793 | -1.024095047 | 3.4437338   | -0.297379271 | 0.766176968 | 0.998252924 |
| chr10:3143556-3151672    | exonic       | PFKP             | 10 | 3143556   | 3151672   | 0 | 1 | 0 | 1 | 0 | 1 | 8116  | 0.588805793 | -1.024095047 | 3.4437338   | -0.297379271 | 0.766176968 | 0.998252924 |
| chr15:43438690-43461875  | exonic       | TMEM62           | 15 | 43438690  | 43461875  | 0 | 1 | 0 | 1 | 0 | 1 | 23185 | 0.588805793 | -1.024095047 | 3.4437338   | -0.297379271 | 0.766176968 | 0.998252924 |
| chr19:38597176-38610522  | exonic       | SIPA1L3          | 19 | 38597176  | 38610522  | 0 | 1 | 0 | 1 | 0 | 1 | 13346 | 0.588805793 | -1.024095047 | 3.4437338   | -0.297379271 | 0.766176968 | 0.998252924 |
| chr7:155503896-155538296 | exonic       | RBM33            | 7  | 155503896 | 155538296 | 0 | 1 | 0 | 1 | 0 | 1 | 34400 | 0.588805793 | -1.024095047 | 3.4437338   | -0.297379271 | 0.766176968 | 0.998252924 |
| chr8:87386258-87393858   | exonic       | WWP1             | 8  | 87386258  | 87393858  | 0 | 1 | 0 | 1 | 0 | 1 | 7600  | 0.588805793 | -1.024095047 | 3.4437338   | -0.297379271 | 0.766176968 | 0.998252924 |
| chr1:12638745-12640694   | exonic       | DHRS3            | 1  | 12638745  | 12640694  | 0 | 1 | 0 | 3 | 0 | 0 | 1949  | 0.493209955 | -1.023877637 | 3.967741878 | -0.258050465 | NA          | NA          |
| chr1:200729966-200801973 | exonic       | CAMSAP2          | 1  | 200729966 | 200801973 | 0 | 1 | 0 | 3 | 0 | 0 | 72007 | 0.493209955 | -1.023877637 | 3.967741878 | -0.258050465 | NA          | NA          |
| chr1:203689676-203691817 | exonic       | ATP2B4           | 1  | 203689676 | 203691817 | 0 | 1 | 0 | 3 | 0 | 0 | 2141  | 0.493209955 | -1.023877637 | 3.967741878 | -0.258050465 | NA          | NA          |
| chr1:33058531-33060824   | exonic       | ZBTB8A           | 1  | 33058531  | 33060824  | 0 | 1 | 0 | 3 | 0 | 0 | 2293  | 0.493209955 | -1.023877637 | 3.967741878 | -0.258050465 | NA          | NA          |

|                           |        |          |    |           |           |   |   |   |   |   |   |        |             |              |             |              |    |    |
|---------------------------|--------|----------|----|-----------|-----------|---|---|---|---|---|---|--------|-------------|--------------|-------------|--------------|----|----|
| chr1:46527600-46543285    | exonic | PIK3R3   | 1  | 46527600  | 46543285  | 0 | 1 | 0 | 3 | 0 | 0 | 15685  | 0.493209955 | -1.023877637 | 3.967741878 | -0.258050465 | NA | NA |
| chr1:78267015-78309092    | exonic | FAM73A   | 1  | 78267015  | 78309092  | 0 | 1 | 0 | 3 | 0 | 0 | 42077  | 0.493209955 | -1.023877637 | 3.967741878 | -0.258050465 | NA | NA |
| chr10:12160747-12162266   | exonic | DHTKD1   | 10 | 12160747  | 12162266  | 0 | 1 | 0 | 3 | 0 | 0 | 1519   | 0.493209955 | -1.023877637 | 3.967741878 | -0.258050465 | NA | NA |
| chr11:103173821-103327084 | exonic | DYNC2H1  | 11 | 103173821 | 103327084 | 0 | 1 | 0 | 3 | 0 | 0 | 153263 | 0.493209955 | -1.023877637 | 3.967741878 | -0.258050465 | NA | NA |
| chr11:16339991-16362798   | exonic | SOX6     | 11 | 16339991  | 16362798  | 0 | 1 | 0 | 3 | 0 | 0 | 22807  | 0.493209955 | -1.023877637 | 3.967741878 | -0.258050465 | NA | NA |
| chr11:581491-587464       | exonic | PHRF1    | 11 | 581491    | 587464    | 0 | 1 | 0 | 3 | 0 | 0 | 5973   | 0.493209955 | -1.023877637 | 3.967741878 | -0.258050465 | NA | NA |
| chr12:27132716-27143560   | exonic | TM7SF3   | 12 | 27132716  | 27143560  | 0 | 1 | 0 | 3 | 0 | 0 | 10844  | 0.493209955 | -1.023877637 | 3.967741878 | -0.258050465 | NA | NA |
| chr13:20235837-20244503   | exonic | MPHOSPH8 | 13 | 20235837  | 20244503  | 0 | 1 | 0 | 3 | 0 | 0 | 8666   | 0.493209955 | -1.023877637 | 3.967741878 | -0.258050465 | NA | NA |
| chr14:57696451-57714430   | exonic | EXOC5    | 14 | 57696451  | 57714430  | 0 | 1 | 0 | 3 | 0 | 0 | 17979  | 0.493209955 | -1.023877637 | 3.967741878 | -0.258050465 | NA | NA |
| chr14:73749066-73754022   | exonic | NUMB     | 14 | 73749066  | 73754022  | 0 | 1 | 0 | 3 | 0 | 0 | 4956   | 0.493209955 | -1.023877637 | 3.967741878 | -0.258050465 | NA | NA |
| chr15:100138634-100230633 | exonic | MEF2A    | 15 | 100138634 | 100230633 | 0 | 1 | 0 | 3 | 0 | 0 | 91999  | 0.493209955 | -1.023877637 | 3.967741878 | -0.258050465 | NA | NA |
| chr15:100138634-100247060 | exonic | MEF2A    | 15 | 100138634 | 100247060 | 0 | 1 | 0 | 3 | 0 | 0 | 108426 | 0.493209955 | -1.023877637 | 3.967741878 | -0.258050465 | NA | NA |
| chr15:28491026-28493882   | exonic | HERC2    | 15 | 28491026  | 28493882  | 0 | 1 | 0 | 3 | 0 | 0 | 2856   | 0.493209955 | -1.023877637 | 3.967741878 | -0.258050465 | NA | NA |
| chr15:41361767-41373271   | exonic | INO80    | 15 | 41361767  | 41373271  | 0 | 1 | 0 | 3 | 0 | 0 | 11504  | 0.493209955 | -1.023877637 | 3.967741878 | -0.258050465 | NA | NA |
| chr15:43120125-43164956   | exonic | TTBK2    | 15 | 43120125  | 43164956  | 0 | 1 | 0 | 3 | 0 | 0 | 44831  | 0.493209955 | -1.023877637 | 3.967741878 | -0.258050465 | NA | NA |
| chr16:4727463-4730098     | exonic | MGRN1    | 16 | 4727463   | 4730098   | 0 | 1 | 0 | 3 | 0 | 0 | 2635   | 0.493209955 | -1.023877637 | 3.967741878 | -0.258050465 | NA | NA |
| chr17:4109615-4113242     | exonic | ANKFY1   | 17 | 4109615   | 4113242   | 0 | 1 | 0 | 3 | 0 | 0 | 3627   | 0.493209955 | -1.023877637 | 3.967741878 | -0.258050465 | NA | NA |
| chr17:5257653-5271763     | exonic | RABEP1   | 17 | 5257653   | 5271763   | 0 | 1 | 0 | 3 | 0 | 0 | 14110  | 0.493209955 | -1.023877637 | 3.967741878 | -0.258050465 | NA | NA |
| chr2:170911969-170917953  | exonic | UBR3     | 2  | 170911969 | 170917953 | 0 | 1 | 0 | 3 | 0 | 0 | 5984   | 0.493209955 | -1.023877637 | 3.967741878 | -0.258050465 | NA | NA |
| chr2:20454623-20455931    | exonic | PUM2     | 2  | 20454623  | 20455931  | 0 | 1 | 0 | 3 | 0 | 0 | 1308   | 0.493209955 | -1.023877637 | 3.967741878 | -0.258050465 | NA | NA |
| chr2:25799706-25830190    | exonic | DTNB     | 2  | 25799706  | 25830190  | 0 | 1 | 0 | 3 | 0 | 0 | 30484  | 0.493209955 | -1.023877637 | 3.967741878 | -0.258050465 | NA | NA |
| chr3:127298582-127299006  | exonic | TPRA1    | 3  | 127298582 | 127299006 | 0 | 1 | 0 | 3 | 0 | 0 | 424    | 0.493209955 | -1.023877637 | 3.967741878 | -0.258050465 | NA | NA |
| chr3:130685988-130688240  | exonic | ATP2C1   | 3  | 130685988 | 130688240 | 0 | 1 | 0 | 3 | 0 | 0 | 2252   | 0.493209955 | -1.023877637 | 3.967741878 | -0.258050465 | NA | NA |
| chr3:153935657-153958368  | exonic | ARHGEF26 | 3  | 153935657 | 153958368 | 0 | 1 | 0 | 3 | 0 | 0 | 22711  | 0.493209955 | -1.023877637 | 3.967741878 | -0.258050465 | NA | NA |
| chr3:23942298-23952941    | exonic | NKIRAS1  | 3  | 23942298  | 23952941  | 0 | 1 | 0 | 3 | 0 | 0 | 10643  | 0.493209955 | -1.023877637 | 3.967741878 | -0.258050465 | NA | NA |
| chr3:3209317-3216953      | exonic | CRBN     | 3  | 3209317   | 3216953   | 0 | 1 | 0 | 3 | 0 | 0 | 7636   | 0.493209955 | -1.023877637 | 3.967741878 | -0.258050465 | NA | NA |
| chr4:156617957-156643344  | exonic | GUCY1A3  | 4  | 156617957 | 156643344 | 0 | 1 | 0 | 3 | 0 | 0 | 25387  | 0.493209955 | -1.023877637 | 3.967741878 | -0.258050465 | NA | NA |
| chr5:16761572-16766307    | exonic | MYO10    | 5  | 16761572  | 16766307  | 0 | 1 | 0 | 3 | 0 | 0 | 4735   | 0.493209955 | -1.023877637 | 3.967741878 | -0.258050465 | NA | NA |
| chr7:91851215-91871451    | exonic | KRIT1    | 7  | 91851215  | 91871451  | 0 | 1 | 0 | 3 | 0 | 0 | 20236  | 0.493209955 | -1.023877637 | 3.967741878 | -0.258050465 | NA | NA |
| chr8:94798450-94828743    | exonic | TMEM67   | 8  | 94798450  | 94828743  | 0 | 1 | 0 | 3 | 0 | 0 | 30293  | 0.493209955 | -1.023877637 | 3.967741878 | -0.258050465 | NA | NA |
| chr9:131565528-131566398  | exonic | TBC1D13  | 9  | 131565528 | 131566398 | 0 | 1 | 0 | 3 | 0 | 0 | 870    | 0.493209955 | -1.023877637 | 3.967741878 | -0.258050465 | NA | NA |
| chr9:20413718-20414423    | exonic | MLLT3    | 9  | 20413718  | 20414423  | 0 | 1 | 0 | 3 | 0 | 0 | 705    | 0.493209955 | -1.023877637 | 3.967741878 | -0.258050465 | NA | NA |
| chr1:107690690-107691461  | exonic | NTNG1    | 1  | 107690690 | 107691461 | 1 | 0 | 0 | 3 | 0 | 0 | 771    | 0.447921098 | -1.023044237 | 4.018710731 | -0.25457026  | NA | NA |
| chr1:174241551-174363283  | exonic | RABGAP1L | 1  | 174241551 | 174363283 | 3 | 0 | 0 | 0 | 0 | 0 | 121732 | 0.447921098 | -1.023044237 | 4.018710731 | -0.25457026  | NA | NA |
| chr1:178252698-178269253  | exonic | RASAL2   | 1  | 178252698 | 178269253 | 1 | 0 | 0 | 3 | 0 | 0 | 16555  | 0.447921098 | -1.023044237 | 4.018710731 | -0.25457026  | NA | NA |

|                           |              |                  |    |           |           |   |   |   |   |   |   |        |             |              |             |             |    |    |
|---------------------------|--------------|------------------|----|-----------|-----------|---|---|---|---|---|---|--------|-------------|--------------|-------------|-------------|----|----|
| chr1:200729966-200811215  | exonic       | CAMSAP2          | 1  | 200729966 | 200811215 | 1 | 0 | 0 | 3 | 0 | 0 | 81249  | 0.447921098 | -1.023044237 | 4.018710731 | -0.25457026 | NA | NA |
| chr1:48821389-48878823    | exonic       | SPATA6           | 1  | 48821389  | 48878823  | 1 | 0 | 0 | 3 | 0 | 0 | 57434  | 0.447921098 | -1.023044237 | 4.018710731 | -0.25457026 | NA | NA |
| chr10:126727565-126799662 | exonic       | CTBP2            | 10 | 126727565 | 126799662 | 1 | 0 | 0 | 3 | 0 | 0 | 72097  | 0.447921098 | -1.023044237 | 4.018710731 | -0.25457026 | NA | NA |
| chr10:128768965-128860040 | exonic       | DOCK1            | 10 | 128768965 | 128860040 | 1 | 0 | 0 | 3 | 0 | 0 | 91075  | 0.447921098 | -1.023044237 | 4.018710731 | -0.25457026 | NA | NA |
| chr10:64936056-64960437   | exonic       | JMJD1C           | 10 | 64936056  | 64960437  | 1 | 0 | 0 | 3 | 0 | 0 | 24381  | 0.447921098 | -1.023044237 | 4.018710731 | -0.25457026 | NA | NA |
| chr11:120318582-120338017 | exonic       | ARHGEF12         | 11 | 120318582 | 120338017 | 1 | 0 | 0 | 3 | 0 | 0 | 19435  | 0.447921098 | -1.023044237 | 4.018710731 | -0.25457026 | NA | NA |
| chr11:58317258-58318705   | exonic       | LPXN             | 11 | 58317258  | 58318705  | 1 | 0 | 0 | 3 | 0 | 0 | 1447   | 0.447921098 | -1.023044237 | 4.018710731 | -0.25457026 | NA | NA |
| chr12:121000747-121001746 | exonic       | RNF10            | 12 | 121000747 | 121001746 | 1 | 0 | 0 | 3 | 0 | 0 | 999    | 0.447921098 | -1.023044237 | 4.018710731 | -0.25457026 | NA | NA |
| chr12:131466428-131498885 | exonic       | ADGRD1           | 12 | 131466428 | 131498885 | 1 | 0 | 0 | 3 | 0 | 0 | 32457  | 0.447921098 | -1.023044237 | 4.018710731 | -0.25457026 | NA | NA |
| chr12:26568235-26596583   | exonic       | ITPR2            | 12 | 26568235  | 26596583  | 1 | 0 | 0 | 3 | 0 | 0 | 28348  | 0.447921098 | -1.023044237 | 4.018710731 | -0.25457026 | NA | NA |
| chr12:6030205-6031970     | exonic       | ANO2             | 12 | 6030205   | 6031970   | 1 | 0 | 0 | 3 | 0 | 0 | 1765   | 0.447921098 | -1.023044237 | 4.018710731 | -0.25457026 | NA | NA |
| chr13:103459495-103486902 | exonic       | BIVM, BIVM-ERCC5 | 13 | 103459495 | 103486902 | 1 | 0 | 0 | 3 | 0 | 0 | 27407  | 0.447921098 | -1.023044237 | 4.018710731 | -0.25457026 | NA | NA |
| chr13:114786879-114793403 | exonic       | RASA3            | 13 | 114786879 | 114793403 | 1 | 0 | 0 | 3 | 0 | 0 | 6524   | 0.447921098 | -1.023044237 | 4.018710731 | -0.25457026 | NA | NA |
| chr13:41400641-41411021   | ncRNA_exonic | TPTE2P5          | 13 | 41400641  | 41411021  | 1 | 0 | 0 | 3 | 0 | 0 | 10380  | 0.447921098 | -1.023044237 | 4.018710731 | -0.25457026 | NA | NA |
| chr13:51956164-51963580   | exonic       | INTS6            | 13 | 51956164  | 51963580  | 1 | 0 | 0 | 3 | 0 | 0 | 7416   | 0.447921098 | -1.023044237 | 4.018710731 | -0.25457026 | NA | NA |
| chr14:37716307-37739730   | exonic       | MIPOL1           | 14 | 37716307  | 37739730  | 1 | 0 | 0 | 3 | 0 | 0 | 23423  | 0.447921098 | -1.023044237 | 4.018710731 | -0.25457026 | NA | NA |
| chr15:50330964-50399205   | exonic       | ATP8B4           | 15 | 50330964  | 50399205  | 1 | 0 | 0 | 3 | 0 | 0 | 68241  | 0.447921098 | -1.023044237 | 4.018710731 | -0.25457026 | NA | NA |
| chr16:28967298-28970421   | exonic       | NFATC2IP         | 16 | 28967298  | 28970421  | 1 | 0 | 0 | 3 | 0 | 0 | 3123   | 0.447921098 | -1.023044237 | 4.018710731 | -0.25457026 | NA | NA |
| chr16:29845053-29847119   | exonic       | MVP              | 16 | 29845053  | 29847119  | 1 | 0 | 0 | 3 | 0 | 0 | 2066   | 0.447921098 | -1.023044237 | 4.018710731 | -0.25457026 | NA | NA |
| chr18:32650158-32682123   | exonic       | MAPRE2           | 18 | 32650158  | 32682123  | 1 | 0 | 0 | 3 | 0 | 0 | 31965  | 0.447921098 | -1.023044237 | 4.018710731 | -0.25457026 | NA | NA |
| chr18:76856475-77013541   | exonic       | ATP9B            | 18 | 76856475  | 77013541  | 1 | 0 | 0 | 3 | 0 | 0 | 157066 | 0.447921098 | -1.023044237 | 4.018710731 | -0.25457026 | NA | NA |
| chr18:76886266-77067234   | exonic       | ATP9B            | 18 | 76886266  | 77067234  | 2 | 0 | 0 | 0 | 0 | 0 | 180968 | 0.447921098 | -1.023044237 | 4.018710731 | -0.25457026 | NA | NA |
| chr19:41884185-41884424   | exonic       | TMEM91           | 19 | 41884185  | 41884424  | 1 | 0 | 0 | 3 | 0 | 0 | 239    | 0.447921098 | -1.023044237 | 4.018710731 | -0.25457026 | NA | NA |
| chr19:55420603-55420882   | exonic       | NCR1             | 19 | 55420603  | 55420882  | 1 | 0 | 0 | 3 | 0 | 0 | 279    | 0.447921098 | -1.023044237 | 4.018710731 | -0.25457026 | NA | NA |
| chr19:651610-652884       | exonic       | RNF126           | 19 | 651610    | 652884    | 1 | 0 | 0 | 3 | 0 | 0 | 1274   | 0.447921098 | -1.023044237 | 4.018710731 | -0.25457026 | NA | NA |
| chr2:239241464-239264721  | exonic       | TRAF3IP1         | 2  | 239241464 | 239264721 | 1 | 0 | 0 | 3 | 0 | 0 | 23257  | 0.447921098 | -1.023044237 | 4.018710731 | -0.25457026 | NA | NA |
| chr20:16474935-16496309   | exonic       | KIF16B           | 20 | 16474935  | 16496309  | 1 | 0 | 0 | 3 | 0 | 0 | 21374  | 0.447921098 | -1.023044237 | 4.018710731 | -0.25457026 | NA | NA |
| chr20:32207322-32217720   | exonic       | CBFA2T2          | 20 | 32207322  | 32217720  | 1 | 0 | 0 | 3 | 0 | 0 | 10398  | 0.447921098 | -1.023044237 | 4.018710731 | -0.25457026 | NA | NA |
| chr20:61833638-61835159   | exonic       | YTHDF1           | 20 | 61833638  | 61835159  | 1 | 0 | 0 | 3 | 0 | 0 | 1521   | 0.447921098 | -1.023044237 | 4.018710731 | -0.25457026 | NA | NA |
| chr3:122255014-122259699  | exonic       | PARP9            | 3  | 122255014 | 122259699 | 1 | 0 | 0 | 3 | 0 | 0 | 4685   | 0.447921098 | -1.023044237 | 4.018710731 | -0.25457026 | NA | NA |
| chr3:12447380-12458653    | exonic       | PPARG            | 3  | 12447380  | 12458653  | 1 | 0 | 0 | 3 | 0 | 0 | 11273  | 0.447921098 | -1.023044237 | 4.018710731 | -0.25457026 | NA | NA |
| chr3:78987750-78988077    | exonic       | ROBO1            | 3  | 78987750  | 78988077  | 1 | 0 | 0 | 3 | 0 | 0 | 327    | 0.447921098 | -1.023044237 | 4.018710731 | -0.25457026 | NA | NA |
| chr4:120180974-120193189  | exonic       | USP53            | 4  | 120180974 | 120193189 | 1 | 0 | 0 | 3 | 0 | 0 | 12215  | 0.447921098 | -1.023044237 | 4.018710731 | -0.25457026 | NA | NA |
| chr5:1032266-1036499      | exonic       | NKD2             | 5  | 1032266   | 1036499   | 1 | 0 | 0 | 3 | 0 | 0 | 4233   | 0.447921098 | -1.023044237 | 4.018710731 | -0.25457026 | NA | NA |
| chr5:134705095-134705832  | exonic       | H2AFY            | 5  | 134705095 | 134705832 | 1 | 0 | 0 | 3 | 0 | 0 | 737    | 0.447921098 | -1.023044237 | 4.018710731 | -0.25457026 | NA | NA |

|                           |          |          |    |           |           |   |   |   |   |    |   |       |             |              |             |              |             |             |
|---------------------------|----------|----------|----|-----------|-----------|---|---|---|---|----|---|-------|-------------|--------------|-------------|--------------|-------------|-------------|
| chr5:38482690-38530768    | exonic   | LIFR     | 5  | 38482690  | 38530768  | 1 | 0 | 0 | 3 | 0  | 0 | 48078 | 0.447921098 | -1.023044237 | 4.018710731 | -0.25457026  | NA          | NA          |
| chr5:5441224-5444439      | exonic   | ICE1     | 5  | 5441224   | 5444439   | 1 | 0 | 0 | 3 | 0  | 0 | 3215  | 0.447921098 | -1.023044237 | 4.018710731 | -0.25457026  | NA          | NA          |
| chr6:109900752-109935683  | exonic   | AK9      | 6  | 109900752 | 109935683 | 1 | 0 | 0 | 0 | 0  | 2 | 34931 | 0.447921098 | -1.023044237 | 4.018710731 | -0.25457026  | NA          | NA          |
| chr6:2779496-2783795      | exonic   | WRNIP1   | 6  | 2779496   | 2783795   | 1 | 0 | 0 | 2 | 0  | 0 | 4299  | 0.447921098 | -1.023044237 | 4.018710731 | -0.25457026  | NA          | NA          |
| chr7:129756284-129767291  | exonic   | KLHDC10  | 7  | 129756284 | 129767291 | 1 | 0 | 0 | 3 | 0  | 0 | 11007 | 0.447921098 | -1.023044237 | 4.018710731 | -0.25457026  | NA          | NA          |
| chr7:129756284-129769416  | exonic   | KLHDC10  | 7  | 129756284 | 129769416 | 1 | 0 | 0 | 3 | 0  | 0 | 13132 | 0.447921098 | -1.023044237 | 4.018710731 | -0.25457026  | NA          | NA          |
| chr7:151873275-151875095  | exonic   | KMT2C    | 7  | 151873275 | 151875095 | 1 | 0 | 0 | 3 | 0  | 0 | 1820  | 0.447921098 | -1.023044237 | 4.018710731 | -0.25457026  | NA          | NA          |
| chr7:30818047-30831190    | exonic   | FAM188B  | 7  | 30818047  | 30831190  | 1 | 0 | 0 | 3 | 0  | 0 | 13143 | 0.447921098 | -1.023044237 | 4.018710731 | -0.25457026  | NA          | NA          |
| chr7:74247927-74251505    | exonic   | GTF2IRD2 | 7  | 74247927  | 74251505  | 1 | 0 | 0 | 3 | 0  | 0 | 3578  | 0.447921098 | -1.023044237 | 4.018710731 | -0.25457026  | NA          | NA          |
| chr8:48812932-48842572    | exonic   | PRKDC    | 8  | 48812932  | 48842572  | 1 | 0 | 0 | 3 | 0  | 0 | 29640 | 0.447921098 | -1.023044237 | 4.018710731 | -0.25457026  | NA          | NA          |
| chr9:127915811-127923185  | exonic   | PPP6C    | 9  | 127915811 | 127923185 | 1 | 0 | 0 | 3 | 0  | 0 | 7374  | 0.447921098 | -1.023044237 | 4.018710731 | -0.25457026  | NA          | NA          |
| chr9:35295692-35370393    | exonic   | UNC13B   | 9  | 35295692  | 35370393  | 1 | 0 | 0 | 3 | 0  | 0 | 74701 | 0.447921098 | -1.023044237 | 4.018710731 | -0.25457026  | NA          | NA          |
| chr9:7015852-7049200      | exonic   | KDM4C    | 9  | 7015852   | 7049200   | 1 | 0 | 0 | 3 | 0  | 0 | 33348 | 0.447921098 | -1.023044237 | 4.018710731 | -0.25457026  | NA          | NA          |
| chrX:67316711-67339174    | exonic   | OPHN1    | X  | 67316711  | 67339174  | 1 | 0 | 0 | 3 | 0  | 0 | 22463 | 0.447921098 | -1.023044237 | 4.018710731 | -0.25457026  | NA          | NA          |
| chr1:243579003-243589860  | exonic   | SDCCAG8  | 1  | 243579003 | 243589860 | 0 | 3 | 2 | 2 | 6  | 3 | 10857 | 2.780808576 | -1.021898753 | 1.657600462 | -0.616492802 | 0.537569321 | 0.998252924 |
| chr11:18305341-18308257   | exonic   | HPS5     | 11 | 18305341  | 18308257  | 0 | 0 | 1 | 1 | 0  | 1 | 2916  | 0.611799019 | -1.021426059 | 3.399068847 | -0.300501761 | 0.763794454 | 0.998252924 |
| chr12:42768664-42792796   | exonic   | PPHLN1   | 12 | 42768664  | 42792796  | 0 | 0 | 1 | 1 | 0  | 1 | 24132 | 0.611799019 | -1.021426059 | 3.399068847 | -0.300501761 | 0.763794454 | 0.998252924 |
| chr12:64878082-64879797   | exonic   | TBK1     | 12 | 64878082  | 64879797  | 0 | 0 | 1 | 1 | 0  | 1 | 1715  | 0.611799019 | -1.021426059 | 3.399068847 | -0.300501761 | 0.763794454 | 0.998252924 |
| chr15:82443805-82444764   | exonic   | EFTUD1   | 15 | 82443805  | 82444764  | 0 | 0 | 1 | 1 | 0  | 1 | 959   | 0.611799019 | -1.021426059 | 3.399068847 | -0.300501761 | 0.763794454 | 0.998252924 |
| chr16:72845475-72845937   | exonic   | ZFX3     | 16 | 72845475  | 72845937  | 0 | 0 | 1 | 1 | 0  | 1 | 462   | 0.611799019 | -1.021426059 | 3.399068847 | -0.300501761 | 0.763794454 | 0.998252924 |
| chr2:171867882-171884915  | exonic   | TLK1     | 2  | 171867882 | 171884915 | 0 | 0 | 1 | 1 | 0  | 1 | 17033 | 0.611799019 | -1.021426059 | 3.399068847 | -0.300501761 | 0.763794454 | 0.998252924 |
| chr2:40387904-40404995    | exonic   | SLC8A1   | 2  | 40387904  | 40404995  | 0 | 0 | 1 | 1 | 0  | 1 | 17091 | 0.611799019 | -1.021426059 | 3.399068847 | -0.300501761 | 0.763794454 | 0.998252924 |
| chr20:43132455-43135637   | exonic   | SERINC3  | 20 | 43132455  | 43135637  | 0 | 0 | 1 | 1 | 0  | 1 | 3182  | 0.611799019 | -1.021426059 | 3.399068847 | -0.300501761 | 0.763794454 | 0.998252924 |
| chr11:82917099-82959129   | exonic   | ANKRD42  | 11 | 82917099  | 82959129  | 2 | 0 | 0 | 0 | 0  | 2 | 42030 | 0.874411103 | -1.020014778 | 3.250613018 | -0.313791513 | 0.75367939  | 0.998252924 |
| chr13:21955572-21995303   | exonic   | ZDHHC20  | 13 | 21955572  | 21995303  | 2 | 0 | 0 | 0 | 0  | 2 | 39731 | 0.874411103 | -1.020014778 | 3.250613018 | -0.313791513 | 0.75367939  | 0.998252924 |
| chr15:71758592-71760282   | intronic | THSD4    | 15 | 71758592  | 71760282  | 2 | 0 | 0 | 0 | 0  | 2 | 1690  | 0.874411103 | -1.020014778 | 3.250613018 | -0.313791513 | 0.75367939  | 0.998252924 |
| chr17:45479498-45517868   | exonic   | EFCAB13  | 17 | 45479498  | 45517868  | 2 | 0 | 0 | 0 | 0  | 2 | 38370 | 0.874411103 | -1.020014778 | 3.250613018 | -0.313791513 | 0.75367939  | 0.998252924 |
| chr8:61707544-61720831    | exonic   | CHD7     | 8  | 61707544  | 61720831  | 2 | 0 | 0 | 0 | 0  | 2 | 13287 | 0.874411103 | -1.020014778 | 3.250613018 | -0.313791513 | 0.75367939  | 0.998252924 |
| chr12:111991961-111993723 | exonic   | ATXN2    | 12 | 111991961 | 111993723 | 3 | 2 | 5 | 3 | 7  | 8 | 1762  | 5.353732533 | -1.019764989 | 1.251878955 | -0.814587532 | 0.415308449 | 0.998252924 |
| chr6:31831332-31837414    | exonic   | SLC44A4  | 6  | 31831332  | 31837414  | 3 | 4 | 2 | 0 | 24 | 0 | 6082  | 4.383260199 | -1.018738143 | 1.641920348 | -0.620455276 | NA          | NA          |
| chr19:30462099-30503438   | exonic   | URI1     | 19 | 30462099  | 30503438  | 3 | 0 | 0 | 4 | 3  | 0 | 41339 | 1.175288634 | -1.018471385 | 2.57281098  | -0.39585939  | NA          | NA          |
| chr9:99284787-99327765    | exonic   | CDC14B   | 9  | 99284787  | 99327765  | 2 | 3 | 0 | 3 | 10 | 0 | 42978 | 2.310009656 | -1.018248207 | 1.878857266 | -0.541950805 | 0.587852397 | 0.998252924 |
| chr11:68282496-68287119   | UTR5     | -----    | 11 | 68282496  | 68287119  | 2 | 0 | 0 | 5 | 0  | 0 | 4623  | 0.789530811 | -1.0171718   | 3.317790676 | -0.306581065 | NA          | NA          |
| chr12:88910110-88939642   | exonic   | KITLG    | 12 | 88910110  | 88939642  | 2 | 0 | 0 | 5 | 0  | 0 | 29532 | 0.789530811 | -1.0171718   | 3.317790676 | -0.306581065 | NA          | NA          |
| chr17:47394188-47399870   | exonic   | ZNF652   | 17 | 47394188  | 47399870  | 2 | 0 | 0 | 5 | 0  | 0 | 5682  | 0.789530811 | -1.0171718   | 3.317790676 | -0.306581065 | NA          | NA          |

|                           |        |                                             |    |           |           |    |   |    |    |    |   |       |             |              |             |              |             |             |
|---------------------------|--------|---------------------------------------------|----|-----------|-----------|----|---|----|----|----|---|-------|-------------|--------------|-------------|--------------|-------------|-------------|
| chr7:104925456-104937980  | UTR5   | SRPK2(NM_001278273:c.-28578..-28690delins0) | 7  | 104925456 | 104937980 | 2  | 0 | 0  | 5  | 0  | 0 | 12524 | 0.789530811 | -1.0171718   | 3.317790676 | -0.306581065 | NA          | NA          |
| chr19:8402679-8404051     | exonic | KANK3                                       | 19 | 8402679   | 8404051   | 2  | 0 | 8  | 17 | 7  | 3 | 1372  | 5.415267416 | -1.015994666 | 1.334503768 | -0.761327686 | NA          | NA          |
| chr19:41211000-41211352   | exonic | ADCK4                                       | 19 | 41211000  | 41211352  | 2  | 0 | 1  | 6  | 2  | 0 | 352   | 1.335166066 | -1.01272905  | 2.295546795 | -0.441171163 | 0.659089088 | 0.998252924 |
| chr2:58311223-58316858    | exonic | VRK2                                        | 2  | 58311223  | 58316858  | 2  | 0 | 1  | 6  | 2  | 0 | 5635  | 1.335166066 | -1.01272905  | 2.295546795 | -0.441171163 | 0.659089088 | 0.998252924 |
| chr14:102506572-102507010 | exonic | DYNC1H1                                     | 14 | 102506572 | 102507010 | 32 | 7 | 3  | 80 | 11 | 7 | 438   | 17.93306255 | -1.009552035 | 0.956859731 | -1.05506795  | NA          | NA          |
| chr4:170076630-170077830  | exonic | SH3RF1                                      | 4  | 170076630 | 170077830 | 1  | 1 | 0  | 1  | 4  | 0 | 1200  | 0.893683814 | -1.00916117  | 2.715974864 | -0.371564989 | NA          | NA          |
| chr13:28141776-28155940   | exonic | LNK2                                        | 13 | 28141776  | 28155940  | 1  | 0 | 1  | 0  | 3  | 1 | 14164 | 0.997556843 | -1.008670893 | 2.641537912 | -0.381849864 | 0.70257273  | 0.998252924 |
| chr12:89853414-89866052   | exonic | POC1B                                       | 12 | 89853414  | 89866052  | 0  | 0 | 5  | 6  | 10 | 0 | 12638 | 2.834487656 | -1.007521522 | 1.929714548 | -0.522109098 | 0.601594372 | 0.998252924 |
| chr17:80828099-80869665   | exonic | TBCD                                        | 17 | 80828099  | 80869665  | 4  | 0 | 0  | 3  | 6  | 0 | 41566 | 1.561046457 | -1.00706861  | 2.323012456 | -0.433518386 | 0.664638212 | 0.998252924 |
| chr7:65705311-65706257    | exonic | TPST1                                       | 7  | 65705311  | 65706257  | 5  | 0 | 2  | 5  | 8  | 2 | 946   | 3.155686283 | -1.005149862 | 1.534144454 | -0.655185931 | 0.512348052 | 0.998252924 |
| chr19:12635610-12639510   | exonic | ZNF564                                      | 19 | 12635610  | 12639510  | 0  | 3 | 0  | 7  | 2  | 0 | 3900  | 1.509061937 | -1.001653218 | 2.380228243 | -0.420822339 | 0.673884818 | 0.998252924 |
| chr1:198201682-198233365  | exonic | NEK7                                        | 1  | 198201682 | 198233365 | 0  | 2 | 0  | 5  | 1  | 0 | 31683 | 1.001135946 | -0.999782626 | 2.793403592 | -0.357908406 | NA          | NA          |
| chr19:46020920-46021352   | exonic | VASP                                        | 19 | 46020920  | 46021352  | 0  | 2 | 0  | 5  | 1  | 0 | 432   | 1.001135946 | -0.999782626 | 2.793403592 | -0.357908406 | NA          | NA          |
| chr3:141272698-141278837  | exonic | RASA2                                       | 3  | 141272698 | 141278837 | 5  | 0 | 0  | 0  | 4  | 3 | 6139  | 2.053700228 | -0.995783103 | 2.171755846 | -0.458515217 | 0.646582332 | 0.998252924 |
| chr6:143792097-143795993  | exonic | PEX3                                        | 6  | 143792097 | 143795993 | 3  | 0 | 0  | 5  | 2  | 0 | 3896  | 1.160572598 | -0.994918213 | 2.595096581 | -0.383383886 | 0.701435149 | 0.998252924 |
| chr8:38205014-38205733    | exonic | WHSC1L1                                     | 8  | 38205014  | 38205733  | 3  | 1 | 4  | 8  | 14 | 0 | 719   | 3.895187716 | -0.993678767 | 1.46563104  | -0.677986983 | 0.497779947 | 0.998252924 |
| chr8:17601112-17613470    | exonic | MTUS1                                       | 8  | 17601112  | 17613470  | 5  | 6 | 1  | 6  | 26 | 3 | 12358 | 8.799558558 | -0.99316444  | 1.052139501 | -0.943947489 | NA          | NA          |
| chr12:112616734-112617201 | exonic | HECTD4                                      | 12 | 112616734 | 112617201 | 2  | 1 | 0  | 3  | 0  | 2 | 467   | 1.367621058 | -0.989762857 | 2.320654566 | -0.426501588 | 0.669742391 | 0.998252924 |
| chr19:16192722-16197350   | exonic | TPM4                                        | 19 | 16192722  | 16197350  | 2  | 1 | 0  | 3  | 0  | 2 | 4628  | 1.367621058 | -0.989762857 | 2.320654566 | -0.426501588 | 0.669742391 | 0.998252924 |
| chr2:63206322-63221112    | exonic | EHBP1                                       | 2  | 63206322  | 63221112  | 7  | 8 | 0  | 22 | 6  | 5 | 14790 | 6.90322304  | -0.988799287 | 1.193000891 | -0.828833653 | 0.407198542 | 0.998252924 |
| chr7:50358643-50367353    | exonic | IKZF1                                       | 7  | 50358643  | 50367353  | 3  | 1 | 0  | 8  | 2  | 0 | 8710  | 1.653782552 | -0.988730717 | 2.124172731 | -0.465466251 | 0.6415976   | 0.998252924 |
| chr9:33996220-34017187    | exonic | UBAP2                                       | 9  | 33996220  | 34017187  | 0  | 0 | 2  | 0  | 6  | 0 | 20967 | 1.120702582 | -0.985705727 | 2.93395915  | -0.335964366 | NA          | NA          |
| chr14:88883055-88904247   | exonic | SPATA7                                      | 14 | 88883055  | 88904247  | 14 | 0 | 0  | 16 | 11 | 2 | 21192 | 5.454538219 | -0.985025751 | 1.459922401 | -0.674711032 | NA          | NA          |
| chr11:89165951-89182692   | exonic | NOX4                                        | 11 | 89165951  | 89182692  | 0  | 2 | 0  | 0  | 1  | 2 | 16741 | 1.086016238 | -0.980120715 | 2.774033182 | -0.353319752 | 0.72384874  | 0.998252924 |
| chr11:89165951-89185059   | exonic | NOX4                                        | 11 | 89165951  | 89185059  | 0  | 2 | 0  | 0  | 1  | 2 | 19108 | 1.086016238 | -0.980120715 | 2.774033182 | -0.353319752 | 0.72384874  | 0.998252924 |
| chr9:88648196-88655783    | exonic | GOLM1                                       | 9  | 88648196  | 88655783  | 0  | 2 | 0  | 0  | 1  | 2 | 7587  | 1.086016238 | -0.980120715 | 2.774033182 | -0.353319752 | 0.72384874  | 0.998252924 |
| chr17:45695715-45697150   | exonic | NPEPPS                                      | 17 | 45695715  | 45697150  | 1  | 0 | 3  | 4  | 3  | 2 | 1435  | 2.125559043 | -0.979711826 | 1.815614597 | -0.539603409 | 0.589470565 | 0.998252924 |
| chr13:42335263-42407667   | exonic | VWA8                                        | 13 | 42335263  | 42407667  | 1  | 0 | 2  | 3  | 1  | 2 | 72404 | 1.579923789 | -0.979367958 | 2.065699844 | -0.474109518 | 0.635421811 | 0.998252924 |
| chr1:155896466-155896947  | exonic | KIAA0907                                    | 1  | 155896466 | 155896947 | 3  | 2 | 0  | 4  | 6  | 1 | 481   | 2.195141107 | -0.978544145 | 1.758060623 | -0.556604324 | 0.577797799 | 0.998252924 |
| chr16:27224905-27226329   | exonic | KDM8                                        | 16 | 27224905  | 27226329  | 8  | 1 | 2  | 22 | 6  | 0 | 1424  | 4.665724396 | -0.971990338 | 1.420615234 | -0.684203798 | 0.493846485 | 0.998252924 |
| chr16:22236974-22237296   | exonic | EEF2K                                       | 16 | 22236974  | 22237296  | 3  | 0 | 0  | 6  | 1  | 0 | 322   | 1.145856561 | -0.970898319 | 2.640710964 | -0.367665501 | NA          | NA          |
| chr6:131481198-131490413  | exonic | AKAP7                                       | 6  | 131481198 | 131490413 | 3  | 0 | 0  | 6  | 1  | 0 | 9215  | 1.145856561 | -0.970898319 | 2.640710964 | -0.367665501 | NA          | NA          |
| chr9:113734353-113773970  | exonic | LPAR1                                       | 9  | 113734353 | 113773970 | 0  | 4 | 2  | 8  | 5  | 2 | 39617 | 3.163706655 | -0.9708093   | 1.550158679 | -0.626264468 | 0.531141488 | 0.998252924 |
| chr18:9584512-9595151     | exonic | PPP4R1                                      | 18 | 9584512   | 9595151   | 0  | 7 | 16 | 32 | 23 | 7 | 10639 | 12.71936029 | -0.96943424  | 1.06643513  | -0.909041922 | 0.363327998 | 0.998252924 |
| chr17:57808781-57851246   | exonic | VMP1                                        | 17 | 57808781  | 57851246  | 4  | 2 | 0  | 5  | 5  | 2 | 42465 | 2.617630622 | -0.968827581 | 1.627900919 | -0.595139157 | 0.551750456 | 0.998252924 |



|                           |          |           |    |           |           |   |   |   |    |    |   |        |             |              |             |              |             |             |
|---------------------------|----------|-----------|----|-----------|-----------|---|---|---|----|----|---|--------|-------------|--------------|-------------|--------------|-------------|-------------|
| chr12:19615443-19626289   | exonic   | AEBP2     | 12 | 19615443  | 19626289  | 4 | 1 | 0 | 2  | 5  | 2 | 10846  | 2.124420667 | -0.964666461 | 1.810812465 | -0.532725768 | 0.594223426 | 0.998252924 |
| chr1:35944566-35944813    | exonic   | KIAA0319L | 1  | 35944566  | 35944813  | 1 | 0 | 1 | 0  | 5  | 0 | 247    | 0.931393077 | -0.959698604 | 2.902697193 | -0.330623052 | NA          | NA          |
| chr3:52771601-52775515    | exonic   | NEK4      | 3  | 52771601  | 52775515  | 7 | 3 | 0 | 7  | 12 | 2 | 3914   | 4.238681972 | -0.959638933 | 1.381841002 | -0.694464075 | 0.487391223 | 0.998252924 |
| chr12:112757028-112757546 | exonic   | HECTD4    | 12 | 112757028 | 112757546 | 2 | 0 | 1 | 8  | 0  | 0 | 518    | 1.305733992 | -0.959130487 | 2.54654407  | -0.376640051 | NA          | NA          |
| chr3:197556434-197566268  | exonic   | LRCH3     | 3  | 197556434 | 197566268 | 0 | 0 | 3 | 2  | 7  | 0 | 9834   | 1.651621799 | -0.957410484 | 2.320823045 | -0.412530583 | 0.679950569 | 0.998252924 |
| chr3:197559067-197566268  | exonic   | LRCH3     | 3  | 197559067 | 197566268 | 0 | 0 | 3 | 2  | 7  | 0 | 7201   | 1.651621799 | -0.957410484 | 2.320823045 | -0.412530583 | 0.679950569 | 0.998252924 |
| chr11:125255446-125267958 | exonic   | PKNOX2    | 11 | 125255446 | 125267958 | 0 | 2 | 0 | 6  | 0  | 0 | 12512  | 0.986419909 | -0.955484746 | 3.060109954 | -0.312238698 | NA          | NA          |
| chr19:20828490-20829211   | exonic   | ZNF626    | 19 | 20828490  | 20829211  | 0 | 2 | 0 | 6  | 0  | 0 | 721    | 0.986419909 | -0.955484746 | 3.060109954 | -0.312238698 | NA          | NA          |
| chr5:16763589-16766307    | exonic   | MYO10     | 5  | 16763589  | 16766307  | 0 | 2 | 0 | 6  | 0  | 0 | 2718   | 0.986419909 | -0.955484746 | 3.060109954 | -0.312238698 | NA          | NA          |
| chr5:68470704-68471364    | exonic   | CCNB1     | 5  | 68470704  | 68471364  | 0 | 2 | 0 | 6  | 0  | 0 | 660    | 0.986419909 | -0.955484746 | 3.060109954 | -0.312238698 | NA          | NA          |
| chr19:40540857-40542533   | exonic   | ZNF780B   | 19 | 40540857  | 40542533  | 0 | 0 | 2 | 2  | 4  | 0 | 1676   | 1.091270509 | -0.95358055  | 2.684390757 | -0.355231647 | 0.722416058 | 0.998252924 |
| chr7:123339355-123342219  | intronic | WASL      | 7  | 123339355 | 123342219 | 4 | 0 | 0 | 6  | 3  | 0 | 2864   | 1.516898347 | -0.952438781 | 2.341296373 | -0.406799751 | 0.68415507  | 0.998252924 |
| chr3:172223764-172224709  | exonic   | TNFSF10   | 3  | 172223764 | 172224709 | 0 | 0 | 3 | 10 | 0  | 0 | 945    | 1.654920928 | -0.951734924 | 2.559788494 | -0.371802173 | NA          | NA          |
| chr8:18622959-18797803    | exonic   | PSD3      | 8  | 18622959  | 18797803  | 0 | 3 | 0 | 0  | 8  | 0 | 174844 | 1.491046772 | -0.949815583 | 2.648996808 | -0.358556711 | NA          | NA          |
| chr2:239184383-239186596  | exonic   | PER2      | 2  | 239184383 | 239186596 | 3 | 0 | 2 | 9  | 4  | 0 | 2213   | 2.222411033 | -0.948808263 | 1.879154192 | -0.504912405 | 0.613620361 | 0.998252924 |
| chr17:45438743-45455269   | exonic   | EFCAB13   | 17 | 45438743  | 45455269  | 2 | 0 | 4 | 8  | 2  | 3 | 16526  | 3.064251739 | -0.948802976 | 1.594397804 | -0.595085476 | 0.551786337 | 0.998252924 |
| chr17:45438743-45456619   | exonic   | EFCAB13   | 17 | 45438743  | 45456619  | 2 | 0 | 4 | 8  | 2  | 3 | 17876  | 3.064251739 | -0.948802976 | 1.594397804 | -0.595085476 | 0.551786337 | 0.998252924 |
| chr2:188243666-188252483  | exonic   | CALCRL    | 2  | 188243666 | 188252483 | 0 | 1 | 1 | 5  | 1  | 0 | 8817   | 1.024129172 | -0.948705957 | 2.588327625 | -0.366532408 | NA          | NA          |
| chr6:139228631-139235898  | exonic   | REPS1     | 6  | 139228631 | 139235898 | 1 | 1 | 0 | 3  | 2  | 0 | 7267   | 0.864251741 | -0.946960401 | 2.715546493 | -0.348718169 | 0.727300903 | 0.998252924 |
| chr22:22055265-22065197   | exonic   | YPEL1     | 22 | 22055265  | 22065197  | 3 | 0 | 0 | 7  | 0  | 0 | 9932   | 1.131140524 | -0.945555411 | 2.893181827 | -0.326821979 | NA          | NA          |
| chr2:200233327-200298237  | exonic   | SATB2     | 2  | 200233327 | 200298237 | 4 | 1 | 1 | 2  | 12 | 0 | 64910  | 2.552444428 | -0.943633717 | 1.746597027 | -0.540269852 | NA          | NA          |
| chr1:150202905-150204264  | exonic   | ANP32E    | 1  | 150202905 | 150204264 | 3 | 0 | 0 | 0  | 4  | 1 | 1359   | 1.179289124 | -0.94051298  | 2.638385563 | -0.35647291  | 0.721486436 | 0.998252924 |
| chr18:12999419-13059311   | exonic   | CEP192    | 18 | 12999419  | 13059311  | 3 | 0 | 0 | 0  | 4  | 1 | 59892  | 1.179289124 | -0.94051298  | 2.638385563 | -0.35647291  | 0.721486436 | 0.998252924 |
| chr13:76195899-76301234   | exonic   | LMO7      | 13 | 76195899  | 76301234  | 3 | 0 | 4 | 11 | 8  | 0 | 105335 | 3.313681541 | -0.940289201 | 1.639431177 | -0.573546004 | 0.56627506  | 0.998252924 |
| chr5:179996109-179998432  | exonic   | CNOT6     | 5  | 179996109 | 179998432 | 1 | 0 | 1 | 1  | 4  | 0 | 2323   | 0.916677041 | -0.939436396 | 2.691833819 | -0.348994945 | NA          | NA          |
| chr4:88983057-88987031    | exonic   | PKD2      | 4  | 88983057  | 88987031  | 1 | 0 | 2 | 4  | 2  | 1 | 3974   | 1.499043987 | -0.938992782 | 2.073470445 | -0.452860461 | 0.650649223 | 0.998252924 |
| chr14:39620949-39628754   | exonic   | TRAPPC6B  | 14 | 39620949  | 39628754  | 1 | 3 | 1 | 5  | 6  | 1 | 7805   | 2.415023431 | -0.934811746 | 1.630053509 | -0.573485313 | 0.566316141 | 0.998252924 |
| chr1:59805629-59812070    | exonic   | FGGY      | 1  | 59805629  | 59812070  | 3 | 0 | 2 | 3  | 7  | 1 | 6441   | 2.255843596 | -0.933496495 | 1.758772846 | -0.53076581  | 0.595581075 | 0.998252924 |
| chr10:15590453-15628663   | exonic   | ITGA8     | 10 | 15590453  | 15628663  | 4 | 1 | 0 | 6  | 1  | 0 | 38210  | 1.342745659 | -0.931818807 | 2.328098711 | -0.400248839 | NA          | NA          |
| chr1:227327276-227335260  | exonic   | CDC42BPA  | 1  | 227327276 | 227335260 | 3 | 0 | 0 | 2  | 0  | 2 | 7984   | 1.216020816 | -0.931527041 | 2.61011058  | -0.356891791 | 0.721172815 | 0.998252924 |
| chr3:170077486-170109048  | exonic   | SKIL      | 3  | 170077486 | 170109048 | 3 | 8 | 0 | 5  | 7  | 7 | 31562  | 5.317446361 | -0.930650802 | 1.331794635 | -0.698794527 | NA          | NA          |
| chr10:7318853-7423911     | exonic   | SFMBT2    | 10 | 7318853   | 7423911   | 0 | 2 | 0 | 0  | 3  | 1 | 105058 | 1.019852472 | -0.929145941 | 2.803351326 | -0.331441134 | 0.740311299 | 0.998252924 |
| chr18:19140819-19164401   | exonic   | ESCO1     | 18 | 19140819  | 19164401  | 0 | 2 | 0 | 0  | 3  | 1 | 23582  | 1.019852472 | -0.929145941 | 2.803351326 | -0.331441134 | 0.740311299 | 0.998252924 |
| chr11:113711319-113725057 | exonic   | USP28     | 11 | 113711319 | 113725057 | 2 | 0 | 0 | 0  | 2  | 1 | 13738  | 0.808247338 | -0.928872674 | 3.051588856 | -0.30438985  | 0.7608309   | 0.998252924 |
| chr13:114174930-114193822 | exonic   | TMCO3     | 13 | 114174930 | 114193822 | 2 | 0 | 0 | 0  | 2  | 1 | 18892  | 0.808247338 | -0.928872674 | 3.051588856 | -0.30438985  | 0.7608309   | 0.998252924 |

|                           |        |           |    |           |           |    |   |    |    |    |    |       |             |              |             |              |             |             |
|---------------------------|--------|-----------|----|-----------|-----------|----|---|----|----|----|----|-------|-------------|--------------|-------------|--------------|-------------|-------------|
| chr17:35578644-35583373   | exonic | ACACA     | 17 | 35578644  | 35583373  | 2  | 0 | 0  | 0  | 2  | 1  | 4729  | 0.808247338 | -0.928872674 | 3.051588856 | -0.30438985  | 0.7608309   | 0.998252924 |
| chr17:58346810-58366043   | exonic | USP32     | 17 | 58346810  | 58366043  | 2  | 0 | 0  | 0  | 2  | 1  | 19233 | 0.808247338 | -0.928872674 | 3.051588856 | -0.30438985  | 0.7608309   | 0.998252924 |
| chr4:152095821-152100549  | exonic | SH3D19    | 4  | 152095821 | 152100549 | 2  | 0 | 0  | 0  | 2  | 1  | 4728  | 0.808247338 | -0.928872674 | 3.051588856 | -0.30438985  | 0.7608309   | 0.998252924 |
| chr3:5215701-5216099      | exonic | ARL8B     | 3  | 5215701   | 5216099   | 2  | 4 | 7  | 2  | 24 | 4  | 398   | 6.686115589 | -0.928763403 | 1.217186908 | -0.763040908 | 0.445439    | 0.998252924 |
| chr2:39107319-39108719    | exonic | MORN2     | 2  | 39107319  | 39108719  | 0  | 3 | 2  | 13 | 2  | 0  | 1400  | 2.541468299 | -0.927949186 | 1.856804013 | -0.499756129 | NA          | NA          |
| chr6:90571844-90578801    | exonic | CASP8AP2  | 6  | 90571844  | 90578801  | 2  | 0 | 2  | 0  | 1  | 4  | 6957  | 2.006413794 | -0.927566085 | 2.091515395 | -0.443489963 | NA          | NA          |
| chr19:52785363-52786666   | exonic | ZNF766    | 19 | 52785363  | 52786666  | 10 | 0 | 0  | 5  | 7  | 4  | 1303  | 3.901492741 | -0.927439349 | 1.585250955 | -0.585042606 | NA          | NA          |
| chr5:102432244-102433485  | exonic | GIN1      | 5  | 102432244 | 102433485 | 2  | 1 | 1  | 5  | 5  | 0  | 1241  | 1.766212745 | -0.927097031 | 1.920175553 | -0.482818891 | 0.629224336 | 0.998252924 |
| chr2:69565029-69573131    | exonic | GFPT1     | 2  | 69565029  | 69573131  | 0  | 0 | 2  | 3  | 3  | 0  | 8102  | 1.076554472 | -0.926708565 | 2.687538983 | -0.34481679  | 0.73023211  | 0.998252924 |
| chr9:125751575-125752492  | exonic | RABGAP1   | 9  | 125751575 | 125752492 | 0  | 0 | 2  | 3  | 3  | 0  | 917   | 1.076554472 | -0.926708565 | 2.687538983 | -0.34481679  | 0.73023211  | 0.998252924 |
| chr18:8076452-8114825     | exonic | PTPRM     | 18 | 8076452   | 8114825   | 4  | 0 | 2  | 0  | 5  | 4  | 38373 | 2.748497366 | -0.924212349 | 1.819750066 | -0.507878728 | 0.611538393 | 0.998252924 |
| chr21:17205666-17214859   | exonic | USP25     | 21 | 17205666  | 17214859  | 3  | 1 | 1  | 6  | 4  | 1  | 9193  | 2.18870226  | -0.923835383 | 1.673778938 | -0.551945877 | 0.580985435 | 0.998252924 |
| chr19:18650180-18650530   | exonic | FKBP8     | 19 | 18650180  | 18650530  | 20 | 8 | 8  | 81 | 14 | 0  | 350   | 15.85770355 | -0.920665951 | 1.061458289 | -0.867359519 | NA          | NA          |
| chr14:93760203-93761283   | exonic | BTBD7     | 14 | 93760203  | 93761283  | 1  | 1 | 0  | 4  | 1  | 0  | 1080  | 0.849535704 | -0.913215879 | 2.757200997 | -0.33121121  | 0.740484953 | 0.998252924 |
| chr6:159128262-159146669  | exonic | SYTL3     | 6  | 159128262 | 159146669 | 5  | 0 | 0  | 8  | 3  | 0  | 18407 | 1.85850806  | -0.910994589 | 2.18610591  | -0.416720245 | 0.676883045 | 0.998252924 |
| chr11:68115314-68133170   | exonic | LRP5      | 11 | 68115314  | 68133170  | 2  | 1 | 0  | 0  | 0  | 3  | 17856 | 1.356905511 | -0.910636375 | 2.570262606 | -0.354297017 | NA          | NA          |
| chr4:7000811-7006651      | exonic | TBC1D14   | 4  | 7000811   | 7006651   | 2  | 1 | 0  | 0  | 0  | 3  | 5840  | 1.356905511 | -0.910636375 | 2.570262606 | -0.354297017 | NA          | NA          |
| chr1:175996707-176015460  | exonic | RFWD2     | 1  | 175996707 | 176015460 | 1  | 0 | 1  | 2  | 3  | 0  | 18753 | 0.901961004 | -0.909570936 | 2.677183816 | -0.339749154 | 0.734045442 | 0.998252924 |
| chr17:28808160-28811788   | exonic | GOSR1     | 17 | 28808160  | 28811788  | 1  | 0 | 1  | 2  | 3  | 0  | 3628  | 0.901961004 | -0.909570936 | 2.677183816 | -0.339749154 | 0.734045442 | 0.998252924 |
| chr7:23015828-23023664    | exonic | FAM126A   | 7  | 23015828  | 23023664  | 0  | 1 | 3  | 4  | 3  | 2  | 7836  | 2.170847899 | -0.908423584 | 1.807561518 | -0.502568557 | 0.615267641 | 0.998252924 |
| chr1:35940405-35944813    | exonic | KIAA0319L | 1  | 35940405  | 35944813  | 1  | 2 | 1  | 1  | 9  | 0  | 4408  | 1.870365748 | -0.907459652 | 1.967549116 | -0.461213214 | NA          | NA          |
| chr9:131271154-131277918  | exonic | GLE1      | 9  | 131271154 | 131277918 | 2  | 1 | 0  | 4  | 3  | 0  | 6764  | 1.220577491 | -0.905124606 | 2.351638754 | -0.384891006 | 0.700318169 | 0.998252924 |
| chr1:153784206-153785928  | exonic | GATAD2B   | 1  | 153784206 | 153785928 | 0  | 3 | 0  | 3  | 5  | 0  | 1722  | 1.446898662 | -0.903298713 | 2.401111802 | -0.376200189 | 0.706768075 | 0.998252924 |
| chr14:67431907-67525503   | exonic | GPHN      | 14 | 67431907  | 67525503  | 0  | 1 | 2  | 1  | 5  | 1  | 93596 | 1.588480953 | -0.90194462  | 2.07580898  | -0.434502707 | 0.66392343  | 0.998252924 |
| chr11:108098321-108100050 | exonic | ATM       | 11 | 108098321 | 108100050 | 1  | 0 | 5  | 4  | 8  | 2  | 1729  | 3.125234203 | -0.899278764 | 1.603611303 | -0.560783503 | NA          | NA          |
| chr4:103225474-103246155  | exonic | SLC39A8   | 4  | 103225474 | 103246155 | 0  | 4 | 3  | 8  | 7  | 2  | 20681 | 3.603030524 | -0.898750875 | 1.47291091  | -0.610186854 | NA          | NA          |
| chr20:33057852-33080402   | exonic | ITCH      | 20 | 33057852  | 33080402  | 4  | 3 | 0  | 8  | 2  | 3  | 22550 | 3.05597692  | -0.898238939 | 1.565683664 | -0.573703973 | 0.566168139 | 0.998252924 |
| chr11:36415396-36440853   | exonic | PRR5L     | 11 | 36415396  | 36440853  | 0  | 0 | 2  | 4  | 2  | 0  | 25457 | 1.061838435 | -0.897846986 | 2.706668634 | -0.331716626 | 0.740103245 | 0.998252924 |
| chr2:32703702-32704685    | exonic | BIRC6     | 2  | 32703702  | 32704685  | 3  | 0 | 0  | 0  | 6  | 0  | 983   | 1.113125359 | -0.896950255 | 2.91544696  | -0.307654458 | NA          | NA          |
| chr3:152017193-152018156  | exonic | MBNL1     | 3  | 152017193 | 152018156 | 2  | 1 | 1  | 7  | 3  | 0  | 963   | 1.736780672 | -0.893960994 | 1.940259472 | -0.460743013 | 0.644982992 | 0.998252924 |
| chr15:94927250-94945248   | exonic | MCTP2     | 15 | 94927250  | 94945248  | 1  | 1 | 1  | 0  | 3  | 2  | 17998 | 1.48005125  | -0.892023079 | 2.143368651 | -0.416178094 | 0.677279688 | 0.998252924 |
| chr7:91924202-91957214    | exonic | ANKIB1    | 7  | 91924202  | 91957214  | 11 | 2 | 12 | 20 | 16 | 12 | 33012 | 11.89592603 | -0.890863204 | 0.927325972 | -0.960679665 | 0.336713259 | 0.998252924 |
| chr5:73136304-73136585    | exonic | ARHGEF28  | 5  | 73136304  | 73136585  | 1  | 1 | 3  | 11 | 3  | 0  | 281   | 2.42757732  | -0.890815095 | 1.75698422  | -0.507013714 | 0.612145196 | 0.998252924 |
| chr1:70758070-70781249    | exonic | ANKRD13C  | 1  | 70758070  | 70781249  | 8  | 5 | 7  | 11 | 10 | 9  | 23179 | 6.26981193  | -0.890676176 | 1.187787785 | -0.74986137  | 0.453338202 | 0.998252924 |
| chr9:127670655-127674305  | exonic | GOLGA1    | 9  | 127670655 | 127674305 | 3  | 2 | 0  | 5  | 0  | 3  | 3650  | 2.191725179 | -0.887905783 | 1.939492009 | -0.45780327  | 0.647093787 | 0.998252924 |

|                           |              |              |    |           |           |    |    |   |    |    |   |        |             |              |             |              |             |             |
|---------------------------|--------------|--------------|----|-----------|-----------|----|----|---|----|----|---|--------|-------------|--------------|-------------|--------------|-------------|-------------|
| chr1:14104912-14109326    | exonic       | PRDM2        | 1  | 14104912  | 14109326  | 5  | 3  | 1 | 10 | 7  | 2 | 4414   | 3.891774158 | -0.887664498 | 1.319361643 | -0.672798473 | 0.501075509 | 0.998252924 |
| chr11:107260799-107289013 | exonic       | CWF19L2      | 11 | 107260799 | 107289013 | 3  | 2  | 0 | 4  | 1  | 3 | 28214  | 2.206441215 | -0.887400704 | 1.802136539 | -0.49241591  | 0.622425354 | 0.998252924 |
| chr10:51829306-51840691   | exonic       | FAM21A       | 10 | 51829306  | 51840691  | 0  | 2  | 1 | 4  | 2  | 1 | 11385  | 1.521339617 | -0.886525154 | 2.064853605 | -0.429340439 | 0.667675492 | 0.998252924 |
| chrX:102094729-102160665  | ncRNA_exonic | LINC00630    | X  | 102094729 | 102160665 | 7  | 0  | 0 | 10 | 5  | 0 | 65936  | 2.57115956  | -0.884541248 | 1.960338367 | -0.451218658 | 0.651831963 | 0.998252924 |
| chr14:64988204-64990120   | exonic       | ZBTB1        | 14 | 64988204  | 64990120  | 0  | 1  | 2 | 2  | 4  | 1 | 1916   | 1.573764916 | -0.884211463 | 2.047855706 | -0.4317743   | 0.66590546  | 0.998252924 |
| chr16:31308834-31309275   | exonic       | ITGAM        | 16 | 31308834  | 31309275  | 1  | 0  | 2 | 5  | 3  | 0 | 441    | 1.418164185 | -0.883941591 | 2.239272929 | -0.39474491  | 0.693031155 | 0.998252924 |
| chr11:102233626-102239279 | exonic       | BIRC2        | 11 | 102233626 | 102239279 | 2  | 1  | 2 | 11 | 0  | 1 | 5653   | 2.304431581 | -0.882608169 | 1.828279415 | -0.482753436 | 0.629270817 | 0.998252924 |
| chr16:48290520-48337216   | exonic       | LONP2        | 16 | 48290520  | 48337216  | 2  | 1  | 0 | 5  | 2  | 0 | 46696  | 1.205861454 | -0.881526065 | 2.372400671 | -0.371575542 | 0.710208902 | 0.998252924 |
| chr1:16044387-16047883    | exonic       | PLEKHM2      | 1  | 16044387  | 16047883  | 12 | 4  | 0 | 27 | 10 | 0 | 3496   | 6.325628127 | -0.880379046 | 1.386931656 | -0.634767432 | 0.525580107 | 0.998252924 |
| chr9:79952170-79986065    | exonic       | VPS13A       | 9  | 79952170  | 79986065  | 2  | 0  | 1 | 3  | 4  | 0 | 33895  | 1.258286754 | -0.878395356 | 2.33021145  | -0.376959506 | 0.706203699 | 0.998252924 |
| chr1:243708811-244006584  | exonic       | AKT3         | 1  | 243708811 | 244006584 | 1  | 0  | 1 | 3  | 2  | 0 | 297773 | 0.887244967 | -0.87752816  | 2.69037666  | -0.326172975 | 0.744293487 | 0.998252924 |
| chr2:29356520-29368233    | exonic       | CLIP4        | 2  | 29356520  | 29368233  | 1  | 0  | 1 | 3  | 2  | 0 | 11713  | 0.887244967 | -0.87752816  | 2.69037666  | -0.326172975 | 0.744293487 | 0.998252924 |
| chr5:158621723-158630664  | exonic       | RNF145       | 5  | 158621723 | 158630664 | 0  | 2  | 5 | 0  | 10 | 4 | 8941   | 3.778045379 | -0.877434847 | 1.68146447  | -0.521827766 | 0.601790256 | 0.998252924 |
| chr12:32480394-32481489   | exonic       | BICD1        | 12 | 32480394  | 32481489  | 1  | 2  | 0 | 0  | 7  | 0 | 1095   | 1.324730494 | -0.877131403 | 2.541629901 | -0.345105872 | NA          | NA          |
| chr10:31661947-31676195   | intronic     | ZEB1         | 10 | 31661947  | 31676195  | 7  | 3  | 2 | 11 | 4  | 6 | 14248  | 5.323120624 | -0.876546958 | 1.18887425  | -0.737291566 | 0.46094506  | 0.998252924 |
| chr2:63206322-63223901    | exonic       | EHBP1        | 2  | 63206322  | 63223901  | 7  | 8  | 1 | 22 | 6  | 5 | 17579  | 7.100492066 | -0.874999619 | 1.107641492 | -0.789966451 | 0.429547361 | 0.998252924 |
| chr19:22157531-22171711   | exonic       | ZNF208       | 19 | 22157531  | 22171711  | 24 | 14 | 0 | 53 | 37 | 0 | 14180  | 15.64806583 | -0.87369039  | 2.112064777 | -0.413666474 | 0.679118383 | 0.998252924 |
| chr17:65941524-65960520   | exonic       | BPTF         | 17 | 65941524  | 65960520  | 3  | 0  | 0 | 2  | 2  | 1 | 18996  | 1.149857051 | -0.873084911 | 2.436577526 | -0.35832429  | NA          | NA          |
| chr4:128842678-128861152  | exonic       | MFSB8        | 4  | 128842678 | 128861152 | 4  | 4  | 3 | 6  | 12 | 4 | 18474  | 5.127929852 | -0.872917181 | 1.170536701 | -0.745740976 | 0.455823901 | 0.998252924 |
| chr7:27824781-27839709    | exonic       | TAX1BP1      | 7  | 27824781  | 27839709  | 1  | 4  | 5 | 12 | 4  | 5 | 14928  | 5.11337462  | -0.871824142 | 1.248544761 | -0.698272236 | 0.485006959 | 0.998252924 |
| chr8:38287199-38287466    | exonic       | FGFR1        | 8  | 38287199  | 38287466  | 8  | 5  | 0 | 26 | 3  | 1 | 267    | 5.338671426 | -0.871596331 | 1.389836294 | -0.627121579 | NA          | NA          |
| chr5:111570330-111576507  | exonic       | EPB41L4A     | 5  | 111570330 | 111576507 | 0  | 0  | 4 | 4  | 3  | 2 | 6177   | 2.193841126 | -0.870914065 | 1.934007265 | -0.450315819 | NA          | NA          |
| chr10:103565801-103567658 | exonic       | MGEA5        | 10 | 103565801 | 103567658 | 2  | 0  | 0 | 0  | 4  | 0 | 1857   | 0.742083573 | -0.870617571 | 3.399572867 | -0.256096164 | NA          | NA          |
| chr10:12070743-12071523   | exonic       | UPF2         | 10 | 12070743  | 12071523  | 2  | 0  | 0 | 0  | 4  | 0 | 780    | 0.742083573 | -0.870617571 | 3.399572867 | -0.256096164 | NA          | NA          |
| chr2:201281101-201284219  | exonic       | SPATS2L      | 2  | 201281101 | 201284219 | 2  | 0  | 0 | 0  | 4  | 0 | 3118   | 0.742083573 | -0.870617571 | 3.399572867 | -0.256096164 | NA          | NA          |
| chr4:120160372-120194863  | exonic       | USP53        | 4  | 120160372 | 120194863 | 2  | 0  | 0 | 0  | 4  | 0 | 34491  | 0.742083573 | -0.870617571 | 3.399572867 | -0.256096164 | NA          | NA          |
| chr5:177046079-177059739  | ncRNA_exonic | LOC202181    | 5  | 177046079 | 177059739 | 2  | 0  | 0 | 0  | 4  | 0 | 13660  | 0.742083573 | -0.870617571 | 3.399572867 | -0.256096164 | NA          | NA          |
| chr6:34574331-34614575    | exonic       | C6orf106     | 6  | 34574331  | 34614575  | 2  | 0  | 0 | 0  | 4  | 0 | 40244  | 0.742083573 | -0.870617571 | 3.399572867 | -0.256096164 | NA          | NA          |
| chr8:52758220-52773806    | exonic       | PCMTD1       | 8  | 52758220  | 52773806  | 0  | 2  | 3 | 2  | 7  | 2 | 15586  | 2.616610615 | -0.870536471 | 1.69291816  | -0.514222419 | 0.607096495 | 0.998252924 |
| chr2:215657020-215661841  | exonic       | BARB1        | 2  | 215657020 | 215661841 | 1  | 1  | 1 | 0  | 5  | 1 | 4821   | 1.413887485 | -0.870166549 | 2.181388348 | -0.398904922 | 0.689963262 | 0.998252924 |
| chr4:25334804-25335610    | exonic       | ZCCHC4       | 4  | 25334804  | 25335610  | 4  | 0  | 2 | 8  | 4  | 1 | 806    | 2.553305199 | -0.869988571 | 1.669764665 | -0.521024662 | 0.602349591 | 0.998252924 |
| chr2:110577272-110582530  | exonic       | RGPD5, RGPD6 | 2  | 110577272 | 110582530 | 1  | 1  | 0 | 5  | 0  | 0 | 5258   | 0.834819668 | -0.869906711 | 3.007706209 | -0.289225958 | NA          | NA          |
| chr2:32339706-32341281    | exonic       | SPAST        | 2  | 32339706  | 32341281  | 1  | 1  | 0 | 5  | 0  | 0 | 1575   | 0.834819668 | -0.869906711 | 3.007706209 | -0.289225958 | NA          | NA          |
| chr8:93017343-93029591    | exonic       | RUNX1T1      | 8  | 93017343  | 93029591  | 3  | 1  | 2 | 11 | 4  | 0 | 12248  | 2.609309602 | -0.869085263 | 1.666221827 | -0.521590372 | 0.601955568 | 0.998252924 |
| chr9:112704966-112705661  | exonic       | PALM2        | 9  | 112704966 | 112705661 | 5  | 0  | 0 | 0  | 0  | 4 | 695    | 1.877809149 | -0.866607089 | 3.835552208 | -0.225940632 | NA          | NA          |

|                           |              |                                                                                |    |           |           |    |    |    |     |    |    |        |             |              |             |              |             |             |
|---------------------------|--------------|--------------------------------------------------------------------------------|----|-----------|-----------|----|----|----|-----|----|----|--------|-------------|--------------|-------------|--------------|-------------|-------------|
| chr20:50071084-50140135   | exonic       | NFATC2                                                                         | 20 | 50071084  | 50140135  | 0  | 0  | 2  | 5   | 1  | 0  | 69051  | 1.047122399 | -0.8660332   | 2.750222104 | -0.314895731 | NA          | NA          |
| chr12:105385490-105389804 | exonic       | C12orf45                                                                       | 12 | 105385490 | 105389804 | 0  | 2  | 0  | 0   | 5  | 0  | 4314   | 0.953688707 | -0.865097475 | 3.102671878 | -0.278823385 | NA          | NA          |
| chr14:65898755-65922436   | UTR5         | <small>UTR5(12825...10542...10586641...1060881...127874...12791641...)</small> | 14 | 65898755  | 65922436  | 0  | 2  | 0  | 0   | 5  | 0  | 23681  | 0.953688707 | -0.865097475 | 3.102671878 | -0.278823385 | NA          | NA          |
| chr22:34157358-34161940   | exonic       | LARGE                                                                          | 22 | 34157358  | 34161940  | 0  | 2  | 0  | 0   | 5  | 0  | 4582   | 0.953688707 | -0.865097475 | 3.102671878 | -0.278823385 | NA          | NA          |
| chr4:170501992-170511960  | exonic       | NEK1                                                                           | 4  | 170501992 | 170511960 | 0  | 2  | 0  | 0   | 5  | 0  | 9968   | 0.953688707 | -0.865097475 | 3.102671878 | -0.278823385 | NA          | NA          |
| chr5:49570822-49707217    | exonic       | EMB                                                                            | 5  | 49570822  | 49707217  | 0  | 2  | 0  | 0   | 5  | 0  | 136395 | 0.953688707 | -0.865097475 | 3.102671878 | -0.278823385 | NA          | NA          |
| chr15:63821212-63866602   | exonic       | USP3                                                                           | 15 | 63821212  | 63866602  | 2  | 1  | 2  | 4   | 6  | 1  | 45390  | 2.286416416 | -0.862563669 | 1.641432147 | -0.525494563 | 0.599239432 | 0.998252924 |
| chrX:67412760-67421552    | exonic       | OPHN1                                                                          | X  | 67412760  | 67421552  | 0  | 3  | 0  | 5   | 3  | 0  | 8792   | 1.417466588 | -0.861748588 | 2.414909292 | -0.356845116 | NA          | NA          |
| chr12:80187642-80215970   | exonic       | PPP1R12A                                                                       | 12 | 80187642  | 80215970  | 0  | 1  | 2  | 1   | 7  | 0  | 28328  | 1.522317188 | -0.861449086 | 2.249862268 | -0.382889699 | NA          | NA          |
| chr2:71653589-71654544    | exonic       | ZNF638                                                                         | 2  | 71653589  | 71654544  | 10 | 3  | 3  | 12  | 20 | 2  | 955    | 6.717226177 | -0.859108649 | 1.098734383 | -0.781907495 | 0.43426894  | 0.998252924 |
| chr16:70292882-70296427   | exonic       | AARS                                                                           | 16 | 70292882  | 70296427  | 5  | 0  | 0  | 4   | 4  | 1  | 3545   | 1.86250855  | -0.857489359 | 2.024045722 | -0.42365118  | NA          | NA          |
| chr7:30590252-30614497    | ncRNA_exonic | LOC401320                                                                      | 7  | 30590252  | 30614497  | 3  | 10 | 6  | 2   | 16 | 13 | 24245  | 9.469236406 | -0.855782109 | 1.112844492 | -0.769004219 | 0.441890806 | 0.998252924 |
| chr15:62299506-62306191   | exonic       | VPS13C                                                                         | 15 | 62299506  | 62306191  | 16 | 9  | 13 | 13  | 30 | 21 | 6685   | 17.68223205 | -0.855322791 | 0.819713474 | -1.043441176 | 0.296744011 | 0.998252924 |
| chr1:197611840-197627499  | exonic       | DENND1B                                                                        | 1  | 197611840 | 197627499 | 3  | 6  | 4  | 3   | 9  | 9  | 15659  | 6.403840156 | -0.853872159 | 1.17133004  | -0.728976573 | 0.466015993 | 0.998252924 |
| chr19:19407797-19408153   | exonic       | SUGP1                                                                          | 19 | 19407797  | 19408153  | 2  | 0  | 0  | 2   | 0  | 1  | 356    | 0.778815265 | -0.850784435 | 3.088290009 | -0.275487222 | 0.782941942 | 0.998252924 |
| chr2:54119944-54120936    | exonic       | PSME4                                                                          | 2  | 54119944  | 54120936  | 2  | 0  | 0  | 2   | 0  | 1  | 992    | 0.778815265 | -0.850784435 | 3.088290009 | -0.275487222 | 0.782941942 | 0.998252924 |
| chr4:146744573-146770713  | exonic       | ZNF827                                                                         | 4  | 146744573 | 146770713 | 2  | 0  | 0  | 2   | 0  | 1  | 26140  | 0.778815265 | -0.850784435 | 3.088290009 | -0.275487222 | 0.782941942 | 0.998252924 |
| chr1:108724562-108728576  | exonic       | SLC25A24                                                                       | 1  | 108724562 | 108728576 | 3  | 0  | 0  | 3   | 1  | 1  | 4014   | 1.135141014 | -0.848380669 | 2.465736558 | -0.344067847 | NA          | NA          |
| chr11:14316016-14317401   | exonic       | RRAS2                                                                          | 11 | 14316016  | 14317401  | 0  | 2  | 0  | 1   | 4  | 0  | 1385   | 0.93897267  | -0.845803116 | 2.861002311 | -0.295631749 | NA          | NA          |
| chr13:41826780-41835051   | exonic       | MTRF1                                                                          | 13 | 41826780  | 41835051  | 0  | 2  | 0  | 1   | 4  | 0  | 8271   | 0.93897267  | -0.845803116 | 2.861002311 | -0.295631749 | NA          | NA          |
| chr4:41663436-41673611    | exonic       | LIMCH1                                                                         | 4  | 41663436  | 41673611  | 0  | 0  | 4  | 13  | 0  | 0  | 10175  | 2.171124109 | -0.845586032 | 3.81861944  | -0.221437628 | NA          | NA          |
| chr22:41531816-41537226   | exonic       | EP300                                                                          | 22 | 41531816  | 41537226  | 4  | 0  | 0  | 4   | 2  | 1  | 5410   | 1.491466764 | -0.844260875 | 2.202964461 | -0.383238536 | NA          | NA          |
| chr11:92085261-92088570   | exonic       | FAT3                                                                           | 11 | 92085261  | 92088570  | 35 | 9  | 5  | 108 | 4  | 2  | 3309   | 19.65154682 | -0.84348177  | 1.078755077 | -0.781902944 | NA          | NA          |
| chr9:117399269-117401006  | exonic       | C9orf91                                                                        | 9  | 117399269 | 117401006 | 1  | 0  | 1  | 4   | 1  | 0  | 1737   | 0.872528931 | -0.842995255 | 2.731462678 | -0.308624116 | 0.757607474 | 0.998252924 |
| chr1:172109620-172113577  | ncRNA_exonic | DNM3OS                                                                         | 1  | 172109620 | 172113577 | 3  | 0  | 0  | 2   | 4  | 0  | 3957   | 1.083693286 | -0.842898861 | 2.662365936 | -0.316597673 | 0.751548901 | 0.998252924 |
| chr2:45925080-45928630    | intronic     | PRKCE                                                                          | 2  | 45925080  | 45928630  | 3  | 0  | 0  | 2   | 4  | 0  | 3550   | 1.083693286 | -0.842898861 | 2.662365936 | -0.316597673 | 0.751548901 | 0.998252924 |
| chr7:73114708-73115261    | exonic       | STX1A                                                                          | 7  | 73114708  | 73115261  | 3  | 0  | 0  | 2   | 4  | 0  | 553    | 1.083693286 | -0.842898861 | 2.662365936 | -0.316597673 | 0.751548901 | 0.998252924 |
| chr12:66597490-66622150   | exonic       | IRAK3                                                                          | 12 | 66597490  | 66622150  | 1  | 1  | 3  | 6   | 7  | 0  | 24660  | 2.380130082 | -0.842798951 | 1.743208219 | -0.483475779 | 0.628757954 | 0.998252924 |
| chr1:169947226-170001116  | exonic       | KIFAP3                                                                         | 1  | 169947226 | 170001116 | 10 | 8  | 3  | 23  | 11 | 7  | 53890  | 9.209876657 | -0.840397725 | 0.946389295 | -0.88800426  | 0.37453846  | 0.998252924 |
| chr10:74100546-74100928   | exonic       | DNAJB12                                                                        | 10 | 74100546  | 74100928  | 0  | 0  | 3  | 8   | 1  | 0  | 382    | 1.56332558  | -0.840305534 | 2.393996578 | -0.35100532  | NA          | NA          |
| chr4:371862-372152        | intergenic   | <small>ZNF141 (dist=4171), ABCA11P (dist=47072)</small>                        | 4  | 371862    | 372152    | 5  | 5  | 0  | 0   | 0  | 9  | 290    | 4.290281188 | -0.837878298 | 3.163645311 | -0.26484584  | NA          | NA          |
| chr14:34394824-34400421   | exonic       | EGLN3                                                                          | 14 | 34394824  | 34400421  | 2  | 3  | 0  | 8   | 4  | 0  | 5597   | 2.115402051 | -0.83551104  | 1.907095691 | -0.438106511 | 0.661309075 | 0.998252924 |
| chr12:111855922-111856681 | exonic       | SH2B3                                                                          | 12 | 111855922 | 111856681 | 5  | 1  | 0  | 4   | 2  | 3  | 759    | 2.411166724 | -0.8344722   | 1.738521235 | -0.479989651 | NA          | NA          |
| chr7:77210743-77230123    | exonic       | PTPN12                                                                         | 7  | 77210743  | 77230123  | 0  | 0  | 2  | 0   | 3  | 3  | 19380  | 1.591503872 | -0.834447565 | 2.271073158 | -0.367424344 | NA          | NA          |
| chrX:54013510-54014377    | exonic       | PHF8                                                                           | X  | 54013510  | 54014377  | 1  | 2  | 1  | 6   | 4  | 0  | 867    | 1.796785565 | -0.834359636 | 1.914670703 | -0.435771872 | 0.663002254 | 0.998252924 |

|                           |              |                   |    |           |           |   |   |   |    |    |   |       |             |              |             |              |             |             |
|---------------------------|--------------|-------------------|----|-----------|-----------|---|---|---|----|----|---|-------|-------------|--------------|-------------|--------------|-------------|-------------|
| chr16:58593708-58594266   | exonic       | CNOT1             | 16 | 58593708  | 58594266  | 3 | 2 | 3 | 13 | 7  | 0 | 558   | 3.556559463 | -0.83375893  | 1.466446127 | -0.568557491 | 0.56965648  | 0.998252924 |
| chr1:70736538-70781249    | exonic       | ANKRD13C          | 1  | 70736538  | 70781249  | 2 | 0 | 0 | 1  | 3  | 0 | 44711 | 0.727367536 | -0.833451709 | 3.136797126 | -0.265701502 | 0.790469106 | 0.998252924 |
| chr16:70044653-70052000   | ncRNA_exonic | PDXDC2P           | 16 | 70044653  | 70052000  | 2 | 0 | 0 | 1  | 3  | 0 | 7347  | 0.727367536 | -0.833451709 | 3.136797126 | -0.265701502 | 0.790469106 | 0.998252924 |
| chr2:24362239-24369956    | exonic       | FAM228B           | 2  | 24362239  | 24369956  | 1 | 0 | 3 | 1  | 3  | 0 | 7717  | 0.727367536 | -0.833451709 | 3.136797126 | -0.265701502 | 0.790469106 | 0.998252924 |
| chr4:108565957-108581228  | exonic       | PAPSS1            | 4  | 108565957 | 108581228 | 0 | 2 | 0 | 3  | 0  | 1 | 15271 | 0.975704362 | -0.832937113 | 2.841088761 | -0.293175322 | 0.769388146 | 0.998252924 |
| chr5:179136873-179150020  | exonic       | CANX              | 5  | 179136873 | 179150020 | 0 | 2 | 0 | 3  | 0  | 1 | 13147 | 0.975704362 | -0.832937113 | 2.841088761 | -0.293175322 | 0.769388146 | 0.998252924 |
| chr14:21464367-21464870   | exonic       | METTL17           | 14 | 21464367  | 21464870  | 1 | 1 | 0 | 0  | 0  | 2 | 503   | 0.919699959 | -0.829352889 | 2.965384365 | -0.279678041 | 0.779724527 | 0.998252924 |
| chr7:40038959-40087476    | exonic       | CDK13             | 7  | 40038959  | 40087476  | 1 | 1 | 0 | 0  | 0  | 2 | 48517 | 0.919699959 | -0.829352889 | 2.965384365 | -0.279678041 | 0.779724527 | 0.998252924 |
| chr8:17570722-17613470    | exonic       | MTUS1             | 8  | 17570722  | 17613470  | 0 | 0 | 1 | 2  | 8  | 1 | 42748 | 4.356974155 | -0.829344501 | 1.528964177 | -0.542422454 | NA          | NA          |
| chr5:38991050-39003724    | exonic       | RICTOR            | 5  | 38991050  | 39003724  | 3 | 0 | 2 | 4  | 1  | 3 | 12674 | 2.252427668 | -0.828009728 | 1.794265327 | -0.461475633 | 0.644457399 | 0.998252924 |
| chr7:44714009-44715748    | exonic       | OGDH              | 7  | 44714009  | 44715748  | 1 | 1 | 1 | 3  | 0  | 2 | 1739  | 1.43590314  | -0.823902582 | 2.15806554  | -0.381778295 | 0.70262582  | 0.998252924 |
| chr20:46252654-46262380   | exonic       | NCOA3             | 20 | 46252654  | 46262380  | 0 | 2 | 2 | 4  | 0  | 3 | 9726  | 2.092991016 | -0.82282665  | 1.999607727 | -0.411494034 | 0.680710315 | 0.998252924 |
| chr6:55966269-56006781    | exonic       | COL21A1           | 6  | 55966269  | 56006781  | 5 | 5 | 0 | 25 | 0  | 0 | 40512 | 4.174098338 | -0.822712313 | 2.959758306 | -0.277966046 | NA          | NA          |
| chr15:101775286-101775782 | exonic       | CHSY1             | 15 | 101775286 | 101775782 | 3 | 0 | 3 | 12 | 3  | 0 | 496   | 2.617586792 | -0.822041266 | 1.794004213 | -0.458215906 | 0.646797334 | 0.998252924 |
| chr2:210968827-211019335  | exonic       | KANSL1L           | 2  | 210968827 | 211019335 | 0 | 3 | 0 | 1  | 5  | 1 | 50508 | 2.411887477 | -0.821712759 | 1.868854635 | -0.439687894 | NA          | NA          |
| chr3:133907680-133914026  | exonic       | RYK               | 3  | 133907680 | 133914026 | 2 | 0 | 6 | 1  | 10 | 4 | 6346  | 3.991048077 | -0.820148433 | 1.537163087 | -0.533546792 | NA          | NA          |
| chr15:90760670-90764997   | exonic       | SEMA4B            | 15 | 90760670  | 90764997  | 6 | 0 | 0 | 6  | 6  | 0 | 4327  | 2.137954498 | -0.816267584 | 2.073094365 | -0.393743574 | NA          | NA          |
| chr9:20907148-20929595    | exonic       | FOCAD             | 9  | 20907148  | 20929595  | 4 | 0 | 0 | 4  | 4  | 0 | 22447 | 1.425302999 | -0.816249473 | 2.388857122 | -0.34169037  | NA          | NA          |
| chr9:20907148-20933102    | exonic       | FOCAD             | 9  | 20907148  | 20933102  | 4 | 0 | 0 | 4  | 4  | 0 | 25954 | 1.425302999 | -0.816249473 | 2.388857122 | -0.34169037  | NA          | NA          |
| chr12:66539620-66547228   | exonic       | TMBIM4            | 12 | 66539620  | 66547228  | 3 | 0 | 0 | 3  | 3  | 0 | 7608  | 1.068977249 | -0.816227486 | 2.665564295 | -0.306211892 | NA          | NA          |
| chr2:71582848-71607695    | exonic       | ZNF638            | 2  | 71582848  | 71607695  | 3 | 0 | 0 | 3  | 3  | 0 | 24847 | 1.068977249 | -0.816227486 | 2.665564295 | -0.306211892 | NA          | NA          |
| chr19:49416267-49416821   | exonic       | NUCB1             | 19 | 49416267  | 49416821  | 0 | 4 | 2 | 12 | 2  | 1 | 554   | 2.917651321 | -0.816039388 | 1.660727653 | -0.491374601 | 0.623161525 | 0.998252924 |
| chr1:76211490-76216231    | exonic       | ACADM             | 1  | 76211490  | 76216231  | 0 | 2 | 0 | 2  | 3  | 0 | 4741  | 0.924256634 | -0.815281407 | 2.846954032 | -0.286369712 | 0.77459497  | 0.998252924 |
| chr1:91403041-91447927    | exonic       | ZNF644            | 1  | 91403041  | 91447927  | 0 | 2 | 0 | 2  | 3  | 0 | 44886 | 0.924256634 | -0.815281407 | 2.846954032 | -0.286369712 | 0.77459497  | 0.998252924 |
| chr12:50488219-50490755   | exonic       | SMARCD1           | 12 | 50488219  | 50490755  | 0 | 2 | 0 | 2  | 3  | 0 | 2536  | 0.924256634 | -0.815281407 | 2.846954032 | -0.286369712 | 0.77459497  | 0.998252924 |
| chr10:98667021-98711953   | exonic       | LCOR              | 10 | 98667021  | 98711953  | 0 | 0 | 2 | 6  | 0  | 0 | 44932 | 1.032406362 | -0.814804204 | 3.010992493 | -0.270609842 | NA          | NA          |
| chr7:140494107-140508795  | exonic       | BRAF              | 7  | 140494107 | 140508795 | 0 | 0 | 2 | 6  | 0  | 0 | 14688 | 1.032406362 | -0.814804204 | 3.010992493 | -0.270609842 | NA          | NA          |
| chrX:13684436-13686502    | downstream   | TCEANC (dist=909) | X  | 13684436  | 13686502  | 0 | 0 | 2 | 6  | 0  | 0 | 2066  | 1.032406362 | -0.814804204 | 3.010992493 | -0.270609842 | NA          | NA          |
| chr15:67524151-67529158   | exonic       | AAGAB             | 15 | 67524151  | 67529158  | 9 | 0 | 0 | 7  | 4  | 3 | 5007  | 3.313827695 | -0.808406617 | 1.664273991 | -0.485741303 | NA          | NA          |
| chr8:74585341-74601048    | exonic       | STAU2             | 8  | 74585341  | 74601048  | 5 | 5 | 7 | 14 | 14 | 6 | 15707 | 7.929251838 | -0.80519554  | 0.982702372 | -0.819368674 | 0.412576102 | 0.998252924 |
| chr2:136505836-136519481  | exonic       | UBXN4             | 2  | 136505836 | 136519481 | 4 | 0 | 1 | 4  | 0  | 3 | 13645 | 2.063118164 | -0.805041965 | 2.007975598 | -0.400922186 | 0.688477415 | 0.998252924 |
| chr17:64023618-64026141   | exonic       | CEP112            | 17 | 64023618  | 64026141  | 5 | 1 | 0 | 5  | 3  | 2 | 2523  | 2.330286922 | -0.803063707 | 1.733978684 | -0.463133552 | NA          | NA          |
| chr6:155095123-155154543  | exonic       | SCAF8             | 6  | 155095123 | 155154543 | 5 | 2 | 0 | 0  | 3  | 5 | 59420 | 2.897661621 | -0.801116635 | 1.809564427 | -0.442712414 | 0.657973762 | 0.998252924 |
| chr3:119582265-119624699  | exonic       | GSK3B             | 3  | 119582265 | 119624699 | 4 | 3 | 1 | 7  | 0  | 5 | 42434 | 3.521316934 | -0.798948644 | 1.561659557 | -0.511602314 | 0.608929365 | 0.998252924 |
| chr7:11091238-11151094    | exonic       | PHF14             | 7  | 11091238  | 11151094  | 1 | 7 | 0 | 10 | 3  | 3 | 59856 | 3.69976948  | -0.798529781 | 1.527821721 | -0.522659006 | NA          | NA          |

|                           |        |          |    |           |           |    |   |   |    |    |   |        |             |              |             |              |             |             |
|---------------------------|--------|----------|----|-----------|-----------|----|---|---|----|----|---|--------|-------------|--------------|-------------|--------------|-------------|-------------|
| chr8:71126137-71128999    | exonic | NCOA2    | 8  | 71126137  | 71128999  | 15 | 4 | 4 | 17 | 13 | 9 | 2862   | 9.57560095  | -0.798397855 | 0.947905969 | -0.842275374 | NA          | NA          |
| chr1:246754813-246755243  | exonic | CNST     | 1  | 246754813 | 246755243 | 1  | 2 | 0 | 4  | 3  | 0 | 430    | 1.265866347 | -0.797561655 | 2.324761641 | -0.343072443 | 0.731543962 | 0.998252924 |
| chr15:76566752-76585041   | exonic | ETFA     | 15 | 76566752  | 76585041  | 0  | 4 | 4 | 8  | 4  | 4 | 18289  | 4.053654502 | -0.796125192 | 1.426895285 | -0.557942268 | 0.576883807 | 0.998252924 |
| chr16:19627435-19637545   | exonic | C16orf62 | 16 | 19627435  | 19637545  | 1  | 0 | 1 | 5  | 0  | 0 | 10110  | 0.857812894 | -0.794950113 | 2.978463951 | -0.266899357 | NA          | NA          |
| chr7:77210743-77227218    | exonic | PTPN12   | 7  | 77210743  | 77227218  | 1  | 2 | 0 | 0  | 0  | 3 | 16475  | 1.402194367 | -0.794798651 | 2.544499843 | -0.312359481 | NA          | NA          |
| chr22:41568502-41569788   | exonic | EP300    | 22 | 41568502  | 41569788  | 3  | 0 | 1 | 0  | 6  | 1 | 1286   | 1.618612993 | -0.794719288 | 2.196057496 | -0.361884554 | 0.717438303 | 0.998252924 |
| chr1:31532050-31532424    | exonic | PUM1     | 1  | 31532050  | 31532424  | 2  | 0 | 0 | 2  | 2  | 0 | 374    | 0.712651499 | -0.79402595  | 3.138857354 | -0.252966561 | 0.800294054 | 0.998252924 |
| chr10:15838098-15889942   | exonic | FAM188A  | 10 | 15838098  | 15889942  | 2  | 0 | 0 | 2  | 2  | 0 | 51844  | 0.712651499 | -0.79402595  | 3.138857354 | -0.252966561 | 0.800294054 | 0.998252924 |
| chr11:10011043-10024236   | exonic | SBF2     | 11 | 10011043  | 10024236  | 2  | 0 | 0 | 2  | 2  | 0 | 13193  | 0.712651499 | -0.79402595  | 3.138857354 | -0.252966561 | 0.800294054 | 0.998252924 |
| chr2:15629017-15674765    | exonic | NBAS     | 2  | 15629017  | 15674765  | 2  | 0 | 0 | 2  | 2  | 0 | 45748  | 0.712651499 | -0.79402595  | 3.138857354 | -0.252966561 | 0.800294054 | 0.998252924 |
| chr3:149238618-149245756  | exonic | WWTR1    | 3  | 149238618 | 149245756 | 2  | 0 | 0 | 2  | 2  | 0 | 7138   | 0.712651499 | -0.79402595  | 3.138857354 | -0.252966561 | 0.800294054 | 0.998252924 |
| chr4:36179448-36231267    | exonic | ARAP2    | 4  | 36179448  | 36231267  | 2  | 0 | 0 | 2  | 2  | 0 | 51819  | 0.712651499 | -0.79402595  | 3.138857354 | -0.252966561 | 0.800294054 | 0.998252924 |
| chr4:36189072-36231267    | exonic | ARAP2    | 4  | 36189072  | 36231267  | 2  | 0 | 0 | 2  | 2  | 0 | 42195  | 0.712651499 | -0.79402595  | 3.138857354 | -0.252966561 | 0.800294054 | 0.998252924 |
| chr5:137342678-137347634  | exonic | FAM13B   | 5  | 137342678 | 137347634 | 2  | 0 | 0 | 2  | 2  | 0 | 4956   | 0.712651499 | -0.79402595  | 3.138857354 | -0.252966561 | 0.800294054 | 0.998252924 |
| chr2:167304121-167328955  | exonic | SCN7A    | 2  | 167304121 | 167328955 | 25 | 6 | 6 | 71 | 12 | 1 | 24834  | 14.76259853 | -0.793959551 | 1.026502706 | -0.773460748 | NA          | NA          |
| chr1:67411832-67428843    | exonic | MIER1    | 1  | 67411832  | 67428843  | 0  | 0 | 2 | 0  | 3  | 1 | 17011  | 1.065838925 | -0.793072536 | 2.761323954 | -0.28720735  | 0.773953558 | 0.998252924 |
| chr5:54941616-54960691    | exonic | SLC38A9  | 5  | 54941616  | 54960691  | 0  | 0 | 2 | 0  | 3  | 1 | 19075  | 1.065838925 | -0.793072536 | 2.761323954 | -0.28720735  | 0.773953558 | 0.998252924 |
| chr8:74585341-74650584    | exonic | STAU2    | 8  | 74585341  | 74650584  | 0  | 0 | 2 | 0  | 3  | 1 | 65243  | 1.065838925 | -0.793072536 | 2.761323954 | -0.28720735  | 0.773953558 | 0.998252924 |
| chr12:105255068-105322472 | exonic | SLC41A2  | 12 | 105255068 | 105322472 | 0  | 1 | 1 | 1  | 3  | 0 | 67404  | 0.961965897 | -0.792308855 | 2.647183781 | -0.29930255  | NA          | NA          |
| chr15:51743841-51745838   | exonic | DMXL2    | 15 | 51743841  | 51745838  | 0  | 1 | 1 | 1  | 4  | 0 | 1997   | 0.961965897 | -0.792308855 | 2.647183781 | -0.29930255  | NA          | NA          |
| chr1:155747413-155753880  | exonic | GON4L    | 1  | 155747413 | 155753880 | 3  | 0 | 0 | 4  | 2  | 0 | 6467   | 1.054261213 | -0.789093719 | 2.685112872 | -0.293877299 | 0.768851665 | 0.998252924 |
| chr1:172520651-172555088  | exonic | SUCO     | 1  | 172520651 | 172555088 | 3  | 0 | 0 | 4  | 2  | 0 | 34437  | 1.054261213 | -0.789093719 | 2.685112872 | -0.293877299 | 0.768851665 | 0.998252924 |
| chr2:44021595-44028848    | exonic | DYNC2LI1 | 2  | 44021595  | 44028848  | 3  | 0 | 0 | 4  | 2  | 0 | 7253   | 1.054261213 | -0.789093719 | 2.685112872 | -0.293877299 | 0.768851665 | 0.998252924 |
| chr5:55256229-55264224    | exonic | IL6ST    | 5  | 55256229  | 55264224  | 3  | 0 | 0 | 4  | 2  | 0 | 7995   | 1.054261213 | -0.789093719 | 2.685112872 | -0.293877299 | 0.768851665 | 0.998252924 |
| chr7:150814181-150815719  | exonic | AGAP3    | 7  | 150814181 | 150815719 | 3  | 0 | 0 | 4  | 2  | 0 | 1538   | 1.054261213 | -0.789093719 | 2.685112872 | -0.293877299 | 0.768851665 | 0.998252924 |
| chr2:32602655-32620661    | exonic | BIRC6    | 2  | 32602655  | 32620661  | 0  | 4 | 1 | 2  | 8  | 1 | 18006  | 2.383432975 | -0.787211157 | 1.789239473 | -0.439969702 | NA          | NA          |
| chr12:22796696-22826594   | exonic | ETNK1    | 12 | 22796696  | 22826594  | 1  | 0 | 2 | 3  | 0  | 2 | 29898  | 1.458896367 | -0.785734505 | 2.27622475  | -0.34519197  | 0.729950055 | 0.998252924 |
| chr11:77336007-77340944   | exonic | CLNS1A   | 11 | 77336007  | 77340944  | 0  | 2 | 0 | 3  | 2  | 0 | 4937   | 0.909540597 | -0.782467348 | 2.8615691   | -0.273439963 | 0.784515037 | 0.998252924 |
| chr7:44684925-44687358    | exonic | OGDH     | 7  | 44684925  | 44687358  | 0  | 2 | 0 | 3  | 2  | 0 | 2433   | 0.909540597 | -0.782467348 | 2.8615691   | -0.273439963 | 0.784515037 | 0.998252924 |
| chr8:141828375-141889736  | exonic | PTK2     | 8  | 141828375 | 141889736 | 2  | 7 | 2 | 9  | 3  | 0 | 61361  | 0.909540597 | -0.782467348 | 2.8615691   | -0.273439963 | 0.784515037 | 0.998252924 |
| chr8:141840570-141889736  | exonic | PTK2     | 8  | 141840570 | 141889736 | 2  | 7 | 2 | 9  | 3  | 0 | 49166  | 0.909540597 | -0.782467348 | 2.8615691   | -0.273439963 | 0.784515037 | 0.998252924 |
| chr7:74171151-74172333    | exonic | GTF2I    | 7  | 74171151  | 74172333  | 4  | 5 | 6 | 10 | 19 | 3 | 1182   | 6.858231612 | -0.780068393 | 1.065173097 | -0.732339556 | NA          | NA          |
| chr13:28748408-28752072   | exonic | PAN3     | 13 | 28748408  | 28752072  | 2  | 4 | 0 | 4  | 3  | 3 | 3664   | 2.668060714 | -0.779864181 | 1.64622195  | -0.47372967  | 0.635692693 | 0.998252924 |
| chr8:141799572-141900868  | exonic | PTK2     | 8  | 141799572 | 141900868 | 5  | 4 | 0 | 9  | 4  | 3 | 101296 | 3.70760589  | -0.777447168 | 1.433012864 | -0.542526301 | 0.587455994 | 0.998252924 |
| chr12:80192273-80215970   | exonic | PPP1R12A | 12 | 80192273  | 80215970  | 1  | 0 | 2 | 0  | 7  | 0 | 23697  | 1.370716946 | -0.77685332  | 2.515443385 | -0.308833554 | NA          | NA          |

|                           |              |           |    |           |           |    |   |   |    |    |   |       |             |              |             |              |             |             |
|---------------------------|--------------|-----------|----|-----------|-----------|----|---|---|----|----|---|-------|-------------|--------------|-------------|--------------|-------------|-------------|
| chr10:116719484-116734144 | exonic       | TRUB1     | 10 | 116719484 | 116734144 | 5  | 0 | 2 | 6  | 9  | 0 | 14660 | 2.766587872 | -0.776622778 | 1.738500722 | -0.446719848 | 0.655077349 | 0.998252924 |
| chr18:6301901-6312055     | exonic       | L3MBTL4   | 18 | 6301901   | 6312055   | 4  | 0 | 0 | 6  | 2  | 0 | 10154 | 1.395870926 | -0.774920032 | 2.423289449 | -0.31978022  | 0.749134943 | 0.998252924 |
| chr15:63988322-64008672   | exonic       | HERC1     | 15 | 63988322  | 64008672  | 9  | 5 | 3 | 17 | 10 | 3 | 20350 | 8.780046064 | -0.773861841 | 0.979451501 | -0.790097152 | 0.429471033 | 0.998252924 |
| chr3:195435004-195435712  | ncRNA_exonic | LINCO0969 | 3  | 195435004 | 195435712 | 2  | 0 | 1 | 7  | 0  | 0 | 708   | 1.199422607 | -0.771853389 | 2.616244266 | -0.295023442 | NA          | NA          |
| chr18:9931806-9937063     | exonic       | VAPA      | 18 | 9931806   | 9937063   | 6  | 0 | 9 | 6  | 11 | 8 | 5257  | 6.984261707 | -0.77137013  | 1.220335158 | -0.632096949 | 0.527323529 | 0.998252924 |
| chr10:7318853-7327916     | exonic       | SFMBT2    | 10 | 7318853   | 7327916   | 8  | 8 | 0 | 9  | 12 | 6 | 9063  | 6.684545116 | -0.771074438 | 1.180151071 | -0.653369266 | NA          | NA          |
| chr4:56277780-56284152    | exonic       | TMEM165   | 4  | 56277780  | 56284152  | 0  | 6 | 9 | 4  | 18 | 7 | 6372  | 7.582345419 | -0.763814112 | 1.238250265 | -0.616849545 | 0.537333969 | 0.998252924 |
| chr7:158528193-158531812  | exonic       | ESYT2     | 7  | 158528193 | 158531812 | 1  | 3 | 0 | 4  | 3  | 1 | 3619  | 1.748360755 | -0.763658602 | 1.941896813 | -0.393253955 | 0.694131923 | 0.998252924 |
| chr14:50616725-50616948   | exonic       | SOS2      | 14 | 50616725  | 50616948  | 5  | 3 | 0 | 4  | 6  | 3 | 223   | 3.243828009 | -0.763645284 | 1.506080646 | -0.50704143  | 0.61212575  | 0.998252924 |
| chr15:75702176-75705386   | exonic       | SIN3A     | 15 | 75702176  | 75705386  | 0  | 1 | 1 | 2  | 3  | 0 | 3210  | 0.94724986  | -0.763172454 | 2.631670915 | -0.289995398 | 0.771819759 | 0.998252924 |
| chr4:128590190-128609022  | exonic       | INTU      | 4  | 128590190 | 128609022 | 0  | 1 | 1 | 2  | 3  | 0 | 18832 | 0.94724986  | -0.763172454 | 2.631670915 | -0.289995398 | 0.771819759 | 0.998252924 |
| chr11:117030649-117034608 | exonic       | PAFAH1B2  | 11 | 117030649 | 117034608 | 1  | 1 | 0 | 0  | 2  | 1 | 3959  | 0.853536194 | -0.761317409 | 2.79124322  | -0.272752086 | 0.785043794 | 0.998252924 |
| chr11:62406454-62407203   | exonic       | GANAB     | 11 | 62406454  | 62407203  | 1  | 1 | 1 | 4  | 3  | 0 | 749   | 1.288859573 | -0.761197955 | 2.175090493 | -0.349961511 | 0.726367583 | 0.998252924 |
| chr16:74493579-74497377   | exonic       | GLG1      | 16 | 74493579  | 74497377  | 0  | 0 | 5 | 4  | 7  | 1 | 3798  | 2.56700123  | -0.760916949 | 1.855110753 | -0.410173326 | NA          | NA          |
| chr15:52161413-52194233   | exonic       | TMOD3     | 15 | 52161413  | 52194233  | 1  | 3 | 3 | 10 | 3  | 2 | 32820 | 3.286254751 | -0.760177006 | 1.444086785 | -0.526406733 | 0.598605639 | 0.998252924 |
| chr2:73784346-73786269    | exonic       | ALMS1     | 2  | 73784346  | 73786269  | 2  | 0 | 1 | 0  | 4  | 1 | 1923  | 1.247571207 | -0.759187723 | 2.404839186 | -0.31569168  | 0.752236542 | 0.998252924 |
| chr2:43939363-43968182    | exonic       | PLEKHH2   | 2  | 43939363  | 43968182  | 2  | 1 | 2 | 10 | 2  | 0 | 28819 | 2.131956431 | -0.755639412 | 1.815153974 | -0.416294938 | NA          | NA          |
| chr3:136085784-136141886  | exonic       | STAG1     | 3  | 136085784 | 136141886 | 4  | 1 | 0 | 0  | 3  | 3 | 56102 | 1.977961662 | -0.755579585 | 2.04571748  | -0.369346986 | 0.711869108 | 0.998252924 |
| chr10:24508554-24508838   | exonic       | KIAA1217  | 10 | 24508554  | 24508838  | 0  | 1 | 6 | 19 | 1  | 0 | 284   | 3.498833692 | -0.753843999 | 1.79151111  | -0.420786672 | NA          | NA          |
| chr7:127344892-127361454  | exonic       | SND1      | 7  | 127344892 | 127361454 | 2  | 5 | 0 | 10 | 4  | 1 | 16562 | 2.984795028 | -0.753667119 | 1.600997718 | -0.470748403 | 0.637820415 | 0.998252924 |
| chr10:99502850-99504672   | exonic       | ZFYVE27   | 10 | 99502850  | 99504672  | 2  | 0 | 0 | 3  | 1  | 0 | 1822  | 0.697935463 | -0.753030057 | 3.182487175 | -0.236616839 | 0.812954055 | 0.998252924 |
| chr12:112667501-112670889 | exonic       | HECTD4    | 12 | 112667501 | 112670889 | 2  | 0 | 0 | 3  | 1  | 0 | 3388  | 0.697935463 | -0.753030057 | 3.182487175 | -0.236616839 | 0.812954055 | 0.998252924 |
| chr12:93244886-93246801   | exonic       | EEA1      | 12 | 93244886  | 93246801  | 2  | 0 | 0 | 3  | 1  | 0 | 1915  | 0.697935463 | -0.753030057 | 3.182487175 | -0.236616839 | 0.812954055 | 0.998252924 |
| chr13:96577933-96592345   | exonic       | UGGT2     | 13 | 96577933  | 96592345  | 2  | 0 | 0 | 3  | 1  | 0 | 14412 | 0.697935463 | -0.753030057 | 3.182487175 | -0.236616839 | 0.812954055 | 0.998252924 |
| chr16:89371613-89383486   | exonic       | ANKRD11   | 16 | 89371613  | 89383486  | 0  | 0 | 0 | 3  | 1  | 0 | 11873 | 0.697935463 | -0.753030057 | 3.182487175 | -0.236616839 | 0.812954055 | 0.998252924 |
| chr19:11168930-11170863   | exonic       | SMARCA4   | 19 | 11168930  | 11170863  | 2  | 0 | 0 | 3  | 1  | 0 | 1933  | 0.697935463 | -0.753030057 | 3.182487175 | -0.236616839 | 0.812954055 | 0.998252924 |
| chr7:73456943-73459623    | exonic       | ELN       | 7  | 73456943  | 73459623  | 2  | 0 | 0 | 3  | 1  | 0 | 2680  | 0.697935463 | -0.753030057 | 3.182487175 | -0.236616839 | 0.812954055 | 0.998252924 |
| chr9:88284399-88327481    | exonic       | AGTPBP1   | 9  | 88284399  | 88327481  | 1  | 0 | 3 | 1  | 2  | 3 | 43082 | 1.993816074 | -0.752528283 | 1.931149382 | -0.38967896  | 0.696773956 | 0.998252924 |
| chr20:30954187-30959677   | exonic       | ASXL1     | 20 | 30954187  | 30959677  | 11 | 6 | 0 | 15 | 7  | 6 | 5490  | 6.755685548 | -0.752095332 | 1.183526223 | -0.635469934 | NA          | NA          |
| chr4:15613888-15646331    | exonic       | FBXL5     | 4  | 15613888  | 15646331  | 1  | 0 | 1 | 0  | 0  | 2 | 32443 | 0.942693186 | -0.751985668 | 2.939858421 | -0.255789756 | 0.798113184 | 0.998252924 |
| chr12:69983264-69985939   | exonic       | CCT2      | 12 | 69983264  | 69985939  | 2  | 4 | 4 | 7  | 10 | 3 | 2675  | 4.623262924 | -0.749650911 | 1.228422145 | -0.610255126 | 0.541692818 | 0.998252924 |
| chr16:18852886-18856973   | exonic       | SMG1      | 16 | 18852886  | 18856973  | 3  | 0 | 2 | 7  | 2  | 1 | 4087  | 2.075952028 | -0.748812013 | 1.815767246 | -0.412394273 | 0.68005046  | 0.998252924 |
| chr17:8411871-8413267     | exonic       | MYH10     | 17 | 8411871   | 8413267   | 0  | 3 | 0 | 3  | 2  | 1 | 1396  | 1.392035005 | -0.747271036 | 2.279069198 | -0.327884312 | NA          | NA          |
| chr22:30374430-30387659   | exonic       | MTMR3     | 22 | 30374430  | 30387659  | 0  | 3 | 0 | 3  | 2  | 1 | 13229 | 1.392035005 | -0.747271036 | 2.279069198 | -0.327884312 | NA          | NA          |
| chr2:24786773-24807429    | UTR5         | -----     | 2  | 24786773  | 24807429  | 0  | 0 | 3 | 4  | 4  | 0 | 20656 | 1.501162304 | -0.744692108 | 2.369951115 | -0.314222561 | NA          | NA          |

|                          |            |                                        |    |           |           |    |    |    |    |    |   |        |             |              |             |              |             |             |
|--------------------------|------------|----------------------------------------|----|-----------|-----------|----|----|----|----|----|---|--------|-------------|--------------|-------------|--------------|-------------|-------------|
| chr1:213290658-213303232 | exonic     | RPS6KC1                                | 1  | 213290658 | 213303232 | 2  | 0  | 2  | 4  | 5  | 0 | 12574  | 1.682894586 | -0.743111116 | 2.072782299 | -0.358509003 | 0.719962432 | 0.998252924 |
| chr7:11101417-11151094   | exonic     | PHF14                                  | 7  | 11101417  | 11151094  | 0  | 7  | 1  | 10 | 3  | 3 | 49677  | 3.768051562 | -0.740529661 | 1.525886829 | -0.485310999 | NA          | NA          |
| chr10:51584615-51585599  | exonic     | NCOA4                                  | 10 | 51584615  | 51585599  | 2  | 0  | 1  | 2  | 0  | 2 | 984    | 1.284302899 | -0.736853268 | 2.382254105 | -0.309309266 | 0.757086283 | 0.998252924 |
| chr10:70227879-70229920  | exonic     | DNA2                                   | 10 | 70227879  | 70229920  | 1  | 3  | 1  | 9  | 3  | 0 | 2041   | 2.168968097 | -0.73595285  | 1.806648976 | -0.407357965 | 0.683745095 | 0.998252924 |
| chr1:185143503-185144245 | exonic     | SWT1                                   | 1  | 185143503 | 185144245 | 3  | 0  | 0  | 0  | 1  | 2 | 742    | 1.124425468 | -0.735480623 | 2.714433628 | -0.27095178  | NA          | NA          |
| chr5:145176004-145205763 | exonic     | PRELID2                                | 5  | 145176004 | 145205763 | 1  | 0  | 2  | 4  | 1  | 1 | 29759  | 1.378016565 | -0.735392169 | 2.161176827 | -0.340273947 | 0.733650235 | 0.998252924 |
| chr4:83799882-83803090   | exonic     | SEC31A                                 | 4  | 83799882  | 83803090  | 1  | 3  | 0  | 4  | 5  | 0 | 3208   | 1.68219699  | -0.735297239 | 2.094577077 | -0.351048069 | 0.725552286 | 0.998252924 |
| chr20:50133322-50140135  | exonic     | NFATC2                                 | 20 | 50133322  | 50140135  | 2  | 2  | 6  | 16 | 1  | 0 | 6813   | 1.828055981 | -0.733893207 | 2.050248061 | -0.357953372 | 0.720378208 | 0.998252924 |
| chr9:88920106-88924932   | exonic     | ZCCHC6                                 | 9  | 88920106  | 88924932  | 3  | 2  | 10 | 5  | 24 | 3 | 4826   | 7.069073557 | -0.733882549 | 1.173813964 | -0.625211977 | NA          | NA          |
| chr3:114412375-114436374 | UTR5       |                                        | 3  | 114412375 | 114436374 | 0  | 3  | 4  | 0  | 8  | 4 | 23999  | 3.512997309 | -0.733825437 | 1.698370144 | -0.43207627  | NA          | NA          |
| chr16:88052034-88071617  | exonic     | BANP                                   | 16 | 88052034  | 88071617  | 3  | 0  | 0  | 6  | 0  | 0 | 19583  | 1.024829139 | -0.73115626  | 2.993913621 | -0.244214213 | NA          | NA          |
| chr22:38083916-38084999  | exonic     | NOL12                                  | 22 | 38083916  | 38084999  | 3  | 0  | 0  | 6  | 0  | 0 | 1083   | 1.024829139 | -0.73115626  | 2.993913621 | -0.244214213 | NA          | NA          |
| chr8:8779799-8780260     | intergenic | MPHAS1 (dist=28668), ER11 (dist=80054) | 8  | 8779799   | 8780260   | 3  | 0  | 0  | 6  | 0  | 0 | 461    | 1.024829139 | -0.73115626  | 2.993913621 | -0.244214213 | NA          | NA          |
| chr1:154145383-154148724 | exonic     | TPM3                                   | 1  | 154145383 | 154148724 | 4  | 0  | 0  | 8  | 0  | 0 | 3341   | 1.366438852 | -0.730392419 | 2.701299407 | -0.270385585 | NA          | NA          |
| chr15:43164808-43170882  | exonic     | TTBK2                                  | 15 | 43164808  | 43170882  | 4  | 0  | 0  | 8  | 0  | 0 | 6074   | 1.366438852 | -0.730392419 | 2.701299407 | -0.270385585 | NA          | NA          |
| chr1:243468014-243589860 | exonic     | SDCCAG8                                | 1  | 243468014 | 243589860 | 0  | 1  | 0  | 3  | 1  | 1 | 121846 | 1.874529413 | -0.727489004 | 2.049605115 | -0.354941056 | NA          | NA          |
| chr8:42780699-42798588   | exonic     | HOOK3                                  | 8  | 42780699  | 42798588  | 1  | 2  | 2  | 1  | 6  | 2 | 17889  | 2.320989726 | -0.727167422 | 1.684294779 | -0.431734059 | 0.66593471  | 0.998252924 |
| chr16:2607703-2616454    | exonic     | PDPK1                                  | 16 | 2607703   | 2616454   | 1  | 3  | 0  | 6  | 1  | 1 | 8751   | 1.718928681 | -0.727005284 | 1.998120325 | -0.363844597 | 0.715974058 | 0.998252924 |
| chr17:3717615-3719564    | exonic     | NCBP3                                  | 17 | 3717615   | 3719564   | 0  | 0  | 2  | 0  | 5  | 0 | 1949   | 0.99967516  | -0.723358484 | 3.051230925 | -0.237071038 | NA          | NA          |
| chrX:76932540-76934088   | intronic   | ATRX                                   | X  | 76932540  | 76934088  | 0  | 0  | 2  | 0  | 5  | 0 | 1548   | 0.99967516  | -0.723358484 | 3.051230925 | -0.237071038 | NA          | NA          |
| chr4:128995614-129012667 | exonic     | LARP1B                                 | 4  | 128995614 | 129012667 | 3  | 2  | 0  | 2  | 8  | 0 | 17053  | 1.916354571 | -0.720964597 | 2.000037434 | -0.360475551 | NA          | NA          |
| chr20:60714130-60716000  | exonic     | PSMA7                                  | 20 | 60714130  | 60716000  | 10 | 3  | 4  | 26 | 9  | 1 | 1870   | 6.763334346 | -0.719684515 | 1.134057942 | -0.634610004 | 0.525682802 | 0.998252924 |
| chr3:138413627-138417937 | exonic     | PIK3CB                                 | 3  | 138413627 | 138417937 | 1  | 1  | 0  | 0  | 4  | 0 | 4310   | 0.787372429 | -0.719448199 | 3.076231122 | -0.23387326  | NA          | NA          |
| chr3:167217940-167254788 | exonic     | WDR49                                  | 3  | 167217940 | 167254788 | 1  | 1  | 0  | 0  | 4  | 0 | 36848  | 0.787372429 | -0.719448199 | 3.076231122 | -0.23387326  | NA          | NA          |
| chr5:112889463-112899189 | exonic     | YTHDC2                                 | 5  | 112889463 | 112899189 | 1  | 1  | 0  | 0  | 4  | 0 | 9726   | 0.787372429 | -0.719448199 | 3.076231122 | -0.23387326  | NA          | NA          |
| chr9:99220660-99233376   | exonic     | HABP4                                  | 9  | 99220660  | 99233376  | 3  | 3  | 1  | 8  | 3  | 2 | 12716  | 2.937067815 | -0.718026641 | 1.476747042 | -0.486221824 | 0.626809899 | 0.998252924 |
| chr16:4382216-4383520    | exonic     | GLIS2                                  | 16 | 4382216   | 4383520   | 31 | 13 | 4  | 81 | 16 | 3 | 1304   | 18.52557349 | -0.717790075 | 0.939663411 | -0.763879988 | NA          | NA          |
| chr14:89041036-89044484  | exonic     | ZC3H14                                 | 14 | 89041036  | 89044484  | 3  | 0  | 3  | 5  | 6  | 1 | 3448   | 2.54470797  | -0.717603915 | 1.66527524  | -0.430922107 | 0.666525009 | 0.998252924 |
| chr2:36668400-36669878   | exonic     | CRIM1                                  | 2  | 36668400  | 36669878  | 6  | 0  | 1  | 9  | 5  | 0 | 1478   | 2.533130258 | -0.714073432 | 1.819138346 | -0.392533879 | 0.694663784 | 0.998252924 |
| chr1:203458872-203459307 | UTR3       |                                        | 1  | 203458872 | 203459307 | 2  | 0  | 0  | 4  | 0  | 0 | 435    | 0.683219426 | -0.713878997 | 3.502205441 | -0.203836985 | NA          | NA          |
| chr1:6867043-6885270     | exonic     | CAMTA1                                 | 1  | 6867043   | 6885270   | 2  | 0  | 0  | 4  | 0  | 0 | 18227  | 0.683219426 | -0.713878997 | 3.502205441 | -0.203836985 | NA          | NA          |
| chr10:15600072-15628663  | exonic     | ITGA8                                  | 10 | 15600072  | 15628663  | 2  | 0  | 0  | 4  | 0  | 0 | 28591  | 0.683219426 | -0.713878997 | 3.502205441 | -0.203836985 | NA          | NA          |
| chr10:21157593-21188379  | exonic     | NEBL                                   | 10 | 21157593  | 21188379  | 2  | 0  | 0  | 4  | 0  | 0 | 30786  | 0.683219426 | -0.713878997 | 3.502205441 | -0.203836985 | NA          | NA          |
| chr10:24764056-24781869  | intronic   | KIAA1217                               | 10 | 24764056  | 24781869  | 2  | 0  | 0  | 4  | 0  | 0 | 17813  | 0.683219426 | -0.713878997 | 3.502205441 | -0.203836985 | NA          | NA          |
| chr12:5915217-6031970    | exonic     | ANO2                                   | 12 | 5915217   | 6031970   | 5  | 4  | 0  | 1  | 0  | 0 | 116753 | 0.683219426 | -0.713878997 | 3.502205441 | -0.203836985 | NA          | NA          |



|                           |        |          |    |           |           |   |   |   |    |   |   |       |             |              |             |              |             |             |
|---------------------------|--------|----------|----|-----------|-----------|---|---|---|----|---|---|-------|-------------|--------------|-------------|--------------|-------------|-------------|
| chr14:89628045-89647150   | exonic | FOXN3    | 14 | 89628045  | 89647150  | 2 | 0 | 0 | 4  | 0 | 0 | 19105 | 0.683219426 | -0.713878997 | 3.502205441 | -0.203836985 | NA          | NA          |
| chr16:21973780-21987564   | exonic | UQCRC2   | 16 | 21973780  | 21987564  | 2 | 2 | 0 | 1  | 0 | 0 | 13784 | 0.683219426 | -0.713878997 | 3.502205441 | -0.203836985 | NA          | NA          |
| chr2:128747137-128754065  | exonic | SAP130   | 2  | 128747137 | 128754065 | 2 | 0 | 0 | 4  | 0 | 0 | 6928  | 0.683219426 | -0.713878997 | 3.502205441 | -0.203836985 | NA          | NA          |
| chr2:203620260-203624076  | exonic | FAM117B  | 2  | 203620260 | 203624076 | 2 | 0 | 0 | 4  | 0 | 0 | 3816  | 0.683219426 | -0.713878997 | 3.502205441 | -0.203836985 | NA          | NA          |
| chr2:61339653-61345251    | exonic | KIAA1841 | 2  | 61339653  | 61345251  | 2 | 0 | 0 | 4  | 0 | 0 | 5598  | 0.683219426 | -0.713878997 | 3.502205441 | -0.203836985 | NA          | NA          |
| chr3:71733723-71759635    | exonic | EIF4E3   | 3  | 71733723  | 71759635  | 2 | 0 | 0 | 4  | 0 | 0 | 25912 | 0.683219426 | -0.713878997 | 3.502205441 | -0.203836985 | NA          | NA          |
| chr4:152080391-152100549  | exonic | SH3D19   | 4  | 152080391 | 152100549 | 2 | 0 | 0 | 4  | 0 | 0 | 20158 | 0.683219426 | -0.713878997 | 3.502205441 | -0.203836985 | NA          | NA          |
| chr5:154244751-154252211  | exonic | CNOT8    | 5  | 154244751 | 154252211 | 2 | 0 | 0 | 4  | 0 | 0 | 7460  | 0.683219426 | -0.713878997 | 3.502205441 | -0.203836985 | NA          | NA          |
| chr8:68030482-68049838    | exonic | CSPP1    | 8  | 68030482  | 68049838  | 2 | 0 | 0 | 4  | 0 | 0 | 19356 | 0.683219426 | -0.713878997 | 3.502205441 | -0.203836985 | NA          | NA          |
| chr4:140046317-140059021  | exonic | ELF2     | 4  | 140046317 | 140059021 | 9 | 2 | 3 | 13 | 3 | 6 | 12704 | 5.695683085 | -0.7130146   | 1.187531378 | -0.600417482 | 0.54822804  | 0.998252924 |
| chr1:100459092-100464971  | exonic | SLC35A3  | 1  | 100459092 | 100464971 | 1 | 0 | 0 | 0  | 2 | 0 | 5879  | 0.371041786 | -0.711438736 | 4.032572146 | -0.176423064 | 0.859961586 | 0.998252924 |
| chr1:10327437-10332364    | exonic | KIF1B    | 1  | 10327437  | 10332364  | 1 | 0 | 0 | 0  | 2 | 0 | 4927  | 0.371041786 | -0.711438736 | 4.032572146 | -0.176423064 | 0.859961586 | 0.998252924 |
| chr1:108697604-108728576  | exonic | SLC25A24 | 1  | 108697604 | 108728576 | 1 | 0 | 0 | 0  | 2 | 0 | 30972 | 0.371041786 | -0.711438736 | 4.032572146 | -0.176423064 | 0.859961586 | 0.998252924 |
| chr1:179304640-179312770  | exonic | SOAT1    | 1  | 179304640 | 179312770 | 0 | 1 | 0 | 0  | 2 | 0 | 8130  | 0.416330643 | -0.711438736 | 4.032572146 | -0.176423064 | 0.859961586 | 0.998252924 |
| chr1:179972308-179993717  | exonic | CEP350   | 1  | 179972308 | 179993717 | 1 | 0 | 0 | 0  | 2 | 0 | 21409 | 0.371041786 | -0.711438736 | 4.032572146 | -0.176423064 | 0.859961586 | 0.998252924 |
| chr1:183866941-183869370  | exonic | RGL1     | 1  | 183866941 | 183869370 | 1 | 0 | 0 | 0  | 2 | 0 | 2429  | 0.371041786 | -0.711438736 | 4.032572146 | -0.176423064 | 0.859961586 | 0.998252924 |
| chr1:220363044-220364626  | exonic | RAB3GAP2 | 1  | 220363044 | 220364626 | 0 | 1 | 0 | 0  | 2 | 0 | 1582  | 0.416330643 | -0.711438736 | 4.032572146 | -0.176423064 | 0.859961586 | 0.998252924 |
| chr1:32691771-32692131    | exonic | EIF3I    | 1  | 32691771  | 32692131  | 0 | 1 | 0 | 0  | 2 | 0 | 360   | 0.416330643 | -0.711438736 | 4.032572146 | -0.176423064 | 0.859961586 | 0.998252924 |
| chr10:126172707-126186697 | exonic | LHPP     | 10 | 126172707 | 126186697 | 0 | 1 | 0 | 0  | 2 | 0 | 13990 | 0.416330643 | -0.711438736 | 4.032572146 | -0.176423064 | 0.859961586 | 0.998252924 |
| chr10:22002700-22024164   | exonic | MLLT10   | 10 | 22002700  | 22024164  | 0 | 1 | 0 | 0  | 2 | 0 | 21464 | 0.416330643 | -0.711438736 | 4.032572146 | -0.176423064 | 0.859961586 | 0.998252924 |
| chr10:50678227-50714058   | exonic | ERCC6    | 10 | 50678227  | 50714058  | 1 | 0 | 0 | 0  | 2 | 0 | 35831 | 0.371041786 | -0.711438736 | 4.032572146 | -0.176423064 | 0.859961586 | 0.998252924 |
| chr10:70252888-70253327   | exonic | SLC25A16 | 10 | 70252888  | 70253327  | 0 | 1 | 0 | 0  | 2 | 0 | 439   | 0.416330643 | -0.711438736 | 4.032572146 | -0.176423064 | 0.859961586 | 0.998252924 |
| chr11:119167627-119168191 | exonic | CBL      | 11 | 119167627 | 119168191 | 0 | 1 | 0 | 0  | 2 | 0 | 564   | 0.416330643 | -0.711438736 | 4.032572146 | -0.176423064 | 0.859961586 | 0.998252924 |
| chr11:35219667-35232996   | exonic | CD44     | 11 | 35219667  | 35232996  | 1 | 0 | 0 | 0  | 2 | 0 | 13329 | 0.371041786 | -0.711438736 | 4.032572146 | -0.176423064 | 0.859961586 | 0.998252924 |
| chr11:36654833-36669705   | exonic | C11orf74 | 11 | 36654833  | 36669705  | 1 | 0 | 0 | 0  | 2 | 0 | 14872 | 0.371041786 | -0.711438736 | 4.032572146 | -0.176423064 | 0.859961586 | 0.998252924 |
| chr11:72468811-72470426   | exonic | STARD10  | 11 | 72468811  | 72470426  | 1 | 0 | 0 | 0  | 2 | 0 | 1615  | 0.371041786 | -0.711438736 | 4.032572146 | -0.176423064 | 0.859961586 | 0.998252924 |
| chr11:72578909-72600990   | exonic | FCHSD2   | 11 | 72578909  | 72600990  | 0 | 1 | 0 | 0  | 2 | 0 | 22081 | 0.416330643 | -0.711438736 | 4.032572146 | -0.176423064 | 0.859961586 | 0.998252924 |
| chr12:112229864-112236046 | exonic | ALDH2    | 12 | 112229864 | 112236046 | 1 | 0 | 0 | 0  | 2 | 0 | 6182  | 0.371041786 | -0.711438736 | 4.032572146 | -0.176423064 | 0.859961586 | 0.998252924 |
| chr12:123062218-123065217 | exonic | KNTC1    | 12 | 123062218 | 123065217 | 0 | 1 | 0 | 0  | 2 | 0 | 2999  | 0.416330643 | -0.711438736 | 4.032572146 | -0.176423064 | 0.859961586 | 0.998252924 |
| chr12:30881581-30904067   | exonic | CAPRN2   | 12 | 30881581  | 30904067  | 1 | 0 | 0 | 0  | 2 | 0 | 22486 | 0.371041786 | -0.711438736 | 4.032572146 | -0.176423064 | 0.859961586 | 0.998252924 |
| chr12:69210591-69218431   | exonic | MDM2     | 12 | 69210591  | 69218431  | 0 | 1 | 0 | 0  | 2 | 0 | 7840  | 0.416330643 | -0.711438736 | 4.032572146 | -0.176423064 | 0.859961586 | 0.998252924 |
| chr12:89853414-89861462   | exonic | POC1B    | 12 | 89853414  | 89861462  | 0 | 1 | 0 | 0  | 2 | 0 | 8048  | 0.416330643 | -0.711438736 | 4.032572146 | -0.176423064 | 0.859961586 | 0.998252924 |
| chr13:20576989-20580726   | exonic | ZMYM2    | 13 | 20576989  | 20580726  | 1 | 0 | 0 | 0  | 2 | 0 | 3737  | 0.371041786 | -0.711438736 | 4.032572146 | -0.176423064 | 0.859961586 | 0.998252924 |
| chr13:41890981-41894960   | exonic | NAA16    | 13 | 41890981  | 41894960  | 1 | 0 | 0 | 0  | 2 | 0 | 3979  | 0.371041786 | -0.711438736 | 4.032572146 | -0.176423064 | 0.859961586 | 0.998252924 |
| chr14:102909983-102912284 | exonic | TECPR2   | 14 | 102909983 | 102912284 | 0 | 1 | 0 | 0  | 2 | 0 | 2301  | 0.416330643 | -0.711438736 | 4.032572146 | -0.176423064 | 0.859961586 | 0.998252924 |

|                          |        |         |    |           |           |   |   |   |    |    |   |       |             |              |             |              |             |             |
|--------------------------|--------|---------|----|-----------|-----------|---|---|---|----|----|---|-------|-------------|--------------|-------------|--------------|-------------|-------------|
| chr14:35263954-35331528  | exonic | BAZ1A   | 14 | 35263954  | 35331528  | 1 | 0 | 0 | 0  | 2  | 0 | 67574 | 0.371041786 | -0.711438736 | 4.032572146 | -0.176423064 | 0.859961586 | 0.998252924 |
| chr14:78043109-78045452  | exonic | SPTLC2  | 14 | 78043109  | 78045452  | 0 | 1 | 0 | 0  | 2  | 0 | 2343  | 0.416330643 | -0.711438736 | 4.032572146 | -0.176423064 | 0.859961586 | 0.998252924 |
| chr15:35182415-35189906  | exonic | AQR     | 15 | 35182415  | 35189906  | 0 | 1 | 0 | 0  | 2  | 0 | 7491  | 0.416330643 | -0.711438736 | 4.032572146 | -0.176423064 | 0.859961586 | 0.998252924 |
| chr15:41347444-41350979  | exonic | INO80   | 15 | 41347444  | 41350979  | 0 | 1 | 0 | 0  | 2  | 0 | 3535  | 0.416330643 | -0.711438736 | 4.032572146 | -0.176423064 | 0.859961586 | 0.998252924 |
| chr15:72180344-72197347  | exonic | MYO9A   | 15 | 72180344  | 72197347  | 1 | 0 | 0 | 0  | 2  | 0 | 17003 | 0.371041786 | -0.711438736 | 4.032572146 | -0.176423064 | 0.859961586 | 0.998252924 |
| chr16:16101672-16142160  | exonic | ABCC1   | 16 | 16101672  | 16142160  | 0 | 1 | 0 | 0  | 2  | 0 | 40488 | 0.416330643 | -0.711438736 | 4.032572146 | -0.176423064 | 0.859961586 | 0.998252924 |
| chr16:19474601-19483565  | exonic | TMC5    | 16 | 19474601  | 19483565  | 0 | 1 | 0 | 0  | 2  | 0 | 8964  | 0.416330643 | -0.711438736 | 4.032572146 | -0.176423064 | 0.859961586 | 0.998252924 |
| chr16:68845586-68849662  | exonic | CDH1    | 16 | 68845586  | 68849662  | 0 | 1 | 0 | 0  | 2  | 0 | 4076  | 0.416330643 | -0.711438736 | 4.032572146 | -0.176423064 | 0.859961586 | 0.998252924 |
| chr17:35800605-35802753  | exonic | TADA2A  | 17 | 35800605  | 35802753  | 1 | 0 | 0 | 0  | 2  | 0 | 2148  | 0.371041786 | -0.711438736 | 4.032572146 | -0.176423064 | 0.859961586 | 0.998252924 |
| chr17:58756813-58767122  | exonic | BCAS3   | 17 | 58756813  | 58767122  | 0 | 1 | 0 | 0  | 2  | 0 | 10309 | 0.416330643 | -0.711438736 | 4.032572146 | -0.176423064 | 0.859961586 | 0.998252924 |
| chr18:10855350-10871413  | exonic | PIEZO2  | 18 | 10855350  | 10871413  | 0 | 1 | 0 | 0  | 2  | 0 | 16063 | 0.416330643 | -0.711438736 | 4.032572146 | -0.176423064 | 0.859961586 | 0.998252924 |
| chr18:54385194-54398828  | exonic | WDR7    | 18 | 54385194  | 54398828  | 0 | 1 | 0 | 0  | 2  | 0 | 13634 | 0.416330643 | -0.711438736 | 4.032572146 | -0.176423064 | 0.859961586 | 0.998252924 |
| chr19:23316881-23318845  | exonic | ZNF730  | 19 | 23316881  | 23318845  | 0 | 1 | 0 | 0  | 2  | 0 | 1964  | 0.416330643 | -0.711438736 | 4.032572146 | -0.176423064 | 0.859961586 | 0.998252924 |
| chr19:34935904-34955036  | exonic | UBA2    | 19 | 34935904  | 34955036  | 0 | 1 | 0 | 0  | 2  | 0 | 19132 | 0.416330643 | -0.711438736 | 4.032572146 | -0.176423064 | 0.859961586 | 0.998252924 |
| chr2:100046301-100052403 | exonic | REV1    | 2  | 100046301 | 100052403 | 1 | 0 | 0 | 0  | 2  | 0 | 6102  | 0.371041786 | -0.711438736 | 4.032572146 | -0.176423064 | 0.859961586 | 0.998252924 |
| chr2:153001401-153004814 | exonic | STAM2   | 2  | 153001401 | 153004814 | 1 | 0 | 0 | 0  | 2  | 0 | 3413  | 0.371041786 | -0.711438736 | 4.032572146 | -0.176423064 | 0.859961586 | 0.998252924 |
| chr2:160599571-160609082 | exonic |         | 2  | 160599571 | 160609082 | 1 | 0 | 0 | 0  | 2  | 0 | 9511  | 0.371041786 | -0.711438736 | 4.032572146 | -0.176423064 | 0.859961586 | 0.998252924 |
| chr2:175945387-175986268 | exonic | ATF2    | 2  | 175945387 | 175986268 | 1 | 0 | 0 | 0  | 2  | 0 | 40881 | 0.371041786 | -0.711438736 | 4.032572146 | -0.176423064 | 0.859961586 | 0.998252924 |
| chr2:183859566-183860566 | exonic | NCKAP1  | 2  | 183859566 | 183860566 | 1 | 0 | 0 | 0  | 2  | 0 | 1000  | 0.371041786 | -0.711438736 | 4.032572146 | -0.176423064 | 0.859961586 | 0.998252924 |
| chr2:191765289-191792208 | exonic | GLS     | 2  | 191765289 | 191792208 | 7 | 9 | 8 | 10 | 14 | 0 | 26919 | 0.416330643 | -0.711438736 | 4.032572146 | -0.176423064 | 0.859961586 | 0.998252924 |
| chr2:230701563-230724290 | exonic | TRIP12  | 2  | 230701563 | 230724290 | 1 | 0 | 0 | 0  | 2  | 0 | 22727 | 0.371041786 | -0.711438736 | 4.032572146 | -0.176423064 | 0.859961586 | 0.998252924 |
| chr2:24896234-24920667   | exonic | NCOA1   | 2  | 24896234  | 24920667  | 1 | 0 | 0 | 0  | 2  | 0 | 24433 | 0.371041786 | -0.711438736 | 4.032572146 | -0.176423064 | 0.859961586 | 0.998252924 |
| chr2:43732760-43755127   | exonic | THADA   | 2  | 43732760  | 43755127  | 0 | 1 | 0 | 0  | 2  | 0 | 22367 | 0.416330643 | -0.711438736 | 4.032572146 | -0.176423064 | 0.859961586 | 0.998252924 |
| chr2:55791448-55800913   | exonic | PPP4R3B | 2  | 55791448  | 55800913  | 1 | 0 | 0 | 0  | 2  | 0 | 9465  | 0.371041786 | -0.711438736 | 4.032572146 | -0.176423064 | 0.859961586 | 0.998252924 |
| chr2:85769687-85770157   | exonic | MAT2A   | 2  | 85769687  | 85770157  | 0 | 1 | 0 | 0  | 2  | 0 | 470   | 0.416330643 | -0.711438736 | 4.032572146 | -0.176423064 | 0.859961586 | 0.998252924 |
| chr21:17150222-17205867  | exonic | USP25   | 21 | 17150222  | 17205867  | 4 | 0 | 0 | 0  | 1  | 0 | 55645 | 0.371041786 | -0.711438736 | 4.032572146 | -0.176423064 | 0.859961586 | 0.998252924 |
| chr22:41550998-41553412  | exonic | EP300   | 22 | 41550998  | 41553412  | 1 | 0 | 0 | 0  | 2  | 0 | 2414  | 0.371041786 | -0.711438736 | 4.032572146 | -0.176423064 | 0.859961586 | 0.998252924 |
| chr22:43213147-43213863  | exonic | ARFGAP3 | 22 | 43213147  | 43213863  | 0 | 1 | 0 | 0  | 2  | 0 | 716   | 0.416330643 | -0.711438736 | 4.032572146 | -0.176423064 | 0.859961586 | 0.998252924 |
| chr3:113045291-113063559 | exonic | CFAP44  | 3  | 113045291 | 113063559 | 1 | 0 | 0 | 0  | 2  | 0 | 18268 | 0.371041786 | -0.711438736 | 4.032572146 | -0.176423064 | 0.859961586 | 0.998252924 |
| chr3:180665652-180669256 | exonic | FXR1    | 3  | 180665652 | 180669256 | 1 | 0 | 0 | 0  | 2  | 0 | 3604  | 0.371041786 | -0.711438736 | 4.032572146 | -0.176423064 | 0.859961586 | 0.998252924 |
| chr3:37116514-37138151   | exonic | LRRFIP2 | 3  | 37116514  | 37138151  | 0 | 1 | 0 | 0  | 2  | 0 | 21637 | 0.416330643 | -0.711438736 | 4.032572146 | -0.176423064 | 0.859961586 | 0.998252924 |
| chr3:47084050-47108608   | exonic | SETD2   | 3  | 47084050  | 47108608  | 0 | 1 | 0 | 0  | 2  | 0 | 24558 | 0.416330643 | -0.711438736 | 4.032572146 | -0.176423064 | 0.859961586 | 0.998252924 |
| chr3:47727538-47742892   | exonic | SMARCC1 | 3  | 47727538  | 47742892  | 1 | 0 | 0 | 0  | 2  | 0 | 15354 | 0.371041786 | -0.711438736 | 4.032572146 | -0.176423064 | 0.859961586 | 0.998252924 |
| chr3:9486731-9487424     | exonic | SETD5   | 3  | 9486731   | 9487424   | 0 | 1 | 0 | 0  | 2  | 0 | 693   | 0.416330643 | -0.711438736 | 4.032572146 | -0.176423064 | 0.859961586 | 0.998252924 |
| chr4:107092251-107157965 | exonic | TBCK    | 4  | 107092251 | 107157965 | 1 | 0 | 0 | 0  | 2  | 0 | 65714 | 0.371041786 | -0.711438736 | 4.032572146 | -0.176423064 | 0.859961586 | 0.998252924 |

7-Mar

|                           |        |                      |    |           |           |   |    |   |   |   |   |       |             |              |             |              |             |             |
|---------------------------|--------|----------------------|----|-----------|-----------|---|----|---|---|---|---|-------|-------------|--------------|-------------|--------------|-------------|-------------|
| chr4:107092251-107173164  | exonic | TBCK                 | 4  | 107092251 | 107173164 | 0 | 1  | 0 | 0 | 2 | 0 | 80913 | 0.416330643 | -0.711438736 | 4.032572146 | -0.176423064 | 0.859961586 | 0.998252924 |
| chr4:1696500-1705427      | exonic | SLBP                 | 4  | 1696500   | 1705427   | 1 | 0  | 0 | 0 | 2 | 0 | 8927  | 0.371041786 | -0.711438736 | 4.032572146 | -0.176423064 | 0.859961586 | 0.998252924 |
| chr4:48592675-48607850    | exonic | FRYL                 | 4  | 48592675  | 48607850  | 0 | 1  | 0 | 0 | 2 | 0 | 15175 | 0.416330643 | -0.711438736 | 4.032572146 | -0.176423064 | 0.859961586 | 0.998252924 |
| chr4:6998051-7006651      | exonic | TBC1D14              | 4  | 6998051   | 7006651   | 0 | 1  | 0 | 0 | 2 | 0 | 8600  | 0.416330643 | -0.711438736 | 4.032572146 | -0.176423064 | 0.859961586 | 0.998252924 |
| chr5:125939261-125939875  | exonic | PHAX                 | 5  | 125939261 | 125939875 | 1 | 0  | 0 | 0 | 2 | 0 | 614   | 0.371041786 | -0.711438736 | 4.032572146 | -0.176423064 | 0.859961586 | 0.998252924 |
| chr5:132227855-132232932  | exonic | AFF4                 | 5  | 132227855 | 132232932 | 1 | 0  | 0 | 0 | 2 | 0 | 5077  | 0.371041786 | -0.711438736 | 4.032572146 | -0.176423064 | 0.859961586 | 0.998252924 |
| chr5:137759763-137761271  | exonic | KDM3B                | 5  | 137759763 | 137761271 | 0 | 1  | 0 | 0 | 2 | 0 | 1508  | 0.416330643 | -0.711438736 | 4.032572146 | -0.176423064 | 0.859961586 | 0.998252924 |
| chr5:149416500-149416936  | exonic | HMGXB3               | 5  | 149416500 | 149416936 | 1 | 0  | 0 | 0 | 2 | 0 | 436   | 0.371041786 | -0.711438736 | 4.032572146 | -0.176423064 | 0.859961586 | 0.998252924 |
| chr5:167993017-167993271  | exonic | PANK3                | 5  | 167993017 | 167993271 | 0 | 1  | 0 | 0 | 2 | 0 | 254   | 0.416330643 | -0.711438736 | 4.032572146 | -0.176423064 | 0.859961586 | 0.998252924 |
| chr5:31448653-31451747    | exonic | DROSHA               | 5  | 31448653  | 31451747  | 1 | 0  | 0 | 0 | 2 | 0 | 3094  | 0.371041786 | -0.711438736 | 4.032572146 | -0.176423064 | 0.859961586 | 0.998252924 |
| chr5:74412390-74414122    | exonic | ANKRD31              | 5  | 74412390  | 74414122  | 1 | 0  | 0 | 0 | 2 | 0 | 1732  | 0.371041786 | -0.711438736 | 4.032572146 | -0.176423064 | 0.859961586 | 0.998252924 |
| chr6:108222573-108246136  | exonic | SEC63                | 6  | 108222573 | 108246136 | 0 | 1  | 0 | 0 | 2 | 0 | 23563 | 0.416330643 | -0.711438736 | 4.032572146 | -0.176423064 | 0.859961586 | 0.998252924 |
| chr6:131481198-131520713  | exonic | AKAP7                | 6  | 131481198 | 131520713 | 1 | 0  | 0 | 0 | 2 | 0 | 39515 | 0.371041786 | -0.711438736 | 4.032572146 | -0.176423064 | 0.859961586 | 0.998252924 |
| chr6:144772505-144809970  | exonic | UTRN                 | 6  | 144772505 | 144809970 | 1 | 0  | 0 | 0 | 2 | 0 | 37465 | 0.371041786 | -0.711438736 | 4.032572146 | -0.176423064 | 0.859961586 | 0.998252924 |
| chr6:30303521-30308397    | exonic | TRIM39, TRIM39-RPP21 | 6  | 30303521  | 30308397  | 1 | 0  | 0 | 0 | 2 | 0 | 4876  | 0.371041786 | -0.711438736 | 4.032572146 | -0.176423064 | 0.859961586 | 0.998252924 |
| chr6:30856464-30857207    | exonic | DDR1                 | 6  | 30856464  | 30857207  | 0 | 1  | 0 | 0 | 2 | 0 | 743   | 0.416330643 | -0.711438736 | 4.032572146 | -0.176423064 | 0.859961586 | 0.998252924 |
| chr6:42571325-42580029    | exonic | UBR2                 | 6  | 42571325  | 42580029  | 1 | 0  | 0 | 0 | 2 | 0 | 8704  | 0.371041786 | -0.711438736 | 4.032572146 | -0.176423064 | 0.859961586 | 0.998252924 |
| chr7:111535667-111585853  | exonic | DOCK4                | 7  | 111535667 | 111585853 | 0 | 1  | 0 | 0 | 2 | 0 | 50186 | 0.416330643 | -0.711438736 | 4.032572146 | -0.176423064 | 0.859961586 | 0.998252924 |
| chr7:158540884-158560465  | exonic | ESYT2                | 7  | 158540884 | 158560465 | 0 | 1  | 0 | 0 | 2 | 0 | 19581 | 0.416330643 | -0.711438736 | 4.032572146 | -0.176423064 | 0.859961586 | 0.998252924 |
| chr7:77016676-77035422    | exonic | GSAP                 | 7  | 77016676  | 77035422  | 0 | 1  | 0 | 0 | 2 | 0 | 18746 | 0.416330643 | -0.711438736 | 4.032572146 | -0.176423064 | 0.859961586 | 0.998252924 |
| chr7:91855033-91864237    | exonic | KRIT1                | 7  | 91855033  | 91864237  | 1 | 0  | 0 | 0 | 2 | 0 | 9204  | 0.371041786 | -0.711438736 | 4.032572146 | -0.176423064 | 0.859961586 | 0.998252924 |
| chr8:17570722-17601308    | exonic | MTUS1                | 8  | 17570722  | 17601308  | 0 | 1  | 0 | 0 | 2 | 0 | 30586 | 0.416330643 | -0.711438736 | 4.032572146 | -0.176423064 | 0.859961586 | 0.998252924 |
| chr8:64087889-64100303    | exonic | YTHDF3               | 8  | 64087889  | 64100303  | 0 | 1  | 0 | 0 | 2 | 0 | 12414 | 0.416330643 | -0.711438736 | 4.032572146 | -0.176423064 | 0.859961586 | 0.998252924 |
| chr9:113703700-113735838  | exonic | LPAR1                | 9  | 113703700 | 113735838 | 0 | 1  | 0 | 0 | 2 | 0 | 32138 | 0.416330643 | -0.711438736 | 4.032572146 | -0.176423064 | 0.859961586 | 0.998252924 |
| chr9:128230250-128246862  | exonic | MAPKAP1              | 9  | 128230250 | 128246862 | 0 | 1  | 0 | 0 | 2 | 0 | 16612 | 0.416330643 | -0.711438736 | 4.032572146 | -0.176423064 | 0.859961586 | 0.998252924 |
| chr9:33941646-33948585    | exonic | UBAP2                | 9  | 33941646  | 33948585  | 1 | 0  | 0 | 0 | 2 | 0 | 6939  | 0.371041786 | -0.711438736 | 4.032572146 | -0.176423064 | 0.859961586 | 0.998252924 |
| chrX:149761066-149787612  | exonic | MTM1                 | X  | 149761066 | 149787612 | 1 | 0  | 0 | 0 | 2 | 0 | 26546 | 0.371041786 | -0.711438736 | 4.032572146 | -0.176423064 | 0.859961586 | 0.998252924 |
| chr1:109884635-109888500  | exonic | SORT1                | 1  | 109884635 | 109888500 | 0 | 0  | 1 | 0 | 2 | 0 | 3865  | 0.439323869 | -0.711438736 | 4.032572146 | -0.176423064 | 0.859961586 | 0.998252924 |
| chr1:197141289-197161029  | exonic | ZBTB41               | 1  | 197141289 | 197161029 | 0 | 0  | 1 | 0 | 2 | 0 | 19740 | 0.439323869 | -0.711438736 | 4.032572146 | -0.176423064 | 0.859961586 | 0.998252924 |
| chr1:237023132-237026854  | exonic | MTR                  | 1  | 237023132 | 237026854 | 0 | 0  | 1 | 0 | 2 | 0 | 3722  | 0.439323869 | -0.711438736 | 4.032572146 | -0.176423064 | 0.859961586 | 0.998252924 |
| chr1:28944464-28948677    | exonic | TAF12                | 1  | 28944464  | 28948677  | 0 | 0  | 1 | 0 | 2 | 0 | 4213  | 0.439323869 | -0.711438736 | 4.032572146 | -0.176423064 | 0.859961586 | 0.998252924 |
| chr10:12123470-12155063   | exonic | DHTKD1               | 10 | 12123470  | 12155063  | 3 | 11 | 1 | 4 | 5 | 0 | 31593 | 0.439323869 | -0.711438736 | 4.032572146 | -0.176423064 | 0.859961586 | 0.998252924 |
| chr11:68312305-68318654   | exonic | PPP6R3               | 11 | 68312305  | 68318654  | 0 | 0  | 1 | 0 | 2 | 0 | 6349  | 0.439323869 | -0.711438736 | 4.032572146 | -0.176423064 | 0.859961586 | 0.998252924 |
| chr11:85685750-85737409   | exonic | PICALM               | 11 | 85685750  | 85737409  | 0 | 3  | 1 | 0 | 0 | 0 | 51659 | 0.439323869 | -0.711438736 | 4.032572146 | -0.176423064 | 0.859961586 | 0.998252924 |
| chr12:109186061-109186605 | exonic | SSH1                 | 12 | 109186061 | 109186605 | 0 | 0  | 1 | 0 | 2 | 0 | 544   | 0.439323869 | -0.711438736 | 4.032572146 | -0.176423064 | 0.859961586 | 0.998252924 |

|                           |              |           |    |           |           |   |   |   |   |   |   |       |             |              |             |              |             |             |
|---------------------------|--------------|-----------|----|-----------|-----------|---|---|---|---|---|---|-------|-------------|--------------|-------------|--------------|-------------|-------------|
| chr12:110941610-110944498 | exonic       | RAD9B     | 12 | 110941610 | 110944498 | 0 | 0 | 1 | 0 | 2 | 0 | 2888  | 0.439323869 | -0.711438736 | 4.032572146 | -0.176423064 | 0.859961586 | 0.998252924 |
| chr12:30818153-30822216   | exonic       | IPO8      | 12 | 30818153  | 30822216  | 0 | 0 | 1 | 0 | 2 | 0 | 4063  | 0.439323869 | -0.711438736 | 4.032572146 | -0.176423064 | 0.859961586 | 0.998252924 |
| chr12:30878899-30904067   | exonic       | CAPRIN2   | 12 | 30878899  | 30904067  | 0 | 0 | 1 | 0 | 2 | 0 | 25168 | 0.439323869 | -0.711438736 | 4.032572146 | -0.176423064 | 0.859961586 | 0.998252924 |
| chr12:62892698-62895478   | exonic       | MON2      | 12 | 62892698  | 62895478  | 0 | 0 | 1 | 0 | 2 | 0 | 2780  | 0.439323869 | -0.711438736 | 4.032572146 | -0.176423064 | 0.859961586 | 0.998252924 |
| chr13:95686858-95715113   | exonic       | ABCC4     | 13 | 95686858  | 95715113  | 0 | 0 | 1 | 0 | 2 | 0 | 28255 | 0.439323869 | -0.711438736 | 4.032572146 | -0.176423064 | 0.859961586 | 0.998252924 |
| chr14:103894723-103928798 | exonic       | MARK3     | 14 | 103894723 | 103928798 | 0 | 0 | 1 | 0 | 2 | 0 | 34075 | 0.439323869 | -0.711438736 | 4.032572146 | -0.176423064 | 0.859961586 | 0.998252924 |
| chr14:50619787-50625364   | exonic       | SOS2      | 14 | 50619787  | 50625364  | 0 | 0 | 1 | 0 | 2 | 0 | 5577  | 0.439323869 | -0.711438736 | 4.032572146 | -0.176423064 | 0.859961586 | 0.998252924 |
| chr14:64465631-64467437   | exonic       | SYNE2     | 14 | 64465631  | 64467437  | 0 | 0 | 1 | 0 | 2 | 0 | 1806  | 0.439323869 | -0.711438736 | 4.032572146 | -0.176423064 | 0.859961586 | 0.998252924 |
| chr14:92264128-92280169   | exonic       | TC2N      | 14 | 92264128  | 92280169  | 0 | 0 | 1 | 0 | 2 | 0 | 16041 | 0.439323869 | -0.711438736 | 4.032572146 | -0.176423064 | 0.859961586 | 0.998252924 |
| chr15:43313472-43317627   | exonic       | UBR1      | 15 | 43313472  | 43317627  | 0 | 0 | 1 | 0 | 2 | 0 | 4155  | 0.439323869 | -0.711438736 | 4.032572146 | -0.176423064 | 0.859961586 | 0.998252924 |
| chr15:56680669-56704634   | exonic       | TEX9      | 15 | 56680669  | 56704634  | 0 | 0 | 1 | 0 | 2 | 0 | 23965 | 0.439323869 | -0.711438736 | 4.032572146 | -0.176423064 | 0.859961586 | 0.998252924 |
| chr15:99816780-99828156   | exonic       | LRRC28    | 15 | 99816780  | 99828156  | 0 | 0 | 1 | 0 | 2 | 0 | 11376 | 0.439323869 | -0.711438736 | 4.032572146 | -0.176423064 | 0.859961586 | 0.998252924 |
| chr16:29332248-29339945   | ncRNA_exonic | SNX29P2   | 16 | 29332248  | 29339945  | 0 | 0 | 1 | 0 | 2 | 0 | 7697  | 0.439323869 | -0.711438736 | 4.032572146 | -0.176423064 | 0.859961586 | 0.998252924 |
| chr16:74382764-74384636   | ncRNA_exonic | LOC283922 | 16 | 74382764  | 74384636  | 0 | 0 | 1 | 0 | 2 | 0 | 1872  | 0.439323869 | -0.711438736 | 4.032572146 | -0.176423064 | 0.859961586 | 0.998252924 |
| chr17:49059884-49064598   | exonic       | SPAG9     | 17 | 49059884  | 49064598  | 0 | 0 | 1 | 0 | 2 | 0 | 4714  | 0.439323869 | -0.711438736 | 4.032572146 | -0.176423064 | 0.859961586 | 0.998252924 |
| chr17:61655830-61657304   | exonic       | DCAF7     | 17 | 61655830  | 61657304  | 0 | 0 | 1 | 0 | 2 | 0 | 1474  | 0.439323869 | -0.711438736 | 4.032572146 | -0.176423064 | 0.859961586 | 0.998252924 |
| chr18:9204473-9211782     | exonic       | ANKRD12   | 18 | 9204473   | 9211782   | 0 | 0 | 1 | 0 | 2 | 0 | 7309  | 0.439323869 | -0.711438736 | 4.032572146 | -0.176423064 | 0.859961586 | 0.998252924 |
| chr19:34945164-34955036   | exonic       | UBA2      | 19 | 34945164  | 34955036  | 0 | 0 | 1 | 0 | 2 | 0 | 9872  | 0.439323869 | -0.711438736 | 4.032572146 | -0.176423064 | 0.859961586 | 0.998252924 |
| chr2:153431649-153435478  | exonic       | FMNL2     | 2  | 153431649 | 153435478 | 0 | 0 | 1 | 0 | 2 | 0 | 3829  | 0.439323869 | -0.711438736 | 4.032572146 | -0.176423064 | 0.859961586 | 0.998252924 |
| chr2:170411633-170419860  | exonic       | FASTKD1   | 2  | 170411633 | 170419860 | 0 | 0 | 1 | 0 | 2 | 0 | 8227  | 0.439323869 | -0.711438736 | 4.032572146 | -0.176423064 | 0.859961586 | 0.998252924 |
| chr2:242343242-242375953  | exonic       | FARP2     | 2  | 242343242 | 242375953 | 0 | 0 | 1 | 2 | 4 | 0 | 32711 | 0.439323869 | -0.711438736 | 4.032572146 | -0.176423064 | 0.859961586 | 0.998252924 |
| chr2:69555402-69573131    | exonic       | GFPT1     | 2  | 69555402  | 69573131  | 0 | 0 | 1 | 0 | 2 | 0 | 17729 | 0.439323869 | -0.711438736 | 4.032572146 | -0.176423064 | 0.859961586 | 0.998252924 |
| chr20:20512330-20527476   | exonic       | RALGAPA2  | 20 | 20512330  | 20527476  | 0 | 0 | 1 | 0 | 2 | 0 | 15146 | 0.439323869 | -0.711438736 | 4.032572146 | -0.176423064 | 0.859961586 | 0.998252924 |
| chr20:2936254-2945848     | exonic       | PTPRA     | 20 | 2936254   | 2945848   | 0 | 0 | 1 | 0 | 2 | 0 | 9594  | 0.439323869 | -0.711438736 | 4.032572146 | -0.176423064 | 0.859961586 | 0.998252924 |
| chr3:130309884-130313187  | exonic       | COL6A6    | 3  | 130309884 | 130313187 | 0 | 0 | 1 | 0 | 2 | 0 | 3303  | 0.439323869 | -0.711438736 | 4.032572146 | -0.176423064 | 0.859961586 | 0.998252924 |
| chr3:149563797-149619949  | exonic       | RNF13     | 3  | 149563797 | 149619949 | 0 | 0 | 1 | 0 | 2 | 0 | 56152 | 0.439323869 | -0.711438736 | 4.032572146 | -0.176423064 | 0.859961586 | 0.998252924 |
| chr3:169835013-169847340  | exonic       | PHC3      | 3  | 169835013 | 169847340 | 0 | 0 | 1 | 0 | 2 | 0 | 12327 | 0.439323869 | -0.711438736 | 4.032572146 | -0.176423064 | 0.859961586 | 0.998252924 |
| chr3:170875248-170885059  | exonic       | TNIK      | 3  | 170875248 | 170885059 | 0 | 0 | 1 | 0 | 2 | 0 | 9811  | 0.439323869 | -0.711438736 | 4.032572146 | -0.176423064 | 0.859961586 | 0.998252924 |
| chr3:38263068-38271921    | exonic       | OXSRI     | 3  | 38263068  | 38271921  | 0 | 0 | 1 | 0 | 2 | 0 | 8853  | 0.439323869 | -0.711438736 | 4.032572146 | -0.176423064 | 0.859961586 | 0.998252924 |
| chr4:144336629-144336924  | exonic       | GAB1      | 4  | 144336629 | 144336924 | 0 | 0 | 1 | 0 | 2 | 0 | 295   | 0.439323869 | -0.711438736 | 4.032572146 | -0.176423064 | 0.859961586 | 0.998252924 |
| chr4:151656409-151753128  | exonic       | LRBA      | 4  | 151656409 | 151753128 | 0 | 0 | 1 | 0 | 2 | 0 | 96719 | 0.439323869 | -0.711438736 | 4.032572146 | -0.176423064 | 0.859961586 | 0.998252924 |
| chr5:122137563-122139308  | exonic       | SNX2      | 5  | 122137563 | 122139308 | 0 | 0 | 1 | 0 | 2 | 0 | 1745  | 0.439323869 | -0.711438736 | 4.032572146 | -0.176423064 | 0.859961586 | 0.998252924 |
| chr5:137278563-137284873  | exonic       | FAM13B    | 5  | 137278563 | 137284873 | 0 | 0 | 1 | 0 | 2 | 0 | 6310  | 0.439323869 | -0.711438736 | 4.032572146 | -0.176423064 | 0.859961586 | 0.998252924 |
| chr5:137733866-137735701  | exonic       | KDM3B     | 5  | 137733866 | 137735701 | 0 | 0 | 1 | 0 | 2 | 0 | 1835  | 0.439323869 | -0.711438736 | 4.032572146 | -0.176423064 | 0.859961586 | 0.998252924 |
| chr5:65317149-65334310    | exonic       | ERBB2IP   | 5  | 65317149  | 65334310  | 0 | 0 | 1 | 0 | 2 | 0 | 17161 | 0.439323869 | -0.711438736 | 4.032572146 | -0.176423064 | 0.859961586 | 0.998252924 |

|                          |          |              |    |           |           |   |   |   |    |    |   |       |             |              |             |              |             |             |
|--------------------------|----------|--------------|----|-----------|-----------|---|---|---|----|----|---|-------|-------------|--------------|-------------|--------------|-------------|-------------|
| chr5:80071512-80109560   | exonic   | MSH3         | 5  | 80071512  | 80109560  | 0 | 0 | 1 | 0  | 2  | 0 | 38048 | 0.439323869 | -0.711438736 | 4.032572146 | -0.176423064 | 0.859961586 | 0.998252924 |
| chr6:117888016-117900227 | exonic   | DCBLD1, GOPC | 6  | 117888016 | 117900227 | 0 | 0 | 1 | 0  | 2  | 0 | 12211 | 0.439323869 | -0.711438736 | 4.032572146 | -0.176423064 | 0.859961586 | 0.998252924 |
| chr6:135263546-135265104 | exonic   | ALDH8A1      | 6  | 135263546 | 135265104 | 0 | 0 | 1 | 0  | 2  | 0 | 1558  | 0.439323869 | -0.711438736 | 4.032572146 | -0.176423064 | 0.859961586 | 0.998252924 |
| chr6:41839301-41859613   | UTR5     |              | 6  | 41839301  | 41859613  | 0 | 0 | 1 | 0  | 2  | 0 | 20312 | 0.439323869 | -0.711438736 | 4.032572146 | -0.176423064 | 0.859961586 | 0.998252924 |
| chr7:155530223-155538296 | exonic   | RBM33        | 7  | 155530223 | 155538296 | 0 | 0 | 1 | 0  | 2  | 0 | 8073  | 0.439323869 | -0.711438736 | 4.032572146 | -0.176423064 | 0.859961586 | 0.998252924 |
| chr7:92881965-92940584   | exonic   | VPS50        | 7  | 92881965  | 92940584  | 0 | 0 | 1 | 0  | 2  | 0 | 58619 | 0.439323869 | -0.711438736 | 4.032572146 | -0.176423064 | 0.859961586 | 0.998252924 |
| chr8:56863017-56866543   | exonic   | LYN          | 8  | 56863017  | 56866543  | 0 | 0 | 1 | 0  | 2  | 0 | 3526  | 0.439323869 | -0.711438736 | 4.032572146 | -0.176423064 | 0.859961586 | 0.998252924 |
| chr8:74439925-74529686   | exonic   | STAU2        | 8  | 74439925  | 74529686  | 0 | 0 | 1 | 0  | 2  | 0 | 89761 | 0.439323869 | -0.711438736 | 4.032572146 | -0.176423064 | 0.859961586 | 0.998252924 |
| chrX:134030846-134033564 | exonic   | MOSPD1       | X  | 134030846 | 134033564 | 0 | 0 | 1 | 0  | 2  | 0 | 2718  | 0.439323869 | -0.711438736 | 4.032572146 | -0.176423064 | 0.859961586 | 0.998252924 |
| chr2:242099746-242102816 | exonic   | PPP1R7       | 2  | 242099746 | 242102816 | 0 | 0 | 2 | 1  | 4  | 0 | 3070  | 0.984959123 | -0.710436253 | 2.8139725   | -0.252467376 | NA          | NA          |
| chr1:153637695-153641033 | exonic   | ILF2         | 1  | 153637695 | 153641033 | 0 | 3 | 1 | 8  | 2  | 0 | 3338  | 1.812642348 | -0.709426041 | 2.07414281  | -0.342033363 | 0.732325785 | 0.998252924 |
| chr6:105192034-105233194 | exonic   | HACE1        | 6  | 105192034 | 105233194 | 1 | 1 | 0 | 1  | 1  | 1 | 41160 | 0.838820158 | -0.709395396 | 2.634106982 | -0.269311536 | 0.787689956 | 0.998252924 |
| chr7:74239461-74248066   | exonic   | GTF2IRD2     | 7  | 74239461  | 74248066  | 1 | 1 | 0 | 1  | 1  | 1 | 8605  | 0.838820158 | -0.709395396 | 2.634106982 | -0.269311536 | 0.787689956 | 0.998252924 |
| chr14:39746137-39748741  | exonic   | CTAGE5       | 14 | 39746137  | 39748741  | 7 | 4 | 2 | 15 | 4  | 4 | 2604  | 5.306204746 | -0.70806151  | 1.178774749 | -0.600675838 | 0.548055915 | 0.998252924 |
| chr16:14321580-14322218  | intronic | MKL2         | 16 | 14321580  | 14322218  | 0 | 3 | 0 | 0  | 0  | 3 | 638   | 1.447483224 | -0.706770349 | 2.719345043 | -0.259904623 | NA          | NA          |
| chrX:79962925-79975155   | exonic   | BRWD3        | X  | 79962925  | 79975155  | 2 | 0 | 2 | 6  | 3  | 0 | 12230 | 1.653462513 | -0.706423454 | 2.089637682 | -0.338060258 | 0.735317779 | 0.998252924 |
| chr1:48821341-48825442   | exonic   | SPATA6       | 1  | 48821341  | 48825442  | 6 | 3 | 0 | 11 | 3  | 2 | 4101  | 3.445693774 | -0.705973885 | 1.494819746 | -0.472280278 | 0.636726745 | 0.998252924 |
| chr14:58785259-58790335  | exonic   | ARID4A       | 14 | 58785259  | 58790335  | 2 | 1 | 0 | 4  | 0  | 1 | 5076  | 1.165713834 | -0.70529053  | 2.451163374 | -0.287737055 | 0.773548023 | 0.998252924 |
| chr10:7262372-7327916    | exonic   | SFMBT2       | 10 | 7262372   | 7327916   | 0 | 3 | 0 | 3  | 4  | 0 | 65544 | 1.32587124  | -0.704832808 | 2.474534503 | -0.284834504 | NA          | NA          |
| chr16:67644726-67646024  | exonic   | CTCF         | 16 | 67644726  | 67646024  | 1 | 0 | 2 | 4  | 3  | 0 | 1298  | 1.3118528   | -0.703397258 | 2.299727779 | -0.305861096 | 0.759710408 | 0.998252924 |
| chr2:37543380-37544322   | exonic   | PRKD3        | 2  | 37543380  | 37544322  | 9 | 7 | 4 | 10 | 19 | 6 | 942   | 8.381835699 | -0.703278942 | 0.968666558 | -0.726027894 | 0.46782167  | 0.998252924 |
| chr18:33722243-33739978  | exonic   | ELP2         | 18 | 33722243  | 33739978  | 2 | 1 | 0 | 3  | 3  | 0 | 17735 | 1.114266105 | -0.70134055  | 2.430757951 | -0.288527515 | 0.772942972 | 0.998252924 |
| chr1:145787771-145791170 | exonic   | GPR89A       | 1  | 145787771 | 145791170 | 1 | 1 | 3 | 1  | 6  | 2 | 3399  | 2.343982952 | -0.700266784 | 1.699569747 | -0.412025917 | 0.680320427 | 0.998252924 |
| chr1:12061457-12062160   | exonic   | MFN2         | 1  | 12061457  | 12062160  | 8 | 1 | 1 | 15 | 3  | 1 | 703   | 3.669412018 | -0.698403103 | 1.461361165 | -0.47791273  | NA          | NA          |
| chr15:94841429-94841959  | exonic   | MCTP2        | 15 | 94841429  | 94841959  | 9 | 0 | 1 | 17 | 3  | 0 | 530   | 3.528527323 | -0.698111091 | 1.698223564 | -0.41108315  | NA          | NA          |
| chr13:30801548-30857928  | exonic   | KATNAL1      | 13 | 30801548  | 30857928  | 0 | 2 | 0 | 5  | 0  | 0 | 56380 | 0.880108524 | -0.696954374 | 3.186502357 | -0.218720809 | NA          | NA          |
| chr3:196050614-196051311 | exonic   | TM4SF19      | 3  | 196050614 | 196051311 | 0 | 2 | 0 | 5  | 0  | 0 | 697   | 0.880108524 | -0.696954374 | 3.186502357 | -0.218720809 | NA          | NA          |
| chr4:40892380-40947090   | exonic   | APBB2        | 4  | 40892380  | 40947090  | 0 | 2 | 0 | 5  | 0  | 0 | 54710 | 0.880108524 | -0.696954374 | 3.186502357 | -0.218720809 | NA          | NA          |
| chr13:42335263-42393522  | exonic   | VWA8         | 13 | 42335263  | 42393522  | 0 | 0 | 2 | 3  | 0  | 1 | 58259 | 1.021690815 | -0.696065067 | 2.796520137 | -0.248904007 | 0.803435036 | 0.998252924 |
| chr8:38194822-38205733   | exonic   | WHSC1L1      | 8  | 38194822  | 38205733  | 0 | 1 | 1 | 4  | 1  | 0 | 10911 | 0.917817787 | -0.695419786 | 2.683995565 | -0.259098709 | 0.795559081 | 0.998252924 |
| chr3:63884074-63938159   | exonic   | ATXN7        | 3  | 63884074  | 63938159  | 0 | 2 | 1 | 2  | 5  | 0 | 54085 | 1.363580503 | -0.69413599  | 2.287777502 | -0.30341062  | 0.761576953 | 0.998252924 |
| chr11:36415396-36424928  | exonic   | PRR5L        | 11 | 36415396  | 36424928  | 4 | 0 | 2 | 11 | 2  | 0 | 9532  | 2.321965902 | -0.69388502  | 1.880607467 | -0.368968555 | NA          | NA          |
| chr4:110384056-110384800 | exonic   | SEC24B       | 4  | 110384056 | 110384800 | 4 | 0 | 2 | 5  | 3  | 2 | 744   | 2.421562231 | -0.692798452 | 1.686889454 | -0.410695823 | 0.68129559  | 0.998252924 |
| chr8:42862989-42868543   | exonic   | HOKK3        | 8  | 42862989  | 42868543  | 4 | 0 | 0 | 2  | 3  | 1 | 5554  | 1.399871416 | -0.69276836  | 2.257534913 | -0.306869389 | NA          | NA          |
| chr17:2297336-2298748    | exonic   | MNT          | 17 | 2297336   | 2298748   | 4 | 4 | 1 | 13 | 0  | 3 | 1412  | 3.717023826 | -0.690991955 | 1.530962423 | -0.451344817 | 0.651741049 | 0.998252924 |

|                           |          |                                              |    |           |           |   |    |   |    |    |    |        |             |              |             |              |             |             |
|---------------------------|----------|----------------------------------------------|----|-----------|-----------|---|----|---|----|----|----|--------|-------------|--------------|-------------|--------------|-------------|-------------|
| chr1:22007300-22021714    | exonic   | USP48                                        | 1  | 22007300  | 22021714  | 0 | 2  | 0 | 0  | 0  | 2  | 14414  | 0.964988816 | -0.689791399 | 3.136770735 | -0.219904946 | 0.825945184 | 0.998252924 |
| chr1:226056309-226057472  | intronic | TMEM63A                                      | 1  | 226056309 | 226057472 | 0 | 2  | 0 | 0  | 0  | 2  | 1163   | 0.964988816 | -0.689791399 | 3.136770735 | -0.219904946 | 0.825945184 | 0.998252924 |
| chr1:27064264-27064609    | intronic | ARID1A                                       | 1  | 27064264  | 27064609  | 0 | 2  | 0 | 0  | 0  | 2  | 345    | 0.964988816 | -0.689791399 | 3.136770735 | -0.219904946 | 0.825945184 | 0.998252924 |
| chr12:95645715-95660408   | exonic   | VEZT                                         | 12 | 95645715  | 95660408  | 0 | 2  | 0 | 0  | 0  | 2  | 14693  | 0.964988816 | -0.689791399 | 3.136770735 | -0.219904946 | 0.825945184 | 0.998252924 |
| chr22:41521867-41527637   | exonic   | EP300                                        | 22 | 41521867  | 41527637  | 0 | 2  | 0 | 0  | 0  | 2  | 5770   | 0.964988816 | -0.689791399 | 3.136770735 | -0.219904946 | 0.825945184 | 0.998252924 |
| chr3:129579783-129599402  | UTR5     | TMCC1 (NM_001017395:c.-51931..-52181delins0) | 3  | 129579783 | 129599402 | 0 | 2  | 0 | 0  | 0  | 2  | 19619  | 0.964988816 | -0.689791399 | 3.136770735 | -0.219904946 | 0.825945184 | 0.998252924 |
| chr3:17625142-17626258    | intronic | TBC1D5                                       | 3  | 17625142  | 17626258  | 0 | 2  | 0 | 0  | 0  | 2  | 1116   | 0.964988816 | -0.689791399 | 3.136770735 | -0.219904946 | 0.825945184 | 0.998252924 |
| chr6:149833290-149862722  | exonic   | PPIL4                                        | 6  | 149833290 | 149862722 | 0 | 2  | 0 | 0  | 0  | 2  | 29432  | 0.964988816 | -0.689791399 | 3.136770735 | -0.219904946 | 0.825945184 | 0.998252924 |
| chr6:20649523-20781496    | exonic   | CDKAL1                                       | 6  | 20649523  | 20781496  | 0 | 2  | 0 | 0  | 0  | 2  | 131973 | 0.964988816 | -0.689791399 | 3.136770735 | -0.219904946 | 0.825945184 | 0.998252924 |
| chr4:39322002-39329376    | exonic   | RFC1                                         | 4  | 39322002  | 39329376  | 1 | 0  | 1 | 0  | 2  | 1  | 7374   | 0.876529421 | -0.688754897 | 2.765804655 | -0.249025142 | 0.803341333 | 0.998252924 |
| chr1:201821231-201828122  | exonic   | IPO9                                         | 1  | 201821231 | 201828122 | 1 | 1  | 0 | 1  | 3  | 0  | 6891   | 0.772656392 | -0.688256251 | 2.854256241 | -0.241133309 | 0.809451798 | 0.998252924 |
| chr12:53410256-53416411   | exonic   | EIF4B                                        | 12 | 53410256  | 53416411  | 1 | 1  | 0 | 1  | 3  | 0  | 6155   | 0.772656392 | -0.688256251 | 2.854256241 | -0.241133309 | 0.809451798 | 0.998252924 |
| chr2:86354283-86355114    | exonic   | PTCD3                                        | 2  | 86354283  | 86355114  | 1 | 1  | 0 | 1  | 3  | 0  | 831    | 0.772656392 | -0.688256251 | 2.854256241 | -0.241133309 | 0.809451798 | 0.998252924 |
| chr6:158288578-158296208  | exonic   | SNX9                                         | 6  | 158288578 | 158296208 | 1 | 1  | 0 | 1  | 3  | 0  | 7630   | 0.772656392 | -0.688256251 | 2.854256241 | -0.241133309 | 0.809451798 | 0.998252924 |
| chr19:47919908-47920607   | exonic   | MEIS3                                        | 19 | 47919908  | 47920607  | 3 | 1  | 0 | 1  | 0  | 3  | 699    | 1.592203839 | -0.687869047 | 2.244411568 | -0.306480797 | 0.759238598 | 0.998252924 |
| chr10:5827104-5842668     | exonic   | GDI2                                         | 10 | 5827104   | 5842668   | 3 | 2  | 2 | 9  | 2  | 2  | 15564  | 2.945345005 | -0.687036719 | 1.480402093 | -0.464087914 | 0.64258476  | 0.998252924 |
| chr7:66456123-66459328    | exonic   | SBDS                                         | 7  | 66456123  | 66459328  | 0 | 0  | 4 | 5  | 3  | 1  | 3205   | 1.991933902 | -0.685667173 | 2.009674615 | -0.341183179 | NA          | NA          |
| chr22:43435786-43442579   | exonic   | TTL1                                         | 22 | 43435786  | 43442579  | 9 | 3  | 0 | 12 | 7  | 2  | 6793   | 4.423075674 | -0.684978934 | 1.364128921 | -0.502136508 | 0.615571501 | 0.998252924 |
| chr4:156617907-156643344  | exonic   | GUCY1A3                                      | 4  | 156617907 | 156643344 | 6 | 0  | 0 | 8  | 1  | 1  | 25437  | 2.053658768 | -0.684645078 | 2.018997829 | -0.339101443 | NA          | NA          |
| chr4:178274461-178274882  | exonic   | NEIL3                                        | 4  | 178274461 | 178274882 | 3 | 1  | 2 | 2  | 4  | 3  | 421    | 2.577162962 | -0.684243327 | 1.580899291 | -0.432819049 | 0.665146234 | 0.998252924 |
| chr3:171969049-172028671  | exonic   | FNDC3B                                       | 3  | 171969049 | 172028671 | 8 | 10 | 5 | 14 | 12 | 11 | 59622  | 6.000725675 | -0.682918476 | 1.117828511 | -0.610933135 | 0.541243848 | 0.998252924 |
| chr3:5212187-5216099      | exonic   | ARL8B                                        | 3  | 5212187   | 5216099   | 1 | 1  | 0 | 2  | 0  | 1  | 3912   | 0.824104121 | -0.682879274 | 2.820838227 | -0.242083813 | 0.808715221 | 0.998252924 |
| chr4:54292038-54310270    | exonic   | FIP1L1                                       | 4  | 54292038  | 54310270  | 0 | 2  | 4 | 5  | 3  | 3  | 18232  | 2.956922718 | -0.682467319 | 1.606023334 | -0.424942344 | 0.670878706 | 0.998252924 |
| chr4:54294193-54310270    | exonic   | FIP1L1                                       | 4  | 54294193  | 54310270  | 0 | 2  | 4 | 5  | 3  | 3  | 16077  | 2.956922718 | -0.682467319 | 1.606023334 | -0.424942344 | 0.670878706 | 0.998252924 |
| chr15:63824845-63829355   | exonic   | USP3                                         | 15 | 63824845  | 63829355  | 2 | 4  | 4 | 1  | 10 | 5  | 4510   | 4.601831831 | -0.680979493 | 1.337919485 | -0.508983912 | NA          | NA          |
| chr1:222889025-222895856  | exonic   | BROX                                         | 1  | 222889025 | 222895856 | 0 | 0  | 2 | 2  | 3  | 0  | 6831   | 0.970243087 | -0.680552955 | 2.799534926 | -0.243095005 | 0.807931801 | 0.998252924 |
| chr19:45766370-45769539   | exonic   | MARK4                                        | 19 | 45766370  | 45769539  | 0 | 0  | 2 | 2  | 3  | 0  | 3169   | 0.970243087 | -0.680552955 | 2.799534926 | -0.243095005 | 0.807931801 | 0.998252924 |
| chr4:40936472-40947087    | exonic   | APBB2                                        | 4  | 40936472  | 40947087  | 2 | 2  | 2 | 8  | 1  | 0  | 10615  | 2.504138963 | -0.6803084   | 1.747970631 | -0.389198988 | NA          | NA          |
| chr14:73555757-73556163   | intronic | RBM25                                        | 14 | 73555757  | 73556163  | 6 | 9  | 0 | 12 | 6  | 6  | 406    | 6.193616654 | -0.676982306 | 1.227825407 | -0.551366914 | 0.581382177 | 0.998252924 |
| chr10:75830427-75834661   | exonic   | VCL                                          | 10 | 75830427  | 75834661  | 2 | 0  | 1 | 2  | 4  | 0  | 4234   | 1.151975369 | -0.676535762 | 2.414348841 | -0.280214587 | 0.779312876 | 0.998252924 |
| chr10:105767934-105778666 | exonic   | SLK                                          | 10 | 105767934 | 105778666 | 1 | 2  | 5 | 5  | 7  | 3  | 10732  | 3.767288373 | -0.675134285 | 1.376933203 | -0.490317384 | 0.623909328 | 0.998252924 |
| chr10:225933-267296       | exonic   | ZMYND11                                      | 10 | 225933    | 267296    | 2 | 1  | 0 | 4  | 2  | 0  | 41363  | 1.099550069 | -0.674457398 | 2.448346836 | -0.275474613 | 0.782951627 | 0.998252924 |
| chr7:77973094-77975360    | exonic   | MAGI2                                        | 7  | 77973094  | 77975360  | 2 | 1  | 0 | 4  | 2  | 0  | 2266   | 1.099550069 | -0.674457398 | 2.448346836 | -0.275474613 | 0.782951627 | 0.998252924 |
| chr7:8043537-8124647      | exonic   | GLCCI1                                       | 7  | 8043537   | 8124647   | 0 | 2  | 1 | 3  | 4  | 0  | 81110  | 1.348864466 | -0.672597846 | 2.281577332 | -0.294795112 | 0.7681504   | 0.998252924 |
| chr4:148860975-148887990  | exonic   | ARHGAP10                                     | 4  | 148860975 | 148887990 | 1 | 1  | 1 | 7  | 0  | 0  | 27015  | 1.244711463 | -0.672211901 | 2.419286471 | -0.277855438 | NA          | NA          |

|                           |        |           |    |           |           |    |    |    |    |     |    |        |             |              |             |              |             |             |
|---------------------------|--------|-----------|----|-----------|-----------|----|----|----|----|-----|----|--------|-------------|--------------|-------------|--------------|-------------|-------------|
| chr1:220179447-220180680  | exonic | EPRS      | 1  | 220179447 | 220180680 | 0  | 5  | 0  | 3  | 6   | 1  | 1233   | 2.22469629  | -0.670485799 | 1.937922708 | -0.345981703 | NA          | NA          |
| chr2:32323864-32341281    | exonic | SPAST     | 2  | 32323864  | 32341281  | 3  | 0  | 2  | 4  | 2   | 2  | 17417  | 2.065236481 | -0.667393987 | 1.804036481 | -0.36994484  | 0.71142359  | 0.998252924 |
| chr8:37623043-37623873    | exonic | PROSC     | 8  | 37623043  | 37623873  | 13 | 6  | 2  | 14 | 12  | 7  | 830    | 8.215241817 | -0.663840823 | 1.001245991 | -0.663014712 | 0.507321132 | 0.998252924 |
| chr3:197557640-197566268  | exonic | LRCH3     | 3  | 197557640 | 197566268 | 1  | 0  | 3  | 2  | 7   | 0  | 8628   | 1.780608742 | -0.660525033 | 2.090514397 | -0.31596292  | 0.752030653 | 0.998252924 |
| chr4:77045801-77065626    | exonic | NUP54     | 4  | 77045801  | 77065626  | 8  | 0  | 2  | 4  | 6   | 4  | 19825  | 3.8107181   | -0.660520613 | 1.458989049 | -0.45272486  | 0.650746876 | 0.998252924 |
| chr11:67934448-67957619   | exonic | KMT5B     | 11 | 67934448  | 67957619  | 5  | 0  | 0  | 5  | 4   | 0  | 23171  | 1.660601327 | -0.660507967 | 2.260677832 | -0.292172532 | NA          | NA          |
| chr6:160103505-160109274  | exonic | SOD2      | 6  | 160103505 | 160109274 | 2  | 5  | 0  | 5  | 1   | 4  | 5769   | 3.014811664 | -0.659653403 | 1.644032988 | -0.401240977 | 0.688242714 | 0.998252924 |
| chr5:137320945-137324004  | exonic | FAM13B    | 5  | 137320945 | 137324004 | 33 | 21 | 42 | 43 | 123 | 19 | 3059   | 41.51557597 | -0.657244098 | 0.697780955 | -0.941906043 | NA          | NA          |
| chr2:61710091-61717911    | exonic | XPO1      | 2  | 61710091  | 61717911  | 3  | 0  | 3  | 0  | 0   | 3  | 7820   | 1.440603598 | -0.656553172 | 2.707631064 | -0.242482508 | NA          | NA          |
| chr9:107513236-107521452  | exonic | NIPSNAP3A | 9  | 107513236 | 107521452 | 0  | 3  | 0  | 5  | 2   | 0  | 8216   | 1.296439167 | -0.656534658 | 2.503207062 | -0.262277407 | 0.793107579 | 0.998252924 |
| chr21:37619814-37620866   | exonic | DOPEY2    | 21 | 37619814  | 37620866  | 12 | 6  | 10 | 10 | 17  | 14 | 1052   | 12.00182891 | -0.655813084 | 0.900720386 | -0.728098413 | 0.466553345 | 0.998252924 |
| chr6:76331247-76344527    | exonic | SENP6     | 6  | 76331247  | 76344527  | 2  | 3  | 2  | 0  | 8   | 3  | 13280  | 3.068214535 | -0.654891187 | 1.618375728 | -0.404659546 | NA          | NA          |
| chr3:169854206-169867032  | exonic | PHC3      | 3  | 169854206 | 169867032 | 3  | 5  | 6  | 6  | 18  | 3  | 12826  | 6.182971707 | -0.653066013 | 1.132092213 | -0.576866447 | NA          | NA          |
| chr1:237532833-237551483  | exonic | RYR2      | 1  | 237532833 | 237551483 | 0  | 0  | 1  | 1  | 1   | 0  | 18650  | 0.424607832 | -0.652759327 | 3.854300042 | -0.169358721 | 0.86551449  | 0.998252924 |
| chr1:39888045-39888572    | exonic | MACF1     | 1  | 39888045  | 39888572  | 0  | 0  | 1  | 1  | 1   | 0  | 527    | 0.424607832 | -0.652759327 | 3.854300042 | -0.169358721 | 0.86551449  | 0.998252924 |
| chr10:104352338-104359301 | exonic | SUFU      | 10 | 104352338 | 104359301 | 0  | 0  | 1  | 1  | 1   | 0  | 6963   | 0.424607832 | -0.652759327 | 3.854300042 | -0.169358721 | 0.86551449  | 0.998252924 |
| chr16:23654275-23672602   | exonic | DCTN5     | 16 | 23654275  | 23672602  | 0  | 0  | 1  | 1  | 1   | 0  | 18327  | 0.424607832 | -0.652759327 | 3.854300042 | -0.169358721 | 0.86551449  | 0.998252924 |
| chr18:48422178-48458730   | exonic | ME2       | 18 | 48422178  | 48458730  | 0  | 0  | 1  | 1  | 1   | 0  | 36552  | 0.424607832 | -0.652759327 | 3.854300042 | -0.169358721 | 0.86551449  | 0.998252924 |
| chr4:110384056-110394342  | exonic | SEC24B    | 4  | 110384056 | 110394342 | 0  | 0  | 1  | 1  | 1   | 0  | 10286  | 0.424607832 | -0.652759327 | 3.854300042 | -0.169358721 | 0.86551449  | 0.998252924 |
| chr5:170667931-170669824  | exonic | RANBP17   | 5  | 170667931 | 170669824 | 0  | 0  | 1  | 1  | 1   | 0  | 1893   | 0.424607832 | -0.652759327 | 3.854300042 | -0.169358721 | 0.86551449  | 0.998252924 |
| chr6:126332398-126334247  | exonic | TRMT11    | 6  | 126332398 | 126334247 | 0  | 0  | 1  | 1  | 1   | 0  | 1849   | 0.424607832 | -0.652759327 | 3.854300042 | -0.169358721 | 0.86551449  | 0.998252924 |
| chr1:78381739-78383958    | exonic | NEXN      | 1  | 78381739  | 78383958  | 0  | 1  | 0  | 1  | 1   | 0  | 2219   | 0.401614606 | -0.652194335 | 3.934396665 | -0.165767306 | 0.868340076 | 0.998252924 |
| chr1:8568685-8617582      | exonic | RERE      | 1  | 8568685   | 8617582   | 0  | 1  | 0  | 1  | 1   | 0  | 48897  | 0.401614606 | -0.652194335 | 3.934396665 | -0.165767306 | 0.868340076 | 0.998252924 |
| chr10:70530962-70532856   | exonic | CCAR1     | 10 | 70530962  | 70532856  | 0  | 1  | 0  | 1  | 1   | 0  | 1894   | 0.401614606 | -0.652194335 | 3.934396665 | -0.165767306 | 0.868340076 | 0.998252924 |
| chr11:107965117-107966418 | exonic | CUL5      | 11 | 107965117 | 107966418 | 0  | 1  | 0  | 1  | 1   | 0  | 1301   | 0.401614606 | -0.652194335 | 3.934396665 | -0.165767306 | 0.868340076 | 0.998252924 |
| chr11:111715323-111728460 | exonic | ALG9      | 11 | 111715323 | 111728460 | 0  | 1  | 0  | 1  | 1   | 0  | 13137  | 0.401614606 | -0.652194335 | 3.934396665 | -0.165767306 | 0.868340076 | 0.998252924 |
| chr12:12311762-12318229   | exonic | LRP6      | 12 | 12311762  | 12318229  | 0  | 1  | 0  | 1  | 1   | 0  | 6467   | 0.401614606 | -0.652194335 | 3.934396665 | -0.165767306 | 0.868340076 | 0.998252924 |
| chr14:45564423-45566208   | exonic | PRPF39    | 14 | 45564423  | 45566208  | 0  | 1  | 0  | 1  | 1   | 0  | 1785   | 0.401614606 | -0.652194335 | 3.934396665 | -0.165767306 | 0.868340076 | 0.998252924 |
| chr19:5039846-5041262     | exonic | KDM4B     | 19 | 5039846   | 5041262   | 0  | 1  | 0  | 1  | 1   | 0  | 1416   | 0.401614606 | -0.652194335 | 3.934396665 | -0.165767306 | 0.868340076 | 0.998252924 |
| chr2:122514815-122520660  | exonic | TSN       | 2  | 122514815 | 122520660 | 0  | 1  | 0  | 1  | 1   | 0  | 5845   | 0.401614606 | -0.652194335 | 3.934396665 | -0.165767306 | 0.868340076 | 0.998252924 |
| chr3:47747898-47755980    | exonic | SMARCC1   | 3  | 47747898  | 47755980  | 0  | 1  | 0  | 1  | 1   | 0  | 8082   | 0.401614606 | -0.652194335 | 3.934396665 | -0.165767306 | 0.868340076 | 0.998252924 |
| chr4:83748521-83750211    | exonic | SEC31A    | 4  | 83748521  | 83750211  | 0  | 1  | 0  | 1  | 1   | 0  | 1690   | 0.401614606 | -0.652194335 | 3.934396665 | -0.165767306 | 0.868340076 | 0.998252924 |
| chr6:131919426-131929211  | exonic | MED23     | 6  | 131919426 | 131929211 | 0  | 1  | 0  | 1  | 1   | 0  | 9785   | 0.401614606 | -0.652194335 | 3.934396665 | -0.165767306 | 0.868340076 | 0.998252924 |
| chr8:141771263-141900868  | exonic | PTK2      | 8  | 141771263 | 141900868 | 0  | 1  | 0  | 1  | 1   | 0  | 129605 | 0.401614606 | -0.652194335 | 3.934396665 | -0.165767306 | 0.868340076 | 0.998252924 |
| chr8:68169966-68170525    | exonic | ARFGEF1   | 8  | 68169966  | 68170525  | 0  | 1  | 0  | 1  | 1   | 0  | 559    | 0.401614606 | -0.652194335 | 3.934396665 | -0.165767306 | 0.868340076 | 0.998252924 |

|                           |            |                                      |    |           |           |    |   |    |    |    |   |        |             |              |             |              |             |             |
|---------------------------|------------|--------------------------------------|----|-----------|-----------|----|---|----|----|----|---|--------|-------------|--------------|-------------|--------------|-------------|-------------|
| chr9:124736287-124752049  | exonic     | TLL1                                 | 9  | 124736287 | 124752049 | 0  | 1 | 0  | 1  | 1  | 0 | 15762  | 0.401614606 | -0.652194335 | 3.934396665 | -0.165767306 | 0.868340076 | 0.998252924 |
| chr1:21295966-21377487    | exonic     | EIF4G3                               | 1  | 21295966  | 21377487  | 1  | 0 | 0  | 1  | 1  | 0 | 81521  | 0.35632575  | -0.651528968 | 4.035567231 | -0.161446689 | 0.871741596 | 0.998252924 |
| chr1:245180543-245246990  | exonic     | EFCAB2                               | 1  | 245180543 | 245246990 | 1  | 0 | 0  | 1  | 1  | 0 | 66447  | 0.35632575  | -0.651528968 | 4.035567231 | -0.161446689 | 0.871741596 | 0.998252924 |
| chr1:44785299-44804994    | exonic     | ERI3                                 | 1  | 44785299  | 44804994  | 1  | 0 | 0  | 1  | 1  | 0 | 19695  | 0.35632575  | -0.651528968 | 4.035567231 | -0.161446689 | 0.871741596 | 0.998252924 |
| chr13:41515056-41515506   | exonic     | ELF1                                 | 13 | 41515056  | 41515506  | 1  | 0 | 0  | 1  | 1  | 0 | 450    | 0.35632575  | -0.651528968 | 4.035567231 | -0.161446689 | 0.871741596 | 0.998252924 |
| chr16:74972047-74985441   | exonic     | WDR59                                | 16 | 74972047  | 74985441  | 1  | 0 | 0  | 1  | 1  | 0 | 13394  | 0.35632575  | -0.651528968 | 4.035567231 | -0.161446689 | 0.871741596 | 0.998252924 |
| chr17:38065210-38066177   | exonic     | GSDMB                                | 17 | 38065210  | 38066177  | 1  | 0 | 0  | 1  | 1  | 0 | 967    | 0.35632575  | -0.651528968 | 4.035567231 | -0.161446689 | 0.871741596 | 0.998252924 |
| chr17:78268518-78272318   | exonic     | RNF213                               | 17 | 78268518  | 78272318  | 1  | 0 | 0  | 1  | 1  | 0 | 3800   | 0.35632575  | -0.651528968 | 4.035567231 | -0.161446689 | 0.871741596 | 0.998252924 |
| chr18:48581150-48593557   | exonic     | SMAD4                                | 18 | 48581150  | 48593557  | 1  | 0 | 0  | 1  | 1  | 0 | 12407  | 0.35632575  | -0.651528968 | 4.035567231 | -0.161446689 | 0.871741596 | 0.998252924 |
| chr2:128855002-128867320  | exonic     | UGGT1                                | 2  | 128855002 | 128867320 | 1  | 0 | 0  | 1  | 1  | 0 | 12318  | 0.35632575  | -0.651528968 | 4.035567231 | -0.161446689 | 0.871741596 | 0.998252924 |
| chr22:41173043-41195087   | exonic     | SLC25A17                             | 22 | 41173043  | 41195087  | 1  | 0 | 0  | 1  | 1  | 0 | 22044  | 0.35632575  | -0.651528968 | 4.035567231 | -0.161446689 | 0.871741596 | 0.998252924 |
| chr4:76573822-76581054    | exonic     | G3BP2                                | 4  | 76573822  | 76581054  | 1  | 0 | 0  | 1  | 1  | 0 | 7232   | 0.35632575  | -0.651528968 | 4.035567231 | -0.161446689 | 0.871741596 | 0.998252924 |
| chr5:179268906-179280437  | exonic     | C5orf45                              | 5  | 179268906 | 179280437 | 1  | 0 | 0  | 1  | 1  | 0 | 11531  | 0.35632575  | -0.651528968 | 4.035567231 | -0.161446689 | 0.871741596 | 0.998252924 |
| chr6:109232101-109258202  | exonic     | ARMC2                                | 6  | 109232101 | 109258202 | 1  | 0 | 0  | 1  | 1  | 0 | 26101  | 0.35632575  | -0.651528968 | 4.035567231 | -0.161446689 | 0.871741596 | 0.998252924 |
| chr6:144852187-144878447  | exonic     | UTRN                                 | 6  | 144852187 | 144878447 | 1  | 0 | 0  | 1  | 1  | 0 | 26260  | 0.35632575  | -0.651528968 | 4.035567231 | -0.161446689 | 0.871741596 | 0.998252924 |
| chr7:6178722-6185287      | exonic     | USP42                                | 7  | 6178722   | 6185287   | 1  | 0 | 0  | 1  | 1  | 0 | 6565   | 0.35632575  | -0.651528968 | 4.035567231 | -0.161446689 | 0.871741596 | 0.998252924 |
| chr8:12955907-12958279    | exonic     | DLC1                                 | 8  | 12955907  | 12958279  | 1  | 0 | 0  | 1  | 1  | 0 | 2372   | 0.35632575  | -0.651528968 | 4.035567231 | -0.161446689 | 0.871741596 | 0.998252924 |
| chr8:131226801-131370389  | exonic     | ASAP1                                | 8  | 131226801 | 131370389 | 1  | 0 | 0  | 1  | 1  | 0 | 143588 | 0.35632575  | -0.651528968 | 4.035567231 | -0.161446689 | 0.871741596 | 0.998252924 |
| chr9:98002930-98011651    | exonic     | FANCC                                | 9  | 98002930  | 98011651  | 1  | 0 | 0  | 1  | 1  | 0 | 8721   | 0.35632575  | -0.651528968 | 4.035567231 | -0.161446689 | 0.871741596 | 0.998252924 |
| chr10:103916775-103917971 | exonic     | NOLC1                                | 10 | 103916775 | 103917971 | 2  | 0 | 1  | 3  | 3  | 0 | 1196   | 1.137259332 | -0.650661509 | 2.414948889 | -0.269430758 | 0.78759822  | 0.998252924 |
| chr1:54506428-54509198    | exonic     | TMEM59                               | 1  | 54506428  | 54509198  | 3  | 0 | 1  | 6  | 2  | 0 | 2770   | 1.464153008 | -0.646523383 | 2.206578861 | -0.292998086 | 0.769523614 | 0.998252924 |
| chr5:133494145-133509713  | exonic     | SKP1                                 | 5  | 133494145 | 133509713 | 1  | 0 | 1  | 0  | 4  | 0 | 15568  | 0.810365656 | -0.643362824 | 3.044647884 | -0.211309435 | NA          | NA          |
| chr9:19086731-19089557    | exonic     | HAUS6                                | 9  | 19086731  | 19089557  | 1  | 0 | 1  | 0  | 4  | 0 | 2826   | 0.810365656 | -0.643362824 | 3.044647884 | -0.211309435 | NA          | NA          |
| chr14:92264128-92268765   | exonic     | TC2N                                 | 14 | 92264128  | 92268765  | 3  | 0 | 0  | 0  | 5  | 0 | 4637   | 0.992097937 | -0.642083789 | 3.034883686 | -0.211567841 | NA          | NA          |
| chr15:74892842-74893754   | intergenic | ARID3B (dist=2370), CLK3 (dist=6959) | 15 | 74892842  | 74893754  | 3  | 0 | 0  | 0  | 5  | 0 | 912    | 0.992097937 | -0.642083789 | 3.034883686 | -0.211567841 | NA          | NA          |
| chr9:16435552-16437522    | exonic     | BNC2                                 | 9  | 16435552  | 16437522  | 9  | 3 | 3  | 30 | 2  | 0 | 1970   | 5.706913357 | -0.641244943 | 1.369303528 | -0.468300074 | NA          | NA          |
| chr2:32664575-32666530    | exonic     | BIRC6                                | 2  | 32664575  | 32666530  | 3  | 0 | 0  | 1  | 2  | 1 | 1955   | 1.043545666 | -0.64099894  | 2.55001348  | -0.251370805 | NA          | NA          |
| chr6:62687970-62757899    | exonic     | KHDRBS2                              | 6  | 62687970  | 62757899  | 0  | 1 | 5  | 8  | 2  | 0 | 69929  | 1.8586288   | -0.640287294 | 2.061527912 | -0.31058871  | 0.756113311 | 0.998252924 |
| chr6:592468-599225        | exonic     | EXOC2                                | 6  | 592468    | 599225    | 0  | 3 | 0  | 0  | 2  | 2 | 6757   | 1.381319458 | -0.638075772 | 2.50974194  | -0.254239594 | 0.799310464 | 0.998252924 |
| chr7:156994414-157018233  | exonic     | UBE3C                                | 7  | 156994414 | 157018233 | 0  | 3 | 0  | 0  | 2  | 2 | 23819  | 1.381319458 | -0.638075772 | 2.50974194  | -0.254239594 | 0.799310464 | 0.998252924 |
| chr13:43528083-43544806   | exonic     | EPSTI1                               | 13 | 43528083  | 43544806  | 11 | 3 | 6  | 26 | 9  | 3 | 16723  | 7.903296557 | -0.638069841 | 1.030987817 | -0.618891737 | NA          | NA          |
| chr14:45587231-45599993   | exonic     | FKBP3                                | 14 | 45587231  | 45599993  | 8  | 6 | 10 | 19 | 15 | 8 | 12762  | 10.35131711 | -0.637400924 | 0.891834975 | -0.714707252 | 0.474789956 | 0.998252924 |
| chr5:16779653-16783578    | exonic     | MYO10                                | 5  | 16779653  | 16783578  | 9  | 6 | 5  | 22 | 11 | 4 | 3925   | 8.095908955 | -0.636981226 | 0.972102816 | -0.655261167 | 0.512299618 | 0.998252924 |
| chr1:155582209-155717687  | exonic     | DAP3, MSTO1, YY1AP1                  | 1  | 155582209 | 155717687 | 0  | 0 | 8  | 3  | 0  | 7 | 135478 | 4.054616621 | -0.636094771 | 3.179554651 | -0.20005782  | NA          | NA          |
| chr3:169863210-169867032  | exonic     | PHC3                                 | 3  | 169863210 | 169867032 | 7  | 4 | 6  | 14 | 15 | 3 | 3822   | 7.012052494 | -0.635475993 | 1.027711076 | -0.618341096 | 0.536350518 | 0.998252924 |



|                          |        |          |    |           |           |   |    |    |    |    |    |        |             |              |             |              |             |             |
|--------------------------|--------|----------|----|-----------|-----------|---|----|----|----|----|----|--------|-------------|--------------|-------------|--------------|-------------|-------------|
| chr2:24205765-24207701   | exonic | UBXN2A   | 2  | 24205765  | 24207701  | 0 | 0  | 3  | 2  | 3  | 1  | 1936   | 1.475730721 | -0.635405474 | 2.242237706 | -0.283380068 | NA          | NA          |
| chr7:77212871-77230123   | exonic | PTPN12   | 7  | 77212871  | 77230123  | 0 | 0  | 2  | 0  | 3  | 3  | 17252  | 1.47047645  | -0.635368281 | 2.509272172 | -0.253208196 | NA          | NA          |
| chr3:172363412-172365904 | exonic | NCEH1    | 3  | 172363412 | 172365904 | 3 | 1  | 1  | 6  | 4  | 0  | 2492   | 1.880483651 | -0.633442845 | 1.866171158 | -0.339434484 | 0.734282444 | 0.998252924 |
| chr8:101299728-101300495 | exonic | RNF19A   | 8  | 101299728 | 101300495 | 3 | 2  | 1  | 5  | 7  | 0  | 767    | 2.31153033  | -0.633195709 | 1.716069205 | -0.368980288 | 0.712142418 | 0.998252924 |
| chr5:38991050-39021238   | exonic | RICTOR   | 5  | 38991050  | 39021238  | 2 | 1  | 1  | 4  | 2  | 1  | 30188  | 1.605037703 | -0.630132091 | 1.885683031 | -0.334166496 | 0.738253925 | 0.998252924 |
| chr5:122881110-122888841 | exonic | CSNK1G3  | 5  | 122881110 | 122888841 | 0 | 3  | 0  | 6  | 1  | 0  | 7731   | 1.28172313  | -0.629794471 | 2.547043088 | -0.247264946 | NA          | NA          |
| chr8:133848784-133855120 | exonic | PHF20L1  | 8  | 133848784 | 133855120 | 3 | 2  | 0  | 3  | 0  | 3  | 6336   | 1.979102408 | -0.627358972 | 2.015552419 | -0.31125907  | 0.75560368  | 0.998252924 |
| chr2:99786012-99787892   | exonic | MITD1    | 2  | 99786012  | 99787892  | 4 | 3  | 9  | 9  | 17 | 4  | 1880   | 7.06133947  | -0.62576545  | 1.076255171 | -0.581428519 | NA          | NA          |
| chr2:176844537-176859008 | exonic | KIAA1715 | 2  | 176844537 | 176859008 | 3 | 0  | 3  | 3  | 7  | 1  | 14471  | 2.453112622 | -0.624976623 | 1.702855282 | -0.367016874 | 0.713606431 | 0.998252924 |
| chr1:76205664-76215244   | exonic | ACADM    | 1  | 76205664  | 76215244  | 2 | 2  | 0  | 5  | 3  | 0  | 9580   | 1.501164675 | -0.623118235 | 2.154304914 | -0.289243287 | 0.772395208 | 0.998252924 |
| chr3:185155234-185161424 | exonic | MAP3K13  | 3  | 185155234 | 185161424 | 5 | 0  | 0  | 1  | 3  | 2  | 6190   | 1.730765582 | -0.61939957  | 2.12300605  | -0.291755914 | 0.770473255 | 0.998252924 |
| chr7:140476711-140508795 | exonic | BRAF     | 7  | 140476711 | 140508795 | 2 | 3  | 1  | 11 | 2  | 0  | 32084  | 2.389550389 | -0.617776475 | 1.74342587  | -0.354346282 | NA          | NA          |
| chr4:106155053-106158508 | exonic | TET2     | 4  | 106155053 | 106158508 | 6 | 5  | 13 | 6  | 23 | 10 | 3455   | 10.71348308 | -0.617621688 | 0.985049495 | -0.626995589 | NA          | NA          |
| chr16:69729038-69729282  | exonic | NFAT5    | 16 | 69729038  | 69729282  | 2 | 3  | 2  | 2  | 8  | 2  | 244    | 2.972618696 | -0.616551968 | 1.487882874 | -0.414382058 | 0.678594326 | 0.998252924 |
| chr1:179959641-179966310 | exonic | CEP350   | 1  | 179959641 | 179966310 | 1 | 0  | 1  | 1  | 3  | 0  | 6669   | 0.795649619 | -0.616421556 | 2.825221563 | -0.218185209 | 0.827284809 | 0.998252924 |
| chr3:179310431-179319578 | exonic | MRPL47   | 3  | 179310431 | 179319578 | 1 | 0  | 1  | 1  | 3  | 0  | 9147   | 0.795649619 | -0.616421556 | 2.825221563 | -0.218185209 | 0.827284809 | 0.998252924 |
| chr1:211952259-211966532 | exonic | LPGAT1   | 1  | 211952259 | 211966532 | 7 | 2  | 8  | 10 | 12 | 6  | 14273  | 7.194366968 | -0.613000201 | 1.053476365 | -0.581883203 | 0.560645356 | 0.998252924 |
| chr1:29313942-29314417   | exonic | EPB41    | 1  | 29313942  | 29314417  | 0 | 2  | 0  | 0  | 2  | 1  | 475    | 0.898825051 | -0.612262296 | 2.937775466 | -0.208410174 | 0.834908713 | 0.998252924 |
| chr1:62365254-62367131   | exonic | INADL    | 1  | 62365254  | 62367131  | 0 | 2  | 0  | 0  | 2  | 1  | 1877   | 0.898825051 | -0.612262296 | 2.937775466 | -0.208410174 | 0.834908713 | 0.998252924 |
| chr2:55209650-55214834   | exonic | RTN4     | 2  | 55209650  | 55214834  | 0 | 6  | 3  | 9  | 7  | 2  | 5184   | 4.057893508 | -0.611502485 | 1.42393261  | -0.429446226 | 0.66759852  | 0.998252924 |
| chr12:95876990-95897937  | exonic | METAP2   | 12 | 95876990  | 95897937  | 0 | 0  | 2  | 4  | 1  | 0  | 20947  | 0.940811013 | -0.611261668 | 2.854607207 | -0.214131621 | 0.830444418 | 0.998252924 |
| chr4:16587544-16760883   | exonic | LDB2     | 4  | 16587544  | 16760883  | 0 | 0  | 2  | 4  | 1  | 0  | 173339 | 0.940811013 | -0.611261668 | 2.854607207 | -0.214131621 | 0.830444418 | 0.998252924 |
| chr5:127474288-127488497 | exonic | SLC12A2  | 5  | 127474288 | 127488497 | 0 | 0  | 2  | 4  | 1  | 0  | 14209  | 0.940811013 | -0.611261668 | 2.854607207 | -0.214131621 | 0.830444418 | 0.998252924 |
| chr3:125032151-125050082 | exonic | ZNF148   | 3  | 125032151 | 125050082 | 6 | 5  | 0  | 9  | 10 | 1  | 17931  | 4.120595945 | -0.610660684 | 1.406844922 | -0.434063964 | 0.664241993 | 0.998252924 |
| chr1:197564337-197742062 | exonic | DENND1B  | 1  | 197564337 | 197742062 | 2 | 1  | 0  | 6  | 0  | 0  | 177725 | 1.070117996 | -0.610637013 | 2.716351929 | -0.224800405 | NA          | NA          |
| chr2:201784944-201802689 | exonic | ORC2     | 2  | 201784944 | 201802689 | 3 | 0  | 0  | 1  | 4  | 0  | 17745  | 0.977381901 | -0.610473092 | 2.794651368 | -0.21844338  | NA          | NA          |
| chr19:33406242-33417890  | exonic | CEP89    | 19 | 33406242  | 33417890  | 3 | 0  | 0  | 0  | 2  | 1  | 11648  | 1.028829629 | -0.609840477 | 2.560437357 | -0.238178245 | NA          | NA          |
| chr1:213246211-213277911 | exonic | RPS6KC1  | 1  | 213246211 | 213277911 | 1 | 0  | 1  | 2  | 0  | 1  | 31700  | 0.847097347 | -0.60983787  | 2.794248431 | -0.218247548 | 0.82723624  | 0.998252924 |
| chr8:125520714-125534441 | exonic | TATDN1   | 8  | 125520714 | 125534441 | 1 | 1  | 0  | 3  | 1  | 0  | 13727  | 0.743224319 | -0.609532238 | 2.890941432 | -0.210842126 | 0.833010466 | 0.998252924 |
| chr7:104714065-104717880 | exonic | KMT2E    | 7  | 104714065 | 104717880 | 3 | 2  | 8  | 14 | 4  | 5  | 3815   | 5.827226754 | -0.609296998 | 1.186762081 | -0.513411245 | NA          | NA          |
| chr9:79829244-79842401   | exonic | VPS13A   | 9  | 79829244  | 79842401  | 5 | 5  | 0  | 3  | 5  | 5  | 13157  | 3.981478018 | -0.608701402 | 1.438345844 | -0.42319544  | 0.672152673 | 0.998252924 |
| chr2:148730307-148739650 | exonic | ORC4     | 2  | 148730307 | 148739650 | 7 | 1  | 5  | 7  | 10 | 4  | 9343   | 5.250857875 | -0.608509058 | 1.193458328 | -0.509870385 | 0.610142271 | 0.998252924 |
| chr4:48371865-48385801   | exonic | SLAIN2   | 4  | 48371865  | 48385801  | 9 | 13 | 6  | 8  | 24 | 11 | 13936  | 11.75563593 | -0.605049631 | 0.913131614 | -0.662609444 | NA          | NA          |
| chr17:30498061-30503232  | exonic | RHOT1    | 17 | 30498061  | 30503232  | 2 | 0  | 3  | 1  | 7  | 1  | 5171   | 2.111502909 | -0.604933445 | 1.857308802 | -0.32570429  | 0.744648098 | 0.998252924 |
| chr9:33948371-33953472   | exonic | UBAP2    | 9  | 33948371  | 33953472  | 0 | 2  | 5  | 6  | 8  | 1  | 5101   | 3.24920302  | -0.603592703 | 1.570169069 | -0.384412555 | 0.700672697 | 0.998252924 |

|                           |              |                                   |    |           |           |    |    |   |    |    |   |        |             |              |             |              |             |             |
|---------------------------|--------------|-----------------------------------|----|-----------|-----------|----|----|---|----|----|---|--------|-------------|--------------|-------------|--------------|-------------|-------------|
| chr1:155646339-155753880  | exonic       | DAP3, GON4L, YY1AP1               | 1  | 155646339 | 155753880 | 15 | 5  | 4 | 23 | 19 | 2 | 107541 | 8.956379329 | -0.602076227 | 0.995104633 | -0.60503811  | 0.545153675 | 0.998252924 |
| chr18:56601664-56621031   | exonic       | ZNF532                            | 18 | 56601664  | 56621031  | 7  | 2  | 2 | 17 | 3  | 3 | 19367  | 9.092868154 | -0.601353615 | 0.946566185 | -0.635300125 | 0.525232692 | 0.998252924 |
| chr2:243056789-243081039  | ncRNA_exonic | LOC728323                         | 2  | 243056789 | 243081039 | 5  | 0  | 0 | 2  | 2  | 2 | 24250  | 1.716049545 | -0.597306655 | 2.10660789  | -0.283539551 | NA          | NA          |
| chr10:15858833-15889942   | exonic       | FAM188A                           | 10 | 15858833  | 15889942  | 14 | 2  | 1 | 12 | 16 | 2 | 31109  | 6.35452621  | -0.596563796 | 1.171973071 | -0.509025174 | 0.610734579 | 0.998252924 |
| chr14:35020920-35024118   | intergenic   | EAPP(dist=11977), SNX6(dist=6500) | 14 | 35020920  | 35024118  | 0  | 6  | 0 | 0  | 8  | 2 | 3198   | 2.630311386 | -0.596387231 | 2.034301302 | -0.293165634 | NA          | NA          |
| chr17:57987922-57992064   | exonic       | RPS6KB1                           | 17 | 57987922  | 57992064  | 2  | 2  | 0 | 1  | 0  | 3 | 4142   | 1.637492695 | -0.596242522 | 2.208234674 | -0.270008677 | NA          | NA          |
| chr3:191074876-191078948  | exonic       | CCDC50                            | 3  | 191074876 | 191078948 | 0  | 3  | 0 | 0  | 4  | 1 | 4072   | 1.315155693 | -0.59556135  | 2.548475089 | -0.23369322  | 0.815223152 | 0.998252924 |
| chr2:110919179-110920709  | exonic       | NPHP1                             | 2  | 110919179 | 110920709 | 9  | 2  | 2 | 5  | 0  | 1 | 1530   | 1.773192324 | -0.595516052 | 2.13678938  | -0.278696655 | 0.78047763  | 0.998252924 |
| chr22:38894089-38897285   | exonic       | DDX17                             | 22 | 38894089  | 38897285  | 3  | 0  | 1 | 8  | 0  | 0 | 3196   | 1.434720935 | -0.594689128 | 2.450626321 | -0.24266822  | NA          | NA          |
| chr9:131196380-131196892  | exonic       | CERCAM                            | 9  | 131196380 | 131196892 | 3  | 0  | 1 | 8  | 0  | 0 | 512    | 1.434720935 | -0.594689128 | 2.450626321 | -0.24266822  | NA          | NA          |
| chr1:155340294-155340774  | exonic       | ASH1L                             | 1  | 155340294 | 155340774 | 2  | 0  | 1 | 5  | 1  | 0 | 480    | 1.107827259 | -0.594639972 | 2.474500055 | -0.240307116 | NA          | NA          |
| chr10:86130769-86133571   | exonic       | CCSER2                            | 10 | 86130769  | 86133571  | 2  | 0  | 2 | 4  | 2  | 1 | 2802   | 1.62803093  | -0.594435973 | 1.979856645 | -0.300241926 | 0.763992627 | 0.998252924 |
| chr11:103090643-103093815 | exonic       | DYNC2H1                           | 11 | 103090643 | 103093815 | 1  | 2  | 0 | 4  | 0  | 1 | 3172   | 1.21100269  | -0.594248522 | 2.422448914 | -0.245309001 | 0.806217183 | 0.998252924 |
| chr22:38641940-38644025   | exonic       | TMEM184B                          | 22 | 38641940  | 38644025  | 1  | 2  | 0 | 4  | 0  | 1 | 2085   | 1.21100269  | -0.594248522 | 2.422448914 | -0.245309001 | 0.806217183 | 0.998252924 |
| chr5:133996808-133997276  | exonic       | SEC24A                            | 5  | 133996808 | 133997276 | 0  | 1  | 1 | 0  | 0  | 2 | 468    | 0.987982042 | -0.593223104 | 2.892761922 | -0.205071527 | 0.837516242 | 0.998252924 |
| chr8:62531536-62559437    | exonic       | ASPH                              | 8  | 62531536  | 62559437  | 16 | 42 | 8 | 13 | 13 | 5 | 27901  | 3.224956012 | -0.589856583 | 1.750642752 | -0.336937152 | 0.736164278 | 0.998252924 |
| chr1:114123163-114165616  | exonic       | MAGI3                             | 1  | 114123163 | 114165616 | 0  | 1  | 0 | 2  | 0  | 0 | 42453  | 0.386898569 | -0.589023111 | 4.038815297 | -0.145840567 | 0.884047251 | 0.998252924 |
| chr1:150195511-150201570  | exonic       | ANP32E                            | 1  | 150195511 | 150201570 | 0  | 1  | 0 | 2  | 0  | 0 | 6059   | 0.386898569 | -0.589023111 | 4.038815297 | -0.145840567 | 0.884047251 | 0.998252924 |
| chr1:151630710-151641111  | exonic       | SNX27                             | 1  | 151630710 | 151641111 | 0  | 0  | 1 | 2  | 0  | 0 | 10401  | 0.409891796 | -0.589023111 | 4.038815297 | -0.145840567 | 0.884047251 | 0.998252924 |
| chr1:153791266-153792211  | exonic       | GATAD2B                           | 1  | 153791266 | 153792211 | 0  | 1  | 0 | 2  | 0  | 0 | 945    | 0.386898569 | -0.589023111 | 4.038815297 | -0.145840567 | 0.884047251 | 0.998252924 |
| chr1:159846345-159847252  | exonic       | CFAP45                            | 1  | 159846345 | 159847252 | 1  | 0  | 0 | 2  | 0  | 0 | 907    | 0.341609713 | -0.589023111 | 4.038815297 | -0.145840567 | 0.884047251 | 0.998252924 |
| chr1:171493959-171502100  | exonic       | PRRC2C                            | 1  | 171493959 | 171502100 | 0  | 1  | 0 | 2  | 0  | 0 | 8141   | 0.386898569 | -0.589023111 | 4.038815297 | -0.145840567 | 0.884047251 | 0.998252924 |
| chr1:180366650-180399397  | exonic       | ACBD6                             | 1  | 180366650 | 180399397 | 0  | 1  | 0 | 2  | 0  | 0 | 32747  | 0.386898569 | -0.589023111 | 4.038815297 | -0.145840567 | 0.884047251 | 0.998252924 |
| chr1:203693008-203696699  | exonic       | ATP2B4                            | 1  | 203693008 | 203696699 | 1  | 0  | 0 | 2  | 0  | 0 | 3691   | 0.341609713 | -0.589023111 | 4.038815297 | -0.145840567 | 0.884047251 | 0.998252924 |
| chr1:21024871-21031392    | exonic       | KIF17                             | 1  | 21024871  | 21031392  | 0  | 0  | 1 | 2  | 0  | 0 | 6521   | 0.409891796 | -0.589023111 | 4.038815297 | -0.145840567 | 0.884047251 | 0.998252924 |
| chr1:213251037-213277911  | exonic       | RPS6KC1                           | 1  | 213251037 | 213277911 | 0  | 1  | 0 | 2  | 0  | 0 | 26874  | 0.386898569 | -0.589023111 | 4.038815297 | -0.145840567 | 0.884047251 | 0.998252924 |
| chr1:222823633-222828135  | exonic       | MIA3                              | 1  | 222823633 | 222828135 | 0  | 1  | 0 | 2  | 0  | 0 | 4502   | 0.386898569 | -0.589023111 | 4.038815297 | -0.145840567 | 0.884047251 | 0.998252924 |
| chr1:229593907-229613507  | exonic       | NUP133                            | 1  | 229593907 | 229613507 | 0  | 1  | 0 | 2  | 0  | 0 | 19600  | 0.386898569 | -0.589023111 | 4.038815297 | -0.145840567 | 0.884047251 | 0.998252924 |
| chr1:236189195-236201553  | exonic       | NID1                              | 1  | 236189195 | 236201553 | 0  | 1  | 0 | 2  | 0  | 0 | 12358  | 0.386898569 | -0.589023111 | 4.038815297 | -0.145840567 | 0.884047251 | 0.998252924 |
| chr1:236341713-236368550  | exonic       | GPR137B                           | 1  | 236341713 | 236368550 | 1  | 0  | 0 | 2  | 0  | 0 | 26837  | 0.341609713 | -0.589023111 | 4.038815297 | -0.145840567 | 0.884047251 | 0.998252924 |
| chr1:236966727-237026854  | exonic       | MTR                               | 1  | 236966727 | 237026854 | 1  | 0  | 0 | 2  | 0  | 0 | 60127  | 0.341609713 | -0.589023111 | 4.038815297 | -0.145840567 | 0.884047251 | 0.998252924 |
| chr1:237532833-237586548  | exonic       | RYR2                              | 1  | 237532833 | 237586548 | 1  | 0  | 0 | 2  | 0  | 0 | 53715  | 0.341609713 | -0.589023111 | 4.038815297 | -0.145840567 | 0.884047251 | 0.998252924 |
| chr1:29319841-29344954    | exonic       | EPB41                             | 1  | 29319841  | 29344954  | 0  | 1  | 0 | 2  | 0  | 0 | 25113  | 0.386898569 | -0.589023111 | 4.038815297 | -0.145840567 | 0.884047251 | 0.998252924 |
| chr1:52279706-52299842    | exonic       | NRDC                              | 1  | 52279706  | 52299842  | 1  | 0  | 0 | 2  | 0  | 0 | 20136  | 0.341609713 | -0.589023111 | 4.038815297 | -0.145840567 | 0.884047251 | 0.998252924 |
| chr1:62908829-62914337    | exonic       | USP1                              | 1  | 62908829  | 62914337  | 0  | 1  | 0 | 2  | 0  | 0 | 5508   | 0.386898569 | -0.589023111 | 4.038815297 | -0.145840567 | 0.884047251 | 0.998252924 |

|                           |          |          |    |           |           |   |   |   |   |   |   |       |             |              |             |              |             |             |
|---------------------------|----------|----------|----|-----------|-----------|---|---|---|---|---|---|-------|-------------|--------------|-------------|--------------|-------------|-------------|
| chr1:7879344-7897209      | exonic   | PER3     | 1  | 7879344   | 7897209   | 1 | 0 | 0 | 2 | 0 | 0 | 17865 | 0.341609713 | -0.589023111 | 4.038815297 | -0.145840567 | 0.884047251 | 0.998252924 |
| chr10:103558598-103567658 | exonic   | MGEA5    | 10 | 103558598 | 103567658 | 1 | 0 | 0 | 2 | 0 | 0 | 9060  | 0.341609713 | -0.589023111 | 4.038815297 | -0.145840567 | 0.884047251 | 0.998252924 |
| chr10:120817833-120818723 | splicing | EIF3A    | 10 | 120817833 | 120818723 | 1 | 0 | 0 | 2 | 0 | 0 | 890   | 0.341609713 | -0.589023111 | 4.038815297 | -0.145840567 | 0.884047251 | 0.998252924 |
| chr10:22856779-22898646   | exonic   | PIP4K2A  | 10 | 22856779  | 22898646  | 1 | 0 | 0 | 2 | 0 | 0 | 41867 | 0.341609713 | -0.589023111 | 4.038815297 | -0.145840567 | 0.884047251 | 0.998252924 |
| chr10:69714351-69804320   | exonic   | HERC4    | 10 | 69714351  | 69804320  | 1 | 0 | 0 | 2 | 0 | 0 | 89969 | 0.341609713 | -0.589023111 | 4.038815297 | -0.145840567 | 0.884047251 | 0.998252924 |
| chr10:88211723-88221044   | exonic   | WAPL     | 10 | 88211723  | 88221044  | 1 | 0 | 0 | 2 | 0 | 0 | 9321  | 0.341609713 | -0.589023111 | 4.038815297 | -0.145840567 | 0.884047251 | 0.998252924 |
| chr10:98708764-98711953   | exonic   | LCOR     | 10 | 98708764  | 98711953  | 1 | 0 | 0 | 2 | 0 | 0 | 3189  | 0.341609713 | -0.589023111 | 4.038815297 | -0.145840567 | 0.884047251 | 0.998252924 |
| chr10:99416041-99424741   | exonic   | PI4K2A   | 10 | 99416041  | 99424741  | 0 | 0 | 1 | 2 | 0 | 0 | 8700  | 0.409891796 | -0.589023111 | 4.038815297 | -0.145840567 | 0.884047251 | 0.998252924 |
| chr11:108055958-108061227 | exonic   | NPAT     | 11 | 108055958 | 108061227 | 1 | 0 | 0 | 2 | 0 | 0 | 5269  | 0.341609713 | -0.589023111 | 4.038815297 | -0.145840567 | 0.884047251 | 0.998252924 |
| chr11:3712576-3714605     | exonic   | NUP98    | 11 | 3712576   | 3714605   | 1 | 0 | 0 | 2 | 0 | 0 | 2029  | 0.341609713 | -0.589023111 | 4.038815297 | -0.145840567 | 0.884047251 | 0.998252924 |
| chr11:70200406-70208594   | exonic   | PPF1A1   | 11 | 70200406  | 70208594  | 0 | 1 | 0 | 2 | 0 | 0 | 8188  | 0.386898569 | -0.589023111 | 4.038815297 | -0.145840567 | 0.884047251 | 0.998252924 |
| chr11:77066712-77070062   | exonic   | PAK1     | 11 | 77066712  | 77070062  | 0 | 0 | 1 | 2 | 0 | 0 | 3350  | 0.409891796 | -0.589023111 | 4.038815297 | -0.145840567 | 0.884047251 | 0.998252924 |
| chr12:119909798-119917006 | exonic   | CCDC60   | 12 | 119909798 | 119917006 | 1 | 0 | 0 | 2 | 0 | 0 | 7208  | 0.341609713 | -0.589023111 | 4.038815297 | -0.145840567 | 0.884047251 | 0.998252924 |
| chr12:123798166-123800207 | exonic   | SBNO1    | 12 | 123798166 | 123800207 | 1 | 0 | 0 | 2 | 0 | 0 | 2041  | 0.341609713 | -0.589023111 | 4.038815297 | -0.145840567 | 0.884047251 | 0.998252924 |
| chr12:124904502-124911346 | exonic   | NCOR2    | 12 | 124904502 | 124911346 | 0 | 0 | 1 | 2 | 0 | 0 | 6844  | 0.409891796 | -0.589023111 | 4.038815297 | -0.145840567 | 0.884047251 | 0.998252924 |
| chr12:133310970-133312098 | exonic   | ANKLE2   | 12 | 133310970 | 133312098 | 0 | 0 | 1 | 2 | 0 | 0 | 1128  | 0.409891796 | -0.589023111 | 4.038815297 | -0.145840567 | 0.884047251 | 0.998252924 |
| chr12:25297298-25314131   | exonic   | CASC1    | 12 | 25297298  | 25314131  | 1 | 0 | 0 | 2 | 0 | 0 | 16833 | 0.341609713 | -0.589023111 | 4.038815297 | -0.145840567 | 0.884047251 | 0.998252924 |
| chr12:53448969-53449629   | exonic   | TNS2     | 12 | 53448969  | 53449629  | 0 | 1 | 0 | 2 | 0 | 0 | 660   | 0.386898569 | -0.589023111 | 4.038815297 | -0.145840567 | 0.884047251 | 0.998252924 |
| chr12:57065532-57066849   | exonic   | PTGES3   | 12 | 57065532  | 57066849  | 0 | 1 | 0 | 2 | 0 | 0 | 1317  | 0.386898569 | -0.589023111 | 4.038815297 | -0.145840567 | 0.884047251 | 0.998252924 |
| chr12:5908672-5963307     | exonic   | ANO2     | 12 | 5908672   | 5963307   | 1 | 0 | 0 | 2 | 0 | 0 | 54635 | 0.341609713 | -0.589023111 | 4.038815297 | -0.145840567 | 0.884047251 | 0.998252924 |
| chr12:6696549-6697588     | exonic   | CHD4     | 12 | 6696549   | 6697588   | 0 | 1 | 0 | 2 | 0 | 0 | 1039  | 0.386898569 | -0.589023111 | 4.038815297 | -0.145840567 | 0.884047251 | 0.998252924 |
| chr12:6859013-6859932     | exonic   | MLF2     | 12 | 6859013   | 6859932   | 0 | 0 | 1 | 2 | 0 | 0 | 919   | 0.409891796 | -0.589023111 | 4.038815297 | -0.145840567 | 0.884047251 | 0.998252924 |
| chr12:96688776-96694138   | exonic   | CDK17    | 12 | 96688776  | 96694138  | 0 | 0 | 1 | 2 | 0 | 0 | 5362  | 0.409891796 | -0.589023111 | 4.038815297 | -0.145840567 | 0.884047251 | 0.998252924 |
| chr13:20325410-20333558   | exonic   | PSPC1    | 13 | 20325410  | 20333558  | 1 | 0 | 0 | 2 | 0 | 0 | 8148  | 0.341609713 | -0.589023111 | 4.038815297 | -0.145840567 | 0.884047251 | 0.998252924 |
| chr13:21148518-21166543   | exonic   | IFT88    | 13 | 21148518  | 21166543  | 0 | 1 | 0 | 2 | 0 | 0 | 18025 | 0.386898569 | -0.589023111 | 4.038815297 | -0.145840567 | 0.884047251 | 0.998252924 |
| chr13:77713330-77715078   | exonic   | MYCBP2   | 13 | 77713330  | 77715078  | 0 | 0 | 1 | 2 | 0 | 0 | 1748  | 0.409891796 | -0.589023111 | 4.038815297 | -0.145840567 | 0.884047251 | 0.998252924 |
| chr14:23419522-23421892   | exonic   | HAUS4    | 14 | 23419522  | 23421892  | 0 | 1 | 0 | 2 | 0 | 0 | 2370  | 0.386898569 | -0.589023111 | 4.038815297 | -0.145840567 | 0.884047251 | 0.998252924 |
| chr14:31816953-31844174   | exonic   | HEATR5A  | 14 | 31816953  | 31844174  | 0 | 1 | 0 | 2 | 0 | 0 | 27221 | 0.386898569 | -0.589023111 | 4.038815297 | -0.145840567 | 0.884047251 | 0.998252924 |
| chr14:35515710-35522657   | exonic   | FAM177A1 | 14 | 35515710  | 35522657  | 0 | 1 | 0 | 2 | 0 | 0 | 6947  | 0.386898569 | -0.589023111 | 4.038815297 | -0.145840567 | 0.884047251 | 0.998252924 |
| chr14:45711236-45716580   | exonic   | MIS18BP1 | 14 | 45711236  | 45716580  | 0 | 1 | 0 | 2 | 0 | 0 | 5344  | 0.386898569 | -0.589023111 | 4.038815297 | -0.145840567 | 0.884047251 | 0.998252924 |
| chr14:50175876-50190670   | exonic   | KLHDC1   | 14 | 50175876  | 50190670  | 0 | 0 | 1 | 2 | 0 | 0 | 14794 | 0.409891796 | -0.589023111 | 4.038815297 | -0.145840567 | 0.884047251 | 0.998252924 |
| chr14:50175876-50192487   | exonic   | KLHDC1   | 14 | 50175876  | 50192487  | 1 | 0 | 0 | 2 | 0 | 0 | 16611 | 0.341609713 | -0.589023111 | 4.038815297 | -0.145840567 | 0.884047251 | 0.998252924 |
| chr14:59954391-59965626   | exonic   | JKAMP    | 14 | 59954391  | 59965626  | 0 | 1 | 0 | 2 | 0 | 0 | 11235 | 0.386898569 | -0.589023111 | 4.038815297 | -0.145840567 | 0.884047251 | 0.998252924 |
| chr14:72085473-72139339   | exonic   | SIPA1L1  | 14 | 72085473  | 72139339  | 0 | 1 | 0 | 2 | 0 | 0 | 53866 | 0.386898569 | -0.589023111 | 4.038815297 | -0.145840567 | 0.884047251 | 0.998252924 |
| chr14:74121549-74138300   | exonic   | DNAL1    | 14 | 74121549  | 74138300  | 0 | 1 | 0 | 2 | 0 | 0 | 16751 | 0.386898569 | -0.589023111 | 4.038815297 | -0.145840567 | 0.884047251 | 0.998252924 |

|                           |              |                  |    |           |           |   |   |   |   |   |   |       |             |              |             |              |             |             |
|---------------------------|--------------|------------------|----|-----------|-----------|---|---|---|---|---|---|-------|-------------|--------------|-------------|--------------|-------------|-------------|
| chr14:74420137-74422631   | exonic       | COQ6             | 14 | 74420137  | 74422631  | 0 | 1 | 0 | 2 | 0 | 0 | 2494  | 0.386898569 | -0.589023111 | 4.038815297 | -0.145840567 | 0.884047251 | 0.998252924 |
| chr14:91779423-91780494   | exonic       | CCDC88C          | 14 | 91779423  | 91780494  | 1 | 0 | 0 | 2 | 0 | 0 | 1071  | 0.341609713 | -0.589023111 | 4.038815297 | -0.145840567 | 0.884047251 | 0.998252924 |
| chr15:100185765-100215663 | exonic       | MEF2A            | 15 | 100185765 | 100215663 | 1 | 0 | 0 | 2 | 0 | 0 | 29898 | 0.341609713 | -0.589023111 | 4.038815297 | -0.145840567 | 0.884047251 | 0.998252924 |
| chr15:100211527-100230633 | exonic       | MEF2A            | 15 | 100211527 | 100230633 | 0 | 0 | 1 | 2 | 0 | 0 | 19106 | 0.409891796 | -0.589023111 | 4.038815297 | -0.145840567 | 0.884047251 | 0.998252924 |
| chr15:100672211-100739628 | exonic       | ADAMTS17         | 15 | 100672211 | 100739628 | 1 | 0 | 0 | 2 | 0 | 0 | 67417 | 0.341609713 | -0.589023111 | 4.038815297 | -0.145840567 | 0.884047251 | 0.998252924 |
| chr15:30058468-30092905   | exonic       | TJP1             | 15 | 30058468  | 30092905  | 2 | 0 | 0 | 8 | 0 | 0 | 34437 | 0.341609713 | -0.589023111 | 4.038815297 | -0.145840567 | 0.884047251 | 0.998252924 |
| chr15:33445248-33447246   | exonic       | FMN1             | 15 | 33445248  | 33447246  | 0 | 1 | 0 | 2 | 0 | 0 | 1998  | 0.386898569 | -0.589023111 | 4.038815297 | -0.145840567 | 0.884047251 | 0.998252924 |
| chr15:40231705-40258044   | exonic       | EIF2AK4          | 15 | 40231705  | 40258044  | 0 | 0 | 1 | 2 | 0 | 0 | 26339 | 0.409891796 | -0.589023111 | 4.038815297 | -0.145840567 | 0.884047251 | 0.998252924 |
| chr15:41365625-41372102   | exonic       | INO80            | 15 | 41365625  | 41372102  | 1 | 0 | 0 | 2 | 0 | 0 | 6477  | 0.341609713 | -0.589023111 | 4.038815297 | -0.145840567 | 0.884047251 | 0.998252924 |
| chr15:45951104-45968508   | exonic       | SQRDL            | 15 | 45951104  | 45968508  | 0 | 1 | 0 | 2 | 0 | 0 | 17404 | 0.386898569 | -0.589023111 | 4.038815297 | -0.145840567 | 0.884047251 | 0.998252924 |
| chr15:66021409-66053776   | exonic       | DENND4A          | 15 | 66021409  | 66053776  | 0 | 0 | 1 | 2 | 0 | 0 | 32367 | 0.409891796 | -0.589023111 | 4.038815297 | -0.145840567 | 0.884047251 | 0.998252924 |
| chr15:66048477-66048810   | exonic       | DENND4A          | 15 | 66048477  | 66048810  | 0 | 0 | 1 | 2 | 0 | 0 | 333   | 0.409891796 | -0.589023111 | 4.038815297 | -0.145840567 | 0.884047251 | 0.998252924 |
| chr15:69629679-69652470   | exonic       | PAQR5            | 15 | 69629679  | 69652470  | 1 | 0 | 0 | 2 | 0 | 0 | 22791 | 0.341609713 | -0.589023111 | 4.038815297 | -0.145840567 | 0.884047251 | 0.998252924 |
| chr15:91150609-91172764   | exonic       | CRTC3            | 15 | 91150609  | 91172764  | 1 | 0 | 0 | 2 | 0 | 0 | 22155 | 0.341609713 | -0.589023111 | 4.038815297 | -0.145840567 | 0.884047251 | 0.998252924 |
| chr15:93467550-93510743   | exonic       | CHD2             | 15 | 93467550  | 93510743  | 1 | 0 | 0 | 2 | 0 | 0 | 43193 | 0.341609713 | -0.589023111 | 4.038815297 | -0.145840567 | 0.884047251 | 0.998252924 |
| chr15:96813076-96834012   | ncRNA_exonic | NR2F2-AS1        | 15 | 96813076  | 96834012  | 1 | 0 | 0 | 2 | 0 | 0 | 20936 | 0.341609713 | -0.589023111 | 4.038815297 | -0.145840567 | 0.884047251 | 0.998252924 |
| chr16:22162015-22163955   | exonic       | VWA3A            | 16 | 22162015  | 22163955  | 0 | 0 | 1 | 2 | 0 | 0 | 1940  | 0.409891796 | -0.589023111 | 4.038815297 | -0.145840567 | 0.884047251 | 0.998252924 |
| chr16:23494243-23498111   | exonic       | GGA2             | 16 | 23494243  | 23498111  | 1 | 0 | 0 | 2 | 0 | 0 | 3868  | 0.341609713 | -0.589023111 | 4.038815297 | -0.145840567 | 0.884047251 | 0.998252924 |
| chr16:28163979-28167848   | exonic       | XPO6             | 16 | 28163979  | 28167848  | 0 | 1 | 0 | 2 | 0 | 0 | 3869  | 0.386898569 | -0.589023111 | 4.038815297 | -0.145840567 | 0.884047251 | 0.998252924 |
| chr16:29472702-29473271   | exonic       | SULT1A3, SULT1A4 | 16 | 29472702  | 29473271  | 0 | 1 | 0 | 2 | 0 | 0 | 569   | 0.386898569 | -0.589023111 | 4.038815297 | -0.145840567 | 0.884047251 | 0.998252924 |
| chr16:425132-426812       | exonic       | TMEM8A           | 16 | 425132    | 426812    | 1 | 0 | 0 | 2 | 0 | 0 | 1680  | 0.341609713 | -0.589023111 | 4.038815297 | -0.145840567 | 0.884047251 | 0.998252924 |
| chr16:68087466-68088520   | exonic       | DUS2             | 16 | 68087466  | 68088520  | 0 | 1 | 0 | 2 | 0 | 0 | 1054  | 0.386898569 | -0.589023111 | 4.038815297 | -0.145840567 | 0.884047251 | 0.998252924 |
| chr16:71712657-71715808   | exonic       | PHLPP2           | 16 | 71712657  | 71715808  | 1 | 0 | 0 | 2 | 0 | 0 | 3151  | 0.341609713 | -0.589023111 | 4.038815297 | -0.145840567 | 0.884047251 | 0.998252924 |
| chr16:74491771-74505184   | exonic       | GLG1             | 16 | 74491771  | 74505184  | 1 | 0 | 0 | 2 | 0 | 0 | 13413 | 0.341609713 | -0.589023111 | 4.038815297 | -0.145840567 | 0.884047251 | 0.998252924 |
| chr16:81957089-81962229   | exonic       | PLCG2            | 16 | 81957089  | 81962229  | 0 | 1 | 0 | 2 | 0 | 0 | 5140  | 0.386898569 | -0.589023111 | 4.038815297 | -0.145840567 | 0.884047251 | 0.998252924 |
| chr16:85701745-85704704   | exonic       | GSE1             | 16 | 85701745  | 85704704  | 1 | 0 | 0 | 2 | 0 | 0 | 2959  | 0.341609713 | -0.589023111 | 4.038815297 | -0.145840567 | 0.884047251 | 0.998252924 |
| chr16:89756960-89759734   | exonic       | CDK10            | 16 | 89756960  | 89759734  | 1 | 0 | 0 | 2 | 0 | 0 | 2774  | 0.341609713 | -0.589023111 | 4.038815297 | -0.145840567 | 0.884047251 | 0.998252924 |
| chr17:16062073-16068475   | exonic       | NCOR1            | 17 | 16062073  | 16068475  | 0 | 1 | 0 | 2 | 0 | 0 | 6402  | 0.386898569 | -0.589023111 | 4.038815297 | -0.145840567 | 0.884047251 | 0.998252924 |
| chr17:25631805-25638642   | exonic       | WSB1             | 17 | 25631805  | 25638642  | 1 | 0 | 0 | 2 | 0 | 0 | 6837  | 0.341609713 | -0.589023111 | 4.038815297 | -0.145840567 | 0.884047251 | 0.998252924 |
| chr17:28934569-28937960   | ncRNA_exonic | LRRC37BP1        | 17 | 28934569  | 28937960  | 0 | 0 | 1 | 2 | 0 | 0 | 3391  | 0.409891796 | -0.589023111 | 4.038815297 | -0.145840567 | 0.884047251 | 0.998252924 |
| chr17:29112936-29131126   | exonic       | CRLF3            | 17 | 29112936  | 29131126  | 1 | 0 | 0 | 2 | 0 | 0 | 18190 | 0.341609713 | -0.589023111 | 4.038815297 | -0.145840567 | 0.884047251 | 0.998252924 |
| chr17:45447802-45455269   | exonic       | EFCAB13          | 17 | 45447802  | 45455269  | 0 | 0 | 1 | 2 | 0 | 0 | 7467  | 0.409891796 | -0.589023111 | 4.038815297 | -0.145840567 | 0.884047251 | 0.998252924 |
| chr17:57987922-58018304   | exonic       | RPS6KB1          | 17 | 57987922  | 58018304  | 0 | 1 | 0 | 2 | 0 | 0 | 30382 | 0.386898569 | -0.589023111 | 4.038815297 | -0.145840567 | 0.884047251 | 0.998252924 |
| chr17:59996760-60002460   | exonic       | INTS2            | 17 | 59996760  | 60002460  | 0 | 0 | 1 | 2 | 0 | 0 | 5700  | 0.409891796 | -0.589023111 | 4.038815297 | -0.145840567 | 0.884047251 | 0.998252924 |
| chr17:62517519-62519013   | exonic       | CEP95            | 17 | 62517519  | 62519013  | 0 | 1 | 0 | 2 | 0 | 0 | 1494  | 0.386898569 | -0.589023111 | 4.038815297 | -0.145840567 | 0.884047251 | 0.998252924 |

|                          |        |          |    |           |           |   |   |   |   |   |   |       |             |              |             |              |             |             |
|--------------------------|--------|----------|----|-----------|-----------|---|---|---|---|---|---|-------|-------------|--------------|-------------|--------------|-------------|-------------|
| chr17:64728805-64785097  | exonic | PRKCA    | 17 | 64728805  | 64785097  | 1 | 0 | 0 | 2 | 0 | 0 | 56292 | 0.341609713 | -0.589023111 | 4.038815297 | -0.145840567 | 0.884047251 | 0.998252924 |
| chr17:65914829-65972074  | exonic | BPTF     | 17 | 65914829  | 65972074  | 0 | 0 | 1 | 2 | 0 | 0 | 57245 | 0.409891796 | -0.589023111 | 4.038815297 | -0.145840567 | 0.884047251 | 0.998252924 |
| chr17:6663724-6674303    | exonic | XAF1     | 17 | 6663724   | 6674303   | 1 | 0 | 0 | 2 | 0 | 0 | 10579 | 0.341609713 | -0.589023111 | 4.038815297 | -0.145840567 | 0.884047251 | 0.998252924 |
| chr17:66982304-66986071  | exonic | ABCA9    | 17 | 66982304  | 66986071  | 1 | 0 | 0 | 2 | 0 | 0 | 3767  | 0.341609713 | -0.589023111 | 4.038815297 | -0.145840567 | 0.884047251 | 0.998252924 |
| chr17:78896523-78899280  | exonic | RPTOR    | 17 | 78896523  | 78899280  | 1 | 0 | 0 | 2 | 0 | 0 | 2757  | 0.341609713 | -0.589023111 | 4.038815297 | -0.145840567 | 0.884047251 | 0.998252924 |
| chr18:10759479-10773627  | exonic | PIEZO2   | 18 | 10759479  | 10773627  | 0 | 1 | 0 | 2 | 0 | 0 | 14148 | 0.386898569 | -0.589023111 | 4.038815297 | -0.145840567 | 0.884047251 | 0.998252924 |
| chr18:685920-694334      | exonic | ENOSF1   | 18 | 685920    | 694334    | 0 | 1 | 0 | 2 | 0 | 0 | 8414  | 0.386898569 | -0.589023111 | 4.038815297 | -0.145840567 | 0.884047251 | 0.998252924 |
| chr18:74778253-74817242  | exonic | MBP      | 18 | 74778253  | 74817242  | 1 | 0 | 0 | 2 | 0 | 0 | 38989 | 0.341609713 | -0.589023111 | 4.038815297 | -0.145840567 | 0.884047251 | 0.998252924 |
| chr19:10748319-10748991  | exonic | SLC44A2  | 19 | 10748319  | 10748991  | 0 | 1 | 0 | 2 | 0 | 0 | 672   | 0.386898569 | -0.589023111 | 4.038815297 | -0.145840567 | 0.884047251 | 0.998252924 |
| chr19:17267718-17273932  | exonic | MYO9B    | 19 | 17267718  | 17273932  | 0 | 0 | 1 | 2 | 0 | 0 | 6214  | 0.409891796 | -0.589023111 | 4.038815297 | -0.145840567 | 0.884047251 | 0.998252924 |
| chr19:38621137-38621412  | exonic | SIPA1L3  | 19 | 38621137  | 38621412  | 0 | 1 | 0 | 2 | 0 | 0 | 275   | 0.386898569 | -0.589023111 | 4.038815297 | -0.145840567 | 0.884047251 | 0.998252924 |
| chr19:48653019-48654596  | exonic | LIG1     | 19 | 48653019  | 48654596  | 1 | 0 | 0 | 2 | 0 | 0 | 1577  | 0.341609713 | -0.589023111 | 4.038815297 | -0.145840567 | 0.884047251 | 0.998252924 |
| chr19:5650988-5654467    | exonic | SAFB     | 19 | 5650988   | 5654467   | 0 | 0 | 1 | 2 | 0 | 0 | 3479  | 0.409891796 | -0.589023111 | 4.038815297 | -0.145840567 | 0.884047251 | 0.998252924 |
| chr2:158655938-158675071 | exonic | ACVR1    | 2  | 158655938 | 158675071 | 1 | 0 | 0 | 2 | 0 | 0 | 19133 | 0.341609713 | -0.589023111 | 4.038815297 | -0.145840567 | 0.884047251 | 0.998252924 |
| chr2:160194077-160252345 | exonic | BAZ2B    | 2  | 160194077 | 160252345 | 0 | 0 | 1 | 2 | 0 | 0 | 58268 | 0.409891796 | -0.589023111 | 4.038815297 | -0.145840567 | 0.884047251 | 0.998252924 |
| chr2:165378489-165404326 | exonic | GRB14    | 2  | 165378489 | 165404326 | 0 | 0 | 1 | 2 | 0 | 0 | 25837 | 0.409891796 | -0.589023111 | 4.038815297 | -0.145840567 | 0.884047251 | 0.998252924 |
| chr2:170460151-170471234 | exonic | PPIG     | 2  | 170460151 | 170471234 | 0 | 0 | 1 | 2 | 0 | 0 | 11083 | 0.409891796 | -0.589023111 | 4.038815297 | -0.145840567 | 0.884047251 | 0.998252924 |
| chr2:178305692-178326746 | exonic | AGPS     | 2  | 178305692 | 178326746 | 0 | 1 | 0 | 2 | 0 | 0 | 21054 | 0.386898569 | -0.589023111 | 4.038815297 | -0.145840567 | 0.884047251 | 0.998252924 |
| chr2:197157288-197172809 | exonic | HECW2    | 2  | 197157288 | 197172809 | 0 | 0 | 1 | 2 | 0 | 0 | 15521 | 0.409891796 | -0.589023111 | 4.038815297 | -0.145840567 | 0.884047251 | 0.998252924 |
| chr2:203650640-203684622 | exonic | ICAIL    | 2  | 203650640 | 203684622 | 1 | 0 | 0 | 2 | 0 | 0 | 33982 | 0.341609713 | -0.589023111 | 4.038815297 | -0.145840567 | 0.884047251 | 0.998252924 |
| chr2:203921149-203949292 | exonic | NBEAL1   | 2  | 203921149 | 203949292 | 0 | 1 | 0 | 2 | 0 | 0 | 28143 | 0.386898569 | -0.589023111 | 4.038815297 | -0.145840567 | 0.884047251 | 0.998252924 |
| chr2:204058517-204078376 | exonic | NBEAL1   | 2  | 204058517 | 204078376 | 1 | 0 | 0 | 2 | 0 | 0 | 19859 | 0.341609713 | -0.589023111 | 4.038815297 | -0.145840567 | 0.884047251 | 0.998252924 |
| chr2:206023445-206050587 | exonic | PARD3B   | 2  | 206023445 | 206050587 | 1 | 0 | 0 | 2 | 0 | 0 | 27142 | 0.341609713 | -0.589023111 | 4.038815297 | -0.145840567 | 0.884047251 | 0.998252924 |
| chr2:242181874-242189395 | exonic | HDLBP    | 2  | 242181874 | 242189395 | 1 | 0 | 0 | 2 | 0 | 0 | 7521  | 0.341609713 | -0.589023111 | 4.038815297 | -0.145840567 | 0.884047251 | 0.998252924 |
| chr2:27900161-27905226   | exonic | SLC4A1AP | 2  | 27900161  | 27905226  | 1 | 0 | 0 | 2 | 0 | 0 | 5065  | 0.341609713 | -0.589023111 | 4.038815297 | -0.145840567 | 0.884047251 | 0.998252924 |
| chr2:32602655-32670736   | exonic | BIRC6    | 2  | 32602655  | 32670736  | 1 | 0 | 0 | 2 | 0 | 0 | 68081 | 0.341609713 | -0.589023111 | 4.038815297 | -0.145840567 | 0.884047251 | 0.998252924 |
| chr2:32639836-32641231   | exonic | BIRC6    | 2  | 32639836  | 32641231  | 0 | 1 | 0 | 2 | 0 | 0 | 1395  | 0.386898569 | -0.589023111 | 4.038815297 | -0.145840567 | 0.884047251 | 0.998252924 |
| chr2:33505105-33540336   | exonic | LTBP1    | 2  | 33505105  | 33540336  | 1 | 0 | 0 | 2 | 0 | 0 | 35231 | 0.341609713 | -0.589023111 | 4.038815297 | -0.145840567 | 0.884047251 | 0.998252924 |
| chr2:37227728-37229715   | exonic | HEATR5B  | 2  | 37227728  | 37229715  | 1 | 0 | 0 | 2 | 0 | 0 | 1987  | 0.341609713 | -0.589023111 | 4.038815297 | -0.145840567 | 0.884047251 | 0.998252924 |
| chr2:39029856-39033835   | exonic | DHX57    | 2  | 39029856  | 39033835  | 1 | 0 | 0 | 2 | 0 | 0 | 3979  | 0.341609713 | -0.589023111 | 4.038815297 | -0.145840567 | 0.884047251 | 0.998252924 |
| chr2:39499423-39507497   | exonic | MAP4K3   | 2  | 39499423  | 39507497  | 0 | 0 | 1 | 2 | 0 | 0 | 8074  | 0.409891796 | -0.589023111 | 4.038815297 | -0.145840567 | 0.884047251 | 0.998252924 |
| chr2:39505547-39514105   | exonic | MAP4K3   | 2  | 39505547  | 39514105  | 0 | 1 | 0 | 2 | 0 | 0 | 8558  | 0.386898569 | -0.589023111 | 4.038815297 | -0.145840567 | 0.884047251 | 0.998252924 |
| chr2:39513992-39517475   | exonic | MAP4K3   | 2  | 39513992  | 39517475  | 0 | 0 | 1 | 2 | 0 | 0 | 3483  | 0.409891796 | -0.589023111 | 4.038815297 | -0.145840567 | 0.884047251 | 0.998252924 |
| chr2:69575302-69577315   | exonic | GFPT1    | 2  | 69575302  | 69577315  | 0 | 1 | 0 | 2 | 0 | 0 | 2013  | 0.386898569 | -0.589023111 | 4.038815297 | -0.145840567 | 0.884047251 | 0.998252924 |
| chr2:73215386-73228707   | exonic | SFXN5    | 2  | 73215386  | 73228707  | 0 | 1 | 0 | 2 | 0 | 0 | 13321 | 0.386898569 | -0.589023111 | 4.038815297 | -0.145840567 | 0.884047251 | 0.998252924 |

|                          |              |           |    |           |           |   |   |   |   |   |   |        |             |              |             |              |             |             |
|--------------------------|--------------|-----------|----|-----------|-----------|---|---|---|---|---|---|--------|-------------|--------------|-------------|--------------|-------------|-------------|
| chr2:8427467-8439923     | ncRNA_exonic | LINCO0299 | 2  | 8427467   | 8439923   | 0 | 1 | 0 | 2 | 0 | 0 | 12456  | 0.386898569 | -0.589023111 | 4.038815297 | -0.145840567 | 0.884047251 | 0.998252924 |
| chr2:98797478-98810955   | exonic       | VWA3B     | 2  | 98797478  | 98810955  | 1 | 0 | 0 | 2 | 0 | 0 | 13477  | 0.341609713 | -0.589023111 | 4.038815297 | -0.145840567 | 0.884047251 | 0.998252924 |
| chr20:34450934-34457473  | exonic       | PHF20     | 20 | 34450934  | 34457473  | 1 | 0 | 0 | 2 | 0 | 0 | 6539   | 0.341609713 | -0.589023111 | 4.038815297 | -0.145840567 | 0.884047251 | 0.998252924 |
| chr20:58486804-58497514  | exonic       | SYCP2     | 20 | 58486804  | 58497514  | 1 | 0 | 0 | 2 | 0 | 0 | 10710  | 0.341609713 | -0.589023111 | 4.038815297 | -0.145840567 | 0.884047251 | 0.998252924 |
| chr21:27326903-27372497  | exonic       | APP       | 21 | 27326903  | 27372497  | 1 | 0 | 0 | 2 | 0 | 0 | 45594  | 0.341609713 | -0.589023111 | 4.038815297 | -0.145840567 | 0.884047251 | 0.998252924 |
| chr22:26074782-26091181  | exonic       | ADRBK2    | 22 | 26074782  | 26091181  | 0 | 1 | 0 | 2 | 0 | 0 | 16399  | 0.386898569 | -0.589023111 | 4.038815297 | -0.145840567 | 0.884047251 | 0.998252924 |
| chr22:26105864-26110537  | exonic       | ADRBK2    | 22 | 26105864  | 26110537  | 1 | 0 | 0 | 2 | 0 | 0 | 4673   | 0.341609713 | -0.589023111 | 4.038815297 | -0.145840567 | 0.884047251 | 0.998252924 |
| chr22:46088875-46114373  | exonic       | ATXN10    | 22 | 46088875  | 46114373  | 0 | 1 | 0 | 2 | 0 | 0 | 25498  | 0.386898569 | -0.589023111 | 4.038815297 | -0.145840567 | 0.884047251 | 0.998252924 |
| chr3:100103322-100105822 | exonic       | TOMM70A   | 3  | 100103322 | 100105822 | 0 | 1 | 0 | 2 | 0 | 0 | 2500   | 0.386898569 | -0.589023111 | 4.038815297 | -0.145840567 | 0.884047251 | 0.998252924 |
| chr3:100274052-100287811 | exonic       | TMEM45A   | 3  | 100274052 | 100287811 | 0 | 0 | 1 | 2 | 0 | 0 | 13759  | 0.409891796 | -0.589023111 | 4.038815297 | -0.145840567 | 0.884047251 | 0.998252924 |
| chr3:105412337-105439094 | exonic       | CBLB      | 3  | 105412337 | 105439094 | 1 | 0 | 0 | 2 | 0 | 0 | 26757  | 0.341609713 | -0.589023111 | 4.038815297 | -0.145840567 | 0.884047251 | 0.998252924 |
| chr3:107429298-107447807 | exonic       | BBX       | 3  | 107429298 | 107447807 | 1 | 0 | 0 | 9 | 4 | 0 | 18509  | 0.341609713 | -0.589023111 | 4.038815297 | -0.145840567 | 0.884047251 | 0.998252924 |
| chr3:11850990-11871338   | exonic       | TAMM41    | 3  | 11850990  | 11871338  | 1 | 3 | 0 | 1 | 0 | 0 | 20348  | 0.341609713 | -0.589023111 | 4.038815297 | -0.145840567 | 0.884047251 | 0.998252924 |
| chr3:122404031-122414509 | exonic       | PARP14    | 3  | 122404031 | 122414509 | 0 | 0 | 1 | 2 | 0 | 0 | 10478  | 0.409891796 | -0.589023111 | 4.038815297 | -0.145840567 | 0.884047251 | 0.998252924 |
| chr3:122422588-122427115 | exonic       | PARP14    | 3  | 122422588 | 122427115 | 0 | 0 | 1 | 2 | 0 | 0 | 4527   | 0.409891796 | -0.589023111 | 4.038815297 | -0.145840567 | 0.884047251 | 0.998252924 |
| chr3:125279222-125301822 | exonic       | OSBPL11   | 3  | 125279222 | 125301822 | 0 | 1 | 0 | 2 | 0 | 0 | 22600  | 0.386898569 | -0.589023111 | 4.038815297 | -0.145840567 | 0.884047251 | 0.998252924 |
| chr3:126189737-126191148 | exonic       | ZXDC      | 3  | 126189737 | 126191148 | 1 | 0 | 0 | 2 | 0 | 0 | 1411   | 0.341609713 | -0.589023111 | 4.038815297 | -0.145840567 | 0.884047251 | 0.998252924 |
| chr3:133666099-133672605 | exonic       | SLCO2A1   | 3  | 133666099 | 133672605 | 0 | 1 | 0 | 2 | 0 | 0 | 6506   | 0.386898569 | -0.589023111 | 4.038815297 | -0.145840567 | 0.884047251 | 0.998252924 |
| chr3:154832782-154836600 | exonic       | MME       | 3  | 154832782 | 154836600 | 1 | 0 | 0 | 2 | 0 | 0 | 3818   | 0.341609713 | -0.589023111 | 4.038815297 | -0.145840567 | 0.884047251 | 0.998252924 |
| chr3:170875248-170912424 | exonic       | TNIK      | 3  | 170875248 | 170912424 | 1 | 0 | 0 | 2 | 0 | 0 | 37176  | 0.341609713 | -0.589023111 | 4.038815297 | -0.145840567 | 0.884047251 | 0.998252924 |
| chr3:17413566-17425507   | exonic       | TBC1D5    | 3  | 17413566  | 17425507  | 0 | 0 | 1 | 2 | 0 | 0 | 11941  | 0.409891796 | -0.589023111 | 4.038815297 | -0.145840567 | 0.884047251 | 0.998252924 |
| chr3:191074876-191100614 | exonic       | CCDC50    | 3  | 191074876 | 191100614 | 1 | 0 | 0 | 2 | 0 | 0 | 25738  | 0.341609713 | -0.589023111 | 4.038815297 | -0.145840567 | 0.884047251 | 0.998252924 |
| chr3:195605123-195613918 | exonic       | TNK2      | 3  | 195605123 | 195613918 | 1 | 0 | 0 | 2 | 0 | 0 | 8795   | 0.341609713 | -0.589023111 | 4.038815297 | -0.145840567 | 0.884047251 | 0.998252924 |
| chr3:20153087-20156480   | exonic       | KAT2B     | 3  | 20153087  | 20156480  | 1 | 0 | 0 | 2 | 0 | 0 | 3393   | 0.341609713 | -0.589023111 | 4.038815297 | -0.145840567 | 0.884047251 | 0.998252924 |
| chr3:33450727-33467233   | exonic       | UBP1      | 3  | 33450727  | 33467233  | 1 | 0 | 0 | 2 | 0 | 0 | 16506  | 0.341609713 | -0.589023111 | 4.038815297 | -0.145840567 | 0.884047251 | 0.998252924 |
| chr3:37136282-37190529   | exonic       | LRRFIP2   | 3  | 37136282  | 37190529  | 0 | 1 | 0 | 2 | 0 | 0 | 54247  | 0.386898569 | -0.589023111 | 4.038815297 | -0.145840567 | 0.884047251 | 0.998252924 |
| chr3:41860914-41977432   | exonic       | ULK4      | 3  | 41860914  | 41977432  | 0 | 1 | 0 | 2 | 0 | 0 | 116518 | 0.386898569 | -0.589023111 | 4.038815297 | -0.145840567 | 0.884047251 | 0.998252924 |
| chr3:42798557-42799843   | exonic       | CCDC13    | 3  | 42798557  | 42799843  | 1 | 0 | 0 | 2 | 0 | 0 | 1286   | 0.341609713 | -0.589023111 | 4.038815297 | -0.145840567 | 0.884047251 | 0.998252924 |
| chr3:47098310-47139571   | exonic       | SETD2     | 3  | 47098310  | 47139571  | 1 | 0 | 0 | 2 | 0 | 0 | 41261  | 0.341609713 | -0.589023111 | 4.038815297 | -0.145840567 | 0.884047251 | 0.998252924 |
| chr3:53886025-53891013   | exonic       | IL17RB    | 3  | 53886025  | 53891013  | 0 | 0 | 1 | 2 | 0 | 0 | 4988   | 0.409891796 | -0.589023111 | 4.038815297 | -0.145840567 | 0.884047251 | 0.998252924 |
| chr3:65415194-65439015   | exonic       | MAG11     | 3  | 65415194  | 65439015  | 0 | 1 | 0 | 2 | 0 | 0 | 23821  | 0.386898569 | -0.589023111 | 4.038815297 | -0.145840567 | 0.884047251 | 0.998252924 |
| chr4:103501691-103504114 | exonic       | NFKB1     | 4  | 103501691 | 103504114 | 0 | 0 | 1 | 2 | 0 | 0 | 2423   | 0.409891796 | -0.589023111 | 4.038815297 | -0.145840567 | 0.884047251 | 0.998252924 |
| chr4:110412482-110437796 | exonic       | SEC24B    | 4  | 110412482 | 110437796 | 1 | 0 | 0 | 2 | 0 | 0 | 25314  | 0.341609713 | -0.589023111 | 4.038815297 | -0.145840567 | 0.884047251 | 0.998252924 |
| chr4:120138704-120177678 | exonic       | USP53     | 4  | 120138704 | 120177678 | 1 | 0 | 0 | 2 | 0 | 0 | 38974  | 0.341609713 | -0.589023111 | 4.038815297 | -0.145840567 | 0.884047251 | 0.998252924 |
| chr4:140624608-140625350 | exonic       | MGST2     | 4  | 140624608 | 140625350 | 0 | 0 | 1 | 2 | 0 | 0 | 742    | 0.409891796 | -0.589023111 | 4.038815297 | -0.145840567 | 0.884047251 | 0.998252924 |

|                          |              |                         |   |           |           |   |   |   |   |   |   |        |             |              |             |              |             |             |
|--------------------------|--------------|-------------------------|---|-----------|-----------|---|---|---|---|---|---|--------|-------------|--------------|-------------|--------------|-------------|-------------|
| chr4:144354643-144387378 | exonic       | GAB1                    | 4 | 144354643 | 144387378 | 0 | 1 | 0 | 2 | 0 | 0 | 32735  | 0.386898569 | -0.589023111 | 4.038815297 | -0.145840567 | 0.884047251 | 0.998252924 |
| chr4:148827788-148876525 | exonic       | ARHGAP10                | 4 | 148827788 | 148876525 | 1 | 0 | 0 | 2 | 0 | 0 | 48737  | 0.341609713 | -0.589023111 | 4.038815297 | -0.145840567 | 0.884047251 | 0.998252924 |
| chr4:159789253-159791621 | exonic       | FNIP2                   | 4 | 159789253 | 159791621 | 1 | 0 | 0 | 2 | 0 | 0 | 2368   | 0.341609713 | -0.589023111 | 4.038815297 | -0.145840567 | 0.884047251 | 0.998252924 |
| chr4:175180849-175184251 | exonic       | FBX08                   | 4 | 175180849 | 175184251 | 0 | 0 | 1 | 2 | 0 | 0 | 3402   | 0.409891796 | -0.589023111 | 4.038815297 | -0.145840567 | 0.884047251 | 0.998252924 |
| chr4:184190123-184192394 | exonic       | WWC2                    | 4 | 184190123 | 184192394 | 0 | 1 | 0 | 2 | 0 | 0 | 2271   | 0.386898569 | -0.589023111 | 4.038815297 | -0.145840567 | 0.884047251 | 0.998252924 |
| chr4:2181034-2230970     | exonic       | POLN                    | 4 | 2181034   | 2230970   | 0 | 1 | 0 | 2 | 0 | 0 | 49936  | 0.386898569 | -0.589023111 | 4.038815297 | -0.145840567 | 0.884047251 | 0.998252924 |
| chr4:3188323-3201666     | exonic       | HTT                     | 4 | 3188323   | 3201666   | 1 | 0 | 0 | 2 | 0 | 0 | 13343  | 0.341609713 | -0.589023111 | 4.038815297 | -0.145840567 | 0.884047251 | 0.998252924 |
| chr4:38055819-38104778   | exonic       | TBC1D1                  | 4 | 38055819  | 38104778  | 0 | 0 | 1 | 2 | 0 | 0 | 48959  | 0.409891796 | -0.589023111 | 4.038815297 | -0.145840567 | 0.884047251 | 0.998252924 |
| chr4:79186178-79188586   | exonic       | FRAS1                   | 4 | 79186178  | 79188586  | 0 | 1 | 0 | 2 | 0 | 0 | 2408   | 0.386898569 | -0.589023111 | 4.038815297 | -0.145840567 | 0.884047251 | 0.998252924 |
| chr4:88983057-88989213   | exonic       | PKD2                    | 4 | 88983057  | 88989213  | 0 | 0 | 1 | 2 | 0 | 0 | 6156   | 0.409891796 | -0.589023111 | 4.038815297 | -0.145840567 | 0.884047251 | 0.998252924 |
| chr5:112418556-112421007 | exonic       | MCC                     | 5 | 112418556 | 112421007 | 0 | 0 | 1 | 2 | 0 | 0 | 2451   | 0.409891796 | -0.589023111 | 4.038815297 | -0.145840567 | 0.884047251 | 0.998252924 |
| chr5:139884405-139885454 | exonic       | ANKHD1, ANKHD1-EIF4EBP3 | 5 | 139884405 | 139885454 | 0 | 0 | 1 | 2 | 0 | 0 | 1049   | 0.409891796 | -0.589023111 | 4.038815297 | -0.145840567 | 0.884047251 | 0.998252924 |
| chr5:154210360-154217738 | exonic       | FAXDC2                  | 5 | 154210360 | 154217738 | 1 | 0 | 0 | 2 | 0 | 0 | 7378   | 0.341609713 | -0.589023111 | 4.038815297 | -0.145840567 | 0.884047251 | 0.998252924 |
| chr5:38493707-38530768   | exonic       | LIFR                    | 5 | 38493707  | 38530768  | 2 | 1 | 0 | 2 | 0 | 0 | 37061  | 0.386898569 | -0.589023111 | 4.038815297 | -0.145840567 | 0.884047251 | 0.998252924 |
| chr5:43292575-43297268   | exonic       | HMGCS1                  | 5 | 43292575  | 43297268  | 1 | 0 | 0 | 2 | 0 | 0 | 4693   | 0.341609713 | -0.589023111 | 4.038815297 | -0.145840567 | 0.884047251 | 0.998252924 |
| chr5:78251117-78265015   | exonic       | ARSB                    | 5 | 78251117  | 78265015  | 0 | 1 | 0 | 2 | 0 | 0 | 13898  | 0.386898569 | -0.589023111 | 4.038815297 | -0.145840567 | 0.884047251 | 0.998252924 |
| chr5:95084036-95124562   | exonic       | RHOBTB3                 | 5 | 95084036  | 95124562  | 0 | 0 | 1 | 2 | 0 | 0 | 40526  | 0.409891796 | -0.589023111 | 4.038815297 | -0.145840567 | 0.884047251 | 0.998252924 |
| chr6:21783862-21979291   | ncRNA_exonic | CASC15                  | 6 | 21783862  | 21979291  | 1 | 0 | 0 | 2 | 0 | 0 | 195429 | 0.341609713 | -0.589023111 | 4.038815297 | -0.145840567 | 0.884047251 | 0.998252924 |
| chr6:28327301-28329248   | exonic       | ZKSCAN3                 | 6 | 28327301  | 28329248  | 0 | 1 | 0 | 2 | 0 | 0 | 1947   | 0.386898569 | -0.589023111 | 4.038815297 | -0.145840567 | 0.884047251 | 0.998252924 |
| chr6:32171546-32172166   | exonic       | NOTCH4                  | 6 | 32171546  | 32172166  | 0 | 1 | 0 | 2 | 0 | 0 | 620    | 0.386898569 | -0.589023111 | 4.038815297 | -0.145840567 | 0.884047251 | 0.998252924 |
| chr6:42630995-42647570   | exonic       | UBR2                    | 6 | 42630995  | 42647570  | 1 | 0 | 0 | 2 | 0 | 0 | 16575  | 0.341609713 | -0.589023111 | 4.038815297 | -0.145840567 | 0.884047251 | 0.998252924 |
| chr6:45459677-45480144   | exonic       | RUNX2                   | 6 | 45459677  | 45480144  | 1 | 0 | 0 | 2 | 0 | 0 | 20467  | 0.341609713 | -0.589023111 | 4.038815297 | -0.145840567 | 0.884047251 | 0.998252924 |
| chr7:102760023-102769239 | exonic       | NAPEPLD                 | 7 | 102760023 | 102769239 | 0 | 1 | 0 | 2 | 0 | 0 | 9216   | 0.386898569 | -0.589023111 | 4.038815297 | -0.145840567 | 0.884047251 | 0.998252924 |
| chr7:157013382-157041274 | exonic       | UBE3C                   | 7 | 157013382 | 157041274 | 1 | 0 | 0 | 2 | 0 | 0 | 27892  | 0.341609713 | -0.589023111 | 4.038815297 | -0.145840567 | 0.884047251 | 0.998252924 |
| chr7:158672374-158711560 | exonic       | WDR60                   | 7 | 158672374 | 158711560 | 0 | 0 | 1 | 2 | 0 | 0 | 39186  | 0.409891796 | -0.589023111 | 4.038815297 | -0.145840567 | 0.884047251 | 0.998252924 |
| chr7:2269618-2270359     | exonic       | MAD1L1                  | 7 | 2269618   | 2270359   | 0 | 0 | 1 | 2 | 0 | 0 | 741    | 0.409891796 | -0.589023111 | 4.038815297 | -0.145840567 | 0.884047251 | 0.998252924 |
| chr7:26232870-26232993   | exonic       | HNRNPA2B1               | 7 | 26232870  | 26232993  | 0 | 1 | 0 | 2 | 0 | 0 | 123    | 0.386898569 | -0.589023111 | 4.038815297 | -0.145840567 | 0.884047251 | 0.998252924 |
| chr7:73449693-73450914   | exonic       | ELN                     | 7 | 73449693  | 73450914  | 1 | 0 | 0 | 2 | 0 | 0 | 1221   | 0.341609713 | -0.589023111 | 4.038815297 | -0.145840567 | 0.884047251 | 0.998252924 |
| chr7:73770739-73774608   | exonic       | CLIP2                   | 7 | 73770739  | 73774608  | 1 | 0 | 0 | 2 | 0 | 0 | 3869   | 0.341609713 | -0.589023111 | 4.038815297 | -0.145840567 | 0.884047251 | 0.998252924 |
| chr8:103323526-103359320 | exonic       | UBR5                    | 8 | 103323526 | 103359320 | 0 | 1 | 0 | 2 | 0 | 0 | 35794  | 0.386898569 | -0.589023111 | 4.038815297 | -0.145840567 | 0.884047251 | 0.998252924 |
| chr8:131172109-131193126 | exonic       | ASAP1                   | 8 | 131172109 | 131193126 | 1 | 0 | 0 | 2 | 0 | 0 | 21017  | 0.341609713 | -0.589023111 | 4.038815297 | -0.145840567 | 0.884047251 | 0.998252924 |
| chr8:141745349-141900868 | exonic       | PTK2                    | 8 | 141745349 | 141900868 | 0 | 1 | 0 | 2 | 0 | 0 | 155519 | 0.386898569 | -0.589023111 | 4.038815297 | -0.145840567 | 0.884047251 | 0.998252924 |
| chr8:42761315-42814457   | exonic       | HOOK3                   | 8 | 42761315  | 42814457  | 0 | 1 | 0 | 2 | 0 | 0 | 53142  | 0.386898569 | -0.589023111 | 4.038815297 | -0.145840567 | 0.884047251 | 0.998252924 |
| chr8:48508372-48511758   | exonic       | SPIDR                   | 8 | 48508372  | 48511758  | 0 | 1 | 0 | 2 | 0 | 0 | 3386   | 0.386898569 | -0.589023111 | 4.038815297 | -0.145840567 | 0.884047251 | 0.998252924 |
| chr9:127733648-127738465 | exonic       | SCAI                    | 9 | 127733648 | 127738465 | 1 | 0 | 0 | 2 | 0 | 0 | 4817   | 0.341609713 | -0.589023111 | 4.038815297 | -0.145840567 | 0.884047251 | 0.998252924 |

|                           |              |           |    |           |           |    |   |    |    |    |   |       |             |              |             |              |             |             |
|---------------------------|--------------|-----------|----|-----------|-----------|----|---|----|----|----|---|-------|-------------|--------------|-------------|--------------|-------------|-------------|
| chr9:131284946-131289804  | exonic       | GLE1      | 9  | 131284946 | 131289804 | 0  | 0 | 1  | 2  | 0  | 0 | 4858  | 0.409891796 | -0.589023111 | 4.038815297 | -0.145840567 | 0.884047251 | 0.998252924 |
| chr9:33351557-33354890    | exonic       | NFX1      | 9  | 33351557  | 33354890  | 1  | 0 | 0  | 2  | 0  | 0 | 3333  | 0.341609713 | -0.589023111 | 4.038815297 | -0.145840567 | 0.884047251 | 0.998252924 |
| chr9:33960823-34017187    | exonic       | UBAP2     | 9  | 33960823  | 34017187  | 0  | 0 | 1  | 0  | 2  | 0 | 56364 | 0.409891796 | -0.589023111 | 4.038815297 | -0.145840567 | 0.884047251 | 0.998252924 |
| chr9:33971648-33998862    | exonic       | UBAP2     | 9  | 33971648  | 33998862  | 0  | 2 | 0  | 4  | 0  | 0 | 27214 | 0.386898569 | -0.589023111 | 4.038815297 | -0.145840567 | 0.884047251 | 0.998252924 |
| chr9:79952170-79966362    | exonic       | VPS13A    | 9  | 79952170  | 79966362  | 0  | 0 | 1  | 2  | 0  | 0 | 14192 | 0.409891796 | -0.589023111 | 4.038815297 | -0.145840567 | 0.884047251 | 0.998252924 |
| chr9:85924450-85928662    | exonic       | FRMD3     | 9  | 85924450  | 85928662  | 1  | 0 | 0  | 2  | 0  | 0 | 4212  | 0.341609713 | -0.589023111 | 4.038815297 | -0.145840567 | 0.884047251 | 0.998252924 |
| chr9:88233897-88270235    | exonic       | AGTPBP1   | 9  | 88233897  | 88270235  | 1  | 0 | 0  | 2  | 0  | 0 | 36338 | 0.341609713 | -0.589023111 | 4.038815297 | -0.145840567 | 0.884047251 | 0.998252924 |
| chr9:97209104-97218619    | exonic       | MFSD14B   | 9  | 97209104  | 97218619  | 0  | 1 | 0  | 2  | 0  | 0 | 9515  | 0.386898569 | -0.589023111 | 4.038815297 | -0.145840567 | 0.884047251 | 0.998252924 |
| chrX:102071919-102082072  | ncRNA_exonic | LINC00630 | X  | 102071919 | 102082072 | 0  | 1 | 0  | 2  | 0  | 0 | 10153 | 0.386898569 | -0.589023111 | 4.038815297 | -0.145840567 | 0.884047251 | 0.998252924 |
| chrX:1404670-1407781      | exonic       | CSF2RA    | X  | 1404670   | 1407781   | 0  | 1 | 0  | 2  | 0  | 0 | 3111  | 0.386898569 | -0.589023111 | 4.038815297 | -0.145840567 | 0.884047251 | 0.998252924 |
| chrX:154736558-154743926  | exonic       | TMLHE     | X  | 154736558 | 154743926 | 1  | 0 | 0  | 2  | 0  | 0 | 7368  | 0.341609713 | -0.589023111 | 4.038815297 | -0.145840567 | 0.884047251 | 0.998252924 |
| chrX:24828014-24906239    | exonic       | POLA1     | X  | 24828014  | 24906239  | 1  | 0 | 0  | 2  | 0  | 0 | 78225 | 0.341609713 | -0.589023111 | 4.038815297 | -0.145840567 | 0.884047251 | 0.998252924 |
| chrX:47102794-47104881    | exonic       | USP11     | X  | 47102794  | 47104881  | 0  | 0 | 1  | 2  | 0  | 0 | 2087  | 0.409891796 | -0.589023111 | 4.038815297 | -0.145840567 | 0.884047251 | 0.998252924 |
| chr18:9583114-9595100     | exonic       | PPP4R1    | 18 | 9583114   | 9595100   | 10 | 7 | 16 | 32 | 23 | 7 | 11986 | 14.00922972 | -0.588378342 | 0.831637594 | -0.707493681 | 0.479259738 | 0.998252924 |
| chr13:77779390-77818086   | exonic       | MYCBP2    | 13 | 77779390  | 77818086  | 2  | 0 | 4  | 9  | 2  | 1 | 38696 | 2.554125906 | -0.588195756 | 1.713071865 | -0.343357315 | 0.731329667 | 0.998252924 |
| chr7:77210743-77221573    | exonic       | PTPN12    | 7  | 77210743  | 77221573  | 3  | 3 | 0  | 2  | 7  | 1 | 10830 | 2.277821557 | -0.587920504 | 1.755749817 | -0.334854373 | 0.737734942 | 0.998252924 |
| chr7:77212871-77221573    | exonic       | PTPN12    | 7  | 77212871  | 77221573  | 3  | 3 | 0  | 2  | 7  | 1 | 8702  | 2.277821557 | -0.587920504 | 1.755749817 | -0.334854373 | 0.737734942 | 0.998252924 |
| chr5:82832825-82850857    | exonic       | VCAN      | 5  | 82832825  | 82850857  | 3  | 2 | 0  | 3  | 2  | 2 | 18032 | 1.912938643 | -0.587588888 | 1.852903196 | -0.317117963 | 0.751154095 | 0.998252924 |
| chr12:124904502-124922542 | exonic       | NCOR2     | 12 | 124904502 | 124922542 | 2  | 0 | 2  | 3  | 5  | 0 | 18040 | 1.576583201 | -0.587577277 | 2.126186789 | -0.276352614 | 0.782277249 | 0.998252924 |
| chr10:96201652-96234540   | exonic       | TBC1D12   | 10 | 96201652  | 96234540  | 1  | 4 | 0  | 2  | 8  | 0 | 32888 | 2.006932284 | -0.585050646 | 2.008047717 | -0.29135296  | NA          | NA          |
| chr2:215632205-215661841  | exonic       | BARD1     | 2  | 215632205 | 215661841 | 2  | 1 | 0  | 0  | 1  | 2 | 29636 | 1.169714324 | -0.583159477 | 2.489653715 | -0.234233168 | 0.814803967 | 0.998252924 |
| chr9:140622800-140638542  | exonic       | EHMT1     | 9  | 140622800 | 140638542 | 2  | 1 | 0  | 0  | 1  | 2 | 15742 | 1.169714324 | -0.583159477 | 2.489653715 | -0.234233168 | 0.814803967 | 0.998252924 |
| chr5:58284319-58289292    | exonic       | PDE4D     | 5  | 58284319  | 58289292  | 3  | 0 | 6  | 0  | 5  | 6 | 4973  | 4.025023743 | -0.582660907 | 1.650419611 | -0.353038041 | 0.724059921 | 0.998252924 |
| chr5:40764615-40777688    | exonic       | PRKAA1    | 5  | 40764615  | 40777688  | 2  | 4 | 0  | 1  | 4  | 3 | 13073 | 2.470153981 | -0.580735175 | 1.745907601 | -0.332626523 | 0.73941622  | 0.998252924 |
| chr19:9724696-9728855     | exonic       | ZNF561    | 19 | 9724696   | 9728855   | 0  | 1 | 2  | 5  | 2  | 0 | 4159  | 1.342425619 | -0.580082365 | 2.2963658   | -0.252608868 | 0.800570477 | 0.998252924 |
| chr10:32854486-32912745   | exonic       | CCDC7     | 10 | 32854486  | 32912745  | 3  | 0 | 0  | 2  | 3  | 0 | 58259 | 0.962665864 | -0.579135298 | 2.779286159 | -0.208375556 | 0.834935741 | 0.998252924 |
| chr11:107260799-107263621 | exonic       | CWF19L2   | 11 | 107260799 | 107263621 | 3  | 0 | 0  | 2  | 3  | 0 | 2822  | 0.962665864 | -0.579135298 | 2.779286159 | -0.208375556 | 0.834935741 | 0.998252924 |
| chr2:65228581-65237897    | exonic       | SLC1A4    | 2  | 65228581  | 65237897  | 3  | 0 | 0  | 2  | 3  | 0 | 9316  | 0.962665864 | -0.579135298 | 2.779286159 | -0.208375556 | 0.834935741 | 0.998252924 |
| chrX:134679347-134686071  | exonic       | DDX26B    | X  | 134679347 | 134686071 | 1  | 0 | 1  | 2  | 2  | 0 | 6724  | 0.780933582 | -0.57858909  | 2.822632616 | -0.204982075 | 0.83758613  | 0.998252924 |
| chr5:179132679-179137066  | exonic       | CANX      | 5  | 179132679 | 179137066 | 2  | 3 | 0  | 1  | 2  | 3 | 4387  | 2.053823338 | -0.577349062 | 1.873209056 | -0.308213897 | 0.757919579 | 0.998252924 |
| chr12:114823280-114841741 | exonic       | TBX5      | 12 | 114823280 | 114841741 | 30 | 2 | 3  | 58 | 8  | 0 | 18461 | 11.94424667 | -0.57715642  | 1.740420823 | -0.331618889 | NA          | NA          |
| chr9:107645319-107651476  | exonic       | ABCA1     | 9  | 107645319 | 107651476 | 3  | 1 | 0  | 2  | 5  | 0 | 6157  | 1.378996507 | -0.574674569 | 2.253525289 | -0.255011369 | 0.798714318 | 0.998252924 |
| chr2:148730307-148733544  | exonic       | ORC4      | 2  | 148730307 | 148733544 | 3  | 2 | 0  | 3  | 4  | 1 | 3237  | 1.846774878 | -0.574023579 | 1.868805959 | -0.30716061  | 0.758721126 | 0.998252924 |
| chr5:60768507-60790237    | exonic       | ZSWIM6    | 5  | 60768507  | 60790237  | 2  | 3 | 0  | 7  | 3  | 0 | 21730 | 1.888063244 | -0.57374039  | 1.985784847 | -0.288923743 | 0.772639734 | 0.998252924 |
| chr9:37126308-37126939    | exonic       | ZCCHC7    | 9  | 37126308  | 37126939  | 17 | 4 | 0  | 12 | 20 | 2 | 631   | 7.202603499 | -0.572774651 | 1.223452069 | -0.468162722 | 0.639668228 | 0.998252924 |



|                           |              |                                   |    |           |           |    |   |   |    |    |    |        |             |              |             |              |             |             |
|---------------------------|--------------|-----------------------------------|----|-----------|-----------|----|---|---|----|----|----|--------|-------------|--------------|-------------|--------------|-------------|-------------|
| chr20:30904020-30904677   | exonic       | KIF3B                             | 20 | 30904020  | 30904677  | 0  | 2 | 2 | 5  | 4  | 0  | 657    | 1.758756262 | -0.571318164 | 2.049462873 | -0.278764827 | 0.780425309 | 0.998252924 |
| chr4:110412482-110416012  | exonic       | SEC24B                            | 4  | 110412482 | 110416012 | 2  | 2 | 3 | 5  | 3  | 3  | 3530   | 3.017627578 | -0.570886219 | 1.456668958 | -0.39191212  | 0.695123148 | 0.998252924 |
| chr2:231325976-231339162  | exonic       | SP100                             | 2  | 231325976 | 231339162 | 4  | 1 | 0 | 6  | 3  | 0  | 13186  | 1.691174146 | -0.569733799 | 2.080299103 | -0.273871098 | 0.784183683 | 0.998252924 |
| chr1:21074036-21100103    | exonic       | HP1BP3                            | 1  | 21074036  | 21100103  | 0  | 0 | 0 | 2  | 0  | 0  | 26067  | 4.912271081 | -0.569625505 | 1.229556905 | -0.463277057 | 0.643165789 | 0.998252924 |
| chr1:21076215-21100103    | exonic       | HP1BP3                            | 1  | 21076215  | 21100103  | 4  | 2 | 2 | 4  | 5  | 5  | 23888  | 4.912271081 | -0.569625505 | 1.229556905 | -0.463277057 | 0.643165789 | 0.998252924 |
| chr7:100410368-100410830  | exonic       | EPHB4                             | 7  | 100410368 | 100410830 | 15 | 3 | 6 | 23 | 14 | 4  | 462    | 9.013665891 | -0.569396763 | 0.972540418 | -0.585473624 | 0.558229296 | 0.998252924 |
| chr3:180665652-180667131  | exonic       | FXR1                              | 3  | 180665652 | 180667131 | 2  | 0 | 2 | 4  | 4  | 0  | 1479   | 1.561867164 | -0.568072451 | 2.126448435 | -0.267146121 | 0.789356658 | 0.998252924 |
| chr9:35295692-35313986    | exonic       | UNC13B                            | 9  | 35295692  | 35313986  | 4  | 9 | 2 | 25 | 7  | 0  | 18294  | 5.983944595 | -0.56740493  | 1.291687521 | -0.439274144 | 0.660462907 | 0.998252924 |
| chr7:17908029-17937069    | exonic       | SNX13                             | 7  | 17908029  | 17937069  | 0  | 3 | 3 | 6  | 3  | 2  | 29040  | 2.732022268 | -0.567194964 | 1.633225474 | -0.347285156 | NA          | NA          |
| chr3:100451351-100455560  | exonic       | TFG                               | 3  | 100451351 | 100455560 | 0  | 2 | 0 | 1  | 1  | 1  | 4209   | 0.884109014 | -0.566069775 | 2.755203102 | -0.205454826 | 0.837216789 | 0.998252924 |
| chr19:11526612-11527733   | exonic       | RGL3                              | 19 | 11526612  | 11527733  | 3  | 3 | 2 | 16 | 1  | 0  | 1121   | 3.126335861 | -0.564764492 | 1.624571204 | -0.347639113 | NA          | NA          |
| chr10:105197771-105198565 | exonic       | PDCD11                            | 10 | 105197771 | 105198565 | 4  | 3 | 0 | 6  | 7  | 0  | 794    | 2.523835432 | -0.563365314 | 1.771602547 | -0.317997575 | 0.750486776 | 0.998252924 |
| chr11:106810185-106810904 | exonic       | GUCY1A2                           | 11 | 106810185 | 106810904 | 1  | 1 | 0 | 4  | 0  | 0  | 719    | 0.728508282 | -0.562671421 | 3.15786179  | -0.178181142 | NA          | NA          |
| chr18:44470542-44471017   | exonic       | PIAS2                             | 18 | 44470542  | 44471017  | 1  | 1 | 0 | 4  | 0  | 0  | 475    | 0.728508282 | -0.562671421 | 3.15786179  | -0.178181142 | NA          | NA          |
| chr2:175976295-175986268  | exonic       | ATF2                              | 2  | 175976295 | 175986268 | 1  | 1 | 0 | 4  | 0  | 0  | 9973   | 0.728508282 | -0.562671421 | 3.15786179  | -0.178181142 | NA          | NA          |
| chr3:71348970-71542706    | ncRNA_exonic | FOXP1-AS1                         | 3  | 71348970  | 71542706  | 1  | 1 | 0 | 4  | 0  | 0  | 193736 | 0.728508282 | -0.562671421 | 3.15786179  | -0.178181142 | NA          | NA          |
| chr7:75182751-75183825    | exonic       | HIP1                              | 7  | 75182751  | 75183825  | 1  | 1 | 0 | 4  | 0  | 0  | 1074   | 0.728508282 | -0.562671421 | 3.15786179  | -0.178181142 | NA          | NA          |
| chr9:19356969-19360487    | exonic       | DENND4C                           | 9  | 19356969  | 19360487  | 1  | 1 | 0 | 4  | 0  | 0  | 3518   | 0.728508282 | -0.562671421 | 3.15786179  | -0.178181142 | NA          | NA          |
| chr9:128103455-128109220  | exonic       | GAPVD1                            | 9  | 128103455 | 128109220 | 2  | 0 | 3 | 4  | 4  | 1  | 5765   | 2.067354799 | -0.560306969 | 1.804590606 | -0.310489796 | 0.756188518 | 0.998252924 |
| chr3:185316199-185331196  | exonic       | SENP2                             | 3  | 185316199 | 185331196 | 3  | 0 | 3 | 0  | 7  | 2  | 14997  | 2.442397075 | -0.560039496 | 1.87811933  | -0.298191647 | 0.765556897 | 0.998252924 |
| chr4:38791691-38792852    | intergenic   | TLR10(dist=7080), TLR1(dist=5024) | 4  | 38791691  | 38792852  | 7  | 0 | 0 | 9  | 3  | 0  | 1161   | 2.222793331 | -0.55917818  | 2.06698294  | -0.270528687 | 0.786753551 | 0.998252924 |
| chr15:44907560-44912601   | exonic       | SPG11                             | 15 | 44907560  | 44912601  | 1  | 0 | 2 | 0  | 6  | 0  | 5041   | 1.249689525 | -0.557790912 | 2.589831073 | -0.215377334 | NA          | NA          |
| chr1:63042932-63052295    | exonic       | DOCK7                             | 1  | 63042932  | 63052295  | 0  | 0 | 3 | 0  | 0  | 3  | 9363   | 1.516462903 | -0.55638796  | 2.682064173 | -0.207447669 | NA          | NA          |
| chr2:44428324-44445676    | exonic       | PPM1B                             | 2  | 44428324  | 44445676  | 1  | 1 | 1 | 3  | 3  | 0  | 17352  | 1.182548188 | -0.555330122 | 2.241719526 | -0.247725068 | 0.804347135 | 0.998252924 |
| chr7:131060182-131084192  | exonic       | MKLN1                             | 7  | 131060182 | 131084192 | 7  | 9 | 5 | 7  | 12 | 10 | 24010  | 8.736430764 | -0.554840443 | 0.992832124 | -0.558846183 | 0.576266701 | 0.998252924 |
| chr20:50071084-50140649   | exonic       | NFATC2                            | 20 | 50071084  | 50140649  | 0  | 0 | 2 | 5  | 0  | 0  | 69565  | 0.926094977 | -0.554453523 | 3.128914753 | -0.177203141 | NA          | NA          |
| chr2:214174782-214215369  | exonic       | SPAG16                            | 2  | 214174782 | 214215369 | 2  | 2 | 1 | 7  | 3  | 0  | 40587  | 1.911056471 | -0.553515148 | 1.848934661 | -0.299369772 | 0.764657924 | 0.998252924 |
| chr1:27432375-27436268    | exonic       | SLC9A1                            | 1  | 27432375  | 27436268  | 2  | 1 | 0 | 0  | 3  | 1  | 3893   | 1.103550559 | -0.552739104 | 2.505973975 | -0.220568573 | 0.825428373 | 0.998252924 |
| chr8:38147992-38157108    | exonic       | WHSC1L1                           | 8  | 38147992  | 38157108  | 1  | 0 | 2 | 2  | 2  | 1  | 9116   | 1.286421217 | -0.551706116 | 2.195760468 | -0.2512597   | 0.801613331 | 0.998252924 |
| chr4:40936472-40947090    | exonic       | APBB2                             | 4  | 40936472  | 40947090  | 0  | 2 | 0 | 4  | 0  | 0  | 10618  | 2.383111542 | -0.551575039 | 1.909806013 | -0.288812076 | NA          | NA          |
| chr13:42439871-42442613   | exonic       | VWAS                              | 13 | 42439871  | 42442613  | 0  | 3 | 5 | 5  | 6  | 3  | 2742   | 3.691549808 | -0.551146157 | 1.47197589  | -0.374426076 | 0.708087346 | 0.998252924 |
| chr11:70200406-70202360   | exonic       | PPFIA1                            | 11 | 70200406  | 70202360  | 4  | 1 | 0 | 7  | 2  | 0  | 1954   | 1.67645811  | -0.551011836 | 2.10323508  | -0.261983    | 0.793334549 | 0.998252924 |
| chr13:77791974-77818086   | exonic       | MYCBP2                            | 13 | 77791974  | 77818086  | 4  | 1 | 0 | 7  | 2  | 0  | 26112  | 1.67645811  | -0.551011836 | 2.10323508  | -0.261983    | 0.793334549 | 0.998252924 |
| chr6:170852688-170858201  | exonic       | PSMB1                             | 6  | 170852688 | 170858201 | 2  | 2 | 2 | 7  | 3  | 1  | 5513   | 2.416544105 | -0.549785405 | 1.587863494 | -0.346242235 | 0.729160677 | 0.998252924 |
| chr1:186375215-186388209  | exonic       | Clorf27                           | 1  | 186375215 | 186388209 | 2  | 4 | 0 | 3  | 2  | 3  | 12994  | 2.440721907 | -0.548932447 | 1.720714885 | -0.319014179 | 0.74971576  | 0.998252924 |

|                           |              |                         |    |           |           |    |   |   |    |    |   |       |             |              |             |              |             |             |
|---------------------------|--------------|-------------------------|----|-----------|-----------|----|---|---|----|----|---|-------|-------------|--------------|-------------|--------------|-------------|-------------|
| chr2:233651859-233660931  | exonic       | GIGYF2                  | 2  | 233651859 | 233660931 | 7  | 5 | 5 | 17 | 8  | 4 | 9072  | 6.76902008  | -0.548827364 | 1.034634991 | -0.530455057 | 0.595796461 | 0.998252924 |
| chr15:90760670-90764712   | exonic       | SEMA4B                  | 15 | 90760670  | 90764712  | 6  | 1 | 0 | 6  | 6  | 0 | 4042  | 2.312230297 | -0.547496076 | 1.867178091 | -0.293221133 | NA          | NA          |
| chr4:10099334-10105610    | exonic       | WDR1                    | 4  | 10099334  | 10105610  | 7  | 2 | 3 | 16 | 5  | 1 | 6276  | 4.457605154 | -0.547479708 | 1.287274582 | -0.42530142  | NA          | NA          |
| chr11:2997253-3000467     | exonic       | NAP1L4                  | 11 | 2997253   | 3000467   | 0  | 2 | 0 | 0  | 4  | 0 | 3214  | 0.832661285 | -0.547334548 | 3.257928793 | -0.168000771 | NA          | NA          |
| chr12:111916874-111924628 | exonic       | ATXN2                   | 12 | 111916874 | 111924628 | 0  | 2 | 0 | 0  | 4  | 0 | 7754  | 0.832661285 | -0.547334548 | 3.257928793 | -0.168000771 | NA          | NA          |
| chr14:58740696-58758425   | ncRNA_exonic | PSMA3-AS1               | 14 | 58740696  | 58758425  | 0  | 2 | 0 | 0  | 4  | 0 | 17729 | 0.832661285 | -0.547334548 | 3.257928793 | -0.168000771 | NA          | NA          |
| chr15:59480316-59506919   | exonic       | LDHAL6B, MYO1E          | 15 | 59480316  | 59506919  | 0  | 2 | 0 | 0  | 4  | 0 | 26603 | 0.832661285 | -0.547334548 | 3.257928793 | -0.168000771 | NA          | NA          |
| chr5:139818045-139828890  | exonic       | ANKHD1, ANKHD1-E1F4EBP3 | 5  | 139818045 | 139828890 | 6  | 3 | 3 | 7  | 4  | 0 | 10845 | 0.832661285 | -0.547334548 | 3.257928793 | -0.168000771 | NA          | NA          |
| chr6:10703637-10705077    | exonic       | PAK1IP1                 | 6  | 10703637  | 10705077  | 0  | 2 | 0 | 0  | 4  | 0 | 1440  | 0.832661285 | -0.547334548 | 3.257928793 | -0.168000771 | NA          | NA          |
| chr6:144843115-144844324  | exonic       | UTRN                    | 6  | 144843115 | 144844324 | 0  | 2 | 0 | 0  | 4  | 0 | 1209  | 0.832661285 | -0.547334548 | 3.257928793 | -0.168000771 | NA          | NA          |
| chr9:114842353-114860942  | exonic       | SUSD1                   | 9  | 114842353 | 114860942 | 0  | 2 | 0 | 0  | 4  | 0 | 18589 | 0.832661285 | -0.547334548 | 3.257928793 | -0.168000771 | NA          | NA          |
| chr9:35231116-35243361    | exonic       | UNC13B                  | 9  | 35231116  | 35243361  | 0  | 2 | 0 | 0  | 4  | 0 | 12245 | 0.832661285 | -0.547334548 | 3.257928793 | -0.168000771 | NA          | NA          |
| chr1:48821341-48869554    | exonic       | SPATA6                  | 1  | 48821341  | 48869554  | 2  | 0 | 0 | 3  | 2  | 0 | 48213 | 0.947949827 | -0.547184714 | 2.793119943 | -0.195904481 | NA          | NA          |
| chr17:65936554-65972074   | exonic       | BPTF                    | 17 | 65936554  | 65972074  | 65 | 0 | 1 | 54 | 56 | 0 | 35520 | 21.09977073 | -0.545495743 | 2.651191055 | -0.205754973 | NA          | NA          |
| chr15:81262803-81274523   | exonic       | MESDC2                  | 15 | 81262803  | 81274523  | 4  | 0 | 0 | 7  | 0  | 0 | 11720 | 1.260127467 | -0.544422765 | 2.775328606 | -0.196165155 | NA          | NA          |
| chr16:4516153-4519466     | exonic       | NMRAL1                  | 16 | 4516153   | 4519466   | 3  | 5 | 2 | 12 | 6  | 1 | 3313  | 3.962997636 | -0.543702146 | 1.323345642 | -0.410854224 | 0.68117943  | 0.998252924 |
| chr1:151175176-151175751  | intronic     | PIP5K1A                 | 1  | 151175176 | 151175751 | 0  | 0 | 2 | 0  | 0  | 2 | 575   | 1.010975269 | -0.542562415 | 3.086538198 | -0.175783477 | 0.860464051 | 0.998252924 |
| chr3:105389076-105423017  | exonic       | CBLB                    | 3  | 105389076 | 105423017 | 0  | 0 | 2 | 0  | 0  | 2 | 33941 | 1.010975269 | -0.542562415 | 3.086538198 | -0.175783477 | 0.860464051 | 0.998252924 |
| chr3:172486796-172504364  | exonic       | ECT2                    | 3  | 172486796 | 172504364 | 0  | 0 | 2 | 0  | 0  | 2 | 17568 | 1.010975269 | -0.542562415 | 3.086538198 | -0.175783477 | 0.860464051 | 0.998252924 |
| chr4:88005271-88012981    | exonic       | AFF1                    | 4  | 88005271  | 88012981  | 0  | 0 | 2 | 0  | 0  | 2 | 7710  | 1.010975269 | -0.542562415 | 3.086538198 | -0.175783477 | 0.860464051 | 0.998252924 |
| chr6:109900752-109940439  | exonic       | AK9                     | 6  | 109900752 | 109940439 | 0  | 0 | 2 | 0  | 0  | 2 | 39687 | 1.010975269 | -0.542562415 | 3.086538198 | -0.175783477 | 0.860464051 | 0.998252924 |
| chr6:151652928-151653266  | intronic     | AKAP12                  | 6  | 151652928 | 151653266 | 0  | 0 | 2 | 0  | 0  | 2 | 338   | 1.010975269 | -0.542562415 | 3.086538198 | -0.175783477 | 0.860464051 | 0.998252924 |
| chr9:140648622-140657272  | exonic       | EHMT1                   | 9  | 140648622 | 140657272 | 0  | 0 | 2 | 0  | 0  | 2 | 8650  | 1.010975269 | -0.542562415 | 3.086538198 | -0.175783477 | 0.860464051 | 0.998252924 |
| chr15:76566752-76588078   | exonic       | ETFA                    | 15 | 76566752  | 76588078  | 2  | 4 | 4 | 8  | 4  | 4 | 21326 | 4.311628388 | -0.542082918 | 1.270752356 | -0.426584232 | 0.669682184 | 0.998252924 |
| chr5:14741935-14758707    | exonic       | ANKH                    | 5  | 14741935  | 14758707  | 0  | 2 | 2 | 0  | 4  | 2 | 16772 | 1.843636554 | -0.541854777 | 2.083456068 | -0.260074971 | NA          | NA          |
| chr2:223765391-223773868  | exonic       | ACSL3                   | 2  | 223765391 | 223773868 | 3  | 5 | 1 | 0  | 8  | 4 | 8477  | 3.656702659 | -0.538676222 | 1.550399411 | -0.347443515 | NA          | NA          |
| chr1:114128008-114137182  | exonic       | MAGI3                   | 1  | 114128008 | 114137182 | 1  | 0 | 1 | 3  | 1  | 0 | 9174  | 0.766217546 | -0.537368817 | 2.860381025 | -0.187866166 | 0.850981566 | 0.998252924 |
| chr1:198247090-198266370  | exonic       | NEK7                    | 1  | 198247090 | 198266370 | 1  | 0 | 1 | 3  | 1  | 0 | 19280 | 0.766217546 | -0.537368817 | 2.860381025 | -0.187866166 | 0.850981566 | 0.998252924 |
| chr3:47466974-47476627    | exonic       | SCAP                    | 3  | 47466974  | 47476627  | 1  | 0 | 1 | 3  | 1  | 0 | 9653  | 0.766217546 | -0.537368817 | 2.860381025 | -0.187866166 | 0.850981566 | 0.998252924 |
| chrX:20204413-20222221    | exonic       | RPS6KA3                 | X  | 20204413  | 20222221  | 1  | 0 | 1 | 3  | 1  | 0 | 17808 | 0.766217546 | -0.537368817 | 2.860381025 | -0.187866166 | 0.850981566 | 0.998252924 |
| chr3:155611306-155629068  | exonic       | GMPS                    | 3  | 155611306 | 155629068 | 4  | 0 | 1 | 6  | 3  | 0 | 17762 | 1.714167373 | -0.536397446 | 2.072947716 | -0.258760721 | 0.795819866 | 0.998252924 |
| chr1:9991948-9995685      | exonic       | LZIC                    | 1  | 9991948   | 9995685   | 3  | 2 | 1 | 4  | 5  | 1 | 3737  | 2.27138271  | -0.535803921 | 1.625524784 | -0.329619041 | 0.741687833 | 0.998252924 |
| chr14:76198680-76201632   | exonic       | TTLL5                   | 14 | 76198680  | 76201632  | 1  | 2 | 0 | 5  | 1  | 0 | 2952  | 1.130122888 | -0.535764559 | 2.459135077 | -0.217867072 | NA          | NA          |
| chr1:32745271-32745811    | exonic       | LCK                     | 1  | 32745271  | 32745811  | 3  | 0 | 1 | 2  | 5  | 0 | 540   | 1.401989733 | -0.534241142 | 2.242763787 | -0.238206602 | 0.811720856 | 0.998252924 |
| chr1:220275470-220276119  | exonic       | IARS2                   | 1  | 220275470 | 220276119 | 0  | 2 | 0 | 2  | 0  | 1 | 649   | 0.869392977 | -0.53272649  | 2.969019027 | -0.179428453 | 0.857601292 | 0.998252924 |

|                           |              |         |    |           |           |   |    |   |    |    |    |       |             |              |             |              |             |             |
|---------------------------|--------------|---------|----|-----------|-----------|---|----|---|----|----|----|-------|-------------|--------------|-------------|--------------|-------------|-------------|
| chr7:77214859-77230123    | exonic       | PTPN12  | 7  | 77214859  | 77230123  | 7 | 5  | 3 | 14 | 6  | 4  | 15264 | 5.813493029 | -0.531036692 | 1.104357995 | -0.480855569 | 0.630619153 | 0.998252924 |
| chr12:94603365-94621011   | exonic       | PLXNC1  | 12 | 94603365  | 94621011  | 3 | 1  | 0 | 4  | 3  | 0  | 17646 | 1.349564433 | -0.530101622 | 2.253510734 | -0.23523368  | 0.814027367 | 0.998252924 |
| chr9:110062421-110074018  | exonic       | RAD23B  | 9  | 110062421 | 110074018 | 3 | 5  | 2 | 6  | 9  | 2  | 11597 | 3.996430199 | -0.52653414  | 1.293348363 | -0.407109295 | 0.683927717 | 0.998252924 |
| chr2:43973004-43989529    | exonic       | PLEKHH2 | 2  | 43973004  | 43989529  | 6 | 0  | 2 | 13 | 2  | 0  | 16525 | 2.792562558 | -0.525697132 | 1.782409557 | -0.294936217 | 0.768042605 | 0.998252924 |
| chr3:67568670-67579610    | exonic       | SUCLG2  | 3  | 67568670  | 67579610  | 2 | 2  | 0 | 2  | 1  | 2  | 10940 | 1.556612893 | -0.525129837 | 2.046424306 | -0.256608483 | 0.797481025 | 0.998252924 |
| chr5:70798425-70808255    | exonic       | BDP1    | 5  | 70798425  | 70808255  | 3 | 2  | 0 | 5  | 6  | 0  | 9830  | 2.167509682 | -0.523637263 | 1.871531243 | -0.279790821 | 0.779637994 | 0.998252924 |
| chr10:31676053-31750166   | exonic       | ZEB1    | 10 | 31676053  | 31750166  | 2 | 0  | 0 | 0  | 3  | 0  | 74113 | 0.621056151 | -0.522755004 | 3.633256647 | -0.143880561 | NA          | NA          |
| chr12:104331472-104337652 | exonic       | HSP90B1 | 12 | 104331472 | 104337652 | 2 | 0  | 0 | 0  | 3  | 0  | 6180  | 0.621056151 | -0.522755004 | 3.633256647 | -0.143880561 | NA          | NA          |
| chr12:104332117-104337652 | exonic       | HSP90B1 | 12 | 104332117 | 104337652 | 2 | 0  | 0 | 0  | 3  | 0  | 5535  | 0.621056151 | -0.522755004 | 3.633256647 | -0.143880561 | NA          | NA          |
| chr12:81593119-81627250   | exonic       | ACSS3   | 12 | 81593119  | 81627250  | 2 | 0  | 0 | 0  | 3  | 0  | 34131 | 0.621056151 | -0.522755004 | 3.633256647 | -0.143880561 | NA          | NA          |
| chr13:25051838-25052414   | exonic       | PARP4   | 13 | 25051838  | 25052414  | 2 | 0  | 0 | 0  | 3  | 0  | 576   | 0.621056151 | -0.522755004 | 3.633256647 | -0.143880561 | NA          | NA          |
| chr13:41400642-41446296   | ncRNA_exonic | TPTE2P5 | 13 | 41400642  | 41446296  | 2 | 0  | 0 | 0  | 3  | 0  | 45654 | 0.621056151 | -0.522755004 | 3.633256647 | -0.143880561 | NA          | NA          |
| chr17:61869771-61885260   | exonic       | DDX42   | 17 | 61869771  | 61885260  | 2 | 0  | 0 | 0  | 3  | 0  | 15489 | 0.621056151 | -0.522755004 | 3.633256647 | -0.143880561 | NA          | NA          |
| chr18:48584494-48586286   | exonic       | SMAD4   | 18 | 48584494  | 48586286  | 2 | 0  | 0 | 0  | 3  | 0  | 1792  | 0.621056151 | -0.522755004 | 3.633256647 | -0.143880561 | NA          | NA          |
| chr19:23990627-23991616   | ncRNA_exonic | RPSAP58 | 19 | 23990627  | 23991616  | 2 | 0  | 0 | 0  | 3  | 0  | 989   | 0.621056151 | -0.522755004 | 3.633256647 | -0.143880561 | NA          | NA          |
| chr19:24309056-24310982   | exonic       | ZNF254  | 19 | 24309056  | 24310982  | 2 | 0  | 0 | 0  | 3  | 0  | 1926  | 0.621056151 | -0.522755004 | 3.633256647 | -0.143880561 | NA          | NA          |
| chr2:15555669-15618413    | exonic       | NBAS    | 2  | 15555669  | 15618413  | 2 | 0  | 0 | 0  | 3  | 0  | 62744 | 0.621056151 | -0.522755004 | 3.633256647 | -0.143880561 | NA          | NA          |
| chr20:35689505-35693876   | exonic       | RBL1    | 20 | 35689505  | 35693876  | 2 | 0  | 0 | 0  | 3  | 0  | 4371  | 0.621056151 | -0.522755004 | 3.633256647 | -0.143880561 | NA          | NA          |
| chr6:158720525-158735300  | exonic       | TULP4   | 6  | 158720525 | 158735300 | 2 | 0  | 0 | 0  | 3  | 0  | 14775 | 0.621056151 | -0.522755004 | 3.633256647 | -0.143880561 | NA          | NA          |
| chr6:167435896-167438382  | exonic       | FGFR1OP | 6  | 167435896 | 167438382 | 2 | 0  | 0 | 0  | 3  | 0  | 2486  | 0.621056151 | -0.522755004 | 3.633256647 | -0.143880561 | NA          | NA          |
| chr7:92146589-92147569    | exonic       | PEX1    | 7  | 92146589  | 92147569  | 2 | 0  | 0 | 0  | 3  | 0  | 980   | 0.621056151 | -0.522755004 | 3.633256647 | -0.143880561 | NA          | NA          |
| chr8:124349864-124351686  | exonic       | ATAD2   | 8  | 124349864 | 124351686 | 2 | 0  | 0 | 0  | 3  | 0  | 1822  | 0.621056151 | -0.522755004 | 3.633256647 | -0.143880561 | NA          | NA          |
| chr8:125504442-125504801  | intronic     | TATDN1  | 8  | 125504442 | 125504801 | 2 | 0  | 0 | 0  | 3  | 0  | 359   | 0.621056151 | -0.522755004 | 3.633256647 | -0.143880561 | NA          | NA          |
| chr8:125987848-125990332  | exonic       | ZNF572  | 8  | 125987848 | 125990332 | 2 | 0  | 0 | 0  | 3  | 0  | 2484  | 0.621056151 | -0.522755004 | 3.633256647 | -0.143880561 | NA          | NA          |
| chr8:17820609-17869336    | exonic       | PCM1    | 8  | 17820609  | 17869336  | 2 | 0  | 0 | 0  | 3  | 0  | 48727 | 0.621056151 | -0.522755004 | 3.633256647 | -0.143880561 | NA          | NA          |
| chr3:56600621-56601081    | exonic       | CCDC66  | 3  | 56600621  | 56601081  | 3 | 4  | 8 | 8  | 16 | 3  | 460   | 6.373801885 | -0.522731345 | 1.115509314 | -0.468603299 | 0.639353219 | 0.998252924 |
| chr14:92258710-92268765   | exonic       | TC2N    | 14 | 92258710  | 92268765  | 1 | 0  | 2 | 2  | 4  | 0  | 10055 | 1.220257451 | -0.522206399 | 2.371969637 | -0.220157286 | 0.825748661 | 0.998252924 |
| chr3:172013152-172028671  | exonic       | FNDC3B  | 3  | 172013152 | 172028671 | 1 | 0  | 2 | 2  | 4  | 0  | 15519 | 1.220257451 | -0.522206399 | 2.371969637 | -0.220157286 | 0.825748661 | 0.998252924 |
| chr1:10211383-10221344    | exonic       | UBE4B   | 1  | 10211383  | 10221344  | 0 | 2  | 0 | 1  | 3  | 0  | 9961  | 0.817945249 | -0.521012897 | 3.006091582 | -0.173319037 | 0.862400661 | 0.998252924 |
| chr1:205588084-205593019  | exonic       | ELK4    | 1  | 205588084 | 205593019 | 0 | 2  | 0 | 1  | 3  | 0  | 4935  | 0.817945249 | -0.521012897 | 3.006091582 | -0.173319037 | 0.862400661 | 0.998252924 |
| chr17:40879652-40880970   | exonic       | EZH1    | 17 | 40879652  | 40880970  | 0 | 2  | 0 | 1  | 3  | 0  | 1318  | 0.817945249 | -0.521012897 | 3.006091582 | -0.173319037 | 0.862400661 | 0.998252924 |
| chr4:79747190-79786874    | exonic       | BMP2K   | 4  | 79747190  | 79786874  | 0 | 2  | 0 | 1  | 3  | 0  | 39684 | 0.817945249 | -0.521012897 | 3.006091582 | -0.173319037 | 0.862400661 | 0.998252924 |
| chr2:24103508-24108699    | exonic       | ATAD2B  | 2  | 24103508  | 24108699  | 1 | 1  | 2 | 3  | 5  | 0  | 5191  | 1.621872057 | -0.520264789 | 1.989444441 | -0.2615126   | 0.793697234 | 0.998252924 |
| chr4:17503341-17510986    | exonic       | QDPR    | 4  | 17503341  | 17510986  | 1 | 3  | 0 | 6  | 2  | 0  | 7645  | 1.531737494 | -0.518331837 | 2.179484536 | -0.237823131 | 0.812018277 | 0.998252924 |
| chr3:171965322-172003774  | exonic       | FNDC3B  | 3  | 171965322 | 172003774 | 5 | 10 | 9 | 6  | 8  | 15 | 38452 | 10.39248075 | -0.518076064 | 1.025722849 | -0.505083868 | NA          | NA          |

|                           |              |          |    |           |           |    |    |    |    |    |    |        |             |              |             |              |             |             |
|---------------------------|--------------|----------|----|-----------|-----------|----|----|----|----|----|----|--------|-------------|--------------|-------------|--------------|-------------|-------------|
| chr15:85081762-85089508   | ncRNA_exonic | UBE2Q2P1 | 15 | 85081762  | 85089508  | 2  | 0  | 4  | 3  | 9  | 0  | 7746   | 2.455230939 | -0.517959888 | 1.843844999 | -0.280912923 | 0.778777189 | 0.998252924 |
| chr19:21587930-21588658   | exonic       | ZNF493   | 19 | 21587930  | 21588658  | 4  | 1  | 3  | 5  | 10 | 0  | 728    | 3.023861791 | -0.517851401 | 1.57114323  | -0.32960165  | 0.741700976 | 0.998252924 |
| chr10:128768965-128926028 | exonic       | DOCK1    | 10 | 128768965 | 128926028 | 4  | 0  | 3  | 4  | 9  | 0  | 157063 | 2.622247184 | -0.51769846  | 1.771814177 | -0.292185528 | 0.770144776 | 0.998252924 |
| chr4:144336629-144387378  | exonic       | GAB1     | 4  | 144336629 | 144387378 | 4  | 0  | 1  | 7  | 2  | 0  | 50749  | 1.699451336 | -0.517447098 | 2.095761235 | -0.246901741 | 0.804984269 | 0.998252924 |
| chr18:9583114-9595151     | exonic       | PPP4R1   | 18 | 9583114   | 9595151   | 11 | 9  | 16 | 32 | 23 | 8  | 12037  | 14.79498687 | -0.517421867 | 0.80170304  | -0.645403399 | 0.518665801 | 0.998252924 |
| chr17:25631805-25636298   | exonic       | WSB1     | 17 | 25631805  | 25636298  | 0  | 2  | 3  | 3  | 1  | 0  | 4493   | 1.365418846 | -0.516196362 | 2.464099792 | -0.209486792 | 0.834068245 | 0.998252924 |
| chr11:128628009-128651918 | exonic       | FLI1     | 11 | 128628009 | 128651918 | 0  | 1  | 5  | 11 | 3  | 0  | 23909  | 2.693128429 | -0.515954152 | 1.834746877 | -0.281212715 | 0.778547253 | 0.998252924 |
| chr6:87920169-87928449    | exonic       | ZNF292   | 6  | 87920169  | 87928449  | 12 | 0  | 6  | 22 | 12 | 0  | 8280   | 6.522637001 | -0.515920281 | 1.362014475 | -0.378792069 | 0.704842277 | 0.998252924 |
| chr1:21091869-21100103    | exonic       | HP1BP3   | 1  | 21091869  | 21100103  | 0  | 2  | 2  | 0  | 6  | 1  | 8234   | 1.777472789 | -0.514172802 | 2.124428413 | -0.242028773 | 0.808757868 | 0.998252924 |
| chr1:65830317-65831879    | exonic       | DNAJC6   | 1  | 65830317  | 65831879  | 5  | 3  | 4  | 12 | 9  | 1  | 1562   | 4.63004024  | -0.511322408 | 1.229697018 | -0.4158117   | 0.677547796 | 0.998252924 |
| chr10:98703869-98711953   | exonic       | LCOR     | 10 | 98703869  | 98711953  | 4  | 3  | 1  | 4  | 2  | 4  | 8084   | 3.136219013 | -0.510955182 | 1.47339445  | -0.346787774 | 0.728750763 | 0.998252924 |
| chr10:61844359-61845011   | exonic       | ANK3     | 10 | 61844359  | 61845011  | 2  | 1  | 0  | 1  | 2  | 1  | 652    | 1.088834522 | -0.510174012 | 2.345104172 | -0.21754855  | 0.827780876 | 0.998252924 |
| chr6:17665469-17669777    | exonic       | NUP153   | 6  | 17665469  | 17669777  | 4  | 0  | 2  | 0  | 6  | 2  | 4308   | 2.253087571 | -0.510125323 | 1.926264633 | -0.26482619  | NA          | NA          |
| chr15:91181677-91184431   | exonic       | CRTC3    | 15 | 91181677  | 91184431  | 6  | 0  | 0  | 2  | 3  | 2  | 2754   | 1.96606391  | -0.508715172 | 2.002791278 | -0.25400309  | NA          | NA          |
| chr14:66028054-66096324   | exonic       | FUT8     | 14 | 66028054  | 66096324  | 0  | 4  | 1  | 0  | 10 | 0  | 68270  | 2.10464644  | -0.508107528 | 2.194252402 | -0.231562936 | NA          | NA          |
| chr11:103173821-103229087 | exonic       | DYNC2H1  | 11 | 103173821 | 103229087 | 4  | 1  | 0  | 9  | 0  | 0  | 55266  | 1.647026037 | -0.506993089 | 2.336928847 | -0.216948449 | NA          | NA          |
| chr19:48229068-48229481   | exonic       | EHD2     | 19 | 48229068  | 48229481  | 4  | 1  | 0  | 9  | 0  | 0  | 413    | 1.647026037 | -0.506993089 | 2.336928847 | -0.216948449 | NA          | NA          |
| chr2:234296902-234299129  | exonic       | DGKD     | 2  | 234296902 | 234299129 | 6  | 7  | 2  | 8  | 9  | 5  | 2227   | 5.869221223 | -0.506962809 | 1.115374143 | -0.454522648 | 0.649452695 | 0.998252924 |
| chr10:3201105-3202522     | exonic       | PITRM1   | 10 | 3201105   | 3202522   | 2  | 3  | 1  | 3  | 4  | 2  | 1417   | 2.397551369 | -0.504511733 | 1.597996737 | -0.315715121 | 0.752218748 | 0.998252924 |
| chr13:41133645-41134997   | exonic       | FOXO1    | 13 | 41133645  | 41134997  | 0  | 1  | 2  | 0  | 4  | 1  | 1352   | 1.361142146 | -0.502108826 | 2.344033746 | -0.214207166 | 0.830385508 | 0.998252924 |
| chr12:70193988-70195501   | exonic       | RAB3IP   | 12 | 70193988  | 70195501  | 11 | 32 | 11 | 19 | 43 | 19 | 1513   | 22.24589024 | -0.501903083 | 0.800024627 | -0.627359541 | NA          | NA          |
| chr17:25630392-25638642   | exonic       | WSB1     | 17 | 25630392  | 25638642  | 0  | 3  | 0  | 2  | 4  | 0  | 8250   | 1.219559855 | -0.501041957 | 2.561296232 | -0.195620464 | 0.844907242 | 0.998252924 |
| chr3:129546645-129551669  | exonic       | TMCC1    | 3  | 129546645 | 129551669 | 3  | 2  | 0  | 6  | 3  | 0  | 5024   | 1.736463003 | -0.500026759 | 2.035955399 | -0.245598091 | 0.805993367 | 0.998252924 |
| chr9:96238537-96261168    | exonic       | FAM120A  | 9  | 96238537  | 96261168  | 15 | 11 | 11 | 9  | 13 | 2  | 22631  | 1.126543785 | -0.500012696 | 2.48997127  | -0.200810629 | 0.840846652 | 0.998252924 |
| chr11:72695132-72700142   | exonic       | FCHSD2   | 11 | 72695132  | 72700142  | 6  | 3  | 7  | 16 | 11 | 2  | 5010   | 6.326353252 | -0.499360684 | 1.093833922 | -0.456523311 | 0.648013712 | 0.998252924 |
| chr1:155646338-155650247  | exonic       | YY1AP1   | 1  | 155646338 | 155650247 | 2  | 3  | 0  | 5  | 0  | 2  | 3909   | 1.928795426 | -0.497128449 | 2.021383561 | -0.245934744 | 0.805732748 | 0.998252924 |
| chr12:459786-463400       | exonic       | KDM5A    | 12 | 459786    | 463400    | 1  | 2  | 0  | 6  | 0  | 0  | 3614   | 1.115406852 | -0.495511774 | 2.68008904  | -0.184886311 | NA          | NA          |
| chr1:32495898-32498935    | exonic       | KHDRBS1  | 1  | 32495898  | 32498935  | 1  | 3  | 0  | 7  | 1  | 0  | 3037   | 1.517021458 | -0.494832402 | 2.223070112 | -0.222589652 | NA          | NA          |
| chr2:203329531-203332412  | exonic       | BMPR2    | 2  | 203329531 | 203332412 | 18 | 12 | 20 | 63 | 29 | 4  | 2881   | 19.798742   | -0.494172598 | 0.806648534 | -0.612624429 | 0.540124701 | 0.998252924 |
| chr17:28811231-28847039   | exonic       | GOSR1    | 17 | 28811231  | 28847039  | 0  | 0  | 3  | 0  | 2  | 2  | 35808  | 1.450299138 | -0.494076836 | 2.473908005 | -0.199715121 | 0.841703387 | 0.998252924 |
| chr3:114069120-114070725  | exonic       | ZBTB20   | 3  | 114069120 | 114070725 | 11 | 7  | 11 | 15 | 18 | 10 | 1605   | 11.6640967  | -0.491282279 | 0.859504462 | -0.571587817 | 0.567601251 | 0.998252924 |
| chr3:127980970-127983624  | exonic       | EEFSEC   | 3  | 127980970 | 127983624 | 1  | 2  | 3  | 4  | 8  | 0  | 2654   | 2.462810532 | -0.491156494 | 1.704227116 | -0.288198967 | 0.773194439 | 0.998252924 |
| chr20:50133322-50140649   | exonic       | NFATC2   | 20 | 50133322  | 50140649  | 2  | 1  | 5  | 14 | 3  | 0  | 7327   | 3.27003647  | -0.48984457  | 1.586639223 | -0.308730909 | 0.75752623  | 0.998252924 |
| chr7:121753171-121773795  | exonic       | AASS     | 7  | 121753171 | 121773795 | 8  | 5  | 0  | 21 | 3  | 0  | 20624  | 4.498895891 | -0.488905781 | 1.539018435 | -0.317673765 | NA          | NA          |
| chr12:123829804-123834988 | exonic       | SBNO1    | 12 | 123829804 | 123834988 | 0  | 1  | 1  | 0  | 4  | 0  | 5184   | 0.855654512 | -0.488253323 | 2.98680854  | -0.16346991  | NA          | NA          |

|                           |          |                                                                                                                                      |   |           |           |    |    |    |    |    |    |       |             |              |             |              |             |             |
|---------------------------|----------|--------------------------------------------------------------------------------------------------------------------------------------|---|-----------|-----------|----|----|----|----|----|----|-------|-------------|--------------|-------------|--------------|-------------|-------------|
| chrX:70641158-70644088    | exonic   | TAF1                                                                                                                                 | X | 70641158  | 70644088  | 0  | 1  | 1  | 0  | 4  | 0  | 2930  | 0.855654512 | -0.488253323 | 2.98680854  | -0.16346991  | NA          | NA          |
| chr3:170077486-170079217  | exonic   | SKIL                                                                                                                                 |   | 170077486 | 170079217 | 27 | 17 | 8  | 24 | 42 | 12 | 1731  | 19.35673651 | -0.487872366 | 0.751813832 | -0.648927095 | 0.516385501 | 0.998252924 |
| chr6:158994451-159010814  | exonic   | TMEM181                                                                                                                              |   | 158994451 | 159010814 | 7  | 3  | 3  | 9  | 8  | 3  | 16363 | 4.86722074  | -0.487736406 | 1.173547862 | -0.415608449 | 0.677696543 | 0.998252924 |
| chr3:51664287-51664947    | exonic   | RAD54L2                                                                                                                              |   | 51664287  | 51664947  | 1  | 0  | 1  | 4  | 0  | 0  | 660   | 0.751501509 | -0.485686083 | 3.122809284 | -0.155528577 | NA          | NA          |
| chr9:100132203-100133988  | exonic   | CCDC180                                                                                                                              |   | 100132203 | 100133988 | 1  | 0  | 1  | 4  | 0  | 0  | 1785  | 0.751501509 | -0.485686083 | 3.122809284 | -0.155528577 | NA          | NA          |
| chr7:6840578-6841154      | exonic   | CCZ1B                                                                                                                                |   | 6840578   | 6841154   | 1  | 5  | 3  | 10 | 4  | 2  | 576   | 3.755833771 | -0.484348305 | 1.371283068 | -0.353208113 | 0.723932426 | 0.998252924 |
| chr21:17135209-17138460   | exonic   | USP25                                                                                                                                |   | 17135209  | 17138460  | 11 | 13 | 17 | 16 | 23 | 18 | 3251  | 17.07056301 | -0.483118552 | 0.811476712 | -0.59535726  | 0.551604688 | 0.998252924 |
| chr10:22171210-22209892   | exonic   | DNAJC1                                                                                                                               |   | 22171210  | 22209892  | 0  | 0  | 4  | 5  | 4  | 0  | 38682 | 1.804742715 | -0.48225402  | 2.223819857 | -0.216858402 | NA          | NA          |
| chr10:22171210-22218070   | exonic   | DNAJC1                                                                                                                               |   | 22171210  | 22218070  | 0  | 0  | 4  | 5  | 4  | 0  | 46860 | 1.804742715 | -0.48225402  | 2.223819857 | -0.216858402 | NA          | NA          |
| chr15:93542222-93544193   | exonic   | CHD2                                                                                                                                 |   | 93542222  | 93544193  | 0  | 2  | 0  | 2  | 2  | 0  | 1971  | 0.803229212 | -0.482253514 | 3.004971989 | -0.160485194 | 0.872498884 | 0.998252924 |
| chr19:23521529-23545527   | exonic   | ZNF91                                                                                                                                |   | 23521529  | 23545527  | 0  | 2  | 0  | 2  | 2  | 0  | 23998 | 0.803229212 | -0.482253514 | 3.004971989 | -0.160485194 | 0.872498884 | 0.998252924 |
| chr2:203818727-203820481  | exonic   | CARF                                                                                                                                 |   | 203818727 | 203820481 | 0  | 2  | 0  | 2  | 2  | 0  | 1754  | 0.803229212 | -0.482253514 | 3.004971989 | -0.160485194 | 0.872498884 | 0.998252924 |
| chr20:32617575-32619410   | UTR5     | <small>ENST00000232123, ENST00000232124, ENST00000232125, ENST00000232126, ENST00000232127, ENST00000232128, ENST00000232129</small> |   | 32617575  | 32619410  | 0  | 2  | 0  | 2  | 2  | 0  | 1835  | 0.803229212 | -0.482253514 | 3.004971989 | -0.160485194 | 0.872498884 | 0.998252924 |
| chr7:137597736-137600758  | exonic   | CREB3L2                                                                                                                              |   | 137597736 | 137600758 | 0  | 2  | 0  | 2  | 2  | 0  | 3022  | 0.803229212 | -0.482253514 | 3.004971989 | -0.160485194 | 0.872498884 | 0.998252924 |
| chr19:55144467-55209724   | exonic   | LILRB1, LILRB4                                                                                                                       |   | 55144467  | 55209724  | 2  | 4  | 0  | 12 | 0  | 0  | 65257 | 2.230813704 | -0.481520747 | 2.11079746  | -0.228122667 | NA          | NA          |
| chr11:108137897-108150335 | exonic   | ATM                                                                                                                                  |   | 108137897 | 108150335 | 2  | 0  | 0  | 1  | 2  | 0  | 12438 | 0.606340114 | -0.479747633 | 3.355144994 | -0.142988644 | 0.88629915  | 0.998252924 |
| chr13:61083896-61141784   | exonic   | TDRD3                                                                                                                                |   | 61083896  | 61141784  | 2  | 0  | 0  | 1  | 2  | 0  | 57888 | 0.606340114 | -0.479747633 | 3.355144994 | -0.142988644 | 0.88629915  | 0.998252924 |
| chr16:67719359-67719705   | exonic   | GFOD2                                                                                                                                |   | 67719359  | 67719705  | 2  | 0  | 0  | 1  | 2  | 0  | 346   | 0.606340114 | -0.479747633 | 3.355144994 | -0.142988644 | 0.88629915  | 0.998252924 |
| chr17:27809214-27838010   | exonic   | TAOK1                                                                                                                                |   | 27809214  | 27838010  | 2  | 0  | 0  | 1  | 2  | 0  | 28796 | 0.606340114 | -0.479747633 | 3.355144994 | -0.142988644 | 0.88629915  | 0.998252924 |
| chr19:50102528-50105175   | exonic   | PRR12                                                                                                                                |   | 50102528  | 50105175  | 2  | 0  | 0  | 1  | 2  | 0  | 2647  | 0.606340114 | -0.479747633 | 3.355144994 | -0.142988644 | 0.88629915  | 0.998252924 |
| chr2:101874252-101883341  | exonic   | CNOT11                                                                                                                               |   | 101874252 | 101883341 | 2  | 0  | 0  | 1  | 2  | 0  | 9089  | 0.606340114 | -0.479747633 | 3.355144994 | -0.142988644 | 0.88629915  | 0.998252924 |
| chr2:39499423-39517475    | exonic   | MAP4K3                                                                                                                               |   | 39499423  | 39517475  | 2  | 0  | 0  | 1  | 2  | 0  | 18052 | 0.606340114 | -0.479747633 | 3.355144994 | -0.142988644 | 0.88629915  | 0.998252924 |
| chr22:42032116-42033795   | exonic   | XRCC6                                                                                                                                |   | 42032116  | 42033795  | 2  | 0  | 0  | 1  | 2  | 0  | 1679  | 0.606340114 | -0.479747633 | 3.355144994 | -0.142988644 | 0.88629915  | 0.998252924 |
| chr7:26236020-26237352    | exonic   | HNRNPA2B1                                                                                                                            |   | 26236020  | 26237352  | 2  | 0  | 0  | 1  | 2  | 0  | 1332  | 0.606340114 | -0.479747633 | 3.355144994 | -0.142988644 | 0.88629915  | 0.998252924 |
| chr1:215759837-215768813  | exonic   | KCTD3                                                                                                                                |   | 215759837 | 215768813 | 2  | 1  | 0  | 2  | 1  | 1  | 8976  | 1.074118486 | -0.47912812  | 2.353650387 | -0.203568093 | 0.838691029 | 0.998252924 |
| chr4:178274461-178281831  | exonic   | NEIL3                                                                                                                                |   | 178274461 | 178281831 | 0  | 3  | 4  | 4  | 4  | 3  | 7370  | 3.145914553 | -0.47898698  | 1.56001873  | -0.307039249 | 0.758813498 | 0.998252924 |
| chr3:56703727-56707753    | exonic   | FAM208A                                                                                                                              |   | 56703727  | 56707753  | 0  | 1  | 3  | 0  | 6  | 1  | 4026  | 1.800466015 | -0.478348635 | 2.137656766 | -0.223772424 | 0.822934389 | 0.998252924 |
| chr13:96409897-96416207   | exonic   | DNAJC3                                                                                                                               |   | 96409897  | 96416207  | 13 | 4  | 7  | 20 | 15 | 4  | 6310  | 8.929330096 | -0.477958146 | 0.948342994 | -0.503992912 | 0.614266358 | 0.998252924 |
| chr1:184559873-184588764  | exonic   | Clorf21                                                                                                                              |   | 184559873 | 184588764 | 3  | 0  | 0  | 5  | 0  | 0  | 28891 | 0.918517754 | -0.477785695 | 3.114043852 | -0.153429341 | NA          | NA          |
| chr16:11214471-11220003   | exonic   | CLEC16A                                                                                                                              |   | 11214471  | 11220003  | 3  | 0  | 0  | 5  | 0  | 0  | 5532  | 0.918517754 | -0.477785695 | 3.114043852 | -0.153429341 | NA          | NA          |
| chr2:46607857-46608734    | splicing | EPAS1                                                                                                                                |   | 46607857  | 46608734  | 3  | 0  | 0  | 5  | 0  | 0  | 877   | 0.918517754 | -0.477785695 | 3.114043852 | -0.153429341 | NA          | NA          |
| chr4:40892380-40947087    | exonic   | APBB2                                                                                                                                |   | 40892380  | 40947087  | 3  | 0  | 0  | 5  | 0  | 0  | 54707 | 0.918517754 | -0.477785695 | 3.114043852 | -0.153429341 | NA          | NA          |
| chr4:88084710-88116842    | exonic   | KLHL8                                                                                                                                |   | 88084710  | 88116842  | 3  | 0  | 0  | 5  | 0  | 0  | 32132 | 0.918517754 | -0.477785695 | 3.114043852 | -0.153429341 | NA          | NA          |
| chr9:33141438-33142090    | intronic | B4GALT1                                                                                                                              |   | 33141438  | 33142090  | 3  | 0  | 0  | 5  | 0  | 0  | 652   | 0.918517754 | -0.477785695 | 3.114043852 | -0.153429341 | NA          | NA          |
| chrX:109310574-109352374  | exonic   | TMEM164                                                                                                                              | X | 109310574 | 109352374 | 3  | 0  | 0  | 5  | 0  | 0  | 41800 | 0.918517754 | -0.477785695 | 3.114043852 | -0.153429341 | NA          | NA          |

|                           |                |                          |    |           |           |    |    |    |    |    |   |        |             |              |             |              |             |             |
|---------------------------|----------------|--------------------------|----|-----------|-----------|----|----|----|----|----|---|--------|-------------|--------------|-------------|--------------|-------------|-------------|
| chr9:115024714-115060196  | exonic         | PTBP3                    | 9  | 115024714 | 115060196 | 3  | 4  | 1  | 0  | 1  | 6 | 35482  | 3.251672125 | -0.476895523 | 1.697359696 | -0.280963148 | NA          | NA          |
| chr18:77488906-77496521   | exonic         | CTDP1                    | 18 | 77488906  | 77496521  | 3  | 1  | 3  | 13 | 1  | 0 | 7615   | 2.656119133 | -0.47473827  | 1.723043775 | -0.275523047 | NA          | NA          |
| chr13:46090277-46104915   | exonic         | COG3                     | 13 | 46090277  | 46104915  | 0  | 3  | 0  | 3  | 3  | 0 | 14638  | 1.204843818 | -0.474598923 | 2.562520495 | -0.185207855 | NA          | NA          |
| chr18:72997403-73000603   | exonic         | TSHZ1                    | 18 | 72997403  | 73000603  | 0  | 3  | 0  | 3  | 3  | 0 | 3200   | 1.204843818 | -0.474598923 | 2.562520495 | -0.185207855 | NA          | NA          |
| chr8:61484604-61504528    | exonic         | RAB2A                    | 8  | 61484604  | 61504528  | 0  | 3  | 0  | 3  | 3  | 0 | 19924  | 1.204843818 | -0.474598923 | 2.562520495 | -0.185207855 | NA          | NA          |
| chr18:21644103-21649235   | exonic         | TTC39C                   | 18 | 21644103  | 21649235  | 9  | 5  | 11 | 15 | 15 | 8 | 5132   | 10.07805174 | -0.474210709 | 0.910011988 | -0.521103805 | 0.602294461 | 0.998252924 |
| chr13:49771012-49772710   | exonic         | FNDC3A                   | 13 | 49771012  | 49772710  | 6  | 0  | 0  | 5  | 0  | 2 | 1698   | 1.9219158   | -0.473691879 | 2.207730007 | -0.214560602 | NA          | NA          |
| chr2:168869143-168986268  | exonic         | STK39                    | 2  | 168869143 | 168986268 | 5  | 0  | 0  | 0  | 3  | 2 | 117125 | 1.624454197 | -0.472672854 | 2.34636651  | -0.201448858 | 0.840347615 | 0.998252924 |
| chr17:4186092-4200109     | exonic         | UBE2G1                   | 17 | 4186092   | 4200109   | 3  | 11 | 3  | 1  | 12 | 4 | 14017  | 3.855710074 | -0.472616074 | 1.555960203 | -0.303745606 | 0.76132171  | 0.998252924 |
| chr12:117365827-117402659 | exonic         | FBXW8                    | 12 | 117365827 | 117402659 | 0  | 0  | 2  | 0  | 2  | 1 | 36832  | 0.944811503 | -0.472385519 | 2.888134823 | -0.163560757 | 0.87007694  | 0.998252924 |
| chr5:77385216-77461496    | exonic         | AP3B1                    | 5  | 77385216  | 77461496  | 2  | 1  | 1  | 2  | 3  | 1 | 76280  | 1.513442355 | -0.471726095 | 1.928261367 | -0.244638047 | 0.806736702 | 0.998252924 |
| chr6:111208707-111211559  | exonic         | AMD1                     | 6  | 111208707 | 111211559 | 0  | 3  | 3  | 3  | 7  | 1 | 2852   | 2.588979191 | -0.469729585 | 1.688224218 | -0.278238862 | NA          | NA          |
| chr15:76146726-76165909   | exonic         | UBE2Q2                   | 15 | 76146726  | 76165909  | 1  | 2  | 0  | 0  | 1  | 2 | 19183  | 1.21500318  | -0.469326222 | 2.461169083 | -0.190692393 | 0.848766599 | 0.998252924 |
| chr5:145634505-145638156  | exonic         | RBM27                    | 5  | 145634505 | 145638156 | 1  | 0  | 2  | 4  | 2  | 0 | 3651   | 1.190825378 | -0.46903123  | 2.388265523 | -0.196389901 | 0.844305    | 0.998252924 |
| chr5:56542126-56543042    | exonic         | GPBP1                    | 5  | 56542126  | 56543042  | 0  | 4  | 0  | 4  | 4  | 0 | 916    | 1.606458424 | -0.468246566 | 2.307309139 | -0.202940542 | NA          | NA          |
| chr2:144966169-144993304  | exonic         | GTDC1                    | 2  | 144966169 | 144993304 | 0  | 2  | 1  | 2  | 4  | 0 | 27135  | 1.242553081 | -0.46803333  | 2.359222725 | -0.198384547 | 0.842744207 | 0.998252924 |
| chr7:129760588-129762042  | exonic         | KLHDC10                  | 7  | 129760588 | 129762042 | 6  | 2  | 11 | 7  | 14 | 7 | 1454   | 7.888526398 | -0.467628404 | 1.067323894 | -0.438131673 | NA          | NA          |
| chr2:15601324-15618413    | exonic         | NBAS                     | 2  | 15601324  | 15618413  | 2  | 2  | 0  | 3  | 4  | 0 | 17089  | 1.409569326 | -0.467516874 | 2.204614052 | -0.212062911 | 0.832057954 | 0.998252924 |
| chr11:66288740-66291353   | exonic         | BBS1                     | 11 | 66288740  | 66291353  | 0  | 1  | 1  | 1  | 3  | 0 | 2613   | 0.840938475 | -0.466906347 | 2.771972691 | -0.168438293 | 0.866238485 | 0.998252924 |
| chr5:179688683-179707608  | exonic         | MAPK9                    | 5  | 179688683 | 179707608 | 4  | 6  | 4  | 0  | 19 | 3 | 18925  | 5.574855508 | -0.466193815 | 1.355750198 | -0.343864095 | 0.730948495 | 0.998252924 |
| chr15:77657505-77681144   | intronic       | PEAK1                    | 15 | 77657505  | 77681144  | 5  | 0  | 0  | 6  | 2  | 0 | 23639  | 1.524857868 | -0.46441867  | 2.348331194 | -0.197765405 | 0.843228614 | 0.998252924 |
| chr19:10906047-10909248   | exonic         | DNM2                     | 19 | 10906047  | 10909248  | 5  | 0  | 0  | 6  | 2  | 0 | 3201   | 1.524857868 | -0.46441867  | 2.348331194 | -0.197765405 | 0.843228614 | 0.998252924 |
| chr8:101271335-101277013  | exonic         | RNF19A                   | 8  | 101271335 | 101277013 | 0  | 0  | 4  | 6  | 3  | 0 | 5678   | 1.790026678 | -0.462843679 | 2.235857915 | -0.207009433 | 0.836002492 | 0.998252924 |
| chr1:21167348-21191755    | exonic         | EIF4G3                   | 1  | 21167348  | 21191755  | 2  | 1  | 0  | 2  | 3  | 0 | 24407  | 1.00795472  | -0.462440124 | 2.529083632 | -0.182848886 | 0.85491659  | 0.998252924 |
| chr20:35236117-35238133   | exonic         | C20orf24, TGIF2-C20orf24 | 20 | 35236117  | 35238133  | 2  | 1  | 0  | 2  | 3  | 0 | 2016   | 1.00795472  | -0.462440124 | 2.529083632 | -0.182848886 | 0.85491659  | 0.998252924 |
| chr3:52771601-52773650    | exonic         | NEK4                     | 3  | 52771601  | 52773650  | 2  | 1  | 0  | 2  | 3  | 0 | 2049   | 1.00795472  | -0.462440124 | 2.529083632 | -0.182848886 | 0.85491659  | 0.998252924 |
| chr8:128818615-128820108  | ncRNA_intronic | PVT1                     | 8  | 128818615 | 128820108 | 3  | 0  | 0  | 0  | 0  | 2 | 1493   | 1.003398046 | -0.461742422 | 3.070641694 | -0.150373267 | NA          | NA          |
| chr3:169835013-169840532  | exonic         | PHC3                     | 3  | 169835013 | 169840532 | 2  | 0  | 1  | 1  | 2  | 1 | 5519   | 1.111827749 | -0.460200482 | 2.330466456 | -0.197471404 | 0.843458658 | 0.998252924 |
| chr21:40578033-40584633   | exonic         | BRWD1                    | 21 | 40578033  | 40584633  | 22 | 9  | 3  | 26 | 19 | 6 | 6600   | 11.91093069 | -0.459314383 | 0.896823616 | -0.512156877 | 0.60854122  | 0.998252924 |
| chr21:40578033-40585479   | exonic         | BRWD1                    | 21 | 40578033  | 40585479  | 22 | 9  | 3  | 26 | 19 | 6 | 7446   | 11.91093069 | -0.459314383 | 0.896823616 | -0.512156877 | 0.60854122  | 0.998252924 |
| chr7:22259484-22357656    | exonic         | RAPGEF5                  | 7  | 22259484  | 22357656  | 0  | 5  | 0  | 0  | 0  | 4 | 98172  | 2.104253431 | -0.459291123 | 3.818585696 | -0.120277809 | NA          | NA          |
| chr2:168920009-168931741  | exonic         | STK39                    | 2  | 168920009 | 168931741 | 4  | 0  | 1  | 2  | 4  | 1 | 11732  | 1.718167863 | -0.45855354  | 1.956316865 | -0.234396354 | 0.814677289 | 0.998252924 |
| chr10:27311486-27337908   | exonic         | ANKRD26                  | 10 | 27311486  | 27337908  | 0  | 1  | 1  | 2  | 0  | 1 | 26422  | 0.892386204 | -0.457665412 | 2.745301699 | -0.166708603 | 0.867599336 | 0.998252924 |
| chr5:108281830-108295048  | exonic         | FER                      | 5  | 108281830 | 108295048 | 0  | 1  | 1  | 2  | 0  | 1 | 13218  | 0.892386204 | -0.457665412 | 2.745301699 | -0.166708603 | 0.867599336 | 0.998252924 |
| chr8:62531536-62557191    | exonic         | ASPH                     | 8  | 62531536  | 62557191  | 2  | 5  | 2  | 2  | 6  | 4 | 25655  | 3.695552668 | -0.453246484 | 1.391693449 | -0.325679829 | 0.744666607 | 0.998252924 |

|                           |              |              |    |           |           |    |    |   |    |    |    |       |             |              |             |              |             |             |
|---------------------------|--------------|--------------|----|-----------|-----------|----|----|---|----|----|----|-------|-------------|--------------|-------------|--------------|-------------|-------------|
| chr8:61653817-61655656    | exonic       | CHD7         | 8  | 61653817  | 61655656  | 3  | 8  | 5 | 3  | 16 | 5  | 1839  | 6.563978297 | -0.450598959 | 1.143889467 | -0.39391827  | NA          | NA          |
| chr16:89484691-89497734   | ncRNA_exonic | LOC101927817 | 16 | 89484691  | 89497734  | 4  | 1  | 2 | 4  | 6  | 1  | 13043 | 2.544390301 | -0.448877679 | 1.563697938 | -0.28706163  | 0.774065131 | 0.998252924 |
| chr12:2929251-2930958     | exonic       | ITFG2        | 12 | 2929251   | 2930958   | 3  | 6  | 0 | 13 | 4  | 0  | 1707  | 3.298773317 | -0.447273485 | 1.658208431 | -0.26973297  | 0.787365694 | 0.998252924 |
| chr1:78097534-78107340    | exonic       | ZZZ3         | 1  | 78097534  | 78107340  | 3  | 3  | 0 | 3  | 3  | 2  | 9806  | 2.208241864 | -0.447177868 | 1.743002681 | -0.256556041 | 0.797521513 | 0.998252924 |
| chr10:86223688-86237420   | exonic       | CCSER2       | 10 | 86223688  | 86237420  | 0  | 3  | 0 | 4  | 2  | 0  | 13732 | 1.190127781 | -0.446648654 | 2.580064275 | -0.173115321 | 0.862560783 | 0.998252924 |
| chr10:11551593-11569566   | exonic       | USP6NL       | 10 | 11551593  | 11569566  | 2  | 0  | 0 | 0  | 1  | 1  | 17973 | 0.687219916 | -0.446333735 | 3.254855283 | -0.137128596 | 0.89092915  | 0.998252924 |
| chr11:33065295-33076271   | exonic       | TCP11L1      | 11 | 33065295  | 33076271  | 2  | 0  | 0 | 0  | 1  | 1  | 10976 | 0.687219916 | -0.446333735 | 3.254855283 | -0.137128596 | 0.89092915  | 0.998252924 |
| chr7:138954139-138969320  | exonic       | UBN2         | 7  | 138954139 | 138969320 | 2  | 0  | 0 | 0  | 1  | 1  | 15181 | 0.687219916 | -0.446333735 | 3.254855283 | -0.137128596 | 0.89092915  | 0.998252924 |
| chr2:47604152-47607108    | exonic       | EPCAM        | 2  | 47604152  | 47607108  | 2  | 3  | 0 | 0  | 2  | 3  | 2956  | 1.947511953 | -0.445058806 | 2.04926321  | -0.217179913 | 0.828068138 | 0.998252924 |
| chr7:22999874-23030758    | exonic       | FAM126A      | 7  | 22999874  | 23030758  | 7  | 7  | 6 | 28 | 4  | 3  | 30884 | 7.691937644 | -0.444938723 | 1.067517211 | -0.416797705 | NA          | NA          |
| chr12:70671911-70713144   | exonic       | CNOT2        | 12 | 70671911  | 70713144  | 3  | 0  | 3 | 5  | 6  | 0  | 41233 | 2.236489361 | -0.444836699 | 1.858969536 | -0.239292086 | 0.810879101 | 0.998252924 |
| chr11:77330650-77336863   | exonic       | CLNS1A       | 11 | 77330650  | 77336863  | 8  | 5  | 4 | 14 | 10 | 3  | 6213  | 6.315640076 | -0.444241748 | 1.056519266 | -0.420476713 | 0.674137238 | 0.998252924 |
| chr1:31810021-31821821    | exonic       | ZCCHC17      | 1  | 31810021  | 31821821  | 4  | 0  | 0 | 2  | 4  | 0  | 11800 | 1.212680229 | -0.442899747 | 2.548721523 | -0.173773299 | 0.862043629 | 0.998252924 |
| chr17:3969740-3976050     | exonic       | ZZEF1        | 17 | 3969740   | 3976050   | 3  | 2  | 2 | 9  | 4  | 0  | 6310  | 2.570962631 | -0.442313653 | 1.634415816 | -0.270624922 | 0.786679526 | 0.998252924 |
| chr4:103225473-103236987  | exonic       | SLC39A8      | 4  | 103225473 | 103236987 | 24 | 8  | 5 | 30 | 7  | 6  | 11514 | 7.021575125 | -0.440804728 | 1.100754749 | -0.400456803 | 0.688820093 | 0.998252924 |
| chr1:167921037-167944253  | exonic       | DCAF6        | 1  | 167921037 | 167944253 | 2  | 0  | 1 | 1  | 4  | 0  | 23216 | 1.045663983 | -0.440105018 | 2.528727056 | -0.17404212  | NA          | NA          |
| chr13:21305979-21311944   | exonic       | N6AMT2       | 13 | 21305979  | 21311944  | 0  | 2  | 0 | 3  | 1  | 0  | 5965  | 0.788513175 | -0.440002626 | 3.044553146 | -0.14452125  | 0.885088877 | 0.998252924 |
| chr14:21883732-21897494   | exonic       | CHD8         | 14 | 21883732  | 21897494  | 0  | 2  | 0 | 3  | 1  | 0  | 13762 | 0.788513175 | -0.440002626 | 3.044553146 | -0.14452125  | 0.885088877 | 0.998252924 |
| chr5:179136873-179147561  | exonic       | CANX         | 5  | 179136873 | 179147561 | 0  | 2  | 0 | 3  | 1  | 0  | 10688 | 0.788513175 | -0.440002626 | 3.044553146 | -0.14452125  | 0.885088877 | 0.998252924 |
| chr9:139341306-139342613  | exonic       | SEC16A       | 9  | 139341306 | 139342613 | 0  | 2  | 0 | 3  | 1  | 0  | 1307  | 0.788513175 | -0.440002626 | 3.044553146 | -0.14452125  | 0.885088877 | 0.998252924 |
| chr2:168920009-168986268  | exonic       | STK39        | 2  | 168920009 | 168986268 | 15 | 5  | 4 | 7  | 4  | 13 | 66259 | 8.830390537 | -0.438711352 | 1.082469404 | -0.40528753  | NA          | NA          |
| chr2:168931491-168986116  | exonic       | STK39        | 2  | 168931491 | 168986116 | 15 | 5  | 4 | 7  | 4  | 13 | 54625 | 8.830390537 | -0.438711352 | 1.082469404 | -0.40528753  | NA          | NA          |
| chr1:33745724-33747412    | exonic       | ZNF362       | 1  | 33745724  | 33747412  | 2  | 0  | 0 | 2  | 1  | 0  | 1688  | 0.591624078 | -0.437369841 | 3.383147382 | -0.12927898  | 0.897136904 | 0.998252924 |
| chr12:5841685-5860136     | exonic       | ANO2         | 12 | 5841685   | 5860136   | 2  | 0  | 0 | 2  | 1  | 0  | 18451 | 0.591624078 | -0.437369841 | 3.383147382 | -0.12927898  | 0.897136904 | 0.998252924 |
| chr14:23502576-23502883   | exonic       | PSMB5        | 14 | 23502576  | 23502883  | 2  | 0  | 0 | 2  | 1  | 0  | 307   | 0.591624078 | -0.437369841 | 3.383147382 | -0.12927898  | 0.897136904 | 0.998252924 |
| chr14:60581417-60592541   | exonic       | PCNXL4       | 14 | 60581417  | 60592541  | 2  | 0  | 0 | 2  | 1  | 0  | 11124 | 0.591624078 | -0.437369841 | 3.383147382 | -0.12927898  | 0.897136904 | 0.998252924 |
| chr16:29845053-29848279   | exonic       | MVP          | 16 | 29845053  | 29848279  | 2  | 0  | 0 | 2  | 1  | 0  | 3226  | 0.591624078 | -0.437369841 | 3.383147382 | -0.12927898  | 0.897136904 | 0.998252924 |
| chr5:52145198-52161651    | exonic       | ITGA1        | 5  | 52145198  | 52161651  | 2  | 0  | 0 | 2  | 1  | 0  | 16453 | 0.591624078 | -0.437369841 | 3.383147382 | -0.12927898  | 0.897136904 | 0.998252924 |
| chr7:158662545-158664253  | exonic       | WDR60        | 7  | 158662545 | 158664253 | 2  | 0  | 0 | 2  | 1  | 0  | 1708  | 0.591624078 | -0.437369841 | 3.383147382 | -0.12927898  | 0.897136904 | 0.998252924 |
| chr9:98231032-98232213    | exonic       | PTCH1        | 9  | 98231032  | 98232213  | 2  | 0  | 0 | 2  | 1  | 0  | 1181  | 0.591624078 | -0.437369841 | 3.383147382 | -0.12927898  | 0.897136904 | 0.998252924 |
| chr16:85667519-85667738   | exonic       | GSE1         | 16 | 85667519  | 85667738  | 48 | 31 | 9 | 96 | 10 | 22 | 219   | 31.56632084 | -0.436054018 | 0.820376459 | -0.53152917  | 0.595052133 | 0.998252924 |
| chr18:9524591-9525849     | exonic       | RALBP1       | 18 | 9524591   | 9525849   | 26 | 16 | 9 | 37 | 26 | 12 | 1258  | 18.69635205 | -0.434689389 | 0.732645506 | -0.593314756 | 0.552970526 | 0.998252924 |
| chr19:18648410-18649243   | exonic       | FKBP8        | 19 | 18648410  | 18649243  | 3  | 3  | 1 | 11 | 2  | 0  | 833   | 2.518537331 | -0.433643527 | 1.699607704 | -0.255143305 | NA          | NA          |
| chr10:126370175-126384781 | exonic       | FAM53B       | 10 | 126370175 | 126384781 | 4  | 1  | 0 | 4  | 4  | 0  | 14606 | 1.599578798 | -0.432833456 | 2.116140257 | -0.204539115 | 0.837932229 | 0.998252924 |
| chr1:16263657-16264501    | exonic       | SPEN         | 1  | 16263657  | 16264501  | 7  | 0  | 2 | 16 | 0  | 0  | 844   | 2.998428813 | -0.432432204 | 1.94227478  | -0.222642135 | NA          | NA          |

|                           |              |                     |       |           |           |           |    |    |    |    |    |        |             |              |              |              |              |             |             |
|---------------------------|--------------|---------------------|-------|-----------|-----------|-----------|----|----|----|----|----|--------|-------------|--------------|--------------|--------------|--------------|-------------|-------------|
| chr12:22635490-22659753   | exonic       | C2CD5               | 12    | 22635490  | 22659753  | 2         | 1  | 0  | 3  | 2  | 0  | 24263  | 0.993238684 | -0.431188739 | 2.540315267  | -0.169738278 | 0.865215969  | 0.998252924 |             |
| chr2:61258553-61259248    | exonic       | PEX13               | 2     | 61258553  | 61259248  | 2         | 1  | 0  | 3  | 2  | 0  | 695    | 0.993238684 | -0.431188739 | 2.540315267  | -0.169738278 | 0.865215969  | 0.998252924 |             |
| chr7:91707009-91709466    | exonic       | AKAP9               | 7     | 91707009  | 91709466  | 2         | 1  | 0  | 3  | 2  | 0  | 2457   | 0.993238684 | -0.431188739 | 2.540315267  | -0.169738278 | 0.865215969  | 0.998252924 |             |
| chr2:242282406-242285664  | exonic       |                     | 2-Sep | 2         | 242282406 | 242285664 | 1  | 3  | 0  | 2  | 3  | 1      | 3258        | 1.535737984  | -0.430639301 | 2.045974612  | -0.210481253 | 0.833292082 | 0.998252924 |
| chr12:97157928-97222866   | exonic       | CFAP54              | 12    | 97157928  | 97222866  | 2         | 0  | 1  | 2  | 1  | 1  | 64938  | 1.097111712 | -0.429053857 | 2.33874301   | -0.183454897 | 0.854441105  | 0.998252924 |             |
| chr9:86297865-86301070    | exonic       | UBQLN1              | 9     | 86297865  | 86301070  | 1         | 1  | 4  | 0  | 7  | 2  | 3205   | 2.555968014 | -0.426450456 | 1.774907313  | -0.240266324 | NA           | NA          |             |
| chrX:130883333-130928494  | ncRNA_exonic | FIRRE               | X     | 130883333 | 130928494 | 0         | 0  | 6  | 2  | 6  | 2  | 45161  | 2.738838672 | -0.423970081 | 1.832174923  | -0.231402622 | NA           | NA          |             |
| chr1:21083658-21100103    | exonic       | HP1BP3              | 1     | 21083658  | 21100103  | 8         | 16 | 6  | 23 | 26 | 3  | 16445  | 11.52045313 | -0.423643125 | 0.914694541  | -0.463152567 | 0.643255013  | 0.998252924 |             |
| chr1:21083658-21103243    | exonic       | HP1BP3              | 1     | 21083658  | 21103243  | 0         | 3  | 2  | 0  | 0  | 0  | 19585  | 11.52045313 | -0.423643125 | 0.914694541  | -0.463152567 | 0.643255013  | 0.998252924 |             |
| chr3:157839891-157841780  | exonic       | RSRC1               | 3     | 157839891 | 157841780 | 5         | 3  | 12 | 17 | 13 | 4  | 1889   | 8.148514883 | -0.423080875 | 1.026934567  | -0.411984258 | NA           | NA          |             |
| chr12:124071293-124074996 | exonic       | TMED2               | 12    | 124071293 | 124074996 | 1         | 0  | 9  | 3  | 6  | 5  | 3703   | 4.490599903 | -0.422465401 | 1.491574565  | -0.283234517 | NA           | NA          |             |
| chr1:155644801-155753880  | exonic       | DAP3, GON4L, YY1AP1 | 1     | 155644801 | 155753880 | 2         | 2  | 0  | 5  | 2  | 0  | 109079 | 1.380137253 | -0.421304368 | 2.230517649  | -0.188881881 | 0.850185395  | 0.998252924 |             |
| chr13:46577273-46594692   | exonic       | ZC3H13              | 13    | 46577273  | 46594692  | 3         | 2  | 0  | 2  | 4  | 1  | 17419  | 1.740463493 | -0.420553321 | 1.921471384  | -0.218870457 | 0.82675096   | 0.998252924 |             |
| chr5:40764615-40775605    | exonic       | PRKAA1              | 5     | 40764615  | 40775605  | 2         | 4  | 1  | 2  | 4  | 3  | 10990  | 2.773734391 | -0.420301772 | 1.545044639  | -0.272032122 | 0.78559732   | 0.998252924 |             |
| chr16:19474601-19475346   | exonic       | TMC5                | 16    | 19474601  | 19475346  | 7         | 0  | 2  | 3  | 7  | 2  | 745    | 3.080009976 | -0.420161053 | 1.567787206  | -0.267996225 | 0.788702224  | 0.998252924 |             |
| chr16:88066715-88071617   | exonic       | BANP                | 16    | 88066715  | 88071617  | 5         | 0  | 0  | 8  | 0  | 0  | 4902   | 1.495425795 | -0.418566894 | 2.61655437   | -0.159968735 | NA           | NA          |             |
| chr12:88898935-88939642   | exonic       | KITLG               | 12    | 88898935  | 88939642  | 4         | 3  | 0  | 8  | 4  | 0  | 40707  | 2.373375937 | -0.417609136 | 1.813644603  | -0.23025963  | 0.817890028  | 0.998252924 |             |
| chr16:66764015-66766408   | exonic       | DYNC1LI2            | 16    | 66764015  | 66766408  | 3         | 0  | 2  | 7  | 2  | 0  | 2393   | 1.767733419 | -0.417004554 | 2.045402834  | -0.203874047 | 0.838451927  | 0.998252924 |             |
| chr7:72277658-72277949    | exonic       | TYW1B               | 7     | 72277658  | 72277949  | 0         | 3  | 0  | 5  | 1  | 0  | 291    | 1.175411745 | -0.416496815 | 2.622413643  | -0.158821937 | NA           | NA          |             |
| chr2:191523883-191537878  | exonic       | NAB1                | 2     | 191523883 | 191537878 | 32        | 6  | 17 | 24 | 34 | 15 | 13995  | 10.68017207 | -0.416374132 | 0.954315676  | -0.4363065   | NA           | NA          |             |
| chr8:141889569-141900868  | exonic       | PTK2                | 8     | 141889569 | 141900868 | 6         | 9  | 2  | 10 | 7  | 6  | 11299  | 6.496559356 | -0.414460939 | 1.094221167  | -0.378772548 | 0.704856775  | 0.998252924 |             |
| chrX:138897036-138908982  | exonic       | ATP11C              | X     | 138897036 | 138908982 | 3         | 0  | 2  | 1  | 1  | 3  | 11946  | 1.933493513 | -0.413132655 | 1.941573848  | -0.212782354 | 0.831496728  | 0.998252924 |             |
| chr1:36823840-36828257    | exonic       | STK40               | 1     | 36823840  | 36828257  | 2         | 3  | 0  | 7  | 2  | 0  | 4417   | 1.767035822 | -0.412382666 | 2.045864783  | -0.201568877 | 0.840253779  | 0.998252924 |             |
| chr3:113207791-113225452  | exonic       | SPICE1              | 3     | 113207791 | 113225452 | 5         | 2  | 1  | 7  | 0  | 3  | 17661  | 2.85959086  | -0.411562188 | 1.654821003  | -0.248704958 | NA           | NA          |             |
| chr2:32703702-32707650    | exonic       | BIRC6               | 2     | 32703702  | 32707650  | 2         | 0  | 1  | 2  | 3  | 0  | 3948   | 1.030947947 | -0.410578965 | 2.510864062  | -0.163520985 | 0.870108252  | 0.998252924 |             |
| chr3:56626997-56628056    | exonic       | CCDC66              | 3     | 56626997  | 56628056  | 13        | 21 | 8  | 26 | 23 | 12 | 1059   | 16.16112426 | -0.408425897 | 0.78511266   | -0.520213108 | NA           | NA          |             |
| chr11:77330650-77340944   | exonic       | CLNS1A              | 11    | 77330650  | 77340944  | 1         | 2  | 3  | 3  | 4  | 2  | 10294  | 2.488826678 | -0.407800223 | 1.588643497  | -0.256697128 | 0.797412589  | 0.998252924 |             |
| chr8:141828375-141874498  | exonic       | PTK2                | 8     | 141828375 | 141874498 | 2         | 2  | 4  | 9  | 2  | 2  | 46123  | 3.210896113 | -0.407584128 | 1.446907183  | -0.281693347 | 0.778178656  | 0.998252924 |             |
| chr4:140810510-140812121  | exonic       | MAML3               | 4     | 140810510 | 140812121 | 8         | 6  | 3  | 7  | 9  | 6  | 1611   | 6.352095558 | -0.407501506 | 1.076411612  | -0.378574053 | 0.705004193  | 0.998252924 |             |
| chr14:32559707-32563592   | exonic       | ARHGAP5             | 14    | 32559707  | 32563592  | 36        | 19 | 15 | 39 | 43 | 17 | 3885   | 25.50384501 | -0.406934587 | 0.668005624  | -0.609178385 | 0.542406206  | 0.998252924 |             |
| chr1:117944807-117948267  | exonic       | MAN1A2              | 1     | 117944807 | 117948267 | 4         | 8  | 11 | 7  | 14 | 10 | 3460   | 9.600863134 | -0.406808567 | 0.99710998   | -0.407987659 | 0.683282735  | 0.998252924 |             |
| chr17:11958205-12016677   | exonic       | MAP2K4              | 17    | 11958205  | 12016677  | 4         | 9  | 2  | 6  | 14 | 3  | 58472  | 5.735876056 | -0.406065949 | 1.165442078  | -0.348422248 | NA           | NA          |             |
| chr16:1859239-1859834     | exonic       | HAGH                | 16    | 1859239   | 1859834   | 0         | 8  | 0  | 12 | 4  | 0  | 595    | 3.154052702 | -0.405745664 | 1.886079901  | -0.215126445 | 0.829668737  | 0.998252924 |             |
| chr8:95676924-95677424    | exonic       | ESRP1               | 8     | 95676924  | 95677424  | 4         | 3  | 0  | 2  | 5  | 2  | 500    | 2.472972265 | -0.405555504 | 1.682148208  | -0.2410938   | 0.809482418  | 0.998252924 |             |
| chr7:104782454-104783777  | exonic       | SRPK2               | 7     | 104782454 | 104783777 | 0         | 0  | 3  | 2  | 2  | 1  | 1323   | 1.354703299 | -0.405496255 | 2.318063801  | -0.174928859 | NA           | NA          |             |



|                           |            |                                         |    |           |           |    |    |   |    |    |   |       |             |              |             |              |             |             |
|---------------------------|------------|-----------------------------------------|----|-----------|-----------|----|----|---|----|----|---|-------|-------------|--------------|-------------|--------------|-------------|-------------|
| chr10:12039670-12056183   | exonic     | UPF2                                    | 10 | 12039670  | 12056183  | 1  | 3  | 0 | 2  | 5  | 0 | 16513 | 1.469574219 | -0.405310111 | 2.213742332 | -0.183088205 | 0.85472881  | 0.998252924 |
| chr16:31373156-31374074   | exonic     | ITGAX                                   | 16 | 31373156  | 31374074  | 0  | 3  | 2 | 6  | 4  | 0 | 918   | 2.039343446 | -0.404110871 | 1.940992651 | -0.208198043 | 0.835074337 | 0.998252924 |
| chr5:43613009-43628489    | exonic     | NNT                                     | 5  | 43613009  | 43628489  | 0  | 0  | 2 | 0  | 4  | 0 | 15480 | 0.878647738 | -0.40339348  | 3.195736171 | -0.126228655 | NA          | NA          |
| chr6:13579682-13597248    | exonic     | SIRT5                                   | 6  | 13579682  | 13597248  | 0  | 0  | 2 | 0  | 4  | 0 | 17566 | 0.878647738 | -0.40339348  | 3.195736171 | -0.126228655 | NA          | NA          |
| chr15:66007815-66048810   | exonic     | DENND4A                                 | 15 | 66007815  | 66048810  | 1  | 2  | 0 | 1  | 2  | 1 | 40995 | 1.134123378 | -0.401908926 | 2.316757771 | -0.173479045 | 0.862274898 | 0.998252924 |
| chr9:114148656-114154104  | exonic     | KIAA0368                                | 9  | 114148656 | 114154104 | 10 | 4  | 8 | 23 | 17 | 0 | 5448  | 8.067752857 | -0.401219464 | 1.122299664 | -0.357497624 | NA          | NA          |
| chr5:176963358-176966148  | exonic     | FAM193B                                 | 5  | 176963358 | 176966148 | 16 | 11 | 5 | 34 | 11 | 5 | 2790  | 11.45415178 | -0.39855112  | 0.898810824 | -0.443420472 | NA          | NA          |
| chr6:149699153-149700654  | exonic     | TAB2                                    | 6  | 149699153 | 149700654 | 1  | 2  | 1 | 1  | 6  | 0 | 1501  | 1.507283482 | -0.39841912  | 2.087187619 | -0.190888024 | NA          | NA          |
| chr12:19615443-19653155   | exonic     | AEBP2                                   | 12 | 19615443  | 19653155  | 2  | 1  | 0 | 4  | 1  | 0 | 37712 | 0.978522647 | -0.398202883 | 2.580356201 | -0.154320897 | 0.877356721 | 0.998252924 |
| chr5:179136873-179143295  | exonic     | CANX                                    | 5  | 179136873 | 179143295 | 2  | 1  | 0 | 4  | 1  | 0 | 6422  | 0.978522647 | -0.398202883 | 2.580356201 | -0.154320897 | 0.877356721 | 0.998252924 |
| chr12:42778741-42792796   | exonic     | PPHLN1                                  | 12 | 42778741  | 42792796  | 0  | 1  | 2 | 3  | 3  | 0 | 14055 | 1.250830271 | -0.397269463 | 2.345953271 | -0.169342445 | 0.865527292 | 0.998252924 |
| chr15:100871094-100874385 | exonic     | ADAMTS17                                | 15 | 100871094 | 100874385 | 10 | 0  | 0 | 9  | 6  | 0 | 3291  | 2.972836425 | -0.396959826 | 1.882622057 | -0.210854762 | NA          | NA          |
| chr1:231672958-231678357  | exonic     | TSNAX                                   | 1  | 231672958 | 231678357 | 2  | 2  | 0 | 6  | 1  | 0 | 5399  | 1.365421216 | -0.395966619 | 2.273908934 | -0.174134774 | NA          | NA          |
| chr10:69785302-69804320   | exonic     | HERC4                                   | 10 | 69785302  | 69804320  | 2  | 2  | 0 | 6  | 1  | 0 | 19018 | 1.365421216 | -0.395966619 | 2.273908934 | -0.174134774 | NA          | NA          |
| chr17:80721840-80739597   | exonic     | TBCD                                    | 17 | 80721840  | 80739597  | 8  | 2  | 0 | 5  | 6  | 2 | 17757 | 3.254605815 | -0.394167045 | 1.520991036 | -0.259151458 | 0.795518383 | 0.998252924 |
| chr1:155695172-155695810  | exonic     | DAP3                                    | 1  | 155695172 | 155695810 | 2  | 0  | 0 | 3  | 0  | 0 | 638   | 0.576908041 | -0.393695295 | 3.729573207 | -0.105560415 | NA          | NA          |
| chr1:65268658-65280523    | exonic     | RAVER2                                  | 1  | 65268658  | 65280523  | 2  | 0  | 0 | 3  | 0  | 0 | 11865 | 0.576908041 | -0.393695295 | 3.729573207 | -0.105560415 | NA          | NA          |
| chr10:21104553-21158770   | exonic     | NEBL                                    | 10 | 21104553  | 21158770  | 2  | 0  | 0 | 3  | 0  | 0 | 54217 | 0.576908041 | -0.393695295 | 3.729573207 | -0.105560415 | NA          | NA          |
| chr11:19371920-19372574   | exonic     | NAV2                                    | 11 | 19371920  | 19372574  | 2  | 0  | 0 | 3  | 0  | 0 | 654   | 0.576908041 | -0.393695295 | 3.729573207 | -0.105560415 | NA          | NA          |
| chr14:31611063-31638674   | exonic     | HECTD1                                  | 14 | 31611063  | 31638674  | 2  | 0  | 0 | 3  | 0  | 0 | 27611 | 0.576908041 | -0.393695295 | 3.729573207 | -0.105560415 | NA          | NA          |
| chr15:76161291-76175765   | exonic     | UBE2Q2                                  | 15 | 76161291  | 76175765  | 2  | 0  | 0 | 3  | 0  | 0 | 14474 | 0.576908041 | -0.393695295 | 3.729573207 | -0.105560415 | NA          | NA          |
| chr17:37420427-37421706   | exonic     | FBXL20                                  | 17 | 37420427  | 37421706  | 2  | 0  | 0 | 3  | 0  | 0 | 1279  | 0.576908041 | -0.393695295 | 3.729573207 | -0.105560415 | NA          | NA          |
| chr18:32902352-32907027   | intergenic | ZNF271P (dist=11622), ZNF24 (dist=5145) | 18 | 32902352  | 32907027  | 2  | 0  | 0 | 3  | 0  | 0 | 4675  | 0.576908041 | -0.393695295 | 3.729573207 | -0.105560415 | NA          | NA          |
| chr2:154757448-154801152  | exonic     | GALNT13                                 | 2  | 154757448 | 154801152 | 2  | 0  | 0 | 3  | 0  | 0 | 43704 | 0.576908041 | -0.393695295 | 3.729573207 | -0.105560415 | NA          | NA          |
| chr2:168902799-168904832  | intronic   | STK39                                   | 2  | 168902799 | 168904832 | 2  | 0  | 0 | 3  | 0  | 0 | 2033  | 0.576908041 | -0.393695295 | 3.729573207 | -0.105560415 | NA          | NA          |
| chr2:27573181-27573499    | UTR5       | GTF3C2 (NM_001521:c.6835_6760del1ins0)  | 2  | 27573181  | 27573499  | 2  | 0  | 0 | 3  | 0  | 0 | 318   | 0.576908041 | -0.393695295 | 3.729573207 | -0.105560415 | NA          | NA          |
| chr2:38812785-38818790    | exonic     | HNRNPLL                                 | 2  | 38812785  | 38818790  | 2  | 0  | 0 | 3  | 0  | 0 | 6005  | 0.576908041 | -0.393695295 | 3.729573207 | -0.105560415 | NA          | NA          |
| chr21:37734480-37742174   | exonic     | MORC3                                   | 21 | 37734480  | 37742174  | 2  | 0  | 0 | 3  | 0  | 0 | 7694  | 0.576908041 | -0.393695295 | 3.729573207 | -0.105560415 | NA          | NA          |
| chr4:119252870-119259469  | exonic     | PRSS12                                  | 4  | 119252870 | 119259469 | 2  | 0  | 0 | 3  | 0  | 0 | 6599  | 0.576908041 | -0.393695295 | 3.729573207 | -0.105560415 | NA          | NA          |
| chr4:149073619-149076052  | exonic     | NR3C2                                   | 4  | 149073619 | 149076052 | 2  | 0  | 0 | 3  | 0  | 0 | 2433  | 0.576908041 | -0.393695295 | 3.729573207 | -0.105560415 | NA          | NA          |
| chr5:128440648-128442755  | exonic     | ISOC1                                   | 5  | 128440648 | 128442755 | 2  | 0  | 0 | 3  | 0  | 0 | 2107  | 0.576908041 | -0.393695295 | 3.729573207 | -0.105560415 | NA          | NA          |
| chr5:98204198-98208259    | exonic     | CHD1                                    | 5  | 98204198  | 98208259  | 2  | 0  | 0 | 3  | 0  | 0 | 4061  | 0.576908041 | -0.393695295 | 3.729573207 | -0.105560415 | NA          | NA          |
| chr6:108066152-108071017  | exonic     | SCML4                                   | 6  | 108066152 | 108071017 | 2  | 0  | 0 | 3  | 0  | 0 | 4865  | 0.576908041 | -0.393695295 | 3.729573207 | -0.105560415 | NA          | NA          |
| chr6:144803344-144809970  | exonic     | UTRN                                    | 6  | 144803344 | 144809970 | 2  | 0  | 0 | 3  | 0  | 0 | 6626  | 0.576908041 | -0.393695295 | 3.729573207 | -0.105560415 | NA          | NA          |
| chr6:152570295-152577900  | exonic     | SYNE1                                   | 6  | 152570295 | 152577900 | 2  | 0  | 0 | 3  | 0  | 0 | 7605  | 0.576908041 | -0.393695295 | 3.729573207 | -0.105560415 | NA          | NA          |

|                          |              |            |    |           |           |    |   |   |    |    |    |       |             |              |             |              |             |             |
|--------------------------|--------------|------------|----|-----------|-----------|----|---|---|----|----|----|-------|-------------|--------------|-------------|--------------|-------------|-------------|
| chr6:158994451-159026379 | exonic       | TMEM181    | 6  | 158994451 | 159026379 | 2  | 0 | 0 | 3  | 0  | 0  | 31928 | 0.576908041 | -0.393695295 | 3.729573207 | -0.105560415 | NA          | NA          |
| chr6:158994451-159029782 | exonic       | TMEM181    | 6  | 158994451 | 159029782 | 2  | 0 | 0 | 3  | 0  | 0  | 35331 | 0.576908041 | -0.393695295 | 3.729573207 | -0.105560415 | NA          | NA          |
| chrX:118971719-118972490 | exonic       | UPF3B      | X  | 118971719 | 118972490 | 2  | 0 | 0 | 3  | 0  | 0  | 771   | 0.576908041 | -0.393695295 | 3.729573207 | -0.105560415 | NA          | NA          |
| chrX:6069035-6069812     | exonic       | NLGN4X     | X  | 6069035   | 6069812   | 2  | 0 | 0 | 3  | 0  | 0  | 777   | 0.576908041 | -0.393695295 | 3.729573207 | -0.105560415 | NA          | NA          |
| chr2:89100615-89104394   | ncRNA_exonic | ANKRD36BP2 | 2  | 89100615  | 89104394  | 4  | 9 | 7 | 0  | 34 | 1  | 3779  | 7.888464091 | -0.393015075 | 1.339232952 | -0.293462818 | NA          | NA          |
| chr9:99220660-99228060   | exonic       | HABP4      | 9  | 99220660  | 99228060  | 0  | 1 | 2 | 7  | 2  | 0  | 7400  | 3.118438599 | -0.392705212 | 1.578111762 | -0.248844994 | NA          | NA          |
| chr4:73950965-73958017   | exonic       | ANKRD17    | 4  | 73950965  | 73958017  | 11 | 7 | 8 | 11 | 10 | 11 | 7052  | 9.98704332  | -0.392646525 | 0.929592084 | -0.422385831 | NA          | NA          |
| chr3:105389076-105400662 | exonic       | CBLB       | 3  | 105389076 | 105400662 | 0  | 0 | 3 | 0  | 6  | 0  | 11586 | 1.317971607 | -0.392527356 | 2.759164844 | -0.142263104 | NA          | NA          |
| chr5:32135677-32143986   | exonic       | GOLPH3     | 5  | 32135677  | 32143986  | 2  | 5 | 3 | 7  | 7  | 2  | 8309  | 3.928968824 | -0.392522332 | 1.302147811 | -0.301442224 | 0.7630773   | 0.998252924 |
| chr1:26584087-26586293   | exonic       | CEP85      | 1  | 26584087  | 26586293  | 0  | 0 | 2 | 2  | 0  | 1  | 2206  | 0.91537943  | -0.392244346 | 2.917090864 | -0.134464219 | 0.893035503 | 0.998252924 |
| chr15:58913669-58936177  | exonic       | ADAM10     | 15 | 58913669  | 58936177  | 0  | 0 | 2 | 2  | 0  | 1  | 22508 | 0.91537943  | -0.392244346 | 2.917090864 | -0.134464219 | 0.893035503 | 0.998252924 |
| chr7:90355880-90356126   | exonic       | CDK14      | 7  | 90355880  | 90356126  | 2  | 0 | 2 | 3  | 4  | 0  | 246   | 1.455555779 | -0.391104533 | 2.184767646 | -0.179014246 | 0.857926516 | 0.998252924 |
| chr1:27042605-27044560   | intronic     | ARID1A     | 1  | 27042605  | 27044560  | 5  | 5 | 0 | 8  | 0  | 4  | 1955  | 3.599679226 | -0.391095157 | 1.643998999 | -0.237892576 | 0.811964414 | 0.998252924 |
| chr2:44436348-44445676   | exonic       | PPM1B      | 2  | 44436348  | 44445676  | 5  | 0 | 3 | 4  | 5  | 2  | 9328  | 2.883561658 | -0.389720862 | 1.575779808 | -0.247319365 | 0.804661073 | 0.998252924 |
| chr2:24042616-24046439   | exonic       | ATAD2B     | 2  | 24042616  | 24046439  | 4  | 0 | 0 | 4  | 2  | 0  | 3823  | 1.183248155 | -0.389437256 | 2.567730077 | -0.151665963 | 0.879450404 | 0.998252924 |
| chr4:77065301-77065626   | exonic       | NUP54      | 4  | 77065301  | 77065626  | 4  | 0 | 0 | 4  | 2  | 0  | 325   | 1.183248155 | -0.389437256 | 2.567730077 | -0.151665963 | 0.879450404 | 0.998252924 |
| chr1:167734819-167745403 | exonic       | MPZL1      | 1  | 167734819 | 167745403 | 0  | 2 | 0 | 4  | 0  | 0  | 10584 | 0.773797139 | -0.388408202 | 3.343111612 | -0.116181644 | NA          | NA          |
| chr18:77208781-77211816  | exonic       | NFATC1     | 18 | 77208781  | 77211816  | 0  | 2 | 0 | 4  | 0  | 0  | 3035  | 0.773797139 | -0.388408202 | 3.343111612 | -0.116181644 | NA          | NA          |
| chr14:93760203-93762503  | exonic       | BTBD7      | 14 | 93760203  | 93762503  | 5  | 3 | 0 | 8  | 3  | 1  | 2300  | 2.689554067 | -0.388319872 | 1.633310987 | -0.237750113 | 0.812074913 | 0.998252924 |
| chr3:67546221-67548719   | exonic       | SUCLG2     | 3  | 67546221  | 67548719  | 3  | 1 | 1 | 2  | 4  | 1  | 2498  | 1.763456719 | -0.387763319 | 1.818549471 | -0.213226709 | 0.831150136 | 0.998252924 |
| chr10:70696691-70703013  | exonic       | DDX50      | 10 | 70696691  | 70703013  | 0  | 1 | 1 | 3  | 1  | 0  | 6322  | 0.811506402 | -0.387640473 | 2.804467872 | -0.138222469 | 0.890064598 | 0.998252924 |
| chr6:116966876-116982009 | exonic       | ZUFSP      | 6  | 116966876 | 116982009 | 0  | 1 | 1 | 3  | 1  | 0  | 15133 | 0.811506402 | -0.387640473 | 2.804467872 | -0.138222469 | 0.890064598 | 0.998252924 |
| chr10:86177526-86185649  | exonic       | CCSER2     | 10 | 86177526  | 86185649  | 19 | 7 | 0 | 31 | 7  | 2  | 8123  | 8.429964616 | -0.38561449  | 1.20300031  | -0.320543966 | 0.748556007 | 0.998252924 |
| chr7:24659670-24708279   | exonic       | MPP6       | 7  | 24659670  | 24708279  | 6  | 7 | 4 | 4  | 10 | 7  | 48609 | 6.575978372 | -0.385583727 | 1.098409138 | -0.351038346 | 0.72555958  | 0.998252924 |
| chr7:24663284-24703340   | exonic       | MPP6       | 7  | 24663284  | 24703340  | 10 | 7 | 6 | 2  | 0  | 5  | 40056 | 6.575978372 | -0.385583727 | 1.098409138 | -0.351038346 | 0.72555958  | 0.998252924 |
| chr14:31416295-31425448  | exonic       | STRN3      | 14 | 31416295  | 31425448  | 1  | 1 | 1 | 0  | 3  | 1  | 9153  | 1.171832642 | -0.385464706 | 2.315096178 | -0.166500515 | 0.867763078 | 0.998252924 |
| chr3:169831147-169840532 | exonic       | PHC3       | 3  | 169831147 | 169840532 | 5  | 6 | 2 | 2  | 9  | 5  | 9385  | 4.92809017  | -0.384407344 | 1.252453418 | -0.306923466 | 0.758901627 | 0.998252924 |
| chr1:175956078-175958615 | exonic       | RFWD2      | 1  | 175956078 | 175958615 | 4  | 0 | 1 | 6  | 0  | 1  | 2537  | 1.659303716 | -0.383847091 | 2.161955426 | -0.177546256 | 0.859079336 | 0.998252924 |
| chr10:7262372-7318951    | exonic       | SFMBT2     | 10 | 7262372   | 7318951   | 1  | 3 | 0 | 3  | 4  | 0  | 56579 | 1.454858183 | -0.383746826 | 2.206542162 | -0.173913208 | 0.861933672 | 0.998252924 |
| chr15:49319561-49320879  | exonic       | SECISBP2L  | 15 | 49319561  | 49320879  | 0  | 0 | 2 | 1  | 3  | 0  | 1318  | 0.863931702 | -0.38315105  | 2.949381856 | -0.129908933 | 0.896638477 | 0.998252924 |
| chr17:953289-1028702     | exonic       | ABR        | 17 | 953289    | 1028702   | 0  | 0 | 2 | 1  | 3  | 0  | 75413 | 0.863931702 | -0.38315105  | 2.949381856 | -0.129908933 | 0.896638477 | 0.998252924 |
| chr4:128998942-129019485 | exonic       | LARP1B     | 4  | 128998942 | 129019485 | 0  | 0 | 2 | 1  | 3  | 0  | 20543 | 0.863931702 | -0.38315105  | 2.949381856 | -0.129908933 | 0.896638477 | 0.998252924 |
| chr1:12335881-12338095   | exonic       | VPS13D     | 1  | 12335881  | 12338095  | 8  | 4 | 0 | 7  | 12 | 0  | 2214  | 3.925507496 | -0.382070244 | 1.545477027 | -0.247218327 | 0.804739263 | 0.998252924 |
| chr5:70798425-70806978   | exonic       | BDP1       | 5  | 70798425  | 70806978  | 3  | 2 | 0 | 5  | 9  | 2  | 8553  | 1.260292037 | -0.381074372 | 2.618374858 | -0.145538509 | NA          | NA          |
| chr6:101246588-101253756 | exonic       | ASCC3      | 6  | 101246588 | 101253756 | 1  | 2 | 0 | 1  | 4  | 0  | 7168  | 1.067959613 | -0.380824499 | 2.51210895  | -0.151595535 | NA          | NA          |

|                           |            |                                          |    |           |           |    |    |    |    |    |    |       |             |              |             |              |             |             |
|---------------------------|------------|------------------------------------------|----|-----------|-----------|----|----|----|----|----|----|-------|-------------|--------------|-------------|--------------|-------------|-------------|
| chr3:149563797-149639014  | exonic     | RNF13                                    | 3  | 149563797 | 149639014 | 23 | 40 | 18 | 17 | 32 | 29 | 75217 | 19.32049175 | -0.377320695 | 0.871748382 | -0.432832113 | 0.665136742 | 0.998252924 |
| chr2:160025760-160027316  | exonic     | TANC1                                    | 2  | 160025760 | 160027316 | 5  | 3  | 1  | 16 | 0  | 0  | 1556  | 3.066013299 | -0.37629714  | 1.777656678 | -0.211681561 | NA          | NA          |
| chr3:183361267-183369064  | exonic     | KLHL24                                   | 3  | 183361267 | 183369064 | 13 | 5  | 6  | 24 | 15 | 1  | 7797  | 8.406926584 | -0.375142027 | 1.029182182 | -0.364504976 | 0.715480959 | 0.998252924 |
| chr20:57014000-57016139   | exonic     | VAPB                                     | 20 | 57014000  | 57016139  | 7  | 24 | 11 | 25 | 32 | 9  | 2139  | 16.56011666 | -0.375030581 | 0.823625183 | -0.455341324 | 0.648863701 | 0.998252924 |
| chr12:10368878-10369233   | intronic   | GABARAPL1                                | 12 | 10368878  | 10369233  | 0  | 5  | 2  | 0  | 4  | 4  | 355   | 2.982901169 | -0.373856135 | 1.79802993  | -0.207925424 | 0.835287198 | 0.998252924 |
| chr15:93540186-93545547   | exonic     | CHD2                                     | 15 | 93540186  | 93545547  | 9  | 7  | 5  | 7  | 11 | 8  | 5361  | 7.908388412 | -0.373031037 | 1.000415771 | -0.372876006 | 0.70924073  | 0.998252924 |
| chr6:157150361-157157084  | exonic     | ARID1B                                   | 6  | 157150361 | 157157084 | 0  | 3  | 0  | 6  | 0  | 0  | 6723  | 1.160695708 | -0.372969294 | 2.870849037 | -0.129916025 | NA          | NA          |
| chr12:111947352-111948386 | exonic     | ATXN2                                    | 12 | 111947352 | 111948386 | 3  | 2  | 8  | 9  | 13 | 1  | 1034  | 5.152042189 | -0.37242675  | 1.247087057 | -0.298637331 | 0.765216778 | 0.998252924 |
| chr9:37424841-37426651    | exonic     | GRHPR                                    | 9  | 37424841  | 37426651  | 48 | 13 | 7  | 84 | 20 | 4  | 1810  | 22.42142104 | -0.370330617 | 0.886264669 | -0.417855557 | NA          | NA          |
| chr10:32573625-32573978   | exonic     | EPC1                                     | 10 | 32573625  | 32573978  | 2  | 0  | 0  | 1  | 0  | 1  | 353   | 0.67250388  | -0.370234666 | 3.277204445 | -0.11297271  | 0.910052191 | 0.998252924 |
| chr12:100598717-100601564 | exonic     | ACTR6                                    | 12 | 100598717 | 100601564 | 2  | 0  | 0  | 1  | 0  | 1  | 2847  | 0.67250388  | -0.370234666 | 3.277204445 | -0.11297271  | 0.910052191 | 0.998252924 |
| chr3:169889160-169896726  | exonic     | PHC3                                     | 3  | 169889160 | 169896726 | 2  | 0  | 0  | 1  | 0  | 1  | 7566  | 0.67250388  | -0.370234666 | 3.277204445 | -0.11297271  | 0.910052191 | 0.998252924 |
| chr5:145144493-145205763  | exonic     | PRELID2                                  | 5  | 145144493 | 145205763 | 2  | 0  | 0  | 1  | 0  | 1  | 61270 | 0.67250388  | -0.370234666 | 3.277204445 | -0.11297271  | 0.910052191 | 0.998252924 |
| chr19:19603114-19603521   | exonic     | GATAD2A                                  | 19 | 19603114  | 19603521  | 4  | 0  | 2  | 6  | 4  | 0  | 407   | 2.03246382  | -0.369938954 | 1.922765284 | -0.192399435 | 0.847429335 | 0.998252924 |
| chr3:8977554-8983488      | exonic     | RAD18                                    | 3  | 8977554   | 8983488   | 2  | 3  | 1  | 4  | 0  | 3  | 5934  | 2.327971675 | -0.369214225 | 1.782590063 | -0.20712234  | 0.835914316 | 0.998252924 |
| chr11:128628009-128642880 | exonic     | FLI1                                     | 11 | 128628009 | 128642880 | 2  | 1  | 1  | 6  | 1  | 0  | 14871 | 1.388414443 | -0.366446206 | 2.130233216 | -0.172021637 | NA          | NA          |
| chr19:24237913-24238175   | intronic   | ZNF254                                   | 19 | 24237913  | 24238175  | 0  | 3  | 5  | 5  | 4  | 3  | 262   | 3.449494964 | -0.365745582 | 1.512806294 | -0.241766301 | 0.808961252 | 0.998252924 |
| chr9:33960823-33989124    | exonic     | UBAP2                                    | 9  | 33960823  | 33989124  | 3  | 13 | 0  | 9  | 8  | 5  | 28301 | 6.118661101 | -0.365110998 | 1.279115948 | -0.285440111 | NA          | NA          |
| chr2:24733838-24807429    | UTR5       | -----                                    | 2  | 24733838  | 24807429  | 0  | 4  | 0  | 3  | 0  | 2  | 73591 | 1.632474569 | -0.364555454 | 2.354773547 | -0.154815504 | 0.876966768 | 0.998252924 |
| chr2:62100136-62107529    | exonic     | CCT4                                     | 2  | 62100136  | 62107529  | 1  | 1  | 0  | 0  | 3  | 0  | 7393  | 0.666345007 | -0.364530484 | 3.263107009 | -0.111712697 | NA          | NA          |
| chr1:246078831-246093239  | exonic     | SMYD3                                    | 1  | 246078831 | 246093239 | 0  | 2  | 4  | 7  | 5  | 0  | 14408 | 2.486944505 | -0.362513563 | 1.819796109 | -0.199205593 | 0.842101924 | 0.998252924 |
| chr18:39607406-39629569   | exonic     | PIK3C3                                   | 18 | 39607406  | 39629569  | 3  | 2  | 2  | 6  | 6  | 0  | 22163 | 2.494083319 | -0.361994782 | 1.640855915 | -0.220613388 | 0.825393476 | 0.998252924 |
| chr10:75296026-75299351   | exonic     | USP54                                    | 10 | 75296026  | 75299351  | 0  | 1  | 3  | 6  | 0  | 1  | 3325  | 1.712169795 | -0.357438127 | 2.162428841 | -0.165294746 | 0.868711994 | 0.998252924 |
| chr12:120995084-120995485 | exonic     | RNF10                                    | 12 | 120995084 | 120995485 | 6  | 0  | 2  | 9  | 4  | 0  | 401   | 2.609371861 | -0.357426332 | 1.776004802 | -0.201253021 | 0.840500735 | 0.998252924 |
| chr5:142434003-142437312  | exonic     | ARHGAP26                                 | 5  | 142434003 | 142437312 | 7  | 4  | 3  | 11 | 6  | 3  | 3309  | 5.012064466 | -0.357388587 | 1.160012255 | -0.308090354 | 0.758013581 | 0.998252924 |
| chr7:65592690-65599361    | exonic     | CRCP                                     | 7  | 65592690  | 65599361  | 2  | 4  | 0  | 3  | 7  | 0  | 6671  | 2.12120319  | -0.356167323 | 1.915683353 | -0.185921813 | 0.852506076 | 0.998252924 |
| chr3:119219541-119236162  | exonic     | TIMMDC1                                  | 3  | 119219541 | 119236162 | 4  | 3  | 2  | 14 | 2  | 0  | 16621 | 3.163727455 | -0.355724746 | 1.561737568 | -0.227774982 | NA          | NA          |
| chr8:67383665-67386173    | intergenic | ADHFE1 (dist=2621), C8orf46 (dist=19318) | 8  | 67383665  | 67386173  | 9  | 0  | 0  | 7  | 6  | 0  | 2508  | 2.631226712 | -0.355028475 | 1.949673202 | -0.182096402 | NA          | NA          |
| chr2:61749745-61761038    | exonic     | XPO1                                     | 2  | 61749745  | 61761038  | 29 | 14 | 32 | 25 | 50 | 24 | 11293 | 28.59949367 | -0.352686504 | 0.718170197 | -0.491090421 | 0.623362496 | 0.998252924 |
| chr2:110342702-110350696  | exonic     |                                          | 2  | 110342702 | 110350696 | 7  | 2  | 2  | 7  | 2  | 4  | 7994  | 3.865107223 | -0.346251384 | 1.351937754 | -0.256114886 | 0.797862128 | 0.998252924 |
| chr8:131370262-131414216  | exonic     | ASAP1                                    | 8  | 131370262 | 131414216 | 2  | 0  | 1  | 4  | 1  | 0  | 43954 | 1.001515873 | -0.345781688 | 2.561329223 | -0.135000876 | 0.892611182 | 0.998252924 |
| chr3:123649948-123667979  | exonic     | CCDC14                                   | 3  | 123649948 | 123667979 | 0  | 0  | 2  | 2  | 2  | 0  | 18031 | 0.849215665 | -0.344778029 | 2.94680001  | -0.117000824 | 0.906859401 | 0.998252924 |
| chr5:43122140-43162033    | exonic     | ZNF131                                   | 5  | 43122140  | 43162033  | 0  | 0  | 2  | 2  | 2  | 0  | 39893 | 0.849215665 | -0.344778029 | 2.94680001  | -0.117000824 | 0.906859401 | 0.998252924 |
| chr16:88664585-88677944   | exonic     | ZC3H18                                   | 16 | 88664585  | 88677944  | 0  | 0  | 3  | 4  | 0  | 1  | 13359 | 1.325271226 | -0.344243865 | 2.540669978 | -0.135493341 | NA          | NA          |
| chr14:80963812-80997230   | exonic     | CEP128                                   | 14 | 80963812  | 80997230  | 0  | 0  | 4  | 3  | 5  | 0  | 33418 | 1.713147367 | -0.343695302 | 2.272154496 | -0.151264055 | 0.879767423 | 0.998252924 |

|                           |              |                                                         |    |           |           |    |    |    |     |    |    |       |             |              |             |              |             |             |
|---------------------------|--------------|---------------------------------------------------------|----|-----------|-----------|----|----|----|-----|----|----|-------|-------------|--------------|-------------|--------------|-------------|-------------|
| chr8:103372298-103373854  | exonic       | UBR5                                                    | 8  | 103372298 | 103373854 | 8  | 12 | 17 | 15  | 29 | 10 | 1556  | 14.66343066 | -0.343562152 | 0.838994368 | -0.409492799 | 0.68217805  | 0.998252924 |
| chr4:169812072-169837178  | exonic       | PALLD                                                   | 4  | 169812072 | 169837178 | 3  | 1  | 0  | 3   | 0  | 0  | 25106 | 1.540714651 | -0.343095543 | 2.38506579  | -0.143851606 | NA          | NA          |
| chr4:153332455-153391140  | exonic       | FBXW7                                                   | 4  | 153332455 | 153391140 | 0  | 4  | 3  | 3   | 10 | 0  | 58685 | 2.818118646 | -0.341736974 | 1.765665262 | -0.193545731 | 0.846531595 | 0.998252924 |
| chr15:59323002-59359282   | exonic       | RNF111                                                  | 15 | 59323002  | 59359282  | 2  | 2  | 0  | 0   | 4  | 1  | 36280 | 1.39885378  | -0.341260825 | 2.28059607  | -0.14963668  | 0.881051267 | 0.998252924 |
| chr21:37711071-37717005   | exonic       | MORC3                                                   | 21 | 37711071  | 37717005  | 9  | 16 | 11 | 33  | 14 | 8  | 5934  | 13.78766304 | -0.340341656 | 0.832366478 | -0.408884386 | 0.682624508 | 0.998252924 |
| chr6:131466424-131490413  | exonic       | AKAP7                                                   | 6  | 131466424 | 131490413 | 2  | 2  | 1  | 9   | 0  | 0  | 23989 | 1.760596976 | -0.339418833 | 2.108452342 | -0.160980083 | NA          | NA          |
| chr2:165548730-165552346  | exonic       | COBLL1                                                  | 2  | 165548730 | 165552346 | 0  | 2  | 3  | 8   | 2  | 0  | 3616  | 2.032904599 | -0.339408619 | 1.972693535 | -0.172053394 | 0.863395552 | 0.998252924 |
| chr11:46333875-46334470   | exonic       | CREB3L1                                                 | 11 | 46333875  | 46334470  | 4  | 1  | 1  | 0   | 9  | 0  | 595   | 1.976739392 | -0.339383574 | 2.055634539 | -0.165099179 | NA          | NA          |
| chr12:70671911-70704797   | exonic       | CNOT2                                                   | 12 | 70671911  | 70704797  | 4  | 2  | 0  | 3   | 4  | 1  | 32886 | 1.975761821 | -0.33799217  | 1.821817093 | -0.185524755 | 0.852817465 | 0.998252924 |
| chr2:214174782-214239843  | exonic       | SPAG16                                                  | 2  | 214174782 | 214239843 | 3  | 4  | 1  | 5   | 2  | 3  | 65061 | 2.979600646 | -0.337846033 | 1.486627821 | -0.227256633 | 0.820224193 | 0.998252924 |
| chr6:30002684-30003760    | ncRNA_exonic | ZNRD1-AS1                                               | 6  | 30002684  | 30003760  | 1  | 3  | 0  | 5   | 2  | 0  | 1076  | 1.425426109 | -0.337140015 | 2.231535652 | -0.151079825 | 0.879912747 | 0.998252924 |
| chr8:135612678-135622898  | exonic       | ZFAT                                                    | 8  | 135612678 | 135622898 | 0  | 3  | 0  | 0   | 3  | 1  | 10220 | 1.194128271 | -0.336970403 | 2.636584274 | -0.127805664 | NA          | NA          |
| chr5:80063751-80088663    | exonic       | MSH3                                                    | 5  | 80063751  | 80088663  | 5  | 0  | 0  | 0   | 0  | 3  | 24912 | 1.56959054  | -0.336021509 | 2.629158809 | -0.12780571  | NA          | NA          |
| chr5:80388619-80422982    | exonic       | RASGRF2                                                 | 5  | 80388619  | 80422982  | 5  | 0  | 0  | 0   | 0  | 3  | 34363 | 1.56959054  | -0.336021509 | 2.629158809 | -0.12780571  | NA          | NA          |
| chr16:48381417-48382201   | exonic       | LONP2                                                   | 16 | 48381417  | 48382201  | 6  | 3  | 0  | 9   | 3  | 1  | 784   | 2.924852394 | -0.335640484 | 1.593309228 | -0.21065621  | 0.833155547 | 0.998252924 |
| chr1:35936463-35944813    | exonic       | KIAA0319L                                               | 1  | 35936463  | 35944813  | 6  | 3  | 2  | 3   | 10 | 2  | 8350  | 3.836932696 | -0.335476108 | 1.331774751 | -0.251901538 | 0.801117171 | 0.998252924 |
| chr2:176844537-176860374  | exonic       | KIAA1715                                                | 2  | 176844537 | 176860374 | 3  | 0  | 3  | 3   | 7  | 0  | 15837 | 2.144894013 | -0.334081424 | 1.901772779 | -0.175668422 | 0.860554445 | 0.998252924 |
| chr6:13579682-13584457    | exonic       | SIRT5                                                   | 6  | 13579682  | 13584457  | 3  | 9  | 13 | 9   | 21 | 7  | 4775  | 10.17584894 | -0.334020554 | 0.986686355 | -0.33852759  | 0.734965639 | 0.998252924 |
| chr11:120310837-120316173 | exonic       | ARHGEF12                                                | 11 | 120310837 | 120316173 | 0  | 0  | 3  | 3   | 3  | 0  | 5336  | 1.273823497 | -0.333257509 | 2.518792624 | -0.132308434 | NA          | NA          |
| chr3:67797195-67801084    | ncRNA_exonic | SUCLG2-AS1                                              | 3  | 67797195  | 67801084  | 0  | 0  | 3  | 3   | 3  | 0  | 3889  | 1.273823497 | -0.333257509 | 2.518792624 | -0.132308434 | NA          | NA          |
| chr13:49741379-49749677   | exonic       | FNDC3A                                                  | 13 | 49741379  | 49749677  | 4  | 2  | 7  | 3   | 15 | 2  | 8298  | 4.996165248 | -0.332298514 | 1.265170437 | -0.262651184 | NA          | NA          |
| chr6:131247744-131277639  | exonic       | EPB41L2                                                 | 6  | 131247744 | 131277639 | 73 | 15 | 13 | 160 | 8  | 1  | 29895 | 32.88094075 | -0.331788018 | 1.509992764 | -0.219728218 | NA          | NA          |
| chr17:25630392-25636298   | exonic       | WSB1                                                    | 17 | 25630392  | 25636298  | 5  | 5  | 0  | 3   | 4  | 4  | 5906  | 3.552231987 | -0.331639862 | 1.487290462 | -0.222982578 | 0.823549066 | 0.998252924 |
| chr17:25630392-25637200   | exonic       | WSB1                                                    | 17 | 25630392  | 25637200  | 1  | 3  | 0  | 2   | 4  | 0  | 6808  | 3.552231987 | -0.331639862 | 1.487290462 | -0.222982578 | 0.823549066 | 0.998252924 |
| chr6:145103057-145124283  | exonic       | UTRN                                                    | 6  | 145103057 | 145124283 | 9  | 3  | 4  | 11  | 2  | 6  | 21226 | 5.733577717 | -0.330683052 | 1.183051156 | -0.27951712  | 0.779848001 | 0.998252924 |
| chr17:66205795-66206606   | intergenic   | <small>LOC140461 (dist=9352), AN22 (dist=37539)</small> | 17 | 66205795  | 66206606  | 3  | 0  | 0  | 0   | 4  | 0  | 811   | 0.871070516 | -0.330245119 | 3.182097486 | -0.103782213 | NA          | NA          |
| chr2:203155045-203160560  | exonic       | NOP58                                                   | 2  | 203155045 | 203160560 | 3  | 0  | 0  | 0   | 4  | 0  | 5515  | 0.871070516 | -0.330245119 | 3.182097486 | -0.103782213 | NA          | NA          |
| chr10:52103251-52104105   | exonic       | SGMS1                                                   | 10 | 52103251  | 52104105  | 0  | 1  | 1  | 4   | 0  | 0  | 854   | 0.796790365 | -0.329745307 | 3.058892996 | -0.107798902 | NA          | NA          |
| chr15:30058468-30064369   | exonic       | TJP1                                                    | 15 | 30058468  | 30064369  | 0  | 1  | 1  | 4   | 0  | 0  | 5901  | 0.796790365 | -0.329745307 | 3.058892996 | -0.107798902 | NA          | NA          |
| chr9:128691933-128697886  | exonic       | PBX3                                                    | 9  | 128691933 | 128697886 | 0  | 1  | 1  | 4   | 0  | 0  | 5953  | 0.796790365 | -0.329745307 | 3.058892996 | -0.107798902 | NA          | NA          |
| chr20:30954186-30956926   | exonic       | ASXL1                                                   | 20 | 30954186  | 30956926  | 3  | 3  | 1  | 2   | 5  | 2  | 2740  | 2.541254348 | -0.329426398 | 1.568873448 | -0.2099764   | 0.833686093 | 0.998252924 |
| chr13:61013821-61109367   | exonic       | TDRD3                                                   | 13 | 61013821  | 61109367  | 3  | 2  | 2  | 3   | 0  | 4  | 95546 | 2.681859068 | -0.329220613 | 1.694901934 | -0.194241688 | 0.845986642 | 0.998252924 |
| chr2:75745181-75749613    | exonic       | EVA1A                                                   | 2  | 75745181  | 75749613  | 0  | 4  | 0  | 3   | 2  | 1  | 4432  | 1.566310804 | -0.328693289 | 2.18823157  | -0.150209554 | NA          | NA          |
| chr11:85692171-85742653   | exonic       | PICALM                                                  | 11 | 85692171  | 85742653  | 1  | 4  | 0  | 1   | 4  | 3  | 50482 | 0.651628971 | -0.326492535 | 3.031373325 | -0.107704495 | 0.914230103 | 0.998252924 |
| chr12:118619175-118619412 | exonic       | TAOK3                                                   | 12 | 118619175 | 118619412 | 1  | 1  | 0  | 1   | 2  | 0  | 237   | 0.651628971 | -0.326492535 | 3.031373325 | -0.107704495 | 0.914230103 | 0.998252924 |

|                           |                |           |    |           |           |    |    |    |    |    |    |        |             |              |             |              |             |             |
|---------------------------|----------------|-----------|----|-----------|-----------|----|----|----|----|----|----|--------|-------------|--------------|-------------|--------------|-------------|-------------|
| chr3:33648082-33686395    | exonic         | CLASP2    | 3  | 33648082  | 33686395  | 1  | 1  | 0  | 1  | 2  | 0  | 38313  | 0.651628971 | -0.326492535 | 3.031373325 | -0.107704495 | 0.914230103 | 0.998252924 |
| chr8:141856358-141900868  | exonic         | PTK2      | 8  | 141856358 | 141900868 | 6  | 9  | 6  | 11 | 14 | 5  | 44510  | 7.930920187 | -0.32478575  | 0.976823914 | -0.332491604 | 0.739518078 | 0.998252924 |
| chr5:92889466-92899169    | ncRNA_exonic   | NR2F1-AS1 | 5  | 92889466  | 92899169  | 4  | 0  | 0  | 0  | 1  | 2  | 9703   | 1.253412411 | -0.324693954 | 2.606893038 | -0.124552082 | NA          | NA          |
| chr11:47774467-47776216   | exonic         | FNBP4     | 11 | 47774467  | 47776216  | 1  | 1  | 2  | 3  | 4  | 0  | 1749   | 1.500844636 | -0.323876877 | 2.040279045 | -0.158741461 | 0.873872571 | 0.998252924 |
| chr3:133666099-133667815  | exonic         | SLCO2A1   | 3  | 133666099 | 133667815 | 6  | 3  | 3  | 20 | 1  | 0  | 1716   | 4.135811255 | -0.322386925 | 1.491450272 | -0.216156671 | NA          | NA          |
| chr1:233334684-233344435  | exonic         | PCNXL2    | 1  | 233334684 | 233344435 | 1  | 2  | 0  | 3  | 2  | 0  | 9751   | 1.03852754  | -0.320221399 | 2.504435196 | -0.127861723 | 0.898258403 | 0.998252924 |
| chr11:108199747-108202764 | exonic         | ATM       | 11 | 108199747 | 108202764 | 1  | 2  | 0  | 3  | 2  | 0  | 3017   | 1.03852754  | -0.320221399 | 2.504435196 | -0.127861723 | 0.898258403 | 0.998252924 |
| chr12:49333437-49334971   | exonic         | ARF3      | 12 | 49333437  | 49334971  | 4  | 2  | 0  | 3  | 6  | 0  | 1534   | 1.909598056 | -0.31975077  | 1.971039629 | -0.162224425 | 0.871129126 | 0.998252924 |
| chr20:62559687-62562375   | exonic         | DNAJC5    | 20 | 62559687  | 62562375  | 1  | 4  | 1  | 2  | 6  | 1  | 2688   | 2.270365074 | -0.319052374 | 1.689720693 | -0.188819593 | 0.850234215 | 0.998252924 |
| chr12:116534473-116675510 | exonic         | MED13L    | 12 | 116534473 | 116675510 | 3  | 0  | 0  | 1  | 1  | 1  | 141037 | 0.922518244 | -0.318946571 | 2.689412051 | -0.118593419 | NA          | NA          |
| chr6:25605039-25606501    | exonic         | LRRC16A   | 6  | 25605039  | 25606501  | 3  | 0  | 0  | 1  | 1  | 1  | 1462   | 0.922518244 | -0.318946571 | 2.689412051 | -0.118593419 | NA          | NA          |
| chr1:46105881-46108171    | exonic         | GPBP1L1   | 1  | 46105881  | 46108171  | 12 | 11 | 10 | 10 | 9  | 16 | 2290   | 12.52142575 | -0.31155015  | 0.917841828 | -0.339437733 | NA          | NA          |
| chrX:131415123-131417060  | ncRNA_intronic | RAP2C-AS1 | X  | 131415123 | 131417060 | 5  | 10 | 4  | 5  | 7  | 9  | 1937   | 7.329485164 | -0.310371777 | 1.09290941  | -0.283986736 | NA          | NA          |
| chr2:9048750-9098771      | exonic         | MBOAT2    | 2  | 9048750   | 9098771   | 8  | 2  | 9  | 9  | 14 | 4  | 50021  | 7.039929177 | -0.310214984 | 1.067347001 | -0.290641173 | 0.771325767 | 0.998252924 |
| chr19:34921480-34925873   | exonic         | UBA2      | 19 | 34921480  | 34925873  | 3  | 6  | 7  | 5  | 14 | 4  | 4393   | 6.272314068 | -0.309607488 | 1.120479678 | -0.276316915 | 0.782304665 | 0.998252924 |
| chr17:7402357-7402810     | exonic         | POLR2A    | 17 | 7402357   | 7402810   | 6  | 1  | 0  | 4  | 6  | 0  | 453    | 2.099607527 | -0.309348972 | 1.933636672 | -0.159982988 | 0.872894476 | 0.998252924 |
| chr6:99860426-99864304    | exonic         | PNISR     | 6  | 99860426  | 99864304  | 5  | 0  | 0  | 4  | 3  | 0  | 3878   | 1.43326252  | -0.308434247 | 2.387149137 | -0.129206107 | NA          | NA          |
| chr6:152650864-152653025  | exonic         | SYNE1     | 6  | 152650864 | 152653025 | 2  | 5  | 0  | 10 | 0  | 1  | 2161   | 2.500685341 | -0.307971072 | 1.892153953 | -0.162762164 | 0.8707057   | 0.998252924 |
| chr5:122881110-122909235  | exonic         | CSNK1G3   | 5  | 122881110 | 122909235 | 4  | 3  | 2  | 3  | 5  | 3  | 28125  | 3.28204031  | -0.305678444 | 1.394473799 | -0.219207018 | 0.826488789 | 0.998252924 |
| chr5:122881110-122911657  | exonic         | CSNK1G3   | 5  | 122881110 | 122911657 | 4  | 3  | 2  | 3  | 5  | 3  | 30547  | 3.28204031  | -0.305678444 | 1.394473799 | -0.219207018 | 0.826488789 | 0.998252924 |
| chr14:64465631-64489581   | exonic         | SYNE2     | 14 | 64465631  | 64489581  | 17 | 4  | 0  | 5  | 9  | 7  | 23950  | 6.668215207 | -0.303823951 | 1.25348964  | -0.242382498 | 0.808483794 | 0.998252924 |
| chr17:54921379-54925426   | exonic         | DGKE      | 17 | 54921379  | 54925426  | 0  | 0  | 2  | 3  | 1  | 0  | 4047   | 0.834499628 | -0.301884943 | 2.984884737 | -0.10113789  | 0.919441001 | 0.998252924 |
| chr2:219520872-219521186  | exonic         | ZNF142    | 2  | 219520872 | 219521186 | 0  | 0  | 2  | 3  | 1  | 0  | 314    | 0.834499628 | -0.301884943 | 2.984884737 | -0.10113789  | 0.919441001 | 0.998252924 |
| chrX:135323318-135326954  | exonic         | MAP7D3    | X  | 135323318 | 135326954 | 0  | 0  | 2  | 3  | 1  | 0  | 3636   | 0.834499628 | -0.301884943 | 2.984884737 | -0.10113789  | 0.919441001 | 0.998252924 |
| chr11:116734383-116744352 | exonic         | SIK3      | 11 | 116734383 | 116744352 | 2  | 0  | 1  | 5  | 0  | 0  | 9969   | 0.986799837 | -0.301344926 | 2.794191869 | -0.107846898 | NA          | NA          |
| chr12:102173929-102190540 | exonic         | GNPTAB    | 12 | 102173929 | 102190540 | 2  | 0  | 1  | 5  | 0  | 0  | 16611  | 0.986799837 | -0.301344926 | 2.794191869 | -0.107846898 | NA          | NA          |
| chr12:88909310-88939642   | exonic         | KITLG     | 12 | 88909310  | 88939642  | 2  | 0  | 1  | 5  | 0  | 0  | 30332  | 0.986799837 | -0.301344926 | 2.794191869 | -0.107846898 | NA          | NA          |
| chr2:71653589-71658558    | exonic         | ZNF638    | 2  | 71653589  | 71658558  | 2  | 0  | 1  | 5  | 0  | 0  | 4969   | 0.986799837 | -0.301344926 | 2.794191869 | -0.107846898 | NA          | NA          |
| chr4:42505466-42546003    | exonic         | ATP8A1    | 4  | 42505466  | 42546003  | 0  | 3  | 3  | 4  | 7  | 0  | 40537  | 2.387071967 | -0.299195167 | 1.841043366 | -0.162513916 | 0.87090117  | 0.998252924 |
| chr16:56419830-56423287   | exonic         | AMFR      | 16 | 56419830  | 56423287  | 3  | 0  | 2  | 4  | 4  | 0  | 3457   | 1.690854107 | -0.298603626 | 2.055487208 | -0.145271459 | 0.884496548 | 0.998252924 |
| chr11:43348056-43357544   | exonic         | API5      | 11 | 43348056  | 43357544  | 3  | 0  | 0  | 2  | 0  | 1  | 9488   | 0.907802207 | -0.298373964 | 2.899701599 | -0.102898162 | NA          | NA          |
| chr7:64004084-64004810    | exonic         | ZNF680    | 7  | 64004084  | 64004810  | 13 | 11 | 11 | 24 | 17 | 8  | 726    | 12.83851161 | -0.297353756 | 0.809635375 | -0.36726873  | 0.713418577 | 0.998252924 |
| chr1:185183638-185200840  | exonic         | SWT1      | 1  | 185183638 | 185200840 | 6  | 1  | 5  | 6  | 8  | 3  | 17202  | 7.927761077 | -0.296757163 | 0.990062183 | -0.299735884 | 0.764378625 | 0.998252924 |
| chr10:70404454-70406762   | exonic         | TET1      | 10 | 70404454  | 70406762  | 9  | 3  | 3  | 10 | 9  | 2  | 2308   | 5.044314824 | -0.295621392 | 1.172592822 | -0.252109161 | 0.800956689 | 0.998252924 |
| chr2:202625603-202626541  | exonic         | ALS2      | 2  | 202625603 | 202626541 | 9  | 2  | 0  | 7  | 0  | 4  | 938    | 3.486488214 | -0.29458656  | 1.686516765 | -0.174671587 | 0.861337695 | 0.998252924 |

|                           |              |           |    |           |           |    |    |    |    |    |    |       |             |              |             |              |             |             |
|---------------------------|--------------|-----------|----|-----------|-----------|----|----|----|----|----|----|-------|-------------|--------------|-------------|--------------|-------------|-------------|
| chr3:37162982-37190529    | exonic       | LRRFIP2   | 3  | 37162982  | 37190529  | 10 | 0  | 1  | 17 | 0  | 0  | 27547 | 3.294432001 | -0.293902905 | 3.042771037 | -0.096590542 | NA          | NA          |
| chr22:32874967-32875262   | exonic       | FBX07     | 22 | 32874967  | 32875262  | 12 | 10 | 17 | 36 | 28 | 2  | 295   | 14.47658963 | -0.292815452 | 0.880000196 | -0.332744757 | NA          | NA          |
| chr1:32381495-32385259    | exonic       | PTP4A2    | 1  | 32381495  | 32385259  | 12 | 16 | 9  | 21 | 34 | 3  | 3764  | 13.38380458 | -0.29276092  | 0.868166197 | -0.337217599 | 0.735952871 | 0.998252924 |
| chr11:59426338-59426942   | exonic       | PATL1     | 11 | 59426338  | 59426942  | 11 | 3  | 2  | 18 | 7  | 0  | 604   | 5.097018704 | -0.292607799 | 1.323487752 | -0.221088407 | 0.825023597 | 0.998252924 |
| chr11:8474368-8486369     | exonic       | STK33     | 11 | 8474368   | 8486369   | 2  | 1  | 0  | 0  | 0  | 2  | 12001 | 1.048686902 | -0.292586117 | 2.792943124 | -0.104759067 | 0.916566991 | 0.998252924 |
| chr16:65005481-65026937   | exonic       | CDH11     | 16 | 65005481  | 65026937  | 3  | 0  | 0  | 1  | 3  | 0  | 21456 | 0.856354479 | -0.292524694 | 2.93281849  | -0.099741834 | NA          | NA          |
| chr5:112321531-112337371  | exonic       | DCP2      | 5  | 112321531 | 112337371 | 1  | 3  | 2  | 3  | 2  | 0  | 15840 | 0.856354479 | -0.292524694 | 2.93281849  | -0.099741834 | NA          | NA          |
| chr7:32584305-32594208    | exonic       | AVL9      | 7  | 32584305  | 32594208  | 3  | 0  | 0  | 1  | 3  | 0  | 9903  | 0.856354479 | -0.292524694 | 2.93281849  | -0.099741834 | NA          | NA          |
| chr16:88653007-88677944   | exonic       | ZC3H18    | 16 | 88653007  | 88677944  | 3  | 3  | 0  | 3  | 2  | 2  | 24937 | 2.087214442 | -0.291453796 | 1.790897576 | -0.162741745 | 0.870721778 | 0.998252924 |
| chr13:51501542-51509135   | exonic       | RNASEH2B  | 13 | 51501542  | 51509135  | 0  | 1  | 2  | 6  | 0  | 0  | 7593  | 1.206682161 | -0.290515887 | 2.615248164 | -0.111085399 | NA          | NA          |
| chr16:69404385-69406258   | exonic       | TERF2     | 16 | 69404385  | 69406258  | 8  | 0  | 8  | 11 | 11 | 2  | 1873  | 5.72721184  | -0.289538905 | 1.265564035 | -0.228782501 | 0.819037968 | 0.998252924 |
| chr1:225140371-225195246  | exonic       | DNAH14    | 1  | 225140371 | 225195246 | 6  | 4  | 8  | 0  | 7  | 10 | 54875 | 6.978555098 | -0.28872242  | 1.293010258 | -0.223294764 | 0.823306102 | 0.998252924 |
| chr9:86278789-86301070    | exonic       | UBQLN1    | 9  | 86278789  | 86301070  | 0  | 4  | 2  | 0  | 6  | 2  | 22281 | 2.434242996 | -0.287728406 | 1.897720362 | -0.151617916 | 0.879488302 | 0.998252924 |
| chr22:28290542-28310335   | exonic       | PITPNB    | 22 | 28290542  | 28310335  | 1  | 3  | 4  | 4  | 10 | 0  | 19793 | 3.076410201 | -0.287286349 | 1.586151816 | -0.181121596 | 0.856272134 | 0.998252924 |
| chr2:15629017-15651474    | exonic       | NBAS      | 2  | 15629017  | 15651474  | 6  | 1  | 5  | 7  | 8  | 2  | 22457 | 4.263378871 | -0.287045525 | 1.282962826 | -0.223736432 | 0.822962396 | 0.998252924 |
| chr5:92880500-92899169    | ncRNA_exonic | NR2F1-AS1 | 5  | 92880500  | 92899169  | 1  | 2  | 0  | 4  | 1  | 0  | 18669 | 1.023811503 | -0.286488088 | 2.543659535 | -0.112628315 | 0.910325236 | 0.998252924 |
| chr16:53907697-53922863   | exonic       | FTO       | 16 | 53907697  | 53922863  | 20 | 6  | 7  | 42 | 12 | 0  | 15166 | 10.92368407 | -0.286108461 | 1.084047461 | -0.263926139 | 0.791836833 | 0.998252924 |
| chr1:14057494-14068652    | exonic       | PRDM2     | 1  | 14057494  | 14068652  | 4  | 1  | 5  | 4  | 6  | 3  | 11158 | 3.752634596 | -0.285976989 | 1.355521902 | -0.210971869 | 0.832909223 | 0.998252924 |
| chr21:30693541-30702014   | exonic       | BACH1     | 21 | 30693541  | 30702014  | 4  | 13 | 5  | 11 | 11 | 7  | 8473  | 8.426135425 | -0.285974704 | 1.006444051 | -0.284143668 | 0.776300283 | 0.998252924 |
| chr12:110893390-110895439 | exonic       | GPN3      | 12 | 110893390 | 110895439 | 3  | 0  | 1  | 3  | 3  | 0  | 2049  | 1.266246275 | -0.28584767  | 2.311061603 | -0.123686738 | 0.901563313 | 0.998252924 |
| chr16:67070541-67116242   | exonic       | CBFB      | 16 | 67070541  | 67116242  | 1  | 0  | 1  | 3  | 3  | 2  | 45701 | 1.266246275 | -0.28584767  | 2.311061603 | -0.123686738 | 0.901563313 | 0.998252924 |
| chr2:207013743-207017234  | exonic       | NDUFS1    | 2  | 207013743 | 207017234 | 3  | 0  | 1  | 3  | 3  | 0  | 3491  | 1.266246275 | -0.28584767  | 2.311061603 | -0.123686738 | 0.901563313 | 0.998252924 |
| chr12:26748397-26755639   | exonic       | ITPR2     | 12 | 26748397  | 26755639  | 1  | 0  | 1  | 0  | 3  | 0  | 7242  | 0.689338234 | -0.285657423 | 3.223453137 | -0.088618451 | NA          | NA          |
| chr19:2137725-2138713     | exonic       | AP3D1     | 19 | 2137725   | 2138713   | 1  | 0  | 1  | 0  | 3  | 0  | 988   | 0.689338234 | -0.285657423 | 3.223453137 | -0.088618451 | NA          | NA          |
| chr6:2836089-2836484      | exonic       | SERPINB1  | 6  | 2836089   | 2836484   | 1  | 0  | 1  | 0  | 3  | 0  | 395   | 0.689338234 | -0.285657423 | 3.223453137 | -0.088618451 | NA          | NA          |
| chr7:105099614-105105861  | exonic       | PUS7      | 7  | 105099614 | 105105861 | 1  | 0  | 1  | 0  | 3  | 0  | 6247  | 0.689338234 | -0.285657423 | 3.223453137 | -0.088618451 | NA          | NA          |
| chr7:77378740-77394949    | exonic       | RSBN1L    | 7  | 77378740  | 77394949  | 1  | 0  | 1  | 0  | 3  | 0  | 16209 | 0.689338234 | -0.285657423 | 3.223453137 | -0.088618451 | NA          | NA          |
| chr8:17532694-17573410    | exonic       | MTUS1     | 8  | 17532694  | 17573410  | 2  | 3  | 1  | 0  | 11 | 2  | 40716 | 0.689338234 | -0.285657423 | 3.223453137 | -0.088618451 | NA          | NA          |
| chr3:71090478-71102924    | exonic       | FOXP1     | 3  | 71090478  | 71102924  | 13 | 9  | 8  | 50 | 3  | 0  | 12446 | 10.50211617 | -0.285495178 | 1.176132439 | -0.242740671 | NA          | NA          |
| chr2:188348850-188368497  | exonic       | TFPI      | 2  | 188348850 | 188368497 | 4  | 3  | 1  | 11 | 0  | 1  | 19647 | 2.713688039 | -0.28471279  | 1.705961304 | -0.166892877 | 0.867454338 | 0.998252924 |
| chr1:117944807-117957453  | exonic       | MAN1A2    | 1  | 117944807 | 117957453 | 36 | 24 | 20 | 30 | 41 | 25 | 12646 | 28.6284607  | -0.284562942 | 0.670946993 | -0.424121346 | 0.671477319 | 0.998252924 |
| chr1:104070316-104093695  | exonic       | RNPC3     | 1  | 104070316 | 104093695 | 1  | 1  | 0  | 2  | 1  | 0  | 23379 | 0.636912934 | -0.284533817 | 3.053090558 | -0.093195342 | 0.925748375 | 0.998252924 |
| chr1:168073714-168074132  | exonic       | GPR161    | 1  | 168073714 | 168074132 | 1  | 1  | 0  | 2  | 1  | 0  | 418   | 0.636912934 | -0.284533817 | 3.053090558 | -0.093195342 | 0.925748375 | 0.998252924 |
| chr12:116434280-116435035 | exonic       | MED13L    | 12 | 116434280 | 116435035 | 1  | 1  | 0  | 2  | 1  | 0  | 755   | 0.636912934 | -0.284533817 | 3.053090558 | -0.093195342 | 0.925748375 | 0.998252924 |
| chr16:18846213-18856973   | exonic       | SMG1      | 16 | 18846213  | 18856973  | 1  | 1  | 0  | 2  | 1  | 0  | 10760 | 0.636912934 | -0.284533817 | 3.053090558 | -0.093195342 | 0.925748375 | 0.998252924 |

|                          |          |         |    |           |           |    |    |    |    |    |   |       |             |              |             |              |             |             |
|--------------------------|----------|---------|----|-----------|-----------|----|----|----|----|----|---|-------|-------------|--------------|-------------|--------------|-------------|-------------|
| chr2:64189191-64211153   | exonic   | VPS54   | 2  | 64189191  | 64211153  | 1  | 1  | 0  | 2  | 1  | 0 | 21962 | 0.636912934 | -0.284533817 | 3.053090558 | -0.093195342 | 0.925748375 | 0.998252924 |
| chr7:2269618-2270399     | exonic   | MAD1L1  | 7  | 2269618   | 2270399   | 1  | 1  | 0  | 2  | 1  | 0 | 781   | 0.636912934 | -0.284533817 | 3.053090558 | -0.093195342 | 0.925748375 | 0.998252924 |
| chr3:169831147-169854453 | exonic   | PHC3    | 3  | 169831147 | 169854453 | 2  | 4  | 1  | 2  | 5  | 2 | 23306 | 2.586543204 | -0.284147415 | 1.573603275 | -0.180571189 | 0.856704172 | 0.998252924 |
| chr5:72354259-72373320   | exonic   | FCHO2   | 5  | 72354259  | 72373320  | 7  | 7  | 3  | 10 | 15 | 1 | 19061 | 5.901390057 | -0.283968786 | 1.141562451 | -0.24875449  | 0.803550696 | 0.998252924 |
| chr5:131013395-131044965 | exonic   | FNIP1   | 5  | 131013395 | 131044965 | 7  | 3  | 1  | 11 | 6  | 0 | 31570 | 3.51859479  | -0.283353175 | 1.483946726 | -0.190945652 | 0.848568173 | 0.998252924 |
| chr8:133848784-133856563 | exonic   | PHF20L1 | 8  | 133848784 | 133856563 | 3  | 2  | 1  | 3  | 0  | 3 | 7779  | 2.176371434 | -0.28286316  | 1.823966309 | -0.155081351 | 0.876757184 | 0.998252924 |
| chr22:34157357-34252790  | exonic   | LARGE   | 22 | 34157357  | 34252790  | 0  | 3  | 0  | 0  | 5  | 0 | 95433 | 1.127964506 | -0.281570188 | 2.906101088 | -0.09688933  | NA          | NA          |
| chr9:37126309-37165932   | exonic   | ZCCHC7  | 9  | 37126309  | 37165932  | 0  | 3  | 0  | 0  | 5  | 0 | 39623 | 1.127964506 | -0.281570188 | 2.906101088 | -0.09688933  | NA          | NA          |
| chr1:15973105-15973724   | intronic | DDI2    | 1  | 15973105  | 15973724  | 0  | 4  | 0  | 0  | 0  | 3 | 619   | 1.621759023 | -0.281472359 | 2.616380414 | -0.107580823 | NA          | NA          |
| chr2:110342702-110343415 | exonic   |         | 2  | 110342702 | 110343415 | 5  | 2  | 1  | 6  | 2  | 2 | 713   | 2.68711571  | -0.281259309 | 1.536921084 | -0.18300179  | 0.854796614 | 0.998252924 |
| chr6:139264649-139265759 | exonic   | REPS1   | 6  | 139264649 | 139265759 | 10 | 9  | 14 | 14 | 28 | 6 | 1110  | 12.34655683 | -0.281257471 | 0.864470949 | -0.325352137 | NA          | NA          |
| chr3:142116170-142123918 | exonic   | XRN1    | 3  | 142116170 | 142123918 | 0  | 2  | 2  | 3  | 0  | 2 | 7748  | 1.678461022 | -0.280946574 | 2.147148964 | -0.130846336 | 0.895896867 | 0.998252924 |
| chr18:29691716-29693823  | exonic   | RNF138  | 18 | 29691716  | 29693823  | 8  | 3  | 9  | 27 | 8  | 0 | 2107  | 7.168770943 | -0.279068906 | 1.200628395 | -0.232435703 | 0.816199621 | 0.998252924 |
| chr3:142455220-142467302 | exonic   | TRPC1   | 3  | 142455220 | 142467302 | 3  | 3  | 2  | 6  | 7  | 0 | 12082 | 2.78938654  | -0.278570046 | 1.571239277 | -0.177293204 | 0.859278088 | 0.998252924 |
| chr3:33725850-33738425   | exonic   | CLASP2  | 3  | 33725850  | 33738425  | 3  | 4  | 6  | 2  | 11 | 4 | 12575 | 5.044477023 | -0.278056194 | 1.244179901 | -0.223485522 | NA          | NA          |
| chr5:49694941-49707217   | exonic   | EMB     | 5  | 49694941  | 49707217  | 6  | 10 | 20 | 10 | 37 | 7 | 12276 | 14.16071888 | -0.276220501 | 0.921907487 | -0.29961846  | 0.764468202 | 0.998252924 |
| chr2:169018296-169023917 | exonic   | STK39   | 2  | 169018296 | 169023917 | 0  | 0  | 7  | 5  | 4  | 2 | 5621  | 3.012987009 | -0.27552893  | 1.759728504 | -0.156574681 | NA          | NA          |
| chr2:45773870-45789895   | exonic   | SRBD1   | 2  | 45773870  | 45789895  | 2  | 4  | 5  | 4  | 9  | 1 | 16025 | 5.671230595 | -0.27428396  | 1.152224523 | -0.23804732  | NA          | NA          |
| chr1:89236034-89251896   | exonic   | PKN2    | 1  | 89236034  | 89251896  | 1  | 0  | 3  | 3  | 4  | 0 | 15862 | 1.523837862 | -0.273616273 | 2.179009159 | -0.125569125 | 0.900073004 | 0.998252924 |
| chr8:71071739-71075089   | exonic   | NCOA2   | 8  | 71071739  | 71075089  | 6  | 7  | 3  | 12 | 14 | 0 | 3350  | 5.555779854 | -0.272584171 | 1.241621296 | -0.219538898 | 0.826230283 | 0.998252924 |
| chr5:56160560-56161804   | exonic   | MAP3K1  | 5  | 56160560  | 56161804  | 8  | 7  | 8  | 13 | 16 | 4 | 1244  | 8.381339531 | -0.272148883 | 0.950558761 | -0.286304113 | 0.774645209 | 0.998252924 |
| chr13:52971366-52976816  | exonic   | THSD1   | 13 | 52971366  | 52976816  | 3  | 2  | 0  | 8  | 0  | 0 | 5450  | 1.586003508 | -0.269072187 | 2.337797453 | -0.11509645  | NA          | NA          |
| chr7:139415730-139416814 | exonic   | HIPK2   | 7  | 139415730 | 139416814 | 9  | 9  | 17 | 27 | 18 | 7 | 1084  | 13.28936936 | -0.268862233 | 0.841683157 | -0.319434018 | NA          | NA          |
| chr7:40027197-40087476   | exonic   | CDK13   | 7  | 40027197  | 40087476  | 0  | 1  | 2  | 0  | 1  | 2 | 60279 | 1.30627849  | -0.265269803 | 2.410480871 | -0.1100485   | 0.912370911 | 0.998252924 |
| chr4:174305802-174325101 | exonic   | SCRG1   | 4  | 174305802 | 174325101 | 4  | 0  | 2  | 3  | 6  | 0 | 19299 | 1.955584508 | -0.264309868 | 1.95995743  | -0.134854902 | 0.892726596 | 0.998252924 |
| chr2:238933982-238940895 | exonic   | UBE2F   | 2  | 238933982 | 238940895 | 1  | 1  | 0  | 0  | 1  | 1 | 6913  | 0.732508772 | -0.264292427 | 2.96263153  | -0.089208673 | 0.928916073 | 0.998252924 |
| chr3:15271948-15282360   | exonic   | CAPN7   | 3  | 15271948  | 15282360  | 1  | 1  | 0  | 0  | 1  | 1 | 10412 | 0.732508772 | -0.264292427 | 2.96263153  | -0.089208673 | 0.928916073 | 0.998252924 |
| chr3:33453072-33467233   | exonic   | UBP1    | 3  | 33453072  | 33467233  | 1  | 1  | 0  | 0  | 1  | 1 | 14161 | 0.732508772 | -0.264292427 | 2.96263153  | -0.089208673 | 0.928916073 | 0.998252924 |
| chr7:2403266-2404164     | exonic   | EIF3B   | 7  | 2403266   | 2404164   | 1  | 1  | 0  | 0  | 1  | 1 | 898   | 0.732508772 | -0.264292427 | 2.96263153  | -0.089208673 | 0.928916073 | 0.998252924 |
| chr7:72873865-72884813   | exonic   | BAZ1B   | 7  | 72873865  | 72884813  | 4  | 3  | 1  | 4  | 4  | 2 | 10948 | 2.761836639 | -0.263877189 | 1.495484568 | -0.176449289 | 0.859940985 | 0.998252924 |
| chr8:124089350-124096580 | exonic   | TBC1D31 | 8  | 124089350 | 124096580 | 0  | 2  | 6  | 2  | 8  | 2 | 7230  | 3.329445114 | -0.263709039 | 1.585692803 | -0.166305251 | 0.867916734 | 0.998252924 |
| chr12:69644908-69656342  | exonic   | CPSF6   | 12 | 69644908  | 69656342  | 5  | 5  | 8  | 17 | 14 | 0 | 11434 | 6.596143366 | -0.26261451  | 1.184008442 | -0.221801214 | NA          | NA          |
| chr18:44470543-44483598  | exonic   | PIAS2   | 18 | 44470543  | 44483598  | 6  | 5  | 5  | 15 | 7  | 2 | 13055 | 5.689945727 | -0.261405124 | 1.115959446 | -0.234242494 | 0.814796727 | 0.998252924 |
| chr13:49742748-49752790  | exonic   | FNDCA3  | 13 | 49742748  | 49752790  | 3  | 0  | 2  | 0  | 1  | 3 | 10042 | 1.827182128 | -0.261241563 | 2.124618978 | -0.122959253 | NA          | NA          |
| chr20:40161688-40179999  | exonic   | CHD6    | 20 | 40161688  | 40179999  | 1  | 5  | 10 | 18 | 5  | 3 | 18311 | 6.416454061 | -0.260094201 | 1.195038205 | -0.217645093 | 0.827705648 | 0.998252924 |

10-Sep

|                           |        |          |    |           |           |    |    |    |    |    |    |        |             |              |             |              |             |             |
|---------------------------|--------|----------|----|-----------|-----------|----|----|----|----|----|----|--------|-------------|--------------|-------------|--------------|-------------|-------------|
| chr21:48063446-48064400   | exonic | PRMT2    | 21 | 48063446  | 48064400  | 3  | 2  | 2  | 12 | 0  | 0  | 954    | 2.405787099 | -0.259803641 | 1.884174579 | -0.137887244 | NA          | NA          |
| chr3:171965322-171969331  | exonic | FNDC3B   | 3  | 171965322 | 171969331 | 49 | 39 | 45 | 52 | 72 | 40 | 4009   | 48.56513326 | -0.259329031 | 0.605625486 | -0.428200327 | 0.668505278 | 0.998252924 |
| chr1:172520651-172548407  | exonic | SUCO     | 1  | 172520651 | 172548407 | 3  | 0  | 1  | 4  | 2  | 0  | 27756  | 1.251530238 | -0.259154669 | 2.327109755 | -0.11136332  | 0.911328245 | 0.998252924 |
| chr15:38794512-38798121   | exonic | RASGRP1  | 15 | 38794512  | 38798121  | 3  | 0  | 1  | 4  | 2  | 0  | 3609   | 1.251530238 | -0.259154669 | 2.327109755 | -0.11136332  | 0.911328245 | 0.998252924 |
| chr22:42807412-42807742   | exonic | NFAM1    | 22 | 42807412  | 42807742  | 4  | 1  | 0  | 3  | 4  | 0  | 330    | 1.493267413 | -0.258130534 | 2.173012139 | -0.118789274 | 0.905442307 | 0.998252924 |
| chr11:119155678-119156276 | exonic | CBL      | 11 | 119155678 | 119156276 | 3  | 3  | 3  | 11 | 2  | 1  | 598    | 3.221293991 | -0.256785903 | 1.445389466 | -0.177658624 | NA          | NA          |
| chr2:231940224-231951895  | exonic | PSMD1    | 2  | 231940224 | 231951895 | 0  | 2  | 2  | 2  | 5  | 0  | 11671  | 1.560849528 | -0.256222056 | 2.15780182  | -0.118742163 | 0.905479632 | 0.998252924 |
| chr10:76598440-76603236   | exonic | KAT6B    | 10 | 76598440  | 76603236  | 1  | 0  | 2  | 2  | 3  | 0  | 4796   | 1.09923003  | -0.254150661 | 2.46125853  | -0.103260449 | 0.917756265 | 0.998252924 |
| chr1:76205664-76216231    | exonic | ACADM    | 1  | 76205664  | 76216231  | 2  | 2  | 1  | 5  | 3  | 0  | 10567  | 1.6984337   | -0.253791427 | 1.919144839 | -0.132241935 | 0.894792933 | 0.998252924 |
| chr1:111434013-111435155  | exonic | CD53     | 1  | 111434013 | 111435155 | 3  | 0  | 0  | 2  | 2  | 0  | 1142   | 0.841638442 | -0.253723598 | 2.930228992 | -0.086588317 | NA          | NA          |
| chr12:122218777-122219098 | exonic | RHOF     | 12 | 122218777 | 122219098 | 3  | 0  | 0  | 2  | 2  | 0  | 321    | 0.841638442 | -0.253723598 | 2.930228992 | -0.086588317 | NA          | NA          |
| chr13:20600751-20611049   | exonic | ZMYM2    | 13 | 20600751  | 20611049  | 3  | 0  | 0  | 2  | 2  | 0  | 10298  | 0.841638442 | -0.253723598 | 2.930228992 | -0.086588317 | NA          | NA          |
| chr2:10784445-10811816    | exonic | NOL10    | 2  | 10784445  | 10811816  | 3  | 0  | 0  | 2  | 2  | 0  | 27371  | 0.841638442 | -0.253723598 | 2.930228992 | -0.086588317 | NA          | NA          |
| chr2:113057426-113075645  | exonic | ZC3H6    | 2  | 113057426 | 113075645 | 3  | 0  | 0  | 2  | 2  | 0  | 18219  | 0.841638442 | -0.253723598 | 2.930228992 | -0.086588317 | NA          | NA          |
| chr20:21321358-21327188   | exonic | XRN2     | 20 | 21321358  | 21327188  | 3  | 0  | 0  | 2  | 2  | 0  | 5830   | 0.841638442 | -0.253723598 | 2.930228992 | -0.086588317 | NA          | NA          |
| chr20:50290691-50307358   | exonic | ATP9A    | 20 | 50290691  | 50307358  | 3  | 0  | 0  | 2  | 2  | 0  | 16667  | 0.841638442 | -0.253723598 | 2.930228992 | -0.086588317 | NA          | NA          |
| chr6:157405795-157431695  | exonic | ARID1B   | 6  | 157405795 | 157431695 | 3  | 0  | 0  | 2  | 2  | 0  | 25900  | 0.841638442 | -0.253723598 | 2.930228992 | -0.086588317 | NA          | NA          |
| chr7:90376995-90492584    | exonic | CDK14    | 7  | 90376995  | 90492584  | 3  | 0  | 0  | 2  | 2  | 0  | 115589 | 0.841638442 | -0.253723598 | 2.930228992 | -0.086588317 | NA          | NA          |
| chr9:271626-289581        | exonic | DOCK8    | 9  | 271626    | 289581    | 3  | 0  | 0  | 2  | 2  | 0  | 17955  | 0.841638442 | -0.253723598 | 2.930228992 | -0.086588317 | NA          | NA          |
| chr7:152007050-152012423  | exonic | KMT2C    | 7  | 152007050 | 152012423 | 11 | 13 | 4  | 18 | 11 | 7  | 5373   | 9.875954695 | -0.25293088  | 0.920378652 | -0.274811763 | 0.78346086  | 0.998252924 |
| chr14:103470264-103478525 | exonic | CDC42BPB | 14 | 103470264 | 103478525 | 7  | 1  | 3  | 6  | 2  | 4  | 8261   | 3.781789065 | -0.252614661 | 1.382754144 | -0.182689498 | 0.855041656 | 0.998252924 |
| chr9:88200377-88248289    | exonic | AGTPBP1  | 9  | 88200377  | 88248289  | 1  | 0  | 1  | 1  | 2  | 0  | 47912  | 0.674622197 | -0.251515352 | 2.995003422 | -0.083978319 | 0.93307367  | 0.998252924 |
| chr10:128768965-128788867 | exonic | DOCK1    | 10 | 128768965 | 128788867 | 3  | 4  | 5  | 4  | 5  | 5  | 19902  | 4.641884846 | -0.250861779 | 1.243703871 | -0.201705394 | 0.840147045 | 0.998252924 |
| chr11:77386080-77389198   | exonic | RSF1     | 11 | 77386080  | 77389198  | 6  | 2  | 1  | 13 | 1  | 0  | 3118   | 2.822817709 | -0.250783104 | 1.689982675 | -0.14839389  | NA          | NA          |
| chr1:9931244-9938047      | exonic | CTNNBIP1 | 1  | 9931244   | 9938047   | 4  | 0  | 2  | 5  | 2  | 1  | 6803   | 1.9923162   | -0.250057492 | 1.831737033 | -0.136513859 | 0.891415069 | 0.998252924 |
| chr3:3197902-3215945      | exonic | CRBN     | 3  | 3197902   | 3215945   | 5  | 2  | 1  | 3  | 4  | 1  | 18043  | 3.932487075 | -0.24999982  | 1.308231468 | -0.191097543 | 0.848449172 | 0.998252924 |
| chr1:33413822-33415375    | exonic | RNF19B   | 1  | 33413822  | 33415375  | 1  | 7  | 11 | 17 | 13 | 2  | 1553   | 7.515964066 | -0.248908757 | 1.13431656  | -0.219435003 | 0.826311206 | 0.998252924 |
| chr14:97022183-97022750   | exonic | PAPOLA   | 14 | 97022183  | 97022750  | 3  | 1  | 2  | 2  | 5  | 1  | 567    | 2.081753167 | -0.246997771 | 1.699294779 | -0.145353104 | 0.884432089 | 0.998252924 |
| chr7:135262543-135277940  | exonic | NUP205   | 7  | 135262543 | 135277940 | 4  | 0  | 1  | 2  | 5  | 0  | 15397  | 1.530976676 | -0.245720385 | 2.171751818 | -0.113143861 | 0.909916502 | 0.998252924 |
| chr5:36953719-36976504    | exonic | NIPBL    | 5  | 36953719  | 36976504  | 15 | 14 | 8  | 14 | 15 | 13 | 22785  | 13.26343017 | -0.24571013  | 0.841127749 | -0.292119872 | 0.770194973 | 0.998252924 |
| chr8:42211943-42229180    | exonic | POLB     | 8  | 42211943  | 42229180  | 7  | 2  | 0  | 9  | 4  | 0  | 17237  | 2.692372351 | -0.245641627 | 1.756796011 | -0.139823648 | 0.888799328 | 0.998252924 |
| chr5:65284462-65310553    | exonic | ERBB2IP  | 5  | 65284462  | 65310553  | 4  | 5  | 7  | 10 | 8  | 4  | 26091  | 6.032417606 | -0.244784275 | 1.0901324   | -0.224545454 | 0.822332902 | 0.998252924 |
| chr13:20425494-20426330   | exonic | ZMYM5    | 13 | 20425494  | 20426330  | 3  | 3  | 0  | 4  | 5  | 0  | 836    | 1.940170875 | -0.244133151 | 1.946477164 | -0.125423075 | 0.900188621 | 0.998252924 |
| chr10:71912019-71921687   | exonic | SARIA    | 10 | 71912019  | 71921687  | 0  | 0  | 2  | 4  | 0  | 0  | 9668   | 0.819783592 | -0.243501438 | 3.274163115 | -0.074370589 | NA          | NA          |
| chr12:95879654-95897937   | exonic | METAP2   | 12 | 95879654  | 95897937  | 0  | 0  | 2  | 4  | 0  | 0  | 18283  | 0.819783592 | -0.243501438 | 3.274163115 | -0.074370589 | NA          | NA          |



|                           |              |                                                         |           |             |             |           |          |           |          |           |          |            |                    |                     |                    |                     |             |             |
|---------------------------|--------------|---------------------------------------------------------|-----------|-------------|-------------|-----------|----------|-----------|----------|-----------|----------|------------|--------------------|---------------------|--------------------|---------------------|-------------|-------------|
| chr19:11230767-11231198   | exonic       | LDLR                                                    | 19        | 11230767    | 11231198    | 0         | 0        | 2         | 4        | 0         | 0        | 431        | 0.819783592        | -0.243501438        | 3.274163115        | -0.074370589        | NA          | NA          |
| chr2:145182362-145187593  | exonic       | ZEB2                                                    | 2         | 145182362   | 145187593   | 0         | 0        | 2         | 4        | 0         | 0        | 5231       | 0.819783592        | -0.243501438        | 3.274163115        | -0.074370589        | NA          | NA          |
| chr3:87939260-87941181    | intergenic   | <small>P001F1 (dist=613523), HTR1F (dist=90545)</small> | 3         | 87939260    | 87941181    | 0         | 0        | 2         | 4        | 0         | 0        | 1921       | 0.819783592        | -0.243501438        | 3.274163115        | -0.074370589        | NA          | NA          |
| chrX:76888694-76920267    | exonic       | ATRX                                                    | X         | 76888694    | 76920267    | 0         | 0        | 2         | 4        | 0         | 0        | 31573      | 0.819783592        | -0.243501438        | 3.274163115        | -0.074370589        | NA          | NA          |
| chr5:68588014-68607031    | exonic       | CCDC125                                                 | 5         | 68588014    | 68607031    | 2         | 4        | 2         | 7        | 4         | 1        | 19017      | 2.886123125        | -0.242483361        | 1.479053757        | -0.163944927        | 0.869774499 | 0.998252924 |
| chr5:68590619-68607031    | exonic       | CCDC125                                                 | 5         | 68590619    | 68607031    | 2         | 4        | 2         | 7        | 4         | 1        | 16412      | 2.886123125        | -0.242483361        | 1.479053757        | -0.163944927        | 0.869774499 | 0.998252924 |
| chr6:25450125-25488813    | exonic       | LRRC16A                                                 | 6         | 25450125    | 25488813    | 0         | 3        | 0         | 3        | 0         | 1        | 38688      | 1.149980161        | -0.241138602        | 2.666139765        | -0.090444847        | NA          | NA          |
| chr17:1339913-1340449     | exonic       | CRK                                                     | 17        | 1339913     | 1340449     | 1         | 2        | 0         | 5        | 0         | 0        | 536        | 1.009095467        | -0.240516248        | 2.773890734        | -0.086707182        | NA          | NA          |
| chr2:168869143-168873605  | exonic       | STK39                                                   | 2         | 168869143   | 168873605   | 4         | 0        | 0         | 0        | 5         | 0        | 4462       | 1.12108488         | -0.239726377        | 2.896615567        | -0.082760854        | NA          | NA          |
| chr6:170626457-170632347  | exonic       | FAM120B                                                 | 6         | 170626457   | 170632347   | 0         | 2        | 2         | 4        | 1         | 1        | 5890       | 1.59758122         | -0.238424587        | 2.0336084          | -0.117242133        | 0.90666818  | 0.998252924 |
| chrX:11187624-11207104    | exonic       | ARHGAP6                                                 | X         | 11187624    | 11207104    | 3         | 1        | 0         | 6        | 0         | 0        | 19480      | 1.199104938        | -0.237253182        | 2.596178607        | -0.091385539        | NA          | NA          |
| chr1:117944807-117984947  | exonic       | MAN1A2                                                  | 1         | 117944807   | 117984947   | 37        | 20       | 28        | 32       | 28        | 32       | 40140      | 30.4352932         | -0.237041182        | 0.705008042        | -0.336224792        | NA          | NA          |
| chr7:158662545-158669382  | exonic       | WDR60                                                   | 7         | 158662545   | 158669382   | 15        | 34       | 7         | 30       | 17        | 19       | 6837       | 20.34402578        | -0.236777878        | 0.821102099        | -0.288365939        | NA          | NA          |
| chr10:99196174-99197507   | exonic       | EXOSC1                                                  | 10        | 99196174    | 99197507    | 35        | 7        | 11        | 63       | 15        | 2        | 1333       | 17.03389868        | -0.236735096        | 0.934351504        | -0.253368347        | NA          | NA          |
| chr1:35857812-35865177    | exonic       | ZMYM4                                                   | 1         | 35857812    | 35865177    | 1         | 1        | 0         | 3        | 0         | 0        | 7365       | 0.622196897        | -0.236531703        | 3.338019062        | -0.070859902        | NA          | NA          |
| chr10:133784141-133787447 | exonic       | BNIP3                                                   | 10        | 133784141   | 133787447   | 1         | 1        | 0         | 3        | 0         | 0        | 3306       | 0.622196897        | -0.236531703        | 3.338019062        | -0.070859902        | NA          | NA          |
| chr12:5841685-5963307     | exonic       | ANO2                                                    | 12        | 5841685     | 5963307     | 4         | 1        | 0         | 2        | 0         | 0        | 121622     | 0.622196897        | -0.236531703        | 3.338019062        | -0.070859902        | NA          | NA          |
| chr16:65388145-65397711   | ncRNA_exonic | LINCO0922                                               | 16        | 65388145    | 65397711    | 1         | 1        | 0         | 3        | 0         | 0        | 9566       | 0.622196897        | -0.236531703        | 3.338019062        | -0.070859902        | NA          | NA          |
| chr2:234164747-234173789  | exonic       | ATG16L1                                                 | 2         | 234164747   | 234173789   | 1         | 1        | 0         | 3        | 0         | 0        | 9042       | 0.622196897        | -0.236531703        | 3.338019062        | -0.070859902        | NA          | NA          |
| chr20:35457456-35467844   | exonic       | SOGA1                                                   | 20        | 35457456    | 35467844    | 1         | 1        | 0         | 3        | 0         | 0        | 10388      | 0.622196897        | -0.236531703        | 3.338019062        | -0.070859902        | NA          | NA          |
| chr3:47676679-47680270    | exonic       | SMARCC1                                                 | 3         | 47676679    | 47680270    | 1         | 1        | 0         | 3        | 0         | 0        | 3591       | 0.622196897        | -0.236531703        | 3.338019062        | -0.070859902        | NA          | NA          |
| chr5:65288537-65310553    | exonic       | ERBB2IP                                                 | 5         | 65288537    | 65310553    | 4         | 5        | 7         | 10       | 8         | 4        | 22016      | 0.622196897        | -0.236531703        | 3.338019062        | -0.070859902        | NA          | NA          |
| chr6:70447833-70500364    | exonic       | LMBRD1                                                  | 6         | 70447833    | 70500364    | 1         | 1        | 0         | 3        | 0         | 0        | 52531      | 0.622196897        | -0.236531703        | 3.338019062        | -0.070859902        | NA          | NA          |
| chr7:138951078-138957186  | exonic       | UBN2                                                    | 7         | 138951078   | 138957186   | 6         | 1        | 1         | 4        | 1         | 3        | 6108       | 2.61639527         | -0.235596044        | 1.623651196        | -0.145102621        | 0.884629849 | 0.998252924 |
| chr11:82984689-82989872   | exonic       | CCDC90B                                                 | 11        | 82984689    | 82989872    | 1         | 0        | 5         | 2        | 4         | 2        | 5183       | 2.428501745        | -0.234404493        | 1.763997894        | -0.132882524        | NA          | NA          |
| chr14:20871535-20874559   | exonic       | TEP1                                                    | 14        | 20871535    | 20874559    | 1         | 3        | 1         | 4        | 0         | 2        | 3024       | 1.890766124        | -0.234305955        | 1.931676847        | -0.121296662        | 0.903456063 | 0.998252924 |
| chr4:170428187-170459062  | exonic       | NEK1                                                    | 4         | 170428187   | 170459062   | 2         | 0        | 2         | 1        | 3         | 1        | 30875      | 1.430124196        | -0.233694018        | 2.10759737         | -0.110881719        | 0.911710143 | 0.998252924 |
| chr12:123983090-123984083 | exonic       | RILPL1                                                  | 12        | 123983090   | 123984083   | 19        | 3        | 3         | 25       | 5         | 3        | 993        | 7.752963951        | -0.233622351        | 1.109688984        | -0.210529576        | NA          | NA          |
| chr1:247302018-247323115  | exonic       | ZNF124                                                  | 1         | 247302018   | 247323115   | 5         | 0        | 0         | 7        | 0         | 0        | 21097      | 1.38911441         | -0.232623077        | 2.680982156        | -0.086767857        | NA          | NA          |
| chr11:68527036-68529155   | exonic       | CPT1A                                                   | 11        | 68527036    | 68529155    | 5         | 0        | 0         | 7        | 0         | 0        | 2119       | 1.38911441         | -0.232623077        | 2.680982156        | -0.086767857        | NA          | NA          |
| chr3:183361267-183390272  | exonic       | KLHL24                                                  | 3         | 183361267   | 183390272   | 3         | 4        | 2         | 6        | 4         | 2        | 29005      | 3.217017291        | -0.232026814        | 1.39229388         | -0.166650746        | 0.867644863 | 0.998252924 |
| <b>chrMT:8398-8624</b>    | intergenic   | <small>NONE (dist=NONE), NONE (dist=NONE)</small>       | <b>MT</b> | <b>8398</b> | <b>8624</b> | <b>12</b> | <b>8</b> | <b>16</b> | <b>4</b> | <b>54</b> | <b>0</b> | <b>226</b> | <b>13.05908043</b> | <b>-0.231810268</b> | <b>1.154192459</b> | <b>-0.200841953</b> | <b>NA</b>   | <b>NA</b>   |
| chr6:130505247-130505768  | exonic       | SAMD3                                                   | 6         | 130505247   | 130505768   | 6         | 0        | 0         | 5        | 3         | 0        | 521        | 1.668560848        | -0.231061621        | 2.26561943         | -0.10198607         | NA          | NA          |
| chr22:38891800-38897285   | exonic       | DDX17                                                   | 22        | 38891800    | 38897285    | 7         | 4        | 4         | 13       | 4         | 0        | 5485       | 1.236814201        | -0.230730517        | 2.36837926         | -0.097421271        | 0.922391853 | 0.998252924 |
| chr7:101559394-101838883  | exonic       | CUX1                                                    | 7         | 101559394   | 101838883   | 3         | 2        | 0         | 3        | 0         | 2        | 279489     | 1.6708838          | -0.229909986        | 2.123472791        | -0.108270747        | 0.913780926 | 0.998252924 |

|                          |        |                                                                                             |       |           |           |          |    |    |    |    |    |        |             |              |              |              |              |             |             |
|--------------------------|--------|---------------------------------------------------------------------------------------------|-------|-----------|-----------|----------|----|----|----|----|----|--------|-------------|--------------|--------------|--------------|--------------|-------------|-------------|
| chr6:148789680-148808851 | exonic | SASH1                                                                                       | 6     | 148789680 | 148808851 | 4        | 0  | 2  | 5  | 4  | 0  | 19171  | 1.926152435 | -0.229739184 | 1.958551292  | -0.11730057  | 0.906621873  | 0.998252924 |             |
| chr7:151935791-151948051 | exonic | KMT2C                                                                                       | 7     | 151935791 | 151948051 | 2        | 3  | 0  | 7  | 1  | 0  | 12260  | 1.646008401 | -0.229452685 | 2.130539276  | -0.107696998 | 0.914236051  | 0.998252924 |             |
| chr15:41377566-41379880  | exonic | INO80                                                                                       | 15    | 41377566  | 41379880  | 1        | 3  | 1  | 3  | 5  | 0  | 2314   | 1.77315463  | -0.226887351 | 1.921001948  | -0.11810886  | 0.905981403  | 0.998252924 |             |
| chr10:91511102-91520393  | exonic | KIF20B                                                                                      | 10    | 91511102  | 91520393  | 2        | 5  | 4  | 3  | 2  | 6  | 9291   | 4.328729635 | -0.226201212 | 1.35453264   | -0.166995763 | NA           | NA          |             |
| chr10:91511102-91522592  | exonic | KIF20B                                                                                      | 10    | 91511102  | 91522592  | 2        | 5  | 4  | 3  | 2  | 6  | 11490  | 4.328729635 | -0.226201212 | 1.35453264   | -0.166995763 | NA           | NA          |             |
| chr16:53922744-54042430  | exonic | FTO                                                                                         | 16    | 53922744  | 54042430  | 4        | 3  | 3  | 17 | 0  | 0  | 119686 | 3.437875792 | -0.226118434 | 1.685758217  | -0.134134558 | NA           | NA          |             |
| chr11:34093272-34098189  | exonic | CAPRIN1                                                                                     | 11    | 34093272  | 34098189  | 4        | 6  | 1  | 7  | 10 | 0  | 4917   | 3.713325505 | -0.226096786 | 1.4611114    | -0.154743017 | 0.877023916  | 0.998252924 |             |
| chr13:25051838-25067871  | exonic | PARP4                                                                                       | 13    | 25051838  | 25067871  | 0        | 0  | 3  | 6  | 0  | 0  | 16033  | 1.229675387 | -0.224874087 | 2.818301899  | -0.079790631 | NA           | NA          |             |
| chr16:30675535-30677862  | exonic | FBRS                                                                                        | 16    | 30675535  | 30677862  | 35       | 15 | 13 | 57 | 20 | 9  | 2327   | 20.94744218 | -0.224626978 | 0.752495119  | -0.298509548 | NA           | NA          |             |
| chr16:22360599-22361170  | exonic | CDR2                                                                                        | 16    | 22360599  | 22361170  | 3        | 3  | 3  | 3  | 11 | 0  | 571    | 3.151831097 | -0.223589642 | 1.538599719  | -0.145320215 | NA           | NA          |             |
| chr2:148653869-148657136 | exonic | ACVR2A                                                                                      | 2     | 148653869 | 148657136 | 24       | 11 | 11 | 38 | 22 | 5  | 3267   | 15.42620866 | -0.223587123 | 0.798312637  | -0.280074639 | 0.779420242  | 0.998252924 |             |
| chr2:148653869-148657467 | exonic | ACVR2A                                                                                      | 2     | 148653869 | 148657467 | 24       | 11 | 11 | 38 | 22 | 5  | 3598   | 15.42620866 | -0.223587123 | 0.798312637  | -0.280074639 | 0.779420242  | 0.998252924 |             |
| chr4:39301640-39304771   | exonic | RFC1                                                                                        | 4     | 39301640  | 39304771  | 1        | 0  | 2  | 3  | 2  | 0  | 3131   | 1.084513993 | -0.222782029 | 2.471070522  | -0.090156079 | 0.928163186  | 0.998252924 |             |
| chr5:134076752-134079742 | exonic | CAMLG                                                                                       | 5     | 134076752 | 134079742 | 1        | 0  | 2  | 3  | 2  | 0  | 2990   | 1.084513993 | -0.222782029 | 2.471070522  | -0.090156079 | 0.928163186  | 0.998252924 |             |
| chr19:3623685-3624160    | exonic | CACTIN                                                                                      | 19    | 3623685   | 3624160   | 4        | 4  | 3  | 14 | 4  | 0  | 475    | 3.777327123 | -0.220604355 | 1.428027825  | -0.154481833 | 0.877229835  | 0.998252924 |             |
| chr2:24046127-24046439   | exonic | ATAD2B                                                                                      | 2     | 24046127  | 24046439  | 3        | 6  | 0  | 7  | 7  | 0  | 312    | 3.023987271 | -0.220573296 | 1.680763252  | -0.131234007 | 0.895590195  | 0.998252924 |             |
| chr10:7839009-7844817    | exonic | ATP5C1                                                                                      | 10    | 7839009   | 7844817   | 25       | 23 | 17 | 40 | 47 | 7  | 5808   | 22.68486487 | -0.220306291 | 0.712541918  | -0.309183622 | 0.757181852  | 0.998252924 |             |
| chr19:13135834-13136366  | exonic | NFIX                                                                                        | 19    | 13135834  | 13136366  | 4        | 5  | 1  | 13 | 3  | 0  | 532    | 3.329726064 | -0.220302388 | 1.538933265  | -0.143152659 | 0.886169618  | 0.998252924 |             |
| chr8:99718694-99719539   | exonic | STK3                                                                                        | 8     | 99718694  | 99719539  | 16       | 10 | 9  | 13 | 16 | 11 | 845    | 12.29086176 | -0.219868157 | 0.845808465  | -0.259950291 | 0.794902118  | 0.998252924 |             |
| chr17:75398140-75398785  | exonic |                                                                                             | 9-Sep | 17        | 75398140  | 75398785 | 8  | 9  | 2  | 10 | 8  | 5      | 645         | 6.567342055  | -0.219521687 | 1.07588607   | -0.204038042 | 0.838323771 | 0.998252924 |
| chr14:65922339-65924925  | UTR5   | <small>019106.179121:c.-10542..-10540;0084041146;NM_004480:c.-12374..-12376del1ins0</small> | 14    | 65922339  | 65924925  | 0        | 0  | 4  | 3  | 0  | 2  | 2586   | 1.724447475 | -0.215948157 | 2.321040405  | -0.093039379 | 0.925872277  | 0.998252924 |             |
| chr9:14639893-14680160   | exonic | ZDHHC21                                                                                     | 9     | 14639893  | 14680160  | 10       | 6  | 7  | 4  | 24 | 3  | 40267  | 7.970966891 | -0.215913393 | 1.058716684  | -0.203938784 | NA           | NA          |             |
| chr10:5751493-5756170    | UTR5   | <small>FAM208B(NM_017782:c.-7820..-7725del1ins0)</small>                                    | 10    | 5751493   | 5756170   | 0        | 0  | 4  | 8  | 0  | 0  | 4677   | 1.639567183 | -0.214837477 | 2.559697154  | -0.083930818 | NA           | NA          |             |
| chr6:155095122-155114110 | exonic | SCAF8                                                                                       | 6     | 155095122 | 155114110 | 5        | 4  | 0  | 5  | 8  | 0  | 18988  | 2.84181421  | -0.214370259 | 1.703801319  | -0.125818813 | 0.89987535   | 0.998252924 |             |
| chr6:155095122-155116273 | exonic | SCAF8                                                                                       | 6     | 155095122 | 155116273 | 5        | 4  | 0  | 5  | 8  | 0  | 21151  | 2.84181421  | -0.214370259 | 1.703801319  | -0.125818813 | 0.89987535   | 0.998252924 |             |
| chr13:30801548-30815223  | exonic | KATNAL1                                                                                     | 13    | 30801548  | 30815223  | 2        | 2  | 0  | 4  | 2  | 0  | 13675  | 1.273825868 | -0.214004049 | 2.294140165  | -0.093282901 | 0.925678816  | 0.998252924 |             |
| chr14:37754522-37838829  | exonic | MIPOL1                                                                                      | 14    | 37754522  | 37838829  | 2        | 0  | 0  | 3  | 1  | 0  | 84307  | 0.826922406 | -0.213572786 | 2.969051163  | -0.071933009 | NA           | NA          |             |
| chr1:114372213-114377061 | exonic | PTPN22                                                                                      | 1     | 114372213 | 114377061 | 15       | 4  | 11 | 23 | 17 | 3  | 4848   | 10.22915047 | -0.21316842  | 0.93485691   | -0.228022511 | 0.81962874   | 0.998252924 |             |
| chr17:60087910-60140662  | exonic | MED13                                                                                       | 17    | 60087910  | 60140662  | 3        | 5  | 1  | 7  | 7  | 0  | 52752  | 3.046980498 | -0.212953158 | 1.554670393  | -0.136976403 | 0.891049447  | 0.998252924 |             |
| chr4:52729602-52752804   | exonic | DCUN1D4                                                                                     | 4     | 52729602  | 52752804  | 2        | 2  | 3  | 4  | 5  | 1  | 23202  | 2.536933819 | -0.210214379 | 1.549258143  | -0.135687122 | 0.892068628  | 0.998252924 |             |
| chr12:31595708-31600703  | exonic | DENND5B                                                                                     | 12    | 31595708  | 31600703  | 4        | 0  | 0  | 1  | 4  | 0  | 4995   | 1.106368843 | -0.209884485 | 2.666896104  | -0.078699911 | NA           | NA          |             |
| chr14:89878277-89878834  | exonic | FOXN3                                                                                       | 14    | 89878277  | 89878834  | 1        | 0  | 1  | 2  | 1  | 0  | 557    | 0.65990616  | -0.209326775 | 3.015567125  | -0.069415392 | 0.944658977  | 0.998252924 |             |
| chr1:113197086-113202401 | exonic | CAPZA1                                                                                      | 1     | 113197086 | 113202401 | 3        | 3  | 0  | 6  | 3  | 0  | 5315   | 1.910738802 | -0.208315721 | 1.961521665  | -0.106201081 | 0.915422813  | 0.998252924 |             |
| chr1:40980187-40981590   | exonic | EXO5                                                                                        | 1     | 40980187  | 40981590  | 3        | 3  | 0  | 6  | 3  | 0  | 1403   | 1.910738802 | -0.208315721 | 1.961521665  | -0.106201081 | 0.915422813  | 0.998252924 |             |
| chr1:48860938-48869554   | exonic | SPATA6                                                                                      | 1     | 48860938  | 48869554  | 2        | 0  | 2  | 2  | 2  | 1  | 8616   | 1.415408159 | -0.20757815  | 2.092750929  | -0.099189133 | 0.920988103  | 0.998252924 |             |

|                           |              |                        |    |           |           |    |    |   |    |    |   |       |             |              |             |              |             |             |
|---------------------------|--------------|------------------------|----|-----------|-----------|----|----|---|----|----|---|-------|-------------|--------------|-------------|--------------|-------------|-------------|
| chr9:96233422-96238620    | exonic       | FAM120A                | 9  | 96233422  | 96238620  | 8  | 10 | 6 | 8  | 18 | 5 | 5198  | 8.528345404 | -0.207184789 | 0.967529779 | -0.214137894 | 0.830439526 | 0.998252924 |
| chr14:102368055-102372866 | exonic       | PPP2R5C                | 14 | 102368055 | 102372866 | 5  | 0  | 0 | 2  | 0  | 2 | 4811  | 1.473994702 | -0.206042889 | 2.432750319 | -0.084695452 | NA          | NA          |
| chr20:44530905-44531243   | exonic       | PLTP                   | 20 | 44530905  | 44531243  | 2  | 1  | 0 | 0  | 4  | 0 | 338   | 0.916359372 | -0.205156562 | 2.874023175 | -0.071383058 | NA          | NA          |
| chr14:64465631-64488746   | exonic       | SYNE2                  | 14 | 64465631  | 64488746  | 17 | 4  | 1 | 5  | 9  | 7 | 23115 | 6.865484233 | -0.20286182  | 1.163746953 | -0.17431781  | NA          | NA          |
| chr19:38631823-38633350   | exonic       | SIPAIL3                | 19 | 38631823  | 38633350  | 3  | 4  | 3 | 3  | 4  | 4 | 1527  | 3.711789379 | -0.202178095 | 1.347719765 | -0.150014937 | 0.880752831 | 0.998252924 |
| chr2:61722589-61726048    | exonic       | XPO1                   | 2  | 61722589  | 61726048  | 2  | 3  | 2 | 6  | 3  | 1 | 3459  | 2.484508519 | -0.202136961 | 1.562225805 | -0.129390361 | 0.897048775 | 0.998252924 |
| chr4:52729602-52765544    | exonic       | DCUN1D4                | 4  | 52729602  | 52765544  | 2  | 2  | 2 | 2  | 1  | 3 | 35942 | 2.259369553 | -0.201925134 | 1.689079602 | -0.119547435 | 0.904841662 | 0.998252924 |
| chr11:34107610-34113603   | exonic       | CAPRIN1                | 11 | 34107610  | 34113603  | 0  | 0  | 3 | 1  | 0  | 2 | 5993  | 1.314555679 | -0.201552342 | 2.58614881  | -0.077935323 | NA          | NA          |
| chr1:151400298-151414681  | exonic       | POGZ                   | 1  | 151400298 | 151414681 | 0  | 3  | 0 | 3  | 2  | 0 | 14383 | 1.083816396 | -0.200390947 | 2.671990743 | -0.074996872 | NA          | NA          |
| chr16:72991325-72994093   | exonic       | ZFH3                   | 16 | 72991325  | 72994093  | 0  | 3  | 0 | 3  | 2  | 0 | 2768  | 1.083816396 | -0.200390947 | 2.671990743 | -0.074996872 | NA          | NA          |
| chr15:85223943-85234875   | exonic       | SEC11A                 | 15 | 85223943  | 85234875  | 5  | 9  | 4 | 6  | 11 | 5 | 10932 | 6.512756002 | -0.200387338 | 1.077865884 | -0.185911199 | 0.8525144   | 0.998252924 |
| chr8:131164981-131181313  | exonic       | ASAP1                  | 8  | 131164981 | 131181313 | 9  | 3  | 8 | 16 | 13 | 1 | 16332 | 6.844419341 | -0.198726118 | 1.096528231 | -0.181232104 | 0.856185397 | 0.998252924 |
| chr2:168986050-168997268  | exonic       | STK39                  | 2  | 168986050 | 168997268 | 4  | 0  | 3 | 9  | 2  | 0 | 11218 | 2.306612158 | -0.198196148 | 1.867593897 | -0.106123793 | NA          | NA          |
| chr19:47767859-47768203   | exonic       | CCDC9                  | 19 | 47767859  | 47768203  | 35 | 37 | 8 | 89 | 26 | 5 | 344   | 26.69041906 | -0.197893575 | 0.824768367 | -0.239938367 | NA          | NA          |
| chrX:38133991-38137603    | exonic       | RPGR                   | X  | 38133991  | 38137603  | 2  | 3  | 0 | 8  | 0  | 0 | 3612  | 1.631292364 | -0.197125919 | 2.319744298 | -0.084977434 | 0.932279331 | 0.998252924 |
| chr15:63824845-63850387   | exonic       | USP3                   | 15 | 63824845  | 63850387  | 9  | 2  | 7 | 3  | 6  | 3 | 25542 | 1.746302326 | -0.19525978  | 1.964191862 | -0.099409729 | 0.920812959 | 0.998252924 |
| chr12:27867712-27877119   | exonic       | MRPS35                 | 12 | 27867712  | 27877119  | 10 | 6  | 5 | 7  | 11 | 6 | 9407  | 7.246662339 | -0.193919569 | 1.015557076 | -0.190948961 | 0.84856558  | 0.998252924 |
| chr2:32602655-32617218    | exonic       | BIRC6                  | 2  | 32602655  | 32617218  | 0  | 4  | 1 | 0  | 8  | 0 | 14563 | 1.862591596 | -0.19217653  | 2.27042934  | -0.084643255 | NA          | NA          |
| chr1:10209241-10221344    | exonic       | UBE4B                  | 1  | 10209241  | 10221344  | 0  | 2  | 0 | 0  | 3  | 0 | 12103 | 0.711633864 | -0.192056209 | 3.452180916 | -0.055633298 | NA          | NA          |
| chr1:155742856-155747611  | exonic       | GON4L                  | 1  | 155742856 | 155747611 | 0  | 2  | 0 | 0  | 3  | 0 | 4755  | 0.711633864 | -0.192056209 | 3.452180916 | -0.055633298 | NA          | NA          |
| chr13:76287317-76335174   | exonic       | LMO7                   | 13 | 76287317  | 76335174  | 0  | 2  | 0 | 0  | 3  | 0 | 47857 | 0.711633864 | -0.192056209 | 3.452180916 | -0.055633298 | NA          | NA          |
| chr18:19144163-19164401   | exonic       | ESCO1                  | 18 | 19144163  | 19164401  | 0  | 2  | 0 | 0  | 3  | 0 | 20238 | 0.711633864 | -0.192056209 | 3.452180916 | -0.055633298 | NA          | NA          |
| chr3:37336469-37343823    | exonic       | GOLGA4                 | 3  | 37336469  | 37343823  | 0  | 2  | 0 | 0  | 3  | 0 | 7354  | 0.711633864 | -0.192056209 | 3.452180916 | -0.055633298 | NA          | NA          |
| chr8:133590654-133627343  | exonic       | LRR6                   | 8  | 133590654 | 133627343 | 0  | 2  | 0 | 0  | 3  | 0 | 36689 | 0.711633864 | -0.192056209 | 3.452180916 | -0.055633298 | NA          | NA          |
| chr10:116879948-116889297 | exonic       | ATRNL1                 | 10 | 116879948 | 116889297 | 1  | 2  | 1 | 0  | 6  | 0 | 9349  | 1.400972097 | -0.191170326 | 2.303047002 | -0.083007566 | NA          | NA          |
| chr12:113705647-113707650 | exonic       | TPCN1                  | 12 | 113705647 | 113707650 | 4  | 3  | 0 | 5  | 5  | 0 | 2003  | 2.175469203 | -0.190181387 | 1.862815027 | -0.102093543 | 0.918682426 | 0.998252924 |
| chr9:134049441-134053797  | exonic       | NUP214                 | 9  | 134049441 | 134053797 | 1  | 1  | 0 | 1  | 0  | 1 | 4356  | 0.717792736 | -0.190150086 | 2.98029954  | -0.06380234  | 0.949127615 | 0.998252924 |
| chr7:99952766-99953427    | ncRNA_exonic | STAG3L5P-PVRIG2P-PILRB | 7  | 99952766  | 99953427  | 0  | 4  | 3 | 6  | 6  | 0 | 661   | 2.652943115 | -0.188487869 | 1.767924922 | -0.106615313 | NA          | NA          |
| chr1:100960373-100964818  | exonic       | CDC14A                 | 1  | 100960373 | 100964818 | 1  | 0  | 2 | 4  | 1  | 0 | 4445  | 1.069797956 | -0.188254285 | 2.509542195 | -0.075015389 | 0.940202468 | 0.998252924 |
| chr1:155490890-155491409  | exonic       | ASH1L                  | 1  | 155490890 | 155491409 | 0  | 2  | 2 | 5  | 2  | 0 | 519   | 1.516701419 | -0.188211834 | 2.173760075 | -0.086583536 | 0.931002553 | 0.998252924 |
| chr10:133757471-133758963 | exonic       | PPP2R2D                | 10 | 133757471 | 133758963 | 1  | 0  | 1 | 0  | 1  | 1 | 1492  | 0.755501999 | -0.187831892 | 2.931770245 | -0.064067739 | 0.948916289 | 0.998252924 |
| chr10:76153898-76158337   | exonic       | ADK                    | 10 | 76153898  | 76158337  | 1  | 0  | 1 | 0  | 1  | 1 | 4439  | 0.755501999 | -0.187831892 | 2.931770245 | -0.064067739 | 0.948916289 | 0.998252924 |
| chr4:166021779-166024248  | exonic       | TMEM192                | 4  | 166021779 | 166024248 | 1  | 0  | 1 | 0  | 1  | 1 | 2469  | 0.755501999 | -0.187831892 | 2.931770245 | -0.064067739 | 0.948916289 | 0.998252924 |
| chr4:148867767-148887990  | exonic       | ARHGAP10               | 4  | 148867767 | 148887990 | 4  | 0  | 0 | 3  | 0  | 1 | 20223 | 1.143100535 | -0.187387797 | 2.654842215 | -0.070583403 | NA          | NA          |
| chr20:3199163-3199640     | exonic       | ITPA                   | 20 | 3199163   | 3199640   | 3  | 2  | 0 | 3  | 4  | 0 | 477   | 1.538556269 | -0.18726312  | 2.125483062 | -0.088103793 | 0.929794182 | 0.998252924 |

|                           |        |           |    |           |           |    |    |    |     |    |    |       |             |              |             |              |             |             |
|---------------------------|--------|-----------|----|-----------|-----------|----|----|----|-----|----|----|-------|-------------|--------------|-------------|--------------|-------------|-------------|
| chr9:19423859-19424839    | exonic | ACER2     | 9  | 19423859  | 19424839  | 2  | 2  | 0  | 5   | 1  | 0  | 980   | 1.259109831 | -0.185365462 | 2.335698285 | -0.079361903 | NA          | NA          |
| chr6:76412360-76412788    | exonic | SENP6     | 6  | 76412360  | 76412788  | 7  | 7  | 5  | 10  | 19 | 0  | 428   | 6.471819186 | -0.184575999 | 1.185580515 | -0.15568407  | 0.876282055 | 0.998252924 |
| chrX:53641494-53642796    | exonic | HUWE1     | X  | 53641494  | 53642796  | 5  | 5  | 3  | 11  | 9  | 0  | 1302  | 4.366792819 | -0.184128098 | 1.330220093 | -0.138419273 | 0.889909066 | 0.998252924 |
| chr1:159888553-159890327  | exonic | TAGLN2    | 1  | 159888553 | 159890327 | 0  | 6  | 0  | 6   | 4  | 0  | 1774  | 2.167632793 | -0.183566894 | 2.093643498 | -0.0876782   | NA          | NA          |
| chr8:17532694-17581342    | exonic | MTUS1     | 8  | 17532694  | 17581342  | 2  | 3  | 0  | 2   | 11 | 2  | 48648 | 1.348546798 | -0.181448699 | 2.278546653 | -0.079633524 | 0.936528732 | 0.998252924 |
| chr15:76152218-76165909   | exonic | UBE2Q2    | 15 | 76152218  | 76165909  | 8  | 7  | 10 | 11  | 19 | 4  | 13691 | 8.926337077 | -0.181113296 | 0.948474866 | -0.19095213  | 0.848563098 | 0.998252924 |
| chr15:44620882-44673174   | exonic | CASC4     | 15 | 44620882  | 44673174  | 2  | 1  | 0  | 1   | 1  | 1  | 52292 | 0.9678071   | -0.179036573 | 2.468407098 | -0.072531218 | 0.942179163 | 0.998252924 |
| chr1:155646338-155649303  | exonic | YY1AP1    | 1  | 155646338 | 155649303 | 97 | 40 | 21 | 102 | 80 | 20 | 2965  | 50.31574215 | -0.179016925 | 0.639244316 | -0.28004461  | 0.77944328  | 0.998252924 |
| chr14:91409421-91467503   | exonic | RPS6KA5   | 14 | 91409421  | 91467503  | 4  | 0  | 0  | 2   | 3  | 0  | 58082 | 1.091652807 | -0.178999879 | 2.649473764 | -0.06756054  | NA          | NA          |
| chr2:48725631-48738607    | exonic | PPP1R21   | 2  | 48725631  | 48738607  | 4  | 0  | 0  | 2   | 3  | 0  | 12976 | 1.091652807 | -0.178999879 | 2.649473764 | -0.06756054  | NA          | NA          |
| chr3:48960180-48965246    | exonic | ARIH2     | 3  | 48960180  | 48965246  | 4  | 0  | 0  | 2   | 3  | 0  | 5066  | 1.091652807 | -0.178999879 | 2.649473764 | -0.06756054  | NA          | NA          |
| chr1:8601272-8674745      | exonic | RERE      | 1  | 8601272   | 8674745   | 9  | 6  | 3  | 4   | 13 | 4  | 73473 | 6.029820815 | -0.178955741 | 1.119880738 | -0.159798927 | 0.873039469 | 0.998252924 |
| chr15:94888357-94945248   | exonic | MCTP2     | 15 | 94888357  | 94945248  | 14 | 2  | 8  | 12  | 12 | 5  | 56891 | 8.001679729 | -0.178668788 | 1.018208906 | -0.175473605 | NA          | NA          |
| chr15:94899365-94945248   | exonic | MCTP2     | 15 | 94899365  | 94945248  | 14 | 2  | 8  | 12  | 12 | 5  | 45883 | 8.001679729 | -0.178668788 | 1.018208906 | -0.175473605 | NA          | NA          |
| chr10:112640990-112650428 | exonic | PDCD4     | 10 | 112640990 | 112650428 | 1  | 2  | 1  | 1   | 5  | 0  | 9438  | 1.386256061 | -0.178366368 | 2.140754851 | -0.08331938  | NA          | NA          |
| chr1:63944434-63974241    | exonic | ITGB3BP   | 1  | 63944434  | 63974241  | 0  | 4  | 0  | 7   | 0  | 0  | 29807 | 1.441282892 | -0.177916952 | 2.66301873  | -0.066810252 | NA          | NA          |
| chr6:109466421-109468140  | exonic | CEP57L1   | 6  | 109466421 | 109468140 | 0  | 2  | 2  | 0   | 0  | 3  | 1719  | 1.667745476 | -0.177355615 | 2.382538686 | -0.074439763 | NA          | NA          |
| chr12:129299319-129299615 | exonic | SLC15A4   | 12 | 129299319 | 129299615 | 3  | 2  | 4  | 6   | 8  | 0  | 296   | 3.130676214 | -0.176038141 | 1.516565104 | -0.116076877 | 0.907591614 | 0.998252924 |
| chr5:124036706-124036962  | exonic | ZNF608    | 5  | 124036706 | 124036962 | 20 | 10 | 1  | 40  | 6  | 0  | 256   | 9.498385809 | -0.176005638 | 1.232211849 | -0.142837157 | NA          | NA          |
| chr12:102173929-102183835 | exonic | GNPTAB    | 12 | 102173929 | 102183835 | 1  | 3  | 0  | 3   | 1  | 1  | 9906  | 1.399994526 | -0.175853234 | 2.138610384 | -0.082227803 | 0.934465564 | 0.998252924 |
| chr2:203817281-203826149  | exonic | CARF      | 2  | 203817281 | 203826149 | 0  | 1  | 3  | 4   | 3  | 0  | 8868  | 1.554410682 | -0.175579995 | 2.167721298 | -0.080997495 | 0.935443945 | 0.998252924 |
| chr7:104714065-104719410  | exonic | KMT2E     | 7  | 104714065 | 104719410 | 7  | 4  | 4  | 10  | 8  | 2  | 5345  | 5.036858341 | -0.174809495 | 1.154083374 | -0.151470422 | 0.879604642 | 0.998252924 |
| chr8:37734626-37735069    | exonic | RAB11FIP1 | 8  | 37734626  | 37735069  | 20 | 7  | 9  | 47  | 9  | 0  | 443   | 11.66097258 | -0.174639816 | 1.082743438 | -0.161293812 | NA          | NA          |
| chr1:94667275-94697199    | exonic | ARHGAP29  | 1  | 94667275  | 94697199  | 3  | 0  | 0  | 4   | 0  | 0  | 29924 | 0.812206369 | -0.174459299 | 3.262083154 | -0.053480948 | NA          | NA          |
| chr11:119142444-119145663 | exonic | CBL       | 11 | 119142444 | 119145663 | 3  | 0  | 0  | 4   | 0  | 0  | 3219  | 0.812206369 | -0.174459299 | 3.262083154 | -0.053480948 | NA          | NA          |
| chr12:72955944-72969322   | exonic | TRHDE     | 12 | 72955944  | 72969322  | 3  | 0  | 0  | 4   | 0  | 0  | 13378 | 0.812206369 | -0.174459299 | 3.262083154 | -0.053480948 | NA          | NA          |
| chr12:72956632-72969322   | exonic | TRHDE     | 12 | 72956632  | 72969322  | 3  | 0  | 0  | 4   | 0  | 0  | 12690 | 0.812206369 | -0.174459299 | 3.262083154 | -0.053480948 | NA          | NA          |
| chr14:62187096-62188541   | exonic | HIF1A     | 14 | 62187096  | 62188541  | 3  | 0  | 0  | 4   | 0  | 0  | 1445  | 0.812206369 | -0.174459299 | 3.262083154 | -0.053480948 | NA          | NA          |
| chr16:70497071-70499079   | exonic | FUK       | 16 | 70497071  | 70499079  | 3  | 0  | 0  | 4   | 0  | 0  | 2008  | 0.812206369 | -0.174459299 | 3.262083154 | -0.053480948 | NA          | NA          |
| chr7:38247047-38259261    | exonic | STARD3NL  | 7  | 38247047  | 38259261  | 3  | 0  | 0  | 4   | 0  | 0  | 12214 | 0.812206369 | -0.174459299 | 3.262083154 | -0.053480948 | NA          | NA          |
| chr7:72954211-72957974    | exonic | BCL7B     | 7  | 72954211  | 72957974  | 3  | 0  | 0  | 4   | 0  | 0  | 3763  | 0.812206369 | -0.174459299 | 3.262083154 | -0.053480948 | NA          | NA          |
| chr8:28956386-28956758    | exonic | KIF13B    | 8  | 28956386  | 28956758  | 3  | 0  | 0  | 4   | 0  | 0  | 372   | 0.812206369 | -0.174459299 | 3.262083154 | -0.053480948 | NA          | NA          |
| chrX:153940503-153944604  | exonic | GAB3      | X  | 153940503 | 153944604 | 3  | 0  | 0  | 4   | 0  | 0  | 4101  | 0.812206369 | -0.174459299 | 3.262083154 | -0.053480948 | NA          | NA          |
| chr7:23650789-23651172    | exonic | CCDC126   | 7  | 23650789  | 23651172  | 6  | 5  | 16 | 8   | 22 | 6  | 383   | 10.16401107 | -0.173568236 | 0.984925566 | -0.176224723 | 0.860117398 | 0.998252924 |
| chr14:50616725-50619891   | exonic | SOS2      | 14 | 50616725  | 50619891  | 0  | 1  | 3  | 5   | 0  | 1  | 3166  | 1.60585841  | -0.173392621 | 2.206490898 | -0.078582976 | 0.937364329 | 0.998252924 |

|                          |              |                                                          |    |           |           |    |    |    |    |     |    |        |             |              |             |              |             |             |
|--------------------------|--------------|----------------------------------------------------------|----|-----------|-----------|----|----|----|----|-----|----|--------|-------------|--------------|-------------|--------------|-------------|-------------|
| chr16:53189837-53191453  | exonic       | CHD9                                                     | 16 | 53189837  | 53191453  | 5  | 0  | 4  | 4  | 7   | 1  | 1616   | 3.014666918 | -0.173339728 | 1.574050323 | -0.110123371 | 0.912311534 | 0.998252924 |
| chr7:158552176-158557544 | exonic       | ESYT2                                                    | 7  | 158552176 | 158557544 | 35 | 32 | 26 | 78 | 36  | 14 | 5368   | 32.18469898 | -0.171977753 | 0.648893625 | -0.265032274 | NA          | NA          |
| chr11:89165951-89185063  | exonic       | NOX4                                                     | 11 | 89165951  | 89185063  | 1  | 2  | 0  | 0  | 0   | 2  | 19112  | 1.093975759 | -0.171006605 | 2.756006732 | -0.062048689 | 0.950524058 | 0.998252924 |
| chr3:11849306-11851156   | exonic       | TAMM41                                                   | 3  | 11849306  | 11851156  | 3  | 0  | 3  | 5  | 2   | 1  | 1850   | 2.060598283 | -0.168393297 | 1.810293201 | -0.093019902 | 0.92588775  | 0.998252924 |
| chr1:59787207-59844509   | exonic       | FGGY                                                     | 1  | 59787207  | 59844509  | 26 | 4  | 0  | 36 | 3   | 1  | 57302  | 8.549274448 | -0.16709085  | 1.330823181 | -0.125554508 | NA          | NA          |
| chr9:86292641-86301070   | exonic       | UBQLN1                                                   | 9  | 86292641  | 86301070  | 3  | 2  | 4  | 7  | 7   | 0  | 8429   | 3.115960177 | -0.165156693 | 1.515493245 | -0.108978838 | 0.913219275 | 0.998252924 |
| chr3:47079155-47103836   | exonic       | SETD2                                                    | 3  | 47079155  | 47103836  | 5  | 4  | 3  | 4  | 3   | 5  | 24681  | 4.263265837 | -0.164645826 | 1.284718328 | -0.128157139 | 0.898024618 | 0.998252924 |
| chr3:47079155-47108608   | exonic       | SETD2                                                    | 3  | 47079155  | 47108608  | 5  | 4  | 3  | 4  | 3   | 5  | 29453  | 4.263265837 | -0.164645826 | 1.284718328 | -0.128157139 | 0.898024618 | 0.998252924 |
| chr6:144808683-144814592 | exonic       | UTRN                                                     | 6  | 144808683 | 144814592 | 15 | 6  | 6  | 35 | 4   | 1  | 5909   | 8.677299865 | -0.164329288 | 1.105624297 | -0.148630316 | NA          | NA          |
| chrX:19701940-19713859   | exonic       | SH3KBP1                                                  | X  | 19701940  | 19713859  | 3  | 1  | 0  | 1  | 0   | 2  | 11919  | 1.28398523  | -0.16398924  | 2.397109919 | -0.068411231 | 0.945458282 | 0.998252924 |
| chr3:149563797-149629870 | exonic       | RNF13                                                    | 3  | 149563797 | 149629870 | 4  | 3  | 1  | 0  | 0   | 2  | 66073  | 1.578588484 | -0.16299269  | 2.226065486 | -0.073220079 | 0.941630989 | 0.998252924 |
| chr7:155499553-155511137 | exonic       | RBM33                                                    | 7  | 155499553 | 155511137 | 3  | 2  | 0  | 5  | 0   | 1  | 11584  | 1.575287961 | -0.162694562 | 2.171375331 | -0.074926964 | 0.940272822 | 0.998252924 |
| chr14:71867511-71884913  | intergenic   | <small>SNORD56B(dist=2387), LOC145474(dist=6966)</small> | 14 | 71867511  | 71884913  | 2  | 6  | 0  | 0  | 5   | 3  | 17402  | 2.833421615 | -0.160634466 | 1.806729817 | -0.088908958 | 0.929154264 | 0.998252924 |
| chr1:117944807-117963271 | exonic       | MAN1A2                                                   | 1  | 117944807 | 117963271 | 90 | 59 | 62 | 69 | 102 | 61 | 18464  | 72.60339431 | -0.159201311 | 0.580106839 | -0.274434467 | 0.783750758 | 0.998252924 |
| chr1:117948170-117963271 | exonic       | MAN1A2                                                   | 1  | 117948170 | 117963271 | 90 | 59 | 62 | 69 | 102 | 61 | 15101  | 72.60339431 | -0.159201311 | 0.580106839 | -0.274434467 | 0.783750758 | 0.998252924 |
| chr10:32759991-32762951  | exonic       | CCDC7                                                    | 10 | 32759991  | 32762951  | 0  | 2  | 0  | 1  | 2   | 0  | 2960   | 0.696917827 | -0.158619291 | 3.189548064 | -0.049730961 | 0.960336783 | 0.998252924 |
| chr4:76725286-76726456   | exonic       | USO1                                                     | 4  | 76725286  | 76726456  | 0  | 2  | 0  | 1  | 2   | 0  | 1170   | 0.696917827 | -0.158619291 | 3.189548064 | -0.049730961 | 0.960336783 | 0.998252924 |
| chr9:137582757-137593179 | exonic       | COL5A1                                                   | 9  | 137582757 | 137593179 | 0  | 2  | 0  | 1  | 2   | 0  | 10422  | 0.696917827 | -0.158619291 | 3.189548064 | -0.049730961 | 0.960336783 | 0.998252924 |
| chr16:80718434-80719026  | exonic       | CDYL2                                                    | 16 | 80718434  | 80719026  | 14 | 6  | 6  | 18 | 11  | 4  | 592    | 8.512867154 | -0.157132401 | 0.949963879 | -0.165408817 | 0.868622215 | 0.998252924 |
| chr14:61909828-61924397  | exonic       | PRKCH                                                    | 14 | 61909828  | 61924397  | 1  | 0  | 1  | 3  | 0   | 0  | 14569  | 0.645190124 | -0.156982613 | 3.294353478 | -0.047652025 | NA          | NA          |
| chr2:54114395-54120936   | exonic       | PSME4                                                    | 2  | 54114395  | 54120936  | 1  | 0  | 1  | 3  | 0   | 0  | 6541   | 0.645190124 | -0.156982613 | 3.294353478 | -0.047652025 | NA          | NA          |
| chr4:5566984-5586577     | exonic       | EVC2                                                     | 4  | 5566984   | 5586577   | 1  | 0  | 1  | 3  | 0   | 0  | 19593  | 0.645190124 | -0.156982613 | 3.294353478 | -0.047652025 | NA          | NA          |
| chr6:3076997-3081350     | exonic       | RIPK1                                                    | 6  | 3076997   | 3081350   | 1  | 0  | 1  | 3  | 0   | 0  | 4353   | 0.645190124 | -0.156982613 | 3.294353478 | -0.047652025 | NA          | NA          |
| chr8:103283361-103285000 | exonic       | UBR5                                                     | 8  | 103283361 | 103285000 | 1  | 0  | 1  | 3  | 0   | 0  | 1639   | 0.645190124 | -0.156982613 | 3.294353478 | -0.047652025 | NA          | NA          |
| chr8:38693679-38697785   | exonic       | TACC1                                                    | 8  | 38693679  | 38697785  | 1  | 0  | 1  | 3  | 0   | 0  | 4106   | 0.645190124 | -0.156982613 | 3.294353478 | -0.047652025 | NA          | NA          |
| chr15:93540186-93541851  | exonic       | CHD2                                                     | 15 | 93540186  | 93541851  | 6  | 4  | 0  | 8  | 6   | 0  | 1665   | 3.047680465 | -0.155444645 | 1.658590767 | -0.093720916 | 0.925330855 | 0.998252924 |
| chr4:153332454-153333024 | exonic       | FBXW7                                                    | 4  | 153332454 | 153333024 | 2  | 1  | 0  | 2  | 0   | 1  | 570    | 0.953091064 | -0.15452537  | 2.641387371 | -0.058501593 | 0.953349093 | 0.998252924 |
| chr7:130630478-130737314 | ncRNA_exonic | LINC-PINT                                                | 7  | 130630478 | 130737314 | 2  | 1  | 0  | 2  | 0   | 1  | 106836 | 0.953091064 | -0.15452537  | 2.641387371 | -0.058501593 | 0.953349093 | 0.998252924 |
| chr10:11523768-11527910  | exonic       | USP6NL                                                   | 10 | 11523768  | 11527910  | 0  | 1  | 2  | 2  | 3   | 0  | 4142   | 1.144518886 | -0.153981676 | 2.431625597 | -0.063324583 | 0.949508041 | 0.998252924 |
| chr16:11114049-11145498  | exonic       | CLEC16A                                                  | 16 | 11114049  | 11145498  | 4  | 0  | 1  | 6  | 1   | 0  | 31449  | 1.472112529 | -0.153493648 | 2.230722383 | -0.068808942 | 0.9451417   | 0.998252924 |
| chr17:80521229-80526077  | exonic       | FO XK2                                                   | 17 | 80521229  | 80526077  | 11 | 4  | 4  | 8  | 10  | 4  | 4848   | 6.198675403 | -0.152636641 | 1.074190318 | -0.142094598 | 0.887005285 | 0.998252924 |
| chr17:25631805-25637200  | exonic       | WSB1                                                     | 17 | 25631805  | 25637200  | 0  | 2  | 0  | 0  | 0   | 0  | 5395   | 1.539694645 | -0.151082984 | 2.186013456 | -0.069113474 | 0.944899296 | 0.998252924 |
| chr2:177161588-177202305 | exonic       | MTX2                                                     | 2  | 177161588 | 177202305 | 3  | 0  | 6  | 16 | 0   | 0  | 40717  | 3.271557144 | -0.150671579 | 2.884139048 | -0.052241441 | NA          | NA          |
| chr8:124089350-124113247 | exonic       | TBC1D31                                                  | 8  | 124089350 | 124113247 | 2  | 4  | 0  | 6  | 3   | 0  | 23897  | 1.956027658 | -0.150341584 | 1.960075181 | -0.076701948 | 0.938860655 | 0.998252924 |
| chr8:124089350-124117704 | exonic       | TBC1D31                                                  | 8  | 124089350 | 124117704 | 2  | 4  | 0  | 6  | 3   | 0  | 28354  | 1.956027658 | -0.150341584 | 1.960075181 | -0.076701948 | 0.938860655 | 0.998252924 |

|                           |              |          |    |           |           |    |    |    |    |    |    |       |             |              |             |              |             |             |
|---------------------------|--------------|----------|----|-----------|-----------|----|----|----|----|----|----|-------|-------------|--------------|-------------|--------------|-------------|-------------|
| chr8:124089350-124121860  | exonic       | TBC1D31  | 8  | 124089350 | 124121860 | 2  | 4  | 0  | 6  | 3  | 0  | 32510 | 1.956027658 | -0.150341584 | 1.960075181 | -0.076701948 | 0.938860655 | 0.998252924 |
| chr10:126097110-126100769 | exonic       | OAT      | 10 | 126097110 | 126100769 | 2  | 0  | 1  | 0  | 4  | 0  | 3659  | 0.939352598 | -0.149018372 | 2.850490296 | -0.052278154 | NA          | NA          |
| chr3:169694733-169703653  | exonic       | SEC62    | 3  | 169694733 | 169703653 | 2  | 0  | 1  | 0  | 4  | 0  | 8920  | 0.939352598 | -0.149018372 | 2.850490296 | -0.052278154 | NA          | NA          |
| chr3:119219541-119222868  | exonic       | TIMMDC1  | 3  | 119219541 | 119222868 | 4  | 9  | 10 | 12 | 20 | 2  | 3327  | 8.369842493 | -0.148036741 | 1.027950267 | -0.144011579 | 0.885491326 | 0.998252924 |
| chr5:172535626-172550205  | exonic       | CREBRF   | 5  | 172535626 | 172550205 | 4  | 0  | 0  | 3  | 2  | 0  | 14579 | 1.07693677  | -0.147335626 | 2.660849409 | -0.055371651 | NA          | NA          |
| chr4:166141085-166184511  | exonic       | KLHL2    | 4  | 166141085 | 166184511 | 3  | 2  | 5  | 5  | 4  | 3  | 43426 | 3.662179993 | -0.146663813 | 1.344990504 | -0.109044497 | 0.913167197 | 0.998252924 |
| chr2:61749745-61753656    | exonic       | XPO1     | 2  | 61749745  | 61753656  | 18 | 8  | 12 | 13 | 11 | 14 | 3911  | 13.11160984 | -0.144944288 | 0.871611288 | -0.166294643 | NA          | NA          |
| chr13:28155433-28155940   | exonic       | LNX2     | 13 | 28155433  | 28155940  | 3  | 1  | 0  | 0  | 5  | 0  | 507   | 1.166373736 | -0.143500578 | 2.627552905 | -0.054613773 | NA          | NA          |
| chr6:161469647-161471011  | exonic       | MAP3K4   | 6  | 161469647 | 161471011 | 4  | 3  | 1  | 2  | 9  | 0  | 1364  | 2.53791376  | -0.143414431 | 1.690455013 | -0.084837769 | NA          | NA          |
| chr19:19675741-19680393   | exonic       | PBX4     | 19 | 19675741  | 19680393  | 4  | 0  | 2  | 2  | 2  | 2  | 4652  | 1.981600654 | -0.13964448  | 1.846494542 | -0.075626803 | 0.939716012 | 0.998252924 |
| chr5:153413350-153414527  | exonic       | FAM114A2 | 5  | 153413350 | 153414527 | 17 | 12 | 11 | 41 | 18 | 1  | 1177  | 13.29952589 | -0.139519781 | 0.922068679 | -0.151311702 | 0.879729839 | 0.998252924 |
| chr3:47139444-47147610    | exonic       | SETD2    | 3  | 47139444  | 47147610  | 5  | 5  | 7  | 14 | 8  | 2  | 8166  | 5.970212872 | -0.138728882 | 1.102104421 | -0.12587635  | 0.899829804 | 0.998252924 |
| chr12:122773035-122801402 | exonic       | CLIP1    | 12 | 122773035 | 122801402 | 3  | 1  | 2  | 0  | 2  | 3  | 28367 | 2.122485348 | -0.138026164 | 1.860076788 | -0.074204552 | 0.940847624 | 0.998252924 |
| chr8:98698895-98703416    | exonic       | MTDH     | 8  | 98698895  | 98703416  | 2  | 1  | 3  | 3  | 6  | 0  | 4521  | 2.069155447 | -0.137839146 | 1.799938297 | -0.076579929 | 0.938957727 | 0.998252924 |
| chr22:28692185-28693840   | exonic       | TTC28    | 22 | 28692185  | 28693840  | 1  | 0  | 2  | 5  | 0  | 0  | 1655  | 1.05508192  | -0.137488856 | 2.734538861 | -0.050278626 | NA          | NA          |
| chr9:86293355-86301070    | exonic       | UBQLN1   | 9  | 86293355  | 86301070  | 7  | 10 | 7  | 11 | 16 | 6  | 7715  | 5.078568094 | -0.136545121 | 1.168167611 | -0.116888295 | 0.906948574 | 0.998252924 |
| chr2:197653927-197657876  | exonic       | GTF3C3   | 2  | 197653927 | 197657876 | 2  | 1  | 0  | 2  | 2  | 0  | 3949  | 0.886927299 | -0.136148935 | 2.656755352 | -0.05124632  | 0.959129242 | 0.998252924 |
| chr19:53883975-53888280   | ncRNA_exonic | ZNF525   | 19 | 53883975  | 53888280  | 2  | 5  | 0  | 2  | 8  | 0  | 4305  | 2.310195026 | -0.134295866 | 1.88864626  | -0.071106945 | 0.943312641 | 0.998252924 |
| chr1:151060665-151079698  | exonic       | GABPB2   | 1  | 151060665 | 151079698 | 0  | 2  | 1  | 4  | 1  | 0  | 19033 | 1.092093586 | -0.133747595 | 2.4940202   | -0.05362731  | 0.957232097 | 0.998252924 |
| chr10:28872327-28884970   | exonic       | WAC      | 10 | 28872327  | 28884970  | 2  | 3  | 3  | 5  | 5  | 1  | 12643 | 2.817521003 | -0.130420202 | 1.482072625 | -0.087998523 | 0.92987785  | 0.998252924 |
| chr19:34922765-34929671   | exonic       | UBA2     | 19 | 34922765  | 34929671  | 3  | 0  | 3  | 6  | 3  | 0  | 6906  | 1.979718481 | -0.128085891 | 1.945335517 | -0.065842571 | 0.947503163 | 0.998252924 |
| chr15:59204761-59209198   | exonic       | SLTM     | 15 | 59204761  | 59209198  | 16 | 8  | 14 | 32 | 22 | 6  | 4437  | 38.10155863 | -0.127672418 | 0.644008459 | -0.198246493 | 0.842852213 | 0.998252924 |
| chr2:206992520-206994966  | exonic       | NDUFS1   | 2  | 206992520 | 206994966 | 0  | 8  | 4  | 9  | 4  | 3  | 2446  | 4.548850475 | -0.127338614 | 1.388830574 | -0.091687651 | 0.926946209 | 0.998252924 |
| chr2:223752547-223773868  | exonic       | ACSL3    | 2  | 223752547 | 223773868 | 0  | 1  | 1  | 0  | 3  | 0  | 21321 | 0.73462709  | -0.127279317 | 3.151529164 | -0.040386527 | NA          | NA          |
| chr3:183454505-183480067  | exonic       | YEATS2   | 3  | 183454505 | 183480067 | 0  | 1  | 1  | 0  | 3  | 0  | 25562 | 0.73462709  | -0.127279317 | 3.151529164 | -0.040386527 | NA          | NA          |
| chr1:23356961-23385660    | exonic       | KDM1A    | 1  | 23356961  | 23385660  | 6  | 5  | 1  | 4  | 4  | 4  | 28699 | 3.984799341 | -0.125884064 | 1.329989596 | -0.094650412 | 0.924592506 | 0.998252924 |
| chr18:21644103-21663045   | exonic       | TTC39C   | 18 | 21644103  | 21663045  | 11 | 8  | 11 | 16 | 9  | 9  | 18942 | 10.54721848 | -0.124841542 | 0.895762442 | -0.139369029 | 0.889158545 | 0.998252924 |
| chr11:45883610-45893784   | exonic       | CRY2     | 11 | 45883610  | 45893784  | 13 | 2  | 0  | 18 | 2  | 0  | 10174 | 4.181041631 | -0.124172965 | 1.625915307 | -0.076371115 | NA          | NA          |
| chr16:70294946-70296427   | exonic       | AARS     | 16 | 70294946  | 70296427  | 0  | 1  | 2  | 3  | 2  | 0  | 1481  | 1.129802849 | -0.122641039 | 2.440840011 | -0.050245423 | 0.959926815 | 0.998252924 |
| chr3:57276883-57282379    | exonic       | APPL1    | 3  | 57276883  | 57282379  | 3  | 0  | 2  | 3  | 4  | 0  | 5496  | 1.584542722 | -0.122504465 | 2.108878764 | -0.058089857 | 0.953677054 | 0.998252924 |
| chr1:21097422-21100103    | exonic       | HP1BP3   | 1  | 21097422  | 21100103  | 12 | 14 | 4  | 14 | 20 | 4  | 2681  | 9.918562866 | -0.122158243 | 0.930595929 | -0.131268834 | 0.895562645 | 0.998252924 |
| chr1:197621364-197643299  | exonic       | DENND1B  | 1  | 197621364 | 197643299 | 0  | 0  | 4  | 4  | 3  | 0  | 21935 | 1.577403908 | -0.12198112  | 2.336326448 | -0.052210649 | NA          | NA          |
| chr5:40852276-40854198    | exonic       | CARD6    | 5  | 40852276  | 40854198  | 7  | 8  | 5  | 25 | 6  | 0  | 1922  | 6.667409279 | -0.120991577 | 1.203461113 | -0.100536341 | 0.919918533 | 0.998252924 |
| chr6:43023282-43024183    | exonic       | MRPL2    | 6  | 43023282  | 43024183  | 6  | 1  | 0  | 6  | 3  | 0  | 901   | 1.949148032 | -0.12007711  | 1.985738464 | -0.060469751 | 0.951781507 | 0.998252924 |
| chr2:169547543-169574488  | exonic       | CERS6    | 2  | 169547543 | 169574488 | 2  | 0  | 5  | 5  | 6  | 0  | 26945 | 2.50204047  | -0.119186943 | 1.813497734 | -0.065722135 | 0.947599049 | 0.998252924 |

|                           |        |          |    |           |           |    |   |   |    |    |   |       |             |              |              |              |             |             |
|---------------------------|--------|----------|----|-----------|-----------|----|---|---|----|----|---|-------|-------------|--------------|--------------|--------------|-------------|-------------|
| chr17:45479497-45492285   | exonic | EFCAB13  | 17 | 45479497  | 45492285  | 7  | 8 | 8 | 16 | 10 | 4 | 12788 | 8.019398012 | -0.118764391 | 0.9675511111 | -0.122747408 | 0.902307121 | 0.998252924 |
| chr11:128993340-129034322 | exonic | ARHGAP32 | 11 | 128993340 | 129034322 | 6  | 0 | 2 | 8  | 3  | 0 | 40982 | 2.382033054 | -0.11823006  | 1.836089312  | -0.064392325 | 0.948657841 | 0.998252924 |
| chr10:93756125-93768032   | exonic | BTAF1    | 10 | 93756125  | 93768032  | 0  | 2 | 0 | 0  | 1  | 1 | 11907 | 0.777797629 | -0.117762427 | 3.115404592  | -0.037800043 | 0.96984711  | 0.998252924 |
| chr11:126275990-126279306 | exonic | ST3GAL4  | 11 | 126275990 | 126279306 | 0  | 2 | 0 | 0  | 1  | 1 | 3316  | 0.777797629 | -0.117762427 | 3.115404592  | -0.037800043 | 0.96984711  | 0.998252924 |
| chr15:31200320-31206294   | exonic | FAN1     | 15 | 31200320  | 31206294  | 0  | 2 | 0 | 0  | 1  | 1 | 5974  | 0.777797629 | -0.117762427 | 3.115404592  | -0.037800043 | 0.96984711  | 0.998252924 |
| chr17:60629662-60631116   | exonic | TLK2     | 17 | 60629662  | 60631116  | 0  | 2 | 0 | 0  | 1  | 1 | 1454  | 0.777797629 | -0.117762427 | 3.115404592  | -0.037800043 | 0.96984711  | 0.998252924 |
| chr10:5815804-5842668     | exonic | GDI2     | 10 | 5815804   | 5842668   | 1  | 2 | 0 | 0  | 2  | 1 | 26864 | 1.027811993 | -0.117335773 | 2.580921716  | -0.04546274  | 0.963738473 | 0.998252924 |
| chr7:104702610-104707254  | exonic | KMT2E    | 7  | 104702610 | 104707254 | 1  | 2 | 0 | 0  | 2  | 1 | 4644  | 1.027811993 | -0.117335773 | 2.580921716  | -0.04546274  | 0.963738473 | 0.998252924 |
| chr17:11958205-11984847   | exonic | MAP2K4   | 17 | 11958205  | 11984847  | 1  | 1 | 4 | 1  | 4  | 2 | 26642 | 2.299197134 | -0.117294242 | 1.710329318  | -0.068579917 | 0.945324005 | 0.998252924 |
| chr10:103384501-103436193 | exonic | FBXW4    | 10 | 103384501 | 103436193 | 3  | 1 | 1 | 5  | 2  | 0 | 51692 | 1.532117422 | -0.117203203 | 2.015749518  | -0.058143734 | 0.953634139 | 0.998252924 |
| chr1:155365249-155429689  | exonic | ASH1L    | 1  | 155365249 | 155429689 | 3  | 3 | 0 | 3  | 1  | 2 | 64440 | 1.96618702  | -0.116903059 | 1.861025337  | -0.062816479 | 0.949912644 | 0.998252924 |
| chr9:95018961-95032265    | exonic | IARS     | 9  | 95018961  | 95032265  | 3  | 3 | 0 | 3  | 1  | 2 | 13304 | 1.96618702  | -0.116903059 | 1.861025337  | -0.062816479 | 0.949912644 | 0.998252924 |
| chr22:40825610-40831558   | exonic | MKL1     | 22 | 40825610  | 40831558  | 0  | 3 | 0 | 5  | 0  | 0 | 5948  | 1.054384323 | -0.116343391 | 2.970307698  | -0.039168801 | NA          | NA          |
| chr4:40892380-40937156    | exonic | APBB2    | 4  | 40892380  | 40937156  | 4  | 3 | 0 | 3  | 0  | 0 | 44776 | 1.054384323 | -0.116343391 | 2.970307698  | -0.039168801 | NA          | NA          |
| chr11:12785725-12785981   | exonic | TEAD1    | 11 | 12785725  | 12785981  | 2  | 1 | 1 | 6  | 0  | 0 | 256   | 1.267387021 | -0.115999612 | 2.36679545   | -0.049011254 | NA          | NA          |
| chr2:231307651-231313865  | exonic | SPI00    | 2  | 231307651 | 231313865 | 2  | 1 | 1 | 6  | 0  | 0 | 6214  | 1.267387021 | -0.115999612 | 2.36679545   | -0.049011254 | NA          | NA          |
| chr21:42598192-42629253   | exonic | BACE2    | 21 | 42598192  | 42629253  | 4  | 4 | 1 | 9  | 4  | 0 | 31061 | 2.851232146 | -0.115992211 | 1.587872795  | -0.073048805 | 0.94176728  | 0.998252924 |
| chr12:27143382-27156323   | exonic | TM7SF3   | 12 | 27143382  | 27156323  | 0  | 2 | 0 | 2  | 1  | 0 | 12941 | 0.68220179  | -0.115744902 | 3.212018511  | -0.036034942 | 0.971254497 | 0.998252924 |
| chr13:100909848-100992513 | exonic | PCCA     | 13 | 100909848 | 100992513 | 0  | 2 | 0 | 2  | 1  | 0 | 82665 | 0.68220179  | -0.115744902 | 3.212018511  | -0.036034942 | 0.971254497 | 0.998252924 |
| chr13:48830312-48832372   | exonic | ITM2B    | 13 | 48830312  | 48832372  | 0  | 2 | 0 | 2  | 1  | 0 | 2060  | 0.68220179  | -0.115744902 | 3.212018511  | -0.036034942 | 0.971254497 | 0.998252924 |
| chr15:85610244-85626875   | exonic | PDE8A    | 15 | 85610244  | 85626875  | 0  | 2 | 0 | 2  | 1  | 0 | 16631 | 0.68220179  | -0.115744902 | 3.212018511  | -0.036034942 | 0.971254497 | 0.998252924 |
| chr19:44001269-44002028   | exonic | PHLDB3   | 19 | 44001269  | 44002028  | 0  | 2 | 0 | 2  | 1  | 0 | 759   | 0.68220179  | -0.115744902 | 3.212018511  | -0.036034942 | 0.971254497 | 0.998252924 |
| chr3:136162128-136192479  | exonic | STAG1    | 3  | 136162128 | 136192479 | 0  | 2 | 0 | 2  | 1  | 0 | 30351 | 0.68220179  | -0.115744902 | 3.212018511  | -0.036034942 | 0.971254497 | 0.998252924 |
| chr4:1902352-1932497      | exonic | WHSC1    | 4  | 1902352   | 1932497   | 0  | 2 | 0 | 2  | 1  | 0 | 30145 | 0.68220179  | -0.115744902 | 3.212018511  | -0.036034942 | 0.971254497 | 0.998252924 |
| chrX:53652117-53654466    | exonic | HUWE1    | X  | 53652117  | 53654466  | 0  | 2 | 0 | 2  | 1  | 0 | 2349  | 0.68220179  | -0.115744902 | 3.212018511  | -0.036034942 | 0.971254497 | 0.998252924 |
| chr16:70497071-70497677   | exonic | FUK      | 16 | 70497071  | 70497677  | 5  | 0 | 5 | 10 | 5  | 0 | 606   | 3.299530802 | -0.115378292 | 1.634796869  | -0.070576531 | 0.943734789 | 0.998252924 |
| chr12:51467605-51467865   | exonic | CSRP2    | 12 | 51467605  | 51467865  | 6  | 4 | 3 | 20 | 0  | 0 | 260   | 4.189059632 | -0.112489384 | 1.592272155  | -0.070647083 | NA          | NA          |
| chr17:11984672-12016677   | exonic | MAP2K4   | 17 | 11984672  | 12016677  | 6  | 5 | 0 | 3  | 3  | 4 | 32005 | 3.560191508 | -0.110293659 | 1.496334979  | -0.073709203 | 0.941241776 | 0.998252924 |
| chr1:155734790-155736500  | exonic | GON4L    | 1  | 155734790 | 155736500 | 17 | 7 | 7 | 31 | 7  | 3 | 1710  | 9.861092518 | -0.10963551  | 0.96981373   | -0.113048007 | NA          | NA          |
| chr22:46125304-46136418   | exonic | ATXN10   | 22 | 46125304  | 46136418  | 9  | 3 | 7 | 11 | 14 | 1 | 11114 | 6.236620812 | -0.109168611 | 1.12354765   | -0.097164202 | 0.922595996 | 0.998252924 |
| chr17:30310017-30315516   | exonic | SUZ12    | 17 | 30310017  | 30315516  | 0  | 5 | 3 | 4  | 0  | 4 | 5499  | 3.121306048 | -0.108956631 | 1.758695077  | -0.061953111 | 0.950600172 | 0.998252924 |
| chr2:95814630-95819004    | exonic | ZNF514   | 2  | 95814630  | 95819004  | 6  | 8 | 6 | 23 | 8  | 0 | 4374  | 6.765123435 | -0.108614758 | 1.181691416  | -0.091914654 | 0.926765848 | 0.998252924 |
| chr18:29691716-29706763   | exonic | RNF138   | 18 | 29691716  | 29706763  | 2  | 0 | 2 | 5  | 1  | 0 | 15047 | 1.305096284 | -0.106923086 | 2.311838229  | -0.046250246 | NA          | NA          |
| chr3:155547476-155551830  | exonic | SLC33A1  | 3  | 155547476 | 155551830 | 2  | 1 | 5 | 2  | 10 | 0 | 4354  | 2.841491801 | -0.104576831 | 1.668288487  | -0.0626851   | NA          | NA          |
| chr21:40600425-40601362   | exonic | BRWD1    | 21 | 40600425  | 40601362  | 4  | 1 | 0 | 0  | 6  | 0 | 937   | 1.416388101 | -0.103876492 | 2.456163291  | -0.042292177 | NA          | NA          |

|                           |        |                                              |    |           |           |    |    |     |     |     |    |        |             |              |             |              |             |             |
|---------------------------|--------|----------------------------------------------|----|-----------|-----------|----|----|-----|-----|-----|----|--------|-------------|--------------|-------------|--------------|-------------|-------------|
| chr10:69714351-69773943   | exonic | HERC4                                        | 10 | 69714351  | 69773943  | 1  | 0  | 3   | 0   | 6   | 0  | 59592  | 1.44695855  | -0.10358911  | 2.45781624  | -0.042146808 | NA          | NA          |
| chr20:21319681-21324846   | exonic | XRN2                                         | 20 | 21319681  | 21324846  | 4  | 0  | 3   | 6   | 4   | 0  | 5165   | 2.229732846 | -0.103249222 | 1.85618981  | -0.05562428  | 0.955641121 | 0.998252924 |
| chr17:65941524-65943924   | exonic | BPTF                                         | 17 | 65941524  | 65943924  | 14 | 19 | 6   | 23  | 9   | 11 | 2400   | 13.22548489 | -0.102729478 | 0.870640792 | -0.117992953 | 0.906073242 | 0.998252924 |
| chr17:65941524-65944422   | exonic | BPTF                                         | 17 | 65941524  | 65944422  | 14 | 19 | 6   | 23  | 9   | 11 | 2898   | 13.22548489 | -0.102729478 | 0.870640792 | -0.117992953 | 0.906073242 | 0.998252924 |
| chr8:48308935-48320523    | exonic | SPIDR                                        | 8  | 48308935  | 48320523  | 8  | 4  | 9   | 3   | 12  | 4  | 11588  | 9.496210022 | -0.102427801 | 0.985462431 | -0.103938819 | 0.917217901 | 0.998252924 |
| chr17:11958205-11999011   | exonic | MAP2K4                                       | 17 | 11958205  | 11999011  | 4  | 7  | 0   | 6   | 3   | 3  | 40806  | 3.661484767 | -0.102301982 | 1.468050201 | -0.069685616 | 0.944443891 | 0.998252924 |
| chr12:122825299-122826244 | exonic | CLIP1                                        | 12 | 122825299 | 122826244 | 5  | 9  | 8   | 15  | 14  | 2  | 945    | 7.69706101  | -0.102147806 | 1.01925551  | -0.100218057 | 0.920171211 | 0.998252924 |
| chr1:243433406-243589860  | exonic | SDCCAG8                                      | 1  | 243433406 | 243589860 | 2  | 2  | 0   | 0   | 1   | 2  | 156454 | 1.343990123 | -0.10110524  | 2.347490948 | -0.043069491 | 0.965646139 | 0.998252924 |
| chr1:28362054-28384605    | exonic | EYA3                                         | 1  | 28362054  | 28384605  | 2  | 2  | 0   | 0   | 1   | 2  | 22551  | 1.343990123 | -0.10110524  | 2.347490948 | -0.043069491 | 0.965646139 | 0.998252924 |
| chr17:35343915-35348156   | exonic | AATF                                         | 17 | 35343915  | 35348156  | 1  | 3  | 0   | 5   | 1   | 0  | 4241   | 1.304398688 | -0.099973925 | 2.332940523 | -0.042853182 | NA          | NA          |
| chr2:71623270-71645769    | exonic | ZNF638                                       | 2  | 71623270  | 71645769  | 5  | 3  | 8   | 6   | 9   | 4  | 22499  | 5.705903858 | -0.098955011 | 1.134257868 | -0.087242076 | 0.930479095 | 0.998252924 |
| chr12:66603235-66611015   | exonic | IRAK3                                        | 12 | 66603235  | 66611015  | 6  | 2  | 0   | 4   | 4   | 1  | 7780   | 2.340047091 | -0.098703781 | 1.71671551  | -0.057495712 | 0.954150321 | 0.998252924 |
| chr10:22193450-22218070   | exonic | DNAJC1                                       | 10 | 22193450  | 22218070  | 0  | 1  | 1   | 1   | 2   | 0  | 24620  | 0.719911053 | -0.098169136 | 2.929027839 | -0.033515945 | 0.973263151 | 0.998252924 |
| chr2:224749364-224760347  | exonic | WDFY1                                        | 2  | 224749364 | 224760347 | 0  | 1  | 1   | 1   | 2   | 0  | 10983  | 0.719911053 | -0.098169136 | 2.929027839 | -0.033515945 | 0.973263151 | 0.998252924 |
| chr2:43625109-43657441    | exonic | THADA                                        | 2  | 43625109  | 43657441  | 0  | 1  | 1   | 1   | 2   | 0  | 32332  | 0.719911053 | -0.098169136 | 2.929027839 | -0.033515945 | 0.973263151 | 0.998252924 |
| chr1:23356961-23377013    | exonic | KDM1A                                        | 1  | 23356961  | 23377013  | 16 | 30 | 17  | 26  | 38  | 13 | 20052  | 22.01561845 | -0.096593547 | 0.727356274 | -0.132800872 | 0.894350865 | 0.998252924 |
| chr1:23356961-23380332    | exonic | KDM1A                                        | 1  | 23356961  | 23380332  | 8  | 9  | 2   | 11  | 6   | 4  | 23371  | 22.01561845 | -0.096593547 | 0.727356274 | -0.132800872 | 0.894350865 | 0.998252924 |
| chr5:56542126-56557109    | exonic | GPBP1                                        | 5  | 56542126  | 56557109  | 2  | 1  | 0   | 3   | 1   | 0  | 14983  | 0.872211262 | -0.096501553 | 2.692358189 | -0.035842762 | 0.971407736 | 0.998252924 |
| chrX:16846216-16847893    | exonic | TXLNG                                        | X  | 16846216  | 16847893  | 2  | 1  | 0   | 3   | 1   | 0  | 1677   | 0.872211262 | -0.096501553 | 2.692358189 | -0.035842762 | 0.971407736 | 0.998252924 |
| chr17:35310185-35311207   | exonic | AATF                                         | 17 | 35310185  | 35311207  | 11 | 3  | 2   | 18  | 4   | 0  | 1022   | 4.733936439 | -0.096370618 | 1.373470539 | -0.07016577  | 0.944061719 | 0.998252924 |
| chr9:138758301-138774924  | exonic | CAMSAP1                                      | 9  | 138758301 | 138774924 | 0  | 1  | 4   | 3   | 3   | 1  | 16623  | 1.953586931 | -0.093622943 | 1.892733598 | -0.049464406 | NA          | NA          |
| chr9:130206308-130207528  | exonic | ZNF79                                        | 9  | 130206308 | 130207528 | 7  | 2  | 0   | 4   | 3   | 2  | 1220   | 2.656225221 | -0.092812964 | 1.640766167 | -0.056566844 | 0.954890247 | 0.998252924 |
| chr2:69583627-69590802    | exonic | GFPT1                                        | 2  | 69583627  | 69590802  | 0  | 3  | 3   | 1   | 4   | 2  | 7175   | 2.321492764 | -0.092112092 | 1.784153796 | -0.051627888 | NA          | NA          |
| chr10:12136071-12162266   | exonic | DHTKD1                                       | 10 | 12136071  | 12162266  | 2  | 3  | 0   | 5   | 0   | 1  | 26195  | 1.620576817 | -0.092083492 | 2.155722219 | -0.042715843 | 0.96592805  | 0.998252924 |
| chr3:179131199-179137293  | exonic | GNB4                                         | 3  | 179131199 | 179137293 | 3  | 2  | 2   | 6   | 4   | 0  | 6094   | 2.252028476 | -0.09106068  | 1.700692732 | -0.053543287 | 0.957299042 | 0.998252924 |
| chr4:153332455-153333681  | exonic | FBXW7                                        | 4  | 153332455 | 153333681 | 76 | 89 | 101 | 112 | 203 | 37 | 1226   | 93.11725563 | -0.09073211  | 0.587349242 | -0.154477274 | 0.877233429 | 0.998252924 |
| chr19:45781180-45783992   | exonic | MARK4                                        | 19 | 45781180  | 45783992  | 7  | 0  | 1   | 5   | 5   | 0  | 2812   | 2.23687166  | -0.090433938 | 1.895445905 | -0.047711168 | NA          | NA          |
| chr15:90984737-90986710   | exonic | IQGAP1                                       | 15 | 90984737  | 90986710  | 5  | 7  | 5   | 8   | 6   | 5  | 1973   | 5.968959091 | -0.089917283 | 1.095071553 | -0.082110874 | 0.934558546 | 0.998252924 |
| chr10:31644073-31750166   | exonic | ZEB1                                         | 10 | 31644073  | 31750166  | 0  | 0  | 3   | 2   | 3   | 0  | 106093 | 1.167512112 | -0.089566547 | 2.610497167 | -0.034310149 | NA          | NA          |
| chr4:151719232-151729550  | exonic | LRBA                                         | 4  | 151719232 | 151729550 | 0  | 0  | 3   | 2   | 3   | 0  | 10318  | 1.167512112 | -0.089566547 | 2.610497167 | -0.034310149 | NA          | NA          |
| chr9:88211276-88248289    | exonic | AGTPBP1                                      | 9  | 88211276  | 88248289  | 0  | 0  | 3   | 2   | 3   | 0  | 37013  | 1.167512112 | -0.089566547 | 2.610497167 | -0.034310149 | NA          | NA          |
| chr8:62593526-62596747    | exonic | ASPH                                         | 8  | 62593526  | 62596747  | 6  | 30 | 23  | 10  | 20  | 26 | 3221   | 22.03672933 | -0.089473517 | 0.912337851 | -0.098070596 | NA          | NA          |
| chr7:72361165-72361649    | UTR5   | <small>UTR5 (chr7:72361165-72361649)</small> | 7  | 72361165  | 72361649  | 4  | 1  | 4   | 7   | 6   | 0  | 484    | 2.949643899 | -0.088668878 | 1.567300831 | -0.056574256 | 0.954884343 | 0.998252924 |
| chr17:62248459-62265775   | exonic | TEX2                                         | 17 | 62248459  | 62265775  | 3  | 1  | 0   | 2   | 3   | 0  | 17316  | 1.136941663 | -0.088521542 | 2.410715257 | -0.036720032 | 0.970708236 | 0.998252924 |
| chr18:19345732-19383975   | exonic | MIB1                                         | 18 | 19345732  | 19383975  | 3  | 2  | 0   | 5   | 0   | 0  | 38243  | 1.136941663 | -0.088521542 | 2.410715257 | -0.036720032 | 0.970708236 | 0.998252924 |



|                           |              |                                                             |    |           |           |    |   |   |    |    |   |       |             |              |             |              |             |             |
|---------------------------|--------------|-------------------------------------------------------------|----|-----------|-----------|----|---|---|----|----|---|-------|-------------|--------------|-------------|--------------|-------------|-------------|
| chr8:28827559-28828036    | exonic       | HMBOX1                                                      | 8  | 28827559  | 28828036  | 3  | 1 | 0 | 2  | 3  | 0 | 477   | 1.136941663 | -0.088521542 | 2.410715257 | -0.036720032 | 0.970708236 | 0.998252924 |
| chr9:86383732-86403593    | exonic       | GKAP1                                                       | 9  | 86383732  | 86403593  | 1  | 2 | 0 | 0  | 4  | 0 | 19861 | 0.961648228 | -0.087781695 | 2.828687794 | -0.031032656 | NA          | NA          |
| chr1:231090078-231097049  | exonic       | TTC13                                                       | 1  | 231090078 | 231097049 | 11 | 7 | 6 | 5  | 19 | 4 | 6971  | 7.886353492 | -0.08758471  | 1.018736677 | -0.085973846 | 0.931487208 | 0.998252924 |
| chr11:27470093-27472122   | intronic     | LGR4                                                        | 11 | 27470093  | 27472122  | 0  | 3 | 0 | 0  | 0  | 2 | 2029  | 1.139264615 | -0.08580799  | 2.944956965 | -0.029137264 | NA          | NA          |
| chr15:82152167-82218366   | intergenic   | <small>TMC3-AS1 (dist=416750), MEX3B (dist=115753)</small>  | 15 | 82152167  | 82218366  | 0  | 3 | 0 | 0  | 0  | 2 | 66199 | 1.139264615 | -0.08580799  | 2.944956965 | -0.029137264 | NA          | NA          |
| chr22:24491893-24530382   | exonic       | CABIN1                                                      | 22 | 24491893  | 24530382  | 0  | 3 | 0 | 0  | 0  | 2 | 38489 | 1.139264615 | -0.08580799  | 2.944956965 | -0.029137264 | NA          | NA          |
| chr4:153253747-153259088  | exonic       | FBXW7                                                       | 4  | 153253747 | 153259088 | 0  | 3 | 0 | 0  | 0  | 2 | 5341  | 1.139264615 | -0.08580799  | 2.944956965 | -0.029137264 | NA          | NA          |
| chr22:41521867-41536261   | exonic       | EP300                                                       | 22 | 41521867  | 41536261  | 4  | 3 | 0 | 3  | 4  | 1 | 14394 | 2.15003762  | -0.085373764 | 1.762298591 | -0.048444551 | 0.961361955 | 0.998252924 |
| chr2:72945231-72960247    | exonic       | EXOC6B                                                      | 2  | 72945231  | 72960247  | 19 | 7 | 6 | 23 | 14 | 3 | 15016 | 9.91849825  | -0.08501795  | 0.928954776 | -0.09152001  | 0.927079408 | 0.998252924 |
| chr8:42878257-42878690    | UTR3         | <small>H00K3 (NM_032410:c.4616_5049delins0)</small>         | 8  | 42878257  | 42878690  | 3  | 3 | 5 | 7  | 3  | 3 | 433   | 3.928051141 | -0.082631095 | 1.306570084 | -0.063242758 | 0.949573197 | 0.998252924 |
| chr18:76856475-76914555   | exonic       | ATP9B                                                       | 18 | 76856475  | 76914555  | 9  | 2 | 0 | 4  | 3  | 3 | 58080 | 3.222417716 | -0.081631618 | 1.552899326 | -0.052567231 | 0.958076727 | 0.998252924 |
| chr1:118035768-118045592  | exonic       | MAN1A2                                                      | 1  | 118035768 | 118045592 | 2  | 0 | 0 | 0  | 2  | 0 | 9824  | 0.500028729 | -0.081283638 | 3.945551474 | -0.020601338 | 0.983563674 | 0.998252924 |
| chr1:26299048-26311019    | exonic       | PAFAH2                                                      | 1  | 26299048  | 26311019  | 2  | 0 | 0 | 0  | 2  | 0 | 11971 | 0.500028729 | -0.081283638 | 3.945551474 | -0.020601338 | 0.983563674 | 0.998252924 |
| chr10:103557736-103573363 | exonic       | MGEA5                                                       | 10 | 103557736 | 103573363 | 2  | 0 | 0 | 0  | 2  | 0 | 15627 | 0.500028729 | -0.081283638 | 3.945551474 | -0.020601338 | 0.983563674 | 0.998252924 |
| chr10:11893995-11894214   | exonic       | PROSER2                                                     | 10 | 11893995  | 11894214  | 2  | 0 | 0 | 0  | 2  | 0 | 219   | 0.500028729 | -0.081283638 | 3.945551474 | -0.020601338 | 0.983563674 | 0.998252924 |
| chr10:27301810-27306721   | exonic       | ANKRD26                                                     | 10 | 27301810  | 27306721  | 2  | 0 | 0 | 0  | 2  | 0 | 4911  | 0.500028729 | -0.081283638 | 3.945551474 | -0.020601338 | 0.983563674 | 0.998252924 |
| chr11:213418-214208       | exonic       | RTC8A                                                       | 11 | 213418    | 214208    | 2  | 0 | 0 | 0  | 2  | 0 | 790   | 0.500028729 | -0.081283638 | 3.945551474 | -0.020601338 | 0.983563674 | 0.998252924 |
| chr11:3521696-3522511     | intergenic   | <small>TSSC2 (dist=91318), LOC101927708 (dist=6699)</small> | 11 | 3521696   | 3522511   | 2  | 0 | 0 | 0  | 2  | 0 | 815   | 0.500028729 | -0.081283638 | 3.945551474 | -0.020601338 | 0.983563674 | 0.998252924 |
| chr11:66583523-66595835   | exonic       | C11orf80                                                    | 11 | 66583523  | 66595835  | 2  | 0 | 0 | 0  | 2  | 0 | 12312 | 0.500028729 | -0.081283638 | 3.945551474 | -0.020601338 | 0.983563674 | 0.998252924 |
| chr13:103275226-103280274 | exonic       | TPP2                                                        | 13 | 103275226 | 103280274 | 2  | 0 | 0 | 0  | 2  | 0 | 5048  | 0.500028729 | -0.081283638 | 3.945551474 | -0.020601338 | 0.983563674 | 0.998252924 |
| chr13:20304378-20356931   | exonic       | PSPC1                                                       | 13 | 20304378  | 20356931  | 2  | 0 | 0 | 0  | 2  | 0 | 52553 | 0.500028729 | -0.081283638 | 3.945551474 | -0.020601338 | 0.983563674 | 0.998252924 |
| chr14:23375403-23378804   | exonic       | RBM23                                                       | 14 | 23375403  | 23378804  | 2  | 0 | 0 | 0  | 2  | 0 | 3401  | 0.500028729 | -0.081283638 | 3.945551474 | -0.020601338 | 0.983563674 | 0.998252924 |
| chr14:71880665-71979562   | ncRNA_exonic | LOC145474                                                   | 14 | 71880665  | 71979562  | 2  | 0 | 0 | 0  | 2  | 0 | 98897 | 0.500028729 | -0.081283638 | 3.945551474 | -0.020601338 | 0.983563674 | 0.998252924 |
| chr15:25638893-25660989   | exonic       | UBE3A                                                       | 15 | 25638893  | 25660989  | 2  | 0 | 0 | 0  | 2  | 0 | 22096 | 0.500028729 | -0.081283638 | 3.945551474 | -0.020601338 | 0.983563674 | 0.998252924 |
| chr15:25650608-25671366   | exonic       | UBE3A                                                       | 15 | 25650608  | 25671366  | 2  | 0 | 0 | 0  | 2  | 0 | 20758 | 0.500028729 | -0.081283638 | 3.945551474 | -0.020601338 | 0.983563674 | 0.998252924 |
| chr15:56665638-56704634   | exonic       | TEX9                                                        | 15 | 56665638  | 56704634  | 2  | 0 | 0 | 0  | 2  | 0 | 38996 | 0.500028729 | -0.081283638 | 3.945551474 | -0.020601338 | 0.983563674 | 0.998252924 |
| chr15:63845913-63866602   | exonic       | USP3                                                        | 15 | 63845913  | 63866602  | 2  | 0 | 0 | 0  | 2  | 0 | 20689 | 0.500028729 | -0.081283638 | 3.945551474 | -0.020601338 | 0.983563674 | 0.998252924 |
| chr15:72283443-72286926   | exonic       | MYO9A                                                       | 15 | 72283443  | 72286926  | 2  | 0 | 0 | 0  | 2  | 0 | 3483  | 0.500028729 | -0.081283638 | 3.945551474 | -0.020601338 | 0.983563674 | 0.998252924 |
| chr15:93496586-93536228   | exonic       | CHD2                                                        | 15 | 93496586  | 93536228  | 2  | 0 | 0 | 0  | 2  | 0 | 39642 | 0.500028729 | -0.081283638 | 3.945551474 | -0.020601338 | 0.983563674 | 0.998252924 |
| chr15:94910833-94945248   | exonic       | MCTP2                                                       | 15 | 94910833  | 94945248  | 2  | 0 | 0 | 0  | 2  | 0 | 34415 | 0.500028729 | -0.081283638 | 3.945551474 | -0.020601338 | 0.983563674 | 0.998252924 |
| chr17:55191819-55193622   | exonic       | AKAP1                                                       | 17 | 55191819  | 55193622  | 2  | 0 | 0 | 0  | 2  | 0 | 1803  | 0.500028729 | -0.081283638 | 3.945551474 | -0.020601338 | 0.983563674 | 0.998252924 |
| chr17:58348710-58366043   | exonic       | USP32                                                       | 17 | 58348710  | 58366043  | 2  | 0 | 0 | 0  | 2  | 0 | 17333 | 0.500028729 | -0.081283638 | 3.945551474 | -0.020601338 | 0.983563674 | 0.998252924 |
| chr18:19358063-19359646   | exonic       | MIB1                                                        | 18 | 19358063  | 19359646  | 2  | 0 | 0 | 0  | 2  | 0 | 1583  | 0.500028729 | -0.081283638 | 3.945551474 | -0.020601338 | 0.983563674 | 0.998252924 |
| chr19:24288741-24289445   | exonic       | ZNF254                                                      | 19 | 24288741  | 24289445  | 2  | 0 | 0 | 0  | 2  | 0 | 704   | 0.500028729 | -0.081283638 | 3.945551474 | -0.020601338 | 0.983563674 | 0.998252924 |
| chr2:113057425-113069514  | exonic       | ZC3H6                                                       | 2  | 113057425 | 113069514 | 2  | 0 | 0 | 0  | 2  | 0 | 12089 | 0.500028729 | -0.081283638 | 3.945551474 | -0.020601338 | 0.983563674 | 0.998252924 |

|                           |            |                                               |    |           |           |    |    |    |    |    |    |        |             |              |             |              |             |             |
|---------------------------|------------|-----------------------------------------------|----|-----------|-----------|----|----|----|----|----|----|--------|-------------|--------------|-------------|--------------|-------------|-------------|
| chr2:174987907-175006728  | exonic     | OLA1                                          | 2  | 174987907 | 175006728 | 2  | 0  | 0  | 0  | 2  | 0  | 18821  | 0.500028729 | -0.081283638 | 3.945551474 | -0.020601338 | 0.983563674 | 0.998252924 |
| chr2:207013743-207018406  | exonic     | NDUFS1                                        | 2  | 207013743 | 207018406 | 2  | 0  | 0  | 0  | 2  | 0  | 4663   | 0.500028729 | -0.081283638 | 3.945551474 | -0.020601338 | 0.983563674 | 0.998252924 |
| chr3:38103659-38105410    | exonic     | DLEC1                                         | 3  | 38103659  | 38105410  | 2  | 0  | 0  | 0  | 2  | 0  | 1751   | 0.500028729 | -0.081283638 | 3.945551474 | -0.020601338 | 0.983563674 | 0.998252924 |
| chr3:42226176-42230616    | exonic     | TRAK1                                         | 3  | 42226176  | 42230616  | 2  | 0  | 0  | 0  | 2  | 0  | 4440   | 0.500028729 | -0.081283638 | 3.945551474 | -0.020601338 | 0.983563674 | 0.998252924 |
| chr3:89456418-89468540    | exonic     | EPHA3                                         | 3  | 89456418  | 89468540  | 2  | 0  | 0  | 0  | 2  | 0  | 12122  | 0.500028729 | -0.081283638 | 3.945551474 | -0.020601338 | 0.983563674 | 0.998252924 |
| chr4:103635595-103657592  | exonic     | MANBA                                         | 4  | 103635595 | 103657592 | 2  | 0  | 0  | 0  | 2  | 0  | 21997  | 0.500028729 | -0.081283638 | 3.945551474 | -0.020601338 | 0.983563674 | 0.998252924 |
| chr6:160015135-160016236  | intergenic | LOC102724053 (dist=197662), S002 (dist=83913) | 6  | 160015135 | 160016236 | 2  | 0  | 0  | 0  | 2  | 0  | 1101   | 0.500028729 | -0.081283638 | 3.945551474 | -0.020601338 | 0.983563674 | 0.998252924 |
| chr7:40027197-40037263    | exonic     | CDK13                                         | 7  | 40027197  | 40037263  | 2  | 0  | 0  | 0  | 2  | 0  | 10066  | 0.500028729 | -0.081283638 | 3.945551474 | -0.020601338 | 0.983563674 | 0.998252924 |
| chr7:40027197-40039099    | exonic     | CDK13                                         | 7  | 40027197  | 40039099  | 2  | 0  | 0  | 0  | 2  | 0  | 11902  | 0.500028729 | -0.081283638 | 3.945551474 | -0.020601338 | 0.983563674 | 0.998252924 |
| chr8:141799573-141840625  | exonic     | PTK2                                          | 8  | 141799573 | 141840625 | 2  | 0  | 0  | 0  | 2  | 0  | 41052  | 0.500028729 | -0.081283638 | 3.945551474 | -0.020601338 | 0.983563674 | 0.998252924 |
| chrX:110385323-110416309  | exonic     | PAK3                                          | X  | 110385323 | 110416309 | 2  | 0  | 0  | 0  | 2  | 0  | 30986  | 0.500028729 | -0.081283638 | 3.945551474 | -0.020601338 | 0.983563674 | 0.998252924 |
| chr3:63898263-63898901    | exonic     | ATXN7                                         | 3  | 63898263  | 63898901  | 25 | 10 | 13 | 59 | 12 | 0  | 638    | 15.25662968 | -0.080891968 | 1.025203437 | -0.078903333 | NA          | NA          |
| chr2:58449076-58459247    | exonic     | FANCL                                         | 2  | 58449076  | 58459247  | 25 | 7  | 15 | 36 | 17 | 6  | 10171  | 15.13762723 | -0.080743174 | 0.820793529 | -0.098372089 | NA          | NA          |
| chr16:3586122-3586994     | exonic     | CLUAP1                                        | 16 | 3586122   | 3586994   | 5  | 0  | 0  | 4  | 2  | 0  | 872    | 1.312235098 | -0.078846113 | 2.475248595 | -0.031853816 | NA          | NA          |
| chr6:146185524-146216113  | exonic     | SHPRH                                         | 6  | 146185524 | 146216113 | 3  | 2  | 4  | 5  | 8  | 0  | 30589  | 3.024364829 | -0.078550031 | 1.537332726 | -0.05109501  | 0.959249812 | 0.998252924 |
| chr15:25650607-25657118   | exonic     | UBE3A                                         | 15 | 25650607  | 25657118  | 25 | 15 | 21 | 33 | 48 | 3  | 6511   | 20.22370787 | -0.078027328 | 0.796941229 | -0.097908509 | 0.922004943 | 0.998252924 |
| chr19:12790270-12791139   | exonic     | DHPS                                          | 19 | 12790270  | 12791139  | 4  | 0  | 0  | 5  | 0  | 0  | 869    | 1.047504697 | -0.076706018 | 2.961640538 | -0.025899841 | NA          | NA          |
| chr2:32602655-32631625    | exonic     | BIRC6                                         | 2  | 32602655  | 32631625  | 4  | 6  | 0  | 2  | 7  | 2  | 28970  | 3.237854506 | -0.076606214 | 1.549430125 | -0.049441542 | 0.960567423 | 0.998252924 |
| chr8:68018139-68028357    | exonic     | CSPP1                                         | 8  | 68018139  | 68028357  | 9  | 3  | 0  | 9  | 2  | 2  | 10218  | 3.49900441  | -0.075679553 | 1.512878125 | -0.050023563 | 0.960103612 | 0.998252924 |
| chr7:139083344-139094400  | exonic     | C7orf55-LUC7L2, LUC7L2                        | 7  | 139083344 | 139094400 | 2  | 5  | 0  | 6  | 4  | 0  | 11056  | 2.251330879 | -0.073396753 | 1.867291265 | -0.039306537 | 0.968645995 | 0.998252924 |
| chr11:108098321-108106561 | exonic     | ATM                                           | 11 | 108098321 | 108106561 | 7  | 0  | 4  | 8  | 7  | 0  | 8240   | 3.389667735 | -0.072954107 | 1.611881062 | -0.04526023  | NA          | NA          |
| chr1:155644800-155649303  | exonic     | YY1AP1                                        | 1  | 155644800 | 155649303 | 18 | 10 | 4  | 19 | 15 | 4  | 4503   | 9.921801143 | -0.070162366 | 0.920899694 | -0.076188934 | 0.939268786 | 0.998252924 |
| chr1:155644800-155650247  | exonic     | YY1AP1                                        | 1  | 155644800 | 155650247 | 18 | 10 | 4  | 19 | 15 | 4  | 5447   | 9.921801143 | -0.070162366 | 0.920899694 | -0.076188934 | 0.939268786 | 0.998252924 |
| chr17:65941524-65972074   | exonic     | BPTF                                          | 17 | 65941524  | 65972074  | 65 | 25 | 14 | 54 | 56 | 12 | 30550  | 31.71978634 | -0.069205366 | 0.6914736   | -0.100083888 | 0.920277727 | 0.998252924 |
| chr16:30507417-30507887   | exonic     | ITGAL                                         | 16 | 30507417  | 30507887  | 9  | 2  | 4  | 17 | 4  | 0  | 470    | 4.58991342  | -0.068857202 | 1.370144057 | -0.050255447 | 0.959918827 | 0.998252924 |
| chr1:200729966-200784772  | exonic     | CAMSAP2                                       | 1  | 200729966 | 200784772 | 0  | 4  | 3  | 7  | 2  | 1  | 54806  | 2.583363421 | -0.068582043 | 1.698265837 | -0.040383573 | NA          | NA          |
| chr1:171492359-171502100  | exonic     | PRRC2C                                        | 1  | 171492359 | 171502100 | 4  | 1  | 5  | 6  | 3  | 3  | 9741   | 5.214852285 | -0.068082992 | 1.219347961 | -0.055835573 | 0.955472796 | 0.998252924 |
| chr9:33948371-33956144    | exonic     | UBAP2                                         | 9  | 33948371  | 33956144  | 8  | 7  | 0  | 7  | 4  | 4  | 7773   | 4.712989954 | -0.0667519   | 1.337462472 | -0.049909363 | NA          | NA          |
| chr13:46090277-46099186   | exonic     | COG3                                          | 13 | 46090277  | 46099186  | 0  | 3  | 1  | 2  | 4  | 0  | 8909   | 1.41682888  | -0.064973636 | 2.247932539 | -0.028903731 | 0.97694137  | 0.998252924 |
| chr9:5968018-5969436      | exonic     | KIAA2026                                      | 9  | 5968018   | 5969436   | 2  | 0  | 2  | 6  | 0  | 0  | 1418   | 1.290380247 | -0.06464957  | 2.519049625 | -0.02566427  | NA          | NA          |
| chr3:48726970-48728915    | exonic     | IP6K2                                         | 3  | 48726970  | 48728915  | 1  | 0  | 2  | 0  | 0  | 2  | 1945   | 1.139962211 | -0.06252061  | 2.721484397 | -0.022972981 | 0.981671825 | 0.998252924 |
| chr3:49372453-49373029    | exonic     | USP4                                          | 3  | 49372453  | 49373029  | 0  | 4  | 0  | 3  | 3  | 0  | 576    | 1.379119617 | -0.061859778 | 2.443585973 | -0.025315163 | NA          | NA          |
| chr1:155631098-155743001  | exonic     | DAP3, GON4L, YY1AP1                           | 1  | 155631098 | 155743001 | 0  | 2  | 0  | 3  | 0  | 0  | 111903 | 0.667485754 | -0.06161524  | 3.530169569 | -0.017453904 | NA          | NA          |
| chr1:168007608-168014465  | exonic     | DCAF6                                         | 1  | 168007608 | 168014465 | 0  | 2  | 0  | 3  | 0  | 0  | 6857   | 0.667485754 | -0.06161524  | 3.530169569 | -0.017453904 | NA          | NA          |
| chr1:200729966-200801469  | exonic     | CAMSAP2                                       | 1  | 200729966 | 200801469 | 0  | 2  | 0  | 3  | 0  | 0  | 71503  | 0.667485754 | -0.06161524  | 3.530169569 | -0.017453904 | NA          | NA          |

|                           |          |                                        |    |           |           |     |    |    |     |    |    |       |             |              |             |              |             |             |
|---------------------------|----------|----------------------------------------|----|-----------|-----------|-----|----|----|-----|----|----|-------|-------------|--------------|-------------|--------------|-------------|-------------|
| chr1:39904663-39905372    | exonic   | MACF1                                  | 1  | 39904663  | 39905372  | 0   | 2  | 0  | 3   | 0  | 0  | 709   | 0.667485754 | -0.06161524  | 3.530169569 | -0.017453904 | NA          | NA          |
| chr12:122380439-122386967 | exonic   | WDR66                                  | 12 | 122380439 | 122386967 | 0   | 2  | 0  | 3   | 0  | 0  | 6528  | 0.667485754 | -0.06161524  | 3.530169569 | -0.017453904 | NA          | NA          |
| chr14:45481177-45501579   | exonic   | FAM179B                                | 14 | 45481177  | 45501579  | 0   | 2  | 0  | 3   | 0  | 0  | 20402 | 0.667485754 | -0.06161524  | 3.530169569 | -0.017453904 | NA          | NA          |
| chr16:68893786-68896964   | exonic   | TANGO6                                 | 16 | 68893786  | 68896964  | 0   | 2  | 0  | 3   | 0  | 0  | 3178  | 0.667485754 | -0.06161524  | 3.530169569 | -0.017453904 | NA          | NA          |
| chr16:71186561-71220821   | exonic   | HYDIN                                  | 16 | 71186561  | 71220821  | 0   | 2  | 0  | 3   | 0  | 0  | 34260 | 0.667485754 | -0.06161524  | 3.530169569 | -0.017453904 | NA          | NA          |
| chr17:58700881-58725443   | exonic   | PPM1D                                  | 17 | 58700881  | 58725443  | 0   | 2  | 0  | 3   | 0  | 0  | 24562 | 0.667485754 | -0.06161524  | 3.530169569 | -0.017453904 | NA          | NA          |
| chr18:13438243-13484118   | exonic   | LDLRAD4                                | 18 | 13438243  | 13484118  | 0   | 2  | 0  | 3   | 0  | 0  | 45875 | 0.667485754 | -0.06161524  | 3.530169569 | -0.017453904 | NA          | NA          |
| chr19:11527287-11527733   | exonic   | RGL3                                   | 19 | 11527287  | 11527733  | 0   | 2  | 0  | 3   | 0  | 0  | 446   | 0.667485754 | -0.06161524  | 3.530169569 | -0.017453904 | NA          | NA          |
| chr2:68368825-68374699    | exonic   | WDR92                                  | 2  | 68368825  | 68374699  | 0   | 2  | 0  | 3   | 0  | 0  | 5874  | 0.667485754 | -0.06161524  | 3.530169569 | -0.017453904 | NA          | NA          |
| chr20:39896103-39897723   | UTR5     | ZHX3(NM_015035:c.-64074_-64167delins0) | 20 | 39896103  | 39897723  | 0   | 2  | 0  | 3   | 0  | 0  | 1620  | 0.667485754 | -0.06161524  | 3.530169569 | -0.017453904 | NA          | NA          |
| chr4:57237616-57250507    | exonic   | AASDH                                  | 4  | 57237616  | 57250507  | 0   | 2  | 0  | 3   | 0  | 0  | 12891 | 0.667485754 | -0.06161524  | 3.530169569 | -0.017453904 | NA          | NA          |
| chr5:132034863-132046749  | exonic   | KIF3A                                  | 5  | 132034863 | 132046749 | 0   | 2  | 0  | 3   | 0  | 0  | 11886 | 0.667485754 | -0.06161524  | 3.530169569 | -0.017453904 | NA          | NA          |
| chr6:170162524-170169809  | exonic   | ERMARD                                 | 6  | 170162524 | 170169809 | 0   | 2  | 0  | 3   | 0  | 0  | 7285  | 0.667485754 | -0.06161524  | 3.530169569 | -0.017453904 | NA          | NA          |
| chr7:31848644-31855768    | exonic   | PDE1C                                  | 7  | 31848644  | 31855768  | 0   | 2  | 0  | 3   | 0  | 0  | 7124  | 0.667485754 | -0.06161524  | 3.530169569 | -0.017453904 | NA          | NA          |
| chr9:115171186-115216442  | exonic   | HSDL2                                  | 9  | 115171186 | 115216442 | 0   | 2  | 0  | 3   | 0  | 0  | 45256 | 0.667485754 | -0.06161524  | 3.530169569 | -0.017453904 | NA          | NA          |
| chrX:117528017-117538407  | exonic   | WDR44                                  | X  | 117528017 | 117538407 | 0   | 2  | 0  | 3   | 0  | 0  | 10390 | 0.667485754 | -0.06161524  | 3.530169569 | -0.017453904 | NA          | NA          |
| chr14:37754522-37777724   | exonic   | MIPOL1                                 | 14 | 37754522  | 37777724  | 0   | 3  | 1  | 3   | 1  | 1  | 23202 | 1.468276609 | -0.061161226 | 2.113004219 | -0.028945151 | 0.976908335 | 0.998252924 |
| chr3:3195107-3215945      | exonic   | CRBN                                   | 3  | 3195107   | 3215945   | 7   | 3  | 2  | 9   | 7  | 0  | 20838 | 3.624268467 | -0.060936472 | 1.430927704 | -0.042585291 | 0.966032121 | 0.998252924 |
| chr14:75576387-75577074   | exonic   | NEK9                                   | 14 | 75576387  | 75577074  | 2   | 4  | 2  | 10  | 2  | 0  | 687   | 2.654783828 | -0.060604039 | 1.651889273 | -0.036687713 | NA          | NA          |
| chr8:48196616-48206619    | exonic   | SPIDR                                  | 8  | 48196616  | 48206619  | 1   | 2  | 0  | 1   | 3  | 0  | 10003 | 0.946932191 | -0.060312644 | 2.621561729 | -0.023006379 | 0.981645184 | 0.998252924 |
| chr15:64791492-64792365   | exonic   | ZNF609                                 | 15 | 64791492  | 64792365  | 106 | 43 | 45 | 152 | 70 | 21 | 873   | 61.1474223  | -0.059605238 | 0.614361977 | -0.097019738 | NA          | NA          |
| chr5:60768507-60768864    | exonic   | ZSWIM6                                 | 5  | 60768507  | 60768864  | 3   | 0  | 5  | 8   | 4  | 0  | 357   | 2.707906724 | -0.058763538 | 1.755421237 | -0.033475463 | 0.973295433 | 0.998252924 |
| chr2:61339657-61345251    | exonic   | KIAA1841                               | 2  | 61339657  | 61345251  | 12  | 6  | 4  | 32  | 0  | 0  | 5594  | 6.784538535 | -0.058370188 | 1.432162303 | -0.040756685 | NA          | NA          |
| chr1:151139409-151139890  | exonic   | SCNM1, TNFAIP8L2-SCNM1                 | 1  | 151139409 | 151139890 | 5   | 4  | 4  | 9   | 3  | 3  | 481   | 4.37565457  | -0.057893485 | 1.237904856 | -0.046767314 | 0.96269868  | 0.998252924 |
| chr13:30854199-30857928   | exonic   | KATNAL1                                | 13 | 30854199  | 30857928  | 3   | 1  | 0  | 3   | 2  | 0  | 3729  | 1.122225626 | -0.057722912 | 2.420057278 | -0.023851878 | 0.980970759 | 0.998252924 |
| chr1:226175596-226176089  | exonic   | SDE2                                   | 1  | 226175596 | 226176089 | 0   | 0  | 3  | 3   | 2  | 0  | 493   | 1.152796076 | -0.057404273 | 2.620685437 | -0.021904297 | NA          | NA          |
| chr22:44107354-44168983   | exonic   | EFCAB6                                 | 22 | 44107354  | 44168983  | 0   | 1  | 1  | 2   | 1  | 0  | 61629 | 0.705195017 | -0.055802434 | 2.947607658 | -0.018931432 | 0.984895805 | 0.998252924 |
| chr2:26292443-26292669    | intronic | RAB10                                  | 2  | 26292443  | 26292669  | 4   | 3  | 4  | 4   | 7  | 2  | 226   | 3.716725981 | -0.054871056 | 1.314001624 | -0.041758743 | 0.966691025 | 0.998252924 |
| chr22:41738532-41739580   | exonic   | ZC3H7B                                 | 22 | 41738532  | 41739580  | 4   | 2  | 1  | 3   | 6  | 0  | 1048  | 2.106867081 | -0.052351431 | 1.773919555 | -0.029511728 | 0.976456466 | 0.998252924 |
| chr5:132426884-132428481  | exonic   | HSPA4                                  | 5  | 132426884 | 132428481 | 1   | 2  | 4  | 1   | 5  | 2  | 1597  | 2.594500355 | -0.052134749 | 1.619687619 | -0.032188151 | 0.974322006 | 0.998252924 |
| chr12:50821544-50822873   | exonic   | LARP4                                  | 12 | 50821544  | 50822873  | 0   | 3  | 3  | 0   | 9  | 0  | 1329  | 2.20388127  | -0.052087825 | 2.124363438 | -0.024519262 | NA          | NA          |
| chr2:232879544-232880381  | exonic   | DIS3L2                                 | 2  | 232879544 | 232880381 | 2   | 1  | 0  | 4   | 0  | 0  | 837   | 0.857495225 | -0.049967581 | 2.939706645 | -0.016997472 | NA          | NA          |
| chr3:196533449-196534785  | exonic   | PAK2                                   | 3  | 196533449 | 196534785 | 2   | 1  | 0  | 4   | 0  | 0  | 1336  | 0.857495225 | -0.049967581 | 2.939706645 | -0.016997472 | NA          | NA          |
| chr3:3178943-3186394      | exonic   | TRNT1                                  | 3  | 3178943   | 3186394   | 0   | 0  | 6  | 5   | 5  | 0  | 7451  | 2.320308188 | -0.049700422 | 2.059216201 | -0.024135602 | NA          | NA          |
| chr9:138773478-138774924  | exonic   | CAMSAP1                                | 9  | 138773478 | 138774924 | 31  | 23 | 27 | 71  | 29 | 8  | 1446  | 26.85685474 | -0.049567785 | 0.707449947 | -0.07006543  | NA          | NA          |

|                           |              |           |    |           |           |    |    |    |    |    |   |       |             |              |             |              |             |             |
|---------------------------|--------------|-----------|----|-----------|-----------|----|----|----|----|----|---|-------|-------------|--------------|-------------|--------------|-------------|-------------|
| chr7:82763565-82764972    | exonic       | PCLO      | 7  | 82763565  | 82764972  | 2  | 5  | 0  | 1  | 2  | 3 | 1407  | 2.402374936 | -0.048801504 | 1.786445929 | -0.02731765  | 0.97820638  | 0.998252924 |
| chr11:85685750-85695016   | exonic       | PICALM    | 11 | 85685750  | 85695016  | 3  | 4  | 3  | 5  | 9  | 0 | 9266  | 3.296674823 | -0.048392073 | 1.482367235 | -0.032645131 | 0.97395758  | 0.998252924 |
| chr8:109462051-109468159  | exonic       | EMC2      | 8  | 109462051 | 109468159 | 10 | 4  | 9  | 7  | 20 | 2 | 6108  | 7.543559203 | -0.048247221 | 1.058201928 | -0.045593586 | NA          | NA          |
| chr14:104219336-104220581 | exonic       | PPP1R13B  | 14 | 104219336 | 104220581 | 3  | 0  | 1  | 2  | 3  | 0 | 1245  | 1.15993489  | -0.046784893 | 2.39630071  | -0.019523799 | 0.984423252 | 0.998252924 |
| chr17:62747924-62760666   | ncRNA_exonic | LOC146880 | 17 | 62747924  | 62760666  | 3  | 0  | 1  | 2  | 3  | 0 | 12742 | 1.15993489  | -0.046784893 | 2.39630071  | -0.019523799 | 0.984423252 | 0.998252924 |
| chr17:37840849-37842272   | exonic       | PGAP3     | 17 | 37840849  | 37842272  | 4  | 3  | 5  | 7  | 10 | 0 | 1423  | 3.97957421  | -0.045372741 | 1.383891535 | -0.032786342 | 0.97384497  | 0.998252924 |
| chr1:9991948-9994918      | exonic       | LZIC      | 1  | 9991948   | 9994918   | 6  | 15 | 5  | 14 | 10 | 6 | 2970  | 8.922349033 | -0.045058225 | 0.971470599 | -0.04638146  | NA          | NA          |
| chr9:16727794-16738483    | exonic       | BNC2      | 9  | 16727794  | 16738483  | 5  | 3  | 7  | 8  | 9  | 2 | 10689 | 5.104820385 | -0.045038198 | 1.170974504 | -0.03846215  | 0.969319209 | 0.998252924 |
| chr13:77589543-77595996   | exonic       | FBXL3     | 13 | 77589543  | 77595996  | 4  | 1  | 0  | 3  | 1  | 1 | 6453  | 1.438403756 | -0.044819886 | 2.106315314 | -0.021278811 | 0.983023246 | 0.998252924 |
| chr1:215749243-215752480  | exonic       | KCTD3     | 1  | 215749243 | 215752480 | 0  | 0  | 2  | 0  | 3  | 0 | 3237  | 0.757620316 | -0.044698151 | 3.374543905 | -0.013245687 | NA          | NA          |
| chr10:26789747-26792203   | exonic       | APBB1IP   | 10 | 26789747  | 26792203  | 0  | 0  | 2  | 0  | 3  | 0 | 2456  | 0.757620316 | -0.044698151 | 3.374543905 | -0.013245687 | NA          | NA          |
| chr10:77673123-77674988   | intronic     | C10orf11  | 10 | 77673123  | 77674988  | 0  | 0  | 2  | 0  | 3  | 0 | 1865  | 0.757620316 | -0.044698151 | 3.374543905 | -0.013245687 | NA          | NA          |
| chr11:6953325-6977013     | exonic       | ZNF215    | 11 | 6953325   | 6977013   | 0  | 0  | 2  | 0  | 3  | 0 | 23688 | 0.757620316 | -0.044698151 | 3.374543905 | -0.013245687 | NA          | NA          |
| chr14:36244211-36244951   | exonic       | RALGAPA1  | 14 | 36244211  | 36244951  | 0  | 0  | 2  | 0  | 3  | 0 | 740   | 0.757620316 | -0.044698151 | 3.374543905 | -0.013245687 | NA          | NA          |
| chr16:16101672-16180848   | exonic       | ABCC1     | 16 | 16101672  | 16180848  | 0  | 0  | 2  | 0  | 3  | 0 | 79176 | 0.757620316 | -0.044698151 | 3.374543905 | -0.013245687 | NA          | NA          |
| chr18:9182379-9211782     | exonic       | ANKRD12   | 18 | 9182379   | 9211782   | 0  | 0  | 2  | 0  | 3  | 0 | 29403 | 0.757620316 | -0.044698151 | 3.374543905 | -0.013245687 | NA          | NA          |
| chr19:53883975-53887309   | ncRNA_exonic | ZNF525    | 19 | 53883975  | 53887309  | 0  | 0  | 2  | 0  | 3  | 0 | 3334  | 0.757620316 | -0.044698151 | 3.374543905 | -0.013245687 | NA          | NA          |
| chr20:30115287-30115853   | exonic       | HM13      | 20 | 30115287  | 30115853  | 0  | 0  | 2  | 0  | 3  | 0 | 566   | 0.757620316 | -0.044698151 | 3.374543905 | -0.013245687 | NA          | NA          |
| chr20:37159809-37161502   | exonic       | RALGAPB   | 20 | 37159809  | 37161502  | 0  | 0  | 2  | 0  | 3  | 0 | 1693  | 0.757620316 | -0.044698151 | 3.374543905 | -0.013245687 | NA          | NA          |
| chr6:32024363-32029497    | exonic       | TNXB      | 6  | 32024363  | 32029497  | 0  | 0  | 2  | 0  | 3  | 0 | 5134  | 0.757620316 | -0.044698151 | 3.374543905 | -0.013245687 | NA          | NA          |
| chr8:81411728-81412617    | exonic       | ZBTB10    | 8  | 81411728  | 81412617  | 0  | 0  | 2  | 0  | 3  | 0 | 889   | 0.757620316 | -0.044698151 | 3.374543905 | -0.013245687 | NA          | NA          |
| chr8:99055650-99056080    | intronic     | RPL30     | 8  | 99055650  | 99056080  | 0  | 0  | 2  | 0  | 3  | 0 | 430   | 0.757620316 | -0.044698151 | 3.374543905 | -0.013245687 | NA          | NA          |
| chr3:43341245-43345284    | exonic       | SNRK      | 3  | 43341245  | 43345284  | 6  | 3  | 13 | 27 | 5  | 1 | 4039  | 7.645009502 | -0.044219881 | 1.155039243 | -0.038284311 | NA          | NA          |
| chr17:76388556-76395618   | exonic       | PGS1      | 17 | 76388556  | 76395618  | 4  | 0  | 0  | 0  | 0  | 2 | 7062  | 1.132384989 | -0.044037172 | 2.93578789  | -0.01500012  | NA          | NA          |
| chr6:90432673-90435115    | exonic       | MDN1      | 6  | 90432673  | 90435115  | 4  | 0  | 0  | 0  | 0  | 2 | 2442  | 1.132384989 | -0.044037172 | 2.93578789  | -0.01500012  | NA          | NA          |
| chr15:44624185-44630515   | exonic       | CASC4     | 15 | 44624185  | 44630515  | 4  | 7  | 7  | 4  | 15 | 3 | 6330  | 6.282074237 | -0.043875076 | 1.124428911 | -0.039019875 | 0.968874543 | 0.998252924 |
| chr8:38153313-38157108    | exonic       | WHSC1L1   | 8  | 38153313  | 38157108  | 2  | 0  | 1  | 3  | 1  | 0 | 3795  | 0.895204488 | -0.043067478 | 2.669954079 | -0.016130419 | 0.987130346 | 0.998252924 |
| chr8:38801306-38803739    | exonic       | PLEKHA2   | 8  | 38801306  | 38803739  | 2  | 0  | 1  | 3  | 1  | 0 | 2433  | 0.895204488 | -0.043067478 | 2.669954079 | -0.016130419 | 0.987130346 | 0.998252924 |
| chr19:14568842-14569187   | exonic       | PKN1      | 19 | 14568842  | 14569187  | 13 | 0  | 1  | 18 | 0  | 0 | 345   | 3.787704214 | -0.042449937 | 3.13315844  | -0.013548608 | NA          | NA          |
| chr6:30638186-30639051    | exonic       | DHX16     | 6  | 30638186  | 30639051  | 4  | 5  | 4  | 14 | 5  | 0 | 865   | 4.26989937  | -0.042150882 | 1.35844452  | -0.031028785 | 0.975246584 | 0.998252924 |
| chr7:2269618-2270362      | exonic       | MAD1L1    | 7  | 2269618   | 2270362   | 3  | 2  | 1  | 5  | 1  | 1 | 744   | 1.893584408 | -0.041176731 | 1.776882019 | -0.023173588 | 0.981511807 | 0.998252924 |
| chr7:140301202-140302342  | exonic       | DENND2A   | 7  | 140301202 | 140302342 | 1  | 4  | 2  | 11 | 0  | 0 | 1140  | 2.390053427 | -0.040001468 | 1.920244214 | -0.020831448 | NA          | NA          |
| chr22:47370185-47393605   | exonic       | TBC1D22A  | 22 | 47370185  | 47393605  | 0  | 3  | 1  | 3  | 3  | 0 | 23420 | 1.402112844 | -0.039829354 | 2.245927196 | -0.017734036 | 0.985851028 | 0.998252924 |
| chr4:95494501-95507595    | exonic       | PDLIM5    | 4  | 95494501  | 95507595  | 10 | 6  | 10 | 18 | 10 | 4 | 13094 | 8.664968063 | -0.038727141 | 0.947116204 | -0.040889535 | 0.967383396 | 0.998252924 |
| chr13:21742126-21742538   | exonic       | SKA3      | 13 | 21742126  | 21742538  | 0  | 3  | 2  | 1  | 0  | 3 | 412   | 1.94833266  | -0.037258826 | 2.093905326 | -0.01779394  | NA          | NA          |

|                           |          |                                           |    |           |           |    |    |    |    |    |    |       |             |              |             |              |             |             |
|---------------------------|----------|-------------------------------------------|----|-----------|-----------|----|----|----|----|----|----|-------|-------------|--------------|-------------|--------------|-------------|-------------|
| chr3:51575514-51586079    | UTR5     | RAD54L2(NM_015106:c.-48841_-48771delins0) | 3  | 51575514  | 51586079  | 21 | 9  | 14 | 28 | 33 | 0  | 10565 | 14.00959805 | -0.036856114 | 0.980213667 | -0.037600081 | 0.970006543 | 0.998252924 |
| chr5:14316621-14336836    | exonic   | TRIO                                      | 5  | 14316621  | 14336836  | 0  | 4  | 0  | 4  | 2  | 0  | 20215 | 1.36440358  | -0.034279602 | 2.459363228 | -0.013938406 | NA          | NA          |
| chr13:47297355-47308133   | exonic   | LRCH1                                     | 13 | 47297355  | 47308133  | 4  | 1  | 4  | 11 | 2  | 0  | 10778 | 2.890779752 | -0.033892946 | 1.624398453 | -0.020864922 | NA          | NA          |
| chr18:45394693-45423180   | exonic   | SMAD2                                     | 18 | 45394693  | 45423180  | 23 | 19 | 0  | 21 | 8  | 11 | 28487 | 12.86910303 | -0.031719676 | 1.062186228 | -0.029862631 | 0.976176608 | 0.998252924 |
| chr5:72370568-72373320    | exonic   | FCH02                                     | 5  | 72370568  | 72373320  | 29 | 28 | 26 | 52 | 50 | 7  | 2752  | 27.48643176 | -0.031094198 | 0.690386577 | -0.045038822 | 0.964076365 | 0.998252924 |
| chr9:111795586-111826847  | exonic   | TMEM245                                   | 9  | 111795586 | 111826847 | 0  | 1  | 1  | 0  | 1  | 1  | 31261 | 0.800790855 | -0.030806952 | 2.875362405 | -0.010714111 | 0.99145154  | 0.998252924 |
| chr3:130649259-130660543  | exonic   | ATP2C1                                    | 3  | 130649259 | 130660543 | 10 | 2  | 0  | 13 | 2  | 0  | 11284 | 3.262523876 | -0.030793106 | 1.71059155  | -0.018001437 | NA          | NA          |
| chrX:76907603-76912143    | exonic   | ATRX                                      | X  | 76907603  | 76912143  | 19 | 4  | 4  | 24 | 11 | 0  | 4540  | 7.819706095 | -0.029783876 | 1.167128678 | -0.025518931 | 0.979641049 | 0.998252924 |
| chr12:95646649-95648217   | intronic | VEZT                                      | 12 | 95646649  | 95648217  | 0  | 5  | 0  | 0  | 0  | 3  | 1568  | 1.796034822 | -0.029543013 | 3.832331826 | -0.007708887 | NA          | NA          |
| chr16:30740286-30740893   | exonic   | SRCAP                                     | 16 | 30740286  | 30740893  | 13 | 7  | 7  | 26 | 7  | 2  | 607   | 8.505369212 | -0.029347808 | 1.006807457 | -0.029149375 | NA          | NA          |
| chr12:459786-475270       | exonic   | KDM5A                                     | 12 | 459786    | 475270    | 5  | 0  | 1  | 3  | 0  | 2  | 15484 | 1.777575112 | -0.027975904 | 2.107164451 | -0.013276564 | 0.989407146 | 0.998252924 |
| chr10:6001716-6008302     | exonic   | IL15RA                                    | 10 | 6001716   | 6008302   | 0  | 0  | 4  | 7  | 0  | 0  | 6586  | 1.533255798 | -0.026262228 | 2.615377222 | -0.010041468 | NA          | NA          |
| chr17:49340634-49346265   | exonic   | UTP18                                     | 17 | 49340634  | 49346265  | 17 | 7  | 11 | 24 | 17 | 3  | 5631  | 11.11626314 | -0.026157828 | 0.887077224 | -0.029487656 | 0.976475664 | 0.998252924 |
| chr8:42183487-42186732    | exonic   | IKBKB                                     | 8  | 42183487  | 42186732  | 3  | 1  | 0  | 4  | 1  | 0  | 3245  | 1.10750959  | -0.025182107 | 2.458579215 | -0.010242545 | 0.991827775 | 0.998252924 |
| chrX:77270158-77275895    | exonic   | ATP7A                                     | X  | 77270158  | 77275895  | 2  | 0  | 3  | 3  | 4  | 0  | 5737  | 1.652824805 | -0.024806374 | 2.086302239 | -0.011890115 | 0.990513284 | 0.998252924 |
| chrX:77270158-77276576    | exonic   | ATP7A                                     | X  | 77270158  | 77276576  | 2  | 0  | 3  | 3  | 4  | 0  | 6418  | 1.652824805 | -0.024806374 | 2.086302239 | -0.011890115 | 0.990513284 | 0.998252924 |
| chrX:147743428-147744289  | exonic   | AFF2                                      | X  | 147743428 | 147744289 | 13 | 8  | 5  | 28 | 8  | 0  | 861   | 8.002319935 | -0.024603359 | 1.136321212 | -0.021651764 | 0.982725741 | 0.998252924 |
| chr1:67423741-67428843    | exonic   | MIER1                                     | 1  | 67423741  | 67428843  | 10 | 13 | 9  | 21 | 13 | 5  | 5102  | 10.67786466 | -0.023985872 | 0.87451887  | -0.027427507 | 0.978118759 | 0.998252924 |
| chr10:105382227-105420872 | exonic   | SH3PXD2A                                  | 10 | 105382227 | 105420872 | 38 | 13 | 8  | 51 | 6  | 9  | 38645 | 17.66725407 | -0.023962659 | 0.888324689 | -0.026975114 | 0.978479583 | 0.998252924 |
| chr16:72122885-72124685   | exonic   | TXNL4B                                    | 16 | 72122885  | 72124685  | 4  | 0  | 1  | 2  | 4  | 0  | 1800  | 1.409949254 | -0.023518899 | 2.233227358 | -0.01053135  | 0.991597354 | 0.998252924 |
| chr10:123298105-123324093 | exonic   | FGFR2                                     | 10 | 123298105 | 123324093 | 3  | 2  | 0  | 2  | 0  | 2  | 25988 | 1.564572414 | -0.022426943 | 2.185211213 | -0.010263055 | 0.991811411 | 0.998252924 |
| chr10:123298105-123325218 | exonic   | FGFR2                                     | 10 | 123298105 | 123325218 | 3  | 2  | 0  | 2  | 0  | 2  | 27113 | 1.564572414 | -0.022426943 | 2.185211213 | -0.010263055 | 0.991811411 | 0.998252924 |
| chr5:170818308-170819982  | exonic   | NPM1                                      | 5  | 170818308 | 170819982 | 7  | 4  | 0  | 9  | 5  | 0  | 1674  | 3.161951371 | -0.022366171 | 1.644548454 | -0.01360019  | 0.989148953 | 0.998252924 |
| chr12:32751430-32764217   | exonic   | FGD4                                      | 12 | 32751430  | 32764217  | 8  | 19 | 8  | 14 | 13 | 10 | 12787 | 12.06518989 | -0.021076767 | 0.888755361 | -0.023714925 | NA          | NA          |
| chr2:122514815-122519100  | exonic   | TSN                                       | 2  | 122514815 | 122519100 | 2  | 0  | 7  | 10 | 4  | 0  | 4285  | 3.186080603 | -0.021039525 | 1.704417083 | -0.012344118 | 0.990151069 | 0.998252924 |
| chr5:138699447-138700432  | exonic   | PAIP2                                     | 5  | 138699447 | 138700432 | 7  | 5  | 7  | 11 | 13 | 1  | 985   | 6.206171102 | -0.020210719 | 1.105830694 | -0.018276504 | 0.985418272 | 0.998252924 |
| chr17:62289933-62291602   | exonic   | TEX2                                      | 17 | 62289933  | 62291602  | 3  | 4  | 2  | 3  | 9  | 0  | 1669  | 2.886783027 | -0.019201312 | 1.578612536 | -0.01216341  | 0.990295242 | 0.998252924 |
| chr2:10559859-10560261    | exonic   | HPCAL1                                    | 2  | 10559859  | 10560261  | 3  | 1  | 6  | 12 | 3  | 0  | 402   | 3.383669668 | -0.018595097 | 1.550089255 | -0.011996146 | 0.99042869  | 0.998252924 |
| chr1:180793888-180794480  | exonic   | XPR1                                      | 1  | 180793888 | 180794480 | 2  | 0  | 0  | 1  | 1  | 0  | 592   | 0.485312693 | -0.018143436 | 3.659523969 | -0.004957868 | 0.99604421  | 0.998252924 |
| chr1:223163966-223165452  | exonic   | DISP1                                     | 1  | 223163966 | 223165452 | 2  | 0  | 0  | 1  | 1  | 0  | 1486  | 0.485312693 | -0.018143436 | 3.659523969 | -0.004957868 | 0.99604421  | 0.998252924 |
| chr10:46121398-46135411   | exonic   | ZFAND4                                    | 10 | 46121398  | 46135411  | 2  | 0  | 0  | 1  | 1  | 0  | 14013 | 0.485312693 | -0.018143436 | 3.659523969 | -0.004957868 | 0.99604421  | 0.998252924 |
| chr14:21870115-21871822   | exonic   | CHD8                                      | 14 | 21870115  | 21871822  | 2  | 0  | 0  | 1  | 1  | 0  | 1707  | 0.485312693 | -0.018143436 | 3.659523969 | -0.004957868 | 0.99604421  | 0.998252924 |
| chr14:50600840-50616948   | exonic   | SOS2                                      | 14 | 50600840  | 50616948  | 2  | 0  | 0  | 1  | 1  | 0  | 16108 | 0.485312693 | -0.018143436 | 3.659523969 | -0.004957868 | 0.99604421  | 0.998252924 |
| chr19:4202022-4202923     | exonic   | ANKRD24                                   | 19 | 4202022   | 4202923   | 2  | 0  | 0  | 1  | 1  | 0  | 901   | 0.485312693 | -0.018143436 | 3.659523969 | -0.004957868 | 0.99604421  | 0.998252924 |
| chr20:50329504-50346517   | exonic   | ATP9A                                     | 20 | 50329504  | 50346517  | 2  | 0  | 0  | 1  | 1  | 0  | 17013 | 0.485312693 | -0.018143436 | 3.659523969 | -0.004957868 | 0.99604421  | 0.998252924 |

|                           |          |                                                          |    |           |           |           |    |    |    |    |    |       |             |              |              |              |              |             |             |
|---------------------------|----------|----------------------------------------------------------|----|-----------|-----------|-----------|----|----|----|----|----|-------|-------------|--------------|--------------|--------------|--------------|-------------|-------------|
| chr3:184654033-184675309  | exonic   | VPS8                                                     | 3  | 184654033 | 184675309 | 2         | 0  | 0  | 1  | 1  | 0  | 21276 | 0.485312693 | -0.018143436 | 3.659523969  | -0.004957868 | 0.99604421   | 0.998252924 |             |
| chr4:169812072-169825057  | exonic   | PALLD                                                    | 4  | 169812072 | 169825057 | 2         | 0  | 0  | 1  | 1  | 0  | 12985 | 0.485312693 | -0.018143436 | 3.659523969  | -0.004957868 | 0.99604421   | 0.998252924 |             |
| chr6:146240483-146254314  | exonic   | SHPRH                                                    | 6  | 146240483 | 146254314 | 2         | 0  | 0  | 1  | 1  | 0  | 13831 | 0.485312693 | -0.018143436 | 3.659523969  | -0.004957868 | 0.99604421   | 0.998252924 |             |
| chr9:96827015-96850545    | exonic   | PTPCD1                                                   | 9  | 96827015  | 96850545  | 2         | 0  | 0  | 1  | 1  | 0  | 23530 | 0.485312693 | -0.018143436 | 3.659523969  | -0.004957868 | 0.99604421   | 0.998252924 |             |
| chr2:8910799-8917022      | exonic   | KIDINS220                                                | 2  | 8910799   | 8917022   | 3         | 1  | 4  | 4  | 7  | 0  | 6223  | 2.622750223 | -0.017525184 | 1.646522415  | -0.010643757 | 0.991507671  | 0.998252924 |             |
| chr10:104853728-104854212 | exonic   | NT5C2                                                    | 10 | 104853728 | 104854212 | 0         | 0  | 2  | 1  | 2  | 0  | 484   | 0.74290428  | -0.016758847 | 3.118767637  | -0.005373548 | 0.99571255   | 0.998252924 |             |
| chr10:16794537-16824083   | exonic   | RSU1                                                     | 10 | 16794537  | 16824083  | 0         | 0  | 2  | 1  | 2  | 0  | 29546 | 0.74290428  | -0.016758847 | 3.118767637  | -0.005373548 | 0.99571255   | 0.998252924 |             |
| chr2:109356944-109370019  | exonic   | RANBP2                                                   | 2  | 109356944 | 109370019 | 0         | 0  | 2  | 1  | 2  | 0  | 13075 | 0.74290428  | -0.016758847 | 3.118767637  | -0.005373548 | 0.99571255   | 0.998252924 |             |
| chr4:2956150-2958538      | exonic   | NOP14                                                    | 4  | 2956150   | 2958538   | 0         | 0  | 2  | 1  | 2  | 0  | 2388  | 0.74290428  | -0.016758847 | 3.118767637  | -0.005373548 | 0.99571255   | 0.998252924 |             |
| chrX:118763280-118767455  | exonic   |                                                          |    | 6-Sep X   | 118763280 | 118767455 | 0  | 0  | 2  | 1  | 2  | 0     | 4175        | 0.74290428   | -0.016758847 | 3.118767637  | -0.005373548 | 0.99571255  | 0.998252924 |
| chr7:128845043-128846428  | exonic   | SMO                                                      | 7  | 128845043 | 128846428 | 5         | 2  | 2  | 1  | 4  | 3  | 1385  | 2.903101262 | -0.015743778 | 1.521296753  | -0.01034892  | 0.991742904  | 0.998252924 |             |
| chr2:211018218-211019335  | exonic   | KANSL1L                                                  | 2  | 211018218 | 211019335 | 8         | 8  | 2  | 13 | 11 | 0  | 1117  | 5.533989633 | -0.015116068 | 1.254572823  | -0.012048776 | 0.9903867    | 0.998252924 |             |
| chr12:100676720-100691953 | exonic   | SCYL2                                                    | 12 | 100676720 | 100691953 | 6         | 6  | 0  | 5  | 8  | 1  | 15233 | 3.62757136  | -0.013608476 | 1.473560396  | -0.009235099 | 0.992631562  | 0.998252924 |             |
| chr22:24698162-24709434   | exonic   | SPECC1L                                                  | 22 | 24698162  | 24709434  | 9         | 7  | 2  | 11 | 6  | 3  | 11272 | 5.595596723 | -0.013343814 | 1.133638927  | -0.01177078  | 0.990608493  | 0.998252924 |             |
| chr14:71511849-71524441   | exonic   | PCNX                                                     | 14 | 71511849  | 71524441  | 4         | 0  | 1  | 3  | 1  | 1  | 12592 | 1.461396983 | -0.011083215 | 2.097781921  | -0.005283302 | 0.995784555  | 0.998252924 |             |
| chr7:151932901-151948051  | exonic   | KMT2C                                                    | 7  | 151932901 | 151948051 | 2         | 3  | 0  | 7  | 0  | 0  | 15150 | 1.524980979 | -0.010896917 | 2.370085853  | -0.004597689 | 0.996331588  | 0.998252924 |             |
| chr13:100909848-100925600 | exonic   | PCCA                                                     | 13 | 100909848 | 100925600 | 8         | 4  | 1  | 14 | 3  | 0  | 15752 | 3.777709422 | -0.010869766 | 1.482189722  | -0.007333586 | NA           | NA          |             |
| chr1:1572770-1635783      | exonic   | CDK11A, CDK11B, SLC35E2B                                 | 1  | 1572770   | 1635783   | 0         | 0  | 5  | 0  | 8  | 0  | 63013 | 1.954564502 | -0.009273563 | 3.821328557  | -0.00242679  | NA           | NA          |             |
| chr10:12021055-12056183   | exonic   | UPF2                                                     | 10 | 12021055  | 12056183  | 2         | 2  | 0  | 2  | 1  | 1  | 35128 | 1.248394285 | -0.008958803 | 2.209313029  | -0.004055017 | 0.996764573  | 0.998252924 |             |
| chr5:138145726-138147991  | exonic   | CTNNA1                                                   | 5  | 138145726 | 138147991 | 1         | 1  | 1  | 1  | 1  | 1  | 2265  | 1.036089183 | -0.008585885 | 2.288719084  | -0.003751393 | 0.997006828  | 0.998326868 |             |
| chr1:246790658-246795226  | exonic   | CNST                                                     | 1  | 246790658 | 246795226 | 6         | 0  | 3  | 5  | 0  | 3  | 4568  | 2.821941485 | -0.007775795 | 1.778608782  | -0.004371841 | 0.996511787  | 0.998252924 |             |
| chr17:37864573-37866734   | exonic   | ERBB2                                                    | 17 | 37864573  | 37866734  | 4         | 1  | 0  | 4  | 2  | 0  | 2161  | 1.357523954 | -0.006449687 | 2.256727393  | -0.002857982 | 0.997719663  | 0.998525843 |             |
| chr9:136277418-136278041  | exonic   | REXO4                                                    | 9  | 136277418 | 136278041 | 6         | 4  | 7  | 15 | 9  | 0  | 623   | 5.535825605 | -0.004375375 | 1.236852724  | -0.003537507 | 0.997177484  | 0.998403328 |             |
| chr16:3900297-3901010     | exonic   | CREBBP                                                   | 16 | 3900297   | 3901010   | 10        | 7  | 2  | 12 | 6  | 3  | 713   | 5.830895051 | -0.003132515 | 1.121495785  | -0.002793158 | 0.997771385  | 0.998525843 |             |
| chr6:144858717-144864006  | exonic   | UTRN                                                     | 6  | 144858717 | 144864006 | 3         | 8  | 5  | 15 | 6  | 1  | 5289  | 5.396566265 | -0.002641944 | 1.199902027  | -0.0022018   | 0.998243219  | 0.998809224 |             |
| chr20:35409862-35410350   | intronic | SOGA1                                                    | 20 | 35409862  | 35410350  | 3         | 4  | 5  | 11 | 2  | 2  | 488   | 4.09832645  | -0.002580979 | 1.313884753  | -0.001964388 | 0.998432646  | 0.998849256 |             |
| chr4:73956383-73958017    | exonic   | ANKRD17                                                  | 4  | 73956383  | 73958017  | 20        | 29 | 21 | 23 | 35 | 17 | 1634  | 23.69722454 | -0.002120226 | 0.710577366  | -0.002983808 | 0.997619269  | 0.998525843 |             |
| chr2:197084762-197085665  | exonic   | HECW2                                                    | 2  | 197084762 | 197085665 | 0         | 5  | 0  | 8  | 0  | 0  | 903   | 1.721870077 | -0.001591121 | 3.833369932  | -0.000415071 | NA           | NA          |             |
| chr7:6854394-6864368      | exonic   | CCZ1B                                                    | 7  | 6854394   | 6864368   | 7         | 3  | 0  | 0  | 5  | 3  | 9974  | 2.955528932 | -0.00117557  | 1.756653271  | -0.00066921  | 0.999466048  | 0.999560453 |             |
| chr10:95790439-95792009   | exonic   | PLCE1                                                    | 10 | 95790439  | 95792009  | 3         | 3  | 3  | 12 | 1  | 0  | 1570  | 2.898359346 | -0.00081351  | 1.631039491  | -0.000498768 | NA           | NA          |             |
| chr3:169694733-169706147  | exonic   | SEC62                                                    | 3  | 169694733 | 169706147 | 3         | 8  | 2  | 3  | 10 | 1  | 11414 | 7.975494553 | 0.000198217  | 1.064127388  | 0.000186272  | 0.999851376  | 0.999851376 |             |
| chr21:16386664-16415895   | UTR5     | <small>NR1P1 (NM_003489;c.-75180_-75382del1ins0)</small> | 21 | 16386664  | 16415895  | 8         | 7  | 3  | 9  | 8  | 3  | 29231 | 5.693310879 | 0.001409841  | 1.102266873  | 0.001279038  | 0.998979476  | 0.999262607 |             |
| chr1:58992932-59004982    | exonic   | OMA1                                                     | 1  | 58992932  | 59004982  | 2         | 3  | 1  | 4  | 4  | 0  | 12050 | 1.887425536 | 0.001755852  | 1.841647447  | 0.000953414  | 0.999239286  | 0.999428071 |             |
| chr1:161138782-161139814  | exonic   | PPOX                                                     | 1  | 161138782 | 161139814 | 0         | 1  | 1  | 3  | 0  | 0  | 1032  | 0.69047898  | 0.00189232   | 3.215507775  | 0.000588498  | NA           | NA          |             |
| chr17:59112026-59161925   | exonic   | BCAS3                                                    | 17 | 59112026  | 59161925  | 0         | 1  | 1  | 3  | 0  | 0  | 49899 | 0.69047898  | 0.00189232   | 3.215507775  | 0.000588498  | NA           | NA          |             |

|                          |          |          |    |           |           |    |    |    |    |    |   |       |             |             |             |             |             |             |
|--------------------------|----------|----------|----|-----------|-----------|----|----|----|----|----|---|-------|-------------|-------------|-------------|-------------|-------------|-------------|
| chr6:43514307-43516197   | exonic   | XPO5     | 6  | 43514307  | 43516197  | 0  | 1  | 1  | 3  | 0  | 0 | 1890  | 0.69047898  | 0.00189232  | 3.215507775 | 0.000588498 | NA          | NA          |
| chr2:242346951-242352836 | exonic   | FARP2    | 2  | 242346951 | 242352836 | 4  | 2  | 0  | 2  | 1  | 2 | 5885  | 1.814586779 | 0.003694981 | 1.929307379 | 0.001915185 | 0.998471904 | 0.998849256 |
| chr21:36206706-36231875  | exonic   | RUNX1    | 21 | 36206706  | 36231875  | 0  | 5  | 7  | 4  | 3  | 5 | 25169 | 4.581683024 | 0.004176667 | 1.425157887 | 0.002930669 | 0.997661667 | 0.998525843 |
| chr2:240929490-240954277 | exonic   | NDUFA10  | 2  | 240929490 | 240954277 | 2  | 2  | 1  | 8  | 3  | 0 | 24787 | 1.335669104 | 0.004390602 | 2.332650739 | 0.001882237 | NA          | NA          |
| chrX:84322132-84329397   | exonic   | APOOL    | X  | 84322132  | 84329397  | 2  | 2  | 4  | 4  | 5  | 1 | 7265  | 2.734202844 | 0.004567761 | 1.513050033 | 0.003018909 | 0.997591263 | 0.998525843 |
| chr17:48814320-48819092  | exonic   | LUC7L3   | 17 | 48814320  | 48819092  | 1  | 4  | 2  | 6  | 4  | 0 | 4772  | 2.342606188 | 0.004579447 | 1.718658065 | 0.002664548 | 0.997874001 | 0.998534158 |
| chr16:57197912-57207781  | exonic   | FAM192A  | 16 | 57197912  | 57207781  | 18 | 1  | 5  | 27 | 4  | 0 | 9869  | 6.836902983 | 0.005523679 | 1.322766517 | 0.004175854 | 0.99666816  | 0.998252924 |
| chr7:158580694-158591763 | exonic   | ESYT2    | 7  | 158580694 | 158591763 | 16 | 11 | 9  | 10 | 17 | 9 | 11069 | 11.65079361 | 0.005666084 | 0.861606971 | 0.006576182 | 0.994753004 | 0.998252924 |
| chr7:101870646-101870949 | exonic   | CUX1     | 7  | 101870646 | 101870949 | 22 | 7  | 9  | 26 | 10 | 6 | 303   | 11.65674645 | 0.005893015 | 0.879180709 | 0.006702848 | 0.994651941 | 0.998252924 |
| chr7:128655032-128658211 | exonic   | TNPO3    | 7  | 128655032 | 128658211 | 11 | 8  | 5  | 8  | 10 | 6 | 3179  | 7.709484843 | 0.006662451 | 0.988085416 | 0.006742788 | 0.994620074 | 0.998252924 |
| chr14:23378691-23380612  | exonic   | RBM23    | 14 | 23378691  | 23380612  | 7  | 8  | 4  | 12 | 7  | 3 | 1921  | 6.133775495 | 0.006760072 | 1.0725185   | 0.006302989 | 0.994970976 | 0.998252924 |
| chr17:59152280-59161925  | exonic   | BCAS3    | 17 | 59152280  | 59161925  | 5  | 1  | 0  | 5  | 0  | 1 | 9645  | 1.658986048 | 0.008554065 | 2.158966325 | 0.003962112 | 0.996838701 | 0.998252924 |
| chr2:69585460-69590802   | exonic   | GFPT1    | 2  | 69585460  | 69590802  | 1  | 1  | 3  | 3  | 0  | 2 | 5342  | 1.830441191 | 0.009438954 | 1.962997101 | 0.00480844  | 0.996163435 | 0.998252924 |
| chr20:32207322-32211102  | exonic   | CBFA2T2  | 20 | 32207322  | 32211102  | 23 | 17 | 13 | 47 | 12 | 6 | 3780  | 16.79216142 | 0.009478595 | 0.807567859 | 0.011737212 | NA          | NA          |
| chr5:95091099-95099324   | exonic   | RHOBTB3  | 5  | 95091099  | 95099324  | 64 | 19 | 15 | 50 | 61 | 5 | 8225  | 28.76477493 | 0.009664997 | 0.7677591   | 0.01258858  | 0.989956032 | 0.998252924 |
| chr7:98562251-98569568   | exonic   | TRRAP    | 7  | 98562251  | 98569568  | 2  | 4  | 0  | 6  | 0  | 1 | 7317  | 1.901164002 | 0.009822138 | 2.046977275 | 0.004798362 | 0.996171476 | 0.998252924 |
| chr2:61343113-61345251   | exonic   | KIAA1841 | 2  | 61343113  | 61345251  | 4  | 3  | 1  | 6  | 0  | 0 | 2138  | 5.66127588  | 0.010017492 | 1.168597    | 0.008572238 | NA          | NA          |
| chr21:44414958-44415453  | intronic | PKNOX1   | 21 | 44414958  | 44415453  | 3  | 3  | 4  | 9  | 5  | 0 | 495   | 3.260803903 | 0.011235254 | 1.48376611  | 0.007572119 | 0.993958381 | 0.998252924 |
| chr15:41036244-41037457  | exonic   | RMDN3    | 15 | 41036244  | 41037457  | 0  | 3  | 4  | 9  | 2  | 0 | 1213  | 2.510760809 | 0.011522049 | 1.838085954 | 0.006268504 | 0.99499849  | 0.998252924 |
| chr11:85707868-85737409  | exonic   | PICALM   | 11 | 85707868  | 85737409  | 18 | 5  | 6  | 12 | 11 | 6 | 29541 | 8.833108033 | 0.012171458 | 0.954863926 | 0.012746798 | NA          | NA          |
| chr11:85707868-85742653  | exonic   | PICALM   | 11 | 85707868  | 85742653  | 13 | 3  | 5  | 6  | 8  | 5 | 34785 | 8.833108033 | 0.012171458 | 0.954863926 | 0.012746798 | NA          | NA          |
| chr11:85711685-85742653  | exonic   | PICALM   | 11 | 85711685  | 85742653  | 18 | 5  | 6  | 12 | 11 | 6 | 30968 | 8.833108033 | 0.012171458 | 0.954863926 | 0.012746798 | NA          | NA          |
| chr9:33971648-33973235   | exonic   | UBAP2    | 9  | 33971648  | 33973235  | 3  | 6  | 1  | 5  | 4  | 2 | 1587  | 3.261988479 | 0.012319544 | 1.424042464 | 0.008651107 | 0.993097501 | 0.998252924 |
| chr13:26911703-26928017  | exonic   | CDK8     | 13 | 26911703  | 26928017  | 1  | 0  | 3  | 5  | 1  | 0 | 16314 | 1.373378367 | 0.012460639 | 2.300033466 | 0.00541759  | NA          | NA          |
| chr13:41943225-41946966  | exonic   | NAA16    | 13 | 41943225  | 41946966  | 2  | 0  | 4  | 1  | 5  | 1 | 3741  | 2.066717091 | 0.013293052 | 1.865955821 | 0.007123991 | 0.994315926 | 0.998252924 |
| chr1:8555122-8617582     | exonic   | RERE     | 1  | 8555122   | 8617582   | 6  | 3  | 2  | 9  | 1  | 2 | 62460 | 3.385554211 | 0.013466393 | 1.429839604 | 0.009418114 | 0.992485543 | 0.998252924 |
| chr1:7837219-7838229     | exonic   | VAMP3    | 1  | 7837219   | 7838229   | 9  | 4  | 8  | 20 | 9  | 0 | 1010  | 6.651612385 | 0.014022484 | 1.179907114 | 0.011884397 | 0.990517847 | 0.998252924 |
| chr10:70513608-70532856  | exonic   | CCAR1    | 10 | 70513608  | 70532856  | 3  | 1  | 1  | 1  | 3  | 1 | 19248 | 1.536117912 | 0.014082611 | 1.938273663 | 0.007265543 | 0.994202986 | 0.998252924 |
| chr16:11114049-11154879  | exonic   | CLEC16A  | 16 | 11114049  | 11154879  | 15 | 5  | 2  | 18 | 5  | 2 | 40830 | 6.335900447 | 0.014566613 | 1.147236292 | 0.012697134 | 0.989869425 | 0.998252924 |
| chr13:20638590-20657172  | exonic   | ZMYM2    | 13 | 20638590  | 20657172  | 2  | 3  | 0  | 0  | 3  | 1 | 18582 | 1.573129579 | 0.014902015 | 2.185601438 | 0.006818267 | 0.994559852 | 0.998252924 |
| chrX:129203274-129206392 | exonic   | ELF4     | X  | 129203274 | 129206392 | 3  | 1  | 0  | 5  | 0  | 0 | 3118  | 1.092793553 | 0.015662921 | 2.680941602 | 0.005842321 | 0.995338529 | 0.998252924 |
| chr2:72945231-72958374   | exonic   | EXOC6B   | 2  | 72945231  | 72958374  | 44 | 19 | 18 | 60 | 34 | 7 | 13143 | 1.007634681 | 0.016336085 | 2.786485433 | 0.005862613 | NA          | NA          |
| chr7:151902190-151904513 | exonic   | KMT2C    | 7  | 151902190 | 151904513 | 1  | 0  | 2  | 0  | 4  | 0 | 2323  | 1.007634681 | 0.016336085 | 2.786485433 | 0.005862613 | NA          | NA          |
| chr17:80417867-80430574  | exonic   | NARF     | 17 | 80417867  | 80430574  | 1  | 2  | 0  | 3  | 1  | 0 | 12707 | 0.917500118 | 0.016649037 | 2.649224334 | 0.006284495 | 0.994985732 | 0.998252924 |
| chr5:140961878-140963182 | exonic   | DIAPH1   | 5  | 140961878 | 140963182 | 3  | 0  | 1  | 4  | 1  | 0 | 1304  | 1.130502816 | 0.016917382 | 2.443550756 | 0.006923278 | 0.994476067 | 0.998252924 |

|                           |        |         |    |           |           |    |    |   |    |   |    |       |             |             |             |             |             |             |
|---------------------------|--------|---------|----|-----------|-----------|----|----|---|----|---|----|-------|-------------|-------------|-------------|-------------|-------------|-------------|
| chr6:155108994-155114110  | exonic | SCAF8   | 6  | 155108994 | 155114110 | 3  | 0  | 1 | 4  | 1 | 0  | 5116  | 1.130502816 | 0.016917382 | 2.443550756 | 0.006923278 | 0.994476067 | 0.998252924 |
| chr4:103644027-103647840  | exonic | MANBA   | 4  | 103644027 | 103647840 | 1  | 2  | 2 | 4  | 3 | 0  | 3813  | 1.660404398 | 0.01697139  | 1.943614704 | 0.008731869 | 0.993033065 | 0.998252924 |
| chr6:36492117-36507984    | exonic | STK38   | 6  | 36492117  | 36507984  | 1  | 2  | 3 | 4  | 0 | 0  | 15867 | 1.660404398 | 0.01697139  | 1.943614704 | 0.008731869 | 0.993033065 | 0.998252924 |
| chr18:45391429-45423180   | exonic | SMAD2   | 18 | 45391429  | 45423180  | 23 | 19 | 1 | 21 | 8 | 11 | 31751 | 13.06637205 | 0.017225085 | 0.986592719 | 0.017459165 | 0.98607031  | 0.998252924 |
| chr1:113124613-113126748  | exonic | ST7L    | 1  | 113124613 | 113126748 | 1  | 0  | 0 | 0  | 1 | 0  | 2135  | 0.250014365 | 0.017514734 | 4.075556191 | 0.004297508 | 0.996571095 | 0.998252924 |
| chr1:15693958-15695998    | exonic | FHAD1   | 1  | 15693958  | 15695998  | 1  | 0  | 0 | 0  | 1 | 0  | 2040  | 0.250014365 | 0.017514734 | 4.075556191 | 0.004297508 | 0.996571095 | 0.998252924 |
| chr1:165648678-165652347  | exonic | ALDH9A1 | 1  | 165648678 | 165652347 | 1  | 0  | 0 | 0  | 0 | 1  | 3669  | 0.437205552 | 0.017514734 | 4.075556191 | 0.004297508 | NA          | NA          |
| chr1:170001026-170007572  | exonic | KIFAP3  | 1  | 170001026 | 170007572 | 1  | 0  | 0 | 0  | 1 | 0  | 6546  | 0.250014365 | 0.017514734 | 4.075556191 | 0.004297508 | 0.996571095 | 0.998252924 |
| chr1:21183895-21188825    | exonic | EIF4G3  | 1  | 21183895  | 21188825  | 1  | 0  | 0 | 0  | 1 | 0  | 4930  | 0.250014365 | 0.017514734 | 4.075556191 | 0.004297508 | 0.996571095 | 0.998252924 |
| chr1:21267983-21307720    | exonic | EIF4G3  | 1  | 21267983  | 21307720  | 1  | 0  | 0 | 0  | 1 | 0  | 39737 | 0.250014365 | 0.017514734 | 4.075556191 | 0.004297508 | 0.996571095 | 0.998252924 |
| chr1:225695652-225700718  | exonic | ENAH    | 1  | 225695652 | 225700718 | 1  | 0  | 0 | 0  | 1 | 0  | 5066  | 0.250014365 | 0.017514734 | 4.075556191 | 0.004297508 | 0.996571095 | 0.998252924 |
| chr1:243716030-243736350  | exonic | AKT3    | 1  | 243716030 | 243736350 | 1  | 0  | 0 | 0  | 1 | 0  | 20320 | 0.250014365 | 0.017514734 | 4.075556191 | 0.004297508 | 0.996571095 | 0.998252924 |
| chr1:33099245-33100393    | exonic | ZBTB80S | 1  | 33099245  | 33100393  | 1  | 0  | 0 | 0  | 1 | 0  | 1148  | 0.250014365 | 0.017514734 | 4.075556191 | 0.004297508 | 0.996571095 | 0.998252924 |
| chr1:36411292-36439112    | exonic | AGO3    | 1  | 36411292  | 36439112  | 1  | 0  | 0 | 0  | 0 | 1  | 27820 | 0.437205552 | 0.017514734 | 4.075556191 | 0.004297508 | NA          | NA          |
| chr1:64474976-64516388    | exonic | ROR1    | 1  | 64474976  | 64516388  | 1  | 0  | 0 | 0  | 0 | 1  | 41412 | 0.437205552 | 0.017514734 | 4.075556191 | 0.004297508 | NA          | NA          |
| chr1:89206670-89206971    | exonic | PKN2    | 1  | 89206670  | 89206971  | 1  | 0  | 0 | 0  | 1 | 0  | 301   | 0.250014365 | 0.017514734 | 4.075556191 | 0.004297508 | 0.996571095 | 0.998252924 |
| chr1:9991948-9996685      | exonic | LZIC    | 1  | 9991948   | 9996685   | 1  | 0  | 0 | 0  | 1 | 0  | 4737  | 0.250014365 | 0.017514734 | 4.075556191 | 0.004297508 | 0.996571095 | 0.998252924 |
| chr10:103344358-103345913 | exonic | POLL    | 10 | 103344358 | 103345913 | 1  | 0  | 0 | 0  | 1 | 0  | 1555  | 0.250014365 | 0.017514734 | 4.075556191 | 0.004297508 | 0.996571095 | 0.998252924 |
| chr10:104851320-104855737 | exonic | NT5C2   | 10 | 104851320 | 104855737 | 1  | 0  | 0 | 0  | 1 | 0  | 4417  | 0.250014365 | 0.017514734 | 4.075556191 | 0.004297508 | 0.996571095 | 0.998252924 |
| chr10:14938844-14939516   | exonic | SUV39H2 | 10 | 14938844  | 14939516  | 1  | 0  | 0 | 0  | 1 | 0  | 672   | 0.250014365 | 0.017514734 | 4.075556191 | 0.004297508 | 0.996571095 | 0.998252924 |
| chr10:20432223-20453496   | exonic | PLXDC2  | 10 | 20432223  | 20453496  | 1  | 0  | 0 | 0  | 1 | 0  | 21273 | 0.250014365 | 0.017514734 | 4.075556191 | 0.004297508 | 0.996571095 | 0.998252924 |
| chr10:21970260-21971186   | exonic | MLLT10  | 10 | 21970260  | 21971186  | 1  | 0  | 0 | 0  | 0 | 1  | 926   | 0.437205552 | 0.017514734 | 4.075556191 | 0.004297508 | NA          | NA          |
| chr10:28408579-28420620   | exonic | MPP7    | 10 | 28408579  | 28420620  | 1  | 0  | 0 | 0  | 1 | 0  | 12041 | 0.250014365 | 0.017514734 | 4.075556191 | 0.004297508 | 0.996571095 | 0.998252924 |
| chr10:46158027-46159290   | exonic | ZFAND4  | 10 | 46158027  | 46159290  | 1  | 0  | 0 | 0  | 1 | 0  | 1263  | 0.250014365 | 0.017514734 | 4.075556191 | 0.004297508 | 0.996571095 | 0.998252924 |
| chr10:51606987-51620382   | exonic | TIMM23  | 10 | 51606987  | 51620382  | 1  | 0  | 0 | 0  | 1 | 0  | 13395 | 0.250014365 | 0.017514734 | 4.075556191 | 0.004297508 | 0.996571095 | 0.998252924 |
| chr10:54031109-54050050   | exonic | PRKG1   | 10 | 54031109  | 54050050  | 1  | 0  | 0 | 0  | 1 | 0  | 18941 | 0.250014365 | 0.017514734 | 4.075556191 | 0.004297508 | 0.996571095 | 0.998252924 |
| chr10:71968960-71978573   | exonic | PPA1    | 10 | 71968960  | 71978573  | 1  | 0  | 0 | 0  | 1 | 0  | 9613  | 0.250014365 | 0.017514734 | 4.075556191 | 0.004297508 | 0.996571095 | 0.998252924 |
| chr10:88213412-88220253   | exonic | WAPL    | 10 | 88213412  | 88220253  | 1  | 0  | 0 | 0  | 1 | 0  | 6841  | 0.250014365 | 0.017514734 | 4.075556191 | 0.004297508 | 0.996571095 | 0.998252924 |
| chr11:117206320-117214993 | exonic | CEP164  | 11 | 117206320 | 117214993 | 1  | 0  | 0 | 0  | 1 | 0  | 8673  | 0.250014365 | 0.017514734 | 4.075556191 | 0.004297508 | 0.996571095 | 0.998252924 |
| chr11:18362807-18363154   | exonic | GTF2H1  | 11 | 18362807  | 18363154  | 1  | 0  | 0 | 0  | 0 | 1  | 347   | 0.437205552 | 0.017514734 | 4.075556191 | 0.004297508 | NA          | NA          |
| chr11:46804823-46822854   | exonic | CKAP5   | 11 | 46804823  | 46822854  | 1  | 0  | 0 | 0  | 0 | 1  | 18031 | 0.437205552 | 0.017514734 | 4.075556191 | 0.004297508 | NA          | NA          |
| chr11:66254010-66255478   | exonic | DPP3    | 11 | 66254010  | 66255478  | 1  | 0  | 0 | 0  | 1 | 0  | 1468  | 0.250014365 | 0.017514734 | 4.075556191 | 0.004297508 | 0.996571095 | 0.998252924 |
| chr11:82917099-82938914   | exonic | ANKRD42 | 11 | 82917099  | 82938914  | 1  | 0  | 0 | 0  | 1 | 0  | 21815 | 0.250014365 | 0.017514734 | 4.075556191 | 0.004297508 | 0.996571095 | 0.998252924 |
| chr11:93521166-93523959   | exonic | MED17   | 11 | 93521166  | 93523959  | 1  | 0  | 0 | 0  | 1 | 0  | 2793  | 0.250014365 | 0.017514734 | 4.075556191 | 0.004297508 | 0.996571095 | 0.998252924 |
| chr12:112743867-112747473 | exonic | HECTD4  | 12 | 112743867 | 112747473 | 1  | 0  | 0 | 0  | 1 | 0  | 3606  | 0.250014365 | 0.017514734 | 4.075556191 | 0.004297508 | 0.996571095 | 0.998252924 |



|                           |              |           |    |           |           |   |   |   |   |   |   |       |             |             |             |             |             |             |
|---------------------------|--------------|-----------|----|-----------|-----------|---|---|---|---|---|---|-------|-------------|-------------|-------------|-------------|-------------|-------------|
| chr12:16747070-16753802   | exonic       | LMO3      | 12 | 16747070  | 16753802  | 1 | 0 | 0 | 0 | 1 | 0 | 6732  | 0.250014365 | 0.017514734 | 4.075556191 | 0.004297508 | 0.996571095 | 0.998252924 |
| chr12:19436213-19440490   | exonic       | PLEKHA5   | 12 | 19436213  | 19440490  | 1 | 0 | 0 | 0 | 1 | 0 | 4277  | 0.250014365 | 0.017514734 | 4.075556191 | 0.004297508 | 0.996571095 | 0.998252924 |
| chr12:31545200-31562318   | exonic       | DENND5B   | 12 | 31545200  | 31562318  | 1 | 0 | 0 | 0 | 1 | 0 | 17118 | 0.250014365 | 0.017514734 | 4.075556191 | 0.004297508 | 0.996571095 | 0.998252924 |
| chr12:31576530-31586182   | exonic       | DENND5B   | 12 | 31576530  | 31586182  | 1 | 0 | 0 | 0 | 1 | 0 | 9652  | 0.250014365 | 0.017514734 | 4.075556191 | 0.004297508 | 0.996571095 | 0.998252924 |
| chr12:65221614-65237265   | exonic       | TBC1D30   | 12 | 65221614  | 65237265  | 1 | 0 | 0 | 0 | 1 | 0 | 15651 | 0.250014365 | 0.017514734 | 4.075556191 | 0.004297508 | 0.996571095 | 0.998252924 |
| chr12:97015367-97038186   | exonic       | CFAP54    | 12 | 97015367  | 97038186  | 1 | 0 | 0 | 0 | 1 | 0 | 22819 | 0.250014365 | 0.017514734 | 4.075556191 | 0.004297508 | 0.996571095 | 0.998252924 |
| chr12:99042096-99043462   | exonic       | APAF1     | 12 | 99042096  | 99043462  | 1 | 0 | 0 | 0 | 1 | 0 | 1366  | 0.250014365 | 0.017514734 | 4.075556191 | 0.004297508 | 0.996571095 | 0.998252924 |
| chr13:102029050-102031004 | exonic       | NALCN     | 13 | 102029050 | 102031004 | 1 | 0 | 0 | 0 | 1 | 0 | 1954  | 0.250014365 | 0.017514734 | 4.075556191 | 0.004297508 | 0.996571095 | 0.998252924 |
| chr13:111274562-111279894 | exonic       | CARKD     | 13 | 111274562 | 111279894 | 1 | 0 | 0 | 0 | 1 | 0 | 5332  | 0.250014365 | 0.017514734 | 4.075556191 | 0.004297508 | 0.996571095 | 0.998252924 |
| chr13:53007796-53016580   | exonic       | VPS36     | 13 | 53007796  | 53016580  | 1 | 0 | 0 | 0 | 1 | 0 | 8784  | 0.250014365 | 0.017514734 | 4.075556191 | 0.004297508 | 0.996571095 | 0.998252924 |
| chr14:30093357-30105700   | exonic       | PRKD1     | 14 | 30093357  | 30105700  | 1 | 0 | 0 | 0 | 1 | 0 | 12343 | 0.250014365 | 0.017514734 | 4.075556191 | 0.004297508 | 0.996571095 | 0.998252924 |
| chr14:31112521-31122794   | exonic       | SCFD1     | 14 | 31112521  | 31122794  | 1 | 0 | 0 | 0 | 0 | 1 | 10273 | 0.437205552 | 0.017514734 | 4.075556191 | 0.004297508 | NA          | NA          |
| chr14:31582309-31602881   | exonic       | HECTD1    | 14 | 31582309  | 31602881  | 1 | 0 | 0 | 0 | 1 | 0 | 20572 | 0.250014365 | 0.017514734 | 4.075556191 | 0.004297508 | 0.996571095 | 0.998252924 |
| chr14:35470141-35488280   | exonic       | SRP54     | 14 | 35470141  | 35488280  | 1 | 0 | 0 | 0 | 1 | 0 | 18139 | 0.250014365 | 0.017514734 | 4.075556191 | 0.004297508 | 0.996571095 | 0.998252924 |
| chr14:52922041-52937398   | exonic       | TXNDC16   | 14 | 52922041  | 52937398  | 1 | 0 | 0 | 0 | 1 | 0 | 15357 | 0.250014365 | 0.017514734 | 4.075556191 | 0.004297508 | 0.996571095 | 0.998252924 |
| chr14:73711351-73712883   | exonic       | PAPLN     | 14 | 73711351  | 73712883  | 1 | 0 | 0 | 0 | 0 | 1 | 1532  | 0.437205552 | 0.017514734 | 4.075556191 | 0.004297508 | NA          | NA          |
| chr15:50330964-50339661   | exonic       | ATP8B4    | 15 | 50330964  | 50339661  | 1 | 0 | 0 | 0 | 1 | 0 | 8697  | 0.250014365 | 0.017514734 | 4.075556191 | 0.004297508 | 0.996571095 | 0.998252924 |
| chr15:50731205-50741682   | exonic       | USP8      | 15 | 50731205  | 50741682  | 1 | 0 | 0 | 0 | 1 | 0 | 10477 | 0.250014365 | 0.017514734 | 4.075556191 | 0.004297508 | 0.996571095 | 0.998252924 |
| chr15:56974451-56985413   | exonic       | ZNF280D   | 15 | 56974451  | 56985413  | 1 | 0 | 0 | 0 | 0 | 1 | 10962 | 0.437205552 | 0.017514734 | 4.075556191 | 0.004297508 | NA          | NA          |
| chr15:62264823-62273677   | exonic       | VPS13C    | 15 | 62264823  | 62273677  | 1 | 0 | 0 | 0 | 1 | 0 | 8854  | 0.250014365 | 0.017514734 | 4.075556191 | 0.004297508 | 0.996571095 | 0.998252924 |
| chr15:64448360-64448923   | splicing     | PPIB      | 15 | 64448360  | 64448923  | 1 | 0 | 0 | 0 | 1 | 0 | 563   | 0.250014365 | 0.017514734 | 4.075556191 | 0.004297508 | 0.996571095 | 0.998252924 |
| chr15:72141185-72180457   | exonic       | MYO9A     | 15 | 72141185  | 72180457  | 1 | 0 | 0 | 0 | 0 | 1 | 39272 | 0.437205552 | 0.017514734 | 4.075556191 | 0.004297508 | NA          | NA          |
| chr15:72300166-72320134   | exonic       | MYO9A     | 15 | 72300166  | 72320134  | 1 | 0 | 0 | 0 | 0 | 1 | 19968 | 0.437205552 | 0.017514734 | 4.075556191 | 0.004297508 | NA          | NA          |
| chr16:71736500-71748704   | exonic       | PHLPP2    | 16 | 71736500  | 71748704  | 1 | 0 | 0 | 0 | 0 | 1 | 12204 | 0.437205552 | 0.017514734 | 4.075556191 | 0.004297508 | NA          | NA          |
| chr16:89371613-89379997   | exonic       | ANKRD11   | 16 | 89371613  | 89379997  | 1 | 0 | 0 | 0 | 0 | 1 | 8384  | 0.437205552 | 0.017514734 | 4.075556191 | 0.004297508 | NA          | NA          |
| chr17:11511445-11523098   | exonic       | DNAH9     | 17 | 11511445  | 11523098  | 1 | 0 | 0 | 0 | 1 | 0 | 11653 | 0.250014365 | 0.017514734 | 4.075556191 | 0.004297508 | 0.996571095 | 0.998252924 |
| chr17:19185267-19187027   | exonic       | EPN2      | 17 | 19185267  | 19187027  | 1 | 0 | 0 | 0 | 1 | 0 | 1760  | 0.250014365 | 0.017514734 | 4.075556191 | 0.004297508 | 0.996571095 | 0.998252924 |
| chr17:29123177-29124416   | exonic       | CRLF3     | 17 | 29123177  | 29124416  | 1 | 0 | 0 | 0 | 1 | 0 | 1239  | 0.250014365 | 0.017514734 | 4.075556191 | 0.004297508 | 0.996571095 | 0.998252924 |
| chr17:36353600-36359042   | ncRNA_exonic | LOC440434 | 17 | 36353600  | 36359042  | 1 | 0 | 0 | 0 | 1 | 0 | 5442  | 0.250014365 | 0.017514734 | 4.075556191 | 0.004297508 | 0.996571095 | 0.998252924 |
| chr17:57128574-57134415   | exonic       | TRIM37    | 17 | 57128574  | 57134415  | 1 | 0 | 0 | 0 | 1 | 0 | 5841  | 0.250014365 | 0.017514734 | 4.075556191 | 0.004297508 | 0.996571095 | 0.998252924 |
| chr17:60601596-60613698   | exonic       | TLK2      | 17 | 60601596  | 60613698  | 1 | 0 | 0 | 0 | 1 | 0 | 12102 | 0.250014365 | 0.017514734 | 4.075556191 | 0.004297508 | 0.996571095 | 0.998252924 |
| chr17:61829299-61831878   | exonic       | CCDC47    | 17 | 61829299  | 61831878  | 1 | 0 | 0 | 0 | 0 | 1 | 2579  | 0.437205552 | 0.017514734 | 4.075556191 | 0.004297508 | NA          | NA          |
| chr17:6493098-6503778     | exonic       | KIAA0753  | 17 | 6493098   | 6503778   | 1 | 0 | 0 | 0 | 1 | 0 | 10680 | 0.250014365 | 0.017514734 | 4.075556191 | 0.004297508 | 0.996571095 | 0.998252924 |
| chr17:80141649-80146295   | exonic       | CCDC57    | 17 | 80141649  | 80146295  | 1 | 0 | 0 | 0 | 1 | 0 | 4646  | 0.250014365 | 0.017514734 | 4.075556191 | 0.004297508 | 0.996571095 | 0.998252924 |
| chr18:12009881-12014372   | exonic       | IMPA2     | 18 | 12009881  | 12014372  | 1 | 0 | 0 | 0 | 1 | 0 | 4491  | 0.250014365 | 0.017514734 | 4.075556191 | 0.004297508 | 0.996571095 | 0.998252924 |

|                          |              |           |    |           |           |   |   |   |   |   |   |       |             |             |             |             |             |             |
|--------------------------|--------------|-----------|----|-----------|-----------|---|---|---|---|---|---|-------|-------------|-------------|-------------|-------------|-------------|-------------|
| chr18:12358668-12360050  | exonic       | AFG3L2    | 18 | 12358668  | 12360050  | 1 | 0 | 0 | 0 | 1 | 0 | 1382  | 0.250014365 | 0.017514734 | 4.075556191 | 0.004297508 | 0.996571095 | 0.998252924 |
| chr18:12698977-12701112  | exonic       | CEP76     | 18 | 12698977  | 12701112  | 1 | 0 | 0 | 0 | 1 | 0 | 2135  | 0.250014365 | 0.017514734 | 4.075556191 | 0.004297508 | 0.996571095 | 0.998252924 |
| chr18:19140819-19148055  | exonic       | ESCO1     | 18 | 19140819  | 19148055  | 1 | 0 | 0 | 0 | 0 | 1 | 7236  | 0.437205552 | 0.017514734 | 4.075556191 | 0.004297508 | NA          | NA          |
| chr18:20577582-20586395  | exonic       | RBBP8     | 18 | 20577582  | 20586395  | 1 | 0 | 0 | 0 | 1 | 0 | 8813  | 0.250014365 | 0.017514734 | 4.075556191 | 0.004297508 | 0.996571095 | 0.998252924 |
| chr19:50285013-50285981  | exonic       | AP2A1     | 19 | 50285013  | 50285981  | 1 | 0 | 0 | 0 | 1 | 0 | 968   | 0.250014365 | 0.017514734 | 4.075556191 | 0.004297508 | 0.996571095 | 0.998252924 |
| chr19:58436990-58441925  | exonic       | ZNF418    | 19 | 58436990  | 58441925  | 1 | 0 | 0 | 0 | 0 | 1 | 4935  | 0.437205552 | 0.017514734 | 4.075556191 | 0.004297508 | NA          | NA          |
| chr2:114670748-114674585 | exonic       | ACTR3     | 2  | 114670748 | 114674585 | 1 | 0 | 0 | 0 | 1 | 0 | 3837  | 0.250014365 | 0.017514734 | 4.075556191 | 0.004297508 | 0.996571095 | 0.998252924 |
| chr2:171902683-171906684 | exonic       | TLK1      | 2  | 171902683 | 171906684 | 1 | 0 | 0 | 0 | 1 | 0 | 4001  | 0.250014365 | 0.017514734 | 4.075556191 | 0.004297508 | 0.996571095 | 0.998252924 |
| chr2:182786674-182793005 | exonic       | SSFA2     | 2  | 182786674 | 182793005 | 1 | 0 | 0 | 0 | 1 | 0 | 6331  | 0.250014365 | 0.017514734 | 4.075556191 | 0.004297508 | 0.996571095 | 0.998252924 |
| chr2:203003154-203030079 | exonic       | KIAA2012  | 2  | 203003154 | 203030079 | 1 | 0 | 0 | 0 | 1 | 0 | 26925 | 0.250014365 | 0.017514734 | 4.075556191 | 0.004297508 | 0.996571095 | 0.998252924 |
| chr2:242343242-242347030 | exonic       | FARP2     | 2  | 242343242 | 242347030 | 1 | 0 | 0 | 0 | 0 | 1 | 3788  | 0.437205552 | 0.017514734 | 4.075556191 | 0.004297508 | NA          | NA          |
| chr2:58449076-58457009   | exonic       | FANCL     | 2  | 58449076  | 58457009  | 1 | 0 | 0 | 0 | 1 | 0 | 7933  | 0.250014365 | 0.017514734 | 4.075556191 | 0.004297508 | 0.996571095 | 0.998252924 |
| chr2:85768951-85769496   | exonic       | MAT2A     | 2  | 85768951  | 85769496  | 1 | 0 | 0 | 0 | 1 | 0 | 545   | 0.250014365 | 0.017514734 | 4.075556191 | 0.004297508 | 0.996571095 | 0.998252924 |
| chr21:40604102-40622815  | exonic       | BRWD1     | 21 | 40604102  | 40622815  | 1 | 0 | 0 | 0 | 1 | 0 | 18713 | 0.250014365 | 0.017514734 | 4.075556191 | 0.004297508 | 0.996571095 | 0.998252924 |
| chr21:42861433-42866505  | exonic       | TMPRSS2   | 21 | 42861433  | 42866505  | 1 | 0 | 0 | 0 | 1 | 0 | 5072  | 0.250014365 | 0.017514734 | 4.075556191 | 0.004297508 | 0.996571095 | 0.998252924 |
| chr22:18138427-18171908  | exonic       | BCL2L13   | 22 | 18138427  | 18171908  | 1 | 0 | 0 | 0 | 1 | 0 | 33481 | 0.250014365 | 0.017514734 | 4.075556191 | 0.004297508 | 0.996571095 | 0.998252924 |
| chr22:51158611-51160865  | exonic       | SHANK3    | 22 | 51158611  | 51160865  | 1 | 0 | 0 | 0 | 0 | 1 | 2254  | 0.437205552 | 0.017514734 | 4.075556191 | 0.004297508 | NA          | NA          |
| chr3:100037912-100039815 | exonic       | TBC1D23   | 3  | 100037912 | 100039815 | 1 | 0 | 0 | 0 | 0 | 1 | 1903  | 0.437205552 | 0.017514734 | 4.075556191 | 0.004297508 | NA          | NA          |
| chr3:155611306-155643155 | exonic       | GMPS      | 3  | 155611306 | 155643155 | 1 | 0 | 0 | 0 | 0 | 1 | 31849 | 0.437205552 | 0.017514734 | 4.075556191 | 0.004297508 | NA          | NA          |
| chr3:176782707-176816329 | exonic       | TBL1XR1   | 3  | 176782707 | 176816329 | 1 | 0 | 0 | 0 | 1 | 0 | 33622 | 0.250014365 | 0.017514734 | 4.075556191 | 0.004297508 | 0.996571095 | 0.998252924 |
| chr3:182923663-182925611 | exonic       | MCF2L2    | 3  | 182923663 | 182925611 | 1 | 0 | 0 | 0 | 1 | 0 | 1948  | 0.250014365 | 0.017514734 | 4.075556191 | 0.004297508 | 0.996571095 | 0.998252924 |
| chr3:184642649-184648356 | exonic       | VPS8      | 3  | 184642649 | 184648356 | 1 | 0 | 0 | 0 | 1 | 0 | 5707  | 0.250014365 | 0.017514734 | 4.075556191 | 0.004297508 | 0.996571095 | 0.998252924 |
| chr3:185335267-185341870 | exonic       | SENP2     | 3  | 185335267 | 185341870 | 1 | 0 | 0 | 0 | 1 | 0 | 6603  | 0.250014365 | 0.017514734 | 4.075556191 | 0.004297508 | 0.996571095 | 0.998252924 |
| chr3:3182193-3186394     | exonic       | TRNT1     | 3  | 3182193   | 3186394   | 1 | 0 | 0 | 0 | 0 | 1 | 4201  | 0.437205552 | 0.017514734 | 4.075556191 | 0.004297508 | NA          | NA          |
| chr3:32576002-32587457   | exonic       | DYNC1LI1  | 3  | 32576002  | 32587457  | 1 | 0 | 0 | 0 | 1 | 0 | 11455 | 0.250014365 | 0.017514734 | 4.075556191 | 0.004297508 | 0.996571095 | 0.998252924 |
| chr3:47147486-47158244   | exonic       | SETD2     | 3  | 47147486  | 47158244  | 1 | 0 | 0 | 0 | 1 | 0 | 10758 | 0.250014365 | 0.017514734 | 4.075556191 | 0.004297508 | 0.996571095 | 0.998252924 |
| chr3:8977554-8990254     | exonic       | RAD18     | 3  | 8977554   | 8990254   | 1 | 0 | 0 | 0 | 0 | 1 | 12700 | 0.437205552 | 0.017514734 | 4.075556191 | 0.004297508 | NA          | NA          |
| chr4:128851837-128859993 | exonic       | MFSB8     | 4  | 128851837 | 128859993 | 1 | 0 | 0 | 0 | 1 | 0 | 8156  | 0.250014365 | 0.017514734 | 4.075556191 | 0.004297508 | 0.996571095 | 0.998252924 |
| chr4:154471224-154479520 | exonic       | KIAA0922  | 4  | 154471224 | 154479520 | 1 | 0 | 0 | 0 | 1 | 0 | 8296  | 0.250014365 | 0.017514734 | 4.075556191 | 0.004297508 | 0.996571095 | 0.998252924 |
| chr4:154547298-154553990 | exonic       | KIAA0922  | 4  | 154547298 | 154553990 | 1 | 0 | 0 | 0 | 1 | 0 | 6692  | 0.250014365 | 0.017514734 | 4.075556191 | 0.004297508 | 0.996571095 | 0.998252924 |
| chr4:15626874-15632414   | exonic       | FBXL5     | 4  | 15626874  | 15632414  | 1 | 0 | 0 | 0 | 1 | 0 | 5540  | 0.250014365 | 0.017514734 | 4.075556191 | 0.004297508 | 0.996571095 | 0.998252924 |
| chr4:25260658-25270825   | exonic       | PI4K2B    | 4  | 25260658  | 25270825  | 1 | 0 | 0 | 0 | 1 | 0 | 10167 | 0.250014365 | 0.017514734 | 4.075556191 | 0.004297508 | 0.996571095 | 0.998252924 |
| chr4:42545933-42558057   | exonic       | ATP8A1    | 4  | 42545933  | 42558057  | 1 | 0 | 0 | 0 | 1 | 0 | 12124 | 0.250014365 | 0.017514734 | 4.075556191 | 0.004297508 | 0.996571095 | 0.998252924 |
| chr4:4650703-4651269     | ncRNA_exonic | STX18-AS1 | 4  | 4650703   | 4651269   | 1 | 0 | 0 | 0 | 1 | 0 | 566   | 0.250014365 | 0.017514734 | 4.075556191 | 0.004297508 | 0.996571095 | 0.998252924 |
| chr4:56762882-56766050   | exonic       | EXOC1     | 4  | 56762882  | 56766050  | 1 | 0 | 0 | 0 | 1 | 0 | 3168  | 0.250014365 | 0.017514734 | 4.075556191 | 0.004297508 | 0.996571095 | 0.998252924 |

|                          |              |           |   |           |           |   |   |   |   |   |   |       |             |             |             |             |             |             |
|--------------------------|--------------|-----------|---|-----------|-----------|---|---|---|---|---|---|-------|-------------|-------------|-------------|-------------|-------------|-------------|
| chr4:83763292-83782861   | exonic       | SEC31A    | 4 | 83763292  | 83782861  | 1 | 0 | 0 | 0 | 1 | 0 | 19569 | 0.250014365 | 0.017514734 | 4.075556191 | 0.004297508 | 0.996571095 | 0.998252924 |
| chr4:99962193-99966461   | exonic       | METAP1    | 4 | 99962193  | 99966461  | 1 | 0 | 0 | 0 | 1 | 0 | 4268  | 0.250014365 | 0.017514734 | 4.075556191 | 0.004297508 | 0.996571095 | 0.998252924 |
| chr5:123979203-123980354 | exonic       | ZNF608    | 5 | 123979203 | 123980354 | 1 | 0 | 0 | 0 | 1 | 0 | 1151  | 0.250014365 | 0.017514734 | 4.075556191 | 0.004297508 | 0.996571095 | 0.998252924 |
| chr5:137277632-137284873 | exonic       | FAM13B    | 5 | 137277632 | 137284873 | 1 | 0 | 0 | 0 | 1 | 0 | 7241  | 0.250014365 | 0.017514734 | 4.075556191 | 0.004297508 | 0.996571095 | 0.998252924 |
| chr5:137726701-137735701 | exonic       | KDM3B     | 5 | 137726701 | 137735701 | 1 | 0 | 0 | 0 | 1 | 0 | 9000  | 0.250014365 | 0.017514734 | 4.075556191 | 0.004297508 | 0.996571095 | 0.998252924 |
| chr5:142264862-142292858 | exonic       | ARHGAP26  | 5 | 142264862 | 142292858 | 1 | 0 | 0 | 0 | 1 | 0 | 27996 | 0.250014365 | 0.017514734 | 4.075556191 | 0.004297508 | 0.996571095 | 0.998252924 |
| chr5:14290824-14304701   | exonic       | TRIO      | 5 | 14290824  | 14304701  | 1 | 0 | 0 | 0 | 0 | 1 | 13877 | 0.437205552 | 0.017514734 | 4.075556191 | 0.004297508 | NA          | NA          |
| chr5:167915606-167929110 | exonic       | RARS      | 5 | 167915606 | 167929110 | 1 | 0 | 0 | 0 | 1 | 0 | 13504 | 0.250014365 | 0.017514734 | 4.075556191 | 0.004297508 | 0.996571095 | 0.998252924 |
| chr5:177053436-177059739 | ncRNA_exonic | LOC202181 | 5 | 177053436 | 177059739 | 1 | 0 | 0 | 0 | 1 | 0 | 6303  | 0.250014365 | 0.017514734 | 4.075556191 | 0.004297508 | 0.996571095 | 0.998252924 |
| chr5:179007947-179021964 | exonic       | RUFY1     | 5 | 179007947 | 179021964 | 1 | 0 | 0 | 0 | 1 | 0 | 14017 | 0.250014365 | 0.017514734 | 4.075556191 | 0.004297508 | 0.996571095 | 0.998252924 |
| chr5:40728446-40747121   | exonic       | TTC33     | 5 | 40728446  | 40747121  | 1 | 0 | 0 | 0 | 1 | 0 | 18675 | 0.250014365 | 0.017514734 | 4.075556191 | 0.004297508 | 0.996571095 | 0.998252924 |
| chr5:70798618-70800431   | exonic       | BDP1      | 5 | 70798618  | 70800431  | 1 | 0 | 0 | 0 | 1 | 0 | 1813  | 0.250014365 | 0.017514734 | 4.075556191 | 0.004297508 | 0.996571095 | 0.998252924 |
| chr5:76330242-76344097   | exonic       | AGGF1     | 5 | 76330242  | 76344097  | 1 | 0 | 0 | 0 | 1 | 0 | 13855 | 0.250014365 | 0.017514734 | 4.075556191 | 0.004297508 | 0.996571095 | 0.998252924 |
| chr5:78324255-78329231   | exonic       | DMGDH     | 5 | 78324255  | 78329231  | 1 | 0 | 0 | 0 | 1 | 0 | 4976  | 0.250014365 | 0.017514734 | 4.075556191 | 0.004297508 | 0.996571095 | 0.998252924 |
| chr5:79729927-79741224   | exonic       | ZFYVE16   | 5 | 79729927  | 79741224  | 1 | 0 | 0 | 0 | 1 | 0 | 11297 | 0.250014365 | 0.017514734 | 4.075556191 | 0.004297508 | 0.996571095 | 0.998252924 |
| chr5:79960961-79974912   | exonic       | MSH3      | 5 | 79960961  | 79974912  | 1 | 0 | 0 | 0 | 1 | 0 | 13951 | 0.250014365 | 0.017514734 | 4.075556191 | 0.004297508 | 0.996571095 | 0.998252924 |
| chr6:109175427-109197553 | exonic       | ARMC2     | 6 | 109175427 | 109197553 | 1 | 0 | 0 | 0 | 1 | 0 | 22126 | 0.250014365 | 0.017514734 | 4.075556191 | 0.004297508 | 0.996571095 | 0.998252924 |
| chr6:109931567-109954526 | exonic       | AK9       | 6 | 109931567 | 109954526 | 1 | 0 | 0 | 0 | 0 | 1 | 22959 | 0.437205552 | 0.017514734 | 4.075556191 | 0.004297508 | NA          | NA          |
| chr6:111708967-111714175 | exonic       | REV3L     | 6 | 111708967 | 111714175 | 1 | 0 | 0 | 0 | 1 | 0 | 5208  | 0.250014365 | 0.017514734 | 4.075556191 | 0.004297508 | 0.996571095 | 0.998252924 |
| chr6:116263809-116264182 | splicing     | FRK       | 6 | 116263809 | 116264182 | 1 | 0 | 0 | 0 | 1 | 0 | 373   | 0.250014365 | 0.017514734 | 4.075556191 | 0.004297508 | 0.996571095 | 0.998252924 |
| chr6:118801033-118845083 | exonic       | CEP85L    | 6 | 118801033 | 118845083 | 1 | 0 | 0 | 0 | 1 | 0 | 44050 | 0.250014365 | 0.017514734 | 4.075556191 | 0.004297508 | 0.996571095 | 0.998252924 |
| chr6:138576572-138576906 | exonic       | ARFGEF3   | 6 | 138576572 | 138576906 | 1 | 0 | 0 | 0 | 1 | 0 | 334   | 0.250014365 | 0.017514734 | 4.075556191 | 0.004297508 | 0.996571095 | 0.998252924 |
| chr6:18255961-18258636   | exonic       | DEK       | 6 | 18255961  | 18258636  | 1 | 0 | 0 | 0 | 1 | 0 | 2675  | 0.250014365 | 0.017514734 | 4.075556191 | 0.004297508 | 0.996571095 | 0.998252924 |
| chr6:31860183-31860687   | exonic       | EHMT2     | 6 | 31860183  | 31860687  | 1 | 0 | 0 | 0 | 1 | 0 | 504   | 0.250014365 | 0.017514734 | 4.075556191 | 0.004297508 | 0.996571095 | 0.998252924 |
| chr6:31901386-31905236   | exonic       | C2        | 6 | 31901386  | 31905236  | 1 | 0 | 0 | 0 | 1 | 0 | 3850  | 0.250014365 | 0.017514734 | 4.075556191 | 0.004297508 | 0.996571095 | 0.998252924 |
| chr6:42902212-42903408   | exonic       | CNPY3     | 6 | 42902212  | 42903408  | 1 | 0 | 0 | 0 | 1 | 0 | 1196  | 0.250014365 | 0.017514734 | 4.075556191 | 0.004297508 | 0.996571095 | 0.998252924 |
| chr6:44371545-44376369   | exonic       | CDC5L     | 6 | 44371545  | 44376369  | 1 | 0 | 0 | 0 | 1 | 0 | 4824  | 0.250014365 | 0.017514734 | 4.075556191 | 0.004297508 | 0.996571095 | 0.998252924 |
| chr6:87925620-87943245   | exonic       | ZNF292    | 6 | 87925620  | 87943245  | 1 | 0 | 0 | 0 | 1 | 0 | 17625 | 0.250014365 | 0.017514734 | 4.075556191 | 0.004297508 | 0.996571095 | 0.998252924 |
| chr7:133002037-133059756 | exonic       | EXOC4     | 7 | 133002037 | 133059756 | 1 | 0 | 0 | 0 | 1 | 0 | 57719 | 0.250014365 | 0.017514734 | 4.075556191 | 0.004297508 | 0.996571095 | 0.998252924 |
| chr7:149981841-149992436 | exonic       | ACTR3C    | 7 | 149981841 | 149992436 | 1 | 0 | 0 | 0 | 1 | 0 | 10595 | 0.250014365 | 0.017514734 | 4.075556191 | 0.004297508 | 0.996571095 | 0.998252924 |
| chr7:158542339-158590767 | exonic       | ESYT2     | 7 | 158542339 | 158590767 | 1 | 0 | 0 | 0 | 1 | 0 | 48428 | 0.250014365 | 0.017514734 | 4.075556191 | 0.004297508 | 0.996571095 | 0.998252924 |
| chr7:23224688-23224917   | exonic       | NUPL2     | 7 | 23224688  | 23224917  | 1 | 0 | 0 | 0 | 1 | 0 | 229   | 0.250014365 | 0.017514734 | 4.075556191 | 0.004297508 | 0.996571095 | 0.998252924 |
| chr7:33035774-33039872   | exonic       | FKBP9     | 7 | 33035774  | 33039872  | 1 | 0 | 0 | 0 | 1 | 0 | 4098  | 0.250014365 | 0.017514734 | 4.075556191 | 0.004297508 | 0.996571095 | 0.998252924 |
| chr7:44838346-44839473   | exonic       | PPIA      | 7 | 44838346  | 44839473  | 1 | 0 | 0 | 0 | 1 | 0 | 1127  | 0.250014365 | 0.017514734 | 4.075556191 | 0.004297508 | 0.996571095 | 0.998252924 |
| chr7:6840578-6862991     | exonic       | CCZ1B     | 7 | 6840578   | 6862991   | 1 | 0 | 0 | 0 | 1 | 0 | 22413 | 0.250014365 | 0.017514734 | 4.075556191 | 0.004297508 | 0.996571095 | 0.998252924 |

|                           |        |           |    |           |           |   |   |   |   |   |   |        |             |             |             |             |             |             |
|---------------------------|--------|-----------|----|-----------|-----------|---|---|---|---|---|---|--------|-------------|-------------|-------------|-------------|-------------|-------------|
| chr7:77755010-77756733    | exonic | MAGI2     | 7  | 77755010  | 77756733  | 1 | 0 | 0 | 0 | 0 | 1 | 1723   | 0.437205552 | 0.017514734 | 4.075556191 | 0.004297508 | NA          | NA          |
| chr7:91851215-91852292    | exonic | KRIT1     | 7  | 91851215  | 91852292  | 1 | 0 | 0 | 0 | 1 | 0 | 1077   | 0.250014365 | 0.017514734 | 4.075556191 | 0.004297508 | 0.996571095 | 0.998252924 |
| chr7:92881965-92888944    | exonic | VPS50     | 7  | 92881965  | 92888944  | 1 | 0 | 0 | 0 | 1 | 0 | 6979   | 0.250014365 | 0.017514734 | 4.075556191 | 0.004297508 | 0.996571095 | 0.998252924 |
| chr8:124346117-124351686  | exonic | ATAD2     | 8  | 124346117 | 124351686 | 1 | 0 | 0 | 0 | 1 | 0 | 5569   | 0.250014365 | 0.017514734 | 4.075556191 | 0.004297508 | 0.996571095 | 0.998252924 |
| chr8:19190465-19192368    | exonic | SH2D4A    | 8  | 19190465  | 19192368  | 1 | 0 | 0 | 0 | 0 | 1 | 1903   | 0.437205552 | 0.017514734 | 4.075556191 | 0.004297508 | NA          | NA          |
| chr8:30032600-30038146    | exonic | DCTN6     | 8  | 30032600  | 30038146  | 1 | 0 | 0 | 0 | 1 | 0 | 5546   | 0.250014365 | 0.017514734 | 4.075556191 | 0.004297508 | 0.996571095 | 0.998252924 |
| chr8:37732032-37735069    | exonic | RAB11FIP1 | 8  | 37732032  | 37735069  | 1 | 0 | 0 | 0 | 1 | 0 | 3037   | 0.250014365 | 0.017514734 | 4.075556191 | 0.004297508 | 0.996571095 | 0.998252924 |
| chr8:66525478-66539668    | exonic | ARMC1     | 8  | 66525478  | 66539668  | 1 | 0 | 0 | 0 | 0 | 1 | 14190  | 0.437205552 | 0.017514734 | 4.075556191 | 0.004297508 | NA          | NA          |
| chr8:68015271-68049838    | exonic | CSPP1     | 8  | 68015271  | 68049838  | 1 | 0 | 0 | 0 | 1 | 0 | 34567  | 0.250014365 | 0.017514734 | 4.075556191 | 0.004297508 | 0.996571095 | 0.998252924 |
| chr8:99718694-99761618    | exonic | STK3      | 8  | 99718694  | 99761618  | 1 | 0 | 0 | 0 | 0 | 1 | 42924  | 0.437205552 | 0.017514734 | 4.075556191 | 0.004297508 | NA          | NA          |
| chr9:114187697-114195652  | exonic | KIAA0368  | 9  | 114187697 | 114195652 | 1 | 0 | 0 | 0 | 1 | 0 | 7955   | 0.250014365 | 0.017514734 | 4.075556191 | 0.004297508 | 0.996571095 | 0.998252924 |
| chr9:126345447-126641300  | exonic | DENND1A   | 9  | 126345447 | 126641300 | 1 | 0 | 0 | 0 | 1 | 0 | 295853 | 0.250014365 | 0.017514734 | 4.075556191 | 0.004297508 | 0.996571095 | 0.998252924 |
| chr9:130501960-130502648  | exonic | SH2D3C    | 9  | 130501960 | 130502648 | 1 | 0 | 0 | 0 | 1 | 0 | 688    | 0.250014365 | 0.017514734 | 4.075556191 | 0.004297508 | 0.996571095 | 0.998252924 |
| chr9:132984928-132988783  | exonic | NCS1      | 9  | 132984928 | 132988783 | 1 | 0 | 0 | 0 | 1 | 0 | 3855   | 0.250014365 | 0.017514734 | 4.075556191 | 0.004297508 | 0.996571095 | 0.998252924 |
| chr9:72338241-72356774    | exonic | PTAR1     | 9  | 72338241  | 72356774  | 1 | 0 | 0 | 0 | 1 | 0 | 18533  | 0.250014365 | 0.017514734 | 4.075556191 | 0.004297508 | 0.996571095 | 0.998252924 |
| chr9:72741074-72758735    | exonic | MAMDC2    | 9  | 72741074  | 72758735  | 1 | 0 | 0 | 0 | 1 | 0 | 17661  | 0.250014365 | 0.017514734 | 4.075556191 | 0.004297508 | 0.996571095 | 0.998252924 |
| chr9:74354978-74365301    | exonic | TMEM2     | 9  | 74354978  | 74365301  | 1 | 0 | 0 | 0 | 1 | 0 | 10323  | 0.250014365 | 0.017514734 | 4.075556191 | 0.004297508 | 0.996571095 | 0.998252924 |
| chr9:79852917-79867268    | exonic | VPS13A    | 9  | 79852917  | 79867268  | 1 | 0 | 0 | 0 | 1 | 0 | 14351  | 0.250014365 | 0.017514734 | 4.075556191 | 0.004297508 | 0.996571095 | 0.998252924 |
| chr9:98643150-98643575    | exonic | ERCC6L2   | 9  | 98643150  | 98643575  | 1 | 0 | 0 | 0 | 1 | 0 | 425    | 0.250014365 | 0.017514734 | 4.075556191 | 0.004297508 | 0.996571095 | 0.998252924 |
| chr9:99537069-99538527    | exonic | ZNF510    | 9  | 99537069  | 99538527  | 1 | 0 | 0 | 0 | 1 | 0 | 1458   | 0.250014365 | 0.017514734 | 4.075556191 | 0.004297508 | 0.996571095 | 0.998252924 |
| chrX:1401570-1409402      | exonic | CSF2RA    | X  | 1401570   | 1409402   | 1 | 0 | 0 | 0 | 0 | 1 | 7832   | 0.437205552 | 0.017514734 | 4.075556191 | 0.004297508 | NA          | NA          |
| chrX:32536124-32717410    | exonic | DMD       | X  | 32536124  | 32717410  | 1 | 0 | 0 | 0 | 1 | 0 | 181286 | 0.250014365 | 0.017514734 | 4.075556191 | 0.004297508 | 0.996571095 | 0.998252924 |
| chrX:53431943-53432323    | exonic | SMC1A     | X  | 53431943  | 53432323  | 1 | 0 | 0 | 0 | 1 | 0 | 380    | 0.250014365 | 0.017514734 | 4.075556191 | 0.004297508 | 0.996571095 | 0.998252924 |
| chrX:53595651-53596787    | exonic | HUWE1     | X  | 53595651  | 53596787  | 1 | 0 | 0 | 0 | 1 | 0 | 1136   | 0.250014365 | 0.017514734 | 4.075556191 | 0.004297508 | 0.996571095 | 0.998252924 |
| chrX:71681853-71708891    | exonic | HDAC8     | X  | 71681853  | 71708891  | 1 | 0 | 0 | 0 | 1 | 0 | 27038  | 0.250014365 | 0.017514734 | 4.075556191 | 0.004297508 | 0.996571095 | 0.998252924 |
| chr1:152287099-152307915  | exonic | FLG       | 1  | 152287099 | 152307915 | 0 | 1 | 0 | 0 | 1 | 0 | 20816  | 0.295303221 | 0.017514734 | 4.075556191 | 0.004297508 | 0.996571095 | 0.998252924 |
| chr1:180031354-180034407  | exonic | CEP350    | 1  | 180031354 | 180034407 | 0 | 1 | 0 | 0 | 1 | 0 | 3053   | 0.295303221 | 0.017514734 | 4.075556191 | 0.004297508 | 0.996571095 | 0.998252924 |
| chr1:44750506-44785416    | exonic | ERI3      | 1  | 44750506  | 44785416  | 0 | 1 | 0 | 0 | 1 | 0 | 34910  | 0.295303221 | 0.017514734 | 4.075556191 | 0.004297508 | 0.996571095 | 0.998252924 |
| chr1:62907158-62907970    | exonic | USP1      | 1  | 62907158  | 62907970  | 0 | 1 | 0 | 0 | 1 | 0 | 812    | 0.295303221 | 0.017514734 | 4.075556191 | 0.004297508 | 0.996571095 | 0.998252924 |
| chr1:78177431-78201843    | exonic | USP33     | 1  | 78177431  | 78201843  | 0 | 1 | 0 | 0 | 1 | 0 | 24412  | 0.295303221 | 0.017514734 | 4.075556191 | 0.004297508 | 0.996571095 | 0.998252924 |
| chr10:120867459-120877179 | exonic | FAM45A    | 10 | 120867459 | 120877179 | 0 | 1 | 0 | 0 | 1 | 0 | 9720   | 0.295303221 | 0.017514734 | 4.075556191 | 0.004297508 | 0.996571095 | 0.998252924 |
| chr10:128859931-128908618 | exonic | DOCK1     | 10 | 128859931 | 128908618 | 0 | 1 | 0 | 0 | 1 | 0 | 48687  | 0.295303221 | 0.017514734 | 4.075556191 | 0.004297508 | 0.996571095 | 0.998252924 |
| chr10:27301810-27332496   | exonic | ANKRD26   | 10 | 27301810  | 27332496  | 0 | 1 | 0 | 0 | 1 | 0 | 30686  | 0.295303221 | 0.017514734 | 4.075556191 | 0.004297508 | 0.996571095 | 0.998252924 |
| chr10:31749965-31791437   | exonic | ZEB1      | 10 | 31749965  | 31791437  | 0 | 1 | 0 | 0 | 1 | 0 | 41472  | 0.295303221 | 0.017514734 | 4.075556191 | 0.004297508 | 0.996571095 | 0.998252924 |
| chr10:32141444-32150586   | exonic | ARHGAP12  | 10 | 32141444  | 32150586  | 0 | 1 | 0 | 0 | 1 | 0 | 9142   | 0.295303221 | 0.017514734 | 4.075556191 | 0.004297508 | 0.996571095 | 0.998252924 |

|                           |              |            |    |           |           |   |   |   |   |   |   |        |             |             |             |             |             |             |
|---------------------------|--------------|------------|----|-----------|-----------|---|---|---|---|---|---|--------|-------------|-------------|-------------|-------------|-------------|-------------|
| chr10:61844359-61848116   | exonic       | ANK3       | 10 | 61844359  | 61848116  | 0 | 1 | 0 | 0 | 1 | 0 | 3757   | 0.295303221 | 0.017514734 | 4.075556191 | 0.004297508 | 0.996571095 | 0.998252924 |
| chr10:99196947-99197507   | exonic       | EXOSC1     | 10 | 99196947  | 99197507  | 0 | 1 | 0 | 0 | 1 | 0 | 560    | 0.295303221 | 0.017514734 | 4.075556191 | 0.004297508 | 0.996571095 | 0.998252924 |
| chr11:34978930-35013926   | exonic       | PDHX       | 11 | 34978930  | 35013926  | 0 | 1 | 0 | 0 | 1 | 0 | 34996  | 0.295303221 | 0.017514734 | 4.075556191 | 0.004297508 | 0.996571095 | 0.998252924 |
| chr11:59540683-59564869   | exonic       | STX3       | 11 | 59540683  | 59564869  | 0 | 1 | 0 | 0 | 1 | 0 | 24186  | 0.295303221 | 0.017514734 | 4.075556191 | 0.004297508 | 0.996571095 | 0.998252924 |
| chr11:77090285-77091039   | exonic       | PAK1       | 11 | 77090285  | 77091039  | 0 | 1 | 0 | 0 | 1 | 0 | 754    | 0.295303221 | 0.017514734 | 4.075556191 | 0.004297508 | 0.996571095 | 0.998252924 |
| chr12:105504902-105516016 | exonic       | KIAA1033   | 12 | 105504902 | 105516016 | 0 | 1 | 0 | 0 | 1 | 0 | 11114  | 0.295303221 | 0.017514734 | 4.075556191 | 0.004297508 | 0.996571095 | 0.998252924 |
| chr12:89860546-89885892   | exonic       | POC1B      | 12 | 89860546  | 89885892  | 0 | 1 | 0 | 0 | 1 | 0 | 25346  | 0.295303221 | 0.017514734 | 4.075556191 | 0.004297508 | 0.996571095 | 0.998252924 |
| chr12:96381970-96384310   | exonic       | HAL        | 12 | 96381970  | 96384310  | 0 | 1 | 0 | 0 | 1 | 0 | 2340   | 0.295303221 | 0.017514734 | 4.075556191 | 0.004297508 | 0.996571095 | 0.998252924 |
| chr13:103279361-103309557 | exonic       | TPP2       | 13 | 103279361 | 103309557 | 0 | 1 | 0 | 0 | 1 | 0 | 30196  | 0.295303221 | 0.017514734 | 4.075556191 | 0.004297508 | 0.996571095 | 0.998252924 |
| chr13:21961646-21965993   | exonic       | ZDHHC20    | 13 | 21961646  | 21965993  | 0 | 1 | 0 | 0 | 1 | 0 | 4347   | 0.295303221 | 0.017514734 | 4.075556191 | 0.004297508 | 0.996571095 | 0.998252924 |
| chr13:95822785-95839146   | exonic       | ABCC4      | 13 | 95822785  | 95839146  | 0 | 1 | 0 | 0 | 1 | 0 | 16361  | 0.295303221 | 0.017514734 | 4.075556191 | 0.004297508 | 0.996571095 | 0.998252924 |
| chr14:54947675-54948126   | splicing     | GMFB       | 14 | 54947675  | 54948126  | 0 | 1 | 0 | 0 | 1 | 0 | 451    | 0.295303221 | 0.017514734 | 4.075556191 | 0.004297508 | 0.996571095 | 0.998252924 |
| chr14:58740696-58740853   | ncRNA_exonic | PSMA3-AS1  | 14 | 58740696  | 58740853  | 0 | 1 | 0 | 0 | 1 | 0 | 157    | 0.295303221 | 0.017514734 | 4.075556191 | 0.004297508 | 0.996571095 | 0.998252924 |
| chr14:76088421-76091095   | exonic       | FLVCR2     | 14 | 76088421  | 76091095  | 0 | 1 | 0 | 0 | 1 | 0 | 2674   | 0.295303221 | 0.017514734 | 4.075556191 | 0.004297508 | 0.996571095 | 0.998252924 |
| chr14:91339975-91372643   | exonic       | RPS6KA5    | 14 | 91339975  | 91372643  | 0 | 1 | 0 | 0 | 1 | 0 | 32668  | 0.295303221 | 0.017514734 | 4.075556191 | 0.004297508 | 0.996571095 | 0.998252924 |
| chr14:92170895-92185822   | exonic       | CATSPERB   | 14 | 92170895  | 92185822  | 0 | 1 | 0 | 0 | 1 | 0 | 14927  | 0.295303221 | 0.017514734 | 4.075556191 | 0.004297508 | 0.996571095 | 0.998252924 |
| chr15:49493358-49531564   | exonic       | GALK2      | 15 | 49493358  | 49531564  | 0 | 1 | 0 | 0 | 1 | 0 | 38206  | 0.295303221 | 0.017514734 | 4.075556191 | 0.004297508 | 0.996571095 | 0.998252924 |
| chr15:75687020-75688837   | exonic       | SIN3A      | 15 | 75687020  | 75688837  | 0 | 1 | 0 | 0 | 1 | 0 | 1817   | 0.295303221 | 0.017514734 | 4.075556191 | 0.004297508 | 0.996571095 | 0.998252924 |
| chr15:93552374-93563488   | exonic       | CHD2       | 15 | 93552374  | 93563488  | 0 | 1 | 0 | 0 | 1 | 0 | 11114  | 0.295303221 | 0.017514734 | 4.075556191 | 0.004297508 | 0.996571095 | 0.998252924 |
| chr16:19639958-19693712   | exonic       | C16orf62   | 16 | 19639958  | 19693712  | 0 | 1 | 0 | 0 | 1 | 0 | 53754  | 0.295303221 | 0.017514734 | 4.075556191 | 0.004297508 | 0.996571095 | 0.998252924 |
| chr16:3799627-3808973     | exonic       | CREBBP     | 16 | 3799627   | 3808973   | 0 | 1 | 0 | 0 | 1 | 0 | 9346   | 0.295303221 | 0.017514734 | 4.075556191 | 0.004297508 | 0.996571095 | 0.998252924 |
| chr16:53269096-53281415   | exonic       | CHD9       | 16 | 53269096  | 53281415  | 0 | 1 | 0 | 0 | 1 | 0 | 12319  | 0.295303221 | 0.017514734 | 4.075556191 | 0.004297508 | 0.996571095 | 0.998252924 |
| chr16:58749917-58753159   | exonic       | GOT2       | 16 | 58749917  | 58753159  | 0 | 1 | 0 | 0 | 1 | 0 | 3242   | 0.295303221 | 0.017514734 | 4.075556191 | 0.004297508 | 0.996571095 | 0.998252924 |
| chr17:49109041-49133843   | exonic       | SPAG9      | 17 | 49109041  | 49133843  | 0 | 1 | 0 | 0 | 1 | 0 | 24802  | 0.295303221 | 0.017514734 | 4.075556191 | 0.004297508 | 0.996571095 | 0.998252924 |
| chr17:55334458-55478832   | exonic       | MSI2       | 17 | 55334458  | 55478832  | 0 | 1 | 0 | 0 | 1 | 0 | 144374 | 0.295303221 | 0.017514734 | 4.075556191 | 0.004297508 | 0.996571095 | 0.998252924 |
| chr17:80540616-80545148   | exonic       | FOXK2      | 17 | 80540616  | 80545148  | 0 | 1 | 0 | 0 | 1 | 0 | 4532   | 0.295303221 | 0.017514734 | 4.075556191 | 0.004297508 | 0.996571095 | 0.998252924 |
| chr18:19345732-19371518   | exonic       | MIB1       | 18 | 19345732  | 19371518  | 0 | 1 | 0 | 0 | 1 | 0 | 25786  | 0.295303221 | 0.017514734 | 4.075556191 | 0.004297508 | 0.996571095 | 0.998252924 |
| chr19:16962222-16965072   | exonic       | SIN3B      | 19 | 16962222  | 16965072  | 0 | 1 | 0 | 0 | 1 | 0 | 2850   | 0.295303221 | 0.017514734 | 4.075556191 | 0.004297508 | 0.996571095 | 0.998252924 |
| chr19:32843734-32851524   | exonic       | ZNF507     | 19 | 32843734  | 32851524  | 0 | 1 | 0 | 0 | 1 | 0 | 7790   | 0.295303221 | 0.017514734 | 4.075556191 | 0.004297508 | 0.996571095 | 0.998252924 |
| chr2:161025722-161052931  | exonic       | ITGB6      | 2  | 161025722 | 161052931 | 0 | 1 | 0 | 0 | 1 | 0 | 27209  | 0.295303221 | 0.017514734 | 4.075556191 | 0.004297508 | 0.996571095 | 0.998252924 |
| chr2:173426947-173429801  | exonic       | PDK1       | 2  | 173426947 | 173429801 | 0 | 1 | 0 | 0 | 1 | 0 | 2854   | 0.295303221 | 0.017514734 | 4.075556191 | 0.004297508 | 0.996571095 | 0.998252924 |
| chr2:219110142-219114644  | exonic       | ARPC2      | 2  | 219110142 | 219114644 | 0 | 1 | 0 | 0 | 1 | 0 | 4502   | 0.295303221 | 0.017514734 | 4.075556191 | 0.004297508 | 0.996571095 | 0.998252924 |
| chr2:89076017-89092011    | ncRNA_exonic | ANKRD36BP2 | 2  | 89076017  | 89092011  | 0 | 1 | 0 | 0 | 1 | 0 | 15994  | 0.295303221 | 0.017514734 | 4.075556191 | 0.004297508 | 0.996571095 | 0.998252924 |
| chr21:27264033-27284274   | exonic       | APP        | 21 | 27264033  | 27284274  | 0 | 1 | 0 | 0 | 1 | 0 | 20241  | 0.295303221 | 0.017514734 | 4.075556191 | 0.004297508 | 0.996571095 | 0.998252924 |
| chr22:24698162-24726399   | exonic       | SPECC1L    | 22 | 24698162  | 24726399  | 0 | 1 | 0 | 0 | 1 | 0 | 28237  | 0.295303221 | 0.017514734 | 4.075556191 | 0.004297508 | 0.996571095 | 0.998252924 |

|                          |          |          |    |           |           |   |   |   |   |   |   |        |             |             |             |             |             |             |
|--------------------------|----------|----------|----|-----------|-----------|---|---|---|---|---|---|--------|-------------|-------------|-------------|-------------|-------------|-------------|
| chr22:29678378-29683123  | exonic   | EWSR1    | 22 | 29678378  | 29683123  | 0 | 1 | 0 | 0 | 1 | 0 | 4745   | 0.295303221 | 0.017514734 | 4.075556191 | 0.004297508 | 0.996571095 | 0.998252924 |
| chr22:41513190-41513825  | exonic   | EP300    | 22 | 41513190  | 41513825  | 0 | 1 | 0 | 0 | 1 | 0 | 635    | 0.295303221 | 0.017514734 | 4.075556191 | 0.004297508 | 0.996571095 | 0.998252924 |
| chr3:141231004-141248644 | exonic   | RASA2    | 3  | 141231004 | 141248644 | 0 | 1 | 0 | 0 | 1 | 0 | 17640  | 0.295303221 | 0.017514734 | 4.075556191 | 0.004297508 | 0.996571095 | 0.998252924 |
| chr3:146234792-146251337 | exonic   | PLSCR1   | 3  | 146234792 | 146251337 | 0 | 1 | 0 | 0 | 1 | 0 | 16545  | 0.295303221 | 0.017514734 | 4.075556191 | 0.004297508 | 0.996571095 | 0.998252924 |
| chr3:154002371-154029463 | exonic   | DHX36    | 3  | 154002371 | 154029463 | 0 | 1 | 0 | 0 | 1 | 0 | 27092  | 0.295303221 | 0.017514734 | 4.075556191 | 0.004297508 | 0.996571095 | 0.998252924 |
| chr3:169846471-169867032 | exonic   | PHC3     | 3  | 169846471 | 169867032 | 0 | 1 | 0 | 0 | 1 | 0 | 20561  | 0.295303221 | 0.017514734 | 4.075556191 | 0.004297508 | 0.996571095 | 0.998252924 |
| chr3:196089164-196089558 | exonic   | UBXN7    | 3  | 196089164 | 196089558 | 0 | 1 | 0 | 0 | 1 | 0 | 394    | 0.295303221 | 0.017514734 | 4.075556191 | 0.004297508 | 0.996571095 | 0.998252924 |
| chr3:33633886-33686395   | exonic   | CLASP2   | 3  | 33633886  | 33686395  | 0 | 1 | 0 | 0 | 1 | 0 | 52509  | 0.295303221 | 0.017514734 | 4.075556191 | 0.004297508 | 0.996571095 | 0.998252924 |
| chr4:153750776-153793716 | exonic   | ARFIP1   | 4  | 153750776 | 153793716 | 0 | 1 | 0 | 0 | 1 | 0 | 42940  | 0.295303221 | 0.017514734 | 4.075556191 | 0.004297508 | 0.996571095 | 0.998252924 |
| chr4:79754735-79772210   | exonic   | BMP2K    | 4  | 79754735  | 79772210  | 0 | 1 | 0 | 0 | 1 | 0 | 17475  | 0.295303221 | 0.017514734 | 4.075556191 | 0.004297508 | 0.996571095 | 0.998252924 |
| chr4:83978078-83989675   | exonic   | COPS4    | 4  | 83978078  | 83989675  | 0 | 1 | 0 | 0 | 1 | 0 | 11597  | 0.295303221 | 0.017514734 | 4.075556191 | 0.004297508 | 0.996571095 | 0.998252924 |
| chr4:84384646-84388691   | exonic   | FAM175A  | 4  | 84384646  | 84388691  | 0 | 1 | 0 | 0 | 1 | 0 | 4045   | 0.295303221 | 0.017514734 | 4.075556191 | 0.004297508 | 0.996571095 | 0.998252924 |
| chr4:89304372-89338731   | exonic   | HERC6    | 4  | 89304372  | 89338731  | 0 | 1 | 0 | 0 | 1 | 0 | 34359  | 0.295303221 | 0.017514734 | 4.075556191 | 0.004297508 | 0.996571095 | 0.998252924 |
| chr5:127466758-127477673 | exonic   | SLC12A2  | 5  | 127466758 | 127477673 | 0 | 1 | 0 | 0 | 1 | 0 | 10915  | 0.295303221 | 0.017514734 | 4.075556191 | 0.004297508 | 0.996571095 | 0.998252924 |
| chr5:142252964-142264964 | exonic   | ARHGAP26 | 5  | 142252964 | 142264964 | 0 | 1 | 0 | 0 | 1 | 0 | 12000  | 0.295303221 | 0.017514734 | 4.075556191 | 0.004297508 | 0.996571095 | 0.998252924 |
| chr5:167920898-167929110 | exonic   | RARS     | 5  | 167920898 | 167929110 | 0 | 1 | 0 | 0 | 1 | 0 | 8212   | 0.295303221 | 0.017514734 | 4.075556191 | 0.004297508 | 0.996571095 | 0.998252924 |
| chr5:64556426-64769779   | exonic   | ADAMTS6  | 5  | 64556426  | 64769779  | 0 | 1 | 0 | 0 | 1 | 0 | 213353 | 0.295303221 | 0.017514734 | 4.075556191 | 0.004297508 | 0.996571095 | 0.998252924 |
| chr5:65000105-65004385   | exonic   | SGTB     | 5  | 65000105  | 65004385  | 0 | 1 | 0 | 0 | 1 | 0 | 4280   | 0.295303221 | 0.017514734 | 4.075556191 | 0.004297508 | 0.996571095 | 0.998252924 |
| chr5:95087942-95099324   | exonic   | RHOBTB3  | 5  | 95087942  | 95099324  | 0 | 1 | 0 | 0 | 1 | 0 | 11382  | 0.295303221 | 0.017514734 | 4.075556191 | 0.004297508 | 0.996571095 | 0.998252924 |
| chr6:117037381-117045538 | exonic   | KPNA5    | 6  | 117037381 | 117045538 | 0 | 1 | 0 | 0 | 1 | 0 | 8157   | 0.295303221 | 0.017514734 | 4.075556191 | 0.004297508 | 0.996571095 | 0.998252924 |
| chr6:154743639-154763424 | exonic   | CNKSR3   | 6  | 154743639 | 154763424 | 0 | 1 | 0 | 0 | 1 | 0 | 19785  | 0.295303221 | 0.017514734 | 4.075556191 | 0.004297508 | 0.996571095 | 0.998252924 |
| chr6:86227473-86246642   | exonic   | SNX14    | 6  | 86227473  | 86246642  | 0 | 1 | 0 | 0 | 1 | 0 | 19169  | 0.295303221 | 0.017514734 | 4.075556191 | 0.004297508 | 0.996571095 | 0.998252924 |
| chr7:102398300-102401858 | exonic   | FAM185A  | 7  | 102398300 | 102401858 | 0 | 1 | 0 | 0 | 1 | 0 | 3558   | 0.295303221 | 0.017514734 | 4.075556191 | 0.004297508 | 0.996571095 | 0.998252924 |
| chr7:133821775-133848292 | exonic   | LRGUK    | 7  | 133821775 | 133848292 | 0 | 1 | 0 | 0 | 1 | 0 | 26517  | 0.295303221 | 0.017514734 | 4.075556191 | 0.004297508 | 0.996571095 | 0.998252924 |
| chr7:157151240-157160177 | exonic   | DNAJB6   | 7  | 157151240 | 157160177 | 0 | 1 | 0 | 0 | 1 | 0 | 8937   | 0.295303221 | 0.017514734 | 4.075556191 | 0.004297508 | 0.996571095 | 0.998252924 |
| chr7:24854677-24874355   | exonic   | OSBPL3   | 7  | 24854677  | 24874355  | 0 | 1 | 0 | 0 | 1 | 0 | 19678  | 0.295303221 | 0.017514734 | 4.075556191 | 0.004297508 | 0.996571095 | 0.998252924 |
| chr8:27898567-27931973   | exonic   | NUGGC    | 8  | 27898567  | 27931973  | 0 | 1 | 0 | 0 | 1 | 0 | 33406  | 0.295303221 | 0.017514734 | 4.075556191 | 0.004297508 | 0.996571095 | 0.998252924 |
| chr8:95952556-95953057   | splicing | TP53INP1 | 8  | 95952556  | 95953057  | 0 | 1 | 0 | 0 | 1 | 0 | 501    | 0.295303221 | 0.017514734 | 4.075556191 | 0.004297508 | 0.996571095 | 0.998252924 |
| chr9:116046574-116050544 | exonic   | PRPF4    | 9  | 116046574 | 116050544 | 0 | 1 | 0 | 0 | 1 | 0 | 3970   | 0.295303221 | 0.017514734 | 4.075556191 | 0.004297508 | 0.996571095 | 0.998252924 |
| chr9:140458885-140459606 | exonic   | DPH7     | 9  | 140458885 | 140459606 | 0 | 1 | 0 | 0 | 1 | 0 | 721    | 0.295303221 | 0.017514734 | 4.075556191 | 0.004297508 | 0.996571095 | 0.998252924 |
| chr9:20694518-20740339   | exonic   | FOCAD    | 9  | 20694518  | 20740339  | 0 | 1 | 0 | 0 | 1 | 0 | 45821  | 0.295303221 | 0.017514734 | 4.075556191 | 0.004297508 | 0.996571095 | 0.998252924 |
| chr1:168153139-168160738 | exonic   | TIPRL    | 1  | 168153139 | 168160738 | 0 | 0 | 1 | 0 | 1 | 0 | 7599   | 0.318296447 | 0.017514734 | 4.075556191 | 0.004297508 | 0.996571095 | 0.998252924 |
| chr1:185183638-185191168 | exonic   | SWT1     | 1  | 185183638 | 185191168 | 0 | 0 | 1 | 0 | 1 | 0 | 7530   | 0.318296447 | 0.017514734 | 4.075556191 | 0.004297508 | 0.996571095 | 0.998252924 |
| chr1:197586788-197627499 | exonic   | DENND1B  | 1  | 197586788 | 197627499 | 0 | 0 | 1 | 0 | 1 | 0 | 40711  | 0.318296447 | 0.017514734 | 4.075556191 | 0.004297508 | 0.996571095 | 0.998252924 |
| chr1:224377278-224378021 | exonic   | DEGS1    | 1  | 224377278 | 224378021 | 0 | 0 | 1 | 0 | 1 | 0 | 743    | 0.318296447 | 0.017514734 | 4.075556191 | 0.004297508 | 0.996571095 | 0.998252924 |

|                           |          |         |    |           |           |   |   |   |   |   |   |       |             |             |             |             |             |             |
|---------------------------|----------|---------|----|-----------|-----------|---|---|---|---|---|---|-------|-------------|-------------|-------------|-------------|-------------|-------------|
| chr1:246707822-246720023  | exonic   | TFB2M   | 1  | 246707822 | 246720023 | 0 | 0 | 1 | 0 | 1 | 0 | 12201 | 0.318296447 | 0.017514734 | 4.075556191 | 0.004297508 | 0.996571095 | 0.998252924 |
| chr1:47148971-47157609    | exonic   | EFCAB14 | 1  | 47148971  | 47157609  | 0 | 0 | 1 | 0 | 1 | 0 | 8638  | 0.318296447 | 0.017514734 | 4.075556191 | 0.004297508 | 0.996571095 | 0.998252924 |
| chr10:103558598-103560157 | exonic   | MGEA5   | 10 | 103558598 | 103560157 | 0 | 0 | 1 | 0 | 1 | 0 | 1559  | 0.318296447 | 0.017514734 | 4.075556191 | 0.004297508 | 0.996571095 | 0.998252924 |
| chr10:27453992-27454468   | exonic   | MASTL   | 10 | 27453992  | 27454468  | 0 | 0 | 1 | 0 | 1 | 0 | 476   | 0.318296447 | 0.017514734 | 4.075556191 | 0.004297508 | 0.996571095 | 0.998252924 |
| chr10:70945742-70947512   | exonic   | SUPV3L1 | 10 | 70945742  | 70947512  | 0 | 0 | 1 | 0 | 1 | 0 | 1770  | 0.318296447 | 0.017514734 | 4.075556191 | 0.004297508 | 0.996571095 | 0.998252924 |
| chr11:102742323-102742682 | exonic   | MMP12   | 11 | 102742323 | 102742682 | 0 | 0 | 1 | 0 | 1 | 0 | 359   | 0.318296447 | 0.017514734 | 4.075556191 | 0.004297508 | 0.996571095 | 0.998252924 |
| chr11:581961-605300       | exonic   | PHRF1   | 11 | 581961    | 605300    | 0 | 0 | 1 | 0 | 1 | 0 | 23339 | 0.318296447 | 0.017514734 | 4.075556191 | 0.004297508 | 0.996571095 | 0.998252924 |
| chr12:110028575-110032986 | exonic   | MVK     | 12 | 110028575 | 110032986 | 0 | 0 | 1 | 0 | 1 | 0 | 4411  | 0.318296447 | 0.017514734 | 4.075556191 | 0.004297508 | 0.996571095 | 0.998252924 |
| chr12:57132217-57137907   | exonic   | PRIM1   | 12 | 57132217  | 57137907  | 0 | 0 | 1 | 0 | 1 | 0 | 5690  | 0.318296447 | 0.017514734 | 4.075556191 | 0.004297508 | 0.996571095 | 0.998252924 |
| chr12:94725475-94729440   | exonic   | CEP83   | 12 | 94725475  | 94729440  | 0 | 0 | 1 | 0 | 1 | 0 | 3965  | 0.318296447 | 0.017514734 | 4.075556191 | 0.004297508 | 0.996571095 | 0.998252924 |
| chr13:114164552-114175048 | exonic   | TMC03   | 13 | 114164552 | 114175048 | 0 | 0 | 1 | 0 | 1 | 0 | 10496 | 0.318296447 | 0.017514734 | 4.075556191 | 0.004297508 | 0.996571095 | 0.998252924 |
| chr13:48562675-48563116   | exonic   | SUCLA2  | 13 | 48562675  | 48563116  | 0 | 0 | 1 | 0 | 1 | 0 | 441   | 0.318296447 | 0.017514734 | 4.075556191 | 0.004297508 | 0.996571095 | 0.998252924 |
| chr13:96412293-96413052   | exonic   | DNAJC3  | 13 | 96412293  | 96413052  | 0 | 0 | 1 | 0 | 1 | 0 | 759   | 0.318296447 | 0.017514734 | 4.075556191 | 0.004297508 | 0.996571095 | 0.998252924 |
| chr14:54947676-54948126   | splicing | GMFB    | 14 | 54947676  | 54948126  | 0 | 0 | 1 | 0 | 1 | 0 | 450   | 0.318296447 | 0.017514734 | 4.075556191 | 0.004297508 | 0.996571095 | 0.998252924 |
| chr14:57710882-57714430   | exonic   | EXOC5   | 14 | 57710882  | 57714430  | 0 | 0 | 1 | 0 | 1 | 0 | 3548  | 0.318296447 | 0.017514734 | 4.075556191 | 0.004297508 | 0.996571095 | 0.998252924 |
| chr14:75497245-75509180   | exonic   | MLH3    | 14 | 75497245  | 75509180  | 0 | 0 | 1 | 0 | 1 | 0 | 11935 | 0.318296447 | 0.017514734 | 4.075556191 | 0.004297508 | 0.996571095 | 0.998252924 |
| chr14:75583897-75590926   | exonic   | NEK9    | 14 | 75583897  | 75590926  | 0 | 0 | 1 | 0 | 1 | 0 | 7029  | 0.318296447 | 0.017514734 | 4.075556191 | 0.004297508 | 0.996571095 | 0.998252924 |
| chr15:68378643-68439038   | exonic   | PIAS1   | 15 | 68378643  | 68439038  | 0 | 0 | 1 | 0 | 1 | 0 | 60395 | 0.318296447 | 0.017514734 | 4.075556191 | 0.004297508 | 0.996571095 | 0.998252924 |
| chr16:3841981-3843627     | exonic   | CREBBP  | 16 | 3841981   | 3843627   | 0 | 0 | 1 | 0 | 1 | 0 | 1646  | 0.318296447 | 0.017514734 | 4.075556191 | 0.004297508 | 0.996571095 | 0.998252924 |
| chr16:71954641-71957283   | exonic   | IST1    | 16 | 71954641  | 71957283  | 0 | 0 | 1 | 0 | 1 | 0 | 2642  | 0.318296447 | 0.017514734 | 4.075556191 | 0.004297508 | 0.996571095 | 0.998252924 |
| chr16:89961445-89970613   | exonic   | TCF25   | 16 | 89961445  | 89970613  | 0 | 0 | 1 | 0 | 1 | 0 | 9168  | 0.318296447 | 0.017514734 | 4.075556191 | 0.004297508 | 0.996571095 | 0.998252924 |
| chr17:13977639-13980373   | exonic   | COX10   | 17 | 13977639  | 13980373  | 0 | 0 | 1 | 0 | 1 | 0 | 2734  | 0.318296447 | 0.017514734 | 4.075556191 | 0.004297508 | 0.996571095 | 0.998252924 |
| chr17:15905228-15909882   | exonic   | TTC19   | 17 | 15905228  | 15909882  | 0 | 0 | 1 | 0 | 1 | 0 | 4654  | 0.318296447 | 0.017514734 | 4.075556191 | 0.004297508 | 0.996571095 | 0.998252924 |
| chr17:18768781-18770647   | exonic   | PRPSAP2 | 17 | 18768781  | 18770647  | 0 | 0 | 1 | 0 | 1 | 0 | 1866  | 0.318296447 | 0.017514734 | 4.075556191 | 0.004297508 | 0.996571095 | 0.998252924 |
| chr17:58012553-58013902   | exonic   | RPS6KB1 | 17 | 58012553  | 58013902  | 0 | 0 | 1 | 0 | 1 | 0 | 1349  | 0.318296447 | 0.017514734 | 4.075556191 | 0.004297508 | 0.996571095 | 0.998252924 |
| chr19:40743875-40746017   | exonic   | AKT2    | 19 | 40743875  | 40746017  | 0 | 0 | 1 | 0 | 1 | 0 | 2142  | 0.318296447 | 0.017514734 | 4.075556191 | 0.004297508 | 0.996571095 | 0.998252924 |
| chr2:114670748-114699936  | exonic   | ACTR3   | 2  | 114670748 | 114699936 | 0 | 0 | 1 | 0 | 1 | 0 | 29188 | 0.318296447 | 0.017514734 | 4.075556191 | 0.004297508 | 0.996571095 | 0.998252924 |
| chr2:136418839-136433056  | exonic   | R3HDM1  | 2  | 136418839 | 136433056 | 0 | 0 | 1 | 0 | 1 | 0 | 14217 | 0.318296447 | 0.017514734 | 4.075556191 | 0.004297508 | 0.996571095 | 0.998252924 |
| chr2:161157161-161174738  | exonic   | RBMS1   | 2  | 161157161 | 161174738 | 0 | 0 | 1 | 0 | 1 | 0 | 17577 | 0.318296447 | 0.017514734 | 4.075556191 | 0.004297508 | 0.996571095 | 0.998252924 |
| chr2:183831943-183853914  | exonic   | NCKAP1  | 2  | 183831943 | 183853914 | 0 | 0 | 1 | 0 | 1 | 0 | 21971 | 0.318296447 | 0.017514734 | 4.075556191 | 0.004297508 | 0.996571095 | 0.998252924 |
| chr2:190606067-190609514  | exonic   | ANKAR   | 2  | 190606067 | 190609514 | 0 | 0 | 1 | 0 | 1 | 0 | 3447  | 0.318296447 | 0.017514734 | 4.075556191 | 0.004297508 | 0.996571095 | 0.998252924 |
| chr2:231222519-231223847  | exonic   | SP140L  | 2  | 231222519 | 231223847 | 0 | 0 | 1 | 0 | 1 | 0 | 1328  | 0.318296447 | 0.017514734 | 4.075556191 | 0.004297508 | 0.996571095 | 0.998252924 |
| chr2:42909540-42924974    | exonic   | MTA3    | 2  | 42909540  | 42924974  | 0 | 0 | 1 | 0 | 1 | 0 | 15434 | 0.318296447 | 0.017514734 | 4.075556191 | 0.004297508 | 0.996571095 | 0.998252924 |
| chr2:64160806-64171789    | exonic   | VPS54   | 2  | 64160806  | 64171789  | 0 | 0 | 1 | 0 | 1 | 0 | 10983 | 0.318296447 | 0.017514734 | 4.075556191 | 0.004297508 | 0.996571095 | 0.998252924 |
| chr20:2944917-2955887     | exonic   | PTPRA   | 20 | 2944917   | 2955887   | 0 | 0 | 1 | 0 | 1 | 0 | 10970 | 0.318296447 | 0.017514734 | 4.075556191 | 0.004297508 | 0.996571095 | 0.998252924 |

|                          |              |           |    |           |           |   |   |   |   |   |   |        |             |             |             |             |             |             |
|--------------------------|--------------|-----------|----|-----------|-----------|---|---|---|---|---|---|--------|-------------|-------------|-------------|-------------|-------------|-------------|
| chr20:3321150-3340240    | exonic       | C2Oorf194 | 20 | 3321150   | 3340240   | 0 | 0 | 1 | 0 | 1 | 0 | 19090  | 0.318296447 | 0.017514734 | 4.075556191 | 0.004297508 | 0.996571095 | 0.998252924 |
| chr20:47679738-47689234  | exonic       | CSE1L     | 20 | 47679738  | 47689234  | 0 | 0 | 1 | 0 | 1 | 0 | 9496   | 0.318296447 | 0.017514734 | 4.075556191 | 0.004297508 | 0.996571095 | 0.998252924 |
| chr21:45513943-45518415  | exonic       | TRAPPC10  | 21 | 45513943  | 45518415  | 0 | 0 | 1 | 0 | 1 | 0 | 4472   | 0.318296447 | 0.017514734 | 4.075556191 | 0.004297508 | 0.996571095 | 0.998252924 |
| chr3:113784083-113789685 | exonic       | QTRTD1    | 3  | 113784083 | 113789685 | 0 | 0 | 1 | 0 | 1 | 0 | 5602   | 0.318296447 | 0.017514734 | 4.075556191 | 0.004297508 | 0.996571095 | 0.998252924 |
| chr3:125032151-125032500 | exonic       | ZNF148    | 3  | 125032151 | 125032500 | 0 | 0 | 1 | 0 | 1 | 0 | 349    | 0.318296447 | 0.017514734 | 4.075556191 | 0.004297508 | 0.996571095 | 0.998252924 |
| chr3:128356641-128363826 | exonic       | RPN1      | 3  | 128356641 | 128363826 | 0 | 0 | 1 | 0 | 1 | 0 | 7185   | 0.318296447 | 0.017514734 | 4.075556191 | 0.004297508 | 0.996571095 | 0.998252924 |
| chr3:47719687-47734790   | exonic       | SMARCC1   | 3  | 47719687  | 47734790  | 0 | 0 | 1 | 0 | 1 | 0 | 15103  | 0.318296447 | 0.017514734 | 4.075556191 | 0.004297508 | 0.996571095 | 0.998252924 |
| chr3:66293626-66313803   | exonic       | SLC25A26  | 3  | 66293626  | 66313803  | 0 | 0 | 1 | 0 | 1 | 0 | 20177  | 0.318296447 | 0.017514734 | 4.075556191 | 0.004297508 | 0.996571095 | 0.998252924 |
| chr4:110434902-110441640 | exonic       | SEC24B    | 4  | 110434902 | 110441640 | 0 | 0 | 1 | 0 | 1 | 0 | 6738   | 0.318296447 | 0.017514734 | 4.075556191 | 0.004297508 | 0.996571095 | 0.998252924 |
| chr4:148778703-148887990 | exonic       | ARHGAP10  | 4  | 148778703 | 148887990 | 0 | 0 | 1 | 0 | 1 | 0 | 109287 | 0.318296447 | 0.017514734 | 4.075556191 | 0.004297508 | 0.996571095 | 0.998252924 |
| chr4:48608454-48611084   | exonic       | FRYL      | 4  | 48608454  | 48611084  | 0 | 0 | 1 | 0 | 1 | 0 | 2630   | 0.318296447 | 0.017514734 | 4.075556191 | 0.004297508 | 0.996571095 | 0.998252924 |
| chr5:112399680-112421007 | exonic       | MCC       | 5  | 112399680 | 112421007 | 0 | 0 | 1 | 0 | 1 | 0 | 21327  | 0.318296447 | 0.017514734 | 4.075556191 | 0.004297508 | 0.996571095 | 0.998252924 |
| chr5:179980385-179998432 | exonic       | CNOT6     | 5  | 179980385 | 179998432 | 0 | 0 | 1 | 0 | 1 | 0 | 18047  | 0.318296447 | 0.017514734 | 4.075556191 | 0.004297508 | 0.996571095 | 0.998252924 |
| chr5:68669656-68670538   | exonic       | RAD17     | 5  | 68669656  | 68670538  | 0 | 0 | 1 | 0 | 1 | 0 | 882    | 0.318296447 | 0.017514734 | 4.075556191 | 0.004297508 | 0.996571095 | 0.998252924 |
| chr5:75893263-75907008   | exonic       | IQGAP2    | 5  | 75893263  | 75907008  | 0 | 0 | 1 | 0 | 1 | 0 | 13745  | 0.318296447 | 0.017514734 | 4.075556191 | 0.004297508 | 0.996571095 | 0.998252924 |
| chr5:78585943-78608321   | exonic       | JMY       | 5  | 78585943  | 78608321  | 0 | 0 | 1 | 0 | 1 | 0 | 22378  | 0.318296447 | 0.017514734 | 4.075556191 | 0.004297508 | 0.996571095 | 0.998252924 |
| chr6:107515025-107533486 | exonic       | PDSS2     | 6  | 107515025 | 107533486 | 0 | 0 | 1 | 0 | 1 | 0 | 18461  | 0.318296447 | 0.017514734 | 4.075556191 | 0.004297508 | 0.996571095 | 0.998252924 |
| chr6:128134027-128135076 | exonic       | THEMIS    | 6  | 128134027 | 128135076 | 0 | 0 | 1 | 0 | 1 | 0 | 1049   | 0.318296447 | 0.017514734 | 4.075556191 | 0.004297508 | 0.996571095 | 0.998252924 |
| chr6:45399599-45405788   | exonic       | RUNX2     | 6  | 45399599  | 45405788  | 0 | 0 | 1 | 0 | 1 | 0 | 6189   | 0.318296447 | 0.017514734 | 4.075556191 | 0.004297508 | 0.996571095 | 0.998252924 |
| chr6:76368977-76376657   | exonic       | SENP6     | 6  | 76368977  | 76376657  | 0 | 0 | 1 | 0 | 1 | 0 | 7680   | 0.318296447 | 0.017514734 | 4.075556191 | 0.004297508 | 0.996571095 | 0.998252924 |
| chr7:138921750-138951149 | exonic       | UBN2      | 7  | 138921750 | 138951149 | 0 | 0 | 1 | 0 | 1 | 0 | 29399  | 0.318296447 | 0.017514734 | 4.075556191 | 0.004297508 | 0.996571095 | 0.998252924 |
| chr7:95813588-95838289   | exonic       | SLC25A13  | 7  | 95813588  | 95838289  | 0 | 0 | 1 | 0 | 1 | 0 | 24701  | 0.318296447 | 0.017514734 | 4.075556191 | 0.004297508 | 0.996571095 | 0.998252924 |
| chr8:11666302-11667359   | exonic       | FDFT1     | 8  | 11666302  | 11667359  | 0 | 0 | 1 | 0 | 1 | 0 | 1057   | 0.318296447 | 0.017514734 | 4.075556191 | 0.004297508 | 0.996571095 | 0.998252924 |
| chr8:131136258-131140336 | exonic       | ASAP1     | 8  | 131136258 | 131140336 | 0 | 0 | 1 | 0 | 1 | 0 | 4078   | 0.318296447 | 0.017514734 | 4.075556191 | 0.004297508 | 0.996571095 | 0.998252924 |
| chr8:131172109-131181313 | exonic       | ASAP1     | 8  | 131172109 | 131181313 | 0 | 0 | 1 | 0 | 1 | 0 | 9204   | 0.318296447 | 0.017514734 | 4.075556191 | 0.004297508 | 0.996571095 | 0.998252924 |
| chr8:68015271-68031056   | exonic       | CSPP1     | 8  | 68015271  | 68031056  | 0 | 0 | 1 | 0 | 1 | 0 | 15785  | 0.318296447 | 0.017514734 | 4.075556191 | 0.004297508 | 0.996571095 | 0.998252924 |
| chr9:86523366-86530593   | exonic       | KIF27     | 9  | 86523366  | 86530593  | 0 | 0 | 1 | 0 | 1 | 0 | 7227   | 0.318296447 | 0.017514734 | 4.075556191 | 0.004297508 | 0.996571095 | 0.998252924 |
| chr9:86590659-86591909   | splicing     | HNRNPK    | 9  | 86590659  | 86591909  | 0 | 0 | 1 | 0 | 1 | 0 | 1250   | 0.318296447 | 0.017514734 | 4.075556191 | 0.004297508 | 0.996571095 | 0.998252924 |
| chr9:86590660-86591909   | splicing     | HNRNPK    | 9  | 86590660  | 86591909  | 0 | 0 | 1 | 0 | 1 | 0 | 1249   | 0.318296447 | 0.017514734 | 4.075556191 | 0.004297508 | 0.996571095 | 0.998252924 |
| chr9:86590672-86591909   | splicing     | HNRNPK    | 9  | 86590672  | 86591909  | 0 | 0 | 1 | 0 | 1 | 0 | 1237   | 0.318296447 | 0.017514734 | 4.075556191 | 0.004297508 | 0.996571095 | 0.998252924 |
| chr9:88430793-88445491   | ncRNA_exonic | LOC389765 | 9  | 88430793  | 88445491  | 0 | 0 | 1 | 0 | 1 | 0 | 14698  | 0.318296447 | 0.017514734 | 4.075556191 | 0.004297508 | 0.996571095 | 0.998252924 |
| chrX:110406142-110416309 | exonic       | PAK3      | X  | 110406142 | 110416309 | 0 | 0 | 1 | 0 | 1 | 0 | 10167  | 0.318296447 | 0.017514734 | 4.075556191 | 0.004297508 | 0.996571095 | 0.998252924 |
| chrX:117521302-117538407 | exonic       | WDR44     | X  | 117521302 | 117538407 | 0 | 0 | 1 | 0 | 1 | 0 | 17105  | 0.318296447 | 0.017514734 | 4.075556191 | 0.004297508 | 0.996571095 | 0.998252924 |
| chrX:117521302-117544922 | exonic       | WDR44     | X  | 117521302 | 117544922 | 0 | 0 | 1 | 0 | 1 | 0 | 23620  | 0.318296447 | 0.017514734 | 4.075556191 | 0.004297508 | 0.996571095 | 0.998252924 |
| chrX:149807415-149818374 | exonic       | MTM1      | X  | 149807415 | 149818374 | 0 | 0 | 1 | 0 | 1 | 0 | 10959  | 0.318296447 | 0.017514734 | 4.075556191 | 0.004297508 | 0.996571095 | 0.998252924 |



|                           |        |                       |   |           |           |   |   |   |   |   |   |        |             |             |             |             |             |             |
|---------------------------|--------|-----------------------|---|-----------|-----------|---|---|---|---|---|---|--------|-------------|-------------|-------------|-------------|-------------|-------------|
| chrX:16716358-16721064    | exonic | CTPS2                 | X | 16716358  | 16721064  | 0 | 0 | 1 | 0 | 1 | 0 | 4706   | 0.318296447 | 0.017514734 | 4.075556191 | 0.004297508 | 0.996571095 | 0.998252924 |
| chr1:16464347-16464925    | exonic | EPHA2                 |   | 16464347  | 16464925  | 0 | 1 | 0 | 0 | 0 | 1 | 578    | 0.482494408 | 0.017551665 | 4.067935354 | 0.004314637 | NA          | NA          |
| chr1:176050287-176105683  | exonic | RFWD2                 |   | 176050287 | 176105683 | 0 | 1 | 0 | 0 | 0 | 1 | 55396  | 0.482494408 | 0.017551665 | 4.067935354 | 0.004314637 | NA          | NA          |
| chr1:235582787-235594119  | exonic | TBCE                  |   | 235582787 | 235594119 | 0 | 1 | 0 | 0 | 0 | 1 | 11332  | 0.482494408 | 0.017551665 | 4.067935354 | 0.004314637 | NA          | NA          |
| chr1:28362054-28369161    | exonic | EYA3                  |   | 28362054  | 28369161  | 0 | 1 | 0 | 0 | 0 | 1 | 7107   | 0.482494408 | 0.017551665 | 4.067935354 | 0.004314637 | NA          | NA          |
| chr1:99150440-99167459    | exonic | SNX7                  |   | 99150440  | 99167459  | 0 | 1 | 0 | 0 | 0 | 1 | 17019  | 0.482494408 | 0.017551665 | 4.067935354 | 0.004314637 | NA          | NA          |
| chr10:105106994-105108756 | exonic | PCGF6                 |   | 105106994 | 105108756 | 0 | 1 | 0 | 0 | 0 | 1 | 1762   | 0.482494408 | 0.017551665 | 4.067935354 | 0.004314637 | NA          | NA          |
| chr10:106019333-106022835 | exonic | GSTO1                 |   | 106019333 | 106022835 | 0 | 1 | 0 | 0 | 0 | 1 | 3502   | 0.482494408 | 0.017551665 | 4.067935354 | 0.004314637 | NA          | NA          |
| chr12:118681219-118693460 | exonic | TAOK3                 |   | 118681219 | 118693460 | 0 | 1 | 0 | 0 | 0 | 1 | 12241  | 0.482494408 | 0.017551665 | 4.067935354 | 0.004314637 | NA          | NA          |
| chr12:32861086-32871697   | exonic | DNM1L                 |   | 32861086  | 32871697  | 0 | 1 | 0 | 0 | 0 | 1 | 10611  | 0.482494408 | 0.017551665 | 4.067935354 | 0.004314637 | NA          | NA          |
| chr13:21955572-21987911   | exonic | ZDHC20                |   | 21955572  | 21987911  | 0 | 1 | 0 | 0 | 0 | 1 | 32339  | 0.482494408 | 0.017551665 | 4.067935354 | 0.004314637 | NA          | NA          |
| chr15:44053621-44061844   | exonic | PDIA3                 |   | 44053621  | 44061844  | 0 | 1 | 0 | 0 | 0 | 1 | 8223   | 0.482494408 | 0.017551665 | 4.067935354 | 0.004314637 | NA          | NA          |
| chr15:63821212-63829355   | exonic | USP3                  |   | 63821212  | 63829355  | 0 | 1 | 0 | 0 | 0 | 1 | 8143   | 0.482494408 | 0.017551665 | 4.067935354 | 0.004314637 | NA          | NA          |
| chr16:69703879-69718873   | exonic | NFAT5                 |   | 69703879  | 69718873  | 0 | 1 | 0 | 0 | 0 | 1 | 14994  | 0.482494408 | 0.017551665 | 4.067935354 | 0.004314637 | NA          | NA          |
| chr17:29123177-29131126   | exonic | CRLF3                 |   | 29123177  | 29131126  | 0 | 1 | 0 | 0 | 0 | 1 | 7949   | 0.482494408 | 0.017551665 | 4.067935354 | 0.004314637 | NA          | NA          |
| chr17:706921-708487       | exonic | NXN                   |   | 706921    | 708487    | 0 | 1 | 0 | 0 | 0 | 1 | 1566   | 0.482494408 | 0.017551665 | 4.067935354 | 0.004314637 | NA          | NA          |
| chr19:39408363-39409453   | exonic | SARS2                 |   | 39408363  | 39409453  | 0 | 1 | 0 | 0 | 0 | 1 | 1090   | 0.482494408 | 0.017551665 | 4.067935354 | 0.004314637 | NA          | NA          |
| chr19:46116798-46117958   | exonic | EML2                  |   | 46116798  | 46117958  | 0 | 1 | 0 | 0 | 0 | 1 | 1160   | 0.482494408 | 0.017551665 | 4.067935354 | 0.004314637 | NA          | NA          |
| chr2:174223439-174224219  | exonic | CDCA7                 |   | 174223439 | 174224219 | 0 | 1 | 0 | 0 | 0 | 1 | 780    | 0.482494408 | 0.017551665 | 4.067935354 | 0.004314637 | NA          | NA          |
| chr2:24468997-24477300    | exonic | ITSN2                 |   | 24468997  | 24477300  | 0 | 1 | 0 | 0 | 0 | 1 | 8303   | 0.482494408 | 0.017551665 | 4.067935354 | 0.004314637 | NA          | NA          |
| chr2:74392344-74399879    | exonic | MOB1A                 |   | 74392344  | 74399879  | 0 | 1 | 0 | 0 | 0 | 1 | 7535   | 0.482494408 | 0.017551665 | 4.067935354 | 0.004314637 | NA          | NA          |
| chr20:35309218-35317187   | exonic | NDRG3                 |   | 35309218  | 35317187  | 0 | 1 | 0 | 0 | 0 | 1 | 7969   | 0.482494408 | 0.017551665 | 4.067935354 | 0.004314637 | NA          | NA          |
| chr21:17135209-17163983   | exonic | USP25                 |   | 17135209  | 17163983  | 0 | 1 | 0 | 0 | 0 | 1 | 28774  | 0.482494408 | 0.017551665 | 4.067935354 | 0.004314637 | NA          | NA          |
| chr22:45210551-45221473   | exonic | ARHGAP8, PRR5-ARHGAP8 |   | 45210551  | 45221473  | 0 | 1 | 0 | 0 | 0 | 1 | 10922  | 0.482494408 | 0.017551665 | 4.067935354 | 0.004314637 | NA          | NA          |
| chr3:24270428-24378862    | exonic | THRB                  |   | 24270428  | 24378862  | 0 | 1 | 0 | 0 | 0 | 1 | 108434 | 0.482494408 | 0.017551665 | 4.067935354 | 0.004314637 | NA          | NA          |
| chr4:15713429-15720616    | exonic | BST1                  |   | 15713429  | 15720616  | 0 | 1 | 0 | 0 | 0 | 1 | 7187   | 0.482494408 | 0.017551665 | 4.067935354 | 0.004314637 | NA          | NA          |
| chr5:50055476-50074484    | exonic | PARP8                 |   | 50055476  | 50074484  | 0 | 1 | 0 | 0 | 0 | 1 | 19008  | 0.482494408 | 0.017551665 | 4.067935354 | 0.004314637 | NA          | NA          |
| chr5:64824278-64825026    | exonic | CENPK                 |   | 64824278  | 64825026  | 0 | 1 | 0 | 0 | 0 | 1 | 748    | 0.482494408 | 0.017551665 | 4.067935354 | 0.004314637 | NA          | NA          |
| chr6:155108994-155116273  | exonic | SCAF8                 |   | 155108994 | 155116273 | 0 | 1 | 0 | 0 | 0 | 1 | 7279   | 0.482494408 | 0.017551665 | 4.067935354 | 0.004314637 | NA          | NA          |
| chr6:86253322-86267778    | exonic | SNX14                 |   | 86253322  | 86267778  | 0 | 1 | 0 | 0 | 0 | 1 | 14456  | 0.482494408 | 0.017551665 | 4.067935354 | 0.004314637 | NA          | NA          |
| chr8:141549418-141551457  | exonic | AGO2                  |   | 141549418 | 141551457 | 0 | 1 | 0 | 0 | 0 | 1 | 2039   | 0.482494408 | 0.017551665 | 4.067935354 | 0.004314637 | NA          | NA          |
| chr1:113124613-113143470  | exonic | ST7L                  |   | 113124613 | 113143470 | 0 | 0 | 1 | 0 | 0 | 1 | 18857  | 0.505487634 | 0.017894172 | 3.999069959 | 0.004474584 | NA          | NA          |
| chr1:179012849-179023773  | exonic | FAM20B                |   | 179012849 | 179023773 | 0 | 0 | 1 | 0 | 0 | 1 | 10924  | 0.505487634 | 0.017894172 | 3.999069959 | 0.004474584 | NA          | NA          |
| chr1:20063864-20073753    | exonic | TMCO4                 |   | 20063864  | 20073753  | 0 | 0 | 1 | 0 | 0 | 1 | 9889   | 0.505487634 | 0.017894172 | 3.999069959 | 0.004474584 | NA          | NA          |
| chr10:115657868-115664795 | exonic | NHLRC2                |   | 115657868 | 115664795 | 0 | 0 | 1 | 0 | 0 | 1 | 6927   | 0.505487634 | 0.017894172 | 3.999069959 | 0.004474584 | NA          | NA          |

|                           |              |                                                          |    |           |           |   |   |   |    |   |   |       |             |             |             |             |             |             |
|---------------------------|--------------|----------------------------------------------------------|----|-----------|-----------|---|---|---|----|---|---|-------|-------------|-------------|-------------|-------------|-------------|-------------|
| chr12:75706627-75720307   | exonic       | CAPS2                                                    | 12 | 75706627  | 75720307  | 0 | 0 | 1 | 0  | 0 | 1 | 13680 | 0.505487634 | 0.017894172 | 3.999069959 | 0.004474584 | NA          | NA          |
| chr13:114149816-114157903 | exonic       | TMC03                                                    | 13 | 114149816 | 114157903 | 0 | 0 | 1 | 0  | 0 | 1 | 8087  | 0.505487634 | 0.017894172 | 3.999069959 | 0.004474584 | NA          | NA          |
| chr14:89305795-89327676   | exonic       | TTC8                                                     | 14 | 89305795  | 89327676  | 0 | 0 | 1 | 0  | 0 | 1 | 21881 | 0.505487634 | 0.017894172 | 3.999069959 | 0.004474584 | NA          | NA          |
| chr16:19474601-19481147   | exonic       | TMC5                                                     | 16 | 19474601  | 19481147  | 0 | 0 | 1 | 0  | 0 | 1 | 6546  | 0.505487634 | 0.017894172 | 3.999069959 | 0.004474584 | NA          | NA          |
| chr16:22477013-22478609   | ncRNA_exonic | SMG1P1                                                   | 16 | 22477013  | 22478609  | 0 | 0 | 1 | 0  | 0 | 1 | 1596  | 0.505487634 | 0.017894172 | 3.999069959 | 0.004474584 | NA          | NA          |
| chr16:90045217-90046744   | ncRNA_exonic | AFG3L1P                                                  | 16 | 90045217  | 90046744  | 0 | 0 | 1 | 0  | 0 | 1 | 1527  | 0.505487634 | 0.017894172 | 3.999069959 | 0.004474584 | NA          | NA          |
| chr19:47653458-47658470   | exonic       | SAE1                                                     | 19 | 47653458  | 47658470  | 0 | 0 | 1 | 0  | 0 | 1 | 5012  | 0.505487634 | 0.017894172 | 3.999069959 | 0.004474584 | NA          | NA          |
| chr2:159477501-159477933  | exonic       | PKP4                                                     | 2  | 159477501 | 159477933 | 0 | 0 | 1 | 0  | 0 | 1 | 432   | 0.505487634 | 0.017894172 | 3.999069959 | 0.004474584 | NA          | NA          |
| chr2:172546656-172549404  | exonic       | DYNC1I2                                                  | 2  | 172546656 | 172549404 | 0 | 0 | 1 | 0  | 0 | 1 | 2748  | 0.505487634 | 0.017894172 | 3.999069959 | 0.004474584 | NA          | NA          |
| chr2:216283964-216299547  | exonic       | FN1                                                      | 2  | 216283964 | 216299547 | 0 | 0 | 1 | 0  | 0 | 1 | 15583 | 0.505487634 | 0.017894172 | 3.999069959 | 0.004474584 | NA          | NA          |
| chr2:48018065-48023202    | exonic       | MSH6                                                     | 2  | 48018065  | 48023202  | 0 | 0 | 1 | 0  | 0 | 1 | 5137  | 0.505487634 | 0.017894172 | 3.999069959 | 0.004474584 | NA          | NA          |
| chr2:61719169-61722748    | exonic       | XPO1                                                     | 2  | 61719169  | 61722748  | 0 | 0 | 1 | 0  | 0 | 1 | 3579  | 0.505487634 | 0.017894172 | 3.999069959 | 0.004474584 | NA          | NA          |
| chr2:9661331-9666373      | exonic       | ADAM17                                                   | 2  | 9661331   | 9666373   | 0 | 0 | 1 | 0  | 0 | 1 | 5042  | 0.505487634 | 0.017894172 | 3.999069959 | 0.004474584 | NA          | NA          |
| chr20:36361280-36365886   | exonic       | CTNBL1                                                   | 20 | 36361280  | 36365886  | 0 | 0 | 1 | 0  | 0 | 1 | 4606  | 0.505487634 | 0.017894172 | 3.999069959 | 0.004474584 | NA          | NA          |
| chr3:56597711-56605330    | exonic       | CCDC66                                                   | 3  | 56597711  | 56605330  | 0 | 0 | 1 | 0  | 0 | 1 | 7619  | 0.505487634 | 0.017894172 | 3.999069959 | 0.004474584 | NA          | NA          |
| chr3:81719988-81754764    | exonic       | GBE1                                                     | 3  | 81719988  | 81754764  | 0 | 0 | 1 | 0  | 0 | 1 | 34776 | 0.505487634 | 0.017894172 | 3.999069959 | 0.004474584 | NA          | NA          |
| chr4:13378168-13383218    | exonic       | RAB28                                                    | 4  | 13378168  | 13383218  | 0 | 0 | 1 | 0  | 0 | 1 | 5050  | 0.505487634 | 0.017894172 | 3.999069959 | 0.004474584 | NA          | NA          |
| chr4:177632652-177650900  | exonic       | VEGFC                                                    | 4  | 177632652 | 177650900 | 0 | 0 | 1 | 0  | 0 | 1 | 18248 | 0.505487634 | 0.017894172 | 3.999069959 | 0.004474584 | NA          | NA          |
| chr4:42003632-42041070    | exonic       | SLC30A9                                                  | 4  | 42003632  | 42041070  | 0 | 0 | 1 | 0  | 0 | 1 | 37438 | 0.505487634 | 0.017894172 | 3.999069959 | 0.004474584 | NA          | NA          |
| chr5:137284643-137290065  | exonic       | FAM13B                                                   | 5  | 137284643 | 137290065 | 0 | 0 | 1 | 0  | 0 | 1 | 5422  | 0.505487634 | 0.017894172 | 3.999069959 | 0.004474584 | NA          | NA          |
| chr5:14290824-14336836    | exonic       | TRIO                                                     | 5  | 14290824  | 14336836  | 0 | 0 | 1 | 0  | 0 | 1 | 46012 | 0.505487634 | 0.017894172 | 3.999069959 | 0.004474584 | NA          | NA          |
| chr5:38903983-38904605    | exonic       | OSMR                                                     | 5  | 38903983  | 38904605  | 0 | 0 | 1 | 0  | 0 | 1 | 622   | 0.505487634 | 0.017894172 | 3.999069959 | 0.004474584 | NA          | NA          |
| chr7:155556505-155559349  | exonic       | RBM33                                                    | 7  | 155556505 | 155559349 | 0 | 0 | 1 | 0  | 0 | 1 | 2844  | 0.505487634 | 0.017894172 | 3.999069959 | 0.004474584 | NA          | NA          |
| chr8:124089350-124109681  | exonic       | TBC1D31                                                  | 8  | 124089350 | 124109681 | 0 | 0 | 1 | 0  | 0 | 1 | 20331 | 0.505487634 | 0.017894172 | 3.999069959 | 0.004474584 | NA          | NA          |
| chr8:143425326-143427253  | exonic       | TSNARE1                                                  | 8  | 143425326 | 143427253 | 0 | 0 | 1 | 0  | 0 | 1 | 1927  | 0.505487634 | 0.017894172 | 3.999069959 | 0.004474584 | NA          | NA          |
| chr9:125617462-125622410  | exonic       | RC3H2                                                    | 9  | 125617462 | 125622410 | 0 | 0 | 1 | 0  | 0 | 1 | 4948  | 0.505487634 | 0.017894172 | 3.999069959 | 0.004474584 | NA          | NA          |
| chr9:77742484-77755848    | exonic       | OSTF1                                                    | 9  | 77742484  | 77755848  | 0 | 0 | 1 | 0  | 0 | 1 | 13364 | 0.505487634 | 0.017894172 | 3.999069959 | 0.004474584 | NA          | NA          |
| chrX:84558411-84563222    | exonic       | POF1B                                                    | X  | 84558411  | 84563222  | 0 | 0 | 1 | 0  | 0 | 1 | 4811  | 0.505487634 | 0.017894172 | 3.999069959 | 0.004474584 | NA          | NA          |
| chr18:44526020-44526886   | UTR5         | <small>KATNAL2(ENL_031303:c.-5255_-52459delins0)</small> | 18 | 44526020  | 44526886  | 6 | 4 | 4 | 14 | 5 | 0 | 866   | 4.353597456 | 0.0185367   | 1.34209372  | 0.013811778 | 0.988980146 | 0.998252924 |
| chr14:38256672-38266152   | exonic       | TTC6                                                     | 14 | 38256672  | 38266152  | 3 | 0 | 0 | 0  | 3 | 0 | 9480  | 0.750043094 | 0.01921329  | 3.364522123 | 0.005710555 | NA          | NA          |
| chr15:90451511-90454051   | exonic       | ARPIN, C15orf38-AP3S2                                    | 15 | 90451511  | 90454051  | 3 | 0 | 0 | 0  | 3 | 0 | 2540  | 0.750043094 | 0.01921329  | 3.364522123 | 0.005710555 | NA          | NA          |
| chr17:1257504-1265302     | exonic       | YWHAE                                                    | 17 | 1257504   | 1265302   | 3 | 0 | 0 | 0  | 3 | 0 | 7798  | 0.750043094 | 0.01921329  | 3.364522123 | 0.005710555 | NA          | NA          |
| chr21:37734480-37744829   | exonic       | MORC3                                                    | 21 | 37734480  | 37744829  | 3 | 0 | 0 | 0  | 3 | 0 | 10349 | 0.750043094 | 0.01921329  | 3.364522123 | 0.005710555 | NA          | NA          |
| chr5:142779221-142780417  | exonic       | NR3C1                                                    | 5  | 142779221 | 142780417 | 3 | 0 | 0 | 0  | 3 | 0 | 1196  | 0.750043094 | 0.01921329  | 3.364522123 | 0.005710555 | NA          | NA          |
| chr5:72157634-72161556    | exonic       | TNPO1                                                    | 5  | 72157634  | 72161556  | 3 | 0 | 0 | 0  | 3 | 0 | 3922  | 0.750043094 | 0.01921329  | 3.364522123 | 0.005710555 | NA          | NA          |

|                           |              |          |    |           |           |    |    |    |    |    |    |       |             |             |             |             |             |             |
|---------------------------|--------------|----------|----|-----------|-----------|----|----|----|----|----|----|-------|-------------|-------------|-------------|-------------|-------------|-------------|
| chr14:21971315-21972024   | exonic       | METTL3   | 14 | 21971315  | 21972024  | 24 | 16 | 15 | 52 | 19 | 2  | 709   | 17.28728505 | 0.019230594 | 0.849748006 | 0.022630937 | 0.981944666 | 0.998252924 |
| chr21:38792601-38802702   | exonic       | DYRK1A   | 21 | 38792601  | 38802702  | 7  | 5  | 2  | 3  | 10 | 2  | 10101 | 4.314471237 | 0.019616648 | 1.275614939 | 0.015378189 | 0.987730464 | 0.998252924 |
| chr8:120800577-120810086  | exonic       | TAF2     | 8  | 120800577 | 120810086 | 4  | 1  | 1  | 1  | 4  | 1  | 9509  | 1.786132277 | 0.020054908 | 1.840104273 | 0.010898789 | 0.991304197 | 0.998252924 |
| chr9:115166274-115171301  | exonic       | HSDL2    | 9  | 115166274 | 115171301 | 3  | 1  | 1  | 1  | 1  | 2  | 5027  | 1.602281677 | 0.020089723 | 1.946315466 | 0.010321926 | 0.991764441 | 0.998252924 |
| chr19:5047486-5082515     | exonic       | KDM4B    | 19 | 5047486   | 5082515   | 4  | 6  | 5  | 8  | 4  | 4  | 35029 | 5.115422897 | 0.020786471 | 1.169850442 | 0.017768486 | 0.985823546 | 0.998252924 |
| chr4:129919028-129925031  | exonic       | SCLT1    | 4  | 129919028 | 129925031 | 2  | 0  | 3  | 5  | 2  | 0  | 6003  | 1.623392731 | 0.021401944 | 2.109305985 | 0.010146439 | 0.991904452 | 0.998252924 |
| chr1:27056141-27059283    | exonic       | ARID1A   | 1  | 27056141  | 27059283  | 33 | 27 | 13 | 35 | 26 | 15 | 3142  | 23.0174036  | 0.02245812  | 0.694391078 | 0.032342178 | 0.974199174 | 0.998252924 |
| chr18:76856475-76936907   | exonic       | ATP9B    | 18 | 76856475  | 76936907  | 3  | 0  | 4  | 9  | 1  | 0  | 80432 | 2.253866819 | 0.023914345 | 1.926016473 | 0.01241648  | 0.990093337 | 0.998252924 |
| chr2:43939363-43973102    | exonic       | PLEKHH2  | 2  | 43939363  | 43973102  | 3  | 3  | 0  | 8  | 0  | 0  | 33739 | 1.760279307 | 0.024545096 | 2.248649603 | 0.010915483 | NA          | NA          |
| chr5:167915606-167921655  | exonic       | RARS     | 5  | 167915606 | 167921655 | 53 | 40 | 29 | 37 | 73 | 21 | 6049  | 38.7692555  | 0.02471783  | 0.627700411 | 0.039378387 | 0.968588711 | 0.998252924 |
| chr5:167915606-167922441  | exonic       | RARS     | 5  | 167915606 | 167922441 | 53 | 40 | 29 | 37 | 73 | 21 | 6835  | 38.7692555  | 0.02471783  | 0.627700411 | 0.039378387 | 0.968588711 | 0.998252924 |
| chr8:106431371-106456609  | exonic       | ZFPM2    | 8  | 106431371 | 106456609 | 7  | 5  | 2  | 13 | 1  | 2  | 25238 | 4.288338292 | 0.024738268 | 1.337127643 | 0.018501052 | 0.985239138 | 0.998252924 |
| chr11:118422500-118430579 | exonic       | IFT46    | 11 | 118422500 | 118430579 | 6  | 2  | 0  | 10 | 0  | 0  | 8079  | 2.185587106 | 0.025686622 | 2.107056105 | 0.012190763 | 0.990273419 | 0.998252924 |
| chr15:34548429-34553221   | exonic       | SLC12A6  | 15 | 34548429  | 34553221  | 0  | 0  | 2  | 2  | 1  | 0  | 4792  | 0.728188243 | 0.026326997 | 3.139063604 | 0.008386895 | 0.993308304 | 0.998252924 |
| chr17:10628327-10629581   | exonic       | TMEM220  | 17 | 10628327  | 10629581  | 0  | 0  | 2  | 2  | 1  | 0  | 1254  | 0.728188243 | 0.026326997 | 3.139063604 | 0.008386895 | 0.993308304 | 0.998252924 |
| chr2:61335451-61345251    | exonic       | KIAA1841 | 2  | 61335451  | 61345251  | 0  | 0  | 2  | 2  | 1  | 0  | 9800  | 0.728188243 | 0.026326997 | 3.139063604 | 0.008386895 | 0.993308304 | 0.998252924 |
| chr5:55264103-55265683    | exonic       | IL6ST    | 5  | 55264103  | 55265683  | 0  | 0  | 2  | 2  | 1  | 0  | 1580  | 0.728188243 | 0.026326997 | 3.139063604 | 0.008386895 | 0.993308304 | 0.998252924 |
| chr5:95084036-95119667    | exonic       | RHOBTB3  | 5  | 95084036  | 95119667  | 0  | 0  | 2  | 2  | 1  | 0  | 35631 | 0.728188243 | 0.026326997 | 3.139063604 | 0.008386895 | 0.993308304 | 0.998252924 |
| chr2:120885264-120932580  | exonic       | EPB41L5  | 2  | 120885264 | 120932580 | 13 | 5  | 4  | 21 | 3  | 2  | 47316 | 6.549343925 | 0.026970639 | 1.138414121 | 0.023691413 | NA          | NA          |
| chr1:150790395-150799093  | exonic       | ARNT     | 1  | 150790395 | 150799093 | 0  | 0  | 2  | 0  | 1  | 1  | 8698  | 0.823784082 | 0.02766512  | 3.055135249 | 0.009055285 | 0.992775027 | 0.998252924 |
| chr22:41531816-41536261   | exonic       | EP300    | 22 | 41531816  | 41536261  | 4  | 0  | 1  | 4  | 2  | 0  | 4445  | 1.380517181 | 0.028162352 | 2.246156153 | 0.012538021 | 0.989996369 | 0.998252924 |
| chr17:47388673-47390207   | exonic       | ZNF652   | 17 | 47388673  | 47390207  | 3  | 0  | 5  | 5  | 6  | 0  | 1534  | 2.631027412 | 0.028561218 | 1.767782569 | 0.016156522 | 0.987109521 | 0.998252924 |
| chr5:77396776-77461496    | exonic       | AP3B1    | 5  | 77396776  | 77461496  | 2  | 1  | 1  | 2  | 3  | 0  | 64720 | 1.205223746 | 0.028876437 | 2.205723424 | 0.013091595 | 0.989554717 | 0.998252924 |
| chr10:112356155-112358048 | exonic       | SMC3     | 10 | 112356155 | 112358048 | 18 | 7  | 14 | 23 | 24 | 2  | 1893  | 12.26971912 | 0.029143813 | 0.896380093 | 0.032512784 | 0.974063121 | 0.998252924 |
| chr3:47108559-47139571    | exonic       | SETD2    | 3  | 47108559  | 47139571  | 3  | 4  | 2  | 7  | 5  | 0  | 31012 | 2.827918881 | 0.029446685 | 1.560634955 | 0.0188684   | 0.984946088 | 0.998252924 |
| chr3:31917924-31921322    | exonic       | OSBPL10  | 3  | 31917924  | 31921322  | 0  | 3  | 0  | 1  | 1  | 1  | 3398  | 1.058384813 | 0.029829007 | 2.577660785 | 0.011572123 | NA          | NA          |
| chr7:72301271-72302378    | ncRNA_exonic | SBDSP1   | 7  | 72301271  | 72302378  | 2  | 5  | 2  | 4  | 8  | 0  | 1107  | 2.917355847 | 0.030254932 | 1.57675367  | 0.019188116 | 0.984691038 | 0.998252924 |
| chr13:37614541-37625720   | exonic       | SUPT20H  | 13 | 37614541  | 37625720  | 3  | 2  | 1  | 0  | 1  | 3  | 11179 | 1.9784647   | 0.030549146 | 1.932266752 | 0.015810005 | NA          | NA          |
| chr2:110321942-110350696  | exonic       |          | 2  | 110321942 | 110350696 | 6  | 5  | 3  | 10 | 4  | 2  | 28754 | 4.400768485 | 0.032376927 | 1.229696307 | 0.026329206 | 0.97899476  | 0.998252924 |
| chr1:149931602-149936274  | exonic       | OTUD7B   | 1  | 149931602 | 149936274 | 0  | 0  | 3  | 5  | 0  | 0  | 4672  | 1.123364002 | 0.032650022 | 2.909488669 | 0.011221911 | NA          | NA          |
| chr17:67124759-67130883   | exonic       | ABCA6    | 17 | 67124759  | 67130883  | 0  | 0  | 3  | 5  | 0  | 0  | 6124  | 1.123364002 | 0.032650022 | 2.909488669 | 0.011221911 | NA          | NA          |
| chr5:142421380-142437312  | exonic       | ARHGAP26 | 5  | 142421380 | 142437312 | 0  | 0  | 3  | 5  | 0  | 0  | 15932 | 1.123364002 | 0.032650022 | 2.909488669 | 0.011221911 | NA          | NA          |
| chr4:56277780-56290810    | exonic       | TMEM165  | 4  | 56277780  | 56290810  | 0  | 3  | 0  | 0  | 4  | 0  | 13030 | 1.006937084 | 0.034295406 | 3.027349658 | 0.011328525 | NA          | NA          |
| chr8:30034641-30038146    | exonic       | DCTN6    | 8  | 30034641  | 30038146  | 0  | 3  | 0  | 0  | 4  | 0  | 3505  | 1.006937084 | 0.034295406 | 3.027349658 | 0.011328525 | NA          | NA          |
| chrX:51070573-51099879    | exonic       | NUDT10   | X  | 51070573  | 51099879  | 0  | 3  | 0  | 0  | 4  | 0  | 29306 | 1.006937084 | 0.034295406 | 3.027349658 | 0.011328525 | NA          | NA          |

|                           |              |         |    |           |           |    |   |   |    |    |   |       |             |             |             |             |             |             |
|---------------------------|--------------|---------|----|-----------|-----------|----|---|---|----|----|---|-------|-------------|-------------|-------------|-------------|-------------|-------------|
| chr20:47307484-47309328   | exonic       | PREX1   | 20 | 47307484  | 47309328  | 3  | 3 | 2 | 10 | 1  | 0 | 1844  | 2.48846755  | 0.034496767 | 1.710069586 | 0.020172727 | NA          | NA          |
| chr3:51575514-51624575    | exonic       | RAD54L2 | 3  | 51575514  | 51624575  | 9  | 3 | 3 | 13 | 6  | 0 | 49061 | 4.383729497 | 0.034775767 | 1.347562611 | 0.02580642  | 0.979411741 | 0.998252924 |
| chr19:1032390-1032695     | exonic       | CNN2    | 19 | 1032390   | 1032695   | 0  | 3 | 2 | 3  | 0  | 2 | 305   | 1.852736821 | 0.035388622 | 2.071533204 | 0.017083299 | 0.986370162 | 0.998252924 |
| chr1:28802618-28807116    | exonic       | PHACTR4 | 1  | 28802618  | 28807116  | 5  | 0 | 1 | 4  | 3  | 0 | 4498  | 1.630531545 | 0.036439498 | 2.11012418  | 0.017268888 | 0.986222106 | 0.998252924 |
| chrX:24091718-24093076    | intronic     | EIF2S3  | X  | 24091718  | 24093076  | 8  | 0 | 7 | 6  | 0  | 6 | 1358  | 4.899958685 | 0.036791729 | 1.537850744 | 0.023924122 | 0.980913133 | 0.998252924 |
| chr5:159520107-159521072  | exonic       | PWWP2A  | 5  | 159520107 | 159521072 | 3  | 2 | 0 | 3  | 3  | 0 | 965   | 1.417528847 | 0.038656333 | 2.191556736 | 0.017638755 | 0.985927039 | 0.998252924 |
| chr4:87967317-87968746    | exonic       | AFF1    | 4  | 87967317  | 87968746  | 26 | 8 | 8 | 31 | 14 | 0 | 1429  | 17.40137437 | 0.038754035 | 0.869924023 | 0.044548758 | 0.964466987 | 0.998252924 |
| chr2:128922303-128928858  | exonic       | UGGT1   | 2  | 128922303 | 128928858 | 3  | 1 | 1 | 2  | 4  | 0 | 6555  | 1.45523811  | 0.039081894 | 2.055588466 | 0.019012509 | 0.984831127 | 0.998252924 |
| chr20:57574398-57574864   | intronic     | CTSZ    | 20 | 57574398  | 57574864  | 6  | 0 | 4 | 3  | 3  | 3 | 466   | 3.169670006 | 0.039165266 | 1.552150184 | 0.02523291  | 0.979869187 | 0.998252924 |
| chr15:50862083-50868116   | exonic       | TRPM7   | 15 | 50862083  | 50868116  | 1  | 0 | 2 | 1  | 3  | 0 | 6033  | 0.992918644 | 0.03926371  | 2.583427747 | 0.0151983   | 0.987873978 | 0.998252924 |
| chr1:115005725-115006178  | exonic       | TRIM33  | 1  | 115005725 | 115006178 | 2  | 0 | 0 | 2  | 0  | 0 | 453   | 0.470596656 | 0.040266925 | 4.019122918 | 0.010018834 | 0.992006261 | 0.998252924 |
| chr1:118424444-118463047  | exonic       | GDAP2   | 1  | 118424444 | 118463047 | 2  | 0 | 0 | 2  | 0  | 0 | 38603 | 0.470596656 | 0.040266925 | 4.019122918 | 0.010018834 | 0.992006261 | 0.998252924 |
| chr1:151261003-151261747  | exonic       | ZNF687  | 1  | 151261003 | 151261747 | 2  | 0 | 0 | 2  | 0  | 0 | 744   | 0.470596656 | 0.040266925 | 4.019122918 | 0.010018834 | 0.992006261 | 0.998252924 |
| chr1:154223516-154224129  | exonic       | UBAP2L  | 1  | 154223516 | 154224129 | 2  | 0 | 0 | 2  | 0  | 0 | 613   | 0.470596656 | 0.040266925 | 4.019122918 | 0.010018834 | 0.992006261 | 0.998252924 |
| chr1:1747194-1756938      | exonic       | GNB1    | 1  | 1747194   | 1756938   | 2  | 0 | 0 | 2  | 0  | 0 | 9744  | 0.470596656 | 0.040266925 | 4.019122918 | 0.010018834 | 0.992006261 | 0.998252924 |
| chr10:11971863-11994248   | exonic       | UPF2    | 10 | 11971863  | 11994248  | 2  | 0 | 0 | 2  | 0  | 0 | 22385 | 0.470596656 | 0.040266925 | 4.019122918 | 0.010018834 | 0.992006261 | 0.998252924 |
| chr10:12257738-12280484   | exonic       | CDC123  | 10 | 12257738  | 12280484  | 2  | 0 | 0 | 2  | 0  | 0 | 22746 | 0.470596656 | 0.040266925 | 4.019122918 | 0.010018834 | 0.992006261 | 0.998252924 |
| chr10:124339093-124357528 | exonic       | DMBT1   | 10 | 124339093 | 124357528 | 2  | 0 | 0 | 2  | 0  | 0 | 18435 | 0.470596656 | 0.040266925 | 4.019122918 | 0.010018834 | 0.992006261 | 0.998252924 |
| chr10:124348460-124352111 | exonic       | DMBT1   | 10 | 124348460 | 124352111 | 2  | 0 | 0 | 2  | 0  | 0 | 3651  | 0.470596656 | 0.040266925 | 4.019122918 | 0.010018834 | 0.992006261 | 0.998252924 |
| chr10:124350181-124390797 | exonic       | DMBT1   | 10 | 124350181 | 124390797 | 2  | 0 | 0 | 2  | 0  | 0 | 40616 | 0.470596656 | 0.040266925 | 4.019122918 | 0.010018834 | 0.992006261 | 0.998252924 |
| chr10:32847914-32873232   | exonic       | CCDC7   | 10 | 32847914  | 32873232  | 2  | 0 | 0 | 2  | 0  | 0 | 25318 | 0.470596656 | 0.040266925 | 4.019122918 | 0.010018834 | 0.992006261 | 0.998252924 |
| chr11:106849345-106856857 | exonic       | GUCY1A2 | 11 | 106849345 | 106856857 | 2  | 0 | 0 | 2  | 0  | 0 | 7512  | 0.470596656 | 0.040266925 | 4.019122918 | 0.010018834 | 0.992006261 | 0.998252924 |
| chr11:108005869-108019585 | exonic       | ACAT1   | 11 | 108005869 | 108019585 | 2  | 0 | 0 | 2  | 0  | 0 | 13716 | 0.470596656 | 0.040266925 | 4.019122918 | 0.010018834 | 0.992006261 | 0.998252924 |
| chr11:92042770-92088570   | exonic       | FAT3    | 11 | 92042770  | 92088570  | 2  | 0 | 0 | 2  | 0  | 0 | 45800 | 0.470596656 | 0.040266925 | 4.019122918 | 0.010018834 | 0.992006261 | 0.998252924 |
| chr12:124882664-124941708 | exonic       | NCOR2   | 12 | 124882664 | 124941708 | 2  | 0 | 0 | 2  | 0  | 0 | 59044 | 0.470596656 | 0.040266925 | 4.019122918 | 0.010018834 | 0.992006261 | 0.998252924 |
| chr12:23998916-24048958   | exonic       | SOX5    | 12 | 23998916  | 24048958  | 2  | 0 | 0 | 2  | 0  | 0 | 50042 | 0.470596656 | 0.040266925 | 4.019122918 | 0.010018834 | 0.992006261 | 0.998252924 |
| chr12:3018695-3031568     | exonic       | TULP3   | 12 | 3018695   | 3031568   | 2  | 0 | 0 | 2  | 0  | 0 | 12873 | 0.470596656 | 0.040266925 | 4.019122918 | 0.010018834 | 0.992006261 | 0.998252924 |
| chr14:51710573-51716483   | exonic       | TMX1    | 14 | 51710573  | 51716483  | 2  | 0 | 0 | 2  | 0  | 0 | 5910  | 0.470596656 | 0.040266925 | 4.019122918 | 0.010018834 | 0.992006261 | 0.998252924 |
| chr14:59730158-59758024   | exonic       | DAAM1   | 14 | 59730158  | 59758024  | 2  | 0 | 0 | 2  | 0  | 0 | 27866 | 0.470596656 | 0.040266925 | 4.019122918 | 0.010018834 | 0.992006261 | 0.998252924 |
| chr15:44941063-44944464   | exonic       | SPG11   | 15 | 44941063  | 44944464  | 2  | 0 | 0 | 2  | 0  | 0 | 3401  | 0.470596656 | 0.040266925 | 4.019122918 | 0.010018834 | 0.992006261 | 0.998252924 |
| chr15:65223019-65226434   | exonic       | ANKDD1A | 15 | 65223019  | 65226434  | 2  | 0 | 0 | 2  | 0  | 0 | 3415  | 0.470596656 | 0.040266925 | 4.019122918 | 0.010018834 | 0.992006261 | 0.998252924 |
| chr15:86205618-86253876   | exonic       | AKAP13  | 15 | 86205618  | 86253876  | 2  | 0 | 0 | 2  | 0  | 0 | 48258 | 0.470596656 | 0.040266925 | 4.019122918 | 0.010018834 | 0.992006261 | 0.998252924 |
| chr15:91161114-91172764   | exonic       | CRTC3   | 15 | 91161114  | 91172764  | 2  | 0 | 0 | 2  | 0  | 0 | 11650 | 0.470596656 | 0.040266925 | 4.019122918 | 0.010018834 | 0.992006261 | 0.998252924 |
| chr16:70247564-70256383   | ncRNA_exonic | SMG1P7  | 16 | 70247564  | 70256383  | 2  | 0 | 0 | 2  | 0  | 0 | 8819  | 0.470596656 | 0.040266925 | 4.019122918 | 0.010018834 | 0.992006261 | 0.998252924 |
| chr16:70566381-70578436   | exonic       | SF3B3   | 16 | 70566381  | 70578436  | 2  | 0 | 0 | 2  | 0  | 0 | 12055 | 0.470596656 | 0.040266925 | 4.019122918 | 0.010018834 | 0.992006261 | 0.998252924 |

|                          |            |                                       |    |           |           |   |   |   |   |   |   |        |             |             |             |             |             |             |
|--------------------------|------------|---------------------------------------|----|-----------|-----------|---|---|---|---|---|---|--------|-------------|-------------|-------------|-------------|-------------|-------------|
| chr17:58756813-59161925  | exonic     | BCAS3                                 | 17 | 58756813  | 59161925  | 2 | 0 | 0 | 2 | 0 | 0 | 405112 | 0.470596656 | 0.040266925 | 4.019122918 | 0.010018834 | 0.992006261 | 0.998252924 |
| chr17:8397050-8398559    | exonic     | MYH10                                 | 17 | 8397050   | 8398559   | 2 | 0 | 0 | 2 | 0 | 0 | 1509   | 0.470596656 | 0.040266925 | 4.019122918 | 0.010018834 | 0.992006261 | 0.998252924 |
| chr18:29477748-29497630  | exonic     | TRAPPC8                               | 18 | 29477748  | 29497630  | 2 | 0 | 0 | 2 | 0 | 0 | 19882  | 0.470596656 | 0.040266925 | 4.019122918 | 0.010018834 | 0.992006261 | 0.998252924 |
| chr19:38834219-38835008  | exonic     | CATSPERG                              | 19 | 38834219  | 38835008  | 2 | 0 | 0 | 2 | 0 | 0 | 789    | 0.470596656 | 0.040266925 | 4.019122918 | 0.010018834 | 0.992006261 | 0.998252924 |
| chr19:50998560-50999865  | intergenic | EMC10 (dist=11777), JOSD2 (dist=9389) | 19 | 50998560  | 50999865  | 2 | 0 | 0 | 2 | 0 | 0 | 1305   | 0.470596656 | 0.040266925 | 4.019122918 | 0.010018834 | 0.992006261 | 0.998252924 |
| chr19:58287911-58291514  | exonic     | ZNF586                                | 19 | 58287911  | 58291514  | 2 | 0 | 0 | 2 | 0 | 0 | 3603   | 0.470596656 | 0.040266925 | 4.019122918 | 0.010018834 | 0.992006261 | 0.998252924 |
| chr19:9923672-9926440    | UTR5       |                                       | 19 | 9923672   | 9926440   | 2 | 0 | 0 | 2 | 0 | 0 | 2768   | 0.470596656 | 0.040266925 | 4.019122918 | 0.010018834 | 0.992006261 | 0.998252924 |
| chr2:122154715-122168545 | exonic     | CLASP1                                | 2  | 122154715 | 122168545 | 2 | 0 | 0 | 2 | 0 | 0 | 13830  | 0.470596656 | 0.040266925 | 4.019122918 | 0.010018834 | 0.992006261 | 0.998252924 |
| chr2:30682417-30756180   | exonic     | LCLAT1                                | 2  | 30682417  | 30756180  | 2 | 0 | 0 | 2 | 0 | 0 | 73763  | 0.470596656 | 0.040266925 | 4.019122918 | 0.010018834 | 0.992006261 | 0.998252924 |
| chr20:17956108-17956861  | exonic     | MGME1                                 | 20 | 17956108  | 17956861  | 2 | 0 | 0 | 2 | 0 | 0 | 753    | 0.470596656 | 0.040266925 | 4.019122918 | 0.010018834 | 0.992006261 | 0.998252924 |
| chr20:2928627-2955887    | exonic     | PTPRA                                 | 20 | 2928627   | 2955887   | 2 | 0 | 0 | 2 | 0 | 0 | 27260  | 0.470596656 | 0.040266925 | 4.019122918 | 0.010018834 | 0.992006261 | 0.998252924 |
| chr20:45891031-45912392  | exonic     | ZMYND8                                | 20 | 45891031  | 45912392  | 2 | 0 | 0 | 2 | 0 | 0 | 21361  | 0.470596656 | 0.040266925 | 4.019122918 | 0.010018834 | 0.992006261 | 0.998252924 |
| chr20:45915972-45919018  | exonic     | ZMYND8                                | 20 | 45915972  | 45919018  | 2 | 0 | 0 | 2 | 0 | 0 | 3046   | 0.470596656 | 0.040266925 | 4.019122918 | 0.010018834 | 0.992006261 | 0.998252924 |
| chr22:46088875-46125470  | exonic     | ATXN10                                | 22 | 46088875  | 46125470  | 2 | 0 | 0 | 0 | 0 | 0 | 36595  | 0.470596656 | 0.040266925 | 4.019122918 | 0.010018834 | 0.992006261 | 0.998252924 |
| chr22:46096161-46125470  | exonic     | ATXN10                                | 22 | 46096161  | 46125470  | 2 | 0 | 0 | 2 | 0 | 0 | 29309  | 0.470596656 | 0.040266925 | 4.019122918 | 0.010018834 | 0.992006261 | 0.998252924 |
| chr3:123345664-123348473 | exonic     | MYLK                                  | 3  | 123345664 | 123348473 | 2 | 0 | 0 | 2 | 0 | 0 | 2809   | 0.470596656 | 0.040266925 | 4.019122918 | 0.010018834 | 0.992006261 | 0.998252924 |
| chr3:129177441-129183624 | exonic     | IFT122                                | 3  | 129177441 | 129183624 | 2 | 0 | 0 | 2 | 0 | 0 | 6183   | 0.470596656 | 0.040266925 | 4.019122918 | 0.010018834 | 0.992006261 | 0.998252924 |
| chr3:129304794-129305562 | exonic     | PLXND1                                | 3  | 129304794 | 129305562 | 2 | 0 | 0 | 2 | 0 | 0 | 768    | 0.470596656 | 0.040266925 | 4.019122918 | 0.010018834 | 0.992006261 | 0.998252924 |
| chr3:197597031-197602646 | exonic     | LRCH3                                 | 3  | 197597031 | 197602646 | 2 | 0 | 0 | 2 | 0 | 0 | 5615   | 0.470596656 | 0.040266925 | 4.019122918 | 0.010018834 | 0.992006261 | 0.998252924 |
| chr3:36931320-36949945   | exonic     | TRANK1                                | 3  | 36931320  | 36949945  | 2 | 0 | 0 | 2 | 0 | 0 | 18625  | 0.470596656 | 0.040266925 | 4.019122918 | 0.010018834 | 0.992006261 | 0.998252924 |
| chr3:49362134-49363278   | exonic     | USP4                                  | 3  | 49362134  | 49363278  | 2 | 0 | 0 | 2 | 0 | 0 | 1144   | 0.470596656 | 0.040266925 | 4.019122918 | 0.010018834 | 0.992006261 | 0.998252924 |
| chr3:54905565-54933895   | exonic     | CACNA2D3                              | 3  | 54905565  | 54933895  | 2 | 0 | 0 | 2 | 0 | 0 | 28330  | 0.470596656 | 0.040266925 | 4.019122918 | 0.010018834 | 0.992006261 | 0.998252924 |
| chr4:83375874-83378191   | exonic     | ENOPH1                                | 4  | 83375874  | 83378191  | 2 | 0 | 0 | 2 | 0 | 0 | 2317   | 0.470596656 | 0.040266925 | 4.019122918 | 0.010018834 | 0.992006261 | 0.998252924 |
| chr5:159516513-159521072 | exonic     | PWWP2A                                | 5  | 159516513 | 159521072 | 2 | 0 | 0 | 2 | 0 | 0 | 4559   | 0.470596656 | 0.040266925 | 4.019122918 | 0.010018834 | 0.992006261 | 0.998252924 |
| chr5:56517203-56527148   | exonic     | GPBP1                                 | 5  | 56517203  | 56527148  | 2 | 0 | 0 | 2 | 0 | 0 | 9945   | 0.470596656 | 0.040266925 | 4.019122918 | 0.010018834 | 0.992006261 | 0.998252924 |
| chr6:111632271-111652987 | exonic     | REV3L                                 | 6  | 111632271 | 111652987 | 2 | 0 | 0 | 2 | 0 | 0 | 20716  | 0.470596656 | 0.040266925 | 4.019122918 | 0.010018834 | 0.992006261 | 0.998252924 |
| chr6:117840978-117866760 | exonic     | DCBLD1                                | 6  | 117840978 | 117866760 | 2 | 0 | 0 | 2 | 0 | 0 | 25782  | 0.470596656 | 0.040266925 | 4.019122918 | 0.010018834 | 0.992006261 | 0.998252924 |
| chr6:146956510-146978116 | exonic     | ADGB                                  | 6  | 146956510 | 146978116 | 2 | 0 | 0 | 2 | 0 | 0 | 21606  | 0.470596656 | 0.040266925 | 4.019122918 | 0.010018834 | 0.992006261 | 0.998252924 |
| chr6:154520802-154535410 | exonic     | IPCEF1                                | 6  | 154520802 | 154535410 | 2 | 0 | 0 | 2 | 0 | 0 | 14608  | 0.470596656 | 0.040266925 | 4.019122918 | 0.010018834 | 0.992006261 | 0.998252924 |
| chr6:25466100-25488813   | exonic     | LRRC16A                               | 6  | 25466100  | 25488813  | 2 | 0 | 0 | 2 | 0 | 0 | 22713  | 0.470596656 | 0.040266925 | 4.019122918 | 0.010018834 | 0.992006261 | 0.998252924 |
| chr6:43523572-43535091   | exonic     | XPO5                                  | 6  | 43523572  | 43535091  | 2 | 0 | 0 | 2 | 0 | 0 | 11519  | 0.470596656 | 0.040266925 | 4.019122918 | 0.010018834 | 0.992006261 | 0.998252924 |
| chr6:69640450-69666701   | exonic     | ADGRB3                                | 6  | 69640450  | 69666701  | 2 | 0 | 0 | 2 | 0 | 0 | 26251  | 0.470596656 | 0.040266925 | 4.019122918 | 0.010018834 | 0.992006261 | 0.998252924 |
| chr7:138768525-138774505 | exonic     | ZC3HAV1                               | 7  | 138768525 | 138774505 | 2 | 0 | 0 | 2 | 0 | 0 | 5980   | 0.470596656 | 0.040266925 | 4.019122918 | 0.010018834 | 0.992006261 | 0.998252924 |
| chr7:66236869-66240380   | exonic     | RABGEF1                               | 7  | 66236869  | 66240380  | 2 | 0 | 0 | 2 | 0 | 0 | 3511   | 0.470596656 | 0.040266925 | 4.019122918 | 0.010018834 | 0.992006261 | 0.998252924 |
| chr8:68930080-68956825   | exonic     | PREX2                                 | 8  | 68930080  | 68956825  | 2 | 0 | 0 | 2 | 0 | 0 | 26745  | 0.470596656 | 0.040266925 | 4.019122918 | 0.010018834 | 0.992006261 | 0.998252924 |

|                           |        |         |    |           |           |    |    |    |    |    |    |       |             |             |             |             |             |             |
|---------------------------|--------|---------|----|-----------|-----------|----|----|----|----|----|----|-------|-------------|-------------|-------------|-------------|-------------|-------------|
| chr8:95839490-95844402    | exonic | INTS8   | 8  | 95839490  | 95844402  | 2  | 0  | 0  | 2  | 0  | 0  | 4912  | 0.470596656 | 0.040266925 | 4.019122918 | 0.010018834 | 0.992006261 | 0.998252924 |
| chrX:200833-209885        | exonic | PLCXD1  | X  | 200833    | 209885    | 2  | 0  | 0  | 2  | 0  | 0  | 9052  | 0.470596656 | 0.040266925 | 4.019122918 | 0.010018834 | 0.992006261 | 0.998252924 |
| chr2:58425728-58459247    | exonic | FANCL   | 2  | 58425728  | 58459247  | 15 | 8  | 12 | 16 | 10 | 9  | 33519 | 11.3814627  | 0.040354384 | 0.868830881 | 0.046446766 | 0.962954163 | 0.998252924 |
| chr10:70719561-70720005   | exonic | DDX21   | 10 | 70719561  | 70720005  | 8  | 0  | 4  | 3  | 5  | 3  | 444   | 3.669698735 | 0.040610359 | 1.471939997 | 0.027589684 | 0.97798941  | 0.998252924 |
| chr17:44248220-44249598   | exonic | KANSL1  | 17 | 44248220  | 44249598  | 28 | 12 | 7  | 48 | 13 | 0  | 1378  | 13.76013014 | 0.041464839 | 1.033783733 | 0.040109781 | 0.968005604 | 0.998252924 |
| chr7:99621041-99621930    | exonic | ZKSCAN1 | 7  | 99621041  | 99621930  | 34 | 16 | 15 | 34 | 15 | 15 | 889   | 20.18628178 | 0.041641851 | 0.74180097  | 0.05613615  | 0.955233346 | 0.998252924 |
| chr4:52729602-52758017    | exonic | DCUN1D4 | 4  | 52729602  | 52758017  | 7  | 4  | 0  | 6  | 4  | 2  | 28415 | 2.991796802 | 0.042312374 | 1.450744296 | 0.029165977 | 0.976732216 | 0.998252924 |
| chr12:1480998-1553916     | exonic | ERC1    | 12 | 1480998   | 1553916   | 4  | 1  | 1  | 2  | 3  | 1  | 72918 | 1.77141624  | 0.042719054 | 1.815620228 | 0.023528629 | 0.981228602 | 0.998252924 |
| chr8:28013458-28019595    | exonic | ELP3    | 8  | 28013458  | 28019595  | 9  | 2  | 1  | 8  | 4  | 1  | 6137  | 3.349522486 | 0.042899721 | 1.439447211 | 0.029802913 | NA          | NA          |
| chr7:8257934-8275635      | exonic | ICA1    | 7  | 8257934   | 8275635   | 2  | 2  | 2  | 5  | 3  | 0  | 17701 | 1.895702726 | 0.044310433 | 1.823995883 | 0.024293055 | 0.980618853 | 0.998252924 |
| chr6:170626457-170639638  | exonic | FAM120B | 6  | 170626457 | 170639638 | 2  | 4  | 3  | 4  | 8  | 0  | 13181 | 2.940349073 | 0.045659937 | 1.560584475 | 0.029258228 | 0.976658642 | 0.998252924 |
| chr3:107429298-107435696  | exonic | BBX     | 3  | 107429298 | 107435696 | 3  | 2  | 5  | 3  | 4  | 3  | 6398  | 3.449557223 | 0.046479676 | 1.389927924 | 0.03344035  | 0.973323433 | 0.998252924 |
| chr11:77409531-77413540   | exonic | RSF1    | 11 | 77409531  | 77413540  | 10 | 2  | 3  | 10 | 4  | 2  | 4009  | 4.393888859 | 0.046689962 | 1.265023838 | 0.036908365 | 0.97055807  | 0.998252924 |
| chr5:65349233-65350779    | exonic | ERBB2IP | 5  | 65349233  | 65350779  | 3  | 8  | 7  | 5  | 15 | 2  | 1546  | 6.12545587  | 0.047452067 | 1.148951837 | 0.04130031  | NA          | NA          |
| chr5:170305100-170351554  | exonic | RANBP17 | 5  | 170305100 | 170351554 | 2  | 2  | 1  | 0  | 2  | 2  | 46454 | 1.66228657  | 0.04765848  | 2.013043006 | 0.023674844 | 0.981111972 | 0.998252924 |
| chr17:35800605-35804870   | exonic | TADA2A  | 17 | 35800605  | 35804870  | 0  | 2  | 3  | 2  | 1  | 2  | 4265  | 1.890446084 | 0.049370043 | 1.930440258 | 0.025574499 | 0.979596726 | 0.998252924 |
| chr6:5404774-5431405      | exonic | FARS2   | 6  | 5404774   | 5431405   | 2  | 2  | 1  | 0  | 4  | 1  | 26631 | 1.596122805 | 0.051462265 | 2.034028527 | 0.02530066  | 0.979815147 | 0.998252924 |
| chr1:38332131-38339760    | exonic | INPP5B  | 1  | 38332131  | 38339760  | 4  | 3  | 0  | 9  | 0  | 0  | 7629  | 1.995577635 | 0.05189802  | 2.155684294 | 0.024074963 | NA          | NA          |
| chr6:18236682-18258636    | exonic | DEK     | 6  | 18236682  | 18258636  | 23 | 19 | 13 | 23 | 23 | 11 | 21954 | 17.46163445 | 0.052961357 | 0.734653454 | 0.072090258 | 0.942530079 | 0.998252924 |
| chr11:68367808-68370960   | exonic | PPP6R3  | 11 | 68367808  | 68370960  | 1  | 1  | 1  | 3  | 1  | 0  | 3152  | 0.940493345 | 0.053447847 | 2.464191975 | 0.021689806 | 0.982695395 | 0.998252924 |
| chr20:32207322-32216241   | exonic | CBFA2T2 | 20 | 32207322  | 32216241  | 1  | 1  | 1  | 3  | 1  | 0  | 8919  | 0.940493345 | 0.053447847 | 2.464191975 | 0.021689806 | 0.982695395 | 0.998252924 |
| chr7:97820039-97823884    | exonic | LMTK2   | 7  | 97820039  | 97823884  | 9  | 2  | 1  | 9  | 3  | 1  | 3845  | 3.334806449 | 0.054308844 | 1.453738439 | 0.037358057 | NA          | NA          |
| chr10:27431315-27434519   | exonic | YME1L1  | 10 | 27431315  | 27434519  | 2  | 0  | 5  | 0  | 5  | 2  | 3204  | 2.46589334  | 0.05510492  | 1.890219655 | 0.029152654 | 0.976742842 | 0.998252924 |
| chr16:68155889-68157024   | exonic | NFATC3  | 16 | 68155889  | 68157024  | 18 | 14 | 19 | 19 | 39 | 4  | 1135  | 16.48259785 | 0.055452436 | 0.815084543 | 0.068032741 | NA          | NA          |
| chr1:145592633-145595220  | exonic | POLR3C  | 1  | 145592633 | 145595220 | 5  | 2  | 3  | 10 | 3  | 0  | 2587  | 3.011489505 | 0.05569894  | 1.545761416 | 0.036033336 | 0.971255778 | 0.998252924 |
| chr15:73064123-73067438   | exonic | ADPGK   | 15 | 73064123  | 73067438  | 4  | 1  | 0  | 6  | 0  | 0  | 3315  | 1.328091881 | 0.056298431 | 2.502289012 | 0.022498772 | NA          | NA          |
| chr20:45891031-45905539   | exonic | ZMYND8  | 20 | 45891031  | 45905539  | 4  | 3  | 2  | 3  | 2  | 3  | 14508 | 2.918958045 | 0.056444444 | 1.479447941 | 0.038152366 | 0.969566199 | 0.998252924 |
| chr3:136183722-136221621  | exonic | STAG1   | 3  | 136183722 | 136221621 | 0  | 1  | 1  | 2  | 2  | 0  | 37899 | 1.43338326  | 0.058034267 | 2.240935948 | 0.025897334 | 0.979339226 | 0.998252924 |
| chr18:45391429-45396935   | exonic | SMAD2   | 18 | 45391429  | 45396935  | 1  | 2  | 3  | 2  | 2  | 2  | 5506  | 2.140460449 | 0.05807217  | 1.704498728 | 0.03406994  | 0.972821379 | 0.998252924 |
| chr9:123924133-123928458  | exonic | CNTRL   | 9  | 123924133 | 123928458 | 7  | 7  | 2  | 3  | 8  | 4  | 4325  | 5.037405209 | 0.058085858 | 1.210317402 | 0.047992252 | 0.961722418 | 0.998252924 |
| chr12:122861935-122865105 | exonic | CLIP1   | 12 | 122861935 | 122865105 | 3  | 0  | 1  | 5  | 0  | 0  | 3170  | 1.11578678  | 0.059874212 | 2.663544437 | 0.022479149 | 0.982065745 | 0.998252924 |
| chr3:98568304-98600611    | exonic | DCBLD2  | 3  | 98568304  | 98600611  | 0  | 3  | 0  | 1  | 3  | 0  | 32307 | 0.992221048 | 0.060064653 | 2.792838804 | 0.021506667 | NA          | NA          |
| chr5:173371969-173380275  | exonic | CPEB4   | 5  | 173371969 | 173380275 | 0  | 3  | 0  | 1  | 3  | 0  | 8306  | 0.992221048 | 0.060064653 | 2.792838804 | 0.021506667 | NA          | NA          |
| chr2:208589523-208607066  | exonic | CCNYL1  | 2  | 208589523 | 208607066 | 2  | 3  | 0  | 1  | 5  | 0  | 17543 | 1.492249777 | 0.060184412 | 2.204329657 | 0.027302818 | 0.978218209 | 0.998252924 |
| chr15:72810407-72853890   | exonic | ARH1    | 15 | 72810407  | 72853890  | 0  | 1  | 0  | 0  | 4  | 0  | 43483 | 1.934596565 | 0.06164806  | 2.033958473 | 0.0303094   | 0.9758203   | 0.998252924 |

|                           |              |              |    |           |           |   |   |   |    |   |   |        |             |             |             |             |             |             |
|---------------------------|--------------|--------------|----|-----------|-----------|---|---|---|----|---|---|--------|-------------|-------------|-------------|-------------|-------------|-------------|
| chr12:19615443-19667718   | exonic       | AEBP2        | 12 | 19615443  | 19667718  | 0 | 3 | 0 | 2  | 0 | 1 | 52275  | 1.043668776 | 0.062210768 | 2.771203787 | 0.022449005 | NA          | NA          |
| chr11:93480462-93493024   | exonic       | C11orf54     | 11 | 93480462  | 93493024  | 2 | 2 | 0 | 4  | 1 | 0 | 12562  | 1.152798446 | 0.062474701 | 2.409052237 | 0.025933311 | NA          | NA          |
| chr15:62315609-62327251   | exonic       | VPS13C       | 15 | 62315609  | 62327251  | 3 | 0 | 0 | 1  | 2 | 0 | 11642  | 0.735327057 | 0.062940308 | 3.105873206 | 0.020264932 | NA          | NA          |
| chr5:137342678-137354203  | exonic       | FAM13B       | 5  | 137342678 | 137354203 | 3 | 2 | 0 | 2  | 2 | 0 | 11525  | 0.735327057 | 0.062940308 | 3.105873206 | 0.020264932 | NA          | NA          |
| chr8:143412261-143427253  | exonic       | TSNARE1      | 8  | 143412261 | 143427253 | 3 | 0 | 0 | 1  | 2 | 0 | 14992  | 0.735327057 | 0.062940308 | 3.105873206 | 0.020264932 | NA          | NA          |
| chr11:68363564-68370960   | exonic       | PPP6R3       | 11 | 68363564  | 68370960  | 3 | 1 | 1 | 3  | 3 | 0 | 7396   | 1.440522074 | 0.063397178 | 2.052311285 | 0.030890625 | 0.975356767 | 0.998252924 |
| chr13:25072253-25077915   | exonic       | PARP4        | 13 | 25072253  | 25077915  | 1 | 2 | 0 | 4  | 0 | 0 | 5662   | 0.902784082 | 0.067880094 | 2.889833438 | 0.023489276 | NA          | NA          |
| chr7:66038371-66041919    | ncRNA_exonic | GSI-124K5.11 | 7  | 66038371  | 66041919  | 2 | 0 | 0 | 9  | 0 | 2 | 3548   | 0.902784082 | 0.067880094 | 2.889833438 | 0.023489276 | NA          | NA          |
| chr8:6582390-6605349      | exonic       | AGPAT5       | 8  | 6582390   | 6605349   | 1 | 2 | 0 | 4  | 0 | 0 | 22959  | 0.902784082 | 0.067880094 | 2.889833438 | 0.023489276 | NA          | NA          |
| chr17:73238416-73239651   | exonic       | GGA3         | 17 | 73238416  | 73239651  | 4 | 6 | 0 | 11 | 2 | 0 | 1235   | 2.973082646 | 0.069344419 | 1.727395908 | 0.040143906 | 0.967978398 | 0.998252924 |
| chr10:98602060-98602482   | intronic     | LCOR         | 10 | 98602060  | 98602482  | 0 | 0 | 3 | 0  | 0 | 2 | 422    | 1.208244294 | 0.070618256 | 2.891412666 | 0.024423444 | NA          | NA          |
| chr7:105733394-105739728  | exonic       | SYPL1        | 7  | 105733394 | 105739728 | 0 | 0 | 3 | 0  | 0 | 2 | 6334   | 1.208244294 | 0.070618256 | 2.891412666 | 0.024423444 | NA          | NA          |
| chr6:32024363-32035761    | exonic       | TNXB         | 6  | 32024363  | 32035761  | 4 | 0 | 0 | 0  | 4 | 0 | 11398  | 1.000057458 | 0.072265369 | 3.019385677 | 0.023933799 | NA          | NA          |
| chr1:100905487-100933650  | exonic       | CDC14A       | 1  | 100905487 | 100933650 | 1 | 0 | 0 | 1  | 0 | 0 | 28163  | 0.235298328 | 0.07340775  | 4.077635733 | 0.018002528 | 0.985636837 | 0.998252924 |
| chr1:10351139-10357304    | exonic       | KIF1B        | 1  | 10351139  | 10357304  | 1 | 0 | 0 | 1  | 0 | 0 | 6165   | 0.235298328 | 0.07340775  | 4.077635733 | 0.018002528 | 0.985636837 | 0.998252924 |
| chr1:10355143-10357304    | exonic       | KIF1B        | 1  | 10355143  | 10357304  | 1 | 0 | 0 | 1  | 0 | 0 | 2161   | 0.235298328 | 0.07340775  | 4.077635733 | 0.018002528 | 0.985636837 | 0.998252924 |
| chr1:117303023-117307228  | exonic       | CD2          | 1  | 117303023 | 117307228 | 1 | 0 | 0 | 1  | 0 | 0 | 4205   | 0.235298328 | 0.07340775  | 4.077635733 | 0.018002528 | 0.985636837 | 0.998252924 |
| chr1:153640030-153641033  | exonic       | ILF2         | 1  | 153640030 | 153641033 | 1 | 0 | 0 | 1  | 0 | 0 | 1003   | 0.235298328 | 0.07340775  | 4.077635733 | 0.018002528 | 0.985636837 | 0.998252924 |
| chr1:170927601-170941024  | exonic       | MROH9        | 1  | 170927601 | 170941024 | 1 | 0 | 0 | 1  | 0 | 0 | 13423  | 0.235298328 | 0.07340775  | 4.077635733 | 0.018002528 | 0.985636837 | 0.998252924 |
| chr1:202920057-202923435  | exonic       | ADIPOR1      | 1  | 202920057 | 202923435 | 1 | 0 | 0 | 1  | 0 | 0 | 3378   | 0.235298328 | 0.07340775  | 4.077635733 | 0.018002528 | 0.985636837 | 0.998252924 |
| chr1:204437997-204439014  | exonic       | PIK3C2B      | 1  | 204437997 | 204439014 | 1 | 0 | 0 | 1  | 0 | 0 | 1017   | 0.235298328 | 0.07340775  | 4.077635733 | 0.018002528 | 0.985636837 | 0.998252924 |
| chr1:237837395-237843877  | exonic       | RYR2         | 1  | 237837395 | 237843877 | 1 | 0 | 0 | 1  | 0 | 0 | 6482   | 0.235298328 | 0.07340775  | 4.077635733 | 0.018002528 | 0.985636837 | 0.998252924 |
| chr1:29386933-29424447    | exonic       | EPB41        | 1  | 29386933  | 29424447  | 1 | 0 | 0 | 1  | 0 | 0 | 37514  | 0.235298328 | 0.07340775  | 4.077635733 | 0.018002528 | 0.985636837 | 0.998252924 |
| chr1:35870623-35881315    | exonic       | ZMYM4        | 1  | 35870623  | 35881315  | 1 | 0 | 0 | 1  | 0 | 0 | 10692  | 0.235298328 | 0.07340775  | 4.077635733 | 0.018002528 | 0.985636837 | 0.998252924 |
| chr1:39815149-39854330    | exonic       | MACF1        | 1  | 39815149  | 39854330  | 1 | 0 | 0 | 1  | 0 | 0 | 39181  | 0.235298328 | 0.07340775  | 4.077635733 | 0.018002528 | 0.985636837 | 0.998252924 |
| chr1:41608549-41618413    | exonic       | SCMH1        | 1  | 41608549  | 41618413  | 1 | 0 | 0 | 1  | 0 | 0 | 9864   | 0.235298328 | 0.07340775  | 4.077635733 | 0.018002528 | 0.985636837 | 0.998252924 |
| chr1:48771458-48869554    | exonic       | SPATA6       | 1  | 48771458  | 48869554  | 1 | 0 | 0 | 1  | 0 | 0 | 98096  | 0.235298328 | 0.07340775  | 4.077635733 | 0.018002528 | 0.985636837 | 0.998252924 |
| chr10:120801505-120803654 | exonic       | EIF3A        | 10 | 120801505 | 120803654 | 1 | 0 | 0 | 1  | 0 | 0 | 2149   | 0.235298328 | 0.07340775  | 4.077635733 | 0.018002528 | 0.985636837 | 0.998252924 |
| chr10:127693452-127697119 | exonic       | FANK1        | 10 | 127693452 | 127697119 | 1 | 0 | 0 | 1  | 0 | 0 | 3667   | 0.235298328 | 0.07340775  | 4.077635733 | 0.018002528 | 0.985636837 | 0.998252924 |
| chr10:15628582-15646354   | exonic       | ITGA8        | 10 | 15628582  | 15646354  | 1 | 0 | 0 | 1  | 0 | 0 | 17772  | 0.235298328 | 0.07340775  | 4.077635733 | 0.018002528 | 0.985636837 | 0.998252924 |
| chr10:29788044-29801790   | exonic       | SVIL         | 10 | 29788044  | 29801790  | 1 | 0 | 0 | 1  | 0 | 0 | 13746  | 0.235298328 | 0.07340775  | 4.077635733 | 0.018002528 | 0.985636837 | 0.998252924 |
| chr10:29843711-29844037   | exonic       | SVIL         | 10 | 29843711  | 29844037  | 1 | 0 | 0 | 1  | 0 | 0 | 326    | 0.235298328 | 0.07340775  | 4.077635733 | 0.018002528 | 0.985636837 | 0.998252924 |
| chr10:30739186-30739448   | exonic       | MAP3K8       | 10 | 30739186  | 30739448  | 1 | 0 | 0 | 1  | 0 | 0 | 262    | 0.235298328 | 0.07340775  | 4.077635733 | 0.018002528 | 0.985636837 | 0.998252924 |
| chr10:34759012-34985347   | exonic       | PARD3        | 10 | 34759012  | 34985347  | 1 | 0 | 0 | 1  | 0 | 0 | 226335 | 0.235298328 | 0.07340775  | 4.077635733 | 0.018002528 | 0.985636837 | 0.998252924 |
| chr10:64948927-64957323   | exonic       | JMJD1C       | 10 | 64948927  | 64957323  | 1 | 0 | 0 | 1  | 0 | 0 | 8396   | 0.235298328 | 0.07340775  | 4.077635733 | 0.018002528 | 0.985636837 | 0.998252924 |

|                           |        |          |    |           |           |   |   |   |   |   |   |       |             |            |             |             |             |             |
|---------------------------|--------|----------|----|-----------|-----------|---|---|---|---|---|---|-------|-------------|------------|-------------|-------------|-------------|-------------|
| chr10:88230748-88277848   | exonic | WAPL     | 10 | 88230748  | 88277848  | 1 | 0 | 0 | 1 | 0 | 0 | 47100 | 0.235298328 | 0.07340775 | 4.077635733 | 0.018002528 | 0.985636837 | 0.998252924 |
| chr11:118245610-118247409 | exonic | UBE4A    | 11 | 118245610 | 118247409 | 1 | 0 | 0 | 1 | 0 | 0 | 1799  | 0.235298328 | 0.07340775 | 4.077635733 | 0.018002528 | 0.985636837 | 0.998252924 |
| chr11:11944270-11958057   | exonic | USP47    | 11 | 11944270  | 11958057  | 1 | 0 | 0 | 1 | 0 | 0 | 13787 | 0.235298328 | 0.07340775 | 4.077635733 | 0.018002528 | 0.985636837 | 0.998252924 |
| chr11:3789810-3794969     | exonic | NUP98    | 11 | 3789810   | 3794969   | 1 | 0 | 0 | 1 | 0 | 0 | 5159  | 0.235298328 | 0.07340775 | 4.077635733 | 0.018002528 | 0.985636837 | 0.998252924 |
| chr11:73789159-73789762   | exonic | C2CD3    | 11 | 73789159  | 73789762  | 1 | 0 | 0 | 1 | 0 | 0 | 603   | 0.235298328 | 0.07340775 | 4.077635733 | 0.018002528 | 0.985636837 | 0.998252924 |
| chr11:75167801-75173934   | exonic | GDPD5    | 11 | 75167801  | 75173934  | 1 | 0 | 0 | 1 | 0 | 0 | 6133  | 0.235298328 | 0.07340775 | 4.077635733 | 0.018002528 | 0.985636837 | 0.998252924 |
| chr11:77333544-77336863   | exonic | CLNS1A   | 11 | 77333544  | 77336863  | 1 | 0 | 0 | 1 | 0 | 0 | 3319  | 0.235298328 | 0.07340775 | 4.077635733 | 0.018002528 | 0.985636837 | 0.998252924 |
| chr12:100166699-100206089 | exonic | ANKS1B   | 12 | 100166699 | 100206089 | 1 | 0 | 0 | 1 | 0 | 0 | 39390 | 0.235298328 | 0.07340775 | 4.077635733 | 0.018002528 | 0.985636837 | 0.998252924 |
| chr12:104376576-104379506 | exonic | TDG      | 12 | 104376576 | 104379506 | 1 | 0 | 0 | 1 | 0 | 0 | 2930  | 0.235298328 | 0.07340775 | 4.077635733 | 0.018002528 | 0.985636837 | 0.998252924 |
| chr12:104712690-104721449 | exonic | TXNRD1   | 12 | 104712690 | 104721449 | 1 | 0 | 0 | 1 | 0 | 0 | 8759  | 0.235298328 | 0.07340775 | 4.077635733 | 0.018002528 | 0.985636837 | 0.998252924 |
| chr12:108136973-108140201 | exonic | PRDM4    | 12 | 108136973 | 108140201 | 1 | 0 | 0 | 1 | 0 | 0 | 3228  | 0.235298328 | 0.07340775 | 4.077635733 | 0.018002528 | 0.985636837 | 0.998252924 |
| chr12:120998528-121001746 | exonic | RNF10    | 12 | 120998528 | 121001746 | 1 | 0 | 0 | 1 | 0 | 0 | 3218  | 0.235298328 | 0.07340775 | 4.077635733 | 0.018002528 | 0.985636837 | 0.998252924 |
| chr12:121666335-121666902 | exonic | P2RX4    | 12 | 121666335 | 121666902 | 1 | 0 | 0 | 1 | 0 | 0 | 567   | 0.235298328 | 0.07340775 | 4.077635733 | 0.018002528 | 0.985636837 | 0.998252924 |
| chr12:122181534-122190129 | exonic | TMEM120B | 12 | 122181534 | 122190129 | 1 | 0 | 0 | 1 | 0 | 0 | 8595  | 0.235298328 | 0.07340775 | 4.077635733 | 0.018002528 | 0.985636837 | 0.998252924 |
| chr12:122773035-122819252 | exonic | CLIP1    | 12 | 122773035 | 122819252 | 1 | 0 | 0 | 1 | 0 | 0 | 46217 | 0.235298328 | 0.07340775 | 4.077635733 | 0.018002528 | 0.985636837 | 0.998252924 |
| chr12:124911167-124934413 | exonic | NCOR2    | 12 | 124911167 | 124934413 | 1 | 0 | 0 | 1 | 0 | 0 | 23246 | 0.235298328 | 0.07340775 | 4.077635733 | 0.018002528 | 0.985636837 | 0.998252924 |
| chr12:20709593-20807139   | exonic | PDE3A    | 12 | 20709593  | 20807139  | 1 | 0 | 0 | 1 | 0 | 0 | 97546 | 0.235298328 | 0.07340775 | 4.077635733 | 0.018002528 | 0.985636837 | 0.998252924 |
| chr12:22059059-22070037   | exonic | ABCC9    | 12 | 22059059  | 22070037  | 1 | 0 | 0 | 1 | 0 | 0 | 10978 | 0.235298328 | 0.07340775 | 4.077635733 | 0.018002528 | 0.985636837 | 0.998252924 |
| chr12:51461455-51467865   | exonic | CSRNP2   | 12 | 51461455  | 51467865  | 1 | 0 | 0 | 1 | 0 | 0 | 6410  | 0.235298328 | 0.07340775 | 4.077635733 | 0.018002528 | 0.985636837 | 0.998252924 |
| chr12:6182784-6184717     | exonic | VWF      | 12 | 6182784   | 6184717   | 1 | 0 | 0 | 1 | 0 | 0 | 1933  | 0.235298328 | 0.07340775 | 4.077635733 | 0.018002528 | 0.985636837 | 0.998252924 |
| chr12:70974815-70984013   | exonic | PTPRB    | 12 | 70974815  | 70984013  | 1 | 0 | 0 | 1 | 0 | 0 | 9198  | 0.235298328 | 0.07340775 | 4.077635733 | 0.018002528 | 0.985636837 | 0.998252924 |
| chr13:101997616-102051516 | exonic | NALCN    | 13 | 101997616 | 102051516 | 1 | 0 | 0 | 1 | 0 | 0 | 53900 | 0.235298328 | 0.07340775 | 4.077635733 | 0.018002528 | 0.985636837 | 0.998252924 |
| chr13:23939304-23945304   | exonic | SACS     | 13 | 23939304  | 23945304  | 1 | 0 | 0 | 1 | 0 | 0 | 6000  | 0.235298328 | 0.07340775 | 4.077635733 | 0.018002528 | 0.985636837 | 0.998252924 |
| chr13:25881943-25887889   | exonic | NUP58    | 13 | 25881943  | 25887889  | 1 | 0 | 0 | 1 | 0 | 0 | 5946  | 0.235298328 | 0.07340775 | 4.077635733 | 0.018002528 | 0.985636837 | 0.998252924 |
| chr13:61041371-61060082   | exonic | TDRD3    | 13 | 61041371  | 61060082  | 1 | 0 | 0 | 1 | 0 | 0 | 18711 | 0.235298328 | 0.07340775 | 4.077635733 | 0.018002528 | 0.985636837 | 0.998252924 |
| chr13:77798585-77818086   | exonic | MYCBP2   | 13 | 77798585  | 77818086  | 1 | 0 | 0 | 1 | 0 | 0 | 19501 | 0.235298328 | 0.07340775 | 4.077635733 | 0.018002528 | 0.985636837 | 0.998252924 |
| chr14:102797958-102805560 | exonic | ZNF839   | 14 | 102797958 | 102805560 | 1 | 0 | 0 | 1 | 0 | 0 | 7602  | 0.235298328 | 0.07340775 | 4.077635733 | 0.018002528 | 0.985636837 | 0.998252924 |
| chr14:71540261-71543136   | exonic | PCNX     | 14 | 71540261  | 71543136  | 1 | 0 | 0 | 1 | 0 | 0 | 2875  | 0.235298328 | 0.07340775 | 4.077635733 | 0.018002528 | 0.985636837 | 0.998252924 |
| chr15:100692816-100695525 | exonic | ADAMTS17 | 15 | 100692816 | 100695525 | 1 | 0 | 0 | 1 | 0 | 0 | 2709  | 0.235298328 | 0.07340775 | 4.077635733 | 0.018002528 | 0.985636837 | 0.998252924 |
| chr15:28491026-28492043   | exonic | HERC2    | 15 | 28491026  | 28492043  | 1 | 0 | 0 | 1 | 0 | 0 | 1017  | 0.235298328 | 0.07340775 | 4.077635733 | 0.018002528 | 0.985636837 | 0.998252924 |
| chr15:41763369-41769713   | exonic | RTF1     | 15 | 41763369  | 41769713  | 1 | 0 | 0 | 1 | 0 | 0 | 6344  | 0.235298328 | 0.07340775 | 4.077635733 | 0.018002528 | 0.985636837 | 0.998252924 |
| chr15:62221699-62244179   | exonic | VPS13C   | 15 | 62221699  | 62244179  | 1 | 0 | 0 | 1 | 0 | 0 | 22480 | 0.235298328 | 0.07340775 | 4.077635733 | 0.018002528 | 0.985636837 | 0.998252924 |
| chr15:64019845-64041990   | exonic | HERC1    | 15 | 64019845  | 64041990  | 1 | 0 | 0 | 1 | 0 | 0 | 22145 | 0.235298328 | 0.07340775 | 4.077635733 | 0.018002528 | 0.985636837 | 0.998252924 |
| chr16:11791980-11815526   | exonic | TXNDC11  | 16 | 11791980  | 11815526  | 1 | 0 | 0 | 1 | 0 | 0 | 23546 | 0.235298328 | 0.07340775 | 4.077635733 | 0.018002528 | 0.985636837 | 0.998252924 |
| chr16:15865425-15880589   | exonic | MYH11    | 16 | 15865425  | 15880589  | 1 | 0 | 0 | 1 | 0 | 0 | 15164 | 0.235298328 | 0.07340775 | 4.077635733 | 0.018002528 | 0.985636837 | 0.998252924 |



|                          |              |            |    |           |           |   |   |   |   |   |   |       |             |            |             |             |             |             |
|--------------------------|--------------|------------|----|-----------|-----------|---|---|---|---|---|---|-------|-------------|------------|-------------|-------------|-------------|-------------|
| chr16:23999828-24046868  | exonic       | PRKCB      | 16 | 23999828  | 24046868  | 1 | 0 | 0 | 1 | 0 | 0 | 47040 | 0.235298328 | 0.07340775 | 4.077635733 | 0.018002528 | 0.985636837 | 0.998252924 |
| chr16:29367107-29376380  | ncRNA_exonic | SNX29P2    | 16 | 29367107  | 29376380  | 1 | 0 | 0 | 1 | 0 | 0 | 9273  | 0.235298328 | 0.07340775 | 4.077635733 | 0.018002528 | 0.985636837 | 0.998252924 |
| chr16:68900981-68914533  | exonic       | TANGO6     | 16 | 68900981  | 68914533  | 1 | 0 | 0 | 1 | 0 | 0 | 13552 | 0.235298328 | 0.07340775 | 4.077635733 | 0.018002528 | 0.985636837 | 0.998252924 |
| chr16:88008653-88052273  | exonic       | BANP       | 16 | 88008653  | 88052273  | 1 | 0 | 0 | 1 | 0 | 0 | 43620 | 0.235298328 | 0.07340775 | 4.077635733 | 0.018002528 | 0.985636837 | 0.998252924 |
| chr17:33997875-34009843  | exonic       | AP2B1      | 17 | 33997875  | 34009843  | 1 | 0 | 0 | 1 | 0 | 0 | 11968 | 0.235298328 | 0.07340775 | 4.077635733 | 0.018002528 | 0.985636837 | 0.998252924 |
| chr17:36969047-36971350  | exonic       | CWC25      | 17 | 36969047  | 36971350  | 1 | 0 | 0 | 1 | 0 | 0 | 2303  | 0.235298328 | 0.07340775 | 4.077635733 | 0.018002528 | 0.985636837 | 0.998252924 |
| chr17:48216627-48218738  | exonic       | PPP1R9B    | 17 | 48216627  | 48218738  | 1 | 0 | 0 | 1 | 0 | 0 | 2111  | 0.235298328 | 0.07340775 | 4.077635733 | 0.018002528 | 0.985636837 | 0.998252924 |
| chr17:60757814-60758138  | exonic       | MRC2       | 17 | 60757814  | 60758138  | 1 | 0 | 0 | 1 | 0 | 0 | 324   | 0.235298328 | 0.07340775 | 4.077635733 | 0.018002528 | 0.985636837 | 0.998252924 |
| chr17:72691863-72694620  | exonic       | CD300LF    | 17 | 72691863  | 72694620  | 1 | 0 | 0 | 1 | 0 | 0 | 2757  | 0.235298328 | 0.07340775 | 4.077635733 | 0.018002528 | 0.985636837 | 0.998252924 |
| chr17:73607739-73607946  | exonic       | MYO15B     | 17 | 73607739  | 73607946  | 1 | 0 | 0 | 1 | 0 | 0 | 207   | 0.235298328 | 0.07340775 | 4.077635733 | 0.018002528 | 0.985636837 | 0.998252924 |
| chr17:78196453-78201759  | exonic       | SLC26A11   | 17 | 78196453  | 78201759  | 1 | 0 | 0 | 1 | 0 | 0 | 5306  | 0.235298328 | 0.07340775 | 4.077635733 | 0.018002528 | 0.985636837 | 0.998252924 |
| chr18:18600111-18624147  | exonic       | ROCK1      | 18 | 18600111  | 18624147  | 1 | 0 | 0 | 1 | 0 | 0 | 24036 | 0.235298328 | 0.07340775 | 4.077635733 | 0.018002528 | 0.985636837 | 0.998252924 |
| chr18:46783379-46812986  | exonic       | DYM        | 18 | 46783379  | 46812986  | 1 | 0 | 0 | 1 | 0 | 0 | 29607 | 0.235298328 | 0.07340775 | 4.077635733 | 0.018002528 | 0.985636837 | 0.998252924 |
| chr19:14156965-14157430  | exonic       | IL27RA     | 19 | 14156965  | 14157430  | 1 | 0 | 0 | 1 | 0 | 0 | 465   | 0.235298328 | 0.07340775 | 4.077635733 | 0.018002528 | 0.985636837 | 0.998252924 |
| chr19:325634-327989      | exonic       | MIER2      | 19 | 325634    | 327989    | 1 | 0 | 0 | 1 | 0 | 0 | 2355  | 0.235298328 | 0.07340775 | 4.077635733 | 0.018002528 | 0.985636837 | 0.998252924 |
| chr19:41774127-41787180  | exonic       | HNRNPUL1   | 19 | 41774127  | 41787180  | 1 | 0 | 0 | 1 | 0 | 0 | 13053 | 0.235298328 | 0.07340775 | 4.077635733 | 0.018002528 | 0.985636837 | 0.998252924 |
| chr19:48724986-48744320  | exonic       | CARD8      | 19 | 48724986  | 48744320  | 1 | 0 | 0 | 1 | 0 | 0 | 19334 | 0.235298328 | 0.07340775 | 4.077635733 | 0.018002528 | 0.985636837 | 0.998252924 |
| chr2:101645952-101648847 | exonic       | TBC1D8     | 2  | 101645952 | 101648847 | 1 | 0 | 0 | 1 | 0 | 0 | 2895  | 0.235298328 | 0.07340775 | 4.077635733 | 0.018002528 | 0.985636837 | 0.998252924 |
| chr2:109964129-109988137 | exonic       | SH3RF3     | 2  | 109964129 | 109988137 | 1 | 0 | 0 | 1 | 0 | 0 | 24008 | 0.235298328 | 0.07340775 | 4.077635733 | 0.018002528 | 0.985636837 | 0.998252924 |
| chr2:113939922-113943832 | exonic       | PSD4       | 2  | 113939922 | 113943832 | 1 | 0 | 0 | 1 | 0 | 0 | 3910  | 0.235298328 | 0.07340775 | 4.077635733 | 0.018002528 | 0.985636837 | 0.998252924 |
| chr2:122187648-122227536 | exonic       | CLASP1     | 2  | 122187648 | 122227536 | 1 | 0 | 0 | 1 | 0 | 0 | 39888 | 0.235298328 | 0.07340775 | 4.077635733 | 0.018002528 | 0.985636837 | 0.998252924 |
| chr2:135694410-135705469 | exonic       | CCNT2      | 2  | 135694410 | 135705469 | 1 | 0 | 0 | 1 | 0 | 0 | 11059 | 0.235298328 | 0.07340775 | 4.077635733 | 0.018002528 | 0.985636837 | 0.998252924 |
| chr2:144899448-144994906 | exonic       | GTDC1      | 2  | 144899448 | 144994906 | 1 | 0 | 0 | 1 | 0 | 0 | 95458 | 0.235298328 | 0.07340775 | 4.077635733 | 0.018002528 | 0.985636837 | 0.998252924 |
| chr2:160104882-160136456 | exonic       | WDSUB1     | 2  | 160104882 | 160136456 | 1 | 0 | 0 | 1 | 0 | 0 | 31574 | 0.235298328 | 0.07340775 | 4.077635733 | 0.018002528 | 0.985636837 | 0.998252924 |
| chr2:179455865-179465394 | exonic       | TTN        | 2  | 179455865 | 179465394 | 1 | 0 | 0 | 1 | 0 | 0 | 9529  | 0.235298328 | 0.07340775 | 4.077635733 | 0.018002528 | 0.985636837 | 0.998252924 |
| chr2:20453582-20455931   | exonic       | PUM2       | 2  | 20453582  | 20455931  | 1 | 0 | 0 | 1 | 0 | 0 | 2349  | 0.235298328 | 0.07340775 | 4.077635733 | 0.018002528 | 0.985636837 | 0.998252924 |
| chr2:214204886-214239843 | exonic       | SPAG16     | 2  | 214204886 | 214239843 | 1 | 0 | 0 | 1 | 0 | 0 | 34957 | 0.235298328 | 0.07340775 | 4.077635733 | 0.018002528 | 0.985636837 | 0.998252924 |
| chr2:240055940-240085619 | exonic       | HDAC4      | 2  | 240055940 | 240085619 | 1 | 0 | 0 | 1 | 0 | 0 | 29679 | 0.235298328 | 0.07340775 | 4.077635733 | 0.018002528 | 0.985636837 | 0.998252924 |
| chr2:36749234-36764689   | exonic       | CRIM1      | 2  | 36749234  | 36764689  | 1 | 0 | 0 | 1 | 0 | 0 | 15455 | 0.235298328 | 0.07340775 | 4.077635733 | 0.018002528 | 0.985636837 | 0.998252924 |
| chr2:37215788-37229715   | exonic       | HEATR5B    | 2  | 37215788  | 37229715  | 1 | 0 | 0 | 1 | 0 | 0 | 13927 | 0.235298328 | 0.07340775 | 4.077635733 | 0.018002528 | 0.985636837 | 0.998252924 |
| chr2:43939363-43953590   | exonic       | PLEKHH2    | 2  | 43939363  | 43953590  | 1 | 0 | 0 | 1 | 0 | 0 | 14227 | 0.235298328 | 0.07340775 | 4.077635733 | 0.018002528 | 0.985636837 | 0.998252924 |
| chr2:47606091-47607108   | exonic       | EPCAM      | 2  | 47606091  | 47607108  | 1 | 0 | 0 | 1 | 0 | 0 | 1017  | 0.235298328 | 0.07340775 | 4.077635733 | 0.018002528 | 0.985636837 | 0.998252924 |
| chr2:66691240-66775151   | exonic       | MEIS1      | 2  | 66691240  | 66775151  | 1 | 0 | 0 | 1 | 0 | 0 | 83911 | 0.235298328 | 0.07340775 | 4.077635733 | 0.018002528 | 0.985636837 | 0.998252924 |
| chr2:70402804-70409129   | exonic       | C2orf42    | 2  | 70402804  | 70409129  | 1 | 0 | 0 | 1 | 0 | 0 | 6325  | 0.235298328 | 0.07340775 | 4.077635733 | 0.018002528 | 0.985636837 | 0.998252924 |
| chr20:25612793-25615463  | ncRNA_exonic | ZNF337-AS1 | 20 | 25612793  | 25615463  | 1 | 0 | 0 | 1 | 0 | 0 | 2670  | 0.235298328 | 0.07340775 | 4.077635733 | 0.018002528 | 0.985636837 | 0.998252924 |

|                          |        |          |    |           |           |   |   |   |   |   |   |       |             |            |             |             |             |             |
|--------------------------|--------|----------|----|-----------|-----------|---|---|---|---|---|---|-------|-------------|------------|-------------|-------------|-------------|-------------|
| chr20:33107224-33122599  | exonic | DYNLRB1  | 20 | 33107224  | 33122599  | 1 | 0 | 0 | 1 | 0 | 0 | 15375 | 0.235298328 | 0.07340775 | 4.077635733 | 0.018002528 | 0.985636837 | 0.998252924 |
| chr20:35288739-35299800  | exonic | NDRG3    | 20 | 35288739  | 35299800  | 1 | 0 | 0 | 1 | 0 | 0 | 11061 | 0.235298328 | 0.07340775 | 4.077635733 | 0.018002528 | 0.985636837 | 0.998252924 |
| chr20:43128898-43142681  | exonic | SERINC3  | 20 | 43128898  | 43142681  | 1 | 0 | 0 | 1 | 0 | 0 | 13783 | 0.235298328 | 0.07340775 | 4.077635733 | 0.018002528 | 0.985636837 | 0.998252924 |
| chr20:9317772-9319684    | exonic | PLCB4    | 20 | 9317772   | 9319684   | 1 | 0 | 0 | 1 | 0 | 0 | 1912  | 0.235298328 | 0.07340775 | 4.077635733 | 0.018002528 | 0.985636837 | 0.998252924 |
| chr21:40585406-40646398  | exonic | BRWD1    | 21 | 40585406  | 40646398  | 1 | 0 | 0 | 1 | 0 | 0 | 60992 | 0.235298328 | 0.07340775 | 4.077635733 | 0.018002528 | 0.985636837 | 0.998252924 |
| chr22:24720187-24765288  | exonic | SPECC1L  | 22 | 24720187  | 24765288  | 1 | 0 | 0 | 1 | 0 | 0 | 45101 | 0.235298328 | 0.07340775 | 4.077635733 | 0.018002528 | 0.985636837 | 0.998252924 |
| chr22:36712561-36714370  | exonic | MYH9     | 22 | 36712561  | 36714370  | 1 | 0 | 0 | 1 | 0 | 0 | 1809  | 0.235298328 | 0.07340775 | 4.077635733 | 0.018002528 | 0.985636837 | 0.998252924 |
| chr3:124536467-124567405 | exonic | ITGB5    | 3  | 124536467 | 124567405 | 1 | 0 | 0 | 1 | 0 | 0 | 30938 | 0.235298328 | 0.07340775 | 4.077635733 | 0.018002528 | 0.985636837 | 0.998252924 |
| chr3:12645634-12647798   | exonic | RAF1     | 3  | 12645634  | 12647798  | 1 | 0 | 0 | 1 | 0 | 0 | 2164  | 0.235298328 | 0.07340775 | 4.077635733 | 0.018002528 | 0.985636837 | 0.998252924 |
| chr3:169098974-169099312 | exonic | MECOM    | 3  | 169098974 | 169099312 | 1 | 0 | 0 | 1 | 0 | 0 | 338   | 0.235298328 | 0.07340775 | 4.077635733 | 0.018002528 | 0.985636837 | 0.998252924 |
| chr3:178921331-178942609 | exonic | PIK3CA   | 3  | 178921331 | 178942609 | 1 | 0 | 0 | 1 | 0 | 0 | 21278 | 0.235298328 | 0.07340775 | 4.077635733 | 0.018002528 | 0.985636837 | 0.998252924 |
| chr3:197483296-197497115 | exonic | FYTTD1   | 3  | 197483296 | 197497115 | 1 | 0 | 0 | 1 | 0 | 0 | 13819 | 0.235298328 | 0.07340775 | 4.077635733 | 0.018002528 | 0.985636837 | 0.998252924 |
| chr3:44434346-44442826   | exonic | TCAIM    | 3  | 44434346  | 44442826  | 1 | 0 | 0 | 1 | 0 | 0 | 8480  | 0.235298328 | 0.07340775 | 4.077635733 | 0.018002528 | 0.985636837 | 0.998252924 |
| chr3:50004902-50036946   | exonic | RBM6     | 3  | 50004902  | 50036946  | 1 | 0 | 0 | 1 | 0 | 0 | 32044 | 0.235298328 | 0.07340775 | 4.077635733 | 0.018002528 | 0.985636837 | 0.998252924 |
| chr3:53531178-53535747   | exonic | CACNA1D  | 3  | 53531178  | 53535747  | 1 | 0 | 0 | 1 | 0 | 0 | 4569  | 0.235298328 | 0.07340775 | 4.077635733 | 0.018002528 | 0.985636837 | 0.998252924 |
| chr3:77595488-77617585   | exonic | ROBO2    | 3  | 77595488  | 77617585  | 1 | 0 | 0 | 1 | 0 | 0 | 22097 | 0.235298328 | 0.07340775 | 4.077635733 | 0.018002528 | 0.985636837 | 0.998252924 |
| chr4:103970049-103979128 | exonic | SLC9B2   | 4  | 103970049 | 103979128 | 1 | 0 | 0 | 1 | 0 | 0 | 9079  | 0.235298328 | 0.07340775 | 4.077635733 | 0.018002528 | 0.985636837 | 0.998252924 |
| chr4:148453657-148461637 | exonic | EDNRA    | 4  | 148453657 | 148461637 | 1 | 0 | 0 | 1 | 0 | 0 | 7980  | 0.235298328 | 0.07340775 | 4.077635733 | 0.018002528 | 0.985636837 | 0.998252924 |
| chr4:185593326-185603490 | exonic | PRIMPOL  | 4  | 185593326 | 185603490 | 1 | 0 | 0 | 1 | 0 | 0 | 10164 | 0.235298328 | 0.07340775 | 4.077635733 | 0.018002528 | 0.985636837 | 0.998252924 |
| chr4:68527906-68547931   | exonic | UBA6     | 4  | 68527906  | 68547931  | 1 | 0 | 0 | 1 | 0 | 0 | 20025 | 0.235298328 | 0.07340775 | 4.077635733 | 0.018002528 | 0.985636837 | 0.998252924 |
| chr5:118264231-118280344 | exonic | DTWD2    | 5  | 118264231 | 118280344 | 1 | 0 | 0 | 1 | 0 | 0 | 16113 | 0.235298328 | 0.07340775 | 4.077635733 | 0.018002528 | 0.985636837 | 0.998252924 |
| chr5:125885620-125890085 | exonic | ALDH7A1  | 5  | 125885620 | 125890085 | 1 | 0 | 0 | 1 | 0 | 0 | 4465  | 0.235298328 | 0.07340775 | 4.077635733 | 0.018002528 | 0.985636837 | 0.998252924 |
| chr5:136969725-136975666 | exonic | KLHL3    | 5  | 136969725 | 136975666 | 1 | 0 | 0 | 1 | 0 | 0 | 5941  | 0.235298328 | 0.07340775 | 4.077635733 | 0.018002528 | 0.985636837 | 0.998252924 |
| chr5:73045661-73049027   | exonic | ARHGEF28 | 5  | 73045661  | 73049027  | 1 | 0 | 0 | 1 | 0 | 0 | 3366  | 0.235298328 | 0.07340775 | 4.077635733 | 0.018002528 | 0.985636837 | 0.998252924 |
| chr5:75884730-75886411   | exonic | IQGAP2   | 5  | 75884730  | 75886411  | 1 | 0 | 0 | 1 | 0 | 0 | 1681  | 0.235298328 | 0.07340775 | 4.077635733 | 0.018002528 | 0.985636837 | 0.998252924 |
| chr6:129932677-129950667 | exonic | ARHGAP18 | 6  | 129932677 | 129950667 | 1 | 0 | 0 | 1 | 0 | 0 | 17990 | 0.235298328 | 0.07340775 | 4.077635733 | 0.018002528 | 0.985636837 | 0.998252924 |
| chr6:15496362-15501640   | exonic | JARID2   | 6  | 15496362  | 15501640  | 1 | 0 | 0 | 1 | 0 | 0 | 5278  | 0.235298328 | 0.07340775 | 4.077635733 | 0.018002528 | 0.985636837 | 0.998252924 |
| chr6:157405795-157454341 | exonic | ARID1B   | 6  | 157405795 | 157454341 | 1 | 0 | 0 | 1 | 0 | 0 | 48546 | 0.235298328 | 0.07340775 | 4.077635733 | 0.018002528 | 0.985636837 | 0.998252924 |
| chr6:160103505-160106065 | exonic | SOD2     | 6  | 160103505 | 160106065 | 1 | 0 | 0 | 1 | 0 | 0 | 2560  | 0.235298328 | 0.07340775 | 4.077635733 | 0.018002528 | 0.985636837 | 0.998252924 |
| chr6:17837108-17837814   | exonic | KIF13A   | 6  | 17837108  | 17837814  | 1 | 0 | 0 | 1 | 0 | 0 | 706   | 0.235298328 | 0.07340775 | 4.077635733 | 0.018002528 | 0.985636837 | 0.998252924 |
| chr6:37336153-37339350   | exonic | RNF8     | 6  | 37336153  | 37339350  | 1 | 0 | 0 | 1 | 0 | 0 | 3197  | 0.235298328 | 0.07340775 | 4.077635733 | 0.018002528 | 0.985636837 | 0.998252924 |
| chr6:41533482-41545819   | exonic | FOXP4    | 6  | 41533482  | 41545819  | 1 | 0 | 0 | 1 | 0 | 0 | 12337 | 0.235298328 | 0.07340775 | 4.077635733 | 0.018002528 | 0.985636837 | 0.998252924 |
| chr6:43565432-43568828   | exonic | POLH     | 6  | 43565432  | 43568828  | 1 | 0 | 0 | 1 | 0 | 0 | 3396  | 0.235298328 | 0.07340775 | 4.077635733 | 0.018002528 | 0.985636837 | 0.998252924 |
| chr6:56357731-56368896   | exonic | DST      | 6  | 56357731  | 56368896  | 1 | 0 | 0 | 1 | 0 | 0 | 11165 | 0.235298328 | 0.07340775 | 4.077635733 | 0.018002528 | 0.985636837 | 0.998252924 |
| chr6:56498929-56501450   | exonic | DST      | 6  | 56498929  | 56501450  | 1 | 0 | 0 | 1 | 0 | 0 | 2521  | 0.235298328 | 0.07340775 | 4.077635733 | 0.018002528 | 0.985636837 | 0.998252924 |

|                          |        |         |   |           |           |   |   |   |   |   |   |        |             |            |             |             |             |             |
|--------------------------|--------|---------|---|-----------|-----------|---|---|---|---|---|---|--------|-------------|------------|-------------|-------------|-------------|-------------|
| chr7:11053373-11091407   | exonic | PHF14   | 7 | 11053373  | 11091407  | 1 | 0 | 0 | 1 | 0 | 0 | 38034  | 0.235298328 | 0.07340775 | 4.077635733 | 0.018002528 | 0.985636837 | 0.998252924 |
| chr7:111624360-111644186 | exonic | DOCK4   | 7 | 111624360 | 111644186 | 1 | 0 | 0 | 1 | 0 | 0 | 19826  | 0.235298328 | 0.07340775 | 4.077635733 | 0.018002528 | 0.985636837 | 0.998252924 |
| chr7:140476711-140487384 | exonic | BRAF    | 7 | 140476711 | 140487384 | 1 | 0 | 0 | 1 | 0 | 0 | 10673  | 0.235298328 | 0.07340775 | 4.077635733 | 0.018002528 | 0.985636837 | 0.998252924 |
| chr7:155499553-155538296 | exonic | RBM33   | 7 | 155499553 | 155538296 | 1 | 0 | 0 | 1 | 0 | 0 | 38743  | 0.235298328 | 0.07340775 | 4.077635733 | 0.018002528 | 0.985636837 | 0.998252924 |
| chr7:156516805-156619438 | exonic | LMBR1   | 7 | 156516805 | 156619438 | 1 | 0 | 0 | 1 | 0 | 0 | 102633 | 0.235298328 | 0.07340775 | 4.077635733 | 0.018002528 | 0.985636837 | 0.998252924 |
| chr7:22999874-23023664   | exonic | FAM126A | 7 | 22999874  | 23023664  | 1 | 0 | 0 | 1 | 0 | 0 | 23790  | 0.235298328 | 0.07340775 | 4.077635733 | 0.018002528 | 0.985636837 | 0.998252924 |
| chr7:30818047-30876380   | exonic | FAM188B | 7 | 30818047  | 30876380  | 1 | 0 | 0 | 1 | 0 | 0 | 58333  | 0.235298328 | 0.07340775 | 4.077635733 | 0.018002528 | 0.985636837 | 0.998252924 |
| chr7:37262219-37382367   | exonic | ELMO1   | 7 | 37262219  | 37382367  | 1 | 0 | 0 | 1 | 0 | 0 | 120148 | 0.235298328 | 0.07340775 | 4.077635733 | 0.018002528 | 0.985636837 | 0.998252924 |
| chr7:6840578-6844686     | exonic | CCZ1B   | 7 | 6840578   | 6844686   | 1 | 0 | 0 | 1 | 0 | 0 | 4108   | 0.235298328 | 0.07340775 | 4.077635733 | 0.018002528 | 0.985636837 | 0.998252924 |
| chr7:86990705-86998800   | exonic | CROT    | 7 | 86990705  | 86998800  | 1 | 0 | 0 | 1 | 0 | 0 | 8095   | 0.235298328 | 0.07340775 | 4.077635733 | 0.018002528 | 0.985636837 | 0.998252924 |
| chr7:98985661-98987635   | exonic | ARPC1B  | 7 | 98985661  | 98987635  | 1 | 0 | 0 | 1 | 0 | 0 | 1974   | 0.235298328 | 0.07340775 | 4.077635733 | 0.018002528 | 0.985636837 | 0.998252924 |
| chr8:101281012-101300495 | exonic | RNF19A  | 8 | 101281012 | 101300495 | 1 | 0 | 0 | 1 | 0 | 0 | 19483  | 0.235298328 | 0.07340775 | 4.077635733 | 0.018002528 | 0.985636837 | 0.998252924 |
| chr8:69039612-69069671   | exonic | PREX2   | 8 | 69039612  | 69069671  | 1 | 0 | 0 | 1 | 0 | 0 | 30059  | 0.235298328 | 0.07340775 | 4.077635733 | 0.018002528 | 0.985636837 | 0.998252924 |
| chr8:69046293-69058587   | exonic | PREX2   | 8 | 69046293  | 69058587  | 1 | 0 | 0 | 1 | 0 | 0 | 12294  | 0.235298328 | 0.07340775 | 4.077635733 | 0.018002528 | 0.985636837 | 0.998252924 |
| chr8:90982591-90990551   | exonic | NBN     | 8 | 90982591  | 90990551  | 1 | 0 | 0 | 1 | 0 | 0 | 7960   | 0.235298328 | 0.07340775 | 4.077635733 | 0.018002528 | 0.985636837 | 0.998252924 |
| chr9:100756912-100767435 | exonic | ANP32B  | 9 | 100756912 | 100767435 | 1 | 0 | 0 | 1 | 0 | 0 | 10523  | 0.235298328 | 0.07340775 | 4.077635733 | 0.018002528 | 0.985636837 | 0.998252924 |
| chr9:126319848-126414402 | exonic | DENND1A | 9 | 126319848 | 126414402 | 1 | 0 | 0 | 1 | 0 | 0 | 94554  | 0.235298328 | 0.07340775 | 4.077635733 | 0.018002528 | 0.985636837 | 0.998252924 |
| chr9:128230250-128268696 | exonic | MAPKAP1 | 9 | 128230250 | 128268696 | 1 | 0 | 0 | 1 | 0 | 0 | 38446  | 0.235298328 | 0.07340775 | 4.077635733 | 0.018002528 | 0.985636837 | 0.998252924 |
| chr9:134049441-134064518 | exonic | NUP214  | 9 | 134049441 | 134064518 | 1 | 0 | 0 | 1 | 0 | 0 | 15077  | 0.235298328 | 0.07340775 | 4.077635733 | 0.018002528 | 0.985636837 | 0.998252924 |
| chr9:140685299-140695436 | exonic | EHMT1   | 9 | 140685299 | 140695436 | 1 | 0 | 0 | 1 | 0 | 0 | 10137  | 0.235298328 | 0.07340775 | 4.077635733 | 0.018002528 | 0.985636837 | 0.998252924 |
| chr9:140685299-140712590 | exonic | EHMT1   | 9 | 140685299 | 140712590 | 1 | 0 | 0 | 1 | 0 | 0 | 27291  | 0.235298328 | 0.07340775 | 4.077635733 | 0.018002528 | 0.985636837 | 0.998252924 |
| chr9:2115821-2123937     | exonic | SMARCA2 | 9 | 2115821   | 2123937   | 1 | 0 | 0 | 1 | 0 | 0 | 8116   | 0.235298328 | 0.07340775 | 4.077635733 | 0.018002528 | 0.985636837 | 0.998252924 |
| chr9:33886878-33900269   | exonic | UBE2R2  | 9 | 33886878  | 33900269  | 1 | 0 | 0 | 1 | 0 | 0 | 13391  | 0.235298328 | 0.07340775 | 4.077635733 | 0.018002528 | 0.985636837 | 0.998252924 |
| chr9:33932559-33933626   | exonic | UBAP2   | 9 | 33932559  | 33933626  | 1 | 0 | 0 | 1 | 0 | 0 | 1067   | 0.235298328 | 0.07340775 | 4.077635733 | 0.018002528 | 0.985636837 | 0.998252924 |
| chr9:4833153-4849550     | exonic | RCL1    | 9 | 4833153   | 4849550   | 1 | 0 | 0 | 1 | 0 | 0 | 16397  | 0.235298328 | 0.07340775 | 4.077635733 | 0.018002528 | 0.985636837 | 0.998252924 |
| chr9:88270057-88287596   | exonic | AGTPBP1 | 9 | 88270057  | 88287596  | 1 | 0 | 0 | 1 | 0 | 0 | 17539  | 0.235298328 | 0.07340775 | 4.077635733 | 0.018002528 | 0.985636837 | 0.998252924 |
| chrX:133607388-133632714 | exonic | HPRT1   | X | 133607388 | 133632714 | 1 | 0 | 0 | 1 | 0 | 0 | 25326  | 0.235298328 | 0.07340775 | 4.077635733 | 0.018002528 | 0.985636837 | 0.998252924 |
| chrX:299338-308428       | exonic | PPP2R3B | X | 299338    | 308428    | 1 | 0 | 0 | 1 | 0 | 0 | 9090   | 0.235298328 | 0.07340775 | 4.077635733 | 0.018002528 | 0.985636837 | 0.998252924 |
| chrX:96167326-96220206   | exonic | DIAPH2  | X | 96167326  | 96220206  | 1 | 0 | 0 | 1 | 0 | 0 | 52880  | 0.235298328 | 0.07340775 | 4.077635733 | 0.018002528 | 0.985636837 | 0.998252924 |
| chr1:111690263-111690675 | exonic | CEPT1   | 1 | 111690263 | 111690675 | 0 | 0 | 1 | 1 | 0 | 0 | 412    | 0.303580411 | 0.07340775 | 4.077635733 | 0.018002528 | 0.985636837 | 0.998252924 |
| chr1:113196219-113209767 | exonic | CAPZA1  | 1 | 113196219 | 113209767 | 0 | 0 | 1 | 1 | 0 | 0 | 13548  | 0.303580411 | 0.07340775 | 4.077635733 | 0.018002528 | 0.985636837 | 0.998252924 |
| chr1:1192371-1203372     | exonic | UBE2J2  | 1 | 1192371   | 1203372   | 0 | 1 | 0 | 1 | 0 | 0 | 11001  | 0.280587184 | 0.07340775 | 4.077635733 | 0.018002528 | 0.985636837 | 0.998252924 |
| chr1:145769407-145803388 | exonic | GPR89A  | 1 | 145769407 | 145803388 | 0 | 1 | 0 | 1 | 0 | 0 | 33981  | 0.280587184 | 0.07340775 | 4.077635733 | 0.018002528 | 0.985636837 | 0.998252924 |
| chr1:153784497-153800824 | exonic | GATAD2B | 1 | 153784497 | 153800824 | 0 | 1 | 0 | 1 | 0 | 0 | 16327  | 0.280587184 | 0.07340775 | 4.077635733 | 0.018002528 | 0.985636837 | 0.998252924 |
| chr1:19519926-19523759   | exonic | UBR4    | 1 | 19519926  | 19523759  | 0 | 1 | 0 | 1 | 0 | 0 | 3833   | 0.280587184 | 0.07340775 | 4.077635733 | 0.018002528 | 0.985636837 | 0.998252924 |

|                           |        |          |    |           |           |   |   |   |   |   |   |        |             |            |             |             |             |             |
|---------------------------|--------|----------|----|-----------|-----------|---|---|---|---|---|---|--------|-------------|------------|-------------|-------------|-------------|-------------|
| chr1:197157421-197161029  | exonic | ZBTB41   | 1  | 197157421 | 197161029 | 0 | 1 | 0 | 1 | 0 | 0 | 3608   | 0.280587184 | 0.07340775 | 4.077635733 | 0.018002528 | 0.985636837 | 0.998252924 |
| chr1:198201682-198266370  | exonic | NEK7     | 1  | 198201682 | 198266370 | 0 | 1 | 0 | 1 | 0 | 0 | 64688  | 0.280587184 | 0.07340775 | 4.077635733 | 0.018002528 | 0.985636837 | 0.998252924 |
| chr1:200776503-200784772  | exonic | CAMSAP2  | 1  | 200776503 | 200784772 | 0 | 0 | 1 | 1 | 0 | 0 | 8269   | 0.303580411 | 0.07340775 | 4.077635733 | 0.018002528 | 0.985636837 | 0.998252924 |
| chr1:208315673-208391347  | exonic | PLXNA2   | 1  | 208315673 | 208391347 | 0 | 1 | 0 | 1 | 0 | 0 | 75674  | 0.280587184 | 0.07340775 | 4.077635733 | 0.018002528 | 0.985636837 | 0.998252924 |
| chr1:212502476-212506940  | exonic | PPP2R5A  | 1  | 212502476 | 212506940 | 0 | 1 | 0 | 1 | 0 | 0 | 4464   | 0.280587184 | 0.07340775 | 4.077635733 | 0.018002528 | 0.985636837 | 0.998252924 |
| chr1:215747128-215753342  | exonic | KCTD3    | 1  | 215747128 | 215753342 | 0 | 0 | 1 | 1 | 0 | 0 | 6214   | 0.303580411 | 0.07340775 | 4.077635733 | 0.018002528 | 0.985636837 | 0.998252924 |
| chr1:227213755-227223308  | exonic | CDC42BPA | 1  | 227213755 | 227223308 | 0 | 0 | 1 | 1 | 0 | 0 | 9553   | 0.303580411 | 0.07340775 | 4.077635733 | 0.018002528 | 0.985636837 | 0.998252924 |
| chr1:233296028-233344435  | exonic | PCNXL2   | 1  | 233296028 | 233344435 | 0 | 0 | 1 | 1 | 0 | 0 | 48407  | 0.303580411 | 0.07340775 | 4.077635733 | 0.018002528 | 0.985636837 | 0.998252924 |
| chr1:237550580-237586548  | exonic | RYR2     | 1  | 237550580 | 237586548 | 0 | 1 | 0 | 1 | 0 | 0 | 35968  | 0.280587184 | 0.07340775 | 4.077635733 | 0.018002528 | 0.985636837 | 0.998252924 |
| chr1:237586391-237608822  | exonic | RYR2     | 1  | 237586391 | 237608822 | 0 | 0 | 1 | 1 | 0 | 0 | 22431  | 0.303580411 | 0.07340775 | 4.077635733 | 0.018002528 | 0.985636837 | 0.998252924 |
| chr1:243327585-243388623  | exonic | CEP170   | 1  | 243327585 | 243388623 | 0 | 1 | 0 | 1 | 0 | 0 | 61038  | 0.280587184 | 0.07340775 | 4.077635733 | 0.018002528 | 0.985636837 | 0.998252924 |
| chr1:243493841-243652442  | exonic | SDCCAG8  | 1  | 243493841 | 243652442 | 0 | 1 | 0 | 1 | 0 | 0 | 158601 | 0.280587184 | 0.07340775 | 4.077635733 | 0.018002528 | 0.985636837 | 0.998252924 |
| chr1:243675625-244006584  | exonic | AKT3     | 1  | 243675625 | 244006584 | 0 | 1 | 0 | 1 | 0 | 0 | 330959 | 0.280587184 | 0.07340775 | 4.077635733 | 0.018002528 | 0.985636837 | 0.998252924 |
| chr1:39904945-39905172    | exonic | MACF1    | 1  | 39904945  | 39905172  | 0 | 0 | 1 | 1 | 0 | 0 | 227    | 0.303580411 | 0.07340775 | 4.077635733 | 0.018002528 | 0.985636837 | 0.998252924 |
| chr1:46179917-46182689    | exonic | IPP      | 1  | 46179917  | 46182689  | 0 | 1 | 0 | 1 | 0 | 0 | 2772   | 0.280587184 | 0.07340775 | 4.077635733 | 0.018002528 | 0.985636837 | 0.998252924 |
| chr1:53443888-53446215    | exonic | SCP2     | 1  | 53443888  | 53446215  | 0 | 0 | 1 | 1 | 0 | 0 | 2327   | 0.303580411 | 0.07340775 | 4.077635733 | 0.018002528 | 0.985636837 | 0.998252924 |
| chr1:62321701-62350080    | exonic | INADL    | 1  | 62321701  | 62350080  | 0 | 1 | 0 | 1 | 0 | 0 | 28379  | 0.280587184 | 0.07340775 | 4.077635733 | 0.018002528 | 0.985636837 | 0.998252924 |
| chr1:67299267-67371058    | exonic | WDR78    | 1  | 67299267  | 67371058  | 0 | 1 | 0 | 1 | 0 | 0 | 71791  | 0.280587184 | 0.07340775 | 4.077635733 | 0.018002528 | 0.985636837 | 0.998252924 |
| chr1:93683294-93692006    | exonic | CCDC18   | 1  | 93683294  | 93692006  | 0 | 0 | 1 | 1 | 0 | 0 | 8712   | 0.303580411 | 0.07340775 | 4.077635733 | 0.018002528 | 0.985636837 | 0.998252924 |
| chr10:103649168-103717489 | exonic | C10orf76 | 10 | 103649168 | 103717489 | 0 | 0 | 1 | 1 | 0 | 0 | 68321  | 0.303580411 | 0.07340775 | 4.077635733 | 0.018002528 | 0.985636837 | 0.998252924 |
| chr10:104111012-104113411 | exonic | GBF1     | 10 | 104111012 | 104113411 | 0 | 0 | 1 | 1 | 0 | 0 | 2399   | 0.303580411 | 0.07340775 | 4.077635733 | 0.018002528 | 0.985636837 | 0.998252924 |
| chr10:11789347-11797607   | exonic | ECHDC3   | 10 | 11789347  | 11797607  | 0 | 1 | 0 | 1 | 0 | 0 | 8260   | 0.280587184 | 0.07340775 | 4.077635733 | 0.018002528 | 0.985636837 | 0.998252924 |
| chr10:121086027-121156284 | exonic | GRK5     | 10 | 121086027 | 121156284 | 0 | 0 | 1 | 1 | 0 | 0 | 70257  | 0.303580411 | 0.07340775 | 4.077635733 | 0.018002528 | 0.985636837 | 0.998252924 |
| chr10:133106473-133107562 | exonic | TCERG1L  | 10 | 133106473 | 133107562 | 0 | 0 | 1 | 1 | 0 | 0 | 1089   | 0.303580411 | 0.07340775 | 4.077635733 | 0.018002528 | 0.985636837 | 0.998252924 |
| chr10:34739244-34806087   | exonic | PARD3    | 10 | 34739244  | 34806087  | 0 | 1 | 0 | 1 | 0 | 0 | 66843  | 0.280587184 | 0.07340775 | 4.077635733 | 0.018002528 | 0.985636837 | 0.998252924 |
| chr10:35333493-35343467   | exonic | CUL2     | 10 | 35333493  | 35343467  | 0 | 0 | 1 | 1 | 0 | 0 | 9974   | 0.303580411 | 0.07340775 | 4.077635733 | 0.018002528 | 0.985636837 | 0.998252924 |
| chr10:69699344-69700862   | exonic | HERC4    | 10 | 69699344  | 69700862  | 0 | 0 | 1 | 1 | 0 | 0 | 1518   | 0.303580411 | 0.07340775 | 4.077635733 | 0.018002528 | 0.985636837 | 0.998252924 |
| chr10:73490225-73492132   | exonic | CDH23    | 10 | 73490225  | 73492132  | 0 | 1 | 0 | 1 | 0 | 0 | 1907   | 0.280587184 | 0.07340775 | 4.077635733 | 0.018002528 | 0.985636837 | 0.998252924 |
| chr10:74790028-74813348   | exonic | P4HA1    | 10 | 74790028  | 74813348  | 0 | 0 | 1 | 1 | 0 | 0 | 23320  | 0.303580411 | 0.07340775 | 4.077635733 | 0.018002528 | 0.985636837 | 0.998252924 |
| chr10:75830427-75849956   | exonic | VCL      | 10 | 75830427  | 75849956  | 0 | 1 | 0 | 1 | 0 | 0 | 19529  | 0.280587184 | 0.07340775 | 4.077635733 | 0.018002528 | 0.985636837 | 0.998252924 |
| chr10:89468952-89475600   | exonic | PAPSS2   | 10 | 89468952  | 89475600  | 0 | 1 | 0 | 1 | 0 | 0 | 6648   | 0.280587184 | 0.07340775 | 4.077635733 | 0.018002528 | 0.985636837 | 0.998252924 |
| chr11:103151076-103229087 | exonic | DYNC2H1  | 11 | 103151076 | 103229087 | 0 | 0 | 1 | 1 | 0 | 0 | 78011  | 0.303580411 | 0.07340775 | 4.077635733 | 0.018002528 | 0.985636837 | 0.998252924 |
| chr11:108200940-108206688 | exonic | ATM      | 11 | 108200940 | 108206688 | 0 | 1 | 0 | 1 | 0 | 0 | 5748   | 0.280587184 | 0.07340775 | 4.077635733 | 0.018002528 | 0.985636837 | 0.998252924 |
| chr11:125466953-125478184 | exonic | STT3A    | 11 | 125466953 | 125478184 | 0 | 0 | 1 | 1 | 0 | 0 | 11231  | 0.303580411 | 0.07340775 | 4.077635733 | 0.018002528 | 0.985636837 | 0.998252924 |
| chr11:129979323-129992408 | exonic | APLP2    | 11 | 129979323 | 129992408 | 0 | 1 | 0 | 1 | 0 | 0 | 13085  | 0.280587184 | 0.07340775 | 4.077635733 | 0.018002528 | 0.985636837 | 0.998252924 |

|                           |        |          |    |           |           |   |   |   |   |   |   |        |             |            |             |             |             |             |
|---------------------------|--------|----------|----|-----------|-----------|---|---|---|---|---|---|--------|-------------|------------|-------------|-------------|-------------|-------------|
| chr11:14839728-14840755   | exonic | PDE3B    | 11 | 14839728  | 14840755  | 0 | 0 | 1 | 1 | 0 | 0 | 1027   | 0.303580411 | 0.07340775 | 4.077635733 | 0.018002528 | 0.985636837 | 0.998252924 |
| chr11:18010143-18029623   | exonic | SERGEF   | 11 | 18010143  | 18029623  | 0 | 1 | 0 | 1 | 0 | 0 | 19480  | 0.280587184 | 0.07340775 | 4.077635733 | 0.018002528 | 0.985636837 | 0.998252924 |
| chr11:18536224-18541150   | exonic | TSG101   | 11 | 18536224  | 18541150  | 0 | 1 | 0 | 1 | 0 | 0 | 4926   | 0.280587184 | 0.07340775 | 4.077635733 | 0.018002528 | 0.985636837 | 0.998252924 |
| chr11:19854029-19901673   | exonic | NAV2     | 11 | 19854029  | 19901673  | 0 | 0 | 1 | 1 | 0 | 0 | 47644  | 0.303580411 | 0.07340775 | 4.077635733 | 0.018002528 | 0.985636837 | 0.998252924 |
| chr11:22696395-22747979   | exonic | GAS2     | 11 | 22696395  | 22747979  | 0 | 1 | 0 | 1 | 0 | 0 | 51584  | 0.280587184 | 0.07340775 | 4.077635733 | 0.018002528 | 0.985636837 | 0.998252924 |
| chr11:47603639-47604020   | exonic | NDUFS3   | 11 | 47603639  | 47604020  | 0 | 1 | 0 | 1 | 0 | 0 | 381    | 0.280587184 | 0.07340775 | 4.077635733 | 0.018002528 | 0.985636837 | 0.998252924 |
| chr11:47647225-47648679   | exonic | MTCH2    | 11 | 47647225  | 47648679  | 0 | 0 | 1 | 1 | 0 | 0 | 1454   | 0.303580411 | 0.07340775 | 4.077635733 | 0.018002528 | 0.985636837 | 0.998252924 |
| chr12:105543392-105553926 | exonic | KIAA1033 | 12 | 105543392 | 105553926 | 0 | 0 | 1 | 1 | 0 | 0 | 10534  | 0.303580411 | 0.07340775 | 4.077635733 | 0.018002528 | 0.985636837 | 0.998252924 |
| chr12:109609609-109612035 | exonic | ACACB    | 12 | 109609609 | 109612035 | 0 | 1 | 0 | 1 | 0 | 0 | 2426   | 0.280587184 | 0.07340775 | 4.077635733 | 0.018002528 | 0.985636837 | 0.998252924 |
| chr12:113384547-113388780 | exonic | OAS3     | 12 | 113384547 | 113388780 | 0 | 1 | 0 | 1 | 0 | 0 | 4233   | 0.280587184 | 0.07340775 | 4.077635733 | 0.018002528 | 0.985636837 | 0.998252924 |
| chr12:120189854-120214646 | exonic | CIT      | 12 | 120189854 | 120214646 | 0 | 1 | 0 | 1 | 0 | 0 | 24792  | 0.280587184 | 0.07340775 | 4.077635733 | 0.018002528 | 0.985636837 | 0.998252924 |
| chr12:121970710-121987543 | exonic | KDM2B    | 12 | 121970710 | 121987543 | 0 | 1 | 0 | 1 | 0 | 0 | 16833  | 0.280587184 | 0.07340775 | 4.077635733 | 0.018002528 | 0.985636837 | 0.998252924 |
| chr12:122817533-122819252 | exonic | CLIP1    | 12 | 122817533 | 122819252 | 0 | 0 | 1 | 1 | 0 | 0 | 1719   | 0.303580411 | 0.07340775 | 4.077635733 | 0.018002528 | 0.985636837 | 0.998252924 |
| chr12:124968141-124979914 | exonic | NCOR2    | 12 | 124968141 | 124979914 | 0 | 1 | 0 | 1 | 0 | 0 | 11773  | 0.280587184 | 0.07340775 | 4.077635733 | 0.018002528 | 0.985636837 | 0.998252924 |
| chr12:1399017-1517413     | exonic | ERC1     | 12 | 1399017   | 1517413   | 0 | 1 | 0 | 1 | 0 | 0 | 118396 | 0.280587184 | 0.07340775 | 4.077635733 | 0.018002528 | 0.985636837 | 0.998252924 |
| chr12:19427449-19427917   | exonic | PLEKHA5  | 12 | 19427449  | 19427917  | 0 | 1 | 0 | 1 | 0 | 0 | 468    | 0.280587184 | 0.07340775 | 4.077635733 | 0.018002528 | 0.985636837 | 0.998252924 |
| chr12:27064110-27070666   | exonic | ASUN     | 12 | 27064110  | 27070666  | 0 | 1 | 0 | 1 | 0 | 0 | 6556   | 0.280587184 | 0.07340775 | 4.077635733 | 0.018002528 | 0.985636837 | 0.998252924 |
| chr12:42748962-42792796   | exonic | PPHLN1   | 12 | 42748962  | 42792796  | 0 | 0 | 1 | 1 | 0 | 0 | 43834  | 0.303580411 | 0.07340775 | 4.077635733 | 0.018002528 | 0.985636837 | 0.998252924 |
| chr12:48457492-48495299   | exonic | SENP1    | 12 | 48457492  | 48495299  | 0 | 0 | 1 | 1 | 0 | 0 | 37807  | 0.303580411 | 0.07340775 | 4.077635733 | 0.018002528 | 0.985636837 | 0.998252924 |
| chr12:50821544-50829407   | exonic | LARP4    | 12 | 50821544  | 50829407  | 0 | 1 | 0 | 1 | 0 | 0 | 7863   | 0.280587184 | 0.07340775 | 4.077635733 | 0.018002528 | 0.985636837 | 0.998252924 |
| chr12:69109406-69119576   | exonic | NUP107   | 12 | 69109406  | 69119576  | 0 | 1 | 0 | 1 | 0 | 0 | 10170  | 0.280587184 | 0.07340775 | 4.077635733 | 0.018002528 | 0.985636837 | 0.998252924 |
| chr13:20632714-20638685   | exonic | ZMYM2    | 13 | 20632714  | 20638685  | 0 | 0 | 1 | 1 | 0 | 0 | 5971   | 0.303580411 | 0.07340775 | 4.077635733 | 0.018002528 | 0.985636837 | 0.998252924 |
| chr13:28794367-28835595   | exonic | PAN3     | 13 | 28794367  | 28835595  | 0 | 0 | 1 | 1 | 0 | 0 | 41228  | 0.303580411 | 0.07340775 | 4.077635733 | 0.018002528 | 0.985636837 | 0.998252924 |
| chr13:42439871-42461497   | exonic | VWA8     | 13 | 42439871  | 42461497  | 0 | 0 | 1 | 1 | 0 | 0 | 21626  | 0.303580411 | 0.07340775 | 4.077635733 | 0.018002528 | 0.985636837 | 0.998252924 |
| chr13:53001123-53009017   | exonic | VPS36    | 13 | 53001123  | 53009017  | 0 | 0 | 1 | 1 | 0 | 0 | 7894   | 0.303580411 | 0.07340775 | 4.077635733 | 0.018002528 | 0.985636837 | 0.998252924 |
| chr13:96622365-96642327   | exonic | UGGT2    | 13 | 96622365  | 96642327  | 0 | 0 | 1 | 1 | 0 | 0 | 19962  | 0.303580411 | 0.07340775 | 4.077635733 | 0.018002528 | 0.985636837 | 0.998252924 |
| chr14:35579024-35579835   | exonic | PPP2R3C  | 14 | 35579024  | 35579835  | 0 | 0 | 1 | 1 | 0 | 0 | 811    | 0.303580411 | 0.07340775 | 4.077635733 | 0.018002528 | 0.985636837 | 0.998252924 |
| chr14:66188492-66191041   | exonic | FUT8     | 14 | 66188492  | 66191041  | 0 | 1 | 0 | 1 | 0 | 0 | 2549   | 0.280587184 | 0.07340775 | 4.077635733 | 0.018002528 | 0.985636837 | 0.998252924 |
| chr14:71413631-71445365   | exonic | PCNX     | 14 | 71413631  | 71445365  | 0 | 0 | 1 | 1 | 0 | 0 | 31734  | 0.303580411 | 0.07340775 | 4.077635733 | 0.018002528 | 0.985636837 | 0.998252924 |
| chr14:73406509-73407085   | exonic | DCAF4    | 14 | 73406509  | 73407085  | 0 | 1 | 0 | 1 | 0 | 0 | 576    | 0.280587184 | 0.07340775 | 4.077635733 | 0.018002528 | 0.985636837 | 0.998252924 |
| chr14:75245149-75249028   | exonic | YLPM1    | 14 | 75245149  | 75249028  | 0 | 0 | 1 | 1 | 0 | 0 | 3879   | 0.303580411 | 0.07340775 | 4.077635733 | 0.018002528 | 0.985636837 | 0.998252924 |
| chr14:81209418-81304622   | exonic | CEP128   | 14 | 81209418  | 81304622  | 0 | 0 | 1 | 1 | 0 | 0 | 95204  | 0.303580411 | 0.07340775 | 4.077635733 | 0.018002528 | 0.985636837 | 0.998252924 |
| chr14:81651874-81682858   | exonic | GTF2A1   | 14 | 81651874  | 81682858  | 0 | 0 | 1 | 1 | 0 | 0 | 30984  | 0.303580411 | 0.07340775 | 4.077635733 | 0.018002528 | 0.985636837 | 0.998252924 |
| chr14:92440970-92461859   | exonic | TRIP11   | 14 | 92440970  | 92461859  | 0 | 1 | 0 | 1 | 0 | 0 | 20889  | 0.280587184 | 0.07340775 | 4.077635733 | 0.018002528 | 0.985636837 | 0.998252924 |
| chr15:28510763-28525433   | exonic | HERC2    | 15 | 28510763  | 28525433  | 0 | 0 | 1 | 1 | 0 | 0 | 14670  | 0.303580411 | 0.07340775 | 4.077635733 | 0.018002528 | 0.985636837 | 0.998252924 |

|                         |        |          |    |          |          |   |   |   |   |   |   |        |             |            |             |             |             |             |
|-------------------------|--------|----------|----|----------|----------|---|---|---|---|---|---|--------|-------------|------------|-------------|-------------|-------------|-------------|
| chr15:34444990-34455891 | exonic | KATNBL1  | 15 | 34444990 | 34455891 | 0 | 1 | 0 | 1 | 0 | 0 | 10901  | 0.280587184 | 0.07340775 | 4.077635733 | 0.018002528 | 0.985636837 | 0.998252924 |
| chr15:35224518-35231014 | exonic | AQR      | 15 | 35224518 | 35231014 | 0 | 0 | 1 | 1 | 0 | 0 | 6496   | 0.303580411 | 0.07340775 | 4.077635733 | 0.018002528 | 0.985636837 | 0.998252924 |
| chr15:38793343-38798121 | exonic | RASGRP1  | 15 | 38793343 | 38798121 | 0 | 0 | 1 | 1 | 0 | 0 | 4778   | 0.303580411 | 0.07340775 | 4.077635733 | 0.018002528 | 0.985636837 | 0.998252924 |
| chr15:50935536-50941082 | exonic | TRPM7    | 15 | 50935536 | 50941082 | 0 | 0 | 1 | 1 | 0 | 0 | 5546   | 0.303580411 | 0.07340775 | 4.077635733 | 0.018002528 | 0.985636837 | 0.998252924 |
| chr15:63951934-63981898 | exonic | HERC1    | 15 | 63951934 | 63981898 | 0 | 1 | 0 | 1 | 0 | 0 | 29964  | 0.280587184 | 0.07340775 | 4.077635733 | 0.018002528 | 0.985636837 | 0.998252924 |
| chr15:78452433-78454709 | exonic | IDH3A    | 15 | 78452433 | 78454709 | 0 | 0 | 1 | 1 | 0 | 0 | 2276   | 0.303580411 | 0.07340775 | 4.077635733 | 0.018002528 | 0.985636837 | 0.998252924 |
| chr15:78581960-78588067 | exonic | WDR61    | 15 | 78581960 | 78588067 | 0 | 0 | 1 | 1 | 0 | 0 | 6107   | 0.303580411 | 0.07340775 | 4.077635733 | 0.018002528 | 0.985636837 | 0.998252924 |
| chr15:78757592-78758831 | exonic | IREB2    | 15 | 78757592 | 78758831 | 0 | 0 | 1 | 1 | 0 | 0 | 1239   | 0.303580411 | 0.07340775 | 4.077635733 | 0.018002528 | 0.985636837 | 0.998252924 |
| chr15:90610341-90611827 | exonic | ZNF710   | 15 | 90610341 | 90611827 | 0 | 0 | 1 | 1 | 0 | 0 | 1486   | 0.303580411 | 0.07340775 | 4.077635733 | 0.018002528 | 0.985636837 | 0.998252924 |
| chr15:93521463-93522513 | exonic | CHD2     | 15 | 93521463 | 93522513 | 0 | 1 | 0 | 1 | 0 | 0 | 1050   | 0.280587184 | 0.07340775 | 4.077635733 | 0.018002528 | 0.985636837 | 0.998252924 |
| chr15:94899365-95001475 | exonic | MCTP2    | 15 | 94899365 | 95001475 | 0 | 0 | 1 | 1 | 0 | 0 | 102110 | 0.303580411 | 0.07340775 | 4.077635733 | 0.018002528 | 0.985636837 | 0.998252924 |
| chr16:20922504-20927036 | exonic | LYRM1    | 16 | 20922504 | 20927036 | 0 | 1 | 0 | 1 | 0 | 0 | 4532   | 0.280587184 | 0.07340775 | 4.077635733 | 0.018002528 | 0.985636837 | 0.998252924 |
| chr16:53476569-53481018 | exonic | RBL2     | 16 | 53476569 | 53481018 | 0 | 0 | 1 | 1 | 0 | 0 | 4449   | 0.303580411 | 0.07340775 | 4.077635733 | 0.018002528 | 0.985636837 | 0.998252924 |
| chr16:68308593-68321774 | exonic | SLC7A6   | 16 | 68308593 | 68321774 | 0 | 1 | 0 | 1 | 0 | 0 | 13181  | 0.280587184 | 0.07340775 | 4.077635733 | 0.018002528 | 0.985636837 | 0.998252924 |
| chr16:70765397-70778482 | exonic | VAC14    | 16 | 70765397 | 70778482 | 0 | 1 | 0 | 1 | 0 | 0 | 13085  | 0.280587184 | 0.07340775 | 4.077635733 | 0.018002528 | 0.985636837 | 0.998252924 |
| chr16:84135225-84135712 | exonic | MBTPS1   | 16 | 84135225 | 84135712 | 0 | 0 | 1 | 1 | 0 | 0 | 487    | 0.303580411 | 0.07340775 | 4.077635733 | 0.018002528 | 0.985636837 | 0.998252924 |
| chr17:27807385-27818883 | exonic | TAOK1    | 17 | 27807385 | 27818883 | 0 | 1 | 0 | 1 | 0 | 0 | 11498  | 0.280587184 | 0.07340775 | 4.077635733 | 0.018002528 | 0.985636837 | 0.998252924 |
| chr17:36517593-36533668 | exonic | SOCS7    | 17 | 36517593 | 36533668 | 0 | 1 | 0 | 1 | 0 | 0 | 16075  | 0.280587184 | 0.07340775 | 4.077635733 | 0.018002528 | 0.985636837 | 0.998252924 |
| chr17:37646809-37650947 | exonic | CDK12    | 17 | 37646809 | 37650947 | 0 | 1 | 0 | 1 | 0 | 0 | 4138   | 0.280587184 | 0.07340775 | 4.077635733 | 0.018002528 | 0.985636837 | 0.998252924 |
| chr17:53016284-53024673 | exonic | TOM1L1   | 17 | 53016284 | 53024673 | 0 | 0 | 1 | 1 | 0 | 0 | 8389   | 0.303580411 | 0.07340775 | 4.077635733 | 0.018002528 | 0.985636837 | 0.998252924 |
| chr17:59853761-59857762 | exonic | BRIP1    | 17 | 59853761 | 59857762 | 0 | 1 | 0 | 1 | 0 | 0 | 4001   | 0.280587184 | 0.07340775 | 4.077635733 | 0.018002528 | 0.985636837 | 0.998252924 |
| chr17:62574609-62582288 | exonic | SMURF2   | 17 | 62574609 | 62582288 | 0 | 1 | 0 | 1 | 0 | 0 | 7679   | 0.280587184 | 0.07340775 | 4.077635733 | 0.018002528 | 0.985636837 | 0.998252924 |
| chr18:18945987-18983955 | exonic | GREB1L   | 18 | 18945987 | 18983955 | 0 | 1 | 0 | 1 | 0 | 0 | 37968  | 0.280587184 | 0.07340775 | 4.077635733 | 0.018002528 | 0.985636837 | 0.998252924 |
| chr18:39573233-39600669 | exonic | PIK3C3   | 18 | 39573233 | 39600669 | 0 | 0 | 1 | 1 | 0 | 0 | 27436  | 0.303580411 | 0.07340775 | 4.077635733 | 0.018002528 | 0.985636837 | 0.998252924 |
| chr18:39575853-39609405 | exonic | PIK3C3   | 18 | 39575853 | 39609405 | 0 | 0 | 1 | 1 | 0 | 0 | 33552  | 0.303580411 | 0.07340775 | 4.077635733 | 0.018002528 | 0.985636837 | 0.998252924 |
| chr18:44579250-44589732 | exonic | KATNAL2  | 18 | 44579250 | 44589732 | 0 | 1 | 0 | 1 | 0 | 0 | 10482  | 0.280587184 | 0.07340775 | 4.077635733 | 0.018002528 | 0.985636837 | 0.998252924 |
| chr18:51797729-51813781 | exonic | POLI     | 18 | 51797729 | 51813781 | 0 | 0 | 1 | 1 | 0 | 0 | 16052  | 0.303580411 | 0.07340775 | 4.077635733 | 0.018002528 | 0.985636837 | 0.998252924 |
| chr18:66503985-66513658 | exonic | CCDC102B | 18 | 66503985 | 66513658 | 0 | 1 | 0 | 1 | 0 | 0 | 9673   | 0.280587184 | 0.07340775 | 4.077635733 | 0.018002528 | 0.985636837 | 0.998252924 |
| chr18:67231722-67345089 | exonic | DOK6     | 18 | 67231722 | 67345089 | 0 | 0 | 1 | 1 | 0 | 0 | 113367 | 0.303580411 | 0.07340775 | 4.077635733 | 0.018002528 | 0.985636837 | 0.998252924 |
| chr18:9593765-9595100   | exonic | PPP4R1   | 18 | 9593765  | 9595100  | 0 | 0 | 1 | 1 | 0 | 0 | 1335   | 0.303580411 | 0.07340775 | 4.077635733 | 0.018002528 | 0.985636837 | 0.998252924 |
| chr19:14501735-14515374 | exonic | ADGRE5   | 19 | 14501735 | 14515374 | 0 | 0 | 1 | 1 | 0 | 0 | 13639  | 0.303580411 | 0.07340775 | 4.077635733 | 0.018002528 | 0.985636837 | 0.998252924 |
| chr19:34685382-34699956 | exonic | LSM14A   | 19 | 34685382 | 34699956 | 0 | 0 | 1 | 1 | 0 | 0 | 14574  | 0.303580411 | 0.07340775 | 4.077635733 | 0.018002528 | 0.985636837 | 0.998252924 |
| chr19:41239064-41243674 | exonic | ITPKC    | 19 | 41239064 | 41243674 | 0 | 0 | 1 | 1 | 0 | 0 | 4610   | 0.303580411 | 0.07340775 | 4.077635733 | 0.018002528 | 0.985636837 | 0.998252924 |
| chr19:42839186-42839537 | exonic | MEGF8    | 19 | 42839186 | 42839537 | 0 | 1 | 0 | 1 | 0 | 0 | 351    | 0.280587184 | 0.07340775 | 4.077635733 | 0.018002528 | 0.985636837 | 0.998252924 |
| chr19:7141687-7184648   | exonic | INSR     | 19 | 7141687  | 7184648  | 0 | 0 | 1 | 1 | 0 | 0 | 42961  | 0.303580411 | 0.07340775 | 4.077635733 | 0.018002528 | 0.985636837 | 0.998252924 |

|                          |              |              |    |           |           |   |   |   |   |   |   |        |             |            |             |             |             |             |
|--------------------------|--------------|--------------|----|-----------|-----------|---|---|---|---|---|---|--------|-------------|------------|-------------|-------------|-------------|-------------|
| chr19:7163042-7174742    | exonic       | INSR         | 19 | 7163042   | 7174742   | 0 | 1 | 0 | 1 | 0 | 0 | 11700  | 0.280587184 | 0.07340775 | 4.077635733 | 0.018002528 | 0.985636837 | 0.998252924 |
| chr2:109408130-109421464 | exonic       | CCDC138      | 2  | 109408130 | 109421464 | 0 | 1 | 0 | 1 | 0 | 0 | 13334  | 0.280587184 | 0.07340775 | 4.077635733 | 0.018002528 | 0.985636837 | 0.998252924 |
| chr2:120567412-120643458 | exonic       | PTPN4        | 2  | 120567412 | 120643458 | 0 | 1 | 0 | 1 | 0 | 0 | 76046  | 0.280587184 | 0.07340775 | 4.077635733 | 0.018002528 | 0.985636837 | 0.998252924 |
| chr2:180036846-180056593 | exonic       | SESTD1       | 2  | 180036846 | 180056593 | 0 | 1 | 0 | 1 | 0 | 0 | 19747  | 0.280587184 | 0.07340775 | 4.077635733 | 0.018002528 | 0.985636837 | 0.998252924 |
| chr2:26477114-26486347   | exonic       | HADHB        | 2  | 26477114  | 26486347  | 0 | 1 | 0 | 1 | 0 | 0 | 9233   | 0.280587184 | 0.07340775 | 4.077635733 | 0.018002528 | 0.985636837 | 0.998252924 |
| chr2:29006772-29011675   | exonic       | PPP1CB       | 2  | 29006772  | 29011675  | 0 | 1 | 0 | 1 | 0 | 0 | 4903   | 0.280587184 | 0.07340775 | 4.077635733 | 0.018002528 | 0.985636837 | 0.998252924 |
| chr2:36623756-36749456   | exonic       | CRIM1        | 2  | 36623756  | 36749456  | 0 | 1 | 0 | 1 | 0 | 0 | 125700 | 0.280587184 | 0.07340775 | 4.077635733 | 0.018002528 | 0.985636837 | 0.998252924 |
| chr2:37276795-37284623   | exonic       | HEATR5B      | 2  | 37276795  | 37284623  | 0 | 0 | 1 | 1 | 0 | 0 | 7828   | 0.303580411 | 0.07340775 | 4.077635733 | 0.018002528 | 0.985636837 | 0.998252924 |
| chr2:46583289-46588229   | exonic       | EPAS1        | 2  | 46583289  | 46588229  | 0 | 0 | 1 | 1 | 0 | 0 | 4940   | 0.303580411 | 0.07340775 | 4.077635733 | 0.018002528 | 0.985636837 | 0.998252924 |
| chr2:48573339-48573890   | exonic       | FOXN2        | 2  | 48573339  | 48573890  | 0 | 0 | 1 | 1 | 0 | 0 | 551    | 0.303580411 | 0.07340775 | 4.077635733 | 0.018002528 | 0.985636837 | 0.998252924 |
| chr2:9419445-9437574     | exonic       | ASAP2        | 2  | 9419445   | 9437574   | 0 | 0 | 1 | 1 | 0 | 0 | 18129  | 0.303580411 | 0.07340775 | 4.077635733 | 0.018002528 | 0.985636837 | 0.998252924 |
| chr20:19970649-19972943  | exonic       | RIN2         | 20 | 19970649  | 19972943  | 0 | 0 | 1 | 1 | 0 | 0 | 2294   | 0.303580411 | 0.07340775 | 4.077635733 | 0.018002528 | 0.985636837 | 0.998252924 |
| chr20:25999467-26000560  | ncRNA_exonic | LOC100134868 | 20 | 25999467  | 26000560  | 0 | 0 | 1 | 1 | 0 | 0 | 1093   | 0.303580411 | 0.07340775 | 4.077635733 | 0.018002528 | 0.985636837 | 0.998252924 |
| chr20:30803071-30804524  | exonic       | POFUT1       | 20 | 30803071  | 30804524  | 0 | 1 | 0 | 1 | 0 | 0 | 1453   | 0.280587184 | 0.07340775 | 4.077635733 | 0.018002528 | 0.985636837 | 0.998252924 |
| chr20:32354656-32358098  | exonic       | ZNF341       | 20 | 32354656  | 32358098  | 0 | 0 | 1 | 1 | 0 | 0 | 3442   | 0.303580411 | 0.07340775 | 4.077635733 | 0.018002528 | 0.985636837 | 0.998252924 |
| chr20:34082350-34086545  | exonic       | CEP250       | 20 | 34082350  | 34086545  | 0 | 1 | 0 | 1 | 0 | 0 | 4195   | 0.280587184 | 0.07340775 | 4.077635733 | 0.018002528 | 0.985636837 | 0.998252924 |
| chr20:45918930-45923523  | exonic       | ZMYND8       | 20 | 45918930  | 45923523  | 0 | 0 | 1 | 1 | 0 | 0 | 4593   | 0.303580411 | 0.07340775 | 4.077635733 | 0.018002528 | 0.985636837 | 0.998252924 |
| chr22:30374430-30384551  | exonic       | MTMR3        | 22 | 30374430  | 30384551  | 0 | 1 | 0 | 1 | 0 | 0 | 10121  | 0.280587184 | 0.07340775 | 4.077635733 | 0.018002528 | 0.985636837 | 0.998252924 |
| chr22:43555215-43557196  | exonic       | TSPO         | 22 | 43555215  | 43557196  | 0 | 0 | 1 | 1 | 0 | 0 | 1981   | 0.303580411 | 0.07340775 | 4.077635733 | 0.018002528 | 0.985636837 | 0.998252924 |
| chr22:50810448-50845304  | exonic       | PPP6R2       | 22 | 50810448  | 50845304  | 0 | 1 | 0 | 1 | 0 | 0 | 34856  | 0.280587184 | 0.07340775 | 4.077635733 | 0.018002528 | 0.985636837 | 0.998252924 |
| chr3:111632165-111664204 | exonic       | PHLDB2       | 3  | 111632165 | 111664204 | 0 | 1 | 0 | 1 | 0 | 0 | 32039  | 0.280587184 | 0.07340775 | 4.077635733 | 0.018002528 | 0.985636837 | 0.998252924 |
| chr3:127429418-127500738 | exonic       | MGLL         | 3  | 127429418 | 127500738 | 0 | 1 | 0 | 1 | 0 | 0 | 71320  | 0.280587184 | 0.07340775 | 4.077635733 | 0.018002528 | 0.985636837 | 0.998252924 |
| chr3:129017196-129020985 | exonic       | HMCEs        | 3  | 129017196 | 129020985 | 0 | 0 | 1 | 1 | 0 | 0 | 3789   | 0.303580411 | 0.07340775 | 4.077635733 | 0.018002528 | 0.985636837 | 0.998252924 |
| chr3:132423041-132424658 | exonic       | NPHP3        | 3  | 132423041 | 132424658 | 0 | 1 | 0 | 1 | 0 | 0 | 1617   | 0.280587184 | 0.07340775 | 4.077635733 | 0.018002528 | 0.985636837 | 0.998252924 |
| chr3:1337284-1394135     | exonic       | CNTN6        | 3  | 1337284   | 1394135   | 0 | 1 | 0 | 1 | 0 | 0 | 56851  | 0.280587184 | 0.07340775 | 4.077635733 | 0.018002528 | 0.985636837 | 0.998252924 |
| chr3:138407716-138417937 | exonic       | PIK3CB       | 3  | 138407716 | 138417937 | 0 | 0 | 1 | 1 | 0 | 0 | 10221  | 0.303580411 | 0.07340775 | 4.077635733 | 0.018002528 | 0.985636837 | 0.998252924 |
| chr3:158378662-158384175 | exonic       | GFMI         | 3  | 158378662 | 158384175 | 0 | 0 | 1 | 1 | 0 | 0 | 5513   | 0.303580411 | 0.07340775 | 4.077635733 | 0.018002528 | 0.985636837 | 0.998252924 |
| chr3:179470072-179483636 | exonic       | USP13        | 3  | 179470072 | 179483636 | 0 | 1 | 0 | 1 | 0 | 0 | 13564  | 0.280587184 | 0.07340775 | 4.077635733 | 0.018002528 | 0.985636837 | 0.998252924 |
| chr3:184603897-184618760 | exonic       | VPS8         | 3  | 184603897 | 184618760 | 0 | 1 | 0 | 1 | 0 | 0 | 14863  | 0.280587184 | 0.07340775 | 4.077635733 | 0.018002528 | 0.985636837 | 0.998252924 |
| chr3:184642649-184689540 | exonic       | VPS8         | 3  | 184642649 | 184689540 | 0 | 1 | 0 | 1 | 0 | 0 | 46891  | 0.280587184 | 0.07340775 | 4.077635733 | 0.018002528 | 0.985636837 | 0.998252924 |
| chr3:33442453-33467233   | exonic       | UBP1         | 3  | 33442453  | 33467233  | 0 | 0 | 1 | 1 | 0 | 0 | 24780  | 0.303580411 | 0.07340775 | 4.077635733 | 0.018002528 | 0.985636837 | 0.998252924 |
| chr3:44399232-44409200   | exonic       | TCAIM        | 3  | 44399232  | 44409200  | 0 | 0 | 1 | 1 | 0 | 0 | 9968   | 0.303580411 | 0.07340775 | 4.077635733 | 0.018002528 | 0.985636837 | 0.998252924 |
| chr3:47747898-47787483   | exonic       | SMARCC1      | 3  | 47747898  | 47787483  | 0 | 0 | 1 | 1 | 0 | 0 | 39585  | 0.303580411 | 0.07340775 | 4.077635733 | 0.018002528 | 0.985636837 | 0.998252924 |
| chr3:47963254-48019423   | exonic       | MAP4         | 3  | 47963254  | 48019423  | 0 | 0 | 1 | 1 | 0 | 0 | 56169  | 0.303580411 | 0.07340775 | 4.077635733 | 0.018002528 | 0.985636837 | 0.998252924 |
| chr3:50091767-50099541   | exonic       | RBM6         | 3  | 50091767  | 50099541  | 0 | 0 | 1 | 1 | 0 | 0 | 7774   | 0.303580411 | 0.07340775 | 4.077635733 | 0.018002528 | 0.985636837 | 0.998252924 |

|                          |        |                         |   |           |           |   |   |   |   |   |   |        |             |            |             |             |             |             |
|--------------------------|--------|-------------------------|---|-----------|-----------|---|---|---|---|---|---|--------|-------------|------------|-------------|-------------|-------------|-------------|
| chr3:57269593-57276170   | exonic | APPL1                   | 3 | 57269593  | 57276170  | 0 | 1 | 0 | 1 | 0 | 0 | 6577   | 0.280587184 | 0.07340775 | 4.077635733 | 0.018002528 | 0.985636837 | 0.998252924 |
| chr3:57487047-57489931   | exonic | DNAH12                  | 3 | 57487047  | 57489931  | 0 | 0 | 1 | 1 | 0 | 0 | 2884   | 0.303580411 | 0.07340775 | 4.077635733 | 0.018002528 | 0.985636837 | 0.998252924 |
| chr3:69087714-69092063   | exonic | TMF1                    | 3 | 69087714  | 69092063  | 0 | 1 | 0 | 1 | 0 | 0 | 4349   | 0.280587184 | 0.07340775 | 4.077635733 | 0.018002528 | 0.985636837 | 0.998252924 |
| chr4:106345352-106359193 | exonic | PPA2                    | 4 | 106345352 | 106359193 | 0 | 0 | 1 | 1 | 0 | 0 | 13841  | 0.303580411 | 0.07340775 | 4.077635733 | 0.018002528 | 0.985636837 | 0.998252924 |
| chr4:107016638-107133992 | exonic | TBCK                    | 4 | 107016638 | 107133992 | 0 | 0 | 1 | 1 | 0 | 0 | 117354 | 0.303580411 | 0.07340775 | 4.077635733 | 0.018002528 | 0.985636837 | 0.998252924 |
| chr4:120460114-120488299 | exonic | PDE5A                   | 4 | 120460114 | 120488299 | 0 | 1 | 0 | 1 | 0 | 0 | 28185  | 0.280587184 | 0.07340775 | 4.077635733 | 0.018002528 | 0.985636837 | 0.998252924 |
| chr4:129012155-129012667 | exonic | LARP1B                  | 4 | 129012155 | 129012667 | 0 | 0 | 1 | 1 | 0 | 0 | 512    | 0.303580411 | 0.07340775 | 4.077635733 | 0.018002528 | 0.985636837 | 0.998252924 |
| chr4:129891532-129925031 | exonic | SCLT1                   | 4 | 129891532 | 129925031 | 0 | 0 | 1 | 1 | 0 | 0 | 33499  | 0.303580411 | 0.07340775 | 4.077635733 | 0.018002528 | 0.985636837 | 0.998252924 |
| chr4:1902352-1952930     | exonic | WHSC1                   | 4 | 1902352   | 1952930   | 0 | 1 | 0 | 1 | 0 | 0 | 50578  | 0.280587184 | 0.07340775 | 4.077635733 | 0.018002528 | 0.985636837 | 0.998252924 |
| chr4:2659529-2661781     | exonic | FAM193A                 | 4 | 2659529   | 2661781   | 0 | 1 | 0 | 1 | 0 | 0 | 2252   | 0.280587184 | 0.07340775 | 4.077635733 | 0.018002528 | 0.985636837 | 0.998252924 |
| chr4:39226503-39230310   | exonic | WDR19                   | 4 | 39226503  | 39230310  | 0 | 1 | 0 | 1 | 0 | 0 | 3807   | 0.280587184 | 0.07340775 | 4.077635733 | 0.018002528 | 0.985636837 | 0.998252924 |
| chr4:39874605-39878773   | exonic | PDS5A                   | 4 | 39874605  | 39878773  | 0 | 0 | 1 | 1 | 0 | 0 | 4168   | 0.303580411 | 0.07340775 | 4.077635733 | 0.018002528 | 0.985636837 | 0.998252924 |
| chr4:83852095-83867627   | exonic | LIN54                   | 4 | 83852095  | 83867627  | 0 | 1 | 0 | 1 | 0 | 0 | 15532  | 0.280587184 | 0.07340775 | 4.077635733 | 0.018002528 | 0.985636837 | 0.998252924 |
| chr4:89028335-89036210   | exonic | ABCG2                   | 4 | 89028335  | 89036210  | 0 | 1 | 0 | 1 | 0 | 0 | 7875   | 0.280587184 | 0.07340775 | 4.077635733 | 0.018002528 | 0.985636837 | 0.998252924 |
| chr5:139818045-139825560 | exonic | ANKHD1, ANKHD1-E1F4EBP3 | 5 | 139818045 | 139825560 | 0 | 1 | 0 | 1 | 0 | 0 | 7515   | 0.280587184 | 0.07340775 | 4.077635733 | 0.018002528 | 0.985636837 | 0.998252924 |
| chr5:172507587-172518404 | exonic | CREBRF                  | 5 | 172507587 | 172518404 | 0 | 1 | 0 | 1 | 0 | 0 | 10817  | 0.280587184 | 0.07340775 | 4.077635733 | 0.018002528 | 0.985636837 | 0.998252924 |
| chr5:179675972-179707608 | exonic | MAPK9                   | 5 | 179675972 | 179707608 | 0 | 1 | 0 | 1 | 0 | 0 | 31636  | 0.280587184 | 0.07340775 | 4.077635733 | 0.018002528 | 0.985636837 | 0.998252924 |
| chr5:37179462-37181107   | exonic | C5orf42                 | 5 | 37179462  | 37181107  | 0 | 0 | 1 | 1 | 0 | 0 | 1645   | 0.303580411 | 0.07340775 | 4.077635733 | 0.018002528 | 0.985636837 | 0.998252924 |
| chr5:72347175-72364606   | exonic | FCH02                   | 5 | 72347175  | 72364606  | 0 | 0 | 1 | 1 | 0 | 0 | 17431  | 0.303580411 | 0.07340775 | 4.077635733 | 0.018002528 | 0.985636837 | 0.998252924 |
| chr6:131179270-131191266 | exonic | EPB41L2                 | 6 | 131179270 | 131191266 | 0 | 1 | 0 | 1 | 0 | 0 | 11996  | 0.280587184 | 0.07340775 | 4.077635733 | 0.018002528 | 0.985636837 | 0.998252924 |
| chr6:24405395-24418806   | exonic | MRS2                    | 6 | 24405395  | 24418806  | 0 | 1 | 0 | 1 | 0 | 0 | 13411  | 0.280587184 | 0.07340775 | 4.077635733 | 0.018002528 | 0.985636837 | 0.998252924 |
| chr6:30627248-30628019   | exonic | DHX16                   | 6 | 30627248  | 30628019  | 0 | 1 | 0 | 1 | 0 | 0 | 771    | 0.280587184 | 0.07340775 | 4.077635733 | 0.018002528 | 0.985636837 | 0.998252924 |
| chr6:35248832-35255622   | exonic | ZNF76                   | 6 | 35248832  | 35255622  | 0 | 1 | 0 | 1 | 0 | 0 | 6790   | 0.280587184 | 0.07340775 | 4.077635733 | 0.018002528 | 0.985636837 | 0.998252924 |
| chr6:36483114-36507984   | exonic | STK38                   | 6 | 36483114  | 36507984  | 0 | 0 | 1 | 1 | 0 | 0 | 24870  | 0.303580411 | 0.07340775 | 4.077635733 | 0.018002528 | 0.985636837 | 0.998252924 |
| chr6:42796230-42797910   | exonic | GLTSCR1L                | 6 | 42796230  | 42797910  | 0 | 1 | 0 | 1 | 0 | 0 | 1680   | 0.280587184 | 0.07340775 | 4.077635733 | 0.018002528 | 0.985636837 | 0.998252924 |
| chr6:52132662-52134024   | exonic | MCM3                    | 6 | 52132662  | 52134024  | 0 | 1 | 0 | 1 | 0 | 0 | 1362   | 0.280587184 | 0.07340775 | 4.077635733 | 0.018002528 | 0.985636837 | 0.998252924 |
| chr6:71442080-71483128   | exonic | SMAP1                   | 6 | 71442080  | 71483128  | 0 | 1 | 0 | 1 | 0 | 0 | 41048  | 0.280587184 | 0.07340775 | 4.077635733 | 0.018002528 | 0.985636837 | 0.998252924 |
| chr6:84881324-84896341   | exonic | CEP162                  | 6 | 84881324  | 84896341  | 0 | 1 | 0 | 1 | 0 | 0 | 15017  | 0.280587184 | 0.07340775 | 4.077635733 | 0.018002528 | 0.985636837 | 0.998252924 |
| chr7:102398300-102417795 | exonic | FAM185A                 | 7 | 102398300 | 102417795 | 0 | 0 | 1 | 1 | 0 | 0 | 19495  | 0.303580411 | 0.07340775 | 4.077635733 | 0.018002528 | 0.985636837 | 0.998252924 |
| chr7:102412855-102427916 | exonic | FAM185A                 | 7 | 102412855 | 102427916 | 0 | 0 | 1 | 1 | 0 | 0 | 15061  | 0.303580411 | 0.07340775 | 4.077635733 | 0.018002528 | 0.985636837 | 0.998252924 |
| chr7:106888840-106938791 | exonic | COG5                    | 7 | 106888840 | 106938791 | 0 | 0 | 1 | 1 | 0 | 0 | 49951  | 0.303580411 | 0.07340775 | 4.077635733 | 0.018002528 | 0.985636837 | 0.998252924 |
| chr7:111535667-111541857 | exonic | DOCK4                   | 7 | 111535667 | 111541857 | 0 | 1 | 0 | 1 | 0 | 0 | 6190   | 0.280587184 | 0.07340775 | 4.077635733 | 0.018002528 | 0.985636837 | 0.998252924 |
| chr7:127013395-127026209 | exonic | ZNF800                  | 7 | 127013395 | 127026209 | 0 | 0 | 1 | 1 | 0 | 0 | 12814  | 0.303580411 | 0.07340775 | 4.077635733 | 0.018002528 | 0.985636837 | 0.998252924 |
| chr7:138921750-138969320 | exonic | UBN2                    | 7 | 138921750 | 138969320 | 0 | 0 | 1 | 1 | 0 | 0 | 47570  | 0.303580411 | 0.07340775 | 4.077635733 | 0.018002528 | 0.985636837 | 0.998252924 |
| chr7:139734034-139757834 | exonic | PARP12                  | 7 | 139734034 | 139757834 | 0 | 1 | 0 | 1 | 0 | 0 | 23800  | 0.280587184 | 0.07340775 | 4.077635733 | 0.018002528 | 0.985636837 | 0.998252924 |



|                          |        |              |    |           |           |    |    |    |    |    |   |       |             |             |             |             |             |             |
|--------------------------|--------|--------------|----|-----------|-----------|----|----|----|----|----|---|-------|-------------|-------------|-------------|-------------|-------------|-------------|
| chr7:155493466-155499762 | exonic | RBM33        | 7  | 155493466 | 155499762 | 0  | 0  | 1  | 1  | 0  | 0 | 6296  | 0.303580411 | 0.07340775  | 4.077635733 | 0.018002528 | 0.985636837 | 0.998252924 |
| chr7:26765046-26779583   | exonic | SKAP2        | 7  | 26765046  | 26779583  | 0  | 0  | 1  | 1  | 0  | 0 | 14537 | 0.303580411 | 0.07340775  | 4.077635733 | 0.018002528 | 0.985636837 | 0.998252924 |
| chr7:45077851-45104245   | exonic | CCM2         | 7  | 45077851  | 45104245  | 0  | 1  | 0  | 1  | 0  | 0 | 26394 | 0.280587184 | 0.07340775  | 4.077635733 | 0.018002528 | 0.985636837 | 0.998252924 |
| chr7:74150841-74157859   | exonic | GTF2I        | 7  | 74150841  | 74157859  | 0  | 1  | 0  | 1  | 0  | 0 | 7018  | 0.280587184 | 0.07340775  | 4.077635733 | 0.018002528 | 0.985636837 | 0.998252924 |
| chr7:74466817-74471723   | exonic | WBSCR16      | 7  | 74466817  | 74471723  | 0  | 1  | 0  | 1  | 0  | 0 | 4906  | 0.280587184 | 0.07340775  | 4.077635733 | 0.018002528 | 0.985636837 | 0.998252924 |
| chr7:7491949-7557468     | exonic | COL28A1      | 7  | 7491949   | 7557468   | 0  | 1  | 0  | 1  | 0  | 0 | 65519 | 0.280587184 | 0.07340775  | 4.077635733 | 0.018002528 | 0.985636837 | 0.998252924 |
| chr7:91842508-91864237   | exonic | KRIT1        | 7  | 91842508  | 91864237  | 0  | 1  | 0  | 1  | 0  | 0 | 21729 | 0.280587184 | 0.07340775  | 4.077635733 | 0.018002528 | 0.985636837 | 0.998252924 |
| chr7:97857325-97858478   | exonic | TECPR1       | 7  | 97857325  | 97858478  | 0  | 1  | 0  | 1  | 0  | 0 | 1153  | 0.280587184 | 0.07340775  | 4.077635733 | 0.018002528 | 0.985636837 | 0.998252924 |
| chr8:101059690-101078524 | exonic | RGS22        | 8  | 101059690 | 101078524 | 0  | 0  | 1  | 1  | 0  | 0 | 18834 | 0.303580411 | 0.07340775  | 4.077635733 | 0.018002528 | 0.985636837 | 0.998252924 |
| chr8:25156459-25159970   | exonic | DOCK5        | 8  | 25156459  | 25159970  | 0  | 1  | 0  | 1  | 0  | 0 | 3511  | 0.280587184 | 0.07340775  | 4.077635733 | 0.018002528 | 0.985636837 | 0.998252924 |
| chr8:68044185-68071372   | exonic | CSPP1        | 8  | 68044185  | 68071372  | 0  | 1  | 0  | 1  | 0  | 0 | 27187 | 0.280587184 | 0.07340775  | 4.077635733 | 0.018002528 | 0.985636837 | 0.998252924 |
| chr8:95538450-95550574   | exonic | KIAA1429     | 8  | 95538450  | 95550574  | 0  | 0  | 1  | 1  | 0  | 0 | 12124 | 0.303580411 | 0.07340775  | 4.077635733 | 0.018002528 | 0.985636837 | 0.998252924 |
| chr9:111835635-111870850 | exonic | TMEM245      | 9  | 111835635 | 111870850 | 0  | 0  | 1  | 1  | 0  | 0 | 35215 | 0.303580411 | 0.07340775  | 4.077635733 | 0.018002528 | 0.985636837 | 0.998252924 |
| chr9:114860749-114919893 | exonic | SUSD1        | 9  | 114860749 | 114919893 | 0  | 1  | 0  | 1  | 0  | 0 | 59144 | 0.280587184 | 0.07340775  | 4.077635733 | 0.018002528 | 0.985636837 | 0.998252924 |
| chr9:114904599-114919893 | exonic | SUSD1        | 9  | 114904599 | 114919893 | 0  | 0  | 1  | 1  | 0  | 0 | 15294 | 0.303580411 | 0.07340775  | 4.077635733 | 0.018002528 | 0.985636837 | 0.998252924 |
| chr9:123912447-123922580 | exonic | CNTRL        | 9  | 123912447 | 123922580 | 0  | 0  | 1  | 1  | 0  | 0 | 10133 | 0.303580411 | 0.07340775  | 4.077635733 | 0.018002528 | 0.985636837 | 0.998252924 |
| chr9:125616230-125618157 | exonic | RC3H2        | 9  | 125616230 | 125618157 | 0  | 1  | 0  | 1  | 0  | 0 | 1927  | 0.280587184 | 0.07340775  | 4.077635733 | 0.018002528 | 0.985636837 | 0.998252924 |
| chr9:128347833-128434922 | exonic | MAPKAP1      | 9  | 128347833 | 128434922 | 0  | 1  | 0  | 1  | 0  | 0 | 87089 | 0.280587184 | 0.07340775  | 4.077635733 | 0.018002528 | 0.985636837 | 0.998252924 |
| chr9:138741982-138754454 | exonic | CAMSAP1      | 9  | 138741982 | 138754454 | 0  | 1  | 0  | 1  | 0  | 0 | 12472 | 0.280587184 | 0.07340775  | 4.077635733 | 0.018002528 | 0.985636837 | 0.998252924 |
| chr9:14306987-14307519   | exonic | NFIB         | 9  | 14306987  | 14307519  | 0  | 1  | 0  | 1  | 0  | 0 | 532   | 0.280587184 | 0.07340775  | 4.077635733 | 0.018002528 | 0.985636837 | 0.998252924 |
| chr9:17366614-17416187   | exonic | CNTLN        | 9  | 17366614  | 17416187  | 0  | 1  | 0  | 1  | 0  | 0 | 49573 | 0.280587184 | 0.07340775  | 4.077635733 | 0.018002528 | 0.985636837 | 0.998252924 |
| chr9:20715320-20758190   | exonic | FOCAD        | 9  | 20715320  | 20758190  | 0  | 0  | 1  | 1  | 0  | 0 | 42870 | 0.303580411 | 0.07340775  | 4.077635733 | 0.018002528 | 0.985636837 | 0.998252924 |
| chr9:286460-289581       | exonic | DOCK8        | 9  | 286460    | 289581    | 0  | 0  | 1  | 1  | 0  | 0 | 3121  | 0.303580411 | 0.07340775  | 4.077635733 | 0.018002528 | 0.985636837 | 0.998252924 |
| chr9:406929-418207       | exonic | DOCK8        | 9  | 406929    | 418207    | 0  | 0  | 1  | 1  | 0  | 0 | 11278 | 0.303580411 | 0.07340775  | 4.077635733 | 0.018002528 | 0.985636837 | 0.998252924 |
| chr9:93607715-93627379   | exonic | SYK          | 9  | 93607715  | 93627379  | 0  | 1  | 0  | 1  | 0  | 0 | 19664 | 0.280587184 | 0.07340775  | 4.077635733 | 0.018002528 | 0.985636837 | 0.998252924 |
| chr9:96827015-96857736   | exonic | PTPDC1       | 9  | 96827015  | 96857736  | 0  | 0  | 1  | 1  | 0  | 0 | 30721 | 0.303580411 | 0.07340775  | 4.077635733 | 0.018002528 | 0.985636837 | 0.998252924 |
| chrX:10491131-10535643   | exonic | MID1         | X  | 10491131  | 10535643  | 0  | 0  | 1  | 1  | 0  | 0 | 44512 | 0.303580411 | 0.07340775  | 4.077635733 | 0.018002528 | 0.985636837 | 0.998252924 |
| chrX:21534602-21550185   | exonic | CNKSR2       | X  | 21534602  | 21550185  | 0  | 0  | 1  | 1  | 0  | 0 | 15583 | 0.303580411 | 0.07340775  | 4.077635733 | 0.018002528 | 0.985636837 | 0.998252924 |
| chrX:56276663-56296754   | exonic | KLF8         | X  | 56276663  | 56296754  | 0  | 1  | 0  | 1  | 0  | 0 | 20091 | 0.280587184 | 0.07340775  | 4.077635733 | 0.018002528 | 0.985636837 | 0.998252924 |
| chr3:50289531-50290616   | exonic | GNAI2        | 3  | 50289531  | 50290616  | 4  | 0  | 3  | 7  | 2  | 0 | 1085  | 2.093989387 | 0.0746269   | 1.921355268 | 0.038840761 | 0.969017347 | 0.998252924 |
| chr8:141840571-141874498 | exonic | PTK2         | 8  | 141840571 | 141874498 | 0  | 8  | 2  | 2  | 5  | 3 | 33927 | 3.531160149 | 0.075520715 | 1.56000802  | 0.048410466 | 0.961389118 | 0.998252924 |
| chr4:106345352-106377902 | exonic | PPA2         | 4  | 106345352 | 106377902 | 6  | 9  | 6  | 13 | 6  | 4 | 32550 | 6.867104974 | 0.077008135 | 1.037434137 | 0.07422942  | 0.940827836 | 0.998252924 |
| chr17:40762126-40811570  | exonic | TUBG1, TUBG2 | 17 | 40762126  | 40811570  | 14 | 0  | 0  | 16 | 0  | 0 | 49444 | 3.506799361 | 0.077699326 | 3.778940687 | 0.020561139 | NA          | NA          |
| chr15:41961025-41962156  | exonic | MGA          | 15 | 41961025  | 41962156  | 30 | 20 | 18 | 47 | 27 | 6 | 1131  | 21.01965387 | 0.078424699 | 0.726056647 | 0.108014573 | 0.913984132 | 0.998252924 |
| chr1:243480056-243542165 | exonic | SDCCAG8      | 1  | 243480056 | 243542165 | 6  | 1  | 0  | 1  | 0  | 3 | 62109 | 1.979164667 | 0.078597769 | 2.091474021 | 0.037580084 | NA          | NA          |

|                           |              |                                       |    |           |           |    |    |    |    |    |    |       |             |             |             |             |             |             |
|---------------------------|--------------|---------------------------------------|----|-----------|-----------|----|----|----|----|----|----|-------|-------------|-------------|-------------|-------------|-------------|-------------|
| chr4:36230203-36231267    | exonic       | ARAP2                                 | 4  | 36230203  | 36231267  | 13 | 3  | 11 | 18 | 10 | 3  | 1064  | 8.418151911 | 0.079158223 | 1.001251247 | 0.0790593   | 0.936985456 | 0.998252924 |
| chr3:133876965-133914026  | exonic       | RYK                                   | 3  | 133876965 | 133914026 | 3  | 0  | 2  | 2  | 4  | 0  | 37061 | 1.478231337 | 0.079216001 | 2.175375617 | 0.036414861 | 0.970951565 | 0.998252924 |
| chr13:33091993-33101669   | exonic       | N4BP2L2                               | 13 | 33091993  | 33101669  | 68 | 51 | 56 | 99 | 70 | 26 | 9676  | 55.71667378 | 0.080942927 | 0.559665375 | 0.144627363 | 0.885005092 | 0.998252924 |
| chr1:243468014-243493994  | exonic       | SDCCAG8                               | 1  | 243468014 | 243493994 | 8  | 3  | 0  | 5  | 1  | 3  | 25980 | 3.131963113 | 0.081826798 | 1.598606472 | 0.05118633  | 0.959177045 | 0.998252924 |
| chr13:26974589-26975761   | exonic       | CDK8                                  | 13 | 26974589  | 26975761  | 4  | 1  | 6  | 4  | 8  | 1  | 1172  | 3.575521247 | 0.08219515  | 1.408315203 | 0.058364172 | 0.953458553 | 0.998252924 |
| chr2:227729319-227773594  | exonic       | RHBDD1                                | 2  | 227729319 | 227773594 | 25 | 6  | 4  | 17 | 8  | 7  | 44275 | 9.99244765  | 0.082427503 | 0.96643215  | 0.085290523 | NA          | NA          |
| chr2:227729319-227779067  | exonic       | RHBDD1                                | 2  | 227729319 | 227779067 | 25 | 6  | 4  | 17 | 8  | 7  | 49748 | 9.99244765  | 0.082427503 | 0.96643215  | 0.085290523 | NA          | NA          |
| chr5:36984777-36986403    | exonic       | NIPBL                                 | 5  | 36984777  | 36986403  | 0  | 4  | 0  | 0  | 3  | 1  | 1626  | 1.36840407  | 0.083036154 | 2.516785634 | 0.032992939 | NA          | NA          |
| chr8:18622958-18662408    | exonic       | PSD3                                  | 8  | 18622958  | 18662408  | 12 | 8  | 0  | 4  | 10 | 4  | 39450 | 5.8104439   | 0.083274387 | 1.270639126 | 0.065537402 | NA          | NA          |
| chr3:37291189-37315092    | exonic       | GOLGA4                                | 3  | 37291189  | 37315092  | 3  | 3  | 0  | 2  | 5  | 0  | 23903 | 1.727548105 | 0.083581177 | 2.050125655 | 0.040768807 | 0.967480207 | 0.998252924 |
| chrX:90669903-90673870    | ncRNA_exonic | PABPC5-AS1                            | X  | 90669903  | 90673870  | 4  | 3  | 0  | 2  | 6  | 0  | 3967  | 1.977562469 | 0.083888599 | 1.955889846 | 0.042890247 | 0.965789023 | 0.998252924 |
| chr13:95813442-95822882   | exonic       | ABCC4                                 | 13 | 95813442  | 95822882  | 1  | 3  | 0  | 2  | 3  | 0  | 9440  | 1.227519376 | 0.084194259 | 2.357350916 | 0.035715624 | 0.971509112 | 0.998252924 |
| chr11:34097782-34098189   | exonic       | CAPRN1                                | 11 | 34097782  | 34098189  | 1  | 1  | 0  | 0  | 2  | 0  | 407   | 0.545317585 | 0.084825399 | 3.508181261 | 0.024179309 | 0.980709582 | 0.998252924 |
| chr13:100191699-100196249 | exonic       | TM9SF2                                | 13 | 100191699 | 100196249 | 1  | 1  | 0  | 0  | 2  | 0  | 4550  | 0.545317585 | 0.084825399 | 3.508181261 | 0.024179309 | 0.980709582 | 0.998252924 |
| chr14:39746137-39818181   | exonic       | CTAGE5                                | 14 | 39746137  | 39818181  | 1  | 1  | 0  | 0  | 2  | 0  | 72044 | 0.545317585 | 0.084825399 | 3.508181261 | 0.024179309 | 0.980709582 | 0.998252924 |
| chr2:197872529-197954756  | exonic       | ANKRD44                               | 2  | 197872529 | 197954756 | 1  | 1  | 0  | 0  | 2  | 0  | 82227 | 0.545317585 | 0.084825399 | 3.508181261 | 0.024179309 | 0.980709582 | 0.998252924 |
| chr20:33315062-33324562   | exonic       | NCOA6                                 | 20 | 33315062  | 33324562  | 1  | 1  | 0  | 0  | 2  | 0  | 9500  | 0.545317585 | 0.084825399 | 3.508181261 | 0.024179309 | 0.980709582 | 0.998252924 |
| chr3:179408028-179426745  | exonic       | USP13                                 | 3  | 179408028 | 179426745 | 1  | 1  | 0  | 0  | 2  | 0  | 18717 | 0.545317585 | 0.084825399 | 3.508181261 | 0.024179309 | 0.980709582 | 0.998252924 |
| chr1:232596632-232607274  | exonic       | SIPA1L2                               | 1  | 232596632 | 232607274 | 5  | 1  | 0  | 7  | 0  | 0  | 10642 | 1.563390209 | 0.085009994 | 2.370017228 | 0.035868935 | NA          | NA          |
| chr10:98303832-98325183   | exonic       | TM9SF3                                | 10 | 98303832  | 98325183  | 3  | 2  | 4  | 1  | 2  | 4  | 21351 | 3.105829193 | 0.085969591 | 1.525469262 | 0.056356161 | NA          | NA          |
| chr10:22193450-22209892   | exonic       | DNAJC1                                | 10 | 22193450  | 22209892  | 0  | 0  | 2  | 3  | 0  | 0  | 16442 | 0.713472206 | 0.086328884 | 3.444515298 | 0.025062709 | NA          | NA          |
| chr11:63426232-63426724   | exonic       | ATL3                                  | 11 | 63426232  | 63426724  | 0  | 0  | 2  | 3  | 0  | 0  | 492   | 0.713472206 | 0.086328884 | 3.444515298 | 0.025062709 | NA          | NA          |
| chr14:50796551-50799150   | exonic       | CDKL1                                 | 14 | 50796551  | 50799150  | 0  | 0  | 2  | 3  | 0  | 0  | 2599  | 0.713472206 | 0.086328884 | 3.444515298 | 0.025062709 | NA          | NA          |
| chr15:55724694-55759359   | exonic       | DYX1C1                                | 15 | 55724694  | 55759359  | 0  | 0  | 2  | 3  | 0  | 0  | 34665 | 0.713472206 | 0.086328884 | 3.444515298 | 0.025062709 | NA          | NA          |
| chr2:9552397-9558861      | exonic       | ITGB1BP1                              | 2  | 9552397   | 9558861   | 0  | 0  | 2  | 3  | 0  | 0  | 6464  | 0.713472206 | 0.086328884 | 3.444515298 | 0.025062709 | NA          | NA          |
| chr2:99919153-99921208    | intergenic   | LYGI (dist=1514), TXNDC9 (dist=14279) | 2  | 99919153  | 99921208  | 0  | 0  | 2  | 3  | 0  | 0  | 2055  | 0.713472206 | 0.086328884 | 3.444515298 | 0.025062709 | NA          | NA          |
| chr20:35421651-35423002   | exonic       | SOGA1                                 | 20 | 35421651  | 35423002  | 0  | 0  | 2  | 3  | 0  | 0  | 1351  | 0.713472206 | 0.086328884 | 3.444515298 | 0.025062709 | NA          | NA          |
| chr4:139993019-139994721  | exonic       | ELF2                                  | 4  | 139993019 | 139994721 | 0  | 0  | 2  | 3  | 0  | 0  | 1702  | 0.713472206 | 0.086328884 | 3.444515298 | 0.025062709 | NA          | NA          |
| chr5:172535626-172537714  | exonic       | CREBRF                                | 5  | 172535626 | 172537714 | 0  | 0  | 2  | 3  | 0  | 0  | 2088  | 0.713472206 | 0.086328884 | 3.444515298 | 0.025062709 | NA          | NA          |
| chr10:1102288-1118233     | exonic       | WDR37                                 | 10 | 1102288   | 1118233   | 2  | 0  | 3  | 7  | 0  | 0  | 15945 | 1.593960658 | 0.087439206 | 2.341170172 | 0.037348505 | 0.970207131 | 0.998252924 |
| chr16:68155889-68160513   | exonic       | NFATC3                                | 16 | 68155889  | 68160513  | 33 | 32 | 49 | 68 | 54 | 14 | 4624  | 37.57929242 | 0.088200685 | 0.644501762 | 0.13685096  | 0.891148602 | 0.998252924 |
| chr16:57554979-57560039   | exonic       | CCDC102A                              | 16 | 57554979  | 57560039  | 4  | 1  | 1  | 4  | 3  | 0  | 5060  | 1.675820402 | 0.088495033 | 1.941294534 | 0.045585578 | 0.963640565 | 0.998252924 |
| chr11:68334481-68363686   | exonic       | PPP6R3                                | 11 | 68334481  | 68363686  | 4  | 3  | 0  | 3  | 3  | 1  | 29205 | 2.029010198 | 0.088667917 | 1.802646087 | 0.049187646 | 0.960769757 | 0.998252924 |
| chr18:54423813-54426184   | exonic       | WDR7                                  | 18 | 54423813  | 54426184  | 4  | 3  | 0  | 3  | 3  | 1  | 2371  | 2.029010198 | 0.088667917 | 1.802646087 | 0.049187646 | 0.960769757 | 0.998252924 |
| chr18:46889530-46906128   | exonic       | DYM                                   | 18 | 46889530  | 46906128  | 4  | 0  | 4  | 6  | 0  | 2  | 16598 | 2.559329402 | 0.088794018 | 1.832856628 | 0.048445698 | 0.961361041 | 0.998252924 |

|                           |        |          |    |           |           |    |    |    |    |    |   |        |             |             |             |             |             |             |
|---------------------------|--------|----------|----|-----------|-----------|----|----|----|----|----|---|--------|-------------|-------------|-------------|-------------|-------------|-------------|
| chr4:52729602-52744020    | exonic | DCUN1D4  | 4  | 52729602  | 52744020  | 2  | 5  | 6  | 5  | 6  | 3 | 14418  | 4.495344317 | 0.089630055 | 1.252265151 | 0.071574343 | 0.942940659 | 0.998252924 |
| chr1:243449573-243589860  | exonic | SDCCAG8  | 1  | 243449573 | 243589860 | 2  | 2  | 1  | 0  | 1  | 2 | 140287 | 1.956405215 | 0.091463039 | 1.966615344 | 0.046507844 | 0.962905482 | 0.998252924 |
| chr6:76343296-76388643    | exonic | SENP6    | 6  | 76343296  | 76388643  | 3  | 8  | 8  | 4  | 6  | 7 | 45347  | 6.668259758 | 0.092487325 | 1.136393096 | 0.081386736 | NA          | NA          |
| chr15:55516086-55527154   | exonic | RAB27A   | 15 | 55516086  | 55527154  | 2  | 0  | 3  | 0  | 2  | 2 | 11068  | 1.708273023 | 0.093564829 | 2.138158199 | 0.043759544 | 0.965096075 | 0.998252924 |
| chr1:155408117-155429689  | exonic | ASH1L    | 1  | 155408117 | 155429689 | 17 | 10 | 14 | 17 | 17 | 8 | 21572  | 13.02781096 | 0.093760518 | 0.81094662  | 0.115618606 | 0.907954816 | 0.998252924 |
| chr14:39648294-39648666   | exonic | PNN      | 14 | 39648294  | 39648666  | 15 | 13 | 12 | 13 | 26 | 5 | 372    | 12.63747185 | 0.094086618 | 0.840877405 | 0.111891005 | NA          | NA          |
| chr12:12397195-12397589   | exonic | LRP6     | 12 | 12397195  | 12397589  | 24 | 5  | 0  | 30 | 4  | 0 | 394    | 7.640516864 | 0.095787508 | 2.122185962 | 0.045136246 | NA          | NA          |
| chr4:3088665-3109150      | exonic | HTT      | 4  | 3088665   | 3109150   | 23 | 12 | 10 | 46 | 5  | 3 | 20485  | 13.45081618 | 0.09612087  | 0.950631422 | 0.101112658 | NA          | NA          |
| chr10:86198267-86237420   | exonic | CCSER2   | 10 | 86198267  | 86237420  | 7  | 3  | 5  | 10 | 9  | 1 | 39153  | 8.519727516 | 0.096577309 | 0.996912696 | 0.096876396 | 0.922824554 | 0.998252924 |
| chr16:47531309-47644831   | exonic | PHKB     | 16 | 47531309  | 47644831  | 2  | 3  | 0  | 5  | 1  | 1 | 113522 | 1.528981469 | 0.097279286 | 2.046516533 | 0.047534083 | 0.962087567 | 0.998252924 |
| chr3:172223764-172227111  | exonic | TNFSF10  | 3  | 172223764 | 172227111 | 0  | 2  | 2  | 6  | 0  | 0 | 3347   | 1.38095796  | 0.097605991 | 2.470147413 | 0.039514237 | NA          | NA          |
| chr1:176012321-176015460  | exonic | RFWD2    | 1  | 176012321 | 176015460 | 0  | 3  | 0  | 2  | 2  | 0 | 3139   | 0.977505011 | 0.097838436 | 2.78685227  | 0.035107148 | NA          | NA          |
| chr1:235993525-235996967  | exonic | LYST     | 1  | 235993525 | 235996967 | 0  | 3  | 0  | 2  | 2  | 0 | 3442   | 0.977505011 | 0.097838436 | 2.78685227  | 0.035107148 | NA          | NA          |
| chr7:156994414-157024021  | exonic | UBE3C    | 7  | 156994414 | 157024021 | 0  | 3  | 0  | 2  | 2  | 0 | 29607  | 0.977505011 | 0.097838436 | 2.78685227  | 0.035107148 | NA          | NA          |
| chr17:57430575-57430887   | exonic | YPEL2    | 17 | 57430575  | 57430887  | 18 | 14 | 15 | 20 | 28 | 5 | 312    | 14.7767501  | 0.101011768 | 0.792483701 | 0.127462266 | 0.898574537 | 0.998252924 |
| chr1:108690900-108703915  | exonic | SLC25A24 | 1  | 108690900 | 108703915 | 6  | 5  | 9  | 15 | 5  | 3 | 13015  | 6.545185594 | 0.101544779 | 1.07908731  | 0.094102468 | 0.92502776  | 0.998252924 |
| chr1:78177431-78180468    | exonic | USP33    | 1  | 78177431  | 78180468  | 4  | 0  | 2  | 3  | 4  | 0 | 3037   | 1.713529665 | 0.101683241 | 2.049109503 | 0.049623137 | 0.960422709 | 0.998252924 |
| chr1:154207066-154207767  | exonic | UBAP2L   | 1  | 154207066 | 154207767 | 7  | 0  | 1  | 7  | 2  | 0 | 701    | 2.086412165 | 0.10174764  | 1.965317946 | 0.051771593 | 0.958710691 | 0.998252924 |
| chr1:243708811-243859018  | exonic | AKT3     | 1  | 243708811 | 243859018 | 0  | 0  | 2  | 1  | 0  | 1 | 150207 | 0.809068045 | 0.103841133 | 3.07193278  | 0.033803192 | 0.973034091 | 0.998252924 |
| chr2:215617170-215661841  | exonic | BARD1    | 2  | 215617170 | 215661841 | 0  | 0  | 2  | 1  | 0  | 1 | 44671  | 0.809068045 | 0.103841133 | 3.07193278  | 0.033803192 | 0.973034091 | 0.998252924 |
| chr11:34991685-35006275   | exonic | PDHX     | 11 | 34991685  | 35006275  | 3  | 0  | 2  | 3  | 3  | 0 | 14590  | 1.4635153   | 0.104132435 | 2.172505182 | 0.047931962 | 0.961770467 | 0.998252924 |
| chr10:15875628-15885271   | exonic | FAM188A  | 10 | 15875628  | 15885271  | 3  | 3  | 0  | 3  | 4  | 0 | 9643   | 1.712832068 | 0.104620218 | 2.040613601 | 0.051269    | 0.95911117  | 0.998252924 |
| chr1:201966446-201969143  | exonic | RNPEP    | 1  | 201966446 | 201969143 | 3  | 0  | 0  | 2  | 1  | 0 | 2697   | 0.72061102  | 0.104767234 | 3.126644913 | 0.033507877 | NA          | NA          |
| chr10:103557736-103570071 | exonic | MGEA5    | 10 | 103557736 | 103570071 | 3  | 0  | 0  | 2  | 1  | 0 | 12335  | 0.72061102  | 0.104767234 | 3.126644913 | 0.033507877 | NA          | NA          |
| chr14:88883054-88899556   | exonic | SPATA7   | 14 | 88883054  | 88899556  | 3  | 0  | 0  | 2  | 1  | 0 | 16502  | 0.72061102  | 0.104767234 | 3.126644913 | 0.033507877 | NA          | NA          |
| chr16:16101672-16110478   | exonic | ABCC1    | 16 | 16101672  | 16110478  | 3  | 0  | 0  | 2  | 1  | 0 | 8806   | 0.72061102  | 0.104767234 | 3.126644913 | 0.033507877 | NA          | NA          |
| chr16:48292528-48311390   | exonic | LONP2    | 16 | 48292528  | 48311390  | 3  | 0  | 4  | 2  | 1  | 0 | 18862  | 0.72061102  | 0.104767234 | 3.126644913 | 0.033507877 | NA          | NA          |
| chr21:46600244-46605006   | exonic | ADARB1   | 21 | 46600244  | 46605006  | 3  | 0  | 0  | 2  | 1  | 0 | 4762   | 0.72061102  | 0.104767234 | 3.126644913 | 0.033507877 | NA          | NA          |
| chrX:23739997-23754133    | exonic | ACOT9    | X  | 23739997  | 23754133  | 3  | 0  | 0  | 2  | 1  | 0 | 14136  | 0.72061102  | 0.104767234 | 3.126644913 | 0.033507877 | NA          | NA          |
| chr2:204073359-204074045  | exonic | NBEAL1   | 2  | 204073359 | 204074045 | 2  | 2  | 0  | 5  | 0  | 0 | 686    | 1.138082409 | 0.106645594 | 2.62697797  | 0.040596303 | NA          | NA          |
| chr2:64083439-64085070    | exonic | UGP2     | 2  | 64083439  | 64085070  | 17 | 7  | 4  | 15 | 7  | 5 | 1631   | 8.184740497 | 0.107089037 | 0.989374743 | 0.108239106 | 0.913806025 | 0.998252924 |
| chr3:32582528-32587457    | exonic | DYNC1LI1 | 3  | 32582528  | 32587457  | 4  | 0  | 0  | 1  | 3  | 0 | 4929   | 0.985341422 | 0.108071168 | 2.783239162 | 0.038829278 | NA          | NA          |
| chr12:94613791-94621011   | exonic | PLXNC1   | 12 | 94613791  | 94621011  | 3  | 0  | 4  | 5  | 4  | 0 | 7220   | 2.191703543 | 0.10852813  | 1.87538093  | 0.057869912 | 0.953852249 | 0.998252924 |
| chr10:96005702-96006378   | exonic | PLCE1    | 10 | 96005702  | 96006378  | 1  | 1  | 1  | 4  | 0  | 0 | 676    | 0.925777308 | 0.108669324 | 2.670426684 | 0.040693618 | NA          | NA          |
| chr6:166843940-166845978  | exonic | RPS6KA2  | 6  | 166843940 | 166845978 | 1  | 2  | 1  | 2  | 3  | 0 | 2038   | 1.250512602 | 0.108971949 | 2.183940826 | 0.049896933 | 0.960204521 | 0.998252924 |

|                           |            |                                          |    |           |           |    |    |    |    |    |   |       |             |             |             |             |             |             |
|---------------------------|------------|------------------------------------------|----|-----------|-----------|----|----|----|----|----|---|-------|-------------|-------------|-------------|-------------|-------------|-------------|
| chr12:82763166-82828503   | exonic     | METTL25                                  | 12 | 82763166  | 82828503  | 3  | 0  | 3  | 8  | 0  | 0 | 65337 | 1.829258986 | 0.109777781 | 2.226550893 | 0.049303962 | NA          | NA          |
| chr8:8849058-8851764      | intergenic | MFHAS1 (dist=97927), ER11 (dist=8550)    | 8  | 8849058   | 8851764   | 3  | 0  | 3  | 8  | 0  | 0 | 2706  | 1.829258986 | 0.109777781 | 2.226550893 | 0.049303962 | NA          | NA          |
| chr10:93754291-93768032   | exonic     | BTAF1                                    | 10 | 93754291  | 93768032  | 2  | 4  | 0  | 0  | 7  | 0 | 13741 | 1.802269034 | 0.110421118 | 2.250838232 | 0.049057776 | NA          | NA          |
| chr1:8601272-8617582      | exonic     | RERE                                     | 1  | 8601272   | 8617582   | 3  | 14 | 4  | 5  | 11 | 5 | 16310 | 7.019849727 | 0.110622487 | 1.116743646 | 0.099058085 | NA          | NA          |
| chr10:70547683-70548085   | exonic     | CCAR1                                    | 10 | 70547683  | 70548085  | 0  | 4  | 2  | 2  | 6  | 0 | 402   | 2.030428548 | 0.110840355 | 1.97236659  | 0.05619663  | 0.955185166 | 0.998252924 |
| chr10:103427642-103436193 | exonic     | FBXW4                                    | 10 | 103427642 | 103436193 | 40 | 21 | 16 | 68 | 15 | 6 | 8551  | 22.86947107 | 0.111948905 | 0.787820677 | 0.142099476 | NA          | NA          |
| chr15:31266516-31269158   | exonic     | MTMR10                                   | 15 | 31266516  | 31269158  | 0  | 4  | 2  | 4  | 0  | 2 | 2642  | 2.133324006 | 0.112102787 | 1.97277222  | 0.056825003 | 0.954684597 | 0.998252924 |
| chrX:117788564-117788924  | exonic     | DOCK11                                   | X  | 117788564 | 117788924 | 7  | 2  | 3  | 14 | 1  | 0 | 360   | 3.452654088 | 0.112407857 | 1.557186525 | 0.072186508 | NA          | NA          |
| chr14:35476488-35483108   | exonic     | SRP54                                    | 14 | 35476488  | 35483108  | 3  | 0  | 0  | 0  | 1  | 1 | 6620  | 0.816206859 | 0.112777692 | 3.04042467  | 0.037092743 | NA          | NA          |
| chr22:46829289-46835308   | exonic     | CELSR1                                   | 22 | 46829289  | 46835308  | 3  | 0  | 0  | 0  | 1  | 1 | 6019  | 0.816206859 | 0.112777692 | 3.04042467  | 0.037092743 | NA          | NA          |
| chr18:54426095-54448887   | exonic     | WDR7                                     | 18 | 54426095  | 54448887  | 4  | 2  | 1  | 3  | 3  | 1 | 22792 | 2.052003424 | 0.113751275 | 1.689940975 | 0.067310797 | 0.946334281 | 0.998252924 |
| chr9:5968018-5988545      | exonic     | KIAA2026                                 | 9  | 5968018   | 5988545   | 21 | 20 | 15 | 29 | 37 | 2 | 20527 | 17.33075916 | 0.113894603 | 0.825537014 | 0.137964259 | 0.890268664 | 0.998252924 |
| chr10:4872867-4950612     | exonic     | AKRIE2                                   | 10 | 4872867   | 4950612   | 4  | 6  | 0  | 8  | 0  | 2 | 77745 | 3.028530864 | 0.11456756  | 1.738504031 | 0.065900083 | 0.947457375 | 0.998252924 |
| chr11:74500670-74528759   | exonic     | RNF169                                   | 11 | 74500670  | 74528759  | 2  | 3  | 3  | 3  | 3  | 2 | 28089 | 2.671061998 | 0.115346512 | 1.516856371 | 0.076043134 | 0.939384781 | 0.998252924 |
| chr15:59963381-59972507   | exonic     | BNIP2                                    | 15 | 59963381  | 59972507  | 3  | 0  | 2  | 4  | 0  | 1 | 9126  | 1.514963029 | 0.115657582 | 2.206279564 | 0.052421998 | 0.958192447 | 0.998252924 |
| chr8:68200189-68214701    | exonic     | ARFGEF1                                  | 8  | 68200189  | 68214701  | 10 | 4  | 0  | 4  | 9  | 1 | 14512 | 3.80968357  | 0.1159181   | 1.471139328 | 0.07879478  | 0.937195856 | 0.998252924 |
| chr10:97681772-97687089   | exonic     | C10orf131                                | 10 | 97681772  | 97687089  | 1  | 0  | 2  | 3  | 1  | 0 | 5317  | 0.963486571 | 0.116237379 | 2.609282702 | 0.044547637 | 0.964467881 | 0.998252924 |
| chr14:50175876-50206900   | exonic     | KLHDC1                                   | 14 | 50175876  | 50206900  | 6  | 8  | 0  | 5  | 5  | 3 | 31024 | 4.22947791  | 0.117775353 | 1.38715162  | 0.084904456 | 0.932337349 | 0.998252924 |
| chr14:50175876-50210523   | exonic     | KLHDC1                                   | 14 | 50175876  | 50210523  | 6  | 8  | 0  | 5  | 5  | 3 | 34647 | 4.22947791  | 0.117775353 | 1.38715162  | 0.084904456 | 0.932337349 | 0.998252924 |
| chr11:18312988-18314523   | exonic     | HPS5                                     | 11 | 18312988  | 18314523  | 13 | 12 | 14 | 20 | 10 | 9 | 1535  | 12.6403756  | 0.117907298 | 0.839413106 | 0.14046397  | 0.888293418 | 0.998252924 |
| chr2:165548730-165561615  | exonic     | COBLL1                                   | 2  | 165548730 | 165561615 | 3  | 3  | 1  | 9  | 0  | 0 | 12885 | 2.063859717 | 0.118065124 | 1.981561946 | 0.059581849 | NA          | NA          |
| chr11:57258696-57259335   | exonic     | SLC43A1                                  | 11 | 57258696  | 57259335  | 20 | 8  | 6  | 35 | 7  | 0 | 639   | 9.725649834 | 0.118780113 | 1.11392497  | 0.106632059 | NA          | NA          |
| chr18:66564456-66564919   | exonic     | CCDC102B                                 | 18 | 66564456  | 66564919  | 5  | 4  | 19 | 27 | 13 | 0 | 463   | 9.533913277 | 0.11878875  | 1.158408147 | 0.102544816 | 0.918324243 | 0.998252924 |
| chr19:24014399-24016323   | intergenic | RPSAP58 (dist=3480), ZNF726 (dist=81361) | 19 | 24014399  | 24016323  | 17 | 28 | 17 | 18 | 49 | 5 | 1924  | 19.81111548 | 0.120240504 | 0.806101384 | 0.149163004 | NA          | NA          |
| chr15:49917309-49926991   | exonic     | DTWD1                                    | 15 | 49917309  | 49926991  | 0  | 1  | 2  | 0  | 4  | 0 | 9682  | 1.052923537 | 0.120459756 | 2.748274152 | 0.043831055 | 0.965039072 | 0.998252924 |
| chr5:176636636-176639196  | exonic     | NSD1                                     | 5  | 176636636 | 176639196 | 4  | 6  | 0  | 6  | 6  | 0 | 2560  | 2.925635407 | 0.121013966 | 1.690420683 | 0.071588077 | 0.942929729 | 0.998252924 |
| chr8:141874410-141900868  | exonic     | PTK2                                     | 8  | 141874410 | 141900868 | 19 | 16 | 12 | 20 | 20 | 8 | 26458 | 14.61891801 | 0.122484626 | 0.77261666  | 0.158532209 | 0.874037442 | 0.998252924 |
| chr9:4860125-4860901      | exonic     | RCL1                                     | 9  | 4860125   | 4860901   | 6  | 0  | 0  | 2  | 4  | 0 | 776   | 1.470654114 | 0.12253794  | 2.385301306 | 0.051372101 | NA          | NA          |
| chr18:12999419-13019205   | exonic     | CEP192                                   | 18 | 12999419  | 13019205  | 13 | 8  | 12 | 23 | 10 | 4 | 19786 | 10.32657547 | 0.124491819 | 0.900040585 | 0.138318005 | 0.889989096 | 0.998252924 |
| chr9:6420911-6434173      | exonic     | UHRF2                                    | 9  | 6420911   | 6434173   | 2  | 1  | 4  | 4  | 5  | 0 | 13262 | 2.251708436 | 0.125003289 | 1.743310737 | 0.071704537 | 0.942837046 | 0.998252924 |
| chr15:76580186-76585041   | exonic     | ETFA                                     | 15 | 76580186  | 76585041  | 5  | 0  | 1  | 0  | 2  | 2 | 4855  | 1.700695801 | 0.12663838  | 2.156053929 | 0.058736184 | 0.953162239 | 0.998252924 |
| chr15:90982563-90986710   | exonic     | IQGAP1                                   | 15 | 90982563  | 90986710  | 10 | 2  | 1  | 5  | 9  | 0 | 4147  | 3.456493773 | 0.12689659  | 1.522880446 | 0.083326692 | 0.933591777 | 0.998252924 |
| chr7:80418621-80440017    | exonic     | SEMA3C                                   | 7  | 80418621  | 80440017  | 11 | 7  | 0  | 4  | 5  | 5 | 21396 | 5.210262658 | 0.128674201 | 1.322134481 | 0.097323081 | NA          | NA          |
| chr19:17212469-17213367   | exonic     | MYO9B                                    | 19 | 17212469  | 17213367  | 19 | 12 | 0  | 27 | 5  | 2 | 898   | 8.634043227 | 0.128795922 | 1.203081357 | 0.107055039 | NA          | NA          |
| chr6:160467529-160469575  | exonic     | IGF2R                                    | 6  | 160467529 | 160469575 | 4  | 4  | 2  | 6  | 4  | 1 | 2046  | 3.037785625 | 0.12893059  | 1.42942881  | 0.090197279 | 0.928130446 | 0.998252924 |

|                           |              |                                    |            |           |           |    |    |    |    |    |    |        |             |             |             |             |             |             |
|---------------------------|--------------|------------------------------------|------------|-----------|-----------|----|----|----|----|----|----|--------|-------------|-------------|-------------|-------------|-------------|-------------|
| chr14:106091233-106208132 | ncRNA_exonic | ELK2AP, MIR8071-1, MIR8071-2       | 14         | 106091233 | 106208132 | 0  | 0  | 7  | 2  | 8  | 0  | 116899 | 2.561725323 | 0.128987256 | 2.039925921 | 0.063231343 | NA          | NA          |
| chr1:180953812-180962561  | exonic       | STX6                               | 1          | 180953812 | 180962561 | 8  | 6  | 8  | 20 | 4  | 2  | 8749   | 6.882477149 | 0.12902478  | 1.087259412 | 0.11866973  | NA          | NA          |
| chr14:75513078-75516421   | exonic       | MLH3                               | 14         | 75513078  | 75516421  | 6  | 9  | 6  | 16 | 11 | 0  | 3343   | 6.558301804 | 0.129138865 | 1.166975817 | 0.110661132 | 0.911885069 | 0.998252924 |
| chr10:25226112-25231365   | exonic       | PRTFDC1                            | 10         | 25226112  | 25231365  | 0  | 2  | 1  | 2  | 2  | 0  | 5253   | 1.000498238 | 0.13019054  | 2.558047659 | 0.050894493 | 0.959409593 | 0.998252924 |
| chr5:132219031-132220811  | exonic       | AFF4                               | 5          | 132219031 | 132220811 | 0  | 2  | 1  | 2  | 2  | 0  | 1780   | 1.000498238 | 0.13019054  | 2.558047659 | 0.050894493 | 0.959409593 | 0.998252924 |
| chr3:37315026-37343823    | exonic       | GOLGA4                             | 3          | 37315026  | 37343823  | 0  | 4  | 0  | 0  | 5  | 0  | 28797  | 1.302240305 | 0.130983148 | 2.76279339  | 0.047409679 | NA          | NA          |
| chr7:102665509-102669865  | exonic       | FBXL13                             | 7          | 102665509 | 102669865 | 6  | 2  | 4  | 13 | 0  | 1  | 4356   | 3.601815973 | 0.131496341 | 1.542347471 | 0.085257274 | NA          | NA          |
| chr2:120677644-120692534  | exonic       | PTPN4                              | 2          | 120677644 | 120692534 | 0  | 0  | 3  | 0  | 2  | 1  | 14890  | 1.142080529 | 0.1315843   | 2.695404758 | 0.048818011 | NA          | NA          |
| chr3:27490141-27493989    | exonic       | SLC4A7                             | 3          | 27490141  | 27493989  | 0  | 0  | 3  | 0  | 2  | 1  | 3848   | 1.142080529 | 0.1315843   | 2.695404758 | 0.048818011 | NA          | NA          |
| chr7:139796354-139820329  | exonic       | KDM7A                              | 7          | 139796354 | 139820329 | 5  | 0  | 0  | 2  | 3  | 0  | 23975  | 1.22063975  | 0.131869227 | 2.546964312 | 0.051775059 | NA          | NA          |
| chr7:139797344-139819019  | exonic       | KDM7A                              | 7          | 139797344 | 139819019 | 5  | 0  | 0  | 2  | 3  | 0  | 21675  | 1.22063975  | 0.131869227 | 2.546964312 | 0.051775059 | NA          | NA          |
| chr5:122881110-122893258  | exonic       | CSNK1G3                            | 5          | 122881110 | 122893258 | 42 | 29 | 49 | 46 | 93 | 6  | 12148  | 38.13281762 | 0.134123071 | 0.732563086 | 0.1830874   | 0.854729442 | 0.998252924 |
| chr17:54921379-54923170   | exonic       | DGKE                               | 17         | 54921379  | 54923170  | 5  | 0  | 4  | 7  | 4  | 0  | 1791   | 2.662300199 | 0.13469834  | 1.748576314 | 0.077033149 | 0.938597174 | 0.998252924 |
| chr19:18648410-18649246   | exonic       | FKBP8                              | 19         | 18648410  | 18649246  | 9  | 6  | 10 | 15 | 12 | 2  | 836    | 7.842664591 | 0.134982985 | 0.997190571 | 0.135363278 | 0.892324656 | 0.998252924 |
| chr10:32740519-32762951   | exonic       | CCDC7                              | 10         | 32740519  | 32762951  | 9  | 4  | 3  | 13 | 6  | 0  | 22432  | 4.558005296 | 0.136470114 | 1.321298691 | 0.103284832 | 0.917736913 | 0.998252924 |
| chr1:46032240-46032692    | exonic       | AKR1A1                             | 1          | 46032240  | 46032692  | 0  | 3  | 0  | 3  | 1  | 0  | 452    | 0.962788974 | 0.13915474  | 2.822047391 | 0.049309852 | NA          | NA          |
| chr13:61013821-61068709   | exonic       | TDRD3                              | 13         | 61013821  | 61068709  | 0  | 3  | 0  | 3  | 1  | 0  | 54888  | 0.962788974 | 0.13915474  | 2.822047391 | 0.049309852 | NA          | NA          |
| chr3:132431969-132435753  | exonic       | NPHP3                              | 3          | 132431969 | 132435753 | 0  | 3  | 0  | 3  | 1  | 0  | 3784   | 0.962788974 | 0.13915474  | 2.822047391 | 0.049309852 | NA          | NA          |
| chr12:50821544-50835426   | exonic       | LARP4                              | 12         | 50821544  | 50835426  | 2  | 4  | 8  | 6  | 6  | 3  | 13882  | 4.821917954 | 0.141167225 | 1.234383325 | 0.11436255  | 0.9089504   | 0.998252924 |
| chr20:34446223-34457473   | exonic       | PHF20                              | 20         | 34446223  | 34457473  | 9  | 0  | 5  | 14 | 3  | 0  | 11250  | 3.99866927  | 0.14260668  | 1.574938022 | 0.090547487 | NA          | NA          |
| chr20:34446223-34459751   | exonic       | PHF20                              | 20         | 34446223  | 34459751  | 9  | 0  | 5  | 14 | 3  | 0  | 13528  | 3.99866927  | 0.14260668  | 1.574938022 | 0.090547487 | NA          | NA          |
| chr13:61013821-61041513   | exonic       | TDRD3                              | 13         | 61013821  | 61041513  | 22 | 9  | 4  | 18 | 15 | 3  | 27692  | 9.848943121 | 0.142659356 | 0.945113023 | 0.150944229 | 0.880019711 | 0.998252924 |
| chr13:61018816-61041513   | exonic       | TDRD3                              | 13         | 61018816  | 61041513  | 22 | 9  | 4  | 18 | 15 | 3  | 22697  | 9.848943121 | 0.142659356 | 0.945113023 | 0.150944229 | 0.880019711 | 0.998252924 |
| chrGL000218.1:90230-90629 | intergenic   | NONE (dist=NONE), NONE (dist=NONE) | GL000218.1 | 90230     | 90629     | 0  | 3  | 2  | 0  | 0  | 3  | 399    | 1.842021275 | 0.143227665 | 2.30058633  | 0.062257027 | NA          | NA          |
| chr12:107393328-107393860 | exonic       | CRY1                               | 12         | 107393328 | 107393860 | 1  | 1  | 0  | 1  | 1  | 0  | 532    | 0.530601549 | 0.143319775 | 3.274371936 | 0.043770157 | 0.965087615 | 0.998252924 |
| chr14:50262508-50267414   | exonic       | NEMF                               | 14         | 50262508  | 50267414  | 1  | 1  | 0  | 1  | 1  | 0  | 4906   | 0.530601549 | 0.143319775 | 3.274371936 | 0.043770157 | 0.965087615 | 0.998252924 |
| chr14:56083234-56086030   | exonic       | KTNI                               | 14         | 56083234  | 56086030  | 1  | 1  | 0  | 1  | 1  | 0  | 2796   | 0.530601549 | 0.143319775 | 3.274371936 | 0.043770157 | 0.965087615 | 0.998252924 |
| chr15:64962544-64968455   | exonic       | ZNF609                             | 15         | 64962544  | 64968455  | 1  | 1  | 0  | 1  | 1  | 0  | 5911   | 0.530601549 | 0.143319775 | 3.274371936 | 0.043770157 | 0.965087615 | 0.998252924 |
| chr17:4186092-4192703     | exonic       | UBE2G1                             | 17         | 4186092   | 4192703   | 1  | 1  | 0  | 1  | 1  | 0  | 6611   | 0.530601549 | 0.143319775 | 3.274371936 | 0.043770157 | 0.965087615 | 0.998252924 |
| chr18:76856475-76974038   | exonic       | ATP9B                              | 18         | 76856475  | 76974038  | 1  | 1  | 0  | 1  | 1  | 0  | 117563 | 0.530601549 | 0.143319775 | 3.274371936 | 0.043770157 | 0.965087615 | 0.998252924 |
| chr2:201283972-201284219  | exonic       | SPATS2L                            | 2          | 201283972 | 201284219 | 1  | 1  | 0  | 1  | 1  | 0  | 247    | 0.530601549 | 0.143319775 | 3.274371936 | 0.043770157 | 0.965087615 | 0.998252924 |
| chr6:110036280-110064975  | exonic       | FIG4                               | 6          | 110036280 | 110064975 | 1  | 1  | 0  | 1  | 1  | 0  | 28695  | 0.530601549 | 0.143319775 | 3.274371936 | 0.043770157 | 0.965087615 | 0.998252924 |
| chr8:22332466-22355625    | exonic       | PPP3CC                             | 8          | 22332466  | 22355625  | 1  | 1  | 0  | 1  | 1  | 0  | 23159  | 0.530601549 | 0.143319775 | 3.274371936 | 0.043770157 | 0.965087615 | 0.998252924 |
| chr8:18656804-18662408    | exonic       | PSD3                               | 8          | 18656804  | 18662408  | 22 | 13 | 7  | 0  | 22 | 11 | 5604   | 12.53718928 | 0.14367937  | 1.103212199 | 0.130237293 | NA          | NA          |
| chr2:159992704-160007067  | exonic       | TANC1                              | 2          | 159992704 | 160007067 | 7  | 4  | 0  | 6  | 2  | 2  | 14363  | 3.096372168 | 0.144129871 | 1.556408376 | 0.092604148 | 0.926218049 | 0.998252924 |

|                           |              |                                           |    |           |           |    |    |    |    |    |   |        |             |             |             |             |             |             |
|---------------------------|--------------|-------------------------------------------|----|-----------|-----------|----|----|----|----|----|---|--------|-------------|-------------|-------------|-------------|-------------|-------------|
| chr17:67270099-67280213   | exonic       | ABCA5                                     | 17 | 67270099  | 67280213  | 1  | 2  | 2  | 0  | 2  | 2 | 10114  | 1.730568653 | 0.144226242 | 1.994868697 | 0.072298614 | 0.942364268 | 0.998252924 |
| chr6:76344422-76373234    | exonic       | SENP6                                     | 6  | 76344422  | 76373234  | 0  | 1  | 2  | 1  | 5  | 0 | 28812  | 2.091131038 | 0.144620448 | 1.998340227 | 0.072370283 | 0.942307234 | 0.998252924 |
| chr12:57064058-57066849   | exonic       | PTGES3                                    | 12 | 57064058  | 57066849  | 2  | 4  | 3  | 3  | 2  | 3 | 2791   | 3.032528984 | 0.145353807 | 1.473672182 | 0.098633745 | 0.921429076 | 0.998252924 |
| chr1:6021853-6046387      | exonic       | NPHP4                                     | 1  | 6021853   | 6046387   | 4  | 0  | 0  | 2  | 2  | 0 | 24534  | 0.970625385 | 0.146265287 | 2.777208396 | 0.052666299 | NA          | NA          |
| chr11:119002244-119003929 | exonic       | HINFP                                     | 11 | 119002244 | 119003929 | 4  | 0  | 0  | 2  | 2  | 0 | 1685   | 0.970625385 | 0.146265287 | 2.777208396 | 0.052666299 | NA          | NA          |
| chr10:123842161-123848106 | exonic       | TACC2                                     | 10 | 123842161 | 123848106 | 3  | 0  | 0  | 3  | 0  | 0 | 5945   | 0.705894984 | 0.146825919 | 3.435478541 | 0.042738127 | NA          | NA          |
| chr10:17195506-17243807   | exonic       | TRDMT1                                    | 10 | 17195506  | 17243807  | 3  | 0  | 0  | 3  | 0  | 0 | 48301  | 0.705894984 | 0.146825919 | 3.435478541 | 0.042738127 | NA          | NA          |
| chr10:72604229-72619256   | exonic       | SGPL1                                     | 10 | 72604229  | 72619256  | 3  | 0  | 0  | 3  | 0  | 0 | 15027  | 0.705894984 | 0.146825919 | 3.435478541 | 0.042738127 | NA          | NA          |
| chr11:16117541-16208501   | exonic       | SOX6                                      | 11 | 16117541  | 16208501  | 3  | 0  | 0  | 3  | 0  | 0 | 90960  | 0.705894984 | 0.146825919 | 3.435478541 | 0.042738127 | NA          | NA          |
| chr13:51501543-51535650   | exonic       | RNASEH2B                                  | 13 | 51501543  | 51535650  | 3  | 0  | 0  | 3  | 0  | 0 | 34107  | 0.705894984 | 0.146825919 | 3.435478541 | 0.042738127 | NA          | NA          |
| chr14:73614502-73614802   | exonic       | PSEN1                                     | 14 | 73614502  | 73614802  | 3  | 0  | 0  | 3  | 0  | 0 | 300    | 0.705894984 | 0.146825919 | 3.435478541 | 0.042738127 | NA          | NA          |
| chr14:75136351-75138186   | exonic       | AREL1                                     | 14 | 75136351  | 75138186  | 3  | 0  | 0  | 3  | 0  | 0 | 1835   | 0.705894984 | 0.146825919 | 3.435478541 | 0.042738127 | NA          | NA          |
| chr15:24369722-24426402   | ncRNA_exonic | PWRN2                                     | 15 | 24369722  | 24426402  | 3  | 0  | 0  | 3  | 0  | 0 | 56680  | 0.705894984 | 0.146825919 | 3.435478541 | 0.042738127 | NA          | NA          |
| chr17:54978779-54981849   | exonic       | TRIM25                                    | 17 | 54978779  | 54981849  | 3  | 0  | 0  | 3  | 0  | 0 | 3070   | 0.705894984 | 0.146825919 | 3.435478541 | 0.042738127 | NA          | NA          |
| chr19:15806746-15807880   | exonic       | CYP4F12                                   | 19 | 15806746  | 15807880  | 3  | 0  | 0  | 3  | 0  | 0 | 1134   | 0.705894984 | 0.146825919 | 3.435478541 | 0.042738127 | NA          | NA          |
| chr19:47865732-47865950   | exonic       | DHX34                                     | 19 | 47865732  | 47865950  | 3  | 0  | 0  | 3  | 0  | 0 | 218    | 0.705894984 | 0.146825919 | 3.435478541 | 0.042738127 | NA          | NA          |
| chr19:8389332-8389980     | exonic       | KANK3                                     | 19 | 8389332   | 8389980   | 3  | 0  | 0  | 3  | 0  | 0 | 648    | 0.705894984 | 0.146825919 | 3.435478541 | 0.042738127 | NA          | NA          |
| chr3:141811903-141820683  | exonic       | TFDP2                                     | 3  | 141811903 | 141820683 | 3  | 0  | 0  | 3  | 0  | 0 | 8780   | 0.705894984 | 0.146825919 | 3.435478541 | 0.042738127 | NA          | NA          |
| chr4:5664833-5667376      | exonic       | EVC2                                      | 4  | 5664833   | 5667376   | 3  | 0  | 0  | 3  | 0  | 0 | 2543   | 0.705894984 | 0.146825919 | 3.435478541 | 0.042738127 | NA          | NA          |
| chr6:168271062-168299147  | exonic       | MLLT4                                     | 6  | 168271062 | 168299147 | 3  | 0  | 0  | 3  | 0  | 0 | 28085  | 0.705894984 | 0.146825919 | 3.435478541 | 0.042738127 | NA          | NA          |
| chr7:152007050-152055760  | exonic       | KMT2C                                     | 7  | 152007050 | 152055760 | 3  | 0  | 0  | 3  | 0  | 0 | 48710  | 0.705894984 | 0.146825919 | 3.435478541 | 0.042738127 | NA          | NA          |
| chr7:152012222-152055760  | exonic       | KMT2C                                     | 7  | 152012222 | 152055760 | 3  | 0  | 0  | 3  | 0  | 0 | 43538  | 0.705894984 | 0.146825919 | 3.435478541 | 0.042738127 | NA          | NA          |
| chrX:64295486-64333693    | intergenic   | ZC4H2 (dist=40862), ZC3H12B (dist=374922) | X  | 64295486  | 64333693  | 3  | 0  | 0  | 3  | 0  | 0 | 38207  | 0.705894984 | 0.146825919 | 3.435478541 | 0.042738127 | NA          | NA          |
| chr3:56661064-56662642    | exonic       | FAM208A                                   | 3  | 56661064  | 56662642  | 6  | 0  | 9  | 3  | 11 | 2 | 1578   | 4.816015899 | 0.147584771 | 1.387440952 | 0.106371929 | 0.915287264 | 0.998252924 |
| chr1:107866903-107867544  | exonic       | NTNG1                                     | 1  | 107866903 | 107867544 | 9  | 1  | 0  | 11 | 0  | 0 | 641    | 2.504583521 | 0.147713054 | 2.064737652 | 0.071540834 | NA          | NA          |
| chr6:117010482-117026323  | exonic       | KPNA5                                     | 6  | 117010482 | 117026323 | 8  | 6  | 0  | 5  | 2  | 4 | 15841  | 4.084036541 | 0.147818507 | 1.438737248 | 0.102741836 | 0.918167869 | 0.998252924 |
| chr10:15590453-15634303   | exonic       | ITGA8                                     | 10 | 15590453  | 15634303  | 4  | 2  | 0  | 7  | 0  | 0 | 43850  | 1.608679065 | 0.148324343 | 2.318329675 | 0.063978969 | NA          | NA          |
| chr1:93029198-93170301    | exonic       | EVI5                                      | 1  | 93029198  | 93170301  | 6  | 0  | 0  | 3  | 3  | 0 | 141103 | 1.455938078 | 0.148535086 | 2.383805181 | 0.062310078 | NA          | NA          |
| chr6:16326624-16328701    | exonic       | ATXN1                                     | 6  | 16326624  | 16328701  | 21 | 33 | 19 | 39 | 44 | 4 | 2077   | 22.91216367 | 0.14916904  | 0.763067353 | 0.195486073 | 0.845012439 | 0.998252924 |
| chr4:128995614-128999117  | exonic       | LARP1B                                    | 4  | 128995614 | 128999117 | 10 | 6  | 5  | 2  | 22 | 0 | 3503   | 6.1970954   | 0.14920939  | 1.296491583 | 0.115087049 | NA          | NA          |
| chr15:63824845-63855207   | exonic       | USP3                                      | 15 | 63824845  | 63855207  | 3  | 4  | 3  | 2  | 3  | 2 | 30362  | 1.862691549 | 0.149662872 | 1.882984342 | 0.07948174  | 0.936649455 | 0.998252924 |
| chr14:61262934-61285565   | exonic       | MNAT1                                     | 14 | 61262934  | 61285565  | 0  | 8  | 2  | 7  | 2  | 2 | 22631  | 3.391416201 | 0.150339092 | 1.572723912 | 0.095591534 | 0.923844989 | 0.998252924 |
| chr5:65284462-65290692    | exonic       | ERBB2IP                                   | 5  | 65284462  | 65290692  | 8  | 3  | 15 | 15 | 14 | 2 | 6230   | 8.419250222 | 0.150934061 | 1.04037113  | 0.145077133 | NA          | NA          |
| chr6:52935854-52941341    | exonic       | FBXO9                                     | 6  | 52935854  | 52941341  | 13 | 9  | 0  | 14 | 11 | 0 | 5487   | 6.06497348  | 0.153067088 | 1.367868628 | 0.111901893 | NA          | NA          |
| chr19:1271327-1272050     | exonic       | CIRBP                                     | 19 | 1271327   | 1272050   | 2  | 5  | 1  | 7  | 3  | 0 | 723    | 2.433883868 | 0.153172653 | 1.702643917 | 0.089961648 | 0.928317692 | 0.998252924 |

|                           |              |                       |    |           |           |    |    |    |    |    |    |       |             |             |             |             |             |             |
|---------------------------|--------------|-----------------------|----|-----------|-----------|----|----|----|----|----|----|-------|-------------|-------------|-------------|-------------|-------------|-------------|
| chr8:90734242-90737869    | ncRNA_exonic | LOC101929709          | 8  | 90734242  | 90737869  | 8  | 0  | 2  | 7  | 4  | 0  | 3627  | 2.654722977 | 0.15376144  | 1.769446178 | 0.08689806  | 0.930752542 | 0.998252924 |
| chr4:79747190-79772210    | exonic       | BMP2K                 | 4  | 79747190  | 79772210  | 6  | 4  | 3  | 6  | 5  | 2  | 25020 | 3.922274567 | 0.154240031 | 1.271506492 | 0.121304949 | 0.9034495   | 0.998252924 |
| chr4:107092251-107133992  | exonic       | TBCK                  | 4  | 107092251 | 107133992 | 2  | 3  | 2  | 8  | 1  | 0  | 41741 | 2.146857837 | 0.155305399 | 1.798567882 | 0.086349478 | NA          | NA          |
| chr4:25351113-25366127    | exonic       | ZCCHC4                | 4  | 25351113  | 25366127  | 2  | 0  | 4  | 7  | 1  | 0  | 15014 | 1.912257105 | 0.157527005 | 2.037783351 | 0.077303117 | 0.938382411 | 0.998252924 |
| chr15:90414706-90432372   | exonic       | AP3S2, C15orf38-AP3S2 | 15 | 90414706  | 90432372  | 2  | 3  | 1  | 2  | 5  | 0  | 17666 | 1.795830188 | 0.157628779 | 1.895568532 | 0.083156466 | 0.933727128 | 0.998252924 |
| chr22:37328806-37330036   | exonic       | CSF2RB                | 22 | 37328806  | 37330036  | 2  | 1  | 2  | 3  | 3  | 0  | 1230  | 1.508804157 | 0.158472601 | 2.008168123 | 0.078914011 | 0.937101019 | 0.998252924 |
| chr5:56542126-56545403    | exonic       | GPBP1                 | 5  | 56542126  | 56545403  | 7  | 3  | 4  | 7  | 1  | 4  | 3277  | 4.312893652 | 0.159206849 | 1.311614353 | 0.121382362 | 0.903388186 | 0.998252924 |
| chr1:26772806-26774151    | exonic       | DHDDS                 | 1  | 26772806  | 26774151  | 5  | 0  | 2  | 6  | 2  | 0  | 1345  | 1.919395919 | 0.159799858 | 1.98278032  | 0.080593829 | 0.935764974 | 0.998252924 |
| chr17:19861326-19861884   | exonic       | AKAP10                | 17 | 19861326  | 19861884  | 4  | 2  | 8  | 10 | 8  | 0  | 558   | 4.473984799 | 0.161426174 | 1.362010559 | 0.118520501 | NA          | NA          |
| chr1:35824525-35827390    | exonic       | ZMYM4                 | 1  | 35824525  | 35827390  | 10 | 14 | 9  | 5  | 18 | 6  | 2865  | 14.32303933 | 0.162374541 | 0.879762219 | 0.184566395 | NA          | NA          |
| chr1:52237741-52238395    | exonic       | OSBPL9                | 1  | 52237741  | 52238395  | 5  | 0  | 0  | 3  | 2  | 0  | 654   | 1.205923713 | 0.163240468 | 2.556490419 | 0.063853346 | NA          | NA          |
| chr14:105692405-105693097 | exonic       | BRF1                  | 14 | 105692405 | 105693097 | 2  | 3  | 0  | 5  | 1  | 0  | 692   | 1.43338563  | 0.163516059 | 2.228185704 | 0.073385292 | 0.941499521 | 0.998252924 |
| chr17:80842020-80861354   | exonic       | TBCD                  | 17 | 80842020  | 80861354  | 7  | 0  | 4  | 2  | 8  | 1  | 19334 | 3.181045455 | 0.164774533 | 1.583479992 | 0.104058487 | NA          | NA          |
| chr12:46319924-46322642   | exonic       | SCAF11                | 12 | 46319924  | 46322642  | 12 | 6  | 5  | 11 | 9  | 3  | 2718  | 6.763171095 | 0.165092665 | 1.026975811 | 0.160756137 | 0.872285473 | 0.998252924 |
| chr7:97820925-97823884    | exonic       | LMTK2                 | 7  | 97820925  | 97823884  | 3  | 3  | 1  | 3  | 5  | 0  | 2959  | 2.031128516 | 0.166047308 | 1.790174134 | 0.092754836 | 0.926098332 | 0.998252924 |
| chr14:51208299-51211083   | exonic       | NIN                   | 14 | 51208299  | 51211083  | 1  | 0  | 1  | 0  | 2  | 0  | 2784  | 0.568310812 | 0.167077157 | 3.455627308 | 0.048349299 | 0.961437866 | 0.998252924 |
| chr17:5250084-5253924     | exonic       | RABEP1                | 17 | 5250084   | 5253924   | 1  | 0  | 1  | 0  | 2  | 0  | 3840  | 0.568310812 | 0.167077157 | 3.455627308 | 0.048349299 | 0.961437866 | 0.998252924 |
| chr2:68740211-68772444    | exonic       | APLF                  | 2  | 68740211  | 68772444  | 1  | 0  | 1  | 0  | 2  | 0  | 32233 | 0.568310812 | 0.167077157 | 3.455627308 | 0.048349299 | 0.961437866 | 0.998252924 |
| chr4:56319220-56322467    | exonic       | CLOCK                 | 4  | 56319220  | 56322467  | 1  | 0  | 1  | 0  | 2  | 0  | 3247  | 0.568310812 | 0.167077157 | 3.455627308 | 0.048349299 | 0.961437866 | 0.998252924 |
| chr4:88359428-88375607    | exonic       | NUDT9                 | 4  | 88359428  | 88375607  | 1  | 0  | 1  | 0  | 2  | 0  | 16179 | 0.568310812 | 0.167077157 | 3.455627308 | 0.048349299 | 0.961437866 | 0.998252924 |
| chr6:18236682-18237747    | exonic       | DEK                   | 6  | 18236682  | 18237747  | 1  | 0  | 1  | 0  | 2  | 0  | 1065  | 0.568310812 | 0.167077157 | 3.455627308 | 0.048349299 | 0.961437866 | 0.998252924 |
| chr8:25101189-25136181    | exonic       | DOCK5                 | 8  | 25101189  | 25136181  | 1  | 0  | 1  | 0  | 2  | 0  | 34992 | 0.568310812 | 0.167077157 | 3.455627308 | 0.048349299 | 0.961437866 | 0.998252924 |
| chr14:35062250-35078948   | exonic       | SNX6                  | 14 | 35062250  | 35078948  | 0  | 1  | 2  | 2  | 0  | 1  | 16698 | 1.089655229 | 0.16777456  | 2.53666638  | 0.066139781 | 0.947266539 | 0.998252924 |
| chr10:122640337-122649521 | exonic       | WDR11                 | 10 | 122640337 | 122649521 | 3  | 1  | 0  | 0  | 4  | 0  | 9184  | 1.045346315 | 0.168502525 | 2.731102188 | 0.061697627 | 0.95080363  | 0.998252924 |
| chr8:52773404-52773806    | exonic       | PCMTD1                | 8  | 52773404  | 52773806  | 44 | 28 | 74 | 41 | 94 | 21 | 402   | 47.36099097 | 0.171090511 | 0.684490991 | 0.249952904 | NA          | NA          |
| chr6:13632601-13644961    | exonic       | RANBP9                | 6  | 13632601  | 13644961  | 16 | 17 | 15 | 25 | 14 | 9  | 12360 | 15.11165106 | 0.171442568 | 0.779188381 | 0.22002711  | 0.825850041 | 0.998252924 |
| chr5:72374006-72378652    | exonic       | FCHO2                 | 5  | 72374006  | 72378652  | 3  | 0  | 3  | 3  | 2  | 1  | 4646  | 1.847975513 | 0.171713755 | 1.886097022 | 0.091041846 | 0.92745934  | 0.998252924 |
| chr17:62515438-62522318   | exonic       | CEP95                 | 17 | 62515438  | 62522318  | 6  | 2  | 0  | 9  | 0  | 0  | 6880  | 2.079275721 | 0.171984661 | 2.137176613 | 0.080472835 | 0.935861201 | 0.998252924 |
| chr20:47886478-47888287   | exonic       | ZNF1                  | 20 | 47886478  | 47888287  | 1  | 0  | 2  | 4  | 0  | 0  | 1809  | 0.948770534 | 0.172412849 | 2.843567175 | 0.060632592 | NA          | NA          |
| chrX:134679347-134690225  | exonic       | DDX26B                | X  | 134679347 | 134690225 | 5  | 5  | 5  | 9  | 5  | 2  | 10878 | 4.68103563  | 0.172432226 | 1.19146431  | 0.144722947 | 0.884929621 | 0.998252924 |
| chrX:44383248-44386611    | exonic       | FUNDC1                | X  | 44383248  | 44386611  | 4  | 3  | 4  | 4  | 9  | 0  | 3363  | 3.342343607 | 0.17273086  | 1.475319488 | 0.117080308 | 0.906796414 | 0.998252924 |
| chr5:70805291-70806978    | exonic       | BDP1                  | 5  | 70805291  | 70806978  | 0  | 3  | 1  | 1  | 4  | 0  | 1687  | 1.310517495 | 0.173701683 | 2.342947416 | 0.074138106 | 0.940900495 | 0.998252924 |
| chr6:117010482-117013555  | exonic       | KPNA5                 | 6  | 117010482 | 117013555 | 15 | 21 | 28 | 30 | 31 | 9  | 3073  | 20.83328775 | 0.174165954 | 0.738494206 | 0.235839296 | 0.813557374 | 0.998252924 |
| chr9:128677964-128697886  | exonic       | PBX3                  | 9  | 128677964 | 128697886 | 1  | 1  | 2  | 3  | 2  | 0  | 19922 | 1.258789792 | 0.174801453 | 2.180299491 | 0.080173138 | 0.936099554 | 0.998252924 |
| chr6:167435896-167447459  | exonic       | FGFR10P               | 6  | 167435896 | 167447459 | 6  | 0  | 0  | 4  | 2  | 0  | 11563 | 1.441222041 | 0.175257676 | 2.399075775 | 0.073052164 | NA          | NA          |

|                           |              |           |    |           |           |    |    |    |    |    |   |        |             |             |             |             |             |             |
|---------------------------|--------------|-----------|----|-----------|-----------|----|----|----|----|----|---|--------|-------------|-------------|-------------|-------------|-------------|-------------|
| chr14:71880665-71996087   | ncRNA_exonic | LOC145474 | 14 | 71880665  | 71996087  | 0  | 7  | 3  | 5  | 8  | 0 | 115422 | 3.31151397  | 0.176820227 | 1.665253414 | 0.106182174 | 0.915437814 | 0.998252924 |
| chr13:51501542-51523641   | exonic       | RNASEH2B  | 13 | 51501542  | 51523641  | 13 | 9  | 13 | 16 | 11 | 7 | 22099  | 10.99962384 | 0.178784606 | 0.865608197 | 0.206542183 | 0.836367418 | 0.998252924 |
| chr7:151478237-151483627  | exonic       | PRKAG2    | 7  | 151478237 | 151483627 | 0  | 4  | 0  | 2  | 3  | 0 | 5390   | 1.272808232 | 0.179149797 | 2.527392706 | 0.070883245 | NA          | NA          |
| chr13:61013821-61034674   | exonic       | TDRD3     | 13 | 61013821  | 61034674  | 0  | 3  | 6  | 0  | 3  | 4 | 20853  | 3.302398251 | 0.180110928 | 1.753337332 | 0.10272463  | 0.918181525 | 0.998252924 |
| chr16:14028048-14029600   | exonic       | ERCC4     | 16 | 14028048  | 14029600  | 6  | 0  | 1  | 3  | 0  | 2 | 1552   | 1.906562055 | 0.180356192 | 2.062995131 | 0.087424439 | 0.930334144 | 0.998252924 |
| chr4:128995614-129003460  | exonic       | LARP1B    | 4  | 128995614 | 129003460 | 0  | 0  | 5  | 0  | 7  | 0 | 7846   | 1.83353708  | 0.180411152 | 3.828073904 | 0.04712844  | NA          | NA          |
| chr6:32088547-32089125    | exonic       | ATF6B     | 6  | 32088547  | 32089125  | 2  | 2  | 2  | 2  | 5  | 0 | 578    | 1.818823414 | 0.181130608 | 1.869643617 | 0.096879751 | 0.922821889 | 0.998252924 |
| chr6:87925620-87928449    | exonic       | ZNF292    | 6  | 87925620  | 87928449  | 27 | 16 | 10 | 22 | 25 | 6 | 2829   | 15.45759817 | 0.182370363 | 0.778026116 | 0.234401339 | 0.814673419 | 0.998252924 |
| chr1:12638745-12639440    | exonic       | DHRS3     | 1  | 12638745  | 12639440  | 4  | 4  | 0  | 6  | 1  | 1 | 695    | 2.280165309 | 0.182375053 | 1.773833153 | 0.102814097 | 0.918110517 | 0.998252924 |
| chr12:28378728-28412375   | exonic       | CCDC91    | 12 | 28378728  | 28412375  | 9  | 9  | 19 | 18 | 22 | 3 | 33647  | 11.9783402  | 0.184049025 | 0.903702599 | 0.203661055 | 0.838618378 | 0.998252924 |
| chr9:128419929-128434922  | exonic       | MAPKAP1   | 9  | 128419929 | 128434922 | 2  | 1  | 2  | 4  | 2  | 0 | 14993  | 1.49408812  | 0.184402273 | 2.021820239 | 0.091206067 | 0.927328854 | 0.998252924 |
| chr16:68155889-68191971   | exonic       | NFATC3    | 16 | 68155889  | 68191971  | 0  | 0  | 3  | 0  | 4  | 0 | 36082  | 1.075916764 | 0.184447408 | 2.962220929 | 0.062266594 | NA          | NA          |
| chr17:7849045-7849304     | exonic       | CNTROB    | 17 | 7849045   | 7849304   | 0  | 0  | 3  | 0  | 4  | 0 | 259    | 1.075916764 | 0.184447408 | 2.962220929 | 0.062266594 | NA          | NA          |
| chr6:108243000-108250718  | exonic       | SEC63     | 6  | 108243000 | 108250718 | 0  | 0  | 3  | 0  | 4  | 0 | 7718   | 1.075916764 | 0.184447408 | 2.962220929 | 0.062266594 | NA          | NA          |
| chr11:120347369-120348235 | exonic       | ARHGEF12  | 11 | 120347369 | 120348235 | 7  | 1  | 3  | 5  | 5  | 1 | 866    | 3.113904119 | 0.184950824 | 1.452790874 | 0.127307259 | 0.898697216 | 0.998252924 |
| chr3:15452752-15457449    | exonic       | METTL6    | 3  | 15452752  | 15457449  | 2  | 4  | 0  | 4  | 3  | 0 | 4697   | 1.743404888 | 0.185191855 | 2.04080366  | 0.090744572 | 0.927695553 | 0.998252924 |
| chr2:202010100-202014558  | exonic       | CFLAR     | 2  | 202010100 | 202014558 | 4  | 3  | 2  | 2  | 4  | 2 | 4458   | 2.746482894 | 0.185446795 | 1.499346085 | 0.123685116 | 0.901564597 | 0.998252924 |
| chr15:43086841-43132631   | exonic       | TTBK2     | 15 | 43086841  | 43132631  | 4  | 0  | 0  | 3  | 1  | 0 | 45790  | 0.955909348 | 0.186049549 | 2.812836147 | 0.066143045 | NA          | NA          |
| chr17:18768781-18781183   | exonic       | PRPSAP2   | 17 | 18768781  | 18781183  | 3  | 0  | 0  | 1  | 0  | 1 | 12402  | 0.801490822 | 0.187938345 | 3.057567214 | 0.061466628 | NA          | NA          |
| chr17:16004563-16005071   | exonic       | NCOR1     | 17 | 16004563  | 16005071  | 5  | 0  | 7  | 10 | 5  | 0 | 508    | 3.694068853 | 0.18833504  | 1.588385423 | 0.118570114 | 0.905615944 | 0.998252924 |
| chr3:169854206-169896726  | exonic       | PHC3      | 3  | 169854206 | 169896726 | 0  | 4  | 2  | 1  | 2  | 3 | 42520  | 3.137822733 | 0.188861114 | 1.605388288 | 0.117642016 | 0.906351312 | 0.998252924 |
| chr18:29691716-29704808   | exonic       | RNF138    | 18 | 29691716  | 29704808  | 2  | 0  | 2  | 5  | 0  | 0 | 13092  | 1.184068862 | 0.189456096 | 2.595259325 | 0.073000834 | NA          | NA          |
| chr1:224592131-224612356  | exonic       | WDR26     | 1  | 224592131 | 224612356 | 2  | 1  | 0  | 1  | 2  | 0 | 20225  | 0.780615913 | 0.189633328 | 2.807145299 | 0.067553799 | 0.946140835 | 0.998252924 |
| chr1:29313942-29323831    | exonic       | EPB41     | 1  | 29313942  | 29323831  | 2  | 1  | 0  | 1  | 2  | 0 | 9889   | 0.780615913 | 0.189633328 | 2.807145299 | 0.067553799 | 0.946140835 | 0.998252924 |
| chr1:100889777-100908552  | exonic       | CDC14A    | 1  | 100889777 | 100908552 | 0  | 0  | 4  | 6  | 0  | 0 | 18775  | 1.426944413 | 0.190719185 | 2.678742313 | 0.071197287 | NA          | NA          |
| chr5:78915434-78919312    | exonic       | PAPD4     | 5  | 78915434  | 78919312  | 0  | 0  | 4  | 6  | 0  | 0 | 3878   | 1.426944413 | 0.190719185 | 2.678742313 | 0.071197287 | NA          | NA          |
| chr12:80317747-80318318   | intronic     | PPP1R12A  | 12 | 80317747  | 80318318  | 0  | 3  | 0  | 4  | 0  | 0 | 571    | 0.948072938 | 0.191659351 | 3.091438932 | 0.06199681  | NA          | NA          |
| chr12:82780581-82796909   | exonic       | METTL25   | 12 | 82780581  | 82796909  | 0  | 3  | 0  | 4  | 0  | 0 | 16328  | 0.948072938 | 0.191659351 | 3.091438932 | 0.06199681  | NA          | NA          |
| chr14:39746137-39796226   | exonic       | CTAGE5    | 14 | 39746137  | 39796226  | 0  | 3  | 0  | 4  | 0  | 0 | 50089  | 0.948072938 | 0.191659351 | 3.091438932 | 0.06199681  | NA          | NA          |
| chr15:86118361-86129054   | exonic       | AKAP13    | 15 | 86118361  | 86129054  | 0  | 3  | 0  | 4  | 0  | 0 | 10693  | 0.948072938 | 0.191659351 | 3.091438932 | 0.06199681  | NA          | NA          |
| chr16:53289511-53302038   | exonic       | CHD9      | 16 | 53289511  | 53302038  | 0  | 3  | 0  | 4  | 0  | 0 | 12527  | 0.948072938 | 0.191659351 | 3.091438932 | 0.06199681  | NA          | NA          |
| chr6:144086397-144098520  | exonic       | PHACTR2   | 6  | 144086397 | 144098520 | 0  | 3  | 0  | 4  | 0  | 0 | 12123  | 0.948072938 | 0.191659351 | 3.091438932 | 0.06199681  | NA          | NA          |
| chr2:173435453-173460751  | exonic       | PDK1      | 2  | 173435453 | 173460751 | 0  | 7  | 0  | 0  | 8  | 0 | 25298  | 1.597543526 | 0.193325534 | 2.581654615 | 0.074884353 | NA          | NA          |
| chr16:31102096-31102663   | exonic       | VKORC1    | 16 | 31102096  | 31102663  | 12 | 13 | 5  | 23 | 4  | 4 | 567    | 8.96191981  | 0.193730493 | 1.002505098 | 0.193246392 | 0.846766008 | 0.998252924 |
| chr7:139741443-139757834  | exonic       | PARP12    | 7  | 139741443 | 139757834 | 1  | 3  | 0  | 5  | 0  | 0 | 16391  | 1.183371266 | 0.195139081 | 2.616332634 | 0.074584966 | NA          | NA          |



|                           |          |         |    |           |           |    |    |    |    |    |    |       |             |             |             |             |             |             |
|---------------------------|----------|---------|----|-----------|-----------|----|----|----|----|----|----|-------|-------------|-------------|-------------|-------------|-------------|-------------|
| chr14:99924615-99932150   | exonic   | SETD3   | 14 | 99924615  | 99932150  | 39 | 34 | 20 | 55 | 27 | 5  | 7535  | 33.84438264 | 0.195675944 | 0.707963145 | 0.27639284  | 0.782246356 | 0.998252924 |
| chr4:78694234-78697546    | exonic   | CNOT6L  | 4  | 78694234  | 78697546  | 17 | 2  | 4  | 10 | 10 | 2  | 3312  | 6.220231015 | 0.196052485 | 1.14124934  | 0.1717876   | NA          | NA          |
| chr11:120916382-120930794 | exonic   | TBCEL   | 11 | 120916382 | 120930794 | 23 | 14 | 18 | 52 | 14 | 1  | 14412 | 16.48819787 | 0.196263373 | 0.910737351 | 0.215499422 | NA          | NA          |
| chr20:47569241-47580435   | exonic   | ARFGEF2 | 20 | 47569241  | 47580435  | 5  | 0  | 6  | 5  | 8  | 0  | 11194 | 3.328325167 | 0.199122971 | 1.635607237 | 0.121742535 | 0.903102926 | 0.998252924 |
| chr7:40027197-40041630    | exonic   | CDK13   | 7  | 40027197  | 40041630  | 9  | 8  | 5  | 3  | 11 | 5  | 14433 | 6.732762845 | 0.200694976 | 1.083118416 | 0.185293661 | NA          | NA          |
| chr7:16298014-16317851    | exonic   | ISPD    | 7  | 16298014  | 16317851  | 7  | 7  | 2  | 10 | 2  | 3  | 19837 | 4.747201766 | 0.202772959 | 1.246260368 | 0.162705133 | 0.870750605 | 0.998252924 |
| chr12:51449617-51450285   | exonic   | LETMD1  | 12 | 51449617  | 51450285  | 5  | 2  | 0  | 1  | 6  | 0  | 668   | 1.825962228 | 0.203085957 | 2.055409472 | 0.098805596 | 0.921292626 | 0.998252924 |
| chr12:42604157-42604482   | exonic   | YAF2    | 12 | 42604157  | 42604482  | 12 | 5  | 0  | 5  | 6  | 3  | 325   | 4.601599592 | 0.203563688 | 1.352940409 | 0.150460202 | 0.880401547 | 0.998252924 |
| chr1:151395872-151403317  | exonic   | POGZ    | 1  | 151395872 | 151403317 | 1  | 1  | 0  | 2  | 0  | 0  | 7445  | 0.515885512 | 0.203966043 | 3.576248469 | 0.057033521 | 0.954518492 | 0.998252924 |
| chr11:47504246-47510576   | exonic   | CELF1   | 11 | 47504246  | 47510576  | 1  | 1  | 0  | 2  | 0  | 0  | 6330  | 0.515885512 | 0.203966043 | 3.576248469 | 0.057033521 | 0.954518492 | 0.998252924 |
| chr19:9767222-9770143     | exonic   | ZNF562  | 19 | 9767222   | 9770143   | 1  | 1  | 0  | 2  | 0  | 0  | 2921  | 0.515885512 | 0.203966043 | 3.576248469 | 0.057033521 | 0.954518492 | 0.998252924 |
| chr20:47682728-47689234   | exonic   | CSE1L   | 20 | 47682728  | 47689234  | 1  | 1  | 0  | 2  | 0  | 0  | 6506  | 0.515885512 | 0.203966043 | 3.576248469 | 0.057033521 | 0.954518492 | 0.998252924 |
| chr22:38895404-38897285   | exonic   | DDX17   | 22 | 38895404  | 38897285  | 1  | 1  | 0  | 2  | 0  | 0  | 1881  | 0.515885512 | 0.203966043 | 3.576248469 | 0.057033521 | 0.954518492 | 0.998252924 |
| chr4:56877577-56878151    | exonic   | CEP135  | 4  | 56877577  | 56878151  | 1  | 1  | 0  | 2  | 0  | 0  | 574   | 0.515885512 | 0.203966043 | 3.576248469 | 0.057033521 | 0.954518492 | 0.998252924 |
| chr4:89396991-89400658    | exonic   | HERC5   | 4  | 89396991  | 89400658  | 1  | 1  | 0  | 2  | 0  | 0  | 3667  | 0.515885512 | 0.203966043 | 3.576248469 | 0.057033521 | 0.954518492 | 0.998252924 |
| chr6:76412360-76419346    | exonic   | SENPA6  | 6  | 76412360  | 76419346  | 1  | 1  | 0  | 2  | 0  | 0  | 6986  | 0.515885512 | 0.203966043 | 3.576248469 | 0.057033521 | 0.954518492 | 0.998252924 |
| chr7:86990705-87006766    | exonic   | CROT    | 7  | 86990705  | 87006766  | 1  | 1  | 0  | 2  | 0  | 0  | 16061 | 0.515885512 | 0.203966043 | 3.576248469 | 0.057033521 | 0.954518492 | 0.998252924 |
| chr10:15858833-15885271   | exonic   | FAM188A | 10 | 15858833  | 15885271  | 0  | 1  | 0  | 1  | 3  | 1  | 26438 | 1.096794043 | 0.205791528 | 2.356533312 | 0.087328079 | 0.930410735 | 0.998252924 |
| chr9:37126309-37127260    | exonic   | ZCCHC7  | 9  | 37126309  | 37127260  | 7  | 3  | 5  | 15 | 3  | 0  | 951   | 4.369834167 | 0.206246293 | 1.373638985 | 0.150145923 | NA          | NA          |
| chr1:172520651-172526934  | exonic   | SUCO    | 1  | 172520651 | 172526934 | 9  | 9  | 8  | 13 | 7  | 5  | 6283  | 8.077849884 | 0.207658001 | 0.96519321  | 0.215146562 | 0.829653053 | 0.998252924 |
| chr2:227771508-227779067  | exonic   | RHBDD1  | 2  | 227771508 | 227779067 | 9  | 8  | 5  | 8  | 17 | 0  | 7559  | 6.449391257 | 0.208243484 | 1.180225533 | 0.176443805 | 0.859945293 | 0.998252924 |
| chr4:129913321-129925031  | exonic   | SCLT1   | 4  | 129913321 | 129925031 | 44 | 26 | 32 | 68 | 38 | 7  | 11710 | 30.50495156 | 0.209127882 | 0.686058908 | 0.304824964 | 0.760499467 | 0.998252924 |
| chr1:225140371-225161855  | exonic   | DNAH14  | 1  | 225140371 | 225161855 | 27 | 12 | 6  | 2  | 9  | 16 | 21484 | 12.9909385  | 0.209530953 | 1.03890077  | 0.201685242 | NA          | NA          |
| chr1:247320302-247323115  | exonic   | ZNF124  | 1  | 247320302 | 247323115 | 3  | 2  | 4  | 8  | 3  | 0  | 2813  | 2.738161875 | 0.209547517 | 1.5978977   | 0.131139507 | 0.895664949 | 0.998252924 |
| chr1:35879572-35881315    | exonic   | ZMYM4   | 1  | 35879572  | 35881315  | 3  | 2  | 3  | 1  | 8  | 0  | 1743  | 2.401850263 | 0.209781318 | 1.73406279  | 0.120976771 | NA          | NA          |
| chr3:47651555-47719801    | exonic   | SMARCC1 | 3  | 47651555  | 47719801  | 0  | 0  | 6  | 3  | 3  | 1  | 68246 | 2.173849183 | 0.210344871 | 1.980240349 | 0.106221889 | NA          | NA          |
| chr22:24698162-24743144   | exonic   | SPECC1L | 22 | 24698162  | 24743144  | 0  | 2  | 0  | 3  | 2  | 0  | 44982 | 1.258092195 | 0.21077058  | 2.536286823 | 0.083102029 | NA          | NA          |
| chr9:91009042-91010687    | intronic | SPIN1   | 9  | 91009042  | 91010687  | 0  | 4  | 0  | 3  | 2  | 0  | 1645  | 1.258092195 | 0.21077058  | 2.536286823 | 0.083102029 | NA          | NA          |
| chr5:95099211-95124562    | exonic   | RHOBTB3 | 5  | 95099211  | 95124562  | 3  | 0  | 1  | 0  | 4  | 0  | 25351 | 1.068339541 | 0.213215889 | 2.712503304 | 0.07860484  | 0.937346937 | 0.998252924 |
| chr18:51804072-51813781   | exonic   | POLI    | 18 | 51804072  | 51813781  | 6  | 9  | 3  | 13 | 6  | 1  | 9709  | 5.350642071 | 0.215583123 | 1.183728616 | 0.182122085 | 0.855486917 | 0.998252924 |
| chr12:26208168-26220646   | exonic   | RASSF8  | 12 | 26208168  | 26220646  | 0  | 1  | 2  | 2  | 1  | 0  | 12478 | 1.008775427 | 0.217395447 | 2.573261173 | 0.084482465 | 0.932672844 | 0.998252924 |
| chr2:70387756-70409129    | exonic   | C2orf42 | 2  | 70387756  | 70409129  | 0  | 1  | 2  | 3  | 1  | 0  | 21373 | 1.008775427 | 0.217395447 | 2.573261173 | 0.084482465 | 0.932672844 | 0.998252924 |
| chr3:110830876-110866331  | exonic   | PVRL3   | 3  | 110830876 | 110866331 | 0  | 1  | 2  | 3  | 1  | 0  | 35455 | 1.008775427 | 0.217395447 | 2.573261173 | 0.084482465 | 0.932672844 | 0.998252924 |
| chr5:123979203-124036962  | exonic   | ZNF608  | 5  | 123979203 | 124036962 | 3  | 0  | 3  | 5  | 0  | 1  | 57759 | 1.818543439 | 0.217637789 | 2.07015799  | 0.105131005 | 0.916271857 | 0.998252924 |
| chr7:11021998-11030474    | exonic   | PHF14   | 7  | 11021998  | 11030474  | 0  | 3  | 1  | 3  | 0  | 1  | 8476  | 1.347249187 | 0.219700193 | 2.340574849 | 0.093865912 | 0.925215673 | 0.998252924 |

|                           |              |                                            |    |           |           |    |    |    |    |    |    |       |             |             |             |             |             |             |
|---------------------------|--------------|--------------------------------------------|----|-----------|-----------|----|----|----|----|----|----|-------|-------------|-------------|-------------|-------------|-------------|-------------|
| chr17:60106901-60140662   | exonic       | MED13                                      | 17 | 60106901  | 60140662  | 1  | 0  | 1  | 1  | 1  | 0  | 33761 | 0.553594775 | 0.222133756 | 3.226204879 | 0.06885296  | 0.945106662 | 0.998252924 |
| chr4:83799882-83802075    | exonic       | SEC31A                                     | 4  | 83799882  | 83802075  | 1  | 0  | 1  | 1  | 1  | 0  | 2193  | 0.553594775 | 0.222133756 | 3.226204879 | 0.06885296  | 0.945106662 | 0.998252924 |
| chr10:102683731-102685776 | exonic       | SLF2                                       | 10 | 102683731 | 102685776 | 5  | 6  | 3  | 7  | 9  | 0  | 2045  | 4.115823077 | 0.222143059 | 1.355678889 | 0.163861119 | 0.869840476 | 0.998252924 |
| chr9:129102786-129157976  | exonic       | MVB12B                                     | 9  | 129102786 | 129157976 | 0  | 5  | 2  | 6  | 3  | 0  | 55190 | 2.266867623 | 0.223881168 | 1.885134361 | 0.118761385 | 0.905464402 | 0.998252924 |
| chr17:58012553-58018304   | exonic       | RPS6KB1                                    | 17 | 58012553  | 58018304  | 6  | 2  | 0  | 3  | 5  | 0  | 5751  | 2.046544519 | 0.224531257 | 1.92642823  | 0.116553139 | 0.907214174 | 0.998252924 |
| chr4:85818063-85853516    | UTR5         | WDFY3(NM_014991:c.-71579..-71772delins0)   | 4  | 85818063  | 85853516  | 3  | 2  | 0  | 0  | 5  | 0  | 35453 | 1.340649536 | 0.226659781 | 2.476880461 | 0.091510182 | NA          | NA          |
| chr18:34646852-34647508   | exonic       | KIAA1328                                   | 18 | 34646852  | 34647508  | 1  | 0  | 3  | 3  | 2  | 0  | 656   | 1.281783018 | 0.227463756 | 2.32887168  | 0.097671228 | 0.922193363 | 0.998252924 |
| chr1:9328189-9331114      | UTR3         | WDFY3(NM_014991:c.-71579..-71772delins0)   | 1  | 9328189   | 9331114   | 4  | 0  | 0  | 4  | 0  | 0  | 2925  | 0.941193312 | 0.227661861 | 3.084342426 | 0.073812122 | NA          | NA          |
| chr12:5908673-5941769     | exonic       | ANO2                                       | 12 | 5908673   | 5941769   | 4  | 0  | 0  | 4  | 0  | 0  | 33096 | 0.941193312 | 0.227661861 | 3.084342426 | 0.073812122 | NA          | NA          |
| chr15:57119722-57142384   | intergenic   | ZNF280D(dist=93438), LOC145783(dist=35984) | 15 | 57119722  | 57142384  | 4  | 0  | 0  | 4  | 0  | 0  | 22662 | 0.941193312 | 0.227661861 | 3.084342426 | 0.073812122 | NA          | NA          |
| chr17:44552566-44564506   | intergenic   | NSFP1(dist=52103), ARL17A(dist=21541)      | 17 | 44552566  | 44564506  | 4  | 0  | 0  | 4  | 0  | 0  | 11940 | 0.941193312 | 0.227661861 | 3.084342426 | 0.073812122 | NA          | NA          |
| chr19:17263453-17265225   | exonic       | MYO9B                                      | 19 | 17263453  | 17265225  | 4  | 0  | 0  | 4  | 0  | 0  | 1772  | 0.941193312 | 0.227661861 | 3.084342426 | 0.073812122 | NA          | NA          |
| chr7:72617462-72618644    | ncRNA_exonic | GTF2IP1,GTF2IP4                            | 7  | 72617462  | 72618644  | 4  | 0  | 0  | 4  | 0  | 0  | 1182  | 0.941193312 | 0.227661861 | 3.084342426 | 0.073812122 | NA          | NA          |
| chr6:82920530-82922510    | exonic       | IBTK                                       | 6  | 82920530  | 82922510  | 9  | 3  | 6  | 10 | 6  | 2  | 1980  | 5.273039635 | 0.228942384 | 1.150553232 | 0.198984608 | 0.842274785 | 0.998252924 |
| chr1:155823066-155823597  | exonic       | GON4L                                      | 1  | 155823066 | 155823597 | 36 | 22 | 15 | 52 | 16 | 7  | 531   | 21.05879394 | 0.229475361 | 0.755943252 | 0.303561624 | NA          | NA          |
| chr1:27269150-27269556    | exonic       | NUDC                                       | 1  | 27269150  | 27269556  | 44 | 20 | 8  | 54 | 19 | 3  | 406   | 19.70408531 | 0.230357522 | 0.852089796 | 0.270344186 | 0.786895475 | 0.998252924 |
| chr22:30366964-30375041   | exonic       | MTMR3                                      | 22 | 30366964  | 30375041  | 2  | 1  | 0  | 2  | 1  | 0  | 8077  | 0.765899877 | 0.230850642 | 2.823645705 | 0.081756235 | 0.934840559 | 0.998252924 |
| chr18:42281140-42339068   | exonic       | SETBP1                                     | 18 | 42281140  | 42339068  | 0  | 5  | 0  | 2  | 4  | 0  | 57928 | 1.568111453 | 0.231708921 | 2.353729425 | 0.098443313 | NA          | NA          |
| chr8:64098705-64100303    | exonic       | YTHDF3                                     | 8  | 64098705  | 64100303  | 0  | 5  | 0  | 2  | 4  | 0  | 1598  | 1.568111453 | 0.231708921 | 2.353729425 | 0.098443313 | NA          | NA          |
| chr17:1746096-1756483     | exonic       | RPA1                                       | 17 | 1746096   | 1756483   | 0  | 1  | 3  | 0  | 5  | 0  | 10387 | 1.371219985 | 0.232072034 | 2.505234654 | 0.092634849 | NA          | NA          |
| chr2:43969879-43973102    | exonic       | PLEKHH2                                    | 2  | 43969879  | 43973102  | 7  | 6  | 0  | 9  | 3  | 1  | 3223  | 3.576666734 | 0.232745708 | 1.495069963 | 0.155675462 | NA          | NA          |
| chr1:205585606-205593019  | exonic       | ELK4                                       | 1  | 205585606 | 205593019 | 52 | 39 | 23 | 64 | 23 | 19 | 7413  | 33.48497769 | 0.232815313 | 0.660796068 | 0.352325511 | NA          | NA          |
| chr13:50025688-50026045   | exonic       | SETDB2                                     | 13 | 50025688  | 50026045  | 4  | 4  | 1  | 6  | 4  | 0  | 357   | 2.532297991 | 0.233807927 | 1.645335031 | 0.142103537 | 0.886998225 | 0.998252924 |
| chr19:8520288-8528570     | exonic       | HNRNPM                                     | 19 | 8520288   | 8528570   | 21 | 17 | 14 | 27 | 26 | 3  | 8282  | 15.37495693 | 0.234579856 | 0.803787328 | 0.291843188 | 0.770406522 | 0.998252924 |
| chr17:74003141-74006624   | exonic       | EVPL                                       | 17 | 74003141  | 74006624  | 5  | 0  | 0  | 5  | 0  | 0  | 3483  | 1.17649164  | 0.234662406 | 2.840865003 | 0.082602449 | NA          | NA          |
| chr4:169923221-169928907  | exonic       | CBR4                                       | 4  | 169923221 | 169928907 | 0  | 2  | 2  | 2  | 3  | 0  | 5686  | 1.318794685 | 0.235374738 | 2.289808304 | 0.102792333 | 0.91812779  | 0.998252924 |
| chr6:36492117-36507981    | exonic       | STK38                                      | 6  | 36492117  | 36507981  | 0  | 2  | 2  | 2  | 3  | 0  | 15864 | 1.318794685 | 0.235374738 | 2.289808304 | 0.102792333 | 0.91812779  | 0.998252924 |
| chr14:104128452-104129264 | exonic       | KLC1                                       | 14 | 104128452 | 104129264 | 6  | 1  | 0  | 5  | 2  | 0  | 812   | 1.721809225 | 0.236206073 | 2.084671217 | 0.113306152 | 0.90978784  | 0.998252924 |
| chr10:32197099-32199491   | exonic       | ARHGAP12                                   | 10 | 32197099  | 32199491  | 83 | 31 | 29 | 85 | 44 | 13 | 2392  | 40.19778397 | 0.237363696 | 0.65187092  | 0.364126836 | NA          | NA          |
| chr11:46098304-46113774   | exonic       | PHF21A                                     | 11 | 46098304  | 46113774  | 21 | 4  | 8  | 29 | 8  | 0  | 15470 | 9.035230743 | 0.238675787 | 1.133631541 | 0.210540884 | 0.833245546 | 0.998252924 |
| chr18:56585502-56587865   | exonic       | ZNF532                                     | 18 | 56585502  | 56587865  | 7  | 8  | 4  | 8  | 5  | 4  | 2363  | 5.77469372  | 0.238927044 | 1.104811392 | 0.216260482 | 0.828784711 | 0.998252924 |
| chr10:15875628-15889942   | exonic       | FAM188A                                    | 10 | 15875628  | 15889942  | 8  | 6  | 4  | 9  | 11 | 0  | 14314 | 5.154730545 | 0.239732697 | 1.247082332 | 0.19223486  | 0.847558241 | 0.998252924 |
| chr2:48722817-48738607    | exonic       | PPP1R21                                    | 2  | 48722817  | 48738607  | 4  | 0  | 1  | 2  | 3  | 0  | 15790 | 1.288921832 | 0.240256669 | 2.307917243 | 0.104101076 | 0.917089137 | 0.998252924 |
| chr7:122255234-122269382  | exonic       | CADPS2                                     | 7  | 122255234 | 122269382 | 4  | 0  | 1  | 2  | 3  | 0  | 14148 | 1.288921832 | 0.240256669 | 2.307917243 | 0.104101076 | 0.917089137 | 0.998252924 |
| chr2:30748452-30756180    | exonic       | LCLAT1                                     | 2  | 30748452  | 30756180  | 8  | 9  | 3  | 16 | 7  | 0  | 7728  | 5.740358925 | 0.240607057 | 1.234118893 | 0.194962623 | 0.845422209 | 0.998252924 |

|                           |              |            |    |           |           |    |    |    |    |    |    |       |             |             |             |             |             |             |
|---------------------------|--------------|------------|----|-----------|-----------|----|----|----|----|----|----|-------|-------------|-------------|-------------|-------------|-------------|-------------|
| chr2:190656515-190682906  | exonic       | PMS1       | 2  | 190656515 | 190682906 | 10 | 10 | 9  | 12 | 19 | 1  | 26391 | 8.691524893 | 0.240661382 | 0.99996335  | 0.240670202 | 0.809810735 | 0.998252924 |
| chr5:132227855-132228810  | exonic       | AFF4       | 5  | 132227855 | 132228810 | 9  | 2  | 13 | 6  | 13 | 4  | 955   | 7.518030644 | 0.24082369  | 1.082813707 | 0.222405469 | 0.823998255 | 0.998252924 |
| chr17:54926056-54933986   | exonic       | DGKE       | 17 | 54926056  | 54933986  | 7  | 3  | 8  | 11 | 10 | 0  | 7930  | 5.383587656 | 0.241395385 | 1.252067189 | 0.192797469 | 0.847117586 | 0.998252924 |
| chr7:35707043-35712888    | exonic       | HERPUD2    | 7  | 35707043  | 35712888  | 6  | 6  | 4  | 9  | 7  | 1  | 5845  | 4.720865581 | 0.241774291 | 1.202738016 | 0.201019912 | 0.840683004 | 0.998252924 |
| chr11:66407170-66407594   | exonic       | RBM4       | 11 | 66407170  | 66407594  | 3  | 0  | 1  | 1  | 3  | 0  | 424   | 1.053623504 | 0.242584119 | 2.513281335 | 0.096520877 | 0.923106894 | 0.998252924 |
| chr9:111819470-111826847  | exonic       | TMEM245    | 9  | 111819470 | 111826847 | 3  | 0  | 1  | 1  | 3  | 0  | 7377  | 1.053623504 | 0.242584119 | 2.513281335 | 0.096520877 | 0.923106894 | 0.998252924 |
| chr10:34558584-34573173   | exonic       | PARD3      | 10 | 34558584  | 34573173  | 10 | 4  | 6  | 9  | 13 | 0  | 14589 | 5.700745727 | 0.24466948  | 1.218157598 | 0.200852074 | 0.840814243 | 0.998252924 |
| chr1:29068914-29070498    | exonic       | YTHDF2     | 1  | 29068914  | 29070498  | 2  | 0  | 1  | 1  | 2  | 0  | 1584  | 0.80360914  | 0.244811435 | 2.780905212 | 0.088033002 | 0.929850446 | 0.998252924 |
| chr14:103803013-103806140 | exonic       | EIF5       | 14 | 103803013 | 103806140 | 2  | 0  | 1  | 1  | 2  | 0  | 3127  | 0.80360914  | 0.244811435 | 2.780905212 | 0.088033002 | 0.929850446 | 0.998252924 |
| chr9:33311103-33319125    | exonic       | NFX1       | 9  | 33311103  | 33319125  | 2  | 2  | 0  | 0  | 2  | 1  | 8022  | 1.156798936 | 0.245405581 | 2.448761311 | 0.100216211 | 0.920172676 | 0.998252924 |
| chr2:89082250-89092011    | ncRNA_exonic | ANKRD36BP2 | 2  | 89082250  | 89092011  | 3  | 25 | 20 | 11 | 44 | 2  | 9761  | 15.80030533 | 0.24577022  | 1.017978045 | 0.241429784 | NA          | NA          |
| chr12:104514178-104517201 | exonic       | NFYB       | 12 | 104514178 | 104517201 | 3  | 0  | 4  | 3  | 5  | 0  | 3023  | 2.100108195 | 0.245893496 | 1.912876255 | 0.128546473 | 0.897716523 | 0.998252924 |
| chr6:144858717-144860579  | exonic       | UTRN       | 6  | 144858717 | 144860579 | 4  | 8  | 6  | 9  | 10 | 1  | 1862  | 5.56906361  | 0.24757041  | 1.157680456 | 0.213850384 | 0.830663733 | 0.998252924 |
| chr1:8716031-8716500      | exonic       | RERE       | 1  | 8716031   | 8716500   | 15 | 24 | 5  | 15 | 10 | 11 | 469   | 13.29911814 | 0.247714442 | 0.894306504 | 0.276990541 | 0.781787369 | 0.998252924 |
| chr1:243468014-243542165  | exonic       | SDCCAG8    | 1  | 243468014 | 243542165 | 6  | 1  | 0  | 0  | 0  | 3  | 74151 | 1.872853282 | 0.248141687 | 2.297084954 | 0.108024602 | NA          | NA          |
| chr18:2890558-2892484     | exonic       | EMILIN2    | 18 | 2890558   | 2892484   | 9  | 8  | 3  | 5  | 8  | 4  | 1926  | 5.87954669  | 0.251987061 | 1.110777076 | 0.226856555 | 0.820535285 | 0.998252924 |
| chr10:50708583-50714058   | exonic       | ERCC6      | 10 | 50708583  | 50714058  | 1  | 2  | 5  | 6  | 4  | 0  | 5475  | 2.585861667 | 0.252438969 | 1.675153605 | 0.150696013 | 0.880215519 | 0.998252924 |
| chr3:182788786-182789145  | exonic       | MCCC1      | 3  | 182788786 | 182789145 | 1  | 1  | 3  | 3  | 3  | 0  | 359   | 1.577086239 | 0.252998755 | 2.007477665 | 0.126028179 | 0.899709618 | 0.998252924 |
| chr5:153377362-153414527  | exonic       | FAM114A2   | 5  | 153377362 | 153414527 | 3  | 1  | 1  | 0  | 5  | 0  | 37165 | 1.363642762 | 0.254883496 | 2.305216247 | 0.11056815  | NA          | NA          |
| chr6:76344422-76388643    | exonic       | SENP6      | 6  | 76344422  | 76388643  | 3  | 8  | 8  | 4  | 6  | 7  | 44221 | 4.711049895 | 0.255061622 | 1.29448383  | 0.197037318 | NA          | NA          |
| chr3:4452548-4461830      | exonic       | SUMF1      | 3  | 4452548   | 4461830   | 3  | 0  | 3  | 6  | 1  | 0  | 9282  | 1.737663638 | 0.257537305 | 2.084784687 | 0.123531848 | 0.901685956 | 0.998252924 |
| chr1:243468014-243480195  | exonic       | SDCCAG8    | 1  | 243468014 | 243480195 | 2  | 4  | 2  | 3  | 2  | 2  | 12181 | 2.52704135  | 0.25772861  | 1.566513941 | 0.164523662 | 0.869318921 | 0.998252924 |
| chr1:155640110-155644887  | exonic       | YY1AP1     | 1  | 155640110 | 155644887 | 0  | 2  | 0  | 0  | 2  | 0  | 4777  | 0.590606442 | 0.258193774 | 3.703223597 | 0.069721357 | 0.944415443 | 0.998252924 |
| chr1:227227831-227257554  | exonic       | CDC42BPA   | 1  | 227227831 | 227257554 | 0  | 2  | 0  | 0  | 2  | 0  | 29723 | 0.590606442 | 0.258193774 | 3.703223597 | 0.069721357 | 0.944415443 | 0.998252924 |
| chr1:93089732-93170301    | exonic       | EVI5       | 1  | 93089732  | 93170301  | 0  | 2  | 0  | 0  | 2  | 0  | 80569 | 0.590606442 | 0.258193774 | 3.703223597 | 0.069721357 | 0.944415443 | 0.998252924 |
| chr10:126384727-126395456 | exonic       | FAM53B     | 10 | 126384727 | 126395456 | 0  | 2  | 0  | 0  | 2  | 0  | 10729 | 0.590606442 | 0.258193774 | 3.703223597 | 0.069721357 | 0.944415443 | 0.998252924 |
| chr15:90760670-90763123   | exonic       | SEMA4B     | 15 | 90760670  | 90763123  | 0  | 2  | 0  | 0  | 2  | 0  | 2453  | 0.590606442 | 0.258193774 | 3.703223597 | 0.069721357 | 0.944415443 | 0.998252924 |
| chr17:6563244-6564732     | ncRNA_exonic | ALOX15P1   | 17 | 6563244   | 6564732   | 0  | 2  | 0  | 0  | 2  | 0  | 1488  | 0.590606442 | 0.258193774 | 3.703223597 | 0.069721357 | 0.944415443 | 0.998252924 |
| chr19:40747844-40748594   | exonic       | AKT2       | 19 | 40747844  | 40748594  | 0  | 2  | 0  | 0  | 2  | 0  | 750   | 0.590606442 | 0.258193774 | 3.703223597 | 0.069721357 | 0.944415443 | 0.998252924 |
| chr2:61706510-61706810    | intronic     | XPO1       | 2  | 61706510  | 61706810  | 0  | 2  | 0  | 0  | 2  | 0  | 300   | 0.590606442 | 0.258193774 | 3.703223597 | 0.069721357 | 0.944415443 | 0.998252924 |
| chr20:37612341-37623523   | exonic       | DHX35      | 20 | 37612341  | 37623523  | 0  | 2  | 0  | 0  | 2  | 0  | 11182 | 0.590606442 | 0.258193774 | 3.703223597 | 0.069721357 | 0.944415443 | 0.998252924 |
| chr3:14986181-14986410    | ncRNA_exonic | FGD5-AS1   | 3  | 14986181  | 14986410  | 0  | 2  | 0  | 0  | 2  | 0  | 229   | 0.590606442 | 0.258193774 | 3.703223597 | 0.069721357 | 0.944415443 | 0.998252924 |
| chr5:108373122-108382899  | exonic       | FER        | 5  | 108373122 | 108382899 | 0  | 2  | 0  | 0  | 2  | 0  | 9777  | 0.590606442 | 0.258193774 | 3.703223597 | 0.069721357 | 0.944415443 | 0.998252924 |
| chr5:132400671-132406188  | exonic       | HSPA4      | 5  | 132400671 | 132406188 | 0  | 2  | 0  | 0  | 2  | 0  | 5517  | 0.590606442 | 0.258193774 | 3.703223597 | 0.069721357 | 0.944415443 | 0.998252924 |
| chr6:109740389-109757402  | exonic       | PPIL6      | 6  | 109740389 | 109757402 | 0  | 2  | 0  | 0  | 2  | 0  | 17013 | 0.590606442 | 0.258193774 | 3.703223597 | 0.069721357 | 0.944415443 | 0.998252924 |

|                          |        |                                                           |    |           |           |    |    |    |    |    |    |        |             |             |             |             |             |             |
|--------------------------|--------|-----------------------------------------------------------|----|-----------|-----------|----|----|----|----|----|----|--------|-------------|-------------|-------------|-------------|-------------|-------------|
| chr6:155095123-155182132 | exonic | SCAF8                                                     | 6  | 155095123 | 155182132 | 0  | 2  | 0  | 0  | 2  | 0  | 87009  | 0.590606442 | 0.258193774 | 3.703223597 | 0.069721357 | 0.944415443 | 0.998252924 |
| chr7:92921014-92940584   | exonic | VPS50                                                     | 7  | 92921014  | 92940584  | 0  | 2  | 0  | 0  | 2  | 0  | 19570  | 0.590606442 | 0.258193774 | 3.703223597 | 0.069721357 | 0.944415443 | 0.998252924 |
| chr8:101232506-101243516 | exonic | SPAG1                                                     | 8  | 101232506 | 101243516 | 0  | 2  | 0  | 0  | 2  | 0  | 11010  | 0.590606442 | 0.258193774 | 3.703223597 | 0.069721357 | 0.944415443 | 0.998252924 |
| chr8:131092147-131104389 | exonic | ASAP1                                                     | 8  | 131092147 | 131104389 | 0  | 2  | 0  | 0  | 2  | 0  | 12242  | 0.590606442 | 0.258193774 | 3.703223597 | 0.069721357 | 0.944415443 | 0.998252924 |
| chr8:74585341-74621397   | exonic | STAU2                                                     | 8  | 74585341  | 74621397  | 0  | 2  | 0  | 0  | 2  | 0  | 36056  | 0.590606442 | 0.258193774 | 3.703223597 | 0.069721357 | 0.944415443 | 0.998252924 |
| chr9:102677459-102691125 | exonic | STX17                                                     | 9  | 102677459 | 102691125 | 0  | 2  | 0  | 0  | 2  | 0  | 13666  | 0.590606442 | 0.258193774 | 3.703223597 | 0.069721357 | 0.944415443 | 0.998252924 |
| chr9:115166274-115216442 | exonic | HSDL2                                                     | 9  | 115166274 | 115216442 | 0  | 2  | 0  | 0  | 2  | 0  | 50168  | 0.590606442 | 0.258193774 | 3.703223597 | 0.069721357 | 0.944415443 | 0.998252924 |
| chr9:123751323-123753558 | exonic | C5                                                        | 9  | 123751323 | 123753558 | 0  | 2  | 0  | 0  | 2  | 0  | 2235   | 0.590606442 | 0.258193774 | 3.703223597 | 0.069721357 | 0.944415443 | 0.998252924 |
| chr9:88190229-88248289   | exonic | AGTPBP1                                                   | 9  | 88190229  | 88248289  | 0  | 2  | 0  | 0  | 2  | 0  | 58060  | 0.590606442 | 0.258193774 | 3.703223597 | 0.069721357 | 0.944415443 | 0.998252924 |
| chrX:53641494-53641706   | exonic | HUWE1                                                     | X  | 53641494  | 53641706  | 0  | 2  | 0  | 0  | 2  | 0  | 212    | 0.590606442 | 0.258193774 | 3.703223597 | 0.069721357 | 0.944415443 | 0.998252924 |
| chr5:137288316-137290065 | exonic | FAM13B                                                    | 5  | 137288316 | 137290065 | 2  | 0  | 3  | 5  | 1  | 0  | 1749   | 1.50236531  | 0.258582958 | 2.200652041 | 0.117502882 | 0.90646156  | 0.998252924 |
| chr3:11399891-11421526   | exonic | ATG7                                                      | 3  | 11399891  | 11421526  | 4  | 0  | 1  | 3  | 0  | 1  | 21635  | 1.340369561 | 0.258773505 | 2.327003737 | 0.111204594 | 0.911454109 | 0.998252924 |
| chr18:74561481-74593468  | exonic | ZNF236                                                    | 18 | 74561481  | 74593468  | 5  | 5  | 2  | 6  | 5  | 1  | 31987  | 3.462075789 | 0.259278501 | 1.361233386 | 0.190473216 | 0.84893833  | 0.998252924 |
| chr22:38890025-38897285  | exonic | DDX17                                                     | 22 | 38890025  | 38897285  | 0  | 0  | 1  | 4  | 0  | 0  | 7260   | 4.255245592 | 0.259980926 | 1.354796022 | 0.191896729 | 0.847823099 | 0.998252924 |
| chr22:38890634-38897285  | exonic | DDX17                                                     | 22 | 38890634  | 38897285  | 4  | 4  | 3  | 7  | 3  | 0  | 6651   | 4.255245592 | 0.259980926 | 1.354796022 | 0.191896729 | 0.847823099 | 0.998252924 |
| chr22:50810448-50832564  | exonic | PPP6R2                                                    | 22 | 50810448  | 50832564  | 17 | 13 | 14 | 14 | 9  | 12 | 22116  | 13.49635927 | 0.263883223 | 0.847267969 | 0.311451905 | NA          | NA          |
| chr4:144336629-144361535 | exonic | GAB1                                                      | 4  | 144336629 | 144361535 | 2  | 8  | 0  | 4  | 3  | 2  | 24906  | 3.056945302 | 0.264118082 | 1.600785208 | 0.16499283  | NA          | NA          |
| chr3:160131260-160132305 | exonic | SMC4                                                      | 3  | 160131260 | 160132305 | 2  | 3  | 0  | 0  | 1  | 2  | 1045   | 1.518265922 | 0.265059929 | 2.249338946 | 0.117839034 | 0.9061952   | 0.998252924 |
| chr10:52193235-52350007  | UTR5   | <small>SOM51 (NM_147156:c.-245682_-246133delins0)</small> | 10 | 52193235  | 52350007  | 5  | 0  | 1  | 4  | 2  | 0  | 156772 | 1.509504124 | 0.26563416  | 2.180242847 | 0.12183696  | 0.903028142 | 0.998252924 |
| chr10:52220432-52350007  | UTR5   | <small>SOM51 (NM_147156:c.-245763_-246133delins0)</small> | 10 | 52220432  | 52350007  | 5  | 0  | 1  | 4  | 2  | 0  | 129575 | 1.509504124 | 0.26563416  | 2.180242847 | 0.12183696  | 0.903028142 | 0.998252924 |
| chr16:8952206-8953192    | exonic | CARHSP1                                                   | 16 | 8952206   | 8953192   | 4  | 1  | 1  | 2  | 0  | 2  | 986    | 1.716552584 | 0.26665051  | 2.000319808 | 0.133303939 | 0.893953012 | 0.998252924 |
| chr17:60111147-60112969  | exonic | MED13                                                     | 17 | 60111147  | 60112969  | 7  | 7  | 4  | 10 | 10 | 0  | 1822   | 5.185303365 | 0.266724937 | 1.244082697 | 0.214394861 | 0.830239149 | 0.998252924 |
| chr18:42529845-42533305  | exonic | SETBP1                                                    | 18 | 42529845  | 42533305  | 9  | 5  | 3  | 8  | 10 | 0  | 3460   | 4.684833856 | 0.268200596 | 1.296575408 | 0.206853064 | 0.836124613 | 0.998252924 |
| chr11:9735012-9761894    | exonic | SWAP70                                                    | 11 | 9735012   | 9761894   | 2  | 1  | 0  | 0  | 1  | 1  | 26882  | 0.861495715 | 0.270639684 | 2.764797141 | 0.097887718 | 0.922021453 | 0.998252924 |
| chr12:77239488-77243250  | exonic | ZDHHC17                                                   | 12 | 77239488  | 77243250  | 2  | 1  | 0  | 0  | 1  | 1  | 3762   | 0.861495715 | 0.270639684 | 2.764797141 | 0.097887718 | 0.922021453 | 0.998252924 |
| chr4:154191486-154197282 | exonic | TRIM2                                                     | 4  | 154191486 | 154197282 | 2  | 1  | 0  | 0  | 1  | 1  | 5796   | 0.861495715 | 0.270639684 | 2.764797141 | 0.097887718 | 0.922021453 | 0.998252924 |
| chr9:33944362-33956144   | exonic | UBAP2                                                     | 9  | 33944362  | 33956144  | 2  | 3  | 1  | 1  | 2  | 3  | 11782  | 3.381400621 | 0.272508641 | 1.47703632  | 0.184496913 | 0.853623649 | 0.998252924 |
| chr3:171830241-171851336 | exonic | FNDC3B                                                    | 3  | 171830241 | 171851336 | 0  | 5  | 3  | 0  | 3  | 3  | 21095  | 2.750924164 | 0.272767562 | 1.83271992  | 0.148832104 | 0.881686117 | 0.998252924 |
| chr4:186168447-186188309 | exonic | SNX25                                                     | 4  | 186168447 | 186188309 | 3  | 12 | 3  | 5  | 9  | 3  | 19862  | 5.615537042 | 0.272984792 | 1.185644915 | 0.230241608 | NA          | NA          |
| chr12:28408514-28460682  | exonic | CCDC91                                                    | 12 | 28408514  | 28460682  | 8  | 4  | 4  | 8  | 5  | 2  | 52168  | 4.590140248 | 0.273732833 | 1.19834112  | 0.228426471 | 0.819314712 | 0.998252924 |
| chr19:17387303-17387718  | exonic | BABAM1                                                    | 19 | 17387303  | 17387718  | 14 | 10 | 4  | 23 | 8  | 0  | 415    | 7.751032525 | 0.274070388 | 1.138924972 | 0.240639545 | 0.809834498 | 0.998252924 |
| chr5:95099211-95119667   | exonic | RHOBTB3                                                   | 5  | 95099211  | 95119667  | 3  | 1  | 1  | 1  | 4  | 0  | 20456  | 1.348926725 | 0.275150733 | 2.14365651  | 0.128355794 | NA          | NA          |
| chr15:80412669-80415142  | exonic | ZFAND6                                                    | 15 | 80412669  | 80415142  | 26 | 12 | 23 | 19 | 22 | 12 | 2473   | 18.36330059 | 0.275447613 | 0.753726192 | 0.365447846 | 0.714777131 | 0.998252924 |
| chr15:93521463-93528903  | exonic | CHD2                                                      | 15 | 93521463  | 93528903  | 3  | 1  | 0  | 3  | 1  | 0  | 7440   | 1.001198205 | 0.275459013 | 2.55462625  | 0.10782752  | 0.914132512 | 0.998252924 |
| chr7:73100965-73101425   | exonic | WBSR22                                                    | 7  | 73100965  | 73101425  | 3  | 4  | 7  | 12 | 5  | 0  | 460    | 4.345820934 | 0.276273782 | 1.365554539 | 0.202316183 | 0.839669549 | 0.998252924 |

|                           |            |                   |    |           |           |    |    |    |    |    |   |        |             |             |             |             |             |             |
|---------------------------|------------|-------------------|----|-----------|-----------|----|----|----|----|----|---|--------|-------------|-------------|-------------|-------------|-------------|-------------|
| chr2:109388156-109389502  | exonic     | RANBP2            | 2  | 109388156 | 109389502 | 9  | 5  | 3  | 9  | 9  | 0 | 1346   | 4.67011782  | 0.276580908 | 1.29515593  | 0.213550277 | 0.830897778 | 0.998252924 |
| chr14:97026986-97031551   | exonic     | PAPOLA            | 14 | 97026986  | 97031551  | 6  | 0  | 4  | 8  | 3  | 0 | 4565   | 2.776571105 | 0.27668786  | 1.735742071 | 0.159406092 | 0.87334894  | 0.998252924 |
| chr1:243456392-243542165  | exonic     | SDCCAG8           | 1  | 243456392 | 243542165 | 6  | 0  | 1  | 0  | 0  | 3 | 85773  | 1.895846509 | 0.276966499 | 2.290258791 | 0.120932403 | NA          | NA          |
| chr1:151498117-151499583  | exonic     | CGN               | 1  | 151498117 | 151499583 | 2  | 1  | 0  | 3  | 0  | 0 | 1466   | 0.75118384  | 0.27707628  | 3.080863018 | 0.089934631 | NA          | NA          |
| chr14:31535331-31542179   | exonic     | AP4S1             | 14 | 31535331  | 31542179  | 2  | 1  | 0  | 3  | 0  | 0 | 6848   | 0.75118384  | 0.27707628  | 3.080863018 | 0.089934631 | NA          | NA          |
| chr6:108202352-108204350  | exonic     | SEC63             | 6  | 108202352 | 108204350 | 2  | 1  | 0  | 3  | 0  | 0 | 1998   | 0.75118384  | 0.27707628  | 3.080863018 | 0.089934631 | NA          | NA          |
| chr7:5680784-5692141      | exonic     | RNF216            | 7  | 5680784   | 5692141   | 2  | 1  | 0  | 3  | 0  | 0 | 11357  | 0.75118384  | 0.27707628  | 3.080863018 | 0.089934631 | NA          | NA          |
| chr9:80409378-80430686    | exonic     | GNAQ              | 9  | 80409378  | 80430686  | 2  | 1  | 0  | 3  | 0  | 0 | 21308  | 0.75118384  | 0.27707628  | 3.080863018 | 0.089934631 | NA          | NA          |
| chr18:60206913-60243885   | exonic     | ZCCHC2            | 18 | 60206913  | 60243885  | 3  | 0  | 0  | 0  | 3  | 1 | 36972  | 1.452102157 | 0.27828024  | 2.249597775 | 0.12370222  | 0.901551053 | 0.998252924 |
| chr17:62515438-62529309   | exonic     | CEP95             | 17 | 62515438  | 62529309  | 3  | 0  | 1  | 2  | 2  | 0 | 13871  | 1.038907468 | 0.27895501  | 2.504251368 | 0.111392576 | 0.911305047 | 0.998252924 |
| chr6:163876310-163956157  | exonic     | QKI               | 6  | 163876310 | 163956157 | 1  | 1  | 3  | 4  | 2  | 0 | 79847  | 1.562370203 | 0.279139561 | 2.020627675 | 0.138144976 | 0.890125841 | 0.998252924 |
| chr6:47251673-47254331    | exonic     | TNFRSF21          | 6  | 47251673  | 47254331  | 6  | 24 | 8  | 18 | 11 | 7 | 2658   | 11.93712987 | 0.280368092 | 0.921455243 | 0.304266642 | 0.760924757 | 0.998252924 |
| chr1:8555122-8674745      | exonic     | RERE              | 1  | 8555122   | 8674745   | 6  | 4  | 0  | 5  | 1  | 2 | 119623 | 2.740046418 | 0.280699455 | 1.65578549  | 0.169526462 | 0.86538256  | 0.998252924 |
| chr12:28458581-28544344   | exonic     | CCDC91            | 12 | 28458581  | 28544344  | 1  | 4  | 2  | 3  | 5  | 0 | 85763  | 2.144699455 | 0.282712096 | 1.780223079 | 0.158807118 | 0.873820841 | 0.998252924 |
| chr7:8043537-8110761      | exonic     | GLCCI1            | 7  | 8043537   | 8110761   | 1  | 4  | 2  | 3  | 5  | 0 | 67224  | 2.144699455 | 0.282712096 | 1.780223079 | 0.158807118 | 0.873820841 | 0.998252924 |
| chr14:50292584-50298079   | exonic     | NEMF              | 14 | 50292584  | 50298079  | 5  | 2  | 1  | 3  | 3  | 1 | 5495   | 2.180990367 | 0.283283666 | 1.656839463 | 0.170978343 | 0.864240795 | 0.998252924 |
| chr2:201994451-201997857  | exonic     | CFLAR             | 2  | 201994451 | 201997857 | 0  | 0  | 3  | 3  | 1  | 0 | 3406   | 1.031768654 | 0.284071845 | 2.760845603 | 0.102893057 | NA          | NA          |
| chr4:151656409-151738409  | exonic     | LRBA              | 4  | 151656409 | 151738409 | 0  | 0  | 0  | 0  | 2  | 0 | 82000  | 1.031768654 | 0.284071845 | 2.760845603 | 0.102893057 | NA          | NA          |
| chr2:113157208-113157771  | exonic     | RGPD5, RGPD8      | 2  | 113157208 | 113157771 | 1  | 2  | 11 | 4  | 11 | 1 | 563    | 4.712263611 | 0.285792287 | 1.378915696 | 0.207258709 | NA          | NA          |
| chr1:53699213-53701307    | exonic     | MAGOH             | 1  | 53699213  | 53701307  | 2  | 0  | 1  | 2  | 1  | 0 | 2094   | 0.788893103 | 0.286108601 | 2.796664312 | 0.102303519 | 0.918515762 | 0.998252924 |
| chr12:109689850-109692139 | exonic     | ACACB             | 12 | 109689850 | 109692139 | 2  | 0  | 1  | 2  | 1  | 0 | 2289   | 0.788893103 | 0.286108601 | 2.796664312 | 0.102303519 | 0.918515762 | 0.998252924 |
| chr1:52305897-52306186    | exonic     | NRDC              | 1  | 52305897  | 52306186  | 1  | 0  | 1  | 2  | 0  | 0 | 289    | 0.538878739 | 0.286520843 | 3.51937272  | 0.081412475 | 0.935113929 | 0.998252924 |
| chr11:9834078-9851043     | exonic     | SBF2              | 11 | 9834078   | 9851043   | 1  | 0  | 1  | 2  | 0  | 0 | 16965  | 0.538878739 | 0.286520843 | 3.51937272  | 0.081412475 | 0.935113929 | 0.998252924 |
| chr17:47793526-47795076   | exonic     | FAM117A           | 17 | 47793526  | 47795076  | 1  | 0  | 1  | 2  | 0  | 0 | 1550   | 0.538878739 | 0.286520843 | 3.51937272  | 0.081412475 | 0.935113929 | 0.998252924 |
| chr2:105912812-105915162  | exonic     | TGFBRAP1          | 2  | 105912812 | 105915162 | 1  | 0  | 1  | 2  | 0  | 0 | 2350   | 0.538878739 | 0.286520843 | 3.51937272  | 0.081412475 | 0.935113929 | 0.998252924 |
| chr5:100222046-100231489  | exonic     | ST8SIA4           | 5  | 100222046 | 100231489 | 1  | 0  | 1  | 2  | 0  | 0 | 9443   | 0.538878739 | 0.286520843 | 3.51937272  | 0.081412475 | 0.935113929 | 0.998252924 |
| chr6:42235891-42237586    | exonic     | TRERF1            | 6  | 42235891  | 42237586  | 1  | 0  | 1  | 2  | 0  | 0 | 1695   | 0.538878739 | 0.286520843 | 3.51937272  | 0.081412475 | 0.935113929 | 0.998252924 |
| chr9:19286766-19300329    | exonic     | DENND4C           | 9  | 19286766  | 19300329  | 5  | 0  | 1  | 4  | 0  | 0 | 13563  | 0.538878739 | 0.286520843 | 3.51937272  | 0.081412475 | 0.935113929 | 0.998252924 |
| chr10:112723882-112745523 | exonic     | SHOC2             | 10 | 112723882 | 112745523 | 5  | 10 | 14 | 21 | 12 | 1 | 21641  | 9.14254582  | 0.287784581 | 1.030629587 | 0.279231825 | 0.780066921 | 0.998252924 |
| chr17:45695715-45696530   | exonic     | NPEPPS            | 17 | 45695715  | 45696530  | 3  | 5  | 1  | 7  | 3  | 0 | 815    | 2.562870811 | 0.288880505 | 1.658351369 | 0.174197405 | 0.861710325 | 0.998252924 |
| chr7:155471301-155473602  | exonic     | RBM33             | 7  | 155471301 | 155473602 | 1  | 3  | 0  | 0  | 0  | 2 | 2301   | 1.268251558 | 0.289752749 | 2.615351569 | 0.110789216 | 0.911783497 | 0.998252924 |
| chr2:231307651-231314970  | exonic     | SP100             | 2  | 231307651 | 231314970 | 32 | 15 | 7  | 37 | 13 | 5 | 7319   | 12.00002688 | 0.290968646 | 0.898814834 | 0.323724793 | 0.746146399 | 0.998252924 |
| chrX:13684436-13698717    | downstream | TCEANC (dist=909) | X  | 13684436  | 13698717  | 4  | 0  | 3  | 8  | 0  | 0 | 14281  | 1.958245929 | 0.291051477 | 2.171861277 | 0.13401016  | NA          | NA          |
| chr22:40948109-40990739   | UTR5       | -----             | 22 | 40948109  | 40990739  | 3  | 0  | 4  | 6  | 0  | 1 | 42630  | 2.12212385  | 0.292395236 | 1.971400836 | 0.148318511 | 0.882091408 | 0.998252924 |
| chr4:151656409-151729550  | exonic     | LRBA              | 4  | 151656409 | 151729550 | 0  | 1  | 3  | 3  | 0  | 1 | 73141  | 1.39323564  | 0.292995946 | 2.319806362 | 0.126301898 | 0.899492954 | 0.998252924 |

|                           |        |          |    |           |           |    |    |    |    |    |   |        |             |             |             |             |             |             |
|---------------------------|--------|----------|----|-----------|-----------|----|----|----|----|----|---|--------|-------------|-------------|-------------|-------------|-------------|-------------|
| chr4:39328182-39329376    | exonic | RFC1     | 4  | 39328182  | 39329376  | 4  | 2  | 7  | 8  | 7  | 0 | 1194   | 3.943065582 | 0.293011183 | 1.407999618 | 0.20810459  | 0.835147303 | 0.998252924 |
| chr17:16004563-16005119   | exonic | NCOR1    | 17 | 16004563  | 16005119  | 5  | 1  | 7  | 10 | 5  | 0 | 556    | 3.868344652 | 0.293559635 | 1.453848815 | 0.201918956 | 0.839980083 | 0.998252924 |
| chr16:24979671-24981901   | exonic | ARHGAP17 | 16 | 24979671  | 24981901  | 1  | 5  | 0  | 6  | 1  | 0 | 2230   | 1.759261671 | 0.293737529 | 2.120894719 | 0.138496987 | NA          | NA          |
| chr6:130475969-130505768  | exonic | SAMD3    | 6  | 130475969 | 130505768 | 0  | 4  | 0  | 5  | 0  | 0 | 29799  | 1.228660122 | 0.293766389 | 2.813582831 | 0.104410073 | NA          | NA          |
| chr11:85733409-85742653   | exonic | PICALM   | 11 | 85733409  | 85742653  | 8  | 10 | 12 | 8  | 17 | 4 | 9244   | 9.282713526 | 0.294079724 | 0.948726571 | 0.309973108 | 0.756581406 | 0.998252924 |
| chr1:94341823-94343418    | exonic | DNTTIP2  | 1  | 94341823  | 94343418  | 2  | 1  | 1  | 0  | 4  | 0 | 1595   | 1.113628397 | 0.294273508 | 2.480200795 | 0.118649066 | NA          | NA          |
| chr11:68286968-68305359   | exonic | PPP6R3   | 11 | 68286968  | 68305359  | 2  | 1  | 1  | 0  | 4  | 0 | 18391  | 1.113628397 | 0.294273508 | 2.480200795 | 0.118649066 | NA          | NA          |
| chr1:233353644-233363117  | exonic | PCNXL2   | 1  | 233353644 | 233363117 | 1  | 2  | 4  | 1  | 7  | 0 | 9473   | 2.220117981 | 0.29439589  | 1.823364011 | 0.161457552 | NA          | NA          |
| chr17:53108528-53124515   | exonic | STXBP4   | 17 | 53108528  | 53124515  | 1  | 5  | 2  | 3  | 2  | 2 | 15987  | 2.572330206 | 0.295670492 | 1.594778228 | 0.185399128 | 0.852915992 | 0.998252924 |
| chr6:35280078-35280549    | exonic | DEF6     | 6  | 35280078  | 35280549  | 5  | 3  | 2  | 10 | 1  | 0 | 471    | 2.981739763 | 0.296122294 | 1.610286935 | 0.183894518 | NA          | NA          |
| chr12:27149674-27152609   | exonic | TM7SF3   | 12 | 27149674  | 27152609  | 4  | 3  | 0  | 3  | 4  | 0 | 2935   | 1.841819011 | 0.296212569 | 1.986023312 | 0.149148586 | 0.881436388 | 0.998252924 |
| chr16:53878066-53922863   | exonic | FTO      | 16 | 53878066  | 53922863  | 4  | 3  | 0  | 3  | 4  | 0 | 44797  | 1.841819011 | 0.296212569 | 1.986023312 | 0.149148586 | 0.881436388 | 0.998252924 |
| chr7:7273934-7283381      | exonic | C1GALT1  | 7  | 7273934   | 7283381   | 3  | 0  | 2  | 0  | 5  | 0 | 9447   | 1.386635988 | 0.296343642 | 2.452864206 | 0.120815348 | NA          | NA          |
| chr1:204082042-204086835  | exonic | SOX13    | 1  | 204082042 | 204086835 | 4  | 2  | 0  | 4  | 2  | 0 | 4793   | 1.531799753 | 0.296645582 | 2.137472303 | 0.138783357 | 0.889621346 | 0.998252924 |
| chr17:33805093-33807214   | exonic | SLFN12L  | 17 | 33805093  | 33807214  | 5  | 2  | 3  | 9  | 2  | 0 | 2121   | 2.784150699 | 0.296857538 | 1.600764043 | 0.185447405 | NA          | NA          |
| chr20:34302106-34313077   | exonic | RBM39    | 20 | 34302106  | 34313077  | 10 | 8  | 9  | 19 | 11 | 0 | 10971  | 11.61651646 | 0.298411465 | 1.000455555 | 0.298275584 | NA          | NA          |
| chr9:138754312-138774924  | exonic | CAMSAP1  | 9  | 138754312 | 138774924 | 1  | 0  | 4  | 3  | 3  | 0 | 20612  | 1.600079466 | 0.29902313  | 2.15250727  | 0.138918523 | NA          | NA          |
| chr3:50102463-50103935    | exonic | RBM6     | 3  | 50102463  | 50103935  | 8  | 3  | 7  | 13 | 7  | 0 | 1472   | 5.164846078 | 0.301432257 | 1.267671135 | 0.237784271 | 0.812048418 | 0.998252924 |
| chr21:38792600-38845182   | exonic | DYRK1A   | 21 | 38792600  | 38845182  | 8  | 0  | 5  | 3  | 6  | 2 | 52582  | 3.679776574 | 0.301969834 | 1.472183911 | 0.205116923 | NA          | NA          |
| chr6:137015277-137019820  | exonic | MAP3K5   | 6  | 137015277 | 137019820 | 8  | 1  | 5  | 11 | 2  | 1 | 4543   | 3.912215158 | 0.302298108 | 1.392405231 | 0.217104979 | NA          | NA          |
| chr12:5841685-6031970     | exonic | ANO2     | 12 | 5841685   | 6031970   | 4  | 0  | 1  | 4  | 1  | 0 | 190285 | 1.259489759 | 0.303137326 | 2.352515421 | 0.12885668  | 0.897471056 | 0.998252924 |
| chr14:21698477-21702388   | exonic | HNRNPC   | 14 | 21698477  | 21702388  | 0  | 13 | 12 | 22 | 11 | 0 | 3911   | 8.302965807 | 0.303395127 | 1.990223238 | 0.152442762 | 0.878837732 | 0.998252924 |
| chr13:76134888-76143643   | exonic | UCHL3    | 13 | 76134888  | 76143643  | 8  | 2  | 3  | 5  | 6  | 1 | 8755   | 3.538194282 | 0.304355265 | 1.36397737  | 0.22313806  | 0.823428057 | 0.998252924 |
| chr1:51868106-51874004    | exonic | EPS15    | 1  | 51868106  | 51874004  | 10 | 9  | 3  | 9  | 14 | 0 | 5898   | 6.101345068 | 0.304987924 | 1.206173854 | 0.252855691 | 0.80037973  | 0.998252924 |
| chr1:51869090-51874004    | exonic | EPS15    | 1  | 51869090  | 51874004  | 10 | 9  | 3  | 9  | 14 | 0 | 4914   | 6.101345068 | 0.304987924 | 1.206173854 | 0.252855691 | 0.80037973  | 0.998252924 |
| chr4:148778703-148803083  | exonic | ARHGAP10 | 4  | 148778703 | 148803083 | 10 | 2  | 4  | 14 | 3  | 2 | 24380  | 7.737155497 | 0.305567632 | 1.055343816 | 0.289543206 | 0.772165721 | 0.998252924 |
| chr11:117023156-117034608 | exonic | PAFAH1B2 | 11 | 117023156 | 117034608 | 6  | 0  | 3  | 4  | 1  | 2 | 11452  | 2.528438913 | 0.305596754 | 1.712202217 | 0.178481695 | 0.858344696 | 0.998252924 |
| chr1:39833819-39838268    | exonic | MACF1    | 1  | 39833819  | 39838268  | 4  | 1  | 0  | 5  | 0  | 0 | 4449   | 1.221780496 | 0.308504779 | 2.57557155  | 0.119781094 | NA          | NA          |
| chrX:117676687-117680079  | exonic | DOCK11   | X  | 117676687 | 117680079 | 4  | 1  | 0  | 5  | 0  | 0 | 3392   | 1.221780496 | 0.308504779 | 2.57557155  | 0.119781094 | NA          | NA          |
| chr11:85707868-85714494   | exonic | PICALM   | 11 | 85707868  | 85714494  | 11 | 8  | 8  | 6  | 16 | 3 | 6626   | 7.890177853 | 0.310861901 | 0.999107758 | 0.311139513 | NA          | NA          |
| chr15:63824845-63852169   | exonic | USP3     | 15 | 63824845  | 63852169  | 2  | 4  | 1  | 1  | 1  | 2 | 27324  | 1.438083717 | 0.312711254 | 2.105007325 | 0.148555898 | 0.881904075 | 0.998252924 |
| chr11:89155069-89185063   | exonic | NOX4     | 11 | 89155069  | 89185063  | 0  | 2  | 0  | 1  | 1  | 0 | 29994  | 0.575890405 | 0.313102901 | 3.437015986 | 0.091097307 | 0.927415272 | 0.998252924 |
| chr14:69583082-69589077   | exonic | DCAF5    | 14 | 69583082  | 69589077  | 0  | 2  | 0  | 1  | 1  | 0 | 5995   | 0.575890405 | 0.313102901 | 3.437015986 | 0.091097307 | 0.927415272 | 0.998252924 |
| chr15:42851536-42856055   | exonic | HAUS2    | 15 | 42851536  | 42856055  | 0  | 2  | 0  | 1  | 1  | 0 | 4519   | 0.575890405 | 0.313102901 | 3.437015986 | 0.091097307 | 0.927415272 | 0.998252924 |
| chr16:11979037-11991892   | exonic | GSPT1    | 16 | 11979037  | 11991892  | 0  | 2  | 0  | 1  | 1  | 0 | 12855  | 0.575890405 | 0.313102901 | 3.437015986 | 0.091097307 | 0.927415272 | 0.998252924 |

|                          |        |         |    |           |           |     |     |    |    |     |    |       |             |             |             |             |             |             |
|--------------------------|--------|---------|----|-----------|-----------|-----|-----|----|----|-----|----|-------|-------------|-------------|-------------|-------------|-------------|-------------|
| chr22:18368643-18389652  | exonic | MICAL3  | 22 | 18368643  | 18389652  | 0   | 2   | 0  | 1  | 1   | 0  | 21009 | 0.575890405 | 0.313102901 | 3.437015986 | 0.091097307 | 0.927415272 | 0.998252924 |
| chr3:50000008-50012825   | exonic | RBM6    | 3  | 50000008  | 50012825  | 0   | 2   | 0  | 1  | 1   | 0  | 12817 | 0.575890405 | 0.313102901 | 3.437015986 | 0.091097307 | 0.927415272 | 0.998252924 |
| chr3:57643406-57658165   | exonic | DENND6A | 3  | 57643406  | 57658165  | 0   | 2   | 0  | 1  | 1   | 0  | 14759 | 0.575890405 | 0.313102901 | 3.437015986 | 0.091097307 | 0.927415272 | 0.998252924 |
| chr4:149356255-149358014 | exonic | NR3C2   | 4  | 149356255 | 149358014 | 0   | 2   | 0  | 1  | 1   | 0  | 1759  | 0.575890405 | 0.313102901 | 3.437015986 | 0.091097307 | 0.927415272 | 0.998252924 |
| chr22:47022648-47033857  | exonic | GRAMD4  | 22 | 47022648  | 47033857  | 0   | 12  | 0  | 10 | 0   | 2  | 11209 | 3.770860658 | 0.314627005 | 3.076110391 | 0.102280791 | NA          | NA          |
| chr4:144464661-144465125 | exonic | SMARCA5 | 4  | 144464661 | 144465125 | 69  | 46  | 62 | 83 | 102 | 6  | 464   | 52.16541904 | 0.31468005  | 0.694269708 | 0.45325332  | 0.650366342 | 0.998252924 |
| chr7:17908029-17915413   | exonic | SNX13   | 7  | 17908029  | 17915413  | 3   | 2   | 6  | 4  | 0   | 4  | 7384  | 3.577246555 | 0.315111638 | 1.541310387 | 0.204443985 | 0.838006561 | 0.998252924 |
| chr20:47570092-47580435  | exonic | ARFGEF2 | 20 | 47570092  | 47580435  | 5   | 1   | 6  | 5  | 8   | 0  | 10343 | 3.502600966 | 0.317020296 | 1.493993667 | 0.212196546 | 0.831953701 | 0.998252924 |
| chr5:109049220-109065214 | exonic | MAN2A1  | 5  | 109049220 | 109065214 | 9   | 8   | 8  | 9  | 18  | 0  | 15994 | 7.268537141 | 0.317075156 | 1.133771259 | 0.279664133 | 0.779735198 | 0.998252924 |
| chr20:40141484-40162209  | exonic | CHD6    | 20 | 40141484  | 40162209  | 4   | 1   | 1  | 4  | 2   | 0  | 20725 | 1.55479298  | 0.31712015  | 2.004744325 | 0.158184835 | 0.874311153 | 0.998252924 |
| chr11:33307958-33309057  | exonic | HIPK3   | 11 | 33307958  | 33309057  | 119 | 150 | 85 | 95 | 185 | 46 | 1099  | 104.9263938 | 0.31790561  | 0.566093146 | 0.561578271 | 0.574403388 | 0.998252924 |
| chr1:117944807-118009049 | exonic | MAN1A2  | 1  | 117944807 | 118009049 | 2   | 4   | 2  | 0  | 0   | 4  | 64242 | 2.582489568 | 0.31797132  | 1.902000455 | 0.16717731  | NA          | NA          |
| chr3:138400808-138403645 | exonic | PIK3CB  | 3  | 138400808 | 138403645 | 2   | 2   | 1  | 0  | 3   | 1  | 2837  | 1.475095383 | 0.318774674 | 2.091986882 | 0.152378907 | 0.878888093 | 0.998252924 |
| chr17:26449628-26499644  | exonic | NLK     | 17 | 26449628  | 26499644  | 6   | 3   | 2  | 5  | 0   | 3  | 50016 | 3.147499857 | 0.31936562  | 1.566643462 | 0.203853415 | 0.83846805  | 0.998252924 |
| chr3:169866873-169896726 | exonic | PHC3    | 3  | 169866873 | 169896726 | 2   | 5   | 0  | 0  | 5   | 1  | 29853 | 2.042708599 | 0.319706142 | 2.012480214 | 0.158861757 | 0.873777792 | 0.998252924 |
| chr13:20638590-20657916  | exonic | ZMYM2   | 13 | 20638590  | 20657916  | 2   | 3   | 0  | 1  | 4   | 0  | 19326 | 1.371222355 | 0.31977719  | 2.268954676 | 0.140935909 | 0.887920574 | 0.998252924 |
| chr19:11623870-11625036  | exonic | ECSIT   | 19 | 11623870  | 11625036  | 2   | 3   | 0  | 1  | 4   | 0  | 1166  | 1.371222355 | 0.31977719  | 2.268954676 | 0.140935909 | 0.887920574 | 0.998252924 |
| chr8:144770831-144772293 | exonic | ZNF707  | 8  | 144770831 | 144772293 | 3   | 2   | 4  | 6  | 4   | 0  | 1462  | 2.646566527 | 0.320715227 | 1.603914183 | 0.199957847 | 0.841513548 | 0.998252924 |
| chr12:53421565-53421972  | exonic | EIF4B   | 12 | 53421565  | 53421972  | 5   | 2   | 1  | 5  | 3   | 0  | 407   | 2.085394529 | 0.321917136 | 1.774719715 | 0.18139041  | 0.856061146 | 0.998252924 |
| chr10:31661947-31750166  | exonic | ZEB1    | 10 | 31661947  | 31750166  | 13  | 6   | 0  | 14 | 5   | 0  | 88219 | 4.815981552 | 0.322302164 | 1.472352327 | 0.218902879 | 0.826725703 | 0.998252924 |
| chr2:188361607-188368497 | exonic | TFPI    | 2  | 188361607 | 188368497 | 3   | 1   | 0  | 4  | 0   | 0  | 6890  | 0.986482168 | 0.322521561 | 2.785451076 | 0.115787911 | 0.907820632 | 0.998252924 |
| chr2:32703702-32730272   | exonic | BIRC6   | 2  | 32703702  | 32730272  | 3   | 1   | 0  | 0  | 0   | 0  | 26570 | 0.986482168 | 0.322521561 | 2.785451076 | 0.115787911 | 0.907820632 | 0.998252924 |
| chr5:159437506-159463810 | exonic | TTC1    | 5  | 159437506 | 159463810 | 3   | 1   | 0  | 4  | 0   | 0  | 26304 | 0.986482168 | 0.322521561 | 2.785451076 | 0.115787911 | 0.907820632 | 0.998252924 |
| chr1:154142875-154148724 | exonic | TPM3    | 1  | 154142875 | 154148724 | 2   | 2   | 0  | 2  | 0   | 1  | 5849  | 1.127366863 | 0.323773278 | 2.46778445  | 0.131199983 | 0.895617109 | 0.998252924 |
| chr6:4891946-4892613     | exonic | CDYL    | 6  | 4891946   | 4892613   | 62  | 80  | 23 | 98 | 73  | 5  | 667   | 47.27105255 | 0.324192162 | 0.742481109 | 0.436633549 | 0.662377128 | 0.998252924 |
| chr2:15534350-15567918   | exonic | NBAS    | 2  | 15534350  | 15567918  | 4   | 2   | 0  | 5  | 1   | 0  | 33568 | 1.517083717 | 0.324596559 | 2.177703553 | 0.149054521 | NA          | NA          |
| chr3:53908237-53910107   | exonic | ACTR8   | 3  | 53908237  | 53910107  | 2   | 2   | 0  | 2  | 2   | 0  | 1870  | 1.061203098 | 0.324722366 | 2.467688812 | 0.131589674 | 0.895308853 | 0.998252924 |
| chr2:26486247-26500028   | exonic | HADHB   | 2  | 26486247  | 26500028  | 6   | 2   | 2  | 5  | 5   | 0  | 13781 | 2.653705341 | 0.326154765 | 1.601210673 | 0.2036926   | 0.838593726 | 0.998252924 |
| chr9:35546426-35548532   | exonic | RUSC2   | 9  | 35546426  | 35548532  | 12  | 5   | 0  | 14 | 3   | 0  | 2106  | 4.270663966 | 0.327272851 | 1.545419014 | 0.211769655 | 0.832286744 | 0.998252924 |
| chr8:122640953-122641580 | exonic | HAS2    | 8  | 122640953 | 122641580 | 4   | 0   | 2  | 3  | 3   | 0  | 627   | 1.592502243 | 0.32746504  | 2.107013526 | 0.155416677 | 0.876492838 | 0.998252924 |
| chr1:52981562-52992045   | exonic | ZCCHC11 | 1  | 52981562  | 52992045  | 7   | 7   | 1  | 6  | 3   | 3  | 10483 | 4.245714621 | 0.328204147 | 1.302603986 | 0.251960036 | 0.801071954 | 0.998252924 |
| chr5:49698119-49707217   | exonic | EMB     | 5  | 49698119  | 49707217  | 5   | 0   | 6  | 6  | 6   | 0  | 9098  | 3.192581709 | 0.328805846 | 1.651441425 | 0.199102337 | 0.842182694 | 0.998252924 |
| chr1:35846859-35847359   | exonic | ZMYM4   | 1  | 35846859  | 35847359  | 0   | 1   | 1  | 0  | 2   | 0  | 500   | 0.613599668 | 0.329429023 | 3.361645839 | 0.09799635  | 0.921935191 | 0.998252924 |
| chr12:19511161-19514640  | exonic | PLEKHA5 | 12 | 19511161  | 19514640  | 0   | 1   | 1  | 0  | 2   | 0  | 3479  | 0.613599668 | 0.329429023 | 3.361645839 | 0.09799635  | 0.921935191 | 0.998252924 |
| chr13:43537390-43544806  | exonic | EPSTI1  | 13 | 43537390  | 43544806  | 0   | 1   | 1  | 0  | 2   | 0  | 7416  | 0.613599668 | 0.329429023 | 3.361645839 | 0.09799635  | 0.921935191 | 0.998252924 |

|                          |              |                                       |    |           |           |    |    |      |      |    |   |        |             |             |             |             |             |             |
|--------------------------|--------------|---------------------------------------|----|-----------|-----------|----|----|------|------|----|---|--------|-------------|-------------|-------------|-------------|-------------|-------------|
| chr4:84367987-84370114   | exonic       | HELQ                                  | 4  | 84367987  | 84370114  | 0  | 1  | 1    | 0    | 2  | 0 | 2127   | 0.613599668 | 0.329429023 | 3.361645839 | 0.09799635  | 0.921935191 | 0.998252924 |
| chr6:149663820-149700654 | exonic       | TAB2                                  | 6  | 149663820 | 149700654 | 0  | 1  | 1    | 0    | 2  | 0 | 36834  | 0.613599668 | 0.329429023 | 3.361645839 | 0.09799635  | 0.921935191 | 0.998252924 |
| chr9:33971648-34017187   | exonic       | UBAP2                                 | 9  | 33971648  | 34017187  | 0  | 1  | 1    | 0    | 2  | 0 | 45539  | 0.613599668 | 0.329429023 | 3.361645839 | 0.09799635  | 0.921935191 | 0.998252924 |
| chr16:47531309-47630442  | exonic       | PHKB                                  | 16 | 47531309  | 47630442  | 1  | 3  | 0    | 5    | 2  | 1 | 99133  | 1.202087792 | 0.331674921 | 2.442331459 | 0.135802583 | 0.891977349 | 0.998252924 |
| chr14:31585441-31590711  | exonic       | HECTD1                                | 14 | 31585441  | 31590711  | 3  | 1  | 1    | 3    | 2  | 0 | 5270   | 1.319494652 | 0.331760499 | 2.127701009 | 0.155924398 | 0.876092614 | 0.998252924 |
| chr17:57808781-57816308  | exonic       | VMP1                                  | 17 | 57808781  | 57816308  | 17 | 17 | 13   | 30   | 15 | 3 | 7527   | 13.64937265 | 0.331818833 | 0.836385377 | 0.396729596 | 0.691566873 | 0.998252924 |
| chr15:49528047-49531564  | exonic       | GALK2                                 | 15 | 49528047  | 49531564  | 6  | 1  | 2    | 6    | 3  | 0 | 3517   | 2.343686083 | 0.332826084 | 1.711586919 | 0.194454678 | 0.84581988  | 0.998252924 |
| chr16:19627435-19659204  | exonic       | C16orf62                              | 16 | 19627435  | 19659204  | 5  | 4  | 1    | 5    | 4  | 0 | 31769  | 2.38069775  | 0.334792375 | 1.680832024 | 0.19918253  | 0.842119965 | 0.998252924 |
| chr8:61496766-61504528   | exonic       | RAB2A                                 | 8  | 61496766  | 61504528  | 0  | 2  | 4    | 1    | 6  | 0 | 7762   | 1.970103616 | 0.334804512 | 2.033574965 | 0.164638392 | 0.869228611 | 0.998252924 |
| chr10:79613111-79614128  | exonic       | DLG5                                  | 10 | 79613111  | 79614128  | 2  | 0  | 1    | 3    | 0  | 0 | 1017   | 0.774177067 | 0.335068038 | 3.049317153 | 0.109882974 | NA          | NA          |
| chr2:110332157-110350696 | exonic       |                                       | 2  | 110332157 | 110350696 | 2  | 0  | 1    | 3    | 0  | 0 | 18539  | 0.774177067 | 0.335068038 | 3.049317153 | 0.109882974 | NA          | NA          |
| chrX:76812921-76920267   | exonic       | ATRX                                  | X  | 76812921  | 76920267  | 2  | 0  | 1    | 3    | 0  | 0 | 107346 | 0.774177067 | 0.335068038 | 3.049317153 | 0.109882974 | NA          | NA          |
| chr20:21346058-21349228  | exonic       | XRN2                                  | 20 | 21346058  | 21349228  | 6  | 4  | 8    | 5    | 6  | 4 | 3170   | 5.539772949 | 0.336006241 | 1.139868418 | 0.294776341 | 0.768164741 | 0.998252924 |
| chr20:2944917-2945848    | exonic       | PTPRA                                 | 20 | 2944917   | 2945848   | 33 | 7  | 19   | 27   | 23 | 5 | 931    | 16.41974233 | 0.336288855 | 0.814344541 | 0.41295648  | NA          | NA          |
| chr20:18278628-18287037  | exonic       | ZNF133                                | 20 | 18278628  | 18287037  | 9  | 2  | 0    | 6    | 0  | 2 | 8409   | 2.763739612 | 0.336922212 | 1.805346725 | 0.186624656 | 0.851954934 | 0.998252924 |
| chr21:47768925-47769734  | exonic       | PCNT                                  | 21 | 47768925  | 47769734  | 17 | 9  | 9    | 21   | 16 | 0 | 809    | 9.705659286 | 0.337077654 | 1.033153787 | 0.326260871 | NA          | NA          |
| chr5:64747301-64769779   | exonic       | ADAMTS6                               | 5  | 64747301  | 64769779  | 3  | 4  | 1    | 1    | 3  | 2 | 22478  | 2.367163918 | 0.337343654 | 1.648505733 | 0.204636021 | 0.83785651  | 0.998252924 |
| chr3:136191254-136221621 | exonic       | STAG1                                 | 3  | 136191254 | 136221621 | 0  | 1  | 3    | 4    | 1  | 0 | 30367  | 1.312355838 | 0.337874927 | 2.342873571 | 0.144213897 | 0.885331568 | 0.998252924 |
| chr6:52657654-52696768   | exonic       | GSTA1, GSTA5                          | 6  | 52657654  | 52696768  | 7  | 0  | 0    | 2    | 4  | 0 | 39114  | 1.599641057 | 0.337912138 | 2.322908863 | 0.145469391 | NA          | NA          |
| chr6:31239376-31324219   | exonic       | HLA-B, HLA-C                          | 6  | 31239376  | 31324219  | 0  | 0  | 1415 | 2077 | 0  | 0 | 84843  | 499.9444181 | 0.338033508 | 3.725350764 | 0.090738706 | NA          | NA          |
| chr3:171965322-172028671 | exonic       | FNDC3B                                | 3  | 171965322 | 172028671 | 2  | 1  | 1    | 2    | 2  | 0 | 63349  | 2.418611647 | 0.338504293 | 1.771292745 | 0.191105786 | 0.848442714 | 0.998252924 |
| chr7:111575594-111585853 | exonic       | DOCK4                                 | 7  | 111575594 | 111585853 | 7  | 7  | 6    | 15   | 7  | 0 | 10259  | 5.748316076 | 0.339375584 | 1.209375856 | 0.280620439 | 0.779001538 | 0.998252924 |
| chr11:73418464-73429763  | exonic       | RAB6A                                 | 11 | 73418464  | 73429763  | 6  | 3  | 6    | 6    | 14 | 0 | 11299  | 6.186874386 | 0.339604338 | 1.411770562 | 0.240552075 | 0.809902298 | 0.998252924 |
| chr2:120885264-120932576 | exonic       | EPB41L5                               | 2  | 120885264 | 120932576 | 5  | 8  | 3    | 16   | 2  | 0 | 47312  | 4.573985189 | 0.34049633  | 1.389078039 | 0.245123975 | NA          | NA          |
| chr22:42605656-42611347  | exonic       | TCF20                                 | 22 | 42605656  | 42611347  | 7  | 4  | 0    | 1    | 5  | 2 | 5691   | 2.927897508 | 0.340860632 | 1.630563385 | 0.209044699 | 0.834413345 | 0.998252924 |
| chr12:69983264-69987393  | exonic       | CCT2                                  | 12 | 69983264  | 69987393  | 4  | 3  | 2    | 2    | 7  | 0 | 4129   | 2.493127942 | 0.341736491 | 1.661557366 | 0.2056724   | NA          | NA          |
| chr16:3794894-3820987    | exonic       | CREBBP                                | 16 | 3794894   | 3820987   | 2  | 4  | 0    | 1    | 5  | 0 | 26093  | 1.666525576 | 0.341817123 | 2.126177436 | 0.160766038 | 0.872277675 | 0.998252924 |
| chr15:72810407-72848248  | exonic       | ARIH1                                 | 15 | 72810407  | 72848248  | 2  | 4  | 1    | 0    | 3  | 2 | 37841  | 2.13186559  | 0.341955913 | 1.840478631 | 0.185797274 | 0.852603742 | 0.998252924 |
| chr1:42946132-42964587   | intergenic   | PPCS (dist=7083), CCDC30 (dist=35973) | 1  | 42946132  | 42964587  | 0  | 0  | 3    | 4    | 0  | 0 | 18455  | 1.017052617 | 0.342120738 | 3.020200124 | 0.113277506 | NA          | NA          |
| chr1:47296770-47312016   | ncRNA_exonic | CYP4Z2P                               | 1  | 47296770  | 47312016  | 0  | 0  | 3    | 4    | 0  | 0 | 15246  | 1.017052617 | 0.342120738 | 3.020200124 | 0.113277506 | NA          | NA          |
| chr14:73627797-73629248  | intronic     | PSEN1                                 | 14 | 73627797  | 73629248  | 0  | 0  | 3    | 4    | 0  | 0 | 1451   | 1.017052617 | 0.342120738 | 3.020200124 | 0.113277506 | NA          | NA          |
| chr17:35913216-35914161  | exonic       | SYNRG                                 | 17 | 35913216  | 35914161  | 0  | 0  | 3    | 4    | 0  | 0 | 945    | 1.017052617 | 0.342120738 | 3.020200124 | 0.113277506 | NA          | NA          |
| chr22:31654276-31656063  | exonic       | LIMK2                                 | 22 | 31654276  | 31656063  | 0  | 0  | 3    | 4    | 0  | 0 | 1787   | 1.017052617 | 0.342120738 | 3.020200124 | 0.113277506 | NA          | NA          |
| chr6:29643162-29643836   | exonic       | ZFP57                                 | 6  | 29643162  | 29643836  | 0  | 0  | 3    | 4    | 0  | 0 | 674    | 1.017052617 | 0.342120738 | 3.020200124 | 0.113277506 | NA          | NA          |
| chr11:77336007-77336863  | exonic       | CLNS1A                                | 11 | 77336007  | 77336863  | 7  | 4  | 2    | 7    | 2  | 2 | 856    | 3.597221604 | 0.342472592 | 1.35807226  | 0.25217553  | 0.800905391 | 0.998252924 |



|                           |            |                                          |    |           |           |    |    |    |    |    |   |        |             |             |             |             |             |             |
|---------------------------|------------|------------------------------------------|----|-----------|-----------|----|----|----|----|----|---|--------|-------------|-------------|-------------|-------------|-------------|-------------|
| chr5:50073902-50093067    | exonic     | PARP8                                    | 5  | 50073902  | 50093067  | 0  | 2  | 6  | 7  | 3  | 0 | 19165  | 2.639427713 | 0.343854337 | 1.810394263 | 0.1899334   | 0.84936132  | 0.998252924 |
| chrMT:14004-14149         | intergenic | NONE (dist=NONE), NONE (dist=NONE)       | MT | 14004     | 14149     | 0  | 4  | 0  | 0  | 0  | 2 | 145    | 1.313540414 | 0.345500473 | 2.805182307 | 0.123165069 | NA          | NA          |
| chr1:41536266-41541123    | exonic     | SCMH1                                    | 1  | 41536266  | 41541123  | 38 | 32 | 23 | 51 | 40 | 4 | 4857   | 26.51136893 | 0.345602436 | 0.723777547 | 0.477498145 | NA          | NA          |
| chr2:48555699-48573890    | exonic     | FOXN2                                    | 2  | 48555699  | 48573890  | 4  | 2  | 2  | 3  | 5  | 0 | 18191  | 2.183108685 | 0.345839196 | 1.7239853   | 0.200604492 | 0.841007845 | 0.998252924 |
| chr3:47702783-47719801    | exonic     | SMARCC1                                  | 3  | 47702783  | 47719801  | 1  | 2  | 0  | 2  | 1  | 0 | 17018  | 0.811188733 | 0.346858694 | 2.771805201 | 0.125138193 | 0.900414147 | 0.998252924 |
| chr9:125832628-125839041  | exonic     | RABGAP1                                  | 9  | 125832628 | 125839041 | 1  | 2  | 0  | 2  | 1  | 0 | 6413   | 0.811188733 | 0.346858694 | 2.771805201 | 0.125138193 | 0.900414147 | 0.998252924 |
| chr2:173433468-173460751  | exonic     | PDK1                                     | 2  | 173433468 | 173460751 | 0  | 3  | 3  | 3  | 4  | 0 | 27283  | 1.917678316 | 0.347572234 | 1.986840073 | 0.174937197 | NA          | NA          |
| chr12:459786-465703       | exonic     | KDM5A                                    | 12 | 459786    | 465703    | 2  | 2  | 4  | 6  | 3  | 0 | 5917   | 2.396552162 | 0.347626644 | 1.682796052 | 0.206576812 | 0.836340371 | 0.998252924 |
| chr16:31733946-31734674   | exonic     | ZNF720                                   | 16 | 31733946  | 31734674  | 14 | 7  | 13 | 18 | 14 | 2 | 728    | 9.81467118  | 0.34816911  | 0.933415272 | 0.373005585 | 0.709144287 | 0.998252924 |
| chr1:47834140-47840965    | exonic     | CMPK1                                    | 1  | 47834140  | 47840965  | 1  | 1  | 1  | 1  | 2  | 0 | 6825   | 0.848897996 | 0.349466443 | 2.559111411 | 0.136557729 | 0.891380391 | 0.998252924 |
| chr10:5741488-5756170     | UTR5       | FAM208B (NM_017782:c.-7820_-7725delins0) | 10 | 5741488   | 5756170   | 7  | 10 | 5  | 6  | 17 | 0 | 14682  | 6.327346199 | 0.349745889 | 1.20791425  | 0.289545296 | 0.772164122 | 0.998252924 |
| chr20:39721111-39729993   | exonic     | TOP1                                     | 20 | 39721111  | 39729993  | 9  | 4  | 9  | 10 | 9  | 2 | 8882   | 6.402204776 | 0.35112841  | 1.071846145 | 0.327592175 | 0.74322004  | 0.998252924 |
| chr12:102433645-102439897 | exonic     | CCDC53                                   | 12 | 102433645 | 102439897 | 0  | 2  | 4  | 2  | 5  | 0 | 6252   | 1.95538758  | 0.352582477 | 2.000347094 | 0.176260649 | 0.860089176 | 0.998252924 |
| chr8:131164981-131193126  | exonic     | ASAP1                                    | 8  | 131164981 | 131193126 | 32 | 17 | 12 | 48 | 12 | 2 | 28145  | 16.62921183 | 0.353988753 | 0.877867981 | 0.403236889 | NA          | NA          |
| chr8:131164981-131199531  | exonic     | ASAP1                                    | 8  | 131164981 | 131199531 | 32 | 17 | 12 | 48 | 12 | 2 | 34550  | 16.62921183 | 0.353988753 | 0.877867981 | 0.403236889 | NA          | NA          |
| chr3:188326948-188327632  | exonic     | LPP                                      | 3  | 188326948 | 188327632 | 2  | 1  | 1  | 2  | 2  | 0 | 684    | 1.084196324 | 0.354249471 | 2.300589962 | 0.153982012 | 0.877623919 | 0.998252924 |
| chr1:172522399-172546959  | exonic     | SUCO                                     | 1  | 172522399 | 172546959 | 3  | 3  | 0  | 4  | 2  | 0 | 24560  | 1.57708861  | 0.3563237   | 2.112683168 | 0.168659317 | 0.86606462  | 0.998252924 |
| chr13:73409380-73505405   | exonic     | PIBF1                                    | 13 | 73409380  | 73505405  | 3  | 2  | 1  | 3  | 1  | 1 | 96025  | 1.680961638 | 0.356824974 | 1.85529204  | 0.192328198 | 0.847485132 | 0.998252924 |
| chr11:61133516-61135470   | exonic     | TMEM138                                  | 11 | 61133516  | 61135470  | 10 | 11 | 3  | 15 | 10 | 0 | 1954   | 6.603655289 | 0.357316995 | 1.179360688 | 0.302975162 | 0.76190879  | 0.998252924 |
| chr1:179955303-179975702  | exonic     | CEP350                                   | 1  | 179955303 | 179975702 | 3  | 2  | 2  | 2  | 5  | 0 | 20399  | 1.947810357 | 0.360757933 | 1.814388349 | 0.198831707 | 0.842394392 | 0.998252924 |
| chr17:58711213-58725443   | exonic     | PPM1D                                    | 17 | 58711213  | 58725443  | 4  | 2  | 0  | 6  | 0  | 0 | 14230  | 1.50236768  | 0.361787363 | 2.371517009 | 0.152555247 | NA          | NA          |
| chr4:151023629-151023964  | exonic     | DCLK2                                    | 4  | 151023629 | 151023964 | 0  | 4  | 3  | 3  | 5  | 0 | 335    | 2.212981537 | 0.362942853 | 1.892411707 | 0.191788527 | 0.847907859 | 0.998252924 |
| chr14:21825355-21829372   | exonic     | SUPT16H                                  | 14 | 21825355  | 21829372  | 2  | 2  | 0  | 3  | 1  | 0 | 4017   | 1.046487061 | 0.363900348 | 2.500494529 | 0.145531352 | 0.884291364 | 0.998252924 |
| chr22:26057542-26074882   | exonic     | ADRBK2                                   | 22 | 26057542  | 26074882  | 2  | 2  | 0  | 3  | 1  | 0 | 17340  | 1.046487061 | 0.363900348 | 2.500494529 | 0.145531352 | 0.884291364 | 0.998252924 |
| chr3:171830241-171944737  | exonic     | FNDC3B                                   | 3  | 171830241 | 171944737 | 4  | 5  | 3  | 3  | 4  | 3 | 114496 | 1.651809539 | 0.364499112 | 2.096643968 | 0.173848835 | 0.861984264 | 0.998252924 |
| chr1:146724277-146731572  | exonic     | CHD1L                                    | 1  | 146724277 | 146731572 | 8  | 1  | 2  | 2  | 4  | 2 | 7295   | 2.913879067 | 0.364997473 | 1.518365045 | 0.240388485 | NA          | NA          |
| chr11:85720259-85721479   | intronic   | PICALM                                   | 11 | 85720259  | 85721479  | 3  | 0  | 4  | 8  | 0  | 0 | 1220   | 2.026528012 | 0.365596271 | 2.154089231 | 0.169721972 | 0.865228794 | 0.998252924 |
| chr10:43650344-43654379   | exonic     | CSGALNACT2                               | 10 | 43650344  | 43654379  | 5  | 4  | 5  | 2  | 2  | 5 | 4035   | 4.324153696 | 0.367249734 | 1.328406411 | 0.276458869 | NA          | NA          |
| chr1:94964157-94965170    | exonic     | ABCD3                                    | 1  | 94964157  | 94965170  | 3  | 0  | 1  | 4  | 0  | 0 | 1013   | 1.009475394 | 0.367394144 | 2.76515862  | 0.132865486 | 0.894299763 | 0.998252924 |
| chr14:62187099-62188541   | exonic     | HIF1A                                    | 14 | 62187099  | 62188541  | 3  | 0  | 1  | 4  | 0  | 0 | 1442   | 1.009475394 | 0.367394144 | 2.76515862  | 0.132865486 | 0.894299763 | 0.998252924 |
| chr11:73418464-73429935   | exonic     | RAB6A                                    | 11 | 73418464  | 73429935  | 7  | 3  | 4  | 7  | 7  | 1 | 11471  | 6.677328314 | 0.367676645 | 1.201042357 | 0.306131289 | 0.759504685 | 0.998252924 |
| chr2:206023445-206058044  | exonic     | PARD3B                                   | 2  | 206023445 | 206058044 | 4  | 0  | 3  | 3  | 4  | 0 | 34599  | 1.91079869  | 0.368455605 | 1.968768625 | 0.187150283 | 0.851542805 | 0.998252924 |
| chr4:170428865-170459062  | exonic     | NEK1                                     | 4  | 170428865 | 170459062 | 2  | 0  | 2  | 1  | 3  | 0 | 30197  | 1.121905587 | 0.36884369  | 2.447086009 | 0.150727718 | 0.880190507 | 0.998252924 |
| chr4:37633006-37640126    | exonic     | RELL1                                    | 4  | 37633006  | 37640126  | 36 | 20 | 16 | 48 | 18 | 4 | 7120   | 19.79966484 | 0.369758057 | 0.780431014 | 0.473786985 | NA          | NA          |
| chr15:30053341-30065560   | exonic     | TJP1                                     | 15 | 30053341  | 30065560  | 14 | 10 | 0  | 18 | 6  | 0 | 12219  | 6.188344653 | 0.369963034 | 1.383856281 | 0.267342093 | 0.78920578  | 0.998252924 |

|                           |              |         |    |           |           |    |    |    |    |    |    |        |             |             |             |             |             |             |
|---------------------------|--------------|---------|----|-----------|-----------|----|----|----|----|----|----|--------|-------------|-------------|-------------|-------------|-------------|-------------|
| chr1:8674619-8716500      | exonic       | RERE    | 1  | 8674619   | 8716500   | 5  | 3  | 1  | 7  | 2  | 0  | 41881  | 2.351265676 | 0.371117734 | 1.713012038 | 0.216646308 | 0.828483994 | 0.998252924 |
| chr3:196118683-196129890  | exonic       | UBXN7   | 3  | 196118683 | 196129890 | 39 | 39 | 17 | 52 | 16 | 14 | 11207  | 26.96051167 | 0.371521721 | 0.71332723  | 0.520829298 | 0.602485691 | 0.998252924 |
| chr5:38523520-38530768    | exonic       | LIFR    | 5  | 38523520  | 38530768  | 39 | 11 | 22 | 51 | 25 | 0  | 7248   | 19.73500931 | 0.372110211 | 0.945759978 | 0.393451002 | 0.693986406 | 0.998252924 |
| chr6:89793472-89794362    | exonic       | PNRC1   | 6  | 89793472  | 89794362  | 4  | 10 | 5  | 4  | 16 | 0  | 890    | 5.606735179 | 0.37363315  | 1.290845871 | 0.289448305 | NA          | NA          |
| chr1:14042035-14075982    | exonic       | PRDM2   | 1  | 14042035  | 14075982  | 3  | 0  | 2  | 3  | 2  | 0  | 33947  | 1.342487878 | 0.373908749 | 2.252795727 | 0.165975434 | 0.868176283 | 0.998252924 |
| chr22:45574118-45574781   | exonic       | NUP50   | 22 | 45574118  | 45574781  | 7  | 3  | 3  | 8  | 5  | 0  | 663    | 3.473171263 | 0.374286574 | 1.438420318 | 0.260206679 | 0.794704353 | 0.998252924 |
| chr12:50824277-50848200   | exonic       | LARP4   | 12 | 50824277  | 50848200  | 1  | 3  | 0  | 1  | 3  | 0  | 23923  | 1.121207991 | 0.375145649 | 2.468097922 | 0.151997879 | 0.879188609 | 0.998252924 |
| chr1:33478807-33480195    | exonic       | AK2     | 1  | 33478807  | 33480195  | 2  | 1  | 1  | 2  | 0  | 1  | 1388   | 1.150360089 | 0.376792979 | 2.307435503 | 0.163295129 | 0.870286069 | 0.998252924 |
| chr8:74585341-74652103    | exonic       | STAU2   | 8  | 74585341  | 74652103  | 1  | 0  | 2  | 0  | 3  | 0  | 66762  | 0.886607259 | 0.37727753  | 2.91703937  | 0.129335769 | 0.89709197  | 0.998252924 |
| chr5:176370335-176385155  | exonic       | UIMC1   | 5  | 176370335 | 176385155 | 21 | 12 | 14 | 33 | 10 | 3  | 14820  | 13.2050075  | 0.377495826 | 0.868382413 | 0.434711506 | NA          | NA          |
| chr1:214564330-214571344  | exonic       | PTPN14  | 1  | 214564330 | 214571344 | 0  | 2  | 0  | 2  | 0  | 0  | 7014   | 0.561174368 | 0.379864908 | 3.771654405 | 0.100715725 | 0.919776128 | 0.998252924 |
| chr1:221005870-221006534  | ncRNA_exonic | HLX-AS1 | 1  | 221005870 | 221006534 | 0  | 2  | 0  | 2  | 0  | 0  | 664    | 0.561174368 | 0.379864908 | 3.771654405 | 0.100715725 | 0.919776128 | 0.998252924 |
| chr1:243456392-243493994  | exonic       | SDCCAG8 | 1  | 243456392 | 243493994 | 0  | 2  | 0  | 2  | 0  | 0  | 37602  | 0.561174368 | 0.379864908 | 3.771654405 | 0.100715725 | 0.919776128 | 0.998252924 |
| chr1:24495906-24507344    | exonic       | IFNLR1  | 1  | 24495906  | 24507344  | 0  | 2  | 0  | 2  | 0  | 0  | 11438  | 0.561174368 | 0.379864908 | 3.771654405 | 0.100715725 | 0.919776128 | 0.998252924 |
| chr1:51064615-51064866    | intronic     | FAF1    | 1  | 51064615  | 51064866  | 0  | 2  | 0  | 2  | 0  | 0  | 251    | 0.561174368 | 0.379864908 | 3.771654405 | 0.100715725 | 0.919776128 | 0.998252924 |
| chr1:62910408-62913182    | exonic       | USP1    | 1  | 62910408  | 62913182  | 0  | 2  | 0  | 2  | 0  | 0  | 2774   | 0.561174368 | 0.379864908 | 3.771654405 | 0.100715725 | 0.919776128 | 0.998252924 |
| chr10:11291115-11330515   | exonic       | CELF2   | 10 | 11291115  | 11330515  | 0  | 2  | 0  | 2  | 0  | 0  | 39400  | 0.561174368 | 0.379864908 | 3.771654405 | 0.100715725 | 0.919776128 | 0.998252924 |
| chr11:43469551-43472815   | exonic       | TTC17   | 11 | 43469551  | 43472815  | 0  | 2  | 0  | 2  | 0  | 0  | 3264   | 0.561174368 | 0.379864908 | 3.771654405 | 0.100715725 | 0.919776128 | 0.998252924 |
| chr11:5719544-5727846     | exonic       | TRIM22  | 11 | 5719544   | 5727846   | 0  | 2  | 0  | 2  | 0  | 0  | 8302   | 0.561174368 | 0.379864908 | 3.771654405 | 0.100715725 | 0.919776128 | 0.998252924 |
| chr13:100959445-101101559 | exonic       | PCCA    | 13 | 100959445 | 101101559 | 0  | 2  | 0  | 2  | 0  | 0  | 142114 | 0.561174368 | 0.379864908 | 3.771654405 | 0.100715725 | 0.919776128 | 0.998252924 |
| chr14:31784975-31817113   | exonic       | HEATR5A | 14 | 31784975  | 31817113  | 0  | 2  | 0  | 2  | 0  | 0  | 32138  | 0.561174368 | 0.379864908 | 3.771654405 | 0.100715725 | 0.919776128 | 0.998252924 |
| chr14:71511849-71543136   | exonic       | PCNX    | 14 | 71511849  | 71543136  | 0  | 2  | 0  | 2  | 0  | 0  | 31287  | 0.561174368 | 0.379864908 | 3.771654405 | 0.100715725 | 0.919776128 | 0.998252924 |
| chr16:21073802-21098381   | exonic       | DNAH3   | 16 | 21073802  | 21098381  | 0  | 2  | 0  | 2  | 0  | 0  | 24579  | 0.561174368 | 0.379864908 | 3.771654405 | 0.100715725 | 0.919776128 | 0.998252924 |
| chr17:2218850-2224910     | exonic       | SRR     | 17 | 2218850   | 2224910   | 0  | 2  | 0  | 2  | 0  | 0  | 6060   | 0.561174368 | 0.379864908 | 3.771654405 | 0.100715725 | 0.919776128 | 0.998252924 |
| chr17:65209661-65211574   | intronic     | HELZ    | 17 | 65209661  | 65211574  | 0  | 2  | 0  | 2  | 0  | 0  | 1913   | 0.561174368 | 0.379864908 | 3.771654405 | 0.100715725 | 0.919776128 | 0.998252924 |
| chr17:986759-1003975      | exonic       | ABR     | 17 | 986759    | 1003975   | 0  | 2  | 0  | 2  | 0  | 0  | 17216  | 0.561174368 | 0.379864908 | 3.771654405 | 0.100715725 | 0.919776128 | 0.998252924 |
| chr19:23557440-23559132   | exonic       | ZNF91   | 19 | 23557440  | 23559132  | 0  | 2  | 0  | 2  | 0  | 0  | 1692   | 0.561174368 | 0.379864908 | 3.771654405 | 0.100715725 | 0.919776128 | 0.998252924 |
| chr19:50837564-50862037   | exonic       | NAPSA   | 19 | 50837564  | 50862037  | 0  | 2  | 0  | 2  | 0  | 0  | 24473  | 0.561174368 | 0.379864908 | 3.771654405 | 0.100715725 | 0.919776128 | 0.998252924 |
| chr2:38542425-38546161    | exonic       | ATL2    | 2  | 38542425  | 38546161  | 0  | 2  | 0  | 2  | 0  | 0  | 3736   | 0.561174368 | 0.379864908 | 3.771654405 | 0.100715725 | 0.919776128 | 0.998252924 |
| chr2:54884986-54886403    | exonic       | SPTBN1  | 2  | 54884986  | 54886403  | 0  | 2  | 0  | 2  | 0  | 0  | 1417   | 0.561174368 | 0.379864908 | 3.771654405 | 0.100715725 | 0.919776128 | 0.998252924 |
| chr22:24761444-24765288   | exonic       | SPECC1L | 22 | 24761444  | 24765288  | 0  | 2  | 0  | 2  | 0  | 0  | 3844   | 0.561174368 | 0.379864908 | 3.771654405 | 0.100715725 | 0.919776128 | 0.998252924 |
| chr3:136162128-136196254  | exonic       | STAG1   | 3  | 136162128 | 136196254 | 0  | 2  | 0  | 2  | 0  | 0  | 34126  | 0.561174368 | 0.379864908 | 3.771654405 | 0.100715725 | 0.919776128 | 0.998252924 |
| chr3:152163070-152165562  | exonic       | MBNL1   | 3  | 152163070 | 152165562 | 0  | 2  | 0  | 2  | 0  | 0  | 2492   | 0.561174368 | 0.379864908 | 3.771654405 | 0.100715725 | 0.919776128 | 0.998252924 |
| chr3:47103652-47139571    | exonic       | SETD2   | 3  | 47103652  | 47139571  | 3  | 4  | 2  | 7  | 5  | 0  | 35919  | 0.561174368 | 0.379864908 | 3.771654405 | 0.100715725 | 0.919776128 | 0.998252924 |
| chr4:170501992-170520348  | exonic       | NEK1    | 4  | 170501992 | 170520348 | 0  | 1  | 0  | 2  | 0  | 0  | 18356  | 0.561174368 | 0.379864908 | 3.771654405 | 0.100715725 | 0.919776128 | 0.998252924 |

|                          |              |                                             |    |           |           |    |    |    |    |    |   |       |             |             |             |             |             |             |
|--------------------------|--------------|---------------------------------------------|----|-----------|-----------|----|----|----|----|----|---|-------|-------------|-------------|-------------|-------------|-------------|-------------|
| chr4:77659913-77663079   | exonic       | SHROOM3                                     | 4  | 77659913  | 77663079  | 0  | 2  | 0  | 2  | 0  | 0 | 3166  | 0.561174368 | 0.379864908 | 3.771654405 | 0.100715725 | 0.919776128 | 0.998252924 |
| chr5:74981031-74998635   | exonic       | POC5                                        | 5  | 74981031  | 74998635  | 0  | 2  | 0  | 2  | 0  | 0 | 17604 | 0.561174368 | 0.379864908 | 3.771654405 | 0.100715725 | 0.919776128 | 0.998252924 |
| chr6:128385902-128411137 | exonic       | PTPRK                                       | 6  | 128385902 | 128411137 | 0  | 2  | 0  | 2  | 0  | 0 | 25235 | 0.561174368 | 0.379864908 | 3.771654405 | 0.100715725 | 0.919776128 | 0.998252924 |
| chr6:168271062-168307969 | exonic       | MLLT4                                       | 6  | 168271062 | 168307969 | 0  | 2  | 0  | 2  | 0  | 0 | 36907 | 0.561174368 | 0.379864908 | 3.771654405 | 0.100715725 | 0.919776128 | 0.998252924 |
| chr6:2397455-2399271     | ncRNA_exonic | GMDS-AS1                                    | 6  | 2397455   | 2399271   | 0  | 2  | 0  | 2  | 0  | 0 | 1816  | 0.561174368 | 0.379864908 | 3.771654405 | 0.100715725 | 0.919776128 | 0.998252924 |
| chr6:77981057-77983024   | intergenic   | IMP1 (dist=1198662), HTR1B (dist=187541)    | 6  | 77981057  | 77983024  | 0  | 2  | 0  | 2  | 0  | 0 | 1967  | 0.561174368 | 0.379864908 | 3.771654405 | 0.100715725 | 0.919776128 | 0.998252924 |
| chr7:158662545-158698782 | exonic       | WDR60                                       | 7  | 158662545 | 158698782 | 0  | 2  | 0  | 2  | 0  | 0 | 36237 | 0.561174368 | 0.379864908 | 3.771654405 | 0.100715725 | 0.919776128 | 0.998252924 |
| chr7:66038371-66041916   | ncRNA_exonic | GS1-124K5.11                                | 7  | 66038371  | 66041916  | 2  | 1  | 0  | 9  | 0  | 2 | 3545  | 0.561174368 | 0.379864908 | 3.771654405 | 0.100715725 | 0.919776128 | 0.998252924 |
| chrX:17047648-17121902   | exonic       | REPS2                                       | X  | 17047648  | 17121902  | 0  | 2  | 0  | 2  | 0  | 0 | 74254 | 0.561174368 | 0.379864908 | 3.771654405 | 0.100715725 | 0.919776128 | 0.998252924 |
| chr1:64117339-64120137   | exonic       | PGM1                                        | 1  | 64117339  | 64120137  | 0  | 1  | 1  | 1  | 1  | 0 | 2798  | 0.598883632 | 0.380076501 | 3.140177893 | 0.121036614 | 0.903662034 | 0.998252924 |
| chr16:16146580-16150152  | exonic       | ABCC1                                       | 16 | 16146580  | 16150152  | 0  | 1  | 1  | 1  | 1  | 0 | 3572  | 0.598883632 | 0.380076501 | 3.140177893 | 0.121036614 | 0.903662034 | 0.998252924 |
| chr5:96314841-96322374   | exonic       | LNPEP                                       | 5  | 96314841  | 96322374  | 0  | 1  | 1  | 1  | 1  | 0 | 7533  | 0.598883632 | 0.380076501 | 3.140177893 | 0.121036614 | 0.903662034 | 0.998252924 |
| chr21:46548316-46554747  | UTR5         | -----                                       | 21 | 46548316  | 46554747  | 30 | 9  | 1  | 35 | 4  | 0 | 6431  | 9.840367668 | 0.380349441 | 1.25556992  | 0.302929717 | 0.761943424 | 0.998252924 |
| chr12:56563312-56563992  | exonic       | SMARCC2                                     | 12 | 56563312  | 56563992  | 3  | 4  | 0  | 5  | 0  | 1 | 680   | 1.923839559 | 0.381169753 | 2.025735767 | 0.188163609 | 0.850748399 | 0.998252924 |
| chr22:45970390-45972988  | exonic       | FBLN1                                       | 22 | 45970390  | 45972988  | 5  | 0  | 3  | 6  | 0  | 1 | 2598  | 2.18282871  | 0.38237826  | 1.945744196 | 0.196520314 | 0.844202935 | 0.998252924 |
| chr10:4872867-4915499    | exonic       | AKRIE2                                      | 10 | 4872867   | 4915499   | 5  | 3  | 0  | 8  | 0  | 0 | 42632 | 2.018253192 | 0.383123951 | 2.142843708 | 0.178792298 | NA          | NA          |
| chr15:62325639-62336454  | exonic       | VPS13C                                      | 15 | 62325639  | 62336454  | 5  | 2  | 4  | 5  | 0  | 3 | 10815 | 3.238775166 | 0.383164673 | 1.552906706 | 0.246740304 | 0.805109212 | 0.998252924 |
| chr9:33941646-33953472   | exonic       | UBAP2                                       | 9  | 33941646  | 33953472  | 2  | 0  | 0  | 2  | 2  | 0 | 11826 | 1.267069352 | 0.383341608 | 2.519352068 | 0.152158808 | NA          | NA          |
| chr9:33941646-33956144   | exonic       | UBAP2                                       | 9  | 33941646  | 33956144  | 3  | 7  | 0  | 5  | 0  | 0 | 14498 | 1.267069352 | 0.383341608 | 2.519352068 | 0.152158808 | NA          | NA          |
| chr22:42204878-42206295  | exonic       | CCDC134                                     | 22 | 42204878  | 42206295  | 6  | 10 | 2  | 14 | 5  | 0 | 1417  | 5.0047142   | 0.38416589  | 1.320554732 | 0.290912509 | 0.771118234 | 0.998252924 |
| chr12:2224389-2229596    | exonic       | CACNA1C                                     | 12 | 2224389   | 2229596   | 0  | 2  | 3  | 5  | 1  | 0 | 5207  | 1.592943022 | 0.385043677 | 2.168452891 | 0.177566079 | 0.859063766 | 0.998252924 |
| chr19:5653125-5654467    | exonic       | SAFB                                        | 19 | 5653125   | 5654467   | 9  | 5  | 1  | 6  | 4  | 2 | 1342  | 3.967945722 | 0.386732824 | 1.321798569 | 0.292580756 | 0.769842625 | 0.998252924 |
| chr3:196214269-196215554 | exonic       | RNF168                                      | 3  | 196214269 | 196215554 | 11 | 5  | 5  | 14 | 5  | 1 | 1285  | 5.678295603 | 0.387633764 | 1.150681489 | 0.336873207 | NA          | NA          |
| chr18:6263945-6312055    | exonic       | L3MBTL4                                     | 18 | 6263945   | 6312055   | 5  | 2  | 2  | 7  | 2  | 0 | 48110 | 2.374258903 | 0.387720959 | 1.689546515 | 0.229482264 | 0.818494104 | 0.998252924 |
| chr1:169446392-169446995 | exonic       | SLC19A2                                     | 1  | 169446392 | 169446995 | 3  | 0  | 3  | 2  | 4  | 0 | 603   | 1.675500362 | 0.387739359 | 2.080185364 | 0.186396542 | 0.852133804 | 0.998252924 |
| chr4:123848788-123900541 | exonic       | SPATA5                                      | 4  | 123848788 | 123900541 | 1  | 2  | 0  | 0  | 1  | 1 | 51753 | 0.906784572 | 0.39035931  | 2.72137437  | 0.143441973 | 0.885941136 | 0.998252924 |
| chr15:75703832-75705386  | exonic       | SIN3A                                       | 15 | 75703832  | 75705386  | 4  | 0  | 5  | 0  | 9  | 0 | 1554  | 2.591539695 | 0.39060251  | 2.00356718  | 0.194953538 | 0.845429321 | 0.998252924 |
| chr8:141840570-141900868 | exonic       | PTK2                                        | 8  | 141840570 | 141900868 | 0  | 2  | 1  | 3  | 2  | 0 | 60298 | 3.192327262 | 0.390603722 | 1.548942257 | 0.252174489 | 0.800906196 | 0.998252924 |
| chr3:3178943-3182332     | exonic       | TRNT1                                       | 3  | 3178943   | 3182332   | 0  | 3  | 0  | 0  | 3  | 0 | 3389  | 0.885909663 | 0.390814116 | 3.173544944 | 0.123147497 | NA          | NA          |
| chr3:33109722-33110462   | exonic       | GLB1                                        | 3  | 33109722  | 33110462  | 0  | 3  | 0  | 0  | 3  | 0 | 740   | 0.885909663 | 0.390814116 | 3.173544944 | 0.123147497 | NA          | NA          |
| chr5:127292496-127302620 | intergenic   | CTXN3 (dist=298174), LINC01184 (dist=54624) | 5  | 127292496 | 127302620 | 0  | 3  | 0  | 0  | 3  | 0 | 10124 | 0.885909663 | 0.390814116 | 3.173544944 | 0.123147497 | NA          | NA          |
| chr6:3076997-3078169     | exonic       | RIPK1                                       | 6  | 3076997   | 3078169   | 17 | 13 | 12 | 31 | 9  | 2 | 1172  | 11.82692867 | 0.391815306 | 0.911950152 | 0.42964553  | NA          | NA          |
| chr3:133894452-133914026 | exonic       | RYK                                         | 3  | 133894452 | 133914026 | 3  | 4  | 0  | 5  | 2  | 0 | 19574 | 1.857675794 | 0.392335925 | 1.996161486 | 0.196545183 | 0.844183471 | 0.998252924 |
| chr12:83250788-83251359  | exonic       | TMTC2                                       | 12 | 83250788  | 83251359  | 0  | 4  | 4  | 3  | 6  | 0 | 571   | 2.531277985 | 0.393865653 | 1.812063838 | 0.217357493 | 0.827929755 | 0.998252924 |
| chr22:46189425-46202902  | exonic       | ATXN10                                      | 22 | 46189425  | 46202902  | 9  | 14 | 0  | 11 | 12 | 0 | 13477 | 6.22249797  | 0.39671074  | 1.373541074 | 0.288823354 | 0.772716559 | 0.998252924 |

|                           |          |         |    |           |           |    |    |    |    |    |    |        |             |             |             |             |             |             |
|---------------------------|----------|---------|----|-----------|-----------|----|----|----|----|----|----|--------|-------------|-------------|-------------|-------------|-------------|-------------|
| chr12:120612964-120614020 | exonic   | GCN1    | 12 | 120612964 | 120614020 | 1  | 2  | 0  | 3  | 0  | 0  | 1056   | 0.796472696 | 0.397128152 | 3.020274866 | 0.131487421 | 0.895389737 | 0.998252924 |
| chr12:12332743-12356334   | exonic   | LRP6    | 12 | 12332743  | 12356334  | 1  | 2  | 0  | 3  | 0  | 0  | 23591  | 0.796472696 | 0.397128152 | 3.020274866 | 0.131487421 | 0.895389737 | 0.998252924 |
| chr15:68434283-68457142   | exonic   | PIAS1   | 15 | 68434283  | 68457142  | 1  | 2  | 0  | 3  | 0  | 0  | 22859  | 0.796472696 | 0.397128152 | 3.020274866 | 0.131487421 | 0.895389737 | 0.998252924 |
| chr2:238657006-238668848  | exonic   | LRRFIP1 | 2  | 238657006 | 238668848 | 1  | 2  | 0  | 3  | 0  | 0  | 11842  | 0.796472696 | 0.397128152 | 3.020274866 | 0.131487421 | 0.895389737 | 0.998252924 |
| chr9:14146687-14307519    | exonic   | NFIB    | 9  | 14146687  | 14307519  | 1  | 2  | 0  | 3  | 0  | 0  | 160832 | 0.796472696 | 0.397128152 | 3.020274866 | 0.131487421 | 0.895389737 | 0.998252924 |
| chr9:33953282-33973235    | exonic   | UBAP2   | 9  | 33953282  | 33973235  | 1  | 2  | 0  | 3  | 0  | 0  | 19953  | 0.796472696 | 0.397128152 | 3.020274866 | 0.131487421 | 0.895389737 | 0.998252924 |
| chr5:167915606-167924353  | exonic   | RARS    | 5  | 167915606 | 167924353 | 6  | 4  | 5  | 6  | 5  | 2  | 8747   | 4.316812618 | 0.397291942 | 1.225632885 | 0.324152483 | 0.745822595 | 0.998252924 |
| chr21:45149733-45150101   | intronic | PDXK    | 21 | 45149733  | 45150101  | 6  | 4  | 0  | 10 | 0  | 0  | 368    | 2.534138704 | 0.397741996 | 1.995457939 | 0.199323668 | NA          | NA          |
| chr1:155408117-155408859  | exonic   | ASH1L   | 1  | 155408117 | 155408859 | 10 | 12 | 7  | 11 | 10 | 4  | 742    | 8.374636085 | 0.398456134 | 0.94857235  | 0.420058769 | 0.674442522 | 0.998252924 |
| chr11:95825055-95826681   | exonic   | MAML2   | 11 | 95825055  | 95826681  | 13 | 14 | 7  | 16 | 12 | 3  | 1626   | 9.575541672 | 0.399107499 | 0.91505237  | 0.436158096 | 0.662722029 | 0.998252924 |
| chr9:96233422-96261168    | exonic   | FAM120A | 9  | 96233422  | 96261168  | 15 | 11 | 11 | 9  | 13 | 2  | 27746  | 4.945128323 | 0.400059038 | 1.170846426 | 0.341683613 | 0.732589005 | 0.998252924 |
| chr5:36982267-36986403    | exonic   | NIPBL   | 5  | 36982267  | 36986403  | 9  | 36 | 9  | 13 | 17 | 12 | 4136   | 16.34836996 | 0.400689455 | 0.883464926 | 0.453543138 | NA          | NA          |
| chr5:179134132-179137066  | exonic   | CANX    | 5  | 179134132 | 179137066 | 1  | 2  | 1  | 1  | 3  | 0  | 2934   | 1.144201217 | 0.40085506  | 2.285931394 | 0.175357432 | 0.860798786 | 0.998252924 |
| chr2:136432901-136437894  | exonic   | R3HDM1  | 2  | 136432901 | 136437894 | 3  | 2  | 5  | 0  | 8  | 1  | 4993   | 2.998295537 | 0.400926586 | 1.638817567 | 0.244643818 | 0.806732233 | 0.998252924 |
| chr13:50025688-50042096   | exonic   | SETDB2  | 13 | 50025688  | 50042096  | 3  | 2  | 2  | 4  | 3  | 0  | 16408  | 1.918378284 | 0.401254169 | 1.806082892 | 0.222168191 | 0.824182955 | 0.998252924 |
| chr18:56552994-56553303   | intronic | ZNF532  | 18 | 56552994  | 56553303  | 9  | 0  | 0  | 0  | 0  | 3  | 309    | 2.085538311 | 0.401323065 | 3.818887343 | 0.105089003 | NA          | NA          |
| chr22:46780439-46785396   | exonic   | CELSR1  | 22 | 46780439  | 46785396  | 9  | 6  | 0  | 8  | 4  | 1  | 4957   | 3.849356657 | 0.40160256  | 1.452306046 | 0.2765275   | NA          | NA          |
| chr12:116668338-116675510 | exonic   | MED13L  | 12 | 116668338 | 116675510 | 35 | 29 | 34 | 24 | 61 | 7  | 7172   | 28.36736427 | 0.402146135 | 0.723260938 | 0.556018048 | NA          | NA          |
| chr20:34304661-34312644   | exonic   | RBM39   | 20 | 34304661  | 34312644  | 4  | 11 | 6  | 2  | 9  | 5  | 7983   | 6.459558325 | 0.402345053 | 1.154746517 | 0.348427163 | 0.727519406 | 0.998252924 |
| chr20:34304661-34313077   | exonic   | RBM39   | 20 | 34304661  | 34313077  | 4  | 11 | 6  | 2  | 9  | 5  | 8416   | 6.459558325 | 0.402345053 | 1.154746517 | 0.348427163 | 0.727519406 | 0.998252924 |
| chr5:135483520-135489852  | exonic   | SMAD5   | 5  | 135483520 | 135489852 | 4  | 4  | 5  | 11 | 3  | 0  | 6332   | 3.731903597 | 0.404239292 | 1.428537267 | 0.282974271 | 0.77719656  | 0.998252924 |
| chr1:224605961-224612356  | exonic   | WDR26   | 1  | 224605961 | 224612356 | 0  | 4  | 0  | 0  | 2  | 1  | 6395   | 1.247376649 | 0.405486761 | 2.611179771 | 0.155288719 | NA          | NA          |
| chr3:178921331-178922376  | exonic   | PIK3CA  | 3  | 178921331 | 178922376 | 5  | 8  | 0  | 8  | 5  | 0  | 1045   | 3.494769297 | 0.405765594 | 1.604368519 | 0.252912962 | 0.800335473 | 0.998252924 |
| chr15:64066892-64067848   | exonic   | HERC1   | 15 | 64066892  | 64067848  | 3  | 1  | 1  | 5  | 0  | 0  | 956    | 1.290062579 | 0.407612547 | 2.341753536 | 0.174062958 | NA          | NA          |
| chr16:354303-364683       | exonic   | AXIN1   | 16 | 354303    | 364683    | 3  | 1  | 1  | 5  | 0  | 0  | 10380  | 1.290062579 | 0.407612547 | 2.341753536 | 0.174062958 | NA          | NA          |
| chr3:171830241-171969331  | exonic   | FNDC3B  | 3  | 171830241 | 171969331 | 4  | 5  | 3  | 3  | 1  | 3  | 139090 | 1.95538995  | 0.408414854 | 1.828901296 | 0.223311589 | 0.823293009 | 0.998252924 |
| chr10:32832228-32873232   | exonic   | CCDC7   | 10 | 32832228  | 32873232  | 16 | 12 | 10 | 23 | 16 | 0  | 41004  | 10.50939154 | 0.408696233 | 1.008924514 | 0.405081081 | NA          | NA          |
| chr1:198190129-198233365  | exonic   | NEK7    | 1  | 198190129 | 198233365 | 0  | 0  | 2  | 0  | 2  | 0  | 43236  | 0.636592895 | 0.40958212  | 3.601283096 | 0.113732275 | 0.909450027 | 0.998252924 |
| chr11:101832471-101834611 | exonic   | CEP126  | 11 | 101832471 | 101834611 | 0  | 0  | 2  | 0  | 2  | 0  | 2140   | 0.636592895 | 0.40958212  | 3.601283096 | 0.113732275 | 0.909450027 | 0.998252924 |
| chr12:102179789-102190540 | exonic   | GNPTAB  | 12 | 102179789 | 102190540 | 0  | 0  | 2  | 0  | 2  | 0  | 10751  | 0.636592895 | 0.40958212  | 3.601283096 | 0.113732275 | 0.909450027 | 0.998252924 |
| chr13:33054727-33101669   | exonic   | N4BP2L2 | 13 | 33054727  | 33101669  | 0  | 0  | 2  | 0  | 2  | 0  | 46942  | 0.636592895 | 0.40958212  | 3.601283096 | 0.113732275 | 0.909450027 | 0.998252924 |
| chr13:79932408-79946065   | exonic   | RBM26   | 13 | 79932408  | 79946065  | 0  | 0  | 2  | 0  | 2  | 0  | 13657  | 0.636592895 | 0.40958212  | 3.601283096 | 0.113732275 | 0.909450027 | 0.998252924 |
| chr15:56981238-56985413   | exonic   | ZNF280D | 15 | 56981238  | 56985413  | 0  | 0  | 2  | 0  | 2  | 0  | 4175   | 0.636592895 | 0.40958212  | 3.601283096 | 0.113732275 | 0.909450027 | 0.998252924 |
| chr16:2303305-2304064     | exonic   | RNPS1   | 16 | 2303305   | 2304064   | 0  | 0  | 2  | 0  | 2  | 0  | 759    | 0.636592895 | 0.40958212  | 3.601283096 | 0.113732275 | 0.909450027 | 0.998252924 |
| chr18:60948120-60948447   | intronic | BCL2    | 18 | 60948120  | 60948447  | 0  | 0  | 2  | 0  | 2  | 0  | 327    | 0.636592895 | 0.40958212  | 3.601283096 | 0.113732275 | 0.909450027 | 0.998252924 |

|                           |              |           |       |           |           |           |    |    |    |    |   |       |             |             |             |             |             |             |
|---------------------------|--------------|-----------|-------|-----------|-----------|-----------|----|----|----|----|---|-------|-------------|-------------|-------------|-------------|-------------|-------------|
| chr20:42331129-42331543   | exonic       | MYBL2     | 20    | 42331129  | 42331543  | 0         | 0  | 2  | 0  | 2  | 0 | 414   | 0.636592895 | 0.40958212  | 3.601283096 | 0.113732275 | 0.909450027 | 0.998252924 |
| chr20:47691321-47706283   | exonic       | CSE1L     | 20    | 47691321  | 47706283  | 0         | 0  | 2  | 0  | 2  | 0 | 14962 | 0.636592895 | 0.40958212  | 3.601283096 | 0.113732275 | 0.909450027 | 0.998252924 |
| chr22:32874967-32883815   | exonic       | FBX07     | 22    | 32874967  | 32883815  | 0         | 0  | 2  | 0  | 2  | 0 | 8848  | 0.636592895 | 0.40958212  | 3.601283096 | 0.113732275 | 0.909450027 | 0.998252924 |
| chr3:122418236-122420482  | exonic       | PARP14    | 3     | 122418236 | 122420482 | 0         | 0  | 2  | 0  | 2  | 0 | 2246  | 0.636592895 | 0.40958212  | 3.601283096 | 0.113732275 | 0.909450027 | 0.998252924 |
| chr6:101246588-101296583  | exonic       | ASCC3     | 6     | 101246588 | 101296583 | 0         | 0  | 2  | 0  | 2  | 0 | 49995 | 0.636592895 | 0.40958212  | 3.601283096 | 0.113732275 | 0.909450027 | 0.998252924 |
| chr6:109461624-109471442  | exonic       | CEP57L1   | 6     | 109461624 | 109471442 | 0         | 0  | 2  | 0  | 2  | 0 | 9818  | 0.636592895 | 0.40958212  | 3.601283096 | 0.113732275 | 0.909450027 | 0.998252924 |
| chr6:14131751-14136140    | exonic       | CD83      | 6     | 14131751  | 14136140  | 0         | 0  | 2  | 0  | 2  | 0 | 4389  | 0.636592895 | 0.40958212  | 3.601283096 | 0.113732275 | 0.909450027 | 0.998252924 |
| chr6:86328535-86333830    | exonic       | SYNCRIP   | 6     | 86328535  | 86333830  | 0         | 0  | 2  | 0  | 2  | 0 | 5295  | 0.636592895 | 0.40958212  | 3.601283096 | 0.113732275 | 0.909450027 | 0.998252924 |
| chr7:6854394-6859572      | exonic       | CCZ1B     | 7     | 6854394   | 6859572   | 0         | 0  | 2  | 0  | 2  | 0 | 5178  | 0.636592895 | 0.40958212  | 3.601283096 | 0.113732275 | 0.909450027 | 0.998252924 |
| chr9:127070843-127072971  | intronic     | NEK6      | 9     | 127070843 | 127072971 | 0         | 0  | 2  | 0  | 2  | 0 | 2128  | 0.636592895 | 0.40958212  | 3.601283096 | 0.113732275 | 0.909450027 | 0.998252924 |
| chr9:97717459-97730083    | exonic       | C9orf3    | 9     | 97717459  | 97730083  | 0         | 0  | 2  | 0  | 2  | 0 | 12624 | 0.636592895 | 0.40958212  | 3.601283096 | 0.113732275 | 0.909450027 | 0.998252924 |
| chrX:14861782-14877456    | exonic       | FANCB     | X     | 14861782  | 14877456  | 0         | 0  | 2  | 0  | 2  | 0 | 15674 | 0.636592895 | 0.40958212  | 3.601283096 | 0.113732275 | 0.909450027 | 0.998252924 |
| chrX:24828015-24861794    | exonic       | POLA1     | X     | 24828015  | 24861794  | 0         | 0  | 2  | 0  | 2  | 0 | 33779 | 0.636592895 | 0.40958212  | 3.601283096 | 0.113732275 | 0.909450027 | 0.998252924 |
| chr20:62407030-62422143   | exonic       | ZBTB46    | 20    | 62407030  | 62422143  | 18        | 6  | 2  | 13 | 11 | 0 | 15113 | 6.475307462 | 0.409795759 | 1.220966785 | 0.335632192 | 0.737148245 | 0.998252924 |
| chr15:94899365-94928754   | exonic       | MCTP2     | 15    | 94899365  | 94928754  | 9         | 4  | 0  | 8  | 4  | 0 | 29389 | 3.19258645  | 0.410406815 | 1.64937203  | 0.248826103 | 0.803495299 | 0.998252924 |
| chr12:120592773-120593523 | exonic       | GCN1      | 12    | 120592773 | 120593523 | 11        | 10 | 6  | 21 | 7  | 0 | 750   | 7.424959555 | 0.410667948 | 1.134164768 | 0.362088437 | 0.717285944 | 0.998252924 |
| chr4:62812631-62910267    | exonic       | ADGRL3    | 4     | 62812631  | 62910267  | 2         | 3  | 0  | 4  | 1  | 0 | 97636 | 1.327074245 | 0.410804938 | 2.290222488 | 0.179373375 | 0.857644536 | 0.998252924 |
| chr11:33307958-33350179   | exonic       | HIPK3     | 11    | 33307958  | 33350179  | 4         | 1  | 0  | 0  | 0  | 2 | 42221 | 1.306660788 | 0.410852841 | 2.577714124 | 0.159386504 | 0.873364372 | 0.998252924 |
| chr9:4823547-4833228      | exonic       | RCL1      | 9     | 4823547   | 4833228   | 4         | 1  | 0  | 0  | 0  | 2 | 9681  | 1.306660788 | 0.410852841 | 2.577714124 | 0.159386504 | 0.873364372 | 0.998252924 |
| chr1:59805629-59844509    | exonic       | FGGY      | 1     | 59805629  | 59844509  | 23        | 14 | 6  | 34 | 7  | 1 | 38880 | 11.36017268 | 0.411956269 | 1.000807899 | 0.411623718 | NA          | NA          |
| chr9:5944870-5988545      | exonic       | KIAA2026  | 9     | 5944870   | 5988545   | 8         | 0  | 4  | 3  | 6  | 1 | 43675 | 3.174288939 | 0.412044684 | 1.563179964 | 0.263593887 | 0.792092869 | 0.998252924 |
| chr14:102659799-102661457 | exonic       | WDR20     | 14    | 102659799 | 102661457 | 4         | 0  | 3  | 5  | 2  | 0 | 1658  | 1.881366617 | 0.413546587 | 1.989937188 | 0.207818915 | 0.835370363 | 0.998252924 |
| chr13:113170753-113181798 | exonic       | TUBGCP3   | 13    | 113170753 | 113181798 | 2         | 2  | 6  | 7  | 4  | 0 | 11045 | 3.01842902  | 0.413994302 | 1.565415225 | 0.264462933 | 0.791423224 | 0.998252924 |
| chr18:19345732-19359646   | exonic       | MIB1      | 18    | 19345732  | 19359646  | 30        | 4  | 13 | 20 | 16 | 4 | 13914 | 12.4267497  | 0.414240052 | 0.905445856 | 0.457498424 | 0.647312835 | 0.998252924 |
| chr12:5936934-6031970     | exonic       | ANO2      | 12    | 5936934   | 6031970   | 2         | 2  | 0  | 4  | 0  | 0 | 95036 | 1.031771024 | 0.414631939 | 2.726120562 | 0.152095966 | NA          | NA          |
| chr7:32872619-32874531    | ncRNA_exonic | DPY19L1P2 | 7     | 32872619  | 32874531  | 2         | 2  | 0  | 4  | 0  | 0 | 1912  | 1.031771024 | 0.414631939 | 2.726120562 | 0.152095966 | NA          | NA          |
| chr8:86193459-86193868    | exonic       | CA13      | 8     | 86193459  | 86193868  | 2         | 2  | 0  | 4  | 0  | 0 | 409   | 1.031771024 | 0.414631939 | 2.726120562 | 0.152095966 | NA          | NA          |
| chr5:171482591-171484477  | exonic       | STK10     | 5     | 171482591 | 171484477 | 6         | 0  | 1  | 2  | 4  | 0 | 1886  | 1.66792314  | 0.417398719 | 2.115226751 | 0.197330484 | 0.843568925 | 0.998252924 |
| chr19:12637734-12639510   | exonic       | ZNF564    | 19    | 12637734  | 12639510  | 7         | 2  | 0  | 5  | 3  | 0 | 1776  | 2.146099389 | 0.417697702 | 1.897048275 | 0.220182959 | 0.825728668 | 0.998252924 |
| chr1:52959282-52975384    | exonic       | ZCCHC11   | 1     | 52959282  | 52975384  | 4         | 7  | 4  | 3  | 12 | 0 | 16102 | 4.296217684 | 0.418438992 | 1.384734324 | 0.302179981 | NA          | NA          |
| chr20:10536878-10541468   | exonic       | SLX4IP    | 20    | 10536878  | 10541468  | 3         | 2  | 3  | 3  | 1  | 2 | 4590  | 2.383718298 | 0.418503566 | 1.619096525 | 0.258479689 | 0.796036722 | 0.998252924 |
| chr6:13639794-13644961    | exonic       | RANBP9    | 6     | 13639794  | 13644961  | 9         | 0  | 6  | 4  | 6  | 2 | 5167  | 4.112343927 | 0.419119267 | 1.415014464 | 0.296194334 | NA          | NA          |
| chr14:62188226-62188541   | exonic       | HIF1A     | 14    | 62188226  | 62188541  | 5         | 9  | 2  | 9  | 3  | 2 | 315   | 4.544276906 | 0.419728382 | 1.261501266 | 0.332721332 | NA          | NA          |
| chr10:49609654-49618211   | exonic       | MAPK8     | 10    | 49609654  | 49618211  | 5         | 3  | 7  | 12 | 4  | 0 | 8557  | 4.308491599 | 0.421337265 | 1.364981689 | 0.30867613  | 0.757567903 | 0.998252924 |
| chr2:242282406-242287606  | exonic       |           | 2-Sep | 2         | 242282406 | 242287606 | 0  | 1  | 0  | 4  | 0 | 5200  | 1.948948733 | 0.422910003 | 2.022645751 | 0.209087529 | NA          | NA          |

|                           |              |          |    |           |           |    |    |    |    |    |    |       |             |             |             |             |             |             |
|---------------------------|--------------|----------|----|-----------|-----------|----|----|----|----|----|----|-------|-------------|-------------|-------------|-------------|-------------|-------------|
| chr21:38792600-38853128   | exonic       | DYRK1A   | 21 | 38792600  | 38853128  | 8  | 1  | 5  | 3  | 6  | 2  | 60528 | 3.854052373 | 0.422978619 | 1.355180691 | 0.31211972  | 0.75494954  | 0.998252924 |
| chr3:101389973-101391057  | exonic       | ZBTB11   | 3  | 101389973 | 101391057 | 5  | 3  | 8  | 11 | 6  | 0  | 1084  | 4.641504083 | 0.423411505 | 1.323243905 | 0.319979939 | 0.748983538 | 0.998252924 |
| chr10:93185037-93221941   | exonic       | HECTD2   | 10 | 93185037  | 93221941  | 3  | 3  | 0  | 6  | 0  | 0  | 36904 | 1.547656536 | 0.423699293 | 2.343981971 | 0.180760474 | NA          | NA          |
| chr4:103610730-103635718  | exonic       | MANBA    | 4  | 103610730 | 103635718 | 0  | 3  | 0  | 1  | 2  | 0  | 24988 | 0.871193626 | 0.423733068 | 2.933209064 | 0.144460575 | NA          | NA          |
| chr6:149899957-149901859  | exonic       | GINM1    | 6  | 149899957 | 149901859 | 0  | 3  | 0  | 1  | 2  | 0  | 1902  | 0.871193626 | 0.423733068 | 2.933209064 | 0.144460575 | NA          | NA          |
| chr6:629834-637861        | exonic       | EXOC2    | 6  | 629834    | 637861    | 0  | 3  | 0  | 1  | 2  | 0  | 8027  | 0.871193626 | 0.423733068 | 2.933209064 | 0.144460575 | NA          | NA          |
| chr7:157174939-157178305  | exonic       | DNAJB6   | 7  | 157174939 | 157178305 | 3  | 2  | 2  | 5  | 2  | 0  | 3366  | 1.903662247 | 0.424022798 | 1.823366429 | 0.232549416 | 0.816111311 | 0.998252924 |
| chr2:197777606-197787849  | exonic       | PGAP1    | 2  | 197777606 | 197787849 | 4  | 0  | 0  | 0  | 3  | 0  | 10243 | 0.879030037 | 0.424358977 | 3.167607217 | 0.133968307 | NA          | NA          |
| chr3:195685883-195686957  | ncRNA_exonic | SDHAP1   | 3  | 195685883 | 195686957 | 4  | 0  | 0  | 0  | 3  | 0  | 1074  | 0.879030037 | 0.424358977 | 3.167607217 | 0.133968307 | NA          | NA          |
| chr6:149997395-150001593  | exonic       | LATS1    | 6  | 149997395 | 150001593 | 4  | 0  | 0  | 0  | 3  | 0  | 4198  | 0.879030037 | 0.424358977 | 3.167607217 | 0.133968307 | NA          | NA          |
| chr8:22332466-22333137    | exonic       | PPP3CC   | 8  | 22332466  | 22333137  | 6  | 2  | 4  | 9  | 3  | 0  | 671   | 3.231434089 | 0.426468019 | 1.503315026 | 0.283685064 | 0.776651742 | 0.998252924 |
| chrX:10031484-10035530    | exonic       | WWC3     | X  | 10031484  | 10035530  | 2  | 3  | 2  | 3  | 4  | 0  | 4046  | 1.978383176 | 0.427324299 | 1.794679308 | 0.238106216 | 0.811798714 | 0.998252924 |
| chr10:95436409-95447206   | exonic       | FRA10AC1 | 10 | 95436409  | 95447206  | 3  | 4  | 3  | 4  | 6  | 0  | 10797 | 2.827281173 | 0.427556834 | 1.557175885 | 0.274571959 | 0.783645112 | 0.998252924 |
| chr12:57861115-57862007   | exonic       | GLI1     | 12 | 57861115  | 57862007  | 7  | 1  | 1  | 5  | 1  | 1  | 892   | 2.23525638  | 0.429888818 | 1.716268139 | 0.25047882  | NA          | NA          |
| chr3:138289159-138290198  | exonic       | CEP70    | 3  | 138289159 | 138290198 | 12 | 8  | 5  | 13 | 7  | 2  | 1039  | 6.774072011 | 0.431449009 | 1.042267183 | 0.413952407 | 0.678908962 | 0.998252924 |
| chr2:153431649-153437563  | exonic       | FMNL2    | 2  | 153431649 | 153437563 | 5  | 2  | 2  | 0  | 4  | 2  | 5914  | 2.488571268 | 0.43271338  | 1.709352184 | 0.253144661 | NA          | NA          |
| chr1:16891301-16893846    | exonic       | NBPF1    | 1  | 16891301  | 16893846  | 36 | 35 | 13 | 32 | 19 | 14 | 2545  | 23.3242261  | 0.433250381 | 0.716713767 | 0.604495688 | 0.545514135 | 0.998252924 |
| chr3:197541778-197547301  | exonic       | LRCH3    | 3  | 197541778 | 197547301 | 6  | 3  | 2  | 2  | 8  | 0  | 5523  | 2.87212925  | 0.434429404 | 1.588422918 | 0.273497316 | NA          | NA          |
| chr12:46633461-46637097   | exonic       | SLC38A1  | 12 | 46633461  | 46637097  | 3  | 0  | 11 | 2  | 13 | 0  | 3636  | 4.342899363 | 0.434565333 | 1.620748475 | 0.268126326 | NA          | NA          |
| chr19:41129508-41129987   | exonic       | LTBP4    | 19 | 41129508  | 41129987  | 0  | 0  | 5  | 4  | 2  | 0  | 479   | 1.653645512 | 0.434732636 | 2.320476829 | 0.187346252 | NA          | NA          |
| chr8:100286425-100287482  | exonic       | VPS13B   | 8  | 100286425 | 100287482 | 1  | 3  | 1  | 2  | 3  | 0  | 1057  | 1.424788401 | 0.437454619 | 2.086660851 | 0.20834944  | 0.834956131 | 0.998252924 |
| chr10:99925835-99926517   | intronic     | R3HCC1L  | 10 | 99925835  | 99926517  | 0  | 3  | 3  | 0  | 0  | 3  | 682   | 2.0392903   | 0.435346365 | 2.222235701 | 0.195904676 | NA          | NA          |
| chr19:33604672-33605325   | exonic       | GPATCH1  | 19 | 33604672  | 33605325  | 2  | 0  | 4  | 0  | 6  | 0  | 653   | 1.773214518 | 0.437005035 | 2.268757907 | 0.192618628 | 0.847257655 | 0.998252924 |
| chr18:9195548-9221997     | exonic       | ANKRD12  | 18 | 9195548   | 9221997   | 11 | 8  | 12 | 7  | 11 | 6  | 26449 | 9.105084058 | 0.438273357 | 0.94463151  | 0.463962246 | 0.642674795 | 0.998252924 |
| chr14:50615003-50616948   | exonic       | SOS2     | 14 | 50615003  | 50616948  | 3  | 0  | 3  | 4  | 2  | 0  | 1945  | 1.646068289 | 0.438357998 | 2.08970217  | 0.209770562 | 0.83384675  | 0.998252924 |
| chr17:43552465-43553092   | exonic       | PLEKHM1  | 17 | 43552465  | 43553092  | 13 | 16 | 11 | 33 | 7  | 1  | 627   | 11.29888859 | 0.439880685 | 0.983124464 | 0.447431328 | NA          | NA          |
| chr2:36623756-36669878    | exonic       | CRIM1    | 2  | 36623756  | 36669878  | 13 | 4  | 4  | 15 | 5  | 0  | 46122 | 5.362817441 | 0.441627951 | 1.270138951 | 0.347700502 | 0.72806512  | 0.998252924 |
| chr21:46275124-46281186   | exonic       | PTTG1IP  | 21 | 46275124  | 46281186  | 11 | 14 | 9  | 20 | 4  | 5  | 6062  | 9.785569221 | 0.442011235 | 0.955795887 | 0.462453586 | 0.64375608  | 0.998252924 |
| chr6:159001971-159010814  | exonic       | TMEM181  | 6  | 159001971 | 159010814 | 7  | 13 | 3  | 6  | 10 | 3  | 8843  | 6.533099419 | 0.442019252 | 1.094544976 | 0.403838363 | NA          | NA          |
| chr8:1824736-1857636      | exonic       | ARHGEF10 | 8  | 1824736   | 1857636   | 1  | 1  | 1  | 3  | 0  | 0  | 32900 | 0.819465923 | 0.442103433 | 2.781935184 | 0.158919387 | NA          | NA          |
| chr17:28011580-28030080   | exonic       | SSH2     | 17 | 28011580  | 28030080  | 4  | 2  | 3  | 7  | 0  | 1  | 18500 | 2.508704751 | 0.443210449 | 1.705923179 | 0.259806804 | 0.795012802 | 0.998252924 |
| chr7:94248069-94259153    | exonic       | SGCE     | 7  | 94248069  | 94259153  | 2  | 0  | 2  | 3  | 1  | 0  | 11084 | 1.092473514 | 0.443965891 | 2.468889422 | 0.17982413  | 0.85729064  | 0.998252924 |
| chr9:4823547-4827033      | exonic       | RCL1     | 9  | 4823547   | 4827033   | 2  | 0  | 2  | 3  | 1  | 0  | 3486  | 1.092473514 | 0.443965891 | 2.468889422 | 0.17982413  | 0.85729064  | 0.998252924 |
| chr2:64800079-64812679    | exonic       | AFTPH    | 2  | 64800079  | 64812679  | 2  | 1  | 1  | 4  | 0  | 0  | 12600 | 1.054764251 | 0.445354287 | 2.524785055 | 0.176392951 | NA          | NA          |
| chr11:120343758-120348235 | exonic       | ARHGEF12 | 11 | 120343758 | 120348235 | 10 | 4  | 4  | 10 | 7  | 0  | 4477  | 4.68635453  | 0.448799519 | 1.291951081 | 0.347381201 | 0.728304954 | 0.998252924 |

|                           |        |          |    |           |           |   |   |   |    |    |   |       |             |             |             |             |             |             |
|---------------------------|--------|----------|----|-----------|-----------|---|---|---|----|----|---|-------|-------------|-------------|-------------|-------------|-------------|-------------|
| chr16:10524467-10525312   | exonic | ATF7IP2  | 16 | 10524467  | 10525312  | 0 | 1 | 1 | 2  | 0  | 0 | 845   | 0.584167595 | 0.44882672  | 3.418122164 | 0.131307981 | 0.895531679 | 0.998252924 |
| chr16:53301205-53302038   | exonic | CHD9     | 16 | 53301205  | 53302038  | 0 | 1 | 1 | 2  | 0  | 0 | 833   | 0.584167595 | 0.44882672  | 3.418122164 | 0.131307981 | 0.895531679 | 0.998252924 |
| chr19:34699833-34706566   | exonic | LSM14A   | 19 | 34699833  | 34706566  | 0 | 1 | 1 | 2  | 0  | 0 | 6733  | 0.584167595 | 0.44882672  | 3.418122164 | 0.131307981 | 0.895531679 | 0.998252924 |
| chr2:101910475-101911643  | exonic | RNF149   | 2  | 101910475 | 101911643 | 0 | 1 | 1 | 2  | 0  | 0 | 1168  | 0.584167595 | 0.44882672  | 3.418122164 | 0.131307981 | 0.895531679 | 0.998252924 |
| chr2:216238044-216245803  | exonic | FN1      | 2  | 216238044 | 216245803 | 0 | 1 | 1 | 2  | 0  | 0 | 7759  | 0.584167595 | 0.44882672  | 3.418122164 | 0.131307981 | 0.895531679 | 0.998252924 |
| chr3:105389076-105412432  | exonic | CBLB     | 3  | 105389076 | 105412432 | 0 | 1 | 1 | 2  | 0  | 0 | 23356 | 0.584167595 | 0.44882672  | 3.418122164 | 0.131307981 | 0.895531679 | 0.998252924 |
| chr3:30686238-30715738    | exonic | TGFBR2   | 3  | 30686238  | 30715738  | 0 | 1 | 1 | 2  | 0  | 0 | 29500 | 0.584167595 | 0.44882672  | 3.418122164 | 0.131307981 | 0.895531679 | 0.998252924 |
| chr6:76331247-76333676    | exonic | SENP6    | 6  | 76331247  | 76333676  | 0 | 1 | 1 | 2  | 0  | 0 | 2429  | 0.584167595 | 0.44882672  | 3.418122164 | 0.131307981 | 0.895531679 | 0.998252924 |
| chr7:104730455-104731761  | exonic | KMT2E    | 7  | 104730455 | 104731761 | 0 | 1 | 1 | 2  | 0  | 0 | 1306  | 0.584167595 | 0.44882672  | 3.418122164 | 0.131307981 | 0.895531679 | 0.998252924 |
| chr9:116091160-116094330  | exonic | WDR31    | 9  | 116091160 | 116094330 | 0 | 1 | 1 | 2  | 0  | 0 | 3170  | 0.584167595 | 0.44882672  | 3.418122164 | 0.131307981 | 0.895531679 | 0.998252924 |
| chrX:80047352-80049271    | exonic | BRWD3    | X  | 80047352  | 80049271  | 0 | 1 | 1 | 2  | 0  | 0 | 1919  | 0.584167595 | 0.44882672  | 3.418122164 | 0.131307981 | 0.895531679 | 0.998252924 |
| chr19:34818325-34821252   | exonic | KIAA0355 | 19 | 34818325  | 34821252  | 8 | 0 | 0 | 7  | 0  | 0 | 2927  | 1.776075238 | 0.449401887 | 3.832258104 | 0.117268168 | NA          | NA          |
| chr1:89236034-89237562    | exonic | PKN2     | 1  | 89236034  | 89237562  | 1 | 0 | 3 | 0  | 2  | 1 | 1528  | 1.271067472 | 0.449680295 | 2.405241292 | 0.186958496 | 0.851693174 | 0.998252924 |
| chr3:169863210-169890500  | exonic | PHC3     | 3  | 169863210 | 169890500 | 0 | 5 | 0 | 0  | 5  | 0 | 27290 | 1.476516104 | 0.450223783 | 2.65071887  | 0.169849692 | NA          | NA          |
| chr3:169863210-169896726  | exonic | PHC3     | 3  | 169863210 | 169896726 | 0 | 5 | 0 | 0  | 5  | 0 | 33516 | 1.476516104 | 0.450223783 | 2.65071887  | 0.169849692 | NA          | NA          |
| chr11:47380394-47397280   | exonic | SPI1     | 11 | 47380394  | 47397280  | 4 | 4 | 2 | 7  | 6  | 0 | 16886 | 3.90503865  | 0.450261728 | 1.370703002 | 0.328489634 | 0.742541481 | 0.998252924 |
| chr11:47380394-47397283   | exonic | SPI1     | 11 | 47380394  | 47397283  | 5 | 4 | 5 | 8  | 6  | 0 | 16889 | 3.90503865  | 0.450261728 | 1.370703002 | 0.328489634 | 0.742541481 | 0.998252924 |
| chr8:27151596-27151827    | exonic | TRIM35   | 8  | 27151596  | 27151827  | 6 | 2 | 1 | 4  | 2  | 1 | 231   | 2.295261273 | 0.452969788 | 1.639294871 | 0.276319896 | 0.782302376 | 0.998252924 |
| chr12:9227156-9305939     | exonic | A2M, PZP | 12 | 9227156   | 9305939   | 0 | 8 | 3 | 0  | 7  | 2 | 78783 | 3.449642639 | 0.453734188 | 1.717530627 | 0.264178222 | 0.791642591 | 0.998252924 |
| chr10:103432671-103436193 | exonic | FBXW4    | 10 | 103432671 | 103436193 | 8 | 5 | 4 | 15 | 2  | 0 | 3522  | 4.529076261 | 0.454513628 | 1.369126458 | 0.331973445 | NA          | NA          |
| chr8:68163533-68172161    | exonic | ARFGEF1  | 8  | 68163533  | 68172161  | 0 | 2 | 7 | 3  | 7  | 0 | 8628  | 2.895560885 | 0.455520966 | 1.772371952 | 0.25701206  | 0.797169463 | 0.998252924 |
| chr10:12139682-12162266   | exonic | DHTKD1   | 10 | 12139682  | 12162266  | 2 | 3 | 0 | 5  | 0  | 0 | 22584 | 1.312358209 | 0.456098068 | 2.493615242 | 0.182906352 | 0.854871498 | 0.998252924 |
| chr10:7409610-7423911     | exonic | SFMBT2   | 10 | 7409610   | 7423911   | 0 | 3 | 7 | 3  | 8  | 0 | 14301 | 3.190864106 | 0.456634402 | 1.709768025 | 0.267073892 | 0.789412269 | 0.998252924 |
| chr17:49041872-49042233   | UTR3   |          | 17 | 49041872  | 49042233  | 5 | 0 | 0 | 2  | 2  | 0 | 361   | 1.099612328 | 0.456778021 | 2.657989949 | 0.171850921 | NA          | NA          |
| chr11:118451960-118455359 | exonic | ARCNI    | 11 | 118451960 | 118455359 | 2 | 3 | 1 | 5  | 1  | 0 | 3399  | 1.630654656 | 0.456909106 | 1.987534826 | 0.229887346 | NA          | NA          |
| chr7:8043537-8099878      | exonic | GLCCI1   | 7  | 8043537   | 8099878   | 1 | 1 | 1 | 3  | 5  | 0 | 56341 | 2.038388069 | 0.457354108 | 1.827228292 | 0.25029938  | 0.802355836 | 0.998252924 |
| chr1:203786053-203787817  | exonic | ZC3H11A  | 1  | 203786053 | 203787817 | 0 | 0 | 2 | 1  | 1  | 0 | 1764  | 0.621876858 | 0.459652519 | 3.344513003 | 0.137434813 | 0.890687115 | 0.998252924 |
| chr10:120832401-120833449 | exonic | EIF3A    | 10 | 120832401 | 120833449 | 0 | 0 | 2 | 1  | 1  | 0 | 1048  | 0.621876858 | 0.459652519 | 3.344513003 | 0.137434813 | 0.890687115 | 0.998252924 |
| chr10:32317355-32326535   | exonic | KIF5B    | 10 | 32317355  | 32326535  | 0 | 0 | 2 | 1  | 1  | 0 | 9180  | 0.621876858 | 0.459652519 | 3.344513003 | 0.137434813 | 0.890687115 | 0.998252924 |
| chr11:581491-582081       | exonic | PHRF1    | 11 | 581491    | 582081    | 0 | 0 | 2 | 1  | 1  | 0 | 590   | 0.621876858 | 0.459652519 | 3.344513003 | 0.137434813 | 0.890687115 | 0.998252924 |
| chr12:104719114-104721449 | exonic | TXNRD1   | 12 | 104719114 | 104721449 | 0 | 0 | 2 | 1  | 1  | 0 | 2335  | 0.621876858 | 0.459652519 | 3.344513003 | 0.137434813 | 0.890687115 | 0.998252924 |
| chr22:43222945-43231499   | exonic | ARFGAP3  | 22 | 43222945  | 43231499  | 0 | 0 | 2 | 1  | 1  | 0 | 8554  | 0.621876858 | 0.459652519 | 3.344513003 | 0.137434813 | 0.890687115 | 0.998252924 |
| chr2:191765289-191789319  | exonic | GLS      | 2  | 191765289 | 191789319 | 7 | 9 | 8 | 10 | 14 | 0 | 24030 | 6.807040752 | 0.460975015 | 1.147005109 | 0.401894474 | 0.68776169  | 0.998252924 |
| chr13:78293666-78320990   | exonic | SLAIN1   | 13 | 78293666  | 78320990  | 6 | 0 | 3 | 2  | 6  | 0 | 27324 | 2.304516034 | 0.46230028  | 1.866845058 | 0.247637198 | NA          | NA          |
| chr13:78293666-78327493   | exonic | SLAIN1   | 13 | 78293666  | 78327493  | 6 | 0 | 3 | 2  | 6  | 0 | 33827 | 2.304516034 | 0.46230028  | 1.866845058 | 0.247637198 | NA          | NA          |

|                           |              |          |    |           |           |    |    |    |    |    |   |        |             |             |             |             |             |             |
|---------------------------|--------------|----------|----|-----------|-----------|----|----|----|----|----|---|--------|-------------|-------------|-------------|-------------|-------------|-------------|
| chr10:69748419-69773943   | exonic       | HERC4    | 10 | 69748419  | 69773943  | 2  | 2  | 2  | 4  | 0  | 1 | 25524  | 1.734527684 | 0.462365121 | 1.949942068 | 0.237117363 | 0.812565743 | 0.998252924 |
| chr3:179131199-179144030  | exonic       | GNB4     | 3  | 179131199 | 179144030 | 1  | 2  | 0  | 1  | 0  | 1 | 12831  | 0.892068535 | 0.463016675 | 2.734184769 | 0.169343594 | 0.865526388 | 0.998252924 |
| chr16:15973660-15978062   | exonic       | FOPNL    | 16 | 15973660  | 15978062  | 0  | 2  | 1  | 1  | 2  | 0 | 4402   | 0.894186852 | 0.46315375  | 2.689337889 | 0.172218505 | 0.863265751 | 0.998252924 |
| chr11:118650340-118657227 | exonic       | DDX6     | 11 | 118650340 | 118657227 | 3  | 0  | 0  | 0  | 2  | 0 | 6887   | 0.629015672 | 0.463256615 | 3.596403227 | 0.128811089 | NA          | NA          |
| chr13:46077378-46085989   | exonic       | COG3     | 13 | 46077378  | 46085989  | 3  | 0  | 0  | 0  | 2  | 0 | 8611   | 0.629015672 | 0.463256615 | 3.596403227 | 0.128811089 | NA          | NA          |
| chr13:99157169-99171727   | exonic       | STK24    | 13 | 99157169  | 99171727  | 3  | 0  | 0  | 0  | 2  | 0 | 14558  | 0.629015672 | 0.463256615 | 3.596403227 | 0.128811089 | NA          | NA          |
| chr14:39627488-39628754   | exonic       | TRAPPC6B | 14 | 39627488  | 39628754  | 3  | 0  | 0  | 0  | 2  | 0 | 1266   | 0.629015672 | 0.463256615 | 3.596403227 | 0.128811089 | NA          | NA          |
| chr15:41988272-42005694   | exonic       | MGA      | 15 | 41988272  | 42005694  | 3  | 0  | 0  | 0  | 2  | 0 | 17422  | 0.629015672 | 0.463256615 | 3.596403227 | 0.128811089 | NA          | NA          |
| chr15:52186011-52194233   | exonic       | TMOD3    | 15 | 52186011  | 52194233  | 3  | 0  | 0  | 0  | 2  | 0 | 8222   | 0.629015672 | 0.463256615 | 3.596403227 | 0.128811089 | NA          | NA          |
| chr15:72338064-72338975   | exonic       | MYO9A    | 15 | 72338064  | 72338975  | 3  | 0  | 0  | 0  | 2  | 0 | 911    | 0.629015672 | 0.463256615 | 3.596403227 | 0.128811089 | NA          | NA          |
| chr15:81271272-81274523   | exonic       | MESDC2   | 15 | 81271272  | 81274523  | 3  | 0  | 0  | 0  | 2  | 0 | 3251   | 0.629015672 | 0.463256615 | 3.596403227 | 0.128811089 | NA          | NA          |
| chr19:36636707-36637214   | exonic       | CAPNS1   | 19 | 36636707  | 36637214  | 3  | 0  | 0  | 0  | 2  | 0 | 507    | 0.629015672 | 0.463256615 | 3.596403227 | 0.128811089 | NA          | NA          |
| chr2:10784445-10808849    | exonic       | NOL10    | 2  | 10784445  | 10808849  | 3  | 0  | 0  | 0  | 2  | 0 | 24404  | 0.629015672 | 0.463256615 | 3.596403227 | 0.128811089 | NA          | NA          |
| chr20:15913920-15967803   | exonic       | MACROD2  | 20 | 15913920  | 15967803  | 3  | 0  | 0  | 0  | 2  | 0 | 53883  | 0.629015672 | 0.463256615 | 3.596403227 | 0.128811089 | NA          | NA          |
| chr20:58755108-58755971   | ncRNA_exonic | MIR646HG | 20 | 58755108  | 58755971  | 3  | 0  | 0  | 0  | 2  | 0 | 863    | 0.629015672 | 0.463256615 | 3.596403227 | 0.128811089 | NA          | NA          |
| chr7:90355880-90492584    | exonic       | CDK14    | 7  | 90355880  | 90492584  | 3  | 0  | 0  | 0  | 2  | 0 | 136704 | 0.629015672 | 0.463256615 | 3.596403227 | 0.128811089 | NA          | NA          |
| chr8:125502674-125503133  | intronic     | TATDN1   | 8  | 125502674 | 125503133 | 3  | 0  | 0  | 0  | 2  | 0 | 459    | 0.629015672 | 0.463256615 | 3.596403227 | 0.128811089 | NA          | NA          |
| chr8:142161717-142166069  | exonic       | DENND3   | 8  | 142161717 | 142166069 | 3  | 0  | 0  | 0  | 2  | 0 | 4352   | 0.629015672 | 0.463256615 | 3.596403227 | 0.128811089 | NA          | NA          |
| chr13:100953713-101020828 | exonic       | PCCA     | 13 | 100953713 | 101020828 | 3  | 1  | 1  | 1  | 6  | 0 | 67115  | 1.713211996 | 0.463327131 | 1.946067093 | 0.238083842 | 0.811816066 | 0.998252924 |
| chr7:23224688-23226765    | exonic       | NUPL2    | 7  | 23224688  | 23226765  | 2  | 7  | 3  | 5  | 5  | 1 | 2077   | 3.514624199 | 0.463389604 | 1.388636553 | 0.333701143 | 0.738605087 | 0.998252924 |
| chr7:33397466-33427756    | exonic       | BBS9     | 7  | 33397466  | 33427756  | 3  | 3  | 6  | 4  | 4  | 2 | 30290  | 3.619194824 | 0.463446612 | 1.349373095 | 0.343453278 | 0.731257484 | 0.998252924 |
| chr12:116674626-116675510 | exonic       | MED13L   | 12 | 116674626 | 116675510 | 13 | 2  | 0  | 0  | 12 | 0 | 884    | 3.477710916 | 0.46437692  | 2.938358832 | 0.158039554 | NA          | NA          |
| chr2:173423435-173431661  | exonic       | PDK1     | 2  | 173423435 | 173431661 | 2  | 0  | 5  | 0  | 7  | 0 | 8226   | 2.091510966 | 0.465141233 | 2.158417192 | 0.215501079 | NA          | NA          |
| chr2:9028147-9098771      | exonic       | MBOAT2   | 2  | 9028147   | 9098771   | 2  | 3  | 3  | 4  | 4  | 0 | 70624  | 2.281963587 | 0.465372768 | 1.695714063 | 0.274440509 | 0.783746054 | 0.998252924 |
| chr13:20625572-20641530   | exonic       | ZMYM2    | 13 | 20625572  | 20641530  | 4  | 0  | 0  | 1  | 2  | 0 | 15958  | 0.864314    | 0.466447315 | 2.92560845  | 0.159436002 | NA          | NA          |
| chr5:64084777-64100213    | exonic       | CWC27    | 5  | 64084777  | 64100213  | 4  | 0  | 0  | 1  | 2  | 0 | 15436  | 0.864314    | 0.466447315 | 2.92560845  | 0.159436002 | NA          | NA          |
| chr8:107691437-107705105  | exonic       | OXR1     | 8  | 107691437 | 107705105 | 4  | 0  | 0  | 1  | 2  | 0 | 13668  | 0.864314    | 0.466447315 | 2.92560845  | 0.159436002 | NA          | NA          |
| chr6:144772505-144780490  | exonic       | UTRN     | 6  | 144772505 | 144780490 | 0  | 5  | 0  | 1  | 4  | 0 | 7985   | 1.461800068 | 0.468839858 | 2.445881007 | 0.191685473 | NA          | NA          |
| chr15:89656955-89659752   | exonic       | ABHD2    | 15 | 89656955  | 89659752  | 42 | 12 | 15 | 45 | 16 | 2 | 2797   | 17.80468487 | 0.469907577 | 0.86423509  | 0.543726565 | 0.586629649 | 0.998252924 |
| chr17:35936438-35946657   | exonic       | SYNRG    | 17 | 35936438  | 35946657  | 0  | 0  | 4  | 1  | 0  | 0 | 10219  | 1.743782445 | 0.470222594 | 2.068871912 | 0.227284537 | 0.820202496 | 0.998252924 |
| chr15:89656955-89698765   | exonic       | ABHD2    | 15 | 89656955  | 89698765  | 1  | 1  | 2  | 2  | 2  | 0 | 41810  | 1.152478407 | 0.471453282 | 2.26269708  | 0.208358992 | 0.834948673 | 0.998252924 |
| chr2:113057426-113089859  | exonic       | ZC3H6    | 2  | 113057426 | 113089859 | 5  | 13 | 7  | 17 | 9  | 0 | 32433  | 7.187943624 | 0.47222378  | 1.159670332 | 0.407205192 | 0.683857288 | 0.998252924 |
| chr8:141799572-141874498  | exonic       | PTK2     | 8  | 141799572 | 141874498 | 1  | 5  | 0  | 4  | 2  | 0 | 74926  | 1.667666322 | 0.474634858 | 2.126405242 | 0.223209973 | NA          | NA          |
| chr13:43491676-43544806   | exonic       | EPSTI1   | 13 | 43491676  | 43544806  | 3  | 2  | 1  | 1  | 0  | 0 | 53130  | 1.335351435 | 0.475609685 | 2.299464882 | 0.206834942 | NA          | NA          |
| chr20:36685933-36694658   | exonic       | RPRD1B   | 20 | 36685933  | 36694658  | 7  | 5  | 3  | 8  | 4  | 1 | 8725   | 4.008914049 | 0.477358083 | 1.286297869 | 0.371110063 | 0.710555556 | 0.998252924 |



|                           |        |                        |    |           |           |    |    |    |    |    |    |        |             |             |             |             |             |             |
|---------------------------|--------|------------------------|----|-----------|-----------|----|----|----|----|----|----|--------|-------------|-------------|-------------|-------------|-------------|-------------|
| chr3:141231004-141259451  | exonic | RASA2                  | 3  | 141231004 | 141259451 | 7  | 5  | 7  | 0  | 5  | 6  | 28447  | 5.609619535 | 0.477653348 | 1.323463805 | 0.360911531 | 0.718165583 | 0.998252924 |
| chr16:19627435-19663412   | exonic | C16orf62               | 16 | 19627435  | 19663412  | 7  | 4  | 2  | 8  | 4  | 0  | 35977  | 3.329150615 | 0.48156353  | 1.471748089 | 0.327205134 | 0.743512738 | 0.998252924 |
| chr14:31602443-31602881   | exonic | HECTD1                 | 14 | 31602443  | 31602881  | 5  | 2  | 3  | 2  | 5  | 1  | 438    | 2.711271877 | 0.48184564  | 1.519428067 | 0.317123035 | 0.751150247 | 0.998252924 |
| chr1:14095613-14109326    | exonic | PRDM2                  | 1  | 14095613  | 14109326  | 8  | 3  | 0  | 10 | 0  | 0  | 13713  | 2.617836791 | 0.482444379 | 1.983769115 | 0.243195831 | 0.807853696 | 0.998252924 |
| chr12:50824277-50835426   | exonic | LARP4                  | 12 | 50824277  | 50835426  | 0  | 1  | 2  | 0  | 3  | 0  | 11149  | 0.931896116 | 0.482725873 | 2.870799178 | 0.168150345 | 0.866465003 | 0.998252924 |
| chr2:170394522-170401345  | exonic | FASTKD1                | 2  | 170394522 | 170401345 | 0  | 1  | 2  | 0  | 3  | 0  | 6823   | 0.931896116 | 0.482725873 | 2.870799178 | 0.168150345 | 0.866465003 | 0.998252924 |
| chr6:7176887-7189555      | exonic | RREB1                  | 6  | 7176887   | 7189555   | 25 | 14 | 9  | 17 | 12 | 7  | 12668  | 12.85710886 | 0.483960651 | 0.823977725 | 0.587346765 | 0.556970839 | 0.998252924 |
| chr7:98563318-98569568    | exonic | TRRAP                  | 7  | 98563318  | 98569568  | 2  | 4  | 0  | 6  | 0  | 0  | 6250   | 1.592945393 | 0.484397785 | 2.333984235 | 0.207541156 | 0.835587255 | 0.998252924 |
| chr7:43679047-43680248    | exonic | COA1                   | 7  | 43679047  | 43680248  | 0  | 4  | 10 | 11 | 5  | 0  | 1201   | 4.444355797 | 0.484438098 | 1.546758256 | 0.313195741 | 0.754131954 | 0.998252924 |
| chr5:179665331-179668155  | exonic | MAPK9                  | 5  | 179665331 | 179668155 | 6  | 0  | 2  | 4  | 3  | 0  | 2824   | 1.956787514 | 0.484798063 | 1.960705186 | 0.247256999 | 0.804709342 | 0.998252924 |
| chr1:243456392-243589860  | exonic | SDCCAG8                | 1  | 243456392 | 243589860 | 2  | 2  | 1  | 4  | 2  | 2  | 133468 | 2.304956814 | 0.485469854 | 1.701851344 | 0.285259847 | 0.775445073 | 0.998252924 |
| chr7:35050079-35058208    | exonic | DPY19L1                | 7  | 35050079  | 35058208  | 2  | 11 | 0  | 4  | 0  | 4  | 8129   | 3.833127651 | 0.488620502 | 1.692311791 | 0.288729598 | NA          | NA          |
| chr9:86293355-86297981    | exonic | UBQLN1                 | 9  | 86293355  | 86297981  | 1  | 0  | 3  | 1  | 3  | 0  | 4626   | 1.19018767  | 0.48942753  | 2.426609317 | 0.201691936 | 0.840157567 | 0.998252924 |
| chr1:28800065-28802803    | exonic | PHACTR4                | 1  | 28800065  | 28802803  | 0  | 0  | 7  | 9  | 0  | 0  | 2738   | 2.337685645 | 0.490374881 | 3.808333895 | 0.128763626 | NA          | NA          |
| chr1:58971731-59000003    | exonic | OMA1                   | 1  | 58971731  | 59000003  | 11 | 14 | 6  | 8  | 8  | 2  | 28272  | 2.406713895 | 0.490680042 | 1.738325885 | 0.282271607 | NA          | NA          |
| chr16:83940591-83945972   | exonic | MLYCD                  | 16 | 83940591  | 83945972  | 9  | 6  | 8  | 12 | 6  | 2  | 5381   | 6.403027854 | 0.490919995 | 1.063832917 | 0.461463438 | 0.644466147 | 0.998252924 |
| chr11:32948702-32956981   | exonic | QSER1                  | 11 | 32948702  | 32956981  | 8  | 17 | 14 | 3  | 22 | 6  | 8279   | 11.58719957 | 0.491108927 | 0.979307557 | 0.501485896 | 0.616029202 | 0.998252924 |
| chr15:49528047-49584734   | exonic | GALK2                  | 15 | 49528047  | 49584734  | 4  | 4  | 6  | 9  | 4  | 0  | 56687  | 3.088593275 | 0.491186047 | 1.47185619  | 0.333718777 | 0.738591779 | 0.998252924 |
| chr1:92798947-92846430    | exonic | RPAP2                  | 1  | 92798947  | 92846430  | 3  | 3  | 11 | 2  | 13 | 1  | 47483  | 5.173945369 | 0.49154883  | 1.312107647 | 0.374625383 | NA          | NA          |
| chr10:103552595-103570071 | exonic | MGEA5                  | 10 | 103552595 | 103570071 | 4  | 0  | 9  | 5  | 6  | 1  | 17476  | 3.857309066 | 0.492736773 | 1.48745952  | 0.331260627 | 0.740447629 | 0.998252924 |
| chr9:33986757-34017187    | exonic | UBAP2                  | 9  | 33986757  | 34017187  | 6  | 4  | 3  | 6  | 6  | 0  | 30430  | 3.426864771 | 0.493199479 | 1.435441801 | 0.343587235 | 0.731156726 | 0.998252924 |
| chr10:24669798-24673352   | exonic | KIAA1217               | 10 | 24669798  | 24673352  | 2  | 4  | 5  | 12 | 0  | 0  | 3554   | 3.217158831 | 0.494417397 | 1.714016877 | 0.288455384 | NA          | NA          |
| chr20:7976672-7990962     | exonic | TMX4                   | 20 | 7976672   | 7990962   | 5  | 0  | 0  | 3  | 1  | 0  | 14290  | 1.084896291 | 0.49619221  | 2.691314603 | 0.18436797  | NA          | NA          |
| chr7:6854394-6861995      | exonic | CCZ1B                  | 7  | 6854394   | 6861995   | 1  | 4  | 9  | 1  | 7  | 3  | 7601   | 4.479670533 | 0.497453656 | 1.392224964 | 0.357308387 | 0.720860952 | 0.998252924 |
| chr11:3756420-3774638     | exonic | NUP98                  | 11 | 3756420   | 3774638   | 0  | 1  | 3  | 0  | 0  | 2  | 18218  | 1.382520093 | 0.497828797 | 2.553270804 | 0.194976888 | 0.845411041 | 0.998252924 |
| chr1:203676136-203677232  | exonic | ATP2B4                 | 1  | 203676136 | 203677232 | 2  | 0  | 2  | 4  | 0  | 0  | 1096   | 1.077757477 | 0.498417969 | 2.689324726 | 0.185332015 | NA          | NA          |
| chr12:26208211-26220646   | exonic | RASSF8                 | 12 | 26208211  | 26220646  | 1  | 0  | 2  | 4  | 0  | 0  | 12435  | 1.077757477 | 0.498417969 | 2.689324726 | 0.185332015 | NA          | NA          |
| chr1:59811918-59844509    | exonic | FGGY                   | 1  | 59811918  | 59844509  | 23 | 14 | 6  | 34 | 7  | 0  | 32591  | 11.05195407 | 0.499199471 | 1.074982316 | 0.46437924  | NA          | NA          |
| chr7:155465560-155473602  | exonic | RBM33                  | 7  | 155465560 | 155473602 | 39 | 77 | 53 | 84 | 50 | 17 | 8042   | 49.12622944 | 0.500292909 | 0.631442567 | 0.792301526 | 0.428184882 | 0.998252924 |
| chr18:74561481-74563895   | exonic | ZNF236                 | 18 | 74561481  | 74563895  | 5  | 6  | 4  | 5  | 7  | 1  | 2414   | 4.166633098 | 0.500377425 | 1.265853758 | 0.395288493 | 0.692629991 | 0.998252924 |
| chr6:170159933-170168267  | exonic | ERMARD                 | 6  | 170159933 | 170168267 | 4  | 2  | 1  | 1  | 3  | 1  | 8334   | 1.839380654 | 0.500458294 | 1.803018538 | 0.277566915 | 0.781344832 | 0.998252924 |
| chr16:53288349-53302038   | exonic | CHD9                   | 16 | 53288349  | 53302038  | 1  | 3  | 0  | 4  | 0  | 0  | 13689  | 1.077059881 | 0.503675175 | 2.710296123 | 0.185837692 | NA          | NA          |
| chr2:48869540-48898819    | exonic | GTF2A1L, STON1-GTF2A1L | 2  | 48869540  | 48898819  | 1  | 3  | 0  | 4  | 0  | 0  | 29279  | 1.077059881 | 0.503675175 | 2.710296123 | 0.185837692 | NA          | NA          |
| chr16:68224670-68225678   | exonic | NFATC3                 | 16 | 68224670  | 68225678  | 1  | 0  | 2  | 3  | 0  | 0  | 1008   | 0.842459149 | 0.503765988 | 2.96450074  | 0.169932826 | 0.865062965 | 0.998252924 |
| chr9:4117767-4118881      | exonic | GLIS3                  | 9  | 4117767   | 4118881   | 0  | 5  | 0  | 3  | 0  | 1  | 1114   | 1.49853176  | 0.504037503 | 2.44387879  | 0.206244886 | NA          | NA          |

|                           |              |                         |    |           |           |    |    |    |    |    |   |       |             |             |             |             |             |             |
|---------------------------|--------------|-------------------------|----|-----------|-----------|----|----|----|----|----|---|-------|-------------|-------------|-------------|-------------|-------------|-------------|
| chr11:34978930-35006275   | exonic       | PDHX                    | 11 | 34978930  | 35006275  | 5  | 1  | 2  | 3  | 0  | 2 | 27345 | 2.149119937 | 0.504322997 | 1.823015894 | 0.276642128 | 0.782054913 | 0.998252924 |
| chr12:9247568-9260240     | exonic       | A2M                     | 12 | 9247568   | 9260240   | 5  | 1  | 0  | 4  | 0  | 0 | 12672 | 1.586065767 | 0.504360316 | 2.360137664 | 0.213699533 | NA          | NA          |
| chr7:134632258-134635265  | exonic       | CALD1                   | 7  | 134632258 | 134635265 | 8  | 0  | 2  | 9  | 0  | 0 | 3007  | 2.38323606  | 0.504693041 | 2.056105741 | 0.245460645 | 0.806099777 | 0.998252924 |
| chr11:65266744-65266983   | ncRNA_exonic | MALAT1                  | 11 | 65266744  | 65266983  | 0  | 2  | 4  | 0  | 2  | 2 | 239   | 1.996119761 | 0.506015664 | 2.047016107 | 0.247196718 | 0.804755985 | 0.998252924 |
| chr16:88061088-88071617   | exonic       | BANP                    | 16 | 88061088  | 88071617  | 16 | 14 | 10 | 17 | 10 | 5 | 10529 | 11.03500334 | 0.50605848  | 0.858040764 | 0.589783727 | 0.555335654 | 0.998252924 |
| chr9:325670-340321        | exonic       | DOCK8                   | 9  | 325670    | 340321    | 2  | 0  | 3  | 4  | 1  | 0 | 14651 | 1.396053925 | 0.506380276 | 2.258990259 | 0.224162222 | 0.822631078 | 0.998252924 |
| chr3:65856527-65856874    | intronic     | MAGI1                   | 3  | 65856527  | 65856874  | 0  | 0  | 4  | 0  | 0  | 2 | 347   | 1.40551332  | 0.507358758 | 2.750450709 | 0.184463861 | NA          | NA          |
| chr13:77779390-77786295   | exonic       | MYCBP2                  | 13 | 77779390  | 77786295  | 0  | 4  | 0  | 2  | 2  | 0 | 6905  | 1.15178081  | 0.507610514 | 2.632468101 | 0.192826843 | NA          | NA          |
| chr2:86992149-86993147    | exonic       | RMND5A                  | 2  | 86992149  | 86993147  | 4  | 0  | 0  | 2  | 1  | 0 | 998   | 0.849597963 | 0.507947655 | 2.941689671 | 0.172672073 | NA          | NA          |
| chr7:72883846-72884813    | exonic       | BAZ1B                   | 7  | 72883846  | 72884813  | 0  | 2  | 2  | 0  | 4  | 0 | 967   | 1.227199336 | 0.507990353 | 2.581525479 | 0.196779136 | NA          | NA          |
| chr8:17532694-17613470    | exonic       | MTUS1                   | 8  | 17532694  | 17613470  | 0  | 2  | 2  | 0  | 4  | 0 | 80776 | 1.227199336 | 0.507990353 | 2.581525479 | 0.196779136 | NA          | NA          |
| chr16:53472927-53481018   | exonic       | RBL2                    | 16 | 53472927  | 53481018  | 4  | 2  | 0  | 2  | 3  | 0 | 8091  | 1.440204405 | 0.508904872 | 2.192666083 | 0.232094105 | 0.816464923 | 0.998252924 |
| chr5:139819703-139828890  | exonic       | ANKHD1, ANKHD1-EIF4EBP3 | 5  | 139819703 | 139828890 | 6  | 3  | 3  | 7  | 2  | 1 | 9187  | 3.183009279 | 0.509272259 | 1.424482568 | 0.357513858 | 0.720707153 | 0.998252924 |
| chr1:151288048-151288985  | exonic       | PI4KB                   | 1  | 151288048 | 151288985 | 5  | 4  | 0  | 6  | 0  | 1 | 937   | 2.28812483  | 0.510409119 | 1.908166414 | 0.267486691 | 0.78909446  | 0.998252924 |
| chr9:33294417-33295425    | exonic       | NFX1                    | 9  | 33294417  | 33295425  | 0  | 1  | 2  | 1  | 2  | 0 | 1008  | 0.917180079 | 0.51072316  | 2.66864386  | 0.191379287 | 0.848228447 | 0.998252924 |
| chr4:40596275-40598817    | intronic     | RBM47                   | 4  | 40596275  | 40598817  | 6  | 4  | 4  | 7  | 6  | 0 | 2542  | 3.730445182 | 0.512203888 | 1.388534448 | 0.368880937 | 0.712216473 | 0.998252924 |
| chr2:122363276-122363756  | exonic       | CLASP1                  | 2  | 122363276 | 122363756 | 2  | 3  | 4  | 6  | 3  | 0 | 480   | 2.570827961 | 0.514356533 | 1.633124564 | 0.31495242  | 0.75279778  | 0.998252924 |
| chr10:70246900-70266475   | exonic       | SLC25A16                | 10 | 70246900  | 70266475  | 7  | 4  | 0  | 10 | 0  | 0 | 19575 | 2.663125647 | 0.517997316 | 1.965726395 | 0.263514453 | NA          | NA          |
| chr7:99090663-99092254    | exonic       | ZNF394                  | 7  | 99090663  | 99092254  | 30 | 10 | 10 | 25 | 20 | 0 | 1591  | 12.66338959 | 0.51876146  | 0.989169009 | 0.524441683 | NA          | NA          |
| chr1:100489471-100493590  | UTR3         | -----                   | 1  | 100489471 | 100493590 | 0  | 3  | 0  | 3  | 0  | 0 | 4119  | 0.841761553 | 0.519198227 | 3.227923206 | 0.160845904 | NA          | NA          |
| chr1:36469941-36492899    | exonic       | AGO3                    | 1  | 36469941  | 36492899  | 0  | 3  | 0  | 3  | 0  | 0 | 22958 | 0.841761553 | 0.519198227 | 3.227923206 | 0.160845904 | NA          | NA          |
| chr11:9225206-9229179     | exonic       | DENND5A                 | 11 | 9225206   | 9229179   | 0  | 3  | 0  | 3  | 0  | 0 | 3973  | 0.841761553 | 0.519198227 | 3.227923206 | 0.160845904 | NA          | NA          |
| chr12:11187381-11199787   | exonic       | PRH1, PRH1-TAS2R14      | 12 | 11187381  | 11199787  | 0  | 3  | 0  | 3  | 0  | 0 | 12406 | 0.841761553 | 0.519198227 | 3.227923206 | 0.160845904 | NA          | NA          |
| chr12:112884079-112893867 | exonic       | PTPN11                  | 12 | 112884079 | 112893867 | 0  | 3  | 0  | 3  | 0  | 0 | 9788  | 0.841761553 | 0.519198227 | 3.227923206 | 0.160845904 | NA          | NA          |
| chr14:91444649-91467503   | exonic       | RPS6KA5                 | 14 | 91444649  | 91467503  | 0  | 3  | 0  | 3  | 0  | 0 | 22854 | 0.841761553 | 0.519198227 | 3.227923206 | 0.160845904 | NA          | NA          |
| chr15:59960302-59970286   | exonic       | BNIP2                   | 15 | 59960302  | 59970286  | 0  | 3  | 0  | 3  | 0  | 0 | 9984  | 0.841761553 | 0.519198227 | 3.227923206 | 0.160845904 | NA          | NA          |
| chr15:93543404-93544193   | exonic       | CHD2                    | 15 | 93543404  | 93544193  | 0  | 3  | 0  | 3  | 0  | 0 | 789   | 0.841761553 | 0.519198227 | 3.227923206 | 0.160845904 | NA          | NA          |
| chr3:130871231-130889731  | exonic       | NEK11                   | 3  | 130871231 | 130889731 | 0  | 3  | 0  | 3  | 0  | 0 | 18500 | 0.841761553 | 0.519198227 | 3.227923206 | 0.160845904 | NA          | NA          |
| chr4:42618049-42629126    | exonic       | ATP8A1                  | 4  | 42618049  | 42629126  | 0  | 3  | 0  | 3  | 0  | 0 | 11077 | 0.841761553 | 0.519198227 | 3.227923206 | 0.160845904 | NA          | NA          |
| chr6:64404470-64410356    | exonic       | PHF3                    | 6  | 64404470  | 64410356  | 0  | 3  | 0  | 3  | 0  | 0 | 5886  | 0.841761553 | 0.519198227 | 3.227923206 | 0.160845904 | NA          | NA          |
| chr7:155465561-155477746  | exonic       | RBM33                   | 7  | 155465561 | 155477746 | 0  | 3  | 0  | 3  | 0  | 0 | 12185 | 0.841761553 | 0.519198227 | 3.227923206 | 0.160845904 | NA          | NA          |
| chr7:151917607-151935911  | exonic       | KMT2C                   | 7  | 151917607 | 151935911 | 8  | 6  | 0  | 13 | 0  | 0 | 18304 | 3.459598344 | 0.520240274 | 1.827980575 | 0.28459836  | NA          | NA          |
| chr22:41521867-41537226   | exonic       | EP300                   | 22 | 41521867  | 41537226  | 4  | 3  | 1  | 3  | 4  | 0 | 15359 | 2.039088037 | 0.520544449 | 1.784293954 | 0.291736958 | 0.770487749 | 0.998252924 |
| chr14:55168779-55169298   | exonic       | SAMD4A                  | 14 | 55168779  | 55169298  | 5  | 4  | 0  | 6  | 2  | 0 | 519   | 2.221961065 | 0.520730817 | 1.87278345  | 0.278051804 | 0.780972592 | 0.998252924 |
| chrX:37245851-37285253    | exonic       | PRRG1                   | X  | 37245851  | 37285253  | 2  | 0  | 4  | 4  | 2  | 0 | 39402 | 1.714350372 | 0.520794632 | 2.077742918 | 0.250654028 | 0.802081606 | 0.998252924 |

|                          |          |                    |    |           |           |    |   |    |    |    |   |       |             |             |             |             |             |             |
|--------------------------|----------|--------------------|----|-----------|-----------|----|---|----|----|----|---|-------|-------------|-------------|-------------|-------------|-------------|-------------|
| chr2:85782606-85783383   | exonic   | GGCX               | 2  | 85782606  | 85783383  | 3  | 3 | 0  | 0  | 5  | 0 | 777   | 1.514925335 | 0.521022715 | 2.368499756 | 0.219980058 | NA          | NA          |
| chr11:68334481-68367962  | exonic   | PPP6R3             | 11 | 68334481  | 68367962  | 4  | 3 | 0  | 3  | 3  | 0 | 33481 | 1.720791589 | 0.521196357 | 2.039320985 | 0.255573478 | 0.7982802   | 0.998252924 |
| chr1:16902762-16914292   | exonic   | NBPF1              | 1  | 16902762  | 16914292  | 0  | 6 | 2  | 4  | 0  | 2 | 11530 | 2.481875604 | 0.522407528 | 1.890476332 | 0.276336455 | 0.782289659 | 0.998252924 |
| chr3:183368083-183369064 | exonic   | KLHL24             | 3  | 183368083 | 183369064 | 6  | 3 | 1  | 8  | 1  | 0 | 981   | 2.465536582 | 0.522494521 | 1.727584541 | 0.30244223  | NA          | NA          |
| chr6:30618770-30619243   | exonic   | C6orf136           | 6  | 30618770  | 30619243  | 19 | 9 | 6  | 15 | 13 | 1 | 473   | 8.679094127 | 0.523060111 | 0.997310997 | 0.524470413 | 0.599951393 | 0.998252924 |
| chr12:56956200-56965639  | exonic   | RBMS2              | 12 | 56956200  | 56965639  | 7  | 3 | 3  | 10 | 2  | 0 | 9439  | 3.322711768 | 0.523604621 | 1.502452122 | 0.348500038 | NA          | NA          |
| chr10:43650344-43671480  | exonic   | CSGALNACT2         | 10 | 43650344  | 43671480  | 8  | 4 | 2  | 4  | 2  | 3 | 21136 | 3.715493    | 0.524131192 | 1.355414548 | 0.386694383 | 0.698982475 | 0.998252924 |
| chr10:43654162-43671480  | exonic   | CSGALNACT2         | 10 | 43654162  | 43671480  | 8  | 4 | 2  | 4  | 2  | 3 | 17318 | 3.715493    | 0.524131192 | 1.355414548 | 0.386694383 | 0.698982475 | 0.998252924 |
| chr11:73418464-73431944  | exonic   | RAB6A              | 11 | 73418464  | 73431944  | 6  | 2 | 14 | 9  | 13 | 0 | 13480 | 6.414398562 | 0.524516609 | 1.257532272 | 0.417099919 | 0.676605324 | 0.998252924 |
| chr5:109117096-109125228 | exonic   | MAN2A1             | 5  | 109117096 | 109125228 | 1  | 0 | 3  | 2  | 2  | 0 | 8132  | 1.175471633 | 0.524622363 | 2.415975911 | 0.217147183 | 0.828093644 | 0.998252924 |
| chr14:35261980-35264971  | exonic   | BAZ1A              | 14 | 35261980  | 35264971  | 3  | 1 | 0  | 0  | 3  | 0 | 2991  | 0.924318893 | 0.526280727 | 2.855569205 | 0.184299763 | 0.8537783   | 0.998252924 |
| chr15:50878588-50884823  | exonic   | TRPM7              | 15 | 50878588  | 50884823  | 3  | 1 | 0  | 0  | 3  | 0 | 6235  | 0.924318893 | 0.526280727 | 2.855569205 | 0.184299763 | 0.8537783   | 0.998252924 |
| chr2:58425713-58459247   | exonic   | FANCL              | 2  | 58425713  | 58459247  | 15 | 8 | 12 | 16 | 10 | 9 | 33534 | 0.924318893 | 0.526280727 | 2.855569205 | 0.184299763 | 0.8537783   | 0.998252924 |
| chr5:95072592-95119667   | exonic   | RHOBTB3            | 5  | 95072592  | 95119667  | 0  | 4 | 2  | 2  | 4  | 0 | 47075 | 1.788373705 | 0.526295007 | 2.0568789   | 0.255870682 | 0.798050694 | 0.998252924 |
| chr10:79761954-79767624  | exonic   | POLR3A             | 10 | 79761954  | 79767624  | 3  | 0 | 0  | 1  | 1  | 0 | 5670  | 0.614299635 | 0.526741363 | 3.336677402 | 0.157864036 | NA          | NA          |
| chr17:64092368-64128881  | exonic   | CEP112             | 17 | 64092368  | 64128881  | 3  | 0 | 0  | 1  | 1  | 0 | 36513 | 0.614299635 | 0.526741363 | 3.336677402 | 0.157864036 | NA          | NA          |
| chr3:169693395-169706147 | exonic   | SEC62              | 3  | 169693395 | 169706147 | 3  | 0 | 0  | 1  | 1  | 0 | 12752 | 0.614299635 | 0.526741363 | 3.336677402 | 0.157864036 | NA          | NA          |
| chr4:106613132-106614643 | exonic   | INTS12             | 4  | 106613132 | 106614643 | 3  | 0 | 0  | 1  | 1  | 0 | 1511  | 0.614299635 | 0.526741363 | 3.336677402 | 0.157864036 | NA          | NA          |
| chr4:38091552-38126752   | exonic   | TBC1D1             | 4  | 38091552  | 38126752  | 3  | 0 | 0  | 1  | 1  | 0 | 35200 | 0.614299635 | 0.526741363 | 3.336677402 | 0.157864036 | NA          | NA          |
| chr6:169972514-170052104 | exonic   | WDR27              | 6  | 169972514 | 170052104 | 3  | 0 | 0  | 1  | 1  | 0 | 79590 | 0.614299635 | 0.526741363 | 3.336677402 | 0.157864036 | NA          | NA          |
| chr9:84225134-84235472   | exonic   | TLE1               | 9  | 84225134  | 84235472  | 3  | 0 | 0  | 1  | 1  | 0 | 10338 | 0.614299635 | 0.526741363 | 3.336677402 | 0.157864036 | NA          | NA          |
| chr14:61278704-61346553  | exonic   | MNAT1              | 14 | 61278704  | 61346553  | 1  | 0 | 0  | 0  | 2  | 0 | 67849 | 1.357647065 | 0.527924164 | 2.498069765 | 0.211332834 | NA          | NA          |
| chr3:169840378-169847340 | exonic   | PHC3               | 3  | 169840378 | 169847340 | 8  | 7 | 9  | 12 | 11 | 0 | 6962  | 6.634285627 | 0.528021492 | 1.146704833 | 0.460468533 | 0.645179953 | 0.998252924 |
| chr17:28111326-28112627  | intronic | SSH2               | 17 | 28111326  | 28112627  | 0  | 5 | 0  | 3  | 2  | 0 | 1301  | 1.432367994 | 0.528763736 | 2.43173307  | 0.217443166 | NA          | NA          |
| chr3:121563299-121591635 | exonic   | EAF2               | 3  | 121563299 | 121591635 | 0  | 2 | 3  | 0  | 5  | 0 | 28336 | 1.545495784 | 0.528968325 | 2.380062088 | 0.222249801 | 0.824119428 | 0.998252924 |
| chr21:17150222-17214859  | exonic   | USP25              | 21 | 17150222  | 17214859  | 4  | 1 | 0  | 2  | 2  | 0 | 64637 | 1.144901184 | 0.529342162 | 2.417482524 | 0.218964215 | 0.826677924 | 0.998252924 |
| chr15:77471131-77474382  | exonic   | PEAK1              | 15 | 77471131  | 77474382  | 5  | 2 | 2  | 5  | 1  | 1 | 3251  | 2.348827319 | 0.52968267  | 1.629856045 | 0.324987395 | 0.745190612 | 0.998252924 |
| chr2:9666239-9676957     | exonic   | ADAM17             | 2  | 9666239   | 9676957   | 4  | 0 | 0  | 0  | 1  | 1 | 10718 | 0.945193802 | 0.529783594 | 2.883678262 | 0.183717997 | NA          | NA          |
| chr6:146209155-146216113 | exonic   | SHPRH              | 6  | 146209155 | 146216113 | 11 | 3 | 4  | 11 | 5  | 0 | 6958  | 4.505322216 | 0.530763063 | 1.331688103 | 0.398564094 | 0.690214422 | 0.998252924 |
| chr1:155737215-155747611 | exonic   | GON4L              | 1  | 155737215 | 155747611 | 0  | 0 | 2  | 2  | 0  | 0 | 10396 | 0.607160821 | 0.5313261   | 3.662376251 | 0.145076875 | 0.884650177 | 0.998252924 |
| chr1:243449573-243507633 | exonic   | SDCCAG8            | 1  | 243449573 | 243507633 | 0  | 0 | 2  | 2  | 0  | 0 | 58060 | 0.607160821 | 0.5313261   | 3.662376251 | 0.145076875 | 0.884650177 | 0.998252924 |
| chr1:39775241-39815299   | exonic   | MACF1              | 1  | 39775241  | 39815299  | 0  | 0 | 2  | 2  | 0  | 0 | 40058 | 0.607160821 | 0.5313261   | 3.662376251 | 0.145076875 | 0.884650177 | 0.998252924 |
| chr10:13534610-13538888  | exonic   | BEND7              | 10 | 13534610  | 13538888  | 0  | 0 | 2  | 2  | 0  | 0 | 4278  | 0.607160821 | 0.5313261   | 3.662376251 | 0.145076875 | 0.884650177 | 0.998252924 |
| chr12:10539501-10546466  | exonic   | KLRC4-KLRK1, KLRK1 | 12 | 10539501  | 10546466  | 0  | 0 | 2  | 2  | 0  | 0 | 6965  | 0.607160821 | 0.5313261   | 3.662376251 | 0.145076875 | 0.884650177 | 0.998252924 |
| chr12:29904598-29921008  | exonic   | TMTC1              | 12 | 29904598  | 29921008  | 0  | 0 | 2  | 2  | 0  | 0 | 16410 | 0.607160821 | 0.5313261   | 3.662376251 | 0.145076875 | 0.884650177 | 0.998252924 |

|                           |              |                      |    |           |           |    |   |   |   |   |   |        |             |             |             |             |             |             |
|---------------------------|--------------|----------------------|----|-----------|-----------|----|---|---|---|---|---|--------|-------------|-------------|-------------|-------------|-------------|-------------|
| chr12:49890615-49893988   | exonic       | SPATS2               | 12 | 49890615  | 49893988  | 0  | 0 | 2 | 2 | 0 | 0 | 3373   | 0.607160821 | 0.5313261   | 3.662376251 | 0.145076875 | 0.884650177 | 0.998252924 |
| chr14:74557934-74567941   | exonic       | LIN52                | 14 | 74557934  | 74567941  | 0  | 0 | 2 | 2 | 0 | 0 | 10007  | 0.607160821 | 0.5313261   | 3.662376251 | 0.145076875 | 0.884650177 | 0.998252924 |
| chr15:65962116-65962526   | exonic       | DENND4A              | 15 | 65962116  | 65962526  | 0  | 0 | 2 | 2 | 0 | 0 | 410    | 0.607160821 | 0.5313261   | 3.662376251 | 0.145076875 | 0.884650177 | 0.998252924 |
| chr16:28499911-28500707   | exonic       | CLN3                 | 16 | 28499911  | 28500707  | 0  | 0 | 2 | 2 | 0 | 0 | 796    | 0.607160821 | 0.5313261   | 3.662376251 | 0.145076875 | 0.884650177 | 0.998252924 |
| chr17:4077203-4083172     | exonic       | ANKFY1               | 17 | 4077203   | 4083172   | 0  | 0 | 2 | 2 | 0 | 0 | 5969   | 0.607160821 | 0.5313261   | 3.662376251 | 0.145076875 | 0.884650177 | 0.998252924 |
| chr17:49067810-49071296   | exonic       | SPAG9                | 17 | 49067810  | 49071296  | 0  | 0 | 2 | 2 | 0 | 0 | 3486   | 0.607160821 | 0.5313261   | 3.662376251 | 0.145076875 | 0.884650177 | 0.998252924 |
| chr17:975853-1003975      | exonic       | ABR                  | 17 | 975853    | 1003975   | 0  | 0 | 2 | 2 | 0 | 0 | 28122  | 0.607160821 | 0.5313261   | 3.662376251 | 0.145076875 | 0.884650177 | 0.998252924 |
| chr2:136379063-136437894  | exonic       | R3HDM1               | 2  | 136379063 | 136437894 | 0  | 0 | 2 | 2 | 0 | 0 | 58831  | 0.607160821 | 0.5313261   | 3.662376251 | 0.145076875 | 0.884650177 | 0.998252924 |
| chr2:231222519-231236366  | exonic       | SP140L               | 2  | 231222519 | 231236366 | 0  | 0 | 2 | 2 | 0 | 0 | 13847  | 0.607160821 | 0.5313261   | 3.662376251 | 0.145076875 | 0.884650177 | 0.998252924 |
| chr3:155547476-155560408  | exonic       | SLC33A1              | 3  | 155547476 | 155560408 | 0  | 0 | 2 | 2 | 0 | 0 | 12932  | 0.607160821 | 0.5313261   | 3.662376251 | 0.145076875 | 0.884650177 | 0.998252924 |
| chr3:30664690-30691952    | exonic       | TGFBR2               | 3  | 30664690  | 30691952  | 0  | 0 | 2 | 2 | 0 | 0 | 27262  | 0.607160821 | 0.5313261   | 3.662376251 | 0.145076875 | 0.884650177 | 0.998252924 |
| chr4:106317405-106359193  | exonic       | PPA2                 | 4  | 106317405 | 106359193 | 0  | 0 | 2 | 2 | 0 | 0 | 41788  | 0.607160821 | 0.5313261   | 3.662376251 | 0.145076875 | 0.884650177 | 0.998252924 |
| chr4:170428187-170429482  | exonic       | NEK1                 | 4  | 170428187 | 170429482 | 0  | 0 | 2 | 2 | 0 | 0 | 1295   | 0.607160821 | 0.5313261   | 3.662376251 | 0.145076875 | 0.884650177 | 0.998252924 |
| chr4:38045982-38104778    | exonic       | TBC1D1               | 4  | 38045982  | 38104778  | 0  | 0 | 2 | 2 | 0 | 0 | 58796  | 0.607160821 | 0.5313261   | 3.662376251 | 0.145076875 | 0.884650177 | 0.998252924 |
| chr4:42487512-42526864    | exonic       | ATP8A1               | 4  | 42487512  | 42526864  | 0  | 0 | 2 | 2 | 0 | 0 | 39352  | 0.607160821 | 0.5313261   | 3.662376251 | 0.145076875 | 0.884650177 | 0.998252924 |
| chr8:52770020-52773806    | exonic       | PCMTD1               | 8  | 52770020  | 52773806  | 0  | 0 | 2 | 2 | 0 | 0 | 3786   | 0.607160821 | 0.5313261   | 3.662376251 | 0.145076875 | 0.884650177 | 0.998252924 |
| chr8:74600888-74652103    | exonic       | STAU2                | 8  | 74600888  | 74652103  | 0  | 0 | 2 | 2 | 0 | 0 | 51215  | 0.607160821 | 0.5313261   | 3.662376251 | 0.145076875 | 0.884650177 | 0.998252924 |
| chr9:114840817-114842445  | exonic       | SUSD1                | 9  | 114840817 | 114842445 | 0  | 0 | 2 | 2 | 0 | 0 | 1628   | 0.607160821 | 0.5313261   | 3.662376251 | 0.145076875 | 0.884650177 | 0.998252924 |
| chr9:91652907-91661909    | exonic       | SHC3                 | 9  | 91652907  | 91661909  | 0  | 0 | 2 | 2 | 0 | 0 | 9002   | 0.607160821 | 0.5313261   | 3.662376251 | 0.145076875 | 0.884650177 | 0.998252924 |
| chrX:102071920-102094900  | ncRNA_exonic | LINC00630            | X  | 102071920 | 102094900 | 0  | 0 | 2 | 2 | 0 | 0 | 22980  | 0.607160821 | 0.5313261   | 3.662376251 | 0.145076875 | 0.884650177 | 0.998252924 |
| chr17:29483000-29497015   | exonic       | NF1                  | 17 | 29483000  | 29497015  | 0  | 1 | 6 | 0 | 3 | 2 | 14015  | 2.337409435 | 0.532406109 | 1.977093162 | 0.269287315 | NA          | NA          |
| chr1:155619605-155736500  | exonic       | DAP3, GON4L, YY1AP1  | 1  | 155619605 | 155736500 | 6  | 3 | 0 | 8 | 0 | 0 | 116895 | 2.147240135 | 0.532644828 | 2.100842235 | 0.253538709 | NA          | NA          |
| chr18:60206913-60217693   | exonic       | ZCCHC2               | 18 | 60206913  | 60217693  | 13 | 2 | 2 | 7 | 7 | 0 | 10780  | 4.011291554 | 0.533670328 | 1.425820521 | 0.374289976 | NA          | NA          |
| chr3:71037144-71102924    | exonic       | FOXP1                | 3  | 71037144  | 71102924  | 5  | 3 | 0 | 6 | 1 | 0 | 65780  | 1.926657844 | 0.533739715 | 2.003168465 | 0.266447742 | NA          | NA          |
| chr19:37690302-37698156   | exonic       | ZNF585B              | 19 | 37690302  | 37698156  | 3  | 3 | 3 | 9 | 0 | 0 | 7854   | 2.458397768 | 0.534644188 | 1.836764305 | 0.291079365 | NA          | NA          |
| chr14:76633005-76662315   | exonic       | GPATCH2L             | 14 | 76633005  | 76662315  | 6  | 3 | 3 | 0 | 2 | 4 | 29310  | 3.363485409 | 0.535400004 | 1.570795898 | 0.340846322 | NA          | NA          |
| chrX:53672262-53681075    | exonic       | HUWE1                | X  | 53672262  | 53681075  | 3  | 2 | 0 | 0 | 4 | 0 | 8813   | 1.219622114 | 0.538502508 | 2.562152503 | 0.210175822 | NA          | NA          |
| chr1:95609446-95616975    | exonic       | TMEM56, TMEM56-RWDD3 | 1  | 95609446  | 95616975  | 0  | 9 | 0 | 5 | 4 | 0 | 7529   | 2.584148805 | 0.538592081 | 2.004721728 | 0.268661767 | NA          | NA          |
| chr1:201970503-201972589  | exonic       | RNPEP                | 1  | 201970503 | 201972589 | 4  | 2 | 0 | 3 | 2 | 0 | 2086   | 1.425488368 | 0.538743078 | 2.199051943 | 0.244988792 | 0.80646511  | 0.998252924 |
| chr2:32602655-32641231    | exonic       | BIRC6                | 2  | 32602655  | 32641231  | 4  | 2 | 0 | 3 | 2 | 0 | 38576  | 1.425488368 | 0.538743078 | 2.199051943 | 0.244988792 | 0.80646511  | 0.998252924 |
| chr1:21295966-21307720    | exonic       | EIF4G3               | 1  | 21295966  | 21307720  | 4  | 2 | 2 | 3 | 4 | 0 | 11754  | 2.062081263 | 0.538984795 | 1.759285251 | 0.306365778 | 0.759326161 | 0.998252924 |
| chr19:41758255-41762516   | exonic       | AXL                  | 19 | 41758255  | 41762516  | 5  | 0 | 2 | 4 | 0 | 1 | 4261   | 1.772936914 | 0.539044456 | 2.092042985 | 0.25766414  | 0.796666124 | 0.998252924 |
| chr1:28800065-28800663    | exonic       | PHACTR4              | 1  | 28800065  | 28800663  | 5  | 0 | 0 | 4 | 0 | 0 | 598    | 1.070180255 | 0.539684905 | 2.945240479 | 0.183239674 | NA          | NA          |
| chr10:77795765-77818541   | exonic       | C10orf11             | 10 | 77795765  | 77818541  | 5  | 0 | 0 | 4 | 0 | 0 | 22776  | 1.070180255 | 0.539684905 | 2.945240479 | 0.183239674 | NA          | NA          |
| chr14:105634473-105634691 | splicing     | JAG2                 | 14 | 105634473 | 105634691 | 5  | 0 | 0 | 4 | 0 | 0 | 218    | 1.070180255 | 0.539684905 | 2.945240479 | 0.183239674 | NA          | NA          |

|                           |          |                                                                                                     |    |           |           |      |     |     |      |     |   |        |             |             |             |             |             |             |
|---------------------------|----------|-----------------------------------------------------------------------------------------------------|----|-----------|-----------|------|-----|-----|------|-----|---|--------|-------------|-------------|-------------|-------------|-------------|-------------|
| chr19:18453669-18454225   | exonic   | PGPEP1                                                                                              | 19 | 18453669  | 18454225  | 5    | 0   | 0   | 4    | 0   | 0 | 556    | 1.070180255 | 0.539684905 | 2.945240479 | 0.183239674 | NA          | NA          |
| chr9:19288593-19300329    | exonic   | DENND4C                                                                                             | 9  | 19288593  | 19300329  | 5    | 0   | 0   | 4    | 0   | 0 | 11736  | 1.070180255 | 0.539684905 | 2.945240479 | 0.183239674 | NA          | NA          |
| chr9:19290701-19300329    | exonic   | DENND4C                                                                                             | 9  | 19290701  | 19300329  | 5    | 0   | 0   | 4    | 0   | 0 | 9628   | 1.070180255 | 0.539684905 | 2.945240479 | 0.183239674 | NA          | NA          |
| chr7:148716083-148718239  | exonic   | PDIA4                                                                                               | 7  | 148716083 | 148718239 | 6    | 10  | 4   | 4    | 12  | 1 | 2156   | 5.491548961 | 0.539996999 | 1.191874986 | 0.453065125 | NA          | NA          |
| chr11:57466031-57467869   | exonic   | ZDHHC5                                                                                              | 11 | 57466031  | 57467869  | 0    | 0   | 3   | 0    | 3   | 0 | 1838   | 0.954889342 | 0.543389631 | 3.094617391 | 0.175591862 | NA          | NA          |
| chr15:69502654-69553668   | exonic   | GLCE                                                                                                | 15 | 69502654  | 69553668  | 0    | 0   | 3   | 0    | 3   | 0 | 51014  | 0.954889342 | 0.543389631 | 3.094617391 | 0.175591862 | NA          | NA          |
| chr19:58372744-58373938   | UTR3     | <small>20738708...5228...-41226...45336...1046...18...91224887...-41221...45336...114491</small>    | 19 | 58372744  | 58373938  | 0    | 0   | 3   | 0    | 3   | 0 | 1194   | 0.954889342 | 0.543389631 | 3.094617391 | 0.175591862 | NA          | NA          |
| chr2:171884848-171906684  | exonic   | TLK1                                                                                                | 2  | 171884848 | 171906684 | 0    | 0   | 3   | 0    | 3   | 0 | 21836  | 0.954889342 | 0.543389631 | 3.094617391 | 0.175591862 | NA          | NA          |
| chr20:45918930-45927691   | exonic   | ZMYND8                                                                                              | 20 | 45918930  | 45927691  | 0    | 0   | 3   | 0    | 3   | 0 | 8761   | 0.954889342 | 0.543389631 | 3.094617391 | 0.175591862 | NA          | NA          |
| chr5:108103793-108134090  | exonic   | FER                                                                                                 | 5  | 108103793 | 108134090 | 0    | 0   | 3   | 0    | 3   | 0 | 30297  | 0.954889342 | 0.543389631 | 3.094617391 | 0.175591862 | NA          | NA          |
| chr8:62531536-62566219    | exonic   | ASPH                                                                                                | 8  | 62531536  | 62566219  | 16   | 42  | 8   | 13   | 13  | 5 | 34683  | 3.44390376  | 0.544290851 | 1.37574001  | 0.395634965 | 0.692374339 | 0.998252924 |
| chr17:27248705-27254081   | exonic   | PHF12                                                                                               | 17 | 27248705  | 27254081  | 1    | 3   | 1   | 5    | 0   | 0 | 5376   | 1.380640291 | 0.544365582 | 2.299607187 | 0.236721117 | NA          | NA          |
| chr17:77073511-77073946   | exonic   | ENGASE                                                                                              | 17 | 77073511  | 77073946  | 16   | 7   | 3   | 11   | 9   | 1 | 435    | 6.442419396 | 0.545839128 | 1.112488365 | 0.490647045 | 0.623676107 | 0.998252924 |
| chr6:16586010-16753578    | UTR5     | <small>4753108...39832...-42480...-42537...1144...18...20122844...-42480...-42537...1144...</small> | 6  | 16586010  | 16753578  | 1    | 4   | 2   | 6    | 1   | 0 | 167568 | 1.979523923 | 0.54711475  | 1.875194199 | 0.291764315 | 0.770466831 | 0.998252924 |
| chr2:61505299-61508377    | exonic   | USP34                                                                                               | 2  | 61505299  | 61508377  | 3    | 4   | 0   | 2    | 2   | 1 | 3078   | 1.846960247 | 0.547724772 | 1.896494869 | 0.288808992 | 0.77272755  | 0.998252924 |
| chr10:103552595-103573363 | exonic   | MGEA5                                                                                               | 10 | 103552595 | 103573363 | 7    | 2   | 10  | 10   | 6   | 1 | 20768  | 5.321647444 | 0.5478014   | 1.212842311 | 0.451667455 | 0.651508567 | 0.998252924 |
| chr1:114483003-114484081  | exonic   | HIPK1                                                                                               | 1  | 114483003 | 114484081 | 0    | 4   | 0   | 3    | 1   | 0 | 1078   | 1.137064774 | 0.548205569 | 2.664764869 | 0.205723805 | NA          | NA          |
| chr1:179972308-179975702  | exonic   | CEP350                                                                                              | 1  | 179972308 | 179975702 | 3    | 2   | 2   | 0    | 6   | 0 | 3394   | 1.856215008 | 0.548669207 | 2.032524271 | 0.269944726 | NA          | NA          |
| chr17:40879652-40882936   | exonic   | EZH1                                                                                                | 17 | 40879652  | 40882936  | 12   | 0   | 4   | 12   | 2   | 0 | 3284   | 3.854710881 | 0.548765832 | 1.616718051 | 0.339431994 | 0.73428432  | 0.998252924 |
| chr2:231222519-231226412  | exonic   | SP140L                                                                                              | 2  | 231222519 | 231226412 | 0    | 3   | 3   | 2    | 4   | 0 | 3893   | 1.811366931 | 0.550120942 | 2.042015557 | 0.269400955 | 0.787621151 | 0.998252924 |
| chr1:243800912-244006584  | exonic   | AKT3                                                                                                | 1  | 243800912 | 244006584 | 4    | 0   | 0   | 3    | 0   | 0 | 205672 | 0.834881927 | 0.551142419 | 3.222836378 | 0.171011604 | NA          | NA          |
| chr11:119144577-119145663 | exonic   | CBL                                                                                                 | 11 | 119144577 | 119145663 | 4    | 0   | 0   | 3    | 0   | 0 | 1086   | 0.834881927 | 0.551142419 | 3.222836378 | 0.171011604 | NA          | NA          |
| chr11:77823695-77832220   | exonic   | ALG8                                                                                                | 11 | 77823695  | 77832220  | 4    | 0   | 0   | 3    | 0   | 0 | 8525   | 0.834881927 | 0.551142419 | 3.222836378 | 0.171011604 | NA          | NA          |
| chr13:42385360-42407667   | exonic   | VWA8                                                                                                | 13 | 42385360  | 42407667  | 4    | 0   | 0   | 3    | 0   | 0 | 22307  | 0.834881927 | 0.551142419 | 3.222836378 | 0.171011604 | NA          | NA          |
| chr4:129913321-129964622  | exonic   | SCLT1                                                                                               | 4  | 129913321 | 129964622 | 4    | 0   | 0   | 3    | 0   | 0 | 51301  | 0.834881927 | 0.551142419 | 3.222836378 | 0.171011604 | NA          | NA          |
| chr5:94204037-94248681    | exonic   | MCTP1                                                                                               | 5  | 94204037  | 94248681  | 3    | 0   | 0   | 2    | 0   | 0 | 44644  | 0.834881927 | 0.551142419 | 3.222836378 | 0.171011604 | NA          | NA          |
| chr5:94204037-94259726    | exonic   | MCTP1                                                                                               | 5  | 94204037  | 94259726  | 4    | 0   | 0   | 3    | 0   | 0 | 55689  | 0.834881927 | 0.551142419 | 3.222836378 | 0.171011604 | NA          | NA          |
| chr10:69726439-69785433   | exonic   | HERC4                                                                                               | 10 | 69726439  | 69785433  | 0    | 1   | 2   | 2    | 1   | 0 | 58994  | 0.902464042 | 0.552020412 | 2.681432811 | 0.205867702 | 0.836894255 | 0.998252924 |
| chr10:7285519-7327916     | exonic   | SFMBT2                                                                                              | 10 | 7285519   | 7327916   | 8    | 3   | 2   | 6    | 5   | 0 | 42397  | 3.19226641  | 0.556189384 | 1.495286366 | 0.371961784 | 0.709921303 | 0.998252924 |
| chr10:7290509-7327916     | exonic   | SFMBT2                                                                                              | 10 | 7290509   | 7327916   | 8    | 3   | 2   | 6    | 5   | 0 | 37407  | 3.19226641  | 0.556189384 | 1.495286366 | 0.371961784 | 0.709921303 | 0.998252924 |
| chr6:32487147-32548633    | exonic   | HLA-DRB1,HLA-DRB5                                                                                   | 6  | 32487147  | 32548633  | 2887 | 192 | 242 | 2358 | 464 | 5 | 61486  | 761.9654244 | 0.556329101 | 1.673223358 | 0.332489442 | NA          | NA          |
| chr12:109046047-109048186 | exonic   | CORO1C                                                                                              | 12 | 109046047 | 109048186 | 50   | 26  | 30  | 57   | 32  | 4 | 2139   | 28.06408957 | 0.557807208 | 0.72465195  | 0.76975879  | 0.441442989 | 0.998252924 |
| chr1:247318868-247323115  | exonic   | ZNF124                                                                                              | 1  | 247318868 | 247323115 | 72   | 51  | 30  | 84   | 41  | 7 | 4247   | 40.14300731 | 0.558015333 | 0.677714274 | 0.823378456 | 0.41029281  | 0.998252924 |
| chr17:75172280-75172763   | intronic | SEC14L1                                                                                             | 17 | 75172280  | 75172763  | 3    | 4   | 6   | 11   | 2   | 0 | 483    | 3.679158258 | 0.55870682  | 1.470780383 | 0.379871003 | NA          | NA          |
| chr12:32729199-32764217   | exonic   | FGD4                                                                                                | 12 | 32729199  | 32764217  | 0    | 4   | 0   | 1    | 0   | 1 | 35018  | 0.937357391 | 0.559390481 | 2.905619327 | 0.192520223 | NA          | NA          |

|                          |              |           |    |           |           |    |    |    |    |    |   |       |             |             |             |             |             |             |
|--------------------------|--------------|-----------|----|-----------|-----------|----|----|----|----|----|---|-------|-------------|-------------|-------------|-------------|-------------|-------------|
| chr22:36737414-36745300  | exonic       | MYH9      | 22 | 36737414  | 36745300  | 0  | 3  | 0  | 1  | 0  | 1 | 7886  | 0.937357391 | 0.559390481 | 2.905619327 | 0.192520223 | NA          | NA          |
| chr15:42040834-42042813  | exonic       | MGA       | 15 | 42040834  | 42042813  | 5  | 2  | 0  | 6  | 0  | 0 | 1979  | 1.631354623 | 0.559475629 | 2.306546779 | 0.242559845 | 0.808346391 | 0.998252924 |
| chr10:64936056-64953232  | exonic       | JMJD1C    | 10 | 64936056  | 64953232  | 0  | 2  | 1  | 3  | 0  | 0 | 17176 | 0.864754779 | 0.559808879 | 2.939374605 | 0.190451696 | 0.848955191 | 0.998252924 |
| chr14:50262508-50298079  | exonic       | NEMF      | 14 | 50262508  | 50298079  | 2  | 4  | 0  | 0  | 1  | 2 | 35571 | 1.692541721 | 0.560452407 | 2.174013415 | 0.257796204 | 0.796564194 | 0.998252924 |
| chr4:57344544-57349436   | exonic       | SRP72     | 4  | 57344544  | 57349436  | 0  | 1  | 4  | 0  | 5  | 0 | 4892  | 1.56848901  | 0.560995497 | 2.399584286 | 0.233788619 | NA          | NA          |
| chr2:176835491-176860374 | exonic       | KIAA1715  | 2  | 176835491 | 176860374 | 0  | 3  | 6  | 1  | 8  | 0 | 24883 | 2.78097231  | 0.561807475 | 1.833968998 | 0.306334227 | 0.759350182 | 0.998252924 |
| chr11:17153462-17167489  | exonic       | PIK3C2A   | 11 | 17153462  | 17167489  | 0  | 2  | 2  | 2  | 2  | 0 | 14027 | 1.197767263 | 0.563226215 | 2.382817645 | 0.236369836 | 0.813145701 | 0.998252924 |
| chr22:26059596-26070495  | exonic       | ADRBK2    | 22 | 26059596  | 26070495  | 4  | 0  | 1  | 2  | 2  | 0 | 10899 | 1.167894411 | 0.564826088 | 2.403661473 | 0.234985706 | 0.814219828 | 0.998252924 |
| chr2:197004343-197010779 | exonic       | STK17B    | 2  | 197004343 | 197010779 | 0  | 1  | 3  | 1  | 3  | 0 | 6436  | 1.235476526 | 0.566003004 | 2.401847521 | 0.235653179 | 0.813701804 | 0.998252924 |
| chr1:223991875-223994649 | exonic       | TP53BP2   | 1  | 223991875 | 223994649 | 4  | 0  | 2  | 2  | 3  | 0 | 2774  | 1.486190858 | 0.566376721 | 2.174391685 | 0.260475941 | 0.794496671 | 0.998252924 |
| chr16:3799627-3820987    | exonic       | CREBBP    | 16 | 3799627   | 3820987   | 2  | 4  | 0  | 0  | 3  | 1 | 21360 | 1.626377956 | 0.566782904 | 2.169194356 | 0.261287285 | 0.793870971 | 0.998252924 |
| chr18:46858233-46906128  | exonic       | DYM       | 18 | 46858233  | 46906128  | 7  | 3  | 2  | 4  | 4  | 1 | 47895 | 3.037847884 | 0.566914749 | 1.439207971 | 0.393907455 | 0.693649366 | 0.998252924 |
| chr3:56694758-56707753   | exonic       | FAM208A   | 3  | 56694758  | 56707753  | 12 | 4  | 6  | 10 | 3  | 3 | 12995 | 5.779412606 | 0.567526427 | 1.132026581 | 0.501336662 | 0.616134207 | 0.998252924 |
| chr3:56696412-56707753   | exonic       | FAM208A   | 3  | 56696412  | 56707753  | 12 | 4  | 6  | 10 | 3  | 3 | 11341 | 5.779412606 | 0.567526427 | 1.132026581 | 0.501336662 | 0.616134207 | 0.998252924 |
| chr7:30590252-30601744   | ncRNA_exonic | LOC401320 | 7  | 30590252  | 30601744  | 5  | 9  | 5  | 12 | 6  | 0 | 11492 | 5.201663186 | 0.567947315 | 1.259926043 | 0.450778296 | 0.652149346 | 0.998252924 |
| chr1:150997086-150998149 | exonic       | PRUNE     | 1  | 150997086 | 150998149 | 6  | 7  | 4  | 4  | 11 | 0 | 1063  | 4.539475533 | 0.568427605 | 1.328185304 | 0.427973118 | 0.668670692 | 0.998252924 |
| chr7:24663284-24708279   | exonic       | MPP6      | 7  | 24663284  | 24708279  | 19 | 13 | 8  | 6  | 4  | 9 | 44995 | 14.79911646 | 0.56844393  | 0.914678566 | 0.621468515 | NA          | NA          |
| chr6:13228047-13230425   | exonic       | PHACTR1   | 6  | 13228047  | 13230425  | 0  | 3  | 1  | 3  | 1  | 0 | 2378  | 1.160058    | 0.568871062 | 2.44735058  | 0.232443634 | 0.816193462 | 0.998252924 |
| chr6:111708967-111793343 | exonic       | REV3L     | 6  | 111708967 | 111793343 | 1  | 0  | 2  | 1  | 0  | 1 | 84376 | 0.938054988 | 0.568969603 | 2.693086313 | 0.211270467 | 0.832676227 | 0.998252924 |
| chr7:33185853-33217203   | exonic       | BBS9      | 7  | 33185853  | 33217203  | 7  | 7  | 6  | 8  | 4  | 3 | 31350 | 5.565709941 | 0.569297721 | 1.118014838 | 0.509204083 | 0.610609181 | 0.998252924 |
| chr14:23375403-23380612  | exonic       | RBM23     | 14 | 23375403  | 23380612  | 19 | 17 | 10 | 29 | 9  | 2 | 5209  | 12.17484494 | 0.569549299 | 0.903089826 | 0.630667385 | NA          | NA          |
| chr9:130947825-130950213 | exonic       | CIZ1      | 9  | 130947825 | 130950213 | 4  | 0  | 1  | 2  | 0  | 1 | 2388  | 1.234058176 | 0.569712212 | 2.409703314 | 0.236424214 | 0.813103509 | 0.998252924 |
| chr15:76584771-76588078  | exonic       | ETFA      | 15 | 76584771  | 76588078  | 4  | 0  | 3  | 2  | 4  | 0 | 3307  | 1.804487305 | 0.569744902 | 2.024600233 | 0.281411062 | 0.778395135 | 0.998252924 |
| chr18:19144163-19148055  | exonic       | ESCO1     | 18 | 19144163  | 19148055  | 4  | 0  | 3  | 2  | 4  | 0 | 3892  | 1.804487305 | 0.569744902 | 2.024600233 | 0.281411062 | 0.778395135 | 0.998252924 |
| chr2:72692288-72707879   | exonic       | EXOC6B    | 2  | 72692288  | 72707879  | 0  | 3  | 6  | 3  | 4  | 1 | 15591 | 2.817704002 | 0.570264797 | 1.657276187 | 0.344097623 | 0.73077287  | 0.998252924 |
| chr1:179870436-179877808 | exonic       | TOR1AIP1  | 1  | 179870436 | 179877808 | 0  | 0  | 3  | 1  | 2  | 0 | 7372  | 0.940173305 | 0.571645919 | 2.862342281 | 0.199712635 | NA          | NA          |
| chr15:34542498-34543258  | exonic       | SLC12A6   | 15 | 34542498  | 34543258  | 0  | 0  | 3  | 1  | 2  | 0 | 760   | 0.940173305 | 0.571645919 | 2.862342281 | 0.199712635 | NA          | NA          |
| chr5:133534776-133541822 | exonic       | PPP2CA    | 5  | 133534776 | 133541822 | 0  | 0  | 3  | 1  | 2  | 0 | 7046  | 0.940173305 | 0.571645919 | 2.862342281 | 0.199712635 | NA          | NA          |
| chr4:83745707-83748785   | exonic       | SEC31A    | 4  | 83745707  | 83748785  | 3  | 0  | 1  | 0  | 3  | 0 | 3078  | 0.947312119 | 0.57204088  | 2.833138891 | 0.201910638 | 0.839986586 | 0.998252924 |
| chr4:2701406-2702271     | exonic       | FAM193A   | 4  | 2701406   | 2702271   | 3  | 4  | 0  | 3  | 3  | 0 | 865   | 1.766080445 | 0.572548156 | 2.026561961 | 0.28252191  | 0.777543349 | 0.998252924 |
| chr4:1902352-1906105     | exonic       | WHSC1     | 4  | 1902352   | 1906105   | 1  | 2  | 2  | 5  | 0  | 0 | 3753  | 1.403633518 | 0.573171947 | 2.269191619 | 0.252588606 | NA          | NA          |
| chr6:158733083-158735300 | exonic       | TULP4     | 6  | 158733083 | 158735300 | 40 | 43 | 13 | 53 | 28 | 3 | 2217  | 25.16576145 | 0.573521298 | 0.789141633 | 0.726765988 | 0.467369322 | 0.998252924 |
| chr1:219366424-219414650 | exonic       | LYPLAL1   | 1  | 219366424 | 219414650 | 8  | 9  | 0  | 11 | 4  | 0 | 48226 | 4.253912658 | 0.575028976 | 1.522046134 | 0.377799965 | 0.7055792   | 0.998252924 |
| chrX:1404670-1409402     | exonic       | CSF2RA    | X  | 1404670   | 1409402   | 14 | 1  | 2  | 4  | 5  | 2 | 4732  | 4.021450916 | 0.575223037 | 1.375630698 | 0.418152225 | NA          | NA          |
| chr4:38091552-38104778   | exonic       | TBC1D1    | 4  | 38091552  | 38104778  | 11 | 4  | 5  | 16 | 0  | 1 | 13226 | 5.111505466 | 0.576391216 | 1.3831324   | 0.41672888  | NA          | NA          |

|                           |            |                                      |    |           |           |   |    |    |   |   |    |       |             |             |             |             |             |             |
|---------------------------|------------|--------------------------------------|----|-----------|-----------|---|----|----|---|---|----|-------|-------------|-------------|-------------|-------------|-------------|-------------|
| chr8:141810557-141900868  | exonic     | PTK2                                 | 8  | 141810557 | 141900868 | 5 | 4  | 2  | 9 | 4 | 3  | 90311 | 11.63882831 | 0.576626965 | 0.888635058 | 0.648890633 | 0.51640907  | 0.998252924 |
| chr4:140037803-140060651  | exonic     | ELF2                                 | 4  | 140037803 | 140060651 | 2 | 7  | 0  | 4 | 0 | 2  | 22848 | 2.519587237 | 0.578013374 | 1.875867071 | 0.308131308 | NA          | NA          |
| chr1:24993305-24996806    | exonic     | SRRM1                                | 1  | 24993305  | 24996806  | 2 | 6  | 1  | 2 | 2 | 2  | 3501  | 2.572012537 | 0.57867802  | 1.611256205 | 0.359147117 | NA          | NA          |
| chr15:93543741-93552553   | exonic     | CHD2                                 | 15 | 93543741  | 93552553  | 7 | 5  | 2  | 7 | 3 | 1  | 8812  | 3.584306216 | 0.579513535 | 1.359139591 | 0.426382646 | 0.669829044 | 0.998252924 |
| chrX:10031484-10066619    | exonic     | WWC3                                 | X  | 10031484  | 10066619  | 9 | 17 | 10 | 7 | 2 | 11 | 35135 | 10.47290056 | 0.580793246 | 1.046599529 | 0.554933602 | NA          | NA          |
| chr15:80390757-80415142   | exonic     | ZFAND6                               | 15 | 80390757  | 80415142  | 3 | 2  | 2  | 2 | 4 | 0  | 24385 | 1.826782935 | 0.581741429 | 1.855367081 | 0.313545193 | 0.753866491 | 0.998252924 |
| chr15:80390920-80412666   | UTR5       |                                      | 15 | 80390920  | 80412666  | 3 | 2  | 2  | 2 | 4 | 0  | 21746 | 1.826782935 | 0.581741429 | 1.855367081 | 0.313545193 | 0.753866491 | 0.998252924 |
| chr2:30775358-30791042    | exonic     | LCLAT1                               | 2  | 30775358  | 30791042  | 2 | 4  | 0  | 0 | 5 | 0  | 15684 | 1.560214191 | 0.581959183 | 2.358147333 | 0.246786609 | 0.805073375 | 0.998252924 |
| chr1:147120047-147131890  | exonic     | ACP6                                 | 1  | 147120047 | 147131890 | 3 | 0  | 0  | 2 | 0 | 0  | 11843 | 0.599583599 | 0.582555714 | 3.658748911 | 0.159222654 | NA          | NA          |
| chr1:202126866-202127429  | exonic     | PTPN7                                | 1  | 202126866 | 202127429 | 3 | 0  | 0  | 2 | 0 | 0  | 563   | 0.599583599 | 0.582555714 | 3.658748911 | 0.159222654 | NA          | NA          |
| chr1:36432555-36439112    | exonic     | AGO3                                 | 1  | 36432555  | 36439112  | 3 | 0  | 0  | 2 | 0 | 0  | 6557  | 0.599583599 | 0.582555714 | 3.658748911 | 0.159222654 | NA          | NA          |
| chr1:36872981-36878958    | intergenic | LSM10 (dist=9421), OSCP1 (dist=4549) | 1  | 36872981  | 36878958  | 3 | 0  | 0  | 2 | 0 | 0  | 5977  | 0.599583599 | 0.582555714 | 3.658748911 | 0.159222654 | NA          | NA          |
| chr1:48821389-48869554    | exonic     | SPATA6                               | 1  | 48821389  | 48869554  | 2 | 0  | 0  | 1 | 0 | 0  | 48165 | 0.599583599 | 0.582555714 | 3.658748911 | 0.159222654 | NA          | NA          |
| chr1:48825257-48869554    | exonic     | SPATA6                               | 1  | 48825257  | 48869554  | 0 | 0  | 0  | 3 | 0 | 0  | 44297 | 0.599583599 | 0.582555714 | 3.658748911 | 0.159222654 | NA          | NA          |
| chr10:32832228-32912745   | exonic     | CCDC7                                | 10 | 32832228  | 32912745  | 3 | 0  | 0  | 2 | 0 | 0  | 80517 | 0.599583599 | 0.582555714 | 3.658748911 | 0.159222654 | NA          | NA          |
| chr10:33542955-33559784   | exonic     | NRP1                                 | 10 | 33542955  | 33559784  | 3 | 0  | 0  | 2 | 0 | 0  | 16829 | 0.599583599 | 0.582555714 | 3.658748911 | 0.159222654 | NA          | NA          |
| chr11:19371725-19372574   | exonic     | NAV2                                 | 11 | 19371725  | 19372574  | 3 | 0  | 0  | 2 | 0 | 0  | 849   | 0.599583599 | 0.582555714 | 3.658748911 | 0.159222654 | NA          | NA          |
| chr12:123488940-123490095 | exonic     | PITPNM2                              | 12 | 123488940 | 123490095 | 3 | 0  | 0  | 2 | 0 | 0  | 1155  | 0.599583599 | 0.582555714 | 3.658748911 | 0.159222654 | NA          | NA          |
| chr13:24823614-24826000   | exonic     | SPATA13                              | 13 | 24823614  | 24826000  | 3 | 0  | 0  | 2 | 0 | 0  | 2386  | 0.599583599 | 0.582555714 | 3.658748911 | 0.159222654 | NA          | NA          |
| chr13:45985496-45986073   | exonic     | SLC25A30                             | 13 | 45985496  | 45986073  | 3 | 0  | 0  | 2 | 0 | 0  | 577   | 0.599583599 | 0.582555714 | 3.658748911 | 0.159222654 | NA          | NA          |
| chr13:79915257-79918929   | exonic     | RBM26                                | 13 | 79915257  | 79918929  | 3 | 0  | 0  | 2 | 0 | 0  | 3672  | 0.599583599 | 0.582555714 | 3.658748911 | 0.159222654 | NA          | NA          |
| chr14:78036727-78043258   | exonic     | SPTLC2                               | 14 | 78036727  | 78043258  | 3 | 0  | 0  | 2 | 0 | 0  | 6531  | 0.599583599 | 0.582555714 | 3.658748911 | 0.159222654 | NA          | NA          |
| chr15:35152242-35159810   | exonic     | AQR                                  | 15 | 35152242  | 35159810  | 3 | 0  | 0  | 2 | 0 | 0  | 7568  | 0.599583599 | 0.582555714 | 3.658748911 | 0.159222654 | NA          | NA          |
| chr15:85185426-85186954   | exonic     | WDR73                                | 15 | 85185426  | 85186954  | 3 | 0  | 0  | 2 | 0 | 0  | 1528  | 0.599583599 | 0.582555714 | 3.658748911 | 0.159222654 | NA          | NA          |
| chr16:67070541-67116211   | exonic     | CBFB                                 | 16 | 67070541  | 67116211  | 3 | 0  | 0  | 2 | 0 | 0  | 45670 | 0.599583599 | 0.582555714 | 3.658748911 | 0.159222654 | NA          | NA          |
| chr17:64125863-64179425   | exonic     | CEP112                               | 17 | 64125863  | 64179425  | 3 | 0  | 0  | 2 | 0 | 0  | 53562 | 0.599583599 | 0.582555714 | 3.658748911 | 0.159222654 | NA          | NA          |
| chr17:65941524-65962772   | exonic     | BPTF                                 | 17 | 65941524  | 65962772  | 3 | 0  | 0  | 2 | 0 | 0  | 21248 | 0.599583599 | 0.582555714 | 3.658748911 | 0.159222654 | NA          | NA          |
| chr19:14153264-14153601   | exonic     | IL27RA                               | 19 | 14153264  | 14153601  | 3 | 0  | 0  | 2 | 0 | 0  | 337   | 0.599583599 | 0.582555714 | 3.658748911 | 0.159222654 | NA          | NA          |
| chr19:39943996-39944161   | exonic     | SUPT5H                               | 19 | 39943996  | 39944161  | 3 | 0  | 0  | 2 | 0 | 0  | 165   | 0.599583599 | 0.582555714 | 3.658748911 | 0.159222654 | NA          | NA          |
| chr19:49407603-49409142   | exonic     | NUCB1                                | 19 | 49407603  | 49409142  | 3 | 0  | 0  | 2 | 0 | 0  | 1539  | 0.599583599 | 0.582555714 | 3.658748911 | 0.159222654 | NA          | NA          |
| chr2:202010101-202019130  | exonic     | CFLAR                                | 2  | 202010101 | 202019130 | 3 | 0  | 0  | 2 | 0 | 0  | 9029  | 0.599583599 | 0.582555714 | 3.658748911 | 0.159222654 | NA          | NA          |
| chr2:202163961-202228896  | exonic     | ALS2CR12                             | 2  | 202163961 | 202228896 | 3 | 0  | 0  | 2 | 0 | 0  | 64935 | 0.599583599 | 0.582555714 | 3.658748911 | 0.159222654 | NA          | NA          |
| chr22:23641970-23645238   | intronic   | BCR                                  | 22 | 23641970  | 23645238  | 3 | 0  | 0  | 2 | 0 | 0  | 3268  | 0.599583599 | 0.582555714 | 3.658748911 | 0.159222654 | NA          | NA          |
| chr3:108324181-108335504  | exonic     | DZIP3                                | 3  | 108324181 | 108335504 | 3 | 0  | 0  | 2 | 0 | 0  | 11323 | 0.599583599 | 0.582555714 | 3.658748911 | 0.159222654 | NA          | NA          |
| chr3:125216184-125223588  | exonic     | SNX4                                 | 3  | 125216184 | 125223588 | 3 | 0  | 0  | 2 | 0 | 0  | 7404  | 0.599583599 | 0.582555714 | 3.658748911 | 0.159222654 | NA          | NA          |

|                          |                |                                        |    |           |           |     |    |    |     |     |   |       |             |             |             |             |             |             |
|--------------------------|----------------|----------------------------------------|----|-----------|-----------|-----|----|----|-----|-----|---|-------|-------------|-------------|-------------|-------------|-------------|-------------|
| chr3:171944660-171965566 | exonic         | FNDC3B                                 | 3  | 171944660 | 171965566 | 3   | 0  | 0  | 2   | 0   | 0 | 20906 | 0.599583599 | 0.582555714 | 3.658748911 | 0.159222654 | NA          | NA          |
| chr5:37121718-37162668   | exonic         | C5orf42                                | 5  | 37121718  | 37162668  | 3   | 0  | 0  | 0   | 0   | 0 | 40950 | 0.599583599 | 0.582555714 | 3.658748911 | 0.159222654 | NA          | NA          |
| chr5:94224583-94259726   | exonic         | MCTP1                                  | 5  | 94224583  | 94259726  | 3   | 0  | 0  | 2   | 0   | 0 | 35143 | 0.599583599 | 0.582555714 | 3.658748911 | 0.159222654 | NA          | NA          |
| chr6:110538904-110541072 | exonic         | CDC40                                  | 6  | 110538904 | 110541072 | 3   | 0  | 0  | 2   | 0   | 0 | 2168  | 0.599583599 | 0.582555714 | 3.658748911 | 0.159222654 | NA          | NA          |
| chr6:136472297-136476896 | exonic         | PDE7B                                  | 6  | 136472297 | 136476896 | 3   | 0  | 0  | 2   | 0   | 0 | 4599  | 0.599583599 | 0.582555714 | 3.658748911 | 0.159222654 | NA          | NA          |
| chr6:149953894-149959696 | exonic         | KATNA1                                 | 6  | 149953894 | 149959696 | 3   | 0  | 0  | 2   | 0   | 0 | 5802  | 0.599583599 | 0.582555714 | 3.658748911 | 0.159222654 | NA          | NA          |
| chr7:77282988-77285143   | intergenic     | PTPN12 (dist=13600), APTX (dist=28025) | 7  | 77282988  | 77285143  | 3   | 0  | 0  | 2   | 0   | 0 | 2155  | 0.599583599 | 0.582555714 | 3.658748911 | 0.159222654 | NA          | NA          |
| chr8:8743322-8744572     | intronic       | MFHAS1                                 | 8  | 8743322   | 8744572   | 3   | 0  | 0  | 2   | 0   | 0 | 1250  | 0.599583599 | 0.582555714 | 3.658748911 | 0.159222654 | NA          | NA          |
| chr9:123215733-123220900 | exonic         | CDK5RAP2                               | 9  | 123215733 | 123220900 | 3   | 0  | 0  | 2   | 0   | 0 | 5167  | 0.599583599 | 0.582555714 | 3.658748911 | 0.159222654 | NA          | NA          |
| chr9:138741982-138758382 | exonic         | CAMSAP1                                | 9  | 138741982 | 138758382 | 3   | 0  | 0  | 2   | 0   | 0 | 16400 | 0.599583599 | 0.582555714 | 3.658748911 | 0.159222654 | NA          | NA          |
| chr16:19627435-19628130  | exonic         | C16orf62                               | 16 | 19627435  | 19628130  | 0   | 7  | 0  | 6   | 1   | 0 | 695   | 1.978826326 | 0.583421159 | 2.222880141 | 0.262461816 | NA          | NA          |
| chr1:115267841-115280693 | exonic         | CSDE1                                  | 1  | 115267841 | 115280693 | 3   | 3  | 1  | 3   | 3   | 0 | 12852 | 1.789073672 | 0.584133725 | 1.876050049 | 0.311363615 | 0.755524211 | 0.998252924 |
| chr11:309013-314356      | exonic         | IFITM1, IFITM2                         | 11 | 309013    | 314356    | 147 | 83 | 96 | 203 | 109 | 0 | 5343  | 87.13699852 | 0.585691354 | 1.5184818   | 0.385708511 | 0.699712559 | 0.998252924 |
| chr15:63845913-63855207  | exonic         | USP3                                   | 15 | 63845913  | 63855207  | 6   | 2  | 2  | 1   | 5   | 1 | 9294  | 2.536678409 | 0.586378367 | 1.598899246 | 0.366738785 | 0.713813873 | 0.998252924 |
| chr17:78022381-78024082  | exonic         | CCDC40                                 | 17 | 78022381  | 78024082  | 3   | 10 | 0  | 13  | 0   | 0 | 1701  | 3.511766826 | 0.58865394  | 2.881190366 | 0.204309284 | NA          | NA          |
| chr12:32751430-32754357  | exonic         | FGD4                                   | 12 | 32751430  | 32754357  | 0   | 2  | 5  | 3   | 2   | 1 | 2927  | 2.204104334 | 0.588738434 | 1.815896441 | 0.324213661 | 0.74577628  | 0.998252924 |
| chrX:149962163-149984551 | exonic         | CD99L2                                 | X  | 149962163 | 149984551 | 6   | 2  | 3  | 10  | 0   | 0 | 22388 | 2.777394183 | 0.588937645 | 1.772008812 | 0.332355935 | NA          | NA          |
| chr11:3416943-3418636    | ncRNA_intronic | TSSC2                                  | 11 | 3416943   | 3418636   | 2   | 3  | 4  | 9   | 0   | 0 | 1693  | 2.526679851 | 0.591119323 | 1.836178178 | 0.321929173 | NA          | NA          |
| chr8:133634856-133673873 | exonic         | LRRC6                                  | 8  | 133634856 | 133673873 | 9   | 14 | 3  | 11  | 12  | 0 | 39017 | 6.814305047 | 0.592488182 | 1.179206974 | 0.502446301 | 0.615353617 | 0.998252924 |
| chr1:52293467-52299842   | exonic         | NRDC                                   | 1  | 52293467  | 52299842  | 4   | 0  | 4  | 3   | 4   | 0 | 6375  | 2.108067716 | 0.594084901 | 1.906554542 | 0.311601314 | 0.755343535 | 0.998252924 |
| chr18:76856475-76886375  | exonic         | ATP9B                                  | 18 | 76856475  | 76886375  | 4   | 0  | 4  | 3   | 4   | 0 | 29900 | 2.108067716 | 0.594084901 | 1.906554542 | 0.311601314 | 0.755343535 | 0.998252924 |
| chr7:27668989-27672064   | exonic         | HIBADH                                 | 7  | 27668989  | 27672064  | 2   | 2  | 3  | 0   | 0   | 3 | 3075  | 2.122988387 | 0.595298651 | 2.013146753 | 0.295705541 | NA          | NA          |
| chr9:140646782-140652463 | exonic         | EHMT1                                  | 9  | 140646782 | 140652463 | 3   | 4  | 4  | 5   | 5   | 0 | 5681  | 3.009834161 | 0.595516535 | 1.517564816 | 0.392415881 | 0.694750954 | 0.998252924 |
| chr17:16042321-16047010  | exonic         | NCOR1                                  | 17 | 16042321  | 16047010  | 4   | 0  | 2  | 3   | 2   | 0 | 4689  | 1.471474821 | 0.596163656 | 2.180461747 | 0.273411655 | 0.784536794 | 0.998252924 |
| chr3:16327849-16345099   | exonic         | OXNAD1                                 | 3  | 16327849  | 16345099  | 4   | 0  | 2  | 3   | 2   | 0 | 17250 | 1.471474821 | 0.596163656 | 2.180461747 | 0.273411655 | 0.784536794 | 0.998252924 |
| chr3:197592294-197602646 | exonic         | LRCH3                                  | 3  | 197592294 | 197602646 | 13  | 4  | 9  | 8   | 4   | 5 | 10352 | 7.025048495 | 0.597014135 | 1.062889861 | 0.561689557 | 0.574327551 | 0.998252924 |
| chr1:114377531-114397671 | exonic         | PTPN22                                 | 1  | 114377531 | 114397671 | 4   | 3  | 7  | 7   | 6   | 0 | 20140 | 3.890002574 | 0.597287577 | 1.396654732 | 0.427655858 | 0.668901692 | 0.998252924 |
| chr6:71136141-71162274   | exonic         | FAM135A                                | 6  | 71136141  | 71162274  | 0   | 0  | 4  | 0   | 4   | 0 | 26133 | 1.273185789 | 0.599086613 | 2.795787176 | 0.214281909 | NA          | NA          |
| chr18:12999419-13042333  | exonic         | CEP192                                 | 18 | 12999419  | 13042333  | 0   | 2  | 3  | 3   | 2   | 0 | 42914 | 1.501347674 | 0.599111769 | 2.187326443 | 0.273901397 | 0.784160398 | 0.998252924 |
| chr18:12999419-13049890  | exonic         | CEP192                                 | 18 | 12999419  | 13049890  | 0   | 2  | 3  | 3   | 2   | 0 | 50471 | 1.501347674 | 0.599111769 | 2.187326443 | 0.273901397 | 0.784160398 | 0.998252924 |
| chr11:85714408-85742653  | exonic         | PICALM                                 | 11 | 85714408  | 85742653  | 14  | 8  | 4  | 5   | 6   | 5 | 28245 | 6.787914194 | 0.599442651 | 1.067551791 | 0.561511541 | 0.574448865 | 0.998252924 |
| chr12:46622935-46637097  | exonic         | SLC38A1                                | 12 | 46622935  | 46637097  | 13  | 14 | 10 | 8   | 20  | 2 | 14162 | 9.976858433 | 0.599965986 | 0.945905907 | 0.634276603 | NA          | NA          |
| chr12:32760871-32764217  | exonic         | FGD4                                   | 12 | 32760871  | 32764217  | 4   | 4  | 3  | 8   | 2   | 0 | 3346  | 2.897403969 | 0.600169916 | 1.562758242 | 0.384045273 | NA          | NA          |
| chr12:32760890-32764217  | exonic         | FGD4                                   | 12 | 32760890  | 32764217  | 4   | 4  | 3  | 8   | 2   | 0 | 3327  | 2.897403969 | 0.600169916 | 1.562758242 | 0.384045273 | NA          | NA          |
| chr10:74468041-74475660  | intronic       | MCU                                    | 10 | 74468041  | 74475660  | 4   | 2  | 3  | 6   | 2   | 0 | 7619  | 2.3362296   | 0.600746107 | 1.690351615 | 0.355397127 | 0.722292101 | 0.998252924 |



|                           |        |                                        |    |           |           |    |    |   |    |    |    |       |             |             |             |             |             |             |
|---------------------------|--------|----------------------------------------|----|-----------|-----------|----|----|---|----|----|----|-------|-------------|-------------|-------------|-------------|-------------|-------------|
| chr12:51324272-51325277   | UTR3   | METTL7A(NM_014033:c.*339_*1344delins0) | 12 | 51324272  | 51325277  | 13 | 0  | 5 | 10 | 5  | 0  | 1005  | 4.331426344 | 0.600770212 | 1.518372471 | 0.395667219 | 0.692350542 | 0.998252924 |
| chr7:22347957-22357656    | exonic | RAPGEF5                                | 7  | 22347957  | 22357656  | 6  | 57 | 4 | 6  | 16 | 17 | 9699  | 19.31074172 | 0.60083884  | 1.048916324 | 0.572818658 | NA          | NA          |
| chr3:196533449-196539722  | exonic | PAK2                                   | 3  | 196533449 | 196539722 | 3  | 6  | 2 | 7  | 3  | 0  | 6273  | 2.934415635 | 0.601422318 | 1.56139937  | 0.385181607 | 0.70010287  | 0.998252924 |
| chr8:132952745-132958880  | exonic | EFR3A                                  | 8  | 132952745 | 132958880 | 0  | 4  | 0 | 4  | 0  | 0  | 6135  | 1.122348737 | 0.60146811  | 2.911671888 | 0.20657139  | NA          | NA          |
| chr10:128768965-128824688 | exonic | DOCK1                                  | 10 | 128768965 | 128824688 | 2  | 1  | 0 | 0  | 2  | 0  | 55723 | 0.674304528 | 0.602802661 | 3.211704671 | 0.187689318 | 0.851120204 | 0.998252924 |
| chr16:50820765-50827575   | exonic | CYLD                                   | 16 | 50820765  | 50827575  | 2  | 1  | 0 | 0  | 2  | 0  | 6810  | 0.674304528 | 0.602802661 | 3.211704671 | 0.187689318 | 0.851120204 | 0.998252924 |
| chr2:97808376-97877478    | exonic | ANKRD36                                | 2  | 97808376  | 97877478  | 2  | 1  | 0 | 0  | 2  | 0  | 69102 | 0.674304528 | 0.602802661 | 3.211704671 | 0.187689318 | 0.851120204 | 0.998252924 |
| chr3:169846471-169896726  | exonic | PHC3                                   | 3  | 169846471 | 169896726 | 2  | 1  | 0 | 0  | 2  | 0  | 50255 | 0.674304528 | 0.602802661 | 3.211704671 | 0.187689318 | 0.851120204 | 0.998252924 |
| chr8:17868745-17869336    | exonic | PCM1                                   | 8  | 17868745  | 17869336  | 14 | 10 | 2 | 4  | 17 | 0  | 591   | 6.425824952 | 0.602909433 | 1.261890007 | 0.477782873 | NA          | NA          |
| chr1:44386075-44386600    | exonic | ST3GAL3                                | 1  | 44386075  | 44386600  | 0  | 4  | 3 | 5  | 2  | 0  | 525   | 2.062522042 | 0.603024725 | 1.949880403 | 0.309262416 | 0.757121918 | 0.998252924 |
| chr17:79660683-79661883   | exonic | HGS                                    | 17 | 79660683  | 79661883  | 0  | 2  | 2 | 3  | 1  | 0  | 1200  | 1.183051226 | 0.603068181 | 2.413591927 | 0.249863357 | 0.802693021 | 0.998252924 |
| chr5:54948356-54960691    | exonic | SLC38A9                                | 5  | 54948356  | 54960691  | 0  | 1  | 2 | 0  | 1  | 1  | 12335 | 0.998059881 | 0.603240754 | 2.644991454 | 0.228069075 | 0.819592541 | 0.998252924 |
| chr11:120346048-120348235 | exonic | ARHGEF12                               | 11 | 120346048 | 120348235 | 4  | 0  | 1 | 3  | 1  | 0  | 2187  | 1.153178374 | 0.603404495 | 2.434848681 | 0.247820121 | 0.804273586 | 0.998252924 |
| chr15:66727364-66729230   | exonic | MAP2K1                                 | 15 | 66727364  | 66729230  | 4  | 0  | 0 | 1  | 0  | 1  | 1866  | 0.930477765 | 0.604178725 | 2.897291556 | 0.208532249 | NA          | NA          |
| chr1:29481207-29481422    | exonic | SRSF4                                  | 1  | 29481207  | 29481422  | 3  | 2  | 2 | 3  | 3  | 0  | 215   | 1.812066898 | 0.6047232   | 1.8497747   | 0.326917219 | 0.743730497 | 0.998252924 |
| chr1:155891165-155891709  | exonic | KIAA0907                               | 1  | 155891165 | 155891709 | 3  | 0  | 1 | 1  | 2  | 0  | 544   | 0.932596083 | 0.608523894 | 2.631520488 | 0.231244217 | 0.817125081 | 0.998252924 |
| chr5:78914470-78915906    | exonic | PAPD4                                  | 5  | 78914470  | 78915906  | 3  | 0  | 2 | 0  | 4  | 0  | 1436  | 1.265608567 | 0.608701603 | 2.534213715 | 0.240193477 | NA          | NA          |
| chr2:215609790-215661841  | exonic | BARD1                                  | 2  | 215609790 | 215661841 | 0  | 1  | 2 | 3  | 0  | 0  | 52051 | 0.887748006 | 0.609072612 | 2.914534585 | 0.208977658 | 0.83446568  | 0.998252924 |
| chr5:137278563-137278905  | exonic | FAM13B                                 | 5  | 137278563 | 137278905 | 0  | 1  | 2 | 3  | 0  | 0  | 342   | 0.887748006 | 0.609072612 | 2.914534585 | 0.208977658 | 0.83446568  | 0.998252924 |
| chr6:82933784-82941559    | exonic | IBTK                                   | 6  | 82933784  | 82941559  | 0  | 1  | 2 | 3  | 0  | 0  | 7775  | 0.887748006 | 0.609072612 | 2.914534585 | 0.208977658 | 0.83446568  | 0.998252924 |
| chr9:125616230-125621381  | exonic | RC3H2                                  | 9  | 125616230 | 125621381 | 0  | 1  | 2 | 3  | 0  | 0  | 5151  | 0.887748006 | 0.609072612 | 2.914534585 | 0.208977658 | 0.83446568  | 0.998252924 |
| chr17:1540002-1540356     | exonic | SCARF1                                 | 17 | 1540002   | 1540356   | 5  | 12 | 9 | 13 | 5  | 3  | 354   | 7.423506475 | 0.609451387 | 1.044102165 | 0.583708575 | NA          | NA          |
| chr3:171851260-171944737  | exonic | FNDC3B                                 | 3  | 171851260 | 171944737 | 2  | 4  | 1 | 2  | 4  | 0  | 93477 | 1.849078565 | 0.609877584 | 1.880308095 | 0.324349815 | 0.745673209 | 0.998252924 |
| chr2:208841374-208842310  | exonic | PLEKHM3                                | 2  | 208841374 | 208842310 | 12 | 15 | 6 | 18 | 5  | 3  | 936   | 8.788992321 | 0.610081682 | 0.985268218 | 0.619203655 | NA          | NA          |
| chrX:76907603-76920267    | exonic | ATRX                                   | X  | 76907603  | 76920267  | 0  | 5  | 0 | 5  | 0  | 0  | 12664 | 1.402935921 | 0.610895463 | 2.69197488  | 0.226932081 | NA          | NA          |
| chr3:188933080-188956698  | exonic | TPRG1                                  | 3  | 188933080 | 188956698 | 3  | 2  | 0 | 2  | 0  | 1  | 23618 | 1.256353806 | 0.612347235 | 2.36992068  | 0.258383009 | 0.796111329 | 0.998252924 |
| chr5:113740134-113740553  | exonic | KCNN2                                  | 5  | 113740134 | 113740553 | 3  | 2  | 0 | 2  | 0  | 1  | 419   | 1.256353806 | 0.612347235 | 2.36992068  | 0.258383009 | 0.796111329 | 0.998252924 |
| chr6:76412360-76421132    | exonic | SENP6                                  | 6  | 76412360  | 76421132  | 6  | 3  | 5 | 5  | 5  | 1  | 8772  | 3.728006825 | 0.612470965 | 1.320484263 | 0.463822994 | 0.642774567 | 0.998252924 |
| chr6:34574331-34574681    | exonic | C6orf106                               | 6  | 34574331  | 34574681  | 0  | 0  | 3 | 2  | 1  | 0  | 350   | 0.925457269 | 0.613730007 | 2.876341788 | 0.213371724 | NA          | NA          |
| chr10:111883774-111890244 | exonic | ADD3                                   | 10 | 111883774 | 111890244 | 3  | 4  | 3 | 6  | 3  | 0  | 6470  | 2.676821677 | 0.614180896 | 1.591503381 | 0.385912404 | 0.699561544 | 0.998252924 |
| chr9:134034769-134039531  | exonic | NUP214                                 | 9  | 134034769 | 134039531 | 1  | 5  | 0 | 0  | 1  | 2  | 4762  | 1.737830578 | 0.614729156 | 2.19237281  | 0.280394444 | NA          | NA          |
| chr5:87516380-87541609    | exonic | TMEM161B                               | 5  | 87516380  | 87541609  | 7  | 3  | 0 | 6  | 2  | 0  | 25229 | 2.305659151 | 0.614868545 | 1.856797395 | 0.331144662 | 0.740535218 | 0.998252924 |
| chr17:45992677-45994496   | exonic | SP2                                    | 17 | 45992677  | 45994496  | 4  | 4  | 0 | 7  | 0  | 0  | 1819  | 1.957230663 | 0.61487918  | 2.161896502 | 0.284416566 | NA          | NA          |
| chr8:133734285-133769540  | exonic | TMEM71                                 | 8  | 133734285 | 133769540 | 4  | 1  | 0 | 4  | 0  | 0  | 35255 | 1.115469111 | 0.615488    | 2.665997376 | 0.230865944 | 0.817418949 | 0.998252924 |
| chr19:5604593-5604947     | exonic | SAFB2                                  | 19 | 5604593   | 5604947   | 22 | 17 | 8 | 26 | 15 | 0  | 354   | 11.95806087 | 0.617129439 | 0.992144998 | 0.622015371 | 0.533931761 | 0.998252924 |

|                           |              |                   |    |           |           |    |    |    |    |    |   |       |             |             |             |             |             |             |
|---------------------------|--------------|-------------------|----|-----------|-----------|----|----|----|----|----|---|-------|-------------|-------------|-------------|-------------|-------------|-------------|
| chr16:88664585-88675459   | exonic       | ZC3H18            | 16 | 88664585  | 88675459  | 1  | 0  | 3  | 4  | 0  | 0 | 10874 | 1.14603956  | 0.622284821 | 2.659955742 | 0.233945554 | NA          | NA          |
| chr11:8435041-8486369     | exonic       | STK33             | 11 | 8435041   | 8486369   | 6  | 5  | 2  | 7  | 4  | 0 | 51328 | 3.268128086 | 0.62374925  | 1.477650331 | 0.422122363 | 0.672935706 | 0.998252924 |
| chr11:8435041-8496363     | exonic       | STK33             | 11 | 8435041   | 8496363   | 6  | 5  | 2  | 7  | 4  | 0 | 61322 | 3.268128086 | 0.62374925  | 1.477650331 | 0.422122363 | 0.672935706 | 0.998252924 |
| chr9:86292641-86293514    | exonic       | UBQLN1            | 9  | 86292641  | 86293514  | 14 | 9  | 3  | 16 | 6  | 0 | 873   | 6.39325316  | 0.623795573 | 1.202250184 | 0.518856708 | 0.603860669 | 0.998252924 |
| chr8:62546241-62566219    | exonic       | ASPH              | 8  | 62546241  | 62566219  | 3  | 7  | 0  | 0  | 4  | 2 | 19978 | 2.707438327 | 0.62555485  | 1.824726553 | 0.342821147 | 0.731733016 | 0.998252924 |
| chr1:51171457-51210447    | exonic       | FAF1              | 1  | 51171457  | 51210447  | 0  | 2  | 1  | 1  | 0  | 1 | 38990 | 0.960350618 | 0.626102188 | 2.67447377  | 0.234102946 | 0.814905059 | 0.998252924 |
| chr6:79752559-79770535    | exonic       | PHIP              | 6  | 79752559  | 79770535  | 2  | 5  | 2  | 4  | 0  | 2 | 17976 | 2.56557369  | 0.627922594 | 1.700453808 | 0.369267658 | NA          | NA          |
| chr11:85722072-85742653   | exonic       | PICALM            | 11 | 85722072  | 85742653  | 9  | 1  | 7  | 6  | 6  | 1 | 20581 | 6.074393417 | 0.628383781 | 1.1376901   | 0.552332996 | 0.580720228 | 0.998252924 |
| chr10:126631026-126631876 | exonic       | ZRANB1            | 10 | 126631026 | 126631876 | 10 | 2  | 4  | 7  | 6  | 0 | 850   | 3.897841355 | 0.629439752 | 1.401318955 | 0.449176649 | 0.653304231 | 0.998252924 |
| chr19:19750893-19751380   | exonic       | GMIP              | 19 | 19750893  | 19751380  | 6  | 7  | 2  | 10 | 1  | 1 | 487   | 3.880750183 | 0.630452476 | 1.39342525  | 0.452448006 | 0.65094627  | 0.998252924 |
| chr4:1219147-1235307      | exonic       | CTBP1             | 4  | 1219147   | 1235307   | 24 | 5  | 4  | 23 | 4  | 0 | 16160 | 7.68541327  | 0.632856191 | 1.214711446 | 0.520993025 | NA          | NA          |
| chr15:57523349-57526305   | exonic       | TCF12             | 15 | 57523349  | 57526305  | 0  | 2  | 3  | 4  | 1  | 0 | 2956  | 1.486631637 | 0.632980241 | 2.222602784 | 0.284792337 | 0.775803243 | 0.998252924 |
| chr1:9327090-9328096      | UTR3         |                   | 1  | 9327090   | 9328096   | 11 | 4  | 5  | 4  | 4  | 4 | 1006  | 5.244534358 | 0.634439379 | 1.174993055 | 0.539951599 | 0.589230412 | 0.998252924 |
| chr3:195415404-195416309  | ncRNA_exonic | LINC00969, SDHAP2 | 3  | 195415404 | 195416309 | 16 | 8  | 24 | 30 | 15 | 0 | 905   | 13.19720697 | 0.636057972 | 1.010573487 | 0.629402988 | 0.529085263 | 0.998252924 |
| chr7:618892-647089        | exonic       | PRKAR1B           | 7  | 618892    | 647089    | 0  | 7  | 0  | 0  | 4  | 1 | 28197 | 2.01225889  | 0.637199551 | 2.234852631 | 0.28511927  | NA          | NA          |
| chr1:66378927-66384518    | exonic       | PDE4B             | 1  | 66378927  | 66384518  | 5  | 4  | 1  | 3  | 5  | 0 | 5591  | 2.4633782   | 0.637709892 | 1.670777186 | 0.381684582 | 0.702695338 | 0.998252924 |
| chr15:44620882-44630515   | exonic       | CASC4             | 15 | 44620882  | 44630515  | 2  | 2  | 2  | 2  | 4  | 0 | 9633  | 3.047545795 | 0.639719664 | 1.512118762 | 0.423061786 | 0.672250183 | 0.998252924 |
| chr8:92998351-93088365    | exonic       | RUNX1T1           | 8  | 92998351  | 93088365  | 3  | 2  | 0  | 3  | 1  | 0 | 90014 | 1.175474004 | 0.640496672 | 2.392967173 | 0.287657943 | 0.788962625 | 0.998252924 |
| chr7:140402665-140404763  | exonic       | NDUFB2            | 7  | 140402665 | 140404763 | 0  | 1  | 3  | 3  | 1  | 0 | 2098  | 1.206044453 | 0.640862028 | 2.420996112 | 0.264710061 | 0.791232826 | 0.998252924 |
| chr1:24840803-24841057    | exonic       | RCAN3             | 1  | 24840803  | 24841057  | 18 | 5  | 2  | 9  | 4  | 3 | 254   | 5.953249996 | 0.641202774 | 1.161431476 | 0.552079729 | 0.58089373  | 0.998252924 |
| chr6:157357969-157431695  | exonic       | ARID1B            | 6  | 157357969 | 157431695 | 2  | 7  | 0  | 6  | 2  | 0 | 73726 | 2.357827634 | 0.642424955 | 1.877742749 | 0.342126181 | NA          | NA          |
| chr3:18419661-18462483    | exonic       | SATB1             | 3  | 18419661  | 18462483  | 5  | 6  | 3  | 7  | 5  | 0 | 42822 | 3.63171339  | 0.6438121   | 1.411354736 | 0.456166039 | 0.648270584 | 0.998252924 |
| chr3:18427890-18462483    | exonic       | SATB1             | 3  | 18427890  | 18462483  | 5  | 6  | 3  | 7  | 5  | 0 | 34593 | 3.63171339  | 0.6438121   | 1.411354736 | 0.456166039 | 0.648270584 | 0.998252924 |
| chr3:47762155-47787483    | exonic       | SMARCC1           | 3  | 47762155  | 47787483  | 5  | 1  | 3  | 0  | 1  | 3 | 25328 | 2.456700838 | 0.644422457 | 1.799304719 | 0.358150818 | NA          | NA          |
| chr10:128768965-128798571 | exonic       | DOCK1             | 10 | 128768965 | 128798571 | 26 | 6  | 3  | 14 | 13 | 0 | 29606 | 8.052838259 | 0.644491719 | 1.158111926 | 0.5565021   | NA          | NA          |
| chr4:91229394-91234198    | exonic       | CCSER1            | 4  | 91229394  | 91234198  | 5  | 2  | 2  | 1  | 6  | 0 | 4804  | 2.220500279 | 0.644756127 | 1.77066419  | 0.364132358 | NA          | NA          |
| chr2:85595808-85598685    | exonic       | ELMOD3            | 2  | 85595808  | 85598685  | 2  | 6  | 0  | 5  | 2  | 0 | 2877  | 2.077240449 | 0.644843045 | 1.94915634  | 0.330831874 | 0.740771483 | 0.998252924 |
| chr12:94562928-94580249   | exonic       | PLXNC1            | 12 | 94562928  | 94580249  | 4  | 11 | 18 | 13 | 16 | 1 | 17321 | 9.610529385 | 0.64498463  | 1.043047573 | 0.618365496 | 0.536334437 | 0.998252924 |
| chr4:88116475-88116842    | exonic       | KLHL8             | 4  | 88116475  | 88116842  | 18 | 13 | 16 | 16 | 18 | 3 | 367   | 12.54778635 | 0.645039954 | 0.839910681 | 0.767986369 | 0.442495283 | 0.998252924 |
| chr22:46085591-46136418   | exonic       | ATXN10            | 22 | 46085591  | 46136418  | 2  | 5  | 0  | 4  | 0  | 1 | 50827 | 1.86281703  | 0.645603868 | 2.068503443 | 0.312111575 | 0.75495573  | 0.998252924 |
| chr9:98740342-98766983    | exonic       | ERCC6L2           | 9  | 98740342  | 98766983  | 3  | 5  | 11 | 3  | 10 | 2 | 26641 | 5.573944696 | 0.646147805 | 1.212378984 | 0.532958599 | 0.594062239 | 0.998252924 |
| chr20:34317233-34320057   | exonic       | RBM39             | 20 | 34317233  | 34320057  | 7  | 10 | 10 | 10 | 14 | 0 | 2824  | 7.375854602 | 0.646532858 | 1.123708183 | 0.575356545 | 0.565050187 | 0.998252924 |
| chr1:11150610-11151654    | exonic       | EXOSC10           | 1  | 11150610  | 11151654  | 2  | 0  | 0  | 0  | 1  | 0 | 1044  | 0.379001307 | 0.646803485 | 4.05604246  | 0.159466645 | 0.873301235 | 0.998252924 |
| chr1:176524542-176526377  | exonic       | PAPPA2            | 1  | 176524542 | 176526377 | 2  | 0  | 0  | 0  | 1  | 0 | 1835  | 0.379001307 | 0.646803485 | 4.05604246  | 0.159466645 | 0.873301235 | 0.998252924 |
| chr1:51005263-51061888    | exonic       | FAF1              | 1  | 51005263  | 51061888  | 2  | 0  | 0  | 0  | 1  | 0 | 56625 | 0.379001307 | 0.646803485 | 4.05604246  | 0.159466645 | 0.873301235 | 0.998252924 |

|                           |              |                                                           |    |           |           |   |   |   |   |   |   |       |             |             |            |             |             |             |
|---------------------------|--------------|-----------------------------------------------------------|----|-----------|-----------|---|---|---|---|---|---|-------|-------------|-------------|------------|-------------|-------------|-------------|
| chr1:70736538-70766591    | exonic       | ANKRD13C                                                  | 1  | 70736538  | 70766591  | 2 | 0 | 0 | 0 | 1 | 0 | 30053 | 0.379001307 | 0.646803485 | 4.05604246 | 0.159466645 | 0.873301235 | 0.998252924 |
| chr10:104122231-104125356 | exonic       | GBF1                                                      | 10 | 104122231 | 104125356 | 2 | 0 | 0 | 0 | 1 | 0 | 3125  | 0.379001307 | 0.646803485 | 4.05604246 | 0.159466645 | 0.873301235 | 0.998252924 |
| chr10:35302626-35317815   | exonic       | CUL2                                                      | 10 | 35302626  | 35317815  | 0 | 0 | 0 | 0 | 3 | 3 | 15189 | 0.379001307 | 0.646803485 | 4.05604246 | 0.159466645 | 0.873301235 | 0.998252924 |
| chr11:108129712-108138069 | exonic       | ATM                                                       | 11 | 108129712 | 108138069 | 2 | 0 | 0 | 0 | 1 | 0 | 8357  | 0.379001307 | 0.646803485 | 4.05604246 | 0.159466645 | 0.873301235 | 0.998252924 |
| chr11:120291461-120348235 | exonic       | ARHGEF12                                                  | 11 | 120291461 | 120348235 | 2 | 0 | 0 | 0 | 1 | 0 | 56774 | 0.379001307 | 0.646803485 | 4.05604246 | 0.159466645 | 0.873301235 | 0.998252924 |
| chr11:33127112-33127610   | exonic       | CSTF3                                                     | 11 | 33127112  | 33127610  | 2 | 0 | 0 | 0 | 1 | 0 | 498   | 0.379001307 | 0.646803485 | 4.05604246 | 0.159466645 | 0.873301235 | 0.998252924 |
| chr11:46817143-46831424   | exonic       | CKAP5                                                     | 11 | 46817143  | 46831424  | 2 | 0 | 0 | 0 | 1 | 0 | 14281 | 0.379001307 | 0.646803485 | 4.05604246 | 0.159466645 | 0.873301235 | 0.998252924 |
| chr12:133438052-133447369 | exonic       | CHFR                                                      | 12 | 133438052 | 133447369 | 2 | 0 | 0 | 0 | 1 | 0 | 9317  | 0.379001307 | 0.646803485 | 4.05604246 | 0.159466645 | 0.873301235 | 0.998252924 |
| chr12:69044179-69048032   | exonic       | RAP1B                                                     | 12 | 69044179  | 69048032  | 2 | 0 | 0 | 0 | 1 | 0 | 3853  | 0.379001307 | 0.646803485 | 4.05604246 | 0.159466645 | 0.873301235 | 0.998252924 |
| chr12:69260675-69279669   | exonic       | CPM                                                       | 12 | 69260675  | 69279669  | 2 | 0 | 0 | 0 | 1 | 0 | 18994 | 0.379001307 | 0.646803485 | 4.05604246 | 0.159466645 | 0.873301235 | 0.998252924 |
| chr12:93192667-93202932   | exonic       | EEA1                                                      | 12 | 93192667  | 93202932  | 2 | 0 | 0 | 0 | 1 | 0 | 10265 | 0.379001307 | 0.646803485 | 4.05604246 | 0.159466645 | 0.873301235 | 0.998252924 |
| chr14:36064839-36133973   | exonic       | RALGAPA1                                                  | 14 | 36064839  | 36133973  | 2 | 0 | 0 | 0 | 1 | 0 | 69134 | 0.379001307 | 0.646803485 | 4.05604246 | 0.159466645 | 0.873301235 | 0.998252924 |
| chr14:60582436-60592541   | exonic       | PCNXL4                                                    | 14 | 60582436  | 60592541  | 2 | 0 | 0 | 0 | 1 | 0 | 10105 | 0.379001307 | 0.646803485 | 4.05604246 | 0.159466645 | 0.873301235 | 0.998252924 |
| chr15:44615162-44673174   | exonic       | CASC4                                                     | 15 | 44615162  | 44673174  | 2 | 0 | 0 | 0 | 1 | 0 | 58012 | 0.379001307 | 0.646803485 | 4.05604246 | 0.159466645 | 0.873301235 | 0.998252924 |
| chr15:65218264-65223783   | exonic       | ANKDD1A                                                   | 15 | 65218264  | 65223783  | 2 | 0 | 0 | 0 | 1 | 0 | 5519  | 0.379001307 | 0.646803485 | 4.05604246 | 0.159466645 | 0.873301235 | 0.998252924 |
| chr15:65261591-65275931   | exonic       | SPG21                                                     | 15 | 65261591  | 65275931  | 2 | 0 | 0 | 0 | 1 | 0 | 14340 | 0.379001307 | 0.646803485 | 4.05604246 | 0.159466645 | 0.873301235 | 0.998252924 |
| chr15:77577299-77578846   | UTR5         | <small>PEAK1 (NM_024776:c.-104376_-104578delins0)</small> | 15 | 77577299  | 77578846  | 2 | 0 | 0 | 0 | 1 | 0 | 1547  | 0.379001307 | 0.646803485 | 4.05604246 | 0.159466645 | 0.873301235 | 0.998252924 |
| chr16:2312278-2314332     | exonic       | RNPS1                                                     | 16 | 2312278   | 2314332   | 2 | 0 | 0 | 0 | 1 | 0 | 2054  | 0.379001307 | 0.646803485 | 4.05604246 | 0.159466645 | 0.873301235 | 0.998252924 |
| chr16:78458766-78466649   | exonic       | WFOX                                                      | 16 | 78458766  | 78466649  | 2 | 0 | 0 | 0 | 1 | 0 | 7883  | 0.379001307 | 0.646803485 | 4.05604246 | 0.159466645 | 0.873301235 | 0.998252924 |
| chr17:44143902-44145033   | exonic       | KANSL1                                                    | 17 | 44143902  | 44145033  | 2 | 0 | 0 | 0 | 1 | 0 | 1131  | 0.379001307 | 0.646803485 | 4.05604246 | 0.159466645 | 0.873301235 | 0.998252924 |
| chr17:62515438-62519013   | exonic       | CEP95                                                     | 17 | 62515438  | 62519013  | 2 | 0 | 0 | 0 | 1 | 0 | 3575  | 0.379001307 | 0.646803485 | 4.05604246 | 0.159466645 | 0.873301235 | 0.998252924 |
| chr18:48444479-48458730   | exonic       | ME2                                                       | 18 | 48444479  | 48458730  | 2 | 0 | 0 | 0 | 1 | 0 | 14251 | 0.379001307 | 0.646803485 | 4.05604246 | 0.159466645 | 0.873301235 | 0.998252924 |
| chr2:17860125-17927218    | exonic       | SMC6                                                      | 2  | 17860125  | 17927218  | 2 | 0 | 0 | 0 | 1 | 0 | 67093 | 0.379001307 | 0.646803485 | 4.05604246 | 0.159466645 | 0.873301235 | 0.998252924 |
| chr2:201194153-201284219  | exonic       | SPATS2L                                                   | 2  | 201194153 | 201284219 | 2 | 0 | 0 | 0 | 1 | 0 | 90066 | 0.379001307 | 0.646803485 | 4.05604246 | 0.159466645 | 0.873301235 | 0.998252924 |
| chr2:204354306-204356042  | exonic       | RAPH1                                                     | 2  | 204354306 | 204356042 | 2 | 0 | 0 | 0 | 1 | 0 | 1736  | 0.379001307 | 0.646803485 | 4.05604246 | 0.159466645 | 0.873301235 | 0.998252924 |
| chr2:24080284-24111269    | exonic       | ATAD2B                                                    | 2  | 24080284  | 24111269  | 2 | 0 | 0 | 0 | 1 | 0 | 30985 | 0.379001307 | 0.646803485 | 4.05604246 | 0.159466645 | 0.873301235 | 0.998252924 |
| chr2:43798845-43802166    | exonic       | THADA                                                     | 2  | 43798845  | 43802166  | 2 | 0 | 0 | 0 | 1 | 0 | 3321  | 0.379001307 | 0.646803485 | 4.05604246 | 0.159466645 | 0.873301235 | 0.998252924 |
| chr20:3944521-3955047     | exonic       | RNF24                                                     | 20 | 3944521   | 3955047   | 2 | 0 | 0 | 0 | 1 | 0 | 10526 | 0.379001307 | 0.646803485 | 4.05604246 | 0.159466645 | 0.873301235 | 0.998252924 |
| chr21:37713696-37717329   | exonic       | MORC3                                                     | 21 | 37713696  | 37717329  | 2 | 0 | 0 | 0 | 1 | 0 | 3633  | 0.379001307 | 0.646803485 | 4.05604246 | 0.159466645 | 0.873301235 | 0.998252924 |
| chr22:31491288-31493324   | exonic       | SMTN                                                      | 22 | 31491288  | 31493324  | 2 | 0 | 0 | 0 | 1 | 0 | 2036  | 0.379001307 | 0.646803485 | 4.05604246 | 0.159466645 | 0.873301235 | 0.998252924 |
| chr3:113114596-113135474  | exonic       | CFAP44                                                    | 3  | 113114596 | 113135474 | 2 | 0 | 0 | 0 | 1 | 0 | 20878 | 0.379001307 | 0.646803485 | 4.05604246 | 0.159466645 | 0.873301235 | 0.998252924 |
| chr3:155615715-155624052  | exonic       | GMPS                                                      | 3  | 155615715 | 155624052 | 2 | 0 | 0 | 0 | 1 | 0 | 8337  | 0.379001307 | 0.646803485 | 4.05604246 | 0.159466645 | 0.873301235 | 0.998252924 |
| chr3:195395389-195404719  | ncRNA_exonic | SDHAP2                                                    | 3  | 195395389 | 195404719 | 2 | 0 | 0 | 0 | 1 | 0 | 9330  | 0.379001307 | 0.646803485 | 4.05604246 | 0.159466645 | 0.873301235 | 0.998252924 |
| chr3:196842797-196846401  | exonic       | DLG1                                                      | 3  | 196842797 | 196846401 | 2 | 0 | 0 | 0 | 1 | 0 | 3604  | 0.379001307 | 0.646803485 | 4.05604246 | 0.159466645 | 0.873301235 | 0.998252924 |
| chr4:121698342-121742500  | exonic       | PRDM5                                                     | 4  | 121698342 | 121742500 | 2 | 0 | 0 | 0 | 1 | 0 | 44158 | 0.379001307 | 0.646803485 | 4.05604246 | 0.159466645 | 0.873301235 | 0.998252924 |

|                           |              |                     |    |           |           |    |    |    |    |    |   |        |             |             |             |             |             |             |
|---------------------------|--------------|---------------------|----|-----------|-----------|----|----|----|----|----|---|--------|-------------|-------------|-------------|-------------|-------------|-------------|
| chr6:32088547-32094029    | exonic       | ATF6B               | 6  | 32088547  | 32094029  | 2  | 0  | 0  | 0  | 1  | 0 | 5482   | 0.379001307 | 0.646803485 | 4.05604246  | 0.159466645 | 0.873301235 | 0.998252924 |
| chr6:43501643-43519190    | exonic       | XPO5                | 6  | 43501643  | 43519190  | 2  | 0  | 0  | 0  | 1  | 0 | 17547  | 0.379001307 | 0.646803485 | 4.05604246  | 0.159466645 | 0.873301235 | 0.998252924 |
| chr7:40037092-40102699    | exonic       | CDK13               | 7  | 40037092  | 40102699  | 2  | 0  | 0  | 0  | 1  | 0 | 65607  | 0.379001307 | 0.646803485 | 4.05604246  | 0.159466645 | 0.873301235 | 0.998252924 |
| chr7:66482839-66483130    | exonic       | TYW1                | 7  | 66482839  | 66483130  | 2  | 0  | 0  | 0  | 1  | 0 | 291    | 0.379001307 | 0.646803485 | 4.05604246  | 0.159466645 | 0.873301235 | 0.998252924 |
| chr7:6776706-6785819      | ncRNA_exonic | PMS2CL              | 7  | 6776706   | 6785819   | 2  | 0  | 0  | 0  | 1  | 0 | 9113   | 0.379001307 | 0.646803485 | 4.05604246  | 0.159466645 | 0.873301235 | 0.998252924 |
| chr8:101936182-101937267  | exonic       | YWHAZ               | 8  | 101936182 | 101937267 | 2  | 0  | 0  | 0  | 1  | 0 | 1085   | 0.379001307 | 0.646803485 | 4.05604246  | 0.159466645 | 0.873301235 | 0.998252924 |
| chr8:16001066-16021760    | exonic       | MSR1                | 8  | 16001066  | 16021760  | 2  | 0  | 0  | 0  | 1  | 0 | 20694  | 0.379001307 | 0.646803485 | 4.05604246  | 0.159466645 | 0.873301235 | 0.998252924 |
| chr8:59513843-59515945    | exonic       | NSMAF               | 8  | 59513843  | 59515945  | 2  | 0  | 0  | 0  | 1  | 0 | 2102   | 0.379001307 | 0.646803485 | 4.05604246  | 0.159466645 | 0.873301235 | 0.998252924 |
| chr2:24357988-24369956    | exonic       | FAM228B             | 2  | 24357988  | 24369956  | 13 | 15 | 24 | 19 | 13 | 7 | 11968  | 14.77622692 | 0.649176422 | 0.815725244 | 0.795827305 | 0.426132419 | 0.998252924 |
| chr2:85595808-85596953    | exonic       | ELMOD3              | 2  | 85595808  | 85596953  | 0  | 6  | 2  | 8  | 0  | 0 | 1145   | 2.290683927 | 0.649301922 | 2.097094681 | 0.309619746 | 0.756850139 | 0.998252924 |
| chr8:141810557-141889736  | exonic       | PTK2                | 8  | 141810557 | 141889736 | 2  | 5  | 0  | 4  | 2  | 0 | 79179  | 1.796653265 | 0.649502464 | 2.041153556 | 0.318203627 | 0.750330482 | 0.998252924 |
| chr16:11114049-11220003   | exonic       | CLEC16A             | 16 | 11114049  | 11220003  | 13 | 13 | 6  | 16 | 7  | 2 | 105954 | 8.29064113  | 0.650376528 | 0.987644869 | 0.658512537 | 0.510208844 | 0.998252924 |
| chr2:29344240-29404563    | exonic       | CLIP4               | 2  | 29344240  | 29404563  | 0  | 4  | 2  | 6  | 0  | 0 | 60323  | 1.729509558 | 0.650877718 | 2.284400898 | 0.284922272 | 0.775703349 | 0.998252924 |
| chr14:73614502-73614814   | exonic       | PSEN1               | 14 | 73614502  | 73614814  | 0  | 1  | 0  | 2  | 0  | 0 | 312    | 0.880170783 | 0.650878034 | 2.90005597  | 0.22443637  | 0.822417774 | 0.998252924 |
| chr16:81929411-81942196   | exonic       | PLCG2               | 16 | 81929411  | 81942196  | 3  | 1  | 0  | 3  | 0  | 0 | 12785  | 0.880170783 | 0.650878034 | 2.90005597  | 0.22443637  | 0.822417774 | 0.998252924 |
| chr2:242283166-242287606  | exonic       |                     | 2  | 242283166 | 242287606 | 3  | 1  | 5  | 4  | 3  | 0 | 4440   | 0.880170783 | 0.650878034 | 2.90005597  | 0.22443637  | 0.822417774 | 0.998252924 |
| chr21:45472160-45483666   | exonic       | TRAPPC10            | 21 | 45472160  | 45483666  | 3  | 1  | 0  | 3  | 0  | 0 | 11506  | 0.880170783 | 0.650878034 | 2.90005597  | 0.22443637  | 0.822417774 | 0.998252924 |
| chr6:168271062-168303066  | exonic       | MLLT4               | 6  | 168271062 | 168303066 | 3  | 1  | 0  | 3  | 0  | 0 | 32004  | 0.880170783 | 0.650878034 | 2.90005597  | 0.22443637  | 0.822417774 | 0.998252924 |
| chr6:47541799-47549801    | exonic       | CD2AP               | 6  | 47541799  | 47549801  | 0  | 8  | 2  | 10 | 0  | 0 | 8002   | 2.851858295 | 0.650892544 | 1.977952508 | 0.329073899 | NA          | NA          |
| chr14:58785259-58796887   | exonic       | ARID4A              | 14 | 58785259  | 58796887  | 2  | 6  | 5  | 8  | 4  | 0 | 11628  | 3.624574576 | 0.650893513 | 1.453755484 | 0.447732456 | 0.654346295 | 0.998252924 |
| chr1:74701785-74737392    | exonic       | FPGT-TNNI3K, TNNI3K | 1  | 74701785  | 74737392  | 2  | 0  | 0  | 0  | 0  | 1 | 35607  | 0.566192494 | 0.652107934 | 3.827275414 | 0.170384376 | NA          | NA          |
| chr10:12154898-12162266   | exonic       | DHTKD1              | 10 | 12154898  | 12162266  | 2  | 0  | 0  | 0  | 0  | 1 | 7368   | 0.566192494 | 0.652107934 | 3.827275414 | 0.170384376 | NA          | NA          |
| chr11:76670022-76709865   | exonic       | ACER3               | 11 | 76670022  | 76709865  | 2  | 0  | 0  | 0  | 0  | 1 | 39843  | 0.566192494 | 0.652107934 | 3.827275414 | 0.170384376 | NA          | NA          |
| chr12:110456149-110468563 | exonic       | ANKRD13A            | 12 | 110456149 | 110468563 | 2  | 0  | 0  | 0  | 0  | 1 | 12414  | 0.566192494 | 0.652107934 | 3.827275414 | 0.170384376 | NA          | NA          |
| chr12:116675272-116675510 | exonic       | MED13L              | 12 | 116675272 | 116675510 | 2  | 0  | 0  | 0  | 0  | 1 | 238    | 0.566192494 | 0.652107934 | 3.827275414 | 0.170384376 | NA          | NA          |
| chr13:33010497-33095586   | exonic       | N4BP2L2             | 13 | 33010497  | 33095586  | 2  | 0  | 0  | 0  | 0  | 1 | 85089  | 0.566192494 | 0.652107934 | 3.827275414 | 0.170384376 | NA          | NA          |
| chr14:52977957-53011089   | exonic       | TXNDC16             | 14 | 52977957  | 53011089  | 2  | 0  | 0  | 0  | 0  | 1 | 33132  | 0.566192494 | 0.652107934 | 3.827275414 | 0.170384376 | NA          | NA          |
| chr17:36933939-36943173   | exonic       | PIP4K2B             | 17 | 36933939  | 36943173  | 2  | 0  | 0  | 0  | 0  | 1 | 9234   | 0.566192494 | 0.652107934 | 3.827275414 | 0.170384376 | NA          | NA          |
| chr17:3725246-3729509     | exonic       | NCBP3               | 17 | 3725246   | 3729509   | 2  | 0  | 0  | 0  | 0  | 1 | 4263   | 0.566192494 | 0.652107934 | 3.827275414 | 0.170384376 | NA          | NA          |
| chr17:63739185-63746842   | exonic       | CEP112              | 17 | 63739185  | 63746842  | 2  | 0  | 0  | 0  | 0  | 1 | 7657   | 0.566192494 | 0.652107934 | 3.827275414 | 0.170384376 | NA          | NA          |
| chr19:15378226-15383944   | exonic       | BRD4                | 19 | 15378226  | 15383944  | 2  | 0  | 0  | 0  | 0  | 1 | 5718   | 0.566192494 | 0.652107934 | 3.827275414 | 0.170384376 | NA          | NA          |
| chr2:240048151-240078469  | exonic       | HDAC4               | 2  | 240048151 | 240078469 | 2  | 0  | 0  | 0  | 0  | 1 | 30318  | 0.566192494 | 0.652107934 | 3.827275414 | 0.170384376 | NA          | NA          |
| chr2:24080284-24092631    | exonic       | ATAD2B              | 2  | 24080284  | 24092631  | 2  | 0  | 0  | 0  | 0  | 1 | 12347  | 0.566192494 | 0.652107934 | 3.827275414 | 0.170384376 | NA          | NA          |
| chr20:13509079-13550233   | exonic       | TASP1               | 20 | 13509079  | 13550233  | 2  | 0  | 0  | 0  | 0  | 1 | 41154  | 0.566192494 | 0.652107934 | 3.827275414 | 0.170384376 | NA          | NA          |
| chr20:33001547-33037285   | exonic       | ITCH                | 20 | 33001547  | 33037285  | 2  | 0  | 0  | 0  | 0  | 1 | 35738  | 0.566192494 | 0.652107934 | 3.827275414 | 0.170384376 | NA          | NA          |

|                           |              |         |    |           |           |    |    |    |    |    |   |       |             |             |             |             |             |             |
|---------------------------|--------------|---------|----|-----------|-----------|----|----|----|----|----|---|-------|-------------|-------------|-------------|-------------|-------------|-------------|
| chr4:13578461-13589395    | exonic       | BOD1L1  | 4  | 13578461  | 13589395  | 2  | 0  | 0  | 0  | 0  | 1 | 10934 | 0.566192494 | 0.652107934 | 3.827275414 | 0.170384376 | NA          | NA          |
| chr6:118801033-118805021  | exonic       | CEP85L  | 6  | 118801033 | 118805021 | 2  | 0  | 0  | 0  | 0  | 1 | 3988  | 0.566192494 | 0.652107934 | 3.827275414 | 0.170384376 | NA          | NA          |
| chr6:135621637-135716034  | exonic       | AHI1    | 6  | 135621637 | 135716034 | 2  | 0  | 0  | 0  | 0  | 1 | 94397 | 0.566192494 | 0.652107934 | 3.827275414 | 0.170384376 | NA          | NA          |
| chr7:102398300-102427916  | exonic       | FAM185A | 7  | 102398300 | 102427916 | 2  | 0  | 0  | 0  | 0  | 1 | 29616 | 0.566192494 | 0.652107934 | 3.827275414 | 0.170384376 | NA          | NA          |
| chr8:27987018-28019595    | exonic       | ELP3    | 8  | 27987018  | 28019595  | 2  | 0  | 0  | 0  | 0  | 1 | 32577 | 0.566192494 | 0.652107934 | 3.827275414 | 0.170384376 | NA          | NA          |
| chr9:114676884-114688776  | exonic       | UGCG    | 9  | 114676884 | 114688776 | 2  | 0  | 0  | 0  | 0  | 1 | 11892 | 0.566192494 | 0.652107934 | 3.827275414 | 0.170384376 | NA          | NA          |
| chr9:74331432-74340625    | exonic       | TMEM2   | 9  | 74331432  | 74340625  | 2  | 0  | 0  | 0  | 0  | 1 | 9193  | 0.566192494 | 0.652107934 | 3.827275414 | 0.170384376 | NA          | NA          |
| chr2:48065997-48066908    | exonic       | FBXO11  | 2  | 48065997  | 48066908  | 4  | 0  | 1  | 4  | 0  | 0 | 911   | 1.138462337 | 0.652768858 | 2.649550033 | 0.246369704 | 0.805396056 | 0.998252924 |
| chr17:53478829-53481229   | exonic       | MMD     | 17 | 53478829  | 53481229  | 1  | 0  | 4  | 5  | 0  | 0 | 2400  | 1.449619971 | 0.65441429  | 2.452284916 | 0.266858996 | NA          | NA          |
| chr2:40655612-40657444    | exonic       | SLC8A1  | 2  | 40655612  | 40657444  | 48 | 28 | 49 | 67 | 32 | 6 | 1832  | 33.58232983 | 0.654845791 | 0.702650348 | 0.931965368 | 0.351354423 | 0.998252924 |
| chr2:24357988-24362320    | exonic       | FAM228B | 2  | 24357988  | 24362320  | 2  | 2  | 1  | 0  | 2  | 1 | 4332  | 1.354067962 | 0.654929188 | 2.168146589 | 0.302068685 | 0.762599704 | 0.998252924 |
| chr19:3425103-3435205     | exonic       | NFIC    | 19 | 3425103   | 3435205   | 2  | 2  | 0  | 1  | 2  | 0 | 10102 | 0.954891712 | 0.655778351 | 2.592764703 | 0.252926288 | 0.800325175 | 0.998252924 |
| chr2:210962809-211019335  | exonic       | KANSL1L | 2  | 210962809 | 211019335 | 1  | 3  | 0  | 1  | 3  | 0 | 56526 | 0.954891712 | 0.655778351 | 2.592764703 | 0.252926288 | 0.800325175 | 0.998252924 |
| chr1:155740858-155743001  | exonic       | GON4L   | 1  | 155740858 | 155743001 | 0  | 0  | 4  | 2  | 2  | 0 | 2143  | 1.243753716 | 0.656083564 | 2.573293345 | 0.254958715 | NA          | NA          |
| chr12:26703179-26755639   | exonic       | ITPR2   | 12 | 26703179  | 26755639  | 0  | 0  | 4  | 2  | 2  | 0 | 52460 | 1.243753716 | 0.656083564 | 2.573293345 | 0.254958715 | NA          | NA          |
| chr2:42946127-42950175    | exonic       | MTA3    | 2  | 42946127  | 42950175  | 0  | 0  | 4  | 2  | 2  | 0 | 4048  | 1.243753716 | 0.656083564 | 2.573293345 | 0.254958715 | NA          | NA          |
| chr22:21288066-21288532   | exonic       | CRKL    | 22 | 21288066  | 21288532  | 10 | 10 | 13 | 21 | 9  | 0 | 466   | 8.918910635 | 0.657301701 | 1.071562882 | 0.613404693 | 0.539608784 | 0.998252924 |
| chr8:18725183-18730243    | exonic       | PSD3    | 8  | 18725183  | 18730243  | 2  | 4  | 0  | 3  | 2  | 0 | 5060  | 1.516066081 | 0.65787938  | 2.163968185 | 0.304015273 | 0.761116255 | 0.998252924 |
| chr19:17273159-17273932   | exonic       | MYO9B   | 19 | 17273159  | 17273932  | 2  | 4  | 1  | 4  | 2  | 0 | 773   | 1.819646492 | 0.65828675  | 1.887330972 | 0.348792427 | 0.727245149 | 0.998252924 |
| chr9:20923658-20933102    | exonic       | FOCAD   | 9  | 20923658  | 20933102  | 2  | 1  | 1  | 3  | 1  | 0 | 9444  | 1.27318816  | 0.658828294 | 2.17813244  | 0.302473937 | 0.762290799 | 0.998252924 |
| chr7:72301271-72304508    | ncRNA_exonic | SBDSP1  | 7  | 72301271  | 72304508  | 9  | 0  | 0  | 0  | 6  | 0 | 3237  | 1.887047016 | 0.660302063 | 3.829321274 | 0.172433185 | NA          | NA          |
| chr4:123848788-123859404  | exonic       | SPATA5  | 4  | 123848788 | 123859404 | 2  | 1  | 0  | 1  | 1  | 0 | 10616 | 0.659588492 | 0.661259096 | 2.998644895 | 0.220519308 | 0.825466737 | 0.998252924 |
| chr5:6622128-6625782      | exonic       | NSUN2   | 5  | 6622128   | 6625782   | 2  | 1  | 0  | 1  | 1  | 0 | 3654  | 0.659588492 | 0.661259096 | 2.998644895 | 0.220519308 | 0.825466737 | 0.998252924 |
| chr6:89554075-89614674    | exonic       | RNGTT   | 6  | 89554075  | 89614674  | 2  | 1  | 0  | 1  | 1  | 0 | 60599 | 0.659588492 | 0.661259096 | 2.998644895 | 0.220519308 | 0.825466737 | 0.998252924 |
| chr1:21548239-21554534    | exonic       | ECE1    | 1  | 21548239  | 21554534  | 0  | 2  | 2  | 4  | 0  | 0 | 6295  | 1.16833519  | 0.66187157  | 2.624741803 | 0.252166354 | NA          | NA          |
| chr3:9495422-9506356      | exonic       | SETD5   | 3  | 9495422   | 9506356   | 0  | 2  | 2  | 4  | 0  | 0 | 10934 | 1.16833519  | 0.66187157  | 2.624741803 | 0.252166354 | NA          | NA          |
| chr4:36212011-36231267    | exonic       | ARAP2   | 4  | 36212011  | 36231267  | 0  | 2  | 2  | 4  | 0  | 0 | 19256 | 1.16833519  | 0.66187157  | 2.624741803 | 0.252166354 | NA          | NA          |
| chrX:62875373-62898452    | exonic       | ARHGEF9 | X  | 62875373  | 62898452  | 2  | 0  | 1  | 0  | 2  | 0 | 23079 | 0.697297755 | 0.662527953 | 3.174728002 | 0.2086881   | 0.834691731 | 0.998252924 |
| chr11:130130750-130131824 | exonic       | ZBTB44  | 11 | 130130750 | 130131824 | 23 | 9  | 25 | 33 | 18 | 0 | 1074  | 15.15367682 | 0.66710044  | 0.973527091 | 0.685240756 | 0.493192009 | 0.998252924 |
| chr12:28458581-28460682   | exonic       | CCDC91  | 12 | 28458581  | 28460682  | 11 | 8  | 3  | 3  | 10 | 2 | 2101  | 5.550515431 | 0.667226607 | 1.169578111 | 0.570484862 | 0.568348886 | 0.998252924 |
| chr4:75937634-75938360    | exonic       | PARM1   | 4  | 75937634  | 75938360  | 2  | 1  | 2  | 0  | 4  | 0 | 726   | 1.310897423 | 0.667529834 | 2.326059393 | 0.286978843 | NA          | NA          |
| chr17:62515438-62530855   | exonic       | CEP95   | 17 | 62515438  | 62530855  | 3  | 0  | 2  | 2  | 2  | 0 | 15417 | 1.236176493 | 0.669027114 | 2.336399457 | 0.286349627 | 0.774610351 | 0.998252924 |
| chr1:113196219-113202401  | exonic       | CAPZA1  | 1  | 113196219 | 113202401 | 5  | 3  | 5  | 6  | 3  | 1 | 6182  | 3.463276424 | 0.669498913 | 1.367492023 | 0.489581586 | 0.62443001  | 0.998252924 |
| chr16:30495147-30495584   | exonic       | ITGAL   | 16 | 30495147  | 30495584  | 21 | 19 | 24 | 30 | 22 | 2 | 437   | 17.22280465 | 0.671457911 | 0.813657245 | 0.825234354 | 0.409238553 | 0.998252924 |
| chr10:15614209-15639298   | exonic       | ITGA8   | 10 | 15614209  | 15639298  | 0  | 0  | 0  | 6  | 0  | 0 | 25089 | 0.910741232 | 0.671779617 | 3.142642962 | 0.213762628 | NA          | NA          |

|                           |                |                                                        |    |           |           |    |    |   |    |    |   |       |             |             |             |             |             |             |
|---------------------------|----------------|--------------------------------------------------------|----|-----------|-----------|----|----|---|----|----|---|-------|-------------|-------------|-------------|-------------|-------------|-------------|
| chr10:31644076-31676195   | intronic       | ZEB1                                                   | 10 | 31644076  | 31676195  | 0  | 0  | 3 | 3  | 0  | 0 | 32119 | 0.910741232 | 0.671779617 | 3.142642962 | 0.213762628 | NA          | NA          |
| chr10:31661947-31676727   | intronic       | ZEB1                                                   | 10 | 31661947  | 31676727  | 0  | 0  | 3 | 3  | 0  | 0 | 14780 | 0.910741232 | 0.671779617 | 3.142642962 | 0.213762628 | NA          | NA          |
| chr16:396147-397106       | exonic         | AXIN1                                                  | 16 | 396147    | 397106    | 0  | 0  | 3 | 3  | 0  | 0 | 959   | 0.910741232 | 0.671779617 | 3.142642962 | 0.213762628 | NA          | NA          |
| chr3:67800277-67801084    | ncRNA_intronic | SUCLG2-AS1                                             | 3  | 67800277  | 67801084  | 0  | 0  | 3 | 3  | 0  | 0 | 807   | 0.910741232 | 0.671779617 | 3.142642962 | 0.213762628 | NA          | NA          |
| chr17:11998891-12016677   | exonic         | MAP2K4                                                 | 17 | 11998891  | 12016677  | 1  | 5  | 2 | 3  | 2  | 1 | 17786 | 2.264111597 | 0.672460571 | 1.67563836  | 0.401316052 | 0.688187447 | 0.998252924 |
| chr1:28362054-28374937    | exonic         | EYA3                                                   | 1  | 28362054  | 28374937  | 2  | 3  | 0 | 2  | 2  | 0 | 12883 | 1.235478897 | 0.672853228 | 2.337002298 | 0.287912951 | 0.773413373 | 0.998252924 |
| chr4:9642695-9643055      | intergenic     | <small>MIR54812(dist=84758), DRD5(dist=140203)</small> | 4  | 9642695   | 9643055   | 4  | 0  | 2 | 5  | 0  | 0 | 360   | 1.442042748 | 0.673479425 | 2.410893904 | 0.279348429 | NA          | NA          |
| chr6:136709530-136710655  | exonic         | MAP7                                                   | 6  | 136709530 | 136710655 | 4  | 4  | 3 | 3  | 6  | 0 | 1125  | 2.84995673  | 0.673993515 | 1.55451211  | 0.43357238  | 0.664598995 | 0.998252924 |
| chr7:7826419-7841374      | exonic         | UMAD1                                                  | 7  | 7826419   | 7841374   | 4  | 4  | 3 | 3  | 6  | 0 | 14955 | 2.84995673  | 0.673993515 | 1.55451211  | 0.43357238  | 0.664598995 | 0.998252924 |
| chr4:1902352-1936989      | exonic         | WHSC1                                                  | 4  | 1902352   | 1936989   | 0  | 7  | 1 | 2  | 3  | 1 | 34637 | 2.301123264 | 0.674103161 | 1.827982434 | 0.368768949 | NA          | NA          |
| chr1:21599191-21616649    | exonic         | ECE1                                                   | 1  | 21599191  | 21616649  | 3  | 3  | 0 | 5  | 0  | 0 | 17458 | 1.441345151 | 0.675462669 | 2.403149126 | 0.281073972 | NA          | NA          |
| chr4:146767107-146770713  | exonic         | ZNF827                                                 | 4  | 146767107 | 146770713 | 2  | 9  | 2 | 3  | 4  | 2 | 3606  | 3.640475189 | 0.676023553 | 1.402892212 | 0.48187847  | NA          | NA          |
| chr15:76146726-76175765   | exonic         | UBE2Q2                                                 | 15 | 76146726  | 76175765  | 6  | 1  | 2 | 4  | 3  | 1 | 29039 | 2.463098226 | 0.680431742 | 1.722275537 | 0.395077168 | 0.692785938 | 0.998252924 |
| chr7:44714009-44714867    | exonic         | OGDH                                                   | 7  | 44714009  | 44714867  | 2  | 2  | 4 | 4  | 3  | 0 | 858   | 2.183929392 | 0.681875633 | 1.740198925 | 0.391837751 | 0.6951781   | 0.998252924 |
| chr9:131071113-131071550  | UTR3           | <small>TRUB2(NM_015679:c. #433_#279del:ins0)</small>   | 9  | 131071113 | 131071550 | 0  | 5  | 0 | 0  | 0  | 2 | 437   | 1.487816213 | 0.68188573  | 2.695882891 | 0.252935961 | NA          | NA          |
| chr3:149563797-149589941  | exonic         | RNF13                                                  | 3  | 149563797 | 149589941 | 0  | 5  | 6 | 1  | 9  | 0 | 26144 | 3.25055133  | 0.682197388 | 1.748777689 | 0.390099549 | NA          | NA          |
| chr18:76886266-76936907   | exonic         | ATP9B                                                  | 18 | 76886266  | 76936907  | 3  | 0  | 2 | 2  | 0  | 1 | 50641 | 1.302340258 | 0.68234102  | 2.346869746 | 0.29074516  | 0.77124623  | 0.998252924 |
| chr21:40578033-40601362   | exonic         | BRWD1                                                  | 21 | 40578033  | 40601362  | 1  | 6  | 3 | 6  | 1  | 1 | 23329 | 2.833563155 | 0.68431627  | 1.581073135 | 0.432817594 | 0.665147291 | 0.998252924 |
| chr2:96517441-96525822    | exonic         | ANKRD36C                                               | 2  | 96517441  | 96525822  | 1  | 6  | 7 | 2  | 0  | 5 | 8381  | 4.30924073  | 0.684955444 | 1.538023281 | 0.445347903 | NA          | NA          |
| chr10:13169745-13178897   | exonic         | OPTN                                                   | 10 | 13169745  | 13178897  | 5  | 5  | 5 | 10 | 3  | 0 | 9152  | 3.928854954 | 0.688426281 | 1.39098668  | 0.494919391 | 0.620657022 | 0.998252924 |
| chr22:41277773-41278181   | exonic         | XPNPEP3                                                | 22 | 41277773  | 41278181  | 3  | 2  | 1 | 5  | 0  | 0 | 408   | 1.464338378 | 0.691149388 | 2.218747863 | 0.311504249 | NA          | NA          |
| chr13:28830428-28855516   | exonic         | PAN3                                                   | 13 | 28830428  | 28855516  | 3  | 2  | 0 | 4  | 0  | 0 | 25088 | 1.160757967 | 0.691156874 | 2.605899223 | 0.265227783 | NA          | NA          |
| chr16:4029117-4033441     | exonic         | ADCY9                                                  | 16 | 4029117   | 4033441   | 3  | 2  | 0 | 4  | 0  | 0 | 4324  | 1.160757967 | 0.691156874 | 2.605899223 | 0.265227783 | NA          | NA          |
| chr3:13170805-13171025    | intergenic     | <small>IQSEC1(dist=56188), NUP210(dist=186705)</small> | 3  | 13170805  | 13171025  | 3  | 2  | 0 | 4  | 0  | 0 | 220   | 1.160757967 | 0.691156874 | 2.605899223 | 0.265227783 | NA          | NA          |
| chr18:76886266-76967012   | exonic         | ATP9B                                                  | 18 | 76886266  | 76967012  | 5  | 5  | 1 | 1  | 0  | 2 | 80746 | 0.977884939 | 0.691182365 | 2.414050226 | 0.286316481 | 0.774635736 | 0.998252924 |
| chr6:117019866-117026323  | exonic         | KPNA5                                                  | 6  | 117019866 | 117026323 | 13 | 11 | 5 | 7  | 16 | 0 | 6457  | 7.260827618 | 0.691710855 | 1.141650526 | 0.605886687 | 0.54459     | 0.998252924 |
| chr12:121853961-121855714 | exonic         | RNF34                                                  | 12 | 121853961 | 121855714 | 6  | 2  | 1 | 6  | 1  | 0 | 1753  | 2.078638013 | 0.693358603 | 1.831129753 | 0.378650722 | NA          | NA          |
| chr6:74175931-74176329    | exonic         | MTO1                                                   | 6  | 74175931  | 74176329  | 2  | 2  | 2 | 3  | 2  | 0 | 398   | 1.562052534 | 0.694295065 | 1.974113166 | 0.351699729 | 0.725063464 | 0.998252924 |
| chr17:74308950-74309972   | exonic         | PRPSAP1                                                | 17 | 74308950  | 74309972  | 0  | 5  | 4 | 2  | 2  | 2 | 1022  | 2.731569929 | 0.695520337 | 1.684523914 | 0.412888372 | NA          | NA          |
| chr11:85718584-85742653   | exonic         | PICALM                                                 | 11 | 85718584  | 85742653  | 14 | 8  | 4 | 5  | 6  | 5 | 24069 | 6.248669216 | 0.695755351 | 1.105711587 | 0.629237641 | 0.529193489 | 0.998252924 |
| chr12:6619445-6619698     | ncRNA_exonic   | SCARNA10                                               | 12 | 6619445   | 6619698   | 6  | 4  | 7 | 4  | 10 | 0 | 253   | 4.48742779  | 0.696079166 | 1.334093082 | 0.521762069 | 0.601836003 | 0.998252924 |
| chr1:59137541-59150923    | exonic         | MYSM1                                                  | 1  | 59137541  | 59150923  | 2  | 2  | 0 | 2  | 1  | 0 | 13382 | 0.940175676 | 0.696330992 | 2.604801088 | 0.267325976 | 0.789218189 | 0.998252924 |
| chr15:96826060-96834012   | ncRNA_exonic   | NR2F2-AS1                                              | 15 | 96826060  | 96834012  | 2  | 2  | 0 | 2  | 1  | 0 | 7952  | 0.940175676 | 0.696330992 | 2.604801088 | 0.267325976 | 0.789218189 | 0.998252924 |
| chr16:5077135-5078186     | exonic         | NAGPA                                                  | 16 | 5077135   | 5078186   | 3  | 0  | 1 | 3  | 0  | 0 | 1051  | 0.903164009 | 0.696697696 | 2.875865806 | 0.242256678 | 0.80858128  | 0.998252924 |
| chr17:46189392-46190763   | exonic         | SNX11                                                  | 17 | 46189392  | 46190763  | 0  | 0  | 6 | 4  | 2  | 0 | 1371  | 1.850914537 | 0.697198381 | 2.245277504 | 0.310517689 | NA          | NA          |

|                           |          |          |    |           |           |    |    |   |    |    |   |        |             |             |             |             |             |             |
|---------------------------|----------|----------|----|-----------|-----------|----|----|---|----|----|---|--------|-------------|-------------|-------------|-------------|-------------|-------------|
| chr14:32559707-32586493   | exonic   | ARHGAP5  | 14 | 32559707  | 32586493  | 10 | 31 | 8 | 13 | 22 | 3 | 26786  | 13.23987852 | 0.697374674 | 0.918462305 | 0.759285025 | NA          | NA          |
| chr1:225268080-225284941  | exonic   | DNAH14   | 1  | 225268080 | 225284941 | 3  | 5  | 0 | 0  | 2  | 2 | 16861  | 2.116831885 | 0.69850888  | 1.98206806  | 0.352414175 | 0.724527673 | 0.998252924 |
| chr1:23356961-23370979    | exonic   | KDM1A    | 1  | 23356961  | 23370979  | 1  | 3  | 3 | 2  | 4  | 0 | 14018  | 1.940353874 | 0.699093994 | 1.852752346 | 0.377327275 | 0.705930405 | 0.998252924 |
| chr2:110919179-110920712  | exonic   | NPHP1    | 2  | 110919179 | 110920712 | 9  | 1  | 3 | 7  | 1  | 1 | 1533   | 3.100391087 | 0.699338588 | 1.526838427 | 0.458030513 | 0.64693052  | 0.998252924 |
| chr9:99083279-99086451    | exonic   | SLC35D2  | 9  | 99083279  | 99086451  | 3  | 2  | 2 | 6  | 0  | 0 | 3172   | 1.767918788 | 0.699345184 | 2.057067039 | 0.339971994 | NA          | NA          |
| chr17:60106901-60112969   | exonic   | MED13    | 17 | 60106901  | 60112969  | 5  | 2  | 1 | 3  | 3  | 0 | 6068   | 1.872771758 | 0.701245078 | 1.851817718 | 0.378679322 | 0.70492601  | 0.998252924 |
| chr1:118420630-118463047  | exonic   | GDAP2    | 1  | 118420630 | 118463047 | 2  | 0  | 0 | 2  | 0  | 0 | 42417  | 0.364285271 | 0.70268845  | 4.058132305 | 0.173155629 | 0.8625291   | 0.998252924 |
| chr1:236175220-236212289  | exonic   | NID1     | 1  | 236175220 | 236212289 | 2  | 0  | 0 | 1  | 0  | 0 | 37069  | 0.364285271 | 0.70268845  | 4.058132305 | 0.173155629 | 0.8625291   | 0.998252924 |
| chr1:47745912-47748131    | exonic   | STIL     | 1  | 47745912  | 47748131  | 2  | 0  | 0 | 1  | 0  | 0 | 2219   | 0.364285271 | 0.70268845  | 4.058132305 | 0.173155629 | 0.8625291   | 0.998252924 |
| chr10:103783233-103799882 | exonic   | C10orf76 | 10 | 103783233 | 103799882 | 2  | 0  | 0 | 1  | 0  | 0 | 16649  | 0.364285271 | 0.70268845  | 4.058132305 | 0.173155629 | 0.8625291   | 0.998252924 |
| chr10:15151700-15172311   | exonic   | NMT2     | 10 | 15151700  | 15172311  | 2  | 0  | 0 | 1  | 0  | 0 | 20611  | 0.364285271 | 0.70268845  | 4.058132305 | 0.173155629 | 0.8625291   | 0.998252924 |
| chr10:71244896-71258152   | exonic   | TSPAN15  | 10 | 71244896  | 71258152  | 2  | 0  | 0 | 1  | 0  | 0 | 13256  | 0.364285271 | 0.70268845  | 4.058132305 | 0.173155629 | 0.8625291   | 0.998252924 |
| chr11:113933932-114057760 | exonic   | ZBTB16   | 11 | 113933932 | 114057760 | 2  | 0  | 0 | 1  | 0  | 0 | 123828 | 0.364285271 | 0.70268845  | 4.058132305 | 0.173155629 | 0.8625291   | 0.998252924 |
| chr11:123988203-123989796 | exonic   | VWA5A    | 11 | 123988203 | 123989796 | 2  | 0  | 0 | 1  | 0  | 0 | 1593   | 0.364285271 | 0.70268845  | 4.058132305 | 0.173155629 | 0.8625291   | 0.998252924 |
| chr11:244040-250865       | exonic   | PSMD13   | 11 | 244040    | 250865    | 2  | 0  | 0 | 1  | 0  | 0 | 6825   | 0.364285271 | 0.70268845  | 4.058132305 | 0.173155629 | 0.8625291   | 0.998252924 |
| chr11:47493742-47510576   | exonic   | CELF1    | 11 | 47493742  | 47510576  | 2  | 0  | 0 | 1  | 0  | 0 | 16834  | 0.364285271 | 0.70268845  | 4.058132305 | 0.173155629 | 0.8625291   | 0.998252924 |
| chr11:74982768-74983938   | exonic   | ARRB1    | 11 | 74982768  | 74983938  | 2  | 0  | 0 | 1  | 0  | 0 | 1170   | 0.364285271 | 0.70268845  | 4.058132305 | 0.173155629 | 0.8625291   | 0.998252924 |
| chr12:110456943-110468563 | exonic   | ANKRD13A | 12 | 110456943 | 110468563 | 2  | 0  | 0 | 1  | 0  | 0 | 11620  | 0.364285271 | 0.70268845  | 4.058132305 | 0.173155629 | 0.8625291   | 0.998252924 |
| chr12:110820647-110834257 | exonic   | ANAPC7   | 12 | 110820647 | 110834257 | 2  | 0  | 0 | 1  | 0  | 0 | 13610  | 0.364285271 | 0.70268845  | 4.058132305 | 0.173155629 | 0.8625291   | 0.998252924 |
| chr12:19626181-19646920   | exonic   | AEBP2    | 12 | 19626181  | 19646920  | 2  | 0  | 0 | 1  | 0  | 0 | 20739  | 0.364285271 | 0.70268845  | 4.058132305 | 0.173155629 | 0.8625291   | 0.998252924 |
| chr12:56651168-56651611   | splicing | ANKRD52  | 12 | 56651168  | 56651611  | 2  | 0  | 0 | 1  | 0  | 0 | 443    | 0.364285271 | 0.70268845  | 4.058132305 | 0.173155629 | 0.8625291   | 0.998252924 |
| chr12:70149163-70150443   | exonic   | RAB3IP   | 12 | 70149163  | 70150443  | 2  | 0  | 0 | 1  | 0  | 0 | 1280   | 0.364285271 | 0.70268845  | 4.058132305 | 0.173155629 | 0.8625291   | 0.998252924 |
| chr12:94972169-94976314   | exonic   | TMCC3    | 12 | 94972169  | 94976314  | 2  | 0  | 0 | 1  | 0  | 0 | 4145   | 0.364285271 | 0.70268845  | 4.058132305 | 0.173155629 | 0.8625291   | 0.998252924 |
| chr13:42385360-42465723   | exonic   | VWA8     | 13 | 42385360  | 42465723  | 2  | 0  | 0 | 1  | 0  | 0 | 80363  | 0.364285271 | 0.70268845  | 4.058132305 | 0.173155629 | 0.8625291   | 0.998252924 |
| chr13:50054354-50059859   | exonic   | SETDB2   | 13 | 50054354  | 50059859  | 2  | 0  | 0 | 1  | 0  | 0 | 5505   | 0.364285271 | 0.70268845  | 4.058132305 | 0.173155629 | 0.8625291   | 0.998252924 |
| chr14:36064839-36125121   | exonic   | RALGAPA1 | 14 | 36064839  | 36125121  | 2  | 0  | 0 | 1  | 0  | 0 | 60282  | 0.364285271 | 0.70268845  | 4.058132305 | 0.173155629 | 0.8625291   | 0.998252924 |
| chr14:76248829-76249873   | exonic   | TTLL5    | 14 | 76248829  | 76249873  | 2  | 0  | 0 | 1  | 0  | 0 | 1044   | 0.364285271 | 0.70268845  | 4.058132305 | 0.173155629 | 0.8625291   | 0.998252924 |
| chr14:88945263-88946696   | exonic   | PTPN21   | 14 | 88945263  | 88946696  | 2  | 0  | 0 | 1  | 0  | 0 | 1433   | 0.364285271 | 0.70268845  | 4.058132305 | 0.173155629 | 0.8625291   | 0.998252924 |
| chr15:44859621-44861703   | exonic   | SPG11    | 15 | 44859621  | 44861703  | 2  | 0  | 0 | 1  | 0  | 0 | 2082   | 0.364285271 | 0.70268845  | 4.058132305 | 0.173155629 | 0.8625291   | 0.998252924 |
| chr15:51017417-51018574   | exonic   | SPPL2A   | 15 | 51017417  | 51018574  | 2  | 0  | 0 | 1  | 0  | 0 | 1157   | 0.364285271 | 0.70268845  | 4.058132305 | 0.173155629 | 0.8625291   | 0.998252924 |
| chr15:93480747-93499879   | exonic   | CHD2     | 15 | 93480747  | 93499879  | 2  | 0  | 0 | 1  | 0  | 0 | 19132  | 0.364285271 | 0.70268845  | 4.058132305 | 0.173155629 | 0.8625291   | 0.998252924 |
| chr15:93543741-93547981   | exonic   | CHD2     | 15 | 93543741  | 93547981  | 2  | 0  | 0 | 1  | 0  | 0 | 4240   | 0.364285271 | 0.70268845  | 4.058132305 | 0.173155629 | 0.8625291   | 0.998252924 |
| chr15:94983404-95013671   | exonic   | MCTP2    | 15 | 94983404  | 95013671  | 2  | 0  | 0 | 1  | 0  | 0 | 30267  | 0.364285271 | 0.70268845  | 4.058132305 | 0.173155629 | 0.8625291   | 0.998252924 |
| chr16:1364020-1370518     | exonic   | UBE2I    | 16 | 1364020   | 1370518   | 2  | 0  | 0 | 1  | 0  | 0 | 6498   | 0.364285271 | 0.70268845  | 4.058132305 | 0.173155629 | 0.8625291   | 0.998252924 |
| chr16:14680174-14721193   | exonic   | PARN     | 16 | 14680174  | 14721193  | 2  | 0  | 0 | 1  | 0  | 0 | 41019  | 0.364285271 | 0.70268845  | 4.058132305 | 0.173155629 | 0.8625291   | 0.998252924 |

|                          |        |         |    |           |           |    |   |    |    |    |    |       |             |            |             |             |           |             |
|--------------------------|--------|---------|----|-----------|-----------|----|---|----|----|----|----|-------|-------------|------------|-------------|-------------|-----------|-------------|
| chr16:66839679-66839929  | exonic | NAE1    | 16 | 66839679  | 66839929  | 2  | 0 | 0  | 1  | 0  | 0  | 250   | 0.364285271 | 0.70268845 | 4.058132305 | 0.173155629 | 0.8625291 | 0.998252924 |
| chr16:69170598-69177292  | exonic | UTP4    | 16 | 69170598  | 69177292  | 2  | 0 | 0  | 1  | 0  | 0  | 6694  | 0.364285271 | 0.70268845 | 4.058132305 | 0.173155629 | 0.8625291 | 0.998252924 |
| chr17:35640167-35646430  | exonic | ACACA   | 17 | 35640167  | 35646430  | 2  | 0 | 0  | 1  | 0  | 0  | 6263  | 0.364285271 | 0.70268845 | 4.058132305 | 0.173155629 | 0.8625291 | 0.998252924 |
| chr17:4086692-4088341    | exonic | ANKFY1  | 17 | 4086692   | 4088341   | 2  | 0 | 0  | 1  | 0  | 0  | 1649  | 0.364285271 | 0.70268845 | 4.058132305 | 0.173155629 | 0.8625291 | 0.998252924 |
| chr17:45479497-45507327  | exonic | EFCAB13 | 17 | 45479497  | 45507327  | 2  | 0 | 0  | 1  | 0  | 0  | 27830 | 0.364285271 | 0.70268845 | 4.058132305 | 0.173155629 | 0.8625291 | 0.998252924 |
| chr17:62515438-62525545  | exonic | CEP95   | 17 | 62515438  | 62525545  | 2  | 0 | 0  | 1  | 0  | 0  | 10107 | 0.364285271 | 0.70268845 | 4.058132305 | 0.173155629 | 0.8625291 | 0.998252924 |
| chr19:19308915-19310043  | exonic | RFXANK  | 19 | 19308915  | 19310043  | 2  | 0 | 0  | 1  | 0  | 0  | 1128  | 0.364285271 | 0.70268845 | 4.058132305 | 0.173155629 | 0.8625291 | 0.998252924 |
| chr2:170401230-170413807 | exonic | FASTKD1 | 2  | 170401230 | 170413807 | 2  | 0 | 0  | 1  | 0  | 0  | 12577 | 0.364285271 | 0.70268845 | 4.058132305 | 0.173155629 | 0.8625291 | 0.998252924 |
| chr2:191523883-191535185 | exonic | NAB1    | 2  | 191523883 | 191535185 | 32 | 6 | 17 | 24 | 34 | 15 | 11302 | 0.364285271 | 0.70268845 | 4.058132305 | 0.173155629 | 0.8625291 | 0.998252924 |
| chr2:33482350-33526711   | exonic | LTBP1   | 2  | 33482350  | 33526711  | 2  | 0 | 0  | 1  | 0  | 0  | 44361 | 0.364285271 | 0.70268845 | 4.058132305 | 0.173155629 | 0.8625291 | 0.998252924 |
| chr2:33482509-33534623   | exonic | LTBP1   | 2  | 33482509  | 33534623  | 2  | 0 | 0  | 1  | 0  | 0  | 52114 | 0.364285271 | 0.70268845 | 4.058132305 | 0.173155629 | 0.8625291 | 0.998252924 |
| chr2:55808702-55816092   | exonic | PPP4R3B | 2  | 55808702  | 55816092  | 2  | 0 | 0  | 1  | 0  | 0  | 7390  | 0.364285271 | 0.70268845 | 4.058132305 | 0.173155629 | 0.8625291 | 0.998252924 |
| chr2:70033516-70039841   | exonic | ANXA4   | 2  | 70033516  | 70039841  | 2  | 0 | 0  | 1  | 0  | 0  | 6325  | 0.364285271 | 0.70268845 | 4.058132305 | 0.173155629 | 0.8625291 | 0.998252924 |
| chr20:18414295-18429713  | exonic | DZANK1  | 20 | 18414295  | 18429713  | 2  | 0 | 0  | 1  | 0  | 0  | 15418 | 0.364285271 | 0.70268845 | 4.058132305 | 0.173155629 | 0.8625291 | 0.998252924 |
| chr20:2473344-2474690    | exonic | ZNF343  | 20 | 2473344   | 2474690   | 2  | 0 | 0  | 1  | 0  | 0  | 1346  | 0.364285271 | 0.70268845 | 4.058132305 | 0.173155629 | 0.8625291 | 0.998252924 |
| chr20:50090516-50140649  | exonic | NFATC2  | 20 | 50090516  | 50140649  | 2  | 0 | 0  | 1  | 0  | 0  | 50133 | 0.364285271 | 0.70268845 | 4.058132305 | 0.173155629 | 0.8625291 | 0.998252924 |
| chr21:33829904-33840156  | exonic | EVA1C   | 21 | 33829904  | 33840156  | 2  | 0 | 0  | 1  | 0  | 0  | 10252 | 0.364285271 | 0.70268845 | 4.058132305 | 0.173155629 | 0.8625291 | 0.998252924 |
| chr21:47817178-47822397  | exonic | PCNT    | 21 | 47817178  | 47822397  | 2  | 0 | 0  | 1  | 0  | 0  | 5219  | 0.364285271 | 0.70268845 | 4.058132305 | 0.173155629 | 0.8625291 | 0.998252924 |
| chr22:41979962-41980607  | exonic | PMM1    | 22 | 41979962  | 41980607  | 2  | 0 | 0  | 1  | 0  | 0  | 645   | 0.364285271 | 0.70268845 | 4.058132305 | 0.173155629 | 0.8625291 | 0.998252924 |
| chr3:115738361-115805403 | exonic | LSAMP   | 3  | 115738361 | 115805403 | 2  | 0 | 0  | 1  | 0  | 0  | 67042 | 0.364285271 | 0.70268845 | 4.058132305 | 0.173155629 | 0.8625291 | 0.998252924 |
| chr3:127429418-127441409 | exonic | MGLL    | 3  | 127429418 | 127441409 | 2  | 0 | 0  | 1  | 0  | 0  | 11991 | 0.364285271 | 0.70268845 | 4.058132305 | 0.173155629 | 0.8625291 | 0.998252924 |
| chr3:15271948-15275480   | exonic | CAPN7   | 3  | 15271948  | 15275480  | 2  | 0 | 0  | 1  | 0  | 0  | 3532  | 0.364285271 | 0.70268845 | 4.058132305 | 0.173155629 | 0.8625291 | 0.998252924 |
| chr3:47079155-47088111   | exonic | SETD2   | 3  | 47079155  | 47088111  | 2  | 0 | 0  | 1  | 0  | 0  | 8956  | 0.364285271 | 0.70268845 | 4.058132305 | 0.173155629 | 0.8625291 | 0.998252924 |
| chr4:169812072-169819865 | exonic | PALLD   | 4  | 169812072 | 169819865 | 2  | 0 | 0  | 1  | 0  | 0  | 7793  | 0.364285271 | 0.70268845 | 4.058132305 | 0.173155629 | 0.8625291 | 0.998252924 |
| chr4:4239553-4248070     | exonic | TMEM128 | 4  | 4239553   | 4248070   | 2  | 0 | 0  | 1  | 0  | 0  | 8517  | 0.364285271 | 0.70268845 | 4.058132305 | 0.173155629 | 0.8625291 | 0.998252924 |
| chr5:108203467-108219219 | exonic | FER     | 5  | 108203467 | 108219219 | 2  | 0 | 0  | 1  | 0  | 0  | 15752 | 0.364285271 | 0.70268845 | 4.058132305 | 0.173155629 | 0.8625291 | 0.998252924 |
| chr5:137717204-137761271 | exonic | KDM3B   | 5  | 137717204 | 137761271 | 2  | 0 | 0  | 1  | 0  | 0  | 44067 | 0.364285271 | 0.70268845 | 4.058132305 | 0.173155629 | 0.8625291 | 0.998252924 |
| chr5:36211945-36227667   | exonic | NADK2   | 5  | 36211945  | 36227667  | 2  | 0 | 0  | 1  | 0  | 0  | 15722 | 0.364285271 | 0.70268845 | 4.058132305 | 0.173155629 | 0.8625291 | 0.998252924 |
| chr5:77385216-77437143   | exonic | AP3B1   | 5  | 77385216  | 77437143  | 2  | 0 | 0  | 1  | 0  | 0  | 51927 | 0.364285271 | 0.70268845 | 4.058132305 | 0.173155629 | 0.8625291 | 0.998252924 |
| chr5:96063192-96066564   | exonic | CAST    | 5  | 96063192  | 96066564  | 2  | 0 | 0  | 1  | 0  | 0  | 3372  | 0.364285271 | 0.70268845 | 4.058132305 | 0.173155629 | 0.8625291 | 0.998252924 |
| chr6:12120122-12136125   | exonic | HIVEP1  | 6  | 12120122  | 12136125  | 2  | 0 | 0  | 1  | 0  | 0  | 16003 | 0.364285271 | 0.70268845 | 4.058132305 | 0.173155629 | 0.8625291 | 0.998252924 |
| chr6:144086397-144086935 | exonic | PHACTR2 | 6  | 144086397 | 144086935 | 2  | 0 | 0  | 1  | 0  | 0  | 538   | 0.364285271 | 0.70268845 | 4.058132305 | 0.173155629 | 0.8625291 | 0.998252924 |
| chr6:34985249-35054826   | exonic | ANKS1A  | 6  | 34985249  | 35054826  | 2  | 0 | 0  | 1  | 0  | 0  | 69577 | 0.364285271 | 0.70268845 | 4.058132305 | 0.173155629 | 0.8625291 | 0.998252924 |
| chr6:86275049-86284096   | exonic | SNX14   | 6  | 86275049  | 86284096  | 2  | 0 | 0  | 1  | 0  | 0  | 9047  | 0.364285271 | 0.70268845 | 4.058132305 | 0.173155629 | 0.8625291 | 0.998252924 |
| chr6:86281854-86284096   | exonic | SNX14   | 6  | 86281854  | 86284096  | 2  | 0 | 0  | 1  | 0  | 0  | 2242  | 0.364285271 | 0.70268845 | 4.058132305 | 0.173155629 | 0.8625291 | 0.998252924 |



|                           |              |           |    |           |           |    |    |    |    |    |   |       |             |             |             |             |             |             |
|---------------------------|--------------|-----------|----|-----------|-----------|----|----|----|----|----|---|-------|-------------|-------------|-------------|-------------|-------------|-------------|
| chr7:100457506-100460449  | exonic       | SLC12A9   | 7  | 100457506 | 100460449 | 2  | 0  | 0  | 1  | 0  | 0 | 2943  | 0.364285271 | 0.70268845  | 4.058132305 | 0.173155629 | 0.8625291   | 0.998252924 |
| chr7:6456257-6456552      | exonic       | DAGLB     | 7  | 6456257   | 6456552   | 2  | 0  | 0  | 1  | 0  | 0 | 295   | 0.364285271 | 0.70268845  | 4.058132305 | 0.173155629 | 0.8625291   | 0.998252924 |
| chr8:618597-642612        | exonic       | ERICH1    | 8  | 618597    | 642612    | 2  | 0  | 0  | 1  | 0  | 0 | 24015 | 0.364285271 | 0.70268845  | 4.058132305 | 0.173155629 | 0.8625291   | 0.998252924 |
| chr8:68005777-68007967    | exonic       | CSPP1     | 8  | 68005777  | 68007967  | 2  | 0  | 0  | 1  | 0  | 0 | 2190  | 0.364285271 | 0.70268845  | 4.058132305 | 0.173155629 | 0.8625291   | 0.998252924 |
| chr9:114190321-114204704  | exonic       | KIAA0368  | 9  | 114190321 | 114204704 | 2  | 0  | 0  | 1  | 0  | 0 | 14383 | 0.364285271 | 0.70268845  | 4.058132305 | 0.173155629 | 0.8625291   | 0.998252924 |
| chr9:125746763-125777915  | exonic       | RABGAP1   | 9  | 125746763 | 125777915 | 2  | 0  | 0  | 1  | 0  | 0 | 31152 | 0.364285271 | 0.70268845  | 4.058132305 | 0.173155629 | 0.8625291   | 0.998252924 |
| chrX:128691301-128692978  | exonic       | OCR1      | X  | 128691301 | 128692978 | 2  | 0  | 0  | 1  | 0  | 0 | 1677  | 0.364285271 | 0.70268845  | 4.058132305 | 0.173155629 | 0.8625291   | 0.998252924 |
| chrX:20206614-20222221    | exonic       | RPS6KA3   | X  | 20206614  | 20222221  | 2  | 0  | 0  | 1  | 0  | 0 | 15607 | 0.364285271 | 0.70268845  | 4.058132305 | 0.173155629 | 0.8625291   | 0.998252924 |
| chrX:32563275-32591963    | exonic       | DMD       | X  | 32563275  | 32591963  | 2  | 0  | 0  | 1  | 0  | 0 | 28688 | 0.364285271 | 0.70268845  | 4.058132305 | 0.173155629 | 0.8625291   | 0.998252924 |
| chrX:53622146-53634660    | exonic       | HUWE1     | X  | 53622146  | 53634660  | 2  | 0  | 0  | 1  | 0  | 0 | 12514 | 0.364285271 | 0.70268845  | 4.058132305 | 0.173155629 | 0.8625291   | 0.998252924 |
| chrX:62875373-62926329    | exonic       | ARHGEF9   | X  | 62875373  | 62926329  | 2  | 0  | 0  | 1  | 0  | 0 | 50956 | 0.364285271 | 0.70268845  | 4.058132305 | 0.173155629 | 0.8625291   | 0.998252924 |
| chrX:76937011-76944420    | exonic       | ATRX      | X  | 76937011  | 76944420  | 2  | 0  | 0  | 1  | 0  | 0 | 7409  | 0.364285271 | 0.70268845  | 4.058132305 | 0.173155629 | 0.8625291   | 0.998252924 |
| chr1:155640110-155649303  | exonic       | YYIAP1    | 1  | 155640110 | 155649303 | 14 | 9  | 0  | 14 | 4  | 0 | 9193  | 5.34676847  | 0.704844923 | 1.441602985 | 0.48893137  | 0.624890286 | 0.998252924 |
| chr1:155640110-155650247  | exonic       | YYIAP1    | 1  | 155640110 | 155650247 | 14 | 9  | 0  | 14 | 4  | 0 | 10137 | 5.34676847  | 0.704844923 | 1.441602985 | 0.48893137  | 0.624890286 | 0.998252924 |
| chr3:119222378-119236162  | exonic       | TIMMDC1   | 3  | 119222378 | 119236162 | 7  | 2  | 3  | 2  | 7  | 0 | 13784 | 2.903081997 | 0.704959697 | 1.582994714 | 0.445332945 | NA          | NA          |
| chr3:196210640-196215554  | exonic       | RNF168    | 3  | 196210640 | 196215554 | 2  | 0  | 2  | 0  | 3  | 0 | 4914  | 1.015594202 | 0.705730418 | 2.751757335 | 0.256465354 | NA          | NA          |
| chr6:29989444-30003760    | ncRNA_exonic | ZNRD1-AS1 | 6  | 29989444  | 30003760  | 2  | 0  | 2  | 0  | 3  | 0 | 14316 | 1.015594202 | 0.705730418 | 2.751757335 | 0.256465354 | NA          | NA          |
| chr18:55833019-55919286   | exonic       | NEDD4L    | 18 | 55833019  | 55919286  | 22 | 7  | 0  | 6  | 6  | 4 | 86267 | 6.654550612 | 0.706159815 | 1.245694385 | 0.566880467 | 0.570795396 | 0.998252924 |
| chr13:24796956-24798720   | exonic       | SPATA13   | 13 | 24796956  | 24798720  | 6  | 2  | 4  | 9  | 1  | 0 | 1764  | 2.989379245 | 0.708141819 | 1.599617367 | 0.442694505 | NA          | NA          |
| chr2:112702536-112705144  | exonic       | MERTK     | 2  | 112702536 | 112705144 | 1  | 3  | 0  | 0  | 3  | 0 | 2608  | 1.014896605 | 0.710205472 | 2.772652631 | 0.256146574 | NA          | NA          |
| chr9:128099296-128099870  | exonic       | GAPVD1    | 9  | 128099296 | 128099870 | 18 | 14 | 10 | 24 | 11 | 0 | 574   | 10.6170913  | 0.710983132 | 1.01081781  | 0.703374164 | 0.481822603 | 0.998252924 |
| chr9:37126309-37147442    | exonic       | ZCCHC7    | 9  | 37126309  | 37147442  | 6  | 6  | 3  | 6  | 6  | 0 | 21133 | 3.775416369 | 0.711236896 | 1.388549794 | 0.512215622 | 0.608500111 | 0.998252924 |
| chr14:102661274-102676199 | exonic       | WDR20     | 14 | 102661274 | 102676199 | 3  | 6  | 1  | 3  | 3  | 1 | 14925 | 2.620119678 | 0.711285441 | 1.569485479 | 0.453196574 | 0.6504072   | 0.998252924 |
| chr3:121433707-121449820  | exonic       | GOLGB1    | 3  | 121433707 | 121449820 | 0  | 0  | 3  | 1  | 0  | 1 | 16113 | 1.006337071 | 0.712699554 | 2.842623741 | 0.25071892  | NA          | NA          |
| chr6:35586872-35610620    | exonic       | FKBP5     | 6  | 35586872  | 35610620  | 3  | 1  | 1  | 4  | 0  | 0 | 23748 | 1.183751194 | 0.714671829 | 2.418976216 | 0.295443925 | NA          | NA          |
| chr7:47384352-47385954    | exonic       | TNS3      | 7  | 47384352  | 47385954  | 3  | 1  | 1  | 4  | 0  | 0 | 1602  | 1.183751194 | 0.714671829 | 2.418976216 | 0.295443925 | NA          | NA          |
| chr15:93467550-93472321   | exonic       | CHD2      | 15 | 93467550  | 93472321  | 8  | 7  | 6  | 8  | 3  | 3 | 4771  | 5.573669462 | 0.714785446 | 1.128973303 | 0.633128741 | 0.526649575 | 0.998252924 |
| chr1:93128976-93170301    | exonic       | EVI5      | 1  | 93128976  | 93170301  | 3  | 2  | 3  | 4  | 1  | 0 | 41325 | 3.411571878 | 0.716380085 | 1.651118217 | 0.433875707 | 0.664378701 | 0.998252924 |
| chr8:54891584-54923052    | exonic       | TCEA1     | 8  | 54891584  | 54923052  | 0  | 5  | 2  | 1  | 1  | 2 | 31468 | 2.109693071 | 0.71699192  | 1.904529258 | 0.376466739 | 0.706569938 | 0.998252924 |
| chr1:118430319-118461358  | exonic       | GDAP2     | 1  | 118430319 | 118461358 | 2  | 1  | 0  | 2  | 0  | 0 | 31039 | 0.644872455 | 0.719293453 | 3.260706597 | 0.22059435  | 0.825408301 | 0.998252924 |
| chr1:210003452-210004388  | exonic       | DIEXF     | 1  | 210003452 | 210004388 | 2  | 1  | 0  | 2  | 0  | 0 | 936   | 0.644872455 | 0.719293453 | 3.260706597 | 0.22059435  | 0.825408301 | 0.998252924 |
| chr1:235316020-235318427  | exonic       | RBM34     | 1  | 235316020 | 235318427 | 2  | 1  | 0  | 2  | 0  | 0 | 2407  | 0.644872455 | 0.719293453 | 3.260706597 | 0.22059435  | 0.825408301 | 0.998252924 |
| chr10:103432671-103433430 | exonic       | FBXW4     | 10 | 103432671 | 103433430 | 2  | 1  | 0  | 2  | 0  | 0 | 759   | 0.644872455 | 0.719293453 | 3.260706597 | 0.22059435  | 0.825408301 | 0.998252924 |
| chr11:118427620-118430579 | exonic       | IFT46     | 11 | 118427620 | 118430579 | 2  | 1  | 0  | 2  | 0  | 0 | 2959  | 0.644872455 | 0.719293453 | 3.260706597 | 0.22059435  | 0.825408301 | 0.998252924 |
| chr14:23416379-23417222   | exonic       | HAUS4     | 14 | 23416379  | 23417222  | 2  | 1  | 0  | 2  | 0  | 0 | 843   | 0.644872455 | 0.719293453 | 3.260706597 | 0.22059435  | 0.825408301 | 0.998252924 |

|                           |        |          |    |           |           |    |    |    |    |    |   |       |             |             |             |             |             |             |
|---------------------------|--------|----------|----|-----------|-----------|----|----|----|----|----|---|-------|-------------|-------------|-------------|-------------|-------------|-------------|
| chr15:91162972-91172764   | exonic | CRTC3    | 15 | 91162972  | 91172764  | 2  | 1  | 0  | 2  | 0  | 0 | 9792  | 0.644872455 | 0.719293453 | 3.260706597 | 0.22059435  | 0.825408301 | 0.998252924 |
| chr16:53907697-53968021   | exonic | FTO      | 16 | 53907697  | 53968021  | 2  | 1  | 0  | 2  | 0  | 0 | 60324 | 0.644872455 | 0.719293453 | 3.260706597 | 0.22059435  | 0.825408301 | 0.998252924 |
| chr17:12608444-12626325   | exonic | MYOCD    | 17 | 12608444  | 12626325  | 2  | 1  | 0  | 2  | 0  | 0 | 17881 | 0.644872455 | 0.719293453 | 3.260706597 | 0.22059435  | 0.825408301 | 0.998252924 |
| chr2:120684173-120725548  | exonic | PTPN4    | 2  | 120684173 | 120725548 | 2  | 1  | 0  | 2  | 0  | 0 | 41375 | 0.644872455 | 0.719293453 | 3.260706597 | 0.22059435  | 0.825408301 | 0.998252924 |
| chr20:3888572-3893281     | exonic | PANK2    | 20 | 3888572   | 3893281   | 2  | 1  | 0  | 2  | 0  | 0 | 4709  | 0.644872455 | 0.719293453 | 3.260706597 | 0.22059435  | 0.825408301 | 0.998252924 |
| chr22:20078957-20082318   | exonic | DGCR8    | 22 | 20078957  | 20082318  | 2  | 1  | 0  | 2  | 0  | 0 | 3361  | 0.644872455 | 0.719293453 | 3.260706597 | 0.22059435  | 0.825408301 | 0.998252924 |
| chr7:74216325-74221352    | exonic | GTF2IRD2 | 7  | 74216325  | 74221352  | 2  | 1  | 0  | 2  | 0  | 0 | 5027  | 0.644872455 | 0.719293453 | 3.260706597 | 0.22059435  | 0.825408301 | 0.998252924 |
| chr8:42294506-42330172    | exonic | SLC20A2  | 8  | 42294506  | 42330172  | 2  | 1  | 0  | 2  | 0  | 0 | 35666 | 0.644872455 | 0.719293453 | 3.260706597 | 0.22059435  | 0.825408301 | 0.998252924 |
| chr7:90355880-90419967    | exonic | CDK14    | 7  | 90355880  | 90419967  | 7  | 2  | 3  | 2  | 3  | 2 | 64087 | 3.035409528 | 0.720449335 | 1.462272327 | 0.492691629 | 0.622230493 | 0.998252924 |
| chr9:125042721-125054119  | exonic | MRRF     | 9  | 125042721 | 125054119 | 4  | 4  | 1  | 3  | 0  | 2 | 11398 | 2.345691366 | 0.721082028 | 1.761541604 | 0.409347146 | 0.682284921 | 0.998252924 |
| chr2:15629017-15679480    | exonic | NBAS     | 2  | 15629017  | 15679480  | 2  | 1  | 2  | 2  | 2  | 0 | 50463 | 1.28146535  | 0.722982721 | 2.15549441  | 0.335413869 | 0.737312907 | 0.998252924 |
| chr4:1902352-1941505      | exonic | WHSC1    | 4  | 1902352   | 1941505   | 0  | 11 | 2  | 3  | 4  | 2 | 39153 | 3.731052901 | 0.723306641 | 1.545473808 | 0.468016111 | NA          | NA          |
| chr4:77055327-77065626    | exonic | NUP54    | 4  | 77055327  | 77065626  | 13 | 24 | 9  | 14 | 11 | 6 | 10299 | 12.30384335 | 0.724657526 | 0.864030264 | 0.838694611 | NA          | NA          |
| chr1:93070863-93170301    | exonic | EVI5     | 1  | 93070863  | 93170301  | 1  | 2  | 0  | 0  | 2  | 0 | 99438 | 0.719593385 | 0.725682878 | 3.140827002 | 0.231048344 | 0.817277245 | 0.998252924 |
| chr10:128768965-128810638 | exonic | DOCK1    | 10 | 128768965 | 128810638 | 1  | 2  | 0  | 0  | 2  | 0 | 41673 | 0.719593385 | 0.725682878 | 3.140827002 | 0.231048344 | 0.817277245 | 0.998252924 |
| chr10:5810175-5842668     | exonic | GDI2     | 10 | 5810175   | 5842668   | 1  | 2  | 0  | 0  | 2  | 0 | 32493 | 0.719593385 | 0.725682878 | 3.140827002 | 0.231048344 | 0.817277245 | 0.998252924 |
| chr11:78180292-78204241   | exonic | NARS2    | 11 | 78180292  | 78204241  | 1  | 4  | 2  | 3  | 2  | 0 | 23949 | 0.719593385 | 0.725682878 | 3.140827002 | 0.231048344 | 0.817277245 | 0.998252924 |
| chr13:20635192-20641530   | exonic | ZMYM2    | 13 | 20635192  | 20641530  | 1  | 2  | 0  | 0  | 2  | 0 | 6338  | 0.719593385 | 0.725682878 | 3.140827002 | 0.231048344 | 0.817277245 | 0.998252924 |
| chr19:34706028-34706566   | exonic | LSM14A   | 19 | 34706028  | 34706566  | 1  | 2  | 0  | 0  | 2  | 0 | 538   | 0.719593385 | 0.725682878 | 3.140827002 | 0.231048344 | 0.817277245 | 0.998252924 |
| chr4:39874605-39891984    | exonic | PDS5A    | 4  | 39874605  | 39891984  | 1  | 2  | 0  | 0  | 2  | 0 | 17379 | 0.719593385 | 0.725682878 | 3.140827002 | 0.231048344 | 0.817277245 | 0.998252924 |
| chr5:126140467-126147590  | exonic | LMNB1    | 5  | 126140467 | 126147590 | 1  | 2  | 0  | 0  | 2  | 0 | 7123  | 0.719593385 | 0.725682878 | 3.140827002 | 0.231048344 | 0.817277245 | 0.998252924 |
| chr8:26439484-26441499    | exonic | DPYSL2   | 8  | 26439484  | 26441499  | 1  | 2  | 0  | 0  | 2  | 0 | 2015  | 0.719593385 | 0.725682878 | 3.140827002 | 0.231048344 | 0.817277245 | 0.998252924 |
| chr5:54570441-54577343    | exonic | DHX29    | 5  | 54570441  | 54577343  | 2  | 2  | 2  | 4  | 1  | 0 | 6902  | 1.547336497 | 0.726574023 | 2.008618475 | 0.361728239 | NA          | NA          |
| chr6:25515902-25520565    | exonic | LRRC16A  | 6  | 25515902  | 25520565  | 2  | 2  | 2  | 4  | 1  | 0 | 4663  | 1.547336497 | 0.726574023 | 2.008618475 | 0.361728239 | NA          | NA          |
| chr5:78936673-78964851    | exonic | PAPD4    | 5  | 78936673  | 78964851  | 5  | 0  | 2  | 1  | 4  | 0 | 28178 | 1.629893837 | 0.730522278 | 2.139803908 | 0.341397068 | 0.732804682 | 0.998252924 |
| chr5:78940945-78964851    | exonic | PAPD4    | 5  | 78940945  | 78964851  | 5  | 0  | 2  | 1  | 4  | 0 | 23906 | 1.629893837 | 0.730522278 | 2.139803908 | 0.341397068 | 0.732804682 | 0.998252924 |
| chr15:65266939-65275931   | exonic | SPG21    | 15 | 65266939  | 65275931  | 10 | 10 | 3  | 9  | 9  | 0 | 8992  | 5.670483758 | 0.730578404 | 1.222789346 | 0.597468736 | 0.550194474 | 0.998252924 |
| chr15:99250790-99251336   | exonic | IGF1R    | 15 | 99250790  | 99251336  | 2  | 2  | 1  | 2  | 0  | 1 | 546   | 1.324635888 | 0.732176683 | 2.181837795 | 0.335577963 | 0.737189144 | 0.998252924 |
| chr6:159004985-159010814  | exonic | TMEM181  | 6  | 159004985 | 159010814 | 3  | 4  | 9  | 8  | 6  | 0 | 5829  | 4.436140866 | 0.733704154 | 1.356499922 | 0.540880351 | 0.588590055 | 0.998252924 |
| chr7:104707173-104731761  | exonic | KMT2E    | 7  | 104707173 | 104731761 | 0  | 5  | 0  | 0  | 2  | 1 | 24588 | 1.421652448 | 0.733745966 | 2.506418825 | 0.29274675  | NA          | NA          |
| chr11:76174864-76183884   | exonic | EMSY     | 11 | 76174864  | 76183884  | 3  | 3  | 4  | 2  | 6  | 0 | 9020  | 2.637651629 | 0.734676569 | 1.626134259 | 0.451793304 | NA          | NA          |
| chr18:12999419-13030607   | exonic | CEP192   | 18 | 12999419  | 13030607  | 11 | 15 | 13 | 14 | 14 | 2 | 31188 | 10.3966712  | 0.736543341 | 0.911527594 | 0.808031865 | 0.419072239 | 0.998252924 |
| chr2:191520702-191537878  | exonic | NAB1     | 2  | 191520702 | 191537878 | 1  | 5  | 1  | 5  | 1  | 0 | 17176 | 1.850219311 | 0.737670556 | 1.947688129 | 0.378741619 | NA          | NA          |
| chr16:30744600-30745329   | exonic | SRCAP    | 16 | 30744600  | 30745329  | 2  | 0  | 2  | 1  | 2  | 0 | 729   | 1.000878165 | 0.737855923 | 2.556544806 | 0.288614509 | 0.772876392 | 0.998252924 |
| chr18:20570899-20581692   | exonic | RBBP8    | 18 | 20570899  | 20581692  | 5  | 0  | 0  | 0  | 3  | 0 | 10793 | 1.008016979 | 0.73898311  | 3.015040809 | 0.245098875 | NA          | NA          |

|                          |            |                                                             |    |           |           |    |    |    |    |    |   |        |             |             |             |             |             |             |
|--------------------------|------------|-------------------------------------------------------------|----|-----------|-----------|----|----|----|----|----|---|--------|-------------|-------------|-------------|-------------|-------------|-------------|
| chr18:9588086-9595151    | exonic     | PPP4R1                                                      | 18 | 9588086   | 9595151   | 0  | 0  | 0  | 0  | 3  | 0 | 7065   | 1.008016979 | 0.73898311  | 3.015040809 | 0.245098875 | NA          | NA          |
| chr5:13911494-13931353   | exonic     | DNAH5                                                       | 5  | 13911494  | 13931353  | 4  | 5  | 6  | 0  | 12 | 0 | 19859  | 4.023269981 | 0.739306804 | 1.587826519 | 0.465609307 | NA          | NA          |
| chr16:3786036-3795355    | exonic     | CREBBP                                                      | 16 | 3786036   | 3795355   | 1  | 4  | 0  | 2  | 2  | 0 | 9319   | 1.280767753 | 0.743190908 | 2.343089047 | 0.317184236 | NA          | NA          |
| chr9:138741982-138774924 | exonic     | CAMSAP1                                                     | 9  | 138741982 | 138774924 | 4  | 3  | 0  | 1  | 2  | 1 | 32942  | 1.695360006 | 0.744169065 | 1.982917287 | 0.375290018 | 0.707444789 | 0.998252924 |
| chr8:142264087-142264728 | exonic     | SLC45A4                                                     | 8  | 142264087 | 142264728 | 36 | 12 | 27 | 23 | 19 | 8 | 641    | 19.27153496 | 0.744177813 | 0.74824274  | 0.99456737  | NA          | NA          |
| chr17:44143902-44172067  | exonic     | KANSL1                                                      | 17 | 44143902  | 44172067  | 2  | 2  | 0  | 3  | 0  | 0 | 28165  | 0.925459639 | 0.744797305 | 2.833394559 | 0.262863957 | NA          | NA          |
| chr1:45553552-45553909   | exonic     | ZSWIM5                                                      | 1  | 45553552  | 45553909  | 1  | 3  | 2  | 3  | 2  | 0 | 357    | 1.60734139  | 0.750219664 | 1.981890339 | 0.378537424 | 0.705031398 | 0.998252924 |
| chr18:76886266-76974038  | exonic     | ATP9B                                                       | 18 | 76886266  | 76974038  | 5  | 5  | 1  | 0  | 1  | 2 | 87772  | 2.405696259 | 0.751076845 | 1.658388153 | 0.452895689 | 0.650623855 | 0.998252924 |
| chr1:230798886-230810870 | exonic     | COG2                                                        | 1  | 230798886 | 230810870 | 5  | 0  | 3  | 3  | 3  | 0 | 11984  | 1.918758211 | 0.754282153 | 1.972733147 | 0.38235387  | 0.702198902 | 0.998252924 |
| chr2:183993014-183995273 | exonic     | NUP35                                                       | 2  | 183993014 | 183995273 | 2  | 1  | 3  | 4  | 1  | 0 | 2259   | 1.570329274 | 0.754443177 | 2.022052492 | 0.373107612 | NA          | NA          |
| chr13:24164288-24200931  | exonic     | TNFRSF19                                                    | 13 | 24164288  | 24200931  | 9  | 2  | 0  | 8  | 0  | 0 | 36643  | 2.359925164 | 0.754659668 | 2.059999138 | 0.366339798 | 0.714111536 | 0.998252924 |
| chr1:29088812-29090062   | intronic   | YTHDF2                                                      | 1  | 29088812  | 29090062  | 0  | 0  | 4  | 4  | 0  | 0 | 1250   | 1.214321643 | 0.754973256 | 2.841060398 | 0.265736433 | NA          | NA          |
| chr2:32117060-32145979   | exonic     | MEMO1                                                       | 2  | 32117060  | 32145979  | 2  | 0  | 3  | 1  | 1  | 1 | 28919  | 1.385338378 | 0.755503657 | 2.176513356 | 0.347116481 | 0.728503812 | 0.998252924 |
| chr1:149239868-149255307 | intergenic | <small>NRP25P (dist=130143), LOC388692 (dist=31823)</small> | 1  | 149239868 | 149255307 | 25 | 7  | 0  | 17 | 6  | 0 | 15439  | 6.978062241 | 0.756034838 | 1.370439577 | 0.551673237 | 0.581172249 | 0.998252924 |
| chr9:127064214-127089724 | exonic     | NEK6                                                        | 9  | 127064214 | 127089724 | 2  | 2  | 0  | 0  | 1  | 1 | 25510  | 1.035771514 | 0.758649225 | 2.574244685 | 0.294707504 | 0.76821733  | 0.998252924 |
| chr1:87181406-87185318   | exonic     | SH3GLB1                                                     | 1  | 87181406  | 87185318  | 4  | 3  | 0  | 2  | 3  | 0 | 3912   | 1.614480204 | 0.759544686 | 2.102155052 | 0.361317156 | 0.71786237  | 0.998252924 |
| chr1:118454615-118461358 | exonic     | GDAP2                                                       | 1  | 118454615 | 118461358 | 0  | 4  | 5  | 4  | 4  | 0 | 6743   | 2.592803552 | 0.76010134  | 1.795218459 | 0.423403256 | 0.67200107  | 0.998252924 |
| chr1:67356836-67371058   | exonic     | WDR78                                                       | 1  | 67356836  | 67371058  | 20 | 24 | 23 | 15 | 26 | 6 | 14222  | 17.89024102 | 0.760368263 | 0.763006005 | 0.99654296  | 0.318986405 | 0.998252924 |
| chr1:67358911-67371058   | exonic     | WDR78                                                       | 1  | 67358911  | 67371058  | 20 | 24 | 23 | 15 | 26 | 6 | 12147  | 17.89024102 | 0.760368263 | 0.763006005 | 0.99654296  | 0.318986405 | 0.998252924 |
| chr5:123974825-124036962 | exonic     | ZNF608                                                      | 5  | 123974825 | 124036962 | 3  | 0  | 3  | 5  | 0  | 0 | 62137  | 1.510324831 | 0.761455856 | 2.372031527 | 0.321014222 | NA          | NA          |
| chr2:160980301-160983112 | exonic     | ITGB6                                                       | 2  | 160980301 | 160983112 | 4  | 10 | 1  | 8  | 0  | 2 | 2811   | 3.922903086 | 0.761807534 | 1.521696362 | 0.50063045  | NA          | NA          |
| chr12:96717725-96728643  | exonic     | CDK17                                                       | 12 | 96717725  | 96728643  | 6  | 9  | 4  | 7  | 8  | 0 | 10918  | 4.843879021 | 0.762111126 | 1.279317692 | 0.595716866 | 0.551364389 | 0.998252924 |
| chr6:86267693-86282092   | exonic     | SNX14                                                       | 6  | 86267693  | 86282092  | 0  | 4  | 2  | 1  | 4  | 0 | 14399  | 1.682062232 | 0.764109642 | 2.137087738 | 0.357547156 | 0.720682231 | 0.998252924 |
| chr1:36826822-36828257   | exonic     | STK40                                                       | 1  | 36826822  | 36828257  | 2  | 3  | 0  | 4  | 0  | 0 | 1435   | 1.206046823 | 0.764353894 | 2.576356931 | 0.296680124 | 0.766710733 | 0.998252924 |
| chr22:24025911-24037704  | exonic     | RGL4                                                        | 22 | 24025911  | 24037704  | 2  | 3  | 0  | 4  | 0  | 0 | 11793  | 1.206046823 | 0.764353894 | 2.576356931 | 0.296680124 | 0.766710733 | 0.998252924 |
| chr22:32874967-32881196  | exonic     | FBX07                                                       | 22 | 32874967  | 32881196  | 2  | 3  | 0  | 4  | 0  | 0 | 6229   | 1.206046823 | 0.764353894 | 2.576356931 | 0.296680124 | 0.766710733 | 0.998252924 |
| chr4:62800557-62910267   | exonic     | ADGRL3                                                      | 4  | 62800557  | 62910267  | 2  | 3  | 0  | 4  | 0  | 0 | 109710 | 1.206046823 | 0.764353894 | 2.576356931 | 0.296680124 | 0.766710733 | 0.998252924 |
| chr2:114697535-114699936 | exonic     | ACTR3                                                       | 2  | 114697535 | 114699936 | 2  | 0  | 3  | 2  | 2  | 0 | 2401   | 1.304458576 | 0.768676442 | 2.30220451  | 0.333887124 | 0.738464737 | 0.998252924 |
| chr6:7181356-7189555     | exonic     | RREB1                                                       | 6  | 7181356   | 7189555   | 5  | 1  | 3  | 6  | 1  | 0 | 8199   | 2.169913322 | 0.769927074 | 1.799090039 | 0.427953608 | NA          | NA          |
| chr15:50875285-50884823  | exonic     | TRPM7                                                       | 15 | 50875285  | 50884823  | 5  | 4  | 2  | 1  | 5  | 1 | 9538   | 2.756243064 | 0.771959476 | 1.543080783 | 0.50027159  | 0.616883856 | 0.998252924 |
| chr2:113057425-113057606 | exonic     | ZC3H6                                                       | 2  | 113057425 | 113057606 | 13 | 3  | 7  | 6  | 11 | 0 | 181    | 5.549710783 | 0.772690113 | 1.249746372 | 0.618277541 | 0.536392404 | 0.998252924 |
| chr15:43120125-43132631  | exonic     | TTBK2                                                       | 15 | 43120125  | 43132631  | 5  | 7  | 3  | 9  | 3  | 0 | 12506  | 4.383717937 | 0.77338506  | 1.347581794 | 0.573905839 | NA          | NA          |
| chr2:209209834-209212747 | exonic     | PIKFYVE                                                     | 2  | 209209834 | 209212747 | 6  | 3  | 4  | 6  | 4  | 0 | 2913   | 3.207803154 | 0.773624995 | 1.476062757 | 0.524113891 | 0.600199328 | 0.998252924 |
| chr16:30740286-30745329  | exonic     | SRCAP                                                       | 16 | 30740286  | 30745329  | 2  | 0  | 2  | 2  | 1  | 0 | 5043   | 0.986162129 | 0.778389999 | 2.567713666 | 0.303145171 | 0.761779231 | 0.998252924 |
| chr6:105280916-105297121 | exonic     | HACE1                                                       | 6  | 105280916 | 105297121 | 2  | 0  | 2  | 2  | 1  | 0 | 16205  | 0.986162129 | 0.778389999 | 2.567713666 | 0.303145171 | 0.761779231 | 0.998252924 |

|                           |            |                                          |    |           |           |    |    |   |    |    |   |        |             |             |             |             |             |             |
|---------------------------|------------|------------------------------------------|----|-----------|-----------|----|----|---|----|----|---|--------|-------------|-------------|-------------|-------------|-------------|-------------|
| chr14:92473983-92477416   | exonic     | TRIP11                                   | 14 | 92473983  | 92477416  | 1  | 1  | 1 | 0  | 2  | 0 | 3433   | 0.742586611 | 0.778594314 | 2.886349067 | 0.269750573 | 0.787352151 | 0.998252924 |
| chr6:17661883-17676001    | exonic     | NUP153                                   | 6  | 17661883  | 17676001  | 1  | 1  | 1 | 0  | 2  | 0 | 14118  | 0.742586611 | 0.778594314 | 2.886349067 | 0.269750573 | 0.787352151 | 0.998252924 |
| chr2:11905658-11907984    | exonic     | LPIN1                                    | 2  | 11905658  | 11907984  | 2  | 0  | 1 | 2  | 0  | 0 | 2326   | 0.667865681 | 0.779007788 | 3.221203885 | 0.241837467 | 0.808906106 | 0.998252924 |
| chr20:32216155-32217720   | exonic     | CBFA2T2                                  | 20 | 32216155  | 32217720  | 2  | 0  | 1 | 2  | 0  | 0 | 1565   | 0.667865681 | 0.779007788 | 3.221203885 | 0.241837467 | 0.808906106 | 0.998252924 |
| chr20:45891031-45916028   | exonic     | ZMYND8                                   | 20 | 45891031  | 45916028  | 0  | 0  | 2 | 0  | 0  | 0 | 24997  | 0.667865681 | 0.779007788 | 3.221203885 | 0.241837467 | 0.808906106 | 0.998252924 |
| chr4:2951660-2952972      | exonic     | NOPI4                                    | 4  | 2951660   | 2952972   | 2  | 0  | 1 | 2  | 0  | 0 | 1312   | 0.667865681 | 0.779007788 | 3.221203885 | 0.241837467 | 0.808906106 | 0.998252924 |
| chr1:84376847-84412965    | exonic     | TTLL7                                    | 1  | 84376847  | 84412965  | 2  | 1  | 1 | 3  | 0  | 0 | 36118  | 0.948452866 | 0.780259406 | 2.618025895 | 0.298033494 | NA          | NA          |
| chr3:71050122-71102924    | exonic     | FOXP1                                    | 3  | 71050122  | 71102924  | 5  | 3  | 0 | 6  | 0  | 0 | 52802  | 1.805630422 | 0.780286879 | 2.22017067  | 0.351453557 | NA          | NA          |
| chr8:131104218-131193126  | exonic     | ASAP1                                    | 8  | 131104218 | 131193126 | 1  | 2  | 0 | 1  | 1  | 0 | 88908  | 0.704877348 | 0.780648055 | 2.934520307 | 0.266022373 | 0.790221979 | 0.998252924 |
| chr11:118352429-118353210 | exonic     | KMT2A                                    | 11 | 118352429 | 118353210 | 5  | 0  | 3 | 4  | 0  | 1 | 781    | 1.97020594  | 0.780987595 | 2.015455294 | 0.387499339 | 0.698386574 | 0.998252924 |
| chr2:24181170-24199945    | exonic     | UBXN2A                                   | 2  | 24181170  | 24199945  | 5  | 4  | 2 | 2  | 6  | 0 | 18775  | 2.675363262 | 0.78234138  | 1.614945667 | 0.484438205 | NA          | NA          |
| chr1:21083658-21107033    | exonic     | HP1BP3                                   | 1  | 21083658  | 21107033  | 1  | 3  | 0 | 2  | 1  | 0 | 23375  | 0.985464532 | 0.78388027  | 2.588590025 | 0.302821328 | 0.762026029 | 0.998252924 |
| chr6:125366356-125379252  | exonic     | RNF217                                   | 6  | 125366356 | 125379252 | 1  | 3  | 0 | 2  | 1  | 0 | 12896  | 0.985464532 | 0.78388027  | 2.588590025 | 0.302821328 | 0.762026029 | 0.998252924 |
| chr13:42385360-42393522   | exonic     | VWA8                                     | 13 | 42385360  | 42393522  | 4  | 0  | 6 | 4  | 4  | 0 | 8162   | 2.608917152 | 0.786465863 | 1.780061196 | 0.441819565 | 0.65861978  | 0.998252924 |
| chr15:57730182-57754090   | exonic     | CGNL1                                    | 15 | 57730182  | 57754090  | 1  | 2  | 2 | 2  | 2  | 0 | 23908  | 1.326754206 | 0.787013808 | 2.136852035 | 0.368305243 | 0.712645644 | 0.998252924 |
| chr1:172525008-172526934  | exonic     | SUCO                                     | 1  | 172525008 | 172526934 | 2  | 3  | 5 | 2  | 4  | 1 | 1926   | 2.772097477 | 0.787343971 | 1.53100069  | 0.514267548 | 0.607064947 | 0.998252924 |
| chr12:124904502-124915333 | exonic     | NCOR2                                    | 12 | 124904502 | 124915333 | 8  | 8  | 5 | 8  | 0  | 4 | 10831  | 5.495812579 | 0.788042351 | 1.289140445 | 0.611292861 | NA          | NA          |
| chr12:82763166-82796909   | exonic     | METTL25                                  | 12 | 82763166  | 82796909  | 9  | 7  | 3 | 6  | 8  | 0 | 33743  | 4.57870784  | 0.788288135 | 1.304508951 | 0.604279591 | 0.545657773 | 0.998252924 |
| chr19:24014399-24015914   | intergenic | RPSAP58 (dist=3480), ZNF726 (dist=81770) | 19 | 24014399  | 24015914  | 22 | 11 | 4 | 5  | 21 | 0 | 1515   | 8.616955417 | 0.788640692 | 1.151036458 | 0.685157004 | 0.493244852 | 0.998252924 |
| chr21:42609439-42629253   | exonic     | BACE2                                    | 21 | 42609439  | 42629253  | 4  | 3  | 0 | 3  | 2  | 0 | 19814  | 1.599764167 | 0.788895483 | 2.107443199 | 0.374337721 | 0.708153072 | 0.998252924 |
| chr12:1136913-1137738     | exonic     | ERC1                                     | 12 | 1136913   | 1137738   | 2  | 7  | 3 | 8  | 2  | 0 | 825    | 3.16225748  | 0.789846089 | 1.556804208 | 0.507350947 | 0.611908598 | 0.998252924 |
| chr9:33960823-33973235    | exonic     | UBAP2                                    | 9  | 33960823  | 33973235  | 27 | 6  | 2 | 12 | 12 | 0 | 12412  | 7.650905984 | 0.789951758 | 1.199293463 | 0.65868095  | 0.510100668 | 0.998252924 |
| chr15:85657103-85664245   | exonic     | PDE8A                                    | 15 | 85657103  | 85664245  | 13 | 13 | 0 | 4  | 6  | 4 | 7142   | 6.326700151 | 0.79191657  | 1.262500879 | 0.627260212 | 0.53048868  | 0.998252924 |
| chr6:13632601-13659064    | exonic     | RANBP9                                   | 6  | 13632601  | 13659064  | 7  | 4  | 3 | 2  | 0  | 4 | 26463  | 3.637316078 | 0.793703682 | 1.525014822 | 0.520456372 | NA          | NA          |
| chr12:23908571-24048958   | exonic     | SOX5                                     | 12 | 23908571  | 24048958  | 6  | 0  | 0 | 4  | 0  | 0 | 140387 | 1.199167197 | 0.794590777 | 2.83222515  | 0.280553535 | NA          | NA          |
| chr3:140978964-141006295  | exonic     | PXYLP1                                   | 3  | 140978964 | 141006295 | 6  | 0  | 0 | 4  | 0  | 0 | 27331  | 1.199167197 | 0.794590777 | 2.83222515  | 0.280553535 | NA          | NA          |
| chr3:140981084-141006295  | exonic     | PXYLP1                                   | 3  | 140981084 | 141006295 | 6  | 0  | 0 | 4  | 0  | 0 | 25211  | 1.199167197 | 0.794590777 | 2.83222515  | 0.280553535 | NA          | NA          |
| chr5:112227300-112228735  | exonic     | SRP19                                    | 5  | 112227300 | 112228735 | 6  | 0  | 0 | 4  | 0  | 0 | 1435   | 1.199167197 | 0.794590777 | 2.83222515  | 0.280553535 | NA          | NA          |
| chr5:109049220-109051965  | exonic     | MAN2A1                                   | 5  | 109049220 | 109051965 | 9  | 6  | 8 | 11 | 7  | 0 | 2745   | 5.801306673 | 0.796542046 | 1.192238539 | 0.668106272 | 0.504065758 | 0.998252924 |
| chr17:28776570-28778864   | exonic     | CPD                                      | 17 | 28776570  | 28778864  | 4  | 3  | 0 | 3  | 0  | 1 | 2294   | 1.665927933 | 0.79692695  | 2.131309026 | 0.373914313 | 0.708468068 | 0.998252924 |
| chr18:44407921-44426804   | exonic     | PIAS2                                    | 18 | 44407921  | 44426804  | 0  | 5  | 1 | 3  | 2  | 0 | 18883  | 1.62963702  | 0.798224989 | 2.159057828 | 0.36970987  | 0.711598677 | 0.998252924 |
| chr3:143704385-143708679  | exonic     | C3orf58                                  | 3  | 143704385 | 143708679 | 7  | 4  | 4 | 12 | 0  | 0 | 4294   | 3.66482452  | 0.800602746 | 1.607403538 | 0.498072032 | NA          | NA          |
| chr1:57252847-57258476    | exonic     | Clorf168                                 | 1  | 57252847  | 57258476  | 4  | 5  | 0 | 7  | 0  | 0 | 5629   | 2.131506463 | 0.801209771 | 2.10440962  | 0.380729    | 0.703404348 | 0.998252924 |
| chr7:155457868-155473602  | exonic     | RBM33                                    | 7  | 155457868 | 155473602 | 7  | 18 | 2 | 10 | 11 | 0 | 15734  | 6.828826525 | 0.801998507 | 1.228585535 | 0.652781987 | NA          | NA          |
| chr15:43086841-43109295   | exonic     | TTBK2                                    | 15 | 43086841  | 43109295  | 0  | 4  | 0 | 0  | 3  | 0 | 22454  | 1.060185462 | 0.803270577 | 2.97691449  | 0.269833272 | NA          | NA          |

|                           |              |                                               |    |           |           |    |    |    |    |    |   |        |             |             |             |             |             |             |
|---------------------------|--------------|-----------------------------------------------|----|-----------|-----------|----|----|----|----|----|---|--------|-------------|-------------|-------------|-------------|-------------|-------------|
| chr14:35261980-35331528   | exonic       | BAZ1A                                         | 14 | 35261980  | 35331528  | 6  | 5  | 0  | 6  | 2  | 0 | 69548  | 2.525223807 | 0.806309114 | 1.79769133  | 0.448524783 | 0.653774504 | 0.998252924 |
| chr1:741179-745550        | intergenic   | LOC100288069 (dist=27111), FAM87B (dist=7201) | 1  | 741179    | 745550    | 3  | 13 | 7  | 11 | 8  | 0 | 4371   | 6.171074006 | 0.807254618 | 1.231526806 | 0.655490903 | 0.512151741 | 0.998252924 |
| chr6:157357969-157406039  | exonic       | ARID1B                                        | 6  | 157357969 | 157406039 | 9  | 2  | 5  | 9  | 3  | 0 | 48070  | 3.815663943 | 0.807362075 | 1.42876167  | 0.565078202 | 0.572020574 | 0.998252924 |
| chr14:61262934-61346553   | exonic       | MNAT1                                         | 14 | 61262934  | 61346553  | 1  | 2  | 1  | 5  | 0  | 0 | 83619  | 1.55491609  | 0.807866242 | 2.21406763  | 0.364878756 | NA          | NA          |
| chr7:156619298-156629579  | exonic       | LMBR1                                         | 7  | 156619298 | 156629579 | 4  | 7  | 6  | 2  | 7  | 2 | 10281  | 4.595744458 | 0.808393622 | 1.258016205 | 0.642593966 | 0.5204876   | 0.998252924 |
| chr19:34921480-34929671   | exonic       | UBA2                                          | 19 | 34921480  | 34929671  | 3  | 5  | 3  | 6  | 3  | 0 | 8191   | 2.023354364 | 0.808401926 | 1.831354562 | 0.441422946 | 0.658906833 | 0.998252924 |
| chr9:33953282-33963789    | exonic       | UBAP2                                         | 9  | 33953282  | 33963789  | 18 | 16 | 8  | 13 | 14 | 2 | 10507  | 10.38119909 | 0.808601634 | 0.907978712 | 0.890551312 | 0.373169929 | 0.998252924 |
| chr11:18312988-18313566   | exonic       | HPS5                                          | 11 | 18312988  | 18313566  | 10 | 5  | 10 | 8  | 5  | 3 | 578    | 6.514222695 | 0.809465589 | 1.064663392 | 0.760301889 | 0.447074153 | 0.998252924 |
| chr1:231930987-231954263  | exonic       | DISC1                                         | 1  | 231930987 | 231954263 | 9  | 5  | 10 | 4  | 4  | 5 | 23276  | 6.455400007 | 0.811761234 | 1.111000881 | 0.730657597 | 0.464988322 | 0.998252924 |
| chr6:84894904-84913814    | exonic       | CEP162                                        | 6  | 84894904  | 84913814  | 0  | 5  | 3  | 6  | 1  | 0 | 18910  | 2.222081805 | 0.811974206 | 1.942336399 | 0.418039947 | 0.675917911 | 0.998252924 |
| chr3:149613259-149639014  | exonic       | RNF13                                         | 3  | 149613259 | 149639014 | 2  | 2  | 5  | 1  | 6  | 0 | 25755  | 2.425346527 | 0.812047287 | 1.742877674 | 0.465923282 | NA          | NA          |
| chr2:20467058-20468141    | intronic     | PUM2                                          | 2  | 20467058  | 20468141  | 0  | 2  | 9  | 0  | 3  | 3 | 1083   | 3.41171092  | 0.812220981 | 1.764701145 | 0.460259791 | NA          | NA          |
| chr6:135360710-135363264  | exonic       | HBS1L                                         | 6  | 135360710 | 135363264 | 3  | 1  | 5  | 3  | 4  | 0 | 2554   | 2.350625598 | 0.812806395 | 1.721604381 | 0.472121473 | 0.636840087 | 0.998252924 |
| chr10:12159671-12162266   | exonic       | DHTKD1                                        | 10 | 12159671  | 12162266  | 1  | 1  | 0  | 0  | 1  | 0 | 2595   | 0.424290164 | 0.814124233 | 3.864657601 | 0.210658826 | 0.833153506 | 0.998252924 |
| chr14:45481177-45523752   | exonic       | FAM179B                                       | 14 | 45481177  | 45523752  | 1  | 1  | 0  | 0  | 1  | 0 | 42575  | 0.424290164 | 0.814124233 | 3.864657601 | 0.210658826 | 0.833153506 | 0.998252924 |
| chr15:63349183-63354844   | exonic       | TPM1                                          | 15 | 63349183  | 63354844  | 1  | 1  | 0  | 0  | 1  | 0 | 5661   | 0.424290164 | 0.814124233 | 3.864657601 | 0.210658826 | 0.833153506 | 0.998252924 |
| chr17:29061914-29093606   | ncRNA_exonic | SUZ12P1                                       | 17 | 29061914  | 29093606  | 1  | 1  | 0  | 0  | 1  | 0 | 31692  | 0.424290164 | 0.814124233 | 3.864657601 | 0.210658826 | 0.833153506 | 0.998252924 |
| chr17:994904-1003975      | exonic       | ABR                                           | 17 | 994904    | 1003975   | 1  | 1  | 0  | 0  | 1  | 0 | 9071   | 0.424290164 | 0.814124233 | 3.864657601 | 0.210658826 | 0.833153506 | 0.998252924 |
| chr2:198388347-198405161  | exonic       | HSPE1-MOB4, MOB4                              | 2  | 198388347 | 198405161 | 1  | 1  | 0  | 0  | 1  | 0 | 16814  | 0.424290164 | 0.814124233 | 3.864657601 | 0.210658826 | 0.833153506 | 0.998252924 |
| chr2:61528085-61528589    | exonic       | USP34                                         | 2  | 61528085  | 61528589  | 1  | 1  | 0  | 0  | 1  | 0 | 504    | 0.424290164 | 0.814124233 | 3.864657601 | 0.210658826 | 0.833153506 | 0.998252924 |
| chr2:61721028-61722748    | exonic       | XPO1                                          | 2  | 61721028  | 61722748  | 1  | 1  | 0  | 0  | 1  | 0 | 1720   | 0.424290164 | 0.814124233 | 3.864657601 | 0.210658826 | 0.833153506 | 0.998252924 |
| chr22:40708508-40717233   | exonic       | TNRC6B                                        | 22 | 40708508  | 40717233  | 1  | 1  | 0  | 0  | 1  | 0 | 8725   | 0.424290164 | 0.814124233 | 3.864657601 | 0.210658826 | 0.833153506 | 0.998252924 |
| chr6:90432673-90433338    | exonic       | MDN1                                          | 6  | 90432673  | 90433338  | 1  | 1  | 0  | 0  | 1  | 0 | 665    | 0.424290164 | 0.814124233 | 3.864657601 | 0.210658826 | 0.833153506 | 0.998252924 |
| chr7:106921744-106938791  | exonic       | COG5                                          | 7  | 106921744 | 106938791 | 1  | 1  | 0  | 0  | 1  | 0 | 17047  | 0.424290164 | 0.814124233 | 3.864657601 | 0.210658826 | 0.833153506 | 0.998252924 |
| chr7:64526630-64527428    | ncRNA_exonic | CCT6P3                                        | 7  | 64526630  | 64527428  | 1  | 1  | 0  | 0  | 1  | 0 | 798    | 0.424290164 | 0.814124233 | 3.864657601 | 0.210658826 | 0.833153506 | 0.998252924 |
| chr7:77256021-77256992    | exonic       | PTPN12                                        | 7  | 77256021  | 77256992  | 1  | 1  | 0  | 0  | 1  | 0 | 971    | 0.424290164 | 0.814124233 | 3.864657601 | 0.210658826 | 0.833153506 | 0.998252924 |
| chr7:27668989-27689252    | exonic       | HIBADH                                        | 7  | 27668989  | 27689252  | 4  | 15 | 2  | 13 | 4  | 0 | 20263  | 5.390780502 | 0.814934396 | 1.342557442 | 0.607001511 | NA          | NA          |
| chr2:206036934-206058044  | exonic       | PARD3B                                        | 2  | 206036934 | 206058044 | 3  | 4  | 3  | 7  | 1  | 0 | 21110  | 2.541078219 | 0.815127676 | 1.676258733 | 0.486277959 | NA          | NA          |
| chr11:78176921-78204241   | exonic       | NARS2                                         | 11 | 78176921  | 78204241  | 0  | 4  | 1  | 0  | 2  | 0 | 27320  | 1.652630246 | 0.819904038 | 2.117870455 | 0.387136067 | 0.698655478 | 0.998252924 |
| chr3:171851260-171969331  | exonic       | FNDC3B                                        | 3  | 171851260 | 171969331 | 4  | 5  | 3  | 3  | 0  | 3 | 118071 | 3.222723825 | 0.820615537 | 1.559066396 | 0.526350603 | 0.59864463  | 0.998252924 |
| chr12:123879593-123880979 | exonic       | KMT5A                                         | 12 | 123879593 | 123880979 | 1  | 1  | 0  | 0  | 0  | 1 | 1386   | 0.611481351 | 0.820841752 | 3.437224262 | 0.238809484 | NA          | NA          |
| chr20:5545662-5550885     | exonic       | GPCPD1                                        | 20 | 5545662   | 5550885   | 1  | 1  | 0  | 0  | 0  | 1 | 5223   | 0.611481351 | 0.820841752 | 3.437224262 | 0.238809484 | NA          | NA          |
| chr3:58062772-58067503    | exonic       | FLNB                                          | 3  | 58062772  | 58067503  | 1  | 1  | 0  | 0  | 0  | 1 | 4731   | 0.611481351 | 0.820841752 | 3.437224262 | 0.238809484 | NA          | NA          |
| chr8:17092224-17094882    | exonic       | CNOT7                                         | 8  | 17092224  | 17094882  | 1  | 1  | 0  | 0  | 0  | 1 | 2658   | 0.611481351 | 0.820841752 | 3.437224262 | 0.238809484 | NA          | NA          |
| chr17:76075475-76089844   | exonic       | TNRC6C                                        | 17 | 76075475  | 76089844  | 4  | 3  | 0  | 4  | 1  | 0 | 14369  | 1.585048131 | 0.820913067 | 2.143068356 | 0.383055008 | NA          | NA          |

|                           |              |            |    |           |           |    |    |   |    |   |   |       |             |             |             |             |             |             |
|---------------------------|--------------|------------|----|-----------|-----------|----|----|---|----|---|---|-------|-------------|-------------|-------------|-------------|-------------|-------------|
| chr18:6237962-6312055     | exonic       | L3MBTL4    | 18 | 6237962   | 6312055   | 4  | 3  | 0 | 4  | 1 | 0 | 74093 | 1.585048131 | 0.820913067 | 2.143068356 | 0.383055008 | NA          | NA          |
| chr15:44884528-44889141   | exonic       | SPG11      | 15 | 44884528  | 44889141  | 5  | 0  | 0 | 2  | 1 | 0 | 4613  | 0.978584906 | 0.820951184 | 2.800132406 | 0.293182988 | NA          | NA          |
| chr14:31371741-31380368   | exonic       | STRN3      | 14 | 31371741  | 31380368  | 4  | 1  | 0 | 0  | 3 | 0 | 8627  | 1.053305836 | 0.821837794 | 2.725795337 | 0.301503852 | 0.763030313 | 0.998252924 |
| chr4:83793096-83796975    | exonic       | SEC31A     | 4  | 83793096  | 83796975  | 6  | 9  | 1 | 8  | 4 | 0 | 3879  | 3.874273642 | 0.822039828 | 1.450365506 | 0.566781149 | 0.57086288  | 0.998252924 |
| chr5:78734832-78752841    | exonic       | HOMER1     | 5  | 78734832  | 78752841  | 6  | 5  | 4 | 4  | 5 | 1 | 18009 | 3.772978013 | 0.822955228 | 1.311952095 | 0.627275364 | 0.530478749 | 0.998252924 |
| chrX:107083899-107097934  | exonic       | MID2       | X  | 107083899 | 107097934 | 10 | 3  | 3 | 4  | 7 | 0 | 14035 | 3.676941395 | 0.823568599 | 1.429219969 | 0.57623642  | 0.564455391 | 0.998252924 |
| chr1:82302569-82372915    | exonic       | ADGRL2     | 1  | 82302569  | 82372915  | 1  | 1  | 5 | 5  | 1 | 0 | 70346 | 1.942192217 | 0.824427779 | 1.927994017 | 0.427609096 | NA          | NA          |
| chr14:81362061-81372425   | exonic       | CEP128     | 14 | 81362061  | 81372425  | 2  | 0  | 6 | 0  | 0 | 3 | 10364 | 2.366243865 | 0.825178803 | 2.136482458 | 0.386232426 | NA          | NA          |
| chr1:243708811-243736350  | exonic       | AKT3       | 1  | 243708811 | 243736350 | 11 | 5  | 5 | 7  | 6 | 1 | 27539 | 5.055143329 | 0.828491356 | 1.176660315 | 0.704104103 | 0.481367945 | 0.998252924 |
| chr12:47606380-47610472   | ncRNA_exonic | PCED1B-AS1 | 12 | 47606380  | 47610472  | 2  | 0  | 2 | 3  | 0 | 0 | 4092  | 0.971446092 | 0.830071212 | 2.789860312 | 0.29753146  | 0.766060793 | 0.998252924 |
| chr15:102248995-102255166 | exonic       | TARSL2     | 15 | 102248995 | 102255166 | 2  | 0  | 2 | 3  | 0 | 0 | 6171  | 0.971446092 | 0.830071212 | 2.789860312 | 0.29753146  | 0.766060793 | 0.998252924 |
| chr3:167272438-167345080  | exonic       | WDR49      | 3  | 167272438 | 167345080 | 2  | 0  | 2 | 3  | 0 | 0 | 72642 | 0.971446092 | 0.830071212 | 2.789860312 | 0.29753146  | 0.766060793 | 0.998252924 |
| chr3:47676679-47719801    | exonic       | SMARCC1    | 3  | 47676679  | 47719801  | 1  | 1  | 1 | 1  | 1 | 0 | 43122 | 0.727870574 | 0.830073691 | 2.715305229 | 0.305701798 | 0.759831704 | 0.998252924 |
| chrX:38132638-38136025    | exonic       | RPGR       | X  | 38132638  | 38136025  | 1  | 1  | 1 | 1  | 1 | 0 | 3387  | 0.727870574 | 0.830073691 | 2.715305229 | 0.305701798 | 0.759831704 | 0.998252924 |
| chr12:50829270-50834332   | exonic       | LARP4      | 12 | 50829270  | 50834332  | 4  | 0  | 2 | 0  | 4 | 0 | 5062  | 1.394595509 | 0.830330729 | 2.448410651 | 0.3391305   | NA          | NA          |
| chr12:50829270-50835426   | exonic       | LARP4      | 12 | 50829270  | 50835426  | 4  | 0  | 2 | 0  | 4 | 0 | 6156  | 1.394595509 | 0.830330729 | 2.448410651 | 0.3391305   | NA          | NA          |
| chr11:76224429-76239510   | exonic       | EMSY       | 11 | 76224429  | 76239510  | 2  | 4  | 1 | 0  | 5 | 0 | 15081 | 1.757483216 | 0.830689239 | 2.101157299 | 0.39534843  | NA          | NA          |
| chr1:179089324-179091002  | exonic       | ABL2       | 1  | 179089324 | 179091002 | 1  | 0  | 3 | 0  | 3 | 0 | 1678  | 1.083876285 | 0.830712621 | 2.717470997 | 0.30569328  | NA          | NA          |
| chr14:66028054-66028484   | exonic       | FUT8       | 14 | 66028054  | 66028484  | 8  | 9  | 6 | 6  | 7 | 2 | 430   | 5.885489368 | 0.831612215 | 1.094269903 | 0.759969925 | 0.447272563 | 0.998252924 |
| chr1:161816238-161833102  | exonic       | ATF6       | 1  | 161816238 | 161833102 | 4  | 2  | 0 | 2  | 2 | 0 | 16864 | 1.319176983 | 0.832523217 | 2.277939631 | 0.365472028 | 0.714759083 | 0.998252924 |
| chr9:14146687-14179779    | exonic       | NFIB       | 9  | 14146687  | 14179779  | 10 | 10 | 3 | 11 | 6 | 0 | 33092 | 5.520024263 | 0.832866085 | 1.238456123 | 0.672503506 | 0.501263209 | 0.998252924 |
| chr9:14150143-14179779    | exonic       | NFIB       | 9  | 14150143  | 14179779  | 10 | 10 | 3 | 11 | 6 | 0 | 29636 | 5.520024263 | 0.832866085 | 1.238456123 | 0.672503506 | 0.501263209 | 0.998252924 |
| chr1:48860938-48865316    | exonic       | SPATA6     | 1  | 48860938  | 48865316  | 1  | 0  | 2 | 0  | 2 | 0 | 4378  | 0.765579837 | 0.83504441  | 3.076105538 | 0.271461561 | 0.78603606  | 0.998252924 |
| chr10:121338237-121347760 | exonic       | TIAL1      | 10 | 121338237 | 121347760 | 1  | 0  | 2 | 0  | 2 | 0 | 9523  | 0.765579837 | 0.83504441  | 3.076105538 | 0.271461561 | 0.78603606  | 0.998252924 |
| chr14:20863608-20864889   | exonic       | TEP1       | 14 | 20863608  | 20864889  | 1  | 0  | 2 | 0  | 2 | 0 | 1281  | 0.765579837 | 0.83504441  | 3.076105538 | 0.271461561 | 0.78603606  | 0.998252924 |
| chr5:135489280-135489852  | exonic       | SMAD5      | 5  | 135489280 | 135489852 | 1  | 0  | 2 | 0  | 2 | 0 | 572   | 0.765579837 | 0.83504441  | 3.076105538 | 0.271461561 | 0.78603606  | 0.998252924 |
| chr13:77655561-77661768   | exonic       | MYCBP2     | 13 | 77655561  | 77661768  | 0  | 4  | 0 | 1  | 2 | 0 | 6207  | 1.045469425 | 0.835683541 | 2.754917007 | 0.303342547 | NA          | NA          |
| chr5:151169883-151170623  | exonic       | G3BP1      | 5  | 151169883 | 151170623 | 12 | 5  | 1 | 5  | 5 | 1 | 740   | 4.061403978 | 0.83716055  | 1.343233808 | 0.623242614 | 0.533125102 | 0.998252924 |
| chr17:953289-1003975      | exonic       | ABR        | 17 | 953289    | 1003975   | 3  | 0  | 6 | 3  | 2 | 1 | 50686 | 2.439782589 | 0.841685919 | 1.743784851 | 0.482677619 | 0.629324657 | 0.998252924 |
| chr11:17981016-18029623   | exonic       | SERGEF     | 11 | 17981016  | 18029623  | 1  | 2  | 0 | 2  | 0 | 0 | 48607 | 0.690161311 | 0.841969707 | 3.185058507 | 0.26434984  | 0.791510359 | 0.998252924 |
| chr13:99549741-99556960   | exonic       | DOCK9      | 13 | 99549741  | 99556960  | 1  | 2  | 0 | 2  | 0 | 0 | 7219  | 0.690161311 | 0.841969707 | 3.185058507 | 0.26434984  | 0.791510359 | 0.998252924 |
| chr15:43427709-43452992   | exonic       | TMEM62     | 15 | 43427709  | 43452992  | 1  | 2  | 0 | 2  | 0 | 0 | 25283 | 0.690161311 | 0.841969707 | 3.185058507 | 0.26434984  | 0.791510359 | 0.998252924 |
| chr16:89164998-89169167   | exonic       | ACSF3      | 16 | 89164998  | 89169167  | 1  | 2  | 0 | 2  | 0 | 0 | 4169  | 0.690161311 | 0.841969707 | 3.185058507 | 0.26434984  | 0.791510359 | 0.998252924 |
| chr19:311844-313643       | exonic       | MIER2      | 19 | 311844    | 313643    | 1  | 2  | 0 | 2  | 0 | 0 | 1799  | 0.690161311 | 0.841969707 | 3.185058507 | 0.26434984  | 0.791510359 | 0.998252924 |
| chr2:9458652-9475308      | exonic       | ASAP2      | 2  | 9458652   | 9475308   | 1  | 2  | 0 | 2  | 0 | 0 | 16656 | 0.690161311 | 0.841969707 | 3.185058507 | 0.26434984  | 0.791510359 | 0.998252924 |

|                           |              |           |    |           |           |   |   |   |   |   |   |       |             |             |             |             |             |             |
|---------------------------|--------------|-----------|----|-----------|-----------|---|---|---|---|---|---|-------|-------------|-------------|-------------|-------------|-------------|-------------|
| chr6:42604748-42610219    | exonic       | UBR2      | 6  | 42604748  | 42610219  | 1 | 2 | 0 | 2 | 0 | 0 | 5471  | 0.690161311 | 0.841969707 | 3.185058507 | 0.26434984  | 0.791510359 | 0.998252924 |
| chr7:158662545-158684024  | exonic       | WDR60     | 7  | 158662545 | 158684024 | 1 | 2 | 0 | 2 | 0 | 0 | 21479 | 0.690161311 | 0.841969707 | 3.185058507 | 0.26434984  | 0.791510359 | 0.998252924 |
| chr9:125639749-125645658  | exonic       | RC3H2     | 9  | 125639749 | 125645658 | 1 | 2 | 0 | 2 | 0 | 0 | 5909  | 0.690161311 | 0.841969707 | 3.185058507 | 0.26434984  | 0.791510359 | 0.998252924 |
| chr13:28830428-28835595   | exonic       | PAN3      | 13 | 28830428  | 28835595  | 2 | 1 | 9 | 6 | 4 | 0 | 5167  | 3.329648912 | 0.842413813 | 1.577796558 | 0.533917893 | NA          | NA          |
| chr1:113119607-113159517  | exonic       | ST7L      | 1  | 113119607 | 113159517 | 0 | 3 | 0 | 0 | 2 | 0 | 39910 | 0.764882241 | 0.843429356 | 3.352202097 | 0.251604567 | NA          | NA          |
| chr1:180044156-180068120  | exonic       | CEP350    | 1  | 180044156 | 180068120 | 0 | 3 | 0 | 0 | 2 | 0 | 23964 | 0.764882241 | 0.843429356 | 3.352202097 | 0.251604567 | NA          | NA          |
| chr1:97235258-97250810    | exonic       | PTBP2     | 1  | 97235258  | 97250810  | 0 | 3 | 0 | 0 | 2 | 0 | 15552 | 0.764882241 | 0.843429356 | 3.352202097 | 0.251604567 | NA          | NA          |
| chr10:93748910-93768032   | exonic       | BTAF1     | 10 | 93748910  | 93768032  | 0 | 3 | 0 | 0 | 2 | 0 | 19122 | 0.764882241 | 0.843429356 | 3.352202097 | 0.251604567 | NA          | NA          |
| chr11:74521228-74528759   | exonic       | RNF169    | 11 | 74521228  | 74528759  | 0 | 3 | 0 | 0 | 2 | 0 | 7531  | 0.764882241 | 0.843429356 | 3.352202097 | 0.251604567 | NA          | NA          |
| chr2:210993754-211019335  | exonic       | KANSL1L   | 2  | 210993754 | 211019335 | 0 | 2 | 0 | 7 | 2 | 0 | 25581 | 0.764882241 | 0.843429356 | 3.352202097 | 0.251604567 | NA          | NA          |
| chr2:96555547-96583790    | exonic       | ANKRD36C  | 2  | 96555547  | 96583790  | 0 | 3 | 0 | 0 | 2 | 0 | 28243 | 0.764882241 | 0.843429356 | 3.352202097 | 0.251604567 | NA          | NA          |
| chr20:33057853-33069011   | exonic       | ITCH      | 20 | 33057853  | 33069011  | 0 | 3 | 0 | 0 | 2 | 0 | 11158 | 0.764882241 | 0.843429356 | 3.352202097 | 0.251604567 | NA          | NA          |
| chr15:93489050-93510743   | exonic       | CHD2      | 15 | 93489050  | 93510743  | 6 | 0 | 5 | 4 | 4 | 0 | 21693 | 2.669622012 | 0.846171317 | 1.756253593 | 0.481804747 | 0.629944657 | 0.998252924 |
| chr15:93492181-93510743   | exonic       | CHD2      | 15 | 93492181  | 93510743  | 6 | 0 | 5 | 4 | 4 | 0 | 18562 | 2.669622012 | 0.846171317 | 1.756253593 | 0.481804747 | 0.629944657 | 0.998252924 |
| chr11:77386080-77404656   | exonic       | RSF1      | 11 | 77386080  | 77404656  | 4 | 1 | 1 | 3 | 3 | 0 | 18576 | 2.001758701 | 0.849051213 | 1.814574235 | 0.467906574 | 0.639851402 | 0.998252924 |
| chr20:32684462-32686439   | exonic       | EIF2S2    | 20 | 32684462  | 32686439  | 1 | 0 | 5 | 3 | 0 | 1 | 1977  | 1.742484835 | 0.850336607 | 2.167138124 | 0.392377767 | NA          | NA          |
| chr14:103907901-103908429 | intronic     | MARK3     | 14 | 103907901 | 103908429 | 0 | 5 | 3 | 0 | 0 | 3 | 528   | 2.387841898 | 0.851313288 | 2.117799423 | 0.40198013  | NA          | NA          |
| chr20:33954359-33971936   | exonic       | UQCC1     | 20 | 33954359  | 33971936  | 2 | 4 | 3 | 5 | 2 | 0 | 17577 | 2.320495928 | 0.853399395 | 1.705586248 | 0.500355462 | 0.616824808 | 0.998252924 |
| chr11:34952950-35006275   | exonic       | PDHX      | 11 | 34952950  | 35006275  | 0 | 2 | 5 | 4 | 0 | 1 | 53325 | 2.068360875 | 0.854739975 | 2.02139375  | 0.422846847 | 0.672407005 | 0.998252924 |
| chr1:150464886-150469384  | exonic       | TARS2     | 1  | 150464886 | 150469384 | 7 | 0 | 0 | 0 | 4 | 0 | 4498  | 1.387018287 | 0.856491689 | 2.697891346 | 0.31746708  | NA          | NA          |
| chr1:179869260-179877808  | exonic       | TOR1AIP1  | 1  | 179869260 | 179877808 | 1 | 0 | 3 | 1 | 2 | 0 | 8548  | 1.069160248 | 0.859773185 | 2.528152619 | 0.340079621 | 0.733796568 | 0.998252924 |
| chr2:170728745-170735084  | exonic       | UBR3      | 2  | 170728745 | 170735084 | 4 | 0 | 3 | 3 | 2 | 0 | 6339  | 1.668743847 | 0.862062397 | 2.08518244  | 0.413423008 | 0.67929672  | 0.998252924 |
| chr15:63821212-63855207   | exonic       | USP3      | 15 | 63821212  | 63855207  | 3 | 3 | 2 | 0 | 2 | 1 | 33995 | 1.889810747 | 0.8624737   | 1.964356886 | 0.439061612 | 0.660616894 | 0.998252924 |
| chr12:1289705-1299218     | exonic       | ERC1      | 12 | 1289705   | 1299218   | 4 | 3 | 0 | 5 | 0 | 0 | 9513  | 1.570332094 | 0.864546336 | 2.329881593 | 0.371068787 | NA          | NA          |
| chr7:33388679-33427756    | exonic       | BBS9      | 7  | 33388679  | 33427756  | 4 | 3 | 0 | 5 | 0 | 0 | 39077 | 1.570332094 | 0.864546336 | 2.329881593 | 0.371068787 | NA          | NA          |
| chr6:18160113-18166609    | exonic       | KDM1B     | 6  | 18160113  | 18166609  | 2 | 3 | 2 | 0 | 3 | 1 | 6496  | 1.846640208 | 0.864585291 | 1.91819614  | 0.450728303 | 0.652185381 | 0.998252924 |
| chr17:58421318-58421599   | intronic     | USP32     | 17 | 58421318  | 58421599  | 5 | 0 | 0 | 3 | 0 | 0 | 281   | 0.963868869 | 0.864854896 | 3.059101745 | 0.282715309 | NA          | NA          |
| chr2:30572803-30573012    | ncRNA_exonic | LOC285043 | 2  | 30572803  | 30573012  | 5 | 0 | 0 | 3 | 0 | 0 | 209   | 0.963868869 | 0.864854896 | 3.059101745 | 0.282715309 | NA          | NA          |
| chr22:29517344-29521404   | exonic       | KREMEN1   | 22 | 29517344  | 29521404  | 5 | 0 | 0 | 3 | 0 | 0 | 4060  | 0.963868869 | 0.864854896 | 3.059101745 | 0.282715309 | NA          | NA          |
| chr3:113737524-113765579  | exonic       | CCDC191   | 3  | 113737524 | 113765579 | 5 | 0 | 0 | 3 | 0 | 0 | 28055 | 0.963868869 | 0.864854896 | 3.059101745 | 0.282715309 | NA          | NA          |
| chr3:180685838-180688146  | exonic       | FXR1      | 3  | 180685838 | 180688146 | 5 | 0 | 0 | 3 | 0 | 0 | 2308  | 0.963868869 | 0.864854896 | 3.059101745 | 0.282715309 | NA          | NA          |
| chr22:46096161-46136418   | exonic       | ATXN10    | 22 | 46096161  | 46136418  | 7 | 6 | 1 | 8 | 0 | 1 | 40257 | 3.304542109 | 0.865795934 | 1.59184227  | 0.543895555 | 0.586513348 | 0.998252924 |
| chr1:113119607-113126748  | exonic       | ST7L      | 1  | 113119607 | 113126748 | 1 | 1 | 0 | 1 | 0 | 0 | 7141  | 0.409574127 | 0.868524973 | 3.917646096 | 0.221695618 | 0.824550841 | 0.998252924 |
| chr10:1118055-1132297     | exonic       | WDR37     | 10 | 1118055   | 1132297   | 1 | 1 | 0 | 1 | 0 | 0 | 14242 | 0.409574127 | 0.868524973 | 3.917646096 | 0.221695618 | 0.824550841 | 0.998252924 |
| chr10:124339093-124360539 | exonic       | DMBT1     | 10 | 124339093 | 124360539 | 1 | 1 | 0 | 1 | 0 | 0 | 21446 | 0.409574127 | 0.868524973 | 3.917646096 | 0.221695618 | 0.824550841 | 0.998252924 |

|                           |        |               |       |           |           |          |    |   |    |    |   |       |             |             |             |             |             |             |             |
|---------------------------|--------|---------------|-------|-----------|-----------|----------|----|---|----|----|---|-------|-------------|-------------|-------------|-------------|-------------|-------------|-------------|
| chr10:882342-890995       | exonic | LARP4B        | 10    | 882342    | 890995    | 1        | 1  | 0 | 1  | 0  | 0 | 8653  | 0.409574127 | 0.868524973 | 3.917646096 | 0.221695618 | 0.824550841 | 0.998252924 |             |
| chr11:120916382-120924441 | exonic | TBCEL         | 11    | 120916382 | 120924441 | 1        | 1  | 0 | 1  | 0  | 0 | 8059  | 0.409574127 | 0.868524973 | 3.917646096 | 0.221695618 | 0.824550841 | 0.998252924 |             |
| chr12:118682698-118693460 | exonic | TAOK3         | 12    | 118682698 | 118693460 | 1        | 1  | 0 | 1  | 0  | 0 | 10762 | 0.409574127 | 0.868524973 | 3.917646096 | 0.221695618 | 0.824550841 | 0.998252924 |             |
| chr18:9588086-9588851     | exonic | PPP4R1        | 18    | 9588086   | 9588851   | 1        | 1  | 0 | 1  | 0  | 0 | 765   | 0.409574127 | 0.868524973 | 3.917646096 | 0.221695618 | 0.824550841 | 0.998252924 |             |
| chr19:10270333-10288043   | exonic | DNMT1         | 19    | 10270333  | 10288043  | 1        | 1  | 0 | 1  | 0  | 0 | 17710 | 0.409574127 | 0.868524973 | 3.917646096 | 0.221695618 | 0.824550841 | 0.998252924 |             |
| chr19:40964061-40964452   | exonic | BLVRB         | 19    | 40964061  | 40964452  | 1        | 1  | 0 | 1  | 0  | 0 | 391   | 0.409574127 | 0.868524973 | 3.917646096 | 0.221695618 | 0.824550841 | 0.998252924 |             |
| chr2:110579481-110582530  | exonic | RGPD5, RGPLD6 | 2     | 110579481 | 110582530 | 1        | 1  | 0 | 1  | 0  | 0 | 3049  | 0.409574127 | 0.868524973 | 3.917646096 | 0.221695618 | 0.824550841 | 0.998252924 |             |
| chr2:135075099-135076310  | exonic | MGAT5         | 2     | 135075099 | 135076310 | 1        | 1  | 0 | 1  | 0  | 0 | 1211  | 0.409574127 | 0.868524973 | 3.917646096 | 0.221695618 | 0.824550841 | 0.998252924 |             |
| chr3:63884074-63898901    | exonic | ATXN7         | 3     | 63884074  | 63898901  | 1        | 1  | 0 | 1  | 0  | 0 | 14827 | 0.409574127 | 0.868524973 | 3.917646096 | 0.221695618 | 0.824550841 | 0.998252924 |             |
| chr5:34823060-34824596    | exonic | RAI14         | 5     | 34823060  | 34824596  | 1        | 1  | 0 | 1  | 0  | 0 | 1536  | 0.409574127 | 0.868524973 | 3.917646096 | 0.221695618 | 0.824550841 | 0.998252924 |             |
| chr6:154533903-154544377  | exonic | IPCEF1        | 6     | 154533903 | 154544377 | 1        | 1  | 0 | 1  | 0  | 0 | 10474 | 0.409574127 | 0.868524973 | 3.917646096 | 0.221695618 | 0.824550841 | 0.998252924 |             |
| chr6:25515902-25540306    | exonic | LRRC16A       | 6     | 25515902  | 25540306  | 1        | 1  | 0 | 1  | 0  | 0 | 24404 | 0.409574127 | 0.868524973 | 3.917646096 | 0.221695618 | 0.824550841 | 0.998252924 |             |
| chr6:42600289-42604932    | exonic | UBR2          | 6     | 42600289  | 42604932  | 1        | 1  | 0 | 1  | 0  | 0 | 4643  | 0.409574127 | 0.868524973 | 3.917646096 | 0.221695618 | 0.824550841 | 0.998252924 |             |
| chr7:21695449-21730499    | exonic | DNAH11        | 7     | 21695449  | 21730499  | 1        | 1  | 0 | 1  | 0  | 0 | 35050 | 0.409574127 | 0.868524973 | 3.917646096 | 0.221695618 | 0.824550841 | 0.998252924 |             |
| chrX:13762533-13767652    | exonic | OFD1          | X     | 13762533  | 13767652  | 1        | 1  | 0 | 1  | 0  | 0 | 5119  | 0.409574127 | 0.868524973 | 3.917646096 | 0.221695618 | 0.824550841 | 0.998252924 |             |
| chr3:152132729-152150709  | exonic | MBNL1         | 3     | 152132729 | 152150709 | 5        | 6  | 4 | 5  | 0  | 3 | 17980 | 3.935878363 | 0.868997168 | 1.438880014 | 0.603939981 | 0.545883546 | 0.998252924 |             |
| chr12:105321750-105322472 | exonic | SLC41A2       | 12    | 105321750 | 105322472 | 6        | 2  | 6 | 3  | 7  | 0 | 722   | 3.472213516 | 0.869792145 | 1.475468392 | 0.589502391 | 0.555524309 | 0.998252924 |             |
| chr6:20781375-20846409    | exonic | CDKAL1        | 6     | 20781375  | 20846409  | 4        | 2  | 0 | 3  | 1  | 0 | 65034 | 1.304460947 | 0.870438435 | 2.308023724 | 0.377135827 | 0.706072668 | 0.998252924 |             |
| chr10:70218860-70229920   | exonic | DNA2          | 10    | 70218860  | 70229920  | 4        | 0  | 0 | 0  | 2  | 0 | 11060 | 0.758002615 | 0.872144433 | 3.348986758 | 0.260420389 | NA          | NA          |             |
| chr13:50279756-50280508   | exonic | KPNA3         | 13    | 50279756  | 50280508  | 4        | 0  | 0 | 0  | 2  | 0 | 752   | 0.758002615 | 0.872144433 | 3.348986758 | 0.260420389 | NA          | NA          |             |
| chr3:131181593-131190123  | exonic | MRPL3         | 3     | 131181593 | 131190123 | 4        | 0  | 0 | 0  | 2  | 0 | 8530  | 0.758002615 | 0.872144433 | 3.348986758 | 0.260420389 | NA          | NA          |             |
| chr3:197592983-197598333  | exonic | LRCH3         | 3     | 197592983 | 197598333 | 4        | 0  | 0 | 0  | 2  | 0 | 5350  | 0.758002615 | 0.872144433 | 3.348986758 | 0.260420389 | NA          | NA          |             |
| chr5:64081307-64100213    | exonic | CWC27         | 5     | 64081307  | 64100213  | 4        | 0  | 0 | 0  | 2  | 0 | 18906 | 0.758002615 | 0.872144433 | 3.348986758 | 0.260420389 | NA          | NA          |             |
| chr5:10415599-10417516    | exonic |               | 6-Mar | 5         | 10415599  | 10417516 | 21 | 9 | 2  | 10 | 7 | 2     | 1917        | 7.198489063 | 0.875159142 | 1.089905169 | 0.802968154 | 0.421993142 | 0.998252924 |
| chr2:27822449-27824309    | exonic | ZNF512        | 2     | 27822449  | 27824309  | 3        | 2  | 1 | 1  | 3  | 0 | 1860  | 1.402175103 | 0.876145663 | 2.1006986   | 0.417073474 | 0.676624666 | 0.998252924 |             |
| chr2:202410265-202446940  | exonic | ALS2CR11      | 2     | 202410265 | 202446940 | 0        | 1  | 6 | 4  | 0  | 1 | 36675 | 2.091354102 | 0.876812244 | 2.051805425 | 0.427336936 | NA          | NA          |             |
| chr1:172520651-172560211  | exonic | SUCO          | 1     | 172520651 | 172560211 | 0        | 4  | 0 | 2  | 1  | 0 | 39560 | 1.030753388 | 0.87711718  | 2.766739045 | 0.317022012 | NA          | NA          |             |
| chr1:172525008-172560211  | exonic | SUCO          | 1     | 172525008 | 172560211 | 0        | 4  | 0 | 2  | 1  | 0 | 35203 | 1.030753388 | 0.87711718  | 2.766739045 | 0.317022012 | NA          | NA          |             |
| chr2:225400244-225422573  | exonic | CUL3          | 2     | 225400244 | 225422573 | 4        | 9  | 1 | 4  | 6  | 0 | 22329 | 3.43310906  | 0.879317626 | 1.519748549 | 0.578594154 | 0.56286305  | 0.998252924 |             |
| chr2:208589523-208605430  | exonic | CCNYL1        | 2     | 208589523 | 208605430 | 5        | 3  | 0 | 0  | 5  | 0 | 15907 | 1.77289922  | 0.879477847 | 2.241040216 | 0.392441796 | NA          | NA          |             |
| chr14:24679096-24681035   | exonic | CHMP4A        | 14    | 24679096  | 24681035  | 6        | 2  | 0 | 2  | 3  | 0 | 1939  | 1.698178291 | 0.880225017 | 2.078607684 | 0.423468567 | 0.671953428 | 0.998252924 |             |
| chr1:1158623-1159348      | exonic | SDF4          | 1     | 1158623   | 1159348   | 16       | 19 | 8 | 22 | 10 | 0 | 725   | 10.50230816 | 0.881999671 | 1.025281789 | 0.860250987 | 0.389650704 | 0.998252924 |             |
| chr5:80071512-80088663    | exonic | MSH3          | 5     | 80071512  | 80088663  | 5        | 2  | 8 | 3  | 8  | 0 | 17151 | 3.858792046 | 0.882903377 | 1.44500769  | 0.611002545 | NA          | NA          |             |
| chr7:6854394-6862991      | exonic | CCZ1B         | 7     | 6854394   | 6862991   | 2        | 3  | 3 | 2  | 0  | 2 | 8597  | 2.201668347 | 0.885613084 | 1.803258972 | 0.49111808  | 0.623342935 | 0.998252924 |             |
| chr12:50821544-50855130   | exonic | LARP4         | 12    | 50821544  | 50855130  | 1        | 0  | 2 | 1  | 1  | 0 | 33586 | 0.750863801 | 0.886236449 | 2.876166434 | 0.308131142 | 0.757982545 | 0.998252924 |             |



|                           |              |         |    |           |           |     |      |     |     |     |     |       |             |             |             |             |             |             |
|---------------------------|--------------|---------|----|-----------|-----------|-----|------|-----|-----|-----|-----|-------|-------------|-------------|-------------|-------------|-------------|-------------|
| chr2:43939363-43986168    | exonic       | PLEKHH2 | 2  | 43939363  | 43986168  | 2   | 0    | 1   | 1   | 1   | 0   | 46805 | 0.750863801 | 0.886236449 | 2.876166434 | 0.308131142 | 0.757982545 | 0.998252924 |
| chr2:135010666-135012215  | exonic       | MGAT5   | 2  | 135010666 | 135012215 | 8   | 4    | 5   | 7   | 5   | 0   | 1549  | 4.064660671 | 0.890286617 | 1.348775498 | 0.660070277 | 0.509208732 | 0.998252924 |
| chr16:23113639-23119504   | exonic       | USP31   | 16 | 23113639  | 23119504  | 1   | 1    | 1   | 2   | 0   | 0   | 5865  | 0.713154538 | 0.891803561 | 2.923536208 | 0.305042763 | 0.760333584 | 0.998252924 |
| chr19:37482077-37482748   | exonic       | ZNF568  | 19 | 37482077  | 37482748  | 1   | 1    | 1   | 2   | 0   | 0   | 671   | 0.713154538 | 0.891803561 | 2.923536208 | 0.305042763 | 0.760333584 | 0.998252924 |
| chr5:137897268-137903411  | exonic       | HSPA9   | 5  | 137897268 | 137903411 | 1   | 1    | 1   | 2   | 0   | 0   | 6143  | 0.713154538 | 0.891803561 | 2.923536208 | 0.305042763 | 0.760333584 | 0.998252924 |
| chr15:51039691-51041067   | exonic       | SPPL2A  | 15 | 51039691  | 51041067  | 0   | 2    | 1   | 0   | 2   | 0   | 1376  | 0.787875467 | 0.891877743 | 3.047103772 | 0.292696872 | 0.769753861 | 0.998252924 |
| chr8:125520714-125528271  | exonic       | TATDN1  | 8  | 125520714 | 125528271 | 0   | 2    | 1   | 0   | 2   | 0   | 7557  | 0.787875467 | 0.891877743 | 3.047103772 | 0.292696872 | 0.769753861 | 0.998252924 |
| chr5:73930508-73932323    | exonic       | ENC1    | 5  | 73930508  | 73932323  | 2   | 4    | 0   | 0   | 4   | 0   | 1815  | 1.439186769 | 0.89349519  | 2.427274363 | 0.368106384 | 0.712793911 | 0.998252924 |
| chr3:57875767-57882659    | exonic       | SLMAP   | 3  | 57875767  | 57882659  | 5   | 5    | 4   | 5   | 5   | 0   | 6892  | 3.442083846 | 0.894109126 | 1.433084588 | 0.623905339 | 0.532689754 | 0.998252924 |
| chr1:14057494-14075982    | exonic       | PRDM2   | 1  | 14057494  | 14075982  | 10  | 7    | 2   | 8   | 1   | 2   | 18488 | 4.492293793 | 0.895014771 | 1.309024923 | 0.683726303 | 0.494148011 | 0.998252924 |
| chr21:45165959-45168961   | exonic       | PDXK    | 21 | 45165959  | 45168961  | 10  | 9    | 3   | 5   | 2   | 4   | 3002  | 5.456644901 | 0.895128226 | 1.192917044 | 0.750369215 | 0.453032367 | 0.998252924 |
| chr3:182804480-182810333  | exonic       | MCCC1   | 3  | 182804480 | 182810333 | 0   | 2    | 3   | 2   | 2   | 0   | 5853  | 1.395036289 | 0.895261556 | 2.26180002  | 0.395818175 | 0.692239168 | 0.998252924 |
| chr2:227729319-227732034  | exonic       | RHBDD1  | 2  | 227729319 | 227732034 | 2   | 7    | 8   | 4   | 9   | 0   | 2715  | 4.57054902  | 0.895692436 | 1.373654611 | 0.652050689 | 0.514368473 | 0.998252924 |
| chrX:139865340-139866824  | exonic       | CDR1    | X  | 139865340 | 139866824 | 773 | 1814 | 166 | 815 | 738 | 211 | 1484  | 689.5860072 | 0.895774452 | 0.688988957 | 1.300128896 | 0.193556796 | 0.998252924 |
| chr20:47708582-47711500   | exonic       | CSE1L   | 20 | 47708582  | 47711500  | 0   | 3    | 0   | 1   | 1   | 0   | 2918  | 0.750166204 | 0.89725056  | 3.115900468 | 0.287958672 | NA          | NA          |
| chr15:41988272-41991357   | exonic       | MGA     | 15 | 41988272  | 41991357  | 7   | 4    | 2   | 7   | 2   | 0   | 3085  | 2.980784386 | 0.897428566 | 1.554048836 | 0.577477712 | NA          | NA          |
| chr1:155695172-155697529  | exonic       | DAP3    | 1  | 155695172 | 155697529 | 1   | 0    | 1   | 0   | 1   | 0   | 2357  | 0.44728339  | 0.900346537 | 3.789764533 | 0.237573213 | 0.812212129 | 0.998252924 |
| chr1:198201682-198248191  | exonic       | NEK7    | 1  | 198201682 | 198248191 | 1   | 0    | 1   | 0   | 1   | 0   | 46509 | 0.44728339  | 0.900346537 | 3.789764533 | 0.237573213 | 0.812212129 | 0.998252924 |
| chr1:235602083-235606226  | exonic       | TBCE    | 1  | 235602083 | 235606226 | 1   | 0    | 1   | 0   | 1   | 0   | 4143  | 0.44728339  | 0.900346537 | 3.789764533 | 0.237573213 | 0.812212129 | 0.998252924 |
| chr10:103557736-103560157 | exonic       | MGEA5   | 10 | 103557736 | 103560157 | 1   | 0    | 1   | 0   | 1   | 0   | 2421  | 0.44728339  | 0.900346537 | 3.789764533 | 0.237573213 | 0.812212129 | 0.998252924 |
| chr10:75478917-75481262   | ncRNA_exonic | BMS1P4  | 10 | 75478917  | 75481262  | 1   | 0    | 1   | 0   | 1   | 0   | 2345  | 0.44728339  | 0.900346537 | 3.789764533 | 0.237573213 | 0.812212129 | 0.998252924 |
| chr11:95546095-95546753   | exonic       | CEP57   | 11 | 95546095  | 95546753  | 1   | 0    | 1   | 0   | 1   | 0   | 658   | 0.44728339  | 0.900346537 | 3.789764533 | 0.237573213 | 0.812212129 | 0.998252924 |
| chr12:69222550-69230529   | exonic       | MDM2    | 12 | 69222550  | 69230529  | 1   | 0    | 1   | 0   | 1   | 0   | 7979  | 0.44728339  | 0.900346537 | 3.789764533 | 0.237573213 | 0.812212129 | 0.998252924 |
| chr12:90003713-90029028   | exonic       | ATP2B1  | 12 | 90003713  | 90029028  | 1   | 0    | 1   | 0   | 1   | 0   | 25315 | 0.44728339  | 0.900346537 | 3.789764533 | 0.237573213 | 0.812212129 | 0.998252924 |
| chr13:20315704-20333558   | exonic       | PSPC1   | 13 | 20315704  | 20333558  | 1   | 0    | 1   | 0   | 1   | 0   | 17854 | 0.44728339  | 0.900346537 | 3.789764533 | 0.237573213 | 0.812212129 | 0.998252924 |
| chr15:55619728-55626205   | exonic       | PIGB    | 15 | 55619728  | 55626205  | 1   | 0    | 1   | 0   | 1   | 0   | 6477  | 0.44728339  | 0.900346537 | 3.789764533 | 0.237573213 | 0.812212129 | 0.998252924 |
| chr18:48444479-48450582   | exonic       | ME2     | 18 | 48444479  | 48450582  | 1   | 0    | 1   | 0   | 1   | 0   | 6103  | 0.44728339  | 0.900346537 | 3.789764533 | 0.237573213 | 0.812212129 | 0.998252924 |
| chr20:37195875-37198494   | exonic       | RALGAPB | 20 | 37195875  | 37198494  | 1   | 0    | 1   | 0   | 1   | 0   | 2619  | 0.44728339  | 0.900346537 | 3.789764533 | 0.237573213 | 0.812212129 | 0.998252924 |
| chr3:112282231-112292803  | exonic       | SLC35A5 | 3  | 112282231 | 112292803 | 1   | 0    | 1   | 0   | 1   | 0   | 10572 | 0.44728339  | 0.900346537 | 3.789764533 | 0.237573213 | 0.812212129 | 0.998252924 |
| chr3:50131152-50143142    | exonic       | RBM5    | 3  | 50131152  | 50143142  | 1   | 0    | 1   | 0   | 1   | 0   | 11990 | 0.44728339  | 0.900346537 | 3.789764533 | 0.237573213 | 0.812212129 | 0.998252924 |
| chr7:122019421-122047750  | exonic       | CADPS2  | 7  | 122019421 | 122047750 | 1   | 0    | 1   | 0   | 1   | 0   | 28329 | 0.44728339  | 0.900346537 | 3.789764533 | 0.237573213 | 0.812212129 | 0.998252924 |
| chr7:156549086-156619438  | exonic       | LMBR1   | 7  | 156549086 | 156619438 | 1   | 0    | 1   | 0   | 1   | 0   | 70352 | 0.44728339  | 0.900346537 | 3.789764533 | 0.237573213 | 0.812212129 | 0.998252924 |
| chr8:124153000-124157095  | exonic       | TBC1D31 | 8  | 124153000 | 124157095 | 1   | 0    | 1   | 0   | 1   | 0   | 4095  | 0.44728339  | 0.900346537 | 3.789764533 | 0.237573213 | 0.812212129 | 0.998252924 |
| chr8:124265561-124268411  | exonic       | ZHX1    | 8  | 124265561 | 124268411 | 1   | 0    | 1   | 0   | 1   | 0   | 2850  | 0.44728339  | 0.900346537 | 3.789764533 | 0.237573213 | 0.812212129 | 0.998252924 |
| chr1:150307405-150307712  | exonic       | PRPF3   | 1  | 150307405 | 150307712 | 1   | 0    | 1   | 0   | 0   | 1   | 307   | 0.634474577 | 0.902011965 | 3.393401769 | 0.265813489 | NA          | NA          |

|                           |                |                                                             |    |           |           |    |    |    |    |    |   |        |             |             |             |             |             |             |
|---------------------------|----------------|-------------------------------------------------------------|----|-----------|-----------|----|----|----|----|----|---|--------|-------------|-------------|-------------|-------------|-------------|-------------|
| chr11:9430032-9435958     | exonic         | IPO7                                                        | 11 | 9430032   | 9435958   | 1  | 0  | 1  | 0  | 0  | 1 | 5926   | 0.634474577 | 0.902011965 | 3.393401769 | 0.265813489 | NA          | NA          |
| chr5:93294481-93388932    | exonic         | FAM172A                                                     | 5  | 93294481  | 93388932  | 1  | 0  | 1  | 0  | 0  | 1 | 94451  | 0.634474577 | 0.902011965 | 3.393401769 | 0.265813489 | NA          | NA          |
| chr2:206305093-206305396  | exonic         | PAR3B                                                       | 2  | 206305093 | 206305396 | 3  | 3  | 6  | 5  | 4  | 0 | 303    | 3.109068992 | 0.903275866 | 1.51880929  | 0.594726324 | 0.552026423 | 0.998252924 |
| chr1:51860052-51913807    | exonic         | EPS15                                                       | 1  | 51860052  | 51913807  | 3  | 2  | 2  | 4  | 1  | 0 | 53755  | 1.67632344  | 0.903517437 | 1.94490718  | 0.464555556 | NA          | NA          |
| chr3:129599151-129599402  | UTR5           | <small>TMC1 (NM_001017395:c.-51931..-52181del ins0)</small> | 3  | 129599151 | 129599402 | 9  | 3  | 0  | 8  | 0  | 0 | 251    | 2.534200963 | 0.903559942 | 2.001112972 | 0.451528702 | 0.651608544 | 0.998252924 |
| chr7:4088979-4091462      | exonic         | SDK1                                                        | 7  | 4088979   | 4091462   | 0  | 3  | 1  | 2  | 1  | 0 | 2483   | 1.053746615 | 0.904344185 | 2.538863563 | 0.356200387 | 0.721690502 | 0.998252924 |
| chr2:240929490-240946787  | exonic         | NDUFA10                                                     | 2  | 240929490 | 240946787 | 8  | 3  | 7  | 9  | 4  | 0 | 17297  | 4.376518272 | 0.904878605 | 1.339934164 | 0.67531572  | 0.499475198 | 0.998252924 |
| chr6:57058639-57075243    | exonic         | RAB23                                                       | 6  | 57058639  | 57075243  | 10 | 4  | 5  | 7  | 6  | 0 | 16604  | 4.443661979 | 0.905137006 | 1.309416732 | 0.691252054 | 0.489407156 | 0.998252924 |
| chr19:30462099-30477324   | exonic         | URI1                                                        | 19 | 30462099  | 30477324  | 3  | 2  | 2  | 3  | 0  | 1 | 15225  | 1.757203242 | 0.906741936 | 1.93966772  | 0.467472819 | 0.640161635 | 0.998252924 |
| chr22:46088875-46136418   | exonic         | ATXN10                                                      | 22 | 46088875  | 46136418  | 7  | 6  | 0  | 8  | 1  | 0 | 47543  | 2.920081897 | 0.906776527 | 1.760405668 | 0.51509521  | NA          | NA          |
| chr7:158552176-158591763  | exonic         | ESYT2                                                       | 7  | 158552176 | 158591763 | 2  | 7  | 3  | 5  | 0  | 2 | 39587  | 3.217705699 | 0.906794646 | 1.579954827 | 0.573937071 | 0.566010386 | 0.998252924 |
| chr7:158557367-158590767  | exonic         | ESYT2                                                       | 7  | 158557367 | 158590767 | 2  | 7  | 3  | 5  | 0  | 2 | 33400  | 3.217705699 | 0.906794646 | 1.579954827 | 0.573937071 | 0.566010386 | 0.998252924 |
| chr9:88233897-88248289    | exonic         | AGTPBP1                                                     | 9  | 88233897  | 88248289  | 11 | 5  | 6  | 7  | 6  | 1 | 14392  | 5.252412355 | 0.90875638  | 1.160342723 | 0.783179281 | 0.43352184  | 0.998252924 |
| chr3:183368083-183390272  | exonic         | KLHL24                                                      | 3  | 183368083 | 183390272 | 6  | 2  | 0  | 3  | 2  | 0 | 22189  | 1.683462254 | 0.909418383 | 2.083514321 | 0.436482905 | 0.6624864   | 0.998252924 |
| chr2:171884848-171902872  | exonic         | TLK1                                                        | 2  | 171884848 | 171902872 | 0  | 1  | 3  | 0  | 3  | 0 | 18024  | 1.129165141 | 0.909720853 | 2.684596455 | 0.33886689  | 0.734710008 | 0.998252924 |
| chr6:90461149-90463341    | exonic         | MDN1                                                        | 6  | 90461149  | 90463341  | 0  | 1  | 3  | 0  | 3  | 0 | 2192   | 1.129165141 | 0.909720853 | 2.684596455 | 0.33886689  | 0.734710008 | 0.998252924 |
| chr14:99723807-99724173   | exonic         | BCL11B                                                      | 14 | 99723807  | 99724173  | 19 | 6  | 8  | 17 | 5  | 0 | 366    | 2.06290197  | 0.910234076 | 1.790586925 | 0.508343976 | 0.611212135 | 0.998252924 |
| chr20:34309661-34313077   | exonic         | RBM39                                                       | 20 | 34309661  | 34313077  | 4  | 7  | 3  | 5  | 3  | 1 | 3416   | 3.530543241 | 0.912462371 | 1.369813447 | 0.666121634 | 0.505333358 | 0.998252924 |
| chr4:41015599-41016415    | exonic         | APBB2                                                       | 4  | 41015599  | 41016415  | 6  | 2  | 2  | 7  | 0  | 0 | 816    | 2.261191002 | 0.912894007 | 1.893188641 | 0.482199178 | NA          | NA          |
| chrX:47705503-47755339    | exonic         | ZNF81                                                       | X  | 47705503  | 47755339  | 11 | 1  | 2  | 7  | 2  | 0 | 49836  | 2.97390476  | 0.914562908 | 1.627248194 | 0.562030372 | NA          | NA          |
| chr13:99890680-99896878   | exonic         | UBAC2                                                       | 13 | 99890680  | 99896878  | 13 | 10 | 13 | 13 | 13 | 0 | 6198   | 8.939490069 | 0.917793278 | 1.042528838 | 0.880352893 | 0.378668167 | 0.998252924 |
| chr1:85331067-85331821    | exonic         | LPAR3                                                       | 1  | 85331067  | 85331821  | 12 | 14 | 4  | 20 | 2  | 0 | 754    | 7.145063149 | 0.918630413 | 1.23437119  | 0.744209214 | NA          | NA          |
| chr10:17746429-17747740   | exonic         | STAM                                                        | 10 | 17746429  | 17747740  | 1  | 4  | 7  | 0  | 9  | 0 | 1311   | 3.296220114 | 0.918944969 | 1.748492882 | 0.525564032 | 0.599191153 | 0.998252924 |
| chr14:80163972-80271533   | exonic         | NRXN3                                                       | 14 | 80163972  | 80271533  | 2  | 3  | 2  | 3  | 2  | 0 | 107561 | 1.736328333 | 0.91920641  | 1.899745822 | 0.483857577 | 0.62848695  | 0.998252924 |
| chr17:1264385-1265302     | exonic         | YWHAE                                                       | 17 | 1264385   | 1265302   | 5  | 7  | 12 | 9  | 7  | 1 | 917    | 6.344306641 | 0.919878276 | 1.122653776 | 0.819378419 | 0.412570544 | 0.998252924 |
| chr15:41581770-41582412   | ncRNA_intronic | OIP5-AS1                                                    | 15 | 41581770  | 41582412  | 4  | 2  | 0  | 4  | 0  | 0 | 642    | 1.28974491  | 0.920479756 | 2.509808744 | 0.366752948 | NA          | NA          |
| chr14:23395341-23396869   | exonic         | PRMT5                                                       | 14 | 23395341  | 23396869  | 6  | 13 | 2  | 10 | 1  | 2 | 1528   | 5.234623587 | 0.925845859 | 1.285933701 | 0.719979465 | 0.471537639 | 0.998252924 |
| chr2:144966169-144969146  | exonic         | GTDC1                                                       | 2  | 144966169 | 144969146 | 7  | 4  | 1  | 6  | 0  | 1 | 2977   | 2.743367741 | 0.926748904 | 1.681040876 | 0.551294688 | 0.58143168  | 0.998252924 |
| chr9:111812562-111812972  | exonic         | TMEM245                                                     | 9  | 111812562 | 111812972 | 5  | 3  | 0  | 2  | 3  | 0 | 410    | 1.743467147 | 0.926889067 | 2.048738052 | 0.452419511 | 0.650966794 | 0.998252924 |
| chr15:76576097-76585041   | exonic         | ETFA                                                        | 15 | 76576097  | 76585041  | 3  | 1  | 3  | 4  | 1  | 0 | 8944   | 1.699316666 | 0.928516319 | 1.959441487 | 0.473867847 | 0.635594149 | 0.998252924 |
| chr8:68939456-68973014    | exonic         | PREX2                                                       | 8  | 68939456  | 68973014  | 4  | 0  | 2  | 3  | 1  | 0 | 33558  | 1.350447399 | 0.928589488 | 2.286462574 | 0.406124945 | 0.684650798 | 0.998252924 |
| chr4:187627716-187630999  | exonic         | FAT1                                                        | 4  | 187627716 | 187630999 | 7  | 19 | 0  | 7  | 9  | 1 | 3283   | 6.355793883 | 0.929435497 | 1.310940614 | 0.708983677 | 0.478334606 | 0.998252924 |
| chr10:126370175-126395456 | exonic         | FAM53B                                                      | 10 | 126370175 | 126395456 | 0  | 4  | 0  | 3  | 0  | 0 | 25281  | 1.016037352 | 0.929919529 | 3.01735588  | 0.308190206 | NA          | NA          |
| chr10:27049601-27051181   | intronic       | ABI1                                                        | 10 | 27049601  | 27051181  | 0  | 4  | 0  | 3  | 0  | 0 | 1580   | 1.016037352 | 0.929919529 | 3.01735588  | 0.308190206 | NA          | NA          |
| chr10:31644073-31676727   | intronic       | ZEB1                                                        | 10 | 31644073  | 31676727  | 0  | 4  | 0  | 3  | 0  | 0 | 32654  | 1.016037352 | 0.929919529 | 3.01735588  | 0.308190206 | NA          | NA          |

|                           |        |         |    |           |           |    |    |    |    |   |   |       |             |             |             |             |             |             |
|---------------------------|--------|---------|----|-----------|-----------|----|----|----|----|---|---|-------|-------------|-------------|-------------|-------------|-------------|-------------|
| chr7:16255690-16317851    | exonic | ISPD    | 7  | 16255690  | 16317851  | 0  | 4  | 0  | 3  | 0 | 0 | 62161 | 1.016037352 | 0.929919529 | 3.01735588  | 0.308190206 | NA          | NA          |
| chr1:104108056-104118162  | exonic | AMY2B   | 1  | 104108056 | 104118162 | 17 | 10 | 10 | 17 | 9 | 0 | 10106 | 8.804766617 | 0.93017938  | 1.049551097 | 0.886264025 | 0.37547527  | 0.998252924 |
| chr1:44773981-44804994    | exonic | ERI3    | 1  | 44773981  | 44804994  | 3  | 2  | 0  | 3  | 1 | 0 | 31013 | 1.349749803 | 0.930909355 | 2.27858567  | 0.408547007 | 0.682872127 | 0.998252924 |
| chr7:129679303-129688984  | exonic | ZC3HC1  | 7  | 129679303 | 129688984 | 3  | 3  | 0  | 3  | 1 | 0 | 9681  | 1.349749803 | 0.930909355 | 2.27858567  | 0.408547007 | 0.682872127 | 0.998252924 |
| chr14:97299803-97327072   | exonic | VRK1    | 14 | 97299803  | 97327072  | 2  | 9  | 6  | 9  | 0 | 2 | 27269 | 4.583309914 | 0.932063693 | 1.425545735 | 0.653829386 | 0.513221732 | 0.998252924 |
| chr1:93029198-93101893    | exonic | EVI5    | 1  | 93029198  | 93101893  | 5  | 6  | 2  | 6  | 3 | 0 | 72695 | 3.086078136 | 0.932835592 | 1.520413524 | 0.613540709 | 0.539518874 | 0.998252924 |
| chr3:33441680-33467233    | exonic | UBP1    | 3  | 33441680  | 33467233  | 4  | 0  | 0  | 1  | 1 | 0 | 25553 | 0.743286578 | 0.933856526 | 3.111021279 | 0.300176836 | NA          | NA          |
| chr3:71090478-71096246    | exonic | FOXP1   | 3  | 71090478  | 71096246  | 4  | 0  | 0  | 1  | 1 | 0 | 5768  | 0.743286578 | 0.933856526 | 3.111021279 | 0.300176836 | NA          | NA          |
| chr5:72850146-72857113    | exonic | ANKRA2  | 5  | 72850146  | 72857113  | 3  | 0  | 4  | 3  | 2 | 0 | 6967  | 1.737025929 | 0.934680718 | 2.065083153 | 0.452611662 | 0.6508284   | 0.998252924 |
| chr6:160819010-160831878  | exonic | SLC22A3 | 6  | 160819010 | 160831878 | 3  | 8  | 1  | 0  | 4 | 2 | 12868 | 3.078983151 | 0.93615176  | 1.644332204 | 0.569320334 | NA          | NA          |
| chr9:134312006-134314448  | exonic | PRRC2B  | 9  | 134312006 | 134314448 | 4  | 2  | 3  | 2  | 4 | 0 | 2442  | 2.153038903 | 0.937590038 | 1.745506192 | 0.537145066 | 0.591167414 | 0.998252924 |
| chr8:17123415-17143936    | exonic | VPS37A  | 8  | 17123415  | 17143936  | 2  | 1  | 4  | 2  | 3 | 0 | 20521 | 1.797030822 | 0.938417598 | 1.914257172 | 0.490225458 | 0.623974368 | 0.998252924 |
| chr10:115636279-115644139 | exonic | NHLRC2  | 10 | 115636279 | 115644139 | 3  | 0  | 3  | 1  | 3 | 0 | 7860  | 1.448161555 | 0.942197666 | 2.233309481 | 0.421884058 | 0.673109647 | 0.998252924 |
| chr13:75876378-75880607   | exonic | TBC1D4  | 13 | 75876378  | 75880607  | 0  | 1  | 2  | 0  | 2 | 0 | 4229  | 0.810868694 | 0.94223757  | 3.018538634 | 0.312150244 | 0.754926344 | 0.998252924 |
| chr16:18809246-18810156   | exonic | ARL6IP1 | 16 | 18809246  | 18810156  | 0  | 1  | 2  | 0  | 2 | 0 | 910   | 0.810868694 | 0.94223757  | 3.018538634 | 0.312150244 | 0.754926344 | 0.998252924 |
| chr2:170387096-170401345  | exonic | FASTKD1 | 2  | 170387096 | 170401345 | 0  | 1  | 2  | 0  | 2 | 0 | 14249 | 0.810868694 | 0.94223757  | 3.018538634 | 0.312150244 | 0.754926344 | 0.998252924 |
| chr19:47858295-47858607   | exonic | DHX34   | 19 | 47858295  | 47858607  | 0  | 2  | 1  | 1  | 1 | 0 | 312   | 0.773159431 | 0.942272656 | 2.85005945  | 0.330615088 | 0.740935248 | 0.998252924 |
| chr4:54265896-54294350    | exonic | FIP1L1  | 4  | 54265896  | 54294350  | 4  | 3  | 7  | 3  | 3 | 2 | 28454 | 3.718111985 | 0.943631315 | 1.354247697 | 0.696793738 | 0.485931886 | 0.998252924 |
| chr16:30675535-30678943   | exonic | FBRS    | 16 | 30675535  | 30678943  | 4  | 1  | 0  | 3  | 0 | 0 | 3408  | 1.009157726 | 0.945135271 | 2.761754329 | 0.34222279  | 0.732183236 | 0.998252924 |
| chr17:973208-1003975      | exonic | ABR     | 17 | 973208    | 1003975   | 1  | 0  | 2  | 2  | 0 | 0 | 30767 | 0.736147764 | 0.951097313 | 3.116237602 | 0.30520693  | 0.760208554 | 0.998252924 |
| chr19:9643520-9645955     | exonic | ZNF426  | 19 | 9643520   | 9645955   | 1  | 0  | 2  | 2  | 0 | 0 | 2435  | 0.736147764 | 0.951097313 | 3.116237602 | 0.30520693  | 0.760208554 | 0.998252924 |
| chr2:206992520-207017234  | exonic | NDUFS1  | 2  | 206992520 | 207017234 | 1  | 0  | 2  | 2  | 0 | 0 | 24714 | 0.736147764 | 0.951097313 | 3.116237602 | 0.30520693  | 0.760208554 | 0.998252924 |
| chr7:29070192-29103850    | exonic | CPVL    | 7  | 29070192  | 29103850  | 1  | 0  | 2  | 2  | 0 | 0 | 33658 | 0.736147764 | 0.951097313 | 3.116237602 | 0.30520693  | 0.760208554 | 0.998252924 |
| chr9:114296018-114296633  | exonic | ZNF483  | 9  | 114296018 | 114296633 | 1  | 0  | 2  | 2  | 0 | 0 | 615   | 0.736147764 | 0.951097313 | 3.116237602 | 0.30520693  | 0.760208554 | 0.998252924 |
| chr9:140611077-140611634  | exonic | EHMT1   | 9  | 140611077 | 140611634 | 1  | 0  | 2  | 2  | 0 | 0 | 557   | 0.736147764 | 0.951097313 | 3.116237602 | 0.30520693  | 0.760208554 | 0.998252924 |
| chr1:58971731-59002413    | exonic | OMA1    | 1  | 58971731  | 59002413  | 11 | 14 | 6  | 8  | 8 | 0 | 30682 | 4.801293044 | 0.951952788 | 1.195806234 | 0.796076121 | 0.425987793 | 0.998252924 |
| chr1:163122339-163138158  | exonic | RGS5    | 1  | 163122339 | 163138158 | 1  | 0  | 1  | 1  | 0 | 0 | 15819 | 0.432567353 | 0.954754641 | 3.838772628 | 0.248713517 | 0.803582392 | 0.998252924 |
| chr1:243675625-243736350  | exonic | AKT3    | 1  | 243675625 | 243736350 | 1  | 0  | 1  | 1  | 0 | 0 | 60725 | 0.432567353 | 0.954754641 | 3.838772628 | 0.248713517 | 0.803582392 | 0.998252924 |
| chr1:27120603-27121725    | exonic | PIGV    | 1  | 27120603  | 27121725  | 1  | 0  | 1  | 1  | 0 | 0 | 1122  | 0.432567353 | 0.954754641 | 3.838772628 | 0.248713517 | 0.803582392 | 0.998252924 |
| chr11:117115160-117117664 | exonic | RNF214  | 11 | 117115160 | 117117664 | 1  | 0  | 1  | 1  | 0 | 0 | 2504  | 0.432567353 | 0.954754641 | 3.838772628 | 0.248713517 | 0.803582392 | 0.998252924 |
| chr11:46455023-46456587   | exonic | AMBRA1  | 11 | 46455023  | 46456587  | 1  | 0  | 1  | 1  | 0 | 0 | 1564  | 0.432567353 | 0.954754641 | 3.838772628 | 0.248713517 | 0.803582392 | 0.998252924 |
| chr11:85468667-85469157   | exonic | SYTL2   | 11 | 85468667  | 85469157  | 1  | 0  | 1  | 1  | 0 | 0 | 490   | 0.432567353 | 0.954754641 | 3.838772628 | 0.248713517 | 0.803582392 | 0.998252924 |
| chr17:20135070-20135718   | exonic | SPECC1  | 17 | 20135070  | 20135718  | 1  | 0  | 1  | 1  | 0 | 0 | 648   | 0.432567353 | 0.954754641 | 3.838772628 | 0.248713517 | 0.803582392 | 0.998252924 |
| chr17:65924470-65925603   | exonic | BPTF    | 17 | 65924470  | 65925603  | 1  | 0  | 1  | 1  | 0 | 0 | 1133  | 0.432567353 | 0.954754641 | 3.838772628 | 0.248713517 | 0.803582392 | 0.998252924 |
| chr2:131883325-131888333  | exonic | PLEKHB2 | 2  | 131883325 | 131888333 | 1  | 0  | 1  | 1  | 0 | 0 | 5008  | 0.432567353 | 0.954754641 | 3.838772628 | 0.248713517 | 0.803582392 | 0.998252924 |

|                          |            |                                     |    |           |           |    |    |    |    |    |   |       |             |             |             |             |             |             |
|--------------------------|------------|-------------------------------------|----|-----------|-----------|----|----|----|----|----|---|-------|-------------|-------------|-------------|-------------|-------------|-------------|
| chr2:136620176-136622733 | exonic     | MCM6                                | 2  | 136620176 | 136622733 | 1  | 0  | 1  | 1  | 0  | 0 | 2557  | 0.432567353 | 0.954754641 | 3.838772628 | 0.248713517 | 0.803582392 | 0.998252924 |
| chr2:201997751-202005162 | exonic     | CFLAR                               | 2  | 201997751 | 202005162 | 1  | 0  | 1  | 1  | 0  | 0 | 7411  | 0.432567353 | 0.954754641 | 3.838772628 | 0.248713517 | 0.803582392 | 0.998252924 |
| chr20:50139619-50140649  | exonic     | NFATC2                              | 20 | 50139619  | 50140649  | 1  | 0  | 1  | 1  | 0  | 0 | 1030  | 0.432567353 | 0.954754641 | 3.838772628 | 0.248713517 | 0.803582392 | 0.998252924 |
| chr5:111519712-111545679 | exonic     | EPB41L4A                            | 5  | 111519712 | 111545679 | 1  | 0  | 1  | 1  | 0  | 0 | 25967 | 0.432567353 | 0.954754641 | 3.838772628 | 0.248713517 | 0.803582392 | 0.998252924 |
| chr5:134010304-134011815 | exonic     | SEC24A                              | 5  | 134010304 | 134011815 | 1  | 0  | 1  | 1  | 0  | 0 | 1511  | 0.432567353 | 0.954754641 | 3.838772628 | 0.248713517 | 0.803582392 | 0.998252924 |
| chr6:151116991-151125877 | exonic     | PLEKHG1                             | 6  | 151116991 | 151125877 | 1  | 0  | 1  | 1  | 0  | 0 | 8886  | 0.432567353 | 0.954754641 | 3.838772628 | 0.248713517 | 0.803582392 | 0.998252924 |
| chr6:610097-619543       | exonic     | EXOC2                               | 6  | 610097    | 619543    | 1  | 0  | 1  | 1  | 0  | 0 | 9446  | 0.432567353 | 0.954754641 | 3.838772628 | 0.248713517 | 0.803582392 | 0.998252924 |
| chr9:6477621-6482099     | exonic     | UHRF2                               | 9  | 6477621   | 6482099   | 1  | 0  | 1  | 1  | 0  | 0 | 4478  | 0.432567353 | 0.954754641 | 3.838772628 | 0.248713517 | 0.803582392 | 0.998252924 |
| chr7:77200394-77214898   | exonic     | PTPN12                              | 7  | 77200394  | 77214898  | 0  | 6  | 0  | 0  | 0  | 2 | 14504 | 1.662092012 | 0.957941685 | 2.607059962 | 0.36744137  | NA          | NA          |
| chr8:95706740-95710109   | exonic     | ESRP1                               | 8  | 95706740  | 95710109  | 0  | 6  | 0  | 0  | 0  | 2 | 3369  | 1.662092012 | 0.957941685 | 2.607059962 | 0.36744137  | NA          | NA          |
| chr13:61013821-61060082  | exonic     | TDRD3                               | 13 | 61013821  | 61060082  | 0  | 3  | 1  | 3  | 0  | 0 | 46261 | 1.039030578 | 0.958289663 | 2.752421298 | 0.348162421 | 0.727718208 | 0.998252924 |
| chr2:209150449-209153542 | exonic     | PIKFYVE                             | 2  | 209150449 | 209153542 | 0  | 0  | 4  | 0  | 3  | 0 | 3093  | 1.152158367 | 0.958776228 | 2.899767388 | 0.330639013 | NA          | NA          |
| chr3:111632165-111639266 | exonic     | PHLDB2                              | 3  | 111632165 | 111639266 | 10 | 2  | 2  | 8  | 1  | 0 | 7101  | 3.00447758  | 0.958883492 | 1.621691691 | 0.591285938 | NA          | NA          |
| chr2:64778576-64780543   | exonic     | AFTPH                               | 2  | 64778576  | 64780543  | 3  | 4  | 2  | 1  | 3  | 1 | 1967  | 2.256214335 | 0.960826277 | 1.664781003 | 0.577148752 | 0.563838974 | 0.998252924 |
| chr5:138979956-138994551 | exonic     | UBE2D2                              | 5  | 138979956 | 138994551 | 6  | 0  | 9  | 0  | 6  | 2 | 14595 | 3.891944635 | 0.9611654   | 1.642549497 | 0.58516678  | 0.55843558  | 0.998252924 |
| chr6:158703295-158735300 | exonic     | TULP4                               | 6  | 158703295 | 158735300 | 21 | 50 | 16 | 22 | 33 | 3 | 32005 | 21.83623138 | 0.962029042 | 0.813388119 | 1.182742924 | 0.236911047 | 0.998252924 |
| chr1:110203787-110214205 | exonic     | GSTM2, GSTM4                        | 1  | 110203787 | 110214205 | 0  | 3  | 0  | 2  | 0  | 0 | 10418 | 0.735450168 | 0.962282415 | 3.397850668 | 0.283203269 | NA          | NA          |
| chr1:110947593-110947892 | intronic   | LAMTOR5                             | 1  | 110947593 | 110947892 | 0  | 3  | 0  | 2  | 0  | 0 | 299   | 0.735450168 | 0.962282415 | 3.397850668 | 0.283203269 | NA          | NA          |
| chr1:237550580-237632487 | exonic     | RYR2                                | 1  | 237550580 | 237632487 | 0  | 3  | 0  | 2  | 0  | 0 | 81907 | 0.735450168 | 0.962282415 | 3.397850668 | 0.283203269 | NA          | NA          |
| chr10:22005531-22007747  | intronic   | MLLT10                              | 10 | 22005531  | 22007747  | 0  | 3  | 0  | 2  | 0  | 0 | 2216  | 0.735450168 | 0.962282415 | 3.397850668 | 0.283203269 | NA          | NA          |
| chr10:74474869-74475660  | intronic   | MCU                                 | 10 | 74474869  | 74475660  | 0  | 3  | 0  | 2  | 0  | 0 | 791   | 0.735450168 | 0.962282415 | 3.397850668 | 0.283203269 | NA          | NA          |
| chr13:41507606-41515506  | exonic     | ELF1                                | 13 | 41507606  | 41515506  | 0  | 3  | 0  | 2  | 0  | 0 | 7900  | 0.735450168 | 0.962282415 | 3.397850668 | 0.283203269 | NA          | NA          |
| chr18:10534463-10550251  | exonic     | NAPG                                | 18 | 10534463  | 10550251  | 0  | 3  | 0  | 2  | 0  | 0 | 15788 | 0.735450168 | 0.962282415 | 3.397850668 | 0.283203269 | NA          | NA          |
| chr18:39617655-39629569  | exonic     | PIK3C3                              | 18 | 39617655  | 39629569  | 0  | 3  | 0  | 2  | 0  | 0 | 11914 | 0.735450168 | 0.962282415 | 3.397850668 | 0.283203269 | NA          | NA          |
| chr2:111525944-111562972 | exonic     | ACOXL                               | 2  | 111525944 | 111562972 | 0  | 3  | 0  | 2  | 0  | 0 | 37028 | 0.735450168 | 0.962282415 | 3.397850668 | 0.283203269 | NA          | NA          |
| chr2:86088303-86090608   | exonic     | ST3GAL5                             | 2  | 86088303  | 86090608  | 0  | 3  | 0  | 2  | 0  | 0 | 2305  | 0.735450168 | 0.962282415 | 3.397850668 | 0.283203269 | NA          | NA          |
| chr5:179268906-179271227 | exonic     | C5orf45                             | 5  | 179268906 | 179271227 | 0  | 3  | 0  | 2  | 0  | 0 | 2321  | 0.735450168 | 0.962282415 | 3.397850668 | 0.283203269 | NA          | NA          |
| chr7:156589082-156629579 | exonic     | LMBR1                               | 7  | 156589082 | 156629579 | 0  | 3  | 0  | 2  | 0  | 0 | 40497 | 0.735450168 | 0.962282415 | 3.397850668 | 0.283203269 | NA          | NA          |
| chr8:104258522-104258912 | intergenic | BAALC(dist=15989), FZD6(dist=51749) | 8  | 104258522 | 104258912 | 0  | 3  | 0  | 2  | 0  | 0 | 390   | 0.735450168 | 0.962282415 | 3.397850668 | 0.283203269 | NA          | NA          |
| chr8:42716887-42743014   | exonic     | RNF170                              | 8  | 42716887  | 42743014  | 0  | 3  | 0  | 2  | 0  | 0 | 26127 | 0.735450168 | 0.962282415 | 3.397850668 | 0.283203269 | NA          | NA          |
| chr8:42720558-42743014   | exonic     | RNF170                              | 8  | 42720558  | 42743014  | 0  | 3  | 0  | 2  | 0  | 0 | 22456 | 0.735450168 | 0.962282415 | 3.397850668 | 0.283203269 | NA          | NA          |
| chr8:81621602-81625240   | intronic   | ZNF704                              | 8  | 81621602  | 81625240  | 0  | 3  | 0  | 2  | 0  | 0 | 3638  | 0.735450168 | 0.962282415 | 3.397850668 | 0.283203269 | NA          | NA          |
| chr8:99718695-99735197   | exonic     | STK3                                | 8  | 99718695  | 99735197  | 0  | 3  | 0  | 2  | 0  | 0 | 16502 | 0.735450168 | 0.962282415 | 3.397850668 | 0.283203269 | NA          | NA          |
| chr9:19316414-19316837   | exonic     | DENND4C                             | 9  | 19316414  | 19316837  | 0  | 3  | 0  | 2  | 0  | 0 | 423   | 0.735450168 | 0.962282415 | 3.397850668 | 0.283203269 | NA          | NA          |
| chr4:25848915-25849486   | exonic     | SEL1L3                              | 4  | 25848915  | 25849486  | 0  | 3  | 2  | 4  | 0  | 0 | 571   | 1.342610989 | 0.962816829 | 2.49772502  | 0.385477513 | NA          | NA          |

|                             |              |                                    |            |           |           |    |    |   |    |   |   |        |             |             |             |             |             |             |
|-----------------------------|--------------|------------------------------------|------------|-----------|-----------|----|----|---|----|---|---|--------|-------------|-------------|-------------|-------------|-------------|-------------|
| chr3:138289159-138291774    | exonic       | CEP70                              | 3          | 138289159 | 138291774 | 12 | 14 | 9 | 12 | 8 | 2 | 2615   | 8.623518944 | 0.963342885 | 0.958583136 | 1.004965401 | 0.31491351  | 0.998252924 |
| chr4:129857809-129925031    | exonic       | SCLT1                              | 4          | 129857809 | 129925031 | 6  | 4  | 1 | 3  | 2 | 1 | 67222  | 2.537501486 | 0.964468448 | 1.585053513 | 0.6084769   | 0.542871222 | 0.998252924 |
| chrX:118544153-118560317    | exonic       | SLC25A43                           | X          | 118544153 | 118560317 | 14 | 3  | 2 | 10 | 2 | 0 | 16164  | 4.028351342 | 0.964983101 | 1.455260991 | 0.663099682 | NA          | NA          |
| chrGL000220.1:121605-123082 | intergenic   | NONE (dist=NONE), NONE (dist=NONE) | GL000220.1 | 121605    | 123082    | 6  | 7  | 4 | 10 | 2 | 0 | 1477   | 4.088097047 | 0.965282256 | 1.393292104 | 0.692806809 | NA          | NA          |
| chr15:68434283-68439038     | exonic       | PIAS1                              | 15         | 68434283  | 68439038  | 3  | 5  | 1 | 3  | 3 | 0 | 4755   | 2.13762527  | 0.965637525 | 1.774238716 | 0.544254567 | 0.586266306 | 0.998252924 |
| chr12:105303432-105322472   | exonic       | SLC41A2                            | 12         | 105303432 | 105322472 | 1  | 4  | 1 | 0  | 4 | 0 | 19040  | 1.507468852 | 0.968989093 | 2.246968911 | 0.431242768 | NA          | NA          |
| chr6:2263835-2273651        | ncRNA_exonic | GMD5-AS1                           | 6          | 2263835   | 2273651   | 9  | 9  | 2 | 6  | 7 | 0 | 9816   | 4.608962991 | 0.969203773 | 1.325940364 | 0.73095578  | 0.464806164 | 0.998252924 |
| chr11:68359043-68367962     | exonic       | PPP6R3                             | 11         | 68359043  | 68367962  | 2  | 0  | 6 | 4  | 2 | 0 | 8919   | 2.108888423 | 0.970814804 | 1.957856728 | 0.495855897 | 0.619996084 | 0.998252924 |
| chr1:235600636-235606226    | exonic       | TBCE                               | 1          | 235600636 | 235606226 | 3  | 0  | 2 | 0  | 3 | 0 | 5590   | 1.144581145 | 0.970944735 | 2.629444419 | 0.369258513 | NA          | NA          |
| chr18:9182379-9208801       | exonic       | ANKRD12                            | 18         | 9182379   | 9208801   | 3  | 0  | 2 | 0  | 3 | 0 | 26422  | 1.144581145 | 0.970944735 | 2.629444419 | 0.369258513 | NA          | NA          |
| chr14:99723807-99724176     | exonic       | BCL11B                             | 14         | 99723807  | 99724176  | 19 | 6  | 8 | 17 | 5 | 0 | 369    | 5.818243351 | 0.972572749 | 1.231920167 | 0.78947709  | NA          | NA          |
| chr5:52157280-52161651      | exonic       | ITGA1                              | 5          | 52157280  | 52161651  | 0  | 3  | 1 | 0  | 1 | 1 | 4371   | 1.149342453 | 0.972678076 | 2.519902689 | 0.385998269 | 0.699497951 | 0.998252924 |
| chr1:10155518-10165802      | exonic       | UBE4B                              | 1          | 10155518  | 10165802  | 2  | 2  | 3 | 4  | 1 | 0 | 10284  | 1.744605523 | 0.973177678 | 1.927904861 | 0.504785116 | NA          | NA          |
| chr8:104417003-104420012    | exonic       | SLC25A32                           | 8          | 104417003 | 104420012 | 2  | 3  | 0 | 0  | 3 | 0 | 3009   | 1.143883548 | 0.973887467 | 2.630722498 | 0.370197719 | 0.711235176 | 0.998252924 |
| chr10:75214169-75239275     | exonic       | PPP3CB                             | 10         | 75214169  | 75239275  | 3  | 2  | 0 | 2  | 1 | 0 | 25106  | 1.069162619 | 0.974944085 | 2.484000744 | 0.39248945  | 0.694696605 | 0.998252924 |
| chr10:125798030-125806240   | exonic       | CHST15                             | 10         | 125798030 | 125806240 | 2  | 5  | 7 | 3  | 5 | 1 | 8210   | 3.742525933 | 0.976261566 | 1.378792109 | 0.708056667 | 0.478910689 | 0.998252924 |
| chr18:46783379-46906128     | exonic       | DYM                                | 18         | 46783379  | 46906128  | 0  | 1  | 3 | 2  | 1 | 0 | 122749 | 1.099733068 | 0.977612673 | 2.508360406 | 0.38974171  | 0.696727551 | 0.998252924 |
| chr13:52971366-52972329     | exonic       | THSD1                              | 13         | 52971366  | 52972329  | 4  | 2  | 4 | 6  | 1 | 0 | 963    | 2.412471204 | 0.978543844 | 1.710509489 | 0.572077414 | NA          | NA          |
| chr16:53288349-53308214     | exonic       | CHD9                               | 16         | 53288349  | 53308214  | 11 | 3  | 5 | 4  | 4 | 2 | 19865  | 4.453821341 | 0.980718665 | 1.246383772 | 0.786851279 | 0.431368931 | 0.998252924 |
| chr1:41512078-41541123      | exonic       | SCMH1                              | 1          | 41512078  | 41541123  | 3  | 1  | 0 | 0  | 2 | 0 | 29045  | 0.803291471 | 0.980844337 | 3.005827353 | 0.326314263 | 0.744186598 | 0.998252924 |
| chr13:46559431-46594692     | exonic       | ZC3H13                             | 13         | 46559431  | 46594692  | 3  | 1  | 0 | 0  | 2 | 0 | 35261  | 0.803291471 | 0.980844337 | 3.005827353 | 0.326314263 | 0.744186598 | 0.998252924 |
| chr18:74561481-74583781     | exonic       | ZNF236                             | 18         | 74561481  | 74583781  | 3  | 1  | 0 | 0  | 2 | 0 | 22300  | 0.803291471 | 0.980844337 | 3.005827353 | 0.326314263 | 0.744186598 | 0.998252924 |
| chr5:170610170-170632616    | exonic       | RANBP17                            | 5          | 170610170 | 170632616 | 14 | 15 | 6 | 7  | 9 | 0 | 22446  | 0.803291471 | 0.980844337 | 3.005827353 | 0.326314263 | 0.744186598 | 0.998252924 |
| chr3:171965322-172016577    | exonic       | FNDC3B                             | 3          | 171965322 | 172016577 | 2  | 0  | 0 | 2  | 2 | 1 | 51255  | 2.272766344 | 0.9815938   | 1.859612308 | 0.527848625 | NA          | NA          |
| chr5:94224583-94248681      | exonic       | MCTP1                              | 5          | 94224583  | 94248681  | 3  | 3  | 0 | 4  | 0 | 0 | 24098  | 1.335033766 | 0.982551969 | 2.476832761 | 0.396696937 | NA          | NA          |
| chr8:16955967-16977910      | exonic       | MICU3                              | 8          | 16955967  | 16977910  | 3  | 3  | 0 | 4  | 0 | 0 | 21943  | 1.335033766 | 0.982551969 | 2.476832761 | 0.396696937 | NA          | NA          |
| chr7:111448876-111474742    | exonic       | DOCK4                              | 7          | 111448876 | 111474742 | 4  | 0  | 1 | 3  | 0 | 0 | 25866  | 1.032150952 | 0.983080905 | 2.74249382  | 0.358462396 | 0.719997304 | 0.998252924 |
| chr1:155385534-155429689    | exonic       | ASH1L                              | 1          | 155385534 | 155429689 | 4  | 2  | 3 | 4  | 2 | 0 | 44155  | 2.12360683  | 0.984250944 | 1.750665527 | 0.5622153   | 0.573969338 | 0.998252924 |
| chr16:9009110-9011013       | exonic       | USP7                               | 16         | 9009110   | 9011013   | 5  | 5  | 5 | 3  | 5 | 1 | 1903   | 3.73494871  | 0.984688974 | 1.331163406 | 0.739720586 | 0.459469554 | 0.998252924 |
| chr14:81209418-81244390     | exonic       | CEP128                             | 14         | 81209418  | 81244390  | 4  | 4  | 4 | 3  | 5 | 0 | 34972  | 2.926198334 | 0.985067292 | 1.538155928 | 0.640420957 | 0.521898962 | 0.998252924 |
| chr8:97847200-97892233      | exonic       | CPQ                                | 8          | 97847200  | 97892233  | 5  | 1  | 2 | 3  | 2 | 0 | 45033  | 1.774737563 | 0.988567255 | 1.905495505 | 0.518797999 | 0.603901614 | 0.998252924 |
| chr11:3752620-3756554       | exonic       | NUP98                              | 11         | 3752620   | 3756554   | 0  | 2  | 0 | 0  | 0 | 1 | 3934   | 0.656770207 | 0.989683753 | 3.626116271 | 0.272932162 | NA          | NA          |
| chr11:70218320-70224301     | exonic       | PPF1A1                             | 11         | 70218320  | 70224301  | 0  | 2  | 0 | 0  | 0 | 1 | 5981   | 0.656770207 | 0.989683753 | 3.626116271 | 0.272932162 | NA          | NA          |
| chr15:43250210-43262805     | exonic       | UBR1                               | 15         | 43250210  | 43262805  | 0  | 2  | 0 | 0  | 0 | 1 | 12595  | 0.656770207 | 0.989683753 | 3.626116271 | 0.272932162 | NA          | NA          |
| chr15:58919898-58925558     | exonic       | ADAM10                             | 15         | 58919898  | 58925558  | 0  | 2  | 0 | 0  | 0 | 1 | 5660   | 0.656770207 | 0.989683753 | 3.626116271 | 0.272932162 | NA          | NA          |

|                           |        |           |    |           |           |   |   |   |   |   |   |        |             |             |             |             |             |             |
|---------------------------|--------|-----------|----|-----------|-----------|---|---|---|---|---|---|--------|-------------|-------------|-------------|-------------|-------------|-------------|
| chr16:69718792-69728142   | exonic | NFAT5     | 16 | 69718792  | 69728142  | 0 | 2 | 0 | 0 | 0 | 1 | 9350   | 0.656770207 | 0.989683753 | 3.626116271 | 0.272932162 | NA          | NA          |
| chr16:90097583-90099332   | exonic | GAS8      | 16 | 90097583  | 90099332  | 0 | 2 | 0 | 0 | 0 | 1 | 1749   | 0.656770207 | 0.989683753 | 3.626116271 | 0.272932162 | NA          | NA          |
| chr2:242593960-242594758  | exonic | ATG4B     | 2  | 242593960 | 242594758 | 0 | 2 | 0 | 0 | 0 | 1 | 798    | 0.656770207 | 0.989683753 | 3.626116271 | 0.272932162 | NA          | NA          |
| chr2:28999716-29016863    | exonic | PPP1CB    | 2  | 28999716  | 29016863  | 0 | 2 | 0 | 0 | 0 | 1 | 17147  | 0.656770207 | 0.989683753 | 3.626116271 | 0.272932162 | NA          | NA          |
| chr21:37661053-37664531   | exonic | DOPEY2    | 21 | 37661053  | 37664531  | 0 | 2 | 0 | 0 | 0 | 1 | 3478   | 0.656770207 | 0.989683753 | 3.626116271 | 0.272932162 | NA          | NA          |
| chr3:186756529-186769134  | exonic | ST6GAL1   | 3  | 186756529 | 186769134 | 0 | 2 | 0 | 0 | 0 | 1 | 12605  | 0.656770207 | 0.989683753 | 3.626116271 | 0.272932162 | NA          | NA          |
| chr6:101214440-101253756  | exonic | ASCC3     | 6  | 101214440 | 101253756 | 0 | 2 | 0 | 0 | 0 | 1 | 39316  | 0.656770207 | 0.989683753 | 3.626116271 | 0.272932162 | NA          | NA          |
| chr9:33886878-33912096    | exonic | UBE2R2    | 9  | 33886878  | 33912096  | 0 | 2 | 0 | 0 | 0 | 1 | 25218  | 0.656770207 | 0.989683753 | 3.626116271 | 0.272932162 | NA          | NA          |
| chrX:10031484-10078060    | exonic | WWC3      | X  | 10031484  | 10078060  | 0 | 2 | 0 | 0 | 0 | 1 | 46576  | 0.656770207 | 0.989683753 | 3.626116271 | 0.272932162 | NA          | NA          |
| chr1:176085759-176105683  | exonic | RFWD2     | 1  | 176085759 | 176105683 | 0 | 2 | 0 | 0 | 1 | 0 | 19924  | 0.46957902  | 0.989790126 | 4.027566469 | 0.24575389  | 0.805872753 | 0.998252924 |
| chr1:21091869-21107033    | exonic | HP1BP3    | 1  | 21091869  | 21107033  | 0 | 2 | 0 | 0 | 1 | 0 | 15164  | 0.46957902  | 0.989790126 | 4.027566469 | 0.24575389  | 0.805872753 | 0.998252924 |
| chr1:35824525-35835714    | exonic | ZMYM4     | 1  | 35824525  | 35835714  | 0 | 2 | 0 | 0 | 1 | 0 | 11189  | 0.46957902  | 0.989790126 | 4.027566469 | 0.24575389  | 0.805872753 | 0.998252924 |
| chr10:71151880-71158584   | exonic | HK1       | 10 | 71151880  | 71158584  | 0 | 2 | 0 | 0 | 1 | 0 | 6704   | 0.46957902  | 0.989790126 | 4.027566469 | 0.24575389  | 0.805872753 | 0.998252924 |
| chr11:1000431-1003804     | exonic | AP2A2     | 11 | 1000431   | 1003804   | 0 | 2 | 0 | 0 | 1 | 0 | 3373   | 0.46957902  | 0.989790126 | 4.027566469 | 0.24575389  | 0.805872753 | 0.998252924 |
| chr11:111622882-111624301 | exonic | PPP2R1B   | 11 | 111622882 | 111624301 | 0 | 2 | 0 | 0 | 1 | 0 | 1419   | 0.46957902  | 0.989790126 | 4.027566469 | 0.24575389  | 0.805872753 | 0.998252924 |
| chr11:89155069-89185059   | exonic | NOX4      | 11 | 89155069  | 89185059  | 0 | 2 | 0 | 0 | 1 | 0 | 29990  | 0.46957902  | 0.989790126 | 4.027566469 | 0.24575389  | 0.805872753 | 0.998252924 |
| chr12:123702922-123707674 | exonic | MPHOSPH9  | 12 | 123702922 | 123707674 | 0 | 2 | 0 | 0 | 1 | 0 | 4752   | 0.46957902  | 0.989790126 | 4.027566469 | 0.24575389  | 0.805872753 | 0.998252924 |
| chr13:21163949-21205241   | exonic | IFT88     | 13 | 21163949  | 21205241  | 0 | 2 | 0 | 0 | 1 | 0 | 41292  | 0.46957902  | 0.989790126 | 4.027566469 | 0.24575389  | 0.805872753 | 0.998252924 |
| chr15:100138634-100173378 | exonic | MEF2A     | 15 | 100138634 | 100173378 | 0 | 2 | 0 | 0 | 1 | 0 | 34744  | 0.46957902  | 0.989790126 | 4.027566469 | 0.24575389  | 0.805872753 | 0.998252924 |
| chr15:25599499-25605674   | exonic | UBE3A     | 15 | 25599499  | 25605674  | 0 | 2 | 0 | 0 | 1 | 0 | 6175   | 0.46957902  | 0.989790126 | 4.027566469 | 0.24575389  | 0.805872753 | 0.998252924 |
| chr15:64495280-64508912   | exonic | CSNK1G1   | 15 | 64495280  | 64508912  | 0 | 2 | 0 | 0 | 1 | 0 | 13632  | 0.46957902  | 0.989790126 | 4.027566469 | 0.24575389  | 0.805872753 | 0.998252924 |
| chr15:93480747-93482948   | exonic | CHD2      | 15 | 93480747  | 93482948  | 0 | 2 | 0 | 0 | 1 | 0 | 2201   | 0.46957902  | 0.989790126 | 4.027566469 | 0.24575389  | 0.805872753 | 0.998252924 |
| chr16:11969617-11990642   | exonic | GSPT1     | 16 | 11969617  | 11990642  | 0 | 2 | 0 | 0 | 1 | 0 | 21025  | 0.46957902  | 0.989790126 | 4.027566469 | 0.24575389  | 0.805872753 | 0.998252924 |
| chr16:67100584-67116242   | exonic | CBFB      | 16 | 67100584  | 67116242  | 0 | 2 | 0 | 0 | 1 | 0 | 15658  | 0.46957902  | 0.989790126 | 4.027566469 | 0.24575389  | 0.805872753 | 0.998252924 |
| chr16:74334012-74336190   | exonic | PSMD7     | 16 | 74334012  | 74336190  | 0 | 2 | 0 | 0 | 1 | 0 | 2178   | 0.46957902  | 0.989790126 | 4.027566469 | 0.24575389  | 0.805872753 | 0.998252924 |
| chr17:57987922-58011885   | exonic | RPS6KB1   | 17 | 57987922  | 58011885  | 0 | 2 | 0 | 0 | 1 | 0 | 23963  | 0.46957902  | 0.989790126 | 4.027566469 | 0.24575389  | 0.805872753 | 0.998252924 |
| chr17:57987922-58012661   | exonic | RPS6KB1   | 17 | 57987922  | 58012661  | 0 | 2 | 0 | 0 | 1 | 0 | 24739  | 0.46957902  | 0.989790126 | 4.027566469 | 0.24575389  | 0.805872753 | 0.998252924 |
| chr18:60015400-60017170   | exonic | TNFRSF11A | 18 | 60015400  | 60017170  | 0 | 2 | 0 | 0 | 1 | 0 | 1770   | 0.46957902  | 0.989790126 | 4.027566469 | 0.24575389  | 0.805872753 | 0.998252924 |
| chr19:11015626-11019883   | exonic | CARM1     | 19 | 11015626  | 11019883  | 0 | 2 | 0 | 0 | 1 | 0 | 4257   | 0.46957902  | 0.989790126 | 4.027566469 | 0.24575389  | 0.805872753 | 0.998252924 |
| chr2:10742901-10747437    | exonic | NOL10     | 2  | 10742901  | 10747437  | 0 | 2 | 0 | 0 | 1 | 0 | 4536   | 0.46957902  | 0.989790126 | 4.027566469 | 0.24575389  | 0.805872753 | 0.998252924 |
| chr2:223791734-223799405  | exonic | ACSL3     | 2  | 223791734 | 223799405 | 0 | 2 | 0 | 0 | 1 | 0 | 7671   | 0.46957902  | 0.989790126 | 4.027566469 | 0.24575389  | 0.805872753 | 0.998252924 |
| chr2:55535944-55536390    | exonic | CCDC88A   | 2  | 55535944  | 55536390  | 0 | 2 | 0 | 0 | 1 | 0 | 446    | 0.46957902  | 0.989790126 | 4.027566469 | 0.24575389  | 0.805872753 | 0.998252924 |
| chr22:41537051-41551117   | exonic | EP300     | 22 | 41537051  | 41551117  | 0 | 2 | 0 | 0 | 1 | 0 | 14066  | 0.46957902  | 0.989790126 | 4.027566469 | 0.24575389  | 0.805872753 | 0.998252924 |
| chr3:11643306-11744521    | exonic | VGLL4     | 3  | 11643306  | 11744521  | 0 | 2 | 0 | 0 | 1 | 0 | 101215 | 0.46957902  | 0.989790126 | 4.027566469 | 0.24575389  | 0.805872753 | 0.998252924 |
| chr3:169824619-169867032  | exonic | PHC3      | 3  | 169824619 | 169867032 | 0 | 2 | 0 | 0 | 1 | 0 | 42413  | 0.46957902  | 0.989790126 | 4.027566469 | 0.24575389  | 0.805872753 | 0.998252924 |

|                           |              |                                                                 |    |           |           |   |   |   |   |   |   |        |             |             |             |             |             |             |
|---------------------------|--------------|-----------------------------------------------------------------|----|-----------|-----------|---|---|---|---|---|---|--------|-------------|-------------|-------------|-------------|-------------|-------------|
| chr3:4490949-4494733      | exonic       | SUMF1                                                           | 3  | 4490949   | 4494733   | 0 | 2 | 0 | 0 | 1 | 0 | 3784   | 0.46957902  | 0.989790126 | 4.027566469 | 0.24575389  | 0.805872753 | 0.998252924 |
| chr4:151771875-151774095  | exonic       | LRBA                                                            | 4  | 151771875 | 151774095 | 0 | 2 | 0 | 0 | 1 | 0 | 2220   | 0.46957902  | 0.989790126 | 4.027566469 | 0.24575389  | 0.805872753 | 0.998252924 |
| chr4:4458917-4473433      | exonic       | STX18                                                           | 4  | 4458917   | 4473433   | 0 | 2 | 0 | 0 | 1 | 0 | 14516  | 0.46957902  | 0.989790126 | 4.027566469 | 0.24575389  | 0.805872753 | 0.998252924 |
| chr5:100191806-100231489  | exonic       | ST8SIA4                                                         | 5  | 100191806 | 100231489 | 0 | 2 | 0 | 0 | 1 | 0 | 39683  | 0.46957902  | 0.989790126 | 4.027566469 | 0.24575389  | 0.805872753 | 0.998252924 |
| chr5:145197456-145202697  | exonic       | PRELID2                                                         | 5  | 145197456 | 145202697 | 0 | 2 | 0 | 0 | 1 | 0 | 5241   | 0.46957902  | 0.989790126 | 4.027566469 | 0.24575389  | 0.805872753 | 0.998252924 |
| chr5:56531792-56545403    | exonic       | GPBP1                                                           | 5  | 56531792  | 56545403  | 0 | 2 | 0 | 0 | 1 | 0 | 13611  | 0.46957902  | 0.989790126 | 4.027566469 | 0.24575389  | 0.805872753 | 0.998252924 |
| chr5:78692645-78746944    | exonic       | HOMER1                                                          | 5  | 78692645  | 78746944  | 0 | 2 | 0 | 0 | 1 | 0 | 54299  | 0.46957902  | 0.989790126 | 4.027566469 | 0.24575389  | 0.805872753 | 0.998252924 |
| chr7:22259484-22306631    | exonic       | RAPGEF5                                                         | 7  | 22259484  | 22306631  | 0 | 2 | 0 | 0 | 1 | 0 | 47147  | 0.46957902  | 0.989790126 | 4.027566469 | 0.24575389  | 0.805872753 | 0.998252924 |
| chr7:74162351-74163788    | exonic       | GTF2I                                                           | 7  | 74162351  | 74163788  | 0 | 2 | 0 | 0 | 1 | 0 | 1437   | 0.46957902  | 0.989790126 | 4.027566469 | 0.24575389  | 0.805872753 | 0.998252924 |
| chr7:74193427-74195181    | exonic       | NCF1                                                            | 7  | 74193427  | 74195181  | 0 | 2 | 0 | 0 | 1 | 0 | 1754   | 0.46957902  | 0.989790126 | 4.027566469 | 0.24575389  | 0.805872753 | 0.998252924 |
| chr7:91972337-92000921    | exonic       | ANKIB1                                                          | 7  | 91972337  | 92000921  | 0 | 2 | 0 | 0 | 1 | 0 | 28584  | 0.46957902  | 0.989790126 | 4.027566469 | 0.24575389  | 0.805872753 | 0.998252924 |
| chr7:92921014-92926555    | exonic       | VPS50                                                           | 7  | 92921014  | 92926555  | 0 | 2 | 0 | 0 | 1 | 0 | 5541   | 0.46957902  | 0.989790126 | 4.027566469 | 0.24575389  | 0.805872753 | 0.998252924 |
| chr8:101540072-101542088  | exonic       | ANKRD46                                                         | 8  | 101540072 | 101542088 | 0 | 2 | 0 | 0 | 1 | 0 | 2016   | 0.46957902  | 0.989790126 | 4.027566469 | 0.24575389  | 0.805872753 | 0.998252924 |
| chr8:16921592-16948093    | exonic       | MICU3                                                           | 8  | 16921592  | 16948093  | 0 | 2 | 0 | 0 | 1 | 0 | 26501  | 0.46957902  | 0.989790126 | 4.027566469 | 0.24575389  | 0.805872753 | 0.998252924 |
| chr8:28902877-28906565    | exonic       | HMBX1                                                           | 8  | 28902877  | 28906565  | 0 | 2 | 0 | 0 | 1 | 0 | 3688   | 0.46957902  | 0.989790126 | 4.027566469 | 0.24575389  | 0.805872753 | 0.998252924 |
| chrX:129790554-129813722  | exonic       | ENOX2                                                           | X  | 129790554 | 129813722 | 0 | 2 | 0 | 0 | 1 | 0 | 23168  | 0.46957902  | 0.989790126 | 4.027566469 | 0.24575389  | 0.805872753 | 0.998252924 |
| chrX:147007057-147027136  | exonic       | FMR1                                                            | X  | 147007057 | 147027136 | 0 | 2 | 0 | 0 | 1 | 0 | 20079  | 0.46957902  | 0.989790126 | 4.027566469 | 0.24575389  | 0.805872753 | 0.998252924 |
| chr1:193110979-193121574  | exonic       | CDC73                                                           | 1  | 193110979 | 193121574 | 4 | 0 | 0 | 2 | 0 | 0 | 10595  | 0.728570541 | 0.989879026 | 3.395322847 | 0.291541945 | NA          | NA          |
| chr1:224142179-224149975  | ncRNA_exonic | GTF2IP20                                                        | 1  | 224142179 | 224149975 | 4 | 0 | 0 | 2 | 0 | 0 | 7796   | 0.728570541 | 0.989879026 | 3.395322847 | 0.291541945 | NA          | NA          |
| chr10:32740520-32770710   | exonic       | CCDC7                                                           | 10 | 32740520  | 32770710  | 4 | 0 | 0 | 2 | 0 | 0 | 30190  | 0.728570541 | 0.989879026 | 3.395322847 | 0.291541945 | NA          | NA          |
| chr11:120276826-120302620 | exonic       | ARHGEF12                                                        | 11 | 120276826 | 120302620 | 4 | 0 | 0 | 2 | 0 | 0 | 25794  | 0.728570541 | 0.989879026 | 3.395322847 | 0.291541945 | NA          | NA          |
| chr11:128638012-128642880 | exonic       | FLI1                                                            | 11 | 128638012 | 128642880 | 4 | 0 | 0 | 2 | 0 | 0 | 4868   | 0.728570541 | 0.989879026 | 3.395322847 | 0.291541945 | NA          | NA          |
| chr12:5860001-5963307     | exonic       | ANO2                                                            | 12 | 5860001   | 5963307   | 4 | 0 | 0 | 2 | 0 | 0 | 103306 | 0.728570541 | 0.989879026 | 3.395322847 | 0.291541945 | NA          | NA          |
| chr13:102220049-102250649 | exonic       | ITGBL1                                                          | 13 | 102220049 | 102250649 | 4 | 0 | 0 | 2 | 0 | 0 | 30600  | 0.728570541 | 0.989879026 | 3.395322847 | 0.291541945 | NA          | NA          |
| chr17:20658772-20677355   | intergenic   | <small>LOC100287072 (dist=17594), CCDC148L (dist=49053)</small> | 17 | 20658772  | 20677355  | 4 | 0 | 0 | 2 | 0 | 0 | 18583  | 0.728570541 | 0.989879026 | 3.395322847 | 0.291541945 | NA          | NA          |
| chr17:3608392-3608939     | intergenic   | <small>P2RX5-TAX1BP3 (dist=8694), ITGAE (dist=8980)</small>     | 17 | 3608392   | 3608939   | 4 | 0 | 0 | 2 | 0 | 0 | 547    | 0.728570541 | 0.989879026 | 3.395322847 | 0.291541945 | NA          | NA          |
| chr19:6230580-6270770     | exonic       | MLLT1                                                           | 19 | 6230580   | 6270770   | 4 | 0 | 0 | 2 | 0 | 0 | 40190  | 0.728570541 | 0.989879026 | 3.395322847 | 0.291541945 | NA          | NA          |
| chr2:242694460-242695429  | exonic       | D2HGDH                                                          | 2  | 242694460 | 242695429 | 4 | 0 | 0 | 2 | 0 | 0 | 969    | 0.728570541 | 0.989879026 | 3.395322847 | 0.291541945 | NA          | NA          |
| chr2:68364430-68368927    | exonic       | WDR92                                                           | 2  | 68364430  | 68368927  | 4 | 0 | 0 | 2 | 0 | 0 | 4497   | 0.728570541 | 0.989879026 | 3.395322847 | 0.291541945 | NA          | NA          |
| chr3:47663696-47719801    | exonic       | SMARCC1                                                         | 3  | 47663696  | 47719801  | 4 | 0 | 0 | 2 | 0 | 0 | 56105  | 0.728570541 | 0.989879026 | 3.395322847 | 0.291541945 | NA          | NA          |
| chr4:129913321-129960251  | exonic       | SCLT1                                                           | 4  | 129913321 | 129960251 | 4 | 0 | 0 | 2 | 0 | 0 | 46930  | 0.728570541 | 0.989879026 | 3.395322847 | 0.291541945 | NA          | NA          |
| chr4:148785996-148803083  | exonic       | ARHGAP10                                                        | 4  | 148785996 | 148803083 | 4 | 0 | 0 | 2 | 0 | 0 | 17087  | 0.728570541 | 0.989879026 | 3.395322847 | 0.291541945 | NA          | NA          |
| chr13:41517087-41518061   | exonic       | ELF1                                                            | 13 | 41517087  | 41518061  | 2 | 4 | 0 | 3 | 1 | 0 | 974    | 1.395038659 | 0.990478523 | 2.267259131 | 0.436861631 | 0.662211699 | 0.998252924 |
| chr10:90653628-90665417   | exonic       | STAMBPL1                                                        | 10 | 90653628  | 90665417  | 2 | 6 | 2 | 5 | 2 | 0 | 11789  | 2.4717785   | 0.991132615 | 1.688541852 | 0.586975451 | 0.557220194 | 0.998252924 |
| chr2:61340905-61345251    | exonic       | KIAA1841                                                        | 2  | 61340905  | 61345251  | 5 | 3 | 9 | 7 | 5 | 0 | 4346   | 4.292500146 | 0.993059805 | 1.360435642 | 0.72995721  | NA          | NA          |

|                           |            |                                                               |    |           |           |    |    |    |    |    |   |       |             |             |             |             |             |             |
|---------------------------|------------|---------------------------------------------------------------|----|-----------|-----------|----|----|----|----|----|---|-------|-------------|-------------|-------------|-------------|-------------|-------------|
| chr3:136117590-136141886  | exonic     | STAG1                                                         | 3  | 136117590 | 136141886 | 0  | 2  | 2  | 3  | 0  | 0 | 24296 | 1.062023805 | 0.995191295 | 2.714099648 | 0.36667456  | NA          | NA          |
| chr12:100166699-100175875 | exonic     | ANKS1B                                                        | 12 | 100166699 | 100175875 | 6  | 0  | 0  | 0  | 3  | 0 | 9176  | 1.137003922 | 0.996197396 | 2.892191155 | 0.344443829 | NA          | NA          |
| chr9:33351557-33352717    | exonic     | NFX1                                                          | 9  | 33351557  | 33352717  | 4  | 3  | 9  | 2  | 9  | 0 | 1160  | 4.116065965 | 0.99642783  | 1.43768171  | 0.693079576 | NA          | NA          |
| chr5:56542126-56546968    | exonic     | GPBP1                                                         | 5  | 56542126  | 56546968  | 9  | 8  | 10 | 6  | 10 | 1 | 4842  | 6.684140271 | 0.99805811  | 1.078996543 | 0.92498731  | 0.354972508 | 0.998252924 |
| chr16:18851019-18853776   | exonic     | SMG1                                                          | 16 | 18851019  | 18853776  | 5  | 2  | 1  | 4  | 1  | 0 | 2757  | 1.7370283   | 0.99838667  | 1.944577882 | 0.513420768 | NA          | NA          |
| chr10:88911106-88912636   | exonic     | FAM35A                                                        | 10 | 88911106  | 88912636  | 2  | 1  | 4  | 4  | 1  | 0 | 1530  | 1.767598749 | 0.998762382 | 1.951251598 | 0.511857304 | NA          | NA          |
| chr10:125780771-125806240 | exonic     | CHST15                                                        | 10 | 125780771 | 125806240 | 0  | 0  | 3  | 0  | 2  | 0 | 25469 | 0.83386192  | 0.999001591 | 3.253940259 | 0.307012886 | NA          | NA          |
| chr13:50054354-50057699   | exonic     | SETDB2                                                        | 13 | 50054354  | 50057699  | 0  | 0  | 3  | 0  | 2  | 0 | 3345  | 0.83386192  | 0.999001591 | 3.253940259 | 0.307012886 | NA          | NA          |
| chr15:33149215-33194241   | exonic     | FMN1                                                          | 15 | 33149215  | 33194241  | 0  | 0  | 3  | 0  | 2  | 0 | 45026 | 0.83386192  | 0.999001591 | 3.253940259 | 0.307012886 | NA          | NA          |
| chr15:43122135-43132631   | exonic     | TTBK2                                                         | 15 | 43122135  | 43132631  | 0  | 0  | 3  | 0  | 2  | 0 | 10496 | 0.83386192  | 0.999001591 | 3.253940259 | 0.307012886 | NA          | NA          |
| chr15:72324834-72338975   | exonic     | MYO9A                                                         | 15 | 72324834  | 72338975  | 0  | 0  | 3  | 0  | 2  | 0 | 14141 | 0.83386192  | 0.999001591 | 3.253940259 | 0.307012886 | NA          | NA          |
| chr17:44380003-44400393   | exonic     | LRRC37A                                                       | 17 | 44380003  | 44400393  | 0  | 0  | 3  | 0  | 2  | 0 | 20390 | 0.83386192  | 0.999001591 | 3.253940259 | 0.307012886 | NA          | NA          |
| chr17:64059081-64092750   | exonic     | CEP112                                                        | 17 | 64059081  | 64092750  | 0  | 0  | 3  | 0  | 2  | 0 | 33669 | 0.83386192  | 0.999001591 | 3.253940259 | 0.307012886 | NA          | NA          |
| chr2:112825689-112828973  | intronic   | TMEM87B                                                       | 2  | 112825689 | 112828973 | 0  | 0  | 3  | 0  | 2  | 0 | 3284  | 0.83386192  | 0.999001591 | 3.253940259 | 0.307012886 | NA          | NA          |
| chr2:54278095-54284497    | intergenic | <small>PSME4 (dist=80118), ACPY2 (dist=57913)</small>         | 2  | 54278095  | 54284497  | 0  | 0  | 3  | 0  | 2  | 0 | 6402  | 0.83386192  | 0.999001591 | 3.253940259 | 0.307012886 | NA          | NA          |
| chr20:39741421-39742795   | exonic     | TOP1                                                          | 20 | 39741421  | 39742795  | 0  | 0  | 3  | 0  | 2  | 0 | 1374  | 0.83386192  | 0.999001591 | 3.253940259 | 0.307012886 | NA          | NA          |
| chr4:169157402-169158946  | exonic     | DDX60                                                         | 4  | 169157402 | 169158946 | 0  | 0  | 3  | 0  | 2  | 0 | 1544  | 0.83386192  | 0.999001591 | 3.253940259 | 0.307012886 | NA          | NA          |
| chr1:1747194-1770677      | exonic     | GNB1                                                          | 1  | 1747194   | 1770677   | 8  | 7  | 8  | 2  | 7  | 3 | 23483 | 5.814448889 | 1.001603883 | 1.147447411 | 0.872897418 | 0.382718994 | 0.998252924 |
| chr19:33406242-33409245   | exonic     | CEP89                                                         | 19 | 33406242  | 33409245  | 2  | 2  | 1  | 0  | 3  | 0 | 3003  | 1.166876775 | 1.001654893 | 2.423023558 | 0.413390489 | NA          | NA          |
| chr20:51870037-51873110   | exonic     | TSHZ2                                                         | 20 | 51870037  | 51873110  | 3  | 0  | 1  | 0  | 2  | 0 | 3073  | 1.166876775 | 1.001654893 | 2.423023558 | 0.413390489 | NA          | NA          |
| chr2:215632205-215646233  | exonic     | BARD1                                                         | 2  | 215632205 | 215646233 | 6  | 6  | 6  | 3  | 3  | 3 | 14028 | 4.609862852 | 1.001878378 | 1.236233348 | 0.810428209 | 0.417694111 | 0.998252924 |
| chr2:106774513-106782539  | exonic     | UXS1                                                          | 2  | 106774513 | 106782539 | 23 | 6  | 2  | 15 | 4  | 0 | 8026  | 6.485672994 | 1.002984314 | 1.266561097 | 0.791895722 | 0.428421482 | 0.998252924 |
| chr1:247319708-247323115  | exonic     | ZNF124                                                        | 1  | 247319708 | 247323115 | 43 | 52 | 37 | 19 | 52 | 8 | 3407  | 32.68682516 | 1.003644083 | 0.699465646 | 1.43487259  | NA          | NA          |
| chr8:133734285-133764243  | exonic     | TMEM71                                                        | 8  | 133734285 | 133764243 | 4  | 0  | 0  | 4  | 0  | 0 | 29958 | 1.129167512 | 1.007327906 | 2.445555411 | 0.411901485 | 0.680411632 | 0.998252924 |
| chr1:32502510-32504220    | exonic     | KHDRBS1                                                       | 1  | 32502510  | 32504220  | 0  | 2  | 1  | 2  | 0  | 0 | 1710  | 0.758443394 | 1.007664305 | 3.085476268 | 0.326583068 | 0.743983252 | 0.998252924 |
| chr10:116247716-116251637 | exonic     | ABLIM1                                                        | 10 | 116247716 | 116251637 | 0  | 2  | 1  | 2  | 0  | 0 | 3921  | 0.758443394 | 1.007664305 | 3.085476268 | 0.326583068 | 0.743983252 | 0.998252924 |
| chr17:37646809-37649143   | exonic     | CDK12                                                         | 17 | 37646809  | 37649143  | 0  | 2  | 1  | 2  | 0  | 0 | 2334  | 0.758443394 | 1.007664305 | 3.085476268 | 0.326583068 | 0.743983252 | 0.998252924 |
| chr2:27656120-27660227    | exonic     | NRBP1                                                         | 2  | 27656120  | 27660227  | 0  | 2  | 1  | 2  | 0  | 0 | 4107  | 0.758443394 | 1.007664305 | 3.085476268 | 0.326583068 | 0.743983252 | 0.998252924 |
| chr3:128525214-128526514  | exonic     | RAB7A                                                         | 3  | 128525214 | 128526514 | 0  | 2  | 1  | 2  | 0  | 0 | 1300  | 0.758443394 | 1.007664305 | 3.085476268 | 0.326583068 | 0.743983252 | 0.998252924 |
| chr4:103610730-103647840  | exonic     | MANBA                                                         | 4  | 103610730 | 103647840 | 0  | 2  | 2  | 2  | 0  | 0 | 37110 | 0.758443394 | 1.007664305 | 3.085476268 | 0.326583068 | 0.743983252 | 0.998252924 |
| chr4:170498078-170520348  | exonic     | NEK1                                                          | 4  | 170498078 | 170520348 | 0  | 2  | 1  | 2  | 0  | 0 | 22270 | 0.758443394 | 1.007664305 | 3.085476268 | 0.326583068 | 0.743983252 | 0.998252924 |
| chr2:49026445-49036780    | intergenic | <small>STON1-GFP2A1L (dist=22789), FSNR (dist=152510)</small> | 2  | 49026445  | 49036780  | 7  | 0  | 0  | 4  | 0  | 0 | 10335 | 1.32815414  | 1.010041115 | 2.738030173 | 0.368893347 | NA          | NA          |
| chr14:104245081-104263855 | exonic     | PPP1R13B                                                      | 14 | 104245081 | 104263855 | 7  | 10 | 2  | 3  | 9  | 0 | 18774 | 4.448385593 | 1.010681706 | 1.37828389  | 0.733289936 | 0.463381612 | 0.998252924 |
| chr12:49491349-49491888   | exonic     | LMBR1L                                                        | 12 | 49491349  | 49491888  | 14 | 3  | 0  | 8  | 2  | 0 | 539   | 3.421190521 | 1.011266815 | 1.673996307 | 0.604103373 | 0.545774917 | 0.998252924 |
| chr7:91924202-91981956    | exonic     | ANKIB1                                                        | 7  | 91924202  | 91981956  | 4  | 7  | 3  | 1  | 0  | 4 | 57754 | 3.666871262 | 1.01481322  | 1.570620135 | 0.646122635 | NA          | NA          |



|                           |        |          |    |           |           |    |    |    |    |    |    |       |             |             |             |             |             |             |
|---------------------------|--------|----------|----|-----------|-----------|----|----|----|----|----|----|-------|-------------|-------------|-------------|-------------|-------------|-------------|
| chr5:74041502-74046492    | exonic | GFM2     | 5  | 74041502  | 74046492  | 7  | 3  | 1  | 7  | 0  | 0  | 4990  | 2.367184718 | 1.015079072 | 1.886531883 | 0.538066216 | NA          | NA          |
| chr11:3752620-3774638     | exonic | NUP98    | 11 | 3752620   | 3774638   | 3  | 0  | 4  | 5  | 0  | 0  | 22018 | 1.707593856 | 1.015166601 | 2.278352316 | 0.445570509 | 0.655907517 | 0.998252924 |
| chr22:39534640-39537441   | exonic | CBX7     | 22 | 39534640  | 39537441  | 3  | 5  | 1  | 5  | 1  | 0  | 2801  | 2.108193197 | 1.018223602 | 1.822793544 | 0.558606105 | NA          | NA          |
| chr16:11988810-11990642   | exonic | GSPT1    | 16 | 11988810  | 11990642  | 2  | 6  | 0  | 0  | 5  | 0  | 1832  | 1.908765789 | 1.019724324 | 2.216375006 | 0.460086547 | NA          | NA          |
| chr2:168994597-169038600  | exonic | STK39    | 2  | 168994597 | 169038600 | 3  | 3  | 0  | 0  | 0  | 2  | 44003 | 1.655212386 | 1.02197203  | 2.354742694 | 0.434005818 | 0.664284216 | 0.998252924 |
| chr3:149570302-149639014  | exonic | RNF13    | 3  | 149570302 | 149639014 | 23 | 40 | 18 | 17 | 32 | 29 | 68712 | 1.655212386 | 1.02197203  | 2.354742694 | 0.434005818 | 0.664284216 | 0.998252924 |
| chr18:9182379-9221997     | exonic | ANKRD12  | 18 | 9182379   | 9221997   | 72 | 52 | 46 | 42 | 53 | 21 | 39618 | 30.58314863 | 1.022582415 | 0.638621119 | 1.601234888 | 0.109324904 | 0.998252924 |
| chr1:16046228-16047883    | exonic | PLEKHM2  | 1  | 16046228  | 16047883  | 1  | 3  | 2  | 0  | 2  | 1  | 1655  | 1.596625843 | 1.025218877 | 2.061776446 | 0.497250261 | 0.619012582 | 0.998252924 |
| chr4:25128885-25160729    | exonic | SEPSECS  | 4  | 25128885  | 25160729  | 2  | 7  | 0  | 4  | 2  | 0  | 31844 | 2.145204863 | 1.026839927 | 1.941663435 | 0.528845478 | 0.596912647 | 0.998252924 |
| chr2:173429230-173460751  | exonic | PDK1     | 2  | 173429230 | 173460751 | 0  | 5  | 6  | 3  | 5  | 0  | 31521 | 2.979064413 | 1.027186732 | 1.729314921 | 0.593984774 | 0.552522297 | 0.998252924 |
| chr17:18188455-18188834   | exonic | TOP3A    | 17 | 18188455  | 18188834  | 3  | 0  | 1  | 0  | 2  | 0  | 379   | 0.826284697 | 1.027920298 | 2.978069956 | 0.345163248 | 0.729971647 | 0.998252924 |
| chr6:90461149-90472249    | exonic | MDN1     | 6  | 90461149  | 90472249  | 3  | 0  | 1  | 0  | 2  | 0  | 11100 | 0.826284697 | 1.027920298 | 2.978069956 | 0.345163248 | 0.729971647 | 0.998252924 |
| chr9:20353522-20365742    | exonic | MLLT3    | 9  | 20353522  | 20365742  | 3  | 0  | 1  | 0  | 2  | 0  | 12220 | 0.826284697 | 1.027920298 | 2.978069956 | 0.345163248 | 0.729971647 | 0.998252924 |
| chr11:85692171-85695016   | exonic | PICALM   | 11 | 85692171  | 85695016  | 0  | 0  | 4  | 2  | 1  | 0  | 2845  | 1.122726294 | 1.028370383 | 2.696626044 | 0.381354465 | NA          | NA          |
| chr12:6442234-6443410     | exonic | TNFRSF1A | 12 | 6442234   | 6443410   | 0  | 0  | 4  | 2  | 1  | 0  | 1176  | 1.122726294 | 1.028370383 | 2.696626044 | 0.381354465 | NA          | NA          |
| chr1:145459651-145460263  | exonic | POLR3GL  | 1  | 145459651 | 145460263 | 4  | 6  | 1  | 3  | 2  | 1  | 612   | 2.628079199 | 1.028717077 | 1.577294045 | 0.652203741 | 0.514269747 | 0.998252924 |
| chr8:68934270-68950527    | exonic | PREX2    | 8  | 68934270  | 68950527  | 5  | 2  | 0  | 2  | 2  | 0  | 16257 | 1.448163926 | 1.029862197 | 2.209119537 | 0.466186723 | 0.641081852 | 0.998252924 |
| chr7:23015828-23030758    | exonic | FAM126A  | 7  | 23015828  | 23030758  | 17 | 3  | 6  | 11 | 3  | 1  | 14930 | 5.739945689 | 1.02994826  | 1.19709669  | 0.860371821 | 0.389584114 | 0.998252924 |
| chr12:112513481-112516545 | exonic | NAA25    | 12 | 112513481 | 112516545 | 2  | 2  | 1  | 1  | 2  | 0  | 3064  | 1.152160738 | 1.032859516 | 2.266188185 | 0.455769527 | 0.64855572  | 0.998252924 |
| chr16:53175091-53191453   | exonic | CHD9     | 16 | 53175091  | 53191453  | 15 | 11 | 19 | 5  | 14 | 5  | 16362 | 11.36698329 | 1.035232729 | 0.912238584 | 1.134826731 | NA          | NA          |
| chr6:47471016-47472494    | exonic | CD2AP    | 6  | 47471016  | 47472494  | 0  | 7  | 4  | 5  | 3  | 0  | 1478  | 2.903645887 | 1.036913677 | 1.741932184 | 0.595266387 | 0.551665421 | 0.998252924 |
| chr8:141828375-141900868  | exonic | PTK2     | 8  | 141828375 | 141900868 | 12 | 11 | 1  | 10 | 5  | 0  | 72493 | 5.330397089 | 1.037210082 | 1.321574946 | 0.784828803 | 0.43255395  | 0.998252924 |
| chr11:1307231-1317024     | exonic | TOLLIP   | 11 | 1307231   | 1317024   | 0  | 5  | 1  | 0  | 4  | 0  | 9793  | 1.552757708 | 1.037364948 | 2.410651414 | 0.430325572 | NA          | NA          |
| chr1:22816372-22818026    | exonic | ZBTB40   | 1  | 22816372  | 22818026  | 1  | 2  | 3  | 1  | 3  | 0  | 1654  | 1.538739268 | 1.03818496  | 2.055146486 | 0.505163484 | 0.613444015 | 0.998252924 |
| chr10:86177526-86198463   | exonic | CCSER2   | 10 | 86177526  | 86198463  | 3  | 1  | 0  | 1  | 1  | 0  | 20937 | 0.788575434 | 1.038564635 | 2.810109852 | 0.369581507 | 0.711694332 | 0.998252924 |
| chr11:10019812-10024236   | exonic | SBF2     | 11 | 10019812  | 10024236  | 3  | 1  | 0  | 1  | 1  | 0  | 4424  | 0.788575434 | 1.038564635 | 2.810109852 | 0.369581507 | 0.711694332 | 0.998252924 |
| chr15:62283198-62327251   | exonic | VPS13C   | 15 | 62283198  | 62327251  | 1  | 0  | 3  | 1  | 0  | 1  | 44053 | 1.135324013 | 1.039541185 | 2.528265669 | 0.411167702 | 0.680949569 | 0.998252924 |
| chr1:35846859-35854683    | exonic | ZMYM4    | 1  | 35846859  | 35854683  | 2  | 7  | 1  | 0  | 4  | 1  | 7824  | 2.376924088 | 1.040458701 | 1.772834532 | 0.586889911 | 0.557277646 | 0.998252924 |
| chr14:66082695-66096324   | exonic | FUT8     | 14 | 66082695  | 66096324  | 2  | 1  | 6  | 0  | 6  | 0  | 13629 | 2.342028369 | 1.041087587 | 1.93749729  | 0.53733628  | NA          | NA          |
| chr6:158688266-158735300  | exonic | TULP4    | 6  | 158688266 | 158735300 | 0  | 7  | 2  | 0  | 2  | 2  | 47034 | 2.472960706 | 1.04117728  | 1.929167934 | 0.539702771 | 0.589402029 | 0.998252924 |
| chr14:31596990-31602881   | exonic | HECTD1   | 14 | 31596990  | 31602881  | 0  | 2  | 5  | 1  | 4  | 0  | 5891  | 1.925317798 | 1.041622638 | 2.0582315   | 0.506076522 | 0.612802932 | 0.998252924 |
| chr5:76342171-76344097    | exonic | AGGF1    | 5  | 76342171  | 76344097  | 2  | 4  | 0  | 4  | 0  | 0  | 1926  | 1.380322622 | 1.043420074 | 2.461743735 | 0.423854059 | 0.67167225  | 0.998252924 |
| chr1:203672779-203691817  | exonic | ATP2B4   | 1  | 203672779 | 203691817 | 0  | 2  | 0  | 1  | 0  | 0  | 19038 | 0.454862983 | 1.045687667 | 4.029670978 | 0.259497034 | 0.79525177  | 0.998252924 |
| chr1:236966727-236979843  | exonic | MTR      | 1  | 236966727 | 236979843 | 0  | 2  | 0  | 1  | 0  | 0  | 13116 | 0.454862983 | 1.045687667 | 4.029670978 | 0.259497034 | 0.79525177  | 0.998252924 |
| chr1:87181406-87200862    | exonic | SH3GLB1  | 1  | 87181406  | 87200862  | 0  | 2  | 0  | 1  | 0  | 0  | 19456 | 0.454862983 | 1.045687667 | 4.029670978 | 0.259497034 | 0.79525177  | 0.998252924 |

|                           |        |         |    |           |           |   |   |   |   |   |   |       |             |             |             |             |            |             |
|---------------------------|--------|---------|----|-----------|-----------|---|---|---|---|---|---|-------|-------------|-------------|-------------|-------------|------------|-------------|
| chr10:14970014-14977563   | exonic | DCLRE1C | 10 | 14970014  | 14977563  | 0 | 2 | 0 | 1 | 0 | 0 | 7549  | 0.454862983 | 1.045687667 | 4.029670978 | 0.259497034 | 0.79525177 | 0.998252924 |
| chr10:32740519-32742364   | exonic | CCDC7   | 10 | 32740519  | 32742364  | 0 | 2 | 0 | 1 | 0 | 0 | 1845  | 0.454862983 | 1.045687667 | 4.029670978 | 0.259497034 | 0.79525177 | 0.998252924 |
| chr11:22696395-22777499   | exonic | GAS2    | 11 | 22696395  | 22777499  | 0 | 2 | 0 | 1 | 0 | 0 | 81104 | 0.454862983 | 1.045687667 | 4.029670978 | 0.259497034 | 0.79525177 | 0.998252924 |
| chr11:9308001-9321248     | exonic | TMEM41B | 11 | 9308001   | 9321248   | 0 | 2 | 0 | 1 | 0 | 0 | 13247 | 0.454862983 | 1.045687667 | 4.029670978 | 0.259497034 | 0.79525177 | 0.998252924 |
| chr12:109210813-109217137 | exonic | SSH1    | 12 | 109210813 | 109217137 | 0 | 2 | 0 | 1 | 0 | 0 | 6324  | 0.454862983 | 1.045687667 | 4.029670978 | 0.259497034 | 0.79525177 | 0.998252924 |
| chr12:109212024-109217137 | exonic | SSH1    | 12 | 109212024 | 109217137 | 0 | 2 | 0 | 1 | 0 | 0 | 5113  | 0.454862983 | 1.045687667 | 4.029670978 | 0.259497034 | 0.79525177 | 0.998252924 |
| chr12:32751430-32772804   | exonic | FGD4    | 12 | 32751430  | 32772804  | 0 | 2 | 0 | 1 | 0 | 0 | 21374 | 0.454862983 | 1.045687667 | 4.029670978 | 0.259497034 | 0.79525177 | 0.998252924 |
| chr12:68696399-68719355   | exonic | MDM1    | 12 | 68696399  | 68719355  | 0 | 2 | 0 | 1 | 0 | 0 | 22956 | 0.454862983 | 1.045687667 | 4.029670978 | 0.259497034 | 0.79525177 | 0.998252924 |
| chr13:61013821-61084889   | exonic | TDRD3   | 13 | 61013821  | 61084889  | 0 | 2 | 0 | 1 | 0 | 0 | 71068 | 0.454862983 | 1.045687667 | 4.029670978 | 0.259497034 | 0.79525177 | 0.998252924 |
| chr14:56119567-56125332   | exonic | KTN1    | 14 | 56119567  | 56125332  | 0 | 2 | 0 | 1 | 0 | 0 | 5765  | 0.454862983 | 1.045687667 | 4.029670978 | 0.259497034 | 0.79525177 | 0.998252924 |
| chr15:102241288-102255166 | exonic | TARSL2  | 15 | 102241288 | 102255166 | 0 | 2 | 0 | 1 | 0 | 0 | 13878 | 0.454862983 | 1.045687667 | 4.029670978 | 0.259497034 | 0.79525177 | 0.998252924 |
| chr15:31251065-31260213   | exonic | MTMR10  | 15 | 31251065  | 31260213  | 0 | 2 | 0 | 1 | 0 | 0 | 9148  | 0.454862983 | 1.045687667 | 4.029670978 | 0.259497034 | 0.79525177 | 0.998252924 |
| chr15:64496639-64508912   | exonic | CSNK1G1 | 15 | 64496639  | 64508912  | 0 | 2 | 0 | 1 | 0 | 0 | 12273 | 0.454862983 | 1.045687667 | 4.029670978 | 0.259497034 | 0.79525177 | 0.998252924 |
| chr15:72300166-72338975   | exonic | MYO9A   | 15 | 72300166  | 72338975  | 0 | 2 | 0 | 1 | 0 | 0 | 38809 | 0.454862983 | 1.045687667 | 4.029670978 | 0.259497034 | 0.79525177 | 0.998252924 |
| chr15:76866498-76958130   | exonic | SCAPER  | 15 | 76866498  | 76958130  | 0 | 2 | 0 | 1 | 0 | 0 | 91632 | 0.454862983 | 1.045687667 | 4.029670978 | 0.259497034 | 0.79525177 | 0.998252924 |
| chr15:86182604-86213061   | exonic | AKAP13  | 15 | 86182604  | 86213061  | 0 | 2 | 0 | 1 | 0 | 0 | 30457 | 0.454862983 | 1.045687667 | 4.029670978 | 0.259497034 | 0.79525177 | 0.998252924 |
| chr15:90982563-90999547   | exonic | IQGAP1  | 15 | 90982563  | 90999547  | 0 | 2 | 0 | 1 | 0 | 0 | 16984 | 0.454862983 | 1.045687667 | 4.029670978 | 0.259497034 | 0.79525177 | 0.998252924 |
| chr16:11647388-11650591   | exonic | LITAF   | 16 | 11647388  | 11650591  | 0 | 2 | 0 | 1 | 0 | 0 | 3203  | 0.454862983 | 1.045687667 | 4.029670978 | 0.259497034 | 0.79525177 | 0.998252924 |
| chr16:89962397-89973730   | exonic | TCF25   | 16 | 89962397  | 89973730  | 0 | 2 | 0 | 1 | 0 | 0 | 11333 | 0.454862983 | 1.045687667 | 4.029670978 | 0.259497034 | 0.79525177 | 0.998252924 |
| chr17:40497576-40500535   | exonic | STAT3   | 17 | 40497576  | 40500535  | 0 | 3 | 0 | 1 | 0 | 0 | 2959  | 0.454862983 | 1.045687667 | 4.029670978 | 0.259497034 | 0.79525177 | 0.998252924 |
| chr17:44127898-44172067   | exonic | KANSL1  | 17 | 44127898  | 44172067  | 0 | 2 | 0 | 1 | 0 | 0 | 44169 | 0.454862983 | 1.045687667 | 4.029670978 | 0.259497034 | 0.79525177 | 0.998252924 |
| chr17:49048067-49064598   | exonic | SPAG9   | 17 | 49048067  | 49064598  | 0 | 2 | 0 | 1 | 0 | 0 | 16531 | 0.454862983 | 1.045687667 | 4.029670978 | 0.259497034 | 0.79525177 | 0.998252924 |
| chr17:57987922-58009083   | exonic | RPS6KB1 | 17 | 57987922  | 58009083  | 0 | 2 | 0 | 1 | 0 | 0 | 21161 | 0.454862983 | 1.045687667 | 4.029670978 | 0.259497034 | 0.79525177 | 0.998252924 |
| chr18:61022436-61030101   | exonic | KDSR    | 18 | 61022436  | 61030101  | 0 | 2 | 0 | 1 | 0 | 0 | 7665  | 0.454862983 | 1.045687667 | 4.029670978 | 0.259497034 | 0.79525177 | 0.998252924 |
| chr19:15280896-15281636   | exonic | NOTCH3  | 19 | 15280896  | 15281636  | 0 | 2 | 0 | 1 | 0 | 0 | 740   | 0.454862983 | 1.045687667 | 4.029670978 | 0.259497034 | 0.79525177 | 0.998252924 |
| chr2:168869143-168931741  | exonic | STK39   | 2  | 168869143 | 168931741 | 0 | 2 | 0 | 1 | 0 | 0 | 62598 | 0.454862983 | 1.045687667 | 4.029670978 | 0.259497034 | 0.79525177 | 0.998252924 |
| chr2:32734804-32738221    | exonic | BIRC6   | 2  | 32734804  | 32738221  | 0 | 2 | 0 | 1 | 0 | 0 | 3417  | 0.454862983 | 1.045687667 | 4.029670978 | 0.259497034 | 0.79525177 | 0.998252924 |
| chr2:69581620-69590802    | exonic | GFPT1   | 2  | 69581620  | 69590802  | 0 | 2 | 0 | 1 | 0 | 0 | 9182  | 0.454862983 | 1.045687667 | 4.029670978 | 0.259497034 | 0.79525177 | 0.998252924 |
| chr20:30897515-30904677   | exonic | KIF3B   | 20 | 30897515  | 30904677  | 0 | 2 | 0 | 1 | 0 | 0 | 7162  | 0.454862983 | 1.045687667 | 4.029670978 | 0.259497034 | 0.79525177 | 0.998252924 |
| chr22:46572649-46594488   | exonic | PPARA   | 22 | 46572649  | 46594488  | 0 | 2 | 0 | 1 | 0 | 0 | 21839 | 0.454862983 | 1.045687667 | 4.029670978 | 0.259497034 | 0.79525177 | 0.998252924 |
| chr3:126360874-126366139  | exonic | TXNRD3  | 3  | 126360874 | 126366139 | 0 | 2 | 0 | 1 | 0 | 0 | 5265  | 0.454862983 | 1.045687667 | 4.029670978 | 0.259497034 | 0.79525177 | 0.998252924 |
| chr4:87693930-87720357    | exonic | PTPN13  | 4  | 87693930  | 87720357  | 0 | 2 | 0 | 1 | 0 | 0 | 26427 | 0.454862983 | 1.045687667 | 4.029670978 | 0.259497034 | 0.79525177 | 0.998252924 |
| chr5:65307876-65324171    | exonic | ERBB2IP | 5  | 65307876  | 65324171  | 0 | 2 | 0 | 1 | 0 | 0 | 16295 | 0.454862983 | 1.045687667 | 4.029670978 | 0.259497034 | 0.79525177 | 0.998252924 |
| chr6:15452236-15468949    | exonic | JARID2  | 6  | 15452236  | 15468949  | 0 | 2 | 0 | 1 | 0 | 0 | 16713 | 0.454862983 | 1.045687667 | 4.029670978 | 0.259497034 | 0.79525177 | 0.998252924 |
| chr6:170159063-170173498  | exonic | ERMARD  | 6  | 170159063 | 170173498 | 0 | 2 | 0 | 1 | 0 | 0 | 14435 | 0.454862983 | 1.045687667 | 4.029670978 | 0.259497034 | 0.79525177 | 0.998252924 |

|                           |            |                                         |    |           |           |    |    |    |    |   |   |       |             |             |             |             |             |             |
|---------------------------|------------|-----------------------------------------|----|-----------|-----------|----|----|----|----|---|---|-------|-------------|-------------|-------------|-------------|-------------|-------------|
| chr6:25482484-25500463    | exonic     | LRRC16A                                 | 6  | 25482484  | 25500463  | 0  | 2  | 0  | 1  | 0 | 0 | 17979 | 0.454862983 | 1.045687667 | 4.029670978 | 0.259497034 | 0.79525177  | 0.998252924 |
| chr6:55926446-55942371    | exonic     | COL21A1                                 | 6  | 55926446  | 55942371  | 0  | 2  | 0  | 1  | 0 | 0 | 15925 | 0.454862983 | 1.045687667 | 4.029670978 | 0.259497034 | 0.79525177  | 0.998252924 |
| chr7:129297182-129367205  | exonic     | NRF1                                    | 7  | 129297182 | 129367205 | 0  | 2  | 0  | 1  | 0 | 0 | 70023 | 0.454862983 | 1.045687667 | 4.029670978 | 0.259497034 | 0.79525177  | 0.998252924 |
| chr7:151864230-151871327  | exonic     | KMT2C                                   | 7  | 151864230 | 151871327 | 0  | 2  | 0  | 1  | 0 | 0 | 7097  | 0.454862983 | 1.045687667 | 4.029670978 | 0.259497034 | 0.79525177  | 0.998252924 |
| chr7:31912904-31920473    | exonic     | PDE1C                                   | 7  | 31912904  | 31920473  | 0  | 2  | 0  | 1  | 0 | 0 | 7569  | 0.454862983 | 1.045687667 | 4.029670978 | 0.259497034 | 0.79525177  | 0.998252924 |
| chr9:136915495-136918712  | exonic     | BRD3                                    | 9  | 136915495 | 136918712 | 0  | 2  | 0  | 1  | 0 | 0 | 3217  | 0.454862983 | 1.045687667 | 4.029670978 | 0.259497034 | 0.79525177  | 0.998252924 |
| chr4:54280781-54294350    | exonic     | FIP1L1                                  | 4  | 54280781  | 54294350  | 22 | 9  | 9  | 7  | 9 | 4 | 13569 | 9.24791709  | 1.04748873  | 0.937463097 | 1.117365296 | 0.263838167 | 0.998252924 |
| chr1:16632297-16641930    | exonic     | FBXO42                                  | 1  | 16632297  | 16641930  | 0  | 0  | 3  | 1  | 1 | 0 | 9633  | 0.819145884 | 1.048575544 | 3.027702916 | 0.346327091 | NA          | NA          |
| chr13:46577273-46619651   | exonic     | ZC3H13                                  | 13 | 46577273  | 46619651  | 0  | 0  | 3  | 1  | 1 | 0 | 42378 | 0.819145884 | 1.048575544 | 3.027702916 | 0.346327091 | NA          | NA          |
| chr2:24360778-24369956    | exonic     | FAM228B                                 | 2  | 24360778  | 24369956  | 2  | 0  | 3  | 1  | 3 | 0 | 9178  | 0.819145884 | 1.048575544 | 3.027702916 | 0.346327091 | NA          | NA          |
| chr9:124751473-124752049  | exonic     | TTLL11                                  | 9  | 124751473 | 124752049 | 0  | 0  | 3  | 1  | 1 | 0 | 576   | 0.819145884 | 1.048575544 | 3.027702916 | 0.346327091 | NA          | NA          |
| chr2:170728745-170734147  | exonic     | UBR3                                    | 2  | 170728745 | 170734147 | 4  | 1  | 3  | 3  | 2 | 0 | 5402  | 1.843019646 | 1.051618274 | 1.876392802 | 0.560446764 | 0.575174742 | 0.998252924 |
| chr22:32875119-32881196   | exonic     | FBXO7                                   | 22 | 32875119  | 32881196  | 2  | 3  | 1  | 4  | 0 | 0 | 6077  | 1.403315849 | 1.054981663 | 2.265783989 | 0.465614405 | NA          | NA          |
| chrX:64271342-64295792    | intergenic | ZC4H2(dist=16718), ZC3H12B(dist=412823) | X  | 64271342  | 64295792  | 19 | 5  | 2  | 9  | 6 | 0 | 24450 | 5.399635956 | 1.05500909  | 1.293928109 | 0.815347392 | 0.414873489 | 0.998252924 |
| chr5:153409048-153414527  | exonic     | FAM114A2                                | 5  | 153409048 | 153414527 | 19 | 9  | 6  | 14 | 7 | 0 | 5479  | 7.538399602 | 1.056098363 | 1.112343536 | 0.94943543  | 0.342399198 | 0.998252924 |
| chr1:93070863-93091491    | exonic     | EVI5                                    | 1  | 93070863  | 93091491  | 0  | 1  | 2  | 2  | 0 | 0 | 20628 | 0.78143662  | 1.057840981 | 3.05522717  | 0.346239714 | 0.729162571 | 0.998252924 |
| chr10:69726439-69773943   | exonic     | HERC4                                   | 10 | 69726439  | 69773943  | 0  | 1  | 2  | 0  | 2 | 0 | 47504 | 0.78143662  | 1.057840981 | 3.05522717  | 0.346239714 | 0.729162571 | 0.998252924 |
| chr11:118947606-118948357 | exonic     | VPS11                                   | 11 | 118947606 | 118948357 | 0  | 1  | 2  | 2  | 0 | 0 | 751   | 0.78143662  | 1.057840981 | 3.05522717  | 0.346239714 | 0.729162571 | 0.998252924 |
| chr6:110048311-110064975  | exonic     | FIG4                                    | 6  | 110048311 | 110064975 | 0  | 1  | 2  | 2  | 0 | 0 | 16664 | 0.78143662  | 1.057840981 | 3.05522717  | 0.346239714 | 0.729162571 | 0.998252924 |
| chr6:86267693-86284096    | exonic     | SNX14                                   | 6  | 86267693  | 86284096  | 0  | 4  | 2  | 0  | 4 | 0 | 16403 | 1.575750935 | 1.06116866  | 2.368497312 | 0.448034564 | 0.654128252 | 0.998252924 |
| chr22:32097641-32134897   | exonic     | PRR14L                                  | 22 | 32097641  | 32134897  | 0  | 1  | 1  | 0  | 0 | 1 | 37256 | 0.679763433 | 1.063610659 | 3.314428114 | 0.320903222 | NA          | NA          |
| chr5:78952780-78977884    | exonic     | PAPD4                                   | 5  | 78952780  | 78977884  | 0  | 1  | 1  | 0  | 0 | 1 | 25104 | 0.679763433 | 1.063610659 | 3.314428114 | 0.320903222 | NA          | NA          |
| chr1:22041881-22050588    | exonic     | USP48                                   | 1  | 22041881  | 22050588  | 4  | 5  | 2  | 5  | 2 | 0 | 8707  | 2.555476587 | 1.063907255 | 1.639692123 | 0.648845744 | 0.516438087 | 0.998252924 |
| chr18:20569183-20581692   | exonic     | RBBP8                                   | 18 | 20569183  | 20581692  | 5  | 1  | 0  | 0  | 3 | 0 | 12509 | 1.182292778 | 1.065787656 | 2.62148941  | 0.406558063 | 0.684332604 | 0.998252924 |
| chr16:47531309-47549512   | exonic     | PHKB                                    | 16 | 47531309  | 47549512  | 6  | 13 | 10 | 6  | 7 | 3 | 18203 | 7.42191339  | 1.065980543 | 1.035269185 | 1.029665093 | 0.303167247 | 0.998252924 |
| chr1:229602380-229623360  | exonic     | NUP133                                  | 1  | 229602380 | 229623360 | 0  | 1  | 1  | 0  | 1 | 0 | 20980 | 0.492572246 | 1.067261703 | 3.658987234 | 0.29168227  | 0.770529566 | 0.998252924 |
| chr1:52911458-52927441    | exonic     | ZCCHC11                                 | 1  | 52911458  | 52927441  | 0  | 1  | 1  | 0  | 1 | 0 | 15983 | 0.492572246 | 1.067261703 | 3.658987234 | 0.29168227  | 0.770529566 | 0.998252924 |
| chr12:19406873-19440490   | exonic     | PLEKHA5                                 | 12 | 19406873  | 19440490  | 0  | 1  | 1  | 0  | 1 | 0 | 33617 | 0.492572246 | 1.067261703 | 3.658987234 | 0.29168227  | 0.770529566 | 0.998252924 |
| chr12:50821544-50831621   | exonic     | LARP4                                   | 12 | 50821544  | 50831621  | 0  | 1  | 1  | 0  | 1 | 0 | 10077 | 0.492572246 | 1.067261703 | 3.658987234 | 0.29168227  | 0.770529566 | 0.998252924 |
| chr17:44770268-44806300   | exonic     | NSF                                     | 17 | 44770268  | 44806300  | 0  | 1  | 1  | 0  | 1 | 0 | 36032 | 0.492572246 | 1.067261703 | 3.658987234 | 0.29168227  | 0.770529566 | 0.998252924 |
| chr17:61838273-61843554   | exonic     | CCDC47                                  | 17 | 61838273  | 61843554  | 0  | 1  | 1  | 0  | 1 | 0 | 5281  | 0.492572246 | 1.067261703 | 3.658987234 | 0.29168227  | 0.770529566 | 0.998252924 |
| chr18:20570899-20576425   | exonic     | RBBP8                                   | 18 | 20570899  | 20576425  | 0  | 1  | 1  | 0  | 1 | 0 | 5526  | 0.492572246 | 1.067261703 | 3.658987234 | 0.29168227  | 0.770529566 | 0.998252924 |
| chr4:42626552-42629126    | exonic     | ATP8A1                                  | 4  | 42626552  | 42629126  | 0  | 1  | 1  | 0  | 1 | 0 | 2574  | 0.492572246 | 1.067261703 | 3.658987234 | 0.29168227  | 0.770529566 | 0.998252924 |
| chr5:172517317-172518404  | exonic     | CREBRF                                  | 5  | 172517317 | 172518404 | 0  | 1  | 1  | 0  | 1 | 0 | 1087  | 0.492572246 | 1.067261703 | 3.658987234 | 0.29168227  | 0.770529566 | 0.998252924 |
| chr7:129756284-129762042  | exonic     | KLHDC10                                 | 7  | 129756284 | 129762042 | 0  | 1  | 1  | 0  | 1 | 0 | 5758  | 0.492572246 | 1.067261703 | 3.658987234 | 0.29168227  | 0.770529566 | 0.998252924 |

|                           |            |                                                              |    |           |           |    |    |   |   |   |   |       |             |             |             |             |             |             |
|---------------------------|------------|--------------------------------------------------------------|----|-----------|-----------|----|----|---|---|---|---|-------|-------------|-------------|-------------|-------------|-------------|-------------|
| chr7:30084700-30102358    | exonic     | PLEKHA8                                                      | 7  | 30084700  | 30102358  | 0  | 1  | 1 | 0 | 1 | 0 | 17658 | 0.492572246 | 1.067261703 | 3.658987234 | 0.29168227  | 0.770529566 | 0.998252924 |
| chr8:30538420-30557652    | exonic     | GSR                                                          | 8  | 30538420  | 30557652  | 0  | 1  | 1 | 0 | 1 | 0 | 19232 | 0.492572246 | 1.067261703 | 3.658987234 | 0.29168227  | 0.770529566 | 0.998252924 |
| chr8:71060507-71069475    | exonic     | NCOA2                                                        | 8  | 71060507  | 71069475  | 0  | 1  | 1 | 0 | 1 | 0 | 8968  | 0.492572246 | 1.067261703 | 3.658987234 | 0.29168227  | 0.770529566 | 0.998252924 |
| chr8:95879367-95888717    | exonic     | INTS8                                                        | 8  | 95879367  | 95888717  | 0  | 1  | 1 | 0 | 1 | 0 | 9350  | 0.492572246 | 1.067261703 | 3.658987234 | 0.29168227  | 0.770529566 | 0.998252924 |
| chrX:19713729-19764559    | exonic     | SH3KBP1                                                      | X  | 19713729  | 19764559  | 0  | 1  | 1 | 0 | 1 | 0 | 50830 | 0.492572246 | 1.067261703 | 3.658987234 | 0.29168227  | 0.770529566 | 0.998252924 |
| chr6:118832460-118887479  | exonic     | CEP85L, PLN                                                  | 6  | 118832460 | 118887479 | 3  | 0  | 3 | 4 | 0 | 0 | 55019 | 1.404013446 | 1.068720283 | 2.441583829 | 0.43771599  | 0.661592177 | 0.998252924 |
| chr11:66515849-66526567   | exonic     | C11orf80                                                     | 11 | 66515849  | 66526567  | 1  | 3  | 1 | 0 | 3 | 0 | 10718 | 1.212165631 | 1.070719666 | 2.41814968  | 0.442784694 | NA          | NA          |
| chr2:61118817-61128218    | exonic     | REL                                                          | 2  | 61118817  | 61128218  | 0  | 0  | 4 | 0 | 1 | 1 | 9401  | 1.218322133 | 1.071570868 | 2.674567295 | 0.400652049 | NA          | NA          |
| chr16:19129674-19131853   | UTR3       | <small>11PRLP2(EN_001034841;c.*2281_*4462&amp;+lins)</small> | 16 | 19129674  | 19131853  | 5  | 3  | 4 | 8 | 0 | 0 | 2179  | 2.807329294 | 1.071657095 | 1.741992981 | 0.615190249 | NA          | NA          |
| chr16:148142-150507       | exonic     | NPRL3                                                        | 16 | 148142    | 150507    | 6  | 0  | 4 | 2 | 0 | 2 | 2365  | 2.392057747 | 1.071889927 | 1.903620948 | 0.563079497 | 0.573380752 | 0.998252924 |
| chr13:33109905-33111164   | exonic     | N4BP2L2                                                      | 13 | 33109905  | 33111164  | 0  | 6  | 3 | 0 | 6 | 0 | 1259  | 2.363626402 | 1.073027889 | 2.072186629 | 0.517823961 | 0.604581099 | 0.998252924 |
| chr3:171969049-172025291  | exonic     | FNDC3B                                                       | 3  | 171969049 | 172025291 | 0  | 3  | 7 | 1 | 2 | 2 | 56242 | 2.868514022 | 1.074228535 | 1.716847001 | 0.625698466 | 0.531512739 | 0.998252924 |
| chr4:83795763-83803093    | exonic     | SEC31A                                                       | 4  | 83795763  | 83803093  | 1  | 5  | 3 | 2 | 2 | 1 | 7330  | 2.355069237 | 1.075658717 | 1.66710298  | 0.645226317 | 0.518780534 | 0.998252924 |
| chr10:35349801-35360267   | exonic     | CUL2                                                         | 10 | 35349801  | 35360267  | 2  | 2  | 0 | 0 | 2 | 0 | 10466 | 0.848580327 | 1.077511646 | 2.932637476 | 0.367420677 | 0.713305251 | 0.998252924 |
| chr17:3608375-3608939     | intergenic | <small>P2RX5-TAX1BP3 (dist=8677), ITGAE (dist=8980)</small>  | 17 | 3608375   | 3608939   | 2  | 2  | 0 | 0 | 2 | 0 | 564   | 0.848580327 | 1.077511646 | 2.932637476 | 0.367420677 | 0.713305251 | 0.998252924 |
| chr18:13387339-13438383   | exonic     | LDLRAD4                                                      | 18 | 13387339  | 13438383  | 2  | 2  | 0 | 0 | 2 | 0 | 51044 | 0.848580327 | 1.077511646 | 2.932637476 | 0.367420677 | 0.713305251 | 0.998252924 |
| chr6:111714078-111793343  | exonic     | REV3L                                                        | 6  | 111714078 | 111793343 | 2  | 2  | 0 | 0 | 2 | 0 | 79265 | 0.848580327 | 1.077511646 | 2.932637476 | 0.367420677 | 0.713305251 | 0.998252924 |
| chr6:111726672-111793343  | exonic     | REV3L                                                        | 6  | 111726672 | 111793343 | 2  | 2  | 0 | 0 | 2 | 0 | 66671 | 0.848580327 | 1.077511646 | 2.932637476 | 0.367420677 | 0.713305251 | 0.998252924 |
| chr7:76092861-76121570    | exonic     | DTX2                                                         | 7  | 76092861  | 76121570  | 2  | 2  | 0 | 0 | 2 | 0 | 28709 | 0.848580327 | 1.077511646 | 2.932637476 | 0.367420677 | 0.713305251 | 0.998252924 |
| chr4:41015599-41035321    | exonic     | APBB2                                                        | 4  | 41015599  | 41035321  | 1  | 4  | 0 | 1 | 2 | 0 | 19722 | 1.174456368 | 1.077963837 | 2.447146461 | 0.440498292 | NA          | NA          |
| chr2:120830753-120836157  | exonic     | EPB41L5                                                      | 2  | 120830753 | 120836157 | 12 | 2  | 6 | 7 | 3 | 1 | 5404  | 4.495489635 | 1.079408559 | 1.285066257 | 0.839963351 | 0.400928936 | 0.998252924 |
| chr14:35331249-35331528   | exonic     | BAZ1A                                                        | 14 | 35331249  | 35331528  | 6  | 5  | 5 | 5 | 5 | 0 | 279   | 3.768339814 | 1.0797568   | 1.385376153 | 0.779396121 | 0.435746408 | 0.998252924 |
| chr1:58971731-59004982    | exonic     | OMA1                                                         | 1  | 58971731  | 59004982  | 5  | 19 | 8 | 9 | 8 | 2 | 33251 | 8.075786159 | 1.081583221 | 1.042719233 | 1.037271766 | 0.29960922  | 0.998252924 |
| chr16:14738130-14738466   | exonic     | BFAR                                                         | 16 | 14738130  | 14738466  | 0  | 2  | 2 | 1 | 0 | 1 | 336   | 1.157619643 | 1.083753618 | 2.495760592 | 0.434237811 | 0.664115758 | 0.998252924 |
| chr12:93226287-93246801   | exonic     | EEA1                                                         | 12 | 93226287  | 93246801  | 3  | 0  | 1 | 1 | 1 | 0 | 20514 | 0.811568661 | 1.083942724 | 2.785202773 | 0.389179106 | 0.697143659 | 0.998252924 |
| chr13:50567928-50618904   | exonic     | KCNRG, TRIM13                                                | 13 | 50567928  | 50618904  | 0  | 0  | 4 | 3 | 0 | 0 | 50976 | 1.108010258 | 1.085088983 | 2.934953273 | 0.369712524 | NA          | NA          |
| chr13:50571209-50618904   | exonic     | KCNRG, TRIM13                                                | 13 | 50571209  | 50618904  | 0  | 0  | 4 | 3 | 0 | 0 | 47695 | 1.108010258 | 1.085088983 | 2.934953273 | 0.369712524 | NA          | NA          |
| chrX:36083759-36103655    | exonic     | CFAP47                                                       | X  | 36083759  | 36103655  | 0  | 0  | 4 | 3 | 0 | 0 | 19896 | 1.108010258 | 1.085088983 | 2.934953273 | 0.369712524 | NA          | NA          |
| chr8:107691437-107696587  | exonic     | OXR1                                                         | 8  | 107691437 | 107696587 | 0  | 3  | 3 | 0 | 4 | 0 | 5150  | 1.598744161 | 1.086226684 | 2.351114954 | 0.462004923 | NA          | NA          |
| chr7:6852606-6861995      | exonic     | CCZ1B                                                        | 7  | 6852606   | 6861995   | 0  | 3  | 3 | 0 | 0 | 2 | 9389  | 1.731071691 | 1.087510738 | 2.345187447 | 0.463720177 | NA          | NA          |
| chr9:134305476-134308181  | exonic     | PRRC2B                                                       | 9  | 134305476 | 134308181 | 0  | 7  | 2 | 2 | 4 | 0 | 2705  | 2.311201102 | 1.088590661 | 1.911834514 | 0.569395862 | 0.569087524 | 0.998252924 |
| chr22:46085591-46098727   | exonic     | ATXN10                                                       | 22 | 46085591  | 46098727  | 6  | 0  | 1 | 4 | 0 | 0 | 13136 | 1.396436223 | 1.089590992 | 2.476983207 | 0.439886305 | 0.660019455 | 0.998252924 |
| chr2:32664575-32679010    | exonic     | BIRC6                                                        | 2  | 32664575  | 32679010  | 3  | 3  | 1 | 0 | 4 | 0 | 14435 | 1.591166938 | 1.090435008 | 2.162499846 | 0.504247439 | NA          | NA          |
| chr12:88542064-88570096   | exonic     | TMTC3                                                        | 12 | 88542064  | 88570096  | 2  | 6  | 0 | 3 | 2 | 0 | 28032 | 1.864617679 | 1.092429564 | 2.033893204 | 0.537112549 | 0.591189873 | 0.998252924 |
| chr11:128354717-128360471 | exonic     | ETS1                                                         | 11 | 128354717 | 128360471 | 0  | 0  | 6 | 5 | 0 | 0 | 5754  | 1.715171079 | 1.094304092 | 3.851023299 | 0.284159302 | NA          | NA          |

|                           |            |                                       |    |           |           |    |   |   |   |   |   |        |             |             |             |             |             |             |
|---------------------------|------------|---------------------------------------|----|-----------|-----------|----|---|---|---|---|---|--------|-------------|-------------|-------------|-------------|-------------|-------------|
| chr1:247012916-247014744  | exonic     | AHCTF1                                | 1  | 247012916 | 247014744 | 3  | 1 | 0 | 2 | 0 | 0 | 1828   | 0.773859398 | 1.095174823 | 3.043181606 | 0.359878234 | 0.718938194 | 0.998252924 |
| chr10:94653105-94669388   | exonic     | EXOC6                                 | 10 | 94653105  | 94669388  | 3  | 1 | 0 | 2 | 0 | 0 | 16283  | 0.773859398 | 1.095174823 | 3.043181606 | 0.359878234 | 0.718938194 | 0.998252924 |
| chr2:191765289-191796363  | exonic     | GLS                                   | 2  | 191765289 | 191796363 | 3  | 1 | 0 | 2 | 0 | 0 | 31074  | 0.773859398 | 1.095174823 | 3.043181606 | 0.359878234 | 0.718938194 | 0.998252924 |
| chr3:78763546-78767033    | exonic     | ROBO1                                 | 3  | 78763546  | 78767033  | 3  | 1 | 0 | 2 | 0 | 0 | 3487   | 0.773859398 | 1.095174823 | 3.043181606 | 0.359878234 | 0.718938194 | 0.998252924 |
| chr4:88026779-88036451    | exonic     | AFF1                                  | 4  | 88026779  | 88036451  | 3  | 1 | 0 | 2 | 0 | 0 | 9672   | 0.773859398 | 1.095174823 | 3.043181606 | 0.359878234 | 0.718938194 | 0.998252924 |
| chr5:94224583-94267696    | exonic     | MCTP1                                 | 5  | 94224583  | 94267696  | 3  | 1 | 0 | 2 | 0 | 0 | 43113  | 0.773859398 | 1.095174823 | 3.043181606 | 0.359878234 | 0.718938194 | 0.998252924 |
| chr8:48308935-48353104    | exonic     | SPIDR                                 | 8  | 48308935  | 48353104  | 3  | 1 | 0 | 2 | 0 | 0 | 44169  | 0.773859398 | 1.095174823 | 3.043181606 | 0.359878234 | 0.718938194 | 0.998252924 |
| chr8:53580580-53599527    | exonic     | RBICC1                                | 8  | 53580580  | 53599527  | 3  | 1 | 0 | 2 | 0 | 0 | 18947  | 0.773859398 | 1.095174823 | 3.043181606 | 0.359878234 | 0.718938194 | 0.998252924 |
| chr10:13705452-13717044   | exonic     | FRMD4A                                | 10 | 13705452  | 13717044  | 2  | 3 | 0 | 3 | 0 | 0 | 11592  | 1.099735438 | 1.096486113 | 2.661464503 | 0.411985999 | 0.680349685 | 0.998252924 |
| chr14:80158515-80271533   | exonic     | NRXN3                                 | 14 | 80158515  | 80271533  | 2  | 3 | 0 | 3 | 0 | 0 | 113018 | 1.099735438 | 1.096486113 | 2.661464503 | 0.411985999 | 0.680349685 | 0.998252924 |
| chr14:80163972-80271542   | exonic     | NRXN3                                 | 14 | 80163972  | 80271542  | 2  | 3 | 0 | 3 | 0 | 0 | 107570 | 1.099735438 | 1.096486113 | 2.661464503 | 0.411985999 | 0.680349685 | 0.998252924 |
| chr16:53289511-53308214   | exonic     | CHD9                                  | 16 | 53289511  | 53308214  | 5  | 0 | 1 | 0 | 3 | 0 | 18703  | 1.205286005 | 1.098284595 | 2.606665269 | 0.421337027 | 0.673508996 | 0.998252924 |
| chr3:32180078-32181858    | exonic     | GPD1L                                 | 3  | 32180078  | 32181858  | 5  | 0 | 3 | 5 | 0 | 0 | 1780   | 1.768298716 | 1.098946429 | 2.244469962 | 0.48962403  | NA          | NA          |
| chr10:126628943-126631876 | exonic     | ZRANB1                                | 10 | 126628943 | 126631876 | 10 | 0 | 0 | 2 | 3 | 0 | 2933   | 1.865574464 | 1.099347087 | 2.2328913   | 0.492342411 | NA          | NA          |
| chr22:42204878-42209826   | exonic     | CCDC134                               | 22 | 42204878  | 42209826  | 1  | 7 | 4 | 5 | 3 | 0 | 4948   | 3.03263283  | 1.112430351 | 1.59452268  | 0.697657277 | 0.485391552 | 0.998252924 |
| chr8:101721360-101725409  | exonic     | PABPC1                                | 8  | 101721360 | 101725409 | 2  | 4 | 2 | 3 | 2 | 0 | 4049   | 1.910604132 | 1.113439121 | 1.842075724 | 0.604448073 | 0.545545783 | 0.998252924 |
| chrX:154736559-154766779  | exonic     | TMLHE                                 | X  | 154736559 | 154766779 | 0  | 4 | 2 | 2 | 2 | 0 | 30220  | 1.546318861 | 1.114988023 | 2.186121238 | 0.510030278 | 0.610030249 | 0.998252924 |
| chr12:12022357-12022903   | exonic     | ETV6                                  | 12 | 12022357  | 12022903  | 1  | 4 | 4 | 2 | 0 | 2 | 546    | 2.444226229 | 1.116098688 | 1.779259733 | 0.627282609 | 0.530474001 | 0.998252924 |
| chr1:15860731-15863309    | exonic     | DNAJC16                               | 1  | 15860731  | 15863309  | 4  | 3 | 3 | 3 | 3 | 0 | 2578   | 2.312598666 | 1.116158795 | 1.683042093 | 0.66317937  | 0.507215683 | 0.998252924 |
| chr11:68358127-68367962   | exonic     | PPP6R3                                | 11 | 68358127  | 68367962  | 2  | 1 | 6 | 4 | 2 | 0 | 9835   | 2.283164222 | 1.116896463 | 1.778485939 | 0.628004101 | NA          | NA          |
| chr1:171548492-171556890  | exonic     | PRRC2C                                | 1  | 171548492 | 171556890 | 0  | 0 | 3 | 2 | 0 | 0 | 8398   | 0.804429847 | 1.117376884 | 3.293712151 | 0.339245457 | NA          | NA          |
| chr1:51906018-51913807    | exonic     | EPS15                                 | 1  | 51906018  | 51913807  | 0  | 0 | 3 | 2 | 0 | 0 | 7789   | 0.804429847 | 1.117376884 | 3.293712151 | 0.339245457 | NA          | NA          |
| chr10:73853450-73854555   | intergenic | SPOCK2 (dist=4660), ASCCI (dist=1235) | 10 | 73853450  | 73854555  | 0  | 0 | 3 | 2 | 0 | 0 | 1105   | 0.804429847 | 1.117376884 | 3.293712151 | 0.339245457 | NA          | NA          |
| chr10:94653105-94679807   | exonic     | EXOC6                                 | 10 | 94653105  | 94679807  | 0  | 0 | 3 | 2 | 0 | 0 | 26702  | 0.804429847 | 1.117376884 | 3.293712151 | 0.339245457 | NA          | NA          |
| chr13:42772613-42780282   | exonic     | DGKH                                  | 13 | 42772613  | 42780282  | 0  | 0 | 3 | 2 | 0 | 0 | 7669   | 0.804429847 | 1.117376884 | 3.293712151 | 0.339245457 | NA          | NA          |
| chr15:64710739-64717830   | exonic     | TRIP4                                 | 15 | 64710739  | 64717830  | 0  | 0 | 3 | 2 | 0 | 0 | 7091   | 0.804429847 | 1.117376884 | 3.293712151 | 0.339245457 | NA          | NA          |
| chr19:41242890-41243674   | exonic     | ITPKC                                 | 19 | 41242890  | 41243674  | 0  | 0 | 3 | 2 | 0 | 0 | 784    | 0.804429847 | 1.117376884 | 3.293712151 | 0.339245457 | NA          | NA          |
| chr3:20112856-20113951    | exonic     | KAT2B                                 | 3  | 20112856  | 20113951  | 0  | 0 | 3 | 2 | 0 | 0 | 1095   | 0.804429847 | 1.117376884 | 3.293712151 | 0.339245457 | NA          | NA          |
| chr5:153405958-153414527  | exonic     | FAM114A2                              | 5  | 153405958 | 153414527 | 0  | 0 | 3 | 2 | 0 | 0 | 8569   | 0.804429847 | 1.117376884 | 3.293712151 | 0.339245457 | NA          | NA          |
| chr9:36351111-36376124    | exonic     | RNF38                                 | 9  | 36351111  | 36376124  | 0  | 0 | 3 | 2 | 0 | 0 | 25013  | 0.804429847 | 1.117376884 | 3.293712151 | 0.339245457 | NA          | NA          |
| chr9:36352738-36376124    | exonic     | RNF38                                 | 9  | 36352738  | 36376124  | 0  | 0 | 3 | 2 | 0 | 0 | 23386  | 0.804429847 | 1.117376884 | 3.293712151 | 0.339245457 | NA          | NA          |
| chr3:47663696-47680270    | exonic     | SMARCC1                               | 3  | 47663696  | 47680270  | 1  | 4 | 0 | 2 | 1 | 0 | 16574  | 1.159740331 | 1.117926888 | 2.455888683 | 0.45520259  | NA          | NA          |
| chr2:106739425-106782539  | exonic     | UXS1                                  | 2  | 106739425 | 106782539 | 4  | 6 | 0 | 4 | 0 | 1 | 43114  | 2.295066715 | 1.119957674 | 1.921419474 | 0.58288036  | 0.559973843 | 0.998252924 |
| chr3:172003715-172028671  | exonic     | FNDCC3B                               | 3  | 172003715 | 172028671 | 4  | 6 | 0 | 4 | 0 | 1 | 24956  | 2.295066715 | 1.119957674 | 1.921419474 | 0.58288036  | 0.559973843 | 0.998252924 |
| chr2:71590282-71597135    | exonic     | ZNF638                                | 2  | 71590282  | 71597135  | 6  | 0 | 0 | 3 | 0 | 0 | 6853   | 1.092855812 | 1.121147467 | 2.928243395 | 0.382873729 | NA          | NA          |

|                           |        |         |    |           |           |    |    |   |    |    |   |       |             |             |             |             |             |             |
|---------------------------|--------|---------|----|-----------|-----------|----|----|---|----|----|---|-------|-------------|-------------|-------------|-------------|-------------|-------------|
| chr2:223765391-223799405  | exonic | ACSL3   | 2  | 223765391 | 223799405 | 2  | 2  | 1 | 3  | 0  | 0 | 34014 | 1.122728665 | 1.12126061  | 2.44990159  | 0.457675775 | NA          | NA          |
| chr1:201823722-201826322  | exonic | IPO9    | 1  | 201823722 | 201826322 | 0  | 1  | 1 | 1  | 0  | 0 | 2600  | 0.47785621  | 1.12127948  | 3.701532525 | 0.302923039 | 0.761948514 | 0.998252924 |
| chr1:203797426-203809502  | exonic | ZC3H11A | 1  | 203797426 | 203809502 | 0  | 1  | 1 | 1  | 0  | 0 | 12076 | 0.47785621  | 1.12127948  | 3.701532525 | 0.302923039 | 0.761948514 | 0.998252924 |
| chr1:220178589-220180680  | exonic | EPRS    | 1  | 220178589 | 220180680 | 0  | 1  | 1 | 1  | 0  | 0 | 2091  | 0.47785621  | 1.12127948  | 3.701532525 | 0.302923039 | 0.761948514 | 0.998252924 |
| chr1:36306765-36316654    | exonic | AGO4    | 1  | 36306765  | 36316654  | 0  | 1  | 1 | 1  | 0  | 0 | 9889  | 0.47785621  | 1.12127948  | 3.701532525 | 0.302923039 | 0.761948514 | 0.998252924 |
| chr14:31611063-31641328   | exonic | HECTD1  | 14 | 31611063  | 31641328  | 0  | 1  | 1 | 1  | 0  | 0 | 30265 | 0.47785621  | 1.12127948  | 3.701532525 | 0.302923039 | 0.761948514 | 0.998252924 |
| chr16:89962397-89967202   | exonic | TCF25   | 16 | 89962397  | 89967202  | 0  | 1  | 1 | 1  | 0  | 0 | 4805  | 0.47785621  | 1.12127948  | 3.701532525 | 0.302923039 | 0.761948514 | 0.998252924 |
| chr2:229965-234272        | exonic | SH3YL1  | 2  | 229965    | 234272    | 0  | 1  | 1 | 1  | 0  | 0 | 4307  | 0.47785621  | 1.12127948  | 3.701532525 | 0.302923039 | 0.761948514 | 0.998252924 |
| chr20:3888572-3897697     | exonic | PANK2   | 20 | 3888572   | 3897697   | 0  | 1  | 1 | 1  | 0  | 0 | 9125  | 0.47785621  | 1.12127948  | 3.701532525 | 0.302923039 | 0.761948514 | 0.998252924 |
| chr4:110451444-110452678  | exonic | SEC24B  | 4  | 110451444 | 110452678 | 0  | 1  | 1 | 1  | 0  | 0 | 1234  | 0.47785621  | 1.12127948  | 3.701532525 | 0.302923039 | 0.761948514 | 0.998252924 |
| chr4:72102292-72121116    | exonic | SLC4A4  | 4  | 72102292  | 72121116  | 0  | 1  | 1 | 1  | 0  | 0 | 18824 | 0.47785621  | 1.12127948  | 3.701532525 | 0.302923039 | 0.761948514 | 0.998252924 |
| chr5:64976320-64981299    | exonic | SGTB    | 5  | 64976320  | 64981299  | 0  | 1  | 1 | 1  | 0  | 0 | 4979  | 0.47785621  | 1.12127948  | 3.701532525 | 0.302923039 | 0.761948514 | 0.998252924 |
| chr7:151167656-151188100  | exonic | RHEB    | 7  | 151167656 | 151188100 | 0  | 1  | 1 | 1  | 0  | 0 | 20444 | 0.47785621  | 1.12127948  | 3.701532525 | 0.302923039 | 0.761948514 | 0.998252924 |
| chr7:98984307-98985884    | exonic | ARPC1B  | 7  | 98984307  | 98985884  | 0  | 1  | 1 | 1  | 0  | 0 | 1577  | 0.47785621  | 1.12127948  | 3.701532525 | 0.302923039 | 0.761948514 | 0.998252924 |
| chr12:95498782-95535315   | exonic | FGD6    | 12 | 95498782  | 95535315  | 3  | 2  | 0 | 1  | 0  | 1 | 36533 | 1.15004242  | 1.122135711 | 2.476521058 | 0.453109699 | 0.650469752 | 0.998252924 |
| chr2:207144263-207162097  | exonic | ZDBF2   | 2  | 207144263 | 207162097 | 0  | 5  | 0 | 0  | 3  | 0 | 17834 | 1.234461261 | 1.122646357 | 2.828314458 | 0.396931237 | NA          | NA          |
| chr4:121675707-121732604  | exonic | PRDM5   | 4  | 121675707 | 121732604 | 11 | 10 | 3 | 7  | 5  | 1 | 56897 | 5.410956852 | 1.126577734 | 1.174075677 | 0.959544394 | 0.337284566 | 0.998252924 |
| chr10:71243446-71244971   | exonic | TSPAN15 | 10 | 71243446  | 71244971  | 2  | 3  | 0 | 0  | 1  | 1 | 1525  | 1.210047313 | 1.127953463 | 2.442536865 | 0.461795881 | 0.644227705 | 0.998252924 |
| chr11:118454523-118455359 | exonic | ARCN1   | 11 | 118454523 | 118455359 | 4  | 3  | 3 | 2  | 2  | 1 | 836   | 2.393478468 | 1.129069507 | 1.601582181 | 0.704971322 | 0.480828083 | 0.998252924 |
| chr17:60061531-60062451   | exonic | MED13   | 17 | 60061531  | 60062451  | 5  | 4  | 4 | 6  | 2  | 0 | 920   | 3.011037167 | 1.131077445 | 1.532314675 | 0.738149587 | 0.460423554 | 0.998252924 |
| chr16:87782278-87795646   | exonic | KLHDC4  | 16 | 87782278  | 87795646  | 2  | 3  | 3 | 3  | 2  | 0 | 13368 | 1.933597358 | 1.13165771  | 1.828525075 | 0.618890998 | 0.535988169 | 0.998252924 |
| chr8:141745349-141762415  | exonic | PTK2    | 8  | 141745349 | 141762415 | 4  | 2  | 0 | 0  | 3  | 0 | 17066 | 1.227581635 | 1.13197831  | 2.560255429 | 0.442134913 | 0.658391582 | 0.998252924 |
| chr2:61721028-61724142    | exonic | XPO1    | 2  | 61721028  | 61724142  | 2  | 2  | 0 | 1  | 1  | 0 | 3114  | 0.833864291 | 1.13249057  | 2.742624789 | 0.412922167 | 0.67966364  | 0.998252924 |
| chr21:38480691-38536517   | exonic | TTC3    | 21 | 38480691  | 38536517  | 2  | 2  | 0 | 1  | 1  | 0 | 55826 | 0.833864291 | 1.13249057  | 2.742624789 | 0.412922167 | 0.67966364  | 0.998252924 |
| chr21:38480691-38545046   | exonic | TTC3    | 21 | 38480691  | 38545046  | 2  | 2  | 0 | 1  | 1  | 0 | 64355 | 0.833864291 | 1.13249057  | 2.742624789 | 0.412922167 | 0.67966364  | 0.998252924 |
| chr3:93714717-93722752    | exonic | ARL13B  | 3  | 93714717  | 93722752  | 8  | 3  | 3 | 5  | 3  | 0 | 8035  | 3.041169207 | 1.136175597 | 1.521892047 | 0.746554658 | 0.455332427 | 0.998252924 |
| chr16:88008653-88017865   | exonic | BANP    | 16 | 88008653  | 88017865  | 14 | 20 | 6 | 12 | 10 | 1 | 9212  | 9.269176782 | 1.138222826 | 0.991766127 | 1.147672617 | 0.251103739 | 0.998252924 |
| chr15:33180372-33194241   | exonic | FMN1    | 15 | 33180372  | 33194241  | 0  | 0  | 2 | 0  | 0  | 1 | 13869 | 0.70275666  | 1.14023385  | 3.540223189 | 0.322079651 | NA          | NA          |
| chr2:32664575-32668656    | exonic | BIRC6   | 2  | 32664575  | 32668656  | 0  | 0  | 2 | 0  | 0  | 1 | 4081  | 0.70275666  | 1.14023385  | 3.540223189 | 0.322079651 | NA          | NA          |
| chr1:48821341-48865316    | exonic | SPATA6  | 1  | 48821341  | 48865316  | 3  | 0  | 1 | 2  | 0  | 0 | 43975 | 0.796852624 | 1.142119673 | 3.013815366 | 0.378961394 | 0.704716532 | 0.998252924 |
| chr12:109577201-109577863 | exonic | ACACB   | 12 | 109577201 | 109577863 | 3  | 0  | 1 | 2  | 0  | 0 | 662   | 0.796852624 | 1.142119673 | 3.013815366 | 0.378961394 | 0.704716532 | 0.998252924 |
| chr13:114128438-114138371 | exonic | DCUN1D2 | 13 | 114128438 | 114138371 | 3  | 0  | 1 | 2  | 0  | 0 | 9933  | 0.796852624 | 1.142119673 | 3.013815366 | 0.378961394 | 0.704716532 | 0.998252924 |
| chr22:40666125-40669604   | exonic | TNRC6B  | 22 | 40666125  | 40669604  | 3  | 0  | 1 | 2  | 0  | 0 | 3479  | 0.796852624 | 1.142119673 | 3.013815366 | 0.378961394 | 0.704716532 | 0.998252924 |
| chr12:56997142-56999111   | exonic | BAZ2A   | 12 | 56997142  | 56999111  | 2  | 0  | 3 | 2  | 1  | 0 | 1969  | 1.183431154 | 1.145260183 | 2.413883539 | 0.474447157 | 0.635181072 | 0.998252924 |
| chr1:153636518-153641033  | exonic | ILF2    | 1  | 153636518 | 153641033 | 0  | 0  | 2 | 0  | 1  | 0 | 4515  | 0.515565473 | 1.145765858 | 3.916587837 | 0.292541852 | 0.769872366 | 0.998252924 |

|                           |        |              |    |           |           |   |   |   |   |   |   |        |             |             |             |             |             |             |
|---------------------------|--------|--------------|----|-----------|-----------|---|---|---|---|---|---|--------|-------------|-------------|-------------|-------------|-------------|-------------|
| chr1:230313963-230339036  | exonic | GALNT2       | 1  | 230313963 | 230339036 | 0 | 0 | 2 | 0 | 1 | 0 | 25073  | 0.515565473 | 1.145765858 | 3.916587837 | 0.292541852 | 0.769872366 | 0.998252924 |
| chr10:116603499-116608496 | exonic | FAM160B1     | 10 | 116603499 | 116608496 | 0 | 0 | 2 | 0 | 1 | 0 | 4997   | 0.515565473 | 1.145765858 | 3.916587837 | 0.292541852 | 0.769872366 | 0.998252924 |
| chr10:74790028-74806859   | exonic | P4HA1        | 10 | 74790028  | 74806859  | 0 | 0 | 2 | 0 | 1 | 0 | 16831  | 0.515565473 | 1.145765858 | 3.916587837 | 0.292541852 | 0.769872366 | 0.998252924 |
| chr11:118940943-118944661 | exonic | VPS11        | 11 | 118940943 | 118944661 | 0 | 0 | 2 | 0 | 1 | 0 | 3718   | 0.515565473 | 1.145765858 | 3.916587837 | 0.292541852 | 0.769872366 | 0.998252924 |
| chr11:93526893-93535138   | exonic | MED17        | 11 | 93526893  | 93535138  | 0 | 0 | 2 | 0 | 1 | 0 | 8245   | 0.515565473 | 1.145765858 | 3.916587837 | 0.292541852 | 0.769872366 | 0.998252924 |
| chr12:26628228-26755639   | exonic | ITPR2        | 12 | 26628228  | 26755639  | 0 | 0 | 2 | 0 | 1 | 0 | 127411 | 0.515565473 | 1.145765858 | 3.916587837 | 0.292541852 | 0.769872366 | 0.998252924 |
| chr13:41826780-41828756   | exonic | MTRF1        | 13 | 41826780  | 41828756  | 0 | 0 | 2 | 0 | 1 | 0 | 1976   | 0.515565473 | 1.145765858 | 3.916587837 | 0.292541852 | 0.769872366 | 0.998252924 |
| chr14:92555073-92562481   | exonic | ATXN3        | 14 | 92555073  | 92562481  | 0 | 0 | 2 | 0 | 1 | 0 | 7408   | 0.515565473 | 1.145765858 | 3.916587837 | 0.292541852 | 0.769872366 | 0.998252924 |
| chr15:43627142-43628024   | exonic | ADAL         | 15 | 43627142  | 43628024  | 0 | 0 | 2 | 0 | 1 | 0 | 882    | 0.515565473 | 1.145765858 | 3.916587837 | 0.292541852 | 0.769872366 | 0.998252924 |
| chr15:58284902-58306479   | exonic | ALDH1A2      | 15 | 58284902  | 58306479  | 0 | 0 | 2 | 0 | 1 | 0 | 21577  | 0.515565473 | 1.145765858 | 3.916587837 | 0.292541852 | 0.769872366 | 0.998252924 |
| chr15:75703832-75706652   | exonic | SIN3A        | 15 | 75703832  | 75706652  | 0 | 0 | 2 | 0 | 1 | 0 | 2820   | 0.515565473 | 1.145765858 | 3.916587837 | 0.292541852 | 0.769872366 | 0.998252924 |
| chr16:28515015-28515371   | exonic | IL27         | 16 | 28515015  | 28515371  | 0 | 0 | 2 | 0 | 1 | 0 | 356    | 0.515565473 | 1.145765858 | 3.916587837 | 0.292541852 | 0.769872366 | 0.998252924 |
| chr17:25628813-25631937   | exonic | WSB1         | 17 | 25628813  | 25631937  | 0 | 0 | 2 | 0 | 1 | 0 | 3124   | 0.515565473 | 1.145765858 | 3.916587837 | 0.292541852 | 0.769872366 | 0.998252924 |
| chr2:101874252-101881509  | exonic | CNOT11       | 2  | 101874252 | 101881509 | 0 | 0 | 2 | 0 | 1 | 0 | 7257   | 0.515565473 | 1.145765858 | 3.916587837 | 0.292541852 | 0.769872366 | 0.998252924 |
| chr2:110602679-110605588  | exonic | RGPD5, RGPD6 | 2  | 110602679 | 110605588 | 0 | 0 | 2 | 0 | 1 | 0 | 2909   | 0.515565473 | 1.145765858 | 3.916587837 | 0.292541852 | 0.769872366 | 0.998252924 |
| chr2:26453059-26457223    | exonic | HADHA        | 2  | 26453059  | 26457223  | 0 | 0 | 2 | 0 | 1 | 0 | 4164   | 0.515565473 | 1.145765858 | 3.916587837 | 0.292541852 | 0.769872366 | 0.998252924 |
| chr2:61725807-61761038    | exonic | XPO1         | 2  | 61725807  | 61761038  | 0 | 0 | 2 | 0 | 1 | 0 | 35231  | 0.515565473 | 1.145765858 | 3.916587837 | 0.292541852 | 0.769872366 | 0.998252924 |
| chr21:34713304-34717666   | exonic | IFNAR1       | 21 | 34713304  | 34717666  | 0 | 0 | 2 | 0 | 1 | 0 | 4362   | 0.515565473 | 1.145765858 | 3.916587837 | 0.292541852 | 0.769872366 | 0.998252924 |
| chr22:47087468-47107046   | exonic | CERK         | 22 | 47087468  | 47107046  | 0 | 0 | 2 | 0 | 1 | 0 | 19578  | 0.515565473 | 1.145765858 | 3.916587837 | 0.292541852 | 0.769872366 | 0.998252924 |
| chr3:174814579-174815081  | exonic | NAALADL2     | 3  | 174814579 | 174815081 | 0 | 0 | 2 | 0 | 1 | 0 | 502    | 0.515565473 | 1.145765858 | 3.916587837 | 0.292541852 | 0.769872366 | 0.998252924 |
| chr3:188202379-188242575  | exonic | LPP          | 3  | 188202379 | 188242575 | 0 | 0 | 2 | 0 | 1 | 0 | 40196  | 0.515565473 | 1.145765858 | 3.916587837 | 0.292541852 | 0.769872366 | 0.998252924 |
| chr3:42659061-42676858    | exonic | NKTR         | 3  | 42659061  | 42676858  | 0 | 0 | 2 | 0 | 1 | 0 | 17797  | 0.515565473 | 1.145765858 | 3.916587837 | 0.292541852 | 0.769872366 | 0.998252924 |
| chr3:47908735-47913590    | exonic | MAP4         | 3  | 47908735  | 47913590  | 0 | 0 | 2 | 0 | 1 | 0 | 4855   | 0.515565473 | 1.145765858 | 3.916587837 | 0.292541852 | 0.769872366 | 0.998252924 |
| chr3:56600621-56628056    | exonic | CCDC66       | 3  | 56600621  | 56628056  | 0 | 0 | 2 | 0 | 1 | 0 | 27435  | 0.515565473 | 1.145765858 | 3.916587837 | 0.292541852 | 0.769872366 | 0.998252924 |
| chr4:123977541-123978443  | exonic | SPATA5       | 4  | 123977541 | 123978443 | 0 | 0 | 2 | 0 | 1 | 0 | 902    | 0.515565473 | 1.145765858 | 3.916587837 | 0.292541852 | 0.769872366 | 0.998252924 |
| chr4:26364067-26388013    | exonic | RBPJ         | 4  | 26364067  | 26388013  | 0 | 0 | 2 | 0 | 1 | 0 | 23946  | 0.515565473 | 1.145765858 | 3.916587837 | 0.292541852 | 0.769872366 | 0.998252924 |
| chr4:68355684-68374823    | exonic | CENPC        | 4  | 68355684  | 68374823  | 0 | 0 | 2 | 0 | 1 | 0 | 19139  | 0.515565473 | 1.145765858 | 3.916587837 | 0.292541852 | 0.769872366 | 0.998252924 |
| chr4:99325627-99342545    | exonic | RAP1GDS1     | 4  | 99325627  | 99342545  | 0 | 0 | 2 | 0 | 1 | 0 | 16918  | 0.515565473 | 1.145765858 | 3.916587837 | 0.292541852 | 0.769872366 | 0.998252924 |
| chr5:122130960-122144050  | exonic | SNX2         | 5  | 122130960 | 122144050 | 0 | 0 | 2 | 0 | 1 | 0 | 13090  | 0.515565473 | 1.145765858 | 3.916587837 | 0.292541852 | 0.769872366 | 0.998252924 |
| chr5:52160596-52161651    | exonic | ITGA1        | 5  | 52160596  | 52161651  | 0 | 0 | 2 | 0 | 1 | 0 | 1055   | 0.515565473 | 1.145765858 | 3.916587837 | 0.292541852 | 0.769872366 | 0.998252924 |
| chr5:5447953-5454751      | exonic | ICE1         | 5  | 5447953   | 5454751   | 0 | 0 | 2 | 0 | 1 | 0 | 6798   | 0.515565473 | 1.145765858 | 3.916587837 | 0.292541852 | 0.769872366 | 0.998252924 |
| chr6:129371062-129381041  | exonic | LAMA2        | 6  | 129371062 | 129381041 | 0 | 0 | 2 | 0 | 1 | 0 | 9979   | 0.515565473 | 1.145765858 | 3.916587837 | 0.292541852 | 0.769872366 | 0.998252924 |
| chr6:159058159-159062392  | exonic | DYNLT1       | 6  | 159058159 | 159062392 | 0 | 0 | 2 | 0 | 1 | 0 | 4233   | 0.515565473 | 1.145765858 | 3.916587837 | 0.292541852 | 0.769872366 | 0.998252924 |
| chr8:124096401-124121860  | exonic | TBC1D31      | 8  | 124096401 | 124121860 | 0 | 0 | 2 | 0 | 1 | 0 | 25459  | 0.515565473 | 1.145765858 | 3.916587837 | 0.292541852 | 0.769872366 | 0.998252924 |
| chr8:17123415-17126465    | exonic | VPS37A       | 8  | 17123415  | 17126465  | 0 | 0 | 2 | 0 | 1 | 0 | 3050   | 0.515565473 | 1.145765858 | 3.916587837 | 0.292541852 | 0.769872366 | 0.998252924 |

|                           |          |                         |    |           |           |    |    |   |    |   |   |        |             |             |             |             |             |             |
|---------------------------|----------|-------------------------|----|-----------|-----------|----|----|---|----|---|---|--------|-------------|-------------|-------------|-------------|-------------|-------------|
| chr9:126438998-126641300  | exonic   | DENND1A                 | 9  | 126438998 | 126641300 | 0  | 0  | 2 | 0  | 1 | 0 | 202302 | 0.515565473 | 1.145765858 | 3.916587837 | 0.292541852 | 0.769872366 | 0.998252924 |
| chr9:19288593-19305525    | exonic   | DENND4C                 | 9  | 19288593  | 19305525  | 0  | 0  | 2 | 0  | 1 | 0 | 16932  | 0.515565473 | 1.145765858 | 3.916587837 | 0.292541852 | 0.769872366 | 0.998252924 |
| chr14:75016565-75022396   | exonic   | LTBP2                   | 14 | 75016565  | 75022396  | 13 | 4  | 3 | 6  | 5 | 0 | 5831   | 4.208745949 | 1.146444532 | 1.360972472 | 0.84237158  | NA          | NA          |
| chr5:64863339-64868113    | exonic   | PPWD1                   | 5  | 64863339  | 64868113  | 1  | 9  | 0 | 1  | 5 | 0 | 4774   | 2.408917629 | 1.151753899 | 1.961082698 | 0.587305114 | NA          | NA          |
| chr7:91924202-91991587    | exonic   | ANKIB1                  | 7  | 91924202  | 91991587  | 4  | 7  | 3 | 0  | 0 | 4 | 67385  | 3.560559876 | 1.15326328  | 1.701173205 | 0.677922317 | NA          | NA          |
| chr4:83799882-83803093    | exonic   | SEC31A                  | 4  | 83799882  | 83803093  | 8  | 5  | 3 | 4  | 5 | 0 | 3211   | 3.525464264 | 1.154744718 | 1.43101267  | 0.806942344 | 0.419699702 | 0.998252924 |
| chr5:172535626-172539382  | exonic   | CREBRF                  | 5  | 172535626 | 172539382 | 4  | 0  | 3 | 2  | 2 | 0 | 3756   | 1.562432462 | 1.156194047 | 2.153351736 | 0.536927631 | 0.591317604 | 0.998252924 |
| chr17:40650941-40653322   | exonic   | ATP6VOA1                | 17 | 40650941  | 40653322  | 11 | 1  | 3 | 4  | 4 | 0 | 2381   | 3.094294474 | 1.159195315 | 1.574746042 | 0.736115719 | 0.461660278 | 0.998252924 |
| chr1:213251037-213290752  | exonic   | RPS6KC1                 | 1  | 213251037 | 213290752 | 2  | 3  | 3 | 4  | 1 | 0 | 39715  | 1.918881322 | 1.16336683  | 1.861676552 | 0.624902768 | NA          | NA          |
| chr10:71243446-71255445   | exonic   | TSPAN15                 | 10 | 71243446  | 71255445  | 2  | 0  | 2 | 0  | 2 | 0 | 11999  | 0.89456678  | 1.164934673 | 2.883047529 | 0.404063638 | 0.686165923 | 0.998252924 |
| chr18:12493070-12546903   | exonic   | SPIRE1                  | 18 | 12493070  | 12546903  | 2  | 0  | 2 | 0  | 2 | 0 | 53833  | 0.89456678  | 1.164934673 | 2.883047529 | 0.404063638 | 0.686165923 | 0.998252924 |
| chr2:136389287-136396692  | exonic   | R3HDM1                  | 2  | 136389287 | 136396692 | 2  | 0  | 2 | 0  | 2 | 0 | 7405   | 0.89456678  | 1.164934673 | 2.883047529 | 0.404063638 | 0.686165923 | 0.998252924 |
| chr12:12672795-12674397   | exonic   | DUSP16                  | 12 | 12672795  | 12674397  | 1  | 2  | 2 | 2  | 1 | 0 | 1602   | 1.205726784 | 1.16822879  | 2.240456653 | 0.521424411 | 0.60207115  | 0.998252924 |
| chr6:163876310-163899928  | exonic   | QKI                     | 6  | 163876310 | 163899928 | 0  | 7  | 5 | 5  | 3 | 0 | 23618  | 3.100914912 | 1.168503865 | 1.707052784 | 0.684515368 | NA          | NA          |
| chr3:170077486-170102553  | exonic   | SKIL                    | 3  | 170077486 | 170102553 | 1  | 4  | 0 | 0  | 2 | 0 | 25067  | 0.893869184 | 1.168601547 | 2.903816006 | 0.402436499 | 0.687362813 | 0.998252924 |
| chr9:79825531-79828230    | exonic   | VPS13A                  | 9  | 79825531  | 79828230  | 1  | 3  | 0 | 0  | 2 | 0 | 2699   | 0.893869184 | 1.168601547 | 2.903816006 | 0.402436499 | 0.687362813 | 0.998252924 |
| chr20:48744511-48747484   | exonic   | TMEM189, TMEM189-UBE2V1 | 20 | 48744511  | 48747484  | 1  | 4  | 0 | 3  | 0 | 0 | 2973   | 1.145024295 | 1.16867487  | 2.658252089 | 0.439640347 | NA          | NA          |
| chr18:6237962-6301956     | exonic   | L3MBTL4                 | 18 | 6237962   | 6301956   | 4  | 3  | 0 | 4  | 0 | 0 | 63994  | 1.464020709 | 1.170726316 | 2.396374217 | 0.488540691 | NA          | NA          |
| chr10:105891088-105924058 | exonic   | CFAP43                  | 10 | 105891088 | 105924058 | 2  | 1  | 1 | 1  | 1 | 0 | 32970  | 0.856857517 | 1.172901852 | 2.54817055  | 0.460291738 | 0.64530683  | 0.998252924 |
| chr2:174819600-174820960  | exonic   | SP3                     | 2  | 174819600 | 174820960 | 2  | 0  | 9 | 1  | 2 | 2 | 1360   | 2.998198562 | 1.173441544 | 1.71766262  | 0.683161833 | NA          | NA          |
| chr12:29492784-29494749   | exonic   | ERGIC2                  | 12 | 29492784  | 29494749  | 3  | 0  | 4 | 0  | 4 | 0 | 1965   | 1.660146618 | 1.174435912 | 2.310281259 | 0.508351919 | 0.611206565 | 0.998252924 |
| chr9:33943417-33956144    | exonic   | UBAP2                   | 9  | 33943417  | 33956144  | 3  | 7  | 0 | 5  | 1 | 0 | 12727  | 2.259475769 | 1.174592781 | 1.926817516 | 0.609602503 | 0.542125153 | 0.998252924 |
| chrX:100296305-100297301  | exonic   | TRMT2B                  | X  | 100296305 | 100297301 | 13 | 8  | 8 | 11 | 6 | 0 | 996    | 6.54477862  | 1.174937728 | 1.143259605 | 1.0277086   | 0.304086921 | 0.998252924 |
| chr8:70650274-70674110    | exonic   | SLCO5A1                 | 8  | 70650274  | 70674110  | 1  | 0  | 4 | 0  | 3 | 0 | 23836  | 1.28114531  | 1.175068976 | 2.573159765 | 0.456663823 | NA          | NA          |
| chr10:12123470-12133683   | exonic   | DHTKD1                  | 10 | 12123470  | 12133683  | 0  | 4  | 1 | 1  | 2 | 0 | 10213  | 1.242738451 | 1.175737433 | 2.410184665 | 0.487820477 | 0.625677006 | 0.998252924 |
| chr6:108225832-108246136  | exonic   | SEC63                   | 6  | 108225832 | 108246136 | 0  | 2  | 1 | 1  | 2 | 0 | 20304  | 1.242738451 | 1.175737433 | 2.410184665 | 0.487820477 | 0.625677006 | 0.998252924 |
| chr18:51686134-51731527   | exonic   | MBD2                    | 18 | 51686134  | 51731527  | 0  | 3  | 2 | 0  | 3 | 0 | 45393  | 1.280447714 | 1.175957127 | 2.545608708 | 0.461955179 | NA          | NA          |
| chr1:27994736-27995857    | exonic   | IFI6                    | 1  | 27994736  | 27995857  | 0  | 6  | 0 | 4  | 0 | 0 | 1121   | 1.470900335 | 1.176790108 | 2.664967055 | 0.441577732 | NA          | NA          |
| chr14:62168614-62175710   | intronic | HIF1A                   | 14 | 62168614  | 62175710  | 0  | 6  | 0 | 4  | 0 | 0 | 7096   | 1.470900335 | 1.176790108 | 2.664967055 | 0.441577732 | NA          | NA          |
| chr9:4286037-4286523      | exonic   | GLIS3                   | 9  | 4286037   | 4286523   | 2  | 4  | 1 | 0  | 2 | 1 | 486    | 1.70261956  | 1.18231534  | 2.015688404 | 0.586556601 | 0.557501537 | 0.998252924 |
| chr6:161455290-161471011  | exonic   | MAP3K4                  | 6  | 161455290 | 161471011 | 0  | 18 | 0 | 3  | 6 | 1 | 15721  | 4.490281678 | 1.182710779 | 1.670498362 | 0.707998766 | NA          | NA          |
| chr21:38480691-38520947   | exonic   | TTC3                    | 21 | 38480691  | 38520947  | 2  | 2  | 1 | 0  | 2 | 1 | 40256  | 1.23304054  | 1.184708696 | 2.271879831 | 0.521466268 | 0.602041998 | 0.998252924 |
| chr6:42571325-42574389    | exonic   | UBR2                    | 6  | 42571325  | 42574389  | 8  | 1  | 1 | 2  | 3 | 0 | 3064   | 1.979145403 | 1.184940196 | 1.881227265 | 0.629876155 | NA          | NA          |
| chr2:101874252-101879153  | exonic   | CNOT11                  | 2  | 101874252 | 101879153 | 2  | 2  | 3 | 0  | 4 | 0 | 4901   | 1.682442247 | 1.184994508 | 2.112515696 | 0.560939978 | NA          | NA          |
| chr10:27458872-27460012   | exonic   | MASTL                   | 10 | 27458872  | 27460012  | 3  | 0  | 0 | 0  | 1 | 0 | 1140   | 0.50798825  | 1.188189247 | 3.918881779 | 0.303195992 | NA          | NA          |



|                           |            |                                                       |    |           |           |   |   |   |   |   |   |       |             |             |             |             |             |             |
|---------------------------|------------|-------------------------------------------------------|----|-----------|-----------|---|---|---|---|---|---|-------|-------------|-------------|-------------|-------------|-------------|-------------|
| chr12:109072047-109095099 | exonic     | CORO1C                                                | 12 | 109072047 | 109095099 | 3 | 0 | 0 | 0 | 1 | 0 | 23052 | 0.50798825  | 1.188189247 | 3.918881779 | 0.303195992 | NA          | NA          |
| chr15:64472546-64508912   | exonic     | CSNK1G1                                               | 15 | 64472546  | 64508912  | 3 | 0 | 0 | 0 | 1 | 0 | 36366 | 0.50798825  | 1.188189247 | 3.918881779 | 0.303195992 | NA          | NA          |
| chr16:84796594-84808831   | exonic     | USP10                                                 | 16 | 84796594  | 84808831  | 3 | 0 | 0 | 0 | 1 | 0 | 12237 | 0.50798825  | 1.188189247 | 3.918881779 | 0.303195992 | NA          | NA          |
| chr17:45438743-45492285   | exonic     | EFCAB13                                               | 17 | 45438743  | 45492285  | 3 | 0 | 0 | 0 | 1 | 0 | 53542 | 0.50798825  | 1.188189247 | 3.918881779 | 0.303195992 | NA          | NA          |
| chr19:14561129-14562835   | exonic     | PKN1                                                  | 19 | 14561129  | 14562835  | 3 | 0 | 0 | 0 | 1 | 0 | 1706  | 0.50798825  | 1.188189247 | 3.918881779 | 0.303195992 | NA          | NA          |
| chr2:25799706-25819109    | exonic     | DTNB                                                  | 2  | 25799706  | 25819109  | 3 | 0 | 0 | 0 | 1 | 0 | 19403 | 0.50798825  | 1.188189247 | 3.918881779 | 0.303195992 | NA          | NA          |
| chr2:32703702-32733326    | exonic     | BIRC6                                                 | 2  | 32703702  | 32733326  | 3 | 0 | 0 | 0 | 1 | 0 | 29624 | 0.50798825  | 1.188189247 | 3.918881779 | 0.303195992 | NA          | NA          |
| chr4:106587333-106588860  | exonic     | ARHGEF38                                              | 4  | 106587333 | 106588860 | 3 | 0 | 0 | 0 | 1 | 0 | 1527  | 0.50798825  | 1.188189247 | 3.918881779 | 0.303195992 | NA          | NA          |
| chr6:3076997-3085642      | exonic     | RIPK1                                                 | 6  | 3076997   | 3085642   | 3 | 0 | 0 | 0 | 1 | 0 | 8645  | 0.50798825  | 1.188189247 | 3.918881779 | 0.303195992 | NA          | NA          |
| chr8:141675015-141684503  | exonic     | PTK2                                                  | 8  | 141675015 | 141684503 | 3 | 0 | 0 | 0 | 1 | 0 | 9488  | 0.50798825  | 1.188189247 | 3.918881779 | 0.303195992 | NA          | NA          |
| chr1:28887144-28887910    | exonic     | TRNAU1AP                                              | 1  | 28887144  | 28887910  | 5 | 0 | 0 | 0 | 2 | 0 | 766   | 0.886989558 | 1.189745556 | 3.162653265 | 0.376185897 | NA          | NA          |
| chr16:29838156-29839376   | intronic   | MVP                                                   | 16 | 29838156  | 29839376  | 5 | 0 | 0 | 0 | 2 | 0 | 1220  | 0.886989558 | 1.189745556 | 3.162653265 | 0.376185897 | NA          | NA          |
| chr17:64171161-64179425   | exonic     | CEP112                                                | 17 | 64171161  | 64179425  | 5 | 0 | 0 | 0 | 2 | 0 | 8264  | 0.886989558 | 1.189745556 | 3.162653265 | 0.376185897 | NA          | NA          |
| chr2:238256449-238262046  | exonic     | COL6A3                                                | 2  | 238256449 | 238262046 | 5 | 0 | 0 | 0 | 2 | 0 | 5597  | 0.886989558 | 1.189745556 | 3.162653265 | 0.376185897 | NA          | NA          |
| chr2:239082174-239093928  | exonic     | ILKAP                                                 | 2  | 239082174 | 239093928 | 5 | 0 | 0 | 0 | 2 | 0 | 11754 | 0.886989558 | 1.189745556 | 3.162653265 | 0.376185897 | NA          | NA          |
| chr10:90661412-90682193   | exonic     | STAMBPL1                                              | 10 | 90661412  | 90682193  | 2 | 2 | 0 | 2 | 0 | 0 | 20781 | 0.819148254 | 1.191217763 | 2.966953651 | 0.401495238 | 0.688055543 | 0.998252924 |
| chr19:16192722-16204563   | exonic     | TPM4                                                  | 19 | 16192722  | 16204563  | 2 | 2 | 0 | 2 | 0 | 0 | 11841 | 0.819148254 | 1.191217763 | 2.966953651 | 0.401495238 | 0.688055543 | 0.998252924 |
| chr2:205969149-205990461  | exonic     | PARD3B                                                | 2  | 205969149 | 205990461 | 2 | 2 | 0 | 2 | 0 | 0 | 21312 | 0.819148254 | 1.191217763 | 2.966953651 | 0.401495238 | 0.688055543 | 0.998252924 |
| chr5:175777615-175782752  | exonic     | KIAA1191                                              | 5  | 175777615 | 175782752 | 2 | 2 | 0 | 2 | 0 | 0 | 5137  | 0.819148254 | 1.191217763 | 2.966953651 | 0.401495238 | 0.688055543 | 0.998252924 |
| chr8:71126137-71209035    | exonic     | NCOA2                                                 | 8  | 71126137  | 71209035  | 2 | 2 | 0 | 2 | 0 | 0 | 82898 | 0.819148254 | 1.191217763 | 2.966953651 | 0.401495238 | 0.688055543 | 0.998252924 |
| chr3:138244331-138256189  | exonic     | CEP70                                                 | 3  | 138244331 | 138256189 | 0 | 1 | 5 | 2 | 2 | 0 | 11858 | 1.615298541 | 1.192539588 | 2.196061888 | 0.543035511 | NA          | NA          |
| chr3:3819409-3830758      | intergenic | <small>CRBN (dist=598008), LRRN1 (dist=10363)</small> | 3  | 3819409   | 3830758   | 5 | 7 | 8 | 4 | 4 | 2 | 11349 | 4.968809957 | 1.193468383 | 1.19832164  | 0.995949954 | 0.319274462 | 0.998252924 |
| chr3:71733723-71748859    | exonic     | EIF4E3                                                | 3  | 71733723  | 71748859  | 4 | 0 | 2 | 0 | 3 | 0 | 15136 | 1.273568088 | 1.193512099 | 2.532923773 | 0.471199375 | NA          | NA          |
| chr18:9182380-9239554     | exonic     | ANKRD12                                               | 18 | 9182380   | 9239554   | 3 | 3 | 0 | 0 | 3 | 0 | 57174 | 1.272870491 | 1.195607032 | 2.525424524 | 0.473428139 | NA          | NA          |
| chr19:11833769-11836142   | exonic     | ZNF823                                                | 19 | 11833769  | 11836142  | 3 | 3 | 0 | 0 | 3 | 0 | 2373  | 1.272870491 | 1.195607032 | 2.525424524 | 0.473428139 | NA          | NA          |
| chr7:127013395-127017383  | exonic     | ZNF800                                                | 7  | 127013395 | 127017383 | 3 | 3 | 3 | 0 | 5 | 0 | 3988  | 2.106732411 | 1.197639873 | 1.933523275 | 0.619408046 | NA          | NA          |
| chr9:117116916-117117565  | intronic   | AKNA                                                  | 9  | 117116916 | 117117565 | 2 | 0 | 3 | 3 | 0 | 0 | 649   | 1.168715118 | 1.197728249 | 2.613918317 | 0.458211812 | 0.646800274 | 0.998252924 |
| chr1:44877652-44878394    | exonic     | RNF220                                                | 1  | 44877652  | 44878394  | 3 | 0 | 0 | 0 | 0 | 1 | 742   | 0.695179437 | 1.199363736 | 3.531716999 | 0.339597917 | NA          | NA          |
| chr3:136136726-136141886  | exonic     | STAG1                                                 | 3  | 136136726 | 136141886 | 3 | 0 | 0 | 0 | 0 | 1 | 5160  | 0.695179437 | 1.199363736 | 3.531716999 | 0.339597917 | NA          | NA          |
| chr3:15253610-15262488    | exonic     | CAPN7                                                 | 3  | 15253610  | 15262488  | 3 | 0 | 0 | 0 | 0 | 1 | 8878  | 0.695179437 | 1.199363736 | 3.531716999 | 0.339597917 | NA          | NA          |
| chr6:36467649-36475379    | exonic     | STK38                                                 | 6  | 36467649  | 36475379  | 3 | 0 | 0 | 0 | 0 | 1 | 7730  | 0.695179437 | 1.199363736 | 3.531716999 | 0.339597917 | NA          | NA          |
| chr9:103261046-103279053  | exonic     | MSANTD3-TMEFF1, TMEFF1                                | 9  | 103261046 | 103279053 | 3 | 0 | 0 | 0 | 0 | 1 | 18007 | 0.695179437 | 1.199363736 | 3.531716999 | 0.339597917 | NA          | NA          |
| chr9:110064315-110087285  | exonic     | RAD23B                                                | 9  | 110064315 | 110087285 | 3 | 0 | 0 | 0 | 0 | 1 | 22970 | 0.695179437 | 1.199363736 | 3.531716999 | 0.339597917 | NA          | NA          |
| chr1:182811679-182812569  | exonic     | DHX9                                                  | 1  | 182811679 | 182812569 | 0 | 0 | 2 | 1 | 0 | 0 | 890   | 0.500849436 | 1.201838112 | 3.961887695 | 0.303349869 | 0.761623246 | 0.998252924 |
| chr1:233353644-233372726  | exonic     | PCNXL2                                                | 1  | 233353644 | 233372726 | 0 | 0 | 2 | 1 | 0 | 0 | 19082 | 0.500849436 | 1.201838112 | 3.961887695 | 0.303349869 | 0.761623246 | 0.998252924 |

|                           |        |          |       |           |           |           |   |   |   |   |   |        |             |             |             |             |             |             |             |
|---------------------------|--------|----------|-------|-----------|-----------|-----------|---|---|---|---|---|--------|-------------|-------------|-------------|-------------|-------------|-------------|-------------|
| chr1:243727021-243859018  | exonic | AKT3     | 1     | 243727021 | 243859018 | 0         | 0 | 2 | 1 | 0 | 0 | 131997 | 0.500849436 | 1.201838112 | 3.961887695 | 0.303349869 | 0.761623246 | 0.998252924 |             |
| chr10:13169744-13174197   | exonic | OPTN     | 10    | 13169744  | 13174197  | 0         | 0 | 2 | 1 | 0 | 0 | 4453   | 0.500849436 | 1.201838112 | 3.961887695 | 0.303349869 | 0.761623246 | 0.998252924 |             |
| chr10:134503895-134523960 | exonic | INPP5A   | 10    | 134503895 | 134523960 | 0         | 0 | 2 | 1 | 0 | 0 | 20065  | 0.500849436 | 1.201838112 | 3.961887695 | 0.303349869 | 0.761623246 | 0.998252924 |             |
| chr10:38242622-38246474   | exonic | ZNF25    | 10    | 38242622  | 38246474  | 0         | 0 | 2 | 1 | 0 | 0 | 3852   | 0.500849436 | 1.201838112 | 3.961887695 | 0.303349869 | 0.761623246 | 0.998252924 |             |
| chr11:122827203-122828199 | exonic | C11orf63 | 11    | 122827203 | 122828199 | 0         | 0 | 2 | 1 | 0 | 0 | 996    | 0.500849436 | 1.201838112 | 3.961887695 | 0.303349869 | 0.761623246 | 0.998252924 |             |
| chr12:50824277-50831621   | exonic | LARP4    | 12    | 50824277  | 50831621  | 0         | 0 | 2 | 1 | 0 | 0 | 7344   | 0.500849436 | 1.201838112 | 3.961887695 | 0.303349869 | 0.761623246 | 0.998252924 |             |
| chr12:70974815-70990107   | exonic | PTPRB    | 12    | 70974815  | 70990107  | 0         | 0 | 2 | 1 | 0 | 0 | 15292  | 0.500849436 | 1.201838112 | 3.961887695 | 0.303349869 | 0.761623246 | 0.998252924 |             |
| chr13:114174930-114188555 | exonic | TMC03    | 13    | 114174930 | 114188555 | 0         | 0 | 2 | 1 | 0 | 0 | 13625  | 0.500849436 | 1.201838112 | 3.961887695 | 0.303349869 | 0.761623246 | 0.998252924 |             |
| chr13:95686858-95696692   | exonic | ABCC4    | 13    | 95686858  | 95696692  | 0         | 0 | 2 | 1 | 0 | 0 | 9834   | 0.500849436 | 1.201838112 | 3.961887695 | 0.303349869 | 0.761623246 | 0.998252924 |             |
| chr14:79423584-79454484   | exonic | NRXN3    | 14    | 79423584  | 79454484  | 0         | 0 | 2 | 1 | 0 | 0 | 30900  | 0.500849436 | 1.201838112 | 3.961887695 | 0.303349869 | 0.761623246 | 0.998252924 |             |
| chr15:42927053-42931010   | exonic | STARD9   | 15    | 42927053  | 42931010  | 0         | 0 | 2 | 1 | 0 | 0 | 3957   | 0.500849436 | 1.201838112 | 3.961887695 | 0.303349869 | 0.761623246 | 0.998252924 |             |
| chr15:58913669-58933159   | exonic | ADAM10   | 15    | 58913669  | 58933159  | 0         | 0 | 2 | 1 | 0 | 0 | 19490  | 0.500849436 | 1.201838112 | 3.961887695 | 0.303349869 | 0.761623246 | 0.998252924 |             |
| chr15:66015185-66034122   | exonic | DENND4A  | 15    | 66015185  | 66034122  | 0         | 0 | 2 | 1 | 0 | 0 | 18937  | 0.500849436 | 1.201838112 | 3.961887695 | 0.303349869 | 0.761623246 | 0.998252924 |             |
| chr16:1675973-1682366     | exonic | CRAMP1   | 16    | 1675973   | 1682366   | 0         | 0 | 2 | 1 | 0 | 0 | 6393   | 0.500849436 | 1.201838112 | 3.961887695 | 0.303349869 | 0.761623246 | 0.998252924 |             |
| chr16:2369581-2369841     | exonic | ABCA3    | 16    | 2369581   | 2369841   | 0         | 0 | 2 | 1 | 0 | 0 | 260    | 0.500849436 | 1.201838112 | 3.961887695 | 0.303349869 | 0.761623246 | 0.998252924 |             |
| chr16:74957823-74985441   | exonic | WDR59    | 16    | 74957823  | 74985441  | 0         | 0 | 2 | 1 | 0 | 0 | 27618  | 0.500849436 | 1.201838112 | 3.961887695 | 0.303349869 | 0.761623246 | 0.998252924 |             |
| chr17:15968183-15971435   | exonic | NCOR1    | 17    | 15968183  | 15971435  | 0         | 0 | 2 | 1 | 0 | 0 | 3252   | 0.500849436 | 1.201838112 | 3.961887695 | 0.303349869 | 0.761623246 | 0.998252924 |             |
| chr17:44770268-44772028   | exonic | NSF      | 17    | 44770268  | 44772028  | 0         | 0 | 2 | 1 | 0 | 0 | 1760   | 0.500849436 | 1.201838112 | 3.961887695 | 0.303349869 | 0.761623246 | 0.998252924 |             |
| chr17:67098975-67130883   | exonic | ABCA6    | 17    | 67098975  | 67130883  | 0         | 0 | 2 | 1 | 0 | 0 | 31908  | 0.500849436 | 1.201838112 | 3.961887695 | 0.303349869 | 0.761623246 | 0.998252924 |             |
| chr17:80361812-80364358   | exonic | OGFOD3   | 17    | 80361812  | 80364358  | 0         | 0 | 2 | 1 | 0 | 0 | 2546   | 0.500849436 | 1.201838112 | 3.961887695 | 0.303349869 | 0.761623246 | 0.998252924 |             |
| chr19:41847787-41848152   | exonic | TGFB1    | 19    | 41847787  | 41848152  | 0         | 0 | 2 | 1 | 0 | 0 | 365    | 0.500849436 | 1.201838112 | 3.961887695 | 0.303349869 | 0.761623246 | 0.998252924 |             |
| chr19:45528586-45528995   | exonic | RELB     | 19    | 45528586  | 45528995  | 0         | 0 | 2 | 1 | 0 | 0 | 409    | 0.500849436 | 1.201838112 | 3.961887695 | 0.303349869 | 0.761623246 | 0.998252924 |             |
| chr2:203947941-203949292  | exonic | NBEAL1   | 2     | 203947941 | 203949292 | 0         | 0 | 2 | 1 | 0 | 0 | 1351   | 0.500849436 | 1.201838112 | 3.961887695 | 0.303349869 | 0.761623246 | 0.998252924 |             |
| chr2:242265407-242275513  | exonic |          | 2-Sep | 2         | 242265407 | 242275513 | 0 | 0 | 2 | 3 | 0 | 0      | 10106       | 0.500849436 | 1.201838112 | 3.961887695 | 0.303349869 | 0.761623246 | 0.998252924 |
| chr20:50090516-50092197   | exonic | NFATC2   | 20    | 50090516  | 50092197  | 0         | 0 | 2 | 1 | 0 | 0 | 1681   | 0.500849436 | 1.201838112 | 3.961887695 | 0.303349869 | 0.761623246 | 0.998252924 |             |
| chr3:136183722-136196254  | exonic | STAG1    | 3     | 136183722 | 136196254 | 0         | 0 | 2 | 1 | 0 | 0 | 12532  | 0.500849436 | 1.201838112 | 3.961887695 | 0.303349869 | 0.761623246 | 0.998252924 |             |
| chr3:42659061-42674315    | exonic | NKTR     | 3     | 42659061  | 42674315  | 0         | 0 | 2 | 1 | 0 | 0 | 15254  | 0.500849436 | 1.201838112 | 3.961887695 | 0.303349869 | 0.761623246 | 0.998252924 |             |
| chr4:128938517-128950008  | exonic | ABHD18   | 4     | 128938517 | 128950008 | 0         | 0 | 2 | 1 | 0 | 0 | 11491  | 0.500849436 | 1.201838112 | 3.961887695 | 0.303349869 | 0.761623246 | 0.998252924 |             |
| chr5:76736637-76785397    | exonic | WDR41    | 5     | 76736637  | 76785397  | 0         | 0 | 2 | 1 | 0 | 0 | 48760  | 0.500849436 | 1.201838112 | 3.961887695 | 0.303349869 | 0.761623246 | 0.998252924 |             |
| chr6:144835044-144838084  | exonic | UTRN     | 6     | 144835044 | 144838084 | 0         | 0 | 2 | 1 | 0 | 0 | 3040   | 0.500849436 | 1.201838112 | 3.961887695 | 0.303349869 | 0.761623246 | 0.998252924 |             |
| chr7:138261117-138264277  | exonic | TRIM24   | 7     | 138261117 | 138264277 | 0         | 0 | 2 | 1 | 0 | 0 | 3160   | 0.500849436 | 1.201838112 | 3.961887695 | 0.303349869 | 0.761623246 | 0.998252924 |             |
| chr8:16012572-16021760    | exonic | MSR1     | 8     | 16012572  | 16021760  | 0         | 0 | 2 | 1 | 0 | 0 | 9188   | 0.500849436 | 1.201838112 | 3.961887695 | 0.303349869 | 0.761623246 | 0.998252924 |             |
| chr8:17847367-17872349    | exonic | PCM1     | 8     | 17847367  | 17872349  | 0         | 0 | 2 | 1 | 0 | 0 | 24982  | 0.500849436 | 1.201838112 | 3.961887695 | 0.303349869 | 0.761623246 | 0.998252924 |             |
| chr11:82935896-82959129   | exonic | ANKRD42  | 11    | 82935896  | 82959129  | 4         | 2 | 0 | 2 | 1 | 0 | 23233  | 1.198149561 | 1.206724006 | 2.389150581 | 0.505084952 | 0.61349917  | 0.998252924 |             |
| chr11:34978930-34999729   | exonic | PDHX     | 11    | 34978930  | 34999729  | 32        | 4 | 9 | 7 | 6 | 5 | 20799  | 9.611543866 | 1.207626979 | 1.010160235 | 1.195480615 | 0.231899306 | 0.998252924 |             |

|                           |                |              |    |           |           |    |   |    |   |   |   |       |             |             |             |             |             |             |
|---------------------------|----------------|--------------|----|-----------|-----------|----|---|----|---|---|---|-------|-------------|-------------|-------------|-------------|-------------|-------------|
| chr2:48049356-48050499    | exonic         | FBX011       | 2  | 48049356  | 48050499  | 1  | 4 | 2  | 0 | 4 | 0 | 1143  | 1.704737877 | 1.212240423 | 2.135331831 | 0.567705874 | 0.570234702 | 0.998252924 |
| chr16:46708225-46711310   | exonic         | VPS35        | 16 | 46708225  | 46711310  | 5  | 3 | 0  | 1 | 3 | 0 | 3085  | 1.637155762 | 1.215705115 | 2.134759484 | 0.56948107  | 0.569029714 | 0.998252924 |
| chr19:15571870-15572418   | exonic         | RASAL3       | 19 | 15571870  | 15572418  | 2  | 0 | 2  | 1 | 1 | 0 | 548   | 0.879850744 | 1.216964454 | 2.698311385 | 0.451009643 | 0.651982599 | 0.998252924 |
| chr2:168994597-168997268  | exonic         | STK39        | 2  | 168994597 | 168997268 | 2  | 0 | 2  | 1 | 1 | 0 | 2671  | 0.879850744 | 1.216964454 | 2.698311385 | 0.451009643 | 0.651982599 | 0.998252924 |
| chr20:13539654-13568017   | exonic         | TASP1        | 20 | 13539654  | 13568017  | 2  | 0 | 2  | 1 | 1 | 0 | 28363 | 0.879850744 | 1.216964454 | 2.698311385 | 0.451009643 | 0.651982599 | 0.998252924 |
| chr4:146791396-146813567  | exonic         | ZNF827       | 4  | 146791396 | 146813567 | 2  | 0 | 2  | 1 | 1 | 0 | 22171 | 0.879850744 | 1.216964454 | 2.698311385 | 0.451009643 | 0.651982599 | 0.998252924 |
| chr5:96248340-96251473    | exonic         | ERAP2        | 5  | 96248340  | 96251473  | 2  | 0 | 2  | 1 | 1 | 0 | 3133  | 0.879850744 | 1.216964454 | 2.698311385 | 0.451009643 | 0.651982599 | 0.998252924 |
| chr5:112321531-112339774  | exonic         | DCP2         | 5  | 112321531 | 112339774 | 3  | 2 | 1  | 0 | 3 | 0 | 18243 | 1.295863717 | 1.219505551 | 2.33025925  | 0.523334711 | NA          | NA          |
| chr20:60831112-60838747   | exonic         | OSBPL2       | 20 | 60831112  | 60838747  | 1  | 2 | 2  | 3 | 0 | 0 | 7635  | 1.191010747 | 1.22041323  | 2.410187862 | 0.50635606  | NA          | NA          |
| chr11:61205096-61205585   | exonic         | SDHAF2       | 11 | 61205096  | 61205585  | 9  | 6 | 0  | 6 | 2 | 0 | 489   | 3.086460434 | 1.220792915 | 1.693859128 | 0.720716909 | 0.471083707 | 0.998252924 |
| chr6:82923943-82924546    | exonic         | IBTK         | 6  | 82923943  | 82924546  | 6  | 4 | 3  | 3 | 4 | 0 | 603   | 2.865875772 | 1.228909689 | 1.549812708 | 0.792940775 | 0.42781233  | 0.998252924 |
| chr4:105439734-105440611  | ncRNA_intronic | LOC101929468 | 4  | 105439734 | 105440611 | 0  | 6 | 4  | 0 | 2 | 2 | 877   | 2.693222958 | 1.231169911 | 1.862720904 | 0.660952432 | 0.50864282  | 0.998252924 |
| chr1:203680004-203691817  | exonic         | ATP2B4       | 1  | 203680004 | 203691817 | 2  | 1 | 1  | 2 | 0 | 0 | 11813 | 0.84214148  | 1.231223157 | 2.734919209 | 0.450186299 | 0.652576114 | 0.998252924 |
| chr1:48771458-48825442    | exonic         | SPATA6       | 1  | 48771458  | 48825442  | 2  | 1 | 1  | 2 | 0 | 0 | 53984 | 0.84214148  | 1.231223157 | 2.734919209 | 0.450186299 | 0.652576114 | 0.998252924 |
| chr3:124996569-125050082  | exonic         | ZNF148       | 3  | 124996569 | 125050082 | 2  | 1 | 1  | 2 | 0 | 0 | 53513 | 0.84214148  | 1.231223157 | 2.734919209 | 0.450186299 | 0.652576114 | 0.998252924 |
| chr1:227381486-227441856  | exonic         | CDC42BPA     | 1  | 227381486 | 227441856 | 0  | 2 | 3  | 1 | 2 | 0 | 60370 | 1.288724903 | 1.233993663 | 2.359101219 | 0.523077879 | 0.600920058 | 0.998252924 |
| chr21:34799190-34805178   | exonic         | IFNGR2       | 21 | 34799190  | 34805178  | 0  | 2 | 3  | 1 | 2 | 0 | 5988  | 1.288724903 | 1.233993663 | 2.359101219 | 0.523077879 | 0.600920058 | 0.998252924 |
| chr2:230723487-230744844  | exonic         | TRIP12       | 2  | 230723487 | 230744844 | 10 | 0 | 2  | 4 | 2 | 0 | 21357 | 2.351707863 | 1.234224979 | 1.88332011  | 0.655345298 | 0.512245462 | 0.998252924 |
| chr16:25066140-25123317   | exonic         | LCMT1        | 16 | 25066140  | 25123317  | 0  | 3 | 3  | 4 | 0 | 0 | 57177 | 1.539880014 | 1.234462797 | 2.381033085 | 0.518456801 | NA          | NA          |
| chr4:25766947-25769452    | exonic         | SELIL3       | 4  | 25766947  | 25769452  | 0  | 1 | 4  | 0 | 3 | 0 | 2505  | 1.326434167 | 1.238266216 | 2.548407646 | 0.485898015 | 0.627039476 | 0.998252924 |
| chr15:45467416-45470504   | exonic         | SHF          | 15 | 45467416  | 45470504  | 7  | 1 | 0  | 4 | 0 | 0 | 3088  | 1.502429939 | 1.240055689 | 2.420425204 | 0.512329688 | NA          | NA          |
| chr9:123924133-123924549  | exonic         | CNTRL        | 9  | 123924133 | 123924549 | 7  | 1 | 0  | 4 | 0 | 0 | 416   | 1.502429939 | 1.240055689 | 2.420425204 | 0.512329688 | NA          | NA          |
| chr4:103635594-103647840  | exonic         | MANBA        | 4  | 103635594 | 103647840 | 2  | 5 | 11 | 4 | 7 | 0 | 12246 | 4.571749655 | 1.242449687 | 1.389555996 | 0.894134306 | 0.371250036 | 0.998252924 |
| chr1:227192694-227223308  | exonic         | CDC42BPA     | 1  | 227192694 | 227223308 | 3  | 0 | 0  | 1 | 0 | 0 | 30614 | 0.493272214 | 1.242694051 | 3.965972591 | 0.313339042 | NA          | NA          |
| chr1:235377083-235384977  | exonic         | ARID4B       | 1  | 235377083 | 235384977 | 3  | 0 | 0  | 1 | 0 | 0 | 7894  | 0.493272214 | 1.242694051 | 3.965972591 | 0.313339042 | NA          | NA          |
| chr1:246021797-246093239  | exonic         | SMYD3        | 1  | 246021797 | 246093239 | 3  | 0 | 0  | 1 | 0 | 0 | 71442 | 0.493272214 | 1.242694051 | 3.965972591 | 0.313339042 | NA          | NA          |
| chr1:32495898-32510991    | exonic         | KHDRBS1      | 1  | 32495898  | 32510991  | 3  | 0 | 0  | 1 | 0 | 0 | 15093 | 0.493272214 | 1.242694051 | 3.965972591 | 0.313339042 | NA          | NA          |
| chr1:40422758-40424497    | exonic         | MFSD2A       | 1  | 40422758  | 40424497  | 3  | 0 | 0  | 1 | 0 | 0 | 1739  | 0.493272214 | 1.242694051 | 3.965972591 | 0.313339042 | NA          | NA          |
| chr10:104636710-104650435 | exonic         | AS3MT        | 10 | 104636710 | 104650435 | 3  | 0 | 0  | 1 | 0 | 0 | 13725 | 0.493272214 | 1.242694051 | 3.965972591 | 0.313339042 | NA          | NA          |
| chr11:67938481-67953395   | exonic         | KMT5B        | 11 | 67938481  | 67953395  | 3  | 0 | 0  | 1 | 0 | 0 | 14914 | 0.493272214 | 1.242694051 | 3.965972591 | 0.313339042 | NA          | NA          |
| chr11:93141396-93148280   | exonic         | CCDC67       | 11 | 93141396  | 93148280  | 3  | 0 | 0  | 1 | 0 | 0 | 6884  | 0.493272214 | 1.242694051 | 3.965972591 | 0.313339042 | NA          | NA          |
| chr12:111990083-111990781 | exonic         | ATXN2        | 12 | 111990083 | 111990781 | 3  | 0 | 0  | 1 | 0 | 0 | 698   | 0.493272214 | 1.242694051 | 3.965972591 | 0.313339042 | NA          | NA          |
| chr12:118474142-118476193 | exonic         | WSB2         | 12 | 118474142 | 118476193 | 3  | 0 | 0  | 1 | 0 | 0 | 2051  | 0.493272214 | 1.242694051 | 3.965972591 | 0.313339042 | NA          | NA          |
| chr12:124911167-124922542 | exonic         | NCOR2        | 12 | 124911167 | 124922542 | 3  | 0 | 0  | 1 | 0 | 0 | 11375 | 0.493272214 | 1.242694051 | 3.965972591 | 0.313339042 | NA          | NA          |
| chr13:100909848-100962162 | exonic         | PCCA         | 13 | 100909848 | 100962162 | 3  | 0 | 0  | 1 | 0 | 0 | 52314 | 0.493272214 | 1.242694051 | 3.965972591 | 0.313339042 | NA          | NA          |

|                          |              |                        |    |           |           |    |    |    |    |    |   |        |             |             |             |             |             |             |
|--------------------------|--------------|------------------------|----|-----------|-----------|----|----|----|----|----|---|--------|-------------|-------------|-------------|-------------|-------------|-------------|
| chr14:74325518-74340917  | exonic       | PTGR2                  | 14 | 74325518  | 74340917  | 3  | 0  | 0  | 1  | 0  | 0 | 15399  | 0.493272214 | 1.242694051 | 3.965972591 | 0.313339042 | NA          | NA          |
| chr15:51204274-51223168  | exonic       | AP4E1                  | 15 | 51204274  | 51223168  | 3  | 0  | 0  | 1  | 0  | 0 | 18894  | 0.493272214 | 1.242694051 | 3.965972591 | 0.313339042 | NA          | NA          |
| chr15:66048477-66053776  | exonic       | DENND4A                | 15 | 66048477  | 66053776  | 3  | 0  | 0  | 1  | 0  | 0 | 5299   | 0.493272214 | 1.242694051 | 3.965972591 | 0.313339042 | NA          | NA          |
| chr2:110321942-110343415 | exonic       |                        | 2  | 110321942 | 110343415 | 3  | 0  | 0  | 1  | 0  | 0 | 21473  | 0.493272214 | 1.242694051 | 3.965972591 | 0.313339042 | NA          | NA          |
| chr2:160604315-160609082 | exonic       |                        | 2  | 160604315 | 160609082 | 3  | 0  | 0  | 1  | 0  | 0 | 4767   | 0.493272214 | 1.242694051 | 3.965972591 | 0.313339042 | NA          | NA          |
| chr2:9496175-9508648     | exonic       | ASAP2                  | 2  | 9496175   | 9508648   | 3  | 0  | 0  | 1  | 0  | 0 | 12473  | 0.493272214 | 1.242694051 | 3.965972591 | 0.313339042 | NA          | NA          |
| chr3:167240102-167254788 | exonic       | WDR49                  | 3  | 167240102 | 167254788 | 3  | 0  | 0  | 1  | 0  | 0 | 14686  | 0.493272214 | 1.242694051 | 3.965972591 | 0.313339042 | NA          | NA          |
| chr5:137342678-137354835 | exonic       | FAM13B                 | 5  | 137342678 | 137354835 | 3  | 2  | 0  | 2  | 0  | 0 | 12157  | 0.493272214 | 1.242694051 | 3.965972591 | 0.313339042 | NA          | NA          |
| chr5:93159853-93388932   | exonic       | FAM172A                | 5  | 93159853  | 93388932  | 3  | 0  | 0  | 1  | 0  | 0 | 229079 | 0.493272214 | 1.242694051 | 3.965972591 | 0.313339042 | NA          | NA          |
| chr7:139083344-139090533 | exonic       | C7orf55-LUC7L2, LUC7L2 | 7  | 139083344 | 139090533 | 3  | 0  | 0  | 1  | 0  | 0 | 7189   | 0.493272214 | 1.242694051 | 3.965972591 | 0.313339042 | NA          | NA          |
| chr7:139083344-139092096 | exonic       | C7orf55-LUC7L2, LUC7L2 | 7  | 139083344 | 139092096 | 3  | 0  | 0  | 1  | 0  | 0 | 8752   | 0.493272214 | 1.242694051 | 3.965972591 | 0.313339042 | NA          | NA          |
| chr8:87454847-87460742   | exonic       | WWP1                   | 8  | 87454847  | 87460742  | 3  | 0  | 0  | 1  | 0  | 0 | 5895   | 0.493272214 | 1.242694051 | 3.965972591 | 0.313339042 | NA          | NA          |
| chr9:8517847-8528779     | exonic       | PTPRD                  | 9  | 8517847   | 8528779   | 3  | 0  | 0  | 1  | 0  | 0 | 10932  | 0.493272214 | 1.242694051 | 3.965972591 | 0.313339042 | NA          | NA          |
| chr4:170384393-170459062 | exonic       | NEK1                   | 4  | 170384393 | 170459062 | 3  | 0  | 2  | 1  | 0  | 2 | 74669  | 2.156061822 | 1.243225429 | 1.844148565 | 0.674146028 | 0.500218479 | 0.998252924 |
| chr8:22054192-22054933   | exonic       | BMP1                   | 8  | 22054192  | 22054933  | 6  | 1  | 5  | 7  | 0  | 0 | 741    | 2.678722279 | 1.244457634 | 1.816757612 | 0.684988259 | NA          | NA          |
| chr15:63998978-64008672  | exonic       | HERC1                  | 15 | 63998978  | 64008672  | 7  | 5  | 5  | 10 | 0  | 0 | 9694   | 3.823746574 | 1.249584472 | 1.570851411 | 0.795482286 | NA          | NA          |
| chr8:37971709-37978667   | exonic       | ASH2L                  | 8  | 37971709  | 37978667  | 3  | 2  | 1  | 1  | 2  | 0 | 6958   | 1.281147681 | 1.251115915 | 2.180987952 | 0.573646413 | 0.566207097 | 0.998252924 |
| chr1:29010094-29023596   | exonic       | GMEB1                  | 1  | 29010094  | 29023596  | 4  | 2  | 0  | 3  | 0  | 0 | 13502  | 1.183433525 | 1.253429286 | 2.587645521 | 0.484389874 | 0.628109204 | 0.998252924 |
| chr1:29474592-29481422   | exonic       | SRSF4                  | 1  | 29474592  | 29481422  | 4  | 2  | 0  | 3  | 0  | 0 | 6830   | 1.183433525 | 1.253429286 | 2.587645521 | 0.484389874 | 0.628109204 | 0.998252924 |
| chr13:30782714-30857928  | exonic       | KATNAL1                | 13 | 30782714  | 30857928  | 4  | 2  | 0  | 3  | 0  | 0 | 75214  | 1.183433525 | 1.253429286 | 2.587645521 | 0.484389874 | 0.628109204 | 0.998252924 |
| chr1:51860052-51912777   | exonic       | EPS15                  | 1  | 51860052  | 51912777  | 3  | 2  | 2  | 4  | 0  | 0 | 52725  | 1.555296018 | 1.254196808 | 2.160135592 | 0.580610223 | NA          | NA          |
| chr1:51864703-51913807   | exonic       | EPS15                  | 1  | 51864703  | 51913807  | 3  | 2  | 2  | 4  | 0  | 0 | 49104  | 1.555296018 | 1.254196808 | 2.160135592 | 0.580610223 | NA          | NA          |
| chr12:95602618-95605043  | exonic       | FGD6                   | 12 | 95602618  | 95605043  | 18 | 74 | 21 | 23 | 26 | 8 | 2425   | 27.41844733 | 1.255908596 | 0.780968079 | 1.608143316 | NA          | NA          |
| chr10:76978820-76979114  | exonic       | VDAC2                  | 10 | 76978820  | 76979114  | 2  | 4  | 0  | 0  | 3  | 0 | 294    | 1.318159347 | 1.257199254 | 2.508405762 | 0.501194533 | 0.616234222 | 0.998252924 |
| chr1:51121113-51210447   | exonic       | FAF1                   | 1  | 51121113  | 51210447  | 0  | 4  | 0  | 0  | 2  | 0 | 89334  | 0.93915804  | 1.258204974 | 3.113591524 | 0.404100848 | NA          | NA          |
| chr16:21326632-21328447  | ncRNA_exonic | CRYM-AS1               | 16 | 21326632  | 21328447  | 0  | 4  | 0  | 0  | 2  | 0 | 1815   | 0.93915804  | 1.258204974 | 3.113591524 | 0.404100848 | NA          | NA          |
| chr21:35229039-35239635  | exonic       | ITSN1                  | 21 | 35229039  | 35239635  | 0  | 4  | 0  | 0  | 2  | 0 | 10596  | 0.93915804  | 1.258204974 | 3.113591524 | 0.404100848 | NA          | NA          |
| chr3:37424717-37441150   | UTR5         |                        | 3  | 37424717  | 37441150  | 0  | 4  | 0  | 0  | 2  | 0 | 16433  | 0.93915804  | 1.258204974 | 3.113591524 | 0.404100848 | NA          | NA          |
| chr6:108227651-108246136 | exonic       | SEC63                  | 6  | 108227651 | 108246136 | 0  | 4  | 0  | 0  | 2  | 0 | 18485  | 0.93915804  | 1.258204974 | 3.113591524 | 0.404100848 | NA          | NA          |
| chr15:86207793-86253876  | exonic       | AKAP13                 | 15 | 86207793  | 86253876  | 4  | 0  | 2  | 2  | 1  | 0 | 46083  | 1.244136014 | 1.266064556 | 2.364551541 | 0.535435381 | 0.59234883  | 0.998252924 |
| chr2:173423435-173460751 | exonic       | PDK1                   | 2  | 173423435 | 173460751 | 0  | 7  | 0  | 1  | 3  | 0 | 37316  | 1.689324244 | 1.266358823 | 2.358604243 | 0.536910263 | NA          | NA          |
| chr16:72984367-72994093  | exonic       | ZFH3                   | 16 | 72984367  | 72994093  | 4  | 8  | 2  | 7  | 1  | 0 | 9726   | 3.169899333 | 1.270327426 | 1.581071226 | 0.803459961 | NA          | NA          |
| chr6:99887644-99913012   | exonic       | USP45                  | 6  | 99887644  | 99913012  | 0  | 2  | 3  | 2  | 1  | 0 | 25368  | 1.274008867 | 1.273564286 | 2.366604723 | 0.53813984  | 0.59048051  | 0.998252924 |
| chr14:91947919-91957146  | exonic       | PPP4R3A                | 14 | 91947919  | 91957146  | 10 | 10 | 3  | 3  | 5  | 2 | 9227   | 5.164942977 | 1.274150029 | 1.197843524 | 1.063703233 | 0.287463159 | 0.998252924 |
| chr15:42553155-42560230  | exonic       | TMEM87A                | 15 | 42553155  | 42560230  | 12 | 4  | 7  | 5  | 7  | 0 | 7075   | 5.004578567 | 1.276123045 | 1.269403295 | 1.005293629 | 0.314755482 | 0.998252924 |

|                          |            |                                                     |    |           |           |    |    |    |    |    |   |       |             |             |             |             |             |             |
|--------------------------|------------|-----------------------------------------------------|----|-----------|-----------|----|----|----|----|----|---|-------|-------------|-------------|-------------|-------------|-------------|-------------|
| chr15:57730182-57734676  | exonic     | CGNL1                                               | 15 | 57730182  | 57734676  | 6  | 4  | 0  | 3  | 2  | 0 | 4494  | 2.032013852 | 1.276749574 | 1.94697323  | 0.655761237 | 0.511977761 | 0.998252924 |
| chr9:6880011-6893232     | exonic     | KDM4C                                               | 9  | 6880011   | 6893232   | 13 | 6  | 6  | 6  | 7  | 0 | 13221 | 5.391159467 | 1.276889136 | 1.222944904 | 1.044110108 | 0.29643445  | 0.998252924 |
| chr6:71298711-71298963   | downstream | SDHAF4(dist=105)                                    | 6  | 71298711  | 71298963  | 20 | 13 | 10 | 12 | 5  | 3 | 252   | 9.623544056 | 1.278241733 | 0.928632414 | 1.376477617 | 0.168673812 | 0.998252924 |
| chr16:53913755-53922863  | exonic     | FTO                                                 | 16 | 53913755  | 53922863  | 2  | 0  | 2  | 2  | 0  | 0 | 9108  | 0.865134707 | 1.278278481 | 2.914662523 | 0.438568263 | 0.660974397 | 0.998252924 |
| chr17:74283272-74301022  | exonic     | QRICH2                                              | 17 | 74283272  | 74301022  | 2  | 0  | 2  | 2  | 0  | 0 | 17750 | 0.865134707 | 1.278278481 | 2.914662523 | 0.438568263 | 0.660974397 | 0.998252924 |
| chr7:5778906-5781446     | exonic     | RNF216                                              | 7  | 5778906   | 5781446   | 4  | 1  | 0  | 0  | 2  | 0 | 2540  | 0.932278414 | 1.278984656 | 2.8506121   | 0.448670184 | 0.653669596 | 0.998252924 |
| chr12:11839672-11843609  | intronic   | ETV6                                                | 12 | 11839672  | 11843609  | 0  | 0  | 5  | 0  | 3  | 0 | 3937  | 1.349427393 | 1.280117793 | 2.75407213  | 0.464809102 | NA          | NA          |
| chr2:110583452-110584015 | exonic     | RGPD5, RGPD6                                        | 2  | 110583452 | 110584015 | 3  | 2  | 4  | 3  | 2  | 0 | 563   | 2.085577528 | 1.280603856 | 1.780819437 | 0.719109321 | 0.472073565 | 0.998252924 |
| chr19:12783660-12784130  | exonic     | WDR83                                               | 19 | 12783660  | 12784130  | 1  | 3  | 0  | 2  | 0  | 0 | 470   | 0.86443711  | 1.282170181 | 2.935467221 | 0.436785726 | 0.662266752 | 0.998252924 |
| chr4:89396991-89415482   | exonic     | HERC5                                               | 4  | 89396991  | 89415482  | 1  | 3  | 0  | 2  | 0  | 0 | 18491 | 0.86443711  | 1.282170181 | 2.935467221 | 0.436785726 | 0.662266752 | 0.998252924 |
| chr9:33036571-33037113   | exonic     | DNAJA1                                              | 9  | 33036571  | 33037113  | 1  | 3  | 0  | 2  | 0  | 0 | 542   | 0.86443711  | 1.282170181 | 2.935467221 | 0.436785726 | 0.662266752 | 0.998252924 |
| chr10:32854486-32873232  | exonic     | CCDC7                                               | 10 | 32854486  | 32873232  | 13 | 9  | 7  | 13 | 3  | 0 | 18746 | 6.371325899 | 1.282868519 | 1.19071871  | 1.077390074 | NA          | NA          |
| chr19:37416101-37428144  | exonic     | ZNF568                                              | 19 | 37416101  | 37428144  | 2  | 1  | 2  | 1  | 0  | 1 | 12043 | 1.24131773  | 1.284277222 | 2.268732211 | 0.566077043 | 0.571341408 | 0.998252924 |
| chr19:13039155-13039661  | exonic     | FARSA                                               | 19 | 13039155  | 13039661  | 20 | 17 | 16 | 21 | 9  | 0 | 506   | 12.02051773 | 1.285259073 | 0.970443024 | 1.324404465 | 0.185368753 | 0.998252924 |
| chr16:11940357-11941663  | exonic     | RSL1D1                                              | 16 | 11940357  | 11941663  | 4  | 3  | 6  | 1  | 6  | 0 | 1306  | 3.054865237 | 1.287793594 | 1.58879133  | 0.810549233 | NA          | NA          |
| chr14:75202687-75203028  | UTR3       | <small>PCF1(OM_015962;c.*1054_*1395de1ins0)</small> | 14 | 75202687  | 75203028  | 5  | 6  | 0  | 6  | 0  | 0 | 341   | 2.328457819 | 1.290483372 | 2.045661469 | 0.630839165 | 0.528145693 | 0.998252924 |
| chr8:42761315-42852780   | exonic     | HOOK3                                               | 8  | 42761315  | 42852780  | 7  | 0  | 0  | 2  | 1  | 0 | 91465 | 1.236558792 | 1.293119987 | 2.594473148 | 0.498413325 | NA          | NA          |
| chr1:113124996-113153625 | exonic     | ST7L                                                | 1  | 113124996 | 113153625 | 0  | 3  | 1  | 0  | 2  | 0 | 28629 | 0.962151266 | 1.294696355 | 2.837780118 | 0.456235614 | 0.648220558 | 0.998252924 |
| chr6:137015277-137041727 | exonic     | MAP3K5                                              | 6  | 137015277 | 137041727 | 0  | 3  | 1  | 0  | 2  | 0 | 26450 | 0.962151266 | 1.294696355 | 2.837780118 | 0.456235614 | 0.648220558 | 0.998252924 |
| chr17:78298829-78302277  | exonic     | RNF213                                              | 17 | 78298829  | 78302277  | 1  | 1  | 2  | 1  | 1  | 0 | 3448  | 0.9251396   | 1.29573722  | 2.494588403 | 0.519419243 | 0.603468415 | 0.998252924 |
| chr3:33661094-33686395   | exonic     | CLASP2                                              | 3  | 33661094  | 33686395  | 0  | 3  | 2  | 3  | 0  | 0 | 25301 | 1.236299604 | 1.297792023 | 2.571075694 | 0.504766167 | NA          | NA          |
| chrX:17121840-17157084   | exonic     | REPS2                                               | X  | 17121840  | 17157084  | 2  | 1  | 5  | 4  | 2  | 0 | 35244 | 2.382719091 | 1.29934991  | 1.90423273  | 0.68234827  | NA          | NA          |
| chr4:39915230-39927553   | exonic     | PDS5A                                               | 4  | 39915230  | 39927553  | 12 | 9  | 14 | 6  | 13 | 0 | 12323 | 8.089316657 | 1.300399104 | 1.096429977 | 1.186030235 | 0.23561036  | 0.998252924 |
| chr15:56680669-56687032  | exonic     | TEX9                                                | 15 | 56680669  | 56687032  | 2  | 6  | 8  | 1  | 8  | 0 | 6363  | 3.956311644 | 1.301525591 | 1.503993133 | 0.865380009 | 0.38683025  | 0.998252924 |
| chr1:78177431-78181553   | exonic     | USP33                                               | 1  | 78177431  | 78181553  | 2  | 12 | 2  | 5  | 4  | 0 | 4122  | 3.759488138 | 1.30182832  | 1.499362863 | 0.868254345 | NA          | NA          |
| chr1:70761812-70781249   | exonic     | ANKRD13C                                            | 1  | 70761812  | 70781249  | 0  | 1  | 4  | 2  | 1  | 0 | 19437 | 1.297002093 | 1.305109146 | 2.383466621 | 0.54756762  | 0.583988828 | 0.998252924 |
| chr16:10513438-10567846  | exonic     | ATF7IP2                                             | 16 | 10513438  | 10567846  | 5  | 0  | 0  | 2  | 0  | 0 | 54408 | 0.857557484 | 1.30593748  | 3.198827361 | 0.408255067 | NA          | NA          |
| chr19:47474571-47474851  | intronic   | ARHGAP35                                            | 19 | 47474571  | 47474851  | 5  | 0  | 0  | 2  | 0  | 0 | 280   | 0.857557484 | 1.30593748  | 3.198827361 | 0.408255067 | NA          | NA          |
| chr2:69573035-69590802   | exonic     | GFPT1                                               | 2  | 69573035  | 69590802  | 5  | 0  | 0  | 2  | 0  | 0 | 17767 | 0.857557484 | 1.30593748  | 3.198827361 | 0.408255067 | NA          | NA          |
| chr2:69577209-69590802   | exonic     | GFPT1                                               | 2  | 69577209  | 69590802  | 5  | 0  | 0  | 2  | 0  | 0 | 13593 | 0.857557484 | 1.30593748  | 3.198827361 | 0.408255067 | NA          | NA          |
| chr3:184023185-184024833 | exonic     | PSMD2                                               | 3  | 184023185 | 184024833 | 5  | 0  | 0  | 2  | 0  | 0 | 1648  | 0.857557484 | 1.30593748  | 3.198827361 | 0.408255067 | NA          | NA          |
| chr3:52238708-52240767   | exonic     | ALAS1                                               | 3  | 52238708  | 52240767  | 5  | 0  | 0  | 2  | 0  | 0 | 2059  | 0.857557484 | 1.30593748  | 3.198827361 | 0.408255067 | NA          | NA          |
| chr4:57363063-57363480   | intronic   | SRP72                                               | 4  | 57363063  | 57363480  | 5  | 0  | 0  | 2  | 0  | 0 | 417   | 0.857557484 | 1.30593748  | 3.198827361 | 0.408255067 | NA          | NA          |
| chr1:225266908-225284941 | exonic     | DNAH14                                              | 1  | 225266908 | 225284941 | 3  | 5  | 0  | 0  | 0  | 2 | 18033 | 1.874777041 | 1.306000867 | 2.271589705 | 0.57492815  | 0.565339891 | 0.998252924 |
| chr9:114289547-114296633 | exonic     | ZNF483                                              | 9  | 114289547 | 114296633 | 10 | 0  | 1  | 3  | 2  | 0 | 7086  | 2.048127452 | 1.310568205 | 2.009976084 | 0.652031741 | NA          | NA          |

|                           |            |                                       |    |           |           |   |   |   |   |   |   |       |             |             |             |             |             |             |
|---------------------------|------------|---------------------------------------|----|-----------|-----------|---|---|---|---|---|---|-------|-------------|-------------|-------------|-------------|-------------|-------------|
| chr11:125472197-125474142 | exonic     | STT3A                                 | 11 | 125472197 | 125474142 | 0 | 4 | 0 | 1 | 1 | 0 | 1945  | 0.924442003 | 1.3110312   | 2.900352817 | 0.45202473  | NA          | NA          |
| chr22:22153300-22162135   | exonic     | MAPK1                                 | 22 | 22153300  | 22162135  | 2 | 5 | 4 | 2 | 4 | 0 | 8835  | 2.615161441 | 1.313417885 | 1.650304338 | 0.795864045 | 0.426111062 | 0.998252924 |
| chr10:64990055-64991707   | intronic   | JMJD1C                                | 10 | 64990055  | 64991707  | 4 | 0 | 2 | 3 | 0 | 0 | 1652  | 1.229419978 | 1.314755163 | 2.558682198 | 0.513840744 | NA          | NA          |
| chr8:68934270-68973014    | exonic     | PREX2                                 | 8  | 68934270  | 68973014  | 4 | 0 | 2 | 3 | 0 | 0 | 38744 | 1.229419978 | 1.314755163 | 2.558682198 | 0.513840744 | NA          | NA          |
| chrX:41519691-41530783    | exonic     | CASK                                  | X  | 41519691  | 41530783  | 4 | 3 | 4 | 1 | 1 | 2 | 11092 | 2.671627295 | 1.315886049 | 1.603393908 | 0.820687944 | 0.41182404  | 0.998252924 |
| chr22:50191452-50198008   | exonic     | BRD1                                  | 22 | 50191452  | 50198008  | 1 | 2 | 1 | 2 | 0 | 0 | 6556  | 0.887430337 | 1.317422408 | 2.692268695 | 0.489335411 | 0.624604255 | 0.998252924 |
| chr7:74157787-74159280    | exonic     | GTF2I                                 | 7  | 74157787  | 74159280  | 1 | 2 | 1 | 2 | 0 | 0 | 1493  | 0.887430337 | 1.317422408 | 2.692268695 | 0.489335411 | 0.624604255 | 0.998252924 |
| chr17:40990747-40991397   | exonic     | PSME3                                 | 17 | 40990747  | 40991397  | 4 | 0 | 1 | 0 | 2 | 0 | 650   | 0.95527164  | 1.317910344 | 2.82888044  | 0.465877004 | 0.641303542 | 0.998252924 |
| chr17:9843442-9850300     | exonic     | GAS7                                  | 17 | 9843442   | 9850300   | 3 | 4 | 2 | 5 | 0 | 0 | 6858  | 2.010159001 | 1.321997653 | 1.964873451 | 0.672815673 | NA          | NA          |
| chr1:46521466-46546422    | exonic     | PIK3R3                                | 1  | 46521466  | 46546422  | 4 | 7 | 0 | 6 | 0 | 0 | 24956 | 2.373746676 | 1.324775042 | 2.042009185 | 0.64876057  | 0.516493148 | 0.998252924 |
| chr3:57276883-57301820    | exonic     | APPL1                                 | 3  | 57276883  | 57301820  | 4 | 2 | 2 | 0 | 2 | 1 | 24937 | 1.809310873 | 1.3250561   | 1.94389888  | 0.681648677 | 0.495461127 | 0.998252924 |
| chr2:172782046-172809519  | exonic     | HAT1                                  | 2  | 172782046 | 172809519 | 2 | 2 | 3 | 4 | 0 | 0 | 27473 | 1.623578101 | 1.325591242 | 2.137420769 | 0.620182634 | NA          | NA          |
| chr6:76357446-76388643    | exonic     | SENP6                                 | 6  | 76357446  | 76388643  | 0 | 5 | 2 | 2 | 2 | 0 | 31197 | 1.72059466  | 1.326307273 | 2.11732745  | 0.626406309 | 0.531048472 | 0.998252924 |
| chr4:100208007-100266423  | exonic     | ADH1A, ADH1B, ADH1C                   | 4  | 100208007 | 100266423 | 0 | 2 | 2 | 0 | 2 | 0 | 58416 | 0.985144493 | 1.333124854 | 2.79739525  | 0.476559347 | 0.633675938 | 0.998252924 |
| chr12:12653452-12674397   | exonic     | DUSP16                                | 12 | 12653452  | 12674397  | 0 | 9 | 0 | 2 | 3 | 0 | 20945 | 2.144187227 | 1.333641519 | 2.165876278 | 0.615751478 | NA          | NA          |
| chr1:145646114-145663367  | exonic     | RNF115                                | 1  | 145646114 | 145663367 | 2 | 2 | 2 | 1 | 2 | 0 | 17253 | 1.349429764 | 1.33373797  | 2.133396064 | 0.62517129  | 0.531858643 | 0.998252924 |
| chr16:69685806-69686118   | intronic   | NFAT5                                 | 16 | 69685806  | 69686118  | 2 | 4 | 5 | 0 | 0 | 3 | 312   | 2.866078036 | 1.335201484 | 1.828501699 | 0.730216157 | NA          | NA          |
| chr1:16199310-16203173    | exonic     | SPEN                                  | 1  | 16199310  | 16203173  | 2 | 1 | 0 | 0 | 1 | 0 | 3863  | 0.553277106 | 1.335238618 | 3.472510842 | 0.38451676  | 0.700595476 | 0.998252924 |
| chr1:51001040-51061888    | exonic     | FAF1                                  | 1  | 51001040  | 51061888  | 2 | 1 | 0 | 0 | 1 | 0 | 60848 | 0.553277106 | 1.335238618 | 3.472510842 | 0.38451676  | 0.700595476 | 0.998252924 |
| chr10:225933-295028       | exonic     | ZMYND11                               | 10 | 225933    | 295028    | 2 | 1 | 0 | 0 | 1 | 0 | 69095 | 0.553277106 | 1.335238618 | 3.472510842 | 0.38451676  | 0.700595476 | 0.998252924 |
| chr10:28872327-28879761   | exonic     | WAC                                   | 10 | 28872327  | 28879761  | 2 | 1 | 0 | 0 | 1 | 0 | 7434  | 0.553277106 | 1.335238618 | 3.472510842 | 0.38451676  | 0.700595476 | 0.998252924 |
| chr11:110007387-110008139 | exonic     | ZC3H12C                               | 11 | 110007387 | 110008139 | 2 | 1 | 0 | 0 | 1 | 0 | 752   | 0.553277106 | 1.335238618 | 3.472510842 | 0.38451676  | 0.700595476 | 0.998252924 |
| chr12:104370695-104374740 | exonic     | TDG                                   | 12 | 104370695 | 104374740 | 2 | 1 | 0 | 0 | 1 | 0 | 4045  | 0.553277106 | 1.335238618 | 3.472510842 | 0.38451676  | 0.700595476 | 0.998252924 |
| chr12:12332743-12340053   | exonic     | LRP6                                  | 12 | 12332743  | 12340053  | 2 | 1 | 0 | 0 | 1 | 0 | 7310  | 0.553277106 | 1.335238618 | 3.472510842 | 0.38451676  | 0.700595476 | 0.998252924 |
| chr16:68059317-68088520   | exonic     | DUS2                                  | 16 | 68059317  | 68088520  | 0 | 1 | 0 | 0 | 2 | 0 | 29203 | 0.553277106 | 1.335238618 | 3.472510842 | 0.38451676  | 0.700595476 | 0.998252924 |
| chr2:174783320-174820960  | exonic     | SP3                                   | 2  | 174783320 | 174820960 | 2 | 1 | 0 | 0 | 1 | 0 | 37640 | 0.553277106 | 1.335238618 | 3.472510842 | 0.38451676  | 0.700595476 | 0.998252924 |
| chr2:43625109-43712464    | exonic     | THADA                                 | 2  | 43625109  | 43712464  | 2 | 1 | 0 | 0 | 1 | 0 | 87355 | 0.553277106 | 1.335238618 | 3.472510842 | 0.38451676  | 0.700595476 | 0.998252924 |
| chr8:141856358-141935848  | exonic     | PTK2                                  | 8  | 141856358 | 141935848 | 2 | 1 | 0 | 0 | 1 | 0 | 79490 | 0.553277106 | 1.335238618 | 3.472510842 | 0.38451676  | 0.700595476 | 0.998252924 |
| chr8:17675958-17676530    | intergenic | MTUS1 (dist=17532), FGL1 (dist=45370) | 8  | 17675958  | 17676530  | 7 | 0 | 0 | 3 | 0 | 0 | 572   | 1.221842755 | 1.337782705 | 2.820685212 | 0.474275789 | NA          | NA          |
| chr22:46085591-46114373   | exonic     | ATXN10                                | 22 | 46085591  | 46114373  | 7 | 9 | 0 | 4 | 2 | 1 | 28782 | 3.446909784 | 1.340036733 | 1.55134264  | 0.863791594 | 0.387702386 | 0.998252924 |
| chr7:139827241-139829453  | exonic     | KDM7A                                 | 7  | 139827241 | 139829453 | 1 | 0 | 3 | 1 | 1 | 0 | 2212  | 0.948132826 | 1.340775182 | 2.659181816 | 0.504205908 | 0.614116689 | 0.998252924 |
| chr16:47531309-47581459   | exonic     | PHKB                                  | 16 | 47531309  | 47581459  | 6 | 5 | 3 | 3 | 4 | 0 | 50150 | 3.040151571 | 1.341333391 | 1.518875603 | 0.883109445 | 0.377177142 | 0.998252924 |
| chr3:47651555-47663831    | exonic     | SMARCC1                               | 3  | 47651555  | 47663831  | 2 | 1 | 0 | 0 | 0 | 1 | 12276 | 0.740468293 | 1.342039867 | 3.181292157 | 0.4218537   | NA          | NA          |
| chr7:8062112-8110761      | exonic     | GLCCI1                                | 7  | 8062112   | 8110761   | 2 | 1 | 0 | 0 | 0 | 1 | 48649 | 0.740468293 | 1.342039867 | 3.181292157 | 0.4218537   | NA          | NA          |
| chr20:34315175-34315528   | intronic   | RBM39                                 | 20 | 34315175  | 34315528  | 0 | 5 | 4 | 0 | 5 | 0 | 353   | 2.265592206 | 1.34381672  | 2.095831764 | 0.641185396 | NA          | NA          |

|                           |                |                   |    |           |           |    |    |   |    |   |   |       |             |             |             |             |             |             |
|---------------------------|----------------|-------------------|----|-----------|-----------|----|----|---|----|---|---|-------|-------------|-------------|-------------|-------------|-------------|-------------|
| chr7:5939914-5940563      | exonic         | CCZ1              | 7  | 5939914   | 5940563   | 0  | 3  | 1 | 1  | 1 | 0 | 649   | 0.94743523  | 1.344470953 | 2.659893919 | 0.505460366 | 0.61323553  | 0.998252924 |
| chr2:190593385-190609514  | exonic         | ANKAR             | 2  | 190593385 | 190609514 | 12 | 6  | 8 | 4  | 9 | 0 | 16129 | 5.686142649 | 1.345005462 | 1.218691997 | 1.10364675  | 0.269746403 | 0.998252924 |
| chr5:43675612-43702838    | exonic         | NNT               | 5  | 43675612  | 43702838  | 6  | 3  | 4 | 7  | 0 | 0 | 27226 | 2.830004852 | 1.345394756 | 1.733805384 | 0.775977955 | NA          | NA          |
| chr19:50902104-50902741   | exonic         | POLD1             | 19 | 50902104  | 50902741  | 26 | 12 | 5 | 20 | 2 | 0 | 637   | 8.799597775 | 1.346615356 | 1.172750498 | 1.14825392  | 0.250863756 | 0.998252924 |
| chr19:50902107-50902741   | exonic         | POLD1             | 19 | 50902107  | 50902741  | 26 | 12 | 5 | 20 | 2 | 0 | 634   | 8.799597775 | 1.346615356 | 1.172750498 | 1.14825392  | 0.250863756 | 0.998252924 |
| chr18:56363597-56367823   | exonic         | MALT1             | 18 | 56363597  | 56367823  | 9  | 3  | 4 | 6  | 2 | 0 | 4226  | 3.352709139 | 1.351529396 | 1.488540857 | 0.907955861 | 0.363901542 | 0.998252924 |
| chr4:121675707-121737729  | exonic         | PRDM5             | 4  | 121675707 | 121737729 | 11 | 10 | 3 | 7  | 5 | 0 | 62022 | 5.102738243 | 1.352502003 | 1.269340824 | 1.065515248 | 0.286642829 | 0.998252924 |
| chr20:48256214-48257202   | exonic         | B4GALT5           | 20 | 48256214  | 48257202  | 3  | 0  | 3 | 2  | 1 | 0 | 988   | 1.312418097 | 1.353472191 | 2.322893445 | 0.582666499 | 0.56011783  | 0.998252924 |
| chr11:128628009-128638167 | exonic         | FLI1              | 11 | 128628009 | 128638167 | 1  | 1  | 2 | 2  | 0 | 0 | 10158 | 0.910423563 | 1.35691005  | 2.671941126 | 0.507836807 | 0.611567795 | 0.998252924 |
| chr17:76075475-76083174   | exonic         | TNRC6C            | 17 | 76075475  | 76083174  | 3  | 2  | 4 | 5  | 0 | 0 | 7699  | 2.056145454 | 1.358431008 | 1.955093727 | 0.694816309 | NA          | NA          |
| chr7:38282029-38299831    | exonic         | TARP              | 7  | 38282029  | 38299831  | 3  | 2  | 0 | 0  | 2 | 0 | 17802 | 0.97756727  | 1.358888541 | 2.780364744 | 0.488744703 | 0.625022451 | 0.998252924 |
| chr7:5087664-5097410      | exonic         | RBAK, RBAK-RBAKDN | 7  | 5087664   | 5097410   | 3  | 2  | 0 | 0  | 2 | 0 | 9746  | 0.97756727  | 1.358888541 | 2.780364744 | 0.488744703 | 0.625022451 | 0.998252924 |
| chr6:86328535-86329135    | exonic         | SYNCRIP           | 6  | 86328535  | 86329135  | 12 | 4  | 3 | 5  | 4 | 0 | 600   | 3.852420199 | 1.359879376 | 1.404966184 | 0.967908973 | 0.333089833 | 0.998252924 |
| chr8:102570646-102571040  | exonic         | GRHL2             | 8  | 102570646 | 102571040 | 0  | 4  | 3 | 1  | 1 | 1 | 394   | 1.824467689 | 1.360251055 | 2.007409075 | 0.677615277 | NA          | NA          |
| chr12:90010578-90029028   | exonic         | ATP2B1            | 12 | 90010578  | 90029028  | 2  | 2  | 5 | 4  | 1 | 0 | 18450 | 2.139143574 | 1.367639606 | 1.816122659 | 0.753054646 | NA          | NA          |
| chr6:135621637-135644462  | exonic         | AHI1              | 6  | 135621637 | 135644462 | 2  | 0  | 4 | 0  | 3 | 0 | 22825 | 1.410132253 | 1.369463813 | 2.461501891 | 0.556352939 | 0.577969603 | 0.998252924 |
| chr1:42730785-42776781    | exonic         | FOXJ3             | 1  | 42730785  | 42776781  | 2  | 2  | 2 | 2  | 1 | 0 | 45996 | 1.334713727 | 1.371564003 | 2.139697282 | 0.641008433 | 0.521517204 | 0.998252924 |
| chr22:32108068-32121596   | exonic         | PRR14L            | 22 | 32108068  | 32121596  | 0  | 1  | 3 | 0  | 2 | 0 | 13528 | 1.008137719 | 1.371665134 | 2.797522415 | 0.49031426  | 0.623911538 | 0.998252924 |
| chr15:23329957-23331101   | ncRNA_exonic   | HERC2P2           | 15 | 23329957  | 23331101  | 4  | 0  | 1 | 1  | 1 | 0 | 1144  | 0.940555604 | 1.373406142 | 2.649998312 | 0.518266799 | 0.604272134 | 0.998252924 |
| chr1:85647780-85656435    | exonic         | SYDE2             | 1  | 85647780  | 85656435  | 0  | 4  | 0 | 2  | 0 | 0 | 8655  | 0.909725967 | 1.374638634 | 3.146583292 | 0.436867073 | NA          | NA          |
| chr15:43628823-43641243   | exonic         | ADAL              | 15 | 43628823  | 43641243  | 0  | 4  | 0 | 2  | 0 | 0 | 12420 | 0.909725967 | 1.374638634 | 3.146583292 | 0.436867073 | NA          | NA          |
| chr15:43628823-43643239   | exonic         | ADAL              | 15 | 43628823  | 43643239  | 0  | 4  | 0 | 2  | 0 | 0 | 14416 | 0.909725967 | 1.374638634 | 3.146583292 | 0.436867073 | NA          | NA          |
| chr20:16351231-16362392   | exonic         | KIF16B            | 20 | 16351231  | 16362392  | 0  | 4  | 0 | 2  | 0 | 0 | 11161 | 0.909725967 | 1.374638634 | 3.146583292 | 0.436867073 | NA          | NA          |
| chr22:24698162-24734445   | exonic         | SPECC1L           | 22 | 24698162  | 24734445  | 0  | 2  | 0 | 3  | 0 | 0 | 36283 | 0.909725967 | 1.374638634 | 3.146583292 | 0.436867073 | NA          | NA          |
| chr9:35058687-35069559    | exonic         | VCP               | 9  | 35058687  | 35069559  | 0  | 4  | 0 | 2  | 0 | 0 | 10872 | 0.909725967 | 1.374638634 | 3.146583292 | 0.436867073 | NA          | NA          |
| chrX:3740114-3744770      | ncRNA_intronic | LOC389906         | X  | 3740114   | 3744770   | 0  | 4  | 0 | 2  | 0 | 0 | 4656  | 0.909725967 | 1.374638634 | 3.146583292 | 0.436867073 | NA          | NA          |
| chrX:71710778-71715118    | exonic         | HDAC8             | X  | 71710778  | 71715118  | 0  | 4  | 0 | 2  | 0 | 0 | 4340  | 0.909725967 | 1.374638634 | 3.146583292 | 0.436867073 | NA          | NA          |
| chr15:38595293-38602436   | intronic       | SPRED1            | 15 | 38595293  | 38602436  | 2  | 4  | 0 | 3  | 0 | 0 | 7143  | 1.274011237 | 1.378173813 | 2.533238272 | 0.544036393 | 0.586416429 | 0.998252924 |
| chr19:34922765-34955036   | exonic         | UBA2              | 19 | 34922765  | 34955036  | 2  | 4  | 0 | 3  | 0 | 0 | 32271 | 1.274011237 | 1.378173813 | 2.533238272 | 0.544036393 | 0.586416429 | 0.998252924 |
| chr19:34922765-34957919   | exonic         | UBA2              | 19 | 34922765  | 34957919  | 2  | 4  | 0 | 3  | 0 | 0 | 35154 | 1.274011237 | 1.378173813 | 2.533238272 | 0.544036393 | 0.586416429 | 0.998252924 |
| chr22:22024201-22029404   | exonic         | PPIL2             | 22 | 22024201  | 22029404  | 5  | 4  | 0 | 0  | 4 | 0 | 5203  | 1.826147597 | 1.38187736  | 2.224035326 | 0.621337865 | NA          | NA          |
| chr1:101372407-101387397  | exonic         | SLC30A7           | 1  | 101372407 | 101387397 | 4  | 4  | 0 | 4  | 0 | 0 | 14990 | 1.638296508 | 1.383167944 | 2.307113876 | 0.599523049 | NA          | NA          |
| chr1:204521309-204521551  | UTR3           |                   | 1  | 204521309 | 204521551 | 4  | 4  | 0 | 4  | 0 | 0 | 242   | 1.638296508 | 1.383167944 | 2.307113876 | 0.599523049 | NA          | NA          |
| chr5:176618884-176631293  | exonic         | NSD1              | 5  | 176618884 | 176631293 | 0  | 4  | 3 | 3  | 1 | 0 | 12409 | 1.72887185  | 1.384291133 | 2.124511952 | 0.65158077  | NA          | NA          |
| chr1:237538016-237540735  | exonic         | RYR2              | 1  | 237538016 | 237540735 | 2  | 1  | 0 | 1  | 0 | 0 | 2719  | 0.53856107  | 1.386819154 | 3.508746098 | 0.395246369 | 0.692661075 | 0.998252924 |

|                           |            |                                                        |    |           |           |   |   |   |   |   |   |        |             |             |             |             |             |             |
|---------------------------|------------|--------------------------------------------------------|----|-----------|-----------|---|---|---|---|---|---|--------|-------------|-------------|-------------|-------------|-------------|-------------|
| chr1:54506428-54513045    | exonic     | TMEM59                                                 | 1  | 54506428  | 54513045  | 2 | 1 | 0 | 1 | 0 | 0 | 6617   | 0.53856107  | 1.386819154 | 3.508746098 | 0.395246369 | 0.692661075 | 0.998252924 |
| chr10:104632204-104632990 | exonic     | AS3MT                                                  | 10 | 104632204 | 104632990 | 2 | 1 | 0 | 1 | 0 | 0 | 786    | 0.53856107  | 1.386819154 | 3.508746098 | 0.395246369 | 0.692661075 | 0.998252924 |
| chr11:82560090-82571159   | exonic     | PRCP                                                   | 11 | 82560090  | 82571159  | 2 | 1 | 0 | 1 | 0 | 0 | 11069  | 0.53856107  | 1.386819154 | 3.508746098 | 0.395246369 | 0.692661075 | 0.998252924 |
| chr12:133357383-133359079 | exonic     | GOLGA3                                                 | 12 | 133357383 | 133359079 | 2 | 1 | 0 | 1 | 0 | 0 | 1696   | 0.53856107  | 1.386819154 | 3.508746098 | 0.395246369 | 0.692661075 | 0.998252924 |
| chr16:1774557-1779579     | exonic     | MAPK8IP3                                               | 16 | 1774557   | 1779579   | 2 | 1 | 0 | 1 | 0 | 0 | 5022   | 0.53856107  | 1.386819154 | 3.508746098 | 0.395246369 | 0.692661075 | 0.998252924 |
| chr2:42513408-42531691    | exonic     | EML4                                                   | 2  | 42513408  | 42531691  | 2 | 1 | 0 | 1 | 0 | 0 | 18283  | 0.53856107  | 1.386819154 | 3.508746098 | 0.395246369 | 0.692661075 | 0.998252924 |
| chr2:9496175-9499018      | exonic     | ASAP2                                                  | 2  | 9496175   | 9499018   | 2 | 1 | 0 | 1 | 0 | 0 | 2843   | 0.53856107  | 1.386819154 | 3.508746098 | 0.395246369 | 0.692661075 | 0.998252924 |
| chr6:16486202-16753578    | UTR5       | <small>UTR5 (dist=362009), PHDC1 (dist=24473)</small>  | 6  | 16486202  | 16753578  | 2 | 1 | 0 | 1 | 0 | 0 | 267376 | 0.53856107  | 1.386819154 | 3.508746098 | 0.395246369 | 0.692661075 | 0.998252924 |
| chr22:24133942-24135875   | exonic     | SMARCB1                                                | 22 | 24133942  | 24135875  | 4 | 3 | 0 | 0 | 3 | 0 | 1933   | 1.401857434 | 1.386868299 | 2.440496719 | 0.568272962 | NA          | NA          |
| chr15:59323002-59323901   | exonic     | RNF111                                                 | 15 | 59323002  | 59323901  | 5 | 3 | 2 | 3 | 0 | 1 | 899    | 2.189452926 | 1.387301291 | 1.7948376   | 0.77293973  | 0.43955805  | 0.998252924 |
| chr3:171969049-172016577  | exonic     | FNDC3B                                                 | 3  | 171969049 | 172016577 | 0 | 0 | 7 | 0 | 2 | 1 | 47528  | 1.931156631 | 1.391081446 | 2.304344447 | 0.603677739 | NA          | NA          |
| chr6:44320462-44344210    | exonic     | SPATS1                                                 | 6  | 44320462  | 44344210  | 4 | 1 | 0 | 2 | 0 | 0 | 23748  | 0.902846341 | 1.39140091  | 2.880324318 | 0.483070917 | 0.629045383 | 0.998252924 |
| chr7:148851036-148851432  | exonic     | ZNF398                                                 | 7  | 148851036 | 148851432 | 0 | 1 | 4 | 0 | 1 | 1 | 396    | 1.392597932 | 1.394044778 | 2.38275234  | 0.585056514 | 0.558509717 | 0.998252924 |
| chr1:180953812-180974599  | exonic     | STX6                                                   | 1  | 180953812 | 180974599 | 6 | 6 | 0 | 6 | 0 | 0 | 20787  | 2.457444762 | 1.394898044 | 2.009449746 | 0.694169161 | NA          | NA          |
| chr13:95813442-95818621   | exonic     | ABCC4                                                  | 13 | 95813442  | 95818621  | 2 | 3 | 1 | 3 | 0 | 0 | 5179   | 1.297004464 | 1.396022708 | 2.330841687 | 0.598935018 | NA          | NA          |
| chr12:112641439-112642427 | exonic     | HECTD4                                                 | 12 | 112641439 | 112642427 | 2 | 0 | 1 | 0 | 1 | 0 | 988    | 0.576270333 | 1.397226611 | 3.423301671 | 0.408151763 | 0.68316226  | 0.998252924 |
| chr13:111857635-111885640 | exonic     | ARHGEF7                                                | 13 | 111857635 | 111885640 | 2 | 0 | 1 | 0 | 1 | 0 | 28005  | 0.576270333 | 1.397226611 | 3.423301671 | 0.408151763 | 0.68316226  | 0.998252924 |
| chr13:20600751-20633702   | exonic     | ZMYM2                                                  | 13 | 20600751  | 20633702  | 2 | 0 | 1 | 0 | 1 | 0 | 32951  | 0.576270333 | 1.397226611 | 3.423301671 | 0.408151763 | 0.68316226  | 0.998252924 |
| chr15:43102811-43132631   | exonic     | TTBK2                                                  | 15 | 43102811  | 43132631  | 2 | 0 | 1 | 0 | 1 | 0 | 29820  | 0.576270333 | 1.397226611 | 3.423301671 | 0.408151763 | 0.68316226  | 0.998252924 |
| chr15:50741596-50751359   | exonic     | USP8                                                   | 15 | 50741596  | 50751359  | 2 | 0 | 1 | 0 | 1 | 0 | 9763   | 0.576270333 | 1.397226611 | 3.423301671 | 0.408151763 | 0.68316226  | 0.998252924 |
| chr16:19656207-19663412   | exonic     | C16orf62                                               | 16 | 19656207  | 19663412  | 2 | 0 | 1 | 0 | 1 | 0 | 7205   | 0.576270333 | 1.397226611 | 3.423301671 | 0.408151763 | 0.68316226  | 0.998252924 |
| chr16:19741751-19746772   | exonic     | IQCK                                                   | 16 | 19741751  | 19746772  | 2 | 0 | 1 | 0 | 1 | 0 | 5021   | 0.576270333 | 1.397226611 | 3.423301671 | 0.408151763 | 0.68316226  | 0.998252924 |
| chr5:134076752-134077213  | exonic     | CAMLG                                                  | 5  | 134076752 | 134077213 | 2 | 0 | 1 | 0 | 1 | 0 | 461    | 0.576270333 | 1.397226611 | 3.423301671 | 0.408151763 | 0.68316226  | 0.998252924 |
| chr5:38496483-38530768    | exonic     | LIFR                                                   | 5  | 38496483  | 38530768  | 2 | 0 | 1 | 0 | 1 | 0 | 34285  | 0.576270333 | 1.397226611 | 3.423301671 | 0.408151763 | 0.68316226  | 0.998252924 |
| chr7:50737418-50771605    | exonic     | GRB10                                                  | 7  | 50737418  | 50771605  | 2 | 0 | 1 | 0 | 1 | 2 | 34187  | 0.576270333 | 1.397226611 | 3.423301671 | 0.408151763 | 0.68316226  | 0.998252924 |
| chr8:125597327-125603476  | exonic     | MTSS1                                                  | 8  | 125597327 | 125603476 | 2 | 0 | 1 | 0 | 1 | 0 | 6149   | 0.576270333 | 1.397226611 | 3.423301671 | 0.408151763 | 0.68316226  | 0.998252924 |
| chr8:17817522-17819683    | exonic     | PCMI                                                   | 8  | 17817522  | 17819683  | 2 | 0 | 1 | 0 | 1 | 0 | 2161   | 0.576270333 | 1.397226611 | 3.423301671 | 0.408151763 | 0.68316226  | 0.998252924 |
| chr1:174244970-174274265  | exonic     | RABGAP1L                                               | 1  | 174244970 | 174274265 | 6 | 3 | 0 | 2 | 2 | 0 | 29295  | 1.751426668 | 1.397798591 | 2.069704177 | 0.675361535 | 0.499446097 | 0.998252924 |
| chr10:94653105-94659401   | exonic     | EXOC6                                                  | 10 | 94653105  | 94659401  | 5 | 0 | 5 | 3 | 2 | 0 | 6296   | 2.192268841 | 1.400429219 | 1.912094228 | 0.732405965 | 0.463920819 | 0.998252924 |
| chr9:146101-164037        | exonic     | CBWD1                                                  | 9  | 146101    | 164037    | 2 | 0 | 1 | 0 | 0 | 1 | 17936  | 0.76346152  | 1.401365529 | 3.149846355 | 0.444899646 | NA          | NA          |
| chr8:87540763-87544808    | exonic     | CPNE3                                                  | 8  | 87540763  | 87544808  | 0 | 5 | 1 | 0 | 3 | 0 | 4045   | 1.431730286 | 1.401702059 | 2.483824264 | 0.564332219 | 0.572528058 | 0.998252924 |
| chr1:58999621-59004978    | exonic     | OMAI                                                   | 1  | 58999621  | 59004978  | 3 | 0 | 3 | 3 | 0 | 0 | 5357   | 1.29770206  | 1.404296108 | 2.511132731 | 0.559228149 | 0.576006025 | 0.998252924 |
| chr17:49118861-49133843   | exonic     | SPAG9                                                  | 17 | 49118861  | 49133843  | 1 | 0 | 3 | 2 | 0 | 0 | 14982  | 0.93341679  | 1.404557292 | 2.865219799 | 0.490209265 | 0.623985825 | 0.998252924 |
| chr5:139819703-139825560  | exonic     | ANKHD1, ANKHD1-E1F4EBP3                                | 5  | 139819703 | 139825560 | 0 | 0 | 5 | 3 | 0 | 0 | 5857   | 1.305279283 | 1.404684709 | 2.781074719 | 0.505087008 | NA          | NA          |
| chrX:75367088-75368291    | intergenic | <small>MAGE2 (dist=362009), PHDC1 (dist=24473)</small> | X  | 75367088  | 75368291  | 0 | 0 | 5 | 3 | 0 | 0 | 1203   | 1.305279283 | 1.404684709 | 2.781074719 | 0.505087008 | NA          | NA          |



|                           |              |                                         |    |           |           |    |   |   |    |    |   |        |             |             |             |             |             |             |
|---------------------------|--------------|-----------------------------------------|----|-----------|-----------|----|---|---|----|----|---|--------|-------------|-------------|-------------|-------------|-------------|-------------|
| chr19:18285849-18286507   | exonic       | IFI30                                   | 19 | 18285849  | 18286507  | 5  | 0 | 8 | 6  | 1  | 0 | 658    | 2.981982651 | 1.410569002 | 1.774660283 | 0.794838886 | 0.426707228 | 0.998252924 |
| chr13:43500471-43544806   | exonic       | EPSTI1                                  | 13 | 43500471  | 43544806  | 3  | 2 | 0 | 1  | 1  | 0 | 44335  | 0.962851233 | 1.41345939  | 2.604551658 | 0.542688177 | 0.587344516 | 0.998252924 |
| chr17:62817884-62818511   | ncRNA_exonic | MIR4315-1, MIR4315-2, PLEKHM1P1         | 17 | 62817884  | 62818511  | 7  | 2 | 2 | 3  | 2  | 0 | 627    | 2.206987248 | 1.415281189 | 1.752919056 | 0.807385363 | 0.419444497 | 0.998252924 |
| chr3:129546645-129599402  | exonic       | TMCC1                                   | 3  | 129546645 | 129599402 | 1  | 1 | 4 | 0  | 3  | 0 | 52757  | 1.455421109 | 1.415621523 | 2.289740707 | 0.618245341 | NA          | NA          |
| chr4:39843567-39847500    | exonic       | PDS5A                                   | 4  | 39843567  | 39847500  | 0  | 0 | 4 | 0  | 2  | 0 | 3933   | 1.031130946 | 1.416215706 | 3.020867224 | 0.468810974 | NA          | NA          |
| chr7:90355880-90377090    | exonic       | CDK14                                   | 7  | 90355880  | 90377090  | 0  | 0 | 4 | 0  | 2  | 0 | 21210  | 1.031130946 | 1.416215706 | 3.020867224 | 0.468810974 | NA          | NA          |
| chr18:51797729-51804225   | exonic       | POLI                                    | 18 | 51797729  | 51804225  | 5  | 1 | 1 | 2  | 1  | 0 | 6496   | 1.350129731 | 1.426366057 | 2.169061464 | 0.657595961 | 0.510797791 | 0.998252924 |
| chr2:69575302-69590802    | exonic       | GFPT1                                   | 2  | 69575302  | 69590802  | 5  | 1 | 1 | 2  | 1  | 0 | 15500  | 1.350129731 | 1.426366057 | 2.169061464 | 0.657595961 | 0.510797791 | 0.998252924 |
| chr10:12123470-12136270   | exonic       | DHTKD1                                  | 10 | 12123470  | 12136270  | 6  | 1 | 2 | 0  | 2  | 1 | 12800  | 1.893008959 | 1.427208613 | 1.947565458 | 0.732816762 | 0.463670197 | 0.998252924 |
| chr12:82763166-82850599   | exonic       | METTL25                                 | 12 | 82763166  | 82850599  | 3  | 5 | 0 | 4  | 0  | 0 | 87433  | 1.683585364 | 1.429559387 | 2.295327631 | 0.622812782 | 0.533407558 | 0.998252924 |
| chr3:47651555-47680270    | exonic       | SMARCC1                                 | 3  | 47651555  | 47680270  | 3  | 5 | 0 | 4  | 0  | 0 | 28715  | 1.683585364 | 1.429559387 | 2.295327631 | 0.622812782 | 0.533407558 | 0.998252924 |
| chr11:93429485-93433352   | exonic       | CEP295                                  | 11 | 93429485  | 93433352  | 3  | 3 | 0 | 1  | 0  | 1 | 3867   | 1.32431822  | 1.431661539 | 2.361885986 | 0.606151841 | 0.544413929 | 0.998252924 |
| chr1:14042035-14068652    | exonic       | PRDM2                                   | 1  | 14042035  | 14068652  | 3  | 0 | 2 | 0  | 2  | 0 | 26617  | 1.023553723 | 1.431918736 | 2.740980244 | 0.522411185 | 0.60138407  | 0.998252924 |
| chr1:233334684-233372726  | exonic       | PCNXL2                                  | 1  | 233334684 | 233372726 | 3  | 0 | 2 | 0  | 2  | 0 | 38042  | 1.023553723 | 1.431918736 | 2.740980244 | 0.522411185 | 0.60138407  | 0.998252924 |
| chr12:111923074-111924628 | exonic       | ATXN2                                   | 12 | 111923074 | 111924628 | 3  | 0 | 2 | 0  | 2  | 0 | 1554   | 1.023553723 | 1.431918736 | 2.740980244 | 0.522411185 | 0.60138407  | 0.998252924 |
| chr2:73675089-73682422    | exonic       | ALMS1                                   | 2  | 73675089  | 73682422  | 3  | 0 | 2 | 0  | 2  | 0 | 7333   | 1.023553723 | 1.431918736 | 2.740980244 | 0.522411185 | 0.60138407  | 0.998252924 |
| chr9:125617462-125621381  | exonic       | RC3H2                                   | 9  | 125617462 | 125621381 | 5  | 0 | 5 | 4  | 1  | 0 | 3919   | 2.177552804 | 1.432227573 | 1.945284464 | 0.736256111 | 0.461574851 | 0.998252924 |
| chr13:41515056-41518061   | exonic       | ELF1                                    | 13 | 41515056  | 41518061  | 2  | 3 | 5 | 1  | 4  | 0 | 3005   | 2.357567483 | 1.432308543 | 1.75335731  | 0.816894842 | 0.413988526 | 0.998252924 |
| chr4:48686689-48712715    | UTR5         | FRYL(NM_015030:c.-75986..-76288delins0) | 4  | 48686689  | 48712715  | 10 | 0 | 4 | 0  | 6  | 0 | 26026  | 2.805110061 | 1.434602767 | 1.949230548 | 0.735984139 | 0.46174035  | 0.998252924 |
| chr15:42040834-42046765   | exonic       | MGA                                     | 15 | 42040834  | 42046765  | 2  | 3 | 0 | 0  | 2  | 0 | 5931   | 1.022856126 | 1.434604538 | 2.74172483  | 0.523248913 | 0.600801047 | 0.998252924 |
| chr16:17352844-17353355   | exonic       | XYLT1                                   | 16 | 17352844  | 17353355  | 2  | 3 | 0 | 0  | 2  | 0 | 511    | 1.022856126 | 1.434604538 | 2.74172483  | 0.523248913 | 0.600801047 | 0.998252924 |
| chr4:87607862-87614827    | exonic       | PTPN13                                  | 4  | 87607862  | 87614827  | 2  | 3 | 0 | 0  | 2  | 0 | 6965   | 1.022856126 | 1.434604538 | 2.74172483  | 0.523248913 | 0.600801047 | 0.998252924 |
| chr8:133740043-133769540  | exonic       | TMEM71                                  | 8  | 133740043 | 133769540 | 2  | 3 | 0 | 0  | 2  | 0 | 29497  | 1.022856126 | 1.434604538 | 2.74172483  | 0.523248913 | 0.600801047 | 0.998252924 |
| chrX:72797242-72804408    | exonic       | CHIC1                                   | X  | 72797242  | 72804408  | 5  | 0 | 7 | 3  | 3  | 0 | 7166   | 2.707834313 | 1.434676884 | 1.781524006 | 0.805308757 | 0.420641529 | 0.998252924 |
| chr14:56078736-56086030   | exonic       | KTN1                                    | 14 | 56078736  | 56086030  | 7  | 4 | 2 | 4  | 2  | 0 | 7294   | 2.661850231 | 1.43601407  | 1.620739617 | 0.886023921 | 0.375604637 | 0.998252924 |
| chr18:51797729-51800460   | exonic       | POLI                                    | 18 | 51797729  | 51800460  | 10 | 0 | 4 | 0  | 4  | 1 | 2731   | 2.871273826 | 1.436432098 | 1.810862632 | 0.793230846 | 0.427643339 | 0.998252924 |
| chr16:48290520-48311390   | exonic       | LONP2                                   | 16 | 48290520  | 48311390  | 2  | 0 | 4 | 2  | 1  | 0 | 20870  | 1.38070018  | 1.437413879 | 2.300702201 | 0.62477181  | 0.532120835 | 0.998252924 |
| chr12:113707561-113722576 | exonic       | TPCN1                                   | 12 | 113707561 | 113722576 | 3  | 1 | 2 | 0  | 1  | 1 | 15015  | 1.385020709 | 1.445329848 | 2.185572088 | 0.661305045 | 0.508416707 | 0.998252924 |
| chr10:74912050-74920309   | exonic       | ECD                                     | 10 | 74912050  | 74920309  | 0  | 2 | 2 | 2  | 0  | 0 | 8259   | 0.955712419 | 1.445512618 | 2.824655296 | 0.511748325 | 0.60882716  | 0.998252924 |
| chr14:89628045-89817152   | exonic       | FOXN3                                   | 14 | 89628045  | 89817152  | 0  | 2 | 2 | 2  | 0  | 0 | 189107 | 0.955712419 | 1.445512618 | 2.824655296 | 0.511748325 | 0.60882716  | 0.998252924 |
| chr2:61333697-61345251    | exonic       | KIAA1841                                | 2  | 61333697  | 61345251  | 0  | 2 | 2 | 2  | 0  | 0 | 11554  | 0.955712419 | 1.445512618 | 2.824655296 | 0.511748325 | 0.60882716  | 0.998252924 |
| chr1:115262199-115263338  | exonic       | CSDE1                                   | 1  | 115262199 | 115263338 | 3  | 1 | 1 | 1  | 1  | 0 | 1139   | 0.98584446  | 1.447777587 | 2.428847848 | 0.596075867 | 0.551124545 | 0.998252924 |
| chr10:15863654-15889942   | exonic       | FAM188A                                 | 10 | 15863654  | 15889942  | 24 | 5 | 7 | 32 | 25 | 2 | 26288  | 0.98584446  | 1.447777587 | 2.428847848 | 0.596075867 | 0.551124545 | 0.998252924 |
| chrX:149905066-149905920  | exonic       | MTMR1                                   | X  | 149905066 | 149905920 | 7  | 3 | 3 | 4  | 2  | 0 | 854    | 2.684843457 | 1.44812944  | 1.609127126 | 0.899947193 | 0.368148354 | 0.998252924 |
| chr10:93841076-93851701   | exonic       | CPEB3                                   | 10 | 93841076  | 93851701  | 2  | 0 | 1 | 1  | 0  | 0 | 10625  | 0.561554296 | 1.448660043 | 3.457471947 | 0.418994012 | 0.675220508 | 0.998252924 |

|                           |        |                                             |    |           |           |   |    |   |   |   |   |        |             |             |             |             |             |             |
|---------------------------|--------|---------------------------------------------|----|-----------|-----------|---|----|---|---|---|---|--------|-------------|-------------|-------------|-------------|-------------|-------------|
| chr12:113758135-113759153 | exonic | SLC8B1                                      | 12 | 113758135 | 113759153 | 2 | 0  | 1 | 1 | 0 | 0 | 1018   | 0.561554296 | 1.448660043 | 3.457471947 | 0.418994012 | 0.675220508 | 0.998252924 |
| chr12:2595269-2602552     | exonic | CACNA1C                                     | 12 | 2595269   | 2602552   | 2 | 0  | 1 | 1 | 0 | 0 | 7283   | 0.561554296 | 1.448660043 | 3.457471947 | 0.418994012 | 0.675220508 | 0.998252924 |
| chr14:35044961-35078948   | exonic | SNX6                                        | 14 | 35044961  | 35078948  | 2 | 0  | 1 | 1 | 0 | 0 | 33987  | 0.561554296 | 1.448660043 | 3.457471947 | 0.418994012 | 0.675220508 | 0.998252924 |
| chr14:75553720-75555344   | exonic | NEK9                                        | 14 | 75553720  | 75555344  | 2 | 0  | 1 | 1 | 0 | 0 | 1624   | 0.561554296 | 1.448660043 | 3.457471947 | 0.418994012 | 0.675220508 | 0.998252924 |
| chr2:128855002-128861588  | exonic | UGGT1                                       | 2  | 128855002 | 128861588 | 2 | 0  | 1 | 1 | 0 | 0 | 6586   | 0.561554296 | 1.448660043 | 3.457471947 | 0.418994012 | 0.675220508 | 0.998252924 |
| chr2:180347998-180409696  | exonic | ZNF385B                                     | 2  | 180347998 | 180409696 | 2 | 0  | 1 | 1 | 0 | 0 | 61698  | 0.561554296 | 1.448660043 | 3.457471947 | 0.418994012 | 0.675220508 | 0.998252924 |
| chr4:62598471-62599272    | exonic | ADGRL3                                      | 4  | 62598471  | 62599272  | 2 | 0  | 1 | 1 | 0 | 0 | 801    | 0.561554296 | 1.448660043 | 3.457471947 | 0.418994012 | 0.675220508 | 0.998252924 |
| chr6:142688705-142691930  | exonic | ADGRG6                                      | 6  | 142688705 | 142691930 | 2 | 0  | 1 | 1 | 0 | 0 | 3225   | 0.561554296 | 1.448660043 | 3.457471947 | 0.418994012 | 0.675220508 | 0.998252924 |
| chr6:86227473-86243518    | exonic | SNX14                                       | 6  | 86227473  | 86243518  | 2 | 0  | 1 | 1 | 0 | 0 | 16045  | 0.561554296 | 1.448660043 | 3.457471947 | 0.418994012 | 0.675220508 | 0.998252924 |
| chr7:94827660-94898019    | exonic | PPP1R9A                                     | 7  | 94827660  | 94898019  | 2 | 0  | 1 | 1 | 0 | 0 | 70359  | 0.561554296 | 1.448660043 | 3.457471947 | 0.418994012 | 0.675220508 | 0.998252924 |
| chr9:128099296-128109220  | exonic | GAPVD1                                      | 9  | 128099296 | 128109220 | 2 | 0  | 1 | 1 | 0 | 0 | 9924   | 0.561554296 | 1.448660043 | 3.457471947 | 0.418994012 | 0.675220508 | 0.998252924 |
| chr9:135917473-135919313  | exonic | GTF3C5                                      | 9  | 135917473 | 135919313 | 2 | 0  | 1 | 1 | 0 | 0 | 1840   | 0.561554296 | 1.448660043 | 3.457471947 | 0.418994012 | 0.675220508 | 0.998252924 |
| chrX:154736558-154754293  | exonic | TMLHE                                       | X  | 154736558 | 154754293 | 2 | 0  | 1 | 1 | 0 | 0 | 17735  | 0.561554296 | 1.448660043 | 3.457471947 | 0.418994012 | 0.675220508 | 0.998252924 |
| chrX:70764416-70767873    | exonic | OGT                                         | X  | 70764416  | 70767873  | 2 | 0  | 1 | 1 | 0 | 0 | 3457   | 0.561554296 | 1.448660043 | 3.457471947 | 0.418994012 | 0.675220508 | 0.998252924 |
| chr10:27047991-27059274   | exonic | ABII                                        | 10 | 27047991  | 27059274  | 5 | 2  | 0 | 3 | 0 | 0 | 11283  | 1.312420468 | 1.451445496 | 2.49936936  | 0.58072469  | 0.561426019 | 0.998252924 |
| chr4:121631463-121732604  | exonic | PRDM5                                       | 4  | 121631463 | 121732604 | 0 | 1  | 0 | 3 | 0 | 0 | 101141 | 1.312420468 | 1.451445496 | 2.49936936  | 0.58072469  | 0.561426019 | 0.998252924 |
| chrX:107838738-107840798  | exonic | COL4A5                                      | X  | 107838738 | 107840798 | 5 | 2  | 0 | 3 | 0 | 0 | 2060   | 1.312420468 | 1.451445496 | 2.49936936  | 0.58072469  | 0.561426019 | 0.998252924 |
| chr20:19970649-19977486   | exonic | RIN2                                        | 20 | 19970649  | 19977486  | 0 | 6  | 0 | 2 | 1 | 0 | 6837   | 1.379304987 | 1.455250896 | 2.524586807 | 0.576431316 | NA          | NA          |
| chr3:184566858-184588593  | exonic | VPS8                                        | 3  | 184566858 | 184588593 | 0 | 6  | 0 | 2 | 1 | 0 | 21735  | 1.379304987 | 1.455250896 | 2.524586807 | 0.576431316 | NA          | NA          |
| chr16:11815432-11830089   | exonic | TXNDC11                                     | 16 | 11815432  | 11830089  | 1 | 2  | 0 | 0 | 1 | 0 | 14657  | 0.598565963 | 1.461612439 | 3.378710434 | 0.432594763 | 0.665309195 | 0.998252924 |
| chr17:65906992-65909303   | exonic | BPTF                                        | 17 | 65906992  | 65909303  | 1 | 2  | 0 | 0 | 1 | 0 | 2311   | 0.598565963 | 1.461612439 | 3.378710434 | 0.432594763 | 0.665309195 | 0.998252924 |
| chr21:40585406-40590586   | exonic | BRWD1                                       | 21 | 40585406  | 40590586  | 1 | 2  | 0 | 0 | 1 | 0 | 5180   | 0.598565963 | 1.461612439 | 3.378710434 | 0.432594763 | 0.665309195 | 0.998252924 |
| chr4:146744573-146824367  | exonic | ZNF827                                      | 4  | 146744573 | 146824367 | 1 | 2  | 0 | 0 | 1 | 0 | 79794  | 0.598565963 | 1.461612439 | 3.378710434 | 0.432594763 | 0.665309195 | 0.998252924 |
| chr5:147774276-147796767  | exonic | FBXO38                                      | 5  | 147774276 | 147796767 | 1 | 2  | 0 | 0 | 1 | 0 | 22491  | 0.598565963 | 1.461612439 | 3.378710434 | 0.432594763 | 0.665309195 | 0.998252924 |
| chr5:70797388-70808255    | exonic | BDP1                                        | 5  | 70797388  | 70808255  | 3 | 0  | 0 | 5 | 9 | 0 | 10867  | 0.598565963 | 1.461612439 | 3.378710434 | 0.432594763 | 0.665309195 | 0.998252924 |
| chr6:158317858-158331057  | exonic | SNX9                                        | 6  | 158317858 | 158331057 | 1 | 2  | 0 | 0 | 1 | 0 | 13199  | 0.598565963 | 1.461612439 | 3.378710434 | 0.432594763 | 0.665309195 | 0.998252924 |
| chr8:101276261-101300495  | exonic | RNF19A                                      | 8  | 101276261 | 101300495 | 1 | 2  | 0 | 0 | 1 | 0 | 24234  | 0.598565963 | 1.461612439 | 3.378710434 | 0.432594763 | 0.665309195 | 0.998252924 |
| chr19:20727425-20728782   | exonic | ZNF737                                      | 19 | 20727425  | 20728782  | 4 | 9  | 4 | 0 | 8 | 0 | 1357   | 3.841725439 | 1.463758505 | 1.598272597 | 0.915837829 | NA          | NA          |
| chr10:54040548-54050050   | exonic | PRKG1                                       | 10 | 54040548  | 54050050  | 1 | 2  | 0 | 0 | 0 | 1 | 9502   | 0.78575715  | 1.464541652 | 3.120921387 | 0.469265794 | NA          | NA          |
| chr4:39900008-39904080    | exonic | PDS5A                                       | 4  | 39900008  | 39904080  | 0 | 0  | 4 | 1 | 1 | 0 | 4072   | 1.016414909 | 1.46519148  | 2.817920605 | 0.519954848 | NA          | NA          |
| chr2:70406663-70409129    | exonic | C2orf42                                     | 2  | 70406663  | 70409129  | 5 | 6  | 2 | 1 | 3 | 1 | 2466   | 2.862739819 | 1.466780366 | 1.543962197 | 0.950010543 | 0.342106895 | 0.998252924 |
| chr14:65896934-65922436   | UTR5   | <small>UTR5 chr14:65896934-65922436</small> | 14 | 65896934  | 65922436  | 4 | 12 | 6 | 6 | 5 | 0 | 25502  | 5.033876933 | 1.467179408 | 1.293777019 | 1.134028033 | 0.256782789 | 0.998252924 |
| chr1:33745724-33746058    | exonic | ZNF362                                      | 1  | 33745724  | 33746058  | 3 | 10 | 1 | 6 | 1 | 0 | 334    | 3.085883577 | 1.4697495   | 1.652530241 | 0.889393406 | NA          | NA          |
| chr1:33058531-33059355    | exonic | ZBTB8A                                      | 1  | 33058531  | 33059355  | 3 | 2  | 0 | 2 | 0 | 0 | 824    | 0.948135197 | 1.470447907 | 2.808017616 | 0.523660499 | 0.600514694 | 0.998252924 |
| chr1:41578954-41608784    | exonic | SCMH1                                       | 1  | 41578954  | 41608784  | 3 | 2  | 0 | 2 | 0 | 0 | 29830  | 0.948135197 | 1.470447907 | 2.808017616 | 0.523660499 | 0.600514694 | 0.998252924 |

|                           |            |                                       |    |           |           |    |    |    |    |   |   |        |             |             |             |             |             |             |
|---------------------------|------------|---------------------------------------|----|-----------|-----------|----|----|----|----|---|---|--------|-------------|-------------|-------------|-------------|-------------|-------------|
| chr5:137342678-137356886  | exonic     | FAM13B                                | 5  | 137342678 | 137356886 | 3  | 2  | 0  | 2  | 0 | 0 | 14208  | 0.948135197 | 1.470447907 | 2.808017616 | 0.523660499 | 0.600514694 | 0.998252924 |
| chr7:26232114-26237352    | exonic     | HNRNPA2B1                             | 7  | 26232114  | 26237352  | 1  | 3  | 0  | 0  | 0 | 0 | 5238   | 0.948135197 | 1.470447907 | 2.808017616 | 0.523660499 | 0.600514694 | 0.998252924 |
| chr7:26232114-26237486    | exonic     | HNRNPA2B1                             | 7  | 26232114  | 26237486  | 3  | 2  | 0  | 2  | 0 | 0 | 5372   | 0.948135197 | 1.470447907 | 2.808017616 | 0.523660499 | 0.600514694 | 0.998252924 |
| chr1:26780100-26789924    | exonic     | DHDDS                                 | 1  | 26780100  | 26789924  | 12 | 2  | 0  | 6  | 0 | 0 | 9824   | 2.534263222 | 1.470546456 | 2.028145771 | 0.725069409 | 0.46840945  | 0.998252924 |
| chr2:106761645-106782539  | exonic     | UXS1                                  | 2  | 106761645 | 106782539 | 8  | 8  | 8  | 10 | 2 | 0 | 20894  | 5.309422834 | 1.47137375  | 1.275677319 | 1.153405902 | NA          | NA          |
| chr1:243468014-243507633  | exonic     | SDCCAG8                               | 1  | 243468014 | 243507633 | 0  | 7  | 3  | 0  | 5 | 0 | 39619  | 2.416874779 | 1.471536366 | 2.064518441 | 0.712774629 | 0.475985228 | 0.998252924 |
| chr15:25650608-25660989   | exonic     | UBE3A                                 | 15 | 25650608  | 25660989  | 7  | 3  | 9  | 3  | 6 | 0 | 10381  | 4.246255913 | 1.478011292 | 1.378730231 | 1.072009055 | 0.283715965 | 0.998252924 |
| chr19:23541232-23557566   | exonic     | ZNF91                                 | 19 | 23541232  | 23557566  | 0  | 2  | 4  | 0  | 3 | 0 | 16334  | 1.500709966 | 1.478079341 | 2.420666347 | 0.610608456 | 0.541458823 | 0.998252924 |
| chr20:35693826-35696589   | exonic     | RBL1                                  | 20 | 35693826  | 35696589  | 2  | 3  | 3  | 0  | 0 | 2 | 2763   | 1.989045577 | 1.478832918 | 2.055836781 | 0.719333817 | 0.471935265 | 0.998252924 |
| chr12:129293332-129299615 | exonic     | SLC15A4                               | 12 | 129293332 | 129299615 | 8  | 0  | 0  | 2  | 1 | 0 | 6283   | 1.365545734 | 1.480529707 | 2.516696757 | 0.588282916 | NA          | NA          |
| chr18:46798547-46906128   | exonic     | DYM                                   | 18 | 46798547  | 46906128  | 0  | 1  | 3  | 2  | 0 | 0 | 107581 | 0.978705646 | 1.484126722 | 2.823858947 | 0.525566875 | 0.599189177 | 0.998252924 |
| chr9:125617462-125618157  | exonic     | RC3H2                                 | 9  | 125617462 | 125618157 | 0  | 1  | 3  | 2  | 0 | 0 | 695    | 0.978705646 | 1.484126722 | 2.823858947 | 0.525566875 | 0.599189177 | 0.998252924 |
| chr11:34952950-34999729   | exonic     | PDHX                                  | 11 | 34952950  | 34999729  | 0  | 2  | 5  | 4  | 0 | 0 | 46779  | 1.760142266 | 1.485248042 | 2.29555406  | 0.647010701 | 0.517625018 | 0.998252924 |
| chr5:63621012-63626233    | exonic     | RNF180                                | 5  | 63621012  | 63626233  | 7  | 2  | 2  | 5  | 0 | 0 | 5221   | 2.177555174 | 1.487837252 | 1.923019824 | 0.773698343 | NA          | NA          |
| chrX:53588716-53589890    | exonic     | HUWE1                                 | X  | 53588716  | 53589890  | 7  | 2  | 2  | 5  | 0 | 0 | 1174   | 2.177555174 | 1.487837252 | 1.923019824 | 0.773698343 | NA          | NA          |
| chr11:107916996-107925682 | exonic     | CUL5                                  | 11 | 107916996 | 107925682 | 4  | 2  | 3  | 1  | 3 | 0 | 8686   | 1.925700096 | 1.48921402  | 1.865484774 | 0.798298673 | 0.424697188 | 0.998252924 |
| chr20:33804551-33805864   | intergenic | PROCR (dist=39386), MMP24 (dist=8675) | 20 | 33804551  | 33805864  | 2  | 0  | 4  | 3  | 0 | 0 | 1313   | 1.365984143 | 1.489927548 | 2.4837144   | 0.599878773 | 0.54858703  | 0.998252924 |
| chr1:29362337-29365938    | exonic     | EPB41                                 | 1  | 29362337  | 29365938  | 6  | 5  | 2  | 5  | 1 | 0 | 3601   | 2.692423051 | 1.490105397 | 1.647154413 | 0.904654345 | NA          | NA          |
| chr11:36248634-36248980   | exonic     | LDLRAD3                               | 11 | 36248634  | 36248980  | 14 | 5  | 5  | 9  | 0 | 1 | 346    | 4.928562397 | 1.493442474 | 1.368107549 | 1.091611894 | NA          | NA          |
| chrX:10031484-10047844    | exonic     | WWC3                                  | X  | 10031484  | 10047844  | 0  | 4  | 2  | 2  | 1 | 0 | 16360  | 1.425291439 | 1.493775705 | 2.282520869 | 0.654441204 | 0.512827596 | 0.998252924 |
| chr5:16685079-16685429    | intronic   | MYO10                                 | 5  | 16685079  | 16685429  | 0  | 7  | 5  | 0  | 6 | 0 | 350    | 2.932440252 | 1.495674364 | 1.940190653 | 0.770890408 | NA          | NA          |
| chr1:59787207-59812070    | exonic     | FGGY                                  | 1  | 59787207  | 59812070  | 13 | 11 | 0  | 10 | 1 | 0 | 24863  | 4.778005319 | 1.496844487 | 1.551654034 | 0.964676696 | NA          | NA          |
| chr1:236969443-236979843  | exonic     | MTR                                   | 1  | 236969443 | 236979843 | 3  | 7  | 2  | 6  | 0 | 0 | 10400  | 2.639297784 | 1.496956883 | 1.808141101 | 0.827898266 | NA          | NA          |
| chr2:239090705-239093928  | exonic     | ILKAP                                 | 2  | 239090705 | 239093928 | 10 | 12 | 11 | 10 | 6 | 0 | 3223   | 7.34041668  | 1.497596353 | 1.107737113 | 1.351942022 | 0.176393863 | 0.998252924 |
| chr1:21295966-21329301    | exonic     | EIF4G3                                | 1  | 21295966  | 21329301  | 5  | 2  | 2  | 3  | 1 | 0 | 33335  | 1.82798594  | 1.498777887 | 1.903251767 | 0.787482725 | 0.430999337 | 0.998252924 |
| chrX:10534927-10535643    | exonic     | MIDI1                                 | X  | 10534927  | 10535643  | 3  | 1  | 1  | 2  | 0 | 0 | 716    | 0.971128423 | 1.503857245 | 2.598974372 | 0.578634888 | 0.562835559 | 0.998252924 |
| chr1:78267015-78280916    | exonic     | FAM73A                                | 1  | 78267015  | 78280916  | 10 | 11 | 3  | 4  | 1 | 3 | 13901  | 5.269639083 | 1.504740735 | 1.251804093 | 1.202057689 | 0.229341178 | 0.998252924 |
| chr1:78268954-78280916    | exonic     | FAM73A                                | 1  | 78268954  | 78280916  | 10 | 11 | 3  | 4  | 1 | 3 | 11962  | 5.269639083 | 1.504740735 | 1.251804093 | 1.202057689 | 0.229341178 | 0.998252924 |
| chr16:1675973-1691188     | exonic     | CRAMP1                                | 16 | 1675973   | 1691188   | 4  | 3  | 0  | 3  | 0 | 0 | 15215  | 1.357709324 | 1.506644109 | 2.462513513 | 0.611831814 | NA          | NA          |
| chr15:52561949-52575089   | exonic     | MYO5C                                 | 15 | 52561949  | 52575089  | 1  | 2  | 0  | 1  | 0 | 0 | 13140  | 0.583849926 | 1.512781699 | 3.411071976 | 0.44349158  | 0.657410208 | 0.998252924 |
| chr22:41537051-41553412   | exonic     | EP300                                 | 22 | 41537051  | 41553412  | 1  | 2  | 0  | 1  | 0 | 0 | 16361  | 0.583849926 | 1.512781699 | 3.411071976 | 0.44349158  | 0.657410208 | 0.998252924 |
| chr22:22160138-22162135   | exonic     | MAPK1                                 | 22 | 22160138  | 22162135  | 4  | 5  | 4  | 3  | 3 | 0 | 1997   | 2.858419289 | 1.515467542 | 1.564405693 | 0.968717736 | 0.332686041 | 0.998252924 |
| chr1:243480056-243589860  | exonic     | SDCCAG8                               | 1  | 243480056 | 243589860 | 2  | 2  | 4  | 4  | 4 | 0 | 109804 | 1.031133316 | 1.518046422 | 2.380663639 | 0.637656827 | 0.523697095 | 0.998252924 |
| chr11:32611092-32617593   | exonic     | EIF3M                                 | 11 | 32611092  | 32617593  | 1  | 1  | 1  | 0  | 1 | 0 | 6501   | 0.621559189 | 1.519900862 | 3.09355701  | 0.491311735 | 0.623205981 | 0.998252924 |
| chr14:31398406-31425448   | exonic     | STRN3                                 | 14 | 31398406  | 31425448  | 1  | 1  | 1  | 0  | 1 | 0 | 27042  | 0.621559189 | 1.519900862 | 3.09355701  | 0.491311735 | 0.623205981 | 0.998252924 |

|                           |          |          |    |           |           |    |    |   |    |   |   |       |             |             |             |             |             |             |
|---------------------------|----------|----------|----|-----------|-----------|----|----|---|----|---|---|-------|-------------|-------------|-------------|-------------|-------------|-------------|
| chr3:56700287-56707753    | exonic   | FAM208A  | 3  | 56700287  | 56707753  | 4  | 0  | 5 | 0  | 4 | 0 | 7466  | 1.986402586 | 1.521674923 | 2.178240723 | 0.698579779 | 0.484814684 | 0.998252924 |
| chr9:134518625-134526336  | exonic   | RAPGEF1  | 9  | 134518625 | 134526336 | 0  | 5  | 1 | 3  | 0 | 0 | 7711  | 1.387582176 | 1.522492907 | 2.505844572 | 0.607576753 | 0.543468223 | 0.998252924 |
| chr4:83795763-83802075    | exonic   | SEC31A   | 4  | 83795763  | 83802075  | 0  | 5  | 3 | 2  | 2 | 0 | 6312  | 1.917863686 | 1.527352172 | 2.038735081 | 0.749166572 | 0.453756814 | 0.998252924 |
| chr15:63506188-63506585   | intronic | RAB8B    | 15 | 63506188  | 63506585  | 2  | 5  | 3 | 5  | 0 | 0 | 397   | 2.252716883 | 1.527504968 | 1.902927275 | 0.802713266 | NA          | NA          |
| chr2:36623756-36691798    | exonic   | CRIM1    | 2  | 36623756  | 36691798  | 8  | 2  | 0 | 3  | 1 | 0 | 68042 | 1.820408718 | 1.530199133 | 2.084676119 | 0.734022479 | 0.462935038 | 0.998252924 |
| chr14:31404368-31425448   | exonic   | STRN3    | 14 | 31404368  | 31425448  | 13 | 13 | 1 | 9  | 3 | 0 | 21080 | 5.459569401 | 1.530626999 | 1.339340019 | 1.142821821 | 0.253112577 | 0.998252924 |
| chr16:70598967-70601439   | exonic   | SF3B3    | 16 | 70598967  | 70601439  | 7  | 0  | 3 | 0  | 4 | 0 | 2472  | 1.978825363 | 1.530989833 | 2.178522767 | 0.702765129 | 0.482202132 | 0.998252924 |
| chr1:174241551-174247917  | exonic   | RABGAP1L | 1  | 174241551 | 174247917 | 0  | 0  | 4 | 2  | 0 | 0 | 6366  | 1.001698872 | 1.531852302 | 3.049339422 | 0.502355458 | NA          | NA          |
| chr20:30954187-30978970   | exonic   | ASXL1    | 20 | 30954187  | 30978970  | 0  | 0  | 4 | 2  | 0 | 0 | 24783 | 1.001698872 | 1.531852302 | 3.049339422 | 0.502355458 | NA          | NA          |
| chr1:113124613-113159517  | exonic   | ST7L     | 1  | 113124613 | 113159517 | 1  | 3  | 1 | 0  | 2 | 0 | 34904 | 1.091138209 | 1.537859879 | 2.512951997 | 0.61197344  | 0.54055533  | 0.998252924 |
| chr2:48555699-48589846    | exonic   | FOXN2    | 2  | 48555699  | 48589846  | 2  | 0  | 3 | 0  | 2 | 0 | 34147 | 1.091835806 | 1.538140021 | 2.687985123 | 0.572227877 | 0.567167604 | 0.998252924 |
| chr12:122812493-122812973 | exonic   | CLIP1    | 12 | 122812493 | 122812973 | 3  | 0  | 2 | 2  | 0 | 0 | 480   | 0.99412165  | 1.543063978 | 2.766755174 | 0.557716126 | 0.577038244 | 0.998252924 |
| chr17:3924422-3928412     | exonic   | ZZEF1    | 17 | 3924422   | 3928412   | 3  | 0  | 2 | 2  | 0 | 0 | 3990  | 0.99412165  | 1.543063978 | 2.766755174 | 0.557716126 | 0.577038244 | 0.998252924 |
| chr8:109249174-109249590  | intronic | EIF3E    | 8  | 109249174 | 109249590 | 3  | 0  | 2 | 2  | 0 | 0 | 416   | 0.99412165  | 1.543063978 | 2.766755174 | 0.557716126 | 0.577038244 | 0.998252924 |
| chr1:235359345-235377341  | exonic   | ARID4B   | 1  | 235359345 | 235377341 | 2  | 3  | 0 | 2  | 0 | 0 | 17996 | 0.993424053 | 1.54571972  | 2.767525372 | 0.558520524 | 0.576488994 | 0.998252924 |
| chr20:23370582-23383709   | exonic   | NAPB     | 20 | 23370582  | 23383709  | 2  | 3  | 0 | 2  | 0 | 0 | 13127 | 0.993424053 | 1.54571972  | 2.767525372 | 0.558520524 | 0.576488994 | 0.998252924 |
| chr5:156786012-156788606  | exonic   | CYFIP2   | 5  | 156786012 | 156788606 | 2  | 3  | 0 | 2  | 0 | 0 | 2594  | 0.993424053 | 1.54571972  | 2.767525372 | 0.558520524 | 0.576488994 | 0.998252924 |
| chr6:7602855-7606428      | exonic   | SNRNP48  | 6  | 7602855   | 7606428   | 2  | 2  | 3 | 0  | 3 | 0 | 3573  | 1.561414826 | 1.555496461 | 2.17603008  | 0.714832242 | NA          | NA          |
| chr7:894556-897594        | exonic   | SUN1     | 7  | 894556    | 897594    | 2  | 2  | 3 | 0  | 3 | 0 | 3038  | 1.561414826 | 1.555496461 | 2.17603008  | 0.714832242 | NA          | NA          |
| chr1:227192694-227204751  | exonic   | CDC42BPA | 1  | 227192694 | 227204751 | 9  | 0  | 5 | 4  | 2 | 0 | 12057 | 2.814527997 | 1.555780411 | 1.760990928 | 0.883468726 | NA          | NA          |
| chr3:170906490-170912424  | exonic   | TNIK     | 3  | 170906490 | 170912424 | 13 | 3  | 9 | 7  | 4 | 0 | 5934  | 5.203368266 | 1.557078626 | 1.278667317 | 1.217735532 | 0.22332449  | 0.998252924 |
| chr4:20493383-20525800    | exonic   | SLIT2    | 4  | 20493383  | 20525800  | 6  | 0  | 0 | 2  | 0 | 0 | 32417 | 0.986544427 | 1.564179002 | 3.045262019 | 0.513643487 | NA          | NA          |
| chr4:20493383-20530722    | exonic   | SLIT2    | 4  | 20493383  | 20530722  | 6  | 0  | 0 | 2  | 0 | 0 | 37339 | 0.986544427 | 1.564179002 | 3.045262019 | 0.513643487 | NA          | NA          |
| chrX:322140-323067        | exonic   | PPP2R3B  | X  | 322140    | 323067    | 0  | 5  | 5 | 3  | 2 | 0 | 927   | 2.418713122 | 1.567502939 | 1.875186616 | 0.835918369 | NA          | NA          |
| chr16:30495147-30500707   | exonic   | ITGAL    | 16 | 30495147  | 30500707  | 1  | 1  | 1 | 1  | 0 | 0 | 5560  | 0.606843153 | 1.568289921 | 3.12055967  | 0.502566875 | 0.615268823 | 0.998252924 |
| chr17:53108528-53158544   | exonic   | STXBP4   | 17 | 53108528  | 53158544  | 1  | 1  | 1 | 1  | 0 | 0 | 50016 | 0.606843153 | 1.568289921 | 3.12055967  | 0.502566875 | 0.615268823 | 0.998252924 |
| chr18:29493331-29497630   | exonic   | TRAPPC8  | 18 | 29493331  | 29497630  | 1  | 1  | 1 | 1  | 0 | 0 | 4299  | 0.606843153 | 1.568289921 | 3.12055967  | 0.502566875 | 0.615268823 | 0.998252924 |
| chr3:100013930-100016889  | exonic   | TBC1D23  | 3  | 100013930 | 100016889 | 1  | 1  | 1 | 1  | 0 | 0 | 2959  | 0.606843153 | 1.568289921 | 3.12055967  | 0.502566875 | 0.615268823 | 0.998252924 |
| chr7:56049902-56062681    | exonic   | GBAS     | 7  | 56049902  | 56062681  | 1  | 1  | 1 | 1  | 0 | 0 | 12779 | 0.606843153 | 1.568289921 | 3.12055967  | 0.502566875 | 0.615268823 | 0.998252924 |
| chr18:9208654-9221997     | exonic   | ANKRD12  | 18 | 9208654   | 9221997   | 13 | 5  | 8 | 12 | 0 | 0 | 13343 | 5.402098078 | 1.568690976 | 1.424724961 | 1.101048285 | NA          | NA          |
| chr7:30661008-30662078    | exonic   | GARS     | 7  | 30661008  | 30662078  | 6  | 5  | 1 | 3  | 2 | 0 | 1070  | 2.403558677 | 1.570090109 | 1.719639343 | 0.913034535 | 0.361224378 | 0.998252924 |
| chr6:24416624-24418806    | exonic   | MRS2     | 6  | 24416624  | 24418806  | 0  | 3  | 3 | 3  | 0 | 0 | 2182  | 1.433568629 | 1.571898119 | 2.44277943  | 0.643487537 | NA          | NA          |
| chr10:121275020-121286936 | exonic   | RGS10    | 10 | 121275020 | 121286936 | 1  | 0  | 2 | 0  | 1 | 0 | 11916 | 0.644552416 | 1.574247987 | 3.294560907 | 0.477832413 | 0.632769489 | 0.998252924 |
| chr11:3789810-3797251     | exonic   | NUP98    | 11 | 3789810   | 3797251   | 1  | 0  | 2 | 0  | 1 | 0 | 7441  | 0.644552416 | 1.574247987 | 3.294560907 | 0.477832413 | 0.632769489 | 0.998252924 |
| chr2:48734407-48738607    | exonic   | PPP1R21  | 2  | 48734407  | 48738607  | 1  | 0  | 2 | 0  | 1 | 0 | 4200  | 0.644552416 | 1.574247987 | 3.294560907 | 0.477832413 | 0.632769489 | 0.998252924 |

|                           |        |                                        |    |           |           |   |   |    |   |    |   |        |             |             |             |             |             |             |
|---------------------------|--------|----------------------------------------|----|-----------|-----------|---|---|----|---|----|---|--------|-------------|-------------|-------------|-------------|-------------|-------------|
| chr10:5836847-5842668     | exonic | GDI2                                   | 10 | 5836847   | 5842668   | 5 | 6 | 13 | 0 | 11 | 0 | 5821   | 5.58638848  | 1.574641327 | 1.454209692 | 1.082815866 | NA          | NA          |
| chr5:77805606-77806221    | exonic | LHFPL2                                 | 5  | 77805606  | 77806221  | 2 | 2 | 1  | 2 | 0  | 0 | 615    | 1.01641728  | 1.575298733 | 2.545096225 | 0.618954489 | 0.535946341 | 0.998252924 |
| chr1:174241551-174274265  | exonic | RABGAP1L                               | 1  | 174241551 | 174274265 | 6 | 3 | 1  | 2 | 2  | 0 | 32714  | 1.948695693 | 1.575968933 | 1.864505697 | 0.845247583 | 0.397972621 | 0.998252924 |
| chr2:233612324-233626146  | exonic | GIGYF2                                 | 2  | 233612324 | 233626146 | 2 | 5 | 2  | 2 | 2  | 0 | 13822  | 1.978568546 | 1.578063699 | 1.850910592 | 0.852587751 | 0.393887958 | 0.998252924 |
| chr1:21083658-21106404    | exonic | HP1BP3                                 | 1  | 21083658  | 21106404  | 0 | 3 | 0  | 0 | 1  | 0 | 22746  | 0.643854819 | 1.578129478 | 3.593881266 | 0.439115642 | NA          | NA          |
| chr1:220287655-220313631  | exonic | IARS2                                  | 1  | 220287655 | 220313631 | 0 | 3 | 0  | 0 | 1  | 0 | 25976  | 0.643854819 | 1.578129478 | 3.593881266 | 0.439115642 | NA          | NA          |
| chr1:220287655-220315290  | exonic | IARS2                                  | 1  | 220287655 | 220315290 | 0 | 3 | 0  | 0 | 1  | 0 | 27635  | 0.643854819 | 1.578129478 | 3.593881266 | 0.439115642 | NA          | NA          |
| chr1:223305816-223310605  | UTR5   | TLR5(NM_003268:c.-23799_-24232delins0) | 1  | 223305816 | 223310605 | 0 | 3 | 0  | 0 | 1  | 0 | 4789   | 0.643854819 | 1.578129478 | 3.593881266 | 0.439115642 | NA          | NA          |
| chr1:61848908-61872399    | exonic | NFIA                                   | 1  | 61848908  | 61872399  | 0 | 3 | 0  | 0 | 1  | 0 | 23491  | 0.643854819 | 1.578129478 | 3.593881266 | 0.439115642 | NA          | NA          |
| chr11:46829580-46842819   | exonic | CKAP5                                  | 11 | 46829580  | 46842819  | 0 | 3 | 0  | 0 | 1  | 0 | 13239  | 0.643854819 | 1.578129478 | 3.593881266 | 0.439115642 | NA          | NA          |
| chr12:133362924-133367879 | exonic | GOLGA3                                 | 12 | 133362924 | 133367879 | 0 | 3 | 0  | 0 | 1  | 0 | 4955   | 0.643854819 | 1.578129478 | 3.593881266 | 0.439115642 | NA          | NA          |
| chr14:50647289-50655418   | exonic | SOS2                                   | 14 | 50647289  | 50655418  | 0 | 3 | 0  | 0 | 1  | 0 | 8129   | 0.643854819 | 1.578129478 | 3.593881266 | 0.439115642 | NA          | NA          |
| chr14:93275644-93282766   | exonic | GOLGA5                                 | 14 | 93275644  | 93282766  | 0 | 3 | 0  | 2 | 1  | 0 | 7122   | 0.643854819 | 1.578129478 | 3.593881266 | 0.439115642 | NA          | NA          |
| chr15:22835915-22846952   | exonic | TUBGCP5                                | 15 | 22835915  | 22846952  | 0 | 3 | 0  | 0 | 1  | 0 | 11037  | 0.643854819 | 1.578129478 | 3.593881266 | 0.439115642 | NA          | NA          |
| chr15:55516086-55522684   | exonic | RAB27A                                 | 15 | 55516086  | 55522684  | 0 | 3 | 0  | 0 | 1  | 0 | 6598   | 0.643854819 | 1.578129478 | 3.593881266 | 0.439115642 | NA          | NA          |
| chr17:79534442-79539114   | exonic | NPLOC4                                 | 17 | 79534442  | 79539114  | 0 | 3 | 0  | 0 | 1  | 0 | 4672   | 0.643854819 | 1.578129478 | 3.593881266 | 0.439115642 | NA          | NA          |
| chr19:38609945-38610522   | exonic | SIPA1L3                                | 19 | 38609945  | 38610522  | 0 | 3 | 0  | 0 | 1  | 0 | 577    | 0.643854819 | 1.578129478 | 3.593881266 | 0.439115642 | NA          | NA          |
| chr3:138244331-138251412  | exonic | CEP70                                  | 3  | 138244331 | 138251412 | 0 | 3 | 0  | 0 | 1  | 0 | 7081   | 0.643854819 | 1.578129478 | 3.593881266 | 0.439115642 | NA          | NA          |
| chr4:119649715-119666215  | exonic | SEC24D                                 | 4  | 119649715 | 119666215 | 0 | 3 | 0  | 0 | 1  | 0 | 16500  | 0.643854819 | 1.578129478 | 3.593881266 | 0.439115642 | NA          | NA          |
| chr4:55146482-55156721    | exonic | PDGFRA                                 | 4  | 55146482  | 55156721  | 0 | 3 | 0  | 0 | 1  | 0 | 10239  | 0.643854819 | 1.578129478 | 3.593881266 | 0.439115642 | NA          | NA          |
| chr6:145069381-145079125  | exonic | UTRN                                   | 6  | 145069381 | 145079125 | 0 | 3 | 0  | 0 | 1  | 0 | 9744   | 0.643854819 | 1.578129478 | 3.593881266 | 0.439115642 | NA          | NA          |
| chr6:47471015-47522502    | exonic | CD2AP                                  | 6  | 47471015  | 47522502  | 0 | 3 | 0  | 0 | 1  | 0 | 51487  | 0.643854819 | 1.578129478 | 3.593881266 | 0.439115642 | NA          | NA          |
| chrX:123155216-123164975  | exonic | STAG2                                  | X  | 123155216 | 123164975 | 0 | 3 | 0  | 0 | 1  | 0 | 9759   | 0.643854819 | 1.578129478 | 3.593881266 | 0.439115642 | NA          | NA          |
| chr1:220287655-220312481  | exonic | IARS2                                  | 1  | 220287655 | 220312481 | 0 | 3 | 0  | 0 | 0  | 1 | 24826  | 0.831046006 | 1.578499278 | 3.324197208 | 0.474851273 | NA          | NA          |
| chr17:29527439-29541603   | exonic | NF1                                    | 17 | 29527439  | 29541603  | 0 | 3 | 0  | 0 | 0  | 1 | 14164  | 0.831046006 | 1.578499278 | 3.324197208 | 0.474851273 | NA          | NA          |
| chr2:242572331-242573494  | exonic | THAP4                                  | 2  | 242572331 | 242573494 | 0 | 3 | 0  | 0 | 0  | 1 | 1163   | 0.831046006 | 1.578499278 | 3.324197208 | 0.474851273 | NA          | NA          |
| chr7:101559394-101758553  | exonic | CUX1                                   | 7  | 101559394 | 101758553 | 0 | 3 | 0  | 0 | 0  | 1 | 199159 | 0.831046006 | 1.578499278 | 3.324197208 | 0.474851273 | NA          | NA          |
| chr7:23292925-23313233    | exonic | GNPMB                                  | 7  | 23292925  | 23313233  | 0 | 3 | 0  | 0 | 0  | 1 | 20308  | 0.831046006 | 1.578499278 | 3.324197208 | 0.474851273 | NA          | NA          |
| chr7:23381682-23391205    | exonic | IGF2BP3                                | 7  | 23381682  | 23391205  | 0 | 3 | 0  | 0 | 0  | 1 | 9523   | 0.831046006 | 1.578499278 | 3.324197208 | 0.474851273 | NA          | NA          |
| chr4:15626874-15646331    | exonic | FBXL5                                  | 4  | 15626874  | 15646331  | 4 | 2 | 3  | 0 | 0  | 2 | 19457  | 2.072743663 | 1.585440106 | 2.020277687 | 0.784763459 | 0.432592268 | 0.998252924 |
| chr1:94032835-94033408    | exonic | BCAR3                                  | 1  | 94032835  | 94033408  | 4 | 3 | 2  | 4 | 0  | 0 | 573    | 1.85855876  | 1.586471199 | 2.02376365  | 0.783921185 | NA          | NA          |
| chr2:61709514-61717911    | exonic | XPO1                                   | 2  | 61709514  | 61717911  | 2 | 0 | 3  | 1 | 1  | 0 | 8397   | 1.077119769 | 1.587729045 | 2.52269776  | 0.629377435 | 0.529101987 | 0.998252924 |
| chr1:21377358-21437876    | UTR5   | -----                                  | 1  | 21377358  | 21437876  | 5 | 0 | 6  | 4 | 1  | 0 | 60518  | 2.374821829 | 1.589695293 | 1.899177224 | 0.837044206 | 0.40256772  | 0.998252924 |
| chr1:35846859-35855699    | exonic | ZMYM4                                  | 1  | 35846859  | 35855699  | 2 | 7 | 2  | 1 | 1  | 0 | 8840   | 2.546561689 | 1.590587851 | 1.696613337 | 0.937507573 | NA          | NA          |
| chr9:99271954-99327765    | exonic | CDC14B                                 | 9  | 99271954  | 99327765  | 0 | 6 | 0  | 1 | 0  | 1 | 55811  | 1.460184788 | 1.591081652 | 2.52753227  | 0.629500035 | NA          | NA          |

|                           |        |          |    |           |           |    |   |   |   |   |   |        |             |             |             |             |             |             |
|---------------------------|--------|----------|----|-----------|-----------|----|---|---|---|---|---|--------|-------------|-------------|-------------|-------------|-------------|-------------|
| chr18:42281139-42449248   | exonic | SETBP1   | 18 | 42281139  | 42449248  | 0  | 9 | 1 | 5 | 0 | 0 | 168109 | 2.297308143 | 1.591663456 | 2.148618994 | 0.740784411 | NA          | NA          |
| chr3:130881251-130889731  | exonic | NEK11    | 3  | 130881251 | 130889731 | 4  | 2 | 0 | 0 | 2 | 0 | 8480   | 1.106554213 | 1.593482168 | 2.66154041  | 0.598706735 | 0.549368466 | 0.998252924 |
| chr1:52975267-52992045    | exonic | ZCCHC11  | 1  | 52975267  | 52992045  | 6  | 5 | 3 | 2 | 2 | 1 | 16778  | 3.000003951 | 1.594268167 | 1.486356928 | 1.072601161 | 0.283450104 | 0.998252924 |
| chr15:85656607-85669605   | exonic | PDE8A    | 15 | 85656607  | 85669605  | 3  | 9 | 3 | 5 | 0 | 1 | 12998  | 3.387025631 | 1.594401147 | 1.568992292 | 1.016194379 | NA          | NA          |
| chr9:86294689-86301070    | exonic | UBQLN1   | 9  | 86294689  | 86301070  | 7  | 2 | 3 | 4 | 1 | 0 | 6381   | 2.389540237 | 1.596100548 | 1.727542244 | 0.923914048 | 0.355531068 | 0.998252924 |
| chrX:24190831-24197887    | exonic | ZFX      | X  | 24190831  | 24197887  | 8  | 9 | 3 | 9 | 0 | 0 | 7056   | 4.148987277 | 1.601422409 | 1.543852386 | 1.03728985  | NA          | NA          |
| chr12:117383168-117402659 | exonic | FBXW8    | 12 | 117383168 | 117402659 | 4  | 0 | 0 | 0 | 1 | 0 | 19491  | 0.636975193 | 1.601617532 | 3.594273346 | 0.445602596 | NA          | NA          |
| chr13:111870025-111896641 | exonic | ARHGEF7  | 13 | 111870025 | 111896641 | 4  | 0 | 0 | 0 | 1 | 0 | 26616  | 0.636975193 | 1.601617532 | 3.594273346 | 0.445602596 | NA          | NA          |
| chr13:25058790-25075972   | exonic | PARP4    | 13 | 25058790  | 25075972  | 4  | 0 | 0 | 0 | 1 | 0 | 17182  | 0.636975193 | 1.601617532 | 3.594273346 | 0.445602596 | NA          | NA          |
| chr13:50025688-50035298   | exonic | SETDB2   | 13 | 50025688  | 50035298  | 4  | 0 | 0 | 0 | 1 | 0 | 9610   | 0.636975193 | 1.601617532 | 3.594273346 | 0.445602596 | NA          | NA          |
| chr14:70170111-70171459   | exonic | SUSD6    | 14 | 70170111  | 70171459  | 4  | 0 | 0 | 0 | 1 | 0 | 1348   | 0.636975193 | 1.601617532 | 3.594273346 | 0.445602596 | NA          | NA          |
| chr15:77020935-77025725   | exonic | SCAPER   | 15 | 77020935  | 77025725  | 4  | 0 | 0 | 0 | 1 | 0 | 4790   | 0.636975193 | 1.601617532 | 3.594273346 | 0.445602596 | NA          | NA          |
| chr16:68155889-68208417   | exonic | NFATC3   | 16 | 68155889  | 68208417  | 4  | 0 | 0 | 0 | 1 | 0 | 52528  | 0.636975193 | 1.601617532 | 3.594273346 | 0.445602596 | NA          | NA          |
| chr19:19636990-19638579   | exonic | NDUFA13  | 19 | 19636990  | 19638579  | 4  | 0 | 0 | 0 | 1 | 0 | 1589   | 0.636975193 | 1.601617532 | 3.594273346 | 0.445602596 | NA          | NA          |
| chr2:10931920-10933328    | exonic | PDIA6    | 2  | 10931920  | 10933328  | 4  | 0 | 0 | 0 | 1 | 0 | 1408   | 0.636975193 | 1.601617532 | 3.594273346 | 0.445602596 | NA          | NA          |
| chr5:179994242-179994818  | exonic | CNOT6    | 5  | 179994242 | 179994818 | 4  | 0 | 0 | 0 | 1 | 0 | 576    | 0.636975193 | 1.601617532 | 3.594273346 | 0.445602596 | NA          | NA          |
| chr1:16528276-16529069    | exonic | ARHGEF19 | 1  | 16528276  | 16529069  | 21 | 5 | 3 | 4 | 7 | 0 | 793    | 5.444349364 | 1.607355132 | 1.292279275 | 1.243814061 | 0.213568004 | 0.998252924 |
| chr19:45783631-45783992   | exonic | MARK4    | 19 | 45783631  | 45783992  | 2  | 1 | 2 | 2 | 0 | 0 | 361    | 1.039410506 | 1.608505856 | 2.528923917 | 0.636043593 | 0.524748009 | 0.998252924 |
| chr1:40733457-40737707    | exonic | ZMPSTE24 | 1  | 40733457  | 40737707  | 4  | 0 | 0 | 0 | 0 | 1 | 4250   | 0.82416638  | 1.60975724  | 3.319543938 | 0.484933253 | NA          | NA          |
| chr2:196821984-196852953  | exonic | DNAH7    | 2  | 196821984 | 196852953 | 4  | 0 | 0 | 0 | 0 | 1 | 30969  | 0.82416638  | 1.60975724  | 3.319543938 | 0.484933253 | NA          | NA          |
| chr4:40108519-40119644    | exonic | N4BP2    | 4  | 40108519  | 40119644  | 4  | 0 | 0 | 0 | 0 | 1 | 11125  | 0.82416638  | 1.60975724  | 3.319543938 | 0.484933253 | NA          | NA          |
| chr15:43627893-43641243   | exonic | ADAL     | 15 | 43627893  | 43641243  | 1  | 4 | 0 | 2 | 0 | 0 | 13350  | 1.038712909 | 1.618269423 | 2.758562986 | 0.586634937 | NA          | NA          |
| chr1:67411832-67425426    | exonic | MIER1    | 1  | 67411832  | 67425426  | 2  | 2 | 3 | 2 | 1 | 0 | 13594  | 1.531982752 | 1.619977733 | 2.045952016 | 0.791796543 | 0.428479318 | 0.998252924 |
| chr12:46622935-46648719   | exonic | SLC38A1  | 12 | 46622935  | 46648719  | 3  | 1 | 3 | 3 | 0 | 0 | 25784  | 1.471977859 | 1.62339413  | 2.23043409  | 0.72783775  | 0.466712913 | 0.998252924 |
| chr15:66044716-66053776   | exonic | DENND4A  | 15 | 66044716  | 66053776  | 5  | 0 | 3 | 0 | 3 | 0 | 9060   | 1.599824056 | 1.624723411 | 2.341721044 | 0.69381595  | NA          | NA          |
| chr1:243456392-243507633  | exonic | SDCCAG8  | 1  | 243456392 | 243507633 | 1  | 0 | 2 | 1 | 0 | 0 | 51241  | 0.629836379 | 1.625022561 | 3.323683515 | 0.488922172 | 0.624896798 | 0.998252924 |
| chr1:35854510-35855699    | exonic | ZMYM4    | 1  | 35854510  | 35855699  | 1  | 0 | 2 | 1 | 0 | 0 | 1189   | 0.629836379 | 1.625022561 | 3.323683515 | 0.488922172 | 0.624896798 | 0.998252924 |
| chr10:69714351-69726559   | exonic | HERC4    | 10 | 69714351  | 69726559  | 1  | 0 | 2 | 1 | 0 | 0 | 12208  | 0.629836379 | 1.625022561 | 3.323683515 | 0.488922172 | 0.624896798 | 0.998252924 |
| chr3:152173366-152173851  | exonic | MBNL1    | 3  | 152173366 | 152173851 | 1  | 0 | 2 | 1 | 0 | 0 | 485    | 0.629836379 | 1.625022561 | 3.323683515 | 0.488922172 | 0.624896798 | 0.998252924 |
| chr8:43013717-43028886    | exonic | HGSNAT   | 8  | 43013717  | 43028886  | 1  | 0 | 2 | 1 | 0 | 0 | 15169  | 0.629836379 | 1.625022561 | 3.323683515 | 0.488922172 | 0.624896798 | 0.998252924 |
| chr9:140646782-140657272  | exonic | EHMT1    | 9  | 140646782 | 140657272 | 1  | 0 | 2 | 1 | 0 | 0 | 10490  | 0.629836379 | 1.625022561 | 3.323683515 | 0.488922172 | 0.624896798 | 0.998252924 |
| chrX:19947902-19954016    | exonic | CXorf23  | X  | 19947902  | 19954016  | 1  | 0 | 2 | 1 | 0 | 0 | 6114   | 0.629836379 | 1.625022561 | 3.323683515 | 0.488922172 | 0.624896798 | 0.998252924 |
| chr21:38459546-38480746   | exonic | TTC3     | 21 | 38459546  | 38480746  | 4  | 1 | 1 | 0 | 2 | 0 | 21200  | 1.129547439 | 1.625875521 | 2.472928947 | 0.657469566 | 0.510879034 | 0.998252924 |
| chr9:6980924-6990524      | exonic | KDM4C    | 9  | 6980924   | 6990524   | 4  | 1 | 1 | 0 | 2 | 0 | 9600   | 1.129547439 | 1.625875521 | 2.472928947 | 0.657469566 | 0.510879034 | 0.998252924 |
| chr11:9735012-9754257     | exonic | SWAP70   | 11 | 9735012   | 9754257   | 2  | 4 | 1 | 3 | 0 | 0 | 19245  | 1.471280263 | 1.626032079 | 2.239300146 | 0.726134048 | NA          | NA          |

|                           |        |          |    |           |           |    |   |   |   |   |   |       |             |             |             |             |             |             |
|---------------------------|--------|----------|----|-----------|-----------|----|---|---|---|---|---|-------|-------------|-------------|-------------|-------------|-------------|-------------|
| chr19:34921480-34955036   | exonic | UBA2     | 19 | 34921480  | 34955036  | 2  | 4 | 1 | 3 | 0 | 0 | 33556 | 1.471280263 | 1.626032079 | 2.239300146 | 0.726134048 | NA          | NA          |
| chr19:34924252-34957919   | exonic | UBA2     | 19 | 34924252  | 34957919  | 2  | 4 | 1 | 3 | 0 | 0 | 33667 | 1.471280263 | 1.626032079 | 2.239300146 | 0.726134048 | NA          | NA          |
| chr2:197777606-197786910  | exonic | PGAP1    | 2  | 197777606 | 197786910 | 3  | 7 | 0 | 0 | 4 | 0 | 9304  | 2.091001109 | 1.62633325  | 2.150581371 | 0.756229233 | 0.449511769 | 0.998252924 |
| chr11:93480462-93490631   | exonic | C11orf54 | 11 | 93480462  | 93490631  | 0  | 2 | 1 | 0 | 0 | 1 | 10169 | 0.854039232 | 1.630617968 | 3.040504795 | 0.536298437 | NA          | NA          |
| chr16:21030945-21053525   | exonic | DNAH3    | 16 | 21030945  | 21053525  | 0  | 2 | 1 | 0 | 0 | 1 | 22580 | 0.854039232 | 1.630617968 | 3.040504795 | 0.536298437 | NA          | NA          |
| chr5:32268806-32276848    | exonic | MTMR12   | 5  | 32268806  | 32276848  | 0  | 2 | 1 | 0 | 0 | 1 | 8042  | 0.854039232 | 1.630617968 | 3.040504795 | 0.536298437 | NA          | NA          |
| chr10:4872866-4889491     | exonic | AKR1E2   | 10 | 4872866   | 4889491   | 0  | 3 | 0 | 1 | 0 | 0 | 16625 | 0.629138782 | 1.631474987 | 3.626753329 | 0.449844486 | NA          | NA          |
| chr10:93751875-93768032   | exonic | BTAF1    | 10 | 93751875  | 93768032  | 2  | 4 | 0 | 1 | 7 | 0 | 16157 | 0.629138782 | 1.631474987 | 3.626753329 | 0.449844486 | NA          | NA          |
| chr11:18524032-18541150   | exonic | TSG101   | 11 | 18524032  | 18541150  | 0  | 3 | 0 | 1 | 0 | 0 | 17118 | 0.629138782 | 1.631474987 | 3.626753329 | 0.449844486 | NA          | NA          |
| chr12:124911167-124979914 | exonic | NCOR2    | 12 | 124911167 | 124979914 | 0  | 4 | 0 | 1 | 0 | 0 | 68747 | 0.629138782 | 1.631474987 | 3.626753329 | 0.449844486 | NA          | NA          |
| chr12:32772631-32786623   | exonic | FGD4     | 12 | 32772631  | 32786623  | 0  | 3 | 0 | 1 | 0 | 0 | 13992 | 0.629138782 | 1.631474987 | 3.626753329 | 0.449844486 | NA          | NA          |
| chr14:55168779-55218255   | exonic | SAMD4A   | 14 | 55168779  | 55218255  | 0  | 3 | 0 | 1 | 0 | 0 | 49476 | 0.629138782 | 1.631474987 | 3.626753329 | 0.449844486 | NA          | NA          |
| chr16:49764681-49823457   | exonic | ZNF423   | 16 | 49764681  | 49823457  | 0  | 3 | 0 | 1 | 0 | 0 | 58776 | 0.629138782 | 1.631474987 | 3.626753329 | 0.449844486 | NA          | NA          |
| chr17:43159011-43164020   | exonic | NMT1     | 17 | 43159011  | 43164020  | 0  | 3 | 0 | 1 | 0 | 0 | 5009  | 0.629138782 | 1.631474987 | 3.626753329 | 0.449844486 | NA          | NA          |
| chr19:12825634-12826553   | exonic | TNPO2    | 19 | 12825634  | 12826553  | 0  | 3 | 0 | 1 | 0 | 0 | 919   | 0.629138782 | 1.631474987 | 3.626753329 | 0.449844486 | NA          | NA          |
| chr2:191792031-191818352  | exonic | GLS      | 2  | 191792031 | 191818352 | 0  | 3 | 0 | 1 | 0 | 0 | 26321 | 0.629138782 | 1.631474987 | 3.626753329 | 0.449844486 | NA          | NA          |
| chr2:191792031-191819386  | exonic | GLS      | 2  | 191792031 | 191819386 | 0  | 3 | 0 | 1 | 0 | 0 | 27355 | 0.629138782 | 1.631474987 | 3.626753329 | 0.449844486 | NA          | NA          |
| chr2:43797526-43802166    | exonic | THADA    | 2  | 43797526  | 43802166  | 0  | 3 | 0 | 1 | 0 | 0 | 4640  | 0.629138782 | 1.631474987 | 3.626753329 | 0.449844486 | NA          | NA          |
| chr22:31998197-31998771   | exonic | SF11     | 22 | 31998197  | 31998771  | 0  | 3 | 0 | 1 | 0 | 0 | 574   | 0.629138782 | 1.631474987 | 3.626753329 | 0.449844486 | NA          | NA          |
| chr3:11849306-11871338    | exonic | TAMM41   | 3  | 11849306  | 11871338  | 0  | 3 | 0 | 1 | 0 | 0 | 22032 | 0.629138782 | 1.631474987 | 3.626753329 | 0.449844486 | NA          | NA          |
| chr5:170305100-170319557  | exonic | RANBP17  | 5  | 170305100 | 170319557 | 0  | 3 | 0 | 1 | 0 | 0 | 14457 | 0.629138782 | 1.631474987 | 3.626753329 | 0.449844486 | NA          | NA          |
| chr5:70797388-70806978    | exonic | BDP1     | 5  | 70797388  | 70806978  | 3  | 0 | 0 | 5 | 9 | 0 | 9590  | 0.629138782 | 1.631474987 | 3.626753329 | 0.449844486 | NA          | NA          |
| chr5:70811887-70849147    | exonic | BDP1     | 5  | 70811887  | 70849147  | 0  | 3 | 0 | 1 | 0 | 0 | 37260 | 0.629138782 | 1.631474987 | 3.626753329 | 0.449844486 | NA          | NA          |
| chr6:86252899-86275137    | exonic | SNX14    | 6  | 86252899  | 86275137  | 0  | 3 | 0 | 1 | 0 | 0 | 22238 | 0.629138782 | 1.631474987 | 3.626753329 | 0.449844486 | NA          | NA          |
| chr8:141710989-141712806  | exonic | PTK2     | 8  | 141710989 | 141712806 | 0  | 3 | 0 | 1 | 0 | 0 | 1817  | 0.629138782 | 1.631474987 | 3.626753329 | 0.449844486 | NA          | NA          |
| chr8:62546241-62596747    | exonic | ASPH     | 8  | 62546241  | 62596747  | 0  | 3 | 0 | 1 | 0 | 0 | 50506 | 0.629138782 | 1.631474987 | 3.626753329 | 0.449844486 | NA          | NA          |
| chrX:83723479-83730405    | exonic | HDX      | X  | 83723479  | 83730405  | 0  | 3 | 0 | 1 | 0 | 0 | 6926  | 0.629138782 | 1.631474987 | 3.626753329 | 0.449844486 | NA          | NA          |
| chr4:37633006-37636745    | exonic | RELL1    | 4  | 37633006  | 37636745  | 0  | 5 | 0 | 1 | 1 | 0 | 3739  | 1.098717802 | 1.631670968 | 2.743379877 | 0.59476669  | NA          | NA          |
| chr14:92469762-92477416   | exonic | TRIP11   | 14 | 92469762  | 92477416  | 0  | 2 | 1 | 0 | 1 | 0 | 7654  | 0.666848045 | 1.631827011 | 3.257312751 | 0.50097339  | 0.616389851 | 0.998252924 |
| chr4:3317796-3344780      | exonic | RGS12    | 4  | 3317796   | 3344780   | 0  | 7 | 0 | 1 | 2 | 0 | 26984 | 1.568296822 | 1.634724729 | 2.432122352 | 0.672139182 | NA          | NA          |
| chr1:93159358-93170301    | exonic | EVI5     | 1  | 93159358  | 93170301  | 4  | 4 | 0 | 1 | 2 | 0 | 10943 | 1.561417196 | 1.635429543 | 2.187634322 | 0.747579029 | 0.454714118 | 0.998252924 |
| chr1:33760537-33760906    | exonic | ZNF362   | 1  | 33760537  | 33760906  | 5  | 1 | 0 | 2 | 0 | 0 | 369   | 1.031833283 | 1.635949865 | 2.752574019 | 0.594334559 | 0.552288369 | 0.998252924 |
| chr15:57743697-57754090   | exonic | CGNL1    | 15 | 57743697  | 57754090  | 13 | 3 | 0 | 5 | 1 | 0 | 10393 | 2.852242001 | 1.637543151 | 1.805063742 | 0.907194085 | 0.364304171 | 0.998252924 |
| chr16:69189773-69201088   | exonic | UTP4     | 16 | 69189773  | 69201088  | 1  | 0 | 4 | 0 | 2 | 0 | 11315 | 1.160117888 | 1.638488434 | 2.668875366 | 0.613924672 | NA          | NA          |
| chr5:93978977-93990457    | exonic | SLF1     | 5  | 93978977  | 93990457  | 0  | 4 | 4 | 4 | 0 | 0 | 11480 | 1.911424839 | 1.638520509 | 2.218994992 | 0.738406583 | NA          | NA          |

|                          |                     |                                             |    |           |           |   |   |   |   |   |   |       |             |             |             |             |             |             |
|--------------------------|---------------------|---------------------------------------------|----|-----------|-----------|---|---|---|---|---|---|-------|-------------|-------------|-------------|-------------|-------------|-------------|
| chr19:3660963-3661999    | exonic              | PIP5K1C                                     | 19 | 3660963   | 3661999   | 3 | 8 | 3 | 3 | 3 | 0 | 1036  | 3.054990718 | 1.639626111 | 1.560395421 | 1.050776033 | 0.293361466 | 0.998252924 |
| chr20:43600718-43615937  | exonic              | STK4                                        | 20 | 43600718  | 43615937  | 0 | 3 | 2 | 0 | 2 | 0 | 15219 | 1.159420292 | 1.639953886 | 2.641067668 | 0.620943532 | 0.534636777 | 0.998252924 |
| chr7:91842508-91855996   | exonic              | KRIT1                                       | 7  | 91842508  | 91855996  | 4 | 2 | 2 | 0 | 3 | 0 | 13488 | 1.622119686 | 1.640642285 | 2.137457159 | 0.76756733  | NA          | NA          |
| chr1:10527246-10529395   | exonic              | DFFA                                        | 1  | 10527246  | 10529395  | 2 | 0 | 0 | 0 | 0 | 0 | 2149  | 0.257973886 | 1.644777126 | 4.060983436 | 0.405019413 | 0.685463242 | 0.998252924 |
| chr1:109154799-109172279 | exonic              | FAM102B                                     | 1  | 109154799 | 109172279 | 2 | 0 | 0 | 0 | 0 | 0 | 17480 | 0.257973886 | 1.644777126 | 4.060983436 | 0.405019413 | 0.685463242 | 0.998252924 |
| chr1:109486096-109493070 | exonic              | CLCC1                                       | 1  | 109486096 | 109493070 | 2 | 0 | 0 | 0 | 0 | 0 | 6974  | 0.257973886 | 1.644777126 | 4.060983436 | 0.405019413 | 0.685463242 | 0.998252924 |
| chr1:109869613-109888503 | exonic              | SORT1                                       | 1  | 109869613 | 109888503 | 2 | 0 | 0 | 0 | 0 | 0 | 18890 | 0.257973886 | 1.644777126 | 4.060983436 | 0.405019413 | 0.685463242 | 0.998252924 |
| chr1:113124614-113125094 | exonic              | ST7L                                        | 1  | 113124614 | 113125094 | 2 | 0 | 0 | 0 | 0 | 0 | 480   | 0.257973886 | 1.644777126 | 4.060983436 | 0.405019413 | 0.685463242 | 0.998252924 |
| chr1:115153693-115164686 | exonic              | DENND2C                                     | 1  | 115153693 | 115164686 | 2 | 0 | 0 | 0 | 0 | 0 | 10993 | 0.257973886 | 1.644777126 | 4.060983436 | 0.405019413 | 0.685463242 | 0.998252924 |
| chr1:1192371-1192690     | exonic              | UBE2J2                                      | 1  | 1192371   | 1192690   | 2 | 0 | 0 | 0 | 0 | 0 | 319   | 0.257973886 | 1.644777126 | 4.060983436 | 0.405019413 | 0.685463242 | 0.998252924 |
| chr1:12422775-12476880   | exonic              | VPS13D                                      | 1  | 12422775  | 12476880  | 2 | 0 | 0 | 0 | 0 | 0 | 54105 | 0.257973886 | 1.644777126 | 4.060983436 | 0.405019413 | 0.685463242 | 0.998252924 |
| chr1:1338417-1338718     | intronic            | MRPL20                                      | 1  | 1338417   | 1338718   | 2 | 0 | 0 | 0 | 0 | 0 | 301   | 0.257973886 | 1.644777126 | 4.060983436 | 0.405019413 | 0.685463242 | 0.998252924 |
| chr1:144892500-144922047 | exonic              | PDE4DIP                                     | 1  | 144892500 | 144922047 | 2 | 0 | 0 | 0 | 0 | 0 | 29547 | 0.257973886 | 1.644777126 | 4.060983436 | 0.405019413 | 0.685463242 | 0.998252924 |
| chr1:145640883-145650540 | exonic              | RNF115                                      | 1  | 145640883 | 145650540 | 2 | 0 | 0 | 0 | 0 | 0 | 9657  | 0.257973886 | 1.644777126 | 4.060983436 | 0.405019413 | 0.685463242 | 0.998252924 |
| chr1:151091361-151092136 | downstream          | GABPB2 (dist=354)                           | 1  | 151091361 | 151092136 | 2 | 0 | 0 | 0 | 0 | 0 | 775   | 0.257973886 | 1.644777126 | 4.060983436 | 0.405019413 | 0.685463242 | 0.998252924 |
| chr1:155328402-155329177 | intronic            | ASH1L                                       | 1  | 155328402 | 155329177 | 2 | 0 | 0 | 0 | 0 | 0 | 775   | 0.257973886 | 1.644777126 | 4.060983436 | 0.405019413 | 0.685463242 | 0.998252924 |
| chr1:155633453-155634655 | intronic            | YY1AP1                                      | 1  | 155633453 | 155634655 | 2 | 0 | 0 | 0 | 0 | 0 | 1202  | 0.257973886 | 1.644777126 | 4.060983436 | 0.405019413 | 0.685463242 | 0.998252924 |
| chr1:155837755-155838582 | exonic              | SYT11                                       | 1  | 155837755 | 155838582 | 2 | 0 | 0 | 0 | 0 | 0 | 827   | 0.257973886 | 1.644777126 | 4.060983436 | 0.405019413 | 0.685463242 | 0.998252924 |
| chr1:156303338-156304709 | exonic              | CCT3                                        | 1  | 156303338 | 156304709 | 2 | 0 | 0 | 0 | 0 | 0 | 1371  | 0.257973886 | 1.644777126 | 4.060983436 | 0.405019413 | 0.685463242 | 0.998252924 |
| chr1:1572443-1635434     | exonic              | CDK11A, CDK11B, SLC35E2B                    | 1  | 1572443   | 1635434   | 2 | 0 | 0 | 0 | 0 | 0 | 62991 | 0.257973886 | 1.644777126 | 4.060983436 | 0.405019413 | 0.685463242 | 0.998252924 |
| chr1:160287144-160302347 | exonic              | COPA                                        | 1  | 160287144 | 160302347 | 2 | 0 | 0 | 0 | 0 | 0 | 15203 | 0.257973886 | 1.644777126 | 4.060983436 | 0.405019413 | 0.685463242 | 0.998252924 |
| chr1:162574851-162576088 | intergenic          | UAP1 (dist=5218), DDR2 (dist=26140)         | 1  | 162574851 | 162576088 | 2 | 0 | 0 | 0 | 0 | 0 | 1237  | 0.257973886 | 1.644777126 | 4.060983436 | 0.405019413 | 0.685463242 | 0.998252924 |
| chr1:16664677-16666925   | intronic            | FBXO42                                      | 1  | 16664677  | 16666925  | 2 | 0 | 0 | 0 | 0 | 0 | 2248  | 0.257973886 | 1.644777126 | 4.060983436 | 0.405019413 | 0.685463242 | 0.998252924 |
| chr1:170927601-170931117 | exonic              | MROH9                                       | 1  | 170927601 | 170931117 | 2 | 0 | 0 | 0 | 0 | 0 | 3516  | 0.257973886 | 1.644777126 | 4.060983436 | 0.405019413 | 0.685463242 | 0.998252924 |
| chr1:173831778-173832321 | upstream;downstream | GASS-AS1 (dist=65), GASS, SNORD81 (dist=65) | 1  | 173831778 | 173832321 | 2 | 0 | 0 | 0 | 0 | 0 | 543   | 0.257973886 | 1.644777126 | 4.060983436 | 0.405019413 | 0.685463242 | 0.998252924 |
| chr1:176132004-176153828 | exonic              | RFWD2                                       | 1  | 176132004 | 176153828 | 2 | 0 | 0 | 0 | 0 | 0 | 21824 | 0.257973886 | 1.644777126 | 4.060983436 | 0.405019413 | 0.685463242 | 0.998252924 |
| chr1:183080453-183080934 | intronic            | LAMC1                                       | 1  | 183080453 | 183080934 | 2 | 0 | 0 | 0 | 0 | 0 | 481   | 0.257973886 | 1.644777126 | 4.060983436 | 0.405019413 | 0.685463242 | 0.998252924 |
| chr1:185149522-185173995 | exonic              | SWT1                                        | 1  | 185149522 | 185173995 | 2 | 0 | 0 | 0 | 0 | 0 | 24473 | 0.257973886 | 1.644777126 | 4.060983436 | 0.405019413 | 0.685463242 | 0.998252924 |
| chr1:186030982-186044023 | exonic              | HMCN1                                       | 1  | 186030982 | 186044023 | 2 | 0 | 0 | 0 | 0 | 0 | 13041 | 0.257973886 | 1.644777126 | 4.060983436 | 0.405019413 | 0.685463242 | 0.998252924 |
| chr1:186375215-186375400 | exonic              | Clorf27                                     | 1  | 186375215 | 186375400 | 2 | 0 | 0 | 0 | 0 | 0 | 185   | 0.257973886 | 1.644777126 | 4.060983436 | 0.405019413 | 0.685463242 | 0.998252924 |
| chr1:186862142-186902031 | exonic              | PLA2G4A                                     | 1  | 186862142 | 186902031 | 2 | 0 | 0 | 0 | 0 | 0 | 39889 | 0.257973886 | 1.644777126 | 4.060983436 | 0.405019413 | 0.685463242 | 0.998252924 |
| chr1:190195211-190250880 | exonic              | BRINP3                                      | 1  | 190195211 | 190250880 | 2 | 0 | 0 | 0 | 0 | 0 | 55669 | 0.257973886 | 1.644777126 | 4.060983436 | 0.405019413 | 0.685463242 | 0.998252924 |
| chr1:192997214-192998787 | exonic              | UCHL5                                       | 1  | 192997214 | 192998787 | 2 | 0 | 0 | 0 | 0 | 0 | 1573  | 0.257973886 | 1.644777126 | 4.060983436 | 0.405019413 | 0.685463242 | 0.998252924 |
| chr1:19483260-19486775   | exonic              | UBR4                                        | 1  | 19483260  | 19486775  | 2 | 0 | 0 | 0 | 0 | 0 | 3515  | 0.257973886 | 1.644777126 | 4.060983436 | 0.405019413 | 0.685463242 | 0.998252924 |
| chr1:20008653-20009937   | exonic              | TMCO4                                       | 1  | 20008653  | 20009937  | 2 | 0 | 0 | 0 | 0 | 0 | 1284  | 0.257973886 | 1.644777126 | 4.060983436 | 0.405019413 | 0.685463242 | 0.998252924 |



|                          |          |          |   |           |           |   |   |   |   |   |   |       |             |             |             |             |             |             |
|--------------------------|----------|----------|---|-----------|-----------|---|---|---|---|---|---|-------|-------------|-------------|-------------|-------------|-------------|-------------|
| chr1:20063864-20113610   | exonic   | TMCO4    | 1 | 20063864  | 20113610  | 2 | 0 | 0 | 0 | 0 | 0 | 49746 | 0.257973886 | 1.644777126 | 4.060983436 | 0.405019413 | 0.685463242 | 0.998252924 |
| chr1:20125863-20126347   | splicing | TMCO4    | 1 | 20125863  | 20126347  | 2 | 0 | 0 | 0 | 0 | 0 | 484   | 0.257973886 | 1.644777126 | 4.060983436 | 0.405019413 | 0.685463242 | 0.998252924 |
| chr1:201962633-201963889 | intronic | RNPEP    | 1 | 201962633 | 201963889 | 2 | 0 | 0 | 0 | 0 | 0 | 1256  | 0.257973886 | 1.644777126 | 4.060983436 | 0.405019413 | 0.685463242 | 0.998252924 |
| chr1:202418116-202465950 | exonic   | PPP1R12B | 1 | 202418116 | 202465950 | 2 | 0 | 0 | 0 | 0 | 0 | 47834 | 0.257973886 | 1.644777126 | 4.060983436 | 0.405019413 | 0.685463242 | 0.998252924 |
| chr1:203682292-203691817 | exonic   | ATP2B4   | 1 | 203682292 | 203691817 | 2 | 0 | 0 | 0 | 0 | 0 | 9525  | 0.257973886 | 1.644777126 | 4.060983436 | 0.405019413 | 0.685463242 | 0.998252924 |
| chr1:203786053-203802981 | exonic   | ZC3H11A  | 1 | 203786053 | 203802981 | 2 | 0 | 0 | 0 | 0 | 0 | 16928 | 0.257973886 | 1.644777126 | 4.060983436 | 0.405019413 | 0.685463242 | 0.998252924 |
| chr1:203797426-203816815 | exonic   | ZC3H11A  | 1 | 203797426 | 203816815 | 2 | 0 | 0 | 0 | 0 | 0 | 19389 | 0.257973886 | 1.644777126 | 4.060983436 | 0.405019413 | 0.685463242 | 0.998252924 |
| chr1:205085865-205086289 | intronic | RBBP5    | 1 | 205085865 | 205086289 | 2 | 0 | 0 | 0 | 0 | 0 | 424   | 0.257973886 | 1.644777126 | 4.060983436 | 0.405019413 | 0.685463242 | 0.998252924 |
| chr1:205563675-205566630 | intronic | MFSD4    | 1 | 205563675 | 205566630 | 2 | 0 | 0 | 0 | 0 | 0 | 2955  | 0.257973886 | 1.644777126 | 4.060983436 | 0.405019413 | 0.685463242 | 0.998252924 |
| chr1:205740600-205742352 | exonic   | RAB29    | 1 | 205740600 | 205742352 | 2 | 0 | 0 | 0 | 0 | 0 | 1752  | 0.257973886 | 1.644777126 | 4.060983436 | 0.405019413 | 0.685463242 | 0.998252924 |
| chr1:212976042-212977993 | exonic   | TATDN3   | 1 | 212976042 | 212977993 | 2 | 0 | 0 | 0 | 0 | 0 | 1951  | 0.257973886 | 1.644777126 | 4.060983436 | 0.405019413 | 0.685463242 | 0.998252924 |
| chr1:21923066-21923522   | UTR3     | -----    | 1 | 21923066  | 21923522  | 2 | 0 | 0 | 0 | 0 | 0 | 456   | 0.257973886 | 1.644777126 | 4.060983436 | 0.405019413 | 0.685463242 | 0.998252924 |
| chr1:220170324-220180680 | exonic   | EPRS     | 1 | 220170324 | 220180680 | 2 | 0 | 0 | 0 | 0 | 0 | 10356 | 0.257973886 | 1.644777126 | 4.060983436 | 0.405019413 | 0.685463242 | 0.998252924 |
| chr1:223900439-223940578 | exonic   | CAPN2    | 1 | 223900439 | 223940578 | 2 | 0 | 0 | 0 | 0 | 0 | 40139 | 0.257973886 | 1.644777126 | 4.060983436 | 0.405019413 | 0.685463242 | 0.998252924 |
| chr1:225211316-225273491 | exonic   | DNAH14   | 1 | 225211316 | 225273491 | 2 | 0 | 0 | 0 | 0 | 0 | 62175 | 0.257973886 | 1.644777126 | 4.060983436 | 0.405019413 | 0.685463242 | 0.998252924 |
| chr1:225266909-225311316 | exonic   | DNAH14   | 1 | 225266909 | 225311316 | 2 | 0 | 0 | 0 | 0 | 0 | 44407 | 0.257973886 | 1.644777126 | 4.060983436 | 0.405019413 | 0.685463242 | 0.998252924 |
| chr1:225283866-225311316 | exonic   | DNAH14   | 1 | 225283866 | 225311316 | 2 | 0 | 0 | 0 | 0 | 0 | 27450 | 0.257973886 | 1.644777126 | 4.060983436 | 0.405019413 | 0.685463242 | 0.998252924 |
| chr1:227216357-227223308 | exonic   | CDC42BPA | 1 | 227216357 | 227223308 | 2 | 0 | 0 | 0 | 0 | 0 | 6951  | 0.257973886 | 1.644777126 | 4.060983436 | 0.405019413 | 0.685463242 | 0.998252924 |
| chr1:230804421-230810870 | exonic   | COG2     | 1 | 230804421 | 230810870 | 2 | 0 | 0 | 0 | 0 | 0 | 6449  | 0.257973886 | 1.644777126 | 4.060983436 | 0.405019413 | 0.685463242 | 0.998252924 |
| chr1:231954075-231954896 | exonic   | DISC1    | 1 | 231954075 | 231954896 | 2 | 0 | 0 | 0 | 0 | 0 | 821   | 0.257973886 | 1.644777126 | 4.060983436 | 0.405019413 | 0.685463242 | 0.998252924 |
| chr1:232596632-232615476 | exonic   | SIPA1L2  | 1 | 232596632 | 232615476 | 2 | 0 | 0 | 0 | 0 | 0 | 18844 | 0.257973886 | 1.644777126 | 4.060983436 | 0.405019413 | 0.685463242 | 0.998252924 |
| chr1:232596632-232619712 | exonic   | SIPA1L2  | 1 | 232596632 | 232619712 | 2 | 0 | 0 | 0 | 0 | 0 | 23080 | 0.257973886 | 1.644777126 | 4.060983436 | 0.405019413 | 0.685463242 | 0.998252924 |
| chr1:233393773-233398909 | exonic   | PCNXL2   | 1 | 233393773 | 233398909 | 2 | 0 | 0 | 0 | 0 | 0 | 5136  | 0.257973886 | 1.644777126 | 4.060983436 | 0.405019413 | 0.685463242 | 0.998252924 |
| chr1:235386480-235420540 | exonic   | ARID4B   | 1 | 235386480 | 235420540 | 2 | 0 | 0 | 0 | 0 | 0 | 34060 | 0.257973886 | 1.644777126 | 4.060983436 | 0.405019413 | 0.685463242 | 0.998252924 |
| chr1:235392545-235424067 | exonic   | ARID4B   | 1 | 235392545 | 235424067 | 2 | 0 | 0 | 0 | 0 | 0 | 31522 | 0.257973886 | 1.644777126 | 4.060983436 | 0.405019413 | 0.685463242 | 0.998252924 |
| chr1:235944164-235956912 | exonic   | LYST     | 1 | 235944164 | 235956912 | 2 | 0 | 0 | 0 | 0 | 0 | 12748 | 0.257973886 | 1.644777126 | 4.060983436 | 0.405019413 | 0.685463242 | 0.998252924 |
| chr1:237550580-237551483 | exonic   | RYR2     | 1 | 237550580 | 237551483 | 2 | 0 | 0 | 0 | 0 | 0 | 903   | 0.257973886 | 1.644777126 | 4.060983436 | 0.405019413 | 0.685463242 | 0.998252924 |
| chr1:243349081-243388623 | exonic   | CEP170   | 1 | 243349081 | 243388623 | 2 | 0 | 0 | 0 | 0 | 0 | 39542 | 0.257973886 | 1.644777126 | 4.060983436 | 0.405019413 | 0.685463242 | 0.998252924 |
| chr1:244582061-244583598 | exonic   | ADSS     | 1 | 244582061 | 244583598 | 2 | 0 | 0 | 0 | 0 | 0 | 1537  | 0.257973886 | 1.644777126 | 4.060983436 | 0.405019413 | 0.685463242 | 0.998252924 |
| chr1:247318868-247323169 | exonic   | ZNF124   | 1 | 247318868 | 247323169 | 2 | 0 | 0 | 0 | 0 | 0 | 4301  | 0.257973886 | 1.644777126 | 4.060983436 | 0.405019413 | 0.685463242 | 0.998252924 |
| chr1:28893805-28898412   | exonic   | TRNAU1AP | 1 | 28893805  | 28898412  | 2 | 0 | 0 | 0 | 0 | 0 | 4607  | 0.257973886 | 1.644777126 | 4.060983436 | 0.405019413 | 0.685463242 | 0.998252924 |
| chr1:29485886-29493424   | exonic   | SRSF4    | 1 | 29485886  | 29493424  | 2 | 0 | 0 | 0 | 0 | 0 | 7538  | 0.257973886 | 1.644777126 | 4.060983436 | 0.405019413 | 0.685463242 | 0.998252924 |
| chr1:31528160-31532424   | exonic   | PUM1     | 1 | 31528160  | 31532424  | 2 | 0 | 0 | 0 | 0 | 0 | 4264  | 0.257973886 | 1.644777126 | 4.060983436 | 0.405019413 | 0.685463242 | 0.998252924 |
| chr1:39898206-39905172   | exonic   | MACF1    | 1 | 39898206  | 39905172  | 2 | 0 | 0 | 0 | 0 | 0 | 6966  | 0.257973886 | 1.644777126 | 4.060983436 | 0.405019413 | 0.685463242 | 0.998252924 |
| chr1:42693553-42776781   | exonic   | FOXJ3    | 1 | 42693553  | 42776781  | 2 | 0 | 0 | 0 | 0 | 0 | 83228 | 0.257973886 | 1.644777126 | 4.060983436 | 0.405019413 | 0.685463242 | 0.998252924 |

|                           |            |                                                                            |    |           |           |   |   |   |   |   |   |       |             |             |             |             |             |             |
|---------------------------|------------|----------------------------------------------------------------------------|----|-----------|-----------|---|---|---|---|---|---|-------|-------------|-------------|-------------|-------------|-------------|-------------|
| chr1:42946132-42948487    | intergenic | PPCS(dist=7083),CCDC30(dist=52073)                                         | 1  | 42946132  | 42948487  | 2 | 0 | 0 | 0 | 0 | 0 | 2355  | 0.257973886 | 1.644777126 | 4.060983436 | 0.405019413 | 0.685463242 | 0.998252924 |
| chr1:44134770-44137546    | exonic     | KDM4A                                                                      | 1  | 44134770  | 44137546  | 2 | 0 | 0 | 0 | 0 | 0 | 2776  | 0.257973886 | 1.644777126 | 4.060983436 | 0.405019413 | 0.685463242 | 0.998252924 |
| chr1:46812592-46818700    | exonic     | NSUN4                                                                      | 1  | 46812592  | 46818700  | 2 | 0 | 0 | 0 | 0 | 0 | 6108  | 0.257973886 | 1.644777126 | 4.060983436 | 0.405019413 | 0.685463242 | 0.998252924 |
| chr1:47838626-47840965    | exonic     | CMPK1                                                                      | 1  | 47838626  | 47840965  | 2 | 0 | 0 | 0 | 0 | 0 | 2339  | 0.257973886 | 1.644777126 | 4.060983436 | 0.405019413 | 0.685463242 | 0.998252924 |
| chr1:51253671-51267349    | exonic     | FAF1                                                                       | 1  | 51253671  | 51267349  | 2 | 0 | 0 | 0 | 0 | 0 | 13678 | 0.257973886 | 1.644777126 | 4.060983436 | 0.405019413 | 0.685463242 | 0.998252924 |
| chr1:51842259-51858991    | intronic   | EPS15                                                                      | 1  | 51842259  | 51858991  | 2 | 0 | 0 | 0 | 0 | 0 | 16732 | 0.257973886 | 1.644777126 | 4.060983436 | 0.405019413 | 0.685463242 | 0.998252924 |
| chr1:51860052-51875368    | exonic     | EPS15                                                                      | 1  | 51860052  | 51875368  | 2 | 0 | 0 | 0 | 0 | 0 | 15316 | 0.257973886 | 1.644777126 | 4.060983436 | 0.405019413 | 0.685463242 | 0.998252924 |
| chr1:52902426-52927441    | exonic     | ZCCHC11                                                                    | 1  | 52902426  | 52927441  | 2 | 0 | 0 | 0 | 0 | 0 | 25015 | 0.257973886 | 1.644777126 | 4.060983436 | 0.405019413 | 0.685463242 | 0.998252924 |
| chr1:53245524-53267811    | exonic     | ZYG11B                                                                     | 1  | 53245524  | 53267811  | 2 | 0 | 0 | 0 | 0 | 0 | 22287 | 0.257973886 | 1.644777126 | 4.060983436 | 0.405019413 | 0.685463242 | 0.998252924 |
| chr1:53440440-53504718    | exonic     | SCP2                                                                       | 1  | 53440440  | 53504718  | 2 | 0 | 0 | 0 | 0 | 0 | 64278 | 0.257973886 | 1.644777126 | 4.060983436 | 0.405019413 | 0.685463242 | 0.998252924 |
| chr1:54266365-54272190    | exonic     | NDC1                                                                       | 1  | 54266365  | 54272190  | 2 | 0 | 0 | 0 | 0 | 0 | 5825  | 0.257973886 | 1.644777126 | 4.060983436 | 0.405019413 | 0.685463242 | 0.998252924 |
| chr1:59137541-59155921    | exonic     | MYSM1                                                                      | 1  | 59137541  | 59155921  | 2 | 0 | 0 | 0 | 0 | 0 | 18380 | 0.257973886 | 1.644777126 | 4.060983436 | 0.405019413 | 0.685463242 | 0.998252924 |
| chr1:62519299-62526948    | intronic   | INADL                                                                      | 1  | 62519299  | 62526948  | 2 | 0 | 0 | 0 | 0 | 0 | 7649  | 0.257973886 | 1.644777126 | 4.060983436 | 0.405019413 | 0.685463242 | 0.998252924 |
| chr1:6504742-6505692      | exonic     | ESPN                                                                       | 1  | 6504742   | 6505692   | 2 | 0 | 0 | 0 | 0 | 0 | 950   | 0.257973886 | 1.644777126 | 4.060983436 | 0.405019413 | 0.685463242 | 0.998252924 |
| chr1:65131739-65141666    | exonic     | CACHD1                                                                     | 1  | 65131739  | 65141666  | 2 | 0 | 0 | 0 | 0 | 0 | 9927  | 0.257973886 | 1.644777126 | 4.060983436 | 0.405019413 | 0.685463242 | 0.998252924 |
| chr1:65139030-65141244    | exonic     | CACHD1                                                                     | 1  | 65139030  | 65141244  | 2 | 0 | 0 | 0 | 0 | 0 | 2214  | 0.257973886 | 1.644777126 | 4.060983436 | 0.405019413 | 0.685463242 | 0.998252924 |
| chr1:65243305-65280523    | exonic     | RAVER2                                                                     | 1  | 65243305  | 65280523  | 2 | 0 | 0 | 0 | 0 | 0 | 37218 | 0.257973886 | 1.644777126 | 4.060983436 | 0.405019413 | 0.685463242 | 0.998252924 |
| chr1:67292502-67301460    | exonic     | WDR78                                                                      | 1  | 67292502  | 67301460  | 2 | 0 | 0 | 0 | 0 | 0 | 8958  | 0.257973886 | 1.644777126 | 4.060983436 | 0.405019413 | 0.685463242 | 0.998252924 |
| chr1:67327829-67371058    | exonic     | WDR78                                                                      | 1  | 67327829  | 67371058  | 2 | 0 | 0 | 0 | 0 | 0 | 43229 | 0.257973886 | 1.644777126 | 4.060983436 | 0.405019413 | 0.685463242 | 0.998252924 |
| chr1:6867043-6948959      | exonic     | CAMTA1                                                                     | 1  | 6867043   | 6948959   | 2 | 0 | 0 | 0 | 0 | 0 | 81916 | 0.257973886 | 1.644777126 | 4.060983436 | 0.405019413 | 0.685463242 | 0.998252924 |
| chr1:70736538-70742527    | exonic     | ANKRD13C                                                                   | 1  | 70736538  | 70742527  | 2 | 0 | 0 | 0 | 0 | 0 | 5989  | 0.257973886 | 1.644777126 | 4.060983436 | 0.405019413 | 0.685463242 | 0.998252924 |
| chr1:78183552-78184326    | exonic     | USP33                                                                      | 1  | 78183552  | 78184326  | 2 | 0 | 0 | 0 | 0 | 0 | 774   | 0.257973886 | 1.644777126 | 4.060983436 | 0.405019413 | 0.685463242 | 0.998252924 |
| chr1:86196191-86252144    | exonic     | COL24A1                                                                    | 1  | 86196191  | 86252144  | 2 | 0 | 0 | 0 | 0 | 0 | 55953 | 0.257973886 | 1.644777126 | 4.060983436 | 0.405019413 | 0.685463242 | 0.998252924 |
| chr1:86241356-86252144    | exonic     | COL24A1                                                                    | 1  | 86241356  | 86252144  | 2 | 0 | 0 | 0 | 0 | 0 | 10788 | 0.257973886 | 1.644777126 | 4.060983436 | 0.405019413 | 0.685463242 | 0.998252924 |
| chr1:92348869-92349618    | intronic   | TGFBR3                                                                     | 1  | 92348869  | 92349618  | 2 | 0 | 0 | 0 | 0 | 0 | 749   | 0.257973886 | 1.644777126 | 4.060983436 | 0.405019413 | 0.685463242 | 0.998252924 |
| chr1:9327157-9328028      | UTR3       | <small>RP196-04291, CC219-030881, M, RP192297, CC221-010861, CC221</small> | 1  | 9327157   | 9328028   | 2 | 0 | 0 | 0 | 0 | 0 | 871   | 0.257973886 | 1.644777126 | 4.060983436 | 0.405019413 | 0.685463242 | 0.998252924 |
| chr1:93739031-93791452    | exonic     | CCDC18                                                                     | 1  | 93739031  | 93791452  | 2 | 0 | 0 | 0 | 0 | 0 | 52421 | 0.257973886 | 1.644777126 | 4.060983436 | 0.405019413 | 0.685463242 | 0.998252924 |
| chr1:9770163-9770654      | exonic     | PIK3CD                                                                     | 1  | 9770163   | 9770654   | 2 | 0 | 0 | 0 | 0 | 0 | 491   | 0.257973886 | 1.644777126 | 4.060983436 | 0.405019413 | 0.685463242 | 0.998252924 |
| chr10:101915901-101935827 | exonic     | ERLIN1                                                                     | 10 | 101915901 | 101935827 | 2 | 0 | 0 | 0 | 0 | 0 | 19926 | 0.257973886 | 1.644777126 | 4.060983436 | 0.405019413 | 0.685463242 | 0.998252924 |
| chr10:103734968-103799882 | exonic     | C10orf76                                                                   | 10 | 103734968 | 103799882 | 2 | 0 | 0 | 0 | 0 | 0 | 64914 | 0.257973886 | 1.644777126 | 4.060983436 | 0.405019413 | 0.685463242 | 0.998252924 |
| chr10:111883774-111892158 | exonic     | ADD3                                                                       | 10 | 111883774 | 111892158 | 2 | 0 | 0 | 0 | 0 | 0 | 8384  | 0.257973886 | 1.644777126 | 4.060983436 | 0.405019413 | 0.685463242 | 0.998252924 |
| chr10:1123846-1142186     | exonic     | WDR37                                                                      | 10 | 1123846   | 1142186   | 2 | 0 | 0 | 0 | 0 | 0 | 18340 | 0.257973886 | 1.644777126 | 4.060983436 | 0.405019413 | 0.685463242 | 0.998252924 |
| chr10:112723882-112724819 | exonic     | SHOC2                                                                      | 10 | 112723882 | 112724819 | 2 | 0 | 0 | 0 | 0 | 0 | 937   | 0.257973886 | 1.644777126 | 4.060983436 | 0.405019413 | 0.685463242 | 0.998252924 |
| chr10:12123470-12129728   | exonic     | DHTKD1                                                                     | 10 | 12123470  | 12129728  | 2 | 0 | 0 | 0 | 0 | 0 | 6258  | 0.257973886 | 1.644777126 | 4.060983436 | 0.405019413 | 0.685463242 | 0.998252924 |
| chr10:127437980-127442414 | exonic     | EDRF1                                                                      | 10 | 127437980 | 127442414 | 2 | 0 | 0 | 0 | 0 | 0 | 4434  | 0.257973886 | 1.644777126 | 4.060983436 | 0.405019413 | 0.685463242 | 0.998252924 |

|                           |              |          |    |           |           |   |   |   |   |   |   |       |             |             |             |             |             |             |
|---------------------------|--------------|----------|----|-----------|-----------|---|---|---|---|---|---|-------|-------------|-------------|-------------|-------------|-------------|-------------|
| chr10:131958010-131973353 | exonic       | GLRX3    | 10 | 131958010 | 131973353 | 2 | 0 | 0 | 0 | 0 | 0 | 15343 | 0.257973886 | 1.644777126 | 4.060983436 | 0.405019413 | 0.685463242 | 0.998252924 |
| chr10:13214375-13214765   | exonic       | MCM10    | 10 | 13214375  | 13214765  | 2 | 0 | 0 | 0 | 0 | 0 | 390   | 0.257973886 | 1.644777126 | 4.060983436 | 0.405019413 | 0.685463242 | 0.998252924 |
| chr10:13330359-13337606   | exonic       | PHYH     | 10 | 13330359  | 13337606  | 2 | 0 | 0 | 0 | 0 | 0 | 7247  | 0.257973886 | 1.644777126 | 4.060983436 | 0.405019413 | 0.685463242 | 0.998252924 |
| chr10:134503895-134540409 | exonic       | INPP5A   | 10 | 134503895 | 134540409 | 2 | 0 | 0 | 0 | 0 | 0 | 36514 | 0.257973886 | 1.644777126 | 4.060983436 | 0.405019413 | 0.685463242 | 0.998252924 |
| chr10:17024482-17026278   | exonic       | CUBN     | 10 | 17024482  | 17026278  | 2 | 0 | 0 | 0 | 0 | 0 | 1796  | 0.257973886 | 1.644777126 | 4.060983436 | 0.405019413 | 0.685463242 | 0.998252924 |
| chr10:18145170-18152611   | exonic       | MRC1     | 10 | 18145170  | 18152611  | 2 | 0 | 0 | 0 | 0 | 0 | 7441  | 0.257973886 | 1.644777126 | 4.060983436 | 0.405019413 | 0.685463242 | 0.998252924 |
| chr10:225933-283617       | exonic       | ZMYND11  | 10 | 225933    | 283617    | 2 | 0 | 0 | 0 | 0 | 0 | 57684 | 0.257973886 | 1.644777126 | 4.060983436 | 0.405019413 | 0.685463242 | 0.998252924 |
| chr10:24918924-24959326   | exonic       | ARHGAP21 | 10 | 24918924  | 24959326  | 2 | 0 | 0 | 0 | 0 | 0 | 40402 | 0.257973886 | 1.644777126 | 4.060983436 | 0.405019413 | 0.685463242 | 0.998252924 |
| chr10:27423760-27425314   | exonic       | YME1L1   | 10 | 27423760  | 27425314  | 2 | 0 | 0 | 0 | 0 | 0 | 1554  | 0.257973886 | 1.644777126 | 4.060983436 | 0.405019413 | 0.685463242 | 0.998252924 |
| chr10:27456030-27470510   | exonic       | MASTL    | 10 | 27456030  | 27470510  | 2 | 0 | 0 | 0 | 0 | 0 | 14480 | 0.257973886 | 1.644777126 | 4.060983436 | 0.405019413 | 0.685463242 | 0.998252924 |
| chr10:27462049-27470510   | exonic       | MASTL    | 10 | 27462049  | 27470510  | 2 | 0 | 0 | 0 | 0 | 0 | 8461  | 0.257973886 | 1.644777126 | 4.060983436 | 0.405019413 | 0.685463242 | 0.998252924 |
| chr10:28196591-28233891   | exonic       | ARMC4    | 10 | 28196591  | 28233891  | 2 | 0 | 0 | 0 | 0 | 0 | 37300 | 0.257973886 | 1.644777126 | 4.060983436 | 0.405019413 | 0.685463242 | 0.998252924 |
| chr10:28223938-28229734   | exonic       | ARMC4    | 10 | 28223938  | 28229734  | 2 | 0 | 0 | 0 | 0 | 0 | 5796  | 0.257973886 | 1.644777126 | 4.060983436 | 0.405019413 | 0.685463242 | 0.998252924 |
| chr10:28434075-28441989   | exonic       | MPP7     | 10 | 28434075  | 28441989  | 2 | 0 | 0 | 0 | 0 | 0 | 7914  | 0.257973886 | 1.644777126 | 4.060983436 | 0.405019413 | 0.685463242 | 0.998252924 |
| chr10:28861648-28863171   | intronic     | WAC      | 10 | 28861648  | 28863171  | 2 | 0 | 0 | 0 | 0 | 0 | 1523  | 0.257973886 | 1.644777126 | 4.060983436 | 0.405019413 | 0.685463242 | 0.998252924 |
| chr10:32158388-32159268   | intronic     | ARHGAP12 | 10 | 32158388  | 32159268  | 2 | 0 | 0 | 0 | 0 | 0 | 880   | 0.257973886 | 1.644777126 | 4.060983436 | 0.405019413 | 0.685463242 | 0.998252924 |
| chr10:32573626-32582665   | exonic       | EPC1     | 10 | 32573626  | 32582665  | 2 | 0 | 0 | 0 | 0 | 0 | 9039  | 0.257973886 | 1.644777126 | 4.060983436 | 0.405019413 | 0.685463242 | 0.998252924 |
| chr10:33474669-33475144   | splicing     | NRP1     | 10 | 33474669  | 33475144  | 2 | 0 | 0 | 0 | 0 | 0 | 475   | 0.257973886 | 1.644777126 | 4.060983436 | 0.405019413 | 0.685463242 | 0.998252924 |
| chr10:34606034-34649187   | exonic       | PARD3    | 10 | 34606034  | 34649187  | 2 | 0 | 0 | 0 | 0 | 0 | 43153 | 0.257973886 | 1.644777126 | 4.060983436 | 0.405019413 | 0.685463242 | 0.998252924 |
| chr10:34663801-34673182   | exonic       | PARD3    | 10 | 34663801  | 34673182  | 2 | 0 | 0 | 0 | 0 | 0 | 9381  | 0.257973886 | 1.644777126 | 4.060983436 | 0.405019413 | 0.685463242 | 0.998252924 |
| chr10:372945-395394       | exonic       | DIP2C    | 10 | 372945    | 395394    | 2 | 0 | 0 | 0 | 0 | 0 | 22449 | 0.257973886 | 1.644777126 | 4.060983436 | 0.405019413 | 0.685463242 | 0.998252924 |
| chr10:38320799-38321769   | intronic     | ZNF33A   | 10 | 38320799  | 38321769  | 2 | 0 | 0 | 0 | 0 | 0 | 970   | 0.257973886 | 1.644777126 | 4.060983436 | 0.405019413 | 0.685463242 | 0.998252924 |
| chr10:49419996-49450395   | exonic       | FRMPD2   | 10 | 49419996  | 49450395  | 2 | 0 | 0 | 0 | 0 | 0 | 30399 | 0.257973886 | 1.644777126 | 4.060983436 | 0.405019413 | 0.685463242 | 0.998252924 |
| chr10:51287080-51309606   | ncRNA_exonic | PARGP1   | 10 | 51287080  | 51309606  | 2 | 0 | 0 | 0 | 0 | 0 | 22526 | 0.257973886 | 1.644777126 | 4.060983436 | 0.405019413 | 0.685463242 | 0.998252924 |
| chr10:5693675-5694915     | exonic       | ASB13    | 10 | 5693675   | 5694915   | 2 | 0 | 0 | 0 | 0 | 0 | 1240  | 0.257973886 | 1.644777126 | 4.060983436 | 0.405019413 | 0.685463242 | 0.998252924 |
| chr10:70246901-70276600   | exonic       | SLC25A16 | 10 | 70246901  | 70276600  | 2 | 0 | 0 | 0 | 0 | 0 | 29699 | 0.257973886 | 1.644777126 | 4.060983436 | 0.405019413 | 0.685463242 | 0.998252924 |
| chr10:70513608-70517134   | exonic       | CCAR1    | 10 | 70513608  | 70517134  | 2 | 0 | 0 | 0 | 0 | 0 | 3526  | 0.257973886 | 1.644777126 | 4.060983436 | 0.405019413 | 0.685463242 | 0.998252924 |
| chr10:70992519-70992889   | exonic       | HKDC1    | 10 | 70992519  | 70992889  | 2 | 0 | 0 | 0 | 0 | 0 | 370   | 0.257973886 | 1.644777126 | 4.060983436 | 0.405019413 | 0.685463242 | 0.998252924 |
| chr10:71873901-71883853   | exonic       | AIFM2    | 10 | 71873901  | 71883853  | 2 | 0 | 0 | 0 | 0 | 0 | 9952  | 0.257973886 | 1.644777126 | 4.060983436 | 0.405019413 | 0.685463242 | 0.998252924 |
| chr10:71966019-71978573   | exonic       | PPA1     | 10 | 71966019  | 71978573  | 2 | 0 | 0 | 0 | 0 | 0 | 12554 | 0.257973886 | 1.644777126 | 4.060983436 | 0.405019413 | 0.685463242 | 0.998252924 |
| chr10:75775220-75775537   | intronic     | VCL      | 10 | 75775220  | 75775537  | 2 | 0 | 0 | 0 | 0 | 0 | 317   | 0.257973886 | 1.644777126 | 4.060983436 | 0.405019413 | 0.685463242 | 0.998252924 |
| chr10:75830427-75854219   | exonic       | VCL      | 10 | 75830427  | 75854219  | 2 | 0 | 0 | 0 | 0 | 0 | 23792 | 0.257973886 | 1.644777126 | 4.060983436 | 0.405019413 | 0.685463242 | 0.998252924 |
| chr10:76349039-76360251   | exonic       | ADK      | 10 | 76349039  | 76360251  | 2 | 0 | 0 | 0 | 0 | 0 | 11212 | 0.257973886 | 1.644777126 | 4.060983436 | 0.405019413 | 0.685463242 | 0.998252924 |
| chr10:81923808-81926740   | exonic       | ANXA11   | 10 | 81923808  | 81926740  | 2 | 0 | 0 | 0 | 0 | 0 | 2932  | 0.257973886 | 1.644777126 | 4.060983436 | 0.405019413 | 0.685463242 | 0.998252924 |
| chr10:92660326-92663033   | exonic       | RPP30    | 10 | 92660326  | 92663033  | 2 | 0 | 0 | 0 | 0 | 0 | 2707  | 0.257973886 | 1.644777126 | 4.060983436 | 0.405019413 | 0.685463242 | 0.998252924 |

|                           |              |                                                           |    |           |           |   |   |   |   |   |   |        |             |             |             |             |             |             |
|---------------------------|--------------|-----------------------------------------------------------|----|-----------|-----------|---|---|---|---|---|---|--------|-------------|-------------|-------------|-------------|-------------|-------------|
| chr10:93608139-93611093   | exonic       | TNKS2                                                     | 10 | 93608139  | 93611093  | 2 | 0 | 0 | 0 | 0 | 0 | 2954   | 0.257973886 | 1.644777126 | 4.060983436 | 0.405019413 | 0.685463242 | 0.998252924 |
| chr10:95123717-95129533   | exonic       | MYOF                                                      | 10 | 95123717  | 95129533  | 2 | 0 | 0 | 0 | 0 | 0 | 5816   | 0.257973886 | 1.644777126 | 4.060983436 | 0.405019413 | 0.685463242 | 0.998252924 |
| chr10:99967857-99969656   | exonic       | R3HCC1L                                                   | 10 | 99967857  | 99969656  | 2 | 0 | 0 | 0 | 0 | 0 | 1799   | 0.257973886 | 1.644777126 | 4.060983436 | 0.405019413 | 0.685463242 | 0.998252924 |
| chr11:102056748-102076817 | exonic       | YAP1                                                      | 11 | 102056748 | 102076817 | 2 | 0 | 0 | 0 | 0 | 0 | 20069  | 0.257973886 | 1.644777126 | 4.060983436 | 0.405019413 | 0.685463242 | 0.998252924 |
| chr11:102076623-102080295 | exonic       | YAP1                                                      | 11 | 102076623 | 102080295 | 2 | 0 | 0 | 0 | 0 | 0 | 3672   | 0.257973886 | 1.644777126 | 4.060983436 | 0.405019413 | 0.685463242 | 0.998252924 |
| chr11:103866792-103870965 | exonic       | PDGFD                                                     | 11 | 103866792 | 103870965 | 2 | 0 | 0 | 0 | 0 | 0 | 4173   | 0.257973886 | 1.644777126 | 4.060983436 | 0.405019413 | 0.685463242 | 0.998252924 |
| chr11:108114679-108117854 | exonic       | ATM                                                       | 11 | 108114679 | 108117854 | 2 | 0 | 0 | 0 | 0 | 0 | 3175   | 0.257973886 | 1.644777126 | 4.060983436 | 0.405019413 | 0.685463242 | 0.998252924 |
| chr11:113682997-113700067 | exonic       | USP28                                                     | 11 | 113682997 | 113700067 | 2 | 0 | 0 | 0 | 0 | 0 | 17070  | 0.257973886 | 1.644777126 | 4.060983436 | 0.405019413 | 0.685463242 | 0.998252924 |
| chr11:118367082-118368634 | exonic       | KMT2A                                                     | 11 | 118367082 | 118368634 | 2 | 0 | 0 | 0 | 0 | 0 | 1552   | 0.257973886 | 1.644777126 | 4.060983436 | 0.405019413 | 0.685463242 | 0.998252924 |
| chr11:118638930-118657227 | exonic       | DDX6                                                      | 11 | 118638930 | 118657227 | 2 | 0 | 0 | 0 | 0 | 0 | 18297  | 0.257973886 | 1.644777126 | 4.060983436 | 0.405019413 | 0.685463242 | 0.998252924 |
| chr11:121413808-121451716 | exonic       | SORL1                                                     | 11 | 121413808 | 121451716 | 2 | 0 | 0 | 0 | 0 | 0 | 37908  | 0.257973886 | 1.644777126 | 4.060983436 | 0.405019413 | 0.685463242 | 0.998252924 |
| chr11:122646926-122672040 | exonic       | UBASH3B                                                   | 11 | 122646926 | 122672040 | 2 | 0 | 0 | 0 | 0 | 0 | 25114  | 0.257973886 | 1.644777126 | 4.060983436 | 0.405019413 | 0.685463242 | 0.998252924 |
| chr11:14480077-14498561   | exonic       | COPB1                                                     | 11 | 14480077  | 14498561  | 2 | 0 | 0 | 0 | 0 | 0 | 18484  | 0.257973886 | 1.644777126 | 4.060983436 | 0.405019413 | 0.685463242 | 0.998252924 |
| chr11:21203889-21206935   | intronic     | NELL1                                                     | 11 | 21203889  | 21206935  | 2 | 0 | 0 | 0 | 0 | 0 | 3046   | 0.257973886 | 1.644777126 | 4.060983436 | 0.405019413 | 0.685463242 | 0.998252924 |
| chr11:36514100-36523087   | exonic       | TRAF6                                                     | 11 | 36514100  | 36523087  | 2 | 0 | 0 | 0 | 0 | 0 | 8987   | 0.257973886 | 1.644777126 | 4.060983436 | 0.405019413 | 0.685463242 | 0.998252924 |
| chr11:45986866-46113774   | exonic       | PHF21A                                                    | 11 | 45986866  | 46113774  | 2 | 0 | 0 | 0 | 0 | 0 | 126908 | 0.257973886 | 1.644777126 | 4.060983436 | 0.405019413 | 0.685463242 | 0.998252924 |
| chr11:46817143-46832728   | exonic       | CKAP5                                                     | 11 | 46817143  | 46832728  | 2 | 0 | 0 | 0 | 0 | 0 | 15585  | 0.257973886 | 1.644777126 | 4.060983436 | 0.405019413 | 0.685463242 | 0.998252924 |
| chr11:47758167-47767946   | exonic       | FNBP4                                                     | 11 | 47758167  | 47767946  | 2 | 0 | 0 | 0 | 0 | 0 | 9779   | 0.257973886 | 1.644777126 | 4.060983436 | 0.405019413 | 0.685463242 | 0.998252924 |
| chr11:58379098-58379801   | exonic       | ZFP91                                                     | 11 | 58379098  | 58379801  | 2 | 0 | 0 | 0 | 0 | 0 | 703    | 0.257973886 | 1.644777126 | 4.060983436 | 0.405019413 | 0.685463242 | 0.998252924 |
| chr11:58911168-58912009   | UTR5         | <small>FAM111A(OM_001312909:c.-5178_-5178delins0)</small> | 11 | 58911168  | 58912009  | 2 | 0 | 0 | 0 | 0 | 0 | 841    | 0.257973886 | 1.644777126 | 4.060983436 | 0.405019413 | 0.685463242 | 0.998252924 |
| chr11:61124001-61125300   | exonic       | CYB561A3                                                  | 11 | 61124001  | 61125300  | 2 | 0 | 0 | 0 | 0 | 0 | 1299   | 0.257973886 | 1.644777126 | 4.060983436 | 0.405019413 | 0.685463242 | 0.998252924 |
| chr11:62620282-62622023   | ncRNA_exonic | <small>SNHG1, SNORD22, SNORD29, SNORD30, SNORD31</small>  | 11 | 62620282  | 62622023  | 2 | 0 | 0 | 0 | 0 | 0 | 1741   | 0.257973886 | 1.644777126 | 4.060983436 | 0.405019413 | 0.685463242 | 0.998252924 |
| chr11:64116802-64117140   | exonic       | CCDC88B                                                   | 11 | 64116802  | 64117140  | 2 | 0 | 0 | 0 | 0 | 0 | 338    | 0.257973886 | 1.644777126 | 4.060983436 | 0.405019413 | 0.685463242 | 0.998252924 |
| chr11:65314412-65314909   | splicing     | LTBP3                                                     | 11 | 65314412  | 65314909  | 2 | 0 | 0 | 0 | 0 | 0 | 497    | 0.257973886 | 1.644777126 | 4.060983436 | 0.405019413 | 0.685463242 | 0.998252924 |
| chr11:68286968-68363686   | exonic       | PPP6R3                                                    | 11 | 68286968  | 68363686  | 2 | 0 | 0 | 0 | 0 | 0 | 76718  | 0.257973886 | 1.644777126 | 4.060983436 | 0.405019413 | 0.685463242 | 0.998252924 |
| chr11:70212631-70218640   | exonic       | PPFIA1                                                    | 11 | 70212631  | 70218640  | 2 | 0 | 0 | 0 | 0 | 0 | 6009   | 0.257973886 | 1.644777126 | 4.060983436 | 0.405019413 | 0.685463242 | 0.998252924 |
| chr11:70848158-70852320   | intronic     | SHANK2                                                    | 11 | 70848158  | 70852320  | 2 | 0 | 0 | 0 | 0 | 0 | 4162   | 0.257973886 | 1.644777126 | 4.060983436 | 0.405019413 | 0.685463242 | 0.998252924 |
| chr11:71705898-71706492   | exonic       | RNF121                                                    | 11 | 71705898  | 71706492  | 2 | 0 | 0 | 0 | 0 | 0 | 594    | 0.257973886 | 1.644777126 | 4.060983436 | 0.405019413 | 0.685463242 | 0.998252924 |
| chr11:77060283-77070062   | exonic       | PAK1                                                      | 11 | 77060283  | 77070062  | 2 | 0 | 0 | 0 | 0 | 0 | 9779   | 0.257973886 | 1.644777126 | 4.060983436 | 0.405019413 | 0.685463242 | 0.998252924 |
| chr11:77337607-77340548   | intronic     | CLNS1A                                                    | 11 | 77337607  | 77340548  | 2 | 0 | 0 | 0 | 0 | 0 | 2941   | 0.257973886 | 1.644777126 | 4.060983436 | 0.405019413 | 0.685463242 | 0.998252924 |
| chr11:78176921-78189729   | exonic       | NARS2                                                     | 11 | 78176921  | 78189729  | 2 | 0 | 0 | 0 | 0 | 0 | 12808  | 0.257973886 | 1.644777126 | 4.060983436 | 0.405019413 | 0.685463242 | 0.998252924 |
| chr11:78775782-78781054   | exonic       | TENM4                                                     | 11 | 78775782  | 78781054  | 2 | 0 | 0 | 0 | 0 | 0 | 5272   | 0.257973886 | 1.644777126 | 4.060983436 | 0.405019413 | 0.685463242 | 0.998252924 |
| chr11:85960513-85963282   | exonic       | EED                                                       | 11 | 85960513  | 85963282  | 2 | 0 | 0 | 0 | 0 | 0 | 2769   | 0.257973886 | 1.644777126 | 4.060983436 | 0.405019413 | 0.685463242 | 0.998252924 |
| chr11:86778736-86782657   | exonic       | TMEM135                                                   | 11 | 86778736  | 86782657  | 2 | 0 | 0 | 0 | 0 | 0 | 3921   | 0.257973886 | 1.644777126 | 4.060983436 | 0.405019413 | 0.685463242 | 0.998252924 |
| chr11:9834078-9838571     | exonic       | SBF2                                                      | 11 | 9834078   | 9838571   | 2 | 0 | 0 | 0 | 0 | 0 | 4493   | 0.257973886 | 1.644777126 | 4.060983436 | 0.405019413 | 0.685463242 | 0.998252924 |

|                           |            |                                                                       |    |           |           |   |   |   |   |   |   |       |             |             |             |             |             |             |
|---------------------------|------------|-----------------------------------------------------------------------|----|-----------|-----------|---|---|---|---|---|---|-------|-------------|-------------|-------------|-------------|-------------|-------------|
| chr12:110771088-110771783 | exonic     | ATP2A2                                                                | 12 | 110771088 | 110771783 | 2 | 0 | 0 | 0 | 0 | 0 | 695   | 0.257973886 | 1.644777126 | 4.060983436 | 0.405019413 | 0.685463242 | 0.998252924 |
| chr12:11126253-11199787   | exonic     | <small>PHH1, PHH1-TAS2R14, TAS2R15, TAS2R20, TAS2R31, TAS2R50</small> | 12 | 11126253  | 11199787  | 2 | 0 | 0 | 0 | 0 | 0 | 73534 | 0.257973886 | 1.644777126 | 4.060983436 | 0.405019413 | 0.685463242 | 0.998252924 |
| chr12:112213409-112221102 | exonic     | ALDH2                                                                 | 12 | 112213409 | 112221102 | 2 | 0 | 0 | 0 | 0 | 0 | 7693  | 0.257973886 | 1.644777126 | 4.060983436 | 0.405019413 | 0.685463242 | 0.998252924 |
| chr12:112696299-112703787 | exonic     | HECTD4                                                                | 12 | 112696299 | 112703787 | 2 | 0 | 0 | 0 | 0 | 0 | 7488  | 0.257973886 | 1.644777126 | 4.060983436 | 0.405019413 | 0.685463242 | 0.998252924 |
| chr12:112915455-112915819 | exonic     | PTPN11                                                                | 12 | 112915455 | 112915819 | 2 | 0 | 0 | 0 | 0 | 0 | 364   | 0.257973886 | 1.644777126 | 4.060983436 | 0.405019413 | 0.685463242 | 0.998252924 |
| chr12:117150040-117152006 | UTR3       | <small>C12orf49(NM_024738:c.4490_*3609delins0)</small>                | 12 | 117150040 | 117152006 | 2 | 0 | 0 | 0 | 0 | 0 | 1966  | 0.257973886 | 1.644777126 | 4.060983436 | 0.405019413 | 0.685463242 | 0.998252924 |
| chr12:120961736-120963012 | intronic   | COQ5                                                                  | 12 | 120961736 | 120963012 | 2 | 0 | 0 | 0 | 0 | 0 | 1276  | 0.257973886 | 1.644777126 | 4.060983436 | 0.405019413 | 0.685463242 | 0.998252924 |
| chr12:121853961-121858581 | exonic     | RNF34                                                                 | 12 | 121853961 | 121858581 | 2 | 0 | 0 | 0 | 0 | 0 | 4620  | 0.257973886 | 1.644777126 | 4.060983436 | 0.405019413 | 0.685463242 | 0.998252924 |
| chr12:121932381-121958903 | exonic     | KDM2B                                                                 | 12 | 121932381 | 121958903 | 2 | 0 | 0 | 0 | 0 | 0 | 26522 | 0.257973886 | 1.644777126 | 4.060983436 | 0.405019413 | 0.685463242 | 0.998252924 |
| chr12:123832575-123834988 | exonic     | SBN01                                                                 | 12 | 123832575 | 123834988 | 2 | 0 | 0 | 0 | 0 | 0 | 2413  | 0.257973886 | 1.644777126 | 4.060983436 | 0.405019413 | 0.685463242 | 0.998252924 |
| chr12:124092146-124093376 | exonic     | DDX55                                                                 | 12 | 124092146 | 124093376 | 2 | 0 | 0 | 0 | 0 | 0 | 1230  | 0.257973886 | 1.644777126 | 4.060983436 | 0.405019413 | 0.685463242 | 0.998252924 |
| chr12:124377780-124387660 | exonic     | DNAH10                                                                | 12 | 124377780 | 124387660 | 2 | 0 | 0 | 0 | 0 | 0 | 9880  | 0.257973886 | 1.644777126 | 4.060983436 | 0.405019413 | 0.685463242 | 0.998252924 |
| chr12:12788710-12788908   | exonic     | CREBL2                                                                | 12 | 12788710  | 12788908  | 2 | 0 | 0 | 0 | 0 | 0 | 198   | 0.257973886 | 1.644777126 | 4.060983436 | 0.405019413 | 0.685463242 | 0.998252924 |
| chr12:128899276-128900165 | exonic     | TMEM132C                                                              | 12 | 128899276 | 128900165 | 2 | 0 | 0 | 0 | 0 | 0 | 889   | 0.257973886 | 1.644777126 | 4.060983436 | 0.405019413 | 0.685463242 | 0.998252924 |
| chr12:131293175-131311812 | exonic     | STX2                                                                  | 12 | 131293175 | 131311812 | 2 | 0 | 0 | 0 | 0 | 0 | 18637 | 0.257973886 | 1.644777126 | 4.060983436 | 0.405019413 | 0.685463242 | 0.998252924 |
| chr12:14609494-14619524   | exonic     | ATF7IP                                                                | 12 | 14609494  | 14619524  | 2 | 0 | 0 | 0 | 0 | 0 | 10030 | 0.257973886 | 1.644777126 | 4.060983436 | 0.405019413 | 0.685463242 | 0.998252924 |
| chr12:24985656-24989530   | exonic     | BCAT1                                                                 | 12 | 24985656  | 24989530  | 2 | 0 | 0 | 0 | 0 | 0 | 3874  | 0.257973886 | 1.644777126 | 4.060983436 | 0.405019413 | 0.685463242 | 0.998252924 |
| chr12:2558141-2622150     | exonic     | CACNA1C                                                               | 12 | 2558141   | 2622150   | 2 | 0 | 0 | 0 | 0 | 0 | 64009 | 0.257973886 | 1.644777126 | 4.060983436 | 0.405019413 | 0.685463242 | 0.998252924 |
| chr12:40651049-40668795   | exonic     | LRRK2                                                                 | 12 | 40651049  | 40668795  | 2 | 0 | 0 | 0 | 0 | 0 | 17746 | 0.257973886 | 1.644777126 | 4.060983436 | 0.405019413 | 0.685463242 | 0.998252924 |
| chr12:416111-465703       | exonic     | KDM5A                                                                 | 12 | 416111    | 465703    | 2 | 0 | 0 | 0 | 0 | 0 | 49592 | 0.257973886 | 1.644777126 | 4.060983436 | 0.405019413 | 0.685463242 | 0.998252924 |
| chr12:45725077-45761576   | exonic     | ANO6                                                                  | 12 | 45725077  | 45761576  | 2 | 0 | 0 | 0 | 0 | 0 | 36499 | 0.257973886 | 1.644777126 | 4.060983436 | 0.405019413 | 0.685463242 | 0.998252924 |
| chr12:459787-461490       | exonic     | KDM5A                                                                 | 12 | 459787    | 461490    | 2 | 0 | 0 | 0 | 0 | 0 | 1703  | 0.257973886 | 1.644777126 | 4.060983436 | 0.405019413 | 0.685463242 | 0.998252924 |
| chr12:50055748-50062337   | exonic     | FMNL3                                                                 | 12 | 50055748  | 50062337  | 2 | 0 | 0 | 0 | 0 | 0 | 6589  | 0.257973886 | 1.644777126 | 4.060983436 | 0.405019413 | 0.685463242 | 0.998252924 |
| chr12:51064969-51074546   | exonic     | DIP2B                                                                 | 12 | 51064969  | 51074546  | 2 | 0 | 0 | 0 | 0 | 0 | 9577  | 0.257973886 | 1.644777126 | 4.060983436 | 0.405019413 | 0.685463242 | 0.998252924 |
| chr12:53925527-53927043   | exonic     | ATF7                                                                  | 12 | 53925527  | 53927043  | 2 | 0 | 0 | 0 | 0 | 0 | 1516  | 0.257973886 | 1.644777126 | 4.060983436 | 0.405019413 | 0.685463242 | 0.998252924 |
| chr12:57927735-57928235   | exonic     | DCTN2                                                                 | 12 | 57927735  | 57928235  | 2 | 0 | 0 | 0 | 0 | 0 | 500   | 0.257973886 | 1.644777126 | 4.060983436 | 0.405019413 | 0.685463242 | 0.998252924 |
| chr12:66620502-66622150   | exonic     | IRAK3                                                                 | 12 | 66620502  | 66622150  | 2 | 0 | 0 | 0 | 0 | 0 | 1648  | 0.257973886 | 1.644777126 | 4.060983436 | 0.405019413 | 0.685463242 | 0.998252924 |
| chr12:67675689-67686556   | exonic     | CAND1                                                                 | 12 | 67675689  | 67686556  | 2 | 0 | 0 | 0 | 0 | 0 | 10867 | 0.257973886 | 1.644777126 | 4.060983436 | 0.405019413 | 0.685463242 | 0.998252924 |
| chr12:69084410-69096564   | exonic     | NUP107                                                                | 12 | 69084410  | 69096564  | 2 | 0 | 0 | 0 | 0 | 0 | 12154 | 0.257973886 | 1.644777126 | 4.060983436 | 0.405019413 | 0.685463242 | 0.998252924 |
| chr12:69429942-69431308   | intergenic | <small>CPM(dist=72922), CPSPF6(dist=202009)</small>                   | 12 | 69429942  | 69431308  | 2 | 0 | 0 | 0 | 0 | 0 | 1366  | 0.257973886 | 1.644777126 | 4.060983436 | 0.405019413 | 0.685463242 | 0.998252924 |
| chr12:9241795-9266139     | exonic     | A2M                                                                   | 12 | 9241795   | 9266139   | 2 | 0 | 0 | 0 | 0 | 0 | 24344 | 0.257973886 | 1.644777126 | 4.060983436 | 0.405019413 | 0.685463242 | 0.998252924 |
| chr12:9242497-9244025     | exonic     | A2M                                                                   | 12 | 9242497   | 9244025   | 2 | 0 | 0 | 0 | 0 | 0 | 1528  | 0.257973886 | 1.644777126 | 4.060983436 | 0.405019413 | 0.685463242 | 0.998252924 |
| chr12:94760490-94797038   | exonic     | CEP83                                                                 | 12 | 94760490  | 94797038  | 2 | 0 | 0 | 0 | 0 | 0 | 36548 | 0.257973886 | 1.644777126 | 4.060983436 | 0.405019413 | 0.685463242 | 0.998252924 |
| chr12:94761570-94797038   | exonic     | CEP83                                                                 | 12 | 94761570  | 94797038  | 2 | 0 | 0 | 0 | 0 | 0 | 35468 | 0.257973886 | 1.644777126 | 4.060983436 | 0.405019413 | 0.685463242 | 0.998252924 |
| chr13:108317195-108407838 | intronic   | FAM155A                                                               | 13 | 108317195 | 108407838 | 2 | 0 | 0 | 0 | 0 | 0 | 90643 | 0.257973886 | 1.644777126 | 4.060983436 | 0.405019413 | 0.685463242 | 0.998252924 |

|                           |              |                                          |    |           |           |   |   |   |   |   |   |        |             |             |             |             |             |             |
|---------------------------|--------------|------------------------------------------|----|-----------|-----------|---|---|---|---|---|---|--------|-------------|-------------|-------------|-------------|-------------|-------------|
| chr13:20222561-20224400   | exonic       | MPHOSPH8                                 | 13 | 20222561  | 20224400  | 2 | 0 | 0 | 0 | 0 | 0 | 1839   | 0.257973886 | 1.644777126 | 4.060983436 | 0.405019413 | 0.685463242 | 0.998252924 |
| chr13:20600751-20637111   | exonic       | ZMYM2                                    | 13 | 20600751  | 20637111  | 2 | 0 | 0 | 0 | 0 | 0 | 36360  | 0.257973886 | 1.644777126 | 4.060983436 | 0.405019413 | 0.685463242 | 0.998252924 |
| chr13:21965860-21977005   | exonic       | ZDHC20                                   | 13 | 21965860  | 21977005  | 2 | 0 | 0 | 0 | 0 | 0 | 11145  | 0.257973886 | 1.644777126 | 4.060983436 | 0.405019413 | 0.685463242 | 0.998252924 |
| chr13:22088491-22113827   | exonic       | MICU2                                    | 13 | 22088491  | 22113827  | 2 | 0 | 0 | 0 | 0 | 0 | 25336  | 0.257973886 | 1.644777126 | 4.060983436 | 0.405019413 | 0.685463242 | 0.998252924 |
| chr13:23927923-23945304   | exonic       | SACS                                     | 13 | 23927923  | 23945304  | 2 | 0 | 0 | 0 | 0 | 0 | 17381  | 0.257973886 | 1.644777126 | 4.060983436 | 0.405019413 | 0.685463242 | 0.998252924 |
| chr13:25478063-25487229   | exonic       | CENPJ                                    | 13 | 25478063  | 25487229  | 2 | 0 | 0 | 0 | 0 | 0 | 9166   | 0.257973886 | 1.644777126 | 4.060983436 | 0.405019413 | 0.685463242 | 0.998252924 |
| chr13:27829491-27830290   | exonic       | RPL21                                    | 13 | 27829491  | 27830290  | 2 | 0 | 0 | 0 | 0 | 0 | 799    | 0.257973886 | 1.644777126 | 4.060983436 | 0.405019413 | 0.685463242 | 0.998252924 |
| chr13:31843350-31860956   | exonic       | B3GLCT                                   | 13 | 31843350  | 31860956  | 2 | 0 | 0 | 0 | 0 | 0 | 17606  | 0.257973886 | 1.644777126 | 4.060983436 | 0.405019413 | 0.685463242 | 0.998252924 |
| chr13:32768279-32776664   | exonic       | FRY                                      | 13 | 32768279  | 32776664  | 2 | 0 | 0 | 0 | 0 | 0 | 8385   | 0.257973886 | 1.644777126 | 4.060983436 | 0.405019413 | 0.685463242 | 0.998252924 |
| chr13:33268359-33315286   | exonic       | PDS5B                                    | 13 | 33268359  | 33315286  | 2 | 0 | 0 | 0 | 0 | 0 | 46927  | 0.257973886 | 1.644777126 | 4.060983436 | 0.405019413 | 0.685463242 | 0.998252924 |
| chr13:36886281-36886614   | exonic       | SPG20                                    | 13 | 36886281  | 36886614  | 2 | 0 | 0 | 0 | 0 | 0 | 333    | 0.257973886 | 1.644777126 | 4.060983436 | 0.405019413 | 0.685463242 | 0.998252924 |
| chr13:38624906-38721283   | ncRNA_exonic | LINC00571                                | 13 | 38624906  | 38721283  | 2 | 0 | 0 | 0 | 0 | 0 | 96377  | 0.257973886 | 1.644777126 | 4.060983436 | 0.405019413 | 0.685463242 | 0.998252924 |
| chr13:45112671-45114072   | intronic     | TSC22D1                                  | 13 | 45112671  | 45114072  | 2 | 0 | 0 | 0 | 0 | 0 | 1401   | 0.257973886 | 1.644777126 | 4.060983436 | 0.405019413 | 0.685463242 | 0.998252924 |
| chr13:45975217-45985615   | exonic       | SLC25A30                                 | 13 | 45975217  | 45985615  | 2 | 0 | 0 | 0 | 0 | 0 | 10398  | 0.257973886 | 1.644777126 | 4.060983436 | 0.405019413 | 0.685463242 | 0.998252924 |
| chr13:46562921-46563232   | exonic       | ZC3H13                                   | 13 | 46562921  | 46563232  | 2 | 0 | 0 | 0 | 0 | 0 | 311    | 0.257973886 | 1.644777126 | 4.060983436 | 0.405019413 | 0.685463242 | 0.998252924 |
| chr13:47202700-47209700   | intronic     | LRCH1                                    | 13 | 47202700  | 47209700  | 2 | 0 | 0 | 0 | 0 | 0 | 7000   | 0.257973886 | 1.644777126 | 4.060983436 | 0.405019413 | 0.685463242 | 0.998252924 |
| chr13:50097310-50098352   | exonic       | PHF11                                    | 13 | 50097310  | 50098352  | 2 | 0 | 0 | 0 | 0 | 0 | 1042   | 0.257973886 | 1.644777126 | 4.060983436 | 0.405019413 | 0.685463242 | 0.998252924 |
| chr13:51320869-51406266   | exonic       | DLEU7                                    | 13 | 51320869  | 51406266  | 2 | 0 | 0 | 0 | 0 | 0 | 85397  | 0.257973886 | 1.644777126 | 4.060983436 | 0.405019413 | 0.685463242 | 0.998252924 |
| chr13:75900332-75936743   | exonic       | TBC1D4                                   | 13 | 75900332  | 75936743  | 2 | 0 | 0 | 0 | 0 | 0 | 36411  | 0.257973886 | 1.644777126 | 4.060983436 | 0.405019413 | 0.685463242 | 0.998252924 |
| chr13:77745626-77754453   | exonic       | MYCBP2                                   | 13 | 77745626  | 77754453  | 2 | 0 | 0 | 0 | 0 | 0 | 8827   | 0.257973886 | 1.644777126 | 4.060983436 | 0.405019413 | 0.685463242 | 0.998252924 |
| chr13:95813442-95830345   | exonic       | ABCC4                                    | 13 | 95813442  | 95830345  | 2 | 0 | 0 | 0 | 0 | 0 | 16903  | 0.257973886 | 1.644777126 | 4.060983436 | 0.405019413 | 0.685463242 | 0.998252924 |
| chr13:96234209-96234567   | exonic       | DZIP1                                    | 13 | 96234209  | 96234567  | 2 | 0 | 0 | 0 | 0 | 0 | 358    | 0.257973886 | 1.644777126 | 4.060983436 | 0.405019413 | 0.685463242 | 0.998252924 |
| chr14:102466622-102471573 | exonic       | DYNC1H1                                  | 14 | 102466622 | 102471573 | 2 | 0 | 0 | 0 | 0 | 0 | 4951   | 0.257973886 | 1.644777126 | 4.060983436 | 0.405019413 | 0.685463242 | 0.998252924 |
| chr14:102471098-102474674 | exonic       | DYNC1H1                                  | 14 | 102471098 | 102474674 | 2 | 0 | 0 | 0 | 0 | 0 | 3576   | 0.257973886 | 1.644777126 | 4.060983436 | 0.405019413 | 0.685463242 | 0.998252924 |
| chr14:106518808-106667885 | intergenic   | ADAM6(dist=80450), LINC00226(dist=76384) | 14 | 106518808 | 106667885 | 2 | 0 | 0 | 0 | 0 | 0 | 149077 | 0.257973886 | 1.644777126 | 4.060983436 | 0.405019413 | 0.685463242 | 0.998252924 |
| chr14:24435492-24470293   | exonic       | DHRS4, DHRS4L2                           | 14 | 24435492  | 24470293  | 2 | 0 | 0 | 0 | 0 | 0 | 34801  | 0.257973886 | 1.644777126 | 4.060983436 | 0.405019413 | 0.685463242 | 0.998252924 |
| chr14:30102074-30108110   | exonic       | PRKD1                                    | 14 | 30102074  | 30108110  | 2 | 0 | 0 | 0 | 0 | 0 | 6036   | 0.257973886 | 1.644777126 | 4.060983436 | 0.405019413 | 0.685463242 | 0.998252924 |
| chr14:31637503-31641328   | exonic       | HECTD1                                   | 14 | 31637503  | 31641328  | 2 | 0 | 0 | 0 | 0 | 0 | 3825   | 0.257973886 | 1.644777126 | 4.060983436 | 0.405019413 | 0.685463242 | 0.998252924 |
| chr14:31782173-31795548   | exonic       | HEATR5A                                  | 14 | 31782173  | 31795548  | 2 | 0 | 0 | 0 | 0 | 0 | 13375  | 0.257973886 | 1.644777126 | 4.060983436 | 0.405019413 | 0.685463242 | 0.998252924 |
| chr14:33684388-33725084   | exonic       | NPAS3                                    | 14 | 33684388  | 33725084  | 2 | 0 | 0 | 0 | 0 | 0 | 40696  | 0.257973886 | 1.644777126 | 4.060983436 | 0.405019413 | 0.685463242 | 0.998252924 |
| chr14:36064839-36128402   | exonic       | RALGAPA1                                 | 14 | 36064839  | 36128402  | 2 | 0 | 0 | 0 | 0 | 0 | 63563  | 0.257973886 | 1.644777126 | 4.060983436 | 0.405019413 | 0.685463242 | 0.998252924 |
| chr14:37777261-37892154   | exonic       | MIPOL1                                   | 14 | 37777261  | 37892154  | 2 | 0 | 0 | 0 | 0 | 0 | 114893 | 0.257973886 | 1.644777126 | 4.060983436 | 0.405019413 | 0.685463242 | 0.998252924 |
| chr14:50053297-50053596   | upstream     | RPS29(dist=163)                          | 14 | 50053297  | 50053596  | 2 | 0 | 0 | 0 | 0 | 0 | 299    | 0.257973886 | 1.644777126 | 4.060983436 | 0.405019413 | 0.685463242 | 0.998252924 |
| chr14:51382053-51383823   | exonic       | PYGL                                     | 14 | 51382053  | 51383823  | 2 | 0 | 0 | 0 | 0 | 0 | 1770   | 0.257973886 | 1.644777126 | 4.060983436 | 0.405019413 | 0.685463242 | 0.998252924 |
| chr14:52505465-52527074   | exonic       | NID2                                     | 14 | 52505465  | 52527074  | 2 | 0 | 0 | 0 | 0 | 0 | 21609  | 0.257973886 | 1.644777126 | 4.060983436 | 0.405019413 | 0.685463242 | 0.998252924 |

|                         |          |                                                    |    |          |          |   |   |   |   |   |   |        |             |             |             |             |             |             |
|-------------------------|----------|----------------------------------------------------|----|----------|----------|---|---|---|---|---|---|--------|-------------|-------------|-------------|-------------|-------------|-------------|
| chr14:61919944-61924397 | exonic   | PRKCH                                              | 14 | 61919944 | 61924397 | 2 | 0 | 0 | 0 | 0 | 0 | 4453   | 0.257973886 | 1.644777126 | 4.060983436 | 0.405019413 | 0.685463242 | 0.998252924 |
| chr14:62233593-62245628 | exonic   | SNAPC1                                             | 14 | 62233593 | 62245628 | 2 | 0 | 0 | 0 | 0 | 0 | 12035  | 0.257973886 | 1.644777126 | 4.060983436 | 0.405019413 | 0.685463242 | 0.998252924 |
| chr14:69571556-69572855 | intronic | DCAF5                                              | 14 | 69571556 | 69572855 | 2 | 0 | 0 | 0 | 0 | 0 | 1299   | 0.257973886 | 1.644777126 | 4.060983436 | 0.405019413 | 0.685463242 | 0.998252924 |
| chr14:69585015-69585910 | splicing | DCAF5                                              | 14 | 69585015 | 69585910 | 2 | 0 | 0 | 0 | 0 | 0 | 895    | 0.257973886 | 1.644777126 | 4.060983436 | 0.405019413 | 0.685463242 | 0.998252924 |
| chr14:71059596-71064494 | exonic   | MED6                                               | 14 | 71059596 | 71064494 | 2 | 0 | 0 | 0 | 0 | 0 | 4898   | 0.257973886 | 1.644777126 | 4.060983436 | 0.405019413 | 0.685463242 | 0.998252924 |
| chr14:74967481-74995401 | exonic   | LTBP2                                              | 14 | 74967481 | 74995401 | 2 | 0 | 0 | 0 | 0 | 0 | 27920  | 0.257973886 | 1.644777126 | 4.060983436 | 0.405019413 | 0.685463242 | 0.998252924 |
| chr14:76620696-76647192 | exonic   | GPATCH2L                                           | 14 | 76620696 | 76647192 | 2 | 0 | 0 | 0 | 0 | 0 | 26496  | 0.257973886 | 1.644777126 | 4.060983436 | 0.405019413 | 0.685463242 | 0.998252924 |
| chr14:78322659-78325622 | exonic   | ADCK1                                              | 14 | 78322659 | 78325622 | 2 | 0 | 0 | 0 | 0 | 0 | 2963   | 0.257973886 | 1.644777126 | 4.060983436 | 0.405019413 | 0.685463242 | 0.998252924 |
| chr14:81209419-81373837 | exonic   | CEP128                                             | 14 | 81209419 | 81373837 | 2 | 0 | 0 | 0 | 0 | 0 | 164418 | 0.257973886 | 1.644777126 | 4.060983436 | 0.405019413 | 0.685463242 | 0.998252924 |
| chr14:88967126-88974364 | exonic   | PTPN21                                             | 14 | 88967126 | 88974364 | 2 | 0 | 0 | 0 | 0 | 0 | 7238   | 0.257973886 | 1.644777126 | 4.060983436 | 0.405019413 | 0.685463242 | 0.998252924 |
| chr14:96997923-96998613 | exonic   | PAPOLA                                             | 14 | 96997923 | 96998613 | 2 | 0 | 0 | 0 | 0 | 0 | 690    | 0.257973886 | 1.644777126 | 4.060983436 | 0.405019413 | 0.685463242 | 0.998252924 |
| chr15:34537606-34537893 | splicing | SLC12A6                                            | 15 | 34537606 | 34537893 | 2 | 0 | 0 | 0 | 0 | 0 | 287    | 0.257973886 | 1.644777126 | 4.060983436 | 0.405019413 | 0.685463242 | 0.998252924 |
| chr15:35174702-35178862 | exonic   | AQR                                                | 15 | 35174702 | 35178862 | 2 | 0 | 0 | 0 | 0 | 0 | 4160   | 0.257973886 | 1.644777126 | 4.060983436 | 0.405019413 | 0.685463242 | 0.998252924 |
| chr15:38794512-38800202 | exonic   | RASGRP1                                            | 15 | 38794512 | 38800202 | 2 | 0 | 0 | 0 | 0 | 0 | 5690   | 0.257973886 | 1.644777126 | 4.060983436 | 0.405019413 | 0.685463242 | 0.998252924 |
| chr15:42804030-42807552 | exonic   | SNAP23                                             | 15 | 42804030 | 42807552 | 2 | 0 | 0 | 0 | 0 | 0 | 3522   | 0.257973886 | 1.644777126 | 4.060983436 | 0.405019413 | 0.685463242 | 0.998252924 |
| chr15:43102811-43122276 | exonic   | TTBK2                                              | 15 | 43102811 | 43122276 | 2 | 0 | 0 | 0 | 0 | 0 | 19465  | 0.257973886 | 1.644777126 | 4.060983436 | 0.405019413 | 0.685463242 | 0.998252924 |
| chr15:43769790-43773220 | exonic   | TP53BP1                                            | 15 | 43769790 | 43773220 | 2 | 0 | 0 | 0 | 0 | 0 | 3430   | 0.257973886 | 1.644777126 | 4.060983436 | 0.405019413 | 0.685463242 | 0.998252924 |
| chr15:44085281-44085887 | exonic   | SERF2                                              | 15 | 44085281 | 44085887 | 2 | 0 | 0 | 0 | 0 | 0 | 606    | 0.257973886 | 1.644777126 | 4.060983436 | 0.405019413 | 0.685463242 | 0.998252924 |
| chr15:44624185-44673174 | exonic   | CASC4                                              | 15 | 44624185 | 44673174 | 2 | 0 | 0 | 0 | 0 | 0 | 48989  | 0.257973886 | 1.644777126 | 4.060983436 | 0.405019413 | 0.685463242 | 0.998252924 |
| chr15:44884528-44892830 | exonic   | SPG11                                              | 15 | 44884528 | 44892830 | 2 | 0 | 0 | 0 | 0 | 0 | 8302   | 0.257973886 | 1.644777126 | 4.060983436 | 0.405019413 | 0.685463242 | 0.998252924 |
| chr15:44918528-44944464 | exonic   | SPG11                                              | 15 | 44918528 | 44944464 | 2 | 0 | 0 | 0 | 0 | 0 | 25936  | 0.257973886 | 1.644777126 | 4.060983436 | 0.405019413 | 0.685463242 | 0.998252924 |
| chr15:50866833-50867986 | exonic   | TRPM7                                              | 15 | 50866833 | 50867986 | 2 | 0 | 0 | 0 | 0 | 0 | 1153   | 0.257973886 | 1.644777126 | 4.060983436 | 0.405019413 | 0.685463242 | 0.998252924 |
| chr15:51012136-51041943 | exonic   | SPPL2A                                             | 15 | 51012136 | 51041943 | 2 | 0 | 0 | 0 | 0 | 0 | 29807  | 0.257973886 | 1.644777126 | 4.060983436 | 0.405019413 | 0.685463242 | 0.998252924 |
| chr15:52338027-52342334 | exonic   | MAPK6                                              | 15 | 52338027 | 52342334 | 2 | 0 | 0 | 0 | 0 | 0 | 4307   | 0.257973886 | 1.644777126 | 4.060983436 | 0.405019413 | 0.685463242 | 0.998252924 |
| chr15:55727102-55742565 | exonic   | DYX1C1                                             | 15 | 55727102 | 55742565 | 2 | 0 | 0 | 0 | 0 | 0 | 15463  | 0.257973886 | 1.644777126 | 4.060983436 | 0.405019413 | 0.685463242 | 0.998252924 |
| chr15:56434975-56436681 | exonic   | RFX7                                               | 15 | 56434975 | 56436681 | 2 | 0 | 0 | 0 | 0 | 0 | 1706   | 0.257973886 | 1.644777126 | 4.060983436 | 0.405019413 | 0.685463242 | 0.998252924 |
| chr15:56993131-56999504 | exonic   | ZNF280D                                            | 15 | 56993131 | 56999504 | 2 | 0 | 0 | 0 | 0 | 0 | 6373   | 0.257973886 | 1.644777126 | 4.060983436 | 0.405019413 | 0.685463242 | 0.998252924 |
| chr15:63872744-63873539 | intronic | USP3                                               | 15 | 63872744 | 63873539 | 2 | 0 | 0 | 0 | 0 | 0 | 795    | 0.257973886 | 1.644777126 | 4.060983436 | 0.405019413 | 0.685463242 | 0.998252924 |
| chr15:63943451-63944740 | exonic   | HERC1                                              | 15 | 63943451 | 63944740 | 2 | 0 | 0 | 0 | 0 | 0 | 1289   | 0.257973886 | 1.644777126 | 4.060983436 | 0.405019413 | 0.685463242 | 0.998252924 |
| chr15:63953951-63961897 | exonic   | HERC1                                              | 15 | 63953951 | 63961897 | 2 | 0 | 0 | 0 | 0 | 0 | 7946   | 0.257973886 | 1.644777126 | 4.060983436 | 0.405019413 | 0.685463242 | 0.998252924 |
| chr15:64039922-64048947 | exonic   | HERC1                                              | 15 | 64039922 | 64048947 | 2 | 0 | 0 | 0 | 0 | 0 | 9025   | 0.257973886 | 1.644777126 | 4.060983436 | 0.405019413 | 0.685463242 | 0.998252924 |
| chr15:64744242-64745304 | intronic | TRIP4                                              | 15 | 64744242 | 64745304 | 2 | 0 | 0 | 0 | 0 | 0 | 1062   | 0.257973886 | 1.644777126 | 4.060983436 | 0.405019413 | 0.685463242 | 0.998252924 |
| chr15:65257660-65262560 | exonic   | SPG21                                              | 15 | 65257660 | 65262560 | 2 | 0 | 0 | 0 | 0 | 0 | 4900   | 0.257973886 | 1.644777126 | 4.060983436 | 0.405019413 | 0.685463242 | 0.998252924 |
| chr15:65442121-65442507 | UTR3     | <small>CLPX(OM_006660:c.*1040_*654de1ins0)</small> | 15 | 65442121 | 65442507 | 2 | 0 | 0 | 0 | 0 | 0 | 386    | 0.257973886 | 1.644777126 | 4.060983436 | 0.405019413 | 0.685463242 | 0.998252924 |
| chr15:65555486-65563410 | exonic   | PARP16                                             | 15 | 65555486 | 65563410 | 2 | 0 | 0 | 0 | 0 | 0 | 7924   | 0.257973886 | 1.644777126 | 4.060983436 | 0.405019413 | 0.685463242 | 0.998252924 |

|                         |              |           |    |          |          |   |   |   |   |   |   |       |             |             |             |             |             |             |
|-------------------------|--------------|-----------|----|----------|----------|---|---|---|---|---|---|-------|-------------|-------------|-------------|-------------|-------------|-------------|
| chr15:68118273-68125595 | exonic       | SKOR1     | 15 | 68118273 | 68125595 | 2 | 0 | 0 | 0 | 0 | 0 | 7322  | 0.257973886 | 1.644777126 | 4.060983436 | 0.405019413 | 0.685463242 | 0.998252924 |
| chr15:68491436-68495076 | exonic       | CALML4    | 15 | 68491436 | 68495076 | 2 | 0 | 0 | 0 | 0 | 0 | 3640  | 0.257973886 | 1.644777126 | 4.060983436 | 0.405019413 | 0.685463242 | 0.998252924 |
| chr15:68491467-68495234 | exonic       | CALML4    | 15 | 68491467 | 68495234 | 2 | 0 | 0 | 0 | 0 | 0 | 3767  | 0.257973886 | 1.644777126 | 4.060983436 | 0.405019413 | 0.685463242 | 0.998252924 |
| chr15:71534987-71549054 | exonic       | THSD4     | 15 | 71534987 | 71549054 | 2 | 0 | 0 | 0 | 0 | 0 | 14067 | 0.257973886 | 1.644777126 | 4.060983436 | 0.405019413 | 0.685463242 | 0.998252924 |
| chr15:72175934-72186119 | exonic       | MYO9A     | 15 | 72175934 | 72186119 | 2 | 0 | 0 | 0 | 0 | 0 | 10185 | 0.257973886 | 1.644777126 | 4.060983436 | 0.405019413 | 0.685463242 | 0.998252924 |
| chr15:72193531-72197347 | exonic       | MYO9A     | 15 | 72193531 | 72197347 | 2 | 0 | 0 | 0 | 0 | 0 | 3816  | 0.257973886 | 1.644777126 | 4.060983436 | 0.405019413 | 0.685463242 | 0.998252924 |
| chr15:75219106-75221573 | exonic       | COX5A     | 15 | 75219106 | 75221573 | 2 | 0 | 0 | 0 | 0 | 0 | 2467  | 0.257973886 | 1.644777126 | 4.060983436 | 0.405019413 | 0.685463242 | 0.998252924 |
| chr15:76566752-76578822 | exonic       | ETFA      | 15 | 76566752 | 76578822 | 2 | 0 | 0 | 0 | 0 | 0 | 12070 | 0.257973886 | 1.644777126 | 4.060983436 | 0.405019413 | 0.685463242 | 0.998252924 |
| chr15:76994098-77025725 | exonic       | SCAPER    | 15 | 76994098 | 77025725 | 2 | 0 | 0 | 0 | 0 | 0 | 31627 | 0.257973886 | 1.644777126 | 4.060983436 | 0.405019413 | 0.685463242 | 0.998252924 |
| chr15:77046149-77057979 | exonic       | SCAPER    | 15 | 77046149 | 77057979 | 2 | 0 | 0 | 0 | 0 | 0 | 11830 | 0.257973886 | 1.644777126 | 4.060983436 | 0.405019413 | 0.685463242 | 0.998252924 |
| chr15:77092588-77096974 | exonic       | SCAPER    | 15 | 77092588 | 77096974 | 2 | 0 | 0 | 0 | 0 | 0 | 4386  | 0.257973886 | 1.644777126 | 4.060983436 | 0.405019413 | 0.685463242 | 0.998252924 |
| chr15:77638884-77657567 | intronic     | PEAK1     | 15 | 77638884 | 77657567 | 2 | 0 | 0 | 0 | 0 | 0 | 18683 | 0.257973886 | 1.644777126 | 4.060983436 | 0.405019413 | 0.685463242 | 0.998252924 |
| chr15:78837210-78838106 | exonic       | PSMA4     | 15 | 78837210 | 78838106 | 2 | 0 | 0 | 0 | 0 | 0 | 896   | 0.257973886 | 1.644777126 | 4.060983436 | 0.405019413 | 0.685463242 | 0.998252924 |
| chr15:79170554-79179691 | exonic       | MORF4L1   | 15 | 79170554 | 79179691 | 2 | 0 | 0 | 0 | 0 | 0 | 9137  | 0.257973886 | 1.644777126 | 4.060983436 | 0.405019413 | 0.685463242 | 0.998252924 |
| chr15:79217675-79220123 | exonic       | CTSH      | 15 | 79217675 | 79220123 | 2 | 0 | 0 | 0 | 0 | 0 | 2448  | 0.257973886 | 1.644777126 | 4.060983436 | 0.405019413 | 0.685463242 | 0.998252924 |
| chr15:82443805-82456325 | exonic       | EFTUD1    | 15 | 82443805 | 82456325 | 2 | 0 | 0 | 0 | 0 | 0 | 12520 | 0.257973886 | 1.644777126 | 4.060983436 | 0.405019413 | 0.685463242 | 0.998252924 |
| chr15:84487614-84488799 | exonic       | ADAMTSL3  | 15 | 84487614 | 84488799 | 2 | 0 | 0 | 0 | 0 | 0 | 1185  | 0.257973886 | 1.644777126 | 4.060983436 | 0.405019413 | 0.685463242 | 0.998252924 |
| chr15:91503130-91505004 | exonic       | RCCD1     | 15 | 91503130 | 91505004 | 2 | 0 | 0 | 0 | 0 | 0 | 1874  | 0.257973886 | 1.644777126 | 4.060983436 | 0.405019413 | 0.685463242 | 0.998252924 |
| chr15:96814931-96834012 | ncRNA_exonic | NR2F2-AS1 | 15 | 96814931 | 96834012 | 2 | 0 | 0 | 0 | 0 | 0 | 19081 | 0.257973886 | 1.644777126 | 4.060983436 | 0.405019413 | 0.685463242 | 0.998252924 |
| chr16:15102635-15112822 | exonic       | PDXDC1    | 16 | 15102635 | 15112822 | 2 | 0 | 0 | 0 | 0 | 0 | 10187 | 0.257973886 | 1.644777126 | 4.060983436 | 0.405019413 | 0.685463242 | 0.998252924 |
| chr16:15116560-15123913 | exonic       | PDXDC1    | 16 | 15116560 | 15123913 | 2 | 0 | 0 | 0 | 0 | 0 | 7353  | 0.257973886 | 1.644777126 | 4.060983436 | 0.405019413 | 0.685463242 | 0.998252924 |
| chr16:15808765-15809129 | exonic       | MYH11     | 16 | 15808765 | 15809129 | 2 | 0 | 0 | 0 | 0 | 0 | 364   | 0.257973886 | 1.644777126 | 4.060983436 | 0.405019413 | 0.685463242 | 0.998252924 |
| chr16:15869935-15880589 | exonic       | MYH11     | 16 | 15869935 | 15880589 | 2 | 0 | 0 | 0 | 0 | 0 | 10654 | 0.257973886 | 1.644777126 | 4.060983436 | 0.405019413 | 0.685463242 | 0.998252924 |
| chr16:17448956-17451907 | exonic       | XYLT1     | 16 | 17448956 | 17451907 | 2 | 0 | 0 | 0 | 0 | 0 | 2951  | 0.257973886 | 1.644777126 | 4.060983436 | 0.405019413 | 0.685463242 | 0.998252924 |
| chr16:19627435-19641142 | exonic       | C16orf62  | 16 | 19627435 | 19641142 | 2 | 0 | 0 | 0 | 0 | 0 | 13707 | 0.257973886 | 1.644777126 | 4.060983436 | 0.405019413 | 0.685463242 | 0.998252924 |
| chr16:21327205-21328447 | ncRNA_exonic | CRYM-AS1  | 16 | 21327205 | 21328447 | 2 | 0 | 0 | 0 | 0 | 0 | 1242  | 0.257973886 | 1.644777126 | 4.060983436 | 0.405019413 | 0.685463242 | 0.998252924 |
| chr16:27351506-27353580 | exonic       | IL4R      | 16 | 27351506 | 27353580 | 2 | 0 | 0 | 0 | 0 | 0 | 2074  | 0.257973886 | 1.644777126 | 4.060983436 | 0.405019413 | 0.685463242 | 0.998252924 |
| chr16:28157415-28167848 | exonic       | XPO6      | 16 | 28157415 | 28167848 | 2 | 0 | 0 | 0 | 0 | 0 | 10433 | 0.257973886 | 1.644777126 | 4.060983436 | 0.405019413 | 0.685463242 | 0.998252924 |
| chr16:28592375-28602256 | exonic       | SGF29     | 16 | 28592375 | 28602256 | 2 | 0 | 0 | 0 | 0 | 0 | 9881  | 0.257973886 | 1.644777126 | 4.060983436 | 0.405019413 | 0.685463242 | 0.998252924 |
| chr16:30680129-30680300 | exonic       | FBRS      | 16 | 30680129 | 30680300 | 2 | 0 | 0 | 0 | 0 | 0 | 171   | 0.257973886 | 1.644777126 | 4.060983436 | 0.405019413 | 0.685463242 | 0.998252924 |
| chr16:3361753-3373013   | exonic       | ZNF75A    | 16 | 3361753  | 3373013  | 2 | 0 | 0 | 0 | 0 | 0 | 11260 | 0.257973886 | 1.644777126 | 4.060983436 | 0.405019413 | 0.685463242 | 0.998252924 |
| chr16:3799627-3819354   | exonic       | CREBBP    | 16 | 3799627  | 3819354  | 2 | 4 | 0 | 0 | 5 | 0 | 19727 | 0.257973886 | 1.644777126 | 4.060983436 | 0.405019413 | 0.685463242 | 0.998252924 |
| chr16:3801726-3820987   | exonic       | CREBBP    | 16 | 3801726  | 3820987  | 2 | 0 | 0 | 0 | 0 | 0 | 19261 | 0.257973886 | 1.644777126 | 4.060983436 | 0.405019413 | 0.685463242 | 0.998252924 |
| chr16:4157475-4158484   | intronic     | ADCY9     | 16 | 4157475  | 4158484  | 2 | 0 | 0 | 0 | 0 | 0 | 1009  | 0.257973886 | 1.644777126 | 4.060983436 | 0.405019413 | 0.685463242 | 0.998252924 |
| chr16:4707246-4721460   | exonic       | MGRN1     | 16 | 4707246  | 4721460  | 2 | 0 | 0 | 0 | 0 | 0 | 14214 | 0.257973886 | 1.644777126 | 4.060983436 | 0.405019413 | 0.685463242 | 0.998252924 |



|                         |            |                                             |    |          |          |   |   |   |   |   |   |       |             |             |             |             |             |             |
|-------------------------|------------|---------------------------------------------|----|----------|----------|---|---|---|---|---|---|-------|-------------|-------------|-------------|-------------|-------------|-------------|
| chr16:50106515-50136346 | exonic     | HEATR3                                      | 16 | 50106515 | 50136346 | 2 | 0 | 0 | 0 | 0 | 0 | 29831 | 0.257973886 | 1.644777126 | 4.060983436 | 0.405019413 | 0.685463242 | 0.998252924 |
| chr16:50616854-50622558 | intronic   | NKD1                                        | 16 | 50616854 | 50622558 | 2 | 0 | 0 | 0 | 0 | 0 | 5704  | 0.257973886 | 1.644777126 | 4.060983436 | 0.405019413 | 0.685463242 | 0.998252924 |
| chr16:50655512-50666319 | exonic     | NKD1                                        | 16 | 50655512 | 50666319 | 2 | 0 | 0 | 0 | 0 | 0 | 10807 | 0.257973886 | 1.644777126 | 4.060983436 | 0.405019413 | 0.685463242 | 0.998252924 |
| chr16:53189837-53263012 | exonic     | CHD9                                        | 16 | 53189837 | 53263012 | 2 | 0 | 0 | 0 | 0 | 0 | 73175 | 0.257973886 | 1.644777126 | 4.060983436 | 0.405019413 | 0.685463242 | 0.998252924 |
| chr16:53337631-53340309 | exonic     | CHD9                                        | 16 | 53337631 | 53340309 | 2 | 0 | 0 | 0 | 0 | 0 | 2678  | 0.257973886 | 1.644777126 | 4.060983436 | 0.405019413 | 0.685463242 | 0.998252924 |
| chr16:58614536-58617086 | exonic     | CNOT1                                       | 16 | 58614536 | 58617086 | 2 | 0 | 0 | 0 | 0 | 0 | 2550  | 0.257973886 | 1.644777126 | 4.060983436 | 0.405019413 | 0.685463242 | 0.998252924 |
| chr16:65843943-65846679 | intergenic | LINC00922 (dist=233740), CDH5 (dist=553831) | 16 | 65843943 | 65846679 | 2 | 0 | 0 | 0 | 0 | 0 | 2736  | 0.257973886 | 1.644777126 | 4.060983436 | 0.405019413 | 0.685463242 | 0.998252924 |
| chr16:66655964-66670484 | exonic     | CMTM4                                       | 16 | 66655964 | 66670484 | 2 | 0 | 0 | 0 | 0 | 0 | 14520 | 0.257973886 | 1.644777126 | 4.060983436 | 0.405019413 | 0.685463242 | 0.998252924 |
| chr16:66719642-66720387 | intronic   | CMTM4                                       | 16 | 66719642 | 66720387 | 2 | 0 | 0 | 0 | 0 | 0 | 745   | 0.257973886 | 1.644777126 | 4.060983436 | 0.405019413 | 0.685463242 | 0.998252924 |
| chr16:67578201-67578733 | exonic     | FAM65A                                      | 16 | 67578201 | 67578733 | 2 | 0 | 0 | 0 | 0 | 0 | 532   | 0.257973886 | 1.644777126 | 4.060983436 | 0.405019413 | 0.685463242 | 0.998252924 |
| chr16:68059317-68083453 | exonic     | DUS2                                        | 16 | 68059317 | 68083453 | 1 | 0 | 0 | 0 | 2 | 0 | 24136 | 0.257973886 | 1.644777126 | 4.060983436 | 0.405019413 | 0.685463242 | 0.998252924 |
| chr16:68130210-68160513 | exonic     | NFATC3                                      | 16 | 68130210 | 68160513 | 2 | 0 | 0 | 0 | 0 | 0 | 30303 | 0.257973886 | 1.644777126 | 4.060983436 | 0.405019413 | 0.685463242 | 0.998252924 |
| chr16:68300496-68309152 | exonic     | SLC7A6                                      | 16 | 68300496 | 68309152 | 2 | 0 | 0 | 0 | 0 | 0 | 8656  | 0.257973886 | 1.644777126 | 4.060983436 | 0.405019413 | 0.685463242 | 0.998252924 |
| chr16:68961470-68961986 | exonic     | TANGO6                                      | 16 | 68961470 | 68961986 | 2 | 0 | 0 | 0 | 0 | 0 | 516   | 0.257973886 | 1.644777126 | 4.060983436 | 0.405019413 | 0.685463242 | 0.998252924 |
| chr16:69832584-69833198 | exonic     | WWP2                                        | 16 | 69832584 | 69833198 | 2 | 0 | 0 | 0 | 0 | 0 | 614   | 0.257973886 | 1.644777126 | 4.060983436 | 0.405019413 | 0.685463242 | 0.998252924 |
| chr16:78777266-78779913 | intronic   | WFOX                                        | 16 | 78777266 | 78779913 | 2 | 0 | 0 | 0 | 0 | 0 | 2647  | 0.257973886 | 1.644777126 | 4.060983436 | 0.405019413 | 0.685463242 | 0.998252924 |
| chr16:84872027-84872341 | exonic     | CRISPLD2                                    | 16 | 84872027 | 84872341 | 2 | 0 | 0 | 0 | 0 | 0 | 314   | 0.257973886 | 1.644777126 | 4.060983436 | 0.405019413 | 0.685463242 | 0.998252924 |
| chr16:89371613-89383483 | exonic     | ANKRD11                                     | 16 | 89371613 | 89383483 | 2 | 0 | 0 | 0 | 0 | 0 | 11870 | 0.257973886 | 1.644777126 | 4.060983436 | 0.405019413 | 0.685463242 | 0.998252924 |
| chr17:18607932-18608477 | intergenic | ZNF286B (dist=22360), TRIM16L (dist=18925)  | 17 | 18607932 | 18608477 | 2 | 0 | 0 | 0 | 0 | 0 | 545   | 0.257973886 | 1.644777126 | 4.060983436 | 0.405019413 | 0.685463242 | 0.998252924 |
| chr17:18609108-18611344 | intergenic | ZNF286B (dist=23536), TRIM16L (dist=14058)  | 17 | 18609108 | 18611344 | 2 | 0 | 0 | 0 | 0 | 0 | 2236  | 0.257973886 | 1.644777126 | 4.060983436 | 0.405019413 | 0.685463242 | 0.998252924 |
| chr17:18775895-18785996 | exonic     | PRPSAP2                                     | 17 | 18775895 | 18785996 | 2 | 0 | 0 | 0 | 0 | 0 | 10101 | 0.257973886 | 1.644777126 | 4.060983436 | 0.405019413 | 0.685463242 | 0.998252924 |
| chr17:25810684-25811400 | UTR5       | KSR1 (NM_014238:c.-93873_-93680delins0)     | 17 | 25810684 | 25811400 | 2 | 0 | 0 | 0 | 0 | 0 | 716   | 0.257973886 | 1.644777126 | 4.060983436 | 0.405019413 | 0.685463242 | 0.998252924 |
| chr17:27853681-27856322 | intronic   | TAOK1                                       | 17 | 27853681 | 27856322 | 2 | 0 | 0 | 0 | 0 | 0 | 2641  | 0.257973886 | 1.644777126 | 4.060983436 | 0.405019413 | 0.685463242 | 0.998252924 |
| chr17:28003838-28085411 | exonic     | SSH2                                        | 17 | 28003838 | 28085411 | 2 | 0 | 0 | 0 | 0 | 0 | 81573 | 0.257973886 | 1.644777126 | 4.060983436 | 0.405019413 | 0.685463242 | 0.998252924 |
| chr17:30740828-30741929 | intergenic | ZNF207 (dist=43360), PSMD11 (dist=29552)    | 17 | 30740828 | 30741929 | 2 | 0 | 0 | 0 | 0 | 0 | 1101  | 0.257973886 | 1.644777126 | 4.060983436 | 0.405019413 | 0.685463242 | 0.998252924 |
| chr17:34147027-34147441 | exonic     | TAF15                                       | 17 | 34147027 | 34147441 | 2 | 0 | 0 | 0 | 0 | 0 | 414   | 0.257973886 | 1.644777126 | 4.060983436 | 0.405019413 | 0.685463242 | 0.998252924 |
| chr17:37420427-37439108 | exonic     | FBXL20                                      | 17 | 37420427 | 37439108 | 2 | 0 | 0 | 0 | 0 | 0 | 18681 | 0.257973886 | 1.644777126 | 4.060983436 | 0.405019413 | 0.685463242 | 0.998252924 |
| chr17:37437641-37441826 | exonic     | FBXL20                                      | 17 | 37437641 | 37441826 | 2 | 0 | 0 | 0 | 0 | 0 | 4185  | 0.257973886 | 1.644777126 | 4.060983436 | 0.405019413 | 0.685463242 | 0.998252924 |
| chr17:3844264-3846025   | exonic     | ATP2A3                                      | 17 | 3844264  | 3846025  | 2 | 0 | 0 | 0 | 0 | 0 | 1761  | 0.257973886 | 1.644777126 | 4.060983436 | 0.405019413 | 0.685463242 | 0.998252924 |
| chr17:3853804-3854979   | exonic     | ATP2A3                                      | 17 | 3853804  | 3854979  | 2 | 0 | 0 | 0 | 0 | 0 | 1175  | 0.257973886 | 1.644777126 | 4.060983436 | 0.405019413 | 0.685463242 | 0.998252924 |
| chr17:40746792-40747093 | intronic   | FAM134C                                     | 17 | 40746792 | 40747093 | 2 | 0 | 0 | 0 | 0 | 0 | 301   | 0.257973886 | 1.644777126 | 4.060983436 | 0.405019413 | 0.685463242 | 0.998252924 |
| chr17:4100667-4139185   | exonic     | ANKFY1                                      | 17 | 4100667  | 4139185  | 2 | 0 | 0 | 0 | 0 | 0 | 38518 | 0.257973886 | 1.644777126 | 4.060983436 | 0.405019413 | 0.685463242 | 0.998252924 |
| chr17:45451837-45492285 | exonic     | EFCAB13                                     | 17 | 45451837 | 45492285 | 2 | 0 | 0 | 0 | 0 | 0 | 40448 | 0.257973886 | 1.644777126 | 4.060983436 | 0.405019413 | 0.685463242 | 0.998252924 |
| chr17:45696530-45697087 | exonic     | NPEPPS                                      | 17 | 45696530 | 45697087 | 2 | 0 | 0 | 0 | 0 | 0 | 557   | 0.257973886 | 1.644777126 | 4.060983436 | 0.405019413 | 0.685463242 | 0.998252924 |
| chr17:46925425-46928990 | exonic     | CALCOCO2                                    | 17 | 46925425 | 46928990 | 2 | 0 | 0 | 0 | 0 | 0 | 3565  | 0.257973886 | 1.644777126 | 4.060983436 | 0.405019413 | 0.685463242 | 0.998252924 |

|                         |                |                                            |    |          |          |   |   |   |   |   |   |        |             |             |             |             |             |             |
|-------------------------|----------------|--------------------------------------------|----|----------|----------|---|---|---|---|---|---|--------|-------------|-------------|-------------|-------------|-------------|-------------|
| chr17:48744914-48746889 | exonic         | ABCC3                                      | 17 | 48744914 | 48746889 | 2 | 0 | 0 | 0 | 0 | 0 | 1975   | 0.257973886 | 1.644777126 | 4.060983436 | 0.405019413 | 0.685463242 | 0.998252924 |
| chr17:53062974-53084958 | exonic         | STXBP4                                     | 17 | 53062974 | 53084958 | 2 | 0 | 0 | 0 | 0 | 0 | 21984  | 0.257973886 | 1.644777126 | 4.060983436 | 0.405019413 | 0.685463242 | 0.998252924 |
| chr17:56434828-56436184 | exonic         | RNF43                                      | 17 | 56434828 | 56436184 | 2 | 0 | 0 | 0 | 0 | 0 | 1356   | 0.257973886 | 1.644777126 | 4.060983436 | 0.405019413 | 0.685463242 | 0.998252924 |
| chr17:57134235-57148308 | exonic         | TRIM37                                     | 17 | 57134235 | 57148308 | 2 | 0 | 0 | 0 | 0 | 0 | 14073  | 0.257973886 | 1.644777126 | 4.060983436 | 0.405019413 | 0.685463242 | 0.998252924 |
| chr17:57650476-57657240 | exonic         | DHX40                                      | 17 | 57650476 | 57657240 | 2 | 0 | 0 | 0 | 0 | 0 | 6764   | 0.257973886 | 1.644777126 | 4.060983436 | 0.405019413 | 0.685463242 | 0.998252924 |
| chr17:57808782-57812834 | exonic         | VMP1                                       | 17 | 57808782 | 57812834 | 2 | 0 | 0 | 0 | 0 | 0 | 4052   | 0.257973886 | 1.644777126 | 4.060983436 | 0.405019413 | 0.685463242 | 0.998252924 |
| chr17:58756813-58786686 | exonic         | BCAS3                                      | 17 | 58756813 | 58786686 | 2 | 0 | 0 | 0 | 0 | 0 | 29873  | 0.257973886 | 1.644777126 | 4.060983436 | 0.405019413 | 0.685463242 | 0.998252924 |
| chr17:58761342-58786686 | exonic         | BCAS3                                      | 17 | 58761342 | 58786686 | 2 | 0 | 0 | 0 | 0 | 0 | 25344  | 0.257973886 | 1.644777126 | 4.060983436 | 0.405019413 | 0.685463242 | 0.998252924 |
| chr17:59152280-59155890 | exonic         | BCAS3                                      | 17 | 59152280 | 59155890 | 2 | 0 | 0 | 0 | 0 | 0 | 3610   | 0.257973886 | 1.644777126 | 4.060983436 | 0.405019413 | 0.685463242 | 0.998252924 |
| chr17:59967146-60002460 | exonic         | INTS2                                      | 17 | 59967146 | 60002460 | 2 | 0 | 0 | 0 | 0 | 0 | 35314  | 0.257973886 | 1.644777126 | 4.060983436 | 0.405019413 | 0.685463242 | 0.998252924 |
| chr17:61254075-61263808 | ncRNA_intronic | MIR548W                                    | 17 | 61254075 | 61263808 | 2 | 0 | 0 | 0 | 0 | 0 | 9733   | 0.257973886 | 1.644777126 | 4.060983436 | 0.405019413 | 0.685463242 | 0.998252924 |
| chr17:63632029-63746842 | exonic         | CEP112                                     | 17 | 63632029 | 63746842 | 2 | 0 | 0 | 0 | 0 | 0 | 114813 | 0.257973886 | 1.644777126 | 4.060983436 | 0.405019413 | 0.685463242 | 0.998252924 |
| chr17:65928026-65972074 | exonic         | BPTF                                       | 17 | 65928026 | 65972074 | 2 | 0 | 0 | 0 | 0 | 0 | 44048  | 0.257973886 | 1.644777126 | 4.060983436 | 0.405019413 | 0.685463242 | 0.998252924 |
| chr17:66110563-66121621 | ncRNA_exonic   | LINC00674                                  | 17 | 66110563 | 66121621 | 2 | 0 | 0 | 0 | 0 | 0 | 11058  | 0.257973886 | 1.644777126 | 4.060983436 | 0.405019413 | 0.685463242 | 0.998252924 |
| chr17:66654789-66662499 | ncRNA_intronic | LINC01482                                  | 17 | 66654789 | 66662499 | 2 | 0 | 0 | 0 | 0 | 0 | 7710   | 0.257973886 | 1.644777126 | 4.060983436 | 0.405019413 | 0.685463242 | 0.998252924 |
| chr17:7148534-7148927   | intronic       | CTDNBP1                                    | 17 | 7148534  | 7148927  | 2 | 0 | 0 | 0 | 0 | 0 | 393    | 0.257973886 | 1.644777126 | 4.060983436 | 0.405019413 | 0.685463242 | 0.998252924 |
| chr17:73279503-73282883 | exonic         | SLC25A19                                   | 17 | 73279503 | 73282883 | 2 | 0 | 0 | 0 | 0 | 0 | 3380   | 0.257973886 | 1.644777126 | 4.060983436 | 0.405019413 | 0.685463242 | 0.998252924 |
| chr17:73626383-73626698 | splicing       | RECQL5                                     | 17 | 73626383 | 73626698 | 2 | 0 | 0 | 0 | 0 | 0 | 315    | 0.257973886 | 1.644777126 | 4.060983436 | 0.405019413 | 0.685463242 | 0.998252924 |
| chr17:74763468-74777212 | exonic         | MFSD11                                     | 17 | 74763468 | 74777212 | 2 | 0 | 0 | 0 | 0 | 0 | 13744  | 0.257973886 | 1.644777126 | 4.060983436 | 0.405019413 | 0.685463242 | 0.998252924 |
| chr17:75968502-75969082 | intergenic     | FLJ45079 (dist=88333), TNRC9C (dist=31236) | 17 | 75968502 | 75969082 | 2 | 0 | 0 | 0 | 0 | 0 | 580    | 0.257973886 | 1.644777126 | 4.060983436 | 0.405019413 | 0.685463242 | 0.998252924 |
| chr17:76260465-76261735 | ncRNA_intronic | LOC100996291                               | 17 | 76260465 | 76261735 | 2 | 0 | 0 | 0 | 0 | 0 | 1270   | 0.257973886 | 1.644777126 | 4.060983436 | 0.405019413 | 0.685463242 | 0.998252924 |
| chr17:76808941-76816094 | exonic         | USP36                                      | 17 | 76808941 | 76816094 | 2 | 0 | 0 | 0 | 0 | 0 | 7153   | 0.257973886 | 1.644777126 | 4.060983436 | 0.405019413 | 0.685463242 | 0.998252924 |
| chr17:76968801-76969051 | splicing       | LGALS3BP                                   | 17 | 76968801 | 76969051 | 2 | 0 | 0 | 0 | 0 | 0 | 250    | 0.257973886 | 1.644777126 | 4.060983436 | 0.405019413 | 0.685463242 | 0.998252924 |
| chr17:7846708-7847956   | exonic         | CNTROB                                     | 17 | 7846708  | 7847956  | 2 | 0 | 0 | 0 | 0 | 0 | 1248   | 0.257973886 | 1.644777126 | 4.060983436 | 0.405019413 | 0.685463242 | 0.998252924 |
| chr17:79244718-79250933 | exonic         | SLC38A10                                   | 17 | 79244718 | 79250933 | 2 | 0 | 0 | 0 | 0 | 0 | 6215   | 0.257973886 | 1.644777126 | 4.060983436 | 0.405019413 | 0.685463242 | 0.998252924 |
| chr17:80525929-80529746 | exonic         | FOXK2                                      | 17 | 80525929 | 80529746 | 2 | 0 | 0 | 0 | 0 | 0 | 3817   | 0.257973886 | 1.644777126 | 4.060983436 | 0.405019413 | 0.685463242 | 0.998252924 |
| chr17:80858526-80861354 | exonic         | TBCD                                       | 17 | 80858526 | 80861354 | 2 | 0 | 0 | 0 | 0 | 0 | 2828   | 0.257973886 | 1.644777126 | 4.060983436 | 0.405019413 | 0.685463242 | 0.998252924 |
| chr17:8424195-8424603   | exonic         | MYH10                                      | 17 | 8424195  | 8424603  | 2 | 0 | 0 | 0 | 0 | 0 | 408    | 0.257973886 | 1.644777126 | 4.060983436 | 0.405019413 | 0.685463242 | 0.998252924 |
| chr18:12463349-12635095 | exonic         | SPIRE1                                     | 18 | 12463349 | 12635095 | 2 | 0 | 0 | 0 | 0 | 0 | 171746 | 0.257973886 | 1.644777126 | 4.060983436 | 0.405019413 | 0.685463242 | 0.998252924 |
| chr18:13029661-13053089 | exonic         | CEP192                                     | 18 | 13029661 | 13053089 | 2 | 0 | 0 | 0 | 0 | 0 | 23428  | 0.257973886 | 1.644777126 | 4.060983436 | 0.405019413 | 0.685463242 | 0.998252924 |
| chr18:13387339-13387761 | exonic         | LDLRAD4                                    | 18 | 13387339 | 13387761 | 2 | 0 | 0 | 0 | 0 | 0 | 422    | 0.257973886 | 1.644777126 | 4.060983436 | 0.405019413 | 0.685463242 | 0.998252924 |
| chr18:13529802-13530836 | intronic       | LDLRAD4                                    | 18 | 13529802 | 13530836 | 2 | 0 | 0 | 0 | 0 | 0 | 1034   | 0.257973886 | 1.644777126 | 4.060983436 | 0.405019413 | 0.685463242 | 0.998252924 |
| chr18:18562723-18572898 | exonic         | ROCK1                                      | 18 | 18562723 | 18572898 | 2 | 0 | 0 | 0 | 0 | 0 | 10175  | 0.257973886 | 1.644777126 | 4.060983436 | 0.405019413 | 0.685463242 | 0.998252924 |
| chr18:18566910-18624147 | exonic         | ROCK1                                      | 18 | 18566910 | 18624147 | 2 | 0 | 0 | 0 | 0 | 0 | 57237  | 0.257973886 | 1.644777126 | 4.060983436 | 0.405019413 | 0.685463242 | 0.998252924 |
| chr18:21599824-21663045 | exonic         | TTC39C                                     | 18 | 21599824 | 21663045 | 2 | 0 | 0 | 0 | 0 | 0 | 63221  | 0.257973886 | 1.644777126 | 4.060983436 | 0.405019413 | 0.685463242 | 0.998252924 |

|                         |                |                                                          |    |          |          |    |    |    |    |    |    |       |             |             |             |             |             |             |
|-------------------------|----------------|----------------------------------------------------------|----|----------|----------|----|----|----|----|----|----|-------|-------------|-------------|-------------|-------------|-------------|-------------|
| chr18:21860805-21921622 | exonic         | OSBPL1A                                                  | 18 | 21860805 | 21921622 | 2  | 0  | 0  | 0  | 0  | 0  | 60817 | 0.257973886 | 1.644777126 | 4.060983436 | 0.405019413 | 0.685463242 | 0.998252924 |
| chr18:24056478-24081214 | exonic         | KCTD1                                                    | 18 | 24056478 | 24081214 | 2  | 0  | 0  | 0  | 0  | 0  | 24736 | 0.257973886 | 1.644777126 | 4.060983436 | 0.405019413 | 0.685463242 | 0.998252924 |
| chr18:2688391-2707918   | exonic         | SMCHD1                                                   | 18 | 2688391  | 2707918  | 2  | 0  | 0  | 0  | 0  | 0  | 19527 | 0.257973886 | 1.644777126 | 4.060983436 | 0.405019413 | 0.685463242 | 0.998252924 |
| chr18:2951052-2960847   | exonic         | LPIN2                                                    | 18 | 2951052  | 2960847  | 2  | 0  | 0  | 0  | 0  | 0  | 9795  | 0.257973886 | 1.644777126 | 4.060983436 | 0.405019413 | 0.685463242 | 0.998252924 |
| chr18:32386182-32392077 | exonic         | DTNA                                                     | 18 | 32386182 | 32392077 | 2  | 0  | 0  | 0  | 0  | 0  | 5895  | 0.257973886 | 1.644777126 | 4.060983436 | 0.405019413 | 0.685463242 | 0.998252924 |
| chr18:33775219-33840138 | exonic         | MOCOS                                                    | 18 | 33775219 | 33840138 | 2  | 0  | 0  | 0  | 0  | 0  | 64919 | 0.257973886 | 1.644777126 | 4.060983436 | 0.405019413 | 0.685463242 | 0.998252924 |
| chr18:43698146-43703330 | exonic         | HAUS1                                                    | 18 | 43698146 | 43703330 | 2  | 0  | 0  | 0  | 0  | 0  | 5184  | 0.257973886 | 1.644777126 | 4.060983436 | 0.405019413 | 0.685463242 | 0.998252924 |
| chr18:46531117-46532608 | intergenic     | <small>SMAD7 (dist=54036), DYM (dist=37564)</small>      | 18 | 46531117 | 46532608 | 2  | 0  | 0  | 0  | 0  | 0  | 1491  | 0.257973886 | 1.644777126 | 4.060983436 | 0.405019413 | 0.685463242 | 0.998252924 |
| chr18:48422178-48466756 | exonic         | ME2                                                      | 18 | 48422178 | 48466756 | 2  | 0  | 0  | 0  | 0  | 0  | 44578 | 0.257973886 | 1.644777126 | 4.060983436 | 0.405019413 | 0.685463242 | 0.998252924 |
| chr18:48467539-48467838 | intronic       | ME2                                                      | 18 | 48467539 | 48467838 | 2  | 0  | 0  | 0  | 0  | 0  | 299   | 0.257973886 | 1.644777126 | 4.060983436 | 0.405019413 | 0.685463242 | 0.998252924 |
| chr18:52937061-52946887 | exonic         | TCF4                                                     | 18 | 52937061 | 52946887 | 2  | 0  | 0  | 0  | 0  | 0  | 9826  | 0.257973886 | 1.644777126 | 4.060983436 | 0.405019413 | 0.685463242 | 0.998252924 |
| chr18:55338699-55368545 | exonic         | ATP8B1                                                   | 18 | 55338699 | 55368545 | 2  | 0  | 0  | 0  | 0  | 0  | 29846 | 0.257973886 | 1.644777126 | 4.060983436 | 0.405019413 | 0.685463242 | 0.998252924 |
| chr18:55398646-55399255 | exonic         | ATP8B1                                                   | 18 | 55398646 | 55399255 | 2  | 0  | 0  | 0  | 0  | 0  | 609   | 0.257973886 | 1.644777126 | 4.060983436 | 0.405019413 | 0.685463242 | 0.998252924 |
| chr18:55833020-55839237 | exonic         | NEDD4L                                                   | 18 | 55833020 | 55839237 | 2  | 0  | 0  | 0  | 0  | 0  | 6217  | 0.257973886 | 1.644777126 | 4.060983436 | 0.405019413 | 0.685463242 | 0.998252924 |
| chr18:56532701-56621031 | exonic         | ZNF532                                                   | 18 | 56532701 | 56621031 | 2  | 0  | 0  | 0  | 0  | 0  | 88330 | 0.257973886 | 1.644777126 | 4.060983436 | 0.405019413 | 0.685463242 | 0.998252924 |
| chr18:9182379-9216898   | exonic         | ANKRD12                                                  | 18 | 9182379  | 9216898  | 72 | 52 | 46 | 42 | 53 | 21 | 34519 | 0.257973886 | 1.644777126 | 4.060983436 | 0.405019413 | 0.685463242 | 0.998252924 |
| chr18:9583114-9584826   | exonic         | PPP4R1                                                   | 18 | 9583114  | 9584826  | 2  | 0  | 0  | 0  | 0  | 0  | 1712  | 0.257973886 | 1.644777126 | 4.060983436 | 0.405019413 | 0.685463242 | 0.998252924 |
| chr18:9722739-9815219   | exonic         | RAB31                                                    | 18 | 9722739  | 9815219  | 2  | 0  | 0  | 0  | 0  | 0  | 92480 | 0.257973886 | 1.644777126 | 4.060983436 | 0.405019413 | 0.685463242 | 0.998252924 |
| chr19:11168933-11170863 | exonic         | SMARCA4                                                  | 19 | 11168933 | 11170863 | 2  | 0  | 0  | 0  | 0  | 0  | 1930  | 0.257973886 | 1.644777126 | 4.060983436 | 0.405019413 | 0.685463242 | 0.998252924 |
| chr19:11759173-11765226 | intergenic     | <small>ZNF627 (dist=29199), ZNF833P (dist=19587)</small> | 19 | 11759173 | 11765226 | 2  | 0  | 0  | 0  | 0  | 0  | 6053  | 0.257973886 | 1.644777126 | 4.060983436 | 0.405019413 | 0.685463242 | 0.998252924 |
| chr19:11941098-11944644 | exonic         | ZNF440                                                   | 19 | 11941098 | 11944644 | 2  | 0  | 0  | 0  | 0  | 0  | 3546  | 0.257973886 | 1.644777126 | 4.060983436 | 0.405019413 | 0.685463242 | 0.998252924 |
| chr19:13184235-13186485 | exonic         | NFIX                                                     | 19 | 13184235 | 13186485 | 2  | 0  | 0  | 0  | 0  | 0  | 2250  | 0.257973886 | 1.644777126 | 4.060983436 | 0.405019413 | 0.685463242 | 0.998252924 |
| chr19:13259929-13260312 | splicing       | STX10                                                    | 19 | 13259929 | 13260312 | 2  | 0  | 0  | 0  | 0  | 0  | 383   | 0.257973886 | 1.644777126 | 4.060983436 | 0.405019413 | 0.685463242 | 0.998252924 |
| chr19:13868231-13870086 | exonic         | CCDC130                                                  | 19 | 13868231 | 13870086 | 2  | 0  | 0  | 0  | 0  | 0  | 1855  | 0.257973886 | 1.644777126 | 4.060983436 | 0.405019413 | 0.685463242 | 0.998252924 |
| chr19:1516483-1517518   | intergenic     | <small>ADAMTSL5 (dist=3295), PLK5 (dist=6555)</small>    | 19 | 1516483  | 1517518  | 2  | 0  | 0  | 0  | 0  | 0  | 1035  | 0.257973886 | 1.644777126 | 4.060983436 | 0.405019413 | 0.685463242 | 0.998252924 |
| chr19:18174685-18180523 | exonic         | IL12RB1                                                  | 19 | 18174685 | 18180523 | 2  | 0  | 0  | 0  | 0  | 0  | 5838  | 0.257973886 | 1.644777126 | 4.060983436 | 0.405019413 | 0.685463242 | 0.998252924 |
| chr19:19215721-19217194 | exonic         | SLC25A42                                                 | 19 | 19215721 | 19217194 | 2  | 0  | 0  | 0  | 0  | 0  | 1473  | 0.257973886 | 1.644777126 | 4.060983436 | 0.405019413 | 0.685463242 | 0.998252924 |
| chr19:2078138-2078678   | exonic         | MOB3A                                                    | 19 | 2078138  | 2078678  | 2  | 0  | 0  | 0  | 0  | 0  | 540   | 0.257973886 | 1.644777126 | 4.060983436 | 0.405019413 | 0.685463242 | 0.998252924 |
| chr19:2334600-2337624   | exonic         | SPPL2B                                                   | 19 | 2334600  | 2337624  | 2  | 0  | 0  | 0  | 0  | 0  | 3024  | 0.257973886 | 1.644777126 | 4.060983436 | 0.405019413 | 0.685463242 | 0.998252924 |
| chr19:23527674-23545527 | exonic         | ZNF91                                                    | 19 | 23527674 | 23545527 | 2  | 0  | 0  | 0  | 0  | 0  | 17853 | 0.257973886 | 1.644777126 | 4.060983436 | 0.405019413 | 0.685463242 | 0.998252924 |
| chr19:23990628-24015914 | ncRNA_exonic   | RPSAP58                                                  | 19 | 23990628 | 24015914 | 2  | 0  | 0  | 0  | 0  | 0  | 25286 | 0.257973886 | 1.644777126 | 4.060983436 | 0.405019413 | 0.685463242 | 0.998252924 |
| chr19:24268917-24269374 | intronic       | ZNF254                                                   | 19 | 24268917 | 24269374 | 2  | 0  | 0  | 0  | 0  | 0  | 457   | 0.257973886 | 1.644777126 | 4.060983436 | 0.405019413 | 0.685463242 | 0.998252924 |
| chr19:2936521-2939405   | exonic         | ZNF77                                                    | 19 | 2936521  | 2939405  | 2  | 0  | 0  | 0  | 0  | 0  | 2884  | 0.257973886 | 1.644777126 | 4.060983436 | 0.405019413 | 0.685463242 | 0.998252924 |
| chr19:35749847-35753595 | exonic         | LSR                                                      | 19 | 35749847 | 35753595 | 2  | 0  | 0  | 0  | 0  | 0  | 3748  | 0.257973886 | 1.644777126 | 4.060983436 | 0.405019413 | 0.685463242 | 0.998252924 |
| chr19:3965539-3965772   | ncRNA_intronic | MIR1268A                                                 | 19 | 3965539  | 3965772  | 2  | 0  | 0  | 0  | 0  | 0  | 233   | 0.257973886 | 1.644777126 | 4.060983436 | 0.405019413 | 0.685463242 | 0.998252924 |

|                          |            |                                                         |    |           |           |   |   |   |   |   |   |       |             |             |             |             |             |             |
|--------------------------|------------|---------------------------------------------------------|----|-----------|-----------|---|---|---|---|---|---|-------|-------------|-------------|-------------|-------------|-------------|-------------|
| chr19:41782063-41787180  | exonic     | HNRNPUL1                                                | 19 | 41782063  | 41787180  | 2 | 0 | 0 | 0 | 0 | 0 | 5117  | 0.257973886 | 1.644777126 | 4.060983436 | 0.405019413 | 0.685463242 | 0.998252924 |
| chr19:42274774-42275109  | UTR3       | <small>CEACAM6(NM_002483:c.*108_*443delins0)</small>    | 19 | 42274774  | 42275109  | 2 | 0 | 0 | 0 | 0 | 0 | 335   | 0.257973886 | 1.644777126 | 4.060983436 | 0.405019413 | 0.685463242 | 0.998252924 |
| chr19:42796237-42797433  | exonic     | CIC                                                     | 19 | 42796237  | 42797433  | 2 | 0 | 0 | 0 | 0 | 0 | 1196  | 0.257973886 | 1.644777126 | 4.060983436 | 0.405019413 | 0.685463242 | 0.998252924 |
| chr19:45730919-45731524  | exonic     | EXOC3L2                                                 | 19 | 45730919  | 45731524  | 2 | 0 | 0 | 0 | 0 | 0 | 605   | 0.257973886 | 1.644777126 | 4.060983436 | 0.405019413 | 0.685463242 | 0.998252924 |
| chr19:4898619-4899424    | intronic   | ARRDC5                                                  | 19 | 4898619   | 4899424   | 2 | 0 | 0 | 0 | 0 | 0 | 805   | 0.257973886 | 1.644777126 | 4.060983436 | 0.405019413 | 0.685463242 | 0.998252924 |
| chr19:55105906-55142558  | exonic     | LILRA1, LILRB1                                          | 19 | 55105906  | 55142558  | 2 | 0 | 0 | 0 | 0 | 0 | 36652 | 0.257973886 | 1.644777126 | 4.060983436 | 0.405019413 | 0.685463242 | 0.998252924 |
| chr19:6364462-6366374    | exonic     | CLPP                                                    | 19 | 6364462   | 6366374   | 2 | 0 | 0 | 0 | 0 | 0 | 1912  | 0.257973886 | 1.644777126 | 4.060983436 | 0.405019413 | 0.685463242 | 0.998252924 |
| chr19:6733331-6733580    | splicing   | GPR108                                                  | 19 | 6733331   | 6733580   | 2 | 0 | 0 | 0 | 0 | 0 | 249   | 0.257973886 | 1.644777126 | 4.060983436 | 0.405019413 | 0.685463242 | 0.998252924 |
| chr19:7709638-7710057    | exonic     | STXBP2                                                  | 19 | 7709638   | 7710057   | 2 | 0 | 0 | 0 | 0 | 0 | 419   | 0.257973886 | 1.644777126 | 4.060983436 | 0.405019413 | 0.685463242 | 0.998252924 |
| chr19:9641660-9644642    | exonic     | ZNF426                                                  | 19 | 9641660   | 9644642   | 2 | 0 | 0 | 0 | 0 | 0 | 2982  | 0.257973886 | 1.644777126 | 4.060983436 | 0.405019413 | 0.685463242 | 0.998252924 |
| chr2:101564696-101582228 | exonic     | NPAS2                                                   | 2  | 101564696 | 101582228 | 2 | 0 | 0 | 0 | 0 | 0 | 17532 | 0.257973886 | 1.644777126 | 4.060983436 | 0.405019413 | 0.685463242 | 0.998252924 |
| chr2:10729168-10784498   | exonic     | NOL10                                                   | 2  | 10729168  | 10784498  | 2 | 0 | 0 | 0 | 0 | 0 | 55330 | 0.257973886 | 1.644777126 | 4.060983436 | 0.405019413 | 0.685463242 | 0.998252924 |
| chr2:10799297-10808849   | exonic     | NOL10                                                   | 2  | 10799297  | 10808849  | 2 | 0 | 0 | 0 | 0 | 0 | 9552  | 0.257973886 | 1.644777126 | 4.060983436 | 0.405019413 | 0.685463242 | 0.998252924 |
| chr2:109288780-109289485 | exonic     | LIMS1                                                   | 2  | 109288780 | 109289485 | 2 | 0 | 0 | 0 | 0 | 0 | 705   | 0.257973886 | 1.644777126 | 4.060983436 | 0.405019413 | 0.685463242 | 0.998252924 |
| chr2:122485292-122489780 | exonic     | NIFK                                                    | 2  | 122485292 | 122489780 | 2 | 0 | 0 | 0 | 0 | 0 | 4488  | 0.257973886 | 1.644777126 | 4.060983436 | 0.405019413 | 0.685463242 | 0.998252924 |
| chr2:128888715-128889296 | intronic   | UGGT1                                                   | 2  | 128888715 | 128889296 | 2 | 0 | 0 | 0 | 0 | 0 | 581   | 0.257973886 | 1.644777126 | 4.060983436 | 0.405019413 | 0.685463242 | 0.998252924 |
| chr2:135703716-135705256 | exonic     | CCNT2                                                   | 2  | 135703716 | 135705256 | 2 | 0 | 0 | 0 | 0 | 0 | 1540  | 0.257973886 | 1.644777126 | 4.060983436 | 0.405019413 | 0.685463242 | 0.998252924 |
| chr2:135756308-135788070 | exonic     | MAP3K19                                                 | 2  | 135756308 | 135788070 | 2 | 0 | 0 | 0 | 0 | 0 | 31762 | 0.257973886 | 1.644777126 | 4.060983436 | 0.405019413 | 0.685463242 | 0.998252924 |
| chr2:15514731-15557836   | exonic     | NBAS                                                    | 2  | 15514731  | 15557836  | 2 | 0 | 0 | 0 | 0 | 0 | 43105 | 0.257973886 | 1.644777126 | 4.060983436 | 0.405019413 | 0.685463242 | 0.998252924 |
| chr2:15514731-15567918   | exonic     | NBAS                                                    | 2  | 15514731  | 15567918  | 2 | 0 | 0 | 0 | 0 | 0 | 53187 | 0.257973886 | 1.644777126 | 4.060983436 | 0.405019413 | 0.685463242 | 0.998252924 |
| chr2:15534350-15557836   | exonic     | NBAS                                                    | 2  | 15534350  | 15557836  | 2 | 0 | 0 | 0 | 0 | 0 | 23486 | 0.257973886 | 1.644777126 | 4.060983436 | 0.405019413 | 0.685463242 | 0.998252924 |
| chr2:15644268-15679480   | exonic     | NBAS                                                    | 2  | 15644268  | 15679480  | 2 | 0 | 0 | 0 | 0 | 0 | 35212 | 0.257973886 | 1.644777126 | 4.060983436 | 0.405019413 | 0.685463242 | 0.998252924 |
| chr2:169684667-169699627 | exonic     | NOSTRIN                                                 | 2  | 169684667 | 169699627 | 2 | 0 | 0 | 0 | 0 | 0 | 14960 | 0.257973886 | 1.644777126 | 4.060983436 | 0.405019413 | 0.685463242 | 0.998252924 |
| chr2:170366277-170367398 | exonic     | KLHL41                                                  | 2  | 170366277 | 170367398 | 2 | 0 | 0 | 0 | 0 | 0 | 1121  | 0.257973886 | 1.644777126 | 4.060983436 | 0.405019413 | 0.685463242 | 0.998252924 |
| chr2:173333852-173352956 | exonic     | ITGA6                                                   | 2  | 173333852 | 173352956 | 2 | 0 | 0 | 0 | 0 | 0 | 19104 | 0.257973886 | 1.644777126 | 4.060983436 | 0.405019413 | 0.685463242 | 0.998252924 |
| chr2:175309808-175324816 | exonic     | GPR155                                                  | 2  | 175309808 | 175324816 | 2 | 0 | 0 | 0 | 0 | 0 | 15008 | 0.257973886 | 1.644777126 | 4.060983436 | 0.405019413 | 0.685463242 | 0.998252924 |
| chr2:175978721-175979596 | exonic     | ATF2                                                    | 2  | 175978721 | 175979596 | 2 | 0 | 0 | 0 | 0 | 0 | 875   | 0.257973886 | 1.644777126 | 4.060983436 | 0.405019413 | 0.685463242 | 0.998252924 |
| chr2:179770055-179783634 | exonic     | CCDC141                                                 | 2  | 179770055 | 179783634 | 2 | 0 | 0 | 0 | 0 | 0 | 13579 | 0.257973886 | 1.644777126 | 4.060983436 | 0.405019413 | 0.685463242 | 0.998252924 |
| chr2:182403818-182414435 | exonic     | CERKL                                                   | 2  | 182403818 | 182414435 | 2 | 0 | 0 | 0 | 0 | 0 | 10617 | 0.257973886 | 1.644777126 | 4.060983436 | 0.405019413 | 0.685463242 | 0.998252924 |
| chr2:18349956-18351774   | intergenic | <small>KCNS3 (dist=235731), RDH14 (dist=384215)</small> | 2  | 18349956  | 18351774  | 2 | 0 | 0 | 0 | 0 | 0 | 1818  | 0.257973886 | 1.644777126 | 4.060983436 | 0.405019413 | 0.685463242 | 0.998252924 |
| chr2:18567164-18585305   | intergenic | <small>KCNS3 (dist=452939), RDH14 (dist=150684)</small> | 2  | 18567164  | 18585305  | 2 | 0 | 0 | 0 | 0 | 0 | 18141 | 0.257973886 | 1.644777126 | 4.060983436 | 0.405019413 | 0.685463242 | 0.998252924 |
| chr2:190179674-190222953 | intergenic | <small>COL5A2 (dist=135069), WDR75 (dist=83206)</small> | 2  | 190179674 | 190222953 | 2 | 0 | 0 | 0 | 0 | 0 | 43279 | 0.257973886 | 1.644777126 | 4.060983436 | 0.405019413 | 0.685463242 | 0.998252924 |
| chr2:197653927-197656184 | exonic     | GTF3C3                                                  | 2  | 197653927 | 197656184 | 2 | 0 | 0 | 0 | 0 | 0 | 2257  | 0.257973886 | 1.644777126 | 4.060983436 | 0.405019413 | 0.685463242 | 0.998252924 |
| chr2:201277033-201305507 | exonic     | SPATS2L                                                 | 2  | 201277033 | 201305507 | 2 | 0 | 0 | 0 | 0 | 0 | 28474 | 0.257973886 | 1.644777126 | 4.060983436 | 0.405019413 | 0.685463242 | 0.998252924 |
| chr2:201480693-201521660 | exonic     | AOX1                                                    | 2  | 201480693 | 201521660 | 2 | 0 | 0 | 0 | 0 | 0 | 40967 | 0.257973886 | 1.644777126 | 4.060983436 | 0.405019413 | 0.685463242 | 0.998252924 |

|                          |                |                                       |       |           |           |   |   |   |   |   |   |       |             |             |             |             |             |             |
|--------------------------|----------------|---------------------------------------|-------|-----------|-----------|---|---|---|---|---|---|-------|-------------|-------------|-------------|-------------|-------------|-------------|
| chr2:201499513-201507524 | exonic         | AOX1                                  | 2     | 201499513 | 201507524 | 2 | 0 | 0 | 0 | 0 | 0 | 8011  | 0.257973886 | 1.644777126 | 4.060983436 | 0.405019413 | 0.685463242 | 0.998252924 |
| chr2:202025155-202028807 | exonic         | CFLAR                                 | 2     | 202025155 | 202028807 | 2 | 0 | 0 | 0 | 0 | 0 | 3652  | 0.257973886 | 1.644777126 | 4.060983436 | 0.405019413 | 0.685463242 | 0.998252924 |
| chr2:202125336-202125749 | UTR5           | CASP8(NM_033356:c.-5874_-5874delins0) | 2     | 202125336 | 202125749 | 2 | 0 | 0 | 0 | 0 | 0 | 413   | 0.257973886 | 1.644777126 | 4.060983436 | 0.405019413 | 0.685463242 | 0.998252924 |
| chr2:203136052-203139200 | intronic       | NOP58                                 | 2     | 203136052 | 203139200 | 2 | 0 | 0 | 0 | 0 | 0 | 3148  | 0.257973886 | 1.644777126 | 4.060983436 | 0.405019413 | 0.685463242 | 0.998252924 |
| chr2:203383544-203383775 | exonic         | BMPR2                                 | 2     | 203383544 | 203383775 | 2 | 0 | 0 | 0 | 0 | 0 | 231   | 0.257973886 | 1.644777126 | 4.060983436 | 0.405019413 | 0.685463242 | 0.998252924 |
| chr2:216983765-217012999 | exonic         | XRCC5                                 | 2     | 216983765 | 217012999 | 2 | 0 | 0 | 0 | 0 | 0 | 29234 | 0.257973886 | 1.644777126 | 4.060983436 | 0.405019413 | 0.685463242 | 0.998252924 |
| chr2:223782763-223789313 | exonic         | ACSL3                                 | 2     | 223782763 | 223789313 | 2 | 0 | 0 | 0 | 0 | 0 | 6550  | 0.257973886 | 1.644777126 | 4.060983436 | 0.405019413 | 0.685463242 | 0.998252924 |
| chr2:228562718-228562986 | intronic       | SLC19A3                               | 2     | 228562718 | 228562986 | 2 | 0 | 0 | 0 | 0 | 0 | 268   | 0.257973886 | 1.644777126 | 4.060983436 | 0.405019413 | 0.685463242 | 0.998252924 |
| chr2:231327233-231328761 | exonic         | SP100                                 | 2     | 231327233 | 231328761 | 2 | 0 | 0 | 0 | 0 | 0 | 1528  | 0.257973886 | 1.644777126 | 4.060983436 | 0.405019413 | 0.685463242 | 0.998252924 |
| chr2:231367780-231372746 | exonic         | SP100                                 | 2     | 231367780 | 231372746 | 2 | 0 | 0 | 0 | 0 | 0 | 4966  | 0.257973886 | 1.644777126 | 4.060983436 | 0.405019413 | 0.685463242 | 0.998252924 |
| chr2:238635907-238643018 | exonic         | LRRFIP1                               | 2     | 238635907 | 238643018 | 2 | 0 | 0 | 0 | 0 | 0 | 7111  | 0.257973886 | 1.644777126 | 4.060983436 | 0.405019413 | 0.685463242 | 0.998252924 |
| chr2:238722234-238743066 | exonic         | RBM44                                 | 2     | 238722234 | 238743066 | 2 | 0 | 0 | 0 | 0 | 0 | 20832 | 0.257973886 | 1.644777126 | 4.060983436 | 0.405019413 | 0.685463242 | 0.998252924 |
| chr2:242274540-242283312 | exonic         |                                       | 2-Sep | 242274540 | 242283312 | 2 | 0 | 0 | 0 | 0 | 0 | 8772  | 0.257973886 | 1.644777126 | 4.060983436 | 0.405019413 | 0.685463242 | 0.998252924 |
| chr2:26652495-26654874   | exonic         | DRC1                                  | 2     | 26652495  | 26654874  | 2 | 0 | 0 | 0 | 0 | 0 | 2379  | 0.257973886 | 1.644777126 | 4.060983436 | 0.405019413 | 0.685463242 | 0.998252924 |
| chr2:27426100-27427799   | exonic         | SLC5A6                                | 2     | 27426100  | 27427799  | 2 | 0 | 0 | 0 | 0 | 0 | 1699  | 0.257973886 | 1.644777126 | 4.060983436 | 0.405019413 | 0.685463242 | 0.998252924 |
| chr2:27994666-27995516   | exonic         | MRPL33                                | 2     | 27994666  | 27995516  | 2 | 0 | 0 | 0 | 0 | 0 | 850   | 0.257973886 | 1.644777126 | 4.060983436 | 0.405019413 | 0.685463242 | 0.998252924 |
| chr2:29145784-29150566   | exonic         | WDR43                                 | 2     | 29145784  | 29150566  | 2 | 0 | 0 | 0 | 0 | 0 | 4782  | 0.257973886 | 1.644777126 | 4.060983436 | 0.405019413 | 0.685463242 | 0.998252924 |
| chr2:29390342-29419902   | exonic         | ALK, CLIP4                            | 2     | 29390342  | 29419902  | 2 | 0 | 0 | 0 | 0 | 0 | 29560 | 0.257973886 | 1.644777126 | 4.060983436 | 0.405019413 | 0.685463242 | 0.998252924 |
| chr2:32855589-32903989   | exonic         | TTC27                                 | 2     | 32855589  | 32903989  | 2 | 0 | 0 | 0 | 0 | 0 | 48400 | 0.257973886 | 1.644777126 | 4.060983436 | 0.405019413 | 0.685463242 | 0.998252924 |
| chr2:33002948-33012216   | exonic         | TTC27                                 | 2     | 33002948  | 33012216  | 2 | 0 | 0 | 0 | 0 | 0 | 9268  | 0.257973886 | 1.644777126 | 4.060983436 | 0.405019413 | 0.685463242 | 0.998252924 |
| chr2:38349127-38358756   | ncRNA_exonic   | CYP1B1-AS1                            | 2     | 38349127  | 38358756  | 2 | 0 | 0 | 0 | 0 | 0 | 9629  | 0.257973886 | 1.644777126 | 4.060983436 | 0.405019413 | 0.685463242 | 0.998252924 |
| chr2:39552658-39564722   | exonic         | MAP4K3                                | 2     | 39552658  | 39564722  | 2 | 0 | 0 | 0 | 0 | 0 | 12064 | 0.257973886 | 1.644777126 | 4.060983436 | 0.405019413 | 0.685463242 | 0.998252924 |
| chr2:39559057-39570593   | exonic         | MAP4K3                                | 2     | 39559057  | 39570593  | 2 | 0 | 0 | 0 | 0 | 0 | 11536 | 0.257973886 | 1.644777126 | 4.060983436 | 0.405019413 | 0.685463242 | 0.998252924 |
| chr2:39717636-39718419   | ncRNA_intronic | LOC728730                             | 2     | 39717636  | 39718419  | 2 | 0 | 0 | 0 | 0 | 0 | 783   | 0.257973886 | 1.644777126 | 4.060983436 | 0.405019413 | 0.685463242 | 0.998252924 |
| chr2:43953410-43986168   | exonic         | PLEKHH2                               | 2     | 43953410  | 43986168  | 2 | 0 | 0 | 0 | 0 | 0 | 32758 | 0.257973886 | 1.644777126 | 4.060983436 | 0.405019413 | 0.685463242 | 0.998252924 |
| chr2:46062919-46070202   | exonic         | PRKCE                                 | 2     | 46062919  | 46070202  | 2 | 0 | 0 | 0 | 0 | 0 | 7283  | 0.257973886 | 1.644777126 | 4.060983436 | 0.405019413 | 0.685463242 | 0.998252924 |
| chr2:47600601-47601187   | exonic         | EPCAM                                 | 2     | 47600601  | 47601187  | 2 | 0 | 0 | 0 | 0 | 0 | 586   | 0.257973886 | 1.644777126 | 4.060983436 | 0.405019413 | 0.685463242 | 0.998252924 |
| chr2:55548610-55550957   | exonic         | CCDC88A                               | 2     | 55548610  | 55550957  | 2 | 0 | 0 | 0 | 0 | 0 | 2347  | 0.257973886 | 1.644777126 | 4.060983436 | 0.405019413 | 0.685463242 | 0.998252924 |
| chr2:61014081-61019424   | exonic         | PAPOLG                                | 2     | 61014081  | 61019424  | 2 | 0 | 0 | 0 | 0 | 0 | 5343  | 0.257973886 | 1.644777126 | 4.060983436 | 0.405019413 | 0.685463242 | 0.998252924 |
| chr2:61505299-61520685   | exonic         | USP34                                 | 2     | 61505299  | 61520685  | 2 | 0 | 0 | 0 | 0 | 0 | 15386 | 0.257973886 | 1.644777126 | 4.060983436 | 0.405019413 | 0.685463242 | 0.998252924 |
| chr2:61717776-61726048   | exonic         | XPO1                                  | 2     | 61717776  | 61726048  | 2 | 0 | 0 | 0 | 0 | 0 | 8272  | 0.257973886 | 1.644777126 | 4.060983436 | 0.405019413 | 0.685463242 | 0.998252924 |
| chr2:62974529-62998527   | exonic         | EHBP1                                 | 2     | 62974529  | 62998527  | 2 | 0 | 0 | 0 | 0 | 0 | 23998 | 0.257973886 | 1.644777126 | 4.060983436 | 0.405019413 | 0.685463242 | 0.998252924 |
| chr2:68717321-68765359   | exonic         | APLF                                  | 2     | 68717321  | 68765359  | 2 | 0 | 0 | 0 | 0 | 0 | 48038 | 0.257973886 | 1.644777126 | 4.060983436 | 0.405019413 | 0.685463242 | 0.998252924 |
| chr2:69553303-69577315   | exonic         | GFPT1                                 | 2     | 69553303  | 69577315  | 2 | 0 | 0 | 0 | 0 | 0 | 24012 | 0.257973886 | 1.644777126 | 4.060983436 | 0.405019413 | 0.685463242 | 0.998252924 |
| chr2:69574178-69579298   | exonic         | GFPT1                                 | 2     | 69574178  | 69579298  | 2 | 0 | 0 | 0 | 0 | 0 | 5120  | 0.257973886 | 1.644777126 | 4.060983436 | 0.405019413 | 0.685463242 | 0.998252924 |

|                         |              |                                       |    |          |          |   |   |   |   |   |   |       |             |             |             |             |             |             |
|-------------------------|--------------|---------------------------------------|----|----------|----------|---|---|---|---|---|---|-------|-------------|-------------|-------------|-------------|-------------|-------------|
| chr2:70278334-70312756  | ncRNA_exonic | PCBP1-AS1                             | 2  | 70278334 | 70312756 | 2 | 0 | 0 | 0 | 0 | 0 | 34422 | 0.257973886 | 1.644777126 | 4.060983436 | 0.405019413 | 0.685463242 | 0.998252924 |
| chr2:70465216-70465512  | intronic     | TIA1                                  | 2  | 70465216 | 70465512 | 2 | 0 | 0 | 0 | 0 | 0 | 296   | 0.257973886 | 1.644777126 | 4.060983436 | 0.405019413 | 0.685463242 | 0.998252924 |
| chr2:71215665-71220905  | exonic       | TEX261                                | 2  | 71215665 | 71220905 | 2 | 0 | 0 | 0 | 0 | 0 | 5240  | 0.257973886 | 1.644777126 | 4.060983436 | 0.405019413 | 0.685463242 | 0.998252924 |
| chr2:71753349-71766369  | exonic       | DYSF                                  | 2  | 71753349 | 71766369 | 2 | 0 | 0 | 0 | 0 | 0 | 13020 | 0.257973886 | 1.644777126 | 4.060983436 | 0.405019413 | 0.685463242 | 0.998252924 |
| chr2:72907743-72960247  | exonic       | EXOC6B                                | 2  | 72907743 | 72960247 | 2 | 0 | 0 | 0 | 0 | 0 | 52504 | 0.257973886 | 1.644777126 | 4.060983436 | 0.405019413 | 0.685463242 | 0.998252924 |
| chr2:75914952-75923441  | exonic       | GCFC2                                 | 2  | 75914952 | 75923441 | 2 | 0 | 0 | 0 | 0 | 0 | 8489  | 0.257973886 | 1.644777126 | 4.060983436 | 0.405019413 | 0.685463242 | 0.998252924 |
| chr2:86088304-86097381  | exonic       | ST3GAL5                               | 2  | 86088304 | 86097381 | 2 | 0 | 0 | 0 | 0 | 0 | 9077  | 0.257973886 | 1.644777126 | 4.060983436 | 0.405019413 | 0.685463242 | 0.998252924 |
| chr2:86348602-86355114  | exonic       | PTCD3                                 | 2  | 86348602 | 86355114 | 2 | 0 | 0 | 0 | 0 | 0 | 6512  | 0.257973886 | 1.644777126 | 4.060983436 | 0.405019413 | 0.685463242 | 0.998252924 |
| chr2:89309900-89340016  | intergenic   | MIR4436A(dist=197932),NONE(dist=NONE) | 2  | 89309900 | 89340016 | 2 | 0 | 0 | 0 | 0 | 0 | 30116 | 0.257973886 | 1.644777126 | 4.060983436 | 0.405019413 | 0.685463242 | 0.998252924 |
| chr2:98165882-98167943  | exonic       | ANKRD36B                              | 2  | 98165882 | 98167943 | 2 | 0 | 0 | 0 | 0 | 0 | 2061  | 0.257973886 | 1.644777126 | 4.060983436 | 0.405019413 | 0.685463242 | 0.998252924 |
| chr2:98412680-98413449  | exonic       | TMEM131                               | 2  | 98412680 | 98413449 | 2 | 0 | 0 | 0 | 0 | 0 | 769   | 0.257973886 | 1.644777126 | 4.060983436 | 0.405019413 | 0.685463242 | 0.998252924 |
| chr2:99291497-99343030  | exonic       | MGAT4A                                | 2  | 99291497 | 99343030 | 2 | 0 | 0 | 0 | 0 | 0 | 51533 | 0.257973886 | 1.644777126 | 4.060983436 | 0.405019413 | 0.685463242 | 0.998252924 |
| chr20:18139727-18143589 | exonic       | CSRP2BP                               | 20 | 18139727 | 18143589 | 2 | 0 | 0 | 0 | 0 | 0 | 3862  | 0.257973886 | 1.644777126 | 4.060983436 | 0.405019413 | 0.685463242 | 0.998252924 |
| chr20:20505049-20517428 | exonic       | RALGAPA2                              | 20 | 20505049 | 20517428 | 2 | 0 | 0 | 0 | 0 | 0 | 12379 | 0.257973886 | 1.644777126 | 4.060983436 | 0.405019413 | 0.685463242 | 0.998252924 |
| chr20:23614321-23614500 | UTR3         | CST3(NM_000099:c.*232_*53delins0)     | 20 | 23614321 | 23614500 | 2 | 0 | 0 | 0 | 0 | 0 | 179   | 0.257973886 | 1.644777126 | 4.060983436 | 0.405019413 | 0.685463242 | 0.998252924 |
| chr20:25439018-25457725 | exonic       | NINL                                  | 20 | 25439018 | 25457725 | 2 | 0 | 0 | 0 | 0 | 0 | 18707 | 0.257973886 | 1.644777126 | 4.060983436 | 0.405019413 | 0.685463242 | 0.998252924 |
| chr20:32161779-32162067 | exonic       | CBFA2T2                               | 20 | 32161779 | 32162067 | 2 | 0 | 0 | 0 | 0 | 0 | 288   | 0.257973886 | 1.644777126 | 4.060983436 | 0.405019413 | 0.685463242 | 0.998252924 |
| chr20:32198899-32207412 | exonic       | CBFA2T2                               | 20 | 32198899 | 32207412 | 2 | 0 | 0 | 0 | 0 | 0 | 8513  | 0.257973886 | 1.644777126 | 4.060983436 | 0.405019413 | 0.685463242 | 0.998252924 |
| chr20:32957199-33001685 | exonic       | ITCH                                  | 20 | 32957199 | 33001685 | 2 | 0 | 0 | 0 | 0 | 0 | 44486 | 0.257973886 | 1.644777126 | 4.060983436 | 0.405019413 | 0.685463242 | 0.998252924 |
| chr20:33961986-33971936 | exonic       | UQCC1                                 | 20 | 33961986 | 33971936 | 2 | 0 | 0 | 0 | 0 | 0 | 9950  | 0.257973886 | 1.644777126 | 4.060983436 | 0.405019413 | 0.685463242 | 0.998252924 |
| chr20:35693826-35695524 | exonic       | RBL1                                  | 20 | 35693826 | 35695524 | 2 | 0 | 0 | 0 | 0 | 0 | 1698  | 0.257973886 | 1.644777126 | 4.060983436 | 0.405019413 | 0.685463242 | 0.998252924 |
| chr20:37534612-37536836 | exonic       | PPP1R16B                              | 20 | 37534612 | 37536836 | 2 | 0 | 0 | 0 | 0 | 0 | 2224  | 0.257973886 | 1.644777126 | 4.060983436 | 0.405019413 | 0.685463242 | 0.998252924 |
| chr20:37630372-37634999 | exonic       | DHX35                                 | 20 | 37630372 | 37634999 | 2 | 0 | 0 | 0 | 0 | 0 | 4627  | 0.257973886 | 1.644777126 | 4.060983436 | 0.405019413 | 0.685463242 | 0.998252924 |
| chr20:40238745-40239205 | intronic     | CHD6                                  | 20 | 40238745 | 40239205 | 2 | 0 | 0 | 0 | 0 | 0 | 460   | 0.257973886 | 1.644777126 | 4.060983436 | 0.405019413 | 0.685463242 | 0.998252924 |
| chr20:42635186-42635432 | exonic       | TOX2                                  | 20 | 42635186 | 42635432 | 2 | 0 | 0 | 0 | 0 | 0 | 246   | 0.257973886 | 1.644777126 | 4.060983436 | 0.405019413 | 0.685463242 | 0.998252924 |
| chr20:47567859-47570327 | exonic       | ARFGEF2                               | 20 | 47567859 | 47570327 | 2 | 0 | 0 | 0 | 0 | 0 | 2468  | 0.257973886 | 1.644777126 | 4.060983436 | 0.405019413 | 0.685463242 | 0.998252924 |
| chr20:61485367-61491660 | exonic       | TCFL5                                 | 20 | 61485367 | 61491660 | 2 | 0 | 0 | 0 | 0 | 0 | 6293  | 0.257973886 | 1.644777126 | 4.060983436 | 0.405019413 | 0.685463242 | 0.998252924 |
| chr21:44317036-44324386 | exonic       | NDUFV3                                | 21 | 44317036 | 44324386 | 2 | 0 | 0 | 0 | 0 | 0 | 7350  | 0.257973886 | 1.644777126 | 4.060983436 | 0.405019413 | 0.685463242 | 0.998252924 |
| chr21:47350699-47360113 | exonic       | PCBP3                                 | 21 | 47350699 | 47360113 | 2 | 0 | 0 | 0 | 0 | 0 | 9414  | 0.257973886 | 1.644777126 | 4.060983436 | 0.405019413 | 0.685463242 | 0.998252924 |
| chr21:47695099-47700489 | exonic       | MCM3AP                                | 21 | 47695099 | 47700489 | 2 | 0 | 0 | 0 | 0 | 0 | 5390  | 0.257973886 | 1.644777126 | 4.060983436 | 0.405019413 | 0.685463242 | 0.998252924 |
| chr22:22064916-22065197 | exonic       | YPEL1                                 | 22 | 22064916 | 22065197 | 2 | 0 | 0 | 0 | 0 | 0 | 281   | 0.257973886 | 1.644777126 | 4.060983436 | 0.405019413 | 0.685463242 | 0.998252924 |
| chr22:23401623-23406192 | exonic       | RSPH14                                | 22 | 23401623 | 23406192 | 2 | 0 | 0 | 0 | 0 | 0 | 4569  | 0.257973886 | 1.644777126 | 4.060983436 | 0.405019413 | 0.685463242 | 0.998252924 |
| chr22:26063705-26070495 | exonic       | ADRBK2                                | 22 | 26063705 | 26070495 | 2 | 0 | 0 | 0 | 0 | 0 | 6790  | 0.257973886 | 1.644777126 | 4.060983436 | 0.405019413 | 0.685463242 | 0.998252924 |
| chr22:29090019-29115473 | exonic       | CHEK2                                 | 22 | 29090019 | 29115473 | 2 | 0 | 0 | 0 | 0 | 0 | 25454 | 0.257973886 | 1.644777126 | 4.060983436 | 0.405019413 | 0.685463242 | 0.998252924 |
| chr22:29191723-29192034 | splicing     | XBP1                                  | 22 | 29191723 | 29192034 | 2 | 0 | 0 | 0 | 0 | 0 | 311   | 0.257973886 | 1.644777126 | 4.060983436 | 0.405019413 | 0.685463242 | 0.998252924 |

|                          |            |                                                          |    |           |           |   |   |   |   |   |   |        |             |             |             |             |             |             |
|--------------------------|------------|----------------------------------------------------------|----|-----------|-----------|---|---|---|---|---|---|--------|-------------|-------------|-------------|-------------|-------------|-------------|
| chr22:30225088-30228684  | exonic     | ASCC2                                                    | 22 | 30225088  | 30228684  | 2 | 0 | 0 | 0 | 0 | 0 | 3596   | 0.257973886 | 1.644777126 | 4.060983436 | 0.405019413 | 0.685463242 | 0.998252924 |
| chr22:31342327-31354680  | exonic     | MORC2                                                    | 22 | 31342327  | 31354680  | 2 | 0 | 0 | 0 | 0 | 0 | 12353  | 0.257973886 | 1.644777126 | 4.060983436 | 0.405019413 | 0.685463242 | 0.998252924 |
| chr22:35658316-35689736  | exonic     | HMGXB4                                                   | 22 | 35658316  | 35689736  | 2 | 0 | 0 | 0 | 0 | 0 | 31420  | 0.257973886 | 1.644777126 | 4.060983436 | 0.405019413 | 0.685463242 | 0.998252924 |
| chr22:39147399-39148511  | splicing   | SUN2                                                     | 22 | 39147399  | 39148511  | 2 | 0 | 0 | 0 | 0 | 0 | 1112   | 0.257973886 | 1.644777126 | 4.060983436 | 0.405019413 | 0.685463242 | 0.998252924 |
| chr22:40642019-40647204  | exonic     | TNRC6B                                                   | 22 | 40642019  | 40647204  | 2 | 0 | 0 | 0 | 0 | 0 | 5185   | 0.257973886 | 1.644777126 | 4.060983436 | 0.405019413 | 0.685463242 | 0.998252924 |
| chr22:41560057-41566575  | exonic     | EP300                                                    | 22 | 41560057  | 41566575  | 2 | 0 | 0 | 0 | 0 | 0 | 6518   | 0.257973886 | 1.644777126 | 4.060983436 | 0.405019413 | 0.685463242 | 0.998252924 |
| chr22:42024121-42033795  | exonic     | XRCC6                                                    | 22 | 42024121  | 42033795  | 2 | 0 | 0 | 0 | 0 | 0 | 9674   | 0.257973886 | 1.644777126 | 4.060983436 | 0.405019413 | 0.685463242 | 0.998252924 |
| chr22:46757470-46757711  | UTR3       | <small>CELSR1 (NM_014246:c.*1605_*1364delins0)</small>   | 22 | 46757470  | 46757711  | 2 | 0 | 0 | 0 | 0 | 0 | 241    | 0.257973886 | 1.644777126 | 4.060983436 | 0.405019413 | 0.685463242 | 0.998252924 |
| chr22:50901893-50902757  | splicing   | SBF1                                                     | 22 | 50901893  | 50902757  | 2 | 0 | 0 | 0 | 0 | 0 | 864    | 0.257973886 | 1.644777126 | 4.060983436 | 0.405019413 | 0.685463242 | 0.998252924 |
| chr3:101383381-101391057 | exonic     | ZBTB11                                                   | 3  | 101383381 | 101391057 | 2 | 0 | 0 | 0 | 0 | 0 | 7676   | 0.257973886 | 1.644777126 | 4.060983436 | 0.405019413 | 0.685463242 | 0.998252924 |
| chr3:107447611-107451870 | exonic     | BBX                                                      | 3  | 107447611 | 107451870 | 2 | 0 | 0 | 0 | 0 | 0 | 4259   | 0.257973886 | 1.644777126 | 4.060983436 | 0.405019413 | 0.685463242 | 0.998252924 |
| chr3:113127952-113135474 | exonic     | CFAP44                                                   | 3  | 113127952 | 113135474 | 2 | 0 | 0 | 0 | 0 | 0 | 7522   | 0.257973886 | 1.644777126 | 4.060983436 | 0.405019413 | 0.685463242 | 0.998252924 |
| chr3:119222378-119232566 | exonic     | TIMMDC1                                                  | 3  | 119222378 | 119232566 | 2 | 0 | 0 | 0 | 0 | 0 | 10188  | 0.257973886 | 1.644777126 | 4.060983436 | 0.405019413 | 0.685463242 | 0.998252924 |
| chr3:123345664-123359351 | exonic     | MYLK                                                     | 3  | 123345664 | 123359351 | 2 | 0 | 0 | 0 | 0 | 0 | 13687  | 0.257973886 | 1.644777126 | 4.060983436 | 0.405019413 | 0.685463242 | 0.998252924 |
| chr3:123663695-123666166 | exonic     | CCDC14                                                   | 3  | 123663695 | 123666166 | 2 | 0 | 0 | 0 | 0 | 0 | 2471   | 0.257973886 | 1.644777126 | 4.060983436 | 0.405019413 | 0.685463242 | 0.998252924 |
| chr3:124563946-124564716 | intronic   | ITGB5                                                    | 3  | 124563946 | 124564716 | 2 | 0 | 0 | 0 | 0 | 0 | 770    | 0.257973886 | 1.644777126 | 4.060983436 | 0.405019413 | 0.685463242 | 0.998252924 |
| chr3:124974322-124975315 | intronic   | ZNF148                                                   | 3  | 124974322 | 124975315 | 2 | 0 | 0 | 0 | 0 | 0 | 993    | 0.257973886 | 1.644777126 | 4.060983436 | 0.405019413 | 0.685463242 | 0.998252924 |
| chr3:128913267-128914151 | intergenic | <small>CNPB (dist=10457), COPG1 (dist=54302)</small>     | 3  | 128913267 | 128914151 | 2 | 0 | 0 | 0 | 0 | 0 | 884    | 0.257973886 | 1.644777126 | 4.060983436 | 0.405019413 | 0.685463242 | 0.998252924 |
| chr3:130678118-130683889 | exonic     | ATP2C1                                                   | 3  | 130678118 | 130683889 | 2 | 0 | 0 | 0 | 0 | 0 | 5771   | 0.257973886 | 1.644777126 | 4.060983436 | 0.405019413 | 0.685463242 | 0.998252924 |
| chr3:130884269-130947532 | exonic     | NEK11                                                    | 3  | 130884269 | 130947532 | 2 | 0 | 0 | 0 | 0 | 0 | 63263  | 0.257973886 | 1.644777126 | 4.060983436 | 0.405019413 | 0.685463242 | 0.998252924 |
| chr3:132175078-132203516 | exonic     | DNAJC13                                                  | 3  | 132175078 | 132203516 | 2 | 0 | 0 | 0 | 0 | 0 | 28438  | 0.257973886 | 1.644777126 | 4.060983436 | 0.405019413 | 0.685463242 | 0.998252924 |
| chr3:133374133-133375701 | exonic     | TOPBP1                                                   | 3  | 133374133 | 133375701 | 2 | 0 | 0 | 0 | 0 | 0 | 1568   | 0.257973886 | 1.644777126 | 4.060983436 | 0.405019413 | 0.685463242 | 0.998252924 |
| chr3:135789319-135809509 | exonic     | PPP2R3A                                                  | 3  | 135789319 | 135809509 | 2 | 0 | 0 | 0 | 0 | 0 | 20190  | 0.257973886 | 1.644777126 | 4.060983436 | 0.405019413 | 0.685463242 | 0.998252924 |
| chr3:141622462-141626116 | exonic     | ATP1B3                                                   | 3  | 141622462 | 141626116 | 2 | 0 | 0 | 0 | 0 | 0 | 3654   | 0.257973886 | 1.644777126 | 4.060983436 | 0.405019413 | 0.685463242 | 0.998252924 |
| chr3:142183938-142186910 | exonic     | ATR                                                      | 3  | 142183938 | 142186910 | 2 | 0 | 0 | 0 | 0 | 0 | 2972   | 0.257973886 | 1.644777126 | 4.060983436 | 0.405019413 | 0.685463242 | 0.998252924 |
| chr3:142279104-142286996 | exonic     | ATR                                                      | 3  | 142279104 | 142286996 | 2 | 0 | 0 | 0 | 0 | 0 | 7892   | 0.257973886 | 1.644777126 | 4.060983436 | 0.405019413 | 0.685463242 | 0.998252924 |
| chr3:148599309-148603964 | exonic     | CPA3                                                     | 3  | 148599309 | 148603964 | 2 | 0 | 0 | 0 | 0 | 0 | 4655   | 0.257973886 | 1.644777126 | 4.060983436 | 0.405019413 | 0.685463242 | 0.998252924 |
| chr3:149540305-149589941 | exonic     | RNF13                                                    | 3  | 149540305 | 149589941 | 2 | 0 | 0 | 0 | 0 | 0 | 49636  | 0.257973886 | 1.644777126 | 4.060983436 | 0.405019413 | 0.685463242 | 0.998252924 |
| chr3:150218811-150219889 | intergenic | <small>TSC2D2 (dist=40906), SERP1 (dist=39891)</small>   | 3  | 150218811 | 150219889 | 2 | 0 | 0 | 0 | 0 | 0 | 1078   | 0.257973886 | 1.644777126 | 4.060983436 | 0.405019413 | 0.685463242 | 0.998252924 |
| chr3:153149646-153161157 | intergenic | <small>RAP2B (dist=261233), C3orf79 (dist=41127)</small> | 3  | 153149646 | 153161157 | 2 | 0 | 0 | 0 | 0 | 0 | 11511  | 0.257973886 | 1.644777126 | 4.060983436 | 0.405019413 | 0.685463242 | 0.998252924 |
| chr3:166858477-166952747 | intergenic | <small>BCHE (dist=1303224), ZBBX (dist=5330)</small>     | 3  | 166858477 | 166952747 | 2 | 0 | 0 | 0 | 0 | 0 | 94270  | 0.257973886 | 1.644777126 | 4.060983436 | 0.405019413 | 0.685463242 | 0.998252924 |
| chr3:174951720-175042114 | exonic     | NAALADL2                                                 | 3  | 174951720 | 175042114 | 2 | 0 | 0 | 0 | 0 | 0 | 90394  | 0.257973886 | 1.644777126 | 4.060983436 | 0.405019413 | 0.685463242 | 0.998252924 |
| chr3:17549966-17627958   | exonic     | TBC1D5                                                   | 3  | 17549966  | 17627958  | 2 | 0 | 0 | 0 | 0 | 0 | 77992  | 0.257973886 | 1.644777126 | 4.060983436 | 0.405019413 | 0.685463242 | 0.998252924 |
| chr3:17549966-17628049   | exonic     | TBC1D5                                                   | 3  | 17549966  | 17628049  | 2 | 0 | 0 | 0 | 0 | 0 | 78083  | 0.257973886 | 1.644777126 | 4.060983436 | 0.405019413 | 0.685463242 | 0.998252924 |
| chr3:184566858-184689540 | exonic     | VPS8                                                     | 3  | 184566858 | 184689540 | 2 | 0 | 0 | 0 | 0 | 0 | 122682 | 0.257973886 | 1.644777126 | 4.060983436 | 0.405019413 | 0.685463242 | 0.998252924 |

|                          |            |                                                             |   |           |           |   |   |   |   |   |   |        |             |             |             |             |             |             |
|--------------------------|------------|-------------------------------------------------------------|---|-----------|-----------|---|---|---|---|---|---|--------|-------------|-------------|-------------|-------------|-------------|-------------|
| chr3:185823094-185823731 | exonic     | ETV5                                                        | 3 | 185823094 | 185823731 | 2 | 0 | 0 | 0 | 0 | 0 | 637    | 0.257973886 | 1.644777126 | 4.060983436 | 0.405019413 | 0.685463242 | 0.998252924 |
| chr3:196098767-196117594 | exonic     | UBXN7                                                       | 3 | 196098767 | 196117594 | 2 | 0 | 0 | 0 | 0 | 0 | 18827  | 0.257973886 | 1.644777126 | 4.060983436 | 0.405019413 | 0.685463242 | 0.998252924 |
| chr3:197707196-197726213 | exonic     | LMLN                                                        | 3 | 197707196 | 197726213 | 2 | 0 | 0 | 0 | 0 | 0 | 19017  | 0.257973886 | 1.644777126 | 4.060983436 | 0.405019413 | 0.685463242 | 0.998252924 |
| chr3:32774914-32776468   | exonic     | CNOT10                                                      | 3 | 32774914  | 32776468  | 2 | 0 | 0 | 0 | 0 | 0 | 1554   | 0.257973886 | 1.644777126 | 4.060983436 | 0.405019413 | 0.685463242 | 0.998252924 |
| chr3:33055038-33055547   | splicing   | GLB1                                                        | 3 | 33055038  | 33055547  | 2 | 0 | 0 | 0 | 0 | 0 | 509    | 0.257973886 | 1.644777126 | 4.060983436 | 0.405019413 | 0.685463242 | 0.998252924 |
| chr3:33648082-33705007   | exonic     | CLASP2                                                      | 3 | 33648082  | 33705007  | 2 | 0 | 0 | 0 | 0 | 0 | 56925  | 0.257973886 | 1.644777126 | 4.060983436 | 0.405019413 | 0.685463242 | 0.998252924 |
| chr3:33712135-33738425   | exonic     | CLASP2                                                      | 3 | 33712135  | 33738425  | 2 | 0 | 0 | 0 | 0 | 0 | 26290  | 0.257973886 | 1.644777126 | 4.060983436 | 0.405019413 | 0.685463242 | 0.998252924 |
| chr3:36931319-36934475   | exonic     | TRANK1                                                      | 3 | 36931319  | 36934475  | 2 | 0 | 0 | 0 | 0 | 0 | 3156   | 0.257973886 | 1.644777126 | 4.060983436 | 0.405019413 | 0.685463242 | 0.998252924 |
| chr3:41657159-41977432   | exonic     | ULK4                                                        | 3 | 41657159  | 41977432  | 2 | 0 | 0 | 0 | 0 | 0 | 320273 | 0.257973886 | 1.644777126 | 4.060983436 | 0.405019413 | 0.685463242 | 0.998252924 |
| chr3:47703823-47727660   | exonic     | SMARCC1                                                     | 3 | 47703823  | 47727660  | 2 | 0 | 0 | 0 | 0 | 0 | 23837  | 0.257973886 | 1.644777126 | 4.060983436 | 0.405019413 | 0.685463242 | 0.998252924 |
| chr3:4808213-4810448     | exonic     | ITPR1                                                       | 3 | 4808213   | 4810448   | 2 | 0 | 0 | 0 | 0 | 0 | 2235   | 0.257973886 | 1.644777126 | 4.060983436 | 0.405019413 | 0.685463242 | 0.998252924 |
| chr3:48491442-48495818   | exonic     | ATRIP                                                       | 3 | 48491442  | 48495818  | 2 | 0 | 0 | 0 | 0 | 0 | 4376   | 0.257973886 | 1.644777126 | 4.060983436 | 0.405019413 | 0.685463242 | 0.998252924 |
| chr3:48744196-48744977   | intronic   | IP6K2                                                       | 3 | 48744196  | 48744977  | 2 | 0 | 0 | 0 | 0 | 0 | 781    | 0.257973886 | 1.644777126 | 4.060983436 | 0.405019413 | 0.685463242 | 0.998252924 |
| chr3:50144199-50145737   | exonic     | RBM5                                                        | 3 | 50144199  | 50145737  | 2 | 0 | 0 | 0 | 0 | 0 | 1538   | 0.257973886 | 1.644777126 | 4.060983436 | 0.405019413 | 0.685463242 | 0.998252924 |
| chr3:51575514-51661770   | exonic     | RAD54L2                                                     | 3 | 51575514  | 51661770  | 2 | 0 | 0 | 0 | 0 | 0 | 86256  | 0.257973886 | 1.644777126 | 4.060983436 | 0.405019413 | 0.685463242 | 0.998252924 |
| chr3:52006556-52006975   | intronic   | ABHD14B                                                     | 3 | 52006556  | 52006975  | 2 | 0 | 0 | 0 | 0 | 0 | 419    | 0.257973886 | 1.644777126 | 4.060983436 | 0.405019413 | 0.685463242 | 0.998252924 |
| chr3:57271519-57280250   | exonic     | APPL1                                                       | 3 | 57271519  | 57280250  | 2 | 0 | 0 | 0 | 0 | 0 | 8731   | 0.257973886 | 1.644777126 | 4.060983436 | 0.405019413 | 0.685463242 | 0.998252924 |
| chr3:57571620-57574636   | intronic   | ARF4                                                        | 3 | 57571620  | 57574636  | 2 | 0 | 0 | 0 | 0 | 0 | 3016   | 0.257973886 | 1.644777126 | 4.060983436 | 0.405019413 | 0.685463242 | 0.998252924 |
| chr3:57616147-57616705   | exonic     | DENND6A                                                     | 3 | 57616147  | 57616705  | 2 | 0 | 0 | 0 | 0 | 0 | 558    | 0.257973886 | 1.644777126 | 4.060983436 | 0.405019413 | 0.685463242 | 0.998252924 |
| chr3:64427425-64427566   | intergenic | <small>PRICKLE2 (dist=216294), ADAMTS9 (dist=73765)</small> | 3 | 64427425  | 64427566  | 2 | 0 | 0 | 0 | 0 | 0 | 141    | 0.257973886 | 1.644777126 | 4.060983436 | 0.405019413 | 0.685463242 | 0.998252924 |
| chr3:71161686-71542706   | exonic     | FOXP1                                                       | 3 | 71161686  | 71542706  | 2 | 0 | 0 | 0 | 0 | 0 | 381020 | 0.257973886 | 1.644777126 | 4.060983436 | 0.405019413 | 0.685463242 | 0.998252924 |
| chr3:9484991-9487424     | exonic     | SETD5                                                       | 3 | 9484991   | 9487424   | 2 | 0 | 0 | 0 | 0 | 0 | 2433   | 0.257973886 | 1.644777126 | 4.060983436 | 0.405019413 | 0.685463242 | 0.998252924 |
| chr4:106317405-106377902 | exonic     | PPA2                                                        | 4 | 106317405 | 106377902 | 2 | 0 | 0 | 0 | 0 | 0 | 60497  | 0.257973886 | 1.644777126 | 4.060983436 | 0.405019413 | 0.685463242 | 0.998252924 |
| chr4:110862101-110866431 | exonic     | EGF                                                         | 4 | 110862101 | 110866431 | 2 | 0 | 0 | 0 | 0 | 0 | 4330   | 0.257973886 | 1.644777126 | 4.060983436 | 0.405019413 | 0.685463242 | 0.998252924 |
| chr4:110862101-110909865 | exonic     | EGF                                                         | 4 | 110862101 | 110909865 | 2 | 0 | 0 | 0 | 0 | 0 | 47764  | 0.257973886 | 1.644777126 | 4.060983436 | 0.405019413 | 0.685463242 | 0.998252924 |
| chr4:113565823-113575315 | exonic     | LARP7                                                       | 4 | 113565823 | 113575315 | 2 | 0 | 0 | 0 | 0 | 0 | 9492   | 0.257973886 | 1.644777126 | 4.060983436 | 0.405019413 | 0.685463242 | 0.998252924 |
| chr4:123091770-123097069 | exonic     | KIAA1109                                                    | 4 | 123091770 | 123097069 | 2 | 0 | 0 | 0 | 0 | 0 | 5299   | 0.257973886 | 1.644777126 | 4.060983436 | 0.405019413 | 0.685463242 | 0.998252924 |
| chr4:140037803-140046483 | exonic     | ELF2                                                        | 4 | 140037803 | 140046483 | 2 | 0 | 0 | 0 | 0 | 0 | 8680   | 0.257973886 | 1.644777126 | 4.060983436 | 0.405019413 | 0.685463242 | 0.998252924 |
| chr4:146697126-146700525 | splicing   | ZNF827                                                      | 4 | 146697126 | 146700525 | 2 | 0 | 0 | 0 | 0 | 0 | 3399   | 0.257973886 | 1.644777126 | 4.060983436 | 0.405019413 | 0.685463242 | 0.998252924 |
| chr4:148743877-148803083 | exonic     | ARHGAP10                                                    | 4 | 148743877 | 148803083 | 2 | 0 | 0 | 0 | 0 | 0 | 59206  | 0.257973886 | 1.644777126 | 4.060983436 | 0.405019413 | 0.685463242 | 0.998252924 |
| chr4:153874650-153875471 | exonic     | FHDC1                                                       | 4 | 153874650 | 153875471 | 2 | 0 | 0 | 0 | 0 | 0 | 821    | 0.257973886 | 1.644777126 | 4.060983436 | 0.405019413 | 0.685463242 | 0.998252924 |
| chr4:154191489-154197282 | exonic     | TRIM2                                                       | 4 | 154191489 | 154197282 | 2 | 0 | 0 | 0 | 0 | 0 | 5793   | 0.257973886 | 1.644777126 | 4.060983436 | 0.405019413 | 0.685463242 | 0.998252924 |
| chr4:15585497-15592952   | exonic     | CC2D2A                                                      | 4 | 15585497  | 15592952  | 2 | 0 | 0 | 0 | 0 | 0 | 7455   | 0.257973886 | 1.644777126 | 4.060983436 | 0.405019413 | 0.685463242 | 0.998252924 |
| chr4:166924542-166946583 | exonic     | TLL1                                                        | 4 | 166924542 | 166946583 | 2 | 0 | 0 | 0 | 0 | 0 | 22041  | 0.257973886 | 1.644777126 | 4.060983436 | 0.405019413 | 0.685463242 | 0.998252924 |
| chr4:184605127-184615876 | exonic     | TRAPPC11                                                    | 4 | 184605127 | 184615876 | 2 | 0 | 0 | 0 | 0 | 0 | 10749  | 0.257973886 | 1.644777126 | 4.060983436 | 0.405019413 | 0.685463242 | 0.998252924 |



|                          |              |                                                             |   |           |           |   |   |   |   |   |   |        |             |             |             |             |             |             |
|--------------------------|--------------|-------------------------------------------------------------|---|-----------|-----------|---|---|---|---|---|---|--------|-------------|-------------|-------------|-------------|-------------|-------------|
| chr4:187077153-187088416 | exonic       | FAM149A                                                     | 4 | 187077153 | 187088416 | 2 | 0 | 0 | 0 | 0 | 0 | 11263  | 0.257973886 | 1.644777126 | 4.060983436 | 0.405019413 | 0.685463242 | 0.998252924 |
| chr4:25256686-25270825   | exonic       | PI4K2B                                                      | 4 | 25256686  | 25270825  | 2 | 0 | 0 | 0 | 0 | 0 | 14139  | 0.257973886 | 1.644777126 | 4.060983436 | 0.405019413 | 0.685463242 | 0.998252924 |
| chr4:25819759-25849486   | exonic       | SELIL3                                                      | 4 | 25819759  | 25849486  | 2 | 0 | 0 | 0 | 0 | 0 | 29727  | 0.257973886 | 1.644777126 | 4.060983436 | 0.405019413 | 0.685463242 | 0.998252924 |
| chr4:2721408-2729708     | exonic       | FAM193A                                                     | 4 | 2721408   | 2729708   | 2 | 0 | 0 | 0 | 0 | 0 | 8300   | 0.257973886 | 1.644777126 | 4.060983436 | 0.405019413 | 0.685463242 | 0.998252924 |
| chr4:3184080-3190820     | exonic       | HTT                                                         | 4 | 3184080   | 3190820   | 2 | 0 | 0 | 0 | 0 | 0 | 6740   | 0.257973886 | 1.644777126 | 4.060983436 | 0.405019413 | 0.685463242 | 0.998252924 |
| chr4:39226503-39241954   | exonic       | WDR19                                                       | 4 | 39226503  | 39241954  | 2 | 0 | 0 | 0 | 0 | 0 | 15451  | 0.257973886 | 1.644777126 | 4.060983436 | 0.405019413 | 0.685463242 | 0.998252924 |
| chr4:40103694-40115128   | exonic       | N4BP2                                                       | 4 | 40103694  | 40115128  | 2 | 0 | 0 | 0 | 0 | 0 | 11434  | 0.257973886 | 1.644777126 | 4.060983436 | 0.405019413 | 0.685463242 | 0.998252924 |
| chr4:41210510-41213078   | intronic     | APBB2                                                       | 4 | 41210510  | 41213078  | 2 | 0 | 0 | 0 | 0 | 0 | 2568   | 0.257973886 | 1.644777126 | 4.060983436 | 0.405019413 | 0.685463242 | 0.998252924 |
| chr4:57785953-57798356   | exonic       | REST                                                        | 4 | 57785953  | 57798356  | 2 | 0 | 0 | 0 | 0 | 0 | 12403  | 0.257973886 | 1.644777126 | 4.060983436 | 0.405019413 | 0.685463242 | 0.998252924 |
| chr4:6596260-6602483     | exonic       | MAN2B2                                                      | 4 | 6596260   | 6602483   | 2 | 0 | 0 | 0 | 0 | 0 | 6223   | 0.257973886 | 1.644777126 | 4.060983436 | 0.405019413 | 0.685463242 | 0.998252924 |
| chr4:68586140-68595888   | ncRNA_exonic | UBA6-AS1                                                    | 4 | 68586140  | 68595888  | 2 | 0 | 0 | 0 | 0 | 0 | 9748   | 0.257973886 | 1.644777126 | 4.060983436 | 0.405019413 | 0.685463242 | 0.998252924 |
| chr4:6878484-6882497     | exonic       | KIAA0232                                                    | 4 | 6878484   | 6882497   | 2 | 0 | 0 | 0 | 0 | 0 | 4013   | 0.257973886 | 1.644777126 | 4.060983436 | 0.405019413 | 0.685463242 | 0.998252924 |
| chr4:71634254-71640950   | exonic       | RUFY3                                                       | 4 | 71634254  | 71640950  | 2 | 0 | 0 | 0 | 0 | 0 | 6696   | 0.257973886 | 1.644777126 | 4.060983436 | 0.405019413 | 0.685463242 | 0.998252924 |
| chr4:71662871-71663346   | intronic     | RUFY3                                                       | 4 | 71662871  | 71663346  | 2 | 0 | 0 | 0 | 0 | 0 | 475    | 0.257973886 | 1.644777126 | 4.060983436 | 0.405019413 | 0.685463242 | 0.998252924 |
| chr4:73984405-73991029   | exonic       | ANKRD17                                                     | 4 | 73984405  | 73991029  | 2 | 0 | 0 | 0 | 0 | 0 | 6624   | 0.257973886 | 1.644777126 | 4.060983436 | 0.405019413 | 0.685463242 | 0.998252924 |
| chr4:76521430-76532545   | exonic       | CDKL2                                                       | 4 | 76521430  | 76532545  | 2 | 0 | 0 | 0 | 0 | 0 | 11115  | 0.257973886 | 1.644777126 | 4.060983436 | 0.405019413 | 0.685463242 | 0.998252924 |
| chr4:81529487-81570141   | exonic       | C4orf22                                                     | 4 | 81529487  | 81570141  | 2 | 0 | 0 | 0 | 0 | 0 | 40654  | 0.257973886 | 1.644777126 | 4.060983436 | 0.405019413 | 0.685463242 | 0.998252924 |
| chr4:82366679-82369438   | exonic       | RASGEF1B                                                    | 4 | 82366679  | 82369438  | 2 | 0 | 0 | 0 | 0 | 0 | 2759   | 0.257973886 | 1.644777126 | 4.060983436 | 0.405019413 | 0.685463242 | 0.998252924 |
| chr4:84384646-84393441   | exonic       | FAM175A                                                     | 4 | 84384646  | 84393441  | 2 | 0 | 0 | 0 | 0 | 0 | 8795   | 0.257973886 | 1.644777126 | 4.060983436 | 0.405019413 | 0.685463242 | 0.998252924 |
| chr4:85478850-85479109   | intergenic   | <small>NX6-1 (dist=59463), CDS1 (dist=24948)</small>        | 4 | 85478850  | 85479109  | 2 | 0 | 0 | 0 | 0 | 0 | 259    | 0.257973886 | 1.644777126 | 4.060983436 | 0.405019413 | 0.685463242 | 0.998252924 |
| chr4:85599320-85600395   | exonic       | WDFY3                                                       | 4 | 85599320  | 85600395  | 2 | 0 | 0 | 0 | 0 | 0 | 1075   | 0.257973886 | 1.644777126 | 4.060983436 | 0.405019413 | 0.685463242 | 0.998252924 |
| chr4:85611658-85623659   | exonic       | WDFY3                                                       | 4 | 85611658  | 85623659  | 2 | 0 | 0 | 0 | 0 | 0 | 12001  | 0.257973886 | 1.644777126 | 4.060983436 | 0.405019413 | 0.685463242 | 0.998252924 |
| chr4:87022204-87028505   | exonic       | MAPK10                                                      | 4 | 87022204  | 87028505  | 2 | 0 | 0 | 0 | 0 | 0 | 6301   | 0.257973886 | 1.644777126 | 4.060983436 | 0.405019413 | 0.685463242 | 0.998252924 |
| chr4:95197489-95202741   | exonic       | SMARCAD1                                                    | 4 | 95197489  | 95202741  | 2 | 0 | 0 | 0 | 0 | 0 | 5252   | 0.257973886 | 1.644777126 | 4.060983436 | 0.405019413 | 0.685463242 | 0.998252924 |
| chr5:10213603-10224173   | intergenic   | <small>LOC285692 (dist=309667), FAM173B (dist=1447)</small> | 5 | 10213603  | 10224173  | 2 | 0 | 0 | 0 | 0 | 0 | 10570  | 0.257973886 | 1.644777126 | 4.060983436 | 0.405019413 | 0.685463242 | 0.998252924 |
| chr5:108133825-108134090 | exonic       | FER                                                         | 5 | 108133825 | 108134090 | 2 | 0 | 0 | 0 | 0 | 0 | 265    | 0.257973886 | 1.644777126 | 4.060983436 | 0.405019413 | 0.685463242 | 0.998252924 |
| chr5:111594925-111602027 | exonic       | EPB41L4A                                                    | 5 | 111594925 | 111602027 | 2 | 0 | 0 | 0 | 0 | 0 | 7102   | 0.257973886 | 1.644777126 | 4.060983436 | 0.405019413 | 0.685463242 | 0.998252924 |
| chr5:111614203-111614538 | intronic     | EPB41L4A                                                    | 5 | 111614203 | 111614538 | 2 | 0 | 0 | 0 | 0 | 0 | 335    | 0.257973886 | 1.644777126 | 4.060983436 | 0.405019413 | 0.685463242 | 0.998252924 |
| chr5:117876-122629       | intergenic   | <small>NONE (dist=NONE), PLEKHG4B (dist=17744)</small>      | 5 | 117876    | 122629    | 2 | 0 | 0 | 0 | 0 | 0 | 4753   | 0.257973886 | 1.644777126 | 4.060983436 | 0.405019413 | 0.685463242 | 0.998252924 |
| chr5:130788746-130799974 | exonic       | RAPGEF6                                                     | 5 | 130788746 | 130799974 | 2 | 0 | 0 | 0 | 0 | 0 | 11228  | 0.257973886 | 1.644777126 | 4.060983436 | 0.405019413 | 0.685463242 | 0.998252924 |
| chr5:130840318-130883883 | exonic       | RAPGEF6                                                     | 5 | 130840318 | 130883883 | 2 | 0 | 0 | 0 | 0 | 0 | 43565  | 0.257973886 | 1.644777126 | 4.060983436 | 0.405019413 | 0.685463242 | 0.998252924 |
| chr5:132222002-132228810 | exonic       | AFF4                                                        | 5 | 132222002 | 132228810 | 2 | 0 | 0 | 0 | 0 | 0 | 6808   | 0.257973886 | 1.644777126 | 4.060983436 | 0.405019413 | 0.685463242 | 0.998252924 |
| chr5:132342451-132343581 | exonic       | ZCCHC10                                                     | 5 | 132342451 | 132343581 | 2 | 0 | 0 | 0 | 0 | 0 | 1130   | 0.257973886 | 1.644777126 | 4.060983436 | 0.405019413 | 0.685463242 | 0.998252924 |
| chr5:138221900-138223331 | exonic       | CTNNA1                                                      | 5 | 138221900 | 138223331 | 2 | 0 | 0 | 0 | 0 | 0 | 1431   | 0.257973886 | 1.644777126 | 4.060983436 | 0.405019413 | 0.685463242 | 0.998252924 |
| chr5:14316621-14420130   | exonic       | TRIO                                                        | 5 | 14316621  | 14420130  | 2 | 0 | 0 | 0 | 0 | 0 | 103509 | 0.257973886 | 1.644777126 | 4.060983436 | 0.405019413 | 0.685463242 | 0.998252924 |

|                          |            |                                           |   |           |           |   |   |   |   |   |   |       |             |             |             |             |             |             |
|--------------------------|------------|-------------------------------------------|---|-----------|-----------|---|---|---|---|---|---|-------|-------------|-------------|-------------|-------------|-------------|-------------|
| chr5:14673751-14693203   | exonic     | OTULIN                                    | 5 | 14673751  | 14693203  | 2 | 0 | 0 | 0 | 0 | 0 | 19452 | 0.257973886 | 1.644777126 | 4.060983436 | 0.405019413 | 0.685463242 | 0.998252924 |
| chr5:149900429-149901329 | exonic     | NDST1                                     | 5 | 149900429 | 149901329 | 2 | 0 | 0 | 0 | 0 | 0 | 900   | 0.257973886 | 1.644777126 | 4.060983436 | 0.405019413 | 0.685463242 | 0.998252924 |
| chr5:153381810-153407843 | exonic     | FAM114A2                                  | 5 | 153381810 | 153407843 | 2 | 0 | 0 | 0 | 0 | 0 | 26033 | 0.257973886 | 1.644777126 | 4.060983436 | 0.405019413 | 0.685463242 | 0.998252924 |
| chr5:154062598-154063063 | intergenic | MIR3141 (dist=86966), MIR1303 (dist=2273) | 5 | 154062598 | 154063063 | 2 | 0 | 0 | 0 | 0 | 0 | 465   | 0.257973886 | 1.644777126 | 4.060983436 | 0.405019413 | 0.685463242 | 0.998252924 |
| chr5:157221906-157232919 | exonic     | CLINT1                                    | 5 | 157221906 | 157232919 | 2 | 0 | 0 | 0 | 0 | 0 | 11013 | 0.257973886 | 1.644777126 | 4.060983436 | 0.405019413 | 0.685463242 | 0.998252924 |
| chr5:169138938-169145795 | exonic     | DOCK2                                     | 5 | 169138938 | 169145795 | 2 | 0 | 0 | 0 | 0 | 0 | 6857  | 0.257973886 | 1.644777126 | 4.060983436 | 0.405019413 | 0.685463242 | 0.998252924 |
| chr5:171479932-171488272 | exonic     | STK10                                     | 5 | 171479932 | 171488272 | 2 | 0 | 0 | 0 | 0 | 0 | 8340  | 0.257973886 | 1.644777126 | 4.060983436 | 0.405019413 | 0.685463242 | 0.998252924 |
| chr5:176344883-176347132 | intronic   | UIMC1                                     | 5 | 176344883 | 176347132 | 2 | 0 | 0 | 0 | 0 | 0 | 2249  | 0.257973886 | 1.644777126 | 4.060983436 | 0.405019413 | 0.685463242 | 0.998252924 |
| chr5:176562941-176631293 | exonic     | NSD1                                      | 5 | 176562941 | 176631293 | 2 | 0 | 0 | 0 | 0 | 0 | 68352 | 0.257973886 | 1.644777126 | 4.060983436 | 0.405019413 | 0.685463242 | 0.998252924 |
| chr5:176618884-176666866 | exonic     | NSD1                                      | 5 | 176618884 | 176666866 | 2 | 0 | 0 | 0 | 0 | 0 | 47982 | 0.257973886 | 1.644777126 | 4.060983436 | 0.405019413 | 0.685463242 | 0.998252924 |
| chr5:176665237-176666866 | exonic     | NSD1                                      | 5 | 176665237 | 176666866 | 2 | 0 | 0 | 0 | 0 | 0 | 1629  | 0.257973886 | 1.644777126 | 4.060983436 | 0.405019413 | 0.685463242 | 0.998252924 |
| chr5:176707565-176710929 | exonic     | NSD1                                      | 5 | 176707565 | 176710929 | 2 | 0 | 0 | 0 | 0 | 0 | 3364  | 0.257973886 | 1.644777126 | 4.060983436 | 0.405019413 | 0.685463242 | 0.998252924 |
| chr5:179041961-179042546 | splicing   | HNRNPH1                                   | 5 | 179041961 | 179042546 | 2 | 0 | 0 | 0 | 0 | 0 | 585   | 0.257973886 | 1.644777126 | 4.060983436 | 0.405019413 | 0.685463242 | 0.998252924 |
| chr5:179151721-179153760 | exonic     | CANX                                      | 5 | 179151721 | 179153760 | 2 | 0 | 0 | 0 | 0 | 0 | 2039  | 0.257973886 | 1.644777126 | 4.060983436 | 0.405019413 | 0.685463242 | 0.998252924 |
| chr5:179195850-179198244 | exonic     | MAML1                                     | 5 | 179195850 | 179198244 | 2 | 0 | 0 | 0 | 0 | 0 | 2394  | 0.257973886 | 1.644777126 | 4.060983436 | 0.405019413 | 0.685463242 | 0.998252924 |
| chr5:179265584-179267039 | intronic   | C5orf45                                   | 5 | 179265584 | 179267039 | 2 | 0 | 0 | 0 | 0 | 0 | 1455  | 0.257973886 | 1.644777126 | 4.060983436 | 0.405019413 | 0.685463242 | 0.998252924 |
| chr5:179994242-179994819 | exonic     | CNOT6                                     | 5 | 179994242 | 179994819 | 2 | 0 | 0 | 0 | 0 | 0 | 577   | 0.257973886 | 1.644777126 | 4.060983436 | 0.405019413 | 0.685463242 | 0.998252924 |
| chr5:31421378-31424578   | exonic     | DROSHA                                    | 5 | 31421378  | 31424578  | 2 | 0 | 0 | 0 | 0 | 0 | 3200  | 0.257973886 | 1.644777126 | 4.060983436 | 0.405019413 | 0.685463242 | 0.998252924 |
| chr5:33588703-33596165   | exonic     | ADAMTS12                                  | 5 | 33588703  | 33596165  | 2 | 0 | 0 | 0 | 0 | 0 | 7462  | 0.257973886 | 1.644777126 | 4.060983436 | 0.405019413 | 0.685463242 | 0.998252924 |
| chr5:37697756-37703189   | exonic     | WDR70                                     | 5 | 37697756  | 37703189  | 2 | 0 | 0 | 0 | 0 | 0 | 5433  | 0.257973886 | 1.644777126 | 4.060983436 | 0.405019413 | 0.685463242 | 0.998252924 |
| chr5:39201928-39250908   | exonic     | FYB                                       | 5 | 39201928  | 39250908  | 2 | 0 | 0 | 0 | 0 | 0 | 48980 | 0.257973886 | 1.644777126 | 4.060983436 | 0.405019413 | 0.685463242 | 0.998252924 |
| chr5:41927114-41930019   | exonic     | FBXO4                                     | 5 | 41927114  | 41930019  | 2 | 0 | 0 | 0 | 0 | 0 | 2905  | 0.257973886 | 1.644777126 | 4.060983436 | 0.405019413 | 0.685463242 | 0.998252924 |
| chr5:42688992-42719076   | exonic     | GHR                                       | 5 | 42688992  | 42719076  | 2 | 0 | 0 | 0 | 0 | 0 | 30084 | 0.257973886 | 1.644777126 | 4.060983436 | 0.405019413 | 0.685463242 | 0.998252924 |
| chr5:43615949-43645612   | exonic     | NNT                                       | 5 | 43615949  | 43645612  | 2 | 0 | 0 | 0 | 0 | 0 | 29663 | 0.257973886 | 1.644777126 | 4.060983436 | 0.405019413 | 0.685463242 | 0.998252924 |
| chr5:453484-454166       | exonic     | EXOC3                                     | 5 | 453484    | 454166    | 2 | 0 | 0 | 0 | 0 | 0 | 682   | 0.257973886 | 1.644777126 | 4.060983436 | 0.405019413 | 0.685463242 | 0.998252924 |
| chr5:61642956-61645947   | exonic     | KIF2A                                     | 5 | 61642956  | 61645947  | 2 | 0 | 0 | 0 | 0 | 0 | 2991  | 0.257973886 | 1.644777126 | 4.060983436 | 0.405019413 | 0.685463242 | 0.998252924 |
| chr5:65307876-65319192   | exonic     | ERBB2IP                                   | 5 | 65307876  | 65319192  | 2 | 0 | 0 | 0 | 0 | 0 | 11316 | 0.257973886 | 1.644777126 | 4.060983436 | 0.405019413 | 0.685463242 | 0.998252924 |
| chr5:72302271-72337142   | exonic     | FCHO2                                     | 5 | 72302271  | 72337142  | 2 | 0 | 0 | 0 | 0 | 0 | 34871 | 0.257973886 | 1.644777126 | 4.060983436 | 0.405019413 | 0.685463242 | 0.998252924 |
| chr5:72347175-72383580   | exonic     | FCHO2                                     | 5 | 72347175  | 72383580  | 2 | 0 | 0 | 0 | 0 | 0 | 36405 | 0.257973886 | 1.644777126 | 4.060983436 | 0.405019413 | 0.685463242 | 0.998252924 |
| chr5:730549-770232       | intergenic | TPPP (dist=37039), ZDHHC11 (dist=25488)   | 5 | 730549    | 770232    | 2 | 0 | 0 | 0 | 0 | 0 | 39683 | 0.257973886 | 1.644777126 | 4.060983436 | 0.405019413 | 0.685463242 | 0.998252924 |
| chr5:78692645-78697878   | exonic     | HOMER1                                    | 5 | 78692645  | 78697878  | 2 | 0 | 0 | 0 | 0 | 0 | 5233  | 0.257973886 | 1.644777126 | 4.060983436 | 0.405019413 | 0.685463242 | 0.998252924 |
| chr5:80057364-80088663   | exonic     | MSH3                                      | 5 | 80057364  | 80088663  | 2 | 0 | 0 | 0 | 0 | 0 | 31299 | 0.257973886 | 1.644777126 | 4.060983436 | 0.405019413 | 0.685463242 | 0.998252924 |
| chr5:80419412-80422982   | exonic     | RASGRF2                                   | 5 | 80419412  | 80422982  | 2 | 0 | 0 | 0 | 0 | 0 | 3570  | 0.257973886 | 1.644777126 | 4.060983436 | 0.405019413 | 0.685463242 | 0.998252924 |
| chr5:86627164-86637138   | exonic     | RASA1                                     | 5 | 86627164  | 86637138  | 2 | 0 | 0 | 0 | 0 | 0 | 9974  | 0.257973886 | 1.644777126 | 4.060983436 | 0.405019413 | 0.685463242 | 0.998252924 |
| chr6:10749434-10755465   | exonic     | TMEM14B                                   | 6 | 10749434  | 10755465  | 2 | 0 | 0 | 0 | 0 | 0 | 6031  | 0.257973886 | 1.644777126 | 4.060983436 | 0.405019413 | 0.685463242 | 0.998252924 |

|                          |            |                                                            |   |           |           |   |   |   |   |   |   |       |             |             |             |             |             |             |
|--------------------------|------------|------------------------------------------------------------|---|-----------|-----------|---|---|---|---|---|---|-------|-------------|-------------|-------------|-------------|-------------|-------------|
| chr6:109884799-109907275 | exonic     | AK9                                                        | 6 | 109884799 | 109907275 | 2 | 0 | 0 | 0 | 0 | 0 | 22476 | 0.257973886 | 1.644777126 | 4.060983436 | 0.405019413 | 0.685463242 | 0.998252924 |
| chr6:112451077-112452303 | exonic     | LAMA4                                                      | 6 | 112451077 | 112452303 | 2 | 0 | 0 | 0 | 0 | 0 | 1226  | 0.257973886 | 1.644777126 | 4.060983436 | 0.405019413 | 0.685463242 | 0.998252924 |
| chr6:12026181-12043689   | intronic   | HIVEP1                                                     | 6 | 12026181  | 12043689  | 2 | 0 | 0 | 0 | 0 | 0 | 17508 | 0.257973886 | 1.644777126 | 4.060983436 | 0.405019413 | 0.685463242 | 0.998252924 |
| chr6:129618829-129674502 | exonic     | LAMA2                                                      | 6 | 129618829 | 129674502 | 2 | 0 | 0 | 0 | 0 | 0 | 55673 | 0.257973886 | 1.644777126 | 4.060983436 | 0.405019413 | 0.685463242 | 0.998252924 |
| chr6:129687364-129704378 | exonic     | LAMA2                                                      | 6 | 129687364 | 129704378 | 2 | 0 | 0 | 0 | 0 | 0 | 17014 | 0.257973886 | 1.644777126 | 4.060983436 | 0.405019413 | 0.685463242 | 0.998252924 |
| chr6:129799837-129835740 | exonic     | LAMA2                                                      | 6 | 129799837 | 129835740 | 2 | 0 | 0 | 0 | 0 | 0 | 35903 | 0.257973886 | 1.644777126 | 4.060983436 | 0.405019413 | 0.685463242 | 0.998252924 |
| chr6:132039811-132047340 | exonic     | ENPP3                                                      | 6 | 132039811 | 132047340 | 2 | 0 | 0 | 0 | 0 | 0 | 7529  | 0.257973886 | 1.644777126 | 4.060983436 | 0.405019413 | 0.685463242 | 0.998252924 |
| chr6:13632601-13634784   | exonic     | RANBP9                                                     | 6 | 13632601  | 13634784  | 2 | 0 | 0 | 0 | 0 | 0 | 2183  | 0.257973886 | 1.644777126 | 4.060983436 | 0.405019413 | 0.685463242 | 0.998252924 |
| chr6:136922159-136923117 | exonic     | MAP3K5                                                     | 6 | 136922159 | 136923117 | 2 | 0 | 0 | 0 | 0 | 0 | 958   | 0.257973886 | 1.644777126 | 4.060983436 | 0.405019413 | 0.685463242 | 0.998252924 |
| chr6:136958462-136980516 | exonic     | MAP3K5                                                     | 6 | 136958462 | 136980516 | 2 | 0 | 0 | 0 | 0 | 0 | 22054 | 0.257973886 | 1.644777126 | 4.060983436 | 0.405019413 | 0.685463242 | 0.998252924 |
| chr6:139262471-139269050 | exonic     | REPS1                                                      | 6 | 139262471 | 139269050 | 2 | 0 | 0 | 0 | 0 | 0 | 6579  | 0.257973886 | 1.644777126 | 4.060983436 | 0.405019413 | 0.685463242 | 0.998252924 |
| chr6:147103155-147109746 | exonic     | ADGB                                                       | 6 | 147103155 | 147109746 | 2 | 0 | 0 | 0 | 0 | 0 | 6591  | 0.257973886 | 1.644777126 | 4.060983436 | 0.405019413 | 0.685463242 | 0.998252924 |
| chr6:151222059-151243874 | exonic     | MTHFD1L                                                    | 6 | 151222059 | 151243874 | 2 | 0 | 0 | 0 | 0 | 0 | 21815 | 0.257973886 | 1.644777126 | 4.060983436 | 0.405019413 | 0.685463242 | 0.998252924 |
| chr6:151725864-151742456 | exonic     | RMND1                                                      | 6 | 151725864 | 151742456 | 2 | 0 | 0 | 0 | 0 | 0 | 16592 | 0.257973886 | 1.644777126 | 4.060983436 | 0.405019413 | 0.685463242 | 0.998252924 |
| chr6:152529106-152536195 | exonic     | SYNE1                                                      | 6 | 152529106 | 152536195 | 2 | 0 | 0 | 0 | 0 | 0 | 7089  | 0.257973886 | 1.644777126 | 4.060983436 | 0.405019413 | 0.685463242 | 0.998252924 |
| chr6:152560283-152560988 | exonic     | SYNE1                                                      | 6 | 152560283 | 152560988 | 2 | 0 | 0 | 0 | 0 | 0 | 705   | 0.257973886 | 1.644777126 | 4.060983436 | 0.405019413 | 0.685463242 | 0.998252924 |
| chr6:152644612-152673488 | exonic     | SYNE1                                                      | 6 | 152644612 | 152673488 | 2 | 0 | 0 | 0 | 0 | 0 | 28876 | 0.257973886 | 1.644777126 | 4.060983436 | 0.405019413 | 0.685463242 | 0.998252924 |
| chr6:152668193-152673488 | exonic     | SYNE1                                                      | 6 | 152668193 | 152673488 | 2 | 0 | 0 | 0 | 0 | 0 | 5295  | 0.257973886 | 1.644777126 | 4.060983436 | 0.405019413 | 0.685463242 | 0.998252924 |
| chr6:15615497-15652371   | exonic     | DTNBP1                                                     | 6 | 15615497  | 15652371  | 2 | 0 | 0 | 0 | 0 | 0 | 36874 | 0.257973886 | 1.644777126 | 4.060983436 | 0.405019413 | 0.685463242 | 0.998252924 |
| chr6:158681516-158681947 | intergenic | <small>GTF2H5 (dist=61140), TULP4 (dist=51745)</small>     | 6 | 158681516 | 158681947 | 2 | 0 | 0 | 0 | 0 | 0 | 431   | 0.257973886 | 1.644777126 | 4.060983436 | 0.405019413 | 0.685463242 | 0.998252924 |
| chr6:158731398-158735300 | exonic     | TULP4                                                      | 6 | 158731398 | 158735300 | 2 | 0 | 0 | 0 | 0 | 0 | 3902  | 0.257973886 | 1.644777126 | 4.060983436 | 0.405019413 | 0.685463242 | 0.998252924 |
| chr6:158870027-158882761 | exonic     | TULP4                                                      | 6 | 158870027 | 158882761 | 2 | 0 | 0 | 0 | 0 | 0 | 12734 | 0.257973886 | 1.644777126 | 4.060983436 | 0.405019413 | 0.685463242 | 0.998252924 |
| chr6:169768304-169770495 | intergenic | <small>THBS2 (dist=114095), WDR27 (dist=86808)</small>     | 6 | 169768304 | 169770495 | 2 | 0 | 0 | 0 | 0 | 0 | 2191  | 0.257973886 | 1.644777126 | 4.060983436 | 0.405019413 | 0.685463242 | 0.998252924 |
| chr6:170110331-170121207 | exonic     | PHF10                                                      | 6 | 170110331 | 170121207 | 2 | 0 | 0 | 0 | 0 | 0 | 10876 | 0.257973886 | 1.644777126 | 4.060983436 | 0.405019413 | 0.685463242 | 0.998252924 |
| chr6:170626457-170667406 | exonic     | FAM120B                                                    | 6 | 170626457 | 170667406 | 2 | 0 | 0 | 0 | 0 | 0 | 40949 | 0.257973886 | 1.644777126 | 4.060983436 | 0.405019413 | 0.685463242 | 0.998252924 |
| chr6:25471396-25488813   | exonic     | LRRC16A                                                    | 6 | 25471396  | 25488813  | 2 | 0 | 0 | 0 | 0 | 0 | 17417 | 0.257973886 | 1.644777126 | 4.060983436 | 0.405019413 | 0.685463242 | 0.998252924 |
| chr6:36043625-36104308   | exonic     | MAPK13, MAPK14                                             | 6 | 36043625  | 36104308  | 2 | 0 | 0 | 0 | 0 | 0 | 60683 | 0.257973886 | 1.644777126 | 4.060983436 | 0.405019413 | 0.685463242 | 0.998252924 |
| chr6:41839302-41875025   | exonic     | MED20                                                      | 6 | 41839302  | 41875025  | 2 | 0 | 0 | 0 | 0 | 0 | 35723 | 0.257973886 | 1.644777126 | 4.060983436 | 0.405019413 | 0.685463242 | 0.998252924 |
| chr6:43521109-43535091   | exonic     | XPO5                                                       | 6 | 43521109  | 43535091  | 2 | 0 | 0 | 0 | 0 | 0 | 13982 | 0.257973886 | 1.644777126 | 4.060983436 | 0.405019413 | 0.685463242 | 0.998252924 |
| chr6:46214484-46216633   | exonic     | RCAN2                                                      | 6 | 46214484  | 46216633  | 2 | 0 | 0 | 0 | 0 | 0 | 2149  | 0.257973886 | 1.644777126 | 4.060983436 | 0.405019413 | 0.685463242 | 0.998252924 |
| chr6:55988859-56006781   | exonic     | COL21A1                                                    | 6 | 55988859  | 56006781  | 2 | 0 | 0 | 0 | 0 | 0 | 17922 | 0.257973886 | 1.644777126 | 4.060983436 | 0.405019413 | 0.685463242 | 0.998252924 |
| chr6:6167690-6251162     | exonic     | F13A1                                                      | 6 | 6167690   | 6251162   | 2 | 0 | 0 | 0 | 0 | 0 | 83472 | 0.257973886 | 1.644777126 | 4.060983436 | 0.405019413 | 0.685463242 | 0.998252924 |
| chr6:76332467-76333676   | exonic     | SENTP6                                                     | 6 | 76332467  | 76333676  | 2 | 0 | 0 | 0 | 0 | 0 | 1209  | 0.257973886 | 1.644777126 | 4.060983436 | 0.405019413 | 0.685463242 | 0.998252924 |
| chr6:79679551-79688428   | exonic     | PHIP                                                       | 6 | 79679551  | 79688428  | 2 | 0 | 0 | 0 | 0 | 0 | 8877  | 0.257973886 | 1.644777126 | 4.060983436 | 0.405019413 | 0.685463242 | 0.998252924 |
| chr6:88081311-88085428   | intergenic | <small>Corf163 (dist=6130), LINC01590 (dist=21414)</small> | 6 | 88081311  | 88085428  | 2 | 0 | 0 | 0 | 0 | 0 | 4117  | 0.257973886 | 1.644777126 | 4.060983436 | 0.405019413 | 0.685463242 | 0.998252924 |

|                          |                |                                                                |   |           |           |   |   |   |   |   |   |        |             |             |             |             |             |             |
|--------------------------|----------------|----------------------------------------------------------------|---|-----------|-----------|---|---|---|---|---|---|--------|-------------|-------------|-------------|-------------|-------------|-------------|
| chr6:88236158-88236498   | intronic       | RARS2                                                          | 6 | 88236158  | 88236498  | 2 | 0 | 0 | 0 | 0 | 0 | 340    | 0.257973886 | 1.644777126 | 4.060983436 | 0.405019413 | 0.685463242 | 0.998252924 |
| chr6:97599646-97616116   | exonic         | MMS22L                                                         | 6 | 97599646  | 97616116  | 2 | 0 | 0 | 0 | 0 | 0 | 16470  | 0.257973886 | 1.644777126 | 4.060983436 | 0.405019413 | 0.685463242 | 0.998252924 |
| chr7:100189290-100192164 | exonic         | FBXO24                                                         | 7 | 100189290 | 100192164 | 2 | 0 | 0 | 0 | 0 | 0 | 2874   | 0.257973886 | 1.644777126 | 4.060983436 | 0.405019413 | 0.685463242 | 0.998252924 |
| chr7:101695409-101696182 | intronic       | CUX1                                                           | 7 | 101695409 | 101696182 | 2 | 0 | 0 | 0 | 0 | 0 | 773    | 0.257973886 | 1.644777126 | 4.060983436 | 0.405019413 | 0.685463242 | 0.998252924 |
| chr7:102106263-102106717 | exonic         | LRWD1                                                          | 7 | 102106263 | 102106717 | 2 | 0 | 0 | 0 | 0 | 0 | 454    | 0.257973886 | 1.644777126 | 4.060983436 | 0.405019413 | 0.685463242 | 0.998252924 |
| chr7:104678572-104707254 | exonic         | KMT2E                                                          | 7 | 104678572 | 104707254 | 2 | 0 | 0 | 0 | 0 | 0 | 28682  | 0.257973886 | 1.644777126 | 4.060983436 | 0.405019413 | 0.685463242 | 0.998252924 |
| chr7:106888840-106964966 | exonic         | COG5                                                           | 7 | 106888840 | 106964966 | 2 | 0 | 0 | 0 | 0 | 0 | 76126  | 0.257973886 | 1.644777126 | 4.060983436 | 0.405019413 | 0.685463242 | 0.998252924 |
| chr7:111575594-111624445 | exonic         | DOCK4                                                          | 7 | 111575594 | 111624445 | 2 | 0 | 0 | 0 | 0 | 0 | 48851  | 0.257973886 | 1.644777126 | 4.060983436 | 0.405019413 | 0.685463242 | 0.998252924 |
| chr7:114268594-114284844 | exonic         | FOXP2                                                          | 7 | 114268594 | 114284844 | 2 | 0 | 0 | 0 | 0 | 0 | 16250  | 0.257973886 | 1.644777126 | 4.060983436 | 0.405019413 | 0.685463242 | 0.998252924 |
| chr7:122091427-122153369 | exonic         | CADPS2                                                         | 7 | 122091427 | 122153369 | 2 | 0 | 0 | 0 | 0 | 0 | 61942  | 0.257973886 | 1.644777126 | 4.060983436 | 0.405019413 | 0.685463242 | 0.998252924 |
| chr7:129579722-129585695 | intronic       | UBE2H                                                          | 7 | 129579722 | 129585695 | 2 | 0 | 0 | 0 | 0 | 0 | 5973   | 0.257973886 | 1.644777126 | 4.060983436 | 0.405019413 | 0.685463242 | 0.998252924 |
| chr7:130596869-130669820 | ncRNA_exonic   | LINC-PINT, LOC100506860                                        | 7 | 130596869 | 130669820 | 2 | 0 | 0 | 0 | 0 | 0 | 72951  | 0.257973886 | 1.644777126 | 4.060983436 | 0.405019413 | 0.685463242 | 0.998252924 |
| chr7:130771519-130778555 | ncRNA_intronic | LINC-PINT                                                      | 7 | 130771519 | 130778555 | 2 | 0 | 0 | 0 | 0 | 0 | 7036   | 0.257973886 | 1.644777126 | 4.060983436 | 0.405019413 | 0.685463242 | 0.998252924 |
| chr7:131122543-131130662 | exonic         | MKLN1                                                          | 7 | 131122543 | 131130662 | 2 | 0 | 0 | 0 | 0 | 0 | 8119   | 0.257973886 | 1.644777126 | 4.060983436 | 0.405019413 | 0.685463242 | 0.998252924 |
| chr7:139059146-139086993 | exonic         | C7orf55-LUC7L2, LUC7L2                                         | 7 | 139059146 | 139086993 | 2 | 0 | 0 | 0 | 0 | 0 | 27847  | 0.257973886 | 1.644777126 | 4.060983436 | 0.405019413 | 0.685463242 | 0.998252924 |
| chr7:140453074-140494267 | exonic         | BRAF                                                           | 7 | 140453074 | 140494267 | 2 | 0 | 0 | 0 | 0 | 0 | 41193  | 0.257973886 | 1.644777126 | 4.060983436 | 0.405019413 | 0.685463242 | 0.998252924 |
| chr7:151174419-151195266 | exonic         | RHEB                                                           | 7 | 151174419 | 151195266 | 2 | 0 | 0 | 0 | 0 | 0 | 20847  | 0.257973886 | 1.644777126 | 4.060983436 | 0.405019413 | 0.685463242 | 0.998252924 |
| chr7:1937835-2108973     | exonic         | MAD1L1                                                         | 7 | 1937835   | 2108973   | 2 | 0 | 0 | 0 | 0 | 0 | 171138 | 0.257973886 | 1.644777126 | 4.060983436 | 0.405019413 | 0.685463242 | 0.998252924 |
| chr7:2482185-2483381     | ncRNA_intronic | LOC101927181                                                   | 7 | 2482185   | 2483381   | 2 | 0 | 0 | 0 | 0 | 0 | 1196   | 0.257973886 | 1.644777126 | 4.060983436 | 0.405019413 | 0.685463242 | 0.998252924 |
| chr7:26883648-26894509   | exonic         | SKAP2                                                          | 7 | 26883648  | 26894509  | 2 | 0 | 0 | 0 | 0 | 0 | 10861  | 0.257973886 | 1.644777126 | 4.060983436 | 0.405019413 | 0.685463242 | 0.998252924 |
| chr7:30876274-30880464   | exonic         | FAM188B                                                        | 7 | 30876274  | 30880464  | 2 | 0 | 0 | 0 | 0 | 0 | 4190   | 0.257973886 | 1.644777126 | 4.060983436 | 0.405019413 | 0.685463242 | 0.998252924 |
| chr7:42956732-42957434   | exonic         | PSMA2                                                          | 7 | 42956732  | 42957434  | 2 | 0 | 0 | 0 | 0 | 0 | 702    | 0.257973886 | 1.644777126 | 4.060983436 | 0.405019413 | 0.685463242 | 0.998252924 |
| chr7:44733424-44734175   | exonic         | OGDH                                                           | 7 | 44733424  | 44734175  | 2 | 0 | 0 | 0 | 0 | 0 | 751    | 0.257973886 | 1.644777126 | 4.060983436 | 0.405019413 | 0.685463242 | 0.998252924 |
| chr7:65872277-65876689   | intergenic     | <small>LINC00174(dist=6882), GSI-124K5.11(dist=118603)</small> | 7 | 65872277  | 65876689  | 2 | 0 | 0 | 0 | 0 | 0 | 4412   | 0.257973886 | 1.644777126 | 4.060983436 | 0.405019413 | 0.685463242 | 0.998252924 |
| chr7:65892936-65904291   | intergenic     | <small>LINC00174(dist=27541), GSI-124K5.11(dist=91001)</small> | 7 | 65892936  | 65904291  | 2 | 0 | 0 | 0 | 0 | 0 | 11355  | 0.257973886 | 1.644777126 | 4.060983436 | 0.405019413 | 0.685463242 | 0.998252924 |
| chr7:66007528-66008822   | ncRNA_intronic | GSI-124K5.11                                                   | 7 | 66007528  | 66008822  | 2 | 0 | 0 | 0 | 0 | 0 | 1294   | 0.257973886 | 1.644777126 | 4.060983436 | 0.405019413 | 0.685463242 | 0.998252924 |
| chr7:6791498-6792411     | downstream     | PMS2CL(dist=266)                                               | 7 | 6791498   | 6792411   | 2 | 0 | 0 | 0 | 0 | 0 | 913    | 0.257973886 | 1.644777126 | 4.060983436 | 0.405019413 | 0.685463242 | 0.998252924 |
| chr7:70227855-70236630   | exonic         | AUTS2                                                          | 7 | 70227855  | 70236630  | 2 | 0 | 0 | 0 | 0 | 0 | 8775   | 0.257973886 | 1.644777126 | 4.060983436 | 0.405019413 | 0.685463242 | 0.998252924 |
| chr7:70800535-70853387   | exonic         | WBSCR17                                                        | 7 | 70800535  | 70853387  | 2 | 0 | 0 | 0 | 0 | 0 | 52852  | 0.257973886 | 1.644777126 | 4.060983436 | 0.405019413 | 0.685463242 | 0.998252924 |
| chr7:70886865-70896251   | intronic       | WBSCR17                                                        | 7 | 70886865  | 70896251  | 2 | 0 | 0 | 0 | 0 | 0 | 9386   | 0.257973886 | 1.644777126 | 4.060983436 | 0.405019413 | 0.685463242 | 0.998252924 |
| chr7:72352020-72384365   | UTR5           | <small>PMS2CL(dist=266), GSI-124K5.11(dist=91001)</small>      | 7 | 72352020  | 72384365  | 2 | 0 | 0 | 0 | 0 | 0 | 32345  | 0.257973886 | 1.644777126 | 4.060983436 | 0.405019413 | 0.685463242 | 0.998252924 |
| chr7:72861594-72874048   | exonic         | BAZ1B                                                          | 7 | 72861594  | 72874048  | 2 | 0 | 0 | 0 | 0 | 0 | 12454  | 0.257973886 | 1.644777126 | 4.060983436 | 0.405019413 | 0.685463242 | 0.998252924 |
| chr7:73935537-73944247   | exonic         | GTF2IRD1                                                       | 7 | 73935537  | 73944247  | 2 | 0 | 0 | 0 | 0 | 0 | 8710   | 0.257973886 | 1.644777126 | 4.060983436 | 0.405019413 | 0.685463242 | 0.998252924 |
| chr7:74536691-74542186   | exonic         | GTF2IRD2, GTF2IRD2B                                            | 7 | 74536691  | 74542186  | 2 | 0 | 0 | 0 | 0 | 0 | 5495   | 0.257973886 | 1.644777126 | 4.060983436 | 0.405019413 | 0.685463242 | 0.998252924 |
| chr7:7472103-7495743     | exonic         | COL28A1                                                        | 7 | 7472103   | 7495743   | 2 | 0 | 0 | 0 | 0 | 0 | 23640  | 0.257973886 | 1.644777126 | 4.060983436 | 0.405019413 | 0.685463242 | 0.998252924 |

|                          |                |                                                        |   |           |           |   |   |   |   |   |   |        |             |             |             |             |             |             |
|--------------------------|----------------|--------------------------------------------------------|---|-----------|-----------|---|---|---|---|---|---|--------|-------------|-------------|-------------|-------------|-------------|-------------|
| chr7:76922269-76924246   | exonic         | CCDC146                                                | 7 | 76922269  | 76924246  | 2 | 0 | 0 | 0 | 0 | 0 | 1977   | 0.257973886 | 1.644777126 | 4.060983436 | 0.405019413 | 0.685463242 | 0.998252924 |
| chr7:77021462-77023100   | intronic       | GSAP                                                   | 7 | 77021462  | 77023100  | 2 | 0 | 0 | 0 | 0 | 0 | 1638   | 0.257973886 | 1.644777126 | 4.060983436 | 0.405019413 | 0.685463242 | 0.998252924 |
| chr7:77026299-77035422   | exonic         | GSAP                                                   | 7 | 77026299  | 77035422  | 2 | 0 | 0 | 0 | 0 | 0 | 9123   | 0.257973886 | 1.644777126 | 4.060983436 | 0.405019413 | 0.685463242 | 0.998252924 |
| chr7:77841670-77844339   | intronic       | MAGI2                                                  | 7 | 77841670  | 77844339  | 2 | 0 | 0 | 0 | 0 | 0 | 2669   | 0.257973886 | 1.644777126 | 4.060983436 | 0.405019413 | 0.685463242 | 0.998252924 |
| chr7:92900531-92926555   | exonic         | VPS50                                                  | 7 | 92900531  | 92926555  | 2 | 0 | 0 | 0 | 0 | 0 | 26024  | 0.257973886 | 1.644777126 | 4.060983436 | 0.405019413 | 0.685463242 | 0.998252924 |
| chr8:103841726-103842048 | splicing       | AZIN1                                                  | 8 | 103841726 | 103842048 | 2 | 0 | 0 | 0 | 0 | 0 | 322    | 0.257973886 | 1.644777126 | 4.060983436 | 0.405019413 | 0.685463242 | 0.998252924 |
| chr8:118540889-118543066 | exonic         | MED30                                                  | 8 | 118540889 | 118543066 | 2 | 0 | 0 | 0 | 0 | 0 | 2177   | 0.257973886 | 1.644777126 | 4.060983436 | 0.405019413 | 0.685463242 | 0.998252924 |
| chr8:118830673-118849440 | exonic         | EXT1                                                   | 8 | 118830673 | 118849440 | 2 | 0 | 0 | 0 | 0 | 0 | 18767  | 0.257973886 | 1.644777126 | 4.060983436 | 0.405019413 | 0.685463242 | 0.998252924 |
| chr8:124089350-124154696 | exonic         | TBC1D31                                                | 8 | 124089350 | 124154696 | 2 | 0 | 0 | 0 | 0 | 0 | 65346  | 0.257973886 | 1.644777126 | 4.060983436 | 0.405019413 | 0.685463242 | 0.998252924 |
| chr8:131179782-131199531 | exonic         | ASAP1                                                  | 8 | 131179782 | 131199531 | 2 | 0 | 0 | 0 | 0 | 0 | 19749  | 0.257973886 | 1.644777126 | 4.060983436 | 0.405019413 | 0.685463242 | 0.998252924 |
| chr8:132855839-132898399 | intergenic     | <small>ADCY8 (dist=803004), EFR3A (dist=17957)</small> | 8 | 132855839 | 132898399 | 2 | 0 | 0 | 0 | 0 | 0 | 42560  | 0.257973886 | 1.644777126 | 4.060983436 | 0.405019413 | 0.685463242 | 0.998252924 |
| chr8:133584505-133764243 | exonic         | LRRC6, TMEM71                                          | 8 | 133584505 | 133764243 | 2 | 0 | 0 | 0 | 0 | 0 | 179738 | 0.257973886 | 1.644777126 | 4.060983436 | 0.405019413 | 0.685463242 | 0.998252924 |
| chr8:133622412-133673873 | exonic         | LRRC6                                                  | 8 | 133622412 | 133673873 | 2 | 0 | 0 | 0 | 0 | 0 | 51461  | 0.257973886 | 1.644777126 | 4.060983436 | 0.405019413 | 0.685463242 | 0.998252924 |
| chr8:141025828-141028050 | intronic       | TRAPPC9                                                | 8 | 141025828 | 141028050 | 2 | 0 | 0 | 0 | 0 | 0 | 2222   | 0.257973886 | 1.644777126 | 4.060983436 | 0.405019413 | 0.685463242 | 0.998252924 |
| chr8:141828486-141828978 | splicing       | PTK2                                                   | 8 | 141828486 | 141828978 | 2 | 0 | 0 | 0 | 0 | 0 | 492    | 0.257973886 | 1.644777126 | 4.060983436 | 0.405019413 | 0.685463242 | 0.998252924 |
| chr8:17654544-17655951   | intronic       | MTUS1                                                  | 8 | 17654544  | 17655951  | 2 | 0 | 0 | 0 | 0 | 0 | 1407   | 0.257973886 | 1.644777126 | 4.060983436 | 0.405019413 | 0.685463242 | 0.998252924 |
| chr8:17842955-17847488   | exonic         | PCM1                                                   | 8 | 17842955  | 17847488  | 2 | 0 | 0 | 0 | 0 | 0 | 4533   | 0.257973886 | 1.644777126 | 4.060983436 | 0.405019413 | 0.685463242 | 0.998252924 |
| chr8:18622958-18730243   | exonic         | PSD3                                                   | 8 | 18622958  | 18730243  | 2 | 0 | 0 | 0 | 0 | 0 | 107285 | 0.257973886 | 1.644777126 | 4.060983436 | 0.405019413 | 0.685463242 | 0.998252924 |
| chr8:27288914-27296915   | exonic         | PTK2B                                                  | 8 | 27288914  | 27296915  | 2 | 0 | 0 | 0 | 0 | 0 | 8001   | 0.257973886 | 1.644777126 | 4.060983436 | 0.405019413 | 0.685463242 | 0.998252924 |
| chr8:38279314-38287466   | exonic         | FGFR1                                                  | 8 | 38279314  | 38287466  | 2 | 0 | 0 | 0 | 0 | 0 | 8152   | 0.257973886 | 1.644777126 | 4.060983436 | 0.405019413 | 0.685463242 | 0.998252924 |
| chr8:38934746-38948865   | exonic         | ADAM9                                                  | 8 | 38934746  | 38948865  | 2 | 0 | 0 | 0 | 0 | 0 | 14119  | 0.257973886 | 1.644777126 | 4.060983436 | 0.405019413 | 0.685463242 | 0.998252924 |
| chr8:41889419-41893897   | intronic       | KAT6A                                                  | 8 | 41889419  | 41893897  | 2 | 0 | 0 | 0 | 0 | 0 | 4478   | 0.257973886 | 1.644777126 | 4.060983436 | 0.405019413 | 0.685463242 | 0.998252924 |
| chr8:42202471-42207583   | exonic         | POLB                                                   | 8 | 42202471  | 42207583  | 2 | 0 | 0 | 0 | 0 | 0 | 5112   | 0.257973886 | 1.644777126 | 4.060983436 | 0.405019413 | 0.685463242 | 0.998252924 |
| chr8:42296967-42330172   | exonic         | SLC20A2                                                | 8 | 42296967  | 42330172  | 2 | 0 | 0 | 0 | 0 | 0 | 33205  | 0.257973886 | 1.644777126 | 4.060983436 | 0.405019413 | 0.685463242 | 0.998252924 |
| chr8:56652632-56675587   | exonic         | TMEM68                                                 | 8 | 56652632  | 56675587  | 2 | 0 | 0 | 0 | 0 | 0 | 22955  | 0.257973886 | 1.644777126 | 4.060983436 | 0.405019413 | 0.685463242 | 0.998252924 |
| chr8:56898615-56899411   | intronic       | LYN                                                    | 8 | 56898615  | 56899411  | 2 | 0 | 0 | 0 | 0 | 0 | 796    | 0.257973886 | 1.644777126 | 4.060983436 | 0.405019413 | 0.685463242 | 0.998252924 |
| chr8:59506790-59515945   | exonic         | NSMAF                                                  | 8 | 59506790  | 59515945  | 2 | 0 | 0 | 0 | 0 | 0 | 9155   | 0.257973886 | 1.644777126 | 4.060983436 | 0.405019413 | 0.685463242 | 0.998252924 |
| chr8:67740888-67763155   | exonic         | C8orf44-SGK3, SGK3                                     | 8 | 67740888  | 67763155  | 2 | 0 | 0 | 0 | 0 | 0 | 22267  | 0.257973886 | 1.644777126 | 4.060983436 | 0.405019413 | 0.685463242 | 0.998252924 |
| chr8:67743489-67748309   | exonic         | C8orf44-SGK3, SGK3                                     | 8 | 67743489  | 67748309  | 2 | 0 | 0 | 0 | 0 | 0 | 4820   | 0.257973886 | 1.644777126 | 4.060983436 | 0.405019413 | 0.685463242 | 0.998252924 |
| chr8:68030482-68102994   | exonic         | CSPP1                                                  | 8 | 68030482  | 68102994  | 2 | 0 | 0 | 2 | 0 | 0 | 72512  | 0.257973886 | 1.644777126 | 4.060983436 | 0.405019413 | 0.685463242 | 0.998252924 |
| chr8:68999958-69021858   | exonic         | PREX2                                                  | 8 | 68999958  | 69021858  | 2 | 0 | 0 | 0 | 0 | 0 | 21900  | 0.257973886 | 1.644777126 | 4.060983436 | 0.405019413 | 0.685463242 | 0.998252924 |
| chr8:71530267-71530674   | ncRNA_intronic | LACTB2-AS1                                             | 8 | 71530267  | 71530674  | 2 | 0 | 0 | 0 | 0 | 0 | 407    | 0.257973886 | 1.644777126 | 4.060983436 | 0.405019413 | 0.685463242 | 0.998252924 |
| chr8:72181974-72229909   | exonic         | EYA1                                                   | 8 | 72181974  | 72229909  | 2 | 0 | 0 | 0 | 0 | 0 | 47935  | 0.257973886 | 1.644777126 | 4.060983436 | 0.405019413 | 0.685463242 | 0.998252924 |
| chr8:72229786-72246409   | exonic         | EYA1                                                   | 8 | 72229786  | 72246409  | 2 | 0 | 0 | 0 | 0 | 0 | 16623  | 0.257973886 | 1.644777126 | 4.060983436 | 0.405019413 | 0.685463242 | 0.998252924 |
| chr8:79648708-79652317   | exonic         | IL7                                                    | 8 | 79648708  | 79652317  | 2 | 0 | 0 | 0 | 0 | 0 | 3609   | 0.257973886 | 1.644777126 | 4.060983436 | 0.405019413 | 0.685463242 | 0.998252924 |

|                          |            |                                                             |    |           |           |   |   |   |   |   |   |        |             |             |             |             |             |             |
|--------------------------|------------|-------------------------------------------------------------|----|-----------|-----------|---|---|---|---|---|---|--------|-------------|-------------|-------------|-------------|-------------|-------------|
| chr8:90775056-90792388   | exonic     | RIPK2                                                       | 8  | 90775056  | 90792388  | 2 | 0 | 0 | 0 | 0 | 0 | 17332  | 0.257973886 | 1.644777126 | 4.060983436 | 0.405019413 | 0.685463242 | 0.998252924 |
| chr8:90965471-90976735   | exonic     | NBN                                                         | 8  | 90965471  | 90976735  | 2 | 0 | 0 | 0 | 0 | 0 | 11264  | 0.257973886 | 1.644777126 | 4.060983436 | 0.405019413 | 0.685463242 | 0.998252924 |
| chr8:92114447-92201851   | exonic     | LRRRC69                                                     | 8  | 92114447  | 92201851  | 2 | 0 | 0 | 0 | 0 | 0 | 87404  | 0.257973886 | 1.644777126 | 4.060983436 | 0.405019413 | 0.685463242 | 0.998252924 |
| chr8:95541297-95550574   | exonic     | KIAA1429                                                    | 8  | 95541297  | 95550574  | 2 | 0 | 0 | 0 | 0 | 0 | 9277   | 0.257973886 | 1.644777126 | 4.060983436 | 0.405019413 | 0.685463242 | 0.998252924 |
| chr9:107620803-107651476 | exonic     | ABCA1                                                       | 9  | 107620803 | 107651476 | 2 | 0 | 0 | 0 | 0 | 0 | 30673  | 0.257973886 | 1.644777126 | 4.060983436 | 0.405019413 | 0.685463242 | 0.998252924 |
| chr9:113191422-113234603 | exonic     | SVEP1                                                       | 9  | 113191422 | 113234603 | 2 | 0 | 0 | 0 | 0 | 0 | 43181  | 0.257973886 | 1.644777126 | 4.060983436 | 0.405019413 | 0.685463242 | 0.998252924 |
| chr9:114485293-114491906 | exonic     | C9orf84                                                     | 9  | 114485293 | 114491906 | 2 | 0 | 0 | 0 | 0 | 0 | 6613   | 0.257973886 | 1.644777126 | 4.060983436 | 0.405019413 | 0.685463242 | 0.998252924 |
| chr9:119106821-119109488 | exonic     | PAPPA                                                       | 9  | 119106821 | 119109488 | 2 | 0 | 0 | 0 | 0 | 0 | 2667   | 0.257973886 | 1.644777126 | 4.060983436 | 0.405019413 | 0.685463242 | 0.998252924 |
| chr9:123280704-123292418 | exonic     | CDK5RAP2                                                    | 9  | 123280704 | 123292418 | 2 | 0 | 0 | 0 | 0 | 0 | 11714  | 0.257973886 | 1.644777126 | 4.060983436 | 0.405019413 | 0.685463242 | 0.998252924 |
| chr9:125746763-125772807 | exonic     | RABGAP1                                                     | 9  | 125746763 | 125772807 | 2 | 0 | 0 | 0 | 0 | 0 | 26044  | 0.257973886 | 1.644777126 | 4.060983436 | 0.405019413 | 0.685463242 | 0.998252924 |
| chr9:127670655-127701145 | exonic     | GOLGA1                                                      | 9  | 127670655 | 127701145 | 2 | 0 | 0 | 0 | 0 | 0 | 30490  | 0.257973886 | 1.644777126 | 4.060983436 | 0.405019413 | 0.685463242 | 0.998252924 |
| chr9:135150642-135224822 | exonic     | SETX                                                        | 9  | 135150642 | 135224822 | 2 | 0 | 0 | 0 | 0 | 0 | 74180  | 0.257973886 | 1.644777126 | 4.060983436 | 0.405019413 | 0.685463242 | 0.998252924 |
| chr9:135941916-135942592 | exonic     | CEL                                                         | 9  | 135941916 | 135942592 | 2 | 0 | 0 | 0 | 0 | 0 | 676    | 0.257973886 | 1.644777126 | 4.060983436 | 0.405019413 | 0.685463242 | 0.998252924 |
| chr9:137007070-137007841 | exonic     | WDR5                                                        | 9  | 137007070 | 137007841 | 2 | 0 | 0 | 0 | 0 | 0 | 771    | 0.257973886 | 1.644777126 | 4.060983436 | 0.405019413 | 0.685463242 | 0.998252924 |
| chr9:139571055-139581728 | exonic     | AGPAT2                                                      | 9  | 139571055 | 139581728 | 2 | 0 | 0 | 0 | 0 | 0 | 10673  | 0.257973886 | 1.644777126 | 4.060983436 | 0.405019413 | 0.685463242 | 0.998252924 |
| chr9:15267912-15274710   | exonic     | TTC39B                                                      | 9  | 15267912  | 15274710  | 2 | 0 | 0 | 0 | 0 | 0 | 6798   | 0.257973886 | 1.644777126 | 4.060983436 | 0.405019413 | 0.685463242 | 0.998252924 |
| chr9:17143286-17236586   | exonic     | CNTLN                                                       | 9  | 17143286  | 17236586  | 2 | 0 | 0 | 0 | 0 | 0 | 93300  | 0.257973886 | 1.644777126 | 4.060983436 | 0.405019413 | 0.685463242 | 0.998252924 |
| chr9:17330630-17342442   | exonic     | CNTLN                                                       | 9  | 17330630  | 17342442  | 2 | 0 | 0 | 0 | 0 | 0 | 11812  | 0.257973886 | 1.644777126 | 4.060983436 | 0.405019413 | 0.685463242 | 0.998252924 |
| chr9:20907149-20916936   | exonic     | FOCAD                                                       | 9  | 20907149  | 20916936  | 2 | 0 | 0 | 0 | 0 | 0 | 9787   | 0.257973886 | 1.644777126 | 4.060983436 | 0.405019413 | 0.685463242 | 0.998252924 |
| chr9:33276562-33278095   | exonic     | CHMP5                                                       | 9  | 33276562  | 33278095  | 2 | 0 | 0 | 0 | 0 | 0 | 1533   | 0.257973886 | 1.644777126 | 4.060983436 | 0.405019413 | 0.685463242 | 0.998252924 |
| chr9:33956076-34017187   | exonic     | UBAP2                                                       | 9  | 33956076  | 34017187  | 2 | 0 | 0 | 0 | 0 | 0 | 61111  | 0.257973886 | 1.644777126 | 4.060983436 | 0.405019413 | 0.685463242 | 0.998252924 |
| chr9:3647338-3651867     | intergenic | <small>RFX3 (dist=121337), RFX3-AS1 (dist=16219)</small>    | 9  | 3647338   | 3651867   | 2 | 0 | 0 | 0 | 0 | 0 | 4529   | 0.257973886 | 1.644777126 | 4.060983436 | 0.405019413 | 0.685463242 | 0.998252924 |
| chr9:37854777-37878456   | exonic     | DCAF10                                                      | 9  | 37854777  | 37878456  | 2 | 0 | 0 | 0 | 0 | 0 | 23679  | 0.257973886 | 1.644777126 | 4.060983436 | 0.405019413 | 0.685463242 | 0.998252924 |
| chr9:72459432-72472893   | exonic     | C9orf135                                                    | 9  | 72459432  | 72472893  | 2 | 0 | 0 | 0 | 0 | 0 | 13461  | 0.257973886 | 1.644777126 | 4.060983436 | 0.405019413 | 0.685463242 | 0.998252924 |
| chr9:74298147-74303414   | exonic     | TMEM2                                                       | 9  | 74298147  | 74303414  | 2 | 0 | 0 | 0 | 0 | 0 | 5267   | 0.257973886 | 1.644777126 | 4.060983436 | 0.405019413 | 0.685463242 | 0.998252924 |
| chr9:77397277-77397769   | exonic     | TRPM6                                                       | 9  | 77397277  | 77397769  | 2 | 0 | 0 | 0 | 0 | 0 | 492    | 0.257973886 | 1.644777126 | 4.060983436 | 0.405019413 | 0.685463242 | 0.998252924 |
| chr9:78547294-78601161   | exonic     | PCSK5                                                       | 9  | 78547294  | 78601161  | 2 | 0 | 0 | 0 | 0 | 0 | 53867  | 0.257973886 | 1.644777126 | 4.060983436 | 0.405019413 | 0.685463242 | 0.998252924 |
| chr9:80409378-80537261   | exonic     | GNAQ                                                        | 9  | 80409378  | 80537261  | 2 | 0 | 0 | 0 | 0 | 0 | 127883 | 0.257973886 | 1.644777126 | 4.060983436 | 0.405019413 | 0.685463242 | 0.998252924 |
| chr9:88496271-88498149   | intergenic | <small>LOC389765 (dist=38477), NAA35 (dist=57908)</small>   | 9  | 88496271  | 88498149  | 2 | 0 | 0 | 0 | 0 | 0 | 1878   | 0.257973886 | 1.644777126 | 4.060983436 | 0.405019413 | 0.685463242 | 0.998252924 |
| chr9:88573386-88577095   | exonic     | NAA35                                                       | 9  | 88573386  | 88577095  | 2 | 0 | 0 | 0 | 0 | 0 | 3709   | 0.257973886 | 1.644777126 | 4.060983436 | 0.405019413 | 0.685463242 | 0.998252924 |
| chrMT:9417-9640          | intergenic | <small>NONE (dist=NONE), NONE (dist=NONE)</small>           | MT | 9417      | 9640      | 2 | 0 | 0 | 0 | 0 | 0 | 223    | 0.257973886 | 1.644777126 | 4.060983436 | 0.405019413 | 0.685463242 | 0.998252924 |
| chrX:11385891-11388625   | intronic   | ARHGAP6                                                     | X  | 11385891  | 11388625  | 2 | 0 | 0 | 0 | 0 | 0 | 2734   | 0.257973886 | 1.644777126 | 4.060983436 | 0.405019413 | 0.685463242 | 0.998252924 |
| chrX:117512382-117532433 | exonic     | WDR44                                                       | X  | 117512382 | 117532433 | 2 | 0 | 0 | 0 | 0 | 0 | 20051  | 0.257973886 | 1.644777126 | 4.060983436 | 0.405019413 | 0.685463242 | 0.998252924 |
| chrX:123190491-123192102 | exonic     | STAG2                                                       | X  | 123190491 | 123192102 | 2 | 0 | 0 | 0 | 0 | 0 | 1611   | 0.257973886 | 1.644777126 | 4.060983436 | 0.405019413 | 0.685463242 | 0.998252924 |
| chrX:128250578-128256170 | intergenic | <small>ACTRT1 (dist=1064196), SMARCA1 (dist=324308)</small> | X  | 128250578 | 128256170 | 2 | 0 | 0 | 0 | 0 | 0 | 5592   | 0.257973886 | 1.644777126 | 4.060983436 | 0.405019413 | 0.685463242 | 0.998252924 |

|                           |                |                                          |    |           |           |    |   |    |   |   |   |        |             |             |             |             |             |             |
|---------------------------|----------------|------------------------------------------|----|-----------|-----------|----|---|----|---|---|---|--------|-------------|-------------|-------------|-------------|-------------|-------------|
| chrX:128691301-128703376  | exonic         | OCRL                                     | X  | 128691301 | 128703376 | 2  | 0 | 0  | 0 | 0 | 0 | 12075  | 0.257973886 | 1.644777126 | 4.060983436 | 0.405019413 | 0.685463242 | 0.998252924 |
| chrX:138839966-138857112  | exonic         | ATP11C                                   | X  | 138839966 | 138857112 | 2  | 0 | 0  | 0 | 0 | 0 | 17146  | 0.257973886 | 1.644777126 | 4.060983436 | 0.405019413 | 0.685463242 | 0.998252924 |
| chrX:138884394-138908982  | exonic         | ATP11C                                   | X  | 138884394 | 138908982 | 2  | 0 | 0  | 0 | 0 | 0 | 24588  | 0.257973886 | 1.644777126 | 4.060983436 | 0.405019413 | 0.685463242 | 0.998252924 |
| chrX:154645236-154649223  | intergenic     | F8A1 (dist=31786), F8A1 (dist=37352)     | X  | 154645236 | 154649223 | 2  | 0 | 0  | 0 | 0 | 0 | 3987   | 0.257973886 | 1.644777126 | 4.060983436 | 0.405019413 | 0.685463242 | 0.998252924 |
| chrX:1553914-1558037      | exonic         | ASMTL                                    | X  | 1553914   | 1558037   | 2  | 0 | 0  | 0 | 0 | 0 | 4123   | 0.257973886 | 1.644777126 | 4.060983436 | 0.405019413 | 0.685463242 | 0.998252924 |
| chrX:32136718-32141511    | intronic       | DMD                                      | X  | 32136718  | 32141511  | 2  | 0 | 0  | 0 | 0 | 0 | 4793   | 0.257973886 | 1.644777126 | 4.060983436 | 0.405019413 | 0.685463242 | 0.998252924 |
| chrX:36223073-36385242    | exonic         | CFAP47                                   | X  | 36223073  | 36385242  | 2  | 0 | 0  | 0 | 0 | 0 | 162169 | 0.257973886 | 1.644777126 | 4.060983436 | 0.405019413 | 0.685463242 | 0.998252924 |
| chrX:36246744-36385242    | exonic         | CFAP47                                   | X  | 36246744  | 36385242  | 2  | 0 | 0  | 0 | 0 | 0 | 138498 | 0.257973886 | 1.644777126 | 4.060983436 | 0.405019413 | 0.685463242 | 0.998252924 |
| chrX:41077624-41082655    | exonic         | USP9X                                    | X  | 41077624  | 41082655  | 2  | 0 | 0  | 0 | 0 | 0 | 5031   | 0.257973886 | 1.644777126 | 4.060983436 | 0.405019413 | 0.685463242 | 0.998252924 |
| chrX:56310746-56325867    | exonic         | KLF8                                     | X  | 56310746  | 56325867  | 2  | 0 | 0  | 0 | 0 | 0 | 15121  | 0.257973886 | 1.644777126 | 4.060983436 | 0.405019413 | 0.685463242 | 0.998252924 |
| chrX:62917004-62944591    | exonic         | ARHGEF9                                  | X  | 62917004  | 62944591  | 2  | 0 | 0  | 0 | 0 | 0 | 27587  | 0.257973886 | 1.644777126 | 4.060983436 | 0.405019413 | 0.685463242 | 0.998252924 |
| chrX:65390399-65413480    | exonic         | HEPH                                     | X  | 65390399  | 65413480  | 2  | 0 | 0  | 0 | 0 | 0 | 23081  | 0.257973886 | 1.644777126 | 4.060983436 | 0.405019413 | 0.685463242 | 0.998252924 |
| chrX:70608587-70644088    | exonic         | TAF1                                     | X  | 70608587  | 70644088  | 2  | 0 | 0  | 0 | 0 | 0 | 35501  | 0.257973886 | 1.644777126 | 4.060983436 | 0.405019413 | 0.685463242 | 0.998252924 |
| chrX:73045950-73061156    | ncRNA_exonic   | TSIX, XIST                               | X  | 73045950  | 73061156  | 2  | 0 | 0  | 0 | 0 | 0 | 15206  | 0.257973886 | 1.644777126 | 4.060983436 | 0.405019413 | 0.685463242 | 0.998252924 |
| chrX:73178100-73179892    | ncRNA_intronic | JPX                                      | X  | 73178100  | 73179892  | 2  | 0 | 0  | 0 | 0 | 0 | 1792   | 0.257973886 | 1.644777126 | 4.060983436 | 0.405019413 | 0.685463242 | 0.998252924 |
| chrX:74598954-74651355    | exonic         | ZDHC15                                   | X  | 74598954  | 74651355  | 2  | 0 | 0  | 0 | 0 | 0 | 52401  | 0.257973886 | 1.644777126 | 4.060983436 | 0.405019413 | 0.685463242 | 0.998252924 |
| chrX:9622254-9665469      | exonic         | TBL1X                                    | X  | 9622254   | 9665469   | 2  | 0 | 0  | 0 | 0 | 0 | 43215  | 0.257973886 | 1.644777126 | 4.060983436 | 0.405019413 | 0.685463242 | 0.998252924 |
| chrX:99596900-99658662    | exonic         | PCDH19                                   | X  | 99596900  | 99658662  | 2  | 0 | 0  | 0 | 0 | 0 | 61762  | 0.257973886 | 1.644777126 | 4.060983436 | 0.405019413 | 0.685463242 | 0.998252924 |
| chr6:69943181-69949118    | exonic         | ADGRB3                                   | 6  | 69943181  | 69949118  | 2  | 0 | 3  | 2 | 0 | 0 | 5937   | 1.062403732 | 1.648596179 | 2.711355647 | 0.608033911 | 0.543164983 | 0.998252924 |
| chr3:195352202-195456610  | exonic         | MUC20                                    | 3  | 195352202 | 195456610 | 18 | 0 | 34 | 0 | 4 | 8 | 104408 | 11.9787704  | 1.648619083 | 2.363640111 | 0.697491583 | 0.485495205 | 0.998252924 |
| chr1:114391161-114397671  | exonic         | PTPN22                                   | 1  | 114391161 | 114397671 | 3  | 1 | 7  | 4 | 1 | 0 | 6510   | 2.488392768 | 1.650423956 | 1.764996025 | 0.9350865   | NA          | NA          |
| chr20:45874751-45875261   | exonic         | ZMYND8                                   | 20 | 45874751  | 45875261  | 2  | 7 | 0  | 4 | 0 | 0 | 510    | 1.90315002  | 1.650434338 | 2.232762718 | 0.739189312 | 0.45979205  | 0.998252924 |
| chr10:128840888-128860040 | exonic         | DOCK1                                    | 10 | 128840888 | 128860040 | 4  | 0 | 0  | 1 | 0 | 0 | 19152  | 0.622259156 | 1.654220758 | 3.627480382 | 0.456024729 | NA          | NA          |
| chr11:8148205-8161740     | exonic         | RIC3                                     | 11 | 8148205   | 8161740   | 4  | 0 | 0  | 1 | 0 | 0 | 13535  | 0.622259156 | 1.654220758 | 3.627480382 | 0.456024729 | NA          | NA          |
| chr15:72855734-72862648   | exonic         | ARIH1                                    | 15 | 72855734  | 72862648  | 4  | 0 | 0  | 1 | 0 | 0 | 6914   | 0.622259156 | 1.654220758 | 3.627480382 | 0.456024729 | NA          | NA          |
| chr2:165548730-165586625  | exonic         | COBLL1                                   | 2  | 165548730 | 165586625 | 4  | 0 | 0  | 1 | 0 | 0 | 37895  | 0.622259156 | 1.654220758 | 3.627480382 | 0.456024729 | NA          | NA          |
| chr7:155493466-155511137  | exonic         | RBM33                                    | 7  | 155493466 | 155511137 | 4  | 0 | 0  | 1 | 0 | 0 | 17671  | 0.622259156 | 1.654220758 | 3.627480382 | 0.456024729 | NA          | NA          |
| chr7:33407378-33427756    | exonic         | BBS9                                     | 7  | 33407378  | 33427756  | 4  | 0 | 0  | 1 | 0 | 0 | 20378  | 0.622259156 | 1.654220758 | 3.627480382 | 0.456024729 | NA          | NA          |
| chr17:79813017-79813462   | exonic         | P4HB                                     | 17 | 79813017  | 79813462  | 3  | 3 | 0  | 0 | 2 | 0 | 445    | 1.151843069 | 1.658427929 | 2.622161216 | 0.632466043 | 0.52708239  | 0.998252924 |
| chr2:175740516-175742856  | exonic         | CHN1                                     | 2  | 175740516 | 175742856 | 3  | 3 | 0  | 0 | 2 | 0 | 2340   | 1.151843069 | 1.658427929 | 2.622161216 | 0.632466043 | 0.52708239  | 0.998252924 |
| chr17:62557617-62559084   | exonic         | SMURF2                                   | 17 | 62557617  | 62559084  | 1  | 3 | 5  | 2 | 2 | 0 | 1467   | 2.092837082 | 1.668280385 | 1.850991475 | 0.901290151 | 0.367434069 | 0.998252924 |
| chr11:47380394-47381591   | exonic         | SPI1                                     | 11 | 47380394  | 47381591  | 5  | 0 | 1  | 2 | 0 | 0 | 1197   | 1.05482651  | 1.668975141 | 2.734267471 | 0.610392055 | 0.54160213  | 0.998252924 |
| chr11:118453893-118455359 | exonic         | ARCNI                                    | 11 | 118453893 | 118455359 | 2  | 2 | 3  | 3 | 0 | 0 | 1466   | 1.517266716 | 1.670336826 | 2.192933426 | 0.761690622 | NA          | NA          |
| chr8:38677039-38678153    | exonic         | TACC1                                    | 8  | 38677039  | 38678153  | 2  | 2 | 3  | 3 | 0 | 0 | 1114   | 1.517266716 | 1.670336826 | 2.192933426 | 0.761690622 | NA          | NA          |
| chr14:35438376-35441270   | intergenic     | IGRP1P1 (dist=28674), SRP54 (dist=10834) | 14 | 35438376  | 35441270  | 0  | 2 | 3  | 0 | 2 | 0 | 2894   | 1.182413518 | 1.671027807 | 2.626072881 | 0.636321946 | 0.524566603 | 0.998252924 |

|                           |          |                      |    |           |           |    |    |    |    |   |   |        |             |             |             |             |             |             |
|---------------------------|----------|----------------------|----|-----------|-----------|----|----|----|----|---|---|--------|-------------|-------------|-------------|-------------|-------------|-------------|
| chr4:76711302-76711950    | exonic   | USO1                 | 4  | 76711302  | 76711950  | 0  | 2  | 3  | 0  | 2 | 0 | 648    | 1.182413518 | 1.671027807 | 2.626072881 | 0.636321946 | 0.524566603 | 0.998252924 |
| chr8:59535778-59548105    | exonic   | NSMAF                | 8  | 59535778  | 59548105  | 0  | 2  | 3  | 0  | 2 | 0 | 12327  | 1.182413518 | 1.671027807 | 2.626072881 | 0.636321946 | 0.524566603 | 0.998252924 |
| chr1:95609446-95639445    | exonic   | TMEM56, TMEM56-RWDD3 | 1  | 95609446  | 95639445  | 4  | 11 | 2  | 3  | 4 | 0 | 29999  | 3.630563455 | 1.671461653 | 1.491537857 | 1.120629721 | NA          | NA          |
| chr3:37319925-37321161    | intronic | GOLGA4               | 3  | 37319925  | 37321161  | 0  | 7  | 2  | 2  | 2 | 0 | 1236   | 2.069146258 | 1.67239986  | 2.012559263 | 0.830981671 | 0.405983984 | 0.998252924 |
| chr15:62312677-62336454   | exonic   | VPS13C               | 15 | 62312677  | 62336454  | 0  | 1  | 5  | 0  | 1 | 1 | 23777  | 1.589866957 | 1.674578917 | 2.29720678  | 0.728963075 | NA          | NA          |
| chr3:185638891-185641772  | exonic   | TRA2B                | 3  | 185638891 | 185641772 | 0  | 1  | 5  | 0  | 1 | 1 | 2881   | 1.589866957 | 1.674578917 | 2.29720678  | 0.728963075 | NA          | NA          |
| chr17:29483000-29509683   | exonic   | NF1                  | 17 | 29483000  | 29509683  | 1  | 2  | 2  | 2  | 0 | 0 | 26683  | 1.084699362 | 1.675881721 | 2.499025529 | 0.670614086 | 0.502466407 | 0.998252924 |
| chr4:87614739-87622954    | exonic   | PTPN13               | 4  | 87614739  | 87622954  | 1  | 5  | 1  | 3  | 0 | 0 | 8215   | 1.516569119 | 1.677146302 | 2.255592179 | 0.743550327 | NA          | NA          |
| chr2:216289816-216299547  | exonic   | FN1                  | 2  | 216289816 | 216299547 | 0  | 1  | 2  | 0  | 0 | 1 | 9731   | 0.877032459 | 1.680976854 | 3.015860305 | 0.557378885 | 0.577268589 | 0.998252924 |
| chr1:97981281-98015300    | exonic   | DPYD                 | 1  | 97981281  | 98015300  | 2  | 4  | 3  | 4  | 0 | 0 | 34019  | 1.972129699 | 1.6809835   | 1.997218257 | 0.841662394 | NA          | NA          |
| chr3:195016436-195022903  | exonic   | ACAP2                | 3  | 195016436 | 195022903 | 0  | 2  | 1  | 1  | 0 | 0 | 6467   | 0.652132009 | 1.682310056 | 3.285067281 | 0.51210825  | 0.608575251 | 0.998252924 |
| chr17:62882203-62888718   | exonic   | LRRC37A3             | 17 | 62882203  | 62888718  | 0  | 1  | 2  | 0  | 1 | 0 | 6515   | 0.689841272 | 1.683393387 | 3.220923026 | 0.52264316  | 0.6012226   | 0.998252924 |
| chr6:71185112-71212494    | exonic   | FAM135A              | 6  | 71185112  | 71212494  | 0  | 1  | 2  | 0  | 1 | 0 | 27382  | 0.689841272 | 1.683393387 | 3.220923026 | 0.52264316  | 0.6012226   | 0.998252924 |
| chr4:121631463-121742500  | exonic   | PRDM5                | 4  | 121631463 | 121742500 | 5  | 2  | 1  | 3  | 0 | 0 | 111037 | 1.509689493 | 1.688664808 | 2.211462832 | 0.763596287 | NA          | NA          |
| chr8:618597-624047        | exonic   | ERICH1               | 8  | 618597    | 624047    | 18 | 21 | 18 | 21 | 4 | 0 | 5450   | 12.24904799 | 1.693198357 | 1.013060054 | 1.671370172 | NA          | NA          |
| chr18:9208655-9239554     | exonic   | ANKRD12              | 18 | 9208655   | 9239554   | 0  | 5  | 0  | 2  | 0 | 0 | 30899  | 1.084001766 | 1.694040996 | 2.963614832 | 0.571613078 | NA          | NA          |
| chr8:116599227-116632287  | exonic   | TRPS1                | 8  | 116599227 | 116632287 | 0  | 5  | 0  | 2  | 0 | 0 | 33060  | 1.084001766 | 1.694040996 | 2.963614832 | 0.571613078 | NA          | NA          |
| chr8:72211281-72246409    | exonic   | EYA1                 | 8  | 72211281  | 72246409  | 0  | 5  | 0  | 2  | 0 | 0 | 35128  | 1.084001766 | 1.694040996 | 2.963614832 | 0.571613078 | NA          | NA          |
| chr9:78682870-78722267    | exonic   | PCSK5                | 9  | 78682870  | 78722267  | 8  | 2  | 1  | 3  | 1 | 0 | 39397  | 2.017677743 | 1.696170308 | 1.884335325 | 0.900142499 | NA          | NA          |
| chr6:108984657-108986092  | exonic   | FOXO3                | 6  | 108984657 | 108986092 | 0  | 8  | 9  | 6  | 2 | 0 | 1435   | 4.049550777 | 1.701778762 | 1.60899783  | 1.057663802 | 0.290208744 | 0.998252924 |
| chr1:70761812-70779473    | exonic   | ANKRD13C             | 1  | 70761812  | 70779473  | 0  | 1  | 4  | 0  | 2 | 0 | 17661  | 1.205406745 | 1.702427051 | 2.63995187  | 0.644870488 | 0.519011118 | 0.998252924 |
| chr7:140055467-140058585  | exonic   | SLC37A3              | 7  | 140055467 | 140058585 | 9  | 2  | 0  | 4  | 0 | 0 | 3118   | 1.934679624 | 1.703123953 | 2.209431031 | 0.770842778 | 0.440800128 | 0.998252924 |
| chr14:31581621-31583546   | exonic   | HECTD1               | 14 | 31581621  | 31583546  | 4  | 2  | 0  | 2  | 0 | 0 | 1925   | 1.077122214 | 1.703156854 | 2.68448448  | 0.634444664 | 0.525790669 | 0.998252924 |
| chr5:79974745-80040434    | exonic   | MSH3                 | 5  | 79974745  | 80040434  | 4  | 2  | 0  | 2  | 0 | 0 | 65689  | 1.077122214 | 1.703156854 | 2.68448448  | 0.634444664 | 0.525790669 | 0.998252924 |
| chr12:116534473-116549317 | exonic   | MED13L               | 12 | 116534473 | 116549317 | 4  | 7  | 1  | 5  | 0 | 0 | 14844  | 2.464704316 | 1.704162519 | 1.876125133 | 0.908341607 | 0.363697766 | 0.998252924 |
| chr12:112371689-112381173 | exonic   | TMEM116              | 12 | 112371689 | 112381173 | 0  | 2  | 5  | 0  | 3 | 0 | 9484   | 1.697978991 | 1.706266834 | 2.332073543 | 0.731652241 | 0.464380854 | 0.998252924 |
| chr8:71587052-71619388    | exonic   | XKR9                 | 8  | 71587052  | 71619388  | 12 | 27 | 3  | 0  | 6 | 5 | 32336  | 9.11235454  | 1.714443316 | 1.222410112 | 1.402510744 | 0.160762784 | 0.998252924 |
| chr10:94291504-94297307   | exonic   | IDE                  | 10 | 94291504  | 94297307  | 3  | 1  | 0  | 0  | 1 | 0 | 5803   | 0.682264049 | 1.716578113 | 3.211599438 | 0.534493216 | 0.593000342 | 0.998252924 |
| chr12:46633461-46648719   | exonic   | SLC38A1              | 12 | 46633461  | 46648719  | 3  | 1  | 0  | 0  | 1 | 0 | 15258  | 0.682264049 | 1.716578113 | 3.211599438 | 0.534493216 | 0.593000342 | 0.998252924 |
| chr17:67151159-67152066   | exonic   | ABCA10               | 17 | 67151159  | 67152066  | 3  | 1  | 0  | 0  | 1 | 0 | 907    | 0.682264049 | 1.716578113 | 3.211599438 | 0.534493216 | 0.593000342 | 0.998252924 |
| chr17:80861280-80869665   | exonic   | TBCD                 | 17 | 80861280  | 80869665  | 3  | 1  | 0  | 0  | 1 | 0 | 8385   | 0.682264049 | 1.716578113 | 3.211599438 | 0.534493216 | 0.593000342 | 0.998252924 |
| chr6:117010482-117037481  | exonic   | KPNA5                | 6  | 117010482 | 117037481 | 3  | 1  | 0  | 0  | 1 | 0 | 26999  | 0.682264049 | 1.716578113 | 3.211599438 | 0.534493216 | 0.593000342 | 0.998252924 |
| chr12:90013775-90029028   | exonic   | ATP2B1               | 12 | 90013775  | 90029028  | 2  | 2  | 5  | 4  | 0 | 0 | 15253  | 2.018116152 | 1.718096311 | 2.000889379 | 0.858666315 | NA          | NA          |
| chr16:1004356-1004666     | exonic   | LMF1                 | 16 | 1004356   | 1004666   | 0  | 4  | 1  | 2  | 0 | 0 | 310    | 1.106994992 | 1.719310817 | 2.707067194 | 0.635119372 | 0.525350563 | 0.998252924 |
| chr12:93221687-93246801   | exonic   | EEA1                 | 12 | 93221687  | 93246801  | 3  | 1  | 0  | 0  | 0 | 1 | 25114  | 0.869455236 | 1.722405395 | 3.002143519 | 0.573725202 | 0.566153772 | 0.998252924 |



|                           |              |           |         |           |           |   |    |   |   |   |   |        |             |             |             |             |             |             |
|---------------------------|--------------|-----------|---------|-----------|-----------|---|----|---|---|---|---|--------|-------------|-------------|-------------|-------------|-------------|-------------|
| chr20:31979947-31981872   | exonic       | CDK5RAP1  | 20      | 31979947  | 31981872  | 3 | 1  | 0 | 0 | 0 | 1 | 1925   | 0.869455236 | 1.722405395 | 3.002143519 | 0.573725202 | 0.566153772 | 0.998252924 |
| chr6:39893421-39895194    | exonic       | MOC51     | 6       | 39893421  | 39895194  | 3 | 1  | 0 | 0 | 0 | 1 | 1773   | 0.869455236 | 1.722405395 | 3.002143519 | 0.573725202 | 0.566153772 | 0.998252924 |
| chr2:106729101-106782539  | exonic       | UXS1      | 2       | 106729101 | 106782539 | 4 | 6  | 0 | 4 | 0 | 0 | 53438  | 1.986848106 | 1.730749747 | 2.172568197 | 0.796637707 | 0.425661471 | 0.998252924 |
| chr17:30689932-30695033   | exonic       | ZNF207    | 17      | 30689932  | 30695033  | 3 | 4  | 1 | 2 | 1 | 0 | 5101   | 1.614983242 | 1.731245189 | 2.023859894 | 0.855417509 | 0.392320054 | 0.998252924 |
| chr12:28378728-28460682   | exonic       | CCDC91    | 12      | 28378728  | 28460682  | 2 | 0  | 5 | 3 | 0 | 0 | 81954  | 1.563253169 | 1.73231297  | 2.382619638 | 0.727062323 | 0.467187778 | 0.998252924 |
| chrX:118774654-118787003  | exonic       |           | 6-Sep X | 118774654 | 118787003 | 7 | 2  | 4 | 4 | 1 | 0 | 12349  | 2.586809262 | 1.732749284 | 1.682784847 | 1.029691518 | NA          | NA          |
| chr6:150092297-150094305  | exonic       | PCMT1     | 6       | 150092297 | 150094305 | 7 | 2  | 0 | 2 | 1 | 0 | 2008   | 1.58511039  | 1.733257284 | 2.191691941 | 0.790830706 | 0.429042789 | 0.998252924 |
| chr1:31437520-31468067    | exonic       | PUM1      | 1       | 31437520  | 31468067  | 0 | 1  | 2 | 1 | 0 | 0 | 30547  | 0.675125235 | 1.733652207 | 3.247383769 | 0.533861204 | 0.593437566 | 0.998252924 |
| chr11:3794861-3797251     | exonic       | NUP98     | 11      | 3794861   | 3797251   | 0 | 1  | 2 | 1 | 0 | 0 | 2390   | 0.675125235 | 1.733652207 | 3.247383769 | 0.533861204 | 0.593437566 | 0.998252924 |
| chr17:47388673-47395345   | exonic       | ZNF652    | 17      | 47388673  | 47395345  | 0 | 1  | 2 | 1 | 0 | 0 | 6672   | 0.675125235 | 1.733652207 | 3.247383769 | 0.533861204 | 0.593437566 | 0.998252924 |
| chr18:77455224-77457988   | exonic       | CTDP1     | 18      | 77455224  | 77457988  | 0 | 1  | 2 | 1 | 0 | 0 | 2764   | 0.675125235 | 1.733652207 | 3.247383769 | 0.533861204 | 0.593437566 | 0.998252924 |
| chr22:36919255-36920779   | exonic       | EIF3D     | 22      | 36919255  | 36920779  | 0 | 1  | 2 | 1 | 0 | 0 | 1524   | 0.675125235 | 1.733652207 | 3.247383769 | 0.533861204 | 0.593437566 | 0.998252924 |
| chr3:15070092-15071959    | exonic       | NR2C2     | 3       | 15070092  | 15071959  | 0 | 1  | 2 | 1 | 0 | 0 | 1867   | 0.675125235 | 1.733652207 | 3.247383769 | 0.533861204 | 0.593437566 | 0.998252924 |
| chr11:77043774-77064644   | exonic       | PAK1      | 11      | 77043774  | 77064644  | 0 | 0  | 3 | 0 | 0 | 1 | 20870  | 0.900025685 | 1.734134161 | 3.23921159  | 0.535356865 | NA          | NA          |
| chr15:41648236-41669502   | exonic       | NUSAP1    | 15      | 41648236  | 41669502  | 0 | 0  | 3 | 0 | 0 | 1 | 21266  | 0.900025685 | 1.734134161 | 3.23921159  | 0.535356865 | NA          | NA          |
| chr5:43122140-43139411    | exonic       | ZNF131    | 5       | 43122140  | 43139411  | 0 | 0  | 3 | 0 | 0 | 1 | 17271  | 0.900025685 | 1.734134161 | 3.23921159  | 0.535356865 | NA          | NA          |
| chr6:84108085-84117620    | exonic       | ME1       | 6       | 84108085  | 84117620  | 6 | 1  | 0 | 0 | 2 | 0 | 9535   | 1.190252299 | 1.735134029 | 2.628511647 | 0.66012035  | 0.5091766   | 0.998252924 |
| chr1:187272597-187298192  | ncRNA_exonic | LINC01036 | 1       | 187272597 | 187298192 | 0 | 0  | 3 | 0 | 1 | 0 | 25595  | 0.712834498 | 1.737037439 | 3.467694972 | 0.500919906 | NA          | NA          |
| chr1:213037066-213046160  | exonic       | FLVCR1    | 1       | 213037066 | 213046160 | 0 | 0  | 3 | 0 | 1 | 0 | 9094   | 0.712834498 | 1.737037439 | 3.467694972 | 0.500919906 | NA          | NA          |
| chr1:22077999-22084276    | exonic       | USP48     | 1       | 22077999  | 22084276  | 0 | 0  | 3 | 0 | 1 | 0 | 6277   | 0.712834498 | 1.737037439 | 3.467694972 | 0.500919906 | NA          | NA          |
| chr11:111907996-111914257 | exonic       | DLAT      | 11      | 111907996 | 111914257 | 0 | 0  | 3 | 0 | 1 | 0 | 6261   | 0.712834498 | 1.737037439 | 3.467694972 | 0.500919906 | NA          | NA          |
| chr11:73914772-73915490   | exonic       | PPME1     | 11      | 73914772  | 73915490  | 0 | 0  | 3 | 0 | 1 | 0 | 718    | 0.712834498 | 1.737037439 | 3.467694972 | 0.500919906 | NA          | NA          |
| chr12:101750331-101760477 | exonic       | UTP20     | 12      | 101750331 | 101760477 | 0 | 0  | 3 | 0 | 1 | 0 | 10146  | 0.712834498 | 1.737037439 | 3.467694972 | 0.500919906 | NA          | NA          |
| chr13:100959445-100992513 | exonic       | PCCA      | 13      | 100959445 | 100992513 | 0 | 0  | 3 | 0 | 1 | 0 | 33068  | 0.712834498 | 1.737037439 | 3.467694972 | 0.500919906 | NA          | NA          |
| chr14:81209418-81227957   | exonic       | CEP128    | 14      | 81209418  | 81227957  | 0 | 0  | 3 | 0 | 1 | 0 | 18539  | 0.712834498 | 1.737037439 | 3.467694972 | 0.500919906 | NA          | NA          |
| chr15:41648236-41668026   | exonic       | NUSAP1    | 15      | 41648236  | 41668026  | 0 | 0  | 3 | 0 | 1 | 0 | 19790  | 0.712834498 | 1.737037439 | 3.467694972 | 0.500919906 | NA          | NA          |
| chr2:173423435-173429801  | exonic       | PDK1      | 2       | 173423435 | 173429801 | 0 | 0  | 3 | 0 | 1 | 0 | 6366   | 0.712834498 | 1.737037439 | 3.467694972 | 0.500919906 | NA          | NA          |
| chr3:138244331-138291774  | exonic       | CEP70     | 3       | 138244331 | 138291774 | 0 | 0  | 3 | 0 | 1 | 0 | 47443  | 0.712834498 | 1.737037439 | 3.467694972 | 0.500919906 | NA          | NA          |
| chr3:180651121-180653019  | exonic       | FXR1      | 3       | 180651121 | 180653019 | 0 | 0  | 3 | 0 | 1 | 0 | 1898   | 0.712834498 | 1.737037439 | 3.467694972 | 0.500919906 | NA          | NA          |
| chr3:29977576-30032700    | exonic       | RBMS3     | 3       | 29977576  | 30032700  | 0 | 0  | 3 | 0 | 1 | 0 | 55124  | 0.712834498 | 1.737037439 | 3.467694972 | 0.500919906 | NA          | NA          |
| chr1:98144650-98165103    | exonic       | DPYD      | 1       | 98144650  | 98165103  | 3 | 3  | 2 | 2 | 1 | 0 | 20453  | 1.637976469 | 1.74959414  | 1.988840765 | 0.87970549  | 0.379018875 | 0.998252924 |
| chr1:243776972-244006584  | exonic       | AKT3      | 1       | 243776972 | 244006584 | 9 | 3  | 6 | 6 | 1 | 0 | 229612 | 3.626219768 | 1.753616325 | 1.491489532 | 1.175748329 | NA          | NA          |
| chr11:13435076-13443385   | exonic       | BTBD10    | 11      | 13435076  | 13443385  | 6 | 4  | 7 | 5 | 0 | 1 | 8309   | 3.691683566 | 1.756861529 | 1.494221745 | 1.175770286 | 0.239686683 | 0.998252924 |
| chr10:12123470-12162266   | exonic       | DHTKD1    | 10      | 12123470  | 12162266  | 3 | 11 | 0 | 4 | 5 | 0 | 38796  | 2.765428748 | 1.759085931 | 1.869714799 | 0.940831153 | NA          | NA          |
| chr6:76368977-76388643    | exonic       | SENP6     | 6       | 76368977  | 76388643  | 3 | 2  | 2 | 1 | 0 | 1 | 19666  | 1.544580471 | 1.761633293 | 2.089595848 | 0.843049767 | 0.399200611 | 0.998252924 |

|                           |        |         |    |           |           |    |    |   |   |   |   |       |             |             |             |             |             |             |
|---------------------------|--------|---------|----|-----------|-----------|----|----|---|---|---|---|-------|-------------|-------------|-------------|-------------|-------------|-------------|
| chr8:141749116-141762415  | exonic | PTK2    | 8  | 141749116 | 141762415 | 11 | 1  | 2 | 5 | 0 | 0 | 13299 | 2.519227146 | 1.763239831 | 1.888577402 | 0.933633871 | NA          | NA          |
| chr1:150416726-150418877  | exonic | RPRD2   | 1  | 150416726 | 150418877 | 3  | 0  | 1 | 0 | 1 | 0 | 2151  | 0.705257276 | 1.76512079  | 3.176498001 | 0.555681379 | 0.578428688 | 0.998252924 |
| chr17:35603741-35609962   | exonic | ACACA   | 17 | 35603741  | 35609962  | 3  | 0  | 1 | 0 | 1 | 0 | 6221  | 0.705257276 | 1.76512079  | 3.176498001 | 0.555681379 | 0.578428688 | 0.998252924 |
| chr17:49278952-49280589   | exonic | MBTD1   | 17 | 49278952  | 49280589  | 3  | 0  | 1 | 0 | 1 | 0 | 1637  | 0.705257276 | 1.76512079  | 3.176498001 | 0.555681379 | 0.578428688 | 0.998252924 |
| chr17:58700881-58711338   | exonic | PPM1D   | 17 | 58700881  | 58711338  | 3  | 0  | 1 | 0 | 1 | 0 | 10457 | 0.705257276 | 1.76512079  | 3.176498001 | 0.555681379 | 0.578428688 | 0.998252924 |
| chr2:32703702-32718734    | exonic | BIRC6   | 2  | 32703702  | 32718734  | 3  | 0  | 1 | 0 | 1 | 0 | 15032 | 0.705257276 | 1.76512079  | 3.176498001 | 0.555681379 | 0.578428688 | 0.998252924 |
| chr3:185155234-185184751  | exonic | MAP3K13 | 3  | 185155234 | 185184751 | 3  | 0  | 1 | 0 | 1 | 0 | 29517 | 0.705257276 | 1.76512079  | 3.176498001 | 0.555681379 | 0.578428688 | 0.998252924 |
| chr11:60899892-60906307   | exonic | VPS37C  | 11 | 60899892  | 60906307  | 4  | 0  | 2 | 2 | 0 | 0 | 6415  | 1.123108592 | 1.765537859 | 2.651024685 | 0.665983183 | 0.505421849 | 0.998252924 |
| chr10:7816793-7822270     | exonic | KIN     | 10 | 7816793   | 7822270   | 3  | 1  | 0 | 1 | 0 | 0 | 5477  | 0.667548013 | 1.765911989 | 3.238600153 | 0.545270149 | 0.585567731 | 0.998252924 |
| chr11:75590922-75623083   | exonic | UVRAG   | 11 | 75590922  | 75623083  | 3  | 1  | 0 | 1 | 0 | 0 | 32161 | 0.667548013 | 1.765911989 | 3.238600153 | 0.545270149 | 0.585567731 | 0.998252924 |
| chr2:168986050-169038600  | exonic | STK39   | 2  | 168986050 | 169038600 | 3  | 1  | 0 | 1 | 0 | 0 | 52550 | 0.667548013 | 1.765911989 | 3.238600153 | 0.545270149 | 0.585567731 | 0.998252924 |
| chr1:94360169-94363454    | exonic | GCLM    | 1  | 94360169  | 94363454  | 3  | 0  | 1 | 0 | 0 | 1 | 3285  | 0.892448463 | 1.769362511 | 2.978170465 | 0.594110556 | 0.552438171 | 0.998252924 |
| chr15:86205618-86236682   | exonic | AKAP13  | 15 | 86205618  | 86236682  | 2  | 2  | 2 | 0 | 2 | 0 | 31064 | 1.243118378 | 1.775721999 | 2.361415141 | 0.751973665 | 0.452066896 | 0.998252924 |
| chr15:86207793-86236682   | exonic | AKAP13  | 15 | 86207793  | 86236682  | 2  | 2  | 2 | 0 | 2 | 0 | 28889 | 1.243118378 | 1.775721999 | 2.361415141 | 0.751973665 | 0.452066896 | 0.998252924 |
| chr18:51797729-51810383   | exonic | POLI    | 18 | 51797729  | 51810383  | 8  | 3  | 3 | 3 | 2 | 0 | 12654 | 2.707519015 | 1.777528351 | 1.621800934 | 1.09602129  | 0.273069458 | 0.998252924 |
| chr8:71550050-71553285    | exonic | LACTB2  | 8  | 71550050  | 71553285  | 0  | 4  | 3 | 3 | 0 | 0 | 3235  | 1.607844428 | 1.779525958 | 2.352911416 | 0.756308098 | NA          | NA          |
| chr11:118425173-118430579 | exonic | IFT46   | 11 | 118425173 | 118430579 | 0  | 2  | 3 | 2 | 0 | 0 | 5406  | 1.152981445 | 1.780531011 | 2.646817902 | 0.672706275 | 0.501134175 | 0.998252924 |
| chr9:77631183-77632364    | exonic | CARNMT1 | 9  | 77631183  | 77632364  | 8  | 2  | 2 | 1 | 3 | 0 | 1181  | 2.244378842 | 1.786408479 | 1.794479541 | 0.995502283 | 0.319492035 | 0.998252924 |
| chr1:229584872-229601266  | exonic | NUP133  | 1  | 229584872 | 229601266 | 0  | 0  | 3 | 1 | 0 | 0 | 16394 | 0.698118462 | 1.789722642 | 3.496236474 | 0.511899768 | NA          | NA          |
| chr11:68318588-68338572   | exonic | PPP6R3  | 11 | 68318588  | 68338572  | 0  | 0  | 3 | 1 | 0 | 0 | 19984 | 0.698118462 | 1.789722642 | 3.496236474 | 0.511899768 | NA          | NA          |
| chr2:242092890-242109282  | exonic | PPP1R7  | 2  | 242092890 | 242109282 | 0  | 0  | 3 | 1 | 0 | 0 | 16392 | 0.698118462 | 1.789722642 | 3.496236474 | 0.511899768 | NA          | NA          |
| chr3:135979320-135980907  | exonic | PCCB    | 3  | 135979320 | 135980907 | 0  | 0  | 3 | 1 | 0 | 0 | 1587  | 0.698118462 | 1.789722642 | 3.496236474 | 0.511899768 | NA          | NA          |
| chrX:135814260-135829751  | exonic | ARHGEF6 | X  | 135814260 | 135829751 | 0  | 0  | 3 | 1 | 0 | 0 | 15491 | 0.698118462 | 1.789722642 | 3.496236474 | 0.511899768 | NA          | NA          |
| chr3:171965322-172013304  | exonic | FNDC3B  | 3  | 171965322 | 172013304 | 2  | 0  | 0 | 2 | 2 | 0 | 47982 | 1.729249407 | 1.791678539 | 2.373067964 | 0.755005152 | NA          | NA          |
| chr6:28239631-28240564    | exonic | ZSCAN26 | 6  | 28239631  | 28240564  | 3  | 0  | 3 | 1 | 1 | 0 | 933   | 1.206106712 | 1.797745295 | 2.42258478  | 0.742077351 | 0.458040472 | 0.998252924 |
| chr1:22404921-22413359    | exonic | CDC42   | 1  | 22404921  | 22413359  | 2  | 12 | 6 | 4 | 4 | 0 | 8438  | 4.442252855 | 1.802177618 | 1.404138328 | 1.283475839 | 0.199325419 | 0.998252924 |
| chr4:151388824-151412187  | exonic | LRBA    | 4  | 151388824 | 151412187 | 0  | 9  | 0 | 4 | 0 | 0 | 23363 | 1.993727732 | 1.808796573 | 3.85896381  | 0.468725975 | NA          | NA          |
| chr18:33606862-33613800   | exonic | RPRD1A  | 18 | 33606862  | 33613800  | 5  | 8  | 3 | 4 | 2 | 0 | 6938  | 3.298248567 | 1.809438976 | 1.512643773 | 1.196209583 | 0.231614782 | 0.998252924 |
| chr1:10032075-10035833    | exonic | NMNAT1  | 1  | 10032075  | 10035833  | 1  | 1  | 0 | 0 | 0 | 0 | 3758  | 0.303262742 | 1.80986109  | 4.048701663 | 0.447022587 | 0.654858752 | 0.998252924 |
| chr1:109525230-109529302  | exonic | WDR47   | 1  | 109525230 | 109529302 | 1  | 1  | 0 | 0 | 0 | 0 | 4072  | 0.303262742 | 1.80986109  | 4.048701663 | 0.447022587 | 0.654858752 | 0.998252924 |
| chr1:156011275-156021648  | exonic | UBQLN4  | 1  | 156011275 | 156021648 | 1  | 1  | 0 | 0 | 0 | 0 | 10373 | 0.303262742 | 1.80986109  | 4.048701663 | 0.447022587 | 0.654858752 | 0.998252924 |
| chr1:179959641-179983640  | exonic | CEP350  | 1  | 179959641 | 179983640 | 1  | 1  | 0 | 0 | 0 | 0 | 23999 | 0.303262742 | 1.80986109  | 4.048701663 | 0.447022587 | 0.654858752 | 0.998252924 |
| chr1:201454410-201459472  | exonic | CSRP1   | 1  | 201454410 | 201459472 | 1  | 1  | 0 | 0 | 0 | 0 | 5062  | 0.303262742 | 1.80986109  | 4.048701663 | 0.447022587 | 0.654858752 | 0.998252924 |
| chr1:2077465-2082417      | exonic | PRKCZ   | 1  | 2077465   | 2082417   | 1  | 1  | 0 | 0 | 0 | 0 | 4952  | 0.303262742 | 1.80986109  | 4.048701663 | 0.447022587 | 0.654858752 | 0.998252924 |
| chr1:208383624-208391347  | exonic | PLXNA2  | 1  | 208383624 | 208391347 | 1  | 1  | 0 | 0 | 0 | 0 | 7723  | 0.303262742 | 1.80986109  | 4.048701663 | 0.447022587 | 0.654858752 | 0.998252924 |

|                           |        |          |    |           |           |   |   |   |   |   |   |        |             |            |             |             |             |             |
|---------------------------|--------|----------|----|-----------|-----------|---|---|---|---|---|---|--------|-------------|------------|-------------|-------------|-------------|-------------|
| chr1:224588651-224592272  | exonic | WDR26    | 1  | 224588651 | 224592272 | 1 | 1 | 0 | 0 | 0 | 0 | 3621   | 0.303262742 | 1.80986109 | 4.048701663 | 0.447022587 | 0.654858752 | 0.998252924 |
| chr1:225195114-225284941  | exonic | DNAH14   | 1  | 225195114 | 225284941 | 1 | 1 | 0 | 0 | 0 | 0 | 89827  | 0.303262742 | 1.80986109 | 4.048701663 | 0.447022587 | 0.654858752 | 0.998252924 |
| chr1:235582787-235597595  | exonic | TBCE     | 1  | 235582787 | 235597595 | 1 | 1 | 0 | 0 | 0 | 0 | 14808  | 0.303262742 | 1.80986109 | 4.048701663 | 0.447022587 | 0.654858752 | 0.998252924 |
| chr1:29010094-29018221    | exonic | GMEB1    | 1  | 29010094  | 29018221  | 1 | 1 | 0 | 0 | 0 | 0 | 8127   | 0.303262742 | 1.80986109 | 4.048701663 | 0.447022587 | 0.654858752 | 0.998252924 |
| chr1:38446257-38450451    | exonic | SF3A3    | 1  | 38446257  | 38450451  | 1 | 1 | 0 | 0 | 0 | 0 | 4194   | 0.303262742 | 1.80986109 | 4.048701663 | 0.447022587 | 0.654858752 | 0.998252924 |
| chr1:97915614-98015300    | exonic | DPYD     | 1  | 97915614  | 98015300  | 1 | 1 | 0 | 0 | 0 | 0 | 99686  | 0.303262742 | 1.80986109 | 4.048701663 | 0.447022587 | 0.654858752 | 0.998252924 |
| chr10:103783233-103789502 | exonic | C10orf76 | 10 | 103783233 | 103789502 | 1 | 1 | 0 | 0 | 0 | 0 | 6269   | 0.303262742 | 1.80986109 | 4.048701663 | 0.447022587 | 0.654858752 | 0.998252924 |
| chr10:18183138-18189882   | exonic | MRC1     | 10 | 18183138  | 18189882  | 1 | 1 | 0 | 0 | 0 | 0 | 6744   | 0.303262742 | 1.80986109 | 4.048701663 | 0.447022587 | 0.654858752 | 0.998252924 |
| chr10:32580090-32582665   | exonic | EPC1     | 10 | 32580090  | 32582665  | 1 | 1 | 0 | 0 | 0 | 0 | 2575   | 0.303262742 | 1.80986109 | 4.048701663 | 0.447022587 | 0.654858752 | 0.998252924 |
| chr10:93902785-93904869   | exonic | CPEB3    | 10 | 93902785  | 93904869  | 1 | 1 | 0 | 0 | 0 | 0 | 2084   | 0.303262742 | 1.80986109 | 4.048701663 | 0.447022587 | 0.654858752 | 0.998252924 |
| chr11:103187273-103194718 | exonic | DYNC2H1  | 11 | 103187273 | 103194718 | 1 | 1 | 0 | 0 | 0 | 0 | 7445   | 0.303262742 | 1.80986109 | 4.048701663 | 0.447022587 | 0.654858752 | 0.998252924 |
| chr11:120310837-120348235 | exonic | ARHGEF12 | 11 | 120310837 | 120348235 | 1 | 1 | 0 | 0 | 0 | 0 | 37398  | 0.303262742 | 1.80986109 | 4.048701663 | 0.447022587 | 0.654858752 | 0.998252924 |
| chr11:20075625-20089944   | exonic | NAV2     | 11 | 20075625  | 20089944  | 1 | 1 | 0 | 0 | 0 | 0 | 14319  | 0.303262742 | 1.80986109 | 4.048701663 | 0.447022587 | 0.654858752 | 0.998252924 |
| chr11:47837030-47841010   | exonic | NUP160   | 11 | 47837030  | 47841010  | 1 | 1 | 0 | 0 | 0 | 0 | 3980   | 0.303262742 | 1.80986109 | 4.048701663 | 0.447022587 | 0.654858752 | 0.998252924 |
| chr11:8728631-8734282     | exonic | ST5      | 11 | 8728631   | 8734282   | 1 | 1 | 0 | 0 | 0 | 0 | 5651   | 0.303262742 | 1.80986109 | 4.048701663 | 0.447022587 | 0.654858752 | 0.998252924 |
| chr12:109926376-109945540 | exonic | UBE3B    | 12 | 109926376 | 109945540 | 1 | 1 | 0 | 0 | 0 | 0 | 19164  | 0.303262742 | 1.80986109 | 4.048701663 | 0.447022587 | 0.654858752 | 0.998252924 |
| chr12:51207792-51208222   | exonic | ATF1     | 12 | 51207792  | 51208222  | 1 | 1 | 0 | 0 | 0 | 0 | 430    | 0.303262742 | 1.80986109 | 4.048701663 | 0.447022587 | 0.654858752 | 0.998252924 |
| chr12:514676-527802       | exonic | CCDC77   | 12 | 514676    | 527802    | 1 | 1 | 0 | 0 | 0 | 0 | 13126  | 0.303262742 | 1.80986109 | 4.048701663 | 0.447022587 | 0.654858752 | 0.998252924 |
| chr12:57928838-57929628   | exonic | DCTN2    | 12 | 57928838  | 57929628  | 1 | 1 | 0 | 0 | 0 | 0 | 790    | 0.303262742 | 1.80986109 | 4.048701663 | 0.447022587 | 0.654858752 | 0.998252924 |
| chr13:47266670-47303119   | exonic | LRCH1    | 13 | 47266670  | 47303119  | 1 | 1 | 0 | 0 | 0 | 0 | 36449  | 0.303262742 | 1.80986109 | 4.048701663 | 0.447022587 | 0.654858752 | 0.998252924 |
| chr14:35055435-35078948   | exonic | SNX6     | 14 | 35055435  | 35078948  | 1 | 1 | 0 | 0 | 0 | 0 | 23513  | 0.303262742 | 1.80986109 | 4.048701663 | 0.447022587 | 0.654858752 | 0.998252924 |
| chr14:35072553-35078948   | exonic | SNX6     | 14 | 35072553  | 35078948  | 1 | 1 | 0 | 0 | 0 | 0 | 6395   | 0.303262742 | 1.80986109 | 4.048701663 | 0.447022587 | 0.654858752 | 0.998252924 |
| chr14:76241826-76243193   | exonic | TTLL5    | 14 | 76241826  | 76243193  | 1 | 1 | 0 | 0 | 0 | 0 | 1367   | 0.303262742 | 1.80986109 | 4.048701663 | 0.447022587 | 0.654858752 | 0.998252924 |
| chr14:76638185-76647192   | exonic | GPATCH2L | 14 | 76638185  | 76647192  | 1 | 1 | 0 | 0 | 0 | 0 | 9007   | 0.303262742 | 1.80986109 | 4.048701663 | 0.447022587 | 0.654858752 | 0.998252924 |
| chr15:100739522-100871259 | exonic | ADAMTS17 | 15 | 100739522 | 100871259 | 1 | 1 | 0 | 0 | 0 | 0 | 131737 | 0.303262742 | 1.80986109 | 4.048701663 | 0.447022587 | 0.654858752 | 0.998252924 |
| chr15:25599499-25657118   | exonic | UBE3A    | 15 | 25599499  | 25657118  | 1 | 1 | 0 | 0 | 0 | 0 | 57619  | 0.303262742 | 1.80986109 | 4.048701663 | 0.447022587 | 0.654858752 | 0.998252924 |
| chr15:40005644-40034101   | exonic | FSIP1    | 15 | 40005644  | 40034101  | 1 | 1 | 0 | 0 | 0 | 0 | 28457  | 0.303262742 | 1.80986109 | 4.048701663 | 0.447022587 | 0.654858752 | 0.998252924 |
| chr15:64039116-64040057   | exonic | HERC1    | 15 | 64039116  | 64040057  | 1 | 1 | 0 | 0 | 0 | 0 | 941    | 0.303262742 | 1.80986109 | 4.048701663 | 0.447022587 | 0.654858752 | 0.998252924 |
| chr15:83481854-83492039   | exonic | WHAMM    | 15 | 83481854  | 83492039  | 1 | 1 | 0 | 0 | 0 | 0 | 10185  | 0.303262742 | 1.80986109 | 4.048701663 | 0.447022587 | 0.654858752 | 0.998252924 |
| chr16:48581917-48596355   | exonic | N4BP1    | 16 | 48581917  | 48596355  | 1 | 1 | 0 | 0 | 0 | 0 | 14438  | 0.303262742 | 1.80986109 | 4.048701663 | 0.447022587 | 0.654858752 | 0.998252924 |
| chr16:68215377-68225678   | exonic | NFATC3   | 16 | 68215377  | 68225678  | 1 | 1 | 0 | 0 | 0 | 0 | 10301  | 0.303262742 | 1.80986109 | 4.048701663 | 0.447022587 | 0.654858752 | 0.998252924 |
| chr17:45741524-45748198   | exonic | KPNB1    | 17 | 45741524  | 45748198  | 1 | 1 | 0 | 0 | 0 | 0 | 6674   | 0.303262742 | 1.80986109 | 4.048701663 | 0.447022587 | 0.654858752 | 0.998252924 |
| chr17:58531662-58538148   | exonic | APPBP2   | 17 | 58531662  | 58538148  | 1 | 1 | 0 | 0 | 0 | 0 | 6486   | 0.303262742 | 1.80986109 | 4.048701663 | 0.447022587 | 0.654858752 | 0.998252924 |
| chr17:79577235-79580520   | exonic | NPLOC4   | 17 | 79577235  | 79580520  | 1 | 1 | 0 | 0 | 0 | 0 | 3285   | 0.303262742 | 1.80986109 | 4.048701663 | 0.447022587 | 0.654858752 | 0.998252924 |
| chr18:23895192-23915195   | exonic | TAF4B    | 18 | 23895192  | 23915195  | 1 | 1 | 0 | 0 | 0 | 0 | 20003  | 0.303262742 | 1.80986109 | 4.048701663 | 0.447022587 | 0.654858752 | 0.998252924 |

|                          |        |           |    |           |           |   |   |   |   |   |   |       |             |            |             |             |             |             |
|--------------------------|--------|-----------|----|-----------|-----------|---|---|---|---|---|---|-------|-------------|------------|-------------|-------------|-------------|-------------|
| chr18:9577061-9595151    | exonic | PPP4R1    | 18 | 9577061   | 9595151   | 1 | 1 | 0 | 0 | 0 | 0 | 18090 | 0.303262742 | 1.80986109 | 4.048701663 | 0.447022587 | 0.654858752 | 0.998252924 |
| chr19:11170428-11170863  | exonic | SMARCA4   | 19 | 11170428  | 11170863  | 1 | 1 | 0 | 0 | 0 | 0 | 435   | 0.303262742 | 1.80986109 | 4.048701663 | 0.447022587 | 0.654858752 | 0.998252924 |
| chr19:42872606-42873154  | exonic | MEGF8     | 19 | 42872606  | 42873154  | 1 | 1 | 0 | 0 | 0 | 0 | 548   | 0.303262742 | 1.80986109 | 4.048701663 | 0.447022587 | 0.654858752 | 0.998252924 |
| chr2:138758487-138762795 | exonic | HNMT      | 2  | 138758487 | 138762795 | 1 | 1 | 0 | 0 | 0 | 0 | 4308  | 0.303262742 | 1.80986109 | 4.048701663 | 0.447022587 | 0.654858752 | 0.998252924 |
| chr2:152293340-152303089 | exonic | RIF1      | 2  | 152293340 | 152303089 | 1 | 1 | 0 | 0 | 0 | 0 | 9749  | 0.303262742 | 1.80986109 | 4.048701663 | 0.447022587 | 0.654858752 | 0.998252924 |
| chr2:159077106-159170406 | exonic | CCDC148   | 2  | 159077106 | 159170406 | 1 | 1 | 0 | 0 | 0 | 0 | 93300 | 0.303262742 | 1.80986109 | 4.048701663 | 0.447022587 | 0.654858752 | 0.998252924 |
| chr2:170338760-170356130 | exonic | BBS5      | 2  | 170338760 | 170356130 | 1 | 1 | 0 | 0 | 0 | 0 | 17370 | 0.303262742 | 1.80986109 | 4.048701663 | 0.447022587 | 0.654858752 | 0.998252924 |
| chr2:214174782-214204994 | exonic | SPAG16    | 2  | 214174782 | 214204994 | 1 | 1 | 0 | 0 | 0 | 0 | 30212 | 0.303262742 | 1.80986109 | 4.048701663 | 0.447022587 | 0.654858752 | 0.998252924 |
| chr2:54163223-54164677   | exonic | PSME4     | 2  | 54163223  | 54164677  | 1 | 1 | 0 | 0 | 0 | 0 | 1454  | 0.303262742 | 1.80986109 | 4.048701663 | 0.447022587 | 0.654858752 | 0.998252924 |
| chr2:71575882-71597135   | exonic | ZNF638    | 2  | 71575882  | 71597135  | 1 | 1 | 0 | 0 | 0 | 0 | 21253 | 0.303262742 | 1.80986109 | 4.048701663 | 0.447022587 | 0.654858752 | 0.998252924 |
| chr2:84668170-84676876   | exonic | SUCLG1    | 2  | 84668170  | 84676876  | 1 | 1 | 0 | 0 | 0 | 0 | 8706  | 0.303262742 | 1.80986109 | 4.048701663 | 0.447022587 | 0.654858752 | 0.998252924 |
| chr20:3329171-3363153    | exonic | C20orf194 | 20 | 3329171   | 3363153   | 1 | 1 | 0 | 0 | 0 | 0 | 33982 | 0.303262742 | 1.80986109 | 4.048701663 | 0.447022587 | 0.654858752 | 0.998252924 |
| chr20:40161688-40162209  | exonic | CHD6      | 20 | 40161688  | 40162209  | 1 | 1 | 0 | 0 | 0 | 0 | 521   | 0.303262742 | 1.80986109 | 4.048701663 | 0.447022587 | 0.654858752 | 0.998252924 |
| chr20:43623730-43629994  | exonic | STK4      | 20 | 43623730  | 43629994  | 1 | 1 | 0 | 0 | 0 | 0 | 6264  | 0.303262742 | 1.80986109 | 4.048701663 | 0.447022587 | 0.654858752 | 0.998252924 |
| chr20:44477088-44483931  | exonic | ACOT8     | 20 | 44477088  | 44483931  | 1 | 1 | 0 | 0 | 0 | 0 | 6843  | 0.303262742 | 1.80986109 | 4.048701663 | 0.447022587 | 0.654858752 | 0.998252924 |
| chr20:45852969-45858552  | exonic | ZMYND8    | 20 | 45852969  | 45858552  | 1 | 1 | 0 | 0 | 0 | 0 | 5583  | 0.303262742 | 1.80986109 | 4.048701663 | 0.447022587 | 0.654858752 | 0.998252924 |
| chr21:32537278-32575328  | exonic | TIAM1     | 21 | 32537278  | 32575328  | 1 | 1 | 0 | 0 | 0 | 0 | 38050 | 0.303262742 | 1.80986109 | 4.048701663 | 0.447022587 | 0.654858752 | 0.998252924 |
| chr3:130881251-130962340 | exonic | NEK11     | 3  | 130881251 | 130962340 | 1 | 1 | 0 | 0 | 0 | 0 | 81089 | 0.303262742 | 1.80986109 | 4.048701663 | 0.447022587 | 0.654858752 | 0.998252924 |
| chr3:13393378-13395607   | exonic | NUP210    | 3  | 13393378  | 13395607  | 1 | 1 | 0 | 0 | 0 | 0 | 2229  | 0.303262742 | 1.80986109 | 4.048701663 | 0.447022587 | 0.654858752 | 0.998252924 |
| chr3:138407716-138413749 | exonic | PIK3CB    | 3  | 138407716 | 138413749 | 1 | 1 | 0 | 0 | 0 | 0 | 6033  | 0.303262742 | 1.80986109 | 4.048701663 | 0.447022587 | 0.654858752 | 0.998252924 |
| chr3:23996027-24001306   | exonic | NR1D2     | 3  | 23996027  | 24001306  | 1 | 1 | 0 | 0 | 0 | 0 | 5279  | 0.303262742 | 1.80986109 | 4.048701663 | 0.447022587 | 0.654858752 | 0.998252924 |
| chr3:50677796-50679763   | exonic | MAPKAPK3  | 3  | 50677796  | 50679763  | 1 | 1 | 0 | 0 | 0 | 0 | 1967  | 0.303262742 | 1.80986109 | 4.048701663 | 0.447022587 | 0.654858752 | 0.998252924 |
| chr4:2877622-2886393     | exonic | ADD1      | 4  | 2877622   | 2886393   | 1 | 1 | 0 | 0 | 0 | 0 | 8771  | 0.303262742 | 1.80986109 | 4.048701663 | 0.447022587 | 0.654858752 | 0.998252924 |
| chr4:36109186-36122948   | exonic | ARAP2     | 4  | 36109186  | 36122948  | 1 | 1 | 0 | 0 | 0 | 0 | 13762 | 0.303262742 | 1.80986109 | 4.048701663 | 0.447022587 | 0.654858752 | 0.998252924 |
| chr4:83778841-83803093   | exonic | SEC31A    | 4  | 83778841  | 83803093  | 1 | 1 | 0 | 0 | 0 | 0 | 24252 | 0.303262742 | 1.80986109 | 4.048701663 | 0.447022587 | 0.654858752 | 0.998252924 |
| chr5:172507587-172550205 | exonic | CREBRF    | 5  | 172507587 | 172550205 | 1 | 1 | 0 | 0 | 0 | 0 | 42618 | 0.303262742 | 1.80986109 | 4.048701663 | 0.447022587 | 0.654858752 | 0.998252924 |
| chr5:93964515-93966448   | exonic | SLF1      | 5  | 93964515  | 93966448  | 1 | 1 | 0 | 0 | 0 | 0 | 1933  | 0.303262742 | 1.80986109 | 4.048701663 | 0.447022587 | 0.654858752 | 0.998252924 |
| chr6:127469792-127476583 | exonic | RSPO3     | 6  | 127469792 | 127476583 | 1 | 1 | 0 | 0 | 0 | 0 | 6791  | 0.303262742 | 1.80986109 | 4.048701663 | 0.447022587 | 0.654858752 | 0.998252924 |
| chr6:138528178-138531178 | exonic | ARFGEF3   | 6  | 138528178 | 138531178 | 1 | 1 | 0 | 0 | 0 | 0 | 3000  | 0.303262742 | 1.80986109 | 4.048701663 | 0.447022587 | 0.654858752 | 0.998252924 |
| chr6:168323535-168352867 | exonic | MLLT4     | 6  | 168323535 | 168352867 | 1 | 1 | 0 | 0 | 0 | 0 | 29332 | 0.303262742 | 1.80986109 | 4.048701663 | 0.447022587 | 0.654858752 | 0.998252924 |
| chr6:24475348-24480187   | exonic | GPLD1     | 6  | 24475348  | 24480187  | 1 | 1 | 0 | 0 | 0 | 0 | 4839  | 0.303262742 | 1.80986109 | 4.048701663 | 0.447022587 | 0.654858752 | 0.998252924 |
| chr6:42583739-42600642   | exonic | UBR2      | 6  | 42583739  | 42600642  | 1 | 1 | 0 | 0 | 0 | 0 | 16903 | 0.303262742 | 1.80986109 | 4.048701663 | 0.447022587 | 0.654858752 | 0.998252924 |
| chr6:57006099-57017149   | exonic | ZNF451    | 6  | 57006099  | 57017149  | 1 | 1 | 0 | 0 | 0 | 0 | 11050 | 0.303262742 | 1.80986109 | 4.048701663 | 0.447022587 | 0.654858752 | 0.998252924 |
| chr7:157013382-157024021 | exonic | UBE3C     | 7  | 157013382 | 157024021 | 1 | 1 | 0 | 0 | 0 | 0 | 10639 | 0.303262742 | 1.80986109 | 4.048701663 | 0.447022587 | 0.654858752 | 0.998252924 |
| chr7:27934838-28031600   | exonic | JAZF1     | 7  | 27934838  | 28031600  | 1 | 1 | 0 | 0 | 0 | 0 | 96762 | 0.303262742 | 1.80986109 | 4.048701663 | 0.447022587 | 0.654858752 | 0.998252924 |

|                           |              |                              |    |           |           |     |     |     |    |   |    |        |             |             |             |             |             |             |
|---------------------------|--------------|------------------------------|----|-----------|-----------|-----|-----|-----|----|---|----|--------|-------------|-------------|-------------|-------------|-------------|-------------|
| chr7:33055281-33075600    | exonic       | NT5C3A                       | 7  | 33055281  | 33075600  | 1   | 1   | 0   | 0  | 0 | 0  | 20319  | 0.303262742 | 1.80986109  | 4.048701663 | 0.447022587 | 0.654858752 | 0.998252924 |
| chr7:44026199-44027846    | ncRNA_exonic | POLR2J4                      | 7  | 44026199  | 44027846  | 1   | 1   | 0   | 0  | 0 | 0  | 1647   | 0.303262742 | 1.80986109  | 4.048701663 | 0.447022587 | 0.654858752 | 0.998252924 |
| chr7:5413685-5417655      | exonic       | TNRC18                       | 7  | 5413685   | 5417655   | 1   | 1   | 0   | 0  | 0 | 0  | 3970   | 0.303262742 | 1.80986109  | 4.048701663 | 0.447022587 | 0.654858752 | 0.998252924 |
| chr7:716865-720363        | exonic       | PRKAR1B                      | 7  | 716865    | 720363    | 1   | 1   | 0   | 0  | 0 | 0  | 3498   | 0.303262742 | 1.80986109  | 4.048701663 | 0.447022587 | 0.654858752 | 0.998252924 |
| chr7:72302181-72304508    | ncRNA_exonic | SBDSP1                       | 7  | 72302181  | 72304508  | 1   | 1   | 0   | 0  | 0 | 0  | 2327   | 0.303262742 | 1.80986109  | 4.048701663 | 0.447022587 | 0.654858752 | 0.998252924 |
| chr8:141710989-141727808  | exonic       | PTK2                         | 8  | 141710989 | 141727808 | 1   | 1   | 0   | 0  | 0 | 0  | 16819  | 0.303262742 | 1.80986109  | 4.048701663 | 0.447022587 | 0.654858752 | 0.998252924 |
| chr8:38975604-39068843    | exonic       | ADAM32                       | 8  | 38975604  | 39068843  | 1   | 1   | 0   | 0  | 0 | 0  | 93239  | 0.303262742 | 1.80986109  | 4.048701663 | 0.447022587 | 0.654858752 | 0.998252924 |
| chr9:100190741-100204157  | exonic       | TDRD7                        | 9  | 100190741 | 100204157 | 1   | 1   | 0   | 0  | 0 | 0  | 13416  | 0.303262742 | 1.80986109  | 4.048701663 | 0.447022587 | 0.654858752 | 0.998252924 |
| chr9:100416079-100418367  | exonic       | NCBP1                        | 9  | 100416079 | 100418367 | 1   | 1   | 0   | 0  | 0 | 0  | 2288   | 0.303262742 | 1.80986109  | 4.048701663 | 0.447022587 | 0.654858752 | 0.998252924 |
| chrX:117575330-117577650  | exonic       | WDR44                        | X  | 117575330 | 117577650 | 1   | 1   | 0   | 0  | 0 | 0  | 2320   | 0.303262742 | 1.80986109  | 4.048701663 | 0.447022587 | 0.654858752 | 0.998252924 |
| chr11:6962802-6977013     | exonic       | ZNF215                       | 11 | 6962802   | 6977013   | 0   | 0   | 8   | 4  | 0 | 0  | 14211  | 2.003397745 | 1.811543369 | 3.858909266 | 0.469444406 | NA          | NA          |
| chr1:65095037-65107652    | exonic       | CACHD1                       | 1  | 65095037  | 65107652  | 3   | 0   | 1   | 1  | 0 | 0  | 12615  | 0.690541239 | 1.814266625 | 3.202273925 | 0.566555725 | 0.571016063 | 0.998252924 |
| chr6:144808683-144852338  | exonic       | UTRN                         | 6  | 144808683 | 144852338 | 3   | 0   | 1   | 1  | 0 | 0  | 43655  | 0.690541239 | 1.814266625 | 3.202273925 | 0.566555725 | 0.571016063 | 0.998252924 |
| chr7:48450116-48452180    | exonic       | ABCA13                       | 7  | 48450116  | 48452180  | 3   | 0   | 1   | 1  | 0 | 0  | 2064   | 0.690541239 | 1.814266625 | 3.202273925 | 0.566555725 | 0.571016063 | 0.998252924 |
| chr1:243468014-243581378  | exonic       | SDCCAG8                      | 1  | 243468014 | 243581378 | 2   | 2   | 0   | 0  | 1 | 0  | 113364 | 0.727552906 | 1.815883438 | 3.124926245 | 0.581096415 | 0.561175475 | 0.998252924 |
| chr15:56686362-56687032   | exonic       | TEX9                         | 15 | 56686362  | 56687032  | 2   | 2   | 0   | 0  | 1 | 0  | 670    | 0.727552906 | 1.815883438 | 3.124926245 | 0.581096415 | 0.561175475 | 0.998252924 |
| chr17:29119457-29120690   | exonic       | CRLF3                        | 17 | 29119457  | 29120690  | 2   | 2   | 0   | 0  | 1 | 0  | 1233   | 0.727552906 | 1.815883438 | 3.124926245 | 0.581096415 | 0.561175475 | 0.998252924 |
| chr17:56772291-56787351   | exonic       | RAD51C                       | 17 | 56772291  | 56787351  | 2   | 2   | 0   | 0  | 1 | 0  | 15060  | 0.727552906 | 1.815883438 | 3.124926245 | 0.581096415 | 0.561175475 | 0.998252924 |
| chr3:37089009-37090508    | exonic       | MLH1                         | 3  | 37089009  | 37090508  | 2   | 2   | 0   | 0  | 1 | 0  | 1499   | 0.727552906 | 1.815883438 | 3.124926245 | 0.581096415 | 0.561175475 | 0.998252924 |
| chr2:55252221-55255356    | exonic       | RTN4                         | 2  | 55252221  | 55255356  | 18  | 0   | 4   | 8  | 0 | 0  | 3135   | 3.961332153 | 1.816988535 | 2.747433706 | 0.661340265 | 0.508394125 | 0.998252924 |
| chr8:478895-481576        | intronic     | TDRP                         | 8  | 478895    | 481576    | 13  | 0   | 5   | 2  | 4 | 0  | 2681   | 3.359907841 | 1.817741596 | 1.685460806 | 1.078483456 | 0.280818061 | 0.998252924 |
| chr10:74322652-74326552   | exonic       | MICU1                        | 10 | 74322652  | 74326552  | 3   | 2   | 3   | 3  | 0 | 0  | 3900   | 1.646253659 | 1.818762534 | 2.122837131 | 0.85676028  | NA          | NA          |
| chr3:179481789-179483636  | exonic       | USP13                        | 3  | 179481789 | 179483636 | 5   | 3   | 3   | 3  | 1 | 0  | 1847   | 2.199530765 | 1.818970173 | 1.777127079 | 1.023545359 | 0.306050065 | 0.998252924 |
| chr1:225372992-225394922  | exonic       | DNAH14                       | 1  | 225372992 | 225394922 | 2   | 2   | 0   | 0  | 0 | 1  | 21930  | 0.914744093 | 1.819407159 | 2.936649177 | 0.619552098 | NA          | NA          |
| chr9:20715320-20740339    | exonic       | FOCAD                        | 9  | 20715320  | 20740339  | 2   | 2   | 0   | 0  | 0 | 1  | 25019  | 0.914744093 | 1.819407159 | 2.936649177 | 0.619552098 | NA          | NA          |
| chr10:16526335-16528616   | exonic       | PTER                         | 10 | 16526335  | 16528616  | 2   | 2   | 2   | 1  | 1 | 0  | 2281   | 1.228402342 | 1.822702123 | 2.23400106  | 0.815891342 | 0.414562284 | 0.998252924 |
| chr22:28910745-28915308   | intronic     | TTC28                        | 22 | 28910745  | 28915308  | 2   | 12  | 3   | 7  | 0 | 0  | 4563   | 3.685270247 | 1.826840976 | 1.66786119  | 1.095319555 | NA          | NA          |
| chr1:24140679-24147083    | exonic       | HMGCL                        | 1  | 24140679  | 24147083  | 2   | 4   | 0   | 2  | 0 | 0  | 6404   | 1.167699852 | 1.829572624 | 2.621116338 | 0.69801275  | 0.48516922  | 0.998252924 |
| chr9:130594677-130595493  | intronic     | ENG                          | 9  | 130594677 | 130595493 | 2   | 4   | 0   | 2  | 0 | 0  | 816    | 1.167699852 | 1.829572624 | 2.621116338 | 0.69801275  | 0.48516922  | 0.998252924 |
| chr14:106053891-106173899 | ncRNA_exonic | ELK2AP, MIR8071-1, MIR8071-2 | 14 | 106053891 | 106173899 | 235 | 165 | 131 | 86 | 0 | 48 | 120008 | 108.8469531 | 1.831648686 | 1.63249179  | 1.12199565  | NA          | NA          |
| chr1:229593907-229601266  | exonic       | NUP133                       | 1  | 229593907 | 229601266 | 2   | 0   | 4   | 0  | 2 | 0  | 7359   | 1.289104831 | 1.834973076 | 2.546852645 | 0.72048655  | 0.471225478 | 0.998252924 |
| chr12:107236366-107237725 | exonic       | RIC8B                        | 12 | 107236366 | 107237725 | 2   | 0   | 4   | 0  | 2 | 0  | 1359   | 1.289104831 | 1.834973076 | 2.546852645 | 0.72048655  | 0.471225478 | 0.998252924 |
| chr20:35539620-35540955   | exonic       | SAMHD1                       | 20 | 35539620  | 35540955  | 1   | 2   | 4   | 0  | 1 | 1  | 1335   | 1.695860674 | 1.841203212 | 2.074882771 | 0.887376982 | 0.374875972 | 0.998252924 |
| chr6:83667030-83754378    | exonic       | UBE3D                        | 6  | 83667030  | 83754378  | 5   | 5   | 1   | 4  | 0 | 0  | 87348  | 2.138828275 | 1.842155578 | 1.962252994 | 0.938796161 | NA          | NA          |
| chr1:92327028-92329836    | exonic       | TGFBR3                       | 1  | 92327028  | 92329836  | 5   | 6   | 0   | 4  | 0 | 0  | 2808   | 2.115835049 | 1.842748558 | 2.126406423 | 0.866602235 | 0.386159989 | 0.998252924 |

|                           |              |             |    |           |           |   |   |   |   |   |   |        |             |             |             |             |             |             |
|---------------------------|--------------|-------------|----|-----------|-----------|---|---|---|---|---|---|--------|-------------|-------------|-------------|-------------|-------------|-------------|
| chr18:60206913-60242783   | exonic       | ZCCHC2      | 18 | 60206913  | 60242783  | 4 | 3 | 0 | 0 | 3 | 0 | 35870  | 1.280830012 | 1.851646592 | 2.526437665 | 0.732908085 | 0.463614491 | 0.998252924 |
| chr6:25551137-25557078    | exonic       | LRRC16A     | 6  | 25551137  | 25557078  | 2 | 3 | 1 | 2 | 0 | 0 | 5941   | 1.190693079 | 1.852396082 | 2.412102625 | 0.767959067 | 0.442511504 | 0.998252924 |
| chrX:17151946-17157084    | exonic       | REPS2       | X  | 17151946  | 17157084  | 2 | 3 | 1 | 2 | 0 | 0 | 5138   | 1.190693079 | 1.852396082 | 2.412102625 | 0.767959067 | 0.442511504 | 0.998252924 |
| chr6:107824860-107827631  | exonic       | SOBP        | 6  | 107824860 | 107827631 | 8 | 3 | 3 | 3 | 0 | 1 | 2771   | 2.77368278  | 1.854248885 | 1.663184898 | 1.11487838  | 0.264902542 | 0.998252924 |
| chr10:75234676-75239275   | exonic       | PPP3CB      | 10 | 75234676  | 75239275  | 1 | 2 | 5 | 1 | 2 | 0 | 4599   | 1.812249897 | 1.858104872 | 1.987378811 | 0.934952542 | 0.349812757 | 0.998252924 |
| chr15:41988272-41989221   | exonic       | MGA         | 15 | 41988272  | 41989221  | 4 | 4 | 0 | 1 | 0 | 1 | 949    | 1.627580961 | 1.860349929 | 2.212568118 | 0.840810239 | 0.40045425  | 0.998252924 |
| chr14:39623414-39628754   | exonic       | TRAPPC6B    | 14 | 39623414  | 39628754  | 2 | 3 | 3 | 3 | 0 | 0 | 5340   | 1.691542515 | 1.861211559 | 2.109380207 | 0.882349968 | NA          | NA          |
| chr1:145594038-145595220  | exonic       | POLR3C      | 1  | 145594038 | 145595220 | 4 | 1 | 4 | 0 | 3 | 0 | 1182   | 1.842381938 | 1.861852475 | 2.076968644 | 0.896427821 | 0.370024314 | 0.998252924 |
| chr2:215632205-215657169  | exonic       | BARB1       | 2  | 215632205 | 215657169 | 1 | 5 | 1 | 0 | 2 | 4 | 24964  | 0.750546132 | 1.864184955 | 2.877543766 | 0.647838958 | 0.517089115 | 0.998252924 |
| chr14:75567694-75570700   | exonic       | NEK9        | 14 | 75567694  | 75570700  | 2 | 2 | 0 | 1 | 0 | 0 | 3006   | 0.712836869 | 1.864561036 | 3.149668667 | 0.591986407 | 0.553859691 | 0.998252924 |
| chr4:87593517-87614827    | exonic       | PTPN13      | 4  | 87593517  | 87614827  | 2 | 2 | 0 | 1 | 0 | 0 | 21310  | 0.712836869 | 1.864561036 | 3.149668667 | 0.591986407 | 0.553859691 | 0.998252924 |
| chr7:50737418-50823753    | exonic       | GRB10       | 7  | 50737418  | 50823753  | 2 | 2 | 0 | 1 | 0 | 0 | 86335  | 0.712836869 | 1.864561036 | 3.149668667 | 0.591986407 | 0.553859691 | 0.998252924 |
| chr13:25049609-25052414   | exonic       | PARP4       | 13 | 25049609  | 25052414  | 2 | 2 | 2 | 2 | 0 | 0 | 2805   | 1.213686305 | 1.879248045 | 2.379139614 | 0.789885568 | 0.4295946   | 0.998252924 |
| chr17:53150260-53158544   | exonic       | STXBP4      | 17 | 53150260  | 53158544  | 2 | 2 | 4 | 3 | 0 | 0 | 8284   | 1.714535741 | 1.882008435 | 2.111399203 | 0.891356041 | NA          | NA          |
| chr17:26490568-26499644   | exonic       | NLK         | 17 | 26490568  | 26499644  | 3 | 5 | 5 | 0 | 1 | 2 | 9076   | 2.982149591 | 1.886046796 | 1.673589871 | 1.126946827 | 0.259764963 | 0.998252924 |
| chr7:24663284-24690331    | exonic       | MPP6        | 7  | 24663284  | 24690331  | 3 | 4 | 2 | 1 | 2 | 0 | 27047  | 1.826968304 | 1.889415662 | 1.923770056 | 0.982142152 | 0.326029822 | 0.998252924 |
| chr9:123593608-123595734  | exonic       | PSMD5       | 9  | 123593608 | 123595734 | 9 | 0 | 1 | 3 | 0 | 0 | 2126   | 1.677085666 | 1.897434003 | 2.35384052  | 0.806101343 | NA          | NA          |
| chr1:10318550-10328321    | exonic       | KIF1B       | 1  | 10318550  | 10328321  | 1 | 0 | 1 | 0 | 0 | 0 | 9771   | 0.326255968 | 1.89749569  | 4.04050233  | 0.469618759 | 0.63862742  | 0.998252924 |
| chr1:109642814-109643234  | ncRNA_exonic | SCARNA2     | 1  | 109642814 | 109643234 | 1 | 0 | 1 | 0 | 0 | 0 | 420    | 0.326255968 | 1.89749569  | 4.04050233  | 0.469618759 | 0.63862742  | 0.998252924 |
| chr1:1192371-1198766      | exonic       | UBE2J2      | 1  | 1192371   | 1198766   | 1 | 0 | 1 | 0 | 0 | 0 | 6395   | 0.326255968 | 1.89749569  | 4.04050233  | 0.469618759 | 0.63862742  | 0.998252924 |
| chr1:151400298-151403317  | exonic       | POGZ        | 1  | 151400298 | 151403317 | 1 | 0 | 1 | 0 | 0 | 0 | 3019   | 0.326255968 | 1.89749569  | 4.04050233  | 0.469618759 | 0.63862742  | 0.998252924 |
| chr1:160593885-160604687  | exonic       | SLAMF1      | 1  | 160593885 | 160604687 | 1 | 0 | 1 | 0 | 0 | 0 | 10802  | 0.326255968 | 1.89749569  | 4.04050233  | 0.469618759 | 0.63862742  | 0.998252924 |
| chr1:236332005-236347206  | exonic       | GPR137B     | 1  | 236332005 | 236347206 | 1 | 0 | 1 | 0 | 0 | 0 | 15201  | 0.326255968 | 1.89749569  | 4.04050233  | 0.469618759 | 0.63862742  | 0.998252924 |
| chr1:243736227-244006584  | exonic       | AKT3        | 1  | 243736227 | 244006584 | 1 | 0 | 1 | 0 | 0 | 0 | 270357 | 0.326255968 | 1.89749569  | 4.04050233  | 0.469618759 | 0.63862742  | 0.998252924 |
| chr1:243776972-243801044  | exonic       | AKT3        | 1  | 243776972 | 243801044 | 1 | 0 | 1 | 0 | 0 | 0 | 24072  | 0.326255968 | 1.89749569  | 4.04050233  | 0.469618759 | 0.63862742  | 0.998252924 |
| chr1:86818541-86820375    | exonic       | ODF2L       | 1  | 86818541  | 86820375  | 1 | 0 | 1 | 0 | 0 | 0 | 1834   | 0.326255968 | 1.89749569  | 4.04050233  | 0.469618759 | 0.63862742  | 0.998252924 |
| chr10:12009339-12056183   | exonic       | UPF2        | 10 | 12009339  | 12056183  | 1 | 0 | 1 | 0 | 0 | 0 | 46844  | 0.326255968 | 1.89749569  | 4.04050233  | 0.469618759 | 0.63862742  | 0.998252924 |
| chr10:72489049-72490005   | exonic       | ADAMTS14    | 10 | 72489049  | 72490005  | 1 | 0 | 1 | 0 | 0 | 0 | 956    | 0.326255968 | 1.89749569  | 4.04050233  | 0.469618759 | 0.63862742  | 0.998252924 |
| chr10:7285519-7318951     | exonic       | SFMBT2      | 10 | 7285519   | 7318951   | 1 | 0 | 1 | 0 | 0 | 0 | 33432  | 0.326255968 | 1.89749569  | 4.04050233  | 0.469618759 | 0.63862742  | 0.998252924 |
| chr10:81813151-81820689   | ncRNA_exonic | TMEM254-AS1 | 10 | 81813151  | 81820689  | 1 | 0 | 1 | 0 | 0 | 0 | 7538   | 0.326255968 | 1.89749569  | 4.04050233  | 0.469618759 | 0.63862742  | 0.998252924 |
| chr11:103086449-103093815 | exonic       | DYNC2H1     | 11 | 103086449 | 103093815 | 1 | 0 | 1 | 0 | 0 | 0 | 7366   | 0.326255968 | 1.89749569  | 4.04050233  | 0.469618759 | 0.63862742  | 0.998252924 |
| chr11:11454167-11470483   | exonic       | GALNT18     | 11 | 11454167  | 11470483  | 1 | 0 | 1 | 0 | 0 | 0 | 16316  | 0.326255968 | 1.89749569  | 4.04050233  | 0.469618759 | 0.63862742  | 0.998252924 |
| chr11:4091255-4095909     | exonic       | STIM1       | 11 | 4091255   | 4095909   | 1 | 0 | 1 | 0 | 0 | 0 | 4654   | 0.326255968 | 1.89749569  | 4.04050233  | 0.469618759 | 0.63862742  | 0.998252924 |
| chr11:66515849-66595835   | exonic       | C11orf80    | 11 | 66515849  | 66595835  | 1 | 0 | 1 | 0 | 0 | 0 | 79986  | 0.326255968 | 1.89749569  | 4.04050233  | 0.469618759 | 0.63862742  | 0.998252924 |
| chr11:77649696-77652297   | exonic       | INTS4       | 11 | 77649696  | 77652297  | 1 | 0 | 1 | 0 | 0 | 0 | 2601   | 0.326255968 | 1.89749569  | 4.04050233  | 0.469618759 | 0.63862742  | 0.998252924 |

|                           |              |          |    |           |           |   |   |   |   |   |   |        |             |            |            |             |            |             |
|---------------------------|--------------|----------|----|-----------|-----------|---|---|---|---|---|---|--------|-------------|------------|------------|-------------|------------|-------------|
| chr11:93528073-93530885   | exonic       | MED17    | 11 | 93528073  | 93530885  | 1 | 0 | 1 | 0 | 0 | 0 | 2812   | 0.326255968 | 1.89749569 | 4.04050233 | 0.469618759 | 0.63862742 | 0.998252924 |
| chr11:94554695-94564707   | exonic       | AMOTL1   | 11 | 94554695  | 94564707  | 1 | 0 | 1 | 0 | 0 | 0 | 10012  | 0.326255968 | 1.89749569 | 4.04050233 | 0.469618759 | 0.63862742 | 0.998252924 |
| chr12:110463546-110468563 | exonic       | ANKRD13A | 12 | 110463546 | 110468563 | 1 | 0 | 1 | 0 | 0 | 0 | 5017   | 0.326255968 | 1.89749569 | 4.04050233 | 0.469618759 | 0.63862742 | 0.998252924 |
| chr12:122468605-122481959 | exonic       | BCL7A    | 12 | 122468605 | 122481959 | 1 | 0 | 1 | 0 | 0 | 0 | 13354  | 0.326255968 | 1.89749569 | 4.04050233 | 0.469618759 | 0.63862742 | 0.998252924 |
| chr12:124130001-124137282 | exonic       | GTF2H3   | 12 | 124130001 | 124137282 | 1 | 0 | 1 | 0 | 0 | 0 | 7281   | 0.326255968 | 1.89749569 | 4.04050233 | 0.469618759 | 0.63862742 | 0.998252924 |
| chr12:30822116-30829521   | exonic       | IPO8     | 12 | 30822116  | 30829521  | 1 | 0 | 1 | 0 | 0 | 0 | 7405   | 0.326255968 | 1.89749569 | 4.04050233 | 0.469618759 | 0.63862742 | 0.998252924 |
| chr12:49854552-49893988   | exonic       | SPATS2   | 12 | 49854552  | 49893988  | 1 | 0 | 1 | 0 | 0 | 0 | 39436  | 0.326255968 | 1.89749569 | 4.04050233 | 0.469618759 | 0.63862742 | 0.998252924 |
| chr13:42439871-42465723   | exonic       | VWA8     | 13 | 42439871  | 42465723  | 1 | 0 | 1 | 0 | 0 | 0 | 25852  | 0.326255968 | 1.89749569 | 4.04050233 | 0.469618759 | 0.63862742 | 0.998252924 |
| chr13:53231666-53233384   | exonic       | SUGT1    | 13 | 53231666  | 53233384  | 1 | 0 | 1 | 0 | 0 | 0 | 1718   | 0.326255968 | 1.89749569 | 4.04050233 | 0.469618759 | 0.63862742 | 0.998252924 |
| chr13:95768175-95822882   | exonic       | ABCC4    | 13 | 95768175  | 95822882  | 1 | 0 | 1 | 0 | 0 | 0 | 54707  | 0.326255968 | 1.89749569 | 4.04050233 | 0.469618759 | 0.63862742 | 0.998252924 |
| chr14:31813101-31844174   | exonic       | HEATR5A  | 14 | 31813101  | 31844174  | 1 | 0 | 1 | 0 | 0 | 0 | 31073  | 0.326255968 | 1.89749569 | 4.04050233 | 0.469618759 | 0.63862742 | 0.998252924 |
| chr14:35276656-35295362   | exonic       | BAZ1A    | 14 | 35276656  | 35295362  | 1 | 0 | 1 | 0 | 0 | 0 | 18706  | 0.326255968 | 1.89749569 | 4.04050233 | 0.469618759 | 0.63862742 | 0.998252924 |
| chr14:39647044-39648666   | exonic       | PNN      | 14 | 39647044  | 39648666  | 1 | 0 | 1 | 0 | 0 | 0 | 1622   | 0.326255968 | 1.89749569 | 4.04050233 | 0.469618759 | 0.63862742 | 0.998252924 |
| chr14:50069087-50074839   | exonic       | LRR1     | 14 | 50069087  | 50074839  | 1 | 0 | 1 | 0 | 0 | 0 | 5752   | 0.326255968 | 1.89749569 | 4.04050233 | 0.469618759 | 0.63862742 | 0.998252924 |
| chr14:72054287-72056087   | exonic       | SIPAL1   | 14 | 72054287  | 72056087  | 1 | 0 | 1 | 0 | 0 | 0 | 1800   | 0.326255968 | 1.89749569 | 4.04050233 | 0.469618759 | 0.63862742 | 0.998252924 |
| chr14:75567694-75568468   | exonic       | NEK9     | 14 | 75567694  | 75568468  | 1 | 0 | 1 | 0 | 0 | 0 | 774    | 0.326255968 | 1.89749569 | 4.04050233 | 0.469618759 | 0.63862742 | 0.998252924 |
| chr15:57523349-57555472   | exonic       | TCF12    | 15 | 57523349  | 57555472  | 1 | 0 | 1 | 0 | 0 | 0 | 32123  | 0.326255968 | 1.89749569 | 4.04050233 | 0.469618759 | 0.63862742 | 0.998252924 |
| chr15:66015185-66031213   | exonic       | DENND4A  | 15 | 66015185  | 66031213  | 1 | 0 | 1 | 0 | 0 | 0 | 16028  | 0.326255968 | 1.89749569 | 4.04050233 | 0.469618759 | 0.63862742 | 0.998252924 |
| chr16:25172422-25180534   | exonic       | LCMT1    | 16 | 25172422  | 25180534  | 1 | 0 | 1 | 0 | 0 | 0 | 8112   | 0.326255968 | 1.89749569 | 4.04050233 | 0.469618759 | 0.63862742 | 0.998252924 |
| chr16:29332248-29376380   | ncRNA_exonic | SNX29P2  | 16 | 29332248  | 29376380  | 1 | 0 | 1 | 0 | 0 | 0 | 44132  | 0.326255968 | 1.89749569 | 4.04050233 | 0.469618759 | 0.63862742 | 0.998252924 |
| chr16:70575571-70582345   | exonic       | SF3B3    | 16 | 70575571  | 70582345  | 1 | 0 | 1 | 0 | 0 | 0 | 6774   | 0.326255968 | 1.89749569 | 4.04050233 | 0.469618759 | 0.63862742 | 0.998252924 |
| chr17:33747292-33750087   | exonic       | SLFN12   | 17 | 33747292  | 33750087  | 1 | 0 | 1 | 0 | 0 | 0 | 2795   | 0.326255968 | 1.89749569 | 4.04050233 | 0.469618759 | 0.63862742 | 0.998252924 |
| chr17:4192524-4200109     | exonic       | UBE2G1   | 17 | 4192524   | 4200109   | 1 | 0 | 1 | 0 | 0 | 0 | 7585   | 0.326255968 | 1.89749569 | 4.04050233 | 0.469618759 | 0.63862742 | 0.998252924 |
| chr17:66426136-66430767   | exonic       | WIPI1    | 17 | 66426136  | 66430767  | 1 | 0 | 1 | 0 | 0 | 0 | 4631   | 0.326255968 | 1.89749569 | 4.04050233 | 0.469618759 | 0.63862742 | 0.998252924 |
| chr18:2738394-2739518     | exonic       | SMCHD1   | 18 | 2738394   | 2739518   | 1 | 0 | 1 | 0 | 0 | 0 | 1124   | 0.326255968 | 1.89749569 | 4.04050233 | 0.469618759 | 0.63862742 | 0.998252924 |
| chr18:67562936-67563281   | exonic       | CD226    | 18 | 67562936  | 67563281  | 1 | 0 | 1 | 0 | 0 | 0 | 345    | 0.326255968 | 1.89749569 | 4.04050233 | 0.469618759 | 0.63862742 | 0.998252924 |
| chr18:74587447-74593468   | exonic       | ZNF236   | 18 | 74587447  | 74593468  | 1 | 0 | 1 | 0 | 0 | 0 | 6021   | 0.326255968 | 1.89749569 | 4.04050233 | 0.469618759 | 0.63862742 | 0.998252924 |
| chr19:49378155-49378791   | exonic       | PPP1R15A | 19 | 49378155  | 49378791  | 1 | 0 | 1 | 0 | 0 | 0 | 636    | 0.326255968 | 1.89749569 | 4.04050233 | 0.469618759 | 0.63862742 | 0.998252924 |
| chr19:7625533-7626203     | exonic       | PNPLA6   | 19 | 7625533   | 7626203   | 1 | 0 | 1 | 0 | 0 | 0 | 670    | 0.326255968 | 1.89749569 | 4.04050233 | 0.469618759 | 0.63862742 | 0.998252924 |
| chr2:128855002-128896426  | exonic       | UGGT1    | 2  | 128855002 | 128896426 | 1 | 0 | 1 | 0 | 0 | 0 | 41424  | 0.326255968 | 1.89749569 | 4.04050233 | 0.469618759 | 0.63862742 | 0.998252924 |
| chr2:144193169-144314054  | exonic       | ARHGAP15 | 2  | 144193169 | 144314054 | 1 | 0 | 1 | 0 | 0 | 0 | 120885 | 0.326255968 | 1.89749569 | 4.04050233 | 0.469618759 | 0.63862742 | 0.998252924 |
| chr2:183866680-183888644  | exonic       | NCKAP1   | 2  | 183866680 | 183888644 | 1 | 0 | 1 | 0 | 0 | 0 | 21964  | 0.326255968 | 1.89749569 | 4.04050233 | 0.469618759 | 0.63862742 | 0.998252924 |
| chr2:202400743-202446940  | exonic       | ALS2CR11 | 2  | 202400743 | 202446940 | 1 | 0 | 1 | 0 | 0 | 0 | 46197  | 0.326255968 | 1.89749569 | 4.04050233 | 0.469618759 | 0.63862742 | 0.998252924 |
| chr2:213914436-213921823  | exonic       | IKZF2    | 2  | 213914436 | 213921823 | 1 | 0 | 1 | 0 | 0 | 0 | 7387   | 0.326255968 | 1.89749569 | 4.04050233 | 0.469618759 | 0.63862742 | 0.998252924 |
| chr2:68729862-68753374    | exonic       | APLF     | 2  | 68729862  | 68753374  | 1 | 0 | 1 | 0 | 0 | 0 | 23512  | 0.326255968 | 1.89749569 | 4.04050233 | 0.469618759 | 0.63862742 | 0.998252924 |

|                           |        |         |    |           |           |   |   |   |   |   |   |        |             |             |             |             |             |             |
|---------------------------|--------|---------|----|-----------|-----------|---|---|---|---|---|---|--------|-------------|-------------|-------------|-------------|-------------|-------------|
| chr2:74531615-74542152    | exonic | SLC4A5  | 2  | 74531615  | 74542152  | 1 | 0 | 1 | 0 | 0 | 0 | 10537  | 0.326255968 | 1.89749569  | 4.04050233  | 0.469618759 | 0.63862742  | 0.998252924 |
| chr2:99938417-99944116    | exonic | TXNDC9  | 2  | 99938417  | 99944116  | 1 | 0 | 1 | 0 | 0 | 0 | 5699   | 0.326255968 | 1.89749569  | 4.04050233  | 0.469618759 | 0.63862742  | 0.998252924 |
| chr20:35467619-35467844   | exonic | SOGA1   | 20 | 35467619  | 35467844  | 1 | 0 | 1 | 0 | 0 | 0 | 225    | 0.326255968 | 1.89749569  | 4.04050233  | 0.469618759 | 0.63862742  | 0.998252924 |
| chr3:7494293-7503409      | exonic | GRM7    | 3  | 7494293   | 7503409   | 1 | 0 | 1 | 0 | 0 | 0 | 9116   | 0.326255968 | 1.89749569  | 4.04050233  | 0.469618759 | 0.63862742  | 0.998252924 |
| chr4:102776191-102791801  | exonic | BANK1   | 4  | 102776191 | 102791801 | 1 | 0 | 1 | 0 | 0 | 0 | 15610  | 0.326255968 | 1.89749569  | 4.04050233  | 0.469618759 | 0.63862742  | 0.998252924 |
| chr4:108614926-108622441  | exonic | PAPSS1  | 4  | 108614926 | 108622441 | 1 | 0 | 1 | 0 | 0 | 0 | 7515   | 0.326255968 | 1.89749569  | 4.04050233  | 0.469618759 | 0.63862742  | 0.998252924 |
| chr4:151656409-151770150  | exonic | LRBA    | 4  | 151656409 | 151770150 | 1 | 0 | 1 | 0 | 0 | 0 | 113741 | 0.326255968 | 1.89749569  | 4.04050233  | 0.469618759 | 0.63862742  | 0.998252924 |
| chr4:169321976-169379159  | exonic | DDX60L  | 4  | 169321976 | 169379159 | 1 | 0 | 1 | 0 | 0 | 0 | 57183  | 0.326255968 | 1.89749569  | 4.04050233  | 0.469618759 | 0.63862742  | 0.998252924 |
| chr4:2659529-2702271      | exonic | FAM193A | 4  | 2659529   | 2702271   | 1 | 0 | 1 | 0 | 0 | 0 | 42742  | 0.326255968 | 1.89749569  | 4.04050233  | 0.469618759 | 0.63862742  | 0.998252924 |
| chr5:112868575-112871495  | exonic | YTHDC2  | 5  | 112868575 | 112871495 | 1 | 0 | 1 | 0 | 0 | 0 | 2920   | 0.326255968 | 1.89749569  | 4.04050233  | 0.469618759 | 0.63862742  | 0.998252924 |
| chr6:101214440-101296583  | exonic | ASCC3   | 6  | 101214440 | 101296583 | 1 | 0 | 1 | 0 | 0 | 0 | 82143  | 0.326255968 | 1.89749569  | 4.04050233  | 0.469618759 | 0.63862742  | 0.998252924 |
| chr6:117861830-117864374  | exonic | DCBLD1  | 6  | 117861830 | 117864374 | 1 | 0 | 1 | 0 | 0 | 0 | 2544   | 0.326255968 | 1.89749569  | 4.04050233  | 0.469618759 | 0.63862742  | 0.998252924 |
| chr6:159026298-159029782  | exonic | TMEM181 | 6  | 159026298 | 159029782 | 1 | 0 | 1 | 0 | 0 | 0 | 3484   | 0.326255968 | 1.89749569  | 4.04050233  | 0.469618759 | 0.63862742  | 0.998252924 |
| chr6:38560351-38565897    | exonic | BTBD9   | 6  | 38560351  | 38565897  | 1 | 0 | 1 | 0 | 0 | 0 | 5546   | 0.326255968 | 1.89749569  | 4.04050233  | 0.469618759 | 0.63862742  | 0.998252924 |
| chr6:86227473-86253478    | exonic | SNX14   | 6  | 86227473  | 86253478  | 1 | 0 | 1 | 0 | 0 | 0 | 26005  | 0.326255968 | 1.89749569  | 4.04050233  | 0.469618759 | 0.63862742  | 0.998252924 |
| chr7:77236551-77247882    | exonic | PTPN12  | 7  | 77236551  | 77247882  | 1 | 0 | 1 | 0 | 0 | 0 | 11331  | 0.326255968 | 1.89749569  | 4.04050233  | 0.469618759 | 0.63862742  | 0.998252924 |
| chr7:77549595-77552095    | exonic | PHTF2   | 7  | 77549595  | 77552095  | 1 | 0 | 1 | 0 | 0 | 0 | 2500   | 0.326255968 | 1.89749569  | 4.04050233  | 0.469618759 | 0.63862742  | 0.998252924 |
| chr7:92881965-92963509    | exonic | VPS50   | 7  | 92881965  | 92963509  | 1 | 0 | 1 | 0 | 0 | 0 | 81544  | 0.326255968 | 1.89749569  | 4.04050233  | 0.469618759 | 0.63862742  | 0.998252924 |
| chr8:23291829-23297428    | exonic | ENTPD4  | 8  | 23291829  | 23297428  | 1 | 0 | 1 | 0 | 0 | 0 | 5599   | 0.326255968 | 1.89749569  | 4.04050233  | 0.469618759 | 0.63862742  | 0.998252924 |
| chr8:29927157-29927575    | exonic | SARAF   | 8  | 29927157  | 29927575  | 1 | 0 | 1 | 0 | 0 | 0 | 418    | 0.326255968 | 1.89749569  | 4.04050233  | 0.469618759 | 0.63862742  | 0.998252924 |
| chr8:98725889-98735263    | exonic | MTDH    | 8  | 98725889  | 98735263  | 1 | 0 | 1 | 0 | 0 | 0 | 9374   | 0.326255968 | 1.89749569  | 4.04050233  | 0.469618759 | 0.63862742  | 0.998252924 |
| chr9:118969734-118997916  | exonic | PAPPA   | 9  | 118969734 | 118997916 | 1 | 0 | 1 | 0 | 0 | 0 | 28182  | 0.326255968 | 1.89749569  | 4.04050233  | 0.469618759 | 0.63862742  | 0.998252924 |
| chr9:130980509-130981531  | exonic | DNM1    | 9  | 130980509 | 130981531 | 1 | 0 | 1 | 0 | 0 | 0 | 1022   | 0.326255968 | 1.89749569  | 4.04050233  | 0.469618759 | 0.63862742  | 0.998252924 |
| chr9:135782117-135782757  | exonic | TSC1    | 9  | 135782117 | 135782757 | 1 | 0 | 1 | 0 | 0 | 0 | 640    | 0.326255968 | 1.89749569  | 4.04050233  | 0.469618759 | 0.63862742  | 0.998252924 |
| chr9:20819794-20874806    | exonic | FOCAD   | 9  | 20819794  | 20874806  | 1 | 0 | 1 | 0 | 0 | 0 | 55012  | 0.326255968 | 1.89749569  | 4.04050233  | 0.469618759 | 0.63862742  | 0.998252924 |
| chr10:74906033-74923708   | exonic | ECD     | 10 | 74906033  | 74923708  | 5 | 2 | 0 | 2 | 0 | 0 | 17675  | 1.206109082 | 1.902685211 | 2.584449774 | 0.736205141 | 0.461605864 | 0.998252924 |
| chr1:87181406-87188356    | exonic | SH3GLB1 | 1  | 87181406  | 87188356  | 2 | 7 | 0 | 1 | 2 | 0 | 6950   | 1.826270708 | 1.903870757 | 2.120454799 | 0.897859628 | 0.36926039  | 0.998252924 |
| chr12:19511161-19519043   | exonic | PLEKHA5 | 12 | 19511161  | 19519043  | 2 | 0 | 2 | 0 | 1 | 0 | 7882   | 0.773539358 | 1.905635731 | 3.063094992 | 0.622127533 | 0.533858012 | 0.998252924 |
| chr4:128584535-128609022  | exonic | INTU    | 4  | 128584535 | 128609022 | 2 | 0 | 2 | 0 | 1 | 0 | 24487  | 0.773539358 | 1.905635731 | 3.063094992 | 0.622127533 | 0.533858012 | 0.998252924 |
| chr5:76745584-76785397    | exonic | WDR41   | 5  | 76745584  | 76785397  | 2 | 0 | 2 | 0 | 1 | 0 | 39813  | 0.773539358 | 1.905635731 | 3.063094992 | 0.622127533 | 0.533858012 | 0.998252924 |
| chr14:64465631-64483349   | exonic | SYNE2   | 14 | 64465631  | 64483349  | 2 | 0 | 2 | 0 | 0 | 1 | 17718  | 0.960730545 | 1.906814389 | 2.893611297 | 0.658973923 | NA          | NA          |
| chr15:86225388-86236682   | exonic | AKAP13  | 15 | 86225388  | 86236682  | 2 | 0 | 2 | 0 | 0 | 1 | 11294  | 0.960730545 | 1.906814389 | 2.893611297 | 0.658973923 | NA          | NA          |
| chr2:120634898-120672818  | exonic | PTPN4   | 2  | 120634898 | 120672818 | 2 | 0 | 2 | 0 | 0 | 1 | 37920  | 0.960730545 | 1.906814389 | 2.893611297 | 0.658973923 | NA          | NA          |
| chr12:110922882-110925748 | exonic | FAM216A | 12 | 110922882 | 110925748 | 1 | 3 | 0 | 0 | 1 | 0 | 2866   | 0.772841762 | 1.90859941  | 3.083552563 | 0.618961205 | 0.535941916 | 0.998252924 |
| chr4:83791477-83803093    | exonic | SEC31A  | 4  | 83791477  | 83803093  | 1 | 3 | 0 | 0 | 1 | 0 | 11616  | 0.772841762 | 1.90859941  | 3.083552563 | 0.618961205 | 0.535941916 | 0.998252924 |



|                           |          |                     |    |           |           |    |    |   |    |    |   |       |             |             |             |             |             |             |
|---------------------------|----------|---------------------|----|-----------|-----------|----|----|---|----|----|---|-------|-------------|-------------|-------------|-------------|-------------|-------------|
| chr10:70404454-70412351   | exonic   | TET1                | 10 | 70404454  | 70412351  | 1  | 3  | 0 | 0  | 0  | 1 | 7897  | 0.960032949 | 1.910287666 | 2.913784157 | 0.655603697 | NA          | NA          |
| chr14:92592465-92609638   | exonic   | CPSF2               | 14 | 92592465  | 92609638  | 1  | 3  | 0 | 0  | 0  | 1 | 17173 | 0.960032949 | 1.910287666 | 2.913784157 | 0.655603697 | NA          | NA          |
| chr3:155267575-155286113  | exonic   | PLCH1               | 3  | 155267575 | 155286113 | 1  | 3  | 0 | 0  | 0  | 1 | 18538 | 0.960032949 | 1.910287666 | 2.913784157 | 0.655603697 | NA          | NA          |
| chr1:10209241-10211619    | exonic   | UBE4B               | 1  | 10209241  | 10211619  | 3  | 3  | 2 | 0  | 1  | 1 | 2378  | 1.733572307 | 1.914673183 | 2.012726177 | 0.95128349  | 0.341460485 | 0.998252924 |
| chrX:128687213-128688423  | intronic | OCRL                | X  | 128687213 | 128688423 | 5  | 4  | 3 | 2  | 2  | 0 | 1210  | 2.388522601 | 1.915070133 | 1.707417119 | 1.12161821  | 0.262024806 | 0.998252924 |
| chr2:36623756-36706837    | exonic   | CRIM1               | 2  | 36623756  | 36706837  | 8  | 2  | 0 | 3  | 0  | 0 | 83081 | 1.699381296 | 1.917336202 | 2.305831407 | 0.831516214 | 0.405682072 | 0.998252924 |
| chr16:69820898-69833198   | exonic   | WWP2                | 16 | 69820898  | 69833198  | 0  | 3  | 3 | 0  | 2  | 0 | 12300 | 1.356689317 | 1.918728472 | 2.502931353 | 0.766592527 | NA          | NA          |
| chr17:30266357-30266637   | intronic | SUZ12               | 17 | 30266357  | 30266637  | 0  | 3  | 3 | 0  | 2  | 0 | 280   | 1.356689317 | 1.918728472 | 2.502931353 | 0.766592527 | NA          | NA          |
| chr10:117849251-117856275 | exonic   | GFRA1               | 10 | 117849251 | 117856275 | 5  | 0  | 0 | 0  | 1  | 0 | 7024  | 0.765962136 | 1.922717297 | 3.360258798 | 0.572193218 | NA          | NA          |
| chrX:19983162-19988416    | exonic   | CXorf23             | X  | 19983162  | 19988416  | 3  | 6  | 5 | 3  | 2  | 0 | 5254  | 2.979949749 | 1.923462055 | 1.581071274 | 1.216556197 | 0.223773117 | 0.998252924 |
| chr9:112898406-112900819  | exonic   | AKAP2, PALM2-AKAP2  | 9  | 112898406 | 112900819 | 0  | 7  | 1 | 3  | 0  | 0 | 2413  | 1.736133774 | 1.924219201 | 2.347042244 | 0.819848559 | NA          | NA          |
| chr3:110830876-110845182  | exonic   | PVRL3               | 3  | 110830876 | 110845182 | 1  | 3  | 4 | 3  | 0  | 0 | 14306 | 1.759824598 | 1.924929072 | 2.119566696 | 0.908171031 | 0.363787867 | 0.998252924 |
| chr6:73005640-73043538    | exonic   | RIMS1               | 6  | 73005640  | 73043538  | 29 | 48 | 7 | 12 | 17 | 0 | 37898 | 16.81994567 | 1.925700789 | 0.976546045 | 1.971950835 | 0.048615219 | 0.998252924 |
| chr7:20193815-20201493    | exonic   | MACC1               | 7  | 20193815  | 20201493  | 5  | 6  | 1 | 3  | 1  | 0 | 7678  | 2.327820111 | 1.927138737 | 1.789330557 | 1.077016614 | 0.281472843 | 0.998252924 |
| chr2:113258782-113260758  | exonic   | TTL                 | 2  | 113258782 | 113260758 | 4  | 0  | 3 | 0  | 2  | 0 | 1976  | 1.349809691 | 1.930743179 | 2.489336947 | 0.7756054   | 0.437982011 | 0.998252924 |
| chr7:139754461-139757834  | exonic   | PARP12              | 7  | 139754461 | 139757834 | 7  | 0  | 1 | 0  | 2  | 0 | 3373  | 1.342232469 | 1.943745716 | 2.5334018   | 0.76724731  | 0.442934489 | 0.998252924 |
| chr22:38208893-38209616   | exonic   | GCAT                | 22 | 38208893  | 38209616  | 5  | 3  | 2 | 0  | 3  | 0 | 723   | 1.925382428 | 1.947446666 | 2.012509115 | 0.96767098  | NA          | NA          |
| chr18:6213147-6312055     | exonic   | L3MBTL4             | 18 | 6213147   | 6312055   | 2  | 0  | 2 | 1  | 0  | 0 | 98908 | 0.758823322 | 1.953897222 | 3.08581883  | 0.633185981 | 0.5266122   | 0.998252924 |
| chr16:28177828-28181230   | exonic   | XPO6                | 16 | 28177828  | 28181230  | 3  | 2  | 2 | 0  | 2  | 0 | 3402  | 1.372105321 | 1.95575452  | 2.275966828 | 0.859307129 | 0.390171092 | 0.998252924 |
| chr15:41961025-42005694   | exonic   | MGA                 | 15 | 41961025  | 42005694  | 1  | 3  | 0 | 1  | 0  | 0 | 44669 | 0.758125725 | 1.957042812 | 3.106246664 | 0.63003458  | 0.52867196  | 0.998252924 |
| chr4:186168447-186209236  | exonic   | SNX25               | 4  | 186168447 | 186209236 | 1  | 3  | 0 | 1  | 0  | 0 | 40789 | 0.758125725 | 1.957042812 | 3.106246664 | 0.63003458  | 0.52867196  | 0.998252924 |
| chr7:137330217-137374748  | exonic   | DGKI                | 7  | 137330217 | 137374748 | 1  | 3  | 0 | 1  | 0  | 0 | 44531 | 0.758125725 | 1.957042812 | 3.106246664 | 0.63003458  | 0.52867196  | 0.998252924 |
| chr8:72964774-72988862    | exonic   | TRPA1               | 8  | 72964774  | 72988862  | 4  | 3  | 0 | 2  | 0  | 0 | 24088 | 1.251397939 | 1.958933001 | 2.544961617 | 0.76972988  | 0.441460141 | 0.998252924 |
| chr1:246790658-246791569  | intronic | CNST                | 1  | 246790658 | 246791569 | 8  | 0  | 0 | 2  | 0  | 0 | 911   | 1.244518313 | 1.971576051 | 2.818857005 | 0.699423932 | NA          | NA          |
| chr5:619104-620376        | exonic   | CEP72               | 5  | 619104    | 620376    | 2  | 4  | 1 | 0  | 2  | 0 | 1272  | 1.394400951 | 1.982436323 | 2.29585395  | 0.863485381 | 0.387870654 | 0.998252924 |
| chr1:100459092-100480976  | exonic   | SLC35A3             | 1  | 100459092 | 100480976 | 0  | 2  | 0 | 0  | 0  | 0 | 21884 | 0.348551598 | 1.987763182 | 4.032542752 | 0.492930467 | 0.622061719 | 0.998252924 |
| chr1:100515464-100544104  | exonic   | MFS14A              | 1  | 100515464 | 100544104 | 0  | 2  | 0 | 0  | 0  | 0 | 28640 | 0.348551598 | 1.987763182 | 4.032542752 | 0.492930467 | 0.622061719 | 0.998252924 |
| chr1:100901689-100908552  | exonic   | CDC14A              | 1  | 100901689 | 100908552 | 0  | 2  | 0 | 0  | 0  | 0 | 6863  | 0.348551598 | 1.987763182 | 4.032542752 | 0.492930467 | 0.622061719 | 0.998252924 |
| chr1:10204997-10221344    | exonic   | UBE4B               | 1  | 10204997  | 10221344  | 0  | 2  | 0 | 0  | 0  | 0 | 16347 | 0.348551598 | 1.987763182 | 4.032542752 | 0.492930467 | 0.622061719 | 0.998252924 |
| chr1:10493898-10502498    | exonic   | APITD1, APITD1-CORT | 1  | 10493898  | 10502498  | 0  | 2  | 0 | 0  | 0  | 0 | 8600  | 0.348551598 | 1.987763182 | 4.032542752 | 0.492930467 | 0.622061719 | 0.998252924 |
| chr1:110121825-110129504  | exonic   | GNAI3               | 1  | 110121825 | 110129504 | 0  | 2  | 0 | 0  | 0  | 0 | 7679  | 0.348551598 | 1.987763182 | 4.032542752 | 0.492930467 | 0.622061719 | 0.998252924 |
| chr1:11088187-11088865    | intronic | MASP2               | 1  | 11088187  | 11088865  | 0  | 2  | 0 | 0  | 0  | 0 | 678   | 0.348551598 | 1.987763182 | 4.032542752 | 0.492930467 | 0.622061719 | 0.998252924 |
| chr1:11130956-11137005    | exonic   | EXOSC10             | 1  | 11130956  | 11137005  | 0  | 2  | 0 | 0  | 0  | 0 | 6049  | 0.348551598 | 1.987763182 | 4.032542752 | 0.492930467 | 0.622061719 | 0.998252924 |
| chr1:114316606-114317728  | intronic | RSBN1               | 1  | 114316606 | 114317728 | 0  | 2  | 0 | 0  | 0  | 0 | 1122  | 0.348551598 | 1.987763182 | 4.032542752 | 0.492930467 | 0.622061719 | 0.998252924 |
| chr1:121115831-121116815  | exonic   | SRGAP2B             | 1  | 121115831 | 121116815 | 0  | 2  | 0 | 0  | 0  | 0 | 984   | 0.348551598 | 1.987763182 | 4.032542752 | 0.492930467 | 0.622061719 | 0.998252924 |

|                          |                |             |   |           |           |   |   |   |   |   |   |        |             |             |             |             |             |             |
|--------------------------|----------------|-------------|---|-----------|-----------|---|---|---|---|---|---|--------|-------------|-------------|-------------|-------------|-------------|-------------|
| chr1:145597514-145601622 | exonic         | POLR3C      | 1 | 145597514 | 145601622 | 0 | 2 | 0 | 0 | 0 | 0 | 4108   | 0.348551598 | 1.987763182 | 4.032542752 | 0.492930467 | 0.622061719 | 0.998252924 |
| chr1:151134211-151134576 | exonic         | LYSDM1      | 1 | 151134211 | 151134576 | 0 | 2 | 0 | 0 | 0 | 0 | 365    | 0.348551598 | 1.987763182 | 4.032542752 | 0.492930467 | 0.622061719 | 0.998252924 |
| chr1:154197559-154218851 | exonic         | UBAP2L      | 1 | 154197559 | 154218851 | 0 | 2 | 0 | 0 | 0 | 0 | 21292  | 0.348551598 | 1.987763182 | 4.032542752 | 0.492930467 | 0.622061719 | 0.998252924 |
| chr1:155324263-155327540 | exonic         | ASH1L       | 1 | 155324263 | 155327540 | 0 | 2 | 0 | 0 | 0 | 0 | 3277   | 0.348551598 | 1.987763182 | 4.032542752 | 0.492930467 | 0.622061719 | 0.998252924 |
| chr1:159888628-159890327 | exonic         | TAGLN2      | 1 | 159888628 | 159890327 | 0 | 2 | 0 | 0 | 0 | 0 | 1699   | 0.348551598 | 1.987763182 | 4.032542752 | 0.492930467 | 0.622061719 | 0.998252924 |
| chr1:16235815-16237796   | exonic         | SPEN        | 1 | 16235815  | 16237796  | 0 | 2 | 0 | 0 | 0 | 0 | 1981   | 0.348551598 | 1.987763182 | 4.032542752 | 0.492930467 | 0.622061719 | 0.998252924 |
| chr1:168260397-168278115 | exonic         | TBX19       | 1 | 168260397 | 168278115 | 0 | 2 | 0 | 0 | 0 | 0 | 17718  | 0.348551598 | 1.987763182 | 4.032542752 | 0.492930467 | 0.622061719 | 0.998252924 |
| chr1:169836036-169847960 | exonic         | SCYL3       | 1 | 169836036 | 169847960 | 0 | 2 | 0 | 0 | 0 | 0 | 11924  | 0.348551598 | 1.987763182 | 4.032542752 | 0.492930467 | 0.622061719 | 0.998252924 |
| chr1:171504566-171506612 | exonic         | PRRC2C      | 1 | 171504566 | 171506612 | 0 | 2 | 0 | 0 | 0 | 0 | 2046   | 0.348551598 | 1.987763182 | 4.032542752 | 0.492930467 | 0.622061719 | 0.998252924 |
| chr1:17349102-17350569   | exonic         | SDHB        | 1 | 17349102  | 17350569  | 0 | 2 | 0 | 0 | 0 | 0 | 1467   | 0.348551598 | 1.987763182 | 4.032542752 | 0.492930467 | 0.622061719 | 0.998252924 |
| chr1:1735857-1770677     | exonic         | GNB1        | 1 | 1735857   | 1770677   | 0 | 2 | 0 | 0 | 0 | 0 | 34820  | 0.348551598 | 1.987763182 | 4.032542752 | 0.492930467 | 0.622061719 | 0.998252924 |
| chr1:179306971-179310445 | exonic         | SOAT1       | 1 | 179306971 | 179310445 | 0 | 2 | 0 | 0 | 0 | 0 | 3474   | 0.348551598 | 1.987763182 | 4.032542752 | 0.492930467 | 0.622061719 | 0.998252924 |
| chr1:179955303-179966310 | exonic         | CEP350      | 1 | 179955303 | 179966310 | 0 | 2 | 0 | 0 | 0 | 0 | 11007  | 0.348551598 | 1.987763182 | 4.032542752 | 0.492930467 | 0.622061719 | 0.998252924 |
| chr1:180971742-180974599 | exonic         | STX6        | 1 | 180971742 | 180974599 | 0 | 2 | 0 | 0 | 0 | 0 | 2857   | 0.348551598 | 1.987763182 | 4.032542752 | 0.492930467 | 0.622061719 | 0.998252924 |
| chr1:183083665-183102685 | exonic         | LAMC1       | 1 | 183083665 | 183102685 | 0 | 2 | 0 | 0 | 0 | 0 | 19020  | 0.348551598 | 1.987763182 | 4.032542752 | 0.492930467 | 0.622061719 | 0.998252924 |
| chr1:185947012-185950134 | exonic         | HMCN1       | 1 | 185947012 | 185950134 | 0 | 2 | 0 | 0 | 0 | 0 | 3122   | 0.348551598 | 1.987763182 | 4.032542752 | 0.492930467 | 0.622061719 | 0.998252924 |
| chr1:186295236-186296621 | exonic         | TPR         | 1 | 186295236 | 186296621 | 0 | 2 | 0 | 0 | 0 | 0 | 1385   | 0.348551598 | 1.987763182 | 4.032542752 | 0.492930467 | 0.622061719 | 0.998252924 |
| chr1:202724398-202729701 | exonic         | KDM5B       | 1 | 202724398 | 202729701 | 0 | 2 | 0 | 0 | 0 | 0 | 5303   | 0.348551598 | 1.987763182 | 4.032542752 | 0.492930467 | 0.622061719 | 0.998252924 |
| chr1:205585606-205589966 | exonic         | ELK4        | 1 | 205585606 | 205589966 | 0 | 2 | 0 | 0 | 0 | 0 | 4360   | 0.348551598 | 1.987763182 | 4.032542752 | 0.492930467 | 0.622061719 | 0.998252924 |
| chr1:206616963-206617295 | intronic       | SRGAP2      | 1 | 206616963 | 206617295 | 0 | 2 | 0 | 0 | 0 | 0 | 332    | 0.348551598 | 1.987763182 | 4.032542752 | 0.492930467 | 0.622061719 | 0.998252924 |
| chr1:206658333-206666452 | exonic         | IKBKE       | 1 | 206658333 | 206666452 | 0 | 2 | 0 | 0 | 0 | 0 | 8119   | 0.348551598 | 1.987763182 | 4.032542752 | 0.492930467 | 0.622061719 | 0.998252924 |
| chr1:21091869-21103243   | exonic         | HP1BP3      | 1 | 21091869  | 21103243  | 0 | 2 | 0 | 0 | 0 | 0 | 11374  | 0.348551598 | 1.987763182 | 4.032542752 | 0.492930467 | 0.622061719 | 0.998252924 |
| chr1:224481968-224491559 | exonic         | NVL         | 1 | 224481968 | 224491559 | 0 | 2 | 0 | 0 | 0 | 0 | 9591   | 0.348551598 | 1.987763182 | 4.032542752 | 0.492930467 | 0.622061719 | 0.998252924 |
| chr1:225226395-225347187 | exonic         | DNAH14      | 1 | 225226395 | 225347187 | 0 | 2 | 0 | 0 | 0 | 0 | 120792 | 0.348551598 | 1.987763182 | 4.032542752 | 0.492930467 | 0.622061719 | 0.998252924 |
| chr1:227935392-227935934 | exonic         | SNAP47      | 1 | 227935392 | 227935934 | 0 | 2 | 0 | 0 | 0 | 0 | 542    | 0.348551598 | 1.987763182 | 4.032542752 | 0.492930467 | 0.622061719 | 0.998252924 |
| chr1:231667726-231668939 | ncRNA_intronic | TSNAX-DISC1 | 1 | 231667726 | 231668939 | 0 | 2 | 0 | 0 | 0 | 0 | 1213   | 0.348551598 | 1.987763182 | 4.032542752 | 0.492930467 | 0.622061719 | 0.998252924 |
| chr1:233190013-233231609 | exonic         | PCNXL2      | 1 | 233190013 | 233231609 | 0 | 2 | 0 | 0 | 0 | 0 | 41596  | 0.348551598 | 1.987763182 | 4.032542752 | 0.492930467 | 0.622061719 | 0.998252924 |
| chr1:235643369-235658138 | exonic         | B3GALNT2    | 1 | 235643369 | 235658138 | 0 | 2 | 0 | 0 | 0 | 0 | 14769  | 0.348551598 | 1.987763182 | 4.032542752 | 0.492930467 | 0.622061719 | 0.998252924 |
| chr1:235963619-235976361 | exonic         | LYST        | 1 | 235963619 | 235976361 | 0 | 2 | 0 | 0 | 0 | 0 | 12742  | 0.348551598 | 1.987763182 | 4.032542752 | 0.492930467 | 0.622061719 | 0.998252924 |
| chr1:243433394-243471479 | exonic         | SDCCAG8     | 1 | 243433394 | 243471479 | 0 | 2 | 0 | 0 | 0 | 0 | 38085  | 0.348551598 | 1.987763182 | 4.032542752 | 0.492930467 | 0.622061719 | 0.998252924 |
| chr1:29063659-29064169   | exonic         | YTHDF2      | 1 | 29063659  | 29064169  | 0 | 2 | 0 | 0 | 0 | 0 | 510    | 0.348551598 | 1.987763182 | 4.032542752 | 0.492930467 | 0.622061719 | 0.998252924 |
| chr1:31418192-31423108   | exonic         | PUM1        | 1 | 31418192  | 31423108  | 0 | 2 | 0 | 0 | 0 | 0 | 4916   | 0.348551598 | 1.987763182 | 4.032542752 | 0.492930467 | 0.622061719 | 0.998252924 |
| chr1:35650329-35652601   | splicing       | SFPQ        | 1 | 35650329  | 35652601  | 0 | 2 | 0 | 0 | 0 | 0 | 2272   | 0.348551598 | 1.987763182 | 4.032542752 | 0.492930467 | 0.622061719 | 0.998252924 |
| chr1:36740799-36743455   | intronic       | THRAP3      | 1 | 36740799  | 36743455  | 0 | 2 | 0 | 0 | 0 | 0 | 2656   | 0.348551598 | 1.987763182 | 4.032542752 | 0.492930467 | 0.622061719 | 0.998252924 |
| chr1:39459640-39461861   | intronic       | AKIRIN1     | 1 | 39459640  | 39461861  | 0 | 2 | 0 | 0 | 0 | 0 | 2221   | 0.348551598 | 1.987763182 | 4.032542752 | 0.492930467 | 0.622061719 | 0.998252924 |

|                           |              |                                                    |    |           |           |   |   |   |   |   |   |        |             |             |             |             |             |             |
|---------------------------|--------------|----------------------------------------------------|----|-----------|-----------|---|---|---|---|---|---|--------|-------------|-------------|-------------|-------------|-------------|-------------|
| chr1:39851105-39854330    | exonic       | MACF1                                              | 1  | 39851105  | 39854330  | 0 | 2 | 0 | 0 | 0 | 0 | 3225   | 0.348551598 | 1.987763182 | 4.032542752 | 0.492930467 | 0.622061719 | 0.998252924 |
| chr1:42654407-42776781    | exonic       | FOXJ3                                              | 1  | 42654407  | 42776781  | 0 | 2 | 0 | 0 | 0 | 0 | 122374 | 0.348551598 | 1.987763182 | 4.032542752 | 0.492930467 | 0.622061719 | 0.998252924 |
| chr1:45325253-45325538    | intronic     | EIF2B3                                             | 1  | 45325253  | 45325538  | 0 | 2 | 0 | 0 | 0 | 0 | 285    | 0.348551598 | 1.987763182 | 4.032542752 | 0.492930467 | 0.622061719 | 0.998252924 |
| chr1:45347283-45363116    | exonic       | EIF2B3                                             | 1  | 45347283  | 45363116  | 0 | 2 | 0 | 0 | 0 | 0 | 15833  | 0.348551598 | 1.987763182 | 4.032542752 | 0.492930467 | 0.622061719 | 0.998252924 |
| chr1:48860938-48878823    | exonic       | SPATA6                                             | 1  | 48860938  | 48878823  | 0 | 2 | 0 | 0 | 0 | 0 | 17885  | 0.348551598 | 1.987763182 | 4.032542752 | 0.492930467 | 0.622061719 | 0.998252924 |
| chr1:51204534-51267349    | exonic       | FAF1                                               | 1  | 51204534  | 51267349  | 0 | 2 | 0 | 0 | 0 | 0 | 62815  | 0.348551598 | 1.987763182 | 4.032542752 | 0.492930467 | 0.622061719 | 0.998252924 |
| chr1:52269485-52299842    | exonic       | NRDC                                               | 1  | 52269485  | 52299842  | 0 | 2 | 0 | 0 | 0 | 0 | 30357  | 0.348551598 | 1.987763182 | 4.032542752 | 0.492930467 | 0.622061719 | 0.998252924 |
| chr1:52279707-52287227    | exonic       | NRDC                                               | 1  | 52279707  | 52287227  | 0 | 2 | 0 | 0 | 0 | 0 | 7520   | 0.348551598 | 1.987763182 | 4.032542752 | 0.492930467 | 0.622061719 | 0.998252924 |
| chr1:52881058-52882312    | exonic       | PRPF38A                                            | 1  | 52881058  | 52882312  | 0 | 2 | 0 | 0 | 0 | 0 | 1254   | 0.348551598 | 1.987763182 | 4.032542752 | 0.492930467 | 0.622061719 | 0.998252924 |
| chr1:54518673-54518926    | exonic       | TMEM59                                             | 1  | 54518673  | 54518926  | 0 | 2 | 0 | 0 | 0 | 0 | 253    | 0.348551598 | 1.987763182 | 4.032542752 | 0.492930467 | 0.622061719 | 0.998252924 |
| chr1:62293093-62330305    | exonic       | INADL                                              | 1  | 62293093  | 62330305  | 0 | 2 | 0 | 0 | 0 | 0 | 37212  | 0.348551598 | 1.987763182 | 4.032542752 | 0.492930467 | 0.622061719 | 0.998252924 |
| chr1:62667902-62669142    | UTR5         | L1TD1 (NM_001164835:c.-3182_-3159delins0)          | 1  | 62667902  | 62669142  | 0 | 2 | 0 | 0 | 0 | 0 | 1240   | 0.348551598 | 1.987763182 | 4.032542752 | 0.492930467 | 0.622061719 | 0.998252924 |
| chr1:668687-848426        | ncRNA_exonic | FAM41C, FAM87B, LINC00115, LINC01128, LOC100288069 | 1  | 668687    | 848426    | 0 | 2 | 0 | 0 | 0 | 0 | 179739 | 0.348551598 | 1.987763182 | 4.032542752 | 0.492930467 | 0.622061719 | 0.998252924 |
| chr1:85121514-85136991    | exonic       | SSX2IP                                             | 1  | 85121514  | 85136991  | 0 | 2 | 0 | 0 | 0 | 0 | 15477  | 0.348551598 | 1.987763182 | 4.032542752 | 0.492930467 | 0.622061719 | 0.998252924 |
| chr1:8684368-8716500      | exonic       | RERE                                               | 1  | 8684368   | 8716500   | 0 | 2 | 0 | 0 | 0 | 0 | 32132  | 0.348551598 | 1.987763182 | 4.032542752 | 0.492930467 | 0.622061719 | 0.998252924 |
| chr1:87185190-87190088    | exonic       | SH3GLB1                                            | 1  | 87185190  | 87190088  | 0 | 2 | 0 | 0 | 0 | 0 | 4898   | 0.348551598 | 1.987763182 | 4.032542752 | 0.492930467 | 0.622061719 | 0.998252924 |
| chr1:91840914-91851391    | exonic       | HFM1                                               | 1  | 91840914  | 91851391  | 0 | 2 | 0 | 0 | 0 | 0 | 10477  | 0.348551598 | 1.987763182 | 4.032542752 | 0.492930467 | 0.622061719 | 0.998252924 |
| chr1:93131495-93170301    | exonic       | EVI5                                               | 1  | 93131495  | 93170301  | 0 | 2 | 0 | 0 | 0 | 0 | 38806  | 0.348551598 | 1.987763182 | 4.032542752 | 0.492930467 | 0.622061719 | 0.998252924 |
| chr1:93575786-93576183    | exonic       | MTF2                                               | 1  | 93575786  | 93576183  | 0 | 2 | 0 | 0 | 0 | 0 | 397    | 0.348551598 | 1.987763182 | 4.032542752 | 0.492930467 | 0.622061719 | 0.998252924 |
| chr1:94360169-94367225    | exonic       | GCLM                                               | 1  | 94360169  | 94367225  | 0 | 2 | 0 | 0 | 0 | 0 | 7056   | 0.348551598 | 1.987763182 | 4.032542752 | 0.492930467 | 0.622061719 | 0.998252924 |
| chr1:98144650-98206035    | exonic       | DPYD                                               | 1  | 98144650  | 98206035  | 0 | 2 | 0 | 0 | 0 | 0 | 61385  | 0.348551598 | 1.987763182 | 4.032542752 | 0.492930467 | 0.622061719 | 0.998252924 |
| chr10:101676143-101700751 | ncRNA_exonic | DNMBP-AS1                                          | 10 | 101676143 | 101700751 | 0 | 2 | 0 | 0 | 0 | 0 | 24608  | 0.348551598 | 1.987763182 | 4.032542752 | 0.492930467 | 0.622061719 | 0.998252924 |
| chr10:1118055-1126416     | exonic       | WDR37                                              | 10 | 1118055   | 1126416   | 0 | 2 | 0 | 0 | 0 | 0 | 8361   | 0.348551598 | 1.987763182 | 4.032542752 | 0.492930467 | 0.622061719 | 0.998252924 |
| chr10:116879948-117027921 | exonic       | ATRNL1                                             | 10 | 116879948 | 117027921 | 0 | 2 | 0 | 0 | 0 | 0 | 147973 | 0.348551598 | 1.987763182 | 4.032542752 | 0.492930467 | 0.622061719 | 0.998252924 |
| chr10:118031536-118031775 | exonic       | GFRA1                                              | 10 | 118031536 | 118031775 | 0 | 2 | 0 | 0 | 0 | 0 | 239    | 0.348551598 | 1.987763182 | 4.032542752 | 0.492930467 | 0.622061719 | 0.998252924 |
| chr10:12130984-12136270   | exonic       | DHTKD1                                             | 10 | 12130984  | 12136270  | 0 | 2 | 0 | 0 | 0 | 0 | 5286   | 0.348551598 | 1.987763182 | 4.032542752 | 0.492930467 | 0.622061719 | 0.998252924 |
| chr10:126172707-126205840 | exonic       | LHPP                                               | 10 | 126172707 | 126205840 | 0 | 2 | 0 | 0 | 0 | 0 | 33133  | 0.348551598 | 1.987763182 | 4.032542752 | 0.492930467 | 0.622061719 | 0.998252924 |
| chr10:12802946-12811798   | exonic       | CAMK1D                                             | 10 | 12802946  | 12811798  | 0 | 2 | 0 | 0 | 0 | 0 | 8852   | 0.348551598 | 1.987763182 | 4.032542752 | 0.492930467 | 0.622061719 | 0.998252924 |
| chr10:131334505-131336707 | exonic       | MGMT                                               | 10 | 131334505 | 131336707 | 0 | 2 | 0 | 0 | 0 | 0 | 2202   | 0.348551598 | 1.987763182 | 4.032542752 | 0.492930467 | 0.622061719 | 0.998252924 |
| chr10:13336427-13337606   | exonic       | PHYH                                               | 10 | 13336427  | 13337606  | 0 | 2 | 0 | 0 | 0 | 0 | 1179   | 0.348551598 | 1.987763182 | 4.032542752 | 0.492930467 | 0.622061719 | 0.998252924 |
| chr10:13840640-13841267   | intronic     | FRMD4A                                             | 10 | 13840640  | 13841267  | 0 | 2 | 0 | 0 | 0 | 0 | 627    | 0.348551598 | 1.987763182 | 4.032542752 | 0.492930467 | 0.622061719 | 0.998252924 |
| chr10:21148642-21188379   | exonic       | NEBL                                               | 10 | 21148642  | 21188379  | 0 | 2 | 0 | 0 | 0 | 0 | 39737  | 0.348551598 | 1.987763182 | 4.032542752 | 0.492930467 | 0.622061719 | 0.998252924 |
| chr10:32309949-32326535   | exonic       | KIF5B                                              | 10 | 32309949  | 32326535  | 0 | 2 | 0 | 0 | 0 | 0 | 16586  | 0.348551598 | 1.987763182 | 4.032542752 | 0.492930467 | 0.622061719 | 0.998252924 |
| chr10:34688257-34759191   | exonic       | PARD3                                              | 10 | 34688257  | 34759191  | 0 | 2 | 0 | 0 | 0 | 0 | 70934  | 0.348551598 | 1.987763182 | 4.032542752 | 0.492930467 | 0.622061719 | 0.998252924 |
| chr10:43659313-43671480   | exonic       | CSGALNACT2                                         | 10 | 43659313  | 43671480  | 0 | 2 | 0 | 0 | 0 | 0 | 12167  | 0.348551598 | 1.987763182 | 4.032542752 | 0.492930467 | 0.622061719 | 0.998252924 |

|                           |              |         |    |           |           |   |   |   |   |   |   |        |             |             |             |             |             |             |
|---------------------------|--------------|---------|----|-----------|-----------|---|---|---|---|---|---|--------|-------------|-------------|-------------|-------------|-------------|-------------|
| chr10:64990055-65127116   | exonic       | JMJD1C  | 10 | 64990055  | 65127116  | 0 | 2 | 0 | 0 | 0 | 0 | 137061 | 0.348551598 | 1.987763182 | 4.032542752 | 0.492930467 | 0.622061719 | 0.998252924 |
| chr10:70115110-70123870   | exonic       | RUFY2   | 10 | 70115110  | 70123870  | 0 | 2 | 0 | 0 | 0 | 0 | 8760   | 0.348551598 | 1.987763182 | 4.032542752 | 0.492930467 | 0.622061719 | 0.998252924 |
| chr10:70496632-70532856   | exonic       | CCAR1   | 10 | 70496632  | 70532856  | 0 | 2 | 0 | 0 | 0 | 0 | 36224  | 0.348551598 | 1.987763182 | 4.032542752 | 0.492930467 | 0.622061719 | 0.998252924 |
| chr10:75156276-75160615   | exonic       | ANXA7   | 10 | 75156276  | 75160615  | 0 | 2 | 0 | 0 | 0 | 0 | 4339   | 0.348551598 | 1.987763182 | 4.032542752 | 0.492930467 | 0.622061719 | 0.998252924 |
| chr10:75580862-75585930   | exonic       | CAMK2G  | 10 | 75580862  | 75585930  | 0 | 2 | 0 | 0 | 0 | 0 | 5068   | 0.348551598 | 1.987763182 | 4.032542752 | 0.492930467 | 0.622061719 | 0.998252924 |
| chr10:8005882-8019286     | exonic       | TAF3    | 10 | 8005882   | 8019286   | 0 | 2 | 0 | 0 | 0 | 0 | 13404  | 0.348551598 | 1.987763182 | 4.032542752 | 0.492930467 | 0.622061719 | 0.998252924 |
| chr10:88930235-88930731   | exonic       | FAM35A  | 10 | 88930235  | 88930731  | 0 | 2 | 0 | 0 | 0 | 0 | 496    | 0.348551598 | 1.987763182 | 4.032542752 | 0.492930467 | 0.622061719 | 0.998252924 |
| chr10:94381106-94408191   | exonic       | KIF11   | 10 | 94381106  | 94408191  | 0 | 2 | 0 | 0 | 0 | 0 | 27085  | 0.348551598 | 1.987763182 | 4.032542752 | 0.492930467 | 0.622061719 | 0.998252924 |
| chr10:98303832-98312816   | exonic       | TM9SF3  | 10 | 98303832  | 98312816  | 0 | 2 | 0 | 0 | 0 | 0 | 8984   | 0.348551598 | 1.987763182 | 4.032542752 | 0.492930467 | 0.622061719 | 0.998252924 |
| chr11:111544706-111545565 | intronic     | SIK2    | 11 | 111544706 | 111545565 | 0 | 2 | 0 | 0 | 0 | 0 | 859    | 0.348551598 | 1.987763182 | 4.032542752 | 0.492930467 | 0.622061719 | 0.998252924 |
| chr11:118451960-118463571 | exonic       | ARCN1   | 11 | 118451960 | 118463571 | 0 | 2 | 0 | 0 | 0 | 0 | 11611  | 0.348551598 | 1.987763182 | 4.032542752 | 0.492930467 | 0.622061719 | 0.998252924 |
| chr11:120916383-120943749 | exonic       | TBCEL   | 11 | 120916383 | 120943749 | 0 | 2 | 0 | 0 | 0 | 0 | 27366  | 0.348551598 | 1.987763182 | 4.032542752 | 0.492930467 | 0.622061719 | 0.998252924 |
| chr11:14810651-14865572   | exonic       | PDE3B   | 11 | 14810651  | 14865572  | 0 | 2 | 0 | 0 | 0 | 0 | 54921  | 0.348551598 | 1.987763182 | 4.032542752 | 0.492930467 | 0.622061719 | 0.998252924 |
| chr11:20101609-20104725   | exonic       | NAV2    | 11 | 20101609  | 20104725  | 0 | 2 | 0 | 0 | 0 | 0 | 3116   | 0.348551598 | 1.987763182 | 4.032542752 | 0.492930467 | 0.622061719 | 0.998252924 |
| chr11:27480335-27481419   | intronic     | LGR4    | 11 | 27480335  | 27481419  | 0 | 2 | 0 | 0 | 0 | 0 | 1084   | 0.348551598 | 1.987763182 | 4.032542752 | 0.492930467 | 0.622061719 | 0.998252924 |
| chr11:28131712-28318478   | exonic       | METTL15 | 11 | 28131712  | 28318478  | 0 | 2 | 0 | 0 | 0 | 0 | 186766 | 0.348551598 | 1.987763182 | 4.032542752 | 0.492930467 | 0.622061719 | 0.998252924 |
| chr11:34952950-34982065   | exonic       | PDHX    | 11 | 34952950  | 34982065  | 0 | 2 | 0 | 0 | 0 | 0 | 29115  | 0.348551598 | 1.987763182 | 4.032542752 | 0.492930467 | 0.622061719 | 0.998252924 |
| chr11:35222628-35226187   | exonic       | CD44    | 11 | 35222628  | 35226187  | 0 | 2 | 0 | 0 | 0 | 0 | 3559   | 0.348551598 | 1.987763182 | 4.032542752 | 0.492930467 | 0.622061719 | 0.998252924 |
| chr11:47502913-47503561   | intronic     | CELF1   | 11 | 47502913  | 47503561  | 0 | 2 | 0 | 0 | 0 | 0 | 648    | 0.348551598 | 1.987763182 | 4.032542752 | 0.492930467 | 0.622061719 | 0.998252924 |
| chr11:47505940-47508350   | exonic       | CELF1   | 11 | 47505940  | 47508350  | 0 | 2 | 0 | 0 | 0 | 0 | 2410   | 0.348551598 | 1.987763182 | 4.032542752 | 0.492930467 | 0.622061719 | 0.998252924 |
| chr11:62650379-62653080   | exonic       | SLC3A2  | 11 | 62650379  | 62653080  | 0 | 2 | 0 | 0 | 0 | 0 | 2701   | 0.348551598 | 1.987763182 | 4.032542752 | 0.492930467 | 0.622061719 | 0.998252924 |
| chr11:65267060-65267236   | ncRNA_exonic | MALAT1  | 11 | 65267060  | 65267236  | 0 | 2 | 0 | 0 | 0 | 0 | 176    | 0.348551598 | 1.987763182 | 4.032542752 | 0.492930467 | 0.622061719 | 0.998252924 |
| chr11:65269792-65271829   | ncRNA_exonic | MALAT1  | 11 | 65269792  | 65271829  | 0 | 2 | 0 | 0 | 0 | 0 | 2037   | 0.348551598 | 1.987763182 | 4.032542752 | 0.492930467 | 0.622061719 | 0.998252924 |
| chr11:73620444-73630450   | exonic       | PAAF1   | 11 | 73620444  | 73630450  | 0 | 2 | 0 | 0 | 0 | 0 | 10006  | 0.348551598 | 1.987763182 | 4.032542752 | 0.492930467 | 0.622061719 | 0.998252924 |
| chr11:73843888-73872601   | exonic       | C2CD3   | 11 | 73843888  | 73872601  | 0 | 2 | 0 | 0 | 0 | 0 | 28713  | 0.348551598 | 1.987763182 | 4.032542752 | 0.492930467 | 0.622061719 | 0.998252924 |
| chr11:7669618-7674431     | exonic       | PPFIBP2 | 11 | 7669618   | 7674431   | 0 | 2 | 0 | 0 | 0 | 0 | 4813   | 0.348551598 | 1.987763182 | 4.032542752 | 0.492930467 | 0.622061719 | 0.998252924 |
| chr11:83770358-83784311   | exonic       | DLG2    | 11 | 83770358  | 83784311  | 0 | 2 | 0 | 0 | 0 | 0 | 13953  | 0.348551598 | 1.987763182 | 4.032542752 | 0.492930467 | 0.622061719 | 0.998252924 |
| chr11:93399847-93402936   | exonic       | CEP295  | 11 | 93399847  | 93402936  | 0 | 2 | 0 | 0 | 0 | 0 | 3089   | 0.348551598 | 1.987763182 | 4.032542752 | 0.492930467 | 0.622061719 | 0.998252924 |
| chr11:992503-1000598      | exonic       | AP2A2   | 11 | 992503    | 1000598   | 0 | 2 | 0 | 0 | 0 | 0 | 8095   | 0.348551598 | 1.987763182 | 4.032542752 | 0.492930467 | 0.622061719 | 0.998252924 |
| chr12:110764194-110771948 | exonic       | ATP2A2  | 12 | 110764194 | 110771948 | 0 | 2 | 0 | 0 | 0 | 0 | 7754   | 0.348551598 | 1.987763182 | 4.032542752 | 0.492930467 | 0.622061719 | 0.998252924 |
| chr12:112684704-112686316 | exonic       | HECTD4  | 12 | 112684704 | 112686316 | 0 | 2 | 0 | 0 | 0 | 0 | 1612   | 0.348551598 | 1.987763182 | 4.032542752 | 0.492930467 | 0.622061719 | 0.998252924 |
| chr12:112910748-112915819 | exonic       | PTPN11  | 12 | 112910748 | 112915819 | 0 | 2 | 0 | 0 | 0 | 0 | 5071   | 0.348551598 | 1.987763182 | 4.032542752 | 0.492930467 | 0.622061719 | 0.998252924 |
| chr12:113565616-113568746 | exonic       | RASAL1  | 12 | 113565616 | 113568746 | 0 | 2 | 0 | 0 | 0 | 0 | 3130   | 0.348551598 | 1.987763182 | 4.032542752 | 0.492930467 | 0.622061719 | 0.998252924 |
| chr12:122437621-122439504 | exonic       | WDR66   | 12 | 122437621 | 122439504 | 0 | 2 | 0 | 0 | 0 | 0 | 1883   | 0.348551598 | 1.987763182 | 4.032542752 | 0.492930467 | 0.622061719 | 0.998252924 |
| chr12:124922475-124979914 | exonic       | NCOR2   | 12 | 124922475 | 124979914 | 0 | 4 | 0 | 0 | 0 | 0 | 57439  | 0.348551598 | 1.987763182 | 4.032542752 | 0.492930467 | 0.622061719 | 0.998252924 |

|                           |              |           |    |           |           |   |   |   |   |   |   |       |             |             |             |             |             |             |
|---------------------------|--------------|-----------|----|-----------|-----------|---|---|---|---|---|---|-------|-------------|-------------|-------------|-------------|-------------|-------------|
| chr12:132237667-132271133 | exonic       | SFSWAP    | 12 | 132237667 | 132271133 | 0 | 2 | 0 | 0 | 0 | 0 | 33466 | 0.348551598 | 1.987763182 | 4.032542752 | 0.492930467 | 0.622061719 | 0.998252924 |
| chr12:15702027-15710457   | exonic       | PTPRO     | 12 | 15702027  | 15710457  | 0 | 2 | 0 | 0 | 0 | 0 | 8430  | 0.348551598 | 1.987763182 | 4.032542752 | 0.492930467 | 0.622061719 | 0.998252924 |
| chr12:15834160-15866259   | exonic       | EPS8      | 12 | 15834160  | 15866259  | 0 | 2 | 0 | 0 | 0 | 0 | 32099 | 0.348551598 | 1.987763182 | 4.032542752 | 0.492930467 | 0.622061719 | 0.998252924 |
| chr12:19433066-19434433   | intronic     | PLEKHA5   | 12 | 19433066  | 19434433  | 0 | 2 | 0 | 0 | 0 | 0 | 1367  | 0.348551598 | 1.987763182 | 4.032542752 | 0.492930467 | 0.622061719 | 0.998252924 |
| chr12:19496256-19501453   | exonic       | PLEKHA5   | 12 | 19496256  | 19501453  | 0 | 2 | 0 | 0 | 0 | 0 | 5197  | 0.348551598 | 1.987763182 | 4.032542752 | 0.492930467 | 0.622061719 | 0.998252924 |
| chr12:29491464-29494694   | exonic       | ERGIC2    | 12 | 29491464  | 29494694  | 0 | 2 | 0 | 0 | 0 | 0 | 3230  | 0.348551598 | 1.987763182 | 4.032542752 | 0.492930467 | 0.622061719 | 0.998252924 |
| chr12:31566369-31577621   | exonic       | DENND5B   | 12 | 31566369  | 31577621  | 0 | 2 | 0 | 0 | 0 | 0 | 11252 | 0.348551598 | 1.987763182 | 4.032542752 | 0.492930467 | 0.622061719 | 0.998252924 |
| chr12:32866142-32890095   | exonic       | DNM1L     | 12 | 32866142  | 32890095  | 0 | 2 | 0 | 0 | 0 | 0 | 23953 | 0.348551598 | 1.987763182 | 4.032542752 | 0.492930467 | 0.622061719 | 0.998252924 |
| chr12:49424383-49424816   | exonic       | KMT2D     | 12 | 49424383  | 49424816  | 0 | 2 | 0 | 0 | 0 | 0 | 433   | 0.348551598 | 1.987763182 | 4.032542752 | 0.492930467 | 0.622061719 | 0.998252924 |
| chr12:50821547-50835426   | exonic       | LARP4     | 12 | 50821547  | 50835426  | 0 | 2 | 0 | 0 | 0 | 0 | 13879 | 0.348551598 | 1.987763182 | 4.032542752 | 0.492930467 | 0.622061719 | 0.998252924 |
| chr12:51510097-51512555   | exonic       | TFCP2     | 12 | 51510097  | 51512555  | 0 | 2 | 0 | 0 | 0 | 0 | 2458  | 0.348551598 | 1.987763182 | 4.032542752 | 0.492930467 | 0.622061719 | 0.998252924 |
| chr12:54734330-54737100   | exonic       | COPZ1     | 12 | 54734330  | 54737100  | 0 | 2 | 0 | 0 | 0 | 0 | 2770  | 0.348551598 | 1.987763182 | 4.032542752 | 0.492930467 | 0.622061719 | 0.998252924 |
| chr12:58109542-58112204   | exonic       | OS9       | 12 | 58109542  | 58112204  | 0 | 2 | 0 | 0 | 0 | 0 | 2662  | 0.348551598 | 1.987763182 | 4.032542752 | 0.492930467 | 0.622061719 | 0.998252924 |
| chr12:5936935-5941769     | exonic       | ANO2      | 12 | 5936935   | 5941769   | 0 | 2 | 0 | 0 | 0 | 0 | 4834  | 0.348551598 | 1.987763182 | 4.032542752 | 0.492930467 | 0.622061719 | 0.998252924 |
| chr12:62918294-62946954   | exonic       | MON2      | 12 | 62918294  | 62946954  | 0 | 2 | 0 | 0 | 0 | 0 | 28660 | 0.348551598 | 1.987763182 | 4.032542752 | 0.492930467 | 0.622061719 | 0.998252924 |
| chr12:66707765-66717991   | exonic       | HELB      | 12 | 66707765  | 66717991  | 0 | 2 | 0 | 0 | 0 | 0 | 10226 | 0.348551598 | 1.987763182 | 4.032542752 | 0.492930467 | 0.622061719 | 0.998252924 |
| chr12:7094798-7108121     | intronic     | LPCAT3    | 12 | 7094798   | 7108121   | 0 | 2 | 0 | 0 | 0 | 0 | 13323 | 0.348551598 | 1.987763182 | 4.032542752 | 0.492930467 | 0.622061719 | 0.998252924 |
| chr12:8255504-8278273     | exonic       | CLEC4A    | 12 | 8255504   | 8278273   | 0 | 2 | 0 | 0 | 0 | 0 | 22769 | 0.348551598 | 1.987763182 | 4.032542752 | 0.492930467 | 0.622061719 | 0.998252924 |
| chr12:88553890-88570096   | exonic       | TMTC3     | 12 | 88553890  | 88570096  | 0 | 2 | 0 | 0 | 0 | 0 | 16206 | 0.348551598 | 1.987763182 | 4.032542752 | 0.492930467 | 0.622061719 | 0.998252924 |
| chr12:8866406-8906689     | exonic       | RIMKLB    | 12 | 8866406   | 8906689   | 0 | 2 | 0 | 0 | 0 | 0 | 40283 | 0.348551598 | 1.987763182 | 4.032542752 | 0.492930467 | 0.622061719 | 0.998252924 |
| chr12:95531297-95535315   | exonic       | FGD6      | 12 | 95531297  | 95535315  | 0 | 2 | 0 | 0 | 0 | 0 | 4018  | 0.348551598 | 1.987763182 | 4.032542752 | 0.492930467 | 0.622061719 | 0.998252924 |
| chr12:95596369-95605043   | exonic       | FGD6      | 12 | 95596369  | 95605043  | 0 | 2 | 0 | 0 | 0 | 0 | 8674  | 0.348551598 | 1.987763182 | 4.032542752 | 0.492930467 | 0.622061719 | 0.998252924 |
| chr12:95663826-95690034   | exonic       | VEZT      | 12 | 95663826  | 95690034  | 0 | 2 | 0 | 0 | 0 | 0 | 26208 | 0.348551598 | 1.987763182 | 4.032542752 | 0.492930467 | 0.622061719 | 0.998252924 |
| chr12:96674586-96691110   | exonic       | CDK17     | 12 | 96674586  | 96691110  | 0 | 2 | 0 | 0 | 0 | 0 | 16524 | 0.348551598 | 1.987763182 | 4.032542752 | 0.492930467 | 0.622061719 | 0.998252924 |
| chr13:100963932-100969122 | intronic     | PCCA      | 13 | 100963932 | 100969122 | 0 | 2 | 0 | 0 | 0 | 0 | 5190  | 0.348551598 | 1.987763182 | 4.032542752 | 0.492930467 | 0.622061719 | 0.998252924 |
| chr13:103271071-103286448 | exonic       | TPP2      | 13 | 103271071 | 103286448 | 0 | 2 | 0 | 0 | 0 | 0 | 15377 | 0.348551598 | 1.987763182 | 4.032542752 | 0.492930467 | 0.622061719 | 0.998252924 |
| chr13:21157095-21205241   | exonic       | IFT88     | 13 | 21157095  | 21205241  | 0 | 2 | 0 | 0 | 0 | 0 | 48146 | 0.348551598 | 1.987763182 | 4.032542752 | 0.492930467 | 0.622061719 | 0.998252924 |
| chr13:32652970-32711109   | exonic       | FRY       | 13 | 32652970  | 32711109  | 0 | 2 | 0 | 0 | 0 | 0 | 58139 | 0.348551598 | 1.987763182 | 4.032542752 | 0.492930467 | 0.622061719 | 0.998252924 |
| chr13:33329979-33332791   | exonic       | PDS5B     | 13 | 33329979  | 33332791  | 0 | 2 | 0 | 0 | 0 | 0 | 2812  | 0.348551598 | 1.987763182 | 4.032542752 | 0.492930467 | 0.622061719 | 0.998252924 |
| chr13:35615069-35644989   | exonic       | NBEA      | 13 | 35615069  | 35644989  | 0 | 2 | 0 | 0 | 0 | 0 | 29920 | 0.348551598 | 1.987763182 | 4.032542752 | 0.492930467 | 0.622061719 | 0.998252924 |
| chr13:35615301-35619019   | exonic       | NBEA      | 13 | 35615301  | 35619019  | 0 | 2 | 0 | 0 | 0 | 0 | 3718  | 0.348551598 | 1.987763182 | 4.032542752 | 0.492930467 | 0.622061719 | 0.998252924 |
| chr13:38624906-38647113   | ncRNA_exonic | LINC00571 | 13 | 38624906  | 38647113  | 0 | 2 | 0 | 0 | 0 | 0 | 22207 | 0.348551598 | 1.987763182 | 4.032542752 | 0.492930467 | 0.622061719 | 0.998252924 |
| chr13:41482295-41486859   | ncRNA_exonic | SUGT1P3   | 13 | 41482295  | 41486859  | 0 | 2 | 0 | 0 | 0 | 0 | 4564  | 0.348551598 | 1.987763182 | 4.032542752 | 0.492930467 | 0.622061719 | 0.998252924 |
| chr13:45951196-45966325   | ncRNA_exonic | TPT1-AS1  | 13 | 45951196  | 45966325  | 0 | 2 | 0 | 0 | 0 | 0 | 15129 | 0.348551598 | 1.987763182 | 4.032542752 | 0.492930467 | 0.622061719 | 0.998252924 |
| chr13:50050611-50051175   | exonic       | SETDB2    | 13 | 50050611  | 50051175  | 0 | 2 | 0 | 0 | 0 | 0 | 564   | 0.348551598 | 1.987763182 | 4.032542752 | 0.492930467 | 0.622061719 | 0.998252924 |

|                           |                |                                                          |    |           |           |   |   |   |   |   |   |        |             |             |             |             |             |             |
|---------------------------|----------------|----------------------------------------------------------|----|-----------|-----------|---|---|---|---|---|---|--------|-------------|-------------|-------------|-------------|-------------|-------------|
| chr13:95768175-95840796   | exonic         | ABCC4                                                    | 13 | 95768175  | 95840796  | 0 | 2 | 0 | 0 | 0 | 0 | 72621  | 0.348551598 | 1.987763182 | 4.032542752 | 0.492930467 | 0.622061719 | 0.998252924 |
| chr13:99933348-99958244   | exonic         | GPR183                                                   | 13 | 99933348  | 99958244  | 0 | 2 | 0 | 0 | 0 | 0 | 24896  | 0.348551598 | 1.987763182 | 4.032542752 | 0.492930467 | 0.622061719 | 0.998252924 |
| chr14:101295044-101311870 | ncRNA_exonic   | MEG3                                                     | 14 | 101295044 | 101311870 | 0 | 2 | 0 | 0 | 0 | 0 | 16826  | 0.348551598 | 1.987763182 | 4.032542752 | 0.492930467 | 0.622061719 | 0.998252924 |
| chr14:104120900-104121162 | exonic         | KLC1                                                     | 14 | 104120900 | 104121162 | 0 | 2 | 0 | 0 | 0 | 0 | 262    | 0.348551598 | 1.987763182 | 4.032542752 | 0.492930467 | 0.622061719 | 0.998252924 |
| chr14:106050470-106170423 | ncRNA_exonic   | ELK2AP, MIR8071-1, MIR8071-2                             | 14 | 106050470 | 106170423 | 0 | 2 | 0 | 0 | 0 | 0 | 119953 | 0.348551598 | 1.987763182 | 4.032542752 | 0.492930467 | 0.622061719 | 0.998252924 |
| chr14:106091233-106109862 | ncRNA_exonic   | MIR8071-1, MIR8071-2                                     | 14 | 106091233 | 106109862 | 0 | 2 | 0 | 0 | 0 | 0 | 18629  | 0.348551598 | 1.987763182 | 4.032542752 | 0.492930467 | 0.622061719 | 0.998252924 |
| chr14:23419522-23420898   | exonic         | HAUS4                                                    | 14 | 23419522  | 23420898  | 0 | 2 | 0 | 0 | 0 | 0 | 1376   | 0.348551598 | 1.987763182 | 4.032542752 | 0.492930467 | 0.622061719 | 0.998252924 |
| chr14:31897350-31901757   | ncRNA_intronic | LOC101927124                                             | 14 | 31897350  | 31901757  | 0 | 2 | 0 | 0 | 0 | 0 | 4407   | 0.348551598 | 1.987763182 | 4.032542752 | 0.492930467 | 0.622061719 | 0.998252924 |
| chr14:33462264-33463932   | intronic       | NPAS3                                                    | 14 | 33462264  | 33463932  | 0 | 2 | 0 | 0 | 0 | 0 | 1668   | 0.348551598 | 1.987763182 | 4.032542752 | 0.492930467 | 0.622061719 | 0.998252924 |
| chr14:33684388-33865159   | exonic         | NPAS3                                                    | 14 | 33684388  | 33865159  | 0 | 2 | 0 | 0 | 0 | 0 | 180771 | 0.348551598 | 1.987763182 | 4.032542752 | 0.492930467 | 0.622061719 | 0.998252924 |
| chr14:34394824-34396239   | exonic         | EGLN3                                                    | 14 | 34394824  | 34396239  | 0 | 2 | 0 | 0 | 0 | 0 | 1415   | 0.348551598 | 1.987763182 | 4.032542752 | 0.492930467 | 0.622061719 | 0.998252924 |
| chr14:50287061-50301167   | exonic         | NEMF                                                     | 14 | 50287061  | 50301167  | 0 | 2 | 0 | 0 | 0 | 0 | 14106  | 0.348551598 | 1.987763182 | 4.032542752 | 0.492930467 | 0.622061719 | 0.998252924 |
| chr14:50641171-50655418   | exonic         | SOS2                                                     | 14 | 50641171  | 50655418  | 0 | 2 | 0 | 0 | 0 | 0 | 14247  | 0.348551598 | 1.987763182 | 4.032542752 | 0.492930467 | 0.622061719 | 0.998252924 |
| chr14:50923234-50952912   | exonic         | MAP4K5                                                   | 14 | 50923234  | 50952912  | 0 | 2 | 0 | 0 | 0 | 0 | 29678  | 0.348551598 | 1.987763182 | 4.032542752 | 0.492930467 | 0.622061719 | 0.998252924 |
| chr14:56114742-56118645   | exonic         | KTN1                                                     | 14 | 56114742  | 56118645  | 0 | 2 | 0 | 0 | 0 | 0 | 3903   | 0.348551598 | 1.987763182 | 4.032542752 | 0.492930467 | 0.622061719 | 0.998252924 |
| chr14:56119734-56125332   | exonic         | KTN1                                                     | 14 | 56119734  | 56125332  | 0 | 2 | 0 | 0 | 0 | 0 | 5598   | 0.348551598 | 1.987763182 | 4.032542752 | 0.492930467 | 0.622061719 | 0.998252924 |
| chr14:61745398-61745867   | UTR3           | <small>TMM30B(ONM_001017970:c.*1412_*943delins0)</small> | 14 | 61745398  | 61745867  | 0 | 2 | 0 | 0 | 0 | 0 | 469    | 0.348551598 | 1.987763182 | 4.032542752 | 0.492930467 | 0.622061719 | 0.998252924 |
| chr14:64447704-64453335   | exonic         | SYNE2                                                    | 14 | 64447704  | 64453335  | 0 | 2 | 0 | 0 | 0 | 0 | 5631   | 0.348551598 | 1.987763182 | 4.032542752 | 0.492930467 | 0.622061719 | 0.998252924 |
| chr14:69387722-69392389   | exonic         | ACTN1                                                    | 14 | 69387722  | 69392389  | 0 | 2 | 0 | 0 | 0 | 0 | 4667   | 0.348551598 | 1.987763182 | 4.032542752 | 0.492930467 | 0.622061719 | 0.998252924 |
| chr14:69908548-69908983   | exonic         | SLC39A9                                                  | 14 | 69908548  | 69908983  | 0 | 2 | 0 | 0 | 0 | 0 | 435    | 0.348551598 | 1.987763182 | 4.032542752 | 0.492930467 | 0.622061719 | 0.998252924 |
| chr14:73459851-73460065   | exonic         | ZFYVE1                                                   | 14 | 73459851  | 73460065  | 0 | 2 | 0 | 0 | 0 | 0 | 214    | 0.348551598 | 1.987763182 | 4.032542752 | 0.492930467 | 0.622061719 | 0.998252924 |
| chr14:76638185-76639968   | exonic         | GPATCH2L                                                 | 14 | 76638185  | 76639968  | 0 | 2 | 0 | 0 | 0 | 0 | 1783   | 0.348551598 | 1.987763182 | 4.032542752 | 0.492930467 | 0.622061719 | 0.998252924 |
| chr14:89747293-89817152   | exonic         | FOXN3                                                    | 14 | 89747293  | 89817152  | 0 | 2 | 0 | 0 | 0 | 0 | 69859  | 0.348551598 | 1.987763182 | 4.032542752 | 0.492930467 | 0.622061719 | 0.998252924 |
| chr14:91937180-91942868   | exonic         | PPP4R3A                                                  | 14 | 91937180  | 91942868  | 0 | 2 | 0 | 0 | 0 | 0 | 5688   | 0.348551598 | 1.987763182 | 4.032542752 | 0.492930467 | 0.622061719 | 0.998252924 |
| chr14:93273080-93275864   | exonic         | GOLGA5                                                   | 14 | 93273080  | 93275864  | 0 | 2 | 0 | 0 | 0 | 0 | 2784   | 0.348551598 | 1.987763182 | 4.032542752 | 0.492930467 | 0.622061719 | 0.998252924 |
| chr15:30053341-30058745   | exonic         | TJP1                                                     | 15 | 30053341  | 30058745  | 0 | 2 | 0 | 0 | 0 | 0 | 5404   | 0.348551598 | 1.987763182 | 4.032542752 | 0.492930467 | 0.622061719 | 0.998252924 |
| chr15:32924125-32925589   | exonic         | ARHGAP11A                                                | 15 | 32924125  | 32925589  | 0 | 2 | 0 | 0 | 0 | 0 | 1464   | 0.348551598 | 1.987763182 | 4.032542752 | 0.492930467 | 0.622061719 | 0.998252924 |
| chr15:42002888-42019604   | exonic         | MGA                                                      | 15 | 42002888  | 42019604  | 0 | 2 | 0 | 0 | 0 | 0 | 16716  | 0.348551598 | 1.987763182 | 4.032542752 | 0.492930467 | 0.622061719 | 0.998252924 |
| chr15:43299277-43317627   | exonic         | UBR1                                                     | 15 | 43299277  | 43317627  | 0 | 2 | 0 | 0 | 0 | 0 | 18350  | 0.348551598 | 1.987763182 | 4.032542752 | 0.492930467 | 0.622061719 | 0.998252924 |
| chr15:43707791-43730614   | exonic         | TP53BP1                                                  | 15 | 43707791  | 43730614  | 0 | 2 | 0 | 0 | 0 | 0 | 22823  | 0.348551598 | 1.987763182 | 4.032542752 | 0.492930467 | 0.622061719 | 0.998252924 |
| chr15:44846750-44849848   | exonic         | EIF3J                                                    | 15 | 44846750  | 44849848  | 0 | 2 | 0 | 0 | 0 | 0 | 3098   | 0.348551598 | 1.987763182 | 4.032542752 | 0.492930467 | 0.622061719 | 0.998252924 |
| chr15:49528048-49620327   | exonic         | GALK2                                                    | 15 | 49528048  | 49620327  | 0 | 2 | 0 | 0 | 0 | 0 | 92279  | 0.348551598 | 1.987763182 | 4.032542752 | 0.492930467 | 0.622061719 | 0.998252924 |
| chr15:52561949-52564920   | exonic         | MYO5C                                                    | 15 | 52561949  | 52564920  | 0 | 2 | 0 | 0 | 0 | 0 | 2971   | 0.348551598 | 1.987763182 | 4.032542752 | 0.492930467 | 0.622061719 | 0.998252924 |
| chr15:52672569-52674194   | intronic       | MYO5A                                                    | 15 | 52672569  | 52674194  | 0 | 2 | 0 | 0 | 0 | 0 | 1625   | 0.348551598 | 1.987763182 | 4.032542752 | 0.492930467 | 0.622061719 | 0.998252924 |
| chr15:56129986-56139232   | exonic         | NEDD4                                                    | 15 | 56129986  | 56139232  | 0 | 2 | 0 | 0 | 0 | 0 | 9246   | 0.348551598 | 1.987763182 | 4.032542752 | 0.492930467 | 0.622061719 | 0.998252924 |

|                         |                |                                             |    |          |          |   |   |   |   |   |   |        |             |             |             |             |             |             |
|-------------------------|----------------|---------------------------------------------|----|----------|----------|---|---|---|---|---|---|--------|-------------|-------------|-------------|-------------|-------------|-------------|
| chr15:57218447-57348374 | intronic       | TCF12                                       | 15 | 57218447 | 57348374 | 0 | 2 | 0 | 0 | 0 | 0 | 129927 | 0.348551598 | 1.987763182 | 4.032542752 | 0.492930467 | 0.622061719 | 0.998252924 |
| chr15:57383987-57387361 | exonic         | TCF12                                       | 15 | 57383987 | 57387361 | 0 | 2 | 0 | 0 | 0 | 0 | 3374   | 0.348551598 | 1.987763182 | 4.032542752 | 0.492930467 | 0.622061719 | 0.998252924 |
| chr15:59193459-59205726 | exonic         | SLTM                                        | 15 | 59193459 | 59205726 | 0 | 2 | 0 | 0 | 0 | 0 | 12267  | 0.348551598 | 1.987763182 | 4.032542752 | 0.492930467 | 0.622061719 | 0.998252924 |
| chr15:59358962-59373483 | exonic         | RNF111                                      | 15 | 59358962 | 59373483 | 0 | 2 | 0 | 0 | 0 | 0 | 14521  | 0.348551598 | 1.987763182 | 4.032542752 | 0.492930467 | 0.622061719 | 0.998252924 |
| chr15:62221700-62221931 | exonic         | VPS13C                                      | 15 | 62221700 | 62221931 | 0 | 2 | 0 | 0 | 0 | 0 | 231    | 0.348551598 | 1.987763182 | 4.032542752 | 0.492930467 | 0.622061719 | 0.998252924 |
| chr15:63982739-63987093 | exonic         | HERC1                                       | 15 | 63982739 | 63987093 | 0 | 2 | 0 | 0 | 0 | 0 | 4354   | 0.348551598 | 1.987763182 | 4.032542752 | 0.492930467 | 0.622061719 | 0.998252924 |
| chr15:65266939-65273363 | exonic         | SPG21                                       | 15 | 65266939 | 65273363 | 0 | 2 | 0 | 0 | 0 | 0 | 6424   | 0.348551598 | 1.987763182 | 4.032542752 | 0.492930467 | 0.622061719 | 0.998252924 |
| chr15:65780027-65782637 | exonic         | DPP8                                        | 15 | 65780027 | 65782637 | 0 | 2 | 0 | 0 | 0 | 0 | 2610   | 0.348551598 | 1.987763182 | 4.032542752 | 0.492930467 | 0.622061719 | 0.998252924 |
| chr15:65988703-66053776 | exonic         | DENND4A                                     | 15 | 65988703 | 66053776 | 0 | 2 | 0 | 0 | 0 | 0 | 65073  | 0.348551598 | 1.987763182 | 4.032542752 | 0.492930467 | 0.622061719 | 0.998252924 |
| chr15:66007815-66044966 | exonic         | DENND4A                                     | 15 | 66007815 | 66044966 | 0 | 2 | 0 | 0 | 0 | 0 | 37151  | 0.348551598 | 1.987763182 | 4.032542752 | 0.492930467 | 0.622061719 | 0.998252924 |
| chr15:67519239-67529158 | exonic         | AAGAB                                       | 15 | 67519239 | 67529158 | 0 | 2 | 0 | 0 | 0 | 0 | 9919   | 0.348551598 | 1.987763182 | 4.032542752 | 0.492930467 | 0.622061719 | 0.998252924 |
| chr15:75670828-75671350 | intronic       | SIN3A                                       | 15 | 75670828 | 75671350 | 0 | 2 | 0 | 0 | 0 | 0 | 522    | 0.348551598 | 1.987763182 | 4.032542752 | 0.492930467 | 0.622061719 | 0.998252924 |
| chr15:78837210-78839040 | exonic         | PSMA4                                       | 15 | 78837210 | 78839040 | 0 | 2 | 0 | 0 | 0 | 0 | 1830   | 0.348551598 | 1.987763182 | 4.032542752 | 0.492930467 | 0.622061719 | 0.998252924 |
| chr15:81241037-81263000 | exonic         | CEMIP                                       | 15 | 81241037 | 81263000 | 0 | 2 | 0 | 0 | 0 | 0 | 21963  | 0.348551598 | 1.987763182 | 4.032542752 | 0.492930467 | 0.622061719 | 0.998252924 |
| chr15:82207688-82218366 | intergenic     | TMC3-AS1 (dist=472271), MEX3B (dist=115753) | 15 | 82207688 | 82218366 | 0 | 2 | 0 | 0 | 0 | 0 | 10678  | 0.348551598 | 1.987763182 | 4.032542752 | 0.492930467 | 0.622061719 | 0.998252924 |
| chr16:11857333-11859541 | exonic         | ZC3H7A                                      | 16 | 11857333 | 11859541 | 0 | 2 | 0 | 0 | 0 | 0 | 2208   | 0.348551598 | 1.987763182 | 4.032542752 | 0.492930467 | 0.622061719 | 0.998252924 |
| chr16:16180680-16184445 | exonic         | ABCC1                                       | 16 | 16180680 | 16184445 | 0 | 2 | 0 | 0 | 0 | 0 | 3765   | 0.348551598 | 1.987763182 | 4.032542752 | 0.492930467 | 0.622061719 | 0.998252924 |
| chr16:21326632-21363459 | ncRNA_exonic   | CRYM-AS1, SNX29P1                           | 16 | 21326632 | 21363459 | 0 | 2 | 0 | 0 | 0 | 0 | 36827  | 0.348551598 | 1.987763182 | 4.032542752 | 0.492930467 | 0.622061719 | 0.998252924 |
| chr16:21486996-21487481 | ncRNA_intronic | SMG1P3                                      | 16 | 21486996 | 21487481 | 0 | 2 | 0 | 0 | 0 | 0 | 485    | 0.348551598 | 1.987763182 | 4.032542752 | 0.492930467 | 0.622061719 | 0.998252924 |
| chr16:22497441-22502297 | ncRNA_exonic   | SMG1P1                                      | 16 | 22497441 | 22502297 | 0 | 2 | 0 | 0 | 0 | 0 | 4856   | 0.348551598 | 1.987763182 | 4.032542752 | 0.492930467 | 0.622061719 | 0.998252924 |
| chr16:3554719-3570036   | exonic         | CLUAP1                                      | 16 | 3554719  | 3570036  | 0 | 2 | 0 | 0 | 0 | 0 | 15317  | 0.348551598 | 1.987763182 | 4.032542752 | 0.492930467 | 0.622061719 | 0.998252924 |
| chr16:4700365-4707364   | exonic         | MGRN1                                       | 16 | 4700365  | 4707364  | 0 | 2 | 0 | 0 | 0 | 0 | 6999   | 0.348551598 | 1.987763182 | 4.032542752 | 0.492930467 | 0.622061719 | 0.998252924 |
| chr16:67606779-67609398 | intronic       | CTCF                                        | 16 | 67606779 | 67609398 | 0 | 2 | 0 | 0 | 0 | 0 | 2619   | 0.348551598 | 1.987763182 | 4.032542752 | 0.492930467 | 0.622061719 | 0.998252924 |
| chr16:67942582-67943609 | exonic         | PSKH1                                       | 16 | 67942582 | 67943609 | 0 | 2 | 0 | 0 | 0 | 0 | 1027   | 0.348551598 | 1.987763182 | 4.032542752 | 0.492930467 | 0.622061719 | 0.998252924 |
| chr16:69189773-69197081 | exonic         | UTP4                                        | 16 | 69189773 | 69197081 | 0 | 2 | 0 | 0 | 0 | 0 | 7308   | 0.348551598 | 1.987763182 | 4.032542752 | 0.492930467 | 0.622061719 | 0.998252924 |
| chr16:69718789-69729282 | exonic         | NFAT5                                       | 16 | 69718789 | 69729282 | 0 | 2 | 0 | 0 | 0 | 0 | 10493  | 0.348551598 | 1.987763182 | 4.032542752 | 0.492930467 | 0.622061719 | 0.998252924 |
| chr16:71778129-71778560 | intronic       | APIG1                                       | 16 | 71778129 | 71778560 | 0 | 2 | 0 | 0 | 0 | 0 | 431    | 0.348551598 | 1.987763182 | 4.032542752 | 0.492930467 | 0.622061719 | 0.998252924 |
| chr16:75445722-75448593 | exonic         | CFDP1                                       | 16 | 75445722 | 75448593 | 0 | 2 | 0 | 0 | 0 | 0 | 2871   | 0.348551598 | 1.987763182 | 4.032542752 | 0.492930467 | 0.622061719 | 0.998252924 |
| chr16:88008653-88039871 | exonic         | BANP                                        | 16 | 88008653 | 88039871 | 0 | 2 | 0 | 0 | 0 | 0 | 31218  | 0.348551598 | 1.987763182 | 4.032542752 | 0.492930467 | 0.622061719 | 0.998252924 |
| chr16:8839857-8851663   | exonic         | ABAT                                        | 16 | 8839857  | 8851663  | 0 | 2 | 0 | 0 | 0 | 0 | 11806  | 0.348551598 | 1.987763182 | 4.032542752 | 0.492930467 | 0.622061719 | 0.998252924 |
| chr17:1296532-1296837   | intronic       | YWHAE                                       | 17 | 1296532  | 1296837  | 0 | 2 | 0 | 0 | 0 | 0 | 305    | 0.348551598 | 1.987763182 | 4.032542752 | 0.492930467 | 0.622061719 | 0.998252924 |
| chr17:1451589-1456443   | exonic         | PITPNA                                      | 17 | 1451589  | 1456443  | 0 | 2 | 0 | 0 | 0 | 0 | 4854   | 0.348551598 | 1.987763182 | 4.032542752 | 0.492930467 | 0.622061719 | 0.998252924 |
| chr17:2541392-2576051   | exonic         | PAFAH1B1                                    | 17 | 2541392  | 2576051  | 0 | 2 | 0 | 0 | 0 | 0 | 34659  | 0.348551598 | 1.987763182 | 4.032542752 | 0.492930467 | 0.622061719 | 0.998252924 |
| chr17:27778473-27794234 | exonic         | TAOK1                                       | 17 | 27778473 | 27794234 | 0 | 2 | 0 | 0 | 0 | 0 | 15761  | 0.348551598 | 1.987763182 | 4.032542752 | 0.492930467 | 0.622061719 | 0.998252924 |
| chr17:27794162-27807499 | exonic         | TAOK1                                       | 17 | 27794162 | 27807499 | 0 | 2 | 0 | 0 | 0 | 0 | 13337  | 0.348551598 | 1.987763182 | 4.032542752 | 0.492930467 | 0.622061719 | 0.998252924 |

|                         |                |               |        |          |          |          |   |   |   |   |   |        |             |             |             |             |             |             |
|-------------------------|----------------|---------------|--------|----------|----------|----------|---|---|---|---|---|--------|-------------|-------------|-------------|-------------|-------------|-------------|
| chr17:29058126-29061241 | ncRNA_intronic | SUZ12P1       | 17     | 29058126 | 29061241 | 0        | 2 | 0 | 0 | 0 | 0 | 3115   | 0.348551598 | 1.987763182 | 4.032542752 | 0.492930467 | 0.622061719 | 0.998252924 |
| chr17:29112936-29119590 | exonic         | CRLF3         | 17     | 29112936 | 29119590 | 0        | 2 | 0 | 0 | 0 | 0 | 6654   | 0.348551598 | 1.987763182 | 4.032542752 | 0.492930467 | 0.622061719 | 0.998252924 |
| chr17:29528054-29554624 | exonic         | NF1           | 17     | 29528054 | 29554624 | 0        | 2 | 0 | 0 | 0 | 0 | 26570  | 0.348551598 | 1.987763182 | 4.032542752 | 0.492930467 | 0.622061719 | 0.998252924 |
| chr17:29576002-29592357 | exonic         | NF1           | 17     | 29576002 | 29592357 | 0        | 2 | 0 | 0 | 0 | 0 | 16355  | 0.348551598 | 1.987763182 | 4.032542752 | 0.492930467 | 0.622061719 | 0.998252924 |
| chr17:33271907-33291279 | exonic         | CCT6B, ZNF830 | 17     | 33271907 | 33291279 | 0        | 2 | 0 | 0 | 0 | 0 | 19372  | 0.348551598 | 1.987763182 | 4.032542752 | 0.492930467 | 0.622061719 | 0.998252924 |
| chr17:33951415-33968994 | exonic         | AP2B1         | 17     | 33951415 | 33968994 | 0        | 2 | 0 | 0 | 0 | 0 | 17579  | 0.348551598 | 1.987763182 | 4.032542752 | 0.492930467 | 0.622061719 | 0.998252924 |
| chr17:34910660-34923615 | exonic         | GGNBP2        | 17     | 34910660 | 34923615 | 0        | 2 | 0 | 0 | 0 | 0 | 12955  | 0.348551598 | 1.987763182 | 4.032542752 | 0.492930467 | 0.622061719 | 0.998252924 |
| chr17:35536200-35550356 | exonic         | ACACA         | 17     | 35536200 | 35550356 | 0        | 2 | 0 | 0 | 0 | 0 | 14156  | 0.348551598 | 1.987763182 | 4.032542752 | 0.492930467 | 0.622061719 | 0.998252924 |
| chr17:35637239-35645704 | exonic         | ACACA         | 17     | 35637239 | 35645704 | 0        | 2 | 0 | 0 | 0 | 0 | 8465   | 0.348551598 | 1.987763182 | 4.032542752 | 0.492930467 | 0.622061719 | 0.998252924 |
| chr17:3988963-3989949   | exonic         | ZZEF1         | 17     | 3988963  | 3989949  | 0        | 2 | 0 | 0 | 0 | 0 | 986    | 0.348551598 | 1.987763182 | 4.032542752 | 0.492930467 | 0.622061719 | 0.998252924 |
| chr17:40497576-40500557 | exonic         | STAT3         | 17     | 40497576 | 40500557 | 0        | 2 | 0 | 0 | 0 | 0 | 2981   | 0.348551598 | 1.987763182 | 4.032542752 | 0.492930467 | 0.622061719 | 0.998252924 |
| chr17:4153208-4153384   | intronic       | ANKFY1        | 17     | 4153208  | 4153384  | 0        | 2 | 0 | 0 | 0 | 0 | 176    | 0.348551598 | 1.987763182 | 4.032542752 | 0.492930467 | 0.622061719 | 0.998252924 |
| chr17:42501717-42552271 | exonic         | GPATCH8       | 17     | 42501717 | 42552271 | 0        | 2 | 0 | 0 | 0 | 0 | 50554  | 0.348551598 | 1.987763182 | 4.032542752 | 0.492930467 | 0.622061719 | 0.998252924 |
| chr17:44380003-44383675 | exonic         | LRRC37A       | 17     | 44380003 | 44383675 | 0        | 2 | 0 | 0 | 0 | 0 | 3672   | 0.348551598 | 1.987763182 | 4.032542752 | 0.492930467 | 0.622061719 | 0.998252924 |
| chr17:45214517-45235669 | exonic         | CDC27         | 17     | 45214517 | 45235669 | 0        | 2 | 0 | 0 | 0 | 0 | 21152  | 0.348551598 | 1.987763182 | 4.032542752 | 0.492930467 | 0.622061719 | 0.998252924 |
| chr17:49062283-49068029 | exonic         | SPAG9         | 17     | 49062283 | 49068029 | 0        | 2 | 0 | 0 | 0 | 0 | 5746   | 0.348551598 | 1.987763182 | 4.032542752 | 0.492930467 | 0.622061719 | 0.998252924 |
| chr17:55062738-55072996 | exonic         | SCPEP1        | 17     | 55062738 | 55072996 | 0        | 2 | 0 | 0 | 0 | 0 | 10258  | 0.348551598 | 1.987763182 | 4.032542752 | 0.492930467 | 0.622061719 | 0.998252924 |
| chr17:56293448-56294097 | exonic         | MKS1          | 17     | 56293448 | 56294097 | 0        | 2 | 0 | 0 | 0 | 0 | 649    | 0.348551598 | 1.987763182 | 4.032542752 | 0.492930467 | 0.622061719 | 0.998252924 |
| chr17:58538023-58543820 | exonic         | APPBP2        | 17     | 58538023 | 58543820 | 0        | 2 | 0 | 0 | 0 | 0 | 5797   | 0.348551598 | 1.987763182 | 4.032542752 | 0.492930467 | 0.622061719 | 0.998252924 |
| chr17:60741908-60744894 | exonic         | MRC2          | 17     | 60741908 | 60744894 | 0        | 2 | 0 | 0 | 0 | 0 | 2986   | 0.348551598 | 1.987763182 | 4.032542752 | 0.492930467 | 0.622061719 | 0.998252924 |
| chr17:60788591-60865960 | exonic         |               | 10-Mar | 17       | 60788591 | 60865960 | 0 | 2 | 0 | 0 | 0 | 77369  | 0.348551598 | 1.987763182 | 4.032542752 | 0.492930467 | 0.622061719 | 0.998252924 |
| chr17:62515438-62515554 | exonic         | CEP95         | 17     | 62515438 | 62515554 | 0        | 2 | 0 | 0 | 0 | 0 | 116    | 0.348551598 | 1.987763182 | 4.032542752 | 0.492930467 | 0.622061719 | 0.998252924 |
| chr17:64023618-64179425 | exonic         | CEP112        | 17     | 64023618 | 64179425 | 0        | 2 | 0 | 0 | 0 | 0 | 155807 | 0.348551598 | 1.987763182 | 4.032542752 | 0.492930467 | 0.622061719 | 0.998252924 |
| chr17:67040637-67047280 | exonic         | ABCA9         | 17     | 67040637 | 67047280 | 0        | 2 | 0 | 0 | 0 | 0 | 6643   | 0.348551598 | 1.987763182 | 4.032542752 | 0.492930467 | 0.622061719 | 0.998252924 |
| chr17:71244118-71244857 | exonic         | CPSF4L        | 17     | 71244118 | 71244857 | 0        | 2 | 0 | 0 | 0 | 0 | 739    | 0.348551598 | 1.987763182 | 4.032542752 | 0.492930467 | 0.622061719 | 0.998252924 |
| chr17:73794364-73795178 | intronic       | UNK           | 17     | 73794364 | 73795178 | 0        | 2 | 0 | 0 | 0 | 0 | 814    | 0.348551598 | 1.987763182 | 4.032542752 | 0.492930467 | 0.622061719 | 0.998252924 |
| chr17:73808192-73809959 | exonic         | UNK           | 17     | 73808192 | 73809959 | 0        | 2 | 0 | 0 | 0 | 0 | 1767   | 0.348551598 | 1.987763182 | 4.032542752 | 0.492930467 | 0.622061719 | 0.998252924 |
| chr17:76198579-76202131 | exonic         | AFMID         | 17     | 76198579 | 76202131 | 0        | 2 | 0 | 0 | 0 | 0 | 3552   | 0.348551598 | 1.987763182 | 4.032542752 | 0.492930467 | 0.622061719 | 0.998252924 |
| chr17:80714040-80726442 | exonic         | TBCD          | 17     | 80714040 | 80726442 | 0        | 2 | 0 | 0 | 0 | 0 | 12402  | 0.348551598 | 1.987763182 | 4.032542752 | 0.492930467 | 0.622061719 | 0.998252924 |
| chr17:84553363-8473130  | exonic         | MYH10         | 17     | 84553363 | 8473130  | 0        | 2 | 0 | 0 | 0 | 0 | 17767  | 0.348551598 | 1.987763182 | 4.032542752 | 0.492930467 | 0.622061719 | 0.998252924 |
| chr18:12356692-12371690 | exonic         | AFG3L2        | 18     | 12356692 | 12371690 | 0        | 2 | 0 | 0 | 0 | 0 | 14998  | 0.348551598 | 1.987763182 | 4.032542752 | 0.492930467 | 0.622061719 | 0.998252924 |
| chr18:12814201-12859253 | exonic         | PTPN2         | 18     | 12814201 | 12859253 | 0        | 2 | 0 | 0 | 0 | 0 | 45052  | 0.348551598 | 1.987763182 | 4.032542752 | 0.492930467 | 0.622061719 | 0.998252924 |
| chr18:13099474-13103587 | exonic         | CEP192        | 18     | 13099474 | 13103587 | 0        | 2 | 0 | 0 | 0 | 0 | 4113   | 0.348551598 | 1.987763182 | 4.032542752 | 0.492930467 | 0.622061719 | 0.998252924 |
| chr18:13730625-13752426 | exonic         | RNMT          | 18     | 13730625 | 13752426 | 0        | 2 | 0 | 0 | 0 | 0 | 21801  | 0.348551598 | 1.987763182 | 4.032542752 | 0.492930467 | 0.622061719 | 0.998252924 |
| chr18:19378044-19383975 | exonic         | MIB1          | 18     | 19378044 | 19383975 | 0        | 2 | 0 | 0 | 0 | 0 | 5931   | 0.348551598 | 1.987763182 | 4.032542752 | 0.492930467 | 0.622061719 | 0.998252924 |



|                          |              |                                            |    |           |           |   |   |   |   |   |   |        |             |             |             |             |             |             |
|--------------------------|--------------|--------------------------------------------|----|-----------|-----------|---|---|---|---|---|---|--------|-------------|-------------|-------------|-------------|-------------|-------------|
| chr18:30846880-30898399  | exonic       | CCDC178                                    | 18 | 30846880  | 30898399  | 0 | 2 | 0 | 0 | 0 | 0 | 51519  | 0.348551598 | 1.987763182 | 4.032542752 | 0.492930467 | 0.622061719 | 0.998252924 |
| chr18:42281140-42383064  | exonic       | SETBP1                                     | 18 | 42281140  | 42383064  | 0 | 2 | 0 | 0 | 0 | 0 | 101924 | 0.348551598 | 1.987763182 | 4.032542752 | 0.492930467 | 0.622061719 | 0.998252924 |
| chr18:46889531-46918015  | exonic       | DYM                                        | 18 | 46889531  | 46918015  | 0 | 2 | 0 | 0 | 0 | 0 | 28484  | 0.348551598 | 1.987763182 | 4.032542752 | 0.492930467 | 0.622061719 | 0.998252924 |
| chr18:6138192-6264037    | exonic       | L3MBTL4                                    | 18 | 6138192   | 6264037   | 0 | 2 | 0 | 0 | 0 | 0 | 125845 | 0.348551598 | 1.987763182 | 4.032542752 | 0.492930467 | 0.622061719 | 0.998252924 |
| chr18:72342923-72353078  | exonic       | ZNF407                                     | 18 | 72342923  | 72353078  | 0 | 2 | 0 | 0 | 0 | 0 | 10155  | 0.348551598 | 1.987763182 | 4.032542752 | 0.492930467 | 0.622061719 | 0.998252924 |
| chr18:74082482-74155167  | exonic       | ZNF516                                     | 18 | 74082482  | 74155167  | 0 | 2 | 0 | 0 | 0 | 0 | 72685  | 0.348551598 | 1.987763182 | 4.032542752 | 0.492930467 | 0.622061719 | 0.998252924 |
| chr18:8714137-8720494    | exonic       | MTCL1                                      | 18 | 8714137   | 8720494   | 0 | 2 | 0 | 0 | 0 | 0 | 6357   | 0.348551598 | 1.987763182 | 4.032542752 | 0.492930467 | 0.622061719 | 0.998252924 |
| chr19:10262073-10273424  | exonic       | DNMT1                                      | 19 | 10262073  | 10273424  | 0 | 2 | 0 | 0 | 0 | 0 | 11351  | 0.348551598 | 1.987763182 | 4.032542752 | 0.492930467 | 0.622061719 | 0.998252924 |
| chr19:1050919-1059084    | exonic       | ABCA7                                      | 19 | 1050919   | 1059084   | 0 | 2 | 0 | 0 | 0 | 0 | 8165   | 0.348551598 | 1.987763182 | 4.032542752 | 0.492930467 | 0.622061719 | 0.998252924 |
| chr19:10912964-10916643  | exonic       | DNM2                                       | 19 | 10912964  | 10916643  | 0 | 2 | 0 | 0 | 0 | 0 | 3679   | 0.348551598 | 1.987763182 | 4.032542752 | 0.492930467 | 0.622061719 | 0.998252924 |
| chr19:11230767-11234020  | exonic       | LDLR                                       | 19 | 11230767  | 11234020  | 0 | 2 | 0 | 0 | 0 | 0 | 3253   | 0.348551598 | 1.987763182 | 4.032542752 | 0.492930467 | 0.622061719 | 0.998252924 |
| chr19:1576821-1578537    | exonic       | MBD3                                       | 19 | 1576821   | 1578537   | 0 | 2 | 0 | 0 | 0 | 0 | 1716   | 0.348551598 | 1.987763182 | 4.032542752 | 0.492930467 | 0.622061719 | 0.998252924 |
| chr19:19696009-19710174  | exonic       | PBX4                                       | 19 | 19696009  | 19710174  | 0 | 2 | 0 | 0 | 0 | 0 | 14165  | 0.348551598 | 1.987763182 | 4.032542752 | 0.492930467 | 0.622061719 | 0.998252924 |
| chr19:23990628-24016323  | ncRNA_exonic | RPSAP58                                    | 19 | 23990628  | 24016323  | 0 | 2 | 0 | 0 | 0 | 0 | 25695  | 0.348551598 | 1.987763182 | 4.032542752 | 0.492930467 | 0.622061719 | 0.998252924 |
| chr19:30476130-30477324  | exonic       | URI1                                       | 19 | 30476130  | 30477324  | 0 | 2 | 0 | 0 | 0 | 0 | 1194   | 0.348551598 | 1.987763182 | 4.032542752 | 0.492930467 | 0.622061719 | 0.998252924 |
| chr19:30934467-30936639  | exonic       | ZNF536                                     | 19 | 30934467  | 30936639  | 0 | 2 | 0 | 0 | 0 | 0 | 2172   | 0.348551598 | 1.987763182 | 4.032542752 | 0.492930467 | 0.622061719 | 0.998252924 |
| chr19:38279791-38280133  | intergenic   | ZNF573 (dist=9561), LOC644554 (dist=27918) | 19 | 38279791  | 38280133  | 0 | 2 | 0 | 0 | 0 | 0 | 342    | 0.348551598 | 1.987763182 | 4.032542752 | 0.492930467 | 0.622061719 | 0.998252924 |
| chr19:38643479-38655546  | exonic       | SIPA1L3                                    | 19 | 38643479  | 38655546  | 0 | 2 | 0 | 0 | 0 | 0 | 12067  | 0.348551598 | 1.987763182 | 4.032542752 | 0.492930467 | 0.622061719 | 0.998252924 |
| chr19:4354945-4355170    | exonic       | MPND                                       | 19 | 4354945   | 4355170   | 0 | 2 | 0 | 0 | 0 | 0 | 225    | 0.348551598 | 1.987763182 | 4.032542752 | 0.492930467 | 0.622061719 | 0.998252924 |
| chr19:46230779-46231282  | intronic     | FBXO46                                     | 19 | 46230779  | 46231282  | 0 | 2 | 0 | 0 | 0 | 0 | 503    | 0.348551598 | 1.987763182 | 4.032542752 | 0.492930467 | 0.622061719 | 0.998252924 |
| chr19:50838316-50862904  | exonic       | NAPSA                                      | 19 | 50838316  | 50862904  | 0 | 2 | 0 | 0 | 0 | 0 | 24588  | 0.348551598 | 1.987763182 | 4.032542752 | 0.492930467 | 0.622061719 | 0.998252924 |
| chr19:52876364-52888577  | exonic       | ZNF880                                     | 19 | 52876364  | 52888577  | 0 | 2 | 0 | 0 | 0 | 0 | 12213  | 0.348551598 | 1.987763182 | 4.032542752 | 0.492930467 | 0.622061719 | 0.998252924 |
| chr19:53005080-53059303  | exonic       | ZNF578, ZNF808                             | 19 | 53005080  | 53059303  | 0 | 2 | 0 | 0 | 0 | 0 | 54223  | 0.348551598 | 1.987763182 | 4.032542752 | 0.492930467 | 0.622061719 | 0.998252924 |
| chr19:55587775-55595012  | exonic       | EPS8L1                                     | 19 | 55587775  | 55595012  | 0 | 2 | 0 | 0 | 0 | 0 | 7237   | 0.348551598 | 1.987763182 | 4.032542752 | 0.492930467 | 0.622061719 | 0.998252924 |
| chr19:55873613-55880309  | exonic       | FAM71E2, IL11                              | 19 | 55873613  | 55880309  | 0 | 2 | 0 | 0 | 0 | 0 | 6696   | 0.348551598 | 1.987763182 | 4.032542752 | 0.492930467 | 0.622061719 | 0.998252924 |
| chr19:9763629-9768811    | exonic       | ZNF562                                     | 19 | 9763629   | 9768811   | 0 | 2 | 0 | 0 | 0 | 0 | 5182   | 0.348551598 | 1.987763182 | 4.032542752 | 0.492930467 | 0.622061719 | 0.998252924 |
| chr2:101521194-101565942 | exonic       | NPAS2                                      | 2  | 101521194 | 101565942 | 0 | 2 | 0 | 0 | 0 | 0 | 44748  | 0.348551598 | 1.987763182 | 4.032542752 | 0.492930467 | 0.622061719 | 0.998252924 |
| chr2:101554214-101582228 | exonic       | NPAS2                                      | 2  | 101554214 | 101582228 | 0 | 2 | 0 | 0 | 0 | 0 | 28014  | 0.348551598 | 1.987763182 | 4.032542752 | 0.492930467 | 0.622061719 | 0.998252924 |
| chr2:106746129-106782539 | exonic       | UXS1                                       | 2  | 106746129 | 106782539 | 0 | 2 | 0 | 0 | 0 | 0 | 36410  | 0.348551598 | 1.987763182 | 4.032542752 | 0.492930467 | 0.622061719 | 0.998252924 |
| chr2:109116928-109117533 | intronic     | GCC2                                       | 2  | 109116928 | 109117533 | 0 | 2 | 0 | 0 | 0 | 0 | 605    | 0.348551598 | 1.987763182 | 4.032542752 | 0.492930467 | 0.622061719 | 0.998252924 |
| chr2:109408130-109432561 | exonic       | CCDC138                                    | 2  | 109408130 | 109432561 | 0 | 2 | 0 | 0 | 0 | 0 | 24431  | 0.348551598 | 1.987763182 | 4.032542752 | 0.492930467 | 0.622061719 | 0.998252924 |
| chr2:110310663-110342898 | exonic       |                                            | 2  | 110310663 | 110342898 | 0 | 2 | 0 | 0 | 0 | 0 | 32235  | 0.348551598 | 1.987763182 | 4.032542752 | 0.492930467 | 0.622061719 | 0.998252924 |
| chr2:111744684-111789291 | exonic       | ACOXL                                      | 2  | 111744684 | 111789291 | 0 | 2 | 0 | 0 | 0 | 0 | 44607  | 0.348551598 | 1.987763182 | 4.032542752 | 0.492930467 | 0.622061719 | 0.998252924 |
| chr2:122295772-122302734 | intronic     | CLASP1                                     | 2  | 122295772 | 122302734 | 0 | 2 | 0 | 0 | 0 | 0 | 6962   | 0.348551598 | 1.987763182 | 4.032542752 | 0.492930467 | 0.622061719 | 0.998252924 |
| chr2:135887564-135893502 | exonic       | RAB3GAP1                                   | 2  | 135887564 | 135893502 | 0 | 2 | 0 | 0 | 0 | 0 | 5938   | 0.348551598 | 1.987763182 | 4.032542752 | 0.492930467 | 0.622061719 | 0.998252924 |

10-Sep

|                          |          |                       |   |           |           |   |   |   |   |   |   |        |             |             |             |             |             |             |
|--------------------------|----------|-----------------------|---|-----------|-----------|---|---|---|---|---|---|--------|-------------|-------------|-------------|-------------|-------------|-------------|
| chr2:15415607-15542425   | exonic   | NBAS                  | 2 | 15415607  | 15542425  | 0 | 2 | 0 | 0 | 0 | 0 | 126818 | 0.348551598 | 1.987763182 | 4.032542752 | 0.492930467 | 0.622061719 | 0.998252924 |
| chr2:15542291-15567918   | exonic   | NBAS                  | 2 | 15542291  | 15567918  | 0 | 2 | 0 | 0 | 0 | 0 | 25627  | 0.348551598 | 1.987763182 | 4.032542752 | 0.492930467 | 0.622061719 | 0.998252924 |
| chr2:160634449-160639980 | exonic   | CD302,LY75-CD302      | 2 | 160634449 | 160639980 | 0 | 2 | 0 | 0 | 0 | 0 | 5531   | 0.348551598 | 1.987763182 | 4.032542752 | 0.492930467 | 0.622061719 | 0.998252924 |
| chr2:160964189-161052126 | exonic   | ITGB6                 | 2 | 160964189 | 161052126 | 0 | 2 | 0 | 0 | 0 | 0 | 87937  | 0.348551598 | 1.987763182 | 4.032542752 | 0.492930467 | 0.622061719 | 0.998252924 |
| chr2:171270458-171270792 | intronic | MYO3B                 | 2 | 171270458 | 171270792 | 0 | 2 | 0 | 0 | 0 | 0 | 334    | 0.348551598 | 1.987763182 | 4.032542752 | 0.492930467 | 0.622061719 | 0.998252924 |
| chr2:174081842-174104224 | exonic   | ZAK                   | 2 | 174081842 | 174104224 | 0 | 2 | 0 | 0 | 0 | 0 | 22382  | 0.348551598 | 1.987763182 | 4.032542752 | 0.492930467 | 0.622061719 | 0.998252924 |
| chr2:183821189-183848110 | exonic   | NCKAP1                | 2 | 183821189 | 183848110 | 0 | 2 | 0 | 0 | 0 | 0 | 26921  | 0.348551598 | 1.987763182 | 4.032542752 | 0.492930467 | 0.622061719 | 0.998252924 |
| chr2:205829875-205830046 | exonic   | PARD3B                | 2 | 205829875 | 205830046 | 0 | 2 | 0 | 0 | 0 | 0 | 171    | 0.348551598 | 1.987763182 | 4.032542752 | 0.492930467 | 0.622061719 | 0.998252924 |
| chr2:205969149-206023631 | exonic   | PARD3B                | 2 | 205969149 | 206023631 | 0 | 2 | 0 | 0 | 0 | 0 | 54482  | 0.348551598 | 1.987763182 | 4.032542752 | 0.492930467 | 0.622061719 | 0.998252924 |
| chr2:208579066-208605430 | exonic   | CCNYL1                | 2 | 208579066 | 208605430 | 0 | 2 | 0 | 0 | 0 | 0 | 26364  | 0.348551598 | 1.987763182 | 4.032542752 | 0.492930467 | 0.622061719 | 0.998252924 |
| chr2:208589523-208611937 | exonic   | CCNYL1                | 2 | 208589523 | 208611937 | 0 | 2 | 0 | 0 | 0 | 0 | 22414  | 0.348551598 | 1.987763182 | 4.032542752 | 0.492930467 | 0.622061719 | 0.998252924 |
| chr2:220077108-220079804 | exonic   | ABCB6                 | 2 | 220077108 | 220079804 | 0 | 2 | 0 | 0 | 0 | 0 | 2696   | 0.348551598 | 1.987763182 | 4.032542752 | 0.492930467 | 0.622061719 | 0.998252924 |
| chr2:232653264-232656518 | exonic   | COPS7B                | 2 | 232653264 | 232656518 | 0 | 2 | 0 | 0 | 0 | 0 | 3254   | 0.348551598 | 1.987763182 | 4.032542752 | 0.492930467 | 0.622061719 | 0.998252924 |
| chr2:232995328-233001429 | exonic   | DIS3L2                | 2 | 232995328 | 233001429 | 0 | 2 | 0 | 0 | 0 | 0 | 6101   | 0.348551598 | 1.987763182 | 4.032542752 | 0.492930467 | 0.622061719 | 0.998252924 |
| chr2:233421125-233431924 | exonic   | EIF4E2                | 2 | 233421125 | 233431924 | 0 | 2 | 0 | 0 | 0 | 0 | 10799  | 0.348551598 | 1.987763182 | 4.032542752 | 0.492930467 | 0.622061719 | 0.998252924 |
| chr2:233651881-233652019 | exonic   | GIGYF2                | 2 | 233651881 | 233652019 | 0 | 2 | 0 | 0 | 0 | 0 | 138    | 0.348551598 | 1.987763182 | 4.032542752 | 0.492930467 | 0.622061719 | 0.998252924 |
| chr2:234091055-234094571 | exonic   | INPP5D                | 2 | 234091055 | 234094571 | 0 | 2 | 0 | 0 | 0 | 0 | 3516   | 0.348551598 | 1.987763182 | 4.032542752 | 0.492930467 | 0.622061719 | 0.998252924 |
| chr2:238617186-238668848 | exonic   | LRRFIP1               | 2 | 238617186 | 238668848 | 0 | 2 | 0 | 0 | 0 | 0 | 51662  | 0.348551598 | 1.987763182 | 4.032542752 | 0.492930467 | 0.622061719 | 0.998252924 |
| chr2:24778884-24807429   | UTR5     | -----                 | 2 | 24778884  | 24807429  | 0 | 2 | 0 | 0 | 0 | 0 | 28545  | 0.348551598 | 1.987763182 | 4.032542752 | 0.492930467 | 0.622061719 | 0.998252924 |
| chr2:24787164-24905997   | exonic   | NCOA1                 | 2 | 24787164  | 24905997  | 0 | 2 | 0 | 0 | 0 | 0 | 118833 | 0.348551598 | 1.987763182 | 4.032542752 | 0.492930467 | 0.622061719 | 0.998252924 |
| chr2:26502861-26508439   | exonic   | HADHB                 | 2 | 26502861  | 26508439  | 0 | 2 | 0 | 0 | 0 | 0 | 5578   | 0.348551598 | 1.987763182 | 4.032542752 | 0.492930467 | 0.622061719 | 0.998252924 |
| chr2:32399131-32409407   | exonic   | SLC30A6               | 2 | 32399131  | 32409407  | 0 | 2 | 0 | 0 | 0 | 0 | 10276  | 0.348551598 | 1.987763182 | 4.032542752 | 0.492930467 | 0.622061719 | 0.998252924 |
| chr2:32664575-32670736   | exonic   | BIRC6                 | 2 | 32664575  | 32670736  | 0 | 2 | 0 | 0 | 0 | 0 | 6161   | 0.348551598 | 1.987763182 | 4.032542752 | 0.492930467 | 0.622061719 | 0.998252924 |
| chr2:32688261-32702651   | exonic   | BIRC6                 | 2 | 32688261  | 32702651  | 0 | 2 | 0 | 0 | 0 | 0 | 14390  | 0.348551598 | 1.987763182 | 4.032542752 | 0.492930467 | 0.622061719 | 0.998252924 |
| chr2:39081195-39085978   | exonic   | DHX57                 | 2 | 39081195  | 39085978  | 0 | 2 | 0 | 0 | 0 | 0 | 4783   | 0.348551598 | 1.987763182 | 4.032542752 | 0.492930467 | 0.622061719 | 0.998252924 |
| chr2:43512966-43513661   | intronic | THADA                 | 2 | 43512966  | 43513661  | 0 | 2 | 0 | 0 | 0 | 0 | 695    | 0.348551598 | 1.987763182 | 4.032542752 | 0.492930467 | 0.622061719 | 0.998252924 |
| chr2:44021596-44037663   | exonic   | DYNC2LI1              | 2 | 44021596  | 44037663  | 0 | 2 | 0 | 0 | 0 | 0 | 16067  | 0.348551598 | 1.987763182 | 4.032542752 | 0.492930467 | 0.622061719 | 0.998252924 |
| chr2:47202111-47206046   | exonic   | TTC7A                 | 2 | 47202111  | 47206046  | 0 | 2 | 0 | 0 | 0 | 0 | 3935   | 0.348551598 | 1.987763182 | 4.032542752 | 0.492930467 | 0.622061719 | 0.998252924 |
| chr2:48698225-48707155   | exonic   | PPP1R21               | 2 | 48698225  | 48707155  | 0 | 2 | 0 | 0 | 0 | 0 | 8930   | 0.348551598 | 1.987763182 | 4.032542752 | 0.492930467 | 0.622061719 | 0.998252924 |
| chr2:48872171-48898819   | exonic   | GTF2A1L,STON1-GTF2A1L | 2 | 48872171  | 48898819  | 0 | 2 | 0 | 0 | 0 | 0 | 26648  | 0.348551598 | 1.987763182 | 4.032542752 | 0.492930467 | 0.622061719 | 0.998252924 |
| chr2:61304054-61319722   | exonic   | KIAA1841              | 2 | 61304054  | 61319722  | 0 | 2 | 0 | 0 | 0 | 0 | 15668  | 0.348551598 | 1.987763182 | 4.032542752 | 0.492930467 | 0.622061719 | 0.998252924 |
| chr2:68358409-68361931   | exonic   | WDR92                 | 2 | 68358409  | 68361931  | 0 | 2 | 0 | 0 | 0 | 0 | 3522   | 0.348551598 | 1.987763182 | 4.032542752 | 0.492930467 | 0.622061719 | 0.998252924 |
| chr2:69590676-69601245   | exonic   | GFPT1                 | 2 | 69590676  | 69601245  | 0 | 2 | 0 | 0 | 0 | 0 | 10569  | 0.348551598 | 1.987763182 | 4.032542752 | 0.492930467 | 0.622061719 | 0.998252924 |
| chr2:69726323-69726463   | intronic | AAK1                  | 2 | 69726323  | 69726463  | 0 | 2 | 0 | 0 | 0 | 0 | 140    | 0.348551598 | 1.987763182 | 4.032542752 | 0.492930467 | 0.622061719 | 0.998252924 |
| chr2:70039784-70046470   | exonic   | ANXA4                 | 2 | 70039784  | 70046470  | 0 | 2 | 0 | 0 | 0 | 0 | 6686   | 0.348551598 | 1.987763182 | 4.032542752 | 0.492930467 | 0.622061719 | 0.998252924 |

|                         |              |                                               |    |          |          |   |   |   |   |   |   |        |             |             |             |             |             |             |
|-------------------------|--------------|-----------------------------------------------|----|----------|----------|---|---|---|---|---|---|--------|-------------|-------------|-------------|-------------|-------------|-------------|
| chr2:70215873-70224020  | ncRNA_exonic | PCBP1-AS1                                     | 2  | 70215873 | 70224020 | 0 | 2 | 0 | 0 | 0 | 0 | 8147   | 0.348551598 | 1.987763182 | 4.032542752 | 0.492930467 | 0.622061719 | 0.998252924 |
| chr2:72562075-72707879  | exonic       | EXOC6B                                        | 2  | 72562075 | 72707879 | 0 | 2 | 0 | 0 | 0 | 0 | 145804 | 0.348551598 | 1.987763182 | 4.032542752 | 0.492930467 | 0.622061719 | 0.998252924 |
| chr2:85813607-85814471  | intronic     | VAMP5                                         | 2  | 85813607 | 85814471 | 0 | 2 | 0 | 0 | 0 | 0 | 864    | 0.348551598 | 1.987763182 | 4.032542752 | 0.492930467 | 0.622061719 | 0.998252924 |
| chr2:85864492-85872206  | exonic       | USP39                                         | 2  | 85864492 | 85872206 | 0 | 2 | 0 | 0 | 0 | 0 | 7714   | 0.348551598 | 1.987763182 | 4.032542752 | 0.492930467 | 0.622061719 | 0.998252924 |
| chr2:96499673-96501170  | intergenic   | LINC00342 (dist=6944), ANKRD36C (dist=14126)  | 2  | 96499673 | 96501170 | 0 | 2 | 0 | 0 | 0 | 0 | 1497   | 0.348551598 | 1.987763182 | 4.032542752 | 0.492930467 | 0.622061719 | 0.998252924 |
| chr2:96550088-96551868  | exonic       | ANKRD36C                                      | 2  | 96550088 | 96551868 | 0 | 2 | 0 | 0 | 0 | 0 | 1780   | 0.348551598 | 1.987763182 | 4.032542752 | 0.492930467 | 0.622061719 | 0.998252924 |
| chr2:96553840-96557485  | exonic       | ANKRD36C                                      | 2  | 96553840 | 96557485 | 0 | 2 | 0 | 0 | 0 | 0 | 3645   | 0.348551598 | 1.987763182 | 4.032542752 | 0.492930467 | 0.622061719 | 0.998252924 |
| chr2:99271907-99291638  | exonic       | MGAT4A                                        | 2  | 99271907 | 99291638 | 0 | 2 | 0 | 0 | 0 | 0 | 19731  | 0.348551598 | 1.987763182 | 4.032542752 | 0.492930467 | 0.622061719 | 0.998252924 |
| chr20:2634039-2635034   | exonic       | NOP56                                         | 20 | 2634039  | 2635034  | 0 | 2 | 0 | 0 | 0 | 0 | 995    | 0.348551598 | 1.987763182 | 4.032542752 | 0.492930467 | 0.622061719 | 0.998252924 |
| chr20:31954664-31967497 | exonic       | CDK5RAP1                                      | 20 | 31954664 | 31967497 | 0 | 2 | 0 | 0 | 0 | 0 | 12833  | 0.348551598 | 1.987763182 | 4.032542752 | 0.492930467 | 0.622061719 | 0.998252924 |
| chr20:33028985-33029485 | intronic     | ITCH                                          | 20 | 33028985 | 33029485 | 0 | 2 | 0 | 0 | 0 | 0 | 500    | 0.348551598 | 1.987763182 | 4.032542752 | 0.492930467 | 0.622061719 | 0.998252924 |
| chr20:33364095-33380366 | exonic       | NCOA6                                         | 20 | 33364095 | 33380366 | 0 | 2 | 0 | 0 | 0 | 0 | 16271  | 0.348551598 | 1.987763182 | 4.032542752 | 0.492930467 | 0.622061719 | 0.998252924 |
| chr20:35668555-35696589 | exonic       | RBL1                                          | 20 | 35668555 | 35696589 | 0 | 2 | 0 | 0 | 0 | 0 | 28034  | 0.348551598 | 1.987763182 | 4.032542752 | 0.492930467 | 0.622061719 | 0.998252924 |
| chr20:43108624-43115346 | exonic       | TTPAL                                         | 20 | 43108624 | 43115346 | 0 | 2 | 0 | 0 | 0 | 0 | 6722   | 0.348551598 | 1.987763182 | 4.032542752 | 0.492930467 | 0.622061719 | 0.998252924 |
| chr20:48556499-48557373 | intronic     | RNF114                                        | 20 | 48556499 | 48557373 | 0 | 2 | 0 | 0 | 0 | 0 | 874    | 0.348551598 | 1.987763182 | 4.032542752 | 0.492930467 | 0.622061719 | 0.998252924 |
| chr20:49540331-49542419 | intronic     | ADNP                                          | 20 | 49540331 | 49542419 | 0 | 2 | 0 | 0 | 0 | 0 | 2088   | 0.348551598 | 1.987763182 | 4.032542752 | 0.492930467 | 0.622061719 | 0.998252924 |
| chr20:49558567-49571822 | exonic       | DPM1                                          | 20 | 49558567 | 49571822 | 0 | 2 | 0 | 0 | 0 | 0 | 13255  | 0.348551598 | 1.987763182 | 4.032542752 | 0.492930467 | 0.622061719 | 0.998252924 |
| chr20:50286535-50287796 | exonic       | ATP9A                                         | 20 | 50286535 | 50287796 | 0 | 2 | 0 | 0 | 0 | 0 | 1261   | 0.348551598 | 1.987763182 | 4.032542752 | 0.492930467 | 0.622061719 | 0.998252924 |
| chr20:55048356-55052180 | exonic       | RTFDC1                                        | 20 | 55048356 | 55052180 | 0 | 2 | 0 | 0 | 0 | 0 | 3824   | 0.348551598 | 1.987763182 | 4.032542752 | 0.492930467 | 0.622061719 | 0.998252924 |
| chr20:9389279-9391735   | exonic       | PLCB4                                         | 20 | 9389279  | 9391735  | 0 | 2 | 0 | 0 | 0 | 0 | 2456   | 0.348551598 | 1.987763182 | 4.032542752 | 0.492930467 | 0.622061719 | 0.998252924 |
| chr21:18586314-18637124 | intergenic   | W18996 (dist=404220), LINC01549 (dist=174084) | 21 | 18586314 | 18637124 | 0 | 2 | 0 | 0 | 0 | 0 | 50810  | 0.348551598 | 1.987763182 | 4.032542752 | 0.492930467 | 0.622061719 | 0.998252924 |
| chr21:34778593-34779996 | intronic     | IFNGR2                                        | 21 | 34778593 | 34779996 | 0 | 2 | 0 | 0 | 0 | 0 | 1403   | 0.348551598 | 1.987763182 | 4.032542752 | 0.492930467 | 0.622061719 | 0.998252924 |
| chr21:34882089-34911629 | exonic       | GART                                          | 21 | 34882089 | 34911629 | 0 | 2 | 0 | 0 | 0 | 0 | 29540  | 0.348551598 | 1.987763182 | 4.032542752 | 0.492930467 | 0.622061719 | 0.998252924 |
| chr21:34931535-34945761 | exonic       | SON                                           | 21 | 34931535 | 34945761 | 0 | 2 | 0 | 0 | 0 | 0 | 14226  | 0.348551598 | 1.987763182 | 4.032542752 | 0.492930467 | 0.622061719 | 0.998252924 |
| chr21:38480691-38539922 | exonic       | TTC3                                          | 21 | 38480691 | 38539922 | 0 | 2 | 0 | 0 | 0 | 0 | 59231  | 0.348551598 | 1.987763182 | 4.032542752 | 0.492930467 | 0.622061719 | 0.998252924 |
| chr21:38504981-38525577 | exonic       | TTC3                                          | 21 | 38504981 | 38525577 | 0 | 2 | 0 | 0 | 0 | 0 | 20596  | 0.348551598 | 1.987763182 | 4.032542752 | 0.492930467 | 0.622061719 | 0.998252924 |
| chr21:38532001-38555215 | exonic       | TTC3                                          | 21 | 38532001 | 38555215 | 0 | 2 | 0 | 0 | 0 | 0 | 23214  | 0.348551598 | 1.987763182 | 4.032542752 | 0.492930467 | 0.622061719 | 0.998252924 |
| chr21:38792600-38868560 | exonic       | DYRK1A                                        | 21 | 38792600 | 38868560 | 0 | 2 | 0 | 0 | 0 | 0 | 75960  | 0.348551598 | 1.987763182 | 4.032542752 | 0.492930467 | 0.622061719 | 0.998252924 |
| chr21:38792601-38798083 | exonic       | DYRK1A                                        | 21 | 38792601 | 38798083 | 0 | 2 | 0 | 0 | 0 | 0 | 5482   | 0.348551598 | 1.987763182 | 4.032542752 | 0.492930467 | 0.622061719 | 0.998252924 |
| chr21:40587162-40590586 | exonic       | BRWD1                                         | 21 | 40587162 | 40590586 | 0 | 2 | 0 | 0 | 0 | 0 | 3424   | 0.348551598 | 1.987763182 | 4.032542752 | 0.492930467 | 0.622061719 | 0.998252924 |
| chr21:40619626-40646398 | exonic       | BRWD1                                         | 21 | 40619626 | 40646398 | 0 | 2 | 0 | 0 | 0 | 0 | 26772  | 0.348551598 | 1.987763182 | 4.032542752 | 0.492930467 | 0.622061719 | 0.998252924 |
| chr21:40630412-40646398 | exonic       | BRWD1                                         | 21 | 40630412 | 40646398 | 0 | 2 | 0 | 0 | 0 | 0 | 15986  | 0.348551598 | 1.987763182 | 4.032542752 | 0.492930467 | 0.622061719 | 0.998252924 |
| chr21:48068531-48069483 | exonic       | PRMT2                                         | 21 | 48068531 | 48069483 | 0 | 2 | 0 | 0 | 0 | 0 | 952    | 0.348551598 | 1.987763182 | 4.032542752 | 0.492930467 | 0.622061719 | 0.998252924 |
| chr22:17669228-17690613 | exonic       | CECR1                                         | 22 | 17669228 | 17690613 | 0 | 2 | 0 | 0 | 0 | 0 | 21385  | 0.348551598 | 1.987763182 | 4.032542752 | 0.492930467 | 0.622061719 | 0.998252924 |
| chr22:18640324-18643035 | exonic       | USP18                                         | 22 | 18640324 | 18643035 | 0 | 2 | 0 | 0 | 0 | 0 | 2711   | 0.348551598 | 1.987763182 | 4.032542752 | 0.492930467 | 0.622061719 | 0.998252924 |

|                          |            |                                                           |    |           |           |   |   |   |   |   |   |        |             |             |             |             |             |             |
|--------------------------|------------|-----------------------------------------------------------|----|-----------|-----------|---|---|---|---|---|---|--------|-------------|-------------|-------------|-------------|-------------|-------------|
| chr22:26000344-26011100  | exonic     | ADRBK2                                                    | 22 | 26000344  | 26011100  | 0 | 2 | 0 | 0 | 0 | 0 | 10756  | 0.348551598 | 1.987763182 | 4.032542752 | 0.492930467 | 0.622061719 | 0.998252924 |
| chr22:30209418-30221769  | exonic     | ASCC2                                                     | 22 | 30209418  | 30221769  | 0 | 2 | 0 | 0 | 0 | 0 | 12351  | 0.348551598 | 1.987763182 | 4.032542752 | 0.492930467 | 0.622061719 | 0.998252924 |
| chr22:36156080-36157248  | splicing   | RBFOX2                                                    | 22 | 36156080  | 36157248  | 0 | 2 | 0 | 0 | 0 | 0 | 1168   | 0.348551598 | 1.987763182 | 4.032542752 | 0.492930467 | 0.622061719 | 0.998252924 |
| chr22:37962078-37962819  | exonic     | CDC42EP1                                                  | 22 | 37962078  | 37962819  | 0 | 2 | 0 | 0 | 0 | 0 | 741    | 0.348551598 | 1.987763182 | 4.032542752 | 0.492930467 | 0.622061719 | 0.998252924 |
| chr22:41277773-41282519  | exonic     | XPNPEP3                                                   | 22 | 41277773  | 41282519  | 0 | 2 | 0 | 0 | 0 | 0 | 4746   | 0.348551598 | 1.987763182 | 4.032542752 | 0.492930467 | 0.622061719 | 0.998252924 |
| chr22:41537051-41554504  | exonic     | EP300                                                     | 22 | 41537051  | 41554504  | 0 | 2 | 0 | 0 | 0 | 0 | 17453  | 0.348551598 | 1.987763182 | 4.032542752 | 0.492930467 | 0.622061719 | 0.998252924 |
| chr22:42231563-42233602  | intronic   | SREBF2                                                    | 22 | 42231563  | 42233602  | 0 | 2 | 0 | 0 | 0 | 0 | 2039   | 0.348551598 | 1.987763182 | 4.032542752 | 0.492930467 | 0.622061719 | 0.998252924 |
| chr22:50167339-50171461  | exonic     | BRD1                                                      | 22 | 50167339  | 50171461  | 0 | 2 | 0 | 0 | 0 | 0 | 4122   | 0.348551598 | 1.987763182 | 4.032542752 | 0.492930467 | 0.622061719 | 0.998252924 |
| chr3:100009421-100018175 | exonic     | TBC1D23                                                   | 3  | 100009421 | 100018175 | 0 | 2 | 0 | 0 | 0 | 0 | 8754   | 0.348551598 | 1.987763182 | 4.032542752 | 0.492930467 | 0.622061719 | 0.998252924 |
| chr3:101117704-101136634 | exonic     | SENP7                                                     | 3  | 101117704 | 101136634 | 0 | 2 | 0 | 0 | 0 | 0 | 18930  | 0.348551598 | 1.987763182 | 4.032542752 | 0.492930467 | 0.622061719 | 0.998252924 |
| chr3:107770722-107770785 | splicing   | CD47                                                      | 3  | 107770722 | 107770785 | 0 | 2 | 0 | 0 | 0 | 0 | 63     | 0.348551598 | 1.987763182 | 4.032542752 | 0.492930467 | 0.622061719 | 0.998252924 |
| chr3:110863745-110866331 | exonic     | PVRL3                                                     | 3  | 110863745 | 110866331 | 0 | 2 | 0 | 0 | 0 | 0 | 2586   | 0.348551598 | 1.987763182 | 4.032542752 | 0.492930467 | 0.622061719 | 0.998252924 |
| chr3:118823991-118892565 | exonic     | C3orf30, IGSF11                                           | 3  | 118823991 | 118892565 | 0 | 2 | 0 | 0 | 0 | 0 | 68574  | 0.348551598 | 1.987763182 | 4.032542752 | 0.492930467 | 0.622061719 | 0.998252924 |
| chr3:121366165-121376199 | exonic     | HCLS1                                                     | 3  | 121366165 | 121376199 | 0 | 2 | 0 | 0 | 0 | 0 | 10034  | 0.348551598 | 1.987763182 | 4.032542752 | 0.492930467 | 0.622061719 | 0.998252924 |
| chr3:122255014-122274968 | exonic     | PARP9                                                     | 3  | 122255014 | 122274968 | 0 | 2 | 0 | 0 | 0 | 0 | 19954  | 0.348551598 | 1.987763182 | 4.032542752 | 0.492930467 | 0.622061719 | 0.998252924 |
| chr3:122552163-122579049 | exonic     | DIRC2                                                     | 3  | 122552163 | 122579049 | 0 | 2 | 0 | 0 | 0 | 0 | 26886  | 0.348551598 | 1.987763182 | 4.032542752 | 0.492930467 | 0.622061719 | 0.998252924 |
| chr3:125032152-125042288 | exonic     | ZNF148                                                    | 3  | 125032152 | 125042288 | 0 | 2 | 0 | 0 | 0 | 0 | 10136  | 0.348551598 | 1.987763182 | 4.032542752 | 0.492930467 | 0.622061719 | 0.998252924 |
| chr3:134206860-134250782 | exonic     | CEP63                                                     | 3  | 134206860 | 134250782 | 0 | 2 | 0 | 0 | 0 | 0 | 43922  | 0.348551598 | 1.987763182 | 4.032542752 | 0.492930467 | 0.622061719 | 0.998252924 |
| chr3:142066075-142144380 | exonic     | XRN1                                                      | 3  | 142066075 | 142144380 | 0 | 2 | 0 | 0 | 0 | 0 | 78305  | 0.348551598 | 1.987763182 | 4.032542752 | 0.492930467 | 0.622061719 | 0.998252924 |
| chr3:142740314-142756177 | exonic     | U2SURP                                                    | 3  | 142740314 | 142756177 | 0 | 2 | 0 | 0 | 0 | 0 | 15863  | 0.348551598 | 1.987763182 | 4.032542752 | 0.492930467 | 0.622061719 | 0.998252924 |
| chr3:15057659-15058779   | exonic     | NR2C2                                                     | 3  | 15057659  | 15058779  | 0 | 2 | 0 | 0 | 0 | 0 | 1120   | 0.348551598 | 1.987763182 | 4.032542752 | 0.492930467 | 0.622061719 | 0.998252924 |
| chr3:152048668-152056462 | UTR5       | <small>MEN1 (NM_001314057:c.-61111_-60992delins0)</small> | 3  | 152048668 | 152056462 | 0 | 2 | 0 | 0 | 0 | 0 | 7794   | 0.348551598 | 1.987763182 | 4.032542752 | 0.492930467 | 0.622061719 | 0.998252924 |
| chr3:154013072-154024084 | exonic     | DHX36                                                     | 3  | 154013072 | 154024084 | 0 | 2 | 0 | 0 | 0 | 0 | 11012  | 0.348551598 | 1.987763182 | 4.032542752 | 0.492930467 | 0.622061719 | 0.998252924 |
| chr3:155628480-155632359 | exonic     | GMPS                                                      | 3  | 155628480 | 155632359 | 0 | 2 | 0 | 0 | 0 | 0 | 3879   | 0.348551598 | 1.987763182 | 4.032542752 | 0.492930467 | 0.622061719 | 0.998252924 |
| chr3:155659097-155659966 | intergenic | <small>GMPS (dist=3577), KCNAB1 (dist=178371)</small>     | 3  | 155659097 | 155659966 | 0 | 2 | 0 | 0 | 0 | 0 | 869    | 0.348551598 | 1.987763182 | 4.032542752 | 0.492930467 | 0.622061719 | 0.998252924 |
| chr3:167000025-167023738 | exonic     | ZBBX                                                      | 3  | 167000025 | 167023738 | 0 | 2 | 0 | 0 | 0 | 0 | 23713  | 0.348551598 | 1.987763182 | 4.032542752 | 0.492930467 | 0.622061719 | 0.998252924 |
| chr3:167272438-167351320 | exonic     | WDR49                                                     | 3  | 167272438 | 167351320 | 0 | 2 | 0 | 0 | 0 | 0 | 78882  | 0.348551598 | 1.987763182 | 4.032542752 | 0.492930467 | 0.622061719 | 0.998252924 |
| chr3:169831147-169867032 | exonic     | PHC3                                                      | 3  | 169831147 | 169867032 | 0 | 2 | 0 | 0 | 0 | 0 | 35885  | 0.348551598 | 1.987763182 | 4.032542752 | 0.492930467 | 0.622061719 | 0.998252924 |
| chr3:170000393-170003807 | exonic     | PRKCI                                                     | 3  | 170000393 | 170003807 | 0 | 2 | 0 | 0 | 0 | 0 | 3414   | 0.348551598 | 1.987763182 | 4.032542752 | 0.492930467 | 0.622061719 | 0.998252924 |
| chr3:171778500-171969331 | exonic     | FNDC3B                                                    | 3  | 171778500 | 171969331 | 0 | 2 | 0 | 0 | 0 | 0 | 190831 | 0.348551598 | 1.987763182 | 4.032542752 | 0.492930467 | 0.622061719 | 0.998252924 |
| chr3:183677520-183696439 | exonic     | ABCC5                                                     | 3  | 183677520 | 183696439 | 0 | 2 | 0 | 0 | 0 | 0 | 18919  | 0.348551598 | 1.987763182 | 4.032542752 | 0.492930467 | 0.622061719 | 0.998252924 |
| chr3:184566858-184603944 | exonic     | VPS8                                                      | 3  | 184566858 | 184603944 | 0 | 2 | 0 | 0 | 0 | 0 | 37086  | 0.348551598 | 1.987763182 | 4.032542752 | 0.492930467 | 0.622061719 | 0.998252924 |
| chr3:185251358-185252920 | exonic     | LIPH                                                      | 3  | 185251358 | 185252920 | 0 | 2 | 0 | 0 | 0 | 0 | 1562   | 0.348551598 | 1.987763182 | 4.032542752 | 0.492930467 | 0.622061719 | 0.998252924 |
| chr3:193151633-193210949 | exonic     | ATP13A4                                                   | 3  | 193151633 | 193210949 | 0 | 2 | 0 | 0 | 0 | 0 | 59316  | 0.348551598 | 1.987763182 | 4.032542752 | 0.492930467 | 0.622061719 | 0.998252924 |
| chr3:195063199-195112876 | exonic     | ACAP2                                                     | 3  | 195063199 | 195112876 | 0 | 2 | 0 | 0 | 0 | 0 | 49677  | 0.348551598 | 1.987763182 | 4.032542752 | 0.492930467 | 0.622061719 | 0.998252924 |

|                          |            |                                                             |   |           |           |   |   |   |   |   |   |        |             |             |             |             |             |             |
|--------------------------|------------|-------------------------------------------------------------|---|-----------|-----------|---|---|---|---|---|---|--------|-------------|-------------|-------------|-------------|-------------|-------------|
| chr3:23996027-24006653   | exonic     | NR1D2                                                       | 3 | 23996027  | 24006653  | 0 | 2 | 0 | 0 | 0 | 0 | 10626  | 0.348551598 | 1.987763182 | 4.032542752 | 0.492930467 | 0.622061719 | 0.998252924 |
| chr3:25640925-25686946   | exonic     | TOP2B                                                       | 3 | 25640925  | 25686946  | 0 | 2 | 0 | 0 | 0 | 0 | 46021  | 0.348551598 | 1.987763182 | 4.032542752 | 0.492930467 | 0.622061719 | 0.998252924 |
| chr3:27459976-27493989   | exonic     | SLC4A7                                                      | 3 | 27459976  | 27493989  | 0 | 2 | 0 | 0 | 0 | 0 | 34013  | 0.348551598 | 1.987763182 | 4.032542752 | 0.492930467 | 0.622061719 | 0.998252924 |
| chr3:33437653-33467233   | exonic     | UBP1                                                        | 3 | 33437653  | 33467233  | 0 | 2 | 0 | 0 | 0 | 0 | 29580  | 0.348551598 | 1.987763182 | 4.032542752 | 0.492930467 | 0.622061719 | 0.998252924 |
| chr3:37356910-37360685   | exonic     | GOLGA4                                                      | 3 | 37356910  | 37360685  | 0 | 2 | 0 | 0 | 0 | 0 | 3775   | 0.348551598 | 1.987763182 | 4.032542752 | 0.492930467 | 0.622061719 | 0.998252924 |
| chr3:37544798-37547449   | exonic     | ITGA9                                                       | 3 | 37544798  | 37547449  | 0 | 2 | 0 | 0 | 0 | 0 | 2651   | 0.348551598 | 1.987763182 | 4.032542752 | 0.492930467 | 0.622061719 | 0.998252924 |
| chr3:44871463-44881948   | exonic     | KIF15                                                       | 3 | 44871463  | 44881948  | 0 | 2 | 0 | 0 | 0 | 0 | 10485  | 0.348551598 | 1.987763182 | 4.032542752 | 0.492930467 | 0.622061719 | 0.998252924 |
| chr3:4836748-4854918     | exonic     | ITPR1                                                       | 3 | 4836748   | 4854918   | 0 | 2 | 0 | 0 | 0 | 0 | 18170  | 0.348551598 | 1.987763182 | 4.032542752 | 0.492930467 | 0.622061719 | 0.998252924 |
| chr3:48612109-48612675   | exonic     | COL7A1                                                      | 3 | 48612109  | 48612675  | 0 | 2 | 0 | 0 | 0 | 0 | 566    | 0.348551598 | 1.987763182 | 4.032542752 | 0.492930467 | 0.622061719 | 0.998252924 |
| chr3:49081822-49114471   | exonic     | QRICH1                                                      | 3 | 49081822  | 49114471  | 0 | 2 | 0 | 0 | 0 | 0 | 32649  | 0.348551598 | 1.987763182 | 4.032542752 | 0.492930467 | 0.622061719 | 0.998252924 |
| chr3:49087162-49087439   | intronic   | QRICH1                                                      | 3 | 49087162  | 49087439  | 0 | 2 | 0 | 0 | 0 | 0 | 277    | 0.348551598 | 1.987763182 | 4.032542752 | 0.492930467 | 0.622061719 | 0.998252924 |
| chr3:52722124-52723222   | exonic     | GNL3                                                        | 3 | 52722124  | 52723222  | 0 | 2 | 0 | 0 | 0 | 0 | 1098   | 0.348551598 | 1.987763182 | 4.032542752 | 0.492930467 | 0.622061719 | 0.998252924 |
| chr3:54537518-54676268   | exonic     | CACNA2D3                                                    | 3 | 54537518  | 54676268  | 0 | 2 | 0 | 0 | 0 | 0 | 138750 | 0.348551598 | 1.987763182 | 4.032542752 | 0.492930467 | 0.622061719 | 0.998252924 |
| chr3:56597711-56649300   | exonic     | CCDC66                                                      | 3 | 56597711  | 56649300  | 0 | 2 | 0 | 0 | 0 | 0 | 51589  | 0.348551598 | 1.987763182 | 4.032542752 | 0.492930467 | 0.622061719 | 0.998252924 |
| chr3:56667071-56683085   | exonic     | FAM208A                                                     | 3 | 56667071  | 56683085  | 0 | 2 | 0 | 0 | 0 | 0 | 16014  | 0.348551598 | 1.987763182 | 4.032542752 | 0.492930467 | 0.622061719 | 0.998252924 |
| chr3:58075203-58075569   | intronic   | FLNB                                                        | 3 | 58075203  | 58075569  | 0 | 2 | 0 | 0 | 0 | 0 | 366    | 0.348551598 | 1.987763182 | 4.032542752 | 0.492930467 | 0.622061719 | 0.998252924 |
| chr3:67568671-67610076   | exonic     | SUCLG2                                                      | 3 | 67568671  | 67610076  | 0 | 2 | 0 | 0 | 0 | 0 | 41405  | 0.348551598 | 1.987763182 | 4.032542752 | 0.492930467 | 0.622061719 | 0.998252924 |
| chr4:100058644-100061488 | exonic     | ADH4                                                        | 4 | 100058644 | 100061488 | 0 | 2 | 0 | 0 | 0 | 0 | 2844   | 0.348551598 | 1.987763182 | 4.032542752 | 0.492930467 | 0.622061719 | 0.998252924 |
| chr4:100239203-100266423 | exonic     | ADH1B, ADH1C                                                | 4 | 100239203 | 100266423 | 0 | 2 | 0 | 0 | 0 | 0 | 27220  | 0.348551598 | 1.987763182 | 4.032542752 | 0.492930467 | 0.622061719 | 0.998252924 |
| chr4:100824882-100844342 | exonic     | DNAJB14                                                     | 4 | 100824882 | 100844342 | 0 | 2 | 0 | 0 | 0 | 0 | 19460  | 0.348551598 | 1.987763182 | 4.032542752 | 0.492930467 | 0.622061719 | 0.998252924 |
| chr4:103610730-103645124 | exonic     | MANBA                                                       | 4 | 103610730 | 103645124 | 0 | 1 | 2 | 2 | 0 | 0 | 34394  | 0.348551598 | 1.987763182 | 4.032542752 | 0.492930467 | 0.622061719 | 0.998252924 |
| chr4:108930914-108935744 | exonic     | HADH                                                        | 4 | 108930914 | 108935744 | 0 | 2 | 0 | 0 | 0 | 0 | 4830   | 0.348551598 | 1.987763182 | 4.032542752 | 0.492930467 | 0.622061719 | 0.998252924 |
| chr4:122602825-122605926 | exonic     | ANXA5                                                       | 4 | 122602825 | 122605926 | 0 | 2 | 0 | 0 | 0 | 0 | 3101   | 0.348551598 | 1.987763182 | 4.032542752 | 0.492930467 | 0.622061719 | 0.998252924 |
| chr4:123107190-123111234 | exonic     | KIAA1109                                                    | 4 | 123107190 | 123111234 | 0 | 2 | 0 | 0 | 0 | 0 | 4044   | 0.348551598 | 1.987763182 | 4.032542752 | 0.492930467 | 0.622061719 | 0.998252924 |
| chr4:128595278-128609022 | exonic     | INTU                                                        | 4 | 128595278 | 128609022 | 0 | 2 | 0 | 0 | 0 | 0 | 13744  | 0.348551598 | 1.987763182 | 4.032542752 | 0.492930467 | 0.622061719 | 0.998252924 |
| chr4:144359151-144361535 | exonic     | GAB1                                                        | 4 | 144359151 | 144361535 | 0 | 2 | 0 | 0 | 0 | 0 | 2384   | 0.348551598 | 1.987763182 | 4.032542752 | 0.492930467 | 0.622061719 | 0.998252924 |
| chr4:146744573-146813567 | exonic     | ZNF827                                                      | 4 | 146744573 | 146813567 | 0 | 2 | 0 | 0 | 0 | 0 | 68994  | 0.348551598 | 1.987763182 | 4.032542752 | 0.492930467 | 0.622061719 | 0.998252924 |
| chr4:147425000-147438272 | exonic     | SLC10A7                                                     | 4 | 147425000 | 147438272 | 0 | 2 | 0 | 0 | 0 | 0 | 13272  | 0.348551598 | 1.987763182 | 4.032542752 | 0.492930467 | 0.622061719 | 0.998252924 |
| chr4:149741444-149752558 | intergenic | <small>NR3C2(d1s1+377772).LOC101927849(d1s1+322889)</small> | 4 | 149741444 | 149752558 | 0 | 2 | 0 | 0 | 0 | 0 | 11114  | 0.348551598 | 1.987763182 | 4.032542752 | 0.492930467 | 0.622061719 | 0.998252924 |
| chr4:153562079-153574079 | exonic     | TMEM154                                                     | 4 | 153562079 | 153574079 | 0 | 2 | 0 | 0 | 0 | 0 | 12000  | 0.348551598 | 1.987763182 | 4.032542752 | 0.492930467 | 0.622061719 | 0.998252924 |
| chr4:154315413-154318485 | exonic     | MND1                                                        | 4 | 154315413 | 154318485 | 0 | 2 | 0 | 0 | 0 | 0 | 3072   | 0.348551598 | 1.987763182 | 4.032542752 | 0.492930467 | 0.622061719 | 0.998252924 |
| chr4:156617907-156625145 | exonic     | GUCY1A3                                                     | 4 | 156617907 | 156625145 | 0 | 2 | 0 | 0 | 0 | 0 | 7238   | 0.348551598 | 1.987763182 | 4.032542752 | 0.492930467 | 0.622061719 | 0.998252924 |
| chr4:16008160-16020163   | exonic     | PROM1                                                       | 4 | 16008160  | 16020163  | 0 | 2 | 0 | 0 | 0 | 0 | 12003  | 0.348551598 | 1.987763182 | 4.032542752 | 0.492930467 | 0.622061719 | 0.998252924 |
| chr4:160251009-160253849 | exonic     | RAPGEF2                                                     | 4 | 160251009 | 160253849 | 0 | 2 | 0 | 0 | 0 | 0 | 2840   | 0.348551598 | 1.987763182 | 4.032542752 | 0.492930467 | 0.622061719 | 0.998252924 |
| chr4:166184348-166220808 | exonic     | KLHL2                                                       | 4 | 166184348 | 166220808 | 0 | 2 | 0 | 0 | 0 | 0 | 36460  | 0.348551598 | 1.987763182 | 4.032542752 | 0.492930467 | 0.622061719 | 0.998252924 |

|                          |              |                                                                   |   |           |           |   |   |   |   |   |   |        |             |             |             |             |             |             |
|--------------------------|--------------|-------------------------------------------------------------------|---|-----------|-----------|---|---|---|---|---|---|--------|-------------|-------------|-------------|-------------|-------------|-------------|
| chr4:170384393-170430003 | exonic       | NEK1                                                              | 4 | 170384393 | 170430003 | 0 | 2 | 0 | 0 | 0 | 0 | 45610  | 0.348551598 | 1.987763182 | 4.032542752 | 0.492930467 | 0.622061719 | 0.998252924 |
| chr4:1893893-1920350     | exonic       | WHSC1                                                             | 4 | 1893893   | 1920350   | 0 | 2 | 0 | 0 | 0 | 0 | 26457  | 0.348551598 | 1.987763182 | 4.032542752 | 0.492930467 | 0.622061719 | 0.998252924 |
| chr4:2659529-2717831     | exonic       | FAM193A                                                           | 4 | 2659529   | 2717831   | 0 | 2 | 0 | 0 | 0 | 0 | 58302  | 0.348551598 | 1.987763182 | 4.032542752 | 0.492930467 | 0.622061719 | 0.998252924 |
| chr4:39077584-39105131   | exonic       | KLHL5                                                             | 4 | 39077584  | 39105131  | 0 | 2 | 0 | 0 | 0 | 0 | 27547  | 0.348551598 | 1.987763182 | 4.032542752 | 0.492930467 | 0.622061719 | 0.998252924 |
| chr4:39900008-39902127   | exonic       | PDS5A                                                             | 4 | 39900008  | 39902127  | 0 | 2 | 0 | 0 | 0 | 0 | 2119   | 0.348551598 | 1.987763182 | 4.032542752 | 0.492930467 | 0.622061719 | 0.998252924 |
| chr4:42505467-42526864   | exonic       | ATP8A1                                                            | 4 | 42505467  | 42526864  | 0 | 2 | 0 | 0 | 0 | 0 | 21397  | 0.348551598 | 1.987763182 | 4.032542752 | 0.492930467 | 0.622061719 | 0.998252924 |
| chr4:4436496-4458984     | exonic       | STX18                                                             | 4 | 4436496   | 4458984   | 0 | 2 | 0 | 0 | 0 | 0 | 22488  | 0.348551598 | 1.987763182 | 4.032542752 | 0.492930467 | 0.622061719 | 0.998252924 |
| chr4:47877143-47888016   | exonic       | NFXL1                                                             | 4 | 47877143  | 47888016  | 0 | 2 | 0 | 0 | 0 | 0 | 10873  | 0.348551598 | 1.987763182 | 4.032542752 | 0.492930467 | 0.622061719 | 0.998252924 |
| chr4:56342129-56355632   | exonic       | CLOCK                                                             | 4 | 56342129  | 56355632  | 0 | 2 | 0 | 0 | 0 | 0 | 13503  | 0.348551598 | 1.987763182 | 4.032542752 | 0.492930467 | 0.622061719 | 0.998252924 |
| chr4:76677231-76677754   | intronic     | USO1                                                              | 4 | 76677231  | 76677754  | 0 | 2 | 0 | 0 | 0 | 0 | 523    | 0.348551598 | 1.987763182 | 4.032542752 | 0.492930467 | 0.622061719 | 0.998252924 |
| chr4:7770570-7780603     | exonic       | AFAP1                                                             | 4 | 7770570   | 7780603   | 0 | 2 | 0 | 0 | 0 | 0 | 10033  | 0.348551598 | 1.987763182 | 4.032542752 | 0.492930467 | 0.622061719 | 0.998252924 |
| chr4:79516534-79525553   | exonic       | ANXA3                                                             | 4 | 79516534  | 79525553  | 0 | 2 | 0 | 0 | 0 | 0 | 9019   | 0.348551598 | 1.987763182 | 4.032542752 | 0.492930467 | 0.622061719 | 0.998252924 |
| chr4:79747190-79782622   | exonic       | BMP2K                                                             | 4 | 79747190  | 79782622  | 0 | 2 | 0 | 0 | 0 | 0 | 35432  | 0.348551598 | 1.987763182 | 4.032542752 | 0.492930467 | 0.622061719 | 0.998252924 |
| chr4:83784470-83791577   | exonic       | SEC31A                                                            | 4 | 83784470  | 83791577  | 0 | 2 | 0 | 0 | 0 | 0 | 7107   | 0.348551598 | 1.987763182 | 4.032542752 | 0.492930467 | 0.622061719 | 0.998252924 |
| chr4:85781564-85853516   | exonic       | WDFY3                                                             | 4 | 85781564  | 85853516  | 0 | 2 | 0 | 0 | 0 | 0 | 71952  | 0.348551598 | 1.987763182 | 4.032542752 | 0.492930467 | 0.622061719 | 0.998252924 |
| chr4:87553975-87556524   | exonic       | PTPN13                                                            | 4 | 87553975  | 87556524  | 0 | 2 | 0 | 0 | 0 | 0 | 2549   | 0.348551598 | 1.987763182 | 4.032542752 | 0.492930467 | 0.622061719 | 0.998252924 |
| chr4:87593518-87622954   | exonic       | PTPN13                                                            | 4 | 87593518  | 87622954  | 0 | 2 | 0 | 0 | 0 | 0 | 29436  | 0.348551598 | 1.987763182 | 4.032542752 | 0.492930467 | 0.622061719 | 0.998252924 |
| chr4:87690921-87720357   | exonic       | PTPN13                                                            | 4 | 87690921  | 87720357  | 0 | 2 | 2 | 0 | 0 | 0 | 29436  | 0.348551598 | 1.987763182 | 4.032542752 | 0.492930467 | 0.622061719 | 0.998252924 |
| chr4:87967318-88016121   | exonic       | AFF1                                                              | 4 | 87967318  | 88016121  | 0 | 2 | 0 | 0 | 0 | 0 | 48803  | 0.348551598 | 1.987763182 | 4.032542752 | 0.492930467 | 0.622061719 | 0.998252924 |
| chr4:95796982-95820201   | UTR5         | <small>BMPR1B (NM_001203;c.-228594_-228525delins0)</small>        | 4 | 95796982  | 95820201  | 0 | 2 | 0 | 0 | 0 | 0 | 23219  | 0.348551598 | 1.987763182 | 4.032542752 | 0.492930467 | 0.622061719 | 0.998252924 |
| chr5:114466288-114483091 | exonic       | TRIM36                                                            | 5 | 114466288 | 114483091 | 0 | 2 | 0 | 0 | 0 | 0 | 16803  | 0.348551598 | 1.987763182 | 4.032542752 | 0.492930467 | 0.622061719 | 0.998252924 |
| chr5:118443850-118444329 | intronic     | DMXL1                                                             | 5 | 118443850 | 118444329 | 0 | 2 | 0 | 0 | 0 | 0 | 479    | 0.348551598 | 1.987763182 | 4.032542752 | 0.492930467 | 0.622061719 | 0.998252924 |
| chr5:122130960-122139308 | exonic       | SNX2                                                              | 5 | 122130960 | 122139308 | 0 | 2 | 0 | 0 | 0 | 0 | 8348   | 0.348551598 | 1.987763182 | 4.032542752 | 0.492930467 | 0.622061719 | 0.998252924 |
| chr5:138456723-138463542 | exonic       | SIL1                                                              | 5 | 138456723 | 138463542 | 0 | 2 | 0 | 0 | 0 | 0 | 6819   | 0.348551598 | 1.987763182 | 4.032542752 | 0.492930467 | 0.622061719 | 0.998252924 |
| chr5:141732791-141843624 | ncRNA_exonic | LOC101926941                                                      | 5 | 141732791 | 141843624 | 0 | 2 | 0 | 0 | 0 | 0 | 110833 | 0.348551598 | 1.987763182 | 4.032542752 | 0.492930467 | 0.622061719 | 0.998252924 |
| chr5:143119770-143146640 | intergenic   | <small>MIR5197 (dist=60234), HMIB1 (dist=45086)</small>           | 5 | 143119770 | 143146640 | 0 | 2 | 0 | 0 | 0 | 0 | 26870  | 0.348551598 | 1.987763182 | 4.032542752 | 0.492930467 | 0.622061719 | 0.998252924 |
| chr5:1470940-1483601     | exonic       | LPCAT1                                                            | 5 | 1470940   | 1483601   | 0 | 2 | 0 | 0 | 0 | 0 | 12661  | 0.348551598 | 1.987763182 | 4.032542752 | 0.492930467 | 0.622061719 | 0.998252924 |
| chr5:157184082-157185217 | UTR3         | <small>LSM11 (NM_173491;c.+1810_+2945delins0)</small>             | 5 | 157184082 | 157185217 | 0 | 2 | 0 | 0 | 0 | 0 | 1135   | 0.348551598 | 1.987763182 | 4.032542752 | 0.492930467 | 0.622061719 | 0.998252924 |
| chr5:162870680-162871487 | UTR3         | <small>CTSD (NM_020201;c.+4911a1aa;NM_064801;c.+4911a1aa)</small> | 5 | 162870680 | 162871487 | 0 | 2 | 0 | 0 | 0 | 0 | 807    | 0.348551598 | 1.987763182 | 4.032542752 | 0.492930467 | 0.622061719 | 0.998252924 |
| chr5:170585338-170669824 | exonic       | RANBP17                                                           | 5 | 170585338 | 170669824 | 0 | 2 | 0 | 0 | 0 | 0 | 84486  | 0.348551598 | 1.987763182 | 4.032542752 | 0.492930467 | 0.622061719 | 0.998252924 |
| chr5:170610325-170669824 | exonic       | RANBP17                                                           | 5 | 170610325 | 170669824 | 0 | 2 | 0 | 0 | 0 | 0 | 59499  | 0.348551598 | 1.987763182 | 4.032542752 | 0.492930467 | 0.622061719 | 0.998252924 |
| chr5:171272510-171274753 | intergenic   | <small>SMIM23 (dist=54418), FBXW11 (dist=13803)</small>           | 5 | 171272510 | 171274753 | 0 | 2 | 0 | 0 | 0 | 0 | 2243   | 0.348551598 | 1.987763182 | 4.032542752 | 0.492930467 | 0.622061719 | 0.998252924 |
| chr5:175716656-175723323 | exonic       | SIMC1                                                             | 5 | 175716656 | 175723323 | 0 | 2 | 0 | 0 | 0 | 0 | 6667   | 0.348551598 | 1.987763182 | 4.032542752 | 0.492930467 | 0.622061719 | 0.998252924 |
| chr5:228299-233760       | exonic       | SDHA                                                              | 5 | 228299    | 233760    | 0 | 2 | 0 | 0 | 0 | 0 | 5461   | 0.348551598 | 1.987763182 | 4.032542752 | 0.492930467 | 0.622061719 | 0.998252924 |
| chr5:40746900-40771965   | exonic       | PRKAA1, TTC33                                                     | 5 | 40746900  | 40771965  | 0 | 2 | 0 | 0 | 0 | 0 | 25065  | 0.348551598 | 1.987763182 | 4.032542752 | 0.492930467 | 0.622061719 | 0.998252924 |

|                          |          |                |   |           |           |   |   |   |   |   |   |       |             |             |             |             |             |             |
|--------------------------|----------|----------------|---|-----------|-----------|---|---|---|---|---|---|-------|-------------|-------------|-------------|-------------|-------------|-------------|
| chr5:59284315-59300173   | exonic   | PDE4D          | 5 | 59284315  | 59300173  | 0 | 2 | 0 | 0 | 0 | 0 | 15858 | 0.348551598 | 1.987763182 | 4.032542752 | 0.492930467 | 0.622061719 | 0.998252924 |
| chr5:66426037-66438065   | exonic   | MAST4          | 5 | 66426037  | 66438065  | 0 | 2 | 0 | 0 | 0 | 0 | 12028 | 0.348551598 | 1.987763182 | 4.032542752 | 0.492930467 | 0.622061719 | 0.998252924 |
| chr5:68800003-68809936   | exonic   | OCLN           | 5 | 68800003  | 68809936  | 0 | 2 | 0 | 0 | 0 | 0 | 9933  | 0.348551598 | 1.987763182 | 4.032542752 | 0.492930467 | 0.622061719 | 0.998252924 |
| chr5:68807353-68807739   | intronic | OCLN           | 5 | 68807353  | 68807739  | 0 | 2 | 0 | 0 | 0 | 0 | 386   | 0.348551598 | 1.987763182 | 4.032542752 | 0.492930467 | 0.622061719 | 0.998252924 |
| chr5:74932978-74935116   | intronic | ANKDD1B        | 5 | 74932978  | 74935116  | 0 | 2 | 0 | 0 | 0 | 0 | 2138  | 0.348551598 | 1.987763182 | 4.032542752 | 0.492930467 | 0.622061719 | 0.998252924 |
| chr5:76342171-76342502   | exonic   | AGGF1          | 5 | 76342171  | 76342502  | 0 | 2 | 0 | 0 | 0 | 0 | 331   | 0.348551598 | 1.987763182 | 4.032542752 | 0.492930467 | 0.622061719 | 0.998252924 |
| chr5:76621363-76649231   | exonic   | PDE8B          | 5 | 76621363  | 76649231  | 0 | 2 | 0 | 0 | 0 | 0 | 27868 | 0.348551598 | 1.987763182 | 4.032542752 | 0.492930467 | 0.622061719 | 0.998252924 |
| chr5:76758919-76760634   | exonic   | WDR41          | 5 | 76758919  | 76760634  | 0 | 2 | 0 | 0 | 0 | 0 | 1715  | 0.348551598 | 1.987763182 | 4.032542752 | 0.492930467 | 0.622061719 | 0.998252924 |
| chr5:82832825-82838087   | exonic   | VCAN           | 5 | 82832825  | 82838087  | 0 | 2 | 0 | 0 | 0 | 0 | 5262  | 0.348551598 | 1.987763182 | 4.032542752 | 0.492930467 | 0.622061719 | 0.998252924 |
| chr5:86653452-86655994   | intronic | RASA1          | 5 | 86653452  | 86655994  | 0 | 2 | 0 | 0 | 0 | 0 | 2542  | 0.348551598 | 1.987763182 | 4.032542752 | 0.492930467 | 0.622061719 | 0.998252924 |
| chr5:90059121-90098699   | exonic   | ADGRV1         | 5 | 90059121  | 90098699  | 0 | 2 | 0 | 0 | 0 | 0 | 39578 | 0.348551598 | 1.987763182 | 4.032542752 | 0.492930467 | 0.622061719 | 0.998252924 |
| chr5:94244955-94248681   | exonic   | MCTP1          | 5 | 94244955  | 94248681  | 0 | 2 | 0 | 0 | 0 | 0 | 3726  | 0.348551598 | 1.987763182 | 4.032542752 | 0.492930467 | 0.622061719 | 0.998252924 |
| chr5:95084036-95103870   | exonic   | RHOBTB3        | 5 | 95084036  | 95103870  | 0 | 2 | 0 | 0 | 0 | 0 | 19834 | 0.348551598 | 1.987763182 | 4.032542752 | 0.492930467 | 0.622061719 | 0.998252924 |
| chr6:101214440-101248380 | exonic   | ASCC3          | 6 | 101214440 | 101248380 | 0 | 2 | 0 | 0 | 0 | 0 | 33940 | 0.348551598 | 1.987763182 | 4.032542752 | 0.492930467 | 0.622061719 | 0.998252924 |
| chr6:10935290-10956475   | exonic   | SYCP2L         | 6 | 10935290  | 10956475  | 0 | 2 | 0 | 0 | 0 | 0 | 21185 | 0.348551598 | 1.987763182 | 4.032542752 | 0.492930467 | 0.622061719 | 0.998252924 |
| chr6:110620124-110644075 | exonic   | METTL24        | 6 | 110620124 | 110644075 | 0 | 2 | 0 | 0 | 0 | 0 | 23951 | 0.348551598 | 1.987763182 | 4.032542752 | 0.492930467 | 0.622061719 | 0.998252924 |
| chr6:125366357-125367807 | exonic   | RNF217         | 6 | 125366357 | 125367807 | 0 | 2 | 0 | 0 | 0 | 0 | 1450  | 0.348551598 | 1.987763182 | 4.032542752 | 0.492930467 | 0.622061719 | 0.998252924 |
| chr6:129371062-129419560 | exonic   | LAMA2          | 6 | 129371062 | 129419560 | 0 | 2 | 0 | 0 | 0 | 0 | 48498 | 0.348551598 | 1.987763182 | 4.032542752 | 0.492930467 | 0.622061719 | 0.998252924 |
| chr6:129486720-129513998 | exonic   | LAMA2          | 6 | 129486720 | 129513998 | 0 | 2 | 0 | 0 | 0 | 0 | 27278 | 0.348551598 | 1.987763182 | 4.032542752 | 0.492930467 | 0.622061719 | 0.998252924 |
| chr6:13652890-13697128   | exonic   | RANBP9         | 6 | 13652890  | 13697128  | 0 | 2 | 0 | 0 | 0 | 0 | 44238 | 0.348551598 | 1.987763182 | 4.032542752 | 0.492930467 | 0.622061719 | 0.998252924 |
| chr6:136582168-136589477 | exonic   | BCLAF1         | 6 | 136582168 | 136589477 | 0 | 2 | 0 | 0 | 0 | 0 | 7309  | 0.348551598 | 1.987763182 | 4.032542752 | 0.492930467 | 0.622061719 | 0.998252924 |
| chr6:144167187-144179144 | exonic   | LTV1           | 6 | 144167187 | 144179144 | 0 | 2 | 0 | 0 | 0 | 0 | 11957 | 0.348551598 | 1.987763182 | 4.032542752 | 0.492930467 | 0.622061719 | 0.998252924 |
| chr6:144772505-144838084 | exonic   | UTRN           | 6 | 144772505 | 144838084 | 0 | 2 | 0 | 0 | 0 | 0 | 65579 | 0.348551598 | 1.987763182 | 4.032542752 | 0.492930467 | 0.622061719 | 0.998252924 |
| chr6:149833290-149838586 | exonic   | PPIL4          | 6 | 149833290 | 149838586 | 0 | 2 | 0 | 0 | 0 | 0 | 5296  | 0.348551598 | 1.987763182 | 4.032542752 | 0.492930467 | 0.622061719 | 0.998252924 |
| chr6:154567724-154587098 | exonic   | IPCEF1, OPRM1  | 6 | 154567724 | 154587098 | 0 | 2 | 0 | 0 | 0 | 0 | 19374 | 0.348551598 | 1.987763182 | 4.032542752 | 0.492930467 | 0.622061719 | 0.998252924 |
| chr6:157120799-157150555 | exonic   | ARID1B         | 6 | 157120799 | 157150555 | 0 | 2 | 0 | 0 | 0 | 0 | 29756 | 0.348551598 | 1.987763182 | 4.032542752 | 0.492930467 | 0.622061719 | 0.998252924 |
| chr6:157262757-157276838 | intronic | ARID1B         | 6 | 157262757 | 157276838 | 0 | 2 | 0 | 0 | 0 | 0 | 14081 | 0.348551598 | 1.987763182 | 4.032542752 | 0.492930467 | 0.622061719 | 0.998252924 |
| chr6:161443042-161471011 | exonic   | MAP3K4         | 6 | 161443042 | 161471011 | 0 | 2 | 0 | 0 | 0 | 0 | 27969 | 0.348551598 | 1.987763182 | 4.032542752 | 0.492930467 | 0.622061719 | 0.998252924 |
| chr6:170159933-170173498 | exonic   | ERMARD         | 6 | 170159933 | 170173498 | 0 | 2 | 0 | 0 | 0 | 0 | 13565 | 0.348551598 | 1.987763182 | 4.032542752 | 0.492930467 | 0.622061719 | 0.998252924 |
| chr6:21108632-21201505   | exonic   | CDKAL1         | 6 | 21108632  | 21201505  | 0 | 2 | 0 | 0 | 0 | 0 | 92873 | 0.348551598 | 1.987763182 | 4.032542752 | 0.492930467 | 0.622061719 | 0.998252924 |
| chr6:26402525-26411809   | exonic   | BTN3A1         | 6 | 26402525  | 26411809  | 0 | 2 | 0 | 0 | 0 | 0 | 9284  | 0.348551598 | 1.987763182 | 4.032542752 | 0.492930467 | 0.622061719 | 0.998252924 |
| chr6:26423161-26458946   | exonic   | BTN2A1, BTN3A3 | 6 | 26423161  | 26458946  | 0 | 2 | 0 | 0 | 0 | 0 | 35785 | 0.348551598 | 1.987763182 | 4.032542752 | 0.492930467 | 0.622061719 | 0.998252924 |
| chr6:2836089-2840828     | exonic   | SERPINB1       | 6 | 2836089   | 2840828   | 0 | 2 | 0 | 0 | 0 | 0 | 4739  | 0.348551598 | 1.987763182 | 4.032542752 | 0.492930467 | 0.622061719 | 0.998252924 |
| chr6:29858023-29912393   | exonic   | HLA-A          | 6 | 29858023  | 29912393  | 0 | 2 | 0 | 0 | 0 | 0 | 54370 | 0.348551598 | 1.987763182 | 4.032542752 | 0.492930467 | 0.622061719 | 0.998252924 |
| chr6:3271147-3271318     | UTR3     | -----          | 6 | 3271147   | 3271318   | 0 | 2 | 0 | 0 | 0 | 0 | 171   | 0.348551598 | 1.987763182 | 4.032542752 | 0.492930467 | 0.622061719 | 0.998252924 |

|                          |              |           |   |           |           |   |   |   |   |   |   |       |             |             |             |             |             |             |
|--------------------------|--------------|-----------|---|-----------|-----------|---|---|---|---|---|---|-------|-------------|-------------|-------------|-------------|-------------|-------------|
| chr6:32942238-32946165   | exonic       | BRD2      | 6 | 32942238  | 32946165  | 0 | 2 | 0 | 0 | 0 | 0 | 3927  | 0.348551598 | 1.987763182 | 4.032542752 | 0.492930467 | 0.622061719 | 0.998252924 |
| chr6:37345131-37345793   | intronic     | RNF8      | 6 | 37345131  | 37345793  | 0 | 2 | 0 | 0 | 0 | 0 | 662   | 0.348551598 | 1.987763182 | 4.032542752 | 0.492930467 | 0.622061719 | 0.998252924 |
| chr6:44371545-44392320   | exonic       | CDC5L     | 6 | 44371545  | 44392320  | 0 | 2 | 0 | 0 | 0 | 0 | 20775 | 0.348551598 | 1.987763182 | 4.032542752 | 0.492930467 | 0.622061719 | 0.998252924 |
| chr6:47501338-47522502   | exonic       | CD2AP     | 6 | 47501338  | 47522502  | 0 | 2 | 0 | 0 | 0 | 0 | 21164 | 0.348551598 | 1.987763182 | 4.032542752 | 0.492930467 | 0.622061719 | 0.998252924 |
| chr6:51656033-51735437   | exonic       | PKHD1     | 6 | 51656033  | 51735437  | 0 | 2 | 0 | 0 | 0 | 0 | 79404 | 0.348551598 | 1.987763182 | 4.032542752 | 0.492930467 | 0.622061719 | 0.998252924 |
| chr6:51695658-51720868   | exonic       | PKHD1     | 6 | 51695658  | 51720868  | 0 | 2 | 0 | 0 | 0 | 0 | 25210 | 0.348551598 | 1.987763182 | 4.032542752 | 0.492930467 | 0.622061719 | 0.998252924 |
| chr6:51695658-51752043   | exonic       | PKHD1     | 6 | 51695658  | 51752043  | 0 | 2 | 0 | 0 | 0 | 0 | 56385 | 0.348551598 | 1.987763182 | 4.032542752 | 0.492930467 | 0.622061719 | 0.998252924 |
| chr6:51882207-51900519   | exonic       | PKHD1     | 6 | 51882207  | 51900519  | 0 | 2 | 0 | 0 | 0 | 0 | 18312 | 0.348551598 | 1.987763182 | 4.032542752 | 0.492930467 | 0.622061719 | 0.998252924 |
| chr6:53138017-53140059   | exonic       | ELOVL5    | 6 | 53138017  | 53140059  | 0 | 2 | 0 | 0 | 0 | 0 | 2042  | 0.348551598 | 1.987763182 | 4.032542752 | 0.492930467 | 0.622061719 | 0.998252924 |
| chr6:82933156-82941559   | exonic       | IBTK      | 6 | 82933156  | 82941559  | 0 | 2 | 0 | 0 | 0 | 0 | 8403  | 0.348551598 | 1.987763182 | 4.032542752 | 0.492930467 | 0.622061719 | 0.998252924 |
| chr6:84910506-84925640   | exonic       | CEP162    | 6 | 84910506  | 84925640  | 0 | 2 | 0 | 0 | 0 | 0 | 15134 | 0.348551598 | 1.987763182 | 4.032542752 | 0.492930467 | 0.622061719 | 0.998252924 |
| chr6:88066019-88108095   | exonic       | C6orf163  | 6 | 88066019  | 88108095  | 0 | 2 | 0 | 0 | 0 | 0 | 42076 | 0.348551598 | 1.987763182 | 4.032542752 | 0.492930467 | 0.622061719 | 0.998252924 |
| chr6:88251635-88273950   | exonic       | RARS2     | 6 | 88251635  | 88273950  | 0 | 2 | 0 | 0 | 0 | 0 | 22315 | 0.348551598 | 1.987763182 | 4.032542752 | 0.492930467 | 0.622061719 | 0.998252924 |
| chr6:90491117-90513273   | exonic       | MDN1      | 6 | 90491117  | 90513273  | 0 | 2 | 0 | 0 | 0 | 0 | 22156 | 0.348551598 | 1.987763182 | 4.032542752 | 0.492930467 | 0.622061719 | 0.998252924 |
| chr6:99347143-99382755   | exonic       | FBXL4     | 6 | 99347143  | 99382755  | 0 | 2 | 0 | 0 | 0 | 0 | 35612 | 0.348551598 | 1.987763182 | 4.032542752 | 0.492930467 | 0.622061719 | 0.998252924 |
| chr6:99781226-99790909   | exonic       | FAXC      | 6 | 99781226  | 99790909  | 0 | 2 | 0 | 0 | 0 | 0 | 9683  | 0.348551598 | 1.987763182 | 4.032542752 | 0.492930467 | 0.622061719 | 0.998252924 |
| chr7:100173973-100174316 | splicing     | LRCH4     | 7 | 100173973 | 100174316 | 0 | 2 | 0 | 0 | 0 | 0 | 343   | 0.348551598 | 1.987763182 | 4.032542752 | 0.492930467 | 0.622061719 | 0.998252924 |
| chr7:104678573-104731761 | exonic       | KMT2E     | 7 | 104678573 | 104731761 | 0 | 2 | 0 | 0 | 0 | 0 | 53188 | 0.348551598 | 1.987763182 | 4.032542752 | 0.492930467 | 0.622061719 | 0.998252924 |
| chr7:111575594-111644186 | exonic       | DOCK4     | 7 | 111575594 | 111644186 | 0 | 2 | 0 | 0 | 0 | 0 | 68592 | 0.348551598 | 1.987763182 | 4.032542752 | 0.492930467 | 0.622061719 | 0.998252924 |
| chr7:129501654-129528424 | exonic       | UBE2H     | 7 | 129501654 | 129528424 | 0 | 2 | 0 | 0 | 0 | 0 | 26770 | 0.348551598 | 1.987763182 | 4.032542752 | 0.492930467 | 0.622061719 | 0.998252924 |
| chr7:130650923-130662006 | ncRNA_exonic | LINC-PINT | 7 | 130650923 | 130662006 | 0 | 2 | 0 | 0 | 0 | 0 | 11083 | 0.348551598 | 1.987763182 | 4.032542752 | 0.492930467 | 0.622061719 | 0.998252924 |
| chr7:134882744-134894507 | exonic       | WDR91     | 7 | 134882744 | 134894507 | 0 | 2 | 0 | 0 | 0 | 0 | 11763 | 0.348551598 | 1.987763182 | 4.032542752 | 0.492930467 | 0.622061719 | 0.998252924 |
| chr7:151167657-151195266 | exonic       | RHEB      | 7 | 151167657 | 151195266 | 0 | 2 | 0 | 0 | 0 | 0 | 27609 | 0.348551598 | 1.987763182 | 4.032542752 | 0.492930467 | 0.622061719 | 0.998252924 |
| chr7:151447106-151448293 | intronic     | PRKAG2    | 7 | 151447106 | 151448293 | 0 | 2 | 0 | 0 | 0 | 0 | 1187  | 0.348551598 | 1.987763182 | 4.032542752 | 0.492930467 | 0.622061719 | 0.998252924 |
| chr7:156961741-157041274 | exonic       | UBE3C     | 7 | 156961741 | 157041274 | 0 | 2 | 0 | 0 | 0 | 0 | 79533 | 0.348551598 | 1.987763182 | 4.032542752 | 0.492930467 | 0.622061719 | 0.998252924 |
| chr7:158794018-158802129 | ncRNA_exonic | LINC00689 | 7 | 158794018 | 158802129 | 0 | 2 | 0 | 0 | 0 | 0 | 8111  | 0.348551598 | 1.987763182 | 4.032542752 | 0.492930467 | 0.622061719 | 0.998252924 |
| chr7:17908030-17946963   | exonic       | SNX13     | 7 | 17908030  | 17946963  | 0 | 2 | 0 | 0 | 0 | 0 | 38933 | 0.348551598 | 1.987763182 | 4.032542752 | 0.492930467 | 0.622061719 | 0.998252924 |
| chr7:18694386-18706099   | exonic       | HDAC9     | 7 | 18694386  | 18706099  | 0 | 2 | 0 | 0 | 0 | 0 | 11713 | 0.348551598 | 1.987763182 | 4.032542752 | 0.492930467 | 0.622061719 | 0.998252924 |
| chr7:21840754-21847667   | exonic       | DNAH11    | 7 | 21840754  | 21847667  | 0 | 2 | 0 | 0 | 0 | 0 | 6913  | 0.348551598 | 1.987763182 | 4.032542752 | 0.492930467 | 0.622061719 | 0.998252924 |
| chr7:21840755-21857957   | exonic       | DNAH11    | 7 | 21840755  | 21857957  | 0 | 2 | 0 | 0 | 0 | 0 | 17202 | 0.348551598 | 1.987763182 | 4.032542752 | 0.492930467 | 0.622061719 | 0.998252924 |
| chr7:23552512-23562051   | exonic       | TRA2A     | 7 | 23552512  | 23562051  | 0 | 2 | 0 | 0 | 0 | 0 | 9539  | 0.348551598 | 1.987763182 | 4.032542752 | 0.492930467 | 0.622061719 | 0.998252924 |
| chr7:23555981-23562051   | exonic       | TRA2A     | 7 | 23555981  | 23562051  | 0 | 2 | 0 | 0 | 0 | 0 | 6070  | 0.348551598 | 1.987763182 | 4.032542752 | 0.492930467 | 0.622061719 | 0.998252924 |
| chr7:26236426-26237352   | exonic       | HNRNPA2B1 | 7 | 26236426  | 26237352  | 0 | 2 | 0 | 0 | 0 | 0 | 926   | 0.348551598 | 1.987763182 | 4.032542752 | 0.492930467 | 0.622061719 | 0.998252924 |
| chr7:50737419-50800065   | exonic       | GRB10     | 7 | 50737419  | 50800065  | 0 | 2 | 0 | 0 | 0 | 0 | 62646 | 0.348551598 | 1.987763182 | 4.032542752 | 0.492930467 | 0.622061719 | 0.998252924 |
| chr7:50771517-50823753   | exonic       | GRB10     | 7 | 50771517  | 50823753  | 0 | 2 | 0 | 0 | 0 | 0 | 52236 | 0.348551598 | 1.987763182 | 4.032542752 | 0.492930467 | 0.622061719 | 0.998252924 |



|                          |            |                                                          |   |           |           |   |   |   |   |   |   |        |             |             |             |             |             |             |
|--------------------------|------------|----------------------------------------------------------|---|-----------|-----------|---|---|---|---|---|---|--------|-------------|-------------|-------------|-------------|-------------|-------------|
| chr7:50793710-50800065   | exonic     | GRB10                                                    | 7 | 50793710  | 50800065  | 0 | 2 | 0 | 0 | 0 | 0 | 6355   | 0.348551598 | 1.987763182 | 4.032542752 | 0.492930467 | 0.622061719 | 0.998252924 |
| chr7:56045818-56049260   | exonic     | GBAS                                                     | 7 | 56045818  | 56049260  | 0 | 2 | 0 | 0 | 0 | 0 | 3442   | 0.348551598 | 1.987763182 | 4.032542752 | 0.492930467 | 0.622061719 | 0.998252924 |
| chr7:56123316-56124107   | exonic     | CCT6A                                                    | 7 | 56123316  | 56124107  | 0 | 2 | 0 | 0 | 0 | 0 | 791    | 0.348551598 | 1.987763182 | 4.032542752 | 0.492930467 | 0.622061719 | 0.998252924 |
| chr7:6018226-6031688     | exonic     | PMS2                                                     | 7 | 6018226   | 6031688   | 0 | 2 | 0 | 0 | 0 | 0 | 13462  | 0.348551598 | 1.987763182 | 4.032542752 | 0.492930467 | 0.622061719 | 0.998252924 |
| chr7:6026389-6031688     | exonic     | PMS2                                                     | 7 | 6026389   | 6031688   | 0 | 2 | 0 | 0 | 0 | 0 | 5299   | 0.348551598 | 1.987763182 | 4.032542752 | 0.492930467 | 0.622061719 | 0.998252924 |
| chr7:6465618-6476164     | exonic     | DAGLB                                                    | 7 | 6465618   | 6476164   | 0 | 2 | 0 | 0 | 0 | 0 | 10546  | 0.348551598 | 1.987763182 | 4.032542752 | 0.492930467 | 0.622061719 | 0.998252924 |
| chr7:6825579-6831628     | exonic     | RSPH10B, RSPH10B2                                        | 7 | 6825579   | 6831628   | 0 | 2 | 0 | 0 | 0 | 0 | 6049   | 0.348551598 | 1.987763182 | 4.032542752 | 0.492930467 | 0.622061719 | 0.998252924 |
| chr7:77265099-77268641   | exonic     | PTPN12                                                   | 7 | 77265099  | 77268641  | 0 | 2 | 0 | 0 | 0 | 0 | 3542   | 0.348551598 | 1.987763182 | 4.032542752 | 0.492930467 | 0.622061719 | 0.998252924 |
| chr7:86792810-86803985   | exonic     | DMTF1                                                    | 7 | 86792810  | 86803985  | 0 | 2 | 0 | 0 | 0 | 0 | 11175  | 0.348551598 | 1.987763182 | 4.032542752 | 0.492930467 | 0.622061719 | 0.998252924 |
| chr7:90350138-90377090   | exonic     | CDK14                                                    | 7 | 90350138  | 90377090  | 0 | 2 | 0 | 0 | 0 | 0 | 26952  | 0.348551598 | 1.987763182 | 4.032542752 | 0.492930467 | 0.622061719 | 0.998252924 |
| chr7:99088700-99092254   | exonic     | ZNF394                                                   | 7 | 99088700  | 99092254  | 0 | 2 | 0 | 0 | 0 | 0 | 3554   | 0.348551598 | 1.987763182 | 4.032542752 | 0.492930467 | 0.622061719 | 0.998252924 |
| chr8:101232506-101245765 | exonic     | SPAG1                                                    | 8 | 101232506 | 101245765 | 0 | 2 | 0 | 0 | 0 | 0 | 13259  | 0.348551598 | 1.987763182 | 4.032542752 | 0.492930467 | 0.622061719 | 0.998252924 |
| chr8:103387525-103388826 | intronic   | UBR5                                                     | 8 | 103387525 | 103388826 | 0 | 2 | 0 | 0 | 0 | 0 | 1301   | 0.348551598 | 1.987763182 | 4.032542752 | 0.492930467 | 0.622061719 | 0.998252924 |
| chr8:103846416-103852051 | exonic     | AZIN1                                                    | 8 | 103846416 | 103852051 | 0 | 2 | 0 | 0 | 0 | 0 | 5635   | 0.348551598 | 1.987763182 | 4.032542752 | 0.492930467 | 0.622061719 | 0.998252924 |
| chr8:127877673-127890035 | intergenic | <small>FAM84B (dist=306962), PCAT1 (dist=135364)</small> | 8 | 127877673 | 127890035 | 0 | 2 | 0 | 0 | 0 | 0 | 12362  | 0.348551598 | 1.987763182 | 4.032542752 | 0.492930467 | 0.622061719 | 0.998252924 |
| chr8:130788347-130789837 | exonic     | GSDMC                                                    | 8 | 130788347 | 130789837 | 0 | 2 | 0 | 0 | 0 | 0 | 1490   | 0.348551598 | 1.987763182 | 4.032542752 | 0.492930467 | 0.622061719 | 0.998252924 |
| chr8:131127873-131199531 | exonic     | ASAP1                                                    | 8 | 131127873 | 131199531 | 0 | 2 | 0 | 0 | 0 | 0 | 71658  | 0.348551598 | 1.987763182 | 4.032542752 | 0.492930467 | 0.622061719 | 0.998252924 |
| chr8:133595940-133673873 | exonic     | LRRC6                                                    | 8 | 133595940 | 133673873 | 0 | 2 | 0 | 0 | 0 | 0 | 77933  | 0.348551598 | 1.987763182 | 4.032542752 | 0.492930467 | 0.622061719 | 0.998252924 |
| chr8:141301092-141358045 | exonic     | TRAPPC9                                                  | 8 | 141301092 | 141358045 | 0 | 2 | 0 | 0 | 0 | 0 | 56953  | 0.348551598 | 1.987763182 | 4.032542752 | 0.492930467 | 0.622061719 | 0.998252924 |
| chr8:141799573-141931231 | exonic     | PTK2                                                     | 8 | 141799573 | 141931231 | 0 | 2 | 0 | 0 | 0 | 0 | 131658 | 0.348551598 | 1.987763182 | 4.032542752 | 0.492930467 | 0.622061719 | 0.998252924 |
| chr8:145251101-145251354 | intronic   | MROH1                                                    | 8 | 145251101 | 145251354 | 0 | 2 | 0 | 0 | 0 | 0 | 253    | 0.348551598 | 1.987763182 | 4.032542752 | 0.492930467 | 0.622061719 | 0.998252924 |
| chr8:16021573-16035501   | exonic     | MSR1                                                     | 8 | 16021573  | 16035501  | 0 | 2 | 0 | 0 | 0 | 0 | 13928  | 0.348551598 | 1.987763182 | 4.032542752 | 0.492930467 | 0.622061719 | 0.998252924 |
| chr8:22880210-22881773   | exonic     | TNFRSF10B                                                | 8 | 22880210  | 22881773  | 0 | 2 | 0 | 0 | 0 | 0 | 1563   | 0.348551598 | 1.987763182 | 4.032542752 | 0.492930467 | 0.622061719 | 0.998252924 |
| chr8:27145553-27156076   | exonic     | TRIM35                                                   | 8 | 27145553  | 27156076  | 0 | 2 | 0 | 0 | 0 | 0 | 10523  | 0.348551598 | 1.987763182 | 4.032542752 | 0.492930467 | 0.622061719 | 0.998252924 |
| chr8:28989824-28991727   | exonic     | KIF13B                                                   | 8 | 28989824  | 28991727  | 0 | 2 | 0 | 0 | 0 | 0 | 1903   | 0.348551598 | 1.987763182 | 4.032542752 | 0.492930467 | 0.622061719 | 0.998252924 |
| chr8:62559308-62563683   | exonic     | ASPH                                                     | 8 | 62559308  | 62563683  | 0 | 2 | 0 | 0 | 0 | 0 | 4375   | 0.348551598 | 1.987763182 | 4.032542752 | 0.492930467 | 0.622061719 | 0.998252924 |
| chr8:67988716-68024300   | exonic     | CSPP1                                                    | 8 | 67988716  | 68024300  | 0 | 2 | 0 | 0 | 0 | 0 | 35584  | 0.348551598 | 1.987763182 | 4.032542752 | 0.492930467 | 0.622061719 | 0.998252924 |
| chr8:71031177-71032742   | intronic   | NCOA2                                                    | 8 | 71031177  | 71032742  | 0 | 2 | 0 | 0 | 0 | 0 | 1565   | 0.348551598 | 1.987763182 | 4.032542752 | 0.492930467 | 0.622061719 | 0.998252924 |
| chr8:71126138-71176702   | exonic     | NCOA2                                                    | 8 | 71126138  | 71176702  | 0 | 2 | 0 | 0 | 0 | 0 | 50564  | 0.348551598 | 1.987763182 | 4.032542752 | 0.492930467 | 0.622061719 | 0.998252924 |
| chr8:71506740-71512317   | exonic     | TRAM1                                                    | 8 | 71506740  | 71512317  | 0 | 2 | 0 | 0 | 0 | 0 | 5577   | 0.348551598 | 1.987763182 | 4.032542752 | 0.492930467 | 0.622061719 | 0.998252924 |
| chr8:8993536-8993683     | downstream | PPP1R3B (dist=81)                                        | 8 | 8993536   | 8993683   | 0 | 2 | 0 | 0 | 0 | 0 | 147    | 0.348551598 | 1.987763182 | 4.032542752 | 0.492930467 | 0.622061719 | 0.998252924 |
| chr8:95521915-95527179   | exonic     | KIAA1429                                                 | 8 | 95521915  | 95527179  | 0 | 2 | 0 | 0 | 0 | 0 | 5264   | 0.348551598 | 1.987763182 | 4.032542752 | 0.492930467 | 0.622061719 | 0.998252924 |
| chr8:95735456-95737064   | intronic   | DPY19L4                                                  | 8 | 95735456  | 95737064  | 0 | 2 | 0 | 0 | 0 | 0 | 1608   | 0.348551598 | 1.987763182 | 4.032542752 | 0.492930467 | 0.622061719 | 0.998252924 |
| chr9:103261046-103312442 | exonic     | MSANTD3-TMEFF1, TMEFF1                                   | 9 | 103261046 | 103312442 | 0 | 2 | 0 | 0 | 0 | 0 | 51396  | 0.348551598 | 1.987763182 | 4.032542752 | 0.492930467 | 0.622061719 | 0.998252924 |
| chr9:114155047-114172493 | exonic     | KIAA0368                                                 | 9 | 114155047 | 114172493 | 0 | 2 | 0 | 0 | 0 | 0 | 17446  | 0.348551598 | 1.987763182 | 4.032542752 | 0.492930467 | 0.622061719 | 0.998252924 |

|                          |              |                                                                   |    |           |           |   |   |   |   |   |   |        |             |             |             |             |             |             |
|--------------------------|--------------|-------------------------------------------------------------------|----|-----------|-----------|---|---|---|---|---|---|--------|-------------|-------------|-------------|-------------|-------------|-------------|
| chr9:114353500-114353759 | intronic     | PTGR1                                                             | 9  | 114353500 | 114353759 | 0 | 2 | 0 | 0 | 0 | 0 | 259    | 0.348551598 | 1.987763182 | 4.032542752 | 0.492930467 | 0.622061719 | 0.998252924 |
| chr9:114904599-114905903 | exonic       | SUSD1                                                             | 9  | 114904599 | 114905903 | 0 | 2 | 0 | 0 | 0 | 0 | 1304   | 0.348551598 | 1.987763182 | 4.032542752 | 0.492930467 | 0.622061719 | 0.998252924 |
| chr9:115167903-115216442 | exonic       | HSDL2                                                             | 9  | 115167903 | 115216442 | 0 | 2 | 0 | 0 | 0 | 0 | 48539  | 0.348551598 | 1.987763182 | 4.032542752 | 0.492930467 | 0.622061719 | 0.998252924 |
| chr9:123924133-123933826 | exonic       | CNTRL                                                             | 9  | 123924133 | 123933826 | 0 | 2 | 0 | 0 | 0 | 0 | 9693   | 0.348551598 | 1.987763182 | 4.032542752 | 0.492930467 | 0.622061719 | 0.998252924 |
| chr9:125047448-125048445 | exonic       | MRRF                                                              | 9  | 125047448 | 125048445 | 0 | 2 | 0 | 0 | 0 | 0 | 997    | 0.348551598 | 1.987763182 | 4.032542752 | 0.492930467 | 0.622061719 | 0.998252924 |
| chr9:126414291-126641300 | exonic       | DENND1A                                                           | 9  | 126414291 | 126641300 | 0 | 2 | 0 | 0 | 0 | 0 | 227009 | 0.348551598 | 1.987763182 | 4.032542752 | 0.492930467 | 0.622061719 | 0.998252924 |
| chr9:129154344-129184227 | exonic       | MVB12B                                                            | 9  | 129154344 | 129184227 | 0 | 2 | 0 | 0 | 0 | 0 | 29883  | 0.348551598 | 1.987763182 | 4.032542752 | 0.492930467 | 0.622061719 | 0.998252924 |
| chr9:137619112-137623973 | exonic       | COL5A1                                                            | 9  | 137619112 | 137623973 | 0 | 2 | 0 | 0 | 0 | 0 | 4861   | 0.348551598 | 1.987763182 | 4.032542752 | 0.492930467 | 0.622061719 | 0.998252924 |
| chr9:140605418-140622981 | exonic       | EHMT1                                                             | 9  | 140605418 | 140622981 | 0 | 2 | 0 | 0 | 0 | 0 | 17563  | 0.348551598 | 1.987763182 | 4.032542752 | 0.492930467 | 0.622061719 | 0.998252924 |
| chr9:15563975-15591554   | exonic       | CCDC171                                                           | 9  | 15563975  | 15591554  | 0 | 2 | 0 | 0 | 0 | 0 | 27579  | 0.348551598 | 1.987763182 | 4.032542752 | 0.492930467 | 0.622061719 | 0.998252924 |
| chr9:15563975-15594170   | exonic       | CCDC171                                                           | 9  | 15563975  | 15594170  | 0 | 2 | 0 | 0 | 0 | 0 | 30195  | 0.348551598 | 1.987763182 | 4.032542752 | 0.492930467 | 0.622061719 | 0.998252924 |
| chr9:20448120-20456784   | exonic       | MLLT3                                                             | 9  | 20448120  | 20456784  | 0 | 2 | 0 | 0 | 0 | 0 | 8664   | 0.348551598 | 1.987763182 | 4.032542752 | 0.492930467 | 0.622061719 | 0.998252924 |
| chr9:20715320-20720533   | exonic       | FOCAD                                                             | 9  | 20715320  | 20720533  | 0 | 2 | 0 | 0 | 0 | 0 | 5213   | 0.348551598 | 1.987763182 | 4.032542752 | 0.492930467 | 0.622061719 | 0.998252924 |
| chr9:33311103-33332500   | exonic       | NFX1                                                              | 9  | 33311103  | 33332500  | 0 | 2 | 0 | 0 | 0 | 0 | 21397  | 0.348551598 | 1.987763182 | 4.032542752 | 0.492930467 | 0.622061719 | 0.998252924 |
| chr9:33338507-33347115   | exonic       | NFX1                                                              | 9  | 33338507  | 33347115  | 0 | 2 | 0 | 0 | 0 | 0 | 8608   | 0.348551598 | 1.987763182 | 4.032542752 | 0.492930467 | 0.622061719 | 0.998252924 |
| chr9:33971648-33989124   | exonic       | UBAP2                                                             | 9  | 33971648  | 33989124  | 0 | 2 | 0 | 0 | 0 | 0 | 17476  | 0.348551598 | 1.987763182 | 4.032542752 | 0.492930467 | 0.622061719 | 0.998252924 |
| chr9:3932359-3937189     | exonic       | GLIS3                                                             | 9  | 3932359   | 3937189   | 0 | 2 | 0 | 0 | 0 | 0 | 4830   | 0.348551598 | 1.987763182 | 4.032542752 | 0.492930467 | 0.622061719 | 0.998252924 |
| chr9:414781-418207       | exonic       | DOCK8                                                             | 9  | 414781    | 418207    | 0 | 2 | 0 | 0 | 0 | 0 | 3426   | 0.348551598 | 1.987763182 | 4.032542752 | 0.492930467 | 0.622061719 | 0.998252924 |
| chr9:6849506-6893232     | exonic       | KDM4C                                                             | 9  | 6849506   | 6893232   | 0 | 2 | 0 | 0 | 0 | 0 | 43726  | 0.348551598 | 1.987763182 | 4.032542752 | 0.492930467 | 0.622061719 | 0.998252924 |
| chr9:98643150-98669553   | exonic       | ERCC6L2                                                           | 9  | 98643150  | 98669553  | 0 | 2 | 0 | 0 | 0 | 0 | 26403  | 0.348551598 | 1.987763182 | 4.032542752 | 0.492930467 | 0.622061719 | 0.998252924 |
| chrX:153996576-153997585 | exonic       | DKC1                                                              | X  | 153996576 | 153997585 | 0 | 2 | 0 | 0 | 0 | 0 | 1009   | 0.348551598 | 1.987763182 | 4.032542752 | 0.492930467 | 0.622061719 | 0.998252924 |
| chrX:20222139-20227522   | exonic       | RPS6KA3                                                           | X  | 20222139  | 20227522  | 0 | 2 | 0 | 0 | 0 | 0 | 5383   | 0.348551598 | 1.987763182 | 4.032542752 | 0.492930467 | 0.622061719 | 0.998252924 |
| chrX:299338-322325       | exonic       | PPP2R3B                                                           | X  | 299338    | 322325    | 0 | 2 | 0 | 0 | 0 | 0 | 22987  | 0.348551598 | 1.987763182 | 4.032542752 | 0.492930467 | 0.622061719 | 0.998252924 |
| chrX:3735586-3747433     | ncRNA_exonic | LOC389906                                                         | X  | 3735586   | 3747433   | 0 | 2 | 0 | 0 | 0 | 0 | 11847  | 0.348551598 | 1.987763182 | 4.032542752 | 0.492930467 | 0.622061719 | 0.998252924 |
| chrX:3772733-3785847     | intergenic   | <small>LOC389906 (41-1-10798), LOC101928201 (41-11-72694)</small> | X  | 3772733   | 3785847   | 0 | 2 | 0 | 0 | 0 | 0 | 13114  | 0.348551598 | 1.987763182 | 4.032542752 | 0.492930467 | 0.622061719 | 0.998252924 |
| chrX:53439849-53440385   | exonic       | SMC1A                                                             | X  | 53439849  | 53440385  | 0 | 2 | 0 | 0 | 0 | 0 | 536    | 0.348551598 | 1.987763182 | 4.032542752 | 0.492930467 | 0.622061719 | 0.998252924 |
| chrX:67494580-67583708   | exonic       | OPHN1                                                             | X  | 67494580  | 67583708  | 0 | 2 | 0 | 0 | 0 | 0 | 89128  | 0.348551598 | 1.987763182 | 4.032542752 | 0.492930467 | 0.622061719 | 0.998252924 |
| chrX:76812921-76849319   | exonic       | ATRX                                                              | X  | 76812921  | 76849319  | 0 | 2 | 0 | 0 | 0 | 0 | 36398  | 0.348551598 | 1.987763182 | 4.032542752 | 0.492930467 | 0.622061719 | 0.998252924 |
| chrX:96638878-96639043   | exonic       | DIAPH2                                                            | X  | 96638878  | 96639043  | 0 | 2 | 0 | 0 | 0 | 0 | 165    | 0.348551598 | 1.987763182 | 4.032542752 | 0.492930467 | 0.622061719 | 0.998252924 |
| chr2:44200745-44209573   | exonic       | LRPPRC                                                            | 2  | 44200745  | 44209573  | 1 | 1 | 2 | 0 | 0 | 1 | 8828   | 1.006019402 | 1.993070113 | 2.674350288 | 0.745253949 | NA          | NA          |
| chr1:21415630-21437876   | UTR5         | -----                                                             | 1  | 21415630  | 21437876  | 0 | 4 | 0 | 0 | 1 | 0 | 22246  | 0.818130618 | 1.99568161  | 3.296608337 | 0.605374192 | NA          | NA          |
| chr1:93142714-93170301   | exonic       | EVI5                                                              | 1  | 93142714  | 93170301  | 0 | 4 | 0 | 0 | 1 | 0 | 27587  | 0.818130618 | 1.99568161  | 3.296608337 | 0.605374192 | NA          | NA          |
| chr11:12159936-12183966  | exonic       | MICAL2                                                            | 11 | 12159936  | 12183966  | 0 | 4 | 0 | 0 | 1 | 0 | 24030  | 0.818130618 | 1.99568161  | 3.296608337 | 0.605374192 | NA          | NA          |
| chr2:53921020-53978078   | exonic       | ASB3, GPR75-ASB3                                                  | 2  | 53921020  | 53978078  | 0 | 4 | 0 | 0 | 1 | 0 | 57058  | 0.818130618 | 1.99568161  | 3.296608337 | 0.605374192 | NA          | NA          |
| chr6:46849191-46851402   | exonic       | ADGRF5                                                            | 6  | 46849191  | 46851402  | 0 | 4 | 0 | 0 | 1 | 0 | 2211   | 0.818130618 | 1.99568161  | 3.296608337 | 0.605374192 | NA          | NA          |

|                           |        |          |    |           |           |   |   |   |   |   |   |       |             |             |             |             |             |             |
|---------------------------|--------|----------|----|-----------|-----------|---|---|---|---|---|---|-------|-------------|-------------|-------------|-------------|-------------|-------------|
| chr7:155457868-155493638  | exonic | RBM33    | 7  | 155457868 | 155493638 | 0 | 4 | 0 | 0 | 1 | 0 | 35770 | 0.818130618 | 1.99568161  | 3.296608337 | 0.605374192 | NA          | NA          |
| chr9:14639893-14662324    | exonic | ZDHC21   | 9  | 14639893  | 14662324  | 0 | 4 | 0 | 0 | 1 | 0 | 22431 | 0.818130618 | 1.99568161  | 3.296608337 | 0.605374192 | NA          | NA          |
| chr1:202396167-202418299  | exonic | PPP1R12B | 1  | 202396167 | 202418299 | 0 | 4 | 0 | 0 | 0 | 1 | 22132 | 1.005321805 | 1.996159023 | 3.115119712 | 0.64079689  | NA          | NA          |
| chr12:124904502-124979914 | exonic | NCOR2    | 12 | 124904502 | 124979914 | 0 | 4 | 0 | 0 | 0 | 1 | 75412 | 1.005321805 | 1.996159023 | 3.115119712 | 0.64079689  | NA          | NA          |
| chr17:1437392-1461853     | exonic | PITPNA   | 17 | 1437392   | 1461853   | 0 | 4 | 0 | 0 | 0 | 1 | 24461 | 1.005321805 | 1.996159023 | 3.115119712 | 0.64079689  | NA          | NA          |
| chr6:56989531-57006893    | exonic | ZNF451   | 6  | 56989531  | 57006893  | 0 | 4 | 0 | 0 | 0 | 1 | 17362 | 1.005321805 | 1.996159023 | 3.115119712 | 0.64079689  | NA          | NA          |
| chr7:77214859-77256992    | exonic | PTPN12   | 7  | 77214859  | 77256992  | 0 | 4 | 0 | 0 | 0 | 1 | 42133 | 1.005321805 | 1.996159023 | 3.115119712 | 0.64079689  | NA          | NA          |
| chr8:94798450-94811986    | exonic | TMEM67   | 8  | 94798450  | 94811986  | 0 | 4 | 0 | 0 | 0 | 1 | 13536 | 1.005321805 | 1.996159023 | 3.115119712 | 0.64079689  | NA          | NA          |
| chr3:179310431-179316559  | exonic | MRPL47   | 3  | 179310431 | 179316559 | 1 | 2 | 1 | 1 | 0 | 0 | 6128  | 0.781118952 | 1.997959987 | 2.846903602 | 0.701801068 | 0.482803233 | 0.998252924 |
| chrX:154018228-154020560  | exonic | MPP1     | X  | 154018228 | 154020560 | 0 | 0 | 6 | 0 | 2 | 0 | 2332  | 1.425668997 | 2.003330675 | 2.721692161 | 0.736060714 | NA          | NA          |
| chr1:52943379-52947595    | exonic | ZCCHC11  | 1  | 52943379  | 52947595  | 6 | 3 | 1 | 3 | 0 | 0 | 4216  | 1.812952235 | 2.005718904 | 2.079666903 | 0.964442383 | 0.334824182 | 0.998252924 |
| chr1:67405710-67428843    | exonic | MIER1    | 1  | 67405710  | 67428843  | 4 | 1 | 2 | 2 | 0 | 0 | 23133 | 1.297384392 | 2.006628525 | 2.341114978 | 0.857125149 | 0.391375724 | 0.998252924 |
| chr1:151060666-151090615  | exonic | GABPB2   | 1  | 151060666 | 151090615 | 2 | 5 | 2 | 3 | 0 | 0 | 29949 | 1.842825087 | 2.012609113 | 2.062950941 | 0.975597176 | NA          | NA          |
| chr15:73052747-73067438   | exonic | ADPGK    | 15 | 73052747  | 73067438  | 1 | 3 | 1 | 3 | 0 | 0 | 14691 | 1.842825087 | 2.012609113 | 2.062950941 | 0.975597176 | NA          | NA          |
| chr1:15964801-15976318    | exonic | DDI2     | 1  | 15964801  | 15976318  | 3 | 4 | 0 | 2 | 0 | 0 | 11517 | 1.296686795 | 2.013332497 | 2.519481206 | 0.799105979 | 0.424228963 | 0.998252924 |
| chr1:15964801-15978390    | exonic | DDI2     | 1  | 15964801  | 15978390  | 3 | 4 | 0 | 2 | 0 | 0 | 13589 | 1.296686795 | 2.013332497 | 2.519481206 | 0.799105979 | 0.424228963 | 0.998252924 |
| chr6:167435897-167458064  | exonic | FGFR10P  | 6  | 167435897 | 167458064 | 3 | 4 | 0 | 2 | 0 | 0 | 22167 | 1.296686795 | 2.013332497 | 2.519481206 | 0.799105979 | 0.424228963 | 0.998252924 |
| chr16:74491771-74493687   | exonic | GLG1     | 16 | 74491771  | 74493687  | 4 | 1 | 0 | 0 | 1 | 0 | 1916  | 0.811250992 | 2.017646829 | 3.021998223 | 0.667653215 | 0.504354981 | 0.998252924 |
| chr22:29090019-29091861   | exonic | CHEK2    | 22 | 29090019  | 29091861  | 4 | 1 | 0 | 0 | 1 | 0 | 1842  | 0.811250992 | 2.017646829 | 3.021998223 | 0.667653215 | 0.504354981 | 0.998252924 |
| chr3:194180199-194182965  | exonic | ATP13A3  | 3  | 194180199 | 194182965 | 4 | 1 | 0 | 0 | 1 | 0 | 2766  | 0.811250992 | 2.017646829 | 3.021998223 | 0.667653215 | 0.504354981 | 0.998252924 |
| chr15:77020935-77046289   | exonic | SCAPER   | 15 | 77020935  | 77046289  | 1 | 0 | 5 | 2 | 0 | 0 | 25354 | 1.327954841 | 2.02613968  | 2.560116302 | 0.791424858 | NA          | NA          |
| chr11:24927536-25004839   | exonic | LUZP2    | 11 | 24927536  | 25004839  | 9 | 0 | 0 | 0 | 2 | 0 | 77303 | 1.402937329 | 2.027528002 | 2.714680402 | 0.746875397 | NA          | NA          |
| chr15:44776421-44778898   | exonic | CTDSPL2  | 15 | 44776421  | 44778898  | 1 | 0 | 3 | 0 | 1 | 0 | 2477  | 0.841821441 | 2.034318819 | 3.001487973 | 0.677770105 | 0.497917469 | 0.998252924 |
| chr20:20634173-20661445   | exonic | RALGAPA2 | 20 | 20634173  | 20661445  | 0 | 3 | 1 | 0 | 0 | 1 | 27272 | 1.028315032 | 2.036717911 | 2.856153145 | 0.713098286 | 0.47578494  | 0.998252924 |
| chr3:196807921-196846401  | exonic | DLG1     | 3  | 196807921 | 196846401 | 0 | 3 | 1 | 0 | 0 | 1 | 38480 | 1.028315032 | 2.036717911 | 2.856153145 | 0.713098286 | 0.47578494  | 0.998252924 |
| chr1:21267983-21276601    | exonic | EIF4G3   | 1  | 21267983  | 21276601  | 0 | 3 | 1 | 0 | 1 | 0 | 8618  | 0.841123845 | 2.037096088 | 3.002403826 | 0.678488373 | 0.497462093 | 0.998252924 |
| chr12:7556130-7586290     | exonic | CDI63L1  | 12 | 7556130   | 7586290   | 0 | 3 | 1 | 0 | 1 | 0 | 30160 | 0.841123845 | 2.037096088 | 3.002403826 | 0.678488373 | 0.497462093 | 0.998252924 |
| chr17:526772-534868       | exonic | VPS53    | 17 | 526772    | 534868    | 0 | 3 | 1 | 0 | 1 | 0 | 8096  | 0.841123845 | 2.037096088 | 3.002403826 | 0.678488373 | 0.497462093 | 0.998252924 |
| chr6:101214440-101215221  | exonic | ASCC3    | 6  | 101214440 | 101215221 | 0 | 3 | 1 | 0 | 1 | 0 | 781   | 0.841123845 | 2.037096088 | 3.002403826 | 0.678488373 | 0.497462093 | 0.998252924 |
| chr9:20881869-20933102    | exonic | FOCAD    | 9  | 20881869  | 20933102  | 0 | 3 | 1 | 0 | 1 | 0 | 51233 | 0.841123845 | 2.037096088 | 3.002403826 | 0.678488373 | 0.497462093 | 0.998252924 |
| chr17:62882203-62885870   | exonic | LRRC37A3 | 17 | 62882203  | 62885870  | 1 | 1 | 2 | 1 | 0 | 0 | 3667  | 0.804112178 | 2.03841472  | 2.822543979 | 0.722190596 | 0.470177304 | 0.998252924 |
| chr9:114202651-114206774  | exonic | KIAA0368 | 9  | 114202651 | 114206774 | 1 | 1 | 2 | 1 | 0 | 0 | 4123  | 0.804112178 | 2.03841472  | 2.822543979 | 0.722190596 | 0.470177304 | 0.998252924 |
| chr3:47466974-47470160    | exonic | SCAP     | 3  | 47466974  | 47470160  | 7 | 0 | 6 | 2 | 2 | 0 | 3186  | 2.541200367 | 2.041254594 | 1.856811731 | 1.099333099 | 0.2716228   | 0.998252924 |
| chr1:28120043-28138779    | exonic | STX12    | 1  | 28120043  | 28138779  | 0 | 4 | 0 | 1 | 0 | 0 | 18736 | 0.803414581 | 2.046554386 | 3.320205537 | 0.616393884 | NA          | NA          |
| chr6:129687363-129725104  | exonic | LAMA2    | 6  | 129687363 | 129725104 | 4 | 0 | 1 | 0 | 1 | 0 | 37741 | 0.834244218 | 2.057607371 | 2.995434839 | 0.686914415 | 0.492136662 | 0.998252924 |

|                           |              |           |    |           |           |   |   |   |   |   |   |       |             |             |             |             |             |             |
|---------------------------|--------------|-----------|----|-----------|-----------|---|---|---|---|---|---|-------|-------------|-------------|-------------|-------------|-------------|-------------|
| chr13:20049713-20144428   | exonic       | TPTE2     | 13 | 20049713  | 20144428  | 0 | 3 | 6 | 0 | 3 | 0 | 94715 | 2.069523816 | 2.05769061  | 2.188051861 | 0.940421316 | 0.347001493 | 0.998252924 |
| chr4:75040222-75091111    | exonic       | MTHFD2L   | 4  | 75040222  | 75091111  | 4 | 3 | 3 | 2 | 1 | 0 | 50889 | 1.964232437 | 2.062436549 | 1.868650953 | 1.103703474 | 0.269721788 | 0.998252924 |
| chr7:63981442-64004810    | exonic       | ZNF680    | 7  | 63981442  | 64004810  | 2 | 5 | 0 | 2 | 0 | 0 | 23368 | 1.341975651 | 2.066264023 | 2.508393511 | 0.823739981 | 0.410087317 | 0.998252924 |
| chr1:150413398-150416853  | exonic       | RPRD2     | 1  | 150413398 | 150416853 | 0 | 1 | 1 | 0 | 0 | 0 | 3455  | 0.371544825 | 2.067904581 | 4.025867196 | 0.513654445 | 0.607493607 | 0.998252924 |
| chr1:161761197-161762117  | exonic       | ATF6      | 1  | 161761197 | 161762117 | 0 | 1 | 1 | 0 | 0 | 0 | 920   | 0.371544825 | 2.067904581 | 4.025867196 | 0.513654445 | 0.607493607 | 0.998252924 |
| chr1:171537385-171544267  | exonic       | PRRC2C    | 1  | 171537385 | 171544267 | 0 | 1 | 1 | 0 | 0 | 0 | 6882  | 0.371544825 | 2.067904581 | 4.025867196 | 0.513654445 | 0.607493607 | 0.998252924 |
| chr1:176118141-176153828  | exonic       | RFWD2     | 1  | 176118141 | 176153828 | 0 | 1 | 1 | 0 | 0 | 0 | 35687 | 0.371544825 | 2.067904581 | 4.025867196 | 0.513654445 | 0.607493607 | 0.998252924 |
| chr1:178846632-178863159  | exonic       | RALGPS2   | 1  | 178846632 | 178863159 | 0 | 1 | 1 | 0 | 0 | 0 | 16527 | 0.371544825 | 2.067904581 | 4.025867196 | 0.513654445 | 0.607493607 | 0.998252924 |
| chr1:233344263-233372726  | exonic       | PCNXL2    | 1  | 233344263 | 233372726 | 0 | 1 | 1 | 0 | 0 | 0 | 28463 | 0.371544825 | 2.067904581 | 4.025867196 | 0.513654445 | 0.607493607 | 0.998252924 |
| chr1:245165422-245222760  | exonic       | EFCAB2    | 1  | 245165422 | 245222760 | 0 | 1 | 1 | 0 | 0 | 0 | 57338 | 0.371544825 | 2.067904581 | 4.025867196 | 0.513654445 | 0.607493607 | 0.998252924 |
| chr1:38039943-38042157    | exonic       | GNL2      | 1  | 38039943  | 38042157  | 0 | 1 | 1 | 0 | 0 | 0 | 2214  | 0.371544825 | 2.067904581 | 4.025867196 | 0.513654445 | 0.607493607 | 0.998252924 |
| chr10:126176990-126186697 | exonic       | LHPP      | 10 | 126176990 | 126186697 | 0 | 1 | 1 | 0 | 0 | 0 | 9707  | 0.371544825 | 2.067904581 | 4.025867196 | 0.513654445 | 0.607493607 | 0.998252924 |
| chr10:5998341-6002530     | exonic       | IL15RA    | 10 | 5998341   | 6002530   | 0 | 1 | 1 | 0 | 0 | 0 | 4189  | 0.371544825 | 2.067904581 | 4.025867196 | 0.513654445 | 0.607493607 | 0.998252924 |
| chr11:46098304-46105853   | exonic       | PHF21A    | 11 | 46098304  | 46105853  | 0 | 1 | 1 | 0 | 0 | 0 | 7549  | 0.371544825 | 2.067904581 | 4.025867196 | 0.513654445 | 0.607493607 | 0.998252924 |
| chr11:66947549-66975159   | exonic       | KDM2A     | 11 | 66947549  | 66975159  | 0 | 1 | 1 | 0 | 0 | 0 | 27610 | 0.371544825 | 2.067904581 | 4.025867196 | 0.513654445 | 0.607493607 | 0.998252924 |
| chr11:85707868-85718626   | exonic       | PICALM    | 11 | 85707868  | 85718626  | 0 | 1 | 1 | 0 | 0 | 0 | 10758 | 0.371544825 | 2.067904581 | 4.025867196 | 0.513654445 | 0.607493607 | 0.998252924 |
| chr12:57037186-57039137   | exonic       | ATP5B     | 12 | 57037186  | 57039137  | 0 | 1 | 1 | 0 | 0 | 0 | 1951  | 0.371544825 | 2.067904581 | 4.025867196 | 0.513654445 | 0.607493607 | 0.998252924 |
| chr12:69044179-69045831   | exonic       | RAP1B     | 12 | 69044179  | 69045831  | 0 | 1 | 1 | 0 | 0 | 0 | 1652  | 0.371544825 | 2.067904581 | 4.025867196 | 0.513654445 | 0.607493607 | 0.998252924 |
| chr13:28611321-28624359   | exonic       | FLT3      | 13 | 28611321  | 28624359  | 0 | 1 | 1 | 0 | 0 | 0 | 13038 | 0.371544825 | 2.067904581 | 4.025867196 | 0.513654445 | 0.607493607 | 0.998252924 |
| chr14:23771087-23771368   | splicing     | PPP1R3E   | 14 | 23771087  | 23771368  | 0 | 1 | 1 | 0 | 0 | 0 | 281   | 0.371544825 | 2.067904581 | 4.025867196 | 0.513654445 | 0.607493607 | 0.998252924 |
| chr14:50933300-50943024   | exonic       | MAP4K5    | 14 | 50933300  | 50943024  | 0 | 1 | 1 | 0 | 0 | 0 | 9724  | 0.371544825 | 2.067904581 | 4.025867196 | 0.513654445 | 0.607493607 | 0.998252924 |
| chr14:64653141-64655426   | exonic       | SYNE2     | 14 | 64653141  | 64655426  | 0 | 1 | 1 | 0 | 0 | 0 | 2285  | 0.371544825 | 2.067904581 | 4.025867196 | 0.513654445 | 0.607493607 | 0.998252924 |
| chr14:91937180-91957146   | exonic       | PPP4R3A   | 14 | 91937180  | 91957146  | 0 | 1 | 1 | 0 | 0 | 0 | 19966 | 0.371544825 | 2.067904581 | 4.025867196 | 0.513654445 | 0.607493607 | 0.998252924 |
| chr14:92278655-92280169   | exonic       | TC2N      | 14 | 92278655  | 92280169  | 0 | 1 | 1 | 0 | 0 | 0 | 1514  | 0.371544825 | 2.067904581 | 4.025867196 | 0.513654445 | 0.607493607 | 0.998252924 |
| chr15:60734614-60758912   | exonic       | ICE2      | 15 | 60734614  | 60758912  | 0 | 1 | 1 | 0 | 0 | 0 | 24298 | 0.371544825 | 2.067904581 | 4.025867196 | 0.513654445 | 0.607493607 | 0.998252924 |
| chr16:18826496-18856973   | exonic       | SMG1      | 16 | 18826496  | 18856973  | 0 | 1 | 1 | 0 | 0 | 0 | 30477 | 0.371544825 | 2.067904581 | 4.025867196 | 0.513654445 | 0.607493607 | 0.998252924 |
| chr17:62557617-62568074   | exonic       | SMURF2    | 17 | 62557617  | 62568074  | 0 | 1 | 1 | 0 | 0 | 0 | 10457 | 0.371544825 | 2.067904581 | 4.025867196 | 0.513654445 | 0.607493607 | 0.998252924 |
| chr17:62750122-62750772   | ncRNA_exonic | LOC146880 | 17 | 62750122  | 62750772  | 0 | 1 | 1 | 0 | 0 | 0 | 650   | 0.371544825 | 2.067904581 | 4.025867196 | 0.513654445 | 0.607493607 | 0.998252924 |
| chr18:13048857-13059311   | exonic       | CEP192    | 18 | 13048857  | 13059311  | 0 | 1 | 1 | 0 | 0 | 0 | 10454 | 0.371544825 | 2.067904581 | 4.025867196 | 0.513654445 | 0.607493607 | 0.998252924 |
| chr19:34929549-34936026   | exonic       | UBA2      | 19 | 34929549  | 34936026  | 0 | 1 | 1 | 0 | 0 | 0 | 6477  | 0.371544825 | 2.067904581 | 4.025867196 | 0.513654445 | 0.607493607 | 0.998252924 |
| chr19:41088256-41089623   | exonic       | SHKBP1    | 19 | 41088256  | 41089623  | 0 | 1 | 1 | 0 | 0 | 0 | 1367  | 0.371544825 | 2.067904581 | 4.025867196 | 0.513654445 | 0.607493607 | 0.998252924 |
| chr19:5016267-5033042     | exonic       | KDM4B     | 19 | 5016267   | 5033042   | 0 | 1 | 1 | 0 | 0 | 0 | 16775 | 0.371544825 | 2.067904581 | 4.025867196 | 0.513654445 | 0.607493607 | 0.998252924 |
| chr2:203147073-203152447  | exonic       | NOP58     | 2  | 203147073 | 203152447 | 0 | 1 | 1 | 0 | 0 | 0 | 5374  | 0.371544825 | 2.067904581 | 4.025867196 | 0.513654445 | 0.607493607 | 0.998252924 |
| chr2:206911227-206927968  | exonic       | INO80D    | 2  | 206911227 | 206927968 | 0 | 1 | 1 | 0 | 0 | 0 | 16741 | 0.371544825 | 2.067904581 | 4.025867196 | 0.513654445 | 0.607493607 | 0.998252924 |
| chr2:44139570-44153100    | exonic       | LRPPRC    | 2  | 44139570  | 44153100  | 0 | 1 | 1 | 0 | 0 | 0 | 13530 | 0.371544825 | 2.067904581 | 4.025867196 | 0.513654445 | 0.607493607 | 0.998252924 |

|                           |        |          |    |           |           |   |   |   |   |   |   |        |             |             |             |             |             |             |
|---------------------------|--------|----------|----|-----------|-----------|---|---|---|---|---|---|--------|-------------|-------------|-------------|-------------|-------------|-------------|
| chr2:44145163-44153100    | exonic | LRPPRC   | 2  | 44145163  | 44153100  | 0 | 1 | 1 | 0 | 0 | 0 | 7937   | 0.371544825 | 2.067904581 | 4.025867196 | 0.513654445 | 0.607493607 | 0.998252924 |
| chr2:54093221-54114604    | exonic | PSME4    | 2  | 54093221  | 54114604  | 0 | 1 | 1 | 0 | 0 | 0 | 21383  | 0.371544825 | 2.067904581 | 4.025867196 | 0.513654445 | 0.607493607 | 0.998252924 |
| chr2:55785910-55800913    | exonic | PPP4R3B  | 2  | 55785910  | 55800913  | 0 | 1 | 1 | 0 | 0 | 0 | 15003  | 0.371544825 | 2.067904581 | 4.025867196 | 0.513654445 | 0.607493607 | 0.998252924 |
| chr2:85584089-85584375    | exonic | ELMOD3   | 2  | 85584089  | 85584375  | 0 | 1 | 1 | 0 | 0 | 0 | 286    | 0.371544825 | 2.067904581 | 4.025867196 | 0.513654445 | 0.607493607 | 0.998252924 |
| chr20:42331129-42333998   | exonic | MYBL2    | 20 | 42331129  | 42333998  | 0 | 1 | 1 | 0 | 0 | 0 | 2869   | 0.371544825 | 2.067904581 | 4.025867196 | 0.513654445 | 0.607493607 | 0.998252924 |
| chr22:30032739-30035201   | exonic | NF2      | 22 | 30032739  | 30035201  | 0 | 1 | 1 | 0 | 0 | 0 | 2462   | 0.371544825 | 2.067904581 | 4.025867196 | 0.513654445 | 0.607493607 | 0.998252924 |
| chr22:41303590-41310328   | exonic | XPNPEP3  | 22 | 41303590  | 41310328  | 0 | 1 | 1 | 0 | 0 | 0 | 6738   | 0.371544825 | 2.067904581 | 4.025867196 | 0.513654445 | 0.607493607 | 0.998252924 |
| chr3:124996569-125032500  | exonic | ZNF148   | 3  | 124996569 | 125032500 | 0 | 1 | 1 | 0 | 0 | 0 | 35931  | 0.371544825 | 2.067904581 | 4.025867196 | 0.513654445 | 0.607493607 | 0.998252924 |
| chr3:130435239-130449286  | exonic | PIK3R4   | 3  | 130435239 | 130449286 | 0 | 1 | 1 | 0 | 0 | 0 | 14047  | 0.371544825 | 2.067904581 | 4.025867196 | 0.513654445 | 0.607493607 | 0.998252924 |
| chr3:142074242-142089462  | exonic | XRN1     | 3  | 142074242 | 142089462 | 0 | 1 | 1 | 0 | 0 | 0 | 15220  | 0.371544825 | 2.067904581 | 4.025867196 | 0.513654445 | 0.607493607 | 0.998252924 |
| chr3:152017193-152132900  | exonic | MBNL1    | 3  | 152017193 | 152132900 | 0 | 1 | 1 | 0 | 0 | 0 | 115707 | 0.371544825 | 2.067904581 | 4.025867196 | 0.513654445 | 0.607493607 | 0.998252924 |
| chr4:110448477-110454841  | exonic | SEC24B   | 4  | 110448477 | 110454841 | 0 | 1 | 1 | 0 | 0 | 0 | 6364   | 0.371544825 | 2.067904581 | 4.025867196 | 0.513654445 | 0.607493607 | 0.998252924 |
| chr4:143226610-143383879  | exonic | INPP4B   | 4  | 143226610 | 143383879 | 0 | 1 | 1 | 0 | 0 | 0 | 157269 | 0.371544825 | 2.067904581 | 4.025867196 | 0.513654445 | 0.607493607 | 0.998252924 |
| chr4:154501977-154510159  | exonic | KIAA0922 | 4  | 154501977 | 154510159 | 0 | 1 | 1 | 0 | 0 | 0 | 8182   | 0.371544825 | 2.067904581 | 4.025867196 | 0.513654445 | 0.607493607 | 0.998252924 |
| chr4:39863838-39927553    | exonic | PDS5A    | 4  | 39863838  | 39927553  | 0 | 1 | 1 | 0 | 0 | 0 | 63715  | 0.371544825 | 2.067904581 | 4.025867196 | 0.513654445 | 0.607493607 | 0.998252924 |
| chr4:88973142-88987031    | exonic | PKD2     | 4  | 88973142  | 88987031  | 0 | 1 | 1 | 0 | 0 | 0 | 13889  | 0.371544825 | 2.067904581 | 4.025867196 | 0.513654445 | 0.607493607 | 0.998252924 |
| chr5:109065042-109110666  | exonic | MAN2A1   | 5  | 109065042 | 109110666 | 0 | 1 | 1 | 0 | 0 | 0 | 45624  | 0.371544825 | 2.067904581 | 4.025867196 | 0.513654445 | 0.607493607 | 0.998252924 |
| chr5:1488505-1501718      | exonic | LPCAT1   | 5  | 1488505   | 1501718   | 0 | 1 | 1 | 0 | 0 | 0 | 13213  | 0.371544825 | 2.067904581 | 4.025867196 | 0.513654445 | 0.607493607 | 0.998252924 |
| chr6:32938974-32939367    | UTR5   |          | 6  | 32938974  | 32939367  | 0 | 1 | 1 | 0 | 0 | 0 | 393    | 0.371544825 | 2.067904581 | 4.025867196 | 0.513654445 | 0.607493607 | 0.998252924 |
| chr7:20406634-20420454    | exonic | ITGB8    | 7  | 20406634  | 20420454  | 0 | 1 | 1 | 0 | 0 | 0 | 13820  | 0.371544825 | 2.067904581 | 4.025867196 | 0.513654445 | 0.607493607 | 0.998252924 |
| chr7:24689230-24708279    | exonic | MPP6     | 7  | 24689230  | 24708279  | 0 | 1 | 1 | 0 | 0 | 0 | 19049  | 0.371544825 | 2.067904581 | 4.025867196 | 0.513654445 | 0.607493607 | 0.998252924 |
| chr9:128305337-128322088  | exonic | MAPKAP1  | 9  | 128305337 | 128322088 | 0 | 1 | 1 | 0 | 0 | 0 | 16751  | 0.371544825 | 2.067904581 | 4.025867196 | 0.513654445 | 0.607493607 | 0.998252924 |
| chrX:117521302-117532433  | exonic | WDR44    | X  | 117521302 | 117532433 | 0 | 1 | 1 | 0 | 0 | 0 | 11131  | 0.371544825 | 2.067904581 | 4.025867196 | 0.513654445 | 0.607493607 | 0.998252924 |
| chrX:2871183-2873578      | exonic | ARSE     | X  | 2871183   | 2873578   | 0 | 1 | 1 | 0 | 0 | 0 | 2395   | 0.371544825 | 2.067904581 | 4.025867196 | 0.513654445 | 0.607493607 | 0.998252924 |
| chr1:235956802-235964397  | exonic | LYST     | 1  | 235956802 | 235964397 | 0 | 2 | 2 | 0 | 1 | 0 | 7595   | 0.864117071 | 2.076663608 | 2.95806062  | 0.702035514 | 0.482657016 | 0.998252924 |
| chr1:154061896-154091284  | exonic | NUP210L  | 1  | 154061896 | 154091284 | 1 | 3 | 3 | 0 | 2 | 0 | 29388  | 1.48567626  | 2.078113539 | 2.252053867 | 0.922763691 | 0.356130366 | 0.998252924 |
| chr20:36668836-36694658   | exonic | RPRD1B   | 20 | 36668836  | 36694658  | 1 | 0 | 3 | 1 | 0 | 0 | 25822  | 0.827105405 | 2.082123785 | 3.021673155 | 0.689063204 | 0.490783494 | 0.998252924 |
| chr8:41832221-41845081    | exonic | KAT6A    | 8  | 41832221  | 41845081  | 1 | 0 | 3 | 1 | 0 | 0 | 12860  | 0.827105405 | 2.082123785 | 3.021673155 | 0.689063204 | 0.490783494 | 0.998252924 |
| chr1:213170496-213186760  | exonic | ANGEL2   | 1  | 213170496 | 213186760 | 0 | 3 | 1 | 1 | 0 | 0 | 16264  | 0.826407808 | 2.08486543  | 3.022610428 | 0.68975658  | 0.490347278 | 0.998252924 |
| chr10:128795011-128797699 | exonic | DOCK1    | 10 | 128795011 | 128797699 | 3 | 2 | 0 | 0 | 1 | 0 | 2688   | 0.856539848 | 2.09970748  | 2.94326987  | 0.713392782 | 0.475602738 | 0.998252924 |
| chr15:65998428-66053776   | exonic | DENND4A  | 15 | 65998428  | 66053776  | 0 | 2 | 0 | 0 | 1 | 0 | 55348  | 0.856539848 | 2.09970748  | 2.94326987  | 0.713392782 | 0.475602738 | 0.998252924 |
| chr16:68155889-68225678   | exonic | NFATC3   | 16 | 68155889  | 68225678  | 4 | 0 | 1 | 1 | 0 | 0 | 69789  | 0.819528182 | 2.104848649 | 3.015934957 | 0.697909165 | 0.485234002 | 0.998252924 |
| chr3:72890195-72893574    | exonic | SHQ1     | 3  | 72890195  | 72893574  | 4 | 0 | 1 | 1 | 0 | 0 | 3379   | 0.819528182 | 2.104848649 | 3.015934957 | 0.697909165 | 0.485234002 | 0.998252924 |
| chr1:40656443-40668286    | exonic | RLF      | 1  | 40656443  | 40668286  | 4 | 7 | 0 | 0 | 3 | 0 | 11843  | 2.09896063  | 2.105881837 | 2.152845459 | 0.978185326 | 0.327982673 | 0.998252924 |
| chr5:145197456-145205763  | exonic | PRELID2  | 5  | 145197456 | 145205763 | 8 | 0 | 2 | 1 | 0 | 1 | 8307   | 1.840963587 | 2.106636806 | 2.155948639 | 0.977127548 | 0.328506011 | 0.998252924 |

|                           |          |          |    |           |           |    |   |    |    |   |   |       |             |             |             |             |             |             |
|---------------------------|----------|----------|----|-----------|-----------|----|---|----|----|---|---|-------|-------------|-------------|-------------|-------------|-------------|-------------|
| chr1:235357327-235377341  | exonic   | ARID4B   | 1  | 235357327 | 235377341 | 2  | 3 | 2  | 2  | 0 | 0 | 20014 | 1.387962104 | 2.106825888 | 2.272453191 | 0.927115197 | 0.353866726 | 0.998252924 |
| chr16:1403209-1404340     | intronic | GNPTG    | 16 | 1403209   | 1404340   | 3  | 0 | 4  | 2  | 0 | 0 | 1131  | 1.388659701 | 2.11367117  | 2.471989468 | 0.855048614 | 0.392524235 | 0.998252924 |
| chr1:244715623-244724447  | exonic   | Clorf101 | 1  | 244715623 | 244724447 | 0  | 1 | 3  | 0  | 0 | 1 | 8824  | 1.074301484 | 2.113936028 | 2.820865606 | 0.749392677 | NA          | NA          |
| chr11:128932174-128936763 | exonic   | ARHGAP32 | 11 | 128932174 | 128936763 | 0  | 1 | 3  | 0  | 0 | 1 | 4589  | 1.074301484 | 2.113936028 | 2.820865606 | 0.749392677 | NA          | NA          |
| chr1:31465236-31468067    | exonic   | PUM1     | 1  | 31465236  | 31468067  | 9  | 5 | 6  | 5  | 1 | 0 | 2831  | 3.868459981 | 2.114497898 | 1.451512638 | 1.456754728 | NA          | NA          |
| chr1:42041214-42050989    | exonic   | HIVEP3   | 1  | 42041214  | 42050989  | 1  | 3 | 3  | 1  | 1 | 0 | 9775  | 1.470960224 | 2.122565192 | 2.137130796 | 0.993184505 | 0.320620048 | 0.998252924 |
| chr1:167935866-167944253  | exonic   | DCAF6    | 1  | 167935866 | 167944253 | 0  | 2 | 2  | 1  | 0 | 0 | 8387  | 0.849401034 | 2.12398167  | 2.977585179 | 0.713323563 | 0.47564556  | 0.998252924 |
| chr9:5924657-5954095      | exonic   | KIAA2026 | 9  | 5924657   | 5954095   | 0  | 2 | 2  | 1  | 0 | 0 | 29438 | 0.849401034 | 2.12398167  | 2.977585179 | 0.713323563 | 0.47564556  | 0.998252924 |
| chr4:108603170-108622441  | exonic   | PAPSS1   | 4  | 108603170 | 108622441 | 5  | 3 | 0  | 2  | 0 | 0 | 19271 | 1.380384881 | 2.12732052  | 2.463311074 | 0.863602061 | 0.387806532 | 0.998252924 |
| chr15:78337241-78346529   | exonic   | TBC1D2B  | 15 | 78337241  | 78346529  | 2  | 2 | 3  | 2  | 0 | 0 | 9288  | 1.410955331 | 2.130170676 | 2.263089318 | 0.941266727 | 0.346568189 | 0.998252924 |
| chr17:40652724-40653322   | exonic   | ATP6VOA1 | 17 | 40652724  | 40653322  | 8  | 4 | 2  | 4  | 0 | 0 | 598   | 2.54878233  | 2.138620306 | 1.828093066 | 1.169864022 | NA          | NA          |
| chr17:45741524-45745776   | exonic   | KPNB1    | 17 | 45741524  | 45745776  | 3  | 1 | 1  | 0  | 1 | 0 | 4252  | 0.879533075 | 2.141284187 | 2.724121077 | 0.786045894 | 0.431840601 | 0.998252924 |
| chr2:68717321-68772444    | exonic   | APLF     | 2  | 68717321  | 68772444  | 14 | 5 | 10 | 11 | 4 | 0 | 55123 | 4.724997459 | 2.143485936 | 1.317915549 | 1.626421312 | 0.10386006  | 0.998252924 |
| chr1:109170788-109171426  | exonic   | FAM102B  | 1  | 109170788 | 109171426 | 0  | 0 | 2  | 0  | 0 | 0 | 638   | 0.394538051 | 2.144896392 | 4.019782494 | 0.533585186 | 0.593628559 | 0.998252924 |
| chr1:109473685-109475544  | UTR3     |          | 1  | 109473685 | 109475544 | 0  | 0 | 2  | 0  | 0 | 0 | 1859  | 0.394538051 | 2.144896392 | 4.019782494 | 0.533585186 | 0.593628559 | 0.998252924 |
| chr1:113187062-113187993  | intronic | CAPZA1   | 1  | 113187062 | 113187993 | 0  | 0 | 2  | 0  | 0 | 0 | 931   | 0.394538051 | 2.144896392 | 4.019782494 | 0.533585186 | 0.593628559 | 0.998252924 |
| chr1:114252875-114254735  | exonic   | PHTF1    | 1  | 114252875 | 114254735 | 0  | 0 | 2  | 0  | 0 | 0 | 1860  | 0.394538051 | 2.144896392 | 4.019782494 | 0.533585186 | 0.593628559 | 0.998252924 |
| chr1:145683574-145687091  | exonic   | RNF115   | 1  | 145683574 | 145687091 | 0  | 0 | 2  | 0  | 0 | 0 | 3517  | 0.394538051 | 2.144896392 | 4.019782494 | 0.533585186 | 0.593628559 | 0.998252924 |
| chr1:150312873-150321694  | exonic   | PRPF3    | 1  | 150312873 | 150321694 | 0  | 0 | 2  | 0  | 0 | 0 | 8821  | 0.394538051 | 2.144896392 | 4.019782494 | 0.533585186 | 0.593628559 | 0.998252924 |
| chr1:154145384-154145677  | exonic   | TPM3     | 1  | 154145384 | 154145677 | 0  | 0 | 2  | 0  | 0 | 0 | 293   | 0.394538051 | 2.144896392 | 4.019782494 | 0.533585186 | 0.593628559 | 0.998252924 |
| chr1:155679563-155695810  | exonic   | DAP3     | 1  | 155679563 | 155695810 | 0  | 0 | 2  | 0  | 0 | 0 | 16247 | 0.394538051 | 2.144896392 | 4.019782494 | 0.533585186 | 0.593628559 | 0.998252924 |
| chr1:15684605-15689222    | exonic   | FHAD1    | 1  | 15684605  | 15689222  | 0  | 0 | 2  | 0  | 0 | 0 | 4617  | 0.394538051 | 2.144896392 | 4.019782494 | 0.533585186 | 0.593628559 | 0.998252924 |
| chr1:174668662-174671394  | exonic   | RABGAP1L | 1  | 174668662 | 174671394 | 0  | 0 | 2  | 0  | 0 | 0 | 2732  | 0.394538051 | 2.144896392 | 4.019782494 | 0.533585186 | 0.593628559 | 0.998252924 |
| chr1:180756888-180780624  | exonic   | XPR1     | 1  | 180756888 | 180780624 | 0  | 0 | 2  | 0  | 0 | 0 | 23736 | 0.394538051 | 2.144896392 | 4.019782494 | 0.533585186 | 0.593628559 | 0.998252924 |
| chr1:197086918-197094321  | exonic   | ASPM     | 1  | 197086918 | 197094321 | 0  | 0 | 2  | 0  | 0 | 0 | 7403  | 0.394538051 | 2.144896392 | 4.019782494 | 0.533585186 | 0.593628559 | 0.998252924 |
| chr1:203786053-203809502  | exonic   | ZC3H11A  | 1  | 203786053 | 203809502 | 0  | 0 | 2  | 0  | 0 | 0 | 23449 | 0.394538051 | 2.144896392 | 4.019782494 | 0.533585186 | 0.593628559 | 0.998252924 |
| chr1:219366472-219392054  | exonic   | LYPLAL1  | 1  | 219366472 | 219392054 | 0  | 0 | 2  | 0  | 0 | 0 | 25582 | 0.394538051 | 2.144896392 | 4.019782494 | 0.533585186 | 0.593628559 | 0.998252924 |
| chr1:220152759-220180680  | exonic   | EPRS     | 1  | 220152759 | 220180680 | 0  | 0 | 2  | 0  | 0 | 0 | 27921 | 0.394538051 | 2.144896392 | 4.019782494 | 0.533585186 | 0.593628559 | 0.998252924 |
| chr1:224599129-224601037  | exonic   | WDR26    | 1  | 224599129 | 224601037 | 0  | 0 | 2  | 0  | 0 | 0 | 1908  | 0.394538051 | 2.144896392 | 4.019782494 | 0.533585186 | 0.593628559 | 0.998252924 |
| chr1:225140372-225156576  | exonic   | DNAH14   | 1  | 225140372 | 225156576 | 0  | 0 | 2  | 0  | 0 | 0 | 16204 | 0.394538051 | 2.144896392 | 4.019782494 | 0.533585186 | 0.593628559 | 0.998252924 |
| chr1:225161792-225211567  | exonic   | DNAH14   | 1  | 225161792 | 225211567 | 0  | 0 | 2  | 0  | 0 | 0 | 49775 | 0.394538051 | 2.144896392 | 4.019782494 | 0.533585186 | 0.593628559 | 0.998252924 |
| chr1:233150410-233161145  | exonic   | PCNXL2   | 1  | 233150410 | 233161145 | 0  | 0 | 2  | 0  | 0 | 0 | 10735 | 0.394538051 | 2.144896392 | 4.019782494 | 0.533585186 | 0.593628559 | 0.998252924 |
| chr1:23381561-23384058    | exonic   | KDM1A    | 1  | 23381561  | 23384058  | 0  | 0 | 2  | 0  | 0 | 0 | 2497  | 0.394538051 | 2.144896392 | 4.019782494 | 0.533585186 | 0.593628559 | 0.998252924 |
| chr1:23381562-23395644    | exonic   | KDM1A    | 1  | 23381562  | 23395644  | 0  | 0 | 2  | 0  | 0 | 0 | 14082 | 0.394538051 | 2.144896392 | 4.019782494 | 0.533585186 | 0.593628559 | 0.998252924 |
| chr1:235498557-235506198  | exonic   | GGPS1    | 1  | 235498557 | 235506198 | 0  | 0 | 2  | 0  | 0 | 0 | 7641  | 0.394538051 | 2.144896392 | 4.019782494 | 0.533585186 | 0.593628559 | 0.998252924 |

|                           |          |         |    |           |           |   |   |   |   |   |   |       |             |             |             |             |             |             |
|---------------------------|----------|---------|----|-----------|-----------|---|---|---|---|---|---|-------|-------------|-------------|-------------|-------------|-------------|-------------|
| chr1:243977294-243979043  | intronic | AKT3    | 1  | 243977294 | 243979043 | 0 | 0 | 2 | 0 | 0 | 0 | 1749  | 0.394538051 | 2.144896392 | 4.019782494 | 0.533585186 | 0.593628559 | 0.998252924 |
| chr1:24984821-24985579    | intronic | SRRM1   | 1  | 24984821  | 24985579  | 0 | 0 | 2 | 0 | 0 | 0 | 758   | 0.394538051 | 2.144896392 | 4.019782494 | 0.533585186 | 0.593628559 | 0.998252924 |
| chr1:39646791-39647597    | intronic | MACF1   | 1  | 39646791  | 39647597  | 0 | 0 | 2 | 0 | 0 | 0 | 806   | 0.394538051 | 2.144896392 | 4.019782494 | 0.533585186 | 0.593628559 | 0.998252924 |
| chr1:40869356-40872541    | exonic   | SMAP2   | 1  | 40869356  | 40872541  | 0 | 0 | 2 | 0 | 0 | 0 | 3185  | 0.394538051 | 2.144896392 | 4.019782494 | 0.533585186 | 0.593628559 | 0.998252924 |
| chr1:46543186-46546422    | exonic   | PIK3R3  | 1  | 46543186  | 46546422  | 0 | 0 | 2 | 0 | 0 | 0 | 3236  | 0.394538051 | 2.144896392 | 4.019782494 | 0.533585186 | 0.593628559 | 0.998252924 |
| chr1:47533247-47534435    | exonic   | CYP4Z1  | 1  | 47533247  | 47534435  | 0 | 0 | 2 | 0 | 0 | 0 | 1188  | 0.394538051 | 2.144896392 | 4.019782494 | 0.533585186 | 0.593628559 | 0.998252924 |
| chr1:61577043-61624827    | intronic | NFIA    | 1  | 61577043  | 61624827  | 0 | 0 | 2 | 0 | 0 | 0 | 47784 | 0.394538051 | 2.144896392 | 4.019782494 | 0.533585186 | 0.593628559 | 0.998252924 |
| chr1:62293093-62350080    | exonic   | INADL   | 1  | 62293093  | 62350080  | 0 | 0 | 2 | 0 | 0 | 0 | 56987 | 0.394538051 | 2.144896392 | 4.019782494 | 0.533585186 | 0.593628559 | 0.998252924 |
| chr1:65234338-65255197    | exonic   | RAVER2  | 1  | 65234338  | 65255197  | 0 | 0 | 2 | 0 | 0 | 0 | 20859 | 0.394538051 | 2.144896392 | 4.019782494 | 0.533585186 | 0.593628559 | 0.998252924 |
| chr1:65301194-65301780    | splicing | JAK1    | 1  | 65301194  | 65301780  | 0 | 0 | 2 | 0 | 0 | 0 | 586   | 0.394538051 | 2.144896392 | 4.019782494 | 0.533585186 | 0.593628559 | 0.998252924 |
| chr1:8674619-8684439      | exonic   | RERE    | 1  | 8674619   | 8684439   | 0 | 0 | 2 | 0 | 0 | 0 | 9820  | 0.394538051 | 2.144896392 | 4.019782494 | 0.533585186 | 0.593628559 | 0.998252924 |
| chr1:90152029-90180410    | exonic   | LRRC8C  | 1  | 90152029  | 90180410  | 0 | 0 | 2 | 0 | 0 | 0 | 28381 | 0.394538051 | 2.144896392 | 4.019782494 | 0.533585186 | 0.593628559 | 0.998252924 |
| chr1:90178268-90180410    | exonic   | LRRC8C  | 1  | 90178268  | 90180410  | 0 | 0 | 2 | 0 | 0 | 0 | 2142  | 0.394538051 | 2.144896392 | 4.019782494 | 0.533585186 | 0.593628559 | 0.998252924 |
| chr1:93676358-93698150    | exonic   | CCDC18  | 1  | 93676358  | 93698150  | 0 | 0 | 2 | 0 | 0 | 0 | 21792 | 0.394538051 | 2.144896392 | 4.019782494 | 0.533585186 | 0.593628559 | 0.998252924 |
| chr10:112653849-112658101 | exonic   | PDCD4   | 10 | 112653849 | 112658101 | 0 | 0 | 2 | 0 | 0 | 0 | 4252  | 0.394538051 | 2.144896392 | 4.019782494 | 0.533585186 | 0.593628559 | 0.998252924 |
| chr10:118661275-118681027 | exonic   | SHTN1   | 10 | 118661275 | 118681027 | 0 | 0 | 2 | 0 | 0 | 0 | 19752 | 0.394538051 | 2.144896392 | 4.019782494 | 0.533585186 | 0.593628559 | 0.998252924 |
| chr10:118704435-118708508 | exonic   | SHTN1   | 10 | 118704435 | 118708508 | 0 | 0 | 2 | 0 | 0 | 0 | 4073  | 0.394538051 | 2.144896392 | 4.019782494 | 0.533585186 | 0.593628559 | 0.998252924 |
| chr10:126662213-126662967 | exonic   | ZRANB1  | 10 | 126662213 | 126662967 | 0 | 0 | 2 | 0 | 0 | 0 | 754   | 0.394538051 | 2.144896392 | 4.019782494 | 0.533585186 | 0.593628559 | 0.998252924 |
| chr10:127792942-127795164 | intronic | ADAM12  | 10 | 127792942 | 127795164 | 0 | 0 | 2 | 0 | 0 | 0 | 2222  | 0.394538051 | 2.144896392 | 4.019782494 | 0.533585186 | 0.593628559 | 0.998252924 |
| chr10:13158266-13164487   | exonic   | OPTN    | 10 | 13158266  | 13164487  | 0 | 0 | 2 | 0 | 0 | 0 | 6221  | 0.394538051 | 2.144896392 | 4.019782494 | 0.533585186 | 0.593628559 | 0.998252924 |
| chr10:21959378-21971186   | exonic   | MLLT10  | 10 | 21959378  | 21971186  | 0 | 0 | 2 | 0 | 0 | 0 | 11808 | 0.394538051 | 2.144896392 | 4.019782494 | 0.533585186 | 0.593628559 | 0.998252924 |
| chr10:267134-283617       | exonic   | ZMYND11 | 10 | 267134    | 283617    | 0 | 0 | 2 | 0 | 0 | 0 | 16483 | 0.394538051 | 2.144896392 | 4.019782494 | 0.533585186 | 0.593628559 | 0.998252924 |
| chr10:27106183-27106871   | intronic | ABI1    | 10 | 27106183  | 27106871  | 0 | 0 | 2 | 0 | 0 | 0 | 688   | 0.394538051 | 2.144896392 | 4.019782494 | 0.533585186 | 0.593628559 | 0.998252924 |
| chr10:27328893-27332496   | exonic   | ANKRD26 | 10 | 27328893  | 27332496  | 0 | 0 | 2 | 0 | 0 | 0 | 3603  | 0.394538051 | 2.144896392 | 4.019782494 | 0.533585186 | 0.593628559 | 0.998252924 |
| chr10:31197861-31230580   | UTR5     |         | 10 | 31197861  | 31230580  | 0 | 0 | 2 | 0 | 0 | 0 | 32719 | 0.394538051 | 2.144896392 | 4.019782494 | 0.533585186 | 0.593628559 | 0.998252924 |
| chr10:51049995-51093341   | exonic   | PARG    | 10 | 51049995  | 51093341  | 0 | 0 | 2 | 0 | 0 | 0 | 43346 | 0.394538051 | 2.144896392 | 4.019782494 | 0.533585186 | 0.593628559 | 0.998252924 |
| chr10:62199219-62202079   | intronic | ANK3    | 10 | 62199219  | 62202079  | 0 | 0 | 2 | 0 | 0 | 0 | 2860  | 0.394538051 | 2.144896392 | 4.019782494 | 0.533585186 | 0.593628559 | 0.998252924 |
| chr10:70496632-70507323   | exonic   | CCAR1   | 10 | 70496632  | 70507323  | 0 | 0 | 2 | 0 | 0 | 0 | 10691 | 0.394538051 | 2.144896392 | 4.019782494 | 0.533585186 | 0.593628559 | 0.998252924 |
| chr10:75138668-75139959   | exonic   | ANXA7   | 10 | 75138668  | 75139959  | 0 | 0 | 2 | 0 | 0 | 0 | 1291  | 0.394538051 | 2.144896392 | 4.019782494 | 0.533585186 | 0.593628559 | 0.998252924 |
| chr10:75335270-75336119   | exonic   | USP54   | 10 | 75335270  | 75336119  | 0 | 0 | 2 | 0 | 0 | 0 | 849   | 0.394538051 | 2.144896392 | 4.019782494 | 0.533585186 | 0.593628559 | 0.998252924 |
| chr10:93756125-93757508   | exonic   | BTAF1   | 10 | 93756125  | 93757508  | 0 | 0 | 2 | 0 | 0 | 0 | 1383  | 0.394538051 | 2.144896392 | 4.019782494 | 0.533585186 | 0.593628559 | 0.998252924 |
| chr10:948813-955531       | intronic | LARP4B  | 10 | 948813    | 955531    | 0 | 0 | 2 | 0 | 0 | 0 | 6718  | 0.394538051 | 2.144896392 | 4.019782494 | 0.533585186 | 0.593628559 | 0.998252924 |
| chr10:98411004-98416691   | exonic   | PIK3AP1 | 10 | 98411004  | 98416691  | 0 | 0 | 2 | 0 | 0 | 0 | 5687  | 0.394538051 | 2.144896392 | 4.019782494 | 0.533585186 | 0.593628559 | 0.998252924 |
| chr11:107904527-107925682 | exonic   | CUL5    | 11 | 107904527 | 107925682 | 0 | 0 | 2 | 0 | 0 | 0 | 21155 | 0.394538051 | 2.144896392 | 4.019782494 | 0.533585186 | 0.593628559 | 0.998252924 |
| chr11:110007387-110030215 | exonic   | ZC3H12C | 11 | 110007387 | 110030215 | 0 | 0 | 2 | 0 | 0 | 0 | 22828 | 0.394538051 | 2.144896392 | 4.019782494 | 0.533585186 | 0.593628559 | 0.998252924 |

|                           |              |                                          |    |           |           |   |   |   |   |   |   |       |             |             |             |             |             |             |
|---------------------------|--------------|------------------------------------------|----|-----------|-----------|---|---|---|---|---|---|-------|-------------|-------------|-------------|-------------|-------------|-------------|
| chr11:112103886-112108229 | exonic       | PTS                                      | 11 | 112103886 | 112108229 | 0 | 0 | 2 | 0 | 0 | 0 | 4343  | 0.394538051 | 2.144896392 | 4.019782494 | 0.533585186 | 0.593628559 | 0.998252924 |
| chr11:115080293-115088711 | exonic       | CADM1                                    | 11 | 115080293 | 115088711 | 0 | 0 | 2 | 0 | 0 | 0 | 8418  | 0.394538051 | 2.144896392 | 4.019782494 | 0.533585186 | 0.593628559 | 0.998252924 |
| chr11:118245610-118245944 | exonic       | UBE4A                                    | 11 | 118245610 | 118245944 | 0 | 0 | 2 | 0 | 0 | 0 | 334   | 0.394538051 | 2.144896392 | 4.019782494 | 0.533585186 | 0.593628559 | 0.998252924 |
| chr11:118365002-118372572 | exonic       | KMT2A                                    | 11 | 118365002 | 118372572 | 0 | 0 | 2 | 0 | 0 | 0 | 7570  | 0.394538051 | 2.144896392 | 4.019782494 | 0.533585186 | 0.593628559 | 0.998252924 |
| chr11:118628531-118632132 | exonic       | DDX6                                     | 11 | 118628531 | 118632132 | 0 | 0 | 2 | 0 | 0 | 0 | 3601  | 0.394538051 | 2.144896392 | 4.019782494 | 0.533585186 | 0.593628559 | 0.998252924 |
| chr11:120906442-120930794 | exonic       | TBCEL                                    | 11 | 120906442 | 120930794 | 0 | 0 | 2 | 0 | 0 | 0 | 24352 | 0.394538051 | 2.144896392 | 4.019782494 | 0.533585186 | 0.593628559 | 0.998252924 |
| chr11:14889052-14891176   | exonic       | PDE3B                                    | 11 | 14889052  | 14891176  | 0 | 0 | 2 | 0 | 0 | 0 | 2124  | 0.394538051 | 2.144896392 | 4.019782494 | 0.533585186 | 0.593628559 | 0.998252924 |
| chr11:17204020-17204513   | intergenic   | PIK3C2A (dist=12866), NUCB2 (dist=93773) | 11 | 17204020  | 17204513  | 0 | 0 | 2 | 0 | 0 | 0 | 493   | 0.394538051 | 2.144896392 | 4.019782494 | 0.533585186 | 0.593628559 | 0.998252924 |
| chr11:22225350-22261230   | exonic       | ANO5                                     | 11 | 22225350  | 22261230  | 0 | 0 | 2 | 0 | 0 | 0 | 35880 | 0.394538051 | 2.144896392 | 4.019782494 | 0.533585186 | 0.593628559 | 0.998252924 |
| chr11:3047905-3063486     | exonic       | CARS                                     | 11 | 3047905   | 3063486   | 0 | 0 | 2 | 0 | 0 | 0 | 15581 | 0.394538051 | 2.144896392 | 4.019782494 | 0.533585186 | 0.593628559 | 0.998252924 |
| chr11:44129232-44135851   | exonic       | EXT2                                     | 11 | 44129232  | 44135851  | 0 | 0 | 2 | 0 | 0 | 0 | 6619  | 0.394538051 | 2.144896392 | 4.019782494 | 0.533585186 | 0.593628559 | 0.998252924 |
| chr11:5584168-5604892     | exonic       | OR52B6                                   | 11 | 5584168   | 5604892   | 0 | 0 | 2 | 0 | 0 | 0 | 20724 | 0.394538051 | 2.144896392 | 4.019782494 | 0.533585186 | 0.593628559 | 0.998252924 |
| chr11:62620546-62621062   | ncRNA_exonic | SNHG1, SNORD31                           | 11 | 62620546  | 62621062  | 0 | 0 | 2 | 0 | 0 | 0 | 516   | 0.394538051 | 2.144896392 | 4.019782494 | 0.533585186 | 0.593628559 | 0.998252924 |
| chr11:64846824-64847259   | exonic       | CDC45                                    | 11 | 64846824  | 64847259  | 0 | 0 | 2 | 0 | 0 | 0 | 435   | 0.394538051 | 2.144896392 | 4.019782494 | 0.533585186 | 0.593628559 | 0.998252924 |
| chr11:66526513-66555740   | exonic       | C11orf80                                 | 11 | 66526513  | 66555740  | 0 | 0 | 2 | 0 | 0 | 0 | 29227 | 0.394538051 | 2.144896392 | 4.019782494 | 0.533585186 | 0.593628559 | 0.998252924 |
| chr11:72609918-72610685   | intronic     | FCHSD2                                   | 11 | 72609918  | 72610685  | 0 | 0 | 2 | 0 | 0 | 0 | 767   | 0.394538051 | 2.144896392 | 4.019782494 | 0.533585186 | 0.593628559 | 0.998252924 |
| chr11:77069942-77091039   | exonic       | PAK1                                     | 11 | 77069942  | 77091039  | 0 | 0 | 2 | 0 | 0 | 0 | 21097 | 0.394538051 | 2.144896392 | 4.019782494 | 0.533585186 | 0.593628559 | 0.998252924 |
| chr11:95718694-95724887   | exonic       | MAML2                                    | 11 | 95718694  | 95724887  | 0 | 0 | 2 | 0 | 0 | 0 | 6193  | 0.394538051 | 2.144896392 | 4.019782494 | 0.533585186 | 0.593628559 | 0.998252924 |
| chr12:105260209-105289123 | exonic       | SLC41A2                                  | 12 | 105260209 | 105289123 | 0 | 0 | 2 | 0 | 0 | 0 | 28914 | 0.394538051 | 2.144896392 | 4.019782494 | 0.533585186 | 0.593628559 | 0.998252924 |
| chr12:105321751-105325569 | exonic       | SLC41A2                                  | 12 | 105321751 | 105325569 | 0 | 0 | 2 | 0 | 0 | 0 | 3818  | 0.394538051 | 2.144896392 | 4.019782494 | 0.533585186 | 0.593628559 | 0.998252924 |
| chr12:10539502-10542626   | exonic       | KLRC4-KLRK1, KLRK1                       | 12 | 10539502  | 10542626  | 0 | 0 | 2 | 0 | 0 | 0 | 3124  | 0.394538051 | 2.144896392 | 4.019782494 | 0.533585186 | 0.593628559 | 0.998252924 |
| chr12:109613735-109617102 | exonic       | ACACB                                    | 12 | 109613735 | 109617102 | 0 | 0 | 2 | 0 | 0 | 0 | 3367  | 0.394538051 | 2.144896392 | 4.019782494 | 0.533585186 | 0.593628559 | 0.998252924 |
| chr12:111087972-111089253 | exonic       | HVCN1                                    | 12 | 111087972 | 111089253 | 0 | 0 | 2 | 0 | 0 | 0 | 1281  | 0.394538051 | 2.144896392 | 4.019782494 | 0.533585186 | 0.593628559 | 0.998252924 |
| chr12:112513481-112518938 | exonic       | NAA25                                    | 12 | 112513481 | 112518938 | 0 | 0 | 2 | 0 | 0 | 0 | 5457  | 0.394538051 | 2.144896392 | 4.019782494 | 0.533585186 | 0.593628559 | 0.998252924 |
| chr12:112939948-112944226 | exonic       | PTPN11                                   | 12 | 112939948 | 112944226 | 0 | 0 | 2 | 0 | 0 | 0 | 4278  | 0.394538051 | 2.144896392 | 4.019782494 | 0.533585186 | 0.593628559 | 0.998252924 |
| chr12:117423010-117448255 | exonic       | FBXW8                                    | 12 | 117423010 | 117448255 | 0 | 0 | 2 | 0 | 0 | 0 | 25245 | 0.394538051 | 2.144896392 | 4.019782494 | 0.533585186 | 0.593628559 | 0.998252924 |
| chr12:118675877-118704564 | exonic       | TAOK3                                    | 12 | 118675877 | 118704564 | 0 | 0 | 2 | 0 | 0 | 0 | 28687 | 0.394538051 | 2.144896392 | 4.019782494 | 0.533585186 | 0.593628559 | 0.998252924 |
| chr12:124950718-124971114 | exonic       | NCOR2                                    | 12 | 124950718 | 124971114 | 0 | 0 | 2 | 0 | 0 | 0 | 20396 | 0.394538051 | 2.144896392 | 4.019782494 | 0.533585186 | 0.593628559 | 0.998252924 |
| chr12:125070935-125071846 | intergenic   | NCOR2 (dist=18925), SCAB1 (dist=190328)  | 12 | 125070935 | 125071846 | 0 | 0 | 2 | 0 | 0 | 0 | 911   | 0.394538051 | 2.144896392 | 4.019782494 | 0.533585186 | 0.593628559 | 0.998252924 |
| chr12:22627684-22637822   | exonic       | C2CD5                                    | 12 | 22627684  | 22637822  | 0 | 0 | 2 | 0 | 0 | 0 | 10138 | 0.394538051 | 2.144896392 | 4.019782494 | 0.533585186 | 0.593628559 | 0.998252924 |
| chr12:26922282-26971438   | exonic       | ITPR2                                    | 12 | 26922282  | 26971438  | 0 | 0 | 2 | 0 | 0 | 0 | 49156 | 0.394538051 | 2.144896392 | 4.019782494 | 0.533585186 | 0.593628559 | 0.998252924 |
| chr12:28603093-28605587   | exonic       | CCDC91                                   | 12 | 28603093  | 28605587  | 0 | 0 | 2 | 0 | 0 | 0 | 2494  | 0.394538051 | 2.144896392 | 4.019782494 | 0.533585186 | 0.593628559 | 0.998252924 |
| chr12:32863862-32871697   | exonic       | DNM1L                                    | 12 | 32863862  | 32871697  | 0 | 0 | 2 | 0 | 0 | 0 | 7835  | 0.394538051 | 2.144896392 | 4.019782494 | 0.533585186 | 0.593628559 | 0.998252924 |
| chr12:415971-416111       | splicing     | KDM5A                                    | 12 | 415971    | 416111    | 0 | 0 | 2 | 0 | 0 | 0 | 140   | 0.394538051 | 2.144896392 | 4.019782494 | 0.533585186 | 0.593628559 | 0.998252924 |
| chr12:49436343-49442552   | exonic       | KMT2D                                    | 12 | 49436343  | 49442552  | 0 | 0 | 2 | 0 | 0 | 0 | 6209  | 0.394538051 | 2.144896392 | 4.019782494 | 0.533585186 | 0.593628559 | 0.998252924 |



|                           |              |                                                                  |    |           |           |   |   |   |   |   |   |        |             |             |             |             |             |             |
|---------------------------|--------------|------------------------------------------------------------------|----|-----------|-----------|---|---|---|---|---|---|--------|-------------|-------------|-------------|-------------|-------------|-------------|
| chr12:54913116-54914471   | exonic       | NCKAP1L                                                          | 12 | 54913116  | 54914471  | 0 | 0 | 2 | 0 | 0 | 0 | 1355   | 0.394538051 | 2.144896392 | 4.019782494 | 0.533585186 | 0.593628559 | 0.998252924 |
| chr12:62775270-62778083   | exonic       | USP15                                                            | 12 | 62775270  | 62778083  | 0 | 0 | 2 | 0 | 0 | 0 | 2813   | 0.394538051 | 2.144896392 | 4.019782494 | 0.533585186 | 0.593628559 | 0.998252924 |
| chr12:69644908-69653977   | exonic       | CPSF6                                                            | 12 | 69644908  | 69653977  | 0 | 0 | 2 | 0 | 0 | 0 | 9069   | 0.394538051 | 2.144896392 | 4.019782494 | 0.533585186 | 0.593628559 | 0.998252924 |
| chr12:7268661-7268825     | ncRNA_exonic | C1RL-AS1                                                         | 12 | 7268661   | 7268825   | 0 | 0 | 2 | 0 | 0 | 0 | 164    | 0.394538051 | 2.144896392 | 4.019782494 | 0.533585186 | 0.593628559 | 0.998252924 |
| chr12:74892326-74895520   | intergenic   | <small>LOC100307377 (dist=205915), ATXN7L3B (dist=30031)</small> | 12 | 74892326  | 74895520  | 0 | 0 | 2 | 0 | 0 | 0 | 3194   | 0.394538051 | 2.144896392 | 4.019782494 | 0.533585186 | 0.593628559 | 0.998252924 |
| chr12:98921663-98931350   | exonic       | TMPO                                                             | 12 | 98921663  | 98931350  | 0 | 0 | 2 | 0 | 0 | 0 | 9687   | 0.394538051 | 2.144896392 | 4.019782494 | 0.533585186 | 0.593628559 | 0.998252924 |
| chr13:100953714-100962162 | exonic       | PCCA                                                             | 13 | 100953714 | 100962162 | 0 | 0 | 2 | 0 | 0 | 0 | 8448   | 0.394538051 | 2.144896392 | 4.019782494 | 0.533585186 | 0.593628559 | 0.998252924 |
| chr13:110844658-110845176 | splicing     | COL4A1                                                           | 13 | 110844658 | 110845176 | 0 | 0 | 2 | 0 | 0 | 0 | 518    | 0.394538051 | 2.144896392 | 4.019782494 | 0.533585186 | 0.593628559 | 0.998252924 |
| chr13:21729831-21732264   | exonic       | SKA3                                                             | 13 | 21729831  | 21732264  | 0 | 0 | 2 | 0 | 0 | 0 | 2433   | 0.394538051 | 2.144896392 | 4.019782494 | 0.533585186 | 0.593628559 | 0.998252924 |
| chr13:26911703-26959479   | exonic       | CDK8                                                             | 13 | 26911703  | 26959479  | 0 | 0 | 2 | 0 | 0 | 0 | 47776  | 0.394538051 | 2.144896392 | 4.019782494 | 0.533585186 | 0.593628559 | 0.998252924 |
| chr13:33686032-33686857   | splicing     | STARD13                                                          | 13 | 33686032  | 33686857  | 0 | 0 | 2 | 0 | 0 | 0 | 825    | 0.394538051 | 2.144896392 | 4.019782494 | 0.533585186 | 0.593628559 | 0.998252924 |
| chr13:41133646-41219623   | exonic       | FOXO1                                                            | 13 | 41133646  | 41219623  | 0 | 0 | 2 | 0 | 0 | 0 | 85977  | 0.394538051 | 2.144896392 | 4.019782494 | 0.533585186 | 0.593628559 | 0.998252924 |
| chr13:42385360-42457627   | exonic       | VWA8                                                             | 13 | 42385360  | 42457627  | 0 | 0 | 2 | 0 | 0 | 0 | 72267  | 0.394538051 | 2.144896392 | 4.019782494 | 0.533585186 | 0.593628559 | 0.998252924 |
| chr13:48523074-48571158   | exonic       | SUCLA2                                                           | 13 | 48523074  | 48571158  | 0 | 0 | 2 | 0 | 0 | 0 | 48084  | 0.394538051 | 2.144896392 | 4.019782494 | 0.533585186 | 0.593628559 | 0.998252924 |
| chr13:52718050-52722604   | exonic       | NEK3                                                             | 13 | 52718050  | 52722604  | 0 | 0 | 2 | 0 | 0 | 0 | 4554   | 0.394538051 | 2.144896392 | 4.019782494 | 0.533585186 | 0.593628559 | 0.998252924 |
| chr13:77638749-77641999   | exonic       | MYCBP2                                                           | 13 | 77638749  | 77641999  | 0 | 0 | 2 | 0 | 0 | 0 | 3250   | 0.394538051 | 2.144896392 | 4.019782494 | 0.533585186 | 0.593628559 | 0.998252924 |
| chr13:99151465-99226331   | exonic       | STK24                                                            | 13 | 99151465  | 99226331  | 0 | 0 | 2 | 0 | 0 | 0 | 74866  | 0.394538051 | 2.144896392 | 4.019782494 | 0.533585186 | 0.593628559 | 0.998252924 |
| chr14:100567916-100568226 | intronic     | EVL                                                              | 14 | 100567916 | 100568226 | 0 | 0 | 2 | 0 | 0 | 0 | 310    | 0.394538051 | 2.144896392 | 4.019782494 | 0.533585186 | 0.593628559 | 0.998252924 |
| chr14:103254470-103254860 | intronic     | TRAF3                                                            | 14 | 103254470 | 103254860 | 0 | 0 | 2 | 0 | 0 | 0 | 390    | 0.394538051 | 2.144896392 | 4.019782494 | 0.533585186 | 0.593628559 | 0.998252924 |
| chr14:106135888-106208722 | ncRNA_exonic | ELK2AP                                                           | 14 | 106135888 | 106208722 | 0 | 0 | 2 | 0 | 0 | 0 | 72834  | 0.394538051 | 2.144896392 | 4.019782494 | 0.533585186 | 0.593628559 | 0.998252924 |
| chr14:106208678-106209407 | intergenic   | <small>ELK2AP (dist=69534), MIR4507 (dist=114886)</small>        | 14 | 106208678 | 106209407 | 0 | 0 | 2 | 0 | 0 | 0 | 729    | 0.394538051 | 2.144896392 | 4.019782494 | 0.533585186 | 0.593628559 | 0.998252924 |
| chr14:20820403-20822406   | exonic       | PARP2                                                            | 14 | 20820403  | 20822406  | 0 | 0 | 2 | 0 | 0 | 0 | 2003   | 0.394538051 | 2.144896392 | 4.019782494 | 0.533585186 | 0.593628559 | 0.998252924 |
| chr14:31171501-31191765   | exonic       | SCFD1                                                            | 14 | 31171501  | 31191765  | 0 | 0 | 2 | 0 | 0 | 0 | 20264  | 0.394538051 | 2.144896392 | 4.019782494 | 0.533585186 | 0.593628559 | 0.998252924 |
| chr14:35777199-35778201   | exonic       | PSMA6                                                            | 14 | 35777199  | 35778201  | 0 | 0 | 2 | 0 | 0 | 0 | 1002   | 0.394538051 | 2.144896392 | 4.019782494 | 0.533585186 | 0.593628559 | 0.998252924 |
| chr14:50732075-50769735   | exonic       | L2HGDH                                                           | 14 | 50732075  | 50769735  | 0 | 0 | 2 | 0 | 0 | 0 | 37660  | 0.394538051 | 2.144896392 | 4.019782494 | 0.533585186 | 0.593628559 | 0.998252924 |
| chr14:51101932-51111732   | exonic       | SAV1                                                             | 14 | 51101932  | 51111732  | 0 | 0 | 2 | 0 | 0 | 0 | 9800   | 0.394538051 | 2.144896392 | 4.019782494 | 0.533585186 | 0.593628559 | 0.998252924 |
| chr14:53521155-53527919   | exonic       | DDHD1                                                            | 14 | 53521155  | 53527919  | 0 | 0 | 2 | 0 | 0 | 0 | 6764   | 0.394538051 | 2.144896392 | 4.019782494 | 0.533585186 | 0.593628559 | 0.998252924 |
| chr14:55647930-55650471   | exonic       | DLGAP5                                                           | 14 | 55647930  | 55650471  | 0 | 0 | 2 | 0 | 0 | 0 | 2541   | 0.394538051 | 2.144896392 | 4.019782494 | 0.533585186 | 0.593628559 | 0.998252924 |
| chr14:55750378-55751013   | intronic     | FBXO34                                                           | 14 | 55750378  | 55751013  | 0 | 0 | 2 | 0 | 0 | 0 | 635    | 0.394538051 | 2.144896392 | 4.019782494 | 0.533585186 | 0.593628559 | 0.998252924 |
| chr14:57740961-57749948   | exonic       | AP5M1                                                            | 14 | 57740961  | 57749948  | 0 | 0 | 2 | 0 | 0 | 0 | 8987   | 0.394538051 | 2.144896392 | 4.019782494 | 0.533585186 | 0.593628559 | 0.998252924 |
| chr14:71568706-71572157   | exonic       | PCNX                                                             | 14 | 71568706  | 71572157  | 0 | 0 | 2 | 0 | 0 | 0 | 3451   | 0.394538051 | 2.144896392 | 4.019782494 | 0.533585186 | 0.593628559 | 0.998252924 |
| chr14:73569962-73570186   | exonic       | RBM25                                                            | 14 | 73569962  | 73570186  | 0 | 0 | 2 | 0 | 0 | 0 | 224    | 0.394538051 | 2.144896392 | 4.019782494 | 0.533585186 | 0.593628559 | 0.998252924 |
| chr14:73925199-74048041   | exonic       | <small>ACOT1, ACOT2, C14orf169, HEATR4</small>                   | 14 | 73925199  | 74048041  | 0 | 0 | 2 | 0 | 0 | 0 | 122842 | 0.394538051 | 2.144896392 | 4.019782494 | 0.533585186 | 0.593628559 | 0.998252924 |
| chr14:92258710-92280169   | exonic       | TC2N                                                             | 14 | 92258710  | 92280169  | 0 | 0 | 2 | 0 | 0 | 0 | 21459  | 0.394538051 | 2.144896392 | 4.019782494 | 0.533585186 | 0.593628559 | 0.998252924 |
| chr14:92555073-92563182   | exonic       | ATXN3                                                            | 14 | 92555073  | 92563182  | 0 | 0 | 2 | 0 | 0 | 0 | 8109   | 0.394538051 | 2.144896392 | 4.019782494 | 0.533585186 | 0.593628559 | 0.998252924 |

|                         |            |                                                           |    |          |          |   |   |   |   |   |   |       |             |             |             |             |             |             |
|-------------------------|------------|-----------------------------------------------------------|----|----------|----------|---|---|---|---|---|---|-------|-------------|-------------|-------------|-------------|-------------|-------------|
| chr14:95590532-95599840 | exonic     | DICER1                                                    | 14 | 95590532 | 95599840 | 0 | 0 | 2 | 0 | 0 | 0 | 9308  | 0.394538051 | 2.144896392 | 4.019782494 | 0.533585186 | 0.593628559 | 0.998252924 |
| chr15:43044171-43045445 | exonic     | TTBK2                                                     | 15 | 43044171 | 43045445 | 0 | 0 | 2 | 0 | 0 | 0 | 1274  | 0.394538051 | 2.144896392 | 4.019782494 | 0.533585186 | 0.593628559 | 0.998252924 |
| chr15:44671887-44673174 | exonic     | CASC4                                                     | 15 | 44671887 | 44673174 | 0 | 0 | 2 | 0 | 0 | 0 | 1287  | 0.394538051 | 2.144896392 | 4.019782494 | 0.533585186 | 0.593628559 | 0.998252924 |
| chr15:52073240-52075025 | exonic     | TMOD2                                                     | 15 | 52073240 | 52075025 | 0 | 0 | 2 | 0 | 0 | 0 | 1785  | 0.394538051 | 2.144896392 | 4.019782494 | 0.533585186 | 0.593628559 | 0.998252924 |
| chr15:55919205-55921202 | exonic     | PRTG                                                      | 15 | 55919205 | 55921202 | 0 | 0 | 2 | 0 | 0 | 0 | 1997  | 0.394538051 | 2.144896392 | 4.019782494 | 0.533585186 | 0.593628559 | 0.998252924 |
| chr15:59175824-59186781 | exonic     | SLTM                                                      | 15 | 59175824 | 59186781 | 0 | 0 | 2 | 0 | 0 | 0 | 10957 | 0.394538051 | 2.144896392 | 4.019782494 | 0.533585186 | 0.593628559 | 0.998252924 |
| chr15:66714073-66716431 | intronic   | MAP2K1                                                    | 15 | 66714073 | 66716431 | 0 | 0 | 2 | 0 | 0 | 0 | 2358  | 0.394538051 | 2.144896392 | 4.019782494 | 0.533585186 | 0.593628559 | 0.998252924 |
| chr15:76518189-76576166 | exonic     | ETFA                                                      | 15 | 76518189 | 76576166 | 0 | 0 | 2 | 0 | 0 | 0 | 57977 | 0.394538051 | 2.144896392 | 4.019782494 | 0.533585186 | 0.593628559 | 0.998252924 |
| chr15:79214120-79214365 | UTR3       | <small>CTSH(NM_004390;c.*352_*107delins0)</small>         | 15 | 79214120 | 79214365 | 0 | 0 | 2 | 0 | 0 | 0 | 245   | 0.394538051 | 2.144896392 | 4.019782494 | 0.533585186 | 0.593628559 | 0.998252924 |
| chr15:80390757-80423635 | exonic     | ZFAND6                                                    | 15 | 80390757 | 80423635 | 0 | 0 | 2 | 0 | 0 | 0 | 32878 | 0.394538051 | 2.144896392 | 4.019782494 | 0.533585186 | 0.593628559 | 0.998252924 |
| chr15:86240708-86244765 | intronic   | AKAP13                                                    | 15 | 86240708 | 86244765 | 0 | 0 | 2 | 0 | 0 | 0 | 4057  | 0.394538051 | 2.144896392 | 4.019782494 | 0.533585186 | 0.593628559 | 0.998252924 |
| chr15:86253876-86253992 | exonic     | AKAP13                                                    | 15 | 86253876 | 86253992 | 0 | 0 | 2 | 0 | 0 | 0 | 116   | 0.394538051 | 2.144896392 | 4.019782494 | 0.533585186 | 0.593628559 | 0.998252924 |
| chr15:91346750-91347589 | exonic     | BLM                                                       | 15 | 91346750 | 91347589 | 0 | 0 | 2 | 0 | 0 | 0 | 839   | 0.394538051 | 2.144896392 | 4.019782494 | 0.533585186 | 0.593628559 | 0.998252924 |
| chr15:93498652-93536228 | exonic     | CHD2                                                      | 15 | 93498652 | 93536228 | 0 | 0 | 2 | 0 | 0 | 0 | 37576 | 0.394538051 | 2.144896392 | 4.019782494 | 0.533585186 | 0.593628559 | 0.998252924 |
| chr15:99740123-99781764 | exonic     | TTC23                                                     | 15 | 99740123 | 99781764 | 0 | 0 | 2 | 0 | 0 | 0 | 41641 | 0.394538051 | 2.144896392 | 4.019782494 | 0.533585186 | 0.593628559 | 0.998252924 |
| chr16:17933335-1798721  | exonic     | MAPK8IP3                                                  | 16 | 17933335 | 1798721  | 0 | 0 | 2 | 0 | 0 | 0 | 5386  | 0.394538051 | 2.144896392 | 4.019782494 | 0.533585186 | 0.593628559 | 0.998252924 |
| chr16:19714364-19715494 | intergenic | <small>CT6orf62(dist=1879),KNOP1(dist=2180)</small>       | 16 | 19714364 | 19715494 | 0 | 0 | 2 | 0 | 0 | 0 | 1130  | 0.394538051 | 2.144896392 | 4.019782494 | 0.533585186 | 0.593628559 | 0.998252924 |
| chr16:4310090-4310596   | exonic     | TFAP4                                                     | 16 | 4310090  | 4310596  | 0 | 0 | 2 | 0 | 0 | 0 | 506   | 0.394538051 | 2.144896392 | 4.019782494 | 0.533585186 | 0.593628559 | 0.998252924 |
| chr16:66759377-66760572 | exonic     | DYNC1LI2                                                  | 16 | 66759377 | 66760572 | 0 | 0 | 2 | 0 | 0 | 0 | 1195  | 0.394538051 | 2.144896392 | 4.019782494 | 0.533585186 | 0.593628559 | 0.998252924 |
| chr16:68587777-68588601 | intronic   | ZFP90                                                     | 16 | 68587777 | 68588601 | 0 | 0 | 2 | 0 | 0 | 0 | 824   | 0.394538051 | 2.144896392 | 4.019782494 | 0.533585186 | 0.593628559 | 0.998252924 |
| chr16:69304045-69333677 | exonic     | SNTB2                                                     | 16 | 69304045 | 69333677 | 0 | 0 | 2 | 0 | 0 | 0 | 29632 | 0.394538051 | 2.144896392 | 4.019782494 | 0.533585186 | 0.593628559 | 0.998252924 |
| chr16:75446432-75448593 | exonic     | CFDP1                                                     | 16 | 75446432 | 75448593 | 0 | 0 | 2 | 0 | 0 | 0 | 2161  | 0.394538051 | 2.144896392 | 4.019782494 | 0.533585186 | 0.593628559 | 0.998252924 |
| chr16:87376482-87380856 | exonic     | FBXO31                                                    | 16 | 87376482 | 87380856 | 0 | 0 | 2 | 0 | 0 | 0 | 4374  | 0.394538051 | 2.144896392 | 4.019782494 | 0.533585186 | 0.593628559 | 0.998252924 |
| chr17:20135070-20135727 | exonic     | SPECC1                                                    | 17 | 20135070 | 20135727 | 0 | 0 | 2 | 0 | 0 | 0 | 657   | 0.394538051 | 2.144896392 | 4.019782494 | 0.533585186 | 0.593628559 | 0.998252924 |
| chr17:20156817-20160920 | exonic     | SPECC1                                                    | 17 | 20156817 | 20160920 | 0 | 0 | 2 | 0 | 0 | 0 | 4103  | 0.394538051 | 2.144896392 | 4.019782494 | 0.533585186 | 0.593628559 | 0.998252924 |
| chr17:2554787-2560633   | intronic   | PAFAH1B1                                                  | 17 | 2554787  | 2560633  | 0 | 0 | 2 | 0 | 0 | 0 | 5846  | 0.394538051 | 2.144896392 | 4.019782494 | 0.533585186 | 0.593628559 | 0.998252924 |
| chr17:27809214-27857637 | exonic     | TAOK1                                                     | 17 | 27809214 | 27857637 | 0 | 0 | 2 | 0 | 0 | 0 | 48423 | 0.394538051 | 2.144896392 | 4.019782494 | 0.533585186 | 0.593628559 | 0.998252924 |
| chr17:28011580-28022541 | exonic     | SSH2                                                      | 17 | 28011580 | 28022541 | 0 | 0 | 2 | 0 | 0 | 0 | 10961 | 0.394538051 | 2.144896392 | 4.019782494 | 0.533585186 | 0.593628559 | 0.998252924 |
| chr17:28747858-28750715 | exonic     | CPD                                                       | 17 | 28747858 | 28750715 | 0 | 0 | 2 | 0 | 0 | 0 | 2857  | 0.394538051 | 2.144896392 | 4.019782494 | 0.533585186 | 0.593628559 | 0.998252924 |
| chr17:30498062-30521126 | exonic     | RHOT1                                                     | 17 | 30498062 | 30521126 | 0 | 0 | 2 | 0 | 0 | 0 | 23064 | 0.394538051 | 2.144896392 | 4.019782494 | 0.533585186 | 0.593628559 | 0.998252924 |
| chr17:43653789-43654009 | intergenic | <small>LINC374P(dist=55900),LOC644172(dist=23460)</small> | 17 | 43653789 | 43654009 | 0 | 0 | 2 | 0 | 0 | 0 | 220   | 0.394538051 | 2.144896392 | 4.019782494 | 0.533585186 | 0.593628559 | 0.998252924 |
| chr17:45405634-45422464 | exonic     | EFCAB13                                                   | 17 | 45405634 | 45422464 | 0 | 0 | 2 | 0 | 0 | 0 | 16830 | 0.394538051 | 2.144896392 | 4.019782494 | 0.533585186 | 0.593628559 | 0.998252924 |
| chr17:49097519-49109083 | exonic     | SPAG9                                                     | 17 | 49097519 | 49109083 | 0 | 0 | 2 | 0 | 0 | 0 | 11564 | 0.394538051 | 2.144896392 | 4.019782494 | 0.533585186 | 0.593628559 | 0.998252924 |
| chr17:5312052-5320002   | exonic     | NUP88                                                     | 17 | 5312052  | 5320002  | 0 | 0 | 2 | 0 | 0 | 0 | 7950  | 0.394538051 | 2.144896392 | 4.019782494 | 0.533585186 | 0.593628559 | 0.998252924 |
| chr17:58346810-58379065 | exonic     | USP32                                                     | 17 | 58346810 | 58379065 | 0 | 0 | 2 | 0 | 0 | 0 | 32255 | 0.394538051 | 2.144896392 | 4.019782494 | 0.533585186 | 0.593628559 | 0.998252924 |

|                          |              |                                                           |    |           |           |   |   |   |   |   |   |        |             |             |             |             |             |             |
|--------------------------|--------------|-----------------------------------------------------------|----|-----------|-----------|---|---|---|---|---|---|--------|-------------|-------------|-------------|-------------|-------------|-------------|
| chr17:59155693-59161925  | exonic       | BCAS3                                                     | 17 | 59155693  | 59161925  | 0 | 0 | 2 | 0 | 0 | 0 | 6232   | 0.394538051 | 2.144896392 | 4.019782494 | 0.533585186 | 0.593628559 | 0.998252924 |
| chr17:60655837-60663587  | exonic       | TLK2                                                      | 17 | 60655837  | 60663587  | 0 | 0 | 2 | 0 | 0 | 0 | 7750   | 0.394538051 | 2.144896392 | 4.019782494 | 0.533585186 | 0.593628559 | 0.998252924 |
| chr17:65113220-65118300  | exonic       | HELZ                                                      | 17 | 65113220  | 65118300  | 0 | 0 | 2 | 0 | 0 | 0 | 5080   | 0.394538051 | 2.144896392 | 4.019782494 | 0.533585186 | 0.593628559 | 0.998252924 |
| chr17:74324797-74328516  | exonic       | PRPSAP1                                                   | 17 | 74324797  | 74328516  | 0 | 0 | 2 | 0 | 0 | 0 | 3719   | 0.394538051 | 2.144896392 | 4.019782494 | 0.533585186 | 0.593628559 | 0.998252924 |
| chr17:78704359-78727985  | exonic       | RPTOR                                                     | 17 | 78704359  | 78727985  | 0 | 0 | 2 | 0 | 0 | 0 | 23626  | 0.394538051 | 2.144896392 | 4.019782494 | 0.533585186 | 0.593628559 | 0.998252924 |
| chr17:78977181-78992832  | intergenic   | <small>CHMP6 (dist=3248), BAIAP2-AS1 (dist=10101)</small> | 17 | 78977181  | 78992832  | 0 | 0 | 2 | 0 | 0 | 0 | 15651  | 0.394538051 | 2.144896392 | 4.019782494 | 0.533585186 | 0.593628559 | 0.998252924 |
| chr17:80851422-80869665  | exonic       | TBCD                                                      | 17 | 80851422  | 80869665  | 0 | 0 | 2 | 0 | 0 | 0 | 18243  | 0.394538051 | 2.144896392 | 4.019782494 | 0.533585186 | 0.593628559 | 0.998252924 |
| chr17:953289-986867      | exonic       | ABR                                                       | 17 | 953289    | 986867    | 0 | 0 | 2 | 0 | 0 | 0 | 33578  | 0.394538051 | 2.144896392 | 4.019782494 | 0.533585186 | 0.593628559 | 0.998252924 |
| chr18:12999419-13117642  | exonic       | CEP192                                                    | 18 | 12999419  | 13117642  | 0 | 0 | 2 | 0 | 0 | 0 | 118223 | 0.394538051 | 2.144896392 | 4.019782494 | 0.533585186 | 0.593628559 | 0.998252924 |
| chr18:18582979-18585606  | intronic     | ROCK1                                                     | 18 | 18582979  | 18585606  | 0 | 0 | 2 | 0 | 0 | 0 | 2627   | 0.394538051 | 2.144896392 | 4.019782494 | 0.533585186 | 0.593628559 | 0.998252924 |
| chr18:19751068-19763004  | exonic       | GATA6                                                     | 18 | 19751068  | 19763004  | 0 | 0 | 2 | 0 | 0 | 0 | 11936  | 0.394538051 | 2.144896392 | 4.019782494 | 0.533585186 | 0.593628559 | 0.998252924 |
| chr18:21461899-21470081  | exonic       | LAMA3                                                     | 18 | 21461899  | 21470081  | 0 | 0 | 2 | 0 | 0 | 0 | 8182   | 0.394538051 | 2.144896392 | 4.019782494 | 0.533585186 | 0.593628559 | 0.998252924 |
| chr18:23632587-23658124  | exonic       | SS18                                                      | 18 | 23632587  | 23658124  | 0 | 0 | 2 | 0 | 0 | 0 | 25537  | 0.394538051 | 2.144896392 | 4.019782494 | 0.533585186 | 0.593628559 | 0.998252924 |
| chr18:2700536-2700916    | exonic       | SMCHD1                                                    | 18 | 2700536   | 2700916   | 0 | 0 | 2 | 0 | 0 | 0 | 380    | 0.394538051 | 2.144896392 | 4.019782494 | 0.533585186 | 0.593628559 | 0.998252924 |
| chr18:33724901-33726344  | exonic       | ELP2                                                      | 18 | 33724901  | 33726344  | 0 | 0 | 2 | 0 | 0 | 0 | 1443   | 0.394538051 | 2.144896392 | 4.019782494 | 0.533585186 | 0.593628559 | 0.998252924 |
| chr18:44013152-44015359  | exonic       | RNF165                                                    | 18 | 44013152  | 44015359  | 0 | 0 | 2 | 0 | 0 | 0 | 2207   | 0.394538051 | 2.144896392 | 4.019782494 | 0.533585186 | 0.593628559 | 0.998252924 |
| chr18:48510465-48510933  | exonic       | ELAC1                                                     | 18 | 48510465  | 48510933  | 0 | 0 | 2 | 0 | 0 | 0 | 468    | 0.394538051 | 2.144896392 | 4.019782494 | 0.533585186 | 0.593628559 | 0.998252924 |
| chr18:55833019-55996359  | exonic       | NEDD4L                                                    | 18 | 55833019  | 55996359  | 0 | 0 | 2 | 0 | 0 | 0 | 163340 | 0.394538051 | 2.144896392 | 4.019782494 | 0.533585186 | 0.593628559 | 0.998252924 |
| chr19:12989195-12989648  | exonic       | DNASE2                                                    | 19 | 12989195  | 12989648  | 0 | 0 | 2 | 0 | 0 | 0 | 453    | 0.394538051 | 2.144896392 | 4.019782494 | 0.533585186 | 0.593628559 | 0.998252924 |
| chr19:13919649-13920034  | exonic       | ZSWIM4                                                    | 19 | 13919649  | 13920034  | 2 | 0 | 2 | 0 | 0 | 0 | 385    | 0.394538051 | 2.144896392 | 4.019782494 | 0.533585186 | 0.593628559 | 0.998252924 |
| chr19:16192722-16199930  | exonic       | TPM4                                                      | 19 | 16192722  | 16199930  | 0 | 0 | 2 | 0 | 0 | 0 | 7208   | 0.394538051 | 2.144896392 | 4.019782494 | 0.533585186 | 0.593628559 | 0.998252924 |
| chr19:20975318-20976684  | intergenic   | <small>ZNF626 (dist=130916), ZNF85 (dist=129375)</small>  | 19 | 20975318  | 20976684  | 0 | 0 | 2 | 0 | 0 | 0 | 1366   | 0.394538051 | 2.144896392 | 4.019782494 | 0.533585186 | 0.593628559 | 0.998252924 |
| chr19:21287632-21288547  | intronic     | ZNF714                                                    | 19 | 21287632  | 21288547  | 0 | 0 | 2 | 0 | 0 | 0 | 915    | 0.394538051 | 2.144896392 | 4.019782494 | 0.533585186 | 0.593628559 | 0.998252924 |
| chr19:38249115-38264391  | exonic       | ZNF573                                                    | 19 | 38249115  | 38264391  | 0 | 0 | 2 | 0 | 0 | 0 | 15276  | 0.394538051 | 2.144896392 | 4.019782494 | 0.533585186 | 0.593628559 | 0.998252924 |
| chr19:41754418-41762516  | exonic       | AXL                                                       | 19 | 41754418  | 41762516  | 0 | 0 | 2 | 0 | 0 | 0 | 8098   | 0.394538051 | 2.144896392 | 4.019782494 | 0.533585186 | 0.593628559 | 0.998252924 |
| chr19:47646750-47658470  | exonic       | SAE1                                                      | 19 | 47646750  | 47658470  | 0 | 0 | 2 | 0 | 0 | 0 | 11720  | 0.394538051 | 2.144896392 | 4.019782494 | 0.533585186 | 0.593628559 | 0.998252924 |
| chr19:50388625-50388793  | intronic     | TBC1D17                                                   | 19 | 50388625  | 50388793  | 0 | 0 | 2 | 0 | 0 | 0 | 168    | 0.394538051 | 2.144896392 | 4.019782494 | 0.533585186 | 0.593628559 | 0.998252924 |
| chr19:52468766-52469467  | exonic       | ZNF350                                                    | 19 | 52468766  | 52469467  | 0 | 0 | 2 | 0 | 0 | 0 | 701    | 0.394538051 | 2.144896392 | 4.019782494 | 0.533585186 | 0.593628559 | 0.998252924 |
| chr19:6077973-6078868    | intronic     | RFX2                                                      | 19 | 6077973   | 6078868   | 0 | 0 | 2 | 0 | 0 | 0 | 895    | 0.394538051 | 2.144896392 | 4.019782494 | 0.533585186 | 0.593628559 | 0.998252924 |
| chr19:9880681-9890356    | intergenic   | <small>ZNF846 (dist=1271), FBXL12 (dist=30587)</small>    | 19 | 9880681   | 9890356   | 0 | 0 | 2 | 0 | 0 | 0 | 9675   | 0.394538051 | 2.144896392 | 4.019782494 | 0.533585186 | 0.593628559 | 0.998252924 |
| chr2:102377352-102378115 | intronic     | MAP4K4                                                    | 2  | 102377352 | 102378115 | 0 | 0 | 2 | 0 | 0 | 0 | 763    | 0.394538051 | 2.144896392 | 4.019782494 | 0.533585186 | 0.593628559 | 0.998252924 |
| chr2:113057425-113060928 | exonic       | ZC3H6                                                     | 2  | 113057425 | 113060928 | 0 | 0 | 2 | 0 | 0 | 0 | 3503   | 0.394538051 | 2.144896392 | 4.019782494 | 0.533585186 | 0.593628559 | 0.998252924 |
| chr2:118575019-118583958 | exonic       | DDX18                                                     | 2  | 118575019 | 118583958 | 0 | 0 | 2 | 0 | 0 | 0 | 8939   | 0.394538051 | 2.144896392 | 4.019782494 | 0.533585186 | 0.593628559 | 0.998252924 |
| chr2:128116428-128140218 | intergenic   | <small>MAP3K2 (dist=15623), PROC (dist=35778)</small>     | 2  | 128116428 | 128140218 | 0 | 0 | 2 | 0 | 0 | 0 | 23790  | 0.394538051 | 2.144896392 | 4.019782494 | 0.533585186 | 0.593628559 | 0.998252924 |
| chr2:132259054-132259531 | ncRNA_exonic | LOC150776                                                 | 2  | 132259054 | 132259531 | 0 | 0 | 2 | 0 | 0 | 0 | 477    | 0.394538051 | 2.144896392 | 4.019782494 | 0.533585186 | 0.593628559 | 0.998252924 |

|                          |            |                                    |    |           |           |   |   |   |   |   |   |        |             |             |             |             |             |             |
|--------------------------|------------|------------------------------------|----|-----------|-----------|---|---|---|---|---|---|--------|-------------|-------------|-------------|-------------|-------------|-------------|
| chr2:136379063-136409602 | exonic     | R3HDM1                             | 2  | 136379063 | 136409602 | 0 | 0 | 2 | 0 | 0 | 0 | 30539  | 0.394538051 | 2.144896392 | 4.019782494 | 0.533585186 | 0.593628559 | 0.998252924 |
| chr2:136389287-136437894 | exonic     | R3HDM1                             | 2  | 136389287 | 136437894 | 0 | 0 | 2 | 0 | 0 | 0 | 48607  | 0.394538051 | 2.144896392 | 4.019782494 | 0.533585186 | 0.593628559 | 0.998252924 |
| chr2:136402948-136437894 | exonic     | R3HDM1                             | 2  | 136402948 | 136437894 | 0 | 0 | 2 | 0 | 0 | 0 | 34946  | 0.394538051 | 2.144896392 | 4.019782494 | 0.533585186 | 0.593628559 | 0.998252924 |
| chr2:152109268-152112257 | exonic     | RBM43                              | 2  | 152109268 | 152112257 | 0 | 0 | 2 | 0 | 0 | 0 | 2989   | 0.394538051 | 2.144896392 | 4.019782494 | 0.533585186 | 0.593628559 | 0.998252924 |
| chr2:15534350-15651474   | exonic     | NBAS                               | 2  | 15534350  | 15651474  | 0 | 0 | 2 | 0 | 0 | 0 | 117124 | 0.394538051 | 2.144896392 | 4.019782494 | 0.533585186 | 0.593628559 | 0.998252924 |
| chr2:15688690-15690820   | intronic   | NBAS                               | 2  | 15688690  | 15690820  | 0 | 0 | 2 | 0 | 0 | 0 | 2130   | 0.394538051 | 2.144896392 | 4.019782494 | 0.533585186 | 0.593628559 | 0.998252924 |
| chr2:160019793-160028783 | exonic     | TANC1                              | 2  | 160019793 | 160028783 | 0 | 0 | 2 | 0 | 0 | 0 | 8990   | 0.394538051 | 2.144896392 | 4.019782494 | 0.533585186 | 0.593628559 | 0.998252924 |
| chr2:161141715-161143479 | splicing   | RBMS1                              | 2  | 161141715 | 161143479 | 0 | 0 | 2 | 0 | 0 | 0 | 1764   | 0.394538051 | 2.144896392 | 4.019782494 | 0.533585186 | 0.593628559 | 0.998252924 |
| chr2:190656515-190708806 | exonic     | PMS1                               | 2  | 190656515 | 190708806 | 0 | 0 | 2 | 0 | 0 | 0 | 52291  | 0.394538051 | 2.144896392 | 4.019782494 | 0.533585186 | 0.593628559 | 0.998252924 |
| chr2:197755551-197763093 | exonic     | PGAP1                              | 2  | 197755551 | 197763093 | 0 | 0 | 2 | 0 | 0 | 0 | 7542   | 0.394538051 | 2.144896392 | 4.019782494 | 0.533585186 | 0.593628559 | 0.998252924 |
| chr2:197951472-197953434 | exonic     | ANKRD44                            | 2  | 197951472 | 197953434 | 0 | 0 | 2 | 0 | 0 | 0 | 1962   | 0.394538051 | 2.144896392 | 4.019782494 | 0.533585186 | 0.593628559 | 0.998252924 |
| chr2:201807407-201822856 | exonic     | ORC2                               | 2  | 201807407 | 201822856 | 0 | 0 | 2 | 0 | 0 | 0 | 15449  | 0.394538051 | 2.144896392 | 4.019782494 | 0.533585186 | 0.593628559 | 0.998252924 |
| chr2:203782599-203818857 | exonic     | CARF                               | 2  | 203782599 | 203818857 | 0 | 0 | 2 | 0 | 0 | 0 | 36258  | 0.394538051 | 2.144896392 | 4.019782494 | 0.533585186 | 0.593628559 | 0.998252924 |
| chr2:203782599-203839219 | exonic     | CARF                               | 2  | 203782599 | 203839219 | 0 | 0 | 2 | 0 | 0 | 0 | 56620  | 0.394538051 | 2.144896392 | 4.019782494 | 0.533585186 | 0.593628559 | 0.998252924 |
| chr2:234270365-234274126 | intronic   | DGKD                               | 2  | 234270365 | 234274126 | 0 | 0 | 2 | 0 | 0 | 0 | 3761   | 0.394538051 | 2.144896392 | 4.019782494 | 0.533585186 | 0.593628559 | 0.998252924 |
| chr2:240929490-240951113 | exonic     | NDUFA10                            | 2  | 240929490 | 240951113 | 2 | 2 | 2 | 8 | 3 | 0 | 21623  | 0.394538051 | 2.144896392 | 4.019782494 | 0.533585186 | 0.593628559 | 0.998252924 |
| chr2:242343242-242350545 | exonic     | FARP2                              | 2  | 242343242 | 242350545 | 0 | 0 | 2 | 0 | 0 | 0 | 7303   | 0.394538051 | 2.144896392 | 4.019782494 | 0.533585186 | 0.593628559 | 0.998252924 |
| chr2:24787164-24807429   | UTR5       | -----                              | 2  | 24787164  | 24807429  | 0 | 0 | 2 | 0 | 0 | 0 | 20265  | 0.394538051 | 2.144896392 | 4.019782494 | 0.533585186 | 0.593628559 | 0.998252924 |
| chr2:29073193-29084174   | exonic     | TRMT61B                            | 2  | 29073193  | 29084174  | 0 | 0 | 2 | 0 | 0 | 0 | 10981  | 0.394538051 | 2.144896392 | 4.019782494 | 0.533585186 | 0.593628559 | 0.998252924 |
| chr2:29354123-29386820   | exonic     | CLIP4                              | 2  | 29354123  | 29386820  | 0 | 0 | 2 | 0 | 0 | 0 | 32697  | 0.394538051 | 2.144896392 | 4.019782494 | 0.533585186 | 0.593628559 | 0.998252924 |
| chr2:32373951-32374253   | intronic   | SPAST                              | 2  | 32373951  | 32374253  | 0 | 0 | 2 | 0 | 0 | 0 | 302    | 0.394538051 | 2.144896392 | 4.019782494 | 0.533585186 | 0.593628559 | 0.998252924 |
| chr2:38156404-38231359   | exonic     | RMDN2                              | 2  | 38156404  | 38231359  | 0 | 0 | 2 | 0 | 0 | 0 | 74955  | 0.394538051 | 2.144896392 | 4.019782494 | 0.533585186 | 0.593628559 | 0.998252924 |
| chr2:39485488-39517475   | exonic     | MAP4K3                             | 2  | 39485488  | 39517475  | 0 | 0 | 2 | 0 | 0 | 0 | 31987  | 0.394538051 | 2.144896392 | 4.019782494 | 0.533585186 | 0.593628559 | 0.998252924 |
| chr2:43793836-43802166   | exonic     | THADA                              | 2  | 43793836  | 43802166  | 0 | 0 | 2 | 0 | 0 | 0 | 8330   | 0.394538051 | 2.144896392 | 4.019782494 | 0.533585186 | 0.593628559 | 0.998252924 |
| chr2:43939363-43989529   | exonic     | PLEKHH2                            | 2  | 43939363  | 43989529  | 0 | 0 | 2 | 0 | 0 | 0 | 50166  | 0.394538051 | 2.144896392 | 4.019782494 | 0.533585186 | 0.593628559 | 0.998252924 |
| chr2:47600601-47602438   | exonic     | EPCAM                              | 2  | 47600601  | 47602438  | 0 | 0 | 2 | 0 | 0 | 0 | 1837   | 0.394538051 | 2.144896392 | 4.019782494 | 0.533585186 | 0.593628559 | 0.998252924 |
| chr2:55544341-55546140   | exonic     | CCDC88A                            | 2  | 55544341  | 55546140  | 0 | 0 | 2 | 0 | 0 | 0 | 1799   | 0.394538051 | 2.144896392 | 4.019782494 | 0.533585186 | 0.593628559 | 0.998252924 |
| chr2:55573310-55591169   | exonic     | CCDC88A                            | 2  | 55573310  | 55591169  | 0 | 0 | 2 | 0 | 0 | 0 | 17859  | 0.394538051 | 2.144896392 | 4.019782494 | 0.533585186 | 0.593628559 | 0.998252924 |
| chr2:61014081-61020850   | exonic     | PAPOLG                             | 2  | 61014081  | 61020850  | 0 | 0 | 2 | 0 | 0 | 0 | 6769   | 0.394538051 | 2.144896392 | 4.019782494 | 0.533585186 | 0.593628559 | 0.998252924 |
| chr2:64778576-64812679   | exonic     | AFTPH                              | 2  | 64778576  | 64812679  | 0 | 0 | 2 | 0 | 0 | 0 | 34103  | 0.394538051 | 2.144896392 | 4.019782494 | 0.533585186 | 0.593628559 | 0.998252924 |
| chr2:68813904-68839379   | intergenic | APLF(dist=6610),PROKR1(dist=33575) | 2  | 68813904  | 68839379  | 0 | 0 | 2 | 0 | 0 | 0 | 25475  | 0.394538051 | 2.144896392 | 4.019782494 | 0.533585186 | 0.593628559 | 0.998252924 |
| chr2:99781298-99804720   | exonic     | MITD1,MRPL30                       | 2  | 99781298  | 99804720  | 0 | 0 | 2 | 0 | 0 | 0 | 23422  | 0.394538051 | 2.144896392 | 4.019782494 | 0.533585186 | 0.593628559 | 0.998252924 |
| chr2:9989502-9992293     | exonic     | TAF1B                              | 2  | 9989502   | 9992293   | 0 | 0 | 2 | 0 | 0 | 0 | 2791   | 0.394538051 | 2.144896392 | 4.019782494 | 0.533585186 | 0.593628559 | 0.998252924 |
| chr20:2097311-2098061    | exonic     | STK35                              | 20 | 2097311   | 2098061   | 0 | 0 | 2 | 0 | 0 | 0 | 750    | 0.394538051 | 2.144896392 | 4.019782494 | 0.533585186 | 0.593628559 | 0.998252924 |
| chr20:3161658-3163307    | intergenic | LZTS3(dist=7420),DDRGI1(dist=7705) | 20 | 3161658   | 3163307   | 0 | 0 | 2 | 0 | 0 | 0 | 1649   | 0.394538051 | 2.144896392 | 4.019782494 | 0.533585186 | 0.593628559 | 0.998252924 |

|                          |            |                                                          |    |           |           |   |   |   |   |   |   |       |             |             |             |             |             |             |
|--------------------------|------------|----------------------------------------------------------|----|-----------|-----------|---|---|---|---|---|---|-------|-------------|-------------|-------------|-------------|-------------|-------------|
| chr20:33954359-33981999  | exonic     | UQCC1                                                    | 20 | 33954359  | 33981999  | 0 | 0 | 2 | 0 | 0 | 0 | 27640 | 0.394538051 | 2.144896392 | 4.019782494 | 0.533585186 | 0.593628559 | 0.998252924 |
| chr20:35563431-35569514  | exonic     | SAMHD1                                                   | 20 | 35563431  | 35569514  | 0 | 0 | 2 | 0 | 0 | 0 | 6083  | 0.394538051 | 2.144896392 | 4.019782494 | 0.533585186 | 0.593628559 | 0.998252924 |
| chr20:35635813-35661279  | exonic     | RBL1                                                     | 20 | 35635813  | 35661279  | 0 | 0 | 2 | 0 | 0 | 0 | 25466 | 0.394538051 | 2.144896392 | 4.019782494 | 0.533585186 | 0.593628559 | 0.998252924 |
| chr20:424698-427094      | exonic     | TBC1D20                                                  | 20 | 424698    | 427094    | 0 | 0 | 2 | 0 | 0 | 0 | 2396  | 0.394538051 | 2.144896392 | 4.019782494 | 0.533585186 | 0.593628559 | 0.998252924 |
| chr20:50048603-50052298  | exonic     | NFATC2                                                   | 20 | 50048603  | 50052298  | 0 | 0 | 2 | 0 | 0 | 0 | 3695  | 0.394538051 | 2.144896392 | 4.019782494 | 0.533585186 | 0.593628559 | 0.998252924 |
| chr21:33264791-33272184  | intronic   | HUNK                                                     | 21 | 33264791  | 33272184  | 0 | 0 | 2 | 0 | 0 | 0 | 7393  | 0.394538051 | 2.144896392 | 4.019782494 | 0.533585186 | 0.593628559 | 0.998252924 |
| chr21:38610761-38612940  | exonic     | DSCR3                                                    | 21 | 38610761  | 38612940  | 0 | 0 | 2 | 0 | 0 | 0 | 2179  | 0.394538051 | 2.144896392 | 4.019782494 | 0.533585186 | 0.593628559 | 0.998252924 |
| chr22:17659013-17659355  | downstream | CECR1 (dist=325)                                         | 22 | 17659013  | 17659355  | 0 | 0 | 2 | 0 | 0 | 0 | 342   | 0.394538051 | 2.144896392 | 4.019782494 | 0.533585186 | 0.593628559 | 0.998252924 |
| chr22:29932612-29939531  | exonic     | THOC5                                                    | 22 | 29932612  | 29939531  | 0 | 0 | 2 | 0 | 0 | 0 | 6919  | 0.394538051 | 2.144896392 | 4.019782494 | 0.533585186 | 0.593628559 | 0.998252924 |
| chr22:32097641-32100712  | exonic     | PRR14L                                                   | 22 | 32097641  | 32100712  | 0 | 0 | 2 | 0 | 0 | 0 | 3071  | 0.394538051 | 2.144896392 | 4.019782494 | 0.533585186 | 0.593628559 | 0.998252924 |
| chr22:36745793-36750027  | intronic   | MYH9                                                     | 22 | 36745793  | 36750027  | 0 | 0 | 2 | 0 | 0 | 0 | 4234  | 0.394538051 | 2.144896392 | 4.019782494 | 0.533585186 | 0.593628559 | 0.998252924 |
| chr22:39382303-39421354  | exonic     | <small>APOBEC3A, B, APOBEC3B, APOBEC3C, APOBEC3D</small> | 22 | 39382303  | 39421354  | 0 | 0 | 2 | 0 | 0 | 0 | 39051 | 0.394538051 | 2.144896392 | 4.019782494 | 0.533585186 | 0.593628559 | 0.998252924 |
| chr22:41536143-41537226  | exonic     | EP300                                                    | 22 | 41536143  | 41537226  | 0 | 0 | 2 | 0 | 0 | 0 | 1083  | 0.394538051 | 2.144896392 | 4.019782494 | 0.533585186 | 0.593628559 | 0.998252924 |
| chr3:101058938-101060623 | exonic     | SENP7                                                    | 3  | 101058938 | 101060623 | 0 | 0 | 2 | 0 | 0 | 0 | 1685  | 0.394538051 | 2.144896392 | 4.019782494 | 0.533585186 | 0.593628559 | 0.998252924 |
| chr3:122928045-122978436 | exonic     | SEC22A                                                   | 3  | 122928045 | 122978436 | 0 | 0 | 2 | 0 | 0 | 0 | 50391 | 0.394538051 | 2.144896392 | 4.019782494 | 0.533585186 | 0.593628559 | 0.998252924 |
| chr3:129513167-129551669 | exonic     | TMCC1                                                    | 3  | 129513167 | 129551669 | 0 | 0 | 2 | 0 | 0 | 0 | 38502 | 0.394538051 | 2.144896392 | 4.019782494 | 0.533585186 | 0.593628559 | 0.998252924 |
| chr3:137928658-137942575 | exonic     | ARMC8                                                    | 3  | 137928658 | 137942575 | 0 | 0 | 2 | 0 | 0 | 0 | 13917 | 0.394538051 | 2.144896392 | 4.019782494 | 0.533585186 | 0.593628559 | 0.998252924 |
| chr3:152173366-152173848 | exonic     | MBNL1                                                    | 3  | 152173366 | 152173848 | 0 | 0 | 2 | 0 | 0 | 0 | 482   | 0.394538051 | 2.144896392 | 4.019782494 | 0.533585186 | 0.593628559 | 0.998252924 |
| chr3:15807741-15855816   | exonic     | ANKRD28                                                  | 3  | 15807741  | 15855816  | 0 | 0 | 2 | 0 | 0 | 0 | 48075 | 0.394538051 | 2.144896392 | 4.019782494 | 0.533585186 | 0.593628559 | 0.998252924 |
| chr3:160952514-160958951 | exonic     | NMD3                                                     | 3  | 160952514 | 160958951 | 0 | 0 | 2 | 0 | 0 | 0 | 6437  | 0.394538051 | 2.144896392 | 4.019782494 | 0.533585186 | 0.593628559 | 0.998252924 |
| chr3:16327831-16345099   | exonic     | OXNAD1                                                   | 3  | 16327831  | 16345099  | 0 | 0 | 2 | 0 | 0 | 0 | 17268 | 0.394538051 | 2.144896392 | 4.019782494 | 0.533585186 | 0.593628559 | 0.998252924 |
| chr3:167774869-167775401 | intronic   | GOLIM4                                                   | 3  | 167774869 | 167775401 | 0 | 0 | 2 | 0 | 0 | 0 | 532   | 0.394538051 | 2.144896392 | 4.019782494 | 0.533585186 | 0.593628559 | 0.998252924 |
| chr3:169873482-169874126 | intronic   | PHC3                                                     | 3  | 169873482 | 169874126 | 0 | 0 | 2 | 0 | 0 | 0 | 644   | 0.394538051 | 2.144896392 | 4.019782494 | 0.533585186 | 0.593628559 | 0.998252924 |
| chr3:183432931-183470041 | exonic     | YEATS2                                                   | 3  | 183432931 | 183470041 | 0 | 0 | 2 | 0 | 0 | 0 | 37110 | 0.394538051 | 2.144896392 | 4.019782494 | 0.533585186 | 0.593628559 | 0.998252924 |
| chr3:184654033-184689540 | exonic     | VPS8                                                     | 3  | 184654033 | 184689540 | 0 | 0 | 2 | 0 | 0 | 0 | 35507 | 0.394538051 | 2.144896392 | 4.019782494 | 0.533585186 | 0.593628559 | 0.998252924 |
| chr3:185241593-185244269 | exonic     | LIPH                                                     | 3  | 185241593 | 185244269 | 0 | 0 | 2 | 0 | 0 | 0 | 2676  | 0.394538051 | 2.144896392 | 4.019782494 | 0.533585186 | 0.593628559 | 0.998252924 |
| chr3:194147803-194171005 | exonic     | ATP13A3                                                  | 3  | 194147803 | 194171005 | 0 | 0 | 2 | 0 | 0 | 0 | 23202 | 0.394538051 | 2.144896392 | 4.019782494 | 0.533585186 | 0.593628559 | 0.998252924 |
| chr3:195253862-195254019 | intronic   | PPP1R2                                                   | 3  | 195253862 | 195254019 | 0 | 0 | 2 | 0 | 0 | 0 | 157   | 0.394538051 | 2.144896392 | 4.019782494 | 0.533585186 | 0.593628559 | 0.998252924 |
| chr3:27439174-27439844   | exonic     | SLC4A7                                                   | 3  | 27439174  | 27439844  | 0 | 0 | 2 | 0 | 0 | 0 | 670   | 0.394538051 | 2.144896392 | 4.019782494 | 0.533585186 | 0.593628559 | 0.998252924 |
| chr3:31578790-31621588   | exonic     | STT3B                                                    | 3  | 31578790  | 31621588  | 0 | 0 | 2 | 0 | 0 | 0 | 42798 | 0.394538051 | 2.144896392 | 4.019782494 | 0.533585186 | 0.593628559 | 0.998252924 |
| chr3:3214459-3215945     | exonic     | CRBN                                                     | 3  | 3214459   | 3215945   | 0 | 0 | 2 | 0 | 0 | 0 | 1486  | 0.394538051 | 2.144896392 | 4.019782494 | 0.533585186 | 0.593628559 | 0.998252924 |
| chr3:33087611-33099761   | exonic     | GLB1                                                     | 3  | 33087611  | 33099761  | 0 | 0 | 2 | 0 | 0 | 0 | 12150 | 0.394538051 | 2.144896392 | 4.019782494 | 0.533585186 | 0.593628559 | 0.998252924 |
| chr3:33454213-33467233   | exonic     | UBP1                                                     | 3  | 33454213  | 33467233  | 0 | 0 | 2 | 0 | 0 | 0 | 13020 | 0.394538051 | 2.144896392 | 4.019782494 | 0.533585186 | 0.593628559 | 0.998252924 |
| chr3:33648082-33653563   | exonic     | CLASP2                                                   | 3  | 33648082  | 33653563  | 0 | 0 | 2 | 0 | 0 | 0 | 5481  | 0.394538051 | 2.144896392 | 4.019782494 | 0.533585186 | 0.593628559 | 0.998252924 |
| chr3:41265511-41268843   | exonic     | CTNNB1                                                   | 3  | 41265511  | 41268843  | 0 | 0 | 2 | 0 | 0 | 0 | 3332  | 0.394538051 | 2.144896392 | 4.019782494 | 0.533585186 | 0.593628559 | 0.998252924 |

|                          |          |                |   |           |           |   |   |   |   |   |   |       |             |             |             |             |             |             |
|--------------------------|----------|----------------|---|-----------|-----------|---|---|---|---|---|---|-------|-------------|-------------|-------------|-------------|-------------|-------------|
| chr3:42661155-42676858   | exonic   | NKTR           | 3 | 42661155  | 42676858  | 0 | 0 | 2 | 0 | 0 | 0 | 15703 | 0.394538051 | 2.144896392 | 4.019782494 | 0.533585186 | 0.593628559 | 0.998252924 |
| chr3:43381778-43384970   | exonic   | SNRK           | 3 | 43381778  | 43384970  | 0 | 0 | 2 | 0 | 0 | 0 | 3192  | 0.394538051 | 2.144896392 | 4.019782494 | 0.533585186 | 0.593628559 | 0.998252924 |
| chr3:47676679-47702945   | exonic   | SMARCC1        | 3 | 47676679  | 47702945  | 0 | 0 | 2 | 0 | 0 | 0 | 26266 | 0.394538051 | 2.144896392 | 4.019782494 | 0.533585186 | 0.593628559 | 0.998252924 |
| chr3:48012230-48019917   | exonic   | MAP4           | 3 | 48012230  | 48019917  | 0 | 0 | 2 | 0 | 0 | 0 | 7687  | 0.394538051 | 2.144896392 | 4.019782494 | 0.533585186 | 0.593628559 | 0.998252924 |
| chr3:53346785-53375266   | exonic   | DCP1A          | 3 | 53346785  | 53375266  | 0 | 0 | 2 | 0 | 0 | 0 | 28481 | 0.394538051 | 2.144896392 | 4.019782494 | 0.533585186 | 0.593628559 | 0.998252924 |
| chr3:56597711-56627129   | exonic   | CCDC66         | 3 | 56597711  | 56627129  | 0 | 0 | 2 | 0 | 0 | 0 | 29418 | 0.394538051 | 2.144896392 | 4.019782494 | 0.533585186 | 0.593628559 | 0.998252924 |
| chr3:56779232-56779490   | exonic   | ARHGEF3        | 3 | 56779232  | 56779490  | 0 | 0 | 2 | 0 | 0 | 0 | 258   | 0.394538051 | 2.144896392 | 4.019782494 | 0.533585186 | 0.593628559 | 0.998252924 |
| chr3:69303514-69325902   | intronic | FRMD4B         | 3 | 69303514  | 69325902  | 0 | 0 | 2 | 0 | 0 | 0 | 22388 | 0.394538051 | 2.144896392 | 4.019782494 | 0.533585186 | 0.593628559 | 0.998252924 |
| chr4:106317405-106345479 | exonic   | PPA2           | 4 | 106317405 | 106345479 | 0 | 0 | 2 | 0 | 0 | 0 | 28074 | 0.394538051 | 2.144896392 | 4.019782494 | 0.533585186 | 0.593628559 | 0.998252924 |
| chr4:143029245-143045913 | exonic   | INPP4B         | 4 | 143029245 | 143045913 | 0 | 0 | 2 | 0 | 0 | 0 | 16668 | 0.394538051 | 2.144896392 | 4.019782494 | 0.533585186 | 0.593628559 | 0.998252924 |
| chr4:151709320-151714167 | intronic | LRBA           | 4 | 151709320 | 151714167 | 0 | 0 | 2 | 0 | 0 | 0 | 4847  | 0.394538051 | 2.144896392 | 4.019782494 | 0.533585186 | 0.593628559 | 0.998252924 |
| chr4:159514552-159529195 | exonic   | RXFP1          | 4 | 159514552 | 159529195 | 0 | 0 | 2 | 0 | 0 | 0 | 14643 | 0.394538051 | 2.144896392 | 4.019782494 | 0.533585186 | 0.593628559 | 0.998252924 |
| chr4:159812597-159817017 | exonic   | C4orf45, FNIP2 | 4 | 159812597 | 159817017 | 0 | 0 | 2 | 0 | 0 | 0 | 4420  | 0.394538051 | 2.144896392 | 4.019782494 | 0.533585186 | 0.593628559 | 0.998252924 |
| chr4:160225493-160253849 | exonic   | RAPGEF2        | 4 | 160225493 | 160253849 | 0 | 0 | 2 | 0 | 0 | 0 | 28356 | 0.394538051 | 2.144896392 | 4.019782494 | 0.533585186 | 0.593628559 | 0.998252924 |
| chr4:166141085-166160051 | exonic   | KLHL2          | 4 | 166141085 | 166160051 | 0 | 0 | 2 | 0 | 0 | 0 | 18966 | 0.394538051 | 2.144896392 | 4.019782494 | 0.533585186 | 0.593628559 | 0.998252924 |
| chr4:185339321-185340722 | exonic   | IRF2           | 4 | 185339321 | 185340722 | 0 | 0 | 2 | 0 | 0 | 0 | 1401  | 0.394538051 | 2.144896392 | 4.019782494 | 0.533585186 | 0.593628559 | 0.998252924 |
| chr4:185580493-185587218 | exonic   | PRIMPOL        | 4 | 185580493 | 185587218 | 0 | 0 | 2 | 0 | 0 | 0 | 6725  | 0.394538051 | 2.144896392 | 4.019782494 | 0.533585186 | 0.593628559 | 0.998252924 |
| chr4:185737197-185740406 | intronic | ACSL1          | 4 | 185737197 | 185740406 | 0 | 0 | 2 | 0 | 0 | 0 | 3209  | 0.394538051 | 2.144896392 | 4.019782494 | 0.533585186 | 0.593628559 | 0.998252924 |
| chr4:20493384-20500455   | exonic   | SLIT2          | 4 | 20493384  | 20500455  | 0 | 0 | 2 | 0 | 0 | 0 | 7071  | 0.394538051 | 2.144896392 | 4.019782494 | 0.533585186 | 0.593628559 | 0.998252924 |
| chr4:22403053-22404422   | exonic   | ADGRA3         | 4 | 22403053  | 22404422  | 0 | 0 | 2 | 0 | 0 | 0 | 1369  | 0.394538051 | 2.144896392 | 4.019782494 | 0.533585186 | 0.593628559 | 0.998252924 |
| chr4:39850470-39851272   | exonic   | PDS5A          | 4 | 39850470  | 39851272  | 0 | 0 | 2 | 0 | 0 | 0 | 802   | 0.394538051 | 2.144896392 | 4.019782494 | 0.533585186 | 0.593628559 | 0.998252924 |
| chr4:42466706-42467093   | exonic   | ATP8A1         | 4 | 42466706  | 42467093  | 0 | 0 | 2 | 0 | 0 | 0 | 387   | 0.394538051 | 2.144896392 | 4.019782494 | 0.533585186 | 0.593628559 | 0.998252924 |
| chr4:56287138-56288660   | intronic | TMEM165        | 4 | 56287138  | 56288660  | 0 | 0 | 2 | 0 | 0 | 0 | 1522  | 0.394538051 | 2.144896392 | 4.019782494 | 0.533585186 | 0.593628559 | 0.998252924 |
| chr4:6590771-6595077     | exonic   | MAN2B2         | 4 | 6590771   | 6595077   | 0 | 0 | 2 | 0 | 0 | 0 | 4306  | 0.394538051 | 2.144896392 | 4.019782494 | 0.533585186 | 0.593628559 | 0.998252924 |
| chr4:83776055-83778917   | exonic   | SEC31A         | 4 | 83776055  | 83778917  | 0 | 0 | 2 | 0 | 0 | 0 | 2862  | 0.394538051 | 2.144896392 | 4.019782494 | 0.533585186 | 0.593628559 | 0.998252924 |
| chr4:89930102-89950800   | exonic   | FAM13A         | 4 | 89930102  | 89950800  | 0 | 0 | 2 | 0 | 0 | 0 | 20698 | 0.394538051 | 2.144896392 | 4.019782494 | 0.533585186 | 0.593628559 | 0.998252924 |
| chr5:130987494-131013565 | exonic   | FNIP1          | 5 | 130987494 | 131013565 | 0 | 0 | 2 | 0 | 0 | 0 | 26071 | 0.394538051 | 2.144896392 | 4.019782494 | 0.533585186 | 0.593628559 | 0.998252924 |
| chr5:134116822-134118755 | exonic   | DDX46          | 5 | 134116822 | 134118755 | 0 | 0 | 2 | 0 | 0 | 0 | 1933  | 0.394538051 | 2.144896392 | 4.019782494 | 0.533585186 | 0.593628559 | 0.998252924 |
| chr5:138654054-138655270 | exonic   | MATR3          | 5 | 138654054 | 138655270 | 0 | 0 | 2 | 0 | 0 | 0 | 1216  | 0.394538051 | 2.144896392 | 4.019782494 | 0.533585186 | 0.593628559 | 0.998252924 |
| chr5:138983295-138991008 | intronic | UBE2D2         | 5 | 138983295 | 138991008 | 0 | 0 | 2 | 0 | 0 | 0 | 7713  | 0.394538051 | 2.144896392 | 4.019782494 | 0.533585186 | 0.593628559 | 0.998252924 |
| chr5:138994170-139003046 | exonic   | UBE2D2         | 5 | 138994170 | 139003046 | 0 | 0 | 2 | 0 | 0 | 0 | 8876  | 0.394538051 | 2.144896392 | 4.019782494 | 0.533585186 | 0.593628559 | 0.998252924 |
| chr5:151169883-151178874 | exonic   | G3BP1          | 5 | 151169883 | 151178874 | 0 | 0 | 2 | 0 | 0 | 0 | 8991  | 0.394538051 | 2.144896392 | 4.019782494 | 0.533585186 | 0.593628559 | 0.998252924 |
| chr5:156522316-156531760 | exonic   | HAVCR2         | 5 | 156522316 | 156531760 | 0 | 0 | 2 | 0 | 0 | 0 | 9444  | 0.394538051 | 2.144896392 | 4.019782494 | 0.533585186 | 0.593628559 | 0.998252924 |
| chr5:162909647-162911251 | exonic   | HMMR           | 5 | 162909647 | 162911251 | 0 | 0 | 2 | 0 | 0 | 0 | 1604  | 0.394538051 | 2.144896392 | 4.019782494 | 0.533585186 | 0.593628559 | 0.998252924 |
| chr5:171422811-171424055 | intronic | FBXW11         | 5 | 171422811 | 171424055 | 0 | 0 | 2 | 0 | 0 | 0 | 1244  | 0.394538051 | 2.144896392 | 4.019782494 | 0.533585186 | 0.593628559 | 0.998252924 |

|                          |            |                                                          |   |           |           |   |   |   |   |   |   |       |             |             |             |             |             |             |
|--------------------------|------------|----------------------------------------------------------|---|-----------|-----------|---|---|---|---|---|---|-------|-------------|-------------|-------------|-------------|-------------|-------------|
| chr5:172291152-172291306 | intronic   | ERGIC1                                                   | 5 | 172291152 | 172291306 | 0 | 0 | 2 | 0 | 0 | 0 | 154   | 0.394538051 | 2.144896392 | 4.019782494 | 0.533585186 | 0.593628559 | 0.998252924 |
| chr5:176900110-176900436 | splicing   | DBN1                                                     | 5 | 176900110 | 176900436 | 0 | 0 | 2 | 0 | 0 | 0 | 326   | 0.394538051 | 2.144896392 | 4.019782494 | 0.533585186 | 0.593628559 | 0.998252924 |
| chr5:179132679-179134191 | exonic     | CANX                                                     | 5 | 179132679 | 179134191 | 0 | 0 | 2 | 0 | 0 | 0 | 1512  | 0.394538051 | 2.144896392 | 4.019782494 | 0.533585186 | 0.593628559 | 0.998252924 |
| chr5:32397324-32417897   | exonic     | ZFR                                                      | 5 | 32397324  | 32417897  | 0 | 0 | 2 | 0 | 0 | 0 | 20573 | 0.394538051 | 2.144896392 | 4.019782494 | 0.533585186 | 0.593628559 | 0.998252924 |
| chr5:37115061-37122590   | exonic     | C5orf42                                                  | 5 | 37115061  | 37122590  | 0 | 0 | 2 | 0 | 0 | 0 | 7529  | 0.394538051 | 2.144896392 | 4.019782494 | 0.533585186 | 0.593628559 | 0.998252924 |
| chr5:55254016-55254639   | intronic   | IL6ST                                                    | 5 | 55254016  | 55254639  | 0 | 0 | 2 | 0 | 0 | 0 | 623   | 0.394538051 | 2.144896392 | 4.019782494 | 0.533585186 | 0.593628559 | 0.998252924 |
| chr5:65054393-65077248   | exonic     | NLN                                                      | 5 | 65054393  | 65077248  | 0 | 0 | 2 | 0 | 0 | 0 | 22855 | 0.394538051 | 2.144896392 | 4.019782494 | 0.533585186 | 0.593628559 | 0.998252924 |
| chr5:65288537-65290692   | exonic     | ERBB2IP                                                  | 5 | 65288537  | 65290692  | 0 | 0 | 2 | 0 | 0 | 0 | 2155  | 0.394538051 | 2.144896392 | 4.019782494 | 0.533585186 | 0.593628559 | 0.998252924 |
| chr5:677864-678179       | exonic     | TPPP                                                     | 5 | 677864    | 678179    | 0 | 0 | 2 | 0 | 0 | 0 | 315   | 0.394538051 | 2.144896392 | 4.019782494 | 0.533585186 | 0.593628559 | 0.998252924 |
| chr5:70791076-70813279   | exonic     | BDP1                                                     | 5 | 70791076  | 70813279  | 0 | 0 | 2 | 0 | 0 | 0 | 22203 | 0.394538051 | 2.144896392 | 4.019782494 | 0.533585186 | 0.593628559 | 0.998252924 |
| chr5:70810770-70813279   | exonic     | BDP1                                                     | 5 | 70810770  | 70813279  | 0 | 0 | 2 | 0 | 0 | 0 | 2509  | 0.394538051 | 2.144896392 | 4.019782494 | 0.533585186 | 0.593628559 | 0.998252924 |
| chr5:78936673-78952824   | exonic     | PAPD4                                                    | 5 | 78936673  | 78952824  | 0 | 0 | 2 | 0 | 0 | 0 | 16151 | 0.394538051 | 2.144896392 | 4.019782494 | 0.533585186 | 0.593628559 | 0.998252924 |
| chr5:84878249-84884827   | intergenic | <small>EDIL3(dist=1197564), NBPF22P(dist=693435)</small> | 5 | 84878249  | 84884827  | 0 | 0 | 2 | 0 | 0 | 0 | 6578  | 0.394538051 | 2.144896392 | 4.019782494 | 0.533585186 | 0.593628559 | 0.998252924 |
| chr5:85101125-85117284   | intergenic | <small>EDIL3(dist=1420440), NBPF22P(dist=460978)</small> | 5 | 85101125  | 85117284  | 0 | 0 | 2 | 0 | 0 | 0 | 16159 | 0.394538051 | 2.144896392 | 4.019782494 | 0.533585186 | 0.593628559 | 0.998252924 |
| chr6:10796230-10804124   | exonic     | MAK                                                      | 6 | 10796230  | 10804124  | 0 | 0 | 2 | 0 | 0 | 0 | 7894  | 0.394538051 | 2.144896392 | 4.019782494 | 0.533585186 | 0.593628559 | 0.998252924 |
| chr6:117853422-117859998 | exonic     | DCBLD1                                                   | 6 | 117853422 | 117859998 | 0 | 0 | 2 | 0 | 0 | 0 | 6576  | 0.394538051 | 2.144896392 | 4.019782494 | 0.533585186 | 0.593628559 | 0.998252924 |
| chr6:130343371-130442103 | exonic     | L3MBTL3                                                  | 6 | 130343371 | 130442103 | 0 | 0 | 2 | 0 | 0 | 0 | 98732 | 0.394538051 | 2.144896392 | 4.019782494 | 0.533585186 | 0.593628559 | 0.998252924 |
| chr6:132014636-132054863 | exonic     | CTAGE9, ENPP3, OR2A4                                     | 6 | 132014636 | 132054863 | 0 | 0 | 2 | 0 | 0 | 0 | 40227 | 0.394538051 | 2.144896392 | 4.019782494 | 0.533585186 | 0.593628559 | 0.998252924 |
| chr6:137531257-137533670 | intronic   | IFNGR1                                                   | 6 | 137531257 | 137533670 | 0 | 0 | 2 | 0 | 0 | 0 | 2413  | 0.394538051 | 2.144896392 | 4.019782494 | 0.533585186 | 0.593628559 | 0.998252924 |
| chr6:144086397-144104417 | exonic     | PHACTR2                                                  | 6 | 144086397 | 144104417 | 0 | 0 | 2 | 0 | 0 | 0 | 18020 | 0.394538051 | 2.144896392 | 4.019782494 | 0.533585186 | 0.593628559 | 0.998252924 |
| chr6:145051493-145079125 | exonic     | UTRN                                                     | 6 | 145051493 | 145079125 | 0 | 0 | 2 | 0 | 0 | 0 | 27632 | 0.394538051 | 2.144896392 | 4.019782494 | 0.533585186 | 0.593628559 | 0.998252924 |
| chr6:154797573-154798526 | intronic   | CNKSR3                                                   | 6 | 154797573 | 154798526 | 0 | 0 | 2 | 0 | 0 | 0 | 953   | 0.394538051 | 2.144896392 | 4.019782494 | 0.533585186 | 0.593628559 | 0.998252924 |
| chr6:155095122-155131342 | exonic     | SCAF8                                                    | 6 | 155095122 | 155131342 | 0 | 0 | 2 | 0 | 0 | 0 | 36220 | 0.394538051 | 2.144896392 | 4.019782494 | 0.533585186 | 0.593628559 | 0.998252924 |
| chr6:16476340-16480201   | intronic   | ATXN1                                                    | 6 | 16476340  | 16480201  | 0 | 0 | 2 | 0 | 0 | 0 | 3861  | 0.394538051 | 2.144896392 | 4.019782494 | 0.533585186 | 0.593628559 | 0.998252924 |
| chr6:167356506-167366036 | exonic     | RNASSET2                                                 | 6 | 167356506 | 167366036 | 0 | 0 | 2 | 0 | 0 | 0 | 9530  | 0.394538051 | 2.144896392 | 4.019782494 | 0.533585186 | 0.593628559 | 0.998252924 |
| chr6:29858045-29912393   | exonic     | HLA-A                                                    | 6 | 29858045  | 29912393  | 0 | 0 | 2 | 0 | 0 | 0 | 54348 | 0.394538051 | 2.144896392 | 4.019782494 | 0.533585186 | 0.593628559 | 0.998252924 |
| chr6:30673906-30675160   | splicing   | MDC1                                                     | 6 | 30673906  | 30675160  | 0 | 0 | 2 | 0 | 0 | 0 | 1254  | 0.394538051 | 2.144896392 | 4.019782494 | 0.533585186 | 0.593628559 | 0.998252924 |
| chr6:34801993-34804125   | exonic     | UHRF1BP1                                                 | 6 | 34801993  | 34804125  | 0 | 0 | 2 | 0 | 0 | 0 | 2132  | 0.394538051 | 2.144896392 | 4.019782494 | 0.533585186 | 0.593628559 | 0.998252924 |
| chr6:41997535-41999609   | UTR5       | <small>CND3(NM_001287434;c.93509_93328del;ins0)</small>  | 6 | 41997535  | 41999609  | 0 | 0 | 2 | 0 | 0 | 0 | 2074  | 0.394538051 | 2.144896392 | 4.019782494 | 0.533585186 | 0.593628559 | 0.998252924 |
| chr6:42790533-42797910   | exonic     | GLTSCR1L                                                 | 6 | 42790533  | 42797910  | 0 | 0 | 2 | 0 | 0 | 0 | 7377  | 0.394538051 | 2.144896392 | 4.019782494 | 0.533585186 | 0.593628559 | 0.998252924 |
| chr6:47471016-47483698   | exonic     | CD2AP                                                    | 6 | 47471016  | 47483698  | 0 | 0 | 2 | 0 | 0 | 0 | 12682 | 0.394538051 | 2.144896392 | 4.019782494 | 0.533585186 | 0.593628559 | 0.998252924 |
| chr6:55976595-55977592   | intronic   | COL21A1                                                  | 6 | 55976595  | 55977592  | 0 | 0 | 2 | 0 | 0 | 0 | 997   | 0.394538051 | 2.144896392 | 4.019782494 | 0.533585186 | 0.593628559 | 0.998252924 |
| chr6:71126421-71127130   | intronic   | FAM135A                                                  | 6 | 71126421  | 71127130  | 0 | 0 | 2 | 0 | 0 | 0 | 709   | 0.394538051 | 2.144896392 | 4.019782494 | 0.533585186 | 0.593628559 | 0.998252924 |
| chr6:76022112-76024918   | exonic     | FILIP1                                                   | 6 | 76022112  | 76024918  | 0 | 0 | 2 | 0 | 0 | 0 | 2806  | 0.394538051 | 2.144896392 | 4.019782494 | 0.533585186 | 0.593628559 | 0.998252924 |
| chr6:82923943-82930430   | exonic     | IBTK                                                     | 6 | 82923943  | 82930430  | 0 | 0 | 2 | 0 | 0 | 0 | 6487  | 0.394538051 | 2.144896392 | 4.019782494 | 0.533585186 | 0.593628559 | 0.998252924 |

|                          |              |                        |   |           |           |   |   |   |   |   |   |        |             |             |             |             |             |             |
|--------------------------|--------------|------------------------|---|-----------|-----------|---|---|---|---|---|---|--------|-------------|-------------|-------------|-------------|-------------|-------------|
| chr6:88311501-88346204   | exonic       | ORC3                   | 6 | 88311501  | 88346204  | 0 | 0 | 2 | 0 | 0 | 0 | 34703  | 0.394538051 | 2.144896392 | 4.019782494 | 0.533585186 | 0.593628559 | 0.998252924 |
| chr6:89600213-89650899   | exonic       | RNGTT                  | 6 | 89600213  | 89650899  | 0 | 0 | 2 | 0 | 0 | 0 | 50686  | 0.394538051 | 2.144896392 | 4.019782494 | 0.533585186 | 0.593628559 | 0.998252924 |
| chr7:104707173-104742036 | exonic       | KMT2E                  | 7 | 104707173 | 104742036 | 0 | 0 | 2 | 0 | 0 | 0 | 34863  | 0.394538051 | 2.144896392 | 4.019782494 | 0.533585186 | 0.593628559 | 0.998252924 |
| chr7:105108783-105135700 | exonic       | PUS7                   | 7 | 105108783 | 105135700 | 0 | 0 | 2 | 0 | 0 | 0 | 26917  | 0.394538051 | 2.144896392 | 4.019782494 | 0.533585186 | 0.593628559 | 0.998252924 |
| chr7:112535623-112555502 | exonic       | C7orf60                | 7 | 112535623 | 112555502 | 0 | 0 | 2 | 0 | 0 | 0 | 19879  | 0.394538051 | 2.144896392 | 4.019782494 | 0.533585186 | 0.593628559 | 0.998252924 |
| chr7:148543561-148544397 | exonic       | EZH2                   | 7 | 148543561 | 148544397 | 0 | 0 | 2 | 0 | 0 | 0 | 836    | 0.394538051 | 2.144896392 | 4.019782494 | 0.533585186 | 0.593628559 | 0.998252924 |
| chr7:152086831-152119271 | intronic     | KMT2C                  | 7 | 152086831 | 152119271 | 0 | 0 | 2 | 0 | 0 | 0 | 32440  | 0.394538051 | 2.144896392 | 4.019782494 | 0.533585186 | 0.593628559 | 0.998252924 |
| chr7:157015947-157018233 | exonic       | UBE3C                  | 7 | 157015947 | 157018233 | 0 | 0 | 2 | 0 | 0 | 0 | 2286   | 0.394538051 | 2.144896392 | 4.019782494 | 0.533585186 | 0.593628559 | 0.998252924 |
| chr7:17474572-17504850   | ncRNA_exonic | KCCAT333, LOC101927630 | 7 | 17474572  | 17504850  | 0 | 0 | 2 | 0 | 0 | 0 | 30278  | 0.394538051 | 2.144896392 | 4.019782494 | 0.533585186 | 0.593628559 | 0.998252924 |
| chr7:22170654-22179733   | exonic       | RAPGEF5                | 7 | 22170654  | 22179733  | 0 | 0 | 2 | 0 | 0 | 0 | 9079   | 0.394538051 | 2.144896392 | 4.019782494 | 0.533585186 | 0.593628559 | 0.998252924 |
| chr7:27788216-27797752   | exonic       | TAX1BP1                | 7 | 27788216  | 27797752  | 0 | 0 | 2 | 0 | 0 | 0 | 9536   | 0.394538051 | 2.144896392 | 4.019782494 | 0.533585186 | 0.593628559 | 0.998252924 |
| chr7:27845445-27845725   | intronic     | TAX1BP1                | 7 | 27845445  | 27845725  | 0 | 0 | 2 | 0 | 0 | 0 | 280    | 0.394538051 | 2.144896392 | 4.019782494 | 0.533585186 | 0.593628559 | 0.998252924 |
| chr7:29070192-29105737   | exonic       | CPVL                   | 7 | 29070192  | 29105737  | 0 | 0 | 2 | 0 | 0 | 0 | 35545  | 0.394538051 | 2.144896392 | 4.019782494 | 0.533585186 | 0.593628559 | 0.998252924 |
| chr7:33059246-33066527   | exonic       | NT5C3A                 | 7 | 33059246  | 33066527  | 0 | 0 | 2 | 0 | 0 | 0 | 7281   | 0.394538051 | 2.144896392 | 4.019782494 | 0.533585186 | 0.593628559 | 0.998252924 |
| chr7:43647854-43659322   | exonic       | STK17A                 | 7 | 43647854  | 43659322  | 0 | 0 | 2 | 0 | 0 | 0 | 11468  | 0.394538051 | 2.144896392 | 4.019782494 | 0.533585186 | 0.593628559 | 0.998252924 |
| chr7:43842622-43843755   | exonic       | BLVRA                  | 7 | 43842622  | 43843755  | 0 | 0 | 2 | 0 | 0 | 0 | 1133   | 0.394538051 | 2.144896392 | 4.019782494 | 0.533585186 | 0.593628559 | 0.998252924 |
| chr7:73510951-73513568   | exonic       | LIMK1                  | 7 | 73510951  | 73513568  | 0 | 0 | 2 | 0 | 0 | 0 | 2617   | 0.394538051 | 2.144896392 | 4.019782494 | 0.533585186 | 0.593628559 | 0.998252924 |
| chr7:8257934-8275570     | exonic       | ICAI                   | 7 | 8257934   | 8275570   | 2 | 2 | 2 | 6 | 4 | 0 | 17636  | 0.394538051 | 2.144896392 | 4.019782494 | 0.533585186 | 0.593628559 | 0.998252924 |
| chr7:94660991-94663762   | intronic     | PPP1R9A                | 7 | 94660991  | 94663762  | 0 | 0 | 2 | 0 | 0 | 0 | 2771   | 0.394538051 | 2.144896392 | 4.019782494 | 0.533585186 | 0.593628559 | 0.998252924 |
| chr7:99007686-99008719   | exonic       | BUD31                  | 7 | 99007686  | 99008719  | 0 | 0 | 2 | 0 | 0 | 0 | 1033   | 0.394538051 | 2.144896392 | 4.019782494 | 0.533585186 | 0.593628559 | 0.998252924 |
| chr8:100168776-100287482 | exonic       | VPS13B                 | 8 | 100168776 | 100287482 | 0 | 0 | 2 | 0 | 0 | 0 | 118706 | 0.394538051 | 2.144896392 | 4.019782494 | 0.533585186 | 0.593628559 | 0.998252924 |
| chr8:103850971-103855975 | exonic       | AZIN1                  | 8 | 103850971 | 103855975 | 0 | 0 | 2 | 0 | 0 | 0 | 5004   | 0.394538051 | 2.144896392 | 4.019782494 | 0.533585186 | 0.593628559 | 0.998252924 |
| chr8:117669453-117671219 | exonic       | EIF3H                  | 8 | 117669453 | 117671219 | 0 | 0 | 2 | 0 | 0 | 0 | 1766   | 0.394538051 | 2.144896392 | 4.019782494 | 0.533585186 | 0.593628559 | 0.998252924 |
| chr8:118920851-118922088 | intronic     | EXT1                   | 8 | 118920851 | 118922088 | 0 | 0 | 2 | 0 | 0 | 0 | 1237   | 0.394538051 | 2.144896392 | 4.019782494 | 0.533585186 | 0.593628559 | 0.998252924 |
| chr8:125516511-125535243 | exonic       | TATDN1                 | 8 | 125516511 | 125535243 | 0 | 0 | 2 | 0 | 0 | 0 | 18732  | 0.394538051 | 2.144896392 | 4.019782494 | 0.533585186 | 0.593628559 | 0.998252924 |
| chr8:131199481-131249240 | exonic       | ASAP1                  | 8 | 131199481 | 131249240 | 0 | 0 | 2 | 0 | 0 | 0 | 49759  | 0.394538051 | 2.144896392 | 4.019782494 | 0.533585186 | 0.593628559 | 0.998252924 |
| chr8:22355514-22356002   | exonic       | PPP3CC                 | 8 | 22355514  | 22356002  | 0 | 0 | 2 | 0 | 0 | 0 | 488    | 0.394538051 | 2.144896392 | 4.019782494 | 0.533585186 | 0.593628559 | 0.998252924 |
| chr8:25224385-25227157   | exonic       | DOCK5                  | 8 | 25224385  | 25227157  | 0 | 0 | 2 | 0 | 0 | 0 | 2772   | 0.394538051 | 2.144896392 | 4.019782494 | 0.533585186 | 0.593628559 | 0.998252924 |
| chr8:38105230-38109805   | exonic       | DDHD2                  | 8 | 38105230  | 38109805  | 0 | 0 | 2 | 0 | 0 | 0 | 4575   | 0.394538051 | 2.144896392 | 4.019782494 | 0.533585186 | 0.593628559 | 0.998252924 |
| chr8:42828431-42837839   | exonic       | HOOK3                  | 8 | 42828431  | 42837839  | 0 | 0 | 2 | 0 | 0 | 0 | 9408   | 0.394538051 | 2.144896392 | 4.019782494 | 0.533585186 | 0.593628559 | 0.998252924 |
| chr8:43016580-43037403   | exonic       | HGSNAT                 | 8 | 43016580  | 43037403  | 0 | 0 | 2 | 0 | 0 | 0 | 20823  | 0.394538051 | 2.144896392 | 4.019782494 | 0.533585186 | 0.593628559 | 0.998252924 |
| chr8:82612539-82612981   | downstream   | ZFAND1 (dist=585)      | 8 | 82612539  | 82612981  | 0 | 0 | 2 | 0 | 0 | 0 | 442    | 0.394538051 | 2.144896392 | 4.019782494 | 0.533585186 | 0.593628559 | 0.998252924 |
| chr8:8703686-8704801     | intronic     | MFHAS1                 | 8 | 8703686   | 8704801   | 0 | 0 | 2 | 0 | 0 | 0 | 1115   | 0.394538051 | 2.144896392 | 4.019782494 | 0.533585186 | 0.593628559 | 0.998252924 |
| chr8:92081806-92082050   | ncRNA_exonic | OTUD6B-AS1             | 8 | 92081806  | 92082050  | 0 | 0 | 2 | 0 | 0 | 0 | 244    | 0.394538051 | 2.144896392 | 4.019782494 | 0.533585186 | 0.593628559 | 0.998252924 |
| chr9:102773106-102776676 | intronic     | ERP44                  | 9 | 102773106 | 102776676 | 0 | 0 | 2 | 0 | 0 | 0 | 3570   | 0.394538051 | 2.144896392 | 4.019782494 | 0.533585186 | 0.593628559 | 0.998252924 |



|                          |            |                                   |    |           |           |   |   |   |   |   |   |       |             |             |             |             |             |             |
|--------------------------|------------|-----------------------------------|----|-----------|-----------|---|---|---|---|---|---|-------|-------------|-------------|-------------|-------------|-------------|-------------|
| chr9:113217869-113265497 | exonic     | SVEP1                             | 9  | 113217869 | 113265497 | 0 | 0 | 2 | 0 | 0 | 0 | 47628 | 0.394538051 | 2.144896392 | 4.019782494 | 0.533585186 | 0.593628559 | 0.998252924 |
| chr9:113259094-113312384 | exonic     | SVEP1                             | 9  | 113259094 | 113312384 | 0 | 0 | 2 | 0 | 0 | 0 | 53290 | 0.394538051 | 2.144896392 | 4.019782494 | 0.533585186 | 0.593628559 | 0.998252924 |
| chr9:114676885-114678116 | exonic     | UGCG                              | 9  | 114676885 | 114678116 | 0 | 0 | 2 | 0 | 0 | 0 | 1231  | 0.394538051 | 2.144896392 | 4.019782494 | 0.533585186 | 0.593628559 | 0.998252924 |
| chr9:125758319-125782738 | exonic     | RABGAP1                           | 9  | 125758319 | 125782738 | 0 | 0 | 2 | 0 | 0 | 0 | 24419 | 0.394538051 | 2.144896392 | 4.019782494 | 0.533585186 | 0.593628559 | 0.998252924 |
| chr9:125760875-125782738 | exonic     | RABGAP1                           | 9  | 125760875 | 125782738 | 0 | 0 | 2 | 0 | 0 | 0 | 21863 | 0.394538051 | 2.144896392 | 4.019782494 | 0.533585186 | 0.593628559 | 0.998252924 |
| chr9:128432096-128434922 | exonic     | MAPKAP1                           | 9  | 128432096 | 128434922 | 0 | 0 | 2 | 0 | 0 | 0 | 2826  | 0.394538051 | 2.144896392 | 4.019782494 | 0.533585186 | 0.593628559 | 0.998252924 |
| chr9:130206308-130207742 | exonic     | ZNF79                             | 9  | 130206308 | 130207742 | 0 | 0 | 2 | 0 | 0 | 0 | 1434  | 0.394538051 | 2.144896392 | 4.019782494 | 0.533585186 | 0.593628559 | 0.998252924 |
| chr9:131495704-131517938 | exonic     | ZER1                              | 9  | 131495704 | 131517938 | 0 | 0 | 2 | 0 | 0 | 0 | 22234 | 0.394538051 | 2.144896392 | 4.019782494 | 0.533585186 | 0.593628559 | 0.998252924 |
| chr9:20715320-20781928   | exonic     | FOCAD                             | 9  | 20715320  | 20781928  | 0 | 0 | 2 | 0 | 0 | 0 | 66608 | 0.394538051 | 2.144896392 | 4.019782494 | 0.533585186 | 0.593628559 | 0.998252924 |
| chr9:27359031-27455746   | exonic     | MOB3B                             | 9  | 27359031  | 27455746  | 0 | 0 | 2 | 0 | 0 | 0 | 96715 | 0.394538051 | 2.144896392 | 4.019782494 | 0.533585186 | 0.593628559 | 0.998252924 |
| chr9:36352738-36356470   | exonic     | RNF38                             | 9  | 36352738  | 36356470  | 0 | 0 | 2 | 0 | 0 | 0 | 3732  | 0.394538051 | 2.144896392 | 4.019782494 | 0.533585186 | 0.593628559 | 0.998252924 |
| chr9:71850943-71852052   | exonic     | TJP2                              | 9  | 71850943  | 71852052  | 0 | 0 | 2 | 0 | 0 | 0 | 1109  | 0.394538051 | 2.144896392 | 4.019782494 | 0.533585186 | 0.593628559 | 0.998252924 |
| chrMT:14004-14420        | intergenic | NONE (dist=NONE),NONE (dist=NONE) | MT | 14004     | 14420     | 0 | 0 | 2 | 0 | 0 | 0 | 416   | 0.394538051 | 2.144896392 | 4.019782494 | 0.533585186 | 0.593628559 | 0.998252924 |
| chrX:149919202-149919712 | exonic     | MTMR1                             | X  | 149919202 | 149919712 | 0 | 0 | 2 | 0 | 0 | 0 | 510   | 0.394538051 | 2.144896392 | 4.019782494 | 0.533585186 | 0.593628559 | 0.998252924 |
| chrX:155173011-155173187 | UTR3       | -----                             | X  | 155173011 | 155173187 | 0 | 0 | 2 | 0 | 0 | 0 | 176   | 0.394538051 | 2.144896392 | 4.019782494 | 0.533585186 | 0.593628559 | 0.998252924 |
| chrX:36083759-36122808   | exonic     | CFAP47                            | X  | 36083759  | 36122808  | 0 | 0 | 2 | 0 | 0 | 0 | 39049 | 0.394538051 | 2.144896392 | 4.019782494 | 0.533585186 | 0.593628559 | 0.998252924 |
| chrX:54948724-54949010   | exonic     | TRO                               | X  | 54948724  | 54949010  | 0 | 0 | 2 | 0 | 0 | 0 | 286   | 0.394538051 | 2.144896392 | 4.019782494 | 0.533585186 | 0.593628559 | 0.998252924 |
| chrX:57358030-57367823   | exonic     | FAAH2                             | X  | 57358030  | 57367823  | 0 | 0 | 2 | 0 | 0 | 0 | 9793  | 0.394538051 | 2.144896392 | 4.019782494 | 0.533585186 | 0.593628559 | 0.998252924 |
| chrX:67266836-67273652   | exonic     | OPHN1                             | X  | 67266836  | 67273652  | 0 | 0 | 2 | 0 | 0 | 0 | 6816  | 0.394538051 | 2.144896392 | 4.019782494 | 0.533585186 | 0.593628559 | 0.998252924 |
| chrX:69606467-69615899   | exonic     | KIF4A                             | X  | 69606467  | 69615899  | 0 | 0 | 2 | 0 | 0 | 0 | 9432  | 0.394538051 | 2.144896392 | 4.019782494 | 0.533585186 | 0.593628559 | 0.998252924 |
| chr9:33960823-33996331   | exonic     | UBAP2                             | 9  | 33960823  | 33996331  | 3 | 3 | 2 | 8 | 5 | 3 | 35508 | 1.49395345  | 2.145061728 | 2.137851105 | 1.003372837 | 0.315681005 | 0.998252924 |
| chr15:90982563-90984916  | exonic     | IQGAP1                            | 15 | 90982563  | 90984916  | 3 | 2 | 0 | 1 | 0 | 0 | 2353  | 0.841823812 | 2.146364964 | 2.963109137 | 0.72436244  | 0.468843253 | 0.998252924 |
| chr11:2972488-3000467    | exonic     | NAP1L4                            | 11 | 2972488   | 3000467   | 0 | 5 | 2 | 1 | 1 | 0 | 27979 | 1.493255853 | 2.154059684 | 2.291511797 | 0.940016842 | 0.347208922 | 0.998252924 |
| chr2:219447693-219449444 | exonic     | RQCD1                             | 2  | 219447693 | 219449444 | 0 | 0 | 4 | 0 | 1 | 0 | 1751  | 0.910103524 | 2.156411893 | 3.183775762 | 0.677312742 | NA          | NA          |
| chr4:113568354-113568705 | exonic     | LARP7                             | 4  | 113568354 | 113568705 | 0 | 0 | 4 | 0 | 1 | 0 | 351   | 0.910103524 | 2.156411893 | 3.183775762 | 0.677312742 | NA          | NA          |
| chr6:105192034-105198347 | exonic     | HACE1                             | 6  | 105192034 | 105198347 | 2 | 6 | 2 | 3 | 0 | 0 | 6313  | 2.017100887 | 2.165078106 | 2.011358729 | 1.076425639 | NA          | NA          |
| chr2:63660878-63667005   | exonic     | WDPCP                             | 2  | 63660878  | 63667005  | 6 | 3 | 0 | 0 | 2 | 0 | 6127  | 1.538803898 | 2.173460185 | 2.380004601 | 0.9132168   | 0.36112853  | 0.998252924 |
| chr6:108233919-108246136 | exonic     | SEC63                             | 6  | 108233919 | 108246136 | 3 | 0 | 2 | 0 | 1 | 0 | 12217 | 0.902526301 | 2.174471569 | 2.895709239 | 0.750928836 | 0.452695485 | 0.998252924 |
| chr17:27613009-27614734  | exonic     | NUFIP2                            | 17 | 27613009  | 27614734  | 0 | 4 | 3 | 1 | 1 | 0 | 1725  | 1.51624908  | 2.175879222 | 2.27085818  | 0.958174861 | NA          | NA          |
| chr17:45221248-45249430  | exonic     | CDC27                             | 17 | 45221248  | 45249430  | 3 | 0 | 2 | 0 | 0 | 1 | 28182 | 1.089717488 | 2.176240603 | 2.767045975 | 0.786485163 | NA          | NA          |
| chr9:127685373-127701145 | exonic     | GOLGA1                            | 9  | 127685373 | 127701145 | 2 | 3 | 0 | 0 | 1 | 0 | 15772 | 0.901828705 | 2.176897973 | 2.89713816  | 0.751395982 | 0.45241438  | 0.998252924 |
| chr1:109482257-109486679 | exonic     | CLCC1                             | 1  | 109482257 | 109486679 | 3 | 0 | 0 | 0 | 0 | 0 | 4422  | 0.386960828 | 2.183944112 | 4.016814454 | 0.543700521 | NA          | NA          |
| chr1:113134146-113159517 | exonic     | ST7L                              | 1  | 113134146 | 113159517 | 3 | 0 | 0 | 0 | 0 | 0 | 25371 | 0.386960828 | 2.183944112 | 4.016814454 | 0.543700521 | NA          | NA          |
| chr1:118581914-118629631 | exonic     | SPAG17                            | 1  | 118581914 | 118629631 | 3 | 0 | 0 | 0 | 0 | 0 | 47717 | 0.386960828 | 2.183944112 | 4.016814454 | 0.543700521 | NA          | NA          |
| chr1:154420600-154427057 | exonic     | IL6R                              | 1  | 154420600 | 154427057 | 3 | 0 | 0 | 0 | 0 | 0 | 6457  | 0.386960828 | 2.183944112 | 4.016814454 | 0.543700521 | NA          | NA          |

|                           |              |           |    |           |           |   |   |   |   |   |   |       |             |             |             |             |    |    |
|---------------------------|--------------|-----------|----|-----------|-----------|---|---|---|---|---|---|-------|-------------|-------------|-------------|-------------|----|----|
| chr1:155173842-155174172  | intronic     | THBS3     | 1  | 155173842 | 155174172 | 3 | 0 | 0 | 0 | 0 | 0 | 330   | 0.386960828 | 2.183944112 | 4.016814454 | 0.543700521 | NA | NA |
| chr1:165648678-165664634  | exonic       | ALDH9A1   | 1  | 165648678 | 165664634 | 3 | 0 | 0 | 0 | 0 | 0 | 15956 | 0.386960828 | 2.183944112 | 4.016814454 | 0.543700521 | NA | NA |
| chr1:183102540-183104291  | exonic       | LAMC1     | 1  | 183102540 | 183104291 | 3 | 0 | 0 | 0 | 0 | 0 | 1751  | 0.386960828 | 2.183944112 | 4.016814454 | 0.543700521 | NA | NA |
| chr1:196249990-196286399  | exonic       | KCNT2     | 1  | 196249990 | 196286399 | 3 | 0 | 0 | 0 | 0 | 0 | 36409 | 0.386960828 | 2.183944112 | 4.016814454 | 0.543700521 | NA | NA |
| chr1:207303516-207328403  | exonic       | C4BPA     | 1  | 207303516 | 207328403 | 3 | 0 | 0 | 0 | 0 | 0 | 24887 | 0.386960828 | 2.183944112 | 4.016814454 | 0.543700521 | NA | NA |
| chr1:210522277-210560925  | exonic       | HHAT      | 1  | 210522277 | 210560925 | 3 | 0 | 0 | 0 | 0 | 0 | 38648 | 0.386960828 | 2.183944112 | 4.016814454 | 0.543700521 | NA | NA |
| chr1:2140772-2141658      | intronic     | FAAP20    | 1  | 2140772   | 2141658   | 3 | 0 | 0 | 0 | 0 | 0 | 886   | 0.386960828 | 2.183944112 | 4.016814454 | 0.543700521 | NA | NA |
| chr1:214478530-214510283  | exonic       | SMYD2     | 1  | 214478530 | 214510283 | 3 | 0 | 0 | 0 | 0 | 0 | 31753 | 0.386960828 | 2.183944112 | 4.016814454 | 0.543700521 | NA | NA |
| chr1:217783662-217787544  | exonic       | GPATCH2   | 1  | 217783662 | 217787544 | 3 | 0 | 0 | 0 | 0 | 0 | 3882  | 0.386960828 | 2.183944112 | 4.016814454 | 0.543700521 | NA | NA |
| chr1:219366472-219414650  | exonic       | LYPLAL1   | 1  | 219366472 | 219414650 | 3 | 0 | 0 | 0 | 0 | 0 | 48178 | 0.386960828 | 2.183944112 | 4.016814454 | 0.543700521 | NA | NA |
| chr1:220145410-220152061  | exonic       | EPRS      | 1  | 220145410 | 220152061 | 3 | 0 | 0 | 0 | 0 | 0 | 6651  | 0.386960828 | 2.183944112 | 4.016814454 | 0.543700521 | NA | NA |
| chr1:220154719-220180680  | exonic       | EPRS      | 1  | 220154719 | 220180680 | 3 | 0 | 0 | 0 | 0 | 0 | 25961 | 0.386960828 | 2.183944112 | 4.016814454 | 0.543700521 | NA | NA |
| chr1:220789280-220792097  | exonic       | MARK1     | 1  | 220789280 | 220792097 | 3 | 0 | 0 | 0 | 0 | 0 | 2817  | 0.386960828 | 2.183944112 | 4.016814454 | 0.543700521 | NA | NA |
| chr1:222897442-222898897  | exonic       | BROX      | 1  | 222897442 | 222898897 | 3 | 0 | 0 | 0 | 0 | 0 | 1455  | 0.386960828 | 2.183944112 | 4.016814454 | 0.543700521 | NA | NA |
| chr1:226453233-226475498  | exonic       | LIN9      | 1  | 226453233 | 226475498 | 3 | 0 | 0 | 0 | 0 | 0 | 22265 | 0.386960828 | 2.183944112 | 4.016814454 | 0.543700521 | NA | NA |
| chr1:231506307-231509845  | exonic       | EGLN1     | 1  | 231506307 | 231509845 | 3 | 0 | 0 | 0 | 0 | 0 | 3538  | 0.386960828 | 2.183944112 | 4.016814454 | 0.543700521 | NA | NA |
| chr1:236966727-236969533  | exonic       | MTR       | 1  | 236966727 | 236969533 | 3 | 0 | 0 | 0 | 0 | 0 | 2806  | 0.386960828 | 2.183944112 | 4.016814454 | 0.543700521 | NA | NA |
| chr1:237765324-237780786  | exonic       | RYR2      | 1  | 237765324 | 237780786 | 3 | 0 | 0 | 0 | 0 | 0 | 15462 | 0.386960828 | 2.183944112 | 4.016814454 | 0.543700521 | NA | NA |
| chr1:39900085-39905172    | exonic       | MACF1     | 1  | 39900085  | 39905172  | 3 | 0 | 0 | 0 | 0 | 0 | 5087  | 0.386960828 | 2.183944112 | 4.016814454 | 0.543700521 | NA | NA |
| chr1:42946132-43002272    | exonic       | CCDC30    | 1  | 42946132  | 43002272  | 3 | 0 | 0 | 0 | 0 | 0 | 56140 | 0.386960828 | 2.183944112 | 4.016814454 | 0.543700521 | NA | NA |
| chr1:42946132-43011250    | exonic       | CCDC30    | 1  | 42946132  | 43011250  | 3 | 0 | 0 | 0 | 0 | 0 | 65118 | 0.386960828 | 2.183944112 | 4.016814454 | 0.543700521 | NA | NA |
| chr1:43239234-43241150    | exonic       | Clorf50   | 1  | 43239234  | 43241150  | 3 | 0 | 0 | 0 | 0 | 0 | 1916  | 0.386960828 | 2.183944112 | 4.016814454 | 0.543700521 | NA | NA |
| chr1:62321701-62393501    | exonic       | INADL     | 1  | 62321701  | 62393501  | 3 | 0 | 0 | 0 | 0 | 0 | 71800 | 0.386960828 | 2.183944112 | 4.016814454 | 0.543700521 | NA | NA |
| chr1:62455839-62483619    | exonic       | INADL     | 1  | 62455839  | 62483619  | 3 | 0 | 0 | 0 | 0 | 0 | 27780 | 0.386960828 | 2.183944112 | 4.016814454 | 0.543700521 | NA | NA |
| chr1:78267015-78272786    | exonic       | FAM73A    | 1  | 78267015  | 78272786  | 3 | 0 | 0 | 0 | 0 | 0 | 5771  | 0.386960828 | 2.183944112 | 4.016814454 | 0.543700521 | NA | NA |
| chr1:7863752-7864739      | exonic       | PER3      | 1  | 7863752   | 7864739   | 3 | 0 | 0 | 0 | 0 | 0 | 987   | 0.386960828 | 2.183944112 | 4.016814454 | 0.543700521 | NA | NA |
| chr10:102678141-102685776 | exonic       | SLF2      | 10 | 102678141 | 102685776 | 3 | 0 | 0 | 0 | 0 | 0 | 7635  | 0.386960828 | 2.183944112 | 4.016814454 | 0.543700521 | NA | NA |
| chr10:23512527-23539620   | ncRNA_exonic | LINC01552 | 10 | 23512527  | 23539620  | 3 | 0 | 0 | 0 | 0 | 0 | 27093 | 0.386960828 | 2.183944112 | 4.016814454 | 0.543700521 | NA | NA |
| chr10:26879064-26880342   | ncRNA_exonic | LINC00264 | 10 | 26879064  | 26880342  | 3 | 0 | 0 | 0 | 0 | 0 | 1278  | 0.386960828 | 2.183944112 | 4.016814454 | 0.543700521 | NA | NA |
| chr10:28223938-28233891   | exonic       | ARMC4     | 10 | 28223938  | 28233891  | 3 | 0 | 0 | 0 | 0 | 0 | 9953  | 0.386960828 | 2.183944112 | 4.016814454 | 0.543700521 | NA | NA |
| chr10:29801663-29820217   | exonic       | SVIL      | 10 | 29801663  | 29820217  | 3 | 0 | 0 | 0 | 0 | 0 | 18554 | 0.386960828 | 2.183944112 | 4.016814454 | 0.543700521 | NA | NA |
| chr10:29801663-29821101   | exonic       | SVIL      | 10 | 29801663  | 29821101  | 3 | 0 | 0 | 0 | 0 | 0 | 19438 | 0.386960828 | 2.183944112 | 4.016814454 | 0.543700521 | NA | NA |
| chr10:34595500-34595924   | intronic     | PARD3     | 10 | 34595500  | 34595924  | 3 | 0 | 0 | 0 | 0 | 0 | 424   | 0.386960828 | 2.183944112 | 4.016814454 | 0.543700521 | NA | NA |
| chr10:34620044-34649187   | exonic       | PARD3     | 10 | 34620044  | 34649187  | 3 | 0 | 0 | 0 | 0 | 0 | 29143 | 0.386960828 | 2.183944112 | 4.016814454 | 0.543700521 | NA | NA |
| chr10:51606987-51613311   | exonic       | TIMM23    | 10 | 51606987  | 51613311  | 3 | 0 | 0 | 0 | 0 | 0 | 6324  | 0.386960828 | 2.183944112 | 4.016814454 | 0.543700521 | NA | NA |

|                           |            |                                            |    |           |           |   |   |   |   |   |   |        |             |             |             |             |    |    |
|---------------------------|------------|--------------------------------------------|----|-----------|-----------|---|---|---|---|---|---|--------|-------------|-------------|-------------|-------------|----|----|
| chr10:5690932-5695013     | exonic     | ASB13                                      | 10 | 5690932   | 5695013   | 3 | 0 | 0 | 0 | 0 | 0 | 4081   | 0.386960828 | 2.183944112 | 4.016814454 | 0.543700521 | NA | NA |
| chr10:70517050-70532856   | exonic     | CCAR1                                      | 10 | 70517050  | 70532856  | 3 | 0 | 0 | 0 | 0 | 0 | 15806  | 0.386960828 | 2.183944112 | 4.016814454 | 0.543700521 | NA | NA |
| chr10:7290509-7423911     | exonic     | SFMBT2                                     | 10 | 7290509   | 7423911   | 3 | 0 | 0 | 0 | 0 | 0 | 133402 | 0.386960828 | 2.183944112 | 4.016814454 | 0.543700521 | NA | NA |
| chr10:75299201-75302889   | exonic     | USP54                                      | 10 | 75299201  | 75302889  | 3 | 0 | 0 | 0 | 0 | 0 | 3688   | 0.386960828 | 2.183944112 | 4.016814454 | 0.543700521 | NA | NA |
| chr11:19998293-20005793   | exonic     | NAV2                                       | 11 | 19998293  | 20005793  | 3 | 0 | 0 | 0 | 0 | 0 | 7500   | 0.386960828 | 2.183944112 | 4.016814454 | 0.543700521 | NA | NA |
| chr11:20805225-21392494   | exonic     | NELL1                                      | 11 | 20805225  | 21392494  | 3 | 0 | 0 | 0 | 0 | 0 | 587269 | 0.386960828 | 2.183944112 | 4.016814454 | 0.543700521 | NA | NA |
| chr11:20959331-20982106   | exonic     | NELL1                                      | 11 | 20959331  | 20982106  | 3 | 0 | 0 | 0 | 0 | 0 | 22775  | 0.386960828 | 2.183944112 | 4.016814454 | 0.543700521 | NA | NA |
| chr11:28373637-28445911   | intergenic |                                            | 11 | 28373637  | 28445911  | 3 | 0 | 0 | 0 | 0 | 0 | 72274  | 0.386960828 | 2.183944112 | 4.016814454 | 0.543700521 | NA | NA |
|                           |            | METTL15 (dist=18583), MIR8068 (dist=53117) |    |           |           |   |   |   |   |   |   |        |             |             |             |             |    |    |
| chr11:47182741-47182987   | exonic     | C11orf49                                   | 11 | 47182741  | 47182987  | 3 | 0 | 0 | 0 | 0 | 0 | 246    | 0.386960828 | 2.183944112 | 4.016814454 | 0.543700521 | NA | NA |
| chr11:66947549-66949363   | exonic     | KDM2A                                      | 11 | 66947549  | 66949363  | 3 | 0 | 0 | 0 | 0 | 0 | 1814   | 0.386960828 | 2.183944112 | 4.016814454 | 0.543700521 | NA | NA |
| chr11:68337215-68343511   | exonic     | PPP6R3                                     | 11 | 68337215  | 68343511  | 3 | 0 | 0 | 0 | 0 | 0 | 6296   | 0.386960828 | 2.183944112 | 4.016814454 | 0.543700521 | NA | NA |
| chr11:82786474-82787597   | intergenic |                                            | 11 | 82786474  | 82787597  | 3 | 0 | 0 | 0 | 0 | 0 | 1123   | 0.386960828 | 2.183944112 | 4.016814454 | 0.543700521 | NA | NA |
|                           |            | RAB30-AS1 (dist=1720), PCF11 (dist=80540)  |    |           |           |   |   |   |   |   |   |        |             |             |             |             |    |    |
| chr11:85406171-85420543   | exonic     | SYTL2                                      | 11 | 85406171  | 85420543  | 3 | 0 | 0 | 0 | 0 | 0 | 14372  | 0.386960828 | 2.183944112 | 4.016814454 | 0.543700521 | NA | NA |
| chr11:85685750-85714494   | exonic     | PICALM                                     | 11 | 85685750  | 85714494  | 3 | 0 | 0 | 0 | 0 | 0 | 28744  | 0.386960828 | 2.183944112 | 4.016814454 | 0.543700521 | NA | NA |
| chr11:86461962-86534635   | exonic     | PRSS23                                     | 11 | 86461962  | 86534635  | 3 | 0 | 0 | 0 | 0 | 0 | 72673  | 0.386960828 | 2.183944112 | 4.016814454 | 0.543700521 | NA | NA |
| chr12:118823918-118829087 | exonic     | SUDS3                                      | 12 | 118823918 | 118829087 | 3 | 0 | 0 | 0 | 0 | 0 | 5169   | 0.386960828 | 2.183944112 | 4.016814454 | 0.543700521 | NA | NA |
| chr12:9230297-9310437     | exonic     | A2M, PZP                                   | 12 | 9230297   | 9310437   | 3 | 0 | 0 | 0 | 0 | 0 | 80140  | 0.386960828 | 2.183944112 | 4.016814454 | 0.543700521 | NA | NA |
| chr13:101910793-101944445 | exonic     | NALCN                                      | 13 | 101910793 | 101944445 | 3 | 0 | 0 | 0 | 0 | 0 | 33652  | 0.386960828 | 2.183944112 | 4.016814454 | 0.543700521 | NA | NA |
| chr13:101910793-101944717 | exonic     | NALCN                                      | 13 | 101910793 | 101944717 | 3 | 0 | 0 | 0 | 0 | 0 | 33924  | 0.386960828 | 2.183944112 | 4.016814454 | 0.543700521 | NA | NA |
| chr13:102227775-102250649 | exonic     | ITGBL1                                     | 13 | 102227775 | 102250649 | 3 | 0 | 0 | 0 | 0 | 0 | 22874  | 0.386960828 | 2.183944112 | 4.016814454 | 0.543700521 | NA | NA |
| chr13:36857605-36869994   | exonic     | CCDC169, CCDC169-SOHLH2                    | 13 | 36857605  | 36869994  | 3 | 0 | 0 | 0 | 0 | 0 | 12389  | 0.386960828 | 2.183944112 | 4.016814454 | 0.543700521 | NA | NA |
| chr13:73482668-73539542   | exonic     | PIBF1                                      | 13 | 73482668  | 73539542  | 3 | 0 | 0 | 0 | 0 | 0 | 56874  | 0.386960828 | 2.183944112 | 4.016814454 | 0.543700521 | NA | NA |
| chr14:102457863-102461637 | exonic     | DYNC1H1                                    | 14 | 102457863 | 102461637 | 3 | 0 | 0 | 0 | 0 | 0 | 3774   | 0.386960828 | 2.183944112 | 4.016814454 | 0.543700521 | NA | NA |
| chr14:31626045-31626509   | exonic     | HECTD1                                     | 14 | 31626045  | 31626509  | 3 | 0 | 0 | 0 | 0 | 0 | 464    | 0.386960828 | 2.183944112 | 4.016814454 | 0.543700521 | NA | NA |
| chr14:33630146-33684793   | exonic     | NPAS3                                      | 14 | 33630146  | 33684793  | 3 | 0 | 0 | 0 | 0 | 0 | 54647  | 0.386960828 | 2.183944112 | 4.016814454 | 0.543700521 | NA | NA |
| chr14:51131896-51132337   | exonic     | SAV1                                       | 14 | 51131896  | 51132337  | 3 | 0 | 0 | 0 | 0 | 0 | 441    | 0.386960828 | 2.183944112 | 4.016814454 | 0.543700521 | NA | NA |
| chr14:56117045-56119658   | exonic     | KTN1                                       | 14 | 56117045  | 56119658  | 3 | 0 | 0 | 0 | 0 | 0 | 2613   | 0.386960828 | 2.183944112 | 4.016814454 | 0.543700521 | NA | NA |
| chr14:58563442-58564821   | exonic     | C14orf37                                   | 14 | 58563442  | 58564821  | 3 | 0 | 0 | 0 | 0 | 0 | 1379   | 0.386960828 | 2.183944112 | 4.016814454 | 0.543700521 | NA | NA |
| chr14:61075595-61076316   | intergenic |                                            | 14 | 61075595  | 61076316  | 3 | 0 | 0 | 0 | 0 | 0 | 721    | 0.386960828 | 2.183944112 | 4.016814454 | 0.543700521 | NA | NA |
|                           |            | SIX6 (dist=97070), SALRNA1 (dist=29618)    |    |           |           |   |   |   |   |   |   |        |             |             |             |             |    |    |
| chr14:64449347-64453335   | exonic     | SYNE2                                      | 14 | 64449347  | 64453335  | 3 | 0 | 0 | 0 | 0 | 0 | 3988   | 0.386960828 | 2.183944112 | 4.016814454 | 0.543700521 | NA | NA |
| chr14:73771038-73772273   | intronic   | NUMB                                       | 14 | 73771038  | 73772273  | 3 | 0 | 0 | 0 | 0 | 0 | 1235   | 0.386960828 | 2.183944112 | 4.016814454 | 0.543700521 | NA | NA |
| chr14:76638186-76644385   | exonic     | GPATCH2L                                   | 14 | 76638186  | 76644385  | 3 | 0 | 0 | 0 | 0 | 0 | 6199   | 0.386960828 | 2.183944112 | 4.016814454 | 0.543700521 | NA | NA |
| chr15:101149911-101152632 | exonic     | ASB7                                       | 15 | 101149911 | 101152632 | 3 | 0 | 0 | 0 | 0 | 0 | 2721   | 0.386960828 | 2.183944112 | 4.016814454 | 0.543700521 | NA | NA |
| chr15:44861595-44862856   | exonic     | SPG11                                      | 15 | 44861595  | 44862856  | 3 | 0 | 0 | 0 | 0 | 0 | 1261   | 0.386960828 | 2.183944112 | 4.016814454 | 0.543700521 | NA | NA |
| chr15:51855578-51868378   | exonic     | DMXL2                                      | 15 | 51855578  | 51868378  | 3 | 0 | 0 | 0 | 0 | 0 | 12800  | 0.386960828 | 2.183944112 | 4.016814454 | 0.543700521 | NA | NA |

|                         |            |                                                               |    |          |          |   |   |   |   |   |   |        |             |             |             |             |    |    |
|-------------------------|------------|---------------------------------------------------------------|----|----------|----------|---|---|---|---|---|---|--------|-------------|-------------|-------------|-------------|----|----|
| chr15:65746600-65766626 | exonic     | DPP8                                                          | 15 | 65746600 | 65766626 | 3 | 0 | 0 | 0 | 0 | 0 | 20026  | 0.386960828 | 2.183944112 | 4.016814454 | 0.543700521 | NA | NA |
| chr15:86259018-86262557 | exonic     | AKAP13                                                        | 15 | 86259018 | 86262557 | 3 | 0 | 0 | 0 | 0 | 0 | 3539   | 0.386960828 | 2.183944112 | 4.016814454 | 0.543700521 | NA | NA |
| chr16:15091610-15092262 | exonic     | PDXDC1                                                        | 16 | 15091610 | 15092262 | 3 | 0 | 0 | 0 | 0 | 0 | 652    | 0.386960828 | 2.183944112 | 4.016814454 | 0.543700521 | NA | NA |
| chr16:30394799-30395254 | intronic   | ZNF48                                                         | 16 | 30394799 | 30395254 | 3 | 0 | 0 | 0 | 0 | 0 | 455    | 0.386960828 | 2.183944112 | 4.016814454 | 0.543700521 | NA | NA |
| chr16:31276716-31277468 | exonic     | ITGAM                                                         | 16 | 31276716 | 31277468 | 3 | 0 | 0 | 0 | 0 | 0 | 752    | 0.386960828 | 2.183944112 | 4.016814454 | 0.543700521 | NA | NA |
| chr16:57238415-57250947 | exonic     | RSPRY1                                                        | 16 | 57238415 | 57250947 | 3 | 0 | 0 | 0 | 0 | 0 | 12532  | 0.386960828 | 2.183944112 | 4.016814454 | 0.543700521 | NA | NA |
| chr16:67736300-67736612 | intronic   | GFOD2                                                         | 16 | 67736300 | 67736612 | 3 | 0 | 0 | 0 | 0 | 0 | 312    | 0.386960828 | 2.183944112 | 4.016814454 | 0.543700521 | NA | NA |
| chr16:78142320-78143732 | exonic     | WVOX                                                          | 16 | 78142320 | 78143732 | 3 | 0 | 0 | 0 | 0 | 0 | 1412   | 0.386960828 | 2.183944112 | 4.016814454 | 0.543700521 | NA | NA |
| chr16:87376482-87393972 | exonic     | FBXO31                                                        | 16 | 87376482 | 87393972 | 3 | 0 | 0 | 0 | 0 | 0 | 17490  | 0.386960828 | 2.183944112 | 4.016814454 | 0.543700521 | NA | NA |
| chr16:88037901-88071617 | exonic     | BANP                                                          | 16 | 88037901 | 88071617 | 3 | 0 | 0 | 0 | 0 | 0 | 33716  | 0.386960828 | 2.183944112 | 4.016814454 | 0.543700521 | NA | NA |
| chr16:89810154-89810415 | intronic   | FANCA                                                         | 16 | 89810154 | 89810415 | 3 | 0 | 0 | 0 | 0 | 0 | 261    | 0.386960828 | 2.183944112 | 4.016814454 | 0.543700521 | NA | NA |
| chr16:929569-1004666    | exonic     | LMF1                                                          | 16 | 929569   | 1004666  | 3 | 0 | 0 | 0 | 0 | 0 | 75097  | 0.386960828 | 2.183944112 | 4.016814454 | 0.543700521 | NA | NA |
| chr17:18770594-18781183 | exonic     | PRPSAP2                                                       | 17 | 18770594 | 18781183 | 3 | 0 | 0 | 0 | 0 | 0 | 10589  | 0.386960828 | 2.183944112 | 4.016814454 | 0.543700521 | NA | NA |
| chr17:35604934-35609962 | exonic     | ACACA                                                         | 17 | 35604934 | 35609962 | 3 | 0 | 0 | 0 | 0 | 0 | 5028   | 0.386960828 | 2.183944112 | 4.016814454 | 0.543700521 | NA | NA |
| chr17:40989666-40991397 | exonic     | PSME3                                                         | 17 | 40989666 | 40991397 | 3 | 0 | 0 | 0 | 0 | 0 | 1731   | 0.386960828 | 2.183944112 | 4.016814454 | 0.543700521 | NA | NA |
| chr17:42517400-42519178 | intronic   | GPATCH8                                                       | 17 | 42517400 | 42519178 | 3 | 0 | 0 | 0 | 0 | 0 | 1778   | 0.386960828 | 2.183944112 | 4.016814454 | 0.543700521 | NA | NA |
| chr17:45447802-45492285 | exonic     | EFCAB13                                                       | 17 | 45447802 | 45492285 | 3 | 0 | 0 | 0 | 0 | 0 | 44483  | 0.386960828 | 2.183944112 | 4.016814454 | 0.543700521 | NA | NA |
| chr17:48814320-48822174 | exonic     | LUC7L3                                                        | 17 | 48814320 | 48822174 | 3 | 0 | 0 | 0 | 0 | 0 | 7854   | 0.386960828 | 2.183944112 | 4.016814454 | 0.543700521 | NA | NA |
| chr17:57148183-57161450 | exonic     | TRIM37                                                        | 17 | 57148183 | 57161450 | 3 | 0 | 0 | 0 | 0 | 0 | 13267  | 0.386960828 | 2.183944112 | 4.016814454 | 0.543700521 | NA | NA |
| chr17:64798551-64804923 | exonic     | PRKCA                                                         | 17 | 64798551 | 64804923 | 3 | 0 | 0 | 0 | 0 | 0 | 6372   | 0.386960828 | 2.183944112 | 4.016814454 | 0.543700521 | NA | NA |
| chr17:72202067-72202946 | intronic   | RPL38                                                         | 17 | 72202067 | 72202946 | 3 | 0 | 0 | 0 | 0 | 0 | 879    | 0.386960828 | 2.183944112 | 4.016814454 | 0.543700521 | NA | NA |
| chr17:74625094-74625793 | exonic     | ST6GALNAC1                                                    | 17 | 74625094 | 74625793 | 3 | 0 | 0 | 0 | 0 | 0 | 699    | 0.386960828 | 2.183944112 | 4.016814454 | 0.543700521 | NA | NA |
| chr18:11926550-11928325 | intergenic | <small>MPPE1 (dist=17754), IMPA2 (dist=53102)</small>         | 18 | 11926550 | 11928325 | 3 | 0 | 0 | 0 | 0 | 0 | 1775   | 0.386960828 | 2.183944112 | 4.016814454 | 0.543700521 | NA | NA |
| chr18:59878385-59899660 | exonic     | KIAA1468                                                      | 18 | 59878385 | 59899660 | 3 | 0 | 0 | 0 | 0 | 0 | 21275  | 0.386960828 | 2.183944112 | 4.016814454 | 0.543700521 | NA | NA |
| chr18:68153481-68199023 | intergenic | <small>LOC101060542 (dist=101654), GTSR1 (dist=98732)</small> | 18 | 68153481 | 68199023 | 3 | 0 | 0 | 0 | 0 | 0 | 45542  | 0.386960828 | 2.183944112 | 4.016814454 | 0.543700521 | NA | NA |
| chr18:71918328-71920048 | downstream | CYB5A (dist=479)                                              | 18 | 71918328 | 71920048 | 3 | 0 | 0 | 0 | 0 | 0 | 1720   | 0.386960828 | 2.183944112 | 4.016814454 | 0.543700521 | NA | NA |
| chr18:7926565-8143777   | exonic     | PTPRM                                                         | 18 | 7926565  | 8143777  | 3 | 0 | 0 | 0 | 0 | 0 | 217212 | 0.386960828 | 2.183944112 | 4.016814454 | 0.543700521 | NA | NA |
| chr19:10273342-10283850 | exonic     | DNMT1                                                         | 19 | 10273342 | 10283850 | 3 | 0 | 0 | 0 | 0 | 0 | 10508  | 0.386960828 | 2.183944112 | 4.016814454 | 0.543700521 | NA | NA |
| chr19:10274001-10284581 | exonic     | DNMT1                                                         | 19 | 10274001 | 10284581 | 3 | 0 | 0 | 0 | 0 | 0 | 10580  | 0.386960828 | 2.183944112 | 4.016814454 | 0.543700521 | NA | NA |
| chr19:11978121-12014780 | exonic     | ZNF439, ZNF69                                                 | 19 | 11978121 | 12014780 | 3 | 0 | 0 | 0 | 0 | 0 | 36659  | 0.386960828 | 2.183944112 | 4.016814454 | 0.543700521 | NA | NA |
| chr19:14815865-14817585 | exonic     | ZNF333                                                        | 19 | 14815865 | 14817585 | 3 | 0 | 0 | 0 | 0 | 0 | 1720   | 0.386960828 | 2.183944112 | 4.016814454 | 0.543700521 | NA | NA |
| chr19:31025754-31040421 | exonic     | ZNF536                                                        | 19 | 31025754 | 31040421 | 3 | 0 | 0 | 0 | 0 | 0 | 14667  | 0.386960828 | 2.183944112 | 4.016814454 | 0.543700521 | NA | NA |
| chr19:46025425-46026076 | exonic     | VASP                                                          | 19 | 46025425 | 46026076 | 3 | 0 | 0 | 0 | 0 | 0 | 651    | 0.386960828 | 2.183944112 | 4.016814454 | 0.543700521 | NA | NA |
| chr19:47793255-47795430 | intergenic | <small>INAPM1 (dist=14275), C5AR1 (dist=17674)</small>        | 19 | 47793255 | 47795430 | 3 | 0 | 0 | 0 | 0 | 0 | 2175   | 0.386960828 | 2.183944112 | 4.016814454 | 0.543700521 | NA | NA |
| chr19:50222714-50223192 | intergenic | <small>CPT1C (dist=5726), TSKS (dist=19819)</small>           | 19 | 50222714 | 50223192 | 3 | 0 | 0 | 0 | 0 | 0 | 478    | 0.386960828 | 2.183944112 | 4.016814454 | 0.543700521 | NA | NA |

|                          |                |                                                                   |        |           |           |           |   |   |   |   |   |       |             |             |             |             |    |    |
|--------------------------|----------------|-------------------------------------------------------------------|--------|-----------|-----------|-----------|---|---|---|---|---|-------|-------------|-------------|-------------|-------------|----|----|
| chr19:54646665-54657577  | exonic         | CNOT3                                                             | 19     | 54646665  | 54657577  | 3         | 0 | 0 | 0 | 0 | 0 | 10912 | 0.386960828 | 2.183944112 | 4.016814454 | 0.543700521 | NA | NA |
| chr19:9763629-9764557    | exonic         | ZNF562                                                            | 19     | 9763629   | 9764557   | 3         | 0 | 0 | 0 | 0 | 0 | 928   | 0.386960828 | 2.183944112 | 4.016814454 | 0.543700521 | NA | NA |
| chr2:101666862-101676001 | exonic         | TBC1D8                                                            | 2      | 101666862 | 101676001 | 3         | 0 | 0 | 0 | 0 | 0 | 9139  | 0.386960828 | 2.183944112 | 4.016814454 | 0.543700521 | NA | NA |
| chr2:110323339-110343415 | exonic         |                                                                   | 10-Sep | 2         | 110323339 | 110343415 | 3 | 0 | 0 | 0 | 0 | 20076 | 0.386960828 | 2.183944112 | 4.016814454 | 0.543700521 | NA | NA |
| chr2:110325391-110343415 | exonic         |                                                                   | 10-Sep | 2         | 110325391 | 110343415 | 3 | 0 | 0 | 0 | 0 | 18024 | 0.386960828 | 2.183944112 | 4.016814454 | 0.543700521 | NA | NA |
| chr2:112988280-112996105 | exonic         | ZC3H8                                                             | 2      | 112988280 | 112996105 | 3         | 0 | 0 | 0 | 0 | 0 | 7825  | 0.386960828 | 2.183944112 | 4.016814454 | 0.543700521 | NA | NA |
| chr2:136527339-136528305 | exonic         | UBXN4                                                             | 2      | 136527339 | 136528305 | 3         | 0 | 0 | 0 | 0 | 0 | 966   | 0.386960828 | 2.183944112 | 4.016814454 | 0.543700521 | NA | NA |
| chr2:197090495-197106928 | exonic         | HECW2                                                             | 2      | 197090495 | 197106928 | 3         | 0 | 0 | 0 | 0 | 0 | 16433 | 0.386960828 | 2.183944112 | 4.016814454 | 0.543700521 | NA | NA |
| chr2:201337555-201342659 | exonic         | SPATS2L                                                           | 2      | 201337555 | 201342659 | 3         | 0 | 0 | 0 | 0 | 0 | 5104  | 0.386960828 | 2.183944112 | 4.016814454 | 0.543700521 | NA | NA |
| chr2:203841991-203847164 | exonic         | CARF                                                              | 2      | 203841991 | 203847164 | 3         | 0 | 0 | 0 | 0 | 0 | 5173  | 0.386960828 | 2.183944112 | 4.016814454 | 0.543700521 | NA | NA |
| chr2:206628398-206631527 | exonic         | NRP2                                                              | 2      | 206628398 | 206631527 | 3         | 0 | 0 | 0 | 0 | 0 | 3129  | 0.386960828 | 2.183944112 | 4.016814454 | 0.543700521 | NA | NA |
| chr2:234164747-234178713 | exonic         | ATG16L1                                                           | 2      | 234164747 | 234178713 | 3         | 0 | 0 | 0 | 0 | 0 | 13966 | 0.386960828 | 2.183944112 | 4.016814454 | 0.543700521 | NA | NA |
| chr2:238635935-238659030 | exonic         | LRRFIP1                                                           | 2      | 238635935 | 238659030 | 3         | 0 | 0 | 0 | 0 | 0 | 23095 | 0.386960828 | 2.183944112 | 4.016814454 | 0.543700521 | NA | NA |
| chr2:33477743-33500990   | exonic         | LTBP1                                                             | 2      | 33477743  | 33500990  | 3         | 0 | 0 | 0 | 0 | 0 | 23247 | 0.386960828 | 2.183944112 | 4.016814454 | 0.543700521 | NA | NA |
| chr2:39406328-39456729   | exonic         | CDKL4                                                             | 2      | 39406328  | 39456729  | 3         | 0 | 0 | 0 | 0 | 0 | 50401 | 0.386960828 | 2.183944112 | 4.016814454 | 0.543700521 | NA | NA |
| chr2:69002352-69015088   | exonic         | ARHGAP25                                                          | 2      | 69002352  | 69015088  | 3         | 0 | 0 | 0 | 0 | 0 | 12736 | 0.386960828 | 2.183944112 | 4.016814454 | 0.543700521 | NA | NA |
| chr2:71590282-71607695   | exonic         | ZNF638                                                            | 2      | 71590282  | 71607695  | 3         | 0 | 0 | 0 | 0 | 0 | 17413 | 0.386960828 | 2.183944112 | 4.016814454 | 0.543700521 | NA | NA |
| chr2:96555547-96595015   | exonic         | ANKRD36C                                                          | 2      | 96555547  | 96595015  | 3         | 0 | 0 | 0 | 0 | 0 | 39468 | 0.386960828 | 2.183944112 | 4.016814454 | 0.543700521 | NA | NA |
| chr2:96876661-96884843   | ncRNA_intronic | STARD7-AS1                                                        | 2      | 96876661  | 96884843  | 3         | 0 | 0 | 0 | 0 | 0 | 8182  | 0.386960828 | 2.183944112 | 4.016814454 | 0.543700521 | NA | NA |
| chr20:10035247-10036124  | exonic         | ANKEF1                                                            | 20     | 10035247  | 10036124  | 3         | 0 | 0 | 0 | 0 | 0 | 877   | 0.386960828 | 2.183944112 | 4.016814454 | 0.543700521 | NA | NA |
| chr20:16316570-16362392  | exonic         | KIF16B                                                            | 20     | 16316570  | 16362392  | 3         | 0 | 0 | 0 | 0 | 0 | 45822 | 0.386960828 | 2.183944112 | 4.016814454 | 0.543700521 | NA | NA |
| chr20:402840-411581      | exonic         | RBCK1                                                             | 20     | 402840    | 411581    | 3         | 0 | 0 | 0 | 0 | 0 | 8741  | 0.386960828 | 2.183944112 | 4.016814454 | 0.543700521 | NA | NA |
| chr20:57242545-57248767  | exonic         | STX16                                                             | 20     | 57242545  | 57248767  | 3         | 0 | 0 | 0 | 0 | 0 | 6222  | 0.386960828 | 2.183944112 | 4.016814454 | 0.543700521 | NA | NA |
| chr20:61488747-61490878  | exonic         | TCFL5                                                             | 20     | 61488747  | 61490878  | 3         | 0 | 0 | 0 | 0 | 0 | 2131  | 0.386960828 | 2.183944112 | 4.016814454 | 0.543700521 | NA | NA |
| chr21:29816469-29818793  | intergenic     | <small>LOC101927973 (dist=215483), LINC00161 (dist=92817)</small> | 21     | 29816469  | 29818793  | 3         | 0 | 0 | 0 | 0 | 0 | 2324  | 0.386960828 | 2.183944112 | 4.016814454 | 0.543700521 | NA | NA |
| chr21:34614145-34635942  | exonic         | IFNAR2                                                            | 21     | 34614145  | 34635942  | 3         | 0 | 0 | 0 | 0 | 0 | 21797 | 0.386960828 | 2.183944112 | 4.016814454 | 0.543700521 | NA | NA |
| chr21:40590078-40597123  | exonic         | BRWD1                                                             | 21     | 40590078  | 40597123  | 3         | 0 | 0 | 0 | 0 | 0 | 7045  | 0.386960828 | 2.183944112 | 4.016814454 | 0.543700521 | NA | NA |
| chr21:45050202-45064273  | exonic         | HSF2BP                                                            | 21     | 45050202  | 45064273  | 3         | 0 | 0 | 0 | 0 | 0 | 14071 | 0.386960828 | 2.183944112 | 4.016814454 | 0.543700521 | NA | NA |
| chr21:48080874-48081682  | exonic         | PRMT2                                                             | 21     | 48080874  | 48081682  | 3         | 0 | 0 | 0 | 0 | 0 | 808   | 0.386960828 | 2.183944112 | 4.016814454 | 0.543700521 | NA | NA |
| chr22:26057542-26091181  | exonic         | ADRBK2                                                            | 22     | 26057542  | 26091181  | 3         | 0 | 0 | 0 | 0 | 0 | 33639 | 0.386960828 | 2.183944112 | 4.016814454 | 0.543700521 | NA | NA |
| chr22:30366964-30394846  | exonic         | MTMR3                                                             | 22     | 30366964  | 30394846  | 3         | 0 | 0 | 0 | 0 | 0 | 27882 | 0.386960828 | 2.183944112 | 4.016814454 | 0.543700521 | NA | NA |
| chr22:32698499-32701738  | intergenic     | <small>SLCSA4 (dist=47181), RPPL3 (dist=49134)</small>            | 22     | 32698499  | 32701738  | 3         | 0 | 0 | 0 | 0 | 0 | 3239  | 0.386960828 | 2.183944112 | 4.016814454 | 0.543700521 | NA | NA |
| chr22:42575614-42611347  | exonic         | TCF20                                                             | 22     | 42575614  | 42611347  | 3         | 0 | 0 | 0 | 0 | 0 | 35733 | 0.386960828 | 2.183944112 | 4.016814454 | 0.543700521 | NA | NA |
| chr22:44107355-44136215  | exonic         | EFCAB6                                                            | 22     | 44107355  | 44136215  | 3         | 0 | 0 | 0 | 0 | 0 | 28860 | 0.386960828 | 2.183944112 | 4.016814454 | 0.543700521 | NA | NA |
| chr22:46096161-46114373  | exonic         | ATXN10                                                            | 22     | 46096161  | 46114373  | 3         | 0 | 0 | 0 | 0 | 0 | 18212 | 0.386960828 | 2.183944112 | 4.016814454 | 0.543700521 | NA | NA |

|                          |              |                                            |   |           |           |   |   |   |   |   |   |        |             |             |             |             |    |    |
|--------------------------|--------------|--------------------------------------------|---|-----------|-----------|---|---|---|---|---|---|--------|-------------|-------------|-------------|-------------|----|----|
| chr3:122928045-122944144 | exonic       | SEC22A                                     | 3 | 122928045 | 122944144 | 3 | 0 | 0 | 0 | 0 | 0 | 16099  | 0.386960828 | 2.183944112 | 4.016814454 | 0.543700521 | NA | NA |
| chr3:125006946-125050082 | exonic       | ZNF148                                     | 3 | 125006946 | 125050082 | 2 | 0 | 0 | 2 | 0 | 0 | 43136  | 0.386960828 | 2.183944112 | 4.016814454 | 0.543700521 | NA | NA |
| chr3:129930733-129947065 | ncRNA_exonic | COL6A4P2                                   | 3 | 129930733 | 129947065 | 3 | 0 | 0 | 0 | 0 | 0 | 16332  | 0.386960828 | 2.183944112 | 4.016814454 | 0.543700521 | NA | NA |
| chr3:133926315-133930451 | exonic       | RYK                                        | 3 | 133926315 | 133930451 | 3 | 0 | 0 | 0 | 0 | 0 | 4136   | 0.386960828 | 2.183944112 | 4.016814454 | 0.543700521 | NA | NA |
| chr3:15000664-15003999   | intronic     | NR2C2                                      | 3 | 15000664  | 15003999  | 3 | 0 | 0 | 0 | 0 | 0 | 3335   | 0.386960828 | 2.183944112 | 4.016814454 | 0.543700521 | NA | NA |
| chr3:166952678-167000283 | exonic       | ZBBX                                       | 3 | 166952678 | 167000283 | 3 | 0 | 0 | 0 | 0 | 0 | 47605  | 0.386960828 | 2.183944112 | 4.016814454 | 0.543700521 | NA | NA |
| chr3:183454506-183460733 | exonic       | YEATS2                                     | 3 | 183454506 | 183460733 | 3 | 0 | 0 | 0 | 0 | 0 | 6227   | 0.386960828 | 2.183944112 | 4.016814454 | 0.543700521 | NA | NA |
| chr3:183573665-183577235 | intronic     | PARL                                       | 3 | 183573665 | 183577235 | 3 | 0 | 0 | 0 | 0 | 0 | 3570   | 0.386960828 | 2.183944112 | 4.016814454 | 0.543700521 | NA | NA |
| chr3:184556502-184587316 | exonic       | VPS8                                       | 3 | 184556502 | 184587316 | 3 | 0 | 0 | 0 | 0 | 0 | 30814  | 0.386960828 | 2.183944112 | 4.016814454 | 0.543700521 | NA | NA |
| chr3:185190763-185191549 | exonic       | MAP3K13                                    | 3 | 185190763 | 185191549 | 3 | 0 | 0 | 0 | 0 | 0 | 786    | 0.386960828 | 2.183944112 | 4.016814454 | 0.543700521 | NA | NA |
| chr3:24338717-24390105   | UTR5         | -----                                      | 3 | 24338717  | 24390105  | 3 | 0 | 0 | 0 | 0 | 0 | 51388  | 0.386960828 | 2.183944112 | 4.016814454 | 0.543700521 | NA | NA |
| chr3:27463112-27490288   | exonic       | SLC4A7                                     | 3 | 27463112  | 27490288  | 3 | 0 | 0 | 0 | 0 | 0 | 27176  | 0.386960828 | 2.183944112 | 4.016814454 | 0.543700521 | NA | NA |
| chr3:41607515-41877463   | exonic       | ULK4                                       | 3 | 41607515  | 41877463  | 3 | 0 | 0 | 0 | 0 | 0 | 269948 | 0.386960828 | 2.183944112 | 4.016814454 | 0.543700521 | NA | NA |
| chr3:52524247-52524695   | exonic       | NISCH                                      | 3 | 52524247  | 52524695  | 3 | 0 | 0 | 0 | 0 | 0 | 448    | 0.386960828 | 2.183944112 | 4.016814454 | 0.543700521 | NA | NA |
| chr3:52582678-52583689   | intronic     | PBRM1                                      | 3 | 52582678  | 52583689  | 3 | 0 | 0 | 0 | 0 | 0 | 1011   | 0.386960828 | 2.183944112 | 4.016814454 | 0.543700521 | NA | NA |
| chr3:56600977-56647778   | exonic       | CCDC66                                     | 3 | 56600977  | 56647778  | 3 | 2 | 0 | 0 | 0 | 0 | 46801  | 0.386960828 | 2.183944112 | 4.016814454 | 0.543700521 | NA | NA |
| chr3:72757995-72765768   | intergenic   | RYBP (dist=262221), SHQ1 (dist=32660)      | 3 | 72757995  | 72765768  | 3 | 0 | 0 | 0 | 0 | 0 | 7773   | 0.386960828 | 2.183944112 | 4.016814454 | 0.543700521 | NA | NA |
| chr4:119944585-119953182 | exonic       | SYNPO2                                     | 4 | 119944585 | 119953182 | 3 | 0 | 0 | 0 | 0 | 0 | 8597   | 0.386960828 | 2.183944112 | 4.016814454 | 0.543700521 | NA | NA |
| chr4:129857809-129869725 | exonic       | SCLT1                                      | 4 | 129857809 | 129869725 | 3 | 0 | 0 | 0 | 0 | 0 | 11916  | 0.386960828 | 2.183944112 | 4.016814454 | 0.543700521 | NA | NA |
| chr4:146086873-146087142 | intronic     | OTUD4                                      | 4 | 146086873 | 146087142 | 3 | 0 | 0 | 0 | 0 | 0 | 269    | 0.386960828 | 2.183944112 | 4.016814454 | 0.543700521 | NA | NA |
| chr4:185580493-185593614 | exonic       | PRIMPOL                                    | 4 | 185580493 | 185593614 | 3 | 0 | 0 | 0 | 0 | 0 | 13121  | 0.386960828 | 2.183944112 | 4.016814454 | 0.543700521 | NA | NA |
| chr4:2643939-2644554     | intronic     | FAM193A                                    | 4 | 2643939   | 2644554   | 3 | 0 | 0 | 0 | 0 | 0 | 615    | 0.386960828 | 2.183944112 | 4.016814454 | 0.543700521 | NA | NA |
| chr4:36340734-36345488   | exonic       | DTHD1                                      | 4 | 36340734  | 36345488  | 3 | 0 | 0 | 0 | 0 | 0 | 4754   | 0.386960828 | 2.183944112 | 4.016814454 | 0.543700521 | NA | NA |
| chr4:38091552-38119813   | exonic       | TBC1D1                                     | 4 | 38091552  | 38119813  | 3 | 0 | 0 | 0 | 0 | 0 | 28261  | 0.386960828 | 2.183944112 | 4.016814454 | 0.543700521 | NA | NA |
| chr4:6969030-7002978     | exonic       | TBC1D14                                    | 4 | 6969030   | 7002978   | 1 | 2 | 0 | 0 | 0 | 0 | 33948  | 0.386960828 | 2.183944112 | 4.016814454 | 0.543700521 | NA | NA |
| chr4:72306332-72319386   | exonic       | SLC4A4                                     | 4 | 72306332  | 72319386  | 3 | 0 | 0 | 0 | 0 | 0 | 13054  | 0.386960828 | 2.183944112 | 4.016814454 | 0.543700521 | NA | NA |
| chr4:76373677-76381065   | intergenic   | LOC441025 (dist=85901), RCHY1 (dist=23182) | 4 | 76373677  | 76381065  | 3 | 0 | 0 | 0 | 0 | 0 | 7388   | 0.386960828 | 2.183944112 | 4.016814454 | 0.543700521 | NA | NA |
| chr4:88005272-88016121   | exonic       | AFF1                                       | 4 | 88005272  | 88016121  | 3 | 0 | 0 | 0 | 0 | 0 | 10849  | 0.386960828 | 2.183944112 | 4.016814454 | 0.543700521 | NA | NA |
| chr4:88116476-88139339   | exonic       | KLHL8                                      | 4 | 88116476  | 88139339  | 3 | 0 | 0 | 0 | 0 | 0 | 22863  | 0.386960828 | 2.183944112 | 4.016814454 | 0.543700521 | NA | NA |
| chr4:89941610-89950800   | exonic       | FAM13A                                     | 4 | 89941610  | 89950800  | 3 | 0 | 0 | 0 | 0 | 0 | 9190   | 0.386960828 | 2.183944112 | 4.016814454 | 0.543700521 | NA | NA |
| chr5:14405956-14420130   | exonic       | TRIO                                       | 5 | 14405956  | 14420130  | 3 | 0 | 0 | 0 | 0 | 0 | 14174  | 0.386960828 | 2.183944112 | 4.016814454 | 0.543700521 | NA | NA |
| chr5:154169884-154183305 | exonic       | LARP1                                      | 5 | 154169884 | 154183305 | 3 | 0 | 0 | 0 | 0 | 0 | 13421  | 0.386960828 | 2.183944112 | 4.016814454 | 0.543700521 | NA | NA |
| chr5:159681356-159682555 | splicing     | CCNJL                                      | 5 | 159681356 | 159682555 | 3 | 0 | 0 | 0 | 0 | 0 | 1199   | 0.386960828 | 2.183944112 | 4.016814454 | 0.543700521 | NA | NA |
| chr5:170319391-170351554 | exonic       | RANBP17                                    | 5 | 170319391 | 170351554 | 3 | 0 | 0 | 0 | 0 | 0 | 32163  | 0.386960828 | 2.183944112 | 4.016814454 | 0.543700521 | NA | NA |
| chr5:179132679-179151784 | exonic       | CANX                                       | 5 | 179132679 | 179151784 | 3 | 0 | 0 | 0 | 0 | 0 | 19105  | 0.386960828 | 2.183944112 | 4.016814454 | 0.543700521 | NA | NA |

|                          |              |                                                          |   |           |           |   |   |   |   |   |   |       |             |             |             |             |    |    |
|--------------------------|--------------|----------------------------------------------------------|---|-----------|-----------|---|---|---|---|---|---|-------|-------------|-------------|-------------|-------------|----|----|
| chr5:34918468-34923339   | exonic       | BRIX1                                                    | 5 | 34918468  | 34923339  | 3 | 0 | 0 | 0 | 0 | 0 | 4871  | 0.386960828 | 2.183944112 | 4.016814454 | 0.543700521 | NA | NA |
| chr5:353844-376831       | exonic       | AHRR                                                     | 5 | 353844    | 376831    | 3 | 0 | 0 | 0 | 0 | 0 | 22987 | 0.386960828 | 2.183944112 | 4.016814454 | 0.543700521 | NA | NA |
| chr5:37243114-37247847   | exonic       | C5orf42                                                  | 5 | 37243114  | 37247847  | 3 | 0 | 0 | 0 | 0 | 0 | 4733  | 0.386960828 | 2.183944112 | 4.016814454 | 0.543700521 | NA | NA |
| chr5:61846193-61887499   | exonic       | IPO11, LRRC70                                            | 5 | 61846193  | 61887499  | 3 | 0 | 0 | 0 | 0 | 0 | 41306 | 0.386960828 | 2.183944112 | 4.016814454 | 0.543700521 | NA | NA |
| chr5:68492879-68504186   | exonic       | CENPH                                                    | 5 | 68492879  | 68504186  | 3 | 0 | 0 | 0 | 0 | 0 | 11307 | 0.386960828 | 2.183944112 | 4.016814454 | 0.543700521 | NA | NA |
| chr6:109884799-109940439 | exonic       | AK9                                                      | 6 | 109884799 | 109940439 | 3 | 0 | 0 | 0 | 0 | 0 | 55640 | 0.386960828 | 2.183944112 | 4.016814454 | 0.543700521 | NA | NA |
| chr6:131466424-131520713 | exonic       | AKAP7                                                    | 6 | 131466424 | 131520713 | 3 | 0 | 0 | 0 | 0 | 0 | 54289 | 0.386960828 | 2.183944112 | 4.016814454 | 0.543700521 | NA | NA |
| chr6:136990420-137019820 | exonic       | MAP3K5                                                   | 6 | 136990420 | 137019820 | 3 | 0 | 0 | 0 | 0 | 0 | 29400 | 0.386960828 | 2.183944112 | 4.016814454 | 0.543700521 | NA | NA |
| chr6:144808683-144860579 | exonic       | UTRN                                                     | 6 | 144808683 | 144860579 | 3 | 0 | 0 | 0 | 0 | 0 | 51896 | 0.386960828 | 2.183944112 | 4.016814454 | 0.543700521 | NA | NA |
| chr6:155129203-155152274 | exonic       | SCAF8                                                    | 6 | 155129203 | 155152274 | 3 | 0 | 0 | 0 | 0 | 0 | 23071 | 0.386960828 | 2.183944112 | 4.016814454 | 0.543700521 | NA | NA |
| chr6:169982931-170052104 | exonic       | WDR27                                                    | 6 | 169982931 | 170052104 | 3 | 0 | 0 | 0 | 0 | 0 | 69173 | 0.386960828 | 2.183944112 | 4.016814454 | 0.543700521 | NA | NA |
| chr6:18215238-18218116   | exonic       | KDM1B                                                    | 6 | 18215238  | 18218116  | 3 | 0 | 0 | 0 | 0 | 0 | 2878  | 0.386960828 | 2.183944112 | 4.016814454 | 0.543700521 | NA | NA |
| chr6:22020567-22111149   | ncRNA_exonic | CASC15                                                   | 6 | 22020567  | 22111149  | 3 | 0 | 0 | 0 | 0 | 0 | 90582 | 0.386960828 | 2.183944112 | 4.016814454 | 0.543700521 | NA | NA |
| chr6:35604791-35614627   | exonic       | FKBP5                                                    | 6 | 35604791  | 35614627  | 3 | 0 | 0 | 0 | 0 | 0 | 9836  | 0.386960828 | 2.183944112 | 4.016814454 | 0.543700521 | NA | NA |
| chr6:43193385-43194133   | exonic       | DNPH1                                                    | 6 | 43193385  | 43194133  | 3 | 0 | 0 | 0 | 0 | 0 | 748   | 0.386960828 | 2.183944112 | 4.016814454 | 0.543700521 | NA | NA |
| chr6:46554813-46610035   | exonic       | CYP39A1                                                  | 6 | 46554813  | 46610035  | 3 | 0 | 0 | 0 | 0 | 0 | 55222 | 0.386960828 | 2.183944112 | 4.016814454 | 0.543700521 | NA | NA |
| chr6:52657654-52712830   | exonic       | GSTA1, GSTA5                                             | 6 | 52657654  | 52712830  | 3 | 0 | 0 | 0 | 0 | 0 | 55176 | 0.386960828 | 2.183944112 | 4.016814454 | 0.543700521 | NA | NA |
| chr6:53709910-53713650   | intronic     | LRRC1                                                    | 6 | 53709910  | 53713650  | 3 | 0 | 0 | 0 | 0 | 0 | 3740  | 0.386960828 | 2.183944112 | 4.016814454 | 0.543700521 | NA | NA |
| chr6:7120591-7120970     | intronic     | RREB1                                                    | 6 | 7120591   | 7120970   | 3 | 0 | 0 | 0 | 0 | 0 | 379   | 0.386960828 | 2.183944112 | 4.016814454 | 0.543700521 | NA | NA |
| chr6:90387288-90398527   | exonic       | MDN1                                                     | 6 | 90387288  | 90398527  | 3 | 0 | 0 | 0 | 0 | 0 | 11239 | 0.386960828 | 2.183944112 | 4.016814454 | 0.543700521 | NA | NA |
| chr7:100146444-100153358 | exonic       | AGFG2                                                    | 7 | 100146444 | 100153358 | 3 | 0 | 0 | 0 | 0 | 0 | 6914  | 0.386960828 | 2.183944112 | 4.016814454 | 0.543700521 | NA | NA |
| chr7:105278799-105283568 | exonic       | ATXN7L1                                                  | 7 | 105278799 | 105283568 | 3 | 0 | 0 | 0 | 0 | 0 | 4769  | 0.386960828 | 2.183944112 | 4.016814454 | 0.543700521 | NA | NA |
| chr7:139796354-139801960 | exonic       | KDM7A                                                    | 7 | 139796354 | 139801960 | 3 | 0 | 0 | 0 | 0 | 0 | 5606  | 0.386960828 | 2.183944112 | 4.016814454 | 0.543700521 | NA | NA |
| chr7:142149344-142168673 | intergenic   | <small>TRY2P(dist=177276), MTRNR2L6(dist=205458)</small> | 7 | 142149344 | 142168673 | 3 | 0 | 0 | 0 | 0 | 0 | 19329 | 0.386960828 | 2.183944112 | 4.016814454 | 0.543700521 | NA | NA |
| chr7:30818048-30821828   | exonic       | FAM188B                                                  | 7 | 30818048  | 30821828  | 3 | 0 | 0 | 0 | 0 | 0 | 3780  | 0.386960828 | 2.183944112 | 4.016814454 | 0.543700521 | NA | NA |
| chr7:32588459-32594208   | exonic       | AVL9                                                     | 7 | 32588459  | 32594208  | 3 | 0 | 0 | 0 | 0 | 0 | 5749  | 0.386960828 | 2.183944112 | 4.016814454 | 0.543700521 | NA | NA |
| chr7:32609631-32615684   | exonic       | AVL9                                                     | 7 | 32609631  | 32615684  | 3 | 0 | 0 | 0 | 0 | 0 | 6053  | 0.386960828 | 2.183944112 | 4.016814454 | 0.543700521 | NA | NA |
| chr7:33376053-33397607   | exonic       | BBS9                                                     | 7 | 33376053  | 33397607  | 3 | 0 | 0 | 0 | 0 | 0 | 21554 | 0.386960828 | 2.183944112 | 4.016814454 | 0.543700521 | NA | NA |
| chr7:38284784-38289173   | intergenic   | <small>STAR3NL(dist=14512), TARP(dist=10071)</small>     | 7 | 38284784  | 38289173  | 3 | 0 | 0 | 0 | 0 | 0 | 4389  | 0.386960828 | 2.183944112 | 4.016814454 | 0.543700521 | NA | NA |
| chr7:45044503-45046037   | intronic     | CCM2                                                     | 7 | 45044503  | 45046037  | 3 | 0 | 0 | 0 | 0 | 0 | 1534  | 0.386960828 | 2.183944112 | 4.016814454 | 0.543700521 | NA | NA |
| chr7:5413686-5434226     | exonic       | TNRC18                                                   | 7 | 5413686   | 5434226   | 3 | 0 | 0 | 0 | 0 | 0 | 20540 | 0.386960828 | 2.183944112 | 4.016814454 | 0.543700521 | NA | NA |
| chr8:100108539-100205285 | exonic       | VPS13B                                                   | 8 | 100108539 | 100205285 | 3 | 0 | 0 | 0 | 0 | 0 | 96746 | 0.386960828 | 2.183944112 | 4.016814454 | 0.543700521 | NA | NA |
| chr8:145218674-145230467 | exonic       | MROH1                                                    | 8 | 145218674 | 145230467 | 3 | 0 | 0 | 0 | 0 | 0 | 11793 | 0.386960828 | 2.183944112 | 4.016814454 | 0.543700521 | NA | NA |
| chr8:38803642-38814904   | exonic       | PLEKHA2                                                  | 8 | 38803642  | 38814904  | 3 | 0 | 0 | 0 | 0 | 0 | 11262 | 0.386960828 | 2.183944112 | 4.016814454 | 0.543700521 | NA | NA |
| chr8:99101304-99105610   | exonic       | ERICH5                                                   | 8 | 99101304  | 99105610  | 3 | 0 | 0 | 0 | 0 | 0 | 4306  | 0.386960828 | 2.183944112 | 4.016814454 | 0.543700521 | NA | NA |

|                           |                |                                                         |    |           |           |    |    |    |   |    |   |        |             |             |             |             |             |             |
|---------------------------|----------------|---------------------------------------------------------|----|-----------|-----------|----|----|----|---|----|---|--------|-------------|-------------|-------------|-------------|-------------|-------------|
| chr9:107610819-107612512  | intronic       | ABCA1                                                   | 9  | 107610819 | 107612512 | 3  | 0  | 0  | 0 | 0  | 0 | 1693   | 0.386960828 | 2.183944112 | 4.016814454 | 0.543700521 | NA          | NA          |
| chr9:117086298-117092856  | exonic         | ORM1,ORM2                                               | 9  | 117086298 | 117092856 | 3  | 0  | 0  | 0 | 0  | 0 | 6558   | 0.386960828 | 2.183944112 | 4.016814454 | 0.543700521 | NA          | NA          |
| chr9:130073915-130087374  | exonic         | GARNL3                                                  | 9  | 130073915 | 130087374 | 3  | 0  | 0  | 0 | 0  | 0 | 13459  | 0.386960828 | 2.183944112 | 4.016814454 | 0.543700521 | NA          | NA          |
| chr9:130230018-130236210  | exonic         | LRSAM1                                                  | 9  | 130230018 | 130236210 | 3  | 0  | 0  | 0 | 0  | 0 | 6192   | 0.386960828 | 2.183944112 | 4.016814454 | 0.543700521 | NA          | NA          |
| chr9:132090572-132092338  | intergenic     | <small>Chorf106(dist=5690),LINC01503(dist=6864)</small> | 9  | 132090572 | 132092338 | 3  | 0  | 0  | 0 | 0  | 0 | 1766   | 0.386960828 | 2.183944112 | 4.016814454 | 0.543700521 | NA          | NA          |
| chr9:132837914-132854660  | exonic         | GPR107                                                  | 9  | 132837914 | 132854660 | 3  | 0  | 0  | 0 | 0  | 0 | 16746  | 0.386960828 | 2.183944112 | 4.016814454 | 0.543700521 | NA          | NA          |
| chr9:17309055-17416187    | exonic         | CNTLN                                                   | 9  | 17309055  | 17416187  | 3  | 0  | 0  | 0 | 0  | 0 | 107132 | 0.386960828 | 2.183944112 | 4.016814454 | 0.543700521 | NA          | NA          |
| chr9:78682870-78711018    | exonic         | PCSK5                                                   | 9  | 78682870  | 78711018  | 3  | 0  | 0  | 0 | 0  | 0 | 28148  | 0.386960828 | 2.183944112 | 4.016814454 | 0.543700521 | NA          | NA          |
| chr9:88257741-88327481    | exonic         | AGTPBP1                                                 | 9  | 88257741  | 88327481  | 3  | 0  | 0  | 0 | 0  | 0 | 69740  | 0.386960828 | 2.183944112 | 4.016814454 | 0.543700521 | NA          | NA          |
| chr9:95008957-95010838    | exonic         | IARS                                                    | 9  | 95008957  | 95010838  | 3  | 0  | 0  | 0 | 0  | 0 | 1881   | 0.386960828 | 2.183944112 | 4.016814454 | 0.543700521 | NA          | NA          |
| chr9:96233422-96259881    | exonic         | FAM120A                                                 | 9  | 96233422  | 96259881  | 15 | 11 | 11 | 9 | 13 | 2 | 26459  | 0.386960828 | 2.183944112 | 4.016814454 | 0.543700521 | NA          | NA          |
| chrX:102693190-102693820  | intergenic     | <small>NGFRAP1(dist=60098),RAB40A(dist=60861)</small>   | X  | 102693190 | 102693820 | 3  | 0  | 0  | 0 | 0  | 0 | 630    | 0.386960828 | 2.183944112 | 4.016814454 | 0.543700521 | NA          | NA          |
| chrX:110366305-110395675  | exonic         | PAK3                                                    | X  | 110366305 | 110395675 | 3  | 0  | 0  | 0 | 0  | 0 | 29370  | 0.386960828 | 2.183944112 | 4.016814454 | 0.543700521 | NA          | NA          |
| chrX:118544153-118553307  | exonic         | SLC25A43                                                | X  | 118544153 | 118553307 | 3  | 0  | 0  | 0 | 0  | 0 | 9154   | 0.386960828 | 2.183944112 | 4.016814454 | 0.543700521 | NA          | NA          |
| chrX:131412036-131417060  | ncRNA_intronic | RAP2C-AS1                                               | X  | 131412036 | 131417060 | 3  | 0  | 0  | 0 | 0  | 0 | 5024   | 0.386960828 | 2.183944112 | 4.016814454 | 0.543700521 | NA          | NA          |
| chrX:149983334-149984551  | exonic         | CD99L2                                                  | X  | 149983334 | 149984551 | 3  | 0  | 0  | 0 | 0  | 0 | 1217   | 0.386960828 | 2.183944112 | 4.016814454 | 0.543700521 | NA          | NA          |
| chrX:149983335-149984928  | exonic         | CD99L2                                                  | X  | 149983335 | 149984928 | 3  | 0  | 0  | 0 | 0  | 0 | 1593   | 0.386960828 | 2.183944112 | 4.016814454 | 0.543700521 | NA          | NA          |
| chrX:153225252-153225865  | exonic         | HCFC1                                                   | X  | 153225252 | 153225865 | 3  | 0  | 0  | 0 | 0  | 0 | 613    | 0.386960828 | 2.183944112 | 4.016814454 | 0.543700521 | NA          | NA          |
| chrX:31272602-31273065    | intronic       | DMD                                                     | X  | 31272602  | 31273065  | 3  | 0  | 0  | 0 | 0  | 0 | 463    | 0.386960828 | 2.183944112 | 4.016814454 | 0.543700521 | NA          | NA          |
| chrX:73045950-73061308    | ncRNA_exonic   | TSIX,XIST                                               | X  | 73045950  | 73061308  | 3  | 0  | 0  | 0 | 0  | 0 | 15358  | 0.386960828 | 2.183944112 | 4.016814454 | 0.543700521 | NA          | NA          |
| chrX:73050900-73057338    | ncRNA_exonic   | XIST                                                    | X  | 73050900  | 73057338  | 3  | 0  | 0  | 0 | 0  | 0 | 6438   | 0.386960828 | 2.183944112 | 4.016814454 | 0.543700521 | NA          | NA          |
| chrX:73959204-73965532    | exonic         | KIAA2022                                                | X  | 73959204  | 73965532  | 3  | 0  | 0  | 0 | 0  | 0 | 6328   | 0.386960828 | 2.183944112 | 4.016814454 | 0.543700521 | NA          | NA          |
| chrX:85211157-85219057    | exonic         | CHM                                                     | X  | 85211157  | 85219057  | 3  | 0  | 0  | 0 | 0  | 0 | 7900   | 0.386960828 | 2.183944112 | 4.016814454 | 0.543700521 | NA          | NA          |
| chr4:54280781-54310270    | exonic         | FIP1L1                                                  | 4  | 54280781  | 54310270  | 3  | 1  | 1  | 1 | 0  | 0 | 29489  | 0.864817038 | 2.184969142 | 2.741099772 | 0.797114051 | 0.425384797 | 0.998252924 |
| chr2:97866070-97873743    | exonic         | ANKRD36                                                 | 2  | 97866070  | 97873743  | 6  | 0  | 10 | 5 | 0  | 0 | 7673   | 3.278168838 | 2.202671312 | 1.877465971 | 1.173215039 | 0.240709583 | 0.998252924 |
| chr1:31465236-31479949    | exonic         | PUM1                                                    | 1  | 31465236  | 31479949  | 2  | 4  | 2  | 0 | 2  | 0 | 14713  | 1.591669977 | 2.204487126 | 2.176892695 | 1.012676064 | 0.311214915 | 0.998252924 |
| chr19:10906047-10916643   | exonic         | DNM2                                                    | 19 | 10906047  | 10916643  | 0  | 0  | 4  | 1 | 0  | 0 | 10596  | 0.895387487 | 2.206438861 | 3.204157522 | 0.688617474 | NA          | NA          |
| chr20:47558400-47570327   | exonic         | ARFGEF2                                                 | 20 | 47558400  | 47570327  | 0  | 0  | 4  | 1 | 0  | 0 | 11927  | 0.895387487 | 2.206438861 | 3.204157522 | 0.688617474 | NA          | NA          |
| chr8:116599227-116635985  | exonic         | TRPS1                                                   | 8  | 116599227 | 116635985 | 0  | 5  | 2  | 2 | 0  | 0 | 36758  | 1.478539817 | 2.21282956  | 2.44398104  | 0.905420101 | 0.365242871 | 0.998252924 |
| chr14:103296670-103369766 | exonic         | TRAF3                                                   | 14 | 103296670 | 103369766 | 2  | 2  | 1  | 0 | 1  | 0 | 73096  | 0.924821931 | 2.215441711 | 2.665886216 | 0.831033859 | 0.405954502 | 0.998252924 |
| chr20:60572605-60589763   | exonic         | TAF4                                                    | 20 | 60572605  | 60589763  | 2  | 2  | 1  | 0 | 1  | 0 | 17158  | 0.924821931 | 2.215441711 | 2.665886216 | 0.831033859 | 0.405954502 | 0.998252924 |
| chr2:172193962-172196064  | exonic         | METTL8                                                  | 2  | 172193962 | 172196064 | 3  | 0  | 2  | 1 | 0  | 0 | 2102   | 0.887810265 | 2.220725509 | 2.914781898 | 0.761883937 | 0.446129278 | 0.998252924 |
| chr2:20490412-20527139    | exonic         | PUM2                                                    | 2  | 20490412  | 20527139  | 3  | 0  | 2  | 1 | 0  | 0 | 36727  | 0.887810265 | 2.220725509 | 2.914781898 | 0.761883937 | 0.446129278 | 0.998252924 |
| chr18:8718421-8720494     | exonic         | MTCL1                                                   | 18 | 8718421   | 8720494   | 16 | 5  | 0  | 2 | 3  | 0 | 2073   | 3.510875116 | 2.222917158 | 1.682404344 | 1.321274024 | 0.186410012 | 0.998252924 |
| chr20:35433137-35434360   | exonic         | SOGA1                                                   | 20 | 35433137  | 35434360  | 2  | 3  | 0  | 1 | 0  | 0 | 1223   | 0.887112668 | 2.223132719 | 2.915652696 | 0.762482007 | 0.445772378 | 0.998252924 |



|                           |          |                     |    |           |           |    |    |    |    |   |   |       |             |             |             |             |             |             |
|---------------------------|----------|---------------------|----|-----------|-----------|----|----|----|----|---|---|-------|-------------|-------------|-------------|-------------|-------------|-------------|
| chr9:108467877-108484902  | exonic   | TMEM38B             | 9  | 108467877 | 108484902 | 2  | 3  | 0  | 1  | 0 | 0 | 17025 | 0.887112668 | 2.223132719 | 2.915652696 | 0.762482007 | 0.445772378 | 0.998252924 |
| chr9:27009017-27029102    | exonic   | IFT74               | 9  | 27009017  | 27029102  | 2  | 3  | 0  | 1  | 0 | 0 | 20085 | 0.887112668 | 2.223132719 | 2.915652696 | 0.762482007 | 0.445772378 | 0.998252924 |
| chr4:87685745-87689129    | exonic   | PTPN13              | 4  | 87685745  | 87689129  | 13 | 30 | 12 | 10 | 6 | 0 | 3384  | 11.06161092 | 2.226250228 | 1.02167079  | 2.179028949 | 0.029329518 | 0.998252924 |
| chr13:113392595-113394585 | intronic | ATP11A              | 13 | 113392595 | 113394585 | 0  | 0  | 7  | 0  | 2 | 0 | 1990  | 1.622938022 | 2.226357117 | 2.618734414 | 0.850165295 | NA          | NA          |
| chr9:36352738-36353328    | exonic   | RNF38               | 9  | 36352738  | 36353328  | 0  | 0  | 7  | 0  | 2 | 0 | 590   | 1.622938022 | 2.226357117 | 2.618734414 | 0.850165295 | NA          | NA          |
| chr19:8616623-8618321     | exonic   | MYO1F               | 19 | 8616623   | 8618321   | 0  | 4  | 3  | 2  | 0 | 0 | 1698  | 1.501533043 | 2.234890339 | 2.421330612 | 0.923000902 | NA          | NA          |
| chr1:40654726-40668286    | exonic   | RLF                 | 1  | 40654726  | 40668286  | 4  | 7  | 1  | 0  | 3 | 0 | 13560 | 2.296229656 | 2.247689179 | 1.947576648 | 1.154095363 | 0.248461074 | 0.998252924 |
| chr6:36181656-36185787    | exonic   | BRPF3               | 6  | 36181656  | 36185787  | 3  | 1  | 4  | 1  | 1 | 0 | 4131  | 1.577651536 | 2.248056631 | 2.087190116 | 1.077073245 | 0.281447545 | 0.998252924 |
| chr12:32751430-32778713   | exonic   | FGD4                | 12 | 32751430  | 32778713  | 2  | 1  | 2  | 0  | 0 | 1 | 27283 | 1.135006344 | 2.2503879   | 2.549090691 | 0.882819865 | NA          | NA          |
| chr6:150147399-150174296  | exonic   | LRP11               | 6  | 150147399 | 150174296 | 1  | 4  | 0  | 0  | 0 | 1 | 26897 | 1.134308748 | 2.251291248 | 2.763852634 | 0.814548222 | NA          | NA          |
| chr2:162036124-162061304  | exonic   | TANK                | 2  | 162036124 | 162061304 | 0  | 4  | 9  | 0  | 2 | 1 | 25180 | 3.022797878 | 2.278660164 | 1.858778222 | 1.225891361 | 0.22023956  | 0.998252924 |
| chr20:34241450-34246936   | exonic   | CPNE1, RBM12        | 20 | 34241450  | 34246936  | 0  | 9  | 4  | 4  | 0 | 0 | 5486  | 2.782803834 | 2.289196199 | 1.994874571 | 1.147538914 | 0.25115896  | 0.998252924 |
| chr2:230701563-230744844  | exonic   | TRIP12              | 2  | 230701563 | 230744844 | 2  | 1  | 2  | 1  | 0 | 0 | 43281 | 0.933099121 | 2.292389453 | 2.662912579 | 0.860857946 | 0.389316286 | 0.998252924 |
| chr6:86227473-86239993    | exonic   | SNX14               | 6  | 86227473  | 86239993  | 6  | 2  | 1  | 2  | 0 | 0 | 12520 | 1.532365051 | 2.295401297 | 2.222730857 | 1.032694215 | 0.301747022 | 0.998252924 |
| chr1:16093870-16095125    | exonic   | FBLIM1              | 1  | 16093870  | 16095125  | 1  | 4  | 0  | 1  | 0 | 0 | 1255  | 0.932401524 | 2.29635173  | 2.898778369 | 0.792179131 | 0.428256235 | 0.998252924 |
| chr16:58608512-58617086   | exonic   | CNOT1               | 16 | 58608512  | 58617086  | 5  | 0  | 1  | 0  | 1 | 0 | 8574  | 0.963231161 | 2.300466611 | 2.855802019 | 0.805541349 | 0.420507355 | 0.998252924 |
| chr18:59739905-59763183   | exonic   | PIGN                | 18 | 59739905  | 59763183  | 0  | 6  | 5  | 0  | 3 | 0 | 23278 | 2.395082187 | 2.310033352 | 2.086260343 | 1.107260348 | NA          | NA          |
| chr17:65924470-65928135   | exonic   | BPTF                | 17 | 65924470  | 65928135  | 5  | 1  | 0  | 1  | 0 | 0 | 3665  | 0.925521898 | 2.312265195 | 2.894127129 | 0.798950804 | 0.424318939 | 0.998252924 |
| chr18:9588086-9595100     | exonic   | PPP4R1              | 18 | 9588086   | 9595100   | 5  | 1  | 0  | 1  | 3 | 0 | 7014  | 0.925521898 | 2.312265195 | 2.894127129 | 0.798950804 | 0.424318939 | 0.998252924 |
| chr9:115336336-115337531  | exonic   | KIAA1958            | 9  | 115336336 | 115337531 | 3  | 7  | 2  | 1  | 2 | 0 | 1195  | 2.349795702 | 2.316584015 | 1.799493414 | 1.287353428 | 0.197971129 | 0.998252924 |
| chr12:120995084-120998689 | exonic   | RNF10               | 12 | 120995084 | 120998689 | 1  | 2  | 2  | 0  | 1 | 0 | 3605  | 0.993104014 | 2.318596417 | 2.613678611 | 0.887100811 | 0.375024627 | 0.998252924 |
| chr3:37315026-37323763    | exonic   | GOLGA4              | 3  | 37315026  | 37323763  | 1  | 2  | 2  | 0  | 1 | 0 | 8737  | 0.993104014 | 2.318596417 | 2.613678611 | 0.887100811 | 0.375024627 | 0.998252924 |
| chr5:43295853-43297268    | exonic   | HMGCS1              | 5  | 43295853  | 43297268  | 1  | 2  | 2  | 0  | 1 | 0 | 1415  | 0.993104014 | 2.318596417 | 2.613678611 | 0.887100811 | 0.375024627 | 0.998252924 |
| chr1:10500403-10502498    | exonic   | APITD1, APITD1-CORT | 1  | 10500403  | 10502498  | 0  | 5  | 0  | 0  | 1 | 0 | 2095  | 0.992406417 | 2.319622738 | 3.087523461 | 0.751289105 | NA          | NA          |
| chr15:50592985-50601995   | exonic   | GABPB1              | 15 | 50592985  | 50601995  | 0  | 5  | 0  | 0  | 1 | 0 | 9010  | 0.992406417 | 2.319622738 | 3.087523461 | 0.751289105 | NA          | NA          |
| chr2:112758777-112761561  | exonic   | MERTK               | 2  | 112758777 | 112761561 | 0  | 5  | 0  | 0  | 1 | 0 | 2784  | 0.992406417 | 2.319622738 | 3.087523461 | 0.751289105 | NA          | NA          |
| chr4:186241886-186267804  | exonic   | SNX25               | 4  | 186241886 | 186267804 | 0  | 5  | 0  | 0  | 1 | 0 | 25918 | 0.992406417 | 2.319622738 | 3.087523461 | 0.751289105 | NA          | NA          |
| chr1:15953163-15970145    | exonic   | DDI2                | 1  | 15953163  | 15970145  | 2  | 1  | 0  | 0  | 0 | 0 | 16982 | 0.432249685 | 2.324347661 | 4.006762691 | 0.580106146 | 0.56184304  | 0.998252924 |
| chr1:179086466-179087899  | exonic   | ABL2                | 1  | 179086466 | 179087899 | 2  | 1  | 0  | 0  | 0 | 0 | 1433  | 0.432249685 | 2.324347661 | 4.006762691 | 0.580106146 | 0.56184304  | 0.998252924 |
| chr1:184853766-184868442  | exonic   | FAM129A             | 1  | 184853766 | 184868442 | 2  | 1  | 0  | 0  | 0 | 0 | 14676 | 0.432249685 | 2.324347661 | 4.006762691 | 0.580106146 | 0.56184304  | 0.998252924 |
| chr1:227300012-227316932  | exonic   | CDC42BPA            | 1  | 227300012 | 227316932 | 2  | 1  | 0  | 0  | 0 | 0 | 16920 | 0.432249685 | 2.324347661 | 4.006762691 | 0.580106146 | 0.56184304  | 0.998252924 |
| chr10:1130342-1142186     | exonic   | WDR37               | 10 | 1130342   | 1142186   | 2  | 1  | 0  | 0  | 0 | 0 | 11844 | 0.432249685 | 2.324347661 | 4.006762691 | 0.580106146 | 0.56184304  | 0.998252924 |
| chr10:35305119-35320547   | exonic   | CUL2                | 10 | 35305119  | 35320547  | 0  | 1  | 0  | 0  | 3 | 3 | 15428 | 0.432249685 | 2.324347661 | 4.006762691 | 0.580106146 | 0.56184304  | 0.998252924 |
| chr10:35321362-35338693   | exonic   | CUL2                | 10 | 35321362  | 35338693  | 2  | 1  | 0  | 0  | 0 | 0 | 17331 | 0.432249685 | 2.324347661 | 4.006762691 | 0.580106146 | 0.56184304  | 0.998252924 |
| chr11:562776-563165       | exonic   | RASSF7              | 11 | 562776    | 563165    | 2  | 1  | 0  | 0  | 0 | 0 | 389   | 0.432249685 | 2.324347661 | 4.006762691 | 0.580106146 | 0.56184304  | 0.998252924 |

|                           |        |          |    |           |           |   |   |   |   |   |   |       |             |             |             |             |            |             |
|---------------------------|--------|----------|----|-----------|-----------|---|---|---|---|---|---|-------|-------------|-------------|-------------|-------------|------------|-------------|
| chr11:82917099-82922472   | exonic | ANKRD42  | 11 | 82917099  | 82922472  | 2 | 1 | 0 | 0 | 0 | 0 | 5373  | 0.432249685 | 2.324347661 | 4.006762691 | 0.580106146 | 0.56184304 | 0.998252924 |
| chr12:107236366-107245372 | exonic | RIC8B    | 12 | 107236366 | 107245372 | 2 | 1 | 0 | 0 | 0 | 0 | 9006  | 0.432249685 | 2.324347661 | 4.006762691 | 0.580106146 | 0.56184304 | 0.998252924 |
| chr12:110764194-110765822 | exonic | ATP2A2   | 12 | 110764194 | 110765822 | 2 | 1 | 0 | 0 | 0 | 0 | 1628  | 0.432249685 | 2.324347661 | 4.006762691 | 0.580106146 | 0.56184304 | 0.998252924 |
| chr12:12639961-12674397   | exonic | DUSP16   | 12 | 12639961  | 12674397  | 2 | 1 | 0 | 0 | 0 | 0 | 34436 | 0.432249685 | 2.324347661 | 4.006762691 | 0.580106146 | 0.56184304 | 0.998252924 |
| chr14:35252967-35262127   | exonic | BAZ1A    | 14 | 35252967  | 35262127  | 2 | 1 | 0 | 0 | 0 | 0 | 9160  | 0.432249685 | 2.324347661 | 4.006762691 | 0.580106146 | 0.56184304 | 0.998252924 |
| chr14:75583897-75587877   | exonic | NEK9     | 14 | 75583897  | 75587877  | 2 | 1 | 0 | 0 | 0 | 0 | 3980  | 0.432249685 | 2.324347661 | 4.006762691 | 0.580106146 | 0.56184304 | 0.998252924 |
| chr16:2312278-2314761     | exonic | RNPS1    | 16 | 2312278   | 2314761   | 2 | 1 | 0 | 0 | 0 | 0 | 2483  | 0.432249685 | 2.324347661 | 4.006762691 | 0.580106146 | 0.56184304 | 0.998252924 |
| chr16:23424768-23428442   | exonic | COG7     | 16 | 23424768  | 23428442  | 2 | 1 | 0 | 0 | 0 | 0 | 3674  | 0.432249685 | 2.324347661 | 4.006762691 | 0.580106146 | 0.56184304 | 0.998252924 |
| chr17:46925425-46933549   | exonic | CALCOCO2 | 17 | 46925425  | 46933549  | 2 | 1 | 0 | 0 | 0 | 0 | 8124  | 0.432249685 | 2.324347661 | 4.006762691 | 0.580106146 | 0.56184304 | 0.998252924 |
| chr17:49118861-49157065   | exonic | SPAG9    | 17 | 49118861  | 49157065  | 2 | 1 | 0 | 0 | 0 | 0 | 38204 | 0.432249685 | 2.324347661 | 4.006762691 | 0.580106146 | 0.56184304 | 0.998252924 |
| chr17:79532530-79539114   | exonic | NPLOC4   | 17 | 79532530  | 79539114  | 2 | 1 | 0 | 0 | 0 | 0 | 6584  | 0.432249685 | 2.324347661 | 4.006762691 | 0.580106146 | 0.56184304 | 0.998252924 |
| chr19:5039846-5047680     | exonic | KDM4B    | 19 | 5039846   | 5047680   | 2 | 1 | 0 | 0 | 0 | 0 | 7834  | 0.432249685 | 2.324347661 | 4.006762691 | 0.580106146 | 0.56184304 | 0.998252924 |
| chr19:55756487-55757046   | exonic | PPP6R1   | 19 | 55756487  | 55757046  | 2 | 1 | 0 | 0 | 0 | 0 | 559   | 0.432249685 | 2.324347661 | 4.006762691 | 0.580106146 | 0.56184304 | 0.998252924 |
| chr2:144899448-144969146  | exonic | GTDC1    | 2  | 144899448 | 144969146 | 2 | 1 | 0 | 0 | 0 | 0 | 69698 | 0.432249685 | 2.324347661 | 4.006762691 | 0.580106146 | 0.56184304 | 0.998252924 |
| chr2:152698416-152739884  | exonic | CACNB4   | 2  | 152698416 | 152739884 | 2 | 1 | 0 | 0 | 0 | 0 | 41468 | 0.432249685 | 2.324347661 | 4.006762691 | 0.580106146 | 0.56184304 | 0.998252924 |
| chr2:240929490-240961757  | exonic | NDUFA10  | 2  | 240929490 | 240961757 | 2 | 1 | 0 | 0 | 0 | 0 | 32267 | 0.432249685 | 2.324347661 | 4.006762691 | 0.580106146 | 0.56184304 | 0.998252924 |
| chr2:33482350-33534623    | exonic | LTBP1    | 2  | 33482350  | 33534623  | 2 | 1 | 0 | 0 | 0 | 0 | 52273 | 0.432249685 | 2.324347661 | 4.006762691 | 0.580106146 | 0.56184304 | 0.998252924 |
| chr20:13251150-13273110   | exonic | ISM1     | 20 | 13251150  | 13273110  | 2 | 1 | 0 | 0 | 0 | 0 | 21960 | 0.432249685 | 2.324347661 | 4.006762691 | 0.580106146 | 0.56184304 | 0.998252924 |
| chr21:30324481-30329798   | exonic | LTN1     | 21 | 30324481  | 30329798  | 2 | 1 | 0 | 0 | 0 | 0 | 5317  | 0.432249685 | 2.324347661 | 4.006762691 | 0.580106146 | 0.56184304 | 0.998252924 |
| chr21:38480691-38524329   | exonic | TTC3     | 21 | 38480691  | 38524329  | 2 | 2 | 0 | 0 | 0 | 0 | 43638 | 0.432249685 | 2.324347661 | 4.006762691 | 0.580106146 | 0.56184304 | 0.998252924 |
| chr21:38480691-38525577   | exonic | TTC3     | 21 | 38480691  | 38525577  | 2 | 1 | 0 | 0 | 0 | 0 | 44886 | 0.432249685 | 2.324347661 | 4.006762691 | 0.580106146 | 0.56184304 | 0.998252924 |
| chr22:46085591-46125470   | exonic | ATXN10   | 22 | 46085591  | 46125470  | 2 | 1 | 0 | 0 | 0 | 0 | 39879 | 0.432249685 | 2.324347661 | 4.006762691 | 0.580106146 | 0.56184304 | 0.998252924 |
| chr3:188925164-188956698  | exonic | TPRG1    | 3  | 188925164 | 188956698 | 2 | 1 | 0 | 0 | 0 | 0 | 31534 | 0.432249685 | 2.324347661 | 4.006762691 | 0.580106146 | 0.56184304 | 0.998252924 |
| chr3:197710813-197729996  | exonic | LMLN     | 3  | 197710813 | 197729996 | 2 | 1 | 0 | 0 | 0 | 0 | 19183 | 0.432249685 | 2.324347661 | 4.006762691 | 0.580106146 | 0.56184304 | 0.998252924 |
| chr3:44402856-44409200    | exonic | TCAIM    | 3  | 44402856  | 44409200  | 2 | 1 | 0 | 0 | 0 | 0 | 6344  | 0.432249685 | 2.324347661 | 4.006762691 | 0.580106146 | 0.56184304 | 0.998252924 |
| chr3:44970797-44986784    | exonic | ZDHHC3   | 3  | 44970797  | 44986784  | 2 | 1 | 0 | 0 | 0 | 0 | 15987 | 0.432249685 | 2.324347661 | 4.006762691 | 0.580106146 | 0.56184304 | 0.998252924 |
| chr3:52524247-52524694    | exonic | NISCH    | 3  | 52524247  | 52524694  | 2 | 1 | 0 | 0 | 0 | 0 | 447   | 0.432249685 | 2.324347661 | 4.006762691 | 0.580106146 | 0.56184304 | 0.998252924 |
| chr5:176707565-176715926  | exonic | NSD1     | 5  | 176707565 | 176715926 | 2 | 1 | 0 | 0 | 0 | 0 | 8361  | 0.432249685 | 2.324347661 | 4.006762691 | 0.580106146 | 0.56184304 | 0.998252924 |
| chr5:179994242-179994815  | exonic | CNOT6    | 5  | 179994242 | 179994815 | 2 | 1 | 0 | 0 | 0 | 0 | 573   | 0.432249685 | 2.324347661 | 4.006762691 | 0.580106146 | 0.56184304 | 0.998252924 |
| chr6:129498850-129513998  | exonic | LAMA2    | 6  | 129498850 | 129513998 | 2 | 1 | 0 | 0 | 0 | 0 | 15148 | 0.432249685 | 2.324347661 | 4.006762691 | 0.580106146 | 0.56184304 | 0.998252924 |
| chr6:84055891-84108235    | exonic | ME1      | 6  | 84055891  | 84108235  | 2 | 1 | 0 | 0 | 0 | 0 | 52344 | 0.432249685 | 2.324347661 | 4.006762691 | 0.580106146 | 0.56184304 | 0.998252924 |
| chr6:84055891-84117620    | exonic | ME1      | 6  | 84055891  | 84117620  | 2 | 1 | 0 | 0 | 0 | 0 | 61729 | 0.432249685 | 2.324347661 | 4.006762691 | 0.580106146 | 0.56184304 | 0.998252924 |
| chr7:74239461-74251505    | exonic | GTF2IRD2 | 7  | 74239461  | 74251505  | 2 | 1 | 0 | 0 | 0 | 0 | 12044 | 0.432249685 | 2.324347661 | 4.006762691 | 0.580106146 | 0.56184304 | 0.998252924 |
| chr8:42317413-42323435    | exonic | SLC20A2  | 8  | 42317413  | 42323435  | 2 | 1 | 0 | 0 | 0 | 0 | 6022  | 0.432249685 | 2.324347661 | 4.006762691 | 0.580106146 | 0.56184304 | 0.998252924 |
| chr9:129957369-129961345  | exonic | RALGPS1  | 9  | 129957369 | 129961345 | 2 | 1 | 0 | 0 | 0 | 0 | 3976  | 0.432249685 | 2.324347661 | 4.006762691 | 0.580106146 | 0.56184304 | 0.998252924 |

|                           |              |            |    |           |           |   |   |   |   |   |   |        |             |             |             |             |             |             |
|---------------------------|--------------|------------|----|-----------|-----------|---|---|---|---|---|---|--------|-------------|-------------|-------------|-------------|-------------|-------------|
| chr9:132740743-132757237  | exonic       | FNBP1      | 9  | 132740743 | 132757237 | 2 | 1 | 0 | 0 | 0 | 0 | 16494  | 0.432249685 | 2.324347661 | 4.006762691 | 0.580106146 | 0.56184304  | 0.998252924 |
| chr9:22029431-22097363    | ncRNA_exonic | CDKN2B-AS1 | 9  | 22029431  | 22097363  | 2 | 1 | 0 | 0 | 0 | 0 | 67932  | 0.432249685 | 2.324347661 | 4.006762691 | 0.580106146 | 0.56184304  | 0.998252924 |
| chr9:33953282-33956144    | exonic       | UBAP2      | 9  | 33953282  | 33956144  | 2 | 1 | 0 | 0 | 0 | 0 | 2862   | 0.432249685 | 2.324347661 | 4.006762691 | 0.580106146 | 0.56184304  | 0.998252924 |
| chr17:30498061-30510291   | exonic       | RHOT1      | 17 | 30498061  | 30510291  | 2 | 0 | 3 | 1 | 0 | 0 | 12230  | 0.956092347 | 2.328217963 | 2.849771214 | 0.816984167 | 0.413937476 | 0.998252924 |
| chr2:200213423-200298237  | exonic       | SATB2      | 2  | 200213423 | 200298237 | 4 | 2 | 0 | 0 | 1 | 0 | 84814  | 0.985526791 | 2.336554126 | 2.804516103 | 0.83313985  | 0.404765861 | 0.998252924 |
| chr9:5954015-5988545      | exonic       | KIAA2026   | 9  | 5954015   | 5988545   | 7 | 3 | 3 | 1 | 2 | 0 | 34530  | 2.365909302 | 2.336920507 | 1.767252027 | 1.322347052 | 0.186052612 | 0.998252924 |
| chr1:76198328-76216231    | exonic       | ACADM      | 1  | 76198328  | 76216231  | 4 | 2 | 0 | 0 | 0 | 1 | 17903  | 1.172717978 | 2.339547882 | 2.695656202 | 0.867895498 | NA          | NA          |
| chr1:87181406-87190088    | exonic       | SH3GLB1    | 1  | 87181406  | 87190088  | 2 | 7 | 0 | 0 | 2 | 0 | 8682   | 1.719959323 | 2.343762833 | 2.331475535 | 1.005270181 | 0.31476677  | 0.998252924 |
| chr6:117013217-117047785  | exonic       | KPNA5      | 6  | 117013217 | 117047785 | 1 | 1 | 3 | 0 | 0 | 1 | 34568  | 1.203288427 | 2.350295177 | 2.531041071 | 0.928588321 | NA          | NA          |
| chr8:17847367-17851128    | exonic       | PCM1       | 8  | 17847367  | 17851128  | 1 | 1 | 3 | 0 | 1 | 0 | 3761   | 1.01609724  | 2.350764545 | 2.617050643 | 0.898249543 | 0.369052526 | 0.998252924 |
| chr12:32734893-32764217   | exonic       | FGD4       | 12 | 32734893  | 32764217  | 0 | 3 | 1 | 0 | 0 | 1 | 29324  | 1.202590831 | 2.353467367 | 2.720254732 | 0.865164332 | NA          | NA          |
| chr3:133341934-133343019  | exonic       | TOPBP1     | 3  | 133341934 | 133343019 | 1 | 2 | 2 | 1 | 0 | 0 | 1085   | 0.978387977 | 2.360950774 | 2.628169012 | 0.898325322 | 0.369012137 | 0.998252924 |
| chr17:65906992-65919106   | exonic       | BPTF       | 17 | 65906992  | 65919106  | 4 | 1 | 1 | 0 | 1 | 0 | 12114  | 1.008520018 | 2.373248019 | 2.606675654 | 0.910450065 | 0.362585205 | 0.998252924 |
| chr9:100756912-100760960  | exonic       | ANP32B     | 9  | 100756912 | 100760960 | 7 | 2 | 1 | 1 | 1 | 0 | 4048   | 1.67606803  | 2.379257222 | 2.053958274 | 1.15837661  | 0.24671038  | 0.998252924 |
| chr3:11399891-11468400    | exonic       | ATG7       | 3  | 11399891  | 11468400  | 4 | 2 | 0 | 1 | 0 | 0 | 68509  | 0.970810754 | 2.381499887 | 2.821004468 | 0.844202806 | 0.398556087 | 0.998252924 |
| chr17:80521229-80529746   | exonic       | FOXK2      | 17 | 80521229  | 80529746  | 0 | 3 | 2 | 0 | 0 | 1 | 8517   | 1.225584057 | 2.385270182 | 2.679053356 | 0.890340678 | NA          | NA          |
| chr15:33256307-33261678   | exonic       | FMN1       | 15 | 33256307  | 33261678  | 0 | 3 | 2 | 0 | 1 | 0 | 5371   | 1.03839287  | 2.385732952 | 2.777608181 | 0.858916304 | 0.390386694 | 0.998252924 |
| chr5:170305100-170323119  | exonic       | RANBP17    | 5  | 170305100 | 170323119 | 0 | 3 | 2 | 0 | 1 | 0 | 18019  | 1.03839287  | 2.385732952 | 2.777608181 | 0.858916304 | 0.390386694 | 0.998252924 |
| chr1:230798886-230800333  | exonic       | COG2       | 1  | 230798886 | 230800333 | 2 | 0 | 1 | 0 | 0 | 0 | 1447   | 0.455242911 | 2.389021128 | 4.002442318 | 0.596890833 | 0.550580268 | 0.998252924 |
| chr1:243727021-244006584  | exonic       | AKT3       | 1  | 243727021 | 244006584 | 2 | 0 | 1 | 0 | 0 | 0 | 279563 | 0.455242911 | 2.389021128 | 4.002442318 | 0.596890833 | 0.550580268 | 0.998252924 |
| chr1:76198328-76200556    | exonic       | ACADM      | 1  | 76198328  | 76200556  | 2 | 0 | 1 | 0 | 0 | 0 | 2228   | 0.455242911 | 2.389021128 | 4.002442318 | 0.596890833 | 0.550580268 | 0.998252924 |
| chr1:92728419-92737209    | exonic       | GLMN       | 1  | 92728419  | 92737209  | 2 | 0 | 1 | 0 | 0 | 0 | 8790   | 0.455242911 | 2.389021128 | 4.002442318 | 0.596890833 | 0.550580268 | 0.998252924 |
| chr10:75289437-75299351   | exonic       | USP54      | 10 | 75289437  | 75299351  | 2 | 0 | 1 | 0 | 0 | 0 | 9914   | 0.455242911 | 2.389021128 | 4.002442318 | 0.596890833 | 0.550580268 | 0.998252924 |
| chr11:82917099-82951976   | exonic       | ANKRD42    | 11 | 82917099  | 82951976  | 2 | 0 | 1 | 0 | 0 | 0 | 34877  | 0.455242911 | 2.389021128 | 4.002442318 | 0.596890833 | 0.550580268 | 0.998252924 |
| chr13:113960799-113965182 | exonic       | LAMP1      | 13 | 113960799 | 113965182 | 2 | 0 | 1 | 0 | 0 | 0 | 4383   | 0.455242911 | 2.389021128 | 4.002442318 | 0.596890833 | 0.550580268 | 0.998252924 |
| chr13:33016524-33095586   | exonic       | N4BP2L2    | 13 | 33016524  | 33095586  | 2 | 0 | 1 | 0 | 0 | 0 | 79062  | 0.455242911 | 2.389021128 | 4.002442318 | 0.596890833 | 0.550580268 | 0.998252924 |
| chr17:44407815-44410022   | exonic       | LRRC37A    | 17 | 44407815  | 44410022  | 2 | 0 | 1 | 0 | 0 | 0 | 2207   | 0.455242911 | 2.389021128 | 4.002442318 | 0.596890833 | 0.550580268 | 0.998252924 |
| chr17:65920662-65972074   | exonic       | BPTF       | 17 | 65920662  | 65972074  | 2 | 0 | 1 | 0 | 0 | 0 | 51412  | 0.455242911 | 2.389021128 | 4.002442318 | 0.596890833 | 0.550580268 | 0.998252924 |
| chr17:74763467-74772623   | exonic       | MFS11      | 17 | 74763467  | 74772623  | 2 | 0 | 1 | 0 | 0 | 0 | 9156   | 0.455242911 | 2.389021128 | 4.002442318 | 0.596890833 | 0.550580268 | 0.998252924 |
| chr18:33722243-33726344   | exonic       | ELP2       | 18 | 33722243  | 33726344  | 2 | 0 | 1 | 0 | 0 | 0 | 4101   | 0.455242911 | 2.389021128 | 4.002442318 | 0.596890833 | 0.550580268 | 0.998252924 |
| chr18:74082482-74092259   | exonic       | ZNF516     | 18 | 74082482  | 74092259  | 2 | 0 | 1 | 0 | 0 | 0 | 9777   | 0.455242911 | 2.389021128 | 4.002442318 | 0.596890833 | 0.550580268 | 0.998252924 |
| chr2:10740978-10747437    | exonic       | NOL10      | 2  | 10740978  | 10747437  | 2 | 0 | 1 | 0 | 0 | 0 | 6459   | 0.455242911 | 2.389021128 | 4.002442318 | 0.596890833 | 0.550580268 | 0.998252924 |
| chr2:10928822-10930959    | exonic       | PDIA6      | 2  | 10928822  | 10930959  | 2 | 0 | 1 | 0 | 0 | 0 | 2137   | 0.455242911 | 2.389021128 | 4.002442318 | 0.596890833 | 0.550580268 | 0.998252924 |
| chr2:27700083-27707133    | exonic       | IFT172     | 2  | 27700083  | 27707133  | 2 | 0 | 1 | 0 | 0 | 0 | 7050   | 0.455242911 | 2.389021128 | 4.002442318 | 0.596890833 | 0.550580268 | 0.998252924 |
| chr20:33001547-33030108   | exonic       | ITCH       | 20 | 33001547  | 33030108  | 2 | 0 | 1 | 0 | 0 | 0 | 28561  | 0.455242911 | 2.389021128 | 4.002442318 | 0.596890833 | 0.550580268 | 0.998252924 |

|                          |              |                                                          |    |           |           |    |    |   |   |   |   |       |             |             |             |             |             |             |
|--------------------------|--------------|----------------------------------------------------------|----|-----------|-----------|----|----|---|---|---|---|-------|-------------|-------------|-------------|-------------|-------------|-------------|
| chr20:50091994-50140135  | exonic       | NFATC2                                                   | 20 | 50091994  | 50140135  | 2  | 0  | 1 | 0 | 0 | 0 | 48141 | 0.455242911 | 2.389021128 | 4.002442318 | 0.596890833 | 0.550580268 | 0.998252924 |
| chr3:113060590-113063559 | exonic       | CFAP44                                                   | 3  | 113060590 | 113063559 | 2  | 0  | 1 | 0 | 0 | 0 | 2969  | 0.455242911 | 2.389021128 | 4.002442318 | 0.596890833 | 0.550580268 | 0.998252924 |
| chr3:30713129-30715738   | exonic       | TGFBR2                                                   | 3  | 30713129  | 30715738  | 2  | 0  | 1 | 0 | 0 | 0 | 2609  | 0.455242911 | 2.389021128 | 4.002442318 | 0.596890833 | 0.550580268 | 0.998252924 |
| chr4:103446668-103488292 | exonic       | NFKB1                                                    | 4  | 103446668 | 103488292 | 2  | 0  | 1 | 0 | 0 | 0 | 41624 | 0.455242911 | 2.389021128 | 4.002442318 | 0.596890833 | 0.550580268 | 0.998252924 |
| chr5:137342678-137346838 | exonic       | FAM13B                                                   | 5  | 137342678 | 137346838 | 2  | 0  | 1 | 0 | 0 | 0 | 4160  | 0.455242911 | 2.389021128 | 4.002442318 | 0.596890833 | 0.550580268 | 0.998252924 |
| chr5:159681355-159682555 | splicing     | CCNJL                                                    | 5  | 159681355 | 159682555 | 2  | 0  | 1 | 0 | 0 | 0 | 1200  | 0.455242911 | 2.389021128 | 4.002442318 | 0.596890833 | 0.550580268 | 0.998252924 |
| chr5:54562965-54568003   | exonic       | DHX29                                                    | 5  | 54562965  | 54568003  | 2  | 0  | 1 | 0 | 0 | 0 | 5038  | 0.455242911 | 2.389021128 | 4.002442318 | 0.596890833 | 0.550580268 | 0.998252924 |
| chr5:74109664-74137504   | exonic       | FAM169A                                                  | 5  | 74109664  | 74137504  | 2  | 0  | 1 | 0 | 0 | 0 | 27840 | 0.455242911 | 2.389021128 | 4.002442318 | 0.596890833 | 0.550580268 | 0.998252924 |
| chr5:76330242-76335544   | exonic       | AGGF1                                                    | 5  | 76330242  | 76335544  | 2  | 0  | 1 | 0 | 0 | 0 | 5302  | 0.455242911 | 2.389021128 | 4.002442318 | 0.596890833 | 0.550580268 | 0.998252924 |
| chr7:107569508-107572822 | exonic       | LAMB1                                                    | 7  | 107569508 | 107572822 | 2  | 0  | 1 | 0 | 0 | 0 | 3314  | 0.455242911 | 2.389021128 | 4.002442318 | 0.596890833 | 0.550580268 | 0.998252924 |
| chr7:40027197-40102699   | exonic       | CDK13                                                    | 7  | 40027197  | 40102699  | 2  | 0  | 1 | 0 | 0 | 0 | 75502 | 0.455242911 | 2.389021128 | 4.002442318 | 0.596890833 | 0.550580268 | 0.998252924 |
| chr8:101287180-101300495 | exonic       | RNF19A                                                   | 8  | 101287180 | 101300495 | 2  | 0  | 1 | 0 | 0 | 0 | 13315 | 0.455242911 | 2.389021128 | 4.002442318 | 0.596890833 | 0.550580268 | 0.998252924 |
| chr8:37985808-37986469   | exonic       | ASH2L                                                    | 8  | 37985808  | 37986469  | 2  | 0  | 1 | 0 | 0 | 0 | 661   | 0.455242911 | 2.389021128 | 4.002442318 | 0.596890833 | 0.550580268 | 0.998252924 |
| chr8:42286275-42330172   | exonic       | SLC20A2                                                  | 8  | 42286275  | 42330172  | 2  | 0  | 1 | 0 | 0 | 0 | 43897 | 0.455242911 | 2.389021128 | 4.002442318 | 0.596890833 | 0.550580268 | 0.998252924 |
| chr9:37768072-37770736   | exonic       | TRMT10B                                                  | 9  | 37768072  | 37770736  | 2  | 0  | 1 | 0 | 0 | 0 | 2664  | 0.455242911 | 2.389021128 | 4.002442318 | 0.596890833 | 0.550580268 | 0.998252924 |
| chrX:79544404-79565732   | ncRNA_exonic | CHMP1B2P                                                 | X  | 79544404  | 79565732  | 2  | 0  | 1 | 0 | 0 | 0 | 21328 | 0.455242911 | 2.389021128 | 4.002442318 | 0.596890833 | 0.550580268 | 0.998252924 |
| chr11:77402203-77413540  | exonic       | RSF1                                                     | 11 | 77402203  | 77413540  | 1  | 1  | 3 | 1 | 0 | 0 | 11337 | 1.001381204 | 2.393249892 | 2.631109783 | 0.909597124 | 0.363035016 | 0.998252924 |
| chr1:28785595-28793279   | exonic       | PHACTR4                                                  | 1  | 28785595  | 28793279  | 14 | 4  | 0 | 4 | 0 | 0 | 7684  | 2.928165936 | 2.400312694 | 1.947104093 | 1.232760335 | 0.217665194 | 0.998252924 |
| chr10:52193235-52226692  | UTR5         | <small>SOM1 (NM_147156:c.-122553_-122818delins0)</small> | 10 | 52193235  | 52226692  | 4  | 0  | 2 | 0 | 1 | 0 | 33457 | 1.031513244 | 2.400702215 | 2.766722179 | 0.867706282 | 0.385555146 | 0.998252924 |
| chr15:86207793-86251317  | exonic       | AKAP13                                                   | 15 | 86207793  | 86251317  | 4  | 0  | 2 | 0 | 1 | 0 | 43524 | 1.031513244 | 2.400702215 | 2.766722179 | 0.867706282 | 0.385555146 | 0.998252924 |
| chr17:18768781-18814564  | exonic       | PRPSAP2                                                  | 17 | 18768781  | 18814564  | 3  | 3  | 0 | 0 | 1 | 0 | 45783 | 1.030815647 | 2.40281284  | 2.759765925 | 0.870658202 | 0.383940807 | 0.998252924 |
| chr19:11446122-11446459  | exonic       | RAB3D                                                    | 19 | 11446122  | 11446459  | 3  | 3  | 0 | 0 | 1 | 0 | 337   | 1.030815647 | 2.40281284  | 2.759765925 | 0.870658202 | 0.383940807 | 0.998252924 |
| chr4:87693930-87696805   | exonic       | PTPN13                                                   | 4  | 87693930  | 87696805  | 0  | 11 | 0 | 3 | 0 | 0 | 2875  | 2.235967945 | 2.415730525 | 3.865714455 | 0.624911786 | NA          | NA          |
| chr1:231885671-231906816 | exonic       | DISC1                                                    | 1  | 231885671 | 231906816 | 0  | 2  | 3 | 0 | 0 | 1 | 21145 | 1.248577284 | 2.416503197 | 2.665780439 | 0.906489957 | 0.364676578 | 0.998252924 |
| chr17:49294694-49302570  | exonic       | MBTD1                                                    | 17 | 49294694  | 49302570  | 0  | 2  | 3 | 0 | 0 | 1 | 7876  | 1.248577284 | 2.416503197 | 2.665780439 | 0.906489957 | 0.364676578 | 0.998252924 |
| chr5:72370568-72378652   | exonic       | FCHO2                                                    | 5  | 72370568  | 72378652  | 0  | 2  | 3 | 0 | 1 | 0 | 8084  | 1.061386097 | 2.417310182 | 2.760061383 | 0.875817544 | 0.381129231 | 0.998252924 |
| chr16:10522724-10534319  | exonic       | ATF7IP2                                                  | 16 | 10522724  | 10534319  | 3  | 0  | 6 | 0 | 2 | 0 | 11595 | 1.812629825 | 2.419201423 | 2.284411902 | 1.059004035 | 0.289597942 | 0.998252924 |
| chr5:138979956-139003046 | exonic       | UBE2D2                                                   | 5  | 138979956 | 139003046 | 2  | 2  | 5 | 0 | 2 | 0 | 23090 | 1.834925455 | 2.43388333  | 2.094143901 | 1.162233086 | 0.245140798 | 0.998252924 |
| chr15:79233224-79235680  | intronic     | CTSH                                                     | 15 | 79233224  | 79235680  | 3  | 4  | 2 | 2 | 0 | 0 | 2456  | 1.691224846 | 2.4362262   | 2.122668665 | 1.147718549 | 0.251084771 | 0.998252924 |
| chr3:196831773-196846401 | exonic       | DLG1                                                     | 3  | 196831773 | 196846401 | 3  | 2  | 1 | 0 | 1 | 0 | 14628 | 1.053808874 | 2.437308966 | 2.548406915 | 0.956404942 | 0.338867689 | 0.998252924 |
| chr13:41410732-41429951  | ncRNA_exonic | TPTE2P5                                                  | 13 | 41410732  | 41429951  | 3  | 3  | 0 | 1 | 0 | 0 | 19219 | 1.016099611 | 2.447250667 | 2.775329051 | 0.881787573 | 0.377891693 | 0.998252924 |
| chr11:9441957-9446809    | exonic       | IPO7                                                     | 11 | 9441957   | 9446809   | 9  | 5  | 0 | 3 | 0 | 0 | 4852  | 2.351195636 | 2.450917079 | 2.069594969 | 1.184249631 | 0.236314261 | 0.998252924 |
| chr19:9763629-9771550    | exonic       | ZNF562                                                   | 19 | 9763629   | 9771550   | 6  | 4  | 0 | 2 | 0 | 0 | 7921  | 1.683647623 | 2.453247819 | 2.309868484 | 1.06207251  | 0.288202769 | 0.998252924 |
| chr1:179961196-179966310 | exonic       | CEP350                                                   | 1  | 179961196 | 179966310 | 1  | 2  | 0 | 0 | 0 | 0 | 5114  | 0.477538541 | 2.45455251  | 3.976489343 | 0.617266211 | 0.53705915  | 0.998252924 |
| chr1:207196857-207198231 | splicing     | Clorf116                                                 | 1  | 207196857 | 207198231 | 1  | 2  | 0 | 0 | 0 | 0 | 1374  | 0.477538541 | 2.45455251  | 3.976489343 | 0.617266211 | 0.53705915  | 0.998252924 |

|                           |              |                                                                                            |    |           |           |   |   |   |   |   |   |       |             |            |             |             |            |             |
|---------------------------|--------------|--------------------------------------------------------------------------------------------|----|-----------|-----------|---|---|---|---|---|---|-------|-------------|------------|-------------|-------------|------------|-------------|
| chr1:212218001-212220759  | exonic       | DTL                                                                                        | 1  | 212218001 | 212220759 | 1 | 2 | 0 | 0 | 0 | 0 | 2758  | 0.477538541 | 2.45455251 | 3.976489343 | 0.617266211 | 0.53705915 | 0.998252924 |
| chr1:22047528-22056325    | exonic       | USP48                                                                                      | 1  | 22047528  | 22056325  | 1 | 2 | 0 | 0 | 0 | 0 | 8797  | 0.477538541 | 2.45455251 | 3.976489343 | 0.617266211 | 0.53705915 | 0.998252924 |
| chr1:23107913-23111569    | exonic       | EPHB2                                                                                      | 1  | 23107913  | 23111569  | 1 | 2 | 0 | 0 | 0 | 0 | 3656  | 0.477538541 | 2.45455251 | 3.976489343 | 0.617266211 | 0.53705915 | 0.998252924 |
| chr1:23397717-23398690    | exonic       | KDM1A                                                                                      | 1  | 23397717  | 23398690  | 1 | 2 | 0 | 0 | 0 | 0 | 973   | 0.477538541 | 2.45455251 | 3.976489343 | 0.617266211 | 0.53705915 | 0.998252924 |
| chr1:235597518-235600789  | exonic       | TBCE                                                                                       | 1  | 235597518 | 235600789 | 1 | 2 | 0 | 0 | 0 | 0 | 3271  | 0.477538541 | 2.45455251 | 3.976489343 | 0.617266211 | 0.53705915 | 0.998252924 |
| chr1:33290913-33295668    | exonic       | S100BPB                                                                                    | 1  | 33290913  | 33295668  | 1 | 2 | 0 | 0 | 0 | 0 | 4755  | 0.477538541 | 2.45455251 | 3.976489343 | 0.617266211 | 0.53705915 | 0.998252924 |
| chr1:94009663-94014983    | exonic       | FNBP1L                                                                                     | 1  | 94009663  | 94014983  | 1 | 2 | 0 | 0 | 0 | 0 | 5320  | 0.477538541 | 2.45455251 | 3.976489343 | 0.617266211 | 0.53705915 | 0.998252924 |
| chr12:112130500-112147488 | exonic       | ACAD10                                                                                     | 12 | 112130500 | 112147488 | 1 | 2 | 0 | 0 | 0 | 0 | 16988 | 0.477538541 | 2.45455251 | 3.976489343 | 0.617266211 | 0.53705915 | 0.998252924 |
| chr12:133313478-133331719 | exonic       | ANKLE2                                                                                     | 12 | 133313478 | 133331719 | 1 | 2 | 0 | 0 | 0 | 0 | 18241 | 0.477538541 | 2.45455251 | 3.976489343 | 0.617266211 | 0.53705915 | 0.998252924 |
| chr14:92347635-92361416   | exonic       | FBLN5                                                                                      | 14 | 92347635  | 92361416  | 1 | 2 | 0 | 0 | 0 | 0 | 13781 | 0.477538541 | 2.45455251 | 3.976489343 | 0.617266211 | 0.53705915 | 0.998252924 |
| chr15:63986162-64008672   | exonic       | HERC1                                                                                      | 15 | 63986162  | 64008672  | 1 | 2 | 0 | 0 | 0 | 0 | 22510 | 0.477538541 | 2.45455251 | 3.976489343 | 0.617266211 | 0.53705915 | 0.998252924 |
| chr15:73862490-73866136   | exonic       | NPTN                                                                                       | 15 | 73862490  | 73866136  | 1 | 2 | 0 | 0 | 0 | 0 | 3646  | 0.477538541 | 2.45455251 | 3.976489343 | 0.617266211 | 0.53705915 | 0.998252924 |
| chr16:21030945-21051265   | exonic       | DNAH3                                                                                      | 16 | 21030945  | 21051265  | 1 | 2 | 0 | 0 | 0 | 0 | 20320 | 0.477538541 | 2.45455251 | 3.976489343 | 0.617266211 | 0.53705915 | 0.998252924 |
| chr16:21809070-21812158   | ncRNA_exonic | RRN3P1                                                                                     | 16 | 21809070  | 21812158  | 1 | 2 | 0 | 0 | 0 | 0 | 3088  | 0.477538541 | 2.45455251 | 3.976489343 | 0.617266211 | 0.53705915 | 0.998252924 |
| chr18:74561481-74620529   | exonic       | ZNF236                                                                                     | 18 | 74561481  | 74620529  | 1 | 2 | 0 | 0 | 0 | 0 | 59048 | 0.477538541 | 2.45455251 | 3.976489343 | 0.617266211 | 0.53705915 | 0.998252924 |
| chr18:77170402-77193738   | exonic       | NFATC1                                                                                     | 18 | 77170402  | 77193738  | 1 | 2 | 0 | 0 | 0 | 0 | 23336 | 0.477538541 | 2.45455251 | 3.976489343 | 0.617266211 | 0.53705915 | 0.998252924 |
| chr19:40761064-40771258   | exonic       | AKT2                                                                                       | 19 | 40761064  | 40771258  | 1 | 2 | 0 | 0 | 0 | 0 | 10194 | 0.477538541 | 2.45455251 | 3.976489343 | 0.617266211 | 0.53705915 | 0.998252924 |
| chr19:5641604-5641957     | exonic       | SAFB                                                                                       | 19 | 5641604   | 5641957   | 1 | 2 | 0 | 0 | 0 | 0 | 353   | 0.477538541 | 2.45455251 | 3.976489343 | 0.617266211 | 0.53705915 | 0.998252924 |
| chr2:100029192-100052403  | exonic       | REV1                                                                                       | 2  | 100029192 | 100052403 | 1 | 2 | 0 | 0 | 0 | 0 | 23211 | 0.477538541 | 2.45455251 | 3.976489343 | 0.617266211 | 0.53705915 | 0.998252924 |
| chr2:168869143-168921891  | exonic       | STK39                                                                                      | 2  | 168869143 | 168921891 | 1 | 2 | 0 | 0 | 0 | 0 | 52748 | 0.477538541 | 2.45455251 | 3.976489343 | 0.617266211 | 0.53705915 | 0.998252924 |
| chr2:173451005-173460751  | exonic       | PDK1                                                                                       | 2  | 173451005 | 173460751 | 1 | 2 | 0 | 0 | 0 | 0 | 9746  | 0.477538541 | 2.45455251 | 3.976489343 | 0.617266211 | 0.53705915 | 0.998252924 |
| chr2:202410265-202469420  | exonic       | ALS2CR11                                                                                   | 2  | 202410265 | 202469420 | 1 | 2 | 0 | 0 | 0 | 0 | 59155 | 0.477538541 | 2.45455251 | 3.976489343 | 0.617266211 | 0.53705915 | 0.998252924 |
| chr2:96589242-96628295    | exonic       | ANKRD36C                                                                                   | 2  | 96589242  | 96628295  | 1 | 2 | 0 | 0 | 0 | 0 | 39053 | 0.477538541 | 2.45455251 | 3.976489343 | 0.617266211 | 0.53705915 | 0.998252924 |
| chr21:38480691-38558075   | exonic       | TTC3                                                                                       | 21 | 38480691  | 38558075  | 1 | 2 | 0 | 0 | 0 | 0 | 77384 | 0.477538541 | 2.45455251 | 3.976489343 | 0.617266211 | 0.53705915 | 0.998252924 |
| chr22:30218323-30228331   | exonic       | ASCC2                                                                                      | 22 | 30218323  | 30228331  | 1 | 2 | 0 | 0 | 0 | 0 | 10008 | 0.477538541 | 2.45455251 | 3.976489343 | 0.617266211 | 0.53705915 | 0.998252924 |
| chr3:129551616-129599402  | UTR5         | <small>UTR5 (MIM:600179) : chr3 : 129551616-129599402 : chr3 : 129551616-129599402</small> | 3  | 129551616 | 129599402 | 1 | 2 | 0 | 0 | 0 | 0 | 47786 | 0.477538541 | 2.45455251 | 3.976489343 | 0.617266211 | 0.53705915 | 0.998252924 |
| chr3:38240212-38278452    | exonic       | OXSRI                                                                                      | 3  | 38240212  | 38278452  | 1 | 2 | 0 | 0 | 0 | 0 | 38240 | 0.477538541 | 2.45455251 | 3.976489343 | 0.617266211 | 0.53705915 | 0.998252924 |
| chr4:88104354-88116842    | exonic       | KLHL8                                                                                      | 4  | 88104354  | 88116842  | 1 | 2 | 0 | 0 | 0 | 0 | 12488 | 0.477538541 | 2.45455251 | 3.976489343 | 0.617266211 | 0.53705915 | 0.998252924 |
| chr5:145539936-145552337  | exonic       | LARS                                                                                       | 5  | 145539936 | 145552337 | 1 | 2 | 0 | 0 | 0 | 0 | 12401 | 0.477538541 | 2.45455251 | 3.976489343 | 0.617266211 | 0.53705915 | 0.998252924 |
| chr5:70779668-70786958    | exonic       | BDP1                                                                                       | 5  | 70779668  | 70786958  | 1 | 2 | 0 | 0 | 0 | 0 | 7290  | 0.477538541 | 2.45455251 | 3.976489343 | 0.617266211 | 0.53705915 | 0.998252924 |
| chr5:78692645-78752841    | exonic       | HOMER1                                                                                     | 5  | 78692645  | 78752841  | 1 | 2 | 0 | 0 | 0 | 0 | 60196 | 0.477538541 | 2.45455251 | 3.976489343 | 0.617266211 | 0.53705915 | 0.998252924 |
| chr7:11068307-11101712    | exonic       | PHF14                                                                                      | 7  | 11068307  | 11101712  | 1 | 2 | 0 | 0 | 0 | 0 | 33405 | 0.477538541 | 2.45455251 | 3.976489343 | 0.617266211 | 0.53705915 | 0.998252924 |
| chr7:138957067-138958820  | exonic       | UBN2                                                                                       | 7  | 138957067 | 138958820 | 1 | 2 | 0 | 0 | 0 | 0 | 1753  | 0.477538541 | 2.45455251 | 3.976489343 | 0.617266211 | 0.53705915 | 0.998252924 |
| chr7:66563527-66582605    | exonic       | TYW1                                                                                       | 7  | 66563527  | 66582605  | 1 | 2 | 0 | 0 | 0 | 0 | 19078 | 0.477538541 | 2.45455251 | 3.976489343 | 0.617266211 | 0.53705915 | 0.998252924 |
| chr8:19683936-19694671    | exonic       | INTS10                                                                                     | 8  | 19683936  | 19694671  | 1 | 2 | 0 | 0 | 0 | 0 | 10735 | 0.477538541 | 2.45455251 | 3.976489343 | 0.617266211 | 0.53705915 | 0.998252924 |

|                           |        |                |    |           |           |   |    |   |   |   |   |        |             |             |             |             |             |             |
|---------------------------|--------|----------------|----|-----------|-----------|---|----|---|---|---|---|--------|-------------|-------------|-------------|-------------|-------------|-------------|
| chr9:32480216-32481495    | exonic | DDX58          | 9  | 32480216  | 32481495  | 1 | 2  | 0 | 0 | 0 | 0 | 1279   | 0.477538541 | 2.45455251  | 3.976489343 | 0.617266211 | 0.53705915  | 0.998252924 |
| chrX:17705861-17710588    | exonic | NHS            | X  | 17705861  | 17710588  | 1 | 2  | 0 | 0 | 0 | 0 | 4727   | 0.477538541 | 2.45455251  | 3.976489343 | 0.617266211 | 0.53705915  | 0.998252924 |
| chr19:37398830-37406153   | exonic | ZNF829         | 19 | 37398830  | 37406153  | 7 | 0  | 0 | 1 | 0 | 0 | 7323   | 1.009219985 | 2.455281661 | 3.059607654 | 0.80248252  | NA          | NA          |
| chr14:50262508-50298995   | exonic | NEMF           | 14 | 50262508  | 50298995  | 2 | 4  | 0 | 0 | 1 | 0 | 36487  | 1.076104504 | 2.466047007 | 2.733073796 | 0.902297995 | 0.36689859  | 0.998252924 |
| chr16:30510394-30510810   | exonic | ITGAL          | 16 | 30510394  | 30510810  | 0 | 2  | 6 | 2 | 0 | 0 | 416    | 1.744788522 | 2.476698067 | 2.334242036 | 1.061028818 | 0.288676805 | 0.998252924 |
| chr3:50150815-50151684    | exonic | RBM5           | 3  | 50150815  | 50151684  | 0 | 0  | 5 | 0 | 1 | 0 | 869    | 1.107372549 | 2.481673164 | 2.985432889 | 0.831260744 | NA          | NA          |
| chr4:108603170-108615162  | exonic | PAPSS1         | 4  | 108603170 | 108615162 | 0 | 1  | 4 | 1 | 0 | 0 | 11992  | 1.069663286 | 2.493561721 | 2.784841757 | 0.895405175 | 0.370570535 | 0.998252924 |
| chr9:100092435-100093049  | exonic | CCDC180        | 9  | 100092435 | 100093049 | 6 | 5  | 0 | 0 | 2 | 0 | 614    | 1.887355496 | 2.509204713 | 2.229932096 | 1.125238171 | 0.260488122 | 0.998252924 |
| chr1:115276352-115280693  | exonic | CSDE1          | 1  | 115276352 | 115280693 | 1 | 1  | 1 | 0 | 0 | 0 | 4341   | 0.500531767 | 2.513786052 | 3.580248458 | 0.702126146 | 0.482600498 | 0.998252924 |
| chr1:98015115-98039526    | exonic | DPYD           | 1  | 98015115  | 98039526  | 1 | 1  | 1 | 0 | 0 | 0 | 24411  | 0.500531767 | 2.513786052 | 3.580248458 | 0.702126146 | 0.482600498 | 0.998252924 |
| chr11:86778735-86802437   | exonic | TMEM135        | 11 | 86778735  | 86802437  | 1 | 1  | 1 | 0 | 0 | 0 | 23702  | 0.500531767 | 2.513786052 | 3.580248458 | 0.702126146 | 0.482600498 | 0.998252924 |
| chr14:72054287-72090953   | exonic | SIPA1L1        | 14 | 72054287  | 72090953  | 1 | 1  | 1 | 0 | 0 | 0 | 36666  | 0.500531767 | 2.513786052 | 3.580248458 | 0.702126146 | 0.482600498 | 0.998252924 |
| chr18:20516716-20529676   | exonic | RBBP8          | 18 | 20516716  | 20529676  | 1 | 1  | 1 | 0 | 0 | 0 | 12960  | 0.500531767 | 2.513786052 | 3.580248458 | 0.702126146 | 0.482600498 | 0.998252924 |
| chr3:172060906-172061859  | exonic | FNDC3B         | 3  | 172060906 | 172061859 | 1 | 1  | 1 | 0 | 0 | 0 | 953    | 0.500531767 | 2.513786052 | 3.580248458 | 0.702126146 | 0.482600498 | 0.998252924 |
| chr4:121675707-121706246  | exonic | PRDM5          | 4  | 121675707 | 121706246 | 1 | 1  | 1 | 0 | 0 | 0 | 30539  | 0.500531767 | 2.513786052 | 3.580248458 | 0.702126146 | 0.482600498 | 0.998252924 |
| chr7:105121498-105146720  | exonic | PUS7           | 7  | 105121498 | 105146720 | 1 | 1  | 1 | 0 | 0 | 0 | 25222  | 0.500531767 | 2.513786052 | 3.580248458 | 0.702126146 | 0.482600498 | 0.998252924 |
| chr9:135153456-135156961  | exonic | SETX           | 9  | 135153456 | 135156961 | 1 | 1  | 1 | 0 | 0 | 0 | 3505   | 0.500531767 | 2.513786052 | 3.580248458 | 0.702126146 | 0.482600498 | 0.998252924 |
| chr21:38480691-38501363   | exonic | TTC3           | 21 | 38480691  | 38501363  | 1 | 5  | 0 | 0 | 1 | 0 | 20672  | 1.12139336  | 2.526639283 | 2.733205643 | 0.924423411 | NA          | NA          |
| chr17:29550461-29554624   | exonic | NF1            | 17 | 29550461  | 29554624  | 2 | 2  | 2 | 0 | 1 | 0 | 4163   | 1.122090957 | 2.526785425 | 2.486348492 | 1.016263582 | 0.309503886 | 0.998252924 |
| chr1:150198939-150201570  | exonic | ANP32E         | 1  | 150198939 | 150201570 | 3 | 0  | 3 | 1 | 0 | 0 | 2631   | 1.08507929  | 2.538024777 | 2.722452822 | 0.932256661 | 0.3512039   | 0.998252924 |
| chr5:156919980-156921803  | exonic | ADAM19         | 5  | 156919980 | 156921803 | 3 | 0  | 3 | 1 | 0 | 0 | 1823   | 1.08507929  | 2.538024777 | 2.722452822 | 0.932256661 | 0.3512039   | 0.998252924 |
| chr10:22880557-22898646   | exonic | PIP4K2A        | 10 | 22880557  | 22898646  | 2 | 3  | 1 | 1 | 0 | 0 | 18089  | 1.084381693 | 2.538921273 | 2.532898592 | 1.002377782 | 0.316161169 | 0.998252924 |
| chr8:42202470-42214910    | exonic | POLB           | 8  | 42202470  | 42214910  | 5 | 2  | 0 | 0 | 1 | 0 | 12440  | 1.114513734 | 2.539812792 | 2.693923521 | 0.942793206 | 0.345786688 | 0.998252924 |
| chr2:169018296-169038600  | exonic | STK39          | 2  | 169018296 | 169038600 | 5 | 11 | 7 | 0 | 5 | 0 | 20304  | 4.547988791 | 2.554182478 | 1.515177942 | 1.685731034 | NA          | NA          |
| chr1:155209406-155209868  | exonic | GBA            | 1  | 155209406 | 155209868 | 1 | 0  | 2 | 0 | 0 | 0 | 462    | 0.523524994 | 2.572268273 | 3.839567222 | 0.669937033 | 0.502897931 | 0.998252924 |
| chr1:197621364-197684204  | exonic | DENND1B        | 1  | 197621364 | 197684204 | 1 | 0  | 2 | 0 | 0 | 0 | 62840  | 0.523524994 | 2.572268273 | 3.839567222 | 0.669937033 | 0.502897931 | 0.998252924 |
| chr10:128768965-129055693 | exonic | DOCK1, FAM196A | 10 | 128768965 | 129055693 | 1 | 0  | 2 | 0 | 0 | 0 | 286728 | 0.523524994 | 2.572268273 | 3.839567222 | 0.669937033 | 0.502897931 | 0.998252924 |
| chr10:62021616-62039397   | exonic | ANK3           | 10 | 62021616  | 62039397  | 1 | 0  | 2 | 0 | 0 | 0 | 17781  | 0.523524994 | 2.572268273 | 3.839567222 | 0.669937033 | 0.502897931 | 0.998252924 |
| chr11:111907996-111910121 | exonic | DLAT           | 11 | 111907996 | 111910121 | 1 | 0  | 2 | 0 | 0 | 0 | 2125   | 0.523524994 | 2.572268273 | 3.839567222 | 0.669937033 | 0.502897931 | 0.998252924 |
| chr11:128638012-128651918 | exonic | FLI1           | 11 | 128638012 | 128651918 | 1 | 0  | 2 | 0 | 0 | 0 | 13906  | 0.523524994 | 2.572268273 | 3.839567222 | 0.669937033 | 0.502897931 | 0.998252924 |
| chr12:69653207-69656342   | exonic | CPSF6          | 12 | 69653207  | 69656342  | 1 | 0  | 2 | 0 | 0 | 0 | 3135   | 0.523524994 | 2.572268273 | 3.839567222 | 0.669937033 | 0.502897931 | 0.998252924 |
| chr14:71443658-71462642   | exonic | PCNX           | 14 | 71443658  | 71462642  | 1 | 0  | 2 | 0 | 0 | 0 | 18984  | 0.523524994 | 2.572268273 | 3.839567222 | 0.669937033 | 0.502897931 | 0.998252924 |
| chr15:65268812-65275931   | exonic | SPG21          | 15 | 65268812  | 65275931  | 1 | 0  | 2 | 0 | 0 | 0 | 7119   | 0.523524994 | 2.572268273 | 3.839567222 | 0.669937033 | 0.502897931 | 0.998252924 |
| chr15:75706545-75715164   | exonic | SIN3A          | 15 | 75706545  | 75715164  | 1 | 0  | 2 | 0 | 0 | 0 | 8619   | 0.523524994 | 2.572268273 | 3.839567222 | 0.669937033 | 0.502897931 | 0.998252924 |
| chr15:91162972-91169225   | exonic | CRTC3          | 15 | 91162972  | 91169225  | 1 | 0  | 2 | 0 | 0 | 0 | 6253   | 0.523524994 | 2.572268273 | 3.839567222 | 0.669937033 | 0.502897931 | 0.998252924 |

|                           |          |                                            |    |           |           |   |   |   |   |   |   |        |             |             |             |             |             |             |
|---------------------------|----------|--------------------------------------------|----|-----------|-----------|---|---|---|---|---|---|--------|-------------|-------------|-------------|-------------|-------------|-------------|
| chr2:128941248-128945188  | exonic   | UGGT1                                      | 2  | 128941248 | 128945188 | 1 | 0 | 2 | 0 | 0 | 0 | 3940   | 0.523524994 | 2.572268273 | 3.839567222 | 0.669937033 | 0.502897931 | 0.998252924 |
| chr2:197143251-197157474  | exonic   | HECW2                                      | 2  | 197143251 | 197157474 | 1 | 0 | 2 | 0 | 0 | 0 | 14223  | 0.523524994 | 2.572268273 | 3.839567222 | 0.669937033 | 0.502897931 | 0.998252924 |
| chr2:43931119-43980899    | exonic   | PLEKHH2                                    | 2  | 43931119  | 43980899  | 1 | 0 | 2 | 0 | 0 | 0 | 49780  | 0.523524994 | 2.572268273 | 3.839567222 | 0.669937033 | 0.502897931 | 0.998252924 |
| chr20:47691321-47707559   | exonic   | CSE1L                                      | 20 | 47691321  | 47707559  | 1 | 0 | 2 | 0 | 0 | 0 | 16238  | 0.523524994 | 2.572268273 | 3.839567222 | 0.669937033 | 0.502897931 | 0.998252924 |
| chr3:138400808-138409985  | exonic   | PIK3CB                                     | 3  | 138400808 | 138409985 | 1 | 0 | 2 | 0 | 0 | 0 | 9177   | 0.523524994 | 2.572268273 | 3.839567222 | 0.669937033 | 0.502897931 | 0.998252924 |
| chr3:195047613-195066046  | exonic   | ACAP2                                      | 3  | 195047613 | 195066046 | 1 | 0 | 2 | 0 | 0 | 0 | 18433  | 0.523524994 | 2.572268273 | 3.839567222 | 0.669937033 | 0.502897931 | 0.998252924 |
| chr5:54567914-54577343    | exonic   | DHX29                                      | 5  | 54567914  | 54577343  | 1 | 0 | 2 | 0 | 0 | 0 | 9429   | 0.523524994 | 2.572268273 | 3.839567222 | 0.669937033 | 0.502897931 | 0.998252924 |
| chr6:144832079-144844324  | exonic   | UTRN                                       | 6  | 144832079 | 144844324 | 1 | 0 | 2 | 0 | 0 | 0 | 12245  | 0.523524994 | 2.572268273 | 3.839567222 | 0.669937033 | 0.502897931 | 0.998252924 |
| chr7:91980263-91991587    | exonic   | ANKIB1                                     | 7  | 91980263  | 91991587  | 1 | 0 | 2 | 0 | 0 | 0 | 11324  | 0.523524994 | 2.572268273 | 3.839567222 | 0.669937033 | 0.502897931 | 0.998252924 |
| chr8:72181974-72246409    | exonic   | EYA1                                       | 8  | 72181974  | 72246409  | 1 | 0 | 2 | 0 | 0 | 0 | 64435  | 0.523524994 | 2.572268273 | 3.839567222 | 0.669937033 | 0.502897931 | 0.998252924 |
| chr9:20715320-20770237    | exonic   | FOCAD                                      | 9  | 20715320  | 20770237  | 1 | 0 | 2 | 0 | 0 | 0 | 54917  | 0.523524994 | 2.572268273 | 3.839567222 | 0.669937033 | 0.502897931 | 0.998252924 |
| chrX:19560042-19564168    | exonic   | SH3KBP1                                    | X  | 19560042  | 19564168  | 1 | 0 | 2 | 0 | 0 | 0 | 4126   | 0.523524994 | 2.572268273 | 3.839567222 | 0.669937033 | 0.502897931 | 0.998252924 |
| chr1:16362731-16385212    | exonic   | CLCNKB, FAM131C                            | 1  | 16362731  | 16385212  | 0 | 3 | 0 | 0 | 0 | 0 | 22481  | 0.522827397 | 2.575533045 | 3.990987446 | 0.645337296 | NA          | NA          |
| chr1:174931220-174936569  | exonic   | RABGAP1L                                   | 1  | 174931220 | 174936569 | 0 | 3 | 0 | 0 | 0 | 0 | 5349   | 0.522827397 | 2.575533045 | 3.990987446 | 0.645337296 | NA          | NA          |
| chr1:21267983-21276604    | exonic   | EIF4G3                                     | 1  | 21267983  | 21276604  | 0 | 3 | 0 | 0 | 0 | 0 | 8621   | 0.522827397 | 2.575533045 | 3.990987446 | 0.645337296 | NA          | NA          |
| chr1:224437913-224468887  | exonic   | NVL                                        | 1  | 224437913 | 224468887 | 0 | 3 | 0 | 0 | 0 | 0 | 30974  | 0.522827397 | 2.575533045 | 3.990987446 | 0.645337296 | NA          | NA          |
| chr1:227169850-227170351  | exonic   | ADCK3                                      | 1  | 227169850 | 227170351 | 0 | 3 | 0 | 0 | 0 | 0 | 501    | 0.522827397 | 2.575533045 | 3.990987446 | 0.645337296 | NA          | NA          |
| chr1:231124065-231133013  | exonic   | ARV1                                       | 1  | 231124065 | 231133013 | 0 | 3 | 0 | 0 | 0 | 0 | 8948   | 0.522827397 | 2.575533045 | 3.990987446 | 0.645337296 | NA          | NA          |
| chr1:29396433-29399362    | intronic | EPB41                                      | 1  | 29396433  | 29399362  | 0 | 3 | 0 | 0 | 0 | 0 | 2929   | 0.522827397 | 2.575533045 | 3.990987446 | 0.645337296 | NA          | NA          |
| chr1:33280222-33280756    | intronic | YARS                                       | 1  | 33280222  | 33280756  | 0 | 3 | 0 | 0 | 0 | 0 | 534    | 0.522827397 | 2.575533045 | 3.990987446 | 0.645337296 | NA          | NA          |
| chr1:40529898-40530231    | exonic   | CAP1                                       | 1  | 40529898  | 40530231  | 0 | 3 | 0 | 0 | 0 | 0 | 333    | 0.522827397 | 2.575533045 | 3.990987446 | 0.645337296 | NA          | NA          |
| chr1:44713610-44785416    | exonic   | ERI3                                       | 1  | 44713610  | 44785416  | 0 | 3 | 0 | 0 | 0 | 0 | 71806  | 0.522827397 | 2.575533045 | 3.990987446 | 0.645337296 | NA          | NA          |
| chr1:48821342-48851021    | exonic   | SPATA6                                     | 1  | 48821342  | 48851021  | 0 | 3 | 0 | 0 | 0 | 0 | 29679  | 0.522827397 | 2.575533045 | 3.990987446 | 0.645337296 | NA          | NA          |
| chr1:61553820-61743257    | exonic   | NFIA                                       | 1  | 61553820  | 61743257  | 0 | 3 | 0 | 0 | 0 | 0 | 189437 | 0.522827397 | 2.575533045 | 3.990987446 | 0.645337296 | NA          | NA          |
| chr1:89478868-89520898    | exonic   | GBP1, GBP3                                 | 1  | 89478868  | 89520898  | 0 | 3 | 0 | 0 | 0 | 0 | 42030  | 0.522827397 | 2.575533045 | 3.990987446 | 0.645337296 | NA          | NA          |
| chr10:128795011-128798571 | exonic   | DOCK1                                      | 10 | 128795011 | 128798571 | 0 | 3 | 0 | 0 | 0 | 0 | 3560   | 0.522827397 | 2.575533045 | 3.990987446 | 0.645337296 | NA          | NA          |
| chr10:5751493-5754881     | UTR5     | FAM208B (NM_017782; c.-7820_-7725del1ins0) | 10 | 5751493   | 5754881   | 0 | 3 | 0 | 0 | 0 | 0 | 3388   | 0.522827397 | 2.575533045 | 3.990987446 | 0.645337296 | NA          | NA          |
| chr10:64954045-64960437   | exonic   | JMJD1C                                     | 10 | 64954045  | 64960437  | 0 | 3 | 0 | 0 | 0 | 0 | 6392   | 0.522827397 | 2.575533045 | 3.990987446 | 0.645337296 | NA          | NA          |
| chr11:102002779-102004084 | intronic | YAP1                                       | 11 | 102002779 | 102004084 | 0 | 3 | 0 | 0 | 0 | 0 | 1305   | 0.522827397 | 2.575533045 | 3.990987446 | 0.645337296 | NA          | NA          |
| chr11:108398862-108412539 | exonic   | EXPH5                                      | 11 | 108398862 | 108412539 | 0 | 3 | 0 | 0 | 0 | 0 | 13677  | 0.522827397 | 2.575533045 | 3.990987446 | 0.645337296 | NA          | NA          |
| chr11:111851461-111866870 | exonic   | DIXDC1                                     | 11 | 111851461 | 111866870 | 0 | 3 | 0 | 0 | 0 | 0 | 15409  | 0.522827397 | 2.575533045 | 3.990987446 | 0.645337296 | NA          | NA          |
| chr11:12225796-12237866   | exonic   | MICAL2                                     | 11 | 12225796  | 12237866  | 0 | 3 | 0 | 0 | 0 | 0 | 12070  | 0.522827397 | 2.575533045 | 3.990987446 | 0.645337296 | NA          | NA          |
| chr11:16822520-16824842   | exonic   | PLEKHA7                                    | 11 | 16822520  | 16824842  | 0 | 3 | 0 | 0 | 0 | 0 | 2322   | 0.522827397 | 2.575533045 | 3.990987446 | 0.645337296 | NA          | NA          |
| chr11:18330492-18332998   | exonic   | HPS5                                       | 11 | 18330492  | 18332998  | 0 | 3 | 0 | 0 | 0 | 0 | 2506   | 0.522827397 | 2.575533045 | 3.990987446 | 0.645337296 | NA          | NA          |
| chr11:22696395-22707335   | exonic   | GAS2                                       | 11 | 22696395  | 22707335  | 0 | 3 | 0 | 0 | 0 | 0 | 10940  | 0.522827397 | 2.575533045 | 3.990987446 | 0.645337296 | NA          | NA          |

|                           |              |                                                             |    |           |           |   |   |   |   |   |   |       |             |             |             |             |    |    |
|---------------------------|--------------|-------------------------------------------------------------|----|-----------|-----------|---|---|---|---|---|---|-------|-------------|-------------|-------------|-------------|----|----|
| chr11:47502931-47503536   | intronic     | CELF1                                                       | 11 | 47502931  | 47503536  | 0 | 3 | 0 | 0 | 0 | 0 | 605   | 0.522827397 | 2.575533045 | 3.990987446 | 0.645337296 | NA | NA |
| chr11:85694908-85742653   | exonic       | PICALM                                                      | 11 | 85694908  | 85742653  | 0 | 2 | 0 | 0 | 2 | 0 | 47745 | 0.522827397 | 2.575533045 | 3.990987446 | 0.645337296 | NA | NA |
| chr11:9182259-9229179     | exonic       | DENND5A                                                     | 11 | 9182259   | 9229179   | 0 | 3 | 0 | 0 | 0 | 0 | 46920 | 0.522827397 | 2.575533045 | 3.990987446 | 0.645337296 | NA | NA |
| chr11:9430032-9438695     | exonic       | IPO7                                                        | 11 | 9430032   | 9438695   | 0 | 3 | 0 | 0 | 0 | 0 | 8663  | 0.522827397 | 2.575533045 | 3.990987446 | 0.645337296 | NA | NA |
| chr12:123041930-123047246 | exonic       | KNTC1                                                       | 12 | 123041930 | 123047246 | 0 | 3 | 0 | 0 | 0 | 0 | 5316  | 0.522827397 | 2.575533045 | 3.990987446 | 0.645337296 | NA | NA |
| chr12:124158165-124184357 | exonic       | TCTN2                                                       | 12 | 124158165 | 124184357 | 0 | 3 | 0 | 0 | 0 | 0 | 26192 | 0.522827397 | 2.575533045 | 3.990987446 | 0.645337296 | NA | NA |
| chr12:19398570-19399007   | intronic     | PLEKHA5                                                     | 12 | 19398570  | 19399007  | 0 | 3 | 0 | 0 | 0 | 0 | 437   | 0.522827397 | 2.575533045 | 3.990987446 | 0.645337296 | NA | NA |
| chr12:29496249-29498375   | splicing     | ERGIC2                                                      | 12 | 29496249  | 29498375  | 0 | 3 | 0 | 0 | 0 | 0 | 2126  | 0.522827397 | 2.575533045 | 3.990987446 | 0.645337296 | NA | NA |
| chr12:3907825-3973123     | exonic       | PARP11                                                      | 12 | 3907825   | 3973123   | 0 | 3 | 0 | 0 | 0 | 0 | 65298 | 0.522827397 | 2.575533045 | 3.990987446 | 0.645337296 | NA | NA |
| chr12:56998000-56999111   | exonic       | BAZ2A                                                       | 12 | 56998000  | 56999111  | 0 | 3 | 0 | 0 | 0 | 0 | 1111  | 0.522827397 | 2.575533045 | 3.990987446 | 0.645337296 | NA | NA |
| chr12:6839568-6840310     | exonic       | COPS7A                                                      | 12 | 6839568   | 6840310   | 0 | 3 | 0 | 0 | 0 | 0 | 742   | 0.522827397 | 2.575533045 | 3.990987446 | 0.645337296 | NA | NA |
| chr12:9736702-9760398     | exonic       | KLRB1                                                       | 12 | 9736702   | 9760398   | 0 | 3 | 0 | 0 | 0 | 0 | 23696 | 0.522827397 | 2.575533045 | 3.990987446 | 0.645337296 | NA | NA |
| chr13:25051839-25077915   | exonic       | PARP4                                                       | 13 | 25051839  | 25077915  | 0 | 3 | 0 | 0 | 0 | 0 | 26076 | 0.522827397 | 2.575533045 | 3.990987446 | 0.645337296 | NA | NA |
| chr13:47266670-47275342   | exonic       | LRCH1                                                       | 13 | 47266670  | 47275342  | 0 | 3 | 0 | 0 | 0 | 0 | 8672  | 0.522827397 | 2.575533045 | 3.990987446 | 0.645337296 | NA | NA |
| chr14:101426419-101427631 | intergenic   | <small>SNORD114-6(dist=2840), SNORD114-7(dist=1780)</small> | 14 | 101426419 | 101427631 | 0 | 3 | 0 | 0 | 0 | 0 | 1212  | 0.522827397 | 2.575533045 | 3.990987446 | 0.645337296 | NA | NA |
| chr14:104053611-104056766 | exonic       | APOPT1                                                      | 14 | 104053611 | 104056766 | 0 | 3 | 0 | 0 | 0 | 0 | 3155  | 0.522827397 | 2.575533045 | 3.990987446 | 0.645337296 | NA | NA |
| chr14:104135847-104143860 | exonic       | KLC1                                                        | 14 | 104135847 | 104143860 | 0 | 3 | 0 | 0 | 0 | 0 | 8013  | 0.522827397 | 2.575533045 | 3.990987446 | 0.645337296 | NA | NA |
| chr14:107083640-107095433 | ncRNA_exonic | MIR7641-2                                                   | 14 | 107083640 | 107095433 | 0 | 3 | 0 | 0 | 0 | 0 | 11793 | 0.522827397 | 2.575533045 | 3.990987446 | 0.645337296 | NA | NA |
| chr14:24687339-24687637   | exonic       | NEDD8, NEDD8-MDP1                                           | 14 | 24687339  | 24687637  | 0 | 3 | 0 | 0 | 0 | 0 | 298   | 0.522827397 | 2.575533045 | 3.990987446 | 0.645337296 | NA | NA |
| chr14:31590589-31592143   | exonic       | HECTD1                                                      | 14 | 31590589  | 31592143  | 0 | 3 | 0 | 0 | 0 | 0 | 1554  | 0.522827397 | 2.575533045 | 3.990987446 | 0.645337296 | NA | NA |
| chr14:32559707-32615546   | exonic       | ARHGAP5                                                     | 14 | 32559707  | 32615546  | 0 | 3 | 0 | 0 | 0 | 0 | 55839 | 0.522827397 | 2.575533045 | 3.990987446 | 0.645337296 | NA | NA |
| chr14:58878624-58890813   | exonic       | TIMM9                                                       | 14 | 58878624  | 58890813  | 0 | 3 | 0 | 0 | 0 | 0 | 12189 | 0.522827397 | 2.575533045 | 3.990987446 | 0.645337296 | NA | NA |
| chr14:60574304-60600766   | exonic       | PCNXL4                                                      | 14 | 60574304  | 60600766  | 0 | 3 | 0 | 0 | 0 | 0 | 26462 | 0.522827397 | 2.575533045 | 3.990987446 | 0.645337296 | NA | NA |
| chr14:71880665-71948928   | intergenic   | <small>SNORD56B(dist=15541), LOC145474(dist=5650)</small>   | 14 | 71880665  | 71948928  | 0 | 3 | 0 | 0 | 0 | 0 | 68263 | 0.522827397 | 2.575533045 | 3.990987446 | 0.645337296 | NA | NA |
| chr14:75506613-75509180   | exonic       | MLH3                                                        | 14 | 75506613  | 75509180  | 0 | 3 | 0 | 0 | 0 | 0 | 2567  | 0.522827397 | 2.575533045 | 3.990987446 | 0.645337296 | NA | NA |
| chr14:80944597-80997230   | exonic       | CEP128                                                      | 14 | 80944597  | 80997230  | 0 | 3 | 0 | 0 | 0 | 0 | 52633 | 0.522827397 | 2.575533045 | 3.990987446 | 0.645337296 | NA | NA |
| chr15:51204274-51233972   | exonic       | AP4E1                                                       | 15 | 51204274  | 51233972  | 0 | 3 | 0 | 0 | 0 | 0 | 29698 | 0.522827397 | 2.575533045 | 3.990987446 | 0.645337296 | NA | NA |
| chr15:56958592-56971019   | exonic       | ZNF280D                                                     | 15 | 56958592  | 56971019  | 0 | 3 | 0 | 0 | 0 | 0 | 12427 | 0.522827397 | 2.575533045 | 3.990987446 | 0.645337296 | NA | NA |
| chr15:62299506-62312737   | exonic       | VPS13C                                                      | 15 | 62299506  | 62312737  | 0 | 3 | 0 | 0 | 0 | 0 | 13231 | 0.522827397 | 2.575533045 | 3.990987446 | 0.645337296 | NA | NA |
| chr15:71761716-71762097   | intronic     | THSD4                                                       | 15 | 71761716  | 71762097  | 0 | 3 | 0 | 0 | 0 | 0 | 381   | 0.522827397 | 2.575533045 | 3.990987446 | 0.645337296 | NA | NA |
| chr15:83819966-83826793   | exonic       | HDGFRP3                                                     | 15 | 83819966  | 83826793  | 0 | 3 | 0 | 0 | 0 | 0 | 6827  | 0.522827397 | 2.575533045 | 3.990987446 | 0.645337296 | NA | NA |
| chr15:85607600-85610435   | exonic       | PDE8A                                                       | 15 | 85607600  | 85610435  | 0 | 3 | 0 | 0 | 0 | 0 | 2835  | 0.522827397 | 2.575533045 | 3.990987446 | 0.645337296 | NA | NA |
| chr16:11868091-11873219   | exonic       | ZC3H7A                                                      | 16 | 11868091  | 11873219  | 0 | 3 | 0 | 0 | 0 | 0 | 5128  | 0.522827397 | 2.575533045 | 3.990987446 | 0.645337296 | NA | NA |
| chr16:21122946-21133445   | exonic       | DNAH3                                                       | 16 | 21122946  | 21133445  | 0 | 3 | 0 | 0 | 0 | 0 | 10499 | 0.522827397 | 2.575533045 | 3.990987446 | 0.645337296 | NA | NA |
| chr16:21327228-21328447   | ncRNA_exonic | CRYM-AS1                                                    | 16 | 21327228  | 21328447  | 0 | 3 | 0 | 0 | 0 | 0 | 1219  | 0.522827397 | 2.575533045 | 3.990987446 | 0.645337296 | NA | NA |



|                          |              |                                              |    |           |           |   |   |   |   |   |   |       |             |             |             |             |    |    |
|--------------------------|--------------|----------------------------------------------|----|-----------|-----------|---|---|---|---|---|---|-------|-------------|-------------|-------------|-------------|----|----|
| chr16:21350242-21363459  | ncRNA_exonic | SNX29P1                                      | 16 | 21350242  | 21363459  | 0 | 3 | 0 | 0 | 0 | 0 | 13217 | 0.522827397 | 2.575533045 | 3.990987446 | 0.645337296 | NA | NA |
| chr16:23113640-23131567  | exonic       | USP31                                        | 16 | 23113640  | 23131567  | 0 | 3 | 0 | 0 | 0 | 0 | 17927 | 0.522827397 | 2.575533045 | 3.990987446 | 0.645337296 | NA | NA |
| chr16:30521681-30525167  | exonic       | ITGAL                                        | 16 | 30521681  | 30525167  | 0 | 3 | 0 | 0 | 0 | 0 | 3486  | 0.522827397 | 2.575533045 | 3.990987446 | 0.645337296 | NA | NA |
| chr16:56435644-56448256  | exonic       | AMFR                                         | 16 | 56435644  | 56448256  | 0 | 3 | 0 | 0 | 0 | 0 | 12612 | 0.522827397 | 2.575533045 | 3.990987446 | 0.645337296 | NA | NA |
| chr16:78282541-78282854  | intronic     | WFOX                                         | 16 | 78282541  | 78282854  | 0 | 3 | 0 | 0 | 0 | 0 | 313   | 0.522827397 | 2.575533045 | 3.990987446 | 0.645337296 | NA | NA |
| chr17:15611469-15620627  | exonic       | ZNF286A                                      | 17 | 15611469  | 15620627  | 0 | 3 | 0 | 0 | 0 | 0 | 9158  | 0.522827397 | 2.575533045 | 3.990987446 | 0.645337296 | NA | NA |
| chr17:16046919-16056709  | exonic       | NCOR1                                        | 17 | 16046919  | 16056709  | 0 | 3 | 0 | 0 | 0 | 0 | 9790  | 0.522827397 | 2.575533045 | 3.990987446 | 0.645337296 | NA | NA |
| chr17:35619769-35644548  | exonic       | ACACA                                        | 17 | 35619769  | 35644548  | 0 | 3 | 0 | 0 | 0 | 0 | 24779 | 0.522827397 | 2.575533045 | 3.990987446 | 0.645337296 | NA | NA |
| chr17:35797838-35800763  | exonic       | TADA2A                                       | 17 | 35797838  | 35800763  | 0 | 3 | 0 | 0 | 0 | 0 | 2925  | 0.522827397 | 2.575533045 | 3.990987446 | 0.645337296 | NA | NA |
| chr17:43545574-43553092  | exonic       | PLEKHM1                                      | 17 | 43545574  | 43553092  | 0 | 3 | 0 | 0 | 0 | 0 | 7518  | 0.522827397 | 2.575533045 | 3.990987446 | 0.645337296 | NA | NA |
| chr17:49079075-49084687  | exonic       | SPAG9                                        | 17 | 49079075  | 49084687  | 0 | 3 | 0 | 0 | 0 | 0 | 5612  | 0.522827397 | 2.575533045 | 3.990987446 | 0.645337296 | NA | NA |
| chr17:62228200-62238293  | exonic       | TEX2                                         | 17 | 62228200  | 62238293  | 0 | 3 | 0 | 0 | 0 | 0 | 10093 | 0.522827397 | 2.575533045 | 3.990987446 | 0.645337296 | NA | NA |
| chr18:21776088-21819346  | exonic       | OSBPL1A                                      | 18 | 21776088  | 21819346  | 0 | 3 | 0 | 0 | 0 | 0 | 43258 | 0.522827397 | 2.575533045 | 3.990987446 | 0.645337296 | NA | NA |
| chr18:2739477-2740819    | exonic       | SMCHD1                                       | 18 | 2739477   | 2740819   | 0 | 3 | 0 | 0 | 0 | 0 | 1342  | 0.522827397 | 2.575533045 | 3.990987446 | 0.645337296 | NA | NA |
| chr18:29218606-29246335  | exonic       | B4GALT6                                      | 18 | 29218606  | 29246335  | 0 | 3 | 0 | 0 | 0 | 0 | 27729 | 0.522827397 | 2.575533045 | 3.990987446 | 0.645337296 | NA | NA |
| chr18:8718422-8733201    | exonic       | MTCL1                                        | 18 | 8718422   | 8733201   | 0 | 3 | 0 | 0 | 0 | 0 | 14779 | 0.522827397 | 2.575533045 | 3.990987446 | 0.645337296 | NA | NA |
| chr19:1254477-1254878    | exonic       | MIDN                                         | 19 | 1254477   | 1254878   | 0 | 3 | 0 | 0 | 0 | 0 | 401   | 0.522827397 | 2.575533045 | 3.990987446 | 0.645337296 | NA | NA |
| chr19:44564902-44653050  | exonic       | ZNF223, ZNF224, ZNF225, ZNF234, ZNF284       | 19 | 44564902  | 44653050  | 0 | 3 | 0 | 0 | 0 | 0 | 88148 | 0.522827397 | 2.575533045 | 3.990987446 | 0.645337296 | NA | NA |
| chr19:58498349-58498742  | intronic     | ZNF606                                       | 19 | 58498349  | 58498742  | 0 | 3 | 0 | 0 | 0 | 0 | 393   | 0.522827397 | 2.575533045 | 3.990987446 | 0.645337296 | NA | NA |
| chr2:114674460-114688973 | exonic       | ACTR3                                        | 2  | 114674460 | 114688973 | 0 | 3 | 0 | 0 | 0 | 0 | 14513 | 0.522827397 | 2.575533045 | 3.990987446 | 0.645337296 | NA | NA |
| chr2:135705663-135706685 | intronic     | CCNT2                                        | 2  | 135705663 | 135706685 | 0 | 3 | 0 | 0 | 0 | 0 | 1022  | 0.522827397 | 2.575533045 | 3.990987446 | 0.645337296 | NA | NA |
| chr2:159389692-159459616 | exonic       | PKP4                                         | 2  | 159389692 | 159459616 | 0 | 3 | 0 | 0 | 0 | 0 | 69924 | 0.522827397 | 2.575533045 | 3.990987446 | 0.645337296 | NA | NA |
| chr2:168861166-168861625 | intronic     | STK39                                        | 2  | 168861166 | 168861625 | 0 | 3 | 0 | 0 | 0 | 0 | 459   | 0.522827397 | 2.575533045 | 3.990987446 | 0.645337296 | NA | NA |
| chr2:191792031-191819544 | exonic       | GLS                                          | 2  | 191792031 | 191819544 | 0 | 3 | 0 | 0 | 0 | 0 | 27513 | 0.522827397 | 2.575533045 | 3.990987446 | 0.645337296 | NA | NA |
| chr2:202208892-202216174 | exonic       | ALS2CR12                                     | 2  | 202208892 | 202216174 | 0 | 3 | 0 | 0 | 0 | 0 | 7282  | 0.522827397 | 2.575533045 | 3.990987446 | 0.645337296 | NA | NA |
| chr2:38566325-38566914   | intronic     | ATL2                                         | 2  | 38566325  | 38566914  | 0 | 3 | 0 | 0 | 0 | 0 | 589   | 0.522827397 | 2.575533045 | 3.990987446 | 0.645337296 | NA | NA |
| chr2:38944300-38945436   | intronic     | GALM                                         | 2  | 38944300  | 38945436  | 0 | 3 | 0 | 0 | 0 | 0 | 1136  | 0.522827397 | 2.575533045 | 3.990987446 | 0.645337296 | NA | NA |
| chr2:54122143-54128696   | exonic       | PSME4                                        | 2  | 54122143  | 54128696  | 0 | 3 | 0 | 0 | 0 | 0 | 6553  | 0.522827397 | 2.575533045 | 3.990987446 | 0.645337296 | NA | NA |
| chr2:55470551-55476670   | exonic       | MTIF2                                        | 2  | 55470551  | 55476670  | 0 | 3 | 0 | 0 | 0 | 0 | 6119  | 0.522827397 | 2.575533045 | 3.990987446 | 0.645337296 | NA | NA |
| chr2:61552509-61577828   | exonic       | USP34                                        | 2  | 61552509  | 61577828  | 0 | 3 | 0 | 0 | 0 | 0 | 25319 | 0.522827397 | 2.575533045 | 3.990987446 | 0.645337296 | NA | NA |
| chr2:85545030-85546410   | UTR3         | -----                                        | 2  | 85545030  | 85546410  | 0 | 3 | 0 | 0 | 0 | 0 | 1380  | 0.522827397 | 2.575533045 | 3.990987446 | 0.645337296 | NA | NA |
| chr2:9083316-9114564     | exonic       | MBOAT2                                       | 2  | 9083316   | 9114564   | 0 | 3 | 0 | 0 | 0 | 0 | 31248 | 0.522827397 | 2.575533045 | 3.990987446 | 0.645337296 | NA | NA |
| chr2:96499673-96500875   | intergenic   | LINC00342 (dist=6944), ANKRD36C (dist=14421) | 2  | 96499673  | 96500875  | 0 | 3 | 0 | 0 | 0 | 0 | 1202  | 0.522827397 | 2.575533045 | 3.990987446 | 0.645337296 | NA | NA |
| chr20:13539655-13581264  | exonic       | TASP1                                        | 20 | 13539655  | 13581264  | 0 | 3 | 0 | 0 | 0 | 0 | 41609 | 0.522827397 | 2.575533045 | 3.990987446 | 0.645337296 | NA | NA |
| chr20:16336974-16362392  | exonic       | KIF16B                                       | 20 | 16336974  | 16362392  | 0 | 3 | 0 | 0 | 0 | 0 | 25418 | 0.522827397 | 2.575533045 | 3.990987446 | 0.645337296 | NA | NA |

|                          |              |                                                              |    |           |           |   |   |   |   |   |   |       |             |             |             |             |    |    |
|--------------------------|--------------|--------------------------------------------------------------|----|-----------|-----------|---|---|---|---|---|---|-------|-------------|-------------|-------------|-------------|----|----|
| chr20:40141484-40179999  | exonic       | CHD6                                                         | 20 | 40141484  | 40179999  | 0 | 3 | 0 | 0 | 0 | 0 | 38515 | 0.522827397 | 2.575533045 | 3.990987446 | 0.645337296 | NA | NA |
| chr21:16338524-16415895  | exonic       | NRIP1                                                        | 21 | 16338524  | 16415895  | 0 | 3 | 0 | 0 | 0 | 0 | 77371 | 0.522827397 | 2.575533045 | 3.990987446 | 0.645337296 | NA | NA |
| chr21:47768925-47787054  | exonic       | PCNT                                                         | 21 | 47768925  | 47787054  | 0 | 3 | 0 | 0 | 0 | 0 | 18129 | 0.522827397 | 2.575533045 | 3.990987446 | 0.645337296 | NA | NA |
| chr22:45574119-45576201  | exonic       | NUP50                                                        | 22 | 45574119  | 45576201  | 0 | 3 | 0 | 0 | 0 | 0 | 2082  | 0.522827397 | 2.575533045 | 3.990987446 | 0.645337296 | NA | NA |
| chr3:119155840-119156601 | splicing     | TMEM39A                                                      | 3  | 119155840 | 119156601 | 0 | 3 | 0 | 0 | 0 | 0 | 761   | 0.522827397 | 2.575533045 | 3.990987446 | 0.645337296 | NA | NA |
| chr3:142383043-142396955 | exonic       | PLS1                                                         | 3  | 142383043 | 142396955 | 0 | 3 | 0 | 0 | 0 | 0 | 13912 | 0.522827397 | 2.575533045 | 3.990987446 | 0.645337296 | NA | NA |
| chr3:170077486-170099129 | exonic       | SKIL                                                         | 3  | 170077486 | 170099129 | 0 | 4 | 0 | 0 | 0 | 0 | 21643 | 0.522827397 | 2.575533045 | 3.990987446 | 0.645337296 | NA | NA |
| chr3:47912302-47919013   | exonic       | MAP4                                                         | 3  | 47912302  | 47919013  | 0 | 3 | 0 | 0 | 0 | 0 | 6711  | 0.522827397 | 2.575533045 | 3.990987446 | 0.645337296 | NA | NA |
| chr3:48572944-48577204   | exonic       | PFKFB4                                                       | 3  | 48572944  | 48577204  | 0 | 3 | 0 | 0 | 0 | 0 | 4260  | 0.522827397 | 2.575533045 | 3.990987446 | 0.645337296 | NA | NA |
| chr3:53262071-53269190   | exonic       | TKT                                                          | 3  | 53262071  | 53269190  | 0 | 3 | 0 | 0 | 0 | 0 | 7119  | 0.522827397 | 2.575533045 | 3.990987446 | 0.645337296 | NA | NA |
| chr3:67797195-67818857   | ncRNA_exonic | SUCLG2-AS1                                                   | 3  | 67797195  | 67818857  | 0 | 3 | 0 | 0 | 0 | 0 | 21662 | 0.522827397 | 2.575533045 | 3.990987446 | 0.645337296 | NA | NA |
| chr3:69047161-69054385   | exonic       | EOGT                                                         | 3  | 69047161  | 69054385  | 0 | 3 | 0 | 0 | 0 | 0 | 7224  | 0.522827397 | 2.575533045 | 3.990987446 | 0.645337296 | NA | NA |
| chr3:81691931-81754764   | exonic       | GBE1                                                         | 3  | 81691931  | 81754764  | 0 | 3 | 0 | 0 | 0 | 0 | 62833 | 0.522827397 | 2.575533045 | 3.990987446 | 0.645337296 | NA | NA |
| chr4:102014932-102030235 | exonic       | PPP3CA                                                       | 4  | 102014932 | 102030235 | 0 | 3 | 0 | 0 | 0 | 0 | 15303 | 0.522827397 | 2.575533045 | 3.990987446 | 0.645337296 | NA | NA |
| chr4:148729217-148744108 | exonic       | ARHGAP10                                                     | 4  | 148729217 | 148744108 | 0 | 3 | 0 | 0 | 0 | 0 | 14891 | 0.522827397 | 2.575533045 | 3.990987446 | 0.645337296 | NA | NA |
| chr4:153189481-153218976 | intergenic   | <small>LOC10096286 (dist=163613), FBXW7 (dist=23424)</small> | 4  | 153189481 | 153218976 | 0 | 3 | 0 | 0 | 0 | 0 | 29495 | 0.522827397 | 2.575533045 | 3.990987446 | 0.645337296 | NA | NA |
| chr4:159772472-159791621 | exonic       | FNIP2                                                        | 4  | 159772472 | 159791621 | 0 | 3 | 0 | 0 | 0 | 0 | 19149 | 0.522827397 | 2.575533045 | 3.990987446 | 0.645337296 | NA | NA |
| chr4:16760781-16816050   | exonic       | LDB2                                                         | 4  | 16760781  | 16816050  | 0 | 3 | 0 | 0 | 0 | 0 | 55269 | 0.522827397 | 2.575533045 | 3.990987446 | 0.645337296 | NA | NA |
| chr4:20703349-20729020   | exonic       | PACRGL                                                       | 4  | 20703349  | 20729020  | 0 | 3 | 0 | 0 | 0 | 0 | 25671 | 0.522827397 | 2.575533045 | 3.990987446 | 0.645337296 | NA | NA |
| chr4:39839475-39843676   | exonic       | PDS5A                                                        | 4  | 39839475  | 39843676  | 0 | 3 | 0 | 0 | 0 | 0 | 4201  | 0.522827397 | 2.575533045 | 3.990987446 | 0.645337296 | NA | NA |
| chr4:83978078-83984399   | exonic       | COPS4                                                        | 4  | 83978078  | 83984399  | 0 | 3 | 0 | 0 | 0 | 0 | 6321  | 0.522827397 | 2.575533045 | 3.990987446 | 0.645337296 | NA | NA |
| chr4:87614739-87638270   | exonic       | PTPN13                                                       | 4  | 87614739  | 87638270  | 0 | 3 | 0 | 0 | 0 | 0 | 23531 | 0.522827397 | 2.575533045 | 3.990987446 | 0.645337296 | NA | NA |
| chr4:87622393-87622954   | exonic       | PTPN13                                                       | 4  | 87622393  | 87622954  | 0 | 3 | 0 | 0 | 0 | 0 | 561   | 0.522827397 | 2.575533045 | 3.990987446 | 0.645337296 | NA | NA |
| chr5:153674375-153709298 | exonic       | GALNT10                                                      | 5  | 153674375 | 153709298 | 0 | 3 | 0 | 0 | 0 | 0 | 34923 | 0.522827397 | 2.575533045 | 3.990987446 | 0.645337296 | NA | NA |
| chr5:37165640-37167315   | exonic       | C5orf42                                                      | 5  | 37165640  | 37167315  | 0 | 3 | 0 | 0 | 0 | 0 | 1675  | 0.522827397 | 2.575533045 | 3.990987446 | 0.645337296 | NA | NA |
| chr5:65486984-65498858   | intergenic   | <small>SREK1 (dist=7540), LOC101928769 (dist=304515)</small> | 5  | 65486984  | 65498858  | 0 | 3 | 0 | 0 | 0 | 0 | 11874 | 0.522827397 | 2.575533045 | 3.990987446 | 0.645337296 | NA | NA |
| chr5:68715197-68720463   | exonic       | MARVELD2                                                     | 5  | 68715197  | 68720463  | 0 | 3 | 0 | 0 | 0 | 0 | 5266  | 0.522827397 | 2.575533045 | 3.990987446 | 0.645337296 | NA | NA |
| chr6:109796601-109798133 | exonic       | ZBTB24                                                       | 6  | 109796601 | 109798133 | 0 | 3 | 0 | 0 | 0 | 0 | 1532  | 0.522827397 | 2.575533045 | 3.990987446 | 0.645337296 | NA | NA |
| chr6:112469358-112486478 | exonic       | LAMA4                                                        | 6  | 112469358 | 112486478 | 0 | 3 | 0 | 0 | 0 | 0 | 17120 | 0.522827397 | 2.575533045 | 3.990987446 | 0.645337296 | NA | NA |
| chr6:119134265-119177708 | exonic       | MCM9                                                         | 6  | 119134265 | 119177708 | 0 | 3 | 0 | 0 | 0 | 0 | 43443 | 0.522827397 | 2.575533045 | 3.990987446 | 0.645337296 | NA | NA |
| chr6:128409446-128410216 | intronic     | PTPRK                                                        | 6  | 128409446 | 128410216 | 0 | 3 | 0 | 0 | 0 | 0 | 770   | 0.522827397 | 2.575533045 | 3.990987446 | 0.645337296 | NA | NA |
| chr6:132181526-132198301 | exonic       | ENPP1                                                        | 6  | 132181526 | 132198301 | 0 | 3 | 0 | 0 | 0 | 0 | 16775 | 0.522827397 | 2.575533045 | 3.990987446 | 0.645337296 | NA | NA |
| chr6:144803103-144805673 | exonic       | UTRN                                                         | 6  | 144803103 | 144805673 | 0 | 3 | 0 | 0 | 0 | 0 | 2570  | 0.522827397 | 2.575533045 | 3.990987446 | 0.645337296 | NA | NA |
| chr6:151857452-151859436 | exonic       | CCDC170                                                      | 6  | 151857452 | 151859436 | 0 | 3 | 0 | 0 | 0 | 0 | 1984  | 0.522827397 | 2.575533045 | 3.990987446 | 0.645337296 | NA | NA |
| chr6:157150360-157222659 | exonic       | ARID1B                                                       | 6  | 157150360 | 157222659 | 0 | 3 | 0 | 0 | 0 | 0 | 72299 | 0.522827397 | 2.575533045 | 3.990987446 | 0.645337296 | NA | NA |

|                          |              |                                                       |   |           |           |   |   |   |   |   |   |       |             |             |             |             |    |    |
|--------------------------|--------------|-------------------------------------------------------|---|-----------|-----------|---|---|---|---|---|---|-------|-------------|-------------|-------------|-------------|----|----|
| chr6:32029934-32035761   | exonic       | TNXB                                                  | 6 | 32029934  | 32035761  | 0 | 3 | 0 | 0 | 0 | 0 | 5827  | 0.522827397 | 2.575533045 | 3.990987446 | 0.645337296 | NA | NA |
| chr6:51892626-51893149   | exonic       | PKHD1                                                 | 6 | 51892626  | 51893149  | 0 | 3 | 0 | 0 | 0 | 0 | 523   | 0.522827397 | 2.575533045 | 3.990987446 | 0.645337296 | NA | NA |
| chr6:76357447-76369123   | exonic       | SENP6                                                 | 6 | 76357447  | 76369123  | 0 | 3 | 0 | 0 | 0 | 0 | 11676 | 0.522827397 | 2.575533045 | 3.990987446 | 0.645337296 | NA | NA |
| chr6:76534687-76535096   | intronic     | MYO6                                                  | 6 | 76534687  | 76535096  | 0 | 3 | 0 | 0 | 0 | 0 | 409   | 0.522827397 | 2.575533045 | 3.990987446 | 0.645337296 | NA | NA |
| chr6:86252899-86277295   | exonic       | SNX14                                                 | 6 | 86252899  | 86277295  | 0 | 3 | 0 | 0 | 0 | 0 | 24396 | 0.522827397 | 2.575533045 | 3.990987446 | 0.645337296 | NA | NA |
| chr7:148543562-148547617 | exonic       | EZH2                                                  | 7 | 148543562 | 148547617 | 0 | 3 | 0 | 0 | 0 | 0 | 4055  | 0.522827397 | 2.575533045 | 3.990987446 | 0.645337296 | NA | NA |
| chr7:155499554-155500074 | exonic       | RBM33                                                 | 7 | 155499554 | 155500074 | 0 | 3 | 0 | 0 | 0 | 0 | 520   | 0.522827397 | 2.575533045 | 3.990987446 | 0.645337296 | NA | NA |
| chr7:157013382-157049738 | exonic       | UBE3C                                                 | 7 | 157013382 | 157049738 | 0 | 3 | 0 | 0 | 0 | 0 | 36356 | 0.522827397 | 2.575533045 | 3.990987446 | 0.645337296 | NA | NA |
| chr7:23292925-23309794   | exonic       | GPNMB                                                 | 7 | 23292925  | 23309794  | 0 | 3 | 0 | 0 | 0 | 0 | 16869 | 0.522827397 | 2.575533045 | 3.990987446 | 0.645337296 | NA | NA |
| chr7:23499373-23505747   | intronic     | IGF2BP3                                               | 7 | 23499373  | 23505747  | 0 | 3 | 0 | 0 | 0 | 0 | 6374  | 0.522827397 | 2.575533045 | 3.990987446 | 0.645337296 | NA | NA |
| chr7:28851121-28854779   | intronic     | CREB5                                                 | 7 | 28851121  | 28854779  | 0 | 3 | 0 | 0 | 0 | 0 | 3658  | 0.522827397 | 2.575533045 | 3.990987446 | 0.645337296 | NA | NA |
| chr7:33677372-33682530   | intergenic   | <small>BBS9 (dist=31692), BMPER (dist=261993)</small> | 7 | 33677372  | 33682530  | 0 | 3 | 0 | 0 | 0 | 0 | 5158  | 0.522827397 | 2.575533045 | 3.990987446 | 0.645337296 | NA | NA |
| chr7:39726229-39736458   | exonic       | RALA                                                  | 7 | 39726229  | 39736458  | 0 | 3 | 0 | 0 | 0 | 0 | 10229 | 0.522827397 | 2.575533045 | 3.990987446 | 0.645337296 | NA | NA |
| chr7:43957676-43958110   | intronic     | URGCP                                                 | 7 | 43957676  | 43958110  | 0 | 3 | 0 | 0 | 0 | 0 | 434   | 0.522827397 | 2.575533045 | 3.990987446 | 0.645337296 | NA | NA |
| chr7:50793710-50823753   | exonic       | GRB10                                                 | 7 | 50793710  | 50823753  | 0 | 3 | 0 | 0 | 0 | 0 | 30043 | 0.522827397 | 2.575533045 | 3.990987446 | 0.645337296 | NA | NA |
| chr7:6505701-6509385     | exonic       | KDELR2                                                | 7 | 6505701   | 6509385   | 0 | 3 | 0 | 0 | 0 | 0 | 3684  | 0.522827397 | 2.575533045 | 3.990987446 | 0.645337296 | NA | NA |
| chr7:65592690-65610487   | exonic       | CRCP                                                  | 7 | 65592690  | 65610487  | 0 | 3 | 0 | 0 | 0 | 0 | 17797 | 0.522827397 | 2.575533045 | 3.990987446 | 0.645337296 | NA | NA |
| chr7:6774935-6777567     | ncRNA_exonic | PMS2CL                                                | 7 | 6774935   | 6777567   | 0 | 3 | 0 | 0 | 0 | 0 | 2632  | 0.522827397 | 2.575533045 | 3.990987446 | 0.645337296 | NA | NA |
| chr7:716865-751164       | exonic       | PRKAR1B                                               | 7 | 716865    | 751164    | 0 | 3 | 0 | 0 | 0 | 0 | 34299 | 0.522827397 | 2.575533045 | 3.990987446 | 0.645337296 | NA | NA |
| chr7:76978667-77035422   | exonic       | GSAP                                                  | 7 | 76978667  | 77035422  | 0 | 3 | 0 | 0 | 0 | 0 | 56755 | 0.522827397 | 2.575533045 | 3.990987446 | 0.645337296 | NA | NA |
| chr7:91924202-92000921   | exonic       | ANKIB1                                                | 7 | 91924202  | 92000921  | 0 | 3 | 0 | 0 | 0 | 0 | 76719 | 0.522827397 | 2.575533045 | 3.990987446 | 0.645337296 | NA | NA |
| chr8:103863857-103867392 | intronic     | AZIN1                                                 | 8 | 103863857 | 103867392 | 0 | 3 | 0 | 0 | 0 | 0 | 3535  | 0.522827397 | 2.575533045 | 3.990987446 | 0.645337296 | NA | NA |
| chr8:130859049-130883742 | exonic       | FAM49B                                                | 8 | 130859049 | 130883742 | 0 | 3 | 0 | 0 | 0 | 0 | 24693 | 0.522827397 | 2.575533045 | 3.990987446 | 0.645337296 | NA | NA |
| chr8:141407718-141415797 | exonic       | TRAPPC9                                               | 8 | 141407718 | 141415797 | 0 | 3 | 0 | 0 | 0 | 0 | 8079  | 0.522827397 | 2.575533045 | 3.990987446 | 0.645337296 | NA | NA |
| chr8:56659838-56660836   | intronic     | TMEM68                                                | 8 | 56659838  | 56660836  | 0 | 3 | 0 | 0 | 0 | 0 | 998   | 0.522827397 | 2.575533045 | 3.990987446 | 0.645337296 | NA | NA |
| chr8:56695307-56702858   | exonic       | TGS1                                                  | 8 | 56695307  | 56702858  | 0 | 3 | 0 | 0 | 0 | 0 | 7551  | 0.522827397 | 2.575533045 | 3.990987446 | 0.645337296 | NA | NA |
| chr9:67930386-67938658   | exonic       | ANKRD20A1, ANKRD20A3                                  | 9 | 67930386  | 67938658  | 0 | 3 | 0 | 0 | 0 | 0 | 8272  | 0.522827397 | 2.575533045 | 3.990987446 | 0.645337296 | NA | NA |
| chr9:79115832-79131692   | exonic       | GCNT1                                                 | 9 | 79115832  | 79131692  | 0 | 3 | 0 | 0 | 0 | 0 | 15860 | 0.522827397 | 2.575533045 | 3.990987446 | 0.645337296 | NA | NA |
| chr9:90219869-90221143   | exonic       | DAPK1                                                 | 9 | 90219869  | 90221143  | 0 | 3 | 0 | 0 | 0 | 0 | 1274  | 0.522827397 | 2.575533045 | 3.990987446 | 0.645337296 | NA | NA |
| chr9:98660130-98718295   | exonic       | ERCC6L2                                               | 9 | 98660130  | 98718295  | 0 | 3 | 0 | 0 | 0 | 0 | 58165 | 0.522827397 | 2.575533045 | 3.990987446 | 0.645337296 | NA | NA |
| chrX:114357089-114364762 | exonic       | LRCH2                                                 | X | 114357089 | 114364762 | 0 | 3 | 0 | 0 | 0 | 0 | 7673  | 0.522827397 | 2.575533045 | 3.990987446 | 0.645337296 | NA | NA |
| chrX:123156380-123164975 | exonic       | STAG2                                                 | X | 123156380 | 123164975 | 0 | 3 | 0 | 0 | 0 | 0 | 8595  | 0.522827397 | 2.575533045 | 3.990987446 | 0.645337296 | NA | NA |
| chrX:128630851-128631821 | spllicing    | SMARCA1                                               | X | 128630851 | 128631821 | 0 | 3 | 0 | 0 | 0 | 0 | 970   | 0.522827397 | 2.575533045 | 3.990987446 | 0.645337296 | NA | NA |
| chrX:131373648-131417060 | ncRNA_exonic | RAP2C-AS1                                             | X | 131373648 | 131417060 | 0 | 3 | 0 | 0 | 0 | 0 | 43412 | 0.522827397 | 2.575533045 | 3.990987446 | 0.645337296 | NA | NA |
| chrX:73494176-73501683   | ncRNA_exonic | FTX                                                   | X | 73494176  | 73501683  | 0 | 3 | 0 | 0 | 0 | 0 | 7507  | 0.522827397 | 2.575533045 | 3.990987446 | 0.645337296 | NA | NA |

|                           |              |                                           |        |          |           |           |   |   |    |    |    |        |             |             |             |             |             |             |
|---------------------------|--------------|-------------------------------------------|--------|----------|-----------|-----------|---|---|----|----|----|--------|-------------|-------------|-------------|-------------|-------------|-------------|
| chrX:80013621-80019914    | intronic     | BRWD3                                     | X      | 80013621 | 80019914  | 0         | 3 | 0 | 0  | 0  | 0  | 6293   | 0.522827397 | 2.575533045 | 3.990987446 | 0.645337296 | NA          | NA          |
| chr14:60749401-60758172   | exonic       | PPM1A                                     |        | 14       | 60749401  | 60758172  | 2 | 0 | 4  | 0  | 1  | 8771   | 1.168077409 | 2.58216918  | 2.670783252 | 0.966820942 | 0.333633553 | 0.998252924 |
| chr14:106208678-106236323 | intergenic   | ELK2AP (dist=69534), MIR4507 (dist=87970) |        | 14       | 106208678 | 106236323 | 0 | 0 | 20 | 6  | 0  | 27645  | 4.583248821 | 2.582941515 | 3.810251635 | 0.677892633 | NA          | NA          |
| chr1:151214598-151215043  | exonic       | PIP5K1A                                   |        | 1        | 151214598 | 151215043 | 4 | 0 | 0  | 0  | 0  | 445    | 0.515947771 | 2.590766001 | 3.990114053 | 0.649296227 | NA          | NA          |
| chr1:243809194-244006584  | exonic       | AKT3                                      |        | 1        | 243809194 | 244006584 | 4 | 0 | 0  | 0  | 0  | 197390 | 0.515947771 | 2.590766001 | 3.990114053 | 0.649296227 | NA          | NA          |
| chr10:101714970-101716962 | exonic       | DNMBP                                     |        | 10       | 101714970 | 101716962 | 4 | 0 | 0  | 0  | 0  | 1992   | 0.515947771 | 2.590766001 | 3.990114053 | 0.649296227 | NA          | NA          |
| chr10:103783233-103793096 | exonic       | C10orf76                                  |        | 10       | 103783233 | 103793096 | 4 | 0 | 0  | 0  | 0  | 9863   | 0.515947771 | 2.590766001 | 3.990114053 | 0.649296227 | NA          | NA          |
| chr10:70136609-70161494   | exonic       | RUFY2                                     |        | 10       | 70136609  | 70161494  | 4 | 0 | 0  | 0  | 0  | 24885  | 0.515947771 | 2.590766001 | 3.990114053 | 0.649296227 | NA          | NA          |
| chr10:99327670-99327898   | exonic       | UBTD1                                     |        | 10       | 99327670  | 99327898  | 4 | 0 | 0  | 0  | 0  | 228    | 0.515947771 | 2.590766001 | 3.990114053 | 0.649296227 | NA          | NA          |
| chr11:3723692-3727857     | exonic       | NUP98                                     |        | 11       | 3723692   | 3727857   | 4 | 0 | 0  | 0  | 0  | 4165   | 0.515947771 | 2.590766001 | 3.990114053 | 0.649296227 | NA          | NA          |
| chr11:6945729-7013224     | exonic       | ZNF215                                    |        | 11       | 6945729   | 7013224   | 4 | 0 | 0  | 0  | 0  | 67495  | 0.515947771 | 2.590766001 | 3.990114053 | 0.649296227 | NA          | NA          |
| chr11:77396149-77404656   | exonic       | RSF1                                      |        | 11       | 77396149  | 77404656  | 8 | 2 | 4  | 28 | 19 | 8507   | 0.515947771 | 2.590766001 | 3.990114053 | 0.649296227 | NA          | NA          |
| chr12:1107490-1137738     | exonic       | ERC1                                      |        | 12       | 1107490   | 1137738   | 4 | 0 | 0  | 0  | 0  | 30248  | 0.515947771 | 2.590766001 | 3.990114053 | 0.649296227 | NA          | NA          |
| chr12:9243797-9316855     | exonic       | A2M, PZP                                  |        | 12       | 9243797   | 9316855   | 4 | 0 | 0  | 0  | 0  | 73058  | 0.515947771 | 2.590766001 | 3.990114053 | 0.649296227 | NA          | NA          |
| chr12:97886239-97987832   | ncRNA_exonic | MIR135A2, RMST                            |        | 12       | 97886239  | 97987832  | 4 | 0 | 0  | 0  | 0  | 101593 | 0.515947771 | 2.590766001 | 3.990114053 | 0.649296227 | NA          | NA          |
| chr14:100877988-100878425 | intronic     | WDR25                                     |        | 14       | 100877988 | 100878425 | 4 | 0 | 0  | 0  | 0  | 437    | 0.515947771 | 2.590766001 | 3.990114053 | 0.649296227 | NA          | NA          |
| chr15:42613982-42622870   | exonic       | GANC                                      |        | 15       | 42613982  | 42622870  | 4 | 0 | 0  | 0  | 0  | 8888   | 0.515947771 | 2.590766001 | 3.990114053 | 0.649296227 | NA          | NA          |
| chr15:72168131-72197347   | exonic       | MYO9A                                     |        | 15       | 72168131  | 72197347  | 4 | 0 | 0  | 0  | 0  | 29216  | 0.515947771 | 2.590766001 | 3.990114053 | 0.649296227 | NA          | NA          |
| chr15:90982563-90983847   | exonic       | IQGAP1                                    |        | 15       | 90982563  | 90983847  | 4 | 0 | 0  | 0  | 0  | 1284   | 0.515947771 | 2.590766001 | 3.990114053 | 0.649296227 | NA          | NA          |
| chr15:91454780-91455250   | exonic       | MAN2A2                                    |        | 15       | 91454780  | 91455250  | 4 | 0 | 0  | 0  | 0  | 470    | 0.515947771 | 2.590766001 | 3.990114053 | 0.649296227 | NA          | NA          |
| chr16:47505875-47508730   | intronic     | PHKB                                      |        | 16       | 47505875  | 47508730  | 4 | 0 | 0  | 0  | 0  | 2855   | 0.515947771 | 2.590766001 | 3.990114053 | 0.649296227 | NA          | NA          |
| chr16:68155889-68217269   | exonic       | NFATC3                                    |        | 16       | 68155889  | 68217269  | 2 | 0 | 0  | 2  | 0  | 61380  | 0.515947771 | 2.590766001 | 3.990114053 | 0.649296227 | NA          | NA          |
| chr17:30500850-30521126   | exonic       | RHOT1                                     |        | 17       | 30500850  | 30521126  | 4 | 0 | 0  | 0  | 0  | 20276  | 0.515947771 | 2.590766001 | 3.990114053 | 0.649296227 | NA          | NA          |
| chr17:65906992-65920705   | exonic       | BPTF                                      |        | 17       | 65906992  | 65920705  | 3 | 0 | 0  | 0  | 0  | 13713  | 0.515947771 | 2.590766001 | 3.990114053 | 0.649296227 | NA          | NA          |
| chr18:12366963-12371690   | exonic       | AFG3L2                                    |        | 18       | 12366963  | 12371690  | 4 | 0 | 0  | 0  | 0  | 4727   | 0.515947771 | 2.590766001 | 3.990114053 | 0.649296227 | NA          | NA          |
| chr18:56606676-56621031   | exonic       | ZNF532                                    |        | 18       | 56606676  | 56621031  | 4 | 0 | 0  | 0  | 0  | 14355  | 0.515947771 | 2.590766001 | 3.990114053 | 0.649296227 | NA          | NA          |
| chr19:16753323-16753722   | intergenic   | MED26 (dist=14308), SMIM7 (dist=3237)     |        | 19       | 16753323  | 16753722  | 4 | 0 | 0  | 0  | 0  | 399    | 0.515947771 | 2.590766001 | 3.990114053 | 0.649296227 | NA          | NA          |
| chr19:20235815-20237682   | intergenic   | ZNF90 (dist=3838), ZNF486 (dist=40341)    |        | 19       | 20235815  | 20237682  | 4 | 0 | 0  | 0  | 0  | 1867   | 0.515947771 | 2.590766001 | 3.990114053 | 0.649296227 | NA          | NA          |
| chr19:24014399-24015746   | intergenic   | RPSAP58 (dist=3480), ZNF726 (dist=81938)  |        | 19       | 24014399  | 24015746  | 4 | 0 | 0  | 0  | 0  | 1347   | 0.515947771 | 2.590766001 | 3.990114053 | 0.649296227 | NA          | NA          |
| chr19:3647407-3648622     | splicing     | PIP5K1C                                   |        | 19       | 3647407   | 3648622   | 4 | 0 | 0  | 0  | 0  | 1215   | 0.515947771 | 2.590766001 | 3.990114053 | 0.649296227 | NA          | NA          |
| chr19:3647409-3648622     | splicing     | PIP5K1C                                   |        | 19       | 3647409   | 3648622   | 4 | 0 | 0  | 0  | 0  | 1213   | 0.515947771 | 2.590766001 | 3.990114053 | 0.649296227 | NA          | NA          |
| chr19:3982804-3983289     | exonic       | EEF2                                      |        | 19       | 3982804   | 3983289   | 4 | 0 | 0  | 0  | 0  | 485    | 0.515947771 | 2.590766001 | 3.990114053 | 0.649296227 | NA          | NA          |
| chr19:54378082-54379039   | UTR3         |                                           |        | 19       | 54378082  | 54379039  | 4 | 0 | 0  | 0  | 0  | 957    | 0.515947771 | 2.590766001 | 3.990114053 | 0.649296227 | NA          | NA          |
| chr19:58130780-58132861   | exonic       | ZNF134                                    |        | 19       | 58130780  | 58132861  | 4 | 0 | 0  | 0  | 0  | 2081   | 0.515947771 | 2.590766001 | 3.990114053 | 0.649296227 | NA          | NA          |
| chr2:110321942-110323436  | exonic       |                                           | 10-Sep | 2        | 110321942 | 110323436 | 4 | 0 | 0  | 0  | 0  | 1494   | 0.515947771 | 2.590766001 | 3.990114053 | 0.649296227 | NA          | NA          |

|                          |              |                                       |    |           |           |   |   |   |   |   |   |       |             |             |             |             |             |             |
|--------------------------|--------------|---------------------------------------|----|-----------|-----------|---|---|---|---|---|---|-------|-------------|-------------|-------------|-------------|-------------|-------------|
| chr2:236877106-236878331 | exonic       | AGAP1                                 | 2  | 236877106 | 236878331 | 4 | 0 | 0 | 0 | 0 | 0 | 1225  | 0.515947771 | 2.590766001 | 3.990114053 | 0.649296227 | NA          | NA          |
| chr2:24021007-24046439   | exonic       | ATAD2B                                | 2  | 24021007  | 24046439  | 4 | 0 | 0 | 0 | 0 | 0 | 25432 | 0.515947771 | 2.590766001 | 3.990114053 | 0.649296227 | NA          | NA          |
| chr2:27430507-27435014   | exonic       | SLC5A6                                | 2  | 27430507  | 27435014  | 4 | 0 | 0 | 0 | 0 | 0 | 4507  | 0.515947771 | 2.590766001 | 3.990114053 | 0.649296227 | NA          | NA          |
| chr2:32422412-32434630   | exonic       | SLC30A6                               | 2  | 32422412  | 32434630  | 4 | 0 | 0 | 0 | 0 | 0 | 12218 | 0.515947771 | 2.590766001 | 3.990114053 | 0.649296227 | NA          | NA          |
| chr20:20493156-20493928  | exonic       | RALGAPA2                              | 20 | 20493156  | 20493928  | 4 | 0 | 0 | 0 | 0 | 0 | 772   | 0.515947771 | 2.590766001 | 3.990114053 | 0.649296227 | NA          | NA          |
| chr22:29240115-29242500  | intergenic   | XBP1 (dist=43555), ZNRF3 (dist=37255) | 22 | 29240115  | 29242500  | 4 | 0 | 0 | 0 | 0 | 0 | 2385  | 0.515947771 | 2.590766001 | 3.990114053 | 0.649296227 | NA          | NA          |
| chr3:138417748-138461623 | exonic       | PIK3CB                                | 3  | 138417748 | 138461623 | 4 | 0 | 0 | 0 | 0 | 0 | 43875 | 0.515947771 | 2.590766001 | 3.990114053 | 0.649296227 | NA          | NA          |
| chr3:155611306-155633981 | exonic       | GMPS                                  | 3  | 155611306 | 155633981 | 4 | 0 | 0 | 0 | 0 | 0 | 22675 | 0.515947771 | 2.590766001 | 3.990114053 | 0.649296227 | NA          | NA          |
| chr4:125422051-125477665 | ncRNA_exonic | LOC101927087                          | 4  | 125422051 | 125477665 | 4 | 0 | 0 | 0 | 0 | 0 | 55614 | 0.515947771 | 2.590766001 | 3.990114053 | 0.649296227 | NA          | NA          |
| chr4:38029408-38055959   | exonic       | TBC1D1                                | 4  | 38029408  | 38055959  | 4 | 0 | 0 | 0 | 0 | 0 | 26551 | 0.515947771 | 2.590766001 | 3.990114053 | 0.649296227 | NA          | NA          |
| chr5:134113264-134118755 | exonic       | DDX46                                 | 5  | 134113264 | 134118755 | 4 | 0 | 0 | 0 | 0 | 0 | 5491  | 0.515947771 | 2.590766001 | 3.990114053 | 0.649296227 | NA          | NA          |
| chr5:52942062-52954454   | exonic       | NDUFS4                                | 5  | 52942062  | 52954454  | 4 | 0 | 0 | 0 | 0 | 0 | 12392 | 0.515947771 | 2.590766001 | 3.990114053 | 0.649296227 | NA          | NA          |
| chr5:74674168-74675520   | exonic       | COL4A3BP                              | 5  | 74674168  | 74675520  | 4 | 0 | 0 | 0 | 0 | 0 | 1352  | 0.515947771 | 2.590766001 | 3.990114053 | 0.649296227 | NA          | NA          |
| chr6:117638305-117650609 | exonic       | ROS1                                  | 6  | 117638305 | 117650609 | 4 | 0 | 0 | 0 | 0 | 0 | 12304 | 0.515947771 | 2.590766001 | 3.990114053 | 0.649296227 | NA          | NA          |
| chr6:26370550-26444532   | exonic       | BTN2A2, BTN3A1, BTN3A2, BTN3A3        | 6  | 26370550  | 26444532  | 4 | 0 | 0 | 0 | 0 | 0 | 73982 | 0.515947771 | 2.590766001 | 3.990114053 | 0.649296227 | NA          | NA          |
| chr7:7591789-7594820     | ncRNA_exonic | LOC101927391                          | 7  | 7591789   | 7594820   | 4 | 0 | 0 | 0 | 0 | 0 | 3031  | 0.515947771 | 2.590766001 | 3.990114053 | 0.649296227 | NA          | NA          |
| chr7:891020-893255       | exonic       | SUN1                                  | 7  | 891020    | 893255    | 4 | 0 | 0 | 0 | 0 | 0 | 2235  | 0.515947771 | 2.590766001 | 3.990114053 | 0.649296227 | NA          | NA          |
| chr8:30539590-30541604   | splicing     | GSR                                   | 8  | 30539590  | 30541604  | 4 | 0 | 0 | 0 | 0 | 0 | 2014  | 0.515947771 | 2.590766001 | 3.990114053 | 0.649296227 | NA          | NA          |
| chr8:39079128-39114862   | exonic       | ADAM32                                | 8  | 39079128  | 39114862  | 4 | 0 | 0 | 0 | 0 | 0 | 35734 | 0.515947771 | 2.590766001 | 3.990114053 | 0.649296227 | NA          | NA          |
| chr8:41905896-41907225   | exonic       | KAT6A                                 | 8  | 41905896  | 41907225  | 4 | 0 | 0 | 0 | 0 | 0 | 1329  | 0.515947771 | 2.590766001 | 3.990114053 | 0.649296227 | NA          | NA          |
| chr8:72964774-72974600   | exonic       | TRPA1                                 | 8  | 72964774  | 72974600  | 4 | 0 | 0 | 0 | 0 | 0 | 9826  | 0.515947771 | 2.590766001 | 3.990114053 | 0.649296227 | NA          | NA          |
| chr8:82626153-82630459   | exonic       | ZFAND1                                | 8  | 82626153  | 82630459  | 4 | 0 | 0 | 0 | 0 | 0 | 4306  | 0.515947771 | 2.590766001 | 3.990114053 | 0.649296227 | NA          | NA          |
| chr9:86274695-86284242   | exonic       | UBQLN1                                | 9  | 86274695  | 86284242  | 4 | 0 | 0 | 0 | 0 | 0 | 9547  | 0.515947771 | 2.590766001 | 3.990114053 | 0.649296227 | NA          | NA          |
| chr1:186026365-186031732 | exonic       | HMCN1                                 | 1  | 186026365 | 186031732 | 4 | 3 | 0 | 0 | 1 | 0 | 5367  | 1.15980259  | 2.597932294 | 2.65177556  | 0.979695391 | 0.327236502 | 0.998252924 |
| chr4:170400553-170459062 | exonic       | NEK1                                  | 4  | 170400553 | 170459062 | 4 | 3 | 0 | 0 | 1 | 0 | 58509 | 1.15980259  | 2.597932294 | 2.65177556  | 0.979695391 | 0.327236502 | 0.998252924 |
| chr22:24709280-24765288  | exonic       | SPECC1L                               | 22 | 24709280  | 24765288  | 0 | 0 | 0 | 2 | 1 | 0 | 56008 | 4.323489904 | 2.623532514 | 1.520899324 | 1.724987626 | 0.084529703 | 0.998252924 |
| chr1:112237962-112246098 | exonic       | RAP1A                                 | 1  | 112237962 | 112246098 | 0 | 2 | 1 | 0 | 0 | 0 | 8136  | 0.545820624 | 2.63040967  | 3.780256721 | 0.695828316 | 0.486536354 | 0.998252924 |
| chr1:36469941-36479649   | exonic       | AGO3                                  | 1  | 36469941  | 36479649  | 0 | 2 | 1 | 0 | 0 | 0 | 9708  | 0.545820624 | 2.63040967  | 3.780256721 | 0.695828316 | 0.486536354 | 0.998252924 |
| chr10:70945742-70951522  | exonic       | SUPV3L1                               | 10 | 70945742  | 70951522  | 0 | 2 | 1 | 0 | 0 | 0 | 5780  | 0.545820624 | 2.63040967  | 3.780256721 | 0.695828316 | 0.486536354 | 0.998252924 |
| chr11:22696395-22770807  | exonic       | GAS2                                  | 11 | 22696395  | 22770807  | 0 | 2 | 1 | 0 | 0 | 0 | 74412 | 0.545820624 | 2.63040967  | 3.780256721 | 0.695828316 | 0.486536354 | 0.998252924 |
| chr15:22840243-22842183  | exonic       | TUBGCP5                               | 15 | 22840243  | 22842183  | 0 | 2 | 1 | 0 | 0 | 0 | 1940  | 0.545820624 | 2.63040967  | 3.780256721 | 0.695828316 | 0.486536354 | 0.998252924 |
| chr15:51240216-51250991  | exonic       | AP4E1                                 | 15 | 51240216  | 51250991  | 0 | 2 | 1 | 0 | 0 | 0 | 10775 | 0.545820624 | 2.63040967  | 3.780256721 | 0.695828316 | 0.486536354 | 0.998252924 |
| chr16:15758592-15761296  | exonic       | NDE1                                  | 16 | 15758592  | 15761296  | 0 | 2 | 1 | 0 | 0 | 0 | 2704  | 0.545820624 | 2.63040967  | 3.780256721 | 0.695828316 | 0.486536354 | 0.998252924 |
| chr17:45206758-45249430  | exonic       | CDC27                                 | 17 | 45206758  | 45249430  | 0 | 2 | 1 | 0 | 0 | 0 | 42672 | 0.545820624 | 2.63040967  | 3.780256721 | 0.695828316 | 0.486536354 | 0.998252924 |
| chr17:72469674-72470824  | exonic       | CD300A                                | 17 | 72469674  | 72470824  | 0 | 2 | 1 | 0 | 0 | 0 | 1150  | 0.545820624 | 2.63040967  | 3.780256721 | 0.695828316 | 0.486536354 | 0.998252924 |

|                          |              |            |    |           |           |   |    |   |   |   |   |       |             |             |             |             |             |             |
|--------------------------|--------------|------------|----|-----------|-----------|---|----|---|---|---|---|-------|-------------|-------------|-------------|-------------|-------------|-------------|
| chr18:20572710-20576425  | exonic       | RBBP8      | 18 | 20572710  | 20576425  | 0 | 2  | 1 | 0 | 0 | 0 | 3715  | 0.545820624 | 2.63040967  | 3.780256721 | 0.695828316 | 0.486536354 | 0.998252924 |
| chr2:152271336-152273415 | exonic       | RIF1       | 2  | 152271336 | 152273415 | 0 | 2  | 1 | 0 | 0 | 0 | 2079  | 0.545820624 | 2.63040967  | 3.780256721 | 0.695828316 | 0.486536354 | 0.998252924 |
| chr2:203378441-203383775 | exonic       | BMP2R2     | 2  | 203378441 | 203383775 | 0 | 2  | 1 | 0 | 0 | 0 | 5334  | 0.545820624 | 2.63040967  | 3.780256721 | 0.695828316 | 0.486536354 | 0.998252924 |
| chr2:217005908-217026771 | exonic       | XRCC5      | 2  | 217005908 | 217026771 | 0 | 2  | 1 | 0 | 0 | 0 | 20863 | 0.545820624 | 2.63040967  | 3.780256721 | 0.695828316 | 0.486536354 | 0.998252924 |
| chr21:34717551-34721849  | exonic       | IFNAR1     | 21 | 34717551  | 34721849  | 0 | 2  | 1 | 0 | 0 | 0 | 4298  | 0.545820624 | 2.63040967  | 3.780256721 | 0.695828316 | 0.486536354 | 0.998252924 |
| chr22:40669428-40696590  | exonic       | TNRC6B     | 22 | 40669428  | 40696590  | 0 | 2  | 1 | 0 | 0 | 0 | 27162 | 0.545820624 | 2.63040967  | 3.780256721 | 0.695828316 | 0.486536354 | 0.998252924 |
| chr3:38232221-38278452   | exonic       | OXSRI      | 3  | 38232221  | 38278452  | 0 | 2  | 1 | 0 | 0 | 0 | 46231 | 0.545820624 | 2.63040967  | 3.780256721 | 0.695828316 | 0.486536354 | 0.998252924 |
| chr3:43640023-43647355   | exonic       | ANO10      | 3  | 43640023  | 43647355  | 0 | 2  | 1 | 0 | 0 | 0 | 7332  | 0.545820624 | 2.63040967  | 3.780256721 | 0.695828316 | 0.486536354 | 0.998252924 |
| chr8:62475302-62531578   | exonic       | ASPH       | 8  | 62475302  | 62531578  | 0 | 2  | 1 | 0 | 0 | 0 | 56276 | 0.545820624 | 2.63040967  | 3.780256721 | 0.695828316 | 0.486536354 | 0.998252924 |
| chr8:71587052-71595865   | exonic       | XKR9       | 8  | 71587052  | 71595865  | 0 | 2  | 1 | 0 | 0 | 0 | 8813  | 0.545820624 | 2.63040967  | 3.780256721 | 0.695828316 | 0.486536354 | 0.998252924 |
| chr9:22046315-22056386   | ncRNA_exonic | CDKN2B-AS1 | 9  | 22046315  | 22056386  | 0 | 2  | 1 | 0 | 0 | 0 | 10071 | 0.545820624 | 2.63040967  | 3.780256721 | 0.695828316 | 0.486536354 | 0.998252924 |
| chr4:170398274-170459062 | exonic       | NEK1       | 4  | 170398274 | 170459062 | 2 | 2  | 2 | 1 | 0 | 2 | 60788 | 1.145086554 | 2.640838924 | 2.665181155 | 0.990866575 | 0.321750735 | 0.998252924 |
| chr22:50181037-50198008  | exonic       | BRD1       | 22 | 50181037  | 50198008  | 3 | 4  | 0 | 0 | 1 | 0 | 16971 | 1.205091446 | 2.653615163 | 2.623578127 | 1.011448882 | 0.311801636 | 0.998252924 |
| chr10:1118055-1142186    | exonic       | WDR37      | 10 | 1118055   | 1142186   | 3 | 4  | 0 | 0 | 0 | 1 | 24131 | 1.392282633 | 2.65500731  | 2.552410551 | 1.040196025 | 0.298248838 | 0.998252924 |
| chr22:24698162-24765288  | exonic       | SPECC1L    | 22 | 24698162  | 24765288  | 7 | 12 | 3 | 1 | 0 | 2 | 67126 | 4.308773868 | 2.656744626 | 1.522322032 | 1.745192259 | 0.080951408 | 0.998252924 |
| chr14:24680620-24681035  | exonic       | CHMP4A     | 14 | 24680620  | 24681035  | 3 | 1  | 6 | 2 | 0 | 0 | 415   | 1.957473551 | 2.662530962 | 2.078281825 | 1.281121227 | 0.200151089 | 0.998252924 |
| chr19:14150319-14150722  | exonic       | IL27RA     | 19 | 14150319  | 14150722  | 0 | 3  | 3 | 0 | 1 | 0 | 403   | 1.235661896 | 2.667057241 | 2.621840467 | 1.017246196 | NA          | NA          |
| chr2:9667914-9676957     | exonic       | ADAM17     | 2  | 9667914   | 9676957   | 4 | 0  | 3 | 0 | 1 | 0 | 9043  | 1.22878227  | 2.678429474 | 2.609326221 | 1.026483179 | 0.304663888 | 0.998252924 |
| chr11:34111725-34113603  | exonic       | CAPRINI    | 11 | 34111725  | 34113603  | 4 | 0  | 3 | 0 | 0 | 1 | 1878  | 1.415973457 | 2.679384059 | 2.540898105 | 1.054502758 | NA          | NA          |
| chr1:150040686-150082742 | exonic       | VPS45      | 1  | 150040686 | 150082742 | 0 | 1  | 2 | 0 | 0 | 0 | 42056 | 0.56881385  | 2.68380486  | 3.722958972 | 0.720879516 | 0.470983647 | 0.998252924 |
| chr1:155330091-155365344 | exonic       | ASH1L      | 1  | 155330091 | 155365344 | 0 | 1  | 2 | 0 | 0 | 0 | 35253 | 0.56881385  | 2.68380486  | 3.722958972 | 0.720879516 | 0.470983647 | 0.998252924 |
| chr1:200776503-200801973 | exonic       | CAMSAP2    | 1  | 200776503 | 200801973 | 0 | 1  | 2 | 0 | 0 | 0 | 25470 | 0.56881385  | 2.68380486  | 3.722958972 | 0.720879516 | 0.470983647 | 0.998252924 |
| chr1:235600636-235605197 | exonic       | TBCE       | 1  | 235600636 | 235605197 | 7 | 1  | 2 | 0 | 3 | 0 | 4561  | 0.56881385  | 2.68380486  | 3.722958972 | 0.720879516 | 0.470983647 | 0.998252924 |
| chr1:54266365-54298264   | exonic       | NDC1       | 1  | 54266365  | 54298264  | 0 | 1  | 2 | 0 | 0 | 0 | 31899 | 0.56881385  | 2.68380486  | 3.722958972 | 0.720879516 | 0.470983647 | 0.998252924 |
| chr10:99915849-99969656  | exonic       | R3HCC1L    | 10 | 99915849  | 99969656  | 0 | 1  | 2 | 0 | 0 | 0 | 53807 | 0.56881385  | 2.68380486  | 3.722958972 | 0.720879516 | 0.470983647 | 0.998252924 |
| chr12:27135705-27143560  | exonic       | TM7SF3     | 12 | 27135705  | 27143560  | 0 | 1  | 2 | 0 | 0 | 0 | 7855  | 0.56881385  | 2.68380486  | 3.722958972 | 0.720879516 | 0.470983647 | 0.998252924 |
| chr17:45403591-45422464  | exonic       | EFCAB13    | 17 | 45403591  | 45422464  | 0 | 1  | 2 | 0 | 0 | 0 | 18873 | 0.56881385  | 2.68380486  | 3.722958972 | 0.720879516 | 0.470983647 | 0.998252924 |
| chr20:33369923-33380366  | exonic       | NCOA6      | 20 | 33369923  | 33380366  | 0 | 1  | 2 | 0 | 0 | 0 | 10443 | 0.56881385  | 2.68380486  | 3.722958972 | 0.720879516 | 0.470983647 | 0.998252924 |
| chr20:34430494-34459751  | exonic       | PHF20      | 20 | 34430494  | 34459751  | 0 | 1  | 2 | 0 | 0 | 0 | 29257 | 0.56881385  | 2.68380486  | 3.722958972 | 0.720879516 | 0.470983647 | 0.998252924 |
| chr3:150340171-150342686 | exonic       | SELT       | 3  | 150340171 | 150342686 | 0 | 1  | 2 | 0 | 0 | 0 | 2515  | 0.56881385  | 2.68380486  | 3.722958972 | 0.720879516 | 0.470983647 | 0.998252924 |
| chr3:183465459-183480067 | exonic       | YEATS2     | 3  | 183465459 | 183480067 | 0 | 1  | 2 | 0 | 0 | 0 | 14608 | 0.56881385  | 2.68380486  | 3.722958972 | 0.720879516 | 0.470983647 | 0.998252924 |
| chr5:50084356-50093067   | exonic       | PARP8      | 5  | 50084356  | 50093067  | 0 | 1  | 2 | 0 | 0 | 0 | 8711  | 0.56881385  | 2.68380486  | 3.722958972 | 0.720879516 | 0.470983647 | 0.998252924 |
| chr6:109962720-109993370 | exonic       | AK9        | 6  | 109962720 | 109993370 | 0 | 1  | 2 | 0 | 0 | 0 | 30650 | 0.56881385  | 2.68380486  | 3.722958972 | 0.720879516 | 0.470983647 | 0.998252924 |
| chr6:146125507-146127557 | exonic       | FBXO30     | 6  | 146125507 | 146127557 | 0 | 1  | 2 | 0 | 0 | 0 | 2050  | 0.56881385  | 2.68380486  | 3.722958972 | 0.720879516 | 0.470983647 | 0.998252924 |
| chr6:151766442-151766960 | exonic       | RMND1      | 6  | 151766442 | 151766960 | 0 | 1  | 2 | 0 | 0 | 0 | 518   | 0.56881385  | 2.68380486  | 3.722958972 | 0.720879516 | 0.470983647 | 0.998252924 |

|                           |              |                  |    |           |           |   |     |   |   |    |   |       |             |             |             |             |             |             |
|---------------------------|--------------|------------------|----|-----------|-----------|---|-----|---|---|----|---|-------|-------------|-------------|-------------|-------------|-------------|-------------|
| chr7:156516805-156549159  | exonic       | LMBR1            | 7  | 156516805 | 156549159 | 0 | 1   | 2 | 0 | 0  | 0 | 32354 | 0.56881385  | 2.68380486  | 3.722958972 | 0.720879516 | 0.470983647 | 0.998252924 |
| chr8:43013717-43027529    | exonic       | HGSNAT           | 8  | 43013717  | 43027529  | 0 | 1   | 2 | 0 | 0  | 0 | 13812 | 0.56881385  | 2.68380486  | 3.722958972 | 0.720879516 | 0.470983647 | 0.998252924 |
| chr9:125932180-125946577  | exonic       | STRBP            | 9  | 125932180 | 125946577 | 0 | 1   | 2 | 0 | 0  | 0 | 14397 | 0.56881385  | 2.68380486  | 3.722958972 | 0.720879516 | 0.470983647 | 0.998252924 |
| chr4:114452371-114469885  | exonic       | CAMK2D           | 4  | 114452371 | 114469885 | 3 | 3   | 1 | 0 | 0  | 1 | 17514 | 1.41527586  | 2.684151192 | 2.368300716 | 1.133365866 | NA          | NA          |
| chr7:22330793-22357656    | exonic       | RAPGEF5          | 7  | 22330793  | 22357656  | 3 | 104 | 5 | 0 | 15 | 4 | 26863 | 22.54627482 | 2.685560897 | 1.981178669 | 1.355536953 | NA          | NA          |
| chr21:37619814-37633030   | exonic       | DOPEY2           | 21 | 37619814  | 37633030  | 0 | 2   | 4 | 0 | 0  | 1 | 13216 | 1.445846309 | 2.692803585 | 2.552116361 | 1.055125709 | 0.291367835 | 0.998252924 |
| chr1:33097427-33100393    | exonic       | ZBTB80S          | 1  | 33097427  | 33100393  | 0 | 2   | 4 | 0 | 1  | 0 | 2966  | 1.258655122 | 2.693383309 | 2.616538092 | 1.029369042 | 0.303306291 | 0.998252924 |
| chr21:38480691-38519903   | exonic       | TTC3             | 21 | 38480691  | 38519903  | 3 | 4   | 0 | 1 | 2  | 0 | 39212 | 1.19037541  | 2.696167414 | 2.636345958 | 1.022691049 | 0.306453945 | 0.998252924 |
| chr1:58992932-59002413    | exonic       | OMA1             | 1  | 58992932  | 59002413  | 3 | 1   | 0 | 0 | 0  | 0 | 9481  | 0.561236627 | 2.702934345 | 3.722041091 | 0.726196804 | 0.467718131 | 0.998252924 |
| chr14:105718843-105739231 | exonic       | BRF1             | 14 | 105718843 | 105739231 | 3 | 1   | 0 | 0 | 0  | 0 | 20388 | 0.561236627 | 2.702934345 | 3.722041091 | 0.726196804 | 0.467718131 | 0.998252924 |
| chr19:11024552-11027453   | exonic       | CARM1            | 19 | 11024552  | 11027453  | 3 | 1   | 0 | 0 | 0  | 0 | 2901  | 0.561236627 | 2.702934345 | 3.722041091 | 0.726196804 | 0.467718131 | 0.998252924 |
| chr2:32703702-32735061    | exonic       | BIRC6            | 2  | 32703702  | 32735061  | 3 | 1   | 0 | 0 | 0  | 0 | 31359 | 0.561236627 | 2.702934345 | 3.722041091 | 0.726196804 | 0.467718131 | 0.998252924 |
| chr4:185578235-185593614  | exonic       | PRIMPOL          | 4  | 185578235 | 185593614 | 3 | 1   | 0 | 0 | 0  | 0 | 15379 | 0.561236627 | 2.702934345 | 3.722041091 | 0.726196804 | 0.467718131 | 0.998252924 |
| chr6:43517225-43523701    | exonic       | XPO5             | 6  | 43517225  | 43523701  | 3 | 1   | 0 | 0 | 0  | 0 | 6476  | 0.561236627 | 2.702934345 | 3.722041091 | 0.726196804 | 0.467718131 | 0.998252924 |
| chr6:6222265-6251162      | exonic       | F13A1            | 6  | 6222265   | 6251162   | 3 | 1   | 0 | 0 | 0  | 0 | 28897 | 0.561236627 | 2.702934345 | 3.722041091 | 0.726196804 | 0.467718131 | 0.998252924 |
| chr11:85692171-85693046   | exonic       | PICALM           | 11 | 85692171  | 85693046  | 7 | 1   | 0 | 1 | 0  | 0 | 875   | 1.183495784 | 2.70639439  | 2.679649053 | 1.00998091  | 0.312504436 | 0.998252924 |
| chr7:74603795-74604975    | ncRNA_exonic | GTF2IP1, GTF2IP4 | 7  | 74603795  | 74604975  | 2 | 5   | 0 | 0 | 1  | 0 | 1180  | 1.250380303 | 2.707182137 | 2.609724786 | 1.037343919 | 0.299575604 | 0.998252924 |
| chr1:59147456-59150923    | exonic       | MYSM1            | 1  | 59147456  | 59150923  | 2 | 5   | 0 | 0 | 0  | 1 | 3467  | 1.43757149  | 2.708125451 | 2.543781222 | 1.064066275 | 0.287054139 | 0.998252924 |
| chr12:51402258-51404549   | exonic       | SLC11A2          | 12 | 51402258  | 51404549  | 3 | 2   | 2 | 0 | 1  | 0 | 2291  | 1.251077899 | 2.708541768 | 2.393485236 | 1.131630865 | 0.257789658 | 0.998252924 |
| chr7:158566031-158590767  | exonic       | ESYT2            | 7  | 158566031 | 158590767 | 3 | 2   | 2 | 0 | 1  | 0 | 24736 | 1.251077899 | 2.708541768 | 2.393485236 | 1.131630865 | 0.257789658 | 0.998252924 |
| chr9:88292350-88327481    | exonic       | AGTPBP1          | 9  | 88292350  | 88327481  | 3 | 0   | 3 | 1 | 2  | 3 | 35131 | 1.214066233 | 2.720821364 | 2.621786299 | 1.037773889 | 0.299375336 | 0.998252924 |
| chr5:66055536-66084622    | exonic       | MAST4            | 5  | 66055536  | 66084622  | 0 | 2   | 4 | 1 | 0  | 0 | 29086 | 1.243939085 | 2.736107609 | 2.628569409 | 1.040911303 | 0.297916715 | 0.998252924 |
| chr1:109714487-109716459  | exonic       | KIAA1324         | 1  | 109714487 | 109716459 | 0 | 0   | 3 | 0 | 0  | 0 | 1972  | 0.591807077 | 2.739365689 | 3.982049838 | 0.687928529 | NA          | NA          |
| chr1:114092136-114128218  | exonic       | MAGI3            | 1  | 114092136 | 114128218 | 0 | 0   | 3 | 0 | 0  | 0 | 36082 | 0.591807077 | 2.739365689 | 3.982049838 | 0.687928529 | NA          | NA          |
| chr1:150115109-150115509  | exonic       | VPS45            | 1  | 150115109 | 150115509 | 0 | 0   | 3 | 0 | 0  | 0 | 400   | 0.591807077 | 2.739365689 | 3.982049838 | 0.687928529 | NA          | NA          |
| chr1:179306972-179312078  | exonic       | SOAT1            | 1  | 179306972 | 179312078 | 0 | 0   | 3 | 0 | 0  | 0 | 5106  | 0.591807077 | 2.739365689 | 3.982049838 | 0.687928529 | NA          | NA          |
| chr1:185171785-185191168  | exonic       | SWT1             | 1  | 185171785 | 185191168 | 0 | 0   | 3 | 0 | 0  | 0 | 19383 | 0.591807077 | 2.739365689 | 3.982049838 | 0.687928529 | NA          | NA          |
| chr1:21186877-21191755    | exonic       | EIF4G3           | 1  | 21186877  | 21191755  | 0 | 0   | 3 | 0 | 0  | 0 | 4878  | 0.591807077 | 2.739365689 | 3.982049838 | 0.687928529 | NA          | NA          |
| chr1:31437520-31454252    | exonic       | PUM1             | 1  | 31437520  | 31454252  | 0 | 0   | 3 | 0 | 0  | 0 | 16732 | 0.591807077 | 2.739365689 | 3.982049838 | 0.687928529 | NA          | NA          |
| chr1:35457834-35480763    | exonic       | ZMYM6            | 1  | 35457834  | 35480763  | 0 | 0   | 3 | 0 | 0  | 0 | 22929 | 0.591807077 | 2.739365689 | 3.982049838 | 0.687928529 | NA          | NA          |
| chr1:76540569-76541057    | exonic       | ST6GALNAC3       | 1  | 76540569  | 76541057  | 0 | 0   | 3 | 0 | 0  | 0 | 488   | 0.591807077 | 2.739365689 | 3.982049838 | 0.687928529 | NA          | NA          |
| chr1:9615409-9620379      | intronic     | SLC25A33         | 1  | 9615409   | 9620379   | 0 | 0   | 3 | 0 | 0  | 0 | 4970  | 0.591807077 | 2.739365689 | 3.982049838 | 0.687928529 | NA          | NA          |
| chr10:102016018-102020076 | exonic       | CWF19L1          | 10 | 102016018 | 102020076 | 0 | 0   | 3 | 0 | 0  | 0 | 4058  | 0.591807077 | 2.739365689 | 3.982049838 | 0.687928529 | NA          | NA          |
| chr10:12422763-12423429   | intronic     | CAMK1D           | 10 | 12422763  | 12423429  | 0 | 0   | 3 | 0 | 0  | 0 | 666   | 0.591807077 | 2.739365689 | 3.982049838 | 0.687928529 | NA          | NA          |
| chr10:15614209-15634303   | exonic       | ITGA8            | 10 | 15614209  | 15634303  | 0 | 0   | 3 | 0 | 2  | 0 | 20094 | 0.591807077 | 2.739365689 | 3.982049838 | 0.687928529 | NA          | NA          |

|                           |              |                                         |    |           |           |   |   |   |   |   |   |        |             |             |             |             |    |    |
|---------------------------|--------------|-----------------------------------------|----|-----------|-----------|---|---|---|---|---|---|--------|-------------|-------------|-------------|-------------|----|----|
| chr10:17195506-17216659   | exonic       | TRDMT1                                  | 10 | 17195506  | 17216659  | 0 | 0 | 3 | 0 | 0 | 0 | 21153  | 0.591807077 | 2.739365689 | 3.982049838 | 0.687928529 | NA | NA |
| chr10:19636699-19641226   | exonic       | MALRD1                                  | 10 | 19636699  | 19641226  | 0 | 0 | 3 | 0 | 0 | 0 | 4527   | 0.591807077 | 2.739365689 | 3.982049838 | 0.687928529 | NA | NA |
| chr10:5827814-5842668     | exonic       | GDI2                                    | 10 | 5827814   | 5842668   | 3 | 2 | 3 | 9 | 2 | 2 | 14854  | 0.591807077 | 2.739365689 | 3.982049838 | 0.687928529 | NA | NA |
| chr10:7247776-7269899     | exonic       | SFMBT2                                  | 10 | 7247776   | 7269899   | 0 | 0 | 3 | 0 | 0 | 0 | 22123  | 0.591807077 | 2.739365689 | 3.982049838 | 0.687928529 | NA | NA |
| chr10:75273185-75273654   | intronic     | USP54                                   | 10 | 75273185  | 75273654  | 0 | 0 | 3 | 0 | 0 | 0 | 469    | 0.591807077 | 2.739365689 | 3.982049838 | 0.687928529 | NA | NA |
| chr10:882342-931700       | exonic       | LARP4B                                  | 10 | 882342    | 931700    | 0 | 0 | 3 | 0 | 0 | 0 | 49358  | 0.591807077 | 2.739365689 | 3.982049838 | 0.687928529 | NA | NA |
| chr10:98994973-99019385   | exonic       | ARHGAP19                                | 10 | 98994973  | 99019385  | 0 | 0 | 3 | 0 | 0 | 0 | 24412  | 0.591807077 | 2.739365689 | 3.982049838 | 0.687928529 | NA | NA |
| chr11:34101174-34104588   | exonic       | CAPRIN1                                 | 11 | 34101174  | 34104588  | 0 | 0 | 3 | 0 | 0 | 0 | 3414   | 0.591807077 | 2.739365689 | 3.982049838 | 0.687928529 | NA | NA |
| chr11:68315534-68338572   | exonic       | PPP6R3                                  | 11 | 68315534  | 68338572  | 0 | 0 | 3 | 0 | 0 | 0 | 23038  | 0.591807077 | 2.739365689 | 3.982049838 | 0.687928529 | NA | NA |
| chr12:32652860-32653462   | intronic     | FGD4                                    | 12 | 32652860  | 32653462  | 0 | 0 | 3 | 0 | 0 | 0 | 602    | 0.591807077 | 2.739365689 | 3.982049838 | 0.687928529 | NA | NA |
| chr12:57013052-57014453   | intronic     | BAZ2A                                   | 12 | 57013052  | 57014453  | 0 | 0 | 3 | 0 | 0 | 0 | 1401   | 0.591807077 | 2.739365689 | 3.982049838 | 0.687928529 | NA | NA |
| chr12:70901675-70916410   | exonic       | PTPRB                                   | 12 | 70901675  | 70916410  | 0 | 0 | 3 | 0 | 0 | 0 | 14735  | 0.591807077 | 2.739365689 | 3.982049838 | 0.687928529 | NA | NA |
| chr13:24164288-24190184   | exonic       | TNFRSF19                                | 13 | 24164288  | 24190184  | 0 | 0 | 3 | 0 | 0 | 0 | 25896  | 0.591807077 | 2.739365689 | 3.982049838 | 0.687928529 | NA | NA |
| chr13:41507606-41508164   | exonic       | ELF1                                    | 13 | 41507606  | 41508164  | 0 | 0 | 3 | 0 | 0 | 0 | 558    | 0.591807077 | 2.739365689 | 3.982049838 | 0.687928529 | NA | NA |
| chr13:49742748-49765520   | exonic       | FNDC3A                                  | 13 | 49742748  | 49765520  | 0 | 0 | 3 | 0 | 0 | 0 | 22772  | 0.591807077 | 2.739365689 | 3.982049838 | 0.687928529 | NA | NA |
| chr14:106667988-106791309 | ncRNA_exonic | LINC00226                               | 14 | 106667988 | 106791309 | 0 | 0 | 3 | 0 | 0 | 0 | 123321 | 0.591807077 | 2.739365689 | 3.982049838 | 0.687928529 | NA | NA |
| chr14:50636281-50636753   | intronic     | SOS2                                    | 14 | 50636281  | 50636753  | 0 | 0 | 3 | 0 | 0 | 0 | 472    | 0.591807077 | 2.739365689 | 3.982049838 | 0.687928529 | NA | NA |
| chr14:55423751-55424353   | exonic       | WDHD1                                   | 14 | 55423751  | 55424353  | 0 | 0 | 3 | 0 | 0 | 0 | 602    | 0.591807077 | 2.739365689 | 3.982049838 | 0.687928529 | NA | NA |
| chr14:92597294-92604691   | exonic       | CPSF2                                   | 14 | 92597294  | 92604691  | 0 | 0 | 3 | 0 | 0 | 0 | 7397   | 0.591807077 | 2.739365689 | 3.982049838 | 0.687928529 | NA | NA |
| chr15:38757469-38773660   | exonic       | FAM98B                                  | 15 | 38757469  | 38773660  | 0 | 0 | 3 | 0 | 0 | 0 | 16191  | 0.591807077 | 2.739365689 | 3.982049838 | 0.687928529 | NA | NA |
| chr15:41650346-41668026   | exonic       | NUSAP1                                  | 15 | 41650346  | 41668026  | 0 | 0 | 3 | 0 | 0 | 0 | 17680  | 0.591807077 | 2.739365689 | 3.982049838 | 0.687928529 | NA | NA |
| chr15:66021409-66025156   | exonic       | DENND4A                                 | 15 | 66021409  | 66025156  | 0 | 0 | 3 | 0 | 0 | 0 | 3747   | 0.591807077 | 2.739365689 | 3.982049838 | 0.687928529 | NA | NA |
| chr15:78316497-78337410   | exonic       | TBC1D2B                                 | 15 | 78316497  | 78337410  | 0 | 0 | 3 | 0 | 0 | 0 | 20913  | 0.591807077 | 2.739365689 | 3.982049838 | 0.687928529 | NA | NA |
| chr15:83826166-83826793   | exonic       | HDCFRP3                                 | 15 | 83826166  | 83826793  | 0 | 0 | 3 | 0 | 0 | 0 | 627    | 0.591807077 | 2.739365689 | 3.982049838 | 0.687928529 | NA | NA |
| chr15:90906948-90907238   | intergenic   | ZNF774 (dist=2235), IQGAP1 (dist=24235) | 15 | 90906948  | 90907238  | 0 | 0 | 3 | 0 | 0 | 0 | 290    | 0.591807077 | 2.739365689 | 3.982049838 | 0.687928529 | NA | NA |
| chr15:98512352-98513973   | exonic       | ARRDC4                                  | 15 | 98512352  | 98513973  | 0 | 0 | 3 | 0 | 0 | 0 | 1621   | 0.591807077 | 2.739365689 | 3.982049838 | 0.687928529 | NA | NA |
| chr16:27451843-27453068   | intronic     | IL21R                                   | 16 | 27451843  | 27453068  | 0 | 0 | 3 | 0 | 0 | 0 | 1225   | 0.591807077 | 2.739365689 | 3.982049838 | 0.687928529 | NA | NA |
| chr16:58622702-58633415   | exonic       | CNOT1                                   | 16 | 58622702  | 58633415  | 0 | 0 | 3 | 0 | 0 | 0 | 10713  | 0.591807077 | 2.739365689 | 3.982049838 | 0.687928529 | NA | NA |
| chr16:66759731-66763002   | exonic       | DYNC1LI2                                | 16 | 66759731  | 66763002  | 0 | 0 | 3 | 0 | 0 | 0 | 3271   | 0.591807077 | 2.739365689 | 3.982049838 | 0.687928529 | NA | NA |
| chr17:30357674-30358477   | exonic       | LRRC37B                                 | 17 | 30357674  | 30358477  | 0 | 0 | 3 | 0 | 0 | 0 | 803    | 0.591807077 | 2.739365689 | 3.982049838 | 0.687928529 | NA | NA |
| chr17:46247970-46266862   | exonic       | SKAP1                                   | 17 | 46247970  | 46266862  | 0 | 0 | 3 | 0 | 0 | 0 | 18892  | 0.591807077 | 2.739365689 | 3.982049838 | 0.687928529 | NA | NA |
| chr18:12337339-12363855   | exonic       | AFG3L2                                  | 18 | 12337339  | 12363855  | 0 | 0 | 3 | 0 | 0 | 0 | 26516  | 0.591807077 | 2.739365689 | 3.982049838 | 0.687928529 | NA | NA |
| chr18:29450334-29451083   | exonic       | TRAPPC8                                 | 18 | 29450334  | 29451083  | 0 | 0 | 3 | 0 | 0 | 0 | 749    | 0.591807077 | 2.739365689 | 3.982049838 | 0.687928529 | NA | NA |
| chr19:12058329-12087979   | exonic       | ZNF700, ZNF763                          | 19 | 12058329  | 12087979  | 0 | 0 | 3 | 0 | 0 | 0 | 29650  | 0.591807077 | 2.739365689 | 3.982049838 | 0.687928529 | NA | NA |
| chr19:53286948-53287251   | intronic     | ZNF600                                  | 19 | 53286948  | 53287251  | 0 | 0 | 3 | 0 | 0 | 0 | 303    | 0.591807077 | 2.739365689 | 3.982049838 | 0.687928529 | NA | NA |



|                          |                |                                             |    |           |           |   |   |   |   |   |   |        |             |             |             |             |    |    |
|--------------------------|----------------|---------------------------------------------|----|-----------|-----------|---|---|---|---|---|---|--------|-------------|-------------|-------------|-------------|----|----|
| chr19:54721188-54778683  | exonic         | LILRA6, LILRB2, LILRB3, LILRB5              | 19 | 54721188  | 54778683  | 0 | 0 | 3 | 0 | 0 | 0 | 57495  | 0.591807077 | 2.739365689 | 3.982049838 | 0.687928529 | NA | NA |
| chr19:56148833-56151038  | intergenic     | ZNF784 (dist=12892), ZNF580 (dist=1354)     | 19 | 56148833  | 56151038  | 0 | 0 | 3 | 0 | 0 | 0 | 2205   | 0.591807077 | 2.739365689 | 3.982049838 | 0.687928529 | NA | NA |
| chr2:120733209-120733666 | intronic       | PTPN4                                       | 2  | 120733209 | 120733666 | 0 | 0 | 3 | 0 | 0 | 0 | 457    | 0.591807077 | 2.739365689 | 3.982049838 | 0.687928529 | NA | NA |
| chr2:144193169-144276933 | exonic         | ARHGAP15                                    | 2  | 144193169 | 144276933 | 0 | 0 | 3 | 0 | 0 | 0 | 83764  | 0.591807077 | 2.739365689 | 3.982049838 | 0.687928529 | NA | NA |
| chr2:145725010-145725794 | ncRNA_intronic | TEX41                                       | 2  | 145725010 | 145725794 | 0 | 0 | 3 | 0 | 0 | 0 | 784    | 0.591807077 | 2.739365689 | 3.982049838 | 0.687928529 | NA | NA |
| chr2:167279768-167301510 | exonic         | SCN7A                                       | 2  | 167279768 | 167301510 | 0 | 0 | 3 | 0 | 0 | 0 | 21742  | 0.591807077 | 2.739365689 | 3.982049838 | 0.687928529 | NA | NA |
| chr2:210906411-210907856 | ncRNA_intronic | LOC101928020                                | 2  | 210906411 | 210907856 | 0 | 0 | 3 | 0 | 0 | 0 | 1445   | 0.591807077 | 2.739365689 | 3.982049838 | 0.687928529 | NA | NA |
| chr2:24778884-24816590   | UTR5           | -----                                       | 2  | 24778884  | 24816590  | 0 | 0 | 3 | 0 | 0 | 0 | 37706  | 0.591807077 | 2.739365689 | 3.982049838 | 0.687928529 | NA | NA |
| chr2:37366773-37368844   | exonic         | EIF2AK2                                     | 2  | 37366773  | 37368844  | 0 | 0 | 3 | 0 | 0 | 0 | 2071   | 0.591807077 | 2.739365689 | 3.982049838 | 0.687928529 | NA | NA |
| chr2:44729828-44732869   | intronic       | CAMKMT                                      | 2  | 44729828  | 44732869  | 0 | 0 | 3 | 0 | 0 | 0 | 3041   | 0.591807077 | 2.739365689 | 3.982049838 | 0.687928529 | NA | NA |
| chr2:48555699-48586286   | exonic         | FOXN2                                       | 2  | 48555699  | 48586286  | 0 | 0 | 3 | 0 | 0 | 0 | 30587  | 0.591807077 | 2.739365689 | 3.982049838 | 0.687928529 | NA | NA |
| chr2:69642316-69650849   | exonic         | NFU1                                        | 2  | 69642316  | 69650849  | 0 | 0 | 3 | 0 | 0 | 0 | 8533   | 0.591807077 | 2.739365689 | 3.982049838 | 0.687928529 | NA | NA |
| chr2:72958135-72960247   | exonic         | EXOC6B                                      | 2  | 72958135  | 72960247  | 0 | 0 | 3 | 0 | 0 | 0 | 2112   | 0.591807077 | 2.739365689 | 3.982049838 | 0.687928529 | NA | NA |
| chr2:89266203-89292223   | intergenic     | MIR4436A (dist=154235), NONE (dist=NONE)    | 2  | 89266203  | 89292223  | 0 | 0 | 3 | 0 | 0 | 0 | 26020  | 0.591807077 | 2.739365689 | 3.982049838 | 0.687928529 | NA | NA |
| chr2:9083316-9102747     | exonic         | MBOAT2                                      | 2  | 9083316   | 9102747   | 0 | 0 | 3 | 0 | 0 | 0 | 19431  | 0.591807077 | 2.739365689 | 3.982049838 | 0.687928529 | NA | NA |
| chr20:45918930-45976670  | exonic         | ZMYND8                                      | 20 | 45918930  | 45976670  | 0 | 0 | 3 | 0 | 0 | 0 | 57740  | 0.591807077 | 2.739365689 | 3.982049838 | 0.687928529 | NA | NA |
| chr21:34713304-34721849  | exonic         | IFNAR1                                      | 21 | 34713304  | 34721849  | 0 | 0 | 3 | 0 | 0 | 0 | 8545   | 0.591807077 | 2.739365689 | 3.982049838 | 0.687928529 | NA | NA |
| chr3:133335657-133339191 | exonic         | TOPBP1                                      | 3  | 133335657 | 133339191 | 0 | 0 | 3 | 0 | 0 | 0 | 3534   | 0.591807077 | 2.739365689 | 3.982049838 | 0.687928529 | NA | NA |
| chr3:149589815-149639014 | exonic         | RNF13                                       | 3  | 149589815 | 149639014 | 0 | 0 | 3 | 0 | 0 | 0 | 49199  | 0.591807077 | 2.739365689 | 3.982049838 | 0.687928529 | NA | NA |
| chr3:158363953-158371256 | exonic         | GFM1                                        | 3  | 158363953 | 158371256 | 0 | 0 | 3 | 0 | 0 | 0 | 7303   | 0.591807077 | 2.739365689 | 3.982049838 | 0.687928529 | NA | NA |
| chr3:167240103-167345080 | exonic         | WDR49                                       | 3  | 167240103 | 167345080 | 0 | 0 | 3 | 0 | 0 | 0 | 104977 | 0.591807077 | 2.739365689 | 3.982049838 | 0.687928529 | NA | NA |
| chr3:197557640-197574892 | exonic         | LRCH3                                       | 3  | 197557640 | 197574892 | 0 | 0 | 3 | 0 | 0 | 0 | 17252  | 0.591807077 | 2.739365689 | 3.982049838 | 0.687928529 | NA | NA |
| chr3:47712147-47718272   | exonic         | SMARCC1                                     | 3  | 47712147  | 47718272  | 0 | 0 | 3 | 0 | 0 | 0 | 6125   | 0.591807077 | 2.739365689 | 3.982049838 | 0.687928529 | NA | NA |
| chr3:9466979-9476682     | exonic         | SETD5                                       | 3  | 9466979   | 9476682   | 0 | 0 | 3 | 0 | 0 | 0 | 9703   | 0.591807077 | 2.739365689 | 3.982049838 | 0.687928529 | NA | NA |
| chr4:110580166-110585550 | exonic         | CCDC109B                                    | 4  | 110580166 | 110585550 | 0 | 0 | 3 | 0 | 0 | 0 | 5384   | 0.591807077 | 2.739365689 | 3.982049838 | 0.687928529 | NA | NA |
| chr4:139981477-139994721 | exonic         | ELF2                                        | 4  | 139981477 | 139994721 | 0 | 0 | 3 | 0 | 0 | 0 | 13244  | 0.591807077 | 2.739365689 | 3.982049838 | 0.687928529 | NA | NA |
| chr4:154221924-154227024 | intronic       | TRIM2                                       | 4  | 154221924 | 154227024 | 0 | 0 | 3 | 0 | 0 | 0 | 5100   | 0.591807077 | 2.739365689 | 3.982049838 | 0.687928529 | NA | NA |
| chr4:169208198-169229346 | exonic         | DDX60                                       | 4  | 169208198 | 169229346 | 0 | 0 | 3 | 0 | 0 | 0 | 21148  | 0.591807077 | 2.739365689 | 3.982049838 | 0.687928529 | NA | NA |
| chr4:769579-770220       | intergenic     | PCGF3 (dist=5152), LOC100129917 (dist=3717) | 4  | 769579    | 770220    | 0 | 0 | 3 | 0 | 0 | 0 | 641    | 0.591807077 | 2.739365689 | 3.982049838 | 0.687928529 | NA | NA |
| chr5:108203467-108233549 | exonic         | FER                                         | 5  | 108203467 | 108233549 | 0 | 0 | 3 | 0 | 0 | 0 | 30082  | 0.591807077 | 2.739365689 | 3.982049838 | 0.687928529 | NA | NA |
| chr5:110679721-110730480 | exonic         | CAMK4                                       | 5  | 110679721 | 110730480 | 0 | 0 | 3 | 0 | 0 | 0 | 50759  | 0.591807077 | 2.739365689 | 3.982049838 | 0.687928529 | NA | NA |
| chr5:131013395-131034695 | exonic         | FNIP1                                       | 5  | 131013395 | 131034695 | 0 | 0 | 3 | 0 | 0 | 0 | 21300  | 0.591807077 | 2.739365689 | 3.982049838 | 0.687928529 | NA | NA |
| chr5:32390380-32397444   | exonic         | ZFR                                         | 5  | 32390380  | 32397444  | 0 | 0 | 3 | 0 | 0 | 0 | 7064   | 0.591807077 | 2.739365689 | 3.982049838 | 0.687928529 | NA | NA |
| chr5:70840183-70845433   | exonic         | BDP1                                        | 5  | 70840183  | 70845433  | 0 | 0 | 3 | 0 | 0 | 0 | 5250   | 0.591807077 | 2.739365689 | 3.982049838 | 0.687928529 | NA | NA |
| chr5:78925894-78931433   | intronic       | PAPD4                                       | 5  | 78925894  | 78931433  | 0 | 0 | 3 | 0 | 0 | 0 | 5539   | 0.591807077 | 2.739365689 | 3.982049838 | 0.687928529 | NA | NA |

|                          |                |                                           |    |           |           |   |   |   |   |   |   |       |             |             |             |             |             |             |
|--------------------------|----------------|-------------------------------------------|----|-----------|-----------|---|---|---|---|---|---|-------|-------------|-------------|-------------|-------------|-------------|-------------|
| chr6:143141170-143158184 | UTR5           | HIVEP2 (NM_006734:c.-62197_-62309delins0) | 6  | 143141170 | 143158184 | 0 | 0 | 3 | 0 | 0 | 0 | 17014 | 0.591807077 | 2.739365689 | 3.982049838 | 0.687928529 | NA          | NA          |
| chr6:33270684-33270982   | intronic       | TAPBP                                     | 6  | 33270684  | 33270982  | 0 | 0 | 3 | 0 | 0 | 0 | 298   | 0.591807077 | 2.739365689 | 3.982049838 | 0.687928529 | NA          | NA          |
| chr7:104672107-104676107 | intronic       | KMT2E                                     | 7  | 104672107 | 104676107 | 0 | 0 | 3 | 0 | 0 | 0 | 4000  | 0.591807077 | 2.739365689 | 3.982049838 | 0.687928529 | NA          | NA          |
| chr7:131113791-131163436 | exonic         | MKLN1                                     | 7  | 131113791 | 131163436 | 0 | 0 | 3 | 0 | 0 | 0 | 49645 | 0.591807077 | 2.739365689 | 3.982049838 | 0.687928529 | NA          | NA          |
| chr7:2405951-2411484     | exonic         | EIF3B                                     | 7  | 2405951   | 2411484   | 0 | 0 | 3 | 0 | 0 | 0 | 5533  | 0.591807077 | 2.739365689 | 3.982049838 | 0.687928529 | NA          | NA          |
| chr7:41728283-41728481   | downstream     | INHBA (dist=120)                          | 7  | 41728283  | 41728481  | 0 | 0 | 3 | 0 | 0 | 0 | 198   | 0.591807077 | 2.739365689 | 3.982049838 | 0.687928529 | NA          | NA          |
| chr7:72940669-72944175   | intergenic     | BAZ1B (dist=4054), BCL7B (dist=6508)      | 7  | 72940669  | 72944175  | 0 | 0 | 3 | 0 | 0 | 0 | 3506  | 0.591807077 | 2.739365689 | 3.982049838 | 0.687928529 | NA          | NA          |
| chr7:77394812-77407763   | exonic         | RSBN1L                                    | 7  | 77394812  | 77407763  | 0 | 0 | 3 | 0 | 0 | 0 | 12951 | 0.591807077 | 2.739365689 | 3.982049838 | 0.687928529 | NA          | NA          |
| chr7:87904638-87906981   | UTR3           | -----                                     | 7  | 87904638  | 87906981  | 0 | 0 | 3 | 0 | 0 | 0 | 2343  | 0.591807077 | 2.739365689 | 3.982049838 | 0.687928529 | NA          | NA          |
| chr7:95906508-95926263   | exonic         | SLC25A13                                  | 7  | 95906508  | 95926263  | 0 | 0 | 3 | 0 | 0 | 0 | 19755 | 0.591807077 | 2.739365689 | 3.982049838 | 0.687928529 | NA          | NA          |
| chr8:103405787-103406398 | intronic       | UBR5                                      | 8  | 103405787 | 103406398 | 0 | 0 | 3 | 0 | 0 | 0 | 611   | 0.591807077 | 2.739365689 | 3.982049838 | 0.687928529 | NA          | NA          |
| chr8:134495508-134509825 | intronic       | ST3GAL1                                   | 8  | 134495508 | 134509825 | 0 | 0 | 3 | 0 | 0 | 0 | 14317 | 0.591807077 | 2.739365689 | 3.982049838 | 0.687928529 | NA          | NA          |
| chr8:163121-163710       | ncRNA_exonic   | RPL23AP53                                 | 8  | 163121    | 163710    | 0 | 0 | 3 | 0 | 0 | 0 | 589   | 0.591807077 | 2.739365689 | 3.982049838 | 0.687928529 | NA          | NA          |
| chr8:67716609-67743546   | exonic         | C8orf44-SGK3, SGK3                        | 8  | 67716609  | 67743546  | 0 | 0 | 3 | 0 | 0 | 0 | 26937 | 0.591807077 | 2.739365689 | 3.982049838 | 0.687928529 | NA          | NA          |
| chr8:81942230-81982405   | UTR5           | PAG1 (NM_018440:c.-76791_-76943delins0)   | 8  | 81942230  | 81982405  | 0 | 0 | 3 | 0 | 0 | 0 | 40175 | 0.591807077 | 2.739365689 | 3.982049838 | 0.687928529 | NA          | NA          |
| chr9:115986939-115988181 | intronic       | SLC31A1                                   | 9  | 115986939 | 115988181 | 0 | 0 | 3 | 0 | 0 | 0 | 1242  | 0.591807077 | 2.739365689 | 3.982049838 | 0.687928529 | NA          | NA          |
| chr9:140468659-140472055 | exonic         | DPH7                                      | 9  | 140468659 | 140472055 | 0 | 0 | 3 | 0 | 0 | 0 | 3396  | 0.591807077 | 2.739365689 | 3.982049838 | 0.687928529 | NA          | NA          |
| chr9:33852065-33853942   | intronic       | UBE2R2                                    | 9  | 33852065  | 33853942  | 0 | 0 | 3 | 0 | 0 | 0 | 1877  | 0.591807077 | 2.739365689 | 3.982049838 | 0.687928529 | NA          | NA          |
| chr9:36351112-36353328   | exonic         | RNF38                                     | 9  | 36351112  | 36353328  | 0 | 0 | 3 | 0 | 0 | 0 | 2216  | 0.591807077 | 2.739365689 | 3.982049838 | 0.687928529 | NA          | NA          |
| chr9:88257741-88261333   | exonic         | AGTPBP1                                   | 9  | 88257741  | 88261333  | 0 | 0 | 3 | 0 | 0 | 0 | 3592  | 0.591807077 | 2.739365689 | 3.982049838 | 0.687928529 | NA          | NA          |
| chrMT:10797-10968        | intergenic     | NONE (dist=NONE), NONE (dist=NONE)        | MT | 10797     | 10968     | 0 | 0 | 3 | 0 | 0 | 0 | 171   | 0.591807077 | 2.739365689 | 3.982049838 | 0.687928529 | NA          | NA          |
| chrX:135095117-135098917 | exonic         | SLC9A6                                    | X  | 135095117 | 135098917 | 0 | 0 | 3 | 0 | 0 | 0 | 3800  | 0.591807077 | 2.739365689 | 3.982049838 | 0.687928529 | NA          | NA          |
| chrX:41196661-41198336   | exonic         | DDX3X                                     | X  | 41196661  | 41198336  | 0 | 0 | 3 | 0 | 0 | 0 | 1675  | 0.591807077 | 2.739365689 | 3.982049838 | 0.687928529 | NA          | NA          |
| chrX:70770348-70775461   | exonic         | OGT                                       | X  | 70770348  | 70775461  | 0 | 0 | 3 | 0 | 0 | 0 | 5113  | 0.591807077 | 2.739365689 | 3.982049838 | 0.687928529 | NA          | NA          |
| chrX:73495316-73495836   | ncRNA_intronic | FTX                                       | X  | 73495316  | 73495836  | 0 | 0 | 3 | 0 | 0 | 0 | 520   | 0.591807077 | 2.739365689 | 3.982049838 | 0.687928529 | NA          | NA          |
| chr10:15863654-15885271  | exonic         | FAM188A                                   | 10 | 15863654  | 15885271  | 3 | 0 | 1 | 0 | 0 | 0 | 21617 | 0.584229854 | 2.753768563 | 3.666991534 | 0.750961255 | 0.452675974 | 0.998252924 |
| chr10:32974897-33018385  | exonic         | CCDC7                                     | 10 | 32974897  | 33018385  | 3 | 0 | 1 | 0 | 0 | 0 | 43488 | 0.584229854 | 2.753768563 | 3.666991534 | 0.750961255 | 0.452675974 | 0.998252924 |
| chr10:50701162-50714058  | exonic         | ERCC6                                     | 10 | 50701162  | 50714058  | 3 | 0 | 1 | 0 | 0 | 0 | 12896 | 0.584229854 | 2.753768563 | 3.666991534 | 0.750961255 | 0.452675974 | 0.998252924 |
| chr12:9241795-9244025    | exonic         | A2M                                       | 12 | 9241795   | 9244025   | 3 | 0 | 1 | 0 | 0 | 0 | 2230  | 0.584229854 | 2.753768563 | 3.666991534 | 0.750961255 | 0.452675974 | 0.998252924 |
| chr12:95498782-95531454  | exonic         | FGD6                                      | 12 | 95498782  | 95531454  | 3 | 0 | 1 | 0 | 0 | 0 | 32672 | 0.584229854 | 2.753768563 | 3.666991534 | 0.750961255 | 0.452675974 | 0.998252924 |
| chr15:64495280-64497148  | exonic         | CSNK1G1                                   | 15 | 64495280  | 64497148  | 3 | 0 | 1 | 0 | 0 | 0 | 1868  | 0.584229854 | 2.753768563 | 3.666991534 | 0.750961255 | 0.452675974 | 0.998252924 |
| chr17:48814320-48824063  | exonic         | LUC7L3                                    | 17 | 48814320  | 48824063  | 3 | 0 | 1 | 0 | 0 | 0 | 9743  | 0.584229854 | 2.753768563 | 3.666991534 | 0.750961255 | 0.452675974 | 0.998252924 |
| chr17:64683228-64685165  | exonic         | PRKCA                                     | 17 | 64683228  | 64685165  | 3 | 0 | 1 | 0 | 0 | 0 | 1937  | 0.584229854 | 2.753768563 | 3.666991534 | 0.750961255 | 0.452675974 | 0.998252924 |
| chr22:41521867-41526007  | exonic         | EP300                                     | 22 | 41521867  | 41526007  | 3 | 0 | 1 | 0 | 0 | 0 | 4140  | 0.584229854 | 2.753768563 | 3.666991534 | 0.750961255 | 0.452675974 | 0.998252924 |
| chr4:185582927-185593614 | exonic         | PRIMPOL                                   | 4  | 185582927 | 185593614 | 3 | 0 | 1 | 0 | 0 | 0 | 10687 | 0.584229854 | 2.753768563 | 3.666991534 | 0.750961255 | 0.452675974 | 0.998252924 |

|                           |          |                                   |    |           |           |   |   |   |   |   |   |        |             |             |             |             |             |             |
|---------------------------|----------|-----------------------------------|----|-----------|-----------|---|---|---|---|---|---|--------|-------------|-------------|-------------|-------------|-------------|-------------|
| chr5:179135239-179137066  | exonic   | CANX                              | 5  | 179135239 | 179137066 | 3 | 0 | 1 | 0 | 0 | 0 | 1827   | 0.584229854 | 2.753768563 | 3.666991534 | 0.750961255 | 0.452675974 | 0.998252924 |
| chr7:92881965-92905617    | exonic   | VPS50                             | 7  | 92881965  | 92905617  | 3 | 0 | 1 | 0 | 0 | 0 | 23652  | 0.584229854 | 2.753768563 | 3.666991534 | 0.750961255 | 0.452675974 | 0.998252924 |
| chr8:18430037-18432795    | exonic   | PSD3                              | 8  | 18430037  | 18432795  | 3 | 0 | 1 | 0 | 0 | 0 | 2758   | 0.584229854 | 2.753768563 | 3.666991534 | 0.750961255 | 0.452675974 | 0.998252924 |
| chr8:38809683-38814904    | exonic   | PLEKHA2                           | 8  | 38809683  | 38814904  | 3 | 0 | 1 | 0 | 0 | 0 | 5221   | 0.584229854 | 2.753768563 | 3.666991534 | 0.750961255 | 0.452675974 | 0.998252924 |
| chr1:156290629-156304709  | exonic   | CCT3                              | 1  | 156290629 | 156304709 | 2 | 3 | 2 | 0 | 1 | 0 | 14080  | 1.296366756 | 2.759428176 | 2.372651795 | 1.163014388 | 0.244823665 | 0.998252924 |
| chr18:10855350-10857209   | exonic   | PIEZO2                            | 18 | 10855350  | 10857209  | 3 | 1 | 3 | 1 | 0 | 0 | 1859   | 1.259355089 | 2.77182631  | 2.413504758 | 1.148465235 | 0.250776557 | 0.998252924 |
| chr1:51032748-51061888    | exonic   | FAF1                              | 1  | 51032748  | 51061888  | 0 | 9 | 2 | 1 | 1 | 0 | 29140  | 2.19035905  | 2.786836481 | 2.078919051 | 1.340521883 | 0.180075735 | 0.998252924 |
| chr1:173961893-173962273  | exonic   | RC3H1                             | 1  | 173961893 | 173962273 | 5 | 7 | 5 | 0 | 3 | 0 | 380    | 3.2142927   | 2.786855654 | 1.703966709 | 1.635510623 | NA          | NA          |
| chr1:104108057-104258640  | exonic   | AMY1A, AMY1B, AMY1C, AMY2A, AMY2B | 1  | 104108057 | 104258640 | 2 | 2 | 0 | 0 | 0 | 0 | 150583 | 0.606525484 | 2.805207663 | 3.598333638 | 0.779585204 | 0.435635068 | 0.998252924 |
| chr10:103783233-103785005 | exonic   | C10orf76                          | 10 | 103783233 | 103785005 | 2 | 2 | 0 | 0 | 0 | 0 | 1772   | 0.606525484 | 2.805207663 | 3.598333638 | 0.779585204 | 0.435635068 | 0.998252924 |
| chr10:111667448-111674857 | exonic   | XPNPEP1                           | 10 | 111667448 | 111674857 | 2 | 2 | 0 | 0 | 0 | 0 | 7409   | 0.606525484 | 2.805207663 | 3.598333638 | 0.779585204 | 0.435635068 | 0.998252924 |
| chr10:112640990-112647644 | exonic   | PDCD4                             | 10 | 112640990 | 112647644 | 2 | 2 | 0 | 0 | 0 | 0 | 6654   | 0.606525484 | 2.805207663 | 3.598333638 | 0.779585204 | 0.435635068 | 0.998252924 |
| chr11:77404551-77413540   | exonic   | RSF1                              | 11 | 77404551  | 77413540  | 2 | 2 | 0 | 0 | 0 | 0 | 8989   | 0.606525484 | 2.805207663 | 3.598333638 | 0.779585204 | 0.435635068 | 0.998252924 |
| chr12:22635490-22637822   | exonic   | C2CD5                             | 12 | 22635490  | 22637822  | 2 | 2 | 0 | 0 | 0 | 0 | 2332   | 0.606525484 | 2.805207663 | 3.598333638 | 0.779585204 | 0.435635068 | 0.998252924 |
| chr14:55168779-55204005   | exonic   | SAMD4A                            | 14 | 55168779  | 55204005  | 2 | 2 | 0 | 0 | 0 | 0 | 35226  | 0.606525484 | 2.805207663 | 3.598333638 | 0.779585204 | 0.435635068 | 0.998252924 |
| chr15:43724391-43730614   | exonic   | TP53BP1                           | 15 | 43724391  | 43730614  | 2 | 2 | 0 | 0 | 0 | 0 | 6223   | 0.606525484 | 2.805207663 | 3.598333638 | 0.779585204 | 0.435635068 | 0.998252924 |
| chr15:60664120-60665116   | intronic | ANXA2                             | 15 | 60664120  | 60665116  | 2 | 2 | 0 | 0 | 0 | 0 | 996    | 0.606525484 | 2.805207663 | 3.598333638 | 0.779585204 | 0.435635068 | 0.998252924 |
| chr15:66007815-66053776   | exonic   | DENND4A                           | 15 | 66007815  | 66053776  | 3 | 2 | 0 | 0 | 0 | 0 | 45961  | 0.606525484 | 2.805207663 | 3.598333638 | 0.779585204 | 0.435635068 | 0.998252924 |
| chr15:75809599-75816639   | exonic   | PTPN9                             | 15 | 75809599  | 75816639  | 2 | 2 | 0 | 0 | 0 | 0 | 7040   | 0.606525484 | 2.805207663 | 3.598333638 | 0.779585204 | 0.435635068 | 0.998252924 |
| chr16:69662885-69663934   | intronic | NFAT5                             | 16 | 69662885  | 69663934  | 2 | 2 | 0 | 0 | 0 | 0 | 1049   | 0.606525484 | 2.805207663 | 3.598333638 | 0.779585204 | 0.435635068 | 0.998252924 |
| chr16:69687138-69693802   | exonic   | NFAT5                             | 16 | 69687138  | 69693802  | 2 | 2 | 0 | 0 | 0 | 0 | 6664   | 0.606525484 | 2.805207663 | 3.598333638 | 0.779585204 | 0.435635068 | 0.998252924 |
| chr17:43352758-43353238   | intronic | MAP3K14                           | 17 | 43352758  | 43353238  | 2 | 2 | 0 | 0 | 0 | 0 | 480    | 0.606525484 | 2.805207663 | 3.598333638 | 0.779585204 | 0.435635068 | 0.998252924 |
| chr17:54926056-54939612   | exonic   | DGKE                              | 17 | 54926056  | 54939612  | 2 | 2 | 0 | 0 | 0 | 0 | 13556  | 0.606525484 | 2.805207663 | 3.598333638 | 0.779585204 | 0.435635068 | 0.998252924 |
| chr17:65850055-65850878   | exonic   | BPTF                              | 17 | 65850055  | 65850878  | 2 | 2 | 0 | 0 | 0 | 0 | 823    | 0.606525484 | 2.805207663 | 3.598333638 | 0.779585204 | 0.435635068 | 0.998252924 |
| chr18:46690054-46906128   | exonic   | DYM                               | 18 | 46690054  | 46906128  | 2 | 2 | 0 | 0 | 0 | 0 | 216074 | 0.606525484 | 2.805207663 | 3.598333638 | 0.779585204 | 0.435635068 | 0.998252924 |
| chr2:128525762-128528578  | exonic   | WDR33                             | 2  | 128525762 | 128528578 | 2 | 2 | 0 | 0 | 0 | 0 | 2816   | 0.606525484 | 2.805207663 | 3.598333638 | 0.779585204 | 0.435635068 | 0.998252924 |
| chr2:39559058-39564722    | exonic   | MAP4K3                            | 2  | 39559058  | 39564722  | 2 | 2 | 0 | 0 | 0 | 0 | 5664   | 0.606525484 | 2.805207663 | 3.598333638 | 0.779585204 | 0.435635068 | 0.998252924 |
| chr2:72945232-72968598    | exonic   | EXOC6B                            | 2  | 72945232  | 72968598  | 2 | 2 | 0 | 0 | 0 | 0 | 23366  | 0.606525484 | 2.805207663 | 3.598333638 | 0.779585204 | 0.435635068 | 0.998252924 |
| chr22:36156096-36157248   | splicing | RBFOX2                            | 22 | 36156096  | 36157248  | 2 | 2 | 0 | 0 | 0 | 0 | 1152   | 0.606525484 | 2.805207663 | 3.598333638 | 0.779585204 | 0.435635068 | 0.998252924 |
| chr3:23942298-23942540    | exonic   | NKIRAS1                           | 3  | 23942298  | 23942540  | 2 | 2 | 0 | 0 | 0 | 0 | 242    | 0.606525484 | 2.805207663 | 3.598333638 | 0.779585204 | 0.435635068 | 0.998252924 |
| chr4:79747190-79800045    | exonic   | BMP2K                             | 4  | 79747190  | 79800045  | 2 | 2 | 0 | 0 | 0 | 0 | 52855  | 0.606525484 | 2.805207663 | 3.598333638 | 0.779585204 | 0.435635068 | 0.998252924 |
| chr4:79747190-79808438    | exonic   | BMP2K                             | 4  | 79747190  | 79808438  | 2 | 2 | 0 | 0 | 0 | 0 | 61248  | 0.606525484 | 2.805207663 | 3.598333638 | 0.779585204 | 0.435635068 | 0.998252924 |
| chr4:87607862-87622954    | exonic   | PTPN13                            | 4  | 87607862  | 87622954  | 2 | 2 | 0 | 0 | 0 | 0 | 15092  | 0.606525484 | 2.805207663 | 3.598333638 | 0.779585204 | 0.435635068 | 0.998252924 |
| chr4:891820-898567        | exonic   | GAK                               | 4  | 891820    | 898567    | 2 | 2 | 0 | 0 | 0 | 0 | 6747   | 0.606525484 | 2.805207663 | 3.598333638 | 0.779585204 | 0.435635068 | 0.998252924 |
| chr5:94244955-94267696    | exonic   | MCTP1                             | 5  | 94244955  | 94267696  | 2 | 2 | 0 | 0 | 0 | 0 | 22741  | 0.606525484 | 2.805207663 | 3.598333638 | 0.779585204 | 0.435635068 | 0.998252924 |

|                           |              |                                                            |    |           |           |   |   |   |   |   |   |       |             |             |             |             |             |             |
|---------------------------|--------------|------------------------------------------------------------|----|-----------|-----------|---|---|---|---|---|---|-------|-------------|-------------|-------------|-------------|-------------|-------------|
| chr6:150004214-150016357  | exonic       | LATS1                                                      | 6  | 150004214 | 150016357 | 2 | 2 | 0 | 0 | 0 | 0 | 12143 | 0.606525484 | 2.805207663 | 3.598333638 | 0.779585204 | 0.435635068 | 0.998252924 |
| chr6:29858430-29913058    | exonic       | HLA-A                                                      | 6  | 29858430  | 29913058  | 2 | 2 | 0 | 0 | 0 | 0 | 54628 | 0.606525484 | 2.805207663 | 3.598333638 | 0.779585204 | 0.435635068 | 0.998252924 |
| chr9:112182703-112195441  | exonic       | PTPN3                                                      | 9  | 112182703 | 112195441 | 2 | 2 | 0 | 0 | 0 | 0 | 12738 | 0.606525484 | 2.805207663 | 3.598333638 | 0.779585204 | 0.435635068 | 0.998252924 |
| chr9:129796709-129831635  | exonic       | RALGPS1                                                    | 9  | 129796709 | 129831635 | 2 | 2 | 0 | 0 | 0 | 0 | 34926 | 0.606525484 | 2.805207663 | 3.598333638 | 0.779585204 | 0.435635068 | 0.998252924 |
| chr9:136025120-136027081  | upstream     | RALGDS (dist=513)                                          | 9  | 136025120 | 136027081 | 2 | 2 | 0 | 0 | 0 | 0 | 1961  | 0.606525484 | 2.805207663 | 3.598333638 | 0.779585204 | 0.435635068 | 0.998252924 |
| chr1:36636571-36639079    | exonic       | MAP7D1                                                     | 1  | 36636571  | 36639079  | 0 | 7 | 0 | 0 | 1 | 0 | 2508  | 1.340958015 | 2.808146501 | 2.809039622 | 0.999682054 | NA          | NA          |
| chr17:80858526-80869665   | exonic       | TBCD                                                       | 17 | 80858526  | 80869665  | 9 | 0 | 4 | 2 | 0 | 0 | 11139 | 2.162581357 | 2.847897264 | 2.15390029  | 1.322204782 | 0.186099969 | 0.998252924 |
| chr15:51827859-51839605   | exonic       | DMXL2                                                      | 15 | 51827859  | 51839605  | 2 | 1 | 1 | 0 | 0 | 0 | 11746 | 0.62951871  | 2.853260685 | 3.264659494 | 0.87398416  | 0.38212688  | 0.998252924 |
| chr3:66455621-66467690    | exonic       | LRIG1                                                      | 3  | 66455621  | 66467690  | 2 | 1 | 1 | 0 | 0 | 0 | 12069 | 0.62951871  | 2.853260685 | 3.264659494 | 0.87398416  | 0.38212688  | 0.998252924 |
| chr9:4117767-4125941      | exonic       | GLIS3                                                      | 9  | 4117767   | 4125941   | 2 | 1 | 1 | 0 | 0 | 0 | 8174  | 0.62951871  | 2.853260685 | 3.264659494 | 0.87398416  | 0.38212688  | 0.998252924 |
| chr21:34793786-34805178   | exonic       | IFNGR2                                                     | 21 | 34793786  | 34805178  | 0 | 5 | 2 | 0 | 1 | 0 | 11392 | 1.386944468 | 2.856905326 | 2.539411054 | 1.125026735 | 0.260577706 | 0.998252924 |
| chr16:53188359-53191453   | exonic       | CHD9                                                       | 16 | 53188359  | 53191453  | 4 | 7 | 2 | 0 | 2 | 0 | 3094  | 2.372471259 | 2.865599777 | 1.920640095 | 1.492002475 | 0.135698496 | 0.998252924 |
| chr4:247349-248626        | ncRNA_exonic | ZNF876P                                                    | 4  | 247349    | 248626    | 3 | 8 | 2 | 0 | 2 | 0 | 1277  | 2.417760116 | 2.893292651 | 1.925919626 | 1.502291483 | NA          | NA          |
| chr6:134301219-134305809  | exonic       | TBPL1                                                      | 6  | 134301219 | 134305809 | 0 | 5 | 2 | 1 | 0 | 0 | 4590  | 1.372228432 | 2.898355183 | 2.550123797 | 1.136554698 | 0.255724487 | 0.998252924 |
| chr1:100335955-100343384  | exonic       | AGL                                                        | 1  | 100335955 | 100343384 | 2 | 0 | 2 | 0 | 0 | 0 | 7429  | 0.652511937 | 2.898531236 | 3.503515502 | 0.827320796 | 0.408055259 | 0.998252924 |
| chr1:233334684-233353930  | exonic       | PCNXL2                                                     | 1  | 233334684 | 233353930 | 2 | 0 | 2 | 0 | 0 | 0 | 19246 | 0.652511937 | 2.898531236 | 3.503515502 | 0.827320796 | 0.408055259 | 0.998252924 |
| chr10:80878671-80921890   | UTR5         | ZMI21 (NM_020338:c.-82718_-82432delins0)                   | 10 | 80878671  | 80921890  | 2 | 0 | 2 | 0 | 0 | 0 | 43219 | 0.652511937 | 2.898531236 | 3.503515502 | 0.827320796 | 0.408055259 | 0.998252924 |
| chr11:120335945-120338017 | exonic       | ARHGEF12                                                   | 11 | 120335945 | 120338017 | 2 | 0 | 2 | 0 | 0 | 0 | 2072  | 0.652511937 | 2.898531236 | 3.503515502 | 0.827320796 | 0.408055259 | 0.998252924 |
| chr12:27183091-27185614   | UTR3         | W02178.04601:c.+497_4212delins0_W0227811:c.+521_424delins0 | 12 | 27183091  | 27185614  | 2 | 0 | 2 | 0 | 0 | 0 | 2523  | 0.652511937 | 2.898531236 | 3.503515502 | 0.827320796 | 0.408055259 | 0.998252924 |
| chr14:53003436-53011089   | exonic       | TXNDC16                                                    | 14 | 53003436  | 53011089  | 2 | 0 | 2 | 0 | 0 | 0 | 7653  | 0.652511937 | 2.898531236 | 3.503515502 | 0.827320796 | 0.408055259 | 0.998252924 |
| chr17:17927937-17931973   | exonic       | ATPAF2                                                     | 17 | 17927937  | 17931973  | 2 | 0 | 2 | 0 | 0 | 0 | 4036  | 0.652511937 | 2.898531236 | 3.503515502 | 0.827320796 | 0.408055259 | 0.998252924 |
| chr17:7246697-7253556     | exonic       | ACAP1                                                      | 17 | 7246697   | 7253556   | 2 | 0 | 2 | 0 | 0 | 0 | 6859  | 0.652511937 | 2.898531236 | 3.503515502 | 0.827320796 | 0.408055259 | 0.998252924 |
| chr3:128514202-128526514  | exonic       | RAB7A                                                      | 3  | 128514202 | 128526514 | 2 | 0 | 2 | 0 | 0 | 0 | 12312 | 0.652511937 | 2.898531236 | 3.503515502 | 0.827320796 | 0.408055259 | 0.998252924 |
| chr4:186096939-186097205  | exonic       | CFAP97                                                     | 4  | 186096939 | 186097205 | 2 | 0 | 2 | 0 | 0 | 0 | 266   | 0.652511937 | 2.898531236 | 3.503515502 | 0.827320796 | 0.408055259 | 0.998252924 |
| chr4:53492184-53497311    | exonic       | USP46                                                      | 4  | 53492184  | 53497311  | 2 | 0 | 2 | 0 | 0 | 0 | 5127  | 0.652511937 | 2.898531236 | 3.503515502 | 0.827320796 | 0.408055259 | 0.998252924 |
| chr4:68383873-68385220    | exonic       | CENPC                                                      | 4  | 68383873  | 68385220  | 2 | 0 | 2 | 0 | 0 | 0 | 1347  | 0.652511937 | 2.898531236 | 3.503515502 | 0.827320796 | 0.408055259 | 0.998252924 |
| chr6:155118014-155118624  | intronic     | SCAF8                                                      | 6  | 155118014 | 155118624 | 2 | 0 | 2 | 0 | 0 | 0 | 610   | 0.652511937 | 2.898531236 | 3.503515502 | 0.827320796 | 0.408055259 | 0.998252924 |
| chr6:167435897-167453827  | exonic       | FGFR10P                                                    | 6  | 167435897 | 167453827 | 2 | 0 | 2 | 0 | 0 | 0 | 17930 | 0.652511937 | 2.898531236 | 3.503515502 | 0.827320796 | 0.408055259 | 0.998252924 |
| chr6:43501643-43521240    | exonic       | XPO5                                                       | 6  | 43501643  | 43521240  | 0 | 0 | 2 | 0 | 0 | 0 | 19597 | 0.652511937 | 2.898531236 | 3.503515502 | 0.827320796 | 0.408055259 | 0.998252924 |
| chr7:38050523-38053183    | intergenic   | EPDR1 (dist=58981), STARD3NL (dist=164625)                 | 7  | 38050523  | 38053183  | 2 | 0 | 2 | 0 | 0 | 0 | 2660  | 0.652511937 | 2.898531236 | 3.503515502 | 0.827320796 | 0.408055259 | 0.998252924 |
| chr8:72156837-72229924    | exonic       | EYA1                                                       | 8  | 72156837  | 72229924  | 2 | 0 | 2 | 0 | 0 | 0 | 73087 | 0.652511937 | 2.898531236 | 3.503515502 | 0.827320796 | 0.408055259 | 0.998252924 |
| chr8:72156837-72246409    | exonic       | EYA1                                                       | 8  | 72156837  | 72246409  | 2 | 0 | 2 | 0 | 0 | 0 | 89572 | 0.652511937 | 2.898531236 | 3.503515502 | 0.827320796 | 0.408055259 | 0.998252924 |
| chr1:151611363-151641111  | exonic       | SNX27                                                      | 1  | 151611363 | 151641111 | 1 | 3 | 0 | 0 | 0 | 0 | 29748 | 0.65181434  | 2.900621239 | 3.524495022 | 0.822989172 | 0.410514151 | 0.998252924 |
| chr1:44773981-44785416    | exonic       | ERI3                                                       | 1  | 44773981  | 44785416  | 1 | 3 | 0 | 0 | 0 | 0 | 11435 | 0.65181434  | 2.900621239 | 3.524495022 | 0.822989172 | 0.410514151 | 0.998252924 |
| chr11:46105716-46113774   | exonic       | PHF21A                                                     | 11 | 46105716  | 46113774  | 1 | 3 | 0 | 0 | 0 | 0 | 8058  | 0.65181434  | 2.900621239 | 3.524495022 | 0.822989172 | 0.410514151 | 0.998252924 |

|                           |              |                             |    |           |           |   |   |   |   |   |   |        |             |             |             |             |             |             |
|---------------------------|--------------|-----------------------------|----|-----------|-----------|---|---|---|---|---|---|--------|-------------|-------------|-------------|-------------|-------------|-------------|
| chr11:47508301-47510576   | exonic       | CELF1                       | 11 | 47508301  | 47510576  | 1 | 3 | 0 | 0 | 0 | 0 | 2275   | 0.65181434  | 2.900621239 | 3.524495022 | 0.822989172 | 0.410514151 | 0.998252924 |
| chr12:124934360-124979914 | exonic       | NCOR2                       | 12 | 124934360 | 124979914 | 1 | 3 | 0 | 0 | 0 | 0 | 45554  | 0.65181434  | 2.900621239 | 3.524495022 | 0.822989172 | 0.410514151 | 0.998252924 |
| chr12:124950718-124979914 | exonic       | NCOR2                       | 12 | 124950718 | 124979914 | 1 | 3 | 0 | 0 | 0 | 0 | 29196  | 0.65181434  | 2.900621239 | 3.524495022 | 0.822989172 | 0.410514151 | 0.998252924 |
| chr12:65702308-65722383   | exonic       | MSRB3                       | 12 | 65702308  | 65722383  | 1 | 3 | 0 | 0 | 0 | 0 | 20075  | 0.65181434  | 2.900621239 | 3.524495022 | 0.822989172 | 0.410514151 | 0.998252924 |
| chr16:2806334-2807946     | exonic       | SRRM2                       | 16 | 2806334   | 2807946   | 1 | 3 | 0 | 0 | 0 | 0 | 1612   | 0.65181434  | 2.900621239 | 3.524495022 | 0.822989172 | 0.410514151 | 0.998252924 |
| chr16:70051949-70065871   | ncRNA_exonic | MIR1972-1,MIR1972-2,PDXDC2P | 16 | 70051949  | 70065871  | 1 | 3 | 0 | 0 | 0 | 0 | 13922  | 0.65181434  | 2.900621239 | 3.524495022 | 0.822989172 | 0.410514151 | 0.998252924 |
| chr18:60206913-60237464   | exonic       | ZCCHC2                      | 18 | 60206913  | 60237464  | 3 | 0 | 0 | 0 | 3 | 0 | 30551  | 0.65181434  | 2.900621239 | 3.524495022 | 0.822989172 | 0.410514151 | 0.998252924 |
| chr2:24098698-24108699    | exonic       | ATAD2B                      | 2  | 24098698  | 24108699  | 1 | 3 | 0 | 0 | 0 | 0 | 10001  | 0.65181434  | 2.900621239 | 3.524495022 | 0.822989172 | 0.410514151 | 0.998252924 |
| chr2:61546307-61577828    | exonic       | USP34                       | 2  | 61546307  | 61577828  | 1 | 3 | 0 | 0 | 0 | 0 | 31521  | 0.65181434  | 2.900621239 | 3.524495022 | 0.822989172 | 0.410514151 | 0.998252924 |
| chr3:69047161-69053633    | exonic       | EOGT                        | 3  | 69047161  | 69053633  | 1 | 3 | 0 | 0 | 0 | 0 | 6472   | 0.65181434  | 2.900621239 | 3.524495022 | 0.822989172 | 0.410514151 | 0.998252924 |
| chr4:56336883-56376232    | exonic       | CLOCK                       | 4  | 56336883  | 56376232  | 1 | 3 | 0 | 0 | 0 | 0 | 39349  | 0.65181434  | 2.900621239 | 3.524495022 | 0.822989172 | 0.410514151 | 0.998252924 |
| chr5:176618884-176639196  | exonic       | NSD1                        | 5  | 176618884 | 176639196 | 1 | 3 | 0 | 0 | 0 | 0 | 20312  | 0.65181434  | 2.900621239 | 3.524495022 | 0.822989172 | 0.410514151 | 0.998252924 |
| chr6:168265230-168291709  | exonic       | MLLT4                       | 6  | 168265230 | 168291709 | 1 | 3 | 0 | 0 | 0 | 0 | 26479  | 0.65181434  | 2.900621239 | 3.524495022 | 0.822989172 | 0.410514151 | 0.998252924 |
| chr7:152007050-152027824  | exonic       | KMT2C                       | 7  | 152007050 | 152027824 | 1 | 3 | 0 | 0 | 0 | 0 | 20774  | 0.65181434  | 2.900621239 | 3.524495022 | 0.822989172 | 0.410514151 | 0.998252924 |
| chr7:45791127-45798773    | ncRNA_exonic | SEPT7P2                     | 7  | 45791127  | 45798773  | 1 | 3 | 0 | 0 | 0 | 0 | 7646   | 0.65181434  | 2.900621239 | 3.524495022 | 0.822989172 | 0.410514151 | 0.998252924 |
| chr8:62550505-62596747    | exonic       | ASPH                        | 8  | 62550505  | 62596747  | 1 | 3 | 0 | 0 | 0 | 0 | 46242  | 0.65181434  | 2.900621239 | 3.524495022 | 0.822989172 | 0.410514151 | 0.998252924 |
| chr9:132686122-132691974  | exonic       | FNBP1                       | 9  | 132686122 | 132691974 | 1 | 3 | 0 | 0 | 0 | 0 | 5852   | 0.65181434  | 2.900621239 | 3.524495022 | 0.822989172 | 0.410514151 | 0.998252924 |
| chr9:134308003-134330553  | exonic       | PRRC2B                      | 9  | 134308003 | 134330553 | 1 | 3 | 0 | 0 | 0 | 0 | 22550  | 0.65181434  | 2.900621239 | 3.524495022 | 0.822989172 | 0.410514151 | 0.998252924 |
| chr9:20874679-20929595    | exonic       | FOCAD                       | 9  | 20874679  | 20929595  | 1 | 3 | 0 | 0 | 0 | 0 | 54916  | 0.65181434  | 2.900621239 | 3.524495022 | 0.822989172 | 0.410514151 | 0.998252924 |
| chr1:21306826-21437876    | exonic       | EIF4G3                      | 1  | 21306826  | 21437876  | 0 | 3 | 4 | 0 | 1 | 0 | 131050 | 1.432930921 | 2.9028845   | 2.505864285 | 1.158436439 | 0.246685976 | 0.998252924 |
| chr1:200012902-200090083  | exonic       | NR5A2                       | 1  | 200012902 | 200090083 | 5 | 0 | 0 | 0 | 0 | 0 | 77181  | 0.644934714 | 2.908663033 | 3.881663671 | 0.74933412  | NA          | NA          |
| chr11:118484008-118484611 | exonic       | PHLDB1                      | 11 | 118484008 | 118484611 | 5 | 0 | 0 | 0 | 0 | 0 | 603    | 0.644934714 | 2.908663033 | 3.881663671 | 0.74933412  | NA          | NA          |
| chr12:122701034-122702944 | exonic       | DIABLO                      | 12 | 122701034 | 122702944 | 5 | 0 | 0 | 0 | 0 | 0 | 1910   | 0.644934714 | 2.908663033 | 3.881663671 | 0.74933412  | NA          | NA          |
| chr12:19406873-19413955   | exonic       | PLEKHA5                     | 12 | 19406873  | 19413955  | 5 | 0 | 0 | 0 | 0 | 0 | 7082   | 0.644934714 | 2.908663033 | 3.881663671 | 0.74933412  | NA          | NA          |
| chr14:106994222-107122406 | ncRNA_exonic | MIR7641-2                   | 14 | 106994222 | 107122406 | 5 | 0 | 0 | 0 | 0 | 0 | 128184 | 0.644934714 | 2.908663033 | 3.881663671 | 0.74933412  | NA          | NA          |
| chr16:58608512-58615419   | exonic       | CNOT1                       | 16 | 58608512  | 58615419  | 5 | 0 | 0 | 0 | 0 | 0 | 6907   | 0.644934714 | 2.908663033 | 3.881663671 | 0.74933412  | NA          | NA          |
| chr17:48506051-48512326   | intronic     | ACSF2                       | 17 | 48506051  | 48512326  | 5 | 0 | 0 | 0 | 0 | 0 | 6275   | 0.644934714 | 2.908663033 | 3.881663671 | 0.74933412  | NA          | NA          |
| chr18:72589152-72632648   | exonic       | ZNF407                      | 18 | 72589152  | 72632648  | 5 | 0 | 0 | 0 | 0 | 0 | 43496  | 0.644934714 | 2.908663033 | 3.881663671 | 0.74933412  | NA          | NA          |
| chr19:21245412-21301688   | exonic       | ZNF714                      | 19 | 21245412  | 21301688  | 5 | 0 | 0 | 0 | 0 | 0 | 56276  | 0.644934714 | 2.908663033 | 3.881663671 | 0.74933412  | NA          | NA          |
| chr19:49136701-49136912   | exonic       | DBP                         | 19 | 49136701  | 49136912  | 5 | 0 | 0 | 0 | 0 | 0 | 211    | 0.644934714 | 2.908663033 | 3.881663671 | 0.74933412  | NA          | NA          |
| chr19:8604616-8604944     | exonic       | MYO1F                       | 19 | 8604616   | 8604944   | 5 | 0 | 0 | 0 | 0 | 0 | 328    | 0.644934714 | 2.908663033 | 3.881663671 | 0.74933412  | NA          | NA          |
| chr2:234296903-234307095  | exonic       | DGKD                        | 2  | 234296903 | 234307095 | 5 | 0 | 0 | 0 | 0 | 0 | 10192  | 0.644934714 | 2.908663033 | 3.881663671 | 0.74933412  | NA          | NA          |
| chr2:43926785-43980899    | exonic       | PLEKHH2                     | 2  | 43926785  | 43980899  | 5 | 0 | 0 | 0 | 0 | 0 | 54114  | 0.644934714 | 2.908663033 | 3.881663671 | 0.74933412  | NA          | NA          |
| chr2:44152205-44202356    | exonic       | LRPPRC                      | 2  | 44152205  | 44202356  | 5 | 0 | 0 | 0 | 0 | 0 | 50151  | 0.644934714 | 2.908663033 | 3.881663671 | 0.74933412  | NA          | NA          |
| chr3:23996027-24009514    | exonic       | NR1D2                       | 3  | 23996027  | 24009514  | 5 | 0 | 0 | 0 | 0 | 0 | 13487  | 0.644934714 | 2.908663033 | 3.881663671 | 0.74933412  | NA          | NA          |

|                           |            |                                            |    |           |           |   |   |   |   |   |   |        |             |             |             |             |             |             |
|---------------------------|------------|--------------------------------------------|----|-----------|-----------|---|---|---|---|---|---|--------|-------------|-------------|-------------|-------------|-------------|-------------|
| chr4:165998184-165998703  | UTR3       | TMEM192(NM_001100389;c.*2626_*2107de1ins0) | 4  | 165998184 | 165998703 | 5 | 0 | 0 | 0 | 0 | 0 | 519    | 0.644934714 | 2.908663033 | 3.881663671 | 0.74933412  | NA          | NA          |
| chr5:53839009-53843428    | exonic     | SNX18                                      | 5  | 53839009  | 53843428  | 5 | 0 | 0 | 0 | 0 | 0 | 4419   | 0.644934714 | 2.908663033 | 3.881663671 | 0.74933412  | NA          | NA          |
| chrMT:10878-11044         | intergenic | NONE(dist=NONE),NONE(dist=NONE)            | MT | 10878     | 11044     | 5 | 0 | 0 | 0 | 0 | 0 | 166    | 0.644934714 | 2.908663033 | 3.881663671 | 0.74933412  | NA          | NA          |
| chr1:28116072-28120143    | exonic     | STX12                                      | 1  | 28116072  | 28120143  | 5 | 3 | 5 | 1 | 1 | 0 | 4071   | 2.381446046 | 2.918016542 | 1.813801702 | 1.608784764 | 0.107663414 | 0.998252924 |
| chr15:25638893-25657118   | exonic     | UBE3A                                      | 15 | 25638893  | 25657118  | 3 | 6 | 4 | 0 | 2 | 0 | 18225  | 2.463746569 | 2.918831538 | 1.888571125 | 1.545523755 | 0.122219627 | 0.998252924 |
| chr12:112370389-112381173 | exonic     | TMEM116                                    | 12 | 112370389 | 112381173 | 0 | 2 | 5 | 0 | 1 | 0 | 10784  | 1.455924148 | 2.925495297 | 2.508278669 | 1.166335836 | 0.24347869  | 0.998252924 |
| chr1:201821231-201826322  | exonic     | IPO9                                       | 1  | 201821231 | 201826322 | 1 | 2 | 1 | 0 | 0 | 0 | 5091   | 0.674807566 | 2.944198281 | 3.18909845  | 0.923207084 | 0.355899298 | 0.998252924 |
| chr1:231079551-231097049  | exonic     | TTC13                                      | 1  | 231079551 | 231097049 | 1 | 2 | 1 | 0 | 0 | 0 | 17498  | 0.674807566 | 2.944198281 | 3.18909845  | 0.923207084 | 0.355899298 | 0.998252924 |
| chr1:26774049-26786635    | exonic     | DHDDS                                      | 1  | 26774049  | 26786635  | 1 | 2 | 1 | 0 | 0 | 0 | 12586  | 0.674807566 | 2.944198281 | 3.18909845  | 0.923207084 | 0.355899298 | 0.998252924 |
| chr12:110463546-110467440 | exonic     | ANKRD13A                                   | 12 | 110463546 | 110467440 | 1 | 2 | 1 | 0 | 0 | 0 | 3894   | 0.674807566 | 2.944198281 | 3.18909845  | 0.923207084 | 0.355899298 | 0.998252924 |
| chr6:151151717-151153341  | exonic     | PLEKHG1                                    | 6  | 151151717 | 151153341 | 1 | 2 | 1 | 0 | 0 | 0 | 1624   | 0.674807566 | 2.944198281 | 3.18909845  | 0.923207084 | 0.355899298 | 0.998252924 |
| chr8:22355513-22370945    | exonic     | PPP3CC                                     | 8  | 22355513  | 22370945  | 1 | 2 | 1 | 0 | 0 | 0 | 15432  | 0.674807566 | 2.944198281 | 3.18909845  | 0.923207084 | 0.355899298 | 0.998252924 |
| chr17:27975161-27977818   | exonic     | SSH2                                       | 17 | 27975161  | 27977818  | 3 | 2 | 8 | 0 | 2 | 0 | 2657   | 2.555719474 | 2.970895244 | 1.907187769 | 1.557736103 | NA          | NA          |
| chr1:172525008-172539870  | exonic     | SUCO                                       | 1  | 172525008 | 172539870 | 1 | 1 | 2 | 0 | 0 | 0 | 14862  | 0.697800793 | 2.986378651 | 3.15351431  | 0.94700019  | 0.343638682 | 0.998252924 |
| chr1:237013643-237016388  | exonic     | MTR                                        | 1  | 237013643 | 237016388 | 1 | 1 | 2 | 0 | 0 | 0 | 2745   | 0.697800793 | 2.986378651 | 3.15351431  | 0.94700019  | 0.343638682 | 0.998252924 |
| chr10:88227035-88233730   | exonic     | WAPL                                       | 10 | 88227035  | 88233730  | 1 | 1 | 2 | 0 | 0 | 0 | 6695   | 0.697800793 | 2.986378651 | 3.15351431  | 0.94700019  | 0.343638682 | 0.998252924 |
| chr13:20567202-20580726   | exonic     | ZMYM2                                      | 13 | 20567202  | 20580726  | 1 | 1 | 2 | 0 | 0 | 0 | 13524  | 0.697800793 | 2.986378651 | 3.15351431  | 0.94700019  | 0.343638682 | 0.998252924 |
| chr3:38103659-38104292    | exonic     | DLEC1                                      | 3  | 38103659  | 38104292  | 1 | 1 | 2 | 0 | 0 | 0 | 633    | 0.697800793 | 2.986378651 | 3.15351431  | 0.94700019  | 0.343638682 | 0.998252924 |
| chr1:155408117-155491409  | exonic     | ASH1L                                      | 1  | 155408117 | 155491409 | 0 | 4 | 0 | 0 | 0 | 0 | 83292  | 0.697103196 | 2.991496271 | 3.779973514 | 0.791406675 | NA          | NA          |
| chr1:23735156-23745632    | exonic     | TCEA3                                      | 1  | 23735156  | 23745632  | 0 | 4 | 0 | 0 | 0 | 0 | 10476  | 0.697103196 | 2.991496271 | 3.779973514 | 0.791406675 | NA          | NA          |
| chr1:28116072-28138779    | exonic     | STX12                                      | 1  | 28116072  | 28138779  | 0 | 4 | 0 | 0 | 0 | 0 | 22707  | 0.697103196 | 2.991496271 | 3.779973514 | 0.791406675 | NA          | NA          |
| chr1:35801462-35802082    | intronic   | ZMYM4                                      | 1  | 35801462  | 35802082  | 0 | 4 | 0 | 0 | 0 | 0 | 620    | 0.697103196 | 2.991496271 | 3.779973514 | 0.791406675 | NA          | NA          |
| chr1:46775568-46775988    | exonic     | UQCRH                                      | 1  | 46775568  | 46775988  | 0 | 4 | 0 | 0 | 0 | 0 | 420    | 0.697103196 | 2.991496271 | 3.779973514 | 0.791406675 | NA          | NA          |
| chr1:8555122-8601377      | exonic     | RERE                                       | 1  | 8555122   | 8601377   | 0 | 4 | 0 | 0 | 0 | 0 | 46255  | 0.697103196 | 2.991496271 | 3.779973514 | 0.791406675 | NA          | NA          |
| chr1:93142714-93169176    | exonic     | EVI5                                       | 1  | 93142714  | 93169176  | 0 | 4 | 0 | 0 | 0 | 0 | 26462  | 0.697103196 | 2.991496271 | 3.779973514 | 0.791406675 | NA          | NA          |
| chr10:124339093-124345899 | exonic     | DMBT1                                      | 10 | 124339093 | 124345899 | 0 | 4 | 0 | 0 | 0 | 0 | 6806   | 0.697103196 | 2.991496271 | 3.779973514 | 0.791406675 | NA          | NA          |
| chr12:112188173-112189281 | intronic   | ACAD10                                     | 12 | 112188173 | 112189281 | 0 | 4 | 0 | 0 | 0 | 0 | 1108   | 0.697103196 | 2.991496271 | 3.779973514 | 0.791406675 | NA          | NA          |
| chr12:46292605-46293938   | intronic   | ARID2                                      | 12 | 46292605  | 46293938  | 0 | 4 | 0 | 0 | 0 | 0 | 1333   | 0.697103196 | 2.991496271 | 3.779973514 | 0.791406675 | NA          | NA          |
| chr13:20216254-20224400   | exonic     | MPHOSPH8                                   | 13 | 20216254  | 20224400  | 0 | 4 | 0 | 0 | 0 | 0 | 8146   | 0.697103196 | 2.991496271 | 3.779973514 | 0.791406675 | NA          | NA          |
| chr14:37028378-37041450   | intergenic | NKX2-1-AS1(dist=36157),NKX2-8(dist=7766)   | 14 | 37028378  | 37041450  | 0 | 4 | 0 | 0 | 0 | 0 | 13072  | 0.697103196 | 2.991496271 | 3.779973514 | 0.791406675 | NA          | NA          |
| chr14:64065474-64066691   | exonic     | WDR89                                      | 14 | 64065474  | 64066691  | 0 | 4 | 0 | 0 | 0 | 0 | 1217   | 0.697103196 | 2.991496271 | 3.779973514 | 0.791406675 | NA          | NA          |
| chr14:65922338-66096324   | exonic     | FUT8                                       | 14 | 65922338  | 66096324  | 0 | 4 | 0 | 0 | 0 | 0 | 173986 | 0.697103196 | 2.991496271 | 3.779973514 | 0.791406675 | NA          | NA          |
| chr15:64409536-64409913   | intronic   | SNX1                                       | 15 | 64409536  | 64409913  | 0 | 4 | 0 | 0 | 0 | 0 | 377    | 0.697103196 | 2.991496271 | 3.779973514 | 0.791406675 | NA          | NA          |
| chr15:67923226-67956983   | exonic     | MAP2K5                                     | 15 | 67923226  | 67956983  | 0 | 4 | 0 | 0 | 0 | 0 | 33757  | 0.697103196 | 2.991496271 | 3.779973514 | 0.791406675 | NA          | NA          |
| chr16:27628163-27629269   | intronic   | KIAA0556                                   | 16 | 27628163  | 27629269  | 0 | 4 | 0 | 0 | 0 | 0 | 1106   | 0.697103196 | 2.991496271 | 3.779973514 | 0.791406675 | NA          | NA          |

|                          |                |                                              |    |           |           |   |   |   |   |   |   |        |             |             |             |             |             |             |
|--------------------------|----------------|----------------------------------------------|----|-----------|-----------|---|---|---|---|---|---|--------|-------------|-------------|-------------|-------------|-------------|-------------|
| chr16:48607466-48618924  | ncRNA_exonic   | MIR5095                                      | 16 | 48607466  | 48618924  | 0 | 4 | 0 | 0 | 0 | 0 | 11458  | 0.697103196 | 2.991496271 | 3.779973514 | 0.791406675 | NA          | NA          |
| chr17:27834913-27838010  | exonic         | TAOK1                                        | 17 | 27834913  | 27838010  | 0 | 4 | 0 | 0 | 0 | 0 | 3097   | 0.697103196 | 2.991496271 | 3.779973514 | 0.791406675 | NA          | NA          |
| chr17:40476728-40477079  | exonic         | STAT3                                        | 17 | 40476728  | 40477079  | 0 | 4 | 0 | 0 | 0 | 0 | 351    | 0.697103196 | 2.991496271 | 3.779973514 | 0.791406675 | NA          | NA          |
| chr19:11941432-12087979  | exonic         | ZNF439, ZNF440, ZNF69, ZNF700, ZNF763        | 19 | 11941432  | 12087979  | 0 | 4 | 0 | 0 | 0 | 0 | 146547 | 0.697103196 | 2.991496271 | 3.779973514 | 0.791406675 | NA          | NA          |
| chr19:23969576-24081285  | ncRNA_exonic   | RPSAP58                                      | 19 | 23969576  | 24081285  | 0 | 4 | 0 | 0 | 0 | 0 | 111709 | 0.697103196 | 2.991496271 | 3.779973514 | 0.791406675 | NA          | NA          |
| chr19:47421745-47440665  | exonic         | ARHGAP35                                     | 19 | 47421745  | 47440665  | 0 | 4 | 0 | 0 | 0 | 0 | 18920  | 0.697103196 | 2.991496271 | 3.779973514 | 0.791406675 | NA          | NA          |
| chr19:8486672-8491688    | exonic         | 2-Mar                                        | 19 | 8486672   | 8491688   | 0 | 4 | 0 | 0 | 0 | 0 | 5016   | 0.697103196 | 2.991496271 | 3.779973514 | 0.791406675 | NA          | NA          |
| chr2:33525517-33526711   | exonic         | LTBP1                                        | 2  | 33525517  | 33526711  | 0 | 4 | 0 | 0 | 0 | 0 | 1194   | 0.697103196 | 2.991496271 | 3.779973514 | 0.791406675 | NA          | NA          |
| chr2:53977919-53992722   | exonic         | ASB3, GPR75-ASB3                             | 2  | 53977919  | 53992722  | 0 | 4 | 0 | 0 | 0 | 0 | 14803  | 0.697103196 | 2.991496271 | 3.779973514 | 0.791406675 | NA          | NA          |
| chr20:60859680-60861251  | intronic       | OSBPL2                                       | 20 | 60859680  | 60861251  | 0 | 4 | 0 | 0 | 0 | 0 | 1571   | 0.697103196 | 2.991496271 | 3.779973514 | 0.791406675 | NA          | NA          |
| chr21:18619180-18632376  | intergenic     | WIR99AB(d1st=637080), LINC01549(d1st=178832) | 21 | 18619180  | 18632376  | 0 | 4 | 0 | 0 | 0 | 0 | 13196  | 0.697103196 | 2.991496271 | 3.779973514 | 0.791406675 | NA          | NA          |
| chr21:18619180-18642678  | intergenic     | WIR99AB(d1st=637080), LINC01549(d1st=168530) | 21 | 18619180  | 18642678  | 0 | 4 | 0 | 0 | 0 | 0 | 23498  | 0.697103196 | 2.991496271 | 3.779973514 | 0.791406675 | NA          | NA          |
| chr22:20800729-20825802  | exonic         | KLHL22                                       | 22 | 20800729  | 20825802  | 0 | 4 | 0 | 0 | 0 | 0 | 25073  | 0.697103196 | 2.991496271 | 3.779973514 | 0.791406675 | NA          | NA          |
| chr22:43402744-43403331  | intronic       | PACSN2                                       | 22 | 43402744  | 43403331  | 0 | 4 | 0 | 0 | 0 | 0 | 587    | 0.697103196 | 2.991496271 | 3.779973514 | 0.791406675 | NA          | NA          |
| chr4:87587778-87666281   | exonic         | PTPN13                                       | 4  | 87587778  | 87666281  | 0 | 4 | 0 | 0 | 0 | 0 | 78503  | 0.697103196 | 2.991496271 | 3.779973514 | 0.791406675 | NA          | NA          |
| chr4:87679412-87689129   | exonic         | PTPN13                                       | 4  | 87679412  | 87689129  | 0 | 4 | 0 | 0 | 0 | 0 | 9717   | 0.697103196 | 2.991496271 | 3.779973514 | 0.791406675 | NA          | NA          |
| chr5:43070047-43070493   | ncRNA_intronic | LOC100506639                                 | 5  | 43070047  | 43070493  | 0 | 4 | 0 | 0 | 0 | 0 | 446    | 0.697103196 | 2.991496271 | 3.779973514 | 0.791406675 | NA          | NA          |
| chr6:106623344-106623757 | intergenic     | PRDM1(dist=65530), ATG5(dist=8595)           | 6  | 106623344 | 106623757 | 0 | 4 | 0 | 0 | 0 | 0 | 413    | 0.697103196 | 2.991496271 | 3.779973514 | 0.791406675 | NA          | NA          |
| chr6:38545375-38565897   | exonic         | BTBD9                                        | 6  | 38545375  | 38565897  | 0 | 4 | 0 | 0 | 0 | 0 | 20522  | 0.697103196 | 2.991496271 | 3.779973514 | 0.791406675 | NA          | NA          |
| chr6:51875106-51900519   | exonic         | PKHD1                                        | 6  | 51875106  | 51900519  | 0 | 4 | 0 | 0 | 0 | 0 | 25413  | 0.697103196 | 2.991496271 | 3.779973514 | 0.791406675 | NA          | NA          |
| chr7:13971126-13978871   | exonic         | ETV1                                         | 7  | 13971126  | 13978871  | 0 | 4 | 0 | 0 | 0 | 0 | 7745   | 0.697103196 | 2.991496271 | 3.779973514 | 0.791406675 | NA          | NA          |
| chr7:140034434-140037149 | exonic         | SLC37A3                                      | 7  | 140034434 | 140037149 | 0 | 4 | 0 | 0 | 0 | 0 | 2715   | 0.697103196 | 2.991496271 | 3.779973514 | 0.791406675 | NA          | NA          |
| chr7:155457868-155499762 | exonic         | RBM33                                        | 7  | 155457868 | 155499762 | 0 | 4 | 0 | 0 | 0 | 0 | 41894  | 0.697103196 | 2.991496271 | 3.779973514 | 0.791406675 | NA          | NA          |
| chr7:2252846-2262389     | exonic         | MAD1L1                                       | 7  | 2252846   | 2262389   | 0 | 4 | 0 | 0 | 0 | 0 | 9543   | 0.697103196 | 2.991496271 | 3.779973514 | 0.791406675 | NA          | NA          |
| chr7:5410005-5410995     | exonic         | TNRC18                                       | 7  | 5410005   | 5410995   | 0 | 4 | 0 | 0 | 0 | 0 | 990    | 0.697103196 | 2.991496271 | 3.779973514 | 0.791406675 | NA          | NA          |
| chr7:56049902-56051561   | exonic         | GBAS                                         | 7  | 56049902  | 56051561  | 0 | 4 | 0 | 0 | 0 | 0 | 1659   | 0.697103196 | 2.991496271 | 3.779973514 | 0.791406675 | NA          | NA          |
| chr8:103846416-103855975 | exonic         | AZIN1                                        | 8  | 103846416 | 103855975 | 0 | 4 | 0 | 0 | 0 | 0 | 9559   | 0.697103196 | 2.991496271 | 3.779973514 | 0.791406675 | NA          | NA          |
| chr9:33143066-33144342   | intronic       | B4GALT1                                      | 9  | 33143066  | 33144342  | 0 | 4 | 0 | 0 | 0 | 0 | 1276   | 0.697103196 | 2.991496271 | 3.779973514 | 0.791406675 | NA          | NA          |
| chr9:3320475-3321012     | intronic       | RFX3                                         | 9  | 3320475   | 3321012   | 0 | 4 | 0 | 0 | 0 | 0 | 537    | 0.697103196 | 2.991496271 | 3.779973514 | 0.791406675 | NA          | NA          |
| chr9:90345923-90461638   | exonic         | CTSL                                         | 9  | 90345923  | 90461638  | 0 | 4 | 0 | 0 | 0 | 0 | 115715 | 0.697103196 | 2.991496271 | 3.779973514 | 0.791406675 | NA          | NA          |
| chrMT:8468-8624          | intergenic     | NONE(dist=NONE), NONE(dist=NONE)             | MT | 8468      | 8624      | 0 | 4 | 0 | 0 | 0 | 0 | 156    | 0.697103196 | 2.991496271 | 3.779973514 | 0.791406675 | NA          | NA          |
| chrX:74961533-74965904   | ncRNA_exonic   | TTC3P1                                       | X  | 74961533  | 74965904  | 0 | 4 | 0 | 0 | 0 | 0 | 4371   | 0.697103196 | 2.991496271 | 3.779973514 | 0.791406675 | NA          | NA          |
| chr1:48917223-48918803   | exonic         | SPATA6                                       | 1  | 48917223  | 48918803  | 4 | 1 | 0 | 0 | 0 | 0 | 1580   | 0.69022357  | 3.002907297 | 3.438832501 | 0.873234534 | 0.382535255 | 0.998252924 |
| chr2:200173482-200298237 | exonic         | SATB2                                        | 2  | 200173482 | 200298237 | 4 | 1 | 0 | 0 | 0 | 0 | 124755 | 0.69022357  | 3.002907297 | 3.438832501 | 0.873234534 | 0.382535255 | 0.998252924 |
| chr21:33825619-33840156  | exonic         | EVA1C                                        | 21 | 33825619  | 33840156  | 4 | 1 | 0 | 0 | 0 | 0 | 14537  | 0.69022357  | 3.002907297 | 3.438832501 | 0.873234534 | 0.382535255 | 0.998252924 |

|                          |        |         |    |           |           |    |   |   |   |   |   |        |             |             |             |             |             |             |
|--------------------------|--------|---------|----|-----------|-----------|----|---|---|---|---|---|--------|-------------|-------------|-------------|-------------|-------------|-------------|
| chr3:155615715-155633981 | exonic | GMPS    | 3  | 155615715 | 155633981 | 4  | 1 | 0 | 0 | 0 | 0 | 18266  | 0.69022357  | 3.002907297 | 3.438832501 | 0.873234534 | 0.382535255 | 0.998252924 |
| chr6:101296023-101315914 | exonic | ASCC3   | 6  | 101296023 | 101315914 | 4  | 1 | 0 | 0 | 0 | 0 | 19891  | 0.69022357  | 3.002907297 | 3.438832501 | 0.873234534 | 0.382535255 | 0.998252924 |
| chr12:5908672-6031970    | exonic | ANO2    | 12 | 5908672   | 6031970   | 5  | 4 | 0 | 1 | 0 | 0 | 123298 | 1.448349295 | 3.008053165 | 2.472912575 | 1.216400934 | 0.223832228 | 0.998252924 |
| chr19:10274001-10288043  | exonic | DNMT1   | 19 | 10274001  | 10288043  | 5  | 4 | 0 | 1 | 0 | 0 | 14042  | 1.448349295 | 3.008053165 | 2.472912575 | 1.216400934 | 0.223832228 | 0.998252924 |
| chr2:197943426-197954756 | exonic | ANKRD44 | 2  | 197943426 | 197954756 | 2  | 1 | 5 | 0 | 1 | 0 | 11330  | 1.539622234 | 3.022172584 | 2.294315788 | 1.317243511 | 0.187757013 | 0.998252924 |
| chr8:52744003-52773806   | exonic | PCMTD1  | 8  | 52744003  | 52773806  | 0  | 7 | 1 | 0 | 1 | 0 | 29803  | 1.538227041 | 3.024375419 | 2.500546438 | 1.209485804 | NA          | NA          |
| chr1:212515529-212519275 | exonic | PPP2R5A | 1  | 212515529 | 212519275 | 1  | 0 | 3 | 0 | 0 | 0 | 3746   | 0.720794019 | 3.030393937 | 3.400607567 | 0.891133092 | 0.372857773 | 0.998252924 |
| chr1:229586271-229601266 | exonic | NUP133  | 1  | 229586271 | 229601266 | 1  | 0 | 3 | 0 | 0 | 0 | 14995  | 0.720794019 | 3.030393937 | 3.400607567 | 0.891133092 | 0.372857773 | 0.998252924 |
| chr1:32495898-32504220   | exonic | KHDRBS1 | 1  | 32495898  | 32504220  | 1  | 0 | 3 | 0 | 0 | 0 | 8322   | 0.720794019 | 3.030393937 | 3.400607567 | 0.891133092 | 0.372857773 | 0.998252924 |
| chr15:38591573-38632096  | exonic | SPRED1  | 15 | 38591573  | 38632096  | 1  | 0 | 3 | 0 | 0 | 0 | 40523  | 0.720794019 | 3.030393937 | 3.400607567 | 0.891133092 | 0.372857773 | 0.998252924 |
| chr2:99279508-99294934   | exonic | MGAT4A  | 2  | 99279508  | 99294934  | 1  | 0 | 3 | 0 | 0 | 0 | 15426  | 0.720794019 | 3.030393937 | 3.400607567 | 0.891133092 | 0.372857773 | 0.998252924 |
| chr20:34302106-34320057  | exonic | RBM39   | 20 | 34302106  | 34320057  | 1  | 0 | 3 | 0 | 0 | 0 | 17951  | 0.720794019 | 3.030393937 | 3.400607567 | 0.891133092 | 0.372857773 | 0.998252924 |
| chr3:122842912-122849463 | exonic | PDIA5   | 3  | 122842912 | 122849463 | 1  | 0 | 3 | 0 | 0 | 0 | 6551   | 0.720794019 | 3.030393937 | 3.400607567 | 0.891133092 | 0.372857773 | 0.998252924 |
| chr3:12976947-12983365   | exonic | IQSEC1  | 3  | 12976947  | 12983365  | 1  | 0 | 3 | 0 | 0 | 0 | 6418   | 0.720794019 | 3.030393937 | 3.400607567 | 0.891133092 | 0.372857773 | 0.998252924 |
| chr3:156411808-156413814 | exonic | TIPARP  | 3  | 156411808 | 156413814 | 1  | 0 | 3 | 0 | 0 | 0 | 2006   | 0.720794019 | 3.030393937 | 3.400607567 | 0.891133092 | 0.372857773 | 0.998252924 |
| chr8:37971709-37974243   | exonic | ASH2L   | 8  | 37971709  | 37974243  | 1  | 0 | 3 | 0 | 0 | 0 | 2534   | 0.720794019 | 3.030393937 | 3.400607567 | 0.891133092 | 0.372857773 | 0.998252924 |
| chr9:107571746-107575003 | exonic | ABCA1   | 9  | 107571746 | 107575003 | 1  | 0 | 3 | 0 | 0 | 0 | 3257   | 0.720794019 | 3.030393937 | 3.400607567 | 0.891133092 | 0.372857773 | 0.998252924 |
| chr17:43552465-43555513  | exonic | PLEKHM1 | 17 | 43552465  | 43555513  | 0  | 3 | 1 | 0 | 0 | 0 | 3048   | 0.720096423 | 3.03226895  | 3.401985867 | 0.891323206 | 0.372755803 | 0.998252924 |
| chr17:505034-534868      | exonic | VPS53   | 17 | 505034    | 534868    | 0  | 3 | 1 | 0 | 0 | 0 | 29834  | 0.720096423 | 3.03226895  | 3.401985867 | 0.891323206 | 0.372755803 | 0.998252924 |
| chr17:62587201-62602758  | exonic | SMURF2  | 17 | 62587201  | 62602758  | 0  | 3 | 1 | 0 | 0 | 0 | 15557  | 0.720096423 | 3.03226895  | 3.401985867 | 0.891323206 | 0.372755803 | 0.998252924 |
| chr6:86256829-86282092   | exonic | SNX14   | 6  | 86256829  | 86282092  | 0  | 3 | 1 | 0 | 0 | 0 | 25263  | 0.720096423 | 3.03226895  | 3.401985867 | 0.891323206 | 0.372755803 | 0.998252924 |
| chrX:117538300-117544922 | exonic | WDR44   | X  | 117538300 | 117544922 | 0  | 3 | 1 | 0 | 0 | 0 | 6622   | 0.720096423 | 3.03226895  | 3.401985867 | 0.891323206 | 0.372755803 | 0.998252924 |
| chrX:62885765-62898452   | exonic | ARHGFE9 | X  | 62885765  | 62898452  | 0  | 3 | 1 | 0 | 0 | 0 | 12687  | 0.720096423 | 3.03226895  | 3.401985867 | 0.891323206 | 0.372755803 | 0.998252924 |
| chr2:24493539-24498718   | exonic | ITSN2   | 2  | 24493539  | 24498718  | 5  | 1 | 3 | 0 | 1 | 0 | 5179   | 1.532045011 | 3.034395145 | 2.271055627 | 1.33611661  | 0.181511162 | 0.998252924 |
| chr10:20290703-20534434  | exonic | PLXDC2  | 10 | 20290703  | 20534434  | 4  | 0 | 1 | 0 | 0 | 0 | 243731 | 0.713216797 | 3.044464903 | 3.399147101 | 0.895655531 | 0.370436767 | 0.998252924 |
| chr10:21962278-22002879  | exonic | MLLT10  | 10 | 21962278  | 22002879  | 4  | 0 | 1 | 0 | 0 | 0 | 40601  | 0.713216797 | 3.044464903 | 3.399147101 | 0.895655531 | 0.370436767 | 0.998252924 |
| chr16:53319507-53331070  | exonic | CHD9    | 16 | 53319507  | 53331070  | 4  | 0 | 1 | 0 | 0 | 0 | 11563  | 0.713216797 | 3.044464903 | 3.399147101 | 0.895655531 | 0.370436767 | 0.998252924 |
| chr3:19992297-19992553   | exonic | RAB5A   | 3  | 19992297  | 19992553  | 4  | 0 | 1 | 0 | 0 | 0 | 256    | 0.713216797 | 3.044464903 | 3.399147101 | 0.895655531 | 0.370436767 | 0.998252924 |
| chr9:95737519-95738991   | exonic | FGD3    | 9  | 95737519  | 95738991  | 4  | 0 | 1 | 0 | 0 | 0 | 1472   | 0.713216797 | 3.044464903 | 3.399147101 | 0.895655531 | 0.370436767 | 0.998252924 |
| chr15:43242459-43258484  | exonic | UBR1    | 15 | 43242459  | 43258484  | 11 | 0 | 0 | 0 | 1 | 0 | 16025  | 1.539883792 | 3.058782441 | 2.684012562 | 1.139630449 | NA          | NA          |
| chr1:15855582-15863309   | exonic | DNAJC16 | 1  | 15855582  | 15863309  | 0  | 2 | 2 | 0 | 0 | 0 | 7727   | 0.743089649 | 3.072870538 | 3.345527893 | 0.918500947 | 0.358356663 | 0.998252924 |
| chr1:39463842-39466778   | exonic | AKIRIN1 | 1  | 39463842  | 39466778  | 0  | 2 | 2 | 0 | 0 | 0 | 2936   | 0.743089649 | 3.072870538 | 3.345527893 | 0.918500947 | 0.358356663 | 0.998252924 |
| chr18:54483261-54547396  | exonic | WDR7    | 18 | 54483261  | 54547396  | 0  | 2 | 2 | 0 | 0 | 0 | 64135  | 0.743089649 | 3.072870538 | 3.345527893 | 0.918500947 | 0.358356663 | 0.998252924 |
| chr19:58904342-58904854  | exonic | RPS5    | 19 | 58904342  | 58904854  | 0  | 2 | 2 | 0 | 0 | 0 | 512    | 0.743089649 | 3.072870538 | 3.345527893 | 0.918500947 | 0.358356663 | 0.998252924 |
| chr2:44931421-44942492   | exonic | CAMKMT  | 2  | 44931421  | 44942492  | 0  | 2 | 2 | 0 | 0 | 0 | 11071  | 0.743089649 | 3.072870538 | 3.345527893 | 0.918500947 | 0.358356663 | 0.998252924 |



|                           |            |           |    |           |           |   |   |   |   |   |   |        |             |             |             |             |             |             |
|---------------------------|------------|-----------|----|-----------|-----------|---|---|---|---|---|---|--------|-------------|-------------|-------------|-------------|-------------|-------------|
| chr3:152173366-152173849  | exonic     | MBNL1     | 3  | 152173366 | 152173849 | 0 | 2 | 2 | 0 | 0 | 0 | 483    | 0.743089649 | 3.072870538 | 3.345527893 | 0.918500947 | 0.358356663 | 0.998252924 |
| chr3:185797605-185798964  | exonic     | ETV5      | 3  | 185797605 | 185798964 | 0 | 2 | 2 | 0 | 0 | 0 | 1359   | 0.743089649 | 3.072870538 | 3.345527893 | 0.918500947 | 0.358356663 | 0.998252924 |
| chr4:103432037-103459113  | exonic     | NFKB1     | 4  | 103432037 | 103459113 | 0 | 2 | 2 | 0 | 0 | 0 | 27076  | 0.743089649 | 3.072870538 | 3.345527893 | 0.918500947 | 0.358356663 | 0.998252924 |
| chr5:112870001-112874878  | exonic     | YTHDC2    | 5  | 112870001 | 112874878 | 0 | 2 | 2 | 0 | 0 | 0 | 4877   | 0.743089649 | 3.072870538 | 3.345527893 | 0.918500947 | 0.358356663 | 0.998252924 |
| chr7:26232907-26233218    | exonic     | HNRNPA2B1 | 7  | 26232907  | 26233218  | 0 | 2 | 2 | 0 | 0 | 0 | 311    | 0.743089649 | 3.072870538 | 3.345527893 | 0.918500947 | 0.358356663 | 0.998252924 |
| chr8:74495004-74601048    | exonic     | STAU2     | 8  | 74495004  | 74601048  | 0 | 2 | 2 | 0 | 0 | 0 | 106044 | 0.743089649 | 3.072870538 | 3.345527893 | 0.918500947 | 0.358356663 | 0.998252924 |
| chr9:98740343-98742148    | exonic     | ERCC6L2   | 9  | 98740343  | 98742148  | 0 | 2 | 2 | 0 | 0 | 0 | 1805   | 0.743089649 | 3.072870538 | 3.345527893 | 0.918500947 | 0.358356663 | 0.998252924 |
| chrX:48797181-48798178    | intronic   | OTUD5     | X  | 48797181  | 48798178  | 0 | 2 | 2 | 0 | 0 | 0 | 997    | 0.743089649 | 3.072870538 | 3.345527893 | 0.918500947 | 0.358356663 | 0.998252924 |
| chr10:104632204-104634418 | exonic     | AS3MT     | 10 | 104632204 | 104634418 | 4 | 2 | 3 | 0 | 1 | 0 | 2214   | 1.577333868 | 3.075996275 | 2.223671858 | 1.383295949 | 0.16657414  | 0.998252924 |
| chr10:75576780-75583842   | exonic     | CAMK2G    | 10 | 75576780  | 75583842  | 3 | 2 | 0 | 0 | 0 | 0 | 7062   | 0.735512427 | 3.086827248 | 3.336309356 | 0.92522213  | 0.354850375 | 0.998252924 |
| chr11:679687-681089       | exonic     | DEAF1     | 11 | 679687    | 681089    | 3 | 2 | 0 | 0 | 0 | 0 | 1402   | 0.735512427 | 3.086827248 | 3.336309356 | 0.92522213  | 0.354850375 | 0.998252924 |
| chr12:69245364-69248718   | UTR3       |           | 12 | 69245364  | 69248718  | 3 | 2 | 0 | 0 | 0 | 0 | 3354   | 0.735512427 | 3.086827248 | 3.336309356 | 0.92522213  | 0.354850375 | 0.998252924 |
| chr13:96622365-96651561   | exonic     | UGGT2     | 13 | 96622365  | 96651561  | 3 | 2 | 0 | 0 | 0 | 0 | 29196  | 0.735512427 | 3.086827248 | 3.336309356 | 0.92522213  | 0.354850375 | 0.998252924 |
| chr16:1866893-1873038     | exonic     | HAGH      | 16 | 1866893   | 1873038   | 3 | 2 | 0 | 0 | 0 | 0 | 6145   | 0.735512427 | 3.086827248 | 3.336309356 | 0.92522213  | 0.354850375 | 0.998252924 |
| chr17:49340634-49350811   | exonic     | UTP18     | 17 | 49340634  | 49350811  | 3 | 2 | 0 | 0 | 0 | 0 | 10177  | 0.735512427 | 3.086827248 | 3.336309356 | 0.92522213  | 0.354850375 | 0.998252924 |
| chr17:58269575-58269905   | intronic   | USP32     | 17 | 58269575  | 58269905  | 3 | 2 | 0 | 0 | 0 | 0 | 330    | 0.735512427 | 3.086827248 | 3.336309356 | 0.92522213  | 0.354850375 | 0.998252924 |
| chr17:64492319-64510584   | exonic     | PRKCA     | 17 | 64492319  | 64510584  | 3 | 2 | 0 | 0 | 0 | 0 | 18265  | 0.735512427 | 3.086827248 | 3.336309356 | 0.92522213  | 0.354850375 | 0.998252924 |
| chr2:70451685-70463307    | exonic     | TIA1      | 2  | 70451685  | 70463307  | 3 | 2 | 0 | 0 | 0 | 0 | 11622  | 0.735512427 | 3.086827248 | 3.336309356 | 0.92522213  | 0.354850375 | 0.998252924 |
| chr3:101419849-101422670  | intergenic |           | 3  | 101419849 | 101422670 | 3 | 2 | 0 | 0 | 0 | 0 | 2821   | 0.735512427 | 3.086827248 | 3.336309356 | 0.92522213  | 0.354850375 | 0.998252924 |
| chr3:167319915-167339431  | exonic     | WDR49     | 3  | 167319915 | 167339431 | 3 | 2 | 0 | 0 | 0 | 0 | 19516  | 0.735512427 | 3.086827248 | 3.336309356 | 0.92522213  | 0.354850375 | 0.998252924 |
| chr3:185332351-185341870  | exonic     | SENP2     | 3  | 185332351 | 185341870 | 3 | 2 | 0 | 0 | 0 | 0 | 9519   | 0.735512427 | 3.086827248 | 3.336309356 | 0.92522213  | 0.354850375 | 0.998252924 |
| chr4:25146395-25158596    | exonic     | SEPSECS   | 4  | 25146395  | 25158596  | 3 | 2 | 0 | 0 | 0 | 0 | 12201  | 0.735512427 | 3.086827248 | 3.336309356 | 0.92522213  | 0.354850375 | 0.998252924 |
| chr4:6969030-7006651      | exonic     | TBC1D14   | 4  | 6969030   | 7006651   | 3 | 2 | 0 | 0 | 0 | 0 | 37621  | 0.735512427 | 3.086827248 | 3.336309356 | 0.92522213  | 0.354850375 | 0.998252924 |
| chr6:36126425-36126718    | intergenic |           | 6  | 36126425  | 36126718  | 3 | 2 | 0 | 0 | 0 | 0 | 293    | 0.735512427 | 3.086827248 | 3.336309356 | 0.92522213  | 0.354850375 | 0.998252924 |
| chr6:57058639-57061404    | exonic     | RAB23     | 6  | 57058639  | 57061404  | 3 | 2 | 0 | 0 | 0 | 0 | 2765   | 0.735512427 | 3.086827248 | 3.336309356 | 0.92522213  | 0.354850375 | 0.998252924 |
| chr6:72993750-73043538    | exonic     | RIMS1     | 6  | 72993750  | 73043538  | 3 | 2 | 0 | 0 | 0 | 0 | 49788  | 0.735512427 | 3.086827248 | 3.336309356 | 0.92522213  | 0.354850375 | 0.998252924 |
| chr8:133759187-133769540  | exonic     | TMEM71    | 8  | 133759187 | 133769540 | 3 | 2 | 0 | 0 | 0 | 0 | 10353  | 0.735512427 | 3.086827248 | 3.336309356 | 0.92522213  | 0.354850375 | 0.998252924 |
| chrX:19968871-19988416    | exonic     | CXorf23   | X  | 19968871  | 19988416  | 3 | 2 | 0 | 0 | 0 | 0 | 19545  | 0.735512427 | 3.086827248 | 3.336309356 | 0.92522213  | 0.354850375 | 0.998252924 |
| chr1:35569895-35576048    | exonic     | ZMYM1     | 1  | 35569895  | 35576048  | 0 | 1 | 3 | 0 | 0 | 0 | 6153   | 0.766082876 | 3.112779858 | 3.330018298 | 0.93476359  | 0.349910148 | 0.998252924 |
| chr13:100953713-100992513 | exonic     | PCCA      | 13 | 100953713 | 100992513 | 0 | 1 | 3 | 0 | 0 | 0 | 38800  | 0.766082876 | 3.112779858 | 3.330018298 | 0.93476359  | 0.349910148 | 0.998252924 |
| chr14:36300615-36304129   | exonic     | BRMS1L    | 14 | 36300615  | 36304129  | 0 | 1 | 3 | 0 | 0 | 0 | 3514   | 0.766082876 | 3.112779858 | 3.330018298 | 0.93476359  | 0.349910148 | 0.998252924 |
| chr16:84773914-84779279   | exonic     | USP10     | 16 | 84773914  | 84779279  | 0 | 1 | 3 | 0 | 0 | 0 | 5365   | 0.766082876 | 3.112779858 | 3.330018298 | 0.93476359  | 0.349910148 | 0.998252924 |
| chr3:149589815-149629870  | exonic     | RNF13     | 3  | 149589815 | 149629870 | 0 | 1 | 3 | 0 | 0 | 0 | 40055  | 0.766082876 | 3.112779858 | 3.330018298 | 0.93476359  | 0.349910148 | 0.998252924 |
| chr3:160073800-160099506  | exonic     | IFT80     | 3  | 160073800 | 160099506 | 0 | 1 | 3 | 0 | 0 | 0 | 25706  | 0.766082876 | 3.112779858 | 3.330018298 | 0.93476359  | 0.349910148 | 0.998252924 |
| chr3:185316199-185344181  | exonic     | SENP2     | 3  | 185316199 | 185344181 | 0 | 1 | 3 | 0 | 0 | 0 | 27982  | 0.766082876 | 3.112779858 | 3.330018298 | 0.93476359  | 0.349910148 | 0.998252924 |

|                           |              |                                                                            |   |           |           |   |   |   |   |   |   |        |             |             |             |             |             |             |
|---------------------------|--------------|----------------------------------------------------------------------------|---|-----------|-----------|---|---|---|---|---|---|--------|-------------|-------------|-------------|-------------|-------------|-------------|
| chrX:77268375-77275895    | exonic       | ATP7A                                                                      | X | 77268375  | 77275895  | 0 | 1 | 3 | 0 | 0 | 0 | 7520   | 0.766082876 | 3.112779858 | 3.330018298 | 0.93476359  | 0.349910148 | 0.998252924 |
| chr15:66030044-66031213   | exonic       | DENND4A                                                                    |   | 66030044  | 66031213  | 3 | 1 | 1 | 0 | 0 | 0 | 1169   | 0.758505653 | 3.127542019 | 3.045852795 | 1.02681982  | 0.304505315 | 0.998252924 |
| chrX:12993287-12994354    | UTR5         | <small>TMSB4X (NM_021109;c.-1094_-1094delIns0)</small>                     | X | 12993287  | 12994354  | 3 | 1 | 1 | 0 | 0 | 0 | 1067   | 0.758505653 | 3.127542019 | 3.045852795 | 1.02681982  | 0.304505315 | 0.998252924 |
| chr7:48258950-48288948    | exonic       | ABCA13                                                                     |   | 48258950  | 48288948  | 2 | 9 | 3 | 2 | 0 | 0 | 29998  | 2.630885924 | 3.129328411 | 1.895227176 | 1.651162695 | 0.098705358 | 0.998252924 |
| chr7:24663284-24720139    | exonic       | MPP6                                                                       |   | 24663284  | 24720139  | 3 | 4 | 2 | 1 | 0 | 0 | 56855  | 1.584913461 | 3.131905533 | 2.225149708 | 1.407503198 | 0.15927823  | 0.998252924 |
| chr20:32659871-32666359   | exonic       | RALY                                                                       |   | 32659871  | 32666359  | 6 | 4 | 0 | 1 | 0 | 0 | 6488   | 1.577336238 | 3.141636529 | 2.410155031 | 1.30349977  | 0.192404195 | 0.998252924 |
| chr10:121017144-121018671 | intronic     | GRK5                                                                       |   | 121017144 | 121018671 | 0 | 0 | 4 | 0 | 0 | 0 | 1527   | 0.789076102 | 3.15582783  | 3.612111889 | 0.873679423 | NA          | NA          |
| chr10:12708734-12811798   | exonic       | CAMK1D                                                                     |   | 12708734  | 12811798  | 0 | 0 | 4 | 0 | 0 | 0 | 103064 | 0.789076102 | 3.15582783  | 3.612111889 | 0.873679423 | NA          | NA          |
| chr10:96493054-96535296   | exonic       | CYP2C18, CYP2C19                                                           |   | 96493054  | 96535296  | 0 | 0 | 4 | 0 | 0 | 0 | 42242  | 0.789076102 | 3.15582783  | 3.612111889 | 0.873679423 | NA          | NA          |
| chr11:61183137-61183991   | exonic       | CPSF7                                                                      |   | 61183137  | 61183991  | 0 | 0 | 4 | 0 | 0 | 0 | 854    | 0.789076102 | 3.15582783  | 3.612111889 | 0.873679423 | NA          | NA          |
| chr14:50941794-50952912   | exonic       | MAP4K5                                                                     |   | 50941794  | 50952912  | 0 | 0 | 4 | 0 | 0 | 0 | 11118  | 0.789076102 | 3.15582783  | 3.612111889 | 0.873679423 | NA          | NA          |
| chr15:100228870-100229780 | intronic     | MEF2A                                                                      |   | 100228870 | 100229780 | 0 | 0 | 4 | 0 | 0 | 0 | 910    | 0.789076102 | 3.15582783  | 3.612111889 | 0.873679423 | NA          | NA          |
| chr16:8895655-8900264     | exonic       | PMM2                                                                       |   | 8895655   | 8900264   | 0 | 0 | 4 | 0 | 0 | 0 | 4609   | 0.789076102 | 3.15582783  | 3.612111889 | 0.873679423 | NA          | NA          |
| chr17:46622856-46627308   | ncRNA_exonic | HOXB-AS1                                                                   |   | 46622856  | 46627308  | 0 | 0 | 4 | 0 | 0 | 0 | 4452   | 0.789076102 | 3.15582783  | 3.612111889 | 0.873679423 | NA          | NA          |
| chr17:71199138-71199932   | exonic       | COG1                                                                       |   | 71199138  | 71199932  | 0 | 0 | 4 | 0 | 0 | 0 | 794    | 0.789076102 | 3.15582783  | 3.612111889 | 0.873679423 | NA          | NA          |
| chr18:23612362-23637706   | exonic       | SS18                                                                       |   | 23612362  | 23637706  | 0 | 0 | 4 | 0 | 0 | 0 | 25344  | 0.789076102 | 3.15582783  | 3.612111889 | 0.873679423 | NA          | NA          |
| chr19:11977352-12058122   | exonic       | ZNF439, ZNF69, ZNF700                                                      |   | 11977352  | 12058122  | 0 | 0 | 4 | 0 | 0 | 0 | 80770  | 0.789076102 | 3.15582783  | 3.612111889 | 0.873679423 | NA          | NA          |
| chr19:2831525-2835203     | exonic       | ZNF554                                                                     |   | 2831525   | 2835203   | 0 | 0 | 4 | 0 | 0 | 0 | 3678   | 0.789076102 | 3.15582783  | 3.612111889 | 0.873679423 | NA          | NA          |
| chr2:223768925-223771369  | intronic     | ACSL3                                                                      |   | 223768925 | 223771369 | 0 | 0 | 4 | 0 | 0 | 0 | 2444   | 0.789076102 | 3.15582783  | 3.612111889 | 0.873679423 | NA          | NA          |
| chr2:37283582-37284623    | exonic       | HEATR5B                                                                    |   | 37283582  | 37284623  | 0 | 0 | 4 | 0 | 0 | 0 | 1041   | 0.789076102 | 3.15582783  | 3.612111889 | 0.873679423 | NA          | NA          |
| chr20:47557735-47570327   | exonic       | ARFGEF2                                                                    |   | 47557735  | 47570327  | 0 | 0 | 4 | 0 | 0 | 0 | 12592  | 0.789076102 | 3.15582783  | 3.612111889 | 0.873679423 | NA          | NA          |
| chr3:8574422-8579126      | exonic       | LMCD1                                                                      |   | 8574422   | 8579126   | 0 | 0 | 4 | 0 | 0 | 0 | 4704   | 0.789076102 | 3.15582783  | 3.612111889 | 0.873679423 | NA          | NA          |
| chr6:154580709-154581716  | intronic     | IPCEF1                                                                     |   | 154580709 | 154581716 | 0 | 0 | 4 | 0 | 0 | 0 | 1007   | 0.789076102 | 3.15582783  | 3.612111889 | 0.873679423 | NA          | NA          |
| chr6:16391316-16392836    | intronic     | ATXN1                                                                      |   | 16391316  | 16392836  | 0 | 0 | 4 | 0 | 0 | 0 | 1520   | 0.789076102 | 3.15582783  | 3.612111889 | 0.873679423 | NA          | NA          |
| chr7:107830088-107850049  | exonic       | NRCAM                                                                      |   | 107830088 | 107850049 | 0 | 0 | 4 | 0 | 0 | 0 | 19961  | 0.789076102 | 3.15582783  | 3.612111889 | 0.873679423 | NA          | NA          |
| chr7:65943996-66053567    | ncRNA_exonic | GS1-124K5.11                                                               |   | 65943996  | 66053567  | 0 | 0 | 4 | 0 | 0 | 0 | 109571 | 0.789076102 | 3.15582783  | 3.612111889 | 0.873679423 | NA          | NA          |
| chr8:142152030-142153630  | intronic     | DENND3                                                                     |   | 142152030 | 142153630 | 0 | 0 | 4 | 0 | 0 | 0 | 1600   | 0.789076102 | 3.15582783  | 3.612111889 | 0.873679423 | NA          | NA          |
| chr8:71495398-71499411    | exonic       | TRAM1                                                                      |   | 71495398  | 71499411  | 0 | 0 | 4 | 0 | 0 | 0 | 4013   | 0.789076102 | 3.15582783  | 3.612111889 | 0.873679423 | NA          | NA          |
| chrX:14868626-14877456    | exonic       | FANCB                                                                      | X | 14868626  | 14877456  | 0 | 0 | 4 | 0 | 0 | 0 | 8830   | 0.789076102 | 3.15582783  | 3.612111889 | 0.873679423 | NA          | NA          |
| chr2:20494136-20527139    | exonic       | PUM2                                                                       |   | 20494136  | 20527139  | 3 | 0 | 2 | 0 | 0 | 0 | 33003  | 0.781498879 | 3.164226905 | 3.266079908 | 0.968814908 | 0.332637547 | 0.998252924 |
| chr2:20497313-20527139    | exonic       | PUM2                                                                       |   | 20497313  | 20527139  | 3 | 0 | 2 | 0 | 0 | 0 | 29826  | 0.781498879 | 3.164226905 | 3.266079908 | 0.968814908 | 0.332637547 | 0.998252924 |
| chr2:206992520-207018406  | exonic       | NDUFS1                                                                     |   | 206992520 | 207018406 | 3 | 0 | 2 | 0 | 0 | 0 | 25886  | 0.781498879 | 3.164226905 | 3.266079908 | 0.968814908 | 0.332637547 | 0.998252924 |
| chr7:100866758-100867422  | exonic       | ZNHIT1                                                                     |   | 100866758 | 100867422 | 3 | 0 | 2 | 0 | 0 | 0 | 664    | 0.781498879 | 3.164226905 | 3.266079908 | 0.968814908 | 0.332637547 | 0.998252924 |
| chr9:3484974-3490345      | UTR5         | <small>WFS30K (LOC101929111; NM_0010022117;c.-30891_-30891delIns0)</small> |   | 3484974   | 3490345   | 3 | 0 | 2 | 0 | 0 | 0 | 5371   | 0.781498879 | 3.164226905 | 3.266079908 | 0.968814908 | 0.332637547 | 0.998252924 |
| chr1:23356961-23395644    | exonic       | KDM1A                                                                      |   | 23356961  | 23395644  | 2 | 3 | 0 | 0 | 0 | 0 | 38683  | 0.780801283 | 3.16589922  | 3.267597233 | 0.968876821 | 0.332606652 | 0.998252924 |

|                          |              |                                                                               |    |           |           |    |   |   |   |   |   |        |             |             |             |             |             |             |
|--------------------------|--------------|-------------------------------------------------------------------------------|----|-----------|-----------|----|---|---|---|---|---|--------|-------------|-------------|-------------|-------------|-------------|-------------|
| chr1:59787207-59922748   | exonic       | FGGY                                                                          | 1  | 59787207  | 59922748  | 2  | 3 | 0 | 0 | 0 | 0 | 135541 | 0.780801283 | 3.16589922  | 3.267597233 | 0.968876821 | 0.332606652 | 0.998252924 |
| chr11:46811625-46812133  | exonic       | CKAP5                                                                         | 11 | 46811625  | 46812133  | 2  | 3 | 0 | 0 | 0 | 0 | 508    | 0.780801283 | 3.16589922  | 3.267597233 | 0.968876821 | 0.332606652 | 0.998252924 |
| chr13:45725821-45781640  | exonic       | GTF2F2, KCTD4                                                                 | 13 | 45725821  | 45781640  | 2  | 3 | 0 | 0 | 0 | 0 | 55819  | 0.780801283 | 3.16589922  | 3.267597233 | 0.968876821 | 0.332606652 | 0.998252924 |
| chr14:51107467-51111732  | exonic       | SAV1                                                                          | 14 | 51107467  | 51111732  | 2  | 3 | 0 | 0 | 0 | 0 | 4265   | 0.780801283 | 3.16589922  | 3.267597233 | 0.968876821 | 0.332606652 | 0.998252924 |
| chr15:76577977-76585041  | exonic       | ETFA                                                                          | 15 | 76577977  | 76585041  | 2  | 3 | 0 | 0 | 0 | 0 | 7064   | 0.780801283 | 3.16589922  | 3.267597233 | 0.968876821 | 0.332606652 | 0.998252924 |
| chr17:36076080-36076315  | intronic     | HNF1B                                                                         | 17 | 36076080  | 36076315  | 2  | 3 | 0 | 0 | 0 | 0 | 235    | 0.780801283 | 3.16589922  | 3.267597233 | 0.968876821 | 0.332606652 | 0.998252924 |
| chr17:46925425-46926739  | exonic       | CALCOCO2                                                                      | 17 | 46925425  | 46926739  | 2  | 3 | 0 | 0 | 0 | 0 | 1314   | 0.780801283 | 3.16589922  | 3.267597233 | 0.968876821 | 0.332606652 | 0.998252924 |
| chr18:48189458-48190874  | exonic       | MAPK4                                                                         | 18 | 48189458  | 48190874  | 2  | 3 | 0 | 0 | 0 | 0 | 1416   | 0.780801283 | 3.16589922  | 3.267597233 | 0.968876821 | 0.332606652 | 0.998252924 |
| chr2:20402129-20402425   | UTR3         | <small>CGTCTG GCGGGGAG C CCG *GCGGCTGAGG TGG GGGGTT C CCG *GCGGCTGAGG</small> | 2  | 20402129  | 20402425  | 2  | 3 | 0 | 0 | 0 | 0 | 296    | 0.780801283 | 3.16589922  | 3.267597233 | 0.968876821 | 0.332606652 | 0.998252924 |
| chr4:16240394-16324659   | ncRNA_exonic | TAPT1-AS1                                                                     | 4  | 16240394  | 16324659  | 2  | 3 | 0 | 0 | 0 | 0 | 84265  | 0.780801283 | 3.16589922  | 3.267597233 | 0.968876821 | 0.332606652 | 0.998252924 |
| chr5:40934426-40945470   | exonic       | C7                                                                            | 5  | 40934426  | 40945470  | 2  | 3 | 0 | 0 | 0 | 0 | 11044  | 0.780801283 | 3.16589922  | 3.267597233 | 0.968876821 | 0.332606652 | 0.998252924 |
| chr7:63796637-63797360   | exonic       | ZNF736                                                                        | 7  | 63796637  | 63797360  | 2  | 3 | 0 | 0 | 0 | 0 | 723    | 0.780801283 | 3.16589922  | 3.267597233 | 0.968876821 | 0.332606652 | 0.998252924 |
| chr8:97613777-97614081   | intronic     | SDC2                                                                          | 8  | 97613777  | 97614081  | 2  | 3 | 0 | 0 | 0 | 0 | 304    | 0.780801283 | 3.16589922  | 3.267597233 | 0.968876821 | 0.332606652 | 0.998252924 |
| chr1:155640111-155753880 | exonic       | DAP3, GON4L, YY1AP1                                                           | 1  | 155640111 | 155753880 | 6  | 0 | 0 | 0 | 0 | 0 | 113769 | 0.773921657 | 3.171074323 | 3.620074768 | 0.87596929  | NA          | NA          |
| chr13:77825285-77862511  | exonic       | MYCBP2                                                                        | 13 | 77825285  | 77862511  | 6  | 0 | 0 | 0 | 0 | 0 | 37226  | 0.773921657 | 3.171074323 | 3.620074768 | 0.87596929  | NA          | NA          |
| chr14:24735636-24737825  | exonic       | RABGGTA                                                                       | 14 | 24735636  | 24737825  | 6  | 0 | 0 | 0 | 0 | 0 | 2189   | 0.773921657 | 3.171074323 | 3.620074768 | 0.87596929  | NA          | NA          |
| chr15:33357158-33384404  | exonic       | FMN1                                                                          | 15 | 33357158  | 33384404  | 6  | 0 | 0 | 0 | 0 | 0 | 27246  | 0.773921657 | 3.171074323 | 3.620074768 | 0.87596929  | NA          | NA          |
| chr16:21030945-21110090  | exonic       | DNAH3                                                                         | 16 | 21030945  | 21110090  | 6  | 0 | 0 | 0 | 0 | 0 | 79145  | 0.773921657 | 3.171074323 | 3.620074768 | 0.87596929  | NA          | NA          |
| chr19:44570217-44586258  | exonic       | ZNF223, ZNF284                                                                | 19 | 44570217  | 44586258  | 6  | 0 | 0 | 0 | 0 | 0 | 16041  | 0.773921657 | 3.171074323 | 3.620074768 | 0.87596929  | NA          | NA          |
| chr20:301149-303209      | ncRNA_exonic | NRSN2-AS1                                                                     | 20 | 301149    | 303209    | 6  | 0 | 0 | 0 | 0 | 0 | 2060   | 0.773921657 | 3.171074323 | 3.620074768 | 0.87596929  | NA          | NA          |
| chr3:51575605-51624575   | exonic       | RAD54L2                                                                       | 3  | 51575605  | 51624575  | 6  | 0 | 0 | 0 | 0 | 0 | 48970  | 0.773921657 | 3.171074323 | 3.620074768 | 0.87596929  | NA          | NA          |
| chr6:56915572-56924175   | exonic       | KIAA1586                                                                      | 6  | 56915572  | 56924175  | 6  | 0 | 0 | 0 | 0 | 0 | 8603   | 0.773921657 | 3.171074323 | 3.620074768 | 0.87596929  | NA          | NA          |
| chr7:30818047-30825608   | exonic       | FAM188B                                                                       | 7  | 30818047  | 30825608  | 6  | 0 | 0 | 0 | 0 | 0 | 7561   | 0.773921657 | 3.171074323 | 3.620074768 | 0.87596929  | NA          | NA          |
| chr7:930703-931889       | exonic       | GET4                                                                          | 7  | 930703    | 931889    | 6  | 0 | 0 | 0 | 0 | 0 | 1186   | 0.773921657 | 3.171074323 | 3.620074768 | 0.87596929  | NA          | NA          |
| chr5:50045984-50059076   | exonic       | PARP8                                                                         | 5  | 50045984  | 50059076  | 4  | 6 | 0 | 0 | 0 | 1 | 13092  | 1.869821174 | 3.182060572 | 2.340382106 | 1.359632926 | 0.173946113 | 0.998252924 |
| chr5:94244955-94259726   | exonic       | MCTP1                                                                         | 5  | 94244955  | 94259726  | 10 | 9 | 4 | 2 | 1 | 0 | 14771  | 3.981077914 | 3.197073902 | 1.522718363 | 2.099583207 | 0.035765521 | 0.998252924 |
| chr16:48311248-48337216  | exonic       | LONP2                                                                         | 16 | 48311248  | 48337216  | 2  | 2 | 1 | 0 | 0 | 0 | 25968  | 0.803794509 | 3.203318355 | 2.969241028 | 1.078834061 | 0.280661708 | 0.998252924 |
| chr7:30494752-30496658   | exonic       | NOD1                                                                          | 7  | 30494752  | 30496658  | 2  | 2 | 1 | 0 | 0 | 0 | 1906   | 0.803794509 | 3.203318355 | 2.969241028 | 1.078834061 | 0.280661708 | 0.998252924 |
| chr9:140622800-140657272 | exonic       | EHMT1                                                                         | 9  | 140622800 | 140657272 | 2  | 2 | 1 | 0 | 0 | 0 | 34472  | 0.803794509 | 3.203318355 | 2.969241028 | 1.078834061 | 0.280661708 | 0.998252924 |
| chr4:25153581-25160729   | exonic       | SEPSECS                                                                       | 4  | 25153581  | 25160729  | 8  | 1 | 2 | 0 | 1 | 0 | 7148   | 1.721736814 | 3.229202064 | 2.213525267 | 1.458850329 | 0.144606307 | 0.998252924 |
| chr1:109773499-109774408 | exonic       | SARS                                                                          | 1  | 109773499 | 109774408 | 2  | 1 | 2 | 0 | 0 | 0 | 909    | 0.826787736 | 3.238689101 | 2.942379021 | 1.100704253 | 0.271025395 | 0.998252924 |
| chr6:71185161-71212494   | exonic       | FAM135A                                                                       | 6  | 71185161  | 71212494  | 2  | 1 | 2 | 0 | 0 | 0 | 27333  | 0.826787736 | 3.238689101 | 2.942379021 | 1.100704253 | 0.271025395 | 0.998252924 |
| chr7:116339124-116340338 | exonic       | MET                                                                           | 7  | 116339124 | 116340338 | 2  | 1 | 2 | 0 | 0 | 0 | 1214   | 0.826787736 | 3.238689101 | 2.942379021 | 1.100704253 | 0.271025395 | 0.998252924 |
| chr1:246021797-246078942 | exonic       | SMYD3                                                                         | 1  | 246021797 | 246078942 | 1  | 4 | 0 | 0 | 0 | 0 | 57145  | 0.826090139 | 3.240960476 | 3.230940196 | 1.003101351 | 0.315811963 | 0.998252924 |
| chr11:94528176-94533477  | exonic       | AMOTL1                                                                        | 11 | 94528176  | 94533477  | 1  | 4 | 0 | 0 | 0 | 0 | 5301   | 0.826090139 | 3.240960476 | 3.230940196 | 1.003101351 | 0.315811963 | 0.998252924 |

|                           |              |                                                          |       |           |           |    |   |   |   |   |   |       |             |             |             |             |             |             |
|---------------------------|--------------|----------------------------------------------------------|-------|-----------|-----------|----|---|---|---|---|---|-------|-------------|-------------|-------------|-------------|-------------|-------------|
| chr14:103465901-103478525 | exonic       | CDC42BPB                                                 | 14    | 103465901 | 103478525 | 1  | 4 | 0 | 0 | 0 | 0 | 12624 | 0.826090139 | 3.240960476 | 3.230940196 | 1.003101351 | 0.315811963 | 0.998252924 |
| chr15:86087002-86129054   | exonic       | AKAP13                                                   | 15    | 86087002  | 86129054  | 1  | 4 | 0 | 0 | 0 | 0 | 42052 | 0.826090139 | 3.240960476 | 3.230940196 | 1.003101351 | 0.315811963 | 0.998252924 |
| chr2:242282406-242283312  | exonic       |                                                          | 2-Sep | 242282406 | 242283312 | 1  | 4 | 0 | 0 | 0 | 0 | 906   | 0.826090139 | 3.240960476 | 3.230940196 | 1.003101351 | 0.315811963 | 0.998252924 |
| chr3:170077486-170108252  | exonic       | SKIL                                                     | 3     | 170077486 | 170108252 | 1  | 4 | 0 | 0 | 0 | 0 | 30766 | 0.826090139 | 3.240960476 | 3.230940196 | 1.003101351 | 0.315811963 | 0.998252924 |
| chr4:42487512-42546003    | exonic       | ATP8A1                                                   | 4     | 42487512  | 42546003  | 1  | 0 | 0 | 0 | 0 | 2 | 58491 | 0.826090139 | 3.240960476 | 3.230940196 | 1.003101351 | 0.315811963 | 0.998252924 |
| chr5:76342171-76344812    | exonic       | AGGF1                                                    | 5     | 76342171  | 76344812  | 1  | 4 | 0 | 0 | 0 | 0 | 2641  | 0.826090139 | 3.240960476 | 3.230940196 | 1.003101351 | 0.315811963 | 0.998252924 |
| chr16:22260075-22262643   | exonic       | EEF2K                                                    | 16    | 22260075  | 22262643  | 8  | 2 | 1 | 1 | 0 | 0 | 2568  | 1.684027551 | 3.246558028 | 2.227497749 | 1.457491047 | NA          | NA          |
| chr16:21080735-21098381   | exonic       | DNAH3                                                    | 16    | 21080735  | 21098381  | 5  | 1 | 0 | 0 | 0 | 0 | 17646 | 0.819210513 | 3.250904157 | 3.230047042 | 1.006457217 | 0.314195682 | 0.998252924 |
| chr16:21082030-21098381   | exonic       | DNAH3                                                    | 16    | 21082030  | 21098381  | 5  | 1 | 0 | 0 | 0 | 0 | 16351 | 0.819210513 | 3.250904157 | 3.230047042 | 1.006457217 | 0.314195682 | 0.998252924 |
| chr12:49880033-49884514   | exonic       | SPATS2                                                   | 12    | 49880033  | 49884514  | 2  | 0 | 3 | 0 | 0 | 0 | 4481  | 0.849780962 | 3.274774158 | 3.173975566 | 1.031757835 | 0.302185577 | 0.998252924 |
| chr14:23550956-23559842   | exonic       | ACIN1                                                    | 14    | 23550956  | 23559842  | 2  | 0 | 3 | 0 | 0 | 0 | 8886  | 0.849780962 | 3.274774158 | 3.173975566 | 1.031757835 | 0.302185577 | 0.998252924 |
| chr20:45923409-45927691   | exonic       | ZMYND8                                                   | 20    | 45923409  | 45927691  | 2  | 0 | 3 | 0 | 0 | 0 | 4282  | 0.849780962 | 3.274774158 | 3.173975566 | 1.031757835 | 0.302185577 | 0.998252924 |
| chr3:47129602-47158244    | exonic       | SETD2                                                    | 3     | 47129602  | 47158244  | 2  | 0 | 3 | 0 | 0 | 0 | 28642 | 0.849780962 | 3.274774158 | 3.173975566 | 1.031757835 | 0.302185577 | 0.998252924 |
| chr5:37205416-37224842    | exonic       | C5orf42                                                  | 5     | 37205416  | 37224842  | 2  | 0 | 3 | 0 | 0 | 0 | 19426 | 0.849780962 | 3.274774158 | 3.173975566 | 1.031757835 | 0.302185577 | 0.998252924 |
| chr15:22835915-22849121   | exonic       | TUBGCP5                                                  | 15    | 22835915  | 22849121  | 1  | 3 | 1 | 0 | 0 | 0 | 13206 | 0.849083366 | 3.27538884  | 2.937630093 | 1.114976609 | 0.264860446 | 0.998252924 |
| chr11:8457040-8486369     | exonic       | STK33                                                    | 11    | 8457040   | 8486369   | 13 | 2 | 4 | 0 | 2 | 0 | 29329 | 3.0565128   | 3.278447681 | 1.800796686 | 1.820554039 | 0.068674675 | 0.998252924 |
| chr20:45891031-45919018   | exonic       | ZMYND8                                                   | 20    | 45891031  | 45919018  | 1  | 2 | 2 | 0 | 0 | 0 | 27987 | 0.872076592 | 3.309028913 | 2.893145453 | 1.143747857 | 0.25272822  | 0.998252924 |
| chr4:140263979-140265493  | exonic       | NAA15                                                    | 4     | 140263979 | 140265493 | 1  | 2 | 2 | 0 | 0 | 0 | 1514  | 0.872076592 | 3.309028913 | 2.893145453 | 1.143747857 | 0.25272822  | 0.998252924 |
| chr1:28813786-28814343    | intronic     | PHACTR4                                                  | 1     | 28813786  | 28814343  | 0  | 5 | 0 | 0 | 0 | 0 | 557   | 0.871378995 | 3.313613624 | 3.47826289  | 0.952663364 | NA          | NA          |
| chr1:6727768-6741097      | exonic       | DNAJC11                                                  | 1     | 6727768   | 6741097   | 0  | 5 | 0 | 0 | 0 | 0 | 13329 | 0.871378995 | 3.313613624 | 3.47826289  | 0.952663364 | NA          | NA          |
| chr15:75693070-75715164   | exonic       | SIN3A                                                    | 15    | 75693070  | 75715164  | 0  | 5 | 0 | 0 | 0 | 0 | 22094 | 0.871378995 | 3.313613624 | 3.47826289  | 0.952663364 | NA          | NA          |
| chr15:91256398-91258273   | ncRNA_exonic | CRTC3-AS1                                                | 15    | 91256398  | 91258273  | 0  | 5 | 0 | 0 | 0 | 0 | 1875  | 0.871378995 | 3.313613624 | 3.47826289  | 0.952663364 | NA          | NA          |
| chr22:32664275-32669494   | intergenic   | <small>SLCSA4 (dist=12957), RPFL3 (dist=81378)</small>   | 22    | 32664275  | 32669494  | 0  | 5 | 0 | 0 | 0 | 0 | 5219  | 0.871378995 | 3.313613624 | 3.47826289  | 0.952663364 | NA          | NA          |
| chr7:20193815-20210401    | exonic       | MACC1                                                    | 7     | 20193815  | 20210401  | 0  | 5 | 0 | 0 | 0 | 0 | 16586 | 0.871378995 | 3.313613624 | 3.47826289  | 0.952663364 | NA          | NA          |
| chr7:22279752-22280100    | intronic     | RAPGEF5                                                  | 7     | 22279752  | 22280100  | 0  | 5 | 0 | 0 | 0 | 0 | 348   | 0.871378995 | 3.313613624 | 3.47826289  | 0.952663364 | NA          | NA          |
| chr7:48541722-48542148    | intronic     | ABCA13                                                   | 7     | 48541722  | 48542148  | 0  | 5 | 0 | 0 | 0 | 0 | 426   | 0.871378995 | 3.313613624 | 3.47826289  | 0.952663364 | NA          | NA          |
| chr7:52382922-52391692    | intergenic   | <small>COBL(dist=998407), POM121L12(dist=711657)</small> | 7     | 52382922  | 52391692  | 0  | 5 | 0 | 0 | 0 | 0 | 8770  | 0.871378995 | 3.313613624 | 3.47826289  | 0.952663364 | NA          | NA          |
| chr7:7491949-7516811      | exonic       | COL28A1                                                  | 7     | 7491949   | 7516811   | 0  | 5 | 0 | 0 | 0 | 0 | 24862 | 0.871378995 | 3.313613624 | 3.47826289  | 0.952663364 | NA          | NA          |
| chr8:141874411-141935848  | exonic       | PTK2                                                     | 8     | 141874411 | 141935848 | 0  | 5 | 0 | 0 | 0 | 0 | 61437 | 0.871378995 | 3.313613624 | 3.47826289  | 0.952663364 | NA          | NA          |
| chrX:2129531-2130869      | intergenic   | <small>ASMT(dist=367557), DHRSX(dist=6686)</small>       | X     | 2129531   | 2130869   | 0  | 5 | 0 | 0 | 0 | 0 | 1338  | 0.871378995 | 3.313613624 | 3.47826289  | 0.952663364 | NA          | NA          |
| chr1:186420311-186439527  | ncRNA_exonic | LOC102724919                                             | 1     | 186420311 | 186439527 | 4  | 2 | 0 | 0 | 0 | 0 | 19216 | 0.864499369 | 3.322148383 | 3.140735243 | 1.05776136  | 0.290164253 | 0.998252924 |
| chr2:26587169-26596497    | exonic       | EPT1                                                     | 2     | 26587169  | 26596497  | 4  | 2 | 0 | 0 | 0 | 0 | 9328  | 0.864499369 | 3.322148383 | 3.140735243 | 1.05776136  | 0.290164253 | 0.998252924 |
| chr2:26587169-26598016    | exonic       | EPT1                                                     | 2     | 26587169  | 26598016  | 4  | 2 | 0 | 0 | 0 | 0 | 10847 | 0.864499369 | 3.322148383 | 3.140735243 | 1.05776136  | 0.290164253 | 0.998252924 |
| chr4:152274052-152274543  | intergenic   | <small>PRSS48(dist=61447), FAM160A1(dist=5885)</small>   | 4     | 152274052 | 152274543 | 4  | 2 | 0 | 0 | 0 | 0 | 491   | 0.864499369 | 3.322148383 | 3.140735243 | 1.05776136  | 0.290164253 | 0.998252924 |
| chr1:243504340-243589860  | exonic       | SDCCAG8                                                  | 1     | 243504340 | 243589860 | 1  | 1 | 2 | 2 | 0 | 0 | 85520 | 0.895069818 | 3.342263876 | 2.890288811 | 1.156377128 | 0.247526933 | 0.998252924 |

|                           |            |                                             |    |           |           |   |   |   |    |    |   |        |             |             |             |             |             |             |
|---------------------------|------------|---------------------------------------------|----|-----------|-----------|---|---|---|----|----|---|--------|-------------|-------------|-------------|-------------|-------------|-------------|
| chr2:42522264-42531691    | exonic     | EML4                                        | 2  | 42522264  | 42531691  | 1 | 1 | 3 | 0  | 0  | 0 | 9427   | 0.895069818 | 3.342263876 | 2.890288811 | 1.156377128 | 0.247526933 | 0.998252924 |
| chr4:55133455-55136915    | exonic     | PDGFRA                                      | 4  | 55133455  | 55136915  | 1 | 1 | 3 | 0  | 0  | 0 | 3460   | 0.895069818 | 3.342263876 | 2.890288811 | 1.156377128 | 0.247526933 | 0.998252924 |
| chr1:15956819-15978390    | exonic     | DDI2                                        | 1  | 15956819  | 15978390  | 0 | 4 | 1 | 0  | 0  | 0 | 21571  | 0.894372222 | 3.346287466 | 3.146935509 | 1.063347964 | 0.287624181 | 0.998252924 |
| chr12:105289051-105322472 | exonic     | SLC41A2                                     | 12 | 105289051 | 105322472 | 0 | 4 | 1 | 0  | 0  | 0 | 33421  | 0.894372222 | 3.346287466 | 3.146935509 | 1.063347964 | 0.287624181 | 0.998252924 |
| chr10:102697158-102703885 | exonic     | SLF2                                        | 10 | 102697158 | 102703885 | 4 | 1 | 1 | 0  | 0  | 0 | 6727   | 0.887492596 | 3.35764249  | 2.882044566 | 1.165021016 | 0.244010486 | 0.998252924 |
| chr6:149997395-150016357  | exonic     | LATS1                                       | 6  | 149997395 | 150016357 | 4 | 1 | 1 | 0  | 0  | 0 | 18962  | 0.887492596 | 3.35764249  | 2.882044566 | 1.165021016 | 0.244010486 | 0.998252924 |
| chr10:12039670-12046726   | exonic     | UPF2                                        | 10 | 12039670  | 12046726  | 0 | 3 | 2 | 0  | 0  | 0 | 7056   | 0.917365448 | 3.379075477 | 3.093838516 | 1.092195168 | 0.274747326 | 0.998252924 |
| chr11:20424464-20448411   | exonic     | PRMT3                                       | 11 | 20424464  | 20448411  | 0 | 3 | 2 | 0  | 0  | 0 | 23947  | 0.917365448 | 3.379075477 | 3.093838516 | 1.092195168 | 0.274747326 | 0.998252924 |
| chr12:112116954-112121111 | exonic     | BRAP                                        | 12 | 112116954 | 112121111 | 0 | 3 | 2 | 0  | 0  | 0 | 4157   | 0.917365448 | 3.379075477 | 3.093838516 | 1.092195168 | 0.274747326 | 0.998252924 |
| chr12:85441024-85460676   | exonic     | LRR1Q1                                      | 12 | 85441024  | 85460676  | 0 | 3 | 2 | 0  | 0  | 0 | 19652  | 0.917365448 | 3.379075477 | 3.093838516 | 1.092195168 | 0.274747326 | 0.998252924 |
| chr19:12511882-12544011   | exonic     | ZNF443, ZNF799                              | 19 | 12511882  | 12544011  | 0 | 3 | 2 | 0  | 0  | 0 | 32129  | 0.917365448 | 3.379075477 | 3.093838516 | 1.092195168 | 0.274747326 | 0.998252924 |
| chr19:36940301-36940903   | exonic     | ZNF566                                      | 19 | 36940301  | 36940903  | 0 | 3 | 2 | 0  | 0  | 0 | 602    | 0.917365448 | 3.379075477 | 3.093838516 | 1.092195168 | 0.274747326 | 0.998252924 |
| chr5:107684099-107703654  | exonic     | FBXL17                                      | 5  | 107684099 | 107703654 | 0 | 3 | 2 | 0  | 0  | 0 | 19555  | 0.917365448 | 3.379075477 | 3.093838516 | 1.092195168 | 0.274747326 | 0.998252924 |
| chr3:151299327-151318739  | intergenic | MIR5186 (dist=15544), MIR548H2 (dist=28581) | 3  | 151299327 | 151318739 | 4 | 0 | 2 | 0  | 0  | 0 | 19412  | 0.910485822 | 3.388323792 | 3.08620215  | 1.097894314 | 0.272250641 | 0.998252924 |
| chr1:63042932-63091072    | exonic     | ANGPTL3, DOCK7                              | 1  | 63042932  | 63091072  | 3 | 3 | 0 | 0  | 0  | 0 | 48140  | 0.909788226 | 3.389749254 | 3.079705313 | 1.100673249 | 0.271038893 | 0.998252924 |
| chr15:54304845-54308083   | exonic     | UNC13C                                      | 15 | 54304845  | 54308083  | 3 | 3 | 0 | 0  | 0  | 0 | 3238   | 0.909788226 | 3.389749254 | 3.079705313 | 1.100673249 | 0.271038893 | 0.998252924 |
| chr16:960930-1004666      | exonic     | LMF1                                        | 16 | 960930    | 1004666   | 3 | 3 | 0 | 0  | 0  | 0 | 43736  | 0.909788226 | 3.389749254 | 3.079705313 | 1.100673249 | 0.271038893 | 0.998252924 |
| chr18:59949495-59954700   | exonic     | KIAA1468                                    | 18 | 59949495  | 59954700  | 3 | 3 | 0 | 0  | 0  | 0 | 5205   | 0.909788226 | 3.389749254 | 3.079705313 | 1.100673249 | 0.271038893 | 0.998252924 |
| chr6:111640587-111641142  | intronic   | REV3L                                       | 6  | 111640587 | 111641142 | 3 | 3 | 0 | 0  | 0  | 0 | 555    | 0.909788226 | 3.389749254 | 3.079705313 | 1.100673249 | 0.271038893 | 0.998252924 |
| chr7:21654731-21659696    | exonic     | DNAH11                                      | 7  | 21654731  | 21659696  | 3 | 3 | 0 | 0  | 0  | 0 | 4965   | 0.909788226 | 3.389749254 | 3.079705313 | 1.100673249 | 0.271038893 | 0.998252924 |
| chr17:76121981-76122357   | splicing   | TMC6                                        | 17 | 76121981  | 76122357  | 7 | 0 | 0 | 0  | 0  | 0 | 376    | 0.9029086   | 3.392883617 | 3.420609097 | 0.991894578 | NA          | NA          |
| chr18:42281140-42283072   | exonic     | SETBP1                                      | 18 | 42281140  | 42283072  | 7 | 0 | 0 | 0  | 0  | 0 | 1932   | 0.9029086   | 3.392883617 | 3.420609097 | 0.991894578 | NA          | NA          |
| chr6:52657654-52761726    | exonic     | GSTA1, GSTA3, GSTA5                         | 6  | 52657654  | 52761726  | 7 | 0 | 0 | 0  | 0  | 0 | 104072 | 0.9029086   | 3.392883617 | 3.420609097 | 0.991894578 | NA          | NA          |
| chr12:28408514-28544344   | exonic     | CCDC91                                      | 12 | 28408514  | 28544344  | 0 | 2 | 3 | 0  | 0  | 0 | 135830 | 0.940358675 | 3.411338948 | 3.0682803   | 1.111808119 | 0.26622066  | 0.998252924 |
| chr15:49517402-49531564   | exonic     | GALK2                                       | 15 | 49517402  | 49531564  | 0 | 2 | 3 | 0  | 0  | 0 | 14162  | 0.940358675 | 3.411338948 | 3.0682803   | 1.111808119 | 0.26622066  | 0.998252924 |
| chr19:20228590-20232155   | exonic     | ZNF90                                       | 19 | 20228590  | 20232155  | 0 | 2 | 3 | 0  | 0  | 0 | 3565   | 0.940358675 | 3.411338948 | 3.0682803   | 1.111808119 | 0.26622066  | 0.998252924 |
| chr2:122260742-122286356  | exonic     | CLASP1                                      | 2  | 122260742 | 122286356 | 0 | 2 | 3 | 0  | 0  | 0 | 25614  | 0.940358675 | 3.411338948 | 3.0682803   | 1.111808119 | 0.26622066  | 0.998252924 |
| chr2:122260742-122287901  | exonic     | CLASP1                                      | 2  | 122260742 | 122287901 | 0 | 2 | 3 | 0  | 0  | 0 | 27159  | 0.940358675 | 3.411338948 | 3.0682803   | 1.111808119 | 0.26622066  | 0.998252924 |
| chr9:88574707-88611492    | exonic     | NAA35                                       | 9  | 88574707  | 88611492  | 0 | 2 | 3 | 0  | 0  | 0 | 36785  | 0.940358675 | 3.411338948 | 3.0682803   | 1.111808119 | 0.26622066  | 0.998252924 |
| chr1:246490502-246498776  | exonic     | SMYD3                                       | 1  | 246490502 | 246498776 | 3 | 2 | 1 | 0  | 0  | 0 | 8274   | 0.932781452 | 3.422747594 | 2.810075439 | 1.218026942 | 0.223213735 | 0.998252924 |
| chr13:43500471-43538275   | exonic     | EPSTI1                                      | 13 | 43500471  | 43538275  | 3 | 2 | 1 | 0  | 0  | 0 | 37804  | 0.932781452 | 3.422747594 | 2.810075439 | 1.218026942 | 0.223213735 | 0.998252924 |
| chr4:25146395-25160729    | exonic     | SEPSECS                                     | 4  | 25146395  | 25160729  | 3 | 2 | 1 | 0  | 0  | 0 | 14334  | 0.932781452 | 3.422747594 | 2.810075439 | 1.218026942 | 0.223213735 | 0.998252924 |
| chr2:97823843-97833504    | exonic     | ANKRD36                                     | 2  | 97823843  | 97833504  | 1 | 3 | 6 | 1  | 0  | 0 | 9661   | 1.941739878 | 3.426953694 | 2.155358941 | 1.589968904 | 0.111841814 | 0.998252924 |
| chr15:38591573-38617010   | exonic     | SPRED1                                      | 15 | 38591573  | 38617010  | 0 | 3 | 7 | 0  | 1  | 0 | 25437  | 2.024737998 | 3.442882126 | 2.283006547 | 1.508047417 | 0.131542392 | 0.998252924 |
| chr1:70758070-70779473    | exonic     | ANKRD13C                                    | 1  | 70758070  | 70779473  | 8 | 5 | 7 | 11 | 10 | 9 | 21403  | 0.963351901 | 3.443342233 | 3.071814934 | 1.120947162 | 0.262310354 | 0.998252924 |

|                           |              |                                           |    |           |           |    |    |    |   |   |   |        |             |             |             |             |             |             |
|---------------------------|--------------|-------------------------------------------|----|-----------|-----------|----|----|----|---|---|---|--------|-------------|-------------|-------------|-------------|-------------|-------------|
| chr18:72589152-72601994   | exonic       | ZNF407                                    | 18 | 72589152  | 72601994  | 0  | 1  | 4  | 0 | 0 | 0 | 12842  | 0.963351901 | 3.443342233 | 3.071814934 | 1.120947162 | 0.262310354 | 0.998252924 |
| chr22:23029445-23192390   | ncRNA_exonic | MIR650                                    | 22 | 23029445  | 23192390  | 4  | 2  | 12 | 0 | 2 | 0 | 162945 | 3.473782519 | 3.451960173 | 1.775609013 | 1.944099262 | NA          | NA          |
| chr3:98487273-98492827    | exonic       | ST3GAL6                                   | 3  | 98487273  | 98492827  | 3  | 1  | 2  | 0 | 0 | 0 | 5554   | 0.955774678 | 3.453249616 | 2.789049835 | 1.238145541 | 0.2156621   | 0.998252924 |
| chr6:108232549-108246136  | exonic       | SEC63                                     | 6  | 108232549 | 108246136 | 3  | 1  | 2  | 0 | 0 | 0 | 13587  | 0.955774678 | 3.453249616 | 2.789049835 | 1.238145541 | 0.2156621   | 0.998252924 |
| chr1:47801217-47801530    | intronic     | CMPK1                                     | 1  | 47801217  | 47801530  | 2  | 4  | 0  | 0 | 0 | 0 | 313    | 0.955077082 | 3.454289402 | 3.038360073 | 1.136892705 | 0.255583142 | 0.998252924 |
| chr14:50266192-50298079   | exonic       | NEMF                                      | 14 | 50266192  | 50298079  | 2  | 4  | 0  | 0 | 0 | 0 | 31887  | 0.955077082 | 3.454289402 | 3.038360073 | 1.136892705 | 0.255583142 | 0.998252924 |
| chr14:50267137-50298079   | exonic       | NEMF                                      | 14 | 50267137  | 50298079  | 2  | 4  | 0  | 0 | 0 | 0 | 30942  | 0.955077082 | 3.454289402 | 3.038360073 | 1.136892705 | 0.255583142 | 0.998252924 |
| chr3:17512337-17513740    | intronic     | TBC1D5                                    | 3  | 17512337  | 17513740  | 2  | 4  | 0  | 0 | 0 | 0 | 1403   | 0.955077082 | 3.454289402 | 3.038360073 | 1.136892705 | 0.255583142 | 0.998252924 |
| chr4:184930311-184932788  | exonic       | STOX2                                     | 4  | 184930311 | 184932788 | 2  | 4  | 0  | 0 | 0 | 0 | 2477   | 0.955077082 | 3.454289402 | 3.038360073 | 1.136892705 | 0.255583142 | 0.998252924 |
| chrMT:8472-8624           | intergenic   | NONE (dist=NONE), NONE (dist=NONE)        | MT | 8472      | 8624      | 2  | 4  | 0  | 0 | 0 | 0 | 152    | 0.955077082 | 3.454289402 | 3.038360073 | 1.136892705 | 0.255583142 | 0.998252924 |
| chr1:155642351-155649303  | exonic       | YY1AP1                                    | 1  | 155642351 | 155649303 | 0  | 0  | 5  | 0 | 0 | 0 | 6952   | 0.986345128 | 3.47853522  | 3.333170378 | 1.043611584 | NA          | NA          |
| chr10:12414540-12415718   | intronic     | CAMK1D                                    | 10 | 12414540  | 12415718  | 0  | 0  | 5  | 0 | 0 | 0 | 1178   | 0.986345128 | 3.47853522  | 3.333170378 | 1.043611584 | NA          | NA          |
| chr10:96493054-96541754   | exonic       | CYP2C18, CYP2C19                          | 10 | 96493054  | 96541754  | 0  | 0  | 5  | 0 | 0 | 0 | 48700  | 0.986345128 | 3.47853522  | 3.333170378 | 1.043611584 | NA          | NA          |
| chr17:49041911-49042201   | UTR3         | -----                                     | 17 | 49041911  | 49042201  | 0  | 0  | 5  | 0 | 0 | 0 | 290    | 0.986345128 | 3.47853522  | 3.333170378 | 1.043611584 | NA          | NA          |
| chr2:233599864-233626146  | exonic       | GIGYF2                                    | 2  | 233599864 | 233626146 | 0  | 0  | 5  | 0 | 0 | 0 | 26282  | 0.986345128 | 3.47853522  | 3.333170378 | 1.043611584 | NA          | NA          |
| chr2:37330584-37331063    | intergenic   | GPATCH11 (dist=4197), EIF2AK2 (dist=1221) | 2  | 37330584  | 37331063  | 0  | 0  | 5  | 0 | 0 | 0 | 479    | 0.986345128 | 3.47853522  | 3.333170378 | 1.043611584 | NA          | NA          |
| chr7:129679304-129681313  | exonic       | ZC3HC1                                    | 7  | 129679304 | 129681313 | 0  | 0  | 5  | 0 | 0 | 0 | 2009   | 0.986345128 | 3.47853522  | 3.333170378 | 1.043611584 | NA          | NA          |
| chr11:108046972-108047817 | exonic       | NPAT                                      | 11 | 108046972 | 108047817 | 3  | 0  | 3  | 0 | 0 | 0 | 845    | 0.978767905 | 3.483622879 | 3.005989194 | 1.158894012 | 0.24649939  | 0.998252924 |
| chr2:99811213-99812219    | exonic       | MRPL30                                    | 2  | 99811213  | 99812219  | 3  | 0  | 3  | 0 | 0 | 0 | 1006   | 0.978767905 | 3.483622879 | 3.005989194 | 1.158894012 | 0.24649939  | 0.998252924 |
| chr1:179316734-179320597  | exonic       | SOAT1                                     | 1  | 179316734 | 179320597 | 2  | 3  | 1  | 0 | 0 | 0 | 3863   | 0.978070308 | 3.484865618 | 2.769634709 | 1.25824016  | 0.208304915 | 0.998252924 |
| chr2:68717321-68740812    | exonic       | APLF                                      | 2  | 68717321  | 68740812  | 2  | 3  | 1  | 0 | 0 | 0 | 23491  | 0.978070308 | 3.484865618 | 2.769634709 | 1.25824016  | 0.208304915 | 0.998252924 |
| chr3:32774914-32778982    | exonic       | CNOT10                                    | 3  | 32774914  | 32778982  | 2  | 3  | 1  | 0 | 0 | 0 | 4068   | 0.978070308 | 3.484865618 | 2.769634709 | 1.25824016  | 0.208304915 | 0.998252924 |
| chr5:33576158-33596165    | exonic       | ADAMTS12                                  | 5  | 33576158  | 33596165  | 2  | 3  | 1  | 0 | 0 | 0 | 20007  | 0.978070308 | 3.484865618 | 2.769634709 | 1.25824016  | 0.208304915 | 0.998252924 |
| chr17:80863811-80869665   | exonic       | TBCD                                      | 17 | 80863811  | 80869665  | 24 | 1  | 0  | 0 | 2 | 0 | 5854   | 3.51201727  | 3.506319389 | 1.99867209  | 1.754324487 | NA          | NA          |
| chr2:68794473-68805135    | exonic       | APLF                                      | 2  | 68794473  | 68805135  | 2  | 2  | 2  | 0 | 0 | 0 | 10662  | 1.001063535 | 3.514063068 | 2.729509935 | 1.287433697 | 0.197943165 | 0.998252924 |
| chr5:39382719-39388954    | exonic       | DAB2                                      | 5  | 39382719  | 39388954  | 1  | 5  | 0  | 0 | 0 | 0 | 6235   | 1.000365938 | 3.516216636 | 3.024165946 | 1.162706246 | NA          | NA          |
| chrX:16836696-16838378    | exonic       | TXLNG                                     | X  | 16836696  | 16838378  | 5  | 2  | 0  | 0 | 0 | 0 | 1682   | 0.993486312 | 3.524274379 | 2.987539041 | 1.179658016 | 0.238136258 | 0.998252924 |
| chrX:73045950-73051109    | ncRNA_exonic | TSIX, XIIST                               | X  | 73045950  | 73051109  | 5  | 2  | 0  | 0 | 0 | 0 | 5159   | 0.993486312 | 3.524274379 | 2.987539041 | 1.179658016 | 0.238136258 | 0.998252924 |
| chr2:68717321-68753374    | exonic       | APLF                                      | 2  | 68717321  | 68753374  | 4  | 4  | 4  | 0 | 1 | 0 | 36053  | 2.123154491 | 3.533956804 | 2.030862125 | 1.740126402 | 0.081836825 | 0.998252924 |
| chr7:22306582-22357656    | exonic       | RAPGEF5                                   | 7  | 22306582  | 22357656  | 0  | 34 | 0  | 0 | 4 | 0 | 51074  | 6.409486856 | 3.570599668 | 3.82892452  | 0.932533313 | NA          | NA          |
| chr1:197611840-197684204  | exonic       | DENND1B                                   | 1  | 197611840 | 197684204 | 1  | 3  | 2  | 0 | 0 | 0 | 72364  | 1.046352391 | 3.57265923  | 2.714361018 | 1.316206358 | 0.18810479  | 0.998252924 |
| chr15:86225388-86251317   | exonic       | AKAP13                                    | 15 | 86225388  | 86251317  | 1  | 3  | 2  | 0 | 0 | 0 | 25929  | 1.046352391 | 3.57265923  | 2.714361018 | 1.316206358 | 0.18810479  | 0.998252924 |
| chr21:40581920-40587288   | exonic       | BRWD1                                     | 21 | 40581920  | 40587288  | 1  | 3  | 2  | 0 | 0 | 0 | 5368   | 1.046352391 | 3.57265923  | 2.714361018 | 1.316206358 | 0.18810479  | 0.998252924 |
| chr4:107216250-107230146  | exonic       | TBCK                                      | 4  | 107216250 | 107230146 | 1  | 3  | 2  | 0 | 0 | 0 | 13896  | 1.046352391 | 3.57265923  | 2.714361018 | 1.316206358 | 0.18810479  | 0.998252924 |
| chrX:117706285-117707981  | exonic       | DOCK11                                    | X  | 117706285 | 117707981 | 1  | 3  | 2  | 0 | 0 | 0 | 1696   | 1.046352391 | 3.57265923  | 2.714361018 | 1.316206358 | 0.18810479  | 0.998252924 |

|                           |              |                                                         |    |           |           |   |   |    |   |   |   |       |             |             |             |             |             |             |
|---------------------------|--------------|---------------------------------------------------------|----|-----------|-----------|---|---|----|---|---|---|-------|-------------|-------------|-------------|-------------|-------------|-------------|
| chr17:67114038-67121176   | exonic       | ABCA6                                                   | 17 | 67114038  | 67121176  | 2 | 0 | 4  | 0 | 0 | 0 | 7138  | 1.047049988 | 3.573202117 | 2.949084791 | 1.211630852 | 0.225653719 | 0.998252924 |
| chr1:42730785-42789498    | exonic       | FOXJ3                                                   | 1  | 42730785  | 42789498  | 0 | 6 | 0  | 0 | 0 | 0 | 58713 | 1.045654794 | 3.576821576 | 3.260558943 | 1.096996447 | NA          | NA          |
| chr1:44750506-44804994    | exonic       | ERI3                                                    | 1  | 44750506  | 44804994  | 0 | 6 | 0  | 0 | 0 | 0 | 54488 | 1.045654794 | 3.576821576 | 3.260558943 | 1.096996447 | NA          | NA          |
| chr16:21327205-21363459   | ncRNA_exonic | CRYM-AS1, SNX29P1                                       | 16 | 21327205  | 21363459  | 0 | 6 | 0  | 0 | 0 | 0 | 36254 | 1.045654794 | 3.576821576 | 3.260558943 | 1.096996447 | NA          | NA          |
| chr2:215609790-215634036  | exonic       | BARD1                                                   | 2  | 215609790 | 215634036 | 0 | 6 | 0  | 0 | 0 | 0 | 24246 | 1.045654794 | 3.576821576 | 3.260558943 | 1.096996447 | NA          | NA          |
| chrX:76918870-76920267    | exonic       | ATRX                                                    | X  | 76918870  | 76920267  | 0 | 6 | 0  | 0 | 0 | 0 | 1397  | 1.045654794 | 3.576821576 | 3.260558943 | 1.096996447 | NA          | NA          |
| chr1:146066114-146074129  | exonic       | NBPF11                                                  | 1  | 146066114 | 146074129 | 4 | 3 | 0  | 0 | 0 | 0 | 8015  | 1.038775168 | 3.583347507 | 2.933355218 | 1.221586627 | 0.221863988 | 0.998252924 |
| chr5:63496634-63513223    | exonic       | RNF180                                                  | 5  | 63496634  | 63513223  | 4 | 3 | 0  | 0 | 0 | 0 | 16589 | 1.038775168 | 3.583347507 | 2.933355218 | 1.221586627 | 0.221863988 | 0.998252924 |
| chr9:138741982-138773640  | exonic       | CAMSAP1                                                 | 9  | 138741982 | 138773640 | 4 | 3 | 0  | 0 | 0 | 0 | 31658 | 1.038775168 | 3.583347507 | 2.933355218 | 1.221586627 | 0.221863988 | 0.998252924 |
| chr13:41894960-41897178   | exonic       | NAA16                                                   | 13 | 41894960  | 41897178  | 8 | 0 | 0  | 0 | 0 | 0 | 2218  | 1.031895542 | 3.584984577 | 3.262000912 | 1.099013971 | NA          | NA          |
| chr5:121354954-121358102  | exonic       | SRFBP1                                                  | 5  | 121354954 | 121358102 | 8 | 0 | 0  | 0 | 0 | 0 | 3148  | 1.031895542 | 3.584984577 | 3.262000912 | 1.099013971 | NA          | NA          |
| chr1:63269389-63307218    | exonic       | ATG4C                                                   | 1  | 63269389  | 63307218  | 1 | 2 | 3  | 0 | 0 | 0 | 37829 | 1.069345618 | 3.600298873 | 2.697087743 | 1.334883851 | 0.181914364 | 0.998252924 |
| chr4:38916541-38933995    | exonic       | FAM114A1                                                | 4  | 38916541  | 38933995  | 1 | 2 | 3  | 0 | 0 | 0 | 17454 | 1.069345618 | 3.600298873 | 2.697087743 | 1.334883851 | 0.181914364 | 0.998252924 |
| chr1:24989150-24996806    | exonic       | SRRM1                                                   | 1  | 24989150  | 24996806  | 4 | 2 | 1  | 0 | 0 | 0 | 7656  | 1.061768395 | 3.612990818 | 2.686267526 | 1.34498548  | 0.178629924 | 0.998252924 |
| chr6:158994451-159046786  | exonic       | TMEM181                                                 | 6  | 158994451 | 159046786 | 4 | 2 | 1  | 0 | 0 | 0 | 52335 | 1.061768395 | 3.612990818 | 2.686267526 | 1.34498548  | 0.178629924 | 0.998252924 |
| chr17:33310020-33313150   | exonic       | LIG3                                                    | 17 | 33310020  | 33313150  | 0 | 4 | 2  | 0 | 0 | 0 | 3130  | 1.091641247 | 3.631580012 | 2.910944955 | 1.247560523 | 0.212192043 | 0.998252924 |
| chr1:1417925-1455686      | exonic       | ATAD3A, ATAD3B                                          | 1  | 1417925   | 1455686   | 3 | 4 | 0  | 0 | 0 | 0 | 37761 | 1.084064025 | 3.640017423 | 2.893811231 | 1.257862774 | 0.208441389 | 0.998252924 |
| chr1:109325043-109337529  | exonic       | STXBP3                                                  | 1  | 109325043 | 109337529 | 1 | 0 | 5  | 0 | 0 | 0 | 12486 | 1.11533207  | 3.658121294 | 2.923189376 | 1.251414405 | NA          | NA          |
| chr11:68315534-68343511   | exonic       | PPP6R3                                                  | 11 | 68315534  | 68343511  | 0 | 3 | 3  | 0 | 0 | 0 | 27977 | 1.114634474 | 3.658717742 | 2.884355467 | 1.268469779 | NA          | NA          |
| chr12:26780965-26808785   | exonic       | ITPR2                                                   | 12 | 26780965  | 26808785  | 0 | 3 | 3  | 0 | 0 | 0 | 27820 | 1.114634474 | 3.658717742 | 2.884355467 | 1.268469779 | NA          | NA          |
| chr12:32458630-32459056   | exonic       | BICD1                                                   | 12 | 32458630  | 32459056  | 0 | 3 | 3  | 0 | 0 | 0 | 426   | 1.114634474 | 3.658717742 | 2.884355467 | 1.268469779 | NA          | NA          |
| chr2:74273404-74307718    | exonic       | TET3                                                    | 2  | 74273404  | 74307718  | 0 | 3 | 3  | 0 | 0 | 0 | 34314 | 1.114634474 | 3.658717742 | 2.884355467 | 1.268469779 | NA          | NA          |
| chr5:54639158-54646857    | exonic       | SKIV2L2                                                 | 5  | 54639158  | 54646857  | 0 | 3 | 3  | 0 | 0 | 0 | 7699  | 1.114634474 | 3.658717742 | 2.884355467 | 1.268469779 | NA          | NA          |
| chr6:90571845-90581107    | exonic       | CASP8AP2                                                | 6  | 90571845  | 90581107  | 4 | 0 | 3  | 0 | 0 | 0 | 9262  | 1.107754848 | 3.665909046 | 2.873295064 | 1.275855408 | 0.202006637 | 0.998252924 |
| chr1:225140371-225211567  | exonic       | DNAH14                                                  | 1  | 225140371 | 225211567 | 3 | 3 | 1  | 0 | 0 | 0 | 71196 | 1.107057251 | 3.667682604 | 2.645640563 | 1.386311752 | 0.16565173  | 0.998252924 |
| chr17:78263457-78264527   | exonic       | RNF213                                                  | 17 | 78263457  | 78264527  | 3 | 3 | 1  | 0 | 0 | 0 | 1070  | 1.107057251 | 3.667682604 | 2.645640563 | 1.386311752 | 0.16565173  | 0.998252924 |
| chr2:89085986-89104922    | ncRNA_exonic | ANKRD36BP2                                              | 2  | 89085986  | 89104922  | 0 | 0 | 19 | 0 | 2 | 0 | 18936 | 3.990166329 | 3.692796187 | 3.868716525 | 0.954527468 | NA          | NA          |
| chr12:51402414-51404477   | exonic       | SLC11A2                                                 | 12 | 51402414  | 51404477  | 3 | 2 | 2  | 0 | 0 | 0 | 2063  | 1.130050478 | 3.693545568 | 2.608808372 | 1.415797959 | 0.156834667 | 0.998252924 |
| chr7:158566031-158591763  | exonic       | ESYT2                                                   | 7  | 158566031 | 158591763 | 3 | 2 | 2  | 0 | 0 | 0 | 25732 | 1.130050478 | 3.693545568 | 2.608808372 | 1.415797959 | 0.156834667 | 0.998252924 |
| chr7:6472467-6476164      | exonic       | DAGLB                                                   | 7  | 6472467   | 6476164   | 3 | 2 | 2  | 0 | 0 | 0 | 3697  | 1.130050478 | 3.693545568 | 2.608808372 | 1.415797959 | 0.156834667 | 0.998252924 |
| chr11:108172374-108175579 | exonic       | ATM                                                     | 11 | 108172374 | 108175579 | 6 | 2 | 0  | 0 | 0 | 0 | 3205  | 1.122473255 | 3.701401483 | 2.864005051 | 1.292386507 | 0.196223327 | 0.998252924 |
| chr18:77170402-77171501   | exonic       | NFATC1                                                  | 18 | 77170402  | 77171501  | 0 | 0 | 6  | 0 | 0 | 0 | 1099  | 1.183614153 | 3.742271301 | 3.131563782 | 1.195016791 | NA          | NA          |
| chr5:34179118-34182972    | intergenic   | <small>C10orf93-AS1(51-5488), RAL16(41st-47361)</small> | 5  | 34179118  | 34182972  | 0 | 0 | 6  | 0 | 0 | 0 | 3854  | 1.183614153 | 3.742271301 | 3.131563782 | 1.195016791 | NA          | NA          |
| chr7:87593949-87607727    | exonic       | ADAM22                                                  | 7  | 87593949  | 87607727  | 0 | 0 | 6  | 0 | 0 | 0 | 13778 | 1.183614153 | 3.742271301 | 3.131563782 | 1.195016791 | NA          | NA          |
| chr2:183817132-183818059  | exonic       | NCKAP1                                                  | 2  | 183817132 | 183818059 | 3 | 0 | 4  | 0 | 0 | 0 | 927   | 1.17603693  | 3.745182311 | 2.820925708 | 1.327643015 | 0.184296067 | 0.998252924 |

|                           |          |                                                                           |    |           |           |      |      |   |   |     |   |        |             |             |             |             |             |             |
|---------------------------|----------|---------------------------------------------------------------------------|----|-----------|-----------|------|------|---|---|-----|---|--------|-------------|-------------|-------------|-------------|-------------|-------------|
| chr13:31789188-31803431   | exonic   | B3GLCT                                                                    | 13 | 31789188  | 31803431  | 6    | 0    | 2 | 0 | 0   | 0 | 14243  | 1.168459708 | 3.752754295 | 2.82890861  | 1.326573182 | 0.184649912 | 0.998252924 |
| chr20:32293334-32293841   | UTR3     | <small>PM99186.133977.c.4482.491561aa1.06.00220.c.4219.14171aa100</small> | 20 | 32293334  | 32293841  | 5    | 3    | 0 | 0 | 0   | 0 | 507    | 1.167762111 | 3.753895525 | 2.815297476 | 1.33339214  | 0.182403151 | 0.998252924 |
| chr17:30500849-30502381   | exonic   | RHOT1                                                                     | 17 | 30500849  | 30502381  | 2    | 2    | 3 | 0 | 0   | 0 | 1532   | 1.19833256  | 3.769784468 | 2.565481764 | 1.469425556 | 0.1417174   | 0.998252924 |
| chr1:45975297-45975538    | UTR3     | <small>MMA3HC (NM_015506:c.#410_#651 de l'ins0)</small>                   | 1  | 45975297  | 45975538  | 0    | 7    | 0 | 0 | 0   | 0 | 241    | 1.219930594 | 3.799368216 | 3.094685091 | 1.227707539 | NA          | NA          |
| chr2:39424093-39456729    | exonic   | CDKL4                                                                     | 2  | 39424093  | 39456729  | 0    | 7    | 0 | 0 | 0   | 0 | 32636  | 1.219930594 | 3.799368216 | 3.094685091 | 1.227707539 | NA          | NA          |
| chr22:29095825-29130715   | exonic   | CHEK2                                                                     | 22 | 29095825  | 29130715  | 0    | 7    | 0 | 0 | 0   | 0 | 34890  | 1.219930594 | 3.799368216 | 3.094685091 | 1.227707539 | NA          | NA          |
| chr6:20781376-20874661    | exonic   | CDKAL1                                                                    | 6  | 20781376  | 20874661  | 0    | 7    | 0 | 0 | 0   | 0 | 93285  | 1.219930594 | 3.799368216 | 3.094685091 | 1.227707539 | NA          | NA          |
| chr6:51695658-51735437    | exonic   | PKHD1                                                                     | 6  | 51695658  | 51735437  | 0    | 7    | 0 | 0 | 0   | 0 | 39779  | 1.219930594 | 3.799368216 | 3.094685091 | 1.227707539 | NA          | NA          |
| chr7:116335804-116340338  | exonic   | MET                                                                       | 7  | 116335804 | 116340338 | 0    | 7    | 0 | 0 | 0   | 0 | 4534   | 1.219930594 | 3.799368216 | 3.094685091 | 1.227707539 | NA          | NA          |
| chr14:21840032-21841589   | exonic   | SUPT16H                                                                   | 14 | 21840032  | 21841589  | 8    | 1    | 0 | 0 | 0   | 0 | 1557   | 1.206171341 | 3.809706168 | 2.831833338 | 1.3453144   | 0.178523725 | 0.998252924 |
| chr16:14173146-14234617   | exonic   | MKL2                                                                      | 16 | 14173146  | 14234617  | 8    | 1    | 0 | 0 | 0   | 0 | 61471  | 1.206171341 | 3.809706168 | 2.831833338 | 1.3453144   | 0.178523725 | 0.998252924 |
| chr4:39752615-39753040    | intronic | UBE2K                                                                     | 4  | 39752615  | 39753040  | 0    | 5    | 2 | 0 | 0   | 0 | 425    | 1.265917046 | 3.846438293 | 2.771408929 | 1.387899942 | 0.165167515 | 0.998252924 |
| chr1:44386076-44387310    | exonic   | ST3GAL3                                                                   | 1  | 44386076  | 44387310  | 7    | 2    | 0 | 0 | 0   | 0 | 1234   | 1.251460198 | 3.859023521 | 2.762865712 | 1.396746684 | 0.16248976  | 0.998252924 |
| chr3:138289159-138291756  | exonic   | CEP70                                                                     | 3  | 138289159 | 138291756 | 8    | 9    | 0 | 2 | 0   | 0 | 2597   | 4.200327271 | 3.861261895 | 1.819049012 | 2.122681615 | 0.033780541 | 0.998252924 |
| chr3:40502898-40503739    | exonic   | RPL14                                                                     | 3  | 40502898  | 40503739  | 0    | 4    | 3 | 0 | 0   | 0 | 841    | 1.288910273 | 3.869870743 | 2.744697434 | 1.409944388 | NA          | NA          |
| chr6:111208708-111214865  | exonic   | AMD1                                                                      | 6  | 111208708 | 111214865 | 0    | 4    | 3 | 0 | 0   | 0 | 6157   | 1.288910273 | 3.869870743 | 2.744697434 | 1.409944388 | NA          | NA          |
| chr3:71739160-71748859    | exonic   | EIF4E3                                                                    | 3  | 71739160  | 71748859  | 1    | 0    | 6 | 0 | 0   | 0 | 9699   | 1.312601096 | 3.892826654 | 2.776716827 | 1.401953061 | NA          | NA          |
| chr12:29491464-29494749   | exonic   | ERGC2                                                                     | 12 | 29491464  | 29494749  | 3    | 3    | 2 | 0 | 0   | 0 | 3285   | 1.304326277 | 3.899488574 | 2.480173549 | 1.572264399 | 0.115889246 | 0.998252924 |
| chr6:157150360-157256710  | exonic   | ARID1B                                                                    | 6  | 157150360 | 157256710 | 2    | 6    | 0 | 0 | 0   | 0 | 106350 | 1.30362868  | 3.900558011 | 2.737885676 | 1.424660659 | 0.154255316 | 0.998252924 |
| chr22:39147397-39148511   | splicing | SUN2                                                                      | 22 | 39147397  | 39148511  | 10   | 0    | 0 | 0 | 0   | 0 | 1114   | 1.289869428 | 3.905925316 | 3.024487069 | 1.291433961 | NA          | NA          |
| chr1:22404922-22417994    | exonic   | CDC42                                                                     | 1  | 22404922  | 22417994  | 0    | 2    | 5 | 0 | 0   | 0 | 13072  | 1.334896726 | 3.916082846 | 2.728838665 | 1.435073057 | 0.15126628  | 0.998252924 |
| chrX:50338697-50351184    | exonic   | SHROOM4                                                                   | X  | 50338697  | 50351184  | 0    | 1    | 6 | 0 | 0   | 0 | 12487  | 1.357889952 | 3.939197394 | 2.750155637 | 1.432354352 | NA          | NA          |
| chr14:50267137-50295525   | exonic   | NEMF                                                                      | 14 | 50267137  | 50295525  | 2    | 4    | 2 | 0 | 0   | 0 | 28388  | 1.349615133 | 3.944550717 | 2.465923399 | 1.599624189 | 0.109681979 | 0.998252924 |
| chr7:33390830-33427756    | exonic   | BBS9                                                                      | 7  | 33390830  | 33427756  | 4    | 4    | 1 | 5 | 0   | 0 | 36926  | 1.349615133 | 3.944550717 | 2.465923399 | 1.599624189 | 0.109681979 | 0.998252924 |
| chr17:4186092-4210418     | exonic   | UBE2G1                                                                    | 17 | 4186092   | 4210418   | 2    | 3    | 3 | 0 | 0   | 0 | 24326  | 1.372608359 | 3.965920791 | 2.446395434 | 1.621128267 | 0.104990133 | 0.998252924 |
| chr4:103635595-103651893  | exonic   | MANBA                                                                     | 4  | 103635595 | 103651893 | 2    | 2    | 4 | 0 | 0   | 0 | 16298  | 1.395601586 | 3.987133759 | 2.444099315 | 1.631330501 | 0.102820601 | 0.998252924 |
| chr3:193201724-193210949  | exonic   | ATP13A4                                                                   | 3  | 193201724 | 193210949 | 5    | 2    | 2 | 0 | 0   | 0 | 9225   | 1.388024363 | 3.996564883 | 2.433902004 | 1.642040179 | 0.100581678 | 0.998252924 |
| chr6:31238850-31232369    | exonic   | HLA-B, HLA-C                                                              | 6  | 31238850  | 31232369  | 5854 | 1683 | 0 | 0 | 540 | 0 | 84519  | 1113.750541 | 4.003369391 | 3.725765064 | 1.074509348 | 0.282594457 | 0.998252924 |
| chr10:126395204-126395456 | exonic   | FAM53B                                                                    | 10 | 126395204 | 126395456 | 2    | 0    | 6 | 0 | 0   | 0 | 252    | 1.441588039 | 4.031871628 | 2.660116522 | 1.515674819 | 0.129601598 | 0.998252924 |
| chr16:11121965-11124596   | intronic | CLEC16A                                                                   | 16 | 11121965  | 11124596  | 8    | 0    | 2 | 0 | 0   | 0 | 2631   | 1.426433593 | 4.043047901 | 2.652494595 | 1.524243597 | 0.127447871 | 0.998252924 |
| chr2:231301096-231314970  | exonic   | SP100                                                                     | 2  | 231301096 | 231314970 | 0    | 5    | 3 | 0 | 0   | 0 | 13874  | 1.463186072 | 4.054059283 | 2.634411619 | 1.538886047 | 0.123832118 | 0.998252924 |
| chr20:18523662-18531819   | exonic   | SEC23B                                                                    | 20 | 18523662  | 18531819  | 0    | 5    | 3 | 0 | 0   | 0 | 8157   | 1.463186072 | 4.054059283 | 2.634411619 | 1.538886047 | 0.123832118 | 0.998252924 |
| chr6:109900752-109907275  | exonic   | AK9                                                                       | 6  | 109900752 | 109907275 | 4    | 2    | 3 | 0 | 0   | 0 | 6523   | 1.456306446 | 4.058806974 | 2.390805998 | 1.697673076 | 0.089569482 | 0.998252924 |
| chr10:124339093-124344825 | exonic   | DMBT1                                                                     | 10 | 124339093 | 124344825 | 2    | 7    | 0 | 0 | 0   | 0 | 5732   | 1.477904479 | 4.080805735 | 2.633675324 | 1.549471834 | 0.121268337 | 0.998252924 |
| chr13:25073438-25075972   | exonic   | PARP4                                                                     | 13 | 25073438  | 25075972  | 0    | 3    | 5 | 0 | 0   | 0 | 2534   | 1.509172525 | 4.094753893 | 2.611922318 | 1.567716568 | 0.116947293 | 0.998252924 |



|                           |                |                                        |    |           |           |     |    |     |   |   |   |        |             |             |             |             |             |             |
|---------------------------|----------------|----------------------------------------|----|-----------|-----------|-----|----|-----|---|---|---|--------|-------------|-------------|-------------|-------------|-------------|-------------|
| chr6:2294539-2295009      | ncRNA_intronic | GMDS-AS1                               | 6  | 2294539   | 2295009   | 0   | 3  | 5   | 0 | 0 | 0 | 470    | 1.509172525 | 4.094753893 | 2.611922318 | 1.567716568 | 0.116947293 | 0.998252924 |
| chr17:75255307-75256242   | intergenic     | SEC14L1(dist=42126), SEPT9(dist=21250) | 17 | 75255307  | 75256242  | 4   | 0  | 5   | 0 | 0 | 0 | 935    | 1.502292899 | 4.099355353 | 2.597562492 | 1.57815466  | 0.114530083 | 0.998252924 |
| chr20:34450934-34459751   | exonic         | PHF20                                  | 20 | 34450934  | 34459751  | 4   | 0  | 5   | 0 | 0 | 0 | 8817   | 1.502292899 | 4.099355353 | 2.597562492 | 1.57815466  | 0.114530083 | 0.998252924 |
| chr4:25667000-25668920    | exonic         | SLC34A2                                | 4  | 25667000  | 25668920  | 3   | 0  | 6   | 0 | 0 | 0 | 1920   | 1.570574982 | 4.158847714 | 2.573197868 | 1.616217612 | 0.106047272 | 0.998252924 |
| chr18:74153200-74155167   | exonic         | ZNF516                                 | 18 | 74153200  | 74155167  | 6   | 4  | 1   | 0 | 0 | 0 | 1967   | 1.668293879 | 4.264734626 | 2.315193407 | 1.842064086 | 0.065465776 | 0.998252924 |
| chr1:21329205-21437876    | exonic         | EIF4G3                                 | 1  | 21329205  | 21437876  | 3   | 3  | 4   | 0 | 0 | 0 | 108671 | 1.698864328 | 4.274695236 | 2.273803365 | 1.879975772 | 0.06011138  | 0.998252924 |
| chr14:55600902-55601586   | intronic       | LGALS3                                 | 14 | 55600902  | 55601586  | 10  | 0  | 2   | 0 | 0 | 0 | 684    | 1.684407479 | 4.284304457 | 2.523338398 | 1.697871542 | 0.089532009 | 0.998252924 |
| chr11:68571467-68575106   | exonic         | CPT1A                                  | 11 | 68571467  | 68575106  | 5   | 5  | 1   | 0 | 0 | 0 | 3639   | 1.713582735 | 4.299980061 | 2.297620734 | 1.871492539 | 0.061276843 | 0.998252924 |
| chr14:106866811-107013248 | ncRNA_exonic   | LINC00221                              | 14 | 106866811 | 107013248 | 0   | 10 | 0   | 0 | 0 | 0 | 146437 | 1.742757991 | 4.316589236 | 3.93218923  | 1.097757525 | NA          | NA          |
| chr2:96585481-96587558    | exonic         | ANKRD36C                               | 2  | 96585481  | 96587558  | 0   | 10 | 0   | 0 | 0 | 0 | 2077   | 1.742757991 | 4.316589236 | 3.93218923  | 1.097757525 | NA          | NA          |
| chr2:89247240-89292223    | intergenic     | MIR4436A(dist=135272), NONE(dist=NONE) | 2  | 89247240  | 89292223  | 0   | 0  | 9   | 0 | 0 | 0 | 44983  | 1.77542123  | 4.337943596 | 3.931817072 | 1.103292324 | NA          | NA          |
| chr3:49343147-49349087    | exonic         | USP4                                   | 3  | 49343147  | 49349087  | 1   | 3  | 6   | 0 | 0 | 0 | 5940   | 1.835428493 | 4.377384525 | 2.283561588 | 1.916911086 | 0.055249228 | 0.998252924 |
| chr22:47370185-47433094   | exonic         | TBC1D22A                               | 22 | 47370185  | 47433094  | 0   | 4  | 6   | 0 | 0 | 0 | 62909  | 1.880717349 | 4.413352254 | 2.438828283 | 1.809619925 | 0.070354748 | 0.998252924 |
| chr12:40696590-40697936   | exonic         | LRRK2                                  | 12 | 40696590  | 40697936  | 7   | 1  | 4   | 0 | 0 | 0 | 1346   | 1.866260501 | 4.421356256 | 2.246189126 | 1.968381115 | 0.049024203 | 0.998252924 |
| chr2:89082250-89104922    | ncRNA_exonic   | ANKRD36BP2                             | 2  | 89082250  | 89104922  | 0   | 0  | 19  | 0 | 1 | 0 | 22672  | 3.869138907 | 4.421729934 | 3.913500561 | 1.12986567  | NA          | NA          |
| chr10:124339093-124354044 | exonic         | DMBT1                                  | 10 | 124339093 | 124354044 | 1   | 9  | 1   | 0 | 0 | 0 | 14951  | 1.89473816  | 4.433708821 | 2.316691939 | 1.913810268 | NA          | NA          |
| chr2:100065797-100081447  | exonic         | REV1                                   | 2  | 100065797 | 100081447 | 10  | 0  | 3   | 0 | 0 | 0 | 15650  | 1.881676504 | 4.440293986 | 2.426845504 | 1.829656638 | 0.067301299 | 0.998252924 |
| chr1:207200838-207201024  | exonic         | Clorf116                               | 1  | 207200838 | 207201024 | 0   | 11 | 0   | 0 | 0 | 0 | 186    | 1.91703379  | 4.454255612 | 3.929883254 | 1.133432045 | NA          | NA          |
| chr7:22330794-22380505    | exonic         | RAPGEF5                                | 7  | 22330794  | 22380505  | 0   | 11 | 0   | 0 | 0 | 0 | 49711  | 1.91703379  | 4.454255612 | 3.929883254 | 1.133432045 | NA          | NA          |
| chr6:29913228-29977144    | exonic         | HLA-A                                  | 6  | 29913228  | 29977144  | 5   | 2  | 6   | 0 | 0 | 0 | 63916  | 2.177100465 | 4.634049039 | 2.120576668 | 2.185277764 | 0.028868487 | 0.998252924 |
| chr3:193177459-193179817  | intronic       | ATP13A4                                | 3  | 193177459 | 193179817 | 3   | 3  | 7   | 0 | 0 | 0 | 2358   | 2.290671404 | 4.701419487 | 2.095940812 | 2.243106991 | 0.024889916 | 0.998252924 |
| chr11:62277998-62304039   | exonic         | AHNAK                                  | 11 | 62277998  | 62304039  | 0   | 15 | 0   | 0 | 0 | 0 | 26041  | 2.614136986 | 4.902148528 | 3.923728324 | 1.249359824 | NA          | NA          |
| chr1:17907047-17914974    | exonic         | ARHGEF10L                              | 1  | 17907047  | 17914974  | 5   | 12 | 0   | 0 | 0 | 0 | 7927   | 2.736244303 | 4.969828906 | 3.640190752 | 1.365266066 | 0.17216944  | 0.998252924 |
| chr11:115080293-115111140 | exonic         | CADM1                                  | 11 | 115080293 | 115111140 | 114 | 0  | 159 | 1 | 0 | 0 | 30847  | 46.17659792 | 8.098670733 | 2.961662098 | 2.734501933 | 0.006247473 | 0.998252924 |
| chr6:29857484-29912174    | exonic         | HLA-A                                  | 6  | 29857484  | 29912174  | 0   | 0  | 151 | 0 | 0 | 0 | 54690  | 29.78762285 | 21.85361569 | 3.908251461 | 5.591660595 | NA          | NA          |

## Supplementary 5

| GENE1                    | TYPE1   | GENE2           | TYPE2    |
|--------------------------|---------|-----------------|----------|
| chr2:113057425-113082774 | CIRCRNA | hsa-miR-873-5p  | MICRORNA |
| chr8:141595218-141616013 | CIRCRNA | hsa-miR-873-5p  | MICRORNA |
| ENSG00000132204          | LINCRNA | hsa-miR-873-5p  | MICRORNA |
| ENSG00000214039          | LINCRNA | hsa-miR-873-5p  | MICRORNA |
| ENSG00000225689          | LINCRNA | hsa-miR-873-5p  | MICRORNA |
| ENSG00000226816          | LINCRNA | hsa-miR-873-5p  | MICRORNA |
| ENSG00000229459          | LINCRNA | hsa-miR-873-5p  | MICRORNA |
| ENSG00000235056          | LINCRNA | hsa-miR-873-5p  | MICRORNA |
| ENSG00000236924          | LINCRNA | hsa-miR-873-5p  | MICRORNA |
| ENSG00000258548          | LINCRNA | hsa-miR-873-5p  | MICRORNA |
| ENSG00000266869          | LINCRNA | hsa-miR-873-5p  | MICRORNA |
| ENSG00000267804          | LINCRNA | hsa-miR-873-5p  | MICRORNA |
| ENSG00000269976          | LINCRNA | hsa-miR-873-5p  | MICRORNA |
| ENSG00000272312          | LINCRNA | hsa-miR-873-5p  | MICRORNA |
| chr5:94244955-94259726   | CIRCRNA | hsa-miR-6811-5p | MICRORNA |
| ENSG00000189149          | LINCRNA | hsa-miR-6811-5p | MICRORNA |
| ENSG00000203635          | LINCRNA | hsa-miR-6811-5p | MICRORNA |
| ENSG00000223749          | LINCRNA | hsa-miR-6811-5p | MICRORNA |
| ENSG00000223956          | LINCRNA | hsa-miR-6811-5p | MICRORNA |
| ENSG00000224259          | LINCRNA | hsa-miR-6811-5p | MICRORNA |
| ENSG00000224652          | LINCRNA | hsa-miR-6811-5p | MICRORNA |
| ENSG00000225490          | LINCRNA | hsa-miR-6811-5p | MICRORNA |
| ENSG00000227066          | LINCRNA | hsa-miR-6811-5p | MICRORNA |
| ENSG00000229236          | LINCRNA | hsa-miR-6811-5p | MICRORNA |
| ENSG00000231535          | LINCRNA | hsa-miR-6811-5p | MICRORNA |
| ENSG00000233410          | LINCRNA | hsa-miR-6811-5p | MICRORNA |
| ENSG00000236318          | LINCRNA | hsa-miR-6811-5p | MICRORNA |
| ENSG00000248673          | LINCRNA | hsa-miR-6811-5p | MICRORNA |
| ENSG00000248942          | LINCRNA | hsa-miR-6811-5p | MICRORNA |
| ENSG00000249378          | LINCRNA | hsa-miR-6811-5p | MICRORNA |
| ENSG00000250446          | LINCRNA | hsa-miR-6811-5p | MICRORNA |
| ENSG00000257060          | LINCRNA | hsa-miR-6811-5p | MICRORNA |
| ENSG00000257826          | LINCRNA | hsa-miR-6811-5p | MICRORNA |
| ENSG00000258882          | LINCRNA | hsa-miR-6811-5p | MICRORNA |
| ENSG00000261307          | LINCRNA | hsa-miR-6811-5p | MICRORNA |
| ENSG00000264026          | LINCRNA | hsa-miR-6811-5p | MICRORNA |
| ENSG00000271815          | LINCRNA | hsa-miR-6811-5p | MICRORNA |
| ENSG00000272142          | LINCRNA | hsa-miR-6811-5p | MICRORNA |
| ENSG00000272796          | LINCRNA | hsa-miR-6811-5p | MICRORNA |
| ENSG00000272829          | LINCRNA | hsa-miR-6811-5p | MICRORNA |
| chr4:87685745-87689129   | CIRCRNA | hsa-miR-551a    | MICRORNA |
| chr5:94244955-94259726   | CIRCRNA | hsa-miR-551a    | MICRORNA |
| ENSG00000189149          | LINCRNA | hsa-miR-551a    | MICRORNA |
| ENSG00000224652          | LINCRNA | hsa-miR-551a    | MICRORNA |
| ENSG00000227066          | LINCRNA | hsa-miR-551a    | MICRORNA |
| ENSG00000231204          | LINCRNA | hsa-miR-551a    | MICRORNA |
| ENSG00000231437          | LINCRNA | hsa-miR-551a    | MICRORNA |
| ENSG00000233005          | LINCRNA | hsa-miR-551a    | MICRORNA |
| ENSG00000236028          | LINCRNA | hsa-miR-551a    | MICRORNA |
| ENSG00000236318          | LINCRNA | hsa-miR-551a    | MICRORNA |
| ENSG00000248673          | LINCRNA | hsa-miR-551a    | MICRORNA |
| ENSG00000248942          | LINCRNA | hsa-miR-551a    | MICRORNA |
| ENSG00000250446          | LINCRNA | hsa-miR-551a    | MICRORNA |

|                           |          |                 |          |
|---------------------------|----------|-----------------|----------|
| ENSG00000253266           | LINC RNA | hsa-miR-551a    | MICRORNA |
| ENSG00000256124           | LINC RNA | hsa-miR-551a    | MICRORNA |
| ENSG00000257060           | LINC RNA | hsa-miR-551a    | MICRORNA |
| ENSG00000258882           | LINC RNA | hsa-miR-551a    | MICRORNA |
| ENSG00000260725           | LINC RNA | hsa-miR-551a    | MICRORNA |
| ENSG00000261307           | LINC RNA | hsa-miR-551a    | MICRORNA |
| ENSG00000264026           | LINC RNA | hsa-miR-551a    | MICRORNA |
| ENSG00000264954           | LINC RNA | hsa-miR-551a    | MICRORNA |
| ENSG00000272142           | LINC RNA | hsa-miR-551a    | MICRORNA |
| ENSG00000272796           | LINC RNA | hsa-miR-551a    | MICRORNA |
| ENSG00000272829           | LINC RNA | hsa-miR-551a    | MICRORNA |
| chr11:115080293-115111140 | CIRC RNA | hsa-miR-548b-5p | MICRORNA |
| chr12:40696590-40697936   | CIRC RNA | hsa-miR-548b-5p | MICRORNA |
| chr3:193177459-193179817  | CIRC RNA | hsa-miR-548b-5p | MICRORNA |
| chr6:29913228-29977144    | CIRC RNA | hsa-miR-548b-5p | MICRORNA |
| ENSG00000223749           | LINC RNA | hsa-miR-548b-5p | MICRORNA |
| ENSG00000223956           | LINC RNA | hsa-miR-548b-5p | MICRORNA |
| ENSG00000224259           | LINC RNA | hsa-miR-548b-5p | MICRORNA |
| ENSG00000227308           | LINC RNA | hsa-miR-548b-5p | MICRORNA |
| ENSG00000231901           | LINC RNA | hsa-miR-548b-5p | MICRORNA |
| ENSG00000233410           | LINC RNA | hsa-miR-548b-5p | MICRORNA |
| ENSG00000236393           | LINC RNA | hsa-miR-548b-5p | MICRORNA |
| ENSG00000236682           | LINC RNA | hsa-miR-548b-5p | MICRORNA |
| ENSG00000242104           | LINC RNA | hsa-miR-548b-5p | MICRORNA |
| ENSG00000249378           | LINC RNA | hsa-miR-548b-5p | MICRORNA |
| ENSG00000256969           | LINC RNA | hsa-miR-548b-5p | MICRORNA |
| ENSG00000257826           | LINC RNA | hsa-miR-548b-5p | MICRORNA |
| ENSG00000257924           | LINC RNA | hsa-miR-548b-5p | MICRORNA |
| ENSG00000257986           | LINC RNA | hsa-miR-548b-5p | MICRORNA |
| ENSG00000258088           | LINC RNA | hsa-miR-548b-5p | MICRORNA |
| ENSG00000259198           | LINC RNA | hsa-miR-548b-5p | MICRORNA |
| ENSG00000267761           | LINC RNA | hsa-miR-548b-5p | MICRORNA |
| chr3:138289159-138291756  | CIRC RNA | hsa-miR-548b-3p | MICRORNA |
| chr4:87685745-87689129    | CIRC RNA | hsa-miR-548b-3p | MICRORNA |
| chr5:94244955-94259726    | CIRC RNA | hsa-miR-548b-3p | MICRORNA |
| chr6:73005640-73043538    | CIRC RNA | hsa-miR-548b-3p | MICRORNA |
| ENSG00000189149           | LINC RNA | hsa-miR-548b-3p | MICRORNA |
| ENSG00000203635           | LINC RNA | hsa-miR-548b-3p | MICRORNA |
| ENSG00000224652           | LINC RNA | hsa-miR-548b-3p | MICRORNA |
| ENSG00000227066           | LINC RNA | hsa-miR-548b-3p | MICRORNA |
| ENSG00000231204           | LINC RNA | hsa-miR-548b-3p | MICRORNA |
| ENSG00000231437           | LINC RNA | hsa-miR-548b-3p | MICRORNA |
| ENSG00000233005           | LINC RNA | hsa-miR-548b-3p | MICRORNA |
| ENSG00000236028           | LINC RNA | hsa-miR-548b-3p | MICRORNA |
| ENSG00000237438           | LINC RNA | hsa-miR-548b-3p | MICRORNA |
| ENSG00000248673           | LINC RNA | hsa-miR-548b-3p | MICRORNA |
| ENSG00000248942           | LINC RNA | hsa-miR-548b-3p | MICRORNA |
| ENSG00000249574           | LINC RNA | hsa-miR-548b-3p | MICRORNA |
| ENSG00000250446           | LINC RNA | hsa-miR-548b-3p | MICRORNA |
| ENSG00000253266           | LINC RNA | hsa-miR-548b-3p | MICRORNA |
| ENSG00000256124           | LINC RNA | hsa-miR-548b-3p | MICRORNA |
| ENSG00000257060           | LINC RNA | hsa-miR-548b-3p | MICRORNA |
| ENSG00000258882           | LINC RNA | hsa-miR-548b-3p | MICRORNA |
| ENSG00000260725           | LINC RNA | hsa-miR-548b-3p | MICRORNA |

|                           |          |                 |          |
|---------------------------|----------|-----------------|----------|
| ENSG00000261307           | LINC RNA | hsa-miR-548b-3p | MICRORNA |
| ENSG00000264026           | LINC RNA | hsa-miR-548b-3p | MICRORNA |
| ENSG00000264954           | LINC RNA | hsa-miR-548b-3p | MICRORNA |
| ENSG00000272142           | LINC RNA | hsa-miR-548b-3p | MICRORNA |
| ENSG00000272829           | LINC RNA | hsa-miR-548b-3p | MICRORNA |
| chr11:115080293-115111140 | CIRC RNA | hsa-miR-542-5p  | MICRORNA |
| chr12:40696590-40697936   | CIRC RNA | hsa-miR-542-5p  | MICRORNA |
| chr3:193177459-193179817  | CIRC RNA | hsa-miR-542-5p  | MICRORNA |
| chr6:29913228-29977144    | CIRC RNA | hsa-miR-542-5p  | MICRORNA |
| ENSG00000227308           | LINC RNA | hsa-miR-542-5p  | MICRORNA |
| ENSG00000231901           | LINC RNA | hsa-miR-542-5p  | MICRORNA |
| ENSG00000236393           | LINC RNA | hsa-miR-542-5p  | MICRORNA |
| ENSG00000242104           | LINC RNA | hsa-miR-542-5p  | MICRORNA |
| ENSG00000256969           | LINC RNA | hsa-miR-542-5p  | MICRORNA |
| ENSG00000257924           | LINC RNA | hsa-miR-542-5p  | MICRORNA |
| ENSG00000257986           | LINC RNA | hsa-miR-542-5p  | MICRORNA |
| ENSG00000258088           | LINC RNA | hsa-miR-542-5p  | MICRORNA |
| ENSG00000259198           | LINC RNA | hsa-miR-542-5p  | MICRORNA |
| ENSG00000267761           | LINC RNA | hsa-miR-542-5p  | MICRORNA |
| chr3:67546221-67559327    | CIRC RNA | hsa-miR-542-3p  | MICRORNA |
| chr5:94244955-94259726    | CIRC RNA | hsa-miR-542-3p  | MICRORNA |
| ENSG00000189149           | LINC RNA | hsa-miR-542-3p  | MICRORNA |
| ENSG00000204625           | LINC RNA | hsa-miR-542-3p  | MICRORNA |
| ENSG00000225490           | LINC RNA | hsa-miR-542-3p  | MICRORNA |
| ENSG00000227066           | LINC RNA | hsa-miR-542-3p  | MICRORNA |
| ENSG00000229236           | LINC RNA | hsa-miR-542-3p  | MICRORNA |
| ENSG00000231535           | LINC RNA | hsa-miR-542-3p  | MICRORNA |
| ENSG00000236318           | LINC RNA | hsa-miR-542-3p  | MICRORNA |
| ENSG00000248673           | LINC RNA | hsa-miR-542-3p  | MICRORNA |
| ENSG00000248942           | LINC RNA | hsa-miR-542-3p  | MICRORNA |
| ENSG00000250446           | LINC RNA | hsa-miR-542-3p  | MICRORNA |
| ENSG00000257060           | LINC RNA | hsa-miR-542-3p  | MICRORNA |
| ENSG00000258882           | LINC RNA | hsa-miR-542-3p  | MICRORNA |
| ENSG00000261307           | LINC RNA | hsa-miR-542-3p  | MICRORNA |
| ENSG00000264026           | LINC RNA | hsa-miR-542-3p  | MICRORNA |
| ENSG00000271815           | LINC RNA | hsa-miR-542-3p  | MICRORNA |
| ENSG00000272142           | LINC RNA | hsa-miR-542-3p  | MICRORNA |
| ENSG00000272796           | LINC RNA | hsa-miR-542-3p  | MICRORNA |
| ENSG00000272829           | LINC RNA | hsa-miR-542-3p  | MICRORNA |
| chr3:67546221-67559327    | CIRC RNA | hsa-miR-486-5p  | MICRORNA |
| ENSG00000204625           | LINC RNA | hsa-miR-486-5p  | MICRORNA |
| chr3:67546221-67559327    | CIRC RNA | hsa-miR-4732-5p | MICRORNA |
| chrY:2821949-2829687      | CIRC RNA | hsa-miR-4732-5p | MICRORNA |
| ENSG00000204625           | LINC RNA | hsa-miR-4732-5p | MICRORNA |
| chr12:40696590-40697936   | CIRC RNA | hsa-miR-4709-5p | MICRORNA |
| chr3:193177459-193179817  | CIRC RNA | hsa-miR-4709-5p | MICRORNA |
| chr6:29913228-29977144    | CIRC RNA | hsa-miR-4709-5p | MICRORNA |
| ENSG00000223749           | LINC RNA | hsa-miR-4709-5p | MICRORNA |
| ENSG00000223956           | LINC RNA | hsa-miR-4709-5p | MICRORNA |
| ENSG00000224259           | LINC RNA | hsa-miR-4709-5p | MICRORNA |
| ENSG00000225490           | LINC RNA | hsa-miR-4709-5p | MICRORNA |
| ENSG00000227308           | LINC RNA | hsa-miR-4709-5p | MICRORNA |
| ENSG00000229236           | LINC RNA | hsa-miR-4709-5p | MICRORNA |
| ENSG00000233410           | LINC RNA | hsa-miR-4709-5p | MICRORNA |

|                           |          |                 |          |
|---------------------------|----------|-----------------|----------|
| ENSG00000236318           | LINC RNA | hsa-miR-4709-5p | MICRORNA |
| ENSG00000236393           | LINC RNA | hsa-miR-4709-5p | MICRORNA |
| ENSG00000236682           | LINC RNA | hsa-miR-4709-5p | MICRORNA |
| ENSG00000242104           | LINC RNA | hsa-miR-4709-5p | MICRORNA |
| ENSG00000249378           | LINC RNA | hsa-miR-4709-5p | MICRORNA |
| ENSG00000256969           | LINC RNA | hsa-miR-4709-5p | MICRORNA |
| ENSG00000257826           | LINC RNA | hsa-miR-4709-5p | MICRORNA |
| ENSG00000257924           | LINC RNA | hsa-miR-4709-5p | MICRORNA |
| ENSG00000257986           | LINC RNA | hsa-miR-4709-5p | MICRORNA |
| ENSG00000259198           | LINC RNA | hsa-miR-4709-5p | MICRORNA |
| ENSG00000263627           | LINC RNA | hsa-miR-4709-5p | MICRORNA |
| ENSG00000267761           | LINC RNA | hsa-miR-4709-5p | MICRORNA |
| chr12:40696590-40697936   | CIRC RNA | hsa-miR-4709-3p | MICRORNA |
| chr3:193177459-193179817  | CIRC RNA | hsa-miR-4709-3p | MICRORNA |
| chr6:29913228-29977144    | CIRC RNA | hsa-miR-4709-3p | MICRORNA |
| ENSG00000223749           | LINC RNA | hsa-miR-4709-3p | MICRORNA |
| ENSG00000223956           | LINC RNA | hsa-miR-4709-3p | MICRORNA |
| ENSG00000224259           | LINC RNA | hsa-miR-4709-3p | MICRORNA |
| ENSG00000225490           | LINC RNA | hsa-miR-4709-3p | MICRORNA |
| ENSG00000227308           | LINC RNA | hsa-miR-4709-3p | MICRORNA |
| ENSG00000229236           | LINC RNA | hsa-miR-4709-3p | MICRORNA |
| ENSG00000233410           | LINC RNA | hsa-miR-4709-3p | MICRORNA |
| ENSG00000236318           | LINC RNA | hsa-miR-4709-3p | MICRORNA |
| ENSG00000236682           | LINC RNA | hsa-miR-4709-3p | MICRORNA |
| ENSG00000242104           | LINC RNA | hsa-miR-4709-3p | MICRORNA |
| ENSG00000249378           | LINC RNA | hsa-miR-4709-3p | MICRORNA |
| ENSG00000256969           | LINC RNA | hsa-miR-4709-3p | MICRORNA |
| ENSG00000257826           | LINC RNA | hsa-miR-4709-3p | MICRORNA |
| ENSG00000257924           | LINC RNA | hsa-miR-4709-3p | MICRORNA |
| ENSG00000257986           | LINC RNA | hsa-miR-4709-3p | MICRORNA |
| ENSG00000259198           | LINC RNA | hsa-miR-4709-3p | MICRORNA |
| ENSG00000263627           | LINC RNA | hsa-miR-4709-3p | MICRORNA |
| ENSG00000267761           | LINC RNA | hsa-miR-4709-3p | MICRORNA |
| ENSG00000272796           | LINC RNA | hsa-miR-4709-3p | MICRORNA |
| chr11:115080293-115111140 | CIRC RNA | hsa-miR-4679    | MICRORNA |
| chr12:40696590-40697936   | CIRC RNA | hsa-miR-4679    | MICRORNA |
| chr3:193177459-193179817  | CIRC RNA | hsa-miR-4679    | MICRORNA |
| chr6:29913228-29977144    | CIRC RNA | hsa-miR-4679    | MICRORNA |
| ENSG00000223749           | LINC RNA | hsa-miR-4679    | MICRORNA |
| ENSG00000223956           | LINC RNA | hsa-miR-4679    | MICRORNA |
| ENSG00000224259           | LINC RNA | hsa-miR-4679    | MICRORNA |
| ENSG00000227308           | LINC RNA | hsa-miR-4679    | MICRORNA |
| ENSG00000231901           | LINC RNA | hsa-miR-4679    | MICRORNA |
| ENSG00000233410           | LINC RNA | hsa-miR-4679    | MICRORNA |
| ENSG00000236393           | LINC RNA | hsa-miR-4679    | MICRORNA |
| ENSG00000236682           | LINC RNA | hsa-miR-4679    | MICRORNA |
| ENSG00000242104           | LINC RNA | hsa-miR-4679    | MICRORNA |
| ENSG00000249378           | LINC RNA | hsa-miR-4679    | MICRORNA |
| ENSG00000256969           | LINC RNA | hsa-miR-4679    | MICRORNA |
| ENSG00000257826           | LINC RNA | hsa-miR-4679    | MICRORNA |
| ENSG00000257924           | LINC RNA | hsa-miR-4679    | MICRORNA |
| ENSG00000257986           | LINC RNA | hsa-miR-4679    | MICRORNA |
| ENSG00000258088           | LINC RNA | hsa-miR-4679    | MICRORNA |
| ENSG00000259198           | LINC RNA | hsa-miR-4679    | MICRORNA |

|                           |          |                 |          |
|---------------------------|----------|-----------------|----------|
| ENSG00000263627           | LINC RNA | hsa-miR-4679    | MICRORNA |
| ENSG00000267761           | LINC RNA | hsa-miR-4679    | MICRORNA |
| chr11:115080293-115111140 | CIRC RNA | hsa-miR-449c-5p | MICRORNA |
| chr12:40696590-40697936   | CIRC RNA | hsa-miR-449c-5p | MICRORNA |
| chr3:193177459-193179817  | CIRC RNA | hsa-miR-449c-5p | MICRORNA |
| chr6:29913228-29977144    | CIRC RNA | hsa-miR-449c-5p | MICRORNA |
| ENSG00000223749           | LINC RNA | hsa-miR-449c-5p | MICRORNA |
| ENSG00000223956           | LINC RNA | hsa-miR-449c-5p | MICRORNA |
| ENSG00000224259           | LINC RNA | hsa-miR-449c-5p | MICRORNA |
| ENSG00000227308           | LINC RNA | hsa-miR-449c-5p | MICRORNA |
| ENSG00000231901           | LINC RNA | hsa-miR-449c-5p | MICRORNA |
| ENSG00000233410           | LINC RNA | hsa-miR-449c-5p | MICRORNA |
| ENSG00000236318           | LINC RNA | hsa-miR-449c-5p | MICRORNA |
| ENSG00000236393           | LINC RNA | hsa-miR-449c-5p | MICRORNA |
| ENSG00000236682           | LINC RNA | hsa-miR-449c-5p | MICRORNA |
| ENSG00000242104           | LINC RNA | hsa-miR-449c-5p | MICRORNA |
| ENSG00000249378           | LINC RNA | hsa-miR-449c-5p | MICRORNA |
| ENSG00000256969           | LINC RNA | hsa-miR-449c-5p | MICRORNA |
| ENSG00000257826           | LINC RNA | hsa-miR-449c-5p | MICRORNA |
| ENSG00000257924           | LINC RNA | hsa-miR-449c-5p | MICRORNA |
| ENSG00000257986           | LINC RNA | hsa-miR-449c-5p | MICRORNA |
| ENSG00000258088           | LINC RNA | hsa-miR-449c-5p | MICRORNA |
| ENSG00000259198           | LINC RNA | hsa-miR-449c-5p | MICRORNA |
| ENSG00000263627           | LINC RNA | hsa-miR-449c-5p | MICRORNA |
| ENSG00000267761           | LINC RNA | hsa-miR-449c-5p | MICRORNA |
| chr3:138289159-138291756  | CIRC RNA | hsa-miR-449b-5p | MICRORNA |
| chr4:87685745-87689129    | CIRC RNA | hsa-miR-449b-5p | MICRORNA |
| chr5:94244955-94259726    | CIRC RNA | hsa-miR-449b-5p | MICRORNA |
| chr6:73005640-73043538    | CIRC RNA | hsa-miR-449b-5p | MICRORNA |
| ENSG00000189149           | LINC RNA | hsa-miR-449b-5p | MICRORNA |
| ENSG00000224652           | LINC RNA | hsa-miR-449b-5p | MICRORNA |
| ENSG00000227066           | LINC RNA | hsa-miR-449b-5p | MICRORNA |
| ENSG00000231204           | LINC RNA | hsa-miR-449b-5p | MICRORNA |
| ENSG00000231437           | LINC RNA | hsa-miR-449b-5p | MICRORNA |
| ENSG00000233005           | LINC RNA | hsa-miR-449b-5p | MICRORNA |
| ENSG00000236028           | LINC RNA | hsa-miR-449b-5p | MICRORNA |
| ENSG00000237438           | LINC RNA | hsa-miR-449b-5p | MICRORNA |
| ENSG00000248673           | LINC RNA | hsa-miR-449b-5p | MICRORNA |
| ENSG00000248942           | LINC RNA | hsa-miR-449b-5p | MICRORNA |
| ENSG00000249574           | LINC RNA | hsa-miR-449b-5p | MICRORNA |
| ENSG00000250446           | LINC RNA | hsa-miR-449b-5p | MICRORNA |
| ENSG00000253266           | LINC RNA | hsa-miR-449b-5p | MICRORNA |
| ENSG00000256124           | LINC RNA | hsa-miR-449b-5p | MICRORNA |
| ENSG00000257060           | LINC RNA | hsa-miR-449b-5p | MICRORNA |
| ENSG00000258882           | LINC RNA | hsa-miR-449b-5p | MICRORNA |
| ENSG00000260725           | LINC RNA | hsa-miR-449b-5p | MICRORNA |
| ENSG00000261307           | LINC RNA | hsa-miR-449b-5p | MICRORNA |
| ENSG00000264954           | LINC RNA | hsa-miR-449b-5p | MICRORNA |
| ENSG00000272142           | LINC RNA | hsa-miR-449b-5p | MICRORNA |
| ENSG00000272829           | LINC RNA | hsa-miR-449b-5p | MICRORNA |
| chr12:40696590-40697936   | CIRC RNA | hsa-miR-449a    | MICRORNA |
| chr3:193177459-193179817  | CIRC RNA | hsa-miR-449a    | MICRORNA |
| chr6:29913228-29977144    | CIRC RNA | hsa-miR-449a    | MICRORNA |
| ENSG00000223749           | LINC RNA | hsa-miR-449a    | MICRORNA |

|                           |          |                 |          |
|---------------------------|----------|-----------------|----------|
| ENSG00000223956           | LINC RNA | hsa-miR-449a    | MICRORNA |
| ENSG00000224259           | LINC RNA | hsa-miR-449a    | MICRORNA |
| ENSG00000225490           | LINC RNA | hsa-miR-449a    | MICRORNA |
| ENSG00000227308           | LINC RNA | hsa-miR-449a    | MICRORNA |
| ENSG00000229236           | LINC RNA | hsa-miR-449a    | MICRORNA |
| ENSG00000233410           | LINC RNA | hsa-miR-449a    | MICRORNA |
| ENSG00000236318           | LINC RNA | hsa-miR-449a    | MICRORNA |
| ENSG00000249378           | LINC RNA | hsa-miR-449a    | MICRORNA |
| ENSG00000256969           | LINC RNA | hsa-miR-449a    | MICRORNA |
| ENSG00000257826           | LINC RNA | hsa-miR-449a    | MICRORNA |
| ENSG00000257924           | LINC RNA | hsa-miR-449a    | MICRORNA |
| ENSG00000257986           | LINC RNA | hsa-miR-449a    | MICRORNA |
| ENSG00000259198           | LINC RNA | hsa-miR-449a    | MICRORNA |
| ENSG00000263627           | LINC RNA | hsa-miR-449a    | MICRORNA |
| ENSG00000264026           | LINC RNA | hsa-miR-449a    | MICRORNA |
| ENSG00000267761           | LINC RNA | hsa-miR-449a    | MICRORNA |
| ENSG00000271815           | LINC RNA | hsa-miR-449a    | MICRORNA |
| ENSG00000272796           | LINC RNA | hsa-miR-449a    | MICRORNA |
| ENSG00000214145           | LINC RNA | hsa-miR-4488    | MICRORNA |
| ENSG00000223414           | LINC RNA | hsa-miR-4488    | MICRORNA |
| ENSG00000226383           | LINC RNA | hsa-miR-4488    | MICRORNA |
| ENSG00000230663           | LINC RNA | hsa-miR-4488    | MICRORNA |
| ENSG00000232324           | LINC RNA | hsa-miR-4488    | MICRORNA |
| ENSG00000243081           | LINC RNA | hsa-miR-4488    | MICRORNA |
| ENSG00000260430           | LINC RNA | hsa-miR-4488    | MICRORNA |
| chr11:115080293-115111140 | CIRC RNA | hsa-miR-424-3p  | MICRORNA |
| chr12:40696590-40697936   | CIRC RNA | hsa-miR-424-3p  | MICRORNA |
| chr3:193177459-193179817  | CIRC RNA | hsa-miR-424-3p  | MICRORNA |
| chr6:29913228-29977144    | CIRC RNA | hsa-miR-424-3p  | MICRORNA |
| ENSG00000224259           | LINC RNA | hsa-miR-424-3p  | MICRORNA |
| ENSG00000227308           | LINC RNA | hsa-miR-424-3p  | MICRORNA |
| ENSG00000231901           | LINC RNA | hsa-miR-424-3p  | MICRORNA |
| ENSG00000233410           | LINC RNA | hsa-miR-424-3p  | MICRORNA |
| ENSG00000236393           | LINC RNA | hsa-miR-424-3p  | MICRORNA |
| ENSG00000236682           | LINC RNA | hsa-miR-424-3p  | MICRORNA |
| ENSG00000242104           | LINC RNA | hsa-miR-424-3p  | MICRORNA |
| ENSG00000249378           | LINC RNA | hsa-miR-424-3p  | MICRORNA |
| ENSG00000256969           | LINC RNA | hsa-miR-424-3p  | MICRORNA |
| ENSG00000257826           | LINC RNA | hsa-miR-424-3p  | MICRORNA |
| ENSG00000257924           | LINC RNA | hsa-miR-424-3p  | MICRORNA |
| ENSG00000257986           | LINC RNA | hsa-miR-424-3p  | MICRORNA |
| ENSG00000258088           | LINC RNA | hsa-miR-424-3p  | MICRORNA |
| ENSG00000259198           | LINC RNA | hsa-miR-424-3p  | MICRORNA |
| ENSG00000267761           | LINC RNA | hsa-miR-424-3p  | MICRORNA |
| chr3:138289159-138291756  | CIRC RNA | hsa-miR-376a-5p | MICRORNA |
| chr4:87685745-87689129    | CIRC RNA | hsa-miR-376a-5p | MICRORNA |
| chr5:94244955-94259726    | CIRC RNA | hsa-miR-376a-5p | MICRORNA |
| chr6:73005640-73043538    | CIRC RNA | hsa-miR-376a-5p | MICRORNA |
| ENSG00000224652           | LINC RNA | hsa-miR-376a-5p | MICRORNA |
| ENSG00000231204           | LINC RNA | hsa-miR-376a-5p | MICRORNA |
| ENSG00000231437           | LINC RNA | hsa-miR-376a-5p | MICRORNA |
| ENSG00000233005           | LINC RNA | hsa-miR-376a-5p | MICRORNA |
| ENSG00000236028           | LINC RNA | hsa-miR-376a-5p | MICRORNA |
| ENSG00000237438           | LINC RNA | hsa-miR-376a-5p | MICRORNA |

|                           |          |                 |          |
|---------------------------|----------|-----------------|----------|
| ENSG00000248942           | LINC RNA | hsa-miR-376a-5p | MICRORNA |
| ENSG00000249574           | LINC RNA | hsa-miR-376a-5p | MICRORNA |
| ENSG00000250446           | LINC RNA | hsa-miR-376a-5p | MICRORNA |
| ENSG00000253266           | LINC RNA | hsa-miR-376a-5p | MICRORNA |
| ENSG00000256124           | LINC RNA | hsa-miR-376a-5p | MICRORNA |
| ENSG00000258882           | LINC RNA | hsa-miR-376a-5p | MICRORNA |
| ENSG00000260725           | LINC RNA | hsa-miR-376a-5p | MICRORNA |
| ENSG00000264954           | LINC RNA | hsa-miR-376a-5p | MICRORNA |
| ENSG00000272142           | LINC RNA | hsa-miR-376a-5p | MICRORNA |
| ENSG00000272829           | LINC RNA | hsa-miR-376a-5p | MICRORNA |
| chr12:40696590-40697936   | CIRC RNA | hsa-miR-3614-3p | MICRORNA |
| chr3:193177459-193179817  | CIRC RNA | hsa-miR-3614-3p | MICRORNA |
| chr6:29913228-29977144    | CIRC RNA | hsa-miR-3614-3p | MICRORNA |
| ENSG00000223749           | LINC RNA | hsa-miR-3614-3p | MICRORNA |
| ENSG00000223956           | LINC RNA | hsa-miR-3614-3p | MICRORNA |
| ENSG00000224259           | LINC RNA | hsa-miR-3614-3p | MICRORNA |
| ENSG00000225490           | LINC RNA | hsa-miR-3614-3p | MICRORNA |
| ENSG00000227308           | LINC RNA | hsa-miR-3614-3p | MICRORNA |
| ENSG00000229236           | LINC RNA | hsa-miR-3614-3p | MICRORNA |
| ENSG00000233410           | LINC RNA | hsa-miR-3614-3p | MICRORNA |
| ENSG00000236318           | LINC RNA | hsa-miR-3614-3p | MICRORNA |
| ENSG00000236393           | LINC RNA | hsa-miR-3614-3p | MICRORNA |
| ENSG00000236682           | LINC RNA | hsa-miR-3614-3p | MICRORNA |
| ENSG00000242104           | LINC RNA | hsa-miR-3614-3p | MICRORNA |
| ENSG00000249378           | LINC RNA | hsa-miR-3614-3p | MICRORNA |
| ENSG00000256969           | LINC RNA | hsa-miR-3614-3p | MICRORNA |
| ENSG00000257826           | LINC RNA | hsa-miR-3614-3p | MICRORNA |
| ENSG00000257924           | LINC RNA | hsa-miR-3614-3p | MICRORNA |
| ENSG00000257986           | LINC RNA | hsa-miR-3614-3p | MICRORNA |
| ENSG00000259198           | LINC RNA | hsa-miR-3614-3p | MICRORNA |
| ENSG00000263627           | LINC RNA | hsa-miR-3614-3p | MICRORNA |
| ENSG00000267761           | LINC RNA | hsa-miR-3614-3p | MICRORNA |
| chr11:115080293-115111140 | CIRC RNA | hsa-miR-34c-5p  | MICRORNA |
| chr12:40696590-40697936   | CIRC RNA | hsa-miR-34c-5p  | MICRORNA |
| chr3:193177459-193179817  | CIRC RNA | hsa-miR-34c-5p  | MICRORNA |
| chr6:29913228-29977144    | CIRC RNA | hsa-miR-34c-5p  | MICRORNA |
| ENSG00000224259           | LINC RNA | hsa-miR-34c-5p  | MICRORNA |
| ENSG00000227308           | LINC RNA | hsa-miR-34c-5p  | MICRORNA |
| ENSG00000231901           | LINC RNA | hsa-miR-34c-5p  | MICRORNA |
| ENSG00000233410           | LINC RNA | hsa-miR-34c-5p  | MICRORNA |
| ENSG00000236393           | LINC RNA | hsa-miR-34c-5p  | MICRORNA |
| ENSG00000236682           | LINC RNA | hsa-miR-34c-5p  | MICRORNA |
| ENSG00000242104           | LINC RNA | hsa-miR-34c-5p  | MICRORNA |
| ENSG00000249378           | LINC RNA | hsa-miR-34c-5p  | MICRORNA |
| ENSG00000256969           | LINC RNA | hsa-miR-34c-5p  | MICRORNA |
| ENSG00000257826           | LINC RNA | hsa-miR-34c-5p  | MICRORNA |
| ENSG00000257924           | LINC RNA | hsa-miR-34c-5p  | MICRORNA |
| ENSG00000257986           | LINC RNA | hsa-miR-34c-5p  | MICRORNA |
| ENSG00000258088           | LINC RNA | hsa-miR-34c-5p  | MICRORNA |
| ENSG00000259198           | LINC RNA | hsa-miR-34c-5p  | MICRORNA |
| ENSG00000263627           | LINC RNA | hsa-miR-34c-5p  | MICRORNA |
| ENSG00000267761           | LINC RNA | hsa-miR-34c-5p  | MICRORNA |
| chr11:115080293-115111140 | CIRC RNA | hsa-miR-34b-5p  | MICRORNA |
| chr12:40696590-40697936   | CIRC RNA | hsa-miR-34b-5p  | MICRORNA |



|                           |         |                 |          |
|---------------------------|---------|-----------------|----------|
| chr3:193177459-193179817  | CIRCRNA | hsa-miR-34b-5p  | MICRORNA |
| chr6:29913228-29977144    | CIRCRNA | hsa-miR-34b-5p  | MICRORNA |
| ENSG00000227308           | LINCRNA | hsa-miR-34b-5p  | MICRORNA |
| ENSG00000231901           | LINCRNA | hsa-miR-34b-5p  | MICRORNA |
| ENSG00000236393           | LINCRNA | hsa-miR-34b-5p  | MICRORNA |
| ENSG00000242104           | LINCRNA | hsa-miR-34b-5p  | MICRORNA |
| ENSG00000256969           | LINCRNA | hsa-miR-34b-5p  | MICRORNA |
| ENSG00000257924           | LINCRNA | hsa-miR-34b-5p  | MICRORNA |
| ENSG00000257986           | LINCRNA | hsa-miR-34b-5p  | MICRORNA |
| ENSG00000258088           | LINCRNA | hsa-miR-34b-5p  | MICRORNA |
| ENSG00000259198           | LINCRNA | hsa-miR-34b-5p  | MICRORNA |
| ENSG00000267761           | LINCRNA | hsa-miR-34b-5p  | MICRORNA |
| ENSG00000132204           | LINCRNA | hsa-miR-3182    | MICRORNA |
| ENSG00000214039           | LINCRNA | hsa-miR-3182    | MICRORNA |
| ENSG00000225689           | LINCRNA | hsa-miR-3182    | MICRORNA |
| ENSG00000226816           | LINCRNA | hsa-miR-3182    | MICRORNA |
| ENSG00000229459           | LINCRNA | hsa-miR-3182    | MICRORNA |
| ENSG00000235056           | LINCRNA | hsa-miR-3182    | MICRORNA |
| ENSG00000236924           | LINCRNA | hsa-miR-3182    | MICRORNA |
| ENSG00000258548           | LINCRNA | hsa-miR-3182    | MICRORNA |
| ENSG00000266869           | LINCRNA | hsa-miR-3182    | MICRORNA |
| ENSG00000267804           | LINCRNA | hsa-miR-3182    | MICRORNA |
| ENSG00000269976           | LINCRNA | hsa-miR-3182    | MICRORNA |
| ENSG00000272312           | LINCRNA | hsa-miR-3182    | MICRORNA |
| chr11:115080293-115111140 | CIRCRNA | hsa-miR-3065-5p | MICRORNA |
| chr12:40696590-40697936   | CIRCRNA | hsa-miR-3065-5p | MICRORNA |
| chr3:193177459-193179817  | CIRCRNA | hsa-miR-3065-5p | MICRORNA |
| chr6:29913228-29977144    | CIRCRNA | hsa-miR-3065-5p | MICRORNA |
| ENSG00000223749           | LINCRNA | hsa-miR-3065-5p | MICRORNA |
| ENSG00000223956           | LINCRNA | hsa-miR-3065-5p | MICRORNA |
| ENSG00000224259           | LINCRNA | hsa-miR-3065-5p | MICRORNA |
| ENSG00000227308           | LINCRNA | hsa-miR-3065-5p | MICRORNA |
| ENSG00000231901           | LINCRNA | hsa-miR-3065-5p | MICRORNA |
| ENSG00000233410           | LINCRNA | hsa-miR-3065-5p | MICRORNA |
| ENSG00000236393           | LINCRNA | hsa-miR-3065-5p | MICRORNA |
| ENSG00000236682           | LINCRNA | hsa-miR-3065-5p | MICRORNA |
| ENSG00000242104           | LINCRNA | hsa-miR-3065-5p | MICRORNA |
| ENSG00000249378           | LINCRNA | hsa-miR-3065-5p | MICRORNA |
| ENSG00000256969           | LINCRNA | hsa-miR-3065-5p | MICRORNA |
| ENSG00000257826           | LINCRNA | hsa-miR-3065-5p | MICRORNA |
| ENSG00000257924           | LINCRNA | hsa-miR-3065-5p | MICRORNA |
| ENSG00000257986           | LINCRNA | hsa-miR-3065-5p | MICRORNA |
| ENSG00000258088           | LINCRNA | hsa-miR-3065-5p | MICRORNA |
| ENSG00000259198           | LINCRNA | hsa-miR-3065-5p | MICRORNA |
| ENSG00000263627           | LINCRNA | hsa-miR-3065-5p | MICRORNA |
| ENSG00000267761           | LINCRNA | hsa-miR-3065-5p | MICRORNA |
| chr3:67546221-67559327    | CIRCRNA | hsa-miR-301b-3p | MICRORNA |
| ENSG00000189149           | LINCRNA | hsa-miR-301b-3p | MICRORNA |
| ENSG00000203635           | LINCRNA | hsa-miR-301b-3p | MICRORNA |
| ENSG00000223749           | LINCRNA | hsa-miR-301b-3p | MICRORNA |
| ENSG00000223956           | LINCRNA | hsa-miR-301b-3p | MICRORNA |
| ENSG00000224259           | LINCRNA | hsa-miR-301b-3p | MICRORNA |
| ENSG00000225490           | LINCRNA | hsa-miR-301b-3p | MICRORNA |
| ENSG00000227066           | LINCRNA | hsa-miR-301b-3p | MICRORNA |

|                          |          |                 |          |
|--------------------------|----------|-----------------|----------|
| ENSG00000229236          | LINC RNA | hsa-miR-301b-3p | MICRORNA |
| ENSG00000233410          | LINC RNA | hsa-miR-301b-3p | MICRORNA |
| ENSG00000236318          | LINC RNA | hsa-miR-301b-3p | MICRORNA |
| ENSG00000248673          | LINC RNA | hsa-miR-301b-3p | MICRORNA |
| ENSG00000248942          | LINC RNA | hsa-miR-301b-3p | MICRORNA |
| ENSG00000249378          | LINC RNA | hsa-miR-301b-3p | MICRORNA |
| ENSG00000250446          | LINC RNA | hsa-miR-301b-3p | MICRORNA |
| ENSG00000257060          | LINC RNA | hsa-miR-301b-3p | MICRORNA |
| ENSG00000257826          | LINC RNA | hsa-miR-301b-3p | MICRORNA |
| ENSG00000261307          | LINC RNA | hsa-miR-301b-3p | MICRORNA |
| ENSG00000264026          | LINC RNA | hsa-miR-301b-3p | MICRORNA |
| ENSG00000271815          | LINC RNA | hsa-miR-301b-3p | MICRORNA |
| ENSG00000272142          | LINC RNA | hsa-miR-301b-3p | MICRORNA |
| ENSG00000272796          | LINC RNA | hsa-miR-301b-3p | MICRORNA |
| chr3:138289159-138291756 | CIRC RNA | hsa-miR-300     | MICRORNA |
| chr4:87685745-87689129   | CIRC RNA | hsa-miR-300     | MICRORNA |
| chr5:94244955-94259726   | CIRC RNA | hsa-miR-300     | MICRORNA |
| chr6:73005640-73043538   | CIRC RNA | hsa-miR-300     | MICRORNA |
| ENSG00000224652          | LINC RNA | hsa-miR-300     | MICRORNA |
| ENSG00000231204          | LINC RNA | hsa-miR-300     | MICRORNA |
| ENSG00000231437          | LINC RNA | hsa-miR-300     | MICRORNA |
| ENSG00000233005          | LINC RNA | hsa-miR-300     | MICRORNA |
| ENSG00000236028          | LINC RNA | hsa-miR-300     | MICRORNA |
| ENSG00000237438          | LINC RNA | hsa-miR-300     | MICRORNA |
| ENSG00000248673          | LINC RNA | hsa-miR-300     | MICRORNA |
| ENSG00000248942          | LINC RNA | hsa-miR-300     | MICRORNA |
| ENSG00000249574          | LINC RNA | hsa-miR-300     | MICRORNA |
| ENSG00000250446          | LINC RNA | hsa-miR-300     | MICRORNA |
| ENSG00000253266          | LINC RNA | hsa-miR-300     | MICRORNA |
| ENSG00000256124          | LINC RNA | hsa-miR-300     | MICRORNA |
| ENSG00000258882          | LINC RNA | hsa-miR-300     | MICRORNA |
| ENSG00000260725          | LINC RNA | hsa-miR-300     | MICRORNA |
| ENSG00000264954          | LINC RNA | hsa-miR-300     | MICRORNA |
| ENSG00000272142          | LINC RNA | hsa-miR-300     | MICRORNA |
| ENSG00000272829          | LINC RNA | hsa-miR-300     | MICRORNA |
| chr11:82822155-82828239  | CIRC RNA | hsa-miR-203b-3p | MICRORNA |
| chr2:113057425-113082774 | CIRC RNA | hsa-miR-203b-3p | MICRORNA |
| chr5:142258938-142311690 | CIRC RNA | hsa-miR-203b-3p | MICRORNA |
| ENSG00000132204          | LINC RNA | hsa-miR-203b-3p | MICRORNA |
| ENSG00000214039          | LINC RNA | hsa-miR-203b-3p | MICRORNA |
| ENSG00000225689          | LINC RNA | hsa-miR-203b-3p | MICRORNA |
| ENSG00000226816          | LINC RNA | hsa-miR-203b-3p | MICRORNA |
| ENSG00000229459          | LINC RNA | hsa-miR-203b-3p | MICRORNA |
| ENSG00000235056          | LINC RNA | hsa-miR-203b-3p | MICRORNA |
| ENSG00000236924          | LINC RNA | hsa-miR-203b-3p | MICRORNA |
| ENSG00000258548          | LINC RNA | hsa-miR-203b-3p | MICRORNA |
| ENSG00000266869          | LINC RNA | hsa-miR-203b-3p | MICRORNA |
| ENSG00000267804          | LINC RNA | hsa-miR-203b-3p | MICRORNA |
| ENSG00000269976          | LINC RNA | hsa-miR-203b-3p | MICRORNA |
| ENSG00000271788          | LINC RNA | hsa-miR-203b-3p | MICRORNA |
| ENSG00000272312          | LINC RNA | hsa-miR-203b-3p | MICRORNA |
| ENSG00000132204          | LINC RNA | hsa-miR-203a-3p | MICRORNA |
| ENSG00000214039          | LINC RNA | hsa-miR-203a-3p | MICRORNA |
| ENSG00000225689          | LINC RNA | hsa-miR-203a-3p | MICRORNA |

|                          |          |                  |          |
|--------------------------|----------|------------------|----------|
| ENSG00000226816          | LINC RNA | hsa-miR-203a-3p  | MICRORNA |
| ENSG00000229459          | LINC RNA | hsa-miR-203a-3p  | MICRORNA |
| ENSG00000235056          | LINC RNA | hsa-miR-203a-3p  | MICRORNA |
| ENSG00000236924          | LINC RNA | hsa-miR-203a-3p  | MICRORNA |
| ENSG00000258548          | LINC RNA | hsa-miR-203a-3p  | MICRORNA |
| ENSG00000266869          | LINC RNA | hsa-miR-203a-3p  | MICRORNA |
| ENSG00000267804          | LINC RNA | hsa-miR-203a-3p  | MICRORNA |
| ENSG00000269976          | LINC RNA | hsa-miR-203a-3p  | MICRORNA |
| ENSG00000272312          | LINC RNA | hsa-miR-203a-3p  | MICRORNA |
| chr3:138289159-138291756 | CIRC RNA | hsa-miR-136-5p   | MICRORNA |
| ENSG00000224652          | LINC RNA | hsa-miR-136-5p   | MICRORNA |
| ENSG00000231204          | LINC RNA | hsa-miR-136-5p   | MICRORNA |
| ENSG00000231437          | LINC RNA | hsa-miR-136-5p   | MICRORNA |
| ENSG00000233005          | LINC RNA | hsa-miR-136-5p   | MICRORNA |
| ENSG00000236028          | LINC RNA | hsa-miR-136-5p   | MICRORNA |
| ENSG00000248673          | LINC RNA | hsa-miR-136-5p   | MICRORNA |
| ENSG00000248942          | LINC RNA | hsa-miR-136-5p   | MICRORNA |
| ENSG00000249574          | LINC RNA | hsa-miR-136-5p   | MICRORNA |
| ENSG00000250446          | LINC RNA | hsa-miR-136-5p   | MICRORNA |
| ENSG00000253266          | LINC RNA | hsa-miR-136-5p   | MICRORNA |
| ENSG00000256124          | LINC RNA | hsa-miR-136-5p   | MICRORNA |
| ENSG00000258882          | LINC RNA | hsa-miR-136-5p   | MICRORNA |
| ENSG00000260725          | LINC RNA | hsa-miR-136-5p   | MICRORNA |
| ENSG00000264954          | LINC RNA | hsa-miR-136-5p   | MICRORNA |
| ENSG00000272142          | LINC RNA | hsa-miR-136-5p   | MICRORNA |
| ENSG00000272829          | LINC RNA | hsa-miR-136-5p   | MICRORNA |
| chr4:87685745-87689129   | CIRC RNA | hsa-miR-1304-3p  | MICRORNA |
| chr5:94244955-94259726   | CIRC RNA | hsa-miR-1304-3p  | MICRORNA |
| ENSG00000189149          | LINC RNA | hsa-miR-1304-3p  | MICRORNA |
| ENSG00000203635          | LINC RNA | hsa-miR-1304-3p  | MICRORNA |
| ENSG00000223486          | LINC RNA | hsa-miR-1304-3p  | MICRORNA |
| ENSG00000223749          | LINC RNA | hsa-miR-1304-3p  | MICRORNA |
| ENSG00000223956          | LINC RNA | hsa-miR-1304-3p  | MICRORNA |
| ENSG00000224259          | LINC RNA | hsa-miR-1304-3p  | MICRORNA |
| ENSG00000227066          | LINC RNA | hsa-miR-1304-3p  | MICRORNA |
| ENSG00000233410          | LINC RNA | hsa-miR-1304-3p  | MICRORNA |
| ENSG00000236318          | LINC RNA | hsa-miR-1304-3p  | MICRORNA |
| ENSG00000248673          | LINC RNA | hsa-miR-1304-3p  | MICRORNA |
| ENSG00000248942          | LINC RNA | hsa-miR-1304-3p  | MICRORNA |
| ENSG00000250446          | LINC RNA | hsa-miR-1304-3p  | MICRORNA |
| ENSG00000257060          | LINC RNA | hsa-miR-1304-3p  | MICRORNA |
| ENSG00000257826          | LINC RNA | hsa-miR-1304-3p  | MICRORNA |
| ENSG00000260197          | LINC RNA | hsa-miR-1304-3p  | MICRORNA |
| ENSG00000261307          | LINC RNA | hsa-miR-1304-3p  | MICRORNA |
| ENSG00000264026          | LINC RNA | hsa-miR-1304-3p  | MICRORNA |
| ENSG00000272142          | LINC RNA | hsa-miR-1304-3p  | MICRORNA |
| ENSG00000272796          | LINC RNA | hsa-miR-1304-3p  | MICRORNA |
| ENSG00000272829          | LINC RNA | hsa-miR-1304-3p  | MICRORNA |
| ENSG00000273381          | LINC RNA | hsa-miR-1304-3p  | MICRORNA |
| chr3:67546221-67559327   | CIRC RNA | hsa-miR-129-5p   | MICRORNA |
| chr5:142258938-142311690 | CIRC RNA | hsa-miR-129-5p   | MICRORNA |
| ENSG00000204625          | LINC RNA | hsa-miR-129-5p   | MICRORNA |
| ENSG00000271788          | LINC RNA | hsa-miR-129-5p   | MICRORNA |
| chr11:82822155-82828239  | CIRC RNA | hsa-miR-129-2-3p | MICRORNA |

|                           |          |                  |          |
|---------------------------|----------|------------------|----------|
| chr2:113057425-113082774  | CIRCRNA  | hsa-miR-129-2-3p | MICRORNA |
| chr5:142258938-142311690  | CIRCRNA  | hsa-miR-129-2-3p | MICRORNA |
| chr8:141595218-141616013  | CIRCRNA  | hsa-miR-129-2-3p | MICRORNA |
| ENSG00000226816           | LINCRNA  | hsa-miR-129-2-3p | MICRORNA |
| ENSG00000229459           | LINCRNA  | hsa-miR-129-2-3p | MICRORNA |
| ENSG00000231535           | LINCRNA  | hsa-miR-129-2-3p | MICRORNA |
| ENSG00000269976           | LINCRNA  | hsa-miR-129-2-3p | MICRORNA |
| ENSG00000271788           | LINCRNA  | hsa-miR-129-2-3p | MICRORNA |
| chr11:115080293-115111140 | CIRCRNA  | hsa-miR-1277-3p  | MICRORNA |
| chr12:40696590-40697936   | CIRCRNA  | hsa-miR-1277-3p  | MICRORNA |
| chr3:193177459-193179817  | CIRCRNA  | hsa-miR-1277-3p  | MICRORNA |
| chr6:29913228-29977144    | CIRCRNA  | hsa-miR-1277-3p  | MICRORNA |
| ENSG00000224259           | LINCRNA  | hsa-miR-1277-3p  | MICRORNA |
| ENSG00000227308           | LINCRNA  | hsa-miR-1277-3p  | MICRORNA |
| ENSG00000231901           | LINCRNA  | hsa-miR-1277-3p  | MICRORNA |
| ENSG00000233410           | LINCRNA  | hsa-miR-1277-3p  | MICRORNA |
| ENSG00000236393           | LINCRNA  | hsa-miR-1277-3p  | MICRORNA |
| ENSG00000236682           | LINCRNA  | hsa-miR-1277-3p  | MICRORNA |
| ENSG00000242104           | LINCRNA  | hsa-miR-1277-3p  | MICRORNA |
| ENSG00000249378           | LINCRNA  | hsa-miR-1277-3p  | MICRORNA |
| ENSG00000256969           | LINCRNA  | hsa-miR-1277-3p  | MICRORNA |
| ENSG00000257826           | LINCRNA  | hsa-miR-1277-3p  | MICRORNA |
| ENSG00000257924           | LINCRNA  | hsa-miR-1277-3p  | MICRORNA |
| ENSG00000257986           | LINCRNA  | hsa-miR-1277-3p  | MICRORNA |
| ENSG00000258088           | LINCRNA  | hsa-miR-1277-3p  | MICRORNA |
| ENSG00000259198           | LINCRNA  | hsa-miR-1277-3p  | MICRORNA |
| ENSG00000267761           | LINCRNA  | hsa-miR-1277-3p  | MICRORNA |
| ENSG00000203635           | LINCRNA  | hsa-miR-107      | MICRORNA |
| ENSG00000227066           | LINCRNA  | hsa-miR-107      | MICRORNA |
| ENSG00000259887           | LINCRNA  | hsa-miR-107      | MICRORNA |
| ENSG00000261307           | LINCRNA  | hsa-miR-107      | MICRORNA |
| ENSG00000264026           | LINCRNA  | hsa-miR-107      | MICRORNA |
| ENSG00000271815           | LINCRNA  | hsa-miR-107      | MICRORNA |
| ENSG00000272142           | LINCRNA  | hsa-miR-107      | MICRORNA |
| chr10:98303832-98336586   | CIRCRNA  | ENSG00000267793  | mRNA     |
| ENSG00000223486           | LINCRNA  | ENSG00000267793  | mRNA     |
| ENSG00000231483           | LINCRNA  | ENSG00000267793  | mRNA     |
| ENSG00000236682           | LINCRNA  | ENSG00000267793  | mRNA     |
| ENSG00000237726           | LINCRNA  | ENSG00000267793  | mRNA     |
| ENSG00000242147           | LINCRNA  | ENSG00000267793  | mRNA     |
| ENSG00000254777           | LINCRNA  | ENSG00000267793  | mRNA     |
| ENSG00000260197           | LINCRNA  | ENSG00000267793  | mRNA     |
| ENSG00000272068           | LINCRNA  | ENSG00000267793  | mRNA     |
| ENSG00000272304           | LINCRNA  | ENSG00000267793  | mRNA     |
| ENSG00000273381           | LINCRNA  | ENSG00000267793  | mRNA     |
| hsa-miR-1304-3p           | MICRORNA | ENSG00000267793  | mRNA     |
| chr4:87685745-87689129    | CIRCRNA  | ENSG00000264175  | mRNA     |
| chr5:94244955-94259726    | CIRCRNA  | ENSG00000264175  | mRNA     |
| ENSG00000189149           | LINCRNA  | ENSG00000264175  | mRNA     |
| ENSG00000203635           | LINCRNA  | ENSG00000264175  | mRNA     |
| ENSG00000224652           | LINCRNA  | ENSG00000264175  | mRNA     |
| ENSG00000227066           | LINCRNA  | ENSG00000264175  | mRNA     |
| ENSG00000236318           | LINCRNA  | ENSG00000264175  | mRNA     |
| ENSG00000248673           | LINCRNA  | ENSG00000264175  | mRNA     |

|                           |          |                 |      |
|---------------------------|----------|-----------------|------|
| ENSG00000248942           | LINC RNA | ENSG00000264175 | mRNA |
| ENSG00000250446           | LINC RNA | ENSG00000264175 | mRNA |
| ENSG00000253266           | LINC RNA | ENSG00000264175 | mRNA |
| ENSG00000257060           | LINC RNA | ENSG00000264175 | mRNA |
| ENSG00000258882           | LINC RNA | ENSG00000264175 | mRNA |
| ENSG00000261307           | LINC RNA | ENSG00000264175 | mRNA |
| ENSG00000264026           | LINC RNA | ENSG00000264175 | mRNA |
| ENSG00000264954           | LINC RNA | ENSG00000264175 | mRNA |
| ENSG00000272142           | LINC RNA | ENSG00000264175 | mRNA |
| ENSG00000272796           | LINC RNA | ENSG00000264175 | mRNA |
| ENSG00000272829           | LINC RNA | ENSG00000264175 | mRNA |
| ENSG00000273381           | LINC RNA | ENSG00000264175 | mRNA |
| hsa-miR-1304-3p           | MICRORNA | ENSG00000264175 | mRNA |
| hsa-miR-301b-3p           | MICRORNA | ENSG00000264175 | mRNA |
| hsa-miR-449b-5p           | MICRORNA | ENSG00000264175 | mRNA |
| hsa-miR-542-3p            | MICRORNA | ENSG00000264175 | mRNA |
| hsa-miR-548b-3p           | MICRORNA | ENSG00000264175 | mRNA |
| hsa-miR-551a              | MICRORNA | ENSG00000264175 | mRNA |
| hsa-miR-6811-5p           | MICRORNA | ENSG00000264175 | mRNA |
| chr11:115080293-115111140 | CIRC RNA | ENSG00000259370 | mRNA |
| chr12:40696590-40697936   | CIRC RNA | ENSG00000259370 | mRNA |
| chr3:193177459-193179817  | CIRC RNA | ENSG00000259370 | mRNA |
| chr6:29913228-29977144    | CIRC RNA | ENSG00000259370 | mRNA |
| ENSG00000223749           | LINC RNA | ENSG00000259370 | mRNA |
| ENSG00000223956           | LINC RNA | ENSG00000259370 | mRNA |
| ENSG00000224259           | LINC RNA | ENSG00000259370 | mRNA |
| ENSG00000227308           | LINC RNA | ENSG00000259370 | mRNA |
| ENSG00000231901           | LINC RNA | ENSG00000259370 | mRNA |
| ENSG00000233410           | LINC RNA | ENSG00000259370 | mRNA |
| ENSG00000236318           | LINC RNA | ENSG00000259370 | mRNA |
| ENSG00000236393           | LINC RNA | ENSG00000259370 | mRNA |
| ENSG00000236682           | LINC RNA | ENSG00000259370 | mRNA |
| ENSG00000242104           | LINC RNA | ENSG00000259370 | mRNA |
| ENSG00000249378           | LINC RNA | ENSG00000259370 | mRNA |
| ENSG00000256969           | LINC RNA | ENSG00000259370 | mRNA |
| ENSG00000257826           | LINC RNA | ENSG00000259370 | mRNA |
| ENSG00000257924           | LINC RNA | ENSG00000259370 | mRNA |
| ENSG00000257986           | LINC RNA | ENSG00000259370 | mRNA |
| ENSG00000259198           | LINC RNA | ENSG00000259370 | mRNA |
| ENSG00000263627           | LINC RNA | ENSG00000259370 | mRNA |
| ENSG00000267761           | LINC RNA | ENSG00000259370 | mRNA |
| hsa-miR-1277-3p           | MICRORNA | ENSG00000259370 | mRNA |
| hsa-miR-3065-5p           | MICRORNA | ENSG00000259370 | mRNA |
| hsa-miR-34b-5p            | MICRORNA | ENSG00000259370 | mRNA |
| hsa-miR-34c-5p            | MICRORNA | ENSG00000259370 | mRNA |
| hsa-miR-3614-3p           | MICRORNA | ENSG00000259370 | mRNA |
| hsa-miR-424-3p            | MICRORNA | ENSG00000259370 | mRNA |
| hsa-miR-449a              | MICRORNA | ENSG00000259370 | mRNA |
| hsa-miR-449c-5p           | MICRORNA | ENSG00000259370 | mRNA |
| hsa-miR-4679              | MICRORNA | ENSG00000259370 | mRNA |
| hsa-miR-4709-3p           | MICRORNA | ENSG00000259370 | mRNA |
| hsa-miR-4709-5p           | MICRORNA | ENSG00000259370 | mRNA |
| hsa-miR-542-5p            | MICRORNA | ENSG00000259370 | mRNA |
| hsa-miR-548b-5p           | MICRORNA | ENSG00000259370 | mRNA |

|                           |          |                 |      |
|---------------------------|----------|-----------------|------|
| chr4:87685745-87689129    | CIRCRNA  | ENSG00000237463 | mRNA |
| chr5:94244955-94259726    | CIRCRNA  | ENSG00000237463 | mRNA |
| ENSG00000189149           | LINC RNA | ENSG00000237463 | mRNA |
| ENSG00000203635           | LINC RNA | ENSG00000237463 | mRNA |
| ENSG00000223956           | LINC RNA | ENSG00000237463 | mRNA |
| ENSG00000224652           | LINC RNA | ENSG00000237463 | mRNA |
| ENSG00000227066           | LINC RNA | ENSG00000237463 | mRNA |
| ENSG00000229236           | LINC RNA | ENSG00000237463 | mRNA |
| ENSG00000236318           | LINC RNA | ENSG00000237463 | mRNA |
| ENSG00000248673           | LINC RNA | ENSG00000237463 | mRNA |
| ENSG00000248942           | LINC RNA | ENSG00000237463 | mRNA |
| ENSG00000250446           | LINC RNA | ENSG00000237463 | mRNA |
| ENSG00000253266           | LINC RNA | ENSG00000237463 | mRNA |
| ENSG00000257060           | LINC RNA | ENSG00000237463 | mRNA |
| ENSG00000258882           | LINC RNA | ENSG00000237463 | mRNA |
| ENSG00000261307           | LINC RNA | ENSG00000237463 | mRNA |
| ENSG00000264026           | LINC RNA | ENSG00000237463 | mRNA |
| ENSG00000264954           | LINC RNA | ENSG00000237463 | mRNA |
| ENSG00000271815           | LINC RNA | ENSG00000237463 | mRNA |
| ENSG00000272142           | LINC RNA | ENSG00000237463 | mRNA |
| ENSG00000272796           | LINC RNA | ENSG00000237463 | mRNA |
| ENSG00000272829           | LINC RNA | ENSG00000237463 | mRNA |
| hsa-miR-1304-3p           | MICRORNA | ENSG00000237463 | mRNA |
| hsa-miR-301b-3p           | MICRORNA | ENSG00000237463 | mRNA |
| hsa-miR-449b-5p           | MICRORNA | ENSG00000237463 | mRNA |
| hsa-miR-542-3p            | MICRORNA | ENSG00000237463 | mRNA |
| hsa-miR-548b-3p           | MICRORNA | ENSG00000237463 | mRNA |
| hsa-miR-551a              | MICRORNA | ENSG00000237463 | mRNA |
| hsa-miR-6811-5p           | MICRORNA | ENSG00000237463 | mRNA |
| chr11:115080293-115111140 | CIRCRNA  | ENSG00000220154 | mRNA |
| chr12:40696590-40697936   | CIRCRNA  | ENSG00000220154 | mRNA |
| chr3:193177459-193179817  | CIRCRNA  | ENSG00000220154 | mRNA |
| chr6:29913228-29977144    | CIRCRNA  | ENSG00000220154 | mRNA |
| ENSG00000227308           | LINC RNA | ENSG00000220154 | mRNA |
| ENSG00000231901           | LINC RNA | ENSG00000220154 | mRNA |
| ENSG00000236393           | LINC RNA | ENSG00000220154 | mRNA |
| ENSG00000242104           | LINC RNA | ENSG00000220154 | mRNA |
| ENSG00000256969           | LINC RNA | ENSG00000220154 | mRNA |
| ENSG00000257924           | LINC RNA | ENSG00000220154 | mRNA |
| ENSG00000257986           | LINC RNA | ENSG00000220154 | mRNA |
| ENSG00000258088           | LINC RNA | ENSG00000220154 | mRNA |
| ENSG00000259198           | LINC RNA | ENSG00000220154 | mRNA |
| ENSG00000267761           | LINC RNA | ENSG00000220154 | mRNA |
| hsa-miR-1277-3p           | MICRORNA | ENSG00000220154 | mRNA |
| hsa-miR-3065-5p           | MICRORNA | ENSG00000220154 | mRNA |
| hsa-miR-34b-5p            | MICRORNA | ENSG00000220154 | mRNA |
| hsa-miR-34c-5p            | MICRORNA | ENSG00000220154 | mRNA |
| hsa-miR-3614-3p           | MICRORNA | ENSG00000220154 | mRNA |
| hsa-miR-424-3p            | MICRORNA | ENSG00000220154 | mRNA |
| hsa-miR-449c-5p           | MICRORNA | ENSG00000220154 | mRNA |
| hsa-miR-4679              | MICRORNA | ENSG00000220154 | mRNA |
| hsa-miR-4709-3p           | MICRORNA | ENSG00000220154 | mRNA |
| hsa-miR-4709-5p           | MICRORNA | ENSG00000220154 | mRNA |
| hsa-miR-542-5p            | MICRORNA | ENSG00000220154 | mRNA |

|                          |          |                 |      |
|--------------------------|----------|-----------------|------|
| hsa-miR-548b-5p          | MICRORNA | ENSG00000220154 | mRNA |
| chr3:138289159-138291756 | CIRCRNA  | ENSG00000218357 | mRNA |
| chr4:87685745-87689129   | CIRCRNA  | ENSG00000218357 | mRNA |
| chr5:94244955-94259726   | CIRCRNA  | ENSG00000218357 | mRNA |
| chr6:73005640-73043538   | CIRCRNA  | ENSG00000218357 | mRNA |
| ENSG00000189149          | LINC RNA | ENSG00000218357 | mRNA |
| ENSG00000224652          | LINC RNA | ENSG00000218357 | mRNA |
| ENSG00000227066          | LINC RNA | ENSG00000218357 | mRNA |
| ENSG00000231204          | LINC RNA | ENSG00000218357 | mRNA |
| ENSG00000231437          | LINC RNA | ENSG00000218357 | mRNA |
| ENSG00000233005          | LINC RNA | ENSG00000218357 | mRNA |
| ENSG00000236028          | LINC RNA | ENSG00000218357 | mRNA |
| ENSG00000237438          | LINC RNA | ENSG00000218357 | mRNA |
| ENSG00000248673          | LINC RNA | ENSG00000218357 | mRNA |
| ENSG00000248942          | LINC RNA | ENSG00000218357 | mRNA |
| ENSG00000249574          | LINC RNA | ENSG00000218357 | mRNA |
| ENSG00000250446          | LINC RNA | ENSG00000218357 | mRNA |
| ENSG00000253266          | LINC RNA | ENSG00000218357 | mRNA |
| ENSG00000256124          | LINC RNA | ENSG00000218357 | mRNA |
| ENSG00000258882          | LINC RNA | ENSG00000218357 | mRNA |
| ENSG00000260725          | LINC RNA | ENSG00000218357 | mRNA |
| ENSG00000261307          | LINC RNA | ENSG00000218357 | mRNA |
| ENSG00000264954          | LINC RNA | ENSG00000218357 | mRNA |
| ENSG00000272142          | LINC RNA | ENSG00000218357 | mRNA |
| ENSG00000272829          | LINC RNA | ENSG00000218357 | mRNA |
| hsa-miR-136-5p           | MICRORNA | ENSG00000218357 | mRNA |
| hsa-miR-300              | MICRORNA | ENSG00000218357 | mRNA |
| hsa-miR-376a-5p          | MICRORNA | ENSG00000218357 | mRNA |
| hsa-miR-449b-5p          | MICRORNA | ENSG00000218357 | mRNA |
| hsa-miR-548b-3p          | MICRORNA | ENSG00000218357 | mRNA |
| hsa-miR-551a             | MICRORNA | ENSG00000218357 | mRNA |
| chr4:87685745-87689129   | CIRCRNA  | ENSG00000213937 | mRNA |
| chr5:94244955-94259726   | CIRCRNA  | ENSG00000213937 | mRNA |
| ENSG00000189149          | LINC RNA | ENSG00000213937 | mRNA |
| ENSG00000203635          | LINC RNA | ENSG00000213937 | mRNA |
| ENSG00000224652          | LINC RNA | ENSG00000213937 | mRNA |
| ENSG00000227066          | LINC RNA | ENSG00000213937 | mRNA |
| ENSG00000229236          | LINC RNA | ENSG00000213937 | mRNA |
| ENSG00000231204          | LINC RNA | ENSG00000213937 | mRNA |
| ENSG00000231437          | LINC RNA | ENSG00000213937 | mRNA |
| ENSG00000236028          | LINC RNA | ENSG00000213937 | mRNA |
| ENSG00000236318          | LINC RNA | ENSG00000213937 | mRNA |
| ENSG00000248673          | LINC RNA | ENSG00000213937 | mRNA |
| ENSG00000248942          | LINC RNA | ENSG00000213937 | mRNA |
| ENSG00000250446          | LINC RNA | ENSG00000213937 | mRNA |
| ENSG00000253266          | LINC RNA | ENSG00000213937 | mRNA |
| ENSG00000256124          | LINC RNA | ENSG00000213937 | mRNA |
| ENSG00000257060          | LINC RNA | ENSG00000213937 | mRNA |
| ENSG00000258882          | LINC RNA | ENSG00000213937 | mRNA |
| ENSG00000260725          | LINC RNA | ENSG00000213937 | mRNA |
| ENSG00000261307          | LINC RNA | ENSG00000213937 | mRNA |
| ENSG00000264026          | LINC RNA | ENSG00000213937 | mRNA |
| ENSG00000264954          | LINC RNA | ENSG00000213937 | mRNA |
| ENSG00000272142          | LINC RNA | ENSG00000213937 | mRNA |

|                         |          |                 |      |
|-------------------------|----------|-----------------|------|
| ENSG00000272796         | LINC RNA | ENSG00000213937 | mRNA |
| ENSG00000272829         | LINC RNA | ENSG00000213937 | mRNA |
| hsa-miR-1304-3p         | MICRORNA | ENSG00000213937 | mRNA |
| hsa-miR-136-5p          | MICRORNA | ENSG00000213937 | mRNA |
| hsa-miR-300             | MICRORNA | ENSG00000213937 | mRNA |
| hsa-miR-301b-3p         | MICRORNA | ENSG00000213937 | mRNA |
| hsa-miR-449b-5p         | MICRORNA | ENSG00000213937 | mRNA |
| hsa-miR-542-3p          | MICRORNA | ENSG00000213937 | mRNA |
| hsa-miR-548b-3p         | MICRORNA | ENSG00000213937 | mRNA |
| hsa-miR-551a            | MICRORNA | ENSG00000213937 | mRNA |
| hsa-miR-6811-5p         | MICRORNA | ENSG00000213937 | mRNA |
| chr4:87685745-87689129  | CIRC RNA | ENSG00000212544 | mRNA |
| chr5:94244955-94259726  | CIRC RNA | ENSG00000212544 | mRNA |
| ENSG00000189149         | LINC RNA | ENSG00000212544 | mRNA |
| ENSG00000203635         | LINC RNA | ENSG00000212544 | mRNA |
| ENSG00000224652         | LINC RNA | ENSG00000212544 | mRNA |
| ENSG00000227066         | LINC RNA | ENSG00000212544 | mRNA |
| ENSG00000231204         | LINC RNA | ENSG00000212544 | mRNA |
| ENSG00000231437         | LINC RNA | ENSG00000212544 | mRNA |
| ENSG00000233005         | LINC RNA | ENSG00000212544 | mRNA |
| ENSG00000236028         | LINC RNA | ENSG00000212544 | mRNA |
| ENSG00000248673         | LINC RNA | ENSG00000212544 | mRNA |
| ENSG00000248942         | LINC RNA | ENSG00000212544 | mRNA |
| ENSG00000250446         | LINC RNA | ENSG00000212544 | mRNA |
| ENSG00000253266         | LINC RNA | ENSG00000212544 | mRNA |
| ENSG00000256124         | LINC RNA | ENSG00000212544 | mRNA |
| ENSG00000257060         | LINC RNA | ENSG00000212544 | mRNA |
| ENSG00000258882         | LINC RNA | ENSG00000212544 | mRNA |
| ENSG00000260725         | LINC RNA | ENSG00000212544 | mRNA |
| ENSG00000261307         | LINC RNA | ENSG00000212544 | mRNA |
| ENSG00000264026         | LINC RNA | ENSG00000212544 | mRNA |
| ENSG00000264954         | LINC RNA | ENSG00000212544 | mRNA |
| ENSG00000272142         | LINC RNA | ENSG00000212544 | mRNA |
| ENSG00000272796         | LINC RNA | ENSG00000212544 | mRNA |
| ENSG00000272829         | LINC RNA | ENSG00000212544 | mRNA |
| hsa-miR-107             | MICRORNA | ENSG00000212544 | mRNA |
| hsa-miR-1304-3p         | MICRORNA | ENSG00000212544 | mRNA |
| hsa-miR-136-5p          | MICRORNA | ENSG00000212544 | mRNA |
| hsa-miR-300             | MICRORNA | ENSG00000212544 | mRNA |
| hsa-miR-301b-3p         | MICRORNA | ENSG00000212544 | mRNA |
| hsa-miR-376a-5p         | MICRORNA | ENSG00000212544 | mRNA |
| hsa-miR-449b-5p         | MICRORNA | ENSG00000212544 | mRNA |
| hsa-miR-542-3p          | MICRORNA | ENSG00000212544 | mRNA |
| hsa-miR-548b-3p         | MICRORNA | ENSG00000212544 | mRNA |
| hsa-miR-551a            | MICRORNA | ENSG00000212544 | mRNA |
| hsa-miR-6811-5p         | MICRORNA | ENSG00000212544 | mRNA |
| chr10:98303832-98336586 | CIRC RNA | ENSG00000206159 | mRNA |
| ENSG00000225689         | LINC RNA | ENSG00000206159 | mRNA |
| ENSG00000236682         | LINC RNA | ENSG00000206159 | mRNA |
| ENSG00000236924         | LINC RNA | ENSG00000206159 | mRNA |
| ENSG00000242147         | LINC RNA | ENSG00000206159 | mRNA |
| ENSG00000254777         | LINC RNA | ENSG00000206159 | mRNA |
| ENSG00000260197         | LINC RNA | ENSG00000206159 | mRNA |
| ENSG00000272068         | LINC RNA | ENSG00000206159 | mRNA |



|                           |          |                 |      |
|---------------------------|----------|-----------------|------|
| ENSG00000272304           | LINC RNA | ENSG00000206159 | mRNA |
| ENSG00000272312           | LINC RNA | ENSG00000206159 | mRNA |
| ENSG00000273381           | LINC RNA | ENSG00000206159 | mRNA |
| hsa-miR-1304-3p           | MIC RNA  | ENSG00000206159 | mRNA |
| hsa-miR-203a-3p           | MIC RNA  | ENSG00000206159 | mRNA |
| hsa-miR-873-5p            | MIC RNA  | ENSG00000206159 | mRNA |
| chr3:193177459-193179817  | CIRC RNA | ENSG00000204544 | mRNA |
| ENSG00000189149           | LINC RNA | ENSG00000204544 | mRNA |
| ENSG00000203635           | LINC RNA | ENSG00000204544 | mRNA |
| ENSG00000223486           | LINC RNA | ENSG00000204544 | mRNA |
| ENSG00000223749           | LINC RNA | ENSG00000204544 | mRNA |
| ENSG00000223956           | LINC RNA | ENSG00000204544 | mRNA |
| ENSG00000224259           | LINC RNA | ENSG00000204544 | mRNA |
| ENSG00000225490           | LINC RNA | ENSG00000204544 | mRNA |
| ENSG00000227066           | LINC RNA | ENSG00000204544 | mRNA |
| ENSG00000229236           | LINC RNA | ENSG00000204544 | mRNA |
| ENSG00000233410           | LINC RNA | ENSG00000204544 | mRNA |
| ENSG00000236318           | LINC RNA | ENSG00000204544 | mRNA |
| ENSG00000248673           | LINC RNA | ENSG00000204544 | mRNA |
| ENSG00000249378           | LINC RNA | ENSG00000204544 | mRNA |
| ENSG00000257060           | LINC RNA | ENSG00000204544 | mRNA |
| ENSG00000257826           | LINC RNA | ENSG00000204544 | mRNA |
| ENSG00000261307           | LINC RNA | ENSG00000204544 | mRNA |
| ENSG00000263627           | LINC RNA | ENSG00000204544 | mRNA |
| ENSG00000264026           | LINC RNA | ENSG00000204544 | mRNA |
| ENSG00000267761           | LINC RNA | ENSG00000204544 | mRNA |
| ENSG00000271815           | LINC RNA | ENSG00000204544 | mRNA |
| ENSG00000272796           | LINC RNA | ENSG00000204544 | mRNA |
| hsa-miR-1304-3p           | MIC RNA  | ENSG00000204544 | mRNA |
| hsa-miR-301b-3p           | MIC RNA  | ENSG00000204544 | mRNA |
| hsa-miR-3614-3p           | MIC RNA  | ENSG00000204544 | mRNA |
| hsa-miR-449a              | MIC RNA  | ENSG00000204544 | mRNA |
| hsa-miR-449c-5p           | MIC RNA  | ENSG00000204544 | mRNA |
| hsa-miR-4709-3p           | MIC RNA  | ENSG00000204544 | mRNA |
| hsa-miR-4709-5p           | MIC RNA  | ENSG00000204544 | mRNA |
| hsa-miR-542-3p            | MIC RNA  | ENSG00000204544 | mRNA |
| hsa-miR-6811-5p           | MIC RNA  | ENSG00000204544 | mRNA |
| chr11:115080293-115111140 | CIRC RNA | ENSG00000201464 | mRNA |
| chr12:40696590-40697936   | CIRC RNA | ENSG00000201464 | mRNA |
| chr3:193177459-193179817  | CIRC RNA | ENSG00000201464 | mRNA |
| chr6:29913228-29977144    | CIRC RNA | ENSG00000201464 | mRNA |
| ENSG00000227308           | LINC RNA | ENSG00000201464 | mRNA |
| ENSG00000231901           | LINC RNA | ENSG00000201464 | mRNA |
| ENSG00000236393           | LINC RNA | ENSG00000201464 | mRNA |
| ENSG00000242104           | LINC RNA | ENSG00000201464 | mRNA |
| ENSG00000256969           | LINC RNA | ENSG00000201464 | mRNA |
| ENSG00000257924           | LINC RNA | ENSG00000201464 | mRNA |
| ENSG00000257986           | LINC RNA | ENSG00000201464 | mRNA |
| ENSG00000258088           | LINC RNA | ENSG00000201464 | mRNA |
| ENSG00000259198           | LINC RNA | ENSG00000201464 | mRNA |
| ENSG00000267761           | LINC RNA | ENSG00000201464 | mRNA |
| hsa-miR-1277-3p           | MIC RNA  | ENSG00000201464 | mRNA |
| hsa-miR-3065-5p           | MIC RNA  | ENSG00000201464 | mRNA |
| hsa-miR-34b-5p            | MIC RNA  | ENSG00000201464 | mRNA |

|                          |          |                 |      |
|--------------------------|----------|-----------------|------|
| hsa-miR-34c-5p           | MICRORNA | ENSG00000201464 | mRNA |
| hsa-miR-3614-3p          | MICRORNA | ENSG00000201464 | mRNA |
| hsa-miR-424-3p           | MICRORNA | ENSG00000201464 | mRNA |
| hsa-miR-449a             | MICRORNA | ENSG00000201464 | mRNA |
| hsa-miR-449c-5p          | MICRORNA | ENSG00000201464 | mRNA |
| hsa-miR-4679             | MICRORNA | ENSG00000201464 | mRNA |
| hsa-miR-4709-3p          | MICRORNA | ENSG00000201464 | mRNA |
| hsa-miR-4709-5p          | MICRORNA | ENSG00000201464 | mRNA |
| hsa-miR-542-5p           | MICRORNA | ENSG00000201464 | mRNA |
| hsa-miR-548b-5p          | MICRORNA | ENSG00000201464 | mRNA |
| chr3:193177459-193179817 | CIRCRNA  | ENSG00000198691 | mRNA |
| chr6:29913228-29977144   | CIRCRNA  | ENSG00000198691 | mRNA |
| ENSG00000203635          | LINCRNA  | ENSG00000198691 | mRNA |
| ENSG00000223749          | LINCRNA  | ENSG00000198691 | mRNA |
| ENSG00000223956          | LINCRNA  | ENSG00000198691 | mRNA |
| ENSG00000224259          | LINCRNA  | ENSG00000198691 | mRNA |
| ENSG00000225490          | LINCRNA  | ENSG00000198691 | mRNA |
| ENSG00000227308          | LINCRNA  | ENSG00000198691 | mRNA |
| ENSG00000229236          | LINCRNA  | ENSG00000198691 | mRNA |
| ENSG00000231535          | LINCRNA  | ENSG00000198691 | mRNA |
| ENSG00000233410          | LINCRNA  | ENSG00000198691 | mRNA |
| ENSG00000236318          | LINCRNA  | ENSG00000198691 | mRNA |
| ENSG00000249378          | LINCRNA  | ENSG00000198691 | mRNA |
| ENSG00000257060          | LINCRNA  | ENSG00000198691 | mRNA |
| ENSG00000257826          | LINCRNA  | ENSG00000198691 | mRNA |
| ENSG00000264026          | LINCRNA  | ENSG00000198691 | mRNA |
| ENSG00000267761          | LINCRNA  | ENSG00000198691 | mRNA |
| ENSG00000271815          | LINCRNA  | ENSG00000198691 | mRNA |
| ENSG00000272796          | LINCRNA  | ENSG00000198691 | mRNA |
| hsa-miR-1304-3p          | MICRORNA | ENSG00000198691 | mRNA |
| hsa-miR-301b-3p          | MICRORNA | ENSG00000198691 | mRNA |
| hsa-miR-3065-5p          | MICRORNA | ENSG00000198691 | mRNA |
| hsa-miR-3614-3p          | MICRORNA | ENSG00000198691 | mRNA |
| hsa-miR-449a             | MICRORNA | ENSG00000198691 | mRNA |
| hsa-miR-449c-5p          | MICRORNA | ENSG00000198691 | mRNA |
| hsa-miR-4679             | MICRORNA | ENSG00000198691 | mRNA |
| hsa-miR-4709-3p          | MICRORNA | ENSG00000198691 | mRNA |
| hsa-miR-4709-5p          | MICRORNA | ENSG00000198691 | mRNA |
| hsa-miR-548b-5p          | MICRORNA | ENSG00000198691 | mRNA |
| hsa-miR-6811-5p          | MICRORNA | ENSG00000198691 | mRNA |
| ENSG00000214145          | LINCRNA  | ENSG00000197757 | mRNA |
| ENSG00000223414          | LINCRNA  | ENSG00000197757 | mRNA |
| ENSG00000223486          | LINCRNA  | ENSG00000197757 | mRNA |
| ENSG00000226383          | LINCRNA  | ENSG00000197757 | mRNA |
| ENSG00000230663          | LINCRNA  | ENSG00000197757 | mRNA |
| ENSG00000231483          | LINCRNA  | ENSG00000197757 | mRNA |
| ENSG00000237726          | LINCRNA  | ENSG00000197757 | mRNA |
| ENSG00000242147          | LINCRNA  | ENSG00000197757 | mRNA |
| ENSG00000243081          | LINCRNA  | ENSG00000197757 | mRNA |
| ENSG00000260430          | LINCRNA  | ENSG00000197757 | mRNA |
| ENSG00000272068          | LINCRNA  | ENSG00000197757 | mRNA |
| ENSG00000272304          | LINCRNA  | ENSG00000197757 | mRNA |
| hsa-miR-4488             | MICRORNA | ENSG00000197757 | mRNA |
| chr12:40696590-40697936  | CIRCRNA  | ENSG00000197635 | mRNA |

|                          |          |                 |      |
|--------------------------|----------|-----------------|------|
| chr3:193177459-193179817 | CIRCRNA  | ENSG00000197635 | mRNA |
| chr6:29913228-29977144   | CIRCRNA  | ENSG00000197635 | mRNA |
| ENSG00000223749          | LINC RNA | ENSG00000197635 | mRNA |
| ENSG00000223956          | LINC RNA | ENSG00000197635 | mRNA |
| ENSG00000224259          | LINC RNA | ENSG00000197635 | mRNA |
| ENSG00000225490          | LINC RNA | ENSG00000197635 | mRNA |
| ENSG00000227308          | LINC RNA | ENSG00000197635 | mRNA |
| ENSG00000233410          | LINC RNA | ENSG00000197635 | mRNA |
| ENSG00000236318          | LINC RNA | ENSG00000197635 | mRNA |
| ENSG00000236393          | LINC RNA | ENSG00000197635 | mRNA |
| ENSG00000236682          | LINC RNA | ENSG00000197635 | mRNA |
| ENSG00000242104          | LINC RNA | ENSG00000197635 | mRNA |
| ENSG00000249378          | LINC RNA | ENSG00000197635 | mRNA |
| ENSG00000256969          | LINC RNA | ENSG00000197635 | mRNA |
| ENSG00000257826          | LINC RNA | ENSG00000197635 | mRNA |
| ENSG00000257924          | LINC RNA | ENSG00000197635 | mRNA |
| ENSG00000257986          | LINC RNA | ENSG00000197635 | mRNA |
| ENSG00000259198          | LINC RNA | ENSG00000197635 | mRNA |
| ENSG00000263627          | LINC RNA | ENSG00000197635 | mRNA |
| ENSG00000267761          | LINC RNA | ENSG00000197635 | mRNA |
| ENSG00000272796          | LINC RNA | ENSG00000197635 | mRNA |
| hsa-miR-1277-3p          | MICRORNA | ENSG00000197635 | mRNA |
| hsa-miR-3065-5p          | MICRORNA | ENSG00000197635 | mRNA |
| hsa-miR-34b-5p           | MICRORNA | ENSG00000197635 | mRNA |
| hsa-miR-34c-5p           | MICRORNA | ENSG00000197635 | mRNA |
| hsa-miR-3614-3p          | MICRORNA | ENSG00000197635 | mRNA |
| hsa-miR-424-3p           | MICRORNA | ENSG00000197635 | mRNA |
| hsa-miR-449a             | MICRORNA | ENSG00000197635 | mRNA |
| hsa-miR-449c-5p          | MICRORNA | ENSG00000197635 | mRNA |
| hsa-miR-4679             | MICRORNA | ENSG00000197635 | mRNA |
| hsa-miR-4709-3p          | MICRORNA | ENSG00000197635 | mRNA |
| hsa-miR-4709-5p          | MICRORNA | ENSG00000197635 | mRNA |
| hsa-miR-548b-5p          | MICRORNA | ENSG00000197635 | mRNA |
| ENSG00000132204          | LINC RNA | ENSG00000188517 | mRNA |
| ENSG00000214039          | LINC RNA | ENSG00000188517 | mRNA |
| ENSG00000225689          | LINC RNA | ENSG00000188517 | mRNA |
| ENSG00000235056          | LINC RNA | ENSG00000188517 | mRNA |
| ENSG00000236924          | LINC RNA | ENSG00000188517 | mRNA |
| ENSG00000258548          | LINC RNA | ENSG00000188517 | mRNA |
| ENSG00000266869          | LINC RNA | ENSG00000188517 | mRNA |
| ENSG00000267804          | LINC RNA | ENSG00000188517 | mRNA |
| ENSG00000272312          | LINC RNA | ENSG00000188517 | mRNA |
| hsa-miR-203a-3p          | MICRORNA | ENSG00000188517 | mRNA |
| hsa-miR-203b-3p          | MICRORNA | ENSG00000188517 | mRNA |
| hsa-miR-3182             | MICRORNA | ENSG00000188517 | mRNA |
| hsa-miR-873-5p           | MICRORNA | ENSG00000188517 | mRNA |
| chr10:98303832-98336586  | CIRCRNA  | ENSG00000188306 | mRNA |
| ENSG00000214145          | LINC RNA | ENSG00000188306 | mRNA |
| ENSG00000226383          | LINC RNA | ENSG00000188306 | mRNA |
| ENSG00000231483          | LINC RNA | ENSG00000188306 | mRNA |
| ENSG00000236682          | LINC RNA | ENSG00000188306 | mRNA |
| ENSG00000237726          | LINC RNA | ENSG00000188306 | mRNA |
| ENSG00000242147          | LINC RNA | ENSG00000188306 | mRNA |
| ENSG00000254777          | LINC RNA | ENSG00000188306 | mRNA |

|                           |          |                 |      |
|---------------------------|----------|-----------------|------|
| ENSG00000260197           | LINC RNA | ENSG00000188306 | mRNA |
| ENSG00000272068           | LINC RNA | ENSG00000188306 | mRNA |
| ENSG00000272304           | LINC RNA | ENSG00000188306 | mRNA |
| ENSG00000273381           | LINC RNA | ENSG00000188306 | mRNA |
| hsa-miR-1304-3p           | MICRORNA | ENSG00000188306 | mRNA |
| chr3:138289159-138291756  | CIRC RNA | ENSG00000188095 | mRNA |
| chr4:87685745-87689129    | CIRC RNA | ENSG00000188095 | mRNA |
| chr5:94244955-94259726    | CIRC RNA | ENSG00000188095 | mRNA |
| chr6:73005640-73043538    | CIRC RNA | ENSG00000188095 | mRNA |
| ENSG00000189149           | LINC RNA | ENSG00000188095 | mRNA |
| ENSG00000224652           | LINC RNA | ENSG00000188095 | mRNA |
| ENSG00000227066           | LINC RNA | ENSG00000188095 | mRNA |
| ENSG00000231204           | LINC RNA | ENSG00000188095 | mRNA |
| ENSG00000231437           | LINC RNA | ENSG00000188095 | mRNA |
| ENSG00000233005           | LINC RNA | ENSG00000188095 | mRNA |
| ENSG00000236028           | LINC RNA | ENSG00000188095 | mRNA |
| ENSG00000248673           | LINC RNA | ENSG00000188095 | mRNA |
| ENSG00000248942           | LINC RNA | ENSG00000188095 | mRNA |
| ENSG00000249574           | LINC RNA | ENSG00000188095 | mRNA |
| ENSG00000250446           | LINC RNA | ENSG00000188095 | mRNA |
| ENSG00000253266           | LINC RNA | ENSG00000188095 | mRNA |
| ENSG00000256124           | LINC RNA | ENSG00000188095 | mRNA |
| ENSG00000257060           | LINC RNA | ENSG00000188095 | mRNA |
| ENSG00000258882           | LINC RNA | ENSG00000188095 | mRNA |
| ENSG00000260725           | LINC RNA | ENSG00000188095 | mRNA |
| ENSG00000261307           | LINC RNA | ENSG00000188095 | mRNA |
| ENSG00000264954           | LINC RNA | ENSG00000188095 | mRNA |
| ENSG00000272142           | LINC RNA | ENSG00000188095 | mRNA |
| ENSG00000272829           | LINC RNA | ENSG00000188095 | mRNA |
| hsa-miR-136-5p            | MICRORNA | ENSG00000188095 | mRNA |
| hsa-miR-300               | MICRORNA | ENSG00000188095 | mRNA |
| hsa-miR-376a-5p           | MICRORNA | ENSG00000188095 | mRNA |
| hsa-miR-449b-5p           | MICRORNA | ENSG00000188095 | mRNA |
| hsa-miR-542-3p            | MICRORNA | ENSG00000188095 | mRNA |
| hsa-miR-548b-3p           | MICRORNA | ENSG00000188095 | mRNA |
| hsa-miR-551a              | MICRORNA | ENSG00000188095 | mRNA |
| hsa-miR-6811-5p           | MICRORNA | ENSG00000188095 | mRNA |
| chr11:115080293-115111140 | CIRC RNA | ENSG00000187867 | mRNA |
| chr12:40696590-40697936   | CIRC RNA | ENSG00000187867 | mRNA |
| chr3:193177459-193179817  | CIRC RNA | ENSG00000187867 | mRNA |
| chr6:29913228-29977144    | CIRC RNA | ENSG00000187867 | mRNA |
| ENSG00000227308           | LINC RNA | ENSG00000187867 | mRNA |
| ENSG00000231901           | LINC RNA | ENSG00000187867 | mRNA |
| ENSG00000236393           | LINC RNA | ENSG00000187867 | mRNA |
| ENSG00000236682           | LINC RNA | ENSG00000187867 | mRNA |
| ENSG00000242104           | LINC RNA | ENSG00000187867 | mRNA |
| ENSG00000256969           | LINC RNA | ENSG00000187867 | mRNA |
| ENSG00000257924           | LINC RNA | ENSG00000187867 | mRNA |
| ENSG00000257986           | LINC RNA | ENSG00000187867 | mRNA |
| ENSG00000258088           | LINC RNA | ENSG00000187867 | mRNA |
| ENSG00000259198           | LINC RNA | ENSG00000187867 | mRNA |
| ENSG00000267761           | LINC RNA | ENSG00000187867 | mRNA |
| hsa-miR-1277-3p           | MICRORNA | ENSG00000187867 | mRNA |
| hsa-miR-3065-5p           | MICRORNA | ENSG00000187867 | mRNA |

|                           |          |                 |      |
|---------------------------|----------|-----------------|------|
| hsa-miR-34b-5p            | MICRORNA | ENSG00000187867 | mRNA |
| hsa-miR-34c-5p            | MICRORNA | ENSG00000187867 | mRNA |
| hsa-miR-3614-3p           | MICRORNA | ENSG00000187867 | mRNA |
| hsa-miR-424-3p            | MICRORNA | ENSG00000187867 | mRNA |
| hsa-miR-449c-5p           | MICRORNA | ENSG00000187867 | mRNA |
| hsa-miR-4679              | MICRORNA | ENSG00000187867 | mRNA |
| hsa-miR-4709-3p           | MICRORNA | ENSG00000187867 | mRNA |
| hsa-miR-4709-5p           | MICRORNA | ENSG00000187867 | mRNA |
| hsa-miR-542-5p            | MICRORNA | ENSG00000187867 | mRNA |
| hsa-miR-548b-5p           | MICRORNA | ENSG00000187867 | mRNA |
| chr4:87685745-87689129    | CIRCRNA  | ENSG00000185038 | mRNA |
| chr5:94244955-94259726    | CIRCRNA  | ENSG00000185038 | mRNA |
| ENSG00000189149           | LINC RNA | ENSG00000185038 | mRNA |
| ENSG00000203635           | LINC RNA | ENSG00000185038 | mRNA |
| ENSG00000224652           | LINC RNA | ENSG00000185038 | mRNA |
| ENSG00000227066           | LINC RNA | ENSG00000185038 | mRNA |
| ENSG00000231204           | LINC RNA | ENSG00000185038 | mRNA |
| ENSG00000231437           | LINC RNA | ENSG00000185038 | mRNA |
| ENSG00000236028           | LINC RNA | ENSG00000185038 | mRNA |
| ENSG00000236318           | LINC RNA | ENSG00000185038 | mRNA |
| ENSG00000248673           | LINC RNA | ENSG00000185038 | mRNA |
| ENSG00000248942           | LINC RNA | ENSG00000185038 | mRNA |
| ENSG00000250446           | LINC RNA | ENSG00000185038 | mRNA |
| ENSG00000253266           | LINC RNA | ENSG00000185038 | mRNA |
| ENSG00000256124           | LINC RNA | ENSG00000185038 | mRNA |
| ENSG00000257060           | LINC RNA | ENSG00000185038 | mRNA |
| ENSG00000258882           | LINC RNA | ENSG00000185038 | mRNA |
| ENSG00000260725           | LINC RNA | ENSG00000185038 | mRNA |
| ENSG00000261307           | LINC RNA | ENSG00000185038 | mRNA |
| ENSG00000264026           | LINC RNA | ENSG00000185038 | mRNA |
| ENSG00000264954           | LINC RNA | ENSG00000185038 | mRNA |
| ENSG00000272142           | LINC RNA | ENSG00000185038 | mRNA |
| ENSG00000272796           | LINC RNA | ENSG00000185038 | mRNA |
| ENSG00000272829           | LINC RNA | ENSG00000185038 | mRNA |
| hsa-miR-1304-3p           | MICRORNA | ENSG00000185038 | mRNA |
| hsa-miR-300               | MICRORNA | ENSG00000185038 | mRNA |
| hsa-miR-301b-3p           | MICRORNA | ENSG00000185038 | mRNA |
| hsa-miR-449b-5p           | MICRORNA | ENSG00000185038 | mRNA |
| hsa-miR-542-3p            | MICRORNA | ENSG00000185038 | mRNA |
| hsa-miR-548b-3p           | MICRORNA | ENSG00000185038 | mRNA |
| hsa-miR-551a              | MICRORNA | ENSG00000185038 | mRNA |
| hsa-miR-6811-5p           | MICRORNA | ENSG00000185038 | mRNA |
| chr11:115080293-115111140 | CIRCRNA  | ENSG00000184368 | mRNA |
| chr12:40696590-40697936   | CIRCRNA  | ENSG00000184368 | mRNA |
| chr3:193177459-193179817  | CIRCRNA  | ENSG00000184368 | mRNA |
| chr6:29913228-29977144    | CIRCRNA  | ENSG00000184368 | mRNA |
| ENSG00000227308           | LINC RNA | ENSG00000184368 | mRNA |
| ENSG00000231901           | LINC RNA | ENSG00000184368 | mRNA |
| ENSG00000236393           | LINC RNA | ENSG00000184368 | mRNA |
| ENSG00000242104           | LINC RNA | ENSG00000184368 | mRNA |
| ENSG00000256969           | LINC RNA | ENSG00000184368 | mRNA |
| ENSG00000257924           | LINC RNA | ENSG00000184368 | mRNA |
| ENSG00000257986           | LINC RNA | ENSG00000184368 | mRNA |
| ENSG00000258088           | LINC RNA | ENSG00000184368 | mRNA |

|                          |          |                 |      |
|--------------------------|----------|-----------------|------|
| ENSG00000259198          | LINC RNA | ENSG00000184368 | mRNA |
| ENSG00000267761          | LINC RNA | ENSG00000184368 | mRNA |
| hsa-miR-1277-3p          | MICRORNA | ENSG00000184368 | mRNA |
| hsa-miR-3065-5p          | MICRORNA | ENSG00000184368 | mRNA |
| hsa-miR-34b-5p           | MICRORNA | ENSG00000184368 | mRNA |
| hsa-miR-34c-5p           | MICRORNA | ENSG00000184368 | mRNA |
| hsa-miR-3614-3p          | MICRORNA | ENSG00000184368 | mRNA |
| hsa-miR-424-3p           | MICRORNA | ENSG00000184368 | mRNA |
| hsa-miR-449c-5p          | MICRORNA | ENSG00000184368 | mRNA |
| hsa-miR-4679             | MICRORNA | ENSG00000184368 | mRNA |
| hsa-miR-4709-5p          | MICRORNA | ENSG00000184368 | mRNA |
| hsa-miR-542-5p           | MICRORNA | ENSG00000184368 | mRNA |
| hsa-miR-548b-5p          | MICRORNA | ENSG00000184368 | mRNA |
| chr4:87685745-87689129   | CIRC RNA | ENSG00000183690 | mRNA |
| chr5:94244955-94259726   | CIRC RNA | ENSG00000183690 | mRNA |
| ENSG00000189149          | LINC RNA | ENSG00000183690 | mRNA |
| ENSG00000203635          | LINC RNA | ENSG00000183690 | mRNA |
| ENSG00000224652          | LINC RNA | ENSG00000183690 | mRNA |
| ENSG00000227066          | LINC RNA | ENSG00000183690 | mRNA |
| ENSG00000231204          | LINC RNA | ENSG00000183690 | mRNA |
| ENSG00000231437          | LINC RNA | ENSG00000183690 | mRNA |
| ENSG00000236028          | LINC RNA | ENSG00000183690 | mRNA |
| ENSG00000236318          | LINC RNA | ENSG00000183690 | mRNA |
| ENSG00000248673          | LINC RNA | ENSG00000183690 | mRNA |
| ENSG00000248942          | LINC RNA | ENSG00000183690 | mRNA |
| ENSG00000250446          | LINC RNA | ENSG00000183690 | mRNA |
| ENSG00000253266          | LINC RNA | ENSG00000183690 | mRNA |
| ENSG00000256124          | LINC RNA | ENSG00000183690 | mRNA |
| ENSG00000257060          | LINC RNA | ENSG00000183690 | mRNA |
| ENSG00000258882          | LINC RNA | ENSG00000183690 | mRNA |
| ENSG00000260725          | LINC RNA | ENSG00000183690 | mRNA |
| ENSG00000261307          | LINC RNA | ENSG00000183690 | mRNA |
| ENSG00000264026          | LINC RNA | ENSG00000183690 | mRNA |
| ENSG00000264954          | LINC RNA | ENSG00000183690 | mRNA |
| ENSG00000272142          | LINC RNA | ENSG00000183690 | mRNA |
| ENSG00000272796          | LINC RNA | ENSG00000183690 | mRNA |
| ENSG00000272829          | LINC RNA | ENSG00000183690 | mRNA |
| hsa-miR-1304-3p          | MICRORNA | ENSG00000183690 | mRNA |
| hsa-miR-300              | MICRORNA | ENSG00000183690 | mRNA |
| hsa-miR-301b-3p          | MICRORNA | ENSG00000183690 | mRNA |
| hsa-miR-449b-5p          | MICRORNA | ENSG00000183690 | mRNA |
| hsa-miR-542-3p           | MICRORNA | ENSG00000183690 | mRNA |
| hsa-miR-548b-3p          | MICRORNA | ENSG00000183690 | mRNA |
| hsa-miR-551a             | MICRORNA | ENSG00000183690 | mRNA |
| hsa-miR-6811-5p          | MICRORNA | ENSG00000183690 | mRNA |
| chr3:138289159-138291756 | CIRC RNA | ENSG00000182175 | mRNA |
| chr4:87685745-87689129   | CIRC RNA | ENSG00000182175 | mRNA |
| chr5:94244955-94259726   | CIRC RNA | ENSG00000182175 | mRNA |
| chr6:73005640-73043538   | CIRC RNA | ENSG00000182175 | mRNA |
| ENSG00000189149          | LINC RNA | ENSG00000182175 | mRNA |
| ENSG00000224652          | LINC RNA | ENSG00000182175 | mRNA |
| ENSG00000227066          | LINC RNA | ENSG00000182175 | mRNA |
| ENSG00000231204          | LINC RNA | ENSG00000182175 | mRNA |
| ENSG00000231437          | LINC RNA | ENSG00000182175 | mRNA |

|                          |          |                 |      |
|--------------------------|----------|-----------------|------|
| ENSG00000233005          | LINC RNA | ENSG00000182175 | mRNA |
| ENSG00000236028          | LINC RNA | ENSG00000182175 | mRNA |
| ENSG00000237438          | LINC RNA | ENSG00000182175 | mRNA |
| ENSG00000248673          | LINC RNA | ENSG00000182175 | mRNA |
| ENSG00000248942          | LINC RNA | ENSG00000182175 | mRNA |
| ENSG00000249574          | LINC RNA | ENSG00000182175 | mRNA |
| ENSG00000250446          | LINC RNA | ENSG00000182175 | mRNA |
| ENSG00000253266          | LINC RNA | ENSG00000182175 | mRNA |
| ENSG00000256124          | LINC RNA | ENSG00000182175 | mRNA |
| ENSG00000258882          | LINC RNA | ENSG00000182175 | mRNA |
| ENSG00000260725          | LINC RNA | ENSG00000182175 | mRNA |
| ENSG00000261307          | LINC RNA | ENSG00000182175 | mRNA |
| ENSG00000264954          | LINC RNA | ENSG00000182175 | mRNA |
| ENSG00000272142          | LINC RNA | ENSG00000182175 | mRNA |
| ENSG00000272829          | LINC RNA | ENSG00000182175 | mRNA |
| hsa-miR-136-5p           | MICRORNA | ENSG00000182175 | mRNA |
| hsa-miR-300              | MICRORNA | ENSG00000182175 | mRNA |
| hsa-miR-376a-5p          | MICRORNA | ENSG00000182175 | mRNA |
| hsa-miR-449b-5p          | MICRORNA | ENSG00000182175 | mRNA |
| hsa-miR-548b-3p          | MICRORNA | ENSG00000182175 | mRNA |
| hsa-miR-551a             | MICRORNA | ENSG00000182175 | mRNA |
| chr3:138289159-138291756 | CIRC RNA | ENSG00000179869 | mRNA |
| chr4:87685745-87689129   | CIRC RNA | ENSG00000179869 | mRNA |
| chr5:94244955-94259726   | CIRC RNA | ENSG00000179869 | mRNA |
| chr6:73005640-73043538   | CIRC RNA | ENSG00000179869 | mRNA |
| ENSG00000189149          | LINC RNA | ENSG00000179869 | mRNA |
| ENSG00000224652          | LINC RNA | ENSG00000179869 | mRNA |
| ENSG00000227066          | LINC RNA | ENSG00000179869 | mRNA |
| ENSG00000231204          | LINC RNA | ENSG00000179869 | mRNA |
| ENSG00000231437          | LINC RNA | ENSG00000179869 | mRNA |
| ENSG00000233005          | LINC RNA | ENSG00000179869 | mRNA |
| ENSG00000236028          | LINC RNA | ENSG00000179869 | mRNA |
| ENSG00000237438          | LINC RNA | ENSG00000179869 | mRNA |
| ENSG00000248673          | LINC RNA | ENSG00000179869 | mRNA |
| ENSG00000248942          | LINC RNA | ENSG00000179869 | mRNA |
| ENSG00000249574          | LINC RNA | ENSG00000179869 | mRNA |
| ENSG00000250446          | LINC RNA | ENSG00000179869 | mRNA |
| ENSG00000253266          | LINC RNA | ENSG00000179869 | mRNA |
| ENSG00000256124          | LINC RNA | ENSG00000179869 | mRNA |
| ENSG00000257060          | LINC RNA | ENSG00000179869 | mRNA |
| ENSG00000258882          | LINC RNA | ENSG00000179869 | mRNA |
| ENSG00000260725          | LINC RNA | ENSG00000179869 | mRNA |
| ENSG00000261307          | LINC RNA | ENSG00000179869 | mRNA |
| ENSG00000264954          | LINC RNA | ENSG00000179869 | mRNA |
| ENSG00000272142          | LINC RNA | ENSG00000179869 | mRNA |
| ENSG00000272829          | LINC RNA | ENSG00000179869 | mRNA |
| hsa-miR-136-5p           | MICRORNA | ENSG00000179869 | mRNA |
| hsa-miR-300              | MICRORNA | ENSG00000179869 | mRNA |
| hsa-miR-376a-5p          | MICRORNA | ENSG00000179869 | mRNA |
| hsa-miR-449b-5p          | MICRORNA | ENSG00000179869 | mRNA |
| hsa-miR-548b-3p          | MICRORNA | ENSG00000179869 | mRNA |
| hsa-miR-551a             | MICRORNA | ENSG00000179869 | mRNA |
| chr11:82822155-82828239  | CIRC RNA | ENSG00000176406 | mRNA |
| ENSG00000132204          | LINC RNA | ENSG00000176406 | mRNA |

|                         |          |                 |      |
|-------------------------|----------|-----------------|------|
| ENSG00000214039         | LINC RNA | ENSG00000176406 | mRNA |
| ENSG00000225689         | LINC RNA | ENSG00000176406 | mRNA |
| ENSG00000226816         | LINC RNA | ENSG00000176406 | mRNA |
| ENSG00000229459         | LINC RNA | ENSG00000176406 | mRNA |
| ENSG00000235056         | LINC RNA | ENSG00000176406 | mRNA |
| ENSG00000236924         | LINC RNA | ENSG00000176406 | mRNA |
| ENSG00000258548         | LINC RNA | ENSG00000176406 | mRNA |
| ENSG00000266869         | LINC RNA | ENSG00000176406 | mRNA |
| ENSG00000267804         | LINC RNA | ENSG00000176406 | mRNA |
| ENSG00000269976         | LINC RNA | ENSG00000176406 | mRNA |
| ENSG00000272312         | LINC RNA | ENSG00000176406 | mRNA |
| hsa-miR-203a-3p         | MIC RNA  | ENSG00000176406 | mRNA |
| hsa-miR-203b-3p         | MIC RNA  | ENSG00000176406 | mRNA |
| hsa-miR-3182            | MIC RNA  | ENSG00000176406 | mRNA |
| hsa-miR-873-5p          | MIC RNA  | ENSG00000176406 | mRNA |
| chr10:98303832-98336586 | CIRC RNA | ENSG00000176153 | mRNA |
| ENSG00000214145         | LINC RNA | ENSG00000176153 | mRNA |
| ENSG00000223414         | LINC RNA | ENSG00000176153 | mRNA |
| ENSG00000226383         | LINC RNA | ENSG00000176153 | mRNA |
| ENSG00000231483         | LINC RNA | ENSG00000176153 | mRNA |
| ENSG00000237726         | LINC RNA | ENSG00000176153 | mRNA |
| ENSG00000242147         | LINC RNA | ENSG00000176153 | mRNA |
| ENSG00000243081         | LINC RNA | ENSG00000176153 | mRNA |
| ENSG00000254777         | LINC RNA | ENSG00000176153 | mRNA |
| ENSG00000260430         | LINC RNA | ENSG00000176153 | mRNA |
| ENSG00000272068         | LINC RNA | ENSG00000176153 | mRNA |
| ENSG00000272304         | LINC RNA | ENSG00000176153 | mRNA |
| ENSG00000273381         | LINC RNA | ENSG00000176153 | mRNA |
| hsa-miR-4488            | MIC RNA  | ENSG00000176153 | mRNA |
| chr11:82822155-82828239 | CIRC RNA | ENSG00000173702 | mRNA |
| ENSG00000132204         | LINC RNA | ENSG00000173702 | mRNA |
| ENSG00000214039         | LINC RNA | ENSG00000173702 | mRNA |
| ENSG00000225689         | LINC RNA | ENSG00000173702 | mRNA |
| ENSG00000226816         | LINC RNA | ENSG00000173702 | mRNA |
| ENSG00000229459         | LINC RNA | ENSG00000173702 | mRNA |
| ENSG00000235056         | LINC RNA | ENSG00000173702 | mRNA |
| ENSG00000236924         | LINC RNA | ENSG00000173702 | mRNA |
| ENSG00000258548         | LINC RNA | ENSG00000173702 | mRNA |
| ENSG00000266869         | LINC RNA | ENSG00000173702 | mRNA |
| ENSG00000267804         | LINC RNA | ENSG00000173702 | mRNA |
| ENSG00000269976         | LINC RNA | ENSG00000173702 | mRNA |
| ENSG00000272312         | LINC RNA | ENSG00000173702 | mRNA |
| hsa-miR-203a-3p         | MIC RNA  | ENSG00000173702 | mRNA |
| hsa-miR-203b-3p         | MIC RNA  | ENSG00000173702 | mRNA |
| hsa-miR-3182            | MIC RNA  | ENSG00000173702 | mRNA |
| hsa-miR-873-5p          | MIC RNA  | ENSG00000173702 | mRNA |
| ENSG00000132204         | LINC RNA | ENSG00000171560 | mRNA |
| ENSG00000214039         | LINC RNA | ENSG00000171560 | mRNA |
| ENSG00000225689         | LINC RNA | ENSG00000171560 | mRNA |
| ENSG00000226816         | LINC RNA | ENSG00000171560 | mRNA |
| ENSG00000229459         | LINC RNA | ENSG00000171560 | mRNA |
| ENSG00000235056         | LINC RNA | ENSG00000171560 | mRNA |
| ENSG00000236924         | LINC RNA | ENSG00000171560 | mRNA |
| ENSG00000258548         | LINC RNA | ENSG00000171560 | mRNA |



|                          |          |                 |      |
|--------------------------|----------|-----------------|------|
| ENSG00000266869          | LINC RNA | ENSG00000171560 | mRNA |
| ENSG00000267804          | LINC RNA | ENSG00000171560 | mRNA |
| ENSG00000269976          | LINC RNA | ENSG00000171560 | mRNA |
| ENSG00000272312          | LINC RNA | ENSG00000171560 | mRNA |
| hsa-miR-203a-3p          | MICRORNA | ENSG00000171560 | mRNA |
| hsa-miR-203b-3p          | MICRORNA | ENSG00000171560 | mRNA |
| hsa-miR-3182             | MICRORNA | ENSG00000171560 | mRNA |
| hsa-miR-873-5p           | MICRORNA | ENSG00000171560 | mRNA |
| chr10:98303832-98336586  | CIRC RNA | ENSG00000171557 | mRNA |
| ENSG00000231483          | LINC RNA | ENSG00000171557 | mRNA |
| ENSG00000237726          | LINC RNA | ENSG00000171557 | mRNA |
| ENSG00000242147          | LINC RNA | ENSG00000171557 | mRNA |
| ENSG00000254777          | LINC RNA | ENSG00000171557 | mRNA |
| ENSG00000260197          | LINC RNA | ENSG00000171557 | mRNA |
| ENSG00000272068          | LINC RNA | ENSG00000171557 | mRNA |
| ENSG00000272304          | LINC RNA | ENSG00000171557 | mRNA |
| ENSG00000273381          | LINC RNA | ENSG00000171557 | mRNA |
| chr11:82822155-82828239  | CIRC RNA | ENSG00000170689 | mRNA |
| chr5:142258938-142311690 | CIRC RNA | ENSG00000170689 | mRNA |
| ENSG00000132204          | LINC RNA | ENSG00000170689 | mRNA |
| ENSG00000214039          | LINC RNA | ENSG00000170689 | mRNA |
| ENSG00000225689          | LINC RNA | ENSG00000170689 | mRNA |
| ENSG00000226816          | LINC RNA | ENSG00000170689 | mRNA |
| ENSG00000229459          | LINC RNA | ENSG00000170689 | mRNA |
| ENSG00000235056          | LINC RNA | ENSG00000170689 | mRNA |
| ENSG00000236924          | LINC RNA | ENSG00000170689 | mRNA |
| ENSG00000258548          | LINC RNA | ENSG00000170689 | mRNA |
| ENSG00000266869          | LINC RNA | ENSG00000170689 | mRNA |
| ENSG00000267804          | LINC RNA | ENSG00000170689 | mRNA |
| ENSG00000269976          | LINC RNA | ENSG00000170689 | mRNA |
| ENSG00000272312          | LINC RNA | ENSG00000170689 | mRNA |
| hsa-miR-203a-3p          | MICRORNA | ENSG00000170689 | mRNA |
| hsa-miR-203b-3p          | MICRORNA | ENSG00000170689 | mRNA |
| hsa-miR-3182             | MICRORNA | ENSG00000170689 | mRNA |
| hsa-miR-873-5p           | MICRORNA | ENSG00000170689 | mRNA |
| chr3:138289159-138291756 | CIRC RNA | ENSG00000167741 | mRNA |
| chr4:87685745-87689129   | CIRC RNA | ENSG00000167741 | mRNA |
| chr5:94244955-94259726   | CIRC RNA | ENSG00000167741 | mRNA |
| ENSG00000189149          | LINC RNA | ENSG00000167741 | mRNA |
| ENSG00000224652          | LINC RNA | ENSG00000167741 | mRNA |
| ENSG00000227066          | LINC RNA | ENSG00000167741 | mRNA |
| ENSG00000231204          | LINC RNA | ENSG00000167741 | mRNA |
| ENSG00000231437          | LINC RNA | ENSG00000167741 | mRNA |
| ENSG00000233005          | LINC RNA | ENSG00000167741 | mRNA |
| ENSG00000236028          | LINC RNA | ENSG00000167741 | mRNA |
| ENSG00000248673          | LINC RNA | ENSG00000167741 | mRNA |
| ENSG00000248942          | LINC RNA | ENSG00000167741 | mRNA |
| ENSG00000250446          | LINC RNA | ENSG00000167741 | mRNA |
| ENSG00000253266          | LINC RNA | ENSG00000167741 | mRNA |
| ENSG00000256124          | LINC RNA | ENSG00000167741 | mRNA |
| ENSG00000257060          | LINC RNA | ENSG00000167741 | mRNA |
| ENSG00000258882          | LINC RNA | ENSG00000167741 | mRNA |
| ENSG00000260725          | LINC RNA | ENSG00000167741 | mRNA |
| ENSG00000261307          | LINC RNA | ENSG00000167741 | mRNA |

|                          |          |                 |      |
|--------------------------|----------|-----------------|------|
| ENSG00000264026          | LINC RNA | ENSG00000167741 | mRNA |
| ENSG00000264954          | LINC RNA | ENSG00000167741 | mRNA |
| ENSG00000272142          | LINC RNA | ENSG00000167741 | mRNA |
| ENSG00000272796          | LINC RNA | ENSG00000167741 | mRNA |
| ENSG00000272829          | LINC RNA | ENSG00000167741 | mRNA |
| hsa-miR-1304-3p          | MICRORNA | ENSG00000167741 | mRNA |
| hsa-miR-136-5p           | MICRORNA | ENSG00000167741 | mRNA |
| hsa-miR-300              | MICRORNA | ENSG00000167741 | mRNA |
| hsa-miR-376a-5p          | MICRORNA | ENSG00000167741 | mRNA |
| hsa-miR-449b-5p          | MICRORNA | ENSG00000167741 | mRNA |
| hsa-miR-542-3p           | MICRORNA | ENSG00000167741 | mRNA |
| hsa-miR-548b-3p          | MICRORNA | ENSG00000167741 | mRNA |
| hsa-miR-551a             | MICRORNA | ENSG00000167741 | mRNA |
| hsa-miR-6811-5p          | MICRORNA | ENSG00000167741 | mRNA |
| chr10:98303832-98336586  | CIRC RNA | ENSG00000167080 | mRNA |
| ENSG00000231483          | LINC RNA | ENSG00000167080 | mRNA |
| ENSG00000237726          | LINC RNA | ENSG00000167080 | mRNA |
| ENSG00000242147          | LINC RNA | ENSG00000167080 | mRNA |
| ENSG00000254777          | LINC RNA | ENSG00000167080 | mRNA |
| ENSG00000260197          | LINC RNA | ENSG00000167080 | mRNA |
| ENSG00000272068          | LINC RNA | ENSG00000167080 | mRNA |
| ENSG00000272304          | LINC RNA | ENSG00000167080 | mRNA |
| ENSG00000273381          | LINC RNA | ENSG00000167080 | mRNA |
| chr3:138289159-138291756 | CIRC RNA | ENSG00000166823 | mRNA |
| chr4:87685745-87689129   | CIRC RNA | ENSG00000166823 | mRNA |
| chr5:94244955-94259726   | CIRC RNA | ENSG00000166823 | mRNA |
| chr6:73005640-73043538   | CIRC RNA | ENSG00000166823 | mRNA |
| ENSG00000189149          | LINC RNA | ENSG00000166823 | mRNA |
| ENSG00000224652          | LINC RNA | ENSG00000166823 | mRNA |
| ENSG00000227066          | LINC RNA | ENSG00000166823 | mRNA |
| ENSG00000231204          | LINC RNA | ENSG00000166823 | mRNA |
| ENSG00000231437          | LINC RNA | ENSG00000166823 | mRNA |
| ENSG00000233005          | LINC RNA | ENSG00000166823 | mRNA |
| ENSG00000236028          | LINC RNA | ENSG00000166823 | mRNA |
| ENSG00000237438          | LINC RNA | ENSG00000166823 | mRNA |
| ENSG00000248673          | LINC RNA | ENSG00000166823 | mRNA |
| ENSG00000248942          | LINC RNA | ENSG00000166823 | mRNA |
| ENSG00000249574          | LINC RNA | ENSG00000166823 | mRNA |
| ENSG00000250446          | LINC RNA | ENSG00000166823 | mRNA |
| ENSG00000253266          | LINC RNA | ENSG00000166823 | mRNA |
| ENSG00000256124          | LINC RNA | ENSG00000166823 | mRNA |
| ENSG00000257060          | LINC RNA | ENSG00000166823 | mRNA |
| ENSG00000258882          | LINC RNA | ENSG00000166823 | mRNA |
| ENSG00000260725          | LINC RNA | ENSG00000166823 | mRNA |
| ENSG00000261307          | LINC RNA | ENSG00000166823 | mRNA |
| ENSG00000264954          | LINC RNA | ENSG00000166823 | mRNA |
| ENSG00000272142          | LINC RNA | ENSG00000166823 | mRNA |
| ENSG00000272829          | LINC RNA | ENSG00000166823 | mRNA |
| hsa-miR-107              | MICRORNA | ENSG00000166823 | mRNA |
| hsa-miR-136-5p           | MICRORNA | ENSG00000166823 | mRNA |
| hsa-miR-300              | MICRORNA | ENSG00000166823 | mRNA |
| hsa-miR-376a-5p          | MICRORNA | ENSG00000166823 | mRNA |
| hsa-miR-449b-5p          | MICRORNA | ENSG00000166823 | mRNA |
| hsa-miR-548b-3p          | MICRORNA | ENSG00000166823 | mRNA |

|                           |          |                 |      |
|---------------------------|----------|-----------------|------|
| hsa-miR-551a              | MICRORNA | ENSG00000166823 | mRNA |
| chr2:113057425-113082774  | CIRCRNA  | ENSG00000165246 | mRNA |
| chr8:141595218-141616013  | CIRCRNA  | ENSG00000165246 | mRNA |
| ENSG00000223749           | LINCRNA  | ENSG00000165246 | mRNA |
| ENSG00000223956           | LINCRNA  | ENSG00000165246 | mRNA |
| ENSG00000229236           | LINCRNA  | ENSG00000165246 | mRNA |
| ENSG00000231535           | LINCRNA  | ENSG00000165246 | mRNA |
| ENSG00000236318           | LINCRNA  | ENSG00000165246 | mRNA |
| ENSG00000257826           | LINCRNA  | ENSG00000165246 | mRNA |
| ENSG00000267804           | LINCRNA  | ENSG00000165246 | mRNA |
| ENSG00000269976           | LINCRNA  | ENSG00000165246 | mRNA |
| ENSG00000271788           | LINCRNA  | ENSG00000165246 | mRNA |
| ENSG00000272312           | LINCRNA  | ENSG00000165246 | mRNA |
| hsa-miR-6811-5p           | MICRORNA | ENSG00000165246 | mRNA |
| hsa-miR-873-5p            | MICRORNA | ENSG00000165246 | mRNA |
| chr11:115080293-115111140 | CIRCRNA  | ENSG00000164265 | mRNA |
| chr12:40696590-40697936   | CIRCRNA  | ENSG00000164265 | mRNA |
| chr3:193177459-193179817  | CIRCRNA  | ENSG00000164265 | mRNA |
| chr6:29913228-29977144    | CIRCRNA  | ENSG00000164265 | mRNA |
| ENSG00000227308           | LINCRNA  | ENSG00000164265 | mRNA |
| ENSG00000231901           | LINCRNA  | ENSG00000164265 | mRNA |
| ENSG00000236393           | LINCRNA  | ENSG00000164265 | mRNA |
| ENSG00000242104           | LINCRNA  | ENSG00000164265 | mRNA |
| ENSG00000256969           | LINCRNA  | ENSG00000164265 | mRNA |
| ENSG00000257924           | LINCRNA  | ENSG00000164265 | mRNA |
| ENSG00000257986           | LINCRNA  | ENSG00000164265 | mRNA |
| ENSG00000258088           | LINCRNA  | ENSG00000164265 | mRNA |
| ENSG00000259198           | LINCRNA  | ENSG00000164265 | mRNA |
| ENSG00000267761           | LINCRNA  | ENSG00000164265 | mRNA |
| hsa-miR-1277-3p           | MICRORNA | ENSG00000164265 | mRNA |
| hsa-miR-3065-5p           | MICRORNA | ENSG00000164265 | mRNA |
| hsa-miR-34b-5p            | MICRORNA | ENSG00000164265 | mRNA |
| hsa-miR-34c-5p            | MICRORNA | ENSG00000164265 | mRNA |
| hsa-miR-424-3p            | MICRORNA | ENSG00000164265 | mRNA |
| hsa-miR-449c-5p           | MICRORNA | ENSG00000164265 | mRNA |
| hsa-miR-4679              | MICRORNA | ENSG00000164265 | mRNA |
| hsa-miR-542-5p            | MICRORNA | ENSG00000164265 | mRNA |
| hsa-miR-548b-5p           | MICRORNA | ENSG00000164265 | mRNA |
| chr3:138289159-138291756  | CIRCRNA  | ENSG00000151882 | mRNA |
| chr4:87685745-87689129    | CIRCRNA  | ENSG00000151882 | mRNA |
| chr5:94244955-94259726    | CIRCRNA  | ENSG00000151882 | mRNA |
| ENSG00000189149           | LINCRNA  | ENSG00000151882 | mRNA |
| ENSG00000224652           | LINCRNA  | ENSG00000151882 | mRNA |
| ENSG00000227066           | LINCRNA  | ENSG00000151882 | mRNA |
| ENSG00000231204           | LINCRNA  | ENSG00000151882 | mRNA |
| ENSG00000231437           | LINCRNA  | ENSG00000151882 | mRNA |
| ENSG00000233005           | LINCRNA  | ENSG00000151882 | mRNA |
| ENSG00000236028           | LINCRNA  | ENSG00000151882 | mRNA |
| ENSG00000248673           | LINCRNA  | ENSG00000151882 | mRNA |
| ENSG00000248942           | LINCRNA  | ENSG00000151882 | mRNA |
| ENSG00000249574           | LINCRNA  | ENSG00000151882 | mRNA |
| ENSG00000250446           | LINCRNA  | ENSG00000151882 | mRNA |
| ENSG00000253266           | LINCRNA  | ENSG00000151882 | mRNA |
| ENSG00000256124           | LINCRNA  | ENSG00000151882 | mRNA |

|                          |          |                 |      |
|--------------------------|----------|-----------------|------|
| ENSG00000257060          | LINC RNA | ENSG00000151882 | mRNA |
| ENSG00000258882          | LINC RNA | ENSG00000151882 | mRNA |
| ENSG00000260725          | LINC RNA | ENSG00000151882 | mRNA |
| ENSG00000261307          | LINC RNA | ENSG00000151882 | mRNA |
| ENSG00000264026          | LINC RNA | ENSG00000151882 | mRNA |
| ENSG00000264954          | LINC RNA | ENSG00000151882 | mRNA |
| ENSG00000272142          | LINC RNA | ENSG00000151882 | mRNA |
| ENSG00000272829          | LINC RNA | ENSG00000151882 | mRNA |
| hsa-miR-136-5p           | MIC RNA  | ENSG00000151882 | mRNA |
| hsa-miR-300              | MIC RNA  | ENSG00000151882 | mRNA |
| hsa-miR-376a-5p          | MIC RNA  | ENSG00000151882 | mRNA |
| hsa-miR-449b-5p          | MIC RNA  | ENSG00000151882 | mRNA |
| hsa-miR-542-3p           | MIC RNA  | ENSG00000151882 | mRNA |
| hsa-miR-548b-3p          | MIC RNA  | ENSG00000151882 | mRNA |
| hsa-miR-551a             | MIC RNA  | ENSG00000151882 | mRNA |
| hsa-miR-6811-5p          | MIC RNA  | ENSG00000151882 | mRNA |
| chr3:193177459-193179817 | CIRC RNA | ENSG00000151364 | mRNA |
| chr6:29913228-29977144   | CIRC RNA | ENSG00000151364 | mRNA |
| ENSG00000203635          | LINC RNA | ENSG00000151364 | mRNA |
| ENSG00000223486          | LINC RNA | ENSG00000151364 | mRNA |
| ENSG00000223749          | LINC RNA | ENSG00000151364 | mRNA |
| ENSG00000223956          | LINC RNA | ENSG00000151364 | mRNA |
| ENSG00000224259          | LINC RNA | ENSG00000151364 | mRNA |
| ENSG00000225490          | LINC RNA | ENSG00000151364 | mRNA |
| ENSG00000229236          | LINC RNA | ENSG00000151364 | mRNA |
| ENSG00000233410          | LINC RNA | ENSG00000151364 | mRNA |
| ENSG00000236318          | LINC RNA | ENSG00000151364 | mRNA |
| ENSG00000249378          | LINC RNA | ENSG00000151364 | mRNA |
| ENSG00000257060          | LINC RNA | ENSG00000151364 | mRNA |
| ENSG00000257826          | LINC RNA | ENSG00000151364 | mRNA |
| ENSG00000257924          | LINC RNA | ENSG00000151364 | mRNA |
| ENSG00000263627          | LINC RNA | ENSG00000151364 | mRNA |
| ENSG00000264026          | LINC RNA | ENSG00000151364 | mRNA |
| ENSG00000267761          | LINC RNA | ENSG00000151364 | mRNA |
| ENSG00000271815          | LINC RNA | ENSG00000151364 | mRNA |
| ENSG00000272796          | LINC RNA | ENSG00000151364 | mRNA |
| hsa-miR-1304-3p          | MIC RNA  | ENSG00000151364 | mRNA |
| hsa-miR-301b-3p          | MIC RNA  | ENSG00000151364 | mRNA |
| hsa-miR-3065-5p          | MIC RNA  | ENSG00000151364 | mRNA |
| hsa-miR-3614-3p          | MIC RNA  | ENSG00000151364 | mRNA |
| hsa-miR-449a             | MIC RNA  | ENSG00000151364 | mRNA |
| hsa-miR-449c-5p          | MIC RNA  | ENSG00000151364 | mRNA |
| hsa-miR-4679             | MIC RNA  | ENSG00000151364 | mRNA |
| hsa-miR-4709-3p          | MIC RNA  | ENSG00000151364 | mRNA |
| hsa-miR-4709-5p          | MIC RNA  | ENSG00000151364 | mRNA |
| hsa-miR-548b-5p          | MIC RNA  | ENSG00000151364 | mRNA |
| hsa-miR-6811-5p          | MIC RNA  | ENSG00000151364 | mRNA |
| chr3:138289159-138291756 | CIRC RNA | ENSG00000149328 | mRNA |
| chr4:87685745-87689129   | CIRC RNA | ENSG00000149328 | mRNA |
| chr5:94244955-94259726   | CIRC RNA | ENSG00000149328 | mRNA |
| chr6:73005640-73043538   | CIRC RNA | ENSG00000149328 | mRNA |
| ENSG00000189149          | LINC RNA | ENSG00000149328 | mRNA |
| ENSG00000224652          | LINC RNA | ENSG00000149328 | mRNA |
| ENSG00000227066          | LINC RNA | ENSG00000149328 | mRNA |

|                          |          |                 |      |
|--------------------------|----------|-----------------|------|
| ENSG00000231204          | LINC RNA | ENSG00000149328 | mRNA |
| ENSG00000231437          | LINC RNA | ENSG00000149328 | mRNA |
| ENSG00000233005          | LINC RNA | ENSG00000149328 | mRNA |
| ENSG00000236028          | LINC RNA | ENSG00000149328 | mRNA |
| ENSG00000237438          | LINC RNA | ENSG00000149328 | mRNA |
| ENSG00000248673          | LINC RNA | ENSG00000149328 | mRNA |
| ENSG00000248942          | LINC RNA | ENSG00000149328 | mRNA |
| ENSG00000249574          | LINC RNA | ENSG00000149328 | mRNA |
| ENSG00000250446          | LINC RNA | ENSG00000149328 | mRNA |
| ENSG00000253266          | LINC RNA | ENSG00000149328 | mRNA |
| ENSG00000256124          | LINC RNA | ENSG00000149328 | mRNA |
| ENSG00000257060          | LINC RNA | ENSG00000149328 | mRNA |
| ENSG00000258882          | LINC RNA | ENSG00000149328 | mRNA |
| ENSG00000260725          | LINC RNA | ENSG00000149328 | mRNA |
| ENSG00000261307          | LINC RNA | ENSG00000149328 | mRNA |
| ENSG00000264954          | LINC RNA | ENSG00000149328 | mRNA |
| ENSG00000272142          | LINC RNA | ENSG00000149328 | mRNA |
| ENSG00000272829          | LINC RNA | ENSG00000149328 | mRNA |
| hsa-miR-136-5p           | MIC RNA  | ENSG00000149328 | mRNA |
| hsa-miR-300              | MIC RNA  | ENSG00000149328 | mRNA |
| hsa-miR-376a-5p          | MIC RNA  | ENSG00000149328 | mRNA |
| hsa-miR-449b-5p          | MIC RNA  | ENSG00000149328 | mRNA |
| hsa-miR-542-3p           | MIC RNA  | ENSG00000149328 | mRNA |
| hsa-miR-548b-3p          | MIC RNA  | ENSG00000149328 | mRNA |
| hsa-miR-551a             | MIC RNA  | ENSG00000149328 | mRNA |
| hsa-miR-6811-5p          | MIC RNA  | ENSG00000149328 | mRNA |
| chr10:98303832-98336586  | CIRC RNA | ENSG00000145920 | mRNA |
| ENSG00000231483          | LINC RNA | ENSG00000145920 | mRNA |
| ENSG00000237726          | LINC RNA | ENSG00000145920 | mRNA |
| ENSG00000242147          | LINC RNA | ENSG00000145920 | mRNA |
| ENSG00000254777          | LINC RNA | ENSG00000145920 | mRNA |
| ENSG00000260197          | LINC RNA | ENSG00000145920 | mRNA |
| ENSG00000272068          | LINC RNA | ENSG00000145920 | mRNA |
| ENSG00000272304          | LINC RNA | ENSG00000145920 | mRNA |
| ENSG00000273381          | LINC RNA | ENSG00000145920 | mRNA |
| ENSG00000223573          | LINC RNA | ENSG00000145850 | mRNA |
| ENSG00000225278          | LINC RNA | ENSG00000145850 | mRNA |
| ENSG00000225490          | LINC RNA | ENSG00000145850 | mRNA |
| ENSG00000259887          | LINC RNA | ENSG00000145850 | mRNA |
| ENSG00000271815          | LINC RNA | ENSG00000145850 | mRNA |
| chr3:193177459-193179817 | CIRC RNA | ENSG00000144063 | mRNA |
| chr6:29913228-29977144   | CIRC RNA | ENSG00000144063 | mRNA |
| ENSG00000203635          | LINC RNA | ENSG00000144063 | mRNA |
| ENSG00000223486          | LINC RNA | ENSG00000144063 | mRNA |
| ENSG00000223749          | LINC RNA | ENSG00000144063 | mRNA |
| ENSG00000223956          | LINC RNA | ENSG00000144063 | mRNA |
| ENSG00000224259          | LINC RNA | ENSG00000144063 | mRNA |
| ENSG00000225490          | LINC RNA | ENSG00000144063 | mRNA |
| ENSG00000227308          | LINC RNA | ENSG00000144063 | mRNA |
| ENSG00000229236          | LINC RNA | ENSG00000144063 | mRNA |
| ENSG00000233410          | LINC RNA | ENSG00000144063 | mRNA |
| ENSG00000236318          | LINC RNA | ENSG00000144063 | mRNA |
| ENSG00000249378          | LINC RNA | ENSG00000144063 | mRNA |
| ENSG00000256969          | LINC RNA | ENSG00000144063 | mRNA |

|                          |          |                 |      |
|--------------------------|----------|-----------------|------|
| ENSG00000257060          | LINC RNA | ENSG00000144063 | mRNA |
| ENSG00000257826          | LINC RNA | ENSG00000144063 | mRNA |
| ENSG00000257924          | LINC RNA | ENSG00000144063 | mRNA |
| ENSG00000263627          | LINC RNA | ENSG00000144063 | mRNA |
| ENSG00000264026          | LINC RNA | ENSG00000144063 | mRNA |
| ENSG00000267761          | LINC RNA | ENSG00000144063 | mRNA |
| ENSG00000271815          | LINC RNA | ENSG00000144063 | mRNA |
| ENSG00000272796          | LINC RNA | ENSG00000144063 | mRNA |
| hsa-miR-1304-3p          | MIC RNA  | ENSG00000144063 | mRNA |
| hsa-miR-301b-3p          | MIC RNA  | ENSG00000144063 | mRNA |
| hsa-miR-3065-5p          | MIC RNA  | ENSG00000144063 | mRNA |
| hsa-miR-3614-3p          | MIC RNA  | ENSG00000144063 | mRNA |
| hsa-miR-449a             | MIC RNA  | ENSG00000144063 | mRNA |
| hsa-miR-449c-5p          | MIC RNA  | ENSG00000144063 | mRNA |
| hsa-miR-4679             | MIC RNA  | ENSG00000144063 | mRNA |
| hsa-miR-4709-3p          | MIC RNA  | ENSG00000144063 | mRNA |
| hsa-miR-4709-5p          | MIC RNA  | ENSG00000144063 | mRNA |
| hsa-miR-548b-5p          | MIC RNA  | ENSG00000144063 | mRNA |
| hsa-miR-6811-5p          | MIC RNA  | ENSG00000144063 | mRNA |
| chr3:138289159-138291756 | CIRC RNA | ENSG00000142319 | mRNA |
| chr4:87685745-87689129   | CIRC RNA | ENSG00000142319 | mRNA |
| chr5:94244955-94259726   | CIRC RNA | ENSG00000142319 | mRNA |
| chr6:73005640-73043538   | CIRC RNA | ENSG00000142319 | mRNA |
| ENSG00000189149          | LINC RNA | ENSG00000142319 | mRNA |
| ENSG00000224652          | LINC RNA | ENSG00000142319 | mRNA |
| ENSG00000227066          | LINC RNA | ENSG00000142319 | mRNA |
| ENSG00000231204          | LINC RNA | ENSG00000142319 | mRNA |
| ENSG00000231437          | LINC RNA | ENSG00000142319 | mRNA |
| ENSG00000233005          | LINC RNA | ENSG00000142319 | mRNA |
| ENSG00000236028          | LINC RNA | ENSG00000142319 | mRNA |
| ENSG00000237438          | LINC RNA | ENSG00000142319 | mRNA |
| ENSG00000248673          | LINC RNA | ENSG00000142319 | mRNA |
| ENSG00000248942          | LINC RNA | ENSG00000142319 | mRNA |
| ENSG00000249574          | LINC RNA | ENSG00000142319 | mRNA |
| ENSG00000250446          | LINC RNA | ENSG00000142319 | mRNA |
| ENSG00000253266          | LINC RNA | ENSG00000142319 | mRNA |
| ENSG00000256124          | LINC RNA | ENSG00000142319 | mRNA |
| ENSG00000258882          | LINC RNA | ENSG00000142319 | mRNA |
| ENSG00000260725          | LINC RNA | ENSG00000142319 | mRNA |
| ENSG00000261307          | LINC RNA | ENSG00000142319 | mRNA |
| ENSG00000264954          | LINC RNA | ENSG00000142319 | mRNA |
| ENSG00000272142          | LINC RNA | ENSG00000142319 | mRNA |
| ENSG00000272829          | LINC RNA | ENSG00000142319 | mRNA |
| hsa-miR-136-5p           | MIC RNA  | ENSG00000142319 | mRNA |
| hsa-miR-300              | MIC RNA  | ENSG00000142319 | mRNA |
| hsa-miR-376a-5p          | MIC RNA  | ENSG00000142319 | mRNA |
| hsa-miR-449b-5p          | MIC RNA  | ENSG00000142319 | mRNA |
| hsa-miR-548b-3p          | MIC RNA  | ENSG00000142319 | mRNA |
| hsa-miR-551a             | MIC RNA  | ENSG00000142319 | mRNA |
| chr3:138289159-138291756 | CIRC RNA | ENSG00000137975 | mRNA |
| chr4:87685745-87689129   | CIRC RNA | ENSG00000137975 | mRNA |
| chr5:94244955-94259726   | CIRC RNA | ENSG00000137975 | mRNA |
| chr6:73005640-73043538   | CIRC RNA | ENSG00000137975 | mRNA |
| ENSG00000189149          | LINC RNA | ENSG00000137975 | mRNA |

|                          |          |                 |      |
|--------------------------|----------|-----------------|------|
| ENSG00000224652          | LINC RNA | ENSG00000137975 | mRNA |
| ENSG00000227066          | LINC RNA | ENSG00000137975 | mRNA |
| ENSG00000231204          | LINC RNA | ENSG00000137975 | mRNA |
| ENSG00000231437          | LINC RNA | ENSG00000137975 | mRNA |
| ENSG00000233005          | LINC RNA | ENSG00000137975 | mRNA |
| ENSG00000236028          | LINC RNA | ENSG00000137975 | mRNA |
| ENSG00000237438          | LINC RNA | ENSG00000137975 | mRNA |
| ENSG00000248673          | LINC RNA | ENSG00000137975 | mRNA |
| ENSG00000248942          | LINC RNA | ENSG00000137975 | mRNA |
| ENSG00000249574          | LINC RNA | ENSG00000137975 | mRNA |
| ENSG00000250446          | LINC RNA | ENSG00000137975 | mRNA |
| ENSG00000253266          | LINC RNA | ENSG00000137975 | mRNA |
| ENSG00000256124          | LINC RNA | ENSG00000137975 | mRNA |
| ENSG00000258882          | LINC RNA | ENSG00000137975 | mRNA |
| ENSG00000260725          | LINC RNA | ENSG00000137975 | mRNA |
| ENSG00000264954          | LINC RNA | ENSG00000137975 | mRNA |
| ENSG00000272142          | LINC RNA | ENSG00000137975 | mRNA |
| ENSG00000272829          | LINC RNA | ENSG00000137975 | mRNA |
| hsa-miR-136-5p           | MIC RNA  | ENSG00000137975 | mRNA |
| hsa-miR-300              | MIC RNA  | ENSG00000137975 | mRNA |
| hsa-miR-376a-5p          | MIC RNA  | ENSG00000137975 | mRNA |
| hsa-miR-449b-5p          | MIC RNA  | ENSG00000137975 | mRNA |
| hsa-miR-548b-3p          | MIC RNA  | ENSG00000137975 | mRNA |
| hsa-miR-551a             | MIC RNA  | ENSG00000137975 | mRNA |
| chr11:82822155-82828239  | CIRC RNA | ENSG00000135643 | mRNA |
| chr2:113057425-113082774 | CIRC RNA | ENSG00000135643 | mRNA |
| chr5:142258938-142311690 | CIRC RNA | ENSG00000135643 | mRNA |
| chr8:141595218-141616013 | CIRC RNA | ENSG00000135643 | mRNA |
| ENSG00000204625          | LINC RNA | ENSG00000135643 | mRNA |
| ENSG00000226816          | LINC RNA | ENSG00000135643 | mRNA |
| ENSG00000229459          | LINC RNA | ENSG00000135643 | mRNA |
| ENSG00000231535          | LINC RNA | ENSG00000135643 | mRNA |
| ENSG00000269976          | LINC RNA | ENSG00000135643 | mRNA |
| ENSG00000271788          | LINC RNA | ENSG00000135643 | mRNA |
| hsa-miR-129-2-3p         | MIC RNA  | ENSG00000135643 | mRNA |
| hsa-miR-129-5p           | MIC RNA  | ENSG00000135643 | mRNA |
| chr10:98303832-98336586  | CIRC RNA | ENSG00000134873 | mRNA |
| ENSG00000132204          | LINC RNA | ENSG00000134873 | mRNA |
| ENSG00000214039          | LINC RNA | ENSG00000134873 | mRNA |
| ENSG00000225689          | LINC RNA | ENSG00000134873 | mRNA |
| ENSG00000235056          | LINC RNA | ENSG00000134873 | mRNA |
| ENSG00000236924          | LINC RNA | ENSG00000134873 | mRNA |
| ENSG00000258548          | LINC RNA | ENSG00000134873 | mRNA |
| ENSG00000260197          | LINC RNA | ENSG00000134873 | mRNA |
| ENSG00000266869          | LINC RNA | ENSG00000134873 | mRNA |
| ENSG00000267804          | LINC RNA | ENSG00000134873 | mRNA |
| ENSG00000272312          | LINC RNA | ENSG00000134873 | mRNA |
| hsa-miR-203a-3p          | MIC RNA  | ENSG00000134873 | mRNA |
| hsa-miR-203b-3p          | MIC RNA  | ENSG00000134873 | mRNA |
| hsa-miR-3182             | MIC RNA  | ENSG00000134873 | mRNA |
| hsa-miR-873-5p           | MIC RNA  | ENSG00000134873 | mRNA |
| chr10:98303832-98336586  | CIRC RNA | ENSG00000131002 | mRNA |
| ENSG00000231483          | LINC RNA | ENSG00000131002 | mRNA |
| ENSG00000237726          | LINC RNA | ENSG00000131002 | mRNA |

|                          |          |                 |      |
|--------------------------|----------|-----------------|------|
| ENSG00000242147          | LINC RNA | ENSG00000131002 | mRNA |
| ENSG00000254777          | LINC RNA | ENSG00000131002 | mRNA |
| ENSG00000260197          | LINC RNA | ENSG00000131002 | mRNA |
| ENSG00000272068          | LINC RNA | ENSG00000131002 | mRNA |
| ENSG00000272304          | LINC RNA | ENSG00000131002 | mRNA |
| ENSG00000272312          | LINC RNA | ENSG00000131002 | mRNA |
| ENSG00000273381          | LINC RNA | ENSG00000131002 | mRNA |
| hsa-miR-1304-3p          | MICRORNA | ENSG00000131002 | mRNA |
| chr3:193177459-193179817 | CIRC RNA | ENSG00000130513 | mRNA |
| chr6:29913228-29977144   | CIRC RNA | ENSG00000130513 | mRNA |
| ENSG00000203635          | LINC RNA | ENSG00000130513 | mRNA |
| ENSG00000223486          | LINC RNA | ENSG00000130513 | mRNA |
| ENSG00000223749          | LINC RNA | ENSG00000130513 | mRNA |
| ENSG00000223956          | LINC RNA | ENSG00000130513 | mRNA |
| ENSG00000224259          | LINC RNA | ENSG00000130513 | mRNA |
| ENSG00000225490          | LINC RNA | ENSG00000130513 | mRNA |
| ENSG00000229236          | LINC RNA | ENSG00000130513 | mRNA |
| ENSG00000233410          | LINC RNA | ENSG00000130513 | mRNA |
| ENSG00000236318          | LINC RNA | ENSG00000130513 | mRNA |
| ENSG00000249378          | LINC RNA | ENSG00000130513 | mRNA |
| ENSG00000257060          | LINC RNA | ENSG00000130513 | mRNA |
| ENSG00000257826          | LINC RNA | ENSG00000130513 | mRNA |
| ENSG00000261307          | LINC RNA | ENSG00000130513 | mRNA |
| ENSG00000263627          | LINC RNA | ENSG00000130513 | mRNA |
| ENSG00000264026          | LINC RNA | ENSG00000130513 | mRNA |
| ENSG00000267761          | LINC RNA | ENSG00000130513 | mRNA |
| ENSG00000271815          | LINC RNA | ENSG00000130513 | mRNA |
| ENSG00000272796          | LINC RNA | ENSG00000130513 | mRNA |
| hsa-miR-1304-3p          | MICRORNA | ENSG00000130513 | mRNA |
| hsa-miR-301b-3p          | MICRORNA | ENSG00000130513 | mRNA |
| hsa-miR-3065-5p          | MICRORNA | ENSG00000130513 | mRNA |
| hsa-miR-3614-3p          | MICRORNA | ENSG00000130513 | mRNA |
| hsa-miR-449a             | MICRORNA | ENSG00000130513 | mRNA |
| hsa-miR-449c-5p          | MICRORNA | ENSG00000130513 | mRNA |
| hsa-miR-4679             | MICRORNA | ENSG00000130513 | mRNA |
| hsa-miR-4709-3p          | MICRORNA | ENSG00000130513 | mRNA |
| hsa-miR-4709-5p          | MICRORNA | ENSG00000130513 | mRNA |
| hsa-miR-548b-5p          | MICRORNA | ENSG00000130513 | mRNA |
| hsa-miR-6811-5p          | MICRORNA | ENSG00000130513 | mRNA |
| chr3:67546221-67559327   | CIRC RNA | ENSG00000129824 | mRNA |
| chr8:141595218-141616013 | CIRC RNA | ENSG00000129824 | mRNA |
| chrY:2821949-2829687     | CIRC RNA | ENSG00000129824 | mRNA |
| ENSG00000204625          | LINC RNA | ENSG00000129824 | mRNA |
| ENSG00000223749          | LINC RNA | ENSG00000129824 | mRNA |
| ENSG00000223956          | LINC RNA | ENSG00000129824 | mRNA |
| ENSG00000224259          | LINC RNA | ENSG00000129824 | mRNA |
| ENSG00000225490          | LINC RNA | ENSG00000129824 | mRNA |
| ENSG00000229236          | LINC RNA | ENSG00000129824 | mRNA |
| ENSG00000231535          | LINC RNA | ENSG00000129824 | mRNA |
| ENSG00000233410          | LINC RNA | ENSG00000129824 | mRNA |
| ENSG00000236318          | LINC RNA | ENSG00000129824 | mRNA |
| ENSG00000249378          | LINC RNA | ENSG00000129824 | mRNA |
| ENSG00000257060          | LINC RNA | ENSG00000129824 | mRNA |
| ENSG00000257826          | LINC RNA | ENSG00000129824 | mRNA |



|                          |          |                 |      |
|--------------------------|----------|-----------------|------|
| ENSG00000261307          | LINC RNA | ENSG00000129824 | mRNA |
| ENSG00000264026          | LINC RNA | ENSG00000129824 | mRNA |
| ENSG00000271815          | LINC RNA | ENSG00000129824 | mRNA |
| ENSG00000272796          | LINC RNA | ENSG00000129824 | mRNA |
| hsa-miR-301b-3p          | MICRORNA | ENSG00000129824 | mRNA |
| hsa-miR-3614-3p          | MICRORNA | ENSG00000129824 | mRNA |
| hsa-miR-449a             | MICRORNA | ENSG00000129824 | mRNA |
| hsa-miR-4709-5p          | MICRORNA | ENSG00000129824 | mRNA |
| hsa-miR-542-3p           | MICRORNA | ENSG00000129824 | mRNA |
| hsa-miR-6811-5p          | MICRORNA | ENSG00000129824 | mRNA |
| chr3:67546221-67559327   | CIRC RNA | ENSG00000125968 | mRNA |
| chr8:141595218-141616013 | CIRC RNA | ENSG00000125968 | mRNA |
| chrY:2821949-2829687     | CIRC RNA | ENSG00000125968 | mRNA |
| ENSG00000204625          | LINC RNA | ENSG00000125968 | mRNA |
| ENSG00000223956          | LINC RNA | ENSG00000125968 | mRNA |
| ENSG00000225490          | LINC RNA | ENSG00000125968 | mRNA |
| ENSG00000229236          | LINC RNA | ENSG00000125968 | mRNA |
| ENSG00000231535          | LINC RNA | ENSG00000125968 | mRNA |
| hsa-miR-129-5p           | MICRORNA | ENSG00000125968 | mRNA |
| hsa-miR-301b-3p          | MICRORNA | ENSG00000125968 | mRNA |
| hsa-miR-4732-5p          | MICRORNA | ENSG00000125968 | mRNA |
| hsa-miR-542-3p           | MICRORNA | ENSG00000125968 | mRNA |
| chr3:138289159-138291756 | CIRC RNA | ENSG00000123838 | mRNA |
| chr4:87685745-87689129   | CIRC RNA | ENSG00000123838 | mRNA |
| chr5:94244955-94259726   | CIRC RNA | ENSG00000123838 | mRNA |
| chr6:73005640-73043538   | CIRC RNA | ENSG00000123838 | mRNA |
| ENSG00000189149          | LINC RNA | ENSG00000123838 | mRNA |
| ENSG00000224652          | LINC RNA | ENSG00000123838 | mRNA |
| ENSG00000227066          | LINC RNA | ENSG00000123838 | mRNA |
| ENSG00000231204          | LINC RNA | ENSG00000123838 | mRNA |
| ENSG00000231437          | LINC RNA | ENSG00000123838 | mRNA |
| ENSG00000233005          | LINC RNA | ENSG00000123838 | mRNA |
| ENSG00000236028          | LINC RNA | ENSG00000123838 | mRNA |
| ENSG00000237438          | LINC RNA | ENSG00000123838 | mRNA |
| ENSG00000248673          | LINC RNA | ENSG00000123838 | mRNA |
| ENSG00000248942          | LINC RNA | ENSG00000123838 | mRNA |
| ENSG00000249574          | LINC RNA | ENSG00000123838 | mRNA |
| ENSG00000250446          | LINC RNA | ENSG00000123838 | mRNA |
| ENSG00000253266          | LINC RNA | ENSG00000123838 | mRNA |
| ENSG00000256124          | LINC RNA | ENSG00000123838 | mRNA |
| ENSG00000257060          | LINC RNA | ENSG00000123838 | mRNA |
| ENSG00000258882          | LINC RNA | ENSG00000123838 | mRNA |
| ENSG00000260725          | LINC RNA | ENSG00000123838 | mRNA |
| ENSG00000261307          | LINC RNA | ENSG00000123838 | mRNA |
| ENSG00000264954          | LINC RNA | ENSG00000123838 | mRNA |
| ENSG00000272142          | LINC RNA | ENSG00000123838 | mRNA |
| ENSG00000272829          | LINC RNA | ENSG00000123838 | mRNA |
| hsa-miR-136-5p           | MICRORNA | ENSG00000123838 | mRNA |
| hsa-miR-300              | MICRORNA | ENSG00000123838 | mRNA |
| hsa-miR-376a-5p          | MICRORNA | ENSG00000123838 | mRNA |
| hsa-miR-449b-5p          | MICRORNA | ENSG00000123838 | mRNA |
| hsa-miR-548b-3p          | MICRORNA | ENSG00000123838 | mRNA |
| hsa-miR-551a             | MICRORNA | ENSG00000123838 | mRNA |
| chr3:193177459-193179817 | CIRC RNA | ENSG00000123572 | mRNA |

|                         |          |                 |      |
|-------------------------|----------|-----------------|------|
| chr6:29913228-29977144  | CIRCRNA  | ENSG00000123572 | mRNA |
| ENSG00000223749         | LINC RNA | ENSG00000123572 | mRNA |
| ENSG00000223956         | LINC RNA | ENSG00000123572 | mRNA |
| ENSG00000224259         | LINC RNA | ENSG00000123572 | mRNA |
| ENSG00000225490         | LINC RNA | ENSG00000123572 | mRNA |
| ENSG00000227308         | LINC RNA | ENSG00000123572 | mRNA |
| ENSG00000229236         | LINC RNA | ENSG00000123572 | mRNA |
| ENSG00000231535         | LINC RNA | ENSG00000123572 | mRNA |
| ENSG00000233410         | LINC RNA | ENSG00000123572 | mRNA |
| ENSG00000236318         | LINC RNA | ENSG00000123572 | mRNA |
| ENSG00000249378         | LINC RNA | ENSG00000123572 | mRNA |
| ENSG00000257060         | LINC RNA | ENSG00000123572 | mRNA |
| ENSG00000257826         | LINC RNA | ENSG00000123572 | mRNA |
| ENSG00000263627         | LINC RNA | ENSG00000123572 | mRNA |
| ENSG00000264026         | LINC RNA | ENSG00000123572 | mRNA |
| ENSG00000267761         | LINC RNA | ENSG00000123572 | mRNA |
| ENSG00000271815         | LINC RNA | ENSG00000123572 | mRNA |
| ENSG00000272796         | LINC RNA | ENSG00000123572 | mRNA |
| hsa-miR-1304-3p         | MICRORNA | ENSG00000123572 | mRNA |
| hsa-miR-301b-3p         | MICRORNA | ENSG00000123572 | mRNA |
| hsa-miR-3065-5p         | MICRORNA | ENSG00000123572 | mRNA |
| hsa-miR-3614-3p         | MICRORNA | ENSG00000123572 | mRNA |
| hsa-miR-449a            | MICRORNA | ENSG00000123572 | mRNA |
| hsa-miR-449c-5p         | MICRORNA | ENSG00000123572 | mRNA |
| hsa-miR-4679            | MICRORNA | ENSG00000123572 | mRNA |
| hsa-miR-4709-3p         | MICRORNA | ENSG00000123572 | mRNA |
| hsa-miR-4709-5p         | MICRORNA | ENSG00000123572 | mRNA |
| hsa-miR-548b-5p         | MICRORNA | ENSG00000123572 | mRNA |
| hsa-miR-6811-5p         | MICRORNA | ENSG00000123572 | mRNA |
| chr10:98303832-98336586 | CIRCRNA  | ENSG00000114374 | mRNA |
| ENSG00000223486         | LINC RNA | ENSG00000114374 | mRNA |
| ENSG00000231483         | LINC RNA | ENSG00000114374 | mRNA |
| ENSG00000236682         | LINC RNA | ENSG00000114374 | mRNA |
| ENSG00000237726         | LINC RNA | ENSG00000114374 | mRNA |
| ENSG00000242147         | LINC RNA | ENSG00000114374 | mRNA |
| ENSG00000254777         | LINC RNA | ENSG00000114374 | mRNA |
| ENSG00000260197         | LINC RNA | ENSG00000114374 | mRNA |
| ENSG00000272068         | LINC RNA | ENSG00000114374 | mRNA |
| ENSG00000272304         | LINC RNA | ENSG00000114374 | mRNA |
| ENSG00000272796         | LINC RNA | ENSG00000114374 | mRNA |
| ENSG00000273381         | LINC RNA | ENSG00000114374 | mRNA |
| hsa-miR-1304-3p         | MICRORNA | ENSG00000114374 | mRNA |
| chr10:98303832-98336586 | CIRCRNA  | ENSG00000113249 | mRNA |
| ENSG00000214145         | LINC RNA | ENSG00000113249 | mRNA |
| ENSG00000223414         | LINC RNA | ENSG00000113249 | mRNA |
| ENSG00000226383         | LINC RNA | ENSG00000113249 | mRNA |
| ENSG00000231483         | LINC RNA | ENSG00000113249 | mRNA |
| ENSG00000237726         | LINC RNA | ENSG00000113249 | mRNA |
| ENSG00000242147         | LINC RNA | ENSG00000113249 | mRNA |
| ENSG00000243081         | LINC RNA | ENSG00000113249 | mRNA |
| ENSG00000254777         | LINC RNA | ENSG00000113249 | mRNA |
| ENSG00000260430         | LINC RNA | ENSG00000113249 | mRNA |
| ENSG00000272068         | LINC RNA | ENSG00000113249 | mRNA |
| ENSG00000272304         | LINC RNA | ENSG00000113249 | mRNA |

|                         |          |                 |      |
|-------------------------|----------|-----------------|------|
| ENSG00000273381         | LINC RNA | ENSG00000113249 | mRNA |
| hsa-miR-4488            | MIC RNA  | ENSG00000113249 | mRNA |
| chr10:98303832-98336586 | CIRC RNA | ENSG00000112541 | mRNA |
| ENSG00000214145         | LINC RNA | ENSG00000112541 | mRNA |
| ENSG00000223414         | LINC RNA | ENSG00000112541 | mRNA |
| ENSG00000223486         | LINC RNA | ENSG00000112541 | mRNA |
| ENSG00000226383         | LINC RNA | ENSG00000112541 | mRNA |
| ENSG00000231483         | LINC RNA | ENSG00000112541 | mRNA |
| ENSG00000237726         | LINC RNA | ENSG00000112541 | mRNA |
| ENSG00000242147         | LINC RNA | ENSG00000112541 | mRNA |
| ENSG00000243081         | LINC RNA | ENSG00000112541 | mRNA |
| ENSG00000254777         | LINC RNA | ENSG00000112541 | mRNA |
| ENSG00000260197         | LINC RNA | ENSG00000112541 | mRNA |
| ENSG00000260430         | LINC RNA | ENSG00000112541 | mRNA |
| ENSG00000272068         | LINC RNA | ENSG00000112541 | mRNA |
| ENSG00000272304         | LINC RNA | ENSG00000112541 | mRNA |
| ENSG00000273381         | LINC RNA | ENSG00000112541 | mRNA |
| ENSG00000203635         | LINC RNA | ENSG00000108511 | mRNA |
| ENSG00000223486         | LINC RNA | ENSG00000108511 | mRNA |
| ENSG00000224259         | LINC RNA | ENSG00000108511 | mRNA |
| ENSG00000230663         | LINC RNA | ENSG00000108511 | mRNA |
| ENSG00000231483         | LINC RNA | ENSG00000108511 | mRNA |
| ENSG00000233410         | LINC RNA | ENSG00000108511 | mRNA |
| ENSG00000236318         | LINC RNA | ENSG00000108511 | mRNA |
| ENSG00000237726         | LINC RNA | ENSG00000108511 | mRNA |
| ENSG00000242147         | LINC RNA | ENSG00000108511 | mRNA |
| ENSG00000260197         | LINC RNA | ENSG00000108511 | mRNA |
| ENSG00000263627         | LINC RNA | ENSG00000108511 | mRNA |
| ENSG00000272304         | LINC RNA | ENSG00000108511 | mRNA |
| ENSG00000272796         | LINC RNA | ENSG00000108511 | mRNA |
| ENSG00000273381         | LINC RNA | ENSG00000108511 | mRNA |
| hsa-miR-1304-3p         | MIC RNA  | ENSG00000108511 | mRNA |
| chr10:98303832-98336586 | CIRC RNA | ENSG00000101210 | mRNA |
| ENSG00000214145         | LINC RNA | ENSG00000101210 | mRNA |
| ENSG00000223414         | LINC RNA | ENSG00000101210 | mRNA |
| ENSG00000223486         | LINC RNA | ENSG00000101210 | mRNA |
| ENSG00000226383         | LINC RNA | ENSG00000101210 | mRNA |
| ENSG00000231483         | LINC RNA | ENSG00000101210 | mRNA |
| ENSG00000237726         | LINC RNA | ENSG00000101210 | mRNA |
| ENSG00000242147         | LINC RNA | ENSG00000101210 | mRNA |
| ENSG00000243081         | LINC RNA | ENSG00000101210 | mRNA |
| ENSG00000254777         | LINC RNA | ENSG00000101210 | mRNA |
| ENSG00000260430         | LINC RNA | ENSG00000101210 | mRNA |
| ENSG00000272068         | LINC RNA | ENSG00000101210 | mRNA |
| ENSG00000272304         | LINC RNA | ENSG00000101210 | mRNA |
| ENSG00000273381         | LINC RNA | ENSG00000101210 | mRNA |
| hsa-miR-4488            | MIC RNA  | ENSG00000101210 | mRNA |
| chr10:98303832-98336586 | CIRC RNA | ENSG00000101076 | mRNA |
| ENSG00000231483         | LINC RNA | ENSG00000101076 | mRNA |
| ENSG00000237726         | LINC RNA | ENSG00000101076 | mRNA |
| ENSG00000242147         | LINC RNA | ENSG00000101076 | mRNA |
| ENSG00000254777         | LINC RNA | ENSG00000101076 | mRNA |
| ENSG00000260197         | LINC RNA | ENSG00000101076 | mRNA |
| ENSG00000272068         | LINC RNA | ENSG00000101076 | mRNA |

|                          |          |                 |      |
|--------------------------|----------|-----------------|------|
| ENSG00000272304          | LINC RNA | ENSG00000101076 | mRNA |
| ENSG00000273381          | LINC RNA | ENSG00000101076 | mRNA |
| hsa-miR-1304-3p          | MICRORNA | ENSG00000101076 | mRNA |
| chr3:138289159-138291756 | CIRC RNA | ENSG00000099998 | mRNA |
| chr4:87685745-87689129   | CIRC RNA | ENSG00000099998 | mRNA |
| chr5:94244955-94259726   | CIRC RNA | ENSG00000099998 | mRNA |
| ENSG00000189149          | LINC RNA | ENSG00000099998 | mRNA |
| ENSG00000224652          | LINC RNA | ENSG00000099998 | mRNA |
| ENSG00000227066          | LINC RNA | ENSG00000099998 | mRNA |
| ENSG00000231204          | LINC RNA | ENSG00000099998 | mRNA |
| ENSG00000231437          | LINC RNA | ENSG00000099998 | mRNA |
| ENSG00000233005          | LINC RNA | ENSG00000099998 | mRNA |
| ENSG00000236028          | LINC RNA | ENSG00000099998 | mRNA |
| ENSG00000248673          | LINC RNA | ENSG00000099998 | mRNA |
| ENSG00000248942          | LINC RNA | ENSG00000099998 | mRNA |
| ENSG00000249574          | LINC RNA | ENSG00000099998 | mRNA |
| ENSG00000250446          | LINC RNA | ENSG00000099998 | mRNA |
| ENSG00000253266          | LINC RNA | ENSG00000099998 | mRNA |
| ENSG00000256124          | LINC RNA | ENSG00000099998 | mRNA |
| ENSG00000257060          | LINC RNA | ENSG00000099998 | mRNA |
| ENSG00000258882          | LINC RNA | ENSG00000099998 | mRNA |
| ENSG00000260725          | LINC RNA | ENSG00000099998 | mRNA |
| ENSG00000261307          | LINC RNA | ENSG00000099998 | mRNA |
| ENSG00000264026          | LINC RNA | ENSG00000099998 | mRNA |
| ENSG00000264954          | LINC RNA | ENSG00000099998 | mRNA |
| ENSG00000272142          | LINC RNA | ENSG00000099998 | mRNA |
| ENSG00000272829          | LINC RNA | ENSG00000099998 | mRNA |
| hsa-miR-136-5p           | MICRORNA | ENSG00000099998 | mRNA |
| hsa-miR-300              | MICRORNA | ENSG00000099998 | mRNA |
| hsa-miR-376a-5p          | MICRORNA | ENSG00000099998 | mRNA |
| hsa-miR-449b-5p          | MICRORNA | ENSG00000099998 | mRNA |
| hsa-miR-542-3p           | MICRORNA | ENSG00000099998 | mRNA |
| hsa-miR-548b-3p          | MICRORNA | ENSG00000099998 | mRNA |
| hsa-miR-551a             | MICRORNA | ENSG00000099998 | mRNA |
| hsa-miR-6811-5p          | MICRORNA | ENSG00000099998 | mRNA |
| chr2:113057425-113082774 | CIRC RNA | ENSG00000099812 | mRNA |
| chr8:141595218-141616013 | CIRC RNA | ENSG00000099812 | mRNA |
| ENSG00000204625          | LINC RNA | ENSG00000099812 | mRNA |
| ENSG00000223749          | LINC RNA | ENSG00000099812 | mRNA |
| ENSG00000223956          | LINC RNA | ENSG00000099812 | mRNA |
| ENSG00000224259          | LINC RNA | ENSG00000099812 | mRNA |
| ENSG00000229236          | LINC RNA | ENSG00000099812 | mRNA |
| ENSG00000231535          | LINC RNA | ENSG00000099812 | mRNA |
| ENSG00000233410          | LINC RNA | ENSG00000099812 | mRNA |
| ENSG00000236318          | LINC RNA | ENSG00000099812 | mRNA |
| ENSG00000249378          | LINC RNA | ENSG00000099812 | mRNA |
| ENSG00000257060          | LINC RNA | ENSG00000099812 | mRNA |
| ENSG00000257826          | LINC RNA | ENSG00000099812 | mRNA |
| ENSG00000264026          | LINC RNA | ENSG00000099812 | mRNA |
| ENSG00000272796          | LINC RNA | ENSG00000099812 | mRNA |
| hsa-miR-301b-3p          | MICRORNA | ENSG00000099812 | mRNA |
| hsa-miR-542-3p           | MICRORNA | ENSG00000099812 | mRNA |
| hsa-miR-6811-5p          | MICRORNA | ENSG00000099812 | mRNA |
| chr3:67546221-67559327   | CIRC RNA | ENSG00000099725 | mRNA |

|                          |          |                 |      |
|--------------------------|----------|-----------------|------|
| chr8:141595218-141616013 | CIRCRNA  | ENSG00000099725 | mRNA |
| chrY:2821949-2829687     | CIRCRNA  | ENSG00000099725 | mRNA |
| ENSG00000204625          | LINC RNA | ENSG00000099725 | mRNA |
| ENSG00000223749          | LINC RNA | ENSG00000099725 | mRNA |
| ENSG00000223956          | LINC RNA | ENSG00000099725 | mRNA |
| ENSG00000225490          | LINC RNA | ENSG00000099725 | mRNA |
| ENSG00000229236          | LINC RNA | ENSG00000099725 | mRNA |
| ENSG00000231535          | LINC RNA | ENSG00000099725 | mRNA |
| ENSG00000236318          | LINC RNA | ENSG00000099725 | mRNA |
| ENSG00000249378          | LINC RNA | ENSG00000099725 | mRNA |
| ENSG00000271815          | LINC RNA | ENSG00000099725 | mRNA |
| hsa-miR-129-5p           | MICRORNA | ENSG00000099725 | mRNA |
| hsa-miR-301b-3p          | MICRORNA | ENSG00000099725 | mRNA |
| hsa-miR-4732-5p          | MICRORNA | ENSG00000099725 | mRNA |
| hsa-miR-542-3p           | MICRORNA | ENSG00000099725 | mRNA |
| hsa-miR-6811-5p          | MICRORNA | ENSG00000099725 | mRNA |
| chr10:98303832-98336586  | CIRCRNA  | ENSG00000095539 | mRNA |
| ENSG00000214145          | LINC RNA | ENSG00000095539 | mRNA |
| ENSG00000223414          | LINC RNA | ENSG00000095539 | mRNA |
| ENSG00000223486          | LINC RNA | ENSG00000095539 | mRNA |
| ENSG00000226383          | LINC RNA | ENSG00000095539 | mRNA |
| ENSG00000231483          | LINC RNA | ENSG00000095539 | mRNA |
| ENSG00000237726          | LINC RNA | ENSG00000095539 | mRNA |
| ENSG00000242147          | LINC RNA | ENSG00000095539 | mRNA |
| ENSG00000243081          | LINC RNA | ENSG00000095539 | mRNA |
| ENSG00000254777          | LINC RNA | ENSG00000095539 | mRNA |
| ENSG00000260197          | LINC RNA | ENSG00000095539 | mRNA |
| ENSG00000260430          | LINC RNA | ENSG00000095539 | mRNA |
| ENSG00000272068          | LINC RNA | ENSG00000095539 | mRNA |
| ENSG00000272304          | LINC RNA | ENSG00000095539 | mRNA |
| ENSG00000273381          | LINC RNA | ENSG00000095539 | mRNA |
| hsa-miR-1304-3p          | MICRORNA | ENSG00000095539 | mRNA |
| chr3:138289159-138291756 | CIRCRNA  | ENSG00000086570 | mRNA |
| chr4:87685745-87689129   | CIRCRNA  | ENSG00000086570 | mRNA |
| chr5:94244955-94259726   | CIRCRNA  | ENSG00000086570 | mRNA |
| chr6:73005640-73043538   | CIRCRNA  | ENSG00000086570 | mRNA |
| ENSG00000189149          | LINC RNA | ENSG00000086570 | mRNA |
| ENSG00000224652          | LINC RNA | ENSG00000086570 | mRNA |
| ENSG00000227066          | LINC RNA | ENSG00000086570 | mRNA |
| ENSG00000231204          | LINC RNA | ENSG00000086570 | mRNA |
| ENSG00000231437          | LINC RNA | ENSG00000086570 | mRNA |
| ENSG00000233005          | LINC RNA | ENSG00000086570 | mRNA |
| ENSG00000236028          | LINC RNA | ENSG00000086570 | mRNA |
| ENSG00000237438          | LINC RNA | ENSG00000086570 | mRNA |
| ENSG00000248673          | LINC RNA | ENSG00000086570 | mRNA |
| ENSG00000248942          | LINC RNA | ENSG00000086570 | mRNA |
| ENSG00000249574          | LINC RNA | ENSG00000086570 | mRNA |
| ENSG00000250446          | LINC RNA | ENSG00000086570 | mRNA |
| ENSG00000253266          | LINC RNA | ENSG00000086570 | mRNA |
| ENSG00000256124          | LINC RNA | ENSG00000086570 | mRNA |
| ENSG00000257060          | LINC RNA | ENSG00000086570 | mRNA |
| ENSG00000258882          | LINC RNA | ENSG00000086570 | mRNA |
| ENSG00000260725          | LINC RNA | ENSG00000086570 | mRNA |
| ENSG00000261307          | LINC RNA | ENSG00000086570 | mRNA |

|                          |          |                 |      |
|--------------------------|----------|-----------------|------|
| ENSG00000264954          | LINC RNA | ENSG00000086570 | mRNA |
| ENSG00000272142          | LINC RNA | ENSG00000086570 | mRNA |
| ENSG00000272829          | LINC RNA | ENSG00000086570 | mRNA |
| hsa-miR-136-5p           | MICRORNA | ENSG00000086570 | mRNA |
| hsa-miR-300              | MICRORNA | ENSG00000086570 | mRNA |
| hsa-miR-376a-5p          | MICRORNA | ENSG00000086570 | mRNA |
| hsa-miR-449b-5p          | MICRORNA | ENSG00000086570 | mRNA |
| hsa-miR-542-3p           | MICRORNA | ENSG00000086570 | mRNA |
| hsa-miR-548b-3p          | MICRORNA | ENSG00000086570 | mRNA |
| hsa-miR-551a             | MICRORNA | ENSG00000086570 | mRNA |
| hsa-miR-6811-5p          | MICRORNA | ENSG00000086570 | mRNA |
| chr3:138289159-138291756 | CIRC RNA | ENSG00000082556 | mRNA |
| chr4:87685745-87689129   | CIRC RNA | ENSG00000082556 | mRNA |
| chr5:94244955-94259726   | CIRC RNA | ENSG00000082556 | mRNA |
| chr6:73005640-73043538   | CIRC RNA | ENSG00000082556 | mRNA |
| ENSG00000224652          | LINC RNA | ENSG00000082556 | mRNA |
| ENSG00000227066          | LINC RNA | ENSG00000082556 | mRNA |
| ENSG00000231204          | LINC RNA | ENSG00000082556 | mRNA |
| ENSG00000231437          | LINC RNA | ENSG00000082556 | mRNA |
| ENSG00000233005          | LINC RNA | ENSG00000082556 | mRNA |
| ENSG00000236028          | LINC RNA | ENSG00000082556 | mRNA |
| ENSG00000237438          | LINC RNA | ENSG00000082556 | mRNA |
| ENSG00000248673          | LINC RNA | ENSG00000082556 | mRNA |
| ENSG00000248942          | LINC RNA | ENSG00000082556 | mRNA |
| ENSG00000249574          | LINC RNA | ENSG00000082556 | mRNA |
| ENSG00000250446          | LINC RNA | ENSG00000082556 | mRNA |
| ENSG00000253266          | LINC RNA | ENSG00000082556 | mRNA |
| ENSG00000256124          | LINC RNA | ENSG00000082556 | mRNA |
| ENSG00000258882          | LINC RNA | ENSG00000082556 | mRNA |
| ENSG00000260725          | LINC RNA | ENSG00000082556 | mRNA |
| ENSG00000264954          | LINC RNA | ENSG00000082556 | mRNA |
| ENSG00000272142          | LINC RNA | ENSG00000082556 | mRNA |
| ENSG00000272829          | LINC RNA | ENSG00000082556 | mRNA |
| hsa-miR-136-5p           | MICRORNA | ENSG00000082556 | mRNA |
| hsa-miR-300              | MICRORNA | ENSG00000082556 | mRNA |
| hsa-miR-376a-5p          | MICRORNA | ENSG00000082556 | mRNA |
| hsa-miR-449b-5p          | MICRORNA | ENSG00000082556 | mRNA |
| hsa-miR-548b-3p          | MICRORNA | ENSG00000082556 | mRNA |
| hsa-miR-551a             | MICRORNA | ENSG00000082556 | mRNA |
| chr4:87685745-87689129   | CIRC RNA | ENSG00000071909 | mRNA |
| chr5:94244955-94259726   | CIRC RNA | ENSG00000071909 | mRNA |
| ENSG00000189149          | LINC RNA | ENSG00000071909 | mRNA |
| ENSG00000224652          | LINC RNA | ENSG00000071909 | mRNA |
| ENSG00000227066          | LINC RNA | ENSG00000071909 | mRNA |
| ENSG00000231204          | LINC RNA | ENSG00000071909 | mRNA |
| ENSG00000231437          | LINC RNA | ENSG00000071909 | mRNA |
| ENSG00000233005          | LINC RNA | ENSG00000071909 | mRNA |
| ENSG00000236028          | LINC RNA | ENSG00000071909 | mRNA |
| ENSG00000248673          | LINC RNA | ENSG00000071909 | mRNA |
| ENSG00000248942          | LINC RNA | ENSG00000071909 | mRNA |
| ENSG00000250446          | LINC RNA | ENSG00000071909 | mRNA |
| ENSG00000253266          | LINC RNA | ENSG00000071909 | mRNA |
| ENSG00000256124          | LINC RNA | ENSG00000071909 | mRNA |
| ENSG00000257060          | LINC RNA | ENSG00000071909 | mRNA |

|                           |          |                 |      |
|---------------------------|----------|-----------------|------|
| ENSG00000258882           | LINC RNA | ENSG00000071909 | mRNA |
| ENSG00000260725           | LINC RNA | ENSG00000071909 | mRNA |
| ENSG00000261307           | LINC RNA | ENSG00000071909 | mRNA |
| ENSG00000264026           | LINC RNA | ENSG00000071909 | mRNA |
| ENSG00000264954           | LINC RNA | ENSG00000071909 | mRNA |
| ENSG00000272142           | LINC RNA | ENSG00000071909 | mRNA |
| ENSG00000272796           | LINC RNA | ENSG00000071909 | mRNA |
| ENSG00000272829           | LINC RNA | ENSG00000071909 | mRNA |
| hsa-miR-1304-3p           | MIC RNA  | ENSG00000071909 | mRNA |
| hsa-miR-136-5p            | MIC RNA  | ENSG00000071909 | mRNA |
| hsa-miR-300               | MIC RNA  | ENSG00000071909 | mRNA |
| hsa-miR-301b-3p           | MIC RNA  | ENSG00000071909 | mRNA |
| hsa-miR-376a-5p           | MIC RNA  | ENSG00000071909 | mRNA |
| hsa-miR-449b-5p           | MIC RNA  | ENSG00000071909 | mRNA |
| hsa-miR-542-3p            | MIC RNA  | ENSG00000071909 | mRNA |
| hsa-miR-548b-3p           | MIC RNA  | ENSG00000071909 | mRNA |
| hsa-miR-551a              | MIC RNA  | ENSG00000071909 | mRNA |
| hsa-miR-6811-5p           | MIC RNA  | ENSG00000071909 | mRNA |
| chr11:115080293-115111140 | CIRC RNA | ENSG00000070729 | mRNA |
| chr12:40696590-40697936   | CIRC RNA | ENSG00000070729 | mRNA |
| chr3:193177459-193179817  | CIRC RNA | ENSG00000070729 | mRNA |
| chr6:29913228-29977144    | CIRC RNA | ENSG00000070729 | mRNA |
| ENSG00000227308           | LINC RNA | ENSG00000070729 | mRNA |
| ENSG00000231901           | LINC RNA | ENSG00000070729 | mRNA |
| ENSG00000236393           | LINC RNA | ENSG00000070729 | mRNA |
| ENSG00000236682           | LINC RNA | ENSG00000070729 | mRNA |
| ENSG00000242104           | LINC RNA | ENSG00000070729 | mRNA |
| ENSG00000256969           | LINC RNA | ENSG00000070729 | mRNA |
| ENSG00000257924           | LINC RNA | ENSG00000070729 | mRNA |
| ENSG00000257986           | LINC RNA | ENSG00000070729 | mRNA |
| ENSG00000258088           | LINC RNA | ENSG00000070729 | mRNA |
| ENSG00000259198           | LINC RNA | ENSG00000070729 | mRNA |
| ENSG00000267761           | LINC RNA | ENSG00000070729 | mRNA |
| hsa-miR-1277-3p           | MIC RNA  | ENSG00000070729 | mRNA |
| hsa-miR-3065-5p           | MIC RNA  | ENSG00000070729 | mRNA |
| hsa-miR-34b-5p            | MIC RNA  | ENSG00000070729 | mRNA |
| hsa-miR-34c-5p            | MIC RNA  | ENSG00000070729 | mRNA |
| hsa-miR-3614-3p           | MIC RNA  | ENSG00000070729 | mRNA |
| hsa-miR-424-3p            | MIC RNA  | ENSG00000070729 | mRNA |
| hsa-miR-449a              | MIC RNA  | ENSG00000070729 | mRNA |
| hsa-miR-449c-5p           | MIC RNA  | ENSG00000070729 | mRNA |
| hsa-miR-4679              | MIC RNA  | ENSG00000070729 | mRNA |
| hsa-miR-4709-3p           | MIC RNA  | ENSG00000070729 | mRNA |
| hsa-miR-4709-5p           | MIC RNA  | ENSG00000070729 | mRNA |
| hsa-miR-542-5p            | MIC RNA  | ENSG00000070729 | mRNA |
| hsa-miR-548b-5p           | MIC RNA  | ENSG00000070729 | mRNA |
| chr2:113057425-113082774  | CIRC RNA | ENSG00000067646 | mRNA |
| chr8:141595218-141616013  | CIRC RNA | ENSG00000067646 | mRNA |
| ENSG00000189149           | LINC RNA | ENSG00000067646 | mRNA |
| ENSG00000223749           | LINC RNA | ENSG00000067646 | mRNA |
| ENSG00000223956           | LINC RNA | ENSG00000067646 | mRNA |
| ENSG00000224259           | LINC RNA | ENSG00000067646 | mRNA |
| ENSG00000229236           | LINC RNA | ENSG00000067646 | mRNA |
| ENSG00000231535           | LINC RNA | ENSG00000067646 | mRNA |

|                          |          |                 |      |
|--------------------------|----------|-----------------|------|
| ENSG00000233410          | LINC RNA | ENSG00000067646 | mRNA |
| ENSG00000236318          | LINC RNA | ENSG00000067646 | mRNA |
| ENSG00000248673          | LINC RNA | ENSG00000067646 | mRNA |
| ENSG00000249378          | LINC RNA | ENSG00000067646 | mRNA |
| ENSG00000257060          | LINC RNA | ENSG00000067646 | mRNA |
| ENSG00000257826          | LINC RNA | ENSG00000067646 | mRNA |
| ENSG00000260197          | LINC RNA | ENSG00000067646 | mRNA |
| ENSG00000264026          | LINC RNA | ENSG00000067646 | mRNA |
| ENSG00000272796          | LINC RNA | ENSG00000067646 | mRNA |
| hsa-miR-1304-3p          | MIC RNA  | ENSG00000067646 | mRNA |
| hsa-miR-301b-3p          | MIC RNA  | ENSG00000067646 | mRNA |
| hsa-miR-3614-3p          | MIC RNA  | ENSG00000067646 | mRNA |
| hsa-miR-449a             | MIC RNA  | ENSG00000067646 | mRNA |
| hsa-miR-4709-3p          | MIC RNA  | ENSG00000067646 | mRNA |
| hsa-miR-4709-5p          | MIC RNA  | ENSG00000067646 | mRNA |
| hsa-miR-542-3p           | MIC RNA  | ENSG00000067646 | mRNA |
| hsa-miR-6811-5p          | MIC RNA  | ENSG00000067646 | mRNA |
| chr2:113057425-113082774 | CIRC RNA | ENSG00000067048 | mRNA |
| chr8:141595218-141616013 | CIRC RNA | ENSG00000067048 | mRNA |
| ENSG00000189149          | LINC RNA | ENSG00000067048 | mRNA |
| ENSG00000223749          | LINC RNA | ENSG00000067048 | mRNA |
| ENSG00000223956          | LINC RNA | ENSG00000067048 | mRNA |
| ENSG00000224259          | LINC RNA | ENSG00000067048 | mRNA |
| ENSG00000225490          | LINC RNA | ENSG00000067048 | mRNA |
| ENSG00000229236          | LINC RNA | ENSG00000067048 | mRNA |
| ENSG00000231535          | LINC RNA | ENSG00000067048 | mRNA |
| ENSG00000233410          | LINC RNA | ENSG00000067048 | mRNA |
| ENSG00000236318          | LINC RNA | ENSG00000067048 | mRNA |
| ENSG00000248673          | LINC RNA | ENSG00000067048 | mRNA |
| ENSG00000248942          | LINC RNA | ENSG00000067048 | mRNA |
| ENSG00000249378          | LINC RNA | ENSG00000067048 | mRNA |
| ENSG00000257060          | LINC RNA | ENSG00000067048 | mRNA |
| ENSG00000257826          | LINC RNA | ENSG00000067048 | mRNA |
| ENSG00000261307          | LINC RNA | ENSG00000067048 | mRNA |
| ENSG00000264026          | LINC RNA | ENSG00000067048 | mRNA |
| ENSG00000272796          | LINC RNA | ENSG00000067048 | mRNA |
| hsa-miR-1304-3p          | MIC RNA  | ENSG00000067048 | mRNA |
| hsa-miR-301b-3p          | MIC RNA  | ENSG00000067048 | mRNA |
| hsa-miR-3614-3p          | MIC RNA  | ENSG00000067048 | mRNA |
| hsa-miR-449a             | MIC RNA  | ENSG00000067048 | mRNA |
| hsa-miR-4709-3p          | MIC RNA  | ENSG00000067048 | mRNA |
| hsa-miR-4709-5p          | MIC RNA  | ENSG00000067048 | mRNA |
| hsa-miR-542-3p           | MIC RNA  | ENSG00000067048 | mRNA |
| hsa-miR-551a             | MIC RNA  | ENSG00000067048 | mRNA |
| hsa-miR-6811-5p          | MIC RNA  | ENSG00000067048 | mRNA |
| chr10:98303832-98336586  | CIRC RNA | ENSG00000053108 | mRNA |
| ENSG00000214145          | LINC RNA | ENSG00000053108 | mRNA |
| ENSG00000223414          | LINC RNA | ENSG00000053108 | mRNA |
| ENSG00000223486          | LINC RNA | ENSG00000053108 | mRNA |
| ENSG00000226383          | LINC RNA | ENSG00000053108 | mRNA |
| ENSG00000231483          | LINC RNA | ENSG00000053108 | mRNA |
| ENSG00000237726          | LINC RNA | ENSG00000053108 | mRNA |
| ENSG00000242147          | LINC RNA | ENSG00000053108 | mRNA |
| ENSG00000243081          | LINC RNA | ENSG00000053108 | mRNA |



|                          |          |                 |      |
|--------------------------|----------|-----------------|------|
| ENSG00000254777          | LINC RNA | ENSG00000053108 | mRNA |
| ENSG00000260430          | LINC RNA | ENSG00000053108 | mRNA |
| ENSG00000272068          | LINC RNA | ENSG00000053108 | mRNA |
| ENSG00000272304          | LINC RNA | ENSG00000053108 | mRNA |
| ENSG00000273381          | LINC RNA | ENSG00000053108 | mRNA |
| hsa-miR-4488             | MICRORNA | ENSG00000053108 | mRNA |
| chr3:138289159-138291756 | CIRC RNA | ENSG00000049089 | mRNA |
| chr4:87685745-87689129   | CIRC RNA | ENSG00000049089 | mRNA |
| chr5:94244955-94259726   | CIRC RNA | ENSG00000049089 | mRNA |
| chr6:73005640-73043538   | CIRC RNA | ENSG00000049089 | mRNA |
| ENSG00000189149          | LINC RNA | ENSG00000049089 | mRNA |
| ENSG00000224652          | LINC RNA | ENSG00000049089 | mRNA |
| ENSG00000227066          | LINC RNA | ENSG00000049089 | mRNA |
| ENSG00000231204          | LINC RNA | ENSG00000049089 | mRNA |
| ENSG00000231437          | LINC RNA | ENSG00000049089 | mRNA |
| ENSG00000233005          | LINC RNA | ENSG00000049089 | mRNA |
| ENSG00000236028          | LINC RNA | ENSG00000049089 | mRNA |
| ENSG00000237438          | LINC RNA | ENSG00000049089 | mRNA |
| ENSG00000248673          | LINC RNA | ENSG00000049089 | mRNA |
| ENSG00000248942          | LINC RNA | ENSG00000049089 | mRNA |
| ENSG00000249574          | LINC RNA | ENSG00000049089 | mRNA |
| ENSG00000250446          | LINC RNA | ENSG00000049089 | mRNA |
| ENSG00000253266          | LINC RNA | ENSG00000049089 | mRNA |
| ENSG00000256124          | LINC RNA | ENSG00000049089 | mRNA |
| ENSG00000257060          | LINC RNA | ENSG00000049089 | mRNA |
| ENSG00000258882          | LINC RNA | ENSG00000049089 | mRNA |
| ENSG00000260725          | LINC RNA | ENSG00000049089 | mRNA |
| ENSG00000261307          | LINC RNA | ENSG00000049089 | mRNA |
| ENSG00000264954          | LINC RNA | ENSG00000049089 | mRNA |
| ENSG00000272142          | LINC RNA | ENSG00000049089 | mRNA |
| ENSG00000272829          | LINC RNA | ENSG00000049089 | mRNA |
| hsa-miR-136-5p           | MICRORNA | ENSG00000049089 | mRNA |
| hsa-miR-300              | MICRORNA | ENSG00000049089 | mRNA |
| hsa-miR-376a-5p          | MICRORNA | ENSG00000049089 | mRNA |
| hsa-miR-449b-5p          | MICRORNA | ENSG00000049089 | mRNA |
| hsa-miR-548b-3p          | MICRORNA | ENSG00000049089 | mRNA |
| hsa-miR-551a             | MICRORNA | ENSG00000049089 | mRNA |
| chr3:138289159-138291756 | CIRC RNA | ENSG00000041982 | mRNA |
| chr4:87685745-87689129   | CIRC RNA | ENSG00000041982 | mRNA |
| chr5:94244955-94259726   | CIRC RNA | ENSG00000041982 | mRNA |
| chr6:73005640-73043538   | CIRC RNA | ENSG00000041982 | mRNA |
| ENSG00000189149          | LINC RNA | ENSG00000041982 | mRNA |
| ENSG00000224652          | LINC RNA | ENSG00000041982 | mRNA |
| ENSG00000227066          | LINC RNA | ENSG00000041982 | mRNA |
| ENSG00000231204          | LINC RNA | ENSG00000041982 | mRNA |
| ENSG00000231437          | LINC RNA | ENSG00000041982 | mRNA |
| ENSG00000233005          | LINC RNA | ENSG00000041982 | mRNA |
| ENSG00000236028          | LINC RNA | ENSG00000041982 | mRNA |
| ENSG00000248673          | LINC RNA | ENSG00000041982 | mRNA |
| ENSG00000248942          | LINC RNA | ENSG00000041982 | mRNA |
| ENSG00000249574          | LINC RNA | ENSG00000041982 | mRNA |
| ENSG00000250446          | LINC RNA | ENSG00000041982 | mRNA |
| ENSG00000253266          | LINC RNA | ENSG00000041982 | mRNA |
| ENSG00000256124          | LINC RNA | ENSG00000041982 | mRNA |

|                          |          |                 |      |
|--------------------------|----------|-----------------|------|
| ENSG00000257060          | LINC RNA | ENSG00000041982 | mRNA |
| ENSG00000258882          | LINC RNA | ENSG00000041982 | mRNA |
| ENSG00000260725          | LINC RNA | ENSG00000041982 | mRNA |
| ENSG00000261307          | LINC RNA | ENSG00000041982 | mRNA |
| ENSG00000264954          | LINC RNA | ENSG00000041982 | mRNA |
| ENSG00000272142          | LINC RNA | ENSG00000041982 | mRNA |
| ENSG00000272829          | LINC RNA | ENSG00000041982 | mRNA |
| hsa-miR-136-5p           | MICRORNA | ENSG00000041982 | mRNA |
| hsa-miR-300              | MICRORNA | ENSG00000041982 | mRNA |
| hsa-miR-376a-5p          | MICRORNA | ENSG00000041982 | mRNA |
| hsa-miR-449b-5p          | MICRORNA | ENSG00000041982 | mRNA |
| hsa-miR-542-3p           | MICRORNA | ENSG00000041982 | mRNA |
| hsa-miR-548b-3p          | MICRORNA | ENSG00000041982 | mRNA |
| hsa-miR-551a             | MICRORNA | ENSG00000041982 | mRNA |
| hsa-miR-6811-5p          | MICRORNA | ENSG00000041982 | mRNA |
| chr3:138289159-138291756 | CIRC RNA | ENSG00000036828 | mRNA |
| chr4:87685745-87689129   | CIRC RNA | ENSG00000036828 | mRNA |
| chr5:94244955-94259726   | CIRC RNA | ENSG00000036828 | mRNA |
| chr6:73005640-73043538   | CIRC RNA | ENSG00000036828 | mRNA |
| ENSG00000224652          | LINC RNA | ENSG00000036828 | mRNA |
| ENSG00000231204          | LINC RNA | ENSG00000036828 | mRNA |
| ENSG00000231437          | LINC RNA | ENSG00000036828 | mRNA |
| ENSG00000233005          | LINC RNA | ENSG00000036828 | mRNA |
| ENSG00000236028          | LINC RNA | ENSG00000036828 | mRNA |
| ENSG00000237438          | LINC RNA | ENSG00000036828 | mRNA |
| ENSG00000248673          | LINC RNA | ENSG00000036828 | mRNA |
| ENSG00000248942          | LINC RNA | ENSG00000036828 | mRNA |
| ENSG00000249574          | LINC RNA | ENSG00000036828 | mRNA |
| ENSG00000250446          | LINC RNA | ENSG00000036828 | mRNA |
| ENSG00000253266          | LINC RNA | ENSG00000036828 | mRNA |
| ENSG00000256124          | LINC RNA | ENSG00000036828 | mRNA |
| ENSG00000258882          | LINC RNA | ENSG00000036828 | mRNA |
| ENSG00000260725          | LINC RNA | ENSG00000036828 | mRNA |
| ENSG00000264954          | LINC RNA | ENSG00000036828 | mRNA |
| ENSG00000272142          | LINC RNA | ENSG00000036828 | mRNA |
| ENSG00000272829          | LINC RNA | ENSG00000036828 | mRNA |
| hsa-miR-136-5p           | MICRORNA | ENSG00000036828 | mRNA |
| hsa-miR-300              | MICRORNA | ENSG00000036828 | mRNA |
| hsa-miR-376a-5p          | MICRORNA | ENSG00000036828 | mRNA |
| hsa-miR-449b-5p          | MICRORNA | ENSG00000036828 | mRNA |
| hsa-miR-548b-3p          | MICRORNA | ENSG00000036828 | mRNA |
| hsa-miR-551a             | MICRORNA | ENSG00000036828 | mRNA |
| chr10:98303832-98336586  | CIRC RNA | ENSG00000021826 | mRNA |
| ENSG00000214145          | LINC RNA | ENSG00000021826 | mRNA |
| ENSG00000223414          | LINC RNA | ENSG00000021826 | mRNA |
| ENSG00000226383          | LINC RNA | ENSG00000021826 | mRNA |
| ENSG00000231483          | LINC RNA | ENSG00000021826 | mRNA |
| ENSG00000237726          | LINC RNA | ENSG00000021826 | mRNA |
| ENSG00000242147          | LINC RNA | ENSG00000021826 | mRNA |
| ENSG00000243081          | LINC RNA | ENSG00000021826 | mRNA |
| ENSG00000254777          | LINC RNA | ENSG00000021826 | mRNA |
| ENSG00000260430          | LINC RNA | ENSG00000021826 | mRNA |
| ENSG00000272068          | LINC RNA | ENSG00000021826 | mRNA |
| ENSG00000272304          | LINC RNA | ENSG00000021826 | mRNA |

|                 |          |                 |      |
|-----------------|----------|-----------------|------|
| ENSG00000273381 | LINC RNA | ENSG00000021826 | mRNA |
| hsa-miR-4488    | MICRORNA | ENSG00000021826 | mRNA |
| ENSG00000132204 | LINC RNA | ENSG00000019186 | mRNA |
| ENSG00000214039 | LINC RNA | ENSG00000019186 | mRNA |
| ENSG00000225689 | LINC RNA | ENSG00000019186 | mRNA |
| ENSG00000226816 | LINC RNA | ENSG00000019186 | mRNA |
| ENSG00000229459 | LINC RNA | ENSG00000019186 | mRNA |
| ENSG00000235056 | LINC RNA | ENSG00000019186 | mRNA |
| ENSG00000236924 | LINC RNA | ENSG00000019186 | mRNA |
| ENSG00000258548 | LINC RNA | ENSG00000019186 | mRNA |
| ENSG00000266869 | LINC RNA | ENSG00000019186 | mRNA |
| ENSG00000267804 | LINC RNA | ENSG00000019186 | mRNA |
| ENSG00000272312 | LINC RNA | ENSG00000019186 | mRNA |
| hsa-miR-203a-3p | MICRORNA | ENSG00000019186 | mRNA |
| hsa-miR-203b-3p | MICRORNA | ENSG00000019186 | mRNA |
| hsa-miR-3182    | MICRORNA | ENSG00000019186 | mRNA |
| hsa-miR-873-5p  | MICRORNA | ENSG00000019186 | mRNA |
| ENSG00000189149 | LINC RNA | ENSG00000012817 | mRNA |
| ENSG00000203635 | LINC RNA | ENSG00000012817 | mRNA |
| ENSG00000223486 | LINC RNA | ENSG00000012817 | mRNA |
| ENSG00000223749 | LINC RNA | ENSG00000012817 | mRNA |
| ENSG00000223956 | LINC RNA | ENSG00000012817 | mRNA |
| ENSG00000224259 | LINC RNA | ENSG00000012817 | mRNA |
| ENSG00000225490 | LINC RNA | ENSG00000012817 | mRNA |
| ENSG00000227066 | LINC RNA | ENSG00000012817 | mRNA |
| ENSG00000229236 | LINC RNA | ENSG00000012817 | mRNA |
| ENSG00000233410 | LINC RNA | ENSG00000012817 | mRNA |
| ENSG00000236318 | LINC RNA | ENSG00000012817 | mRNA |
| ENSG00000248673 | LINC RNA | ENSG00000012817 | mRNA |
| ENSG00000248942 | LINC RNA | ENSG00000012817 | mRNA |
| ENSG00000249378 | LINC RNA | ENSG00000012817 | mRNA |
| ENSG00000257060 | LINC RNA | ENSG00000012817 | mRNA |
| ENSG00000257826 | LINC RNA | ENSG00000012817 | mRNA |
| ENSG00000261307 | LINC RNA | ENSG00000012817 | mRNA |
| ENSG00000263627 | LINC RNA | ENSG00000012817 | mRNA |
| ENSG00000264026 | LINC RNA | ENSG00000012817 | mRNA |
| ENSG00000267761 | LINC RNA | ENSG00000012817 | mRNA |
| ENSG00000271815 | LINC RNA | ENSG00000012817 | mRNA |
| ENSG00000272796 | LINC RNA | ENSG00000012817 | mRNA |
| ENSG00000273381 | LINC RNA | ENSG00000012817 | mRNA |
| hsa-miR-1304-3p | MICRORNA | ENSG00000012817 | mRNA |
| hsa-miR-301b-3p | MICRORNA | ENSG00000012817 | mRNA |
| hsa-miR-3614-3p | MICRORNA | ENSG00000012817 | mRNA |
| hsa-miR-449a    | MICRORNA | ENSG00000012817 | mRNA |
| hsa-miR-4709-3p | MICRORNA | ENSG00000012817 | mRNA |
| hsa-miR-4709-5p | MICRORNA | ENSG00000012817 | mRNA |
| hsa-miR-6811-5p | MICRORNA | ENSG00000012817 | mRNA |

| rho          | P           | index            |
|--------------|-------------|------------------|
| 0.896989869  | 0.039068514 | CIRCRNA_MICRORNA |
| 0.902336856  | 0.036096348 | CIRCRNA_MICRORNA |
| 0.98455823   | 0.002298111 | LINCRNA_MICRORNA |
| 0.983837122  | 0.002460686 | LINCRNA_MICRORNA |
| 0.99709622   | 0.000187754 | LINCRNA_MICRORNA |
| 0.905933782  | 0.034139699 | LINCRNA_MICRORNA |
| 0.932404469  | 0.020881308 | LINCRNA_MICRORNA |
| 0.985900319  | 0.002005521 | LINCRNA_MICRORNA |
| 0.994355438  | 0.000508641 | LINCRNA_MICRORNA |
| 0.989399023  | 0.00130816  | LINCRNA_MICRORNA |
| 0.966019297  | 0.007480942 | LINCRNA_MICRORNA |
| 0.995649052  | 0.000344291 | LINCRNA_MICRORNA |
| 0.915648393  | 0.029033621 | LINCRNA_MICRORNA |
| 0.99277277   | 0.00073675  | LINCRNA_MICRORNA |
| 0.930751587  | 0.021646381 | CIRCRNA_MICRORNA |
| 0.977267441  | 0.00410034  | LINCRNA_MICRORNA |
| 0.930381627  | 0.021818842 | LINCRNA_MICRORNA |
| 0.909511604  | 0.03222841  | LINCRNA_MICRORNA |
| 0.919658445  | 0.027004741 | LINCRNA_MICRORNA |
| 0.896812604  | 0.039168326 | LINCRNA_MICRORNA |
| 0.879627988  | 0.049217669 | LINCRNA_MICRORNA |
| -0.895479815 | 0.039921365 | LINCRNA_MICRORNA |
| 0.968602618  | 0.006646883 | LINCRNA_MICRORNA |
| -0.948798015 | 0.013800669 | LINCRNA_MICRORNA |
| -0.883686483 | 0.046779239 | LINCRNA_MICRORNA |
| 0.904618164  | 0.034851319 | LINCRNA_MICRORNA |
| 0.975783658  | 0.004507262 | LINCRNA_MICRORNA |
| 0.977183892  | 0.004122914 | LINCRNA_MICRORNA |
| 0.969174554  | 0.006466653 | LINCRNA_MICRORNA |
| 0.898950449  | 0.037970011 | LINCRNA_MICRORNA |
| 0.953130686  | 0.01209455  | LINCRNA_MICRORNA |
| 0.996989505  | 0.000198196 | LINCRNA_MICRORNA |
| 0.905082639  | 0.034599547 | LINCRNA_MICRORNA |
| 0.914262998  | 0.029745465 | LINCRNA_MICRORNA |
| 0.980359509  | 0.003294418 | LINCRNA_MICRORNA |
| 0.988966978  | 0.001388851 | LINCRNA_MICRORNA |
| -0.916395214 | 0.028652195 | LINCRNA_MICRORNA |
| 0.931571324  | 0.021265833 | LINCRNA_MICRORNA |
| 0.981895546  | 0.002916279 | LINCRNA_MICRORNA |
| 0.933307038  | 0.020467314 | LINCRNA_MICRORNA |
| 0.943254339  | 0.016087971 | CIRCRNA_MICRORNA |
| 0.983362837  | 0.002569603 | CIRCRNA_MICRORNA |
| 0.988267399  | 0.001522858 | LINCRNA_MICRORNA |
| 0.968928353  | 0.006544037 | LINCRNA_MICRORNA |
| 0.978450053  | 0.003785248 | LINCRNA_MICRORNA |
| 0.914916488  | 0.029408998 | LINCRNA_MICRORNA |
| 0.914695702  | 0.029522538 | LINCRNA_MICRORNA |
| 0.890474983  | 0.042789497 | LINCRNA_MICRORNA |
| 0.907502941  | 0.033297108 | LINCRNA_MICRORNA |
| 0.885838057  | 0.045502535 | LINCRNA_MICRORNA |
| 0.997435277  | 0.000155857 | LINCRNA_MICRORNA |
| 0.997337796  | 0.000164825 | LINCRNA_MICRORNA |
| 0.998525293  | 6.80E-05    | LINCRNA_MICRORNA |

|             |             |                   |
|-------------|-------------|-------------------|
| 0.960336177 | 0.009425944 | LINC RNA_MICR RNA |
| 0.917509388 | 0.028086176 | LINC RNA_MICR RNA |
| 0.979691793 | 0.003463489 | LINC RNA_MICR RNA |
| 0.987029016 | 0.001769891 | LINC RNA_MICR RNA |
| 0.925558728 | 0.024107089 | LINC RNA_MICR RNA |
| 0.973192659 | 0.005247596 | LINC RNA_MICR RNA |
| 0.938019888 | 0.018349872 | LINC RNA_MICR RNA |
| 0.957366461 | 0.010499387 | LINC RNA_MICR RNA |
| 0.977339951 | 0.004080782 | LINC RNA_MICR RNA |
| 0.910635434 | 0.031635377 | LINC RNA_MICR RNA |
| 0.993171045 | 0.000676737 | LINC RNA_MICR RNA |
| 0.936126647 | 0.019191465 | CIRC RNA_MICR RNA |
| 0.993839708 | 0.000579875 | CIRC RNA_MICR RNA |
| 0.995973301 | 0.000306546 | CIRC RNA_MICR RNA |
| 0.998980736 | 3.91E-05    | CIRC RNA_MICR RNA |
| 0.922127225 | 0.025779428 | LINC RNA_MICR RNA |
| 0.930070787 | 0.021964086 | LINC RNA_MICR RNA |
| 0.950491111 | 0.013125229 | LINC RNA_MICR RNA |
| 0.997294268 | 0.000168883 | LINC RNA_MICR RNA |
| 0.929535739 | 0.022214823 | LINC RNA_MICR RNA |
| 0.944510728 | 0.015559628 | LINC RNA_MICR RNA |
| 0.943334052 | 0.016054279 | LINC RNA_MICR RNA |
| 0.923928474 | 0.024897078 | LINC RNA_MICR RNA |
| 0.957674754 | 0.010386195 | LINC RNA_MICR RNA |
| 0.936865017 | 0.018861785 | LINC RNA_MICR RNA |
| 0.987391062 | 0.001696401 | LINC RNA_MICR RNA |
| 0.945953629 | 0.014959986 | LINC RNA_MICR RNA |
| 0.970168353 | 0.006157391 | LINC RNA_MICR RNA |
| 0.992166314 | 0.000831328 | LINC RNA_MICR RNA |
| 0.903519003 | 0.035449445 | LINC RNA_MICR RNA |
| 0.993839708 | 0.000579875 | LINC RNA_MICR RNA |
| 0.981469752 | 0.003019568 | LINC RNA_MICR RNA |
| 0.891158804 | 0.042393898 | CIRC RNA_MICR RNA |
| 0.944976807 | 0.015365096 | CIRC RNA_MICR RNA |
| 0.967293048 | 0.007065644 | CIRC RNA_MICR RNA |
| 0.908251108 | 0.032897745 | CIRC RNA_MICR RNA |
| 0.963860447 | 0.008202375 | LINC RNA_MICR RNA |
| 0.883780775 | 0.046723054 | LINC RNA_MICR RNA |
| 0.968503339 | 0.006678334 | LINC RNA_MICR RNA |
| 0.979896959 | 0.003411242 | LINC RNA_MICR RNA |
| 0.956113379 | 0.010963577 | LINC RNA_MICR RNA |
| 0.961784367 | 0.008916413 | LINC RNA_MICR RNA |
| 0.946184949 | 0.014864571 | LINC RNA_MICR RNA |
| 0.954097865 | 0.011723847 | LINC RNA_MICR RNA |
| 0.894811331 | 0.040300781 | LINC RNA_MICR RNA |
| 0.968907605 | 0.006550572 | LINC RNA_MICR RNA |
| 0.978196006 | 0.003852232 | LINC RNA_MICR RNA |
| 0.894961924 | 0.040215209 | LINC RNA_MICR RNA |
| 0.973875657 | 0.005048853 | LINC RNA_MICR RNA |
| 0.976874775 | 0.004206787 | LINC RNA_MICR RNA |
| 0.967929815 | 0.006860974 | LINC RNA_MICR RNA |
| 0.936736692 | 0.018918948 | LINC RNA_MICR RNA |
| 0.979134374 | 0.003606758 | LINC RNA_MICR RNA |
| 0.964053541 | 0.008136964 | LINC RNA_MICR RNA |

|              |             |                  |
|--------------|-------------|------------------|
| 0.96607759   | 0.007461766 | LINC RNA_MIC RNA |
| 0.911583746  | 0.031137719 | LINC RNA_MIC RNA |
| 0.981134775  | 0.003101659 | LINC RNA_MIC RNA |
| 0.994517345  | 0.000486926 | LINC RNA_MIC RNA |
| 0.987607704  | 0.001652923 | LINC RNA_MIC RNA |
| 0.9999814    | 9.63E-08    | CIRC RNA_MIC RNA |
| 0.968245837  | 0.006760135 | CIRC RNA_MIC RNA |
| 0.906845313  | 0.033649414 | CIRC RNA_MIC RNA |
| 0.943242218  | 0.016093096 | CIRC RNA_MIC RNA |
| 0.95961623   | 0.009682684 | LINC RNA_MIC RNA |
| 0.999328814  | 2.09E-05    | LINC RNA_MIC RNA |
| 0.992216819  | 0.000823307 | LINC RNA_MIC RNA |
| 0.997550564  | 0.00014547  | LINC RNA_MIC RNA |
| 0.958155139  | 0.010210622 | LINC RNA_MIC RNA |
| 0.929150645  | 0.022395856 | LINC RNA_MIC RNA |
| 0.971930783  | 0.005621371 | LINC RNA_MIC RNA |
| 0.982481203  | 0.002776168 | LINC RNA_MIC RNA |
| 0.968245837  | 0.006760135 | LINC RNA_MIC RNA |
| 0.889575555  | 0.0433116   | LINC RNA_MIC RNA |
| -0.922936435 | 0.025381807 | CIRC RNA_MIC RNA |
| 0.880101501  | 0.048931158 | CIRC RNA_MIC RNA |
| 0.929084358  | 0.022427065 | LINC RNA_MIC RNA |
| -0.8982651   | 0.038352872 | LINC RNA_MIC RNA |
| -0.882862055 | 0.047271395 | LINC RNA_MIC RNA |
| 0.938421124  | 0.018173092 | LINC RNA_MIC RNA |
| -0.947736944 | 0.014229572 | LINC RNA_MIC RNA |
| -0.897961565 | 0.03852283  | LINC RNA_MIC RNA |
| 0.896760952  | 0.039197424 | LINC RNA_MIC RNA |
| 0.956458959  | 0.010834906 | LINC RNA_MIC RNA |
| 0.958875826  | 0.009949067 | LINC RNA_MIC RNA |
| 0.931574082  | 0.021264557 | LINC RNA_MIC RNA |
| 0.965846797  | 0.007537782 | LINC RNA_MIC RNA |
| 0.937860577  | 0.018420216 | LINC RNA_MIC RNA |
| 0.948876372  | 0.013769166 | LINC RNA_MIC RNA |
| 0.937320415  | 0.018659377 | LINC RNA_MIC RNA |
| -0.901381407 | 0.036621919 | LINC RNA_MIC RNA |
| 0.904341681  | 0.035001465 | LINC RNA_MIC RNA |
| 0.893065804  | 0.041296868 | LINC RNA_MIC RNA |
| 0.920166926  | 0.026750874 | LINC RNA_MIC RNA |
| 0.88763492   | 0.044444928 | CIRC RNA_MIC RNA |
| 0.930250626  | 0.021880016 | LINC RNA_MIC RNA |
| 0.933752869  | 0.020263812 | CIRC RNA_MIC RNA |
| 0.906978564  | 0.033577932 | CIRC RNA_MIC RNA |
| 0.968427752  | 0.006702312 | LINC RNA_MIC RNA |
| 0.968245837  | 0.006760135 | CIRC RNA_MIC RNA |
| 0.997529844  | 0.000147319 | CIRC RNA_MIC RNA |
| 0.986116865  | 0.001959561 | CIRC RNA_MIC RNA |
| 0.962504245  | 0.008666609 | LINC RNA_MIC RNA |
| 0.97563755   | 0.004548014 | LINC RNA_MIC RNA |
| 0.985672713  | 0.002054207 | LINC RNA_MIC RNA |
| -0.889000889 | 0.043646235 | LINC RNA_MIC RNA |
| 0.974610234  | 0.004837946 | LINC RNA_MIC RNA |
| -0.89147261  | 0.042212749 | LINC RNA_MIC RNA |
| 0.981399492  | 0.003036726 | LINC RNA_MIC RNA |

|              |             |                   |
|--------------|-------------|-------------------|
| 0.916827808  | 0.028431999 | LINC RNA_MICRORNA |
| 0.880592427  | 0.04863467  | LINC RNA_MICRORNA |
| 0.906073416  | 0.034064447 | LINC RNA_MICRORNA |
| 0.904254468  | 0.035048869 | LINC RNA_MICRORNA |
| 0.977302246  | 0.004090948 | LINC RNA_MICRORNA |
| 0.961883369  | 0.00888192  | LINC RNA_MICRORNA |
| 0.983075798  | 0.002636274 | LINC RNA_MICRORNA |
| 0.956749179  | 0.010727231 | LINC RNA_MICRORNA |
| 0.964337574  | 0.008041059 | LINC RNA_MICRORNA |
| 0.968245837  | 0.006760135 | LINC RNA_MICRORNA |
| 0.886200267  | 0.045288709 | LINC RNA_MICRORNA |
| 0.986872881  | 0.001801901 | LINC RNA_MICRORNA |
| 0.949247823  | 0.013620146 | CIRC RNA_MICRORNA |
| 0.987154337  | 0.001744336 | CIRC RNA_MICRORNA |
| 0.971116485  | 0.005867031 | CIRC RNA_MICRORNA |
| 0.954262349  | 0.011661179 | LINC RNA_MICRORNA |
| 0.979421411  | 0.003532744 | LINC RNA_MICRORNA |
| 0.99191732   | 0.000871244 | LINC RNA_MICRORNA |
| -0.901611461 | 0.03649515  | LINC RNA_MICRORNA |
| 0.959035572  | 0.009891393 | LINC RNA_MICRORNA |
| -0.883552124 | 0.046859335 | LINC RNA_MICRORNA |
| 0.989396219  | 0.001308679 | LINC RNA_MICRORNA |
| 0.933112942  | 0.020556116 | LINC RNA_MICRORNA |
| 0.898066429  | 0.038464086 | LINC RNA_MICRORNA |
| 0.879476223  | 0.049309609 | LINC RNA_MICRORNA |
| 0.988175441  | 0.001540776 | LINC RNA_MICRORNA |
| 0.957252395  | 0.010541369 | LINC RNA_MICRORNA |
| 0.985059999  | 0.002187178 | LINC RNA_MICRORNA |
| 0.959435758  | 0.009747396 | LINC RNA_MICRORNA |
| 0.944646152  | 0.015503023 | LINC RNA_MICRORNA |
| 0.949247823  | 0.013620146 | LINC RNA_MICRORNA |
| 0.932870829  | 0.020667061 | LINC RNA_MICRORNA |
| 0.99147392   | 0.000943847 | LINC RNA_MICRORNA |
| 0.904787945  | 0.03475922  | LINC RNA_MICRORNA |
| 0.933528744  | 0.020366033 | CIRC RNA_MICRORNA |
| 0.986216243  | 0.001938587 | CIRC RNA_MICRORNA |
| 0.98525455   | 0.002144658 | CIRC RNA_MICRORNA |
| 0.989862157  | 0.001223463 | CIRC RNA_MICRORNA |
| 0.902793792  | 0.035845857 | LINC RNA_MICRORNA |
| 0.912952857  | 0.030423715 | LINC RNA_MICRORNA |
| 0.941283403  | 0.016928275 | LINC RNA_MICRORNA |
| 0.992698762  | 0.000748087 | LINC RNA_MICRORNA |
| 0.930272021  | 0.021870021 | LINC RNA_MICRORNA |
| 0.937138151  | 0.018740302 | LINC RNA_MICRORNA |
| 0.949152001  | 0.013658538 | LINC RNA_MICRORNA |
| 0.938326547  | 0.018214711 | LINC RNA_MICRORNA |
| 0.956368003  | 0.010868723 | LINC RNA_MICRORNA |
| 0.926375468  | 0.023714416 | LINC RNA_MICRORNA |
| 0.991760869  | 0.000896641 | LINC RNA_MICRORNA |
| 0.933537045  | 0.020362244 | LINC RNA_MICRORNA |
| 0.971382793  | 0.005786309 | LINC RNA_MICRORNA |
| 0.98481349   | 0.00224145  | LINC RNA_MICRORNA |
| 0.911700832  | 0.03107645  | LINC RNA_MICRORNA |
| 0.986216243  | 0.001938587 | LINC RNA_MICRORNA |

|             |             |                   |
|-------------|-------------|-------------------|
| 0.900201728 | 0.03727417  | LINC RNA_MICR RNA |
| 0.979233417 | 0.003581162 | LINC RNA_MICR RNA |
| 0.908503078 | 0.032763594 | CIRC RNA_MICR RNA |
| 0.984380127 | 0.002337921 | CIRC RNA_MICR RNA |
| 0.99980203  | 3.34E-06    | CIRC RNA_MICR RNA |
| 0.99576439  | 0.000330698 | CIRC RNA_MICR RNA |
| 0.940900189 | 0.017093267 | LINC RNA_MICR RNA |
| 0.956091029 | 0.010971916 | LINC RNA_MICR RNA |
| 0.971138924 | 0.005860215 | LINC RNA_MICR RNA |
| 0.988858798 | 0.001409304 | LINC RNA_MICR RNA |
| 0.900459497 | 0.037131334 | LINC RNA_MICR RNA |
| 0.965541359 | 0.007638771 | LINC RNA_MICR RNA |
| 0.88436131  | 0.046377605 | LINC RNA_MICR RNA |
| 0.913605838 | 0.030085058 | LINC RNA_MICR RNA |
| 0.910039452 | 0.03194943  | LINC RNA_MICR RNA |
| 0.934522565 | 0.019914036 | LINC RNA_MICR RNA |
| 0.962219329 | 0.008765198 | LINC RNA_MICR RNA |
| 0.979758476 | 0.003446479 | LINC RNA_MICR RNA |
| 0.966291719 | 0.007391466 | LINC RNA_MICR RNA |
| 0.971513666 | 0.005746775 | LINC RNA_MICR RNA |
| 0.981608302 | 0.002985828 | LINC RNA_MICR RNA |
| 0.878553843 | 0.049869561 | LINC RNA_MICR RNA |
| 0.984380127 | 0.002337921 | LINC RNA_MICR RNA |
| 0.885604475 | 0.045640596 | LINC RNA_MICR RNA |
| 0.990348606 | 0.001136552 | LINC RNA_MICR RNA |
| 0.942095171 | 0.016580495 | CIRC RNA_MICR RNA |
| 0.945835852 | 0.015008644 | CIRC RNA_MICR RNA |
| 0.963265661 | 0.00840494  | CIRC RNA_MICR RNA |
| 0.910796093 | 0.031550888 | CIRC RNA_MICR RNA |
| 0.941301855 | 0.016920344 | LINC RNA_MICR RNA |
| 0.980392968 | 0.00328602  | LINC RNA_MICR RNA |
| 0.947271099 | 0.014419222 | LINC RNA_MICR RNA |
| 0.985213915 | 0.002153516 | LINC RNA_MICR RNA |
| 0.98476692  | 0.002251752 | LINC RNA_MICR RNA |
| 0.974724213 | 0.004805487 | LINC RNA_MICR RNA |
| 0.982476821 | 0.002777208 | LINC RNA_MICR RNA |
| 0.892011466 | 0.041902262 | LINC RNA_MICR RNA |
| 0.956928767 | 0.010660778 | LINC RNA_MICR RNA |
| 0.967537079 | 0.006986974 | LINC RNA_MICR RNA |
| 0.944093422 | 0.015734478 | LINC RNA_MICR RNA |
| 0.973602832 | 0.005127938 | LINC RNA_MICR RNA |
| 0.995791127 | 0.000327573 | LINC RNA_MICR RNA |
| 0.98668991  | 0.001839655 | LINC RNA_MICR RNA |
| 0.910285298 | 0.031819761 | LINC RNA_MICR RNA |
| 0.992575613 | 0.00076708  | LINC RNA_MICR RNA |
| 0.989714096 | 0.001250335 | LINC RNA_MICR RNA |
| 0.928247834 | 0.022822127 | LINC RNA_MICR RNA |
| 0.997230767 | 0.000174861 | LINC RNA_MICR RNA |
| 0.974436713 | 0.004887498 | LINC RNA_MICR RNA |
| 0.987502277 | 0.001674034 | LINC RNA_MICR RNA |
| 0.928902123 | 0.022512938 | CIRC RNA_MICR RNA |
| 0.97831853  | 0.003819878 | CIRC RNA_MICR RNA |
| 0.95612794  | 0.010958146 | CIRC RNA_MICR RNA |
| 0.962290363 | 0.008740584 | LINC RNA_MICR RNA |



|              |             |                   |
|--------------|-------------|-------------------|
| 0.990418317  | 0.001124272 | LINC RNA_MICR RNA |
| 0.997274354  | 0.00017075  | LINC RNA_MICR RNA |
| -0.926491968 | 0.023658575 | LINC RNA_MICR RNA |
| 0.939325215  | 0.017776803 | LINC RNA_MICR RNA |
| -0.911584877 | 0.031137127 | LINC RNA_MICR RNA |
| 0.995155041  | 0.000404532 | LINC RNA_MICR RNA |
| 0.952711091  | 0.012256543 | LINC RNA_MICR RNA |
| 0.99657951   | 0.000240018 | LINC RNA_MICR RNA |
| 0.935862888  | 0.019309681 | LINC RNA_MICR RNA |
| 0.991368401  | 0.000961408 | LINC RNA_MICR RNA |
| 0.944430685  | 0.015593117 | LINC RNA_MICR RNA |
| 0.923367304  | 0.025170906 | LINC RNA_MICR RNA |
| 0.928902123  | 0.022512938 | LINC RNA_MICR RNA |
| 0.927890561  | 0.022991532 | LINC RNA_MICR RNA |
| 0.884304259  | 0.046411518 | LINC RNA_MICR RNA |
| 0.984067829  | 0.002408273 | LINC RNA_MICR RNA |
| -0.880522461 | 0.04867689  | LINC RNA_MICR RNA |
| 0.927274347  | 0.023284669 | LINC RNA_MICR RNA |
| 0.915259474  | 0.029232896 | LINC RNA_MICR RNA |
| 0.946695211  | 0.014654801 | LINC RNA_MICR RNA |
| 0.917841087  | 0.02791837  | LINC RNA_MICR RNA |
| 0.937394965  | 0.01862631  | LINC RNA_MICR RNA |
| 0.959212551  | 0.009827626 | LINC RNA_MICR RNA |
| 0.926911458  | 0.023457858 | LINC RNA_MICR RNA |
| 0.938414829  | 0.018175861 | LINC RNA_MICR RNA |
| 0.975145735  | 0.004686078 | CIRC RNA_MICR RNA |
| 0.998559698  | 6.56E-05    | CIRC RNA_MICR RNA |
| 0.975821469  | 0.004496735 | CIRC RNA_MICR RNA |
| 0.991961229  | 0.00086416  | CIRC RNA_MICR RNA |
| 0.899187551  | 0.037837842 | LINC RNA_MICR RNA |
| 0.997732087  | 0.000129606 | LINC RNA_MICR RNA |
| 0.970748954  | 0.005979036 | LINC RNA_MICR RNA |
| 0.890684451  | 0.042668193 | LINC RNA_MICR RNA |
| 0.978206511  | 0.003849454 | LINC RNA_MICR RNA |
| 0.908042194  | 0.033009106 | LINC RNA_MICR RNA |
| 0.987571677  | 0.001660127 | LINC RNA_MICR RNA |
| 0.883220062  | 0.047057476 | LINC RNA_MICR RNA |
| 0.989539423  | 0.001282285 | LINC RNA_MICR RNA |
| 0.892934221  | 0.041372269 | LINC RNA_MICR RNA |
| 0.965021645  | 0.00781162  | LINC RNA_MICR RNA |
| 0.998961776  | 4.02E-05    | LINC RNA_MICR RNA |
| 0.945255688  | 0.015249079 | LINC RNA_MICR RNA |
| 0.998559698  | 6.56E-05    | LINC RNA_MICR RNA |
| 0.957814464  | 0.010335032 | LINC RNA_MICR RNA |
| 0.968458395  | 0.006692588 | CIRC RNA_MICR RNA |
| 0.908436656  | 0.032798941 | CIRC RNA_MICR RNA |
| 0.900405628  | 0.03716117  | CIRC RNA_MICR RNA |
| 0.954550199  | 0.011551775 | CIRC RNA_MICR RNA |
| 0.945110838  | 0.015309302 | LINC RNA_MICR RNA |
| 0.997280856  | 0.000170139 | LINC RNA_MICR RNA |
| 0.997941573  | 0.000112073 | LINC RNA_MICR RNA |
| 0.999511752  | 1.29E-05    | LINC RNA_MICR RNA |
| 0.998211086  | 9.08E-05    | LINC RNA_MICR RNA |
| 0.921318156  | 0.026178966 | LINC RNA_MICR RNA |

|              |             |                   |
|--------------|-------------|-------------------|
| 0.889196002  | 0.043532527 | LINC RNA_MICRORNA |
| 0.979976026  | 0.003391178 | LINC RNA_MICRORNA |
| 0.90183458   | 0.036372336 | LINC RNA_MICRORNA |
| 0.978095346  | 0.00387888  | LINC RNA_MICRORNA |
| 0.997862074  | 0.000118627 | LINC RNA_MICRORNA |
| 0.943700392  | 0.015899737 | LINC RNA_MICRORNA |
| 0.995958934  | 0.000308187 | LINC RNA_MICRORNA |
| 0.982780357  | 0.002705485 | LINC RNA_MICRORNA |
| 0.923212494  | 0.025246617 | LINC RNA_MICRORNA |
| 0.93230863   | 0.020925425 | LINC RNA_MICRORNA |
| 0.968245837  | 0.006760135 | CIRC RNA_MICRORNA |
| 0.997529844  | 0.000147319 | CIRC RNA_MICRORNA |
| 0.986116865  | 0.001959561 | CIRC RNA_MICRORNA |
| 0.962504245  | 0.008666609 | LINC RNA_MICRORNA |
| 0.97563755   | 0.004548014 | LINC RNA_MICRORNA |
| 0.985672713  | 0.002054207 | LINC RNA_MICRORNA |
| -0.889000889 | 0.043646235 | LINC RNA_MICRORNA |
| 0.974610234  | 0.004837946 | LINC RNA_MICRORNA |
| -0.89147261  | 0.042212749 | LINC RNA_MICRORNA |
| 0.981399492  | 0.003036726 | LINC RNA_MICRORNA |
| 0.916827808  | 0.028431999 | LINC RNA_MICRORNA |
| 0.880592427  | 0.04863467  | LINC RNA_MICRORNA |
| 0.906073416  | 0.034064447 | LINC RNA_MICRORNA |
| 0.904254468  | 0.035048869 | LINC RNA_MICRORNA |
| 0.977302246  | 0.004090948 | LINC RNA_MICRORNA |
| 0.961883369  | 0.00888192  | LINC RNA_MICRORNA |
| 0.983075798  | 0.002636274 | LINC RNA_MICRORNA |
| 0.956749179  | 0.010727231 | LINC RNA_MICRORNA |
| 0.964337574  | 0.008041059 | LINC RNA_MICRORNA |
| 0.968245837  | 0.006760135 | LINC RNA_MICRORNA |
| 0.886200267  | 0.045288709 | LINC RNA_MICRORNA |
| 0.986872881  | 0.001801901 | LINC RNA_MICRORNA |
| 0.945697528  | 0.015065856 | CIRC RNA_MICRORNA |
| 0.97456052   | 0.004852125 | CIRC RNA_MICRORNA |
| 0.957031451  | 0.010622843 | CIRC RNA_MICRORNA |
| 0.970325098  | 0.006109071 | CIRC RNA_MICRORNA |
| 0.897464677  | 0.038801566 | LINC RNA_MICRORNA |
| 0.980754253  | 0.00319579  | LINC RNA_MICRORNA |
| 0.946555508  | 0.014712136 | LINC RNA_MICRORNA |
| 0.893112832  | 0.04126993  | LINC RNA_MICRORNA |
| 0.964400513  | 0.008019858 | LINC RNA_MICRORNA |
| 0.92754449   | 0.023156013 | LINC RNA_MICRORNA |
| 0.964372258  | 0.008029374 | LINC RNA_MICRORNA |
| 0.881931091  | 0.047829105 | LINC RNA_MICRORNA |
| 0.989805423  | 0.001233737 | LINC RNA_MICRORNA |
| 0.885248514  | 0.045851244 | LINC RNA_MICRORNA |
| 0.965214831  | 0.007747221 | LINC RNA_MICRORNA |
| 0.974562518  | 0.004851555 | LINC RNA_MICRORNA |
| 0.937377803  | 0.018633921 | LINC RNA_MICRORNA |
| 0.97456052   | 0.004852125 | LINC RNA_MICRORNA |
| 0.899317958  | 0.037765212 | LINC RNA_MICRORNA |
| 0.958448127  | 0.010104021 | LINC RNA_MICRORNA |
| 0.975698109  | 0.004531109 | CIRC RNA_MICRORNA |
| 0.966470055  | 0.007333085 | CIRC RNA_MICRORNA |

|              |             |                  |
|--------------|-------------|------------------|
| 0.921185361  | 0.026244733 | CIRCRNA_MICRORNA |
| 0.94907844   | 0.013688034 | CIRCRNA_MICRORNA |
| 0.962982924  | 0.008501798 | LINCRNA_MICRORNA |
| 0.978162256  | 0.00386116  | LINCRNA_MICRORNA |
| 0.972408509  | 0.00547887  | LINCRNA_MICRORNA |
| 0.983214664  | 0.002603949 | LINCRNA_MICRORNA |
| 0.982756014  | 0.002711214 | LINCRNA_MICRORNA |
| 0.971634845  | 0.00571025  | LINCRNA_MICRORNA |
| 0.968808259  | 0.006581893 | LINCRNA_MICRORNA |
| 0.989597901  | 0.001271559 | LINCRNA_MICRORNA |
| 0.966470055  | 0.007333085 | LINCRNA_MICRORNA |
| 0.933858981  | 0.020215474 | LINCRNA_MICRORNA |
| 0.999458122  | 1.51E-05    | LINCRNA_MICRORNA |
| 0.999731676  | 5.28E-06    | LINCRNA_MICRORNA |
| 0.986062811  | 0.001971    | LINCRNA_MICRORNA |
| 0.911073726  | 0.031405054 | LINCRNA_MICRORNA |
| 0.936323881  | 0.019103219 | LINCRNA_MICRORNA |
| 0.999970035  | 1.97E-07    | LINCRNA_MICRORNA |
| 0.982303763  | 0.002818377 | LINCRNA_MICRORNA |
| 0.996133259  | 0.000288469 | LINCRNA_MICRORNA |
| 0.992517644  | 0.000776074 | LINCRNA_MICRORNA |
| 0.9879135    | 0.001592193 | LINCRNA_MICRORNA |
| 0.89536742   | 0.039985078 | LINCRNA_MICRORNA |
| 0.969924433  | 0.006232835 | LINCRNA_MICRORNA |
| 0.921959475  | 0.025862104 | CIRCRNA_MICRORNA |
| 0.976517516  | 0.004304416 | CIRCRNA_MICRORNA |
| 0.977310841  | 0.00408863  | CIRCRNA_MICRORNA |
| 0.980952856  | 0.003146545 | CIRCRNA_MICRORNA |
| 0.892060755  | 0.041873898 | LINCRNA_MICRORNA |
| 0.908051739  | 0.033004015 | LINCRNA_MICRORNA |
| 0.938877249  | 0.017972804 | LINCRNA_MICRORNA |
| 0.984587432  | 0.002291605 | LINCRNA_MICRORNA |
| 0.920193943  | 0.026737406 | LINCRNA_MICRORNA |
| 0.935547377  | 0.019451401 | LINCRNA_MICRORNA |
| 0.940323561  | 0.017342511 | LINCRNA_MICRORNA |
| 0.934407908  | 0.019966014 | LINCRNA_MICRORNA |
| 0.946631917  | 0.014680768 | LINCRNA_MICRORNA |
| 0.925866443  | 0.023958901 | LINCRNA_MICRORNA |
| 0.989934992  | 0.001210315 | LINCRNA_MICRORNA |
| 0.928626967  | 0.022642799 | LINCRNA_MICRORNA |
| 0.972143749  | 0.005557696 | LINCRNA_MICRORNA |
| 0.974982398  | 0.00473223  | LINCRNA_MICRORNA |
| 0.908967501  | 0.032516793 | LINCRNA_MICRORNA |
| 0.976517516  | 0.004304416 | LINCRNA_MICRORNA |
| 0.922014328  | 0.02583506  | LINCRNA_MICRORNA |
| 0.979026711  | 0.00363465  | LINCRNA_MICRORNA |
| -0.878383176 | 0.049973387 | CIRCRNA_MICRORNA |
| 0.937173763  | 0.018724481 | LINCRNA_MICRORNA |
| 0.93488581   | 0.019749651 | LINCRNA_MICRORNA |
| 0.933209064  | 0.020512123 | LINCRNA_MICRORNA |
| 0.963062671  | 0.008474442 | LINCRNA_MICRORNA |
| 0.944636717  | 0.015506964 | LINCRNA_MICRORNA |
| -0.952346489 | 0.012397876 | LINCRNA_MICRORNA |
| 0.937191676  | 0.018716525 | LINCRNA_MICRORNA |

|              |             |                  |
|--------------|-------------|------------------|
| -0.968575184 | 0.006655569 | LINC RNA_MIC RNA |
| 0.947814784  | 0.014197962 | LINC RNA_MIC RNA |
| 0.986931686  | 0.001789823 | LINC RNA_MIC RNA |
| 0.932887258  | 0.020659526 | LINC RNA_MIC RNA |
| 0.922987656  | 0.025356706 | LINC RNA_MIC RNA |
| 0.953445568  | 0.011973447 | LINC RNA_MIC RNA |
| 0.893370698  | 0.041122322 | LINC RNA_MIC RNA |
| 0.972977429  | 0.005310747 | LINC RNA_MIC RNA |
| 0.94600577   | 0.014938462 | LINC RNA_MIC RNA |
| 0.957982681  | 0.01027354  | LINC RNA_MIC RNA |
| 0.989160303  | 0.001352546 | LINC RNA_MIC RNA |
| -0.95676361  | 0.010721886 | LINC RNA_MIC RNA |
| 0.880858112  | 0.048474451 | LINC RNA_MIC RNA |
| 0.984257055  | 0.002365563 | LINC RNA_MIC RNA |
| 0.975016869  | 0.004722478 | CIRC RNA_MIC RNA |
| 0.913446691  | 0.030167484 | CIRC RNA_MIC RNA |
| 0.909810917  | 0.03207012  | CIRC RNA_MIC RNA |
| 0.940783818  | 0.017143473 | CIRC RNA_MIC RNA |
| 0.953168751  | 0.012079889 | LINC RNA_MIC RNA |
| 0.999731185  | 5.29E-06    | LINC RNA_MIC RNA |
| 0.998068626  | 0.000101861 | LINC RNA_MIC RNA |
| 0.998763614  | 5.22E-05    | LINC RNA_MIC RNA |
| 0.99954961   | 1.15E-05    | LINC RNA_MIC RNA |
| 0.909309469  | 0.032335448 | LINC RNA_MIC RNA |
| 0.882716685  | 0.047358345 | LINC RNA_MIC RNA |
| 0.900070321  | 0.037347053 | LINC RNA_MIC RNA |
| 0.983630434  | 0.002507959 | LINC RNA_MIC RNA |
| 0.914597623  | 0.02957302  | LINC RNA_MIC RNA |
| 0.984222585  | 0.002373325 | LINC RNA_MIC RNA |
| 0.997040538  | 0.000193179 | LINC RNA_MIC RNA |
| 0.955492117  | 0.011196142 | LINC RNA_MIC RNA |
| 0.998630293  | 6.08E-05    | LINC RNA_MIC RNA |
| 0.987171976  | 0.001740749 | LINC RNA_MIC RNA |
| 0.924368237  | 0.024683168 | LINC RNA_MIC RNA |
| 0.941082284  | 0.017014802 | LINC RNA_MIC RNA |
| 0.930154296  | 0.021925035 | CIRC RNA_MIC RNA |
| 0.88865754   | 0.043846561 | CIRC RNA_MIC RNA |
| 0.90549114   | 0.0343786   | CIRC RNA_MIC RNA |
| 0.984495249  | 0.002312163 | LINC RNA_MIC RNA |
| 0.987259063  | 0.001723075 | LINC RNA_MIC RNA |
| 0.973650443  | 0.005114107 | LINC RNA_MIC RNA |
| 0.96240115   | 0.008702241 | LINC RNA_MIC RNA |
| 0.976810856  | 0.0042242   | LINC RNA_MIC RNA |
| 0.984107025  | 0.002399405 | LINC RNA_MIC RNA |
| 0.972990272  | 0.005306972 | LINC RNA_MIC RNA |
| 0.970503884  | 0.006054109 | LINC RNA_MIC RNA |
| 0.991898296  | 0.000874319 | LINC RNA_MIC RNA |
| 0.989106323  | 0.001362651 | LINC RNA_MIC RNA |
| 0.955746675  | 0.011100657 | LINC RNA_MIC RNA |
| 0.901358942  | 0.036634305 | LINC RNA_MIC RNA |
| 0.95755042   | 0.010431797 | LINC RNA_MIC RNA |
| 0.989782654  | 0.001237868 | LINC RNA_MIC RNA |
| 0.9886366    | 0.001451626 | LINC RNA_MIC RNA |
| 0.995938544  | 0.000310522 | LINC RNA_MIC RNA |

|              |             |                   |
|--------------|-------------|-------------------|
| 0.879932908  | 0.049033108 | LINC RNA_MICR RNA |
| 0.910581429  | 0.031663794 | LINC RNA_MICR RNA |
| 0.991736968  | 0.000900542 | LINC RNA_MICR RNA |
| 0.992219232  | 0.000822925 | LINC RNA_MICR RNA |
| 0.997695451  | 0.000132759 | LINC RNA_MICR RNA |
| 0.968649698  | 0.006631985 | LINC RNA_MICR RNA |
| 0.98811655   | 0.001552287 | LINC RNA_MICR RNA |
| 0.881394977  | 0.04815121  | LINC RNA_MICR RNA |
| 0.989023876  | 0.001378133 | LINC RNA_MICR RNA |
| 0.940107698  | 0.017436118 | CIRC RNA_MICR RNA |
| 0.919648573  | 0.027009678 | LINC RNA_MICR RNA |
| 0.984629185  | 0.002282314 | LINC RNA_MICR RNA |
| 0.974051107  | 0.004998209 | LINC RNA_MICR RNA |
| 0.981769279  | 0.002946785 | LINC RNA_MICR RNA |
| 0.986313547  | 0.001918124 | LINC RNA_MICR RNA |
| 0.881506877  | 0.048083922 | LINC RNA_MICR RNA |
| 0.90012313   | 0.037317757 | LINC RNA_MICR RNA |
| 0.951805983  | 0.012608367 | LINC RNA_MICR RNA |
| 0.905502132  | 0.034372661 | LINC RNA_MICR RNA |
| 0.963126792  | 0.008452467 | LINC RNA_MICR RNA |
| 0.97683758   | 0.004216917 | LINC RNA_MICR RNA |
| 0.961650655  | 0.008963067 | LINC RNA_MICR RNA |
| 0.983897212  | 0.002446998 | LINC RNA_MICR RNA |
| 0.966892688  | 0.007195337 | LINC RNA_MICR RNA |
| 0.897213437  | 0.038942746 | LINC RNA_MICR RNA |
| 0.927075958  | 0.023379299 | LINC RNA_MICR RNA |
| -0.891440827 | 0.042231085 | CIRC RNA_MICR RNA |
| -0.923737887 | 0.024989968 | CIRC RNA_MICR RNA |
| -0.945689419 | 0.015069212 | LINC RNA_MICR RNA |
| -0.925248764 | 0.024256657 | LINC RNA_MICR RNA |
| 0.914677949  | 0.029531673 | LINC RNA_MICR RNA |
| -0.901669374 | 0.036463259 | LINC RNA_MICR RNA |
| -0.880302092 | 0.048809945 | LINC RNA_MICR RNA |
| -0.882743248 | 0.047342453 | LINC RNA_MICR RNA |
| -0.906206248 | 0.03399291  | LINC RNA_MICR RNA |
| -0.897664475 | 0.03868941  | LINC RNA_MICR RNA |
| -0.954458448 | 0.01158661  | LINC RNA_MICR RNA |
| -0.919315554 | 0.027176371 | LINC RNA_MICR RNA |
| -0.900048087 | 0.037359389 | LINC RNA_MICR RNA |
| -0.90934959  | 0.032314194 | LINC RNA_MICR RNA |
| -0.936845347 | 0.018870543 | LINC RNA_MICR RNA |
| -0.892042918 | 0.041884161 | LINC RNA_MICR RNA |
| 0.939127381  | 0.017863276 | LINC RNA_MICR RNA |
| -0.913394675 | 0.03019444  | LINC RNA_MICR RNA |
| -0.931280195 | 0.021400734 | LINC RNA_MICR RNA |
| -0.880772916 | 0.04852581  | LINC RNA_MICR RNA |
| -0.972085645 | 0.005575045 | LINC RNA_MICR RNA |
| -0.881282147 | 0.048219087 | LINC RNA_MICR RNA |
| 0.969221225  | 0.006452018 | LINC RNA_MICR RNA |
| 0.892773947  | 0.041464169 | CIRC RNA_MICR RNA |
| 0.895742522  | 0.039772572 | CIRC RNA_MICR RNA |
| 0.956686048  | 0.010750623 | LINC RNA_MICR RNA |
| 0.907876032  | 0.033097763 | LINC RNA_MICR RNA |
| 0.989868026  | 0.001222401 | CIRC RNA_MICR RNA |

|              |             |                  |
|--------------|-------------|------------------|
| 0.946099834  | 0.014899656 | CIRC RNA_MIC RNA |
| 0.997529844  | 0.000147319 | CIRC RNA_MIC RNA |
| 0.909717652  | 0.032119416 | CIRC RNA_MIC RNA |
| 0.968936854  | 0.00654136  | LINC RNA_MIC RNA |
| 0.954622245  | 0.011524444 | LINC RNA_MIC RNA |
| 0.890944175  | 0.042517938 | LINC RNA_MIC RNA |
| 0.963635356  | 0.008278843 | LINC RNA_MIC RNA |
| 0.992690446  | 0.000749365 | LINC RNA_MIC RNA |
| 0.974547137  | 0.004855945 | CIRC RNA_MIC RNA |
| 0.999588731  | 1.00E-05    | CIRC RNA_MIC RNA |
| 0.97780954   | 0.003954872 | CIRC RNA_MIC RNA |
| 0.993447963  | 0.000636021 | CIRC RNA_MIC RNA |
| 0.902065003  | 0.036245641 | LINC RNA_MIC RNA |
| 0.997559498  | 0.000144675 | LINC RNA_MIC RNA |
| 0.969664464  | 0.006313574 | LINC RNA_MIC RNA |
| 0.892552922  | 0.041591011 | LINC RNA_MIC RNA |
| 0.97311889   | 0.005269213 | LINC RNA_MIC RNA |
| 0.892563664  | 0.041584844 | LINC RNA_MIC RNA |
| 0.987034892  | 0.00176869  | LINC RNA_MIC RNA |
| 0.889732421  | 0.043220397 | LINC RNA_MIC RNA |
| 0.990882019  | 0.001043727 | LINC RNA_MIC RNA |
| 0.894595128  | 0.040423737 | LINC RNA_MIC RNA |
| 0.971891073  | 0.005633271 | LINC RNA_MIC RNA |
| 0.999908959  | 1.04E-06    | LINC RNA_MIC RNA |
| 0.948438697  | 0.013945432 | LINC RNA_MIC RNA |
| 0.999588731  | 1.00E-05    | LINC RNA_MIC RNA |
| 0.963014904  | 0.008490824 | LINC RNA_MIC RNA |
| 0.92777501   | 0.023046409 | LINC RNA_MIC RNA |
| 0.918466967  | 0.027602621 | LINC RNA_MIC RNA |
| -0.894543133 | 0.040453325 | LINC RNA_MIC RNA |
| 0.910697242  | 0.031602864 | LINC RNA_MIC RNA |
| 0.883526721  | 0.046874484 | LINC RNA_MIC RNA |
| -0.878855499 | 0.049686214 | LINC RNA_MIC RNA |
| 0.917620542  | 0.028029907 | LINC RNA_MIC RNA |
| 0.958011139  | 0.010263148 | CIRC RNA_m RNA   |
| 0.88765817   | 0.044431295 | LINC RNA_m RNA   |
| 0.923952539  | 0.024885357 | LINC RNA_m RNA   |
| -0.890348983 | 0.042862516 | LINC RNA_m RNA   |
| 0.911668554  | 0.031093337 | LINC RNA_m RNA   |
| 0.943114835  | 0.016146989 | LINC RNA_m RNA   |
| 0.962693041  | 0.008601482 | LINC RNA_m RNA   |
| 0.999823983  | 2.80E-06    | LINC RNA_m RNA   |
| 0.928377947  | 0.022760532 | LINC RNA_m RNA   |
| 0.94470791   | 0.015477231 | LINC RNA_m RNA   |
| 0.978312741  | 0.003821404 | LINC RNA_m RNA   |
| 0.943405086  | 0.016024275 | MIC RNA_m RNA    |
| 0.940887754  | 0.01709863  | CIRC RNA_m RNA   |
| 0.980173285  | 0.00334129  | CIRC RNA_m RNA   |
| 0.998943117  | 4.12E-05    | LINC RNA_m RNA   |
| 0.943432857  | 0.01601255  | LINC RNA_m RNA   |
| 0.945530966  | 0.015134841 | LINC RNA_m RNA   |
| 0.98714092   | 0.001747066 | LINC RNA_m RNA   |
| 0.938407053  | 0.018179282 | LINC RNA_m RNA   |
| 0.991769995  | 0.000895153 | LINC RNA_m RNA   |

|              |             |               |
|--------------|-------------|---------------|
| 0.985948715  | 0.001995218 | LINC RNA_mRNA |
| 0.98395945   | 0.002432848 | LINC RNA_mRNA |
| 0.917553811  | 0.028063683 | LINC RNA_mRNA |
| 0.990573888  | 0.001097028 | LINC RNA_mRNA |
| 0.945555792  | 0.015124552 | LINC RNA_mRNA |
| 0.987497405  | 0.001675012 | LINC RNA_mRNA |
| 0.974560729  | 0.004852066 | LINC RNA_mRNA |
| 0.913966482  | 0.029898538 | LINC RNA_mRNA |
| 0.973619755  | 0.00512302  | LINC RNA_mRNA |
| 0.964354973  | 0.008035196 | LINC RNA_mRNA |
| 0.973108797  | 0.005272173 | LINC RNA_mRNA |
| -0.88295813  | 0.047213958 | LINC RNA_mRNA |
| -0.957921348 | 0.010295946 | MIC RNA_mRNA  |
| 0.947184916  | 0.014454398 | MIC RNA_mRNA  |
| 0.925688188  | 0.024044708 | MIC RNA_mRNA  |
| 0.927443004  | 0.023204319 | MIC RNA_mRNA  |
| 0.950858255  | 0.012980227 | MIC RNA_mRNA  |
| 0.983642182  | 0.002505264 | MIC RNA_mRNA  |
| 0.983099813  | 0.002630674 | MIC RNA_mRNA  |
| 0.889225968  | 0.043515071 | CIRC RNA_mRNA |
| 0.975364205  | 0.00462458  | CIRC RNA_mRNA |
| 0.99860657   | 6.24E-05    | CIRC RNA_mRNA |
| 0.990408409  | 0.001126015 | CIRC RNA_mRNA |
| 0.952574576  | 0.012309399 | LINC RNA_mRNA |
| 0.966391781  | 0.007358691 | LINC RNA_mRNA |
| 0.980707208  | 0.003207493 | LINC RNA_mRNA |
| 0.9819823    | 0.002895381 | LINC RNA_mRNA |
| 0.880982528  | 0.04839948  | LINC RNA_mRNA |
| 0.976522899  | 0.00430294  | LINC RNA_mRNA |
| 0.904490323  | 0.034920718 | LINC RNA_mRNA |
| 0.898019933  | 0.038490129 | LINC RNA_mRNA |
| 0.916095783  | 0.02880493  | LINC RNA_mRNA |
| 0.918329833  | 0.027671705 | LINC RNA_mRNA |
| 0.971367209  | 0.005791023 | LINC RNA_mRNA |
| 0.972813495  | 0.005359014 | LINC RNA_mRNA |
| 0.976528155  | 0.004301498 | LINC RNA_mRNA |
| 0.965052498  | 0.007801323 | LINC RNA_mRNA |
| 0.971951116  | 0.005615282 | LINC RNA_mRNA |
| 0.975364205  | 0.00462458  | LINC RNA_mRNA |
| 0.897189468  | 0.038956223 | LINC RNA_mRNA |
| 0.990292081  | 0.001146541 | LINC RNA_mRNA |
| 0.968730428  | 0.006606466 | MIC RNA_mRNA  |
| 0.980149907  | 0.00334719  | MIC RNA_mRNA  |
| 0.913309624  | 0.030238533 | MIC RNA_mRNA  |
| 0.957369178  | 0.010498388 | MIC RNA_mRNA  |
| 0.998727232  | 5.45E-05    | MIC RNA_mRNA  |
| 0.967340369  | 0.007050366 | MIC RNA_mRNA  |
| 0.986168557  | 0.001948642 | MIC RNA_mRNA  |
| 0.998803243  | 4.97E-05    | MIC RNA_mRNA  |
| 0.985638598  | 0.002061538 | MIC RNA_mRNA  |
| 0.993651041  | 0.000606699 | MIC RNA_mRNA  |
| 0.998727232  | 5.45E-05    | MIC RNA_mRNA  |
| 0.89005743   | 0.04303163  | MIC RNA_mRNA  |
| 0.992802323  | 0.000732239 | MIC RNA_mRNA  |

|              |             |               |
|--------------|-------------|---------------|
| 0.90410543   | 0.035129926 | CIRCRNA_mRNA  |
| 0.958436319  | 0.01010831  | CIRCRNA_mRNA  |
| 0.992585451  | 0.000765557 | LINCRNA_mRNA  |
| 0.942874785  | 0.016248709 | LINCRNA_mRNA  |
| 0.879642988  | 0.049208584 | LINCRNA_mRNA  |
| 0.917931778  | 0.027872546 | LINCRNA_mRNA  |
| 0.988590062  | 0.001460542 | LINCRNA_mRNA  |
| -0.915565127 | 0.029076248 | LINCRNA_mRNA  |
| 0.953245818  | 0.012050224 | LINCRNA_mRNA  |
| 0.990826233  | 0.001053312 | LINCRNA_mRNA  |
| 0.986137546  | 0.00195519  | LINCRNA_mRNA  |
| 0.973920774  | 0.005035814 | LINCRNA_mRNA  |
| 0.89648452   | 0.039353272 | LINCRNA_mRNA  |
| 0.998623515  | 6.13E-05    | LINCRNA_mRNA  |
| 0.941174148  | 0.016975262 | LINCRNA_mRNA  |
| 0.994037482  | 0.000552191 | LINCRNA_mRNA  |
| 0.988607029  | 0.001457289 | LINCRNA_mRNA  |
| 0.895177741  | 0.040092674 | LINCRNA_mRNA  |
| -0.908473172 | 0.032779507 | LINCRNA_mRNA  |
| 0.964048638  | 0.008138623 | LINCRNA_mRNA  |
| 0.971055803  | 0.005885475 | LINCRNA_mRNA  |
| 0.961739796  | 0.008931955 | LINCRNA_mRNA  |
| -0.940876844 | 0.017103335 | MICRORNA_mRNA |
| 0.97097142   | 0.005911156 | MICRORNA_mRNA |
| 0.914213976  | 0.029770754 | MICRORNA_mRNA |
| 0.955831534  | 0.011068886 | MICRORNA_mRNA |
| 0.945382072  | 0.015196596 | MICRORNA_mRNA |
| 0.978891252  | 0.003669845 | MICRORNA_mRNA |
| 0.994646663  | 0.000469809 | MICRORNA_mRNA |
| 0.997255078  | 0.000172564 | CIRCRNA_mRNA  |
| 0.982387785  | 0.002798364 | CIRCRNA_mRNA  |
| 0.932566264  | 0.020806898 | CIRCRNA_mRNA  |
| 0.962917393  | 0.008524299 | CIRCRNA_mRNA  |
| 0.976210612  | 0.004388872 | LINCRNA_mRNA  |
| 0.996035277  | 0.000299498 | LINCRNA_mRNA  |
| 0.992205449  | 0.00082511  | LINCRNA_mRNA  |
| 0.999902516  | 1.16E-06    | LINCRNA_mRNA  |
| 0.976188842  | 0.004394884 | LINCRNA_mRNA  |
| 0.95126445   | 0.012820416 | LINCRNA_mRNA  |
| 0.985081927  | 0.002182372 | LINCRNA_mRNA  |
| 0.981359402  | 0.003046531 | LINCRNA_mRNA  |
| 0.982387785  | 0.002798364 | LINCRNA_mRNA  |
| 0.91953943   | 0.027064273 | LINCRNA_mRNA  |
| 0.987285116  | 0.001717799 | MICRORNA_mRNA |
| 0.946549324  | 0.014714676 | MICRORNA_mRNA |
| 0.984602595  | 0.002288229 | MICRORNA_mRNA |
| 0.963906206  | 0.008186859 | MICRORNA_mRNA |
| 0.904976732  | 0.034656904 | MICRORNA_mRNA |
| 0.987269123  | 0.001721037 | MICRORNA_mRNA |
| 0.935195329  | 0.01960993  | MICRORNA_mRNA |
| 0.956074799  | 0.010977973 | MICRORNA_mRNA |
| 0.880752552  | 0.048538088 | MICRORNA_mRNA |
| 0.904976732  | 0.034656904 | MICRORNA_mRNA |
| 0.997409034  | 0.000158255 | MICRORNA_mRNA |



|              |             |               |
|--------------|-------------|---------------|
| 0.957676073  | 0.010385712 | MICRORNA_mRNA |
| 0.971457992  | 0.005763582 | CIRCRNA_mRNA  |
| 0.941371524  | 0.016890409 | CIRCRNA_mRNA  |
| 0.943080248  | 0.016161633 | CIRCRNA_mRNA  |
| 0.938255346  | 0.018246064 | CIRCRNA_mRNA  |
| 0.902872637  | 0.035802691 | LINCRNA_mRNA  |
| 0.975222075  | 0.004664558 | LINCRNA_mRNA  |
| 0.908752952  | 0.032630733 | LINCRNA_mRNA  |
| 0.997624899  | 0.0001389   | LINCRNA_mRNA  |
| 0.997471439  | 0.000152574 | LINCRNA_mRNA  |
| 0.991688991  | 0.00090839  | LINCRNA_mRNA  |
| 0.995463428  | 0.000366547 | LINCRNA_mRNA  |
| 0.915982022  | 0.028863026 | LINCRNA_mRNA  |
| 0.919179434  | 0.027244601 | LINCRNA_mRNA  |
| 0.932702727  | 0.020744205 | LINCRNA_mRNA  |
| 0.975324522  | 0.004635731 | LINCRNA_mRNA  |
| 0.946558984  | 0.014710709 | LINCRNA_mRNA  |
| 0.996038103  | 0.000299178 | LINCRNA_mRNA  |
| 0.996407984  | 0.00025829  | LINCRNA_mRNA  |
| 0.974359509  | 0.004909598 | LINCRNA_mRNA  |
| 0.998890152  | 4.44E-05    | LINCRNA_mRNA  |
| 0.882504638  | 0.047485267 | LINCRNA_mRNA  |
| 0.997409719  | 0.000158192 | LINCRNA_mRNA  |
| 0.951578775  | 0.012697195 | LINCRNA_mRNA  |
| 0.96711138   | 0.007124398 | LINCRNA_mRNA  |
| 0.978435146  | 0.003789168 | MICRORNA_mRNA |
| 0.995962971  | 0.000307725 | MICRORNA_mRNA |
| 0.991981624  | 0.000860876 | MICRORNA_mRNA |
| 0.993173124  | 0.000676428 | MICRORNA_mRNA |
| 0.968883568  | 0.006558146 | MICRORNA_mRNA |
| 0.938103548  | 0.018312966 | MICRORNA_mRNA |
| 0.931435875  | 0.021328562 | CIRCRNA_mRNA  |
| 0.977746276  | 0.003971759 | CIRCRNA_mRNA  |
| 0.993480431  | 0.000631302 | LINCRNA_mRNA  |
| 0.902369698  | 0.036078325 | LINCRNA_mRNA  |
| 0.954678132  | 0.011503259 | LINCRNA_mRNA  |
| 0.986711804  | 0.001835124 | LINCRNA_mRNA  |
| -0.883220987 | 0.047056924 | LINCRNA_mRNA  |
| 0.892093772  | 0.041854901 | LINCRNA_mRNA  |
| 0.893204309  | 0.041217548 | LINCRNA_mRNA  |
| 0.884869406  | 0.046075929 | LINCRNA_mRNA  |
| 0.911848941  | 0.030999002 | LINCRNA_mRNA  |
| 0.999929313  | 7.13E-07    | LINCRNA_mRNA  |
| 0.998677169  | 5.77E-05    | LINCRNA_mRNA  |
| 0.994404671  | 0.000502004 | LINCRNA_mRNA  |
| 0.943098985  | 0.016153699 | LINCRNA_mRNA  |
| 0.898151455  | 0.038416477 | LINCRNA_mRNA  |
| 0.990893803  | 0.001041706 | LINCRNA_mRNA  |
| 0.977204657  | 0.0041173   | LINCRNA_mRNA  |
| 0.904511094  | 0.034909439 | LINCRNA_mRNA  |
| 0.985243734  | 0.002147014 | LINCRNA_mRNA  |
| 0.959741117  | 0.009637986 | LINCRNA_mRNA  |
| 0.941003399  | 0.017048779 | LINCRNA_mRNA  |
| 0.977218875  | 0.004113457 | LINCRNA_mRNA  |

|              |             |               |
|--------------|-------------|---------------|
| 0.93390373   | 0.0201951   | LINC RNA_mRNA |
| 0.987005907  | 0.001774616 | LINC RNA_mRNA |
| -0.91783243  | 0.027922745 | MIC RNA_mRNA  |
| 0.882227171  | 0.047651508 | MIC RNA_mRNA  |
| 0.881404288  | 0.04814561  | MIC RNA_mRNA  |
| 0.933595954  | 0.020335361 | MIC RNA_mRNA  |
| 0.956121576  | 0.01096052  | MIC RNA_mRNA  |
| 0.959157671  | 0.009847386 | MIC RNA_mRNA  |
| 0.967199521  | 0.007095872 | MIC RNA_mRNA  |
| 0.997546939  | 0.000145793 | MIC RNA_mRNA  |
| 0.977773289  | 0.003964546 | MIC RNA_mRNA  |
| 0.93558162   | 0.019436004 | CIRC RNA_mRNA |
| 0.975077138  | 0.004705442 | CIRC RNA_mRNA |
| 0.9879914    | 0.001576843 | LINC RNA_mRNA |
| 0.90999626   | 0.031972229 | LINC RNA_mRNA |
| 0.959543152  | 0.00970887  | LINC RNA_mRNA |
| 0.994742876  | 0.000457208 | LINC RNA_mRNA |
| 0.919092354  | 0.027288278 | LINC RNA_mRNA |
| 0.922602022  | 0.025545886 | LINC RNA_mRNA |
| 0.900836559  | 0.036922711 | LINC RNA_mRNA |
| 0.91473627   | 0.029501665 | LINC RNA_mRNA |
| 0.99352903   | 0.000624261 | LINC RNA_mRNA |
| 0.997173564  | 0.000180305 | LINC RNA_mRNA |
| 0.989205121  | 0.001344176 | LINC RNA_mRNA |
| 0.957486507  | 0.010455264 | LINC RNA_mRNA |
| 0.929646913  | 0.022162648 | LINC RNA_mRNA |
| 0.977752048  | 0.003970217 | LINC RNA_mRNA |
| 0.981525586  | 0.003005957 | LINC RNA_mRNA |
| 0.930289493  | 0.02186186  | LINC RNA_mRNA |
| 0.989408283  | 0.001306448 | LINC RNA_mRNA |
| 0.954305753  | 0.011644661 | LINC RNA_mRNA |
| 0.959182122  | 0.00983858  | LINC RNA_mRNA |
| 0.99215468   | 0.000833179 | LINC RNA_mRNA |
| 0.910310962  | 0.031806234 | LINC RNA_mRNA |
| 0.99116191   | 0.000996082 | LINC RNA_mRNA |
| 0.892831398  | 0.04143122  | MIC RNA_mRNA  |
| -0.884428904 | 0.046337436 | MIC RNA_mRNA  |
| 0.903807556  | 0.035292109 | MIC RNA_mRNA  |
| 0.909852967  | 0.032047903 | MIC RNA_mRNA  |
| 0.915730208  | 0.028991757 | MIC RNA_mRNA  |
| 0.903594449  | 0.035408286 | MIC RNA_mRNA  |
| 0.971951768  | 0.005615086 | MIC RNA_mRNA  |
| 0.950377681  | 0.013170133 | MIC RNA_mRNA  |
| 0.989137506  | 0.001356811 | MIC RNA_mRNA  |
| 0.9904749    | 0.001114337 | MIC RNA_mRNA  |
| 0.959465622  | 0.009736678 | MIC RNA_mRNA  |
| 0.942000601  | 0.01662089  | CIRC RNA_mRNA |
| 0.888199702  | 0.044114138 | LINC RNA_mRNA |
| -0.888507214 | 0.04393436  | LINC RNA_mRNA |
| 0.887690492  | 0.044412345 | LINC RNA_mRNA |
| 0.889099089  | 0.043588994 | LINC RNA_mRNA |
| 0.941591644  | 0.016795942 | LINC RNA_mRNA |
| 0.988736881  | 0.001432474 | LINC RNA_mRNA |
| 0.881785472  | 0.047916527 | LINC RNA_mRNA |

|              |             |               |
|--------------|-------------|---------------|
| 0.90162841   | 0.036485815 | LINC RNA_mRNA |
| 0.915090118  | 0.029319807 | LINC RNA_mRNA |
| 0.941652652  | 0.016769789 | LINC RNA_mRNA |
| 0.918305714  | 0.027683861 | MIC RNA_mRNA  |
| 0.886316263  | 0.0452203   | MIC RNA_mRNA  |
| 0.883055412  | 0.047155821 | MIC RNA_mRNA  |
| 0.898410487  | 0.038271552 | CIRC RNA_mRNA |
| 0.905155832  | 0.034559926 | LINC RNA_mRNA |
| 0.938079946  | 0.018323376 | LINC RNA_mRNA |
| -0.879700815 | 0.049173568 | LINC RNA_mRNA |
| 0.952835991  | 0.012208249 | LINC RNA_mRNA |
| 0.982861394  | 0.002686442 | LINC RNA_mRNA |
| 0.975807363  | 0.004500662 | LINC RNA_mRNA |
| -0.947954556 | 0.014141261 | LINC RNA_mRNA |
| 0.899114721  | 0.037878425 | LINC RNA_mRNA |
| -0.950143409 | 0.013263036 | LINC RNA_mRNA |
| 0.978546019  | 0.003760046 | LINC RNA_mRNA |
| 0.992430239  | 0.000789702 | LINC RNA_mRNA |
| 0.889573436  | 0.043312832 | LINC RNA_mRNA |
| 0.980780245  | 0.003189331 | LINC RNA_mRNA |
| 0.942097138  | 0.016579655 | LINC RNA_mRNA |
| 0.973652381  | 0.005113545 | LINC RNA_mRNA |
| 0.924338877  | 0.024697431 | LINC RNA_mRNA |
| 0.897633787  | 0.038706629 | LINC RNA_mRNA |
| 0.973426234  | 0.005179344 | LINC RNA_mRNA |
| 0.911070771  | 0.031406605 | LINC RNA_mRNA |
| -0.941989588 | 0.016625596 | LINC RNA_mRNA |
| 0.98733689   | 0.001707331 | LINC RNA_mRNA |
| -0.927823235 | 0.023023501 | MIC RNA_mRNA  |
| 0.990568818  | 0.001097912 | MIC RNA_mRNA  |
| 0.926051016  | 0.023870157 | MIC RNA_mRNA  |
| 0.967391508  | 0.007033868 | MIC RNA_mRNA  |
| 0.897417003  | 0.038828343 | MIC RNA_mRNA  |
| 0.948310445  | 0.013997221 | MIC RNA_mRNA  |
| 0.926051016  | 0.023870157 | MIC RNA_mRNA  |
| 0.885352     | 0.045789973 | MIC RNA_mRNA  |
| 0.963816067  | 0.008217434 | MIC RNA_mRNA  |
| 0.989976388  | 0.001202863 | CIRC RNA_mRNA |
| 0.993608471  | 0.000612808 | CIRC RNA_mRNA |
| 0.956656384  | 0.01076162  | CIRC RNA_mRNA |
| 0.980269259  | 0.003317106 | CIRC RNA_mRNA |
| 0.98906111   | 0.001371134 | LINC RNA_mRNA |
| 0.986670926  | 0.001843587 | LINC RNA_mRNA |
| 0.986133827  | 0.001955975 | LINC RNA_mRNA |
| 0.996873637  | 0.000209744 | LINC RNA_mRNA |
| 0.984324702  | 0.002350357 | LINC RNA_mRNA |
| 0.961419212  | 0.009044011 | LINC RNA_mRNA |
| 0.995208151  | 0.000397902 | LINC RNA_mRNA |
| 0.966981793  | 0.007166405 | LINC RNA_mRNA |
| 0.993608471  | 0.000612808 | LINC RNA_mRNA |
| 0.940834339  | 0.017121671 | LINC RNA_mRNA |
| 0.996436926  | 0.000255175 | MIC RNA_mRNA  |
| 0.959702521  | 0.009651793 | MIC RNA_mRNA  |
| 0.978501259  | 0.003771794 | MIC RNA_mRNA  |

|              |             |               |
|--------------|-------------|---------------|
| 0.969181816  | 0.006464375 | MICRORNA_mRNA |
| 0.933836918  | 0.020225521 | MICRORNA_mRNA |
| 0.996021983  | 0.000301006 | MICRORNA_mRNA |
| 0.88262068   | 0.047415796 | MICRORNA_mRNA |
| 0.958329112  | 0.010147279 | MICRORNA_mRNA |
| 0.970331443  | 0.006107117 | MICRORNA_mRNA |
| 0.909789913  | 0.03208122  | MICRORNA_mRNA |
| 0.933836918  | 0.020225521 | MICRORNA_mRNA |
| 0.990277611  | 0.001149103 | MICRORNA_mRNA |
| 0.975901032  | 0.004474612 | MICRORNA_mRNA |
| 0.940983311  | 0.017057435 | CIRCRNA_mRNA  |
| 0.904008182  | 0.035182848 | CIRCRNA_mRNA  |
| 0.88197465   | 0.047802964 | LINCRNA_mRNA  |
| 0.985730964  | 0.00204171  | LINCRNA_mRNA  |
| 0.99680042   | 0.000217153 | LINCRNA_mRNA  |
| 0.992754616  | 0.000739526 | LINCRNA_mRNA  |
| -0.931798152 | 0.021160919 | LINCRNA_mRNA  |
| 0.878595609  | 0.049844163 | LINCRNA_mRNA  |
| -0.959374729 | 0.009769311 | LINCRNA_mRNA  |
| -0.894191645 | 0.040653519 | LINCRNA_mRNA  |
| 0.994268821  | 0.000520387 | LINCRNA_mRNA  |
| 0.990175531  | 0.00116723  | LINCRNA_mRNA  |
| 0.988065199  | 0.001562347 | LINCRNA_mRNA  |
| 0.912533189  | 0.030642011 | LINCRNA_mRNA  |
| 0.9952378    | 0.000394217 | LINCRNA_mRNA  |
| 0.936708643  | 0.018931451 | LINCRNA_mRNA  |
| 0.934956977  | 0.019717497 | LINCRNA_mRNA  |
| -0.899714982 | 0.037544363 | LINCRNA_mRNA  |
| 0.969561717  | 0.006345578 | LINCRNA_mRNA  |
| -0.914343925 | 0.02970373  | MICRORNA_mRNA |
| 0.9727462    | 0.00537887  | MICRORNA_mRNA |
| 0.892877906  | 0.041404552 | MICRORNA_mRNA |
| 0.962416452  | 0.008696949 | MICRORNA_mRNA |
| 0.982601138  | 0.002747758 | MICRORNA_mRNA |
| 0.938737895  | 0.018033919 | MICRORNA_mRNA |
| 0.896469351  | 0.039361831 | MICRORNA_mRNA |
| 0.969592915  | 0.006335855 | MICRORNA_mRNA |
| 0.962416452  | 0.008696949 | MICRORNA_mRNA |
| 0.910896838  | 0.031497944 | MICRORNA_mRNA |
| 0.941483397  | 0.016842376 | MICRORNA_mRNA |
| 0.990630024  | 0.001087252 | LINCRNA_mRNA  |
| 0.998891085  | 4.43E-05    | LINCRNA_mRNA  |
| 0.88114986   | 0.048298708 | LINCRNA_mRNA  |
| 0.992350039  | 0.000802276 | LINCRNA_mRNA  |
| 0.895703776  | 0.039794506 | LINCRNA_mRNA  |
| 0.960119466  | 0.009502987 | LINCRNA_mRNA  |
| 0.966446006  | 0.007340949 | LINCRNA_mRNA  |
| 0.951913424  | 0.012566434 | LINCRNA_mRNA  |
| 0.994235143  | 0.000524978 | LINCRNA_mRNA  |
| 0.997377875  | 0.000161118 | LINCRNA_mRNA  |
| 0.939145965  | 0.017855148 | LINCRNA_mRNA  |
| 0.933681717  | 0.020296245 | LINCRNA_mRNA  |
| 0.95830939   | 0.010154453 | MICRORNA_mRNA |
| 0.962772012  | 0.008574288 | CIRCRNA_mRNA  |

|              |             |               |
|--------------|-------------|---------------|
| 0.990601986  | 0.001092131 | CIRCRNA_mRNA  |
| 0.979932829  | 0.003402135 | CIRCRNA_mRNA  |
| 0.937776613  | 0.018457326 | LINCRNA_mRNA  |
| 0.967819683  | 0.006896231 | LINCRNA_mRNA  |
| 0.982895528  | 0.002678434 | LINCRNA_mRNA  |
| -0.892454532 | 0.041647515 | LINCRNA_mRNA  |
| 0.970468945  | 0.006064837 | LINCRNA_mRNA  |
| 0.978824558  | 0.003687214 | LINCRNA_mRNA  |
| 0.909860819  | 0.032043754 | LINCRNA_mRNA  |
| 0.878488955  | 0.049909028 | LINCRNA_mRNA  |
| 0.893656597  | 0.040958865 | LINCRNA_mRNA  |
| 0.902909186  | 0.035782686 | LINCRNA_mRNA  |
| 0.980554548  | 0.003245563 | LINCRNA_mRNA  |
| 0.972052997  | 0.005584801 | LINCRNA_mRNA  |
| 0.973764912  | 0.005080906 | LINCRNA_mRNA  |
| 0.974647762  | 0.004827251 | LINCRNA_mRNA  |
| 0.958993731  | 0.009906489 | LINCRNA_mRNA  |
| 0.962772012  | 0.008574288 | LINCRNA_mRNA  |
| 0.933565423  | 0.020349292 | LINCRNA_mRNA  |
| 0.997283847  | 0.000169859 | LINCRNA_mRNA  |
| 0.878501733  | 0.049901255 | LINCRNA_mRNA  |
| 0.955451069  | 0.011211564 | MICRORNA_mRNA |
| 0.980731699  | 0.003201399 | MICRORNA_mRNA |
| 0.915803905  | 0.028954063 | MICRORNA_mRNA |
| 0.95643779   | 0.010842773 | MICRORNA_mRNA |
| 0.992570609  | 0.000767855 | MICRORNA_mRNA |
| 0.952292668  | 0.012418784 | MICRORNA_mRNA |
| 0.992302492  | 0.000809761 | MICRORNA_mRNA |
| 0.992241651  | 0.000819373 | MICRORNA_mRNA |
| 0.980898488  | 0.003160001 | MICRORNA_mRNA |
| 0.998132588  | 9.68E-05    | MICRORNA_mRNA |
| 0.992570609  | 0.000767855 | MICRORNA_mRNA |
| 0.982173855  | 0.002849412 | MICRORNA_mRNA |
| 0.970298523  | 0.006117254 | LINCRNA_mRNA  |
| 0.96890583   | 0.006551131 | LINCRNA_mRNA  |
| 0.986620237  | 0.001854099 | LINCRNA_mRNA  |
| 0.974997938  | 0.004727833 | LINCRNA_mRNA  |
| 0.983690816  | 0.002494118 | LINCRNA_mRNA  |
| 0.990088493  | 0.00118276  | LINCRNA_mRNA  |
| 0.939177018  | 0.017841567 | LINCRNA_mRNA  |
| 0.962491701  | 0.008670942 | LINCRNA_mRNA  |
| 0.984432467  | 0.002326199 | LINCRNA_mRNA  |
| 0.992296263  | 0.000810744 | MICRORNA_mRNA |
| 0.933442391  | 0.020405462 | MICRORNA_mRNA |
| 0.973987881  | 0.00501644  | MICRORNA_mRNA |
| 0.980613925  | 0.003230738 | MICRORNA_mRNA |
| 0.979020472  | 0.003636269 | CIRCRNA_mRNA  |
| 0.888593563  | 0.04388392  | LINCRNA_mRNA  |
| 0.880227528  | 0.048854991 | LINCRNA_mRNA  |
| 0.95050509   | 0.013119698 | LINCRNA_mRNA  |
| -0.881290348 | 0.048214152 | LINCRNA_mRNA  |
| 0.940302498  | 0.017351638 | LINCRNA_mRNA  |
| 0.964743387  | 0.007904685 | LINCRNA_mRNA  |
| 0.980029169  | 0.003377713 | LINCRNA_mRNA  |

DPP4

|             |             |               |
|-------------|-------------|---------------|
| 0.996211874 | 0.00027972  | LINC RNA_mRNA |
| 0.95370712  | 0.011873158 | LINC RNA_mRNA |
| 0.968133954 | 0.00679578  | LINC RNA_mRNA |
| 0.971033209 | 0.005892348 | LINC RNA_mRNA |
| 0.914679645 | 0.0295308   | MICRORNA_mRNA |
| 0.933897106 | 0.020198115 | CIRC RNA_mRNA |
| 0.942374027 | 0.01646157  | CIRC RNA_mRNA |
| 0.965157459 | 0.007766328 | CIRC RNA_mRNA |
| 0.894744516 | 0.040338766 | CIRC RNA_mRNA |
| 0.94733531  | 0.014393032 | LINC RNA_mRNA |
| 0.978949908 | 0.003654591 | LINC RNA_mRNA |
| 0.951408914 | 0.012763735 | LINC RNA_mRNA |
| 0.979576186 | 0.003493045 | LINC RNA_mRNA |
| 0.977916551 | 0.003926362 | LINC RNA_mRNA |
| 0.967170824 | 0.007105155 | LINC RNA_mRNA |
| 0.976472043 | 0.004316895 | LINC RNA_mRNA |
| 0.964472999 | 0.007995464 | LINC RNA_mRNA |
| 0.974049176 | 0.004998766 | LINC RNA_mRNA |
| 0.934754672 | 0.019808946 | LINC RNA_mRNA |
| 0.978845891 | 0.003681655 | LINC RNA_mRNA |
| 0.99325459  | 0.000664365 | LINC RNA_mRNA |
| 0.980253233 | 0.003321141 | LINC RNA_mRNA |
| 0.921455151 | 0.026111176 | LINC RNA_mRNA |
| 0.996526055 | 0.000245664 | LINC RNA_mRNA |
| 0.984742922 | 0.002257067 | LINC RNA_mRNA |
| 0.934485489 | 0.019930839 | LINC RNA_mRNA |
| 0.994181581 | 0.000532307 | LINC RNA_mRNA |
| 0.974339148 | 0.004915432 | LINC RNA_mRNA |
| 0.989964611 | 0.001204981 | LINC RNA_mRNA |
| 0.970525076 | 0.006047605 | MICRORNA_mRNA |
| 0.974689759 | 0.004815291 | MICRORNA_mRNA |
| 0.96680788  | 0.00722291  | MICRORNA_mRNA |
| 0.999254727 | 2.44E-05    | MICRORNA_mRNA |
| 0.910968639 | 0.031460228 | MICRORNA_mRNA |
| 0.985610928 | 0.00206749  | MICRORNA_mRNA |
| 0.976387507 | 0.004340127 | MICRORNA_mRNA |
| 0.888626342 | 0.043864778 | MICRORNA_mRNA |
| 0.98910588  | 0.001362734 | CIRC RNA_mRNA |
| 0.990225426 | 0.001158358 | CIRC RNA_mRNA |
| 0.951887315 | 0.01257662  | CIRC RNA_mRNA |
| 0.976216851 | 0.00438715  | CIRC RNA_mRNA |
| 0.987649206 | 0.001644637 | LINC RNA_mRNA |
| 0.98649712  | 0.001879714 | LINC RNA_mRNA |
| 0.992695147 | 0.000748643 | LINC RNA_mRNA |
| 0.899172725 | 0.037846103 | LINC RNA_mRNA |
| 0.995851754 | 0.000320524 | LINC RNA_mRNA |
| 0.979899136 | 0.003410689 | LINC RNA_mRNA |
| 0.947616798 | 0.014278406 | LINC RNA_mRNA |
| 0.991946249 | 0.000866574 | LINC RNA_mRNA |
| 0.959122489 | 0.00986006  | LINC RNA_mRNA |
| 0.990225426 | 0.001158358 | LINC RNA_mRNA |
| 0.930167055 | 0.02191907  | LINC RNA_mRNA |
| 0.993283294 | 0.000660131 | MICRORNA_mRNA |
| 0.961800988 | 0.008910619 | MICRORNA_mRNA |

|             |             |               |
|-------------|-------------|---------------|
| 0.973073804 | 0.005282439 | MICRORNA_mRNA |
| 0.973609442 | 0.005126017 | MICRORNA_mRNA |
| 0.928573457 | 0.022668081 | MICRORNA_mRNA |
| 0.995797409 | 0.00032684  | MICRORNA_mRNA |
| 0.953579258 | 0.011922151 | MICRORNA_mRNA |
| 0.972340109 | 0.005499199 | MICRORNA_mRNA |
| 0.903782508 | 0.035305758 | MICRORNA_mRNA |
| 0.928573457 | 0.022668081 | MICRORNA_mRNA |
| 0.988989835 | 0.001384542 | MICRORNA_mRNA |
| 0.974467053 | 0.004878821 | MICRORNA_mRNA |
| 0.941925337 | 0.016653062 | CIRCRNA_mRNA  |
| 0.983701029 | 0.002491779 | CIRCRNA_mRNA  |
| 0.996067691 | 0.000295835 | LINCRNA_mRNA  |
| 0.907976106 | 0.033044358 | LINCRNA_mRNA  |
| 0.960956895 | 0.009206414 | LINCRNA_mRNA  |
| 0.987353944 | 0.001703888 | LINCRNA_mRNA  |
| 0.893442431 | 0.041081291 | LINCRNA_mRNA  |
| 0.895956198 | 0.03965168  | LINCRNA_mRNA  |
| 0.88558093  | 0.045654519 | LINCRNA_mRNA  |
| 0.910797239 | 0.031550285 | LINCRNA_mRNA  |
| 0.999685276 | 6.70E-06    | LINCRNA_mRNA  |
| 0.997820346 | 0.000122116 | LINCRNA_mRNA  |
| 0.996083528 | 0.00029405  | LINCRNA_mRNA  |
| 0.94631736  | 0.014810043 | LINCRNA_mRNA  |
| 0.899802184 | 0.037495911 | LINCRNA_mRNA  |
| 0.989174682 | 0.001349859 | LINCRNA_mRNA  |
| 0.975485371 | 0.004590589 | LINCRNA_mRNA  |
| 0.905756545 | 0.034235293 | LINCRNA_mRNA  |
| 0.984758216 | 0.002253679 | LINCRNA_mRNA  |
| 0.958552459 | 0.010066149 | LINCRNA_mRNA  |
| 0.943645662 | 0.015922794 | LINCRNA_mRNA  |
| 0.980234539 | 0.003325849 | LINCRNA_mRNA  |
| 0.935560643 | 0.019445436 | LINCRNA_mRNA  |
| 0.988926136 | 0.001396561 | LINCRNA_mRNA  |
| -0.92581707 | 0.023982658 | MICRORNA_mRNA |
| 0.882869082 | 0.047267193 | MICRORNA_mRNA |
| 0.929531713 | 0.022216713 | MICRORNA_mRNA |
| 0.956589431 | 0.010786456 | MICRORNA_mRNA |
| 0.949251883 | 0.01361852  | MICRORNA_mRNA |
| 0.968053416 | 0.006821476 | MICRORNA_mRNA |
| 0.997529962 | 0.000147309 | MICRORNA_mRNA |
| 0.975678621 | 0.004536547 | MICRORNA_mRNA |
| 0.998874646 | 4.53E-05    | CIRCRNA_mRNA  |
| 0.977685236 | 0.003988075 | CIRCRNA_mRNA  |
| 0.923576042 | 0.025068938 | CIRCRNA_mRNA  |
| 0.956168126 | 0.01094316  | CIRCRNA_mRNA  |
| 0.971103919 | 0.005870848 | LINCRNA_mRNA  |
| 0.997894666 | 0.000115925 | LINCRNA_mRNA  |
| 0.994709838 | 0.000461522 | LINCRNA_mRNA  |
| 0.999668839 | 7.23E-06    | LINCRNA_mRNA  |
| 0.969239659 | 0.006446241 | LINCRNA_mRNA  |
| 0.940225285 | 0.017385107 | LINCRNA_mRNA  |
| 0.980745466 | 0.003197975 | LINCRNA_mRNA  |
| 0.979781351 | 0.00344065  | LINCRNA_mRNA  |

|              |             |               |
|--------------|-------------|---------------|
| 0.977685236  | 0.003988075 | LINC RNA_mRNA |
| 0.906887683  | 0.033626679 | LINC RNA_mRNA |
| 0.983274772  | 0.002589998 | MIC RNA_mRNA  |
| 0.93894969   | 0.017941061 | MIC RNA_mRNA  |
| 0.98024953   | 0.003322073 | MIC RNA_mRNA  |
| 0.958853905  | 0.00995699  | MIC RNA_mRNA  |
| 0.894405855  | 0.040531476 | MIC RNA_mRNA  |
| 0.984152973  | 0.002389024 | MIC RNA_mRNA  |
| 0.926078277  | 0.023857059 | MIC RNA_mRNA  |
| 0.949457008  | 0.013536458 | MIC RNA_mRNA  |
| 0.894405855  | 0.040531476 | MIC RNA_mRNA  |
| 0.998873463  | 4.54E-05    | MIC RNA_mRNA  |
| 0.951090629  | 0.012888724 | MIC RNA_mRNA  |
| 0.958836573  | 0.009963256 | CIRC RNA_mRNA |
| 0.991637834  | 0.000916783 | CIRC RNA_mRNA |
| 0.998638992  | 6.03E-05    | LINC RNA_mRNA |
| 0.921385987  | 0.026145394 | LINC RNA_mRNA |
| 0.968565759  | 0.006658554 | LINC RNA_mRNA |
| 0.987201147  | 0.001734822 | LINC RNA_mRNA |
| 0.890705908  | 0.042655773 | LINC RNA_mRNA |
| 0.896535874  | 0.039324305 | LINC RNA_mRNA |
| 0.881734678  | 0.047947033 | LINC RNA_mRNA |
| 0.908060609  | 0.032999284 | LINC RNA_mRNA |
| 0.995759771  | 0.000331239 | LINC RNA_mRNA |
| 0.992696226  | 0.000748477 | LINC RNA_mRNA |
| 0.995109452  | 0.000410253 | LINC RNA_mRNA |
| 0.947575735  | 0.014295109 | LINC RNA_mRNA |
| 0.898555659  | 0.038190406 | LINC RNA_mRNA |
| 0.983333866  | 0.002576306 | LINC RNA_mRNA |
| 0.966990433  | 0.007163602 | LINC RNA_mRNA |
| 0.903003255  | 0.035731216 | LINC RNA_mRNA |
| 0.982689697  | 0.002726842 | LINC RNA_mRNA |
| 0.956248161  | 0.010913334 | LINC RNA_mRNA |
| 0.944079911  | 0.01574015  | LINC RNA_mRNA |
| 0.98401338   | 0.002420609 | LINC RNA_mRNA |
| 0.938525177  | 0.018127338 | LINC RNA_mRNA |
| 0.988670339  | 0.001445173 | LINC RNA_mRNA |
| -0.939616418 | 0.017649766 | MIC RNA_mRNA  |
| 0.880280541  | 0.048822963 | MIC RNA_mRNA  |
| 0.92140617   | 0.026135407 | MIC RNA_mRNA  |
| 0.952805288  | 0.012220115 | MIC RNA_mRNA  |
| 0.92633917   | 0.023731823 | MIC RNA_mRNA  |
| 0.967220719  | 0.007089017 | MIC RNA_mRNA  |
| 0.993173245  | 0.00067641  | MIC RNA_mRNA  |
| 0.969568328  | 0.006343518 | MIC RNA_mRNA  |
| 0.980299184  | 0.003309578 | CIRC RNA_mRNA |
| 0.961157311  | 0.009135895 | CIRC RNA_mRNA |
| 0.957626508  | 0.010403883 | CIRC RNA_mRNA |
| 0.935966826  | 0.019263068 | CIRC RNA_mRNA |
| 0.911493902  | 0.031184759 | LINC RNA_mRNA |
| 0.98725371   | 0.00172416  | LINC RNA_mRNA |
| 0.905993804  | 0.034107345 | LINC RNA_mRNA |
| 0.989440748  | 0.001300453 | LINC RNA_mRNA |
| 0.990368862  | 0.001132979 | LINC RNA_mRNA |



|             |             |               |
|-------------|-------------|---------------|
| 0.979301102 | 0.003563704 | LINC RNA_mRNA |
| 0.984502611 | 0.002310519 | LINC RNA_mRNA |
| 0.924513347 | 0.024612715 | LINC RNA_mRNA |
| 0.923474537 | 0.025118506 | LINC RNA_mRNA |
| 0.933326083 | 0.020458607 | LINC RNA_mRNA |
| 0.977675347 | 0.00399072  | LINC RNA_mRNA |
| 0.954521371 | 0.011562716 | LINC RNA_mRNA |
| 0.997591882 | 0.000141806 | LINC RNA_mRNA |
| 0.985881562 | 0.002009518 | LINC RNA_mRNA |
| 0.971556642 | 0.005733813 | LINC RNA_mRNA |
| 0.99098701  | 0.001025768 | LINC RNA_mRNA |
| 0.879338127 | 0.049393317 | LINC RNA_mRNA |
| 0.995713531 | 0.00033667  | LINC RNA_mRNA |
| 0.950386842 | 0.013166505 | LINC RNA_mRNA |
| 0.97061191  | 0.006020979 | LINC RNA_mRNA |
| 0.963255717 | 0.00840834  | MICR RNA_mRNA |
| 0.987329881 | 0.001708747 | MICR RNA_mRNA |
| 0.980351491 | 0.003296432 | MICR RNA_mRNA |
| 0.988443694 | 0.001488703 | MICR RNA_mRNA |
| 0.960239868 | 0.009460157 | MICR RNA_mRNA |
| 0.943793932 | 0.015860355 | MICR RNA_mRNA |
| 0.959003793 | 0.009902858 | CIRC RNA_mRNA |
| 0.965850001 | 0.007536725 | CIRC RNA_mRNA |
| 0.970337136 | 0.006105365 | CIRC RNA_mRNA |
| 0.936442089 | 0.019050394 | CIRC RNA_mRNA |
| 0.937973521 | 0.018370336 | LINC RNA_mRNA |
| 0.990382806 | 0.001130522 | LINC RNA_mRNA |
| 0.939503896 | 0.017698818 | LINC RNA_mRNA |
| 0.986454559 | 0.001888597 | LINC RNA_mRNA |
| 0.989336019 | 0.001319827 | LINC RNA_mRNA |
| 0.976254128 | 0.004376864 | LINC RNA_mRNA |
| 0.982355501 | 0.002806048 | LINC RNA_mRNA |
| 0.924912286 | 0.024419357 | LINC RNA_mRNA |
| 0.94704452  | 0.01451176  | LINC RNA_mRNA |
| 0.956649872 | 0.010764035 | LINC RNA_mRNA |
| 0.958315898 | 0.010152086 | LINC RNA_mRNA |
| 0.969678461 | 0.006309218 | LINC RNA_mRNA |
| 0.999469901 | 1.46E-05    | LINC RNA_mRNA |
| 0.988278748 | 0.001520652 | LINC RNA_mRNA |
| 0.894975399 | 0.040207555 | LINC RNA_mRNA |
| 0.982032434 | 0.002883326 | LINC RNA_mRNA |
| 0.990219261 | 0.001159453 | LINC RNA_mRNA |
| 0.91685754  | 0.028416885 | LINC RNA_mRNA |
| 0.999588215 | 1.00E-05    | LINC RNA_mRNA |
| 0.97440109  | 0.004897691 | LINC RNA_mRNA |
| 0.985127026 | 0.002172498 | LINC RNA_mRNA |
| 0.959491853 | 0.009727267 | MICR RNA_mRNA |
| 0.982888787 | 0.002680015 | MICR RNA_mRNA |
| 0.978414718 | 0.003794541 | MICR RNA_mRNA |
| 0.996258684 | 0.000274553 | MICR RNA_mRNA |
| 0.982353761 | 0.002806462 | MICR RNA_mRNA |
| 0.960982858 | 0.009197268 | MICR RNA_mRNA |
| 0.905923395 | 0.034145299 | CIRC RNA_mRNA |
| 0.993044032 | 0.000695691 | LINC RNA_mRNA |

|             |             |               |
|-------------|-------------|---------------|
| 0.994028491 | 0.00055344  | LINC RNA_mRNA |
| 0.962659225 | 0.008613135 | LINC RNA_mRNA |
| 0.945921264 | 0.014973352 | LINC RNA_mRNA |
| 0.963430208 | 0.008348738 | LINC RNA_mRNA |
| 0.990876197 | 0.001044726 | LINC RNA_mRNA |
| 0.95819172  | 0.010197292 | LINC RNA_mRNA |
| 0.976244079 | 0.004379636 | LINC RNA_mRNA |
| 0.999689668 | 6.56E-06    | LINC RNA_mRNA |
| 0.980288069 | 0.003312374 | LINC RNA_mRNA |
| 0.914877868 | 0.029428848 | LINC RNA_mRNA |
| 0.93889564  | 0.017964744 | LINC RNA_mRNA |
| 0.967370112 | 0.007040769 | MIC RNA_mRNA  |
| 0.990831405 | 0.001052422 | MIC RNA_mRNA  |
| 0.991430281 | 0.000951097 | MIC RNA_mRNA  |
| 0.965234923 | 0.007740533 | MIC RNA_mRNA  |
| 0.884789999 | 0.046123035 | CIRC RNA_mRNA |
| 0.995877746 | 0.000317517 | LINC RNA_mRNA |
| 0.998847726 | 4.69E-05    | LINC RNA_mRNA |
| 0.99818229  | 9.30E-05    | LINC RNA_mRNA |
| 0.975177062 | 0.004677243 | LINC RNA_mRNA |
| 0.978839563 | 0.003683303 | LINC RNA_mRNA |
| 0.964757049 | 0.007900107 | LINC RNA_mRNA |
| 0.998497778 | 6.99E-05    | LINC RNA_mRNA |
| 0.902875183 | 0.035801297 | LINC RNA_mRNA |
| 0.999711405 | 5.89E-06    | LINC RNA_mRNA |
| 0.959567535 | 0.009700131 | LINC RNA_mRNA |
| 0.953734126 | 0.011862819 | LINC RNA_mRNA |
| 0.879714806 | 0.049165097 | LINC RNA_mRNA |
| 0.936468452 | 0.01903862  | MIC RNA_mRNA  |
| 0.903446187 | 0.035489183 | CIRC RNA_mRNA |
| 0.994334544 | 0.000511466 | LINC RNA_mRNA |
| 0.995325328 | 0.000383403 | LINC RNA_mRNA |
| 0.966049506 | 0.007471003 | LINC RNA_mRNA |
| 0.943916997 | 0.015808591 | LINC RNA_mRNA |
| 0.962078053 | 0.00881422  | LINC RNA_mRNA |
| 0.992486188 | 0.00078097  | LINC RNA_mRNA |
| 0.961777477 | 0.008918814 | LINC RNA_mRNA |
| 0.978869197 | 0.003675585 | LINC RNA_mRNA |
| 0.999792967 | 3.58E-06    | LINC RNA_mRNA |
| 0.982089706 | 0.002869576 | LINC RNA_mRNA |
| 0.914993091 | 0.029369637 | LINC RNA_mRNA |
| 0.943177559 | 0.016120445 | LINC RNA_mRNA |
| 0.97042182  | 0.006079317 | MIC RNA_mRNA  |
| 0.99147748  | 0.000943257 | MIC RNA_mRNA  |
| 0.99299897  | 0.000702458 | MIC RNA_mRNA  |
| 0.968161419 | 0.006787024 | MIC RNA_mRNA  |
| 0.995501468 | 0.000361949 | LINC RNA_mRNA |
| 0.995206316 | 0.00039813  | LINC RNA_mRNA |
| 0.992460499 | 0.000784975 | LINC RNA_mRNA |
| 0.885384559 | 0.0457707   | LINC RNA_mRNA |
| 0.914847538 | 0.029444441 | LINC RNA_mRNA |
| 0.997402433 | 0.00015886  | LINC RNA_mRNA |
| 0.988980267 | 0.001386345 | LINC RNA_mRNA |
| 0.999911362 | 1.00E-06    | LINC RNA_mRNA |

|             |             |               |
|-------------|-------------|---------------|
| 0.980317781 | 0.003304902 | LINC RNA_mRNA |
| 0.985781856 | 0.002030813 | LINC RNA_mRNA |
| 0.878855469 | 0.049686232 | LINC RNA_mRNA |
| 0.981112927 | 0.003107038 | LINC RNA_mRNA |
| 0.997415927 | 0.000157624 | MIC RNA_mRNA  |
| 0.973594882 | 0.005130248 | MIC RNA_mRNA  |
| 0.99706556  | 0.000190735 | MIC RNA_mRNA  |
| 0.989871296 | 0.00122181  | MIC RNA_mRNA  |
| 0.985369972 | 0.002119563 | CIRC RNA_mRNA |
| 0.928799143 | 0.022561512 | LINC RNA_mRNA |
| 0.914239843 | 0.029757409 | LINC RNA_mRNA |
| 0.937208279 | 0.018709152 | LINC RNA_mRNA |
| 0.983526808 | 0.002531771 | LINC RNA_mRNA |
| 0.98221493  | 0.002839587 | LINC RNA_mRNA |
| 0.942754742 | 0.016299654 | LINC RNA_mRNA |
| 0.956070923 | 0.01097942  | LINC RNA_mRNA |
| 0.934321043 | 0.020005423 | LINC RNA_mRNA |
| 0.911489538 | 0.031187044 | CIRC RNA_mRNA |
| 0.881079578 | 0.048341026 | CIRC RNA_mRNA |
| 0.991949037 | 0.000866125 | LINC RNA_mRNA |
| 0.993113251 | 0.00068534  | LINC RNA_mRNA |
| 0.962095034 | 0.008808323 | LINC RNA_mRNA |
| 0.950236477 | 0.013226104 | LINC RNA_mRNA |
| 0.966904246 | 0.007191582 | LINC RNA_mRNA |
| 0.989714141 | 0.001250327 | LINC RNA_mRNA |
| 0.957878853 | 0.01031148  | LINC RNA_mRNA |
| 0.974398025 | 0.004898568 | LINC RNA_mRNA |
| 0.999573278 | 1.06E-05    | LINC RNA_mRNA |
| 0.980786819 | 0.003187698 | LINC RNA_mRNA |
| 0.920223997 | 0.026722428 | LINC RNA_mRNA |
| 0.938483715 | 0.018145565 | LINC RNA_mRNA |
| 0.965814969 | 0.007548285 | MIC RNA_mRNA  |
| 0.992198886 | 0.000826152 | MIC RNA_mRNA  |
| 0.990295098 | 0.001146007 | MIC RNA_mRNA  |
| 0.964906025 | 0.007850246 | MIC RNA_mRNA  |
| 0.892205064 | 0.041790889 | CIRC RNA_mRNA |
| 0.958758465 | 0.009991508 | CIRC RNA_mRNA |
| 0.988761737 | 0.00142774  | CIRC RNA_mRNA |
| 0.980000826 | 0.003384892 | LINC RNA_mRNA |
| 0.980444639 | 0.003273065 | LINC RNA_mRNA |
| 0.960625934 | 0.009323254 | LINC RNA_mRNA |
| 0.921124505 | 0.026274889 | LINC RNA_mRNA |
| 0.920863415 | 0.026404396 | LINC RNA_mRNA |
| 0.895253554 | 0.040049658 | LINC RNA_mRNA |
| 0.911841531 | 0.031002876 | LINC RNA_mRNA |
| 0.987982263 | 0.001578641 | LINC RNA_mRNA |
| 0.986581437 | 0.001862159 | LINC RNA_mRNA |
| 0.997361743 | 0.000162606 | LINC RNA_mRNA |
| 0.96751396  | 0.006994415 | LINC RNA_mRNA |
| 0.919545826 | 0.027061073 | LINC RNA_mRNA |
| 0.962517927 | 0.008661884 | LINC RNA_mRNA |
| 0.983573083 | 0.002521128 | LINC RNA_mRNA |
| 0.930288895 | 0.02186214  | LINC RNA_mRNA |
| 0.951612398 | 0.012684037 | LINC RNA_mRNA |

|              |             |               |
|--------------|-------------|---------------|
| 0.909937669  | 0.032003164 | LINC RNA_mRNA |
| 0.961806589  | 0.008908666 | LINC RNA_mRNA |
| 0.968284547  | 0.006747817 | LINC RNA_mRNA |
| 0.890913733  | 0.04253554  | LINC RNA_mRNA |
| 0.991346739  | 0.000965026 | LINC RNA_mRNA |
| -0.907324813 | 0.033392418 | MIC RNA_mRNA  |
| 0.90610445   | 0.034047729 | MIC RNA_mRNA  |
| 0.912580044  | 0.030617613 | MIC RNA_mRNA  |
| 0.896123096  | 0.039557335 | MIC RNA_mRNA  |
| 0.96881464   | 0.00657988  | MIC RNA_mRNA  |
| 0.921358436  | 0.026159028 | MIC RNA_mRNA  |
| 0.958835567  | 0.009963619 | MIC RNA_mRNA  |
| 0.99556251   | 0.00035461  | MIC RNA_mRNA  |
| 0.942267638  | 0.016506909 | MIC RNA_mRNA  |
| 0.987870836  | 0.001600621 | CIRC RNA_mRNA |
| 0.931521433  | 0.021288932 | LINC RNA_mRNA |
| 0.917637098  | 0.028021529 | LINC RNA_mRNA |
| 0.939360359  | 0.017761456 | LINC RNA_mRNA |
| 0.984335184  | 0.002348003 | LINC RNA_mRNA |
| 0.97959009   | 0.003489486 | LINC RNA_mRNA |
| 0.944847418  | 0.015419021 | LINC RNA_mRNA |
| 0.958157136  | 0.010209894 | LINC RNA_mRNA |
| 0.929978023  | 0.022007492 | LINC RNA_mRNA |
| 0.931553955  | 0.021273874 | CIRC RNA_mRNA |
| 0.954834358  | 0.011444104 | CIRC RNA_mRNA |
| 0.963202187  | 0.008426653 | CIRC RNA_mRNA |
| 0.941374214  | 0.016889253 | CIRC RNA_mRNA |
| 0.942102221  | 0.016577485 | LINC RNA_mRNA |
| 0.977998122  | 0.003904676 | LINC RNA_mRNA |
| 0.955801725  | 0.011080043 | LINC RNA_mRNA |
| 0.978901015  | 0.003667304 | LINC RNA_mRNA |
| 0.984471894  | 0.002317381 | LINC RNA_mRNA |
| 0.972022755  | 0.005593843 | LINC RNA_mRNA |
| 0.976900686  | 0.004199736 | LINC RNA_mRNA |
| 0.925857682  | 0.023963116 | LINC RNA_mRNA |
| 0.948147581  | 0.014063078 | LINC RNA_mRNA |
| 0.959587567  | 0.009692952 | LINC RNA_mRNA |
| 0.93591345   | 0.019287001 | LINC RNA_mRNA |
| 0.963617772  | 0.008284826 | LINC RNA_mRNA |
| 0.990188814  | 0.001164866 | LINC RNA_mRNA |
| 0.987363462  | 0.001701967 | LINC RNA_mRNA |
| 0.902073751  | 0.036240833 | LINC RNA_mRNA |
| 0.976059092  | 0.004430768 | LINC RNA_mRNA |
| 0.983971884  | 0.002430025 | LINC RNA_mRNA |
| 0.935297874  | 0.01956371  | LINC RNA_mRNA |
| 0.993747312  | 0.000592961 | LINC RNA_mRNA |
| 0.984942084  | 0.002213083 | LINC RNA_mRNA |
| 0.982445265  | 0.0027847   | LINC RNA_mRNA |
| 0.892752478  | 0.041476485 | MIC RNA_mRNA  |
| 0.949406255  | 0.013556747 | MIC RNA_mRNA  |
| 0.974788838  | 0.004787116 | MIC RNA_mRNA  |
| 0.975601002  | 0.004558227 | MIC RNA_mRNA  |
| 0.992869516  | 0.000722017 | MIC RNA_mRNA  |
| 0.994305562  | 0.000515393 | MIC RNA_mRNA  |

|              |             |               |
|--------------|-------------|---------------|
| 0.95602137   | 0.01099792  | MICRORNA_mRNA |
| 0.982371834  | 0.002802159 | CIRCRNA_mRNA  |
| 0.995875751  | 0.000317748 | CIRCRNA_mRNA  |
| -0.940668169 | 0.017193416 | LINCRNA_mRNA  |
| -0.882417755 | 0.047537302 | LINCRNA_mRNA  |
| 0.934458317  | 0.019943157 | LINCRNA_mRNA  |
| 0.992658066  | 0.000754346 | LINCRNA_mRNA  |
| -0.899623146 | 0.037595411 | LINCRNA_mRNA  |
| -0.887570058 | 0.044482967 | LINCRNA_mRNA  |
| 0.887326383  | 0.044625966 | LINCRNA_mRNA  |
| 0.909935619  | 0.032004247 | LINCRNA_mRNA  |
| 0.921162468  | 0.026256075 | LINCRNA_mRNA  |
| 0.890160241  | 0.042971971 | LINCRNA_mRNA  |
| -0.885526232 | 0.045686872 | MICRORNA_mRNA |
| 0.890847327  | 0.042573947 | MICRORNA_mRNA |
| 0.996574851  | 0.000240508 | CIRCRNA_mRNA  |
| 0.966597821  | 0.007291352 | CIRCRNA_mRNA  |
| 0.906487296  | 0.033841709 | CIRCRNA_mRNA  |
| 0.942197248  | 0.01653693  | CIRCRNA_mRNA  |
| 0.959381434  | 0.009766903 | LINCRNA_mRNA  |
| 0.997802962  | 0.00012358  | LINCRNA_mRNA  |
| 0.990423129  | 0.001123426 | LINCRNA_mRNA  |
| 0.996334417  | 0.000266262 | LINCRNA_mRNA  |
| 0.967113604  | 0.007123678 | LINCRNA_mRNA  |
| 0.943370801  | 0.016038755 | LINCRNA_mRNA  |
| 0.970177231  | 0.006154651 | LINCRNA_mRNA  |
| 0.992526501  | 0.000774698 | LINCRNA_mRNA  |
| 0.966597821  | 0.007291352 | LINCRNA_mRNA  |
| 0.900744057  | 0.036973857 | LINCRNA_mRNA  |
| 0.973169886  | 0.005254266 | MICRORNA_mRNA |
| 0.933651915  | 0.020309835 | MICRORNA_mRNA |
| 0.989612109  | 0.001268957 | MICRORNA_mRNA |
| 0.957820192  | 0.010332936 | MICRORNA_mRNA |
| 0.973068018  | 0.005284137 | MICRORNA_mRNA |
| 0.910470202  | 0.031722346 | MICRORNA_mRNA |
| 0.940384053  | 0.017316309 | MICRORNA_mRNA |
| 0.996663849  | 0.000231199 | MICRORNA_mRNA |
| 0.936230951  | 0.019144781 | MICRORNA_mRNA |
| 0.894646328  | 0.040394609 | CIRCRNA_mRNA  |
| 0.916098269  | 0.02880366  | CIRCRNA_mRNA  |
| 0.957785421  | 0.010345661 | CIRCRNA_mRNA  |
| 0.954279741  | 0.01165456  | LINCRNA_mRNA  |
| 0.960624236  | 0.009323855 | LINCRNA_mRNA  |
| 0.951687052  | 0.012654838 | LINCRNA_mRNA  |
| 0.948704637  | 0.013838242 | LINCRNA_mRNA  |
| 0.94227772   | 0.016502611 | LINCRNA_mRNA  |
| 0.929870616  | 0.022057783 | LINCRNA_mRNA  |
| 0.944477186  | 0.015573659 | LINCRNA_mRNA  |
| 0.977544737  | 0.004025713 | LINCRNA_mRNA  |
| 0.9836379    | 0.002506246 | LINCRNA_mRNA  |
| 0.891751527  | 0.042051946 | LINCRNA_mRNA  |
| 0.983964517  | 0.002431697 | LINCRNA_mRNA  |
| 0.97198755   | 0.005604375 | LINCRNA_mRNA  |
| 0.946039404  | 0.014924583 | LINCRNA_mRNA  |

|              |             |               |
|--------------|-------------|---------------|
| 0.9471797    | 0.014456527 | LINC RNA_mRNA |
| 0.99837882   | 7.83E-05    | LINC RNA_mRNA |
| 0.955954387  | 0.011022943 | LINC RNA_mRNA |
| 0.942206152  | 0.016533131 | LINC RNA_mRNA |
| 0.889093414  | 0.043592302 | LINC RNA_mRNA |
| 0.971119969  | 0.005865972 | LINC RNA_mRNA |
| 0.95983004   | 0.009606201 | LINC RNA_mRNA |
| 0.985309768  | 0.00213264  | LINC RNA_mRNA |
| 0.956558065  | 0.010798097 | MIC RNA_mRNA  |
| 0.94172019   | 0.016740854 | MIC RNA_mRNA  |
| 0.926991783  | 0.023419487 | MIC RNA_mRNA  |
| 0.984404386  | 0.002332486 | MIC RNA_mRNA  |
| 0.950287706  | 0.013205789 | MIC RNA_mRNA  |
| 0.96844295   | 0.006697488 | MIC RNA_mRNA  |
| 0.987634503  | 0.001647571 | MIC RNA_mRNA  |
| 0.921440665  | 0.026118341 | MIC RNA_mRNA  |
| 0.926248102  | 0.023775514 | CIRC RNA_mRNA |
| 0.890689654  | 0.042665181 | CIRC RNA_mRNA |
| 0.931490641  | 0.021303192 | LINC RNA_mRNA |
| -0.915494884 | 0.029112224 | LINC RNA_mRNA |
| 0.941991108  | 0.016624947 | LINC RNA_mRNA |
| 0.980490981  | 0.00326146  | LINC RNA_mRNA |
| 0.983908338  | 0.002444467 | LINC RNA_mRNA |
| -0.935626104 | 0.019416008 | LINC RNA_mRNA |
| -0.910769763 | 0.03156473  | LINC RNA_mRNA |
| 0.985488483  | 0.002093898 | LINC RNA_mRNA |
| 0.974213292  | 0.004951545 | LINC RNA_mRNA |
| 0.989257074  | 0.001334494 | LINC RNA_mRNA |
| 0.892216316  | 0.041784419 | LINC RNA_mRNA |
| 0.976001577  | 0.004446705 | LINC RNA_mRNA |
| 0.893758069  | 0.0409009   | LINC RNA_mRNA |
| 0.947202053  | 0.014447401 | LINC RNA_mRNA |
| 0.943248761  | 0.016090329 | LINC RNA_mRNA |
| 0.947662909  | 0.014259658 | LINC RNA_mRNA |
| -0.923654208 | 0.025030788 | LINC RNA_mRNA |
| 0.969139956  | 0.006477509 | LINC RNA_mRNA |
| -0.908899905 | 0.032552677 | MIC RNA_mRNA  |
| 0.963669281  | 0.008267303 | MIC RNA_mRNA  |
| 0.906588599  | 0.033787263 | MIC RNA_mRNA  |
| 0.946735058  | 0.01463846  | MIC RNA_mRNA  |
| 0.983914157  | 0.002443143 | MIC RNA_mRNA  |
| 0.927547753  | 0.02315446  | MIC RNA_mRNA  |
| 0.899359178  | 0.037742264 | MIC RNA_mRNA  |
| 0.973157956  | 0.005257761 | MIC RNA_mRNA  |
| 0.946735058  | 0.01463846  | MIC RNA_mRNA  |
| 0.897840211  | 0.038590846 | MIC RNA_mRNA  |
| 0.921216922  | 0.026229097 | MIC RNA_mRNA  |
| 0.942125681  | 0.01656747  | CIRC RNA_mRNA |
| 0.959973121  | 0.00955513  | CIRC RNA_mRNA |
| 0.973563814  | 0.005139281 | CIRC RNA_mRNA |
| 0.920048344  | 0.026810009 | CIRC RNA_mRNA |
| 0.950925715  | 0.012953641 | LINC RNA_mRNA |
| 0.987592912  | 0.00165588  | LINC RNA_mRNA |
| 0.954731782  | 0.011482933 | LINC RNA_mRNA |

|              |             |               |
|--------------|-------------|---------------|
| 0.981088934  | 0.003112949 | LINC RNA_mRNA |
| 0.983091666  | 0.002632574 | LINC RNA_mRNA |
| 0.969624153  | 0.006326124 | LINC RNA_mRNA |
| 0.977375459  | 0.004071216 | LINC RNA_mRNA |
| 0.907163752  | 0.033478671 | LINC RNA_mRNA |
| 0.961496286  | 0.009017029 | LINC RNA_mRNA |
| 0.970615105  | 0.00602     | LINC RNA_mRNA |
| 0.942032454  | 0.016607281 | LINC RNA_mRNA |
| 0.978421589  | 0.003792734 | LINC RNA_mRNA |
| 0.997079249  | 0.000189402 | LINC RNA_mRNA |
| 0.984164857  | 0.002386341 | LINC RNA_mRNA |
| 0.916165102  | 0.028769548 | LINC RNA_mRNA |
| 0.989958522  | 0.001206077 | LINC RNA_mRNA |
| 0.986190888  | 0.001943931 | LINC RNA_mRNA |
| 0.935617806  | 0.019419737 | LINC RNA_mRNA |
| 0.997874356  | 0.000117606 | LINC RNA_mRNA |
| 0.981931034  | 0.002907724 | LINC RNA_mRNA |
| 0.99155997   | 0.000929607 | LINC RNA_mRNA |
| 0.95979631   | 0.009618254 | MIC RNA_mRNA  |
| 0.976471014  | 0.004317178 | MIC RNA_mRNA  |
| 0.971320906  | 0.005805035 | MIC RNA_mRNA  |
| 0.998757958  | 5.25E-05    | MIC RNA_mRNA  |
| 0.889812018  | 0.043174142 | MIC RNA_mRNA  |
| 0.989660415  | 0.001260125 | MIC RNA_mRNA  |
| 0.972538308  | 0.005440361 | MIC RNA_mRNA  |
| 0.882543351  | 0.047462087 | MIC RNA_mRNA  |
| 0.991789069  | 0.000892045 | CIRC RNA_mRNA |
| 0.935306859  | 0.019559662 | LINC RNA_mRNA |
| 0.922940132  | 0.025379995 | LINC RNA_mRNA |
| 0.942441247  | 0.016432944 | LINC RNA_mRNA |
| 0.984271905  | 0.002362222 | LINC RNA_mRNA |
| 0.973721097  | 0.005093606 | LINC RNA_mRNA |
| 0.947054018  | 0.014507877 | LINC RNA_mRNA |
| 0.960670168  | 0.00930761  | LINC RNA_mRNA |
| 0.920169534  | 0.026749574 | LINC RNA_mRNA |
| 0.953845352  | 0.011820267 | LINC RNA_mRNA |
| 0.910695739  | 0.031603654 | LINC RNA_mRNA |
| 0.899746564  | 0.037526813 | LINC RNA_mRNA |
| 0.914925179  | 0.029404531 | LINC RNA_mRNA |
| 0.93739567   | 0.018625998 | LINC RNA_mRNA |
| 0.933927366  | 0.020184342 | CIRC RNA_mRNA |
| 0.900148621  | 0.037303619 | CIRC RNA_mRNA |
| 0.923844337  | 0.024938072 | LINC RNA_mRNA |
| -0.914133138 | 0.029812472 | LINC RNA_mRNA |
| 0.944905856  | 0.015394658 | LINC RNA_mRNA |
| 0.982408349  | 0.002793473 | LINC RNA_mRNA |
| 0.986751204  | 0.001826979 | LINC RNA_mRNA |
| -0.934441451 | 0.019950803 | LINC RNA_mRNA |
| 0.878741953  | 0.049755203 | LINC RNA_mRNA |
| -0.909816987 | 0.032066913 | LINC RNA_mRNA |
| 0.987949971  | 0.001585001 | LINC RNA_mRNA |
| 0.972341712  | 0.005498722 | LINC RNA_mRNA |
| 0.991314788  | 0.000970371 | LINC RNA_mRNA |
| 0.883247599  | 0.047041035 | LINC RNA_mRNA |

|              |             |               |
|--------------|-------------|---------------|
| 0.884687065  | 0.04618412  | LINC RNA_mRNA |
| 0.978854815  | 0.003679331 | LINC RNA_mRNA |
| 0.90209191   | 0.036230855 | LINC RNA_mRNA |
| 0.948414029  | 0.013955388 | LINC RNA_mRNA |
| 0.936647682  | 0.018958632 | LINC RNA_mRNA |
| 0.953961288  | 0.011775966 | LINC RNA_mRNA |
| -0.918637306 | 0.027516888 | LINC RNA_mRNA |
| 0.965170906  | 0.007761848 | LINC RNA_mRNA |
| -0.904290338 | 0.03502937  | MIC RNA_mRNA  |
| 0.959849313  | 0.009599317 | MIC RNA_mRNA  |
| 0.914917971  | 0.029408236 | MIC RNA_mRNA  |
| 0.953072129  | 0.012117115 | MIC RNA_mRNA  |
| 0.987341399  | 0.001706421 | MIC RNA_mRNA  |
| 0.935232654  | 0.019593103 | MIC RNA_mRNA  |
| 0.908297924  | 0.032872806 | MIC RNA_mRNA  |
| 0.977848369  | 0.003944519 | MIC RNA_mRNA  |
| 0.953072129  | 0.012117115 | MIC RNA_mRNA  |
| 0.90701192   | 0.033560046 | MIC RNA_mRNA  |
| 0.915175628  | 0.029275914 | MIC RNA_mRNA  |
| 0.966452191  | 0.007338926 | CIRC RNA_mRNA |
| 0.941983455  | 0.016628217 | CIRC RNA_mRNA |
| 0.94662947   | 0.014681772 | CIRC RNA_mRNA |
| 0.934729863  | 0.01982017  | CIRC RNA_mRNA |
| 0.909943528  | 0.03200007  | LINC RNA_mRNA |
| 0.976252787  | 0.004377234 | LINC RNA_mRNA |
| 0.916570964  | 0.02856267  | LINC RNA_mRNA |
| 0.996618929  | 0.000235882 | LINC RNA_mRNA |
| 0.996437288  | 0.000255137 | LINC RNA_mRNA |
| 0.990153117  | 0.001171223 | LINC RNA_mRNA |
| 0.994515544  | 0.000487166 | LINC RNA_mRNA |
| 0.912509039  | 0.030654588 | LINC RNA_mRNA |
| 0.92624793   | 0.023775597 | LINC RNA_mRNA |
| 0.939479473  | 0.017709471 | LINC RNA_mRNA |
| 0.970378385  | 0.006092672 | LINC RNA_mRNA |
| 0.95154413   | 0.012710757 | LINC RNA_mRNA |
| 0.996656795  | 0.000231932 | LINC RNA_mRNA |
| 0.99610001   | 0.000292196 | LINC RNA_mRNA |
| 0.978306536  | 0.003823041 | LINC RNA_mRNA |
| 0.998448732  | 7.33E-05    | LINC RNA_mRNA |
| 0.891578041  | 0.042151942 | LINC RNA_mRNA |
| 0.99824782   | 8.80E-05    | LINC RNA_mRNA |
| 0.956609843  | 0.010778882 | LINC RNA_mRNA |
| 0.971250191  | 0.005826457 | LINC RNA_mRNA |
| 0.97859244   | 0.003747875 | MIC RNA_mRNA  |
| 0.994527278  | 0.000485604 | MIC RNA_mRNA  |
| 0.990445758  | 0.00111945  | MIC RNA_mRNA  |
| 0.995359486  | 0.000379211 | MIC RNA_mRNA  |
| 0.973400687  | 0.005186795 | MIC RNA_mRNA  |
| 0.943921721  | 0.015806605 | MIC RNA_mRNA  |
| 0.987085444  | 0.001758369 | CIRC RNA_mRNA |
| 0.941845567  | 0.016687181 | CIRC RNA_mRNA |
| 0.934114548  | 0.020099207 | CIRC RNA_mRNA |
| 0.942078429  | 0.016587644 | CIRC RNA_mRNA |
| 0.881665043  | 0.047988865 | LINC RNA_mRNA |



|             |             |               |
|-------------|-------------|---------------|
| 0.973090702 | 0.00527748  | LINC RNA_mRNA |
| 0.881035373 | 0.048367649 | LINC RNA_mRNA |
| 0.995631705 | 0.000346351 | LINC RNA_mRNA |
| 0.995297974 | 0.000386772 | LINC RNA_mRNA |
| 0.989633588 | 0.001265028 | LINC RNA_mRNA |
| 0.992375868 | 0.000798219 | LINC RNA_mRNA |
| 0.922726965 | 0.025484543 | LINC RNA_mRNA |
| 0.897547232 | 0.038755211 | LINC RNA_mRNA |
| 0.910681064 | 0.031611373 | LINC RNA_mRNA |
| 0.988528836 | 0.0014723   | LINC RNA_mRNA |
| 0.9322765   | 0.020940222 | LINC RNA_mRNA |
| 0.992156052 | 0.00083296  | LINC RNA_mRNA |
| 0.99093094  | 0.001035346 | LINC RNA_mRNA |
| 0.960405052 | 0.009401501 | LINC RNA_mRNA |
| 0.995246916 | 0.000393086 | LINC RNA_mRNA |
| 0.991660374 | 0.000913082 | LINC RNA_mRNA |
| 0.932289312 | 0.020934322 | LINC RNA_mRNA |
| 0.953413917 | 0.011985602 | LINC RNA_mRNA |
| 0.97248929  | 0.005454893 | MIC RNA_mRNA  |
| 0.995099952 | 0.000411448 | MIC RNA_mRNA  |
| 0.989829963 | 0.001229289 | MIC RNA_mRNA  |
| 0.982861882 | 0.002686328 | MIC RNA_mRNA  |
| 0.949055725 | 0.013697147 | MIC RNA_mRNA  |
| 0.921018638 | 0.026327377 | MIC RNA_mRNA  |
| 0.960358437 | 0.009418042 | CIRC RNA_mRNA |
| 0.988180884 | 0.001539714 | CIRC RNA_mRNA |
| 0.972559776 | 0.005434    | CIRC RNA_mRNA |
| 0.969861102 | 0.006252472 | CIRC RNA_mRNA |
| 0.903545068 | 0.035435223 | LINC RNA_mRNA |
| 0.937488424 | 0.018584883 | LINC RNA_mRNA |
| 0.930308166 | 0.02185314  | LINC RNA_mRNA |
| 0.963694615 | 0.008258689 | LINC RNA_mRNA |
| 0.964424266 | 0.008011862 | LINC RNA_mRNA |
| 0.993573575 | 0.00061783  | LINC RNA_mRNA |
| 0.979577134 | 0.003492802 | MIC RNA_mRNA  |
| 0.927665633 | 0.023098393 | MIC RNA_mRNA  |
| 0.89127339  | 0.042327723 | CIRC RNA_mRNA |
| 0.938796831 | 0.018008064 | LINC RNA_mRNA |
| 0.93676854  | 0.018904756 | LINC RNA_mRNA |
| 0.968187951 | 0.006778569 | LINC RNA_mRNA |
| 0.945554655 | 0.015125024 | LINC RNA_mRNA |
| 0.965810413 | 0.007549788 | LINC RNA_mRNA |
| 0.969333441 | 0.006416874 | LINC RNA_mRNA |
| 0.900296955 | 0.037221382 | LINC RNA_mRNA |
| 0.897134435 | 0.038987174 | LINC RNA_mRNA |
| 0.931422602 | 0.021334712 | LINC RNA_mRNA |
| 0.97228218  | 0.005516435 | LINC RNA_mRNA |
| 0.974311052 | 0.004923487 | MIC RNA_mRNA  |
| 0.891624198 | 0.04212533  | MIC RNA_mRNA  |
| 0.944135579 | 0.015716786 | MIC RNA_mRNA  |
| 0.959262821 | 0.009809538 | MIC RNA_mRNA  |
| 0.969101221 | 0.006489671 | CIRC RNA_mRNA |
| 0.90620357  | 0.033994352 | LINC RNA_mRNA |
| 0.890528709 | 0.042758374 | LINC RNA_mRNA |

|              |             |               |
|--------------|-------------|---------------|
| 0.921327111  | 0.026174533 | LINC RNA_mRNA |
| 0.968382882  | 0.006716559 | LINC RNA_mRNA |
| 0.991710835  | 0.000904814 | LINC RNA_mRNA |
| 0.91950013   | 0.02708394  | LINC RNA_mRNA |
| 0.936039022  | 0.019230712 | LINC RNA_mRNA |
| 0.890524342  | 0.042760903 | LINC RNA_mRNA |
| 0.946066728  | 0.01491331  | LINC RNA_mRNA |
| 0.899190598  | 0.037836145 | MIC RNA_mRNA  |
| 0.933240879  | 0.020497569 | CIRC RNA_mRNA |
| 0.895585352  | 0.039861569 | CIRC RNA_mRNA |
| 0.904663774  | 0.03482657  | LINC RNA_mRNA |
| -0.899014425 | 0.037934334 | LINC RNA_mRNA |
| 0.979129361  | 0.003608055 | LINC RNA_mRNA |
| 0.989156721  | 0.001353216 | LINC RNA_mRNA |
| 0.990519194  | 0.001106581 | LINC RNA_mRNA |
| -0.911823808 | 0.03101214  | LINC RNA_mRNA |
| -0.935150039 | 0.019630354 | LINC RNA_mRNA |
| 0.994123146  | 0.000540341 | LINC RNA_mRNA |
| 0.991647521  | 0.000915192 | LINC RNA_mRNA |
| 0.983807345  | 0.002467478 | LINC RNA_mRNA |
| 0.912109391  | 0.030862962 | LINC RNA_mRNA |
| 0.991566118  | 0.000928592 | LINC RNA_mRNA |
| 0.878619151  | 0.049829849 | LINC RNA_mRNA |
| 0.90314693   | 0.03565265  | LINC RNA_mRNA |
| 0.939995767  | 0.01748472  | LINC RNA_mRNA |
| 0.932298354  | 0.020930157 | LINC RNA_mRNA |
| -0.888806764 | 0.043759461 | LINC RNA_mRNA |
| 0.978763656  | 0.003703098 | LINC RNA_mRNA |
| -0.937487922 | 0.018585105 | MIC RNA_mRNA  |
| 0.967936907  | 0.006858706 | MIC RNA_mRNA  |
| 0.901315266  | 0.036658391 | MIC RNA_mRNA  |
| 0.955215334  | 0.011300267 | MIC RNA_mRNA  |
| 0.981098226  | 0.00311066  | MIC RNA_mRNA  |
| 0.932267489  | 0.020944373 | MIC RNA_mRNA  |
| 0.900412203  | 0.037157528 | MIC RNA_mRNA  |
| 0.970095685  | 0.006179836 | MIC RNA_mRNA  |
| 0.955215334  | 0.011300267 | MIC RNA_mRNA  |
| 0.9055369    | 0.034353878 | MIC RNA_mRNA  |
| 0.940229282  | 0.017383374 | MIC RNA_mRNA  |
| 0.954664259  | 0.011508516 | CIRC RNA_mRNA |
| 0.898906883  | 0.037994312 | CIRC RNA_mRNA |
| 0.884369882  | 0.046372511 | CIRC RNA_mRNA |
| 0.9456488    | 0.015086027 | LINC RNA_mRNA |
| -0.933570071 | 0.020347171 | LINC RNA_mRNA |
| -0.954123611 | 0.01171403  | LINC RNA_mRNA |
| -0.924342446 | 0.024695697 | LINC RNA_mRNA |
| 0.957920088  | 0.010296407 | LINC RNA_mRNA |
| 0.998998394  | 3.80E-05    | LINC RNA_mRNA |
| 0.945906698  | 0.014979369 | LINC RNA_mRNA |
| -0.921622806 | 0.02602829  | LINC RNA_mRNA |
| -0.946296239 | 0.014818736 | LINC RNA_mRNA |
| -0.932461517 | 0.020855061 | LINC RNA_mRNA |
| -0.92359387  | 0.025060235 | LINC RNA_mRNA |
| -0.931964137 | 0.021084253 | LINC RNA_mRNA |

|              |             |               |
|--------------|-------------|---------------|
| -0.885190743 | 0.045885461 | LINC RNA_mRNA |
| -0.925385165 | 0.024190802 | LINC RNA_mRNA |
| 0.92565064   | 0.024062795 | LINC RNA_mRNA |
| -0.916118736 | 0.028793213 | LINC RNA_mRNA |
| -0.966072499 | 0.00746344  | MICRORNA_mRNA |
| -0.885678531 | 0.04559681  | MICRORNA_mRNA |
| -0.907247022 | 0.033434068 | MICRORNA_mRNA |
| -0.885678531 | 0.04559681  | MICRORNA_mRNA |
| -0.948515056 | 0.013914627 | MICRORNA_mRNA |
| -0.942203169 | 0.016534403 | MICRORNA_mRNA |
| 0.976125371  | 0.004412425 | CIRC RNA_mRNA |
| 0.879390748  | 0.049361415 | CIRC RNA_mRNA |
| 0.926567523  | 0.023622383 | CIRC RNA_mRNA |
| 0.988299741  | 0.001516573 | LINC RNA_mRNA |
| -0.895654462 | 0.039822428 | LINC RNA_mRNA |
| 0.926591657  | 0.023610826 | LINC RNA_mRNA |
| 0.964775798  | 0.007893826 | LINC RNA_mRNA |
| 0.929802998  | 0.022089463 | LINC RNA_mRNA |
| 0.917357831  | 0.028162956 | MICRORNA_mRNA |
| -0.880140007 | 0.048907882 | MICRORNA_mRNA |
| 0.929385272  | 0.022285501 | MICRORNA_mRNA |
| -0.890202408 | 0.04294751  | MICRORNA_mRNA |
| 0.957572814  | 0.010423579 | CIRC RNA_mRNA |
| 0.956931219  | 0.010659872 | CIRC RNA_mRNA |
| 0.964886284  | 0.007856847 | CIRC RNA_mRNA |
| 0.929969702  | 0.022011386 | CIRC RNA_mRNA |
| 0.934181165  | 0.020068936 | LINC RNA_mRNA |
| 0.986196315  | 0.001942787 | LINC RNA_mRNA |
| 0.937633724  | 0.018520535 | LINC RNA_mRNA |
| 0.989366828  | 0.001314117 | LINC RNA_mRNA |
| 0.990666422  | 0.001080929 | LINC RNA_mRNA |
| 0.979737382  | 0.003451857 | LINC RNA_mRNA |
| 0.985979687  | 0.001988634 | LINC RNA_mRNA |
| 0.914420414  | 0.029664302 | LINC RNA_mRNA |
| 0.946565526  | 0.014708022 | LINC RNA_mRNA |
| 0.957130669  | 0.010586231 | LINC RNA_mRNA |
| 0.958409084  | 0.010118205 | LINC RNA_mRNA |
| 0.968307966  | 0.006740369 | LINC RNA_mRNA |
| 0.999189786  | 2.77E-05    | LINC RNA_mRNA |
| 0.990465084  | 0.001116059 | LINC RNA_mRNA |
| 0.894431899  | 0.040516646 | LINC RNA_mRNA |
| 0.985346908  | 0.002124569 | LINC RNA_mRNA |
| 0.992917945  | 0.000714679 | LINC RNA_mRNA |
| 0.915430379  | 0.029145273 | LINC RNA_mRNA |
| 0.999875619  | 1.67E-06    | LINC RNA_mRNA |
| 0.971627823  | 0.005712364 | LINC RNA_mRNA |
| 0.984113701  | 0.002397896 | LINC RNA_mRNA |
| 0.967911956  | 0.006866687 | MICRORNA_mRNA |
| 0.985921532  | 0.002001003 | MICRORNA_mRNA |
| 0.980976576  | 0.00314068  | MICRORNA_mRNA |
| 0.998231853  | 8.92E-05    | MICRORNA_mRNA |
| 0.98248106   | 0.002776202 | MICRORNA_mRNA |
| 0.961034836  | 0.009178968 | MICRORNA_mRNA |
| 0.945201091  | 0.015271769 | CIRC RNA_mRNA |

|              |             |               |
|--------------|-------------|---------------|
| 0.909496538  | 0.032236384 | CIRC RNA_mRNA |
| 0.988235469  | 0.001529072 | LINC RNA_mRNA |
| 0.996155179  | 0.000286021 | LINC RNA_mRNA |
| 0.993941327  | 0.000565594 | LINC RNA_mRNA |
| -0.923538996 | 0.025087025 | LINC RNA_mRNA |
| 0.885492473  | 0.045706842 | LINC RNA_mRNA |
| -0.953826138 | 0.011827614 | LINC RNA_mRNA |
| -0.892107229 | 0.04184716  | LINC RNA_mRNA |
| 0.995729782  | 0.000334758 | LINC RNA_mRNA |
| 0.988918178  | 0.001398065 | LINC RNA_mRNA |
| 0.987273092  | 0.001720233 | LINC RNA_mRNA |
| 0.906289003  | 0.033948366 | LINC RNA_mRNA |
| 0.996762155  | 0.000221058 | LINC RNA_mRNA |
| 0.88018902   | 0.04887826  | LINC RNA_mRNA |
| 0.930371136  | 0.021823739 | LINC RNA_mRNA |
| 0.937498106  | 0.018580593 | LINC RNA_mRNA |
| -0.889398314 | 0.043414722 | LINC RNA_mRNA |
| 0.967659816  | 0.006947516 | LINC RNA_mRNA |
| -0.916378009 | 0.028660964 | MIC RNA_mRNA  |
| 0.96751862   | 0.006992915 | MIC RNA_mRNA  |
| 0.900364891  | 0.037183737 | MIC RNA_mRNA  |
| 0.96568342   | 0.007591745 | MIC RNA_mRNA  |
| 0.983781254  | 0.002473434 | MIC RNA_mRNA  |
| 0.943077428  | 0.016162826 | MIC RNA_mRNA  |
| 0.903947622  | 0.035215818 | MIC RNA_mRNA  |
| 0.972291996  | 0.005513513 | MIC RNA_mRNA  |
| 0.96568342   | 0.007591745 | MIC RNA_mRNA  |
| 0.917002178  | 0.028343397 | MIC RNA_mRNA  |
| 0.93623271   | 0.019143994 | MIC RNA_mRNA  |
| 0.938611264  | 0.018089512 | CIRC RNA_mRNA |
| 0.928911172  | 0.022508672 | LINC RNA_mRNA |
| 0.925921874  | 0.023932238 | LINC RNA_mRNA |
| -0.887475868 | 0.044538225 | LINC RNA_mRNA |
| 0.916230549  | 0.028736156 | LINC RNA_mRNA |
| 0.947384577  | 0.014372948 | LINC RNA_mRNA |
| 0.947147311  | 0.014469755 | LINC RNA_mRNA |
| 0.992512771  | 0.000776832 | LINC RNA_mRNA |
| 0.924038834  | 0.024843341 | LINC RNA_mRNA |
| 0.939829388  | 0.017557046 | LINC RNA_mRNA |
| -0.887923163 | 0.044276007 | LINC RNA_mRNA |
| 0.988504102  | 0.001477059 | LINC RNA_mRNA |
| 0.961546876  | 0.008999333 | MIC RNA_mRNA  |
| 0.900901923  | 0.036886584 | CIRC RNA_mRNA |
| 0.997994242  | 0.000107801 | LINC RNA_mRNA |
| 0.99786907   | 0.000118045 | LINC RNA_mRNA |
| 0.999019574  | 3.68E-05    | LINC RNA_mRNA |
| 0.982221703  | 0.002837968 | LINC RNA_mRNA |
| 0.985718948  | 0.002044286 | LINC RNA_mRNA |
| 0.973457173  | 0.005170326 | LINC RNA_mRNA |
| 0.998424496  | 7.51E-05    | LINC RNA_mRNA |
| 0.91531667   | 0.029203562 | LINC RNA_mRNA |
| 0.998357183  | 7.99E-05    | LINC RNA_mRNA |
| 0.966987657  | 0.007164503 | LINC RNA_mRNA |
| 0.963015309  | 0.008490685 | LINC RNA_mRNA |

|              |             |               |
|--------------|-------------|---------------|
| 0.887873962  | 0.044304827 | LINCRNA_mRNA  |
| 0.925674147  | 0.024051471 | MICRORNA_mRNA |
| 0.967350249  | 0.007047178 | CIRCRNA_mRNA  |
| 0.974927981  | 0.00474764  | LINCRNA_mRNA  |
| 0.960803964  | 0.009260343 | LINCRNA_mRNA  |
| 0.903604785  | 0.035402648 | LINCRNA_mRNA  |
| 0.96962627   | 0.006325465 | LINCRNA_mRNA  |
| 0.994945586  | 0.000431033 | LINCRNA_mRNA  |
| 0.993802904  | 0.000585076 | LINCRNA_mRNA  |
| 0.999259405  | 2.42E-05    | LINCRNA_mRNA  |
| 0.962743758  | 0.008584014 | LINCRNA_mRNA  |
| 0.969979722  | 0.006215707 | LINCRNA_mRNA  |
| 0.946587454  | 0.014699019 | LINCRNA_mRNA  |
| 0.959916353  | 0.009575383 | LINCRNA_mRNA  |
| 0.98524952   | 0.002145754 | LINCRNA_mRNA  |
| 0.992149108  | 0.000834066 | LINCRNA_mRNA  |
| 0.948498916  | 0.013921136 | LINCRNA_mRNA  |
| -0.921084745 | 0.026294598 | LINCRNA_mRNA  |
| 0.987310396  | 0.001712685 | LINCRNA_mRNA  |
| -0.879984793 | 0.049001726 | LINCRNA_mRNA  |
| 0.926491472  | 0.023658813 | LINCRNA_mRNA  |
| 0.881901478  | 0.047846879 | LINCRNA_mRNA  |
| -0.893787595 | 0.040884039 | LINCRNA_mRNA  |
| -0.90914252  | 0.03242394  | LINCRNA_mRNA  |
| 0.879490363  | 0.049301041 | LINCRNA_mRNA  |
| 0.910963256  | 0.031463055 | LINCRNA_mRNA  |
| 0.933554996  | 0.020354051 | LINCRNA_mRNA  |
| -0.909938119 | 0.032002926 | LINCRNA_mRNA  |
| 0.879944828  | 0.049025898 | LINCRNA_mRNA  |
| -0.933023697 | 0.020596988 | LINCRNA_mRNA  |
| 0.96600444   | 0.007485832 | LINCRNA_mRNA  |
| 0.964554038  | 0.007968221 | MICRORNA_mRNA |
| 0.903368099  | 0.035531815 | CIRCRNA_mRNA  |
| 0.998482268  | 7.10E-05    | LINCRNA_mRNA  |
| 0.997954031  | 0.000111058 | LINCRNA_mRNA  |
| 0.879365211  | 0.049376896 | LINCRNA_mRNA  |
| 0.99834601   | 8.07E-05    | LINCRNA_mRNA  |
| 0.982655954  | 0.002734805 | LINCRNA_mRNA  |
| 0.987049165  | 0.001765774 | LINCRNA_mRNA  |
| 0.975851253  | 0.004488449 | LINCRNA_mRNA  |
| 0.997667183  | 0.000135208 | LINCRNA_mRNA  |
| 0.914899193  | 0.029417887 | LINCRNA_mRNA  |
| 0.997296352  | 0.000168688 | LINCRNA_mRNA  |
| 0.965702928  | 0.007585295 | LINCRNA_mRNA  |
| 0.963222202  | 0.008419804 | LINCRNA_mRNA  |
| 0.889446343  | 0.04338677  | LINCRNA_mRNA  |
| 0.926309261  | 0.02374617  | MICRORNA_mRNA |
| 0.982847855  | 0.00268962  | CIRCRNA_mRNA  |
| 0.941983773  | 0.016628081 | LINCRNA_mRNA  |
| 0.928072398  | 0.022905261 | LINCRNA_mRNA  |
| 0.951666397  | 0.012662914 | LINCRNA_mRNA  |
| 0.986731966  | 0.001830954 | LINCRNA_mRNA  |
| 0.992110919  | 0.000840154 | LINCRNA_mRNA  |
| 0.952944108  | 0.012166495 | LINCRNA_mRNA  |

|              |             |               |
|--------------|-------------|---------------|
| 0.9652948    | 0.007720614 | LINC RNA_mRNA |
| 0.958957333  | 0.009919627 | LINC RNA_mRNA |
| 0.89553255   | 0.039891483 | MIC RNA_mRNA  |
| 0.894011893  | 0.040756021 | CIRC RNA_mRNA |
| 0.941598288  | 0.016793093 | CIRC RNA_mRNA |
| 0.974129567  | 0.004975616 | CIRC RNA_mRNA |
| 0.972650869  | 0.005407038 | LINC RNA_mRNA |
| 0.973123695  | 0.005267804 | LINC RNA_mRNA |
| 0.978743816  | 0.003708278 | LINC RNA_mRNA |
| 0.954454016  | 0.011588294 | LINC RNA_mRNA |
| 0.955050743  | 0.011362335 | LINC RNA_mRNA |
| 0.939130461  | 0.017861929 | LINC RNA_mRNA |
| 0.950893187  | 0.012966458 | LINC RNA_mRNA |
| 0.984757467  | 0.002253845 | LINC RNA_mRNA |
| 0.991590546  | 0.000924564 | LINC RNA_mRNA |
| 0.893498897  | 0.041049001 | LINC RNA_mRNA |
| 0.989237989  | 0.001338048 | LINC RNA_mRNA |
| 0.980122501  | 0.00335411  | LINC RNA_mRNA |
| 0.960098758  | 0.00951036  | LINC RNA_mRNA |
| 0.955627143  | 0.011145461 | LINC RNA_mRNA |
| 0.995162795  | 0.000403562 | LINC RNA_mRNA |
| 0.962722513  | 0.00859133  | LINC RNA_mRNA |
| 0.967860942  | 0.006883016 | LINC RNA_mRNA |
| 0.916795515  | 0.028448417 | LINC RNA_mRNA |
| 0.981631662  | 0.002980152 | LINC RNA_mRNA |
| 0.988305223  | 0.001515509 | LINC RNA_mRNA |
| 0.99579757   | 0.000326821 | LINC RNA_mRNA |
| 0.94360369   | 0.015940484 | MIC RNA_mRNA  |
| 0.947315912  | 0.014400943 | MIC RNA_mRNA  |
| 0.940140931  | 0.017421696 | MIC RNA_mRNA  |
| 0.991192789  | 0.000990871 | MIC RNA_mRNA  |
| 0.93874719   | 0.018029841 | MIC RNA_mRNA  |
| 0.993041458  | 0.000696077 | MIC RNA_mRNA  |
| 0.98909018   | 0.001365678 | MIC RNA_mRNA  |
| 0.930031464  | 0.021982482 | MIC RNA_mRNA  |
| 0.956526668  | 0.010809753 | CIRC RNA_mRNA |
| 0.978296581  | 0.003825667 | CIRC RNA_mRNA |
| 0.881965022  | 0.047808741 | LINC RNA_mRNA |
| -0.962927588 | 0.008520797 | LINC RNA_mRNA |
| -0.926770787 | 0.023525105 | LINC RNA_mRNA |
| -0.90430392  | 0.035021987 | LINC RNA_mRNA |
| 0.968287825  | 0.006746774 | LINC RNA_mRNA |
| 0.989045118  | 0.001374138 | LINC RNA_mRNA |
| -0.90820252  | 0.032923634 | LINC RNA_mRNA |
| -0.944339511 | 0.015631291 | LINC RNA_mRNA |
| -0.885341616 | 0.04579612  | LINC RNA_mRNA |
| -0.915404187 | 0.029158696 | LINC RNA_mRNA |
| -0.925972422 | 0.023907933 | LINC RNA_mRNA |
| -0.881558492 | 0.048052895 | LINC RNA_mRNA |
| -0.909956778 | 0.031993074 | LINC RNA_mRNA |
| -0.925986581 | 0.023901126 | MIC RNA_mRNA  |
| -0.912367547 | 0.030728309 | MIC RNA_mRNA  |
| -0.932639524 | 0.020773234 | MIC RNA_mRNA  |
| 0.985221144  | 0.002151939 | CIRC RNA_mRNA |

|              |             |               |
|--------------|-------------|---------------|
| 0.881717465  | 0.047957373 | CIRCRNA_mRNA  |
| 0.930077246  | 0.021961065 | CIRCRNA_mRNA  |
| 0.982986701  | 0.002657084 | LINCRNA_mRNA  |
| -0.88004183  | 0.048967234 | LINCRNA_mRNA  |
| -0.907894406 | 0.033087956 | LINCRNA_mRNA  |
| 0.944914737  | 0.015390957 | LINCRNA_mRNA  |
| 0.982356993  | 0.002805692 | LINCRNA_mRNA  |
| 0.934438605  | 0.019952094 | LINCRNA_mRNA  |
| -0.88564998  | 0.045613689 | LINCRNA_mRNA  |
| -0.883509763 | 0.046884597 | LINCRNA_mRNA  |
| 0.903579968  | 0.035416184 | LINCRNA_mRNA  |
| 0.889942267  | 0.043098487 | MICRORNA_mRNA |
| -0.921066826 | 0.026303482 | MICRORNA_mRNA |
| 0.908043561  | 0.033008376 | MICRORNA_mRNA |
| -0.937998858 | 0.018359153 | MICRORNA_mRNA |
| -0.89153328  | 0.042177754 | MICRORNA_mRNA |
| 0.936160424  | 0.019176343 | CIRCRNA_mRNA  |
| 0.925063057  | 0.024346411 | LINCRNA_mRNA  |
| 0.917363447  | 0.028160109 | LINCRNA_mRNA  |
| 0.945051084  | 0.015334168 | LINCRNA_mRNA  |
| 0.920517234  | 0.026576426 | LINCRNA_mRNA  |
| 0.959258148  | 0.009811219 | LINCRNA_mRNA  |
| 0.95205472   | 0.012511357 | LINCRNA_mRNA  |
| 0.972050865  | 0.005585439 | LINCRNA_mRNA  |
| 0.911485375  | 0.031189225 | LINCRNA_mRNA  |
| 0.953471406  | 0.011963528 | LINCRNA_mRNA  |
| 0.972242479  | 0.005528258 | LINCRNA_mRNA  |
| 0.916873426  | 0.028408811 | LINCRNA_mRNA  |
| 0.954134715  | 0.011709798 | LINCRNA_mRNA  |
| 0.962838408  | 0.008551446 | LINCRNA_mRNA  |
| 0.990204352  | 0.001162103 | LINCRNA_mRNA  |
| 0.940937029  | 0.017077383 | MICRORNA_mRNA |
| 0.933384348  | 0.020431978 | CIRCRNA_mRNA  |
| 0.954028961  | 0.011750131 | CIRCRNA_mRNA  |
| 0.974532724  | 0.004860059 | CIRCRNA_mRNA  |
| 0.899850839  | 0.037468886 | CIRCRNA_mRNA  |
| 0.956675155  | 0.010754661 | LINCRNA_mRNA  |
| 0.985284982  | 0.002138032 | LINCRNA_mRNA  |
| 0.958416818  | 0.010115395 | LINCRNA_mRNA  |
| 0.975755052  | 0.004515231 | LINCRNA_mRNA  |
| 0.975851538  | 0.00448837  | LINCRNA_mRNA  |
| 0.962143977  | 0.008791334 | LINCRNA_mRNA  |
| 0.971742865  | 0.005677755 | LINCRNA_mRNA  |
| 0.886740042  | 0.044970654 | LINCRNA_mRNA  |
| 0.969974355  | 0.006217369 | LINCRNA_mRNA  |
| 0.978112925  | 0.003874222 | LINCRNA_mRNA  |
| 0.932227872  | 0.020962623 | LINCRNA_mRNA  |
| 0.984283414  | 0.002359634 | LINCRNA_mRNA  |
| 0.994476819  | 0.000492331 | LINCRNA_mRNA  |
| 0.977491331  | 0.004040051 | LINCRNA_mRNA  |
| 0.928550038  | 0.022679149 | LINCRNA_mRNA  |
| 0.995615322  | 0.000348301 | LINCRNA_mRNA  |
| 0.981513974  | 0.003008786 | LINCRNA_mRNA  |
| 0.941742651  | 0.016731235 | LINCRNA_mRNA  |

|             |             |               |
|-------------|-------------|---------------|
| 0.994721371 | 0.000460014 | LINC RNA_mRNA |
| 0.980741933 | 0.003198854 | LINC RNA_mRNA |
| 0.994229855 | 0.0005257   | LINC RNA_mRNA |
| 0.961025398 | 0.00918229  | MIC RNA_mRNA  |
| 0.970448122 | 0.006071234 | MIC RNA_mRNA  |
| 0.96282215  | 0.008557037 | MIC RNA_mRNA  |
| 0.998605013 | 6.25E-05    | MIC RNA_mRNA  |
| 0.908132622 | 0.032960888 | MIC RNA_mRNA  |
| 0.988112208 | 0.001553137 | MIC RNA_mRNA  |
| 0.980651787 | 0.003221296 | MIC RNA_mRNA  |
| 0.897031178 | 0.039045266 | MIC RNA_mRNA  |
| 0.975301211 | 0.004642285 | CIRC RNA_mRNA |
| 0.924990006 | 0.024381746 | CIRC RNA_mRNA |
| 0.92103394  | 0.026319788 | CIRC RNA_mRNA |
| 0.94613328  | 0.014885866 | CIRC RNA_mRNA |
| 0.961169539 | 0.009131598 | LINC RNA_mRNA |
| 0.884894504 | 0.046061044 | LINC RNA_mRNA |
| 0.99974867  | 4.78E-06    | LINC RNA_mRNA |
| 0.999374825 | 1.88E-05    | LINC RNA_mRNA |
| 0.997727384 | 0.000130009 | LINC RNA_mRNA |
| 0.998968226 | 3.98E-05    | LINC RNA_mRNA |
| 0.918149953 | 0.027762406 | LINC RNA_mRNA |
| 0.892709924 | 0.041500898 | LINC RNA_mRNA |
| 0.908984956 | 0.032507529 | LINC RNA_mRNA |
| 0.982592212 | 0.002749869 | LINC RNA_mRNA |
| 0.923637628 | 0.025038878 | LINC RNA_mRNA |
| 0.988506549 | 0.001476588 | LINC RNA_mRNA |
| 0.998215565 | 9.05E-05    | LINC RNA_mRNA |
| 0.959639752 | 0.00967426  | LINC RNA_mRNA |
| 0.999336251 | 2.05E-05    | LINC RNA_mRNA |
| 0.991120354 | 0.001003109 | LINC RNA_mRNA |
| 0.934404289 | 0.019967656 | LINC RNA_mRNA |
| 0.949047121 | 0.013700599 | LINC RNA_mRNA |
| 0.980469885 | 0.003266741 | MIC RNA_mRNA  |
| 0.999520036 | 1.26E-05    | MIC RNA_mRNA  |
| 0.997766844 | 0.000126639 | MIC RNA_mRNA  |
| 0.984669882 | 0.002273269 | MIC RNA_mRNA  |
| 0.956912525 | 0.010666783 | MIC RNA_mRNA  |
| 0.913998986 | 0.029881746 | MIC RNA_mRNA  |
| 0.941833115 | 0.016692509 | CIRC RNA_mRNA |
| 0.980472608 | 0.003266059 | CIRC RNA_mRNA |
| 0.984184398 | 0.002381932 | LINC RNA_mRNA |
| 0.970913861 | 0.005928694 | LINC RNA_mRNA |
| 0.981341755 | 0.00305085  | LINC RNA_mRNA |
| 0.931813078 | 0.021154022 | LINC RNA_mRNA |
| 0.931607688 | 0.021249003 | LINC RNA_mRNA |
| 0.910965951 | 0.03146164  | LINC RNA_mRNA |
| 0.926095193 | 0.023848932 | LINC RNA_mRNA |
| 0.995177099 | 0.000401774 | LINC RNA_mRNA |
| 0.997961169 | 0.000110477 | LINC RNA_mRNA |
| 0.996838352 | 0.000213304 | LINC RNA_mRNA |
| 0.969206034 | 0.006456781 | LINC RNA_mRNA |
| 0.935701945 | 0.019381931 | LINC RNA_mRNA |
| 0.973593851 | 0.005130548 | LINC RNA_mRNA |



|              |             |               |
|--------------|-------------|---------------|
| 0.992922628  | 0.000713971 | LINC RNA_mRNA |
| 0.941637545  | 0.016776264 | LINC RNA_mRNA |
| 0.974279295  | 0.004932595 | LINC RNA_mRNA |
| 0.933258208  | 0.020489643 | LINC RNA_mRNA |
| 0.96820737   | 0.006772383 | LINC RNA_mRNA |
| 0.983513989  | 0.002534722 | LINC RNA_mRNA |
| 0.895299879  | 0.04002338  | LINC RNA_mRNA |
| 0.996081924  | 0.000294231 | LINC RNA_mRNA |
| -0.883511304 | 0.046883678 | MIC RNA_mRNA  |
| 0.92312416   | 0.02528985  | MIC RNA_mRNA  |
| 0.923173291  | 0.025265801 | MIC RNA_mRNA  |
| 0.897379217  | 0.03884957  | MIC RNA_mRNA  |
| 0.911696933  | 0.031078489 | MIC RNA_mRNA  |
| 0.98002835   | 0.003377921 | MIC RNA_mRNA  |
| 0.950695617  | 0.013044395 | MIC RNA_mRNA  |
| 0.98158413   | 0.002991706 | MIC RNA_mRNA  |
| 0.998184186  | 9.29E-05    | MIC RNA_mRNA  |
| 0.953098302  | 0.012107028 | MIC RNA_mRNA  |
| 0.987395519  | 0.001695503 | CIRC RNA_mRNA |
| 0.995191161  | 0.000400019 | CIRC RNA_mRNA |
| 0.961209481  | 0.009117568 | CIRC RNA_mRNA |
| 0.983262906  | 0.00259275  | CIRC RNA_mRNA |
| 0.991715347  | 0.000904076 | LINC RNA_mRNA |
| 0.984253983  | 0.002366255 | LINC RNA_mRNA |
| 0.98548967   | 0.002093641 | LINC RNA_mRNA |
| 0.882470999  | 0.047505412 | LINC RNA_mRNA |
| 0.995806046  | 0.000325834 | LINC RNA_mRNA |
| 0.987933135  | 0.001588319 | LINC RNA_mRNA |
| 0.965349969  | 0.007702276 | LINC RNA_mRNA |
| 0.996539743  | 0.000244214 | LINC RNA_mRNA |
| 0.965323826  | 0.007710964 | LINC RNA_mRNA |
| 0.995191161  | 0.000400019 | LINC RNA_mRNA |
| 0.946922483  | 0.014561682 | LINC RNA_mRNA |
| 0.997545153  | 0.000145952 | MIC RNA_mRNA  |
| 0.966208716  | 0.007418691 | MIC RNA_mRNA  |
| 0.980022688  | 0.003379354 | MIC RNA_mRNA  |
| 0.974535687  | 0.004859213 | MIC RNA_mRNA  |
| 0.939499956  | 0.017700537 | MIC RNA_mRNA  |
| 0.997404312  | 0.000158688 | MIC RNA_mRNA  |
| 0.891147034  | 0.042400697 | MIC RNA_mRNA  |
| 0.963072478  | 0.00847108  | MIC RNA_mRNA  |
| 0.975748425  | 0.004517078 | MIC RNA_mRNA  |
| 0.917808439  | 0.027934872 | MIC RNA_mRNA  |
| 0.939499956  | 0.017700537 | MIC RNA_mRNA  |
| 0.987679441  | 0.001638609 | MIC RNA_mRNA  |
| 0.979699742  | 0.00346146  | MIC RNA_mRNA  |
| 0.895505007  | 0.039907089 | CIRC RNA_mRNA |
| 0.934534011  | 0.019908849 | CIRC RNA_mRNA |
| -0.89401051  | 0.04075681  | LINC RNA_mRNA |
| -0.981461784 | 0.003021513 | LINC RNA_mRNA |
| -0.947729399 | 0.014232637 | LINC RNA_mRNA |
| -0.938591674 | 0.018098118 | LINC RNA_mRNA |
| 0.944609394  | 0.01551838  | LINC RNA_mRNA |
| 0.943503931  | 0.015982555 | LINC RNA_mRNA |

|              |             |               |
|--------------|-------------|---------------|
| -0.946074348 | 0.014910167 | LINC RNA_mRNA |
| -0.977275703 | 0.00409811  | LINC RNA_mRNA |
| -0.892118766 | 0.041840523 | LINC RNA_mRNA |
| -0.916358326 | 0.028670997 | LINC RNA_mRNA |
| -0.932438419 | 0.020865687 | LINC RNA_mRNA |
| -0.955453246 | 0.011210746 | LINC RNA_mRNA |
| 0.878466882  | 0.049922456 | LINC RNA_mRNA |
| -0.913561868 | 0.030107824 | LINC RNA_mRNA |
| -0.95726261  | 0.010537607 | LINC RNA_mRNA |
| 0.94596474   | 0.014955399 | MIC RNA_mRNA  |
| -0.94447521  | 0.015574485 | MIC RNA_mRNA  |
| -0.895153064 | 0.040106679 | MIC RNA_mRNA  |
| -0.910680376 | 0.031611735 | MIC RNA_mRNA  |
| -0.893123043 | 0.041264082 | MIC RNA_mRNA  |
| -0.895153064 | 0.040106679 | MIC RNA_mRNA  |
| -0.880485473 | 0.048699215 | MIC RNA_mRNA  |
| -0.951346031 | 0.012788397 | MIC RNA_mRNA  |
| 0.91078922   | 0.0315545   | CIRC RNA_mRNA |
| 0.943657625  | 0.015917754 | CIRC RNA_mRNA |
| -0.891591625 | 0.04214411  | LINC RNA_mRNA |
| -0.980008213 | 0.003383021 | LINC RNA_mRNA |
| -0.961310521 | 0.009082107 | LINC RNA_mRNA |
| -0.944352645 | 0.01562579  | LINC RNA_mRNA |
| 0.887634851  | 0.044444968 | LINC RNA_mRNA |
| 0.977702854  | 0.003983363 | LINC RNA_mRNA |
| 0.964081788  | 0.008127409 | LINC RNA_mRNA |
| -0.94854132  | 0.013904036 | LINC RNA_mRNA |
| -0.979017748 | 0.003636976 | LINC RNA_mRNA |
| -0.897828041 | 0.038597669 | LINC RNA_mRNA |
| -0.880528213 | 0.048673419 | LINC RNA_mRNA |
| -0.931050327 | 0.021507444 | LINC RNA_mRNA |
| -0.942041073 | 0.016603599 | LINC RNA_mRNA |
| -0.959369213 | 0.009771293 | LINC RNA_mRNA |
| -0.887779546 | 0.044360146 | LINC RNA_mRNA |
| -0.927035173 | 0.023398768 | LINC RNA_mRNA |
| -0.95401304  | 0.011756207 | LINC RNA_mRNA |
| 0.915444977  | 0.029137793 | MIC RNA_mRNA  |
| -0.962870643 | 0.008540364 | MIC RNA_mRNA  |
| -0.902429487 | 0.036045523 | MIC RNA_mRNA  |
| -0.918665258 | 0.027502827 | MIC RNA_mRNA  |
| -0.896745649 | 0.039206047 | MIC RNA_mRNA  |
| -0.902429487 | 0.036045523 | MIC RNA_mRNA  |
| -0.917739908 | 0.027969522 | MIC RNA_mRNA  |
| -0.880476055 | 0.0487049   | MIC RNA_mRNA  |
| -0.960908501 | 0.009223468 | MIC RNA_mRNA  |
| 0.900478198  | 0.037120978 | CIRC RNA_mRNA |
| 0.997840257  | 0.000120447 | LINC RNA_mRNA |
| 0.998213131  | 9.06E-05    | LINC RNA_mRNA |
| 0.884310665  | 0.046407709 | LINC RNA_mRNA |
| 0.997643255  | 0.000137293 | LINC RNA_mRNA |
| 0.981294147  | 0.003062512 | LINC RNA_mRNA |
| 0.985810961  | 0.002024589 | LINC RNA_mRNA |
| 0.975103987  | 0.00469786  | LINC RNA_mRNA |
| 0.997076721  | 0.000189648 | LINC RNA_mRNA |

|             |             |               |
|-------------|-------------|---------------|
| 0.912525753 | 0.030645883 | LINC RNA_mRNA |
| 0.99725572  | 0.000172503 | LINC RNA_mRNA |
| 0.963787169 | 0.008227244 | LINC RNA_mRNA |
| 0.961437312 | 0.009037673 | LINC RNA_mRNA |
| 0.891194818 | 0.042373096 | LINC RNA_mRNA |
| 0.92977667  | 0.022101803 | MICRORNA_mRNA |
| 0.959494446 | 0.009726337 | CIRC RNA_mRNA |
| 0.97359266  | 0.005130894 | CIRC RNA_mRNA |
| 0.978315948 | 0.003820559 | CIRC RNA_mRNA |
| 0.926654109 | 0.023580929 | CIRC RNA_mRNA |
| 0.945032072 | 0.015342083 | LINC RNA_mRNA |
| 0.995546856 | 0.000356487 | LINC RNA_mRNA |
| 0.93984211  | 0.017551512 | LINC RNA_mRNA |
| 0.979690714 | 0.003463765 | LINC RNA_mRNA |
| 0.982373619 | 0.002801735 | LINC RNA_mRNA |
| 0.966398989 | 0.007356331 | LINC RNA_mRNA |
| 0.974025949 | 0.005005461 | LINC RNA_mRNA |
| 0.920698654 | 0.026486227 | LINC RNA_mRNA |
| 0.952927821 | 0.012172782 | LINC RNA_mRNA |
| 0.960197601 | 0.009475185 | LINC RNA_mRNA |
| 0.954992862 | 0.011384189 | LINC RNA_mRNA |
| 0.976274563 | 0.004371229 | LINC RNA_mRNA |
| 0.999004682 | 3.77E-05    | LINC RNA_mRNA |
| 0.979806172 | 0.003434329 | LINC RNA_mRNA |
| 0.902578417 | 0.035963855 | LINC RNA_mRNA |
| 0.982837625 | 0.002692023 | LINC RNA_mRNA |
| 0.983905249 | 0.00244517  | LINC RNA_mRNA |
| 0.918056014 | 0.027809812 | LINC RNA_mRNA |
| 0.997219937 | 0.000175887 | LINC RNA_mRNA |
| 0.973397028 | 0.005187862 | LINC RNA_mRNA |
| 0.988048699 | 0.001565585 | LINC RNA_mRNA |
| 0.951784435 | 0.012616783 | MICRORNA_mRNA |
| 0.975584393 | 0.004562871 | MICRORNA_mRNA |
| 0.968548447 | 0.006664038 | MICRORNA_mRNA |
| 0.993602703 | 0.000613637 | MICRORNA_mRNA |
| 0.977269733 | 0.004099722 | MICRORNA_mRNA |
| 0.967353987 | 0.007045972 | MICRORNA_mRNA |
| 0.92953493  | 0.022215202 | CIRC RNA_mRNA |
| 0.946216222 | 0.014851686 | CIRC RNA_mRNA |
| 0.970642562 | 0.00601159  | CIRC RNA_mRNA |
| 0.887827052 | 0.044332309 | CIRC RNA_mRNA |
| 0.954705063 | 0.011493054 | LINC RNA_mRNA |
| 0.981232038 | 0.003077748 | LINC RNA_mRNA |
| 0.956136196 | 0.010955067 | LINC RNA_mRNA |
| 0.974239113 | 0.004944129 | LINC RNA_mRNA |
| 0.972711683 | 0.005389063 | LINC RNA_mRNA |
| 0.960062829 | 0.009523156 | LINC RNA_mRNA |
| 0.970402976 | 0.00608511  | LINC RNA_mRNA |
| 0.970821814 | 0.005956777 | LINC RNA_mRNA |
| 0.979033692 | 0.00363284  | LINC RNA_mRNA |
| 0.92857153  | 0.022668991 | LINC RNA_mRNA |
| 0.984133641 | 0.00239339  | LINC RNA_mRNA |
| 0.992230022 | 0.000821215 | LINC RNA_mRNA |
| 0.974786362 | 0.004787819 | LINC RNA_mRNA |

|             |             |               |
|-------------|-------------|---------------|
| 0.930424845 | 0.021798673 | LINC RNA_mRNA |
| 0.997872671 | 0.000117746 | LINC RNA_mRNA |
| 0.980024903 | 0.003378794 | LINC RNA_mRNA |
| 0.940430183 | 0.017296336 | LINC RNA_mRNA |
| 0.992411141 | 0.00079269  | LINC RNA_mRNA |
| 0.976614483 | 0.004277845 | LINC RNA_mRNA |
| 0.993007343 | 0.000701199 | LINC RNA_mRNA |
| 0.964802893 | 0.007884752 | MICRORNA_mRNA |
| 0.968804009 | 0.006583234 | MICRORNA_mRNA |
| 0.959832595 | 0.009605289 | MICRORNA_mRNA |
| 0.998061642 | 0.000102414 | MICRORNA_mRNA |
| 0.916577228 | 0.028559481 | MICRORNA_mRNA |
| 0.985325138 | 0.002129299 | MICRORNA_mRNA |
| 0.981962446 | 0.002900159 | MICRORNA_mRNA |
| 0.899321751 | 0.0377631   | MICRORNA_mRNA |
| 0.975075585 | 0.004705881 | CIRC RNA_mRNA |
| 0.916785676 | 0.028453421 | CIRC RNA_mRNA |
| 0.912985112 | 0.030406958 | CIRC RNA_mRNA |
| 0.94271201  | 0.016317802 | CIRC RNA_mRNA |
| 0.955439092 | 0.011216066 | LINC RNA_mRNA |
| 0.99982439  | 2.79E-06    | LINC RNA_mRNA |
| 0.998577961 | 6.44E-05    | LINC RNA_mRNA |
| 0.998617106 | 6.17E-05    | LINC RNA_mRNA |
| 0.999494318 | 1.36E-05    | LINC RNA_mRNA |
| 0.912197366 | 0.030817053 | LINC RNA_mRNA |
| 0.885492481 | 0.045706838 | LINC RNA_mRNA |
| 0.902570913 | 0.035967968 | LINC RNA_mRNA |
| 0.983371265 | 0.002567654 | LINC RNA_mRNA |
| 0.917087138 | 0.028300258 | LINC RNA_mRNA |
| 0.985469914 | 0.002097912 | LINC RNA_mRNA |
| 0.997535788 | 0.000146788 | LINC RNA_mRNA |
| 0.956600098 | 0.010782498 | LINC RNA_mRNA |
| 0.998919315 | 4.26E-05    | LINC RNA_mRNA |
| 0.98836035  | 0.001504818 | LINC RNA_mRNA |
| 0.927381744 | 0.023233493 | LINC RNA_mRNA |
| 0.943344196 | 0.016049993 | LINC RNA_mRNA |
| 0.98305935  | 0.002640112 | MICRORNA_mRNA |
| 0.999958136 | 3.25E-07    | MICRORNA_mRNA |
| 0.998132226 | 9.69E-05    | MICRORNA_mRNA |
| 0.982066508 | 0.002875143 | MICRORNA_mRNA |
| 0.952008274 | 0.012529453 | MICRORNA_mRNA |
| 0.907779004 | 0.033149569 | MICRORNA_mRNA |
| 0.891412804 | 0.042247254 | CIRC RNA_mRNA |
| 0.996885068 | 0.000208595 | LINC RNA_mRNA |
| 0.998776335 | 5.14E-05    | LINC RNA_mRNA |
| 0.998398942 | 7.69E-05    | LINC RNA_mRNA |
| 0.978066284 | 0.003886585 | LINC RNA_mRNA |
| 0.981859932 | 0.002924873 | LINC RNA_mRNA |
| 0.968961708 | 0.006533535 | LINC RNA_mRNA |
| 0.998341445 | 8.11E-05    | LINC RNA_mRNA |
| 0.907587182 | 0.033252064 | LINC RNA_mRNA |
| 0.999156345 | 2.94E-05    | LINC RNA_mRNA |
| 0.962101492 | 0.00880608  | LINC RNA_mRNA |
| 0.957400835 | 0.010486747 | LINC RNA_mRNA |

|              |             |               |
|--------------|-------------|---------------|
| 0.884521861  | 0.046282213 | LINC RNA_mRNA |
| 0.933413578  | 0.020418623 | MICRORNA_mRNA |
| 0.995830766  | 0.000322958 | LINC RNA_mRNA |
| 0.995643477  | 0.000344953 | LINC RNA_mRNA |
| 0.991501089  | 0.000939343 | LINC RNA_mRNA |
| 0.885309978  | 0.04581485  | LINC RNA_mRNA |
| 0.91465858   | 0.029541642 | LINC RNA_mRNA |
| 0.997733764  | 0.000129462 | LINC RNA_mRNA |
| 0.988043193  | 0.001566665 | LINC RNA_mRNA |
| 0.999821463  | 2.86E-06    | LINC RNA_mRNA |
| 0.981404197  | 0.003035576 | LINC RNA_mRNA |
| 0.984884838  | 0.002225697 | LINC RNA_mRNA |
| 0.979542791  | 0.003501598 | LINC RNA_mRNA |
| 0.996640256  | 0.000233654 | MICRORNA_mRNA |
| 0.973892971  | 0.005043848 | MICRORNA_mRNA |
| 0.997463707  | 0.000153274 | MICRORNA_mRNA |
| 0.988553061  | 0.001467644 | MICRORNA_mRNA |
| -0.924143696 | 0.024792315 | LINC RNA_mRNA |
| -0.940857415 | 0.017111716 | LINC RNA_mRNA |
| 0.919415062  | 0.027126527 | LINC RNA_mRNA |
| -0.95590747  | 0.011040481 | LINC RNA_mRNA |
| -0.961412172 | 0.009046478 | LINC RNA_mRNA |
| -0.961459413 | 0.009029935 | LINC RNA_mRNA |
| 0.88188213   | 0.047858492 | LINC RNA_mRNA |
| -0.900212902 | 0.037267974 | LINC RNA_mRNA |
| 0.915246131  | 0.02923974  | LINC RNA_mRNA |
| -0.96925649  | 0.006440967 | LINC RNA_mRNA |
| -0.993514419 | 0.000626375 | LINC RNA_mRNA |
| -0.901495058 | 0.036559275 | LINC RNA_mRNA |
| -0.882271466 | 0.047624957 | LINC RNA_mRNA |
| -0.953667974 | 0.011888151 | LINC RNA_mRNA |
| -0.944097902 | 0.015732598 | LINC RNA_mRNA |
| -0.964090022 | 0.008124625 | LINC RNA_mRNA |
| -0.919924532 | 0.026871797 | LINC RNA_mRNA |
| -0.889563691 | 0.0433185   | LINC RNA_mRNA |
| -0.962433986 | 0.008690887 | LINC RNA_mRNA |
| -0.878847682 | 0.049690963 | LINC RNA_mRNA |
| 0.882914591  | 0.047239984 | LINC RNA_mRNA |
| -0.99539805  | 0.000374496 | LINC RNA_mRNA |
| 0.903030528  | 0.035716298 | LINC RNA_mRNA |
| 0.974754329  | 0.004796923 | MICRORNA_mRNA |
| -0.971428874 | 0.005772379 | MICRORNA_mRNA |
| -0.905073949 | 0.034604253 | MICRORNA_mRNA |
| -0.946766148 | 0.014625715 | MICRORNA_mRNA |
| -0.930778759 | 0.021633732 | MICRORNA_mRNA |
| -0.905073949 | 0.034604253 | MICRORNA_mRNA |
| -0.963088055 | 0.00846574  | MICRORNA_mRNA |

## Supplementary 6

The primers involved in this study are as follows:

### **1.miR-196a-3p<sup>[1]</sup>:fold chang-9.843328306**

#### **miR-196a-3p:**

F-primer:5'- CGGCAACAAGAAACUGC CUGAG-3'

R-primer:5'-CAGGCAGUUUCUUGUUGCCG UU-3'

#### **U6:**

F-primer :5'-GCTTCGGCAGCACATATACTAAAAT-3' ,

R-primer :5'-CAGGCAGUUUCUUGUUGCCG UU-3'

### **2. miR-300[2]fold chang 7.284084107**

F-primer:UAUACAAGGGCAGACUCUCUCU;

R-primer:AGAGAGUCUGCCCUUGUAUAUU

### **3.miR-542-5P<sup>[3]</sup>fold chang5.658159366**

F-primer: 5'-GCGGTCGGGGATCATCATGTC

R-primer: 5'-ATCCAGTGCAGGGTCCGAGG

### **4.miR-34b-5P<sup>[4]</sup>:fold chang 3.896564553**

F-primer: 5'-AGGCAGUGUAAUUAGCUGAUUGU-3'

R-primer: 5'-AAUCAGCUAAUUACACUGCCUUU-3'

### **5.miR-205-5p<sup>[5]</sup>fold chang 5.862530004**

F-primer: ATCCAGTGCAGGGTCCGAGG

R-primer: ATTACGGTCCTTCATTCCACCGG

### **6.mRNA CLCA2<sup>[6]</sup>,fold chang 4.420609071**

#### **β-actin,**

F-primer: 5'-CACCATTGGCAATGAGCGGTTC-3'

R-primer 5'- AGGTCTTTGCGGATGTCCACGT -3';

#### **CLCA2,**

F-primer: 5'-ACAGGCTGGTGACAAAGTG.GTC-3'

R-primer: 5'-ACTGGCAATGCCACGAAGGTA-3';

β-actin was used as the internal control for measuring the relative level of CLCA2.

### **7.mRNA MUC13<sup>[7]</sup> : fold chang -7.023747882**

#### **MUC13:**

F-primer:GAATTCATGAAAGCCATCATTTCATCTTACTC;

R-primer:CTCGAGATAGTCAGGGCGGGGCATGCTGCTG;

#### **β-actin:**

primer:AGAAGGAGATCACTGCCCTGGCACC;

R-primerCCTGCTTGCTGATCCACATCTGCTG.

β-actin was used as the internal control for measuring the relative level of muc13.

### **8.mRNA CYP24A1<sup>[8]</sup>:fold chang-6.488609353**

F-primer:TATCGCGACTACCGCAAAGA

R-primer:CGGCCAAGACCTCATTGATT

### **9.mRNA KDM5D<sup>[9]</sup>:fold chang-11.85959483**

F-prime:TAACACACACCCGTTTGACAA

R-primer:GCTGCTGAACTTTGAAGGCTG

### **10.mRNA CASR<sup>[10]</sup>:fold chang 6.107240499**

F-prime:ATGCCAAGAAGGGAGAAAGACTCTT  
R-primer:TCAGGACACTCCACACACTCAAAG-3

**11.LncRNA TINCR<sup>[11]</sup>:fold chang -2.044176655**

**LncRNA TINCR**

F-prime:5'-TGTGGCCCAAACCTCAGGGATACAT-3'  
R-primer:5'-AGATGACAGTGGCTGGAGTTGTCA-3'

**GAPDH**

F-primer:5'-GCACCGTCAAGGCTGAGAAC-3'  
R-primer:5'-ATGGTGGTGAAGACGCCAGT-3'

**12.LINCO1133<sup>[12]</sup>:fold chang 3.791235529**

**LINC01133**

F-primer: 5'- TGGTGGAGAGAATGGAGG -3';  
R-primer: 5'- AACCCAGTTCCTTAGAATCTTC -3'.

**GAPDH**

F-primer: 5'- CTCCTCCTGTTTCGACAGTCAGC -3';  
R-primer: 5'- CCCAATACGACCAAATCCGTT -3

**13.LINC00473<sup>[13]</sup>:fold chang-6.836787401**

**LINC00473**

F-primer: 5'-GGCAGCCTCAGGTTACAAAT-3'  
R-primer: 5'-AGGAGCAGGTAGGGAAATGA-3'

**GAPDH**

F-primer: 5'-CCCCTCCTCCACCTTTGAC-3'  
R-primer: 5'-ATACCAGGAAATGAGCTTGACAA-3'

**14.LncRNA TTTY10<sup>[14]</sup> fold chang -7.847888075**

F-primer: TGCCTGTGAATCTTGAACAA  
R-primerCCTGGTGTCTTTTGGAGTTACC

**15.Lnc00994、 Lnc00523<sup>[15]</sup> fold chang1.919358552、 -0.017400677**

**LINC00523:**

F-primer:TTCCCTTCCCTGGTTCCCAA  
R-primer:CTCTCACGCACAACCTGTT CAAG

**LINC00994:**

F-primer:GCTTGTCTCTTGAGTTGTCTCTTTC  
R-primer:AAGACCTGTGCTCTAAATGTGTTT G

**GAPDH**

F-primer:TGCACCACCAACTGCTTAGC  
R-primer:GGCATGGACTGTGGTCATGAG

**16.circRNA ITCH<sup>[16]</sup>fold chang 1.987763182**

**circ-ITCH**

F-primer:GCAGAGGCCAACACTGGAA  
R-primer:CCATGACCCCTTCATTGACC

**GAPDH**

F-primer:TCCTTGAAGCTGACTACGCTGAG C  
R-primer:TTGATTTTGGAGGGATCTCG

**17.circRNA-FOXO3<sup>[17]</sup> :fold chang 1.701778762**

### **circRNA-FOXO3**

F-primer: 5'-GTGGGGAACCTCACTGGTGCTAAG-3'

R-primer:5'-GGGTTGATGATCCACCAAGAGCTCTT-3';

### **GAPDH**

F-primer:TCCTTGAAGCTGACTACGCTGAG C

R-primer:TTGATTTTGGAGGGATCTCG

### **18.CircRNA HIPK3<sup>[18]</sup>:fold chang -1.984826747**

F-primer: cggaattcTGAAATATGCTATCTTACagGTATGGCCTCACAAGTCTTG

R-primer: cgggatccTCAAGAAAAAATATATTCacCTGTAGTACCGAGATTGTAG

### **19.Circ-UBR5<sup>[19]</sup>:fold chang -2.676722948**

F-primer:TAGTGGGCGCAGAAGCGTTGT

R-primer:CTTCTCCAGCCACACCCTCCAC

### **20.Circ-FARSA<sup>[12]</sup>:fold chang 1.285259073**

F-primer:5'-GCTCCTTCTGGAACCTTGAC-3'

R-primer:5'-TTGCTCACCCAGTAGGTCTT- 3'

### **Reference**

- [1] Chen Y, Huang S, Wu B, et al. Transforming growth factor- $\beta$ 1 promotes breast cancer metastasis by downregulating miR-196a-3p expression[J]. *Oncotarget*, 2017, 8(30): 49110-49122
- [2] Kang Y, Zhang Y, Sun Y, et al. MicroRNA-300 suppresses metastasis of oral squamous cell carcinoma by inhibiting epithelial-to-mesenchymal transition[J]. *OncoTargets and Therapy*,
- [3] He R Q, Li X J, Liang L, et al. The suppressive role of miR-542-5p in NSCLC: the evidence from clinical data and in vivo validation using a chick chorioallantoic membrane model[J]. *BMC cancer*, 2017, 17(1): 655
- [4] Xie W, Lu Q, Wang K, et al. miR-34b-5p inhibition attenuates lung inflammation and apoptosis in an LPS-induced acute lung injury mouse model by targeting progranulin[J]. *Journal of Cellular Physiology*, 2017,
- [5] Zhong L, Bian L, Jing L, et al. Identification and integrated analysis of microRNA expression profiles in keloid[J]. *Journal of Cosmetic Dermatology*,
- [6] Qiang Y Y, Li C Z, Sun R, et al. Along with its favorable prognostic role, CLCA2 inhibits growth and metastasis of nasopharyngeal carcinoma cells via inhibition of FAK/ERK signaling[J]. *Journal of Experimental & Clinical Cancer Research Cr*, 2018, 37(1): 34
- [7] Shimamura T, Ito H, Shibahara J, et al. Overexpression of MUC13 is associated with intestinal-type gastric cancer[J]. *Cancer Science*, 2010, 96(5): 265-273
- [8] Asadzadeh Manjili F, Kalantar S M, Arsang-Jang S, et al. Upregulation of vitamin D-related genes in schizophrenic patients[J]. *Neuropsychiatric Disease and Treatment*,
- [9] Dudakovic A, Gluscevic M, Paradise C R, et al. Profiling of human epigenetic regulators using a semi-automated real-time qPCR platform validated by next generation sequencing[J]. *Gene*, 2017, 609(28-37
- [10] Mingione A, Verdelli C, Ferrero S, et al. Filamin A is reduced and contributes to the CASR sensitivity in human parathyroid tumors[J]. *Journal of Molecular Endocrinology*, 2016, 58(2): 91
- [11] Dong H, Hu J, Zou K, et al. Activation of LncRNA TINCR by H3K27 acetylation promotes Trastuzumab resistance and epithelial-mesenchymal transition by targeting MicroRNA-125b in breast Cancer[J]. 2019,



- [12] Hang D, Zhou J, Qin N, et al. A novel plasma circular RNA circFARSA is a potential biomarker for non-small cell lung cancer[J]. *Cancer Medicine*, 2018,
- [13] Shi C, Yang Y, Yu J, et al. The long noncoding RNA LINC00473, a target of microRNA 34a, promotes tumorigenesis by inhibiting ILF2 degradation in cervical cancer[J]. *American Journal of Cancer Research*, 2017, 7(11): 2157
- [14] 杨长群, 刘婷婷, 金志珊, et al. TTTY10 调控 miR-490-3p 通过 HMGB1 信号通路对宫颈癌细胞迁移和侵袭的影响[J]. *中国肿瘤生物治疗杂志*, 2018, 6): 562-567
- [15] Mansoori Z, Ghaedi H, Sadatamini M, et al. Downregulation of long non-coding RNAs LINC00523 and LINC00994 in type 2 diabetes in an Iranian cohort[J]. *Molecular Biology Reports*, 2018, 1): 1-7
- [16] Wan L, Zhang L, Fan K, et al. Circular RNA-ITCH Suppresses Lung Cancer Proliferation via Inhibiting the Wnt/ $\beta$ -Catenin Pathway[J]. *Biomed Res Int*, 2016, 2016(1): 1579490
- [17] Zhang Y, Zhao H, Zhang L. Identification of the tumor suppressive function of circular RNA FOXO3 in non-small cell lung cancer through sponging miR-155[J]. *Molecular Medicine Reports*, 2018, 17(6): 7692
- [18] Tian F, Wang Y, Xiao Z, et al. Circular RNA CircHIPK3 Promotes NCI-H1299 and NCI-H2170 Cell Proliferation through miR-379 and its Target IGF1[J]. *Chinese Journal of Lung Cancer*, 2017, 20(7): 459
- [19] Qin M, Wei G, Sun X. Circ-UBR5: An exonic circular RNA and novel small nuclear RNA involved in RNA splicing[J]. *Biochemical & Biophysical Research Communications*, 2018, S0006291X18314244-

Supplementary figure 1

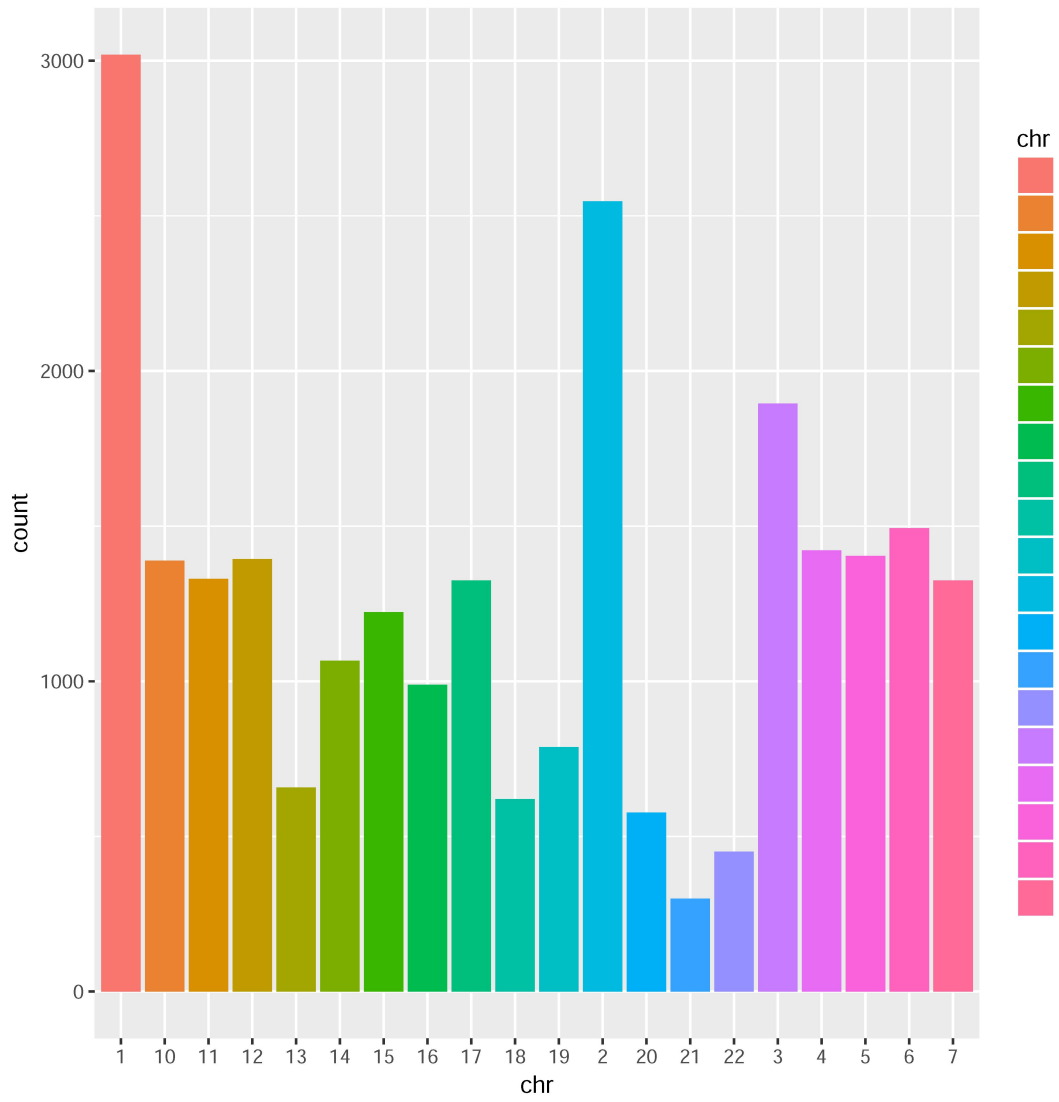

Supplementary figure 1 The location of circRNAs on the chromosome.
